# Supplementary material
Source: PubMed Central journal article supplement (PMC8661685)
Supplement: JMV-94-1035-s003.pdf [file JMV-94-1035-s003.pdf]

| Accession ID   | Collection date | Submission date | Location                                              |
|----------------|-----------------|-----------------|-------------------------------------------------------|
| EPI_ISL_402119 | 12/30/2019      | 1/10/2020       | Asia / China / Hubei / Wuhan                          |
| EPI_ISL_402121 | 12/30/2019      | 1/10/2020       | Asia / China / Hubei / Wuhan                          |
| EPI_ISL_402120 | 1/1/2020        | 1/11/2020       | Asia / China / Hubei / Wuhan                          |
| EPI_ISL_402123 | 12/24/2019      | 1/11/2020       | Asia / China / Hubei / Wuhan                          |
| EPI_ISL_402124 | 12/30/2019      | 1/11/2020       | Asia / China / Hubei / Wuhan                          |
| EPI_ISL_402125 | 12/31/2019      | 1/12/2020       | Asia / China                                          |
| EPI_ISL_403962 | 1/8/2020        | 1/17/2020       | Asia / Thailand / Nonthaburi                          |
| EPI_ISL_403963 | 1/13/2020       | 1/17/2020       | Asia / Thailand / Nonthaburi                          |
| EPI_ISL_402127 | 12/30/2019      | 1/18/2020       | Asia / China / Hubei / Wuhan                          |
| EPI_ISL_402128 | 12/30/2019      | 1/18/2020       | Asia / China / Hubei / Wuhan                          |
| EPI_ISL_402129 | 12/30/2019      | 1/18/2020       | Asia / China / Hubei / Wuhan                          |
| EPI_ISL_402130 | 12/30/2019      | 1/18/2020       | Asia / China / Hubei / Wuhan                          |
| EPI_ISL_402132 | 12/30/2019      | 1/19/2020       | Asia / China / Hubei / Wuhan                          |
| EPI_ISL_403928 | 1/1/2020        | 1/21/2020       | Asia / China / Hubei / Wuhan                          |
| EPI_ISL_403929 | 12/30/2019      | 1/21/2020       | Asia / China / Hubei / Wuhan                          |
| EPI_ISL_403930 | 12/30/2019      | 1/21/2020       | Asia / China / Hubei / Wuhan                          |
| EPI_ISL_403931 | 12/30/2019      | 1/21/2020       | Asia / China / Hubei / Wuhan                          |
| EPI_ISL_404227 | 1/16/2020       | 1/21/2020       | Asia / China / Zhejiang                               |
| EPI_ISL_404228 | 1/17/2020       | 1/21/2020       | Asia / China / Zhejiang                               |
| EPI_ISL_403932 | 1/14/2020       | 1/22/2020       | Asia / China / Guangdong / Shenzhen                   |
| EPI_ISL_403933 | 1/15/2020       | 1/22/2020       | Asia / China / Guangdong / Shenzhen                   |
| EPI_ISL_403934 | 1/15/2020       | 1/22/2020       | Asia / China / Guangdong / Shenzhen                   |
| EPI_ISL_403935 | 1/15/2020       | 1/22/2020       | Asia / China / Guangdong / Shenzhen                   |
| EPI_ISL_403936 | 1/17/2020       | 1/22/2020       | Asia / China / Guangdong / Zhuhai                     |
| EPI_ISL_403937 | 1/18/2020       | 1/22/2020       | Asia / China / Guangdong / Zhuhai                     |
| EPI_ISL_406716 | 1/2/2020        | 1/23/2020       | Asia / China / Hubei / Wuhan                          |
| EPI_ISL_406717 | 1/2/2020        | 1/23/2020       | Asia / China / Hubei / Wuhan                          |
| EPI_ISL_404895 | 1/19/2020       | 1/24/2020       | North America / USA / Washington / Snohomish County   |
| EPI_ISL_405839 | 1/11/2020       | 1/24/2020       | Asia / China / Guangdong / Shenzhen                   |
| EPI_ISL_406030 | 1/10/2020       | 1/24/2020       | Asia / China / Guangdong / Shenzhen                   |
| EPI_ISL_404253 | 1/21/2020       | 1/25/2020       | North America / USA / Illinois / Chicago              |
| EPI_ISL_406031 | 1/23/2020       | 1/27/2020       | Asia / Taiwan / Kaohsiung                             |
| EPI_ISL_406034 | 1/23/2020       | 1/27/2020       | North America / USA / California / Los Angeles County |
| EPI_ISL_406036 | 1/22/2020       | 1/27/2020       | North America / USA / California / Orange County      |
| EPI_ISL_406223 | 1/22/2020       | 1/28/2020       | North America / USA / Arizona / Phoenix County        |
| EPI_ISL_406531 | 1/22/2020       | 1/29/2020       | Asia / China / Guangdong / Zhuhai                     |
| EPI_ISL_406533 | 1/22/2020       | 1/29/2020       | Asia / China / Guangdong / Guangzhou                  |
| EPI_ISL_406534 | 1/22/2020       | 1/29/2020       | Asia / China / Guangdong / Foshan                     |
| EPI_ISL_406535 | 1/22/2020       | 1/29/2020       | Asia / China / Guangdong / Foshan                     |
| EPI_ISL_406536 | 1/22/2020       | 1/29/2020       | Asia / China / Guangdong / Foshan                     |
| EPI_ISL_406538 | 1/23/2020       | 1/29/2020       | Asia / China / Guangdong                              |
| EPI_ISL_406592 | 1/13/2020       | 1/29/2020       | Asia / China / Guangdong / Shenzhen                   |
| EPI_ISL_406593 | 1/13/2020       | 1/29/2020       | Asia / China / Guangdong / Shenzhen                   |
| EPI_ISL_406594 | 1/16/2020       | 1/29/2020       | Asia / China / Guangdong / Shenzhen                   |
| EPI_ISL_406595 | 1/16/2020       | 1/29/2020       | Asia / China / Guangdong / Shenzhen                   |
| EPI_ISL_406596 | 1/23/2020       | 1/29/2020       | Europe / France / Île-de-France / Paris               |

|                |            |                                                          |
|----------------|------------|----------------------------------------------------------|
| EPI_ISL_406597 | 1/23/2020  | 1/29/2020 Europe / France / Île-de-France / Paris        |
| EPI_ISL_406798 | 12/26/2019 | 1/30/2020 Asia / China / Hubei / Wuhan                   |
| EPI_ISL_406800 | 1/1/2020   | 1/30/2020 Asia / China / Hubei / Wuhan                   |
| EPI_ISL_406801 | 1/5/2020   | 1/30/2020 Asia / China / Hubei / Wuhan                   |
| EPI_ISL_406844 | 1/25/2020  | 1/31/2020 Oceania / Australia / Victoria / Clayton       |
| EPI_ISL_406862 | 1/28/2020  | 1/31/2020 Europe / Germany / Bavaria / Munich            |
| EPI_ISL_406970 | 1/20/2020  | 2/3/2020 Asia / China / Zhejiang / Hangzhou              |
| EPI_ISL_406973 | 1/23/2020  | 2/3/2020 Asia / Singapore                                |
| EPI_ISL_407071 | 1/29/2020  | 2/3/2020 Europe / United Kingdom / England               |
| EPI_ISL_407073 | 1/29/2020  | 2/3/2020 Europe / United Kingdom / England               |
| EPI_ISL_407079 | 1/29/2020  | 2/3/2020 Europe / Finland / Lapland                      |
| EPI_ISL_407193 | 1/25/2020  | 2/4/2020 Asia / South Korea / Gyeonggi-do                |
| EPI_ISL_407214 | 1/25/2020  | 2/4/2020 North America / USA / Washington                |
| EPI_ISL_407215 | 1/25/2020  | 2/4/2020 North America / USA / Washington                |
| EPI_ISL_407313 | 1/19/2020  | 2/5/2020 Asia / China / Zhejiang / Hangzhou              |
| EPI_ISL_407893 | 1/24/2020  | 2/6/2020 Oceania / Australia / New South Wales / Sydney  |
| EPI_ISL_407894 | 1/28/2020  | 2/6/2020 Oceania / Australia / Queensland / Gold Coast   |
| EPI_ISL_407896 | 1/30/2020  | 2/6/2020 Oceania / Australia / Queensland / Gold Coast   |
| EPI_ISL_407976 | 2/3/2020   | 2/7/2020 Europe / Belgium / Leuven                       |
| EPI_ISL_407987 | 1/25/2020  | 2/7/2020 Asia / Singapore                                |
| EPI_ISL_407988 | 2/1/2020   | 2/7/2020 Asia / Singapore                                |
| EPI_ISL_408008 | 1/29/2020  | 2/7/2020 North America / USA / California                |
| EPI_ISL_408009 | 1/29/2020  | 2/7/2020 North America / USA / California                |
| EPI_ISL_408010 | 1/29/2020  | 2/7/2020 North America / USA / California                |
| EPI_ISL_408430 | 1/29/2020  | 2/8/2020 Europe / France / Île-de-France / Paris         |
| EPI_ISL_408431 | 1/29/2020  | 2/8/2020 Europe / France / Île-de-France / Paris         |
| EPI_ISL_408478 | 1/21/2020  | 2/9/2020 Asia / China / Chongqing / Yongchuan            |
| EPI_ISL_408479 | 1/23/2020  | 2/9/2020 Asia / China / Chongqing / Zhongxian            |
| EPI_ISL_408480 | 1/17/2020  | 2/9/2020 Asia / China / Yunnan / Kunming                 |
| EPI_ISL_408481 | 1/18/2020  | 2/9/2020 Asia / China / Chongqing                        |
| EPI_ISL_408482 | 1/19/2020  | 2/9/2020 Asia / China / Shandong / Qingdao               |
| EPI_ISL_408484 | 1/15/2020  | 2/9/2020 Asia / China / Sichuan / Chengdu                |
| EPI_ISL_408485 | 1/18/2020  | 2/9/2020 Asia / China / Beijing                          |
| EPI_ISL_408486 | 1/11/2020  | 2/9/2020 Asia / China / Jiangxi / Pingxiang              |
| EPI_ISL_408488 | 1/19/2020  | 2/9/2020 Asia / China / Jiangsu / Huaian                 |
| EPI_ISL_408489 | 1/31/2020  | 2/9/2020 Asia / Taiwan / Taipei                          |
| EPI_ISL_450444 | 1/22/2020  | 2/9/2020 Asia / China / Beijing                          |
| EPI_ISL_514752 | 1/3/2020   | 2/9/2020 Asia / China / Beijing                          |
| EPI_ISL_408665 | 1/29/2020  | 2/10/2020 Asia / Japan / Tokyo                           |
| EPI_ISL_408666 | 1/31/2020  | 2/10/2020 Asia / Japan / Tokyo                           |
| EPI_ISL_408667 | 1/31/2020  | 2/10/2020 Asia / Japan / Tokyo                           |
| EPI_ISL_408668 | 1/24/2020  | 2/10/2020 Asia / Vietnam / Thanh Hoa                     |
| EPI_ISL_408669 | 1/29/2020  | 2/10/2020 Asia / Japan / Kyoto                           |
| EPI_ISL_408670 | 1/31/2020  | 2/10/2020 North America / USA / Wisconsin                |
| EPI_ISL_409067 | 1/29/2020  | 2/10/2020 North America / USA / Massachusetts            |
| EPI_ISL_408977 | 1/25/2020  | 2/11/2020 Oceania / Australia / New South Wales / Sydney |
| EPI_ISL_410044 | 1/27/2020  | 2/11/2020 North America / USA / California               |

|                |           |                                                               |
|----------------|-----------|---------------------------------------------------------------|
| EPI_ISL_410045 | 1/28/2020 | 2/11/2020 North America / USA / Illinois                      |
| EPI_ISL_411929 | 2020-01   | 2/11/2020 Asia / South Korea                                  |
| EPI_ISL_410218 | 2/5/2020  | 2/13/2020 Asia / Taiwan / Taipei                              |
| EPI_ISL_410301 | 1/13/2020 | 2/14/2020 Asia / Nepal / Kathmandu                            |
| EPI_ISL_410486 | 2/8/2020  | 2/14/2020 Europe / France / Auvergne-Rhone-Alpes / Contamines |
| EPI_ISL_410531 | 1/25/2020 | 2/17/2020 Asia / Japan / Nara                                 |
| EPI_ISL_410532 | 1/23/2020 | 2/17/2020 Asia / Japan / Osaka                                |
| EPI_ISL_410535 | 2/3/2020  | 2/17/2020 Asia / Singapore                                    |
| EPI_ISL_410536 | 2/6/2020  | 2/17/2020 Asia / Singapore                                    |
| EPI_ISL_410537 | 2/9/2020  | 2/17/2020 Asia / Singapore                                    |
| EPI_ISL_410545 | 1/29/2020 | 2/17/2020 Europe / Italy / Lazio / Rome                       |
| EPI_ISL_410546 | 1/31/2020 | 2/17/2020 Europe / Italy / Lazio / Rome                       |
| EPI_ISL_410713 | 1/27/2020 | 2/18/2020 Asia / Singapore                                    |
| EPI_ISL_410714 | 2/3/2020  | 2/18/2020 Asia / Singapore                                    |
| EPI_ISL_410715 | 2/4/2020  | 2/18/2020 Asia / Singapore                                    |
| EPI_ISL_410716 | 2/4/2020  | 2/18/2020 Asia / Singapore                                    |
| EPI_ISL_410717 | 2/5/2020  | 2/18/2020 Oceania / Australia / Queensland / Gold Coast       |
| EPI_ISL_410718 | 2/5/2020  | 2/18/2020 Oceania / Australia / Queensland / Gold Coast       |
| EPI_ISL_410719 | 2/2/2020  | 2/18/2020 Asia / Singapore                                    |
| EPI_ISL_410720 | 1/23/2020 | 2/18/2020 Europe / France / Île-de-France / Paris             |
| EPI_ISL_410984 | 1/29/2020 | 2/18/2020 Europe / France / Île-de-France / Paris             |
| EPI_ISL_411060 | 1/21/2020 | 2/19/2020 Asia / China / Fujian                               |
| EPI_ISL_411066 | 1/22/2020 | 2/19/2020 Asia / China / Fujian                               |
| EPI_ISL_411218 | 2/2/2020  | 2/19/2020 Europe / France / Île-de-France / Paris             |
| EPI_ISL_411219 | 1/28/2020 | 2/19/2020 Europe / France / Île-de-France / Paris             |
| EPI_ISL_411220 | 1/28/2020 | 2/19/2020 Europe / France / Île-de-France / Paris             |
| EPI_ISL_411951 | 2/7/2020  | 2/20/2020 Europe / Sweden                                     |
| EPI_ISL_411902 | 1/27/2020 | 2/21/2020 Asia / Cambodia / Sihanoukville                     |
| EPI_ISL_411915 | 1/25/2020 | 2/21/2020 Asia / Taiwan / Taoyuan                             |
| EPI_ISL_411926 | 1/24/2020 | 2/21/2020 Asia / Taiwan / Taipei                              |
| EPI_ISL_411927 | 1/28/2020 | 2/21/2020 Asia / Taiwan / Taipei                              |
| EPI_ISL_411957 | 1/8/2020  | 2/21/2020 Asia / China                                        |
| EPI_ISL_411950 | 1/23/2020 | 2/22/2020 Asia / China / Jiangsu                              |
| EPI_ISL_411952 | 1/24/2020 | 2/22/2020 Asia / China / Jiangsu                              |
| EPI_ISL_411953 | 1/24/2020 | 2/22/2020 Asia / China / Jiangsu                              |
| EPI_ISL_411954 | 2/6/2020  | 2/22/2020 North America / USA / California                    |
| EPI_ISL_411955 | 2/10/2020 | 2/22/2020 North America / USA / California                    |
| EPI_ISL_411956 | 2/11/2020 | 2/22/2020 North America / USA / Texas                         |
| EPI_ISL_412026 | 2/23/2020 | 2/24/2020 Asia / China / Anhui / Hefei                        |
| EPI_ISL_412028 | 1/22/2020 | 2/24/2020 Asia / Hong Kong                                    |
| EPI_ISL_412029 | 1/30/2020 | 2/24/2020 Asia / Hong Kong                                    |
| EPI_ISL_412030 | 2/1/2020  | 2/24/2020 Asia / Hong Kong                                    |
| EPI_ISL_412116 | 2/9/2020  | 2/24/2020 Europe / United Kingdom / England                   |
| EPI_ISL_434563 | 1/23/2020 | 2/24/2020 Asia / Hong Kong                                    |
| EPI_ISL_434564 | 1/24/2020 | 2/24/2020 Asia / Hong Kong                                    |
| EPI_ISL_434565 | 1/24/2020 | 2/24/2020 Asia / Hong Kong                                    |
| EPI_ISL_434566 | 1/27/2020 | 2/24/2020 Asia / Hong Kong                                    |

|                |            |                                                              |
|----------------|------------|--------------------------------------------------------------|
| EPI_ISL_434567 | 1/27/2020  | 2/24/2020 Asia / Hong Kong                                   |
| EPI_ISL_434568 | 1/29/2020  | 2/24/2020 Asia / Hong Kong                                   |
| EPI_ISL_434569 | 1/27/2020  | 2/24/2020 Asia / Hong Kong                                   |
| EPI_ISL_412386 | 2/5/2020   | 2/25/2020 Asia / China / Beijing                             |
| EPI_ISL_412459 | 1/8/2020   | 2/26/2020 Asia / China / Hubei / Jingzhou                    |
| EPI_ISL_412968 | 2/10/2020  | 2/26/2020 Asia / Japan                                       |
| EPI_ISL_412969 | 2/10/2020  | 2/26/2020 Asia / Japan                                       |
| EPI_ISL_412862 | 2/23/2020  | 2/27/2020 North America / USA / California / Solano County   |
| EPI_ISL_412966 | 2/5/2020   | 2/27/2020 Asia / China / Guangdong / Guangzhou               |
| EPI_ISL_414510 | 2/2/2020   | 2/27/2020 Asia / China / Shanghai                            |
| EPI_ISL_412869 | 1/30/2020  | 2/28/2020 Asia / South Korea / Seoul                         |
| EPI_ISL_412870 | 1/30/2020  | 2/28/2020 Asia / South Korea / Seoul                         |
| EPI_ISL_412871 | 1/31/2020  | 2/28/2020 Asia / South Korea / Seoul                         |
| EPI_ISL_412872 | 2/1/2020   | 2/28/2020 Asia / South Korea / Gyeonggi-do                   |
| EPI_ISL_412873 | 2/6/2020   | 2/28/2020 Asia / South Korea / Chungcheongnam-do             |
| EPI_ISL_412898 | 12/30/2019 | 2/28/2020 Asia / China / Hubei / Wuhan                       |
| EPI_ISL_412899 | 12/30/2019 | 2/28/2020 Asia / China / Hubei / Wuhan                       |
| EPI_ISL_412912 | 2/25/2020  | 2/28/2020 Europe / Germany / Baden-Wurttemberg               |
| EPI_ISL_412964 | 2/25/2020  | 2/28/2020 South America / Brazil / Sao Paulo / Sao Paulo     |
| EPI_ISL_412967 | 1/29/2020  | 2/28/2020 Asia / China / Guangzhou                           |
| EPI_ISL_529149 | 1/29/2020  | 2/28/2020 Asia / China / Guangdong / Guangzhou               |
| EPI_ISL_529150 | 1/27/2020  | 2/28/2020 Asia / China / Guangdong / Guangzhou               |
| EPI_ISL_412965 | 2/16/2020  | 2/29/2020 North America / Canada / British Columbia          |
| EPI_ISL_412970 | 2/24/2020  | 3/1/2020 North America / USA / Washington / Snohomish County |
| EPI_ISL_412972 | 2/27/2020  | 3/1/2020 North America / Mexico / Mexico City                |
| EPI_ISL_412973 | 2/20/2020  | 3/1/2020 Europe / Italy / Lombardy                           |
| EPI_ISL_412974 | 1/29/2020  | 3/1/2020 Europe / Italy / Lazio / Rome                       |
| EPI_ISL_412975 | 2/28/2020  | 3/2/2020 Oceania / Australia / New South Wales / Sydney      |
| EPI_ISL_412978 | 1/17/2020  | 3/2/2020 Asia / China / Hubei / Wuhan                        |
| EPI_ISL_412979 | 1/18/2020  | 3/2/2020 Asia / China / Hubei / Wuhan                        |
| EPI_ISL_412980 | 1/18/2020  | 3/2/2020 Asia / China / Hubei / Wuhan                        |
| EPI_ISL_412981 | 1/18/2020  | 3/2/2020 Asia / China / Hubei / Wuhan                        |
| EPI_ISL_412982 | 2/7/2020   | 3/2/2020 Asia / China / Hubei / Wuhan                        |
| EPI_ISL_412983 | 2/8/2020   | 3/2/2020 Asia / China / Hubei / Tianmen                      |
| EPI_ISL_413014 | 2020-01    | 3/2/2020 North America / Canada / Ontario                    |
| EPI_ISL_413015 | 1/23/2020  | 3/2/2020 North America / Canada / Ontario                    |
| EPI_ISL_413016 | 2/28/2020  | 3/2/2020 South America / Brazil / Sao Paulo / Sao Paulo      |
| EPI_ISL_413518 | 1/26/2020  | 3/2/2020 Asia / China / Beijing                              |
| EPI_ISL_413519 | 1/28/2020  | 3/2/2020 Asia / China / Beijing                              |
| EPI_ISL_413520 | 1/28/2020  | 3/2/2020 Asia / China / Beijing                              |
| EPI_ISL_413521 | 1/28/2020  | 3/2/2020 Asia / China / Beijing                              |
| EPI_ISL_413017 | 2/6/2020   | 3/3/2020 Asia / South Korea                                  |
| EPI_ISL_413018 | 2/6/2020   | 3/3/2020 Asia / South Korea                                  |
| EPI_ISL_413019 | 2/26/2020  | 3/3/2020 Europe / Switzerland / Zurich                       |
| EPI_ISL_413020 | 2/27/2020  | 3/3/2020 Europe / Switzerland / Zurich                       |
| EPI_ISL_413021 | 2/29/2020  | 3/3/2020 Europe / Switzerland / Zurich                       |
| EPI_ISL_413022 | 2/29/2020  | 3/3/2020 Europe / Switzerland / Zurich                       |

|                |           |                                                                       |
|----------------|-----------|-----------------------------------------------------------------------|
| EPI_ISL_413023 | 2/29/2020 | 3/3/2020 Europe / Switzerland / Zurich                                |
| EPI_ISL_413024 | 2/29/2020 | 3/3/2020 Europe / Switzerland / Zurich                                |
| EPI_ISL_413025 | 2/27/2020 | 3/3/2020 North America / USA / Washington                             |
| EPI_ISL_413213 | 2/29/2020 | 3/4/2020 Oceania / Australia / New South Wales / Sydney               |
| EPI_ISL_413214 | 2/29/2020 | 3/4/2020 Oceania / Australia / New South Wales / Sydney               |
| EPI_ISL_413221 | 2/28/2020 | 3/4/2020 Europe / United Kingdom / Scotland                           |
| EPI_ISL_413455 | 2/28/2020 | 3/4/2020 North America / USA / Washington                             |
| EPI_ISL_414511 | 2020-01   | 3/4/2020 Asia / Japan                                                 |
| EPI_ISL_413456 | 2/21/2020 | 3/5/2020 North America / USA / Washington / King County               |
| EPI_ISL_413457 | 2/29/2020 | 3/5/2020 North America / USA / Washington                             |
| EPI_ISL_413458 | 3/1/2020  | 3/5/2020 North America / USA / Washington                             |
| EPI_ISL_413459 | 2/20/2020 | 3/5/2020 Asia / Japan / Tokyo                                         |
| EPI_ISL_413486 | 3/1/2020  | 3/5/2020 North America / USA / Washington                             |
| EPI_ISL_413487 | 3/1/2020  | 3/5/2020 North America / USA / Washington                             |
| EPI_ISL_413488 | 2/28/2020 | 3/5/2020 Europe / Germany / North Rhine-Westphalia / Heinsberg Distri |
| EPI_ISL_413489 | 3/3/2020  | 3/5/2020 Europe / Italy / Lombardy / Milan                            |
| EPI_ISL_413490 | 2/27/2020 | 3/5/2020 Oceania / New Zealand / Auckland                             |
| EPI_ISL_413513 | 2/27/2020 | 3/6/2020 Asia / South Korea                                           |
| EPI_ISL_413514 | 2/27/2020 | 3/6/2020 Asia / South Korea                                           |
| EPI_ISL_413515 | 2/27/2020 | 3/6/2020 Asia / South Korea                                           |
| EPI_ISL_413516 | 2/27/2020 | 3/6/2020 Asia / South Korea                                           |
| EPI_ISL_413522 | 1/27/2020 | 3/6/2020 Asia / India / Maharashtra                                   |
| EPI_ISL_413523 | 1/31/2020 | 3/6/2020 Asia / India / Maharashtra                                   |
| EPI_ISL_413555 | 2/27/2020 | 3/7/2020 Europe / United Kingdom / Wales                              |
| EPI_ISL_413556 | 3/4/2020  | 3/7/2020 Europe / United Kingdom / Wales                              |
| EPI_ISL_413557 | 2/28/2020 | 3/7/2020 North America / USA / California / Sonoma County             |
| EPI_ISL_413558 | 2/27/2020 | 3/7/2020 North America / USA / California / Solano County             |
| EPI_ISL_413559 | 2/27/2020 | 3/7/2020 North America / USA / California / Solano County             |
| EPI_ISL_413560 | 2/28/2020 | 3/7/2020 North America / USA / Washington                             |
| EPI_ISL_413561 | 2/27/2020 | 3/7/2020 North America / USA / California / Solano County             |
| EPI_ISL_413562 | 3/2/2020  | 3/7/2020 North America / USA / Washington                             |
| EPI_ISL_413563 | 3/3/2020  | 3/7/2020 North America / USA / Washington                             |
| EPI_ISL_413564 | 3/1/2020  | 3/7/2020 Europe / Netherlands / Noord-Brabant / Andel                 |
| EPI_ISL_413566 | 3/2/2020  | 3/7/2020 Europe / Netherlands / Noord-Holland / Blaricum              |
| EPI_ISL_413568 | 3/1/2020  | 3/7/2020 Europe / Netherlands / Drenthe / Dalen                       |
| EPI_ISL_413571 | 3/2/2020  | 3/7/2020 Europe / Netherlands / Noord-Brabant / Eindhoven             |
| EPI_ISL_413572 | 3/1/2020  | 3/7/2020 Europe / Netherlands / Noord-Holland / Haarlem               |
| EPI_ISL_413573 | 3/2/2020  | 3/7/2020 Europe / Netherlands / Zuid-Holland / Hardinxveld-Giessenda  |
| EPI_ISL_413574 | 2/29/2020 | 3/7/2020 Europe / Netherlands / Noord-Brabant / Helmond               |
| EPI_ISL_413575 | 2/29/2020 | 3/7/2020 Europe / Netherlands / Utrecht / Houten                      |
| EPI_ISL_413577 | 3/2/2020  | 3/7/2020 Europe / Netherlands / Noord-Holland / Naarden               |
| EPI_ISL_413579 | 3/3/2020  | 3/7/2020 Europe / Netherlands / Zuid-Holland / Nootdorp               |
| EPI_ISL_413580 | 3/2/2020  | 3/7/2020 Europe / Netherlands / Noord-Brabant / Oisterwijk            |
| EPI_ISL_413582 | 3/1/2020  | 3/7/2020 Europe / Netherlands / Zuid-Holland / Rotterdam              |
| EPI_ISL_413583 | 3/2/2020  | 3/7/2020 Europe / Netherlands / Zuid-Holland / Rotterdam              |
| EPI_ISL_413584 | 3/3/2020  | 3/7/2020 Europe / Netherlands / Zuid-Holland / Rotterdam              |
| EPI_ISL_413587 | 3/3/2020  | 3/7/2020 Europe / Netherlands / Noord-Brabant / Tilburg               |

|                |           |                                                         |
|----------------|-----------|---------------------------------------------------------|
| EPI_ISL_413588 | 3/1/2020  | 3/7/2020 Europe / Netherlands / Utrecht                 |
| EPI_ISL_413589 | 3/1/2020  | 3/7/2020 Europe / Netherlands / Utrecht                 |
| EPI_ISL_413590 | 3/2/2020  | 3/7/2020 Europe / Netherlands / Utrecht                 |
| EPI_ISL_413591 | 3/2/2020  | 3/7/2020 Europe / Netherlands / Flevoland / Zeewolde    |
| EPI_ISL_413592 | 3/2/2020  | 3/7/2020 Asia / Taiwan / Taipei                         |
| EPI_ISL_413593 | 2/29/2020 | 3/7/2020 Europe / Luxembourg                            |
| EPI_ISL_413594 | 2/28/2020 | 3/8/2020 Oceania / Australia / New South Wales / Sydney |
| EPI_ISL_413595 | 2/28/2020 | 3/8/2020 Oceania / Australia / New South Wales / Sydney |
| EPI_ISL_413596 | 2/28/2020 | 3/8/2020 Oceania / Australia / New South Wales / Sydney |
| EPI_ISL_413597 | 3/2/2020  | 3/8/2020 Oceania / Australia / New South Wales / Sydney |
| EPI_ISL_413598 | 3/4/2020  | 3/8/2020 Oceania / Australia / New South Wales / Sydney |
| EPI_ISL_413599 | 3/4/2020  | 3/8/2020 Oceania / Australia / New South Wales / Sydney |
| EPI_ISL_413600 | 3/3/2020  | 3/8/2020 Oceania / Australia / New South Wales / Sydney |
| EPI_ISL_413601 | 3/2/2020  | 3/8/2020 North America / USA / Washington               |
| EPI_ISL_413602 | 3/3/2020  | 3/8/2020 Europe / Finland / Helsinki                    |
| EPI_ISL_413603 | 3/3/2020  | 3/8/2020 Europe / Finland / Helsinki                    |
| EPI_ISL_413604 | 3/3/2020  | 3/8/2020 Europe / Finland / Helsinki                    |
| EPI_ISL_413606 | 2/17/2020 | 3/8/2020 North America / USA                            |
| EPI_ISL_413607 | 2/18/2020 | 3/8/2020 North America / USA                            |
| EPI_ISL_413608 | 2/18/2020 | 3/8/2020 North America / USA                            |
| EPI_ISL_413609 | 2/21/2020 | 3/8/2020 North America / USA                            |
| EPI_ISL_413610 | 2/21/2020 | 3/8/2020 North America / USA                            |
| EPI_ISL_413611 | 2/21/2020 | 3/8/2020 North America / USA                            |
| EPI_ISL_413612 | 2/17/2020 | 3/8/2020 North America / USA                            |
| EPI_ISL_413613 | 2/17/2020 | 3/8/2020 North America / USA                            |
| EPI_ISL_413614 | 2/17/2020 | 3/8/2020 North America / USA                            |
| EPI_ISL_413615 | 2/17/2020 | 3/8/2020 North America / USA                            |
| EPI_ISL_413616 | 2/17/2020 | 3/8/2020 North America / USA                            |
| EPI_ISL_413617 | 2/20/2020 | 3/8/2020 North America / USA                            |
| EPI_ISL_413618 | 2/20/2020 | 3/8/2020 North America / USA                            |
| EPI_ISL_413619 | 2/25/2020 | 3/8/2020 North America / USA                            |
| EPI_ISL_413620 | 2/18/2020 | 3/8/2020 North America / USA                            |
| EPI_ISL_413621 | 2/18/2020 | 3/8/2020 North America / USA                            |
| EPI_ISL_413622 | 2/24/2020 | 3/8/2020 North America / USA                            |
| EPI_ISL_413623 | 2/24/2020 | 3/8/2020 North America / USA                            |
| EPI_ISL_413647 | 3/1/2020  | 3/9/2020 Europe / Portugal                              |
| EPI_ISL_413648 | 3/1/2020  | 3/9/2020 Europe / Portugal                              |
| EPI_ISL_413649 | 3/5/2020  | 3/9/2020 North America / USA / Washington               |
| EPI_ISL_413650 | 3/5/2020  | 3/9/2020 North America / USA / Washington               |
| EPI_ISL_413651 | 3/5/2020  | 3/9/2020 North America / USA / Washington               |
| EPI_ISL_413652 | 3/5/2020  | 3/9/2020 North America / USA / Washington               |
| EPI_ISL_413653 | 3/5/2020  | 3/9/2020 North America / USA / Washington               |
| EPI_ISL_413691 | 2020-01   | 3/9/2020 Asia / China / Weifang                         |
| EPI_ISL_413692 | 2020-01   | 3/9/2020 Asia / China / Weifang                         |
| EPI_ISL_413693 | 2020-01   | 3/9/2020 Asia / China / Weifang                         |
| EPI_ISL_413694 | 2020-01   | 3/9/2020 Asia / China / Weifang                         |
| EPI_ISL_413697 | 2020-02   | 3/9/2020 Asia / China / Weifang                         |

|                |           |           |                                                |
|----------------|-----------|-----------|------------------------------------------------|
| EPI_ISL_413711 | 2020-02   | 3/9/2020  | Asia / China / Weifang                         |
| EPI_ISL_413729 | 2020-02   | 3/9/2020  | Asia / China / Weifang                         |
| EPI_ISL_413746 | 2020-02   | 3/9/2020  | Asia / China / Weifang                         |
| EPI_ISL_413748 | 2020-02   | 3/9/2020  | Asia / China / Weifang                         |
| EPI_ISL_413749 | 2020-02   | 3/9/2020  | Asia / China / Weifang                         |
| EPI_ISL_413750 | 2020-02   | 3/9/2020  | Asia / China / Weifang                         |
| EPI_ISL_413751 | 2020-02   | 3/9/2020  | Asia / China / Weifang                         |
| EPI_ISL_413753 | 2020-02   | 3/9/2020  | Asia / China / Weifang                         |
| EPI_ISL_413761 | 2020-02   | 3/9/2020  | Asia / China / Weifang                         |
| EPI_ISL_413791 | 2020-02   | 3/9/2020  | Asia / China / Weifang                         |
| EPI_ISL_413809 | 2020-02   | 3/9/2020  | Asia / China / Weifang                         |
| EPI_ISL_413851 | 1/30/2020 | 3/9/2020  | Asia / China / Guangdong                       |
| EPI_ISL_413852 | 1/30/2020 | 3/9/2020  | Asia / China / Guangdong                       |
| EPI_ISL_413853 | 1/30/2020 | 3/9/2020  | Asia / China / Guangdong                       |
| EPI_ISL_413854 | 1/30/2020 | 3/9/2020  | Asia / China / Guangdong                       |
| EPI_ISL_413855 | 2/7/2020  | 3/9/2020  | Asia / China / Guangdong                       |
| EPI_ISL_413856 | 2/7/2020  | 3/9/2020  | Asia / China / Guangdong                       |
| EPI_ISL_413857 | 1/31/2020 | 3/9/2020  | Asia / China / Guangdong                       |
| EPI_ISL_413858 | 1/30/2020 | 3/9/2020  | Asia / China / Guangdong                       |
| EPI_ISL_413860 | 1/30/2020 | 3/9/2020  | Asia / China / Guangdong                       |
| EPI_ISL_413861 | 2/1/2020  | 3/9/2020  | Asia / China / Guangdong                       |
| EPI_ISL_413862 | 2/1/2020  | 3/9/2020  | Asia / China / Guangdong                       |
| EPI_ISL_413863 | 2/1/2020  | 3/9/2020  | Asia / China / Guangdong                       |
| EPI_ISL_413864 | 2/9/2020  | 3/9/2020  | Asia / China / Guangdong                       |
| EPI_ISL_413866 | 2/5/2020  | 3/9/2020  | Asia / China / Guangdong                       |
| EPI_ISL_413867 | 2/5/2020  | 3/9/2020  | Asia / China / Guangdong                       |
| EPI_ISL_413875 | 2/10/2020 | 3/9/2020  | Asia / China / Guangdong                       |
| EPI_ISL_413884 | 2/1/2020  | 3/9/2020  | Asia / China / Guangdong                       |
| EPI_ISL_413924 | 3/5/2020  | 3/10/2020 | North America / USA / California               |
| EPI_ISL_413925 | 3/5/2020  | 3/10/2020 | North America / USA / California               |
| EPI_ISL_413928 | 3/5/2020  | 3/10/2020 | North America / USA / California               |
| EPI_ISL_413931 | 3/5/2020  | 3/10/2020 | North America / USA / California               |
| EPI_ISL_413996 | 2/24/2020 | 3/10/2020 | Europe / Switzerland / Ticino                  |
| EPI_ISL_413997 | 2/26/2020 | 3/10/2020 | Europe / Switzerland / Geneva                  |
| EPI_ISL_413999 | 2/27/2020 | 3/10/2020 | Europe / Switzerland / Aargau                  |
| EPI_ISL_414005 | 2/25/2020 | 3/10/2020 | Europe / United Kingdom / England              |
| EPI_ISL_414006 | 2/28/2020 | 3/10/2020 | Europe / United Kingdom / England              |
| EPI_ISL_414007 | 2/28/2020 | 3/10/2020 | Europe / United Kingdom / England              |
| EPI_ISL_414008 | 2/27/2020 | 3/10/2020 | Europe / United Kingdom / England              |
| EPI_ISL_414009 | 2/25/2020 | 3/10/2020 | Europe / United Kingdom / England              |
| EPI_ISL_414010 | 2/26/2020 | 3/10/2020 | Europe / United Kingdom / England              |
| EPI_ISL_414011 | 2/26/2020 | 3/10/2020 | Europe / United Kingdom / England              |
| EPI_ISL_414012 | 2/27/2020 | 3/10/2020 | Europe / United Kingdom / England              |
| EPI_ISL_414013 | 3/1/2020  | 3/10/2020 | Europe / United Kingdom / England              |
| EPI_ISL_414014 | 3/2/2020  | 3/10/2020 | South America / Brazil / Sao Paulo             |
| EPI_ISL_414015 | 2/29/2020 | 3/10/2020 | South America / Brazil / Sao Paulo / Sao Paulo |
| EPI_ISL_414016 | 2/29/2020 | 3/10/2020 | South America / Brazil / Sao Paulo / Sao Paulo |

|                |           |                                                         |
|----------------|-----------|---------------------------------------------------------|
| EPI_ISL_414017 | 3/4/2020  | 3/10/2020 South America / Brazil / Sao Paulo            |
| EPI_ISL_414019 | 2/27/2020 | 3/10/2020 Europe / Switzerland / Geneva                 |
| EPI_ISL_414020 | 2/27/2020 | 3/10/2020 Europe / Switzerland / Geneva                 |
| EPI_ISL_414021 | 2/27/2020 | 3/10/2020 Europe / Switzerland / Basel-Landschaft       |
| EPI_ISL_414022 | 2/27/2020 | 3/10/2020 Europe / Switzerland / Geneva                 |
| EPI_ISL_414023 | 3/1/2020  | 3/10/2020 Europe / Switzerland / Vaud                   |
| EPI_ISL_414027 | 3/4/2020  | 3/10/2020 Europe / United Kingdom / Scotland            |
| EPI_ISL_414040 | 2/5/2020  | 3/11/2020 Europe / United Kingdom / England             |
| EPI_ISL_414041 | 2/8/2020  | 3/11/2020 Europe / United Kingdom / England             |
| EPI_ISL_414042 | 2/8/2020  | 3/11/2020 Europe / United Kingdom / England             |
| EPI_ISL_414043 | 2/7/2020  | 3/11/2020 Europe / United Kingdom / England             |
| EPI_ISL_414044 | 2/8/2020  | 3/11/2020 Europe / United Kingdom / England             |
| EPI_ISL_414045 | 3/4/2020  | 3/11/2020 South America / Brazil / Rio de Janeiro       |
| EPI_ISL_414363 | 3/4/2020  | 3/11/2020 North America / USA / Washington              |
| EPI_ISL_414364 | 3/5/2020  | 3/11/2020 North America / USA / Washington              |
| EPI_ISL_414365 | 3/6/2020  | 3/11/2020 North America / USA / Washington              |
| EPI_ISL_414366 | 3/5/2020  | 3/11/2020 North America / USA / Washington              |
| EPI_ISL_414367 | 3/5/2020  | 3/11/2020 North America / USA / Washington              |
| EPI_ISL_414368 | 3/5/2020  | 3/11/2020 North America / USA / Washington              |
| EPI_ISL_414369 | 3/5/2020  | 3/11/2020 North America / USA / Washington              |
| EPI_ISL_414378 | 2/17/2020 | 3/12/2020 Asia / Singapore                              |
| EPI_ISL_414379 | 2/18/2020 | 3/12/2020 Asia / Singapore                              |
| EPI_ISL_414380 | 2/13/2020 | 3/12/2020 Asia / Singapore                              |
| EPI_ISL_414414 | 2/29/2020 | 3/12/2020 Oceania / Australia / Queensland / Gold Coast |
| EPI_ISL_414423 | 3/2/2020  | 3/12/2020 Europe / Netherlands / Gelderland             |
| EPI_ISL_414424 | 3/3/2020  | 3/12/2020 Europe / Netherlands / Limburg                |
| EPI_ISL_414425 | 3/3/2020  | 3/12/2020 Europe / Netherlands / Limburg                |
| EPI_ISL_414426 | 3/3/2020  | 3/12/2020 Europe / Netherlands / Limburg                |
| EPI_ISL_414428 | 3/2/2020  | 3/12/2020 Europe / Netherlands / Noord-Brabant          |
| EPI_ISL_414429 | 3/2/2020  | 3/12/2020 Europe / Netherlands / Noord-Brabant          |
| EPI_ISL_414430 | 3/5/2020  | 3/12/2020 Europe / Netherlands / Noord-Brabant          |
| EPI_ISL_414432 | 3/2/2020  | 3/12/2020 Europe / Netherlands / Noord-Brabant          |
| EPI_ISL_414433 | 3/3/2020  | 3/12/2020 Europe / Netherlands / Noord-Holland          |
| EPI_ISL_414434 | 3/3/2020  | 3/12/2020 Europe / Netherlands / Overijssel             |
| EPI_ISL_414435 | 3/3/2020  | 3/12/2020 Europe / Netherlands / Utrecht                |
| EPI_ISL_414436 | 3/3/2020  | 3/12/2020 Europe / Netherlands / Utrecht                |
| EPI_ISL_414437 | 3/3/2020  | 3/12/2020 Europe / Netherlands / Utrecht                |
| EPI_ISL_414438 | 3/3/2020  | 3/12/2020 Europe / Netherlands / Utrecht                |
| EPI_ISL_414439 | 3/2/2020  | 3/12/2020 Europe / Netherlands / Utrecht                |
| EPI_ISL_414440 | 3/3/2020  | 3/12/2020 Europe / Netherlands / Utrecht                |
| EPI_ISL_414441 | 3/3/2020  | 3/12/2020 Europe / Netherlands / Utrecht                |
| EPI_ISL_414442 | 3/3/2020  | 3/12/2020 Europe / Netherlands / Utrecht                |
| EPI_ISL_414443 | 3/3/2020  | 3/12/2020 Europe / Netherlands / Utrecht                |
| EPI_ISL_414444 | 3/2/2020  | 3/12/2020 Europe / Netherlands / Zuid-Holland           |
| EPI_ISL_414445 | 3/3/2020  | 3/12/2020 Europe / Netherlands / Zuid-Holland           |
| EPI_ISL_414446 | 3/3/2020  | 3/12/2020 Europe / Netherlands / Zuid-Holland           |
| EPI_ISL_414448 | 3/4/2020  | 3/12/2020 Europe / Netherlands / Limburg                |



|                |           |           |                                                                |
|----------------|-----------|-----------|----------------------------------------------------------------|
| EPI_ISL_414449 | 3/3/2020  | 3/12/2020 | Europe / Netherlands / Noord-Brabant                           |
| EPI_ISL_414451 | 3/6/2020  | 3/12/2020 | Europe / Netherlands / Noord-Brabant                           |
| EPI_ISL_414452 | 3/6/2020  | 3/12/2020 | Europe / Netherlands / Noord-Brabant                           |
| EPI_ISL_414454 | 3/5/2020  | 3/12/2020 | Europe / Netherlands / Noord-Brabant                           |
| EPI_ISL_414456 | 3/4/2020  | 3/12/2020 | Europe / Netherlands / Noord-Brabant                           |
| EPI_ISL_414457 | 3/6/2020  | 3/12/2020 | Europe / Netherlands / Noord-Brabant                           |
| EPI_ISL_414458 | 3/5/2020  | 3/12/2020 | Europe / Netherlands / Noord-Brabant                           |
| EPI_ISL_414460 | 3/3/2020  | 3/12/2020 | Europe / Netherlands / Overijssel                              |
| EPI_ISL_414461 | 3/4/2020  | 3/12/2020 | Europe / Netherlands / Utrecht                                 |
| EPI_ISL_414462 | 3/4/2020  | 3/12/2020 | Europe / Netherlands / Utrecht                                 |
| EPI_ISL_414463 | 3/4/2020  | 3/12/2020 | Europe / Netherlands / Utrecht                                 |
| EPI_ISL_414464 | 3/4/2020  | 3/12/2020 | Europe / Netherlands / Utrecht                                 |
| EPI_ISL_414467 | 3/5/2020  | 3/12/2020 | Europe / Netherlands / Zuid-Holland                            |
| EPI_ISL_414468 | 3/6/2020  | 3/12/2020 | Europe / Netherlands / Zuid-Holland                            |
| EPI_ISL_414469 | 3/4/2020  | 3/12/2020 | Europe / Netherlands / Zuid-Holland                            |
| EPI_ISL_414470 | 3/6/2020  | 3/12/2020 | Europe / Netherlands / Zuid-Holland                            |
| EPI_ISL_414471 | 3/5/2020  | 3/12/2020 | Europe / Netherlands / Zuid-Holland                            |
| EPI_ISL_414476 | 2/29/2020 | 3/12/2020 | North America / USA / New York                                 |
| EPI_ISL_414477 | 3/1/2020  | 3/12/2020 | Europe / Czech Republic / Usti nad Labem                       |
| EPI_ISL_414479 | 2/18/2020 | 3/12/2020 | North America / USA                                            |
| EPI_ISL_414480 | 2/21/2020 | 3/12/2020 | North America / USA                                            |
| EPI_ISL_414481 | 2/21/2020 | 3/12/2020 | North America / USA                                            |
| EPI_ISL_414482 | 2/18/2020 | 3/12/2020 | North America / USA                                            |
| EPI_ISL_414483 | 2/17/2020 | 3/12/2020 | North America / USA                                            |
| EPI_ISL_414484 | 2/17/2020 | 3/12/2020 | North America / USA                                            |
| EPI_ISL_414485 | 2/24/2020 | 3/12/2020 | North America / USA                                            |
| EPI_ISL_414487 | 3/4/2020  | 3/12/2020 | Europe / Ireland / Cork                                        |
| EPI_ISL_414495 | 3/8/2020  | 3/12/2020 | Europe / Spain / Comunitat Valenciana / Valencia               |
| EPI_ISL_414496 | 3/4/2020  | 3/12/2020 | Europe / Spain / Comunitat Valenciana / Valencia               |
| EPI_ISL_414497 | 2/25/2020 | 3/12/2020 | Europe / Germany / North Rhine-Westphalia / Heinsberg Distrikt |
| EPI_ISL_414498 | 2/26/2020 | 3/12/2020 | Europe / Germany / North Rhine-Westphalia / Heinsberg Distrikt |
| EPI_ISL_414499 | 2/26/2020 | 3/12/2020 | Europe / Germany / North Rhine-Westphalia / Heinsberg Distrikt |
| EPI_ISL_414500 | 3/4/2020  | 3/12/2020 | Europe / United Kingdom / England / Yorkshire / Sheffield      |
| EPI_ISL_414501 | 3/3/2020  | 3/12/2020 | Europe / United Kingdom / England / Yorkshire / Sheffield      |
| EPI_ISL_434560 | 2020-01   | 3/12/2020 | Asia / Hong Kong                                               |
| EPI_ISL_414505 | 2/27/2020 | 3/13/2020 | Europe / Germany / North Rhine-Westphalia / Heinsberg Distrikt |
| EPI_ISL_414508 | 2/27/2020 | 3/13/2020 | Europe / Germany / North Rhine-Westphalia / Heinsberg Distrikt |
| EPI_ISL_414509 | 2/28/2020 | 3/13/2020 | Europe / Germany / North Rhine-Westphalia / Heinsberg Distrikt |
| EPI_ISL_414517 | 2/25/2020 | 3/13/2020 | Asia / Hong Kong                                               |
| EPI_ISL_414519 | 2/24/2020 | 3/13/2020 | Asia / Hong Kong                                               |
| EPI_ISL_414520 | 3/2/2020  | 3/13/2020 | Europe / Germany / Bavaria / Munich                            |
| EPI_ISL_414521 | 3/2/2020  | 3/13/2020 | Europe / Germany / Bavaria / Munich                            |
| EPI_ISL_414522 | 2/28/2020 | 3/13/2020 | Europe / United Kingdom / England                              |
| EPI_ISL_414523 | 2/27/2020 | 3/13/2020 | Europe / United Kingdom / England                              |
| EPI_ISL_414524 | 3/1/2020  | 3/13/2020 | Europe / United Kingdom / England                              |
| EPI_ISL_414525 | 3/2/2020  | 3/13/2020 | Europe / United Kingdom / England                              |
| EPI_ISL_414526 | 3/3/2020  | 3/13/2020 | Europe / United Kingdom / England                              |

|                |           |                                                                        |
|----------------|-----------|------------------------------------------------------------------------|
| EPI_ISL_414527 | 2/9/2020  | 3/13/2020 Asia / Hong Kong                                             |
| EPI_ISL_414528 | 2/10/2020 | 3/13/2020 Asia / Hong Kong                                             |
| EPI_ISL_414529 | 3/4/2020  | 3/13/2020 Europe / Netherlands / Noord-Brabant                         |
| EPI_ISL_414530 | 3/4/2020  | 3/13/2020 Europe / Netherlands / Noord-Brabant                         |
| EPI_ISL_414531 | 3/4/2020  | 3/13/2020 Europe / Netherlands / Noord-Brabant                         |
| EPI_ISL_414532 | 3/5/2020  | 3/13/2020 Europe / Netherlands / Noord-Brabant                         |
| EPI_ISL_414534 | 3/6/2020  | 3/13/2020 Europe / Netherlands / Noord-Brabant                         |
| EPI_ISL_414535 | 3/6/2020  | 3/13/2020 Europe / Netherlands / Noord-Brabant                         |
| EPI_ISL_414536 | 3/8/2020  | 3/13/2020 Europe / Netherlands / Noord-Brabant                         |
| EPI_ISL_414537 | 3/8/2020  | 3/13/2020 Europe / Netherlands / Noord-Brabant                         |
| EPI_ISL_414539 | 3/8/2020  | 3/13/2020 Europe / Netherlands / Noord-Brabant                         |
| EPI_ISL_414541 | 3/8/2020  | 3/13/2020 Europe / Netherlands / Noord-Brabant                         |
| EPI_ISL_414542 | 2020-03   | 3/13/2020 Europe / Netherlands / Noord-Brabant                         |
| EPI_ISL_414543 | 2020-03   | 3/13/2020 Europe / Netherlands / Noord-Brabant                         |
| EPI_ISL_414544 | 3/9/2020  | 3/13/2020 Europe / Netherlands / Noord-Brabant                         |
| EPI_ISL_414545 | 3/3/2020  | 3/13/2020 Europe / Netherlands / Noord-Brabant                         |
| EPI_ISL_414548 | 3/4/2020  | 3/13/2020 Europe / Netherlands / Noord-Brabant                         |
| EPI_ISL_414549 | 3/3/2020  | 3/13/2020 Europe / Netherlands / Noord-Holland                         |
| EPI_ISL_414551 | 3/7/2020  | 3/13/2020 Europe / Netherlands / Utrecht                               |
| EPI_ISL_414552 | 3/7/2020  | 3/13/2020 Europe / Netherlands / Utrecht                               |
| EPI_ISL_414554 | 3/8/2020  | 3/13/2020 Europe / Netherlands / Utrecht                               |
| EPI_ISL_414555 | 3/8/2020  | 3/13/2020 Europe / Netherlands / Utrecht                               |
| EPI_ISL_414556 | 3/6/2020  | 3/13/2020 Europe / Netherlands / Zuid-Holland                          |
| EPI_ISL_414557 | 3/8/2020  | 3/13/2020 Europe / Netherlands / Zuid-Holland                          |
| EPI_ISL_414558 | 3/6/2020  | 3/13/2020 Europe / Netherlands / Zuid-Holland                          |
| EPI_ISL_414559 | 3/7/2020  | 3/13/2020 Europe / Netherlands / Zuid-Holland                          |
| EPI_ISL_414560 | 3/3/2020  | 3/13/2020 Europe / Netherlands / Zuid-Holland                          |
| EPI_ISL_414561 | 3/5/2020  | 3/13/2020 Europe / Netherlands / Zuid-Holland                          |
| EPI_ISL_414562 | 3/3/2020  | 3/13/2020 Europe / Netherlands / Zuid-Holland                          |
| EPI_ISL_414563 | 3/3/2020  | 3/13/2020 Europe / Netherlands / Zuid-Holland                          |
| EPI_ISL_414564 | 3/8/2020  | 3/13/2020 Europe / Netherlands / Zuid-Holland                          |
| EPI_ISL_414566 | 3/6/2020  | 3/13/2020 Europe / Netherlands / Zuid-Holland                          |
| EPI_ISL_414569 | 2/12/2020 | 3/13/2020 Asia / Hong Kong                                             |
| EPI_ISL_414571 | 2/22/2020 | 3/13/2020 Asia / Hong Kong                                             |
| EPI_ISL_414577 | 3/2/2020  | 3/13/2020 South America / Chile / Maule / Talca                        |
| EPI_ISL_414578 | 3/4/2020  | 3/13/2020 South America / Chile / Maule / Talca                        |
| EPI_ISL_414579 | 3/3/2020  | 3/13/2020 South America / Chile / Region Metropolitana de Santiago / S |
| EPI_ISL_414580 | 3/5/2020  | 3/13/2020 South America / Chile / Region Metropolitana de Santiago / S |
| EPI_ISL_414586 | 3/3/2020  | 3/13/2020 Europe / Ireland / Limerick                                  |
| EPI_ISL_414587 | 3/3/2020  | 3/13/2020 Europe / Ireland / Limerick                                  |
| EPI_ISL_414589 | 3/7/2020  | 3/13/2020 North America / USA / Minnesota                              |
| EPI_ISL_414590 | 3/9/2020  | 3/13/2020 North America / USA / Minnesota                              |
| EPI_ISL_414591 | 3/6/2020  | 3/14/2020 North America / USA / Washington / King County / Kirkland    |
| EPI_ISL_414592 | 3/6/2020  | 3/14/2020 North America / USA / Washington / Pierce County / Tacoma    |
| EPI_ISL_414593 | 3/5/2020  | 3/14/2020 North America / USA / Washington / King County / Kirkland    |
| EPI_ISL_414594 | 3/5/2020  | 3/14/2020 North America / USA / Washington / King County / Kirkland    |
| EPI_ISL_414595 | 3/5/2020  | 3/14/2020 North America / USA / Washington / King County / Kirkland    |

|                |           |                                                                     |
|----------------|-----------|---------------------------------------------------------------------|
| EPI_ISL_414596 | 3/4/2020  | 3/14/2020 North America / USA / Washington / King County / Kirkland |
| EPI_ISL_414597 | 3/4/2020  | 3/14/2020 North America / USA / Washington / King County / Kirkland |
| EPI_ISL_414598 | 3/5/2020  | 3/14/2020 Europe / Spain / Comunitat Valenciana / Valencia          |
| EPI_ISL_414600 | 2/26/2020 | 3/14/2020 Europe / France / Grand Est / Strasbourg                  |
| EPI_ISL_418269 | 1/22/2020 | 3/14/2020 Asia / Vietnam / Ho Chi Minh City                         |
| EPI_ISL_547870 | 2020      | 3/14/2020 Asia / India / Delhi                                      |
| EPI_ISL_547871 | 2020      | 3/14/2020 Asia / India / Delhi                                      |
| EPI_ISL_547872 | 2020      | 3/14/2020 Asia / India / Delhi                                      |
| EPI_ISL_547873 | 2020      | 3/14/2020 Asia / India / Delhi                                      |
| EPI_ISL_547874 | 2020      | 3/14/2020 Asia / India / Delhi                                      |
| EPI_ISL_547875 | 2020      | 3/14/2020 Asia / India / Delhi                                      |
| EPI_ISL_547876 | 2020      | 3/14/2020 Asia / India / Uttar Pradesh                              |
| EPI_ISL_414616 | 3/8/2020  | 3/15/2020 North America / USA / Washington / King County / Kirkland |
| EPI_ISL_414617 | 3/8/2020  | 3/15/2020 North America / USA / Washington                          |
| EPI_ISL_414618 | 3/8/2020  | 3/15/2020 North America / USA / Washington                          |
| EPI_ISL_414619 | 3/7/2020  | 3/15/2020 North America / USA / Washington                          |
| EPI_ISL_414620 | 3/8/2020  | 3/15/2020 North America / USA / Washington                          |
| EPI_ISL_414621 | 3/7/2020  | 3/15/2020 North America / USA / Washington                          |
| EPI_ISL_414622 | 3/8/2020  | 3/15/2020 North America / USA / Washington / King County / Seattle  |
| EPI_ISL_414623 | 2/25/2020 | 3/15/2020 Europe / France / Grand Est / Strasbourg                  |
| EPI_ISL_414624 | 2/26/2020 | 3/15/2020 Europe / France / Normandie / Rouen                       |
| EPI_ISL_414625 | 2/26/2020 | 3/15/2020 Europe / France / Pays-de-la-Loire / Nantes               |
| EPI_ISL_414626 | 2/29/2020 | 3/15/2020 Europe / France / Hauts-de-France / CrÃ©py en Valois      |
| EPI_ISL_414627 | 3/2/2020  | 3/15/2020 Europe / France / Hauts-de-France / CompiÃ¨gne            |
| EPI_ISL_414628 | 3/2/2020  | 3/15/2020 Europe / France / Hauts-de-France / CompiÃ¨gne            |
| EPI_ISL_414629 | 3/3/2020  | 3/15/2020 Europe / France / Hauts-de-France / CompiÃ¨gne            |
| EPI_ISL_414630 | 3/3/2020  | 3/15/2020 Europe / France / Hauts-de-France / CompiÃ¨gne            |
| EPI_ISL_414631 | 3/4/2020  | 3/15/2020 Europe / France / Grand Est / Reims                       |
| EPI_ISL_414632 | 3/4/2020  | 3/15/2020 Europe / France / Grand Est / Reims                       |
| EPI_ISL_414633 | 3/4/2020  | 3/15/2020 Europe / France / ÃŽle-de-France / Pontoise               |
| EPI_ISL_414634 | 3/4/2020  | 3/15/2020 Europe / France / Hauts-de-France / CompiÃ¨gne            |
| EPI_ISL_414635 | 3/4/2020  | 3/15/2020 Europe / France / Hauts-de-France / CompiÃ¨gne            |
| EPI_ISL_414636 | 3/4/2020  | 3/15/2020 Europe / France / Hauts-de-France / CompiÃ¨gne            |
| EPI_ISL_414637 | 3/4/2020  | 3/15/2020 Europe / France / Hauts-de-France / CompiÃ¨gne            |
| EPI_ISL_414638 | 3/4/2020  | 3/15/2020 Europe / France / Hauts-de-France / CompiÃ¨gne            |
| EPI_ISL_414641 | 3/5/2020  | 3/15/2020 Europe / Finland                                          |
| EPI_ISL_414642 | 3/8/2020  | 3/15/2020 Europe / Finland                                          |
| EPI_ISL_414643 | 3/7/2020  | 3/15/2020 Europe / Finland                                          |
| EPI_ISL_414646 | 3/4/2020  | 3/15/2020 Europe / Finland                                          |
| EPI_ISL_414648 | 3/11/2020 | 3/16/2020 North America / USA / California / San Diego County       |
| EPI_ISL_414663 | 2/25/2020 | 3/16/2020 Asia / China / Guangdong / Guangzhou                      |
| EPI_ISL_414686 | 2/27/2020 | 3/16/2020 Asia / China / Guangdong / Guangzhou                      |
| EPI_ISL_414687 | 2/25/2020 | 3/16/2020 Asia / China / Guangdong / Guangzhou                      |
| EPI_ISL_414689 | 2/25/2020 | 3/16/2020 Asia / China / Guangdong / Guangzhou                      |
| EPI_ISL_414690 | 2/25/2020 | 3/16/2020 Asia / China / Guangdong / Guangzhou                      |
| EPI_ISL_414691 | 2/25/2020 | 3/16/2020 Asia / China / Guangdong / Guangzhou                      |
| EPI_ISL_414692 | 2/25/2020 | 3/16/2020 Asia / China / Guangdong / Guangzhou                      |

|                |           |                                                                |
|----------------|-----------|----------------------------------------------------------------|
| EPI_ISL_414936 | 1/23/2020 | 3/16/2020 Asia / China / Shandong                              |
| EPI_ISL_414937 | 1/26/2020 | 3/16/2020 Asia / China / Shandong                              |
| EPI_ISL_414938 | 1/24/2020 | 3/16/2020 Asia / China / Shandong                              |
| EPI_ISL_414939 | 1/25/2020 | 3/16/2020 Asia / China / Shandong                              |
| EPI_ISL_414940 | 1/25/2020 | 3/16/2020 Asia / China / Shandong                              |
| EPI_ISL_414941 | 1/30/2020 | 3/16/2020 Asia / China / Shandong                              |
| EPI_ISL_415041 | 3/7/2020  | 3/16/2020 Europe / United Kingdom / Wales                      |
| EPI_ISL_415105 | 3/4/2020  | 3/16/2020 South America / Brazil / Bahia / Feira de Santana    |
| EPI_ISL_415128 | 2/29/2020 | 3/16/2020 South America / Brazil / Espirito Santo / Vila Velha |
| EPI_ISL_415129 | 2/29/2020 | 3/16/2020 Europe / United Kingdom / England                    |
| EPI_ISL_415130 | 3/1/2020  | 3/16/2020 Europe / United Kingdom / England                    |
| EPI_ISL_415133 | 2/29/2020 | 3/16/2020 Europe / United Kingdom / England                    |
| EPI_ISL_415134 | 2/29/2020 | 3/16/2020 Europe / United Kingdom / England                    |
| EPI_ISL_415136 | 2/29/2020 | 3/16/2020 Europe / United Kingdom / England                    |
| EPI_ISL_415140 | 2/29/2020 | 3/16/2020 Europe / United Kingdom / England                    |
| EPI_ISL_415141 | 2/29/2020 | 3/16/2020 Europe / United Kingdom / England                    |
| EPI_ISL_415142 | 3/2/2020  | 3/16/2020 Europe / United Kingdom / England                    |
| EPI_ISL_415143 | 3/2/2020  | 3/16/2020 Europe / United Kingdom / England                    |
| EPI_ISL_415144 | 2/27/2020 | 3/16/2020 Europe / United Kingdom / England                    |
| EPI_ISL_415145 | 3/1/2020  | 3/16/2020 Europe / United Kingdom / England                    |
| EPI_ISL_415146 | 3/1/2020  | 3/16/2020 Europe / United Kingdom / England                    |
| EPI_ISL_415147 | 3/1/2020  | 3/16/2020 Europe / United Kingdom / England                    |
| EPI_ISL_415148 | 3/3/2020  | 3/16/2020 Europe / United Kingdom / England                    |
| EPI_ISL_415150 | 3/9/2020  | 3/16/2020 Europe / United Kingdom / England                    |
| EPI_ISL_415151 | 3/4/2020  | 3/16/2020 North America / USA / New York                       |
| EPI_ISL_415152 | 3/6/2020  | 3/16/2020 North America / Panama / Panama City                 |
| EPI_ISL_415153 | 3/3/2020  | 3/16/2020 Europe / Belgium / Huldenberg                        |
| EPI_ISL_415154 | 3/1/2020  | 3/16/2020 Europe / Belgium / Kraainem                          |
| EPI_ISL_415155 | 3/1/2020  | 3/16/2020 Europe / Belgium / Huldenberg                        |
| EPI_ISL_415156 | 3/1/2020  | 3/16/2020 Europe / Belgium / Huldenberg                        |
| EPI_ISL_415157 | 3/1/2020  | 3/16/2020 Europe / Belgium / Sint-Niklaas                      |
| EPI_ISL_415158 | 3/1/2020  | 3/16/2020 Europe / Belgium / Brussels                          |
| EPI_ISL_415159 | 2/29/2020 | 3/16/2020 Europe / Belgium / Leuven                            |
| EPI_ISL_415454 | 2/28/2020 | 3/17/2020 Europe / Switzerland / Geneva                        |
| EPI_ISL_415455 | 2/28/2020 | 3/17/2020 Europe / Switzerland / Geneva                        |
| EPI_ISL_415456 | 2/29/2020 | 3/17/2020 Europe / Switzerland / Bern                          |
| EPI_ISL_415457 | 2/29/2020 | 3/17/2020 Europe / Switzerland / Aargau                        |
| EPI_ISL_415458 | 3/1/2020  | 3/17/2020 Europe / Switzerland / Geneva                        |
| EPI_ISL_415459 | 2/29/2020 | 3/17/2020 Europe / Switzerland / Geneva                        |
| EPI_ISL_415460 | 3/9/2020  | 3/17/2020 Europe / Netherlands / Flevoland                     |
| EPI_ISL_415461 | 3/10/2020 | 3/17/2020 Europe / Netherlands / Gelderland                    |
| EPI_ISL_415462 | 3/9/2020  | 3/17/2020 Europe / Netherlands / Gelderland                    |
| EPI_ISL_415463 | 3/9/2020  | 3/17/2020 Europe / Netherlands / Gelderland                    |
| EPI_ISL_415464 | 2020      | 3/17/2020 Europe / Netherlands / Limburg                       |
| EPI_ISL_415465 | 3/10/2020 | 3/17/2020 Europe / Netherlands                                 |
| EPI_ISL_415466 | 3/9/2020  | 3/17/2020 Europe / Netherlands                                 |
| EPI_ISL_415467 | 3/10/2020 | 3/17/2020 Europe / Netherlands                                 |

|                |           |                                                |
|----------------|-----------|------------------------------------------------|
| EPI_ISL_415468 | 3/10/2020 | 3/17/2020 Europe / Netherlands                 |
| EPI_ISL_415469 | 3/10/2020 | 3/17/2020 Europe / Netherlands                 |
| EPI_ISL_415470 | 3/10/2020 | 3/17/2020 Europe / Netherlands                 |
| EPI_ISL_415471 | 3/11/2020 | 3/17/2020 Europe / Netherlands                 |
| EPI_ISL_415472 | 3/11/2020 | 3/17/2020 Europe / Netherlands                 |
| EPI_ISL_415473 | 3/9/2020  | 3/17/2020 Europe / Netherlands                 |
| EPI_ISL_415474 | 3/9/2020  | 3/17/2020 Europe / Netherlands                 |
| EPI_ISL_415475 | 3/12/2020 | 3/17/2020 Europe / Netherlands                 |
| EPI_ISL_415476 | 3/10/2020 | 3/17/2020 Europe / Netherlands                 |
| EPI_ISL_415478 | 3/8/2020  | 3/17/2020 Europe / Netherlands                 |
| EPI_ISL_415479 | 3/8/2020  | 3/17/2020 Europe / Netherlands                 |
| EPI_ISL_415480 | 3/9/2020  | 3/17/2020 Europe / Netherlands                 |
| EPI_ISL_415481 | 3/8/2020  | 3/17/2020 Europe / Netherlands                 |
| EPI_ISL_415482 | 3/9/2020  | 3/17/2020 Europe / Netherlands                 |
| EPI_ISL_415483 | 3/9/2020  | 3/17/2020 Europe / Netherlands                 |
| EPI_ISL_415484 | 3/13/2020 | 3/17/2020 Europe / Netherlands                 |
| EPI_ISL_415485 | 3/12/2020 | 3/17/2020 Europe / Netherlands                 |
| EPI_ISL_415486 | 3/13/2020 | 3/17/2020 Europe / Netherlands                 |
| EPI_ISL_415487 | 3/13/2020 | 3/17/2020 Europe / Netherlands                 |
| EPI_ISL_415488 | 3/13/2020 | 3/17/2020 Europe / Netherlands                 |
| EPI_ISL_415489 | 3/13/2020 | 3/17/2020 Europe / Netherlands                 |
| EPI_ISL_415491 | 3/7/2020  | 3/17/2020 Europe / Netherlands                 |
| EPI_ISL_415492 | 3/10/2020 | 3/17/2020 Europe / Netherlands                 |
| EPI_ISL_415493 | 2020      | 3/17/2020 Europe / Netherlands                 |
| EPI_ISL_415494 | 2020      | 3/17/2020 Europe / Netherlands                 |
| EPI_ISL_415495 | 3/10/2020 | 3/17/2020 Europe / Netherlands                 |
| EPI_ISL_415496 | 3/9/2020  | 3/17/2020 Europe / Netherlands                 |
| EPI_ISL_415497 | 3/9/2020  | 3/17/2020 Europe / Netherlands                 |
| EPI_ISL_415498 | 3/9/2020  | 3/17/2020 Europe / Netherlands                 |
| EPI_ISL_415499 | 2020      | 3/17/2020 Europe / Netherlands / Noord-Brabant |
| EPI_ISL_415500 | 3/10/2020 | 3/17/2020 Europe / Netherlands / Noord-Brabant |
| EPI_ISL_415501 | 3/11/2020 | 3/17/2020 Europe / Netherlands / Noord-Brabant |
| EPI_ISL_415502 | 3/9/2020  | 3/17/2020 Europe / Netherlands / Noord-Brabant |
| EPI_ISL_415503 | 3/11/2020 | 3/17/2020 Europe / Netherlands / Noord-Brabant |
| EPI_ISL_415504 | 3/9/2020  | 3/17/2020 Europe / Netherlands / Noord-Brabant |
| EPI_ISL_415505 | 3/11/2020 | 3/17/2020 Europe / Netherlands / Noord-Brabant |
| EPI_ISL_415506 | 3/11/2020 | 3/17/2020 Europe / Netherlands / Noord-Brabant |
| EPI_ISL_415507 | 2020      | 3/17/2020 Europe / Netherlands / Noord-Brabant |
| EPI_ISL_415508 | 3/9/2020  | 3/17/2020 Europe / Netherlands / Noord-Brabant |
| EPI_ISL_415509 | 2020      | 3/17/2020 Europe / Netherlands / Noord-Brabant |
| EPI_ISL_415510 | 3/9/2020  | 3/17/2020 Europe / Netherlands / Noord-Brabant |
| EPI_ISL_415511 | 3/9/2020  | 3/17/2020 Europe / Netherlands / Noord-Brabant |
| EPI_ISL_415512 | 3/9/2020  | 3/17/2020 Europe / Netherlands / Noord-Brabant |
| EPI_ISL_415513 | 3/11/2020 | 3/17/2020 Europe / Netherlands / Noord-Brabant |
| EPI_ISL_415514 | 3/11/2020 | 3/17/2020 Europe / Netherlands / Noord-Brabant |
| EPI_ISL_415515 | 3/11/2020 | 3/17/2020 Europe / Netherlands / Noord-Brabant |
| EPI_ISL_415517 | 2020      | 3/17/2020 Europe / Netherlands / Noord-Brabant |

|                |           |           |                                                          |
|----------------|-----------|-----------|----------------------------------------------------------|
| EPI_ISL_415518 | 2020      | 3/17/2020 | Europe / Netherlands / Noord-Brabant                     |
| EPI_ISL_415519 | 2020      | 3/17/2020 | Europe / Netherlands / Noord-Brabant                     |
| EPI_ISL_415520 | 2020      | 3/17/2020 | Europe / Netherlands / Noord-Brabant                     |
| EPI_ISL_415521 | 2020      | 3/17/2020 | Europe / Netherlands / Noord-Brabant                     |
| EPI_ISL_415522 | 2020      | 3/17/2020 | Europe / Netherlands / Noord-Brabant                     |
| EPI_ISL_415523 | 2020      | 3/17/2020 | Europe / Netherlands / Noord-Brabant                     |
| EPI_ISL_415524 | 3/12/2020 | 3/17/2020 | Europe / Netherlands / Noord-Brabant                     |
| EPI_ISL_415525 | 3/12/2020 | 3/17/2020 | Europe / Netherlands / Noord-Holland                     |
| EPI_ISL_415526 | 3/10/2020 | 3/17/2020 | Europe / Netherlands / Utrecht                           |
| EPI_ISL_415527 | 3/12/2020 | 3/17/2020 | Europe / Netherlands / Utrecht                           |
| EPI_ISL_415529 | 3/9/2020  | 3/17/2020 | Europe / Netherlands / Zuid-Holland                      |
| EPI_ISL_415530 | 3/9/2020  | 3/17/2020 | Europe / Netherlands / Zuid-Holland                      |
| EPI_ISL_415531 | 3/9/2020  | 3/17/2020 | Europe / Netherlands / Zuid-Holland                      |
| EPI_ISL_415532 | 3/9/2020  | 3/17/2020 | Europe / Netherlands / Zuid-Holland                      |
| EPI_ISL_415533 | 3/9/2020  | 3/17/2020 | Europe / Netherlands / Zuid-Holland                      |
| EPI_ISL_415534 | 3/11/2020 | 3/17/2020 | Europe / Netherlands / Zuid-Holland                      |
| EPI_ISL_415535 | 3/12/2020 | 3/17/2020 | Europe / Netherlands / Zuid-Holland                      |
| EPI_ISL_415539 | 3/13/2020 | 3/17/2020 | North America / USA / Utah                               |
| EPI_ISL_415541 | 3/13/2020 | 3/17/2020 | North America / USA / Utah                               |
| EPI_ISL_415542 | 3/13/2020 | 3/17/2020 | North America / USA / Utah                               |
| EPI_ISL_415543 | 3/13/2020 | 3/17/2020 | North America / USA / Utah                               |
| EPI_ISL_415544 | 3/13/2020 | 3/17/2020 | North America / USA / Utah                               |
| EPI_ISL_415578 | 2/27/2020 | 3/18/2020 | North America / Canada / British Columbia                |
| EPI_ISL_415581 | 3/1/2020  | 3/18/2020 | North America / Canada / British Columbia                |
| EPI_ISL_415582 | 3/4/2020  | 3/18/2020 | North America / Canada / British Columbia                |
| EPI_ISL_415583 | 3/3/2020  | 3/18/2020 | North America / Canada / British Columbia                |
| EPI_ISL_415584 | 3/2/2020  | 3/18/2020 | North America / Canada / British Columbia                |
| EPI_ISL_415585 | 3/4/2020  | 3/18/2020 | North America / Canada / British Columbia                |
| EPI_ISL_415586 | 3/5/2020  | 3/18/2020 | North America / Canada / British Columbia                |
| EPI_ISL_415588 | 3/5/2020  | 3/18/2020 | North America / Canada / British Columbia                |
| EPI_ISL_415589 | 3/5/2020  | 3/18/2020 | North America / Canada / British Columbia                |
| EPI_ISL_415591 | 3/10/2020 | 3/18/2020 | North America / USA / Washington                         |
| EPI_ISL_415592 | 3/9/2020  | 3/18/2020 | North America / USA / Washington                         |
| EPI_ISL_415594 | 3/10/2020 | 3/18/2020 | North America / USA / Washington                         |
| EPI_ISL_415595 | 3/9/2020  | 3/18/2020 | North America / USA / Washington                         |
| EPI_ISL_415596 | 3/9/2020  | 3/18/2020 | North America / USA / Washington                         |
| EPI_ISL_415597 | 3/10/2020 | 3/18/2020 | North America / USA / Washington / King County / Seattle |
| EPI_ISL_415598 | 3/10/2020 | 3/18/2020 | North America / USA / Washington                         |
| EPI_ISL_415599 | 3/9/2020  | 3/18/2020 | North America / USA / Washington                         |
| EPI_ISL_415600 | 3/9/2020  | 3/18/2020 | North America / USA / Washington                         |
| EPI_ISL_415601 | 3/10/2020 | 3/18/2020 | North America / USA / Washington                         |
| EPI_ISL_415602 | 3/10/2020 | 3/18/2020 | North America / USA / Washington / King County / Seattle |
| EPI_ISL_415603 | 3/10/2020 | 3/18/2020 | North America / USA / Washington / King County / Seattle |
| EPI_ISL_415604 | 3/10/2020 | 3/18/2020 | North America / USA / Washington                         |
| EPI_ISL_415605 | 3/5/2020  | 3/18/2020 | North America / USA / Washington                         |
| EPI_ISL_415606 | 3/8/2020  | 3/18/2020 | North America / USA / Washington                         |
| EPI_ISL_415607 | 3/9/2020  | 3/18/2020 | North America / USA / Washington                         |

|                |           |                                                                        |
|----------------|-----------|------------------------------------------------------------------------|
| EPI_ISL_415608 | 3/8/2020  | 3/18/2020 North America / USA / Washington                             |
| EPI_ISL_415609 | 3/8/2020  | 3/18/2020 North America / USA / Washington                             |
| EPI_ISL_415610 | 3/8/2020  | 3/18/2020 North America / USA / Washington                             |
| EPI_ISL_415611 | 3/9/2020  | 3/18/2020 North America / USA / Washington                             |
| EPI_ISL_415612 | 3/9/2020  | 3/18/2020 North America / USA / Washington / King County / Seattle     |
| EPI_ISL_415613 | 3/9/2020  | 3/18/2020 North America / USA / Washington                             |
| EPI_ISL_415614 | 3/9/2020  | 3/18/2020 North America / USA / Washington                             |
| EPI_ISL_415615 | 3/8/2020  | 3/18/2020 North America / USA / Washington                             |
| EPI_ISL_415616 | 3/8/2020  | 3/18/2020 North America / USA / Washington                             |
| EPI_ISL_415617 | 3/9/2020  | 3/18/2020 North America / USA / Washington                             |
| EPI_ISL_415619 | 3/9/2020  | 3/18/2020 North America / USA / Washington                             |
| EPI_ISL_415620 | 3/9/2020  | 3/18/2020 North America / USA / Washington                             |
| EPI_ISL_415621 | 3/9/2020  | 3/18/2020 North America / USA / Washington / King County / Seattle     |
| EPI_ISL_415622 | 3/9/2020  | 3/18/2020 North America / USA / Washington                             |
| EPI_ISL_415624 | 3/9/2020  | 3/18/2020 North America / USA / Washington                             |
| EPI_ISL_415625 | 3/9/2020  | 3/18/2020 North America / USA / Washington                             |
| EPI_ISL_415626 | 3/10/2020 | 3/18/2020 North America / USA / Washington                             |
| EPI_ISL_415627 | 3/9/2020  | 3/18/2020 North America / USA / Washington                             |
| EPI_ISL_415629 | 3/4/2020  | 3/18/2020 Europe / United Kingdom / Scotland                           |
| EPI_ISL_415630 | 3/9/2020  | 3/18/2020 Europe / United Kingdom / Scotland                           |
| EPI_ISL_415631 | 3/10/2020 | 3/18/2020 Europe / United Kingdom / Scotland                           |
| EPI_ISL_415640 | 3/8/2020  | 3/18/2020 Europe / United Kingdom / Scotland                           |
| EPI_ISL_415641 | 2/27/2020 | 3/18/2020 Asia / Georgia / Tbilisi                                     |
| EPI_ISL_415642 | 3/10/2020 | 3/18/2020 Asia / Georgia / Tbilisi                                     |
| EPI_ISL_415643 | 3/10/2020 | 3/18/2020 Asia / Georgia / Tbilisi                                     |
| EPI_ISL_415644 | 2/28/2020 | 3/18/2020 Asia / Georgia / Tbilisi                                     |
| EPI_ISL_415646 | 3/3/2020  | 3/18/2020 Europe / Denmark                                             |
| EPI_ISL_415647 | 3/3/2020  | 3/18/2020 Europe / Denmark / Hovedstaden / Copenhagen                  |
| EPI_ISL_415648 | 3/3/2020  | 3/18/2020 Europe / Denmark                                             |
| EPI_ISL_415649 | 3/5/2020  | 3/18/2020 Europe / France / Hauts-de-France / CrÃ©py-en -Valois        |
| EPI_ISL_415650 | 3/2/2020  | 3/18/2020 Europe / France / ÅŽle-de-France                             |
| EPI_ISL_415651 | 3/5/2020  | 3/18/2020 Europe / France / Bourgogne-Franche-Comte / Montreux-Cha     |
| EPI_ISL_415652 | 3/5/2020  | 3/18/2020 Europe / France / Bourgogne-Franche-Comte / Thise            |
| EPI_ISL_415654 | 3/9/2020  | 3/18/2020 Europe / France / Hauts-de-France / CompiÅ“gne               |
| EPI_ISL_415655 | 3/12/2020 | 3/19/2020 Europe / United Kingdom / Wales                              |
| EPI_ISL_415656 | 3/12/2020 | 3/19/2020 Europe / United Kingdom / Wales                              |
| EPI_ISL_415657 | 3/12/2020 | 3/19/2020 Europe / United Kingdom / Wales                              |
| EPI_ISL_415658 | 3/6/2020  | 3/19/2020 South America / Chile / Region Metropolitana de Santiago / S |
| EPI_ISL_415659 | 3/12/2020 | 3/19/2020 Europe / United Kingdom / Wales                              |
| EPI_ISL_415660 | 3/7/2020  | 3/19/2020 South America / Chile / Region Metropolitana de Santiago / S |
| EPI_ISL_415661 | 3/8/2020  | 3/19/2020 South America / Chile / Region Metropolitana de Santiago / S |
| EPI_ISL_415698 | 2/27/2020 | 3/19/2020 Europe / Switzerland / Grisons                               |
| EPI_ISL_415699 | 2/27/2020 | 3/19/2020 Europe / Switzerland / Grisons                               |
| EPI_ISL_415700 | 2/28/2020 | 3/19/2020 Europe / Switzerland / Geneva                                |
| EPI_ISL_415701 | 3/2/2020  | 3/19/2020 Europe / Switzerland / Basel-Stadt                           |
| EPI_ISL_415702 | 3/2/2020  | 3/19/2020 Europe / Switzerland / Schwyz                                |
| EPI_ISL_415703 | 3/1/2020  | 3/19/2020 Europe / Switzerland / Ticino                                |

|                |           |                                                                |
|----------------|-----------|----------------------------------------------------------------|
| EPI_ISL_415704 | 3/4/2020  | 3/19/2020 Europe / Switzerland / Bern                          |
| EPI_ISL_415705 | 3/6/2020  | 3/19/2020 Europe / Switzerland / Geneva                        |
| EPI_ISL_415706 | 3/6/2020  | 3/19/2020 Europe / Switzerland / Geneva                        |
| EPI_ISL_415707 | 3/8/2020  | 3/19/2020 Europe / Switzerland / Geneva                        |
| EPI_ISL_415708 | 3/7/2020  | 3/19/2020 Europe / Switzerland / Geneva                        |
| EPI_ISL_415709 | 1/25/2020 | 3/19/2020 Asia / China / Hangzhou                              |
| EPI_ISL_415710 | 3/15/2020 | 3/19/2020 Europe / Russia / Saint Petersburg                   |
| EPI_ISL_415711 | 1/22/2020 | 3/19/2020 Asia / China / Hangzhou                              |
| EPI_ISL_415741 | 2/26/2020 | 3/19/2020 Asia / Taiwan / Taoyuan                              |
| EPI_ISL_415742 | 2/27/2020 | 3/19/2020 Asia / Taiwan / Taoyuan                              |
| EPI_ISL_415743 | 2/27/2020 | 3/19/2020 Asia / Taiwan / Taoyuan                              |
| EPI_ISL_415787 | 3/10/2020 | 3/19/2020 South America / Peru / Lima                          |
| EPI_ISL_415920 | 3/12/2020 | 3/19/2020 Europe / United Kingdom / Wales                      |
| EPI_ISL_416024 | 3/11/2020 | 3/19/2020 Europe / United Kingdom / Wales                      |
| EPI_ISL_416026 | 3/11/2020 | 3/19/2020 Europe / United Kingdom / Wales                      |
| EPI_ISL_420889 | 2/14/2020 | 3/19/2020 Asia / Japan                                         |
| EPI_ISL_420890 | 3/9/2020  | 3/19/2020 Asia / Japan                                         |
| EPI_ISL_416028 | 3/3/2020  | 3/20/2020 South America / Brazil / Sao Paulo / Sao Paulo       |
| EPI_ISL_416029 | 3/4/2020  | 3/20/2020 South America / Brazil / Sao Paulo / Sao Paulo       |
| EPI_ISL_416031 | 3/4/2020  | 3/20/2020 South America / Brazil / Sao Paulo / Sao Paulo       |
| EPI_ISL_416032 | 3/4/2020  | 3/20/2020 South America / Brazil / Distrito Federal / Brasilia |
| EPI_ISL_416033 | 3/3/2020  | 3/20/2020 South America / Brazil / Sao Paulo / Sao Paulo       |
| EPI_ISL_416034 | 3/4/2020  | 3/20/2020 South America / Brazil / Sao Paulo / Sao Paulo       |
| EPI_ISL_416035 | 3/5/2020  | 3/20/2020 South America / Brazil / Sao Paulo / Sao Paulo       |
| EPI_ISL_416036 | 3/5/2020  | 3/20/2020 South America / Brazil / Sao Paulo / Sao Paulo       |
| EPI_ISL_416042 | 1/26/2020 | 3/20/2020 Asia / China / Hangzhou                              |
| EPI_ISL_416044 | 1/25/2020 | 3/20/2020 Asia / China / Hangzhou                              |
| EPI_ISL_416046 | 1/24/2020 | 3/20/2020 Asia / China / Hangzhou                              |
| EPI_ISL_416047 | 2/2/2020  | 3/20/2020 Asia / China / Hangzhou                              |
| EPI_ISL_416140 | 3/2/2020  | 3/20/2020 Europe / Denmark / Hovedstaden / Copenhagen          |
| EPI_ISL_416141 | 3/3/2020  | 3/20/2020 Europe / Denmark / Hovedstaden / Copenhagen          |
| EPI_ISL_416142 | 2/26/2020 | 3/20/2020 Europe / Denmark / Hovedstaden / Copenhagen          |
| EPI_ISL_416143 | 2/28/2020 | 3/20/2020 Europe / Denmark / Hovedstaden / Copenhagen          |
| EPI_ISL_416144 | 3/1/2020  | 3/20/2020 Europe / Denmark / Hovedstaden / Copenhagen          |
| EPI_ISL_416153 | 3/2/2020  | 3/20/2020 Europe / Denmark / Hovedstaden / Copenhagen          |
| EPI_ISL_416314 | 2/7/2020  | 3/20/2020 Asia / Hong Kong                                     |
| EPI_ISL_416316 | 1/25/2020 | 3/20/2020 Asia / China / Shanghai                              |
| EPI_ISL_416317 | 1/25/2020 | 3/20/2020 Asia / China / Shanghai                              |
| EPI_ISL_416318 | 1/28/2020 | 3/20/2020 Asia / China / Shanghai                              |
| EPI_ISL_416319 | 1/28/2020 | 3/20/2020 Asia / China / Shanghai                              |
| EPI_ISL_416320 | 1/28/2020 | 3/20/2020 Asia / China / Shanghai                              |
| EPI_ISL_416321 | 1/28/2020 | 3/20/2020 Asia / China / Shanghai                              |
| EPI_ISL_416322 | 1/29/2020 | 3/20/2020 Asia / China / Shanghai                              |
| EPI_ISL_416323 | 1/29/2020 | 3/20/2020 Asia / China / Shanghai                              |
| EPI_ISL_416324 | 1/29/2020 | 3/20/2020 Asia / China / Shanghai                              |
| EPI_ISL_416325 | 2/2/2020  | 3/20/2020 Asia / China / Shanghai                              |
| EPI_ISL_416326 | 1/30/2020 | 3/20/2020 Asia / China / Shanghai                              |



|                |           |                                   |
|----------------|-----------|-----------------------------------|
| EPI_ISL_416329 | 2/1/2020  | 3/20/2020 Asia / China / Shanghai |
| EPI_ISL_416330 | 2/2/2020  | 3/20/2020 Asia / China / Shanghai |
| EPI_ISL_416331 | 1/30/2020 | 3/20/2020 Asia / China / Shanghai |
| EPI_ISL_416332 | 1/30/2020 | 3/20/2020 Asia / China / Shanghai |
| EPI_ISL_416333 | 1/30/2020 | 3/20/2020 Asia / China / Shanghai |
| EPI_ISL_416334 | 2/6/2020  | 3/20/2020 Asia / China / Shanghai |
| EPI_ISL_416335 | 2/2/2020  | 3/20/2020 Asia / China / Shanghai |
| EPI_ISL_416336 | 2/1/2020  | 3/20/2020 Asia / China / Shanghai |
| EPI_ISL_416337 | 2/4/2020  | 3/20/2020 Asia / China / Shanghai |
| EPI_ISL_416338 | 2/1/2020  | 3/20/2020 Asia / China / Shanghai |
| EPI_ISL_416339 | 2/3/2020  | 3/20/2020 Asia / China / Shanghai |
| EPI_ISL_416340 | 2/2/2020  | 3/20/2020 Asia / China / Shanghai |
| EPI_ISL_416341 | 2/1/2020  | 3/20/2020 Asia / China / Shanghai |
| EPI_ISL_416342 | 2/4/2020  | 3/20/2020 Asia / China / Shanghai |
| EPI_ISL_416348 | 2/6/2020  | 3/20/2020 Asia / China / Shanghai |
| EPI_ISL_416349 | 1/30/2020 | 3/20/2020 Asia / China / Shanghai |
| EPI_ISL_416350 | 1/29/2020 | 3/20/2020 Asia / China / Shanghai |
| EPI_ISL_416352 | 1/30/2020 | 3/20/2020 Asia / China / Shanghai |
| EPI_ISL_416353 | 2/4/2020  | 3/20/2020 Asia / China / Shanghai |
| EPI_ISL_416354 | 2/4/2020  | 3/20/2020 Asia / China / Shanghai |
| EPI_ISL_416355 | 2/4/2020  | 3/20/2020 Asia / China / Shanghai |
| EPI_ISL_416358 | 2/5/2020  | 3/20/2020 Asia / China / Shanghai |
| EPI_ISL_416359 | 2/6/2020  | 3/20/2020 Asia / China / Shanghai |
| EPI_ISL_416361 | 2/1/2020  | 3/20/2020 Asia / China / Shanghai |
| EPI_ISL_416362 | 2/2/2020  | 3/20/2020 Asia / China / Shanghai |
| EPI_ISL_416363 | 2/8/2020  | 3/20/2020 Asia / China / Shanghai |
| EPI_ISL_416364 | 2/8/2020  | 3/20/2020 Asia / China / Shanghai |
| EPI_ISL_416365 | 1/30/2020 | 3/20/2020 Asia / China / Shanghai |
| EPI_ISL_416366 | 1/30/2020 | 3/20/2020 Asia / China / Shanghai |
| EPI_ISL_416367 | 2/1/2020  | 3/20/2020 Asia / China / Shanghai |
| EPI_ISL_416368 | 2/5/2020  | 3/20/2020 Asia / China / Shanghai |
| EPI_ISL_416369 | 2/5/2020  | 3/20/2020 Asia / China / Shanghai |
| EPI_ISL_416370 | 2/1/2020  | 3/20/2020 Asia / China / Shanghai |
| EPI_ISL_416372 | 2/1/2020  | 3/20/2020 Asia / China / Shanghai |
| EPI_ISL_416373 | 2/7/2020  | 3/20/2020 Asia / China / Shanghai |
| EPI_ISL_416376 | 2/5/2020  | 3/20/2020 Asia / China / Shanghai |
| EPI_ISL_416377 | 2/7/2020  | 3/20/2020 Asia / China / Shanghai |
| EPI_ISL_416378 | 1/30/2020 | 3/20/2020 Asia / China / Shanghai |
| EPI_ISL_416379 | 2/1/2020  | 3/20/2020 Asia / China / Shanghai |
| EPI_ISL_416380 | 2/9/2020  | 3/20/2020 Asia / China / Shanghai |
| EPI_ISL_416381 | 2/1/2020  | 3/20/2020 Asia / China / Shanghai |
| EPI_ISL_416382 | 2/8/2020  | 3/20/2020 Asia / China / Shanghai |
| EPI_ISL_416384 | 2/4/2020  | 3/20/2020 Asia / China / Shanghai |
| EPI_ISL_416387 | 2/1/2020  | 3/20/2020 Asia / China / Shanghai |
| EPI_ISL_416389 | 1/21/2020 | 3/20/2020 Asia / China / Shanghai |
| EPI_ISL_416390 | 1/31/2020 | 3/20/2020 Asia / China / Shanghai |
| EPI_ISL_416393 | 2/9/2020  | 3/20/2020 Asia / China / Shanghai |

|                |           |                                                      |
|----------------|-----------|------------------------------------------------------|
| EPI_ISL_416394 | 2/14/2020 | 3/20/2020 Asia / China / Shanghai                    |
| EPI_ISL_416396 | 2/10/2020 | 3/20/2020 Asia / China / Shanghai                    |
| EPI_ISL_416397 | 2/2/2020  | 3/20/2020 Asia / China / Shanghai                    |
| EPI_ISL_416398 | 2/2/2020  | 3/20/2020 Asia / China / Shanghai                    |
| EPI_ISL_416399 | 2/13/2020 | 3/20/2020 Asia / China / Shanghai                    |
| EPI_ISL_416400 | 2/2/2020  | 3/20/2020 Asia / China / Shanghai                    |
| EPI_ISL_416401 | 2/2/2020  | 3/20/2020 Asia / China / Shanghai                    |
| EPI_ISL_416402 | 2/11/2020 | 3/20/2020 Asia / China / Shanghai                    |
| EPI_ISL_416403 | 2/2/2020  | 3/20/2020 Asia / China / Shanghai                    |
| EPI_ISL_416404 | 2/9/2020  | 3/20/2020 Asia / China / Shanghai                    |
| EPI_ISL_416405 | 2/2/2020  | 3/20/2020 Asia / China / Shanghai                    |
| EPI_ISL_416406 | 2/15/2020 | 3/20/2020 Asia / China / Shanghai                    |
| EPI_ISL_416407 | 2/15/2020 | 3/20/2020 Asia / China / Shanghai                    |
| EPI_ISL_416409 | 2/2/2020  | 3/20/2020 Asia / China / Shanghai                    |
| EPI_ISL_416410 | 1/24/2020 | 3/20/2020 Oceania / Australia / Victoria / Melbourne |
| EPI_ISL_416411 | 1/25/2020 | 3/20/2020 Oceania / Australia / Victoria / Melbourne |
| EPI_ISL_416412 | 3/2/2020  | 3/20/2020 Oceania / Australia / Victoria / Melbourne |
| EPI_ISL_416413 | 3/5/2020  | 3/20/2020 Oceania / Australia / Victoria / Melbourne |
| EPI_ISL_416415 | 2/8/2020  | 3/20/2020 Oceania / Australia / Victoria / Melbourne |
| EPI_ISL_416425 | 2/3/2020  | 3/21/2020 Asia / China / Hangzhou                    |
| EPI_ISL_416426 | 3/17/2020 | 3/21/2020 Europe / Hungary / Budapest                |
| EPI_ISL_416427 | 1/24/2020 | 3/21/2020 Asia / Vietnam / Thanhhoa                  |
| EPI_ISL_416428 | 3/7/2020  | 3/21/2020 Asia / Vietnam / Quangninh                 |
| EPI_ISL_416429 | 2/11/2020 | 3/21/2020 Asia / Vietnam / Vinhphuc                  |
| EPI_ISL_416430 | 3/6/2020  | 3/21/2020 Asia / Vietnam / Hanoi                     |
| EPI_ISL_416431 | 3/6/2020  | 3/21/2020 Asia / Vietnam / Hanoi                     |
| EPI_ISL_416432 | 3/7/2020  | 3/21/2020 Asia / Saudi Arabia / Riyadh               |
| EPI_ISL_416433 | 3/10/2020 | 3/21/2020 North America / USA / Washington           |
| EPI_ISL_416434 | 3/10/2020 | 3/21/2020 North America / USA / Washington           |
| EPI_ISL_416435 | 3/10/2020 | 3/21/2020 North America / USA / Washington           |
| EPI_ISL_416436 | 3/10/2020 | 3/21/2020 North America / USA / Washington           |
| EPI_ISL_416437 | 3/10/2020 | 3/21/2020 North America / USA / Washington           |
| EPI_ISL_416438 | 3/10/2020 | 3/21/2020 North America / USA / Washington           |
| EPI_ISL_416439 | 3/10/2020 | 3/21/2020 North America / USA / Washington           |
| EPI_ISL_416440 | 3/10/2020 | 3/21/2020 North America / USA / Washington           |
| EPI_ISL_416441 | 3/10/2020 | 3/21/2020 North America / USA / Washington           |
| EPI_ISL_416442 | 3/10/2020 | 3/21/2020 North America / USA / Washington           |
| EPI_ISL_416443 | 3/10/2020 | 3/21/2020 North America / USA / Washington           |
| EPI_ISL_416444 | 3/10/2020 | 3/21/2020 North America / USA / Washington           |
| EPI_ISL_416445 | 3/10/2020 | 3/21/2020 North America / USA / Washington           |
| EPI_ISL_416446 | 3/10/2020 | 3/21/2020 North America / USA / Washington           |
| EPI_ISL_416447 | 3/10/2020 | 3/21/2020 North America / USA / Washington           |
| EPI_ISL_416448 | 3/11/2020 | 3/21/2020 North America / USA / Washington           |
| EPI_ISL_416449 | 3/11/2020 | 3/21/2020 North America / USA / Washington           |
| EPI_ISL_416450 | 3/11/2020 | 3/21/2020 North America / USA / Washington           |
| EPI_ISL_416451 | 3/10/2020 | 3/21/2020 North America / USA / Washington           |
| EPI_ISL_416452 | 3/10/2020 | 3/21/2020 North America / USA / Washington           |

|                |           |                                                               |
|----------------|-----------|---------------------------------------------------------------|
| EPI_ISL_416453 | 3/7/2020  | 3/21/2020 North America / USA / Washington                    |
| EPI_ISL_416454 | 3/6/2020  | 3/21/2020 North America / USA / Washington                    |
| EPI_ISL_416455 | 3/7/2020  | 3/21/2020 North America / USA / Washington                    |
| EPI_ISL_416456 | 3/6/2020  | 3/21/2020 North America / USA / Washington                    |
| EPI_ISL_416457 | 3/18/2020 | 3/22/2020 North America / USA / California / San Diego County |
| EPI_ISL_416458 | 3/2/2020  | 3/22/2020 Asia / Kuwait / Hawali                              |
| EPI_ISL_416460 | 2/29/2020 | 3/22/2020 North America / USA / Washington / King County      |
| EPI_ISL_416461 | 2/29/2020 | 3/22/2020 North America / USA / Washington / King County      |
| EPI_ISL_416462 | 2/24/2020 | 3/22/2020 North America / USA / Washington                    |
| EPI_ISL_416465 | 2/29/2020 | 3/22/2020 North America / USA / Washington / King County      |
| EPI_ISL_416466 | 3/3/2020  | 3/22/2020 North America / USA / Washington / King County      |
| EPI_ISL_416467 | 3/2/2020  | 3/22/2020 Europe / Belgium / Holsbeek                         |
| EPI_ISL_416468 | 3/2/2020  | 3/22/2020 Europe / Belgium / Holsbeek                         |
| EPI_ISL_416469 | 3/3/2020  | 3/22/2020 Europe / Belgium / Kessel-Lo                        |
| EPI_ISL_416470 | 3/2/2020  | 3/22/2020 Europe / Belgium / Couthuin                         |
| EPI_ISL_416471 | 3/2/2020  | 3/22/2020 Europe / Belgium / Kessel-Lo                        |
| EPI_ISL_416472 | 3/2/2020  | 3/22/2020 Europe / Belgium / Kessel-Lo                        |
| EPI_ISL_416473 | 1/26/2020 | 3/22/2020 Asia / China / Hangzhou                             |
| EPI_ISL_416474 | 1/28/2020 | 3/22/2020 Asia / China / Hangzhou                             |
| EPI_ISL_416475 | 3/3/2020  | 3/22/2020 Europe / Belgium / Leuven                           |
| EPI_ISL_416476 | 3/2/2020  | 3/22/2020 Europe / Belgium / Holsbeek                         |
| EPI_ISL_416477 | 3/8/2020  | 3/22/2020 Asia / Georgia / Tbilisi                            |
| EPI_ISL_416478 | 3/14/2020 | 3/22/2020 Asia / Georgia / Tbilisi                            |
| EPI_ISL_416479 | 3/5/2020  | 3/22/2020 Asia / Georgia / Tbilisi                            |
| EPI_ISL_416480 | 3/11/2020 | 3/22/2020 Asia / Georgia / Tbilisi                            |
| EPI_ISL_416481 | 3/16/2020 | 3/22/2020 Asia / Georgia / Tbilisi                            |
| EPI_ISL_416482 | 3/13/2020 | 3/22/2020 Asia / Georgia / Tbilisi                            |
| EPI_ISL_416484 | 2/27/2020 | 3/22/2020 Europe / Spain / Comunitat Valenciana / Valencia    |
| EPI_ISL_416485 | 2/27/2020 | 3/22/2020 Europe / Spain / Comunitat Valenciana / Valencia    |
| EPI_ISL_416486 | 3/2/2020  | 3/22/2020 Europe / Spain / Comunitat Valenciana / Valencia    |
| EPI_ISL_416487 | 3/4/2020  | 3/22/2020 Europe / Spain / Comunitat Valenciana / Valencia    |
| EPI_ISL_416488 | 3/3/2020  | 3/22/2020 Europe / Poland / Zielonogorskie                    |
| EPI_ISL_416489 | 3/15/2020 | 3/22/2020 North America / USA / Wisconsin / Dane County       |
| EPI_ISL_416491 | 3/15/2020 | 3/22/2020 North America / USA / Wisconsin / Dane County       |
| EPI_ISL_416492 | 3/15/2020 | 3/22/2020 North America / USA / Wisconsin / Dane County       |
| EPI_ISL_416493 | 3/8/2020  | 3/22/2020 Europe / France / Hauts-de-France / Chateau-Thierry |
| EPI_ISL_416494 | 3/4/2020  | 3/22/2020 Europe / France / Normandie / Rouen                 |
| EPI_ISL_416495 | 3/10/2020 | 3/22/2020 Europe / France / Hauts-de-France / Compi gne       |
| EPI_ISL_416496 | 3/10/2020 | 3/22/2020 Europe / France / Hauts-de-France / Compi gne       |
| EPI_ISL_416497 | 3/10/2020 | 3/22/2020 Europe / France / Hauts-de-France / Compi gne       |
| EPI_ISL_416498 | 3/11/2020 | 3/22/2020 Europe / France /  le-de-France / Garches           |
| EPI_ISL_416499 | 3/11/2020 | 3/22/2020 Europe / France /  le-de-France / Longjumeau        |
| EPI_ISL_416500 | 3/11/2020 | 3/22/2020 Europe / France /  le-de-France / Longjumeau        |
| EPI_ISL_416501 | 3/10/2020 | 3/22/2020 Europe / France /  le-de-France / Levallois-Perret  |
| EPI_ISL_416502 | 2/26/2020 | 3/22/2020 Europe / France / Bretagne / Rennes                 |
| EPI_ISL_416503 | 3/1/2020  | 3/22/2020 Europe / France / Bretagne / Rennes                 |
| EPI_ISL_416504 | 3/2/2020  | 3/22/2020 Europe / France / Bretagne / Rennes                 |

|                 |           |                                                         |
|-----------------|-----------|---------------------------------------------------------|
| EPI_ISL_416505  | 3/2/2020  | 3/22/2020 Europe / France / Bretagne / Rennes           |
| EPI_ISL_416506  | 3/3/2020  | 3/22/2020 Europe / France / Bretagne / Rennes           |
| EPI_ISL_416507  | 3/5/2020  | 3/22/2020 Europe / France / Bretagne / Rennes           |
| EPI_ISL_416508  | 3/6/2020  | 3/22/2020 Europe / France / Bretagne / Rennes           |
| EPI_ISL_416509  | 3/6/2020  | 3/22/2020 Europe / France / Bretagne / Rennes           |
| EPI_ISL_416510  | 3/6/2020  | 3/22/2020 Europe / France / Bretagne / Rennes           |
| EPI_ISL_416511  | 3/7/2020  | 3/22/2020 Europe / France / Bretagne / Rennes           |
| EPI_ISL_416512  | 3/7/2020  | 3/22/2020 Europe / France / Bretagne / Rennes           |
| EPI_ISL_416513  | 3/7/2020  | 3/22/2020 Europe / France / Bretagne / Rennes           |
| EPI_ISL_416514  | 3/15/2020 | 3/22/2020 Oceania / Australia / Victoria / Melbourne    |
| EPI_ISL_416515  | 3/15/2020 | 3/22/2020 Oceania / Australia / Victoria / Melbourne    |
| EPI_ISL_416516  | 3/16/2020 | 3/22/2020 Oceania / Australia / Victoria / Melbourne    |
| EPI_ISL_416519  | 3/2/2020  | 3/22/2020 Oceania / New Zealand / Auckland              |
| EPI_ISL_416521  | 3/10/2020 | 3/22/2020 Asia / Saudi Arabia                           |
| EPI_ISL_416522  | 3/10/2020 | 3/22/2020 Asia / Saudi Arabia                           |
| EPI_ISL_416523  | 3/14/2020 | 3/22/2020 North America / USA / Wisconsin / Dane County |
| EPI_ISL_416524  | 3/11/2020 | 3/22/2020 Asia / Japan / Saitama                        |
| EPI_ISL_416525  | 3/11/2020 | 3/22/2020 Asia / Japan / Saitama                        |
| EPI_ISL_2896259 | 2/27/2020 | 3/22/2020 Asia / Georgia                                |
| EPI_ISL_2896260 | 3/10/2020 | 3/22/2020 Asia / Georgia                                |
| EPI_ISL_2896261 | 2/28/2020 | 3/22/2020 Asia / Georgia                                |
| EPI_ISL_2896262 | 3/10/2020 | 3/22/2020 Asia / Georgia                                |
| EPI_ISL_2896263 | 3/5/2020  | 3/22/2020 Asia / Georgia                                |
| EPI_ISL_2896264 | 3/14/2020 | 3/22/2020 Asia / Georgia                                |
| EPI_ISL_2896265 | 3/22/2020 | 3/22/2020 Asia / Georgia                                |
| EPI_ISL_434571  | 1/22/2020 | 3/22/2020 Asia / Hong Kong                              |
| EPI_ISL_416538  | 3/15/2020 | 3/23/2020 Oceania / New Zealand / Wellington            |
| EPI_ISL_416539  | 3/15/2020 | 3/23/2020 Oceania / New Zealand / Wellington            |
| EPI_ISL_416541  | 3/2/2020  | 3/23/2020 Asia / Kuwait / Dasman                        |
| EPI_ISL_416542  | 3/2/2020  | 3/23/2020 Asia / Kuwait / Dasman                        |
| EPI_ISL_416543  | 3/2/2020  | 3/23/2020 Asia / Kuwait / Dasman                        |
| EPI_ISL_416565  | 2/15/2020 | 3/23/2020 Asia / Japan                                  |
| EPI_ISL_416566  | 2/15/2020 | 3/23/2020 Asia / Japan                                  |
| EPI_ISL_416567  | 2/15/2020 | 3/23/2020 Asia / Japan                                  |
| EPI_ISL_416569  | 2/15/2020 | 3/23/2020 Asia / Japan                                  |
| EPI_ISL_416570  | 2/15/2020 | 3/23/2020 Asia / Japan                                  |
| EPI_ISL_416571  | 2/15/2020 | 3/23/2020 Asia / Japan                                  |
| EPI_ISL_416572  | 2/15/2020 | 3/23/2020 Asia / Japan                                  |
| EPI_ISL_416573  | 2/15/2020 | 3/23/2020 Asia / Japan                                  |
| EPI_ISL_416574  | 2/15/2020 | 3/23/2020 Asia / Japan                                  |
| EPI_ISL_416575  | 2/15/2020 | 3/23/2020 Asia / Japan                                  |
| EPI_ISL_416576  | 2/15/2020 | 3/23/2020 Asia / Japan                                  |
| EPI_ISL_416577  | 2/15/2020 | 3/23/2020 Asia / Japan                                  |
| EPI_ISL_416578  | 2/15/2020 | 3/23/2020 Asia / Japan                                  |
| EPI_ISL_416579  | 2/15/2020 | 3/23/2020 Asia / Japan                                  |
| EPI_ISL_416580  | 2/15/2020 | 3/23/2020 Asia / Japan                                  |
| EPI_ISL_416581  | 2/15/2020 | 3/23/2020 Asia / Japan                                  |





|                |           |                                                                |
|----------------|-----------|----------------------------------------------------------------|
| EPI_ISL_416682 | 3/9/2020  | 3/23/2020 North America / USA / Washington                     |
| EPI_ISL_416683 | 3/15/2020 | 3/23/2020 North America / USA / Washington                     |
| EPI_ISL_416684 | 3/14/2020 | 3/23/2020 North America / USA / Washington                     |
| EPI_ISL_416685 | 3/15/2020 | 3/23/2020 North America / USA / Washington                     |
| EPI_ISL_416686 | 3/14/2020 | 3/23/2020 North America / USA / Washington                     |
| EPI_ISL_416687 | 3/14/2020 | 3/23/2020 North America / USA / Washington                     |
| EPI_ISL_416688 | 3/14/2020 | 3/23/2020 North America / USA / Washington                     |
| EPI_ISL_416689 | 3/14/2020 | 3/23/2020 North America / USA / Washington                     |
| EPI_ISL_416690 | 3/13/2020 | 3/23/2020 North America / USA / Washington                     |
| EPI_ISL_416691 | 3/13/2020 | 3/23/2020 North America / USA / Washington                     |
| EPI_ISL_416692 | 3/14/2020 | 3/23/2020 North America / USA / Washington                     |
| EPI_ISL_416693 | 3/12/2020 | 3/23/2020 North America / USA / Washington                     |
| EPI_ISL_416694 | 3/13/2020 | 3/23/2020 North America / USA / Washington                     |
| EPI_ISL_416696 | 3/13/2020 | 3/23/2020 North America / USA / Connecticut                    |
| EPI_ISL_416697 | 3/13/2020 | 3/23/2020 North America / USA / Connecticut                    |
| EPI_ISL_416698 | 3/13/2020 | 3/23/2020 North America / USA / Washington                     |
| EPI_ISL_416699 | 3/13/2020 | 3/23/2020 North America / USA / Washington                     |
| EPI_ISL_416700 | 3/13/2020 | 3/23/2020 North America / USA / Washington                     |
| EPI_ISL_416701 | 3/13/2020 | 3/23/2020 North America / USA / Washington                     |
| EPI_ISL_416702 | 3/13/2020 | 3/23/2020 North America / USA / Washington                     |
| EPI_ISL_416703 | 3/13/2020 | 3/23/2020 North America / USA / Washington                     |
| EPI_ISL_416705 | 3/13/2020 | 3/23/2020 North America / USA / Washington                     |
| EPI_ISL_416706 | 3/13/2020 | 3/23/2020 North America / USA / Washington                     |
| EPI_ISL_416707 | 3/14/2020 | 3/23/2020 North America / USA / Washington                     |
| EPI_ISL_416708 | 3/14/2020 | 3/23/2020 North America / USA / Washington                     |
| EPI_ISL_416709 | 3/13/2020 | 3/23/2020 North America / USA / Washington                     |
| EPI_ISL_416710 | 3/13/2020 | 3/23/2020 North America / USA / Washington                     |
| EPI_ISL_416711 | 3/15/2020 | 3/23/2020 North America / USA / Washington                     |
| EPI_ISL_416712 | 3/14/2020 | 3/23/2020 North America / USA / Washington                     |
| EPI_ISL_416713 | 3/15/2020 | 3/23/2020 North America / USA / Washington                     |
| EPI_ISL_416714 | 3/14/2020 | 3/23/2020 North America / USA / Washington                     |
| EPI_ISL_416715 | 3/15/2020 | 3/23/2020 North America / USA / Washington                     |
| EPI_ISL_416716 | 3/13/2020 | 3/23/2020 North America / USA / Washington                     |
| EPI_ISL_416717 | 3/15/2020 | 3/23/2020 North America / USA / Washington                     |
| EPI_ISL_416718 | 3/14/2020 | 3/23/2020 North America / USA / Washington                     |
| EPI_ISL_416719 | 3/14/2020 | 3/23/2020 North America / USA / Washington                     |
| EPI_ISL_416721 | 3/13/2020 | 3/23/2020 North America / USA / Washington                     |
| EPI_ISL_416722 | 3/12/2020 | 3/23/2020 North America / USA / Washington                     |
| EPI_ISL_416723 | 3/14/2020 | 3/23/2020 North America / USA / Washington                     |
| EPI_ISL_416724 | 3/13/2020 | 3/23/2020 North America / USA / Washington                     |
| EPI_ISL_416725 | 3/13/2020 | 3/23/2020 North America / USA / Washington                     |
| EPI_ISL_416726 | 3/13/2020 | 3/23/2020 North America / USA / Washington                     |
| EPI_ISL_416727 | 3/13/2020 | 3/23/2020 North America / USA / Washington                     |
| EPI_ISL_416728 | 3/13/2020 | 3/23/2020 North America / USA / Washington                     |
| EPI_ISL_416729 | 3/13/2020 | 3/23/2020 North America / USA / Washington                     |
| EPI_ISL_416730 | 3/3/2020  | 3/23/2020 Europe / United Kingdom / England / South Yorkshire  |
| EPI_ISL_416731 | 3/3/2020  | 3/23/2020 Europe / United Kingdom / England / Northamptonshire |

|                |           |                                                                     |
|----------------|-----------|---------------------------------------------------------------------|
| EPI_ISL_416732 | 3/3/2020  | 3/23/2020 Europe / United Kingdom / England / London                |
| EPI_ISL_416733 | 3/7/2020  | 3/23/2020 Europe / United Kingdom / England / South Yorkshire       |
| EPI_ISL_416734 | 3/9/2020  | 3/23/2020 Europe / United Kingdom / England / South Yorkshire       |
| EPI_ISL_416735 | 3/9/2020  | 3/23/2020 Europe / United Kingdom / England / South Yorkshire       |
| EPI_ISL_416736 | 3/9/2020  | 3/23/2020 Europe / United Kingdom / England / South Yorkshire       |
| EPI_ISL_416737 | 3/3/2020  | 3/23/2020 Europe / United Kingdom / England / London                |
| EPI_ISL_416738 | 3/9/2020  | 3/23/2020 Europe / United Kingdom / England / Nottinghamhisre       |
| EPI_ISL_416739 | 3/9/2020  | 3/23/2020 Europe / United Kingdom / England / South Yorkshire       |
| EPI_ISL_416740 | 3/3/2020  | 3/23/2020 Europe / United Kingdom / England / South Yorkshire       |
| EPI_ISL_416741 | 2020-02   | 3/23/2020 Europe / Lithuania / Vilnius                              |
| EPI_ISL_416742 | 2/29/2020 | 3/23/2020 Europe / Czech Republic / Prague                          |
| EPI_ISL_416743 | 3/5/2020  | 3/23/2020 Europe / Czech Republic / Prague                          |
| EPI_ISL_416744 | 3/20/2020 | 3/23/2020 Europe / Hungary / Baranya                                |
| EPI_ISL_416745 | 3/10/2020 | 3/23/2020 Europe / France / Auvergne-Rhone-Alpes / Pollionnay       |
| EPI_ISL_416746 | 3/3/2020  | 3/23/2020 Europe / France / Auvergne-Rhone-Alpes / Valence          |
| EPI_ISL_416747 | 3/4/2020  | 3/23/2020 Europe / France / Auvergne-Rhone-Alpes / Lyon             |
| EPI_ISL_416748 | 3/4/2020  | 3/23/2020 Europe / France / Auvergne-Rhone-Alpes / Lyon             |
| EPI_ISL_416749 | 3/4/2020  | 3/23/2020 Europe / France / Auvergne-Rhone-Alpes / Valence          |
| EPI_ISL_416750 | 3/6/2020  | 3/23/2020 Europe / France / Auvergne-Rhone-Alpes / Lyon             |
| EPI_ISL_416751 | 3/5/2020  | 3/23/2020 Europe / France / Auvergne-Rhone-Alpes / Clermond-Ferrand |
| EPI_ISL_416752 | 3/4/2020  | 3/23/2020 Europe / France / Auvergne-Rhone-Alpes / Clermond-Ferrand |
| EPI_ISL_416753 | 3/6/2020  | 3/23/2020 Europe / France / Auvergne-Rhone-Alpes / Lyon             |
| EPI_ISL_416754 | 3/6/2020  | 3/23/2020 Europe / France / Auvergne-Rhone-Alpes / Lyon             |
| EPI_ISL_416756 | 3/6/2020  | 3/23/2020 Europe / France / Auvergne-Rhone-Alpes / Lyon             |
| EPI_ISL_416757 | 3/7/2020  | 3/23/2020 Europe / France / Auvergne-Rhone-Alpes / Bourg-en-Bresse  |
| EPI_ISL_416758 | 3/8/2020  | 3/23/2020 Europe / France / Auvergne-Rhone-Alpes / Lyon             |
| EPI_ISL_416829 | 1/24/2020 | 3/23/2020 Asia / Malaysia / Selangor                                |
| EPI_ISL_416830 | 3/16/2020 | 3/23/2020 North America / USA / New York / New York City            |
| EPI_ISL_416831 | 3/16/2020 | 3/23/2020 North America / USA / New York / New York City            |
| EPI_ISL_416832 | 3/16/2020 | 3/23/2020 North America / USA / New York / New York City            |
| EPI_ISL_416866 | 1/24/2020 | 3/23/2020 Asia / Malaysia / Selangor                                |
| EPI_ISL_416885 | 1/30/2020 | 3/23/2020 Asia / Malaysia / Selangor                                |
| EPI_ISL_416886 | 2/4/2020  | 3/23/2020 Asia / Malaysia / Selangor                                |
| EPI_ISL_416907 | 2/6/2020  | 3/23/2020 Asia / Malaysia / Selangor                                |
| EPI_ISL_416994 | 3/4/2020  | 3/23/2020 Europe / Spain / Castilla y Leon                          |
| EPI_ISL_416997 | 3/5/2020  | 3/23/2020 Europe / Belgium / Liège                                  |
| EPI_ISL_417004 | 3/5/2020  | 3/23/2020 Europe / Belgium / Liège                                  |
| EPI_ISL_417006 | 3/5/2020  | 3/23/2020 Europe / Belgium / Liège                                  |
| EPI_ISL_417007 | 3/7/2020  | 3/23/2020 Europe / Spain / Galicia                                  |
| EPI_ISL_417008 | 3/7/2020  | 3/23/2020 Europe / Belgium / Liège                                  |
| EPI_ISL_417009 | 3/7/2020  | 3/23/2020 Europe / Belgium / Liège                                  |
| EPI_ISL_417010 | 3/4/2020  | 3/23/2020 Europe / Spain / Madrid                                   |
| EPI_ISL_417012 | 3/8/2020  | 3/23/2020 Europe / Belgium / Liège                                  |
| EPI_ISL_417013 | 3/9/2020  | 3/23/2020 Europe / Belgium / Liège                                  |
| EPI_ISL_417014 | 3/13/2020 | 3/23/2020 Europe / Belgium / Liège                                  |
| EPI_ISL_417015 | 3/13/2020 | 3/23/2020 Europe / Belgium / Liège                                  |
| EPI_ISL_417016 | 3/13/2020 | 3/23/2020 Europe / Belgium / Liège                                  |



|                |           |                                                               |
|----------------|-----------|---------------------------------------------------------------|
| EPI_ISL_417017 | 3/14/2020 | 3/23/2020 Europe / Belgium / Liège                            |
| EPI_ISL_417018 | 3/14/2020 | 3/23/2020 Europe / Belgium / Liège                            |
| EPI_ISL_417019 | 3/14/2020 | 3/23/2020 Europe / Belgium / Liege                            |
| EPI_ISL_417020 | 3/15/2020 | 3/23/2020 Europe / Belgium / Liège                            |
| EPI_ISL_417021 | 3/15/2020 | 3/23/2020 Europe / Belgium / Liège                            |
| EPI_ISL_417022 | 3/15/2020 | 3/23/2020 Europe / Belgium / Liège                            |
| EPI_ISL_417023 | 3/15/2020 | 3/23/2020 Europe / Belgium / Liège                            |
| EPI_ISL_417025 | 3/15/2020 | 3/23/2020 Europe / Belgium / Liège                            |
| EPI_ISL_417026 | 3/20/2020 | 3/23/2020 North America / USA / Utah                          |
| EPI_ISL_417027 | 3/20/2020 | 3/23/2020 North America / USA / Utah                          |
| EPI_ISL_417028 | 3/20/2020 | 3/23/2020 North America / USA / Utah                          |
| EPI_ISL_417030 | 1/24/2020 | 3/24/2020 Oceania / Australia / New South Wales / Sydney      |
| EPI_ISL_417031 | 3/11/2020 | 3/24/2020 Oceania / Australia / Queensland / Gold Coast       |
| EPI_ISL_417032 | 3/11/2020 | 3/24/2020 Oceania / Australia / Queensland / Rockhampton      |
| EPI_ISL_417033 | 3/11/2020 | 3/24/2020 Oceania / Australia / Queensland / Brisbane         |
| EPI_ISL_417034 | 3/16/2020 | 3/24/2020 South America / Brazil / Amazonas / Manaus          |
| EPI_ISL_417064 | 1/21/2020 | 3/24/2020 Asia / Hong Kong                                    |
| EPI_ISL_417065 | 3/3/2020  | 3/24/2020 North America / USA / Washington                    |
| EPI_ISL_417066 | 3/3/2020  | 3/24/2020 North America / USA / Washington / King County      |
| EPI_ISL_417068 | 3/2/2020  | 3/24/2020 North America / USA / Washington / King County      |
| EPI_ISL_417069 | 3/3/2020  | 3/24/2020 North America / USA / Washington                    |
| EPI_ISL_417070 | 3/3/2020  | 3/24/2020 North America / USA / Washington / King County      |
| EPI_ISL_417071 | 3/3/2020  | 3/24/2020 North America / USA / Washington / King County      |
| EPI_ISL_417072 | 3/2/2020  | 3/24/2020 North America / USA / Washington / King County      |
| EPI_ISL_417073 | 3/2/2020  | 3/24/2020 North America / USA / Washington                    |
| EPI_ISL_417074 | 3/2/2020  | 3/24/2020 North America / USA / Washington / King County      |
| EPI_ISL_417075 | 3/2/2020  | 3/24/2020 North America / USA / Washington / Snohomish County |
| EPI_ISL_417076 | 3/2/2020  | 3/24/2020 North America / USA / Washington / Snohomish County |
| EPI_ISL_417077 | 3/2/2020  | 3/24/2020 North America / USA / Washington / Snohomish County |
| EPI_ISL_417079 | 3/2/2020  | 3/24/2020 North America / USA / Washington / Snohomish County |
| EPI_ISL_417081 | 3/2/2020  | 3/24/2020 North America / USA / Washington / Snohomish County |
| EPI_ISL_417082 | 3/2/2020  | 3/24/2020 North America / USA / Washington / Grant County     |
| EPI_ISL_417085 | 3/2/2020  | 3/24/2020 North America / USA / Washington / Snohomish County |
| EPI_ISL_417086 | 3/1/2020  | 3/24/2020 North America / USA / Washington / Clark County     |
| EPI_ISL_417087 | 3/2/2020  | 3/24/2020 North America / USA / Washington                    |
| EPI_ISL_417088 | 3/2/2020  | 3/24/2020 North America / USA / Washington                    |
| EPI_ISL_417089 | 3/2/2020  | 3/24/2020 North America / USA / Washington                    |
| EPI_ISL_417090 | 3/4/2020  | 3/24/2020 North America / USA / Washington / King County      |
| EPI_ISL_417091 | 3/4/2020  | 3/24/2020 North America / USA / Washington / Snohomish County |
| EPI_ISL_417092 | 3/4/2020  | 3/24/2020 North America / USA / Washington / Snohomish County |
| EPI_ISL_417093 | 2/28/2020 | 3/24/2020 North America / USA / Washington / Snohomish County |
| EPI_ISL_417095 | 2/28/2020 | 3/24/2020 North America / USA / Washington / King County      |
| EPI_ISL_417096 | 2/27/2020 | 3/24/2020 North America / USA / Washington                    |
| EPI_ISL_417097 | 2/28/2020 | 3/24/2020 North America / USA / Washington                    |
| EPI_ISL_417098 | 2/29/2020 | 3/24/2020 North America / USA / Washington                    |
| EPI_ISL_417099 | 2/29/2020 | 3/24/2020 North America / USA / Washington                    |
| EPI_ISL_417100 | 2/29/2020 | 3/24/2020 North America / USA / Washington / Snohomish County |



|                |           |                                                               |
|----------------|-----------|---------------------------------------------------------------|
| EPI_ISL_417152 | 2/28/2020 | 3/24/2020 North America / USA / Washington / King County      |
| EPI_ISL_417153 | 2/29/2020 | 3/24/2020 North America / USA / Washington / King County      |
| EPI_ISL_417154 | 2/28/2020 | 3/24/2020 North America / USA / Washington / King County      |
| EPI_ISL_417155 | 2/28/2020 | 3/24/2020 North America / USA / Washington / King County      |
| EPI_ISL_417156 | 2/28/2020 | 3/24/2020 North America / USA / Washington / King County      |
| EPI_ISL_417157 | 3/5/2020  | 3/24/2020 North America / USA / Washington / Snohomish County |
| EPI_ISL_417158 | 2/28/2020 | 3/24/2020 North America / USA / Washington / King County      |
| EPI_ISL_417159 | 2/29/2020 | 3/24/2020 North America / USA / Washington / King County      |
| EPI_ISL_417160 | 2/29/2020 | 3/24/2020 North America / USA / Washington / King County      |
| EPI_ISL_417161 | 2/29/2020 | 3/24/2020 North America / USA / Washington / King County      |
| EPI_ISL_417162 | 3/1/2020  | 3/24/2020 North America / USA / Washington / Snohomish County |
| EPI_ISL_417163 | 3/5/2020  | 3/24/2020 North America / USA / Washington / King County      |
| EPI_ISL_417164 | 3/7/2020  | 3/24/2020 North America / USA / Washington / King County      |
| EPI_ISL_417165 | 3/8/2020  | 3/24/2020 North America / USA / Washington / King County      |
| EPI_ISL_417166 | 2/29/2020 | 3/24/2020 North America / USA / Washington / King County      |
| EPI_ISL_417167 | 3/5/2020  | 3/24/2020 North America / USA / Washington / Snohomish County |
| EPI_ISL_417168 | 2/29/2020 | 3/24/2020 North America / USA / Washington / King County      |
| EPI_ISL_417169 | 3/2/2020  | 3/24/2020 North America / USA / Washington                    |
| EPI_ISL_417170 | 3/2/2020  | 3/24/2020 North America / USA / Washington                    |
| EPI_ISL_417171 | 3/1/2020  | 3/24/2020 North America / USA / Washington / King County      |
| EPI_ISL_417172 | 2/29/2020 | 3/24/2020 North America / USA / Washington / King County      |
| EPI_ISL_417175 | 3/2/2020  | 3/24/2020 North America / USA / Washington / Grant County     |
| EPI_ISL_417176 | 1/21/2020 | 3/24/2020 Asia / Hong Kong                                    |
| EPI_ISL_417178 | 1/25/2020 | 3/24/2020 Asia / Hong Kong                                    |
| EPI_ISL_417181 | 2/5/2020  | 3/24/2020 Asia / Hong Kong                                    |
| EPI_ISL_417185 | 2/9/2020  | 3/24/2020 Asia / Hong Kong                                    |
| EPI_ISL_417186 | 3/7/2020  | 3/24/2020 Africa / South Africa / KwaZulu-Natal               |
| EPI_ISL_417187 | 2/8/2020  | 3/24/2020 Asia / Hong Kong                                    |
| EPI_ISL_417188 | 2/8/2020  | 3/24/2020 Asia / Hong Kong                                    |
| EPI_ISL_417191 | 3/10/2020 | 3/24/2020 North America / USA / Minnesota                     |
| EPI_ISL_417193 | 2/9/2020  | 3/24/2020 Asia / Hong Kong                                    |
| EPI_ISL_417194 | 3/12/2020 | 3/24/2020 North America / USA / Minnesota                     |
| EPI_ISL_417196 | 3/11/2020 | 3/24/2020 North America / USA / Minnesota                     |
| EPI_ISL_417197 | 2/9/2020  | 3/24/2020 Asia / Hong Kong                                    |
| EPI_ISL_417200 | 3/21/2020 | 3/24/2020 North America / USA / Wisconsin / Dane County       |
| EPI_ISL_417201 | 3/21/2020 | 3/24/2020 North America / USA / Wisconsin / Dane County       |
| EPI_ISL_417202 | 3/21/2020 | 3/24/2020 North America / USA / Wisconsin / Dane County       |
| EPI_ISL_417203 | 3/21/2020 | 3/24/2020 North America / USA / Wisconsin / Dane County       |
| EPI_ISL_417204 | 3/21/2020 | 3/24/2020 North America / USA / Wisconsin / Dane County       |
| EPI_ISL_417211 | 3/11/2020 | 3/25/2020 Oceania / New Zealand / Otago                       |
| EPI_ISL_417212 | 3/11/2020 | 3/25/2020 Oceania / New Zealand / Otago                       |
| EPI_ISL_417213 | 3/1/2020  | 3/25/2020 Europe / United Kingdom / England                   |
| EPI_ISL_417215 | 2/25/2020 | 3/25/2020 Europe / United Kingdom / England                   |
| EPI_ISL_417217 | 3/1/2020  | 3/25/2020 Europe / United Kingdom / England                   |
| EPI_ISL_417220 | 3/3/2020  | 3/25/2020 Europe / United Kingdom / England                   |
| EPI_ISL_417222 | 3/4/2020  | 3/25/2020 Europe / United Kingdom / England                   |
| EPI_ISL_417226 | 3/2/2020  | 3/25/2020 Europe / United Kingdom / England                   |



|                |           |                                                                    |
|----------------|-----------|--------------------------------------------------------------------|
| EPI_ISL_417292 | 3/8/2020  | 3/25/2020 Europe / United Kingdom / England                        |
| EPI_ISL_417293 | 3/8/2020  | 3/25/2020 Europe / United Kingdom / England                        |
| EPI_ISL_417295 | 3/8/2020  | 3/25/2020 Europe / United Kingdom / England                        |
| EPI_ISL_417296 | 3/6/2020  | 3/25/2020 Europe / United Kingdom / England                        |
| EPI_ISL_417297 | 3/6/2020  | 3/25/2020 Europe / United Kingdom / England                        |
| EPI_ISL_417298 | 3/8/2020  | 3/25/2020 Europe / United Kingdom / England                        |
| EPI_ISL_417299 | 3/8/2020  | 3/25/2020 Europe / United Kingdom / England                        |
| EPI_ISL_417301 | 3/6/2020  | 3/25/2020 Europe / United Kingdom / England                        |
| EPI_ISL_417302 | 3/5/2020  | 3/25/2020 Europe / United Kingdom / England                        |
| EPI_ISL_417306 | 3/8/2020  | 3/25/2020 Europe / United Kingdom / England                        |
| EPI_ISL_417307 | 3/8/2020  | 3/25/2020 Europe / United Kingdom / England                        |
| EPI_ISL_417311 | 3/9/2020  | 3/25/2020 Europe / United Kingdom / England                        |
| EPI_ISL_417312 | 3/8/2020  | 3/25/2020 Europe / United Kingdom / England                        |
| EPI_ISL_417313 | 3/8/2020  | 3/25/2020 Europe / United Kingdom / England                        |
| EPI_ISL_417314 | 3/10/2020 | 3/25/2020 Europe / United Kingdom / England                        |
| EPI_ISL_417315 | 3/13/2020 | 3/25/2020 Europe / United Kingdom / England                        |
| EPI_ISL_417317 | 3/2/2020  | 3/25/2020 North America / USA / California / Santa Clara County    |
| EPI_ISL_417318 | 2/29/2020 | 3/25/2020 North America / USA / California / Santa Clara County    |
| EPI_ISL_417320 | 3/4/2020  | 3/25/2020 North America / USA / California / Santa Clara County    |
| EPI_ISL_417330 | 3/13/2020 | 3/25/2020 North America / USA / California / San Francisco County  |
| EPI_ISL_417333 | 3/4/2020  | 3/25/2020 Europe / France / Auvergne-Rhone-Alpes / Lyon            |
| EPI_ISL_417334 | 3/4/2020  | 3/25/2020 Europe / France / Auvergne-Rhone-Alpes / Lyon            |
| EPI_ISL_417335 | 3/6/2020  | 3/25/2020 Europe / France / Auvergne-Rhone-Alpes / Lyon            |
| EPI_ISL_417336 | 3/6/2020  | 3/25/2020 Europe / France / Auvergne-Rhone-Alpes / Lyon            |
| EPI_ISL_417337 | 3/7/2020  | 3/25/2020 Europe / France / Auvergne-Rhone-Alpes / Lyon            |
| EPI_ISL_417338 | 3/7/2020  | 3/25/2020 Europe / France / Auvergne-Rhone-Alpes / Macon           |
| EPI_ISL_417339 | 3/8/2020  | 3/25/2020 Europe / France / Auvergne-Rhone-Alpes / Lyon            |
| EPI_ISL_417340 | 3/7/2020  | 3/25/2020 Europe / France / Auvergne-Rhone-Alpes / Bourg-en-Bresse |
| EPI_ISL_417341 | 3/13/2020 | 3/25/2020 North America / USA / Washington                         |
| EPI_ISL_417342 | 3/13/2020 | 3/25/2020 North America / USA / Washington                         |
| EPI_ISL_417343 | 3/13/2020 | 3/25/2020 North America / USA / Washington                         |
| EPI_ISL_417344 | 3/13/2020 | 3/25/2020 North America / USA / Washington                         |
| EPI_ISL_417345 | 3/13/2020 | 3/25/2020 North America / USA / Washington                         |
| EPI_ISL_417346 | 3/12/2020 | 3/25/2020 North America / USA / Washington                         |
| EPI_ISL_417347 | 3/12/2020 | 3/25/2020 North America / USA / Washington                         |
| EPI_ISL_417348 | 3/13/2020 | 3/25/2020 North America / USA / Washington                         |
| EPI_ISL_417349 | 3/12/2020 | 3/25/2020 North America / USA / Washington                         |
| EPI_ISL_417350 | 3/12/2020 | 3/25/2020 North America / USA / Washington                         |
| EPI_ISL_417351 | 3/12/2020 | 3/25/2020 North America / USA / Washington                         |
| EPI_ISL_417352 | 3/12/2020 | 3/25/2020 North America / USA / Washington                         |
| EPI_ISL_417353 | 3/13/2020 | 3/25/2020 North America / USA / Washington                         |
| EPI_ISL_417354 | 3/13/2020 | 3/25/2020 North America / USA / Washington                         |
| EPI_ISL_417355 | 3/13/2020 | 3/25/2020 North America / USA / Washington                         |
| EPI_ISL_417356 | 3/13/2020 | 3/25/2020 North America / USA / Washington                         |
| EPI_ISL_417358 | 3/13/2020 | 3/25/2020 North America / USA / Washington                         |
| EPI_ISL_417359 | 3/14/2020 | 3/25/2020 North America / USA / Washington                         |
| EPI_ISL_417360 | 3/14/2020 | 3/25/2020 North America / USA / Washington                         |



|                |           |                                                                   |
|----------------|-----------|-------------------------------------------------------------------|
| EPI_ISL_417408 | 3/17/2020 | 3/25/2020 Oceania / Australia / New South Wales / Sydney          |
| EPI_ISL_417409 | 3/16/2020 | 3/25/2020 Oceania / Australia / New South Wales / Sydney          |
| EPI_ISL_417410 | 3/16/2020 | 3/25/2020 Oceania / Australia / New South Wales / Sydney          |
| EPI_ISL_417411 | 3/17/2020 | 3/25/2020 Oceania / Australia / New South Wales / Sydney          |
| EPI_ISL_417412 | 3/17/2020 | 3/25/2020 Oceania / Australia / New South Wales / Sydney          |
| EPI_ISL_417418 | 3/1/2020  | 3/25/2020 Europe / Italy / Friuli Venezia Giulia                  |
| EPI_ISL_417419 | 3/1/2020  | 3/25/2020 Europe / Italy / Friuli Venezia Giulia                  |
| EPI_ISL_417420 | 3/23/2020 | 3/25/2020 Asia / China / NanChang                                 |
| EPI_ISL_417421 | 3/1/2020  | 3/25/2020 Europe / Italy / Friuli Venezia Giulia                  |
| EPI_ISL_417422 | 3/4/2020  | 3/25/2020 Europe / Belgium / Dilbeek                              |
| EPI_ISL_417423 | 3/1/2020  | 3/25/2020 Europe / Italy / Friuli Venezia Giulia                  |
| EPI_ISL_417424 | 3/4/2020  | 3/25/2020 Europe / Belgium / Kasterlee                            |
| EPI_ISL_417425 | 3/6/2020  | 3/25/2020 Europe / Belgium / Schoten                              |
| EPI_ISL_417426 | 3/4/2020  | 3/25/2020 Europe / Belgium / Leuven                               |
| EPI_ISL_417427 | 3/2/2020  | 3/25/2020 Europe / Belgium / Sint-Pieters-Woluwe                  |
| EPI_ISL_417428 | 3/2/2020  | 3/25/2020 Europe / Belgium / Rixensart                            |
| EPI_ISL_417429 | 3/3/2020  | 3/25/2020 Europe / Belgium / Holsbeek                             |
| EPI_ISL_417430 | 3/3/2020  | 3/25/2020 Europe / Belgium / Vorst                                |
| EPI_ISL_417433 | 3/11/2020 | 3/25/2020 Africa / Democratic Republic of the Congo / Kinshasa    |
| EPI_ISL_417434 | 3/14/2020 | 3/25/2020 Africa / Democratic Republic of the Congo / Kinshasa    |
| EPI_ISL_417435 | 3/15/2020 | 3/25/2020 Africa / Democratic Republic of the Congo / Kinshasa    |
| EPI_ISL_417436 | 3/17/2020 | 3/25/2020 Africa / Democratic Republic of the Congo / Kinshasa    |
| EPI_ISL_417437 | 3/17/2020 | 3/25/2020 Africa / Democratic Republic of the Congo / Kinshasa    |
| EPI_ISL_417438 | 3/17/2020 | 3/25/2020 Africa / Democratic Republic of the Congo / Kinshasa    |
| EPI_ISL_417439 | 3/17/2020 | 3/25/2020 Africa / Democratic Republic of the Congo / Kinshasa    |
| EPI_ISL_417440 | 3/17/2020 | 3/25/2020 Africa / Democratic Republic of the Congo / Kinshasa    |
| EPI_ISL_417441 | 3/17/2020 | 3/25/2020 Africa / Democratic Republic of the Congo / Kinshasa    |
| EPI_ISL_417442 | 3/18/2020 | 3/25/2020 Africa / Democratic Republic of the Congo / Kinshasa    |
| EPI_ISL_417444 | 3/4/2020  | 3/25/2020 Asia / Pakistan / Gilgit                                |
| EPI_ISL_417443 | 1/22/2020 | 3/26/2020 Asia / Hong Kong                                        |
| EPI_ISL_417445 | 2/24/2020 | 3/26/2020 Europe / Italy / Lombardy / Milan                       |
| EPI_ISL_417447 | 2/24/2020 | 3/26/2020 Europe / Italy / Lombardy / Milan                       |
| EPI_ISL_417448 | 3/14/2020 | 3/26/2020 North America / USA / Washington                        |
| EPI_ISL_417449 | 3/14/2020 | 3/26/2020 North America / USA / Washington                        |
| EPI_ISL_417450 | 3/14/2020 | 3/26/2020 North America / USA / Washington                        |
| EPI_ISL_417451 | 3/14/2020 | 3/26/2020 North America / USA / Washington                        |
| EPI_ISL_417452 | 3/12/2020 | 3/26/2020 North America / USA / Connecticut                       |
| EPI_ISL_417453 | 3/14/2020 | 3/26/2020 North America / USA / Washington                        |
| EPI_ISL_417454 | 3/14/2020 | 3/26/2020 North America / USA / Washington                        |
| EPI_ISL_417455 | 3/14/2020 | 3/26/2020 North America / USA / Washington                        |
| EPI_ISL_417456 | 3/13/2020 | 3/26/2020 North America / USA / Washington                        |
| EPI_ISL_417457 | 3/10/2020 | 3/26/2020 Europe / Germany / North Rhine-Westphalia / Duesseldorf |
| EPI_ISL_417458 | 3/11/2020 | 3/26/2020 Europe / Germany / North Rhine-Westphalia / Duesseldorf |
| EPI_ISL_417459 | 3/11/2020 | 3/26/2020 Europe / Germany / North Rhine-Westphalia / Duesseldorf |
| EPI_ISL_417460 | 3/11/2020 | 3/26/2020 Europe / Germany / North Rhine-Westphalia / Duesseldorf |
| EPI_ISL_417461 | 3/11/2020 | 3/26/2020 Europe / Germany / North Rhine-Westphalia / Duesseldorf |
| EPI_ISL_417462 | 3/11/2020 | 3/26/2020 Europe / Germany / North Rhine-Westphalia / Duesseldorf |

|                |           |                                                                   |
|----------------|-----------|-------------------------------------------------------------------|
| EPI_ISL_417463 | 3/13/2020 | 3/26/2020 Europe / Germany / North Rhine-Westphalia / Duesseldorf |
| EPI_ISL_417464 | 3/14/2020 | 3/26/2020 Europe / Germany / North Rhine-Westphalia / Duesseldorf |
| EPI_ISL_417465 | 3/14/2020 | 3/26/2020 Europe / Germany / North Rhine-Westphalia / Duesseldorf |
| EPI_ISL_417466 | 3/14/2020 | 3/26/2020 Europe / Germany / North Rhine-Westphalia / Duesseldorf |
| EPI_ISL_417467 | 3/15/2020 | 3/26/2020 Europe / Germany / North Rhine-Westphalia / Duesseldorf |
| EPI_ISL_417468 | 3/16/2020 | 3/26/2020 Europe / Germany / North Rhine-Westphalia / Duesseldorf |
| EPI_ISL_417469 | 3/12/2020 | 3/26/2020 North America / USA / Minnesota                         |
| EPI_ISL_417470 | 3/12/2020 | 3/26/2020 North America / USA / Minnesota                         |
| EPI_ISL_417471 | 3/12/2020 | 3/26/2020 North America / USA / Minnesota                         |
| EPI_ISL_417472 | 3/12/2020 | 3/26/2020 North America / USA / Minnesota                         |
| EPI_ISL_417473 | 3/13/2020 | 3/26/2020 North America / USA / Minnesota                         |
| EPI_ISL_417474 | 3/12/2020 | 3/26/2020 North America / USA / Minnesota                         |
| EPI_ISL_417475 | 3/12/2020 | 3/26/2020 North America / USA / Minnesota                         |
| EPI_ISL_417476 | 3/12/2020 | 3/26/2020 North America / USA / Minnesota                         |
| EPI_ISL_417477 | 3/12/2020 | 3/26/2020 North America / USA / Minnesota                         |
| EPI_ISL_417478 | 3/13/2020 | 3/26/2020 North America / USA / Minnesota                         |
| EPI_ISL_417479 | 3/12/2020 | 3/26/2020 North America / USA / Minnesota                         |
| EPI_ISL_417480 | 3/12/2020 | 3/26/2020 North America / USA / Minnesota                         |
| EPI_ISL_417481 | 3/13/2020 | 3/26/2020 Europe / Iceland / Reykjavik                            |
| EPI_ISL_417483 | 2/27/2020 | 3/26/2020 Europe / Norway / Oslo                                  |
| EPI_ISL_417484 | 2/26/2020 | 3/26/2020 Europe / Norway / Oslo                                  |
| EPI_ISL_417485 | 3/2/2020  | 3/26/2020 Europe / Norway / Oslo                                  |
| EPI_ISL_417486 | 3/1/2020  | 3/26/2020 Europe / Norway / Oslo                                  |
| EPI_ISL_417487 | 3/1/2020  | 3/26/2020 Europe / Norway / Oslo                                  |
| EPI_ISL_417488 | 2/29/2020 | 3/26/2020 Europe / Norway / Oslo                                  |
| EPI_ISL_417491 | 3/3/2020  | 3/26/2020 Europe / Italy / Marche                                 |
| EPI_ISL_417492 | 3/13/2020 | 3/26/2020 North America / USA / Minnesota                         |
| EPI_ISL_417493 | 3/13/2020 | 3/26/2020 North America / USA / Minnesota                         |
| EPI_ISL_417494 | 3/13/2020 | 3/26/2020 North America / USA / Minnesota                         |
| EPI_ISL_417495 | 3/13/2020 | 3/26/2020 North America / USA / Minnesota                         |
| EPI_ISL_417496 | 3/13/2020 | 3/26/2020 North America / USA / Minnesota                         |
| EPI_ISL_417497 | 3/13/2020 | 3/26/2020 North America / USA / Minnesota                         |
| EPI_ISL_417498 | 3/13/2020 | 3/26/2020 North America / USA / Minnesota                         |
| EPI_ISL_417499 | 3/13/2020 | 3/26/2020 North America / USA / Minnesota                         |
| EPI_ISL_417500 | 3/14/2020 | 3/26/2020 North America / USA / Minnesota                         |
| EPI_ISL_417501 | 3/14/2020 | 3/26/2020 North America / USA / Minnesota                         |
| EPI_ISL_417502 | 3/14/2020 | 3/26/2020 North America / USA / Minnesota                         |
| EPI_ISL_417503 | 3/14/2020 | 3/26/2020 North America / USA / Minnesota                         |
| EPI_ISL_417504 | 3/16/2020 | 3/26/2020 North America / USA / Wisconsin                         |
| EPI_ISL_417505 | 3/15/2020 | 3/26/2020 North America / USA / Wisconsin                         |
| EPI_ISL_417506 | 3/16/2020 | 3/27/2020 North America / USA / Wisconsin                         |
| EPI_ISL_417507 | 3/17/2020 | 3/27/2020 North America / USA / Wisconsin                         |
| EPI_ISL_417508 | 3/16/2020 | 3/27/2020 North America / USA / Wisconsin                         |
| EPI_ISL_417509 | 3/14/2020 | 3/27/2020 North America / USA / Wisconsin                         |
| EPI_ISL_417510 | 3/16/2020 | 3/27/2020 North America / USA / Wisconsin                         |
| EPI_ISL_417512 | 3/15/2020 | 3/27/2020 North America / USA / Wisconsin                         |
| EPI_ISL_417513 | 3/16/2020 | 3/27/2020 North America / USA / Wisconsin                         |



|                |           |                                           |
|----------------|-----------|-------------------------------------------|
| EPI_ISL_417514 | 3/13/2020 | 3/27/2020 North America / USA / Wisconsin |
| EPI_ISL_417515 | 3/17/2020 | 3/27/2020 North America / USA / Wisconsin |
| EPI_ISL_417516 | 3/15/2020 | 3/27/2020 North America / USA / Wisconsin |
| EPI_ISL_417517 | 3/13/2020 | 3/27/2020 North America / USA / Wisconsin |
| EPI_ISL_417519 | 3/5/2020  | 3/27/2020 Asia / Taiwan / Taoyuan         |
| EPI_ISL_417520 | 3/9/2020  | 3/27/2020 Asia / Taiwan / Taoyuan         |
| EPI_ISL_417521 | 3/10/2020 | 3/27/2020 Asia / Taiwan / Taoyuan         |
| EPI_ISL_417522 | 3/13/2020 | 3/27/2020 Asia / Taiwan / Taoyuan         |
| EPI_ISL_417523 | 3/13/2020 | 3/27/2020 Asia / Taiwan / Taoyuan         |
| EPI_ISL_417524 | 3/14/2020 | 3/27/2020 Asia / Taiwan / Taoyuan         |
| EPI_ISL_417525 | 3/14/2020 | 3/27/2020 Asia / Taiwan / Taoyuan         |
| EPI_ISL_417526 | 3/18/2020 | 3/27/2020 Europe / Luxembourg             |
| EPI_ISL_417527 | 3/18/2020 | 3/27/2020 Europe / Luxembourg             |
| EPI_ISL_417528 | 3/18/2020 | 3/27/2020 Europe / Luxembourg             |
| EPI_ISL_417529 | 3/18/2020 | 3/27/2020 Europe / Luxembourg             |
| EPI_ISL_417530 | 3/18/2020 | 3/27/2020 Europe / Luxembourg             |
| EPI_ISL_417531 | 3/18/2020 | 3/27/2020 Europe / Luxembourg             |
| EPI_ISL_417532 | 3/18/2020 | 3/27/2020 Europe / Luxembourg             |
| EPI_ISL_417533 | 3/18/2020 | 3/27/2020 Europe / Luxembourg             |
| EPI_ISL_417534 | 3/18/2020 | 3/27/2020 Europe / Luxembourg             |
| EPI_ISL_417535 | 3/13/2020 | 3/27/2020 Europe / Iceland / Reykjavik    |
| EPI_ISL_417536 | 3/16/2020 | 3/27/2020 Europe / Iceland / Reykjavik    |
| EPI_ISL_417537 | 3/16/2020 | 3/27/2020 Europe / Iceland / Reykjavik    |
| EPI_ISL_417538 | 3/17/2020 | 3/27/2020 Europe / Iceland / Reykjavik    |
| EPI_ISL_417539 | 3/16/2020 | 3/27/2020 Europe / Iceland / Reykjavik    |
| EPI_ISL_417540 | 3/17/2020 | 3/27/2020 Europe / Iceland / Reykjavik    |
| EPI_ISL_417541 | 3/17/2020 | 3/27/2020 Europe / Iceland / Reykjavik    |
| EPI_ISL_417542 | 3/17/2020 | 3/27/2020 Europe / Iceland / Reykjavik    |
| EPI_ISL_417543 | 3/17/2020 | 3/27/2020 Europe / Iceland / Reykjavik    |
| EPI_ISL_417544 | 3/17/2020 | 3/27/2020 Europe / Iceland / Reykjavik    |
| EPI_ISL_417545 | 3/17/2020 | 3/27/2020 Europe / Iceland / Reykjavik    |
| EPI_ISL_417548 | 3/17/2020 | 3/27/2020 Europe / Iceland / Reykjavik    |
| EPI_ISL_417549 | 3/14/2020 | 3/27/2020 Europe / Iceland / Reykjavik    |
| EPI_ISL_417550 | 3/16/2020 | 3/27/2020 Europe / Iceland / Reykjavik    |
| EPI_ISL_417551 | 3/16/2020 | 3/27/2020 Europe / Iceland / Reykjavik    |
| EPI_ISL_417552 | 3/16/2020 | 3/27/2020 Europe / Iceland / Reykjavik    |
| EPI_ISL_417553 | 3/16/2020 | 3/27/2020 Europe / Iceland / Reykjavik    |
| EPI_ISL_417555 | 3/17/2020 | 3/27/2020 Europe / Iceland / Reykjavik    |
| EPI_ISL_417556 | 3/17/2020 | 3/27/2020 Europe / Iceland / Reykjavik    |
| EPI_ISL_417557 | 3/17/2020 | 3/27/2020 Europe / Iceland / Reykjavik    |
| EPI_ISL_417558 | 3/17/2020 | 3/27/2020 Europe / Iceland / Reykjavik    |
| EPI_ISL_417560 | 3/17/2020 | 3/27/2020 Europe / Iceland / Reykjavik    |
| EPI_ISL_417561 | 3/17/2020 | 3/27/2020 Europe / Iceland / Reykjavik    |
| EPI_ISL_417562 | 3/17/2020 | 3/27/2020 Europe / Iceland / Reykjavik    |
| EPI_ISL_417563 | 3/16/2020 | 3/27/2020 Europe / Iceland / Reykjavik    |
| EPI_ISL_417564 | 3/17/2020 | 3/27/2020 Europe / Iceland / Reykjavik    |
| EPI_ISL_417565 | 3/17/2020 | 3/27/2020 Europe / Iceland / Reykjavik    |











|                |           |           |                                |
|----------------|-----------|-----------|--------------------------------|
| EPI_ISL_417833 | 3/16/2020 | 3/27/2020 | Europe / Iceland / Reykjavik   |
| EPI_ISL_417834 | 3/16/2020 | 3/27/2020 | Europe / Iceland / Reykjavik   |
| EPI_ISL_417835 | 3/16/2020 | 3/27/2020 | Europe / Iceland / Reykjavik   |
| EPI_ISL_417836 | 3/16/2020 | 3/27/2020 | Europe / Iceland / Reykjavik   |
| EPI_ISL_417837 | 3/16/2020 | 3/27/2020 | Europe / Iceland / Reykjavik   |
| EPI_ISL_417838 | 3/16/2020 | 3/27/2020 | Europe / Iceland / Reykjavik   |
| EPI_ISL_417839 | 3/16/2020 | 3/27/2020 | Europe / Iceland / Reykjavik   |
| EPI_ISL_417840 | 3/2/2020  | 3/27/2020 | Europe / Iceland / Reykjavik   |
| EPI_ISL_417841 | 3/3/2020  | 3/27/2020 | Europe / Iceland / Reykjavik   |
| EPI_ISL_417842 | 3/3/2020  | 3/27/2020 | Europe / Iceland / Reykjavik   |
| EPI_ISL_417843 | 3/3/2020  | 3/27/2020 | Europe / Iceland / Reykjavik   |
| EPI_ISL_417844 | 3/4/2020  | 3/27/2020 | Europe / Iceland / Reykjavik   |
| EPI_ISL_417845 | 3/13/2020 | 3/27/2020 | Europe / Iceland / Reykjavik   |
| EPI_ISL_417846 | 3/4/2020  | 3/27/2020 | Europe / Iceland / Reykjavik   |
| EPI_ISL_417849 | 3/5/2020  | 3/27/2020 | Europe / Iceland / Reykjavik   |
| EPI_ISL_417850 | 3/5/2020  | 3/27/2020 | Europe / Iceland / Reykjavik   |
| EPI_ISL_417851 | 3/5/2020  | 3/27/2020 | Europe / Iceland / Reykjavik   |
| EPI_ISL_417852 | 3/6/2020  | 3/27/2020 | Europe / Iceland / Reykjavik   |
| EPI_ISL_417853 | 3/6/2020  | 3/27/2020 | Europe / Iceland / Reykjavik   |
| EPI_ISL_417854 | 3/13/2020 | 3/27/2020 | Europe / Iceland / Reykjavik   |
| EPI_ISL_417855 | 3/7/2020  | 3/27/2020 | Europe / Iceland / Reykjavik   |
| EPI_ISL_417856 | 3/7/2020  | 3/27/2020 | Europe / Iceland / Reykjavik   |
| EPI_ISL_417857 | 3/7/2020  | 3/27/2020 | Europe / Iceland / Reykjavik   |
| EPI_ISL_417860 | 3/8/2020  | 3/27/2020 | Europe / Iceland / Reykjavik   |
| EPI_ISL_417861 | 3/9/2020  | 3/27/2020 | Europe / Iceland / Reykjavik   |
| EPI_ISL_417862 | 3/9/2020  | 3/27/2020 | Europe / Iceland / Reykjavik   |
| EPI_ISL_417863 | 3/9/2020  | 3/27/2020 | Europe / Iceland / Reykjavik   |
| EPI_ISL_417864 | 3/15/2020 | 3/27/2020 | Europe / Iceland / Reykjavik   |
| EPI_ISL_417865 | 3/9/2020  | 3/27/2020 | Europe / Iceland / Reykjavik   |
| EPI_ISL_417866 | 3/9/2020  | 3/27/2020 | Europe / Iceland / Reykjavik   |
| EPI_ISL_417867 | 3/9/2020  | 3/27/2020 | Europe / Iceland / Reykjavik   |
| EPI_ISL_417868 | 3/9/2020  | 3/27/2020 | Europe / Iceland / Reykjavik   |
| EPI_ISL_417871 | 3/11/2020 | 3/27/2020 | Europe / Iceland / Reykjavik   |
| EPI_ISL_417872 | 3/10/2020 | 3/27/2020 | Europe / Iceland / Reykjavik   |
| EPI_ISL_417873 | 3/10/2020 | 3/27/2020 | Europe / Iceland / Reykjavik   |
| EPI_ISL_417874 | 3/10/2020 | 3/27/2020 | Europe / Iceland / Reykjavik   |
| EPI_ISL_417875 | 3/10/2020 | 3/27/2020 | Europe / Iceland / Reykjavik   |
| EPI_ISL_417876 | 3/10/2020 | 3/27/2020 | Europe / Iceland / Reykjavik   |
| EPI_ISL_417877 | 3/6/2020  | 3/27/2020 | Europe / Slovakia / Kostoliste |
| EPI_ISL_417878 | 3/7/2020  | 3/27/2020 | Europe / Slovakia / Bratislava |
| EPI_ISL_417879 | 3/6/2020  | 3/27/2020 | Europe / Slovakia / Kosice     |
| EPI_ISL_417880 | 3/8/2020  | 3/27/2020 | Europe / Slovakia / Martin     |
| EPI_ISL_417917 | 3/20/2020 | 3/27/2020 | Asia / Malaysia / Kuala Lumpur |
| EPI_ISL_417918 | 3/18/2020 | 3/27/2020 | Asia / Malaysia / Kuala Lumpur |
| EPI_ISL_417921 | 3/1/2020  | 3/27/2020 | Europe / Italy / Lazio / Rome  |
| EPI_ISL_417922 | 2/28/2020 | 3/27/2020 | Europe / Italy / Lazio / Rome  |
| EPI_ISL_417923 | 3/4/2020  | 3/27/2020 | Europe / Italy / Lazio / Rome  |

|                |           |                                                                   |
|----------------|-----------|-------------------------------------------------------------------|
| EPI_ISL_417924 | 3/11/2020 | 3/27/2020 South America / Colombia / Antioquia                    |
| EPI_ISL_417931 | 3/18/2020 | 3/27/2020 North America / USA / California / San Francisco County |
| EPI_ISL_417932 | 3/18/2020 | 3/27/2020 North America / USA / California / San Francisco County |
| EPI_ISL_417933 | 3/18/2020 | 3/27/2020 North America / USA / California / San Francisco County |
| EPI_ISL_417935 | 3/18/2020 | 3/27/2020 North America / USA / California / San Francisco County |
| EPI_ISL_417937 | 3/18/2020 | 3/27/2020 North America / USA / California / San Francisco County |
| EPI_ISL_417938 | 3/18/2020 | 3/27/2020 North America / USA / California / San Francisco County |
| EPI_ISL_417939 | 3/18/2020 | 3/27/2020 North America / USA / California / San Francisco County |
| EPI_ISL_417941 | 3/18/2020 | 3/27/2020 Africa / Democratic Republic of the Congo / Kinshasa    |
| EPI_ISL_417942 | 3/18/2020 | 3/27/2020 Africa / Democratic Republic of the Congo / Kinshasa    |
| EPI_ISL_417944 | 3/18/2020 | 3/27/2020 Africa / Democratic Republic of the Congo / Kinshasa    |
| EPI_ISL_417946 | 3/18/2020 | 3/27/2020 Africa / Democratic Republic of the Congo / Kinshasa    |
| EPI_ISL_417947 | 3/19/2020 | 3/27/2020 Africa / Democratic Republic of the Congo / Kinshasa    |
| EPI_ISL_417948 | 3/19/2020 | 3/27/2020 Africa / Democratic Republic of the Congo / Kinshasa    |
| EPI_ISL_417950 | 3/20/2020 | 3/27/2020 Africa / Democratic Republic of the Congo / Kinshasa    |
| EPI_ISL_417952 | 3/9/2020  | 3/27/2020 Europe / Spain / Madrid                                 |
| EPI_ISL_417954 | 3/12/2020 | 3/27/2020 Europe / Spain / Madrid                                 |
| EPI_ISL_417955 | 3/21/2020 | 3/27/2020 Africa / Democratic Republic of the Congo / Kinshasa    |
| EPI_ISL_417958 | 3/10/2020 | 3/27/2020 North America / USA / Utah                              |
| EPI_ISL_417959 | 3/11/2020 | 3/27/2020 North America / USA / Utah                              |
| EPI_ISL_417960 | 3/12/2020 | 3/27/2020 North America / USA / Utah                              |
| EPI_ISL_417961 | 3/12/2020 | 3/27/2020 Europe / Spain / Madrid                                 |
| EPI_ISL_417963 | 3/12/2020 | 3/27/2020 Europe / Spain / Madrid                                 |
| EPI_ISL_417964 | 3/13/2020 | 3/27/2020 North America / USA / Utah                              |
| EPI_ISL_417966 | 3/13/2020 | 3/27/2020 North America / USA / Utah                              |
| EPI_ISL_417967 | 3/12/2020 | 3/27/2020 Europe / Spain / Madrid                                 |
| EPI_ISL_417969 | 3/9/2020  | 3/27/2020 Europe / Spain / Madrid                                 |
| EPI_ISL_417970 | 3/16/2020 | 3/27/2020 North America / USA / Utah                              |
| EPI_ISL_417971 | 3/19/2020 | 3/27/2020 North America / USA / Utah                              |
| EPI_ISL_417972 | 3/9/2020  | 3/27/2020 Europe / Spain / Madrid                                 |
| EPI_ISL_417973 | 3/19/2020 | 3/27/2020 North America / USA / Utah                              |
| EPI_ISL_417974 | 3/19/2020 | 3/27/2020 North America / USA / Utah                              |
| EPI_ISL_417975 | 3/9/2020  | 3/27/2020 Europe / Spain / Madrid                                 |
| EPI_ISL_417976 | 3/19/2020 | 3/27/2020 North America / USA / Utah                              |
| EPI_ISL_417977 | 3/20/2020 | 3/27/2020 North America / USA / Utah                              |
| EPI_ISL_417978 | 3/9/2020  | 3/27/2020 Europe / Spain / Madrid                                 |
| EPI_ISL_417979 | 3/3/2020  | 3/27/2020 Europe / Spain / Madrid                                 |
| EPI_ISL_417980 | 3/3/2020  | 3/27/2020 Europe / Spain / Madrid                                 |
| EPI_ISL_417981 | 3/2/2020  | 3/27/2020 Europe / Spain / Madrid                                 |
| EPI_ISL_417986 | 3/3/2020  | 3/28/2020 Europe / Portugal                                       |
| EPI_ISL_417987 | 3/3/2020  | 3/28/2020 Europe / Portugal                                       |
| EPI_ISL_417988 | 3/5/2020  | 3/28/2020 Europe / Portugal                                       |
| EPI_ISL_417989 | 3/4/2020  | 3/28/2020 Europe / Portugal                                       |
| EPI_ISL_417990 | 3/6/2020  | 3/28/2020 Europe / Portugal                                       |
| EPI_ISL_417991 | 3/8/2020  | 3/28/2020 Europe / Portugal                                       |
| EPI_ISL_417992 | 3/7/2020  | 3/28/2020 Europe / Portugal                                       |
| EPI_ISL_417993 | 3/8/2020  | 3/28/2020 Europe / Portugal                                       |



|                |           |                                             |
|----------------|-----------|---------------------------------------------|
| EPI_ISL_417994 | 3/8/2020  | 3/28/2020 Europe / Portugal                 |
| EPI_ISL_417995 | 3/8/2020  | 3/28/2020 Europe / Portugal                 |
| EPI_ISL_417996 | 3/8/2020  | 3/28/2020 Europe / Portugal                 |
| EPI_ISL_417997 | 3/7/2020  | 3/28/2020 Europe / Portugal                 |
| EPI_ISL_417998 | 3/8/2020  | 3/28/2020 Europe / Portugal                 |
| EPI_ISL_417999 | 3/7/2020  | 3/28/2020 Europe / Portugal                 |
| EPI_ISL_418000 | 3/10/2020 | 3/28/2020 Europe / Portugal                 |
| EPI_ISL_418001 | 3/10/2020 | 3/28/2020 Europe / Portugal                 |
| EPI_ISL_418002 | 3/11/2020 | 3/28/2020 Europe / Portugal                 |
| EPI_ISL_418003 | 3/10/2020 | 3/28/2020 Europe / Portugal                 |
| EPI_ISL_418004 | 3/12/2020 | 3/28/2020 Europe / Portugal                 |
| EPI_ISL_418005 | 3/12/2020 | 3/28/2020 Europe / Portugal                 |
| EPI_ISL_418006 | 3/13/2020 | 3/28/2020 Europe / Portugal                 |
| EPI_ISL_418007 | 3/13/2020 | 3/28/2020 Europe / Portugal                 |
| EPI_ISL_418008 | 3/13/2020 | 3/28/2020 Europe / Portugal                 |
| EPI_ISL_418009 | 3/15/2020 | 3/28/2020 Europe / Portugal                 |
| EPI_ISL_418010 | 3/3/2020  | 3/28/2020 Europe / Portugal                 |
| EPI_ISL_418011 | 3/4/2020  | 3/28/2020 Europe / Portugal                 |
| EPI_ISL_418012 | 3/6/2020  | 3/28/2020 Europe / Portugal                 |
| EPI_ISL_418013 | 3/7/2020  | 3/28/2020 Europe / Portugal                 |
| EPI_ISL_418014 | 3/9/2020  | 3/28/2020 Europe / Portugal                 |
| EPI_ISL_418015 | 3/9/2020  | 3/28/2020 Europe / Portugal                 |
| EPI_ISL_418016 | 3/10/2020 | 3/28/2020 Europe / Portugal                 |
| EPI_ISL_418017 | 3/16/2020 | 3/28/2020 Europe / Portugal                 |
| EPI_ISL_418018 | 3/16/2020 | 3/28/2020 Europe / Portugal                 |
| EPI_ISL_418019 | 3/15/2020 | 3/28/2020 Europe / Portugal                 |
| EPI_ISL_418020 | 3/16/2020 | 3/28/2020 Europe / Portugal                 |
| EPI_ISL_418021 | 3/16/2020 | 3/28/2020 Europe / Portugal                 |
| EPI_ISL_418022 | 3/15/2020 | 3/28/2020 Europe / Portugal                 |
| EPI_ISL_418023 | 3/17/2020 | 3/28/2020 Europe / Portugal                 |
| EPI_ISL_418024 | 3/17/2020 | 3/28/2020 Europe / Portugal                 |
| EPI_ISL_418025 | 3/17/2020 | 3/28/2020 Europe / Portugal                 |
| EPI_ISL_418026 | 3/17/2020 | 3/28/2020 Europe / Portugal                 |
| EPI_ISL_418027 | 3/17/2020 | 3/28/2020 Europe / Portugal                 |
| EPI_ISL_418028 | 3/13/2020 | 3/28/2020 North America / USA / Minnesota   |
| EPI_ISL_418029 | 3/16/2020 | 3/28/2020 North America / USA / Washington  |
| EPI_ISL_418030 | 3/16/2020 | 3/28/2020 North America / USA / Washington  |
| EPI_ISL_418032 | 3/16/2020 | 3/28/2020 North America / USA / Washington  |
| EPI_ISL_418033 | 3/16/2020 | 3/28/2020 North America / USA / Washington  |
| EPI_ISL_418034 | 3/16/2020 | 3/28/2020 North America / USA / Washington  |
| EPI_ISL_418036 | 3/13/2020 | 3/28/2020 North America / USA / Minnesota   |
| EPI_ISL_418037 | 3/16/2020 | 3/28/2020 North America / USA / Washington  |
| EPI_ISL_418038 | 3/15/2020 | 3/28/2020 North America / USA / Washington  |
| EPI_ISL_418039 | 3/13/2020 | 3/28/2020 North America / USA / Connecticut |
| EPI_ISL_418040 | 3/16/2020 | 3/28/2020 North America / USA / Washington  |
| EPI_ISL_418041 | 3/14/2020 | 3/28/2020 North America / USA / Connecticut |
| EPI_ISL_418042 | 3/13/2020 | 3/28/2020 North America / USA / Minnesota   |

|                |           |                                             |
|----------------|-----------|---------------------------------------------|
| EPI_ISL_418043 | 3/14/2020 | 3/28/2020 North America / USA / Connecticut |
| EPI_ISL_418044 | 3/14/2020 | 3/28/2020 North America / USA / Connecticut |
| EPI_ISL_418045 | 3/14/2020 | 3/28/2020 North America / USA / Connecticut |
| EPI_ISL_418046 | 3/16/2020 | 3/28/2020 North America / USA / Washington  |
| EPI_ISL_418047 | 3/16/2020 | 3/28/2020 North America / USA / Washington  |
| EPI_ISL_418049 | 3/13/2020 | 3/28/2020 North America / USA / Minnesota   |
| EPI_ISL_418050 | 3/16/2020 | 3/28/2020 North America / USA / Washington  |
| EPI_ISL_418051 | 3/13/2020 | 3/28/2020 North America / USA / Minnesota   |
| EPI_ISL_418053 | 3/16/2020 | 3/28/2020 North America / USA / Washington  |
| EPI_ISL_418054 | 3/16/2020 | 3/28/2020 North America / USA / Washington  |
| EPI_ISL_418055 | 3/14/2020 | 3/28/2020 North America / USA / Washington  |
| EPI_ISL_418056 | 3/13/2020 | 3/28/2020 North America / USA / Connecticut |
| EPI_ISL_418057 | 3/13/2020 | 3/28/2020 North America / USA / Connecticut |
| EPI_ISL_418058 | 3/13/2020 | 3/28/2020 North America / USA / Connecticut |
| EPI_ISL_418059 | 3/13/2020 | 3/28/2020 North America / USA / Washington  |
| EPI_ISL_418060 | 3/14/2020 | 3/28/2020 North America / USA / Washington  |
| EPI_ISL_418061 | 3/13/2020 | 3/28/2020 North America / USA               |
| EPI_ISL_418062 | 3/14/2020 | 3/28/2020 North America / USA / Washington  |
| EPI_ISL_418064 | 3/15/2020 | 3/28/2020 North America / USA / Washington  |
| EPI_ISL_418067 | 3/15/2020 | 3/28/2020 North America / USA / Washington  |
| EPI_ISL_418069 | 3/14/2020 | 3/28/2020 North America / USA / Washington  |
| EPI_ISL_418070 | 3/14/2020 | 3/28/2020 North America / USA / Washington  |
| EPI_ISL_418071 | 3/15/2020 | 3/28/2020 North America / USA / Washington  |
| EPI_ISL_418072 | 3/15/2020 | 3/28/2020 North America / USA / Washington  |
| EPI_ISL_418073 | 3/15/2020 | 3/28/2020 North America / USA / Washington  |
| EPI_ISL_418074 | 3/15/2020 | 3/28/2020 North America / USA / Washington  |
| EPI_ISL_418075 | 3/15/2020 | 3/28/2020 North America / USA / Washington  |
| EPI_ISL_418076 | 3/15/2020 | 3/28/2020 North America / USA / Washington  |
| EPI_ISL_418077 | 3/15/2020 | 3/28/2020 North America / USA / Washington  |
| EPI_ISL_418078 | 3/15/2020 | 3/28/2020 North America / USA / Washington  |
| EPI_ISL_418079 | 3/15/2020 | 3/28/2020 North America / USA / Washington  |
| EPI_ISL_418080 | 3/15/2020 | 3/28/2020 North America / USA / Washington  |
| EPI_ISL_418081 | 3/15/2020 | 3/28/2020 North America / USA / Washington  |
| EPI_ISL_418082 | 3/15/2020 | 3/28/2020 North America / USA / Washington  |
| EPI_ISL_418093 | 3/12/2020 | 3/28/2020 Europe / United Kingdom / Wales   |
| EPI_ISL_418096 | 3/12/2020 | 3/28/2020 Europe / United Kingdom / Wales   |
| EPI_ISL_418103 | 3/15/2020 | 3/28/2020 Europe / United Kingdom / Wales   |
| EPI_ISL_418110 | 3/13/2020 | 3/28/2020 Europe / United Kingdom / Wales   |
| EPI_ISL_418117 | 3/14/2020 | 3/28/2020 Europe / United Kingdom / Wales   |
| EPI_ISL_418120 | 3/13/2020 | 3/28/2020 Europe / United Kingdom / Wales   |
| EPI_ISL_418122 | 3/13/2020 | 3/28/2020 Europe / United Kingdom / Wales   |
| EPI_ISL_418136 | 3/15/2020 | 3/28/2020 Europe / United Kingdom / Wales   |
| EPI_ISL_418137 | 3/15/2020 | 3/28/2020 Europe / United Kingdom / Wales   |
| EPI_ISL_418139 | 3/16/2020 | 3/28/2020 Europe / United Kingdom / Wales   |
| EPI_ISL_418140 | 3/15/2020 | 3/28/2020 Europe / United Kingdom / Wales   |
| EPI_ISL_418143 | 3/14/2020 | 3/28/2020 Europe / United Kingdom / Wales   |
| EPI_ISL_418144 | 3/14/2020 | 3/28/2020 Europe / United Kingdom / Wales   |

|                |           |           |                                                    |
|----------------|-----------|-----------|----------------------------------------------------|
| EPI_ISL_418145 | 3/14/2020 | 3/28/2020 | Europe / United Kingdom / Wales                    |
| EPI_ISL_418147 | 3/14/2020 | 3/28/2020 | Europe / United Kingdom / Wales                    |
| EPI_ISL_418149 | 3/16/2020 | 3/28/2020 | Europe / United Kingdom / Wales                    |
| EPI_ISL_418150 | 3/16/2020 | 3/28/2020 | Europe / United Kingdom / Wales                    |
| EPI_ISL_418151 | 3/16/2020 | 3/28/2020 | Europe / United Kingdom / Wales                    |
| EPI_ISL_418155 | 3/16/2020 | 3/28/2020 | Europe / United Kingdom / Wales                    |
| EPI_ISL_418156 | 3/16/2020 | 3/28/2020 | Europe / United Kingdom / Wales                    |
| EPI_ISL_418158 | 3/16/2020 | 3/28/2020 | Europe / United Kingdom / Wales                    |
| EPI_ISL_418159 | 3/16/2020 | 3/28/2020 | Europe / United Kingdom / Wales                    |
| EPI_ISL_418163 | 3/16/2020 | 3/28/2020 | Europe / United Kingdom / Wales                    |
| EPI_ISL_418183 | 3/17/2020 | 3/28/2020 | Europe / Hungary / Baranya                         |
| EPI_ISL_418184 | 3/18/2020 | 3/28/2020 | North America / USA / Wisconsin / La Crosse County |
| EPI_ISL_418186 | 3/23/2020 | 3/28/2020 | North America / USA / Wisconsin / La Crosse County |
| EPI_ISL_418187 | 3/23/2020 | 3/28/2020 | North America / USA / Wisconsin / La Crosse County |
| EPI_ISL_418188 | 3/23/2020 | 3/28/2020 | North America / USA / Wisconsin / Monroe County    |
| EPI_ISL_418192 | 3/16/2020 | 3/28/2020 | North America / USA / New York / Manhattan         |
| EPI_ISL_418193 | 3/17/2020 | 3/28/2020 | North America / USA / New York / Manhattan         |
| EPI_ISL_418196 | 3/14/2020 | 3/28/2020 | North America / USA / New York / Manhattan         |
| EPI_ISL_418197 | 3/15/2020 | 3/28/2020 | North America / USA / New York / Manhattan         |
| EPI_ISL_418198 | 3/17/2020 | 3/28/2020 | North America / USA / New York / Manhattan         |
| EPI_ISL_418199 | 3/17/2020 | 3/28/2020 | North America / USA / New York / Manhattan         |
| EPI_ISL_418200 | 3/17/2020 | 3/28/2020 | North America / USA / New York / Manhattan         |
| EPI_ISL_418203 | 3/17/2020 | 3/28/2020 | North America / USA / New York / Manhattan         |
| EPI_ISL_418204 | 3/17/2020 | 3/28/2020 | North America / USA / New York / Manhattan         |
| EPI_ISL_450198 | 1/28/2020 | 3/28/2020 | Europe / Germany / Bavaria                         |
| EPI_ISL_450199 | 1/29/2020 | 3/28/2020 | Europe / Germany / Bavaria                         |
| EPI_ISL_450200 | 1/28/2020 | 3/28/2020 | Europe / Germany / Bavaria                         |
| EPI_ISL_450201 | 2020-01   | 3/28/2020 | Europe / Germany / Bavaria                         |
| EPI_ISL_450202 | 2020-01   | 3/28/2020 | Europe / Germany / Bavaria                         |
| EPI_ISL_450203 | 2/1/2020  | 3/28/2020 | Europe / Germany / Bavaria                         |
| EPI_ISL_450204 | 2/3/2020  | 3/28/2020 | Europe / Germany / Bavaria                         |
| EPI_ISL_450205 | 2020-01   | 3/28/2020 | Europe / Germany / Bavaria                         |
| EPI_ISL_450206 | 2020-01   | 3/28/2020 | Europe / Germany / Bavaria                         |
| EPI_ISL_450207 | 2/7/2020  | 3/28/2020 | Europe / Germany / Bavaria                         |
| EPI_ISL_450208 | 2/8/2020  | 3/28/2020 | Europe / Germany / Bavaria                         |
| EPI_ISL_450209 | 1/30/2020 | 3/28/2020 | Europe / Germany / Bavaria                         |
| EPI_ISL_450210 | 2020-02   | 3/28/2020 | Europe / Germany / Bavaria                         |
| EPI_ISL_450211 | 2020-02   | 3/28/2020 | Europe / Germany / Bavaria                         |
| EPI_ISL_418206 | 2/28/2020 | 3/29/2020 | Africa / Senegal / Dakar                           |
| EPI_ISL_418207 | 3/2/2020  | 3/29/2020 | Africa / Senegal / Dakar                           |
| EPI_ISL_418208 | 3/4/2020  | 3/29/2020 | Africa / Senegal / Dakar                           |
| EPI_ISL_418209 | 3/3/2020  | 3/29/2020 | Africa / Senegal / Dakar                           |
| EPI_ISL_418210 | 3/10/2020 | 3/29/2020 | Africa / Senegal / Diourbel / Touba                |
| EPI_ISL_418211 | 3/11/2020 | 3/29/2020 | Africa / Senegal / Diourbel / Touba                |
| EPI_ISL_418212 | 3/11/2020 | 3/29/2020 | Africa / Senegal / Diourbel / Touba                |
| EPI_ISL_418213 | 3/12/2020 | 3/29/2020 | Africa / Senegal / Diourbel / Touba                |
| EPI_ISL_418215 | 3/12/2020 | 3/29/2020 | Africa / Senegal / Diourbel / Touba                |

|                |           |                                                               |
|----------------|-----------|---------------------------------------------------------------|
| EPI_ISL_418216 | 3/13/2020 | 3/29/2020 Africa / Senegal / Dakar                            |
| EPI_ISL_418217 | 3/13/2020 | 3/29/2020 Africa / Senegal / Thies / Mbour                    |
| EPI_ISL_418218 | 2/21/2020 | 3/29/2020 Europe / France / Hauts-de-France / Compiègne       |
| EPI_ISL_418219 | 2/26/2020 | 3/29/2020 Europe / France / Bretagne / Brest                  |
| EPI_ISL_418220 | 2/28/2020 | 3/29/2020 Europe / France / Hauts-de-France / Compiègne       |
| EPI_ISL_418221 | 3/2/2020  | 3/29/2020 Europe / France / Hauts-de-France / Compiègne       |
| EPI_ISL_418222 | 3/4/2020  | 3/29/2020 Europe / France / Centre-Val de Loire / Tours       |
| EPI_ISL_418223 | 3/5/2020  | 3/29/2020 Europe / France / Hauts-de-France / Compiègne       |
| EPI_ISL_418224 | 3/8/2020  | 3/29/2020 Europe / France / Hauts-de-France / Compiègne       |
| EPI_ISL_418225 | 3/8/2020  | 3/29/2020 Europe / France / Hauts-de-France / Compiègne       |
| EPI_ISL_418226 | 3/9/2020  | 3/29/2020 Europe / France / Hauts-de-France / Crouy en Thelle |
| EPI_ISL_418227 | 3/12/2020 | 3/29/2020 Europe / France / Hauts-de-France / Compiègne       |
| EPI_ISL_418228 | 3/12/2020 | 3/29/2020 Europe / France / Hauts-de-France / Compiègne       |
| EPI_ISL_418229 | 3/12/2020 | 3/29/2020 Europe / France / Île-de-France / Levallois-Perret  |
| EPI_ISL_418230 | 3/13/2020 | 3/29/2020 Europe / France / Île-de-France / Paris             |
| EPI_ISL_418231 | 3/15/2020 | 3/29/2020 Europe / France / Hauts-de-France / Compiègne       |
| EPI_ISL_418232 | 3/15/2020 | 3/29/2020 Europe / France / Île-de-France / Meudon la Forêt   |
| EPI_ISL_418233 | 3/15/2020 | 3/29/2020 Europe / France / Île-de-France / Meudon la Forêt   |
| EPI_ISL_418234 | 3/14/2020 | 3/29/2020 Europe / France / Île-de-France / Longjumeau        |
| EPI_ISL_418235 | 3/16/2020 | 3/29/2020 Europe / France / Île-de-France / Vanves            |
| EPI_ISL_418236 | 3/16/2020 | 3/29/2020 Europe / France / Hauts-de-France / Compiègne       |
| EPI_ISL_418237 | 3/16/2020 | 3/29/2020 Europe / France / Hauts-de-France / Compiègne       |
| EPI_ISL_418238 | 3/16/2020 | 3/29/2020 Europe / France / Hauts-de-France / Compiègne       |
| EPI_ISL_418239 | 3/16/2020 | 3/29/2020 Europe / France / Hauts-de-France / Compiègne       |
| EPI_ISL_418240 | 3/16/2020 | 3/29/2020 Europe / France / Île-de-France / Longjumeau        |
| EPI_ISL_418241 | 3/2/2020  | 3/29/2020 Africa / Algeria / Boufarik                         |
| EPI_ISL_418242 | 3/8/2020  | 3/29/2020 Africa / Algeria / Blida                            |
| EPI_ISL_418243 | 2/28/2020 | 3/29/2020 Europe / Spain / Andalusia                          |
| EPI_ISL_418244 | 3/2/2020  | 3/29/2020 Europe / Spain / Andalusia                          |
| EPI_ISL_418245 | 3/1/2020  | 3/29/2020 Europe / Spain / Castilla-La Mancha                 |
| EPI_ISL_418246 | 3/1/2020  | 3/29/2020 Europe / Spain / Castilla-La Mancha                 |
| EPI_ISL_418247 | 2/26/2020 | 3/29/2020 Europe / Spain / Castilla y Leon                    |
| EPI_ISL_418248 | 3/1/2020  | 3/29/2020 Europe / Spain / Castilla y Leon                    |
| EPI_ISL_418249 | 3/3/2020  | 3/29/2020 Europe / Spain / Castilla y Leon                    |
| EPI_ISL_418250 | 2020      | 3/29/2020 Europe / Spain / Catalunya                          |
| EPI_ISL_418251 | 2/25/2020 | 3/29/2020 Europe / Spain / Madrid                             |
| EPI_ISL_418252 | 3/4/2020  | 3/29/2020 Europe / Spain / Madrid                             |
| EPI_ISL_418253 | 3/2/2020  | 3/29/2020 Europe / Spain / Basque Country                     |
| EPI_ISL_418255 | 3/14/2020 | 3/29/2020 Europe / Italy / Abruzzo                            |
| EPI_ISL_418256 | 3/14/2020 | 3/29/2020 Europe / Italy / Abruzzo                            |
| EPI_ISL_418257 | 3/17/2020 | 3/29/2020 Europe / Italy / Abruzzo                            |
| EPI_ISL_418258 | 3/14/2020 | 3/29/2020 Europe / Italy / Abruzzo                            |
| EPI_ISL_418259 | 3/14/2020 | 3/29/2020 Europe / Italy / Abruzzo                            |
| EPI_ISL_418260 | 3/16/2020 | 3/29/2020 Europe / Italy / Abruzzo                            |
| EPI_ISL_418262 | 3/6/2020  | 3/29/2020 South America / Colombia / Bogota                   |
| EPI_ISL_418263 | 3/18/2020 | 3/30/2020 Europe / Greece / Athens                            |
| EPI_ISL_418264 | 3/18/2020 | 3/30/2020 Europe / Greece / Athens                            |

|                |           |                                                               |
|----------------|-----------|---------------------------------------------------------------|
| EPI_ISL_418265 | 3/18/2020 | 3/30/2020 Europe / Greece / Athens                            |
| EPI_ISL_418267 | 1/22/2020 | 3/30/2020 Asia / Vietnam / Ho Chi Minh City                   |
| EPI_ISL_418270 | 3/4/2020  | 3/30/2020 Europe / Belgium / Antwerp                          |
| EPI_ISL_418271 | 2/27/2020 | 3/30/2020 Europe / Switzerland / Basel-Stadt                  |
| EPI_ISL_418279 | 3/3/2020  | 3/30/2020 Europe / Switzerland / Basel                        |
| EPI_ISL_418280 | 3/3/2020  | 3/30/2020 Europe / Switzerland / Basel                        |
| EPI_ISL_418282 | 3/4/2020  | 3/30/2020 Europe / Switzerland / Basel-Landschaft             |
| EPI_ISL_418286 | 3/18/2020 | 3/30/2020 Europe / United Kingdom / England / South Yorkshire |
| EPI_ISL_418287 | 3/16/2020 | 3/30/2020 Europe / United Kingdom / England / South Yorkshire |
| EPI_ISL_418288 | 3/18/2020 | 3/30/2020 Europe / United Kingdom / England / South Yorkshire |
| EPI_ISL_418289 | 3/18/2020 | 3/30/2020 Europe / United Kingdom / England / South Yorkshire |
| EPI_ISL_418290 | 3/18/2020 | 3/30/2020 Europe / United Kingdom / England / South Yorkshire |
| EPI_ISL_418291 | 3/16/2020 | 3/30/2020 Europe / United Kingdom / England / South Yorkshire |
| EPI_ISL_418292 | 3/18/2020 | 3/30/2020 Europe / United Kingdom / England / South Yorkshire |
| EPI_ISL_418293 | 3/16/2020 | 3/30/2020 Europe / United Kingdom / England / South Yorkshire |
| EPI_ISL_418294 | 3/18/2020 | 3/30/2020 Europe / United Kingdom / England / South Yorkshire |
| EPI_ISL_418295 | 3/17/2020 | 3/30/2020 Europe / United Kingdom / England / South Yorkshire |
| EPI_ISL_418296 | 3/18/2020 | 3/30/2020 Europe / United Kingdom / England / South Yorkshire |
| EPI_ISL_418297 | 3/17/2020 | 3/30/2020 Europe / United Kingdom / England / South Yorkshire |
| EPI_ISL_418298 | 3/16/2020 | 3/30/2020 Europe / United Kingdom / England / South Yorkshire |
| EPI_ISL_418299 | 3/18/2020 | 3/30/2020 Europe / United Kingdom / England / South Yorkshire |
| EPI_ISL_418300 | 3/15/2020 | 3/30/2020 Europe / United Kingdom / England / South Yorkshire |
| EPI_ISL_418301 | 3/5/2020  | 3/30/2020 Europe / United Kingdom / England / South Yorkshire |
| EPI_ISL_418302 | 3/24/2020 | 3/30/2020 Europe / United Kingdom / England / South Yorkshire |
| EPI_ISL_418303 | 3/25/2020 | 3/30/2020 Europe / United Kingdom / England / Derbyshire      |
| EPI_ISL_418304 | 3/24/2020 | 3/30/2020 Europe / United Kingdom / England / Derbyshire      |
| EPI_ISL_418305 | 3/25/2020 | 3/30/2020 Europe / United Kingdom / England / South Yorkshire |
| EPI_ISL_418306 | 3/25/2020 | 3/30/2020 Europe / United Kingdom / England / South Yorkshire |
| EPI_ISL_418307 | 3/24/2020 | 3/30/2020 Europe / United Kingdom / England / Derbyshire      |
| EPI_ISL_418308 | 3/25/2020 | 3/30/2020 Europe / United Kingdom / England / South Yorkshire |
| EPI_ISL_418309 | 3/25/2020 | 3/30/2020 Europe / United Kingdom / England / Derbyshire      |
| EPI_ISL_418310 | 3/25/2020 | 3/30/2020 Europe / United Kingdom / England / South Yorkshire |
| EPI_ISL_418311 | 3/25/2020 | 3/30/2020 Europe / United Kingdom / England / Derbyshire      |
| EPI_ISL_418312 | 3/25/2020 | 3/30/2020 Europe / United Kingdom / England / South Yorkshire |
| EPI_ISL_418313 | 3/24/2020 | 3/30/2020 Europe / United Kingdom / England / Derbyshire      |
| EPI_ISL_418314 | 3/25/2020 | 3/30/2020 Europe / United Kingdom / England / South Yorkshire |
| EPI_ISL_418315 | 3/25/2020 | 3/30/2020 Europe / United Kingdom / England / Derbyshire      |
| EPI_ISL_418316 | 3/25/2020 | 3/30/2020 Europe / United Kingdom / England / South Yorkshire |
| EPI_ISL_418317 | 3/23/2020 | 3/30/2020 Europe / United Kingdom / England / South Yorkshire |
| EPI_ISL_418318 | 3/25/2020 | 3/30/2020 Europe / United Kingdom / England / South Yorkshire |
| EPI_ISL_418319 | 3/25/2020 | 3/30/2020 Europe / United Kingdom / England / Derbyshire      |
| EPI_ISL_418320 | 3/25/2020 | 3/30/2020 Europe / United Kingdom / England / South Yorkshire |
| EPI_ISL_418321 | 3/25/2020 | 3/30/2020 Europe / United Kingdom / England / South Yorkshire |
| EPI_ISL_418322 | 2020-03   | 3/30/2020 North America / Canada / Ontario                    |
| EPI_ISL_418323 | 2020-03   | 3/30/2020 North America / Canada / Ontario                    |
| EPI_ISL_418324 | 2020-03   | 3/30/2020 North America / Canada / Ontario                    |
| EPI_ISL_418325 | 2020-02   | 3/30/2020 North America / Canada / Ontario                    |



|                |           |           |                                                     |
|----------------|-----------|-----------|-----------------------------------------------------|
| EPI_ISL_418373 | 2020-03   | 3/30/2020 | North America / Canada / Ontario                    |
| EPI_ISL_418374 | 2020-03   | 3/30/2020 | North America / Canada / Ontario                    |
| EPI_ISL_418375 | 2020-03   | 3/30/2020 | North America / Canada / Ontario                    |
| EPI_ISL_418376 | 2020-03   | 3/30/2020 | North America / Canada / Ontario                    |
| EPI_ISL_418377 | 2020-03   | 3/30/2020 | North America / Canada / Ontario                    |
| EPI_ISL_418378 | 2020-03   | 3/30/2020 | North America / Canada / Ontario                    |
| EPI_ISL_418379 | 2020-03   | 3/30/2020 | North America / Canada / Ontario                    |
| EPI_ISL_418380 | 2020-03   | 3/30/2020 | North America / Canada / Ontario                    |
| EPI_ISL_418381 | 2020-03   | 3/30/2020 | North America / Canada / Ontario                    |
| EPI_ISL_418382 | 2020-02   | 3/30/2020 | North America / Canada / Ontario                    |
| EPI_ISL_418383 | 2020-02   | 3/30/2020 | North America / Canada / Ontario                    |
| EPI_ISL_418385 | 3/13/2020 | 3/30/2020 | Europe / Finland                                    |
| EPI_ISL_418386 | 3/13/2020 | 3/30/2020 | Europe / Finland                                    |
| EPI_ISL_418387 | 3/13/2020 | 3/30/2020 | Europe / Finland                                    |
| EPI_ISL_418388 | 3/13/2020 | 3/30/2020 | Europe / Finland                                    |
| EPI_ISL_418389 | 3/13/2020 | 3/30/2020 | Europe / Finland                                    |
| EPI_ISL_418390 | 3/13/2020 | 3/30/2020 | Europe / Finland                                    |
| EPI_ISL_418391 | 3/13/2020 | 3/30/2020 | Europe / Finland                                    |
| EPI_ISL_418392 | 3/13/2020 | 3/30/2020 | Europe / Finland                                    |
| EPI_ISL_418393 | 3/13/2020 | 3/30/2020 | Europe / Finland                                    |
| EPI_ISL_418394 | 3/13/2020 | 3/30/2020 | Europe / Finland                                    |
| EPI_ISL_418395 | 3/13/2020 | 3/30/2020 | Europe / Finland                                    |
| EPI_ISL_418396 | 3/13/2020 | 3/30/2020 | Europe / Finland                                    |
| EPI_ISL_418397 | 3/13/2020 | 3/30/2020 | Europe / Finland                                    |
| EPI_ISL_418399 | 3/13/2020 | 3/30/2020 | Europe / Finland                                    |
| EPI_ISL_418400 | 3/13/2020 | 3/30/2020 | Europe / Finland                                    |
| EPI_ISL_418401 | 3/14/2020 | 3/30/2020 | Europe / Finland                                    |
| EPI_ISL_418402 | 3/14/2020 | 3/30/2020 | Europe / Finland                                    |
| EPI_ISL_418403 | 3/14/2020 | 3/30/2020 | Europe / Finland                                    |
| EPI_ISL_418404 | 3/14/2020 | 3/30/2020 | Europe / Finland                                    |
| EPI_ISL_418405 | 3/14/2020 | 3/30/2020 | Europe / Finland                                    |
| EPI_ISL_418406 | 3/14/2020 | 3/30/2020 | Europe / Finland                                    |
| EPI_ISL_418408 | 3/14/2020 | 3/30/2020 | Europe / Finland / Helsinki                         |
| EPI_ISL_418409 | 3/14/2020 | 3/30/2020 | Europe / Finland / Helsinki                         |
| EPI_ISL_418410 | 3/14/2020 | 3/30/2020 | Europe / Finland / Helsinki                         |
| EPI_ISL_418411 | 3/14/2020 | 3/30/2020 | Europe / Finland / Helsinki                         |
| EPI_ISL_418412 | 3/15/2020 | 3/30/2020 | Europe / France / Auvergne-Rhone-Alpes / Privas     |
| EPI_ISL_418413 | 3/15/2020 | 3/30/2020 | Europe / France / Auvergne-Rhone-Alpes / Macon      |
| EPI_ISL_418414 | 3/15/2020 | 3/30/2020 | Europe / France / Auvergne-Rhone-Alpes / Valence    |
| EPI_ISL_418416 | 3/16/2020 | 3/30/2020 | Europe / France / Auvergne-Rhone-Alpes / Venissieux |
| EPI_ISL_418417 | 3/16/2020 | 3/30/2020 | Europe / France / Auvergne-Rhone-Alpes / Valence    |
| EPI_ISL_418418 | 3/16/2020 | 3/30/2020 | Europe / France / Auvergne-Rhone-Alpes / Lyon       |
| EPI_ISL_418419 | 3/16/2020 | 3/30/2020 | Europe / France / Auvergne-Rhone-Alpes / Lyon       |
| EPI_ISL_418420 | 3/17/2020 | 3/30/2020 | Europe / France / Auvergne-Rhone-Alpes / Lyon       |
| EPI_ISL_418421 | 3/17/2020 | 3/30/2020 | Europe / France / Auvergne-Rhone-Alpes / Lyon       |
| EPI_ISL_418422 | 3/17/2020 | 3/30/2020 | Europe / France / Auvergne-Rhone-Alpes / Lyon       |
| EPI_ISL_418423 | 3/17/2020 | 3/30/2020 | Europe / France / Auvergne-Rhone-Alpes / Lyon       |

|                |           |                                                                    |
|----------------|-----------|--------------------------------------------------------------------|
| EPI_ISL_418424 | 3/17/2020 | 3/30/2020 Europe / France / Auvergne-Rhone-Alpes / Lyon            |
| EPI_ISL_418425 | 3/17/2020 | 3/30/2020 Europe / France / Auvergne-Rhone-Alpes / Lyon            |
| EPI_ISL_418426 | 3/17/2020 | 3/30/2020 Europe / France / Auvergne-Rhone-Alpes / Bourg-en-Bresse |
| EPI_ISL_418427 | 3/17/2020 | 3/30/2020 Europe / France / Auvergne-Rhone-Alpes / Saint-Priest    |
| EPI_ISL_418428 | 3/17/2020 | 3/30/2020 Europe / France / Auvergne-Rhone-Alpes / Vienne          |
| EPI_ISL_418429 | 3/18/2020 | 3/30/2020 Europe / France / Auvergne-Rhone-Alpes / Lyon            |
| EPI_ISL_418430 | 3/18/2020 | 3/30/2020 Europe / France / Auvergne-Rhone-Alpes / Lyon            |
| EPI_ISL_418431 | 3/18/2020 | 3/30/2020 Europe / France / Auvergne-Rhone-Alpes / Lyon            |
| EPI_ISL_418432 | 3/18/2020 | 3/30/2020 Europe / France / Auvergne-Rhone-Alpes / Lyon            |
| EPI_ISL_418433 | 3/5/2020  | 3/30/2020 Europe / Switzerland / Basel                             |
| EPI_ISL_418434 | 3/5/2020  | 3/30/2020 Europe / Switzerland / Basel                             |
| EPI_ISL_418438 | 3/22/2020 | 3/30/2020 Europe / Switzerland / Basel                             |
| EPI_ISL_418441 | 1/21/2020 | 3/30/2020 Asia / China / Hangzhou                                  |
| EPI_ISL_418442 | 1/21/2020 | 3/30/2020 Asia / China / Hangzhou                                  |
| EPI_ISL_418502 | 1/22/2020 | 3/30/2020 Asia / China / Hangzhou                                  |
| EPI_ISL_418503 | 1/22/2020 | 3/30/2020 Asia / China / Hangzhou                                  |
| EPI_ISL_418504 | 1/21/2020 | 3/30/2020 Asia / China / Hangzhou                                  |
| EPI_ISL_418506 | 1/21/2020 | 3/30/2020 Asia / China / Hangzhou                                  |
| EPI_ISL_418507 | 1/21/2020 | 3/30/2020 Asia / China / Zhejiang / Hangzhou                       |
| EPI_ISL_418508 | 1/23/2020 | 3/30/2020 Asia / China / Zhejiang / Hangzhou                       |
| EPI_ISL_418509 | 1/23/2020 | 3/30/2020 Asia / China / Zhejiang / Hangzhou                       |
| EPI_ISL_418510 | 1/23/2020 | 3/30/2020 Asia / China / Hangzhou                                  |
| EPI_ISL_418511 | 1/24/2020 | 3/30/2020 Asia / China / Zhejiang / Hangzhou                       |
| EPI_ISL_418512 | 1/25/2020 | 3/30/2020 Asia / China / Zhejiang / Hangzhou                       |
| EPI_ISL_418513 | 1/25/2020 | 3/30/2020 Asia / China / Hangzhou                                  |
| EPI_ISL_418514 | 1/25/2020 | 3/30/2020 Asia / China / Zhejiang / Hangzhou                       |
| EPI_ISL_418515 | 1/25/2020 | 3/30/2020 Asia / China / Hangzhou                                  |
| EPI_ISL_418516 | 3/6/2020  | 3/30/2020 Europe / Ireland / Tipperary                             |
| EPI_ISL_418548 | 3/6/2020  | 3/30/2020 Europe / Ireland / Dublin                                |
| EPI_ISL_418580 | 3/8/2020  | 3/30/2020 Europe / Ireland / Cork                                  |
| EPI_ISL_418581 | 3/8/2020  | 3/30/2020 Europe / Ireland / Dublin                                |
| EPI_ISL_418582 | 3/10/2020 | 3/30/2020 Europe / Ireland / Louth                                 |
| EPI_ISL_418583 | 3/10/2020 | 3/30/2020 Europe / Ireland / Dublin                                |
| EPI_ISL_418584 | 3/10/2020 | 3/30/2020 Europe / Ireland / Wicklow                               |
| EPI_ISL_418624 | 3/15/2020 | 3/30/2020 Europe / Belgium / Liège                                 |
| EPI_ISL_418625 | 3/14/2020 | 3/30/2020 Europe / Belgium / Liège                                 |
| EPI_ISL_418626 | 3/16/2020 | 3/30/2020 Europe / Belgium / Liège                                 |
| EPI_ISL_418627 | 3/14/2020 | 3/30/2020 Europe / Belgium / Liège                                 |
| EPI_ISL_418628 | 3/16/2020 | 3/30/2020 Europe / Belgium / Liège                                 |
| EPI_ISL_418629 | 3/17/2020 | 3/30/2020 Europe / Belgium / Liège                                 |
| EPI_ISL_418630 | 3/17/2020 | 3/30/2020 Europe / Belgium / Liège                                 |
| EPI_ISL_418631 | 3/14/2020 | 3/30/2020 Europe / Belgium / Liège                                 |
| EPI_ISL_418632 | 3/16/2020 | 3/30/2020 Europe / Belgium / Liège                                 |
| EPI_ISL_418633 | 3/17/2020 | 3/30/2020 Europe / Belgium / Liège                                 |
| EPI_ISL_418634 | 3/19/2020 | 3/30/2020 Europe / Belgium / Liège                                 |
| EPI_ISL_418635 | 3/19/2020 | 3/30/2020 Europe / Belgium / Liège                                 |
| EPI_ISL_418636 | 3/19/2020 | 3/30/2020 Europe / Belgium / Liège                                 |







|                |           |                                                             |
|----------------|-----------|-------------------------------------------------------------|
| EPI_ISL_418791 | 3/13/2020 | 3/30/2020 North America / USA / Washington                  |
| EPI_ISL_418809 | 2/1/2020  | 3/30/2020 Asia / Japan / Tokyo                              |
| EPI_ISL_450404 | 3/16/2020 | 3/30/2020 Asia / Hong Kong                                  |
| EPI_ISL_450489 | 1/25/2020 | 3/30/2020 Asia / China / Hubei / Wuhan                      |
| EPI_ISL_450500 | 1/10/2020 | 3/30/2020 Asia / China / Hubei / Wuhan                      |
| EPI_ISL_450501 | 1/26/2020 | 3/30/2020 Asia / China / Hubei / Wuhan                      |
| EPI_ISL_450502 | 1/26/2020 | 3/30/2020 Asia / China / Hubei / Wuhan                      |
| EPI_ISL_450503 | 1/26/2020 | 3/30/2020 Asia / China / Hubei / Wuhan                      |
| EPI_ISL_450504 | 1/25/2020 | 3/30/2020 Asia / China / Hubei / Wuhan                      |
| EPI_ISL_524437 | 3/24/2020 | 3/30/2020 North America / USA / Washington                  |
| EPI_ISL_524438 | 3/24/2020 | 3/30/2020 North America / USA / Washington                  |
| EPI_ISL_524439 | 3/24/2020 | 3/30/2020 North America / USA / Washington                  |
| EPI_ISL_524440 | 3/24/2020 | 3/30/2020 North America / USA / Washington                  |
| EPI_ISL_524441 | 3/24/2020 | 3/30/2020 North America / USA / Washington                  |
| EPI_ISL_524442 | 3/24/2020 | 3/30/2020 North America / USA / Washington                  |
| EPI_ISL_524443 | 3/24/2020 | 3/30/2020 North America / USA / Washington                  |
| EPI_ISL_418792 | 3/5/2020  | 3/31/2020 Europe / Belgium / Houthalen-Helchteren           |
| EPI_ISL_418793 | 3/10/2020 | 3/31/2020 Europe / Belgium / Zonhoven                       |
| EPI_ISL_418794 | 3/6/2020  | 3/31/2020 Europe / Belgium / Nevele                         |
| EPI_ISL_418795 | 3/6/2020  | 3/31/2020 Europe / Belgium / Ganshoren                      |
| EPI_ISL_418796 | 3/5/2020  | 3/31/2020 Europe / Belgium / Kalmthout                      |
| EPI_ISL_418797 | 3/5/2020  | 3/31/2020 Europe / Belgium / Kalmthout                      |
| EPI_ISL_418798 | 3/5/2020  | 3/31/2020 Europe / Belgium / Chaineux                       |
| EPI_ISL_418799 | 2/28/2020 | 3/31/2020 Oceania / Australia / Queensland / Brisbane       |
| EPI_ISL_418800 | 3/10/2020 | 3/31/2020 Europe / Belgium / Gierle                         |
| EPI_ISL_418801 | 3/14/2020 | 3/31/2020 Oceania / Australia / Queensland / Brisbane       |
| EPI_ISL_418802 | 3/18/2020 | 3/31/2020 Oceania / Australia / Queensland / Gold Coast     |
| EPI_ISL_418803 | 3/18/2020 | 3/31/2020 Oceania / Australia / Queensland / Sunshine Coast |
| EPI_ISL_418804 | 3/18/2020 | 3/31/2020 Oceania / Australia / Queensland / Sunshine Coast |
| EPI_ISL_418805 | 3/6/2020  | 3/31/2020 Europe / Belgium / Deinze                         |
| EPI_ISL_418806 | 3/5/2020  | 3/31/2020 Europe / Belgium / Beersel                        |
| EPI_ISL_418807 | 3/19/2020 | 3/31/2020 Oceania / Australia / Queensland / Brisbane       |
| EPI_ISL_418808 | 3/19/2020 | 3/31/2020 Oceania / Australia / Queensland / Brisbane       |
| EPI_ISL_418811 | 3/12/2020 | 3/31/2020 North America / Canada / New Brunswick            |
| EPI_ISL_418812 | 3/12/2020 | 3/31/2020 North America / Canada / Manitoba                 |
| EPI_ISL_418813 | 3/13/2020 | 3/31/2020 North America / Canada / Manitoba                 |
| EPI_ISL_418814 | 3/13/2020 | 3/31/2020 North America / Canada / Nova Scotia              |
| EPI_ISL_418815 | 2/9/2020  | 3/31/2020 Asia / Hong Kong                                  |
| EPI_ISL_418816 | 3/11/2020 | 3/31/2020 North America / Canada / British Columbia         |
| EPI_ISL_418817 | 3/13/2020 | 3/31/2020 North America / Canada / British Columbia         |
| EPI_ISL_418818 | 3/6/2020  | 3/31/2020 North America / Canada / British Columbia         |
| EPI_ISL_418819 | 3/9/2020  | 3/31/2020 North America / Canada / British Columbia         |
| EPI_ISL_418820 | 3/9/2020  | 3/31/2020 North America / Canada / British Columbia         |
| EPI_ISL_418821 | 3/10/2020 | 3/31/2020 North America / Canada / British Columbia         |
| EPI_ISL_418822 | 3/10/2020 | 3/31/2020 North America / Canada / British Columbia         |
| EPI_ISL_418823 | 3/9/2020  | 3/31/2020 North America / Canada / British Columbia         |
| EPI_ISL_418824 | 3/3/2020  | 3/31/2020 North America / Canada / British Columbia         |

|                |           |           |                                           |
|----------------|-----------|-----------|-------------------------------------------|
| EPI_ISL_418825 | 3/10/2020 | 3/31/2020 | North America / Canada / British Columbia |
| EPI_ISL_418826 | 3/10/2020 | 3/31/2020 | North America / Canada / British Columbia |
| EPI_ISL_418829 | 3/10/2020 | 3/31/2020 | North America / Canada / British Columbia |
| EPI_ISL_418830 | 3/9/2020  | 3/31/2020 | North America / Canada / British Columbia |
| EPI_ISL_418831 | 3/11/2020 | 3/31/2020 | North America / Canada / British Columbia |
| EPI_ISL_418832 | 3/11/2020 | 3/31/2020 | North America / Canada / British Columbia |
| EPI_ISL_418833 | 3/11/2020 | 3/31/2020 | North America / Canada / British Columbia |
| EPI_ISL_418834 | 3/11/2020 | 3/31/2020 | North America / Canada / British Columbia |
| EPI_ISL_418835 | 3/11/2020 | 3/31/2020 | North America / Canada / British Columbia |
| EPI_ISL_418836 | 3/10/2020 | 3/31/2020 | North America / Canada / British Columbia |
| EPI_ISL_418837 | 3/10/2020 | 3/31/2020 | North America / Canada / British Columbia |
| EPI_ISL_418838 | 3/12/2020 | 3/31/2020 | North America / Canada / British Columbia |
| EPI_ISL_418839 | 3/10/2020 | 3/31/2020 | North America / Canada / British Columbia |
| EPI_ISL_418840 | 3/12/2020 | 3/31/2020 | North America / Canada / British Columbia |
| EPI_ISL_418841 | 3/11/2020 | 3/31/2020 | North America / Canada / British Columbia |
| EPI_ISL_418842 | 3/11/2020 | 3/31/2020 | North America / Canada / British Columbia |
| EPI_ISL_418843 | 3/12/2020 | 3/31/2020 | North America / Canada / British Columbia |
| EPI_ISL_418844 | 3/12/2020 | 3/31/2020 | North America / Canada / British Columbia |
| EPI_ISL_418845 | 3/11/2020 | 3/31/2020 | North America / Canada / British Columbia |
| EPI_ISL_418846 | 3/12/2020 | 3/31/2020 | North America / Canada / British Columbia |
| EPI_ISL_418847 | 3/12/2020 | 3/31/2020 | North America / Canada / British Columbia |
| EPI_ISL_418848 | 3/5/2020  | 3/31/2020 | North America / Canada / British Columbia |
| EPI_ISL_418849 | 3/13/2020 | 3/31/2020 | North America / Canada / British Columbia |
| EPI_ISL_418850 | 3/13/2020 | 3/31/2020 | North America / Canada / British Columbia |
| EPI_ISL_418851 | 3/13/2020 | 3/31/2020 | North America / Canada / British Columbia |
| EPI_ISL_418852 | 3/7/2020  | 3/31/2020 | North America / Canada / British Columbia |
| EPI_ISL_418853 | 3/11/2020 | 3/31/2020 | North America / Canada / British Columbia |
| EPI_ISL_418854 | 3/11/2020 | 3/31/2020 | North America / Canada / British Columbia |
| EPI_ISL_418855 | 3/11/2020 | 3/31/2020 | North America / Canada / British Columbia |
| EPI_ISL_418856 | 3/13/2020 | 3/31/2020 | North America / Canada / British Columbia |
| EPI_ISL_418857 | 3/13/2020 | 3/31/2020 | North America / Canada / British Columbia |
| EPI_ISL_418858 | 3/13/2020 | 3/31/2020 | North America / Canada / British Columbia |
| EPI_ISL_418860 | 3/15/2020 | 3/31/2020 | Europe / Spain / Catalunya / Barcelona    |
| EPI_ISL_418861 | 3/24/2020 | 3/31/2020 | Europe / Spain / Catalunya / Barcelona    |
| EPI_ISL_418863 | 3/5/2020  | 3/31/2020 | Europe / Belgium / Komen                  |
| EPI_ISL_418864 | 3/17/2020 | 3/31/2020 | North America / USA / Virginia            |
| EPI_ISL_418866 | 3/13/2020 | 3/31/2020 | North America / USA / Washington          |
| EPI_ISL_418867 | 3/13/2020 | 3/31/2020 | North America / USA / Washington          |
| EPI_ISL_418868 | 3/13/2020 | 3/31/2020 | North America / USA / Washington          |
| EPI_ISL_418869 | 3/16/2020 | 3/31/2020 | North America / USA / Washington          |
| EPI_ISL_418870 | 3/16/2020 | 3/31/2020 | North America / USA / Washington          |
| EPI_ISL_418871 | 3/14/2020 | 3/31/2020 | North America / USA / Connecticut         |
| EPI_ISL_418872 | 3/16/2020 | 3/31/2020 | North America / USA / Washington          |
| EPI_ISL_418873 | 3/16/2020 | 3/31/2020 | North America / USA / Washington          |
| EPI_ISL_418875 | 3/16/2020 | 3/31/2020 | North America / USA / Washington          |
| EPI_ISL_418876 | 3/16/2020 | 3/31/2020 | North America / USA / Washington          |
| EPI_ISL_418877 | 3/24/2020 | 3/31/2020 | North America / USA / Washington          |

|                |           |           |                                   |
|----------------|-----------|-----------|-----------------------------------|
| EPI_ISL_418878 | 3/14/2020 | 3/31/2020 | North America / USA / Washington  |
| EPI_ISL_418880 | 3/14/2020 | 3/31/2020 | North America / USA / Washington  |
| EPI_ISL_418881 | 3/14/2020 | 3/31/2020 | North America / USA / Washington  |
| EPI_ISL_418882 | 3/13/2020 | 3/31/2020 | North America / USA / Washington  |
| EPI_ISL_418883 | 3/14/2020 | 3/31/2020 | North America / USA / Washington  |
| EPI_ISL_418884 | 3/15/2020 | 3/31/2020 | North America / USA / Washington  |
| EPI_ISL_418886 | 3/15/2020 | 3/31/2020 | North America / USA / Washington  |
| EPI_ISL_418887 | 3/14/2020 | 3/31/2020 | North America / USA / Washington  |
| EPI_ISL_418888 | 3/15/2020 | 3/31/2020 | North America / USA / Washington  |
| EPI_ISL_418889 | 3/16/2020 | 3/31/2020 | North America / USA / Washington  |
| EPI_ISL_418890 | 3/16/2020 | 3/31/2020 | North America / USA / Washington  |
| EPI_ISL_418891 | 3/24/2020 | 3/31/2020 | North America / USA / Washington  |
| EPI_ISL_418892 | 3/16/2020 | 3/31/2020 | North America / USA / Washington  |
| EPI_ISL_418893 | 3/13/2020 | 3/31/2020 | North America / USA / Minnesota   |
| EPI_ISL_418895 | 3/14/2020 | 3/31/2020 | North America / USA / Connecticut |
| EPI_ISL_418897 | 3/16/2020 | 3/31/2020 | North America / USA / Washington  |
| EPI_ISL_418898 | 3/14/2020 | 3/31/2020 | North America / USA / Connecticut |
| EPI_ISL_418899 | 3/16/2020 | 3/31/2020 | North America / USA / Washington  |
| EPI_ISL_418900 | 3/16/2020 | 3/31/2020 | North America / USA / Washington  |
| EPI_ISL_418901 | 3/13/2020 | 3/31/2020 | North America / USA / Minnesota   |
| EPI_ISL_418902 | 3/13/2020 | 3/31/2020 | North America / USA / Minnesota   |
| EPI_ISL_418903 | 3/16/2020 | 3/31/2020 | North America / USA / Washington  |
| EPI_ISL_418904 | 3/16/2020 | 3/31/2020 | North America / USA / Washington  |
| EPI_ISL_418905 | 3/16/2020 | 3/31/2020 | North America / USA / Washington  |
| EPI_ISL_418906 | 3/16/2020 | 3/31/2020 | North America / USA / Washington  |
| EPI_ISL_418907 | 3/16/2020 | 3/31/2020 | North America / USA / Washington  |
| EPI_ISL_418908 | 3/16/2020 | 3/31/2020 | North America / USA / Washington  |
| EPI_ISL_418909 | 3/16/2020 | 3/31/2020 | North America / USA / Washington  |
| EPI_ISL_418910 | 3/16/2020 | 3/31/2020 | North America / USA / Washington  |
| EPI_ISL_418911 | 3/16/2020 | 3/31/2020 | North America / USA / Washington  |
| EPI_ISL_418912 | 3/16/2020 | 3/31/2020 | North America / USA / Washington  |
| EPI_ISL_418913 | 3/16/2020 | 3/31/2020 | North America / USA / Washington  |
| EPI_ISL_418915 | 3/13/2020 | 3/31/2020 | North America / USA / Illinois    |
| EPI_ISL_418916 | 3/13/2020 | 3/31/2020 | North America / USA / Illinois    |
| EPI_ISL_418917 | 3/14/2020 | 3/31/2020 | North America / USA / Illinois    |
| EPI_ISL_418918 | 3/13/2020 | 3/31/2020 | North America / USA / Illinois    |
| EPI_ISL_418919 | 3/13/2020 | 3/31/2020 | North America / USA / Illinois    |
| EPI_ISL_418920 | 3/13/2020 | 3/31/2020 | North America / USA / Illinois    |
| EPI_ISL_418921 | 3/16/2020 | 3/31/2020 | North America / USA               |
| EPI_ISL_418922 | 3/16/2020 | 3/31/2020 | North America / USA / Washington  |
| EPI_ISL_418923 | 3/16/2020 | 3/31/2020 | North America / USA / Washington  |
| EPI_ISL_418924 | 3/14/2020 | 3/31/2020 | North America / USA / Washington  |
| EPI_ISL_418925 | 2020-03   | 3/31/2020 | North America / USA               |
| EPI_ISL_418926 | 3/14/2020 | 3/31/2020 | North America / USA / Washington  |
| EPI_ISL_418927 | 3/16/2020 | 3/31/2020 | North America / USA / Washington  |
| EPI_ISL_418928 | 3/15/2020 | 3/31/2020 | North America / USA / Washington  |
| EPI_ISL_418929 | 3/17/2020 | 3/31/2020 | North America / USA / Washington  |

|                |           |                                                      |
|----------------|-----------|------------------------------------------------------|
| EPI_ISL_418930 | 3/17/2020 | 3/31/2020 North America / USA / Washington           |
| EPI_ISL_418931 | 3/17/2020 | 3/31/2020 North America / USA / Washington           |
| EPI_ISL_418932 | 3/16/2020 | 3/31/2020 North America / USA / Washington           |
| EPI_ISL_418933 | 3/17/2020 | 3/31/2020 North America / USA / Washington           |
| EPI_ISL_418934 | 3/17/2020 | 3/31/2020 North America / USA / Washington           |
| EPI_ISL_418935 | 3/16/2020 | 3/31/2020 North America / USA / Washington           |
| EPI_ISL_418936 | 3/17/2020 | 3/31/2020 North America / USA / Washington           |
| EPI_ISL_418937 | 3/17/2020 | 3/31/2020 North America / USA / Washington           |
| EPI_ISL_418938 | 3/16/2020 | 3/31/2020 North America / USA / Washington           |
| EPI_ISL_418939 | 3/17/2020 | 3/31/2020 North America / USA / Washington           |
| EPI_ISL_418940 | 3/17/2020 | 3/31/2020 North America / USA / Washington           |
| EPI_ISL_418941 | 2020-03   | 3/31/2020 North America / USA / Washington           |
| EPI_ISL_418942 | 3/17/2020 | 3/31/2020 North America / USA / Washington           |
| EPI_ISL_418943 | 3/17/2020 | 3/31/2020 North America / USA / Washington           |
| EPI_ISL_418944 | 3/15/2020 | 3/31/2020 North America / USA / Washington           |
| EPI_ISL_418945 | 3/15/2020 | 3/31/2020 North America / USA / Washington           |
| EPI_ISL_418948 | 3/16/2020 | 3/31/2020 North America / USA / Washington           |
| EPI_ISL_418949 | 3/16/2020 | 3/31/2020 North America / USA / Washington           |
| EPI_ISL_418950 | 3/16/2020 | 3/31/2020 North America / USA / Washington           |
| EPI_ISL_418951 | 3/16/2020 | 3/31/2020 North America / USA / Washington           |
| EPI_ISL_418952 | 3/16/2020 | 3/31/2020 North America / USA / Washington           |
| EPI_ISL_418953 | 3/16/2020 | 3/31/2020 North America / USA / Washington           |
| EPI_ISL_418954 | 3/17/2020 | 3/31/2020 North America / USA / Washington           |
| EPI_ISL_418955 | 3/15/2020 | 3/31/2020 North America / USA / Washington           |
| EPI_ISL_418956 | 3/17/2020 | 3/31/2020 North America / USA / Virginia             |
| EPI_ISL_418957 | 3/17/2020 | 3/31/2020 North America / USA / Virginia             |
| EPI_ISL_418958 | 3/17/2020 | 3/31/2020 North America / USA / Virginia             |
| EPI_ISL_418962 | 3/13/2020 | 3/31/2020 North America / USA / Utah                 |
| EPI_ISL_418963 | 3/14/2020 | 3/31/2020 North America / USA / Utah                 |
| EPI_ISL_418964 | 3/14/2020 | 3/31/2020 North America / USA / Utah                 |
| EPI_ISL_418965 | 3/11/2020 | 3/31/2020 North America / USA / Utah                 |
| EPI_ISL_418967 | 3/11/2020 | 3/31/2020 North America / USA / Utah                 |
| EPI_ISL_418972 | 3/17/2020 | 3/31/2020 North America / USA / New York / Manhattan |
| EPI_ISL_418973 | 3/17/2020 | 3/31/2020 North America / USA / New York / Manhattan |
| EPI_ISL_418974 | 3/17/2020 | 3/31/2020 North America / USA / New York / Manhattan |
| EPI_ISL_418975 | 3/17/2020 | 3/31/2020 North America / USA / New York / Manhattan |
| EPI_ISL_418976 | 3/17/2020 | 3/31/2020 North America / USA / New York / Manhattan |
| EPI_ISL_418977 | 3/17/2020 | 3/31/2020 North America / USA / New York / Manhattan |
| EPI_ISL_418978 | 3/17/2020 | 3/31/2020 North America / USA / New York / Manhattan |
| EPI_ISL_418979 | 3/17/2020 | 3/31/2020 North America / USA / New York / Manhattan |
| EPI_ISL_418980 | 3/17/2020 | 3/31/2020 North America / USA / New York / Manhattan |
| EPI_ISL_418981 | 3/6/2020  | 3/31/2020 Europe / Belgium / Merelbeke               |
| EPI_ISL_418982 | 3/9/2020  | 3/31/2020 Europe / Belgium / Oevel                   |
| EPI_ISL_418983 | 3/9/2020  | 3/31/2020 Europe / Belgium / Asse                    |
| EPI_ISL_418984 | 3/9/2020  | 3/31/2020 Europe / Belgium / Kaulile                 |
| EPI_ISL_418985 | 3/9/2020  | 3/31/2020 Europe / Belgium / Ellezelles              |
| EPI_ISL_418986 | 3/2/2020  | 3/31/2020 Europe / Belgium / Hoegaarden              |

|                |           |                                                                   |
|----------------|-----------|-------------------------------------------------------------------|
| EPI_ISL_418987 | 3/1/2020  | 3/31/2020 Europe / Belgium / Eupen                                |
| EPI_ISL_418988 | 3/4/2020  | 3/31/2020 Europe / Belgium / Zolder                               |
| EPI_ISL_418989 | 3/4/2020  | 3/31/2020 Europe / Belgium / Vorst                                |
| EPI_ISL_418990 | 2/3/2020  | 4/1/2020 Asia / China / Hangzhou                                  |
| EPI_ISL_418991 | 2/4/2020  | 4/1/2020 Asia / China / Hangzhou                                  |
| EPI_ISL_418992 | 2/10/2020 | 4/1/2020 Asia / Singapore                                         |
| EPI_ISL_418993 | 1/29/2020 | 4/1/2020 Asia / Singapore                                         |
| EPI_ISL_418994 | 1/29/2020 | 4/1/2020 Asia / Singapore                                         |
| EPI_ISL_418995 | 2/28/2020 | 4/1/2020 Asia / Singapore                                         |
| EPI_ISL_418996 | 1/27/2020 | 4/1/2020 Asia / Singapore                                         |
| EPI_ISL_418997 | 2/6/2020  | 4/1/2020 Asia / Singapore                                         |
| EPI_ISL_418998 | 2/14/2020 | 4/1/2020 Asia / Singapore                                         |
| EPI_ISL_418999 | 3/1/2020  | 4/1/2020 Asia / Singapore                                         |
| EPI_ISL_419000 | 2/13/2020 | 4/1/2020 Asia / Singapore                                         |
| EPI_ISL_419001 | 3/2/2020  | 4/1/2020 Asia / Singapore                                         |
| EPI_ISL_419168 | 3/17/2020 | 4/1/2020 Europe / France / Auvergne-Rhone-Alpes / Valence         |
| EPI_ISL_419169 | 3/21/2020 | 4/1/2020 Europe / France / Auvergne-Rhone-Alpes / Lyon            |
| EPI_ISL_419170 | 3/21/2020 | 4/1/2020 Europe / France / Auvergne-Rhone-Alpes / Lyon            |
| EPI_ISL_419171 | 3/21/2020 | 4/1/2020 Europe / France / Auvergne-Rhone-Alpes / Lyon            |
| EPI_ISL_419172 | 3/21/2020 | 4/1/2020 Europe / France / Auvergne-Rhone-Alpes / Lyon            |
| EPI_ISL_419173 | 3/21/2020 | 4/1/2020 Europe / France / Auvergne-Rhone-Alpes / Lyon            |
| EPI_ISL_419174 | 3/20/2020 | 4/1/2020 Europe / France / Auvergne-Rhone-Alpes / Macon           |
| EPI_ISL_419175 | 3/21/2020 | 4/1/2020 Europe / France / Auvergne-Rhone-Alpes / Macon           |
| EPI_ISL_419176 | 3/21/2020 | 4/1/2020 Europe / France / Auvergne-Rhone-Alpes / Macon           |
| EPI_ISL_419177 | 3/22/2020 | 4/1/2020 Europe / France / Auvergne-Rhone-Alpes / Lyon            |
| EPI_ISL_419178 | 3/22/2020 | 4/1/2020 Europe / France / Auvergne-Rhone-Alpes / Lyon            |
| EPI_ISL_419179 | 3/22/2020 | 4/1/2020 Europe / France / Auvergne-Rhone-Alpes / Lyon            |
| EPI_ISL_419180 | 3/22/2020 | 4/1/2020 Europe / France / Auvergne-Rhone-Alpes / Lyon            |
| EPI_ISL_419181 | 3/22/2020 | 4/1/2020 Europe / France / Auvergne-Rhone-Alpes / Lyon            |
| EPI_ISL_419182 | 3/22/2020 | 4/1/2020 Europe / France / Auvergne-Rhone-Alpes / Lyon            |
| EPI_ISL_419183 | 3/22/2020 | 4/1/2020 Europe / France / Auvergne-Rhone-Alpes / Bourg-en-Bresse |
| EPI_ISL_419184 | 3/22/2020 | 4/1/2020 Europe / France / Auvergne-Rhone-Alpes / Lyon            |
| EPI_ISL_419185 | 3/22/2020 | 4/1/2020 Europe / France / Auvergne-Rhone-Alpes / Bourg-en-Bresse |
| EPI_ISL_419186 | 3/22/2020 | 4/1/2020 Europe / France / Auvergne-Rhone-Alpes / Bourg-en-Bresse |
| EPI_ISL_419187 | 3/22/2020 | 4/1/2020 Europe / France / Auvergne-Rhone-Alpes / Macon           |
| EPI_ISL_419188 | 3/22/2020 | 4/1/2020 Europe / France / Auvergne-Rhone-Alpes / Macon           |
| EPI_ISL_419210 | 3/1/2020  | 4/1/2020 Asia / Israel / Ramat Gan                                |
| EPI_ISL_419211 | 2/23/2020 | 4/1/2020 Asia / Israel / Ramat Gan                                |
| EPI_ISL_419214 | 2/10/2020 | 4/1/2020 Asia / Hong Kong                                         |
| EPI_ISL_419215 | 2/10/2020 | 4/1/2020 Asia / Hong Kong                                         |
| EPI_ISL_419216 | 2/10/2020 | 4/1/2020 Asia / Hong Kong                                         |
| EPI_ISL_419217 | 2/10/2020 | 4/1/2020 Asia / Hong Kong                                         |
| EPI_ISL_419219 | 2/10/2020 | 4/1/2020 Asia / Hong Kong                                         |
| EPI_ISL_419221 | 2/11/2020 | 4/1/2020 Asia / Hong Kong                                         |
| EPI_ISL_419222 | 2/11/2020 | 4/1/2020 Asia / Hong Kong                                         |
| EPI_ISL_419224 | 2/13/2020 | 4/1/2020 Asia / Hong Kong                                         |
| EPI_ISL_419225 | 2/13/2020 | 4/1/2020 Asia / Hong Kong                                         |

|                |           |                                          |
|----------------|-----------|------------------------------------------|
| EPI_ISL_419226 | 2/13/2020 | 4/1/2020 Asia / Hong Kong                |
| EPI_ISL_419227 | 2/15/2020 | 4/1/2020 Asia / Hong Kong                |
| EPI_ISL_419228 | 2/17/2020 | 4/1/2020 Asia / Hong Kong                |
| EPI_ISL_419229 | 2/17/2020 | 4/1/2020 Asia / Hong Kong                |
| EPI_ISL_419230 | 3/5/2020  | 4/1/2020 Europe / Spain / Andalusia      |
| EPI_ISL_419231 | 2/19/2020 | 4/1/2020 Asia / Hong Kong                |
| EPI_ISL_419232 | 2/19/2020 | 4/1/2020 Asia / Hong Kong                |
| EPI_ISL_419233 | 3/4/2020  | 4/1/2020 Africa / Canary Islands         |
| EPI_ISL_419234 | 3/3/2020  | 4/1/2020 Europe / Spain / La Rioja       |
| EPI_ISL_419235 | 3/7/2020  | 4/1/2020 Europe / Spain / Madrid         |
| EPI_ISL_419236 | 3/7/2020  | 4/1/2020 Europe / Spain / Madrid         |
| EPI_ISL_419237 | 3/7/2020  | 4/1/2020 Europe / Spain / Madrid         |
| EPI_ISL_419238 | 3/5/2020  | 4/1/2020 Europe / Spain / Basque Country |
| EPI_ISL_419240 | 3/3/2020  | 4/1/2020 Europe / Spain / Basque Country |
| EPI_ISL_419245 | 2/22/2020 | 4/1/2020 Asia / Hong Kong                |
| EPI_ISL_419247 | 2/24/2020 | 4/1/2020 Asia / Hong Kong                |
| EPI_ISL_419250 | 2/26/2020 | 4/1/2020 Asia / Hong Kong                |
| EPI_ISL_419252 | 2/26/2020 | 4/1/2020 Asia / Hong Kong                |
| EPI_ISL_419254 | 3/23/2020 | 4/1/2020 Europe / Italy / Lazio / Rome   |
| EPI_ISL_419255 | 3/23/2020 | 4/1/2020 Europe / Italy / Lazio / Rome   |
| EPI_ISL_419256 | 3/16/2020 | 4/1/2020 North America / USA / Virginia  |
| EPI_ISL_419257 | 3/19/2020 | 4/1/2020 North America / USA / Virginia  |
| EPI_ISL_419258 | 3/19/2020 | 4/1/2020 North America / USA / Virginia  |
| EPI_ISL_419259 | 3/24/2020 | 4/1/2020 Europe / Belgium / Ghent        |
| EPI_ISL_419260 | 3/8/2020  | 4/1/2020 North America / USA / Virginia  |
| EPI_ISL_419261 | 3/9/2020  | 4/1/2020 North America / USA / Virginia  |
| EPI_ISL_419262 | 3/9/2020  | 4/1/2020 North America / USA / Virginia  |
| EPI_ISL_419263 | 3/10/2020 | 4/1/2020 North America / USA / Virginia  |
| EPI_ISL_419264 | 3/20/2020 | 4/1/2020 Europe / Belgium / Ghent        |
| EPI_ISL_419265 | 3/24/2020 | 4/1/2020 Europe / Belgium / Ghent        |
| EPI_ISL_419266 | 3/24/2020 | 4/1/2020 Europe / Belgium / Ghent        |
| EPI_ISL_419296 | 3/8/2020  | 4/2/2020 Asia / Japan / Kochi            |
| EPI_ISL_419297 | 3/10/2020 | 4/2/2020 Asia / Japan / Chiba            |
| EPI_ISL_419298 | 3/10/2020 | 4/2/2020 Asia / Japan / Chiba            |
| EPI_ISL_419299 | 3/9/2020  | 4/2/2020 Asia / Japan / Ishikawa         |
| EPI_ISL_419300 | 3/20/2020 | 4/2/2020 Asia / Japan / Ishikawa         |
| EPI_ISL_419301 | 3/11/2020 | 4/2/2020 Asia / Japan / Saitama          |
| EPI_ISL_419302 | 3/12/2020 | 4/2/2020 Asia / Japan / Saitama          |
| EPI_ISL_419303 | 3/12/2020 | 4/2/2020 Asia / Japan / Saitama          |
| EPI_ISL_419304 | 3/17/2020 | 4/2/2020 Asia / Japan / Saitama          |
| EPI_ISL_419305 | 3/18/2020 | 4/2/2020 Asia / Japan / Saitama          |
| EPI_ISL_419306 | 3/20/2020 | 4/2/2020 Asia / Japan / Saitama          |
| EPI_ISL_419307 | 3/20/2020 | 4/2/2020 Asia / Japan / Saitama          |
| EPI_ISL_419308 | 3/19/2020 | 4/2/2020 Asia / Japan / Saitama          |
| EPI_ISL_419309 | 3/12/2020 | 4/2/2020 Asia / Japan / Chiba            |
| EPI_ISL_419310 | 3/13/2020 | 4/2/2020 Asia / Japan / Chiba            |
| EPI_ISL_419311 | 3/13/2020 | 4/2/2020 Asia / Japan / Chiba            |



|                |           |                                                                  |
|----------------|-----------|------------------------------------------------------------------|
| EPI_ISL_419386 | 3/18/2020 | 4/2/2020 Europe / Portugal / Lisbon                              |
| EPI_ISL_419387 | 3/18/2020 | 4/2/2020 Europe / Portugal / Lisbon                              |
| EPI_ISL_419388 | 3/14/2020 | 4/2/2020 North America / USA / Minnesota                         |
| EPI_ISL_419390 | 3/14/2020 | 4/2/2020 North America / USA / Minnesota                         |
| EPI_ISL_419391 | 3/14/2020 | 4/2/2020 North America / USA / Minnesota                         |
| EPI_ISL_419392 | 3/13/2020 | 4/2/2020 North America / USA / Minnesota                         |
| EPI_ISL_419393 | 3/14/2020 | 4/2/2020 North America / USA / Minnesota                         |
| EPI_ISL_419394 | 3/14/2020 | 4/2/2020 North America / USA / Minnesota                         |
| EPI_ISL_419395 | 3/14/2020 | 4/2/2020 North America / USA / Minnesota                         |
| EPI_ISL_419396 | 3/14/2020 | 4/2/2020 North America / USA / Minnesota                         |
| EPI_ISL_419397 | 3/14/2020 | 4/2/2020 North America / USA / Minnesota                         |
| EPI_ISL_419399 | 3/18/2020 | 4/2/2020 Europe / United Kingdom / Wales                         |
| EPI_ISL_419406 | 3/17/2020 | 4/2/2020 Europe / United Kingdom / Wales                         |
| EPI_ISL_419407 | 3/16/2020 | 4/2/2020 Europe / United Kingdom / Wales                         |
| EPI_ISL_419409 | 3/17/2020 | 4/2/2020 Europe / United Kingdom / Wales                         |
| EPI_ISL_419412 | 3/17/2020 | 4/2/2020 Europe / United Kingdom / Wales                         |
| EPI_ISL_419418 | 3/18/2020 | 4/2/2020 Europe / United Kingdom / Wales                         |
| EPI_ISL_419420 | 3/18/2020 | 4/2/2020 Europe / United Kingdom / Wales                         |
| EPI_ISL_419421 | 3/18/2020 | 4/2/2020 Europe / United Kingdom / Wales                         |
| EPI_ISL_419422 | 3/18/2020 | 4/2/2020 Europe / United Kingdom / Wales                         |
| EPI_ISL_419424 | 3/18/2020 | 4/2/2020 Europe / United Kingdom / Wales                         |
| EPI_ISL_419425 | 3/18/2020 | 4/2/2020 Europe / United Kingdom / Wales                         |
| EPI_ISL_419428 | 3/17/2020 | 4/2/2020 Europe / United Kingdom / Wales                         |
| EPI_ISL_419434 | 3/17/2020 | 4/2/2020 Europe / United Kingdom / Wales                         |
| EPI_ISL_419438 | 3/18/2020 | 4/2/2020 Europe / United Kingdom / Wales                         |
| EPI_ISL_419439 | 3/17/2020 | 4/2/2020 Europe / United Kingdom / Wales                         |
| EPI_ISL_419440 | 3/17/2020 | 4/2/2020 Europe / United Kingdom / Wales                         |
| EPI_ISL_419443 | 3/18/2020 | 4/2/2020 Europe / United Kingdom / Wales                         |
| EPI_ISL_419448 | 3/18/2020 | 4/2/2020 Europe / United Kingdom / Wales                         |
| EPI_ISL_419449 | 3/17/2020 | 4/2/2020 Europe / United Kingdom / Wales                         |
| EPI_ISL_419453 | 3/19/2020 | 4/2/2020 Europe / United Kingdom / Wales                         |
| EPI_ISL_419472 | 3/20/2020 | 4/2/2020 Europe / United Kingdom / Wales                         |
| EPI_ISL_419474 | 3/20/2020 | 4/2/2020 Europe / United Kingdom / Wales                         |
| EPI_ISL_419496 | 3/20/2020 | 4/2/2020 Europe / United Kingdom / Wales                         |
| EPI_ISL_419498 | 3/20/2020 | 4/2/2020 Europe / United Kingdom / Wales                         |
| EPI_ISL_419499 | 3/20/2020 | 4/2/2020 Europe / United Kingdom / Wales                         |
| EPI_ISL_419508 | 3/20/2020 | 4/2/2020 Europe / United Kingdom / Wales                         |
| EPI_ISL_419517 | 3/19/2020 | 4/2/2020 North America / USA / Connecticut                       |
| EPI_ISL_419518 | 3/19/2020 | 4/2/2020 North America / USA / Connecticut                       |
| EPI_ISL_419524 | 3/15/2020 | 4/2/2020 North America / USA / Connecticut                       |
| EPI_ISL_419525 | 3/16/2020 | 4/2/2020 North America / USA / Connecticut                       |
| EPI_ISL_419528 | 3/12/2020 | 4/2/2020 North America / USA / Connecticut                       |
| EPI_ISL_419541 | 3/14/2020 | 4/2/2020 Europe / Germany / North Rhine-Westphalia / Duesseldorf |
| EPI_ISL_419542 | 3/15/2020 | 4/2/2020 Europe / Germany / North Rhine-Westphalia / Duesseldorf |
| EPI_ISL_419543 | 3/15/2020 | 4/2/2020 Europe / Germany / North Rhine-Westphalia / Duesseldorf |
| EPI_ISL_419544 | 3/15/2020 | 4/2/2020 Europe / Germany / North Rhine-Westphalia / Duesseldorf |
| EPI_ISL_419545 | 3/15/2020 | 4/2/2020 Europe / Germany / North Rhine-Westphalia / Duesseldorf |

|                |           |                                                                  |
|----------------|-----------|------------------------------------------------------------------|
| EPI_ISL_419546 | 3/15/2020 | 4/2/2020 Europe / Germany / North Rhine-Westphalia / Duesseldorf |
| EPI_ISL_419547 | 3/15/2020 | 4/2/2020 Europe / Germany / North Rhine-Westphalia / Duesseldorf |
| EPI_ISL_419548 | 3/15/2020 | 4/2/2020 Europe / Germany / North Rhine-Westphalia / Duesseldorf |
| EPI_ISL_419549 | 3/15/2020 | 4/2/2020 Europe / Germany / North Rhine-Westphalia / Duesseldorf |
| EPI_ISL_419550 | 3/16/2020 | 4/2/2020 Europe / Germany / North Rhine-Westphalia / Duesseldorf |
| EPI_ISL_419551 | 3/16/2020 | 4/2/2020 Europe / Germany / North Rhine-Westphalia / Duesseldorf |
| EPI_ISL_419552 | 3/16/2020 | 4/2/2020 Europe / Germany / North Rhine-Westphalia / Duesseldorf |
| EPI_ISL_419553 | 2/28/2020 | 4/2/2020 North America / USA / Rhode Island                      |
| EPI_ISL_419554 | 2/26/2020 | 4/2/2020 North America / USA / California                        |
| EPI_ISL_419555 | 2/27/2020 | 4/2/2020 North America / USA / Washington                        |
| EPI_ISL_419556 | 2/29/2020 | 4/2/2020 North America / USA / Georgia                           |
| EPI_ISL_419557 | 2/29/2020 | 4/2/2020 North America / USA / Georgia                           |
| EPI_ISL_419558 | 2/27/2020 | 4/2/2020 North America / USA / Oregon                            |
| EPI_ISL_419559 | 2/28/2020 | 4/2/2020 North America / USA / Florida                           |
| EPI_ISL_419560 | 2/28/2020 | 4/2/2020 North America / USA / Florida                           |
| EPI_ISL_419562 | 2/29/2020 | 4/2/2020 Europe / Luxembourg                                     |
| EPI_ISL_419563 | 3/12/2020 | 4/2/2020 Europe / Luxembourg                                     |
| EPI_ISL_419564 | 3/15/2020 | 4/2/2020 Europe / Luxembourg                                     |
| EPI_ISL_419566 | 3/5/2020  | 4/2/2020 Europe / Luxembourg                                     |
| EPI_ISL_419568 | 3/14/2020 | 4/2/2020 Europe / Luxembourg                                     |
| EPI_ISL_419569 | 3/7/2020  | 4/2/2020 Europe / Luxembourg                                     |
| EPI_ISL_419570 | 3/12/2020 | 4/2/2020 Europe / Luxembourg                                     |
| EPI_ISL_419573 | 3/11/2020 | 4/2/2020 Europe / Luxembourg                                     |
| EPI_ISL_419578 | 3/8/2020  | 4/2/2020 Europe / Luxembourg                                     |
| EPI_ISL_419579 | 3/14/2020 | 4/2/2020 Europe / Luxembourg                                     |
| EPI_ISL_419580 | 3/12/2020 | 4/2/2020 Europe / Luxembourg                                     |
| EPI_ISL_419582 | 3/13/2020 | 4/2/2020 Europe / Luxembourg                                     |
| EPI_ISL_419583 | 3/15/2020 | 4/2/2020 Europe / Luxembourg                                     |
| EPI_ISL_419584 | 3/13/2020 | 4/2/2020 Europe / Luxembourg                                     |
| EPI_ISL_419585 | 3/14/2020 | 4/2/2020 Europe / Luxembourg                                     |
| EPI_ISL_419586 | 3/14/2020 | 4/2/2020 Europe / Luxembourg                                     |
| EPI_ISL_419587 | 3/11/2020 | 4/2/2020 Europe / Luxembourg                                     |
| EPI_ISL_419588 | 3/16/2020 | 4/2/2020 Europe / Luxembourg                                     |
| EPI_ISL_419589 | 3/15/2020 | 4/2/2020 Europe / Luxembourg                                     |
| EPI_ISL_419590 | 3/11/2020 | 4/2/2020 Europe / Luxembourg                                     |
| EPI_ISL_419591 | 3/14/2020 | 4/2/2020 Europe / Luxembourg                                     |
| EPI_ISL_419592 | 3/15/2020 | 4/2/2020 Europe / Luxembourg                                     |
| EPI_ISL_419593 | 3/16/2020 | 4/2/2020 Europe / Luxembourg                                     |
| EPI_ISL_419594 | 3/16/2020 | 4/2/2020 Europe / Luxembourg                                     |
| EPI_ISL_419595 | 3/12/2020 | 4/2/2020 Europe / Luxembourg                                     |
| EPI_ISL_419596 | 3/12/2020 | 4/2/2020 Europe / Luxembourg                                     |
| EPI_ISL_419597 | 3/15/2020 | 4/2/2020 Europe / Luxembourg                                     |
| EPI_ISL_419598 | 3/14/2020 | 4/2/2020 Europe / Luxembourg                                     |
| EPI_ISL_419599 | 3/16/2020 | 4/2/2020 Europe / Luxembourg                                     |
| EPI_ISL_419600 | 3/13/2020 | 4/2/2020 Europe / Luxembourg                                     |
| EPI_ISL_419601 | 3/15/2020 | 4/2/2020 Europe / Luxembourg                                     |
| EPI_ISL_419602 | 3/12/2020 | 4/2/2020 Europe / Luxembourg                                     |

|                |           |                                                             |
|----------------|-----------|-------------------------------------------------------------|
| EPI_ISL_419603 | 3/16/2020 | 4/2/2020 Europe / Luxembourg                                |
| EPI_ISL_419604 | 3/15/2020 | 4/2/2020 Europe / Luxembourg                                |
| EPI_ISL_419606 | 3/11/2020 | 4/2/2020 Europe / Luxembourg                                |
| EPI_ISL_419607 | 3/14/2020 | 4/2/2020 Europe / Luxembourg                                |
| EPI_ISL_450405 | 3/8/2020  | 4/2/2020 Asia / Hong Kong                                   |
| EPI_ISL_419651 | 3/29/2020 | 4/3/2020 North America / USA / Minnesota / Winona County    |
| EPI_ISL_419652 | 3/25/2020 | 4/3/2020 North America / USA / Wisconsin / La Crosse County |
| EPI_ISL_419654 | 3/3/2020  | 4/3/2020 Europe / Austria                                   |
| EPI_ISL_419655 | 2/26/2020 | 4/3/2020 Europe / Austria / Vienna                          |
| EPI_ISL_419656 | 2/26/2020 | 4/3/2020 Europe / Austria                                   |
| EPI_ISL_419657 | 3/3/2020  | 4/3/2020 Europe / Austria                                   |
| EPI_ISL_419658 | 3/6/2020  | 4/3/2020 Europe / Austria                                   |
| EPI_ISL_419659 | 3/10/2020 | 4/3/2020 Europe / Austria                                   |
| EPI_ISL_419660 | 3/13/2020 | 4/3/2020 Europe / Austria                                   |
| EPI_ISL_419661 | 3/10/2020 | 4/3/2020 Europe / Austria                                   |
| EPI_ISL_419662 | 3/14/2020 | 4/3/2020 Europe / Austria                                   |
| EPI_ISL_419664 | 3/23/2020 | 4/3/2020 Europe / Austria                                   |
| EPI_ISL_419665 | 3/10/2020 | 4/3/2020 Europe / Austria                                   |
| EPI_ISL_419666 | 3/11/2020 | 4/3/2020 Europe / Austria                                   |
| EPI_ISL_419667 | 3/13/2020 | 4/3/2020 Europe / Austria                                   |
| EPI_ISL_419669 | 3/16/2020 | 4/3/2020 Europe / Austria                                   |
| EPI_ISL_419670 | 3/16/2020 | 4/3/2020 Europe / Austria                                   |
| EPI_ISL_419671 | 3/19/2020 | 4/3/2020 Europe / Austria                                   |
| EPI_ISL_419672 | 3/19/2020 | 4/3/2020 Europe / Austria                                   |
| EPI_ISL_419673 | 3/22/2020 | 4/3/2020 Europe / Austria                                   |
| EPI_ISL_419674 | 3/24/2020 | 4/3/2020 Europe / Austria                                   |
| EPI_ISL_419675 | 3/20/2020 | 4/3/2020 Europe / Spain / Comunitat Valenciana / Valencia   |
| EPI_ISL_419676 | 3/9/2020  | 4/3/2020 Europe / Spain / Comunitat Valenciana / Valencia   |
| EPI_ISL_419677 | 3/9/2020  | 4/3/2020 Europe / Spain / Comunitat Valenciana / Valencia   |
| EPI_ISL_419678 | 3/9/2020  | 4/3/2020 Europe / Spain / Comunitat Valenciana / Valencia   |
| EPI_ISL_419679 | 3/2/2020  | 4/3/2020 Europe / Spain / Comunitat Valenciana / Valencia   |
| EPI_ISL_419680 | 3/10/2020 | 4/3/2020 Europe / Spain / Comunitat Valenciana / Valencia   |
| EPI_ISL_419681 | 3/10/2020 | 4/3/2020 Europe / Spain / Comunitat Valenciana / Valencia   |
| EPI_ISL_419682 | 3/10/2020 | 4/3/2020 Europe / Spain / Comunitat Valenciana / Valencia   |
| EPI_ISL_419683 | 3/8/2020  | 4/3/2020 Europe / Spain / Comunitat Valenciana / Valencia   |
| EPI_ISL_419691 | 2020-03   | 4/3/2020 Europe / Latvia / Riga                             |
| EPI_ISL_419692 | 2020-03   | 4/3/2020 Europe / Belarus                                   |
| EPI_ISL_419693 | 2020-03   | 4/3/2020 Europe / Belarus                                   |
| EPI_ISL_419696 | 3/18/2020 | 4/3/2020 North America / USA / New York / Manhattan         |
| EPI_ISL_419697 | 3/18/2020 | 4/3/2020 North America / USA / New York / Manhattan         |
| EPI_ISL_419698 | 3/18/2020 | 4/3/2020 North America / USA / New York / Manhattan         |
| EPI_ISL_419699 | 3/18/2020 | 4/3/2020 North America / USA / New York / Manhattan         |
| EPI_ISL_419700 | 3/18/2020 | 4/3/2020 North America / USA / New York / Manhattan         |
| EPI_ISL_419702 | 3/18/2020 | 4/3/2020 North America / USA / New York / Brooklyn          |
| EPI_ISL_419703 | 3/18/2020 | 4/3/2020 North America / USA / New York / Manhattan         |
| EPI_ISL_419704 | 3/18/2020 | 4/3/2020 North America / USA / New York / Manhattan         |
| EPI_ISL_419705 | 3/18/2020 | 4/3/2020 North America / USA / New York / Manhattan         |

|                |           |                                          |
|----------------|-----------|------------------------------------------|
| EPI_ISL_419706 | 3/10/2020 | 4/3/2020 North America / USA / Virginia  |
| EPI_ISL_419707 | 2020      | 4/3/2020 Europe / Spain / Catalunya      |
| EPI_ISL_419709 | 3/4/2020  | 4/3/2020 Europe / Spain / Basque Country |
| EPI_ISL_419710 | 3/12/2020 | 4/3/2020 North America / USA / Virginia  |
| EPI_ISL_419711 | 3/11/2020 | 4/3/2020 North America / USA / Virginia  |
| EPI_ISL_419712 | 3/10/2020 | 4/3/2020 North America / USA / Virginia  |
| EPI_ISL_419713 | 3/11/2020 | 4/3/2020 North America / USA / Virginia  |
| EPI_ISL_419714 | 3/18/2020 | 4/3/2020 Oceania / Australia / Victoria  |
| EPI_ISL_419715 | 3/18/2020 | 4/3/2020 Oceania / Australia / Victoria  |
| EPI_ISL_419716 | 3/18/2020 | 4/3/2020 Oceania / Australia / Victoria  |
| EPI_ISL_419717 | 3/18/2020 | 4/3/2020 Oceania / Australia / Victoria  |
| EPI_ISL_419718 | 3/18/2020 | 4/3/2020 Oceania / Australia / Victoria  |
| EPI_ISL_419719 | 3/17/2020 | 4/3/2020 Oceania / Australia / Victoria  |
| EPI_ISL_419720 | 3/19/2020 | 4/3/2020 Oceania / Australia / Victoria  |
| EPI_ISL_419721 | 3/19/2020 | 4/3/2020 Oceania / Australia / Victoria  |
| EPI_ISL_419722 | 3/19/2020 | 4/3/2020 Oceania / Australia / Victoria  |
| EPI_ISL_419723 | 3/19/2020 | 4/3/2020 Oceania / Australia / Victoria  |
| EPI_ISL_419725 | 3/20/2020 | 4/3/2020 Oceania / Australia / Victoria  |
| EPI_ISL_419726 | 3/20/2020 | 4/3/2020 Oceania / Australia / Victoria  |
| EPI_ISL_419727 | 3/19/2020 | 4/3/2020 Oceania / Australia / Victoria  |
| EPI_ISL_419728 | 3/20/2020 | 4/3/2020 Oceania / Australia / Victoria  |
| EPI_ISL_419729 | 3/20/2020 | 4/3/2020 Oceania / Australia / Victoria  |
| EPI_ISL_419730 | 3/20/2020 | 4/3/2020 Oceania / Australia / Victoria  |
| EPI_ISL_419731 | 3/20/2020 | 4/3/2020 Oceania / Australia / Victoria  |
| EPI_ISL_419732 | 3/20/2020 | 4/3/2020 Oceania / Australia / Victoria  |
| EPI_ISL_419733 | 1/31/2020 | 4/3/2020 Oceania / Australia / Victoria  |
| EPI_ISL_419736 | 3/7/2020  | 4/3/2020 Oceania / Australia / Victoria  |
| EPI_ISL_419737 | 3/7/2020  | 4/3/2020 Oceania / Australia / Victoria  |
| EPI_ISL_419739 | 3/9/2020  | 4/3/2020 Oceania / Australia / Victoria  |
| EPI_ISL_419740 | 3/9/2020  | 4/3/2020 Oceania / Australia / Victoria  |
| EPI_ISL_419741 | 3/8/2020  | 4/3/2020 Oceania / Australia / Victoria  |
| EPI_ISL_419742 | 3/9/2020  | 4/3/2020 Oceania / Australia / Victoria  |
| EPI_ISL_419743 | 3/9/2020  | 4/3/2020 Oceania / Australia / Victoria  |
| EPI_ISL_419744 | 3/10/2020 | 4/3/2020 Oceania / Australia / Victoria  |
| EPI_ISL_419745 | 3/10/2020 | 4/3/2020 Oceania / Australia / Victoria  |
| EPI_ISL_419746 | 3/10/2020 | 4/3/2020 Oceania / Australia / Victoria  |
| EPI_ISL_419747 | 3/10/2020 | 4/3/2020 Oceania / Australia / Victoria  |
| EPI_ISL_419748 | 3/10/2020 | 4/3/2020 Oceania / Australia / Victoria  |
| EPI_ISL_419749 | 3/10/2020 | 4/3/2020 Oceania / Australia / Victoria  |
| EPI_ISL_419750 | 3/10/2020 | 4/3/2020 Oceania / Australia / Victoria  |
| EPI_ISL_419751 | 3/10/2020 | 4/3/2020 Oceania / Australia / Victoria  |
| EPI_ISL_419752 | 3/10/2020 | 4/3/2020 Oceania / Australia / Victoria  |
| EPI_ISL_419753 | 3/10/2020 | 4/3/2020 Oceania / Australia / Victoria  |
| EPI_ISL_419754 | 3/11/2020 | 4/3/2020 Oceania / Australia / Victoria  |
| EPI_ISL_419755 | 3/10/2020 | 4/3/2020 Oceania / Australia / Victoria  |
| EPI_ISL_419756 | 3/11/2020 | 4/3/2020 Oceania / Australia / Victoria  |
| EPI_ISL_419757 | 3/11/2020 | 4/3/2020 Oceania / Australia / Victoria  |













|                |           |                                                               |
|----------------|-----------|---------------------------------------------------------------|
| EPI_ISL_419998 | 3/23/2020 | 4/3/2020 Oceania / Australia / Victoria                       |
| EPI_ISL_419999 | 3/23/2020 | 4/3/2020 Oceania / Australia / Victoria                       |
| EPI_ISL_420000 | 3/23/2020 | 4/3/2020 Oceania / Australia / Victoria                       |
| EPI_ISL_420001 | 3/23/2020 | 4/3/2020 Oceania / Australia / Victoria                       |
| EPI_ISL_420002 | 3/23/2020 | 4/3/2020 Oceania / Australia / Victoria                       |
| EPI_ISL_420003 | 3/23/2020 | 4/3/2020 Oceania / Australia / Victoria                       |
| EPI_ISL_420004 | 3/24/2020 | 4/3/2020 Oceania / Australia / Victoria                       |
| EPI_ISL_420005 | 3/24/2020 | 4/3/2020 Oceania / Australia / Victoria                       |
| EPI_ISL_420006 | 3/24/2020 | 4/3/2020 Oceania / Australia / Victoria                       |
| EPI_ISL_420007 | 3/24/2020 | 4/3/2020 Oceania / Australia / Victoria                       |
| EPI_ISL_420008 | 3/24/2020 | 4/3/2020 Oceania / Australia / Victoria                       |
| EPI_ISL_420009 | 3/24/2020 | 4/3/2020 Oceania / Australia / Victoria                       |
| EPI_ISL_420010 | 3/24/2020 | 4/3/2020 Oceania / Australia / Victoria                       |
| EPI_ISL_420011 | 3/24/2020 | 4/3/2020 Oceania / Australia / Victoria                       |
| EPI_ISL_420012 | 3/24/2020 | 4/3/2020 Oceania / Australia / Victoria                       |
| EPI_ISL_420013 | 3/24/2020 | 4/3/2020 Oceania / Australia / Victoria                       |
| EPI_ISL_420014 | 3/24/2020 | 4/3/2020 Oceania / Australia / Victoria                       |
| EPI_ISL_420015 | 3/24/2020 | 4/3/2020 Oceania / Australia / Victoria                       |
| EPI_ISL_420016 | 3/24/2020 | 4/3/2020 Oceania / Australia / Victoria                       |
| EPI_ISL_420017 | 3/24/2020 | 4/3/2020 Oceania / Australia / Victoria                       |
| EPI_ISL_420018 | 3/16/2020 | 4/3/2020 North America / USA / Virginia                       |
| EPI_ISL_420019 | 3/19/2020 | 4/3/2020 North America / USA / Virginia                       |
| EPI_ISL_420020 | 3/20/2020 | 4/3/2020 North America / USA / Virginia                       |
| EPI_ISL_420021 | 3/22/2020 | 4/3/2020 North America / USA / Virginia                       |
| EPI_ISL_420022 | 3/22/2020 | 4/3/2020 North America / USA / Virginia                       |
| EPI_ISL_420023 | 3/25/2020 | 4/3/2020 North America / USA / Virginia                       |
| EPI_ISL_420024 | 3/27/2020 | 4/3/2020 North America / USA / Virginia                       |
| EPI_ISL_420025 | 3/27/2020 | 4/3/2020 North America / USA / Virginia                       |
| EPI_ISL_420026 | 3/27/2020 | 4/3/2020 North America / USA / Virginia                       |
| EPI_ISL_420027 | 3/28/2020 | 4/3/2020 North America / USA / Virginia                       |
| EPI_ISL_420028 | 3/11/2020 | 4/3/2020 North America / USA / Virginia                       |
| EPI_ISL_420029 | 3/11/2020 | 4/3/2020 North America / USA / Virginia                       |
| EPI_ISL_529155 | 3/28/2020 | 4/3/2020 North America / USA / Connecticut                    |
| EPI_ISL_529156 | 3/28/2020 | 4/3/2020 North America / USA / Connecticut                    |
| EPI_ISL_529157 | 3/28/2020 | 4/3/2020 North America / USA / Connecticut                    |
| EPI_ISL_529159 | 3/28/2020 | 4/3/2020 North America / USA / Connecticut                    |
| EPI_ISL_529170 | 3/27/2020 | 4/3/2020 North America / USA / Oregon                         |
| EPI_ISL_529200 | 3/29/2020 | 4/3/2020 North America / USA / Washington                     |
| EPI_ISL_529208 | 3/30/2020 | 4/3/2020 North America / USA / Washington                     |
| EPI_ISL_529209 | 3/29/2020 | 4/3/2020 North America / USA / Washington                     |
| EPI_ISL_529210 | 3/30/2020 | 4/3/2020 North America / USA / Washington                     |
| EPI_ISL_529211 | 3/30/2020 | 4/3/2020 North America / USA / Washington                     |
| EPI_ISL_529212 | 3/26/2020 | 4/3/2020 North America / USA / Washington                     |
| EPI_ISL_420030 | 3/21/2020 | 4/4/2020 Africa / Democratic Republic of the Congo / Kinshasa |
| EPI_ISL_420031 | 3/21/2020 | 4/4/2020 Africa / Democratic Republic of the Congo / Kinshasa |
| EPI_ISL_420032 | 3/22/2020 | 4/4/2020 Africa / Democratic Republic of the Congo / Kinshasa |
| EPI_ISL_420033 | 3/22/2020 | 4/4/2020 Africa / Democratic Republic of the Congo / Kinshasa |

|                |           |                                                                      |
|----------------|-----------|----------------------------------------------------------------------|
| EPI_ISL_420034 | 3/22/2020 | 4/4/2020 Africa / Democratic Republic of the Congo / Kinshasa        |
| EPI_ISL_420035 | 3/22/2020 | 4/4/2020 Africa / Democratic Republic of the Congo / Kinshasa        |
| EPI_ISL_420036 | 3/21/2020 | 4/4/2020 Oceania / Australia / Victoria                              |
| EPI_ISL_420037 | 3/2/2020  | 4/4/2020 Africa / Algeria / Boufarik                                 |
| EPI_ISL_420038 | 3/17/2020 | 4/4/2020 Europe / France / Bourgogne-Franche-Comte / Montreux-Cha    |
| EPI_ISL_420039 | 3/12/2020 | 4/4/2020 Europe / France / Grand Est / Strasbourg                    |
| EPI_ISL_420040 | 3/12/2020 | 4/4/2020 Europe / France / Grand Est / Strasbourg                    |
| EPI_ISL_420041 | 3/17/2020 | 4/4/2020 Europe / France / Hauts-de-France / Compiègne               |
| EPI_ISL_420042 | 3/17/2020 | 4/4/2020 Europe / France / Île-de-France / Orsay                     |
| EPI_ISL_420043 | 3/18/2020 | 4/4/2020 Europe / France / Île-de-France / Paris                     |
| EPI_ISL_420044 | 3/18/2020 | 4/4/2020 Europe / France / Hauts-de-France / Chateau-Thierry         |
| EPI_ISL_420045 | 3/17/2020 | 4/4/2020 Europe / France / Grand Est / Woippy                        |
| EPI_ISL_420046 | 3/17/2020 | 4/4/2020 Europe / France / Île-de-France / Gennevilliers             |
| EPI_ISL_420047 | 3/17/2020 | 4/4/2020 Europe / France / Île-de-France / Gennevilliers             |
| EPI_ISL_420048 | 3/18/2020 | 4/4/2020 Europe / France / Île-de-France / Longjumeau                |
| EPI_ISL_420049 | 3/19/2020 | 4/4/2020 Europe / France / Hauts-de-France / Compiègne               |
| EPI_ISL_420050 | 3/19/2020 | 4/4/2020 Europe / France / Hauts-de-France / Compiègne               |
| EPI_ISL_420051 | 3/19/2020 | 4/4/2020 Europe / France / Île-de-France / Saint-Thibault-des-Vignes |
| EPI_ISL_420052 | 3/20/2020 | 4/4/2020 Europe / France / Île-de-France / Asnières-sur-Seine        |
| EPI_ISL_420053 | 3/19/2020 | 4/4/2020 Europe / France / Hauts-de-France / Chateau-Thierry         |
| EPI_ISL_420055 | 3/17/2020 | 4/4/2020 Europe / France / Grand Est / Spicheren                     |
| EPI_ISL_420056 | 3/22/2020 | 4/4/2020 Europe / France / Hauts-de-France / Compiègne               |
| EPI_ISL_420057 | 3/22/2020 | 4/4/2020 Europe / France / Hauts-de-France / Compiègne               |
| EPI_ISL_420058 | 3/20/2020 | 4/4/2020 Europe / France / Île-de-France / Longjumeau                |
| EPI_ISL_420059 | 3/21/2020 | 4/4/2020 Europe / France / Île-de-France / Longjumeau                |
| EPI_ISL_420060 | 3/20/2020 | 4/4/2020 Europe / France / Île-de-France / Longjumeau                |
| EPI_ISL_420061 | 3/23/2020 | 4/4/2020 Europe / France / Île-de-France / Paris                     |
| EPI_ISL_420063 | 3/22/2020 | 4/4/2020 Europe / France / Île-de-France / Juvisy-sur-Orge           |
| EPI_ISL_420064 | 3/23/2020 | 4/4/2020 Europe / France / Île-de-France / Longjumeau                |
| EPI_ISL_420065 | 2020-03   | 4/4/2020 Europe / Estonia                                            |
| EPI_ISL_420066 | 2020-03   | 4/4/2020 Europe / Estonia                                            |
| EPI_ISL_420067 | 2020-03   | 4/4/2020 Europe / Estonia                                            |
| EPI_ISL_420069 | 3/17/2020 | 4/4/2020 Africa / Senegal / Dakar                                    |
| EPI_ISL_420070 | 3/17/2020 | 4/4/2020 Africa / Senegal / Dakar                                    |
| EPI_ISL_420072 | 3/18/2020 | 4/4/2020 Africa / Senegal / Thies / Mbour                            |
| EPI_ISL_420073 | 3/19/2020 | 4/4/2020 Africa / Senegal / Dakar                                    |
| EPI_ISL_420074 | 3/20/2020 | 4/4/2020 Africa / Senegal / Saint-Louis                              |
| EPI_ISL_420076 | 3/20/2020 | 4/4/2020 Africa / Senegal / Dakar                                    |
| EPI_ISL_420077 | 3/20/2020 | 4/4/2020 Africa / Senegal / Dakar                                    |
| EPI_ISL_420078 | 3/20/2020 | 4/4/2020 Africa / Senegal / Thies                                    |
| EPI_ISL_424352 | 3/10/2020 | 4/4/2020 Asia / China / Anhui / Fuyang                               |
| EPI_ISL_420080 | 3/18/2020 | 4/5/2020 Europe / Russia / Saint Petersburg                          |
| EPI_ISL_420081 | 3/18/2020 | 4/5/2020 Europe / Russia / Saint Petersburg                          |
| EPI_ISL_420082 | 3/19/2020 | 4/5/2020 Asia / Taiwan                                               |
| EPI_ISL_420083 | 3/18/2020 | 4/5/2020 Asia / Taiwan                                               |
| EPI_ISL_420084 | 3/21/2020 | 4/5/2020 Asia / Taiwan                                               |
| EPI_ISL_420085 | 3/20/2020 | 4/5/2020 Asia / Taiwan                                               |

|                |           |                                                           |
|----------------|-----------|-----------------------------------------------------------|
| EPI_ISL_420099 | 3/2/2020  | 4/5/2020 Asia / Singapore                                 |
| EPI_ISL_420100 | 3/2/2020  | 4/5/2020 Asia / Singapore                                 |
| EPI_ISL_420101 | 3/4/2020  | 4/5/2020 Asia / Singapore                                 |
| EPI_ISL_420102 | 3/5/2020  | 4/5/2020 Asia / Singapore                                 |
| EPI_ISL_420103 | 3/5/2020  | 4/5/2020 Asia / Singapore                                 |
| EPI_ISL_420104 | 3/5/2020  | 4/5/2020 Asia / Singapore                                 |
| EPI_ISL_420105 | 3/6/2020  | 4/5/2020 Asia / Singapore                                 |
| EPI_ISL_420106 | 3/6/2020  | 4/5/2020 Asia / Singapore                                 |
| EPI_ISL_420107 | 3/9/2020  | 4/5/2020 Asia / Singapore                                 |
| EPI_ISL_420108 | 3/10/2020 | 4/5/2020 Asia / Singapore                                 |
| EPI_ISL_420109 | 3/11/2020 | 4/5/2020 Asia / Singapore                                 |
| EPI_ISL_420110 | 3/11/2020 | 4/5/2020 Asia / Singapore                                 |
| EPI_ISL_420111 | 3/12/2020 | 4/5/2020 Asia / Singapore                                 |
| EPI_ISL_420112 | 3/9/2020  | 4/5/2020 Europe / Spain / Comunitat Valenciana / Valencia |
| EPI_ISL_420113 | 3/9/2020  | 4/5/2020 Europe / Spain / Comunitat Valenciana / Valencia |
| EPI_ISL_420114 | 3/9/2020  | 4/5/2020 Europe / Spain / Comunitat Valenciana / Valencia |
| EPI_ISL_420115 | 3/9/2020  | 4/5/2020 Europe / Spain / Comunitat Valenciana / Valencia |
| EPI_ISL_420116 | 3/9/2020  | 4/5/2020 Europe / Spain / Comunitat Valenciana / Valencia |
| EPI_ISL_420117 | 3/9/2020  | 4/5/2020 Europe / Spain / Comunitat Valenciana / Valencia |
| EPI_ISL_420118 | 3/9/2020  | 4/5/2020 Europe / Spain / Comunitat Valenciana / Valencia |
| EPI_ISL_420119 | 3/9/2020  | 4/5/2020 Europe / Spain / Comunitat Valenciana / Valencia |
| EPI_ISL_420120 | 3/9/2020  | 4/5/2020 Europe / Spain / Comunitat Valenciana / Valencia |
| EPI_ISL_420121 | 3/9/2020  | 4/5/2020 Europe / Spain / Comunitat Valenciana / Valencia |
| EPI_ISL_420122 | 3/9/2020  | 4/5/2020 Europe / Spain / Comunitat Valenciana / Valencia |
| EPI_ISL_420123 | 3/9/2020  | 4/5/2020 Europe / Spain / Comunitat Valenciana / Valencia |
| EPI_ISL_420124 | 3/9/2020  | 4/5/2020 Europe / Spain / Comunitat Valenciana / Valencia |
| EPI_ISL_420125 | 3/11/2020 | 4/5/2020 Europe / Spain / Comunitat Valenciana / Valencia |
| EPI_ISL_420126 | 3/12/2020 | 4/5/2020 Europe / Spain / Comunitat Valenciana / Valencia |
| EPI_ISL_420127 | 3/12/2020 | 4/5/2020 Europe / Spain / Comunitat Valenciana / Valencia |
| EPI_ISL_420128 | 3/12/2020 | 4/5/2020 Europe / Spain / Comunitat Valenciana / Valencia |
| EPI_ISL_420129 | 3/13/2020 | 4/5/2020 Europe / Spain / Comunitat Valenciana / Valencia |
| EPI_ISL_420130 | 3/18/2020 | 4/5/2020 Europe / Spain / Comunitat Valenciana / Valencia |
| EPI_ISL_420131 | 3/18/2020 | 4/5/2020 Europe / Spain / Comunitat Valenciana / Valencia |
| EPI_ISL_420132 | 3/18/2020 | 4/5/2020 Europe / Spain / Comunitat Valenciana / Valencia |
| EPI_ISL_420135 | 2/28/2020 | 4/5/2020 Europe / Norway                                  |
| EPI_ISL_420136 | 3/4/2020  | 4/5/2020 Europe / Norway                                  |
| EPI_ISL_420137 | 3/8/2020  | 4/5/2020 Europe / Norway                                  |
| EPI_ISL_420139 | 3/5/2020  | 4/5/2020 Europe / Norway                                  |
| EPI_ISL_420140 | 3/28/2020 | 4/5/2020 Asia / Georgia / Tbilisi                         |
| EPI_ISL_420141 | 3/10/2020 | 4/5/2020 Europe / Norway                                  |
| EPI_ISL_420142 | 3/30/2020 | 4/5/2020 Asia / Georgia / Tbilisi                         |
| EPI_ISL_420143 | 3/10/2020 | 4/5/2020 Europe / Norway                                  |
| EPI_ISL_420144 | 4/1/2020  | 4/5/2020 Asia / Georgia / Tbilisi                         |
| EPI_ISL_420145 | 3/9/2020  | 4/5/2020 Europe / Norway                                  |
| EPI_ISL_420146 | 3/11/2020 | 4/5/2020 Europe / Norway                                  |
| EPI_ISL_420147 | 3/10/2020 | 4/5/2020 Europe / Norway                                  |
| EPI_ISL_420150 | 3/9/2020  | 4/5/2020 Europe / Norway                                  |







|                |           |                                                              |
|----------------|-----------|--------------------------------------------------------------|
| EPI_ISL_420290 | 3/16/2020 | 4/6/2020 Europe / United Kingdom / England / South Yorkshire |
| EPI_ISL_420291 | 3/15/2020 | 4/6/2020 Europe / United Kingdom / England / South Yorkshire |
| EPI_ISL_420292 | 3/12/2020 | 4/6/2020 Europe / United Kingdom / England / South Yorkshire |
| EPI_ISL_420294 | 3/6/2020  | 4/6/2020 Europe / Slovenia                                   |
| EPI_ISL_420295 | 3/24/2020 | 4/6/2020 Europe / Slovenia                                   |
| EPI_ISL_420296 | 3/18/2020 | 4/6/2020 North America / USA / New York / Nassau County      |
| EPI_ISL_420297 | 3/18/2020 | 4/6/2020 North America / USA / New York / Brooklyn           |
| EPI_ISL_420298 | 3/19/2020 | 4/6/2020 North America / USA / New York / Nassau County      |
| EPI_ISL_420299 | 3/18/2020 | 4/6/2020 North America / USA / New York / Staten Island      |
| EPI_ISL_420300 | 3/18/2020 | 4/6/2020 North America / USA / New York / Queens             |
| EPI_ISL_420301 | 3/18/2020 | 4/6/2020 North America / USA / New York / Nassau County      |
| EPI_ISL_420302 | 3/18/2020 | 4/6/2020 North America / USA / New York / Bronx              |
| EPI_ISL_420303 | 3/15/2020 | 4/6/2020 North America / USA / Alaska / Interior             |
| EPI_ISL_420304 | 3/15/2020 | 4/6/2020 North America / USA / Alaska / Interior             |
| EPI_ISL_420305 | 3/16/2020 | 4/6/2020 North America / USA / Alaska / Anchorage-Mat Su     |
| EPI_ISL_420306 | 3/16/2020 | 4/6/2020 North America / USA / Alaska / Southeast            |
| EPI_ISL_420307 | 3/19/2020 | 4/6/2020 North America / USA / New York / Brooklyn           |
| EPI_ISL_420308 | 3/19/2020 | 4/6/2020 North America / USA / New York / Manhattan          |
| EPI_ISL_420309 | 3/19/2020 | 4/6/2020 North America / USA / New York / Manhattan          |
| EPI_ISL_420312 | 3/18/2020 | 4/6/2020 Europe / Norway                                     |
| EPI_ISL_420313 | 3/10/2020 | 4/6/2020 Europe / Norway                                     |
| EPI_ISL_420314 | 3/4/2020  | 4/6/2020 Europe / Belgium / Brussel                          |
| EPI_ISL_420315 | 3/6/2020  | 4/6/2020 Europe / Belgium / Yerneefraigneux                  |
| EPI_ISL_420316 | 3/7/2020  | 4/6/2020 Europe / Belgium / Dilbeek                          |
| EPI_ISL_420317 | 3/5/2020  | 4/6/2020 Europe / Belgium / Heverlee                         |
| EPI_ISL_420318 | 3/7/2020  | 4/6/2020 Europe / Belgium / Arbre                            |
| EPI_ISL_420319 | 3/4/2020  | 4/6/2020 Europe / Belgium / Montigny-le-Tilleul              |
| EPI_ISL_420320 | 3/9/2020  | 4/6/2020 Europe / Belgium / Ukkel                            |
| EPI_ISL_420321 | 3/6/2020  | 4/6/2020 Europe / Belgium / Rixensart                        |
| EPI_ISL_420322 | 3/5/2020  | 4/6/2020 Europe / Belgium / Elsene                           |
| EPI_ISL_420323 | 3/7/2020  | 4/6/2020 Europe / Belgium / Waterloo                         |
| EPI_ISL_420324 | 3/4/2020  | 4/6/2020 Europe / Belgium / Braine-le-Chateau                |
| EPI_ISL_420325 | 3/5/2020  | 4/6/2020 Europe / Belgium / Poppel                           |
| EPI_ISL_420326 | 3/6/2020  | 4/6/2020 Europe / Belgium / Winksele                         |
| EPI_ISL_420327 | 3/7/2020  | 4/6/2020 Europe / Belgium / Zonhoven                         |
| EPI_ISL_420328 | 3/6/2020  | 4/6/2020 Europe / Belgium / Alken                            |
| EPI_ISL_420329 | 3/5/2020  | 4/6/2020 Europe / Belgium / Riemst                           |
| EPI_ISL_420330 | 3/5/2020  | 4/6/2020 Europe / Belgium / Neerpelt                         |
| EPI_ISL_420331 | 3/5/2020  | 4/6/2020 Europe / Belgium / Bree                             |
| EPI_ISL_420332 | 3/6/2020  | 4/6/2020 Europe / Belgium / Herstal                          |
| EPI_ISL_420333 | 3/6/2020  | 4/6/2020 Europe / Belgium / Seraing                          |
| EPI_ISL_420334 | 3/5/2020  | 4/6/2020 Europe / Belgium / Berloz                           |
| EPI_ISL_420335 | 3/6/2020  | 4/6/2020 Europe / Belgium / Bierset                          |
| EPI_ISL_420336 | 3/6/2020  | 4/6/2020 Europe / Belgium / Soumagne                         |
| EPI_ISL_420337 | 3/5/2020  | 4/6/2020 Europe / Belgium / Herve                            |
| EPI_ISL_420338 | 3/9/2020  | 4/6/2020 Europe / Belgium / Saive                            |
| EPI_ISL_420339 | 3/5/2020  | 4/6/2020 Europe / Belgium / Limbourg                         |



|                |           |                                                 |
|----------------|-----------|-------------------------------------------------|
| EPI_ISL_420340 | 3/6/2020  | 4/6/2020 Europe / Belgium / Henri-chapelle      |
| EPI_ISL_420341 | 3/6/2020  | 4/6/2020 Europe / Belgium / Theux               |
| EPI_ISL_420342 | 3/6/2020  | 4/6/2020 Europe / Belgium / Temploux            |
| EPI_ISL_420343 | 3/6/2020  | 4/6/2020 Europe / Belgium / Andenne             |
| EPI_ISL_420344 | 3/5/2020  | 4/6/2020 Europe / Belgium / Havelange           |
| EPI_ISL_420345 | 3/6/2020  | 4/6/2020 Europe / Belgium / Couvin              |
| EPI_ISL_420346 | 3/9/2020  | 4/6/2020 Europe / Belgium / Charleroi           |
| EPI_ISL_420347 | 3/6/2020  | 4/6/2020 Europe / Belgium / Courcelles          |
| EPI_ISL_420348 | 3/5/2020  | 4/6/2020 Europe / Belgium / Havre               |
| EPI_ISL_420349 | 3/5/2020  | 4/6/2020 Europe / Belgium / Haulchin            |
| EPI_ISL_420350 | 3/6/2020  | 4/6/2020 Europe / Belgium / Geluwe              |
| EPI_ISL_420351 | 3/6/2020  | 4/6/2020 Europe / Belgium / Gent                |
| EPI_ISL_420352 | 3/7/2020  | 4/6/2020 Europe / Belgium / Sint-Gillis-Waas    |
| EPI_ISL_420353 | 3/5/2020  | 4/6/2020 Europe / Belgium / Stekene             |
| EPI_ISL_420354 | 3/5/2020  | 4/6/2020 Europe / Belgium / Waasmunster         |
| EPI_ISL_420355 | 3/6/2020  | 4/6/2020 Europe / Belgium / Ronse               |
| EPI_ISL_420356 | 3/6/2020  | 4/6/2020 Europe / Belgium / Henri-chapelle      |
| EPI_ISL_420357 | 3/20/2020 | 4/6/2020 Europe / Belgium / Etterbeek           |
| EPI_ISL_420358 | 3/18/2020 | 4/6/2020 Europe / Belgium / Honnelles           |
| EPI_ISL_420359 | 3/18/2020 | 4/6/2020 Europe / Belgium / Honnelles           |
| EPI_ISL_420360 | 3/18/2020 | 4/6/2020 Europe / Belgium / Doornik             |
| EPI_ISL_420361 | 3/17/2020 | 4/6/2020 Europe / Belgium / Villerot            |
| EPI_ISL_420362 | 3/18/2020 | 4/6/2020 Europe / Belgium / Quevy               |
| EPI_ISL_420363 | 3/20/2020 | 4/6/2020 Europe / Belgium / Watermaal-Bosvoorde |
| EPI_ISL_420364 | 3/19/2020 | 4/6/2020 Europe / Belgium / Anderlecht          |
| EPI_ISL_420365 | 3/19/2020 | 4/6/2020 Europe / Belgium / Liege               |
| EPI_ISL_420366 | 3/19/2020 | 4/6/2020 Europe / Belgium / Oudergem            |
| EPI_ISL_420367 | 3/5/2020  | 4/6/2020 Europe / Belgium / Knokke-Heist        |
| EPI_ISL_420368 | 3/19/2020 | 4/6/2020 Europe / Belgium / Boussu              |
| EPI_ISL_420369 | 3/19/2020 | 4/6/2020 Europe / Belgium / La Louviere         |
| EPI_ISL_420370 | 3/19/2020 | 4/6/2020 Europe / Belgium / Namur               |
| EPI_ISL_420371 | 3/23/2020 | 4/6/2020 Europe / Belgium / Hemiksem            |
| EPI_ISL_420372 | 3/23/2020 | 4/6/2020 Europe / Belgium / Vorst               |
| EPI_ISL_420373 | 3/23/2020 | 4/6/2020 Europe / Belgium / Couillet            |
| EPI_ISL_420374 | 3/24/2020 | 4/6/2020 Europe / Belgium / Beersel             |
| EPI_ISL_420375 | 3/24/2020 | 4/6/2020 Europe / Belgium / Tervuren            |
| EPI_ISL_420376 | 3/24/2020 | 4/6/2020 Europe / Belgium / Zinnik              |
| EPI_ISL_420377 | 3/24/2020 | 4/6/2020 Europe / Belgium / Beringen            |
| EPI_ISL_420378 | 3/24/2020 | 4/6/2020 Europe / Belgium / Frameries           |
| EPI_ISL_420379 | 3/25/2020 | 4/6/2020 Europe / Belgium / Tienen              |
| EPI_ISL_420380 | 3/25/2020 | 4/6/2020 Europe / Belgium / Jemappes            |
| EPI_ISL_420381 | 3/24/2020 | 4/6/2020 Europe / Belgium / Saisinne            |
| EPI_ISL_420382 | 3/24/2020 | 4/6/2020 Europe / Belgium / Oudergem            |
| EPI_ISL_420383 | 3/24/2020 | 4/6/2020 Europe / Belgium / Bassilly            |
| EPI_ISL_420384 | 3/25/2020 | 4/6/2020 Europe / Belgium / Vilvoorde           |
| EPI_ISL_420385 | 3/25/2020 | 4/6/2020 Europe / Belgium / Genappe             |
| EPI_ISL_420386 | 3/23/2020 | 4/6/2020 Europe / Belgium / Watermaal-Bosvoorde |

|                |           |                                                   |
|----------------|-----------|---------------------------------------------------|
| EPI_ISL_420387 | 3/24/2020 | 4/6/2020 Europe / Belgium / Sint-Agatha-Berchem   |
| EPI_ISL_420388 | 3/24/2020 | 4/6/2020 Europe / Belgium / Vilvoorde             |
| EPI_ISL_420389 | 3/24/2020 | 4/6/2020 Europe / Belgium / Mons                  |
| EPI_ISL_420390 | 3/24/2020 | 4/6/2020 Europe / Belgium / Mons                  |
| EPI_ISL_420391 | 3/24/2020 | 4/6/2020 Europe / Belgium / Quaregnon             |
| EPI_ISL_420392 | 3/24/2020 | 4/6/2020 Europe / Belgium / Linter                |
| EPI_ISL_420393 | 3/24/2020 | 4/6/2020 Europe / Belgium / Bierbeek              |
| EPI_ISL_420394 | 3/25/2020 | 4/6/2020 Europe / Belgium / Sint-Pieter-Woluwe    |
| EPI_ISL_420395 | 3/24/2020 | 4/6/2020 Europe / Belgium / Trazegnies            |
| EPI_ISL_420396 | 3/23/2020 | 4/6/2020 Europe / Belgium / Colfontaine           |
| EPI_ISL_420397 | 3/23/2020 | 4/6/2020 Europe / Belgium / Ukkel                 |
| EPI_ISL_420398 | 3/23/2020 | 4/6/2020 Europe / Belgium / Waterloo              |
| EPI_ISL_420399 | 3/24/2020 | 4/6/2020 Europe / Belgium / Zoutleeuw             |
| EPI_ISL_420400 | 3/25/2020 | 4/6/2020 Europe / Belgium / Lummen                |
| EPI_ISL_420401 | 3/24/2020 | 4/6/2020 Europe / Belgium / Ath                   |
| EPI_ISL_420402 | 3/25/2020 | 4/6/2020 Europe / Belgium / Zolder                |
| EPI_ISL_420403 | 3/25/2020 | 4/6/2020 Europe / Belgium / Geraardsbergen        |
| EPI_ISL_420404 | 3/25/2020 | 4/6/2020 Europe / Belgium / Quaregnon             |
| EPI_ISL_420405 | 3/25/2020 | 4/6/2020 Europe / Belgium / Sint-Truiden          |
| EPI_ISL_420406 | 3/24/2020 | 4/6/2020 Europe / Belgium / Confontaine           |
| EPI_ISL_420407 | 3/24/2020 | 4/6/2020 Europe / Belgium / Quevaucamps           |
| EPI_ISL_420408 | 3/24/2020 | 4/6/2020 Europe / Belgium / Braine-l'Alleud       |
| EPI_ISL_420409 | 3/25/2020 | 4/6/2020 Europe / Belgium / Blandain              |
| EPI_ISL_420410 | 3/25/2020 | 4/6/2020 Europe / Belgium / Huldenberg            |
| EPI_ISL_420411 | 3/23/2020 | 4/6/2020 Europe / Belgium / Tubize                |
| EPI_ISL_420412 | 3/24/2020 | 4/6/2020 Europe / Belgium / Koersel               |
| EPI_ISL_420413 | 3/25/2020 | 4/6/2020 Europe / Belgium / Mouscron              |
| EPI_ISL_420414 | 3/25/2020 | 4/6/2020 Europe / Belgium / Wanze                 |
| EPI_ISL_420415 | 3/25/2020 | 4/6/2020 Europe / Belgium / Montignies-sur-Sambre |
| EPI_ISL_420416 | 3/23/2020 | 4/6/2020 Europe / Belgium / Lasne                 |
| EPI_ISL_420417 | 3/24/2020 | 4/6/2020 Europe / Belgium / Saint-Ghislain        |
| EPI_ISL_420418 | 3/24/2020 | 4/6/2020 Europe / Belgium / Nieuwerkerken         |
| EPI_ISL_420419 | 3/25/2020 | 4/6/2020 Europe / Belgium / Winksele              |
| EPI_ISL_420420 | 3/24/2020 | 4/6/2020 Europe / Belgium / Forchies-la-marche    |
| EPI_ISL_420421 | 3/24/2020 | 4/6/2020 Europe / Belgium / Zoutleeuw             |
| EPI_ISL_420422 | 3/25/2020 | 4/6/2020 Europe / Belgium / Tielt-Winge           |
| EPI_ISL_420423 | 3/25/2020 | 4/6/2020 Europe / Belgium / Soignies              |
| EPI_ISL_420424 | 3/24/2020 | 4/6/2020 Europe / Belgium / Mons                  |
| EPI_ISL_420425 | 3/24/2020 | 4/6/2020 Europe / Belgium / Montigny-le-Tilleul   |
| EPI_ISL_420426 | 3/24/2020 | 4/6/2020 Europe / Belgium / Lasne                 |
| EPI_ISL_420427 | 3/24/2020 | 4/6/2020 Europe / Belgium / Boussu                |
| EPI_ISL_420428 | 3/25/2020 | 4/6/2020 Europe / Belgium / Boutersem             |
| EPI_ISL_420429 | 3/24/2020 | 4/6/2020 Europe / Belgium / Ladeuze               |
| EPI_ISL_420430 | 3/24/2020 | 4/6/2020 Europe / Belgium / Cuesmes               |
| EPI_ISL_420431 | 3/24/2020 | 4/6/2020 Europe / Belgium / Saint-Saulve          |
| EPI_ISL_420432 | 3/23/2020 | 4/6/2020 Europe / Belgium / Leuven                |
| EPI_ISL_420433 | 3/24/2020 | 4/6/2020 Europe / Belgium / Fontaine-l'Évêque     |

|                |           |                                                          |
|----------------|-----------|----------------------------------------------------------|
| EPI_ISL_420434 | 3/24/2020 | 4/6/2020 Europe / Belgium / Tertre                       |
| EPI_ISL_420435 | 3/25/2020 | 4/6/2020 Europe / Belgium / Colfontaine                  |
| EPI_ISL_420436 | 3/24/2020 | 4/6/2020 Europe / Belgium / Jumet                        |
| EPI_ISL_420437 | 3/25/2020 | 4/6/2020 Europe / Belgium / Grimbergen                   |
| EPI_ISL_420438 | 3/25/2020 | 4/6/2020 Europe / Belgium / Herselt                      |
| EPI_ISL_420439 | 3/25/2020 | 4/6/2020 Europe / Belgium / Quaregnon                    |
| EPI_ISL_420440 | 3/25/2020 | 4/6/2020 Europe / Belgium / Kain                         |
| EPI_ISL_420441 | 3/6/2020  | 4/6/2020 Europe / Belgium / Sint-Genesius-Rode           |
| EPI_ISL_420442 | 3/4/2020  | 4/6/2020 Europe / Belgium / Lubbeek                      |
| EPI_ISL_420443 | 3/4/2020  | 4/6/2020 Europe / Belgium / Hasselt                      |
| EPI_ISL_420444 | 3/5/2020  | 4/6/2020 Europe / Belgium / Lanaken                      |
| EPI_ISL_420445 | 3/9/2020  | 4/6/2020 Europe / Belgium / Wandre                       |
| EPI_ISL_420446 | 3/6/2020  | 4/6/2020 Europe / Belgium / Oostrozebeke                 |
| EPI_ISL_420447 | 3/4/2020  | 4/6/2020 Europe / Belgium / Dendermonde                  |
| EPI_ISL_420448 | 3/4/2020  | 4/6/2020 Europe / Belgium / Lubbeek                      |
| EPI_ISL_420449 | 3/6/2020  | 4/6/2020 Europe / Belgium / Dalhem                       |
| EPI_ISL_420450 | 3/7/2020  | 4/6/2020 Europe / Belgium / Sint-Agatha-Berchem          |
| EPI_ISL_420451 | 3/7/2020  | 4/6/2020 Europe / Belgium / Mons                         |
| EPI_ISL_420452 | 3/9/2020  | 4/6/2020 Europe / Belgium / Watermaal-Bosvoorde          |
| EPI_ISL_420453 | 3/5/2020  | 4/6/2020 Europe / Belgium / Wevelgem                     |
| EPI_ISL_420454 | 3/4/2020  | 4/6/2020 Europe / Belgium / Bonheiden                    |
| EPI_ISL_420456 | 2/22/2020 | 4/6/2020 Oceania / Australia / Western Australia / Perth |
| EPI_ISL_420458 | 3/11/2020 | 4/6/2020 Europe / United Kingdom / England               |
| EPI_ISL_420464 | 3/12/2020 | 4/6/2020 Europe / United Kingdom / England               |
| EPI_ISL_420466 | 3/18/2020 | 4/6/2020 Europe / United Kingdom / England               |
| EPI_ISL_420477 | 3/18/2020 | 4/6/2020 Europe / United Kingdom / England               |
| EPI_ISL_420478 | 3/19/2020 | 4/6/2020 Europe / United Kingdom / England               |
| EPI_ISL_420479 | 3/19/2020 | 4/6/2020 Europe / United Kingdom / England               |
| EPI_ISL_420488 | 3/20/2020 | 4/6/2020 Europe / United Kingdom / England               |
| EPI_ISL_420492 | 3/20/2020 | 4/6/2020 Europe / United Kingdom / England               |
| EPI_ISL_420508 | 3/23/2020 | 4/6/2020 Europe / United Kingdom / England               |
| EPI_ISL_420520 | 3/24/2020 | 4/6/2020 Europe / United Kingdom / England               |
| EPI_ISL_420521 | 3/25/2020 | 4/6/2020 Europe / United Kingdom / England               |
| EPI_ISL_420522 | 3/25/2020 | 4/6/2020 Europe / United Kingdom / England               |
| EPI_ISL_420523 | 3/26/2020 | 4/6/2020 Europe / United Kingdom / England               |
| EPI_ISL_420524 | 3/26/2020 | 4/6/2020 Europe / United Kingdom / England               |
| EPI_ISL_420529 | 3/27/2020 | 4/6/2020 Europe / United Kingdom / England               |
| EPI_ISL_420531 | 3/14/2020 | 4/6/2020 Oceania / Australia / Western Australia         |
| EPI_ISL_420532 | 3/13/2020 | 4/6/2020 Oceania / Australia / Western Australia / Perth |
| EPI_ISL_420533 | 3/14/2020 | 4/6/2020 Oceania / Australia / Western Australia / Perth |
| EPI_ISL_420534 | 3/4/2020  | 4/6/2020 Oceania / Australia / Western Australia / Perth |
| EPI_ISL_420536 | 3/15/2020 | 4/6/2020 Oceania / Australia / Western Australia / Perth |
| EPI_ISL_420537 | 3/13/2020 | 4/6/2020 Oceania / Australia / Western Australia / Perth |
| EPI_ISL_420538 | 3/14/2020 | 4/6/2020 Oceania / Australia / Western Australia / Perth |
| EPI_ISL_420539 | 3/14/2020 | 4/6/2020 Oceania / Australia / Western Australia / Perth |
| EPI_ISL_420540 | 2020-03   | 4/6/2020 Europe / Estonia                                |
| EPI_ISL_420541 | 3/5/2020  | 4/6/2020 Europe / Slovenia                               |

|                |           |                                                                 |
|----------------|-----------|-----------------------------------------------------------------|
| EPI_ISL_420543 | 3/3/2020  | 4/6/2020 Asia / India                                           |
| EPI_ISL_420544 | 2020      | 4/6/2020 Asia / India                                           |
| EPI_ISL_420545 | 3/3/2020  | 4/6/2020 Asia / India                                           |
| EPI_ISL_420546 | 2020      | 4/6/2020 Asia / India                                           |
| EPI_ISL_420547 | 3/3/2020  | 4/6/2020 Asia / India                                           |
| EPI_ISL_420548 | 2020      | 4/6/2020 Asia / India                                           |
| EPI_ISL_420549 | 3/3/2020  | 4/6/2020 Asia / India                                           |
| EPI_ISL_420550 | 2020      | 4/6/2020 Asia / India                                           |
| EPI_ISL_420551 | 3/3/2020  | 4/6/2020 Asia / India                                           |
| EPI_ISL_420552 | 2020      | 4/6/2020 Asia / India                                           |
| EPI_ISL_420553 | 3/3/2020  | 4/6/2020 Asia / India                                           |
| EPI_ISL_420554 | 2020      | 4/6/2020 Asia / India                                           |
| EPI_ISL_420555 | 3/3/2020  | 4/6/2020 Asia / India                                           |
| EPI_ISL_420556 | 2020      | 4/6/2020 Asia / India                                           |
| EPI_ISL_420563 | 3/18/2020 | 4/6/2020 Europe / Italy / Abruzzo / Teramo                      |
| EPI_ISL_420564 | 3/19/2020 | 4/6/2020 Europe / Italy / Abruzzo / L'Aquila / Castel di Sangro |
| EPI_ISL_420565 | 3/19/2020 | 4/6/2020 Europe / Italy / Abruzzo / Teramo                      |
| EPI_ISL_420566 | 3/19/2020 | 4/6/2020 Europe / Italy / Abruzzo                               |
| EPI_ISL_420567 | 3/21/2020 | 4/6/2020 Europe / Italy / Abruzzo / L'Aquila                    |
| EPI_ISL_420568 | 3/23/2020 | 4/6/2020 Europe / Italy / Abruzzo                               |
| EPI_ISL_420569 | 3/23/2020 | 4/6/2020 Europe / Italy / Abruzzo                               |
| EPI_ISL_420570 | 3/17/2020 | 4/6/2020 North America / USA / New York / Nassau County         |
| EPI_ISL_420571 | 3/18/2020 | 4/6/2020 North America / USA / New York / Nassau County         |
| EPI_ISL_420572 | 3/17/2020 | 4/6/2020 North America / USA / New York / Nassau County         |
| EPI_ISL_420573 | 3/18/2020 | 4/6/2020 North America / USA / New York / Manhattan             |
| EPI_ISL_420575 | 3/18/2020 | 4/6/2020 North America / USA / New York / Nassau County         |
| EPI_ISL_420576 | 3/18/2020 | 4/6/2020 North America / USA / New York                         |
| EPI_ISL_420577 | 3/18/2020 | 4/6/2020 North America / USA / New York / Manhattan             |
| EPI_ISL_420578 | 3/18/2020 | 4/6/2020 North America / USA / New York / Manhattan             |
| EPI_ISL_420579 | 3/18/2020 | 4/6/2020 North America / USA / New York / Manhattan             |
| EPI_ISL_420580 | 3/18/2020 | 4/6/2020 North America / USA / New York / Manhattan             |
| EPI_ISL_420581 | 3/18/2020 | 4/6/2020 North America / USA / New York / Manhattan             |
| EPI_ISL_420582 | 3/18/2020 | 4/6/2020 North America / USA / New York / Nassau County         |
| EPI_ISL_420583 | 3/23/2020 | 4/6/2020 Europe / Italy / Abruzzo                               |
| EPI_ISL_420585 | 3/18/2020 | 4/6/2020 North America / USA / New York / Manhattan             |
| EPI_ISL_420586 | 3/19/2020 | 4/6/2020 North America / USA / New York / Brooklyn              |
| EPI_ISL_420587 | 3/18/2020 | 4/6/2020 North America / USA / New York / Manhattan             |
| EPI_ISL_420588 | 3/18/2020 | 4/6/2020 North America / USA / New York / Manhattan             |
| EPI_ISL_420589 | 3/18/2020 | 4/6/2020 North America / USA / New York / Manhattan             |
| EPI_ISL_420590 | 3/18/2020 | 4/6/2020 North America / USA / New York / Nassau County         |
| EPI_ISL_420591 | 3/18/2020 | 4/6/2020 North America / USA / New York / Manhattan             |
| EPI_ISL_420598 | 3/22/2020 | 4/6/2020 South America / Argentina                              |
| EPI_ISL_420599 | 3/18/2020 | 4/6/2020 South America / Argentina                              |
| EPI_ISL_420600 | 3/7/2020  | 4/6/2020 South America / Argentina                              |
| EPI_ISL_420604 | 3/23/2020 | 4/6/2020 Europe / France / Auvergne-Rhone-Alpes / Lyon          |
| EPI_ISL_420605 | 3/22/2020 | 4/6/2020 Europe / France / Auvergne-Rhone-Alpes / Lyon          |
| EPI_ISL_420606 | 3/22/2020 | 4/6/2020 Europe / France / Auvergne-Rhone-Alpes / Lyon          |

|                |           |                                                                   |
|----------------|-----------|-------------------------------------------------------------------|
| EPI_ISL_420607 | 3/23/2020 | 4/6/2020 Europe / France / Auvergne-Rhone-Alpes / Lyon            |
| EPI_ISL_420608 | 3/23/2020 | 4/6/2020 Europe / France / Auvergne-Rhone-Alpes / Lyon            |
| EPI_ISL_420609 | 3/23/2020 | 4/6/2020 Europe / France / Auvergne-Rhone-Alpes / Lyon            |
| EPI_ISL_420610 | 3/23/2020 | 4/6/2020 Europe / France / Auvergne-Rhone-Alpes / Lyon            |
| EPI_ISL_420611 | 3/23/2020 | 4/6/2020 Europe / France / Auvergne-Rhone-Alpes / Lyon            |
| EPI_ISL_420613 | 3/23/2020 | 4/6/2020 Europe / France / Auvergne-Rhone-Alpes / Macon           |
| EPI_ISL_420614 | 3/23/2020 | 4/6/2020 Europe / France / Auvergne-Rhone-Alpes / Macon           |
| EPI_ISL_420615 | 3/23/2020 | 4/6/2020 Europe / France / Auvergne-Rhone-Alpes / Lyon            |
| EPI_ISL_420616 | 3/23/2020 | 4/6/2020 Europe / France / Auvergne-Rhone-Alpes / Lyon            |
| EPI_ISL_420617 | 3/23/2020 | 4/6/2020 Europe / France / Auvergne-Rhone-Alpes / Lyon            |
| EPI_ISL_420618 | 3/23/2020 | 4/6/2020 Europe / France / Auvergne-Rhone-Alpes / Lyon            |
| EPI_ISL_420619 | 3/23/2020 | 4/6/2020 Europe / France / Auvergne-Rhone-Alpes / Lyon            |
| EPI_ISL_420620 | 3/23/2020 | 4/6/2020 Europe / France / Auvergne-Rhone-Alpes / Bourg-en-Bresse |
| EPI_ISL_420621 | 3/24/2020 | 4/6/2020 Europe / France / Auvergne-Rhone-Alpes / Lyon            |
| EPI_ISL_420622 | 3/24/2020 | 4/6/2020 Europe / France / Auvergne-Rhone-Alpes / Lyon            |
| EPI_ISL_420623 | 3/24/2020 | 4/6/2020 Europe / France / Auvergne-Rhone-Alpes / Lyon            |
| EPI_ISL_420624 | 3/24/2020 | 4/6/2020 Europe / France / Auvergne-Rhone-Alpes / Lyon            |
| EPI_ISL_420625 | 3/24/2020 | 4/6/2020 Europe / France / Auvergne-Rhone-Alpes / Lyon            |
| EPI_ISL_420628 | 3/13/2020 | 4/6/2020 North America / USA / Virginia                           |
| EPI_ISL_420629 | 3/20/2020 | 4/6/2020 North America / USA / Virginia                           |
| EPI_ISL_420630 | 3/23/2020 | 4/6/2020 North America / USA / Virginia                           |
| EPI_ISL_420633 | 3/19/2020 | 4/6/2020 Europe / United Kingdom / England                        |
| EPI_ISL_420636 | 3/24/2020 | 4/6/2020 Europe / United Kingdom / England                        |
| EPI_ISL_420640 | 3/23/2020 | 4/6/2020 Europe / United Kingdom / England                        |
| EPI_ISL_420642 | 3/23/2020 | 4/6/2020 Europe / United Kingdom / England                        |
| EPI_ISL_420643 | 3/26/2020 | 4/6/2020 Europe / United Kingdom / England                        |
| EPI_ISL_420645 | 3/13/2020 | 4/6/2020 Europe / United Kingdom / England                        |
| EPI_ISL_420648 | 3/23/2020 | 4/6/2020 Europe / United Kingdom / England                        |
| EPI_ISL_420652 | 3/23/2020 | 4/6/2020 Europe / United Kingdom / England                        |
| EPI_ISL_420661 | 3/27/2020 | 4/6/2020 Europe / United Kingdom / England                        |
| EPI_ISL_420670 | 3/27/2020 | 4/6/2020 Europe / United Kingdom / England                        |
| EPI_ISL_420672 | 3/27/2020 | 4/6/2020 Europe / United Kingdom / England                        |
| EPI_ISL_420673 | 3/27/2020 | 4/6/2020 Europe / United Kingdom / England                        |
| EPI_ISL_420683 | 3/28/2020 | 4/6/2020 Europe / United Kingdom / England                        |
| EPI_ISL_420686 | 3/28/2020 | 4/6/2020 Europe / United Kingdom / England                        |
| EPI_ISL_420687 | 3/28/2020 | 4/6/2020 Europe / United Kingdom / England                        |
| EPI_ISL_420688 | 3/28/2020 | 4/6/2020 Europe / United Kingdom / England                        |
| EPI_ISL_420689 | 3/28/2020 | 4/6/2020 Europe / United Kingdom / England                        |
| EPI_ISL_420690 | 3/28/2020 | 4/6/2020 Europe / United Kingdom / England                        |
| EPI_ISL_420692 | 3/29/2020 | 4/6/2020 Europe / United Kingdom / England                        |
| EPI_ISL_420693 | 3/28/2020 | 4/6/2020 Europe / United Kingdom / England                        |
| EPI_ISL_420694 | 3/28/2020 | 4/6/2020 Europe / United Kingdom / England                        |
| EPI_ISL_420695 | 3/28/2020 | 4/6/2020 Europe / United Kingdom / England                        |
| EPI_ISL_420697 | 3/29/2020 | 4/6/2020 Europe / United Kingdom / England                        |
| EPI_ISL_420698 | 3/28/2020 | 4/6/2020 Europe / United Kingdom / England                        |
| EPI_ISL_420702 | 3/27/2020 | 4/6/2020 Europe / United Kingdom / England                        |
| EPI_ISL_420707 | 3/28/2020 | 4/6/2020 Europe / United Kingdom / England                        |



|                |            |                                                               |
|----------------|------------|---------------------------------------------------------------|
| EPI_ISL_420784 | 3/2/2020   | 4/6/2020 North America / USA / Arizona                        |
| EPI_ISL_420785 | 3/2/2020   | 4/6/2020 North America / USA / Florida                        |
| EPI_ISL_420786 | 3/3/2020   | 4/6/2020 North America / USA / Georgia                        |
| EPI_ISL_420787 | 3/3/2020   | 4/6/2020 North America / USA / Georgia                        |
| EPI_ISL_420788 | 3/4/2020   | 4/6/2020 North America / USA / Georgia                        |
| EPI_ISL_420789 | 3/1/2020   | 4/6/2020 North America / USA / Illinois                       |
| EPI_ISL_420790 | 3/1/2020   | 4/6/2020 North America / USA / Illinois                       |
| EPI_ISL_420791 | 2/29/2020  | 4/6/2020 North America / USA / New Hampshire                  |
| EPI_ISL_420792 | 3/2/2020   | 4/6/2020 North America / USA / New Hampshire                  |
| EPI_ISL_420793 | 3/2/2020   | 4/6/2020 North America / USA / New York                       |
| EPI_ISL_420794 | 3/1/2020   | 4/6/2020 North America / USA / Oregon                         |
| EPI_ISL_420795 | 3/1/2020   | 4/6/2020 North America / USA / Rhode Island                   |
| EPI_ISL_420796 | 2/29/2020  | 4/6/2020 North America / USA / Texas                          |
| EPI_ISL_420797 | 3/1/2020   | 4/6/2020 North America / USA / Texas                          |
| EPI_ISL_420798 | 3/1/2020   | 4/6/2020 North America / USA / Texas                          |
| EPI_ISL_420799 | 2/27/2020  | 4/6/2020 Asia / South Korea                                   |
| EPI_ISL_420800 | 2/29/2020  | 4/6/2020 Asia / South Korea                                   |
| EPI_ISL_420801 | 2/29/2020  | 4/6/2020 Asia / South Korea                                   |
| EPI_ISL_420803 | 3/12/2020  | 4/6/2020 North America / USA / Utah                           |
| EPI_ISL_420809 | 3/24/2020  | 4/6/2020 North America / USA / Utah                           |
| EPI_ISL_420810 | 3/27/2020  | 4/6/2020 North America / USA / Utah                           |
| EPI_ISL_420812 | 3/27/2020  | 4/6/2020 North America / USA / Utah                           |
| EPI_ISL_420814 | 3/27/2020  | 4/6/2020 North America / USA / Utah                           |
| EPI_ISL_420820 | 3/25/2020  | 4/6/2020 North America / USA / Utah                           |
| EPI_ISL_420821 | 3/26/2020  | 4/6/2020 North America / USA / Utah                           |
| EPI_ISL_420822 | 3/25/2020  | 4/6/2020 North America / USA / Utah                           |
| EPI_ISL_420824 | 3/26/2020  | 4/6/2020 North America / USA / Utah                           |
| EPI_ISL_420825 | 3/25/2020  | 4/6/2020 North America / USA / Utah                           |
| EPI_ISL_424351 | 3/27/2020  | 4/6/2020 North America / USA / Florida                        |
| EPI_ISL_424355 | 1/24/2020  | 4/6/2020 Asia / China / Beijing                               |
| EPI_ISL_424356 | 1/25/2020  | 4/6/2020 Asia / China / Beijing                               |
| EPI_ISL_424357 | 1/28/2020  | 4/6/2020 Asia / China / Beijing                               |
| EPI_ISL_424358 | 1/28/2020  | 4/6/2020 Asia / China / Beijing                               |
| EPI_ISL_424359 | 1/27/2020  | 4/6/2020 Asia / China / Beijing                               |
| EPI_ISL_424360 | 1/29/2020  | 4/6/2020 Asia / China / Beijing                               |
| EPI_ISL_529213 | 12/30/2019 | 4/6/2020 Asia / China / Hubei / Wuhan                         |
| EPI_ISL_529214 | 12/30/2019 | 4/6/2020 Asia / China / Hubei / Wuhan                         |
| EPI_ISL_529215 | 12/30/2019 | 4/6/2020 Asia / China / Hubei / Wuhan                         |
| EPI_ISL_529216 | 12/30/2019 | 4/6/2020 Asia / China / Hubei / Wuhan                         |
| EPI_ISL_529217 | 12/30/2019 | 4/6/2020 Asia / China / Hubei / Wuhan                         |
| EPI_ISL_420838 | 3/22/2020  | 4/7/2020 Africa / Democratic Republic of the Congo / Kinshasa |
| EPI_ISL_420839 | 3/22/2020  | 4/7/2020 Africa / Democratic Republic of the Congo / Kinshasa |
| EPI_ISL_420840 | 3/20/2020  | 4/7/2020 Africa / Democratic Republic of the Congo / Sud Kivu |
| EPI_ISL_420841 | 3/22/2020  | 4/7/2020 Africa / Democratic Republic of the Congo / Sud Kivu |
| EPI_ISL_420842 | 2020-03    | 4/7/2020 Africa / Democratic Republic of the Congo / Kinshasa |
| EPI_ISL_420843 | 2020-03    | 4/7/2020 Africa / Democratic Republic of the Congo / Kinshasa |
| EPI_ISL_420844 | 2020-03    | 4/7/2020 Africa / Democratic Republic of the Congo / Kinshasa |

|                |           |                                                               |
|----------------|-----------|---------------------------------------------------------------|
| EPI_ISL_420845 | 3/26/2020 | 4/7/2020 Africa / Democratic Republic of the Congo / Kinshasa |
| EPI_ISL_420846 | 2020-03   | 4/7/2020 Africa / Democratic Republic of the Congo / Kinshasa |
| EPI_ISL_420847 | 3/26/2020 | 4/7/2020 Africa / Democratic Republic of the Congo            |
| EPI_ISL_420848 | 2020-03   | 4/7/2020 Africa / Democratic Republic of the Congo / Kinshasa |
| EPI_ISL_420849 | 3/28/2020 | 4/7/2020 Africa / Democratic Republic of the Congo / Kinshasa |
| EPI_ISL_420850 | 2020-03   | 4/7/2020 Africa / Democratic Republic of the Congo / Kinshasa |
| EPI_ISL_420851 | 3/25/2020 | 4/7/2020 Africa / Democratic Republic of the Congo / Kinshasa |
| EPI_ISL_420852 | 3/26/2020 | 4/7/2020 Africa / Democratic Republic of the Congo / Kinshasa |
| EPI_ISL_420853 | 3/26/2020 | 4/7/2020 Africa / Democratic Republic of the Congo / Kinshasa |
| EPI_ISL_420854 | 3/25/2020 | 4/7/2020 Africa / Democratic Republic of the Congo / Kinshasa |
| EPI_ISL_420855 | 3/23/2020 | 4/7/2020 Oceania / Australia / Victoria                       |
| EPI_ISL_420876 | 3/24/2020 | 4/7/2020 Oceania / Australia / Victoria                       |
| EPI_ISL_420877 | 3/28/2020 | 4/7/2020 Oceania / Australia / Victoria                       |
| EPI_ISL_420878 | 3/24/2020 | 4/7/2020 Oceania / Australia / Queensland / Brisbane          |
| EPI_ISL_420879 | 3/25/2020 | 4/7/2020 Oceania / Australia / Queensland / Brisbane          |
| EPI_ISL_420898 | 3/11/2020 | 4/7/2020 Europe / Germany / Bavaria / Munich                  |
| EPI_ISL_420899 | 3/11/2020 | 4/7/2020 Europe / Germany / Bavaria / Munich                  |
| EPI_ISL_420900 | 3/12/2020 | 4/7/2020 Europe / Germany / Bavaria / Munich                  |
| EPI_ISL_420901 | 3/12/2020 | 4/7/2020 Europe / Germany / Bavaria / Munich                  |
| EPI_ISL_420902 | 3/13/2020 | 4/7/2020 Europe / Germany / Bavaria / Munich                  |
| EPI_ISL_420903 | 3/14/2020 | 4/7/2020 Europe / Germany / Bavaria / Munich                  |
| EPI_ISL_420905 | 3/16/2020 | 4/7/2020 Europe / Germany / Bavaria / Munich                  |
| EPI_ISL_420906 | 3/16/2020 | 4/7/2020 Europe / Germany / Bavaria / Munich                  |
| EPI_ISL_420907 | 3/16/2020 | 4/7/2020 Europe / Germany / Bavaria / Munich                  |
| EPI_ISL_420910 | 3/25/2020 | 4/7/2020 Europe / United Kingdom / England                    |
| EPI_ISL_420912 | 3/21/2020 | 4/7/2020 Europe / Germany / Bavaria / Munich                  |
| EPI_ISL_420929 | 3/20/2020 | 4/7/2020 Europe / United Kingdom / Wales                      |
| EPI_ISL_420937 | 3/21/2020 | 4/7/2020 Europe / United Kingdom / Wales                      |
| EPI_ISL_420940 | 3/21/2020 | 4/7/2020 Europe / United Kingdom / Wales                      |
| EPI_ISL_420943 | 3/21/2020 | 4/7/2020 Europe / United Kingdom / Wales                      |
| EPI_ISL_420944 | 3/21/2020 | 4/7/2020 Europe / United Kingdom / Wales                      |
| EPI_ISL_420949 | 3/21/2020 | 4/7/2020 Europe / United Kingdom / Wales                      |
| EPI_ISL_420951 | 3/22/2020 | 4/7/2020 Europe / United Kingdom / Wales                      |
| EPI_ISL_420960 | 3/22/2020 | 4/7/2020 Europe / United Kingdom / Wales                      |
| EPI_ISL_420961 | 3/22/2020 | 4/7/2020 Europe / United Kingdom / Wales                      |
| EPI_ISL_420965 | 3/22/2020 | 4/7/2020 Europe / United Kingdom / Wales                      |
| EPI_ISL_420969 | 3/22/2020 | 4/7/2020 Europe / United Kingdom / Wales                      |
| EPI_ISL_420970 | 3/22/2020 | 4/7/2020 Europe / United Kingdom / Wales                      |
| EPI_ISL_420974 | 3/22/2020 | 4/7/2020 Europe / United Kingdom / Wales                      |
| EPI_ISL_420976 | 3/22/2020 | 4/7/2020 Europe / United Kingdom / Wales                      |
| EPI_ISL_420977 | 3/22/2020 | 4/7/2020 Europe / United Kingdom / Wales                      |
| EPI_ISL_420978 | 3/22/2020 | 4/7/2020 Europe / United Kingdom / Wales                      |
| EPI_ISL_420982 | 3/23/2020 | 4/7/2020 Europe / United Kingdom / Wales                      |
| EPI_ISL_420985 | 3/23/2020 | 4/7/2020 Europe / United Kingdom / Wales                      |
| EPI_ISL_420988 | 3/23/2020 | 4/7/2020 Europe / United Kingdom / Wales                      |
| EPI_ISL_420990 | 3/23/2020 | 4/7/2020 Europe / United Kingdom / Wales                      |
| EPI_ISL_420994 | 3/23/2020 | 4/7/2020 Europe / United Kingdom / Wales                      |



|                |           |                                          |
|----------------|-----------|------------------------------------------|
| EPI_ISL_420995 | 3/23/2020 | 4/7/2020 Europe / United Kingdom / Wales |
| EPI_ISL_420998 | 3/23/2020 | 4/7/2020 Europe / United Kingdom / Wales |
| EPI_ISL_421002 | 3/23/2020 | 4/7/2020 Europe / United Kingdom / Wales |
| EPI_ISL_421003 | 3/23/2020 | 4/7/2020 Europe / United Kingdom / Wales |
| EPI_ISL_421004 | 3/23/2020 | 4/7/2020 Europe / United Kingdom / Wales |
| EPI_ISL_421005 | 3/23/2020 | 4/7/2020 Europe / United Kingdom / Wales |
| EPI_ISL_421006 | 3/23/2020 | 4/7/2020 Europe / United Kingdom / Wales |
| EPI_ISL_421008 | 3/23/2020 | 4/7/2020 Europe / United Kingdom / Wales |
| EPI_ISL_421009 | 3/23/2020 | 4/7/2020 Europe / United Kingdom / Wales |
| EPI_ISL_421010 | 3/23/2020 | 4/7/2020 Europe / United Kingdom / Wales |
| EPI_ISL_421011 | 3/24/2020 | 4/7/2020 Europe / United Kingdom / Wales |
| EPI_ISL_421171 | 3/5/2020  | 4/7/2020 Europe / Spain / Madrid         |
| EPI_ISL_421172 | 3/9/2020  | 4/7/2020 Europe / Spain / Madrid         |
| EPI_ISL_421173 | 3/8/2020  | 4/7/2020 Europe / Spain / Madrid         |
| EPI_ISL_421174 | 3/29/2020 | 4/7/2020 Europe / Spain / Madrid         |
| EPI_ISL_421175 | 3/29/2020 | 4/7/2020 Europe / Spain / Madrid         |
| EPI_ISL_421176 | 3/27/2020 | 4/7/2020 Europe / Spain / Madrid         |
| EPI_ISL_421177 | 3/27/2020 | 4/7/2020 Europe / Spain / Madrid         |
| EPI_ISL_421178 | 3/27/2020 | 4/7/2020 Europe / Spain / Madrid         |
| EPI_ISL_421180 | 3/27/2020 | 4/7/2020 Europe / Spain / Madrid         |
| EPI_ISL_421182 | 3/30/2020 | 4/7/2020 Europe / Belgium / Liège        |
| EPI_ISL_421183 | 3/30/2020 | 4/7/2020 Europe / Belgium / Liège        |
| EPI_ISL_421184 | 3/31/2020 | 4/7/2020 Europe / Belgium / Liège        |
| EPI_ISL_421185 | 3/30/2020 | 4/7/2020 Europe / Belgium / Liège        |
| EPI_ISL_421186 | 3/30/2020 | 4/7/2020 Europe / Belgium / Liège        |
| EPI_ISL_421187 | 3/30/2020 | 4/7/2020 Europe / Belgium / Liège        |
| EPI_ISL_421188 | 3/30/2020 | 4/7/2020 Europe / Belgium / Liège        |
| EPI_ISL_421189 | 3/30/2020 | 4/7/2020 Europe / Belgium / Liège        |
| EPI_ISL_421190 | 3/31/2020 | 4/7/2020 Europe / Belgium / Liège        |
| EPI_ISL_421191 | 3/30/2020 | 4/7/2020 Europe / Belgium / Liège        |
| EPI_ISL_421192 | 3/30/2020 | 4/7/2020 Europe / Belgium / Liège        |
| EPI_ISL_421193 | 3/31/2020 | 4/7/2020 Europe / Belgium / Liège        |
| EPI_ISL_421194 | 3/30/2020 | 4/7/2020 Europe / Belgium / Liège        |
| EPI_ISL_421195 | 3/30/2020 | 4/7/2020 Europe / Belgium / Liège        |
| EPI_ISL_421196 | 3/30/2020 | 4/7/2020 Europe / Belgium / Liège        |
| EPI_ISL_421198 | 3/30/2020 | 4/7/2020 Europe / Belgium / Liège        |
| EPI_ISL_421200 | 3/31/2020 | 4/7/2020 Europe / Belgium / Liège        |
| EPI_ISL_421201 | 3/31/2020 | 4/7/2020 Europe / Belgium / Liège        |
| EPI_ISL_421202 | 3/30/2020 | 4/7/2020 Europe / Belgium / Liège        |
| EPI_ISL_421203 | 3/30/2020 | 4/7/2020 Europe / Belgium / Liège        |
| EPI_ISL_421204 | 3/31/2020 | 4/7/2020 Europe / Belgium / Liège        |
| EPI_ISL_421205 | 3/31/2020 | 4/7/2020 Europe / Belgium / Liège        |
| EPI_ISL_421206 | 3/31/2020 | 4/7/2020 Europe / Belgium / Liège        |
| EPI_ISL_421207 | 3/31/2020 | 4/7/2020 Europe / Belgium / Liège        |
| EPI_ISL_421210 | 3/31/2020 | 4/7/2020 Europe / Belgium / Liège        |
| EPI_ISL_421212 | 3/31/2020 | 4/7/2020 Europe / Belgium / Liège        |
| EPI_ISL_421213 | 3/31/2020 | 4/7/2020 Europe / Belgium / Liège        |

|                |           |                                                                       |
|----------------|-----------|-----------------------------------------------------------------------|
| EPI_ISL_421214 | 3/30/2020 | 4/7/2020 Europe / Belgium / Liège                                     |
| EPI_ISL_421221 | 3/15/2020 | 4/7/2020 Asia / China / Hangzhou                                      |
| EPI_ISL_421222 | 3/14/2020 | 4/7/2020 Asia / China / Hangzhou                                      |
| EPI_ISL_421224 | 1/23/2020 | 4/7/2020 Asia / China / Hangzhou                                      |
| EPI_ISL_421225 | 1/22/2020 | 4/7/2020 Asia / China / Hangzhou                                      |
| EPI_ISL_421226 | 1/22/2020 | 4/7/2020 Asia / China / Hangzhou                                      |
| EPI_ISL_421227 | 1/21/2020 | 4/7/2020 Asia / China / Hangzhou                                      |
| EPI_ISL_421228 | 1/21/2020 | 4/7/2020 Asia / China / Hangzhou                                      |
| EPI_ISL_421229 | 1/21/2020 | 4/7/2020 Asia / China / Hangzhou                                      |
| EPI_ISL_421230 | 1/21/2020 | 4/7/2020 Asia / China / Hangzhou                                      |
| EPI_ISL_421231 | 1/21/2020 | 4/7/2020 Asia / China / Hangzhou                                      |
| EPI_ISL_421232 | 1/21/2020 | 4/7/2020 Asia / China / Hangzhou                                      |
| EPI_ISL_421233 | 1/21/2020 | 4/7/2020 Asia / China / Hangzhou                                      |
| EPI_ISL_421234 | 1/21/2020 | 4/7/2020 Asia / China / Hangzhou                                      |
| EPI_ISL_421235 | 1/20/2020 | 4/7/2020 Asia / China / Hangzhou                                      |
| EPI_ISL_421236 | 1/20/2020 | 4/7/2020 Asia / China / Hangzhou                                      |
| EPI_ISL_421237 | 1/22/2020 | 4/7/2020 Asia / China / Jiangxi / Jiujiang                            |
| EPI_ISL_421238 | 1/29/2020 | 4/7/2020 Asia / China / Jiangxi / Nanchang                            |
| EPI_ISL_421239 | 1/26/2020 | 4/7/2020 Asia / China / Jiangxi / Shangrao                            |
| EPI_ISL_421240 | 2/5/2020  | 4/7/2020 Asia / China / Jiangxi / Shangrao                            |
| EPI_ISL_421241 | 1/30/2020 | 4/7/2020 Asia / China / Jiangxi / Nanchang                            |
| EPI_ISL_421242 | 1/25/2020 | 4/7/2020 Asia / China / Jiangxi / Ganzhou                             |
| EPI_ISL_421243 | 1/21/2020 | 4/7/2020 Asia / China / Jiangxi / Nanchang                            |
| EPI_ISL_421244 | 1/22/2020 | 4/7/2020 Asia / China / Jiangxi / Shangrao                            |
| EPI_ISL_421245 | 1/25/2020 | 4/7/2020 Asia / China / Jiangxi / Nanchang                            |
| EPI_ISL_421246 | 2/26/2020 | 4/7/2020 Asia / China / Jiangxi / Nanchang                            |
| EPI_ISL_421247 | 1/27/2020 | 4/7/2020 Asia / China / Jiangxi / Nanchang                            |
| EPI_ISL_421248 | 1/23/2020 | 4/7/2020 Asia / China / Jiangxi / Nanchang                            |
| EPI_ISL_421249 | 1/25/2020 | 4/7/2020 Asia / China / Jiangxi / Xinyu                               |
| EPI_ISL_421250 | 2/3/2020  | 4/7/2020 Asia / China / Jiangxi / Shangrao                            |
| EPI_ISL_421251 | 2/3/2020  | 4/7/2020 Asia / China / Jiangxi / Shangrao                            |
| EPI_ISL_421252 | 1/11/2020 | 4/7/2020 Asia / China / Jiangxi / Pingxiang                           |
| EPI_ISL_421253 | 1/26/2020 | 4/7/2020 Asia / China / Jiangxi / Jian                                |
| EPI_ISL_421254 | 2/3/2020  | 4/7/2020 Asia / China / Jiangxi / Shangrao                            |
| EPI_ISL_421256 | 1/27/2020 | 4/7/2020 Asia / China / Jiangxi / Jian                                |
| EPI_ISL_421257 | 2/2/2020  | 4/7/2020 Asia / China / Jiangxi / Shangrao                            |
| EPI_ISL_421258 | 2/8/2020  | 4/7/2020 Asia / China / Jiangxi / Shangrao                            |
| EPI_ISL_421259 | 1/27/2020 | 4/7/2020 Asia / China / Jiangxi / Pingxiang                           |
| EPI_ISL_421260 | 1/26/2020 | 4/7/2020 Asia / China / Jiangxi / Xinyu                               |
| EPI_ISL_421261 | 1/29/2020 | 4/7/2020 Asia / China / Jiangxi / Nanchang                            |
| EPI_ISL_421262 | 1/29/2020 | 4/7/2020 Asia / China / Jiangxi / Nanchang                            |
| EPI_ISL_421272 | 3/10/2020 | 4/7/2020 North America / USA / Wyoming                                |
| EPI_ISL_421275 | 3/18/2020 | 4/7/2020 Europe / Russia / Moscow                                     |
| EPI_ISL_421279 | 3/19/2020 | 4/7/2020 North America / USA / Indiana / Marion County / Indianapolis |
| EPI_ISL_421281 | 3/19/2020 | 4/7/2020 North America / USA / Indiana / Marion County / Indianapolis |
| EPI_ISL_421283 | 3/23/2020 | 4/7/2020 North America / USA / Wisconsin / Dane County                |
| EPI_ISL_421284 | 3/24/2020 | 4/7/2020 North America / USA / Wisconsin / Dane County                |



|                |           |                                                              |
|----------------|-----------|--------------------------------------------------------------|
| EPI_ISL_421332 | 3/20/2020 | 4/7/2020 North America / USA / Wisconsin / Dane County       |
| EPI_ISL_421333 | 3/26/2020 | 4/7/2020 North America / USA / Wisconsin / Dane County       |
| EPI_ISL_421334 | 3/22/2020 | 4/7/2020 North America / USA / Wisconsin / Dane County       |
| EPI_ISL_421335 | 3/19/2020 | 4/7/2020 North America / USA / Wisconsin / Dane County       |
| EPI_ISL_421336 | 3/24/2020 | 4/7/2020 North America / USA / Wisconsin / Dane County       |
| EPI_ISL_421338 | 3/23/2020 | 4/7/2020 North America / USA / Wisconsin / Dane County       |
| EPI_ISL_421339 | 3/24/2020 | 4/7/2020 North America / USA / Wisconsin / Dane County       |
| EPI_ISL_421340 | 3/25/2020 | 4/7/2020 North America / USA / Wisconsin / Dane County       |
| EPI_ISL_421341 | 3/25/2020 | 4/7/2020 North America / USA / Wisconsin / Dane County       |
| EPI_ISL_421342 | 3/25/2020 | 4/7/2020 North America / USA / Wisconsin / Columbia County   |
| EPI_ISL_421343 | 3/24/2020 | 4/7/2020 North America / USA / Wisconsin / Dane County       |
| EPI_ISL_421346 | 3/14/2020 | 4/7/2020 North America / USA / Wyoming                       |
| EPI_ISL_421348 | 3/17/2020 | 4/7/2020 North America / USA / New York / Manhattan          |
| EPI_ISL_421349 | 3/17/2020 | 4/7/2020 North America / USA / New York                      |
| EPI_ISL_421350 | 3/17/2020 | 4/7/2020 North America / USA / New York                      |
| EPI_ISL_421351 | 3/11/2020 | 4/7/2020 North America / USA / New York / Manhattan          |
| EPI_ISL_421352 | 3/14/2020 | 4/7/2020 North America / USA / New York / Manhattan          |
| EPI_ISL_421353 | 3/14/2020 | 4/7/2020 North America / USA / New York / Manhattan          |
| EPI_ISL_421354 | 3/13/2020 | 4/7/2020 North America / USA / New York / Manhattan          |
| EPI_ISL_421355 | 3/14/2020 | 4/7/2020 North America / USA / New York / Manhattan          |
| EPI_ISL_421357 | 3/17/2020 | 4/7/2020 North America / USA / New York / Manhattan          |
| EPI_ISL_421358 | 3/17/2020 | 4/7/2020 North America / USA / New York / Manhattan          |
| EPI_ISL_421359 | 3/17/2020 | 4/7/2020 North America / USA / New York / Manhattan          |
| EPI_ISL_421360 | 3/13/2020 | 4/7/2020 North America / USA / New York / Brooklyn           |
| EPI_ISL_421363 | 3/17/2020 | 4/7/2020 North America / USA / New York / Westchester County |
| EPI_ISL_421364 | 3/17/2020 | 4/7/2020 North America / USA / New York / Manhattan          |
| EPI_ISL_421365 | 3/14/2020 | 4/7/2020 North America / USA / New York / Bronx              |
| EPI_ISL_421366 | 3/15/2020 | 4/7/2020 North America / USA / New York / Westchester County |
| EPI_ISL_421367 | 3/17/2020 | 4/7/2020 North America / USA / New York / Manhattan          |
| EPI_ISL_421369 | 3/16/2020 | 4/7/2020 North America / USA / New York / Manhattan          |
| EPI_ISL_421370 | 3/16/2020 | 4/7/2020 North America / USA / New York / Brooklyn           |
| EPI_ISL_421371 | 3/17/2020 | 4/7/2020 North America / USA / New York / Brooklyn           |
| EPI_ISL_421375 | 3/16/2020 | 4/7/2020 North America / USA / New York / Brooklyn           |
| EPI_ISL_421376 | 3/16/2020 | 4/7/2020 North America / USA / New York / Brooklyn           |
| EPI_ISL_421378 | 3/16/2020 | 4/7/2020 North America / USA / New York / Manhattan          |
| EPI_ISL_421379 | 3/17/2020 | 4/7/2020 North America / USA / New York / Bronx              |
| EPI_ISL_421383 | 3/18/2020 | 4/7/2020 North America / USA / New York / Brooklyn           |
| EPI_ISL_421384 | 3/18/2020 | 4/7/2020 North America / USA / New York                      |
| EPI_ISL_421385 | 3/19/2020 | 4/7/2020 North America / USA / New York                      |
| EPI_ISL_421386 | 3/19/2020 | 4/7/2020 North America / USA / New York / Bronx              |
| EPI_ISL_421387 | 3/19/2020 | 4/7/2020 North America / USA / New York / Manhattan          |
| EPI_ISL_421388 | 3/18/2020 | 4/7/2020 North America / USA / New York / Brooklyn           |
| EPI_ISL_421389 | 3/18/2020 | 4/7/2020 North America / USA / New York / Brooklyn           |
| EPI_ISL_421390 | 3/18/2020 | 4/7/2020 North America / USA / New York / Manhattan          |
| EPI_ISL_421391 | 3/18/2020 | 4/7/2020 North America / USA / New York / Manhattan          |
| EPI_ISL_421394 | 3/17/2020 | 4/7/2020 North America / USA / New York / Manhattan          |
| EPI_ISL_421395 | 3/17/2020 | 4/7/2020 North America / USA / New York / Manhattan          |

|                |           |                                                     |
|----------------|-----------|-----------------------------------------------------|
| EPI_ISL_421396 | 3/18/2020 | 4/7/2020 North America / USA / New York / Manhattan |
| EPI_ISL_421397 | 3/17/2020 | 4/7/2020 North America / USA / New York / Manhattan |
| EPI_ISL_421398 | 3/17/2020 | 4/7/2020 North America / USA / New York / Manhattan |
| EPI_ISL_421399 | 3/17/2020 | 4/7/2020 North America / USA / New York / Manhattan |
| EPI_ISL_421400 | 3/17/2020 | 4/7/2020 North America / USA / New York / Manhattan |
| EPI_ISL_421401 | 3/17/2020 | 4/7/2020 North America / USA / New York / Brooklyn  |
| EPI_ISL_421402 | 3/18/2020 | 4/7/2020 North America / USA / New York / Manhattan |
| EPI_ISL_421403 | 3/17/2020 | 4/7/2020 North America / USA / New York / Manhattan |
| EPI_ISL_421404 | 3/17/2020 | 4/7/2020 North America / USA / New York / Manhattan |
| EPI_ISL_421405 | 3/17/2020 | 4/7/2020 North America / USA / New York / Manhattan |
| EPI_ISL_421406 | 3/18/2020 | 4/7/2020 North America / USA / New York / Manhattan |
| EPI_ISL_421407 | 3/18/2020 | 4/7/2020 North America / USA / New York / Manhattan |
| EPI_ISL_421408 | 3/18/2020 | 4/7/2020 North America / USA / New York / Bronx     |
| EPI_ISL_421409 | 3/18/2020 | 4/7/2020 North America / USA / New York / Manhattan |
| EPI_ISL_421410 | 3/18/2020 | 4/7/2020 North America / USA / New York / Manhattan |
| EPI_ISL_421411 | 3/18/2020 | 4/7/2020 North America / USA / New York / Queens    |
| EPI_ISL_421412 | 3/18/2020 | 4/7/2020 North America / USA / New York / Manhattan |
| EPI_ISL_421413 | 3/18/2020 | 4/7/2020 North America / USA / New York / Manhattan |
| EPI_ISL_421414 | 3/18/2020 | 4/7/2020 North America / USA / New York / Bronx     |
| EPI_ISL_421415 | 3/13/2020 | 4/7/2020 North America / USA / New York / Queens    |
| EPI_ISL_421416 | 3/18/2020 | 4/7/2020 North America / USA / New York / Manhattan |
| EPI_ISL_421417 | 3/17/2020 | 4/7/2020 North America / USA / New York / Queens    |
| EPI_ISL_421419 | 3/18/2020 | 4/7/2020 North America / USA / New York / Manhattan |
| EPI_ISL_421420 | 3/18/2020 | 4/7/2020 North America / USA / New York / Bronx     |
| EPI_ISL_421421 | 3/18/2020 | 4/7/2020 North America / USA / New York / Brooklyn  |
| EPI_ISL_421422 | 3/17/2020 | 4/7/2020 North America / USA / New York / Brooklyn  |
| EPI_ISL_421423 | 3/18/2020 | 4/7/2020 North America / USA / New York / Queens    |
| EPI_ISL_421424 | 3/18/2020 | 4/7/2020 North America / USA / New York / Queens    |
| EPI_ISL_421425 | 3/17/2020 | 4/7/2020 North America / USA / New York / Queens    |
| EPI_ISL_421426 | 3/17/2020 | 4/7/2020 North America / USA / New York             |
| EPI_ISL_421427 | 3/17/2020 | 4/7/2020 North America / USA / New York / Brooklyn  |
| EPI_ISL_421428 | 3/18/2020 | 4/7/2020 North America / USA / New York / Manhattan |
| EPI_ISL_421429 | 3/17/2020 | 4/7/2020 North America / USA / New York / Manhattan |
| EPI_ISL_421430 | 3/17/2020 | 4/7/2020 North America / USA / New York / Manhattan |
| EPI_ISL_421431 | 3/18/2020 | 4/7/2020 North America / USA / New York / Manhattan |
| EPI_ISL_421432 | 3/17/2020 | 4/7/2020 North America / USA / New York / Queens    |
| EPI_ISL_421433 | 3/17/2020 | 4/7/2020 North America / USA / New York / Queens    |
| EPI_ISL_421434 | 3/17/2020 | 4/7/2020 North America / USA / New York / Manhattan |
| EPI_ISL_421435 | 3/18/2020 | 4/7/2020 North America / USA / New York / Bronx     |
| EPI_ISL_421446 | 3/18/2020 | 4/8/2020 Europe / Portugal                          |
| EPI_ISL_421447 | 3/18/2020 | 4/8/2020 Europe / Portugal                          |
| EPI_ISL_421448 | 3/18/2020 | 4/8/2020 Europe / Portugal                          |
| EPI_ISL_421449 | 3/18/2020 | 4/8/2020 Europe / Portugal                          |
| EPI_ISL_421450 | 3/18/2020 | 4/8/2020 Europe / Portugal                          |
| EPI_ISL_421451 | 3/18/2020 | 4/8/2020 Europe / Portugal                          |
| EPI_ISL_421452 | 3/18/2020 | 4/8/2020 Europe / Portugal                          |
| EPI_ISL_421453 | 3/18/2020 | 4/8/2020 Europe / Portugal                          |

|                |           |                                                        |
|----------------|-----------|--------------------------------------------------------|
| EPI_ISL_421454 | 3/18/2020 | 4/8/2020 Europe / Portugal                             |
| EPI_ISL_421455 | 3/18/2020 | 4/8/2020 Europe / Portugal                             |
| EPI_ISL_421456 | 3/19/2020 | 4/8/2020 Europe / Portugal                             |
| EPI_ISL_421457 | 3/18/2020 | 4/8/2020 Europe / Portugal                             |
| EPI_ISL_421458 | 3/19/2020 | 4/8/2020 Europe / Portugal                             |
| EPI_ISL_421459 | 3/20/2020 | 4/8/2020 Europe / Portugal                             |
| EPI_ISL_421460 | 3/20/2020 | 4/8/2020 Europe / Portugal                             |
| EPI_ISL_421461 | 3/20/2020 | 4/8/2020 Europe / Portugal                             |
| EPI_ISL_421462 | 3/20/2020 | 4/8/2020 Europe / Portugal                             |
| EPI_ISL_421463 | 3/20/2020 | 4/8/2020 Europe / Portugal                             |
| EPI_ISL_421464 | 3/17/2020 | 4/8/2020 Europe / Portugal                             |
| EPI_ISL_421465 | 3/19/2020 | 4/8/2020 Europe / Portugal                             |
| EPI_ISL_421466 | 3/20/2020 | 4/8/2020 Europe / Portugal                             |
| EPI_ISL_421467 | 3/20/2020 | 4/8/2020 Europe / Portugal                             |
| EPI_ISL_421468 | 3/21/2020 | 4/8/2020 Europe / Portugal                             |
| EPI_ISL_421469 | 3/21/2020 | 4/8/2020 Europe / Portugal                             |
| EPI_ISL_421470 | 3/21/2020 | 4/8/2020 Europe / Portugal                             |
| EPI_ISL_421471 | 3/21/2020 | 4/8/2020 Europe / Portugal                             |
| EPI_ISL_421472 | 3/21/2020 | 4/8/2020 Europe / Portugal                             |
| EPI_ISL_421473 | 3/21/2020 | 4/8/2020 Europe / Portugal                             |
| EPI_ISL_421474 | 3/21/2020 | 4/8/2020 Europe / Portugal                             |
| EPI_ISL_421475 | 3/21/2020 | 4/8/2020 Europe / Portugal                             |
| EPI_ISL_421476 | 3/21/2020 | 4/8/2020 Europe / Portugal                             |
| EPI_ISL_421477 | 3/21/2020 | 4/8/2020 Europe / Portugal                             |
| EPI_ISL_421478 | 3/21/2020 | 4/8/2020 Europe / Portugal                             |
| EPI_ISL_421479 | 3/21/2020 | 4/8/2020 Europe / Portugal                             |
| EPI_ISL_421480 | 3/21/2020 | 4/8/2020 Europe / Portugal                             |
| EPI_ISL_421481 | 3/21/2020 | 4/8/2020 Europe / Portugal                             |
| EPI_ISL_421482 | 3/18/2020 | 4/8/2020 Europe / Portugal                             |
| EPI_ISL_421483 | 3/18/2020 | 4/8/2020 Europe / Portugal                             |
| EPI_ISL_421484 | 3/19/2020 | 4/8/2020 Europe / Portugal                             |
| EPI_ISL_421485 | 3/22/2020 | 4/8/2020 Europe / Portugal                             |
| EPI_ISL_421486 | 3/22/2020 | 4/8/2020 Europe / Portugal                             |
| EPI_ISL_421487 | 3/22/2020 | 4/8/2020 Europe / Portugal                             |
| EPI_ISL_421488 | 3/22/2020 | 4/8/2020 Europe / Portugal                             |
| EPI_ISL_421489 | 3/20/2020 | 4/8/2020 Europe / Portugal                             |
| EPI_ISL_421490 | 3/22/2020 | 4/8/2020 Europe / Portugal                             |
| EPI_ISL_421491 | 3/22/2020 | 4/8/2020 Europe / Portugal                             |
| EPI_ISL_421492 | 3/22/2020 | 4/8/2020 Europe / Portugal                             |
| EPI_ISL_421494 | 3/20/2020 | 4/8/2020 Europe / Portugal                             |
| EPI_ISL_421495 | 3/23/2020 | 4/8/2020 Europe / Portugal                             |
| EPI_ISL_421496 | 3/24/2020 | 4/8/2020 Europe / Portugal                             |
| EPI_ISL_421497 | 3/24/2020 | 4/8/2020 Europe / Portugal                             |
| EPI_ISL_421498 | 3/24/2020 | 4/8/2020 Europe / Portugal                             |
| EPI_ISL_421499 | 3/24/2020 | 4/8/2020 Europe / Portugal                             |
| EPI_ISL_421500 | 3/11/2020 | 4/8/2020 Europe / France / Hauts-de-France / Compiègne |
| EPI_ISL_421501 | 3/12/2020 | 4/8/2020 Europe / France / Île-de-France / Longjumeau  |

|                |           |          |                                                         |
|----------------|-----------|----------|---------------------------------------------------------|
| EPI_ISL_421502 | 3/12/2020 | 4/8/2020 | Europe / France / Île-de-France / Saint Germain en Laye |
| EPI_ISL_421503 | 3/12/2020 | 4/8/2020 | Europe / France / Île-de-France / Saint Germain en Laye |
| EPI_ISL_421504 | 3/14/2020 | 4/8/2020 | Europe / France / Île-de-France / Longjumeau            |
| EPI_ISL_421505 | 3/15/2020 | 4/8/2020 | Europe / France / Île-de-France / Longjumeau            |
| EPI_ISL_421506 | 3/21/2020 | 4/8/2020 | Europe / France / Île-de-France / Longjumeau            |
| EPI_ISL_421507 | 3/23/2020 | 4/8/2020 | Europe / France / Île-de-France / Seine-Port            |
| EPI_ISL_421508 | 3/23/2020 | 4/8/2020 | Europe / France / Île-de-France / Seine-Port            |
| EPI_ISL_421509 | 3/23/2020 | 4/8/2020 | Europe / France / Hauts-de-France / Compiègne           |
| EPI_ISL_421510 | 3/23/2020 | 4/8/2020 | Europe / France / Hauts-de-France / Compiègne           |
| EPI_ISL_421511 | 3/23/2020 | 4/8/2020 | Europe / France / Hauts-de-France / Compiègne           |
| EPI_ISL_421512 | 3/23/2020 | 4/8/2020 | Europe / France / Île-de-France / Longjumeau            |
| EPI_ISL_421513 | 3/23/2020 | 4/8/2020 | Europe / France / Île-de-France / Orsay                 |
| EPI_ISL_421514 | 3/20/2020 | 4/8/2020 | Europe / France / Centre-Val de Loire / Abondant        |
| EPI_ISL_421515 | 3/7/2020  | 4/8/2020 | Europe / Spain / Comunitat Valenciana / Valencia        |
| EPI_ISL_421519 | 3/21/2020 | 4/8/2020 | Europe / Spain / Comunitat Valenciana / Valencia        |
| EPI_ISL_421543 | 3/15/2020 | 4/8/2020 | North America / USA / Wyoming                           |
| EPI_ISL_421544 | 3/15/2020 | 4/8/2020 | North America / USA / Wyoming                           |
| EPI_ISL_421545 | 3/15/2020 | 4/8/2020 | North America / USA / Wyoming                           |
| EPI_ISL_421548 | 3/14/2020 | 4/8/2020 | North America / USA / Wyoming                           |
| EPI_ISL_421549 | 3/14/2020 | 4/8/2020 | North America / USA / Wyoming                           |
| EPI_ISL_421550 | 3/16/2020 | 4/8/2020 | North America / USA / Wyoming                           |
| EPI_ISL_421551 | 3/18/2020 | 4/8/2020 | North America / USA / Wyoming                           |
| EPI_ISL_421552 | 3/19/2020 | 4/8/2020 | North America / USA / Wyoming                           |
| EPI_ISL_421560 | 3/18/2020 | 4/8/2020 | North America / USA / Utah                              |
| EPI_ISL_421561 | 3/17/2020 | 4/8/2020 | North America / USA / Utah                              |
| EPI_ISL_421562 | 3/19/2020 | 4/8/2020 | North America / USA / Utah                              |
| EPI_ISL_421563 | 3/29/2020 | 4/8/2020 | North America / USA / Utah                              |
| EPI_ISL_424354 | 2020-03   | 4/8/2020 | North America / USA / North Carolina                    |
| EPI_ISL_424983 | 2020-03   | 4/8/2020 | North America / USA / North Carolina                    |
| EPI_ISL_424987 | 2020-03   | 4/8/2020 | North America / USA / North Carolina                    |
| EPI_ISL_450413 | 3/19/2020 | 4/8/2020 | Europe / Germany / Hamburg                              |
| EPI_ISL_421573 | 3/31/2020 | 4/9/2020 | Africa / South Africa / KwaZulu-Natal                   |
| EPI_ISL_421574 | 4/1/2020  | 4/9/2020 | Africa / South Africa / KwaZulu-Natal                   |
| EPI_ISL_421575 | 4/1/2020  | 4/9/2020 | Africa / South Africa / KwaZulu-Natal                   |
| EPI_ISL_421576 | 4/1/2020  | 4/9/2020 | Africa / South Africa / KwaZulu-Natal                   |
| EPI_ISL_421577 | 3/18/2020 | 4/9/2020 | North America / USA / New York / Brooklyn               |
| EPI_ISL_421578 | 3/18/2020 | 4/9/2020 | North America / USA / New York / Brooklyn               |
| EPI_ISL_421579 | 3/18/2020 | 4/9/2020 | North America / USA / New York / Bronx                  |
| EPI_ISL_421580 | 3/18/2020 | 4/9/2020 | North America / USA / New York / Brooklyn               |
| EPI_ISL_421581 | 3/18/2020 | 4/9/2020 | North America / USA / New York / Queens                 |
| EPI_ISL_421582 | 3/18/2020 | 4/9/2020 | North America / USA / New York / Brooklyn               |
| EPI_ISL_421583 | 3/18/2020 | 4/9/2020 | North America / USA / New York / Brooklyn               |
| EPI_ISL_421584 | 3/18/2020 | 4/9/2020 | North America / USA / New Jersey                        |
| EPI_ISL_421585 | 3/18/2020 | 4/9/2020 | North America / USA / New Jersey                        |
| EPI_ISL_421586 | 3/18/2020 | 4/9/2020 | North America / USA / New York / Brooklyn               |
| EPI_ISL_421587 | 3/18/2020 | 4/9/2020 | North America / USA / New York / Brooklyn               |
| EPI_ISL_421588 | 3/18/2020 | 4/9/2020 | North America / USA / New York / Nassau County          |

|                |           |                                                              |
|----------------|-----------|--------------------------------------------------------------|
| EPI_ISL_421589 | 3/18/2020 | 4/9/2020 North America / USA / New York / Brooklyn           |
| EPI_ISL_421590 | 3/18/2020 | 4/9/2020 North America / USA / New York / Queens             |
| EPI_ISL_421591 | 3/18/2020 | 4/9/2020 North America / USA / New York / Nassau County      |
| EPI_ISL_421592 | 3/18/2020 | 4/9/2020 North America / USA / New York / Queens             |
| EPI_ISL_421593 | 3/20/2020 | 4/9/2020 North America / USA / New York / Nassau County      |
| EPI_ISL_421594 | 3/21/2020 | 4/9/2020 North America / USA / New York / Staten Island      |
| EPI_ISL_421595 | 3/20/2020 | 4/9/2020 North America / USA / New York / Nassau County      |
| EPI_ISL_421596 | 3/21/2020 | 4/9/2020 North America / USA / New York / Staten Island      |
| EPI_ISL_421597 | 3/21/2020 | 4/9/2020 North America / USA / New York / Brooklyn           |
| EPI_ISL_421598 | 3/21/2020 | 4/9/2020 North America / USA / New York / Manhattan          |
| EPI_ISL_421599 | 3/21/2020 | 4/9/2020 North America / USA / New York / Manhattan          |
| EPI_ISL_421600 | 3/21/2020 | 4/9/2020 North America / USA / New York / Manhattan          |
| EPI_ISL_421602 | 3/21/2020 | 4/9/2020 North America / USA / New York / Queens             |
| EPI_ISL_421603 | 3/21/2020 | 4/9/2020 North America / USA / New York / Queens             |
| EPI_ISL_421604 | 3/21/2020 | 4/9/2020 North America / USA / New York / Bronx              |
| EPI_ISL_421605 | 3/20/2020 | 4/9/2020 North America / USA / New York / Nassau County      |
| EPI_ISL_421606 | 3/21/2020 | 4/9/2020 North America / USA / New York / Brooklyn           |
| EPI_ISL_421607 | 3/21/2020 | 4/9/2020 North America / USA / New York / Bronx              |
| EPI_ISL_421608 | 3/21/2020 | 4/9/2020 North America / USA / New York / Nassau County      |
| EPI_ISL_421611 | 3/21/2020 | 4/9/2020 North America / USA / New York / Nassau County      |
| EPI_ISL_421612 | 3/20/2020 | 4/9/2020 North America / USA / New York / Manhattan          |
| EPI_ISL_421613 | 3/20/2020 | 4/9/2020 North America / USA / New York / Bronx              |
| EPI_ISL_421614 | 3/20/2020 | 4/9/2020 North America / USA / New York / Manhattan          |
| EPI_ISL_421615 | 3/20/2020 | 4/9/2020 North America / USA / New York / Manhattan          |
| EPI_ISL_421616 | 3/20/2020 | 4/9/2020 North America / USA / New York / Manhattan          |
| EPI_ISL_421617 | 3/20/2020 | 4/9/2020 North America / USA / New York / Manhattan          |
| EPI_ISL_421619 | 3/20/2020 | 4/9/2020 North America / USA / New Jersey / Hudson County    |
| EPI_ISL_421620 | 3/20/2020 | 4/9/2020 North America / USA / New York / Manhattan          |
| EPI_ISL_421621 | 3/20/2020 | 4/9/2020 North America / USA / New York / Manhattan          |
| EPI_ISL_421623 | 3/20/2020 | 4/9/2020 North America / USA / New York / Queens             |
| EPI_ISL_421624 | 3/20/2020 | 4/9/2020 North America / USA / New York / Manhattan          |
| EPI_ISL_421626 | 3/21/2020 | 4/9/2020 North America / USA / New York / Manhattan          |
| EPI_ISL_421627 | 3/18/2020 | 4/9/2020 North America / USA / New York / Queens             |
| EPI_ISL_421628 | 3/19/2020 | 4/9/2020 North America / USA / New York / Brooklyn           |
| EPI_ISL_421629 | 3/19/2020 | 4/9/2020 North America / USA / New York / Queens             |
| EPI_ISL_421630 | 3/18/2020 | 4/9/2020 North America / USA / New York / Queens             |
| EPI_ISL_421631 | 3/18/2020 | 4/9/2020 North America / USA / New York / Queens             |
| EPI_ISL_421632 | 3/19/2020 | 4/9/2020 North America / USA / New York / Queens             |
| EPI_ISL_421633 | 3/18/2020 | 4/9/2020 North America / USA / New York / Queens             |
| EPI_ISL_421634 | 3/21/2020 | 4/9/2020 North America / USA / New York / Manhattan          |
| EPI_ISL_421635 | 3/21/2020 | 4/9/2020 North America / USA / New York / Manhattan          |
| EPI_ISL_421636 | 3/26/2020 | 4/9/2020 Oceania / Australia / New South Wales / Tweed Heads |
| EPI_ISL_421641 | 3/19/2020 | 4/9/2020 Asia / Taiwan / Taipei                              |
| EPI_ISL_421651 | 3/22/2020 | 4/9/2020 Asia / Taiwan / Taipei                              |
| EPI_ISL_421652 | 3/16/2020 | 4/9/2020 Asia / Kuwait / Dasman                              |
| EPI_ISL_421653 | 3/25/2020 | 4/9/2020 Europe / Latvia                                     |
| EPI_ISL_421654 | 3/25/2020 | 4/9/2020 Europe / Latvia                                     |



|                |           |                                                         |
|----------------|-----------|---------------------------------------------------------|
| EPI_ISL_421655 | 3/25/2020 | 4/9/2020 Europe / Latvia                                |
| EPI_ISL_421656 | 3/25/2020 | 4/9/2020 Europe / Latvia                                |
| EPI_ISL_421660 | 4/1/2020  | 4/9/2020 North America / USA / Ohio / Columbus          |
| EPI_ISL_421662 | 3/10/2020 | 4/9/2020 Asia / India                                   |
| EPI_ISL_421663 | 3/10/2020 | 4/9/2020 Asia / India                                   |
| EPI_ISL_421664 | 3/10/2020 | 4/9/2020 Asia / India                                   |
| EPI_ISL_421665 | 3/10/2020 | 4/9/2020 Asia / India                                   |
| EPI_ISL_421666 | 3/10/2020 | 4/9/2020 Asia / India                                   |
| EPI_ISL_421667 | 3/10/2020 | 4/9/2020 Asia / India                                   |
| EPI_ISL_421668 | 3/10/2020 | 4/9/2020 Asia / India                                   |
| EPI_ISL_421669 | 3/12/2020 | 4/9/2020 Asia / India                                   |
| EPI_ISL_421670 | 3/12/2020 | 4/9/2020 Asia / India                                   |
| EPI_ISL_421671 | 3/12/2020 | 4/9/2020 Asia / India                                   |
| EPI_ISL_421672 | 3/12/2020 | 4/9/2020 Asia / India                                   |
| EPI_ISL_421675 | 4/1/2020  | 4/9/2020 North America / USA / Ohio / Columbus          |
| EPI_ISL_421683 | 3/15/2020 | 4/9/2020 North America / USA / Minnesota                |
| EPI_ISL_421684 | 3/16/2020 | 4/9/2020 North America / USA / Minnesota                |
| EPI_ISL_421685 | 3/16/2020 | 4/9/2020 North America / USA / Minnesota                |
| EPI_ISL_421686 | 3/17/2020 | 4/9/2020 North America / USA / Minnesota                |
| EPI_ISL_421687 | 3/16/2020 | 4/9/2020 North America / USA / Minnesota                |
| EPI_ISL_421688 | 3/16/2020 | 4/9/2020 North America / USA / Minnesota                |
| EPI_ISL_421689 | 3/16/2020 | 4/9/2020 North America / USA / Minnesota                |
| EPI_ISL_421690 | 3/16/2020 | 4/9/2020 North America / USA / Minnesota                |
| EPI_ISL_421691 | 3/16/2020 | 4/9/2020 North America / USA / Minnesota                |
| EPI_ISL_421692 | 3/17/2020 | 4/9/2020 North America / USA / Minnesota                |
| EPI_ISL_421706 | 3/18/2020 | 4/9/2020 North America / USA / New York / Queens        |
| EPI_ISL_421707 | 3/18/2020 | 4/9/2020 North America / USA / New York / Manhattan     |
| EPI_ISL_421709 | 3/18/2020 | 4/9/2020 North America / USA / New York / Brooklyn      |
| EPI_ISL_421710 | 3/18/2020 | 4/9/2020 North America / USA / New York / Bronx         |
| EPI_ISL_421711 | 3/18/2020 | 4/9/2020 North America / USA / New York / Queens        |
| EPI_ISL_421712 | 3/18/2020 | 4/9/2020 North America / USA / New York / Brooklyn      |
| EPI_ISL_421714 | 3/18/2020 | 4/9/2020 North America / USA / New York / Brooklyn      |
| EPI_ISL_421715 | 3/18/2020 | 4/9/2020 North America / USA / New York / Brooklyn      |
| EPI_ISL_421716 | 3/18/2020 | 4/9/2020 North America / USA / New York / Brooklyn      |
| EPI_ISL_421717 | 3/18/2020 | 4/9/2020 North America / USA / New York / Nassau County |
| EPI_ISL_421718 | 3/18/2020 | 4/9/2020 North America / USA / New Jersey               |
| EPI_ISL_421719 | 3/17/2020 | 4/9/2020 North America / USA / New York / Nassau County |
| EPI_ISL_421720 | 3/18/2020 | 4/9/2020 North America / USA / New York / Queens        |
| EPI_ISL_421721 | 3/17/2020 | 4/9/2020 North America / USA / New York / Nassau County |
| EPI_ISL_421722 | 3/18/2020 | 4/9/2020 North America / USA / New York / Brooklyn      |
| EPI_ISL_421723 | 3/18/2020 | 4/9/2020 North America / USA / New Jersey               |
| EPI_ISL_421724 | 3/18/2020 | 4/9/2020 North America / USA / New York / Manhattan     |
| EPI_ISL_421725 | 3/18/2020 | 4/9/2020 North America / USA / New York / Brooklyn      |
| EPI_ISL_421726 | 3/18/2020 | 4/9/2020 North America / USA / New York / Manhattan     |
| EPI_ISL_421727 | 3/18/2020 | 4/9/2020 North America / USA / New York / Brooklyn      |
| EPI_ISL_421728 | 3/18/2020 | 4/9/2020 North America / USA / New York / Brooklyn      |
| EPI_ISL_421729 | 3/18/2020 | 4/9/2020 North America / USA / New York / Brooklyn      |

|                |           |                                                         |
|----------------|-----------|---------------------------------------------------------|
| EPI_ISL_421730 | 3/18/2020 | 4/9/2020 North America / USA / New York / Staten Island |
| EPI_ISL_421731 | 3/18/2020 | 4/9/2020 North America / USA / New York / Brooklyn      |
| EPI_ISL_421732 | 3/18/2020 | 4/9/2020 North America / USA / New York / Manhattan     |
| EPI_ISL_421733 | 3/18/2020 | 4/9/2020 North America / USA / New York / Bronx         |
| EPI_ISL_421734 | 3/17/2020 | 4/9/2020 Europe / Luxembourg                            |
| EPI_ISL_421735 | 3/17/2020 | 4/9/2020 Europe / Luxembourg                            |
| EPI_ISL_421737 | 3/17/2020 | 4/9/2020 Europe / Luxembourg                            |
| EPI_ISL_421738 | 3/17/2020 | 4/9/2020 Europe / Luxembourg                            |
| EPI_ISL_421740 | 3/17/2020 | 4/9/2020 Europe / Luxembourg                            |
| EPI_ISL_421741 | 3/17/2020 | 4/9/2020 Europe / Luxembourg                            |
| EPI_ISL_421742 | 3/17/2020 | 4/9/2020 Europe / Luxembourg                            |
| EPI_ISL_421743 | 3/17/2020 | 4/9/2020 Europe / Luxembourg                            |
| EPI_ISL_421744 | 3/17/2020 | 4/9/2020 Europe / Luxembourg                            |
| EPI_ISL_421745 | 3/17/2020 | 4/9/2020 Europe / Luxembourg                            |
| EPI_ISL_421746 | 3/17/2020 | 4/9/2020 Europe / Luxembourg                            |
| EPI_ISL_421747 | 3/17/2020 | 4/9/2020 Europe / Luxembourg                            |
| EPI_ISL_421748 | 3/17/2020 | 4/9/2020 Europe / Luxembourg                            |
| EPI_ISL_421750 | 3/17/2020 | 4/9/2020 Europe / Luxembourg                            |
| EPI_ISL_421752 | 3/17/2020 | 4/9/2020 Europe / Luxembourg                            |
| EPI_ISL_421753 | 3/17/2020 | 4/9/2020 Europe / Luxembourg                            |
| EPI_ISL_421754 | 3/17/2020 | 4/9/2020 Europe / Luxembourg                            |
| EPI_ISL_421755 | 3/17/2020 | 4/9/2020 Europe / Luxembourg                            |
| EPI_ISL_421756 | 3/17/2020 | 4/9/2020 Europe / Luxembourg                            |
| EPI_ISL_421757 | 3/17/2020 | 4/9/2020 Europe / Luxembourg                            |
| EPI_ISL_421759 | 3/17/2020 | 4/9/2020 Europe / Luxembourg                            |
| EPI_ISL_421760 | 3/17/2020 | 4/9/2020 Europe / Luxembourg                            |
| EPI_ISL_421761 | 3/17/2020 | 4/9/2020 Europe / Luxembourg                            |
| EPI_ISL_421762 | 3/17/2020 | 4/9/2020 Europe / Luxembourg                            |
| EPI_ISL_421768 | 3/24/2020 | 4/9/2020 Europe / United Kingdom / England              |
| EPI_ISL_421769 | 3/24/2020 | 4/9/2020 Europe / United Kingdom / England              |
| EPI_ISL_421771 | 3/24/2020 | 4/9/2020 Europe / United Kingdom / England              |
| EPI_ISL_421772 | 3/24/2020 | 4/9/2020 Europe / United Kingdom / England              |
| EPI_ISL_421773 | 3/26/2020 | 4/9/2020 Europe / United Kingdom / England              |
| EPI_ISL_421774 | 3/25/2020 | 4/9/2020 Europe / United Kingdom / England              |
| EPI_ISL_421776 | 3/25/2020 | 4/9/2020 Europe / United Kingdom / England              |
| EPI_ISL_421777 | 3/25/2020 | 4/9/2020 Europe / United Kingdom / England              |
| EPI_ISL_421778 | 3/25/2020 | 4/9/2020 Europe / United Kingdom / England              |
| EPI_ISL_421779 | 3/25/2020 | 4/9/2020 Europe / United Kingdom / England              |
| EPI_ISL_421780 | 3/24/2020 | 4/9/2020 Europe / United Kingdom / England              |
| EPI_ISL_421781 | 3/25/2020 | 4/9/2020 Europe / United Kingdom / England              |
| EPI_ISL_421782 | 3/25/2020 | 4/9/2020 Europe / United Kingdom / England              |
| EPI_ISL_421783 | 3/25/2020 | 4/9/2020 Europe / United Kingdom / England              |
| EPI_ISL_421784 | 3/26/2020 | 4/9/2020 Europe / United Kingdom / England              |
| EPI_ISL_421785 | 3/25/2020 | 4/9/2020 Europe / United Kingdom / England              |
| EPI_ISL_421787 | 3/26/2020 | 4/9/2020 Europe / United Kingdom / England              |
| EPI_ISL_421789 | 3/25/2020 | 4/9/2020 Europe / United Kingdom / England              |
| EPI_ISL_421790 | 3/25/2020 | 4/9/2020 Europe / United Kingdom / England              |





|                |           |           |                                      |
|----------------|-----------|-----------|--------------------------------------|
| EPI_ISL_421924 | 3/28/2020 | 4/9/2020  | Europe / United Kingdom / England    |
| EPI_ISL_421929 | 3/29/2020 | 4/9/2020  | Europe / United Kingdom / England    |
| EPI_ISL_421930 | 3/30/2020 | 4/9/2020  | Europe / United Kingdom / England    |
| EPI_ISL_421932 | 3/31/2020 | 4/9/2020  | Europe / United Kingdom / England    |
| EPI_ISL_421934 | 3/31/2020 | 4/9/2020  | Europe / United Kingdom / England    |
| EPI_ISL_421935 | 3/31/2020 | 4/9/2020  | Europe / United Kingdom / England    |
| EPI_ISL_421936 | 3/31/2020 | 4/9/2020  | Europe / United Kingdom / England    |
| EPI_ISL_421937 | 3/30/2020 | 4/9/2020  | Europe / United Kingdom / England    |
| EPI_ISL_421938 | 3/30/2020 | 4/9/2020  | Europe / United Kingdom / England    |
| EPI_ISL_421939 | 4/1/2020  | 4/9/2020  | Europe / United Kingdom / England    |
| EPI_ISL_421940 | 3/30/2020 | 4/9/2020  | Europe / United Kingdom / England    |
| EPI_ISL_421942 | 3/31/2020 | 4/9/2020  | Europe / United Kingdom / England    |
| EPI_ISL_421945 | 3/31/2020 | 4/9/2020  | Europe / United Kingdom / England    |
| EPI_ISL_421946 | 3/31/2020 | 4/9/2020  | Europe / United Kingdom / England    |
| EPI_ISL_421947 | 3/31/2020 | 4/9/2020  | Europe / United Kingdom / England    |
| EPI_ISL_421948 | 3/31/2020 | 4/9/2020  | Europe / United Kingdom / England    |
| EPI_ISL_421951 | 3/31/2020 | 4/9/2020  | Europe / United Kingdom / England    |
| EPI_ISL_421953 | 3/31/2020 | 4/9/2020  | Europe / United Kingdom / England    |
| EPI_ISL_421956 | 3/31/2020 | 4/9/2020  | Europe / United Kingdom / England    |
| EPI_ISL_421957 | 3/20/2020 | 4/9/2020  | Europe / United Kingdom / England    |
| EPI_ISL_421958 | 4/1/2020  | 4/9/2020  | Europe / United Kingdom / England    |
| EPI_ISL_421962 | 4/1/2020  | 4/9/2020  | Europe / United Kingdom / England    |
| EPI_ISL_421963 | 4/1/2020  | 4/9/2020  | Europe / United Kingdom / England    |
| EPI_ISL_421964 | 4/1/2020  | 4/9/2020  | Europe / United Kingdom / England    |
| EPI_ISL_421974 | 4/2/2020  | 4/9/2020  | Europe / United Kingdom / England    |
| EPI_ISL_421976 | 4/2/2020  | 4/9/2020  | Europe / United Kingdom / England    |
| EPI_ISL_421981 | 4/1/2020  | 4/9/2020  | Europe / United Kingdom / England    |
| EPI_ISL_421982 | 4/1/2020  | 4/9/2020  | Europe / United Kingdom / England    |
| EPI_ISL_421986 | 4/2/2020  | 4/9/2020  | Europe / United Kingdom / England    |
| EPI_ISL_422000 | 4/2/2020  | 4/9/2020  | Europe / United Kingdom / England    |
| EPI_ISL_422001 | 4/3/2020  | 4/9/2020  | Europe / United Kingdom / England    |
| EPI_ISL_422002 | 3/30/2020 | 4/9/2020  | Europe / United Kingdom / England    |
| EPI_ISL_422003 | 3/31/2020 | 4/9/2020  | Europe / United Kingdom / England    |
| EPI_ISL_422007 | 3/31/2020 | 4/9/2020  | Europe / United Kingdom / England    |
| EPI_ISL_422008 | 4/2/2020  | 4/9/2020  | Europe / United Kingdom / England    |
| EPI_ISL_422009 | 4/2/2020  | 4/9/2020  | Europe / United Kingdom / England    |
| EPI_ISL_422010 | 4/2/2020  | 4/9/2020  | Europe / United Kingdom / England    |
| EPI_ISL_422011 | 4/2/2020  | 4/9/2020  | Europe / United Kingdom / England    |
| EPI_ISL_424353 | 2020-03   | 4/9/2020  | North America / USA / North Carolina |
| EPI_ISL_422016 | 3/28/2020 | 4/10/2020 | Europe / United Kingdom / Wales      |
| EPI_ISL_422017 | 3/29/2020 | 4/10/2020 | Europe / United Kingdom / Wales      |
| EPI_ISL_422018 | 3/28/2020 | 4/10/2020 | Europe / United Kingdom / Wales      |
| EPI_ISL_422019 | 3/27/2020 | 4/10/2020 | Europe / United Kingdom / Wales      |
| EPI_ISL_422020 | 3/27/2020 | 4/10/2020 | Europe / United Kingdom / Wales      |
| EPI_ISL_422021 | 3/27/2020 | 4/10/2020 | Europe / United Kingdom / Wales      |
| EPI_ISL_422022 | 3/30/2020 | 4/10/2020 | Europe / United Kingdom / Wales      |
| EPI_ISL_422023 | 3/30/2020 | 4/10/2020 | Europe / United Kingdom / Wales      |









|                |           |                                           |
|----------------|-----------|-------------------------------------------|
| EPI_ISL_422167 | 3/27/2020 | 4/10/2020 Europe / United Kingdom / Wales |
| EPI_ISL_422168 | 3/25/2020 | 4/10/2020 Europe / United Kingdom / Wales |
| EPI_ISL_422170 | 3/27/2020 | 4/10/2020 Europe / United Kingdom / Wales |
| EPI_ISL_422171 | 3/30/2020 | 4/10/2020 Europe / United Kingdom / Wales |
| EPI_ISL_422173 | 3/29/2020 | 4/10/2020 Europe / United Kingdom / Wales |
| EPI_ISL_422174 | 3/29/2020 | 4/10/2020 Europe / United Kingdom / Wales |
| EPI_ISL_422176 | 3/30/2020 | 4/10/2020 Europe / United Kingdom / Wales |
| EPI_ISL_422177 | 3/27/2020 | 4/10/2020 Europe / United Kingdom / Wales |
| EPI_ISL_422178 | 3/30/2020 | 4/10/2020 Europe / United Kingdom / Wales |
| EPI_ISL_422180 | 3/25/2020 | 4/10/2020 Europe / United Kingdom / Wales |
| EPI_ISL_422181 | 3/26/2020 | 4/10/2020 Europe / United Kingdom / Wales |
| EPI_ISL_422182 | 3/25/2020 | 4/10/2020 Europe / United Kingdom / Wales |
| EPI_ISL_422184 | 3/27/2020 | 4/10/2020 Europe / United Kingdom / Wales |
| EPI_ISL_422185 | 3/26/2020 | 4/10/2020 Europe / United Kingdom / Wales |
| EPI_ISL_422186 | 3/29/2020 | 4/10/2020 Europe / United Kingdom / Wales |
| EPI_ISL_422187 | 3/29/2020 | 4/10/2020 Europe / United Kingdom / Wales |
| EPI_ISL_422191 | 3/27/2020 | 4/10/2020 Europe / United Kingdom / Wales |
| EPI_ISL_422192 | 3/27/2020 | 4/10/2020 Europe / United Kingdom / Wales |
| EPI_ISL_422193 | 3/29/2020 | 4/10/2020 Europe / United Kingdom / Wales |
| EPI_ISL_422194 | 3/24/2020 | 4/10/2020 Europe / United Kingdom / Wales |
| EPI_ISL_422195 | 3/26/2020 | 4/10/2020 Europe / United Kingdom / Wales |
| EPI_ISL_422200 | 3/30/2020 | 4/10/2020 Europe / United Kingdom / Wales |
| EPI_ISL_422202 | 3/25/2020 | 4/10/2020 Europe / United Kingdom / Wales |
| EPI_ISL_422204 | 3/30/2020 | 4/10/2020 Europe / United Kingdom / Wales |
| EPI_ISL_422209 | 3/27/2020 | 4/10/2020 Europe / United Kingdom / Wales |
| EPI_ISL_422214 | 3/28/2020 | 4/10/2020 Europe / United Kingdom / Wales |
| EPI_ISL_422215 | 3/29/2020 | 4/10/2020 Europe / United Kingdom / Wales |
| EPI_ISL_422407 | 3/4/2020  | 4/10/2020 Asia / Taiwan / Taipei          |
| EPI_ISL_422408 | 3/13/2020 | 4/10/2020 Asia / Taiwan / Taipei          |
| EPI_ISL_422409 | 3/13/2020 | 4/10/2020 Asia / Taiwan / Taipei          |
| EPI_ISL_422410 | 3/13/2020 | 4/10/2020 Asia / Taiwan / Taipei          |
| EPI_ISL_422411 | 3/14/2020 | 4/10/2020 Asia / Taiwan / Taipei          |
| EPI_ISL_422412 | 3/14/2020 | 4/10/2020 Asia / Taiwan / Taipei          |
| EPI_ISL_422413 | 3/16/2020 | 4/10/2020 Asia / Taiwan / Taipei          |
| EPI_ISL_422414 | 3/16/2020 | 4/10/2020 Asia / Taiwan / Taipei          |
| EPI_ISL_422415 | 3/17/2020 | 4/10/2020 Asia / Taiwan / Taipei          |
| EPI_ISL_422416 | 3/18/2020 | 4/10/2020 Asia / Taiwan / Taipei          |
| EPI_ISL_422417 | 3/18/2020 | 4/10/2020 Asia / Taiwan / Taipei          |
| EPI_ISL_422418 | 3/19/2020 | 4/10/2020 Asia / Taiwan / Taipei          |
| EPI_ISL_422419 | 3/19/2020 | 4/10/2020 Asia / Taiwan / Taipei          |
| EPI_ISL_422420 | 3/19/2020 | 4/10/2020 Asia / Taiwan / Taipei          |
| EPI_ISL_422421 | 3/19/2020 | 4/10/2020 Asia / Taiwan / Taipei          |
| EPI_ISL_422422 | 3/19/2020 | 4/10/2020 Asia / Taiwan / Taipei          |
| EPI_ISL_422424 | 3/15/2020 | 4/10/2020 Asia / Kuwait / Dasman          |
| EPI_ISL_422425 | 1/24/2020 | 4/10/2020 Asia / China / Zhejiang         |
| EPI_ISL_422426 | 3/16/2020 | 4/10/2020 Asia / Kuwait / Dasman          |
| EPI_ISL_422427 | 3/16/2020 | 4/10/2020 Asia / Kuwait / Dasman          |

|                |           |                                                            |
|----------------|-----------|------------------------------------------------------------|
| EPI_ISL_422428 | 2/6/2020  | 4/10/2020 Asia / Singapore                                 |
| EPI_ISL_422429 | 2/16/2020 | 4/10/2020 Asia / Singapore                                 |
| EPI_ISL_422430 | 3/13/2020 | 4/10/2020 Asia / Singapore                                 |
| EPI_ISL_422431 | 3/31/2020 | 4/10/2020 Asia / Singapore                                 |
| EPI_ISL_422432 | 3/31/2020 | 4/10/2020 Asia / Singapore                                 |
| EPI_ISL_422433 | 3/31/2020 | 4/10/2020 Asia / Singapore                                 |
| EPI_ISL_422434 | 3/31/2020 | 4/10/2020 Asia / Singapore                                 |
| EPI_ISL_422435 | 3/31/2020 | 4/10/2020 Asia / Singapore                                 |
| EPI_ISL_422437 | 3/25/2020 | 4/10/2020 Europe / Italy / Veneto / Verona                 |
| EPI_ISL_422438 | 3/25/2020 | 4/10/2020 Europe / Italy / Veneto / Verona                 |
| EPI_ISL_422453 | 3/31/2020 | 4/10/2020 North America / USA / Wisconsin / Adams County   |
| EPI_ISL_422459 | 4/2/2020  | 4/10/2020 North America / USA / Wisconsin / Monroe County  |
| EPI_ISL_422461 | 4/6/2020  | 4/10/2020 North America / USA / Iowa / Allamakee County    |
| EPI_ISL_422462 | 4/3/2020  | 4/10/2020 North America / USA / Iowa / Winneshiek County   |
| EPI_ISL_422463 | 4/6/2020  | 4/10/2020 North America / USA / Minnesota / Winona County  |
| EPI_ISL_422465 | 3/28/2020 | 4/10/2020 North America / USA / Wisconsin / Jackson County |
| EPI_ISL_422488 | 3/21/2020 | 4/11/2020 North America / USA / New York / Manhattan       |
| EPI_ISL_422489 | 3/21/2020 | 4/11/2020 North America / USA / New York / Brooklyn        |
| EPI_ISL_422490 | 3/20/2020 | 4/11/2020 North America / USA / New York / Brooklyn        |
| EPI_ISL_422491 | 3/19/2020 | 4/11/2020 North America / USA / New York / Nassau County   |
| EPI_ISL_422492 | 3/19/2020 | 4/11/2020 North America / USA / New York / Nassau County   |
| EPI_ISL_422494 | 3/19/2020 | 4/11/2020 North America / USA / New York / Manhattan       |
| EPI_ISL_422495 | 3/19/2020 | 4/11/2020 North America / USA / New York / Brooklyn        |
| EPI_ISL_422496 | 3/19/2020 | 4/11/2020 North America / USA / New York / Nassau County   |
| EPI_ISL_422497 | 3/19/2020 | 4/11/2020 North America / USA / New York / Nassau County   |
| EPI_ISL_422498 | 3/19/2020 | 4/11/2020 North America / USA / New York / Brooklyn        |
| EPI_ISL_422499 | 3/19/2020 | 4/11/2020 North America / USA / New York / Queens          |
| EPI_ISL_422500 | 3/19/2020 | 4/11/2020 North America / USA / New York / Nassau County   |
| EPI_ISL_422501 | 3/19/2020 | 4/11/2020 North America / USA / New York / Brooklyn        |
| EPI_ISL_422502 | 3/19/2020 | 4/11/2020 North America / USA / New York / Manhattan       |
| EPI_ISL_422503 | 3/19/2020 | 4/11/2020 North America / USA / New York / Nassau County   |
| EPI_ISL_422504 | 3/19/2020 | 4/11/2020 North America / USA / New York / Manhattan       |
| EPI_ISL_422505 | 3/19/2020 | 4/11/2020 North America / USA / New York / Manhattan       |
| EPI_ISL_422506 | 3/19/2020 | 4/11/2020 North America / USA / New York / Manhattan       |
| EPI_ISL_422507 | 3/20/2020 | 4/11/2020 North America / USA / New York / Nassau County   |
| EPI_ISL_422508 | 3/20/2020 | 4/11/2020 North America / USA / New York / Nassau County   |
| EPI_ISL_422509 | 3/20/2020 | 4/11/2020 North America / USA / New York / Manhattan       |
| EPI_ISL_422510 | 3/20/2020 | 4/11/2020 North America / USA / New York / Queens          |
| EPI_ISL_422511 | 3/20/2020 | 4/11/2020 North America / USA / New York / Manhattan       |
| EPI_ISL_422513 | 3/20/2020 | 4/11/2020 North America / USA / New York / Manhattan       |
| EPI_ISL_422514 | 3/20/2020 | 4/11/2020 North America / USA / New York / Manhattan       |
| EPI_ISL_422515 | 3/20/2020 | 4/11/2020 North America / USA / New York / Manhattan       |
| EPI_ISL_422516 | 3/20/2020 | 4/11/2020 North America / USA / New York / Queens          |
| EPI_ISL_422517 | 3/20/2020 | 4/11/2020 North America / USA / New York / Manhattan       |
| EPI_ISL_422519 | 3/22/2020 | 4/11/2020 North America / USA / New York / Brooklyn        |
| EPI_ISL_422520 | 3/21/2020 | 4/11/2020 North America / USA / New York / Brooklyn        |
| EPI_ISL_422521 | 3/22/2020 | 4/11/2020 North America / USA / New York / Brooklyn        |

|                |           |           |                                                     |
|----------------|-----------|-----------|-----------------------------------------------------|
| EPI_ISL_422522 | 3/22/2020 | 4/11/2020 | North America / USA / New York / Manhattan          |
| EPI_ISL_422523 | 3/21/2020 | 4/11/2020 | North America / USA / New York / Bronx              |
| EPI_ISL_422524 | 3/22/2020 | 4/11/2020 | North America / USA / New York / Manhattan          |
| EPI_ISL_422525 | 3/22/2020 | 4/11/2020 | North America / USA / New York / Brooklyn           |
| EPI_ISL_422527 | 3/21/2020 | 4/11/2020 | North America / USA / New York / Brooklyn           |
| EPI_ISL_422528 | 3/21/2020 | 4/11/2020 | North America / USA / New York / Brooklyn           |
| EPI_ISL_422529 | 3/22/2020 | 4/11/2020 | North America / USA / New York / Brooklyn           |
| EPI_ISL_422530 | 3/22/2020 | 4/11/2020 | North America / USA / New York / Manhattan          |
| EPI_ISL_422531 | 3/19/2020 | 4/11/2020 | North America / USA / New York / Manhattan          |
| EPI_ISL_422532 | 3/19/2020 | 4/11/2020 | North America / USA / New York / Brooklyn           |
| EPI_ISL_422533 | 3/19/2020 | 4/11/2020 | North America / USA / New York / Manhattan          |
| EPI_ISL_422534 | 3/19/2020 | 4/11/2020 | North America / USA / New York / Queens             |
| EPI_ISL_422535 | 3/19/2020 | 4/11/2020 | North America / USA / New York / Brooklyn           |
| EPI_ISL_422536 | 3/19/2020 | 4/11/2020 | North America / USA / New York / Brooklyn           |
| EPI_ISL_422537 | 3/19/2020 | 4/11/2020 | North America / USA / New York / Manhattan          |
| EPI_ISL_422539 | 3/19/2020 | 4/11/2020 | North America / USA / New York / Bronx              |
| EPI_ISL_422540 | 3/19/2020 | 4/11/2020 | North America / USA / New York / Manhattan          |
| EPI_ISL_422541 | 3/19/2020 | 4/11/2020 | North America / USA / New York / Manhattan          |
| EPI_ISL_422542 | 3/19/2020 | 4/11/2020 | North America / USA / New York / Bronx              |
| EPI_ISL_422543 | 3/20/2020 | 4/11/2020 | North America / USA / New York / Bronx              |
| EPI_ISL_422544 | 3/20/2020 | 4/11/2020 | North America / USA / New York / Westchester County |
| EPI_ISL_422546 | 3/19/2020 | 4/11/2020 | North America / USA / New York / Queens             |
| EPI_ISL_422547 | 3/20/2020 | 4/11/2020 | North America / USA / New York / Manhattan          |
| EPI_ISL_422548 | 3/20/2020 | 4/11/2020 | North America / USA / New York / Bronx              |
| EPI_ISL_422549 | 3/20/2020 | 4/11/2020 | North America / USA / New York / Manhattan          |
| EPI_ISL_422550 | 3/20/2020 | 4/11/2020 | North America / USA / New York / Bronx              |
| EPI_ISL_422551 | 3/20/2020 | 4/11/2020 | North America / USA / New York / Bronx              |
| EPI_ISL_422552 | 3/20/2020 | 4/11/2020 | North America / USA / New York / Manhattan          |
| EPI_ISL_422553 | 3/20/2020 | 4/11/2020 | North America / USA / New York / Manhattan          |
| EPI_ISL_422554 | 3/21/2020 | 4/11/2020 | North America / USA / New York / Brooklyn           |
| EPI_ISL_422555 | 3/22/2020 | 4/11/2020 | North America / USA / New York / Manhattan          |
| EPI_ISL_422556 | 3/21/2020 | 4/11/2020 | North America / USA / New York / Brooklyn           |
| EPI_ISL_422557 | 3/21/2020 | 4/11/2020 | North America / USA / New York / Manhattan          |
| EPI_ISL_422558 | 3/21/2020 | 4/11/2020 | North America / USA / New York / Brooklyn           |
| EPI_ISL_422559 | 3/22/2020 | 4/11/2020 | North America / USA / New York / Brooklyn           |
| EPI_ISL_422560 | 3/22/2020 | 4/11/2020 | North America / USA / New York                      |
| EPI_ISL_422561 | 3/22/2020 | 4/11/2020 | North America / USA / New York / Manhattan          |
| EPI_ISL_422562 | 3/22/2020 | 4/11/2020 | North America / USA / New York / Bronx              |
| EPI_ISL_422566 | 3/30/2020 | 4/11/2020 | Europe / Netherlands / Friesland                    |
| EPI_ISL_422568 | 3/28/2020 | 4/11/2020 | Europe / Netherlands / Friesland                    |
| EPI_ISL_422569 | 3/27/2020 | 4/11/2020 | Europe / Netherlands / Friesland                    |
| EPI_ISL_422571 | 3/28/2020 | 4/11/2020 | Europe / Netherlands / Friesland                    |
| EPI_ISL_422572 | 3/28/2020 | 4/11/2020 | Europe / Netherlands / Friesland                    |
| EPI_ISL_422576 | 3/30/2020 | 4/11/2020 | Europe / Netherlands                                |
| EPI_ISL_422577 | 3/30/2020 | 4/11/2020 | Europe / Netherlands                                |
| EPI_ISL_422578 | 3/30/2020 | 4/11/2020 | Europe / Netherlands                                |
| EPI_ISL_422579 | 3/30/2020 | 4/11/2020 | Europe / Netherlands                                |









|                |           |           |                                      |
|----------------|-----------|-----------|--------------------------------------|
| EPI_ISL_422801 | 3/13/2020 | 4/11/2020 | Europe / Netherlands                 |
| EPI_ISL_422802 | 3/13/2020 | 4/11/2020 | Europe / Netherlands                 |
| EPI_ISL_422803 | 3/13/2020 | 4/11/2020 | Europe / Netherlands                 |
| EPI_ISL_422804 | 3/7/2020  | 4/11/2020 | Europe / Netherlands                 |
| EPI_ISL_422805 | 3/8/2020  | 4/11/2020 | Europe / Netherlands                 |
| EPI_ISL_422807 | 3/8/2020  | 4/11/2020 | Europe / Netherlands                 |
| EPI_ISL_422808 | 3/8/2020  | 4/11/2020 | Europe / Netherlands                 |
| EPI_ISL_422809 | 3/9/2020  | 4/11/2020 | Europe / Netherlands                 |
| EPI_ISL_422810 | 3/9/2020  | 4/11/2020 | Europe / Netherlands                 |
| EPI_ISL_422811 | 3/8/2020  | 4/11/2020 | Europe / Netherlands                 |
| EPI_ISL_422812 | 3/14/2020 | 4/11/2020 | Europe / Netherlands                 |
| EPI_ISL_422813 | 3/14/2020 | 4/11/2020 | Europe / Netherlands                 |
| EPI_ISL_422815 | 3/15/2020 | 4/11/2020 | Europe / Netherlands                 |
| EPI_ISL_422816 | 3/15/2020 | 4/11/2020 | Europe / Netherlands                 |
| EPI_ISL_422817 | 3/15/2020 | 4/11/2020 | Europe / Netherlands                 |
| EPI_ISL_422818 | 3/8/2020  | 4/11/2020 | Europe / Netherlands                 |
| EPI_ISL_422819 | 3/8/2020  | 4/11/2020 | Europe / Netherlands                 |
| EPI_ISL_422820 | 3/9/2020  | 4/11/2020 | Europe / Netherlands                 |
| EPI_ISL_422821 | 3/9/2020  | 4/11/2020 | Europe / Netherlands                 |
| EPI_ISL_422822 | 3/9/2020  | 4/11/2020 | Europe / Netherlands                 |
| EPI_ISL_422823 | 3/9/2020  | 4/11/2020 | Europe / Netherlands                 |
| EPI_ISL_422825 | 3/3/2020  | 4/11/2020 | Europe / Netherlands                 |
| EPI_ISL_422827 | 3/9/2020  | 4/11/2020 | Europe / Netherlands                 |
| EPI_ISL_422833 | 3/10/2020 | 4/11/2020 | Europe / Netherlands                 |
| EPI_ISL_422834 | 3/10/2020 | 4/11/2020 | Europe / Netherlands                 |
| EPI_ISL_422835 | 3/10/2020 | 4/11/2020 | Europe / Netherlands                 |
| EPI_ISL_422837 | 3/9/2020  | 4/11/2020 | Europe / Netherlands                 |
| EPI_ISL_422838 | 3/9/2020  | 4/11/2020 | Europe / Netherlands                 |
| EPI_ISL_422839 | 3/10/2020 | 4/11/2020 | Europe / Netherlands                 |
| EPI_ISL_422840 | 3/11/2020 | 4/11/2020 | Europe / Netherlands                 |
| EPI_ISL_422842 | 3/11/2020 | 4/11/2020 | Europe / Netherlands                 |
| EPI_ISL_422843 | 3/11/2020 | 4/11/2020 | Europe / Netherlands                 |
| EPI_ISL_422845 | 3/12/2020 | 4/11/2020 | Europe / Netherlands                 |
| EPI_ISL_422847 | 3/16/2020 | 4/11/2020 | Europe / Netherlands                 |
| EPI_ISL_422848 | 3/16/2020 | 4/11/2020 | Europe / Netherlands                 |
| EPI_ISL_422849 | 3/16/2020 | 4/11/2020 | Europe / Netherlands                 |
| EPI_ISL_422850 | 3/16/2020 | 4/11/2020 | Europe / Netherlands                 |
| EPI_ISL_422851 | 3/16/2020 | 4/11/2020 | Europe / Netherlands                 |
| EPI_ISL_422852 | 3/16/2020 | 4/11/2020 | Europe / Netherlands                 |
| EPI_ISL_422853 | 3/18/2020 | 4/11/2020 | Europe / Netherlands                 |
| EPI_ISL_422854 | 3/18/2020 | 4/11/2020 | Europe / Netherlands                 |
| EPI_ISL_422855 | 3/17/2020 | 4/11/2020 | Europe / Netherlands                 |
| EPI_ISL_422856 | 3/18/2020 | 4/11/2020 | Europe / Netherlands                 |
| EPI_ISL_422857 | 3/18/2020 | 4/11/2020 | Europe / Netherlands                 |
| EPI_ISL_422858 | 3/17/2020 | 4/11/2020 | Europe / Netherlands                 |
| EPI_ISL_422859 | 3/20/2020 | 4/11/2020 | Europe / Netherlands / Noord-Brabant |
| EPI_ISL_422860 | 3/20/2020 | 4/11/2020 | Europe / Netherlands / Noord-Brabant |









|                |           |                                             |
|----------------|-----------|---------------------------------------------|
| EPI_ISL_423022 | 3/19/2020 | 4/12/2020 North America / USA / Washington  |
| EPI_ISL_423023 | 2020-03   | 4/12/2020 North America / USA               |
| EPI_ISL_423024 | 3/17/2020 | 4/12/2020 North America / USA / Washington  |
| EPI_ISL_423025 | 3/18/2020 | 4/12/2020 North America / USA / Washington  |
| EPI_ISL_423026 | 3/18/2020 | 4/12/2020 North America / USA / Washington  |
| EPI_ISL_423028 | 3/18/2020 | 4/12/2020 North America / USA / Washington  |
| EPI_ISL_423029 | 3/18/2020 | 4/12/2020 North America / USA / Washington  |
| EPI_ISL_423030 | 3/18/2020 | 4/12/2020 North America / USA / Washington  |
| EPI_ISL_423031 | 3/18/2020 | 4/12/2020 North America / USA / Washington  |
| EPI_ISL_423032 | 3/18/2020 | 4/12/2020 North America / USA / Washington  |
| EPI_ISL_423033 | 3/18/2020 | 4/12/2020 North America / USA / Washington  |
| EPI_ISL_423039 | 3/21/2020 | 4/12/2020 Asia / Thailand / Bangkok         |
| EPI_ISL_423040 | 3/20/2020 | 4/12/2020 Asia / Thailand / Bangkok         |
| EPI_ISL_423041 | 3/21/2020 | 4/12/2020 Asia / Thailand / Bangkok         |
| EPI_ISL_423042 | 3/24/2020 | 4/12/2020 Asia / Thailand / Bangkok         |
| EPI_ISL_423043 | 3/18/2020 | 4/12/2020 Asia / Thailand / Bangkok         |
| EPI_ISL_423044 | 3/25/2020 | 4/12/2020 Europe / United Kingdom / England |
| EPI_ISL_423045 | 3/24/2020 | 4/12/2020 Europe / United Kingdom / England |
| EPI_ISL_423047 | 3/24/2020 | 4/12/2020 Europe / United Kingdom / England |
| EPI_ISL_423052 | 3/19/2020 | 4/12/2020 Europe / United Kingdom / England |
| EPI_ISL_423053 | 3/18/2020 | 4/12/2020 Europe / United Kingdom / England |
| EPI_ISL_423055 | 3/19/2020 | 4/12/2020 Europe / United Kingdom / England |
| EPI_ISL_423056 | 3/19/2020 | 4/12/2020 Europe / United Kingdom / England |
| EPI_ISL_423057 | 3/23/2020 | 4/12/2020 Europe / United Kingdom / England |
| EPI_ISL_423058 | 3/24/2020 | 4/12/2020 Europe / United Kingdom / England |
| EPI_ISL_423059 | 3/24/2020 | 4/12/2020 Europe / United Kingdom / England |
| EPI_ISL_423063 | 3/24/2020 | 4/12/2020 Europe / United Kingdom / England |
| EPI_ISL_423065 | 3/24/2020 | 4/12/2020 Europe / United Kingdom / England |
| EPI_ISL_423066 | 3/24/2020 | 4/12/2020 Europe / United Kingdom / England |
| EPI_ISL_423067 | 3/24/2020 | 4/12/2020 Europe / United Kingdom / England |
| EPI_ISL_423068 | 3/23/2020 | 4/12/2020 Europe / United Kingdom / England |
| EPI_ISL_423069 | 3/24/2020 | 4/12/2020 Europe / United Kingdom / England |
| EPI_ISL_423070 | 3/24/2020 | 4/12/2020 Europe / United Kingdom / England |
| EPI_ISL_423071 | 3/23/2020 | 4/12/2020 Europe / United Kingdom / England |
| EPI_ISL_423072 | 3/24/2020 | 4/12/2020 Europe / United Kingdom / England |
| EPI_ISL_423073 | 3/24/2020 | 4/12/2020 Europe / United Kingdom / England |
| EPI_ISL_423074 | 3/24/2020 | 4/12/2020 Europe / United Kingdom / England |
| EPI_ISL_423075 | 3/23/2020 | 4/12/2020 Europe / United Kingdom / England |
| EPI_ISL_423076 | 3/24/2020 | 4/12/2020 Europe / United Kingdom / England |
| EPI_ISL_423078 | 3/25/2020 | 4/12/2020 Europe / United Kingdom / England |
| EPI_ISL_423079 | 3/24/2020 | 4/12/2020 Europe / United Kingdom / England |
| EPI_ISL_423081 | 3/24/2020 | 4/12/2020 Europe / United Kingdom / England |
| EPI_ISL_423084 | 3/24/2020 | 4/12/2020 Europe / United Kingdom / England |
| EPI_ISL_423085 | 3/25/2020 | 4/12/2020 Europe / United Kingdom / England |
| EPI_ISL_423086 | 3/24/2020 | 4/12/2020 Europe / United Kingdom / England |
| EPI_ISL_423087 | 3/23/2020 | 4/12/2020 Europe / United Kingdom / England |
| EPI_ISL_423091 | 3/24/2020 | 4/12/2020 Europe / United Kingdom / England |





















|                |           |           |                                   |
|----------------|-----------|-----------|-----------------------------------|
| EPI_ISL_424009 | 3/20/2020 | 4/12/2020 | Europe / United Kingdom / England |
| EPI_ISL_424010 | 3/20/2020 | 4/12/2020 | Europe / United Kingdom / England |
| EPI_ISL_424012 | 3/20/2020 | 4/12/2020 | Europe / United Kingdom / England |
| EPI_ISL_424015 | 3/19/2020 | 4/12/2020 | Europe / United Kingdom / England |
| EPI_ISL_424017 | 3/12/2020 | 4/12/2020 | Europe / United Kingdom / England |
| EPI_ISL_424019 | 3/19/2020 | 4/12/2020 | Europe / United Kingdom / England |
| EPI_ISL_424020 | 3/20/2020 | 4/12/2020 | Europe / United Kingdom / England |
| EPI_ISL_424021 | 3/20/2020 | 4/12/2020 | Europe / United Kingdom / England |
| EPI_ISL_424024 | 3/20/2020 | 4/12/2020 | Europe / United Kingdom / England |
| EPI_ISL_424025 | 3/20/2020 | 4/12/2020 | Europe / United Kingdom / England |
| EPI_ISL_424028 | 3/21/2020 | 4/12/2020 | Europe / United Kingdom / England |
| EPI_ISL_424029 | 3/20/2020 | 4/12/2020 | Europe / United Kingdom / England |
| EPI_ISL_424031 | 3/20/2020 | 4/12/2020 | Europe / United Kingdom / England |
| EPI_ISL_424032 | 3/20/2020 | 4/12/2020 | Europe / United Kingdom / England |
| EPI_ISL_424034 | 3/20/2020 | 4/12/2020 | Europe / United Kingdom / England |
| EPI_ISL_424035 | 3/20/2020 | 4/12/2020 | Europe / United Kingdom / England |
| EPI_ISL_424037 | 3/20/2020 | 4/12/2020 | Europe / United Kingdom / England |
| EPI_ISL_424038 | 3/20/2020 | 4/12/2020 | Europe / United Kingdom / England |
| EPI_ISL_424052 | 3/21/2020 | 4/12/2020 | Europe / United Kingdom / England |
| EPI_ISL_424054 | 3/9/2020  | 4/12/2020 | Europe / United Kingdom / England |
| EPI_ISL_424062 | 3/11/2020 | 4/12/2020 | Europe / United Kingdom / England |
| EPI_ISL_424076 | 3/21/2020 | 4/12/2020 | Europe / United Kingdom / England |
| EPI_ISL_424078 | 3/11/2020 | 4/12/2020 | Europe / United Kingdom / England |
| EPI_ISL_424082 | 3/11/2020 | 4/12/2020 | Europe / United Kingdom / England |
| EPI_ISL_424084 | 3/11/2020 | 4/12/2020 | Europe / United Kingdom / England |
| EPI_ISL_424100 | 3/12/2020 | 4/12/2020 | Europe / United Kingdom / England |
| EPI_ISL_424101 | 3/12/2020 | 4/12/2020 | Europe / United Kingdom / England |
| EPI_ISL_424115 | 3/12/2020 | 4/12/2020 | Europe / United Kingdom / England |
| EPI_ISL_424116 | 3/21/2020 | 4/12/2020 | Europe / United Kingdom / England |
| EPI_ISL_424117 | 3/12/2020 | 4/12/2020 | Europe / United Kingdom / England |
| EPI_ISL_424119 | 3/21/2020 | 4/12/2020 | Europe / United Kingdom / England |
| EPI_ISL_424120 | 3/12/2020 | 4/12/2020 | Europe / United Kingdom / England |
| EPI_ISL_424121 | 3/21/2020 | 4/12/2020 | Europe / United Kingdom / England |
| EPI_ISL_424126 | 3/21/2020 | 4/12/2020 | Europe / United Kingdom / England |
| EPI_ISL_424133 | 3/20/2020 | 4/12/2020 | Europe / United Kingdom / England |
| EPI_ISL_424140 | 3/21/2020 | 4/12/2020 | Europe / United Kingdom / England |
| EPI_ISL_424152 | 3/20/2020 | 4/12/2020 | Europe / United Kingdom / England |
| EPI_ISL_424166 | 3/19/2020 | 4/12/2020 | North America / USA / Washington  |
| EPI_ISL_424167 | 3/19/2020 | 4/12/2020 | North America / USA / Washington  |
| EPI_ISL_424169 | 3/19/2020 | 4/12/2020 | North America / USA / Washington  |
| EPI_ISL_424170 | 3/19/2020 | 4/12/2020 | North America / USA / Washington  |
| EPI_ISL_424172 | 3/19/2020 | 4/12/2020 | North America / USA / Washington  |
| EPI_ISL_424173 | 3/14/2020 | 4/12/2020 | North America / USA / Illinois    |
| EPI_ISL_424174 | 3/13/2020 | 4/12/2020 | North America / USA / Connecticut |
| EPI_ISL_424175 | 3/17/2020 | 4/12/2020 | North America / USA / Washington  |
| EPI_ISL_424176 | 3/17/2020 | 4/12/2020 | North America / USA / Washington  |
| EPI_ISL_424178 | 3/17/2020 | 4/12/2020 | North America / USA / Washington  |









|                |           |                                                    |
|----------------|-----------|----------------------------------------------------|
| EPI_ISL_424335 | 3/24/2020 | 4/12/2020 North America / USA / Washington         |
| EPI_ISL_424336 | 3/24/2020 | 4/12/2020 North America / USA / Washington         |
| EPI_ISL_424337 | 3/24/2020 | 4/12/2020 North America / USA / Washington         |
| EPI_ISL_424338 | 3/24/2020 | 4/12/2020 North America / USA / Washington         |
| EPI_ISL_424339 | 3/24/2020 | 4/12/2020 North America / USA / Washington         |
| EPI_ISL_424340 | 3/24/2020 | 4/12/2020 North America / USA / Washington         |
| EPI_ISL_424341 | 3/24/2020 | 4/12/2020 North America / USA / Washington         |
| EPI_ISL_424342 | 3/7/2020  | 4/12/2020 Europe / Italy / Lazio / Rome            |
| EPI_ISL_424343 | 3/23/2020 | 4/12/2020 Europe / Italy / Lazio / Rome            |
| EPI_ISL_424344 | 3/4/2020  | 4/12/2020 Europe / Italy / Lazio / Rome            |
| EPI_ISL_424345 | 3/12/2020 | 4/12/2020 North America / Mexico / Mexico City     |
| EPI_ISL_424346 | 3/21/2020 | 4/13/2020 North America / USA / Alaska / Southeast |
| EPI_ISL_424347 | 3/29/2020 | 4/13/2020 North America / USA / Alaska / Interior  |
| EPI_ISL_424350 | 3/10/2020 | 4/13/2020 North America / USA / Florida            |
| EPI_ISL_424361 | 3/10/2020 | 4/13/2020 Asia / India                             |
| EPI_ISL_424362 | 3/10/2020 | 4/13/2020 Asia / India                             |
| EPI_ISL_424363 | 3/12/2020 | 4/13/2020 Asia / India                             |
| EPI_ISL_424364 | 3/17/2020 | 4/13/2020 Asia / India                             |
| EPI_ISL_424365 | 3/17/2020 | 4/13/2020 Asia / India                             |
| EPI_ISL_424366 | 3/17/2020 | 4/13/2020 Europe / Turkey / Kayseri                |
| EPI_ISL_424367 | 2020-03   | 4/13/2020 Europe / Iceland / Reykjavik             |
| EPI_ISL_424368 | 2020-03   | 4/13/2020 Europe / Iceland / Reykjavik             |
| EPI_ISL_424369 | 2020-03   | 4/13/2020 Europe / Iceland / Reykjavik             |
| EPI_ISL_424370 | 2020-03   | 4/13/2020 Europe / Iceland / Reykjavik             |
| EPI_ISL_424371 | 2020-03   | 4/13/2020 Europe / Iceland / Reykjavik             |
| EPI_ISL_424375 | 2020-03   | 4/13/2020 Europe / Iceland / Reykjavik             |
| EPI_ISL_424376 | 2020-03   | 4/13/2020 Europe / Iceland / Reykjavik             |
| EPI_ISL_424377 | 3/18/2020 | 4/13/2020 Europe / Iceland / Reykjavik             |
| EPI_ISL_424379 | 3/19/2020 | 4/13/2020 Europe / Iceland / Reykjavik             |
| EPI_ISL_424380 | 3/19/2020 | 4/13/2020 Europe / Iceland / Reykjavik             |
| EPI_ISL_424381 | 3/19/2020 | 4/13/2020 Europe / Iceland / Reykjavik             |
| EPI_ISL_424382 | 3/19/2020 | 4/13/2020 Europe / Iceland / Reykjavik             |
| EPI_ISL_424383 | 3/19/2020 | 4/13/2020 Europe / Iceland / Reykjavik             |
| EPI_ISL_424384 | 3/19/2020 | 4/13/2020 Europe / Iceland / Reykjavik             |
| EPI_ISL_424385 | 3/19/2020 | 4/13/2020 Europe / Iceland / Reykjavik             |
| EPI_ISL_424387 | 3/19/2020 | 4/13/2020 Europe / Iceland / Reykjavik             |
| EPI_ISL_424388 | 3/19/2020 | 4/13/2020 Europe / Iceland / Reykjavik             |
| EPI_ISL_424389 | 3/19/2020 | 4/13/2020 Europe / Iceland / Reykjavik             |
| EPI_ISL_424390 | 3/19/2020 | 4/13/2020 Europe / Iceland / Reykjavik             |
| EPI_ISL_424391 | 3/19/2020 | 4/13/2020 Europe / Iceland / Reykjavik             |
| EPI_ISL_424392 | 3/19/2020 | 4/13/2020 Europe / Iceland / Reykjavik             |
| EPI_ISL_424393 | 3/19/2020 | 4/13/2020 Europe / Iceland / Reykjavik             |
| EPI_ISL_424394 | 3/19/2020 | 4/13/2020 Europe / Iceland / Reykjavik             |
| EPI_ISL_424395 | 3/19/2020 | 4/13/2020 Europe / Iceland / Reykjavik             |
| EPI_ISL_424396 | 3/19/2020 | 4/13/2020 Europe / Iceland / Reykjavik             |
| EPI_ISL_424398 | 3/19/2020 | 4/13/2020 Europe / Iceland / Reykjavik             |
| EPI_ISL_424399 | 3/19/2020 | 4/13/2020 Europe / Iceland / Reykjavik             |









|                |           |           |                                          |
|----------------|-----------|-----------|------------------------------------------|
| EPI_ISL_424612 | 3/27/2020 | 4/13/2020 | Europe / Iceland / Reykjavik             |
| EPI_ISL_424613 | 3/27/2020 | 4/13/2020 | Europe / Iceland / Reykjavik             |
| EPI_ISL_424614 | 3/27/2020 | 4/13/2020 | Europe / Iceland / Reykjavik             |
| EPI_ISL_424615 | 3/27/2020 | 4/13/2020 | Europe / Iceland / Reykjavik             |
| EPI_ISL_424616 | 3/28/2020 | 4/13/2020 | Europe / Iceland / Reykjavik             |
| EPI_ISL_424617 | 3/28/2020 | 4/13/2020 | Europe / Iceland / Reykjavik             |
| EPI_ISL_424619 | 3/28/2020 | 4/13/2020 | Europe / Iceland / Reykjavik             |
| EPI_ISL_424621 | 3/28/2020 | 4/13/2020 | Europe / Iceland / Reykjavik             |
| EPI_ISL_424622 | 3/28/2020 | 4/13/2020 | Europe / Iceland / Reykjavik             |
| EPI_ISL_424624 | 3/28/2020 | 4/13/2020 | Europe / Iceland / Reykjavik             |
| EPI_ISL_424626 | 3/15/2020 | 4/13/2020 | North America / Mexico / Mexico City     |
| EPI_ISL_424627 | 3/16/2020 | 4/13/2020 | North America / Mexico / Mexico City     |
| EPI_ISL_424629 | 4/3/2020  | 4/13/2020 | Europe / Belgium / Liège                 |
| EPI_ISL_424630 | 4/3/2020  | 4/13/2020 | Europe / Belgium / Liège                 |
| EPI_ISL_424631 | 4/3/2020  | 4/13/2020 | Europe / Belgium / Liège                 |
| EPI_ISL_424633 | 4/3/2020  | 4/13/2020 | Europe / Belgium / Liège                 |
| EPI_ISL_424636 | 4/3/2020  | 4/13/2020 | Europe / Belgium / Liège                 |
| EPI_ISL_424637 | 4/3/2020  | 4/13/2020 | Europe / Belgium / Liège                 |
| EPI_ISL_424640 | 4/3/2020  | 4/13/2020 | Europe / Belgium / Liège                 |
| EPI_ISL_424641 | 4/3/2020  | 4/13/2020 | Europe / Belgium / Liège                 |
| EPI_ISL_424642 | 4/4/2020  | 4/13/2020 | Europe / Belgium / Liège                 |
| EPI_ISL_424643 | 4/4/2020  | 4/13/2020 | Europe / Belgium / Liège                 |
| EPI_ISL_424644 | 4/4/2020  | 4/13/2020 | Europe / Belgium / Liège                 |
| EPI_ISL_424645 | 4/4/2020  | 4/13/2020 | Europe / Belgium / Liège                 |
| EPI_ISL_424646 | 4/4/2020  | 4/13/2020 | Europe / Belgium / Liège                 |
| EPI_ISL_424647 | 4/4/2020  | 4/13/2020 | Europe / Belgium / Liège                 |
| EPI_ISL_424649 | 4/4/2020  | 4/13/2020 | Europe / Belgium / Liège                 |
| EPI_ISL_424650 | 4/4/2020  | 4/13/2020 | Europe / Belgium / Liège                 |
| EPI_ISL_424651 | 4/5/2020  | 4/13/2020 | Europe / Belgium / Liège                 |
| EPI_ISL_424652 | 4/5/2020  | 4/13/2020 | Europe / Belgium / Liège                 |
| EPI_ISL_424653 | 4/5/2020  | 4/13/2020 | Europe / Belgium / Liège                 |
| EPI_ISL_424654 | 4/5/2020  | 4/13/2020 | Europe / Belgium / Liège                 |
| EPI_ISL_424655 | 4/5/2020  | 4/13/2020 | Europe / Belgium / Liège                 |
| EPI_ISL_424657 | 4/5/2020  | 4/13/2020 | Europe / Belgium / Liège                 |
| EPI_ISL_424658 | 4/5/2020  | 4/13/2020 | Europe / Belgium / Liège                 |
| EPI_ISL_424660 | 4/5/2020  | 4/13/2020 | Europe / Belgium / Liège                 |
| EPI_ISL_424661 | 4/5/2020  | 4/13/2020 | Europe / Belgium / Liège                 |
| EPI_ISL_424662 | 4/5/2020  | 4/13/2020 | Europe / Belgium / Liège                 |
| EPI_ISL_424664 | 4/5/2020  | 4/13/2020 | Europe / Belgium / Liège                 |
| EPI_ISL_424667 | 3/4/2020  | 4/13/2020 | North America / Mexico / State of Mexico |
| EPI_ISL_424668 | 3/16/2020 | 4/13/2020 | North America / USA / Arizona            |
| EPI_ISL_424670 | 3/10/2020 | 4/13/2020 | North America / Mexico / Queretaro       |
| EPI_ISL_424671 | 3/17/2020 | 4/13/2020 | North America / USA / Arizona            |
| EPI_ISL_424672 | 3/11/2020 | 4/13/2020 | North America / Mexico / Puebla          |
| EPI_ISL_424673 | 3/12/2020 | 4/13/2020 | North America / Mexico / Mexico City     |
| EPI_ISL_424703 | 3/15/2020 | 4/13/2020 | Europe / Sweden / Vasterbotten           |
| EPI_ISL_424841 | 3/6/2020  | 4/13/2020 | North America / USA / South Carolina     |

|                |           |           |                                            |
|----------------|-----------|-----------|--------------------------------------------|
| EPI_ISL_424842 | 3/7/2020  | 4/13/2020 | North America / USA / South Carolina       |
| EPI_ISL_424843 | 3/5/2020  | 4/13/2020 | North America / USA / Massachusetts        |
| EPI_ISL_424844 | 3/6/2020  | 4/13/2020 | North America / USA / Massachusetts        |
| EPI_ISL_424845 | 3/6/2020  | 4/13/2020 | North America / USA / Massachusetts        |
| EPI_ISL_424846 | 3/6/2020  | 4/13/2020 | North America / USA / Massachusetts        |
| EPI_ISL_424847 | 3/7/2020  | 4/13/2020 | North America / USA / Massachusetts        |
| EPI_ISL_424848 | 3/9/2020  | 4/13/2020 | North America / USA / Arizona              |
| EPI_ISL_424849 | 3/9/2020  | 4/13/2020 | North America / USA / Arizona              |
| EPI_ISL_424850 | 3/7/2020  | 4/13/2020 | North America / USA / Illinois             |
| EPI_ISL_424851 | 3/7/2020  | 4/13/2020 | North America / USA / Illinois             |
| EPI_ISL_424852 | 3/6/2020  | 4/13/2020 | North America / USA / District of Columbia |
| EPI_ISL_424853 | 3/5/2020  | 4/13/2020 | North America / USA / Florida              |
| EPI_ISL_424854 | 3/5/2020  | 4/13/2020 | North America / USA / Florida              |
| EPI_ISL_424855 | 3/2/2020  | 4/13/2020 | North America / USA / Florida              |
| EPI_ISL_424856 | 3/6/2020  | 4/13/2020 | North America / USA / Florida              |
| EPI_ISL_424857 | 3/6/2020  | 4/13/2020 | North America / USA / Florida              |
| EPI_ISL_424858 | 3/4/2020  | 4/13/2020 | North America / USA / Georgia              |
| EPI_ISL_424859 | 3/5/2020  | 4/13/2020 | North America / USA / Georgia              |
| EPI_ISL_424860 | 2020-03   | 4/13/2020 | North America / USA / Georgia              |
| EPI_ISL_424861 | 3/8/2020  | 4/13/2020 | North America / USA / Georgia              |
| EPI_ISL_424862 | 2020-03   | 4/13/2020 | North America / USA / Georgia              |
| EPI_ISL_424863 | 2020-03   | 4/13/2020 | North America / USA / Georgia              |
| EPI_ISL_424864 | 3/10/2020 | 4/13/2020 | North America / USA / Georgia              |
| EPI_ISL_424865 | 3/8/2020  | 4/13/2020 | North America / USA / Iowa                 |
| EPI_ISL_424866 | 3/9/2020  | 4/13/2020 | North America / USA / Indiana              |
| EPI_ISL_424867 | 3/6/2020  | 4/13/2020 | North America / USA / Kansas               |
| EPI_ISL_424868 | 3/9/2020  | 4/13/2020 | North America / USA / Louisiana            |
| EPI_ISL_424869 | 3/4/2020  | 4/13/2020 | North America / USA / Maryland             |
| EPI_ISL_424870 | 3/6/2020  | 4/13/2020 | North America / USA / Missouri             |
| EPI_ISL_424871 | 3/6/2020  | 4/13/2020 | North America / USA / North Carolina       |
| EPI_ISL_424872 | 3/8/2020  | 4/13/2020 | North America / USA / North Carolina       |
| EPI_ISL_424873 | 3/7/2020  | 4/13/2020 | North America / USA / North Carolina       |
| EPI_ISL_424874 | 3/5/2020  | 4/13/2020 | North America / USA / Nebraska             |
| EPI_ISL_424875 | 3/7/2020  | 4/13/2020 | North America / USA / Nebraska             |
| EPI_ISL_424876 | 3/6/2020  | 4/13/2020 | North America / USA / New Hampshire        |
| EPI_ISL_424877 | 3/6/2020  | 4/13/2020 | North America / USA / New Hampshire        |
| EPI_ISL_424878 | 3/4/2020  | 4/13/2020 | North America / USA / New Jersey           |
| EPI_ISL_424879 | 3/9/2020  | 4/13/2020 | North America / USA / Nevada               |
| EPI_ISL_424880 | 3/8/2020  | 4/13/2020 | North America / USA / Ohio                 |
| EPI_ISL_424881 | 3/5/2020  | 4/13/2020 | North America / USA / Pennsylvania         |
| EPI_ISL_424882 | 3/5/2020  | 4/13/2020 | North America / USA / Pennsylvania         |
| EPI_ISL_424883 | 3/7/2020  | 4/13/2020 | North America / USA / Pennsylvania         |
| EPI_ISL_424884 | 3/8/2020  | 4/13/2020 | North America / USA / Pennsylvania         |
| EPI_ISL_424885 | 3/9/2020  | 4/13/2020 | North America / USA / Pennsylvania         |
| EPI_ISL_424886 | 3/6/2020  | 4/13/2020 | North America / USA / Pennsylvania         |
| EPI_ISL_424887 | 3/5/2020  | 4/13/2020 | North America / USA / Rhode Island         |
| EPI_ISL_424888 | 3/8/2020  | 4/13/2020 | North America / USA / South Carolina       |



|                |           |           |                                            |
|----------------|-----------|-----------|--------------------------------------------|
| EPI_ISL_424889 | 3/5/2020  | 4/13/2020 | North America / USA / Utah                 |
| EPI_ISL_424890 | 3/7/2020  | 4/13/2020 | North America / USA / Utah                 |
| EPI_ISL_424891 | 3/8/2020  | 4/13/2020 | North America / USA / Virginia             |
| EPI_ISL_424892 | 3/8/2020  | 4/13/2020 | North America / USA / Virginia             |
| EPI_ISL_424893 | 3/8/2020  | 4/13/2020 | North America / USA / Virginia             |
| EPI_ISL_424894 | 3/8/2020  | 4/13/2020 | North America / USA / Virginia             |
| EPI_ISL_424895 | 3/8/2020  | 4/13/2020 | North America / USA / Iowa                 |
| EPI_ISL_424896 | 3/8/2020  | 4/13/2020 | North America / USA / Iowa                 |
| EPI_ISL_424897 | 3/8/2020  | 4/13/2020 | North America / USA / Iowa                 |
| EPI_ISL_424898 | 3/8/2020  | 4/13/2020 | North America / USA / Iowa                 |
| EPI_ISL_424899 | 3/7/2020  | 4/13/2020 | North America / USA / Iowa                 |
| EPI_ISL_424900 | 3/7/2020  | 4/13/2020 | North America / USA / Iowa                 |
| EPI_ISL_424901 | 3/4/2020  | 4/13/2020 | North America / USA / New Jersey           |
| EPI_ISL_424902 | 3/5/2020  | 4/13/2020 | North America / USA / South Carolina       |
| EPI_ISL_424903 | 3/7/2020  | 4/13/2020 | North America / USA / South Carolina       |
| EPI_ISL_424904 | 3/7/2020  | 4/13/2020 | North America / USA / South Carolina       |
| EPI_ISL_424905 | 3/5/2020  | 4/13/2020 | North America / USA / South Carolina       |
| EPI_ISL_424906 | 3/4/2020  | 4/13/2020 | North America / USA / New York             |
| EPI_ISL_424907 | 3/6/2020  | 4/13/2020 | North America / USA / Virginia             |
| EPI_ISL_424908 | 3/5/2020  | 4/13/2020 | North America / USA / Massachusetts        |
| EPI_ISL_424909 | 3/5/2020  | 4/13/2020 | North America / USA / Massachusetts        |
| EPI_ISL_424910 | 3/5/2020  | 4/13/2020 | North America / USA / Massachusetts        |
| EPI_ISL_424911 | 3/4/2020  | 4/13/2020 | North America / USA / Massachusetts        |
| EPI_ISL_424912 | 3/4/2020  | 4/13/2020 | North America / USA / Massachusetts        |
| EPI_ISL_424913 | 3/5/2020  | 4/13/2020 | North America / USA / Massachusetts        |
| EPI_ISL_424914 | 3/6/2020  | 4/13/2020 | North America / USA / Massachusetts        |
| EPI_ISL_424915 | 3/6/2020  | 4/13/2020 | North America / USA / Massachusetts        |
| EPI_ISL_424916 | 3/6/2020  | 4/13/2020 | North America / USA / Massachusetts        |
| EPI_ISL_424917 | 3/6/2020  | 4/13/2020 | North America / USA / Massachusetts        |
| EPI_ISL_424918 | 3/6/2020  | 4/13/2020 | North America / USA / Massachusetts        |
| EPI_ISL_424919 | 3/7/2020  | 4/13/2020 | North America / USA / Massachusetts        |
| EPI_ISL_424920 | 3/6/2020  | 4/13/2020 | North America / USA / Massachusetts        |
| EPI_ISL_424929 | 3/31/2020 | 4/14/2020 | North America / USA / New York / Manhattan |
| EPI_ISL_424930 | 4/1/2020  | 4/14/2020 | North America / USA / New York / Nassau    |
| EPI_ISL_424931 | 4/1/2020  | 4/14/2020 | North America / USA / New York / Suffolk   |
| EPI_ISL_424932 | 4/1/2020  | 4/14/2020 | North America / USA / New York / Nassau    |
| EPI_ISL_424933 | 4/1/2020  | 4/14/2020 | North America / USA / New York / Brooklyn  |
| EPI_ISL_424934 | 4/1/2020  | 4/14/2020 | North America / USA / New York / Nassau    |
| EPI_ISL_424935 | 4/1/2020  | 4/14/2020 | North America / USA / New York / Nassau    |
| EPI_ISL_424936 | 4/1/2020  | 4/14/2020 | North America / USA / New York / Suffolk   |
| EPI_ISL_424937 | 4/1/2020  | 4/14/2020 | North America / USA / New York / Nassau    |
| EPI_ISL_424938 | 4/1/2020  | 4/14/2020 | North America / USA / New York / Nassau    |
| EPI_ISL_424939 | 4/1/2020  | 4/14/2020 | North America / USA / New York / Nassau    |
| EPI_ISL_424940 | 4/1/2020  | 4/14/2020 | North America / USA / New York / Queens    |
| EPI_ISL_424941 | 4/1/2020  | 4/14/2020 | North America / USA / New York / Rockland  |
| EPI_ISL_424942 | 4/1/2020  | 4/14/2020 | North America / USA / New York / Brooklyn  |
| EPI_ISL_424943 | 4/1/2020  | 4/14/2020 | North America / USA / New York / Queens    |

|                |           |           |                                            |
|----------------|-----------|-----------|--------------------------------------------|
| EPI_ISL_424944 | 4/1/2020  | 4/14/2020 | North America / USA / New York / Brooklyn  |
| EPI_ISL_424945 | 4/1/2020  | 4/14/2020 | North America / USA / New York / Manhattan |
| EPI_ISL_424946 | 4/1/2020  | 4/14/2020 | North America / USA / New York / Brooklyn  |
| EPI_ISL_424947 | 4/1/2020  | 4/14/2020 | North America / USA / New York / Brooklyn  |
| EPI_ISL_424948 | 4/1/2020  | 4/14/2020 | North America / USA / New York / Brooklyn  |
| EPI_ISL_424949 | 4/1/2020  | 4/14/2020 | North America / USA / New York / Manhattan |
| EPI_ISL_424950 | 4/1/2020  | 4/14/2020 | North America / USA / New York / Brooklyn  |
| EPI_ISL_424951 | 4/1/2020  | 4/14/2020 | North America / USA / New York / Brooklyn  |
| EPI_ISL_424952 | 4/1/2020  | 4/14/2020 | North America / USA / New York / Brooklyn  |
| EPI_ISL_424953 | 4/1/2020  | 4/14/2020 | North America / USA / New York / Brooklyn  |
| EPI_ISL_424954 | 4/1/2020  | 4/14/2020 | North America / USA / New York / Brooklyn  |
| EPI_ISL_424955 | 4/1/2020  | 4/14/2020 | North America / USA / New York / Suffolk   |
| EPI_ISL_424956 | 4/1/2020  | 4/14/2020 | North America / USA / New York / Brooklyn  |
| EPI_ISL_424957 | 4/1/2020  | 4/14/2020 | North America / USA / New York / Bronx     |
| EPI_ISL_424958 | 4/1/2020  | 4/14/2020 | North America / USA / New York / Manhattan |
| EPI_ISL_424959 | 4/1/2020  | 4/14/2020 | North America / USA / New York / Brooklyn  |
| EPI_ISL_424960 | 4/1/2020  | 4/14/2020 | North America / USA / New York / Manhattan |
| EPI_ISL_424961 | 4/1/2020  | 4/14/2020 | North America / USA / New York / Queens    |
| EPI_ISL_424962 | 4/1/2020  | 4/14/2020 | North America / USA / New York / Brooklyn  |
| EPI_ISL_424963 | 4/1/2020  | 4/14/2020 | North America / USA / New York / Bronx     |
| EPI_ISL_424964 | 4/1/2020  | 4/14/2020 | North America / USA / New York / Queens    |
| EPI_ISL_424965 | 4/1/2020  | 4/14/2020 | North America / USA / New York / Brooklyn  |
| EPI_ISL_424966 | 4/1/2020  | 4/14/2020 | North America / USA / New York / Queens    |
| EPI_ISL_424967 | 4/1/2020  | 4/14/2020 | North America / USA / New York / Bronx     |
| EPI_ISL_424968 | 4/1/2020  | 4/14/2020 | North America / USA / New York / Bronx     |
| EPI_ISL_424969 | 3/17/2020 | 4/14/2020 | Asia / Taiwan / Taoyuan                    |
| EPI_ISL_424970 | 3/17/2020 | 4/14/2020 | Asia / Taiwan / Taoyuan                    |
| EPI_ISL_424971 | 3/17/2020 | 4/14/2020 | Asia / Taiwan / Taoyuan                    |
| EPI_ISL_424972 | 3/16/2020 | 4/14/2020 | Asia / Taiwan / Taoyuan                    |
| EPI_ISL_424973 | 3/17/2020 | 4/14/2020 | Asia / Taiwan / Taoyuan                    |
| EPI_ISL_424974 | 3/18/2020 | 4/14/2020 | Asia / Taiwan / Taoyuan                    |
| EPI_ISL_424975 | 3/18/2020 | 4/14/2020 | Asia / Taiwan / Taoyuan                    |
| EPI_ISL_424978 | 3/18/2020 | 4/14/2020 | Asia / Taiwan / Taoyuan                    |
| EPI_ISL_424993 | 2020-03   | 4/14/2020 | Europe / France / Occitanie / Toulouse     |
| EPI_ISL_425048 | 3/24/2020 | 4/14/2020 | Europe / Belgium / Ghent                   |
| EPI_ISL_425050 | 3/24/2020 | 4/14/2020 | Europe / Belgium / Ghent                   |
| EPI_ISL_425052 | 3/25/2020 | 4/14/2020 | Europe / Belgium / Ghent                   |
| EPI_ISL_425053 | 3/25/2020 | 4/14/2020 | Europe / Belgium / Ghent                   |
| EPI_ISL_425054 | 3/25/2020 | 4/14/2020 | Europe / Belgium / Ghent                   |
| EPI_ISL_425055 | 3/20/2020 | 4/14/2020 | Europe / Belgium / Ghent                   |
| EPI_ISL_425056 | 3/25/2020 | 4/14/2020 | Europe / Belgium / Ghent                   |
| EPI_ISL_425057 | 3/26/2020 | 4/14/2020 | Europe / Belgium / Ghent                   |
| EPI_ISL_425058 | 3/23/2020 | 4/14/2020 | Europe / Belgium / Ghent                   |
| EPI_ISL_425059 | 3/24/2020 | 4/14/2020 | Europe / Belgium / Ghent                   |
| EPI_ISL_425060 | 3/25/2020 | 4/14/2020 | Europe / Belgium / Ghent                   |
| EPI_ISL_425061 | 3/25/2020 | 4/14/2020 | Europe / Belgium / Ghent                   |
| EPI_ISL_425062 | 3/24/2020 | 4/14/2020 | Europe / Belgium / Ghent                   |

|                |           |                                                                   |
|----------------|-----------|-------------------------------------------------------------------|
| EPI_ISL_425063 | 3/24/2020 | 4/14/2020 Europe / Belgium / Ghent                                |
| EPI_ISL_425064 | 3/25/2020 | 4/14/2020 Europe / Belgium / Ghent                                |
| EPI_ISL_425117 | 2/23/2020 | 4/14/2020 Asia / South Korea                                      |
| EPI_ISL_425118 | 1/30/2020 | 4/14/2020 Asia / South Korea                                      |
| EPI_ISL_425121 | 3/16/2020 | 4/14/2020 Europe / Germany / North Rhine-Westphalia / Duesseldorf |
| EPI_ISL_425122 | 3/16/2020 | 4/14/2020 Europe / Germany / North Rhine-Westphalia / Duesseldorf |
| EPI_ISL_425123 | 3/17/2020 | 4/14/2020 Europe / Germany / North Rhine-Westphalia / Duesseldorf |
| EPI_ISL_425124 | 3/17/2020 | 4/14/2020 Europe / Germany / North Rhine-Westphalia / Duesseldorf |
| EPI_ISL_425125 | 3/18/2020 | 4/14/2020 Europe / Germany / North Rhine-Westphalia / Duesseldorf |
| EPI_ISL_425126 | 3/18/2020 | 4/14/2020 Europe / Germany / North Rhine-Westphalia / Duesseldorf |
| EPI_ISL_425127 | 3/19/2020 | 4/14/2020 Europe / Germany / North Rhine-Westphalia / Duesseldorf |
| EPI_ISL_425128 | 3/20/2020 | 4/14/2020 Europe / Germany / North Rhine-Westphalia / Duesseldorf |
| EPI_ISL_425130 | 3/21/2020 | 4/14/2020 Europe / Germany / North Rhine-Westphalia / Duesseldorf |
| EPI_ISL_425131 | 3/20/2020 | 4/14/2020 Europe / Germany / North Rhine-Westphalia / Duesseldorf |
| EPI_ISL_425132 | 3/23/2020 | 4/14/2020 Europe / Germany / North Rhine-Westphalia / Duesseldorf |
| EPI_ISL_425138 | 3/19/2020 | 4/14/2020 Europe / Germany / North Rhine-Westphalia / Duesseldorf |
| EPI_ISL_425139 | 3/19/2020 | 4/14/2020 Europe / Germany / North Rhine-Westphalia / Duesseldorf |
| EPI_ISL_425142 | 4/2/2020  | 4/14/2020 North America / USA / Wisconsin / Dane County           |
| EPI_ISL_425143 | 4/2/2020  | 4/14/2020 North America / USA / Wisconsin / Dane County           |
| EPI_ISL_425144 | 4/2/2020  | 4/14/2020 North America / USA / Wisconsin / Dane County           |
| EPI_ISL_425145 | 4/5/2020  | 4/14/2020 North America / USA / Wisconsin / Dane County           |
| EPI_ISL_425146 | 3/31/2020 | 4/14/2020 North America / USA / Wisconsin / Dane County           |
| EPI_ISL_425147 | 4/3/2020  | 4/14/2020 North America / USA / Wisconsin / Dane County           |
| EPI_ISL_425148 | 4/1/2020  | 4/14/2020 North America / USA / Wisconsin / Dane County           |
| EPI_ISL_425149 | 3/30/2020 | 4/14/2020 North America / USA / Wisconsin / Dane County           |
| EPI_ISL_425150 | 4/4/2020  | 4/14/2020 North America / USA / Wisconsin / Dane County           |
| EPI_ISL_425151 | 3/30/2020 | 4/14/2020 North America / USA / Wisconsin / Dane County           |
| EPI_ISL_425152 | 3/30/2020 | 4/14/2020 North America / USA / Wisconsin / Dane County           |
| EPI_ISL_425153 | 4/1/2020  | 4/14/2020 North America / USA / Wisconsin / Dane County           |
| EPI_ISL_425154 | 3/30/2020 | 4/14/2020 North America / USA / Wisconsin / Dane County           |
| EPI_ISL_425155 | 3/31/2020 | 4/14/2020 North America / USA / Wisconsin / Dane County           |
| EPI_ISL_425156 | 4/2/2020  | 4/14/2020 North America / USA / Wisconsin / Dane County           |
| EPI_ISL_425157 | 4/3/2020  | 4/14/2020 North America / USA / Wisconsin / Dane County           |
| EPI_ISL_425158 | 3/31/2020 | 4/14/2020 North America / USA / Wisconsin / Dane County           |
| EPI_ISL_425159 | 3/30/2020 | 4/14/2020 North America / USA / Wisconsin / Dane County           |
| EPI_ISL_425160 | 4/3/2020  | 4/14/2020 North America / USA / Wisconsin / Dane County           |
| EPI_ISL_425161 | 4/4/2020  | 4/14/2020 North America / USA / Wisconsin / Sauk County           |
| EPI_ISL_425162 | 3/30/2020 | 4/14/2020 North America / USA / Wisconsin / Dane County           |
| EPI_ISL_425163 | 3/30/2020 | 4/14/2020 North America / USA / Wisconsin / Dane County           |
| EPI_ISL_425164 | 3/31/2020 | 4/14/2020 North America / USA / Wisconsin / Dane County           |
| EPI_ISL_425165 | 3/30/2020 | 4/14/2020 North America / USA / Wisconsin / Dane County           |
| EPI_ISL_425166 | 3/30/2020 | 4/14/2020 North America / USA / Wisconsin / Dane County           |
| EPI_ISL_425167 | 3/31/2020 | 4/14/2020 North America / USA / Wisconsin / Dane County           |
| EPI_ISL_425168 | 3/31/2020 | 4/14/2020 North America / USA / Wisconsin / Dane County           |
| EPI_ISL_425169 | 3/30/2020 | 4/14/2020 North America / USA / Wisconsin / Dane County           |
| EPI_ISL_425170 | 3/31/2020 | 4/14/2020 North America / USA / Colorado / El Paso County         |
| EPI_ISL_425171 | 3/30/2020 | 4/14/2020 North America / USA / Wisconsin / Dane County           |

|                |           |                                                               |
|----------------|-----------|---------------------------------------------------------------|
| EPI_ISL_425172 | 3/31/2020 | 4/14/2020 North America / USA / Wisconsin / Dane County       |
| EPI_ISL_425173 | 3/30/2020 | 4/14/2020 North America / USA / Wisconsin / Dane County       |
| EPI_ISL_425174 | 3/30/2020 | 4/14/2020 North America / USA / Wisconsin / Dane County       |
| EPI_ISL_425175 | 3/25/2020 | 4/14/2020 North America / USA / Wisconsin / Sauk County       |
| EPI_ISL_425176 | 4/10/2020 | 4/14/2020 North America / USA / Wisconsin / Dane County       |
| EPI_ISL_425177 | 1/23/2020 | 4/14/2020 North America / Canada / Ontario                    |
| EPI_ISL_425178 | 2/28/2020 | 4/14/2020 Europe / Spain / Comunitat Valenciana / Valencia    |
| EPI_ISL_425179 | 3/10/2020 | 4/14/2020 Europe / Spain / Comunitat Valenciana / Valencia    |
| EPI_ISL_425180 | 3/10/2020 | 4/14/2020 Europe / Spain / Comunitat Valenciana / Valencia    |
| EPI_ISL_425181 | 3/10/2020 | 4/14/2020 Europe / Spain / Comunitat Valenciana / Valencia    |
| EPI_ISL_425182 | 3/10/2020 | 4/14/2020 Europe / Spain / Comunitat Valenciana / Valencia    |
| EPI_ISL_425183 | 3/10/2020 | 4/14/2020 Europe / Spain / Comunitat Valenciana / Valencia    |
| EPI_ISL_425184 | 3/10/2020 | 4/14/2020 Europe / Spain / Comunitat Valenciana / Valencia    |
| EPI_ISL_425185 | 3/10/2020 | 4/14/2020 Europe / Spain / Comunitat Valenciana / Valencia    |
| EPI_ISL_425186 | 3/10/2020 | 4/14/2020 Europe / Spain / Comunitat Valenciana / Valencia    |
| EPI_ISL_425187 | 3/16/2020 | 4/14/2020 Europe / Spain / Comunitat Valenciana / Valencia    |
| EPI_ISL_425188 | 3/16/2020 | 4/14/2020 Europe / Spain / Comunitat Valenciana / Valencia    |
| EPI_ISL_425189 | 3/16/2020 | 4/14/2020 Europe / Spain / Comunitat Valenciana / Valencia    |
| EPI_ISL_425193 | 3/17/2020 | 4/14/2020 Europe / Spain / Comunitat Valenciana / Valencia    |
| EPI_ISL_425196 | 3/17/2020 | 4/14/2020 Europe / Spain / Comunitat Valenciana / Valencia    |
| EPI_ISL_425197 | 3/17/2020 | 4/14/2020 Europe / Spain / Comunitat Valenciana / Valencia    |
| EPI_ISL_425199 | 3/19/2020 | 4/14/2020 Europe / Spain / Comunitat Valenciana / Valencia    |
| EPI_ISL_425201 | 3/19/2020 | 4/14/2020 Europe / Spain / Comunitat Valenciana / Valencia    |
| EPI_ISL_425203 | 3/20/2020 | 4/14/2020 Europe / Spain / Comunitat Valenciana / Valencia    |
| EPI_ISL_425205 | 3/20/2020 | 4/14/2020 Europe / Spain / Comunitat Valenciana / Valencia    |
| EPI_ISL_425210 | 3/25/2020 | 4/14/2020 Europe / Spain / Comunitat Valenciana / Valencia    |
| EPI_ISL_425212 | 3/11/2020 | 4/14/2020 Europe / Spain / Comunitat Valenciana / Valencia    |
| EPI_ISL_425213 | 3/11/2020 | 4/14/2020 Europe / Spain / Comunitat Valenciana / Valencia    |
| EPI_ISL_425214 | 3/11/2020 | 4/14/2020 Europe / Spain / Comunitat Valenciana / Valencia    |
| EPI_ISL_425216 | 3/16/2020 | 4/14/2020 Europe / Spain / Comunitat Valenciana / Valencia    |
| EPI_ISL_425217 | 3/17/2020 | 4/14/2020 Europe / Spain / Comunitat Valenciana / Valencia    |
| EPI_ISL_425218 | 3/17/2020 | 4/14/2020 Europe / Spain / Comunitat Valenciana / Valencia    |
| EPI_ISL_425219 | 3/17/2020 | 4/14/2020 Europe / Spain / Comunitat Valenciana / Valencia    |
| EPI_ISL_425220 | 3/17/2020 | 4/14/2020 Europe / Spain / Comunitat Valenciana / Valencia    |
| EPI_ISL_425221 | 3/17/2020 | 4/14/2020 Europe / Spain / Comunitat Valenciana / Valencia    |
| EPI_ISL_425224 | 3/3/2020  | 4/14/2020 North America / USA / New York / Westchester County |
| EPI_ISL_425228 | 3/22/2020 | 4/14/2020 Europe / Czech Republic / Prague                    |
| EPI_ISL_425229 | 3/19/2020 | 4/14/2020 Europe / Czech Republic / Prague                    |
| EPI_ISL_425231 | 3/30/2020 | 4/14/2020 Europe / United Kingdom / England                   |
| EPI_ISL_425232 | 3/30/2020 | 4/14/2020 Europe / United Kingdom / England                   |
| EPI_ISL_425233 | 3/30/2020 | 4/14/2020 Europe / United Kingdom / England                   |
| EPI_ISL_425234 | 3/29/2020 | 4/14/2020 Europe / United Kingdom / England                   |
| EPI_ISL_425235 | 3/30/2020 | 4/14/2020 Europe / United Kingdom / England                   |
| EPI_ISL_425236 | 3/30/2020 | 4/14/2020 Europe / United Kingdom / England                   |
| EPI_ISL_425237 | 3/29/2020 | 4/14/2020 Europe / United Kingdom / England                   |
| EPI_ISL_425238 | 3/30/2020 | 4/14/2020 Europe / United Kingdom / England                   |
| EPI_ISL_425239 | 3/31/2020 | 4/14/2020 Europe / United Kingdom / England                   |





























|                |           |           |                                                     |
|----------------|-----------|-----------|-----------------------------------------------------|
| EPI_ISL_426013 | 4/1/2020  | 4/14/2020 | Europe / United Kingdom / Scotland                  |
| EPI_ISL_426014 | 4/1/2020  | 4/14/2020 | Europe / United Kingdom / Scotland                  |
| EPI_ISL_426015 | 3/31/2020 | 4/14/2020 | Europe / United Kingdom / Scotland                  |
| EPI_ISL_426016 | 3/31/2020 | 4/14/2020 | Europe / United Kingdom / Scotland                  |
| EPI_ISL_426017 | 3/31/2020 | 4/14/2020 | Europe / United Kingdom / Scotland                  |
| EPI_ISL_426019 | 4/1/2020  | 4/14/2020 | Europe / United Kingdom / Scotland                  |
| EPI_ISL_426020 | 4/1/2020  | 4/14/2020 | Europe / United Kingdom / Scotland                  |
| EPI_ISL_426021 | 4/1/2020  | 4/14/2020 | Europe / United Kingdom / Scotland                  |
| EPI_ISL_426022 | 3/31/2020 | 4/14/2020 | Europe / United Kingdom / Scotland                  |
| EPI_ISL_426023 | 3/31/2020 | 4/14/2020 | Europe / United Kingdom / Scotland                  |
| EPI_ISL_426024 | 3/31/2020 | 4/14/2020 | Europe / United Kingdom / Scotland                  |
| EPI_ISL_426025 | 3/3/2020  | 4/14/2020 | North America / USA / New York / Westchester County |
| EPI_ISL_426026 | 3/3/2020  | 4/14/2020 | North America / USA / New York / Westchester County |
| EPI_ISL_426027 | 3/4/2020  | 4/14/2020 | North America / USA / New York / Nassau County      |
| EPI_ISL_426028 | 3/4/2020  | 4/14/2020 | North America / USA / New York / Westchester County |
| EPI_ISL_426029 | 3/4/2020  | 4/14/2020 | North America / USA / New York / Westchester County |
| EPI_ISL_426030 | 3/4/2020  | 4/14/2020 | North America / USA / New York / Westchester County |
| EPI_ISL_426031 | 3/4/2020  | 4/14/2020 | North America / USA / New York / Westchester County |
| EPI_ISL_426032 | 3/4/2020  | 4/14/2020 | North America / USA / New York / Westchester County |
| EPI_ISL_426033 | 3/4/2020  | 4/14/2020 | North America / USA / New York / Westchester County |
| EPI_ISL_426034 | 3/4/2020  | 4/14/2020 | North America / USA / New York / Westchester County |
| EPI_ISL_426035 | 3/4/2020  | 4/14/2020 | North America / USA / New York / Rockland County    |
| EPI_ISL_426036 | 3/4/2020  | 4/14/2020 | North America / USA / New York / Rockland County    |
| EPI_ISL_426037 | 3/5/2020  | 4/14/2020 | North America / USA / New York / Westchester County |
| EPI_ISL_426038 | 3/5/2020  | 4/14/2020 | North America / USA / New York / Nassau County      |
| EPI_ISL_426039 | 3/5/2020  | 4/14/2020 | North America / USA / New York / Westchester County |
| EPI_ISL_426040 | 3/5/2020  | 4/14/2020 | North America / USA / New York / Westchester County |
| EPI_ISL_426041 | 3/6/2020  | 4/14/2020 | North America / USA / New York / Westchester County |
| EPI_ISL_426042 | 3/6/2020  | 4/14/2020 | North America / USA / New York / Saratoga County    |
| EPI_ISL_426043 | 3/6/2020  | 4/14/2020 | North America / USA / New York / Westchester County |
| EPI_ISL_426044 | 3/6/2020  | 4/14/2020 | North America / USA / New York / Westchester County |
| EPI_ISL_426045 | 3/6/2020  | 4/14/2020 | North America / USA / New York / Bronx              |
| EPI_ISL_426046 | 3/6/2020  | 4/14/2020 | North America / USA / New York / Westchester County |
| EPI_ISL_426047 | 3/6/2020  | 4/14/2020 | North America / USA / New York / Westchester County |
| EPI_ISL_426048 | 3/6/2020  | 4/14/2020 | North America / USA / New York / Westchester County |
| EPI_ISL_426049 | 3/6/2020  | 4/14/2020 | North America / USA / New York / Westchester County |
| EPI_ISL_426050 | 3/8/2020  | 4/14/2020 | North America / USA / New York / Westchester County |
| EPI_ISL_426051 | 3/20/2020 | 4/14/2020 | Europe / Czech Republic / Prague                    |
| EPI_ISL_426052 | 3/30/2020 | 4/14/2020 | North America / USA / Connecticut                   |
| EPI_ISL_426053 | 3/30/2020 | 4/14/2020 | North America / USA / Connecticut                   |
| EPI_ISL_426054 | 3/30/2020 | 4/14/2020 | North America / USA / Connecticut                   |
| EPI_ISL_426055 | 3/30/2020 | 4/14/2020 | North America / USA / Connecticut                   |
| EPI_ISL_426056 | 3/30/2020 | 4/14/2020 | North America / USA / Connecticut                   |
| EPI_ISL_426057 | 3/21/2020 | 4/14/2020 | North America / USA / Idaho                         |
| EPI_ISL_426058 | 3/24/2020 | 4/14/2020 | North America / USA / Idaho                         |
| EPI_ISL_426059 | 3/23/2020 | 4/14/2020 | North America / USA / Idaho                         |
| EPI_ISL_426060 | 3/23/2020 | 4/14/2020 | North America / USA / Idaho                         |



|                |           |                                                           |
|----------------|-----------|-----------------------------------------------------------|
| EPI_ISL_426113 | 3/25/2020 | 4/14/2020 North America / USA / Washington                |
| EPI_ISL_426114 | 3/25/2020 | 4/14/2020 North America / USA / Washington                |
| EPI_ISL_426115 | 3/25/2020 | 4/14/2020 North America / USA / Washington                |
| EPI_ISL_426116 | 3/25/2020 | 4/14/2020 North America / USA / Washington                |
| EPI_ISL_426117 | 3/25/2020 | 4/14/2020 North America / USA / Washington                |
| EPI_ISL_426118 | 3/25/2020 | 4/14/2020 North America / USA / Washington                |
| EPI_ISL_426119 | 3/23/2020 | 4/14/2020 North America / USA / Washington                |
| EPI_ISL_426120 | 3/25/2020 | 4/14/2020 North America / USA / Washington                |
| EPI_ISL_426121 | 3/25/2020 | 4/14/2020 North America / USA / Washington                |
| EPI_ISL_426122 | 3/24/2020 | 4/14/2020 North America / USA / Washington                |
| EPI_ISL_426123 | 3/24/2020 | 4/14/2020 North America / USA / Washington                |
| EPI_ISL_426124 | 3/23/2020 | 4/14/2020 North America / USA / Washington                |
| EPI_ISL_426125 | 3/24/2020 | 4/14/2020 North America / USA / Washington                |
| EPI_ISL_426126 | 3/26/2020 | 4/14/2020 North America / USA / Washington                |
| EPI_ISL_426127 | 3/25/2020 | 4/14/2020 North America / USA / Washington                |
| EPI_ISL_426128 | 3/25/2020 | 4/14/2020 North America / USA / Washington                |
| EPI_ISL_426129 | 3/24/2020 | 4/14/2020 North America / USA / Washington                |
| EPI_ISL_426130 | 3/24/2020 | 4/14/2020 North America / USA / Washington                |
| EPI_ISL_426131 | 3/24/2020 | 4/14/2020 North America / USA / Washington                |
| EPI_ISL_426132 | 3/24/2020 | 4/14/2020 North America / USA / Washington                |
| EPI_ISL_426133 | 3/23/2020 | 4/14/2020 North America / USA / Washington                |
| EPI_ISL_426135 | 3/30/2020 | 4/14/2020 North America / USA / Washington                |
| EPI_ISL_426136 | 3/31/2020 | 4/14/2020 North America / USA / Washington                |
| EPI_ISL_426137 | 3/31/2020 | 4/14/2020 North America / USA / Washington                |
| EPI_ISL_529160 | 3/23/2020 | 4/14/2020 North America / USA / Idaho                     |
| EPI_ISL_529161 | 3/20/2020 | 4/14/2020 North America / USA / Idaho                     |
| EPI_ISL_426159 | 4/6/2020  | 4/15/2020 North America / USA / Minnesota / Winona County |
| EPI_ISL_426160 | 4/3/2020  | 4/15/2020 North America / USA / Iowa / Allamakee County   |
| EPI_ISL_426161 | 4/6/2020  | 4/15/2020 North America / USA / Iowa / Allamakee County   |
| EPI_ISL_426163 | 2/23/2020 | 4/15/2020 Asia / South Korea                              |
| EPI_ISL_426164 | 2/2/2020  | 4/15/2020 Asia / South Korea                              |
| EPI_ISL_426166 | 2/4/2020  | 4/15/2020 Asia / South Korea                              |
| EPI_ISL_426167 | 2/23/2020 | 4/15/2020 Asia / South Korea                              |
| EPI_ISL_426168 | 2/2/2020  | 4/15/2020 Asia / South Korea                              |
| EPI_ISL_426169 | 2/5/2020  | 4/15/2020 Asia / South Korea                              |
| EPI_ISL_426171 | 2/5/2020  | 4/15/2020 Asia / South Korea                              |
| EPI_ISL_426173 | 2/7/2020  | 4/15/2020 Asia / South Korea                              |
| EPI_ISL_426179 | 3/2/2020  | 4/15/2020 Asia / India                                    |
| EPI_ISL_426180 | 2/5/2020  | 4/15/2020 Asia / South Korea                              |
| EPI_ISL_426181 | 2/23/2020 | 4/15/2020 Asia / South Korea                              |
| EPI_ISL_426182 | 2/9/2020  | 4/15/2020 Asia / South Korea                              |
| EPI_ISL_426183 | 2/23/2020 | 4/15/2020 Asia / South Korea                              |
| EPI_ISL_426187 | 2/12/2020 | 4/15/2020 Asia / South Korea                              |
| EPI_ISL_426285 | 3/30/2020 | 4/15/2020 Europe / Latvia                                 |
| EPI_ISL_426286 | 3/30/2020 | 4/15/2020 Europe / Latvia                                 |
| EPI_ISL_426287 | 3/30/2020 | 4/15/2020 Europe / Latvia                                 |
| EPI_ISL_426288 | 3/30/2020 | 4/15/2020 Europe / Latvia                                 |

|                |           |                                                                |
|----------------|-----------|----------------------------------------------------------------|
| EPI_ISL_426289 | 3/30/2020 | 4/15/2020 Europe / Latvia                                      |
| EPI_ISL_426290 | 3/8/2020  | 4/15/2020 North America / USA / New York / Westchester County  |
| EPI_ISL_426291 | 3/8/2020  | 4/15/2020 North America / USA / New York / Westchester County  |
| EPI_ISL_426292 | 3/6/2020  | 4/15/2020 North America / USA / New York / Saratoga County     |
| EPI_ISL_426293 | 3/10/2020 | 4/15/2020 North America / USA / New York / Nassau County       |
| EPI_ISL_426294 | 3/11/2020 | 4/15/2020 North America / USA / New York / Suffolk County      |
| EPI_ISL_426295 | 3/22/2020 | 4/15/2020 North America / USA / New York / Queens              |
| EPI_ISL_426296 | 3/14/2020 | 4/15/2020 North America / USA / New York / Orange County       |
| EPI_ISL_426297 | 3/16/2020 | 4/15/2020 North America / USA / New York / Schenectady County  |
| EPI_ISL_426298 | 3/27/2020 | 4/15/2020 North America / USA / New York / Franklin County     |
| EPI_ISL_426299 | 3/28/2020 | 4/15/2020 North America / USA / New York / Onondaga County     |
| EPI_ISL_426300 | 3/21/2020 | 4/15/2020 North America / USA / New York / Saratoga County     |
| EPI_ISL_426301 | 3/27/2020 | 4/15/2020 North America / USA / New York / Ulster County       |
| EPI_ISL_426302 | 3/21/2020 | 4/15/2020 North America / USA / New York / Putnam County       |
| EPI_ISL_426303 | 3/27/2020 | 4/15/2020 North America / USA / New York / Cayuga County       |
| EPI_ISL_426304 | 3/23/2020 | 4/15/2020 North America / USA / New York / Jefferson County    |
| EPI_ISL_426305 | 3/28/2020 | 4/15/2020 North America / USA / New York / Washington County   |
| EPI_ISL_426306 | 3/15/2020 | 4/15/2020 North America / USA / New York / Richmond County     |
| EPI_ISL_426307 | 3/26/2020 | 4/15/2020 North America / USA / New York / Onondaga County     |
| EPI_ISL_426308 | 3/26/2020 | 4/15/2020 North America / USA / New York / Montgomery County   |
| EPI_ISL_426309 | 3/28/2020 | 4/15/2020 North America / USA / New York / Orange County       |
| EPI_ISL_426310 | 3/14/2020 | 4/15/2020 North America / USA / New York / Schenectady County  |
| EPI_ISL_426311 | 3/8/2020  | 4/15/2020 North America / USA / New York / Bronx               |
| EPI_ISL_426312 | 3/27/2020 | 4/15/2020 North America / USA / New York / Suffolk County      |
| EPI_ISL_426313 | 3/19/2020 | 4/15/2020 North America / USA / New York / Clinton County      |
| EPI_ISL_426314 | 3/25/2020 | 4/15/2020 North America / USA / New York / Albany County       |
| EPI_ISL_426315 | 3/19/2020 | 4/15/2020 North America / USA / New York / Onondaga County     |
| EPI_ISL_426316 | 3/15/2020 | 4/15/2020 North America / USA / New York / Rockland County     |
| EPI_ISL_426317 | 3/15/2020 | 4/15/2020 North America / USA / New York / New York City       |
| EPI_ISL_426318 | 3/22/2020 | 4/15/2020 North America / USA / New York / Ulster County       |
| EPI_ISL_426319 | 3/15/2020 | 4/15/2020 North America / USA / New York / Bronx               |
| EPI_ISL_426320 | 3/20/2020 | 4/15/2020 North America / USA / New York / Broome County       |
| EPI_ISL_426321 | 3/27/2020 | 4/15/2020 North America / USA / New York / Chenango County     |
| EPI_ISL_426322 | 3/12/2020 | 4/15/2020 North America / USA / New York / Nassau County       |
| EPI_ISL_426323 | 3/16/2020 | 4/15/2020 North America / USA / New York / Dutchess County     |
| EPI_ISL_426324 | 3/6/2020  | 4/15/2020 North America / USA / New York / Westchester County  |
| EPI_ISL_426325 | 3/6/2020  | 4/15/2020 North America / USA / New York / Westchester County  |
| EPI_ISL_426326 | 3/6/2020  | 4/15/2020 North America / USA / New York / Westchester County  |
| EPI_ISL_426327 | 3/6/2020  | 4/15/2020 North America / USA / New York / Westchester County  |
| EPI_ISL_426328 | 3/7/2020  | 4/15/2020 North America / USA / New York / Westchester County  |
| EPI_ISL_426356 | 3/21/2020 | 4/16/2020 Europe / Czech Republic / Central Czechia and Prague |
| EPI_ISL_426357 | 3/18/2020 | 4/16/2020 Europe / Czech Republic / Central Czechia and Prague |
| EPI_ISL_426358 | 3/19/2020 | 4/16/2020 Europe / Czech Republic / Central Czechia and Prague |
| EPI_ISL_426359 | 3/17/2020 | 4/16/2020 Europe / Czech Republic / Central Czechia and Prague |
| EPI_ISL_426360 | 3/18/2020 | 4/16/2020 Europe / Czech Republic / Central Czechia and Prague |
| EPI_ISL_426361 | 3/12/2020 | 4/16/2020 North America / Mexico / Mexico City                 |
| EPI_ISL_426362 | 3/10/2020 | 4/16/2020 North America / Mexico / Mexico City                 |

|                |           |                                                |
|----------------|-----------|------------------------------------------------|
| EPI_ISL_426363 | 3/12/2020 | 4/16/2020 North America / Mexico / Mexico City |
| EPI_ISL_426364 | 3/12/2020 | 4/16/2020 North America / Mexico / Mexico City |
| EPI_ISL_426365 | 3/12/2020 | 4/16/2020 North America / Mexico / Mexico City |
| EPI_ISL_426379 | 3/29/2020 | 4/16/2020 Europe / Slovenia                    |
| EPI_ISL_426414 | 4/5/2020  | 4/16/2020 Asia / India / Gujarat               |
| EPI_ISL_426415 | 4/5/2020  | 4/16/2020 Asia / India / Gujarat               |
| EPI_ISL_426416 | 3/8/2020  | 4/16/2020 North America / USA / Connecticut    |
| EPI_ISL_426417 | 3/7/2020  | 4/16/2020 North America / USA / Georgia        |
| EPI_ISL_426418 | 2020-03   | 4/16/2020 North America / USA / Georgia        |
| EPI_ISL_426419 | 2020-03   | 4/16/2020 North America / USA / Georgia        |
| EPI_ISL_426420 | 3/5/2020  | 4/16/2020 North America / USA / Hawaii         |
| EPI_ISL_426421 | 3/7/2020  | 4/16/2020 North America / USA / Hawaii         |
| EPI_ISL_426422 | 3/7/2020  | 4/16/2020 North America / USA / Indiana        |
| EPI_ISL_426423 | 3/8/2020  | 4/16/2020 North America / USA / Indiana        |
| EPI_ISL_426424 | 3/9/2020  | 4/16/2020 North America / USA / Indiana        |
| EPI_ISL_426425 | 3/4/2020  | 4/16/2020 North America / USA / Maryland       |
| EPI_ISL_426426 | 3/5/2020  | 4/16/2020 North America / USA / Minnesota      |
| EPI_ISL_426427 | 3/7/2020  | 4/16/2020 North America / USA / Minnesota      |
| EPI_ISL_426428 | 3/8/2020  | 4/16/2020 North America / USA / North Carolina |
| EPI_ISL_426429 | 3/7/2020  | 4/16/2020 North America / USA / Nevada         |
| EPI_ISL_426430 | 3/8/2020  | 4/16/2020 North America / USA / Ohio           |
| EPI_ISL_426431 | 3/7/2020  | 4/16/2020 North America / USA / Ohio           |
| EPI_ISL_426432 | 3/7/2020  | 4/16/2020 North America / USA / Pennsylvania   |
| EPI_ISL_426433 | 3/7/2020  | 4/16/2020 North America / USA / Pennsylvania   |
| EPI_ISL_426434 | 3/8/2020  | 4/16/2020 North America / USA / Pennsylvania   |
| EPI_ISL_426435 | 3/9/2020  | 4/16/2020 North America / USA / Rhode Island   |
| EPI_ISL_426436 | 3/19/2020 | 4/16/2020 North America / USA / Washington     |
| EPI_ISL_426437 | 3/19/2020 | 4/16/2020 North America / USA / Washington     |
| EPI_ISL_426438 | 3/19/2020 | 4/16/2020 North America / USA / Washington     |
| EPI_ISL_426439 | 3/19/2020 | 4/16/2020 North America / USA / Washington     |
| EPI_ISL_426440 | 3/19/2020 | 4/16/2020 North America / USA / Washington     |
| EPI_ISL_426441 | 3/19/2020 | 4/16/2020 North America / USA / Washington     |
| EPI_ISL_426442 | 3/19/2020 | 4/16/2020 North America / USA / Washington     |
| EPI_ISL_426443 | 3/19/2020 | 4/16/2020 North America / USA / Washington     |
| EPI_ISL_426444 | 3/19/2020 | 4/16/2020 North America / USA / Washington     |
| EPI_ISL_426445 | 3/19/2020 | 4/16/2020 North America / USA / Washington     |
| EPI_ISL_426446 | 3/19/2020 | 4/16/2020 North America / USA / Washington     |
| EPI_ISL_426447 | 3/19/2020 | 4/16/2020 North America / USA / Washington     |
| EPI_ISL_426448 | 3/20/2020 | 4/16/2020 North America / USA / Washington     |
| EPI_ISL_426449 | 3/19/2020 | 4/16/2020 North America / USA / Washington     |
| EPI_ISL_426450 | 3/19/2020 | 4/16/2020 North America / USA / Washington     |
| EPI_ISL_426451 | 3/19/2020 | 4/16/2020 North America / USA / Washington     |
| EPI_ISL_426452 | 3/19/2020 | 4/16/2020 North America / USA / Washington     |
| EPI_ISL_426453 | 3/20/2020 | 4/16/2020 North America / USA / Washington     |
| EPI_ISL_450506 | 3/18/2020 | 4/16/2020 South America / Brazil               |
| EPI_ISL_426454 | 3/23/2020 | 4/17/2020 North America / USA / Virginia       |
| EPI_ISL_426455 | 3/27/2020 | 4/17/2020 North America / USA / Virginia       |



|                |           |           |                                                      |
|----------------|-----------|-----------|------------------------------------------------------|
| EPI_ISL_426526 | 3/23/2020 | 4/17/2020 | North America / USA / Arizona                        |
| EPI_ISL_426527 | 3/17/2020 | 4/17/2020 | North America / USA / Arizona                        |
| EPI_ISL_426528 | 3/14/2020 | 4/17/2020 | North America / USA / Arizona                        |
| EPI_ISL_426529 | 3/16/2020 | 4/17/2020 | North America / USA / Arizona                        |
| EPI_ISL_426530 | 3/17/2020 | 4/17/2020 | North America / USA / Arizona                        |
| EPI_ISL_426531 | 3/12/2020 | 4/17/2020 | North America / USA / Arizona                        |
| EPI_ISL_426532 | 3/25/2020 | 4/17/2020 | North America / USA / Arizona                        |
| EPI_ISL_426533 | 3/26/2020 | 4/17/2020 | North America / USA / Arizona                        |
| EPI_ISL_426534 | 3/27/2020 | 4/17/2020 | North America / USA / Arizona                        |
| EPI_ISL_426535 | 3/17/2020 | 4/17/2020 | North America / USA / Arizona                        |
| EPI_ISL_426536 | 3/25/2020 | 4/17/2020 | North America / USA / Arizona                        |
| EPI_ISL_426537 | 3/17/2020 | 4/17/2020 | North America / USA / Arizona                        |
| EPI_ISL_426538 | 3/19/2020 | 4/17/2020 | North America / USA / Arizona                        |
| EPI_ISL_426540 | 3/23/2020 | 4/17/2020 | North America / USA / Arizona                        |
| EPI_ISL_426541 | 3/24/2020 | 4/17/2020 | North America / USA / Arizona                        |
| EPI_ISL_426542 | 3/20/2020 | 4/17/2020 | North America / USA / Arizona                        |
| EPI_ISL_426543 | 3/24/2020 | 4/17/2020 | North America / USA / Arizona                        |
| EPI_ISL_426544 | 3/20/2020 | 4/17/2020 | North America / USA / Arizona                        |
| EPI_ISL_426545 | 3/25/2020 | 4/17/2020 | North America / USA / Arizona                        |
| EPI_ISL_426546 | 3/26/2020 | 4/17/2020 | North America / USA / Arizona                        |
| EPI_ISL_426547 | 3/26/2020 | 4/17/2020 | North America / USA / Arizona                        |
| EPI_ISL_426548 | 3/26/2020 | 4/17/2020 | North America / USA / Arizona                        |
| EPI_ISL_426549 | 3/26/2020 | 4/17/2020 | North America / USA / Arizona                        |
| EPI_ISL_426550 | 3/26/2020 | 4/17/2020 | North America / USA / Arizona                        |
| EPI_ISL_426551 | 3/27/2020 | 4/17/2020 | North America / USA / Arizona                        |
| EPI_ISL_426552 | 3/27/2020 | 4/17/2020 | North America / USA / Arizona                        |
| EPI_ISL_426553 | 3/27/2020 | 4/17/2020 | North America / USA / Arizona                        |
| EPI_ISL_426554 | 3/26/2020 | 4/17/2020 | North America / USA / Arizona                        |
| EPI_ISL_426555 | 3/26/2020 | 4/17/2020 | North America / USA / Arizona                        |
| EPI_ISL_426556 | 4/1/2020  | 4/17/2020 | North America / USA / Arizona                        |
| EPI_ISL_426557 | 4/1/2020  | 4/17/2020 | North America / USA / Arizona                        |
| EPI_ISL_426558 | 3/25/2020 | 4/17/2020 | North America / USA / Arizona                        |
| EPI_ISL_426559 | 3/25/2020 | 4/17/2020 | North America / USA / Arizona                        |
| EPI_ISL_426560 | 3/30/2020 | 4/17/2020 | North America / USA / Arizona                        |
| EPI_ISL_426561 | 3/31/2020 | 4/17/2020 | North America / USA / Arizona                        |
| EPI_ISL_426562 | 3/31/2020 | 4/17/2020 | North America / USA / Arizona                        |
| EPI_ISL_426563 | 3/31/2020 | 4/17/2020 | North America / USA / Arizona                        |
| EPI_ISL_426564 | 4/1/2020  | 4/17/2020 | North America / USA / Arizona                        |
| EPI_ISL_426565 | 4/1/2020  | 4/17/2020 | North America / USA / Arizona                        |
| EPI_ISL_426566 | 4/1/2020  | 4/17/2020 | North America / USA / Arizona                        |
| EPI_ISL_426567 | 4/1/2020  | 4/17/2020 | North America / USA / Arizona                        |
| EPI_ISL_426568 | 4/2/2020  | 4/17/2020 | North America / USA / Arizona                        |
| EPI_ISL_426569 | 4/2/2020  | 4/17/2020 | North America / USA / Arizona                        |
| EPI_ISL_426580 | 3/13/2020 | 4/17/2020 | South America / Brazil / Distrito Federal / Brasilia |
| EPI_ISL_426581 | 2020      | 4/17/2020 | Europe / Czech Republic                              |
| EPI_ISL_426617 | 4/1/2020  | 4/17/2020 | North America / USA / New York / Suffolk County      |
| EPI_ISL_426618 | 4/1/2020  | 4/17/2020 | North America / USA / New York / Nassau County       |

|                |           |                                                          |
|----------------|-----------|----------------------------------------------------------|
| EPI_ISL_426619 | 4/1/2020  | 4/17/2020 North America / USA / New York / Nassau County |
| EPI_ISL_426620 | 4/1/2020  | 4/17/2020 North America / USA / New York / Brooklyn      |
| EPI_ISL_426621 | 4/1/2020  | 4/17/2020 North America / USA / New York / Brooklyn      |
| EPI_ISL_426622 | 4/1/2020  | 4/17/2020 North America / USA / New York / Manhattan     |
| EPI_ISL_426623 | 4/1/2020  | 4/17/2020 North America / USA / New York / Manhattan     |
| EPI_ISL_426624 | 4/1/2020  | 4/17/2020 North America / USA / New York / Brooklyn      |
| EPI_ISL_426625 | 4/1/2020  | 4/17/2020 North America / USA / New York / Brooklyn      |
| EPI_ISL_426626 | 4/1/2020  | 4/17/2020 North America / USA / New York / Brooklyn      |
| EPI_ISL_426627 | 4/6/2020  | 4/17/2020 North America / USA / Louisiana                |
| EPI_ISL_426628 | 4/6/2020  | 4/17/2020 North America / USA / Louisiana                |
| EPI_ISL_426629 | 2/7/2020  | 4/17/2020 Asia / Taiwan / Taipei                         |
| EPI_ISL_426630 | 3/17/2020 | 4/17/2020 Asia / Taiwan / New Taipei City                |
| EPI_ISL_426631 | 3/17/2020 | 4/17/2020 Asia / Taiwan / New Taipei City                |
| EPI_ISL_426632 | 3/17/2020 | 4/17/2020 Asia / Taiwan / New Taipei City                |
| EPI_ISL_426634 | 3/20/2020 | 4/17/2020 Oceania / Australia / Northern Territory       |
| EPI_ISL_426635 | 3/23/2020 | 4/17/2020 Oceania / Australia / Northern Territory       |
| EPI_ISL_426636 | 3/25/2020 | 4/17/2020 Oceania / Australia / Northern Territory       |
| EPI_ISL_426637 | 3/17/2020 | 4/17/2020 Oceania / Australia / Victoria                 |
| EPI_ISL_426638 | 3/17/2020 | 4/17/2020 Oceania / Australia / Victoria                 |
| EPI_ISL_426639 | 3/17/2020 | 4/17/2020 Oceania / Australia / Victoria                 |
| EPI_ISL_426640 | 3/18/2020 | 4/17/2020 Oceania / Australia / Victoria                 |
| EPI_ISL_426641 | 3/18/2020 | 4/17/2020 Oceania / Australia / Victoria                 |
| EPI_ISL_426642 | 3/18/2020 | 4/17/2020 Oceania / Australia / Victoria                 |
| EPI_ISL_426643 | 3/19/2020 | 4/17/2020 Oceania / Australia / Victoria                 |
| EPI_ISL_426644 | 3/20/2020 | 4/17/2020 Oceania / Australia / Victoria                 |
| EPI_ISL_426645 | 3/20/2020 | 4/17/2020 Oceania / Australia / Victoria                 |
| EPI_ISL_426646 | 3/20/2020 | 4/17/2020 Oceania / Australia / Victoria                 |
| EPI_ISL_426647 | 3/20/2020 | 4/17/2020 Oceania / Australia / Victoria                 |
| EPI_ISL_426648 | 3/20/2020 | 4/17/2020 Oceania / Australia / Victoria                 |
| EPI_ISL_426649 | 3/20/2020 | 4/17/2020 Oceania / Australia / Victoria                 |
| EPI_ISL_426650 | 3/20/2020 | 4/17/2020 Oceania / Australia / Victoria                 |
| EPI_ISL_426651 | 3/20/2020 | 4/17/2020 Oceania / Australia / Victoria                 |
| EPI_ISL_426652 | 3/20/2020 | 4/17/2020 Oceania / Australia / Victoria                 |
| EPI_ISL_426653 | 3/20/2020 | 4/17/2020 Oceania / Australia / Victoria                 |
| EPI_ISL_426654 | 3/20/2020 | 4/17/2020 Oceania / Australia / Victoria                 |
| EPI_ISL_426655 | 3/20/2020 | 4/17/2020 Oceania / Australia / Victoria                 |
| EPI_ISL_426656 | 3/20/2020 | 4/17/2020 Oceania / Australia / Victoria                 |
| EPI_ISL_426657 | 3/20/2020 | 4/17/2020 Oceania / Australia / Victoria                 |
| EPI_ISL_426658 | 3/20/2020 | 4/17/2020 Oceania / Australia / Victoria                 |
| EPI_ISL_426659 | 3/20/2020 | 4/17/2020 Oceania / Australia / Victoria                 |
| EPI_ISL_426661 | 3/21/2020 | 4/17/2020 Oceania / Australia / Victoria                 |
| EPI_ISL_426662 | 3/21/2020 | 4/17/2020 Oceania / Australia / Victoria                 |
| EPI_ISL_426663 | 3/21/2020 | 4/17/2020 Oceania / Australia / Victoria                 |
| EPI_ISL_426664 | 3/21/2020 | 4/17/2020 Oceania / Australia / Victoria                 |
| EPI_ISL_426665 | 3/21/2020 | 4/17/2020 Oceania / Australia / Victoria                 |
| EPI_ISL_426666 | 3/21/2020 | 4/17/2020 Oceania / Australia / Victoria                 |
| EPI_ISL_426667 | 3/22/2020 | 4/17/2020 Oceania / Australia / Victoria                 |









|                |           |                                                    |
|----------------|-----------|----------------------------------------------------|
| EPI_ISL_426858 | 3/26/2020 | 4/17/2020 Oceania / Australia / Victoria           |
| EPI_ISL_426860 | 3/27/2020 | 4/17/2020 Oceania / Australia / Victoria           |
| EPI_ISL_426861 | 3/27/2020 | 4/17/2020 Oceania / Australia / Victoria           |
| EPI_ISL_426862 | 3/27/2020 | 4/17/2020 Oceania / Australia / Victoria           |
| EPI_ISL_426864 | 3/26/2020 | 4/17/2020 Oceania / Australia / Victoria           |
| EPI_ISL_426865 | 3/27/2020 | 4/17/2020 Oceania / Australia / Victoria           |
| EPI_ISL_426866 | 3/26/2020 | 4/17/2020 Oceania / Australia / Victoria           |
| EPI_ISL_426870 | 3/28/2020 | 4/17/2020 Oceania / Australia / Victoria           |
| EPI_ISL_426872 | 3/26/2020 | 4/17/2020 Oceania / Australia / Victoria           |
| EPI_ISL_426873 | 3/25/2020 | 4/17/2020 Oceania / Australia / Victoria           |
| EPI_ISL_426874 | 3/26/2020 | 4/17/2020 Oceania / Australia / Victoria           |
| EPI_ISL_426875 | 3/27/2020 | 4/17/2020 Oceania / Australia / Victoria           |
| EPI_ISL_426876 | 3/28/2020 | 4/17/2020 Oceania / Australia / Victoria           |
| EPI_ISL_426877 | 3/28/2020 | 4/17/2020 Oceania / Australia / Victoria           |
| EPI_ISL_426878 | 3/21/2020 | 4/17/2020 Oceania / Australia / Victoria           |
| EPI_ISL_426881 | 3/24/2020 | 4/17/2020 Oceania / Australia / Victoria           |
| EPI_ISL_426882 | 3/24/2020 | 4/17/2020 Oceania / Australia / Victoria           |
| EPI_ISL_426883 | 3/27/2020 | 4/17/2020 Europe / Czech Republic                  |
| EPI_ISL_426884 | 3/27/2020 | 4/17/2020 Europe / Czech Republic                  |
| EPI_ISL_426885 | 3/27/2020 | 4/17/2020 Europe / Czech Republic                  |
| EPI_ISL_426886 | 3/28/2020 | 4/17/2020 Europe / Czech Republic                  |
| EPI_ISL_426887 | 3/31/2020 | 4/17/2020 Europe / Czech Republic                  |
| EPI_ISL_426888 | 3/31/2020 | 4/17/2020 Europe / Czech Republic                  |
| EPI_ISL_426889 | 4/2/2020  | 4/17/2020 Europe / Czech Republic                  |
| EPI_ISL_426890 | 3/26/2020 | 4/17/2020 Europe / Czech Republic                  |
| EPI_ISL_426891 | 3/26/2020 | 4/17/2020 Europe / Czech Republic                  |
| EPI_ISL_426892 | 3/27/2020 | 4/17/2020 Europe / Czech Republic                  |
| EPI_ISL_426893 | 3/27/2020 | 4/17/2020 Europe / Czech Republic                  |
| EPI_ISL_426894 | 3/27/2020 | 4/17/2020 Europe / Czech Republic                  |
| EPI_ISL_426895 | 3/27/2020 | 4/17/2020 Europe / Czech Republic                  |
| EPI_ISL_426896 | 3/28/2020 | 4/17/2020 Europe / Czech Republic                  |
| EPI_ISL_426897 | 3/29/2020 | 4/17/2020 Europe / Czech Republic                  |
| EPI_ISL_426898 | 3/26/2020 | 4/17/2020 Oceania / Australia / Northern Territory |
| EPI_ISL_426899 | 3/27/2020 | 4/17/2020 Oceania / Australia / Northern Territory |
| EPI_ISL_426900 | 3/25/2020 | 4/17/2020 Oceania / Australia / Northern Territory |
| EPI_ISL_426901 | 3/25/2020 | 4/17/2020 Oceania / Australia / Northern Territory |
| EPI_ISL_426904 | 3/24/2020 | 4/17/2020 Oceania / Australia / Northern Territory |
| EPI_ISL_426906 | 3/28/2020 | 4/17/2020 Oceania / Australia / Victoria           |
| EPI_ISL_426907 | 3/28/2020 | 4/17/2020 Oceania / Australia / Victoria           |
| EPI_ISL_426910 | 3/28/2020 | 4/17/2020 Oceania / Australia / Victoria           |
| EPI_ISL_426914 | 3/29/2020 | 4/17/2020 Oceania / Australia / Victoria           |
| EPI_ISL_426917 | 3/29/2020 | 4/17/2020 Oceania / Australia / Victoria           |
| EPI_ISL_426918 | 3/29/2020 | 4/17/2020 Oceania / Australia / Victoria           |
| EPI_ISL_426919 | 3/29/2020 | 4/17/2020 Oceania / Australia / Victoria           |
| EPI_ISL_426920 | 3/29/2020 | 4/17/2020 Oceania / Australia / Victoria           |
| EPI_ISL_426921 | 3/30/2020 | 4/17/2020 Oceania / Australia / Victoria           |
| EPI_ISL_426922 | 3/30/2020 | 4/17/2020 Oceania / Australia / Victoria           |







|                |           |                                             |
|----------------|-----------|---------------------------------------------|
| EPI_ISL_427128 | 4/5/2020  | 4/17/2020 Oceania / Australia / Victoria    |
| EPI_ISL_427129 | 4/5/2020  | 4/17/2020 Oceania / Australia / Victoria    |
| EPI_ISL_427130 | 4/5/2020  | 4/17/2020 Oceania / Australia / Victoria    |
| EPI_ISL_427131 | 4/5/2020  | 4/17/2020 Oceania / Australia / Victoria    |
| EPI_ISL_427133 | 4/6/2020  | 4/17/2020 Oceania / Australia / Victoria    |
| EPI_ISL_427134 | 4/6/2020  | 4/17/2020 Oceania / Australia / Victoria    |
| EPI_ISL_427135 | 4/6/2020  | 4/17/2020 Oceania / Australia / Victoria    |
| EPI_ISL_427136 | 4/6/2020  | 4/17/2020 Oceania / Australia / Victoria    |
| EPI_ISL_427137 | 4/6/2020  | 4/17/2020 Oceania / Australia / Victoria    |
| EPI_ISL_427138 | 4/6/2020  | 4/17/2020 Oceania / Australia / Victoria    |
| EPI_ISL_427139 | 4/6/2020  | 4/17/2020 Oceania / Australia / Victoria    |
| EPI_ISL_427140 | 4/6/2020  | 4/17/2020 Oceania / Australia / Victoria    |
| EPI_ISL_427144 | 4/6/2020  | 4/17/2020 Oceania / Australia / Victoria    |
| EPI_ISL_427145 | 4/6/2020  | 4/17/2020 Oceania / Australia / Victoria    |
| EPI_ISL_427146 | 4/6/2020  | 4/17/2020 Oceania / Australia / Victoria    |
| EPI_ISL_427147 | 4/6/2020  | 4/17/2020 Oceania / Australia / Victoria    |
| EPI_ISL_427148 | 4/8/2020  | 4/17/2020 Oceania / Australia / Victoria    |
| EPI_ISL_427149 | 4/8/2020  | 4/17/2020 Oceania / Australia / Victoria    |
| EPI_ISL_427151 | 3/26/2020 | 4/17/2020 Oceania / Australia / Victoria    |
| EPI_ISL_427153 | 3/27/2020 | 4/17/2020 Oceania / Australia / Victoria    |
| EPI_ISL_427155 | 3/30/2020 | 4/17/2020 Oceania / Australia / Victoria    |
| EPI_ISL_427157 | 3/30/2020 | 4/17/2020 Oceania / Australia / Victoria    |
| EPI_ISL_427159 | 3/30/2020 | 4/17/2020 Oceania / Australia / Victoria    |
| EPI_ISL_427160 | 3/31/2020 | 4/17/2020 Oceania / Australia / Victoria    |
| EPI_ISL_427161 | 3/25/2020 | 4/17/2020 North America / USA / Connecticut |
| EPI_ISL_427162 | 3/30/2020 | 4/17/2020 North America / USA / Connecticut |
| EPI_ISL_427163 | 3/31/2020 | 4/17/2020 North America / USA / Connecticut |
| EPI_ISL_427164 | 3/31/2020 | 4/17/2020 North America / USA / Connecticut |
| EPI_ISL_427165 | 3/30/2020 | 4/17/2020 North America / USA / Connecticut |
| EPI_ISL_427166 | 3/25/2020 | 4/17/2020 North America / USA / Idaho       |
| EPI_ISL_427167 | 3/26/2020 | 4/17/2020 North America / USA / Idaho       |
| EPI_ISL_427169 | 3/30/2020 | 4/17/2020 North America / USA / Idaho       |
| EPI_ISL_427170 | 3/30/2020 | 4/17/2020 North America / USA / Idaho       |
| EPI_ISL_427171 | 3/29/2020 | 4/17/2020 North America / USA / Idaho       |
| EPI_ISL_427172 | 3/29/2020 | 4/17/2020 North America / USA / Idaho       |
| EPI_ISL_427173 | 3/31/2020 | 4/17/2020 North America / USA / Oregon      |
| EPI_ISL_427174 | 3/26/2020 | 4/17/2020 North America / USA / Washington  |
| EPI_ISL_427175 | 3/26/2020 | 4/17/2020 North America / USA / Washington  |
| EPI_ISL_427177 | 3/26/2020 | 4/17/2020 North America / USA / Washington  |
| EPI_ISL_427178 | 3/27/2020 | 4/17/2020 North America / USA / Washington  |
| EPI_ISL_427179 | 3/26/2020 | 4/17/2020 North America / USA / Washington  |
| EPI_ISL_427180 | 3/26/2020 | 4/17/2020 North America / USA / Washington  |
| EPI_ISL_427181 | 3/26/2020 | 4/17/2020 North America / USA / Washington  |
| EPI_ISL_427182 | 3/26/2020 | 4/17/2020 North America / USA / Washington  |
| EPI_ISL_427183 | 3/25/2020 | 4/17/2020 North America / USA / Washington  |
| EPI_ISL_427184 | 3/25/2020 | 4/17/2020 North America / USA / Washington  |
| EPI_ISL_427185 | 3/26/2020 | 4/17/2020 North America / USA / Washington  |







|                |           |                                                                   |
|----------------|-----------|-------------------------------------------------------------------|
| EPI_ISL_427286 | 3/23/2020 | 4/17/2020 North America / USA / Minnesota                         |
| EPI_ISL_427287 | 3/23/2020 | 4/17/2020 North America / USA / Minnesota                         |
| EPI_ISL_427288 | 3/31/2020 | 4/17/2020 North America / USA / Ohio / Columbus                   |
| EPI_ISL_427290 | 3/31/2020 | 4/17/2020 North America / USA / Ohio / Columbus                   |
| EPI_ISL_427292 | 3/18/2020 | 4/18/2020 South America / Brazil / Alagoas / Maceio               |
| EPI_ISL_427293 | 3/6/2020  | 4/18/2020 South America / Brazil / Bahia / Feira de Santana       |
| EPI_ISL_427294 | 3/13/2020 | 4/18/2020 South America / Brazil / Distrito Federal / Brasilia    |
| EPI_ISL_427295 | 3/13/2020 | 4/18/2020 South America / Brazil / Distrito Federal / Brasilia    |
| EPI_ISL_427296 | 3/23/2020 | 4/18/2020 South America / Brazil / Distrito Federal / Brasilia    |
| EPI_ISL_427297 | 3/23/2020 | 4/18/2020 South America / Brazil / Distrito Federal / Brasilia    |
| EPI_ISL_427298 | 3/22/2020 | 4/18/2020 South America / Brazil / Distrito Federal / Brasilia    |
| EPI_ISL_427299 | 3/5/2020  | 4/18/2020 South America / Brazil / Rio de Janeiro / Niteroi       |
| EPI_ISL_427300 | 3/11/2020 | 4/18/2020 South America / Brazil / Rio de Janeiro                 |
| EPI_ISL_427301 | 3/11/2020 | 4/18/2020 South America / Brazil / Rio de Janeiro                 |
| EPI_ISL_427302 | 3/20/2020 | 4/18/2020 South America / Brazil / Rio de Janeiro                 |
| EPI_ISL_427303 | 3/25/2020 | 4/18/2020 South America / Brazil / Rio de Janeiro                 |
| EPI_ISL_427304 | 3/26/2020 | 4/18/2020 South America / Brazil / Rio de Janeiro                 |
| EPI_ISL_427305 | 3/10/2020 | 4/18/2020 South America / Brazil / Santa Catarina / Joinville     |
| EPI_ISL_427306 | 3/10/2020 | 4/18/2020 South America / Brazil / Santa Catarina / Florianopolis |
| EPI_ISL_427307 | 3/20/2020 | 4/18/2020 Europe / Russia / Saint Petersburg                      |
| EPI_ISL_427308 | 3/24/2020 | 4/18/2020 Europe / Russia / Saint Petersburg                      |
| EPI_ISL_427309 | 3/24/2020 | 4/18/2020 Europe / Russia / Saint Petersburg                      |
| EPI_ISL_427310 | 3/29/2020 | 4/18/2020 Europe / Russia / Saint Petersburg                      |
| EPI_ISL_427311 | 3/29/2020 | 4/18/2020 Europe / Russia / Saint Petersburg                      |
| EPI_ISL_427312 | 3/29/2020 | 4/18/2020 Europe / Russia / Saint Petersburg                      |
| EPI_ISL_427313 | 4/3/2020  | 4/18/2020 Europe / Russia / Saint Petersburg                      |
| EPI_ISL_427314 | 4/2/2020  | 4/18/2020 Europe / Russia / Saint Petersburg                      |
| EPI_ISL_427315 | 3/25/2020 | 4/18/2020 Europe / Russia / Buryatia / Ulan-Ude                   |
| EPI_ISL_427316 | 4/3/2020  | 4/18/2020 Europe / Russia / Saint Petersburg                      |
| EPI_ISL_427317 | 4/3/2020  | 4/18/2020 Europe / Russia / Saint Petersburg                      |
| EPI_ISL_427318 | 4/3/2020  | 4/18/2020 Europe / Russia / Saint Petersburg                      |
| EPI_ISL_427319 | 4/4/2020  | 4/18/2020 Europe / Russia / Saint Petersburg                      |
| EPI_ISL_427320 | 4/5/2020  | 4/18/2020 Europe / Russia / Saint Petersburg                      |
| EPI_ISL_427321 | 4/5/2020  | 4/18/2020 Europe / Russia / Saint Petersburg                      |
| EPI_ISL_427322 | 4/5/2020  | 4/18/2020 Europe / Russia / Saint Petersburg                      |
| EPI_ISL_427323 | 4/6/2020  | 4/18/2020 Europe / Russia / Saint Petersburg                      |
| EPI_ISL_427324 | 4/7/2020  | 4/18/2020 Europe / Russia / Saint Petersburg                      |
| EPI_ISL_427325 | 4/7/2020  | 4/18/2020 Europe / Russia / Saint Petersburg                      |
| EPI_ISL_427326 | 4/7/2020  | 4/18/2020 Europe / Russia / Saint Petersburg                      |
| EPI_ISL_427327 | 4/7/2020  | 4/18/2020 Europe / Russia / Saint Petersburg                      |
| EPI_ISL_427328 | 4/7/2020  | 4/18/2020 Europe / Russia / Saint Petersburg                      |
| EPI_ISL_427329 | 4/7/2020  | 4/18/2020 Europe / Russia / Saint Petersburg                      |
| EPI_ISL_427330 | 4/7/2020  | 4/18/2020 Europe / Russia / Saint Petersburg                      |
| EPI_ISL_427331 | 4/7/2020  | 4/18/2020 Europe / Russia / Saint Petersburg                      |
| EPI_ISL_427332 | 4/7/2020  | 4/18/2020 Europe / Russia / Saint Petersburg                      |
| EPI_ISL_427333 | 4/7/2020  | 4/18/2020 Europe / Russia / Saint Petersburg                      |
| EPI_ISL_427334 | 4/7/2020  | 4/18/2020 Europe / Russia / Saint Petersburg                      |

|                |           |                                                             |
|----------------|-----------|-------------------------------------------------------------|
| EPI_ISL_427335 | 4/7/2020  | 4/18/2020 Europe / Russia / Saint Petersburg                |
| EPI_ISL_427336 | 4/7/2020  | 4/18/2020 Europe / Russia / Saint Petersburg                |
| EPI_ISL_427337 | 3/25/2020 | 4/18/2020 Europe / Russia / Saint Petersburg                |
| EPI_ISL_427338 | 3/25/2020 | 4/18/2020 Europe / Russia / Saint Petersburg                |
| EPI_ISL_427339 | 3/25/2020 | 4/18/2020 Europe / Russia / Saint Petersburg                |
| EPI_ISL_427349 | 4/6/2020  | 4/18/2020 Europe / Belgium / Liege                          |
| EPI_ISL_427350 | 4/6/2020  | 4/18/2020 Europe / Belgium / Liege                          |
| EPI_ISL_427351 | 4/7/2020  | 4/18/2020 Europe / Belgium / Liege                          |
| EPI_ISL_427352 | 4/6/2020  | 4/18/2020 Europe / Belgium / Liege                          |
| EPI_ISL_427354 | 4/6/2020  | 4/18/2020 Europe / Belgium / Liege                          |
| EPI_ISL_427357 | 4/7/2020  | 4/18/2020 Europe / Belgium / Liege                          |
| EPI_ISL_427358 | 4/6/2020  | 4/18/2020 Europe / Belgium / Liege                          |
| EPI_ISL_427359 | 4/6/2020  | 4/18/2020 Europe / Belgium / Liege                          |
| EPI_ISL_427364 | 4/7/2020  | 4/18/2020 Europe / Belgium / Liege                          |
| EPI_ISL_427366 | 4/7/2020  | 4/18/2020 Europe / Belgium / Liege                          |
| EPI_ISL_427370 | 4/7/2020  | 4/18/2020 Europe / Belgium / Liege                          |
| EPI_ISL_427371 | 4/7/2020  | 4/18/2020 Europe / Belgium / Liege                          |
| EPI_ISL_427372 | 4/7/2020  | 4/18/2020 Europe / Belgium / Liege                          |
| EPI_ISL_427379 | 4/8/2020  | 4/18/2020 Europe / Belgium / Liege                          |
| EPI_ISL_427385 | 4/8/2020  | 4/18/2020 Europe / Belgium / Liege                          |
| EPI_ISL_427388 | 4/7/2020  | 4/18/2020 Europe / Belgium / Liege                          |
| EPI_ISL_427390 | 4/7/2020  | 4/18/2020 Europe / Belgium / Liege                          |
| EPI_ISL_427391 | 4/13/2020 | 4/18/2020 Europe / Turkey / Istanbul                        |
| EPI_ISL_427392 | 3/14/2020 | 4/18/2020 Asia / Taiwan / New Taipei City                   |
| EPI_ISL_427393 | 3/15/2020 | 4/18/2020 Asia / Taiwan / Taipei                            |
| EPI_ISL_427394 | 3/22/2020 | 4/18/2020 Asia / Taiwan / New Taipei City                   |
| EPI_ISL_427395 | 3/23/2020 | 4/18/2020 Asia / Taiwan / Keelung                           |
| EPI_ISL_427396 | 3/23/2020 | 4/18/2020 Asia / Taiwan / New Taipei City                   |
| EPI_ISL_427397 | 3/24/2020 | 4/18/2020 Asia / Taiwan / Taipei                            |
| EPI_ISL_427398 | 3/25/2020 | 4/18/2020 Asia / Taiwan / New Taipei City                   |
| EPI_ISL_427416 | 3/23/2020 | 4/18/2020 Asia / Qatar / Doha                               |
| EPI_ISL_427417 | 3/23/2020 | 4/18/2020 Asia / Qatar / Doha                               |
| EPI_ISL_427418 | 3/23/2020 | 4/18/2020 Asia / Qatar / Doha                               |
| EPI_ISL_427427 | 4/13/2020 | 4/18/2020 North America / USA / Wisconsin / Dane County     |
| EPI_ISL_427428 | 4/11/2020 | 4/18/2020 North America / USA / Iowa / Dubuque County       |
| EPI_ISL_427429 | 4/7/2020  | 4/18/2020 North America / USA / Wisconsin / Dane County     |
| EPI_ISL_427430 | 4/11/2020 | 4/18/2020 North America / USA / Illinois / Winnebago County |
| EPI_ISL_427431 | 4/7/2020  | 4/18/2020 North America / USA / Wisconsin / Dane County     |
| EPI_ISL_427432 | 4/7/2020  | 4/18/2020 North America / USA / Illinois / Winnebago County |
| EPI_ISL_427433 | 4/11/2020 | 4/18/2020 North America / USA / Illinois / Winnebago County |
| EPI_ISL_427434 | 4/7/2020  | 4/18/2020 North America / USA / Wisconsin / Dane County     |
| EPI_ISL_427435 | 4/7/2020  | 4/18/2020 North America / USA / Wisconsin / Dane County     |
| EPI_ISL_427436 | 4/6/2020  | 4/18/2020 North America / USA / Wisconsin / Dane County     |
| EPI_ISL_427437 | 4/13/2020 | 4/18/2020 North America / USA / Illinois / Winnebago County |
| EPI_ISL_427438 | 4/8/2020  | 4/18/2020 North America / USA / Wisconsin / Richland County |
| EPI_ISL_427439 | 4/10/2020 | 4/18/2020 North America / USA / Wisconsin / Rock County     |
| EPI_ISL_427440 | 4/12/2020 | 4/18/2020 North America / USA / Illinois / Winnebago County |

|                |           |                                                             |
|----------------|-----------|-------------------------------------------------------------|
| EPI_ISL_427441 | 4/13/2020 | 4/18/2020 North America / USA / Wisconsin                   |
| EPI_ISL_427442 | 4/9/2020  | 4/18/2020 North America / USA / Wisconsin / Dane County     |
| EPI_ISL_427443 | 4/9/2020  | 4/18/2020 North America / USA / Wisconsin / Grant County    |
| EPI_ISL_427444 | 4/9/2020  | 4/18/2020 North America / USA / Illinois / Winnebago County |
| EPI_ISL_427445 | 4/12/2020 | 4/18/2020 North America / USA / Illinois / Winnebago County |
| EPI_ISL_427446 | 4/12/2020 | 4/18/2020 North America / USA / Illinois / Winnebago County |
| EPI_ISL_427447 | 4/9/2020  | 4/18/2020 North America / USA / Wisconsin / Dane County     |
| EPI_ISL_427448 | 4/7/2020  | 4/18/2020 North America / USA / Illinois / Winnebago County |
| EPI_ISL_427449 | 4/10/2020 | 4/18/2020 North America / USA / Illinois / Winnebago County |
| EPI_ISL_427450 | 4/13/2020 | 4/18/2020 North America / USA / Illinois / Winnebago County |
| EPI_ISL_427451 | 4/6/2020  | 4/18/2020 North America / USA / Wisconsin / Dane County     |
| EPI_ISL_427452 | 4/10/2020 | 4/18/2020 North America / USA / Wisconsin / Dane County     |
| EPI_ISL_427453 | 4/6/2020  | 4/18/2020 North America / USA / Wisconsin / Dane County     |
| EPI_ISL_427454 | 4/10/2020 | 4/18/2020 North America / USA / Wisconsin / Dane County     |
| EPI_ISL_427455 | 4/7/2020  | 4/18/2020 North America / USA / Wisconsin / Dane County     |
| EPI_ISL_427456 | 4/7/2020  | 4/18/2020 North America / USA / Illinois / Winnebago County |
| EPI_ISL_427457 | 4/13/2020 | 4/18/2020 North America / USA / Wisconsin / Dane County     |
| EPI_ISL_427458 | 4/8/2020  | 4/18/2020 North America / USA / Wisconsin / Dane County     |
| EPI_ISL_427459 | 4/6/2020  | 4/18/2020 North America / USA / Wisconsin / Dane County     |
| EPI_ISL_427460 | 4/9/2020  | 4/18/2020 North America / USA / Wisconsin / Dane County     |
| EPI_ISL_427461 | 4/12/2020 | 4/18/2020 North America / USA / Wisconsin / Monroe County   |
| EPI_ISL_427462 | 4/10/2020 | 4/18/2020 North America / USA / Wisconsin / Dane County     |
| EPI_ISL_427469 | 4/1/2020  | 4/18/2020 North America / USA / New York / Manhattan        |
| EPI_ISL_427470 | 4/1/2020  | 4/18/2020 North America / USA / New York / Staten Island    |
| EPI_ISL_427471 | 4/1/2020  | 4/18/2020 North America / USA / New York / Nassau County    |
| EPI_ISL_427472 | 4/1/2020  | 4/18/2020 North America / USA / New York / Nassau County    |
| EPI_ISL_427473 | 4/1/2020  | 4/18/2020 North America / USA / New York / Brooklyn         |
| EPI_ISL_427474 | 4/1/2020  | 4/18/2020 North America / USA / New York / Manhattan        |
| EPI_ISL_427475 | 4/1/2020  | 4/18/2020 North America / USA / New York / Staten Island    |
| EPI_ISL_427476 | 4/1/2020  | 4/18/2020 North America / USA / New York / Brooklyn         |
| EPI_ISL_427477 | 4/1/2020  | 4/18/2020 North America / USA / New York / Queens           |
| EPI_ISL_427478 | 4/1/2020  | 4/18/2020 North America / USA / New York / Manhattan        |
| EPI_ISL_427479 | 4/1/2020  | 4/18/2020 North America / USA / New York / Manhattan        |
| EPI_ISL_427480 | 4/1/2020  | 4/18/2020 North America / USA / New York / Queens           |
| EPI_ISL_427481 | 4/1/2020  | 4/18/2020 North America / USA / New York / Manhattan        |
| EPI_ISL_427482 | 4/1/2020  | 4/18/2020 North America / USA / New York / Brooklyn         |
| EPI_ISL_427484 | 4/1/2020  | 4/18/2020 North America / USA / New York / Brooklyn         |
| EPI_ISL_427485 | 4/1/2020  | 4/18/2020 North America / USA / New York / Brooklyn         |
| EPI_ISL_427487 | 4/1/2020  | 4/18/2020 North America / USA / New York / Brooklyn         |
| EPI_ISL_427488 | 4/1/2020  | 4/18/2020 North America / USA / New York / Queens           |
| EPI_ISL_427489 | 4/1/2020  | 4/18/2020 North America / USA / New York / Brooklyn         |
| EPI_ISL_427490 | 4/1/2020  | 4/18/2020 North America / USA / New York / Manhattan        |
| EPI_ISL_427491 | 4/1/2020  | 4/18/2020 North America / USA / New York / Brooklyn         |
| EPI_ISL_427492 | 4/1/2020  | 4/18/2020 North America / USA / New York / Queens           |
| EPI_ISL_427493 | 4/1/2020  | 4/18/2020 North America / USA / New York / Brooklyn         |
| EPI_ISL_427494 | 4/1/2020  | 4/18/2020 North America / USA / New York / Bronx            |
| EPI_ISL_427495 | 4/1/2020  | 4/18/2020 North America / USA / New York / Brooklyn         |





|                |           |           |                                                |
|----------------|-----------|-----------|------------------------------------------------|
| EPI_ISL_427598 | 3/16/2020 | 4/19/2020 | North America / USA / New York / Manhattan     |
| EPI_ISL_427599 | 3/16/2020 | 4/19/2020 | North America / USA / New York / Manhattan     |
| EPI_ISL_427600 | 3/16/2020 | 4/19/2020 | North America / USA / New York / Manhattan     |
| EPI_ISL_427601 | 3/16/2020 | 4/19/2020 | North America / USA / New York / Manhattan     |
| EPI_ISL_427602 | 3/16/2020 | 4/19/2020 | North America / USA / New York / Manhattan     |
| EPI_ISL_427603 | 3/16/2020 | 4/19/2020 | North America / USA / New York / Manhattan     |
| EPI_ISL_427604 | 3/16/2020 | 4/19/2020 | North America / USA / New York / Manhattan     |
| EPI_ISL_427605 | 3/16/2020 | 4/19/2020 | North America / USA / New York / Manhattan     |
| EPI_ISL_427606 | 3/16/2020 | 4/19/2020 | North America / USA / New York / Manhattan     |
| EPI_ISL_427607 | 3/16/2020 | 4/19/2020 | North America / USA / New York / Manhattan     |
| EPI_ISL_427608 | 3/16/2020 | 4/19/2020 | North America / USA / New York / Manhattan     |
| EPI_ISL_427609 | 3/16/2020 | 4/19/2020 | North America / USA / New York / Manhattan     |
| EPI_ISL_427610 | 3/16/2020 | 4/19/2020 | North America / USA / New York / Manhattan     |
| EPI_ISL_427611 | 3/16/2020 | 4/19/2020 | North America / USA / New York / Manhattan     |
| EPI_ISL_427612 | 3/16/2020 | 4/19/2020 | North America / USA / New York / Manhattan     |
| EPI_ISL_427613 | 3/16/2020 | 4/19/2020 | North America / USA / New York / Manhattan     |
| EPI_ISL_427614 | 3/16/2020 | 4/19/2020 | North America / USA / New York / Manhattan     |
| EPI_ISL_427615 | 3/16/2020 | 4/19/2020 | North America / USA / New York / Manhattan     |
| EPI_ISL_427616 | 3/16/2020 | 4/19/2020 | North America / USA / New York / Manhattan     |
| EPI_ISL_427617 | 3/16/2020 | 4/19/2020 | North America / USA / New York / Manhattan     |
| EPI_ISL_427618 | 3/16/2020 | 4/19/2020 | North America / USA / New York / Manhattan     |
| EPI_ISL_427619 | 4/2/2020  | 4/19/2020 | North America / USA / Alaska / Interior        |
| EPI_ISL_427620 | 4/4/2020  | 4/19/2020 | North America / USA / Alaska / Interior        |
| EPI_ISL_427621 | 3/25/2020 | 4/19/2020 | North America / USA / Alaska / Interior        |
| EPI_ISL_427622 | 3/24/2020 | 4/19/2020 | North America / USA / Alaska / Interior        |
| EPI_ISL_427627 | 4/1/2020  | 4/19/2020 | North America / USA / New York / Brooklyn      |
| EPI_ISL_427628 | 4/3/2020  | 4/19/2020 | North America / USA / New York / Brooklyn      |
| EPI_ISL_427629 | 3/30/2020 | 4/19/2020 | North America / USA / New York / Queens        |
| EPI_ISL_427630 | 4/6/2020  | 4/19/2020 | North America / USA / New York / Staten Island |
| EPI_ISL_427631 | 4/6/2020  | 4/19/2020 | North America / USA / New York / Staten Island |
| EPI_ISL_427632 | 4/6/2020  | 4/19/2020 | North America / USA / New York / Queens        |
| EPI_ISL_427633 | 4/6/2020  | 4/19/2020 | North America / USA / New York / Brooklyn      |
| EPI_ISL_427634 | 4/6/2020  | 4/19/2020 | North America / USA / New York / Brooklyn      |
| EPI_ISL_427635 | 4/5/2020  | 4/19/2020 | North America / USA / New York / Brooklyn      |
| EPI_ISL_427636 | 4/5/2020  | 4/19/2020 | North America / USA / New York / Brooklyn      |
| EPI_ISL_427637 | 4/6/2020  | 4/19/2020 | North America / USA / New York / Queens        |
| EPI_ISL_427638 | 4/6/2020  | 4/19/2020 | North America / USA / New York / Brooklyn      |
| EPI_ISL_427639 | 4/6/2020  | 4/19/2020 | North America / USA / New York / Queens        |
| EPI_ISL_427640 | 4/5/2020  | 4/19/2020 | North America / USA / New York / Brooklyn      |
| EPI_ISL_427641 | 4/6/2020  | 4/19/2020 | North America / USA / New York / Brooklyn      |
| EPI_ISL_427643 | 2/28/2020 | 4/19/2020 | Oceania / Australia / New South Wales / Sydney |
| EPI_ISL_427644 | 3/2/2020  | 4/19/2020 | Oceania / Australia / New South Wales / Sydney |
| EPI_ISL_427645 | 3/4/2020  | 4/19/2020 | Oceania / Australia / New South Wales / Sydney |
| EPI_ISL_427646 | 3/5/2020  | 4/19/2020 | Oceania / Australia / New South Wales / Sydney |
| EPI_ISL_427647 | 3/6/2020  | 4/19/2020 | Oceania / Australia / New South Wales / Sydney |
| EPI_ISL_427648 | 3/6/2020  | 4/19/2020 | Oceania / Australia / New South Wales / Sydney |
| EPI_ISL_427649 | 3/3/2020  | 4/19/2020 | Oceania / Australia / New South Wales / Sydney |









|                |           |                                                              |
|----------------|-----------|--------------------------------------------------------------|
| EPI_ISL_427791 | 3/26/2020 | 4/19/2020 Oceania / Australia / New South Wales / Sydney     |
| EPI_ISL_427792 | 3/23/2020 | 4/19/2020 Oceania / Australia / New South Wales / Sydney     |
| EPI_ISL_427793 | 3/25/2020 | 4/19/2020 Oceania / Australia / New South Wales / Sydney     |
| EPI_ISL_427794 | 3/23/2020 | 4/19/2020 Oceania / Australia / New South Wales / Sydney     |
| EPI_ISL_427795 | 3/25/2020 | 4/19/2020 Oceania / Australia / New South Wales / Sydney     |
| EPI_ISL_427796 | 3/19/2020 | 4/19/2020 Oceania / Australia / New South Wales / Sydney     |
| EPI_ISL_427797 | 3/25/2020 | 4/19/2020 Oceania / Australia / New South Wales / Sydney     |
| EPI_ISL_427798 | 3/23/2020 | 4/19/2020 Oceania / Australia / New South Wales / Sydney     |
| EPI_ISL_427799 | 3/25/2020 | 4/19/2020 Oceania / Australia / New South Wales / Sydney     |
| EPI_ISL_427800 | 3/24/2020 | 4/19/2020 Oceania / Australia / New South Wales / Sydney     |
| EPI_ISL_427801 | 3/24/2020 | 4/19/2020 Oceania / Australia / New South Wales / Sydney     |
| EPI_ISL_427802 | 3/22/2020 | 4/19/2020 Oceania / Australia / New South Wales / Sydney     |
| EPI_ISL_427803 | 3/23/2020 | 4/19/2020 Oceania / Australia / New South Wales / Sydney     |
| EPI_ISL_427804 | 3/19/2020 | 4/19/2020 Oceania / Australia / New South Wales / Sydney     |
| EPI_ISL_427805 | 3/20/2020 | 4/19/2020 Oceania / Australia / New South Wales / Sydney     |
| EPI_ISL_427806 | 3/23/2020 | 4/19/2020 Oceania / Australia / New South Wales / Sydney     |
| EPI_ISL_427807 | 3/21/2020 | 4/19/2020 Oceania / Australia / New South Wales / Sydney     |
| EPI_ISL_427808 | 3/26/2020 | 4/19/2020 Oceania / Australia / New South Wales / Sydney     |
| EPI_ISL_427809 | 2/26/2020 | 4/19/2020 Asia / South Korea                                 |
| EPI_ISL_427810 | 2/18/2020 | 4/19/2020 Asia / South Korea                                 |
| EPI_ISL_427811 | 2/18/2020 | 4/19/2020 Asia / South Korea                                 |
| EPI_ISL_427812 | 2/19/2020 | 4/19/2020 Asia / South Korea                                 |
| EPI_ISL_427813 | 2/18/2020 | 4/19/2020 Asia / South Korea                                 |
| EPI_ISL_427815 | 4/7/2020  | 4/19/2020 Europe / Russia / Saint Petersburg                 |
| EPI_ISL_428148 | 3/18/2020 | 4/19/2020 Europe / Sweden / Västerbotten                     |
| EPI_ISL_428201 | 3/20/2020 | 4/19/2020 Europe / Sweden / Västerbotten                     |
| EPI_ISL_428209 | 4/6/2020  | 4/20/2020 Europe / Poland / Pomerania                        |
| EPI_ISL_428229 | 3/18/2020 | 4/20/2020 Asia / Taiwan / Taipei                             |
| EPI_ISL_428230 | 3/17/2020 | 4/20/2020 Asia / Taiwan / New Taipei City                    |
| EPI_ISL_428231 | 3/24/2020 | 4/20/2020 Asia / Taiwan / New Taipei City                    |
| EPI_ISL_428252 | 3/25/2020 | 4/20/2020 North America / USA / Wisconsin / Milwaukee County |
| EPI_ISL_428253 | 3/15/2020 | 4/20/2020 North America / USA / Wisconsin / Milwaukee County |
| EPI_ISL_428254 | 3/15/2020 | 4/20/2020 North America / USA / Wisconsin / Milwaukee County |
| EPI_ISL_428255 | 3/15/2020 | 4/20/2020 North America / USA / Wisconsin / Milwaukee County |
| EPI_ISL_428256 | 3/15/2020 | 4/20/2020 North America / USA / Wisconsin / Milwaukee County |
| EPI_ISL_428257 | 3/29/2020 | 4/20/2020 North America / USA / Wisconsin / Milwaukee County |
| EPI_ISL_428258 | 3/29/2020 | 4/20/2020 North America / USA / Wisconsin / Milwaukee County |
| EPI_ISL_428259 | 3/16/2020 | 4/20/2020 North America / USA / Wisconsin / Waukesha County  |
| EPI_ISL_428260 | 3/16/2020 | 4/20/2020 North America / USA / Wisconsin / Waukesha County  |
| EPI_ISL_428261 | 3/17/2020 | 4/20/2020 North America / USA / Wisconsin / Milwaukee County |
| EPI_ISL_428262 | 3/17/2020 | 4/20/2020 North America / USA / Wisconsin / Milwaukee County |
| EPI_ISL_428263 | 3/18/2020 | 4/20/2020 North America / USA / Wisconsin / Waukesha County  |
| EPI_ISL_428264 | 3/19/2020 | 4/20/2020 North America / USA / Wisconsin / Milwaukee County |
| EPI_ISL_428265 | 3/19/2020 | 4/20/2020 North America / USA / Wisconsin / Ozaukee County   |
| EPI_ISL_428266 | 3/19/2020 | 4/20/2020 North America / USA / Wisconsin / Milwaukee County |
| EPI_ISL_428267 | 3/19/2020 | 4/20/2020 North America / USA / Wisconsin / Milwaukee County |
| EPI_ISL_428268 | 3/19/2020 | 4/20/2020 North America / USA / Wisconsin / Milwaukee County |



|                |           |           |                                                      |
|----------------|-----------|-----------|------------------------------------------------------|
| EPI_ISL_428316 | 3/25/2020 | 4/20/2020 | North America / USA / Wisconsin / Ozaukee County     |
| EPI_ISL_428317 | 3/25/2020 | 4/20/2020 | North America / USA / Wisconsin / Milwaukee County   |
| EPI_ISL_428318 | 3/25/2020 | 4/20/2020 | North America / USA / Wisconsin / Milwaukee County   |
| EPI_ISL_428319 | 3/26/2020 | 4/20/2020 | North America / USA / Wisconsin / Milwaukee County   |
| EPI_ISL_428320 | 3/26/2020 | 4/20/2020 | North America / USA / Wisconsin / Waukesha County    |
| EPI_ISL_428321 | 3/26/2020 | 4/20/2020 | North America / USA / Wisconsin / Milwaukee County   |
| EPI_ISL_428322 | 3/26/2020 | 4/20/2020 | North America / USA / Wisconsin / Milwaukee County   |
| EPI_ISL_428323 | 3/26/2020 | 4/20/2020 | North America / USA / Wisconsin / Milwaukee County   |
| EPI_ISL_428324 | 3/26/2020 | 4/20/2020 | North America / USA / Wisconsin / Milwaukee County   |
| EPI_ISL_428325 | 3/26/2020 | 4/20/2020 | North America / USA / Wisconsin / Milwaukee County   |
| EPI_ISL_428326 | 3/26/2020 | 4/20/2020 | North America / USA / Wisconsin / Milwaukee County   |
| EPI_ISL_428327 | 3/26/2020 | 4/20/2020 | North America / USA / Wisconsin / Milwaukee County   |
| EPI_ISL_428328 | 3/27/2020 | 4/20/2020 | North America / USA / Wisconsin / Milwaukee County   |
| EPI_ISL_428329 | 3/27/2020 | 4/20/2020 | North America / USA / Wisconsin / Milwaukee County   |
| EPI_ISL_428330 | 3/26/2020 | 4/20/2020 | North America / USA / Wisconsin / Milwaukee County   |
| EPI_ISL_428331 | 3/28/2020 | 4/20/2020 | North America / USA / Wisconsin / Milwaukee County   |
| EPI_ISL_428332 | 3/27/2020 | 4/20/2020 | North America / USA / Wisconsin / Milwaukee County   |
| EPI_ISL_428333 | 3/27/2020 | 4/20/2020 | North America / USA / Wisconsin / Milwaukee County   |
| EPI_ISL_428334 | 3/27/2020 | 4/20/2020 | North America / USA / Wisconsin / Milwaukee County   |
| EPI_ISL_428335 | 3/27/2020 | 4/20/2020 | North America / USA / Wisconsin / Ozaukee County     |
| EPI_ISL_428336 | 3/27/2020 | 4/20/2020 | North America / USA / Wisconsin / Milwaukee County   |
| EPI_ISL_428337 | 3/27/2020 | 4/20/2020 | North America / USA / Wisconsin / Milwaukee County   |
| EPI_ISL_428338 | 3/28/2020 | 4/20/2020 | North America / USA / Wisconsin / Milwaukee County   |
| EPI_ISL_428339 | 3/28/2020 | 4/20/2020 | North America / USA / Wisconsin / Ozaukee County     |
| EPI_ISL_428340 | 3/28/2020 | 4/20/2020 | North America / USA / Wisconsin / Ozaukee County     |
| EPI_ISL_428341 | 3/28/2020 | 4/20/2020 | North America / USA / Wisconsin / Milwaukee County   |
| EPI_ISL_428342 | 3/28/2020 | 4/20/2020 | North America / USA / Wisconsin / Milwaukee County   |
| EPI_ISL_428343 | 3/28/2020 | 4/20/2020 | North America / USA / Wisconsin / Ozaukee County     |
| EPI_ISL_428344 | 3/28/2020 | 4/20/2020 | North America / USA / Wisconsin / Milwaukee County   |
| EPI_ISL_428345 | 3/16/2020 | 4/20/2020 | North America / USA / Wisconsin / Racine County      |
| EPI_ISL_428346 | 4/17/2020 | 4/20/2020 | Europe / Turkey / Istanbul                           |
| EPI_ISL_428347 | 3/23/2020 | 4/20/2020 | Europe / France / Île-de-France / Longjumeau         |
| EPI_ISL_428348 | 3/20/2020 | 4/20/2020 | Europe / France / Grand Est / Gondrecourt-le-chateau |
| EPI_ISL_428349 | 3/23/2020 | 4/20/2020 | Europe / France / Île-de-France / Longjumeau         |
| EPI_ISL_428350 | 3/24/2020 | 4/20/2020 | Europe / France / Hauts-de-France / Chateau-Thierry  |
| EPI_ISL_428351 | 3/24/2020 | 4/20/2020 | Europe / France / Île-de-France / Orsay              |
| EPI_ISL_428352 | 3/23/2020 | 4/20/2020 | Europe / France / Île-de-France / Orsay              |
| EPI_ISL_428353 | 3/24/2020 | 4/20/2020 | Europe / France / Hauts-de-France / Compiègne        |
| EPI_ISL_428354 | 3/25/2020 | 4/20/2020 | Europe / France / Île-de-France / Longjumeau         |
| EPI_ISL_428355 | 3/11/2020 | 4/20/2020 | Europe / France / Île-de-France / Garches            |
| EPI_ISL_428356 | 3/11/2020 | 4/20/2020 | Europe / France / Île-de-France / Garches            |
| EPI_ISL_428357 | 3/11/2020 | 4/20/2020 | Europe / France / Île-de-France / Garches            |
| EPI_ISL_428358 | 3/24/2020 | 4/20/2020 | Europe / France / Hauts-de-France / Chateau-Thierry  |
| EPI_ISL_428359 | 3/23/2020 | 4/20/2020 | Europe / France / Hauts-de-France / Compiègne        |
| EPI_ISL_428360 | 3/25/2020 | 4/20/2020 | Europe / France / Hauts-de-France / Compiègne        |
| EPI_ISL_428361 | 3/25/2020 | 4/20/2020 | Europe / France / Île-de-France / Longjumeau         |
| EPI_ISL_428363 | 3/26/2020 | 4/20/2020 | Europe / France / Île-de-France / Orsay              |

|                |           |                                                               |
|----------------|-----------|---------------------------------------------------------------|
| EPI_ISL_428365 | 3/26/2020 | 4/20/2020 Europe / France / Île-de-France / Longjumeau        |
| EPI_ISL_428366 | 3/30/2020 | 4/20/2020 Europe / France / Hauts-de-France / Château-Thierry |
| EPI_ISL_428367 | 3/23/2020 | 4/20/2020 Europe / France / Normandie / Carentan              |
| EPI_ISL_428368 | 4/16/2020 | 4/20/2020 Europe / Turkey / Istanbul                          |
| EPI_ISL_428384 | 4/4/2020  | 4/20/2020 North America / USA / Connecticut                   |
| EPI_ISL_428385 | 4/4/2020  | 4/20/2020 North America / USA / Connecticut                   |
| EPI_ISL_428387 | 3/31/2020 | 4/20/2020 North America / USA / Connecticut                   |
| EPI_ISL_428391 | 4/1/2020  | 4/20/2020 North America / USA / Connecticut                   |
| EPI_ISL_434561 | 2020-02   | 4/20/2020 Asia / Japan                                        |
| EPI_ISL_434570 | 1/29/2020 | 4/20/2020 Asia / Hong Kong                                    |
| EPI_ISL_468063 | 3/18/2020 | 4/20/2020 North America / USA / Kentucky                      |
| EPI_ISL_468064 | 3/18/2020 | 4/20/2020 North America / USA / Kentucky                      |
| EPI_ISL_468065 | 3/18/2020 | 4/20/2020 North America / USA / Kentucky                      |
| EPI_ISL_428441 | 1/29/2020 | 4/21/2020 Asia / China / Guangdong / Huizhou                  |
| EPI_ISL_428442 | 1/30/2020 | 4/21/2020 Asia / China / Guangdong / Shanwei                  |
| EPI_ISL_428443 | 1/21/2020 | 4/21/2020 Asia / China / Guangdong / Guangzhou                |
| EPI_ISL_428444 | 1/30/2020 | 4/21/2020 Asia / China / Guangdong / Huizhou                  |
| EPI_ISL_428445 | 1/30/2020 | 4/21/2020 Asia / China / Guangdong / Huizhou                  |
| EPI_ISL_428446 | 1/31/2020 | 4/21/2020 Asia / China / Guangdong / Zhuhai                   |
| EPI_ISL_428447 | 1/21/2020 | 4/21/2020 Asia / China / Guangdong / Shenzhen                 |
| EPI_ISL_428448 | 1/21/2020 | 4/21/2020 Asia / China / Guangdong / Shenzhen                 |
| EPI_ISL_428449 | 1/20/2020 | 4/21/2020 Asia / China / Guangdong / Zhanjiang                |
| EPI_ISL_428452 | 1/23/2020 | 4/21/2020 Asia / China / Guangdong / Shaoguan                 |
| EPI_ISL_428454 | 1/22/2020 | 4/21/2020 Asia / China / Guangdong / Huizhou                  |
| EPI_ISL_428455 | 1/23/2020 | 4/21/2020 Asia / China / Guangdong / Yangjiang                |
| EPI_ISL_428456 | 1/22/2020 | 4/21/2020 Asia / China / Guangdong / Shenzhen                 |
| EPI_ISL_428457 | 1/23/2020 | 4/21/2020 Asia / China / Guangdong / Huizhou                  |
| EPI_ISL_428458 | 2/6/2020  | 4/21/2020 Asia / China / Guangdong / Guangzhou                |
| EPI_ISL_428460 | 1/23/2020 | 4/21/2020 Asia / China / Guangdong / Guangzhou                |
| EPI_ISL_428461 | 1/24/2020 | 4/21/2020 Asia / China / Guangdong / Huizhou                  |
| EPI_ISL_428462 | 2/17/2020 | 4/21/2020 Asia / China / Guangdong / Guangzhou                |
| EPI_ISL_428463 | 2/17/2020 | 4/21/2020 Asia / China / Guangdong / Guangzhou                |
| EPI_ISL_428464 | 1/25/2020 | 4/21/2020 Asia / China / Guangdong / Zhanjiang                |
| EPI_ISL_428465 | 1/24/2020 | 4/21/2020 Asia / China / Guangdong / Shenzhen                 |
| EPI_ISL_428466 | 1/26/2020 | 4/21/2020 Asia / China / Guangdong / Dongguan                 |
| EPI_ISL_428467 | 1/26/2020 | 4/21/2020 Asia / China / Guangdong / Dongguan                 |
| EPI_ISL_428468 | 1/26/2020 | 4/21/2020 Asia / China / Guangdong / Dongguan                 |
| EPI_ISL_428469 | 1/27/2020 | 4/21/2020 Asia / China / Guangdong / Zhongshan                |
| EPI_ISL_428470 | 1/27/2020 | 4/21/2020 Asia / China / Guangdong / Shantou                  |
| EPI_ISL_428471 | 1/27/2020 | 4/21/2020 Asia / China / Guangdong / Shantou                  |
| EPI_ISL_428472 | 1/28/2020 | 4/21/2020 Asia / China / Guangdong / Zhuhai                   |
| EPI_ISL_428473 | 1/27/2020 | 4/21/2020 Asia / China / Guangdong / Zhuhai                   |
| EPI_ISL_428474 | 1/28/2020 | 4/21/2020 Asia / China / Guangdong / Huizhou                  |
| EPI_ISL_428475 | 1/28/2020 | 4/21/2020 Asia / China / Guangdong / Huizhou                  |
| EPI_ISL_428476 | 1/28/2020 | 4/21/2020 Asia / China / Guangdong / Huizhou                  |
| EPI_ISL_428477 | 1/28/2020 | 4/21/2020 Asia / China / Guangdong / Foshan                   |
| EPI_ISL_428478 | 1/29/2020 | 4/21/2020 Asia / China / Guangdong / Dongguan                 |

|                |           |                                    |
|----------------|-----------|------------------------------------|
| EPI_ISL_428479 | 4/6/2020  | 4/21/2020 Asia / India / Karnataka |
| EPI_ISL_428480 | 4/6/2020  | 4/21/2020 Asia / India / Karnataka |
| EPI_ISL_428481 | 4/6/2020  | 4/21/2020 Asia / India / Karnataka |
| EPI_ISL_428482 | 4/8/2020  | 4/21/2020 Asia / India / Karnataka |
| EPI_ISL_428483 | 4/10/2020 | 4/21/2020 Asia / India / Karnataka |
| EPI_ISL_428484 | 4/10/2020 | 4/21/2020 Asia / India / Karnataka |
| EPI_ISL_428486 | 4/14/2020 | 4/21/2020 Asia / India / Karnataka |
| EPI_ISL_428487 | 4/14/2020 | 4/21/2020 Asia / India / Karnataka |
| EPI_ISL_428488 | 1/31/2020 | 4/21/2020 Asia / Taiwan            |
| EPI_ISL_428489 | 1/31/2020 | 4/21/2020 Asia / Taiwan            |
| EPI_ISL_428490 | 3/16/2020 | 4/21/2020 Asia / Taiwan            |
| EPI_ISL_428491 | 3/15/2020 | 4/21/2020 Asia / Taiwan            |
| EPI_ISL_428670 | 3/16/2020 | 4/21/2020 Asia / Sri Lanka         |
| EPI_ISL_428671 | 3/10/2020 | 4/21/2020 Asia / Sri Lanka         |
| EPI_ISL_428672 | 3/19/2020 | 4/21/2020 Asia / Sri Lanka         |
| EPI_ISL_428673 | 3/31/2020 | 4/21/2020 Asia / Sri Lanka         |
| EPI_ISL_428674 | 3/9/2020  | 4/21/2020 Europe / Spain / Madrid  |
| EPI_ISL_428675 | 3/9/2020  | 4/21/2020 Europe / Spain / Madrid  |
| EPI_ISL_428676 | 3/7/2020  | 4/21/2020 Europe / Spain / Madrid  |
| EPI_ISL_428677 | 3/11/2020 | 4/21/2020 Europe / Spain / Madrid  |
| EPI_ISL_428678 | 3/8/2020  | 4/21/2020 Europe / Spain / Madrid  |
| EPI_ISL_428679 | 3/8/2020  | 4/21/2020 Europe / Spain / Madrid  |
| EPI_ISL_428680 | 3/9/2020  | 4/21/2020 Europe / Spain / Madrid  |
| EPI_ISL_428681 | 3/11/2020 | 4/21/2020 Europe / Spain / Madrid  |
| EPI_ISL_428682 | 3/11/2020 | 4/21/2020 Europe / Spain / Madrid  |
| EPI_ISL_428683 | 3/3/2020  | 4/21/2020 Europe / Spain / Madrid  |
| EPI_ISL_428684 | 3/27/2020 | 4/21/2020 Europe / Spain / Madrid  |
| EPI_ISL_428686 | 3/22/2020 | 4/21/2020 Europe / Spain / Madrid  |
| EPI_ISL_428687 | 3/22/2020 | 4/21/2020 Europe / Spain / Madrid  |
| EPI_ISL_428688 | 3/22/2020 | 4/21/2020 Europe / Spain / Madrid  |
| EPI_ISL_428689 | 3/26/2020 | 4/21/2020 Europe / Spain / Madrid  |
| EPI_ISL_428690 | 3/21/2020 | 4/21/2020 Europe / Spain / Madrid  |
| EPI_ISL_428691 | 3/21/2020 | 4/21/2020 Europe / Spain / Madrid  |
| EPI_ISL_428692 | 3/12/2020 | 4/21/2020 Europe / Spain / Madrid  |
| EPI_ISL_428693 | 3/12/2020 | 4/21/2020 Europe / Spain / Madrid  |
| EPI_ISL_428694 | 3/12/2020 | 4/21/2020 Europe / Spain / Madrid  |
| EPI_ISL_428695 | 3/12/2020 | 4/21/2020 Europe / Spain / Madrid  |
| EPI_ISL_428696 | 3/12/2020 | 4/21/2020 Europe / Spain / Madrid  |
| EPI_ISL_428697 | 3/12/2020 | 4/21/2020 Europe / Spain / Madrid  |
| EPI_ISL_428698 | 3/12/2020 | 4/21/2020 Europe / Spain / Madrid  |
| EPI_ISL_428699 | 3/9/2020  | 4/21/2020 Europe / Spain / Madrid  |
| EPI_ISL_428700 | 3/27/2020 | 4/21/2020 Europe / Spain / Madrid  |
| EPI_ISL_428701 | 3/27/2020 | 4/21/2020 Europe / Spain / Madrid  |
| EPI_ISL_428703 | 3/11/2020 | 4/21/2020 Europe / Spain / Madrid  |
| EPI_ISL_428704 | 3/11/2020 | 4/21/2020 Europe / Spain / Madrid  |
| EPI_ISL_428705 | 3/21/2020 | 4/21/2020 Europe / Spain / Madrid  |
| EPI_ISL_428706 | 3/21/2020 | 4/21/2020 Europe / Spain / Madrid  |



|                |           |                                                      |
|----------------|-----------|------------------------------------------------------|
| EPI_ISL_428707 | 3/26/2020 | 4/21/2020 Europe / Spain / Madrid                    |
| EPI_ISL_428708 | 3/21/2020 | 4/21/2020 Europe / Spain / Madrid                    |
| EPI_ISL_428709 | 3/21/2020 | 4/21/2020 Europe / Spain / Madrid                    |
| EPI_ISL_428710 | 3/22/2020 | 4/21/2020 Europe / Spain / Madrid                    |
| EPI_ISL_428711 | 3/22/2020 | 4/21/2020 Europe / Spain / Madrid                    |
| EPI_ISL_428712 | 3/17/2020 | 4/21/2020 Europe / Turkey / Karaman                  |
| EPI_ISL_428713 | 3/18/2020 | 4/21/2020 Europe / Turkey / Ankara                   |
| EPI_ISL_428714 | 3/18/2020 | 4/21/2020 Europe / Turkey / Kastamonu                |
| EPI_ISL_428715 | 3/18/2020 | 4/21/2020 Europe / Turkey / Nevsehir                 |
| EPI_ISL_428716 | 3/18/2020 | 4/21/2020 Europe / Turkey / Ankara                   |
| EPI_ISL_428717 | 3/19/2020 | 4/21/2020 Europe / Turkey / Kocaeli                  |
| EPI_ISL_428718 | 3/19/2020 | 4/21/2020 Europe / Turkey / Kocaeli                  |
| EPI_ISL_428719 | 3/21/2020 | 4/21/2020 Europe / Turkey / Siirt                    |
| EPI_ISL_428720 | 3/21/2020 | 4/21/2020 Europe / Turkey / Ankara                   |
| EPI_ISL_428721 | 3/21/2020 | 4/21/2020 Europe / Turkey / Ankara                   |
| EPI_ISL_428722 | 3/22/2020 | 4/21/2020 Europe / Turkey / Balikesir                |
| EPI_ISL_428723 | 3/22/2020 | 4/21/2020 Europe / Turkey / Aksaray                  |
| EPI_ISL_428724 | 3/13/2020 | 4/21/2020 North America / USA / Wisconsin            |
| EPI_ISL_428725 | 3/14/2020 | 4/21/2020 North America / USA / Wisconsin            |
| EPI_ISL_428726 | 3/24/2020 | 4/21/2020 North America / USA / Wisconsin            |
| EPI_ISL_428727 | 3/26/2020 | 4/21/2020 North America / USA / Wisconsin            |
| EPI_ISL_428728 | 4/1/2020  | 4/21/2020 North America / USA / Wisconsin            |
| EPI_ISL_428729 | 4/2/2020  | 4/21/2020 North America / USA / Wisconsin            |
| EPI_ISL_428730 | 4/6/2020  | 4/21/2020 North America / USA / Wisconsin            |
| EPI_ISL_428731 | 4/6/2020  | 4/21/2020 North America / USA / Wisconsin            |
| EPI_ISL_428732 | 4/6/2020  | 4/21/2020 North America / USA / Wisconsin            |
| EPI_ISL_428757 | 3/30/2020 | 4/22/2020 North America / USA / New York / Brooklyn  |
| EPI_ISL_428758 | 4/3/2020  | 4/22/2020 North America / USA / New York / Manhattan |
| EPI_ISL_428759 | 4/3/2020  | 4/22/2020 North America / USA / New York / Brooklyn  |
| EPI_ISL_428760 | 4/3/2020  | 4/22/2020 North America / USA / New York / Brooklyn  |
| EPI_ISL_428761 | 4/3/2020  | 4/22/2020 North America / USA / New York / Brooklyn  |
| EPI_ISL_428762 | 4/3/2020  | 4/22/2020 North America / USA / New York / Brooklyn  |
| EPI_ISL_428763 | 4/3/2020  | 4/22/2020 North America / USA / New York / Brooklyn  |
| EPI_ISL_428764 | 4/2/2020  | 4/22/2020 North America / USA / New York / Brooklyn  |
| EPI_ISL_428765 | 4/3/2020  | 4/22/2020 North America / USA / New York / Queens    |
| EPI_ISL_428766 | 4/3/2020  | 4/22/2020 North America / USA / New York / Manhattan |
| EPI_ISL_428767 | 4/5/2020  | 4/22/2020 North America / USA / New York / Brooklyn  |
| EPI_ISL_428768 | 4/5/2020  | 4/22/2020 North America / USA / New York / Brooklyn  |
| EPI_ISL_428769 | 4/5/2020  | 4/22/2020 North America / USA / New York / Brooklyn  |
| EPI_ISL_428770 | 4/5/2020  | 4/22/2020 North America / USA / New York / Brooklyn  |
| EPI_ISL_428772 | 4/5/2020  | 4/22/2020 North America / USA / New York / Brooklyn  |
| EPI_ISL_428773 | 4/5/2020  | 4/22/2020 North America / USA / New York / Brooklyn  |
| EPI_ISL_428774 | 4/5/2020  | 4/22/2020 North America / USA / New York / Brooklyn  |
| EPI_ISL_428775 | 4/5/2020  | 4/22/2020 North America / USA / New York / Brooklyn  |
| EPI_ISL_428776 | 4/5/2020  | 4/22/2020 North America / USA / New York / Brooklyn  |
| EPI_ISL_428777 | 4/6/2020  | 4/22/2020 North America / USA / New York / Brooklyn  |
| EPI_ISL_428778 | 4/6/2020  | 4/22/2020 North America / USA / New York / Brooklyn  |

|                |           |                                                     |
|----------------|-----------|-----------------------------------------------------|
| EPI_ISL_428779 | 4/6/2020  | 4/22/2020 North America / USA / New York / Queens   |
| EPI_ISL_428780 | 4/6/2020  | 4/22/2020 North America / USA / New York / Brooklyn |
| EPI_ISL_428781 | 4/6/2020  | 4/22/2020 North America / USA / New York / Brooklyn |
| EPI_ISL_428782 | 4/6/2020  | 4/22/2020 North America / USA / New York            |
| EPI_ISL_428783 | 4/6/2020  | 4/22/2020 North America / USA / New York / Brooklyn |
| EPI_ISL_428784 | 4/6/2020  | 4/22/2020 North America / USA / New York / Brooklyn |
| EPI_ISL_428785 | 4/6/2020  | 4/22/2020 North America / USA / New York / Brooklyn |
| EPI_ISL_428786 | 4/6/2020  | 4/22/2020 North America / USA / New York / Brooklyn |
| EPI_ISL_428787 | 4/6/2020  | 4/22/2020 North America / USA / New York / Brooklyn |
| EPI_ISL_428788 | 4/6/2020  | 4/22/2020 North America / USA / New York / Brooklyn |
| EPI_ISL_428789 | 4/6/2020  | 4/22/2020 North America / USA / New York / Brooklyn |
| EPI_ISL_428790 | 4/6/2020  | 4/22/2020 North America / USA / New York / Brooklyn |
| EPI_ISL_428791 | 4/4/2020  | 4/22/2020 North America / USA / New York / Brooklyn |
| EPI_ISL_428792 | 4/4/2020  | 4/22/2020 North America / USA / New York / Brooklyn |
| EPI_ISL_428793 | 4/5/2020  | 4/22/2020 North America / USA / New York / Brooklyn |
| EPI_ISL_428795 | 4/5/2020  | 4/22/2020 North America / USA / New York / Brooklyn |
| EPI_ISL_428797 | 4/5/2020  | 4/22/2020 North America / USA / New York / Brooklyn |
| EPI_ISL_428798 | 4/5/2020  | 4/22/2020 North America / USA / New York / Brooklyn |
| EPI_ISL_428799 | 4/5/2020  | 4/22/2020 North America / USA / New York / Brooklyn |
| EPI_ISL_428801 | 4/5/2020  | 4/22/2020 North America / USA / New York / Brooklyn |
| EPI_ISL_428804 | 4/6/2020  | 4/22/2020 North America / USA / New York            |
| EPI_ISL_428805 | 4/6/2020  | 4/22/2020 North America / USA / New York / Queens   |
| EPI_ISL_428822 | 2/16/2020 | 4/22/2020 Asia / Singapore                          |
| EPI_ISL_428823 | 3/8/2020  | 4/22/2020 Asia / Singapore                          |
| EPI_ISL_428824 | 3/16/2020 | 4/22/2020 Asia / Singapore                          |
| EPI_ISL_428825 | 3/16/2020 | 4/22/2020 Asia / Singapore                          |
| EPI_ISL_428826 | 3/17/2020 | 4/22/2020 Asia / Singapore                          |
| EPI_ISL_428827 | 3/17/2020 | 4/22/2020 Asia / Singapore                          |
| EPI_ISL_428828 | 3/8/2020  | 4/22/2020 Asia / Singapore                          |
| EPI_ISL_428829 | 3/8/2020  | 4/22/2020 Asia / Singapore                          |
| EPI_ISL_428830 | 2/27/2020 | 4/22/2020 Asia / Singapore                          |
| EPI_ISL_428831 | 3/13/2020 | 4/22/2020 Asia / Singapore                          |
| EPI_ISL_428832 | 4/8/2020  | 4/22/2020 Asia / Singapore                          |
| EPI_ISL_428833 | 4/8/2020  | 4/22/2020 Asia / Singapore                          |
| EPI_ISL_428834 | 4/8/2020  | 4/22/2020 Asia / Singapore                          |
| EPI_ISL_428835 | 4/8/2020  | 4/22/2020 Asia / Singapore                          |
| EPI_ISL_428836 | 4/8/2020  | 4/22/2020 Asia / Singapore                          |
| EPI_ISL_428837 | 4/8/2020  | 4/22/2020 Asia / Singapore                          |
| EPI_ISL_428838 | 4/8/2020  | 4/22/2020 Asia / Singapore                          |
| EPI_ISL_428839 | 4/8/2020  | 4/22/2020 Asia / Singapore                          |
| EPI_ISL_428840 | 4/7/2020  | 4/22/2020 Asia / Singapore                          |
| EPI_ISL_428841 | 4/8/2020  | 4/22/2020 Asia / Singapore                          |
| EPI_ISL_428842 | 4/8/2020  | 4/22/2020 Asia / Singapore                          |
| EPI_ISL_428843 | 4/8/2020  | 4/22/2020 Asia / Singapore                          |
| EPI_ISL_428844 | 4/8/2020  | 4/22/2020 Asia / Singapore                          |
| EPI_ISL_428845 | 4/8/2020  | 4/22/2020 Asia / Singapore                          |
| EPI_ISL_428846 | 4/15/2020 | 4/22/2020 Asia / Singapore                          |

|                |           |                                                  |
|----------------|-----------|--------------------------------------------------|
| EPI_ISL_428847 | 4/15/2020 | 4/22/2020 Asia / Singapore                       |
| EPI_ISL_428848 | 4/15/2020 | 4/22/2020 Asia / Singapore                       |
| EPI_ISL_428849 | 4/15/2020 | 4/22/2020 Asia / Singapore                       |
| EPI_ISL_428850 | 4/15/2020 | 4/22/2020 Asia / Singapore                       |
| EPI_ISL_428851 | 4/2/2020  | 4/22/2020 Europe / Russia / Moscow               |
| EPI_ISL_428852 | 4/2/2020  | 4/22/2020 Europe / Russia / Moscow               |
| EPI_ISL_428853 | 3/30/2020 | 4/22/2020 Europe / Italy / Friuli Venezia Giulia |
| EPI_ISL_428854 | 3/30/2020 | 4/22/2020 Europe / Italy / Friuli Venezia Giulia |
| EPI_ISL_428855 | 3/17/2020 | 4/22/2020 Africa / Gambia / West Coast Region    |
| EPI_ISL_428856 | 3/21/2020 | 4/22/2020 Africa / Gambia / West Coast Region    |
| EPI_ISL_428857 | 4/20/2020 | 4/22/2020 Africa / Gambia / West Coast Region    |
| EPI_ISL_428860 | 3/11/2020 | 4/22/2020 Europe / Russia / Moscow               |
| EPI_ISL_428861 | 3/11/2020 | 4/22/2020 Europe / Russia / Moscow               |
| EPI_ISL_428862 | 3/11/2020 | 4/22/2020 Europe / Russia / Moscow               |
| EPI_ISL_428863 | 3/11/2020 | 4/22/2020 Europe / Russia / Moscow               |
| EPI_ISL_428864 | 3/11/2020 | 4/22/2020 Europe / Russia / Moscow               |
| EPI_ISL_428865 | 3/11/2020 | 4/22/2020 Europe / Russia / Lipetsk              |
| EPI_ISL_428866 | 3/11/2020 | 4/22/2020 Europe / Russia / Lipetsk              |
| EPI_ISL_428867 | 3/11/2020 | 4/22/2020 Europe / Russia / Krasnodar            |
| EPI_ISL_428868 | 3/13/2020 | 4/22/2020 Europe / Russia / Saint Petersburg     |
| EPI_ISL_428869 | 3/13/2020 | 4/22/2020 Europe / Russia / Moscow               |
| EPI_ISL_428870 | 3/13/2020 | 4/22/2020 Europe / Russia / Moscow Region        |
| EPI_ISL_428871 | 3/13/2020 | 4/22/2020 Europe / Russia / Krasnoyarsk          |
| EPI_ISL_428872 | 3/19/2020 | 4/22/2020 Europe / Russia / Moscow Region        |
| EPI_ISL_428873 | 3/19/2020 | 4/22/2020 Europe / Russia / Sverdlovsk           |
| EPI_ISL_428874 | 3/20/2020 | 4/22/2020 Europe / Russia / Sakha (Yakutia)      |
| EPI_ISL_428875 | 3/16/2020 | 4/22/2020 Europe / Russia / Moscow               |
| EPI_ISL_428876 | 3/19/2020 | 4/22/2020 Europe / Russia / Moscow Region        |
| EPI_ISL_428877 | 3/19/2020 | 4/22/2020 Europe / Russia / Moscow Region        |
| EPI_ISL_428878 | 4/1/2020  | 4/22/2020 Europe / Russia / Omsk                 |
| EPI_ISL_428879 | 3/19/2020 | 4/22/2020 Europe / Russia / Sverdlovsk           |
| EPI_ISL_428880 | 3/19/2020 | 4/22/2020 Europe / Russia / Khabarovsk           |
| EPI_ISL_428881 | 3/16/2020 | 4/22/2020 Europe / Russia / Moscow               |
| EPI_ISL_428882 | 3/16/2020 | 4/22/2020 Europe / Russia / Moscow               |
| EPI_ISL_428883 | 3/20/2020 | 4/22/2020 Europe / Russia / Saint Petersburg     |
| EPI_ISL_428884 | 3/22/2020 | 4/22/2020 Europe / Russia / Moscow               |
| EPI_ISL_428885 | 3/20/2020 | 4/22/2020 Europe / Russia / Samara               |
| EPI_ISL_428886 | 3/20/2020 | 4/22/2020 Europe / Russia / Samara               |
| EPI_ISL_428887 | 3/22/2020 | 4/22/2020 Europe / Russia / Moscow               |
| EPI_ISL_428888 | 3/20/2020 | 4/22/2020 Europe / Russia / Sakha (Yakutia)      |
| EPI_ISL_428889 | 3/22/2020 | 4/22/2020 Europe / Russia / Moscow               |
| EPI_ISL_428890 | 3/19/2020 | 4/22/2020 Europe / Russia / Sverdlovsk           |
| EPI_ISL_428891 | 3/25/2020 | 4/22/2020 Europe / Russia / Sakha (Yakutia)      |
| EPI_ISL_428892 | 3/23/2020 | 4/22/2020 Europe / Russia / Krasnodar            |
| EPI_ISL_428893 | 3/23/2020 | 4/22/2020 Europe / Russia / Kabardino-Balkaria   |
| EPI_ISL_428894 | 3/27/2020 | 4/22/2020 Europe / Russia / Buryatia             |
| EPI_ISL_428895 | 3/24/2020 | 4/22/2020 Europe / Russia / Perm                 |

|                |           |                                                         |
|----------------|-----------|---------------------------------------------------------|
| EPI_ISL_428896 | 3/27/2020 | 4/22/2020 Europe / Russia / Sakha (Yakutia)             |
| EPI_ISL_428897 | 3/24/2020 | 4/22/2020 Europe / Russia / Saint Petersburg            |
| EPI_ISL_428898 | 3/23/2020 | 4/22/2020 Europe / Russia / Kabardino-Balkaria          |
| EPI_ISL_428899 | 3/29/2020 | 4/22/2020 Europe / Russia / Buryatia                    |
| EPI_ISL_428900 | 3/23/2020 | 4/22/2020 Europe / Russia / Moscow Region               |
| EPI_ISL_428901 | 3/23/2020 | 4/22/2020 Europe / Crimea                               |
| EPI_ISL_428902 | 3/23/2020 | 4/22/2020 Europe / Russia / Orenburg                    |
| EPI_ISL_428903 | 3/22/2020 | 4/22/2020 Europe / Russia / Primorsky                   |
| EPI_ISL_428904 | 3/22/2020 | 4/22/2020 Europe / Russia / Moscow                      |
| EPI_ISL_428905 | 3/23/2020 | 4/22/2020 Europe / Russia / Moscow                      |
| EPI_ISL_428906 | 3/27/2020 | 4/22/2020 Europe / Russia / Buryatia                    |
| EPI_ISL_428907 | 4/1/2020  | 4/22/2020 Europe / Russia / Sakha (Yakutia)             |
| EPI_ISL_428908 | 3/25/2020 | 4/22/2020 Europe / Russia / Pskov                       |
| EPI_ISL_428909 | 3/26/2020 | 4/22/2020 Europe / Russia / Chechen                     |
| EPI_ISL_428910 | 3/31/2020 | 4/22/2020 Europe / Russia / Khabarovsk                  |
| EPI_ISL_428911 | 4/1/2020  | 4/22/2020 Europe / Russia / Buryatia                    |
| EPI_ISL_428912 | 3/27/2020 | 4/22/2020 Europe / Russia / Sakhalin                    |
| EPI_ISL_428913 | 3/27/2020 | 4/22/2020 Europe / Russia / Buryatia                    |
| EPI_ISL_428914 | 3/30/2020 | 4/22/2020 Europe / Russia / Buryatia                    |
| EPI_ISL_428915 | 3/25/2020 | 4/22/2020 Europe / Russia / Sverdlovsk                  |
| EPI_ISL_428916 | 3/26/2020 | 4/22/2020 Europe / Russia / Chechen                     |
| EPI_ISL_428917 | 3/24/2020 | 4/22/2020 Europe / Russia / Tatarstan                   |
| EPI_ISL_428918 | 3/27/2020 | 4/22/2020 Europe / Russia / Novosibirsk                 |
| EPI_ISL_428919 | 3/30/2020 | 4/22/2020 Europe / Russia / Buryatia                    |
| EPI_ISL_428920 | 3/30/2020 | 4/22/2020 Europe / Russia / Buryatia                    |
| EPI_ISL_428921 | 3/19/2020 | 4/22/2020 Europe / Russia / Tver                        |
| EPI_ISL_428922 | 3/30/2020 | 4/22/2020 Europe / Russia / Sverdlovsk                  |
| EPI_ISL_428923 | 3/27/2020 | 4/22/2020 Europe / Russia / Sverdlovsk                  |
| EPI_ISL_428924 | 3/28/2020 | 4/22/2020 Europe / Russia / Chelyabinsk                 |
| EPI_ISL_428925 | 3/28/2020 | 4/22/2020 Europe / Poland / Malopolskie                 |
| EPI_ISL_428926 | 3/28/2020 | 4/22/2020 Europe / Poland / Malopolskie                 |
| EPI_ISL_428927 | 3/28/2020 | 4/22/2020 Europe / Poland / Malopolskie                 |
| EPI_ISL_428928 | 3/30/2020 | 4/22/2020 Europe / Poland / Malopolskie                 |
| EPI_ISL_428929 | 3/29/2020 | 4/22/2020 Europe / Poland / Malopolskie                 |
| EPI_ISL_428930 | 3/29/2020 | 4/22/2020 Europe / Poland / Malopolskie                 |
| EPI_ISL_428931 | 3/28/2020 | 4/22/2020 Europe / Poland / Malopolskie                 |
| EPI_ISL_428932 | 3/28/2020 | 4/22/2020 Europe / Poland / Malopolskie                 |
| EPI_ISL_428935 | 4/17/2020 | 4/22/2020 North America / USA / Wisconsin / Dane County |
| EPI_ISL_428936 | 4/18/2020 | 4/22/2020 North America / USA / Wisconsin / Dane County |
| EPI_ISL_428939 | 4/1/2020  | 4/22/2020 Europe / Luxembourg                           |
| EPI_ISL_428940 | 4/2/2020  | 4/22/2020 Europe / Luxembourg                           |
| EPI_ISL_428943 | 4/1/2020  | 4/22/2020 Europe / Luxembourg                           |
| EPI_ISL_428944 | 4/1/2020  | 4/22/2020 Europe / Luxembourg                           |
| EPI_ISL_428945 | 4/3/2020  | 4/22/2020 Europe / Luxembourg                           |
| EPI_ISL_428949 | 4/3/2020  | 4/22/2020 Europe / Luxembourg                           |
| EPI_ISL_428954 | 4/5/2020  | 4/22/2020 Europe / Luxembourg                           |
| EPI_ISL_428956 | 4/1/2020  | 4/22/2020 Europe / Luxembourg                           |





|                |           |                                        |
|----------------|-----------|----------------------------------------|
| EPI_ISL_429095 | 2/8/2020  | 4/23/2020 Asia / China / Guangzhou     |
| EPI_ISL_429096 | 1/29/2020 | 4/23/2020 Asia / China / Guangzhou     |
| EPI_ISL_429097 | 1/29/2020 | 4/23/2020 Asia / China / Guangzhou     |
| EPI_ISL_429098 | 1/29/2020 | 4/23/2020 Asia / China / Guangzhou     |
| EPI_ISL_429100 | 1/27/2020 | 4/23/2020 Asia / China / Guangzhou     |
| EPI_ISL_429101 | 1/27/2020 | 4/23/2020 Asia / China / Guangzhou     |
| EPI_ISL_429102 | 1/27/2020 | 4/23/2020 Asia / China / Guangzhou     |
| EPI_ISL_429103 | 2/9/2020  | 4/23/2020 Asia / China / Guangzhou     |
| EPI_ISL_429104 | 2/1/2020  | 4/23/2020 Asia / China / Guangzhou     |
| EPI_ISL_429105 | 1/29/2020 | 4/23/2020 Asia / China / Guangzhou     |
| EPI_ISL_429115 | 3/11/2020 | 4/23/2020 Europe / Sweden / Halland    |
| EPI_ISL_429116 | 3/15/2020 | 4/23/2020 Europe / Sweden / Halland    |
| EPI_ISL_429117 | 3/11/2020 | 4/23/2020 Europe / Sweden / Halland    |
| EPI_ISL_429118 | 3/11/2020 | 4/23/2020 Europe / Sweden / Halland    |
| EPI_ISL_429119 | 3/11/2020 | 4/23/2020 Europe / Sweden / Halland    |
| EPI_ISL_429120 | 3/11/2020 | 4/23/2020 Europe / Sweden / Halland    |
| EPI_ISL_429121 | 3/11/2020 | 4/23/2020 Europe / Sweden / Halland    |
| EPI_ISL_429122 | 3/11/2020 | 4/23/2020 Europe / Sweden / Halland    |
| EPI_ISL_429123 | 3/12/2020 | 4/23/2020 Europe / Sweden / Halland    |
| EPI_ISL_429124 | 3/12/2020 | 4/23/2020 Europe / Sweden / Halland    |
| EPI_ISL_429125 | 3/12/2020 | 4/23/2020 Europe / Sweden / Halland    |
| EPI_ISL_429126 | 3/21/2020 | 4/23/2020 Europe / Sweden / Sormland   |
| EPI_ISL_429127 | 3/20/2020 | 4/23/2020 Europe / Sweden / Sormland   |
| EPI_ISL_429128 | 4/2/2020  | 4/23/2020 Europe / Sweden / Norrbotten |
| EPI_ISL_429129 | 3/27/2020 | 4/23/2020 Europe / Sweden / Norrbotten |
| EPI_ISL_429130 | 3/23/2020 | 4/23/2020 Europe / Sweden / Norrbotten |
| EPI_ISL_429131 | 3/27/2020 | 4/23/2020 Europe / Sweden / Norrbotten |
| EPI_ISL_429132 | 3/27/2020 | 4/23/2020 Europe / Sweden / Norrbotten |
| EPI_ISL_429133 | 3/26/2020 | 4/23/2020 Europe / Sweden / Norrbotten |
| EPI_ISL_429134 | 3/24/2020 | 4/23/2020 Europe / Sweden / Norrbotten |
| EPI_ISL_429135 | 4/2/2020  | 4/23/2020 Europe / Sweden / Norrbotten |
| EPI_ISL_429136 | 3/4/2020  | 4/23/2020 Europe / Sweden / Varmland   |
| EPI_ISL_429137 | 3/4/2020  | 4/23/2020 Europe / Sweden / Orebro lan |
| EPI_ISL_429138 | 3/5/2020  | 4/23/2020 Europe / Sweden / Varmland   |
| EPI_ISL_429139 | 3/6/2020  | 4/23/2020 Europe / Sweden / Varmland   |
| EPI_ISL_429140 | 3/6/2020  | 4/23/2020 Europe / Sweden / Varmland   |
| EPI_ISL_429141 | 3/6/2020  | 4/23/2020 Europe / Sweden / Varmland   |
| EPI_ISL_429142 | 3/6/2020  | 4/23/2020 Europe / Sweden / Varmland   |
| EPI_ISL_429143 | 3/6/2020  | 4/23/2020 Europe / Sweden / Varmland   |
| EPI_ISL_429144 | 3/6/2020  | 4/23/2020 Europe / Sweden / Varmland   |
| EPI_ISL_429145 | 3/8/2020  | 4/23/2020 Europe / Sweden / Varmland   |
| EPI_ISL_429146 | 3/8/2020  | 4/23/2020 Europe / Sweden / Varmland   |
| EPI_ISL_429147 | 3/8/2020  | 4/23/2020 Europe / Sweden / Varmland   |
| EPI_ISL_429148 | 3/8/2020  | 4/23/2020 Europe / Sweden / Varmland   |
| EPI_ISL_429150 | 3/8/2020  | 4/23/2020 Europe / Sweden / Varmland   |
| EPI_ISL_429151 | 3/8/2020  | 4/23/2020 Europe / Sweden / Varmland   |
| EPI_ISL_429152 | 3/8/2020  | 4/23/2020 Europe / Sweden / Orebro lan |

|                |           |                                            |
|----------------|-----------|--------------------------------------------|
| EPI_ISL_429153 | 3/8/2020  | 4/23/2020 Europe / Sweden / Varmland       |
| EPI_ISL_429154 | 3/8/2020  | 4/23/2020 Europe / Sweden / Varmland       |
| EPI_ISL_429155 | 3/9/2020  | 4/23/2020 Europe / Sweden / Orebro lan     |
| EPI_ISL_429156 | 3/9/2020  | 4/23/2020 Europe / Sweden / Varmland       |
| EPI_ISL_429157 | 3/10/2020 | 4/23/2020 Europe / Sweden / Orebro lan     |
| EPI_ISL_429158 | 3/10/2020 | 4/23/2020 Europe / Sweden / Varmland       |
| EPI_ISL_429160 | 3/12/2020 | 4/23/2020 Europe / Sweden / Ostergotland   |
| EPI_ISL_429161 | 3/12/2020 | 4/23/2020 Europe / Sweden / Stockholm      |
| EPI_ISL_429162 | 3/15/2020 | 4/23/2020 Europe / Sweden / Stockholm      |
| EPI_ISL_429163 | 3/16/2020 | 4/23/2020 Europe / Sweden / Gavleborgs lan |
| EPI_ISL_429164 | 3/13/2020 | 4/23/2020 Asia / Thailand / Bangkok        |
| EPI_ISL_429165 | 3/13/2020 | 4/23/2020 Asia / Thailand / Bangkok        |
| EPI_ISL_429166 | 3/13/2020 | 4/23/2020 Asia / Thailand / Bangkok        |
| EPI_ISL_429167 | 3/13/2020 | 4/23/2020 Asia / Thailand / Bangkok        |
| EPI_ISL_429169 | 3/17/2020 | 4/23/2020 Asia / Thailand / Bangkok        |
| EPI_ISL_429170 | 3/17/2020 | 4/23/2020 Asia / Thailand / Bangkok        |
| EPI_ISL_429171 | 3/18/2020 | 4/23/2020 Asia / Thailand / Bangkok        |
| EPI_ISL_429172 | 3/21/2020 | 4/23/2020 Asia / Thailand / Bangkok        |
| EPI_ISL_429173 | 3/21/2020 | 4/23/2020 Asia / Thailand / Bangkok        |
| EPI_ISL_429174 | 3/25/2020 | 4/23/2020 Asia / Thailand / Bangkok        |
| EPI_ISL_429175 | 3/28/2020 | 4/23/2020 Asia / Thailand / Bangkok        |
| EPI_ISL_429177 | 3/28/2020 | 4/23/2020 Asia / Thailand / Bangkok        |
| EPI_ISL_429178 | 3/28/2020 | 4/23/2020 Asia / Thailand / Bangkok        |
| EPI_ISL_429179 | 3/28/2020 | 4/23/2020 Asia / Thailand / Bangkok        |
| EPI_ISL_429181 | 3/28/2020 | 4/23/2020 Asia / Thailand / Bangkok        |
| EPI_ISL_429182 | 3/28/2020 | 4/23/2020 Asia / Thailand / Bangkok        |
| EPI_ISL_429183 | 3/28/2020 | 4/23/2020 Asia / Thailand / Bangkok        |
| EPI_ISL_429184 | 3/28/2020 | 4/23/2020 Asia / Thailand / Bangkok        |
| EPI_ISL_429196 | 3/18/2020 | 4/23/2020 Europe / Switzerland / Geneva    |
| EPI_ISL_429197 | 3/21/2020 | 4/23/2020 Europe / Switzerland / Geneva    |
| EPI_ISL_429199 | 3/22/2020 | 4/23/2020 Europe / Switzerland / Geneva    |
| EPI_ISL_429200 | 3/19/2020 | 4/23/2020 Europe / Switzerland / Geneva    |
| EPI_ISL_429201 | 3/29/2020 | 4/23/2020 Europe / Switzerland / Geneva    |
| EPI_ISL_429203 | 3/21/2020 | 4/23/2020 Europe / Switzerland / Geneva    |
| EPI_ISL_429204 | 4/3/2020  | 4/23/2020 Europe / Switzerland / Geneva    |
| EPI_ISL_429206 | 4/7/2020  | 4/23/2020 Europe / Switzerland / Geneva    |
| EPI_ISL_429207 | 4/3/2020  | 4/23/2020 Europe / Switzerland / Geneva    |
| EPI_ISL_429208 | 3/17/2020 | 4/23/2020 Europe / Switzerland / Geneva    |
| EPI_ISL_429209 | 3/16/2020 | 4/23/2020 Europe / Switzerland / Geneva    |
| EPI_ISL_429210 | 3/16/2020 | 4/23/2020 Europe / Switzerland / Geneva    |
| EPI_ISL_429211 | 3/24/2020 | 4/23/2020 Europe / Switzerland / Geneva    |
| EPI_ISL_429212 | 3/24/2020 | 4/23/2020 Europe / Switzerland / Geneva    |
| EPI_ISL_429213 | 3/16/2020 | 4/23/2020 Europe / Switzerland / Geneva    |
| EPI_ISL_429214 | 3/23/2020 | 4/23/2020 Europe / Switzerland / Geneva    |
| EPI_ISL_429215 | 3/23/2020 | 4/23/2020 Europe / Switzerland / Geneva    |
| EPI_ISL_429217 | 4/6/2020  | 4/23/2020 Europe / Switzerland / Geneva    |
| EPI_ISL_429218 | 4/2/2020  | 4/23/2020 Europe / Switzerland / Geneva    |



|                |           |                                                                |
|----------------|-----------|----------------------------------------------------------------|
| EPI_ISL_429219 | 4/3/2020  | 4/23/2020 Europe / Switzerland / Geneva                        |
| EPI_ISL_429220 | 4/6/2020  | 4/23/2020 Europe / Switzerland / Geneva                        |
| EPI_ISL_429221 | 4/6/2020  | 4/23/2020 Europe / Switzerland / Geneva                        |
| EPI_ISL_429222 | 4/7/2020  | 4/23/2020 Europe / Switzerland / Geneva                        |
| EPI_ISL_429223 | 4/7/2020  | 4/23/2020 Europe / Switzerland / Geneva                        |
| EPI_ISL_429226 | 3/17/2020 | 4/23/2020 Europe / Italy / Abruzzo                             |
| EPI_ISL_429227 | 3/17/2020 | 4/23/2020 Europe / Italy / Abruzzo                             |
| EPI_ISL_429228 | 3/20/2020 | 4/23/2020 Europe / Italy / Abruzzo                             |
| EPI_ISL_429231 | 3/24/2020 | 4/23/2020 Europe / Italy / Abruzzo                             |
| EPI_ISL_429232 | 3/24/2020 | 4/23/2020 Europe / Italy / Abruzzo                             |
| EPI_ISL_429235 | 3/24/2020 | 4/23/2020 Europe / Italy / Abruzzo                             |
| EPI_ISL_429236 | 3/28/2020 | 4/23/2020 Europe / Italy / Abruzzo                             |
| EPI_ISL_429239 | 3/6/2020  | 4/23/2020 Asia / China / Yunnan                                |
| EPI_ISL_429254 | 4/3/2020  | 4/23/2020 Africa / Democratic Republic of the Congo / Kinshasa |
| EPI_ISL_429255 | 4/5/2020  | 4/23/2020 Africa / Democratic Republic of the Congo / Kinshasa |
| EPI_ISL_429256 | 3/12/2020 | 4/23/2020 Europe / Spain / Madrid                              |
| EPI_ISL_429258 | 4/6/2020  | 4/23/2020 Africa / Democratic Republic of the Congo / Kinshasa |
| EPI_ISL_429259 | 4/6/2020  | 4/23/2020 Africa / Democratic Republic of the Congo / Kinshasa |
| EPI_ISL_429262 | 3/10/2020 | 4/23/2020 Europe / Denmark                                     |
| EPI_ISL_429263 | 3/10/2020 | 4/23/2020 Europe / Denmark                                     |
| EPI_ISL_429264 | 3/10/2020 | 4/23/2020 Europe / Denmark                                     |
| EPI_ISL_429265 | 3/10/2020 | 4/23/2020 Europe / Denmark                                     |
| EPI_ISL_429266 | 3/10/2020 | 4/23/2020 Europe / Denmark                                     |
| EPI_ISL_429267 | 3/10/2020 | 4/23/2020 Europe / Denmark                                     |
| EPI_ISL_429268 | 3/10/2020 | 4/23/2020 Europe / Denmark                                     |
| EPI_ISL_429269 | 3/10/2020 | 4/23/2020 Europe / Denmark                                     |
| EPI_ISL_429270 | 3/10/2020 | 4/23/2020 Europe / Denmark                                     |
| EPI_ISL_429271 | 3/10/2020 | 4/23/2020 Europe / Denmark                                     |
| EPI_ISL_429272 | 3/10/2020 | 4/23/2020 Europe / Denmark                                     |
| EPI_ISL_429273 | 3/10/2020 | 4/23/2020 Europe / Denmark                                     |
| EPI_ISL_429274 | 3/10/2020 | 4/23/2020 Europe / Denmark                                     |
| EPI_ISL_429275 | 3/10/2020 | 4/23/2020 Europe / Denmark                                     |
| EPI_ISL_429276 | 3/10/2020 | 4/23/2020 Europe / Denmark                                     |
| EPI_ISL_429277 | 3/10/2020 | 4/23/2020 Europe / Denmark                                     |
| EPI_ISL_429278 | 3/10/2020 | 4/23/2020 Europe / Denmark                                     |
| EPI_ISL_429279 | 3/10/2020 | 4/23/2020 Europe / Denmark                                     |
| EPI_ISL_429280 | 3/10/2020 | 4/23/2020 Europe / Denmark                                     |
| EPI_ISL_429281 | 3/10/2020 | 4/23/2020 Europe / Denmark                                     |
| EPI_ISL_429282 | 3/11/2020 | 4/23/2020 Europe / Denmark                                     |
| EPI_ISL_429283 | 3/11/2020 | 4/23/2020 Europe / Denmark                                     |
| EPI_ISL_429284 | 3/11/2020 | 4/23/2020 Europe / Denmark                                     |
| EPI_ISL_429285 | 3/11/2020 | 4/23/2020 Europe / Denmark                                     |
| EPI_ISL_429287 | 3/11/2020 | 4/23/2020 Europe / Denmark                                     |
| EPI_ISL_429289 | 3/12/2020 | 4/23/2020 Europe / Denmark                                     |
| EPI_ISL_429293 | 3/13/2020 | 4/23/2020 Europe / Denmark                                     |
| EPI_ISL_429295 | 3/13/2020 | 4/23/2020 Europe / Denmark                                     |
| EPI_ISL_429299 | 3/14/2020 | 4/23/2020 Europe / Denmark                                     |

|                |           |                            |
|----------------|-----------|----------------------------|
| EPI_ISL_429300 | 3/13/2020 | 4/23/2020 Europe / Denmark |
| EPI_ISL_429301 | 3/16/2020 | 4/23/2020 Europe / Denmark |
| EPI_ISL_429302 | 3/16/2020 | 4/23/2020 Europe / Denmark |
| EPI_ISL_429303 | 3/16/2020 | 4/23/2020 Europe / Denmark |
| EPI_ISL_429304 | 3/17/2020 | 4/23/2020 Europe / Denmark |
| EPI_ISL_429305 | 3/17/2020 | 4/23/2020 Europe / Denmark |
| EPI_ISL_429306 | 3/17/2020 | 4/23/2020 Europe / Denmark |
| EPI_ISL_429307 | 3/17/2020 | 4/23/2020 Europe / Denmark |
| EPI_ISL_429308 | 3/17/2020 | 4/23/2020 Europe / Denmark |
| EPI_ISL_429309 | 3/18/2020 | 4/23/2020 Europe / Denmark |
| EPI_ISL_429310 | 3/17/2020 | 4/23/2020 Europe / Denmark |
| EPI_ISL_429311 | 3/17/2020 | 4/23/2020 Europe / Denmark |
| EPI_ISL_429312 | 3/18/2020 | 4/23/2020 Europe / Denmark |
| EPI_ISL_429315 | 3/18/2020 | 4/23/2020 Europe / Denmark |
| EPI_ISL_429316 | 3/18/2020 | 4/23/2020 Europe / Denmark |
| EPI_ISL_429318 | 3/16/2020 | 4/23/2020 Europe / Denmark |
| EPI_ISL_429321 | 3/16/2020 | 4/23/2020 Europe / Denmark |
| EPI_ISL_429322 | 3/16/2020 | 4/23/2020 Europe / Denmark |
| EPI_ISL_429323 | 3/15/2020 | 4/23/2020 Europe / Denmark |
| EPI_ISL_429324 | 3/16/2020 | 4/23/2020 Europe / Denmark |
| EPI_ISL_429325 | 3/16/2020 | 4/23/2020 Europe / Denmark |
| EPI_ISL_429327 | 3/15/2020 | 4/23/2020 Europe / Denmark |
| EPI_ISL_429328 | 3/15/2020 | 4/23/2020 Europe / Denmark |
| EPI_ISL_429329 | 3/15/2020 | 4/23/2020 Europe / Denmark |
| EPI_ISL_429331 | 3/15/2020 | 4/23/2020 Europe / Denmark |
| EPI_ISL_429335 | 3/2/2020  | 4/23/2020 Europe / Denmark |
| EPI_ISL_429337 | 3/8/2020  | 4/23/2020 Europe / Denmark |
| EPI_ISL_429339 | 3/7/2020  | 4/23/2020 Europe / Denmark |
| EPI_ISL_429340 | 3/7/2020  | 4/23/2020 Europe / Denmark |
| EPI_ISL_429341 | 3/4/2020  | 4/23/2020 Europe / Denmark |
| EPI_ISL_429342 | 3/8/2020  | 4/23/2020 Europe / Denmark |
| EPI_ISL_429343 | 3/9/2020  | 4/23/2020 Europe / Denmark |
| EPI_ISL_429344 | 3/8/2020  | 4/23/2020 Europe / Denmark |
| EPI_ISL_429345 | 3/9/2020  | 4/23/2020 Europe / Denmark |
| EPI_ISL_429346 | 3/6/2020  | 4/23/2020 Europe / Denmark |
| EPI_ISL_429348 | 3/8/2020  | 4/23/2020 Europe / Denmark |
| EPI_ISL_429349 | 3/8/2020  | 4/23/2020 Europe / Denmark |
| EPI_ISL_429350 | 3/8/2020  | 4/23/2020 Europe / Denmark |
| EPI_ISL_429351 | 3/8/2020  | 4/23/2020 Europe / Denmark |
| EPI_ISL_429352 | 3/8/2020  | 4/23/2020 Europe / Denmark |
| EPI_ISL_429353 | 3/8/2020  | 4/23/2020 Europe / Denmark |
| EPI_ISL_429354 | 3/8/2020  | 4/23/2020 Europe / Denmark |
| EPI_ISL_429355 | 3/8/2020  | 4/23/2020 Europe / Denmark |
| EPI_ISL_429356 | 3/8/2020  | 4/23/2020 Europe / Denmark |
| EPI_ISL_429357 | 3/8/2020  | 4/23/2020 Europe / Denmark |
| EPI_ISL_429358 | 3/9/2020  | 4/23/2020 Europe / Denmark |
| EPI_ISL_429360 | 3/9/2020  | 4/23/2020 Europe / Denmark |







|                |           |                                            |
|----------------|-----------|--------------------------------------------|
| EPI_ISL_429565 | 3/24/2020 | 4/23/2020 Europe / Denmark                 |
| EPI_ISL_429566 | 3/23/2020 | 4/23/2020 Europe / Denmark                 |
| EPI_ISL_429567 | 3/21/2020 | 4/23/2020 Europe / Denmark                 |
| EPI_ISL_429569 | 3/24/2020 | 4/23/2020 Europe / Denmark                 |
| EPI_ISL_429570 | 3/24/2020 | 4/23/2020 Europe / Denmark                 |
| EPI_ISL_429571 | 3/26/2020 | 4/23/2020 Europe / Denmark                 |
| EPI_ISL_429572 | 3/24/2020 | 4/23/2020 Europe / Denmark                 |
| EPI_ISL_429573 | 3/23/2020 | 4/23/2020 Europe / Denmark                 |
| EPI_ISL_429574 | 3/26/2020 | 4/23/2020 Europe / Denmark                 |
| EPI_ISL_429575 | 3/25/2020 | 4/23/2020 Europe / Denmark                 |
| EPI_ISL_429577 | 3/25/2020 | 4/23/2020 Europe / Denmark                 |
| EPI_ISL_429578 | 3/25/2020 | 4/23/2020 Europe / Denmark                 |
| EPI_ISL_429579 | 3/26/2020 | 4/23/2020 Europe / Denmark                 |
| EPI_ISL_429580 | 3/25/2020 | 4/23/2020 Europe / Denmark                 |
| EPI_ISL_429581 | 3/24/2020 | 4/23/2020 Europe / Denmark                 |
| EPI_ISL_429582 | 3/16/2020 | 4/23/2020 Europe / Denmark                 |
| EPI_ISL_429583 | 3/23/2020 | 4/23/2020 Europe / Denmark                 |
| EPI_ISL_429584 | 3/26/2020 | 4/23/2020 Europe / Denmark                 |
| EPI_ISL_429585 | 3/26/2020 | 4/23/2020 Europe / Denmark                 |
| EPI_ISL_429586 | 3/26/2020 | 4/23/2020 Europe / Denmark                 |
| EPI_ISL_429587 | 3/26/2020 | 4/23/2020 Europe / Denmark                 |
| EPI_ISL_429588 | 3/26/2020 | 4/23/2020 Europe / Denmark                 |
| EPI_ISL_429589 | 3/28/2020 | 4/23/2020 Europe / Denmark                 |
| EPI_ISL_429590 | 3/28/2020 | 4/23/2020 Europe / Denmark                 |
| EPI_ISL_429598 | 3/31/2020 | 4/23/2020 North America / USA / Washington |
| EPI_ISL_429600 | 3/31/2020 | 4/23/2020 North America / USA / Washington |
| EPI_ISL_429601 | 3/29/2020 | 4/23/2020 North America / USA / Idaho      |
| EPI_ISL_429602 | 3/30/2020 | 4/23/2020 North America / USA / Washington |
| EPI_ISL_429603 | 3/30/2020 | 4/23/2020 North America / USA / Washington |
| EPI_ISL_429604 | 3/29/2020 | 4/23/2020 North America / USA / Washington |
| EPI_ISL_429605 | 3/31/2020 | 4/23/2020 North America / USA / Washington |
| EPI_ISL_429606 | 3/31/2020 | 4/23/2020 North America / USA / Washington |
| EPI_ISL_429608 | 3/31/2020 | 4/23/2020 North America / USA / Washington |
| EPI_ISL_429609 | 3/31/2020 | 4/23/2020 North America / USA / Washington |
| EPI_ISL_429610 | 3/30/2020 | 4/23/2020 North America / USA / Idaho      |
| EPI_ISL_429611 | 3/31/2020 | 4/23/2020 North America / USA / Washington |
| EPI_ISL_429612 | 3/26/2020 | 4/23/2020 North America / USA / Washington |
| EPI_ISL_429613 | 3/26/2020 | 4/23/2020 North America / USA / Washington |
| EPI_ISL_429614 | 3/26/2020 | 4/23/2020 North America / USA / Washington |
| EPI_ISL_429615 | 3/29/2020 | 4/23/2020 North America / USA / Washington |
| EPI_ISL_429616 | 3/29/2020 | 4/23/2020 North America / USA / Washington |
| EPI_ISL_429617 | 3/28/2020 | 4/23/2020 North America / USA / Washington |
| EPI_ISL_429618 | 3/25/2020 | 4/23/2020 North America / USA / Washington |
| EPI_ISL_429621 | 3/28/2020 | 4/23/2020 North America / USA / Washington |
| EPI_ISL_429622 | 3/27/2020 | 4/23/2020 North America / USA / Washington |
| EPI_ISL_429623 | 3/28/2020 | 4/23/2020 North America / USA / Washington |
| EPI_ISL_429624 | 3/27/2020 | 4/23/2020 North America / USA / Washington |

|                |           |           |                                       |
|----------------|-----------|-----------|---------------------------------------|
| EPI_ISL_429625 | 3/27/2020 | 4/23/2020 | North America / USA / Washington      |
| EPI_ISL_429626 | 3/28/2020 | 4/23/2020 | North America / USA / Washington      |
| EPI_ISL_429627 | 3/27/2020 | 4/23/2020 | North America / USA / Washington      |
| EPI_ISL_429628 | 4/6/2020  | 4/23/2020 | North America / USA                   |
| EPI_ISL_429629 | 4/6/2020  | 4/23/2020 | North America / USA / Washington      |
| EPI_ISL_429630 | 4/5/2020  | 4/23/2020 | North America / USA / Washington      |
| EPI_ISL_429631 | 4/6/2020  | 4/23/2020 | North America / USA / Washington      |
| EPI_ISL_429632 | 4/6/2020  | 4/23/2020 | North America / USA / Washington      |
| EPI_ISL_429634 | 4/7/2020  | 4/23/2020 | North America / USA / Washington      |
| EPI_ISL_429635 | 4/8/2020  | 4/23/2020 | North America / USA / Washington      |
| EPI_ISL_429636 | 4/7/2020  | 4/23/2020 | North America / USA / Washington      |
| EPI_ISL_429637 | 4/7/2020  | 4/23/2020 | North America / USA / Washington      |
| EPI_ISL_429638 | 4/7/2020  | 4/23/2020 | North America / USA / Washington      |
| EPI_ISL_429639 | 4/7/2020  | 4/23/2020 | North America / USA / Washington      |
| EPI_ISL_429641 | 4/6/2020  | 4/23/2020 | North America / USA / Connecticut     |
| EPI_ISL_429642 | 4/6/2020  | 4/23/2020 | North America / USA / Connecticut     |
| EPI_ISL_429643 | 4/8/2020  | 4/23/2020 | North America / USA                   |
| EPI_ISL_429644 | 4/8/2020  | 4/23/2020 | North America / USA / Washington      |
| EPI_ISL_429645 | 4/6/2020  | 4/23/2020 | North America / USA / Connecticut     |
| EPI_ISL_429647 | 4/8/2020  | 4/23/2020 | North America / USA / Washington      |
| EPI_ISL_429649 | 4/2/2020  | 4/23/2020 | North America / USA / Washington      |
| EPI_ISL_429650 | 4/2/2020  | 4/23/2020 | North America / USA / Washington      |
| EPI_ISL_429651 | 4/2/2020  | 4/23/2020 | North America / USA / Washington      |
| EPI_ISL_429652 | 4/2/2020  | 4/23/2020 | North America / USA / Washington      |
| EPI_ISL_429653 | 4/2/2020  | 4/23/2020 | North America / USA / Washington      |
| EPI_ISL_429654 | 4/2/2020  | 4/23/2020 | North America / USA / Washington      |
| EPI_ISL_429655 | 4/2/2020  | 4/23/2020 | North America / USA / Washington      |
| EPI_ISL_429656 | 4/2/2020  | 4/23/2020 | North America / USA                   |
| EPI_ISL_429659 | 2020-03   | 4/23/2020 | Europe / Croatia / Istria             |
| EPI_ISL_429663 | 2020-03   | 4/23/2020 | Europe / Croatia / Istria             |
| EPI_ISL_429667 | 3/9/2020  | 4/24/2020 | South America / Brazil / Minas Gerais |
| EPI_ISL_429669 | 3/13/2020 | 4/24/2020 | South America / Brazil / Minas Gerais |
| EPI_ISL_429671 | 3/13/2020 | 4/24/2020 | South America / Brazil / Minas Gerais |
| EPI_ISL_429674 | 3/11/2020 | 4/24/2020 | South America / Brazil / Minas Gerais |
| EPI_ISL_429676 | 3/16/2020 | 4/24/2020 | South America / Brazil / Minas Gerais |
| EPI_ISL_429681 | 3/16/2020 | 4/24/2020 | South America / Brazil / Minas Gerais |
| EPI_ISL_429687 | 3/17/2020 | 4/24/2020 | South America / Brazil / Minas Gerais |
| EPI_ISL_429688 | 3/17/2020 | 4/24/2020 | South America / Brazil / Minas Gerais |
| EPI_ISL_429689 | 3/17/2020 | 4/24/2020 | South America / Brazil / Minas Gerais |
| EPI_ISL_429695 | 3/20/2020 | 4/24/2020 | South America / Brazil / Minas Gerais |
| EPI_ISL_429702 | 3/22/2020 | 4/24/2020 | South America / Brazil / Minas Gerais |
| EPI_ISL_429705 | 2020-03   | 4/24/2020 | Europe / Croatia / Istria             |
| EPI_ISL_429706 | 4/9/2020  | 4/24/2020 | Europe / Luxembourg                   |
| EPI_ISL_429707 | 3/18/2020 | 4/24/2020 | Europe / Luxembourg                   |
| EPI_ISL_429710 | 3/28/2020 | 4/24/2020 | Europe / Luxembourg                   |
| EPI_ISL_429711 | 3/20/2020 | 4/24/2020 | Europe / Luxembourg                   |
| EPI_ISL_429713 | 4/8/2020  | 4/24/2020 | Europe / Luxembourg                   |

|                |           |                               |
|----------------|-----------|-------------------------------|
| EPI_ISL_429715 | 3/23/2020 | 4/24/2020 Europe / Luxembourg |
| EPI_ISL_429716 | 3/29/2020 | 4/24/2020 Europe / Luxembourg |
| EPI_ISL_429718 | 3/19/2020 | 4/24/2020 Europe / Luxembourg |
| EPI_ISL_429722 | 4/1/2020  | 4/24/2020 Europe / Luxembourg |
| EPI_ISL_429723 | 3/22/2020 | 4/24/2020 Europe / Luxembourg |
| EPI_ISL_429724 | 3/19/2020 | 4/24/2020 Europe / Luxembourg |
| EPI_ISL_429725 | 3/30/2020 | 4/24/2020 Europe / Luxembourg |
| EPI_ISL_429727 | 3/19/2020 | 4/24/2020 Europe / Luxembourg |
| EPI_ISL_429728 | 3/26/2020 | 4/24/2020 Europe / Luxembourg |
| EPI_ISL_429730 | 4/9/2020  | 4/24/2020 Europe / Luxembourg |
| EPI_ISL_429732 | 3/23/2020 | 4/24/2020 Europe / Luxembourg |
| EPI_ISL_429733 | 3/22/2020 | 4/24/2020 Europe / Luxembourg |
| EPI_ISL_429734 | 3/20/2020 | 4/24/2020 Europe / Luxembourg |
| EPI_ISL_429735 | 3/20/2020 | 4/24/2020 Europe / Luxembourg |
| EPI_ISL_429736 | 3/29/2020 | 4/24/2020 Europe / Luxembourg |
| EPI_ISL_429737 | 3/24/2020 | 4/24/2020 Europe / Luxembourg |
| EPI_ISL_429738 | 3/18/2020 | 4/24/2020 Europe / Luxembourg |
| EPI_ISL_429741 | 3/28/2020 | 4/24/2020 Europe / Luxembourg |
| EPI_ISL_429742 | 4/10/2020 | 4/24/2020 Europe / Luxembourg |
| EPI_ISL_429743 | 3/29/2020 | 4/24/2020 Europe / Luxembourg |
| EPI_ISL_429746 | 3/26/2020 | 4/24/2020 Europe / Luxembourg |
| EPI_ISL_429748 | 3/18/2020 | 4/24/2020 Europe / Luxembourg |
| EPI_ISL_429749 | 3/24/2020 | 4/24/2020 Europe / Luxembourg |
| EPI_ISL_429750 | 3/18/2020 | 4/24/2020 Europe / Luxembourg |
| EPI_ISL_429753 | 3/24/2020 | 4/24/2020 Europe / Luxembourg |
| EPI_ISL_429755 | 3/29/2020 | 4/24/2020 Europe / Luxembourg |
| EPI_ISL_429756 | 3/27/2020 | 4/24/2020 Europe / Luxembourg |
| EPI_ISL_429757 | 3/24/2020 | 4/24/2020 Europe / Luxembourg |
| EPI_ISL_429758 | 3/24/2020 | 4/24/2020 Europe / Luxembourg |
| EPI_ISL_429759 | 3/24/2020 | 4/24/2020 Europe / Luxembourg |
| EPI_ISL_429760 | 3/22/2020 | 4/24/2020 Europe / Luxembourg |
| EPI_ISL_429762 | 3/22/2020 | 4/24/2020 Europe / Luxembourg |
| EPI_ISL_429764 | 4/9/2020  | 4/24/2020 Europe / Luxembourg |
| EPI_ISL_429766 | 3/23/2020 | 4/24/2020 Europe / Luxembourg |
| EPI_ISL_429767 | 3/25/2020 | 4/24/2020 Europe / Luxembourg |
| EPI_ISL_429769 | 3/28/2020 | 4/24/2020 Europe / Luxembourg |
| EPI_ISL_429770 | 3/28/2020 | 4/24/2020 Europe / Luxembourg |
| EPI_ISL_429772 | 3/28/2020 | 4/24/2020 Europe / Luxembourg |
| EPI_ISL_429773 | 4/9/2020  | 4/24/2020 Europe / Luxembourg |
| EPI_ISL_429774 | 3/23/2020 | 4/24/2020 Europe / Luxembourg |
| EPI_ISL_429775 | 3/23/2020 | 4/24/2020 Europe / Luxembourg |
| EPI_ISL_429776 | 3/23/2020 | 4/24/2020 Europe / Luxembourg |
| EPI_ISL_429777 | 3/24/2020 | 4/24/2020 Europe / Luxembourg |
| EPI_ISL_429778 | 3/22/2020 | 4/24/2020 Europe / Luxembourg |
| EPI_ISL_429779 | 3/26/2020 | 4/24/2020 Europe / Luxembourg |
| EPI_ISL_429780 | 3/26/2020 | 4/24/2020 Europe / Luxembourg |
| EPI_ISL_429781 | 3/23/2020 | 4/24/2020 Europe / Luxembourg |



|                |           |                                                                 |
|----------------|-----------|-----------------------------------------------------------------|
| EPI_ISL_429782 | 3/29/2020 | 4/24/2020 Europe / Luxembourg                                   |
| EPI_ISL_429784 | 3/27/2020 | 4/24/2020 Europe / Luxembourg                                   |
| EPI_ISL_429786 | 3/31/2020 | 4/24/2020 Europe / Luxembourg                                   |
| EPI_ISL_429787 | 3/22/2020 | 4/24/2020 Europe / Luxembourg                                   |
| EPI_ISL_429791 | 3/28/2020 | 4/24/2020 Europe / Luxembourg                                   |
| EPI_ISL_429792 | 2020-03   | 4/24/2020 Europe / Croatia / Istria                             |
| EPI_ISL_429793 | 3/27/2020 | 4/24/2020 Europe / Luxembourg                                   |
| EPI_ISL_429794 | 3/31/2020 | 4/24/2020 Europe / Luxembourg                                   |
| EPI_ISL_429802 | 2020-03   | 4/24/2020 Europe / Croatia / Istria                             |
| EPI_ISL_429803 | 2020-03   | 4/24/2020 Europe / Croatia / Istria                             |
| EPI_ISL_429805 | 2020-03   | 4/24/2020 Europe / Croatia / Istria                             |
| EPI_ISL_429806 | 3/9/2020  | 4/24/2020 North America / Canada / New Brunswick                |
| EPI_ISL_429807 | 3/10/2020 | 4/24/2020 North America / Canada / Manitoba                     |
| EPI_ISL_429811 | 3/12/2020 | 4/24/2020 North America / Canada / New Brunswick                |
| EPI_ISL_429812 | 3/14/2020 | 4/24/2020 North America / Canada / Nova Scotia                  |
| EPI_ISL_429813 | 3/15/2020 | 4/24/2020 North America / Canada / Nova Scotia                  |
| EPI_ISL_429814 | 3/15/2020 | 4/24/2020 North America / Canada / Nova Scotia                  |
| EPI_ISL_429815 | 3/15/2020 | 4/24/2020 North America / Canada / Newfoundland and Labrador    |
| EPI_ISL_429816 | 3/14/2020 | 4/24/2020 North America / Canada / New Brunswick                |
| EPI_ISL_429817 | 3/14/2020 | 4/24/2020 North America / Canada / Manitoba                     |
| EPI_ISL_429818 | 3/18/2020 | 4/24/2020 North America / Canada / Manitoba                     |
| EPI_ISL_429819 | 3/18/2020 | 4/24/2020 North America / Canada / Manitoba                     |
| EPI_ISL_429820 | 3/14/2020 | 4/24/2020 North America / Canada / Manitoba                     |
| EPI_ISL_429843 | 4/8/2020  | 4/24/2020 North America / USA / Wisconsin / La Crosse County    |
| EPI_ISL_429844 | 4/9/2020  | 4/24/2020 North America / USA / Iowa / Allamakee County         |
| EPI_ISL_429845 | 4/14/2020 | 4/24/2020 North America / USA / Iowa / Allamakee County         |
| EPI_ISL_429846 | 4/16/2020 | 4/24/2020 North America / USA / Iowa / Allamakee County         |
| EPI_ISL_429847 | 4/16/2020 | 4/24/2020 North America / USA / Iowa / Allamakee County         |
| EPI_ISL_429848 | 4/6/2020  | 4/24/2020 North America / USA / Iowa / Winneshiek County        |
| EPI_ISL_429852 | 1/25/2020 | 4/24/2020 Asia / China / Zhejiang / Lishui                      |
| EPI_ISL_429853 | 1/28/2020 | 4/24/2020 Asia / China / Zhejiang / Lishui                      |
| EPI_ISL_429854 | 2/1/2020  | 4/24/2020 Asia / China / Zhejiang / Lishui                      |
| EPI_ISL_429861 | 3/22/2020 | 4/24/2020 Europe / Turkey / Ankara                              |
| EPI_ISL_429862 | 3/22/2020 | 4/24/2020 Europe / Turkey / Ankara                              |
| EPI_ISL_429863 | 3/22/2020 | 4/24/2020 Europe / Turkey / Sakarya                             |
| EPI_ISL_429864 | 3/22/2020 | 4/24/2020 Europe / Turkey / Sakarya                             |
| EPI_ISL_429865 | 3/18/2020 | 4/24/2020 Europe / Turkey / Canakkale                           |
| EPI_ISL_429866 | 3/16/2020 | 4/24/2020 Europe / Turkey / Afyon                               |
| EPI_ISL_429867 | 3/17/2020 | 4/24/2020 Europe / Turkey / Balikesir                           |
| EPI_ISL_429868 | 3/17/2020 | 4/24/2020 Europe / Turkey / Eskisehir                           |
| EPI_ISL_429869 | 3/17/2020 | 4/24/2020 Europe / Turkey / Konya                               |
| EPI_ISL_429870 | 3/22/2020 | 4/24/2020 Europe / Turkey / Sakarya                             |
| EPI_ISL_429871 | 3/23/2020 | 4/24/2020 Europe / Turkey / Ankara                              |
| EPI_ISL_429872 | 3/25/2020 | 4/24/2020 Europe / Turkey / Kocaeli                             |
| EPI_ISL_429873 | 3/23/2020 | 4/24/2020 Europe / Turkey / Kocaeli                             |
| EPI_ISL_429879 | 3/5/2020  | 4/24/2020 North America / USA / California / Santa Clara County |
| EPI_ISL_429882 | 3/29/2020 | 4/24/2020 Asia / Taiwan                                         |

|                |           |                                                               |
|----------------|-----------|---------------------------------------------------------------|
| EPI_ISL_429883 | 3/23/2020 | 4/24/2020 Asia / Taiwan                                       |
| EPI_ISL_429884 | 3/30/2020 | 4/24/2020 Asia / Taiwan                                       |
| EPI_ISL_429968 | 2/21/2020 | 4/24/2020 Europe / France / Hauts-de-France / Compiègne       |
| EPI_ISL_429969 | 3/26/2020 | 4/24/2020 North America / USA / Virginia                      |
| EPI_ISL_429970 | 3/28/2020 | 4/24/2020 North America / USA / Virginia                      |
| EPI_ISL_429971 | 3/30/2020 | 4/24/2020 North America / USA / Virginia                      |
| EPI_ISL_429972 | 3/28/2020 | 4/24/2020 North America / USA / Virginia                      |
| EPI_ISL_429973 | 3/28/2020 | 4/24/2020 North America / USA / Virginia                      |
| EPI_ISL_429974 | 3/29/2020 | 4/24/2020 North America / USA / Virginia                      |
| EPI_ISL_429975 | 3/27/2020 | 4/24/2020 North America / USA / Virginia                      |
| EPI_ISL_429976 | 4/4/2020  | 4/24/2020 North America / USA / Virginia                      |
| EPI_ISL_429977 | 3/27/2020 | 4/24/2020 North America / USA / Virginia                      |
| EPI_ISL_429978 | 3/30/2020 | 4/24/2020 North America / USA / Virginia                      |
| EPI_ISL_429979 | 3/26/2020 | 4/24/2020 North America / USA / Virginia                      |
| EPI_ISL_429980 | 4/3/2020  | 4/24/2020 North America / USA / Virginia                      |
| EPI_ISL_429982 | 4/6/2020  | 4/24/2020 North America / USA / Virginia                      |
| EPI_ISL_429983 | 3/30/2020 | 4/24/2020 North America / USA / Virginia                      |
| EPI_ISL_429984 | 4/2/2020  | 4/24/2020 North America / USA / Virginia                      |
| EPI_ISL_429985 | 4/2/2020  | 4/24/2020 North America / USA / Virginia                      |
| EPI_ISL_429986 | 4/2/2020  | 4/24/2020 North America / USA / Virginia                      |
| EPI_ISL_429987 | 4/2/2020  | 4/24/2020 North America / USA / Virginia                      |
| EPI_ISL_429988 | 4/2/2020  | 4/24/2020 North America / USA / Virginia                      |
| EPI_ISL_429989 | 4/1/2020  | 4/24/2020 North America / USA / Virginia                      |
| EPI_ISL_429990 | 3/21/2020 | 4/24/2020 North America / USA / California / San Diego County |
| EPI_ISL_429991 | 3/24/2020 | 4/24/2020 North America / USA / California / San Diego County |
| EPI_ISL_429992 | 3/22/2020 | 4/24/2020 Asia / Jordan / Amman                               |
| EPI_ISL_429993 | 3/16/2020 | 4/24/2020 Asia / Jordan / Amman                               |
| EPI_ISL_429994 | 3/17/2020 | 4/24/2020 Asia / Jordan / Amman                               |
| EPI_ISL_429995 | 3/30/2020 | 4/24/2020 Asia / Jordan / Amman                               |
| EPI_ISL_429996 | 3/23/2020 | 4/24/2020 Asia / Jordan / Amman                               |
| EPI_ISL_429997 | 3/16/2020 | 4/24/2020 Asia / Jordan / Amman                               |
| EPI_ISL_429998 | 3/28/2020 | 4/24/2020 Asia / Jordan / Amman                               |
| EPI_ISL_429999 | 3/17/2020 | 4/24/2020 Asia / Jordan / Amman                               |
| EPI_ISL_430000 | 3/30/2020 | 4/24/2020 Asia / Jordan / Amman                               |
| EPI_ISL_430001 | 3/17/2020 | 4/24/2020 Asia / Jordan / Amman                               |
| EPI_ISL_430002 | 3/16/2020 | 4/24/2020 Asia / Jordan / Amman                               |
| EPI_ISL_430003 | 3/16/2020 | 4/24/2020 Asia / Jordan / Amman                               |
| EPI_ISL_430004 | 3/17/2020 | 4/24/2020 Asia / Jordan / Amman                               |
| EPI_ISL_430006 | 3/23/2020 | 4/24/2020 Asia / Jordan / Amman                               |
| EPI_ISL_430007 | 3/19/2020 | 4/24/2020 Asia / Jordan / Amman                               |
| EPI_ISL_430009 | 3/30/2020 | 4/24/2020 Asia / Jordan / Irbid                               |
| EPI_ISL_430011 | 3/19/2020 | 4/24/2020 Asia / Jordan / Amman                               |
| EPI_ISL_430012 | 3/30/2020 | 4/24/2020 Asia / Jordan / Irbid                               |
| EPI_ISL_430014 | 3/17/2020 | 4/24/2020 Asia / Jordan / Amman                               |
| EPI_ISL_430015 | 3/24/2020 | 4/24/2020 Asia / Jordan / Amman                               |
| EPI_ISL_430016 | 3/24/2020 | 4/24/2020 North America / USA / California / San Diego County |
| EPI_ISL_430019 | 3/16/2020 | 4/25/2020 North America / USA / Utah                          |

|                |           |           |                                    |
|----------------|-----------|-----------|------------------------------------|
| EPI_ISL_430021 | 3/16/2020 | 4/25/2020 | North America / USA / Utah         |
| EPI_ISL_430022 | 3/16/2020 | 4/25/2020 | North America / USA / Utah         |
| EPI_ISL_430023 | 3/16/2020 | 4/25/2020 | North America / USA / Utah         |
| EPI_ISL_430024 | 3/16/2020 | 4/25/2020 | North America / USA / Utah         |
| EPI_ISL_430025 | 3/17/2020 | 4/25/2020 | North America / USA / Utah         |
| EPI_ISL_430026 | 3/16/2020 | 4/25/2020 | North America / USA / Utah         |
| EPI_ISL_430028 | 3/17/2020 | 4/25/2020 | North America / USA / Utah         |
| EPI_ISL_430029 | 3/15/2020 | 4/25/2020 | North America / USA / Utah         |
| EPI_ISL_430031 | 3/15/2020 | 4/25/2020 | North America / USA / Utah         |
| EPI_ISL_430032 | 3/17/2020 | 4/25/2020 | North America / USA / Utah         |
| EPI_ISL_430033 | 3/17/2020 | 4/25/2020 | North America / USA / Utah         |
| EPI_ISL_430034 | 3/17/2020 | 4/25/2020 | North America / USA / Utah         |
| EPI_ISL_430035 | 3/15/2020 | 4/25/2020 | North America / USA / Utah         |
| EPI_ISL_430036 | 3/14/2020 | 4/25/2020 | North America / USA / Utah         |
| EPI_ISL_430037 | 3/14/2020 | 4/25/2020 | North America / USA / Utah         |
| EPI_ISL_430038 | 3/15/2020 | 4/25/2020 | North America / USA / Utah         |
| EPI_ISL_430039 | 3/30/2020 | 4/25/2020 | North America / USA / Utah         |
| EPI_ISL_430041 | 3/30/2020 | 4/25/2020 | North America / USA / Utah         |
| EPI_ISL_430042 | 3/30/2020 | 4/25/2020 | North America / USA / Utah         |
| EPI_ISL_430043 | 3/30/2020 | 4/25/2020 | North America / USA / Utah         |
| EPI_ISL_430044 | 3/30/2020 | 4/25/2020 | North America / USA / Utah         |
| EPI_ISL_430045 | 3/31/2020 | 4/25/2020 | North America / USA / Utah         |
| EPI_ISL_430046 | 4/2/2020  | 4/25/2020 | North America / USA / Utah         |
| EPI_ISL_430047 | 4/2/2020  | 4/25/2020 | North America / USA / Utah         |
| EPI_ISL_430048 | 4/2/2020  | 4/25/2020 | North America / USA / Utah         |
| EPI_ISL_430050 | 3/31/2020 | 4/25/2020 | North America / USA / Utah         |
| EPI_ISL_430051 | 4/2/2020  | 4/25/2020 | North America / USA / Utah         |
| EPI_ISL_430052 | 4/3/2020  | 4/25/2020 | North America / USA / Utah         |
| EPI_ISL_430053 | 4/2/2020  | 4/25/2020 | North America / USA / Utah         |
| EPI_ISL_430054 | 4/2/2020  | 4/25/2020 | North America / USA / Utah         |
| EPI_ISL_430055 | 4/2/2020  | 4/25/2020 | North America / USA / Utah         |
| EPI_ISL_430056 | 4/2/2020  | 4/25/2020 | North America / USA / Utah         |
| EPI_ISL_430057 | 4/3/2020  | 4/25/2020 | North America / USA / Utah         |
| EPI_ISL_430058 | 4/3/2020  | 4/25/2020 | North America / USA / Utah         |
| EPI_ISL_430059 | 4/3/2020  | 4/25/2020 | North America / USA / Utah         |
| EPI_ISL_430060 | 4/3/2020  | 4/25/2020 | North America / USA / Utah         |
| EPI_ISL_430061 | 4/3/2020  | 4/25/2020 | North America / USA / Utah         |
| EPI_ISL_430062 | 4/3/2020  | 4/25/2020 | North America / USA / Utah         |
| EPI_ISL_430064 | 3/7/2020  | 4/25/2020 | Oceania / Australia / Victoria     |
| EPI_ISL_430065 | 4/8/2020  | 4/25/2020 | Oceania / Australia / Victoria     |
| EPI_ISL_430067 | 4/7/2020  | 4/25/2020 | Europe / Russia / Saint Petersburg |
| EPI_ISL_430068 | 4/7/2020  | 4/25/2020 | Europe / Russia / Saint Petersburg |
| EPI_ISL_430069 | 4/7/2020  | 4/25/2020 | Europe / Russia / Saint Petersburg |
| EPI_ISL_430070 | 4/7/2020  | 4/25/2020 | Europe / Russia / Saint Petersburg |
| EPI_ISL_430071 | 4/8/2020  | 4/25/2020 | Europe / Russia / Saint Petersburg |
| EPI_ISL_430072 | 4/8/2020  | 4/25/2020 | Europe / Russia / Saint Petersburg |
| EPI_ISL_430073 | 4/8/2020  | 4/25/2020 | Europe / Russia / Saint Petersburg |

|                |           |           |                                                     |
|----------------|-----------|-----------|-----------------------------------------------------|
| EPI_ISL_430074 | 4/8/2020  | 4/25/2020 | Europe / Russia / Saint Petersburg                  |
| EPI_ISL_430075 | 4/9/2020  | 4/25/2020 | Europe / Russia / Saint Petersburg                  |
| EPI_ISL_430076 | 4/10/2020 | 4/25/2020 | Europe / Russia / Saint Petersburg                  |
| EPI_ISL_430077 | 4/10/2020 | 4/25/2020 | Europe / Russia / Saint Petersburg                  |
| EPI_ISL_430078 | 4/10/2020 | 4/25/2020 | Europe / Russia / Saint Petersburg                  |
| EPI_ISL_430079 | 4/10/2020 | 4/25/2020 | Europe / Russia / Saint Petersburg                  |
| EPI_ISL_430080 | 4/10/2020 | 4/25/2020 | Europe / Russia / Saint Petersburg                  |
| EPI_ISL_430081 | 4/10/2020 | 4/25/2020 | Europe / Russia / Saint Petersburg                  |
| EPI_ISL_430082 | 4/10/2020 | 4/25/2020 | Europe / Russia / Saint Petersburg                  |
| EPI_ISL_430083 | 4/10/2020 | 4/25/2020 | Europe / Russia / Saint Petersburg                  |
| EPI_ISL_430084 | 4/9/2020  | 4/25/2020 | Europe / Russia / Saint Petersburg                  |
| EPI_ISL_430085 | 4/10/2020 | 4/25/2020 | Europe / Russia / Saint Petersburg                  |
| EPI_ISL_430086 | 4/10/2020 | 4/25/2020 | Europe / Russia / Saint Petersburg                  |
| EPI_ISL_430087 | 4/10/2020 | 4/25/2020 | Europe / Russia / Saint Petersburg                  |
| EPI_ISL_430088 | 4/9/2020  | 4/25/2020 | Europe / Russia / Saint Petersburg                  |
| EPI_ISL_430089 | 4/9/2020  | 4/25/2020 | Europe / Russia / Saint Petersburg                  |
| EPI_ISL_430090 | 4/10/2020 | 4/25/2020 | Europe / Russia / Saint Petersburg                  |
| EPI_ISL_430091 | 4/10/2020 | 4/25/2020 | Europe / Russia / Saint Petersburg                  |
| EPI_ISL_430092 | 4/14/2020 | 4/25/2020 | Europe / Russia / Saint Petersburg                  |
| EPI_ISL_430093 | 4/14/2020 | 4/25/2020 | Europe / Russia / Saint Petersburg                  |
| EPI_ISL_430094 | 4/14/2020 | 4/25/2020 | Europe / Russia / Saint Petersburg                  |
| EPI_ISL_430095 | 4/14/2020 | 4/25/2020 | Europe / Russia / Saint Petersburg                  |
| EPI_ISL_430096 | 4/14/2020 | 4/25/2020 | Europe / Russia / Saint Petersburg                  |
| EPI_ISL_430097 | 4/14/2020 | 4/25/2020 | Europe / Russia / Saint Petersburg                  |
| EPI_ISL_430098 | 4/14/2020 | 4/25/2020 | Europe / Russia / Saint Petersburg                  |
| EPI_ISL_430099 | 4/13/2020 | 4/25/2020 | Europe / Russia / Saint Petersburg                  |
| EPI_ISL_430100 | 4/14/2020 | 4/25/2020 | Europe / Russia / Saint Petersburg                  |
| EPI_ISL_430101 | 4/14/2020 | 4/25/2020 | Europe / Russia / Saint Petersburg                  |
| EPI_ISL_430102 | 4/14/2020 | 4/25/2020 | Europe / Russia / Saint Petersburg                  |
| EPI_ISL_430103 | 4/14/2020 | 4/25/2020 | Europe / Russia / Saint Petersburg                  |
| EPI_ISL_430104 | 4/15/2020 | 4/25/2020 | Europe / Russia / Saint Petersburg                  |
| EPI_ISL_430105 | 4/15/2020 | 4/25/2020 | Europe / Russia / Saint Petersburg                  |
| EPI_ISL_430106 | 4/15/2020 | 4/25/2020 | Europe / Russia / Saint Petersburg                  |
| EPI_ISL_430107 | 4/15/2020 | 4/25/2020 | Europe / Russia / Saint Petersburg                  |
| EPI_ISL_430108 | 4/15/2020 | 4/25/2020 | Europe / Russia / Saint Petersburg                  |
| EPI_ISL_430109 | 4/15/2020 | 4/25/2020 | Europe / Russia / Saint Petersburg                  |
| EPI_ISL_430110 | 4/15/2020 | 4/25/2020 | Europe / Russia / Saint Petersburg                  |
| EPI_ISL_430111 | 4/15/2020 | 4/25/2020 | Europe / Russia / Saint Petersburg                  |
| EPI_ISL_430112 | 3/25/2020 | 4/25/2020 | Europe / Russia / Buryatia / Ulan-Ude               |
| EPI_ISL_430113 | 3/4/2020  | 4/26/2020 | North America / USA / Washington / King County      |
| EPI_ISL_430114 | 3/12/2020 | 4/26/2020 | North America / USA / Washington / King County      |
| EPI_ISL_430115 | 3/30/2020 | 4/26/2020 | North America / USA / Washington                    |
| EPI_ISL_430116 | 3/16/2020 | 4/26/2020 | North America / USA / Washington                    |
| EPI_ISL_430117 | 3/5/2020  | 4/26/2020 | North America / USA / Washington / King County      |
| EPI_ISL_430118 | 3/3/2020  | 4/26/2020 | North America / USA / Washington / King County      |
| EPI_ISL_430119 | 3/5/2020  | 4/26/2020 | North America / USA / Washington / Snohomish County |
| EPI_ISL_430121 | 3/31/2020 | 4/26/2020 | North America / USA / Washington / King County      |







|                |           |                                                               |
|----------------|-----------|---------------------------------------------------------------|
| EPI_ISL_430279 | 3/4/2020  | 4/26/2020 North America / USA / Washington / King County      |
| EPI_ISL_430280 | 3/1/2020  | 4/26/2020 North America / USA / Washington / King County      |
| EPI_ISL_430281 | 2/29/2020 | 4/26/2020 North America / USA / Washington / King County      |
| EPI_ISL_430282 | 3/11/2020 | 4/26/2020 North America / USA / Washington / Thurston County  |
| EPI_ISL_430283 | 3/2/2020  | 4/26/2020 North America / USA / Washington / Snohomish County |
| EPI_ISL_430284 | 3/10/2020 | 4/26/2020 North America / USA / Washington / King County      |
| EPI_ISL_430285 | 3/1/2020  | 4/26/2020 North America / USA / Washington / King County      |
| EPI_ISL_430286 | 3/10/2020 | 4/26/2020 North America / USA / Washington / King County      |
| EPI_ISL_430287 | 3/1/2020  | 4/26/2020 North America / USA / Washington / King County      |
| EPI_ISL_430288 | 3/3/2020  | 4/26/2020 North America / USA / Washington / Snohomish County |
| EPI_ISL_430289 | 3/11/2020 | 4/26/2020 North America / USA / Washington / Skagit County    |
| EPI_ISL_430290 | 3/2/2020  | 4/26/2020 North America / USA / Washington / King County      |
| EPI_ISL_430291 | 3/7/2020  | 4/26/2020 North America / USA / Washington / Snohomish County |
| EPI_ISL_430292 | 2/24/2020 | 4/26/2020 North America / USA / Washington / Snohomish County |
| EPI_ISL_430293 | 3/8/2020  | 4/26/2020 North America / USA / Washington / Clark County     |
| EPI_ISL_430294 | 3/2/2020  | 4/26/2020 North America / USA / Washington / King County      |
| EPI_ISL_430295 | 2/25/2020 | 4/26/2020 North America / USA / Washington / King County      |
| EPI_ISL_430297 | 3/6/2020  | 4/26/2020 Africa / South Africa / Gauteng                     |
| EPI_ISL_430323 | 4/10/2020 | 4/26/2020 North America / USA / New York / Queens             |
| EPI_ISL_430324 | 4/10/2020 | 4/26/2020 North America / USA / New York / Westchester County |
| EPI_ISL_430325 | 4/8/2020  | 4/26/2020 North America / USA / New York / Brooklyn           |
| EPI_ISL_430326 | 3/30/2020 | 4/26/2020 North America / USA / New York / Brooklyn           |
| EPI_ISL_430327 | 3/30/2020 | 4/26/2020 North America / USA / New York / Manhattan          |
| EPI_ISL_430328 | 3/30/2020 | 4/26/2020 North America / USA / New York / Brooklyn           |
| EPI_ISL_430329 | 3/30/2020 | 4/26/2020 North America / USA / New York / Staten Island      |
| EPI_ISL_430330 | 3/30/2020 | 4/26/2020 North America / USA / New York / Nassau County      |
| EPI_ISL_430331 | 3/30/2020 | 4/26/2020 North America / USA / New York / Manhattan          |
| EPI_ISL_430332 | 3/30/2020 | 4/26/2020 North America / USA / New York / Brooklyn           |
| EPI_ISL_430333 | 3/30/2020 | 4/26/2020 North America / USA / New York / Brooklyn           |
| EPI_ISL_430334 | 3/30/2020 | 4/26/2020 North America / USA / New York / Brooklyn           |
| EPI_ISL_430335 | 3/30/2020 | 4/26/2020 North America / USA / New York / Brooklyn           |
| EPI_ISL_430336 | 3/30/2020 | 4/26/2020 North America / USA / New York / Manhattan          |
| EPI_ISL_430337 | 3/30/2020 | 4/26/2020 North America / USA / New York / Manhattan          |
| EPI_ISL_430338 | 3/30/2020 | 4/26/2020 North America / USA / New York / Manhattan          |
| EPI_ISL_430339 | 3/30/2020 | 4/26/2020 North America / USA / New York / Manhattan          |
| EPI_ISL_430340 | 3/30/2020 | 4/26/2020 North America / USA / New York / Westchester County |
| EPI_ISL_430341 | 3/30/2020 | 4/26/2020 North America / USA / New York / Brooklyn           |
| EPI_ISL_430342 | 3/30/2020 | 4/26/2020 North America / USA / New York / Queens             |
| EPI_ISL_430343 | 3/30/2020 | 4/26/2020 North America / USA / New York / Manhattan          |
| EPI_ISL_430344 | 3/30/2020 | 4/26/2020 North America / USA / New York / Brooklyn           |
| EPI_ISL_430345 | 3/30/2020 | 4/26/2020 North America / USA / New York / Manhattan          |
| EPI_ISL_430346 | 3/30/2020 | 4/26/2020 North America / USA / New York / Brooklyn           |
| EPI_ISL_430347 | 3/30/2020 | 4/26/2020 North America / USA / New York / Manhattan          |
| EPI_ISL_430348 | 3/30/2020 | 4/26/2020 North America / USA / New York / Manhattan          |
| EPI_ISL_430349 | 3/30/2020 | 4/26/2020 North America / USA / New York / Staten Island      |
| EPI_ISL_430350 | 4/2/2020  | 4/26/2020 North America / USA / New York / Queens             |
| EPI_ISL_430351 | 3/31/2020 | 4/26/2020 North America / USA / New York / Brooklyn           |



|                |           |           |                                                  |
|----------------|-----------|-----------|--------------------------------------------------|
| EPI_ISL_430352 | 4/1/2020  | 4/26/2020 | North America / USA / New York / Suffolk County  |
| EPI_ISL_430353 | 4/1/2020  | 4/26/2020 | North America / USA / New York / Brooklyn        |
| EPI_ISL_430354 | 4/3/2020  | 4/26/2020 | North America / USA / New York / Nassau County   |
| EPI_ISL_430355 | 4/2/2020  | 4/26/2020 | North America / USA / New York / Nassau County   |
| EPI_ISL_430356 | 4/2/2020  | 4/26/2020 | North America / USA / New Jersey / Bergen County |
| EPI_ISL_430357 | 4/3/2020  | 4/26/2020 | North America / USA / New York / Brooklyn        |
| EPI_ISL_430358 | 4/13/2020 | 4/26/2020 | North America / USA / New York / Manhattan       |
| EPI_ISL_430359 | 4/8/2020  | 4/26/2020 | North America / USA / New York / Brooklyn        |
| EPI_ISL_430360 | 4/7/2020  | 4/26/2020 | North America / USA / New York / Queens          |
| EPI_ISL_430361 | 4/7/2020  | 4/26/2020 | North America / USA / New York / Brooklyn        |
| EPI_ISL_430362 | 4/8/2020  | 4/26/2020 | North America / USA / New York / Brooklyn        |
| EPI_ISL_430363 | 4/8/2020  | 4/26/2020 | North America / USA / New York / Brooklyn        |
| EPI_ISL_430364 | 4/8/2020  | 4/26/2020 | North America / USA / New York / Brooklyn        |
| EPI_ISL_430365 | 4/8/2020  | 4/26/2020 | North America / USA / New York / Brooklyn        |
| EPI_ISL_430366 | 4/8/2020  | 4/26/2020 | North America / USA / New York / Brooklyn        |
| EPI_ISL_430367 | 4/7/2020  | 4/26/2020 | North America / USA / New York / Brooklyn        |
| EPI_ISL_430368 | 4/8/2020  | 4/26/2020 | North America / USA / New York / Brooklyn        |
| EPI_ISL_430369 | 4/8/2020  | 4/26/2020 | North America / USA / New York / Manhattan       |
| EPI_ISL_430370 | 4/8/2020  | 4/26/2020 | North America / USA / New York / Queens          |
| EPI_ISL_430371 | 4/8/2020  | 4/26/2020 | North America / USA / New Jersey / Hudson County |
| EPI_ISL_430372 | 4/7/2020  | 4/26/2020 | North America / USA / New York / Brooklyn        |
| EPI_ISL_430373 | 4/8/2020  | 4/26/2020 | North America / USA / New York / Brooklyn        |
| EPI_ISL_430374 | 4/8/2020  | 4/26/2020 | North America / USA / New York / Brooklyn        |
| EPI_ISL_430375 | 4/8/2020  | 4/26/2020 | North America / USA / New York / Brooklyn        |
| EPI_ISL_430376 | 4/8/2020  | 4/26/2020 | North America / USA / New York / Brooklyn        |
| EPI_ISL_430377 | 4/8/2020  | 4/26/2020 | North America / USA / New York / Brooklyn        |
| EPI_ISL_430378 | 4/7/2020  | 4/26/2020 | North America / USA / New York / Brooklyn        |
| EPI_ISL_430379 | 4/7/2020  | 4/26/2020 | North America / USA / New York / Brooklyn        |
| EPI_ISL_430380 | 4/8/2020  | 4/26/2020 | North America / USA / New York / Queens          |
| EPI_ISL_430381 | 4/7/2020  | 4/26/2020 | North America / USA / New York / Brooklyn        |
| EPI_ISL_430382 | 4/9/2020  | 4/26/2020 | North America / USA / New York / Brooklyn        |
| EPI_ISL_430383 | 4/8/2020  | 4/26/2020 | North America / USA / New York / Brooklyn        |
| EPI_ISL_430384 | 4/9/2020  | 4/26/2020 | North America / USA / New York / Brooklyn        |
| EPI_ISL_430385 | 4/8/2020  | 4/26/2020 | North America / USA / New York / Brooklyn        |
| EPI_ISL_430386 | 4/8/2020  | 4/26/2020 | North America / USA / New York / Brooklyn        |
| EPI_ISL_430387 | 4/8/2020  | 4/26/2020 | North America / USA / New York / Brooklyn        |
| EPI_ISL_430388 | 4/9/2020  | 4/26/2020 | North America / USA / New York / Queens          |
| EPI_ISL_430389 | 4/8/2020  | 4/26/2020 | North America / USA / New York / Brooklyn        |
| EPI_ISL_430390 | 4/8/2020  | 4/26/2020 | North America / USA / New York / Brooklyn        |
| EPI_ISL_430391 | 4/9/2020  | 4/26/2020 | North America / USA / New York / Queens          |
| EPI_ISL_430392 | 4/8/2020  | 4/26/2020 | North America / USA / New York / Brooklyn        |
| EPI_ISL_430393 | 4/9/2020  | 4/26/2020 | North America / USA / New York / Manhattan       |
| EPI_ISL_430394 | 4/9/2020  | 4/26/2020 | North America / USA / New Jersey / Hudson County |
| EPI_ISL_430395 | 4/9/2020  | 4/26/2020 | North America / USA / New York / Brooklyn        |
| EPI_ISL_430396 | 4/10/2020 | 4/26/2020 | North America / USA / New York / Nassau County   |
| EPI_ISL_430397 | 4/9/2020  | 4/26/2020 | North America / USA / New York / Nassau County   |
| EPI_ISL_430398 | 4/10/2020 | 4/26/2020 | North America / USA / New York / Nassau County   |

|                |           |                                                                |
|----------------|-----------|----------------------------------------------------------------|
| EPI_ISL_430399 | 4/10/2020 | 4/26/2020 North America / USA / New York / Nassau County       |
| EPI_ISL_430400 | 4/10/2020 | 4/26/2020 North America / USA / New York / Brooklyn            |
| EPI_ISL_430401 | 4/10/2020 | 4/26/2020 North America / USA / Connecticut / Fairfield County |
| EPI_ISL_430402 | 4/10/2020 | 4/26/2020 North America / USA / New York / Brooklyn            |
| EPI_ISL_430403 | 4/10/2020 | 4/26/2020 North America / USA / New York                       |
| EPI_ISL_430404 | 4/10/2020 | 4/26/2020 North America / USA / New York / Brooklyn            |
| EPI_ISL_430405 | 4/10/2020 | 4/26/2020 North America / USA / New Jersey / Hudson County     |
| EPI_ISL_430406 | 4/10/2020 | 4/26/2020 North America / USA / New York / Manhattan           |
| EPI_ISL_430407 | 4/10/2020 | 4/26/2020 North America / USA / New York / Brooklyn            |
| EPI_ISL_430408 | 4/9/2020  | 4/26/2020 North America / USA / New York / Nassau County       |
| EPI_ISL_430409 | 4/10/2020 | 4/26/2020 North America / USA / New York / Brooklyn            |
| EPI_ISL_430410 | 4/10/2020 | 4/26/2020 North America / USA / New York / Brooklyn            |
| EPI_ISL_430411 | 4/9/2020  | 4/26/2020 North America / USA / New York / Brooklyn            |
| EPI_ISL_430412 | 4/10/2020 | 4/26/2020 North America / USA / New York / Staten Island       |
| EPI_ISL_430413 | 4/9/2020  | 4/26/2020 North America / USA / New York / Nassau County       |
| EPI_ISL_430414 | 4/10/2020 | 4/26/2020 North America / USA / New York / Rockland County     |
| EPI_ISL_430415 | 4/10/2020 | 4/26/2020 North America / USA / New York / Manhattan           |
| EPI_ISL_430416 | 4/13/2020 | 4/26/2020 North America / USA / New York / Manhattan           |
| EPI_ISL_430417 | 4/13/2020 | 4/26/2020 North America / USA / New York / Nassau County       |
| EPI_ISL_430418 | 4/13/2020 | 4/26/2020 North America / USA / New York / Nassau County       |
| EPI_ISL_430419 | 4/13/2020 | 4/26/2020 North America / USA / New York / Nassau County       |
| EPI_ISL_430420 | 4/13/2020 | 4/26/2020 North America / USA / New York / Staten Island       |
| EPI_ISL_430421 | 4/13/2020 | 4/26/2020 North America / USA / New York / Brooklyn            |
| EPI_ISL_430422 | 4/13/2020 | 4/26/2020 North America / USA / New York / Queens              |
| EPI_ISL_430423 | 4/11/2020 | 4/26/2020 North America / USA / New York / Queens              |
| EPI_ISL_430424 | 4/13/2020 | 4/26/2020 North America / USA / New York / Brooklyn            |
| EPI_ISL_430425 | 4/13/2020 | 4/26/2020 North America / USA / New York / Manhattan           |
| EPI_ISL_430426 | 4/13/2020 | 4/26/2020 North America / USA / New York / Manhattan           |
| EPI_ISL_430427 | 4/13/2020 | 4/26/2020 North America / USA / New York / Nassau County       |
| EPI_ISL_430428 | 4/13/2020 | 4/26/2020 North America / USA / New Jersey / Hudson County     |
| EPI_ISL_430429 | 4/13/2020 | 4/26/2020 North America / USA / New York / Brooklyn            |
| EPI_ISL_430430 | 4/13/2020 | 4/26/2020 North America / USA / New York / Bronx               |
| EPI_ISL_430431 | 4/13/2020 | 4/26/2020 North America / USA / New York / Nassau County       |
| EPI_ISL_430432 | 4/13/2020 | 4/26/2020 North America / USA / New York / Staten Island       |
| EPI_ISL_430433 | 4/13/2020 | 4/26/2020 North America / USA / New York / Queens              |
| EPI_ISL_430434 | 4/12/2020 | 4/26/2020 North America / USA / New York / Queens              |
| EPI_ISL_430439 | 3/5/2020  | 4/27/2020 Asia / Malaysia                                      |
| EPI_ISL_430440 | 3/5/2020  | 4/27/2020 Asia / Malaysia                                      |
| EPI_ISL_430441 | 2/29/2020 | 4/27/2020 Asia / Malaysia                                      |
| EPI_ISL_430442 | 2/29/2020 | 4/27/2020 Asia / Malaysia                                      |
| EPI_ISL_430443 | 1/28/2020 | 4/27/2020 Asia / Malaysia                                      |
| EPI_ISL_430444 | 2/12/2020 | 4/27/2020 Asia / Malaysia                                      |
| EPI_ISL_430464 | 3/21/2020 | 4/27/2020 Asia / India / West Bengal / Kolkata                 |
| EPI_ISL_430465 | 3/28/2020 | 4/27/2020 Asia / India / West Bengal / Darjeeling              |
| EPI_ISL_430466 | 3/26/2020 | 4/27/2020 Asia / India / West Bengal / Tehatta                 |
| EPI_ISL_430467 | 4/3/2020  | 4/27/2020 Asia / India / West Bengal / East Medinipur          |
| EPI_ISL_430468 | 3/21/2020 | 4/27/2020 Asia / India / West Bengal / Kolkata                 |

|                |           |                                          |
|----------------|-----------|------------------------------------------|
| EPI_ISL_430469 | 2/29/2020 | 4/27/2020 Europe / Greece / Athens       |
| EPI_ISL_430471 | 3/25/2020 | 4/27/2020 Oceania / Australia / Victoria |
| EPI_ISL_430472 | 3/25/2020 | 4/27/2020 Oceania / Australia / Victoria |
| EPI_ISL_430473 | 3/31/2020 | 4/27/2020 Oceania / Australia / Victoria |
| EPI_ISL_430474 | 3/31/2020 | 4/27/2020 Oceania / Australia / Victoria |
| EPI_ISL_430476 | 4/1/2020  | 4/27/2020 Oceania / Australia / Victoria |
| EPI_ISL_430478 | 3/31/2020 | 4/27/2020 Oceania / Australia / Victoria |
| EPI_ISL_430479 | 3/31/2020 | 4/27/2020 Oceania / Australia / Victoria |
| EPI_ISL_430480 | 3/31/2020 | 4/27/2020 Oceania / Australia / Victoria |
| EPI_ISL_430481 | 3/31/2020 | 4/27/2020 Oceania / Australia / Victoria |
| EPI_ISL_430482 | 3/31/2020 | 4/27/2020 Oceania / Australia / Victoria |
| EPI_ISL_430484 | 3/31/2020 | 4/27/2020 Oceania / Australia / Victoria |
| EPI_ISL_430486 | 3/31/2020 | 4/27/2020 Oceania / Australia / Victoria |
| EPI_ISL_430490 | 4/1/2020  | 4/27/2020 Oceania / Australia / Victoria |
| EPI_ISL_430498 | 4/1/2020  | 4/27/2020 Oceania / Australia / Victoria |
| EPI_ISL_430500 | 4/1/2020  | 4/27/2020 Oceania / Australia / Victoria |
| EPI_ISL_430501 | 4/1/2020  | 4/27/2020 Oceania / Australia / Victoria |
| EPI_ISL_430505 | 4/1/2020  | 4/27/2020 Oceania / Australia / Victoria |
| EPI_ISL_430507 | 3/31/2020 | 4/27/2020 Oceania / Australia / Victoria |
| EPI_ISL_430512 | 4/2/2020  | 4/27/2020 Oceania / Australia / Victoria |
| EPI_ISL_430519 | 4/1/2020  | 4/27/2020 Oceania / Australia / Victoria |
| EPI_ISL_430521 | 3/23/2020 | 4/27/2020 Oceania / Australia / Victoria |
| EPI_ISL_430522 | 4/1/2020  | 4/27/2020 Oceania / Australia / Victoria |
| EPI_ISL_430523 | 3/31/2020 | 4/27/2020 Oceania / Australia / Victoria |
| EPI_ISL_430527 | 3/31/2020 | 4/27/2020 Oceania / Australia / Victoria |
| EPI_ISL_430528 | 3/30/2020 | 4/27/2020 Oceania / Australia / Victoria |
| EPI_ISL_430530 | 4/2/2020  | 4/27/2020 Oceania / Australia / Victoria |
| EPI_ISL_430531 | 4/2/2020  | 4/27/2020 Oceania / Australia / Victoria |
| EPI_ISL_430532 | 4/2/2020  | 4/27/2020 Oceania / Australia / Victoria |
| EPI_ISL_430533 | 4/3/2020  | 4/27/2020 Oceania / Australia / Victoria |
| EPI_ISL_430535 | 4/3/2020  | 4/27/2020 Oceania / Australia / Victoria |
| EPI_ISL_430536 | 4/3/2020  | 4/27/2020 Oceania / Australia / Victoria |
| EPI_ISL_430538 | 4/3/2020  | 4/27/2020 Oceania / Australia / Victoria |
| EPI_ISL_430539 | 4/3/2020  | 4/27/2020 Oceania / Australia / Victoria |
| EPI_ISL_430542 | 3/29/2020 | 4/27/2020 Oceania / Australia / Victoria |
| EPI_ISL_430543 | 3/30/2020 | 4/27/2020 Oceania / Australia / Victoria |
| EPI_ISL_430545 | 3/30/2020 | 4/27/2020 Oceania / Australia / Victoria |
| EPI_ISL_430546 | 4/3/2020  | 4/27/2020 Oceania / Australia / Victoria |
| EPI_ISL_430547 | 4/1/2020  | 4/27/2020 Oceania / Australia / Victoria |
| EPI_ISL_430548 | 4/1/2020  | 4/27/2020 Oceania / Australia / Victoria |
| EPI_ISL_430550 | 4/3/2020  | 4/27/2020 Oceania / Australia / Victoria |
| EPI_ISL_430551 | 3/31/2020 | 4/27/2020 Oceania / Australia / Victoria |
| EPI_ISL_430552 | 3/30/2020 | 4/27/2020 Oceania / Australia / Victoria |
| EPI_ISL_430553 | 4/1/2020  | 4/27/2020 Oceania / Australia / Victoria |
| EPI_ISL_430554 | 3/30/2020 | 4/27/2020 Oceania / Australia / Victoria |
| EPI_ISL_430556 | 3/31/2020 | 4/27/2020 Oceania / Australia / Victoria |
| EPI_ISL_430559 | 4/1/2020  | 4/27/2020 Oceania / Australia / Victoria |



|                |           |                                          |
|----------------|-----------|------------------------------------------|
| EPI_ISL_430651 | 3/27/2020 | 4/27/2020 Oceania / Australia / Victoria |
| EPI_ISL_430653 | 3/27/2020 | 4/27/2020 Oceania / Australia / Victoria |
| EPI_ISL_430654 | 3/27/2020 | 4/27/2020 Oceania / Australia / Victoria |
| EPI_ISL_430655 | 3/27/2020 | 4/27/2020 Oceania / Australia / Victoria |
| EPI_ISL_430658 | 3/28/2020 | 4/27/2020 Oceania / Australia / Victoria |
| EPI_ISL_430659 | 3/28/2020 | 4/27/2020 Oceania / Australia / Victoria |
| EPI_ISL_430661 | 3/27/2020 | 4/27/2020 Oceania / Australia / Victoria |
| EPI_ISL_430663 | 3/27/2020 | 4/27/2020 Oceania / Australia / Victoria |
| EPI_ISL_430669 | 4/3/2020  | 4/27/2020 Oceania / Australia / Victoria |
| EPI_ISL_430670 | 4/4/2020  | 4/27/2020 Oceania / Australia / Victoria |
| EPI_ISL_430673 | 4/6/2020  | 4/27/2020 Oceania / Australia / Victoria |
| EPI_ISL_430674 | 4/10/2020 | 4/27/2020 Oceania / Australia / Victoria |
| EPI_ISL_430676 | 4/8/2020  | 4/27/2020 Oceania / Australia / Victoria |
| EPI_ISL_430677 | 4/10/2020 | 4/27/2020 Oceania / Australia / Victoria |
| EPI_ISL_430678 | 4/7/2020  | 4/27/2020 Oceania / Australia / Victoria |
| EPI_ISL_430679 | 4/10/2020 | 4/27/2020 Oceania / Australia / Victoria |
| EPI_ISL_430680 | 4/10/2020 | 4/27/2020 Oceania / Australia / Victoria |
| EPI_ISL_430681 | 4/11/2020 | 4/27/2020 Oceania / Australia / Victoria |
| EPI_ISL_430682 | 4/13/2020 | 4/27/2020 Oceania / Australia / Victoria |
| EPI_ISL_430683 | 4/14/2020 | 4/27/2020 Oceania / Australia / Victoria |
| EPI_ISL_430684 | 4/14/2020 | 4/27/2020 Oceania / Australia / Victoria |
| EPI_ISL_430686 | 4/13/2020 | 4/27/2020 Oceania / Australia / Victoria |
| EPI_ISL_430687 | 3/25/2020 | 4/27/2020 Oceania / Australia / Victoria |
| EPI_ISL_430689 | 4/11/2020 | 4/27/2020 Oceania / Australia / Victoria |
| EPI_ISL_430690 | 4/11/2020 | 4/27/2020 Oceania / Australia / Victoria |
| EPI_ISL_430691 | 4/11/2020 | 4/27/2020 Oceania / Australia / Victoria |
| EPI_ISL_430693 | 4/11/2020 | 4/27/2020 Oceania / Australia / Victoria |
| EPI_ISL_430694 | 4/10/2020 | 4/27/2020 Oceania / Australia / Victoria |
| EPI_ISL_430695 | 4/12/2020 | 4/27/2020 Oceania / Australia / Victoria |
| EPI_ISL_430696 | 4/12/2020 | 4/27/2020 Oceania / Australia / Victoria |
| EPI_ISL_430697 | 4/14/2020 | 4/27/2020 Oceania / Australia / Victoria |
| EPI_ISL_430698 | 4/13/2020 | 4/27/2020 Oceania / Australia / Victoria |
| EPI_ISL_430700 | 4/11/2020 | 4/27/2020 Oceania / Australia / Victoria |
| EPI_ISL_430701 | 4/9/2020  | 4/27/2020 Oceania / Australia / Victoria |
| EPI_ISL_430705 | 4/10/2020 | 4/27/2020 Oceania / Australia / Victoria |
| EPI_ISL_430708 | 4/14/2020 | 4/27/2020 Oceania / Australia / Victoria |
| EPI_ISL_430711 | 4/9/2020  | 4/27/2020 Oceania / Australia / Victoria |
| EPI_ISL_430714 | 4/10/2020 | 4/27/2020 Oceania / Australia / Victoria |
| EPI_ISL_430716 | 4/12/2020 | 4/27/2020 Oceania / Australia / Victoria |
| EPI_ISL_430718 | 3/10/2020 | 4/27/2020 Europe / Spain / Madrid        |
| EPI_ISL_430719 | 3/11/2020 | 4/27/2020 Europe / Spain / Madrid        |
| EPI_ISL_430720 | 3/9/2020  | 4/27/2020 Europe / Spain / Madrid        |
| EPI_ISL_430721 | 3/11/2020 | 4/27/2020 Europe / Spain / Madrid        |
| EPI_ISL_430722 | 1/29/2020 | 4/27/2020 Asia / China / Beijing         |
| EPI_ISL_430724 | 2/8/2020  | 4/27/2020 Asia / China / Beijing         |
| EPI_ISL_430725 | 1/29/2020 | 4/27/2020 Asia / China / Beijing         |
| EPI_ISL_430728 | 2/2/2020  | 4/27/2020 Asia / China / Beijing         |

|                |           |                                                                           |
|----------------|-----------|---------------------------------------------------------------------------|
| EPI_ISL_430729 | 2/7/2020  | 4/27/2020 Asia / China / Beijing                                          |
| EPI_ISL_430730 | 1/31/2020 | 4/27/2020 Asia / China / Beijing                                          |
| EPI_ISL_430731 | 2/4/2020  | 4/27/2020 Asia / China / Beijing                                          |
| EPI_ISL_430733 | 2/4/2020  | 4/27/2020 Asia / China / Beijing                                          |
| EPI_ISL_430734 | 1/24/2020 | 4/27/2020 Asia / China / Beijing                                          |
| EPI_ISL_430735 | 1/24/2020 | 4/27/2020 Asia / China / Beijing                                          |
| EPI_ISL_430736 | 1/29/2020 | 4/27/2020 Asia / China / Beijing                                          |
| EPI_ISL_430737 | 2/25/2020 | 4/27/2020 Asia / China / Beijing                                          |
| EPI_ISL_430738 | 2/5/2020  | 4/27/2020 Asia / China / Beijing                                          |
| EPI_ISL_430740 | 2/7/2020  | 4/27/2020 Asia / China / Beijing                                          |
| EPI_ISL_430741 | 2/10/2020 | 4/27/2020 Asia / China / Beijing                                          |
| EPI_ISL_430742 | 1/29/2020 | 4/27/2020 Asia / China / Beijing                                          |
| EPI_ISL_430791 | 3/28/2020 | 4/27/2020 North America / USA / California / San Francisco County         |
| EPI_ISL_430792 | 3/23/2020 | 4/27/2020 North America / USA / California / San Francisco County         |
| EPI_ISL_430796 | 3/27/2020 | 4/27/2020 South America / Argentina / Ciudad Autonoma de Buenos Aires     |
| EPI_ISL_430797 | 3/27/2020 | 4/27/2020 South America / Argentina / Buenos Aires / Bahia Blanca         |
| EPI_ISL_430798 | 3/28/2020 | 4/27/2020 South America / Argentina / Buenos Aires / Quilmes              |
| EPI_ISL_430799 | 3/30/2020 | 4/27/2020 South America / Argentina / Ciudad Autonoma de Buenos Aires     |
| EPI_ISL_430800 | 3/30/2020 | 4/27/2020 South America / Argentina / Ciudad Autonoma de Buenos Aires     |
| EPI_ISL_430801 | 3/31/2020 | 4/27/2020 South America / Argentina / Ciudad Autonoma de Buenos Aires     |
| EPI_ISL_430802 | 3/31/2020 | 4/27/2020 South America / Argentina / Buenos Aires / Bahia Blanca         |
| EPI_ISL_430803 | 4/1/2020  | 4/27/2020 South America / Argentina / Ciudad Autonoma de Buenos Aires     |
| EPI_ISL_430804 | 4/1/2020  | 4/27/2020 South America / Argentina / Ciudad Autonoma de Buenos Aires     |
| EPI_ISL_430805 | 4/1/2020  | 4/27/2020 South America / Argentina / Buenos Aires / Bahia Blanca         |
| EPI_ISL_430807 | 4/2/2020  | 4/27/2020 South America / Argentina / Ciudad Autonoma de Buenos Aires     |
| EPI_ISL_430808 | 4/3/2020  | 4/27/2020 South America / Argentina / Rio Negro / San Carlos de Bariloche |
| EPI_ISL_430809 | 4/4/2020  | 4/27/2020 South America / Argentina / Ciudad Autonoma de Buenos Aires     |
| EPI_ISL_430810 | 4/7/2020  | 4/27/2020 South America / Argentina / Ciudad Autonoma de Buenos Aires     |
| EPI_ISL_430811 | 4/11/2020 | 4/27/2020 South America / Argentina / Ciudad Autonoma de Buenos Aires     |
| EPI_ISL_430812 | 4/11/2020 | 4/27/2020 South America / Argentina / Ciudad Autonoma de Buenos Aires     |
| EPI_ISL_430813 | 4/11/2020 | 4/27/2020 South America / Argentina / Ciudad Autonoma de Buenos Aires     |
| EPI_ISL_430814 | 4/17/2020 | 4/27/2020 South America / Argentina / Ciudad Autonoma de Buenos Aires     |
| EPI_ISL_430815 | 4/18/2020 | 4/27/2020 South America / Argentina / Ciudad Autonoma de Buenos Aires     |
| EPI_ISL_430816 | 4/18/2020 | 4/27/2020 South America / Argentina / Ciudad Autonoma de Buenos Aires     |
| EPI_ISL_430817 | 4/18/2020 | 4/27/2020 South America / Argentina / Ciudad Autonoma de Buenos Aires     |
| EPI_ISL_430818 | 4/19/2020 | 4/27/2020 South America / Argentina / Ciudad Autonoma de Buenos Aires     |
| EPI_ISL_430819 | 3/18/2020 | 4/28/2020 Africa / Egypt                                                  |
| EPI_ISL_430820 | 3/18/2020 | 4/28/2020 Africa / Egypt                                                  |
| EPI_ISL_430837 | 3/3/2020  | 4/28/2020 Asia / Thailand / Nonthaburi                                    |
| EPI_ISL_430841 | 3/17/2020 | 4/28/2020 Asia / Thailand / Bangkok                                       |
| EPI_ISL_430842 | 3/18/2020 | 4/28/2020 Asia / Thailand / Nonthaburi                                    |
| EPI_ISL_430847 | 2/27/2020 | 4/28/2020 Europe / Sweden / Stockholm                                     |
| EPI_ISL_430848 | 3/11/2020 | 4/28/2020 Europe / Sweden / Halland                                       |
| EPI_ISL_430849 | 3/11/2020 | 4/28/2020 Europe / Sweden / Halland                                       |
| EPI_ISL_430850 | 3/11/2020 | 4/28/2020 Europe / Sweden / Halland                                       |
| EPI_ISL_430851 | 3/11/2020 | 4/28/2020 Europe / Sweden / Halland                                       |
| EPI_ISL_430852 | 3/11/2020 | 4/28/2020 Europe / Sweden / Halland                                       |

|                |           |                                            |
|----------------|-----------|--------------------------------------------|
| EPI_ISL_430853 | 3/11/2020 | 4/28/2020 Europe / Sweden / Halland        |
| EPI_ISL_430854 | 3/12/2020 | 4/28/2020 Europe / Sweden / Halland        |
| EPI_ISL_430855 | 3/12/2020 | 4/28/2020 Europe / Sweden / Halland        |
| EPI_ISL_430856 | 3/22/2020 | 4/28/2020 Europe / Sweden / Norrbotten     |
| EPI_ISL_430857 | 3/22/2020 | 4/28/2020 Europe / Sweden / Norrbotten     |
| EPI_ISL_430858 | 4/2/2020  | 4/28/2020 Europe / Sweden / Norrbotten     |
| EPI_ISL_430859 | 4/2/2020  | 4/28/2020 Europe / Sweden / Norrbotten     |
| EPI_ISL_430860 | 3/4/2020  | 4/28/2020 Europe / Sweden / Varmland       |
| EPI_ISL_430861 | 3/6/2020  | 4/28/2020 Europe / Sweden / Varmland       |
| EPI_ISL_430862 | 3/8/2020  | 4/28/2020 Europe / Sweden / Varmland       |
| EPI_ISL_430863 | 3/9/2020  | 4/28/2020 Europe / Sweden / Orebro lan     |
| EPI_ISL_430864 | 3/16/2020 | 4/28/2020 Europe / Sweden / Gavleborgs lan |
| EPI_ISL_430867 | 3/11/2020 | 4/28/2020 North America / USA / Washington |
| EPI_ISL_430868 | 4/1/2020  | 4/28/2020 North America / USA / Washington |
| EPI_ISL_430869 | 4/1/2020  | 4/28/2020 North America / USA / Washington |
| EPI_ISL_430870 | 3/11/2020 | 4/28/2020 North America / USA / Washington |
| EPI_ISL_430871 | 4/2/2020  | 4/28/2020 North America / USA / Washington |
| EPI_ISL_430872 | 4/2/2020  | 4/28/2020 North America / USA / Washington |
| EPI_ISL_430873 | 4/1/2020  | 4/28/2020 North America / USA / Washington |
| EPI_ISL_430874 | 4/1/2020  | 4/28/2020 North America / USA / Washington |
| EPI_ISL_430877 | 3/12/2020 | 4/28/2020 North America / USA / Washington |
| EPI_ISL_430878 | 3/11/2020 | 4/28/2020 North America / USA / Washington |
| EPI_ISL_430879 | 3/11/2020 | 4/28/2020 North America / USA              |
| EPI_ISL_430880 | 3/12/2020 | 4/28/2020 North America / USA / Washington |
| EPI_ISL_430881 | 3/13/2020 | 4/28/2020 North America / USA              |
| EPI_ISL_430882 | 3/11/2020 | 4/28/2020 North America / USA              |
| EPI_ISL_430883 | 3/12/2020 | 4/28/2020 North America / USA / Washington |
| EPI_ISL_430884 | 3/12/2020 | 4/28/2020 North America / USA / Washington |
| EPI_ISL_430885 | 3/12/2020 | 4/28/2020 North America / USA / Washington |
| EPI_ISL_430886 | 3/10/2020 | 4/28/2020 North America / USA              |
| EPI_ISL_430887 | 3/12/2020 | 4/28/2020 North America / USA / Washington |
| EPI_ISL_430888 | 3/13/2020 | 4/28/2020 North America / USA / Washington |
| EPI_ISL_430889 | 3/12/2020 | 4/28/2020 North America / USA / Washington |
| EPI_ISL_430890 | 3/12/2020 | 4/28/2020 North America / USA              |
| EPI_ISL_430891 | 3/12/2020 | 4/28/2020 North America / USA / Washington |
| EPI_ISL_430892 | 3/12/2020 | 4/28/2020 North America / USA / Washington |
| EPI_ISL_430893 | 3/12/2020 | 4/28/2020 North America / USA / Washington |
| EPI_ISL_430894 | 3/12/2020 | 4/28/2020 North America / USA / Washington |
| EPI_ISL_430895 | 3/13/2020 | 4/28/2020 North America / USA / Washington |
| EPI_ISL_430897 | 4/2/2020  | 4/28/2020 North America / USA              |
| EPI_ISL_430898 | 4/2/2020  | 4/28/2020 North America / USA / Washington |
| EPI_ISL_430899 | 4/1/2020  | 4/28/2020 North America / USA / Washington |
| EPI_ISL_430900 | 4/2/2020  | 4/28/2020 North America / USA / Washington |
| EPI_ISL_430901 | 4/5/2020  | 4/28/2020 North America / USA / Washington |
| EPI_ISL_430902 | 4/5/2020  | 4/28/2020 North America / USA / Washington |
| EPI_ISL_430904 | 4/5/2020  | 4/28/2020 North America / USA / Washington |
| EPI_ISL_430905 | 4/5/2020  | 4/28/2020 North America / USA / Washington |

|                |           |                                             |
|----------------|-----------|---------------------------------------------|
| EPI_ISL_430906 | 4/5/2020  | 4/28/2020 North America / USA / Washington  |
| EPI_ISL_430907 | 4/7/2020  | 4/28/2020 North America / USA / Connecticut |
| EPI_ISL_430908 | 4/7/2020  | 4/28/2020 North America / USA / Connecticut |
| EPI_ISL_430909 | 4/8/2020  | 4/28/2020 North America / USA               |
| EPI_ISL_430910 | 4/8/2020  | 4/28/2020 North America / USA               |
| EPI_ISL_430911 | 4/8/2020  | 4/28/2020 North America / USA / Washington  |
| EPI_ISL_430912 | 4/8/2020  | 4/28/2020 North America / USA / Washington  |
| EPI_ISL_430914 | 4/6/2020  | 4/28/2020 North America / USA / Washington  |
| EPI_ISL_430915 | 4/6/2020  | 4/28/2020 North America / USA / Washington  |
| EPI_ISL_430916 | 4/7/2020  | 4/28/2020 North America / USA               |
| EPI_ISL_430917 | 4/4/2020  | 4/28/2020 North America / USA / Connecticut |
| EPI_ISL_430918 | 4/6/2020  | 4/28/2020 North America / USA / Washington  |
| EPI_ISL_430919 | 4/5/2020  | 4/28/2020 North America / USA / Connecticut |
| EPI_ISL_430920 | 4/7/2020  | 4/28/2020 North America / USA / Washington  |
| EPI_ISL_430921 | 4/6/2020  | 4/28/2020 North America / USA / Connecticut |
| EPI_ISL_430922 | 4/5/2020  | 4/28/2020 North America / USA / Connecticut |
| EPI_ISL_430923 | 4/5/2020  | 4/28/2020 North America / USA / Connecticut |
| EPI_ISL_430925 | 4/4/2020  | 4/28/2020 North America / USA / Connecticut |
| EPI_ISL_430926 | 4/4/2020  | 4/28/2020 North America / USA / Connecticut |
| EPI_ISL_430927 | 4/4/2020  | 4/28/2020 North America / USA / Connecticut |
| EPI_ISL_430928 | 4/7/2020  | 4/28/2020 North America / USA / Washington  |
| EPI_ISL_430929 | 4/7/2020  | 4/28/2020 North America / USA / Washington  |
| EPI_ISL_430930 | 4/7/2020  | 4/28/2020 North America / USA / Washington  |
| EPI_ISL_430931 | 4/7/2020  | 4/28/2020 North America / USA / Washington  |
| EPI_ISL_430932 | 4/7/2020  | 4/28/2020 North America / USA / Washington  |
| EPI_ISL_430933 | 4/1/2020  | 4/28/2020 North America / USA / Washington  |
| EPI_ISL_430934 | 4/1/2020  | 4/28/2020 North America / USA / Washington  |
| EPI_ISL_430936 | 4/1/2020  | 4/28/2020 North America / USA / Washington  |
| EPI_ISL_430937 | 4/1/2020  | 4/28/2020 North America / USA / Washington  |
| EPI_ISL_430938 | 3/31/2020 | 4/28/2020 North America / USA / Washington  |
| EPI_ISL_430939 | 4/1/2020  | 4/28/2020 North America / USA / Washington  |
| EPI_ISL_430940 | 3/30/2020 | 4/28/2020 North America / USA / Idaho       |
| EPI_ISL_430941 | 3/31/2020 | 4/28/2020 North America / USA / Washington  |
| EPI_ISL_430942 | 3/31/2020 | 4/28/2020 North America / USA / Idaho       |
| EPI_ISL_430943 | 3/30/2020 | 4/28/2020 North America / USA / Washington  |
| EPI_ISL_430945 | 3/30/2020 | 4/28/2020 North America / USA / Connecticut |
| EPI_ISL_430946 | 3/30/2020 | 4/28/2020 North America / USA / Connecticut |
| EPI_ISL_430947 | 3/27/2020 | 4/28/2020 North America / USA / Idaho       |
| EPI_ISL_430948 | 3/29/2020 | 4/28/2020 North America / USA / Idaho       |
| EPI_ISL_430949 | 3/29/2020 | 4/28/2020 North America / USA / Idaho       |
| EPI_ISL_430950 | 3/29/2020 | 4/28/2020 North America / USA / Oregon      |
| EPI_ISL_430951 | 3/31/2020 | 4/28/2020 North America / USA / Washington  |
| EPI_ISL_430952 | 3/28/2020 | 4/28/2020 North America / USA / Idaho       |
| EPI_ISL_430953 | 4/1/2020  | 4/28/2020 North America / USA / Washington  |
| EPI_ISL_430954 | 4/1/2020  | 4/28/2020 North America / USA / Washington  |
| EPI_ISL_430955 | 4/1/2020  | 4/28/2020 North America / USA / Washington  |
| EPI_ISL_430957 | 4/1/2020  | 4/28/2020 North America / USA / Washington  |



|                |            |                                                                |
|----------------|------------|----------------------------------------------------------------|
| EPI_ISL_430958 | 4/1/2020   | 4/28/2020 North America / USA / Washington                     |
| EPI_ISL_430959 | 4/2/2020   | 4/28/2020 North America / USA / Washington                     |
| EPI_ISL_430960 | 4/1/2020   | 4/28/2020 North America / USA / Connecticut                    |
| EPI_ISL_430961 | 4/1/2020   | 4/28/2020 North America / USA / Connecticut                    |
| EPI_ISL_430962 | 4/1/2020   | 4/28/2020 North America / USA / Connecticut                    |
| EPI_ISL_430964 | 4/2/2020   | 4/28/2020 North America / USA / Washington                     |
| EPI_ISL_430965 | 4/1/2020   | 4/28/2020 North America / USA / Connecticut                    |
| EPI_ISL_430967 | 4/2/2020   | 4/28/2020 North America / USA / Washington                     |
| EPI_ISL_430968 | 4/1/2020   | 4/28/2020 North America / USA / Washington                     |
| EPI_ISL_430969 | 4/2/2020   | 4/28/2020 North America / USA / Washington                     |
| EPI_ISL_430970 | 4/1/2020   | 4/28/2020 North America / USA / Idaho                          |
| EPI_ISL_430971 | 4/2/2020   | 4/28/2020 North America / USA / Connecticut                    |
| EPI_ISL_430972 | 4/1/2020   | 4/28/2020 North America / USA / Connecticut                    |
| EPI_ISL_430973 | 4/1/2020   | 4/28/2020 North America / USA / Connecticut                    |
| EPI_ISL_430974 | 4/3/2020   | 4/28/2020 North America / USA / Washington                     |
| EPI_ISL_430975 | 4/3/2020   | 4/28/2020 North America / USA / Washington                     |
| EPI_ISL_430976 | 4/3/2020   | 4/28/2020 North America / USA / Washington                     |
| EPI_ISL_430977 | 4/3/2020   | 4/28/2020 North America / USA / Washington                     |
| EPI_ISL_430979 | 4/3/2020   | 4/28/2020 North America / USA / Washington                     |
| EPI_ISL_430980 | 4/3/2020   | 4/28/2020 North America / USA / Washington                     |
| EPI_ISL_431011 | 4/7/2020   | 4/28/2020 Africa / Democratic Republic of the Congo / Kinshasa |
| EPI_ISL_431012 | 4/7/2020   | 4/28/2020 Africa / Democratic Republic of the Congo / Kinshasa |
| EPI_ISL_434534 | 12/30/2019 | 4/28/2020 Asia / China / Hubei / Wuhan                         |
| EPI_ISL_431013 | 3/17/2020  | 4/29/2020 North America / USA / Alaska / Interior              |
| EPI_ISL_431014 | 3/17/2020  | 4/29/2020 North America / USA / Alaska / Southeast             |
| EPI_ISL_431015 | 3/19/2020  | 4/29/2020 North America / USA / Alaska / Interior              |
| EPI_ISL_431016 | 3/18/2020  | 4/29/2020 North America / USA / Alaska / Southeast             |
| EPI_ISL_431017 | 3/24/2020  | 4/29/2020 North America / USA / Alaska / Interior              |
| EPI_ISL_431018 | 3/26/2020  | 4/29/2020 North America / USA / Alaska / Interior              |
| EPI_ISL_431019 | 3/27/2020  | 4/29/2020 North America / USA / Alaska / Southeast             |
| EPI_ISL_431080 | 3/2/2020   | 4/29/2020 North America / USA / Connecticut                    |
| EPI_ISL_431085 | 4/11/2020  | 4/29/2020 North America / USA / Connecticut                    |
| EPI_ISL_431101 | 3/1/2020   | 4/29/2020 Asia / India / Telangana / Hyderabad                 |
| EPI_ISL_431102 | 3/11/2020  | 4/29/2020 Asia / India / Telangana / Hyderabad                 |
| EPI_ISL_431103 | 3/16/2020  | 4/29/2020 Asia / India / Telangana / Hyderabad                 |
| EPI_ISL_431117 | 3/20/2020  | 4/29/2020 Asia / India / Telangana / Hyderabad                 |
| EPI_ISL_431118 | 3/13/2020  | 4/29/2020 Asia / China / Fujian                                |
| EPI_ISL_431180 | 3/15/2020  | 4/29/2020 Asia / China / Fujian                                |
| EPI_ISL_431240 | 3/16/2020  | 4/29/2020 Asia / China / Fujian                                |
| EPI_ISL_431782 | 3/22/2020  | 4/29/2020 Asia / China / Fujian                                |
| EPI_ISL_431783 | 3/19/2020  | 4/29/2020 Asia / China / Fujian                                |
| EPI_ISL_431784 | 3/18/2020  | 4/29/2020 Asia / China / Fujian                                |
| EPI_ISL_431785 | 1/23/2020  | 4/29/2020 Asia / China / Fujian                                |
| EPI_ISL_431944 | 4/1/2020   | 4/29/2020 Europe / United Kingdom / Wales                      |
| EPI_ISL_432176 | 4/1/2020   | 4/29/2020 Europe / United Kingdom / Wales                      |
| EPI_ISL_432177 | 3/22/2020  | 4/29/2020 Europe / United Kingdom / Wales                      |
| EPI_ISL_432178 | 4/4/2020   | 4/29/2020 Europe / United Kingdom / Wales                      |

|                |           |           |                                 |
|----------------|-----------|-----------|---------------------------------|
| EPI_ISL_432179 | 3/23/2020 | 4/29/2020 | Europe / United Kingdom / Wales |
| EPI_ISL_432180 | 3/30/2020 | 4/29/2020 | Europe / United Kingdom / Wales |
| EPI_ISL_432181 | 4/4/2020  | 4/29/2020 | Europe / United Kingdom / Wales |
| EPI_ISL_432182 | 3/22/2020 | 4/29/2020 | Europe / United Kingdom / Wales |
| EPI_ISL_432183 | 3/24/2020 | 4/29/2020 | Europe / United Kingdom / Wales |
| EPI_ISL_432184 | 4/5/2020  | 4/29/2020 | Europe / United Kingdom / Wales |
| EPI_ISL_432185 | 4/1/2020  | 4/29/2020 | Europe / United Kingdom / Wales |
| EPI_ISL_432186 | 4/4/2020  | 4/29/2020 | Europe / United Kingdom / Wales |
| EPI_ISL_432187 | 4/4/2020  | 4/29/2020 | Europe / United Kingdom / Wales |
| EPI_ISL_432188 | 3/23/2020 | 4/29/2020 | Europe / United Kingdom / Wales |
| EPI_ISL_432189 | 4/5/2020  | 4/29/2020 | Europe / United Kingdom / Wales |
| EPI_ISL_432190 | 3/23/2020 | 4/29/2020 | Europe / United Kingdom / Wales |
| EPI_ISL_432191 | 4/8/2020  | 4/29/2020 | Europe / United Kingdom / Wales |
| EPI_ISL_432192 | 4/1/2020  | 4/29/2020 | Europe / United Kingdom / Wales |
| EPI_ISL_432193 | 4/4/2020  | 4/29/2020 | Europe / United Kingdom / Wales |
| EPI_ISL_432194 | 4/4/2020  | 4/29/2020 | Europe / United Kingdom / Wales |
| EPI_ISL_432195 | 4/4/2020  | 4/29/2020 | Europe / United Kingdom / Wales |
| EPI_ISL_432196 | 4/5/2020  | 4/29/2020 | Europe / United Kingdom / Wales |
| EPI_ISL_432197 | 4/4/2020  | 4/29/2020 | Europe / United Kingdom / Wales |
| EPI_ISL_432198 | 3/30/2020 | 4/29/2020 | Europe / United Kingdom / Wales |
| EPI_ISL_432199 | 4/1/2020  | 4/29/2020 | Europe / United Kingdom / Wales |
| EPI_ISL_432200 | 3/31/2020 | 4/29/2020 | Europe / United Kingdom / Wales |
| EPI_ISL_432201 | 4/4/2020  | 4/29/2020 | Europe / United Kingdom / Wales |
| EPI_ISL_432202 | 4/5/2020  | 4/29/2020 | Europe / United Kingdom / Wales |
| EPI_ISL_432203 | 4/4/2020  | 4/29/2020 | Europe / United Kingdom / Wales |
| EPI_ISL_432204 | 4/4/2020  | 4/29/2020 | Europe / United Kingdom / Wales |
| EPI_ISL_432205 | 4/4/2020  | 4/29/2020 | Europe / United Kingdom / Wales |
| EPI_ISL_432206 | 3/31/2020 | 4/29/2020 | Europe / United Kingdom / Wales |
| EPI_ISL_432207 | 3/23/2020 | 4/29/2020 | Europe / United Kingdom / Wales |
| EPI_ISL_432208 | 3/31/2020 | 4/29/2020 | Europe / United Kingdom / Wales |
| EPI_ISL_432209 | 4/2/2020  | 4/29/2020 | Europe / United Kingdom / Wales |
| EPI_ISL_432210 | 4/1/2020  | 4/29/2020 | Europe / United Kingdom / Wales |
| EPI_ISL_432211 | 3/30/2020 | 4/29/2020 | Europe / United Kingdom / Wales |
| EPI_ISL_432212 | 4/1/2020  | 4/29/2020 | Europe / United Kingdom / Wales |
| EPI_ISL_432213 | 4/7/2020  | 4/29/2020 | Europe / United Kingdom / Wales |
| EPI_ISL_432214 | 3/31/2020 | 4/29/2020 | Europe / United Kingdom / Wales |
| EPI_ISL_432215 | 4/4/2020  | 4/29/2020 | Europe / United Kingdom / Wales |
| EPI_ISL_432216 | 4/6/2020  | 4/29/2020 | Europe / United Kingdom / Wales |
| EPI_ISL_432217 | 4/1/2020  | 4/29/2020 | Europe / United Kingdom / Wales |
| EPI_ISL_432218 | 3/31/2020 | 4/29/2020 | Europe / United Kingdom / Wales |
| EPI_ISL_432219 | 4/4/2020  | 4/29/2020 | Europe / United Kingdom / Wales |
| EPI_ISL_432220 | 3/23/2020 | 4/29/2020 | Europe / United Kingdom / Wales |
| EPI_ISL_432221 | 4/1/2020  | 4/29/2020 | Europe / United Kingdom / Wales |
| EPI_ISL_432222 | 3/30/2020 | 4/29/2020 | Europe / United Kingdom / Wales |
| EPI_ISL_432223 | 3/31/2020 | 4/29/2020 | Europe / United Kingdom / Wales |
| EPI_ISL_432224 | 3/31/2020 | 4/29/2020 | Europe / United Kingdom / Wales |
| EPI_ISL_432225 | 4/8/2020  | 4/29/2020 | Europe / United Kingdom / Wales |



|                |           |           |                                 |
|----------------|-----------|-----------|---------------------------------|
| EPI_ISL_432273 | 4/8/2020  | 4/29/2020 | Europe / United Kingdom / Wales |
| EPI_ISL_432274 | 4/4/2020  | 4/29/2020 | Europe / United Kingdom / Wales |
| EPI_ISL_432275 | 4/8/2020  | 4/29/2020 | Europe / United Kingdom / Wales |
| EPI_ISL_432276 | 4/7/2020  | 4/29/2020 | Europe / United Kingdom / Wales |
| EPI_ISL_432277 | 3/31/2020 | 4/29/2020 | Europe / United Kingdom / Wales |
| EPI_ISL_432278 | 3/31/2020 | 4/29/2020 | Europe / United Kingdom / Wales |
| EPI_ISL_432279 | 4/5/2020  | 4/29/2020 | Europe / United Kingdom / Wales |
| EPI_ISL_432280 | 4/8/2020  | 4/29/2020 | Europe / United Kingdom / Wales |
| EPI_ISL_432281 | 4/8/2020  | 4/29/2020 | Europe / United Kingdom / Wales |
| EPI_ISL_432282 | 3/31/2020 | 4/29/2020 | Europe / United Kingdom / Wales |
| EPI_ISL_432283 | 4/8/2020  | 4/29/2020 | Europe / United Kingdom / Wales |
| EPI_ISL_432284 | 4/7/2020  | 4/29/2020 | Europe / United Kingdom / Wales |
| EPI_ISL_432285 | 3/31/2020 | 4/29/2020 | Europe / United Kingdom / Wales |
| EPI_ISL_432286 | 4/8/2020  | 4/29/2020 | Europe / United Kingdom / Wales |
| EPI_ISL_432287 | 4/1/2020  | 4/29/2020 | Europe / United Kingdom / Wales |
| EPI_ISL_432288 | 3/31/2020 | 4/29/2020 | Europe / United Kingdom / Wales |
| EPI_ISL_432289 | 4/1/2020  | 4/29/2020 | Europe / United Kingdom / Wales |
| EPI_ISL_432290 | 3/30/2020 | 4/29/2020 | Europe / United Kingdom / Wales |
| EPI_ISL_432291 | 4/8/2020  | 4/29/2020 | Europe / United Kingdom / Wales |
| EPI_ISL_432292 | 4/5/2020  | 4/29/2020 | Europe / United Kingdom / Wales |
| EPI_ISL_432293 | 3/30/2020 | 4/29/2020 | Europe / United Kingdom / Wales |
| EPI_ISL_432294 | 4/3/2020  | 4/29/2020 | Europe / United Kingdom / Wales |
| EPI_ISL_432295 | 4/8/2020  | 4/29/2020 | Europe / United Kingdom / Wales |
| EPI_ISL_432296 | 4/8/2020  | 4/29/2020 | Europe / United Kingdom / Wales |
| EPI_ISL_432297 | 4/4/2020  | 4/29/2020 | Europe / United Kingdom / Wales |
| EPI_ISL_432298 | 3/31/2020 | 4/29/2020 | Europe / United Kingdom / Wales |
| EPI_ISL_432299 | 3/31/2020 | 4/29/2020 | Europe / United Kingdom / Wales |
| EPI_ISL_432300 | 4/7/2020  | 4/29/2020 | Europe / United Kingdom / Wales |
| EPI_ISL_432301 | 3/30/2020 | 4/29/2020 | Europe / United Kingdom / Wales |
| EPI_ISL_432302 | 3/31/2020 | 4/29/2020 | Europe / United Kingdom / Wales |
| EPI_ISL_432303 | 3/31/2020 | 4/29/2020 | Europe / United Kingdom / Wales |
| EPI_ISL_432304 | 4/8/2020  | 4/29/2020 | Europe / United Kingdom / Wales |
| EPI_ISL_432305 | 4/7/2020  | 4/29/2020 | Europe / United Kingdom / Wales |
| EPI_ISL_432306 | 3/31/2020 | 4/29/2020 | Europe / United Kingdom / Wales |
| EPI_ISL_432307 | 3/31/2020 | 4/29/2020 | Europe / United Kingdom / Wales |
| EPI_ISL_432308 | 2020-03   | 4/29/2020 | Europe / United Kingdom / Wales |
| EPI_ISL_432309 | 4/7/2020  | 4/29/2020 | Europe / United Kingdom / Wales |
| EPI_ISL_432310 | 4/1/2020  | 4/29/2020 | Europe / United Kingdom / Wales |
| EPI_ISL_432311 | 2020-03   | 4/29/2020 | Europe / United Kingdom / Wales |
| EPI_ISL_432312 | 3/31/2020 | 4/29/2020 | Europe / United Kingdom / Wales |
| EPI_ISL_432313 | 4/3/2020  | 4/29/2020 | Europe / United Kingdom / Wales |
| EPI_ISL_432314 | 3/31/2020 | 4/29/2020 | Europe / United Kingdom / Wales |
| EPI_ISL_432315 | 4/7/2020  | 4/29/2020 | Europe / United Kingdom / Wales |
| EPI_ISL_432316 | 4/1/2020  | 4/29/2020 | Europe / United Kingdom / Wales |
| EPI_ISL_432317 | 3/30/2020 | 4/29/2020 | Europe / United Kingdom / Wales |
| EPI_ISL_432318 | 4/8/2020  | 4/29/2020 | Europe / United Kingdom / Wales |
| EPI_ISL_432319 | 3/30/2020 | 4/29/2020 | Europe / United Kingdom / Wales |

|                |           |           |                                 |
|----------------|-----------|-----------|---------------------------------|
| EPI_ISL_432320 | 4/6/2020  | 4/29/2020 | Europe / United Kingdom / Wales |
| EPI_ISL_432321 | 3/30/2020 | 4/29/2020 | Europe / United Kingdom / Wales |
| EPI_ISL_432322 | 4/1/2020  | 4/29/2020 | Europe / United Kingdom / Wales |
| EPI_ISL_432323 | 3/23/2020 | 4/29/2020 | Europe / United Kingdom / Wales |
| EPI_ISL_432325 | 4/1/2020  | 4/29/2020 | Europe / United Kingdom / Wales |
| EPI_ISL_432326 | 2020-03   | 4/29/2020 | Europe / United Kingdom / Wales |
| EPI_ISL_432327 | 4/1/2020  | 4/29/2020 | Europe / United Kingdom / Wales |
| EPI_ISL_432328 | 3/31/2020 | 4/29/2020 | Europe / United Kingdom / Wales |
| EPI_ISL_432329 | 4/1/2020  | 4/29/2020 | Europe / United Kingdom / Wales |
| EPI_ISL_432330 | 4/5/2020  | 4/29/2020 | Europe / United Kingdom / Wales |
| EPI_ISL_432331 | 3/30/2020 | 4/29/2020 | Europe / United Kingdom / Wales |
| EPI_ISL_432332 | 4/8/2020  | 4/29/2020 | Europe / United Kingdom / Wales |
| EPI_ISL_432334 | 4/4/2020  | 4/29/2020 | Europe / United Kingdom / Wales |
| EPI_ISL_432335 | 4/1/2020  | 4/29/2020 | Europe / United Kingdom / Wales |
| EPI_ISL_432336 | 2020-03   | 4/29/2020 | Europe / United Kingdom / Wales |
| EPI_ISL_432337 | 3/30/2020 | 4/29/2020 | Europe / United Kingdom / Wales |
| EPI_ISL_432338 | 3/30/2020 | 4/29/2020 | Europe / United Kingdom / Wales |
| EPI_ISL_432339 | 3/27/2020 | 4/29/2020 | Europe / United Kingdom / Wales |
| EPI_ISL_432340 | 3/31/2020 | 4/29/2020 | Europe / United Kingdom / Wales |
| EPI_ISL_432342 | 3/28/2020 | 4/29/2020 | Europe / United Kingdom / Wales |
| EPI_ISL_432343 | 4/3/2020  | 4/29/2020 | Europe / United Kingdom / Wales |
| EPI_ISL_432344 | 4/3/2020  | 4/29/2020 | Europe / United Kingdom / Wales |
| EPI_ISL_432345 | 4/6/2020  | 4/29/2020 | Europe / United Kingdom / Wales |
| EPI_ISL_432346 | 4/1/2020  | 4/29/2020 | Europe / United Kingdom / Wales |
| EPI_ISL_432347 | 3/29/2020 | 4/29/2020 | Europe / United Kingdom / Wales |
| EPI_ISL_432349 | 3/31/2020 | 4/29/2020 | Europe / United Kingdom / Wales |
| EPI_ISL_432350 | 4/1/2020  | 4/29/2020 | Europe / United Kingdom / Wales |
| EPI_ISL_432351 | 3/31/2020 | 4/29/2020 | Europe / United Kingdom / Wales |
| EPI_ISL_432352 | 3/27/2020 | 4/29/2020 | Europe / United Kingdom / Wales |
| EPI_ISL_432353 | 4/4/2020  | 4/29/2020 | Europe / United Kingdom / Wales |
| EPI_ISL_432354 | 4/7/2020  | 4/29/2020 | Europe / United Kingdom / Wales |
| EPI_ISL_432355 | 4/1/2020  | 4/29/2020 | Europe / United Kingdom / Wales |
| EPI_ISL_432356 | 4/1/2020  | 4/29/2020 | Europe / United Kingdom / Wales |
| EPI_ISL_432357 | 3/30/2020 | 4/29/2020 | Europe / United Kingdom / Wales |
| EPI_ISL_432358 | 4/8/2020  | 4/29/2020 | Europe / United Kingdom / Wales |
| EPI_ISL_432359 | 3/30/2020 | 4/29/2020 | Europe / United Kingdom / Wales |
| EPI_ISL_432360 | 3/29/2020 | 4/29/2020 | Europe / United Kingdom / Wales |
| EPI_ISL_432361 | 3/30/2020 | 4/29/2020 | Europe / United Kingdom / Wales |
| EPI_ISL_432362 | 3/31/2020 | 4/29/2020 | Europe / United Kingdom / Wales |
| EPI_ISL_432365 | 4/1/2020  | 4/29/2020 | Europe / United Kingdom / Wales |
| EPI_ISL_432366 | 3/31/2020 | 4/29/2020 | Europe / United Kingdom / Wales |
| EPI_ISL_432367 | 3/30/2020 | 4/29/2020 | Europe / United Kingdom / Wales |
| EPI_ISL_432369 | 3/30/2020 | 4/29/2020 | Europe / United Kingdom / Wales |
| EPI_ISL_432370 | 3/31/2020 | 4/29/2020 | Europe / United Kingdom / Wales |
| EPI_ISL_432371 | 3/31/2020 | 4/29/2020 | Europe / United Kingdom / Wales |
| EPI_ISL_432375 | 2020      | 4/29/2020 | Europe / United Kingdom / Wales |
| EPI_ISL_432376 | 2020-03   | 4/29/2020 | Europe / United Kingdom / Wales |

|                |           |           |                                   |
|----------------|-----------|-----------|-----------------------------------|
| EPI_ISL_432377 | 3/24/2020 | 4/29/2020 | Europe / United Kingdom / Wales   |
| EPI_ISL_432378 | 4/8/2020  | 4/29/2020 | Europe / United Kingdom / Wales   |
| EPI_ISL_432379 | 3/27/2020 | 4/29/2020 | Europe / United Kingdom / Wales   |
| EPI_ISL_432382 | 4/8/2020  | 4/29/2020 | Europe / United Kingdom / Wales   |
| EPI_ISL_432383 | 4/5/2020  | 4/29/2020 | Europe / United Kingdom / Wales   |
| EPI_ISL_432385 | 4/1/2020  | 4/29/2020 | Europe / United Kingdom / Wales   |
| EPI_ISL_432387 | 3/27/2020 | 4/29/2020 | Europe / United Kingdom / Wales   |
| EPI_ISL_432389 | 4/1/2020  | 4/29/2020 | Europe / United Kingdom / Wales   |
| EPI_ISL_432390 | 3/30/2020 | 4/29/2020 | Europe / United Kingdom / Wales   |
| EPI_ISL_432393 | 4/2/2020  | 4/29/2020 | Europe / United Kingdom / Wales   |
| EPI_ISL_432395 | 3/30/2020 | 4/29/2020 | Europe / United Kingdom / Wales   |
| EPI_ISL_432396 | 3/30/2020 | 4/29/2020 | Europe / United Kingdom / Wales   |
| EPI_ISL_432397 | 3/30/2020 | 4/29/2020 | Europe / United Kingdom / Wales   |
| EPI_ISL_432399 | 4/5/2020  | 4/29/2020 | Europe / United Kingdom / Wales   |
| EPI_ISL_432400 | 3/24/2020 | 4/29/2020 | Europe / United Kingdom / Wales   |
| EPI_ISL_432401 | 3/30/2020 | 4/29/2020 | Europe / United Kingdom / Wales   |
| EPI_ISL_432403 | 3/30/2020 | 4/29/2020 | Europe / United Kingdom / Wales   |
| EPI_ISL_432405 | 2020-03   | 4/29/2020 | Europe / United Kingdom / Wales   |
| EPI_ISL_432406 | 2020-03   | 4/29/2020 | Europe / United Kingdom / Wales   |
| EPI_ISL_432407 | 3/31/2020 | 4/29/2020 | Europe / United Kingdom / Wales   |
| EPI_ISL_432416 | 3/31/2020 | 4/29/2020 | Europe / United Kingdom / Wales   |
| EPI_ISL_432417 | 3/31/2020 | 4/29/2020 | Europe / United Kingdom / Wales   |
| EPI_ISL_432419 | 3/24/2020 | 4/29/2020 | Europe / United Kingdom / Wales   |
| EPI_ISL_432421 | 3/28/2020 | 4/29/2020 | Europe / United Kingdom / Wales   |
| EPI_ISL_432423 | 3/30/2020 | 4/29/2020 | Europe / United Kingdom / Wales   |
| EPI_ISL_432425 | 4/1/2020  | 4/29/2020 | Europe / United Kingdom / Wales   |
| EPI_ISL_432428 | 3/27/2020 | 4/29/2020 | Europe / United Kingdom / Wales   |
| EPI_ISL_432430 | 3/31/2020 | 4/29/2020 | Europe / United Kingdom / Wales   |
| EPI_ISL_432458 | 3/28/2020 | 4/29/2020 | Europe / United Kingdom / England |
| EPI_ISL_432466 | 4/1/2020  | 4/29/2020 | Europe / United Kingdom / England |
| EPI_ISL_432478 | 4/7/2020  | 4/29/2020 | Europe / United Kingdom / England |
| EPI_ISL_432480 | 3/29/2020 | 4/29/2020 | Europe / United Kingdom / England |
| EPI_ISL_432481 | 3/30/2020 | 4/29/2020 | Europe / United Kingdom / England |
| EPI_ISL_432487 | 3/30/2020 | 4/29/2020 | Europe / United Kingdom / England |
| EPI_ISL_432502 | 3/25/2020 | 4/29/2020 | Europe / United Kingdom / England |
| EPI_ISL_432505 | 3/31/2020 | 4/29/2020 | Europe / United Kingdom / England |
| EPI_ISL_432510 | 3/27/2020 | 4/29/2020 | Europe / United Kingdom / England |
| EPI_ISL_432517 | 3/30/2020 | 4/29/2020 | Europe / United Kingdom / England |
| EPI_ISL_432519 | 4/2/2020  | 4/29/2020 | Europe / United Kingdom / England |
| EPI_ISL_432529 | 3/31/2020 | 4/29/2020 | Europe / United Kingdom / England |
| EPI_ISL_432533 | 3/31/2020 | 4/29/2020 | Europe / United Kingdom / England |
| EPI_ISL_432539 | 3/27/2020 | 4/29/2020 | Europe / United Kingdom / England |
| EPI_ISL_432541 | 4/3/2020  | 4/29/2020 | Europe / United Kingdom / England |
| EPI_ISL_432542 | 4/1/2020  | 4/29/2020 | Europe / United Kingdom / England |
| EPI_ISL_432547 | 3/31/2020 | 4/29/2020 | Europe / United Kingdom / England |
| EPI_ISL_432548 | 3/29/2020 | 4/29/2020 | Europe / United Kingdom / England |
| EPI_ISL_432549 | 3/28/2020 | 4/29/2020 | Europe / United Kingdom / England |

|                |           |           |                                   |
|----------------|-----------|-----------|-----------------------------------|
| EPI_ISL_432551 | 3/30/2020 | 4/29/2020 | Europe / United Kingdom / England |
| EPI_ISL_432570 | 4/6/2020  | 4/29/2020 | Europe / United Kingdom / England |
| EPI_ISL_432578 | 4/4/2020  | 4/29/2020 | Europe / United Kingdom / England |
| EPI_ISL_432579 | 4/1/2020  | 4/29/2020 | Europe / United Kingdom / England |
| EPI_ISL_432588 | 3/28/2020 | 4/29/2020 | Europe / United Kingdom / England |
| EPI_ISL_432601 | 3/30/2020 | 4/29/2020 | Europe / United Kingdom / England |
| EPI_ISL_432602 | 3/30/2020 | 4/29/2020 | Europe / United Kingdom / England |
| EPI_ISL_432614 | 4/1/2020  | 4/29/2020 | Europe / United Kingdom / England |
| EPI_ISL_432620 | 3/28/2020 | 4/29/2020 | Europe / United Kingdom / England |
| EPI_ISL_432622 | 4/2/2020  | 4/29/2020 | Europe / United Kingdom / England |
| EPI_ISL_432630 | 4/2/2020  | 4/29/2020 | Europe / United Kingdom / England |
| EPI_ISL_432642 | 4/2/2020  | 4/29/2020 | Europe / United Kingdom / England |
| EPI_ISL_432644 | 3/30/2020 | 4/29/2020 | Europe / United Kingdom / England |
| EPI_ISL_432675 | 4/5/2020  | 4/29/2020 | Europe / United Kingdom / England |
| EPI_ISL_432691 | 4/7/2020  | 4/29/2020 | Europe / United Kingdom / England |
| EPI_ISL_432706 | 4/8/2020  | 4/29/2020 | Europe / United Kingdom / England |
| EPI_ISL_432712 | 3/25/2020 | 4/29/2020 | Europe / United Kingdom / England |
| EPI_ISL_432713 | 3/25/2020 | 4/29/2020 | Europe / United Kingdom / England |
| EPI_ISL_432716 | 3/24/2020 | 4/29/2020 | Europe / United Kingdom / England |
| EPI_ISL_432720 | 3/30/2020 | 4/29/2020 | Europe / United Kingdom / England |
| EPI_ISL_432722 | 4/7/2020  | 4/29/2020 | Europe / United Kingdom / England |
| EPI_ISL_432724 | 3/29/2020 | 4/29/2020 | Europe / United Kingdom / England |
| EPI_ISL_432727 | 4/1/2020  | 4/29/2020 | Europe / United Kingdom / England |
| EPI_ISL_432732 | 4/1/2020  | 4/29/2020 | Europe / United Kingdom / England |
| EPI_ISL_432734 | 3/30/2020 | 4/29/2020 | Europe / United Kingdom / England |
| EPI_ISL_432742 | 4/2/2020  | 4/29/2020 | Europe / United Kingdom / England |
| EPI_ISL_432744 | 4/1/2020  | 4/29/2020 | Europe / United Kingdom / England |
| EPI_ISL_432746 | 3/30/2020 | 4/29/2020 | Europe / United Kingdom / England |
| EPI_ISL_432753 | 3/29/2020 | 4/29/2020 | Europe / United Kingdom / England |
| EPI_ISL_432762 | 4/15/2020 | 4/29/2020 | Europe / United Kingdom / England |
| EPI_ISL_432766 | 4/3/2020  | 4/29/2020 | Europe / United Kingdom / England |
| EPI_ISL_432768 | 3/24/2020 | 4/29/2020 | Europe / United Kingdom / England |
| EPI_ISL_432777 | 3/30/2020 | 4/29/2020 | Europe / United Kingdom / England |
| EPI_ISL_432780 | 4/15/2020 | 4/29/2020 | Europe / United Kingdom / England |
| EPI_ISL_432786 | 3/29/2020 | 4/29/2020 | Europe / United Kingdom / England |
| EPI_ISL_432788 | 3/30/2020 | 4/29/2020 | Europe / United Kingdom / England |
| EPI_ISL_432790 | 4/1/2020  | 4/29/2020 | Europe / United Kingdom / England |
| EPI_ISL_432799 | 3/30/2020 | 4/29/2020 | Europe / United Kingdom / England |
| EPI_ISL_432802 | 3/31/2020 | 4/29/2020 | Europe / United Kingdom / England |
| EPI_ISL_432804 | 3/27/2020 | 4/29/2020 | Europe / United Kingdom / England |
| EPI_ISL_432812 | 4/1/2020  | 4/29/2020 | Europe / United Kingdom / England |
| EPI_ISL_432813 | 3/30/2020 | 4/29/2020 | Europe / United Kingdom / England |
| EPI_ISL_432825 | 4/1/2020  | 4/29/2020 | Europe / United Kingdom / England |
| EPI_ISL_432828 | 3/30/2020 | 4/29/2020 | Europe / United Kingdom / England |
| EPI_ISL_432831 | 3/30/2020 | 4/29/2020 | Europe / United Kingdom / England |
| EPI_ISL_432836 | 4/3/2020  | 4/29/2020 | Europe / United Kingdom / England |
| EPI_ISL_432837 | 3/29/2020 | 4/29/2020 | Europe / United Kingdom / England |









































|                |           |           |                                                    |
|----------------|-----------|-----------|----------------------------------------------------|
| EPI_ISL_434034 | 4/14/2020 | 4/29/2020 | Europe / United Kingdom / England                  |
| EPI_ISL_434035 | 4/13/2020 | 4/29/2020 | Europe / United Kingdom / England                  |
| EPI_ISL_434036 | 4/14/2020 | 4/29/2020 | Europe / United Kingdom / England                  |
| EPI_ISL_434038 | 4/14/2020 | 4/29/2020 | Europe / United Kingdom / England                  |
| EPI_ISL_434039 | 4/14/2020 | 4/29/2020 | Europe / United Kingdom / England                  |
| EPI_ISL_434041 | 4/16/2020 | 4/29/2020 | Europe / United Kingdom / England                  |
| EPI_ISL_434045 | 4/16/2020 | 4/29/2020 | Europe / United Kingdom / England                  |
| EPI_ISL_434046 | 4/15/2020 | 4/29/2020 | Europe / United Kingdom / England                  |
| EPI_ISL_434047 | 4/16/2020 | 4/29/2020 | Europe / United Kingdom / England                  |
| EPI_ISL_434049 | 4/16/2020 | 4/29/2020 | Europe / United Kingdom / England                  |
| EPI_ISL_434051 | 4/16/2020 | 4/29/2020 | Europe / United Kingdom / England                  |
| EPI_ISL_434054 | 4/15/2020 | 4/29/2020 | Europe / United Kingdom / England                  |
| EPI_ISL_434063 | 4/3/2020  | 4/29/2020 | North America / USA / Washington / Yakima County   |
| EPI_ISL_434064 | 4/5/2020  | 4/29/2020 | North America / USA / Washington / Yakima County   |
| EPI_ISL_434065 | 4/1/2020  | 4/29/2020 | North America / USA / Washington / Pierce County   |
| EPI_ISL_434066 | 4/2/2020  | 4/29/2020 | North America / USA / Washington / King County     |
| EPI_ISL_434068 | 4/2/2020  | 4/29/2020 | North America / USA / Washington / Yakima County   |
| EPI_ISL_434069 | 4/3/2020  | 4/29/2020 | North America / USA / Washington / Asotin County   |
| EPI_ISL_434070 | 4/1/2020  | 4/29/2020 | North America / USA / Washington / Benton County   |
| EPI_ISL_434071 | 4/4/2020  | 4/29/2020 | North America / USA / Washington / Yakima County   |
| EPI_ISL_434072 | 4/1/2020  | 4/29/2020 | North America / USA / Washington / Yakima County   |
| EPI_ISL_434073 | 4/2/2020  | 4/29/2020 | North America / USA / Washington / Yakima County   |
| EPI_ISL_434074 | 4/3/2020  | 4/29/2020 | North America / USA / Washington / King County     |
| EPI_ISL_434075 | 4/2/2020  | 4/29/2020 | North America / USA / Washington / Yakima County   |
| EPI_ISL_434076 | 4/1/2020  | 4/29/2020 | North America / USA / Washington / Franklin County |
| EPI_ISL_434077 | 4/4/2020  | 4/29/2020 | North America / USA / Washington / Yakima County   |
| EPI_ISL_434079 | 4/4/2020  | 4/29/2020 | North America / USA / Washington / Yakima County   |
| EPI_ISL_434080 | 4/1/2020  | 4/29/2020 | North America / USA / Washington / Franklin County |
| EPI_ISL_434081 | 3/30/2020 | 4/29/2020 | North America / USA / Washington / Yakima County   |
| EPI_ISL_434082 | 3/31/2020 | 4/29/2020 | North America / USA / Washington / Yakima County   |
| EPI_ISL_434083 | 4/2/2020  | 4/29/2020 | North America / USA / Washington / Yakima County   |
| EPI_ISL_434084 | 4/1/2020  | 4/29/2020 | North America / USA / Washington / Yakima County   |
| EPI_ISL_434085 | 4/3/2020  | 4/29/2020 | North America / USA / Washington / Yakima County   |
| EPI_ISL_434086 | 4/1/2020  | 4/29/2020 | North America / USA / Washington / Adams County    |
| EPI_ISL_434087 | 4/5/2020  | 4/29/2020 | North America / USA / Washington / Yakima County   |
| EPI_ISL_434088 | 4/3/2020  | 4/29/2020 | North America / USA / Washington / Yakima County   |
| EPI_ISL_434089 | 4/1/2020  | 4/29/2020 | North America / USA / Washington / Yakima County   |
| EPI_ISL_434090 | 4/2/2020  | 4/29/2020 | North America / USA / Washington / Yakima County   |
| EPI_ISL_434091 | 4/2/2020  | 4/29/2020 | North America / USA / Washington / Pierce County   |
| EPI_ISL_434092 | 4/2/2020  | 4/29/2020 | North America / USA / Washington / Whatcom County  |
| EPI_ISL_434093 | 4/4/2020  | 4/29/2020 | North America / USA / Washington / Yakima County   |
| EPI_ISL_434094 | 4/4/2020  | 4/29/2020 | North America / USA / Washington / Yakima County   |
| EPI_ISL_434095 | 4/2/2020  | 4/29/2020 | North America / USA / Washington / Yakima County   |
| EPI_ISL_434096 | 4/3/2020  | 4/29/2020 | North America / USA / Washington / Pierce County   |
| EPI_ISL_434097 | 4/1/2020  | 4/29/2020 | North America / USA / Washington / Pierce County   |
| EPI_ISL_434098 | 4/2/2020  | 4/29/2020 | North America / USA / Washington / Yakima County   |
| EPI_ISL_434099 | 4/2/2020  | 4/29/2020 | North America / USA / Washington / Yakima County   |









|                |           |           |                                                     |
|----------------|-----------|-----------|-----------------------------------------------------|
| EPI_ISL_434306 | 3/23/2020 | 4/29/2020 | North America / USA / Washington / Adams County     |
| EPI_ISL_434307 | 3/24/2020 | 4/29/2020 | North America / USA / Washington / Yakima County    |
| EPI_ISL_434308 | 3/31/2020 | 4/29/2020 | North America / USA / Washington / Pierce County    |
| EPI_ISL_434309 | 3/30/2020 | 4/29/2020 | North America / USA / Washington / Yakima County    |
| EPI_ISL_434310 | 3/24/2020 | 4/29/2020 | North America / USA / Washington / Yakima County    |
| EPI_ISL_434311 | 3/24/2020 | 4/29/2020 | North America / USA / Washington / Yakima County    |
| EPI_ISL_434313 | 3/31/2020 | 4/29/2020 | North America / USA / Washington / Pierce County    |
| EPI_ISL_434314 | 3/31/2020 | 4/29/2020 | North America / USA / Washington / King County      |
| EPI_ISL_434315 | 3/30/2020 | 4/29/2020 | North America / USA / Washington / Adams County     |
| EPI_ISL_434316 | 3/29/2020 | 4/29/2020 | North America / USA / Washington / Yakima County    |
| EPI_ISL_434317 | 4/1/2020  | 4/29/2020 | North America / USA / Washington / Yakima County    |
| EPI_ISL_434319 | 3/27/2020 | 4/29/2020 | North America / USA / Washington / Snohomish County |
| EPI_ISL_434320 | 3/24/2020 | 4/29/2020 | North America / USA / Washington / Yakima County    |
| EPI_ISL_434321 | 3/30/2020 | 4/29/2020 | North America / USA / Washington / King County      |
| EPI_ISL_434322 | 3/24/2020 | 4/29/2020 | North America / USA / Washington / Whatcom County   |
| EPI_ISL_434323 | 3/31/2020 | 4/29/2020 | North America / USA / Washington / Pierce County    |
| EPI_ISL_434324 | 3/24/2020 | 4/29/2020 | North America / USA / Washington / Yakima County    |
| EPI_ISL_434327 | 3/25/2020 | 4/29/2020 | North America / USA / Washington / King County      |
| EPI_ISL_434328 | 3/31/2020 | 4/29/2020 | North America / USA / Washington / Pierce County    |
| EPI_ISL_434329 | 3/25/2020 | 4/29/2020 | North America / USA / Washington / Grant County     |
| EPI_ISL_434330 | 3/24/2020 | 4/29/2020 | North America / USA / Washington / Pierce County    |
| EPI_ISL_434331 | 3/30/2020 | 4/29/2020 | North America / USA / Washington / King County      |
| EPI_ISL_434332 | 3/26/2020 | 4/29/2020 | North America / USA / Washington / King County      |
| EPI_ISL_434334 | 3/31/2020 | 4/29/2020 | North America / USA / Washington / Pierce County    |
| EPI_ISL_434335 | 3/31/2020 | 4/29/2020 | North America / USA / Washington / Pierce County    |
| EPI_ISL_434336 | 3/29/2020 | 4/29/2020 | North America / USA / Washington / Pierce County    |
| EPI_ISL_434337 | 3/28/2020 | 4/29/2020 | North America / USA / Washington / Yakima County    |
| EPI_ISL_434338 | 3/30/2020 | 4/29/2020 | North America / USA / Washington / Yakima County    |
| EPI_ISL_434339 | 3/24/2020 | 4/29/2020 | North America / USA / Washington / Kittitas County  |
| EPI_ISL_434341 | 3/30/2020 | 4/29/2020 | North America / USA / Washington / Yakima County    |
| EPI_ISL_434342 | 3/31/2020 | 4/29/2020 | North America / USA / Washington / Yakima County    |
| EPI_ISL_434343 | 3/24/2020 | 4/29/2020 | North America / USA / Washington / King County      |
| EPI_ISL_434345 | 3/26/2020 | 4/29/2020 | North America / USA / Washington / Yakima County    |
| EPI_ISL_434346 | 3/31/2020 | 4/29/2020 | North America / USA / Washington / Pierce County    |
| EPI_ISL_434347 | 3/26/2020 | 4/29/2020 | Europe / Belgium / Ghent                            |
| EPI_ISL_434348 | 3/26/2020 | 4/29/2020 | Europe / Belgium / Ghent                            |
| EPI_ISL_434349 | 3/26/2020 | 4/29/2020 | Europe / Belgium / Ghent                            |
| EPI_ISL_434351 | 3/28/2020 | 4/29/2020 | Europe / Belgium / Ghent                            |
| EPI_ISL_434352 | 3/26/2020 | 4/29/2020 | Europe / Belgium / Ghent                            |
| EPI_ISL_434354 | 3/27/2020 | 4/29/2020 | Europe / Belgium / Ghent                            |
| EPI_ISL_434355 | 3/27/2020 | 4/29/2020 | Europe / Belgium / Ghent                            |
| EPI_ISL_434357 | 3/27/2020 | 4/29/2020 | Europe / Belgium / Ghent                            |
| EPI_ISL_434360 | 3/29/2020 | 4/29/2020 | Europe / Belgium / Ghent                            |
| EPI_ISL_434361 | 3/29/2020 | 4/29/2020 | Europe / Belgium / Ghent                            |
| EPI_ISL_434362 | 3/29/2020 | 4/29/2020 | Europe / Belgium / Ghent                            |
| EPI_ISL_434366 | 3/30/2020 | 4/29/2020 | Europe / Belgium / Antwerp                          |
| EPI_ISL_434368 | 3/31/2020 | 4/29/2020 | Europe / Belgium / Antwerp                          |

|                |           |           |                            |
|----------------|-----------|-----------|----------------------------|
| EPI_ISL_434369 | 4/2/2020  | 4/29/2020 | Europe / Belgium / Antwerp |
| EPI_ISL_434370 | 4/5/2020  | 4/29/2020 | Europe / Belgium / Antwerp |
| EPI_ISL_434371 | 4/1/2020  | 4/29/2020 | Europe / Belgium / Antwerp |
| EPI_ISL_434372 | 3/26/2020 | 4/29/2020 | Europe / Belgium / Antwerp |
| EPI_ISL_434373 | 3/28/2020 | 4/29/2020 | Europe / Belgium / Antwerp |
| EPI_ISL_434374 | 4/8/2020  | 4/29/2020 | Europe / Belgium / Antwerp |
| EPI_ISL_434375 | 3/29/2020 | 4/29/2020 | Europe / Belgium / Antwerp |
| EPI_ISL_434376 | 3/25/2020 | 4/29/2020 | Europe / Belgium / Antwerp |
| EPI_ISL_434377 | 4/12/2020 | 4/29/2020 | Europe / Belgium / Antwerp |
| EPI_ISL_434378 | 4/13/2020 | 4/29/2020 | Europe / Belgium / Antwerp |
| EPI_ISL_434379 | 4/3/2020  | 4/29/2020 | Europe / Belgium / Antwerp |
| EPI_ISL_434380 | 4/4/2020  | 4/29/2020 | Europe / Belgium / Antwerp |
| EPI_ISL_434381 | 4/16/2020 | 4/29/2020 | Europe / Belgium / Antwerp |
| EPI_ISL_434382 | 4/7/2020  | 4/29/2020 | Europe / Belgium / Antwerp |
| EPI_ISL_434383 | 4/10/2020 | 4/29/2020 | Europe / Belgium / Antwerp |
| EPI_ISL_434384 | 4/15/2020 | 4/29/2020 | Europe / Belgium / Antwerp |
| EPI_ISL_434455 | 3/9/2020  | 4/29/2020 | Europe / Greece / Athens   |
| EPI_ISL_434456 | 3/22/2020 | 4/29/2020 | Europe / Greece / Athens   |
| EPI_ISL_434457 | 3/28/2020 | 4/29/2020 | Europe / Greece / Athens   |
| EPI_ISL_434458 | 3/20/2020 | 4/29/2020 | Europe / Greece / Athens   |
| EPI_ISL_434459 | 3/29/2020 | 4/29/2020 | Europe / Greece / Athens   |
| EPI_ISL_434460 | 3/23/2020 | 4/29/2020 | Europe / Greece / Athens   |
| EPI_ISL_434461 | 3/29/2020 | 4/29/2020 | Europe / Greece / Athens   |
| EPI_ISL_434462 | 3/23/2020 | 4/29/2020 | Europe / Greece / Athens   |
| EPI_ISL_434463 | 3/23/2020 | 4/29/2020 | Europe / Greece / Athens   |
| EPI_ISL_434464 | 3/16/2020 | 4/29/2020 | Europe / Greece / Athens   |
| EPI_ISL_434465 | 3/23/2020 | 4/29/2020 | Europe / Greece / Athens   |
| EPI_ISL_434466 | 4/4/2020  | 4/29/2020 | Europe / Greece / Athens   |
| EPI_ISL_434467 | 3/12/2020 | 4/29/2020 | Europe / Greece / Athens   |
| EPI_ISL_434468 | 3/26/2020 | 4/29/2020 | Europe / Greece / Athens   |
| EPI_ISL_434469 | 3/20/2020 | 4/29/2020 | Europe / Greece / Athens   |
| EPI_ISL_434470 | 3/19/2020 | 4/29/2020 | Europe / Greece / Athens   |
| EPI_ISL_434471 | 3/11/2020 | 4/29/2020 | Europe / Greece / Athens   |
| EPI_ISL_434472 | 3/12/2020 | 4/29/2020 | Europe / Greece / Athens   |
| EPI_ISL_434473 | 3/11/2020 | 4/29/2020 | Europe / Greece / Athens   |
| EPI_ISL_434474 | 3/11/2020 | 4/29/2020 | Europe / Greece / Athens   |
| EPI_ISL_434475 | 3/10/2020 | 4/29/2020 | Europe / Greece / Athens   |
| EPI_ISL_434476 | 3/10/2020 | 4/29/2020 | Europe / Greece / Athens   |
| EPI_ISL_434477 | 3/16/2020 | 4/29/2020 | Europe / Greece / Athens   |
| EPI_ISL_434478 | 3/14/2020 | 4/29/2020 | Europe / Greece / Athens   |
| EPI_ISL_434479 | 3/11/2020 | 4/29/2020 | Europe / Greece / Athens   |
| EPI_ISL_434480 | 3/12/2020 | 4/29/2020 | Europe / Greece / Athens   |
| EPI_ISL_434481 | 3/19/2020 | 4/29/2020 | Europe / Greece / Athens   |
| EPI_ISL_434482 | 3/16/2020 | 4/29/2020 | Europe / Greece / Athens   |
| EPI_ISL_434483 | 3/16/2020 | 4/29/2020 | Europe / Greece / Athens   |
| EPI_ISL_434484 | 3/9/2020  | 4/29/2020 | Europe / Greece / Athens   |
| EPI_ISL_434485 | 3/12/2020 | 4/29/2020 | Europe / Greece / Athens   |

|                |           |                                                                         |
|----------------|-----------|-------------------------------------------------------------------------|
| EPI_ISL_434486 | 3/13/2020 | 4/29/2020 Europe / Greece / Athens                                      |
| EPI_ISL_434487 | 4/13/2020 | 4/29/2020 Europe / Luxembourg                                           |
| EPI_ISL_434488 | 4/21/2020 | 4/29/2020 Europe / Luxembourg                                           |
| EPI_ISL_434489 | 4/13/2020 | 4/29/2020 Europe / Luxembourg                                           |
| EPI_ISL_434491 | 4/14/2020 | 4/29/2020 Europe / Luxembourg                                           |
| EPI_ISL_434492 | 4/12/2020 | 4/29/2020 Europe / Luxembourg                                           |
| EPI_ISL_434493 | 4/11/2020 | 4/29/2020 Europe / Luxembourg                                           |
| EPI_ISL_434495 | 4/12/2020 | 4/29/2020 Europe / Luxembourg                                           |
| EPI_ISL_434496 | 4/10/2020 | 4/29/2020 Europe / Luxembourg                                           |
| EPI_ISL_434497 | 4/12/2020 | 4/29/2020 Europe / Luxembourg                                           |
| EPI_ISL_434498 | 4/15/2020 | 4/29/2020 Europe / Luxembourg                                           |
| EPI_ISL_434500 | 4/15/2020 | 4/29/2020 Europe / Luxembourg                                           |
| EPI_ISL_434502 | 4/13/2020 | 4/29/2020 Europe / Luxembourg                                           |
| EPI_ISL_434503 | 4/12/2020 | 4/29/2020 Europe / Luxembourg                                           |
| EPI_ISL_434504 | 4/14/2020 | 4/29/2020 Europe / Luxembourg                                           |
| EPI_ISL_434505 | 4/8/2020  | 4/29/2020 Europe / Luxembourg                                           |
| EPI_ISL_434506 | 4/15/2020 | 4/29/2020 Europe / Luxembourg                                           |
| EPI_ISL_434507 | 4/12/2020 | 4/29/2020 Europe / Luxembourg                                           |
| EPI_ISL_434511 | 4/21/2020 | 4/29/2020 Europe / Luxembourg                                           |
| EPI_ISL_434512 | 4/17/2020 | 4/29/2020 Europe / Luxembourg                                           |
| EPI_ISL_434514 | 4/16/2020 | 4/29/2020 Europe / Luxembourg                                           |
| EPI_ISL_434515 | 4/15/2020 | 4/29/2020 Europe / Luxembourg                                           |
| EPI_ISL_434516 | 3/16/2020 | 4/29/2020 Asia / Jordan / Amman                                         |
| EPI_ISL_434517 | 3/23/2020 | 4/29/2020 North America / USA / Louisiana / New Orleans                 |
| EPI_ISL_434518 | 3/23/2020 | 4/29/2020 North America / USA / Louisiana / New Orleans                 |
| EPI_ISL_434519 | 3/25/2020 | 4/29/2020 North America / USA / Louisiana / New Orleans                 |
| EPI_ISL_434526 | 3/26/2020 | 4/29/2020 North America / USA / Louisiana / New Orleans                 |
| EPI_ISL_434527 | 3/26/2020 | 4/29/2020 North America / USA / Louisiana / New Orleans                 |
| EPI_ISL_434530 | 3/31/2020 | 4/29/2020 North America / USA / Louisiana / New Orleans                 |
| EPI_ISL_434533 | 3/16/2020 | 4/29/2020 North America / Costa Rica                                    |
| EPI_ISL_434535 | 3/16/2020 | 4/29/2020 North America / Costa Rica                                    |
| EPI_ISL_434538 | 3/20/2020 | 4/29/2020 North America / Costa Rica / Tibas                            |
| EPI_ISL_434539 | 3/25/2020 | 4/29/2020 North America / Costa Rica                                    |
| EPI_ISL_434541 | 3/23/2020 | 4/29/2020 North America / USA / Puerto Rico                             |
| EPI_ISL_434543 | 3/23/2020 | 4/29/2020 North America / USA / Puerto Rico                             |
| EPI_ISL_434545 | 3/23/2020 | 4/29/2020 North America / USA / Puerto Rico                             |
| EPI_ISL_434546 | 3/24/2020 | 4/29/2020 North America / USA / Puerto Rico                             |
| EPI_ISL_434547 | 3/24/2020 | 4/29/2020 North America / USA / Puerto Rico                             |
| EPI_ISL_434548 | 3/23/2020 | 4/29/2020 North America / USA / Puerto Rico                             |
| EPI_ISL_434549 | 3/23/2020 | 4/29/2020 North America / USA / Puerto Rico                             |
| EPI_ISL_434551 | 3/24/2020 | 4/29/2020 North America / USA / Puerto Rico                             |
| EPI_ISL_450442 | 2/24/2020 | 4/29/2020 Asia / China / Henan                                          |
| EPI_ISL_434555 | 3/26/2020 | 4/30/2020 Asia / Philippines / Manila                                   |
| EPI_ISL_434558 | 3/28/2020 | 4/30/2020 Asia / Philippines / Manila                                   |
| EPI_ISL_434572 | 4/14/2020 | 4/30/2020 Europe / Czech Republic / Vysocina Region / Bela - Ledec na S |
| EPI_ISL_434586 | 3/19/2020 | 4/30/2020 North America / USA / Maryland                                |
| EPI_ISL_434587 | 3/24/2020 | 4/30/2020 North America / USA / Maryland                                |



|                |           |                                           |
|----------------|-----------|-------------------------------------------|
| EPI_ISL_434588 | 3/14/2020 | 4/30/2020 North America / USA / Maryland  |
| EPI_ISL_434590 | 4/9/2020  | 4/30/2020 North America / USA / Virginia  |
| EPI_ISL_434592 | 4/10/2020 | 4/30/2020 North America / USA / Virginia  |
| EPI_ISL_434593 | 4/11/2020 | 4/30/2020 North America / USA / Virginia  |
| EPI_ISL_434594 | 4/10/2020 | 4/30/2020 North America / USA / Virginia  |
| EPI_ISL_434595 | 4/10/2020 | 4/30/2020 North America / USA / Virginia  |
| EPI_ISL_434596 | 4/8/2020  | 4/30/2020 North America / USA / Virginia  |
| EPI_ISL_434597 | 4/14/2020 | 4/30/2020 North America / USA / Virginia  |
| EPI_ISL_434598 | 4/14/2020 | 4/30/2020 North America / USA / Virginia  |
| EPI_ISL_434599 | 4/14/2020 | 4/30/2020 North America / USA / Virginia  |
| EPI_ISL_434600 | 4/14/2020 | 4/30/2020 North America / USA / Virginia  |
| EPI_ISL_434601 | 4/8/2020  | 4/30/2020 North America / USA / Virginia  |
| EPI_ISL_434602 | 4/8/2020  | 4/30/2020 North America / USA / Virginia  |
| EPI_ISL_434603 | 4/8/2020  | 4/30/2020 North America / USA / Virginia  |
| EPI_ISL_434604 | 4/8/2020  | 4/30/2020 North America / USA / Virginia  |
| EPI_ISL_434605 | 4/9/2020  | 4/30/2020 North America / USA / Virginia  |
| EPI_ISL_434607 | 3/26/2020 | 4/30/2020 North America / USA / Wisconsin |
| EPI_ISL_434608 | 4/10/2020 | 4/30/2020 North America / USA / Wisconsin |
| EPI_ISL_434609 | 4/8/2020  | 4/30/2020 North America / USA / Wisconsin |
| EPI_ISL_434610 | 4/12/2020 | 4/30/2020 North America / USA / Wisconsin |
| EPI_ISL_434611 | 4/8/2020  | 4/30/2020 North America / USA / Wisconsin |
| EPI_ISL_434612 | 4/7/2020  | 4/30/2020 North America / USA / Wisconsin |
| EPI_ISL_434613 | 4/8/2020  | 4/30/2020 North America / USA / Wisconsin |
| EPI_ISL_434614 | 4/6/2020  | 4/30/2020 North America / USA / Wisconsin |
| EPI_ISL_434615 | 4/6/2020  | 4/30/2020 North America / USA / Wisconsin |
| EPI_ISL_434616 | 2020-03   | 4/30/2020 Europe / France / Occitanie     |
| EPI_ISL_434617 | 2020-03   | 4/30/2020 Europe / France / Occitanie     |
| EPI_ISL_434618 | 2020-03   | 4/30/2020 Europe / France / Occitanie     |
| EPI_ISL_434619 | 2020-03   | 4/30/2020 Europe / France / Occitanie     |
| EPI_ISL_434620 | 2020-03   | 4/30/2020 Europe / France / Occitanie     |
| EPI_ISL_434621 | 2020-03   | 4/30/2020 Europe / France / Occitanie     |
| EPI_ISL_434622 | 2020-03   | 4/30/2020 Europe / France / Occitanie     |
| EPI_ISL_434623 | 2020-03   | 4/30/2020 Europe / France / Occitanie     |
| EPI_ISL_434624 | 2020-03   | 4/30/2020 Europe / France / Occitanie     |
| EPI_ISL_434625 | 2020-03   | 4/30/2020 Europe / France / Occitanie     |
| EPI_ISL_434626 | 3/26/2020 | 4/30/2020 Europe / France / Occitanie     |
| EPI_ISL_434627 | 3/26/2020 | 4/30/2020 Europe / France / Occitanie     |
| EPI_ISL_434628 | 4/7/2020  | 4/30/2020 Europe / France / Occitanie     |
| EPI_ISL_434629 | 4/7/2020  | 4/30/2020 Europe / France / Occitanie     |
| EPI_ISL_434630 | 4/8/2020  | 4/30/2020 Europe / France / Occitanie     |
| EPI_ISL_434631 | 4/8/2020  | 4/30/2020 Europe / France / Occitanie     |
| EPI_ISL_434632 | 4/9/2020  | 4/30/2020 Europe / France / Occitanie     |
| EPI_ISL_434633 | 4/9/2020  | 4/30/2020 Europe / France / Occitanie     |
| EPI_ISL_434634 | 4/11/2020 | 4/30/2020 Europe / France / Occitanie     |
| EPI_ISL_434635 | 4/11/2020 | 4/30/2020 Europe / France / Occitanie     |
| EPI_ISL_434636 | 3/10/2020 | 4/30/2020 North America / USA / Florida   |
| EPI_ISL_434637 | 3/27/2020 | 4/30/2020 North America / USA / Florida   |

|                 |           |                                                                |
|-----------------|-----------|----------------------------------------------------------------|
| EPI_ISL_434638  | 3/19/2020 | 4/30/2020 North America / USA / Maryland                       |
| EPI_ISL_434639  | 3/22/2020 | 4/30/2020 North America / USA / District of Columbia           |
| EPI_ISL_434640  | 3/24/2020 | 4/30/2020 North America / USA / Maryland                       |
| EPI_ISL_434641  | 3/25/2020 | 4/30/2020 Europe / Sweden / Norrbotten                         |
| EPI_ISL_434642  | 3/27/2020 | 4/30/2020 Europe / Sweden / Norrbotten                         |
| EPI_ISL_434643  | 3/10/2020 | 4/30/2020 Europe / Sweden / Uppsala                            |
| EPI_ISL_434644  | 3/10/2020 | 4/30/2020 Europe / Sweden / Stockholm                          |
| EPI_ISL_434645  | 3/13/2020 | 4/30/2020 Europe / Sweden / Dalarna                            |
| EPI_ISL_434646  | 3/12/2020 | 4/30/2020 Europe / Sweden / Uppsala                            |
| EPI_ISL_434647  | 3/16/2020 | 4/30/2020 Europe / Sweden / Skane                              |
| EPI_ISL_434648  | 3/16/2020 | 4/30/2020 Europe / Sweden / Skane                              |
| EPI_ISL_434649  | 3/17/2020 | 4/30/2020 Europe / Sweden / Dalarna                            |
| EPI_ISL_434650  | 3/20/2020 | 4/30/2020 Europe / Sweden / Jamtland                           |
| EPI_ISL_434651  | 3/23/2020 | 4/30/2020 Europe / Sweden / Jamtland                           |
| EPI_ISL_434652  | 3/20/2020 | 4/30/2020 Europe / Sweden / Stockholm                          |
| EPI_ISL_434653  | 3/24/2020 | 4/30/2020 Europe / Sweden / Stockholm                          |
| EPI_ISL_434654  | 3/25/2020 | 4/30/2020 Europe / Sweden / Halland                            |
| EPI_ISL_434655  | 3/25/2020 | 4/30/2020 Europe / Sweden / Uppsala                            |
| EPI_ISL_434656  | 3/30/2020 | 4/30/2020 Europe / Sweden / Stockholm                          |
| EPI_ISL_434657  | 4/1/2020  | 4/30/2020 Europe / Sweden / Skane                              |
| EPI_ISL_434658  | 4/3/2020  | 4/30/2020 Europe / Sweden / Skane                              |
| EPI_ISL_434659  | 4/6/2020  | 4/30/2020 Europe / Sweden / Uppsala                            |
| EPI_ISL_434660  | 4/6/2020  | 4/30/2020 Europe / Sweden / Vastra Gotaland                    |
| EPI_ISL_434661  | 4/7/2020  | 4/30/2020 Europe / Sweden / Vastra Gotaland                    |
| EPI_ISL_434662  | 4/7/2020  | 4/30/2020 Europe / Sweden / Vastra Gotaland                    |
| EPI_ISL_434663  | 4/6/2020  | 4/30/2020 Europe / Sweden / Stockholm                          |
| EPI_ISL_434664  | 4/6/2020  | 4/30/2020 Europe / Sweden / Vastra Gotaland                    |
| EPI_ISL_434665  | 4/4/2020  | 4/30/2020 Europe / Sweden / Uppsala                            |
| EPI_ISL_434666  | 4/8/2020  | 4/30/2020 Europe / Sweden / Vasterbotten                       |
| EPI_ISL_434667  | 4/14/2020 | 4/30/2020 Europe / Sweden / Uppsala                            |
| EPI_ISL_434668  | 4/15/2020 | 4/30/2020 Europe / Sweden / Vastmanland                        |
| EPI_ISL_434669  | 4/15/2020 | 4/30/2020 Europe / Sweden / Vastmanland                        |
| EPI_ISL_434670  | 4/17/2020 | 4/30/2020 Europe / Sweden / Vastra Gotaland                    |
| EPI_ISL_434671  | 4/16/2020 | 4/30/2020 Europe / Sweden / Vastra Gotaland                    |
| EPI_ISL_434672  | 4/16/2020 | 4/30/2020 Europe / Sweden / Stockholm                          |
| EPI_ISL_434673  | 4/16/2020 | 4/30/2020 Europe / Sweden / Vastra Gotaland                    |
| EPI_ISL_434674  | 4/21/2020 | 4/30/2020 Europe / Sweden / Vastra Gotaland                    |
| EPI_ISL_434675  | 4/20/2020 | 4/30/2020 Europe / Sweden / Stockholm                          |
| EPI_ISL_434676  | 4/20/2020 | 4/30/2020 Europe / Sweden / Stockholm                          |
| EPI_ISL_434678  | 4/7/2020  | 4/30/2020 Africa / Democratic Republic of the Congo / Kinshasa |
| EPI_ISL_1255104 | 4/2/2020  | 4/30/2020 Asia / China / Henan                                 |
| EPI_ISL_605929  | 2/24/2020 | 4/30/2020 Asia / China / Henan                                 |
| EPI_ISL_605930  | 2/24/2020 | 4/30/2020 Asia / China / Henan                                 |
| EPI_ISL_434682  | 3/21/2020 | 5/1/2020 North America / USA / Maryland                        |
| EPI_ISL_434683  | 3/14/2020 | 5/1/2020 North America / USA / Maryland                        |
| EPI_ISL_434684  | 3/13/2020 | 5/1/2020 North America / USA / Maryland                        |
| EPI_ISL_434685  | 3/20/2020 | 5/1/2020 North America / USA / Maryland                        |

|                |           |                                                               |
|----------------|-----------|---------------------------------------------------------------|
| EPI_ISL_434686 | 3/20/2020 | 5/1/2020 North America / USA / Maryland                       |
| EPI_ISL_434687 | 3/7/2020  | 5/1/2020 North America / USA / District of Columbia           |
| EPI_ISL_434688 | 3/14/2020 | 5/1/2020 North America / USA / District of Columbia           |
| EPI_ISL_434689 | 3/15/2020 | 5/1/2020 North America / USA / Maryland                       |
| EPI_ISL_434690 | 3/17/2020 | 5/1/2020 North America / USA / Maryland                       |
| EPI_ISL_434691 | 3/22/2020 | 5/1/2020 North America / USA / District of Columbia           |
| EPI_ISL_434692 | 1/5/2020  | 5/1/2020 Asia / Thailand / Nonthaburi                         |
| EPI_ISL_434693 | 1/16/2020 | 5/1/2020 Asia / Thailand / Nonthaburi                         |
| EPI_ISL_434694 | 1/22/2020 | 5/1/2020 Asia / Thailand / Samut Prakan                       |
| EPI_ISL_434697 | 3/3/2020  | 5/1/2020 Asia / Thailand / Nonthaburi                         |
| EPI_ISL_434699 | 3/13/2020 | 5/1/2020 Asia / Thailand / Bangkok                            |
| EPI_ISL_434701 | 3/14/2020 | 5/1/2020 Asia / Thailand / Nonthaburi                         |
| EPI_ISL_434703 | 3/14/2020 | 5/1/2020 Asia / Thailand / Bangkok                            |
| EPI_ISL_434704 | 3/17/2020 | 5/1/2020 Asia / Thailand / Bangkok                            |
| EPI_ISL_434705 | 3/16/2020 | 5/1/2020 Asia / Thailand / Bangkok                            |
| EPI_ISL_434706 | 3/16/2020 | 5/1/2020 Asia / Thailand / Bangkok                            |
| EPI_ISL_434708 | 3/18/2020 | 5/1/2020 Asia / Thailand                                      |
| EPI_ISL_434709 | 2020      | 5/1/2020 Asia / Myanmar                                       |
| EPI_ISL_434710 | 4/8/2020  | 5/1/2020 Africa / Democratic Republic of the Congo / Kinshasa |
| EPI_ISL_434712 | 3/16/2020 | 5/1/2020 North America / USA / Texas                          |
| EPI_ISL_434713 | 3/16/2020 | 5/1/2020 North America / USA / Texas                          |
| EPI_ISL_434714 | 3/16/2020 | 5/1/2020 North America / USA / Texas                          |
| EPI_ISL_434715 | 3/16/2020 | 5/1/2020 North America / USA / Texas                          |
| EPI_ISL_434716 | 3/16/2020 | 5/1/2020 North America / USA / Texas                          |
| EPI_ISL_434717 | 3/16/2020 | 5/1/2020 North America / USA / Texas                          |
| EPI_ISL_434718 | 3/15/2020 | 5/1/2020 North America / USA / Texas                          |
| EPI_ISL_434720 | 3/15/2020 | 5/1/2020 North America / USA / Texas                          |
| EPI_ISL_434721 | 3/15/2020 | 5/1/2020 North America / USA / Texas                          |
| EPI_ISL_434722 | 3/13/2020 | 5/1/2020 North America / USA / Texas                          |
| EPI_ISL_434724 | 3/14/2020 | 5/1/2020 North America / USA / Texas                          |
| EPI_ISL_434725 | 3/15/2020 | 5/1/2020 North America / USA / Texas                          |
| EPI_ISL_434726 | 3/13/2020 | 5/1/2020 North America / USA / Texas                          |
| EPI_ISL_434727 | 3/13/2020 | 5/1/2020 North America / USA / Texas                          |
| EPI_ISL_434728 | 3/16/2020 | 5/1/2020 North America / USA / Texas                          |
| EPI_ISL_434729 | 3/17/2020 | 5/1/2020 North America / USA / Texas                          |
| EPI_ISL_434730 | 3/13/2020 | 5/1/2020 North America / USA / Texas                          |
| EPI_ISL_434731 | 3/17/2020 | 5/1/2020 North America / USA / Texas                          |
| EPI_ISL_434732 | 3/17/2020 | 5/1/2020 North America / USA / Texas                          |
| EPI_ISL_434735 | 3/13/2020 | 5/1/2020 North America / USA / Texas                          |
| EPI_ISL_434737 | 3/11/2020 | 5/1/2020 North America / USA / Texas                          |
| EPI_ISL_434744 | 3/9/2020  | 5/1/2020 North America / USA / Texas                          |
| EPI_ISL_434745 | 3/9/2020  | 5/1/2020 North America / USA / Texas                          |
| EPI_ISL_434746 | 3/8/2020  | 5/1/2020 North America / USA / Texas                          |
| EPI_ISL_434753 | 3/9/2020  | 5/1/2020 North America / USA / Texas                          |
| EPI_ISL_434755 | 3/14/2020 | 5/1/2020 North America / USA / Texas                          |
| EPI_ISL_434759 | 3/16/2020 | 5/1/2020 North America / USA / Texas                          |
| EPI_ISL_434760 | 3/17/2020 | 5/1/2020 North America / USA / Texas                          |









|                |           |                                                                    |
|----------------|-----------|--------------------------------------------------------------------|
| EPI_ISL_434995 | 3/31/2020 | 5/1/2020 North America / USA / Texas                               |
| EPI_ISL_434996 | 3/30/2020 | 5/1/2020 North America / USA / Texas                               |
| EPI_ISL_434997 | 3/31/2020 | 5/1/2020 North America / USA / Texas                               |
| EPI_ISL_434998 | 4/1/2020  | 5/1/2020 North America / USA / Texas                               |
| EPI_ISL_434999 | 4/1/2020  | 5/1/2020 North America / USA / Texas                               |
| EPI_ISL_435000 | 4/1/2020  | 5/1/2020 North America / USA / Texas                               |
| EPI_ISL_435001 | 4/1/2020  | 5/1/2020 North America / USA / Texas                               |
| EPI_ISL_435002 | 4/1/2020  | 5/1/2020 North America / USA / Texas                               |
| EPI_ISL_435003 | 4/1/2020  | 5/1/2020 North America / USA / Texas                               |
| EPI_ISL_435005 | 4/1/2020  | 5/1/2020 North America / USA / Texas                               |
| EPI_ISL_435006 | 4/1/2020  | 5/1/2020 North America / USA / Texas                               |
| EPI_ISL_435007 | 4/1/2020  | 5/1/2020 North America / USA / Texas                               |
| EPI_ISL_435008 | 4/1/2020  | 5/1/2020 North America / USA / Texas                               |
| EPI_ISL_435009 | 4/1/2020  | 5/1/2020 North America / USA / Texas                               |
| EPI_ISL_435010 | 4/2/2020  | 5/1/2020 North America / USA / Texas                               |
| EPI_ISL_435011 | 4/2/2020  | 5/1/2020 North America / USA / Texas                               |
| EPI_ISL_435012 | 4/2/2020  | 5/1/2020 North America / USA / Texas                               |
| EPI_ISL_435013 | 4/2/2020  | 5/1/2020 North America / USA / Texas                               |
| EPI_ISL_435014 | 4/2/2020  | 5/1/2020 North America / USA / Texas                               |
| EPI_ISL_435015 | 4/2/2020  | 5/1/2020 North America / USA / Texas                               |
| EPI_ISL_435016 | 4/2/2020  | 5/1/2020 North America / USA / Texas                               |
| EPI_ISL_435017 | 4/2/2020  | 5/1/2020 North America / USA / Texas                               |
| EPI_ISL_435018 | 4/2/2020  | 5/1/2020 North America / USA / Texas                               |
| EPI_ISL_435019 | 4/2/2020  | 5/1/2020 North America / USA / Texas                               |
| EPI_ISL_435020 | 4/2/2020  | 5/1/2020 North America / USA / Texas                               |
| EPI_ISL_435021 | 4/2/2020  | 5/1/2020 North America / USA / Texas                               |
| EPI_ISL_435022 | 4/2/2020  | 5/1/2020 North America / USA / Texas                               |
| EPI_ISL_435023 | 4/3/2020  | 5/1/2020 North America / USA / Texas                               |
| EPI_ISL_435024 | 4/3/2020  | 5/1/2020 North America / USA / Texas                               |
| EPI_ISL_435028 | 4/3/2020  | 5/1/2020 North America / USA / Texas                               |
| EPI_ISL_435029 | 4/3/2020  | 5/1/2020 North America / USA / Texas                               |
| EPI_ISL_435030 | 4/3/2020  | 5/1/2020 North America / USA / Texas                               |
| EPI_ISL_435031 | 4/3/2020  | 5/1/2020 North America / USA / Texas                               |
| EPI_ISL_435032 | 4/9/2020  | 5/1/2020 Africa / Democratic Republic of the Congo / Kinshasa      |
| EPI_ISL_435033 | 4/7/2020  | 5/1/2020 Africa / Democratic Republic of the Congo / Kinshasa      |
| EPI_ISL_435034 | 4/9/2020  | 5/1/2020 North America / USA / Louisiana / East Feliciana Parish   |
| EPI_ISL_435035 | 4/11/2020 | 5/1/2020 North America / USA / Louisiana / East Baton Rouge Parish |
| EPI_ISL_435036 | 4/11/2020 | 5/1/2020 North America / USA / Louisiana / East Baton Rouge Parish |
| EPI_ISL_435037 | 4/13/2020 | 5/1/2020 North America / USA / Louisiana / East Baton Rouge Parish |
| EPI_ISL_435038 | 4/13/2020 | 5/1/2020 North America / USA / Louisiana / Livingston Parish       |
| EPI_ISL_435039 | 4/15/2020 | 5/1/2020 North America / USA / Louisiana / East Baton Rouge Parish |
| EPI_ISL_435040 | 4/15/2020 | 5/1/2020 North America / USA / Louisiana / Iberville Parish        |
| EPI_ISL_435041 | 4/15/2020 | 5/1/2020 North America / USA / Louisiana / Caddo Parish            |
| EPI_ISL_435042 | 4/15/2020 | 5/1/2020 North America / USA / Louisiana / East Baton Rouge Parish |
| EPI_ISL_435043 | 4/15/2020 | 5/1/2020 North America / USA / Louisiana / Caddo Parish            |
| EPI_ISL_435044 | 4/15/2020 | 5/1/2020 North America / USA / Louisiana / Caddo Parish            |
| EPI_ISL_435045 | 3/22/2020 | 5/2/2020 Asia / Kazakhstan / Nur-Sultan                            |



|                |           |                                                               |
|----------------|-----------|---------------------------------------------------------------|
| EPI_ISL_435046 | 3/25/2020 | 5/2/2020 Asia / Kazakhstan / Nur-Sultan                       |
| EPI_ISL_435047 | 3/25/2020 | 5/2/2020 Asia / Kazakhstan / Nur-Sultan                       |
| EPI_ISL_435048 | 4/21/2020 | 5/2/2020 Asia / Kazakhstan / Nur-Sultan                       |
| EPI_ISL_435049 | 4/13/2020 | 5/2/2020 Asia / India / Gujarat / Ahmedabad                   |
| EPI_ISL_435050 | 4/13/2020 | 5/2/2020 Asia / India / Gujarat / Ahmedabad                   |
| EPI_ISL_435051 | 4/13/2020 | 5/2/2020 Asia / India / Gujarat / Ahmedabad                   |
| EPI_ISL_435052 | 4/13/2020 | 5/2/2020 Asia / India / Gujarat / Ahmedabad                   |
| EPI_ISL_435053 | 4/7/2020  | 5/2/2020 Asia / India / Gujarat / Ahmedabad                   |
| EPI_ISL_435054 | 4/14/2020 | 5/2/2020 Asia / India / Gujarat / Ahmedabad                   |
| EPI_ISL_435055 | 4/22/2020 | 5/2/2020 Asia / India / Gujarat / Gandhinagar                 |
| EPI_ISL_435056 | 4/21/2020 | 5/2/2020 Asia / India / Gujarat / Mansa                       |
| EPI_ISL_435060 | 3/12/2020 | 5/2/2020 Asia / India / Uttar Pradesh / Noida                 |
| EPI_ISL_435061 | 3/16/2020 | 5/2/2020 Asia / India / Delhi                                 |
| EPI_ISL_435062 | 3/16/2020 | 5/2/2020 Asia / India / Punjab                                |
| EPI_ISL_435063 | 3/13/2020 | 5/2/2020 Asia / India / Delhi / Delhi National Capital Region |
| EPI_ISL_435064 | 3/18/2020 | 5/2/2020 Asia / India / Delhi                                 |
| EPI_ISL_435065 | 3/15/2020 | 5/2/2020 Asia / India / Delhi                                 |
| EPI_ISL_435066 | 3/18/2020 | 5/2/2020 Asia / India / Delhi                                 |
| EPI_ISL_435067 | 3/18/2020 | 5/2/2020 Asia / India / Delhi                                 |
| EPI_ISL_435068 | 3/18/2020 | 5/2/2020 Asia / India / Delhi                                 |
| EPI_ISL_435069 | 3/18/2020 | 5/2/2020 Asia / India / Delhi                                 |
| EPI_ISL_435070 | 3/18/2020 | 5/2/2020 Asia / India / Delhi                                 |
| EPI_ISL_435071 | 3/25/2020 | 5/2/2020 Asia / India / Delhi / Delhi National Capital Region |
| EPI_ISL_435072 | 3/26/2020 | 5/2/2020 Asia / India / Delhi                                 |
| EPI_ISL_435074 | 3/28/2020 | 5/2/2020 Asia / India / West Bengal                           |
| EPI_ISL_435078 | 3/29/2020 | 5/2/2020 Asia / India / Tamil Nadu                            |
| EPI_ISL_435080 | 3/29/2020 | 5/2/2020 Asia / India / Tamil Nadu                            |
| EPI_ISL_435081 | 3/28/2020 | 5/2/2020 Asia / India / West Bengal                           |
| EPI_ISL_435082 | 3/29/2020 | 5/2/2020 Asia / India / Uttar Pradesh                         |
| EPI_ISL_435083 | 3/28/2020 | 5/2/2020 Asia / India / Tamil Nadu                            |
| EPI_ISL_435084 | 3/29/2020 | 5/2/2020 Asia / India / Tamil Nadu                            |
| EPI_ISL_435085 | 3/29/2020 | 5/2/2020 Asia / India / Maharashtra / Mumbai                  |
| EPI_ISL_435086 | 3/29/2020 | 5/2/2020 Asia / India / Maharashtra / Mumbai                  |
| EPI_ISL_435087 | 3/29/2020 | 5/2/2020 Asia / India / Tamil Nadu                            |
| EPI_ISL_435088 | 3/29/2020 | 5/2/2020 Asia / India / Odisha                                |
| EPI_ISL_435090 | 3/29/2020 | 5/2/2020 Asia / India / Jammu and Kashmir                     |
| EPI_ISL_435091 | 3/28/2020 | 5/2/2020 Asia / India / Tamil Nadu                            |
| EPI_ISL_435092 | 3/28/2020 | 5/2/2020 Asia / India / Tamil Nadu                            |
| EPI_ISL_435093 | 3/29/2020 | 5/2/2020 Asia / India / Tamil Nadu                            |
| EPI_ISL_435094 | 3/29/2020 | 5/2/2020 Asia / India / Tamil Nadu                            |
| EPI_ISL_435095 | 3/29/2020 | 5/2/2020 Asia / India / Tamil Nadu                            |
| EPI_ISL_435096 | 3/29/2020 | 5/2/2020 Asia / India / Tamil Nadu                            |
| EPI_ISL_435097 | 3/28/2020 | 5/2/2020 Asia / India / West Bengal                           |
| EPI_ISL_435098 | 3/28/2020 | 5/2/2020 Asia / India                                         |
| EPI_ISL_435099 | 3/29/2020 | 5/2/2020 Asia / India / Uttar Pradesh                         |
| EPI_ISL_435100 | 3/29/2020 | 5/2/2020 Asia / India / Uttar Pradesh                         |
| EPI_ISL_435101 | 3/15/2020 | 5/2/2020 Asia / India / Ladakh                                |

|                |           |                                                               |
|----------------|-----------|---------------------------------------------------------------|
| EPI_ISL_435102 | 3/15/2020 | 5/2/2020 Asia / India / Ladakh                                |
| EPI_ISL_435103 | 3/17/2020 | 5/2/2020 Asia / India / Ladakh                                |
| EPI_ISL_435104 | 3/17/2020 | 5/2/2020 Asia / India / Ladakh                                |
| EPI_ISL_435105 | 3/17/2020 | 5/2/2020 Asia / India / Ladakh                                |
| EPI_ISL_435106 | 3/18/2020 | 5/2/2020 Asia / India / Ladakh                                |
| EPI_ISL_435108 | 3/15/2020 | 5/2/2020 Asia / India / Delhi                                 |
| EPI_ISL_435109 | 3/17/2020 | 5/2/2020 Asia / India / Delhi                                 |
| EPI_ISL_435110 | 3/16/2020 | 5/2/2020 Asia / India / Delhi                                 |
| EPI_ISL_435111 | 3/30/2020 | 5/2/2020 Asia / India / Delhi                                 |
| EPI_ISL_435112 | 3/28/2020 | 5/2/2020 Asia / India / Bihar                                 |
| EPI_ISL_435114 | 4/7/2020  | 5/2/2020 Africa / Democratic Republic of the Congo / Kinshasa |
| EPI_ISL_524433 | 3/27/2020 | 5/2/2020 North America / USA / Florida                        |
| EPI_ISL_524434 | 3/27/2020 | 5/2/2020 North America / USA / Florida                        |
| EPI_ISL_435119 | 3/12/2020 | 5/3/2020 Asia / United Arab Emirates                          |
| EPI_ISL_435120 | 3/14/2020 | 5/3/2020 Asia / United Arab Emirates                          |
| EPI_ISL_435121 | 2/25/2020 | 5/3/2020 Asia / United Arab Emirates                          |
| EPI_ISL_435122 | 3/14/2020 | 5/3/2020 Asia / United Arab Emirates                          |
| EPI_ISL_435123 | 3/12/2020 | 5/3/2020 Asia / United Arab Emirates                          |
| EPI_ISL_435124 | 3/16/2020 | 5/3/2020 Asia / United Arab Emirates                          |
| EPI_ISL_435125 | 3/16/2020 | 5/3/2020 Asia / United Arab Emirates                          |
| EPI_ISL_435126 | 2/25/2020 | 5/3/2020 Asia / United Arab Emirates                          |
| EPI_ISL_435127 | 3/15/2020 | 5/3/2020 Asia / United Arab Emirates                          |
| EPI_ISL_435128 | 3/15/2020 | 5/3/2020 Asia / United Arab Emirates                          |
| EPI_ISL_435129 | 3/10/2020 | 5/3/2020 Asia / United Arab Emirates                          |
| EPI_ISL_435130 | 3/12/2020 | 5/3/2020 Asia / United Arab Emirates                          |
| EPI_ISL_435131 | 2/25/2020 | 5/3/2020 Asia / United Arab Emirates                          |
| EPI_ISL_435132 | 3/15/2020 | 5/3/2020 Asia / United Arab Emirates                          |
| EPI_ISL_435133 | 3/10/2020 | 5/3/2020 Asia / United Arab Emirates                          |
| EPI_ISL_435134 | 2/8/2020  | 5/3/2020 Asia / United Arab Emirates                          |
| EPI_ISL_435135 | 2/25/2020 | 5/3/2020 Asia / United Arab Emirates                          |
| EPI_ISL_435136 | 3/11/2020 | 5/3/2020 Asia / United Arab Emirates                          |
| EPI_ISL_435137 | 1/29/2020 | 5/3/2020 Asia / United Arab Emirates                          |
| EPI_ISL_435138 | 2/25/2020 | 5/3/2020 Asia / United Arab Emirates                          |
| EPI_ISL_435139 | 2/25/2020 | 5/3/2020 Asia / United Arab Emirates                          |
| EPI_ISL_435140 | 3/12/2020 | 5/3/2020 Asia / United Arab Emirates                          |
| EPI_ISL_435141 | 3/12/2020 | 5/3/2020 Asia / United Arab Emirates                          |
| EPI_ISL_435142 | 3/14/2020 | 5/3/2020 Asia / United Arab Emirates                          |
| EPI_ISL_435143 | 3/18/2020 | 5/3/2020 Asia / United Arab Emirates                          |
| EPI_ISL_435144 | 3/11/2020 | 5/3/2020 Europe / Spain / Madrid                              |
| EPI_ISL_435145 | 3/24/2020 | 5/3/2020 Europe / Italy / Abruzzo                             |
| EPI_ISL_435146 | 4/7/2020  | 5/3/2020 Europe / Italy / Abruzzo                             |
| EPI_ISL_435147 | 4/8/2020  | 5/3/2020 Europe / Italy / Abruzzo                             |
| EPI_ISL_435148 | 4/8/2020  | 5/3/2020 Europe / Italy / Abruzzo                             |
| EPI_ISL_435149 | 4/8/2020  | 5/3/2020 Europe / Italy / Abruzzo                             |
| EPI_ISL_435150 | 4/8/2020  | 5/3/2020 Europe / Italy / Abruzzo                             |
| EPI_ISL_435151 | 4/8/2020  | 5/3/2020 Europe / Italy / Abruzzo                             |
| EPI_ISL_435152 | 4/9/2020  | 5/3/2020 Europe / Italy / Abruzzo                             |

|                |           |                                                               |
|----------------|-----------|---------------------------------------------------------------|
| EPI_ISL_435153 | 4/9/2020  | 5/3/2020 Europe / Italy / Abruzzo                             |
| EPI_ISL_435154 | 4/9/2020  | 5/3/2020 Europe / Italy / Abruzzo                             |
| EPI_ISL_435155 | 4/9/2020  | 5/3/2020 Europe / Italy / Abruzzo                             |
| EPI_ISL_435156 | 4/10/2020 | 5/3/2020 Africa / Democratic Republic of the Congo / Kinshasa |
| EPI_ISL_435163 | 4/12/2020 | 5/3/2020 Africa / Democratic Republic of the Congo / Kinshasa |
| EPI_ISL_435281 | 3/17/2020 | 5/4/2020 Asia / Indonesia / Jakarta                           |
| EPI_ISL_435282 | 3/19/2020 | 5/4/2020 Asia / Indonesia / Jakarta                           |
| EPI_ISL_435283 | 3/30/2020 | 5/4/2020 Asia / Indonesia / Jakarta                           |
| EPI_ISL_435284 | 2020-03   | 5/4/2020 Asia / Israel                                        |
| EPI_ISL_435286 | 2020-03   | 5/4/2020 Asia / Israel                                        |
| EPI_ISL_435289 | 2020-03   | 5/4/2020 Asia / Israel                                        |
| EPI_ISL_435291 | 2020-03   | 5/4/2020 Asia / Israel                                        |
| EPI_ISL_435292 | 2020-03   | 5/4/2020 Asia / Israel                                        |
| EPI_ISL_435303 | 3/7/2020  | 5/4/2020 Asia / Vietnam / Hanoi                               |
| EPI_ISL_435305 | 3/7/2020  | 5/4/2020 Asia / Vietnam / Hanoi                               |
| EPI_ISL_435308 | 3/9/2020  | 5/4/2020 Asia / Vietnam                                       |
| EPI_ISL_435310 | 3/9/2020  | 5/4/2020 Asia / Vietnam                                       |
| EPI_ISL_435311 | 3/10/2020 | 5/4/2020 Asia / Vietnam                                       |
| EPI_ISL_435312 | 3/10/2020 | 5/4/2020 Asia / Vietnam                                       |
| EPI_ISL_435313 | 3/13/2020 | 5/4/2020 Asia / Vietnam / Hanoi                               |
| EPI_ISL_435314 | 3/13/2020 | 5/4/2020 Asia / Vietnam / Hanoi                               |
| EPI_ISL_435315 | 3/15/2020 | 5/4/2020 Asia / Vietnam                                       |
| EPI_ISL_435316 | 3/17/2020 | 5/4/2020 Asia / Vietnam / Hanoi                               |
| EPI_ISL_435317 | 3/18/2020 | 5/4/2020 Asia / Vietnam / Hanoi                               |
| EPI_ISL_435350 | 3/12/2020 | 5/4/2020 North America / USA / Utah                           |
| EPI_ISL_435353 | 3/27/2020 | 5/4/2020 North America / USA / Utah                           |
| EPI_ISL_435356 | 3/29/2020 | 5/4/2020 North America / USA / Utah                           |
| EPI_ISL_435358 | 4/3/2020  | 5/4/2020 North America / USA / Utah                           |
| EPI_ISL_435359 | 4/3/2020  | 5/4/2020 North America / USA / Utah                           |
| EPI_ISL_435360 | 4/3/2020  | 5/4/2020 North America / USA / Utah                           |
| EPI_ISL_435362 | 4/3/2020  | 5/4/2020 North America / USA / Utah                           |
| EPI_ISL_435363 | 4/3/2020  | 5/4/2020 North America / USA / Utah                           |
| EPI_ISL_435368 | 4/2/2020  | 5/4/2020 North America / USA / Utah                           |
| EPI_ISL_435369 | 4/3/2020  | 5/4/2020 North America / USA / Utah                           |
| EPI_ISL_435372 | 4/2/2020  | 5/4/2020 North America / USA / Utah                           |
| EPI_ISL_435375 | 4/2/2020  | 5/4/2020 North America / USA / Utah                           |
| EPI_ISL_435376 | 4/2/2020  | 5/4/2020 North America / USA / Utah                           |
| EPI_ISL_435377 | 4/2/2020  | 5/4/2020 North America / USA / Utah                           |
| EPI_ISL_435379 | 4/5/2020  | 5/4/2020 North America / USA / Utah                           |
| EPI_ISL_435384 | 4/6/2020  | 5/4/2020 North America / USA / Utah                           |
| EPI_ISL_435389 | 4/6/2020  | 5/4/2020 North America / USA / Utah                           |
| EPI_ISL_435390 | 4/6/2020  | 5/4/2020 North America / USA / Utah                           |
| EPI_ISL_435391 | 4/5/2020  | 5/4/2020 North America / USA / Utah                           |
| EPI_ISL_435393 | 4/7/2020  | 5/4/2020 North America / USA / Utah                           |
| EPI_ISL_435394 | 4/21/2020 | 5/4/2020 North America / USA / Iowa / Winneshiek County       |
| EPI_ISL_435395 | 4/21/2020 | 5/4/2020 North America / USA / Minnesota / Winona County      |
| EPI_ISL_435397 | 4/21/2020 | 5/4/2020 North America / USA / Iowa / Allamakee County        |

|                |           |                                                             |
|----------------|-----------|-------------------------------------------------------------|
| EPI_ISL_435398 | 4/22/2020 | 5/4/2020 North America / USA / Iowa / Allamakee County      |
| EPI_ISL_435399 | 4/23/2020 | 5/4/2020 North America / USA / Iowa / Allamakee County      |
| EPI_ISL_435400 | 4/23/2020 | 5/4/2020 North America / USA / Wisconsin / La Crosse County |
| EPI_ISL_435401 | 4/26/2020 | 5/4/2020 North America / USA / Iowa / Allamakee County      |
| EPI_ISL_435402 | 4/26/2020 | 5/4/2020 North America / USA / Wisconsin / La Crosse County |
| EPI_ISL_435403 | 3/20/2020 | 5/4/2020 Europe / Hungary / Baranya                         |
| EPI_ISL_435404 | 3/20/2020 | 5/4/2020 Europe / Hungary / Baranya                         |
| EPI_ISL_435405 | 3/22/2020 | 5/4/2020 Europe / Hungary / Baranya                         |
| EPI_ISL_435406 | 3/22/2020 | 5/4/2020 Europe / Hungary / Baranya                         |
| EPI_ISL_435407 | 3/22/2020 | 5/4/2020 Europe / Hungary / Baranya                         |
| EPI_ISL_435408 | 3/22/2020 | 5/4/2020 Europe / Hungary / Baranya                         |
| EPI_ISL_435409 | 3/25/2020 | 5/4/2020 Europe / Hungary / Baranya                         |
| EPI_ISL_435410 | 3/26/2020 | 5/4/2020 Europe / Hungary / Baranya                         |
| EPI_ISL_435411 | 3/27/2020 | 5/4/2020 Europe / Hungary / Baranya                         |
| EPI_ISL_435412 | 3/30/2020 | 5/4/2020 Europe / Hungary / Baranya                         |
| EPI_ISL_435413 | 3/30/2020 | 5/4/2020 Europe / Hungary / Baranya                         |
| EPI_ISL_435414 | 3/30/2020 | 5/4/2020 Europe / Hungary / Baranya                         |
| EPI_ISL_435415 | 3/30/2020 | 5/4/2020 Europe / Hungary / Baranya                         |
| EPI_ISL_435416 | 3/27/2020 | 5/4/2020 Europe / Hungary / Baranya                         |
| EPI_ISL_435417 | 3/30/2020 | 5/4/2020 Europe / Hungary / Baranya                         |
| EPI_ISL_435418 | 4/2/2020  | 5/4/2020 Europe / Hungary / Baranya                         |
| EPI_ISL_435419 | 3/20/2020 | 5/4/2020 Europe / Hungary / Baranya                         |
| EPI_ISL_435420 | 3/23/2020 | 5/4/2020 Europe / Hungary / Budapest                        |
| EPI_ISL_435421 | 3/25/2020 | 5/4/2020 Europe / Hungary / Balatonfured                    |
| EPI_ISL_435422 | 3/27/2020 | 5/4/2020 Europe / Hungary / Balassagyarmat                  |
| EPI_ISL_435423 | 3/27/2020 | 5/4/2020 Europe / Hungary / Balassagyarmat                  |
| EPI_ISL_435424 | 3/27/2020 | 5/4/2020 Europe / Hungary / Balassagyarmat                  |
| EPI_ISL_435425 | 3/19/2020 | 5/4/2020 Europe / Hungary / Szeged                          |
| EPI_ISL_435426 | 3/21/2020 | 5/4/2020 Europe / Hungary / Kecskemet                       |
| EPI_ISL_435427 | 3/25/2020 | 5/4/2020 Europe / Hungary / Oroshaza                        |
| EPI_ISL_435428 | 3/25/2020 | 5/4/2020 Europe / Hungary / Bekesszentandras                |
| EPI_ISL_435429 | 3/28/2020 | 5/4/2020 Europe / Hungary / Szeged                          |
| EPI_ISL_435430 | 3/29/2020 | 5/4/2020 Europe / Hungary / Kecskemet                       |
| EPI_ISL_435431 | 3/25/2020 | 5/4/2020 Europe / Hungary / Kecskemet                       |
| EPI_ISL_435441 | 4/7/2020  | 5/5/2020 North America / USA / Alaska / Anchorage-Mat Su    |
| EPI_ISL_435442 | 4/7/2020  | 5/5/2020 North America / USA / Alaska / Anchorage-Mat Su    |
| EPI_ISL_435443 | 4/8/2020  | 5/5/2020 North America / USA / Alaska / Anchorage-Mat Su    |
| EPI_ISL_435444 | 4/9/2020  | 5/5/2020 North America / USA / Alaska / Anchorage-Mat Su    |
| EPI_ISL_435445 | 3/31/2020 | 5/5/2020 North America / USA / Louisiana / New Orleans      |
| EPI_ISL_435446 | 3/28/2020 | 5/5/2020 North America / USA / Louisiana / New Orleans      |
| EPI_ISL_435447 | 3/31/2020 | 5/5/2020 North America / USA / Louisiana / New Orleans      |
| EPI_ISL_435448 | 3/27/2020 | 5/5/2020 North America / USA / Louisiana / New Orleans      |
| EPI_ISL_435449 | 3/27/2020 | 5/5/2020 North America / USA / Louisiana / New Orleans      |
| EPI_ISL_435450 | 3/28/2020 | 5/5/2020 North America / USA / Louisiana / New Orleans      |
| EPI_ISL_435451 | 3/27/2020 | 5/5/2020 North America / USA / Louisiana / New Orleans      |
| EPI_ISL_435452 | 3/27/2020 | 5/5/2020 North America / USA / Louisiana / New Orleans      |
| EPI_ISL_435453 | 3/30/2020 | 5/5/2020 North America / USA / Louisiana / New Orleans      |

|                |           |          |                                                     |
|----------------|-----------|----------|-----------------------------------------------------|
| EPI_ISL_435454 | 4/2/2020  | 5/5/2020 | North America / USA / Louisiana / New Orleans       |
| EPI_ISL_435456 | 4/2/2020  | 5/5/2020 | North America / USA / Louisiana / New Orleans       |
| EPI_ISL_435457 | 4/2/2020  | 5/5/2020 | North America / USA / Louisiana / New Orleans       |
| EPI_ISL_435458 | 4/2/2020  | 5/5/2020 | North America / USA / Louisiana / New Orleans       |
| EPI_ISL_435459 | 4/2/2020  | 5/5/2020 | North America / USA / Louisiana / New Orleans       |
| EPI_ISL_435460 | 4/2/2020  | 5/5/2020 | North America / USA / Louisiana / New Orleans       |
| EPI_ISL_435461 | 4/3/2020  | 5/5/2020 | North America / USA / Louisiana / New Orleans       |
| EPI_ISL_435462 | 4/2/2020  | 5/5/2020 | North America / USA / Louisiana / New Orleans       |
| EPI_ISL_435464 | 3/28/2020 | 5/5/2020 | North America / USA / Louisiana / New Orleans       |
| EPI_ISL_435465 | 3/31/2020 | 5/5/2020 | North America / USA / Louisiana / New Orleans       |
| EPI_ISL_435466 | 3/28/2020 | 5/5/2020 | North America / USA / Louisiana / New Orleans       |
| EPI_ISL_435467 | 3/31/2020 | 5/5/2020 | North America / USA / Louisiana / New Orleans       |
| EPI_ISL_435468 | 4/3/2020  | 5/5/2020 | North America / USA / Louisiana / New Orleans       |
| EPI_ISL_435469 | 4/3/2020  | 5/5/2020 | North America / USA / Louisiana / New Orleans       |
| EPI_ISL_435470 | 4/4/2020  | 5/5/2020 | North America / USA / Louisiana / New Orleans       |
| EPI_ISL_435471 | 4/3/2020  | 5/5/2020 | North America / USA / Louisiana / New Orleans       |
| EPI_ISL_435473 | 4/28/2020 | 5/5/2020 | North America / USA / California / San Diego County |
| EPI_ISL_435474 | 4/29/2020 | 5/5/2020 | North America / USA / California / San Diego County |
| EPI_ISL_435475 | 3/30/2020 | 5/5/2020 | North America / USA / New York / Nassau County      |
| EPI_ISL_435476 | 3/30/2020 | 5/5/2020 | North America / USA / New York / Staten Island      |
| EPI_ISL_435477 | 3/30/2020 | 5/5/2020 | North America / USA / New York / Brooklyn           |
| EPI_ISL_435478 | 3/30/2020 | 5/5/2020 | North America / USA / New York / Suffolk County     |
| EPI_ISL_435479 | 3/30/2020 | 5/5/2020 | North America / USA / New York / Manhattan          |
| EPI_ISL_435480 | 3/30/2020 | 5/5/2020 | North America / USA / New York / Brooklyn           |
| EPI_ISL_435481 | 3/30/2020 | 5/5/2020 | North America / USA / New York / Manhattan          |
| EPI_ISL_435482 | 3/30/2020 | 5/5/2020 | North America / USA / New York / Manhattan          |
| EPI_ISL_435483 | 3/30/2020 | 5/5/2020 | North America / USA / New Jersey / Camden County    |
| EPI_ISL_435484 | 3/30/2020 | 5/5/2020 | North America / USA / New York / Brooklyn           |
| EPI_ISL_435485 | 3/30/2020 | 5/5/2020 | North America / USA / New York / Staten Island      |
| EPI_ISL_435486 | 3/30/2020 | 5/5/2020 | North America / USA / New York / Bronx              |
| EPI_ISL_435487 | 4/22/2020 | 5/5/2020 | North America / USA / New York / Nassau County      |
| EPI_ISL_435488 | 4/22/2020 | 5/5/2020 | North America / USA / New Jersey / Essex County     |
| EPI_ISL_435489 | 3/31/2020 | 5/5/2020 | North America / USA / New York / Nassau County      |
| EPI_ISL_435490 | 4/22/2020 | 5/5/2020 | North America / USA / New York / Manhattan          |
| EPI_ISL_435491 | 4/22/2020 | 5/5/2020 | North America / USA / New York / Nassau County      |
| EPI_ISL_435492 | 4/20/2020 | 5/5/2020 | North America / USA / New York / Queens             |
| EPI_ISL_435493 | 4/14/2020 | 5/5/2020 | North America / USA / New York / Bronx              |
| EPI_ISL_435494 | 4/16/2020 | 5/5/2020 | North America / USA / New York / Manhattan          |
| EPI_ISL_435495 | 4/14/2020 | 5/5/2020 | North America / USA / New York / Nassau County      |
| EPI_ISL_435496 | 4/15/2020 | 5/5/2020 | North America / USA / New York / Nassau County      |
| EPI_ISL_435497 | 4/21/2020 | 5/5/2020 | North America / USA / New York / Queens             |
| EPI_ISL_435498 | 4/7/2020  | 5/5/2020 | North America / USA / New York / Nassau County      |
| EPI_ISL_435499 | 4/20/2020 | 5/5/2020 | North America / USA / New York / Queens             |
| EPI_ISL_435500 | 4/20/2020 | 5/5/2020 | North America / USA / New York / Nassau County      |
| EPI_ISL_435501 | 4/15/2020 | 5/5/2020 | North America / USA / New York / Brooklyn           |
| EPI_ISL_435502 | 4/24/2020 | 5/5/2020 | North America / USA / New York / Brooklyn           |
| EPI_ISL_435503 | 4/20/2020 | 5/5/2020 | North America / USA / New York / Queens             |

|                |           |                                                           |
|----------------|-----------|-----------------------------------------------------------|
| EPI_ISL_435504 | 4/13/2020 | 5/5/2020 North America / USA / New York / Suffolk County  |
| EPI_ISL_435505 | 4/15/2020 | 5/5/2020 North America / USA / New York / Nassau County   |
| EPI_ISL_435506 | 4/15/2020 | 5/5/2020 North America / USA / New York / Brooklyn        |
| EPI_ISL_435507 | 4/15/2020 | 5/5/2020 North America / USA / New York / Manhattan       |
| EPI_ISL_435508 | 4/15/2020 | 5/5/2020 North America / USA / New York / Nassau County   |
| EPI_ISL_435509 | 4/15/2020 | 5/5/2020 North America / USA / New York / Suffolk County  |
| EPI_ISL_435510 | 4/14/2020 | 5/5/2020 North America / USA / New York / Nassau County   |
| EPI_ISL_435511 | 4/15/2020 | 5/5/2020 North America / USA / New York / Brooklyn        |
| EPI_ISL_435512 | 4/15/2020 | 5/5/2020 North America / USA / New York / Queens          |
| EPI_ISL_435513 | 4/14/2020 | 5/5/2020 North America / USA / New York / Brooklyn        |
| EPI_ISL_435514 | 4/15/2020 | 5/5/2020 North America / USA / New York / Manhattan       |
| EPI_ISL_435515 | 4/20/2020 | 5/5/2020 North America / USA / New York / Brooklyn        |
| EPI_ISL_435516 | 4/20/2020 | 5/5/2020 North America / USA / New York / Suffolk County  |
| EPI_ISL_435517 | 4/20/2020 | 5/5/2020 North America / USA / New York / Nassau County   |
| EPI_ISL_435518 | 4/20/2020 | 5/5/2020 North America / USA / New York / Brooklyn        |
| EPI_ISL_435519 | 4/20/2020 | 5/5/2020 North America / USA / New Jersey / Bergen County |
| EPI_ISL_435520 | 4/20/2020 | 5/5/2020 North America / USA / New York / Brooklyn        |
| EPI_ISL_435521 | 4/20/2020 | 5/5/2020 North America / USA / New York / Queens          |
| EPI_ISL_435522 | 4/20/2020 | 5/5/2020 North America / USA / New York / Queens          |
| EPI_ISL_435523 | 4/20/2020 | 5/5/2020 North America / USA / New York / Bronx           |
| EPI_ISL_435524 | 4/20/2020 | 5/5/2020 North America / USA / New York / Nassau County   |
| EPI_ISL_435525 | 4/20/2020 | 5/5/2020 North America / USA / New York / Brooklyn        |
| EPI_ISL_435526 | 4/20/2020 | 5/5/2020 North America / USA / New York / Brooklyn        |
| EPI_ISL_435527 | 4/20/2020 | 5/5/2020 North America / USA / New York                   |
| EPI_ISL_435528 | 4/20/2020 | 5/5/2020 North America / USA / New York / Queens          |
| EPI_ISL_435529 | 4/15/2020 | 5/5/2020 North America / USA / New York / Brooklyn        |
| EPI_ISL_435530 | 4/16/2020 | 5/5/2020 North America / USA / New York / Nassau County   |
| EPI_ISL_435531 | 4/16/2020 | 5/5/2020 North America / USA / New York / Brooklyn        |
| EPI_ISL_435532 | 4/16/2020 | 5/5/2020 North America / USA / New York / Brooklyn        |
| EPI_ISL_435533 | 4/16/2020 | 5/5/2020 North America / USA / New York / Brooklyn        |
| EPI_ISL_435534 | 4/20/2020 | 5/5/2020 North America / USA / New York / Queens          |
| EPI_ISL_435535 | 4/16/2020 | 5/5/2020 North America / USA / New York / Nassau County   |
| EPI_ISL_435536 | 4/20/2020 | 5/5/2020 North America / USA / New York / Brooklyn        |
| EPI_ISL_435537 | 4/20/2020 | 5/5/2020 North America / USA / New York / Brooklyn        |
| EPI_ISL_435538 | 4/20/2020 | 5/5/2020 North America / USA / New York / Suffolk County  |
| EPI_ISL_435539 | 4/21/2020 | 5/5/2020 North America / USA / New York / Staten Island   |
| EPI_ISL_435540 | 4/21/2020 | 5/5/2020 North America / USA / New York / Nassau County   |
| EPI_ISL_435541 | 4/21/2020 | 5/5/2020 North America / USA / New York / Nassau County   |
| EPI_ISL_435542 | 4/22/2020 | 5/5/2020 North America / USA / New York / Brooklyn        |
| EPI_ISL_435543 | 4/22/2020 | 5/5/2020 North America / USA / New York / Nassau County   |
| EPI_ISL_435544 | 4/22/2020 | 5/5/2020 North America / USA / New York / Staten Island   |
| EPI_ISL_435545 | 4/23/2020 | 5/5/2020 North America / USA / New York / Nassau County   |
| EPI_ISL_435546 | 4/24/2020 | 5/5/2020 North America / USA / New York                   |
| EPI_ISL_435547 | 4/24/2020 | 5/5/2020 North America / USA / New York                   |
| EPI_ISL_435548 | 4/24/2020 | 5/5/2020 North America / USA / New York / Brooklyn        |
| EPI_ISL_435549 | 4/24/2020 | 5/5/2020 North America / USA / New York / Nassau County   |
| EPI_ISL_435550 | 4/25/2020 | 5/5/2020 North America / USA / Louisiana / Caddo Parish   |



|                |           |                                                                |
|----------------|-----------|----------------------------------------------------------------|
| EPI_ISL_435643 | 3/12/2020 | 5/5/2020 North America / USA / California / Santa Clara County |
| EPI_ISL_435645 | 3/13/2020 | 5/5/2020 North America / USA / California / Santa Clara County |
| EPI_ISL_435649 | 3/13/2020 | 5/5/2020 North America / USA / California / Santa Clara County |
| EPI_ISL_435650 | 3/13/2020 | 5/5/2020 North America / USA / California / Santa Clara County |
| EPI_ISL_435654 | 3/13/2020 | 5/5/2020 North America / USA / California / Santa Clara County |
| EPI_ISL_435657 | 3/14/2020 | 5/5/2020 North America / USA / California / Santa Clara County |
| EPI_ISL_435662 | 3/16/2020 | 5/5/2020 North America / USA / California / Santa Clara County |
| EPI_ISL_435663 | 3/16/2020 | 5/5/2020 North America / USA / California / Santa Clara County |
| EPI_ISL_435670 | 3/19/2020 | 5/5/2020 North America / USA / California / Santa Clara County |
| EPI_ISL_435671 | 3/21/2020 | 5/5/2020 North America / USA / California / Santa Clara County |
| EPI_ISL_435674 | 3/11/2020 | 5/5/2020 Asia / Brunei                                         |
| EPI_ISL_435675 | 3/11/2020 | 5/5/2020 Asia / Brunei                                         |
| EPI_ISL_435676 | 3/21/2020 | 5/5/2020 Asia / Brunei                                         |
| EPI_ISL_435677 | 3/21/2020 | 5/5/2020 Asia / Brunei                                         |
| EPI_ISL_435678 | 3/25/2020 | 5/5/2020 Asia / Singapore                                      |
| EPI_ISL_435679 | 4/1/2020  | 5/5/2020 Asia / Singapore                                      |
| EPI_ISL_435680 | 4/1/2020  | 5/5/2020 Asia / Singapore                                      |
| EPI_ISL_435681 | 4/8/2020  | 5/5/2020 Asia / Singapore                                      |
| EPI_ISL_435682 | 4/7/2020  | 5/5/2020 Asia / Singapore                                      |
| EPI_ISL_435683 | 4/9/2020  | 5/5/2020 Asia / Singapore                                      |
| EPI_ISL_435684 | 4/11/2020 | 5/5/2020 Asia / Singapore                                      |
| EPI_ISL_435685 | 4/11/2020 | 5/5/2020 Asia / Singapore                                      |
| EPI_ISL_435686 | 4/13/2020 | 5/5/2020 Asia / Singapore                                      |
| EPI_ISL_435687 | 4/14/2020 | 5/5/2020 Asia / Singapore                                      |
| EPI_ISL_435688 | 4/16/2020 | 5/5/2020 Asia / Singapore                                      |
| EPI_ISL_435689 | 4/18/2020 | 5/5/2020 Asia / Singapore                                      |
| EPI_ISL_435690 | 4/19/2020 | 5/5/2020 Asia / Singapore                                      |
| EPI_ISL_435691 | 4/20/2020 | 5/5/2020 Asia / Singapore                                      |
| EPI_ISL_435692 | 4/21/2020 | 5/5/2020 Asia / Singapore                                      |
| EPI_ISL_435693 | 4/21/2020 | 5/5/2020 Asia / Singapore                                      |
| EPI_ISL_435694 | 4/22/2020 | 5/5/2020 Asia / Singapore                                      |
| EPI_ISL_435695 | 4/23/2020 | 5/5/2020 Asia / Singapore                                      |
| EPI_ISL_435696 | 4/20/2020 | 5/5/2020 Asia / Singapore                                      |
| EPI_ISL_435697 | 3/18/2020 | 5/5/2020 Asia / Singapore                                      |
| EPI_ISL_435698 | 3/18/2020 | 5/5/2020 Asia / Singapore                                      |
| EPI_ISL_435699 | 3/18/2020 | 5/5/2020 Asia / Singapore                                      |
| EPI_ISL_435700 | 3/18/2020 | 5/5/2020 Asia / Singapore                                      |
| EPI_ISL_435702 | 4/6/2020  | 5/5/2020 North America / USA / Connecticut                     |
| EPI_ISL_435703 | 4/7/2020  | 5/5/2020 North America / USA / Connecticut                     |
| EPI_ISL_435704 | 4/7/2020  | 5/5/2020 North America / USA / Connecticut                     |
| EPI_ISL_435705 | 4/7/2020  | 5/5/2020 North America / USA / Connecticut                     |
| EPI_ISL_435706 | 4/8/2020  | 5/5/2020 North America / USA / Connecticut                     |
| EPI_ISL_435708 | 4/9/2020  | 5/5/2020 North America / USA / Connecticut                     |
| EPI_ISL_435709 | 3/21/2020 | 5/5/2020 North America / USA / Connecticut                     |
| EPI_ISL_435716 | 3/25/2020 | 5/5/2020 North America / USA / Connecticut                     |
| EPI_ISL_435720 | 3/13/2020 | 5/5/2020 North America / USA / Connecticut                     |
| EPI_ISL_436040 | 3/20/2020 | 5/5/2020 North America / USA / District of Columbia            |



|                |           |                                                         |
|----------------|-----------|---------------------------------------------------------|
| EPI_ISL_436041 | 3/22/2020 | 5/5/2020 North America / USA / District of Columbia     |
| EPI_ISL_436042 | 3/29/2020 | 5/5/2020 North America / USA / District of Columbia     |
| EPI_ISL_436043 | 3/28/2020 | 5/5/2020 North America / USA / District of Columbia     |
| EPI_ISL_436044 | 3/23/2020 | 5/5/2020 North America / USA / Louisiana                |
| EPI_ISL_436045 | 3/21/2020 | 5/5/2020 North America / USA / Virgin Islands           |
| EPI_ISL_436046 | 4/1/2020  | 5/5/2020 North America / USA / Virgin Islands           |
| EPI_ISL_436047 | 3/4/2020  | 5/5/2020 North America / USA / New York / New York City |
| EPI_ISL_436048 | 3/5/2020  | 5/5/2020 North America / USA / New York / New York City |
| EPI_ISL_436049 | 3/9/2020  | 5/5/2020 North America / USA / New York / New York City |
| EPI_ISL_436050 | 3/2/2020  | 5/5/2020 North America / USA / New York / New York City |
| EPI_ISL_436051 | 3/9/2020  | 5/5/2020 North America / USA / New York / New York City |
| EPI_ISL_436052 | 3/9/2020  | 5/5/2020 North America / USA / New York / New York City |
| EPI_ISL_436053 | 3/9/2020  | 5/5/2020 North America / USA / New York / New York City |
| EPI_ISL_436054 | 3/9/2020  | 5/5/2020 North America / USA / New York / New York City |
| EPI_ISL_436055 | 3/9/2020  | 5/5/2020 North America / USA / New York / New York City |
| EPI_ISL_436056 | 3/9/2020  | 5/5/2020 North America / USA / New York / New York City |
| EPI_ISL_436057 | 3/17/2020 | 5/5/2020 North America / USA / New York / New York City |
| EPI_ISL_436058 | 3/17/2020 | 5/5/2020 North America / USA / New York / New York City |
| EPI_ISL_436059 | 3/17/2020 | 5/5/2020 North America / USA / New York / New York City |
| EPI_ISL_436060 | 3/9/2020  | 5/5/2020 North America / USA / New York / New York City |
| EPI_ISL_436061 | 3/8/2020  | 5/5/2020 North America / USA / New York / New York City |
| EPI_ISL_436062 | 3/9/2020  | 5/5/2020 North America / USA / New York / New York City |
| EPI_ISL_436063 | 3/9/2020  | 5/5/2020 North America / USA / New York / New York City |
| EPI_ISL_436064 | 3/17/2020 | 5/5/2020 North America / USA / New York / New York City |
| EPI_ISL_436065 | 3/17/2020 | 5/5/2020 North America / USA / New York / New York City |
| EPI_ISL_436066 | 3/9/2020  | 5/5/2020 North America / USA / New York / New York City |
| EPI_ISL_436067 | 3/9/2020  | 5/5/2020 North America / USA / New York / New York City |
| EPI_ISL_436068 | 3/9/2020  | 5/5/2020 North America / USA / New York / New York City |
| EPI_ISL_436069 | 3/9/2020  | 5/5/2020 North America / USA / New York / New York City |
| EPI_ISL_436070 | 3/13/2020 | 5/5/2020 North America / USA / New York / New York City |
| EPI_ISL_436071 | 3/17/2020 | 5/5/2020 North America / USA / New York / New York City |
| EPI_ISL_436072 | 3/8/2020  | 5/5/2020 North America / USA / New York / New York City |
| EPI_ISL_436073 | 3/17/2020 | 5/5/2020 North America / USA / New York / New York City |
| EPI_ISL_436074 | 3/10/2020 | 5/5/2020 North America / USA / New York / New York City |
| EPI_ISL_436075 | 3/10/2020 | 5/5/2020 North America / USA / New York / New York City |
| EPI_ISL_436076 | 3/9/2020  | 5/5/2020 North America / USA / New York / New York City |
| EPI_ISL_436077 | 3/19/2020 | 5/5/2020 North America / USA / New York / New York City |
| EPI_ISL_436078 | 3/19/2020 | 5/5/2020 North America / USA / New York / New York City |
| EPI_ISL_436079 | 3/19/2020 | 5/5/2020 North America / USA / New York / New York City |
| EPI_ISL_436080 | 3/18/2020 | 5/5/2020 North America / USA / New York / New York City |
| EPI_ISL_436081 | 3/17/2020 | 5/5/2020 North America / USA / New York / New York City |
| EPI_ISL_436082 | 3/19/2020 | 5/5/2020 North America / USA / New York / New York City |
| EPI_ISL_436097 | 3/25/2020 | 5/5/2020 Oceania / Australia / Queensland / Brisbane    |
| EPI_ISL_450408 | 1/24/2020 | 5/5/2020 Asia / Hong Kong                               |
| EPI_ISL_450409 | 1/30/2020 | 5/5/2020 Asia / Hong Kong                               |
| EPI_ISL_450410 | 1/31/2020 | 5/5/2020 Asia / Hong Kong                               |
| EPI_ISL_450411 | 2/2/2020  | 5/5/2020 Asia / Hong Kong                               |

|                |           |                                                                      |
|----------------|-----------|----------------------------------------------------------------------|
| EPI_ISL_450412 | 1/30/2020 | 5/5/2020 Asia / Hong Kong                                            |
| EPI_ISL_450484 | 3/24/2020 | 5/5/2020 North America / USA / California                            |
| EPI_ISL_450485 | 3/24/2020 | 5/5/2020 North America / USA / California                            |
| EPI_ISL_450486 | 3/31/2020 | 5/5/2020 North America / USA / California                            |
| EPI_ISL_450487 | 3/31/2020 | 5/5/2020 North America / USA / California                            |
| EPI_ISL_436098 | 3/23/2020 | 5/6/2020 Oceania / Australia / Queensland / Brisbane                 |
| EPI_ISL_436099 | 4/2/2020  | 5/6/2020 Asia / Taiwan / Taipei                                      |
| EPI_ISL_436100 | 3/19/2020 | 5/6/2020 Asia / Taiwan / New Taipei City                             |
| EPI_ISL_436101 | 3/19/2020 | 5/6/2020 Asia / Taiwan / New Taipei City                             |
| EPI_ISL_436102 | 3/19/2020 | 5/6/2020 Asia / Taiwan / New Taipei City                             |
| EPI_ISL_436103 | 3/24/2020 | 5/6/2020 Asia / Taiwan / New Taipei City                             |
| EPI_ISL_436104 | 3/26/2020 | 5/6/2020 Asia / Taiwan / New Taipei City                             |
| EPI_ISL_436106 | 3/30/2020 | 5/6/2020 Asia / Taiwan / New Taipei City                             |
| EPI_ISL_436107 | 3/31/2020 | 5/6/2020 Asia / Taiwan / New Taipei City                             |
| EPI_ISL_436108 | 4/2/2020  | 5/6/2020 Asia / Taiwan / Taipei                                      |
| EPI_ISL_436113 | 4/9/2020  | 5/6/2020 Oceania / Australia / Victoria                              |
| EPI_ISL_436114 | 4/9/2020  | 5/6/2020 Oceania / Australia / Victoria                              |
| EPI_ISL_436119 | 4/11/2020 | 5/6/2020 Oceania / Australia / Victoria                              |
| EPI_ISL_436120 | 4/11/2020 | 5/6/2020 Oceania / Australia / Victoria                              |
| EPI_ISL_436126 | 4/12/2020 | 5/6/2020 Oceania / Australia / Victoria                              |
| EPI_ISL_436131 | 4/14/2020 | 5/6/2020 Oceania / Australia / Victoria                              |
| EPI_ISL_436157 | 4/17/2020 | 5/6/2020 Asia / India / Karnataka                                    |
| EPI_ISL_436197 | 3/17/2020 | 5/6/2020 Europe / Spain / Comunitat Valenciana / Valencia / Valencia |
| EPI_ISL_436200 | 3/18/2020 | 5/6/2020 Europe / Spain / Comunitat Valenciana / Valencia / Valencia |
| EPI_ISL_436201 | 3/18/2020 | 5/6/2020 Europe / Spain / Comunitat Valenciana / Valencia / Valencia |
| EPI_ISL_436202 | 3/18/2020 | 5/6/2020 Europe / Spain / Comunitat Valenciana / Valencia / Valencia |
| EPI_ISL_436203 | 3/18/2020 | 5/6/2020 Europe / Spain / Comunitat Valenciana / Valencia / Valencia |
| EPI_ISL_436205 | 3/22/2020 | 5/6/2020 Europe / Spain / Comunitat Valenciana / Valencia / Valencia |
| EPI_ISL_436206 | 3/22/2020 | 5/6/2020 Europe / Spain / Comunitat Valenciana / Valencia / Valencia |
| EPI_ISL_436207 | 3/22/2020 | 5/6/2020 Europe / Spain / Comunitat Valenciana / Valencia / Valencia |
| EPI_ISL_436209 | 3/22/2020 | 5/6/2020 Europe / Spain / Comunitat Valenciana / Valencia / Valencia |
| EPI_ISL_436210 | 3/12/2020 | 5/6/2020 Europe / Spain / Comunitat Valenciana / Valencia / Valencia |
| EPI_ISL_436211 | 3/12/2020 | 5/6/2020 Europe / Spain / Comunitat Valenciana / Valencia / Valencia |
| EPI_ISL_436212 | 3/13/2020 | 5/6/2020 Europe / Spain / Comunitat Valenciana / Valencia / Valencia |
| EPI_ISL_436213 | 3/13/2020 | 5/6/2020 Europe / Spain / Comunitat Valenciana / Valencia / Valencia |
| EPI_ISL_436214 | 3/13/2020 | 5/6/2020 Europe / Spain / Comunitat Valenciana / Valencia / Valencia |
| EPI_ISL_436217 | 3/13/2020 | 5/6/2020 Europe / Spain / Comunitat Valenciana / Valencia / Valencia |
| EPI_ISL_436219 | 3/14/2020 | 5/6/2020 Europe / Spain / Comunitat Valenciana / Valencia / Valencia |
| EPI_ISL_436220 | 3/14/2020 | 5/6/2020 Europe / Spain / Comunitat Valenciana / Valencia / Valencia |
| EPI_ISL_436223 | 3/14/2020 | 5/6/2020 Europe / Spain / Comunitat Valenciana / Valencia / Valencia |
| EPI_ISL_436224 | 3/15/2020 | 5/6/2020 Europe / Spain / Comunitat Valenciana / Valencia / Valencia |
| EPI_ISL_436225 | 3/16/2020 | 5/6/2020 Europe / Spain / Comunitat Valenciana / Valencia / Valencia |
| EPI_ISL_436227 | 3/18/2020 | 5/6/2020 Europe / Spain / Comunitat Valenciana / Valencia / Valencia |
| EPI_ISL_436229 | 3/18/2020 | 5/6/2020 Europe / Spain / Comunitat Valenciana / Valencia / Valencia |
| EPI_ISL_436230 | 3/18/2020 | 5/6/2020 Europe / Spain / Comunitat Valenciana / Valencia / Valencia |
| EPI_ISL_436231 | 3/18/2020 | 5/6/2020 Europe / Spain / Comunitat Valenciana / Valencia / Valencia |
| EPI_ISL_436233 | 3/18/2020 | 5/6/2020 Europe / Spain / Comunitat Valenciana / Valencia / Valencia |



|                |           |          |                                                               |
|----------------|-----------|----------|---------------------------------------------------------------|
| EPI_ISL_436310 | 3/28/2020 | 5/6/2020 | Europe / Spain / Comunitat Valenciana / Valencia / Massamag   |
| EPI_ISL_436311 | 3/28/2020 | 5/6/2020 | Europe / Spain / Comunitat Valenciana / Valencia / Valencia   |
| EPI_ISL_436314 | 3/25/2020 | 5/6/2020 | Europe / Spain / Comunitat Valenciana / Valencia / Gandi      |
| EPI_ISL_436316 | 3/23/2020 | 5/6/2020 | Europe / Spain / Comunitat Valenciana / Valencia / Simat de l |
| EPI_ISL_436317 | 3/26/2020 | 5/6/2020 | Europe / Spain / Comunitat Valenciana / Valencia / Almenara   |
| EPI_ISL_436318 | 3/26/2020 | 5/6/2020 | Europe / Spain / Comunitat Valenciana / Valencia / Sagunto    |
| EPI_ISL_436325 | 3/26/2020 | 5/6/2020 | Europe / Spain / Comunitat Valenciana / Valencia / Denia      |
| EPI_ISL_436326 | 3/26/2020 | 5/6/2020 | Europe / Spain / Comunitat Valenciana / Valencia / Valencia   |
| EPI_ISL_436327 | 3/26/2020 | 5/6/2020 | Europe / Spain / Comunitat Valenciana / Valencia / Valencia   |
| EPI_ISL_436328 | 3/26/2020 | 5/6/2020 | Europe / Spain / Comunitat Valenciana / Valencia / Valencia   |
| EPI_ISL_436330 | 3/26/2020 | 5/6/2020 | Europe / Spain / Comunitat Valenciana / Valencia / Valencia   |
| EPI_ISL_436335 | 3/26/2020 | 5/6/2020 | Europe / Spain / Comunitat Valenciana / Valencia / Valencia   |
| EPI_ISL_436336 | 3/26/2020 | 5/6/2020 | Europe / Spain / Comunitat Valenciana / Valencia / Valencia   |
| EPI_ISL_436337 | 3/26/2020 | 5/6/2020 | Europe / Spain / Comunitat Valenciana / Valencia / Valencia   |
| EPI_ISL_436341 | 3/29/2020 | 5/6/2020 | Europe / Spain / Comunitat Valenciana / Valencia / Valencia   |
| EPI_ISL_436342 | 3/25/2020 | 5/6/2020 | Europe / Spain / Comunitat Valenciana / Valencia / Valencia   |
| EPI_ISL_436345 | 3/25/2020 | 5/6/2020 | Europe / Spain / Comunitat Valenciana / Valencia / Bonrep     |
| EPI_ISL_436346 | 3/27/2020 | 5/6/2020 | Europe / Spain / Comunitat Valenciana / Valencia / Valencia   |
| EPI_ISL_436355 | 3/26/2020 | 5/6/2020 | Europe / Spain / Comunitat Valenciana / Valencia / Sagunto    |
| EPI_ISL_436356 | 3/26/2020 | 5/6/2020 | Europe / Spain / Comunitat Valenciana / Valencia / Almenara   |
| EPI_ISL_436361 | 2/29/2020 | 5/6/2020 | Europe / Spain / Comunitat Valenciana / Valencia / Valencia   |
| EPI_ISL_436364 | 3/21/2020 | 5/6/2020 | Europe / Spain / Comunitat Valenciana / Valencia / Almassera  |
| EPI_ISL_436366 | 3/21/2020 | 5/6/2020 | Europe / Spain / Comunitat Valenciana / Valencia / Gandia     |
| EPI_ISL_436367 | 3/25/2020 | 5/6/2020 | Europe / Spain / Comunitat Valenciana / Valencia / Valencia   |
| EPI_ISL_436368 | 3/25/2020 | 5/6/2020 | Europe / Spain / Comunitat Valenciana / Valencia / Valencia   |
| EPI_ISL_436369 | 3/26/2020 | 5/6/2020 | Europe / Spain / Comunitat Valenciana / Valencia / Valencia   |
| EPI_ISL_436371 | 3/26/2020 | 5/6/2020 | Europe / Spain / Comunitat Valenciana / Valencia / Valencia   |
| EPI_ISL_436373 | 3/16/2020 | 5/6/2020 | Europe / Spain / Comunitat Valenciana / Valencia / Valencia   |
| EPI_ISL_436374 | 3/16/2020 | 5/6/2020 | Europe / Spain / Comunitat Valenciana / Valencia / Valencia   |
| EPI_ISL_436376 | 3/16/2020 | 5/6/2020 | Europe / Spain / Comunitat Valenciana / Valencia / Valencia   |
| EPI_ISL_436377 | 3/17/2020 | 5/6/2020 | Europe / Spain / Comunitat Valenciana / Valencia / Valencia   |
| EPI_ISL_436378 | 3/17/2020 | 5/6/2020 | Europe / Spain / Comunitat Valenciana / Valencia / Valencia   |
| EPI_ISL_436379 | 3/18/2020 | 5/6/2020 | Europe / Spain / Comunitat Valenciana / Valencia / Valencia   |
| EPI_ISL_436380 | 3/18/2020 | 5/6/2020 | Europe / Spain / Comunitat Valenciana / Valencia / Valencia   |
| EPI_ISL_436382 | 3/17/2020 | 5/6/2020 | Europe / Spain / Comunitat Valenciana / Valencia / Torrent    |
| EPI_ISL_436383 | 3/17/2020 | 5/6/2020 | Europe / Spain / Comunitat Valenciana / Valencia / Torrent    |
| EPI_ISL_436384 | 3/17/2020 | 5/6/2020 | Europe / Spain / Comunitat Valenciana / Valencia / Valencia   |
| EPI_ISL_436386 | 3/17/2020 | 5/6/2020 | Europe / Spain / Comunitat Valenciana / Valencia / Valencia   |
| EPI_ISL_436387 | 3/17/2020 | 5/6/2020 | Europe / Spain / Comunitat Valenciana / Valencia / Requena    |
| EPI_ISL_436388 | 3/17/2020 | 5/6/2020 | Europe / Spain / Comunitat Valenciana / Valencia / Valencia   |
| EPI_ISL_436389 | 3/17/2020 | 5/6/2020 | Europe / Spain / Comunitat Valenciana / Valencia / Alzira     |
| EPI_ISL_436390 | 3/17/2020 | 5/6/2020 | Europe / Spain / Comunitat Valenciana / Valencia / Xativa     |
| EPI_ISL_436391 | 3/17/2020 | 5/6/2020 | Europe / Spain / Comunitat Valenciana / Valencia / Requena    |
| EPI_ISL_436397 | 3/22/2020 | 5/6/2020 | Europe / Spain / Comunitat Valenciana / Valencia / Valencia   |
| EPI_ISL_436411 | 3/26/2020 | 5/6/2020 | Europe / Spain / Comunitat Valenciana / Valencia / Valencia   |
| EPI_ISL_436412 | 4/14/2020 | 5/6/2020 | Africa / Democratic Republic of the Congo / Kinshasa          |
| EPI_ISL_436413 | 3/30/2020 | 5/6/2020 | Asia / India / Uttar Pradesh                                  |

|                |           |                                                                        |
|----------------|-----------|------------------------------------------------------------------------|
| EPI_ISL_436414 | 3/31/2020 | 5/6/2020 Asia / India / West Bengal                                    |
| EPI_ISL_436415 | 3/31/2020 | 5/6/2020 Asia / India / Delhi                                          |
| EPI_ISL_436417 | 3/31/2020 | 5/6/2020 Asia / India / Bihar                                          |
| EPI_ISL_436418 | 3/31/2020 | 5/6/2020 Asia / India / Tamil Nadu                                     |
| EPI_ISL_436419 | 3/31/2020 | 5/6/2020 Asia / India / Bihar                                          |
| EPI_ISL_436420 | 3/31/2020 | 5/6/2020 Asia / India / Rajasthan                                      |
| EPI_ISL_436421 | 3/31/2020 | 5/6/2020 Asia / India / Assam                                          |
| EPI_ISL_436422 | 3/31/2020 | 5/6/2020 Asia / India / Assam                                          |
| EPI_ISL_436424 | 4/5/2020  | 5/6/2020 Asia / India / Delhi                                          |
| EPI_ISL_436425 | 4/5/2020  | 5/6/2020 Asia / India / Delhi                                          |
| EPI_ISL_436426 | 4/5/2020  | 5/6/2020 Asia / India / Delhi                                          |
| EPI_ISL_436428 | 4/5/2020  | 5/6/2020 Asia / India / Delhi                                          |
| EPI_ISL_436429 | 4/5/2020  | 5/6/2020 Asia / India / Delhi                                          |
| EPI_ISL_436430 | 4/5/2020  | 5/6/2020 Asia / India / Delhi                                          |
| EPI_ISL_436431 | 4/5/2020  | 5/6/2020 Asia / India / Delhi                                          |
| EPI_ISL_436432 | 4/5/2020  | 5/6/2020 Asia / India / Delhi                                          |
| EPI_ISL_436433 | 4/5/2020  | 5/6/2020 Asia / India / Delhi                                          |
| EPI_ISL_436434 | 4/5/2020  | 5/6/2020 Asia / India / Delhi                                          |
| EPI_ISL_436435 | 4/9/2020  | 5/6/2020 Asia / India / Delhi                                          |
| EPI_ISL_436436 | 4/6/2020  | 5/6/2020 Asia / India / Delhi                                          |
| EPI_ISL_436437 | 4/8/2020  | 5/6/2020 Asia / India / Delhi                                          |
| EPI_ISL_436440 | 4/9/2020  | 5/6/2020 Asia / India / Andhra Pradesh                                 |
| EPI_ISL_436444 | 4/9/2020  | 5/6/2020 Asia / India / Maharashtra                                    |
| EPI_ISL_436445 | 4/9/2020  | 5/6/2020 Asia / India / Delhi                                          |
| EPI_ISL_436447 | 4/10/2020 | 5/6/2020 Asia / India / Karnataka                                      |
| EPI_ISL_436448 | 4/12/2020 | 5/6/2020 Asia / India / Delhi                                          |
| EPI_ISL_436449 | 4/12/2020 | 5/6/2020 Asia / India / Bihar                                          |
| EPI_ISL_436450 | 4/13/2020 | 5/6/2020 Asia / India / Delhi                                          |
| EPI_ISL_436451 | 4/13/2020 | 5/6/2020 Asia / India / Delhi                                          |
| EPI_ISL_436452 | 4/14/2020 | 5/6/2020 Asia / India / Delhi                                          |
| EPI_ISL_436453 | 4/16/2020 | 5/6/2020 Asia / India / Madhya Pradesh                                 |
| EPI_ISL_436454 | 4/13/2020 | 5/6/2020 Asia / India / Delhi                                          |
| EPI_ISL_436455 | 4/13/2020 | 5/6/2020 Asia / India / Delhi                                          |
| EPI_ISL_436456 | 4/20/2020 | 5/6/2020 Asia / India / Madhya Pradesh                                 |
| EPI_ISL_436457 | 4/20/2020 | 5/6/2020 Asia / India / Madhya Pradesh                                 |
| EPI_ISL_436458 | 4/16/2020 | 5/6/2020 Asia / India / Madhya Pradesh                                 |
| EPI_ISL_436459 | 4/20/2020 | 5/6/2020 Asia / India / Madhya Pradesh                                 |
| EPI_ISL_436460 | 4/20/2020 | 5/6/2020 Asia / India / Madhya Pradesh                                 |
| EPI_ISL_436461 | 4/20/2020 | 5/6/2020 Asia / India / Madhya Pradesh                                 |
| EPI_ISL_436462 | 4/16/2020 | 5/6/2020 Asia / India / Madhya Pradesh                                 |
| EPI_ISL_436463 | 4/16/2020 | 5/6/2020 Asia / India / Madhya Pradesh                                 |
| EPI_ISL_436464 | 4/7/2020  | 5/6/2020 North America / USA / Alaska / Anchorage-Mat Su               |
| EPI_ISL_436466 | 3/23/2020 | 5/6/2020 North America / USA / Pennsylvania / Allegheny County / Pitts |
| EPI_ISL_436467 | 3/25/2020 | 5/6/2020 North America / USA / Pennsylvania / Allegheny County / Pitts |
| EPI_ISL_436468 | 3/26/2020 | 5/6/2020 North America / USA / Pennsylvania / Allegheny County / Pitts |
| EPI_ISL_436469 | 3/27/2020 | 5/6/2020 North America / USA / Pennsylvania / Allegheny County / Pitts |
| EPI_ISL_436470 | 3/25/2020 | 5/6/2020 North America / USA / Pennsylvania / Allegheny County / Pitts |









|                |           |                                                                |
|----------------|-----------|----------------------------------------------------------------|
| EPI_ISL_436674 | 3/31/2020 | 5/7/2020 North America / USA / California / Santa Clara County |
| EPI_ISL_436675 | 4/1/2020  | 5/7/2020 North America / USA / California / Santa Clara County |
| EPI_ISL_436676 | 4/1/2020  | 5/7/2020 North America / USA / California / Santa Clara County |
| EPI_ISL_436677 | 4/2/2020  | 5/7/2020 North America / USA / California / Santa Clara County |
| EPI_ISL_436678 | 4/3/2020  | 5/7/2020 North America / USA / California / Santa Clara County |
| EPI_ISL_436679 | 4/4/2020  | 5/7/2020 North America / USA / California / Santa Clara County |
| EPI_ISL_436680 | 4/4/2020  | 5/7/2020 North America / USA / California / Santa Clara County |
| EPI_ISL_436681 | 4/3/2020  | 5/7/2020 North America / USA / California / Santa Clara County |
| EPI_ISL_436682 | 4/8/2020  | 5/7/2020 North America / USA / California / Santa Clara County |
| EPI_ISL_436683 | 4/20/2020 | 5/7/2020 North America / USA / California / Santa Clara County |
| EPI_ISL_436684 | 3/31/2020 | 5/7/2020 Africa / South Africa / KwaZulu-Natal                 |
| EPI_ISL_436686 | 3/27/2020 | 5/7/2020 Africa / South Africa / KwaZulu-Natal                 |
| EPI_ISL_436688 | 4/2/2020  | 5/7/2020 Oceania / Australia / Victoria                        |
| EPI_ISL_436689 | 3/23/2020 | 5/7/2020 Oceania / Australia / Victoria                        |
| EPI_ISL_436715 | 4/14/2020 | 5/7/2020 Europe / Russia / Moscow                              |
| EPI_ISL_436716 | 4/14/2020 | 5/7/2020 Europe / Russia / Moscow                              |
| EPI_ISL_436717 | 4/14/2020 | 5/7/2020 Europe / Russia / Moscow                              |
| EPI_ISL_436718 | 3/19/2020 | 5/7/2020 Europe / Italy / Abruzzo                              |
| EPI_ISL_436719 | 3/20/2020 | 5/7/2020 Europe / Italy / Abruzzo                              |
| EPI_ISL_436720 | 3/20/2020 | 5/7/2020 Europe / Italy / Abruzzo                              |
| EPI_ISL_436721 | 3/20/2020 | 5/7/2020 Europe / Italy / Abruzzo                              |
| EPI_ISL_436722 | 3/20/2020 | 5/7/2020 Europe / Italy / Abruzzo                              |
| EPI_ISL_436723 | 3/20/2020 | 5/7/2020 Europe / Italy / Abruzzo                              |
| EPI_ISL_436724 | 3/21/2020 | 5/7/2020 Europe / Italy / Abruzzo                              |
| EPI_ISL_436725 | 4/27/2020 | 5/7/2020 Europe / Italy / Abruzzo                              |
| EPI_ISL_436726 | 4/27/2020 | 5/7/2020 Europe / Italy / Abruzzo                              |
| EPI_ISL_436727 | 4/27/2020 | 5/7/2020 Europe / Italy / Abruzzo                              |
| EPI_ISL_436729 | 4/27/2020 | 5/7/2020 Europe / Italy / Abruzzo                              |
| EPI_ISL_436730 | 4/27/2020 | 5/7/2020 Europe / Italy / Abruzzo                              |
| EPI_ISL_436731 | 4/26/2020 | 5/7/2020 Europe / Italy / Abruzzo                              |
| EPI_ISL_436732 | 4/27/2020 | 5/7/2020 Europe / Italy / Abruzzo                              |
| EPI_ISL_436800 | 3/10/2020 | 5/7/2020 North America / USA / Michigan                        |
| EPI_ISL_436801 | 3/10/2020 | 5/7/2020 North America / USA / Michigan                        |
| EPI_ISL_436802 | 3/10/2020 | 5/7/2020 North America / USA / Michigan                        |
| EPI_ISL_436803 | 3/10/2020 | 5/7/2020 North America / USA / Michigan                        |
| EPI_ISL_436804 | 3/11/2020 | 5/7/2020 North America / USA / Michigan                        |
| EPI_ISL_436807 | 3/12/2020 | 5/7/2020 North America / USA / Michigan                        |
| EPI_ISL_436808 | 3/12/2020 | 5/7/2020 North America / USA / Michigan                        |
| EPI_ISL_436812 | 3/13/2020 | 5/7/2020 North America / USA / Michigan                        |
| EPI_ISL_436814 | 3/13/2020 | 5/7/2020 North America / USA / Michigan                        |
| EPI_ISL_436815 | 3/14/2020 | 5/7/2020 North America / USA / Michigan                        |
| EPI_ISL_436818 | 3/16/2020 | 5/7/2020 North America / USA / Michigan                        |
| EPI_ISL_436819 | 3/16/2020 | 5/7/2020 North America / USA / Michigan                        |
| EPI_ISL_436820 | 3/17/2020 | 5/7/2020 North America / USA / Michigan                        |
| EPI_ISL_436821 | 3/17/2020 | 5/7/2020 North America / USA / Michigan                        |
| EPI_ISL_436822 | 3/18/2020 | 5/7/2020 North America / USA / Michigan                        |
| EPI_ISL_436823 | 3/18/2020 | 5/7/2020 North America / USA / Michigan                        |



|                |           |                                                             |
|----------------|-----------|-------------------------------------------------------------|
| EPI_ISL_436895 | 4/28/2020 | 5/7/2020 North America / USA / Wisconsin / Juneau County    |
| EPI_ISL_436896 | 5/2/2020  | 5/7/2020 North America / USA / Wisconsin / La Crosse County |
| EPI_ISL_436897 | 5/3/2020  | 5/7/2020 North America / USA / Wisconsin / Vernon County    |
| EPI_ISL_436898 | 5/3/2020  | 5/7/2020 North America / USA / Wisconsin / La Crosse County |
| EPI_ISL_436899 | 5/3/2020  | 5/7/2020 North America / USA / Wisconsin / La Crosse County |
| EPI_ISL_436900 | 5/4/2020  | 5/7/2020 North America / USA / Iowa / Fayette County        |
| EPI_ISL_436903 | 4/7/2020  | 5/7/2020 North America / USA / Utah                         |
| EPI_ISL_436905 | 4/7/2020  | 5/7/2020 North America / USA / Utah                         |
| EPI_ISL_436907 | 4/8/2020  | 5/7/2020 North America / USA / Utah                         |
| EPI_ISL_436914 | 4/9/2020  | 5/7/2020 North America / USA / Utah                         |
| EPI_ISL_436915 | 4/10/2020 | 5/7/2020 North America / USA / Utah                         |
| EPI_ISL_436917 | 4/10/2020 | 5/7/2020 North America / USA / Utah                         |
| EPI_ISL_436921 | 4/14/2020 | 5/7/2020 North America / USA / Utah                         |
| EPI_ISL_436922 | 4/15/2020 | 5/7/2020 North America / USA / Utah                         |
| EPI_ISL_436923 | 4/15/2020 | 5/7/2020 North America / USA / Utah                         |
| EPI_ISL_436924 | 4/15/2020 | 5/7/2020 North America / USA / Utah                         |
| EPI_ISL_436925 | 4/14/2020 | 5/7/2020 North America / USA / Utah                         |
| EPI_ISL_436926 | 4/15/2020 | 5/7/2020 North America / USA / Utah                         |
| EPI_ISL_436927 | 4/15/2020 | 5/7/2020 North America / USA / Utah                         |
| EPI_ISL_436928 | 4/15/2020 | 5/7/2020 North America / USA / Utah                         |
| EPI_ISL_436930 | 4/15/2020 | 5/7/2020 North America / USA / Utah                         |
| EPI_ISL_436931 | 4/14/2020 | 5/7/2020 North America / USA / Utah                         |
| EPI_ISL_436934 | 4/15/2020 | 5/7/2020 North America / USA / Utah                         |
| EPI_ISL_436935 | 4/14/2020 | 5/7/2020 North America / USA / Utah                         |
| EPI_ISL_436937 | 4/15/2020 | 5/7/2020 North America / USA / Utah                         |
| EPI_ISL_436938 | 4/15/2020 | 5/7/2020 North America / USA / Utah                         |
| EPI_ISL_436939 | 4/6/2020  | 5/7/2020 North America / USA / Louisiana                    |
| EPI_ISL_436942 | 4/8/2020  | 5/7/2020 North America / USA / Louisiana                    |
| EPI_ISL_436943 | 4/4/2020  | 5/7/2020 North America / USA / Louisiana                    |
| EPI_ISL_436944 | 4/6/2020  | 5/7/2020 North America / USA / Louisiana                    |
| EPI_ISL_436945 | 4/6/2020  | 5/7/2020 North America / USA / Louisiana                    |
| EPI_ISL_436946 | 4/7/2020  | 5/7/2020 North America / USA / Louisiana                    |
| EPI_ISL_436947 | 4/6/2020  | 5/7/2020 North America / USA / Louisiana                    |
| EPI_ISL_436948 | 4/6/2020  | 5/7/2020 North America / USA / Louisiana                    |
| EPI_ISL_436949 | 4/4/2020  | 5/7/2020 North America / USA / Louisiana                    |
| EPI_ISL_436950 | 4/6/2020  | 5/7/2020 North America / USA / Louisiana                    |
| EPI_ISL_436952 | 4/6/2020  | 5/7/2020 North America / USA / Louisiana                    |
| EPI_ISL_436953 | 4/6/2020  | 5/7/2020 North America / USA / Louisiana                    |
| EPI_ISL_436954 | 4/9/2020  | 5/7/2020 North America / USA / Louisiana                    |
| EPI_ISL_436956 | 4/3/2020  | 5/7/2020 North America / USA / Louisiana                    |
| EPI_ISL_436957 | 4/6/2020  | 5/7/2020 North America / USA / Louisiana                    |
| EPI_ISL_436958 | 4/6/2020  | 5/7/2020 North America / USA / Louisiana                    |
| EPI_ISL_436959 | 4/5/2020  | 5/7/2020 North America / USA / Louisiana                    |
| EPI_ISL_436960 | 4/5/2020  | 5/7/2020 North America / USA / Louisiana                    |
| EPI_ISL_436961 | 4/6/2020  | 5/7/2020 North America / USA / Louisiana                    |
| EPI_ISL_436962 | 4/2/2020  | 5/8/2020 Europe / Denmark                                   |
| EPI_ISL_436963 | 3/9/2020  | 5/8/2020 Europe / Denmark                                   |

|                |           |                           |
|----------------|-----------|---------------------------|
| EPI_ISL_436965 | 3/10/2020 | 5/8/2020 Europe / Denmark |
| EPI_ISL_436967 | 3/26/2020 | 5/8/2020 Europe / Denmark |
| EPI_ISL_436969 | 3/29/2020 | 5/8/2020 Europe / Denmark |
| EPI_ISL_436973 | 3/28/2020 | 5/8/2020 Europe / Denmark |
| EPI_ISL_436975 | 3/27/2020 | 5/8/2020 Europe / Denmark |
| EPI_ISL_436978 | 3/23/2020 | 5/8/2020 Europe / Denmark |
| EPI_ISL_436979 | 3/30/2020 | 5/8/2020 Europe / Denmark |
| EPI_ISL_436980 | 3/30/2020 | 5/8/2020 Europe / Denmark |
| EPI_ISL_436981 | 3/30/2020 | 5/8/2020 Europe / Denmark |
| EPI_ISL_436982 | 3/30/2020 | 5/8/2020 Europe / Denmark |
| EPI_ISL_436984 | 3/28/2020 | 5/8/2020 Europe / Denmark |
| EPI_ISL_436985 | 3/28/2020 | 5/8/2020 Europe / Denmark |
| EPI_ISL_436986 | 3/27/2020 | 5/8/2020 Europe / Denmark |
| EPI_ISL_436987 | 3/28/2020 | 5/8/2020 Europe / Denmark |
| EPI_ISL_436988 | 3/27/2020 | 5/8/2020 Europe / Denmark |
| EPI_ISL_436989 | 3/27/2020 | 5/8/2020 Europe / Denmark |
| EPI_ISL_436990 | 3/26/2020 | 5/8/2020 Europe / Denmark |
| EPI_ISL_436991 | 3/26/2020 | 5/8/2020 Europe / Denmark |
| EPI_ISL_436993 | 3/26/2020 | 5/8/2020 Europe / Denmark |
| EPI_ISL_436995 | 3/24/2020 | 5/8/2020 Europe / Denmark |
| EPI_ISL_436996 | 3/24/2020 | 5/8/2020 Europe / Denmark |
| EPI_ISL_436997 | 3/24/2020 | 5/8/2020 Europe / Denmark |
| EPI_ISL_436998 | 3/25/2020 | 5/8/2020 Europe / Denmark |
| EPI_ISL_436999 | 3/25/2020 | 5/8/2020 Europe / Denmark |
| EPI_ISL_437000 | 3/25/2020 | 5/8/2020 Europe / Denmark |
| EPI_ISL_437001 | 3/24/2020 | 5/8/2020 Europe / Denmark |
| EPI_ISL_437003 | 3/24/2020 | 5/8/2020 Europe / Denmark |
| EPI_ISL_437004 | 3/24/2020 | 5/8/2020 Europe / Denmark |
| EPI_ISL_437006 | 3/24/2020 | 5/8/2020 Europe / Denmark |
| EPI_ISL_437007 | 3/24/2020 | 5/8/2020 Europe / Denmark |
| EPI_ISL_437011 | 3/26/2020 | 5/8/2020 Europe / Denmark |
| EPI_ISL_437013 | 3/26/2020 | 5/8/2020 Europe / Denmark |
| EPI_ISL_437014 | 3/26/2020 | 5/8/2020 Europe / Denmark |
| EPI_ISL_437015 | 3/23/2020 | 5/8/2020 Europe / Denmark |
| EPI_ISL_437016 | 3/26/2020 | 5/8/2020 Europe / Denmark |
| EPI_ISL_437017 | 3/25/2020 | 5/8/2020 Europe / Denmark |
| EPI_ISL_437018 | 3/25/2020 | 5/8/2020 Europe / Denmark |
| EPI_ISL_437019 | 3/28/2020 | 5/8/2020 Europe / Denmark |
| EPI_ISL_437020 | 3/28/2020 | 5/8/2020 Europe / Denmark |
| EPI_ISL_437021 | 3/28/2020 | 5/8/2020 Europe / Denmark |
| EPI_ISL_437023 | 3/28/2020 | 5/8/2020 Europe / Denmark |
| EPI_ISL_437024 | 3/28/2020 | 5/8/2020 Europe / Denmark |
| EPI_ISL_437025 | 3/29/2020 | 5/8/2020 Europe / Denmark |
| EPI_ISL_437026 | 3/28/2020 | 5/8/2020 Europe / Denmark |
| EPI_ISL_437027 | 3/29/2020 | 5/8/2020 Europe / Denmark |
| EPI_ISL_437028 | 3/28/2020 | 5/8/2020 Europe / Denmark |
| EPI_ISL_437029 | 3/29/2020 | 5/8/2020 Europe / Denmark |



|                |           |                                                                |
|----------------|-----------|----------------------------------------------------------------|
| EPI_ISL_437088 | 4/5/2020  | 5/8/2020 North America / USA / California / Santa Clara County |
| EPI_ISL_437089 | 3/23/2020 | 5/8/2020 Europe / Latvia                                       |
| EPI_ISL_437090 | 3/24/2020 | 5/8/2020 Europe / Latvia                                       |
| EPI_ISL_437091 | 3/23/2020 | 5/8/2020 Europe / Latvia                                       |
| EPI_ISL_437092 | 3/20/2020 | 5/8/2020 Europe / Latvia                                       |
| EPI_ISL_437093 | 3/22/2020 | 5/8/2020 Europe / Latvia                                       |
| EPI_ISL_437094 | 3/23/2020 | 5/8/2020 Europe / Latvia                                       |
| EPI_ISL_437095 | 3/23/2020 | 5/8/2020 Europe / Latvia                                       |
| EPI_ISL_437096 | 3/23/2020 | 5/8/2020 Europe / Latvia                                       |
| EPI_ISL_437099 | 3/13/2020 | 5/8/2020 North America / USA / Michigan                        |
| EPI_ISL_437100 | 3/13/2020 | 5/8/2020 North America / USA / Michigan                        |
| EPI_ISL_437101 | 3/12/2020 | 5/8/2020 North America / USA / Michigan                        |
| EPI_ISL_437107 | 3/13/2020 | 5/8/2020 North America / USA / Michigan                        |
| EPI_ISL_437109 | 3/16/2020 | 5/8/2020 North America / USA / Michigan                        |
| EPI_ISL_437111 | 3/17/2020 | 5/8/2020 North America / USA / Michigan                        |
| EPI_ISL_437113 | 3/17/2020 | 5/8/2020 North America / USA / Michigan                        |
| EPI_ISL_437115 | 3/16/2020 | 5/8/2020 North America / USA / Michigan                        |
| EPI_ISL_437117 | 3/17/2020 | 5/8/2020 North America / USA / Michigan                        |
| EPI_ISL_437120 | 3/18/2020 | 5/8/2020 North America / USA / Michigan                        |
| EPI_ISL_437123 | 3/18/2020 | 5/8/2020 North America / USA / Michigan                        |
| EPI_ISL_437128 | 3/19/2020 | 5/8/2020 North America / USA / Michigan                        |
| EPI_ISL_437131 | 3/18/2020 | 5/8/2020 North America / USA / Michigan                        |
| EPI_ISL_437132 | 3/19/2020 | 5/8/2020 North America / USA / Michigan                        |
| EPI_ISL_437135 | 3/20/2020 | 5/8/2020 North America / USA / Michigan                        |
| EPI_ISL_437137 | 3/19/2020 | 5/8/2020 North America / USA / Michigan                        |
| EPI_ISL_437138 | 3/16/2020 | 5/8/2020 North America / USA / Michigan                        |
| EPI_ISL_437139 | 3/20/2020 | 5/8/2020 North America / USA / Michigan                        |
| EPI_ISL_437140 | 3/20/2020 | 5/8/2020 North America / USA / Michigan                        |
| EPI_ISL_437142 | 3/21/2020 | 5/8/2020 North America / USA / Michigan                        |
| EPI_ISL_437145 | 3/21/2020 | 5/8/2020 North America / USA / Michigan                        |
| EPI_ISL_437146 | 3/21/2020 | 5/8/2020 North America / USA / Michigan                        |
| EPI_ISL_437147 | 3/21/2020 | 5/8/2020 North America / USA / Michigan                        |
| EPI_ISL_437150 | 3/20/2020 | 5/8/2020 North America / USA / Michigan                        |
| EPI_ISL_437152 | 3/23/2020 | 5/8/2020 North America / USA / Michigan                        |
| EPI_ISL_437153 | 3/23/2020 | 5/8/2020 North America / USA / Michigan                        |
| EPI_ISL_437154 | 3/22/2020 | 5/8/2020 North America / USA / Michigan                        |
| EPI_ISL_437155 | 3/22/2020 | 5/8/2020 North America / USA / Michigan                        |
| EPI_ISL_437157 | 3/24/2020 | 5/8/2020 North America / USA / Michigan                        |
| EPI_ISL_437162 | 3/26/2020 | 5/8/2020 North America / USA / Michigan                        |
| EPI_ISL_437163 | 3/25/2020 | 5/8/2020 North America / USA / Michigan                        |
| EPI_ISL_437164 | 3/26/2020 | 5/8/2020 North America / USA / Michigan                        |
| EPI_ISL_437166 | 3/25/2020 | 5/8/2020 North America / USA / Michigan                        |
| EPI_ISL_437170 | 3/26/2020 | 5/8/2020 North America / USA / Michigan                        |
| EPI_ISL_437174 | 3/26/2020 | 5/8/2020 North America / USA / Michigan                        |
| EPI_ISL_437176 | 3/27/2020 | 5/8/2020 North America / USA / Michigan                        |
| EPI_ISL_437180 | 3/30/2020 | 5/8/2020 North America / USA / Michigan                        |
| EPI_ISL_437187 | 3/25/2020 | 5/8/2020 Asia / Indonesia / East Java / Surabaya               |

|                |           |                                                               |
|----------------|-----------|---------------------------------------------------------------|
| EPI_ISL_437188 | 4/14/2020 | 5/8/2020 Asia / Indonesia / East Java / Surabaya              |
| EPI_ISL_437189 | 3/26/2020 | 5/8/2020 Asia / Indonesia / Jakarta                           |
| EPI_ISL_437190 | 3/26/2020 | 5/8/2020 Asia / Indonesia / Jakarta                           |
| EPI_ISL_437191 | 3/27/2020 | 5/8/2020 Asia / Indonesia / Jakarta                           |
| EPI_ISL_437192 | 4/1/2020  | 5/8/2020 Asia / Indonesia / Jakarta                           |
| EPI_ISL_437194 | 4/14/2020 | 5/8/2020 Africa / Democratic Republic of the Congo / Kinshasa |
| EPI_ISL_437197 | 3/24/2020 | 5/8/2020 Europe / Austria / Styria                            |
| EPI_ISL_437198 | 3/27/2020 | 5/8/2020 Europe / Austria / Styria                            |
| EPI_ISL_437199 | 3/31/2020 | 5/8/2020 Europe / Austria / Styria                            |
| EPI_ISL_437200 | 3/31/2020 | 5/8/2020 Europe / Austria / Styria                            |
| EPI_ISL_437201 | 4/2/2020  | 5/8/2020 Europe / Austria / Styria                            |
| EPI_ISL_437202 | 4/3/2020  | 5/8/2020 Europe / Austria / Styria                            |
| EPI_ISL_437203 | 4/6/2020  | 5/8/2020 Europe / Austria / Styria                            |
| EPI_ISL_437204 | 3/5/2020  | 5/8/2020 Europe / Germany / Bavaria / Munich                  |
| EPI_ISL_437205 | 3/16/2020 | 5/8/2020 Europe / Germany / Bavaria / Munich                  |
| EPI_ISL_437206 | 3/18/2020 | 5/8/2020 Europe / Germany / Bavaria / Munich                  |
| EPI_ISL_437207 | 4/9/2020  | 5/8/2020 Europe / Germany / Bavaria / Munich                  |
| EPI_ISL_437208 | 4/11/2020 | 5/8/2020 Europe / Germany / Bavaria / Munich                  |
| EPI_ISL_437209 | 4/13/2020 | 5/8/2020 Europe / Germany / Bavaria / Munich                  |
| EPI_ISL_437210 | 3/7/2020  | 5/8/2020 Europe / Germany / Bavaria / Munich                  |
| EPI_ISL_437211 | 3/12/2020 | 5/8/2020 Europe / Germany / Bavaria / Munich                  |
| EPI_ISL_437212 | 3/22/2020 | 5/8/2020 Europe / Germany / Bavaria / Munich                  |
| EPI_ISL_437213 | 4/5/2020  | 5/8/2020 Europe / Germany / Bavaria / Munich                  |
| EPI_ISL_437214 | 4/7/2020  | 5/8/2020 Europe / Germany / Bavaria / Munich                  |
| EPI_ISL_437215 | 4/8/2020  | 5/8/2020 Europe / Germany / Bavaria / Munich                  |
| EPI_ISL_437216 | 4/9/2020  | 5/8/2020 Europe / Germany / Bavaria / Munich                  |
| EPI_ISL_437217 | 4/11/2020 | 5/8/2020 Europe / Germany / Bavaria / Munich                  |
| EPI_ISL_437218 | 3/12/2020 | 5/8/2020 Europe / Germany / Bavaria / Munich                  |
| EPI_ISL_437219 | 4/2/2020  | 5/8/2020 Europe / Germany / Bavaria / Munich                  |
| EPI_ISL_437220 | 4/6/2020  | 5/8/2020 Europe / Germany / Bavaria / Munich                  |
| EPI_ISL_437221 | 4/6/2020  | 5/8/2020 Europe / Germany / Bavaria / Munich                  |
| EPI_ISL_437222 | 4/11/2020 | 5/8/2020 Europe / Germany / Bavaria / Munich                  |
| EPI_ISL_437223 | 3/12/2020 | 5/8/2020 Europe / Germany / Bavaria / Munich                  |
| EPI_ISL_437224 | 3/29/2020 | 5/8/2020 Europe / Germany / Bavaria / Munich                  |
| EPI_ISL_437225 | 4/1/2020  | 5/8/2020 Europe / Germany / Bavaria / Munich                  |
| EPI_ISL_437226 | 4/10/2020 | 5/8/2020 Europe / Germany / Bavaria / Munich                  |
| EPI_ISL_437227 | 4/13/2020 | 5/8/2020 Europe / Germany / Bavaria / Munich                  |
| EPI_ISL_437228 | 3/11/2020 | 5/8/2020 Europe / Germany / Bavaria / Munich                  |
| EPI_ISL_437229 | 3/14/2020 | 5/8/2020 Europe / Germany / Bavaria / Munich                  |
| EPI_ISL_437230 | 3/22/2020 | 5/8/2020 Europe / Germany / Bavaria / Munich                  |
| EPI_ISL_437231 | 3/25/2020 | 5/8/2020 Europe / Germany / Bavaria / Munich                  |
| EPI_ISL_437232 | 3/31/2020 | 5/8/2020 Europe / Germany / Bavaria / Munich                  |
| EPI_ISL_437233 | 3/13/2020 | 5/8/2020 Europe / Germany / Bavaria / Munich                  |
| EPI_ISL_437234 | 3/15/2020 | 5/8/2020 Europe / Germany / Bavaria / Munich                  |
| EPI_ISL_437235 | 3/21/2020 | 5/8/2020 Europe / Germany / Bavaria / Munich                  |
| EPI_ISL_437236 | 3/22/2020 | 5/8/2020 Europe / Germany / Bavaria / Munich                  |
| EPI_ISL_437237 | 3/23/2020 | 5/8/2020 Europe / Germany / Bavaria / Munich                  |





|                |           |                                                               |
|----------------|-----------|---------------------------------------------------------------|
| EPI_ISL_437286 | 4/2/2020  | 5/8/2020 Europe / Germany / Bavaria / Munich                  |
| EPI_ISL_437287 | 4/3/2020  | 5/8/2020 Europe / Germany / Bavaria / Munich                  |
| EPI_ISL_437288 | 4/3/2020  | 5/8/2020 Europe / Germany / Bavaria / Munich                  |
| EPI_ISL_437289 | 4/3/2020  | 5/8/2020 Europe / Germany / Bavaria / Munich                  |
| EPI_ISL_437290 | 4/5/2020  | 5/8/2020 Europe / Germany / Bavaria / Munich                  |
| EPI_ISL_437291 | 4/6/2020  | 5/8/2020 Europe / Germany / Bavaria / Munich                  |
| EPI_ISL_437292 | 4/7/2020  | 5/8/2020 Europe / Germany / Bavaria / Munich                  |
| EPI_ISL_437294 | 4/10/2020 | 5/8/2020 Europe / Germany / Bavaria / Munich                  |
| EPI_ISL_437295 | 4/12/2020 | 5/8/2020 Europe / Germany / Bavaria / Munich                  |
| EPI_ISL_437296 | 4/13/2020 | 5/8/2020 Europe / Germany / Bavaria / Munich                  |
| EPI_ISL_437297 | 4/13/2020 | 5/8/2020 Europe / Germany / Bavaria / Munich                  |
| EPI_ISL_437298 | 4/8/2020  | 5/8/2020 Europe / Austria / Styria                            |
| EPI_ISL_437299 | 4/9/2020  | 5/8/2020 Europe / Austria / Styria                            |
| EPI_ISL_437300 | 4/14/2020 | 5/8/2020 Europe / Austria / Styria                            |
| EPI_ISL_437301 | 4/17/2020 | 5/8/2020 Europe / Austria / Styria                            |
| EPI_ISL_437302 | 4/17/2020 | 5/8/2020 Europe / Austria / Styria                            |
| EPI_ISL_437303 | 4/17/2020 | 5/8/2020 Europe / Austria / Styria                            |
| EPI_ISL_437304 | 3/26/2020 | 5/8/2020 Europe / Turkey / Nevsehir                           |
| EPI_ISL_437305 | 3/27/2020 | 5/8/2020 Europe / Turkey / Kocaeli                            |
| EPI_ISL_437306 | 3/27/2020 | 5/8/2020 Europe / Turkey / Kocaeli                            |
| EPI_ISL_437308 | 3/25/2020 | 5/8/2020 Europe / Turkey / Ankara                             |
| EPI_ISL_437309 | 3/26/2020 | 5/8/2020 Europe / Turkey / Ankara                             |
| EPI_ISL_437310 | 3/27/2020 | 5/8/2020 Europe / Turkey / Ankara                             |
| EPI_ISL_437311 | 3/27/2020 | 5/8/2020 Europe / Turkey / Ankara                             |
| EPI_ISL_437312 | 3/25/2020 | 5/8/2020 Europe / Turkey / Kocaeli                            |
| EPI_ISL_437313 | 3/27/2020 | 5/8/2020 Europe / Turkey / Kocaeli                            |
| EPI_ISL_437316 | 3/25/2020 | 5/8/2020 Europe / Turkey / Denizli                            |
| EPI_ISL_437318 | 3/19/2020 | 5/8/2020 Europe / Turkey / Ankara                             |
| EPI_ISL_437319 | 3/19/2020 | 5/8/2020 Europe / Turkey / Kocaeli                            |
| EPI_ISL_437320 | 3/19/2020 | 5/8/2020 Europe / Turkey / Istanbul                           |
| EPI_ISL_437321 | 3/19/2020 | 5/8/2020 Europe / Turkey / Istanbul                           |
| EPI_ISL_437322 | 3/19/2020 | 5/8/2020 Europe / Turkey / Ankara                             |
| EPI_ISL_437323 | 3/19/2020 | 5/8/2020 Europe / Turkey / Istanbul                           |
| EPI_ISL_437324 | 3/19/2020 | 5/8/2020 Europe / Turkey / Istanbul                           |
| EPI_ISL_437325 | 3/19/2020 | 5/8/2020 Europe / Turkey / Istanbul                           |
| EPI_ISL_437326 | 3/19/2020 | 5/8/2020 Europe / Turkey / Istanbul                           |
| EPI_ISL_437327 | 3/19/2020 | 5/8/2020 Europe / Turkey / Agri                               |
| EPI_ISL_437328 | 3/19/2020 | 5/8/2020 Europe / Turkey / Tekirdag                           |
| EPI_ISL_437330 | 3/19/2020 | 5/8/2020 Europe / Turkey / Tokat                              |
| EPI_ISL_437331 | 3/25/2020 | 5/8/2020 Europe / Turkey / Ankara                             |
| EPI_ISL_437332 | 3/18/2020 | 5/8/2020 Europe / Turkey / Istanbul                           |
| EPI_ISL_437333 | 3/25/2020 | 5/8/2020 Europe / Turkey / Ankara                             |
| EPI_ISL_437335 | 3/25/2020 | 5/8/2020 Europe / Turkey / Denizli                            |
| EPI_ISL_437337 | 4/15/2020 | 5/8/2020 Africa / Democratic Republic of the Congo / Kinshasa |
| EPI_ISL_437338 | 4/15/2020 | 5/8/2020 Africa / Democratic Republic of the Congo / Kinshasa |
| EPI_ISL_437339 | 4/15/2020 | 5/8/2020 Africa / Democratic Republic of the Congo / Kinshasa |
| EPI_ISL_437340 | 4/15/2020 | 5/8/2020 Africa / Democratic Republic of the Congo / Kinshasa |

|                |           |                                                               |
|----------------|-----------|---------------------------------------------------------------|
| EPI_ISL_437341 | 4/15/2020 | 5/8/2020 Africa / Democratic Republic of the Congo / Kinshasa |
| EPI_ISL_437343 | 4/15/2020 | 5/8/2020 Africa / Democratic Republic of the Congo / Kinshasa |
| EPI_ISL_437346 | 4/16/2020 | 5/8/2020 Africa / Democratic Republic of the Congo / Kinshasa |
| EPI_ISL_437348 | 4/16/2020 | 5/8/2020 Africa / Democratic Republic of the Congo / Kinshasa |
| EPI_ISL_437350 | 4/16/2020 | 5/8/2020 Africa / Democratic Republic of the Congo / Kinshasa |
| EPI_ISL_437351 | 4/16/2020 | 5/8/2020 Africa / Democratic Republic of the Congo / Kinshasa |
| EPI_ISL_437352 | 4/17/2020 | 5/8/2020 Africa / Democratic Republic of the Congo / Kinshasa |
| EPI_ISL_437354 | 4/17/2020 | 5/8/2020 Africa / Democratic Republic of the Congo / Kinshasa |
| EPI_ISL_437356 | 4/18/2020 | 5/8/2020 Africa / Democratic Republic of the Congo / Kinshasa |
| EPI_ISL_437357 | 4/18/2020 | 5/8/2020 Africa / Democratic Republic of the Congo / Kinshasa |
| EPI_ISL_437358 | 4/19/2020 | 5/8/2020 Africa / Democratic Republic of the Congo / Kinshasa |
| EPI_ISL_437359 | 3/14/2020 | 5/8/2020 Europe / Germany / Bavaria / Munich                  |
| EPI_ISL_437360 | 3/21/2020 | 5/8/2020 North America / USA / Minnesota                      |
| EPI_ISL_437361 | 3/29/2020 | 5/8/2020 North America / USA / Minnesota                      |
| EPI_ISL_437362 | 3/29/2020 | 5/8/2020 North America / USA / Minnesota                      |
| EPI_ISL_437363 | 3/31/2020 | 5/8/2020 North America / USA / Minnesota                      |
| EPI_ISL_437364 | 4/2/2020  | 5/8/2020 North America / USA / Minnesota                      |
| EPI_ISL_437365 | 4/5/2020  | 5/8/2020 North America / USA / Minnesota                      |
| EPI_ISL_437366 | 4/6/2020  | 5/8/2020 North America / USA / Minnesota                      |
| EPI_ISL_437367 | 4/8/2020  | 5/8/2020 North America / USA / Minnesota                      |
| EPI_ISL_437368 | 4/8/2020  | 5/8/2020 North America / USA / Minnesota                      |
| EPI_ISL_437369 | 4/7/2020  | 5/8/2020 North America / USA / Minnesota                      |
| EPI_ISL_437370 | 4/8/2020  | 5/8/2020 North America / USA / Minnesota                      |
| EPI_ISL_437371 | 4/9/2020  | 5/8/2020 North America / USA / Minnesota                      |
| EPI_ISL_437372 | 4/9/2020  | 5/8/2020 North America / USA / Minnesota                      |
| EPI_ISL_437373 | 4/9/2020  | 5/8/2020 North America / USA / Minnesota                      |
| EPI_ISL_437374 | 4/10/2020 | 5/8/2020 North America / USA / Minnesota                      |
| EPI_ISL_437375 | 4/12/2020 | 5/8/2020 North America / USA / Minnesota                      |
| EPI_ISL_437376 | 4/12/2020 | 5/8/2020 North America / USA / Minnesota                      |
| EPI_ISL_437377 | 4/12/2020 | 5/8/2020 North America / USA / Minnesota                      |
| EPI_ISL_437378 | 4/13/2020 | 5/8/2020 North America / USA / Minnesota                      |
| EPI_ISL_437379 | 4/13/2020 | 5/8/2020 North America / USA / Minnesota                      |
| EPI_ISL_437380 | 4/14/2020 | 5/8/2020 North America / USA / Minnesota                      |
| EPI_ISL_437381 | 4/14/2020 | 5/8/2020 North America / USA / Minnesota                      |
| EPI_ISL_437382 | 4/14/2020 | 5/8/2020 North America / USA / Minnesota                      |
| EPI_ISL_437383 | 4/15/2020 | 5/8/2020 North America / USA / Minnesota                      |
| EPI_ISL_437384 | 4/16/2020 | 5/8/2020 North America / USA / Minnesota                      |
| EPI_ISL_437385 | 4/16/2020 | 5/8/2020 North America / USA / Minnesota                      |
| EPI_ISL_437386 | 4/17/2020 | 5/8/2020 North America / USA / Minnesota                      |
| EPI_ISL_437387 | 4/13/2020 | 5/8/2020 North America / USA / Virginia                       |
| EPI_ISL_437388 | 4/13/2020 | 5/8/2020 North America / USA / Virginia                       |
| EPI_ISL_437389 | 4/13/2020 | 5/8/2020 North America / USA / Virginia                       |
| EPI_ISL_437390 | 4/13/2020 | 5/8/2020 North America / USA / Virginia                       |
| EPI_ISL_437391 | 4/13/2020 | 5/8/2020 North America / USA / Virginia                       |
| EPI_ISL_437392 | 4/13/2020 | 5/8/2020 North America / USA / Virginia                       |
| EPI_ISL_437393 | 4/6/2020  | 5/8/2020 North America / USA / Virginia                       |
| EPI_ISL_437394 | 4/6/2020  | 5/8/2020 North America / USA / Virginia                       |

|                |           |                                         |
|----------------|-----------|-----------------------------------------|
| EPI_ISL_437395 | 4/6/2020  | 5/8/2020 North America / USA / Virginia |
| EPI_ISL_437396 | 4/6/2020  | 5/8/2020 North America / USA / Virginia |
| EPI_ISL_437397 | 4/6/2020  | 5/8/2020 North America / USA / Virginia |
| EPI_ISL_437398 | 3/28/2020 | 5/8/2020 North America / USA / Virginia |
| EPI_ISL_437399 | 3/31/2020 | 5/8/2020 North America / USA / Virginia |
| EPI_ISL_437400 | 4/7/2020  | 5/8/2020 North America / USA / Virginia |
| EPI_ISL_437401 | 4/7/2020  | 5/8/2020 North America / USA / Virginia |
| EPI_ISL_437403 | 4/14/2020 | 5/8/2020 North America / USA / Virginia |
| EPI_ISL_437404 | 4/15/2020 | 5/8/2020 North America / USA / Virginia |
| EPI_ISL_437405 | 4/15/2020 | 5/8/2020 North America / USA / Virginia |
| EPI_ISL_437406 | 4/15/2020 | 5/8/2020 North America / USA / Virginia |
| EPI_ISL_437407 | 4/15/2020 | 5/8/2020 North America / USA / Virginia |
| EPI_ISL_437408 | 4/16/2020 | 5/8/2020 North America / USA / Virginia |
| EPI_ISL_437409 | 4/16/2020 | 5/8/2020 North America / USA / Virginia |
| EPI_ISL_437410 | 4/16/2020 | 5/8/2020 North America / USA / Virginia |
| EPI_ISL_437411 | 4/9/2020  | 5/8/2020 North America / USA / Virginia |
| EPI_ISL_437412 | 4/9/2020  | 5/8/2020 North America / USA / Virginia |
| EPI_ISL_437413 | 4/11/2020 | 5/8/2020 North America / USA / Virginia |
| EPI_ISL_437414 | 4/11/2020 | 5/8/2020 North America / USA / Virginia |
| EPI_ISL_437415 | 4/11/2020 | 5/8/2020 North America / USA / Virginia |
| EPI_ISL_437416 | 4/11/2020 | 5/8/2020 North America / USA / Virginia |
| EPI_ISL_437417 | 4/14/2020 | 5/8/2020 North America / USA / Virginia |
| EPI_ISL_437418 | 4/14/2020 | 5/8/2020 North America / USA / Virginia |
| EPI_ISL_437419 | 4/13/2020 | 5/8/2020 North America / USA / Virginia |
| EPI_ISL_437420 | 4/16/2020 | 5/8/2020 North America / USA / Virginia |
| EPI_ISL_437421 | 4/8/2020  | 5/8/2020 North America / USA / Virginia |
| EPI_ISL_437422 | 4/8/2020  | 5/8/2020 North America / USA / Virginia |
| EPI_ISL_437423 | 4/8/2020  | 5/8/2020 North America / USA / Virginia |
| EPI_ISL_437424 | 4/13/2020 | 5/8/2020 North America / USA / Virginia |
| EPI_ISL_437425 | 4/16/2020 | 5/8/2020 North America / USA / Virginia |
| EPI_ISL_437426 | 4/4/2020  | 5/8/2020 North America / USA / Virginia |
| EPI_ISL_437427 | 4/4/2020  | 5/8/2020 North America / USA / Virginia |
| EPI_ISL_437428 | 4/4/2020  | 5/8/2020 North America / USA / Virginia |
| EPI_ISL_437429 | 4/4/2020  | 5/8/2020 North America / USA / Virginia |
| EPI_ISL_437431 | 4/6/2020  | 5/8/2020 North America / USA / Virginia |
| EPI_ISL_437432 | 4/9/2020  | 5/8/2020 North America / USA / Virginia |
| EPI_ISL_437433 | 4/15/2020 | 5/8/2020 North America / USA / Montana  |
| EPI_ISL_437435 | 4/4/2020  | 5/8/2020 Europe / Serbia / Kraljevo     |
| EPI_ISL_437436 | 4/4/2020  | 5/8/2020 Europe / Serbia / Novi Pazar   |
| EPI_ISL_437602 | 3/20/2020 | 5/8/2020 Asia / Thailand                |
| EPI_ISL_437603 | 3/19/2020 | 5/8/2020 Asia / Thailand                |
| EPI_ISL_437604 | 3/1/2020  | 5/8/2020 Asia / Thailand                |
| EPI_ISL_437605 | 3/18/2020 | 5/8/2020 Asia / Thailand                |
| EPI_ISL_437606 | 3/18/2020 | 5/8/2020 Asia / Thailand                |
| EPI_ISL_437607 | 3/16/2020 | 5/8/2020 Asia / Thailand                |
| EPI_ISL_437608 | 3/13/2020 | 5/8/2020 Asia / Thailand                |
| EPI_ISL_437609 | 3/12/2020 | 5/8/2020 Asia / Thailand                |

|                |           |                                                                       |
|----------------|-----------|-----------------------------------------------------------------------|
| EPI_ISL_437610 | 3/12/2020 | 5/8/2020 Asia / Thailand                                              |
| EPI_ISL_437611 | 3/11/2020 | 5/8/2020 Asia / Thailand                                              |
| EPI_ISL_437612 | 1/23/2020 | 5/8/2020 Asia / Thailand                                              |
| EPI_ISL_437613 | 2/25/2020 | 5/8/2020 Asia / Thailand                                              |
| EPI_ISL_437614 | 2/25/2020 | 5/8/2020 Asia / Thailand                                              |
| EPI_ISL_437615 | 2/22/2020 | 5/8/2020 Asia / Thailand                                              |
| EPI_ISL_437616 | 2/7/2020  | 5/8/2020 Asia / Thailand                                              |
| EPI_ISL_437617 | 2/3/2020  | 5/8/2020 Asia / Thailand                                              |
| EPI_ISL_437618 | 1/29/2020 | 5/8/2020 Asia / Thailand                                              |
| EPI_ISL_437619 | 1/26/2020 | 5/8/2020 Asia / Thailand                                              |
| EPI_ISL_437620 | 1/25/2020 | 5/8/2020 Asia / Thailand                                              |
| EPI_ISL_437621 | 1/25/2020 | 5/8/2020 Asia / Thailand                                              |
| EPI_ISL_437622 | 1/23/2020 | 5/8/2020 Asia / Thailand                                              |
| EPI_ISL_437623 | 1/8/2020  | 5/8/2020 Asia / Thailand                                              |
| EPI_ISL_437624 | 2/1/2020  | 5/8/2020 Asia / Thailand                                              |
| EPI_ISL_444273 | 2/5/2020  | 5/8/2020 Asia / China / Guangdong / Guangzhou                         |
| EPI_ISL_445183 | 3/23/2020 | 5/8/2020 Asia / Japan                                                 |
| EPI_ISL_437437 | 4/12/2020 | 5/9/2020 North America / USA / Alaska / Anchorage-Mat Su              |
| EPI_ISL_437438 | 4/24/2020 | 5/9/2020 Asia / India / Gujarat / Surat                               |
| EPI_ISL_437440 | 4/26/2020 | 5/9/2020 Asia / India / Gujarat / Surat                               |
| EPI_ISL_437441 | 4/26/2020 | 5/9/2020 Asia / India / Gujarat / Surat                               |
| EPI_ISL_437442 | 4/27/2020 | 5/9/2020 Asia / India / Gujarat / Surat                               |
| EPI_ISL_437444 | 4/26/2020 | 5/9/2020 Asia / India / Gujarat / Surat                               |
| EPI_ISL_437445 | 4/26/2020 | 5/9/2020 Asia / India / Gujarat / Ahmedabad                           |
| EPI_ISL_437446 | 4/26/2020 | 5/9/2020 Asia / India / Gujarat / Ahmedabad                           |
| EPI_ISL_437447 | 4/26/2020 | 5/9/2020 Asia / India / Gujarat / Ahmedabad                           |
| EPI_ISL_437448 | 4/26/2020 | 5/9/2020 Asia / India / Gujarat / Ahmedabad                           |
| EPI_ISL_437449 | 4/26/2020 | 5/9/2020 Asia / India / Gujarat / Ahmedabad                           |
| EPI_ISL_437450 | 4/26/2020 | 5/9/2020 Asia / India / Gujarat / Ahmedabad                           |
| EPI_ISL_437451 | 4/26/2020 | 5/9/2020 Asia / India / Gujarat / Ahmedabad                           |
| EPI_ISL_437452 | 4/26/2020 | 5/9/2020 Asia / India / Gujarat / Ahmedabad                           |
| EPI_ISL_437453 | 4/26/2020 | 5/9/2020 Asia / India / Gujarat / Ahmedabad                           |
| EPI_ISL_437454 | 4/26/2020 | 5/9/2020 Asia / India / Gujarat / Ahmedabad                           |
| EPI_ISL_437455 | 3/24/2020 | 5/9/2020 North America / USA / Indiana / Marion County / Indianapolis |
| EPI_ISL_437456 | 4/6/2020  | 5/9/2020 North America / USA / Indiana / Marion County / Indianapolis |
| EPI_ISL_437457 | 4/6/2020  | 5/9/2020 North America / USA / Indiana / Marion County / Indianapolis |
| EPI_ISL_437458 | 4/7/2020  | 5/9/2020 North America / USA / Indiana / Marion County / Indianapolis |
| EPI_ISL_437459 | 3/23/2020 | 5/9/2020 Asia / Saudi Arabia / Makkah                                 |
| EPI_ISL_437460 | 3/23/2020 | 5/9/2020 Asia / Saudi Arabia / Makkah                                 |
| EPI_ISL_437461 | 3/23/2020 | 5/9/2020 Asia / Saudi Arabia / Makkah                                 |
| EPI_ISL_437462 | 3/23/2020 | 5/9/2020 Asia / Saudi Arabia / Makkah                                 |
| EPI_ISL_437463 | 3/23/2020 | 5/9/2020 Asia / Saudi Arabia / Makkah                                 |
| EPI_ISL_437464 | 3/23/2020 | 5/9/2020 Asia / Saudi Arabia / Makkah                                 |
| EPI_ISL_437465 | 3/23/2020 | 5/9/2020 Asia / Saudi Arabia / Makkah                                 |
| EPI_ISL_437466 | 3/23/2020 | 5/9/2020 Asia / Saudi Arabia / Makkah                                 |
| EPI_ISL_437468 | 3/22/2020 | 5/9/2020 Asia / Saudi Arabia / Makkah                                 |
| EPI_ISL_437469 | 3/29/2020 | 5/9/2020 Asia / Saudi Arabia / Madinah                                |

|                |           |                                                            |
|----------------|-----------|------------------------------------------------------------|
| EPI_ISL_437470 | 3/29/2020 | 5/9/2020 Asia / Saudi Arabia / Madinah                     |
| EPI_ISL_437471 | 3/29/2020 | 5/9/2020 Asia / Saudi Arabia / Madinah                     |
| EPI_ISL_437472 | 3/29/2020 | 5/9/2020 Asia / Saudi Arabia / Madinah                     |
| EPI_ISL_437473 | 3/29/2020 | 5/9/2020 Asia / Saudi Arabia / Madinah                     |
| EPI_ISL_437474 | 3/29/2020 | 5/9/2020 Asia / Saudi Arabia / Madinah                     |
| EPI_ISL_437475 | 4/1/2020  | 5/9/2020 Asia / Saudi Arabia / Jeddah                      |
| EPI_ISL_437477 | 4/6/2020  | 5/9/2020 Asia / Saudi Arabia / Makkah                      |
| EPI_ISL_437479 | 4/6/2020  | 5/9/2020 Asia / Saudi Arabia / Makkah                      |
| EPI_ISL_445086 | 4/13/2020 | 5/9/2020 Europe / Serbia / Kraljevo                        |
| EPI_ISL_437481 | 3/18/2020 | 5/10/2020 Asia / Saudi Arabia / Makkah                     |
| EPI_ISL_437482 | 3/20/2020 | 5/10/2020 Asia / Saudi Arabia / Madinah                    |
| EPI_ISL_437483 | 3/20/2020 | 5/10/2020 Asia / Saudi Arabia / Madinah                    |
| EPI_ISL_437484 | 3/29/2020 | 5/10/2020 Asia / Saudi Arabia / Madinah                    |
| EPI_ISL_437485 | 3/26/2020 | 5/10/2020 Asia / Saudi Arabia / Madinah                    |
| EPI_ISL_437486 | 3/26/2020 | 5/10/2020 Asia / Saudi Arabia / Madinah                    |
| EPI_ISL_437487 | 3/26/2020 | 5/10/2020 Asia / Saudi Arabia / Madinah                    |
| EPI_ISL_437488 | 3/26/2020 | 5/10/2020 Asia / Saudi Arabia / Madinah                    |
| EPI_ISL_437489 | 3/26/2020 | 5/10/2020 Asia / Saudi Arabia / Madinah                    |
| EPI_ISL_437490 | 3/26/2020 | 5/10/2020 Asia / Saudi Arabia / Madinah                    |
| EPI_ISL_437491 | 3/26/2020 | 5/10/2020 Asia / Saudi Arabia / Madinah                    |
| EPI_ISL_437492 | 3/26/2020 | 5/10/2020 Asia / Saudi Arabia / Madinah                    |
| EPI_ISL_437493 | 3/26/2020 | 5/10/2020 Asia / Saudi Arabia / Madinah                    |
| EPI_ISL_437494 | 3/26/2020 | 5/10/2020 Asia / Saudi Arabia / Madinah                    |
| EPI_ISL_437495 | 3/26/2020 | 5/10/2020 Asia / Saudi Arabia / Madinah                    |
| EPI_ISL_437496 | 3/25/2020 | 5/10/2020 Asia / Saudi Arabia / Jeddah                     |
| EPI_ISL_437497 | 3/25/2020 | 5/10/2020 Asia / Saudi Arabia / Jeddah                     |
| EPI_ISL_454692 | 3/13/2020 | 5/10/2020 North America / USA / Washington                 |
| EPI_ISL_437513 | 3/23/2020 | 5/11/2020 North America / USA / Alaska / Anchorage-Mat Su  |
| EPI_ISL_437514 | 3/23/2020 | 5/11/2020 North America / USA / Alaska / Anchorage-Mat Su  |
| EPI_ISL_437515 | 3/28/2020 | 5/11/2020 North America / USA / Alaska / Anchorage-Mat Su  |
| EPI_ISL_437516 | 3/24/2020 | 5/11/2020 North America / USA / Alaska / Anchorage-Mat Su  |
| EPI_ISL_437517 | 4/8/2020  | 5/11/2020 North America / USA / Alaska / Anchorage-Mat Su  |
| EPI_ISL_437518 | 4/26/2020 | 5/11/2020 North America / USA / Alaska / Interior          |
| EPI_ISL_437519 | 3/16/2020 | 5/11/2020 Europe / Czech Republic / Prague                 |
| EPI_ISL_437521 | 4/8/2020  | 5/11/2020 North America / USA / Oregon / Washington County |
| EPI_ISL_437523 | 4/7/2020  | 5/11/2020 North America / USA / Oregon / Multnomah County  |
| EPI_ISL_437524 | 4/16/2020 | 5/11/2020 North America / USA / Oregon / Multnomah County  |
| EPI_ISL_437525 | 4/20/2020 | 5/11/2020 North America / USA / Oregon / Multnomah County  |
| EPI_ISL_437528 | 4/19/2020 | 5/11/2020 North America / USA / Oregon / Wasco County      |
| EPI_ISL_437529 | 4/9/2020  | 5/11/2020 North America / USA / Oregon / Washington County |
| EPI_ISL_437531 | 4/17/2020 | 5/11/2020 North America / USA / Oregon / Washington County |
| EPI_ISL_437532 | 4/18/2020 | 5/11/2020 North America / USA / Oregon / Washington County |
| EPI_ISL_437535 | 4/8/2020  | 5/11/2020 North America / USA / Oregon / Washington County |
| EPI_ISL_437539 | 4/6/2020  | 5/11/2020 Asia / India / West Bengal / East Medinipur      |
| EPI_ISL_437541 | 4/3/2020  | 5/11/2020 North America / USA / Louisiana / New Orleans    |
| EPI_ISL_437542 | 4/3/2020  | 5/11/2020 North America / USA / Louisiana / New Orleans    |
| EPI_ISL_437546 | 3/27/2020 | 5/11/2020 North America / USA / Louisiana / New Orleans    |

|                |           |           |                                                     |
|----------------|-----------|-----------|-----------------------------------------------------|
| EPI_ISL_437547 | 3/31/2020 | 5/11/2020 | North America / USA / Louisiana / New Orleans       |
| EPI_ISL_437549 | 4/20/2020 | 5/11/2020 | North America / USA / California / San Diego County |
| EPI_ISL_437550 | 4/27/2020 | 5/11/2020 | North America / USA / California / San Diego County |
| EPI_ISL_437551 | 4/28/2020 | 5/11/2020 | North America / USA / California / San Diego County |
| EPI_ISL_437552 | 3/25/2020 | 5/11/2020 | North America / USA / California / San Diego County |
| EPI_ISL_437553 | 3/25/2020 | 5/11/2020 | North America / USA / California / San Diego County |
| EPI_ISL_437554 | 3/19/2020 | 5/11/2020 | North America / USA / California / San Diego County |
| EPI_ISL_437555 | 3/20/2020 | 5/11/2020 | North America / USA / California / San Diego County |
| EPI_ISL_437556 | 3/26/2020 | 5/11/2020 | North America / USA / California / San Diego County |
| EPI_ISL_437559 | 3/26/2020 | 5/11/2020 | North America / USA / California / San Diego County |
| EPI_ISL_437560 | 3/22/2020 | 5/11/2020 | North America / USA / California / San Diego County |
| EPI_ISL_437561 | 3/17/2020 | 5/11/2020 | North America / USA / California / San Diego County |
| EPI_ISL_437562 | 3/21/2020 | 5/11/2020 | North America / USA / California / San Diego County |
| EPI_ISL_437563 | 3/27/2020 | 5/11/2020 | North America / USA / California / San Diego County |
| EPI_ISL_437564 | 3/24/2020 | 5/11/2020 | North America / USA / California / San Diego County |
| EPI_ISL_437566 | 3/24/2020 | 5/11/2020 | North America / USA / California / San Diego County |
| EPI_ISL_437567 | 4/26/2020 | 5/11/2020 | North America / USA / California / San Diego County |
| EPI_ISL_437568 | 4/26/2020 | 5/11/2020 | North America / USA / California / San Diego County |
| EPI_ISL_437569 | 4/20/2020 | 5/11/2020 | North America / USA / California / San Diego County |
| EPI_ISL_437570 | 4/24/2020 | 5/11/2020 | North America / USA / California / San Diego County |
| EPI_ISL_437571 | 4/25/2020 | 5/11/2020 | North America / USA / California / San Diego County |
| EPI_ISL_437572 | 4/21/2020 | 5/11/2020 | North America / USA / California / San Diego County |
| EPI_ISL_437574 | 4/7/2020  | 5/11/2020 | North America / USA / California / San Diego County |
| EPI_ISL_437575 | 4/6/2020  | 5/11/2020 | North America / USA / California / San Diego County |
| EPI_ISL_437576 | 4/2/2020  | 5/11/2020 | North America / USA / California / San Diego County |
| EPI_ISL_437580 | 4/18/2020 | 5/11/2020 | North America / USA / California / San Diego County |
| EPI_ISL_437582 | 3/14/2020 | 5/11/2020 | North America / USA / California / San Diego County |
| EPI_ISL_437583 | 3/22/2020 | 5/11/2020 | North America / USA / California / San Diego County |
| EPI_ISL_437584 | 3/15/2020 | 5/11/2020 | North America / USA / California / San Diego County |
| EPI_ISL_437585 | 3/21/2020 | 5/11/2020 | North America / USA / California / San Diego County |
| EPI_ISL_437586 | 3/24/2020 | 5/11/2020 | North America / USA / California / San Diego County |
| EPI_ISL_437587 | 3/28/2020 | 5/11/2020 | North America / USA / California / San Diego County |
| EPI_ISL_437588 | 3/23/2020 | 5/11/2020 | North America / USA / California / San Diego County |
| EPI_ISL_437589 | 3/24/2020 | 5/11/2020 | North America / USA / California / San Diego County |
| EPI_ISL_437590 | 3/30/2020 | 5/11/2020 | North America / USA / California / San Diego County |
| EPI_ISL_437591 | 3/26/2020 | 5/11/2020 | North America / USA / California / San Diego County |
| EPI_ISL_437592 | 3/28/2020 | 5/11/2020 | North America / USA / California / San Diego County |
| EPI_ISL_437593 | 3/25/2020 | 5/11/2020 | North America / USA / California / San Diego County |
| EPI_ISL_437594 | 3/23/2020 | 5/11/2020 | North America / USA / California / San Diego County |
| EPI_ISL_437595 | 3/22/2020 | 5/11/2020 | North America / USA / California / San Diego County |
| EPI_ISL_437596 | 3/24/2020 | 5/11/2020 | North America / USA / California / San Diego County |
| EPI_ISL_437598 | 3/25/2020 | 5/11/2020 | North America / USA / California / San Diego County |
| EPI_ISL_437599 | 3/20/2020 | 5/11/2020 | North America / USA / California / San Diego County |
| EPI_ISL_437600 | 3/19/2020 | 5/11/2020 | North America / USA / California / San Diego County |
| EPI_ISL_437601 | 4/6/2020  | 5/11/2020 | Asia / Japan / Kanto                                |
| EPI_ISL_437625 | 3/18/2020 | 5/11/2020 | Europe / Poland / Dolnoslaskie                      |
| EPI_ISL_437626 | 3/24/2020 | 5/11/2020 | Asia / India / Telangana / Hyderabad                |

|                |           |                            |
|----------------|-----------|----------------------------|
| EPI_ISL_437628 | 3/31/2020 | 5/11/2020 Europe / Denmark |
| EPI_ISL_437629 | 3/31/2020 | 5/11/2020 Europe / Denmark |
| EPI_ISL_437630 | 4/1/2020  | 5/11/2020 Europe / Denmark |
| EPI_ISL_437631 | 4/2/2020  | 5/11/2020 Europe / Denmark |
| EPI_ISL_437632 | 4/2/2020  | 5/11/2020 Europe / Denmark |
| EPI_ISL_437633 | 4/1/2020  | 5/11/2020 Europe / Denmark |
| EPI_ISL_437634 | 4/1/2020  | 5/11/2020 Europe / Denmark |
| EPI_ISL_437635 | 3/18/2020 | 5/11/2020 Europe / Denmark |
| EPI_ISL_437636 | 3/31/2020 | 5/11/2020 Europe / Denmark |
| EPI_ISL_437637 | 4/2/2020  | 5/11/2020 Europe / Denmark |
| EPI_ISL_437639 | 4/2/2020  | 5/11/2020 Europe / Denmark |
| EPI_ISL_437640 | 3/27/2020 | 5/11/2020 Europe / Denmark |
| EPI_ISL_437642 | 3/8/2020  | 5/11/2020 Europe / Denmark |
| EPI_ISL_437643 | 4/2/2020  | 5/11/2020 Europe / Denmark |
| EPI_ISL_437644 | 4/2/2020  | 5/11/2020 Europe / Denmark |
| EPI_ISL_437645 | 4/2/2020  | 5/11/2020 Europe / Denmark |
| EPI_ISL_437646 | 4/2/2020  | 5/11/2020 Europe / Denmark |
| EPI_ISL_437647 | 3/8/2020  | 5/11/2020 Europe / Denmark |
| EPI_ISL_437648 | 3/8/2020  | 5/11/2020 Europe / Denmark |
| EPI_ISL_437649 | 3/8/2020  | 5/11/2020 Europe / Denmark |
| EPI_ISL_437650 | 3/8/2020  | 5/11/2020 Europe / Denmark |
| EPI_ISL_437651 | 4/4/2020  | 5/11/2020 Europe / Denmark |
| EPI_ISL_437653 | 3/26/2020 | 5/11/2020 Europe / Denmark |
| EPI_ISL_437654 | 4/4/2020  | 5/11/2020 Europe / Denmark |
| EPI_ISL_437655 | 4/4/2020  | 5/11/2020 Europe / Denmark |
| EPI_ISL_437656 | 4/3/2020  | 5/11/2020 Europe / Denmark |
| EPI_ISL_437657 | 3/10/2020 | 5/11/2020 Europe / Denmark |
| EPI_ISL_437658 | 3/10/2020 | 5/11/2020 Europe / Denmark |
| EPI_ISL_437659 | 3/10/2020 | 5/11/2020 Europe / Denmark |
| EPI_ISL_437660 | 3/6/2020  | 5/11/2020 Europe / Denmark |
| EPI_ISL_437661 | 3/10/2020 | 5/11/2020 Europe / Denmark |
| EPI_ISL_437663 | 3/2/2020  | 5/11/2020 Europe / Denmark |
| EPI_ISL_437664 | 3/10/2020 | 5/11/2020 Europe / Denmark |
| EPI_ISL_437667 | 3/27/2020 | 5/11/2020 Europe / Denmark |
| EPI_ISL_437668 | 3/27/2020 | 5/11/2020 Europe / Denmark |
| EPI_ISL_437669 | 3/30/2020 | 5/11/2020 Europe / Denmark |
| EPI_ISL_437670 | 3/30/2020 | 5/11/2020 Europe / Denmark |
| EPI_ISL_437672 | 3/28/2020 | 5/11/2020 Europe / Denmark |
| EPI_ISL_437674 | 3/28/2020 | 5/11/2020 Europe / Denmark |
| EPI_ISL_437676 | 3/28/2020 | 5/11/2020 Europe / Denmark |
| EPI_ISL_437677 | 3/28/2020 | 5/11/2020 Europe / Denmark |
| EPI_ISL_437678 | 3/28/2020 | 5/11/2020 Europe / Denmark |
| EPI_ISL_437679 | 3/30/2020 | 5/11/2020 Europe / Denmark |
| EPI_ISL_437683 | 4/1/2020  | 5/11/2020 Europe / Denmark |
| EPI_ISL_437684 | 2020-04   | 5/11/2020 Europe / Ireland |
| EPI_ISL_437685 | 2020-04   | 5/11/2020 Europe / Ireland |
| EPI_ISL_437686 | 2020-04   | 5/11/2020 Europe / Ireland |







|                |           |           |                                   |
|----------------|-----------|-----------|-----------------------------------|
| EPI_ISL_437781 | 4/17/2020 | 5/11/2020 | North America / USA / Virginia    |
| EPI_ISL_437782 | 4/17/2020 | 5/11/2020 | North America / USA / Virginia    |
| EPI_ISL_437783 | 4/16/2020 | 5/11/2020 | North America / USA / Virginia    |
| EPI_ISL_437784 | 4/17/2020 | 5/11/2020 | North America / USA / Virginia    |
| EPI_ISL_437785 | 4/17/2020 | 5/11/2020 | North America / USA / Virginia    |
| EPI_ISL_437786 | 4/8/2020  | 5/11/2020 | North America / USA / Virginia    |
| EPI_ISL_437787 | 4/9/2020  | 5/11/2020 | North America / USA / Virginia    |
| EPI_ISL_437788 | 4/9/2020  | 5/11/2020 | North America / USA / Virginia    |
| EPI_ISL_437789 | 4/11/2020 | 5/11/2020 | North America / USA / Virginia    |
| EPI_ISL_437790 | 4/14/2020 | 5/11/2020 | North America / USA / Virginia    |
| EPI_ISL_437791 | 4/14/2020 | 5/11/2020 | North America / USA / Virginia    |
| EPI_ISL_437792 | 4/14/2020 | 5/11/2020 | North America / USA / Virginia    |
| EPI_ISL_437793 | 4/14/2020 | 5/11/2020 | North America / USA / Virginia    |
| EPI_ISL_437794 | 4/15/2020 | 5/11/2020 | North America / USA / Virginia    |
| EPI_ISL_437795 | 4/16/2020 | 5/11/2020 | North America / USA / Virginia    |
| EPI_ISL_437796 | 4/8/2020  | 5/11/2020 | North America / USA / Virginia    |
| EPI_ISL_437797 | 4/8/2020  | 5/11/2020 | North America / USA / Virginia    |
| EPI_ISL_437798 | 4/8/2020  | 5/11/2020 | North America / USA / Virginia    |
| EPI_ISL_437799 | 4/8/2020  | 5/11/2020 | North America / USA / Virginia    |
| EPI_ISL_437800 | 4/1/2020  | 5/11/2020 | North America / USA / Virginia    |
| EPI_ISL_437801 | 4/13/2020 | 5/11/2020 | North America / USA / Virginia    |
| EPI_ISL_437802 | 4/13/2020 | 5/11/2020 | North America / USA / Virginia    |
| EPI_ISL_437803 | 3/29/2020 | 5/11/2020 | North America / USA               |
| EPI_ISL_437804 | 3/29/2020 | 5/11/2020 | North America / USA / Washington  |
| EPI_ISL_437805 | 3/28/2020 | 5/11/2020 | North America / USA / Washington  |
| EPI_ISL_437806 | 3/28/2020 | 5/11/2020 | North America / USA / Washington  |
| EPI_ISL_437807 | 3/29/2020 | 5/11/2020 | North America / USA / Washington  |
| EPI_ISL_437808 | 3/29/2020 | 5/11/2020 | North America / USA / Washington  |
| EPI_ISL_437809 | 3/29/2020 | 5/11/2020 | North America / USA / Washington  |
| EPI_ISL_437810 | 3/29/2020 | 5/11/2020 | North America / USA / Washington  |
| EPI_ISL_437811 | 3/29/2020 | 5/11/2020 | North America / USA / Washington  |
| EPI_ISL_437812 | 3/28/2020 | 5/11/2020 | North America / USA / Washington  |
| EPI_ISL_437813 | 4/1/2020  | 5/11/2020 | North America / USA / Washington  |
| EPI_ISL_437814 | 4/1/2020  | 5/11/2020 | North America / USA / Washington  |
| EPI_ISL_437815 | 4/1/2020  | 5/11/2020 | North America / USA / Washington  |
| EPI_ISL_437816 | 4/1/2020  | 5/11/2020 | North America / USA / Washington  |
| EPI_ISL_437817 | 4/1/2020  | 5/11/2020 | North America / USA / Washington  |
| EPI_ISL_437818 | 4/1/2020  | 5/11/2020 | North America / USA               |
| EPI_ISL_437819 | 4/1/2020  | 5/11/2020 | North America / USA               |
| EPI_ISL_437820 | 3/31/2020 | 5/11/2020 | North America / USA / Washington  |
| EPI_ISL_437821 | 3/31/2020 | 5/11/2020 | North America / USA / Washington  |
| EPI_ISL_437822 | 3/31/2020 | 5/11/2020 | North America / USA / Washington  |
| EPI_ISL_437824 | 3/31/2020 | 5/11/2020 | North America / USA / Washington  |
| EPI_ISL_437825 | 3/30/2020 | 5/11/2020 | North America / USA / Connecticut |
| EPI_ISL_437826 | 3/30/2020 | 5/11/2020 | North America / USA / Idaho       |
| EPI_ISL_437827 | 3/31/2020 | 5/11/2020 | North America / USA / Washington  |
| EPI_ISL_437828 | 3/30/2020 | 5/11/2020 | North America / USA / Idaho       |

|                |           |           |                                          |
|----------------|-----------|-----------|------------------------------------------|
| EPI_ISL_437829 | 3/31/2020 | 5/11/2020 | North America / USA / Washington         |
| EPI_ISL_437830 | 4/2/2020  | 5/11/2020 | North America / USA / Idaho              |
| EPI_ISL_437831 | 4/2/2020  | 5/11/2020 | North America / USA / Idaho              |
| EPI_ISL_437832 | 4/2/2020  | 5/11/2020 | North America / USA / Idaho              |
| EPI_ISL_437833 | 4/3/2020  | 5/11/2020 | North America / USA / Idaho              |
| EPI_ISL_437835 | 4/2/2020  | 5/11/2020 | North America / USA / Idaho              |
| EPI_ISL_437836 | 4/2/2020  | 5/11/2020 | North America / USA / Idaho              |
| EPI_ISL_437837 | 4/2/2020  | 5/11/2020 | North America / USA / Idaho              |
| EPI_ISL_437838 | 4/2/2020  | 5/11/2020 | North America / USA / Idaho              |
| EPI_ISL_437839 | 4/5/2020  | 5/11/2020 | North America / USA / Washington         |
| EPI_ISL_437840 | 4/3/2020  | 5/11/2020 | North America / USA / Washington         |
| EPI_ISL_437841 | 4/3/2020  | 5/11/2020 | North America / USA / Washington         |
| EPI_ISL_437842 | 4/4/2020  | 5/11/2020 | North America / USA / Washington         |
| EPI_ISL_437843 | 4/5/2020  | 5/11/2020 | North America / USA / Washington         |
| EPI_ISL_437844 | 4/5/2020  | 5/11/2020 | North America / USA / Washington         |
| EPI_ISL_437845 | 4/4/2020  | 5/11/2020 | North America / USA / Washington         |
| EPI_ISL_437848 | 4/3/2020  | 5/11/2020 | North America / USA / Washington         |
| EPI_ISL_437850 | 4/3/2020  | 5/11/2020 | North America / USA / Washington         |
| EPI_ISL_437851 | 4/3/2020  | 5/11/2020 | North America / USA / Washington         |
| EPI_ISL_437852 | 4/5/2020  | 5/11/2020 | North America / USA                      |
| EPI_ISL_437853 | 4/4/2020  | 5/11/2020 | North America / USA / Washington         |
| EPI_ISL_437854 | 4/4/2020  | 5/11/2020 | North America / USA / Washington         |
| EPI_ISL_437855 | 4/4/2020  | 5/11/2020 | North America / USA / Washington         |
| EPI_ISL_437856 | 4/5/2020  | 5/11/2020 | North America / USA / Washington         |
| EPI_ISL_437857 | 4/5/2020  | 5/11/2020 | North America / USA / Washington         |
| EPI_ISL_437858 | 4/5/2020  | 5/11/2020 | North America / USA / Washington         |
| EPI_ISL_437859 | 4/4/2020  | 5/11/2020 | North America / USA / Washington         |
| EPI_ISL_437860 | 4/4/2020  | 5/11/2020 | North America / USA / Washington         |
| EPI_ISL_437861 | 4/4/2020  | 5/11/2020 | North America / USA / Washington         |
| EPI_ISL_437862 | 4/4/2020  | 5/11/2020 | North America / USA / Washington         |
| EPI_ISL_437863 | 4/5/2020  | 5/11/2020 | North America / USA / Washington         |
| EPI_ISL_437864 | 4/5/2020  | 5/11/2020 | North America / USA / Washington         |
| EPI_ISL_437865 | 4/2/2020  | 5/11/2020 | North America / USA / Connecticut        |
| EPI_ISL_437866 | 4/2/2020  | 5/11/2020 | North America / USA / Connecticut        |
| EPI_ISL_437868 | 4/2/2020  | 5/11/2020 | North America / USA / Connecticut        |
| EPI_ISL_437869 | 4/3/2020  | 5/11/2020 | North America / USA / Connecticut        |
| EPI_ISL_437870 | 4/2/2020  | 5/11/2020 | North America / USA / Connecticut        |
| EPI_ISL_437871 | 4/3/2020  | 5/11/2020 | North America / USA / Connecticut        |
| EPI_ISL_437872 | 4/2/2020  | 5/11/2020 | North America / USA / Connecticut        |
| EPI_ISL_437873 | 3/31/2020 | 5/11/2020 | North America / USA / Alaska / Southeast |
| EPI_ISL_437874 | 3/20/2020 | 5/11/2020 | Europe / Greece / Athens                 |
| EPI_ISL_437875 | 3/14/2020 | 5/11/2020 | Europe / Greece / Athens                 |
| EPI_ISL_437876 | 3/12/2020 | 5/11/2020 | Europe / Greece / Athens                 |
| EPI_ISL_437877 | 3/12/2020 | 5/11/2020 | Europe / Greece / Athens                 |
| EPI_ISL_437878 | 3/14/2020 | 5/11/2020 | Europe / Greece / Athens                 |
| EPI_ISL_437879 | 3/14/2020 | 5/11/2020 | Europe / Greece / Athens                 |
| EPI_ISL_437880 | 3/14/2020 | 5/11/2020 | Europe / Greece / Athens                 |

|                |           |           |                                  |
|----------------|-----------|-----------|----------------------------------|
| EPI_ISL_437881 | 3/14/2020 | 5/11/2020 | Europe / Greece / Athens         |
| EPI_ISL_437882 | 3/14/2020 | 5/11/2020 | Europe / Greece / Athens         |
| EPI_ISL_437883 | 3/15/2020 | 5/11/2020 | Europe / Greece / Athens         |
| EPI_ISL_437884 | 3/16/2020 | 5/11/2020 | Europe / Greece / Athens         |
| EPI_ISL_437885 | 3/17/2020 | 5/11/2020 | Europe / Greece / Athens         |
| EPI_ISL_437886 | 3/17/2020 | 5/11/2020 | Europe / Greece / Athens         |
| EPI_ISL_437887 | 3/18/2020 | 5/11/2020 | Europe / Greece / Athens         |
| EPI_ISL_437888 | 3/12/2020 | 5/11/2020 | Europe / Greece / Athens         |
| EPI_ISL_437889 | 3/17/2020 | 5/11/2020 | Europe / Greece / Athens         |
| EPI_ISL_437890 | 3/18/2020 | 5/11/2020 | Europe / Greece / Athens         |
| EPI_ISL_437891 | 3/18/2020 | 5/11/2020 | Europe / Greece / Athens         |
| EPI_ISL_437892 | 3/19/2020 | 5/11/2020 | Europe / Greece / Athens         |
| EPI_ISL_437893 | 3/29/2020 | 5/11/2020 | Europe / Greece / Athens         |
| EPI_ISL_437894 | 3/5/2020  | 5/11/2020 | Europe / Greece / Athens         |
| EPI_ISL_437895 | 3/7/2020  | 5/11/2020 | Europe / Greece / Athens         |
| EPI_ISL_437896 | 3/8/2020  | 5/11/2020 | Europe / Greece / Athens         |
| EPI_ISL_437897 | 3/23/2020 | 5/11/2020 | Europe / Greece / Athens         |
| EPI_ISL_437898 | 3/28/2020 | 5/11/2020 | Europe / Greece / Athens         |
| EPI_ISL_437899 | 3/23/2020 | 5/11/2020 | Europe / Greece / Athens         |
| EPI_ISL_437900 | 3/10/2020 | 5/11/2020 | Europe / Greece / Athens         |
| EPI_ISL_437901 | 3/11/2020 | 5/11/2020 | Europe / Greece / Athens         |
| EPI_ISL_437902 | 3/14/2020 | 5/11/2020 | Europe / Greece / Athens         |
| EPI_ISL_437903 | 3/10/2020 | 5/11/2020 | Europe / Greece / Athens         |
| EPI_ISL_437904 | 3/10/2020 | 5/11/2020 | Europe / Greece / Athens         |
| EPI_ISL_437905 | 3/10/2020 | 5/11/2020 | Europe / Greece / Athens         |
| EPI_ISL_437906 | 3/10/2020 | 5/11/2020 | Europe / Greece / Athens         |
| EPI_ISL_437907 | 3/10/2020 | 5/11/2020 | Europe / Greece / Athens         |
| EPI_ISL_437908 | 3/11/2020 | 5/11/2020 | Europe / Greece / Athens         |
| EPI_ISL_437909 | 3/27/2020 | 5/11/2020 | Europe / Greece / Athens         |
| EPI_ISL_437910 | 4/1/2020  | 5/11/2020 | Europe / Greece / Athens         |
| EPI_ISL_437911 | 3/31/2020 | 5/11/2020 | Europe / Greece / Athens         |
| EPI_ISL_437912 | 4/18/2020 | 5/11/2020 | Asia / Bangladesh / Dhaka        |
| EPI_ISL_444455 | 3/13/2020 | 5/11/2020 | North America / USA / California |
| EPI_ISL_444518 | 3/13/2020 | 5/11/2020 | North America / USA / Washington |
| EPI_ISL_444519 | 3/12/2020 | 5/11/2020 | North America / USA / New York   |
| EPI_ISL_450212 | 3/19/2020 | 5/11/2020 | Oceania / Australia / Victoria   |
| EPI_ISL_450213 | 3/20/2020 | 5/11/2020 | Oceania / Australia / Victoria   |
| EPI_ISL_450214 | 3/18/2020 | 5/11/2020 | Oceania / Australia / Victoria   |
| EPI_ISL_454693 | 3/13/2020 | 5/11/2020 | North America / USA / California |
| EPI_ISL_529147 | 3/7/2020  | 5/11/2020 | Europe / Greece / Athens         |
| EPI_ISL_529148 | 3/18/2020 | 5/11/2020 | Europe / Greece / Athens         |
| EPI_ISL_437913 | 3/9/2020  | 5/12/2020 | Europe / Austria / Ischgl        |
| EPI_ISL_437914 | 3/9/2020  | 5/12/2020 | Europe / Austria / Ischgl        |
| EPI_ISL_437915 | 3/9/2020  | 5/12/2020 | Europe / Austria / Ischgl        |
| EPI_ISL_437916 | 3/19/2020 | 5/12/2020 | Europe / Austria / Ischgl        |
| EPI_ISL_437917 | 3/9/2020  | 5/12/2020 | Europe / Austria / Ischgl        |
| EPI_ISL_437918 | 3/9/2020  | 5/12/2020 | Europe / Austria / Ischgl        |

|                |           |           |                                        |
|----------------|-----------|-----------|----------------------------------------|
| EPI_ISL_437919 | 3/9/2020  | 5/12/2020 | Europe / Austria / Ischgl              |
| EPI_ISL_437920 | 3/9/2020  | 5/12/2020 | Europe / Austria / Ischgl              |
| EPI_ISL_437921 | 3/12/2020 | 5/12/2020 | Europe / Austria / Ischgl              |
| EPI_ISL_437922 | 3/12/2020 | 5/12/2020 | Europe / Austria / Ischgl              |
| EPI_ISL_437923 | 3/10/2020 | 5/12/2020 | Europe / Austria / Ischgl              |
| EPI_ISL_437924 | 3/7/2020  | 5/12/2020 | Europe / Austria / Ischgl              |
| EPI_ISL_437925 | 3/9/2020  | 5/12/2020 | Europe / Austria / Ischgl              |
| EPI_ISL_437926 | 3/9/2020  | 5/12/2020 | Europe / Austria / Ischgl              |
| EPI_ISL_437927 | 3/9/2020  | 5/12/2020 | Europe / Austria / Ischgl              |
| EPI_ISL_437928 | 3/10/2020 | 5/12/2020 | Europe / Austria / Ischgl              |
| EPI_ISL_437929 | 3/5/2020  | 5/12/2020 | Europe / Austria / Ischgl              |
| EPI_ISL_437930 | 3/9/2020  | 5/12/2020 | Europe / Austria / Ischgl              |
| EPI_ISL_437931 | 3/9/2020  | 5/12/2020 | Europe / Austria / Ischgl              |
| EPI_ISL_437932 | 2/24/2020 | 5/12/2020 | Europe / Austria / Ischgl              |
| EPI_ISL_437933 | 3/25/2020 | 5/12/2020 | Europe / Austria / Innsbruck           |
| EPI_ISL_437934 | 3/25/2020 | 5/12/2020 | Europe / Austria / Ischgl              |
| EPI_ISL_437935 | 3/30/2020 | 5/12/2020 | Europe / Austria / Ischgl              |
| EPI_ISL_437936 | 3/30/2020 | 5/12/2020 | Europe / Austria / Matrei am Brenner   |
| EPI_ISL_437937 | 3/27/2020 | 5/12/2020 | Europe / Austria / Innsbruck           |
| EPI_ISL_437938 | 4/3/2020  | 5/12/2020 | Europe / Austria / Innsbruck           |
| EPI_ISL_437939 | 4/6/2020  | 5/12/2020 | Europe / Austria / Strass im Zillertal |
| EPI_ISL_437940 | 3/12/2020 | 5/12/2020 | Europe / Austria / Innsbruck           |
| EPI_ISL_437941 | 3/11/2020 | 5/12/2020 | Europe / Austria / Ischgl              |
| EPI_ISL_437942 | 3/11/2020 | 5/12/2020 | Europe / Austria / Ischgl              |
| EPI_ISL_437943 | 3/17/2020 | 5/12/2020 | Europe / Austria / Elbigenalp          |
| EPI_ISL_437944 | 3/17/2020 | 5/12/2020 | Europe / Austria / Aldrans             |
| EPI_ISL_437945 | 3/17/2020 | 5/12/2020 | Europe / Austria / Innsbruck           |
| EPI_ISL_437946 | 3/24/2020 | 5/12/2020 | Europe / Austria / Innsbruck           |
| EPI_ISL_437947 | 3/24/2020 | 5/12/2020 | Europe / Austria / Ramsau im Zillertal |
| EPI_ISL_437948 | 3/24/2020 | 5/12/2020 | Europe / Austria / Innsbruck           |
| EPI_ISL_437949 | 3/24/2020 | 5/12/2020 | Europe / Austria / Steinach am Brenner |
| EPI_ISL_437950 | 3/24/2020 | 5/12/2020 | Europe / Austria / Zams                |
| EPI_ISL_437951 | 3/24/2020 | 5/12/2020 | Europe / Austria / Innsbruck           |
| EPI_ISL_437952 | 3/24/2020 | 5/12/2020 | Europe / Austria / Innsbruck           |
| EPI_ISL_437953 | 3/25/2020 | 5/12/2020 | Europe / Austria / Innsbruck           |
| EPI_ISL_437954 | 3/25/2020 | 5/12/2020 | Europe / Austria / Seefeld in Tirol    |
| EPI_ISL_437955 | 3/23/2020 | 5/12/2020 | Europe / Austria / Innsbruck           |
| EPI_ISL_437956 | 3/23/2020 | 5/12/2020 | Europe / Austria / Innsbruck           |
| EPI_ISL_437957 | 3/23/2020 | 5/12/2020 | Europe / Austria / Innsbruck           |
| EPI_ISL_437958 | 3/23/2020 | 5/12/2020 | Europe / Austria / Bad Gastein         |
| EPI_ISL_437959 | 3/20/2020 | 5/12/2020 | Europe / Austria / Kematen In Tirol    |
| EPI_ISL_437960 | 3/20/2020 | 5/12/2020 | Europe / Austria / Innsbruck           |
| EPI_ISL_437961 | 3/20/2020 | 5/12/2020 | Europe / Austria / Innsbruck           |
| EPI_ISL_437962 | 3/20/2020 | 5/12/2020 | Europe / Austria / Innsbruck           |
| EPI_ISL_437963 | 3/19/2020 | 5/12/2020 | Europe / Austria / Innsbruck           |
| EPI_ISL_437964 | 3/19/2020 | 5/12/2020 | Europe / Austria / Innsbruck           |
| EPI_ISL_437965 | 3/19/2020 | 5/12/2020 | Europe / Austria / Innsbruck           |

|                |           |           |                                |
|----------------|-----------|-----------|--------------------------------|
| EPI_ISL_437966 | 3/18/2020 | 5/12/2020 | Europe / Austria / Laengenfeld |
| EPI_ISL_437967 | 3/13/2020 | 5/12/2020 | Europe / Austria / St. Anton   |
| EPI_ISL_437968 | 3/12/2020 | 5/12/2020 | Europe / Austria / Innsbruck   |
| EPI_ISL_437969 | 3/12/2020 | 5/12/2020 | Europe / Austria / Innsbruck   |
| EPI_ISL_437970 | 3/17/2020 | 5/12/2020 | Europe / Austria / Sistrans    |
| EPI_ISL_437971 | 3/18/2020 | 5/12/2020 | Europe / Austria / Innsbruck   |
| EPI_ISL_437972 | 3/18/2020 | 5/12/2020 | Europe / Austria / St. Anton   |
| EPI_ISL_437973 | 3/18/2020 | 5/12/2020 | Europe / Austria / Innsbruck   |
| EPI_ISL_437974 | 3/10/2020 | 5/12/2020 | Europe / Austria / Ischgl      |
| EPI_ISL_437975 | 3/13/2020 | 5/12/2020 | Europe / Austria / Ischgl      |
| EPI_ISL_437976 | 3/11/2020 | 5/12/2020 | Europe / Austria / Ischgl      |
| EPI_ISL_437977 | 3/15/2020 | 5/12/2020 | Europe / Austria / Ischgl      |
| EPI_ISL_437978 | 3/11/2020 | 5/12/2020 | Europe / Austria / Ischgl      |
| EPI_ISL_437979 | 3/11/2020 | 5/12/2020 | Europe / Austria / Ischgl      |
| EPI_ISL_437980 | 3/11/2020 | 5/12/2020 | Europe / Austria / Ischgl      |
| EPI_ISL_437981 | 3/11/2020 | 5/12/2020 | Europe / Austria / Ischgl      |
| EPI_ISL_437982 | 3/11/2020 | 5/12/2020 | Europe / Austria / Ischgl      |
| EPI_ISL_437983 | 3/11/2020 | 5/12/2020 | Europe / Austria / Ischgl      |
| EPI_ISL_437984 | 3/11/2020 | 5/12/2020 | Europe / Austria / Ischgl      |
| EPI_ISL_437985 | 3/13/2020 | 5/12/2020 | Europe / Austria / Ischgl      |
| EPI_ISL_437986 | 3/13/2020 | 5/12/2020 | Europe / Austria / Ischgl      |
| EPI_ISL_437987 | 3/13/2020 | 5/12/2020 | Europe / Austria / Ischgl      |
| EPI_ISL_437988 | 3/13/2020 | 5/12/2020 | Europe / Austria / Ischgl      |
| EPI_ISL_437989 | 3/13/2020 | 5/12/2020 | Europe / Austria / Ischgl      |
| EPI_ISL_437990 | 3/13/2020 | 5/12/2020 | Europe / Austria / Ischgl      |
| EPI_ISL_437991 | 3/13/2020 | 5/12/2020 | Europe / Austria / Ischgl      |
| EPI_ISL_437992 | 3/13/2020 | 5/12/2020 | Europe / Austria / Ischgl      |
| EPI_ISL_437993 | 2/27/2020 | 5/12/2020 | Europe / Austria / Vienna      |
| EPI_ISL_437994 | 2/28/2020 | 5/12/2020 | Europe / Austria / Vienna      |
| EPI_ISL_437995 | 2/28/2020 | 5/12/2020 | Europe / Austria / Vienna      |
| EPI_ISL_437996 | 3/2/2020  | 5/12/2020 | Europe / Austria / Vienna      |
| EPI_ISL_437997 | 3/3/2020  | 5/12/2020 | Europe / Austria / Vienna      |
| EPI_ISL_437998 | 3/3/2020  | 5/12/2020 | Europe / Austria / Vienna      |
| EPI_ISL_437999 | 3/3/2020  | 5/12/2020 | Europe / Austria / Vienna      |
| EPI_ISL_438000 | 3/3/2020  | 5/12/2020 | Europe / Austria / Vienna      |
| EPI_ISL_438001 | 3/3/2020  | 5/12/2020 | Europe / Austria               |
| EPI_ISL_438002 | 3/3/2020  | 5/12/2020 | Europe / Austria               |
| EPI_ISL_438003 | 3/4/2020  | 5/12/2020 | Europe / Austria / Vienna      |
| EPI_ISL_438004 | 3/4/2020  | 5/12/2020 | Europe / Austria / Vienna      |
| EPI_ISL_438005 | 3/4/2020  | 5/12/2020 | Europe / Austria / Vienna      |
| EPI_ISL_438006 | 3/4/2020  | 5/12/2020 | Europe / Austria / Vienna      |
| EPI_ISL_438007 | 3/5/2020  | 5/12/2020 | Europe / Austria / Vienna      |
| EPI_ISL_438008 | 3/5/2020  | 5/12/2020 | Europe / Austria / Vienna      |
| EPI_ISL_438009 | 3/6/2020  | 5/12/2020 | Europe / Austria               |
| EPI_ISL_438010 | 3/6/2020  | 5/12/2020 | Europe / Austria / Vienna      |
| EPI_ISL_438011 | 3/6/2020  | 5/12/2020 | Europe / Austria / Vienna      |
| EPI_ISL_438012 | 3/6/2020  | 5/12/2020 | Europe / Austria / Vienna      |







|                |           |                                                               |
|----------------|-----------|---------------------------------------------------------------|
| EPI_ISL_438107 | 3/25/2020 | 5/12/2020 Europe / Austria / Vienna                           |
| EPI_ISL_438108 | 3/25/2020 | 5/12/2020 Europe / Austria / Vienna                           |
| EPI_ISL_438109 | 3/25/2020 | 5/12/2020 Europe / Austria / Vienna                           |
| EPI_ISL_438110 | 3/26/2020 | 5/12/2020 Europe / Austria / Vienna                           |
| EPI_ISL_438111 | 3/26/2020 | 5/12/2020 Europe / Austria / Burgenland                       |
| EPI_ISL_438112 | 3/26/2020 | 5/12/2020 Europe / Austria / Vienna                           |
| EPI_ISL_438113 | 3/26/2020 | 5/12/2020 Europe / Austria / Vienna                           |
| EPI_ISL_438114 | 3/27/2020 | 5/12/2020 Europe / Austria / Tyrol                            |
| EPI_ISL_438115 | 3/27/2020 | 5/12/2020 Europe / Austria / Tyrol                            |
| EPI_ISL_438116 | 3/27/2020 | 5/12/2020 Europe / Austria / Burgenland                       |
| EPI_ISL_438117 | 3/27/2020 | 5/12/2020 Europe / Austria / Vienna                           |
| EPI_ISL_438118 | 3/27/2020 | 5/12/2020 Europe / Austria / Vienna                           |
| EPI_ISL_438119 | 3/27/2020 | 5/12/2020 Europe / Austria / Vienna                           |
| EPI_ISL_438120 | 3/19/2020 | 5/12/2020 Europe / Austria / Vienna                           |
| EPI_ISL_438121 | 3/31/2020 | 5/12/2020 Europe / Austria / Vienna                           |
| EPI_ISL_438122 | 4/2/2020  | 5/12/2020 Europe / Austria / Vienna                           |
| EPI_ISL_438123 | 4/5/2020  | 5/12/2020 Europe / Austria / Vienna                           |
| EPI_ISL_438124 | 3/22/2020 | 5/12/2020 Europe / Austria / Vienna                           |
| EPI_ISL_438125 | 3/30/2020 | 5/12/2020 Europe / Austria / Vienna                           |
| EPI_ISL_438126 | 4/2/2020  | 5/12/2020 Europe / Austria / Vienna                           |
| EPI_ISL_438127 | 4/5/2020  | 5/12/2020 Europe / Austria / Vienna                           |
| EPI_ISL_438128 | 4/7/2020  | 5/12/2020 Europe / Austria / Vienna                           |
| EPI_ISL_438138 | 3/25/2020 | 5/12/2020 Asia / India / Telangana / Hyderabad                |
| EPI_ISL_438139 | 3/25/2020 | 5/12/2020 Asia / India / Telangana / Hyderabad                |
| EPI_ISL_438140 | 4/1/2020  | 5/12/2020 North America / USA / Washington                    |
| EPI_ISL_438141 | 4/2/2020  | 5/12/2020 North America / USA / Washington / King County      |
| EPI_ISL_438142 | 4/4/2020  | 5/12/2020 North America / USA / Washington / King County      |
| EPI_ISL_438143 | 4/4/2020  | 5/12/2020 North America / USA / Washington / King County      |
| EPI_ISL_438144 | 4/4/2020  | 5/12/2020 North America / USA / Washington / King County      |
| EPI_ISL_438145 | 4/4/2020  | 5/12/2020 North America / USA / Washington / King County      |
| EPI_ISL_438147 | 4/12/2020 | 5/12/2020 North America / USA / Washington / King County      |
| EPI_ISL_438148 | 4/12/2020 | 5/12/2020 North America / USA / Washington / King County      |
| EPI_ISL_438149 | 4/13/2020 | 5/12/2020 North America / USA / Washington                    |
| EPI_ISL_438150 | 4/13/2020 | 5/12/2020 North America / USA / Washington                    |
| EPI_ISL_438151 | 4/13/2020 | 5/12/2020 North America / USA / Washington / King County      |
| EPI_ISL_438152 | 3/26/2020 | 5/12/2020 North America / USA / Washington / Snohomish County |
| EPI_ISL_438153 | 4/15/2020 | 5/12/2020 North America / USA / Washington / King County      |
| EPI_ISL_438154 | 3/20/2020 | 5/12/2020 North America / USA / Washington / King County      |
| EPI_ISL_438155 | 3/23/2020 | 5/12/2020 North America / USA / Washington / King County      |
| EPI_ISL_438156 | 4/15/2020 | 5/12/2020 North America / USA / Washington                    |
| EPI_ISL_438157 | 4/19/2020 | 5/12/2020 North America / USA / Washington / King County      |
| EPI_ISL_438158 | 4/18/2020 | 5/12/2020 North America / USA / Washington / King County      |
| EPI_ISL_438159 | 4/20/2020 | 5/12/2020 North America / USA / Washington / King County      |
| EPI_ISL_438160 | 4/20/2020 | 5/12/2020 North America / USA / Washington / King County      |
| EPI_ISL_438161 | 4/19/2020 | 5/12/2020 North America / USA / Washington / King County      |
| EPI_ISL_438162 | 4/23/2020 | 5/12/2020 North America / USA / Washington                    |
| EPI_ISL_438163 | 4/23/2020 | 5/12/2020 North America / USA / Washington                    |



|                |           |           |                                                     |
|----------------|-----------|-----------|-----------------------------------------------------|
| EPI_ISL_438212 | 4/21/2020 | 5/12/2020 | North America / USA / Washington / Snohomish County |
| EPI_ISL_438213 | 4/21/2020 | 5/12/2020 | North America / USA / Washington / King County      |
| EPI_ISL_438214 | 4/21/2020 | 5/12/2020 | North America / USA / Washington / Yakima County    |
| EPI_ISL_438215 | 4/20/2020 | 5/12/2020 | North America / USA / Washington / Yakima County    |
| EPI_ISL_438216 | 4/21/2020 | 5/12/2020 | North America / USA / Washington / Yakima County    |
| EPI_ISL_438217 | 4/22/2020 | 5/12/2020 | North America / USA / Washington / Yakima County    |
| EPI_ISL_438218 | 4/22/2020 | 5/12/2020 | North America / USA / Washington / Yakima County    |
| EPI_ISL_438219 | 4/22/2020 | 5/12/2020 | North America / USA / Washington / Yakima County    |
| EPI_ISL_438220 | 4/21/2020 | 5/12/2020 | North America / USA / Washington / Yakima County    |
| EPI_ISL_438221 | 4/22/2020 | 5/12/2020 | North America / USA / Washington / Yakima County    |
| EPI_ISL_438222 | 3/17/2020 | 5/12/2020 | North America / USA / Maryland                      |
| EPI_ISL_438223 | 3/14/2020 | 5/12/2020 | North America / USA / District of Columbia          |
| EPI_ISL_438224 | 3/26/2020 | 5/12/2020 | North America / USA / Maryland                      |
| EPI_ISL_438225 | 3/21/2020 | 5/12/2020 | North America / USA / Maryland                      |
| EPI_ISL_438226 | 3/16/2020 | 5/12/2020 | North America / USA / Maryland                      |
| EPI_ISL_438228 | 3/21/2020 | 5/12/2020 | North America / USA / Maryland                      |
| EPI_ISL_438229 | 3/17/2020 | 5/12/2020 | North America / USA / District of Columbia          |
| EPI_ISL_438230 | 3/11/2020 | 5/12/2020 | North America / USA / District of Columbia          |
| EPI_ISL_438231 | 3/17/2020 | 5/12/2020 | North America / USA / District of Columbia          |
| EPI_ISL_438233 | 3/8/2020  | 5/12/2020 | North America / USA / Maryland                      |
| EPI_ISL_438234 | 3/11/2020 | 5/12/2020 | North America / USA / Maryland                      |
| EPI_ISL_438235 | 3/23/2020 | 5/12/2020 | North America / USA / Maryland                      |
| EPI_ISL_438237 | 3/20/2020 | 5/12/2020 | North America / USA / District of Columbia          |
| EPI_ISL_438240 | 3/26/2020 | 5/12/2020 | North America / USA / Maryland                      |
| EPI_ISL_438241 | 3/30/2020 | 5/12/2020 | North America / USA / Maryland                      |
| EPI_ISL_438242 | 3/31/2020 | 5/12/2020 | North America / USA / District of Columbia          |
| EPI_ISL_438243 | 3/27/2020 | 5/12/2020 | North America / USA / District of Columbia          |
| EPI_ISL_438244 | 3/26/2020 | 5/12/2020 | North America / USA / District of Columbia          |
| EPI_ISL_438245 | 3/14/2020 | 5/12/2020 | North America / USA / District of Columbia          |
| EPI_ISL_438246 | 3/18/2020 | 5/12/2020 | North America / USA / Maryland                      |
| EPI_ISL_438247 | 3/17/2020 | 5/12/2020 | North America / USA / Maryland                      |
| EPI_ISL_438257 | 3/30/2020 | 5/12/2020 | Europe / United Kingdom / England                   |
| EPI_ISL_438259 | 3/30/2020 | 5/12/2020 | Europe / United Kingdom / England                   |
| EPI_ISL_438260 | 3/29/2020 | 5/12/2020 | Europe / United Kingdom / England                   |
| EPI_ISL_438262 | 3/29/2020 | 5/12/2020 | Europe / United Kingdom / England                   |
| EPI_ISL_438265 | 3/31/2020 | 5/12/2020 | Europe / United Kingdom / England                   |
| EPI_ISL_438266 | 3/29/2020 | 5/12/2020 | Europe / United Kingdom / England                   |
| EPI_ISL_438267 | 3/30/2020 | 5/12/2020 | Europe / United Kingdom / England                   |
| EPI_ISL_438268 | 3/30/2020 | 5/12/2020 | Europe / United Kingdom / England                   |
| EPI_ISL_438269 | 3/30/2020 | 5/12/2020 | Europe / United Kingdom / England                   |
| EPI_ISL_438270 | 3/29/2020 | 5/12/2020 | Europe / United Kingdom / England                   |
| EPI_ISL_438272 | 3/30/2020 | 5/12/2020 | Europe / United Kingdom / England                   |
| EPI_ISL_438273 | 3/30/2020 | 5/12/2020 | Europe / United Kingdom / England                   |
| EPI_ISL_438274 | 3/30/2020 | 5/12/2020 | Europe / United Kingdom / England                   |
| EPI_ISL_438276 | 3/28/2020 | 5/12/2020 | Europe / United Kingdom / England                   |
| EPI_ISL_438277 | 3/28/2020 | 5/12/2020 | Europe / United Kingdom / England                   |
| EPI_ISL_438278 | 3/30/2020 | 5/12/2020 | Europe / United Kingdom / England                   |

















































































































|                |           |                                             |
|----------------|-----------|---------------------------------------------|
| EPI_ISL_441892 | 4/30/2020 | 5/12/2020 Europe / United Kingdom / England |
| EPI_ISL_441894 | 4/30/2020 | 5/12/2020 Europe / United Kingdom / England |
| EPI_ISL_441895 | 4/30/2020 | 5/12/2020 Europe / United Kingdom / England |
| EPI_ISL_441896 | 4/30/2020 | 5/12/2020 Europe / United Kingdom / England |
| EPI_ISL_441897 | 4/30/2020 | 5/12/2020 Europe / United Kingdom / England |
| EPI_ISL_441898 | 4/10/2020 | 5/12/2020 Europe / United Kingdom / England |
| EPI_ISL_441913 | 4/11/2020 | 5/12/2020 Europe / United Kingdom / England |
| EPI_ISL_441916 | 4/10/2020 | 5/12/2020 Europe / United Kingdom / England |
| EPI_ISL_441932 | 4/8/2020  | 5/12/2020 Europe / United Kingdom / England |
| EPI_ISL_441935 | 4/11/2020 | 5/12/2020 Europe / United Kingdom / England |
| EPI_ISL_441942 | 4/9/2020  | 5/12/2020 Europe / United Kingdom / England |
| EPI_ISL_441952 | 4/8/2020  | 5/12/2020 Europe / United Kingdom / England |
| EPI_ISL_441955 | 4/12/2020 | 5/12/2020 Europe / United Kingdom / England |
| EPI_ISL_441975 | 3/26/2020 | 5/12/2020 Europe / United Kingdom / England |
| EPI_ISL_441981 | 3/26/2020 | 5/12/2020 Europe / United Kingdom / England |
| EPI_ISL_441984 | 3/24/2020 | 5/12/2020 Europe / United Kingdom / England |
| EPI_ISL_441991 | 4/12/2020 | 5/12/2020 Europe / United Kingdom / England |
| EPI_ISL_441999 | 4/9/2020  | 5/12/2020 Europe / United Kingdom / England |
| EPI_ISL_442001 | 3/25/2020 | 5/12/2020 Europe / United Kingdom / England |
| EPI_ISL_442013 | 3/30/2020 | 5/12/2020 Europe / United Kingdom / England |
| EPI_ISL_442032 | 4/19/2020 | 5/12/2020 Europe / United Kingdom / England |
| EPI_ISL_442043 | 4/12/2020 | 5/12/2020 Europe / United Kingdom / England |
| EPI_ISL_442044 | 3/26/2020 | 5/12/2020 Asia / Iran / Tehran              |
| EPI_ISL_442045 | 4/5/2020  | 5/12/2020 Europe / United Kingdom / England |
| EPI_ISL_442046 | 4/4/2020  | 5/12/2020 Europe / United Kingdom / England |
| EPI_ISL_442047 | 4/5/2020  | 5/12/2020 Europe / United Kingdom / England |
| EPI_ISL_442048 | 4/5/2020  | 5/12/2020 Europe / United Kingdom / England |
| EPI_ISL_442049 | 4/6/2020  | 5/12/2020 Europe / United Kingdom / England |
| EPI_ISL_442050 | 4/4/2020  | 5/12/2020 Europe / United Kingdom / England |
| EPI_ISL_442051 | 4/6/2020  | 5/12/2020 Europe / United Kingdom / England |
| EPI_ISL_442053 | 4/5/2020  | 5/12/2020 Europe / United Kingdom / England |
| EPI_ISL_442054 | 4/5/2020  | 5/12/2020 Europe / United Kingdom / England |
| EPI_ISL_442055 | 4/6/2020  | 5/12/2020 Europe / United Kingdom / England |
| EPI_ISL_442056 | 4/7/2020  | 5/12/2020 Europe / United Kingdom / England |
| EPI_ISL_442057 | 4/5/2020  | 5/12/2020 Europe / United Kingdom / England |
| EPI_ISL_442058 | 4/6/2020  | 5/12/2020 Europe / United Kingdom / England |
| EPI_ISL_442059 | 4/5/2020  | 5/12/2020 Europe / United Kingdom / England |
| EPI_ISL_442060 | 4/4/2020  | 5/12/2020 Europe / United Kingdom / England |
| EPI_ISL_442061 | 4/4/2020  | 5/12/2020 Europe / United Kingdom / England |
| EPI_ISL_442062 | 4/5/2020  | 5/12/2020 Europe / United Kingdom / England |
| EPI_ISL_442064 | 4/5/2020  | 5/12/2020 Europe / United Kingdom / England |
| EPI_ISL_442066 | 4/4/2020  | 5/12/2020 Europe / United Kingdom / England |
| EPI_ISL_442067 | 4/6/2020  | 5/12/2020 Europe / United Kingdom / England |
| EPI_ISL_442068 | 4/5/2020  | 5/12/2020 Europe / United Kingdom / England |
| EPI_ISL_442070 | 4/6/2020  | 5/12/2020 Europe / United Kingdom / England |
| EPI_ISL_442071 | 4/4/2020  | 5/12/2020 Europe / United Kingdom / England |
| EPI_ISL_442073 | 4/2/2020  | 5/12/2020 Europe / United Kingdom / England |



































|                |           |                                             |
|----------------|-----------|---------------------------------------------|
| EPI_ISL_443116 | 4/12/2020 | 5/12/2020 Europe / United Kingdom / England |
| EPI_ISL_443183 | 4/5/2020  | 5/12/2020 North America / USA / Minnesota   |
| EPI_ISL_443184 | 3/31/2020 | 5/12/2020 North America / USA / Washington  |
| EPI_ISL_443185 | 3/30/2020 | 5/12/2020 North America / USA / Oregon      |
| EPI_ISL_443186 | 3/31/2020 | 5/12/2020 North America / USA / Washington  |
| EPI_ISL_443187 | 3/11/2020 | 5/12/2020 Asia / Brunei                     |
| EPI_ISL_443188 | 3/18/2020 | 5/12/2020 Asia / Singapore                  |
| EPI_ISL_443189 | 3/18/2020 | 5/12/2020 Asia / Singapore                  |
| EPI_ISL_443190 | 4/9/2020  | 5/12/2020 Asia / Singapore                  |
| EPI_ISL_443191 | 4/16/2020 | 5/12/2020 Asia / Singapore                  |
| EPI_ISL_443192 | 4/20/2020 | 5/12/2020 Asia / Singapore                  |
| EPI_ISL_443193 | 3/16/2020 | 5/12/2020 Asia / Singapore                  |
| EPI_ISL_443195 | 3/11/2020 | 5/12/2020 Asia / Singapore                  |
| EPI_ISL_443197 | 3/18/2020 | 5/12/2020 Asia / Singapore                  |
| EPI_ISL_443198 | 3/12/2020 | 5/12/2020 Asia / Singapore                  |
| EPI_ISL_443199 | 3/16/2020 | 5/12/2020 Asia / Singapore                  |
| EPI_ISL_443200 | 3/18/2020 | 5/12/2020 Asia / Singapore                  |
| EPI_ISL_443201 | 3/5/2020  | 5/12/2020 Asia / Singapore                  |
| EPI_ISL_443202 | 3/18/2020 | 5/12/2020 Asia / Singapore                  |
| EPI_ISL_443203 | 3/18/2020 | 5/12/2020 Asia / Singapore                  |
| EPI_ISL_443204 | 3/18/2020 | 5/12/2020 Asia / Singapore                  |
| EPI_ISL_443205 | 3/18/2020 | 5/12/2020 Asia / Singapore                  |
| EPI_ISL_443206 | 3/18/2020 | 5/12/2020 Asia / Singapore                  |
| EPI_ISL_443207 | 3/18/2020 | 5/12/2020 Asia / Singapore                  |
| EPI_ISL_443208 | 3/18/2020 | 5/12/2020 Asia / Singapore                  |
| EPI_ISL_443209 | 3/18/2020 | 5/12/2020 Asia / Singapore                  |
| EPI_ISL_443210 | 3/18/2020 | 5/12/2020 Asia / Singapore                  |
| EPI_ISL_443211 | 3/18/2020 | 5/12/2020 Asia / Singapore                  |
| EPI_ISL_443212 | 4/8/2020  | 5/12/2020 Asia / Singapore                  |
| EPI_ISL_443213 | 4/8/2020  | 5/12/2020 Asia / Singapore                  |
| EPI_ISL_443214 | 3/18/2020 | 5/12/2020 Asia / Singapore                  |
| EPI_ISL_443215 | 3/18/2020 | 5/12/2020 Asia / Singapore                  |
| EPI_ISL_443216 | 3/19/2020 | 5/12/2020 Asia / Singapore                  |
| EPI_ISL_443217 | 3/21/2020 | 5/12/2020 Asia / Singapore                  |
| EPI_ISL_443218 | 3/20/2020 | 5/12/2020 Asia / Singapore                  |
| EPI_ISL_443219 | 3/20/2020 | 5/12/2020 Asia / Singapore                  |
| EPI_ISL_443220 | 3/21/2020 | 5/12/2020 Asia / Singapore                  |
| EPI_ISL_443221 | 3/20/2020 | 5/12/2020 Asia / Singapore                  |
| EPI_ISL_443222 | 3/20/2020 | 5/12/2020 Asia / Singapore                  |
| EPI_ISL_443223 | 3/20/2020 | 5/12/2020 Asia / Singapore                  |
| EPI_ISL_443224 | 3/20/2020 | 5/12/2020 Asia / Singapore                  |
| EPI_ISL_443225 | 3/20/2020 | 5/12/2020 Asia / Singapore                  |
| EPI_ISL_443226 | 3/16/2020 | 5/12/2020 Asia / Singapore                  |
| EPI_ISL_443227 | 3/16/2020 | 5/12/2020 Asia / Singapore                  |
| EPI_ISL_443228 | 3/18/2020 | 5/12/2020 Asia / Singapore                  |
| EPI_ISL_443229 | 3/16/2020 | 5/12/2020 Asia / Singapore                  |
| EPI_ISL_443230 | 3/17/2020 | 5/12/2020 Asia / Singapore                  |

|                |           |                                                             |
|----------------|-----------|-------------------------------------------------------------|
| EPI_ISL_443231 | 3/17/2020 | 5/12/2020 Asia / Singapore                                  |
| EPI_ISL_443232 | 3/17/2020 | 5/12/2020 Asia / Singapore                                  |
| EPI_ISL_443233 | 3/17/2020 | 5/12/2020 Asia / Singapore                                  |
| EPI_ISL_443234 | 3/17/2020 | 5/12/2020 Asia / Singapore                                  |
| EPI_ISL_443235 | 3/17/2020 | 5/12/2020 Asia / Singapore                                  |
| EPI_ISL_443236 | 3/17/2020 | 5/12/2020 Asia / Singapore                                  |
| EPI_ISL_443237 | 3/17/2020 | 5/12/2020 Asia / Singapore                                  |
| EPI_ISL_443238 | 3/17/2020 | 5/12/2020 Asia / Singapore                                  |
| EPI_ISL_443239 | 3/17/2020 | 5/12/2020 Asia / Singapore                                  |
| EPI_ISL_443240 | 3/17/2020 | 5/12/2020 Asia / Singapore                                  |
| EPI_ISL_443241 | 3/18/2020 | 5/12/2020 Asia / Singapore                                  |
| EPI_ISL_443242 | 3/18/2020 | 5/12/2020 Asia / Singapore                                  |
| EPI_ISL_443243 | 3/18/2020 | 5/12/2020 Asia / Singapore                                  |
| EPI_ISL_443244 | 4/8/2020  | 5/12/2020 Asia / Singapore                                  |
| EPI_ISL_443245 | 4/8/2020  | 5/12/2020 Asia / Singapore                                  |
| EPI_ISL_443246 | 4/8/2020  | 5/12/2020 Asia / Singapore                                  |
| EPI_ISL_443247 | 4/15/2020 | 5/12/2020 Asia / Singapore                                  |
| EPI_ISL_443248 | 3/20/2020 | 5/12/2020 Asia / Singapore                                  |
| EPI_ISL_443249 | 3/20/2020 | 5/12/2020 Asia / Singapore                                  |
| EPI_ISL_443253 | 4/4/2020  | 5/12/2020 North America / USA / Minnesota                   |
| EPI_ISL_443254 | 4/2/2020  | 5/12/2020 North America / USA / Minnesota                   |
| EPI_ISL_443255 | 3/31/2020 | 5/12/2020 North America / USA / Minnesota                   |
| EPI_ISL_443256 | 4/3/2020  | 5/12/2020 North America / USA / Minnesota                   |
| EPI_ISL_443258 | 4/2/2020  | 5/12/2020 Europe / France / Île-de-France / Paris           |
| EPI_ISL_443259 | 4/2/2020  | 5/12/2020 Europe / France / Île-de-France / Paris           |
| EPI_ISL_443260 | 4/2/2020  | 5/12/2020 Europe / France / Île-de-France / Longjumeau      |
| EPI_ISL_443261 | 4/3/2020  | 5/12/2020 Europe / France / Bourgogne-Franche-Comte / Dijon |
| EPI_ISL_443262 | 4/2/2020  | 5/12/2020 Europe / France / Bourgogne-Franche-Comte / Dijon |
| EPI_ISL_443263 | 4/2/2020  | 5/12/2020 Europe / France / Bourgogne-Franche-Comte / Dijon |
| EPI_ISL_443264 | 4/2/2020  | 5/12/2020 Europe / France / Bourgogne-Franche-Comte / Dijon |
| EPI_ISL_443265 | 4/3/2020  | 5/12/2020 Europe / France / Bretagne / Brest                |
| EPI_ISL_443266 | 3/16/2020 | 5/12/2020 Europe / France / Bretagne / Brest                |
| EPI_ISL_443267 | 3/18/2020 | 5/12/2020 Europe / France / Bretagne / Brest                |
| EPI_ISL_443268 | 3/18/2020 | 5/12/2020 Europe / France / Bretagne / Brest                |
| EPI_ISL_443269 | 3/21/2020 | 5/12/2020 Europe / France / Bretagne / Brest                |
| EPI_ISL_443270 | 3/23/2020 | 5/12/2020 Europe / France / Bretagne / Brest                |
| EPI_ISL_443271 | 3/24/2020 | 5/12/2020 Europe / France / Bretagne / Brest                |
| EPI_ISL_443272 | 3/24/2020 | 5/12/2020 Europe / France / Bretagne / Brest                |
| EPI_ISL_443273 | 3/24/2020 | 5/12/2020 Europe / France / Bretagne / Brest                |
| EPI_ISL_443274 | 3/25/2020 | 5/12/2020 Europe / France / Bretagne / Brest                |
| EPI_ISL_443275 | 3/27/2020 | 5/12/2020 Europe / France / Bretagne / Brest                |
| EPI_ISL_443276 | 3/27/2020 | 5/12/2020 Europe / France / Bretagne / Brest                |
| EPI_ISL_443277 | 3/28/2020 | 5/12/2020 Europe / France / Bretagne / Brest                |
| EPI_ISL_443278 | 3/29/2020 | 5/12/2020 Europe / France / Bretagne / Brest                |
| EPI_ISL_443279 | 4/1/2020  | 5/12/2020 Europe / France / Bretagne / Brest                |
| EPI_ISL_443280 | 4/1/2020  | 5/12/2020 Europe / France / Bretagne / Brest                |
| EPI_ISL_443281 | 4/3/2020  | 5/12/2020 Europe / France / Bretagne / Brest                |

|                |           |                                                                      |
|----------------|-----------|----------------------------------------------------------------------|
| EPI_ISL_443282 | 3/22/2020 | 5/12/2020 Europe / France / Bretagne / Brest                         |
| EPI_ISL_443283 | 3/23/2020 | 5/12/2020 Europe / France / Bretagne / Brest                         |
| EPI_ISL_443284 | 4/2/2020  | 5/12/2020 Europe / France / Hauts-de-France / Pontoise               |
| EPI_ISL_443285 | 4/2/2020  | 5/12/2020 Europe / France / Hauts-de-France / Pontoise               |
| EPI_ISL_443286 | 4/2/2020  | 5/12/2020 Europe / France / Hauts-de-France / Pontoise               |
| EPI_ISL_443287 | 4/3/2020  | 5/12/2020 Europe / France / Hauts-de-France / Pontoise               |
| EPI_ISL_443288 | 4/3/2020  | 5/12/2020 Europe / France / Hauts-de-France / Pontoise               |
| EPI_ISL_443289 | 3/27/2020 | 5/12/2020 Europe / France / Bretagne / Rennes                        |
| EPI_ISL_443290 | 3/31/2020 | 5/12/2020 Europe / France / Bretagne / Rennes                        |
| EPI_ISL_443291 | 4/2/2020  | 5/12/2020 Europe / France / Bretagne / Rennes                        |
| EPI_ISL_443292 | 4/3/2020  | 5/12/2020 Europe / France / Bretagne / Rennes                        |
| EPI_ISL_443293 | 4/3/2020  | 5/12/2020 Europe / France / Bretagne / Rennes                        |
| EPI_ISL_443294 | 4/6/2020  | 5/12/2020 Europe / France / Bretagne / Rennes                        |
| EPI_ISL_443295 | 3/19/2020 | 5/12/2020 Europe / France / Île-de-France / Paris                    |
| EPI_ISL_443296 | 3/19/2020 | 5/12/2020 Europe / France / Île-de-France / Paris                    |
| EPI_ISL_443298 | 3/25/2020 | 5/12/2020 Europe / France / Île-de-France / Paris                    |
| EPI_ISL_443299 | 3/25/2020 | 5/12/2020 Europe / France / Île-de-France / Paris                    |
| EPI_ISL_443300 | 3/17/2020 | 5/12/2020 Europe / France / Île-de-France / Pecq                     |
| EPI_ISL_443301 | 3/23/2020 | 5/12/2020 Europe / France / Île-de-France / Guyancourt               |
| EPI_ISL_443302 | 3/23/2020 | 5/12/2020 Europe / France / Île-de-France / Cergy                    |
| EPI_ISL_443303 | 4/9/2020  | 5/12/2020 Europe / France / Île-de-France / Asnieres sur Seine       |
| EPI_ISL_443305 | 4/13/2020 | 5/12/2020 Europe / France / Île-de-France / Longjumeau               |
| EPI_ISL_443306 | 4/2/2020  | 5/12/2020 Europe / France / Île-de-France / Moussy le Neuf           |
| EPI_ISL_443307 | 4/9/2020  | 5/12/2020 Europe / France / Bourgogne-Franche-Comte / Chalon sur Sac |
| EPI_ISL_443308 | 4/15/2020 | 5/12/2020 Europe / France / Grand Est / Nancy                        |
| EPI_ISL_443309 | 3/25/2020 | 5/12/2020 Europe / France / Hauts-de-France / Compiègne              |
| EPI_ISL_443310 | 3/20/2020 | 5/12/2020 Europe / France / Grand Est / Ham sous Varsberg            |
| EPI_ISL_443311 | 3/23/2020 | 5/12/2020 Europe / France / Île-de-France / Montigny le Bretonneux   |
| EPI_ISL_443312 | 3/24/2020 | 5/12/2020 Europe / France / Centre-Val de Loire / Abondant           |
| EPI_ISL_443313 | 3/5/2020  | 5/12/2020 Europe / France / Bretagne / Ploudalmezeau                 |
| EPI_ISL_443314 | 4/14/2020 | 5/12/2020 Europe / France / Île-de-France / Longjumeau               |
| EPI_ISL_443315 | 4/2/2020  | 5/12/2020 Europe / France / Hauts-de-France / Nogent l'Artaud        |
| EPI_ISL_443316 | 3/25/2020 | 5/12/2020 Europe / France / Hauts-de-France / Compiègne              |
| EPI_ISL_443317 | 3/23/2020 | 5/12/2020 Europe / France / Île-de-France / Cergy                    |
| EPI_ISL_443319 | 4/15/2020 | 5/12/2020 Europe / United Kingdom / England                          |
| EPI_ISL_443332 | 4/15/2020 | 5/12/2020 Europe / United Kingdom / England                          |
| EPI_ISL_443335 | 4/13/2020 | 5/12/2020 Europe / United Kingdom / England                          |
| EPI_ISL_443336 | 4/15/2020 | 5/12/2020 Europe / United Kingdom / England                          |
| EPI_ISL_443338 | 4/15/2020 | 5/12/2020 Europe / United Kingdom / England                          |
| EPI_ISL_443340 | 4/15/2020 | 5/12/2020 Europe / United Kingdom / England                          |
| EPI_ISL_443342 | 4/16/2020 | 5/12/2020 Europe / United Kingdom / England                          |
| EPI_ISL_443343 | 4/16/2020 | 5/12/2020 Europe / United Kingdom / England                          |
| EPI_ISL_443345 | 4/16/2020 | 5/12/2020 Europe / United Kingdom / England                          |
| EPI_ISL_443349 | 4/15/2020 | 5/12/2020 Europe / United Kingdom / England                          |
| EPI_ISL_443353 | 4/12/2020 | 5/12/2020 Europe / United Kingdom / England                          |
| EPI_ISL_443359 | 4/15/2020 | 5/12/2020 Europe / United Kingdom / England                          |
| EPI_ISL_443360 | 4/16/2020 | 5/12/2020 Europe / United Kingdom / England                          |























|                |           |           |                                                         |
|----------------|-----------|-----------|---------------------------------------------------------|
| EPI_ISL_443976 | 3/26/2020 | 5/12/2020 | Europe / United Kingdom / England                       |
| EPI_ISL_443978 | 3/29/2020 | 5/12/2020 | Europe / United Kingdom / England                       |
| EPI_ISL_443980 | 3/28/2020 | 5/12/2020 | Europe / United Kingdom / England                       |
| EPI_ISL_443981 | 3/27/2020 | 5/12/2020 | Europe / United Kingdom / England                       |
| EPI_ISL_443982 | 3/26/2020 | 5/12/2020 | Europe / United Kingdom / England                       |
| EPI_ISL_443983 | 3/29/2020 | 5/12/2020 | Europe / United Kingdom / England                       |
| EPI_ISL_443985 | 3/26/2020 | 5/12/2020 | Europe / United Kingdom / England                       |
| EPI_ISL_443986 | 3/25/2020 | 5/12/2020 | Europe / United Kingdom / England                       |
| EPI_ISL_443987 | 3/29/2020 | 5/12/2020 | Europe / United Kingdom / England                       |
| EPI_ISL_443988 | 3/26/2020 | 5/12/2020 | Europe / United Kingdom / England                       |
| EPI_ISL_443989 | 3/27/2020 | 5/12/2020 | Europe / United Kingdom / England                       |
| EPI_ISL_443990 | 3/26/2020 | 5/12/2020 | Europe / United Kingdom / England                       |
| EPI_ISL_443991 | 3/26/2020 | 5/12/2020 | Europe / United Kingdom / England                       |
| EPI_ISL_443992 | 3/30/2020 | 5/12/2020 | Europe / United Kingdom / England                       |
| EPI_ISL_443996 | 3/28/2020 | 5/12/2020 | Europe / United Kingdom / England                       |
| EPI_ISL_443997 | 3/26/2020 | 5/12/2020 | Europe / United Kingdom / England                       |
| EPI_ISL_443998 | 3/26/2020 | 5/12/2020 | Europe / United Kingdom / England                       |
| EPI_ISL_443999 | 3/26/2020 | 5/12/2020 | Europe / United Kingdom / England                       |
| EPI_ISL_444000 | 3/27/2020 | 5/12/2020 | Europe / United Kingdom / England                       |
| EPI_ISL_444001 | 3/26/2020 | 5/12/2020 | Europe / United Kingdom / England                       |
| EPI_ISL_444002 | 3/26/2020 | 5/12/2020 | Europe / United Kingdom / England                       |
| EPI_ISL_444003 | 3/27/2020 | 5/12/2020 | Europe / United Kingdom / England                       |
| EPI_ISL_444006 | 3/27/2020 | 5/12/2020 | Europe / United Kingdom / England                       |
| EPI_ISL_444007 | 3/26/2020 | 5/12/2020 | Europe / United Kingdom / England                       |
| EPI_ISL_444009 | 3/25/2020 | 5/12/2020 | Europe / United Kingdom / England                       |
| EPI_ISL_444010 | 3/25/2020 | 5/12/2020 | Europe / United Kingdom / England                       |
| EPI_ISL_444011 | 3/28/2020 | 5/12/2020 | Europe / United Kingdom / England                       |
| EPI_ISL_444012 | 3/26/2020 | 5/12/2020 | Europe / United Kingdom / England                       |
| EPI_ISL_444013 | 3/30/2020 | 5/12/2020 | Europe / United Kingdom / England                       |
| EPI_ISL_444015 | 3/25/2020 | 5/12/2020 | Europe / United Kingdom / England                       |
| EPI_ISL_444016 | 3/26/2020 | 5/12/2020 | Europe / United Kingdom / England                       |
| EPI_ISL_444018 | 3/29/2020 | 5/12/2020 | Europe / United Kingdom / England                       |
| EPI_ISL_444019 | 3/26/2020 | 5/12/2020 | Europe / United Kingdom / England                       |
| EPI_ISL_444020 | 3/27/2020 | 5/12/2020 | Europe / United Kingdom / England                       |
| EPI_ISL_444021 | 3/26/2020 | 5/12/2020 | Europe / United Kingdom / England                       |
| EPI_ISL_445087 | 4/4/2020  | 5/12/2020 | Europe / Serbia / Kraljevo                              |
| EPI_ISL_447656 | 2020-03   | 5/12/2020 | Europe / France                                         |
| EPI_ISL_444022 | 3/18/2020 | 5/13/2020 | North America / USA / Texas / Houston County            |
| EPI_ISL_444023 | 5/1/2020  | 5/13/2020 | North America / USA / California / Santa Clara County   |
| EPI_ISL_444024 | 5/1/2020  | 5/13/2020 | North America / USA / California / Santa Clara County   |
| EPI_ISL_444025 | 5/1/2020  | 5/13/2020 | North America / USA / California / Santa Clara County   |
| EPI_ISL_444026 | 5/1/2020  | 5/13/2020 | North America / USA / California / Santa Clara County   |
| EPI_ISL_444051 | 4/27/2020 | 5/13/2020 | North America / USA / California / San Francisco County |
| EPI_ISL_444052 | 4/27/2020 | 5/13/2020 | North America / USA / California / San Francisco County |
| EPI_ISL_444053 | 4/27/2020 | 5/13/2020 | North America / USA / California / San Francisco County |
| EPI_ISL_444054 | 4/29/2020 | 5/13/2020 | North America / USA / California / San Francisco County |
| EPI_ISL_444055 | 4/26/2020 | 5/13/2020 | North America / USA / California / San Francisco County |











|                |           |           |                                    |
|----------------|-----------|-----------|------------------------------------|
| EPI_ISL_444372 | 4/28/2020 | 5/13/2020 | Europe / United Kingdom / England  |
| EPI_ISL_444374 | 4/29/2020 | 5/13/2020 | Europe / United Kingdom / England  |
| EPI_ISL_444375 | 2020      | 5/13/2020 | Europe / United Kingdom / England  |
| EPI_ISL_444376 | 4/29/2020 | 5/13/2020 | Europe / United Kingdom / England  |
| EPI_ISL_444377 | 4/28/2020 | 5/13/2020 | Europe / United Kingdom / England  |
| EPI_ISL_444384 | 4/27/2020 | 5/13/2020 | Europe / United Kingdom / England  |
| EPI_ISL_444393 | 4/20/2020 | 5/13/2020 | Europe / United Kingdom / England  |
| EPI_ISL_444394 | 4/7/2020  | 5/13/2020 | Europe / United Kingdom / England  |
| EPI_ISL_444395 | 4/10/2020 | 5/13/2020 | Europe / United Kingdom / England  |
| EPI_ISL_444397 | 4/16/2020 | 5/13/2020 | Europe / United Kingdom / England  |
| EPI_ISL_444398 | 4/19/2020 | 5/13/2020 | Europe / United Kingdom / England  |
| EPI_ISL_444400 | 4/15/2020 | 5/13/2020 | Europe / United Kingdom / England  |
| EPI_ISL_444402 | 4/18/2020 | 5/13/2020 | Europe / United Kingdom / England  |
| EPI_ISL_444407 | 4/20/2020 | 5/13/2020 | Europe / United Kingdom / England  |
| EPI_ISL_444413 | 4/20/2020 | 5/13/2020 | Europe / United Kingdom / England  |
| EPI_ISL_444415 | 4/20/2020 | 5/13/2020 | Europe / United Kingdom / England  |
| EPI_ISL_444416 | 4/20/2020 | 5/13/2020 | Europe / United Kingdom / England  |
| EPI_ISL_444417 | 4/20/2020 | 5/13/2020 | Europe / United Kingdom / England  |
| EPI_ISL_444418 | 4/19/2020 | 5/13/2020 | Europe / United Kingdom / England  |
| EPI_ISL_444419 | 4/20/2020 | 5/13/2020 | Europe / United Kingdom / England  |
| EPI_ISL_444420 | 4/19/2020 | 5/13/2020 | Europe / United Kingdom / England  |
| EPI_ISL_444421 | 4/19/2020 | 5/13/2020 | Europe / United Kingdom / England  |
| EPI_ISL_444422 | 4/19/2020 | 5/13/2020 | Europe / United Kingdom / England  |
| EPI_ISL_444423 | 4/19/2020 | 5/13/2020 | Europe / United Kingdom / England  |
| EPI_ISL_444430 | 4/18/2020 | 5/13/2020 | Europe / United Kingdom / England  |
| EPI_ISL_444432 | 4/20/2020 | 5/13/2020 | Europe / United Kingdom / England  |
| EPI_ISL_444434 | 2020      | 5/13/2020 | Europe / United Kingdom / England  |
| EPI_ISL_444435 | 4/18/2020 | 5/13/2020 | Europe / United Kingdom / England  |
| EPI_ISL_444436 | 4/17/2020 | 5/13/2020 | Europe / United Kingdom / England  |
| EPI_ISL_444437 | 4/18/2020 | 5/13/2020 | Europe / United Kingdom / England  |
| EPI_ISL_444438 | 4/17/2020 | 5/13/2020 | Europe / United Kingdom / England  |
| EPI_ISL_444439 | 4/16/2020 | 5/13/2020 | Europe / United Kingdom / England  |
| EPI_ISL_444440 | 4/17/2020 | 5/13/2020 | Europe / United Kingdom / England  |
| EPI_ISL_444441 | 4/17/2020 | 5/13/2020 | Europe / United Kingdom / England  |
| EPI_ISL_444442 | 4/17/2020 | 5/13/2020 | Europe / United Kingdom / England  |
| EPI_ISL_444443 | 4/17/2020 | 5/13/2020 | Europe / United Kingdom / England  |
| EPI_ISL_444445 | 2020      | 5/13/2020 | Europe / United Kingdom / England  |
| EPI_ISL_444446 | 4/16/2020 | 5/13/2020 | Europe / United Kingdom / England  |
| EPI_ISL_444447 | 4/16/2020 | 5/13/2020 | Europe / United Kingdom / England  |
| EPI_ISL_444448 | 4/15/2020 | 5/13/2020 | Europe / United Kingdom / England  |
| EPI_ISL_444449 | 4/15/2020 | 5/13/2020 | Europe / United Kingdom / England  |
| EPI_ISL_444450 | 4/15/2020 | 5/13/2020 | Europe / United Kingdom / England  |
| EPI_ISL_444451 | 4/15/2020 | 5/13/2020 | Europe / United Kingdom / England  |
| EPI_ISL_444452 | 4/14/2020 | 5/13/2020 | Europe / United Kingdom / England  |
| EPI_ISL_444453 | 4/15/2020 | 5/13/2020 | Europe / United Kingdom / England  |
| EPI_ISL_444456 | 4/26/2020 | 5/13/2020 | Asia / India / Gujarat / Ahmedabad |
| EPI_ISL_444457 | 4/26/2020 | 5/13/2020 | Asia / India / Gujarat / Ahmedabad |



|                |           |                                                |
|----------------|-----------|------------------------------------------------|
| EPI_ISL_444458 | 4/26/2020 | 5/13/2020 Asia / India / Gujarat / Ahmedabad   |
| EPI_ISL_444459 | 4/30/2020 | 5/13/2020 Asia / India / Gujarat / Ahmedabad   |
| EPI_ISL_444460 | 4/30/2020 | 5/13/2020 Asia / India / Gujarat / Ahmedabad   |
| EPI_ISL_444461 | 4/29/2020 | 5/13/2020 Asia / India / Gujarat / Ahmedabad   |
| EPI_ISL_444462 | 4/29/2020 | 5/13/2020 Asia / India / Gujarat / Ahmedabad   |
| EPI_ISL_444463 | 4/29/2020 | 5/13/2020 Asia / India / Gujarat / Ahmedabad   |
| EPI_ISL_444464 | 4/29/2020 | 5/13/2020 Asia / India / Gujarat / Ahmedabad   |
| EPI_ISL_444465 | 4/29/2020 | 5/13/2020 Asia / India / Gujarat / Ahmedabad   |
| EPI_ISL_444466 | 4/29/2020 | 5/13/2020 Asia / India / Gujarat / Ahmedabad   |
| EPI_ISL_444467 | 4/29/2020 | 5/13/2020 Asia / India / Gujarat / Ahmedabad   |
| EPI_ISL_444468 | 4/29/2020 | 5/13/2020 Asia / India / Gujarat / Ahmedabad   |
| EPI_ISL_444469 | 4/29/2020 | 5/13/2020 Asia / India / Gujarat / Ahmedabad   |
| EPI_ISL_444470 | 4/29/2020 | 5/13/2020 Asia / India / Gujarat / Ahmedabad   |
| EPI_ISL_444471 | 4/29/2020 | 5/13/2020 Asia / India / Gujarat / Ahmedabad   |
| EPI_ISL_444472 | 4/29/2020 | 5/13/2020 Asia / India / Gujarat / Ahmedabad   |
| EPI_ISL_444473 | 4/29/2020 | 5/13/2020 Asia / India / Gujarat / Ahmedabad   |
| EPI_ISL_444474 | 4/29/2020 | 5/13/2020 Asia / India / Gujarat / Ahmedabad   |
| EPI_ISL_444475 | 4/29/2020 | 5/13/2020 Asia / India / Gujarat / Ahmedabad   |
| EPI_ISL_444476 | 4/29/2020 | 5/13/2020 Asia / India / Gujarat / Ahmedabad   |
| EPI_ISL_444477 | 4/29/2020 | 5/13/2020 Asia / India / Gujarat / Ahmedabad   |
| EPI_ISL_444478 | 4/30/2020 | 5/13/2020 Asia / India / Gujarat / Ahmedabad   |
| EPI_ISL_444479 | 4/29/2020 | 5/13/2020 Asia / India / Gujarat / Ahmedabad   |
| EPI_ISL_444480 | 4/30/2020 | 5/13/2020 Asia / India / Gujarat / Ahmedabad   |
| EPI_ISL_444481 | 4/30/2020 | 5/13/2020 Asia / India / Gujarat / Ahmedabad   |
| EPI_ISL_444482 | 5/2/2020  | 5/13/2020 Asia / India / Gujarat / Prantij     |
| EPI_ISL_444483 | 5/2/2020  | 5/13/2020 Asia / India / Gujarat / Prantij     |
| EPI_ISL_444484 | 5/4/2020  | 5/13/2020 Asia / India / Gujarat / Modasa      |
| EPI_ISL_444485 | 5/4/2020  | 5/13/2020 Asia / India / Gujarat / Modasa      |
| EPI_ISL_444486 | 5/4/2020  | 5/13/2020 Asia / India / Gujarat / Dhansura    |
| EPI_ISL_444487 | 2020-03   | 5/13/2020 Europe / Sweden / Stockholm          |
| EPI_ISL_444488 | 2020-03   | 5/13/2020 Europe / Sweden / Stockholm          |
| EPI_ISL_444489 | 2020-03   | 5/13/2020 Europe / Sweden / Stockholm          |
| EPI_ISL_444490 | 2020-03   | 5/13/2020 Europe / Sweden / Stockholm          |
| EPI_ISL_444491 | 2020-03   | 5/13/2020 Europe / Sweden / Stockholm          |
| EPI_ISL_444492 | 2020-03   | 5/13/2020 Europe / Sweden / Stockholm          |
| EPI_ISL_444493 | 3/13/2020 | 5/13/2020 South America / Uruguay / Montevideo |
| EPI_ISL_444495 | 4/5/2020  | 5/13/2020 North America / Canada / Quebec      |
| EPI_ISL_444500 | 4/7/2020  | 5/13/2020 North America / Canada / Quebec      |
| EPI_ISL_447635 | 3/12/2020 | 5/13/2020 Europe / Greece / Athens             |
| EPI_ISL_447636 | 3/13/2020 | 5/13/2020 Europe / Greece / Athens             |
| EPI_ISL_447637 | 3/13/2020 | 5/13/2020 Europe / Greece / Athens             |
| EPI_ISL_447638 | 3/13/2020 | 5/13/2020 Europe / Greece / Athens             |
| EPI_ISL_447639 | 3/14/2020 | 5/13/2020 Europe / Greece / Athens             |
| EPI_ISL_447640 | 3/16/2020 | 5/13/2020 Europe / Greece / Athens             |
| EPI_ISL_447641 | 3/18/2020 | 5/13/2020 Europe / Greece / Athens             |
| EPI_ISL_447642 | 3/14/2020 | 5/13/2020 Europe / Greece / Athens             |
| EPI_ISL_447643 | 3/22/2020 | 5/13/2020 Europe / Greece / Athens             |







|                |           |           |                                                         |
|----------------|-----------|-----------|---------------------------------------------------------|
| EPI_ISL_444583 | 3/19/2020 | 5/14/2020 | North America / USA / Illinois / Chicago                |
| EPI_ISL_444585 | 3/15/2020 | 5/14/2020 | North America / USA / Illinois / Chicago                |
| EPI_ISL_444586 | 3/21/2020 | 5/14/2020 | North America / USA / Illinois / Chicago                |
| EPI_ISL_444587 | 3/21/2020 | 5/14/2020 | North America / USA / Illinois / Chicago                |
| EPI_ISL_444588 | 3/21/2020 | 5/14/2020 | North America / USA / Illinois / Chicago                |
| EPI_ISL_444589 | 3/20/2020 | 5/14/2020 | North America / USA / Illinois / Chicago                |
| EPI_ISL_444590 | 3/20/2020 | 5/14/2020 | North America / USA / Illinois / Chicago                |
| EPI_ISL_444591 | 3/20/2020 | 5/14/2020 | North America / USA / Illinois / Chicago                |
| EPI_ISL_444592 | 3/20/2020 | 5/14/2020 | North America / USA / Illinois / Chicago                |
| EPI_ISL_444593 | 3/20/2020 | 5/14/2020 | North America / USA / Illinois / Chicago                |
| EPI_ISL_444594 | 3/20/2020 | 5/14/2020 | North America / USA / Illinois / Chicago                |
| EPI_ISL_444595 | 3/20/2020 | 5/14/2020 | North America / USA / Illinois / Chicago                |
| EPI_ISL_444596 | 3/20/2020 | 5/14/2020 | North America / USA / Illinois / Chicago                |
| EPI_ISL_444597 | 3/19/2020 | 5/14/2020 | North America / USA / Illinois / Chicago                |
| EPI_ISL_444598 | 3/19/2020 | 5/14/2020 | North America / USA / Illinois / Chicago                |
| EPI_ISL_444599 | 3/19/2020 | 5/14/2020 | North America / USA / Illinois / Chicago                |
| EPI_ISL_444600 | 3/21/2020 | 5/14/2020 | North America / USA / Illinois / Chicago                |
| EPI_ISL_444601 | 3/21/2020 | 5/14/2020 | North America / USA / Illinois / Chicago                |
| EPI_ISL_444603 | 3/21/2020 | 5/14/2020 | North America / USA / Illinois / Chicago                |
| EPI_ISL_444604 | 3/21/2020 | 5/14/2020 | North America / USA / Illinois / Chicago                |
| EPI_ISL_444605 | 3/21/2020 | 5/14/2020 | North America / USA / Illinois / Chicago                |
| EPI_ISL_444606 | 3/20/2020 | 5/14/2020 | North America / USA / Illinois / Chicago                |
| EPI_ISL_444607 | 3/21/2020 | 5/14/2020 | North America / USA / Illinois / Chicago                |
| EPI_ISL_444608 | 3/21/2020 | 5/14/2020 | North America / USA / Illinois / Chicago                |
| EPI_ISL_444609 | 3/21/2020 | 5/14/2020 | North America / USA / Illinois / Chicago                |
| EPI_ISL_444610 | 3/24/2020 | 5/14/2020 | Oceania / Guam                                          |
| EPI_ISL_444611 | 3/22/2020 | 5/14/2020 | Oceania / Australia / Queensland / Southeast Queensland |
| EPI_ISL_444612 | 3/23/2020 | 5/14/2020 | Oceania / Australia / Queensland / Brisbane             |
| EPI_ISL_444613 | 4/3/2020  | 5/14/2020 | North America / USA / New York / Queens                 |
| EPI_ISL_444615 | 4/3/2020  | 5/14/2020 | North America / USA / New York / Manhattan              |
| EPI_ISL_444616 | 3/30/2020 | 5/14/2020 | North America / USA / New York / Brooklyn               |
| EPI_ISL_444617 | 3/30/2020 | 5/14/2020 | North America / USA / New York / Queens                 |
| EPI_ISL_444618 | 3/30/2020 | 5/14/2020 | North America / USA / New York / Brooklyn               |
| EPI_ISL_444619 | 3/30/2020 | 5/14/2020 | North America / USA / New York / Nassau County          |
| EPI_ISL_444620 | 3/30/2020 | 5/14/2020 | North America / USA / New York / Manhattan              |
| EPI_ISL_444621 | 3/30/2020 | 5/14/2020 | North America / USA / New York / Queens                 |
| EPI_ISL_444622 | 3/30/2020 | 5/14/2020 | North America / USA / New York / Nassau County          |
| EPI_ISL_444623 | 3/30/2020 | 5/14/2020 | North America / USA / New York / Suffolk County         |
| EPI_ISL_444624 | 3/30/2020 | 5/14/2020 | North America / USA / New York / Brooklyn               |
| EPI_ISL_444625 | 3/30/2020 | 5/14/2020 | North America / USA / New York / Queens                 |
| EPI_ISL_444626 | 3/30/2020 | 5/14/2020 | North America / USA / New York / Rockland County        |
| EPI_ISL_444627 | 3/30/2020 | 5/14/2020 | North America / USA / New York / Nassau County          |
| EPI_ISL_444628 | 3/30/2020 | 5/14/2020 | North America / USA / New York / Queens                 |
| EPI_ISL_444629 | 3/30/2020 | 5/14/2020 | North America / USA / New York / Rockland County        |
| EPI_ISL_444630 | 3/30/2020 | 5/14/2020 | North America / USA / New York / Staten Island          |
| EPI_ISL_444631 | 3/30/2020 | 5/14/2020 | North America / USA / New York / Queens                 |
| EPI_ISL_444632 | 3/30/2020 | 5/14/2020 | North America / USA / New York / Queens                 |

|                |           |           |                                                |
|----------------|-----------|-----------|------------------------------------------------|
| EPI_ISL_444633 | 3/30/2020 | 5/14/2020 | North America / USA / New York / Manhattan     |
| EPI_ISL_444634 | 3/30/2020 | 5/14/2020 | North America / USA / New York / Bronx         |
| EPI_ISL_444635 | 3/30/2020 | 5/14/2020 | North America / USA / New York / Manhattan     |
| EPI_ISL_444636 | 3/30/2020 | 5/14/2020 | North America / USA / New York / Bronx         |
| EPI_ISL_444637 | 3/30/2020 | 5/14/2020 | North America / USA / New York / Manhattan     |
| EPI_ISL_444638 | 3/30/2020 | 5/14/2020 | North America / USA / New York / Queens        |
| EPI_ISL_444639 | 3/30/2020 | 5/14/2020 | North America / USA / New York / Manhattan     |
| EPI_ISL_444640 | 3/30/2020 | 5/14/2020 | North America / USA / New York / Manhattan     |
| EPI_ISL_444641 | 3/30/2020 | 5/14/2020 | North America / USA / New York / Bronx         |
| EPI_ISL_444642 | 3/30/2020 | 5/14/2020 | North America / USA / New York / Brooklyn      |
| EPI_ISL_444643 | 3/29/2020 | 5/14/2020 | North America / USA / New York / Manhattan     |
| EPI_ISL_444644 | 3/29/2020 | 5/14/2020 | North America / USA / New York / Brooklyn      |
| EPI_ISL_444645 | 3/29/2020 | 5/14/2020 | North America / USA / New York / Brooklyn      |
| EPI_ISL_444646 | 3/29/2020 | 5/14/2020 | North America / USA / New York / Brooklyn      |
| EPI_ISL_444647 | 3/29/2020 | 5/14/2020 | North America / USA / New York                 |
| EPI_ISL_444648 | 3/29/2020 | 5/14/2020 | North America / USA / New York / Brooklyn      |
| EPI_ISL_444650 | 3/30/2020 | 5/14/2020 | North America / USA / New York / Brooklyn      |
| EPI_ISL_444651 | 3/29/2020 | 5/14/2020 | North America / USA / New York / Manhattan     |
| EPI_ISL_444652 | 3/30/2020 | 5/14/2020 | North America / USA / New York / Queens        |
| EPI_ISL_444653 | 3/30/2020 | 5/14/2020 | North America / USA / New York / Brooklyn      |
| EPI_ISL_444654 | 3/30/2020 | 5/14/2020 | North America / USA / New York / Manhattan     |
| EPI_ISL_444655 | 3/30/2020 | 5/14/2020 | North America / USA / New Jersey               |
| EPI_ISL_444656 | 3/30/2020 | 5/14/2020 | North America / USA / New York / Queens        |
| EPI_ISL_444657 | 3/30/2020 | 5/14/2020 | North America / USA / New York / Brooklyn      |
| EPI_ISL_444658 | 3/30/2020 | 5/14/2020 | North America / USA / New York / Queens        |
| EPI_ISL_444659 | 3/30/2020 | 5/14/2020 | North America / USA / New York / Queens        |
| EPI_ISL_444660 | 3/30/2020 | 5/14/2020 | North America / USA / New York / Queens        |
| EPI_ISL_444661 | 3/30/2020 | 5/14/2020 | North America / USA / New York / Brooklyn      |
| EPI_ISL_444662 | 3/31/2020 | 5/14/2020 | North America / USA / New York / Nassau County |
| EPI_ISL_444663 | 3/31/2020 | 5/14/2020 | North America / USA / New York / Brooklyn      |
| EPI_ISL_444664 | 3/30/2020 | 5/14/2020 | North America / USA / New York / Brooklyn      |
| EPI_ISL_444665 | 3/30/2020 | 5/14/2020 | North America / USA / New York / Brooklyn      |
| EPI_ISL_444666 | 3/30/2020 | 5/14/2020 | North America / USA / New York / Bronx         |
| EPI_ISL_444667 | 3/30/2020 | 5/14/2020 | North America / USA / New York / Staten Island |
| EPI_ISL_444668 | 3/30/2020 | 5/14/2020 | North America / USA / New York / Brooklyn      |
| EPI_ISL_444669 | 3/31/2020 | 5/14/2020 | North America / USA / New York / Brooklyn      |
| EPI_ISL_444670 | 3/30/2020 | 5/14/2020 | North America / USA / New Jersey               |
| EPI_ISL_444671 | 3/30/2020 | 5/14/2020 | North America / USA / New York / Manhattan     |
| EPI_ISL_444673 | 3/31/2020 | 5/14/2020 | North America / USA / New York / Queens        |
| EPI_ISL_444675 | 3/30/2020 | 5/14/2020 | North America / USA / New York / Nassau County |
| EPI_ISL_444677 | 3/31/2020 | 5/14/2020 | North America / USA / New York / Queens        |
| EPI_ISL_444678 | 3/30/2020 | 5/14/2020 | North America / USA / New York / Nassau County |
| EPI_ISL_444679 | 3/30/2020 | 5/14/2020 | North America / USA / New York / Manhattan     |
| EPI_ISL_444680 | 3/30/2020 | 5/14/2020 | North America / USA / New York / Nassau County |
| EPI_ISL_444681 | 3/30/2020 | 5/14/2020 | North America / USA / New York / Nassau County |
| EPI_ISL_444682 | 3/30/2020 | 5/14/2020 | North America / USA / New York / Brooklyn      |
| EPI_ISL_444683 | 3/30/2020 | 5/14/2020 | North America / USA / New York / Staten Island |

|                |           |           |                                                     |
|----------------|-----------|-----------|-----------------------------------------------------|
| EPI_ISL_444684 | 3/30/2020 | 5/14/2020 | North America / USA / New York / Queens             |
| EPI_ISL_444685 | 3/30/2020 | 5/14/2020 | North America / USA / New York / Manhattan          |
| EPI_ISL_444686 | 3/30/2020 | 5/14/2020 | North America / USA / New York / Nassau County      |
| EPI_ISL_444687 | 3/30/2020 | 5/14/2020 | North America / USA / New York / Brooklyn           |
| EPI_ISL_444688 | 3/30/2020 | 5/14/2020 | North America / USA / New York / Brooklyn           |
| EPI_ISL_444690 | 3/30/2020 | 5/14/2020 | North America / USA / New York / Nassau County      |
| EPI_ISL_444691 | 3/30/2020 | 5/14/2020 | North America / USA / New York / Queens             |
| EPI_ISL_444692 | 3/30/2020 | 5/14/2020 | North America / USA / New York / Nassau County      |
| EPI_ISL_444693 | 3/30/2020 | 5/14/2020 | North America / USA / New York / Westchester County |
| EPI_ISL_444694 | 3/30/2020 | 5/14/2020 | North America / USA / New York / Queens             |
| EPI_ISL_444695 | 3/30/2020 | 5/14/2020 | North America / USA / New York / Nassau County      |
| EPI_ISL_444696 | 3/30/2020 | 5/14/2020 | North America / USA / New York / Nassau County      |
| EPI_ISL_444697 | 3/30/2020 | 5/14/2020 | North America / USA / New York / Nassau County      |
| EPI_ISL_444698 | 3/30/2020 | 5/14/2020 | North America / USA / New York / Nassau County      |
| EPI_ISL_444699 | 3/30/2020 | 5/14/2020 | North America / USA / New York / Nassau County      |
| EPI_ISL_444700 | 3/30/2020 | 5/14/2020 | North America / USA / New York / Queens             |
| EPI_ISL_444701 | 3/30/2020 | 5/14/2020 | North America / USA / New York / Nassau County      |
| EPI_ISL_444702 | 3/30/2020 | 5/14/2020 | North America / USA / New York / Brooklyn           |
| EPI_ISL_444703 | 3/30/2020 | 5/14/2020 | North America / USA / New York / Nassau County      |
| EPI_ISL_444704 | 3/30/2020 | 5/14/2020 | North America / USA / New York / Queens             |
| EPI_ISL_444705 | 3/30/2020 | 5/14/2020 | North America / USA / New York / Brooklyn           |
| EPI_ISL_444706 | 3/31/2020 | 5/14/2020 | North America / USA / New York / Queens             |
| EPI_ISL_444707 | 4/3/2020  | 5/14/2020 | North America / USA / New York / Queens             |
| EPI_ISL_444708 | 4/1/2020  | 5/14/2020 | North America / USA / New York / Bronx              |
| EPI_ISL_444710 | 4/1/2020  | 5/14/2020 | North America / USA / New York / Queens             |
| EPI_ISL_444711 | 4/2/2020  | 5/14/2020 | North America / USA / New York / Queens             |
| EPI_ISL_444712 | 4/2/2020  | 5/14/2020 | North America / USA / New York / Brooklyn           |
| EPI_ISL_444713 | 4/2/2020  | 5/14/2020 | North America / USA / New York / Brooklyn           |
| EPI_ISL_444714 | 4/3/2020  | 5/14/2020 | North America / USA / New York / Queens             |
| EPI_ISL_444715 | 4/3/2020  | 5/14/2020 | North America / USA / New York / Queens             |
| EPI_ISL_444716 | 4/3/2020  | 5/14/2020 | North America / USA / New York / Manhattan          |
| EPI_ISL_444717 | 4/3/2020  | 5/14/2020 | North America / USA / New York / Nassau County      |
| EPI_ISL_444718 | 4/3/2020  | 5/14/2020 | North America / USA / New York / Queens             |
| EPI_ISL_444719 | 4/3/2020  | 5/14/2020 | North America / USA / New York / Queens             |
| EPI_ISL_444720 | 4/3/2020  | 5/14/2020 | North America / USA / New York / Queens             |
| EPI_ISL_444721 | 4/3/2020  | 5/14/2020 | North America / USA / New York / Brooklyn           |
| EPI_ISL_444722 | 4/3/2020  | 5/14/2020 | North America / USA / New York / Brooklyn           |
| EPI_ISL_444723 | 4/3/2020  | 5/14/2020 | North America / USA / New York / Manhattan          |
| EPI_ISL_444724 | 4/2/2020  | 5/14/2020 | North America / USA / New York / Bronx              |
| EPI_ISL_444725 | 4/2/2020  | 5/14/2020 | North America / USA / New York / Manhattan          |
| EPI_ISL_444726 | 4/2/2020  | 5/14/2020 | North America / USA / New York / Manhattan          |
| EPI_ISL_444727 | 4/2/2020  | 5/14/2020 | North America / USA / New York / Manhattan          |
| EPI_ISL_444728 | 4/1/2020  | 5/14/2020 | North America / USA / New York / Queens             |
| EPI_ISL_444729 | 4/1/2020  | 5/14/2020 | North America / USA / New York / Nassau County      |
| EPI_ISL_444730 | 4/2/2020  | 5/14/2020 | North America / USA / New York / Bronx              |
| EPI_ISL_444731 | 4/1/2020  | 5/14/2020 | North America / USA / New York / Nassau County      |
| EPI_ISL_444732 | 4/2/2020  | 5/14/2020 | North America / USA / New York / Nassau County      |

|                |           |           |                                                     |
|----------------|-----------|-----------|-----------------------------------------------------|
| EPI_ISL_444733 | 4/1/2020  | 5/14/2020 | North America / USA / New York / Nassau County      |
| EPI_ISL_444734 | 4/2/2020  | 5/14/2020 | North America / USA / New York / Queens             |
| EPI_ISL_444735 | 4/2/2020  | 5/14/2020 | North America / USA / New York / Brooklyn           |
| EPI_ISL_444736 | 4/2/2020  | 5/14/2020 | North America / USA / New York / Queens             |
| EPI_ISL_444737 | 4/2/2020  | 5/14/2020 | North America / USA / New York / Manhattan          |
| EPI_ISL_444738 | 4/2/2020  | 5/14/2020 | North America / USA / New York / Bronx              |
| EPI_ISL_444739 | 4/2/2020  | 5/14/2020 | North America / USA / New York / Manhattan          |
| EPI_ISL_444740 | 4/2/2020  | 5/14/2020 | North America / USA / New York / Bronx              |
| EPI_ISL_444741 | 4/2/2020  | 5/14/2020 | North America / USA / New York / Manhattan          |
| EPI_ISL_444742 | 4/2/2020  | 5/14/2020 | North America / USA / New Jersey / Hudson County    |
| EPI_ISL_444743 | 4/2/2020  | 5/14/2020 | North America / USA / New York / Suffolk County     |
| EPI_ISL_444744 | 4/2/2020  | 5/14/2020 | North America / USA / New Jersey / Hudson County    |
| EPI_ISL_444745 | 4/2/2020  | 5/14/2020 | North America / USA / New York / Nassau County      |
| EPI_ISL_444746 | 4/2/2020  | 5/14/2020 | North America / USA / New York / Suffolk County     |
| EPI_ISL_444747 | 4/2/2020  | 5/14/2020 | North America / USA / New York / Nassau County      |
| EPI_ISL_444748 | 4/2/2020  | 5/14/2020 | North America / USA / New York / Suffolk County     |
| EPI_ISL_444749 | 4/2/2020  | 5/14/2020 | North America / USA / New York / Manhattan          |
| EPI_ISL_444750 | 4/2/2020  | 5/14/2020 | North America / USA / New York / Westchester County |
| EPI_ISL_444751 | 4/2/2020  | 5/14/2020 | North America / USA / New York / Brooklyn           |
| EPI_ISL_444752 | 4/2/2020  | 5/14/2020 | North America / USA / New York                      |
| EPI_ISL_444753 | 4/2/2020  | 5/14/2020 | North America / USA / New York / Staten Island      |
| EPI_ISL_444754 | 4/2/2020  | 5/14/2020 | North America / USA / New York / Bronx              |
| EPI_ISL_444755 | 4/2/2020  | 5/14/2020 | North America / USA / New Jersey                    |
| EPI_ISL_444756 | 4/2/2020  | 5/14/2020 | North America / USA / New York / Manhattan          |
| EPI_ISL_444757 | 4/3/2020  | 5/14/2020 | North America / USA / New York / Nassau County      |
| EPI_ISL_444758 | 4/3/2020  | 5/14/2020 | North America / USA / New York / Nassau County      |
| EPI_ISL_444759 | 4/3/2020  | 5/14/2020 | North America / USA / New York / Brooklyn           |
| EPI_ISL_444760 | 4/3/2020  | 5/14/2020 | North America / USA / New York / Nassau County      |
| EPI_ISL_444761 | 4/3/2020  | 5/14/2020 | North America / USA / New York / Queens             |
| EPI_ISL_444762 | 4/2/2020  | 5/14/2020 | North America / USA / New York / Brooklyn           |
| EPI_ISL_444763 | 4/3/2020  | 5/14/2020 | North America / USA / New York / Suffolk County     |
| EPI_ISL_444764 | 4/2/2020  | 5/14/2020 | North America / USA / New York / Queens             |
| EPI_ISL_444765 | 3/30/2020 | 5/14/2020 | North America / USA / New York / Westchester County |
| EPI_ISL_444766 | 4/3/2020  | 5/14/2020 | North America / USA / New York / Nassau County      |
| EPI_ISL_444767 | 4/6/2020  | 5/14/2020 | North America / USA / New York / Nassau County      |
| EPI_ISL_444768 | 4/6/2020  | 5/14/2020 | North America / USA / New York / Suffolk County     |
| EPI_ISL_444769 | 4/6/2020  | 5/14/2020 | North America / USA / New York / Suffolk County     |
| EPI_ISL_444770 | 4/10/2020 | 5/14/2020 | North America / USA / New York                      |
| EPI_ISL_444771 | 4/10/2020 | 5/14/2020 | North America / USA / New York / Queens             |
| EPI_ISL_444772 | 4/10/2020 | 5/14/2020 | North America / USA / New York / Brooklyn           |
| EPI_ISL_444773 | 3/17/2020 | 5/14/2020 | North America / USA / New York / Brooklyn           |
| EPI_ISL_444774 | 3/17/2020 | 5/14/2020 | North America / USA / New York / Manhattan          |
| EPI_ISL_444775 | 3/17/2020 | 5/14/2020 | North America / USA / New York / Manhattan          |
| EPI_ISL_444776 | 3/18/2020 | 5/14/2020 | North America / USA / New York / Queens             |
| EPI_ISL_444777 | 3/18/2020 | 5/14/2020 | North America / USA / New York / Brooklyn           |
| EPI_ISL_444780 | 3/18/2020 | 5/14/2020 | North America / USA / New Jersey / Hudson County    |
| EPI_ISL_444781 | 3/18/2020 | 5/14/2020 | North America / USA / New York / Queens             |



|                |           |                                                                  |
|----------------|-----------|------------------------------------------------------------------|
| EPI_ISL_444782 | 3/18/2020 | 5/14/2020 North America / USA / New York / Nassau County         |
| EPI_ISL_444784 | 3/18/2020 | 5/14/2020 North America / USA / New York / Bronx                 |
| EPI_ISL_444786 | 3/17/2020 | 5/14/2020 North America / USA / New York / Brooklyn              |
| EPI_ISL_444787 | 4/14/2020 | 5/14/2020 North America / USA / New York / Nassau County         |
| EPI_ISL_444788 | 3/17/2020 | 5/14/2020 North America / USA / New York / Nassau County         |
| EPI_ISL_444789 | 3/18/2020 | 5/14/2020 North America / USA / New York / Manhattan             |
| EPI_ISL_444790 | 3/18/2020 | 5/14/2020 North America / USA / New York / Manhattan             |
| EPI_ISL_444791 | 3/18/2020 | 5/14/2020 North America / USA / New York / Manhattan             |
| EPI_ISL_444793 | 3/24/2020 | 5/14/2020 Oceania / Australia / Queensland / Northern Queensland |
| EPI_ISL_444794 | 3/26/2020 | 5/14/2020 Oceania / Australia / Queensland / Cairns              |
| EPI_ISL_444817 | 3/11/2020 | 5/14/2020 Europe / Denmark                                       |
| EPI_ISL_444818 | 3/11/2020 | 5/14/2020 Europe / Denmark                                       |
| EPI_ISL_444819 | 3/11/2020 | 5/14/2020 Europe / Denmark                                       |
| EPI_ISL_444820 | 3/11/2020 | 5/14/2020 Europe / Denmark                                       |
| EPI_ISL_444822 | 3/11/2020 | 5/14/2020 Europe / Denmark                                       |
| EPI_ISL_444823 | 3/11/2020 | 5/14/2020 Europe / Denmark                                       |
| EPI_ISL_444824 | 3/11/2020 | 5/14/2020 Europe / Denmark                                       |
| EPI_ISL_444825 | 3/11/2020 | 5/14/2020 Europe / Denmark                                       |
| EPI_ISL_444826 | 3/11/2020 | 5/14/2020 Europe / Denmark                                       |
| EPI_ISL_444827 | 3/11/2020 | 5/14/2020 Europe / Denmark                                       |
| EPI_ISL_444828 | 3/11/2020 | 5/14/2020 Europe / Denmark                                       |
| EPI_ISL_444829 | 3/11/2020 | 5/14/2020 Europe / Denmark                                       |
| EPI_ISL_444831 | 3/11/2020 | 5/14/2020 Europe / Denmark                                       |
| EPI_ISL_444832 | 3/11/2020 | 5/14/2020 Europe / Denmark                                       |
| EPI_ISL_444833 | 3/9/2020  | 5/14/2020 Europe / Denmark                                       |
| EPI_ISL_444834 | 3/9/2020  | 5/14/2020 Europe / Denmark                                       |
| EPI_ISL_444835 | 3/9/2020  | 5/14/2020 Europe / Denmark                                       |
| EPI_ISL_444836 | 3/9/2020  | 5/14/2020 Europe / Denmark                                       |
| EPI_ISL_444837 | 3/9/2020  | 5/14/2020 Europe / Denmark                                       |
| EPI_ISL_444838 | 3/9/2020  | 5/14/2020 Europe / Denmark                                       |
| EPI_ISL_444839 | 3/9/2020  | 5/14/2020 Europe / Denmark                                       |
| EPI_ISL_444840 | 3/9/2020  | 5/14/2020 Europe / Denmark                                       |
| EPI_ISL_444841 | 3/10/2020 | 5/14/2020 Europe / Denmark                                       |
| EPI_ISL_444844 | 4/2/2020  | 5/14/2020 Europe / Denmark                                       |
| EPI_ISL_444846 | 4/2/2020  | 5/14/2020 Europe / Denmark                                       |
| EPI_ISL_444848 | 3/31/2020 | 5/14/2020 Europe / Denmark                                       |
| EPI_ISL_444849 | 4/3/2020  | 5/14/2020 Europe / Denmark                                       |
| EPI_ISL_444850 | 4/3/2020  | 5/14/2020 Europe / Denmark                                       |
| EPI_ISL_444852 | 4/3/2020  | 5/14/2020 Europe / Denmark                                       |
| EPI_ISL_444853 | 4/3/2020  | 5/14/2020 Europe / Denmark                                       |
| EPI_ISL_444854 | 4/3/2020  | 5/14/2020 Europe / Denmark                                       |
| EPI_ISL_444855 | 4/3/2020  | 5/14/2020 Europe / Denmark                                       |
| EPI_ISL_444856 | 4/4/2020  | 5/14/2020 Europe / Denmark                                       |
| EPI_ISL_444857 | 4/5/2020  | 5/14/2020 Europe / Denmark                                       |
| EPI_ISL_444859 | 3/27/2020 | 5/14/2020 Europe / Denmark                                       |
| EPI_ISL_444860 | 3/27/2020 | 5/14/2020 Europe / Denmark                                       |
| EPI_ISL_444861 | 3/27/2020 | 5/14/2020 Europe / Denmark                                       |

|                |           |                            |
|----------------|-----------|----------------------------|
| EPI_ISL_444862 | 3/27/2020 | 5/14/2020 Europe / Denmark |
| EPI_ISL_444863 | 3/27/2020 | 5/14/2020 Europe / Denmark |
| EPI_ISL_444864 | 3/27/2020 | 5/14/2020 Europe / Denmark |
| EPI_ISL_444866 | 3/27/2020 | 5/14/2020 Europe / Denmark |
| EPI_ISL_444867 | 3/27/2020 | 5/14/2020 Europe / Denmark |
| EPI_ISL_444869 | 3/28/2020 | 5/14/2020 Europe / Denmark |
| EPI_ISL_444870 | 3/27/2020 | 5/14/2020 Europe / Denmark |
| EPI_ISL_444872 | 3/27/2020 | 5/14/2020 Europe / Denmark |
| EPI_ISL_444873 | 3/28/2020 | 5/14/2020 Europe / Denmark |
| EPI_ISL_444874 | 3/28/2020 | 5/14/2020 Europe / Denmark |
| EPI_ISL_444875 | 3/28/2020 | 5/14/2020 Europe / Denmark |
| EPI_ISL_444877 | 3/27/2020 | 5/14/2020 Europe / Denmark |
| EPI_ISL_444879 | 3/28/2020 | 5/14/2020 Europe / Denmark |
| EPI_ISL_444880 | 3/28/2020 | 5/14/2020 Europe / Denmark |
| EPI_ISL_444881 | 3/27/2020 | 5/14/2020 Europe / Denmark |
| EPI_ISL_444883 | 3/27/2020 | 5/14/2020 Europe / Denmark |
| EPI_ISL_444884 | 3/27/2020 | 5/14/2020 Europe / Denmark |
| EPI_ISL_444885 | 3/28/2020 | 5/14/2020 Europe / Denmark |
| EPI_ISL_444887 | 3/27/2020 | 5/14/2020 Europe / Denmark |
| EPI_ISL_444888 | 3/19/2020 | 5/14/2020 Europe / Denmark |
| EPI_ISL_444890 | 3/11/2020 | 5/14/2020 Europe / Denmark |
| EPI_ISL_444891 | 3/11/2020 | 5/14/2020 Europe / Denmark |
| EPI_ISL_444892 | 3/14/2020 | 5/14/2020 Europe / Denmark |
| EPI_ISL_444893 | 3/9/2020  | 5/14/2020 Europe / Denmark |
| EPI_ISL_444894 | 3/20/2020 | 5/14/2020 Europe / Denmark |
| EPI_ISL_444895 | 3/20/2020 | 5/14/2020 Europe / Denmark |
| EPI_ISL_444897 | 3/18/2020 | 5/14/2020 Europe / Denmark |
| EPI_ISL_444898 | 3/18/2020 | 5/14/2020 Europe / Denmark |
| EPI_ISL_444899 | 3/18/2020 | 5/14/2020 Europe / Denmark |
| EPI_ISL_444900 | 3/19/2020 | 5/14/2020 Europe / Denmark |
| EPI_ISL_444901 | 3/19/2020 | 5/14/2020 Europe / Denmark |
| EPI_ISL_444902 | 3/19/2020 | 5/14/2020 Europe / Denmark |
| EPI_ISL_444903 | 3/30/2020 | 5/14/2020 Europe / Denmark |
| EPI_ISL_444904 | 3/30/2020 | 5/14/2020 Europe / Denmark |
| EPI_ISL_444905 | 3/30/2020 | 5/14/2020 Europe / Denmark |
| EPI_ISL_444906 | 3/30/2020 | 5/14/2020 Europe / Denmark |
| EPI_ISL_444908 | 3/28/2020 | 5/14/2020 Europe / Denmark |
| EPI_ISL_444909 | 3/28/2020 | 5/14/2020 Europe / Denmark |
| EPI_ISL_444910 | 3/30/2020 | 5/14/2020 Europe / Denmark |
| EPI_ISL_444911 | 3/30/2020 | 5/14/2020 Europe / Denmark |
| EPI_ISL_444912 | 3/27/2020 | 5/14/2020 Europe / Denmark |
| EPI_ISL_444915 | 3/27/2020 | 5/14/2020 Europe / Denmark |
| EPI_ISL_444916 | 3/28/2020 | 5/14/2020 Europe / Denmark |
| EPI_ISL_444917 | 3/28/2020 | 5/14/2020 Europe / Denmark |
| EPI_ISL_444918 | 3/30/2020 | 5/14/2020 Europe / Denmark |
| EPI_ISL_444920 | 3/30/2020 | 5/14/2020 Europe / Denmark |
| EPI_ISL_444921 | 3/30/2020 | 5/14/2020 Europe / Denmark |

|                |           |                                                |
|----------------|-----------|------------------------------------------------|
| EPI_ISL_444922 | 3/27/2020 | 5/14/2020 Europe / Denmark                     |
| EPI_ISL_444923 | 3/27/2020 | 5/14/2020 Europe / Denmark                     |
| EPI_ISL_444924 | 3/28/2020 | 5/14/2020 Europe / Denmark                     |
| EPI_ISL_444925 | 3/28/2020 | 5/14/2020 Europe / Denmark                     |
| EPI_ISL_444926 | 3/30/2020 | 5/14/2020 Europe / Denmark                     |
| EPI_ISL_444927 | 3/30/2020 | 5/14/2020 Europe / Denmark                     |
| EPI_ISL_444928 | 3/30/2020 | 5/14/2020 Europe / Denmark                     |
| EPI_ISL_444929 | 3/30/2020 | 5/14/2020 Europe / Denmark                     |
| EPI_ISL_444930 | 3/27/2020 | 5/14/2020 Europe / Denmark                     |
| EPI_ISL_444931 | 3/27/2020 | 5/14/2020 Europe / Denmark                     |
| EPI_ISL_444933 | 3/29/2020 | 5/14/2020 Europe / Denmark                     |
| EPI_ISL_444934 | 3/28/2020 | 5/14/2020 Europe / Denmark                     |
| EPI_ISL_444935 | 3/28/2020 | 5/14/2020 Europe / Denmark                     |
| EPI_ISL_444937 | 3/30/2020 | 5/14/2020 Europe / Denmark                     |
| EPI_ISL_444938 | 3/30/2020 | 5/14/2020 Europe / Denmark                     |
| EPI_ISL_444939 | 3/30/2020 | 5/14/2020 Europe / Denmark                     |
| EPI_ISL_444940 | 3/30/2020 | 5/14/2020 Europe / Denmark                     |
| EPI_ISL_444941 | 3/29/2020 | 5/14/2020 Europe / Denmark                     |
| EPI_ISL_444942 | 3/29/2020 | 5/14/2020 Europe / Denmark                     |
| EPI_ISL_444944 | 3/29/2020 | 5/14/2020 Europe / Denmark                     |
| EPI_ISL_444945 | 3/27/2020 | 5/14/2020 Europe / Denmark                     |
| EPI_ISL_444946 | 3/29/2020 | 5/14/2020 Europe / Denmark                     |
| EPI_ISL_444947 | 3/29/2020 | 5/14/2020 Europe / Denmark                     |
| EPI_ISL_444948 | 3/30/2020 | 5/14/2020 Europe / Denmark                     |
| EPI_ISL_444949 | 3/30/2020 | 5/14/2020 Europe / Denmark                     |
| EPI_ISL_444950 | 3/30/2020 | 5/14/2020 Europe / Denmark                     |
| EPI_ISL_444952 | 3/30/2020 | 5/14/2020 Europe / Denmark                     |
| EPI_ISL_444954 | 3/31/2020 | 5/14/2020 Europe / Denmark                     |
| EPI_ISL_444955 | 3/30/2020 | 5/14/2020 Europe / Denmark                     |
| EPI_ISL_444956 | 3/31/2020 | 5/14/2020 Europe / Denmark                     |
| EPI_ISL_444957 | 3/30/2020 | 5/14/2020 Europe / Denmark                     |
| EPI_ISL_444958 | 3/31/2020 | 5/14/2020 Europe / Denmark                     |
| EPI_ISL_444959 | 3/31/2020 | 5/14/2020 Europe / Denmark                     |
| EPI_ISL_444960 | 3/31/2020 | 5/14/2020 Europe / Denmark                     |
| EPI_ISL_444961 | 3/30/2020 | 5/14/2020 Europe / Denmark                     |
| EPI_ISL_444963 | 3/30/2020 | 5/14/2020 Europe / Denmark                     |
| EPI_ISL_444964 | 3/31/2020 | 5/14/2020 Europe / Denmark                     |
| EPI_ISL_444965 | 3/30/2020 | 5/14/2020 Europe / Denmark                     |
| EPI_ISL_444966 | 3/30/2020 | 5/14/2020 Europe / Denmark                     |
| EPI_ISL_444967 | 3/30/2020 | 5/14/2020 Europe / Denmark                     |
| EPI_ISL_444968 | 3/31/2020 | 5/14/2020 Europe / Denmark                     |
| EPI_ISL_444969 | 4/16/2020 | 5/14/2020 Asia / China / Guangdong / Guangzhou |
| EPI_ISL_444971 | 4/4/2020  | 5/14/2020 Europe / Spain / Catalunya           |
| EPI_ISL_444972 | 4/5/2020  | 5/14/2020 Europe / Spain / Catalunya           |
| EPI_ISL_444973 | 4/6/2020  | 5/14/2020 Europe / Spain / Catalunya           |
| EPI_ISL_444974 | 4/6/2020  | 5/14/2020 Europe / Spain / Catalunya           |
| EPI_ISL_444975 | 4/10/2020 | 5/14/2020 Europe / Spain / Catalunya           |

|                |           |                                                        |
|----------------|-----------|--------------------------------------------------------|
| EPI_ISL_444976 | 4/6/2020  | 5/14/2020 Europe / Spain / Catalunya                   |
| EPI_ISL_444977 | 3/16/2020 | 5/14/2020 Europe / Spain / Catalunya                   |
| EPI_ISL_444978 | 3/20/2020 | 5/14/2020 Europe / Spain / Catalunya                   |
| EPI_ISL_444979 | 3/20/2020 | 5/14/2020 Europe / Spain / Catalunya                   |
| EPI_ISL_444980 | 3/21/2020 | 5/14/2020 Europe / Spain / Catalunya                   |
| EPI_ISL_444981 | 3/21/2020 | 5/14/2020 Europe / Spain / Catalunya                   |
| EPI_ISL_444982 | 3/21/2020 | 5/14/2020 Europe / Spain / Catalunya                   |
| EPI_ISL_444983 | 3/22/2020 | 5/14/2020 Europe / Spain / Catalunya                   |
| EPI_ISL_444984 | 3/23/2020 | 5/14/2020 Europe / Spain / Catalunya                   |
| EPI_ISL_444985 | 3/23/2020 | 5/14/2020 Europe / Spain / Catalunya                   |
| EPI_ISL_444986 | 3/26/2020 | 5/14/2020 Europe / Spain / Catalunya                   |
| EPI_ISL_444987 | 3/26/2020 | 5/14/2020 Europe / Spain / Catalunya                   |
| EPI_ISL_444988 | 3/28/2020 | 5/14/2020 Europe / Spain / Catalunya                   |
| EPI_ISL_444989 | 3/28/2020 | 5/14/2020 Europe / Spain / Catalunya                   |
| EPI_ISL_444990 | 3/29/2020 | 5/14/2020 Europe / Spain / Catalunya                   |
| EPI_ISL_444994 | 3/11/2020 | 5/14/2020 North America / USA / California             |
| EPI_ISL_444995 | 3/27/2020 | 5/14/2020 North America / USA / South Carolina         |
| EPI_ISL_444996 | 3/27/2020 | 5/14/2020 North America / USA / South Carolina         |
| EPI_ISL_444997 | 3/26/2020 | 5/14/2020 North America / USA / South Carolina         |
| EPI_ISL_444998 | 3/26/2020 | 5/14/2020 Oceania / Guam                               |
| EPI_ISL_444999 | 3/24/2020 | 5/14/2020 Oceania / Guam                               |
| EPI_ISL_445000 | 3/20/2020 | 5/14/2020 Oceania / Guam                               |
| EPI_ISL_445043 | 4/27/2020 | 5/14/2020 North America / USA / Florida                |
| EPI_ISL_445054 | 4/22/2020 | 5/14/2020 Europe / Luxembourg                          |
| EPI_ISL_445055 | 4/22/2020 | 5/14/2020 Europe / Luxembourg                          |
| EPI_ISL_445056 | 4/22/2020 | 5/14/2020 Europe / Luxembourg                          |
| EPI_ISL_445057 | 4/23/2020 | 5/14/2020 Europe / Luxembourg                          |
| EPI_ISL_445058 | 4/22/2020 | 5/14/2020 Europe / Luxembourg                          |
| EPI_ISL_445060 | 4/21/2020 | 5/14/2020 Europe / Luxembourg                          |
| EPI_ISL_445061 | 4/24/2020 | 5/14/2020 Europe / Luxembourg                          |
| EPI_ISL_445064 | 4/28/2020 | 5/14/2020 Europe / Luxembourg                          |
| EPI_ISL_445065 | 4/17/2020 | 5/14/2020 Europe / Luxembourg                          |
| EPI_ISL_445066 | 4/24/2020 | 5/14/2020 Europe / Luxembourg                          |
| EPI_ISL_445067 | 4/21/2020 | 5/14/2020 Europe / Luxembourg                          |
| EPI_ISL_445069 | 4/26/2020 | 5/14/2020 Europe / Luxembourg                          |
| EPI_ISL_445070 | 4/23/2020 | 5/14/2020 Europe / Luxembourg                          |
| EPI_ISL_445071 | 4/23/2020 | 5/14/2020 Europe / Luxembourg                          |
| EPI_ISL_445072 | 4/21/2020 | 5/14/2020 Europe / Luxembourg                          |
| EPI_ISL_445074 | 4/21/2020 | 5/14/2020 Europe / Luxembourg                          |
| EPI_ISL_445075 | 5/8/2020  | 5/14/2020 Europe / Luxembourg                          |
| EPI_ISL_445076 | 4/22/2020 | 5/14/2020 Europe / Luxembourg                          |
| EPI_ISL_445077 | 3/21/2020 | 5/14/2020 North America / USA / Minnesota              |
| EPI_ISL_445078 | 3/20/2020 | 5/14/2020 North America / USA / Texas / Houston County |
| EPI_ISL_445079 | 3/23/2020 | 5/14/2020 North America / USA / Texas / Houston County |
| EPI_ISL_445080 | 3/21/2020 | 5/14/2020 North America / USA / Texas / Houston County |
| EPI_ISL_445081 | 3/23/2020 | 5/14/2020 North America / USA / Texas / Houston County |
| EPI_ISL_445082 | 3/24/2020 | 5/14/2020 North America / USA / Texas / Houston County |

|                |           |                                                               |
|----------------|-----------|---------------------------------------------------------------|
| EPI_ISL_445083 | 3/24/2020 | 5/14/2020 North America / USA / Texas / Houston County        |
| EPI_ISL_445084 | 3/25/2020 | 5/14/2020 North America / USA / Texas / Houston County        |
| EPI_ISL_445085 | 4/2/2020  | 5/14/2020 South America / Colombia                            |
| EPI_ISL_447608 | 2020-02   | 5/14/2020 Europe / Germany / Hesse / Frankfurt                |
| EPI_ISL_447609 | 2020-02   | 5/14/2020 Europe / Germany / Hesse / Frankfurt                |
| EPI_ISL_447610 | 2020-02   | 5/14/2020 Europe / Germany / Hesse / Frankfurt                |
| EPI_ISL_447611 | 2020-02   | 5/14/2020 Europe / Germany / Hesse / Frankfurt                |
| EPI_ISL_447612 | 2020-02   | 5/14/2020 Europe / Germany / Hesse / Frankfurt                |
| EPI_ISL_447613 | 2020-02   | 5/14/2020 Europe / Germany / Hesse / Frankfurt                |
| EPI_ISL_445094 | 3/17/2020 | 5/15/2020 North America / USA / California / San Diego County |
| EPI_ISL_445096 | 3/13/2020 | 5/15/2020 North America / USA / California / San Diego County |
| EPI_ISL_445097 | 3/14/2020 | 5/15/2020 North America / USA / California / San Diego County |
| EPI_ISL_445098 | 3/14/2020 | 5/15/2020 North America / USA / California / San Diego County |
| EPI_ISL_445101 | 3/15/2020 | 5/15/2020 North America / USA / California / San Diego County |
| EPI_ISL_445102 | 3/14/2020 | 5/15/2020 North America / USA / California / San Diego County |
| EPI_ISL_445105 | 3/24/2020 | 5/15/2020 North America / USA / California / San Diego County |
| EPI_ISL_445107 | 3/25/2020 | 5/15/2020 North America / USA / California / San Diego County |
| EPI_ISL_445108 | 3/14/2020 | 5/15/2020 North America / USA / California / San Diego County |
| EPI_ISL_445109 | 3/12/2020 | 5/15/2020 North America / USA / California / San Diego County |
| EPI_ISL_445110 | 3/26/2020 | 5/15/2020 North America / USA / California / San Diego County |
| EPI_ISL_445111 | 3/26/2020 | 5/15/2020 North America / USA / California / San Diego County |
| EPI_ISL_445113 | 3/28/2020 | 5/15/2020 North America / USA / California / San Diego County |
| EPI_ISL_445114 | 3/28/2020 | 5/15/2020 North America / USA / California / San Diego County |
| EPI_ISL_445115 | 3/30/2020 | 5/15/2020 North America / USA / California / San Diego County |
| EPI_ISL_445116 | 3/31/2020 | 5/15/2020 North America / USA / California / San Diego County |
| EPI_ISL_445117 | 3/14/2020 | 5/15/2020 North America / USA / California / San Diego County |
| EPI_ISL_445118 | 5/4/2020  | 5/15/2020 North America / USA / California / San Diego County |
| EPI_ISL_445119 | 3/31/2020 | 5/15/2020 North America / USA / Louisiana / New Orleans       |
| EPI_ISL_445120 | 4/2/2020  | 5/15/2020 North America / USA / Louisiana / New Orleans       |
| EPI_ISL_445121 | 3/31/2020 | 5/15/2020 North America / USA / Louisiana / New Orleans       |
| EPI_ISL_445122 | 3/31/2020 | 5/15/2020 North America / USA / Louisiana / New Orleans       |
| EPI_ISL_445123 | 4/1/2020  | 5/15/2020 North America / USA / Louisiana / New Orleans       |
| EPI_ISL_445124 | 4/2/2020  | 5/15/2020 North America / USA / Louisiana / New Orleans       |
| EPI_ISL_445125 | 4/1/2020  | 5/15/2020 North America / USA / Louisiana / New Orleans       |
| EPI_ISL_445126 | 3/31/2020 | 5/15/2020 North America / USA / Louisiana / New Orleans       |
| EPI_ISL_445127 | 4/1/2020  | 5/15/2020 North America / USA / Louisiana / New Orleans       |
| EPI_ISL_445128 | 4/1/2020  | 5/15/2020 North America / USA / Louisiana / New Orleans       |
| EPI_ISL_445129 | 4/2/2020  | 5/15/2020 North America / USA / Louisiana / New Orleans       |
| EPI_ISL_445130 | 3/31/2020 | 5/15/2020 North America / USA / Louisiana / New Orleans       |
| EPI_ISL_445132 | 4/2/2020  | 5/15/2020 North America / USA / Louisiana / New Orleans       |
| EPI_ISL_445133 | 4/1/2020  | 5/15/2020 North America / USA / Louisiana / New Orleans       |
| EPI_ISL_445134 | 3/31/2020 | 5/15/2020 North America / USA / Louisiana / New Orleans       |
| EPI_ISL_445135 | 4/1/2020  | 5/15/2020 North America / USA / Louisiana / New Orleans       |
| EPI_ISL_445136 | 3/31/2020 | 5/15/2020 North America / USA / Louisiana / New Orleans       |
| EPI_ISL_445137 | 4/1/2020  | 5/15/2020 North America / USA / Louisiana / New Orleans       |
| EPI_ISL_445138 | 3/31/2020 | 5/15/2020 North America / USA / Louisiana / New Orleans       |
| EPI_ISL_445139 | 4/1/2020  | 5/15/2020 North America / USA / Louisiana / New Orleans       |

|                |           |           |                                                         |
|----------------|-----------|-----------|---------------------------------------------------------|
| EPI_ISL_445140 | 4/1/2020  | 5/15/2020 | North America / USA / Louisiana / New Orleans           |
| EPI_ISL_445141 | 3/31/2020 | 5/15/2020 | North America / USA / Louisiana / New Orleans           |
| EPI_ISL_445143 | 4/1/2020  | 5/15/2020 | North America / USA / Louisiana / New Orleans           |
| EPI_ISL_445144 | 3/31/2020 | 5/15/2020 | North America / USA / Louisiana / New Orleans           |
| EPI_ISL_445145 | 4/1/2020  | 5/15/2020 | North America / USA / Louisiana / New Orleans           |
| EPI_ISL_445146 | 4/2/2020  | 5/15/2020 | North America / USA / Louisiana / New Orleans           |
| EPI_ISL_445147 | 4/7/2020  | 5/15/2020 | North America / USA / Louisiana / New Orleans           |
| EPI_ISL_445148 | 4/7/2020  | 5/15/2020 | North America / USA / Louisiana / New Orleans           |
| EPI_ISL_445149 | 4/8/2020  | 5/15/2020 | North America / USA / Louisiana / New Orleans           |
| EPI_ISL_445150 | 4/8/2020  | 5/15/2020 | North America / USA / Louisiana / New Orleans           |
| EPI_ISL_445151 | 4/7/2020  | 5/15/2020 | North America / USA / Louisiana / New Orleans           |
| EPI_ISL_445152 | 4/8/2020  | 5/15/2020 | North America / USA / Louisiana / New Orleans           |
| EPI_ISL_445153 | 4/8/2020  | 5/15/2020 | North America / USA / Louisiana / New Orleans           |
| EPI_ISL_445154 | 4/7/2020  | 5/15/2020 | North America / USA / Louisiana / New Orleans           |
| EPI_ISL_445155 | 4/9/2020  | 5/15/2020 | North America / USA / Louisiana / New Orleans           |
| EPI_ISL_445156 | 4/8/2020  | 5/15/2020 | North America / USA / Louisiana / New Orleans           |
| EPI_ISL_445157 | 4/8/2020  | 5/15/2020 | North America / USA / Louisiana / New Orleans           |
| EPI_ISL_445159 | 4/7/2020  | 5/15/2020 | North America / USA / Louisiana / New Orleans           |
| EPI_ISL_445161 | 4/7/2020  | 5/15/2020 | North America / USA / Louisiana / New Orleans           |
| EPI_ISL_445162 | 4/2/2020  | 5/15/2020 | North America / USA / Louisiana / New Orleans           |
| EPI_ISL_445164 | 3/21/2020 | 5/15/2020 | North America / USA / California / San Diego County     |
| EPI_ISL_445166 | 3/22/2020 | 5/15/2020 | North America / USA / California / San Diego County     |
| EPI_ISL_445167 | 3/27/2020 | 5/15/2020 | North America / USA / California / San Diego County     |
| EPI_ISL_445169 | 3/28/2020 | 5/15/2020 | North America / USA / California / San Francisco County |
| EPI_ISL_445170 | 3/27/2020 | 5/15/2020 | North America / USA / California / San Francisco County |
| EPI_ISL_445171 | 3/27/2020 | 5/15/2020 | North America / USA / California / San Francisco County |
| EPI_ISL_445172 | 3/25/2020 | 5/15/2020 | North America / USA / California / San Francisco County |
| EPI_ISL_445173 | 3/31/2020 | 5/15/2020 | North America / USA / California / San Francisco County |
| EPI_ISL_445175 | 4/5/2020  | 5/15/2020 | North America / USA / California / San Francisco County |
| EPI_ISL_445176 | 4/5/2020  | 5/15/2020 | North America / USA / California / San Francisco County |
| EPI_ISL_445177 | 3/31/2020 | 5/15/2020 | North America / USA / California / San Francisco County |
| EPI_ISL_445179 | 3/31/2020 | 5/15/2020 | North America / USA / California / San Francisco County |
| EPI_ISL_445180 | 3/30/2020 | 5/15/2020 | North America / USA / California / San Francisco County |
| EPI_ISL_445181 | 4/8/2020  | 5/15/2020 | North America / USA / California / San Francisco County |
| EPI_ISL_445182 | 4/12/2020 | 5/15/2020 | North America / USA / California / San Francisco County |
| EPI_ISL_445214 | 4/28/2020 | 5/15/2020 | Asia / Bangladesh / Dhaka                               |
| EPI_ISL_445215 | 4/28/2020 | 5/15/2020 | Asia / Bangladesh / Dhaka                               |
| EPI_ISL_445216 | 4/28/2020 | 5/15/2020 | Asia / Bangladesh / Dhaka                               |
| EPI_ISL_445219 | 4/2/2020  | 5/15/2020 | South America / Colombia / Valle del Cauca / Cali       |
| EPI_ISL_445220 | 4/30/2020 | 5/15/2020 | Europe / Romania / Bucharest                            |
| EPI_ISL_445221 | 3/11/2020 | 5/15/2020 | Europe / Sweden / Vastra Gotaland                       |
| EPI_ISL_445222 | 3/17/2020 | 5/15/2020 | Europe / Sweden / Halland                               |
| EPI_ISL_445223 | 3/23/2020 | 5/15/2020 | Europe / Sweden / Skane                                 |
| EPI_ISL_445224 | 3/25/2020 | 5/15/2020 | Europe / Sweden / Vastra Gotaland                       |
| EPI_ISL_445225 | 3/30/2020 | 5/15/2020 | Europe / Sweden / Stockholm                             |
| EPI_ISL_445226 | 3/31/2020 | 5/15/2020 | Europe / Sweden / Halland                               |
| EPI_ISL_445227 | 4/1/2020  | 5/15/2020 | Europe / Sweden / Uppsala                               |

|                |           |           |                                                              |
|----------------|-----------|-----------|--------------------------------------------------------------|
| EPI_ISL_445228 | 4/1/2020  | 5/15/2020 | Europe / Sweden / Uppsala                                    |
| EPI_ISL_445229 | 4/1/2020  | 5/15/2020 | Europe / Sweden / Vastra Gotaland                            |
| EPI_ISL_445230 | 4/5/2020  | 5/15/2020 | Europe / Sweden / Uppsala                                    |
| EPI_ISL_445231 | 4/13/2020 | 5/15/2020 | Europe / Sweden / Uppsala                                    |
| EPI_ISL_445232 | 4/14/2020 | 5/15/2020 | Europe / Sweden / Vastmanland                                |
| EPI_ISL_445233 | 4/16/2020 | 5/15/2020 | Europe / Sweden / Ostergotland                               |
| EPI_ISL_445234 | 4/20/2020 | 5/15/2020 | Europe / Sweden / Vastra Gotaland                            |
| EPI_ISL_445235 | 4/20/2020 | 5/15/2020 | Europe / Sweden / Vastra Gotaland                            |
| EPI_ISL_445236 | 4/21/2020 | 5/15/2020 | Europe / Sweden / Vastra Gotaland                            |
| EPI_ISL_445237 | 4/21/2020 | 5/15/2020 | Europe / Sweden / Vastra Gotaland                            |
| EPI_ISL_445238 | 4/20/2020 | 5/15/2020 | Europe / Sweden / Skane                                      |
| EPI_ISL_445239 | 4/19/2020 | 5/15/2020 | Europe / Sweden / Uppsala                                    |
| EPI_ISL_445240 | 4/22/2020 | 5/15/2020 | Europe / Sweden / Uppsala                                    |
| EPI_ISL_445241 | 4/23/2020 | 5/15/2020 | Europe / Sweden / Skane                                      |
| EPI_ISL_445242 | 4/22/2020 | 5/15/2020 | Europe / Sweden / Norrbotten                                 |
| EPI_ISL_445243 | 4/30/2020 | 5/15/2020 | Europe / Romania / Constanta                                 |
| EPI_ISL_445244 | 4/25/2020 | 5/15/2020 | Asia / Bangladesh                                            |
| EPI_ISL_445245 | 3/6/2020  | 5/15/2020 | South America / Chile / Region Metropolitana de Santiago / S |
| EPI_ISL_445246 | 3/5/2020  | 5/15/2020 | South America / Chile / Los Lagos / Llanquihue / Puerto Mont |
| EPI_ISL_445247 | 3/8/2020  | 5/15/2020 | South America / Chile / Region Metropolitana de Santiago / S |
| EPI_ISL_445248 | 3/9/2020  | 5/15/2020 | South America / Chile / Region Metropolitana de Santiago / S |
| EPI_ISL_445249 | 3/9/2020  | 5/15/2020 | South America / Chile / Region Metropolitana de Santiago / S |
| EPI_ISL_445250 | 3/9/2020  | 5/15/2020 | South America / Chile / Region Metropolitana de Santiago / S |
| EPI_ISL_445251 | 3/10/2020 | 5/15/2020 | South America / Chile / Region Metropolitana de Santiago / S |
| EPI_ISL_445252 | 3/9/2020  | 5/15/2020 | South America / Chile / Region Metropolitana de Santiago / S |
| EPI_ISL_445253 | 3/10/2020 | 5/15/2020 | South America / Chile / Region Metropolitana de Santiago / S |
| EPI_ISL_445254 | 3/11/2020 | 5/15/2020 | South America / Chile / Region Metropolitana de Santiago / S |
| EPI_ISL_445255 | 3/10/2020 | 5/15/2020 | South America / Chile / Region Metropolitana de Santiago / S |
| EPI_ISL_445256 | 3/10/2020 | 5/15/2020 | South America / Chile / Region Metropolitana de Santiago / S |
| EPI_ISL_445257 | 3/10/2020 | 5/15/2020 | South America / Chile / Region Metropolitana de Santiago / S |
| EPI_ISL_445258 | 3/11/2020 | 5/15/2020 | South America / Chile / Region Metropolitana de Santiago / S |
| EPI_ISL_445259 | 3/10/2020 | 5/15/2020 | South America / Chile / Region Metropolitana de Santiago / S |
| EPI_ISL_445260 | 3/11/2020 | 5/15/2020 | South America / Chile / Region Metropolitana de Santiago / S |
| EPI_ISL_445261 | 3/11/2020 | 5/15/2020 | South America / Chile / Region Metropolitana de Santiago / S |
| EPI_ISL_445262 | 3/11/2020 | 5/15/2020 | South America / Chile / Region Metropolitana de Santiago / S |
| EPI_ISL_445263 | 3/11/2020 | 5/15/2020 | South America / Chile / Region Metropolitana de Santiago / S |
| EPI_ISL_445264 | 3/12/2020 | 5/15/2020 | South America / Chile / Region Metropolitana de Santiago / S |
| EPI_ISL_445265 | 3/11/2020 | 5/15/2020 | South America / Chile / Region Metropolitana de Santiago / S |
| EPI_ISL_445266 | 3/12/2020 | 5/15/2020 | South America / Chile / Antofagasta                          |
| EPI_ISL_445267 | 3/12/2020 | 5/15/2020 | South America / Chile / Antofagasta                          |
| EPI_ISL_445268 | 3/14/2020 | 5/15/2020 | South America / Chile / Magallanes / Punta Arenas            |
| EPI_ISL_445269 | 3/15/2020 | 5/15/2020 | South America / Chile / Magallanes / Punta Arenas            |
| EPI_ISL_445270 | 3/14/2020 | 5/15/2020 | South America / Chile / La Araucania / Temuco                |
| EPI_ISL_445271 | 3/13/2020 | 5/15/2020 | South America / Chile / Biobio / Diguillin / Chillan         |
| EPI_ISL_445272 | 3/15/2020 | 5/15/2020 | South America / Chile / Valparaiso                           |
| EPI_ISL_445273 | 3/16/2020 | 5/15/2020 | South America / Chile / Oâ€™Higgins / Rancagua               |
| EPI_ISL_445274 | 3/15/2020 | 5/15/2020 | South America / Chile / Oâ€™Higgins / Rancagua               |







|                |           |                                                                        |
|----------------|-----------|------------------------------------------------------------------------|
| EPI_ISL_445371 | 3/28/2020 | 5/15/2020 South America / Chile / Region Metropolitana de Santiago / S |
| EPI_ISL_445372 | 3/30/2020 | 5/15/2020 South America / Chile / Magallanes / Punta Arenas            |
| EPI_ISL_445373 | 4/3/2020  | 5/15/2020 South America / Chile / Region Metropolitana de Santiago / S |
| EPI_ISL_445374 | 4/4/2020  | 5/15/2020 South America / Chile / Region Metropolitana de Santiago / S |
| EPI_ISL_445375 | 4/4/2020  | 5/15/2020 South America / Chile / Region Metropolitana de Santiago / S |
| EPI_ISL_445376 | 4/4/2020  | 5/15/2020 South America / Chile / Region Metropolitana de Santiago / S |
| EPI_ISL_445377 | 4/5/2020  | 5/15/2020 South America / Chile / Region Metropolitana de Santiago / S |
| EPI_ISL_445378 | 4/4/2020  | 5/15/2020 South America / Chile / Biobio / Diguillin / Chillan         |
| EPI_ISL_445379 | 4/6/2020  | 5/15/2020 South America / Chile / Region Metropolitana de Santiago / S |
| EPI_ISL_447902 | 3/25/2020 | 5/15/2020 Asia / India                                                 |
| EPI_ISL_449476 | 1/22/2020 | 5/15/2020 Asia / China / Wuhan                                         |
| EPI_ISL_449477 | 1/22/2020 | 5/15/2020 Asia / China / Wuhan                                         |
| EPI_ISL_449479 | 1/22/2020 | 5/15/2020 Asia / China / Wuhan                                         |
| EPI_ISL_449480 | 1/22/2020 | 5/15/2020 Asia / China / Wuhan                                         |
| EPI_ISL_449481 | 1/22/2020 | 5/15/2020 Asia / China / Wuhan                                         |
| EPI_ISL_449482 | 1/22/2020 | 5/15/2020 Asia / China / Wuhan                                         |
| EPI_ISL_449483 | 1/22/2020 | 5/15/2020 Asia / China / Wuhan                                         |
| EPI_ISL_449484 | 1/22/2020 | 5/15/2020 Asia / China / Wuhan                                         |
| EPI_ISL_449485 | 1/22/2020 | 5/15/2020 Asia / China / Wuhan                                         |
| EPI_ISL_449486 | 1/22/2020 | 5/15/2020 Asia / China / Wuhan                                         |
| EPI_ISL_449487 | 1/22/2020 | 5/15/2020 Asia / China / Wuhan                                         |
| EPI_ISL_445385 | 4/1/2020  | 5/16/2020 Europe / United Kingdom / Wales                              |
| EPI_ISL_445387 | 4/1/2020  | 5/16/2020 Europe / United Kingdom / Wales                              |
| EPI_ISL_445388 | 4/1/2020  | 5/16/2020 Europe / United Kingdom / Wales                              |
| EPI_ISL_445392 | 4/2/2020  | 5/16/2020 Europe / United Kingdom / Wales                              |
| EPI_ISL_445398 | 4/2/2020  | 5/16/2020 Europe / United Kingdom / Wales                              |
| EPI_ISL_445405 | 4/2/2020  | 5/16/2020 Europe / United Kingdom / Wales                              |
| EPI_ISL_445406 | 4/3/2020  | 5/16/2020 Europe / United Kingdom / Wales                              |
| EPI_ISL_445408 | 4/3/2020  | 5/16/2020 Europe / United Kingdom / Wales                              |
| EPI_ISL_445409 | 4/3/2020  | 5/16/2020 Europe / United Kingdom / Wales                              |
| EPI_ISL_445412 | 4/3/2020  | 5/16/2020 Europe / United Kingdom / Wales                              |
| EPI_ISL_445413 | 4/3/2020  | 5/16/2020 Europe / United Kingdom / Wales                              |
| EPI_ISL_445414 | 4/3/2020  | 5/16/2020 Europe / United Kingdom / Wales                              |
| EPI_ISL_445416 | 4/3/2020  | 5/16/2020 Europe / United Kingdom / Wales                              |
| EPI_ISL_445417 | 4/4/2020  | 5/16/2020 Europe / United Kingdom / Wales                              |
| EPI_ISL_445419 | 4/1/2020  | 5/16/2020 Europe / United Kingdom / Wales                              |
| EPI_ISL_445420 | 4/1/2020  | 5/16/2020 Europe / United Kingdom / Wales                              |
| EPI_ISL_445422 | 4/2/2020  | 5/16/2020 Europe / United Kingdom / Wales                              |
| EPI_ISL_445423 | 4/2/2020  | 5/16/2020 Europe / United Kingdom / Wales                              |
| EPI_ISL_445427 | 4/2/2020  | 5/16/2020 Europe / United Kingdom / Wales                              |
| EPI_ISL_445428 | 4/2/2020  | 5/16/2020 Europe / United Kingdom / Wales                              |
| EPI_ISL_445433 | 4/2/2020  | 5/16/2020 Europe / United Kingdom / Wales                              |
| EPI_ISL_445434 | 4/2/2020  | 5/16/2020 Europe / United Kingdom / Wales                              |
| EPI_ISL_445438 | 4/3/2020  | 5/16/2020 Europe / United Kingdom / Wales                              |
| EPI_ISL_445439 | 4/3/2020  | 5/16/2020 Europe / United Kingdom / Wales                              |
| EPI_ISL_445448 | 4/2/2020  | 5/16/2020 Europe / United Kingdom / Wales                              |
| EPI_ISL_445452 | 4/3/2020  | 5/16/2020 Europe / United Kingdom / Wales                              |

















|                |           |                                              |
|----------------|-----------|----------------------------------------------|
| EPI_ISL_446771 | 4/20/2020 | 5/16/2020 Europe / United Kingdom / Wales    |
| EPI_ISL_446774 | 4/20/2020 | 5/16/2020 Europe / United Kingdom / Wales    |
| EPI_ISL_446780 | 4/14/2020 | 5/16/2020 Europe / United Kingdom / Wales    |
| EPI_ISL_446788 | 4/19/2020 | 5/16/2020 Europe / United Kingdom / Wales    |
| EPI_ISL_446794 | 4/21/2020 | 5/16/2020 Europe / United Kingdom / Wales    |
| EPI_ISL_446795 | 4/21/2020 | 5/16/2020 Europe / United Kingdom / Wales    |
| EPI_ISL_446796 | 4/20/2020 | 5/16/2020 Europe / United Kingdom / Wales    |
| EPI_ISL_446802 | 4/16/2020 | 5/16/2020 Europe / United Kingdom / Wales    |
| EPI_ISL_446811 | 4/18/2020 | 5/16/2020 Europe / United Kingdom / Wales    |
| EPI_ISL_446823 | 4/16/2020 | 5/16/2020 Europe / United Kingdom / Wales    |
| EPI_ISL_446835 | 4/15/2020 | 5/16/2020 Europe / United Kingdom / Wales    |
| EPI_ISL_446851 | 4/21/2020 | 5/16/2020 Europe / United Kingdom / Wales    |
| EPI_ISL_446862 | 4/17/2020 | 5/16/2020 Europe / United Kingdom / Wales    |
| EPI_ISL_446866 | 4/20/2020 | 5/16/2020 Europe / United Kingdom / Wales    |
| EPI_ISL_446873 | 4/16/2020 | 5/16/2020 Europe / United Kingdom / Wales    |
| EPI_ISL_446877 | 4/16/2020 | 5/16/2020 Europe / United Kingdom / Wales    |
| EPI_ISL_446887 | 4/17/2020 | 5/16/2020 Europe / United Kingdom / Wales    |
| EPI_ISL_446894 | 4/14/2020 | 5/16/2020 Europe / United Kingdom / Wales    |
| EPI_ISL_446920 | 4/16/2020 | 5/16/2020 Europe / United Kingdom / Wales    |
| EPI_ISL_446923 | 4/16/2020 | 5/16/2020 Europe / United Kingdom / Wales    |
| EPI_ISL_446926 | 4/16/2020 | 5/16/2020 Europe / United Kingdom / Wales    |
| EPI_ISL_446934 | 4/16/2020 | 5/16/2020 Europe / United Kingdom / Wales    |
| EPI_ISL_446943 | 4/18/2020 | 5/16/2020 Europe / United Kingdom / Wales    |
| EPI_ISL_446949 | 4/21/2020 | 5/16/2020 Europe / United Kingdom / Wales    |
| EPI_ISL_446957 | 4/20/2020 | 5/16/2020 Europe / United Kingdom / Wales    |
| EPI_ISL_446959 | 4/20/2020 | 5/16/2020 Europe / United Kingdom / Wales    |
| EPI_ISL_446968 | 4/20/2020 | 5/16/2020 Europe / United Kingdom / Wales    |
| EPI_ISL_446979 | 4/16/2020 | 5/16/2020 Europe / United Kingdom / Wales    |
| EPI_ISL_446988 | 4/20/2020 | 5/16/2020 Europe / United Kingdom / Wales    |
| EPI_ISL_446992 | 4/18/2020 | 5/16/2020 Europe / United Kingdom / Wales    |
| EPI_ISL_446994 | 4/19/2020 | 5/16/2020 Europe / United Kingdom / Wales    |
| EPI_ISL_446995 | 4/18/2020 | 5/16/2020 Europe / United Kingdom / Wales    |
| EPI_ISL_446996 | 3/28/2020 | 5/16/2020 Asia / Thailand / Bangkok          |
| EPI_ISL_447011 | 3/29/2020 | 5/16/2020 Asia / Thailand / Bangkok          |
| EPI_ISL_447015 | 3/31/2020 | 5/16/2020 Asia / Thailand / Bangkok          |
| EPI_ISL_447017 | 3/31/2020 | 5/16/2020 Asia / Thailand / Bangkok          |
| EPI_ISL_447019 | 4/1/2020  | 5/16/2020 Asia / Thailand / Bangkok          |
| EPI_ISL_447020 | 4/1/2020  | 5/16/2020 Asia / Thailand / Bangkok          |
| EPI_ISL_447025 | 4/2/2020  | 5/16/2020 Asia / Thailand / Bangkok          |
| EPI_ISL_447026 | 4/3/2020  | 5/16/2020 Asia / Thailand / Bangkok          |
| EPI_ISL_447030 | 5/3/2020  | 5/16/2020 Asia / India / Gujarat / Ahmedabad |
| EPI_ISL_447031 | 5/3/2020  | 5/16/2020 Asia / India / Gujarat / Ahmedabad |
| EPI_ISL_447032 | 5/3/2020  | 5/16/2020 Asia / India / Gujarat / Ahmedabad |
| EPI_ISL_447033 | 5/3/2020  | 5/16/2020 Asia / India / Gujarat / Ahmedabad |
| EPI_ISL_447034 | 5/3/2020  | 5/16/2020 Asia / India / Gujarat / Ahmedabad |
| EPI_ISL_447035 | 5/3/2020  | 5/16/2020 Asia / India / Gujarat / Ahmedabad |
| EPI_ISL_447036 | 5/3/2020  | 5/16/2020 Asia / India / Gujarat / Ahmedabad |

|                |           |                                                |
|----------------|-----------|------------------------------------------------|
| EPI_ISL_447037 | 5/3/2020  | 5/16/2020 Asia / India / Gujarat / Ahmedabad   |
| EPI_ISL_447038 | 5/3/2020  | 5/16/2020 Asia / India / Gujarat / Ahmedabad   |
| EPI_ISL_447039 | 5/3/2020  | 5/16/2020 Asia / India / Gujarat / Ahmedabad   |
| EPI_ISL_447040 | 5/3/2020  | 5/16/2020 Asia / India / Gujarat / Ahmedabad   |
| EPI_ISL_447041 | 5/3/2020  | 5/16/2020 Asia / India / Gujarat / Ahmedabad   |
| EPI_ISL_447042 | 5/3/2020  | 5/16/2020 Asia / India / Gujarat / Ahmedabad   |
| EPI_ISL_447043 | 5/3/2020  | 5/16/2020 Asia / India / Gujarat / Ahmedabad   |
| EPI_ISL_447044 | 5/3/2020  | 5/16/2020 Asia / India / Gujarat / Ahmedabad   |
| EPI_ISL_447045 | 5/3/2020  | 5/16/2020 Asia / India / Gujarat / Ahmedabad   |
| EPI_ISL_447046 | 5/4/2020  | 5/16/2020 Asia / India / Gujarat / Ahmedabad   |
| EPI_ISL_447047 | 4/29/2020 | 5/16/2020 Asia / India / Gujarat / Gandhinagar |
| EPI_ISL_447048 | 4/27/2020 | 5/16/2020 Asia / India / Gujarat / Gandhinagar |
| EPI_ISL_447049 | 4/29/2020 | 5/16/2020 Asia / India / Gujarat / Gandhinagar |
| EPI_ISL_447050 | 4/29/2020 | 5/16/2020 Asia / India / Gujarat / Gandhinagar |
| EPI_ISL_447051 | 4/29/2020 | 5/16/2020 Asia / India / Gujarat / Gandhinagar |
| EPI_ISL_447052 | 5/2/2020  | 5/16/2020 Asia / India / Gujarat / Gandhinagar |
| EPI_ISL_447053 | 4/29/2020 | 5/16/2020 Asia / India / Gujarat / Gandhinagar |
| EPI_ISL_447054 | 4/30/2020 | 5/16/2020 Europe / Romania / Constanta         |
| EPI_ISL_447055 | 4/29/2020 | 5/16/2020 Asia / Georgia / Tbilisi             |
| EPI_ISL_447056 | 4/29/2020 | 5/16/2020 Asia / Georgia / Tbilisi             |
| EPI_ISL_447057 | 3/21/2020 | 5/16/2020 North America / USA / Michigan       |
| EPI_ISL_447059 | 3/15/2020 | 5/16/2020 North America / USA / Michigan       |
| EPI_ISL_447063 | 3/28/2020 | 5/16/2020 North America / USA / Michigan       |
| EPI_ISL_447064 | 4/3/2020  | 5/16/2020 North America / USA / Michigan       |
| EPI_ISL_447068 | 4/2/2020  | 5/16/2020 North America / USA / Michigan       |
| EPI_ISL_447069 | 3/25/2020 | 5/16/2020 North America / USA / Michigan       |
| EPI_ISL_447071 | 3/27/2020 | 5/16/2020 North America / USA / Michigan       |
| EPI_ISL_447072 | 3/19/2020 | 5/16/2020 North America / USA / Michigan       |
| EPI_ISL_447077 | 4/20/2020 | 5/16/2020 North America / USA / Michigan       |
| EPI_ISL_447081 | 3/27/2020 | 5/16/2020 North America / USA / Michigan       |
| EPI_ISL_447082 | 4/6/2020  | 5/16/2020 North America / USA / Michigan       |
| EPI_ISL_447083 | 3/28/2020 | 5/16/2020 North America / USA / Michigan       |
| EPI_ISL_447088 | 4/3/2020  | 5/16/2020 North America / USA / Michigan       |
| EPI_ISL_447089 | 3/14/2020 | 5/16/2020 North America / USA / Michigan       |
| EPI_ISL_447090 | 4/1/2020  | 5/16/2020 North America / USA / Michigan       |
| EPI_ISL_447091 | 3/20/2020 | 5/16/2020 North America / USA / Michigan       |
| EPI_ISL_447092 | 3/15/2020 | 5/16/2020 North America / USA / Michigan       |
| EPI_ISL_447093 | 3/14/2020 | 5/16/2020 North America / USA / Michigan       |
| EPI_ISL_447094 | 3/20/2020 | 5/16/2020 North America / USA / Michigan       |
| EPI_ISL_447095 | 3/27/2020 | 5/16/2020 North America / USA / Michigan       |
| EPI_ISL_447096 | 3/12/2020 | 5/16/2020 North America / USA / Michigan       |
| EPI_ISL_447098 | 4/3/2020  | 5/16/2020 North America / USA / Michigan       |
| EPI_ISL_447099 | 3/25/2020 | 5/16/2020 North America / USA / Michigan       |
| EPI_ISL_447101 | 3/16/2020 | 5/16/2020 North America / USA / Michigan       |
| EPI_ISL_447102 | 4/2/2020  | 5/16/2020 North America / USA / Michigan       |
| EPI_ISL_447104 | 4/3/2020  | 5/16/2020 North America / USA / Michigan       |
| EPI_ISL_447105 | 4/2/2020  | 5/16/2020 North America / USA / Michigan       |

|                |           |                                                         |
|----------------|-----------|---------------------------------------------------------|
| EPI_ISL_447106 | 3/13/2020 | 5/16/2020 North America / USA / Michigan                |
| EPI_ISL_447107 | 3/14/2020 | 5/16/2020 North America / USA / Michigan                |
| EPI_ISL_447111 | 3/12/2020 | 5/16/2020 North America / USA / Michigan                |
| EPI_ISL_447113 | 4/2/2020  | 5/16/2020 North America / USA / Michigan                |
| EPI_ISL_447115 | 4/6/2020  | 5/16/2020 North America / USA / Michigan                |
| EPI_ISL_447116 | 3/13/2020 | 5/16/2020 North America / USA / Michigan                |
| EPI_ISL_447117 | 3/25/2020 | 5/16/2020 North America / USA / Michigan                |
| EPI_ISL_447118 | 3/27/2020 | 5/16/2020 North America / USA / Michigan                |
| EPI_ISL_447119 | 3/26/2020 | 5/16/2020 South America / Chile / La Araucania / Temuco |
| EPI_ISL_447120 | 3/14/2020 | 5/16/2020 Europe / Belgium / Liege                      |
| EPI_ISL_447121 | 3/14/2020 | 5/16/2020 Europe / Belgium / Liege                      |
| EPI_ISL_447122 | 3/20/2020 | 5/16/2020 Europe / Belgium / Liege                      |
| EPI_ISL_447123 | 3/21/2020 | 5/16/2020 Europe / Belgium / Liege                      |
| EPI_ISL_447124 | 3/21/2020 | 5/16/2020 Europe / Belgium / Liege                      |
| EPI_ISL_447127 | 3/23/2020 | 5/16/2020 Europe / Belgium / Liege                      |
| EPI_ISL_447128 | 3/23/2020 | 5/16/2020 Europe / Belgium / Liege                      |
| EPI_ISL_447129 | 3/23/2020 | 5/16/2020 Europe / Belgium / Liege                      |
| EPI_ISL_447130 | 3/23/2020 | 5/16/2020 Europe / Belgium / Liege                      |
| EPI_ISL_447133 | 3/24/2020 | 5/16/2020 Europe / Belgium / Liege                      |
| EPI_ISL_447134 | 3/24/2020 | 5/16/2020 Europe / Belgium / Liege                      |
| EPI_ISL_447135 | 3/24/2020 | 5/16/2020 Europe / Belgium / Liege                      |
| EPI_ISL_447136 | 3/17/2020 | 5/16/2020 Europe / Belgium / Liege                      |
| EPI_ISL_447137 | 4/17/2020 | 5/16/2020 Europe / Belgium / Liege                      |
| EPI_ISL_447138 | 4/17/2020 | 5/16/2020 Europe / Belgium / Liege                      |
| EPI_ISL_447139 | 4/11/2020 | 5/16/2020 Europe / Belgium / Liege                      |
| EPI_ISL_447140 | 4/18/2020 | 5/16/2020 Europe / Belgium / Liege                      |
| EPI_ISL_447141 | 3/23/2020 | 5/16/2020 Europe / Belgium / Liege                      |
| EPI_ISL_447147 | 4/18/2020 | 5/16/2020 Europe / Belgium / Liege                      |
| EPI_ISL_447148 | 4/18/2020 | 5/16/2020 Europe / Belgium / Liege                      |
| EPI_ISL_447152 | 4/18/2020 | 5/16/2020 Europe / Belgium / Liege                      |
| EPI_ISL_447153 | 4/18/2020 | 5/16/2020 Europe / Belgium / Liege                      |
| EPI_ISL_447155 | 4/18/2020 | 5/16/2020 Europe / Belgium / Liege                      |
| EPI_ISL_447163 | 3/21/2020 | 5/16/2020 North America / USA / Michigan                |
| EPI_ISL_447165 | 3/21/2020 | 5/16/2020 North America / USA / Michigan                |
| EPI_ISL_447167 | 3/22/2020 | 5/16/2020 North America / USA / Michigan                |
| EPI_ISL_447168 | 3/23/2020 | 5/16/2020 North America / USA / Michigan                |
| EPI_ISL_447172 | 3/30/2020 | 5/16/2020 North America / USA / Michigan                |
| EPI_ISL_447173 | 3/19/2020 | 5/16/2020 North America / USA / Michigan                |
| EPI_ISL_447174 | 3/22/2020 | 5/16/2020 North America / USA / Michigan                |
| EPI_ISL_447175 | 3/18/2020 | 5/16/2020 North America / USA / Michigan                |
| EPI_ISL_447177 | 3/17/2020 | 5/16/2020 North America / USA / Michigan                |
| EPI_ISL_447178 | 3/19/2020 | 5/16/2020 North America / USA / Michigan                |
| EPI_ISL_447179 | 3/19/2020 | 5/16/2020 North America / USA / Michigan                |
| EPI_ISL_447183 | 3/17/2020 | 5/16/2020 North America / USA / Michigan                |
| EPI_ISL_447184 | 3/26/2020 | 5/16/2020 North America / USA / Michigan                |
| EPI_ISL_447189 | 3/26/2020 | 5/16/2020 North America / USA / Michigan                |
| EPI_ISL_447190 | 4/19/2020 | 5/16/2020 North America / USA / Michigan                |

|                |           |                                                                |
|----------------|-----------|----------------------------------------------------------------|
| EPI_ISL_447191 | 3/15/2020 | 5/16/2020 North America / USA / Michigan                       |
| EPI_ISL_447193 | 3/22/2020 | 5/16/2020 North America / USA / Michigan                       |
| EPI_ISL_447194 | 3/15/2020 | 5/16/2020 North America / USA / Michigan                       |
| EPI_ISL_447196 | 3/17/2020 | 5/16/2020 North America / USA / Michigan                       |
| EPI_ISL_447197 | 3/21/2020 | 5/16/2020 North America / USA / Michigan                       |
| EPI_ISL_447200 | 3/18/2020 | 5/16/2020 North America / USA / Michigan                       |
| EPI_ISL_447201 | 3/22/2020 | 5/16/2020 North America / USA / Michigan                       |
| EPI_ISL_447204 | 3/28/2020 | 5/16/2020 North America / USA / Michigan                       |
| EPI_ISL_447205 | 4/22/2020 | 5/16/2020 North America / USA / Michigan                       |
| EPI_ISL_447206 | 3/17/2020 | 5/16/2020 North America / USA / Michigan                       |
| EPI_ISL_447207 | 3/22/2020 | 5/16/2020 North America / USA / Michigan                       |
| EPI_ISL_447209 | 3/24/2020 | 5/16/2020 North America / USA / Michigan                       |
| EPI_ISL_447210 | 4/22/2020 | 5/16/2020 North America / USA / Michigan                       |
| EPI_ISL_447211 | 3/24/2020 | 5/16/2020 North America / USA / Michigan                       |
| EPI_ISL_447212 | 3/23/2020 | 5/16/2020 North America / USA / Michigan                       |
| EPI_ISL_447215 | 3/19/2020 | 5/16/2020 North America / USA / Michigan                       |
| EPI_ISL_447216 | 3/21/2020 | 5/16/2020 North America / USA / Michigan                       |
| EPI_ISL_447218 | 3/17/2020 | 5/16/2020 North America / USA / Michigan                       |
| EPI_ISL_447219 | 4/22/2020 | 5/16/2020 North America / USA / Michigan                       |
| EPI_ISL_447220 | 3/21/2020 | 5/16/2020 North America / USA / Michigan                       |
| EPI_ISL_447221 | 3/19/2020 | 5/16/2020 North America / USA / Michigan                       |
| EPI_ISL_447224 | 4/8/2020  | 5/16/2020 North America / USA / Michigan                       |
| EPI_ISL_447228 | 3/17/2020 | 5/16/2020 North America / USA / Michigan                       |
| EPI_ISL_447229 | 3/26/2020 | 5/16/2020 North America / USA / Michigan                       |
| EPI_ISL_447231 | 4/23/2020 | 5/16/2020 Africa / Democratic Republic of the Congo / Kinshasa |
| EPI_ISL_447232 | 4/23/2020 | 5/16/2020 Africa / Democratic Republic of the Congo / Kinshasa |
| EPI_ISL_447233 | 4/23/2020 | 5/16/2020 Africa / Democratic Republic of the Congo / Kinshasa |
| EPI_ISL_447234 | 4/23/2020 | 5/16/2020 Africa / Democratic Republic of the Congo / Kinshasa |
| EPI_ISL_447235 | 4/23/2020 | 5/16/2020 Africa / Democratic Republic of the Congo / Kinshasa |
| EPI_ISL_447236 | 4/24/2020 | 5/16/2020 Africa / Democratic Republic of the Congo / Kinshasa |
| EPI_ISL_447237 | 4/24/2020 | 5/16/2020 Africa / Democratic Republic of the Congo / Kinshasa |
| EPI_ISL_447239 | 4/24/2020 | 5/16/2020 Africa / Democratic Republic of the Congo / Kinshasa |
| EPI_ISL_447240 | 4/24/2020 | 5/16/2020 Africa / Democratic Republic of the Congo / Kinshasa |
| EPI_ISL_447245 | 4/24/2020 | 5/16/2020 Africa / Democratic Republic of the Congo / Kinshasa |
| EPI_ISL_447246 | 4/24/2020 | 5/16/2020 Africa / Democratic Republic of the Congo / Kinshasa |
| EPI_ISL_447248 | 4/25/2020 | 5/16/2020 Africa / Democratic Republic of the Congo / Kinshasa |
| EPI_ISL_447249 | 4/25/2020 | 5/16/2020 Africa / Democratic Republic of the Congo / Kinshasa |
| EPI_ISL_447251 | 3/9/2020  | 5/17/2020 Asia / Israel                                        |
| EPI_ISL_447252 | 2/25/2020 | 5/17/2020 Asia / Taiwan / New Taipei City                      |
| EPI_ISL_447253 | 3/11/2020 | 5/17/2020 Asia / Taiwan / Taipei                               |
| EPI_ISL_447255 | 3/17/2020 | 5/17/2020 Asia / Taiwan / New Taipei City                      |
| EPI_ISL_447257 | 3/25/2020 | 5/17/2020 Asia / Taiwan / New Taipei City                      |
| EPI_ISL_447260 | 3/26/2020 | 5/17/2020 Asia / Israel / South Coast District                 |
| EPI_ISL_447263 | 3/26/2020 | 5/17/2020 Asia / Israel / South Coast District                 |
| EPI_ISL_447264 | 4/2/2020  | 5/17/2020 Asia / Israel / South Coast District                 |
| EPI_ISL_447265 | 4/1/2020  | 5/17/2020 Asia / Israel / South Coast District                 |
| EPI_ISL_447267 | 3/30/2020 | 5/17/2020 Asia / Israel / South Coast District                 |





|                |           |                                                |
|----------------|-----------|------------------------------------------------|
| EPI_ISL_447385 | 3/30/2020 | 5/17/2020 Asia / Israel / North District       |
| EPI_ISL_447386 | 3/30/2020 | 5/17/2020 Asia / Israel / North District       |
| EPI_ISL_447387 | 3/30/2020 | 5/17/2020 Asia / Israel / North District       |
| EPI_ISL_447388 | 3/29/2020 | 5/17/2020 Asia / Israel / North District       |
| EPI_ISL_447389 | 3/29/2020 | 5/17/2020 Asia / Israel / North District       |
| EPI_ISL_447391 | 3/29/2020 | 5/17/2020 Asia / Israel / North District       |
| EPI_ISL_447393 | 3/28/2020 | 5/17/2020 Asia / Israel / North District       |
| EPI_ISL_447394 | 3/26/2020 | 5/17/2020 Asia / Israel / North District       |
| EPI_ISL_447395 | 3/26/2020 | 5/17/2020 Asia / Israel / North District       |
| EPI_ISL_447396 | 3/26/2020 | 5/17/2020 Asia / Israel / North District       |
| EPI_ISL_447397 | 3/26/2020 | 5/17/2020 Asia / Israel / North District       |
| EPI_ISL_447399 | 3/27/2020 | 5/17/2020 Asia / Israel / North District       |
| EPI_ISL_447400 | 4/4/2020  | 5/17/2020 Asia / Israel / North District       |
| EPI_ISL_447401 | 4/2/2020  | 5/17/2020 Asia / Israel / North District       |
| EPI_ISL_447402 | 4/2/2020  | 5/17/2020 Asia / Israel / North District       |
| EPI_ISL_447403 | 4/1/2020  | 5/17/2020 Asia / Israel / North District       |
| EPI_ISL_447404 | 4/1/2020  | 5/17/2020 Asia / Israel / North District       |
| EPI_ISL_447406 | 3/31/2020 | 5/17/2020 Asia / Israel / North District       |
| EPI_ISL_447408 | 3/17/2020 | 5/17/2020 Asia / Israel / Jerusalem District   |
| EPI_ISL_447409 | 3/17/2020 | 5/17/2020 Asia / Israel / Jerusalem District   |
| EPI_ISL_447410 | 3/17/2020 | 5/17/2020 Asia / Israel / Jerusalem District   |
| EPI_ISL_447411 | 3/17/2020 | 5/17/2020 Asia / Israel / Jerusalem District   |
| EPI_ISL_447412 | 3/17/2020 | 5/17/2020 Asia / Israel / Jerusalem District   |
| EPI_ISL_447416 | 3/17/2020 | 5/17/2020 Asia / Israel / Tel Aviv District    |
| EPI_ISL_447417 | 3/26/2020 | 5/17/2020 Asia / Israel / North District       |
| EPI_ISL_447418 | 3/26/2020 | 5/17/2020 Asia / Israel / North District       |
| EPI_ISL_447419 | 4/4/2020  | 5/17/2020 Asia / Israel / Jerusalem District   |
| EPI_ISL_447420 | 4/4/2020  | 5/17/2020 Asia / Israel / Tel Aviv District    |
| EPI_ISL_447422 | 4/4/2020  | 5/17/2020 Asia / Israel / Tel Aviv District    |
| EPI_ISL_447423 | 4/4/2020  | 5/17/2020 Asia / Israel / Jerusalem District   |
| EPI_ISL_447424 | 4/4/2020  | 5/17/2020 Asia / Israel / South Coast District |
| EPI_ISL_447426 | 4/3/2020  | 5/17/2020 Asia / Israel / Tel Aviv District    |
| EPI_ISL_447427 | 4/3/2020  | 5/17/2020 Asia / Israel / Tel Aviv District    |
| EPI_ISL_447428 | 4/3/2020  | 5/17/2020 Asia / Israel / Tel Aviv District    |
| EPI_ISL_447429 | 4/3/2020  | 5/17/2020 Asia / Israel / Tel Aviv District    |
| EPI_ISL_447430 | 4/3/2020  | 5/17/2020 Asia / Israel / Tel Aviv District    |
| EPI_ISL_447432 | 4/3/2020  | 5/17/2020 Asia / Israel / Tel Aviv District    |
| EPI_ISL_447434 | 4/3/2020  | 5/17/2020 Asia / Israel / Jerusalem District   |
| EPI_ISL_447435 | 4/3/2020  | 5/17/2020 Asia / Israel / South Coast District |
| EPI_ISL_447436 | 4/2/2020  | 5/17/2020 Asia / Israel / South Coast District |
| EPI_ISL_447438 | 4/3/2020  | 5/17/2020 Asia / Israel / Tel Aviv District    |
| EPI_ISL_447440 | 4/2/2020  | 5/17/2020 Asia / Israel / Tel Aviv District    |
| EPI_ISL_447441 | 3/30/2020 | 5/17/2020 Asia / Israel / Tel Aviv District    |
| EPI_ISL_447442 | 3/30/2020 | 5/17/2020 Asia / Israel / Tel Aviv District    |
| EPI_ISL_447443 | 3/30/2020 | 5/17/2020 Asia / Israel / Tel Aviv District    |
| EPI_ISL_447444 | 3/30/2020 | 5/17/2020 Asia / Israel / Tel Aviv District    |
| EPI_ISL_447445 | 3/30/2020 | 5/17/2020 Asia / Israel / Tel Aviv District    |



|                |           |                                                                         |
|----------------|-----------|-------------------------------------------------------------------------|
| EPI_ISL_447446 | 3/30/2020 | 5/17/2020 Asia / Israel / Tel Aviv District                             |
| EPI_ISL_447447 | 3/30/2020 | 5/17/2020 Asia / Israel / Tel Aviv District                             |
| EPI_ISL_447448 | 3/30/2020 | 5/17/2020 Asia / Israel / Tel Aviv District                             |
| EPI_ISL_447449 | 3/29/2020 | 5/17/2020 Asia / Israel / Tel Aviv District                             |
| EPI_ISL_447450 | 3/29/2020 | 5/17/2020 Asia / Israel / Tel Aviv District                             |
| EPI_ISL_447452 | 4/22/2020 | 5/17/2020 Asia / Israel / North District                                |
| EPI_ISL_447453 | 4/21/2020 | 5/17/2020 Asia / Israel / Tel Aviv District                             |
| EPI_ISL_447454 | 4/21/2020 | 5/17/2020 Asia / Israel / Tel Aviv District                             |
| EPI_ISL_447455 | 4/20/2020 | 5/17/2020 Asia / Israel / Tel Aviv District                             |
| EPI_ISL_447456 | 4/20/2020 | 5/17/2020 Asia / Israel / Tel Aviv District                             |
| EPI_ISL_447457 | 4/19/2020 | 5/17/2020 Asia / Israel / Tel Aviv District                             |
| EPI_ISL_447460 | 4/17/2020 | 5/17/2020 Asia / Israel / Tel Aviv District                             |
| EPI_ISL_447461 | 4/17/2020 | 5/17/2020 Asia / Israel / Tel Aviv District                             |
| EPI_ISL_447462 | 4/16/2020 | 5/17/2020 Asia / Israel / Tel Aviv District                             |
| EPI_ISL_447463 | 4/16/2020 | 5/17/2020 Asia / Israel / Tel Aviv District                             |
| EPI_ISL_447464 | 4/15/2020 | 5/17/2020 Asia / Israel / Tel Aviv District                             |
| EPI_ISL_447465 | 4/15/2020 | 5/17/2020 Asia / Israel / Tel Aviv District                             |
| EPI_ISL_447467 | 4/15/2020 | 5/17/2020 Asia / Israel / Tel Aviv District                             |
| EPI_ISL_447468 | 4/14/2020 | 5/17/2020 Asia / Israel / Tel Aviv District                             |
| EPI_ISL_447469 | 4/14/2020 | 5/17/2020 Asia / Israel / Tel Aviv District                             |
| EPI_ISL_447471 | 3/26/2020 | 5/17/2020 Europe / Spain / Comunitat Valenciana / Valencia              |
| EPI_ISL_447472 | 3/26/2020 | 5/17/2020 Europe / Spain / Comunitat Valenciana / Sagunt                |
| EPI_ISL_447473 | 3/26/2020 | 5/17/2020 Europe / Spain / Comunitat Valenciana / Sagunt                |
| EPI_ISL_447474 | 3/25/2020 | 5/17/2020 Europe / Spain / Comunitat Valenciana / Valencia              |
| EPI_ISL_447477 | 3/29/2020 | 5/17/2020 Europe / Spain / Comunitat Valenciana / Valencia              |
| EPI_ISL_447478 | 3/29/2020 | 5/17/2020 Europe / Spain / Comunitat Valenciana / Alboraya              |
| EPI_ISL_447481 | 3/29/2020 | 5/17/2020 Europe / Spain / Comunitat Valenciana / Valencia              |
| EPI_ISL_447482 | 3/29/2020 | 5/17/2020 Europe / Spain / Comunitat Valenciana / Albuixech             |
| EPI_ISL_447483 | 3/29/2020 | 5/17/2020 Europe / Spain / Comunitat Valenciana / Valencia              |
| EPI_ISL_447485 | 3/29/2020 | 5/17/2020 Europe / Spain / Comunitat Valenciana / El Puig               |
| EPI_ISL_447493 | 3/26/2020 | 5/17/2020 Europe / Spain / Comunitat Valenciana / Lutxent               |
| EPI_ISL_447497 | 3/27/2020 | 5/17/2020 Europe / Spain / Comunitat Valenciana / Valencia              |
| EPI_ISL_447498 | 3/27/2020 | 5/17/2020 Europe / Spain / Comunitat Valenciana / Valencia              |
| EPI_ISL_447500 | 3/27/2020 | 5/17/2020 Europe / Spain / Comunitat Valenciana / Elda                  |
| EPI_ISL_447501 | 3/27/2020 | 5/17/2020 Europe / Spain / Comunitat Valenciana / Tavernes de la Valldi |
| EPI_ISL_447502 | 3/27/2020 | 5/17/2020 Europe / Spain / Comunitat Valenciana / Tavernes de la Valldi |
| EPI_ISL_447503 | 3/27/2020 | 5/17/2020 Europe / Spain / Comunitat Valenciana / Olleria               |
| EPI_ISL_447505 | 3/27/2020 | 5/17/2020 Europe / Spain / Comunitat Valenciana / Tavernes de la Valldi |
| EPI_ISL_447506 | 3/30/2020 | 5/17/2020 Europe / Spain / Comunitat Valenciana / Meliana               |
| EPI_ISL_447510 | 3/28/2020 | 5/17/2020 Europe / Spain / Comunitat Valenciana / Tavernes de la Valldi |
| EPI_ISL_447511 | 3/28/2020 | 5/17/2020 Europe / Spain / Comunitat Valenciana / Tavernes de la Valldi |
| EPI_ISL_447512 | 3/28/2020 | 5/17/2020 Europe / Spain / Comunitat Valenciana / Beniganim             |
| EPI_ISL_447513 | 3/28/2020 | 5/17/2020 Europe / Spain / Comunitat Valenciana / Gandia                |
| EPI_ISL_447514 | 3/28/2020 | 5/17/2020 Europe / Spain / Comunitat Valenciana / Palma de Gandia       |
| EPI_ISL_447515 | 3/28/2020 | 5/17/2020 Europe / Spain / Comunitat Valenciana / Gandia                |
| EPI_ISL_447517 | 4/1/2020  | 5/17/2020 Europe / Spain / Comunitat Valenciana / Valencia              |
| EPI_ISL_447519 | 4/1/2020  | 5/17/2020 Europe / Spain / Comunitat Valenciana / Bonrepos i Mirambel   |

|                |           |           |                                                               |
|----------------|-----------|-----------|---------------------------------------------------------------|
| EPI_ISL_447520 | 4/1/2020  | 5/17/2020 | Europe / Spain / Comunitat Valenciana / Valencia              |
| EPI_ISL_447522 | 4/1/2020  | 5/17/2020 | Europe / Spain / Comunitat Valenciana / Sagunt                |
| EPI_ISL_447523 | 4/1/2020  | 5/17/2020 | Europe / Spain / Comunitat Valenciana / Gilet                 |
| EPI_ISL_447527 | 4/1/2020  | 5/17/2020 | Europe / Spain / Comunitat Valenciana / Tavernes de la Valldi |
| EPI_ISL_447528 | 4/1/2020  | 5/17/2020 | Europe / Spain / Comunitat Valenciana / Valencia              |
| EPI_ISL_447529 | 3/31/2020 | 5/17/2020 | Europe / Spain / Comunitat Valenciana / Xeraco                |
| EPI_ISL_447530 | 3/31/2020 | 5/17/2020 | Europe / Spain / Comunitat Valenciana / Gandia                |
| EPI_ISL_447531 | 3/31/2020 | 5/17/2020 | Europe / Spain / Comunitat Valenciana / Oliva                 |
| EPI_ISL_447532 | 3/16/2020 | 5/17/2020 | Europe / Spain / Catalunya                                    |
| EPI_ISL_447533 | 3/25/2020 | 5/17/2020 | Europe / Spain / Catalunya                                    |
| EPI_ISL_447534 | 5/5/2020  | 5/17/2020 | Asia / India / Gujarat / Modasa                               |
| EPI_ISL_447535 | 5/5/2020  | 5/17/2020 | Asia / India / Gujarat / Modasa                               |
| EPI_ISL_447536 | 5/5/2020  | 5/17/2020 | Asia / India / Gujarat / Modasa                               |
| EPI_ISL_447537 | 5/5/2020  | 5/17/2020 | Asia / India / Gujarat / Modasa                               |
| EPI_ISL_447538 | 5/5/2020  | 5/17/2020 | Asia / India / Gujarat / Modasa                               |
| EPI_ISL_447539 | 5/5/2020  | 5/17/2020 | Asia / India / Gujarat / Modasa                               |
| EPI_ISL_447540 | 5/5/2020  | 5/17/2020 | Asia / India / Gujarat / Modasa                               |
| EPI_ISL_447541 | 5/5/2020  | 5/17/2020 | Asia / India / Gujarat / Modasa                               |
| EPI_ISL_447542 | 5/5/2020  | 5/17/2020 | Asia / India / Gujarat / Modasa                               |
| EPI_ISL_447543 | 5/5/2020  | 5/17/2020 | Asia / India / Gujarat / Modasa                               |
| EPI_ISL_447544 | 5/5/2020  | 5/17/2020 | Asia / India / Gujarat / Modasa                               |
| EPI_ISL_447545 | 5/5/2020  | 5/17/2020 | Asia / India / Gujarat / Prantij                              |
| EPI_ISL_447546 | 5/5/2020  | 5/17/2020 | Asia / India / Gujarat / Himatnagar                           |
| EPI_ISL_447547 | 4/28/2020 | 5/17/2020 | Asia / India / Gujarat / Gandhinagar                          |
| EPI_ISL_447548 | 4/28/2020 | 5/17/2020 | Asia / India / Gujarat / Dahegam                              |
| EPI_ISL_447549 | 5/3/2020  | 5/17/2020 | Asia / India / Gujarat / Dahegam                              |
| EPI_ISL_447550 | 5/3/2020  | 5/17/2020 | Asia / India / Gujarat / Dahegam                              |
| EPI_ISL_447551 | 4/25/2020 | 5/17/2020 | Asia / India / Gujarat / Gandhinagar                          |
| EPI_ISL_447552 | 5/2/2020  | 5/17/2020 | Asia / India / Gujarat / Gandhinagar                          |
| EPI_ISL_447553 | 4/27/2020 | 5/17/2020 | Asia / India / Gujarat / Gandhinagar                          |
| EPI_ISL_447554 | 4/26/2020 | 5/17/2020 | Asia / India / Gujarat / Gandhinagar                          |
| EPI_ISL_447555 | 4/28/2020 | 5/17/2020 | Asia / India / Gujarat / Mansa                                |
| EPI_ISL_447556 | 3/30/2020 | 5/17/2020 | Asia / India / Telangana / Kamareddy                          |
| EPI_ISL_447557 | 3/30/2020 | 5/17/2020 | Asia / India / Telangana / Kamareddy                          |
| EPI_ISL_447558 | 3/30/2020 | 5/17/2020 | Asia / India / Telangana / Hyderabad                          |
| EPI_ISL_447559 | 3/31/2020 | 5/17/2020 | Asia / India / Telangana / Sangareddy                         |
| EPI_ISL_447560 | 3/31/2020 | 5/17/2020 | Asia / India / Telangana / Sangareddy                         |
| EPI_ISL_447561 | 3/31/2020 | 5/17/2020 | Asia / India / Telangana / Gadwal                             |
| EPI_ISL_447562 | 3/31/2020 | 5/17/2020 | Asia / India / Telangana / Jogulamba Gadwal                   |
| EPI_ISL_447563 | 3/31/2020 | 5/17/2020 | Asia / India / Telangana / Sangareddy                         |
| EPI_ISL_447564 | 4/1/2020  | 5/17/2020 | Asia / India / Telangana / Nizamabad                          |
| EPI_ISL_447565 | 4/1/2020  | 5/17/2020 | Asia / India / Telangana / Adilabad                           |
| EPI_ISL_447566 | 4/1/2020  | 5/17/2020 | Asia / India / Telangana / Kamareddy                          |
| EPI_ISL_447567 | 4/1/2020  | 5/17/2020 | Asia / India / Telangana / Adilabad                           |
| EPI_ISL_447568 | 4/1/2020  | 5/17/2020 | Asia / India / Telangana / Mahboobnagar                       |
| EPI_ISL_447569 | 4/1/2020  | 5/17/2020 | Asia / India / Telangana / Nizamabad                          |
| EPI_ISL_447570 | 4/1/2020  | 5/17/2020 | Asia / India / Telangana / Nizamabad                          |

|                |           |                                                                |
|----------------|-----------|----------------------------------------------------------------|
| EPI_ISL_447571 | 4/1/2020  | 5/17/2020 Asia / India / Telangana / Nizamabad                 |
| EPI_ISL_447572 | 4/1/2020  | 5/17/2020 Asia / India / Telangana / Nizamabad                 |
| EPI_ISL_447573 | 4/1/2020  | 5/17/2020 Asia / India / Telangana / Nagarkurnool              |
| EPI_ISL_447574 | 4/1/2020  | 5/17/2020 Asia / India / Telangana / Nizamabad                 |
| EPI_ISL_447575 | 4/2/2020  | 5/17/2020 Asia / India / Telangana / Nirmal                    |
| EPI_ISL_447576 | 4/2/2020  | 5/17/2020 Asia / India / Telangana / Nizamabad                 |
| EPI_ISL_447577 | 4/2/2020  | 5/17/2020 Asia / India / Telangana / Nalgonda                  |
| EPI_ISL_447578 | 4/2/2020  | 5/17/2020 Asia / India / Telangana / Nalgonda                  |
| EPI_ISL_447579 | 4/10/2020 | 5/17/2020 Asia / India / Telangana / Khammam                   |
| EPI_ISL_447580 | 4/13/2020 | 5/17/2020 Asia / India / Telangana / Nizamabad                 |
| EPI_ISL_447581 | 4/14/2020 | 5/17/2020 Asia / India / Telangana / Nizamabad                 |
| EPI_ISL_447582 | 4/14/2020 | 5/17/2020 Asia / India / Telangana / Nizamabad                 |
| EPI_ISL_447584 | 4/16/2020 | 5/17/2020 Asia / India / Tamil Nadu / Chennai                  |
| EPI_ISL_447585 | 4/16/2020 | 5/17/2020 Asia / India / Tamil Nadu / Chennai                  |
| EPI_ISL_447586 | 4/16/2020 | 5/17/2020 Asia / India / Tamil Nadu / Chennai                  |
| EPI_ISL_447587 | 4/20/2020 | 5/17/2020 Asia / India / Tamil Nadu / Chennai                  |
| EPI_ISL_447588 | 3/27/2020 | 5/17/2020 North America / USA / Florida                        |
| EPI_ISL_447589 | 3/27/2020 | 5/17/2020 North America / USA / Florida                        |
| EPI_ISL_447592 | 3/29/2020 | 5/18/2020 Asia / Taiwan / New Taipei City                      |
| EPI_ISL_447593 | 4/1/2020  | 5/18/2020 Asia / Taiwan / New Taipei City                      |
| EPI_ISL_447594 | 3/24/2020 | 5/18/2020 Oceania / Australia / Queensland / Sunshine Coast    |
| EPI_ISL_447595 | 3/24/2020 | 5/18/2020 Oceania / Australia / Queensland / Sunshine Coast    |
| EPI_ISL_447596 | 4/5/2020  | 5/18/2020 Africa / Democratic Republic of the Congo / Kinshasa |
| EPI_ISL_447597 | 4/22/2020 | 5/18/2020 Africa / Democratic Republic of the Congo / Kinshasa |
| EPI_ISL_447598 | 4/22/2020 | 5/18/2020 Africa / Democratic Republic of the Congo / Kinshasa |
| EPI_ISL_447599 | 4/22/2020 | 5/18/2020 Africa / Democratic Republic of the Congo / Kinshasa |
| EPI_ISL_447606 | 4/23/2020 | 5/18/2020 Africa / Democratic Republic of the Congo / Kinshasa |
| EPI_ISL_447607 | 4/23/2020 | 5/18/2020 Africa / Democratic Republic of the Congo / Kinshasa |
| EPI_ISL_447614 | 3/15/2020 | 5/18/2020 Asia / Taiwan / Taipei                               |
| EPI_ISL_447615 | 3/19/2020 | 5/18/2020 Asia / Taiwan / Taipei                               |
| EPI_ISL_447616 | 3/21/2020 | 5/18/2020 Asia / Taiwan / Taipei                               |
| EPI_ISL_447617 | 3/25/2020 | 5/18/2020 Asia / Taiwan / Taipei                               |
| EPI_ISL_447618 | 3/25/2020 | 5/18/2020 Asia / Taiwan / Taipei                               |
| EPI_ISL_447619 | 3/26/2020 | 5/18/2020 Asia / Taiwan / Taipei                               |
| EPI_ISL_447620 | 3/30/2020 | 5/18/2020 Asia / Taiwan / Taipei                               |
| EPI_ISL_447621 | 4/13/2020 | 5/18/2020 Asia / Taiwan / Taipei                               |
| EPI_ISL_447622 | 4/27/2020 | 5/18/2020 Asia / Taiwan / Taipei                               |
| EPI_ISL_447734 | 3/26/2020 | 5/18/2020 South America / Colombia / Caldas / Anserma          |
| EPI_ISL_447735 | 3/26/2020 | 5/18/2020 South America / Colombia / Valle del Cauca / Cali    |
| EPI_ISL_447736 | 3/26/2020 | 5/18/2020 South America / Colombia / Valle del Cauca / Cali    |
| EPI_ISL_447738 | 3/26/2020 | 5/18/2020 South America / Colombia / Boyaca / Togui            |
| EPI_ISL_447739 | 3/27/2020 | 5/18/2020 South America / Colombia / Boyaca / Togui            |
| EPI_ISL_447740 | 3/28/2020 | 5/18/2020 South America / Colombia / Boyaca / Togui            |
| EPI_ISL_447741 | 3/28/2020 | 5/18/2020 South America / Colombia / Boyaca / Togui            |
| EPI_ISL_447742 | 3/28/2020 | 5/18/2020 South America / Colombia / Boyaca / Togui            |
| EPI_ISL_447743 | 3/28/2020 | 5/18/2020 South America / Colombia / Boyaca / Togui            |
| EPI_ISL_447744 | 3/28/2020 | 5/18/2020 South America / Colombia / Cundinamarca / Soacha     |

|                |           |                                                                   |
|----------------|-----------|-------------------------------------------------------------------|
| EPI_ISL_447745 | 3/28/2020 | 5/18/2020 South America / Colombia / Cundinamarca / Madrid        |
| EPI_ISL_447746 | 3/28/2020 | 5/18/2020 South America / Colombia / Cundinamarca / Zipaquirá     |
| EPI_ISL_447747 | 3/28/2020 | 5/18/2020 South America / Colombia / Boyacá / Santa Sofía         |
| EPI_ISL_447748 | 3/29/2020 | 5/18/2020 South America / Colombia / Narino / Ipiales             |
| EPI_ISL_447750 | 3/30/2020 | 5/18/2020 South America / Colombia / Choco / Quibdó               |
| EPI_ISL_447754 | 3/31/2020 | 5/18/2020 South America / Colombia / Cundinamarca / Funza         |
| EPI_ISL_447755 | 3/31/2020 | 5/18/2020 South America / Colombia / Valle del Cauca / Buga       |
| EPI_ISL_447756 | 3/31/2020 | 5/18/2020 South America / Colombia / Valle del Cauca / Cali       |
| EPI_ISL_447757 | 3/31/2020 | 5/18/2020 South America / Colombia / Tolima / Ibagué              |
| EPI_ISL_447759 | 3/31/2020 | 5/18/2020 South America / Colombia / Huila / Neiva                |
| EPI_ISL_447760 | 3/31/2020 | 5/18/2020 South America / Colombia / Risaralda / Pereira          |
| EPI_ISL_447761 | 3/31/2020 | 5/18/2020 South America / Colombia / Antioquia / Medellín         |
| EPI_ISL_447762 | 3/31/2020 | 5/18/2020 South America / Colombia / Antioquia / Envigado         |
| EPI_ISL_447763 | 3/31/2020 | 5/18/2020 South America / Colombia / Antioquia / Medellín         |
| EPI_ISL_447765 | 3/31/2020 | 5/18/2020 South America / Colombia / Antioquia / Itagüí           |
| EPI_ISL_447766 | 4/1/2020  | 5/18/2020 South America / Colombia / Antioquia / Medellín         |
| EPI_ISL_447767 | 4/1/2020  | 5/18/2020 South America / Colombia / Antioquia / Sabaneta         |
| EPI_ISL_447768 | 3/31/2020 | 5/18/2020 South America / Colombia / Antioquia / Medellín         |
| EPI_ISL_447769 | 4/1/2020  | 5/18/2020 South America / Colombia / Cundinamarca / Chocontá      |
| EPI_ISL_447771 | 4/1/2020  | 5/18/2020 South America / Colombia / Valle del Cauca / Buga       |
| EPI_ISL_447774 | 4/1/2020  | 5/18/2020 South America / Colombia / Valle del Cauca / Cali       |
| EPI_ISL_447775 | 4/1/2020  | 5/18/2020 South America / Colombia / Valle del Cauca / Cali       |
| EPI_ISL_447777 | 4/1/2020  | 5/18/2020 South America / Colombia / Magdalena / Santa Marta      |
| EPI_ISL_447778 | 4/1/2020  | 5/18/2020 South America / Colombia / Magdalena / Santa Marta      |
| EPI_ISL_447779 | 4/1/2020  | 5/18/2020 South America / Colombia / Valle del Cauca / Cali       |
| EPI_ISL_447780 | 4/1/2020  | 5/18/2020 South America / Colombia / Valle del Cauca / Palmira    |
| EPI_ISL_447781 | 4/1/2020  | 5/18/2020 South America / Colombia / Valle del Cauca / Cali       |
| EPI_ISL_447785 | 4/2/2020  | 5/18/2020 South America / Colombia / Valle del Cauca / Cali       |
| EPI_ISL_447786 | 4/3/2020  | 5/18/2020 South America / Colombia / Valle del Cauca / Trujillo   |
| EPI_ISL_447789 | 4/3/2020  | 5/18/2020 South America / Colombia / Valle del Cauca / Andalucía  |
| EPI_ISL_447790 | 4/3/2020  | 5/18/2020 South America / Colombia / Valle del Cauca / Tuluá      |
| EPI_ISL_447791 | 4/3/2020  | 5/18/2020 South America / Colombia / Valle del Cauca / Cali       |
| EPI_ISL_447792 | 4/3/2020  | 5/18/2020 South America / Colombia / Valle del Cauca / Cali       |
| EPI_ISL_447793 | 4/3/2020  | 5/18/2020 South America / Colombia / Valle del Cauca / Jamundí    |
| EPI_ISL_447794 | 4/3/2020  | 5/18/2020 South America / Colombia / Valle del Cauca / El Cerrito |
| EPI_ISL_447795 | 4/4/2020  | 5/18/2020 South America / Colombia / Valle del Cauca / Ansermo    |
| EPI_ISL_447796 | 4/4/2020  | 5/18/2020 South America / Colombia / Valle del Cauca / El Cerrito |
| EPI_ISL_447797 | 4/4/2020  | 5/18/2020 South America / Colombia / Boyacá / Santana             |
| EPI_ISL_447798 | 4/4/2020  | 5/18/2020 South America / Colombia / Narino / Ipiales             |
| EPI_ISL_447800 | 4/4/2020  | 5/18/2020 South America / Colombia / Cundinamarca / Cajica        |
| EPI_ISL_447802 | 4/4/2020  | 5/18/2020 South America / Colombia / Meta / Villavicencio         |
| EPI_ISL_447803 | 4/4/2020  | 5/18/2020 South America / Colombia / Meta / Villavicencio         |
| EPI_ISL_447804 | 4/4/2020  | 5/18/2020 South America / Colombia / Meta / Villavicencio         |
| EPI_ISL_447805 | 4/4/2020  | 5/18/2020 South America / Colombia / Boyacá / Togui               |
| EPI_ISL_447806 | 4/4/2020  | 5/18/2020 South America / Colombia / Huila / Neiva                |
| EPI_ISL_447807 | 4/4/2020  | 5/18/2020 South America / Colombia / Huila / Neiva                |
| EPI_ISL_447808 | 4/4/2020  | 5/18/2020 South America / Colombia / Tolima / Ibagué              |

|                |           |                                                                  |
|----------------|-----------|------------------------------------------------------------------|
| EPI_ISL_447809 | 4/4/2020  | 5/18/2020 South America / Colombia / Risaralda / Pereira         |
| EPI_ISL_447810 | 4/5/2020  | 5/18/2020 South America / Colombia / Risaralda / Dosquebradas    |
| EPI_ISL_447812 | 4/5/2020  | 5/18/2020 South America / Colombia / Cundinamarca / Zipaquirá    |
| EPI_ISL_447813 | 4/5/2020  | 5/18/2020 South America / Colombia / Cundinamarca / Soacha       |
| EPI_ISL_447816 | 4/7/2020  | 5/18/2020 South America / Colombia / Córdoba / Tierralta         |
| EPI_ISL_447817 | 4/9/2020  | 5/18/2020 South America / Colombia / Córdoba / Montería          |
| EPI_ISL_447837 | 3/20/2020 | 5/18/2020 Europe / Norway                                        |
| EPI_ISL_447840 | 3/8/2020  | 5/18/2020 North America / USA / District of Columbia             |
| EPI_ISL_447841 | 3/6/2020  | 5/18/2020 North America / USA / Florida                          |
| EPI_ISL_447842 | 3/7/2020  | 5/18/2020 North America / USA / Iowa                             |
| EPI_ISL_447843 | 3/4/2020  | 5/18/2020 North America / USA / Maryland                         |
| EPI_ISL_447844 | 3/8/2020  | 5/18/2020 North America / USA / Pennsylvania                     |
| EPI_ISL_447845 | 3/8/2020  | 5/18/2020 North America / USA / Puerto Rico                      |
| EPI_ISL_447846 | 3/5/2020  | 5/18/2020 North America / USA / Vermont                          |
| EPI_ISL_447847 | 3/31/2020 | 5/18/2020 Asia / India / Telangana / Sangareddy                  |
| EPI_ISL_447848 | 4/1/2020  | 5/18/2020 Asia / India / Telangana / Peddapally                  |
| EPI_ISL_447849 | 4/1/2020  | 5/18/2020 Asia / India / Telangana / Mahboobnagar                |
| EPI_ISL_447850 | 4/1/2020  | 5/18/2020 Asia / India / Telangana / Kamareddy                   |
| EPI_ISL_447851 | 4/1/2020  | 5/18/2020 Asia / India / Telangana / Nizamabad                   |
| EPI_ISL_447852 | 4/1/2020  | 5/18/2020 Asia / India / Telangana / Nizamabad                   |
| EPI_ISL_447853 | 4/1/2020  | 5/18/2020 Asia / India / Telangana / Adilabad                    |
| EPI_ISL_447854 | 4/2/2020  | 5/18/2020 Asia / India / Telangana / Nalgonda                    |
| EPI_ISL_447855 | 4/2/2020  | 5/18/2020 Asia / India / Telangana / Nalgonda                    |
| EPI_ISL_447856 | 4/2/2020  | 5/18/2020 Asia / India / Telangana / Rangareddy                  |
| EPI_ISL_447857 | 4/2/2020  | 5/18/2020 Asia / India / Telangana / Rangareddy                  |
| EPI_ISL_447858 | 4/6/2020  | 5/18/2020 Asia / India / Telangana / Rangareddy                  |
| EPI_ISL_447859 | 4/15/2020 | 5/18/2020 Asia / India / Telangana / Jogulamba Gadwal            |
| EPI_ISL_447860 | 4/16/2020 | 5/18/2020 Asia / India / Telangana / Rangareddy                  |
| EPI_ISL_447861 | 4/16/2020 | 5/18/2020 Asia / India / Telangana / Vikarabad                   |
| EPI_ISL_447862 | 3/31/2020 | 5/18/2020 Asia / India / Telangana / Kamareddy                   |
| EPI_ISL_447863 | 4/14/2020 | 5/18/2020 Asia / India / Telangana / Nizamabad                   |
| EPI_ISL_447865 | 4/14/2020 | 5/18/2020 Asia / India / Telangana / Rangareddy                  |
| EPI_ISL_447866 | 4/14/2020 | 5/18/2020 Asia / India / Telangana / Rangareddy                  |
| EPI_ISL_447886 | 3/23/2020 | 5/18/2020 North America / USA / California                       |
| EPI_ISL_447887 | 3/27/2020 | 5/18/2020 North America / USA / California / Yolo County / Davis |
| EPI_ISL_447888 | 3/25/2020 | 5/18/2020 North America / USA / California / Yolo County / Davis |
| EPI_ISL_447889 | 4/1/2020  | 5/18/2020 North America / USA / California / Yolo County / Davis |
| EPI_ISL_447890 | 4/2/2020  | 5/18/2020 North America / USA / California / Yolo County / Davis |
| EPI_ISL_447891 | 4/1/2020  | 5/18/2020 North America / USA / California / Yolo County / Davis |
| EPI_ISL_447892 | 4/4/2020  | 5/18/2020 North America / USA / California / Yolo County / Davis |
| EPI_ISL_447893 | 4/3/2020  | 5/18/2020 North America / USA / California / Yolo County / Davis |
| EPI_ISL_447894 | 4/6/2020  | 5/18/2020 North America / USA / California / Yolo County / Davis |
| EPI_ISL_447895 | 4/8/2020  | 5/18/2020 North America / USA / California / Yolo County / Davis |
| EPI_ISL_447896 | 4/7/2020  | 5/18/2020 North America / USA / California / Yolo County / Davis |
| EPI_ISL_447903 | 4/7/2020  | 5/18/2020 North America / USA / Florida                          |
| EPI_ISL_447905 | 4/29/2020 | 5/18/2020 North America / USA / Florida                          |
| EPI_ISL_447899 | 4/18/2020 | 5/19/2020 Asia / Bangladesh                                      |

|                |           |                                             |
|----------------|-----------|---------------------------------------------|
| EPI_ISL_447904 | 5/11/2020 | 5/19/2020 Asia / Bangladesh                 |
| EPI_ISL_447906 | 2020      | 5/19/2020 Asia / Thailand / Bangkok         |
| EPI_ISL_447907 | 2020      | 5/19/2020 Asia / Thailand / Bangkok         |
| EPI_ISL_447908 | 2020      | 5/19/2020 Asia / Thailand / Bangkok         |
| EPI_ISL_447909 | 1/13/2020 | 5/19/2020 Asia / Thailand / Nonthaburi      |
| EPI_ISL_447910 | 1/15/2020 | 5/19/2020 Asia / Thailand / Nonthaburi      |
| EPI_ISL_447911 | 1/24/2020 | 5/19/2020 Asia / Thailand / Nonthaburi      |
| EPI_ISL_447912 | 1/25/2020 | 5/19/2020 Asia / Thailand / Bangkok         |
| EPI_ISL_447913 | 1/31/2020 | 5/19/2020 Asia / Thailand / Bangkok         |
| EPI_ISL_447914 | 1/25/2020 | 5/19/2020 Asia / Thailand / Phuket          |
| EPI_ISL_447915 | 1/26/2020 | 5/19/2020 Asia / Thailand / Bangkok         |
| EPI_ISL_447916 | 1/29/2020 | 5/19/2020 Asia / Thailand / Bangkok         |
| EPI_ISL_447917 | 1/29/2020 | 5/19/2020 Asia / Thailand / Nonthaburi      |
| EPI_ISL_447918 | 2/1/2020  | 5/19/2020 Asia / Thailand / Bangkok         |
| EPI_ISL_447919 | 2/4/2020  | 5/19/2020 Asia / Thailand / Samut Prakan    |
| EPI_ISL_447920 | 2/25/2020 | 5/19/2020 Asia / Thailand / Bangkok         |
| EPI_ISL_447921 | 3/13/2020 | 5/19/2020 Asia / Thailand / Bangkok         |
| EPI_ISL_447927 | 4/26/2020 | 5/19/2020 Europe / United Kingdom / England |
| EPI_ISL_447928 | 4/26/2020 | 5/19/2020 Europe / United Kingdom / England |
| EPI_ISL_447931 | 4/28/2020 | 5/19/2020 Europe / United Kingdom / England |
| EPI_ISL_447933 | 4/27/2020 | 5/19/2020 Europe / United Kingdom / England |
| EPI_ISL_447936 | 4/28/2020 | 5/19/2020 Europe / United Kingdom / England |
| EPI_ISL_447939 | 4/29/2020 | 5/19/2020 Europe / United Kingdom / England |
| EPI_ISL_447940 | 4/29/2020 | 5/19/2020 Europe / United Kingdom / England |
| EPI_ISL_447953 | 4/27/2020 | 5/19/2020 Europe / United Kingdom / England |
| EPI_ISL_447954 | 4/29/2020 | 5/19/2020 Europe / United Kingdom / England |
| EPI_ISL_447955 | 4/29/2020 | 5/19/2020 Europe / United Kingdom / England |
| EPI_ISL_447956 | 4/30/2020 | 5/19/2020 Europe / United Kingdom / England |
| EPI_ISL_447959 | 4/29/2020 | 5/19/2020 Europe / United Kingdom / England |
| EPI_ISL_447960 | 4/30/2020 | 5/19/2020 Europe / United Kingdom / England |
| EPI_ISL_447963 | 4/29/2020 | 5/19/2020 Europe / United Kingdom / England |
| EPI_ISL_447964 | 4/29/2020 | 5/19/2020 Europe / United Kingdom / England |
| EPI_ISL_447966 | 4/29/2020 | 5/19/2020 Europe / United Kingdom / England |
| EPI_ISL_447967 | 4/29/2020 | 5/19/2020 Europe / United Kingdom / England |
| EPI_ISL_447969 | 4/27/2020 | 5/19/2020 Europe / United Kingdom / England |
| EPI_ISL_447970 | 4/30/2020 | 5/19/2020 Europe / United Kingdom / England |
| EPI_ISL_447971 | 4/30/2020 | 5/19/2020 Europe / United Kingdom / England |
| EPI_ISL_447972 | 4/28/2020 | 5/19/2020 Europe / United Kingdom / England |
| EPI_ISL_447973 | 4/29/2020 | 5/19/2020 Europe / United Kingdom / England |
| EPI_ISL_447975 | 4/30/2020 | 5/19/2020 Europe / United Kingdom / England |
| EPI_ISL_447976 | 4/29/2020 | 5/19/2020 Europe / United Kingdom / England |
| EPI_ISL_447977 | 4/28/2020 | 5/19/2020 Europe / United Kingdom / England |
| EPI_ISL_447978 | 5/1/2020  | 5/19/2020 Europe / United Kingdom / England |
| EPI_ISL_447979 | 4/30/2020 | 5/19/2020 Europe / United Kingdom / England |
| EPI_ISL_447980 | 4/27/2020 | 5/19/2020 Europe / United Kingdom / England |
| EPI_ISL_447981 | 4/30/2020 | 5/19/2020 Europe / United Kingdom / England |
| EPI_ISL_447983 | 4/29/2020 | 5/19/2020 Europe / United Kingdom / England |























































|                |           |                                             |
|----------------|-----------|---------------------------------------------|
| EPI_ISL_449716 | 4/16/2020 | 5/19/2020 Europe / United Kingdom / England |
| EPI_ISL_449718 | 4/17/2020 | 5/19/2020 Europe / United Kingdom / England |
| EPI_ISL_449719 | 4/17/2020 | 5/19/2020 Europe / United Kingdom / England |
| EPI_ISL_449720 | 4/17/2020 | 5/19/2020 Europe / United Kingdom / England |
| EPI_ISL_449721 | 4/17/2020 | 5/19/2020 Europe / United Kingdom / England |
| EPI_ISL_449722 | 4/17/2020 | 5/19/2020 Europe / United Kingdom / England |
| EPI_ISL_449723 | 4/17/2020 | 5/19/2020 Europe / United Kingdom / England |
| EPI_ISL_449724 | 4/17/2020 | 5/19/2020 Europe / United Kingdom / England |
| EPI_ISL_449725 | 4/17/2020 | 5/19/2020 Europe / United Kingdom / England |
| EPI_ISL_449726 | 4/17/2020 | 5/19/2020 Europe / United Kingdom / England |
| EPI_ISL_449727 | 4/17/2020 | 5/19/2020 Europe / United Kingdom / England |
| EPI_ISL_449728 | 4/17/2020 | 5/19/2020 Europe / United Kingdom / England |
| EPI_ISL_449729 | 4/17/2020 | 5/19/2020 Europe / United Kingdom / England |
| EPI_ISL_449791 | 4/4/2020  | 5/19/2020 Europe / Norway                   |
| EPI_ISL_449792 | 4/5/2020  | 5/19/2020 Europe / Norway                   |
| EPI_ISL_449793 | 4/2/2020  | 5/19/2020 Europe / Norway                   |
| EPI_ISL_449794 | 4/2/2020  | 5/19/2020 Europe / Norway                   |
| EPI_ISL_449799 | 4/19/2020 | 5/19/2020 Europe / Slovenia                 |
| EPI_ISL_449801 | 3/26/2020 | 5/19/2020 North America / USA / Utah        |
| EPI_ISL_449802 | 3/26/2020 | 5/19/2020 North America / USA / Utah        |
| EPI_ISL_449804 | 3/26/2020 | 5/19/2020 North America / USA / Utah        |
| EPI_ISL_449805 | 3/27/2020 | 5/19/2020 North America / USA / Utah        |
| EPI_ISL_449806 | 3/26/2020 | 5/19/2020 North America / USA / Utah        |
| EPI_ISL_449809 | 3/27/2020 | 5/19/2020 North America / USA / Utah        |
| EPI_ISL_449810 | 3/30/2020 | 5/19/2020 North America / USA / Utah        |
| EPI_ISL_449812 | 4/1/2020  | 5/19/2020 North America / USA / Utah        |
| EPI_ISL_449815 | 4/7/2020  | 5/19/2020 North America / USA / Utah        |
| EPI_ISL_449816 | 4/7/2020  | 5/19/2020 North America / USA / Utah        |
| EPI_ISL_449817 | 4/7/2020  | 5/19/2020 North America / USA / Utah        |
| EPI_ISL_449818 | 4/7/2020  | 5/19/2020 North America / USA / Utah        |
| EPI_ISL_449819 | 4/7/2020  | 5/19/2020 North America / USA / Utah        |
| EPI_ISL_449820 | 4/7/2020  | 5/19/2020 North America / USA / Utah        |
| EPI_ISL_449821 | 4/7/2020  | 5/19/2020 North America / USA / Utah        |
| EPI_ISL_449822 | 4/7/2020  | 5/19/2020 North America / USA / Utah        |
| EPI_ISL_449823 | 4/7/2020  | 5/19/2020 North America / USA / Utah        |
| EPI_ISL_449824 | 4/7/2020  | 5/19/2020 North America / USA / Utah        |
| EPI_ISL_449825 | 4/7/2020  | 5/19/2020 North America / USA / Utah        |
| EPI_ISL_449826 | 4/7/2020  | 5/19/2020 North America / USA / Utah        |
| EPI_ISL_449827 | 4/7/2020  | 5/19/2020 North America / USA / Utah        |
| EPI_ISL_449828 | 4/7/2020  | 5/19/2020 North America / USA / Utah        |
| EPI_ISL_449829 | 4/7/2020  | 5/19/2020 North America / USA / Utah        |
| EPI_ISL_449830 | 4/7/2020  | 5/19/2020 North America / USA / Utah        |
| EPI_ISL_449831 | 4/7/2020  | 5/19/2020 North America / USA / Utah        |
| EPI_ISL_449833 | 4/6/2020  | 5/19/2020 North America / USA / Utah        |
| EPI_ISL_449834 | 4/6/2020  | 5/19/2020 North America / USA / Utah        |
| EPI_ISL_449835 | 4/6/2020  | 5/19/2020 North America / USA / Utah        |
| EPI_ISL_449836 | 4/5/2020  | 5/19/2020 North America / USA / Utah        |









|                |           |           |                                                     |
|----------------|-----------|-----------|-----------------------------------------------------|
| EPI_ISL_449987 | 4/17/2020 | 5/19/2020 | North America / USA / Washington / Snohomish County |
| EPI_ISL_449988 | 4/17/2020 | 5/19/2020 | North America / USA / Washington / Snohomish County |
| EPI_ISL_449989 | 4/15/2020 | 5/19/2020 | North America / USA / Washington / Asotin County    |
| EPI_ISL_449990 | 4/15/2020 | 5/19/2020 | North America / USA / Washington / Yakima County    |
| EPI_ISL_449991 | 4/16/2020 | 5/19/2020 | North America / USA / Washington / Yakima County    |
| EPI_ISL_449992 | 4/16/2020 | 5/19/2020 | North America / USA / Washington / Yakima County    |
| EPI_ISL_449994 | 4/17/2020 | 5/19/2020 | North America / USA / Washington / Yakima County    |
| EPI_ISL_449995 | 4/16/2020 | 5/19/2020 | North America / USA / Washington / Yakima County    |
| EPI_ISL_449996 | 4/16/2020 | 5/19/2020 | North America / USA / Washington / Yakima County    |
| EPI_ISL_449997 | 4/16/2020 | 5/19/2020 | North America / USA / Washington / Yakima County    |
| EPI_ISL_449998 | 4/16/2020 | 5/19/2020 | North America / USA / Washington / Snohomish County |
| EPI_ISL_449999 | 4/14/2020 | 5/19/2020 | North America / USA / Washington / King County      |
| EPI_ISL_450000 | 4/16/2020 | 5/19/2020 | North America / USA / Washington / Snohomish County |
| EPI_ISL_450001 | 4/16/2020 | 5/19/2020 | North America / USA / Washington / Whatcom County   |
| EPI_ISL_450002 | 4/16/2020 | 5/19/2020 | North America / USA / Washington / King County      |
| EPI_ISL_450003 | 4/16/2020 | 5/19/2020 | North America / USA / Washington / King County      |
| EPI_ISL_450004 | 3/21/2020 | 5/19/2020 | North America / USA / New York / Queens             |
| EPI_ISL_450005 | 3/21/2020 | 5/19/2020 | North America / USA / New York / Manhattan          |
| EPI_ISL_450006 | 3/21/2020 | 5/19/2020 | North America / USA / New York / Queens             |
| EPI_ISL_450007 | 3/21/2020 | 5/19/2020 | North America / USA / New York / Queens             |
| EPI_ISL_450008 | 3/22/2020 | 5/19/2020 | North America / USA / New York / Manhattan          |
| EPI_ISL_450009 | 3/21/2020 | 5/19/2020 | North America / USA / New York / Brooklyn           |
| EPI_ISL_450010 | 3/21/2020 | 5/19/2020 | North America / USA / New York / Manhattan          |
| EPI_ISL_450011 | 3/18/2020 | 5/19/2020 | North America / USA / New York / Manhattan          |
| EPI_ISL_450012 | 3/18/2020 | 5/19/2020 | North America / USA / New York / Queens             |
| EPI_ISL_450013 | 3/18/2020 | 5/19/2020 | North America / USA / New York / Manhattan          |
| EPI_ISL_450014 | 3/18/2020 | 5/19/2020 | North America / USA / New York / Manhattan          |
| EPI_ISL_450015 | 3/18/2020 | 5/19/2020 | North America / USA / New York / Queens             |
| EPI_ISL_450016 | 3/18/2020 | 5/19/2020 | North America / USA / New York / Manhattan          |
| EPI_ISL_450017 | 3/18/2020 | 5/19/2020 | North America / USA / New York / Manhattan          |
| EPI_ISL_450018 | 3/18/2020 | 5/19/2020 | North America / USA / New York / Manhattan          |
| EPI_ISL_450019 | 3/18/2020 | 5/19/2020 | North America / USA / New York / Manhattan          |
| EPI_ISL_450020 | 3/18/2020 | 5/19/2020 | North America / USA / New York / Bronx              |
| EPI_ISL_450021 | 3/18/2020 | 5/19/2020 | North America / USA / New York / Brooklyn           |
| EPI_ISL_450022 | 3/18/2020 | 5/19/2020 | North America / USA / New York / Queens             |
| EPI_ISL_450023 | 3/18/2020 | 5/19/2020 | North America / USA / New York / Manhattan          |
| EPI_ISL_450024 | 3/18/2020 | 5/19/2020 | North America / USA / New York / Westchester County |
| EPI_ISL_450025 | 3/18/2020 | 5/19/2020 | North America / USA / New York / Manhattan          |
| EPI_ISL_450026 | 3/24/2020 | 5/19/2020 | North America / USA / New York / Nassau County      |
| EPI_ISL_450027 | 3/24/2020 | 5/19/2020 | North America / USA / New York / Suffolk County     |
| EPI_ISL_450028 | 3/24/2020 | 5/19/2020 | North America / USA / New York / Nassau County      |
| EPI_ISL_450029 | 3/24/2020 | 5/19/2020 | North America / USA / New York / Nassau County      |
| EPI_ISL_450030 | 3/24/2020 | 5/19/2020 | North America / USA / New York / Nassau County      |
| EPI_ISL_450031 | 3/24/2020 | 5/19/2020 | North America / USA / New York / Bronx              |
| EPI_ISL_450032 | 3/24/2020 | 5/19/2020 | North America / USA / New York / Nassau County      |
| EPI_ISL_450033 | 3/24/2020 | 5/19/2020 | North America / USA / New York / Nassau County      |
| EPI_ISL_450034 | 3/24/2020 | 5/19/2020 | North America / USA / New York / Nassau County      |



|                |           |           |                                                     |
|----------------|-----------|-----------|-----------------------------------------------------|
| EPI_ISL_450087 | 3/10/2020 | 5/20/2020 | North America / USA / New York / Manhattan          |
| EPI_ISL_450089 | 3/11/2020 | 5/20/2020 | North America / USA / New York / Manhattan          |
| EPI_ISL_450090 | 3/12/2020 | 5/20/2020 | North America / USA / New York / Manhattan          |
| EPI_ISL_450091 | 3/11/2020 | 5/20/2020 | North America / USA / New York / Manhattan          |
| EPI_ISL_450092 | 3/11/2020 | 5/20/2020 | North America / USA / New York / Manhattan          |
| EPI_ISL_450093 | 3/9/2020  | 5/20/2020 | North America / USA / New York / Manhattan          |
| EPI_ISL_450094 | 3/12/2020 | 5/20/2020 | North America / USA / New York / Manhattan          |
| EPI_ISL_450095 | 3/12/2020 | 5/20/2020 | North America / USA / New York / Manhattan          |
| EPI_ISL_450096 | 3/13/2020 | 5/20/2020 | North America / USA / New York / Manhattan          |
| EPI_ISL_450097 | 3/13/2020 | 5/20/2020 | North America / USA / New York / Manhattan          |
| EPI_ISL_450098 | 3/12/2020 | 5/20/2020 | North America / USA / New York / Manhattan          |
| EPI_ISL_450099 | 3/13/2020 | 5/20/2020 | North America / USA / New York / Manhattan          |
| EPI_ISL_450100 | 3/13/2020 | 5/20/2020 | North America / USA / New York / Manhattan          |
| EPI_ISL_450101 | 3/13/2020 | 5/20/2020 | North America / USA / New York / Brooklyn           |
| EPI_ISL_450102 | 3/12/2020 | 5/20/2020 | North America / USA / New York / Manhattan          |
| EPI_ISL_450103 | 3/14/2020 | 5/20/2020 | North America / USA / New York / Bronx              |
| EPI_ISL_450104 | 3/12/2020 | 5/20/2020 | North America / USA / New York / Bronx              |
| EPI_ISL_450105 | 3/13/2020 | 5/20/2020 | North America / USA / New York / Queens             |
| EPI_ISL_450106 | 3/12/2020 | 5/20/2020 | North America / USA / New York / Manhattan          |
| EPI_ISL_450107 | 3/12/2020 | 5/20/2020 | North America / USA / New York / Manhattan          |
| EPI_ISL_450108 | 3/11/2020 | 5/20/2020 | North America / USA / New York                      |
| EPI_ISL_450109 | 3/12/2020 | 5/20/2020 | North America / USA / New York / Manhattan          |
| EPI_ISL_450110 | 3/11/2020 | 5/20/2020 | North America / USA / New York / Manhattan          |
| EPI_ISL_450111 | 3/13/2020 | 5/20/2020 | North America / USA / New York / Manhattan          |
| EPI_ISL_450112 | 3/13/2020 | 5/20/2020 | North America / USA / New York / Manhattan          |
| EPI_ISL_450113 | 3/10/2020 | 5/20/2020 | North America / USA / New York                      |
| EPI_ISL_450114 | 3/10/2020 | 5/20/2020 | North America / USA / New York / Manhattan          |
| EPI_ISL_450115 | 3/10/2020 | 5/20/2020 | North America / USA / New York                      |
| EPI_ISL_450116 | 3/7/2020  | 5/20/2020 | North America / USA / New York                      |
| EPI_ISL_450117 | 3/14/2020 | 5/20/2020 | North America / USA / New York / Manhattan          |
| EPI_ISL_450118 | 3/12/2020 | 5/20/2020 | North America / USA / New York / Queens             |
| EPI_ISL_450120 | 3/4/2020  | 5/20/2020 | North America / USA / New York / Queens             |
| EPI_ISL_450121 | 3/12/2020 | 5/20/2020 | North America / USA / New York / Queens             |
| EPI_ISL_450123 | 3/9/2020  | 5/20/2020 | North America / USA / New York / Westchester County |
| EPI_ISL_450124 | 3/19/2020 | 5/20/2020 | North America / USA / New York / Manhattan          |
| EPI_ISL_450125 | 3/19/2020 | 5/20/2020 | North America / USA / New York / Manhattan          |
| EPI_ISL_450126 | 3/19/2020 | 5/20/2020 | North America / USA / New York / Manhattan          |
| EPI_ISL_450127 | 3/19/2020 | 5/20/2020 | North America / USA / New York / Westchester County |
| EPI_ISL_450128 | 3/19/2020 | 5/20/2020 | North America / USA / New York / Manhattan          |
| EPI_ISL_450129 | 3/19/2020 | 5/20/2020 | North America / USA / New York / Manhattan          |
| EPI_ISL_450130 | 3/19/2020 | 5/20/2020 | North America / USA / New York / Bronx              |
| EPI_ISL_450132 | 3/19/2020 | 5/20/2020 | North America / USA / New York / Manhattan          |
| EPI_ISL_450133 | 3/19/2020 | 5/20/2020 | North America / USA / New York / Manhattan          |
| EPI_ISL_450134 | 3/19/2020 | 5/20/2020 | North America / USA / New York / Manhattan          |
| EPI_ISL_450135 | 3/19/2020 | 5/20/2020 | North America / USA / New York / Manhattan          |
| EPI_ISL_450136 | 3/19/2020 | 5/20/2020 | North America / USA / New York / Queens             |
| EPI_ISL_450137 | 3/19/2020 | 5/20/2020 | North America / USA / New York / Bronx              |

|                |           |                                                            |
|----------------|-----------|------------------------------------------------------------|
| EPI_ISL_450138 | 3/19/2020 | 5/20/2020 North America / USA / New Jersey / Bergen County |
| EPI_ISL_450139 | 3/19/2020 | 5/20/2020 North America / USA / New York / Bronx           |
| EPI_ISL_450140 | 3/19/2020 | 5/20/2020 North America / USA / New York / Bronx           |
| EPI_ISL_450141 | 3/19/2020 | 5/20/2020 North America / USA / New York / Manhattan       |
| EPI_ISL_450142 | 3/19/2020 | 5/20/2020 North America / USA / New York / Manhattan       |
| EPI_ISL_450143 | 3/19/2020 | 5/20/2020 North America / USA / New York / Manhattan       |
| EPI_ISL_450144 | 3/19/2020 | 5/20/2020 North America / USA / New York / Manhattan       |
| EPI_ISL_450145 | 3/19/2020 | 5/20/2020 North America / USA / New Jersey / Bergen County |
| EPI_ISL_450146 | 3/20/2020 | 5/20/2020 North America / USA / New York / Nassau County   |
| EPI_ISL_450147 | 3/20/2020 | 5/20/2020 North America / USA / New York / Nassau County   |
| EPI_ISL_450148 | 3/20/2020 | 5/20/2020 North America / USA / New York / Nassau County   |
| EPI_ISL_450149 | 3/20/2020 | 5/20/2020 North America / USA / New York / Nassau County   |
| EPI_ISL_450150 | 3/20/2020 | 5/20/2020 North America / USA / New York / Queens          |
| EPI_ISL_450151 | 3/20/2020 | 5/20/2020 North America / USA / New York / Manhattan       |
| EPI_ISL_450152 | 3/20/2020 | 5/20/2020 North America / USA / New York / Queens          |
| EPI_ISL_450153 | 3/20/2020 | 5/20/2020 North America / USA / New York / Manhattan       |
| EPI_ISL_450154 | 3/20/2020 | 5/20/2020 North America / USA / New York / Queens          |
| EPI_ISL_450155 | 3/20/2020 | 5/20/2020 North America / USA / New York / Queens          |
| EPI_ISL_450156 | 3/20/2020 | 5/20/2020 North America / USA / New York                   |
| EPI_ISL_450157 | 3/20/2020 | 5/20/2020 North America / USA / New York / Queens          |
| EPI_ISL_450158 | 3/20/2020 | 5/20/2020 North America / USA / New York / Manhattan       |
| EPI_ISL_450159 | 3/20/2020 | 5/20/2020 North America / USA / New York / Nassau County   |
| EPI_ISL_450160 | 3/20/2020 | 5/20/2020 North America / USA / New York / Manhattan       |
| EPI_ISL_450161 | 3/20/2020 | 5/20/2020 North America / USA / New York / Brooklyn        |
| EPI_ISL_450162 | 3/20/2020 | 5/20/2020 North America / USA / New York / Nassau County   |
| EPI_ISL_450163 | 3/20/2020 | 5/20/2020 North America / USA / New York / Manhattan       |
| EPI_ISL_450164 | 3/21/2020 | 5/20/2020 North America / USA / New York                   |
| EPI_ISL_450165 | 3/20/2020 | 5/20/2020 North America / USA / New York / Brooklyn        |
| EPI_ISL_450166 | 3/21/2020 | 5/20/2020 North America / USA / New York / Manhattan       |
| EPI_ISL_450167 | 3/20/2020 | 5/20/2020 North America / USA / New York / Brooklyn        |
| EPI_ISL_450168 | 3/20/2020 | 5/20/2020 North America / USA / New York / Queens          |
| EPI_ISL_450169 | 3/20/2020 | 5/20/2020 North America / USA / New York / Brooklyn        |
| EPI_ISL_450170 | 3/20/2020 | 5/20/2020 North America / USA / New York / Brooklyn        |
| EPI_ISL_450173 | 4/4/2020  | 5/20/2020 North America / USA / Louisiana / New Orleans    |
| EPI_ISL_450174 | 4/4/2020  | 5/20/2020 North America / USA / Louisiana / New Orleans    |
| EPI_ISL_450175 | 4/4/2020  | 5/20/2020 North America / USA / Louisiana / New Orleans    |
| EPI_ISL_450176 | 4/6/2020  | 5/20/2020 North America / USA / Louisiana / New Orleans    |
| EPI_ISL_450177 | 4/7/2020  | 5/20/2020 North America / USA / Louisiana / New Orleans    |
| EPI_ISL_450178 | 4/5/2020  | 5/20/2020 North America / USA / Louisiana / New Orleans    |
| EPI_ISL_450179 | 4/5/2020  | 5/20/2020 North America / USA / Louisiana / New Orleans    |
| EPI_ISL_450180 | 4/8/2020  | 5/20/2020 North America / USA / Louisiana / New Orleans    |
| EPI_ISL_450181 | 4/4/2020  | 5/20/2020 North America / USA / Louisiana / New Orleans    |
| EPI_ISL_450182 | 4/4/2020  | 5/20/2020 North America / USA / Louisiana / New Orleans    |
| EPI_ISL_450184 | 4/4/2020  | 5/20/2020 North America / USA / Louisiana / New Orleans    |
| EPI_ISL_450185 | 4/4/2020  | 5/20/2020 North America / USA / Louisiana / New Orleans    |
| EPI_ISL_450186 | 4/7/2020  | 5/20/2020 Asia / Jordan / Amman                            |
| EPI_ISL_450187 | 4/8/2020  | 5/20/2020 Asia / Jordan / Amman                            |

|                |           |                                                                   |
|----------------|-----------|-------------------------------------------------------------------|
| EPI_ISL_450188 | 4/6/2020  | 5/20/2020 Asia / Jordan / Amman                                   |
| EPI_ISL_450190 | 5/8/2020  | 5/20/2020 North America / USA / California / San Diego County     |
| EPI_ISL_450191 | 3/23/2020 | 5/20/2020 North America / USA / California / San Diego County     |
| EPI_ISL_450193 | 3/16/2020 | 5/20/2020 Oceania / Australia / South Australia                   |
| EPI_ISL_450194 | 3/19/2020 | 5/20/2020 Oceania / Australia / South Australia                   |
| EPI_ISL_450195 | 3/21/2020 | 5/20/2020 Oceania / Australia / South Australia                   |
| EPI_ISL_450196 | 1/23/2020 | 5/20/2020 Asia / Thailand / Bangkok                               |
| EPI_ISL_450197 | 3/14/2020 | 5/20/2020 Asia / Thailand / Nonthaburi                            |
| EPI_ISL_450231 | 3/31/2020 | 5/20/2020 North America / USA / Louisiana / New Orleans           |
| EPI_ISL_450232 | 3/15/2020 | 5/20/2020 North America / USA / California / San Francisco County |
| EPI_ISL_450233 | 3/14/2020 | 5/20/2020 North America / USA / California / San Francisco County |
| EPI_ISL_450235 | 3/14/2020 | 5/20/2020 North America / USA / California / San Francisco County |
| EPI_ISL_450236 | 3/19/2020 | 5/20/2020 North America / USA / California / San Francisco County |
| EPI_ISL_450237 | 3/19/2020 | 5/20/2020 North America / USA / California / San Francisco County |
| EPI_ISL_450238 | 3/17/2020 | 5/20/2020 North America / USA / California / San Francisco County |
| EPI_ISL_450239 | 3/20/2020 | 5/20/2020 North America / USA / California / San Francisco County |
| EPI_ISL_450240 | 3/20/2020 | 5/20/2020 North America / USA / California / San Francisco County |
| EPI_ISL_450241 | 4/15/2020 | 5/20/2020 Europe / Russia / Saint Petersburg                      |
| EPI_ISL_450242 | 4/16/2020 | 5/20/2020 Europe / Russia / Saint Petersburg                      |
| EPI_ISL_450243 | 4/16/2020 | 5/20/2020 Europe / Russia / Saint Petersburg                      |
| EPI_ISL_450244 | 4/15/2020 | 5/20/2020 Europe / Russia / Saint Petersburg                      |
| EPI_ISL_450245 | 4/15/2020 | 5/20/2020 Europe / Russia / Saint Petersburg                      |
| EPI_ISL_450246 | 4/19/2020 | 5/20/2020 Europe / Russia / Leningrad / Kipen                     |
| EPI_ISL_450247 | 4/16/2020 | 5/20/2020 Europe / Russia / Saint Petersburg                      |
| EPI_ISL_450248 | 4/21/2020 | 5/20/2020 Europe / Russia / Saint Petersburg                      |
| EPI_ISL_450249 | 4/21/2020 | 5/20/2020 Europe / Russia / Saint Petersburg                      |
| EPI_ISL_450250 | 4/21/2020 | 5/20/2020 Europe / Russia / Saint Petersburg                      |
| EPI_ISL_450251 | 4/20/2020 | 5/20/2020 Europe / Russia / Saint Petersburg                      |
| EPI_ISL_450252 | 4/20/2020 | 5/20/2020 Europe / Russia / Saint Petersburg                      |
| EPI_ISL_450253 | 4/20/2020 | 5/20/2020 Europe / Russia / Saint Petersburg                      |
| EPI_ISL_450254 | 4/20/2020 | 5/20/2020 Europe / Russia / Saint Petersburg                      |
| EPI_ISL_450255 | 4/20/2020 | 5/20/2020 Europe / Russia / Saint Petersburg                      |
| EPI_ISL_450256 | 4/20/2020 | 5/20/2020 Europe / Russia / Saint Petersburg                      |
| EPI_ISL_450257 | 4/20/2020 | 5/20/2020 Europe / Russia / Saint Petersburg                      |
| EPI_ISL_450258 | 4/21/2020 | 5/20/2020 Europe / Russia / Saint Petersburg                      |
| EPI_ISL_450259 | 4/21/2020 | 5/20/2020 Europe / Russia / Saint Petersburg                      |
| EPI_ISL_450260 | 4/21/2020 | 5/20/2020 Europe / Russia / Saint Petersburg                      |
| EPI_ISL_450261 | 4/21/2020 | 5/20/2020 Europe / Russia / Saint Petersburg                      |
| EPI_ISL_450262 | 4/21/2020 | 5/20/2020 Europe / Russia / Saint Petersburg                      |
| EPI_ISL_450263 | 4/21/2020 | 5/20/2020 Europe / Russia / Saint Petersburg                      |
| EPI_ISL_450264 | 4/20/2020 | 5/20/2020 Europe / Russia / Saint Petersburg                      |
| EPI_ISL_450265 | 4/21/2020 | 5/20/2020 Europe / Russia / Saint Petersburg                      |
| EPI_ISL_450266 | 4/22/2020 | 5/20/2020 Europe / Russia / Saint Petersburg                      |
| EPI_ISL_450267 | 4/21/2020 | 5/20/2020 Europe / Russia / Saint Petersburg                      |
| EPI_ISL_450268 | 4/21/2020 | 5/20/2020 Europe / Russia / Saint Petersburg                      |
| EPI_ISL_450269 | 4/21/2020 | 5/20/2020 Europe / Russia / Saint Petersburg                      |
| EPI_ISL_450270 | 4/21/2020 | 5/20/2020 Europe / Russia / Saint Petersburg                      |

|                |           |                                                   |
|----------------|-----------|---------------------------------------------------|
| EPI_ISL_450271 | 4/21/2020 | 5/20/2020 Europe / Russia / Saint Petersburg      |
| EPI_ISL_450272 | 4/21/2020 | 5/20/2020 Europe / Russia / Saint Petersburg      |
| EPI_ISL_450273 | 4/22/2020 | 5/20/2020 Europe / Russia / Saint Petersburg      |
| EPI_ISL_450274 | 4/22/2020 | 5/20/2020 Europe / Russia / Saint Petersburg      |
| EPI_ISL_450275 | 4/22/2020 | 5/20/2020 Europe / Russia / Saint Petersburg      |
| EPI_ISL_450276 | 4/22/2020 | 5/20/2020 Europe / Russia / Saint Petersburg      |
| EPI_ISL_450277 | 4/22/2020 | 5/20/2020 Europe / Russia / Saint Petersburg      |
| EPI_ISL_450278 | 4/22/2020 | 5/20/2020 Europe / Russia / Saint Petersburg      |
| EPI_ISL_450279 | 4/22/2020 | 5/20/2020 Europe / Russia / Saint Petersburg      |
| EPI_ISL_450280 | 4/22/2020 | 5/20/2020 Europe / Russia / Saint Petersburg      |
| EPI_ISL_450281 | 4/22/2020 | 5/20/2020 Europe / Russia / Saint Petersburg      |
| EPI_ISL_450282 | 4/22/2020 | 5/20/2020 Europe / Russia / Saint Petersburg      |
| EPI_ISL_450283 | 4/22/2020 | 5/20/2020 Europe / Russia / Saint Petersburg      |
| EPI_ISL_450284 | 4/22/2020 | 5/20/2020 Europe / Russia / Saint Petersburg      |
| EPI_ISL_450285 | 4/22/2020 | 5/20/2020 Europe / Russia / Saint Petersburg      |
| EPI_ISL_450286 | 4/22/2020 | 5/20/2020 Europe / Russia / Saint Petersburg      |
| EPI_ISL_450287 | 4/22/2020 | 5/20/2020 Europe / Russia / Saint Petersburg      |
| EPI_ISL_450288 | 4/23/2020 | 5/20/2020 Europe / Russia / Saint Petersburg      |
| EPI_ISL_450289 | 4/23/2020 | 5/20/2020 Europe / Russia / Saint Petersburg      |
| EPI_ISL_450290 | 4/23/2020 | 5/20/2020 Europe / Russia / Saint Petersburg      |
| EPI_ISL_450292 | 4/21/2020 | 5/20/2020 Europe / Russia / Saint Petersburg      |
| EPI_ISL_450293 | 4/22/2020 | 5/20/2020 Europe / Russia / Saint Petersburg      |
| EPI_ISL_450294 | 4/11/2020 | 5/20/2020 Europe / Poland / Wielkopolska          |
| EPI_ISL_450295 | 4/11/2020 | 5/20/2020 Europe / Poland / Wielkopolska          |
| EPI_ISL_450302 | 3/27/2020 | 5/20/2020 North America / Canada / Quebec         |
| EPI_ISL_450304 | 3/27/2020 | 5/20/2020 North America / Canada / Quebec         |
| EPI_ISL_450306 | 3/27/2020 | 5/20/2020 North America / Canada / Quebec         |
| EPI_ISL_450307 | 3/27/2020 | 5/20/2020 North America / Canada / Quebec         |
| EPI_ISL_450311 | 3/27/2020 | 5/20/2020 North America / Canada / Quebec         |
| EPI_ISL_450313 | 3/27/2020 | 5/20/2020 North America / Canada / Quebec         |
| EPI_ISL_450315 | 3/27/2020 | 5/20/2020 North America / Canada / Quebec         |
| EPI_ISL_450318 | 3/27/2020 | 5/20/2020 North America / Canada / Quebec         |
| EPI_ISL_450321 | 4/4/2020  | 5/20/2020 Asia / India / Maharashtra / Pune       |
| EPI_ISL_450322 | 4/4/2020  | 5/20/2020 Asia / India / Maharashtra / Ahmednagar |
| EPI_ISL_450323 | 3/27/2020 | 5/20/2020 Asia / India / Maharashtra / Kolhapur   |
| EPI_ISL_450324 | 3/26/2020 | 5/20/2020 Asia / India / Maharashtra / Sangli     |
| EPI_ISL_450325 | 3/17/2020 | 5/20/2020 Asia / India / Maharashtra / Mumbai     |
| EPI_ISL_450326 | 4/1/2020  | 5/20/2020 Asia / India / Telangana / Sangareddy   |
| EPI_ISL_450327 | 4/1/2020  | 5/20/2020 Asia / India / Telangana / Mahbubnagar  |
| EPI_ISL_450328 | 4/1/2020  | 5/20/2020 Asia / India / Telangana / Adilabad     |
| EPI_ISL_450329 | 4/1/2020  | 5/20/2020 Asia / India / Telangana / Adilabad     |
| EPI_ISL_450330 | 4/2/2020  | 5/20/2020 Asia / India / Telangana / Rangaraddy   |
| EPI_ISL_450331 | 4/1/2020  | 5/20/2020 Asia / India / Telangana / Nizamabad    |
| EPI_ISL_450332 | 4/1/2020  | 5/20/2020 Asia / India / Telangana / Nizamabad    |
| EPI_ISL_450337 | 3/25/2020 | 5/20/2020 Europe / Spain / Catalunya              |
| EPI_ISL_450338 | 4/11/2020 | 5/20/2020 Europe / Poland / Wielkopolska          |
| EPI_ISL_450339 | 5/10/2020 | 5/20/2020 Asia / Bangladesh / Chittagong          |



|                |           |                                                                          |
|----------------|-----------|--------------------------------------------------------------------------|
| EPI_ISL_450340 | 5/13/2020 | 5/20/2020 Asia / Bangladesh / Chittagong                                 |
| EPI_ISL_450341 | 5/13/2020 | 5/20/2020 Asia / Bangladesh / Chittagong                                 |
| EPI_ISL_450342 | 5/8/2020  | 5/20/2020 Asia / Bangladesh / Chittagong / Chittagong / Satkania Upazila |
| EPI_ISL_450343 | 5/9/2020  | 5/20/2020 Asia / Bangladesh / Chittagong                                 |
| EPI_ISL_450344 | 5/3/2020  | 5/20/2020 Asia / Bangladesh / Chittagong                                 |
| EPI_ISL_450345 | 5/10/2020 | 5/20/2020 Asia / Bangladesh / Chittagong                                 |
| EPI_ISL_450346 | 3/25/2020 | 5/20/2020 Europe / Norway / Trondelag / Trondheim                        |
| EPI_ISL_450347 | 3/25/2020 | 5/20/2020 Europe / Norway / Trondelag / Trondheim                        |
| EPI_ISL_450348 | 3/24/2020 | 5/20/2020 Europe / Norway / Trondelag / Trondheim                        |
| EPI_ISL_450349 | 3/29/2020 | 5/20/2020 Europe / Norway / Trondelag / Trondheim                        |
| EPI_ISL_450350 | 3/28/2020 | 5/20/2020 Europe / Norway / Trondelag / Trondheim                        |
| EPI_ISL_450351 | 3/11/2020 | 5/20/2020 Europe / Norway / Trondelag / Trondheim                        |
| EPI_ISL_450352 | 3/11/2020 | 5/20/2020 Europe / Norway / Trondelag / Trondheim                        |
| EPI_ISL_463001 | 3/18/2020 | 5/20/2020 Africa / Tunisia                                               |
| EPI_ISL_463002 | 3/28/2020 | 5/20/2020 Africa / Tunisia                                               |
| EPI_ISL_463003 | 3/30/2020 | 5/20/2020 Africa / Tunisia                                               |
| EPI_ISL_463004 | 4/1/2020  | 5/20/2020 Africa / Tunisia                                               |
| EPI_ISL_463005 | 3/27/2020 | 5/20/2020 Africa / Tunisia                                               |
| EPI_ISL_463006 | 3/31/2020 | 5/20/2020 Africa / Tunisia                                               |
| EPI_ISL_450393 | 3/29/2020 | 5/21/2020 North America / USA / New York / Brooklyn                      |
| EPI_ISL_450394 | 3/30/2020 | 5/21/2020 North America / USA / New York / New York                      |
| EPI_ISL_450396 | 3/30/2020 | 5/21/2020 North America / USA / New York / Nassau County                 |
| EPI_ISL_450397 | 3/30/2020 | 5/21/2020 North America / USA / New York / Brooklyn                      |
| EPI_ISL_450398 | 3/30/2020 | 5/21/2020 North America / USA / New York / Bronx                         |
| EPI_ISL_450399 | 3/30/2020 | 5/21/2020 North America / USA / New Jersey / Hudson County               |
| EPI_ISL_450400 | 4/3/2020  | 5/21/2020 North America / USA / New York / Queens                        |
| EPI_ISL_450401 | 4/1/2020  | 5/21/2020 North America / USA / New York / Queens                        |
| EPI_ISL_450402 | 4/2/2020  | 5/21/2020 North America / USA / New York / Manhattan                     |
| EPI_ISL_450445 | 3/29/2020 | 5/21/2020 North America / USA / California / Santa Clara County          |
| EPI_ISL_450446 | 3/28/2020 | 5/21/2020 North America / USA / California / Santa Clara County          |
| EPI_ISL_450447 | 3/28/2020 | 5/21/2020 North America / USA / California / Santa Clara County          |
| EPI_ISL_450448 | 3/28/2020 | 5/21/2020 North America / USA / California / Santa Clara County          |
| EPI_ISL_450449 | 3/25/2020 | 5/21/2020 North America / USA / California / Santa Clara County          |
| EPI_ISL_450450 | 3/25/2020 | 5/21/2020 North America / USA / California / Santa Clara County          |
| EPI_ISL_450451 | 3/25/2020 | 5/21/2020 North America / USA / California / Santa Clara County          |
| EPI_ISL_450452 | 3/25/2020 | 5/21/2020 North America / USA / California / Santa Clara County          |
| EPI_ISL_450453 | 3/24/2020 | 5/21/2020 North America / USA / California / Santa Clara County          |
| EPI_ISL_450454 | 3/24/2020 | 5/21/2020 North America / USA / California / Santa Clara County          |
| EPI_ISL_450455 | 3/24/2020 | 5/21/2020 North America / USA / California / Santa Clara County          |
| EPI_ISL_450456 | 3/27/2020 | 5/21/2020 North America / USA / California / Santa Clara County          |
| EPI_ISL_450457 | 3/21/2020 | 5/21/2020 North America / USA / California / Santa Clara County          |
| EPI_ISL_450458 | 3/26/2020 | 5/21/2020 North America / USA / California / Santa Clara County          |
| EPI_ISL_450459 | 3/25/2020 | 5/21/2020 North America / USA / California / Santa Clara County          |
| EPI_ISL_450460 | 3/24/2020 | 5/21/2020 North America / USA / California / Santa Clara County          |
| EPI_ISL_450461 | 3/23/2020 | 5/21/2020 North America / USA / California / Santa Clara County          |
| EPI_ISL_450462 | 3/23/2020 | 5/21/2020 North America / USA / California / Santa Clara County          |
| EPI_ISL_450463 | 3/23/2020 | 5/21/2020 North America / USA / California / Santa Clara County          |

|                |           |                                                                 |
|----------------|-----------|-----------------------------------------------------------------|
| EPI_ISL_450464 | 3/23/2020 | 5/21/2020 North America / USA / California / Santa Clara County |
| EPI_ISL_450465 | 3/23/2020 | 5/21/2020 North America / USA / California / Santa Clara County |
| EPI_ISL_450466 | 3/23/2020 | 5/21/2020 North America / USA / California / Santa Clara County |
| EPI_ISL_450467 | 3/23/2020 | 5/21/2020 North America / USA / California / Santa Clara County |
| EPI_ISL_450468 | 3/18/2020 | 5/21/2020 North America / USA / California / Santa Clara County |
| EPI_ISL_450469 | 3/17/2020 | 5/21/2020 North America / USA / California / Santa Clara County |
| EPI_ISL_450470 | 3/20/2020 | 5/21/2020 North America / USA / California / Santa Clara County |
| EPI_ISL_450471 | 3/19/2020 | 5/21/2020 North America / USA / California / Santa Clara County |
| EPI_ISL_450472 | 3/19/2020 | 5/21/2020 North America / USA / California / Santa Clara County |
| EPI_ISL_450473 | 3/20/2020 | 5/21/2020 North America / USA / California / Santa Clara County |
| EPI_ISL_450474 | 3/17/2020 | 5/21/2020 North America / USA / California / Santa Clara County |
| EPI_ISL_450475 | 3/19/2020 | 5/21/2020 North America / USA / California / Santa Clara County |
| EPI_ISL_450476 | 3/25/2020 | 5/21/2020 North America / USA / California / Santa Clara County |
| EPI_ISL_450477 | 3/17/2020 | 5/21/2020 North America / USA / California / Santa Clara County |
| EPI_ISL_450478 | 3/17/2020 | 5/21/2020 North America / USA / California / Santa Clara County |
| EPI_ISL_450479 | 3/17/2020 | 5/21/2020 North America / USA / California / Santa Clara County |
| EPI_ISL_450480 | 3/17/2020 | 5/21/2020 North America / USA / California / Santa Clara County |
| EPI_ISL_450481 | 3/18/2020 | 5/21/2020 North America / USA / California / Santa Clara County |
| EPI_ISL_450496 | 2020-03   | 5/21/2020 Europe / Lithuania                                    |
| EPI_ISL_450497 | 2020-03   | 5/21/2020 Europe / Lithuania                                    |
| EPI_ISL_450498 | 2020-03   | 5/21/2020 Europe / Estonia                                      |
| EPI_ISL_450508 | 3/4/2020  | 5/21/2020 Asia / Lebanon / Beirut                               |
| EPI_ISL_450509 | 3/15/2020 | 5/21/2020 Asia / Lebanon / Beirut                               |
| EPI_ISL_450511 | 3/4/2020  | 5/21/2020 Asia / Lebanon / Beirut                               |
| EPI_ISL_450512 | 2/27/2020 | 5/21/2020 Asia / Lebanon / Beirut                               |
| EPI_ISL_450515 | 3/11/2020 | 5/21/2020 Asia / Lebanon / Beirut                               |
| EPI_ISL_450518 | 4/18/2020 | 5/21/2020 Europe / Latvia                                       |
| EPI_ISL_450519 | 4/14/2020 | 5/21/2020 Europe / Latvia                                       |
| EPI_ISL_450520 | 4/28/2020 | 5/21/2020 Europe / Latvia                                       |
| EPI_ISL_450521 | 4/28/2020 | 5/21/2020 Europe / Latvia                                       |
| EPI_ISL_450522 | 4/28/2020 | 5/21/2020 Europe / Latvia                                       |
| EPI_ISL_450523 | 4/28/2020 | 5/21/2020 Europe / Latvia                                       |
| EPI_ISL_450524 | 4/19/2020 | 5/21/2020 Europe / Latvia                                       |
| EPI_ISL_450525 | 3/28/2020 | 5/21/2020 Europe / Poland / Pomorskie                           |
| EPI_ISL_450526 | 3/29/2020 | 5/21/2020 Europe / Poland / Pomorskie                           |
| EPI_ISL_450527 | 3/29/2020 | 5/21/2020 Europe / Poland / Pomorskie                           |
| EPI_ISL_450528 | 3/30/2020 | 5/21/2020 Europe / Poland / Pomorskie                           |
| EPI_ISL_450529 | 3/31/2020 | 5/21/2020 Europe / Poland / Pomorskie                           |
| EPI_ISL_450530 | 4/1/2020  | 5/21/2020 Europe / Poland / Pomorskie                           |
| EPI_ISL_450538 | 3/13/2020 | 5/21/2020 North America / USA / Utah                            |
| EPI_ISL_450539 | 3/15/2020 | 5/21/2020 North America / USA / Utah                            |
| EPI_ISL_450541 | 3/14/2020 | 5/21/2020 North America / USA / Utah                            |
| EPI_ISL_450542 | 3/19/2020 | 5/21/2020 North America / USA / Utah                            |
| EPI_ISL_450543 | 3/30/2020 | 5/21/2020 North America / USA / Utah                            |
| EPI_ISL_450544 | 4/2/2020  | 5/21/2020 North America / USA / Utah                            |
| EPI_ISL_450546 | 4/3/2020  | 5/21/2020 North America / USA / Utah                            |
| EPI_ISL_450547 | 4/3/2020  | 5/21/2020 North America / USA / Utah                            |

|                |           |           |                                                     |
|----------------|-----------|-----------|-----------------------------------------------------|
| EPI_ISL_450548 | 4/3/2020  | 5/21/2020 | North America / USA / Utah                          |
| EPI_ISL_450551 | 4/7/2020  | 5/21/2020 | North America / USA / Utah                          |
| EPI_ISL_450553 | 4/7/2020  | 5/21/2020 | North America / USA / Utah                          |
| EPI_ISL_450554 | 4/7/2020  | 5/21/2020 | North America / USA / Utah                          |
| EPI_ISL_450559 | 4/9/2020  | 5/21/2020 | North America / USA / Utah                          |
| EPI_ISL_450560 | 4/9/2020  | 5/21/2020 | North America / USA / Utah                          |
| EPI_ISL_450561 | 4/9/2020  | 5/21/2020 | North America / USA / Utah                          |
| EPI_ISL_450563 | 4/13/2020 | 5/21/2020 | North America / USA / Utah                          |
| EPI_ISL_450564 | 4/13/2020 | 5/21/2020 | North America / USA / Utah                          |
| EPI_ISL_450566 | 4/13/2020 | 5/21/2020 | North America / USA / Utah                          |
| EPI_ISL_450567 | 4/13/2020 | 5/21/2020 | North America / USA / Utah                          |
| EPI_ISL_450572 | 3/14/2020 | 5/21/2020 | North America / USA / Michigan                      |
| EPI_ISL_450574 | 3/14/2020 | 5/21/2020 | North America / USA / Michigan                      |
| EPI_ISL_450576 | 3/14/2020 | 5/21/2020 | North America / USA / Michigan                      |
| EPI_ISL_450577 | 3/14/2020 | 5/21/2020 | North America / USA / Michigan                      |
| EPI_ISL_450580 | 3/15/2020 | 5/21/2020 | North America / USA / Michigan                      |
| EPI_ISL_450581 | 3/16/2020 | 5/21/2020 | North America / USA / Michigan                      |
| EPI_ISL_450585 | 3/23/2020 | 5/21/2020 | North America / USA / Michigan                      |
| EPI_ISL_450588 | 3/25/2020 | 5/21/2020 | North America / USA / Michigan                      |
| EPI_ISL_450592 | 3/25/2020 | 5/21/2020 | North America / USA / Michigan                      |
| EPI_ISL_450601 | 3/11/2020 | 5/21/2020 | North America / USA / Michigan                      |
| EPI_ISL_450604 | 3/15/2020 | 5/21/2020 | North America / USA / Michigan                      |
| EPI_ISL_450606 | 3/15/2020 | 5/21/2020 | North America / USA / Michigan                      |
| EPI_ISL_450607 | 3/18/2020 | 5/21/2020 | North America / USA / Michigan                      |
| EPI_ISL_450610 | 3/17/2020 | 5/21/2020 | North America / USA / Michigan                      |
| EPI_ISL_450612 | 3/19/2020 | 5/21/2020 | North America / USA / Michigan                      |
| EPI_ISL_450614 | 3/20/2020 | 5/21/2020 | North America / USA / Michigan                      |
| EPI_ISL_450616 | 3/24/2020 | 5/21/2020 | North America / USA / Michigan                      |
| EPI_ISL_450618 | 3/25/2020 | 5/21/2020 | North America / USA / Michigan                      |
| EPI_ISL_450620 | 3/27/2020 | 5/21/2020 | North America / USA / Michigan                      |
| EPI_ISL_450623 | 3/30/2020 | 5/21/2020 | North America / USA / Michigan                      |
| EPI_ISL_450631 | 3/30/2020 | 5/21/2020 | North America / USA / Michigan                      |
| EPI_ISL_450635 | 3/30/2020 | 5/21/2020 | North America / USA / Michigan                      |
| EPI_ISL_450636 | 3/30/2020 | 5/21/2020 | North America / USA / Michigan                      |
| EPI_ISL_450639 | 4/11/2020 | 5/21/2020 | North America / Canada / Quebec                     |
| EPI_ISL_451958 | 3/16/2020 | 5/21/2020 | Asia / Pakistan / Karachi                           |
| EPI_ISL_450700 | 3/16/2020 | 5/22/2020 | North America / USA / Wisconsin                     |
| EPI_ISL_450701 | 4/18/2020 | 5/22/2020 | North America / USA / California / San Diego County |
| EPI_ISL_450702 | 4/15/2020 | 5/22/2020 | North America / USA / Wisconsin                     |
| EPI_ISL_450703 | 4/15/2020 | 5/22/2020 | North America / USA / Illinois / Ogle County        |
| EPI_ISL_450704 | 4/18/2020 | 5/22/2020 | North America / USA / Illinois / Winnebago County   |
| EPI_ISL_450705 | 4/14/2020 | 5/22/2020 | North America / USA / Wisconsin / Dane County       |
| EPI_ISL_450706 | 4/18/2020 | 5/22/2020 | North America / USA / Illinois / Winnebago County   |
| EPI_ISL_450707 | 4/14/2020 | 5/22/2020 | North America / USA / Illinois / Winnebago County   |
| EPI_ISL_450708 | 4/1/2020  | 5/22/2020 | North America / USA / Wisconsin                     |
| EPI_ISL_450709 | 4/17/2020 | 5/22/2020 | North America / USA / Illinois / Winnebago County   |
| EPI_ISL_450710 | 4/14/2020 | 5/22/2020 | North America / USA / Wisconsin / Dane County       |

|                |           |                                                             |
|----------------|-----------|-------------------------------------------------------------|
| EPI_ISL_450711 | 4/14/2020 | 5/22/2020 North America / USA / Illinois / Winnebago County |
| EPI_ISL_450712 | 4/15/2020 | 5/22/2020 North America / USA / Illinois / Winnebago County |
| EPI_ISL_450713 | 4/18/2020 | 5/22/2020 North America / USA / Wisconsin / Dane County     |
| EPI_ISL_450714 | 4/18/2020 | 5/22/2020 North America / USA / Illinois / Winnebago County |
| EPI_ISL_450715 | 4/18/2020 | 5/22/2020 North America / USA / Illinois / Winnebago County |
| EPI_ISL_450716 | 4/17/2020 | 5/22/2020 North America / USA / Wisconsin / Dane County     |
| EPI_ISL_450717 | 4/17/2020 | 5/22/2020 North America / USA / Illinois / Winnebago County |
| EPI_ISL_450718 | 4/16/2020 | 5/22/2020 North America / USA / Illinois / Winnebago County |
| EPI_ISL_450719 | 4/15/2020 | 5/22/2020 North America / USA / Illinois / Winnebago County |
| EPI_ISL_450720 | 4/14/2020 | 5/22/2020 North America / USA / Illinois / Winnebago County |
| EPI_ISL_450721 | 4/1/2020  | 5/22/2020 North America / USA / Wisconsin                   |
| EPI_ISL_450722 | 4/14/2020 | 5/22/2020 North America / USA / Illinois / Winnebago County |
| EPI_ISL_450723 | 3/20/2020 | 5/22/2020 Asia / Thailand / Bangkok                         |
| EPI_ISL_450724 | 3/25/2020 | 5/22/2020 Europe / Belgium / Antwerp                        |
| EPI_ISL_450725 | 3/26/2020 | 5/22/2020 Europe / Belgium / Antwerp                        |
| EPI_ISL_450726 | 3/26/2020 | 5/22/2020 Europe / Belgium / Antwerp                        |
| EPI_ISL_450727 | 3/28/2020 | 5/22/2020 Europe / Belgium / Antwerp                        |
| EPI_ISL_450728 | 3/29/2020 | 5/22/2020 Europe / Belgium / Antwerp                        |
| EPI_ISL_450729 | 3/29/2020 | 5/22/2020 Europe / Belgium / Antwerp                        |
| EPI_ISL_450730 | 3/30/2020 | 5/22/2020 Europe / Belgium / Antwerp                        |
| EPI_ISL_450731 | 3/31/2020 | 5/22/2020 Europe / Belgium / Antwerp                        |
| EPI_ISL_450732 | 4/1/2020  | 5/22/2020 Europe / Belgium / Antwerp                        |
| EPI_ISL_450734 | 4/6/2020  | 5/22/2020 Europe / Belgium / Antwerp                        |
| EPI_ISL_450736 | 4/8/2020  | 5/22/2020 Europe / Belgium / Antwerp                        |
| EPI_ISL_450737 | 4/10/2020 | 5/22/2020 Europe / Belgium / Antwerp                        |
| EPI_ISL_450738 | 3/27/2020 | 5/22/2020 Asia / Vietnam / Ho Chi Minh City                 |
| EPI_ISL_450739 | 3/17/2020 | 5/22/2020 Asia / Vietnam / Ho Chi Minh City                 |
| EPI_ISL_450740 | 3/30/2020 | 5/22/2020 Asia / Vietnam / Ho Chi Minh City                 |
| EPI_ISL_450741 | 3/20/2020 | 5/22/2020 Asia / Vietnam / Ho Chi Minh City                 |
| EPI_ISL_450742 | 3/25/2020 | 5/22/2020 Asia / Vietnam / Ho Chi Minh City                 |
| EPI_ISL_450743 | 3/24/2020 | 5/22/2020 Asia / Vietnam / Ho Chi Minh City                 |
| EPI_ISL_450744 | 3/25/2020 | 5/22/2020 Asia / Vietnam / Ho Chi Minh City                 |
| EPI_ISL_450745 | 3/26/2020 | 5/22/2020 Asia / Vietnam / Ho Chi Minh City                 |
| EPI_ISL_450746 | 5/8/2020  | 5/22/2020 Europe / Poland / Pomerania                       |
| EPI_ISL_450747 | 2/26/2020 | 5/22/2020 North America / Canada / Ontario                  |
| EPI_ISL_450748 | 3/29/2020 | 5/22/2020 North America / USA / Minnesota                   |
| EPI_ISL_450749 | 3/29/2020 | 5/22/2020 North America / USA / Minnesota                   |
| EPI_ISL_450750 | 3/29/2020 | 5/22/2020 North America / USA / Minnesota                   |
| EPI_ISL_450751 | 3/29/2020 | 5/22/2020 North America / USA / Minnesota                   |
| EPI_ISL_450752 | 3/29/2020 | 5/22/2020 North America / USA / Minnesota                   |
| EPI_ISL_450753 | 3/30/2020 | 5/22/2020 North America / USA / Minnesota                   |
| EPI_ISL_450754 | 3/30/2020 | 5/22/2020 North America / USA / Minnesota                   |
| EPI_ISL_450755 | 3/30/2020 | 5/22/2020 North America / USA / Minnesota                   |
| EPI_ISL_450756 | 3/31/2020 | 5/22/2020 North America / USA / Minnesota                   |
| EPI_ISL_450757 | 3/31/2020 | 5/22/2020 North America / USA / Minnesota                   |
| EPI_ISL_450758 | 3/31/2020 | 5/22/2020 North America / USA / Minnesota                   |
| EPI_ISL_450759 | 3/30/2020 | 5/22/2020 North America / USA / Minnesota                   |

|                |           |                                                |
|----------------|-----------|------------------------------------------------|
| EPI_ISL_450760 | 3/30/2020 | 5/22/2020 North America / USA / Minnesota      |
| EPI_ISL_450761 | 3/30/2020 | 5/22/2020 North America / USA / Minnesota      |
| EPI_ISL_450762 | 3/30/2020 | 5/22/2020 North America / USA / Minnesota      |
| EPI_ISL_450763 | 3/26/2020 | 5/22/2020 North America / USA / Minnesota      |
| EPI_ISL_450764 | 3/30/2020 | 5/22/2020 North America / USA / Minnesota      |
| EPI_ISL_450765 | 3/26/2020 | 5/22/2020 North America / USA / Minnesota      |
| EPI_ISL_450766 | 3/30/2020 | 5/22/2020 North America / USA / Minnesota      |
| EPI_ISL_450767 | 3/30/2020 | 5/22/2020 North America / USA / Minnesota      |
| EPI_ISL_450768 | 3/30/2020 | 5/22/2020 North America / USA / Minnesota      |
| EPI_ISL_450769 | 3/31/2020 | 5/22/2020 North America / USA / Minnesota      |
| EPI_ISL_450770 | 3/20/2020 | 5/22/2020 North America / USA / Minnesota      |
| EPI_ISL_450771 | 3/30/2020 | 5/22/2020 North America / USA / Minnesota      |
| EPI_ISL_450772 | 3/30/2020 | 5/22/2020 North America / USA / Minnesota      |
| EPI_ISL_450773 | 3/30/2020 | 5/22/2020 North America / USA / Minnesota      |
| EPI_ISL_450774 | 3/30/2020 | 5/22/2020 North America / USA / Minnesota      |
| EPI_ISL_450775 | 3/30/2020 | 5/22/2020 North America / USA / Minnesota      |
| EPI_ISL_450776 | 3/30/2020 | 5/22/2020 North America / USA / Minnesota      |
| EPI_ISL_450777 | 3/30/2020 | 5/22/2020 North America / USA / Minnesota      |
| EPI_ISL_450778 | 3/30/2020 | 5/22/2020 North America / USA / Minnesota      |
| EPI_ISL_450779 | 3/30/2020 | 5/22/2020 North America / USA / Minnesota      |
| EPI_ISL_450780 | 3/30/2020 | 5/22/2020 North America / USA / Minnesota      |
| EPI_ISL_450781 | 5/9/2020  | 5/22/2020 Asia / India / Gujarat / Junagadh    |
| EPI_ISL_450782 | 4/11/2020 | 5/22/2020 Asia / India / Gujarat / Ahmedabad   |
| EPI_ISL_450783 | 4/11/2020 | 5/22/2020 Asia / India / Gujarat / Ahmedabad   |
| EPI_ISL_450784 | 5/9/2020  | 5/22/2020 Asia / India / Gujarat / Botad       |
| EPI_ISL_450785 | 5/10/2020 | 5/22/2020 Asia / India / Gujarat / Una         |
| EPI_ISL_450786 | 5/10/2020 | 5/22/2020 Asia / India / Gujarat / Una         |
| EPI_ISL_450787 | 5/11/2020 | 5/22/2020 Asia / India / Gujarat / Una         |
| EPI_ISL_450788 | 5/6/2020  | 5/22/2020 Asia / India / Gujarat / Rajkot      |
| EPI_ISL_450789 | 5/10/2020 | 5/22/2020 Asia / India / Gujarat / Kodinar     |
| EPI_ISL_450790 | 4/28/2020 | 5/22/2020 Asia / India / Gujarat / Rajkot      |
| EPI_ISL_450791 | 4/27/2020 | 5/22/2020 Asia / India / Gujarat / Rajkot      |
| EPI_ISL_450792 | 3/11/2020 | 5/22/2020 North America / Jamaica              |
| EPI_ISL_450793 | 3/9/2020  | 5/22/2020 North America / Jamaica              |
| EPI_ISL_450794 | 3/11/2020 | 5/22/2020 North America / Jamaica              |
| EPI_ISL_450795 | 3/14/2020 | 5/22/2020 North America / Jamaica              |
| EPI_ISL_450796 | 3/16/2020 | 5/22/2020 North America / Jamaica              |
| EPI_ISL_450797 | 3/16/2020 | 5/22/2020 North America / Jamaica              |
| EPI_ISL_450798 | 3/16/2020 | 5/22/2020 North America / Jamaica              |
| EPI_ISL_450799 | 3/17/2020 | 5/22/2020 North America / Jamaica              |
| EPI_ISL_450800 | 3/31/2020 | 5/22/2020 North America / USA / Arkansas       |
| EPI_ISL_450801 | 4/2/2020  | 5/22/2020 North America / USA / Georgia        |
| EPI_ISL_450802 | 3/31/2020 | 5/22/2020 North America / USA / Pennsylvania   |
| EPI_ISL_450803 | 3/15/2020 | 5/22/2020 North America / USA / Pennsylvania   |
| EPI_ISL_450804 | 4/3/2020  | 5/22/2020 North America / USA / Virgin Islands |
| EPI_ISL_450806 | 4/8/2020  | 5/22/2020 North America / USA / Virgin Islands |
| EPI_ISL_450807 | 3/20/2020 | 5/22/2020 Europe / Sweden / Skane              |

|                |           |           |                                       |
|----------------|-----------|-----------|---------------------------------------|
| EPI_ISL_450808 | 3/31/2020 | 5/22/2020 | Europe / Sweden / Halland             |
| EPI_ISL_450809 | 3/31/2020 | 5/22/2020 | Europe / Sweden / Stockholm           |
| EPI_ISL_450810 | 4/1/2020  | 5/22/2020 | Europe / Sweden / Halland             |
| EPI_ISL_450811 | 4/6/2020  | 5/22/2020 | Europe / Sweden / Uppsala             |
| EPI_ISL_450812 | 4/5/2020  | 5/22/2020 | Europe / Sweden / Uppsala             |
| EPI_ISL_450813 | 4/14/2020 | 5/22/2020 | Europe / Sweden / Kalmar              |
| EPI_ISL_450814 | 4/22/2020 | 5/22/2020 | Europe / Sweden / Halland             |
| EPI_ISL_450815 | 4/23/2020 | 5/22/2020 | Europe / Sweden / Vastra Gotaland     |
| EPI_ISL_450816 | 4/22/2020 | 5/22/2020 | Europe / Sweden / Skane               |
| EPI_ISL_450817 | 4/22/2020 | 5/22/2020 | Europe / Sweden / Vastra Gotaland     |
| EPI_ISL_450818 | 4/23/2020 | 5/22/2020 | Europe / Sweden / Jonkoping           |
| EPI_ISL_450819 | 4/24/2020 | 5/22/2020 | Europe / Sweden / Vastra Gotaland     |
| EPI_ISL_450820 | 4/24/2020 | 5/22/2020 | Europe / Sweden / Vastra Gotaland     |
| EPI_ISL_450821 | 4/23/2020 | 5/22/2020 | Europe / Sweden / Jamtland            |
| EPI_ISL_450822 | 4/23/2020 | 5/22/2020 | Europe / Sweden / Jamtland            |
| EPI_ISL_450823 | 4/24/2020 | 5/22/2020 | Europe / Sweden / Vastra Gotaland     |
| EPI_ISL_450824 | 4/26/2020 | 5/22/2020 | Europe / Sweden / Uppsala             |
| EPI_ISL_450825 | 4/27/2020 | 5/22/2020 | Europe / Sweden / Vastra Gotaland     |
| EPI_ISL_450826 | 4/27/2020 | 5/22/2020 | Europe / Sweden / Uppsala             |
| EPI_ISL_450827 | 4/27/2020 | 5/22/2020 | Europe / Sweden / Uppsala             |
| EPI_ISL_450828 | 4/28/2020 | 5/22/2020 | Europe / Sweden / Uppsala             |
| EPI_ISL_450829 | 4/28/2020 | 5/22/2020 | Europe / Sweden / Vastra Gotaland     |
| EPI_ISL_450830 | 4/27/2020 | 5/22/2020 | Europe / Sweden / Vastra Gotaland     |
| EPI_ISL_450831 | 4/27/2020 | 5/22/2020 | Europe / Sweden / Jonkoping           |
| EPI_ISL_450832 | 5/4/2020  | 5/22/2020 | Europe / Sweden / Vastmanland         |
| EPI_ISL_450833 | 5/7/2020  | 5/22/2020 | Europe / Sweden / Jonkoping           |
| EPI_ISL_450834 | 3/12/2020 | 5/22/2020 | Europe / Sweden / Halland             |
| EPI_ISL_450835 | 3/19/2020 | 5/22/2020 | Europe / Sweden / Sormland            |
| EPI_ISL_450836 | 4/2/2020  | 5/22/2020 | Europe / Sweden / Norrbotten          |
| EPI_ISL_450837 | 4/2/2020  | 5/22/2020 | Europe / Sweden / Norrbotten          |
| EPI_ISL_450839 | 5/6/2020  | 5/22/2020 | Asia / Bangladesh / Dhaka             |
| EPI_ISL_450840 | 5/6/2020  | 5/22/2020 | Asia / Bangladesh / Dhaka             |
| EPI_ISL_450841 | 5/13/2020 | 5/22/2020 | Asia / Bangladesh / Dhaka             |
| EPI_ISL_450843 | 5/6/2020  | 5/22/2020 | Asia / Bangladesh / Dhaka             |
| EPI_ISL_450849 | 4/7/2020  | 5/22/2020 | North America / USA / Florida         |
| EPI_ISL_450850 | 4/7/2020  | 5/22/2020 | North America / USA / Florida         |
| EPI_ISL_450873 | 3/17/2020 | 5/22/2020 | South America / Brazil / Amapa        |
| EPI_ISL_450874 | 3/20/2020 | 5/22/2020 | South America / Brazil / Para         |
| EPI_ISL_462446 | 2020-03   | 5/22/2020 | Asia / Japan / Tokyo                  |
| EPI_ISL_451076 | 2/8/2020  | 5/23/2020 | Asia / China / Sichuan                |
| EPI_ISL_451077 | 3/18/2020 | 5/23/2020 | Oceania / Australia / South Australia |
| EPI_ISL_451078 | 3/19/2020 | 5/23/2020 | Oceania / Australia / South Australia |
| EPI_ISL_451079 | 3/19/2020 | 5/23/2020 | Oceania / Australia / South Australia |
| EPI_ISL_451080 | 3/20/2020 | 5/23/2020 | Oceania / Australia / South Australia |
| EPI_ISL_451081 | 3/20/2020 | 5/23/2020 | Oceania / Australia / South Australia |
| EPI_ISL_451082 | 3/21/2020 | 5/23/2020 | Oceania / Australia / South Australia |
| EPI_ISL_451083 | 3/21/2020 | 5/23/2020 | Oceania / Australia / South Australia |



|                |           |                                                 |
|----------------|-----------|-------------------------------------------------|
| EPI_ISL_451139 | 3/25/2020 | 5/23/2020 Oceania / Australia / South Australia |
| EPI_ISL_451140 | 3/24/2020 | 5/23/2020 Oceania / Australia / South Australia |
| EPI_ISL_451141 | 3/26/2020 | 5/23/2020 Oceania / Australia / South Australia |
| EPI_ISL_451144 | 4/10/2020 | 5/23/2020 Oceania / Australia / South Australia |
| EPI_ISL_451145 | 4/11/2020 | 5/23/2020 Oceania / Australia / South Australia |
| EPI_ISL_451147 | 3/16/2020 | 5/23/2020 Oceania / Australia / South Australia |
| EPI_ISL_451148 | 3/23/2020 | 5/23/2020 Oceania / Australia / South Australia |
| EPI_ISL_451149 | 5/7/2020  | 5/23/2020 Asia / India / Gujarat / Jamnagar     |
| EPI_ISL_451150 | 5/6/2020  | 5/23/2020 Asia / India / Gujarat / Jamnagar     |
| EPI_ISL_451151 | 5/5/2020  | 5/23/2020 Asia / India / Gujarat / Jamnagar     |
| EPI_ISL_451152 | 5/9/2020  | 5/23/2020 Asia / India / Gujarat / Jamnagar     |
| EPI_ISL_451153 | 5/10/2020 | 5/23/2020 Asia / India / Gujarat / Jamnagar     |
| EPI_ISL_451154 | 5/3/2020  | 5/23/2020 Asia / India / Gujarat / Dahod        |
| EPI_ISL_451155 | 5/3/2020  | 5/23/2020 Asia / India / Gujarat / Vadodara     |
| EPI_ISL_451156 | 5/1/2020  | 5/23/2020 Asia / India / Gujarat / Dahod        |
| EPI_ISL_451157 | 5/2/2020  | 5/23/2020 Asia / India / Gujarat / Vadodara     |
| EPI_ISL_451158 | 5/3/2020  | 5/23/2020 Asia / India / Gujarat / Vadodara     |
| EPI_ISL_451159 | 5/3/2020  | 5/23/2020 Asia / India / Gujarat / Dahod        |
| EPI_ISL_451160 | 5/3/2020  | 5/23/2020 Asia / India / Gujarat / Vadodara     |
| EPI_ISL_451161 | 5/3/2020  | 5/23/2020 Asia / India / Gujarat / Dahod        |
| EPI_ISL_451162 | 5/3/2020  | 5/23/2020 Asia / India / Gujarat / Vadodara     |
| EPI_ISL_451163 | 5/2/2020  | 5/23/2020 Asia / India / Gujarat / Vadodara     |
| EPI_ISL_451164 | 3/24/2020 | 5/23/2020 Europe / Belgium / Ghent              |
| EPI_ISL_451165 | 3/31/2020 | 5/23/2020 Europe / Belgium / Ghent              |
| EPI_ISL_451166 | 3/31/2020 | 5/23/2020 Europe / Belgium / Ghent              |
| EPI_ISL_451167 | 4/1/2020  | 5/23/2020 Europe / Belgium / Ghent              |
| EPI_ISL_451168 | 4/3/2020  | 5/23/2020 Europe / Belgium / Ghent              |
| EPI_ISL_451169 | 4/5/2020  | 5/23/2020 Europe / Belgium / Ghent              |
| EPI_ISL_451170 | 4/5/2020  | 5/23/2020 Europe / Belgium / Ghent              |
| EPI_ISL_451173 | 4/5/2020  | 5/23/2020 Europe / Belgium / Ghent              |
| EPI_ISL_451175 | 4/7/2020  | 5/23/2020 Europe / Belgium / Ghent              |
| EPI_ISL_451177 | 4/8/2020  | 5/23/2020 Europe / Belgium / Ghent              |
| EPI_ISL_451178 | 4/9/2020  | 5/23/2020 Europe / Belgium / Ghent              |
| EPI_ISL_451179 | 4/9/2020  | 5/23/2020 Europe / Belgium / Ghent              |
| EPI_ISL_451180 | 4/14/2020 | 5/23/2020 Europe / Belgium / Ghent              |
| EPI_ISL_451181 | 4/14/2020 | 5/23/2020 Europe / Belgium / Ghent              |
| EPI_ISL_451183 | 3/25/2020 | 5/23/2020 Africa / Uganda                       |
| EPI_ISL_451184 | 3/26/2020 | 5/23/2020 Africa / Uganda                       |
| EPI_ISL_451186 | 3/27/2020 | 5/23/2020 Africa / Uganda                       |
| EPI_ISL_451189 | 3/30/2020 | 5/23/2020 Africa / Uganda                       |
| EPI_ISL_451190 | 3/30/2020 | 5/23/2020 Africa / Uganda                       |
| EPI_ISL_451192 | 3/30/2020 | 5/23/2020 Africa / Uganda                       |
| EPI_ISL_451193 | 3/30/2020 | 5/23/2020 Africa / Uganda                       |
| EPI_ISL_451194 | 3/22/2020 | 5/23/2020 Africa / Uganda                       |
| EPI_ISL_451195 | 3/22/2020 | 5/23/2020 Africa / Uganda                       |
| EPI_ISL_451196 | 3/25/2020 | 5/23/2020 Africa / Uganda                       |
| EPI_ISL_451197 | 4/27/2020 | 5/23/2020 Africa / Uganda                       |



|                |           |                                                              |
|----------------|-----------|--------------------------------------------------------------|
| EPI_ISL_451198 | 4/27/2020 | 5/23/2020 Africa / Uganda                                    |
| EPI_ISL_451199 | 4/20/2020 | 5/23/2020 Africa / Uganda                                    |
| EPI_ISL_451201 | 4/30/2020 | 5/23/2020 Africa / Uganda                                    |
| EPI_ISL_451202 | 5/1/2020  | 5/23/2020 Africa / Uganda                                    |
| EPI_ISL_454416 | 3/9/2020  | 5/23/2020 Europe / Netherlands / Zuid-Holland / Leiden       |
| EPI_ISL_451203 | 5/2/2020  | 5/24/2020 North America / USA / Louisiana / Caddo Parish     |
| EPI_ISL_451204 | 4/23/2020 | 5/24/2020 North America / USA / Louisiana / Morehouse Parish |
| EPI_ISL_451205 | 5/1/2020  | 5/24/2020 North America / USA / Louisiana / Caddo Parish     |
| EPI_ISL_451206 | 5/1/2020  | 5/24/2020 North America / USA / Louisiana / Bienville Parish |
| EPI_ISL_451207 | 5/1/2020  | 5/24/2020 North America / USA / Louisiana / Caddo Parish     |
| EPI_ISL_451208 | 5/1/2020  | 5/24/2020 North America / USA / Louisiana / Caddo Parish     |
| EPI_ISL_451209 | 5/1/2020  | 5/24/2020 North America / USA / Louisiana / Caddo Parish     |
| EPI_ISL_451210 | 5/1/2020  | 5/24/2020 North America / USA / Louisiana / Caddo Parish     |
| EPI_ISL_451211 | 5/7/2020  | 5/24/2020 North America / USA / Louisiana / Webster Parish   |
| EPI_ISL_451212 | 4/23/2020 | 5/24/2020 North America / USA / Louisiana / Morehouse Parish |
| EPI_ISL_451213 | 5/2/2020  | 5/24/2020 North America / USA / Louisiana / Caddo Parish     |
| EPI_ISL_451214 | 4/27/2020 | 5/24/2020 North America / USA / Louisiana / Caddo Parish     |
| EPI_ISL_451215 | 4/24/2020 | 5/24/2020 North America / USA / Louisiana / Bienville Parish |
| EPI_ISL_451216 | 4/27/2020 | 5/24/2020 North America / USA / Louisiana / Caddo Parish     |
| EPI_ISL_451217 | 5/2/2020  | 5/24/2020 North America / USA / Louisiana / Caddo Parish     |
| EPI_ISL_451218 | 4/27/2020 | 5/24/2020 North America / USA / Louisiana / Caddo Parish     |
| EPI_ISL_451219 | 4/27/2020 | 5/24/2020 North America / USA / Louisiana / Caddo Parish     |
| EPI_ISL_451220 | 4/27/2020 | 5/24/2020 North America / USA / Louisiana / Caddo Parish     |
| EPI_ISL_451221 | 4/24/2020 | 5/24/2020 North America / USA / Louisiana / Bienville Parish |
| EPI_ISL_451222 | 4/28/2020 | 5/24/2020 North America / USA / Louisiana / Caddo Parish     |
| EPI_ISL_451223 | 4/29/2020 | 5/24/2020 North America / USA / Louisiana / Caddo Parish     |
| EPI_ISL_451224 | 4/29/2020 | 5/24/2020 North America / USA / Louisiana / Caddo Parish     |
| EPI_ISL_451225 | 4/30/2020 | 5/24/2020 North America / USA / Louisiana / Morehouse Parish |
| EPI_ISL_451226 | 5/2/2020  | 5/24/2020 North America / USA / Louisiana / Caddo Parish     |
| EPI_ISL_451227 | 5/2/2020  | 5/24/2020 North America / USA / Louisiana / Caddo Parish     |
| EPI_ISL_451228 | 4/29/2020 | 5/24/2020 North America / USA / Louisiana / Caddo Parish     |
| EPI_ISL_451229 | 4/29/2020 | 5/24/2020 North America / USA / Louisiana / Caddo Parish     |
| EPI_ISL_451230 | 4/30/2020 | 5/24/2020 North America / USA / Louisiana / Caddo Parish     |
| EPI_ISL_451231 | 5/4/2020  | 5/24/2020 North America / USA / Louisiana / Caddo Parish     |
| EPI_ISL_451232 | 5/4/2020  | 5/24/2020 North America / USA / Louisiana / Caddo Parish     |
| EPI_ISL_451233 | 5/4/2020  | 5/24/2020 North America / USA / Louisiana / Caddo Parish     |
| EPI_ISL_451234 | 5/4/2020  | 5/24/2020 North America / USA / Louisiana / Caddo Parish     |
| EPI_ISL_451235 | 5/4/2020  | 5/24/2020 North America / USA / Louisiana / Caddo Parish     |
| EPI_ISL_451236 | 5/4/2020  | 5/24/2020 North America / USA / Louisiana / Caddo Parish     |
| EPI_ISL_451237 | 5/8/2020  | 5/24/2020 North America / USA / Louisiana / Caddo Parish     |
| EPI_ISL_451238 | 5/8/2020  | 5/24/2020 North America / USA / Louisiana / Caddo Parish     |
| EPI_ISL_451239 | 5/4/2020  | 5/24/2020 North America / USA / Louisiana / Caddo Parish     |
| EPI_ISL_451240 | 5/1/2020  | 5/24/2020 North America / USA / Louisiana / Bienville Parish |
| EPI_ISL_451241 | 5/1/2020  | 5/24/2020 North America / USA / Louisiana / Caddo Parish     |
| EPI_ISL_451242 | 5/8/2020  | 5/24/2020 North America / USA / Louisiana / Caddo Parish     |
| EPI_ISL_451243 | 5/7/2020  | 5/24/2020 North America / USA / Louisiana / Rapides Parish   |
| EPI_ISL_451244 | 5/7/2020  | 5/24/2020 North America / USA / Louisiana / Rapides Parish   |



|                |           |                                                            |
|----------------|-----------|------------------------------------------------------------|
| EPI_ISL_451292 | 5/6/2020  | 5/24/2020 North America / USA / Louisiana / Bossier Parish |
| EPI_ISL_451293 | 5/6/2020  | 5/24/2020 North America / USA / Louisiana / Caddo Parish   |
| EPI_ISL_451294 | 5/6/2020  | 5/24/2020 North America / USA / Louisiana / Caddo Parish   |
| EPI_ISL_451295 | 5/6/2020  | 5/24/2020 North America / USA / Louisiana / Caddo Parish   |
| EPI_ISL_451296 | 5/9/2020  | 5/24/2020 North America / USA / Louisiana / Rapides Parish |
| EPI_ISL_451297 | 5/7/2020  | 5/24/2020 North America / USA / Louisiana / Rapides Parish |
| EPI_ISL_451298 | 2/12/2020 | 5/24/2020 Europe / Italy / Lazio                           |
| EPI_ISL_451299 | 2/4/2020  | 5/24/2020 Europe / Italy / Lazio                           |
| EPI_ISL_451300 | 2/3/2020  | 5/24/2020 Europe / Italy / Lazio                           |
| EPI_ISL_451301 | 2/3/2020  | 5/24/2020 Europe / Italy / Lazio                           |
| EPI_ISL_451302 | 1/30/2020 | 5/24/2020 Europe / Italy / Lazio                           |
| EPI_ISL_451303 | 3/4/2020  | 5/24/2020 Europe / Italy / Lazio                           |
| EPI_ISL_451304 | 3/23/2020 | 5/24/2020 Europe / Italy / Lazio                           |
| EPI_ISL_451306 | 2/21/2020 | 5/24/2020 Europe / Italy / Lombardy                        |
| EPI_ISL_451307 | 2/21/2020 | 5/24/2020 Europe / Italy / Lombardy                        |
| EPI_ISL_451308 | 3/1/2020  | 5/24/2020 Europe / Italy / Lombardy                        |
| EPI_ISL_451309 | 3/1/2020  | 5/24/2020 Europe / Italy / Lombardy                        |
| EPI_ISL_451310 | 3/28/2020 | 5/24/2020 Europe / Greece / Athens                         |
| EPI_ISL_451311 | 3/29/2020 | 5/24/2020 Europe / Greece / Athens                         |
| EPI_ISL_451313 | 1/26/2020 | 5/24/2020 Asia / China / Sichuan                           |
| EPI_ISL_451314 | 1/30/2020 | 5/24/2020 Asia / China / Sichuan                           |
| EPI_ISL_451315 | 1/30/2020 | 5/24/2020 Asia / China / Sichuan                           |
| EPI_ISL_451316 | 2/1/2020  | 5/24/2020 Asia / China / Sichuan                           |
| EPI_ISL_451318 | 2/19/2020 | 5/24/2020 Asia / China / Sichuan                           |
| EPI_ISL_451319 | 1/27/2020 | 5/24/2020 Asia / China / Sichuan                           |
| EPI_ISL_451320 | 1/27/2020 | 5/24/2020 Asia / China / Sichuan                           |
| EPI_ISL_451321 | 2/2/2020  | 5/24/2020 Asia / China / Sichuan                           |
| EPI_ISL_451322 | 2/1/2020  | 5/24/2020 Asia / China / Sichuan                           |
| EPI_ISL_451325 | 1/31/2020 | 5/24/2020 Asia / China / Sichuan                           |
| EPI_ISL_451326 | 2/2/2020  | 5/24/2020 Asia / China / Sichuan                           |
| EPI_ISL_451327 | 2/1/2020  | 5/24/2020 Asia / China / Sichuan                           |
| EPI_ISL_451328 | 2/2/2020  | 5/24/2020 Asia / China / Sichuan                           |
| EPI_ISL_451329 | 2/5/2020  | 5/24/2020 Asia / China / Sichuan                           |
| EPI_ISL_451330 | 1/29/2020 | 5/24/2020 Asia / China / Sichuan                           |
| EPI_ISL_451331 | 2/2/2020  | 5/24/2020 Asia / China / Sichuan                           |
| EPI_ISL_451334 | 1/30/2020 | 5/24/2020 Asia / China / Sichuan                           |
| EPI_ISL_451337 | 1/30/2020 | 5/24/2020 Asia / China / Sichuan                           |
| EPI_ISL_451338 | 2/5/2020  | 5/24/2020 Asia / China / Sichuan                           |
| EPI_ISL_451344 | 1/31/2020 | 5/24/2020 Asia / China / Sichuan                           |
| EPI_ISL_451345 | 1/24/2020 | 5/24/2020 Asia / China / Sichuan                           |
| EPI_ISL_451346 | 2/4/2020  | 5/24/2020 Asia / China / Sichuan                           |
| EPI_ISL_451348 | 2/9/2020  | 5/24/2020 Asia / China / Sichuan                           |
| EPI_ISL_451353 | 1/27/2020 | 5/24/2020 Asia / China / Sichuan                           |
| EPI_ISL_451354 | 2/9/2020  | 5/24/2020 Asia / China / Sichuan                           |
| EPI_ISL_451356 | 2/7/2020  | 5/24/2020 Asia / China / Sichuan                           |
| EPI_ISL_451357 | 2/3/2020  | 5/24/2020 Asia / China / Sichuan                           |
| EPI_ISL_451359 | 1/27/2020 | 5/24/2020 Asia / China / Sichuan                           |

|                |           |                                                          |
|----------------|-----------|----------------------------------------------------------|
| EPI_ISL_451360 | 1/24/2020 | 5/24/2020 Asia / China / Sichuan                         |
| EPI_ISL_451365 | 1/26/2020 | 5/24/2020 Asia / China / Sichuan                         |
| EPI_ISL_451369 | 2/8/2020  | 5/24/2020 Asia / China / Sichuan                         |
| EPI_ISL_451370 | 2/4/2020  | 5/24/2020 Asia / China / Sichuan                         |
| EPI_ISL_451371 | 2/9/2020  | 5/24/2020 Asia / China / Sichuan                         |
| EPI_ISL_451374 | 1/31/2020 | 5/24/2020 Asia / China / Sichuan                         |
| EPI_ISL_451376 | 1/28/2020 | 5/24/2020 Asia / China / Sichuan                         |
| EPI_ISL_451377 | 2/8/2020  | 5/24/2020 Asia / China / Sichuan                         |
| EPI_ISL_451378 | 1/28/2020 | 5/24/2020 Asia / China / Sichuan                         |
| EPI_ISL_451379 | 1/23/2020 | 5/24/2020 Asia / China / Sichuan                         |
| EPI_ISL_451380 | 1/24/2020 | 5/24/2020 Asia / China / Sichuan                         |
| EPI_ISL_451381 | 1/27/2020 | 5/24/2020 Asia / China / Sichuan                         |
| EPI_ISL_451382 | 1/25/2020 | 5/24/2020 Asia / China / Sichuan                         |
| EPI_ISL_451383 | 2/2/2020  | 5/24/2020 Asia / China / Sichuan                         |
| EPI_ISL_451384 | 1/27/2020 | 5/24/2020 Asia / China / Sichuan                         |
| EPI_ISL_451385 | 2/3/2020  | 5/24/2020 Asia / China / Sichuan                         |
| EPI_ISL_451386 | 2/2/2020  | 5/24/2020 Asia / China / Sichuan                         |
| EPI_ISL_451387 | 1/27/2020 | 5/24/2020 Asia / China / Sichuan                         |
| EPI_ISL_451388 | 2/10/2020 | 5/24/2020 Asia / China / Sichuan                         |
| EPI_ISL_451389 | 1/30/2020 | 5/24/2020 Asia / China / Sichuan                         |
| EPI_ISL_451390 | 1/23/2020 | 5/24/2020 Asia / China / Sichuan                         |
| EPI_ISL_451391 | 2/13/2020 | 5/24/2020 Asia / China / Sichuan                         |
| EPI_ISL_451392 | 1/24/2020 | 5/24/2020 Asia / China / Sichuan                         |
| EPI_ISL_451393 | 2/15/2020 | 5/24/2020 Asia / China / Sichuan                         |
| EPI_ISL_451394 | 2/3/2020  | 5/24/2020 Asia / China / Sichuan                         |
| EPI_ISL_451395 | 1/30/2020 | 5/24/2020 Asia / China / Sichuan                         |
| EPI_ISL_451398 | 1/31/2020 | 5/24/2020 Asia / China / Sichuan                         |
| EPI_ISL_451400 | 4/23/2020 | 5/24/2020 Africa / Morocco / Ouarzazate                  |
| EPI_ISL_451401 | 3/22/2020 | 5/25/2020 North America / USA / New York / Brooklyn      |
| EPI_ISL_451402 | 3/21/2020 | 5/25/2020 North America / USA / New York / Nassau County |
| EPI_ISL_451404 | 3/20/2020 | 5/25/2020 North America / USA / New York / Manhattan     |
| EPI_ISL_451405 | 3/26/2020 | 5/25/2020 North America / USA / New York / Brooklyn      |
| EPI_ISL_451406 | 3/21/2020 | 5/25/2020 North America / USA / New York / Nassau County |
| EPI_ISL_451407 | 3/26/2020 | 5/25/2020 North America / USA / New York / Brooklyn      |
| EPI_ISL_451408 | 3/21/2020 | 5/25/2020 North America / USA / New York / Nassau County |
| EPI_ISL_451409 | 3/26/2020 | 5/25/2020 North America / USA / New York / Nassau County |
| EPI_ISL_451410 | 3/26/2020 | 5/25/2020 North America / USA / New York / Nassau County |
| EPI_ISL_451411 | 3/22/2020 | 5/25/2020 North America / USA / New York / Nassau County |
| EPI_ISL_451412 | 3/26/2020 | 5/25/2020 North America / USA / New York / Nassau County |
| EPI_ISL_451413 | 3/26/2020 | 5/25/2020 North America / USA / New York / Brooklyn      |
| EPI_ISL_451414 | 3/26/2020 | 5/25/2020 North America / USA / New York / Queens        |
| EPI_ISL_451415 | 3/21/2020 | 5/25/2020 North America / USA / New York / Brooklyn      |
| EPI_ISL_451416 | 3/26/2020 | 5/25/2020 North America / USA / New York / Brooklyn      |
| EPI_ISL_451417 | 3/26/2020 | 5/25/2020 North America / USA / New York / Nassau County |
| EPI_ISL_451418 | 3/26/2020 | 5/25/2020 North America / USA / New York / Nassau County |
| EPI_ISL_451419 | 3/26/2020 | 5/25/2020 North America / USA / New York / Nassau County |
| EPI_ISL_451420 | 3/21/2020 | 5/25/2020 North America / USA / New York / Nassau County |

|                |           |           |                                                 |
|----------------|-----------|-----------|-------------------------------------------------|
| EPI_ISL_451421 | 3/26/2020 | 5/25/2020 | North America / USA / New York / Queens         |
| EPI_ISL_451422 | 3/20/2020 | 5/25/2020 | North America / USA / New York / Manhattan      |
| EPI_ISL_451423 | 3/26/2020 | 5/25/2020 | North America / USA / New York / Queens         |
| EPI_ISL_451424 | 3/20/2020 | 5/25/2020 | North America / USA / New York / Manhattan      |
| EPI_ISL_451426 | 3/26/2020 | 5/25/2020 | North America / USA / New York / Nassau County  |
| EPI_ISL_451427 | 3/20/2020 | 5/25/2020 | North America / USA / New York / Nassau County  |
| EPI_ISL_451428 | 3/26/2020 | 5/25/2020 | North America / USA / New York / Brooklyn       |
| EPI_ISL_451429 | 3/22/2020 | 5/25/2020 | North America / USA / New York / Nassau County  |
| EPI_ISL_451430 | 3/26/2020 | 5/25/2020 | North America / USA / New York / Suffolk County |
| EPI_ISL_451431 | 3/26/2020 | 5/25/2020 | North America / USA / New York / Nassau County  |
| EPI_ISL_451432 | 3/26/2020 | 5/25/2020 | North America / USA / New York / Nassau County  |
| EPI_ISL_451434 | 3/21/2020 | 5/25/2020 | North America / USA / New York / Manhattan      |
| EPI_ISL_451435 | 3/20/2020 | 5/25/2020 | North America / USA / New York / Nassau County  |
| EPI_ISL_451436 | 3/21/2020 | 5/25/2020 | North America / USA / New York / Queens         |
| EPI_ISL_451437 | 3/26/2020 | 5/25/2020 | North America / USA / New York / Manhattan      |
| EPI_ISL_451438 | 3/26/2020 | 5/25/2020 | North America / USA / New York / Bronx          |
| EPI_ISL_451439 | 3/20/2020 | 5/25/2020 | North America / USA / New York / Brooklyn       |
| EPI_ISL_451440 | 3/20/2020 | 5/25/2020 | North America / USA / New York / Nassau County  |
| EPI_ISL_451441 | 3/26/2020 | 5/25/2020 | North America / USA / New York / Suffolk County |
| EPI_ISL_451442 | 3/26/2020 | 5/25/2020 | North America / USA / New York / Manhattan      |
| EPI_ISL_451443 | 3/26/2020 | 5/25/2020 | North America / USA / New York / Nassau County  |
| EPI_ISL_451444 | 3/20/2020 | 5/25/2020 | North America / USA / New Jersey                |
| EPI_ISL_451445 | 3/26/2020 | 5/25/2020 | North America / USA / New York / Nassau County  |
| EPI_ISL_451446 | 3/26/2020 | 5/25/2020 | North America / USA / New York / Nassau County  |
| EPI_ISL_451447 | 3/26/2020 | 5/25/2020 | North America / USA / New York / Queens         |
| EPI_ISL_451448 | 3/22/2020 | 5/25/2020 | North America / USA / New York / Westchester    |
| EPI_ISL_451449 | 3/26/2020 | 5/25/2020 | North America / USA / New York / Brooklyn       |
| EPI_ISL_451450 | 3/25/2020 | 5/25/2020 | North America / USA / New York / Nassau County  |
| EPI_ISL_451451 | 3/26/2020 | 5/25/2020 | North America / USA / New York / Nassau County  |
| EPI_ISL_451452 | 3/21/2020 | 5/25/2020 | North America / USA / New York / Nassau County  |
| EPI_ISL_451453 | 3/22/2020 | 5/25/2020 | North America / USA / New York / Manhattan      |
| EPI_ISL_451454 | 3/26/2020 | 5/25/2020 | North America / USA / New York / Bronx          |
| EPI_ISL_451455 | 3/21/2020 | 5/25/2020 | North America / USA / New York / Nassau County  |
| EPI_ISL_451456 | 3/20/2020 | 5/25/2020 | North America / USA / New York / Nassau County  |
| EPI_ISL_451457 | 3/21/2020 | 5/25/2020 | North America / USA / New York / Brooklyn       |
| EPI_ISL_451458 | 3/26/2020 | 5/25/2020 | North America / USA / New York / Queens         |
| EPI_ISL_451459 | 3/20/2020 | 5/25/2020 | North America / USA / New York / Manhattan      |
| EPI_ISL_451460 | 3/25/2020 | 5/25/2020 | North America / USA / New York / Nassau County  |
| EPI_ISL_451461 | 3/26/2020 | 5/25/2020 | North America / USA / New York / Brooklyn       |
| EPI_ISL_451462 | 3/20/2020 | 5/25/2020 | North America / USA / New York / Brooklyn       |
| EPI_ISL_451463 | 3/20/2020 | 5/25/2020 | North America / USA / New York / Queens         |
| EPI_ISL_451464 | 3/21/2020 | 5/25/2020 | North America / USA / New York / Nassau County  |
| EPI_ISL_451465 | 3/21/2020 | 5/25/2020 | North America / USA / New York / Brooklyn       |
| EPI_ISL_451466 | 3/26/2020 | 5/25/2020 | North America / USA / New York / Manhattan      |
| EPI_ISL_451467 | 3/20/2020 | 5/25/2020 | North America / USA / New York / Brooklyn       |
| EPI_ISL_451468 | 3/20/2020 | 5/25/2020 | North America / USA / New York / Nassau County  |
| EPI_ISL_451469 | 3/26/2020 | 5/25/2020 | North America / USA / New York / Brooklyn       |









|                |           |                                                          |
|----------------|-----------|----------------------------------------------------------|
| EPI_ISL_451620 | 4/14/2020 | 5/25/2020 Oceania / Australia / New South Wales / Sydney |
| EPI_ISL_451621 | 4/17/2020 | 5/25/2020 Oceania / Australia / New South Wales / Sydney |
| EPI_ISL_451622 | 4/17/2020 | 5/25/2020 Oceania / Australia / New South Wales / Sydney |
| EPI_ISL_451623 | 4/15/2020 | 5/25/2020 Oceania / Australia / New South Wales / Sydney |
| EPI_ISL_451624 | 4/19/2020 | 5/25/2020 Oceania / Australia / New South Wales / Sydney |
| EPI_ISL_451625 | 4/14/2020 | 5/25/2020 Oceania / Australia / New South Wales / Sydney |
| EPI_ISL_451626 | 4/14/2020 | 5/25/2020 Oceania / Australia / New South Wales / Sydney |
| EPI_ISL_451627 | 4/14/2020 | 5/25/2020 Oceania / Australia / New South Wales / Sydney |
| EPI_ISL_451628 | 4/14/2020 | 5/25/2020 Oceania / Australia / New South Wales / Sydney |
| EPI_ISL_451629 | 4/14/2020 | 5/25/2020 Oceania / Australia / New South Wales / Sydney |
| EPI_ISL_451630 | 4/20/2020 | 5/25/2020 Oceania / Australia / New South Wales / Sydney |
| EPI_ISL_451631 | 3/26/2020 | 5/25/2020 Oceania / Australia / New South Wales / Sydney |
| EPI_ISL_451632 | 3/27/2020 | 5/25/2020 Oceania / Australia / New South Wales / Sydney |
| EPI_ISL_451633 | 3/22/2020 | 5/25/2020 Oceania / Australia / New South Wales / Sydney |
| EPI_ISL_451634 | 3/21/2020 | 5/25/2020 Oceania / Australia / New South Wales / Sydney |
| EPI_ISL_451635 | 3/8/2020  | 5/25/2020 Oceania / Australia / New South Wales / Sydney |
| EPI_ISL_451636 | 3/10/2020 | 5/25/2020 Oceania / Australia / New South Wales / Sydney |
| EPI_ISL_451637 | 4/13/2020 | 5/25/2020 Oceania / Australia / New South Wales / Sydney |
| EPI_ISL_451638 | 4/13/2020 | 5/25/2020 Oceania / Australia / New South Wales / Sydney |
| EPI_ISL_451639 | 4/13/2020 | 5/25/2020 Oceania / Australia / New South Wales / Sydney |
| EPI_ISL_451640 | 4/13/2020 | 5/25/2020 Oceania / Australia / New South Wales / Sydney |
| EPI_ISL_451641 | 4/6/2020  | 5/25/2020 Oceania / Australia / New South Wales / Sydney |
| EPI_ISL_451642 | 4/21/2020 | 5/25/2020 Oceania / Australia / New South Wales / Sydney |
| EPI_ISL_451643 | 4/7/2020  | 5/25/2020 Oceania / Australia / New South Wales / Sydney |
| EPI_ISL_451644 | 5/2/2020  | 5/25/2020 Europe / Poland / Pomorze                      |
| EPI_ISL_451645 | 5/2/2020  | 5/25/2020 Europe / Poland / Pomorze                      |
| EPI_ISL_451646 | 4/22/2020 | 5/25/2020 Europe / Poland / Pomorze                      |
| EPI_ISL_451647 | 4/23/2020 | 5/25/2020 Europe / Poland / Pomorze                      |
| EPI_ISL_451648 | 4/26/2020 | 5/25/2020 Europe / Poland / Pomorze                      |
| EPI_ISL_451649 | 4/27/2020 | 5/25/2020 Europe / Poland / Pomorze                      |
| EPI_ISL_451650 | 4/27/2020 | 5/25/2020 Europe / Poland / Pomorze                      |
| EPI_ISL_451651 | 4/27/2020 | 5/25/2020 Europe / Poland / Pomorze                      |
| EPI_ISL_451652 | 4/30/2020 | 5/25/2020 Europe / Poland / Pomorze                      |
| EPI_ISL_451653 | 5/4/2020  | 5/25/2020 Europe / Poland / Pomorze                      |
| EPI_ISL_451654 | 5/4/2020  | 5/25/2020 Europe / Poland / Pomorze                      |
| EPI_ISL_451655 | 5/5/2020  | 5/25/2020 Europe / Poland / Slask                        |
| EPI_ISL_451656 | 5/5/2020  | 5/25/2020 Europe / Poland / Slask                        |
| EPI_ISL_451657 | 5/5/2020  | 5/25/2020 Europe / Poland / Slask                        |
| EPI_ISL_451658 | 5/5/2020  | 5/25/2020 Europe / Poland / Slask                        |
| EPI_ISL_451659 | 5/5/2020  | 5/25/2020 Europe / Poland / Slask                        |
| EPI_ISL_451660 | 5/5/2020  | 5/25/2020 Europe / Poland / Slask                        |
| EPI_ISL_451661 | 5/5/2020  | 5/25/2020 Europe / Poland / Slask                        |
| EPI_ISL_451662 | 5/5/2020  | 5/25/2020 Europe / Poland / Slask                        |
| EPI_ISL_451663 | 5/5/2020  | 5/25/2020 Europe / Poland / Slask                        |
| EPI_ISL_451664 | 5/5/2020  | 5/25/2020 Europe / Poland / Slask                        |
| EPI_ISL_451665 | 3/20/2020 | 5/25/2020 North America / USA / New York / Brooklyn      |
| EPI_ISL_451666 | 5/4/2020  | 5/25/2020 Asia / India / Gujarat / Jamnagar              |

|                |           |                                                   |
|----------------|-----------|---------------------------------------------------|
| EPI_ISL_451668 | 3/12/2020 | 5/25/2020 Europe / Switzerland / Ticino           |
| EPI_ISL_451669 | 3/12/2020 | 5/25/2020 Europe / Switzerland / Vaud             |
| EPI_ISL_451670 | 3/12/2020 | 5/25/2020 Europe / Switzerland / Ticino           |
| EPI_ISL_451672 | 3/13/2020 | 5/25/2020 Europe / Switzerland / Aargau           |
| EPI_ISL_451673 | 3/13/2020 | 5/25/2020 Europe / Switzerland / Basel-Landschaft |
| EPI_ISL_451674 | 3/13/2020 | 5/25/2020 Europe / Switzerland / Zurich           |
| EPI_ISL_451675 | 3/13/2020 | 5/25/2020 Europe / Switzerland / Basel-Stadt      |
| EPI_ISL_451676 | 3/13/2020 | 5/25/2020 Europe / Switzerland / Ticino           |
| EPI_ISL_451677 | 3/13/2020 | 5/25/2020 Europe / Switzerland / Ticino           |
| EPI_ISL_451678 | 3/13/2020 | 5/25/2020 Europe / Switzerland / Basel-Landschaft |
| EPI_ISL_451680 | 3/13/2020 | 5/25/2020 Europe / Switzerland / Grisons          |
| EPI_ISL_451681 | 3/12/2020 | 5/25/2020 Europe / Switzerland / Grisons          |
| EPI_ISL_451682 | 3/13/2020 | 5/25/2020 Europe / Switzerland / Wallis           |
| EPI_ISL_451683 | 3/13/2020 | 5/25/2020 Europe / Switzerland / Basel-Landschaft |
| EPI_ISL_451684 | 3/13/2020 | 5/25/2020 Europe / Switzerland / Jura             |
| EPI_ISL_451685 | 3/13/2020 | 5/25/2020 Europe / Switzerland / Zurich           |
| EPI_ISL_451688 | 3/12/2020 | 5/25/2020 Europe / Switzerland / Schwyz           |
| EPI_ISL_451689 | 3/13/2020 | 5/25/2020 Europe / Switzerland / Schwyz           |
| EPI_ISL_451690 | 3/13/2020 | 5/25/2020 Europe / Switzerland / Ticino           |
| EPI_ISL_451691 | 3/13/2020 | 5/25/2020 Europe / Switzerland / Wallis           |
| EPI_ISL_451692 | 3/14/2020 | 5/25/2020 Europe / Switzerland / Bern             |
| EPI_ISL_451693 | 3/14/2020 | 5/25/2020 Europe / Switzerland / Basel-Landschaft |
| EPI_ISL_451694 | 3/16/2020 | 5/25/2020 Europe / Switzerland / Aargau           |
| EPI_ISL_451695 | 3/16/2020 | 5/25/2020 Europe / Switzerland / Basel-Stadt      |
| EPI_ISL_451696 | 3/16/2020 | 5/25/2020 Europe / Switzerland / Basel-Landschaft |
| EPI_ISL_451697 | 3/16/2020 | 5/25/2020 Europe / Switzerland / Bern             |
| EPI_ISL_451698 | 3/16/2020 | 5/25/2020 Europe / Switzerland / Basel-Landschaft |
| EPI_ISL_451699 | 3/16/2020 | 5/25/2020 Europe / Switzerland / Basel-Stadt      |
| EPI_ISL_451701 | 3/16/2020 | 5/25/2020 Europe / Switzerland / Bern             |
| EPI_ISL_451702 | 3/16/2020 | 5/25/2020 Europe / Switzerland / Bern             |
| EPI_ISL_451703 | 3/16/2020 | 5/25/2020 Europe / Switzerland / Basel-Stadt      |
| EPI_ISL_451704 | 3/16/2020 | 5/25/2020 Europe / Switzerland / Jura             |
| EPI_ISL_451705 | 3/16/2020 | 5/25/2020 Europe / Switzerland / Thurgau          |
| EPI_ISL_451706 | 3/16/2020 | 5/25/2020 Europe / Switzerland / Bern             |
| EPI_ISL_451707 | 3/16/2020 | 5/25/2020 Europe / Switzerland / Schwyz           |
| EPI_ISL_451708 | 3/16/2020 | 5/25/2020 Europe / Switzerland / Jura             |
| EPI_ISL_451709 | 3/16/2020 | 5/25/2020 Europe / Switzerland / Aargau           |
| EPI_ISL_451711 | 3/16/2020 | 5/25/2020 Europe / Switzerland / Ticino           |
| EPI_ISL_451712 | 3/16/2020 | 5/25/2020 Europe / Switzerland / Vaud             |
| EPI_ISL_451713 | 3/16/2020 | 5/25/2020 Europe / Switzerland / Basel-Stadt      |
| EPI_ISL_451714 | 3/16/2020 | 5/25/2020 Europe / Switzerland / Vaud             |
| EPI_ISL_451716 | 3/16/2020 | 5/25/2020 Europe / Switzerland / Basel-Stadt      |
| EPI_ISL_451717 | 3/16/2020 | 5/25/2020 Europe / Switzerland / Aargau           |
| EPI_ISL_451718 | 3/15/2020 | 5/25/2020 Europe / Switzerland / Grisons          |
| EPI_ISL_451719 | 3/16/2020 | 5/25/2020 Europe / Switzerland / Basel-Landschaft |
| EPI_ISL_451720 | 3/16/2020 | 5/25/2020 Europe / Switzerland / Basel-Landschaft |
| EPI_ISL_451721 | 3/16/2020 | 5/25/2020 Europe / Switzerland / Basel-Landschaft |

|                |           |                                                   |
|----------------|-----------|---------------------------------------------------|
| EPI_ISL_451722 | 3/15/2020 | 5/25/2020 Europe / Switzerland / Grisons          |
| EPI_ISL_451723 | 3/16/2020 | 5/25/2020 Europe / Switzerland / Grisons          |
| EPI_ISL_451724 | 3/16/2020 | 5/25/2020 Europe / Switzerland / Schwyz           |
| EPI_ISL_451725 | 3/15/2020 | 5/25/2020 Europe / Switzerland / Grisons          |
| EPI_ISL_451727 | 3/16/2020 | 5/25/2020 Europe / Switzerland / Grisons          |
| EPI_ISL_451728 | 3/16/2020 | 5/25/2020 Europe / Switzerland / Basel-Stadt      |
| EPI_ISL_451730 | 3/16/2020 | 5/25/2020 Europe / Switzerland / Ticino           |
| EPI_ISL_451731 | 3/16/2020 | 5/25/2020 Europe / Switzerland / Grisons          |
| EPI_ISL_451732 | 3/16/2020 | 5/25/2020 Europe / Switzerland / Basel-Stadt      |
| EPI_ISL_451734 | 3/16/2020 | 5/25/2020 Europe / Switzerland / Grisons          |
| EPI_ISL_451736 | 3/16/2020 | 5/25/2020 Europe / Switzerland / St Gall          |
| EPI_ISL_451738 | 3/16/2020 | 5/25/2020 Europe / Switzerland / Bern             |
| EPI_ISL_451740 | 3/25/2020 | 5/25/2020 Europe / Switzerland / Grisons          |
| EPI_ISL_451741 | 3/25/2020 | 5/25/2020 Europe / Switzerland / Basel-Landschaft |
| EPI_ISL_451742 | 3/25/2020 | 5/25/2020 Europe / Switzerland / Basel-Landschaft |
| EPI_ISL_451744 | 3/25/2020 | 5/25/2020 Europe / Switzerland / Vaud             |
| EPI_ISL_451745 | 3/25/2020 | 5/25/2020 Europe / Switzerland / Vaud             |
| EPI_ISL_451746 | 3/25/2020 | 5/25/2020 Europe / Switzerland / Bern             |
| EPI_ISL_451747 | 3/25/2020 | 5/25/2020 Europe / Switzerland / Zurich           |
| EPI_ISL_451748 | 3/25/2020 | 5/25/2020 Europe / Switzerland / Wallis           |
| EPI_ISL_451749 | 3/25/2020 | 5/25/2020 Europe / Switzerland / Uri              |
| EPI_ISL_451750 | 3/25/2020 | 5/25/2020 Europe / Switzerland / Basel-Landschaft |
| EPI_ISL_451751 | 3/25/2020 | 5/25/2020 Europe / Switzerland / Bern             |
| EPI_ISL_451752 | 3/25/2020 | 5/25/2020 Europe / Switzerland / Vaud             |
| EPI_ISL_451753 | 3/25/2020 | 5/25/2020 Europe / Switzerland / Zurich           |
| EPI_ISL_451754 | 3/25/2020 | 5/25/2020 Europe / Switzerland / Uri              |
| EPI_ISL_451755 | 3/25/2020 | 5/25/2020 Europe / Switzerland / Vaud             |
| EPI_ISL_451756 | 3/25/2020 | 5/25/2020 Europe / Switzerland / Bern             |
| EPI_ISL_451758 | 3/26/2020 | 5/25/2020 Europe / Switzerland / Schaffhausen     |
| EPI_ISL_451759 | 3/26/2020 | 5/25/2020 Europe / Switzerland / Aargau           |
| EPI_ISL_451760 | 3/26/2020 | 5/25/2020 Europe / Switzerland / Grisons          |
| EPI_ISL_451761 | 3/26/2020 | 5/25/2020 Europe / Switzerland / Zurich           |
| EPI_ISL_451763 | 3/26/2020 | 5/25/2020 Europe / Switzerland / Grisons          |
| EPI_ISL_451764 | 3/26/2020 | 5/25/2020 Europe / Switzerland / Basel-Landschaft |
| EPI_ISL_451765 | 3/26/2020 | 5/25/2020 Europe / Switzerland / Zurich           |
| EPI_ISL_451766 | 3/26/2020 | 5/25/2020 Europe / Switzerland / Basel-Landschaft |
| EPI_ISL_451767 | 3/26/2020 | 5/25/2020 Europe / Switzerland / Zurich           |
| EPI_ISL_451769 | 3/26/2020 | 5/25/2020 Europe / Switzerland / Vaud             |
| EPI_ISL_451770 | 3/26/2020 | 5/25/2020 Europe / Switzerland / Vaud             |
| EPI_ISL_451771 | 3/26/2020 | 5/25/2020 Europe / Switzerland / Bern             |
| EPI_ISL_451772 | 3/26/2020 | 5/25/2020 Europe / Switzerland / Basel-Stadt      |
| EPI_ISL_451773 | 3/26/2020 | 5/25/2020 Europe / Switzerland / Ticino           |
| EPI_ISL_451776 | 3/26/2020 | 5/25/2020 Europe / Switzerland / Basel-Landschaft |
| EPI_ISL_451777 | 3/26/2020 | 5/25/2020 Europe / Switzerland / Schwyz           |
| EPI_ISL_451778 | 3/26/2020 | 5/25/2020 Europe / Switzerland / Basel-Stadt      |
| EPI_ISL_451780 | 3/25/2020 | 5/25/2020 Europe / Switzerland / Uri              |
| EPI_ISL_451781 | 3/25/2020 | 5/25/2020 Europe / Switzerland / Basel-Landschaft |

|                |           |           |                                         |
|----------------|-----------|-----------|-----------------------------------------|
| EPI_ISL_451782 | 3/25/2020 | 5/25/2020 | Europe / Switzerland / Basel-Landschaft |
| EPI_ISL_451785 | 3/25/2020 | 5/25/2020 | Europe / Switzerland / Basel-Landschaft |
| EPI_ISL_451786 | 3/25/2020 | 5/25/2020 | Europe / Switzerland / Grisons          |
| EPI_ISL_451787 | 3/25/2020 | 5/25/2020 | Europe / Switzerland / Vaud             |
| EPI_ISL_451788 | 3/25/2020 | 5/25/2020 | Europe / Switzerland / Grisons          |
| EPI_ISL_451789 | 3/25/2020 | 5/25/2020 | Europe / Switzerland / Aargau           |
| EPI_ISL_451790 | 3/25/2020 | 5/25/2020 | Europe / Switzerland / Basel-Landschaft |
| EPI_ISL_451791 | 3/25/2020 | 5/25/2020 | Europe / Switzerland / Grisons          |
| EPI_ISL_451792 | 3/25/2020 | 5/25/2020 | Europe / Switzerland / Vaud             |
| EPI_ISL_451793 | 3/25/2020 | 5/25/2020 | Europe / Switzerland / Vaud             |
| EPI_ISL_451794 | 3/25/2020 | 5/25/2020 | Europe / Switzerland / Vaud             |
| EPI_ISL_451797 | 3/30/2020 | 5/25/2020 | Europe / Switzerland / Zurich           |
| EPI_ISL_451798 | 3/30/2020 | 5/25/2020 | Europe / Switzerland / Zurich           |
| EPI_ISL_451799 | 3/30/2020 | 5/25/2020 | Europe / Switzerland / Zurich           |
| EPI_ISL_451800 | 3/30/2020 | 5/25/2020 | Europe / Switzerland / Zurich           |
| EPI_ISL_451801 | 3/30/2020 | 5/25/2020 | Europe / Switzerland / Zurich           |
| EPI_ISL_451802 | 3/30/2020 | 5/25/2020 | Europe / Switzerland / Geneva           |
| EPI_ISL_451803 | 3/30/2020 | 5/25/2020 | Europe / Switzerland / Basel-Stadt      |
| EPI_ISL_451804 | 3/30/2020 | 5/25/2020 | Europe / Switzerland / St Gall          |
| EPI_ISL_451805 | 3/31/2020 | 5/25/2020 | Europe / Switzerland / Zurich           |
| EPI_ISL_451806 | 3/31/2020 | 5/25/2020 | Europe / Switzerland / Bern             |
| EPI_ISL_451807 | 3/31/2020 | 5/25/2020 | Europe / Switzerland / Basel-Landschaft |
| EPI_ISL_451808 | 3/31/2020 | 5/25/2020 | Europe / Switzerland / Lucerne          |
| EPI_ISL_451809 | 3/31/2020 | 5/25/2020 | Europe / Switzerland / Basel-Landschaft |
| EPI_ISL_451810 | 3/31/2020 | 5/25/2020 | Europe / Switzerland / Basel-Landschaft |
| EPI_ISL_451811 | 3/31/2020 | 5/25/2020 | Europe / Switzerland / Bern             |
| EPI_ISL_451812 | 3/31/2020 | 5/25/2020 | Europe / Switzerland / Bern             |
| EPI_ISL_451813 | 3/31/2020 | 5/25/2020 | Europe / Switzerland / Basel-Landschaft |
| EPI_ISL_451814 | 3/31/2020 | 5/25/2020 | Europe / Switzerland / Basel-Stadt      |
| EPI_ISL_451815 | 3/31/2020 | 5/25/2020 | Europe / Switzerland / Basel-Landschaft |
| EPI_ISL_451816 | 3/31/2020 | 5/25/2020 | Europe / Switzerland / Basel-Landschaft |
| EPI_ISL_451817 | 3/31/2020 | 5/25/2020 | Europe / Switzerland / Basel-Landschaft |
| EPI_ISL_451818 | 3/31/2020 | 5/25/2020 | Europe / Switzerland / Wallis           |
| EPI_ISL_451819 | 3/31/2020 | 5/25/2020 | Europe / Switzerland / Basel-Landschaft |
| EPI_ISL_451821 | 3/31/2020 | 5/25/2020 | Europe / Switzerland / Basel-Landschaft |
| EPI_ISL_451822 | 3/31/2020 | 5/25/2020 | Europe / Switzerland / Basel-Landschaft |
| EPI_ISL_451824 | 3/31/2020 | 5/25/2020 | Europe / Switzerland / Aargau           |
| EPI_ISL_451826 | 3/31/2020 | 5/25/2020 | Europe / Switzerland / Bern             |
| EPI_ISL_451827 | 3/31/2020 | 5/25/2020 | Europe / Switzerland / Lucerne          |
| EPI_ISL_451829 | 3/31/2020 | 5/25/2020 | Europe / Switzerland / Aargau           |
| EPI_ISL_451830 | 3/31/2020 | 5/25/2020 | Europe / Switzerland / Bern             |
| EPI_ISL_451831 | 3/31/2020 | 5/25/2020 | Europe / Switzerland / Zurich           |
| EPI_ISL_451832 | 3/31/2020 | 5/25/2020 | Europe / Switzerland / Grisons          |
| EPI_ISL_451833 | 3/31/2020 | 5/25/2020 | Europe / Switzerland / Grisons          |
| EPI_ISL_451834 | 3/31/2020 | 5/25/2020 | Europe / Switzerland / Zurich           |
| EPI_ISL_451835 | 3/31/2020 | 5/25/2020 | Europe / Switzerland / Zurich           |
| EPI_ISL_451837 | 3/31/2020 | 5/25/2020 | Europe / Switzerland / Zurich           |

|                |           |           |                                         |
|----------------|-----------|-----------|-----------------------------------------|
| EPI_ISL_451839 | 3/31/2020 | 5/25/2020 | Europe / Switzerland / Geneva           |
| EPI_ISL_451840 | 3/31/2020 | 5/25/2020 | Europe / Switzerland / Zurich           |
| EPI_ISL_451842 | 3/31/2020 | 5/25/2020 | Europe / Switzerland / Zurich           |
| EPI_ISL_451843 | 3/31/2020 | 5/25/2020 | Europe / Switzerland / Zurich           |
| EPI_ISL_451844 | 3/31/2020 | 5/25/2020 | Europe / Switzerland / Basel-Landschaft |
| EPI_ISL_451846 | 3/31/2020 | 5/25/2020 | Europe / Switzerland / Basel-Landschaft |
| EPI_ISL_451848 | 3/31/2020 | 5/25/2020 | Europe / Switzerland / Schaffhausen     |
| EPI_ISL_451849 | 3/31/2020 | 5/25/2020 | Europe / Switzerland / Jura             |
| EPI_ISL_451850 | 3/31/2020 | 5/25/2020 | Europe / Switzerland / Grisons          |
| EPI_ISL_451851 | 3/31/2020 | 5/25/2020 | Europe / Switzerland / Geneva           |
| EPI_ISL_451852 | 3/31/2020 | 5/25/2020 | Europe / Switzerland / Zurich           |
| EPI_ISL_451853 | 3/31/2020 | 5/25/2020 | Europe / Switzerland / Zurich           |
| EPI_ISL_451854 | 3/31/2020 | 5/25/2020 | Europe / Switzerland / Aargau           |
| EPI_ISL_451855 | 3/31/2020 | 5/25/2020 | Europe / Switzerland / Zurich           |
| EPI_ISL_451859 | 4/7/2020  | 5/25/2020 | Europe / Switzerland / Basel-Landschaft |
| EPI_ISL_451862 | 4/7/2020  | 5/25/2020 | Europe / Switzerland / Zurich           |
| EPI_ISL_451863 | 4/7/2020  | 5/25/2020 | Europe / Switzerland / Zurich           |
| EPI_ISL_451864 | 4/7/2020  | 5/25/2020 | Europe / Switzerland / Zurich           |
| EPI_ISL_451867 | 4/7/2020  | 5/25/2020 | Europe / Switzerland / Aargau           |
| EPI_ISL_451869 | 4/7/2020  | 5/25/2020 | Europe / Switzerland / Vaud             |
| EPI_ISL_451870 | 4/7/2020  | 5/25/2020 | Europe / Switzerland / Grisons          |
| EPI_ISL_451871 | 4/7/2020  | 5/25/2020 | Europe / Switzerland / Lucerne          |
| EPI_ISL_451872 | 4/7/2020  | 5/25/2020 | Europe / Switzerland / Lucerne          |
| EPI_ISL_451873 | 4/7/2020  | 5/25/2020 | Europe / Switzerland / Lucerne          |
| EPI_ISL_451874 | 4/7/2020  | 5/25/2020 | Europe / Switzerland / Basel-Stadt      |
| EPI_ISL_451875 | 4/7/2020  | 5/25/2020 | Europe / Switzerland / Glarus           |
| EPI_ISL_451877 | 4/7/2020  | 5/25/2020 | Europe / Switzerland / Bern             |
| EPI_ISL_451878 | 4/7/2020  | 5/25/2020 | Europe / Switzerland / Glarus           |
| EPI_ISL_451879 | 4/7/2020  | 5/25/2020 | Europe / Switzerland / Bern             |
| EPI_ISL_451883 | 4/7/2020  | 5/25/2020 | Europe / Switzerland / Basel-Landschaft |
| EPI_ISL_451884 | 4/6/2020  | 5/25/2020 | Europe / Switzerland / Vaud             |
| EPI_ISL_451885 | 4/6/2020  | 5/25/2020 | Europe / Switzerland / Basel-Stadt      |
| EPI_ISL_451886 | 4/6/2020  | 5/25/2020 | Europe / Switzerland / Bern             |
| EPI_ISL_451887 | 4/6/2020  | 5/25/2020 | Europe / Switzerland / Vaud             |
| EPI_ISL_451888 | 4/6/2020  | 5/25/2020 | Europe / Switzerland / Vaud             |
| EPI_ISL_451889 | 4/6/2020  | 5/25/2020 | Europe / Switzerland / Freiburg         |
| EPI_ISL_451891 | 4/6/2020  | 5/25/2020 | Europe / Switzerland / Ticino           |
| EPI_ISL_451892 | 4/7/2020  | 5/25/2020 | Europe / Switzerland / Basel-Landschaft |
| EPI_ISL_451894 | 4/7/2020  | 5/25/2020 | Europe / Switzerland / Basel-Landschaft |
| EPI_ISL_451900 | 4/7/2020  | 5/25/2020 | Europe / Switzerland / Basel-Landschaft |
| EPI_ISL_451902 | 4/7/2020  | 5/25/2020 | Europe / Switzerland / Bern             |
| EPI_ISL_451905 | 4/7/2020  | 5/25/2020 | Europe / Switzerland / Bern             |
| EPI_ISL_451906 | 4/7/2020  | 5/25/2020 | Europe / Switzerland / Zurich           |
| EPI_ISL_451907 | 4/7/2020  | 5/25/2020 | Europe / Switzerland / Bern             |
| EPI_ISL_451908 | 4/7/2020  | 5/25/2020 | Europe / Switzerland / Bern             |
| EPI_ISL_451909 | 4/7/2020  | 5/25/2020 | Europe / Switzerland                    |
| EPI_ISL_451911 | 4/7/2020  | 5/25/2020 | Europe / Switzerland / Zurich           |

|                |           |           |                                         |
|----------------|-----------|-----------|-----------------------------------------|
| EPI_ISL_451913 | 4/7/2020  | 5/25/2020 | Europe / Switzerland / Vaud             |
| EPI_ISL_451914 | 4/7/2020  | 5/25/2020 | Europe / Switzerland / Vaud             |
| EPI_ISL_451915 | 4/7/2020  | 5/25/2020 | Europe / Switzerland / Basel-Landschaft |
| EPI_ISL_451916 | 4/7/2020  | 5/25/2020 | Europe / Switzerland                    |
| EPI_ISL_451934 | 3/5/2020  | 5/25/2020 | Europe / Croatia / Varazdin County      |
| EPI_ISL_451935 | 3/18/2020 | 5/25/2020 | Europe / Belgium / Brussels             |
| EPI_ISL_451937 | 3/17/2020 | 5/25/2020 | Europe / Germany / Bavaria / Munich     |
| EPI_ISL_451940 | 3/23/2020 | 5/25/2020 | Europe / Germany / Bavaria / Munich     |
| EPI_ISL_451941 | 3/23/2020 | 5/25/2020 | Europe / Germany / Bavaria / Munich     |
| EPI_ISL_451944 | 3/31/2020 | 5/25/2020 | Europe / Germany / Bavaria / Munich     |
| EPI_ISL_451945 | 4/1/2020  | 5/25/2020 | Europe / Germany / Bavaria / Munich     |
| EPI_ISL_451948 | 2020-03   | 5/25/2020 | Europe / Belarus                        |
| EPI_ISL_454417 | 2/13/2020 | 5/25/2020 | Asia / China / Guangdong / Meizhou      |
| EPI_ISL_454418 | 2/15/2020 | 5/25/2020 | Asia / China / Guangdong / Meizhou      |
| EPI_ISL_468044 | 5/2/2020  | 5/25/2020 | Africa / Egypt                          |
| EPI_ISL_468045 | 5/2/2020  | 5/25/2020 | Africa / Egypt                          |
| EPI_ISL_468046 | 5/2/2020  | 5/25/2020 | Africa / Egypt                          |
| EPI_ISL_468047 | 5/2/2020  | 5/25/2020 | Africa / Egypt                          |
| EPI_ISL_468048 | 5/2/2020  | 5/25/2020 | Africa / Egypt                          |
| EPI_ISL_468049 | 5/2/2020  | 5/25/2020 | Africa / Egypt                          |
| EPI_ISL_468050 | 5/2/2020  | 5/25/2020 | Africa / Egypt                          |
| EPI_ISL_468051 | 5/2/2020  | 5/25/2020 | Africa / Egypt                          |
| EPI_ISL_468052 | 5/2/2020  | 5/25/2020 | Africa / Egypt                          |
| EPI_ISL_468053 | 5/2/2020  | 5/25/2020 | Africa / Egypt                          |
| EPI_ISL_468054 | 5/2/2020  | 5/25/2020 | Africa / Egypt                          |
| EPI_ISL_468055 | 5/2/2020  | 5/25/2020 | Africa / Egypt                          |
| EPI_ISL_468056 | 5/2/2020  | 5/25/2020 | Africa / Egypt                          |
| EPI_ISL_468057 | 5/2/2020  | 5/25/2020 | Africa / Egypt                          |
| EPI_ISL_475722 | 5/2/2020  | 5/25/2020 | Africa / Egypt                          |
| EPI_ISL_451961 | 3/14/2020 | 5/26/2020 | Europe / Italy / Apulia                 |
| EPI_ISL_451962 | 3/20/2020 | 5/26/2020 | Europe / Italy / Apulia                 |
| EPI_ISL_451963 | 3/20/2020 | 5/26/2020 | Europe / Russia / Moscow                |
| EPI_ISL_451965 | 3/20/2020 | 5/26/2020 | Europe / Russia / Moscow                |
| EPI_ISL_451966 | 3/20/2020 | 5/26/2020 | Europe / Russia / Moscow                |
| EPI_ISL_451968 | 3/18/2020 | 5/26/2020 | Europe / Russia / Moscow                |
| EPI_ISL_451969 | 3/22/2020 | 5/26/2020 | Europe / Russia / Moscow                |
| EPI_ISL_451970 | 3/22/2020 | 5/26/2020 | Europe / Russia / Moscow                |
| EPI_ISL_451971 | 4/1/2020  | 5/26/2020 | Europe / Poland / Malopolska / KrakÅ³w  |
| EPI_ISL_451972 | 4/2/2020  | 5/26/2020 | Europe / Poland / Malopolska / KrakÅ³w  |
| EPI_ISL_451973 | 3/31/2020 | 5/26/2020 | Europe / Poland / Malopolska / KrakÅ³w  |
| EPI_ISL_451974 | 4/3/2020  | 5/26/2020 | Europe / Poland / Malopolska / KrakÅ³w  |
| EPI_ISL_451975 | 3/31/2020 | 5/26/2020 | Europe / Poland / Malopolska / KrakÅ³w  |
| EPI_ISL_451976 | 4/7/2020  | 5/26/2020 | Europe / Poland / Malopolska / KrakÅ³w  |
| EPI_ISL_451977 | 4/3/2020  | 5/26/2020 | Europe / Poland / Malopolska / KrakÅ³w  |
| EPI_ISL_451978 | 4/1/2020  | 5/26/2020 | Europe / Poland / Malopolska / KrakÅ³w  |
| EPI_ISL_451979 | 3/31/2020 | 5/26/2020 | Europe / Poland / Malopolska / KrakÅ³w  |
| EPI_ISL_451980 | 4/2/2020  | 5/26/2020 | Europe / Poland / Malopolska / KrakÅ³w  |

|                |           |                                                  |
|----------------|-----------|--------------------------------------------------|
| EPI_ISL_451981 | 4/7/2020  | 5/26/2020 Europe / Poland / Malopolska / KrakÃ³w |
| EPI_ISL_451982 | 3/29/2020 | 5/26/2020 Europe / Poland / Malopolska / KrakÃ³w |
| EPI_ISL_451983 | 4/2/2020  | 5/26/2020 Europe / Poland / Malopolska           |
| EPI_ISL_451984 | 3/29/2020 | 5/26/2020 Europe / Poland / Malopolska / KrakÃ³w |
| EPI_ISL_451985 | 3/29/2020 | 5/26/2020 Europe / Poland / Malopolska / KrakÃ³w |
| EPI_ISL_451986 | 4/7/2020  | 5/26/2020 Europe / Poland / Malopolska / KrakÃ³w |
| EPI_ISL_451987 | 4/1/2020  | 5/26/2020 Europe / Poland / Malopolska / KrakÃ³w |
| EPI_ISL_451988 | 3/9/2020  | 5/26/2020 Europe / Denmark                       |
| EPI_ISL_451989 | 3/8/2020  | 5/26/2020 Europe / Denmark                       |
| EPI_ISL_451990 | 3/8/2020  | 5/26/2020 Europe / Denmark                       |
| EPI_ISL_451991 | 3/9/2020  | 5/26/2020 Europe / Denmark                       |
| EPI_ISL_451992 | 3/9/2020  | 5/26/2020 Europe / Denmark                       |
| EPI_ISL_451993 | 3/9/2020  | 5/26/2020 Europe / Denmark                       |
| EPI_ISL_451994 | 3/9/2020  | 5/26/2020 Europe / Denmark                       |
| EPI_ISL_451995 | 3/9/2020  | 5/26/2020 Europe / Denmark                       |
| EPI_ISL_451996 | 3/9/2020  | 5/26/2020 Europe / Denmark                       |
| EPI_ISL_451997 | 3/9/2020  | 5/26/2020 Europe / Denmark                       |
| EPI_ISL_451998 | 3/9/2020  | 5/26/2020 Europe / Denmark                       |
| EPI_ISL_451999 | 3/9/2020  | 5/26/2020 Europe / Denmark                       |
| EPI_ISL_452000 | 3/9/2020  | 5/26/2020 Europe / Denmark                       |
| EPI_ISL_452001 | 3/11/2020 | 5/26/2020 Europe / Denmark                       |
| EPI_ISL_452002 | 3/11/2020 | 5/26/2020 Europe / Denmark                       |
| EPI_ISL_452003 | 3/11/2020 | 5/26/2020 Europe / Denmark                       |
| EPI_ISL_452004 | 3/11/2020 | 5/26/2020 Europe / Denmark                       |
| EPI_ISL_452005 | 3/11/2020 | 5/26/2020 Europe / Denmark                       |
| EPI_ISL_452007 | 3/11/2020 | 5/26/2020 Europe / Denmark                       |
| EPI_ISL_452008 | 3/11/2020 | 5/26/2020 Europe / Denmark                       |
| EPI_ISL_452009 | 3/11/2020 | 5/26/2020 Europe / Denmark                       |
| EPI_ISL_452010 | 3/11/2020 | 5/26/2020 Europe / Denmark                       |
| EPI_ISL_452012 | 3/11/2020 | 5/26/2020 Europe / Denmark                       |
| EPI_ISL_452013 | 3/11/2020 | 5/26/2020 Europe / Denmark                       |
| EPI_ISL_452014 | 3/11/2020 | 5/26/2020 Europe / Denmark                       |
| EPI_ISL_452015 | 3/11/2020 | 5/26/2020 Europe / Denmark                       |
| EPI_ISL_452016 | 3/11/2020 | 5/26/2020 Europe / Denmark                       |
| EPI_ISL_452017 | 3/11/2020 | 5/26/2020 Europe / Denmark                       |
| EPI_ISL_452018 | 3/11/2020 | 5/26/2020 Europe / Denmark                       |
| EPI_ISL_452019 | 3/11/2020 | 5/26/2020 Europe / Denmark                       |
| EPI_ISL_452020 | 3/11/2020 | 5/26/2020 Europe / Denmark                       |
| EPI_ISL_452021 | 3/11/2020 | 5/26/2020 Europe / Denmark                       |
| EPI_ISL_452022 | 3/11/2020 | 5/26/2020 Europe / Denmark                       |
| EPI_ISL_452023 | 3/11/2020 | 5/26/2020 Europe / Denmark                       |
| EPI_ISL_452024 | 3/11/2020 | 5/26/2020 Europe / Denmark                       |
| EPI_ISL_452025 | 3/12/2020 | 5/26/2020 Europe / Denmark                       |
| EPI_ISL_452026 | 3/19/2020 | 5/26/2020 Europe / Denmark                       |
| EPI_ISL_452027 | 3/19/2020 | 5/26/2020 Europe / Denmark                       |
| EPI_ISL_452028 | 3/19/2020 | 5/26/2020 Europe / Denmark                       |
| EPI_ISL_452029 | 3/19/2020 | 5/26/2020 Europe / Denmark                       |





|                |           |                                                |
|----------------|-----------|------------------------------------------------|
| EPI_ISL_452089 | 4/26/2020 | 5/26/2020 Europe / Denmark                     |
| EPI_ISL_452090 | 4/26/2020 | 5/26/2020 Europe / Denmark                     |
| EPI_ISL_452091 | 4/26/2020 | 5/26/2020 Europe / Denmark                     |
| EPI_ISL_452092 | 4/14/2020 | 5/26/2020 Europe / Denmark                     |
| EPI_ISL_452093 | 4/14/2020 | 5/26/2020 Europe / Denmark                     |
| EPI_ISL_452094 | 4/14/2020 | 5/26/2020 Europe / Denmark                     |
| EPI_ISL_452098 | 5/9/2020  | 5/26/2020 Europe / Denmark                     |
| EPI_ISL_452099 | 3/3/2020  | 5/26/2020 Europe / Denmark                     |
| EPI_ISL_452100 | 3/7/2020  | 5/26/2020 Europe / Denmark                     |
| EPI_ISL_452101 | 3/27/2020 | 5/26/2020 Europe / Denmark                     |
| EPI_ISL_452102 | 3/19/2020 | 5/26/2020 Europe / Denmark                     |
| EPI_ISL_452103 | 3/25/2020 | 5/26/2020 Europe / Germany / Bavaria / Munich  |
| EPI_ISL_452104 | 4/4/2020  | 5/26/2020 Europe / Germany / Bavaria / Munich  |
| EPI_ISL_452105 | 3/10/2020 | 5/26/2020 North America / USA / Texas          |
| EPI_ISL_452106 | 3/10/2020 | 5/26/2020 North America / USA / Louisiana      |
| EPI_ISL_452107 | 3/10/2020 | 5/26/2020 North America / USA / Louisiana      |
| EPI_ISL_452108 | 3/10/2020 | 5/26/2020 North America / USA / Minnesota      |
| EPI_ISL_452109 | 3/9/2020  | 5/26/2020 North America / USA / New Mexico     |
| EPI_ISL_452110 | 3/9/2020  | 5/26/2020 North America / USA / Florida        |
| EPI_ISL_452111 | 3/9/2020  | 5/26/2020 North America / USA / Florida        |
| EPI_ISL_452112 | 3/10/2020 | 5/26/2020 North America / USA / Texas          |
| EPI_ISL_452113 | 3/10/2020 | 5/26/2020 North America / USA / Minnesota      |
| EPI_ISL_452114 | 3/10/2020 | 5/26/2020 North America / USA / Kansas         |
| EPI_ISL_452115 | 3/11/2020 | 5/26/2020 North America / USA / Texas          |
| EPI_ISL_452116 | 3/3/2020  | 5/26/2020 North America / USA / New Jersey     |
| EPI_ISL_452117 | 3/10/2020 | 5/26/2020 North America / USA / New Jersey     |
| EPI_ISL_452118 | 3/13/2020 | 5/26/2020 North America / USA / Arizona        |
| EPI_ISL_452119 | 3/17/2020 | 5/26/2020 North America / USA / Virgin Islands |
| EPI_ISL_452120 | 3/21/2020 | 5/26/2020 North America / USA / Georgia        |
| EPI_ISL_452121 | 3/23/2020 | 5/26/2020 North America / USA / Virgin Islands |
| EPI_ISL_452122 | 3/23/2020 | 5/26/2020 North America / USA / Virgin Islands |
| EPI_ISL_452123 | 3/23/2020 | 5/26/2020 North America / USA / Virgin Islands |
| EPI_ISL_452124 | 3/3/2020  | 5/26/2020 North America / USA / North Carolina |
| EPI_ISL_452125 | 3/7/2020  | 5/26/2020 North America / USA / Georgia        |
| EPI_ISL_452126 | 3/8/2020  | 5/26/2020 North America / USA / North Carolina |
| EPI_ISL_452127 | 3/7/2020  | 5/26/2020 North America / USA / Colorado       |
| EPI_ISL_452128 | 3/8/2020  | 5/26/2020 North America / USA / Colorado       |
| EPI_ISL_452129 | 3/9/2020  | 5/26/2020 North America / USA / Colorado       |
| EPI_ISL_452130 | 3/7/2020  | 5/26/2020 North America / USA / Colorado       |
| EPI_ISL_452131 | 3/9/2020  | 5/26/2020 North America / USA / Indiana        |
| EPI_ISL_452132 | 3/9/2020  | 5/26/2020 North America / USA / Florida        |
| EPI_ISL_452133 | 3/10/2020 | 5/26/2020 North America / USA / Minnesota      |
| EPI_ISL_452134 | 3/5/2020  | 5/26/2020 North America / USA / Illinois       |
| EPI_ISL_452135 | 3/9/2020  | 5/26/2020 North America / USA / Indiana        |
| EPI_ISL_452136 | 3/9/2020  | 5/26/2020 North America / USA / Indiana        |
| EPI_ISL_452137 | 4/28/2020 | 5/26/2020 North America / USA / Virgin Islands |
| EPI_ISL_452138 | 5/5/2020  | 5/26/2020 North America / USA / Virgin Islands |

|                |           |                                                    |
|----------------|-----------|----------------------------------------------------|
| EPI_ISL_452139 | 2/28/2020 | 5/26/2020 North America / Mexico / State of Mexico |
| EPI_ISL_452140 | 4/3/2020  | 5/26/2020 Europe / Belgium / Brussels              |
| EPI_ISL_452142 | 3/30/2020 | 5/26/2020 Europe / Belgium / Brussels              |
| EPI_ISL_452145 | 5/12/2020 | 5/26/2020 North America / USA / Connecticut        |
| EPI_ISL_452148 | 4/1/2020  | 5/26/2020 Europe / Belgium / Brussels              |
| EPI_ISL_452149 | 4/9/2020  | 5/26/2020 Europe / Belgium / Brussels              |
| EPI_ISL_452150 | 4/10/2020 | 5/26/2020 Europe / Belgium / Brussels              |
| EPI_ISL_452151 | 4/14/2020 | 5/26/2020 Europe / Belgium / Brussels              |
| EPI_ISL_452152 | 4/20/2020 | 5/26/2020 Europe / Belgium / Brussels              |
| EPI_ISL_460097 | 3/22/2020 | 5/26/2020 North America / USA / Massachusetts      |
| EPI_ISL_460098 | 4/1/2020  | 5/26/2020 North America / USA / Massachusetts      |
| EPI_ISL_460099 | 4/4/2020  | 5/26/2020 North America / USA / Massachusetts      |
| EPI_ISL_460101 | 3/25/2020 | 5/26/2020 North America / USA / Massachusetts      |
| EPI_ISL_460102 | 3/25/2020 | 5/26/2020 North America / USA / Massachusetts      |
| EPI_ISL_460103 | 3/7/2020  | 5/26/2020 North America / USA / Massachusetts      |
| EPI_ISL_460104 | 3/24/2020 | 5/26/2020 North America / USA / Massachusetts      |
| EPI_ISL_460105 | 3/25/2020 | 5/26/2020 North America / USA / Massachusetts      |
| EPI_ISL_460106 | 4/7/2020  | 5/26/2020 North America / USA / Massachusetts      |
| EPI_ISL_460107 | 3/26/2020 | 5/26/2020 North America / USA / Massachusetts      |
| EPI_ISL_460108 | 3/27/2020 | 5/26/2020 North America / USA / Massachusetts      |
| EPI_ISL_460109 | 3/25/2020 | 5/26/2020 North America / USA / Massachusetts      |
| EPI_ISL_460110 | 3/27/2020 | 5/26/2020 North America / USA / Massachusetts      |
| EPI_ISL_460111 | 3/25/2020 | 5/26/2020 North America / USA / Massachusetts      |
| EPI_ISL_460112 | 4/7/2020  | 5/26/2020 North America / USA / Massachusetts      |
| EPI_ISL_460114 | 3/26/2020 | 5/26/2020 North America / USA / Massachusetts      |
| EPI_ISL_460115 | 3/28/2020 | 5/26/2020 North America / USA / Massachusetts      |
| EPI_ISL_460116 | 3/4/2020  | 5/26/2020 North America / USA / Massachusetts      |
| EPI_ISL_460117 | 3/7/2020  | 5/26/2020 North America / USA / Massachusetts      |
| EPI_ISL_460118 | 3/22/2020 | 5/26/2020 North America / USA / Massachusetts      |
| EPI_ISL_460119 | 3/25/2020 | 5/26/2020 North America / USA / Massachusetts      |
| EPI_ISL_460120 | 4/1/2020  | 5/26/2020 North America / USA / Massachusetts      |
| EPI_ISL_460121 | 4/6/2020  | 5/26/2020 North America / USA / Massachusetts      |
| EPI_ISL_460122 | 3/25/2020 | 5/26/2020 North America / USA / Massachusetts      |
| EPI_ISL_460123 | 4/8/2020  | 5/26/2020 North America / USA / Massachusetts      |
| EPI_ISL_460124 | 3/26/2020 | 5/26/2020 North America / USA / Massachusetts      |
| EPI_ISL_460125 | 3/22/2020 | 5/26/2020 North America / USA / Massachusetts      |
| EPI_ISL_460126 | 3/25/2020 | 5/26/2020 North America / USA / Massachusetts      |
| EPI_ISL_460128 | 3/25/2020 | 5/26/2020 North America / USA / Massachusetts      |
| EPI_ISL_460129 | 3/28/2020 | 5/26/2020 North America / USA / Massachusetts      |
| EPI_ISL_460130 | 4/7/2020  | 5/26/2020 North America / USA / Massachusetts      |
| EPI_ISL_460131 | 4/1/2020  | 5/26/2020 North America / USA / Massachusetts      |
| EPI_ISL_460132 | 4/6/2020  | 5/26/2020 North America / USA / Massachusetts      |
| EPI_ISL_460133 | 4/1/2020  | 5/26/2020 North America / USA / Massachusetts      |
| EPI_ISL_460134 | 3/28/2020 | 5/26/2020 North America / USA / Massachusetts      |
| EPI_ISL_460135 | 4/3/2020  | 5/26/2020 North America / USA / Massachusetts      |
| EPI_ISL_460137 | 3/28/2020 | 5/26/2020 North America / USA / Massachusetts      |
| EPI_ISL_460138 | 3/20/2020 | 5/26/2020 North America / USA / Massachusetts      |









|                |           |           |                                     |
|----------------|-----------|-----------|-------------------------------------|
| EPI_ISL_460351 | 4/4/2020  | 5/26/2020 | North America / USA / Massachusetts |
| EPI_ISL_460352 | 4/1/2020  | 5/26/2020 | North America / USA / Massachusetts |
| EPI_ISL_460353 | 3/7/2020  | 5/26/2020 | North America / USA / Massachusetts |
| EPI_ISL_460354 | 3/8/2020  | 5/26/2020 | North America / USA / Massachusetts |
| EPI_ISL_460356 | 4/4/2020  | 5/26/2020 | North America / USA / Massachusetts |
| EPI_ISL_460357 | 4/6/2020  | 5/26/2020 | North America / USA / Massachusetts |
| EPI_ISL_460358 | 4/6/2020  | 5/26/2020 | North America / USA / Massachusetts |
| EPI_ISL_460359 | 3/26/2020 | 5/26/2020 | North America / USA / Massachusetts |
| EPI_ISL_460360 | 4/6/2020  | 5/26/2020 | North America / USA / Massachusetts |
| EPI_ISL_460361 | 4/4/2020  | 5/26/2020 | North America / USA / Massachusetts |
| EPI_ISL_460362 | 3/27/2020 | 5/26/2020 | North America / USA / Massachusetts |
| EPI_ISL_460364 | 3/25/2020 | 5/26/2020 | North America / USA / Massachusetts |
| EPI_ISL_460365 | 4/6/2020  | 5/26/2020 | North America / USA / Massachusetts |
| EPI_ISL_460366 | 3/7/2020  | 5/26/2020 | North America / USA / Massachusetts |
| EPI_ISL_460368 | 3/26/2020 | 5/26/2020 | North America / USA / Massachusetts |
| EPI_ISL_460369 | 3/25/2020 | 5/26/2020 | North America / USA / Massachusetts |
| EPI_ISL_460370 | 4/6/2020  | 5/26/2020 | North America / USA / Massachusetts |
| EPI_ISL_460371 | 3/7/2020  | 5/26/2020 | North America / USA / Massachusetts |
| EPI_ISL_460372 | 3/26/2020 | 5/26/2020 | North America / USA / Massachusetts |
| EPI_ISL_460373 | 4/6/2020  | 5/26/2020 | North America / USA / Massachusetts |
| EPI_ISL_460376 | 3/28/2020 | 5/26/2020 | North America / USA / Massachusetts |
| EPI_ISL_460377 | 4/3/2020  | 5/26/2020 | North America / USA / Massachusetts |
| EPI_ISL_460378 | 4/6/2020  | 5/26/2020 | North America / USA / Massachusetts |
| EPI_ISL_460379 | 4/1/2020  | 5/26/2020 | North America / USA / Massachusetts |
| EPI_ISL_460380 | 3/22/2020 | 5/26/2020 | North America / USA / Massachusetts |
| EPI_ISL_460381 | 3/18/2020 | 5/26/2020 | North America / USA / Massachusetts |
| EPI_ISL_460382 | 3/28/2020 | 5/26/2020 | North America / USA / Massachusetts |
| EPI_ISL_460383 | 4/4/2020  | 5/26/2020 | North America / USA / Massachusetts |
| EPI_ISL_460384 | 3/7/2020  | 5/26/2020 | North America / USA / Massachusetts |
| EPI_ISL_460385 | 4/4/2020  | 5/26/2020 | North America / USA / Massachusetts |
| EPI_ISL_460386 | 4/2/2020  | 5/26/2020 | North America / USA / Massachusetts |
| EPI_ISL_460388 | 3/21/2020 | 5/26/2020 | North America / USA / Massachusetts |
| EPI_ISL_460389 | 4/6/2020  | 5/26/2020 | North America / USA / Massachusetts |
| EPI_ISL_460390 | 4/4/2020  | 5/26/2020 | North America / USA / Massachusetts |
| EPI_ISL_460391 | 3/23/2020 | 5/26/2020 | North America / USA / Massachusetts |
| EPI_ISL_460392 | 4/4/2020  | 5/26/2020 | North America / USA / Massachusetts |
| EPI_ISL_460394 | 3/26/2020 | 5/26/2020 | North America / USA / Massachusetts |
| EPI_ISL_460396 | 3/28/2020 | 5/26/2020 | North America / USA / Massachusetts |
| EPI_ISL_460397 | 3/7/2020  | 5/26/2020 | North America / USA / Massachusetts |
| EPI_ISL_460398 | 3/11/2020 | 5/26/2020 | North America / USA / Massachusetts |
| EPI_ISL_460399 | 3/20/2020 | 5/26/2020 | North America / USA / Massachusetts |
| EPI_ISL_460400 | 3/27/2020 | 5/26/2020 | North America / USA / Massachusetts |
| EPI_ISL_460402 | 4/3/2020  | 5/26/2020 | North America / USA / Massachusetts |
| EPI_ISL_460403 | 4/6/2020  | 5/26/2020 | North America / USA / Massachusetts |
| EPI_ISL_460404 | 4/6/2020  | 5/26/2020 | North America / USA / Massachusetts |
| EPI_ISL_460406 | 3/20/2020 | 5/26/2020 | North America / USA / Massachusetts |
| EPI_ISL_460407 | 4/6/2020  | 5/26/2020 | North America / USA / Massachusetts |

|                |           |           |                                     |
|----------------|-----------|-----------|-------------------------------------|
| EPI_ISL_460408 | 4/1/2020  | 5/26/2020 | North America / USA / Massachusetts |
| EPI_ISL_460409 | 3/26/2020 | 5/26/2020 | North America / USA / Massachusetts |
| EPI_ISL_460410 | 3/27/2020 | 5/26/2020 | North America / USA / Massachusetts |
| EPI_ISL_460411 | 3/25/2020 | 5/26/2020 | North America / USA / Massachusetts |
| EPI_ISL_460412 | 4/3/2020  | 5/26/2020 | North America / USA / Massachusetts |
| EPI_ISL_460413 | 3/18/2020 | 5/26/2020 | North America / USA / Massachusetts |
| EPI_ISL_460414 | 4/6/2020  | 5/26/2020 | North America / USA / Massachusetts |
| EPI_ISL_460415 | 3/14/2020 | 5/26/2020 | North America / USA / Massachusetts |
| EPI_ISL_460417 | 3/26/2020 | 5/26/2020 | North America / USA / Massachusetts |
| EPI_ISL_460418 | 4/5/2020  | 5/26/2020 | North America / USA / Massachusetts |
| EPI_ISL_460419 | 4/2/2020  | 5/26/2020 | North America / USA / Massachusetts |
| EPI_ISL_460420 | 4/4/2020  | 5/26/2020 | North America / USA / Massachusetts |
| EPI_ISL_460421 | 3/25/2020 | 5/26/2020 | North America / USA / Massachusetts |
| EPI_ISL_460422 | 4/6/2020  | 5/26/2020 | North America / USA / Massachusetts |
| EPI_ISL_460423 | 3/22/2020 | 5/26/2020 | North America / USA / Massachusetts |
| EPI_ISL_460425 | 3/27/2020 | 5/26/2020 | North America / USA / Massachusetts |
| EPI_ISL_460426 | 3/28/2020 | 5/26/2020 | North America / USA / Massachusetts |
| EPI_ISL_460427 | 3/27/2020 | 5/26/2020 | North America / USA / Massachusetts |
| EPI_ISL_460428 | 3/5/2020  | 5/26/2020 | North America / USA / Massachusetts |
| EPI_ISL_460429 | 4/6/2020  | 5/26/2020 | North America / USA / Massachusetts |
| EPI_ISL_460430 | 4/1/2020  | 5/26/2020 | North America / USA / Massachusetts |
| EPI_ISL_460431 | 4/5/2020  | 5/26/2020 | North America / USA / Massachusetts |
| EPI_ISL_460432 | 4/1/2020  | 5/26/2020 | North America / USA / Massachusetts |
| EPI_ISL_460433 | 3/25/2020 | 5/26/2020 | North America / USA / Massachusetts |
| EPI_ISL_460434 | 3/7/2020  | 5/26/2020 | North America / USA / Massachusetts |
| EPI_ISL_460435 | 4/6/2020  | 5/26/2020 | North America / USA / Massachusetts |
| EPI_ISL_460436 | 3/19/2020 | 5/26/2020 | North America / USA / Massachusetts |
| EPI_ISL_460437 | 3/27/2020 | 5/26/2020 | North America / USA / Massachusetts |
| EPI_ISL_460440 | 3/11/2020 | 5/26/2020 | North America / USA / Massachusetts |
| EPI_ISL_460441 | 4/4/2020  | 5/26/2020 | North America / USA / Massachusetts |
| EPI_ISL_460442 | 3/7/2020  | 5/26/2020 | North America / USA / Massachusetts |
| EPI_ISL_460443 | 4/2/2020  | 5/26/2020 | North America / USA / Massachusetts |
| EPI_ISL_460444 | 3/23/2020 | 5/26/2020 | North America / USA / Massachusetts |
| EPI_ISL_460445 | 3/27/2020 | 5/26/2020 | North America / USA / Massachusetts |
| EPI_ISL_460446 | 3/23/2020 | 5/26/2020 | North America / USA / Massachusetts |
| EPI_ISL_460447 | 3/26/2020 | 5/26/2020 | North America / USA / Massachusetts |
| EPI_ISL_460448 | 3/25/2020 | 5/26/2020 | North America / USA / Massachusetts |
| EPI_ISL_460450 | 4/6/2020  | 5/26/2020 | North America / USA / Massachusetts |
| EPI_ISL_460451 | 3/26/2020 | 5/26/2020 | North America / USA / Massachusetts |
| EPI_ISL_460453 | 3/26/2020 | 5/26/2020 | North America / USA / Massachusetts |
| EPI_ISL_460454 | 4/4/2020  | 5/26/2020 | North America / USA / Massachusetts |
| EPI_ISL_460455 | 4/6/2020  | 5/26/2020 | North America / USA / Massachusetts |
| EPI_ISL_460456 | 3/20/2020 | 5/26/2020 | North America / USA / Massachusetts |
| EPI_ISL_460457 | 3/26/2020 | 5/26/2020 | North America / USA / Massachusetts |
| EPI_ISL_460458 | 3/18/2020 | 5/26/2020 | North America / USA / Massachusetts |
| EPI_ISL_460459 | 3/27/2020 | 5/26/2020 | North America / USA / Massachusetts |
| EPI_ISL_460460 | 3/19/2020 | 5/26/2020 | North America / USA / Massachusetts |



|                |           |                                               |
|----------------|-----------|-----------------------------------------------|
| EPI_ISL_460461 | 4/1/2020  | 5/26/2020 North America / USA / Massachusetts |
| EPI_ISL_460462 | 3/26/2020 | 5/26/2020 North America / USA / Massachusetts |
| EPI_ISL_460463 | 4/1/2020  | 5/26/2020 North America / USA / Massachusetts |
| EPI_ISL_460464 | 4/1/2020  | 5/26/2020 North America / USA / Massachusetts |
| EPI_ISL_460465 | 3/22/2020 | 5/26/2020 North America / USA / Massachusetts |
| EPI_ISL_460466 | 3/26/2020 | 5/26/2020 North America / USA / Massachusetts |
| EPI_ISL_460467 | 3/11/2020 | 5/26/2020 North America / USA / Massachusetts |
| EPI_ISL_460468 | 3/27/2020 | 5/26/2020 North America / USA / Massachusetts |
| EPI_ISL_460469 | 3/25/2020 | 5/26/2020 North America / USA / Massachusetts |
| EPI_ISL_460470 | 3/25/2020 | 5/26/2020 North America / USA / Massachusetts |
| EPI_ISL_460471 | 3/27/2020 | 5/26/2020 North America / USA / Massachusetts |
| EPI_ISL_460472 | 3/11/2020 | 5/26/2020 North America / USA / Massachusetts |
| EPI_ISL_468058 | 5/2/2020  | 5/26/2020 Africa / Egypt                      |
| EPI_ISL_468059 | 5/2/2020  | 5/26/2020 Africa / Egypt                      |
| EPI_ISL_468060 | 5/2/2020  | 5/26/2020 Africa / Egypt                      |
| EPI_ISL_468061 | 5/2/2020  | 5/26/2020 Africa / Egypt                      |
| EPI_ISL_452154 | 4/10/2020 | 5/27/2020 North America / USA / Utah          |
| EPI_ISL_452157 | 4/10/2020 | 5/27/2020 North America / USA / Utah          |
| EPI_ISL_452158 | 4/10/2020 | 5/27/2020 North America / USA / Utah          |
| EPI_ISL_452161 | 4/13/2020 | 5/27/2020 North America / USA / Utah          |
| EPI_ISL_452163 | 4/15/2020 | 5/27/2020 North America / USA / Utah          |
| EPI_ISL_452166 | 4/16/2020 | 5/27/2020 North America / USA / Utah          |
| EPI_ISL_452167 | 4/16/2020 | 5/27/2020 North America / USA / Utah          |
| EPI_ISL_452168 | 4/16/2020 | 5/27/2020 North America / USA / Utah          |
| EPI_ISL_452169 | 4/16/2020 | 5/27/2020 North America / USA / Utah          |
| EPI_ISL_452171 | 4/16/2020 | 5/27/2020 North America / USA / Utah          |
| EPI_ISL_452172 | 4/16/2020 | 5/27/2020 North America / USA / Utah          |
| EPI_ISL_452173 | 4/16/2020 | 5/27/2020 North America / USA / Utah          |
| EPI_ISL_452176 | 4/16/2020 | 5/27/2020 North America / USA / Utah          |
| EPI_ISL_452178 | 4/19/2020 | 5/27/2020 Asia / Taiwan / Taoyuan             |
| EPI_ISL_452179 | 4/19/2020 | 5/27/2020 Asia / Taiwan / Taoyuan             |
| EPI_ISL_452181 | 3/22/2020 | 5/27/2020 Europe / Italy / Veneto / Verona    |
| EPI_ISL_452182 | 3/23/2020 | 5/27/2020 Europe / Italy / Veneto / Verona    |
| EPI_ISL_452183 | 3/24/2020 | 5/27/2020 Europe / Italy / Veneto / Verona    |
| EPI_ISL_452184 | 3/24/2020 | 5/27/2020 Europe / Italy / Veneto / Verona    |
| EPI_ISL_452185 | 3/26/2020 | 5/27/2020 Europe / Italy / Veneto / Verona    |
| EPI_ISL_452186 | 3/28/2020 | 5/27/2020 Europe / Italy / Veneto / Verona    |
| EPI_ISL_452187 | 3/31/2020 | 5/27/2020 Europe / Italy / Veneto / Verona    |
| EPI_ISL_452188 | 3/31/2020 | 5/27/2020 Europe / Italy / Veneto / Verona    |
| EPI_ISL_452189 | 4/1/2020  | 5/27/2020 Europe / Italy / Veneto / Verona    |
| EPI_ISL_452190 | 4/3/2020  | 5/27/2020 Europe / Italy / Veneto / Verona    |
| EPI_ISL_452191 | 4/3/2020  | 5/27/2020 Europe / Italy / Veneto / Verona    |
| EPI_ISL_452192 | 4/16/2020 | 5/27/2020 Asia / India / Maharashtra          |
| EPI_ISL_452193 | 4/16/2020 | 5/27/2020 Asia / India / Maharashtra          |
| EPI_ISL_452194 | 4/19/2020 | 5/27/2020 Asia / India / Maharashtra          |
| EPI_ISL_452195 | 4/19/2020 | 5/27/2020 Asia / India / Maharashtra          |
| EPI_ISL_452196 | 4/19/2020 | 5/27/2020 Asia / India / Maharashtra          |

|                |           |                                                |
|----------------|-----------|------------------------------------------------|
| EPI_ISL_452197 | 4/19/2020 | 5/27/2020 Asia / India / Maharashtra           |
| EPI_ISL_452198 | 4/20/2020 | 5/27/2020 Asia / India / Maharashtra           |
| EPI_ISL_452199 | 4/20/2020 | 5/27/2020 Asia / India / Maharashtra           |
| EPI_ISL_452200 | 4/20/2020 | 5/27/2020 Asia / India / Maharashtra           |
| EPI_ISL_452201 | 4/20/2020 | 5/27/2020 Asia / India / Maharashtra           |
| EPI_ISL_452202 | 3/16/2020 | 5/27/2020 Asia / India / Maharashtra           |
| EPI_ISL_452203 | 3/22/2020 | 5/27/2020 Asia / India / Maharashtra           |
| EPI_ISL_452204 | 3/26/2020 | 5/27/2020 Asia / India / Maharashtra           |
| EPI_ISL_452205 | 3/26/2020 | 5/27/2020 Asia / India / Maharashtra           |
| EPI_ISL_452206 | 3/30/2020 | 5/27/2020 Asia / India / Maharashtra           |
| EPI_ISL_452207 | 4/5/2020  | 5/27/2020 Asia / India / Maharashtra           |
| EPI_ISL_452208 | 4/5/2020  | 5/27/2020 Asia / India / Maharashtra           |
| EPI_ISL_452209 | 4/6/2020  | 5/27/2020 Asia / India / Maharashtra           |
| EPI_ISL_452210 | 4/6/2020  | 5/27/2020 Asia / India / Maharashtra           |
| EPI_ISL_452211 | 4/13/2020 | 5/27/2020 Asia / India / Maharashtra           |
| EPI_ISL_452212 | 4/15/2020 | 5/27/2020 Asia / India / Maharashtra           |
| EPI_ISL_452213 | 3/10/2020 | 5/27/2020 Asia / India / Maharashtra           |
| EPI_ISL_452214 | 4/7/2020  | 5/27/2020 Asia / India / Maharashtra           |
| EPI_ISL_452215 | 4/22/2020 | 5/27/2020 Asia / India / Maharashtra           |
| EPI_ISL_452216 | 4/27/2020 | 5/27/2020 Asia / India / Maharashtra           |
| EPI_ISL_452217 | 4/26/2020 | 5/27/2020 Asia / India / Maharashtra           |
| EPI_ISL_452218 | 3/2/2020  | 5/27/2020 Europe / Germany / Hesse / Frankfurt |
| EPI_ISL_452219 | 3/2/2020  | 5/27/2020 Europe / Germany / Hesse / Frankfurt |
| EPI_ISL_452220 | 3/2/2020  | 5/27/2020 Europe / Germany / Hesse / Frankfurt |
| EPI_ISL_452221 | 3/2/2020  | 5/27/2020 Europe / Germany / Hesse / Frankfurt |
| EPI_ISL_452222 | 3/2/2020  | 5/27/2020 Europe / Germany / Hesse / Frankfurt |
| EPI_ISL_452223 | 3/2/2020  | 5/27/2020 Europe / Germany / Hesse / Frankfurt |
| EPI_ISL_452229 | 3/16/2020 | 5/27/2020 Europe / Sweden / Vastra Gotaland    |
| EPI_ISL_452230 | 3/23/2020 | 5/27/2020 Europe / Sweden / Vastra Gotaland    |
| EPI_ISL_452231 | 3/23/2020 | 5/27/2020 Europe / Sweden / Halland            |
| EPI_ISL_452232 | 3/23/2020 | 5/27/2020 Europe / Sweden / Halland            |
| EPI_ISL_452233 | 3/23/2020 | 5/27/2020 Europe / Sweden / Skane              |
| EPI_ISL_452234 | 4/1/2020  | 5/27/2020 Europe / Sweden / Vastra Gotaland    |
| EPI_ISL_452235 | 4/15/2020 | 5/27/2020 Europe / Sweden / Vastra Gotaland    |
| EPI_ISL_452236 | 4/14/2020 | 5/27/2020 Europe / Sweden / Skane              |
| EPI_ISL_452237 | 4/23/2020 | 5/27/2020 Europe / Sweden / Stockholm          |
| EPI_ISL_452238 | 4/27/2020 | 5/27/2020 Europe / Sweden / Vastra Gotaland    |
| EPI_ISL_452239 | 4/25/2020 | 5/27/2020 Europe / Sweden / Vastra Gotaland    |
| EPI_ISL_452240 | 4/24/2020 | 5/27/2020 Europe / Sweden / Stockholm          |
| EPI_ISL_452241 | 4/24/2020 | 5/27/2020 Europe / Sweden / Halland            |
| EPI_ISL_452242 | 5/4/2020  | 5/27/2020 Europe / Sweden / Vastra Gotaland    |
| EPI_ISL_452251 | 3/3/2020  | 5/27/2020 Europe / United Kingdom / England    |
| EPI_ISL_452252 | 3/3/2020  | 5/27/2020 Europe / United Kingdom / England    |
| EPI_ISL_452254 | 3/4/2020  | 5/27/2020 Europe / United Kingdom / England    |
| EPI_ISL_452256 | 3/5/2020  | 5/27/2020 Europe / United Kingdom / England    |
| EPI_ISL_452257 | 3/5/2020  | 5/27/2020 Europe / United Kingdom / England    |
| EPI_ISL_452262 | 5/1/2020  | 5/27/2020 North America / USA / Michigan       |



|                |           |                                                     |
|----------------|-----------|-----------------------------------------------------|
| EPI_ISL_452331 | 3/12/2020 | 5/27/2020 Asia / China / Beijing                    |
| EPI_ISL_452332 | 2/29/2020 | 5/27/2020 Asia / China / Beijing                    |
| EPI_ISL_452333 | 3/12/2020 | 5/27/2020 Asia / China / Beijing                    |
| EPI_ISL_452334 | 3/19/2020 | 5/27/2020 Asia / China / Beijing                    |
| EPI_ISL_452335 | 3/16/2020 | 5/27/2020 Asia / China / Beijing                    |
| EPI_ISL_452336 | 3/20/2020 | 5/27/2020 Asia / China / Beijing                    |
| EPI_ISL_452337 | 3/24/2020 | 5/27/2020 Asia / China / Beijing                    |
| EPI_ISL_452338 | 3/19/2020 | 5/27/2020 Asia / China / Beijing                    |
| EPI_ISL_452339 | 3/22/2020 | 5/27/2020 Asia / China / Beijing                    |
| EPI_ISL_452340 | 3/19/2020 | 5/27/2020 Asia / China / Beijing                    |
| EPI_ISL_452341 | 3/22/2020 | 5/27/2020 Asia / China / Beijing                    |
| EPI_ISL_452342 | 3/12/2020 | 5/27/2020 Asia / China / Beijing                    |
| EPI_ISL_452343 | 3/16/2020 | 5/27/2020 Asia / China / Beijing                    |
| EPI_ISL_452344 | 3/12/2020 | 5/27/2020 Asia / China / Beijing                    |
| EPI_ISL_452345 | 3/7/2020  | 5/27/2020 Asia / China / Beijing                    |
| EPI_ISL_452346 | 3/19/2020 | 5/27/2020 Asia / China / Beijing                    |
| EPI_ISL_452347 | 3/15/2020 | 5/27/2020 Asia / China / Beijing                    |
| EPI_ISL_452348 | 3/18/2020 | 5/27/2020 Asia / China / Beijing                    |
| EPI_ISL_452349 | 3/19/2020 | 5/27/2020 Asia / China / Beijing                    |
| EPI_ISL_452350 | 3/20/2020 | 5/27/2020 Asia / China / Beijing                    |
| EPI_ISL_452351 | 3/4/2020  | 5/27/2020 Asia / China / Beijing                    |
| EPI_ISL_452352 | 3/5/2020  | 5/27/2020 Asia / China / Beijing                    |
| EPI_ISL_452353 | 3/6/2020  | 5/27/2020 Asia / China / Beijing                    |
| EPI_ISL_452354 | 3/7/2020  | 5/27/2020 Asia / China / Beijing                    |
| EPI_ISL_452355 | 3/22/2020 | 5/27/2020 Asia / China / Beijing                    |
| EPI_ISL_452356 | 3/21/2020 | 5/27/2020 Asia / China / Beijing                    |
| EPI_ISL_452357 | 2/4/2020  | 5/27/2020 Asia / China / Beijing                    |
| EPI_ISL_452358 | 2/11/2020 | 5/27/2020 Asia / China / Beijing                    |
| EPI_ISL_452359 | 2/8/2020  | 5/27/2020 Asia / China / Beijing                    |
| EPI_ISL_452360 | 2/1/2020  | 5/27/2020 Asia / China / Beijing                    |
| EPI_ISL_452361 | 2/11/2020 | 5/27/2020 Asia / China / Beijing                    |
| EPI_ISL_452362 | 2/1/2020  | 5/27/2020 Asia / China / Beijing                    |
| EPI_ISL_452363 | 1/31/2020 | 5/27/2020 Asia / China / Beijing                    |
| EPI_ISL_452364 | 2/5/2020  | 5/27/2020 Asia / China / Beijing                    |
| EPI_ISL_452367 | 4/6/2020  | 5/27/2020 Europe / Spain / Andalusia / Malaga       |
| EPI_ISL_452371 | 4/1/2020  | 5/27/2020 Europe / Spain / Andalusia / Malaga       |
| EPI_ISL_452372 | 3/28/2020 | 5/27/2020 Europe / Spain / Andalusia / Malaga       |
| EPI_ISL_452374 | 3/15/2020 | 5/27/2020 Europe / Spain / Andalusia / Velez Malaga |
| EPI_ISL_452379 | 3/16/2020 | 5/27/2020 Europe / Spain / Andalusia / Malaga       |
| EPI_ISL_452380 | 3/16/2020 | 5/27/2020 Europe / Spain / Andalusia / Malaga       |
| EPI_ISL_452381 | 3/16/2020 | 5/27/2020 Europe / Spain / Andalusia / Velez Malaga |
| EPI_ISL_452383 | 3/16/2020 | 5/27/2020 Europe / Spain / Andalusia / Malaga       |
| EPI_ISL_452385 | 3/16/2020 | 5/27/2020 Europe / Spain / Andalusia / Malaga       |
| EPI_ISL_452387 | 3/17/2020 | 5/27/2020 Europe / Spain / Andalusia / Malaga       |
| EPI_ISL_452392 | 3/17/2020 | 5/27/2020 Europe / Spain / Andalusia / Velez Malaga |
| EPI_ISL_452394 | 3/17/2020 | 5/27/2020 Europe / Spain / Andalusia / Benajarafe   |
| EPI_ISL_452396 | 3/14/2020 | 5/27/2020 Europe / Spain / Andalusia / Malaga       |

|                |           |           |                                                   |
|----------------|-----------|-----------|---------------------------------------------------|
| EPI_ISL_452397 | 3/16/2020 | 5/27/2020 | Europe / Spain / Andalusia / Malaga               |
| EPI_ISL_452398 | 3/16/2020 | 5/27/2020 | Europe / Spain / Andalusia / Malaga               |
| EPI_ISL_452400 | 3/15/2020 | 5/27/2020 | Europe / Spain / Andalusia / Malaga               |
| EPI_ISL_452402 | 3/15/2020 | 5/27/2020 | Europe / Spain / Andalusia / Malaga               |
| EPI_ISL_452404 | 3/15/2020 | 5/27/2020 | Europe / Spain / Andalusia / Malaga               |
| EPI_ISL_452405 | 3/15/2020 | 5/27/2020 | Europe / Spain / Andalusia / Malaga               |
| EPI_ISL_452406 | 3/15/2020 | 5/27/2020 | Europe / Spain / Andalusia / Malaga               |
| EPI_ISL_452407 | 3/15/2020 | 5/27/2020 | Europe / Spain / Andalusia / Malaga               |
| EPI_ISL_452409 | 3/14/2020 | 5/27/2020 | Europe / Spain / Andalusia / Malaga               |
| EPI_ISL_452410 | 3/14/2020 | 5/27/2020 | Europe / Spain / Andalusia / Malaga               |
| EPI_ISL_452411 | 3/14/2020 | 5/27/2020 | Europe / Spain / Andalusia / Malaga               |
| EPI_ISL_452413 | 3/14/2020 | 5/27/2020 | Europe / Spain / Andalusia / Almeria              |
| EPI_ISL_452414 | 3/14/2020 | 5/27/2020 | Europe / Spain / Andalusia / Malaga               |
| EPI_ISL_452426 | 3/13/2020 | 5/27/2020 | Europe / Spain / Andalusia / Malaga               |
| EPI_ISL_452429 | 3/13/2020 | 5/27/2020 | Europe / Spain / Andalusia / Malaga               |
| EPI_ISL_452430 | 3/13/2020 | 5/27/2020 | Europe / Spain / Andalusia / Malaga               |
| EPI_ISL_452432 | 3/13/2020 | 5/27/2020 | Europe / Spain / Andalusia / Malaga               |
| EPI_ISL_452433 | 3/13/2020 | 5/27/2020 | Europe / Spain / Andalusia / Malaga               |
| EPI_ISL_452434 | 3/12/2020 | 5/27/2020 | Europe / Spain / Andalusia / Malaga               |
| EPI_ISL_452436 | 3/12/2020 | 5/27/2020 | Europe / Spain / Andalusia / Cadiz                |
| EPI_ISL_452439 | 3/12/2020 | 5/27/2020 | Europe / Spain / Andalusia / Malaga               |
| EPI_ISL_452441 | 3/12/2020 | 5/27/2020 | Europe / Spain / Andalusia / Malaga               |
| EPI_ISL_452443 | 3/11/2020 | 5/27/2020 | Europe / Spain / Andalusia / Malaga               |
| EPI_ISL_452444 | 3/9/2020  | 5/27/2020 | Europe / Spain / Comunitat Valenciana / Chilches  |
| EPI_ISL_452447 | 3/11/2020 | 5/27/2020 | Europe / Spain / Andalusia / Malaga               |
| EPI_ISL_452448 | 3/11/2020 | 5/27/2020 | Europe / Spain / Andalusia / Malaga               |
| EPI_ISL_452449 | 3/11/2020 | 5/27/2020 | Europe / Spain / Andalusia / Alhaurin de la Torre |
| EPI_ISL_452452 | 3/7/2020  | 5/27/2020 | Europe / Spain / Andalusia / Malaga               |
| EPI_ISL_452453 | 3/15/2020 | 5/27/2020 | Europe / Spain / Andalusia / Conil                |
| EPI_ISL_452454 | 3/13/2020 | 5/27/2020 | Europe / Spain / Andalusia / San Fernando         |
| EPI_ISL_452457 | 3/13/2020 | 5/27/2020 | Europe / Spain / Andalusia / Algeciras            |
| EPI_ISL_452459 | 3/13/2020 | 5/27/2020 | Europe / Spain / Andalusia / La Linea             |
| EPI_ISL_452460 | 3/13/2020 | 5/27/2020 | Europe / Spain / Andalusia / Algeciras            |
| EPI_ISL_452461 | 3/12/2020 | 5/27/2020 | Europe / Spain / Andalusia / Algeciras            |
| EPI_ISL_452462 | 3/12/2020 | 5/27/2020 | Europe / Spain / Andalusia / San Roque            |
| EPI_ISL_452464 | 3/12/2020 | 5/27/2020 | Europe / Spain / Andalusia / Cadiz                |
| EPI_ISL_452465 | 3/11/2020 | 5/27/2020 | Europe / Spain / Andalusia / Chiclana             |
| EPI_ISL_452466 | 3/11/2020 | 5/27/2020 | Europe / Spain / Andalusia / Mairena Aljarafe     |
| EPI_ISL_452467 | 3/10/2020 | 5/27/2020 | Europe / Spain / Andalusia / San Fernando         |
| EPI_ISL_452468 | 3/10/2020 | 5/27/2020 | Europe / Spain / Andalusia / Puerto Santa Maria   |
| EPI_ISL_452469 | 3/9/2020  | 5/27/2020 | Europe / Spain / Andalusia / Puerto Santa Maria   |
| EPI_ISL_452470 | 3/7/2020  | 5/27/2020 | Europe / Spain / Andalusia / Puerto Santa Maria   |
| EPI_ISL_452471 | 3/6/2020  | 5/27/2020 | Europe / Spain / Andalusia / Rota                 |
| EPI_ISL_452473 | 3/23/2020 | 5/27/2020 | Europe / Spain / Basque Country / Bermeo          |
| EPI_ISL_452474 | 3/23/2020 | 5/27/2020 | Europe / Spain / Navarra / Pamplona               |
| EPI_ISL_452476 | 3/23/2020 | 5/27/2020 | Europe / Spain / Navarra / Pamplona               |
| EPI_ISL_452477 | 3/22/2020 | 5/27/2020 | Europe / Spain / Navarra / Pamplona               |

|                |           |           |                                               |
|----------------|-----------|-----------|-----------------------------------------------|
| EPI_ISL_452479 | 3/22/2020 | 5/27/2020 | Europe / Spain / Navarra / Cizur              |
| EPI_ISL_452480 | 3/22/2020 | 5/27/2020 | Europe / Spain / Basque Country / Portugaleta |
| EPI_ISL_452481 | 3/21/2020 | 5/27/2020 | Europe / Spain / Navarra / Pamplona           |
| EPI_ISL_452483 | 3/21/2020 | 5/27/2020 | Europe / Spain / Navarra / Pamplona           |
| EPI_ISL_452484 | 3/22/2020 | 5/27/2020 | Europe / Spain / Navarra / Pamplona           |
| EPI_ISL_452485 | 3/21/2020 | 5/27/2020 | Europe / Spain / Navarra / Pamplona           |
| EPI_ISL_452486 | 3/21/2020 | 5/27/2020 | Europe / Spain / Navarra / Pamplona           |
| EPI_ISL_452487 | 3/21/2020 | 5/27/2020 | Europe / Spain / Navarra / Echavarri          |
| EPI_ISL_452488 | 3/20/2020 | 5/27/2020 | Europe / Spain / Navarra / Pamplona           |
| EPI_ISL_452490 | 3/20/2020 | 5/27/2020 | Europe / Spain / Navarra / Pamplona           |
| EPI_ISL_452491 | 3/20/2020 | 5/27/2020 | Europe / Spain / La Rioja / Pradejon          |
| EPI_ISL_452492 | 3/20/2020 | 5/27/2020 | Europe / Spain / Navarra / Pamplona           |
| EPI_ISL_452493 | 3/20/2020 | 5/27/2020 | Europe / Spain / Navarra / Peralta            |
| EPI_ISL_452495 | 3/20/2020 | 5/27/2020 | Europe / Spain / Navarra / Fitero             |
| EPI_ISL_452496 | 3/20/2020 | 5/27/2020 | Europe / Spain / Navarra / Pamplona           |
| EPI_ISL_452498 | 3/19/2020 | 5/27/2020 | Europe / Spain / Navarra / Tafalla            |
| EPI_ISL_452500 | 3/18/2020 | 5/27/2020 | Europe / Spain / Navarra / Cintruenigo        |
| EPI_ISL_452503 | 3/18/2020 | 5/27/2020 | Europe / Spain / Navarra / Pamplona           |
| EPI_ISL_452505 | 3/18/2020 | 5/27/2020 | Europe / Spain / Navarra / Pamplona           |
| EPI_ISL_452506 | 3/18/2020 | 5/27/2020 | Europe / Spain / Navarra / Mutilva            |
| EPI_ISL_452507 | 3/18/2020 | 5/27/2020 | Europe / Spain / Navarra / Pamplona           |
| EPI_ISL_452508 | 3/17/2020 | 5/27/2020 | Europe / Spain / Navarra / Pamplona           |
| EPI_ISL_452509 | 3/17/2020 | 5/27/2020 | Europe / Spain / La Rioja / Calahorra         |
| EPI_ISL_452510 | 3/17/2020 | 5/27/2020 | Europe / Spain / Navarra / Pamplona           |
| EPI_ISL_452513 | 3/16/2020 | 5/27/2020 | Europe / Spain / Navarra / Mutilva            |
| EPI_ISL_452514 | 3/16/2020 | 5/27/2020 | Europe / Spain / Navarra / Pamplona           |
| EPI_ISL_452516 | 3/15/2020 | 5/27/2020 | Europe / Spain / Navarra / Pamplona           |
| EPI_ISL_452517 | 3/15/2020 | 5/27/2020 | Europe / Spain / Navarra / Cizur              |
| EPI_ISL_452518 | 3/15/2020 | 5/27/2020 | Europe / Spain / Navarra / Cizur              |
| EPI_ISL_452519 | 3/15/2020 | 5/27/2020 | Europe / Spain / Navarra / Pamplona           |
| EPI_ISL_452520 | 3/14/2020 | 5/27/2020 | Europe / Spain / Navarra / Cizur              |
| EPI_ISL_452521 | 3/14/2020 | 5/27/2020 | Europe / Spain / Navarra / Pamplona           |
| EPI_ISL_452523 | 3/14/2020 | 5/27/2020 | Europe / Spain / Navarra / Pamplona           |
| EPI_ISL_452524 | 3/14/2020 | 5/27/2020 | Europe / Spain / Navarra / Cizur              |
| EPI_ISL_452526 | 3/13/2020 | 5/27/2020 | Europe / Spain / La Rioja / Logrono           |
| EPI_ISL_452527 | 3/13/2020 | 5/27/2020 | Europe / Spain / Navarra / Cizur              |
| EPI_ISL_452528 | 3/13/2020 | 5/27/2020 | Europe / Spain / Navarra / Cizur              |
| EPI_ISL_452531 | 3/12/2020 | 5/27/2020 | Europe / Spain / Navarra / Zulueta            |
| EPI_ISL_452532 | 3/12/2020 | 5/27/2020 | Europe / Spain / Navarra / Pamplona           |
| EPI_ISL_452534 | 3/12/2020 | 5/27/2020 | Europe / Spain / Madrid                       |
| EPI_ISL_452535 | 3/12/2020 | 5/27/2020 | Europe / Spain / Madrid / Alcobendas          |
| EPI_ISL_452538 | 3/10/2020 | 5/27/2020 | Europe / Spain / Navarra / Baranain           |
| EPI_ISL_452539 | 3/10/2020 | 5/27/2020 | Europe / Spain / Navarra / Baranain           |
| EPI_ISL_452540 | 3/10/2020 | 5/27/2020 | Europe / Spain / Navarra / Pamplona           |
| EPI_ISL_452541 | 3/10/2020 | 5/27/2020 | Europe / Spain / Navarra / Baranain           |
| EPI_ISL_452544 | 3/23/2020 | 5/27/2020 | Europe / Spain / Andalusia / Sevilla          |
| EPI_ISL_452546 | 3/23/2020 | 5/27/2020 | Europe / Spain / Andalusia / Sevilla          |











|                |           |                                                     |
|----------------|-----------|-----------------------------------------------------|
| EPI_ISL_452783 | 3/6/2020  | 5/27/2020 Europe / Spain / Basque Country / Vitoria |
| EPI_ISL_452784 | 3/6/2020  | 5/27/2020 Europe / Spain / Basque Country / Vitoria |
| EPI_ISL_452785 | 3/6/2020  | 5/27/2020 Europe / Spain / Basque Country / Vitoria |
| EPI_ISL_452786 | 3/7/2020  | 5/27/2020 Europe / Spain / Basque Country / Vitoria |
| EPI_ISL_452790 | 4/24/2020 | 5/27/2020 Asia / India / Madhya Pradesh / Ujjain    |
| EPI_ISL_452792 | 4/30/2020 | 5/27/2020 Asia / India / Madhya Pradesh / Mandsaur  |
| EPI_ISL_452794 | 5/8/2020  | 5/27/2020 Asia / India / Madhya Pradesh / Neemach   |
| EPI_ISL_452796 | 4/9/2020  | 5/27/2020 North America / USA / Virginia            |
| EPI_ISL_452797 | 4/3/2020  | 5/27/2020 North America / USA / Virginia            |
| EPI_ISL_452798 | 4/3/2020  | 5/27/2020 North America / USA / Virginia            |
| EPI_ISL_452799 | 4/3/2020  | 5/27/2020 North America / USA / Virginia            |
| EPI_ISL_452800 | 4/3/2020  | 5/27/2020 North America / USA / Virginia            |
| EPI_ISL_452801 | 4/3/2020  | 5/27/2020 North America / USA / Virginia            |
| EPI_ISL_452802 | 4/3/2020  | 5/27/2020 North America / USA / Virginia            |
| EPI_ISL_452803 | 4/3/2020  | 5/27/2020 North America / USA / Virginia            |
| EPI_ISL_452804 | 4/3/2020  | 5/27/2020 North America / USA / Virginia            |
| EPI_ISL_452805 | 4/5/2020  | 5/27/2020 North America / USA / Virginia            |
| EPI_ISL_452806 | 4/5/2020  | 5/27/2020 North America / USA / Virginia            |
| EPI_ISL_452807 | 4/5/2020  | 5/27/2020 North America / USA / Virginia            |
| EPI_ISL_452808 | 4/5/2020  | 5/27/2020 North America / USA / Virginia            |
| EPI_ISL_452809 | 4/1/2020  | 5/27/2020 North America / USA / Virginia            |
| EPI_ISL_452810 | 4/4/2020  | 5/27/2020 North America / USA / Virginia            |
| EPI_ISL_452811 | 4/9/2020  | 5/27/2020 North America / USA / Virginia            |
| EPI_ISL_452812 | 4/12/2020 | 5/27/2020 North America / USA / Virginia            |
| EPI_ISL_452813 | 4/15/2020 | 5/27/2020 North America / USA / Virginia            |
| EPI_ISL_452814 | 4/9/2020  | 5/27/2020 North America / USA / Virginia            |
| EPI_ISL_452815 | 4/10/2020 | 5/27/2020 North America / USA / Virginia            |
| EPI_ISL_452816 | 4/16/2020 | 5/27/2020 North America / USA / Virginia            |
| EPI_ISL_452817 | 4/16/2020 | 5/27/2020 North America / USA / Virginia            |
| EPI_ISL_452818 | 4/16/2020 | 5/27/2020 North America / USA / Virginia            |
| EPI_ISL_452819 | 4/16/2020 | 5/27/2020 North America / USA / Virginia            |
| EPI_ISL_452820 | 4/16/2020 | 5/27/2020 North America / USA / Virginia            |
| EPI_ISL_452821 | 4/16/2020 | 5/27/2020 North America / USA / Virginia            |
| EPI_ISL_452822 | 4/17/2020 | 5/27/2020 North America / USA / Virginia            |
| EPI_ISL_452823 | 4/16/2020 | 5/27/2020 North America / USA / Virginia            |
| EPI_ISL_452824 | 4/20/2020 | 5/27/2020 North America / USA / Virginia            |
| EPI_ISL_452825 | 4/20/2020 | 5/27/2020 North America / USA / Virginia            |
| EPI_ISL_452826 | 4/20/2020 | 5/27/2020 North America / USA / Virginia            |
| EPI_ISL_452827 | 4/20/2020 | 5/27/2020 North America / USA / Virginia            |
| EPI_ISL_452828 | 4/20/2020 | 5/27/2020 North America / USA / Virginia            |
| EPI_ISL_452829 | 4/20/2020 | 5/27/2020 North America / USA / Virginia            |
| EPI_ISL_452830 | 4/20/2020 | 5/27/2020 North America / USA / Virginia            |
| EPI_ISL_452831 | 4/22/2020 | 5/27/2020 North America / USA / Virginia            |
| EPI_ISL_452832 | 4/22/2020 | 5/27/2020 North America / USA / Virginia            |
| EPI_ISL_452833 | 4/19/2020 | 5/27/2020 North America / USA / Virginia            |
| EPI_ISL_452834 | 4/18/2020 | 5/27/2020 North America / USA / Virginia            |
| EPI_ISL_452835 | 4/18/2020 | 5/27/2020 North America / USA / Virginia            |





















|                |           |                                                |
|----------------|-----------|------------------------------------------------|
| EPI_ISL_453766 | 4/22/2020 | 5/27/2020 Europe / United Kingdom / England    |
| EPI_ISL_453767 | 4/14/2020 | 5/27/2020 Europe / United Kingdom / England    |
| EPI_ISL_453768 | 4/22/2020 | 5/27/2020 Europe / United Kingdom / England    |
| EPI_ISL_453769 | 4/22/2020 | 5/27/2020 Europe / United Kingdom / England    |
| EPI_ISL_453770 | 4/22/2020 | 5/27/2020 Europe / United Kingdom / England    |
| EPI_ISL_453771 | 4/16/2020 | 5/27/2020 Europe / United Kingdom / England    |
| EPI_ISL_453772 | 4/13/2020 | 5/27/2020 Europe / United Kingdom / England    |
| EPI_ISL_453773 | 4/21/2020 | 5/27/2020 Europe / United Kingdom / England    |
| EPI_ISL_453774 | 4/20/2020 | 5/27/2020 Europe / United Kingdom / England    |
| EPI_ISL_453775 | 4/20/2020 | 5/27/2020 Europe / United Kingdom / England    |
| EPI_ISL_453776 | 4/21/2020 | 5/27/2020 Europe / United Kingdom / England    |
| EPI_ISL_453777 | 4/21/2020 | 5/27/2020 Europe / United Kingdom / England    |
| EPI_ISL_454412 | 2020-03   | 5/27/2020 North America / USA / North Carolina |
| EPI_ISL_454413 | 2020-03   | 5/27/2020 North America / USA / North Carolina |
| EPI_ISL_454414 | 2020-03   | 5/27/2020 North America / USA / North Carolina |
| EPI_ISL_454415 | 2020-03   | 5/27/2020 North America / USA / North Carolina |
| EPI_ISL_454818 | 2020-03   | 5/27/2020 North America / USA / North Carolina |
| EPI_ISL_454819 | 2020-03   | 5/27/2020 North America / USA / North Carolina |
| EPI_ISL_454829 | 2020-04   | 5/27/2020 North America / USA / North Carolina |
| EPI_ISL_468062 | 5/2/2020  | 5/27/2020 Africa / Egypt                       |
| EPI_ISL_453813 | 3/24/2020 | 5/28/2020 Europe / Portugal                    |
| EPI_ISL_453814 | 3/24/2020 | 5/28/2020 Europe / Portugal                    |
| EPI_ISL_453815 | 3/24/2020 | 5/28/2020 Europe / Portugal                    |
| EPI_ISL_453816 | 3/24/2020 | 5/28/2020 Europe / Portugal                    |
| EPI_ISL_453817 | 3/24/2020 | 5/28/2020 Europe / Portugal                    |
| EPI_ISL_453818 | 3/24/2020 | 5/28/2020 Europe / Portugal                    |
| EPI_ISL_453820 | 3/21/2020 | 5/28/2020 Europe / Portugal                    |
| EPI_ISL_453821 | 3/20/2020 | 5/28/2020 Europe / Portugal                    |
| EPI_ISL_453822 | 3/21/2020 | 5/28/2020 Europe / Portugal                    |
| EPI_ISL_453823 | 3/21/2020 | 5/28/2020 Europe / Portugal                    |
| EPI_ISL_453824 | 3/21/2020 | 5/28/2020 Europe / Portugal                    |
| EPI_ISL_453825 | 3/17/2020 | 5/28/2020 Europe / Portugal                    |
| EPI_ISL_453826 | 3/23/2020 | 5/28/2020 Europe / Portugal                    |
| EPI_ISL_453827 | 3/25/2020 | 5/28/2020 Europe / Portugal                    |
| EPI_ISL_453828 | 3/25/2020 | 5/28/2020 Europe / Portugal                    |
| EPI_ISL_453829 | 3/25/2020 | 5/28/2020 Europe / Portugal                    |
| EPI_ISL_453830 | 3/25/2020 | 5/28/2020 Europe / Portugal                    |
| EPI_ISL_453832 | 3/25/2020 | 5/28/2020 Europe / Portugal                    |
| EPI_ISL_453833 | 3/25/2020 | 5/28/2020 Europe / Portugal                    |
| EPI_ISL_453834 | 3/25/2020 | 5/28/2020 Europe / Portugal                    |
| EPI_ISL_453835 | 3/25/2020 | 5/28/2020 Europe / Portugal                    |
| EPI_ISL_453836 | 3/25/2020 | 5/28/2020 Europe / Portugal                    |
| EPI_ISL_453839 | 3/25/2020 | 5/28/2020 Europe / Portugal                    |
| EPI_ISL_453840 | 3/23/2020 | 5/28/2020 Europe / Portugal                    |
| EPI_ISL_453844 | 3/23/2020 | 5/28/2020 Europe / Portugal                    |
| EPI_ISL_453845 | 3/23/2020 | 5/28/2020 Europe / Portugal                    |
| EPI_ISL_453846 | 3/23/2020 | 5/28/2020 Europe / Portugal                    |











|                |           |                             |
|----------------|-----------|-----------------------------|
| EPI_ISL_454123 | 4/21/2020 | 5/28/2020 Europe / Portugal |
| EPI_ISL_454127 | 3/17/2020 | 5/28/2020 Europe / Portugal |
| EPI_ISL_454128 | 3/18/2020 | 5/28/2020 Europe / Portugal |
| EPI_ISL_454129 | 3/20/2020 | 5/28/2020 Europe / Portugal |
| EPI_ISL_454130 | 3/21/2020 | 5/28/2020 Europe / Portugal |
| EPI_ISL_454131 | 3/21/2020 | 5/28/2020 Europe / Portugal |
| EPI_ISL_454132 | 3/21/2020 | 5/28/2020 Europe / Portugal |
| EPI_ISL_454133 | 3/21/2020 | 5/28/2020 Europe / Portugal |
| EPI_ISL_454134 | 3/21/2020 | 5/28/2020 Europe / Portugal |
| EPI_ISL_454135 | 3/21/2020 | 5/28/2020 Europe / Portugal |
| EPI_ISL_454137 | 3/23/2020 | 5/28/2020 Europe / Portugal |
| EPI_ISL_454139 | 3/23/2020 | 5/28/2020 Europe / Portugal |
| EPI_ISL_454141 | 3/24/2020 | 5/28/2020 Europe / Portugal |
| EPI_ISL_454142 | 3/24/2020 | 5/28/2020 Europe / Portugal |
| EPI_ISL_454143 | 3/25/2020 | 5/28/2020 Europe / Portugal |
| EPI_ISL_454144 | 3/25/2020 | 5/28/2020 Europe / Portugal |
| EPI_ISL_454145 | 3/28/2020 | 5/28/2020 Europe / Portugal |
| EPI_ISL_454146 | 3/28/2020 | 5/28/2020 Europe / Portugal |
| EPI_ISL_454147 | 3/28/2020 | 5/28/2020 Europe / Portugal |
| EPI_ISL_454149 | 3/28/2020 | 5/28/2020 Europe / Portugal |
| EPI_ISL_454150 | 3/28/2020 | 5/28/2020 Europe / Portugal |
| EPI_ISL_454154 | 3/31/2020 | 5/28/2020 Europe / Portugal |
| EPI_ISL_454158 | 3/19/2020 | 5/28/2020 Europe / Portugal |
| EPI_ISL_454159 | 3/20/2020 | 5/28/2020 Europe / Portugal |
| EPI_ISL_454162 | 3/22/2020 | 5/28/2020 Europe / Portugal |
| EPI_ISL_454163 | 3/22/2020 | 5/28/2020 Europe / Portugal |
| EPI_ISL_454167 | 3/23/2020 | 5/28/2020 Europe / Portugal |
| EPI_ISL_454168 | 3/26/2020 | 5/28/2020 Europe / Portugal |
| EPI_ISL_454169 | 3/26/2020 | 5/28/2020 Europe / Portugal |
| EPI_ISL_454171 | 3/27/2020 | 5/28/2020 Europe / Portugal |
| EPI_ISL_454172 | 3/28/2020 | 5/28/2020 Europe / Portugal |
| EPI_ISL_454173 | 3/28/2020 | 5/28/2020 Europe / Portugal |
| EPI_ISL_454174 | 3/31/2020 | 5/28/2020 Europe / Portugal |
| EPI_ISL_454178 | 4/17/2020 | 5/28/2020 Europe / Portugal |
| EPI_ISL_454181 | 4/18/2020 | 5/28/2020 Europe / Portugal |
| EPI_ISL_454182 | 4/19/2020 | 5/28/2020 Europe / Portugal |
| EPI_ISL_454183 | 4/17/2020 | 5/28/2020 Europe / Portugal |
| EPI_ISL_454184 | 4/17/2020 | 5/28/2020 Europe / Portugal |
| EPI_ISL_454185 | 4/17/2020 | 5/28/2020 Europe / Portugal |
| EPI_ISL_454186 | 4/17/2020 | 5/28/2020 Europe / Portugal |
| EPI_ISL_454188 | 4/17/2020 | 5/28/2020 Europe / Portugal |
| EPI_ISL_454189 | 4/18/2020 | 5/28/2020 Europe / Portugal |
| EPI_ISL_454190 | 4/18/2020 | 5/28/2020 Europe / Portugal |
| EPI_ISL_454191 | 4/18/2020 | 5/28/2020 Europe / Portugal |
| EPI_ISL_454192 | 4/18/2020 | 5/28/2020 Europe / Portugal |
| EPI_ISL_454193 | 4/18/2020 | 5/28/2020 Europe / Portugal |
| EPI_ISL_454194 | 4/18/2020 | 5/28/2020 Europe / Portugal |

|                |           |                             |
|----------------|-----------|-----------------------------|
| EPI_ISL_454195 | 4/18/2020 | 5/28/2020 Europe / Portugal |
| EPI_ISL_454196 | 4/18/2020 | 5/28/2020 Europe / Portugal |
| EPI_ISL_454197 | 4/24/2020 | 5/28/2020 Europe / Portugal |
| EPI_ISL_454198 | 4/24/2020 | 5/28/2020 Europe / Portugal |
| EPI_ISL_454199 | 4/24/2020 | 5/28/2020 Europe / Portugal |
| EPI_ISL_454200 | 4/24/2020 | 5/28/2020 Europe / Portugal |
| EPI_ISL_454201 | 4/26/2020 | 5/28/2020 Europe / Portugal |
| EPI_ISL_454202 | 3/25/2020 | 5/28/2020 Europe / Portugal |
| EPI_ISL_454203 | 3/25/2020 | 5/28/2020 Europe / Portugal |
| EPI_ISL_454204 | 3/27/2020 | 5/28/2020 Europe / Portugal |
| EPI_ISL_454205 | 3/28/2020 | 5/28/2020 Europe / Portugal |
| EPI_ISL_454206 | 3/29/2020 | 5/28/2020 Europe / Portugal |
| EPI_ISL_454207 | 3/30/2020 | 5/28/2020 Europe / Portugal |
| EPI_ISL_454208 | 3/31/2020 | 5/28/2020 Europe / Portugal |
| EPI_ISL_454209 | 3/30/2020 | 5/28/2020 Europe / Portugal |
| EPI_ISL_454210 | 3/30/2020 | 5/28/2020 Europe / Portugal |
| EPI_ISL_454211 | 4/1/2020  | 5/28/2020 Europe / Portugal |
| EPI_ISL_454213 | 4/27/2020 | 5/28/2020 Europe / Portugal |
| EPI_ISL_454214 | 4/28/2020 | 5/28/2020 Europe / Portugal |
| EPI_ISL_454215 | 4/29/2020 | 5/28/2020 Europe / Portugal |
| EPI_ISL_454216 | 4/29/2020 | 5/28/2020 Europe / Portugal |
| EPI_ISL_454217 | 4/29/2020 | 5/28/2020 Europe / Portugal |
| EPI_ISL_454218 | 4/29/2020 | 5/28/2020 Europe / Portugal |
| EPI_ISL_454219 | 4/30/2020 | 5/28/2020 Europe / Portugal |
| EPI_ISL_454220 | 4/30/2020 | 5/28/2020 Europe / Portugal |
| EPI_ISL_454221 | 5/1/2020  | 5/28/2020 Europe / Portugal |
| EPI_ISL_454222 | 3/11/2020 | 5/28/2020 Europe / Portugal |
| EPI_ISL_454223 | 3/13/2020 | 5/28/2020 Europe / Portugal |
| EPI_ISL_454224 | 3/14/2020 | 5/28/2020 Europe / Portugal |
| EPI_ISL_454225 | 3/15/2020 | 5/28/2020 Europe / Portugal |
| EPI_ISL_454226 | 3/17/2020 | 5/28/2020 Europe / Portugal |
| EPI_ISL_454227 | 3/17/2020 | 5/28/2020 Europe / Portugal |
| EPI_ISL_454228 | 3/17/2020 | 5/28/2020 Europe / Portugal |
| EPI_ISL_454229 | 3/18/2020 | 5/28/2020 Europe / Portugal |
| EPI_ISL_454230 | 3/19/2020 | 5/28/2020 Europe / Portugal |
| EPI_ISL_454232 | 3/19/2020 | 5/28/2020 Europe / Portugal |
| EPI_ISL_454233 | 3/19/2020 | 5/28/2020 Europe / Portugal |
| EPI_ISL_454234 | 3/19/2020 | 5/28/2020 Europe / Portugal |
| EPI_ISL_454235 | 3/19/2020 | 5/28/2020 Europe / Portugal |
| EPI_ISL_454236 | 3/20/2020 | 5/28/2020 Europe / Portugal |
| EPI_ISL_454237 | 3/20/2020 | 5/28/2020 Europe / Portugal |
| EPI_ISL_454238 | 3/20/2020 | 5/28/2020 Europe / Portugal |
| EPI_ISL_454239 | 3/20/2020 | 5/28/2020 Europe / Portugal |
| EPI_ISL_454240 | 3/20/2020 | 5/28/2020 Europe / Portugal |
| EPI_ISL_454241 | 3/21/2020 | 5/28/2020 Europe / Portugal |
| EPI_ISL_454242 | 3/21/2020 | 5/28/2020 Europe / Portugal |
| EPI_ISL_454243 | 3/22/2020 | 5/28/2020 Europe / Portugal |

|                |           |                             |
|----------------|-----------|-----------------------------|
| EPI_ISL_454244 | 3/22/2020 | 5/28/2020 Europe / Portugal |
| EPI_ISL_454245 | 3/23/2020 | 5/28/2020 Europe / Portugal |
| EPI_ISL_454246 | 3/23/2020 | 5/28/2020 Europe / Portugal |
| EPI_ISL_454247 | 3/23/2020 | 5/28/2020 Europe / Portugal |
| EPI_ISL_454248 | 3/23/2020 | 5/28/2020 Europe / Portugal |
| EPI_ISL_454249 | 3/23/2020 | 5/28/2020 Europe / Portugal |
| EPI_ISL_454250 | 4/6/2020  | 5/28/2020 Europe / Portugal |
| EPI_ISL_454251 | 4/6/2020  | 5/28/2020 Europe / Portugal |
| EPI_ISL_454252 | 4/6/2020  | 5/28/2020 Europe / Portugal |
| EPI_ISL_454253 | 4/6/2020  | 5/28/2020 Europe / Portugal |
| EPI_ISL_454255 | 4/7/2020  | 5/28/2020 Europe / Portugal |
| EPI_ISL_454257 | 4/7/2020  | 5/28/2020 Europe / Portugal |
| EPI_ISL_454258 | 4/7/2020  | 5/28/2020 Europe / Portugal |
| EPI_ISL_454260 | 4/7/2020  | 5/28/2020 Europe / Portugal |
| EPI_ISL_454261 | 4/7/2020  | 5/28/2020 Europe / Portugal |
| EPI_ISL_454262 | 4/7/2020  | 5/28/2020 Europe / Portugal |
| EPI_ISL_454263 | 4/7/2020  | 5/28/2020 Europe / Portugal |
| EPI_ISL_454264 | 4/8/2020  | 5/28/2020 Europe / Portugal |
| EPI_ISL_454266 | 4/8/2020  | 5/28/2020 Europe / Portugal |
| EPI_ISL_454267 | 4/8/2020  | 5/28/2020 Europe / Portugal |
| EPI_ISL_454268 | 4/9/2020  | 5/28/2020 Europe / Portugal |
| EPI_ISL_454269 | 4/10/2020 | 5/28/2020 Europe / Portugal |
| EPI_ISL_454270 | 4/14/2020 | 5/28/2020 Europe / Portugal |
| EPI_ISL_454271 | 4/3/2020  | 5/28/2020 Europe / Portugal |
| EPI_ISL_454272 | 5/2/2020  | 5/28/2020 Europe / Portugal |
| EPI_ISL_454274 | 4/7/2020  | 5/28/2020 Europe / Portugal |
| EPI_ISL_454275 | 4/7/2020  | 5/28/2020 Europe / Portugal |
| EPI_ISL_454276 | 4/7/2020  | 5/28/2020 Europe / Portugal |
| EPI_ISL_454277 | 4/7/2020  | 5/28/2020 Europe / Portugal |
| EPI_ISL_454278 | 4/8/2020  | 5/28/2020 Europe / Portugal |
| EPI_ISL_454279 | 4/20/2020 | 5/28/2020 Europe / Portugal |
| EPI_ISL_454280 | 4/20/2020 | 5/28/2020 Europe / Portugal |
| EPI_ISL_454281 | 4/21/2020 | 5/28/2020 Europe / Portugal |
| EPI_ISL_454282 | 4/22/2020 | 5/28/2020 Europe / Portugal |
| EPI_ISL_454283 | 4/22/2020 | 5/28/2020 Europe / Portugal |
| EPI_ISL_454284 | 4/27/2020 | 5/28/2020 Europe / Portugal |
| EPI_ISL_454285 | 4/27/2020 | 5/28/2020 Europe / Portugal |
| EPI_ISL_454287 | 3/26/2020 | 5/28/2020 Europe / Portugal |
| EPI_ISL_454288 | 3/26/2020 | 5/28/2020 Europe / Portugal |
| EPI_ISL_454289 | 4/10/2020 | 5/28/2020 Europe / Portugal |
| EPI_ISL_454290 | 4/14/2020 | 5/28/2020 Europe / Portugal |
| EPI_ISL_454291 | 4/14/2020 | 5/28/2020 Europe / Portugal |
| EPI_ISL_454292 | 4/14/2020 | 5/28/2020 Europe / Portugal |
| EPI_ISL_454293 | 4/14/2020 | 5/28/2020 Europe / Portugal |
| EPI_ISL_454294 | 3/26/2020 | 5/28/2020 Europe / Portugal |
| EPI_ISL_454295 | 3/26/2020 | 5/28/2020 Europe / Portugal |
| EPI_ISL_454296 | 4/11/2020 | 5/28/2020 Europe / Portugal |

|                |           |                                                                         |
|----------------|-----------|-------------------------------------------------------------------------|
| EPI_ISL_454297 | 3/29/2020 | 5/28/2020 Europe / Portugal                                             |
| EPI_ISL_454298 | 4/11/2020 | 5/28/2020 Europe / Portugal                                             |
| EPI_ISL_454300 | 3/24/2020 | 5/28/2020 Europe / Portugal                                             |
| EPI_ISL_454301 | 3/24/2020 | 5/28/2020 Europe / Portugal                                             |
| EPI_ISL_454302 | 3/24/2020 | 5/28/2020 Europe / Portugal                                             |
| EPI_ISL_454303 | 3/25/2020 | 5/28/2020 Europe / Portugal                                             |
| EPI_ISL_454304 | 4/24/2020 | 5/28/2020 Europe / Portugal                                             |
| EPI_ISL_454307 | 3/27/2020 | 5/28/2020 Europe / Portugal                                             |
| EPI_ISL_454311 | 3/28/2020 | 5/28/2020 Europe / Portugal                                             |
| EPI_ISL_454314 | 3/28/2020 | 5/28/2020 Europe / Portugal                                             |
| EPI_ISL_454315 | 3/30/2020 | 5/28/2020 Europe / Portugal                                             |
| EPI_ISL_454317 | 4/3/2020  | 5/28/2020 Europe / Portugal                                             |
| EPI_ISL_454318 | 3/19/2020 | 5/28/2020 Europe / Portugal                                             |
| EPI_ISL_454319 | 3/28/2020 | 5/28/2020 Europe / Portugal                                             |
| EPI_ISL_454320 | 3/28/2020 | 5/28/2020 Europe / Portugal                                             |
| EPI_ISL_454321 | 3/28/2020 | 5/28/2020 Europe / Portugal                                             |
| EPI_ISL_454322 | 3/28/2020 | 5/28/2020 Europe / Portugal                                             |
| EPI_ISL_454324 | 4/6/2020  | 5/28/2020 Europe / Portugal                                             |
| EPI_ISL_454326 | 3/26/2020 | 5/28/2020 Europe / Portugal                                             |
| EPI_ISL_454327 | 3/27/2020 | 5/28/2020 Europe / Portugal                                             |
| EPI_ISL_454328 | 3/14/2020 | 5/28/2020 Europe / Portugal                                             |
| EPI_ISL_454329 | 3/13/2020 | 5/28/2020 Europe / Portugal                                             |
| EPI_ISL_454330 | 3/13/2020 | 5/28/2020 Europe / Portugal                                             |
| EPI_ISL_454331 | 3/14/2020 | 5/28/2020 Europe / Portugal                                             |
| EPI_ISL_454332 | 3/14/2020 | 5/28/2020 Europe / Portugal                                             |
| EPI_ISL_454333 | 3/14/2020 | 5/28/2020 Europe / Portugal                                             |
| EPI_ISL_454334 | 3/15/2020 | 5/28/2020 Europe / Portugal                                             |
| EPI_ISL_454335 | 3/15/2020 | 5/28/2020 Europe / Portugal                                             |
| EPI_ISL_454337 | 3/16/2020 | 5/28/2020 Europe / Portugal                                             |
| EPI_ISL_454338 | 3/17/2020 | 5/28/2020 Europe / Portugal                                             |
| EPI_ISL_454339 | 3/17/2020 | 5/28/2020 Europe / Portugal                                             |
| EPI_ISL_454340 | 3/17/2020 | 5/28/2020 Europe / Portugal                                             |
| EPI_ISL_454341 | 3/17/2020 | 5/28/2020 Europe / Portugal                                             |
| EPI_ISL_454342 | 3/18/2020 | 5/28/2020 Europe / Portugal                                             |
| EPI_ISL_454343 | 3/24/2020 | 5/28/2020 Europe / Portugal                                             |
| EPI_ISL_454344 | 3/25/2020 | 5/28/2020 Europe / Portugal                                             |
| EPI_ISL_454345 | 3/26/2020 | 5/28/2020 Europe / Portugal                                             |
| EPI_ISL_454346 | 3/26/2020 | 5/28/2020 Europe / Portugal                                             |
| EPI_ISL_454347 | 3/26/2020 | 5/28/2020 Europe / Portugal                                             |
| EPI_ISL_454348 | 3/27/2020 | 5/28/2020 Europe / Portugal                                             |
| EPI_ISL_454349 | 3/29/2020 | 5/28/2020 Europe / Portugal                                             |
| EPI_ISL_454350 | 3/31/2020 | 5/28/2020 Europe / Portugal                                             |
| EPI_ISL_454351 | 4/6/2020  | 5/28/2020 Europe / Portugal                                             |
| EPI_ISL_454352 | 4/6/2020  | 5/28/2020 Europe / Portugal                                             |
| EPI_ISL_454353 | 3/30/2020 | 5/28/2020 North America / USA / Pennsylvania / Allegheny County / Pitts |
| EPI_ISL_454354 | 3/30/2020 | 5/28/2020 North America / USA / Pennsylvania / Allegheny County / Pitts |
| EPI_ISL_454355 | 3/23/2020 | 5/28/2020 North America / USA / Pennsylvania / Allegheny County / Pitts |



|                |           |                                                                         |
|----------------|-----------|-------------------------------------------------------------------------|
| EPI_ISL_454403 | 4/7/2020  | 5/28/2020 North America / USA / Pennsylvania / Allegheny County / Pitts |
| EPI_ISL_454404 | 4/8/2020  | 5/28/2020 North America / USA / Pennsylvania / Allegheny County / Pitts |
| EPI_ISL_454405 | 2020      | 5/28/2020 North America / USA / Pennsylvania / Allegheny County / Pitts |
| EPI_ISL_454406 | 4/8/2020  | 5/28/2020 North America / USA / Pennsylvania / Allegheny County / Pitts |
| EPI_ISL_454407 | 4/10/2020 | 5/28/2020 North America / USA / Pennsylvania / Allegheny County / Pitts |
| EPI_ISL_454408 | 4/7/2020  | 5/28/2020 North America / USA / Pennsylvania / Allegheny County / Pitts |
| EPI_ISL_454409 | 4/7/2020  | 5/28/2020 North America / USA / Pennsylvania / Allegheny County / Pitts |
| EPI_ISL_454410 | 4/5/2020  | 5/28/2020 North America / USA / Pennsylvania / Allegheny County / Pitts |
| EPI_ISL_454411 | 4/8/2020  | 5/28/2020 North America / USA / Pennsylvania / Allegheny County / Pitts |
| EPI_ISL_454431 | 3/13/2020 | 5/28/2020 North America / USA / Maryland                                |
| EPI_ISL_454435 | 3/16/2020 | 5/28/2020 North America / USA / Maryland                                |
| EPI_ISL_454436 | 3/7/2020  | 5/28/2020 Europe / Sweden / Halland                                     |
| EPI_ISL_454437 | 3/8/2020  | 5/28/2020 Europe / Sweden / Halland                                     |
| EPI_ISL_454438 | 3/8/2020  | 5/28/2020 Europe / Sweden / Halland                                     |
| EPI_ISL_454439 | 3/9/2020  | 5/28/2020 Europe / Sweden / Halland                                     |
| EPI_ISL_454440 | 3/9/2020  | 5/28/2020 Europe / Sweden / Halland                                     |
| EPI_ISL_454441 | 3/9/2020  | 5/28/2020 Europe / Sweden / Halland                                     |
| EPI_ISL_454442 | 3/9/2020  | 5/28/2020 Europe / Sweden / Halland                                     |
| EPI_ISL_454443 | 3/10/2020 | 5/28/2020 Europe / Sweden / Halland                                     |
| EPI_ISL_454444 | 3/10/2020 | 5/28/2020 Europe / Sweden / Halland                                     |
| EPI_ISL_454445 | 3/10/2020 | 5/28/2020 Europe / Sweden / Halland                                     |
| EPI_ISL_454446 | 3/10/2020 | 5/28/2020 Europe / Sweden / Halland                                     |
| EPI_ISL_454447 | 3/3/2020  | 5/28/2020 Europe / Sweden / Gavleborg                                   |
| EPI_ISL_454448 | 3/3/2020  | 5/28/2020 Europe / Sweden / Stockholm                                   |
| EPI_ISL_454449 | 3/3/2020  | 5/28/2020 Europe / Sweden / Stockholm                                   |
| EPI_ISL_454450 | 3/3/2020  | 5/28/2020 Europe / Sweden / Stockholm                                   |
| EPI_ISL_454451 | 3/5/2020  | 5/28/2020 Europe / Sweden / Stockholm                                   |
| EPI_ISL_454452 | 3/5/2020  | 5/28/2020 Europe / Sweden / Stockholm                                   |
| EPI_ISL_454453 | 3/5/2020  | 5/28/2020 Europe / Sweden / Stockholm                                   |
| EPI_ISL_454454 | 3/5/2020  | 5/28/2020 Europe / Sweden / Stockholm                                   |
| EPI_ISL_454455 | 3/5/2020  | 5/28/2020 Europe / Sweden / Stockholm                                   |
| EPI_ISL_454456 | 3/5/2020  | 5/28/2020 Europe / Sweden / Stockholm                                   |
| EPI_ISL_454457 | 3/5/2020  | 5/28/2020 Europe / Sweden / Stockholm                                   |
| EPI_ISL_454458 | 3/5/2020  | 5/28/2020 Europe / Sweden / Stockholm                                   |
| EPI_ISL_454459 | 3/5/2020  | 5/28/2020 Europe / Sweden / Stockholm                                   |
| EPI_ISL_454460 | 3/5/2020  | 5/28/2020 Europe / Sweden / Stockholm                                   |
| EPI_ISL_454461 | 3/5/2020  | 5/28/2020 Europe / Sweden / Stockholm                                   |
| EPI_ISL_454462 | 3/5/2020  | 5/28/2020 Europe / Sweden / Stockholm                                   |
| EPI_ISL_454463 | 3/20/2020 | 5/28/2020 Europe / Sweden / Stockholm                                   |
| EPI_ISL_454464 | 3/6/2020  | 5/28/2020 Europe / Sweden / Stockholm                                   |
| EPI_ISL_454465 | 3/6/2020  | 5/28/2020 Europe / Sweden / Stockholm                                   |
| EPI_ISL_454466 | 3/6/2020  | 5/28/2020 Europe / Sweden / Stockholm                                   |
| EPI_ISL_454467 | 3/6/2020  | 5/28/2020 Europe / Sweden / Stockholm                                   |
| EPI_ISL_454468 | 3/6/2020  | 5/28/2020 Europe / Sweden / Stockholm                                   |
| EPI_ISL_454469 | 3/6/2020  | 5/28/2020 Europe / Sweden / Stockholm                                   |
| EPI_ISL_454470 | 3/6/2020  | 5/28/2020 Europe / Sweden / Stockholm                                   |
| EPI_ISL_454471 | 3/6/2020  | 5/28/2020 Europe / Sweden / Stockholm                                   |

|                |           |                                             |
|----------------|-----------|---------------------------------------------|
| EPI_ISL_454472 | 3/7/2020  | 5/28/2020 Europe / Sweden / Stockholm       |
| EPI_ISL_454473 | 3/7/2020  | 5/28/2020 Europe / Sweden / Stockholm       |
| EPI_ISL_454474 | 3/7/2020  | 5/28/2020 Europe / Sweden / Stockholm       |
| EPI_ISL_454475 | 3/6/2020  | 5/28/2020 Europe / Sweden / Stockholm       |
| EPI_ISL_454476 | 3/10/2020 | 5/28/2020 Europe / Sweden / Stockholm       |
| EPI_ISL_454477 | 3/10/2020 | 5/28/2020 Europe / Sweden / Stockholm       |
| EPI_ISL_454478 | 3/8/2020  | 5/28/2020 Europe / Sweden / Stockholm       |
| EPI_ISL_454479 | 3/9/2020  | 5/28/2020 Europe / Sweden / Stockholm       |
| EPI_ISL_454480 | 3/9/2020  | 5/28/2020 Europe / Sweden / Stockholm       |
| EPI_ISL_454481 | 3/9/2020  | 5/28/2020 Europe / Sweden / Stockholm       |
| EPI_ISL_454482 | 3/9/2020  | 5/28/2020 Europe / Sweden / Stockholm       |
| EPI_ISL_454483 | 3/9/2020  | 5/28/2020 Europe / Sweden / Stockholm       |
| EPI_ISL_454484 | 3/9/2020  | 5/28/2020 Europe / Sweden / Vasternorrland  |
| EPI_ISL_454485 | 3/8/2020  | 5/28/2020 Europe / Sweden / Stockholm       |
| EPI_ISL_454486 | 3/9/2020  | 5/28/2020 Europe / Sweden / Stockholm       |
| EPI_ISL_454487 | 3/9/2020  | 5/28/2020 Europe / Sweden / Stockholm       |
| EPI_ISL_454488 | 3/9/2020  | 5/28/2020 Europe / Sweden / Vasternorrland  |
| EPI_ISL_454489 | 3/9/2020  | 5/28/2020 Europe / Sweden / Vasternorrland  |
| EPI_ISL_454490 | 3/9/2020  | 5/28/2020 Europe / Sweden / Vasternorrland  |
| EPI_ISL_454491 | 3/9/2020  | 5/28/2020 Europe / Sweden / Vasternorrland  |
| EPI_ISL_454492 | 3/9/2020  | 5/28/2020 Europe / Sweden / Vasternorrland  |
| EPI_ISL_454493 | 3/9/2020  | 5/28/2020 Europe / Sweden / Stockholm       |
| EPI_ISL_454494 | 3/7/2020  | 5/28/2020 Europe / Sweden / Vastra Gotaland |
| EPI_ISL_454495 | 3/8/2020  | 5/28/2020 Europe / Sweden / Sormland        |
| EPI_ISL_454496 | 3/9/2020  | 5/28/2020 Europe / Sweden / Sormland        |
| EPI_ISL_454497 | 5/14/2020 | 5/28/2020 Asia / Kazakhstan / Nur-Sultan    |
| EPI_ISL_454498 | 4/14/2020 | 5/28/2020 Asia / Kazakhstan / Nur-Sultan    |
| EPI_ISL_454499 | 4/16/2020 | 5/28/2020 Asia / Kazakhstan / Nur-Sultan    |
| EPI_ISL_454500 | 4/16/2020 | 5/28/2020 Asia / Kazakhstan / Nur-Sultan    |
| EPI_ISL_454501 | 4/20/2020 | 5/28/2020 Asia / Kazakhstan / Nur-Sultan    |
| EPI_ISL_454502 | 4/20/2020 | 5/28/2020 Asia / Kazakhstan / Nur-Sultan    |
| EPI_ISL_454503 | 4/22/2020 | 5/28/2020 Asia / Kazakhstan / Nur-Sultan    |
| EPI_ISL_454504 | 4/26/2020 | 5/28/2020 Asia / Kazakhstan / Nur-Sultan    |
| EPI_ISL_454505 | 4/26/2020 | 5/28/2020 Asia / Kazakhstan / Nur-Sultan    |
| EPI_ISL_454506 | 4/26/2020 | 5/28/2020 Asia / Kazakhstan / Nur-Sultan    |
| EPI_ISL_454507 | 4/26/2020 | 5/28/2020 Asia / Kazakhstan / Nur-Sultan    |
| EPI_ISL_454508 | 4/19/2020 | 5/28/2020 Asia / Kazakhstan / Nur-Sultan    |
| EPI_ISL_454509 | 4/26/2020 | 5/28/2020 Asia / Kazakhstan / Nur-Sultan    |
| EPI_ISL_454510 | 4/26/2020 | 5/28/2020 Asia / Kazakhstan / Nur-Sultan    |
| EPI_ISL_454511 | 4/26/2020 | 5/28/2020 Asia / Kazakhstan / Nur-Sultan    |
| EPI_ISL_454512 | 4/26/2020 | 5/28/2020 Asia / Kazakhstan / Nur-Sultan    |
| EPI_ISL_454513 | 4/26/2020 | 5/28/2020 Asia / Kazakhstan / Nur-Sultan    |
| EPI_ISL_454514 | 4/26/2020 | 5/28/2020 Asia / Kazakhstan / Nur-Sultan    |
| EPI_ISL_454515 | 4/26/2020 | 5/28/2020 Asia / Kazakhstan / Nur-Sultan    |
| EPI_ISL_454516 | 4/26/2020 | 5/28/2020 Asia / Kazakhstan / Nur-Sultan    |
| EPI_ISL_454517 | 4/26/2020 | 5/28/2020 Asia / Kazakhstan / Nur-Sultan    |
| EPI_ISL_454518 | 4/26/2020 | 5/28/2020 Asia / Kazakhstan / Nur-Sultan    |



|                |           |                                          |
|----------------|-----------|------------------------------------------|
| EPI_ISL_454519 | 4/26/2020 | 5/28/2020 Asia / Kazakhstan / Nur-Sultan |
| EPI_ISL_454520 | 4/26/2020 | 5/28/2020 Asia / Kazakhstan / Nur-Sultan |
| EPI_ISL_454521 | 4/18/2020 | 5/28/2020 Asia / India / Maharashtra     |
| EPI_ISL_454522 | 4/19/2020 | 5/28/2020 Asia / India / Maharashtra     |
| EPI_ISL_454524 | 4/20/2020 | 5/28/2020 Asia / India / Maharashtra     |
| EPI_ISL_454525 | 3/12/2020 | 5/28/2020 Asia / India / Maharashtra     |
| EPI_ISL_454526 | 3/13/2020 | 5/28/2020 Asia / India / Maharashtra     |
| EPI_ISL_454527 | 3/13/2020 | 5/28/2020 Asia / India / Maharashtra     |
| EPI_ISL_454528 | 3/17/2020 | 5/28/2020 Asia / India / Maharashtra     |
| EPI_ISL_454529 | 3/21/2020 | 5/28/2020 Asia / India / Maharashtra     |
| EPI_ISL_454530 | 3/22/2020 | 5/28/2020 Asia / India / Maharashtra     |
| EPI_ISL_454531 | 3/22/2020 | 5/28/2020 Asia / India / Maharashtra     |
| EPI_ISL_454532 | 3/23/2020 | 5/28/2020 Asia / India / Maharashtra     |
| EPI_ISL_454533 | 3/23/2020 | 5/28/2020 Asia / India / Maharashtra     |
| EPI_ISL_454534 | 3/24/2020 | 5/28/2020 Asia / India / Maharashtra     |
| EPI_ISL_454536 | 3/26/2020 | 5/28/2020 Asia / India / Maharashtra     |
| EPI_ISL_454537 | 3/26/2020 | 5/28/2020 Asia / India / Maharashtra     |
| EPI_ISL_454540 | 4/1/2020  | 5/28/2020 Asia / India / Maharashtra     |
| EPI_ISL_454542 | 3/30/2020 | 5/28/2020 Asia / India / Maharashtra     |
| EPI_ISL_454543 | 3/31/2020 | 5/28/2020 Asia / India / Maharashtra     |
| EPI_ISL_454544 | 4/2/2020  | 5/28/2020 Asia / India / Maharashtra     |
| EPI_ISL_454546 | 4/3/2020  | 5/28/2020 Asia / India / Maharashtra     |
| EPI_ISL_454547 | 4/4/2020  | 5/28/2020 Asia / India / Maharashtra     |
| EPI_ISL_454549 | 4/5/2020  | 5/28/2020 Asia / India / Maharashtra     |
| EPI_ISL_454551 | 4/7/2020  | 5/28/2020 Asia / India / Maharashtra     |
| EPI_ISL_454552 | 4/6/2020  | 5/28/2020 Asia / India / Maharashtra     |
| EPI_ISL_454556 | 4/12/2020 | 5/28/2020 Asia / India / Maharashtra     |
| EPI_ISL_454557 | 4/13/2020 | 5/28/2020 Asia / India / Maharashtra     |
| EPI_ISL_454558 | 4/13/2020 | 5/28/2020 Asia / India / Maharashtra     |
| EPI_ISL_454560 | 4/6/2020  | 5/28/2020 Asia / India / Maharashtra     |
| EPI_ISL_454561 | 4/7/2020  | 5/28/2020 Asia / India / Maharashtra     |
| EPI_ISL_454562 | 4/7/2020  | 5/28/2020 Asia / India / Maharashtra     |
| EPI_ISL_454563 | 4/10/2020 | 5/28/2020 Asia / India / Maharashtra     |
| EPI_ISL_454564 | 4/4/2020  | 5/28/2020 Asia / India / Maharashtra     |
| EPI_ISL_454565 | 3/31/2020 | 5/28/2020 Asia / India / Maharashtra     |
| EPI_ISL_454566 | 4/21/2020 | 5/28/2020 Asia / India / Maharashtra     |
| EPI_ISL_454567 | 4/22/2020 | 5/28/2020 Asia / India / Maharashtra     |
| EPI_ISL_454568 | 4/25/2020 | 5/28/2020 Asia / India / Maharashtra     |
| EPI_ISL_454569 | 4/26/2020 | 5/28/2020 Asia / India / Maharashtra     |
| EPI_ISL_454570 | 4/26/2020 | 5/28/2020 Asia / India / Maharashtra     |
| EPI_ISL_454571 | 3/25/2020 | 5/28/2020 Asia / Kazakhstan / Nur-Sultan |
| EPI_ISL_454572 | 3/25/2020 | 5/28/2020 Asia / Kazakhstan / Nur-Sultan |
| EPI_ISL_454574 | 4/9/2020  | 5/28/2020 Europe / Croatia / Istria      |
| EPI_ISL_454575 | 5/9/2020  | 5/28/2020 Asia / Kazakhstan / Nur-Sultan |
| EPI_ISL_454576 | 4/14/2020 | 5/28/2020 Asia / Kazakhstan / Nur-Sultan |
| EPI_ISL_454577 | 4/15/2020 | 5/28/2020 Asia / Kazakhstan / Nur-Sultan |
| EPI_ISL_454578 | 3/13/2020 | 5/28/2020 Europe / Croatia / Osijek      |

|                |           |                                                                   |
|----------------|-----------|-------------------------------------------------------------------|
| EPI_ISL_454579 | 4/16/2020 | 5/28/2020 Asia / Kazakhstan / Nur-Sultan                          |
| EPI_ISL_454580 | 4/16/2020 | 5/28/2020 Asia / Kazakhstan / Nur-Sultan                          |
| EPI_ISL_454581 | 3/18/2020 | 5/28/2020 Europe / Croatia / Split                                |
| EPI_ISL_454582 | 4/23/2020 | 5/28/2020 Asia / Kazakhstan / Nur-Sultan                          |
| EPI_ISL_454583 | 3/18/2020 | 5/28/2020 Europe / Croatia / Split                                |
| EPI_ISL_454584 | 4/21/2020 | 5/28/2020 Asia / Kazakhstan / Nur-Sultan                          |
| EPI_ISL_454585 | 5/4/2020  | 5/28/2020 Asia / Kazakhstan / Nur-Sultan                          |
| EPI_ISL_454586 | 4/21/2020 | 5/28/2020 Asia / Kazakhstan / Nur-Sultan                          |
| EPI_ISL_454587 | 4/26/2020 | 5/28/2020 Asia / Kazakhstan / Nur-Sultan                          |
| EPI_ISL_454588 | 3/20/2020 | 5/28/2020 Europe / Croatia / Dubrovnik                            |
| EPI_ISL_454589 | 4/26/2020 | 5/28/2020 Asia / Kazakhstan / Nur-Sultan                          |
| EPI_ISL_454590 | 4/26/2020 | 5/28/2020 Asia / Kazakhstan / Nur-Sultan                          |
| EPI_ISL_454591 | 4/26/2020 | 5/28/2020 Asia / Kazakhstan / Nur-Sultan                          |
| EPI_ISL_454592 | 3/5/2020  | 5/28/2020 Europe / Croatia / Varazdin                             |
| EPI_ISL_454593 | 4/26/2020 | 5/28/2020 Asia / Kazakhstan / Nur-Sultan                          |
| EPI_ISL_454594 | 4/26/2020 | 5/28/2020 Asia / Kazakhstan / Nur-Sultan                          |
| EPI_ISL_454596 | 4/26/2020 | 5/28/2020 Asia / Kazakhstan / Nur-Sultan                          |
| EPI_ISL_454597 | 4/26/2020 | 5/28/2020 Asia / Kazakhstan / Nur-Sultan                          |
| EPI_ISL_454598 | 4/26/2020 | 5/28/2020 Asia / Kazakhstan / Nur-Sultan                          |
| EPI_ISL_454599 | 4/26/2020 | 5/28/2020 Asia / Kazakhstan / Nur-Sultan                          |
| EPI_ISL_454600 | 4/26/2020 | 5/28/2020 Asia / Kazakhstan / Nur-Sultan                          |
| EPI_ISL_454601 | 4/26/2020 | 5/28/2020 Asia / Kazakhstan / Nur-Sultan                          |
| EPI_ISL_454602 | 4/21/2020 | 5/28/2020 Europe / Croatia / Koprivnica                           |
| EPI_ISL_454603 | 4/26/2020 | 5/28/2020 Asia / Kazakhstan / Nur-Sultan                          |
| EPI_ISL_454604 | 4/26/2020 | 5/28/2020 Asia / Kazakhstan / Nur-Sultan                          |
| EPI_ISL_454605 | 3/31/2020 | 5/28/2020 Europe / Croatia / Istria                               |
| EPI_ISL_454606 | 3/30/2020 | 5/28/2020 Europe / Croatia / Istria                               |
| EPI_ISL_454607 | 3/19/2020 | 5/28/2020 North America / USA / California / Alameda County       |
| EPI_ISL_454608 | 3/19/2020 | 5/28/2020 North America / USA / California / Alameda County       |
| EPI_ISL_454609 | 3/24/2020 | 5/28/2020 North America / USA / California / Alameda County       |
| EPI_ISL_454610 | 4/14/2020 | 5/28/2020 North America / USA / California / Alameda County       |
| EPI_ISL_454611 | 4/16/2020 | 5/28/2020 North America / USA / California / Alameda County       |
| EPI_ISL_454612 | 4/16/2020 | 5/28/2020 North America / USA / California / Alameda County       |
| EPI_ISL_454613 | 4/16/2020 | 5/28/2020 North America / USA / California / Alameda County       |
| EPI_ISL_454615 | 4/26/2020 | 5/28/2020 North America / USA / California / San Francisco County |
| EPI_ISL_454617 | 4/26/2020 | 5/28/2020 North America / USA / California / San Francisco County |
| EPI_ISL_454618 | 4/26/2020 | 5/28/2020 North America / USA / California / San Francisco County |
| EPI_ISL_454619 | 4/26/2020 | 5/28/2020 North America / USA / California / San Francisco County |
| EPI_ISL_454620 | 4/27/2020 | 5/28/2020 North America / USA / California / San Francisco County |
| EPI_ISL_454621 | 4/27/2020 | 5/28/2020 North America / USA / California / San Francisco County |
| EPI_ISL_454622 | 4/27/2020 | 5/28/2020 North America / USA / California / San Francisco County |
| EPI_ISL_454624 | 4/30/2020 | 5/28/2020 North America / USA / California / San Francisco County |
| EPI_ISL_454625 | 4/30/2020 | 5/28/2020 North America / USA / California / San Francisco County |
| EPI_ISL_454626 | 4/30/2020 | 5/28/2020 North America / USA / California / San Francisco County |
| EPI_ISL_454627 | 4/30/2020 | 5/28/2020 North America / USA / California / San Francisco County |
| EPI_ISL_454628 | 4/30/2020 | 5/28/2020 North America / USA / California / San Francisco County |
| EPI_ISL_454629 | 4/30/2020 | 5/28/2020 North America / USA / California / San Francisco County |



|                |           |                                                                 |
|----------------|-----------|-----------------------------------------------------------------|
| EPI_ISL_454681 | 5/12/2020 | 5/28/2020 North America / USA / California / Santa Clara County |
| EPI_ISL_454682 | 5/12/2020 | 5/28/2020 North America / USA / California / Santa Clara County |
| EPI_ISL_454683 | 5/12/2020 | 5/28/2020 North America / USA / California / Santa Clara County |
| EPI_ISL_454684 | 4/12/2020 | 5/28/2020 North America / USA / California / Santa Clara County |
| EPI_ISL_454685 | 5/12/2020 | 5/28/2020 North America / USA / California / Santa Clara County |
| EPI_ISL_454686 | 4/12/2020 | 5/28/2020 North America / USA / California / Santa Clara County |
| EPI_ISL_454687 | 5/12/2020 | 5/28/2020 North America / USA / California / Santa Clara County |
| EPI_ISL_454688 | 4/27/2020 | 5/28/2020 North America / USA / California / Santa Clara County |
| EPI_ISL_454689 | 4/27/2020 | 5/28/2020 North America / USA / California / Santa Clara County |
| EPI_ISL_454690 | 3/9/2020  | 5/28/2020 North America / USA / Georgia                         |
| EPI_ISL_454691 | 3/12/2020 | 5/28/2020 North America / USA / New York                        |
| EPI_ISL_454707 | 4/13/2020 | 5/28/2020 North America / USA / Utah                            |
| EPI_ISL_454708 | 4/13/2020 | 5/28/2020 North America / USA / Utah                            |
| EPI_ISL_454709 | 4/13/2020 | 5/28/2020 North America / USA / Utah                            |
| EPI_ISL_454710 | 4/13/2020 | 5/28/2020 North America / USA / Utah                            |
| EPI_ISL_454711 | 4/13/2020 | 5/28/2020 North America / USA / Utah                            |
| EPI_ISL_454714 | 4/13/2020 | 5/28/2020 North America / USA / Utah                            |
| EPI_ISL_454715 | 4/13/2020 | 5/28/2020 North America / USA / Utah                            |
| EPI_ISL_454717 | 4/13/2020 | 5/28/2020 North America / USA / Utah                            |
| EPI_ISL_454718 | 4/13/2020 | 5/28/2020 North America / USA / Utah                            |
| EPI_ISL_454721 | 4/13/2020 | 5/28/2020 North America / USA / Utah                            |
| EPI_ISL_454722 | 4/16/2020 | 5/28/2020 North America / USA / Utah                            |
| EPI_ISL_454723 | 4/15/2020 | 5/28/2020 North America / USA / Utah                            |
| EPI_ISL_454725 | 4/17/2020 | 5/28/2020 North America / USA / Utah                            |
| EPI_ISL_454727 | 4/16/2020 | 5/28/2020 North America / USA / Utah                            |
| EPI_ISL_454728 | 4/17/2020 | 5/28/2020 North America / USA / Utah                            |
| EPI_ISL_454729 | 4/16/2020 | 5/28/2020 North America / USA / Utah                            |
| EPI_ISL_454730 | 4/17/2020 | 5/28/2020 North America / USA / Utah                            |
| EPI_ISL_454731 | 4/17/2020 | 5/28/2020 North America / USA / Utah                            |
| EPI_ISL_454732 | 4/2/2020  | 5/28/2020 Europe / Russia / Moscow                              |
| EPI_ISL_454733 | 3/1/2020  | 5/28/2020 Europe / Italy / Tuscany / Siena                      |
| EPI_ISL_454796 | 2020-03   | 5/28/2020 North America / USA / North Carolina                  |
| EPI_ISL_454797 | 2020-03   | 5/28/2020 North America / USA / North Carolina                  |
| EPI_ISL_454798 | 2020-03   | 5/28/2020 North America / USA / North Carolina                  |
| EPI_ISL_454799 | 2020-03   | 5/28/2020 North America / USA / North Carolina                  |
| EPI_ISL_454800 | 2020-03   | 5/28/2020 North America / USA / North Carolina                  |
| EPI_ISL_454801 | 2020-03   | 5/28/2020 North America / USA / North Carolina                  |
| EPI_ISL_454802 | 2020-03   | 5/28/2020 North America / USA / North Carolina                  |
| EPI_ISL_454803 | 2020-03   | 5/28/2020 North America / USA / North Carolina                  |
| EPI_ISL_454804 | 2020-03   | 5/28/2020 North America / USA / North Carolina                  |
| EPI_ISL_454805 | 2020-03   | 5/28/2020 North America / USA / North Carolina                  |
| EPI_ISL_454806 | 2020-03   | 5/28/2020 North America / USA / North Carolina                  |
| EPI_ISL_454807 | 2020-03   | 5/28/2020 North America / USA / North Carolina                  |
| EPI_ISL_454808 | 2020-03   | 5/28/2020 North America / USA / North Carolina                  |
| EPI_ISL_454809 | 2020-04   | 5/28/2020 North America / USA / North Carolina                  |
| EPI_ISL_454810 | 2020-04   | 5/28/2020 North America / USA / North Carolina                  |
| EPI_ISL_454811 | 2020-04   | 5/28/2020 North America / USA / North Carolina                  |

|                |           |           |                                      |
|----------------|-----------|-----------|--------------------------------------|
| EPI_ISL_454812 | 2020-04   | 5/28/2020 | North America / USA / North Carolina |
| EPI_ISL_454813 | 2020-04   | 5/28/2020 | North America / USA / North Carolina |
| EPI_ISL_454814 | 2020-03   | 5/28/2020 | North America / USA / North Carolina |
| EPI_ISL_454815 | 2020-03   | 5/28/2020 | North America / USA / North Carolina |
| EPI_ISL_454816 | 2020-03   | 5/28/2020 | North America / USA / North Carolina |
| EPI_ISL_454817 | 2020-03   | 5/28/2020 | North America / USA / North Carolina |
| EPI_ISL_454820 | 2020-03   | 5/28/2020 | North America / USA / North Carolina |
| EPI_ISL_454821 | 2020-03   | 5/28/2020 | North America / USA / North Carolina |
| EPI_ISL_454822 | 2020-03   | 5/28/2020 | North America / USA / North Carolina |
| EPI_ISL_454823 | 2020-03   | 5/28/2020 | North America / USA / North Carolina |
| EPI_ISL_454824 | 2020-03   | 5/28/2020 | North America / USA / North Carolina |
| EPI_ISL_454825 | 2020-03   | 5/28/2020 | North America / USA / North Carolina |
| EPI_ISL_454826 | 2020-03   | 5/28/2020 | North America / USA / North Carolina |
| EPI_ISL_454827 | 2020-03   | 5/28/2020 | North America / USA / North Carolina |
| EPI_ISL_454828 | 2020-03   | 5/28/2020 | North America / USA / North Carolina |
| EPI_ISL_454749 | 2/16/2020 | 5/29/2020 | Asia / Japan                         |
| EPI_ISL_454750 | 2/27/2020 | 5/29/2020 | Europe / Netherlands / Utrecht       |
| EPI_ISL_454751 | 2/28/2020 | 5/29/2020 | Europe / Netherlands / Utrecht       |
| EPI_ISL_454752 | 2/28/2020 | 5/29/2020 | Europe / Netherlands / Utrecht       |
| EPI_ISL_454753 | 2/28/2020 | 5/29/2020 | Europe / Netherlands / Utrecht       |
| EPI_ISL_454754 | 2/28/2020 | 5/29/2020 | Europe / Netherlands / Utrecht       |
| EPI_ISL_454755 | 3/3/2020  | 5/29/2020 | Europe / Netherlands / Utrecht       |
| EPI_ISL_454756 | 3/5/2020  | 5/29/2020 | Europe / Netherlands / Utrecht       |
| EPI_ISL_454757 | 3/6/2020  | 5/29/2020 | Europe / Netherlands / Utrecht       |
| EPI_ISL_454758 | 3/11/2020 | 5/29/2020 | Europe / Netherlands / Utrecht       |
| EPI_ISL_454759 | 3/13/2020 | 5/29/2020 | Europe / Netherlands / Utrecht       |
| EPI_ISL_454760 | 3/14/2020 | 5/29/2020 | Europe / Netherlands / Utrecht       |
| EPI_ISL_454761 | 3/14/2020 | 5/29/2020 | Europe / Netherlands / Utrecht       |
| EPI_ISL_454762 | 3/16/2020 | 5/29/2020 | Europe / Netherlands / Utrecht       |
| EPI_ISL_454763 | 3/16/2020 | 5/29/2020 | Europe / Netherlands / Utrecht       |
| EPI_ISL_454764 | 3/16/2020 | 5/29/2020 | Europe / Netherlands / Utrecht       |
| EPI_ISL_454765 | 3/18/2020 | 5/29/2020 | Europe / Netherlands / Utrecht       |
| EPI_ISL_454766 | 3/23/2020 | 5/29/2020 | Europe / Netherlands / Utrecht       |
| EPI_ISL_454767 | 3/23/2020 | 5/29/2020 | Europe / Netherlands / Utrecht       |
| EPI_ISL_454768 | 2020      | 5/29/2020 | Europe / Netherlands / Utrecht       |
| EPI_ISL_454769 | 3/24/2020 | 5/29/2020 | Europe / Netherlands / Utrecht       |
| EPI_ISL_454770 | 3/25/2020 | 5/29/2020 | Europe / Netherlands / Utrecht       |
| EPI_ISL_454771 | 3/23/2020 | 5/29/2020 | Europe / Netherlands / Utrecht       |
| EPI_ISL_454772 | 3/26/2020 | 5/29/2020 | Europe / Netherlands / Utrecht       |
| EPI_ISL_454773 | 3/26/2020 | 5/29/2020 | Europe / Netherlands / Utrecht       |
| EPI_ISL_454774 | 3/27/2020 | 5/29/2020 | Europe / Netherlands / Utrecht       |
| EPI_ISL_454775 | 4/1/2020  | 5/29/2020 | Europe / Netherlands / Utrecht       |
| EPI_ISL_454776 | 4/2/2020  | 5/29/2020 | Europe / Netherlands / Utrecht       |
| EPI_ISL_454777 | 4/1/2020  | 5/29/2020 | Europe / Netherlands / Utrecht       |
| EPI_ISL_454778 | 4/3/2020  | 5/29/2020 | Europe / Netherlands / Utrecht       |
| EPI_ISL_454779 | 4/4/2020  | 5/29/2020 | Europe / Netherlands / Utrecht       |
| EPI_ISL_454780 | 4/4/2020  | 5/29/2020 | Europe / Netherlands / Utrecht       |

|                |           |                                              |
|----------------|-----------|----------------------------------------------|
| EPI_ISL_454781 | 4/4/2020  | 5/29/2020 Europe / Netherlands / Utrecht     |
| EPI_ISL_454782 | 4/11/2020 | 5/29/2020 Europe / Netherlands / Utrecht     |
| EPI_ISL_454783 | 4/22/2020 | 5/29/2020 Europe / Netherlands / Utrecht     |
| EPI_ISL_454784 | 4/22/2020 | 5/29/2020 Europe / Netherlands / Utrecht     |
| EPI_ISL_454785 | 3/10/2020 | 5/29/2020 Europe / Netherlands / Utrecht     |
| EPI_ISL_454786 | 3/11/2020 | 5/29/2020 Europe / Netherlands / Utrecht     |
| EPI_ISL_454787 | 3/12/2020 | 5/29/2020 Europe / Netherlands / Utrecht     |
| EPI_ISL_454788 | 3/16/2020 | 5/29/2020 Europe / Netherlands / Utrecht     |
| EPI_ISL_454789 | 3/20/2020 | 5/29/2020 Europe / Netherlands / Utrecht     |
| EPI_ISL_454790 | 3/24/2020 | 5/29/2020 Europe / Netherlands / Utrecht     |
| EPI_ISL_454791 | 3/25/2020 | 5/29/2020 Europe / Netherlands / Utrecht     |
| EPI_ISL_454792 | 3/27/2020 | 5/29/2020 Europe / Netherlands / Utrecht     |
| EPI_ISL_454793 | 3/31/2020 | 5/29/2020 Europe / Netherlands / Utrecht     |
| EPI_ISL_454794 | 4/7/2020  | 5/29/2020 Europe / Netherlands / Utrecht     |
| EPI_ISL_454795 | 4/25/2020 | 5/29/2020 Europe / Serbia / Cacak            |
| EPI_ISL_454830 | 4/23/2020 | 5/29/2020 Asia / India / Rajasthan / Jaipur  |
| EPI_ISL_454832 | 4/21/2020 | 5/29/2020 Asia / India / Rajasthan / Jaipur  |
| EPI_ISL_454833 | 4/27/2020 | 5/29/2020 Asia / India / Rajasthan / Jaipur  |
| EPI_ISL_454858 | 4/7/2020  | 5/29/2020 Asia / India / Haryana / Faridabad |
| EPI_ISL_454862 | 4/11/2020 | 5/29/2020 Asia / India / Haryana / Faridabad |
| EPI_ISL_454865 | 4/16/2020 | 5/29/2020 Asia / India / Haryana / Faridabad |
| EPI_ISL_454866 | 4/16/2020 | 5/29/2020 Asia / India / Haryana / Faridabad |
| EPI_ISL_454867 | 4/16/2020 | 5/29/2020 Asia / India / Haryana / Faridabad |
| EPI_ISL_454868 | 3/2/2020  | 5/29/2020 Europe / Sweden / Stockholm        |
| EPI_ISL_454869 | 3/2/2020  | 5/29/2020 Europe / Sweden / Stockholm        |
| EPI_ISL_454870 | 3/3/2020  | 5/29/2020 Europe / Sweden / Stockholm        |
| EPI_ISL_454871 | 3/4/2020  | 5/29/2020 Europe / Sweden / Stockholm        |
| EPI_ISL_454872 | 3/3/2020  | 5/29/2020 Europe / Sweden / Stockholm        |
| EPI_ISL_454873 | 3/3/2020  | 5/29/2020 Europe / Sweden / Stockholm        |
| EPI_ISL_454874 | 3/4/2020  | 5/29/2020 Europe / Sweden / Stockholm        |
| EPI_ISL_454875 | 3/4/2020  | 5/29/2020 Europe / Sweden / Stockholm        |
| EPI_ISL_454876 | 3/4/2020  | 5/29/2020 Europe / Sweden / Stockholm        |
| EPI_ISL_454877 | 3/4/2020  | 5/29/2020 Europe / Sweden / Stockholm        |
| EPI_ISL_454878 | 3/3/2020  | 5/29/2020 Europe / Sweden / Stockholm        |
| EPI_ISL_454879 | 3/3/2020  | 5/29/2020 Europe / Sweden / Stockholm        |
| EPI_ISL_454880 | 3/3/2020  | 5/29/2020 Europe / Sweden / Stockholm        |
| EPI_ISL_454881 | 3/3/2020  | 5/29/2020 Europe / Sweden / Stockholm        |
| EPI_ISL_454882 | 3/4/2020  | 5/29/2020 Europe / Sweden / Stockholm        |
| EPI_ISL_454883 | 3/4/2020  | 5/29/2020 Europe / Sweden / Stockholm        |
| EPI_ISL_454884 | 3/4/2020  | 5/29/2020 Europe / Sweden / Stockholm        |
| EPI_ISL_454885 | 3/4/2020  | 5/29/2020 Europe / Sweden / Stockholm        |
| EPI_ISL_454886 | 3/4/2020  | 5/29/2020 Europe / Sweden / Stockholm        |
| EPI_ISL_454887 | 3/4/2020  | 5/29/2020 Europe / Sweden / Stockholm        |
| EPI_ISL_454888 | 3/4/2020  | 5/29/2020 Europe / Sweden / Stockholm        |
| EPI_ISL_454889 | 3/6/2020  | 5/29/2020 Europe / Sweden / Stockholm        |
| EPI_ISL_454890 | 3/7/2020  | 5/29/2020 Europe / Sweden / Stockholm        |
| EPI_ISL_454891 | 3/7/2020  | 5/29/2020 Europe / Sweden / Stockholm        |



|                |           |                                        |
|----------------|-----------|----------------------------------------|
| EPI_ISL_454941 | 3/13/2020 | 5/29/2020 Asia / China / Hubei / Wuhan |
| EPI_ISL_454942 | 3/2/2020  | 5/29/2020 Asia / China / Hubei / Wuhan |
| EPI_ISL_454943 | 3/2/2020  | 5/29/2020 Asia / China / Hubei / Wuhan |
| EPI_ISL_454944 | 3/12/2020 | 5/29/2020 Asia / China / Hubei / Wuhan |
| EPI_ISL_454946 | 3/16/2020 | 5/29/2020 Asia / China / Hubei / Wuhan |
| EPI_ISL_454947 | 3/3/2020  | 5/29/2020 Asia / China / Hubei / Wuhan |
| EPI_ISL_454948 | 3/24/2020 | 5/29/2020 Asia / China / Hubei / Wuhan |
| EPI_ISL_454949 | 3/22/2020 | 5/29/2020 Asia / China / Hubei / Wuhan |
| EPI_ISL_454950 | 3/20/2020 | 5/29/2020 Asia / China / Hubei / Wuhan |
| EPI_ISL_454951 | 3/25/2020 | 5/29/2020 Asia / China / Hubei / Wuhan |
| EPI_ISL_454952 | 2/19/2020 | 5/29/2020 Asia / China / Hubei / Wuhan |
| EPI_ISL_454953 | 3/18/2020 | 5/29/2020 Asia / China / Hubei / Wuhan |
| EPI_ISL_454954 | 3/17/2020 | 5/29/2020 Asia / China / Hubei / Wuhan |
| EPI_ISL_454955 | 3/1/2020  | 5/29/2020 Asia / China / Hubei / Wuhan |
| EPI_ISL_454956 | 3/27/2020 | 5/29/2020 Asia / China / Hubei / Wuhan |
| EPI_ISL_454957 | 3/19/2020 | 5/29/2020 Asia / China / Hubei / Wuhan |
| EPI_ISL_454958 | 3/19/2020 | 5/29/2020 Asia / China / Hubei / Wuhan |
| EPI_ISL_454960 | 3/18/2020 | 5/29/2020 Asia / China / Hubei / Wuhan |
| EPI_ISL_454961 | 3/19/2020 | 5/29/2020 Asia / China / Hubei / Wuhan |
| EPI_ISL_454962 | 3/14/2020 | 5/29/2020 Asia / China / Hubei / Wuhan |
| EPI_ISL_454963 | 3/20/2020 | 5/29/2020 Asia / China / Hubei / Wuhan |
| EPI_ISL_454965 | 2/20/2020 | 5/29/2020 Asia / China / Hubei / Wuhan |
| EPI_ISL_454967 | 3/20/2020 | 5/29/2020 Asia / China / Hubei / Wuhan |
| EPI_ISL_454968 | 3/2/2020  | 5/29/2020 Asia / China / Hubei / Wuhan |
| EPI_ISL_454969 | 3/16/2020 | 5/29/2020 Asia / China / Hubei / Wuhan |
| EPI_ISL_454971 | 3/18/2020 | 5/29/2020 Asia / China / Hubei / Wuhan |
| EPI_ISL_454972 | 3/17/2020 | 5/29/2020 Asia / China / Hubei / Wuhan |
| EPI_ISL_454973 | 2/22/2020 | 5/29/2020 Asia / China / Hubei / Wuhan |
| EPI_ISL_454974 | 2/17/2020 | 5/29/2020 Asia / China / Hubei / Wuhan |
| EPI_ISL_454975 | 3/1/2020  | 5/29/2020 Asia / China / Hubei / Wuhan |
| EPI_ISL_454976 | 3/4/2020  | 5/29/2020 Asia / China / Hubei / Wuhan |
| EPI_ISL_454977 | 3/17/2020 | 5/29/2020 Asia / China / Hubei / Wuhan |
| EPI_ISL_454978 | 3/14/2020 | 5/29/2020 Asia / China / Hubei / Wuhan |
| EPI_ISL_454979 | 3/18/2020 | 5/29/2020 Asia / China / Hubei / Wuhan |
| EPI_ISL_454980 | 2/9/2020  | 5/29/2020 Asia / China / Hubei / Wuhan |
| EPI_ISL_454981 | 2/4/2020  | 5/29/2020 Asia / China / Hubei / Wuhan |
| EPI_ISL_454982 | 3/14/2020 | 5/29/2020 Asia / China / Hubei / Wuhan |
| EPI_ISL_454983 | 3/12/2020 | 5/29/2020 Asia / China / Hubei / Wuhan |
| EPI_ISL_454984 | 3/15/2020 | 5/29/2020 Asia / China / Hubei / Wuhan |
| EPI_ISL_454988 | 3/2/2020  | 5/29/2020 Asia / China / Hubei / Wuhan |
| EPI_ISL_454989 | 3/2/2020  | 5/29/2020 Asia / China / Hubei / Wuhan |
| EPI_ISL_454990 | 3/2/2020  | 5/29/2020 Asia / China / Hubei / Wuhan |
| EPI_ISL_454991 | 3/2/2020  | 5/29/2020 Asia / China / Hubei / Wuhan |
| EPI_ISL_454992 | 2/27/2020 | 5/29/2020 Asia / China / Hubei / Wuhan |
| EPI_ISL_454993 | 2/28/2020 | 5/29/2020 Asia / China / Hubei / Wuhan |
| EPI_ISL_454995 | 2/21/2020 | 5/29/2020 Asia / China / Hubei / Wuhan |
| EPI_ISL_454996 | 2/26/2020 | 5/29/2020 Asia / China / Hubei / Wuhan |



|                |           |                                                          |
|----------------|-----------|----------------------------------------------------------|
| EPI_ISL_454997 | 3/2/2020  | 5/29/2020 Asia / China / Hubei / Wuhan                   |
| EPI_ISL_455015 | 4/28/2020 | 5/29/2020 Asia / India / Gujarat / Rajkot                |
| EPI_ISL_455016 | 4/27/2020 | 5/29/2020 Asia / India / Gujarat / Rajkot                |
| EPI_ISL_455017 | 5/2/2020  | 5/29/2020 Asia / India / Gujarat / Vadodara              |
| EPI_ISL_455018 | 5/2/2020  | 5/29/2020 Asia / India / Gujarat / Vadodara              |
| EPI_ISL_455019 | 5/2/2020  | 5/29/2020 Asia / India / Gujarat / Vadodara              |
| EPI_ISL_455020 | 5/2/2020  | 5/29/2020 Asia / India / Gujarat / Vadodara              |
| EPI_ISL_455021 | 5/2/2020  | 5/29/2020 Asia / India / Gujarat / Vadodara              |
| EPI_ISL_455022 | 5/2/2020  | 5/29/2020 Asia / India / Gujarat / Vadodara              |
| EPI_ISL_455023 | 5/2/2020  | 5/29/2020 Asia / India / Gujarat / Vadodara              |
| EPI_ISL_455024 | 5/2/2020  | 5/29/2020 Asia / India / Gujarat / Vadodara              |
| EPI_ISL_455025 | 5/2/2020  | 5/29/2020 Asia / India / Gujarat / Vadodara              |
| EPI_ISL_455026 | 5/2/2020  | 5/29/2020 Asia / India / Gujarat / Vadodara              |
| EPI_ISL_455027 | 5/2/2020  | 5/29/2020 Asia / India / Gujarat / Vadodara              |
| EPI_ISL_455028 | 4/22/2020 | 5/29/2020 Oceania / Australia / New South Wales / Sydney |
| EPI_ISL_455029 | 4/23/2020 | 5/29/2020 Oceania / Australia / New South Wales / Sydney |
| EPI_ISL_455030 | 4/23/2020 | 5/29/2020 Oceania / Australia / New South Wales / Sydney |
| EPI_ISL_455031 | 4/23/2020 | 5/29/2020 Oceania / Australia / New South Wales / Sydney |
| EPI_ISL_455032 | 4/23/2020 | 5/29/2020 Oceania / Australia / New South Wales / Sydney |
| EPI_ISL_455033 | 4/23/2020 | 5/29/2020 Oceania / Australia / New South Wales / Sydney |
| EPI_ISL_455034 | 4/11/2020 | 5/29/2020 Oceania / Australia / New South Wales / Sydney |
| EPI_ISL_455035 | 4/26/2020 | 5/29/2020 Oceania / Australia / New South Wales / Sydney |
| EPI_ISL_455036 | 3/31/2020 | 5/29/2020 Oceania / Australia / New South Wales / Sydney |
| EPI_ISL_455037 | 4/7/2020  | 5/29/2020 Oceania / Australia / New South Wales / Sydney |
| EPI_ISL_455038 | 4/14/2020 | 5/29/2020 Oceania / Australia / New South Wales / Sydney |
| EPI_ISL_455039 | 4/14/2020 | 5/29/2020 Oceania / Australia / New South Wales / Sydney |
| EPI_ISL_455040 | 4/14/2020 | 5/29/2020 Oceania / Australia / New South Wales / Sydney |
| EPI_ISL_455041 | 3/23/2020 | 5/29/2020 Oceania / Australia / New South Wales / Sydney |
| EPI_ISL_455042 | 3/20/2020 | 5/29/2020 Oceania / Australia / New South Wales / Sydney |
| EPI_ISL_455043 | 3/24/2020 | 5/29/2020 Oceania / Australia / New South Wales / Sydney |
| EPI_ISL_455044 | 3/28/2020 | 5/29/2020 Oceania / Australia / New South Wales / Sydney |
| EPI_ISL_455045 | 3/27/2020 | 5/29/2020 Oceania / Australia / New South Wales / Sydney |
| EPI_ISL_455046 | 3/29/2020 | 5/29/2020 Oceania / Australia / New South Wales / Sydney |
| EPI_ISL_455047 | 4/6/2020  | 5/29/2020 Oceania / Australia / New South Wales / Sydney |
| EPI_ISL_455048 | 3/24/2020 | 5/29/2020 Oceania / Australia / New South Wales / Sydney |
| EPI_ISL_455049 | 4/17/2020 | 5/29/2020 Oceania / Australia / New South Wales / Sydney |
| EPI_ISL_455050 | 3/26/2020 | 5/29/2020 Oceania / Australia / New South Wales / Sydney |
| EPI_ISL_455051 | 3/28/2020 | 5/29/2020 Oceania / Australia / New South Wales / Sydney |
| EPI_ISL_455052 | 3/31/2020 | 5/29/2020 Oceania / Australia / New South Wales / Sydney |
| EPI_ISL_455053 | 3/28/2020 | 5/29/2020 Oceania / Australia / New South Wales / Sydney |
| EPI_ISL_455054 | 4/1/2020  | 5/29/2020 Oceania / Australia / New South Wales / Sydney |
| EPI_ISL_455055 | 4/30/2020 | 5/29/2020 Oceania / Australia / New South Wales / Sydney |
| EPI_ISL_455056 | 4/14/2020 | 5/29/2020 Oceania / Australia / New South Wales / Sydney |
| EPI_ISL_455057 | 5/1/2020  | 5/29/2020 Oceania / Australia / New South Wales / Sydney |
| EPI_ISL_455058 | 5/5/2020  | 5/29/2020 Oceania / Australia / New South Wales / Sydney |
| EPI_ISL_455059 | 4/17/2020 | 5/29/2020 Oceania / Australia / New South Wales / Sydney |
| EPI_ISL_455060 | 5/4/2020  | 5/29/2020 Oceania / Australia / New South Wales / Sydney |

|                |           |                                                          |
|----------------|-----------|----------------------------------------------------------|
| EPI_ISL_455061 | 5/3/2020  | 5/29/2020 Oceania / Australia / New South Wales / Sydney |
| EPI_ISL_455062 | 4/30/2020 | 5/29/2020 Oceania / Australia / New South Wales / Sydney |
| EPI_ISL_455063 | 3/26/2020 | 5/29/2020 Oceania / Australia / New South Wales / Sydney |
| EPI_ISL_455064 | 3/26/2020 | 5/29/2020 Oceania / Australia / New South Wales / Sydney |
| EPI_ISL_455065 | 3/31/2020 | 5/29/2020 Oceania / Australia / New South Wales / Sydney |
| EPI_ISL_455066 | 5/1/2020  | 5/29/2020 Oceania / Australia / New South Wales / Sydney |
| EPI_ISL_455067 | 3/19/2020 | 5/29/2020 Oceania / Australia / New South Wales / Sydney |
| EPI_ISL_455068 | 5/5/2020  | 5/29/2020 Oceania / Australia / New South Wales / Sydney |
| EPI_ISL_455069 | 5/7/2020  | 5/29/2020 Oceania / Australia / New South Wales / Sydney |
| EPI_ISL_455070 | 5/6/2020  | 5/29/2020 Oceania / Australia / New South Wales / Sydney |
| EPI_ISL_455071 | 5/8/2020  | 5/29/2020 Oceania / Australia / New South Wales / Sydney |
| EPI_ISL_455072 | 5/7/2020  | 5/29/2020 Oceania / Australia / New South Wales / Sydney |
| EPI_ISL_455073 | 5/7/2020  | 5/29/2020 Oceania / Australia / New South Wales / Sydney |
| EPI_ISL_455074 | 5/13/2020 | 5/29/2020 Oceania / Australia / New South Wales / Sydney |
| EPI_ISL_455075 | 3/25/2020 | 5/29/2020 Oceania / Australia / New South Wales / Sydney |
| EPI_ISL_455076 | 3/26/2020 | 5/29/2020 Oceania / Australia / New South Wales / Sydney |
| EPI_ISL_455077 | 3/28/2020 | 5/29/2020 Oceania / Australia / New South Wales / Sydney |
| EPI_ISL_455078 | 3/25/2020 | 5/29/2020 Oceania / Australia / New South Wales / Sydney |
| EPI_ISL_455079 | 3/22/2020 | 5/29/2020 Oceania / Australia / New South Wales / Sydney |
| EPI_ISL_455080 | 3/22/2020 | 5/29/2020 Oceania / Australia / New South Wales / Sydney |
| EPI_ISL_455081 | 3/31/2020 | 5/29/2020 Oceania / Australia / New South Wales / Sydney |
| EPI_ISL_455082 | 3/31/2020 | 5/29/2020 Oceania / Australia / New South Wales / Sydney |
| EPI_ISL_455083 | 4/6/2020  | 5/29/2020 Oceania / Australia / New South Wales / Sydney |
| EPI_ISL_455084 | 4/5/2020  | 5/29/2020 Oceania / Australia / New South Wales / Sydney |
| EPI_ISL_455085 | 4/12/2020 | 5/29/2020 Oceania / Australia / New South Wales / Sydney |
| EPI_ISL_455086 | 4/3/2020  | 5/29/2020 Oceania / Australia / New South Wales / Sydney |
| EPI_ISL_455087 | 3/23/2020 | 5/29/2020 Oceania / Australia / New South Wales / Sydney |
| EPI_ISL_455088 | 3/21/2020 | 5/29/2020 Oceania / Australia / New South Wales / Sydney |
| EPI_ISL_455089 | 3/20/2020 | 5/29/2020 Oceania / Australia / New South Wales / Sydney |
| EPI_ISL_455090 | 5/12/2020 | 5/29/2020 Oceania / Australia / New South Wales / Sydney |
| EPI_ISL_455091 | 5/13/2020 | 5/29/2020 Oceania / Australia / New South Wales / Sydney |
| EPI_ISL_455092 | 5/18/2020 | 5/29/2020 Oceania / Australia / New South Wales / Sydney |
| EPI_ISL_455093 | 5/20/2020 | 5/29/2020 Oceania / Australia / New South Wales / Sydney |
| EPI_ISL_455094 | 3/29/2020 | 5/29/2020 Oceania / Australia / New South Wales / Sydney |
| EPI_ISL_455095 | 4/14/2020 | 5/29/2020 Oceania / Australia / New South Wales / Sydney |
| EPI_ISL_455096 | 3/27/2020 | 5/29/2020 Oceania / Australia / New South Wales / Sydney |
| EPI_ISL_455097 | 4/17/2020 | 5/29/2020 Oceania / Australia / New South Wales / Sydney |
| EPI_ISL_455098 | 3/22/2020 | 5/29/2020 Oceania / Australia / New South Wales / Sydney |
| EPI_ISL_455099 | 5/24/2020 | 5/29/2020 Oceania / Australia / New South Wales / Sydney |
| EPI_ISL_455100 | 3/31/2020 | 5/29/2020 Europe / Sweden / Dalarna                      |
| EPI_ISL_455101 | 4/15/2020 | 5/29/2020 Europe / Sweden / Ostergotland                 |
| EPI_ISL_455102 | 4/27/2020 | 5/29/2020 Europe / Sweden / Vastmanland                  |
| EPI_ISL_455103 | 4/27/2020 | 5/29/2020 Europe / Sweden / Halland                      |
| EPI_ISL_455104 | 5/6/2020  | 5/29/2020 Europe / Sweden / Uppsala                      |
| EPI_ISL_455105 | 5/7/2020  | 5/29/2020 Europe / Sweden / Jonkoping                    |
| EPI_ISL_455106 | 5/11/2020 | 5/29/2020 Europe / Sweden / Stockholm                    |
| EPI_ISL_455107 | 5/12/2020 | 5/29/2020 Europe / Sweden / Vastra Gotaland              |

|                |           |                                             |
|----------------|-----------|---------------------------------------------|
| EPI_ISL_455108 | 5/13/2020 | 5/29/2020 Europe / Sweden / Kalmar          |
| EPI_ISL_455109 | 5/13/2020 | 5/29/2020 Europe / Sweden / Uppsala         |
| EPI_ISL_455110 | 5/14/2020 | 5/29/2020 Europe / Sweden / Stockholm       |
| EPI_ISL_455111 | 5/14/2020 | 5/29/2020 Europe / Sweden / Kalmar          |
| EPI_ISL_455112 | 3/31/2020 | 5/29/2020 Europe / Netherlands / Flevoland  |
| EPI_ISL_455113 | 4/1/2020  | 5/29/2020 Europe / Netherlands / Flevoland  |
| EPI_ISL_455114 | 3/31/2020 | 5/29/2020 Europe / Netherlands / Friesland  |
| EPI_ISL_455115 | 3/31/2020 | 5/29/2020 Europe / Netherlands / Friesland  |
| EPI_ISL_455116 | 3/31/2020 | 5/29/2020 Europe / Netherlands / Friesland  |
| EPI_ISL_455117 | 3/31/2020 | 5/29/2020 Europe / Netherlands / Friesland  |
| EPI_ISL_455118 | 3/31/2020 | 5/29/2020 Europe / Netherlands / Friesland  |
| EPI_ISL_455119 | 4/1/2020  | 5/29/2020 Europe / Netherlands / Friesland  |
| EPI_ISL_455120 | 4/3/2020  | 5/29/2020 Europe / Netherlands / Friesland  |
| EPI_ISL_455121 | 4/6/2020  | 5/29/2020 Europe / Netherlands / Friesland  |
| EPI_ISL_455122 | 3/12/2020 | 5/29/2020 Europe / Netherlands / Gelderland |
| EPI_ISL_455123 | 3/12/2020 | 5/29/2020 Europe / Netherlands / Gelderland |
| EPI_ISL_455125 | 4/2/2020  | 5/29/2020 Europe / Netherlands              |
| EPI_ISL_455126 | 4/2/2020  | 5/29/2020 Europe / Netherlands              |
| EPI_ISL_455129 | 4/2/2020  | 5/29/2020 Europe / Netherlands              |
| EPI_ISL_455131 | 4/2/2020  | 5/29/2020 Europe / Netherlands              |
| EPI_ISL_455132 | 4/3/2020  | 5/29/2020 Europe / Netherlands              |
| EPI_ISL_455133 | 4/3/2020  | 5/29/2020 Europe / Netherlands              |
| EPI_ISL_455134 | 4/3/2020  | 5/29/2020 Europe / Netherlands              |
| EPI_ISL_455135 | 4/3/2020  | 5/29/2020 Europe / Netherlands              |
| EPI_ISL_455141 | 4/3/2020  | 5/29/2020 Europe / Netherlands              |
| EPI_ISL_455142 | 4/4/2020  | 5/29/2020 Europe / Netherlands              |
| EPI_ISL_455143 | 4/4/2020  | 5/29/2020 Europe / Netherlands              |
| EPI_ISL_455144 | 4/4/2020  | 5/29/2020 Europe / Netherlands              |
| EPI_ISL_455145 | 4/4/2020  | 5/29/2020 Europe / Netherlands              |
| EPI_ISL_455146 | 4/4/2020  | 5/29/2020 Europe / Netherlands              |
| EPI_ISL_455147 | 4/4/2020  | 5/29/2020 Europe / Netherlands              |
| EPI_ISL_455148 | 4/4/2020  | 5/29/2020 Europe / Netherlands              |
| EPI_ISL_455149 | 4/4/2020  | 5/29/2020 Europe / Netherlands              |
| EPI_ISL_455151 | 4/5/2020  | 5/29/2020 Europe / Netherlands              |
| EPI_ISL_455152 | 4/5/2020  | 5/29/2020 Europe / Netherlands              |
| EPI_ISL_455155 | 4/6/2020  | 5/29/2020 Europe / Netherlands              |
| EPI_ISL_455156 | 4/6/2020  | 5/29/2020 Europe / Netherlands              |
| EPI_ISL_455157 | 4/6/2020  | 5/29/2020 Europe / Netherlands              |
| EPI_ISL_455159 | 4/7/2020  | 5/29/2020 Europe / Netherlands              |
| EPI_ISL_455160 | 4/7/2020  | 5/29/2020 Europe / Netherlands              |
| EPI_ISL_455161 | 4/7/2020  | 5/29/2020 Europe / Netherlands              |
| EPI_ISL_455162 | 4/7/2020  | 5/29/2020 Europe / Netherlands              |
| EPI_ISL_455163 | 4/7/2020  | 5/29/2020 Europe / Netherlands              |
| EPI_ISL_455164 | 3/20/2020 | 5/29/2020 Europe / Netherlands              |
| EPI_ISL_455165 | 3/30/2020 | 5/29/2020 Europe / Netherlands              |
| EPI_ISL_455167 | 4/8/2020  | 5/29/2020 Europe / Netherlands              |
| EPI_ISL_455168 | 4/8/2020  | 5/29/2020 Europe / Netherlands              |

|                |           |                                |
|----------------|-----------|--------------------------------|
| EPI_ISL_455169 | 4/8/2020  | 5/29/2020 Europe / Netherlands |
| EPI_ISL_455170 | 4/8/2020  | 5/29/2020 Europe / Netherlands |
| EPI_ISL_455171 | 4/8/2020  | 5/29/2020 Europe / Netherlands |
| EPI_ISL_455172 | 4/8/2020  | 5/29/2020 Europe / Netherlands |
| EPI_ISL_455173 | 4/8/2020  | 5/29/2020 Europe / Netherlands |
| EPI_ISL_455174 | 4/8/2020  | 5/29/2020 Europe / Netherlands |
| EPI_ISL_455175 | 4/8/2020  | 5/29/2020 Europe / Netherlands |
| EPI_ISL_455176 | 4/8/2020  | 5/29/2020 Europe / Netherlands |
| EPI_ISL_455177 | 4/8/2020  | 5/29/2020 Europe / Netherlands |
| EPI_ISL_455178 | 4/8/2020  | 5/29/2020 Europe / Netherlands |
| EPI_ISL_455179 | 4/9/2020  | 5/29/2020 Europe / Netherlands |
| EPI_ISL_455180 | 4/9/2020  | 5/29/2020 Europe / Netherlands |
| EPI_ISL_455181 | 2020      | 5/29/2020 Europe / Netherlands |
| EPI_ISL_455184 | 2020      | 5/29/2020 Europe / Netherlands |
| EPI_ISL_455185 | 2020      | 5/29/2020 Europe / Netherlands |
| EPI_ISL_455186 | 2020      | 5/29/2020 Europe / Netherlands |
| EPI_ISL_455187 | 2020      | 5/29/2020 Europe / Netherlands |
| EPI_ISL_455188 | 2020      | 5/29/2020 Europe / Netherlands |
| EPI_ISL_455189 | 2020      | 5/29/2020 Europe / Netherlands |
| EPI_ISL_455190 | 2020      | 5/29/2020 Europe / Netherlands |
| EPI_ISL_455191 | 2020      | 5/29/2020 Europe / Netherlands |
| EPI_ISL_455192 | 2020      | 5/29/2020 Europe / Netherlands |
| EPI_ISL_455193 | 2020      | 5/29/2020 Europe / Netherlands |
| EPI_ISL_455195 | 4/2/2020  | 5/29/2020 Europe / Netherlands |
| EPI_ISL_455196 | 3/31/2020 | 5/29/2020 Europe / Netherlands |
| EPI_ISL_455198 | 4/3/2020  | 5/29/2020 Europe / Netherlands |
| EPI_ISL_455199 | 4/3/2020  | 5/29/2020 Europe / Netherlands |
| EPI_ISL_455200 | 4/3/2020  | 5/29/2020 Europe / Netherlands |
| EPI_ISL_455201 | 2020      | 5/29/2020 Europe / Netherlands |
| EPI_ISL_455202 | 3/26/2020 | 5/29/2020 Europe / Netherlands |
| EPI_ISL_455203 | 4/5/2020  | 5/29/2020 Europe / Netherlands |
| EPI_ISL_455205 | 3/27/2020 | 5/29/2020 Europe / Netherlands |
| EPI_ISL_455206 | 3/27/2020 | 5/29/2020 Europe / Netherlands |
| EPI_ISL_455208 | 3/18/2020 | 5/29/2020 Europe / Netherlands |
| EPI_ISL_455209 | 3/18/2020 | 5/29/2020 Europe / Netherlands |
| EPI_ISL_455210 | 3/19/2020 | 5/29/2020 Europe / Netherlands |
| EPI_ISL_455211 | 3/21/2020 | 5/29/2020 Europe / Netherlands |
| EPI_ISL_455212 | 3/21/2020 | 5/29/2020 Europe / Netherlands |
| EPI_ISL_455213 | 3/21/2020 | 5/29/2020 Europe / Netherlands |
| EPI_ISL_455214 | 3/21/2020 | 5/29/2020 Europe / Netherlands |
| EPI_ISL_455215 | 3/24/2020 | 5/29/2020 Europe / Netherlands |
| EPI_ISL_455216 | 3/24/2020 | 5/29/2020 Europe / Netherlands |
| EPI_ISL_455217 | 3/25/2020 | 5/29/2020 Europe / Netherlands |
| EPI_ISL_455219 | 3/26/2020 | 5/29/2020 Europe / Netherlands |
| EPI_ISL_455220 | 3/28/2020 | 5/29/2020 Europe / Netherlands |
| EPI_ISL_455221 | 3/28/2020 | 5/29/2020 Europe / Netherlands |
| EPI_ISL_455222 | 3/31/2020 | 5/29/2020 Europe / Netherlands |

|                |           |                                |
|----------------|-----------|--------------------------------|
| EPI_ISL_455223 | 2020      | 5/29/2020 Europe / Netherlands |
| EPI_ISL_455224 | 2020      | 5/29/2020 Europe / Netherlands |
| EPI_ISL_455225 | 2020      | 5/29/2020 Europe / Netherlands |
| EPI_ISL_455226 | 4/2/2020  | 5/29/2020 Europe / Netherlands |
| EPI_ISL_455227 | 4/3/2020  | 5/29/2020 Europe / Netherlands |
| EPI_ISL_455228 | 4/6/2020  | 5/29/2020 Europe / Netherlands |
| EPI_ISL_455231 | 4/6/2020  | 5/29/2020 Europe / Netherlands |
| EPI_ISL_455232 | 4/6/2020  | 5/29/2020 Europe / Netherlands |
| EPI_ISL_455233 | 4/6/2020  | 5/29/2020 Europe / Netherlands |
| EPI_ISL_455235 | 4/6/2020  | 5/29/2020 Europe / Netherlands |
| EPI_ISL_455236 | 4/7/2020  | 5/29/2020 Europe / Netherlands |
| EPI_ISL_455237 | 4/7/2020  | 5/29/2020 Europe / Netherlands |
| EPI_ISL_455238 | 4/7/2020  | 5/29/2020 Europe / Netherlands |
| EPI_ISL_455241 | 4/9/2020  | 5/29/2020 Europe / Netherlands |
| EPI_ISL_455242 | 4/10/2020 | 5/29/2020 Europe / Netherlands |
| EPI_ISL_455244 | 4/10/2020 | 5/29/2020 Europe / Netherlands |
| EPI_ISL_455245 | 4/10/2020 | 5/29/2020 Europe / Netherlands |
| EPI_ISL_455246 | 4/11/2020 | 5/29/2020 Europe / Netherlands |
| EPI_ISL_455249 | 4/1/2020  | 5/29/2020 Europe / Netherlands |
| EPI_ISL_455251 | 4/3/2020  | 5/29/2020 Europe / Netherlands |
| EPI_ISL_455252 | 4/2/2020  | 5/29/2020 Europe / Netherlands |
| EPI_ISL_455253 | 3/30/2020 | 5/29/2020 Europe / Netherlands |
| EPI_ISL_455254 | 3/30/2020 | 5/29/2020 Europe / Netherlands |
| EPI_ISL_455255 | 3/30/2020 | 5/29/2020 Europe / Netherlands |
| EPI_ISL_455256 | 3/26/2020 | 5/29/2020 Europe / Netherlands |
| EPI_ISL_455257 | 3/24/2020 | 5/29/2020 Europe / Netherlands |
| EPI_ISL_455258 | 4/1/2020  | 5/29/2020 Europe / Netherlands |
| EPI_ISL_455259 | 2020      | 5/29/2020 Europe / Netherlands |
| EPI_ISL_455260 | 2020      | 5/29/2020 Europe / Netherlands |
| EPI_ISL_455261 | 4/2/2020  | 5/29/2020 Europe / Netherlands |
| EPI_ISL_455262 | 2020      | 5/29/2020 Europe / Netherlands |
| EPI_ISL_455263 | 4/8/2020  | 5/29/2020 Europe / Netherlands |
| EPI_ISL_455266 | 4/3/2020  | 5/29/2020 Europe / Netherlands |
| EPI_ISL_455269 | 4/13/2020 | 5/29/2020 Europe / Netherlands |
| EPI_ISL_455270 | 4/13/2020 | 5/29/2020 Europe / Netherlands |
| EPI_ISL_455274 | 4/14/2020 | 5/29/2020 Europe / Netherlands |
| EPI_ISL_455275 | 4/14/2020 | 5/29/2020 Europe / Netherlands |
| EPI_ISL_455276 | 4/14/2020 | 5/29/2020 Europe / Netherlands |
| EPI_ISL_455277 | 4/14/2020 | 5/29/2020 Europe / Netherlands |
| EPI_ISL_455278 | 4/14/2020 | 5/29/2020 Europe / Netherlands |
| EPI_ISL_455279 | 4/14/2020 | 5/29/2020 Europe / Netherlands |
| EPI_ISL_455280 | 3/31/2020 | 5/29/2020 Europe / Netherlands |
| EPI_ISL_455281 | 4/9/2020  | 5/29/2020 Europe / Netherlands |
| EPI_ISL_455283 | 3/17/2020 | 5/29/2020 Europe / Netherlands |
| EPI_ISL_455284 | 4/8/2020  | 5/29/2020 Europe / Netherlands |
| EPI_ISL_455285 | 4/1/2020  | 5/29/2020 Europe / Netherlands |
| EPI_ISL_455286 | 3/26/2020 | 5/29/2020 Europe / Netherlands |

|                |           |                                                |
|----------------|-----------|------------------------------------------------|
| EPI_ISL_455287 | 4/1/2020  | 5/29/2020 Europe / Netherlands                 |
| EPI_ISL_455289 | 4/9/2020  | 5/29/2020 Europe / Netherlands                 |
| EPI_ISL_455290 | 4/6/2020  | 5/29/2020 Europe / Netherlands / Noord-Brabant |
| EPI_ISL_455291 | 4/4/2020  | 5/29/2020 Europe / Netherlands / Noord-Brabant |
| EPI_ISL_455292 | 3/12/2020 | 5/29/2020 Europe / Netherlands / Utrecht       |
| EPI_ISL_455293 | 3/12/2020 | 5/29/2020 Europe / Netherlands / Utrecht       |
| EPI_ISL_455294 | 4/2/2020  | 5/29/2020 Europe / Netherlands / Zuid-Holland  |
| EPI_ISL_455296 | 4/4/2020  | 5/29/2020 Europe / Netherlands / Zuid-Holland  |
| EPI_ISL_455297 | 4/7/2020  | 5/29/2020 Europe / Netherlands / Zuid-Holland  |
| EPI_ISL_455298 | 4/7/2020  | 5/29/2020 Europe / Netherlands / Zuid-Holland  |
| EPI_ISL_455299 | 4/7/2020  | 5/29/2020 Europe / Netherlands / Zuid-Holland  |
| EPI_ISL_455300 | 4/7/2020  | 5/29/2020 Europe / Netherlands / Zuid-Holland  |
| EPI_ISL_455302 | 4/7/2020  | 5/29/2020 Europe / Netherlands / Zuid-Holland  |
| EPI_ISL_455303 | 4/8/2020  | 5/29/2020 Europe / Netherlands / Zuid-Holland  |
| EPI_ISL_455304 | 4/8/2020  | 5/29/2020 Europe / Netherlands / Zuid-Holland  |
| EPI_ISL_455305 | 4/8/2020  | 5/29/2020 Europe / Netherlands / Zuid-Holland  |
| EPI_ISL_455306 | 4/9/2020  | 5/29/2020 Europe / Netherlands / Zuid-Holland  |
| EPI_ISL_455307 | 4/10/2020 | 5/29/2020 Europe / Netherlands / Zuid-Holland  |
| EPI_ISL_455309 | 4/4/2020  | 5/29/2020 Asia / India / Odisha                |
| EPI_ISL_455311 | 5/7/2020  | 5/29/2020 Asia / India / Odisha                |
| EPI_ISL_455312 | 4/9/2020  | 5/29/2020 Asia / Malaysia / Pahang             |
| EPI_ISL_455313 | 4/2/2020  | 5/29/2020 Asia / Malaysia / Pahang             |
| EPI_ISL_455314 | 2/28/2020 | 5/29/2020 Europe / Spain / Andalusia           |
| EPI_ISL_455315 | 3/4/2020  | 5/29/2020 Europe / Spain / Andalusia           |
| EPI_ISL_455316 | 3/5/2020  | 5/29/2020 Europe / Spain / Andalusia           |
| EPI_ISL_455317 | 3/5/2020  | 5/29/2020 Europe / Spain / Andalusia           |
| EPI_ISL_455318 | 3/5/2020  | 5/29/2020 Europe / Spain / Andalusia           |
| EPI_ISL_455319 | 3/5/2020  | 5/29/2020 Europe / Spain / Andalusia           |
| EPI_ISL_455320 | 3/5/2020  | 5/29/2020 Europe / Spain / Andalusia           |
| EPI_ISL_455321 | 3/5/2020  | 5/29/2020 Europe / Spain / Andalusia           |
| EPI_ISL_455322 | 3/5/2020  | 5/29/2020 Europe / Spain / Andalusia           |
| EPI_ISL_455324 | 3/3/2020  | 5/29/2020 Europe / Spain / Andalusia           |
| EPI_ISL_455325 | 3/5/2020  | 5/29/2020 Africa / Canary Islands              |
| EPI_ISL_455326 | 2/29/2020 | 5/29/2020 Africa / Canary Islands              |
| EPI_ISL_455327 | 3/2/2020  | 5/29/2020 Europe / Spain / Castilla-La Mancha  |
| EPI_ISL_455328 | 3/9/2020  | 5/29/2020 Europe / Spain / Galicia             |
| EPI_ISL_455329 | 3/9/2020  | 5/29/2020 Europe / Spain / Galicia             |
| EPI_ISL_455330 | 3/9/2020  | 5/29/2020 Europe / Spain / Galicia             |
| EPI_ISL_455331 | 3/10/2020 | 5/29/2020 Europe / Spain / Galicia             |
| EPI_ISL_455332 | 3/10/2020 | 5/29/2020 Europe / Spain / Galicia             |
| EPI_ISL_455333 | 3/11/2020 | 5/29/2020 Europe / Spain / Galicia             |
| EPI_ISL_455334 | 3/11/2020 | 5/29/2020 Europe / Spain / Galicia             |
| EPI_ISL_455335 | 3/11/2020 | 5/29/2020 Europe / Spain / Galicia             |
| EPI_ISL_455336 | 2/29/2020 | 5/29/2020 Europe / Spain / La Rioja            |
| EPI_ISL_455337 | 3/1/2020  | 5/29/2020 Europe / Spain / La Rioja            |
| EPI_ISL_455338 | 3/4/2020  | 5/29/2020 Europe / Spain / La Rioja            |
| EPI_ISL_455339 | 3/4/2020  | 5/29/2020 Europe / Spain / La Rioja            |

|                |           |           |                                 |
|----------------|-----------|-----------|---------------------------------|
| EPI_ISL_455340 | 3/5/2020  | 5/29/2020 | Europe / Spain / La Rioja       |
| EPI_ISL_455341 | 3/3/2020  | 5/29/2020 | Europe / Spain / La Rioja       |
| EPI_ISL_455342 | 3/3/2020  | 5/29/2020 | Europe / Spain / La Rioja       |
| EPI_ISL_455343 | 3/3/2020  | 5/29/2020 | Europe / Spain / La Rioja       |
| EPI_ISL_455344 | 3/11/2020 | 5/29/2020 | Europe / Spain / Melilla        |
| EPI_ISL_455345 | 3/11/2020 | 5/29/2020 | Europe / Spain / Melilla        |
| EPI_ISL_455346 | 3/11/2020 | 5/29/2020 | Europe / Spain / Melilla        |
| EPI_ISL_455347 | 3/14/2020 | 5/29/2020 | Europe / Spain / Melilla        |
| EPI_ISL_455348 | 3/14/2020 | 5/29/2020 | Europe / Spain / Melilla        |
| EPI_ISL_455349 | 3/14/2020 | 5/29/2020 | Europe / Spain / Melilla        |
| EPI_ISL_455350 | 2/29/2020 | 5/29/2020 | Europe / Spain / Basque Country |
| EPI_ISL_455351 | 2/29/2020 | 5/29/2020 | Europe / Spain / Basque Country |
| EPI_ISL_455352 | 3/4/2020  | 5/29/2020 | Europe / Spain / Basque Country |
| EPI_ISL_455353 | 3/4/2020  | 5/29/2020 | Europe / Spain / Basque Country |
| EPI_ISL_455354 | 3/5/2020  | 5/29/2020 | Europe / Spain / Basque Country |
| EPI_ISL_455355 | 3/13/2020 | 5/29/2020 | North America / USA / Georgia   |
| EPI_ISL_455356 | 3/10/2020 | 5/29/2020 | North America / USA / Georgia   |
| EPI_ISL_455358 | 4/5/2020  | 5/29/2020 | North America / USA / Georgia   |
| EPI_ISL_455359 | 4/23/2020 | 5/29/2020 | North America / USA / Georgia   |
| EPI_ISL_455360 | 3/10/2020 | 5/29/2020 | North America / USA / Georgia   |
| EPI_ISL_455361 | 3/30/2020 | 5/29/2020 | North America / USA / Georgia   |
| EPI_ISL_455362 | 4/10/2020 | 5/29/2020 | Africa / Nigeria / Kwara State  |
| EPI_ISL_455363 | 3/2/2020  | 5/29/2020 | Asia / China / Hubei / Wuhan    |
| EPI_ISL_455364 | 3/2/2020  | 5/29/2020 | Asia / China / Hubei / Wuhan    |
| EPI_ISL_455365 | 2/23/2020 | 5/29/2020 | Asia / China / Hubei / Wuhan    |
| EPI_ISL_455366 | 2/23/2020 | 5/29/2020 | Asia / China / Hubei / Wuhan    |
| EPI_ISL_455367 | 2/23/2020 | 5/29/2020 | Asia / China / Hubei / Wuhan    |
| EPI_ISL_455368 | 2/23/2020 | 5/29/2020 | Asia / China / Hubei / Wuhan    |
| EPI_ISL_455369 | 3/2/2020  | 5/29/2020 | Asia / China / Hubei / Wuhan    |
| EPI_ISL_455370 | 2/24/2020 | 5/29/2020 | Asia / China / Hubei / Wuhan    |
| EPI_ISL_455371 | 3/2/2020  | 5/29/2020 | Asia / China / Hubei / Wuhan    |
| EPI_ISL_455372 | 3/3/2020  | 5/29/2020 | Asia / China / Hubei / Wuhan    |
| EPI_ISL_455373 | 2/28/2020 | 5/29/2020 | Asia / China / Hubei / Wuhan    |
| EPI_ISL_455374 | 2/10/2020 | 5/29/2020 | Asia / China / Hubei / Wuhan    |
| EPI_ISL_455375 | 2/11/2020 | 5/29/2020 | Asia / China / Hubei / Wuhan    |
| EPI_ISL_455376 | 2/28/2020 | 5/29/2020 | Asia / China / Hubei / Wuhan    |
| EPI_ISL_455377 | 3/3/2020  | 5/29/2020 | Asia / China / Hubei / Wuhan    |
| EPI_ISL_455378 | 3/13/2020 | 5/29/2020 | Asia / China / Hubei / Wuhan    |
| EPI_ISL_455379 | 3/13/2020 | 5/29/2020 | Asia / China / Hubei / Wuhan    |
| EPI_ISL_455380 | 3/12/2020 | 5/29/2020 | Asia / China / Hubei / Wuhan    |
| EPI_ISL_455381 | 3/15/2020 | 5/29/2020 | Asia / China / Hubei / Wuhan    |
| EPI_ISL_455382 | 3/3/2020  | 5/29/2020 | Asia / China / Hubei / Wuhan    |
| EPI_ISL_455383 | 3/3/2020  | 5/29/2020 | Asia / China / Hubei / Wuhan    |
| EPI_ISL_455384 | 3/16/2020 | 5/29/2020 | Asia / China / Hubei / Wuhan    |
| EPI_ISL_455386 | 2/12/2020 | 5/29/2020 | Asia / China / Hubei / Wuhan    |
| EPI_ISL_455388 | 3/17/2020 | 5/29/2020 | Asia / China / Hubei / Wuhan    |
| EPI_ISL_455389 | 3/29/2020 | 5/29/2020 | Asia / China / Hubei / Wuhan    |

|                |           |                                                                         |
|----------------|-----------|-------------------------------------------------------------------------|
| EPI_ISL_455390 | 3/19/2020 | 5/29/2020 Asia / China / Hubei / Wuhan                                  |
| EPI_ISL_455391 | 2/4/2020  | 5/29/2020 Asia / China / Hubei / Wuhan                                  |
| EPI_ISL_455392 | 3/17/2020 | 5/29/2020 Asia / China / Hubei / Wuhan                                  |
| EPI_ISL_455394 | 3/16/2020 | 5/29/2020 Asia / China / Hubei / Wuhan                                  |
| EPI_ISL_455395 | 3/15/2020 | 5/29/2020 Asia / China / Hubei / Wuhan                                  |
| EPI_ISL_455397 | 3/16/2020 | 5/29/2020 Asia / China / Hubei / Wuhan                                  |
| EPI_ISL_455398 | 3/15/2020 | 5/29/2020 Asia / China / Hubei / Wuhan                                  |
| EPI_ISL_455399 | 3/2/2020  | 5/29/2020 Asia / China / Hubei / Wuhan                                  |
| EPI_ISL_455406 | 3/2/2020  | 5/29/2020 Asia / China / Hubei / Wuhan                                  |
| EPI_ISL_455412 | 3/29/2020 | 5/29/2020 Africa / Nigeria / Ogun State                                 |
| EPI_ISL_455413 | 3/27/2020 | 5/29/2020 Africa / Nigeria / Osun State                                 |
| EPI_ISL_455419 | 3/29/2020 | 5/29/2020 Africa / Nigeria / Osun State                                 |
| EPI_ISL_455420 | 5/21/2020 | 5/29/2020 Asia / Bangladesh / Dhaka / Dhaka / Mirpur                    |
| EPI_ISL_455422 | 3/29/2020 | 5/29/2020 Africa / Nigeria / Osun State                                 |
| EPI_ISL_455423 | 3/29/2020 | 5/29/2020 Africa / Nigeria / Osun State                                 |
| EPI_ISL_455424 | 3/29/2020 | 5/29/2020 Africa / Nigeria / Osun State                                 |
| EPI_ISL_455426 | 3/29/2020 | 5/29/2020 Africa / Nigeria / Osun State                                 |
| EPI_ISL_455429 | 3/27/2020 | 5/29/2020 Africa / Nigeria / Oyo State                                  |
| EPI_ISL_455431 | 4/2/2020  | 5/29/2020 Africa / Nigeria / Oyo State                                  |
| EPI_ISL_455434 | 3/13/2020 | 5/29/2020 North America / Mexico / Guerrero                             |
| EPI_ISL_455435 | 3/20/2020 | 5/29/2020 North America / Mexico / Jalisco                              |
| EPI_ISL_455436 | 3/12/2020 | 5/29/2020 North America / Mexico / Mexico City                          |
| EPI_ISL_455437 | 3/21/2020 | 5/29/2020 North America / Mexico / Mexico City                          |
| EPI_ISL_455438 | 3/14/2020 | 5/29/2020 North America / Mexico / Quintana Roo                         |
| EPI_ISL_455439 | 3/11/2020 | 5/29/2020 North America / Mexico / Mexico City                          |
| EPI_ISL_455440 | 3/27/2020 | 5/29/2020 Europe / Poland / Mazowieckie / Plock                         |
| EPI_ISL_455441 | 4/1/2020  | 5/29/2020 Europe / Poland / Malopolska / Krakow                         |
| EPI_ISL_455442 | 3/18/2020 | 5/29/2020 Europe / Poland / Mazowieckie / Grodzisk Mazowiecki           |
| EPI_ISL_455443 | 4/1/2020  | 5/29/2020 Europe / Poland / Malopolska / Krakow                         |
| EPI_ISL_455444 | 3/5/2020  | 5/29/2020 Europe / Poland / Warminsko-Mazurskie / Olsztyn               |
| EPI_ISL_455445 | 3/13/2020 | 5/29/2020 Europe / Poland / Mazowieckie / Warszawa                      |
| EPI_ISL_455446 | 3/13/2020 | 5/29/2020 Europe / Poland / Mazowieckie / Warszawa                      |
| EPI_ISL_455447 | 3/25/2020 | 5/29/2020 Europe / Poland / Mazowieckie / Radom                         |
| EPI_ISL_455448 | 4/1/2020  | 5/29/2020 Europe / Poland / Malopolska / Krakow                         |
| EPI_ISL_455449 | 3/15/2020 | 5/29/2020 Europe / Poland / Wielkopolska / Kalisz                       |
| EPI_ISL_455450 | 3/26/2020 | 5/29/2020 Europe / Poland / Mazowieckie / Plock                         |
| EPI_ISL_455451 | 3/17/2020 | 5/29/2020 Europe / Poland / Mazowieckie / Warszawa                      |
| EPI_ISL_455452 | 3/28/2020 | 5/29/2020 Europe / Poland / Mazowieckie / Warszawa                      |
| EPI_ISL_455453 | 3/5/2020  | 5/29/2020 Europe / Poland / Warminsko-Mazurskie / Olsztyn               |
| EPI_ISL_455455 | 3/14/2020 | 5/29/2020 North America / Mexico / Puebla                               |
| EPI_ISL_455456 | 3/12/2020 | 5/29/2020 North America / Mexico / Queretaro                            |
| EPI_ISL_455609 | 4/6/2020  | 5/29/2020 North America / USA / Louisiana / Assumption Parish / Napole  |
| EPI_ISL_455610 | 4/7/2020  | 5/29/2020 North America / USA / Louisiana / New Orleans                 |
| EPI_ISL_455611 | 4/6/2020  | 5/29/2020 North America / USA / Louisiana / St. Tammany Parish / Lacor  |
| EPI_ISL_455612 | 4/7/2020  | 5/29/2020 North America / USA / Louisiana / Jefferson Parish / Marrero  |
| EPI_ISL_455613 | 4/7/2020  | 5/29/2020 North America / USA / Louisiana / New Orleans                 |
| EPI_ISL_455614 | 4/8/2020  | 5/29/2020 North America / USA / Louisiana / Jefferson Parish / Metairie |



|                |           |                                                                         |
|----------------|-----------|-------------------------------------------------------------------------|
| EPI_ISL_455615 | 4/6/2020  | 5/29/2020 North America / USA / Louisiana / St. Bernard Parish / Chalme |
| EPI_ISL_455616 | 4/7/2020  | 5/29/2020 North America / USA / Louisiana / St. Bernard Parish / Violet |
| EPI_ISL_455617 | 4/3/2020  | 5/29/2020 North America / USA / Louisiana / St. Tammany Parish / Slidel |
| EPI_ISL_455618 | 4/8/2020  | 5/29/2020 North America / USA / Louisiana / New Orleans                 |
| EPI_ISL_455619 | 4/6/2020  | 5/29/2020 North America / USA / Louisiana / New Orleans                 |
| EPI_ISL_455620 | 4/6/2020  | 5/29/2020 North America / USA / Louisiana / New Orleans                 |
| EPI_ISL_455621 | 4/4/2020  | 5/29/2020 North America / USA / Louisiana / Jefferson Parish / Kenner   |
| EPI_ISL_455622 | 4/7/2020  | 5/29/2020 North America / USA / Louisiana / Jefferson Parish / Avondale |
| EPI_ISL_455623 | 4/6/2020  | 5/29/2020 North America / USA / Louisiana / Jefferson Parish / Metairie |
| EPI_ISL_455680 | 1/26/2020 | 5/29/2020 Asia / China / Jiangsu / Changzhou                            |
| EPI_ISL_455683 | 1/22/2020 | 5/29/2020 Asia / China / Zhejiang                                       |
| EPI_ISL_455684 | 1/22/2020 | 5/29/2020 Asia / China / Zhejiang                                       |
| EPI_ISL_455685 | 1/22/2020 | 5/29/2020 Asia / China / Zhejiang                                       |
| EPI_ISL_455686 | 1/26/2020 | 5/29/2020 Asia / China / Zhejiang                                       |
| EPI_ISL_455687 | 1/26/2020 | 5/29/2020 Asia / China / Zhejiang                                       |
| EPI_ISL_455688 | 3/24/2020 | 5/29/2020 Asia / China / Zhejiang                                       |
| EPI_ISL_455689 | 3/24/2020 | 5/29/2020 Asia / China / Zhejiang                                       |
| EPI_ISL_455690 | 3/24/2020 | 5/29/2020 Asia / China / Zhejiang                                       |
| EPI_ISL_455691 | 3/24/2020 | 5/29/2020 Asia / China / Zhejiang                                       |
| EPI_ISL_455692 | 3/24/2020 | 5/29/2020 Asia / China / Zhejiang                                       |
| EPI_ISL_455693 | 3/24/2020 | 5/29/2020 Asia / China / Zhejiang                                       |
| EPI_ISL_455458 | 5/21/2020 | 5/30/2020 Asia / Bangladesh / Dhaka / Narayanganj                       |
| EPI_ISL_455459 | 5/21/2020 | 5/30/2020 Asia / Bangladesh / Dhaka / Dhaka / Mirpur                    |
| EPI_ISL_455460 | 2/9/2020  | 5/30/2020 Asia / China / Jiangxi / Yichun                               |
| EPI_ISL_455461 | 2/6/2020  | 5/30/2020 Asia / China / Jiangxi / Yichun                               |
| EPI_ISL_455462 | 2/5/2020  | 5/30/2020 Asia / China / Jiangxi / Fuzhou                               |
| EPI_ISL_455463 | 2/3/2020  | 5/30/2020 Asia / China / Jiangxi / Jiujiang                             |
| EPI_ISL_455464 | 2/5/2020  | 5/30/2020 Asia / China / Jiangxi / Fuzhou                               |
| EPI_ISL_455465 | 2/10/2020 | 5/30/2020 Asia / China / Jiangxi / Fuzhou                               |
| EPI_ISL_455466 | 2/1/2020  | 5/30/2020 Asia / China / Jiangxi / Yingtan                              |
| EPI_ISL_455467 | 2/12/2020 | 5/30/2020 Asia / China / Jiangxi / Yichun                               |
| EPI_ISL_455468 | 5/13/2020 | 5/30/2020 Europe / Romania / Bucuresti                                  |
| EPI_ISL_455469 | 5/12/2020 | 5/30/2020 Europe / Romania / Bucuresti                                  |
| EPI_ISL_455470 | 5/14/2020 | 5/30/2020 Europe / Romania / Bucuresti                                  |
| EPI_ISL_455471 | 5/14/2020 | 5/30/2020 Europe / Romania / Bucuresti                                  |
| EPI_ISL_455472 | 5/13/2020 | 5/30/2020 Europe / Romania / Buzau                                      |
| EPI_ISL_455473 | 5/14/2020 | 5/30/2020 Europe / Romania / Arges                                      |
| EPI_ISL_455474 | 5/14/2020 | 5/30/2020 Europe / Romania / Arges                                      |
| EPI_ISL_455475 | 5/14/2020 | 5/30/2020 Europe / Romania / Arges                                      |
| EPI_ISL_455476 | 5/17/2020 | 5/30/2020 Europe / Romania / Bucuresti                                  |
| EPI_ISL_455477 | 5/13/2020 | 5/30/2020 Europe / Romania / Bucuresti                                  |
| EPI_ISL_455478 | 4/9/2020  | 5/30/2020 Asia / India / Odisha                                         |
| EPI_ISL_455480 | 4/7/2020  | 5/30/2020 Europe / Serbia / Cacak                                       |
| EPI_ISL_455566 | 3/30/2020 | 5/31/2020 Europe / Croatia / Istria                                     |
| EPI_ISL_455567 | 3/29/2020 | 5/31/2020 Europe / Croatia / Istria                                     |
| EPI_ISL_455568 | 5/8/2020  | 5/31/2020 North America / USA / Iowa / Allamakee County                 |
| EPI_ISL_455569 | 5/8/2020  | 5/31/2020 North America / USA / Wisconsin / Grant County                |

|                |           |                                                                |
|----------------|-----------|----------------------------------------------------------------|
| EPI_ISL_455570 | 5/10/2020 | 5/31/2020 North America / USA / Minnesota / Fillmore County    |
| EPI_ISL_455571 | 5/12/2020 | 5/31/2020 North America / USA / Wisconsin / Vernon County      |
| EPI_ISL_455572 | 5/12/2020 | 5/31/2020 North America / USA / Wisconsin / La Crosse County   |
| EPI_ISL_455573 | 5/10/2020 | 5/31/2020 North America / USA / Wisconsin / La Crosse County   |
| EPI_ISL_455574 | 5/10/2020 | 5/31/2020 North America / USA / Wisconsin / Trempealeau County |
| EPI_ISL_455575 | 5/19/2020 | 5/31/2020 North America / USA / Wisconsin / Crawford County    |
| EPI_ISL_455576 | 5/19/2020 | 5/31/2020 North America / USA / Wisconsin / Trempealeau County |
| EPI_ISL_455578 | 5/25/2020 | 5/31/2020 North America / USA / Wisconsin / Vernon County      |
| EPI_ISL_455580 | 5/12/2020 | 5/31/2020 North America / USA / Wisconsin / La Crosse County   |
| EPI_ISL_455581 | 5/24/2020 | 5/31/2020 North America / USA / Wisconsin / Vernon County      |
| EPI_ISL_455582 | 5/26/2020 | 5/31/2020 North America / USA / Iowa / Allamakee County        |
| EPI_ISL_529146 | 2020-02   | 5/31/2020 Europe / Germany / Hesse / Frankfurt                 |
| EPI_ISL_455583 | 3/18/2020 | 6/1/2020 Asia / Thailand / Nonthaburi                          |
| EPI_ISL_455584 | 3/18/2020 | 6/1/2020 Asia / Thailand / Phatum thani                        |
| EPI_ISL_455585 | 3/14/2020 | 6/1/2020 Asia / Thailand / Bangkok                             |
| EPI_ISL_455586 | 3/17/2020 | 6/1/2020 Asia / Thailand / Bangkok                             |
| EPI_ISL_455587 | 3/13/2020 | 6/1/2020 Asia / Thailand / Nakhonnayok                         |
| EPI_ISL_455588 | 3/23/2020 | 6/1/2020 Asia / Thailand / Trang                               |
| EPI_ISL_455589 | 3/20/2020 | 6/1/2020 Asia / Thailand / Nonthaburi                          |
| EPI_ISL_455590 | 3/20/2020 | 6/1/2020 Asia / Thailand / Nonthaburi                          |
| EPI_ISL_455591 | 3/20/2020 | 6/1/2020 Asia / Thailand / Nonthaburi                          |
| EPI_ISL_455592 | 3/20/2020 | 6/1/2020 Asia / Thailand / Nonthaburi                          |
| EPI_ISL_455593 | 3/20/2020 | 6/1/2020 Asia / Thailand / Nonthaburi                          |
| EPI_ISL_455594 | 3/18/2020 | 6/1/2020 Asia / Thailand / Nonthaburi                          |
| EPI_ISL_455595 | 3/6/2020  | 6/1/2020 Oceania / Australia / South Australia                 |
| EPI_ISL_455596 | 3/3/2020  | 6/1/2020 Oceania / Australia / South Australia                 |
| EPI_ISL_455597 | 4/2/2020  | 6/1/2020 Oceania / Australia / South Australia                 |
| EPI_ISL_455598 | 4/1/2020  | 6/1/2020 Oceania / Australia / South Australia                 |
| EPI_ISL_455599 | 4/1/2020  | 6/1/2020 Oceania / Australia / South Australia                 |
| EPI_ISL_455602 | 3/19/2020 | 6/1/2020 Oceania / Australia / South Australia                 |
| EPI_ISL_455603 | 1/30/2020 | 6/1/2020 Oceania / Australia / South Australia                 |
| EPI_ISL_455604 | 3/13/2020 | 6/1/2020 Asia / Thailand / Bangkok                             |
| EPI_ISL_455605 | 3/14/2020 | 6/1/2020 Asia / Thailand / Nonthaburi                          |
| EPI_ISL_455606 | 3/13/2020 | 6/1/2020 Asia / Thailand / Bangkok                             |
| EPI_ISL_455607 | 3/13/2020 | 6/1/2020 Asia / Thailand / Bangkok                             |
| EPI_ISL_455608 | 3/14/2020 | 6/1/2020 Asia / Thailand / Bangkok                             |
| EPI_ISL_455624 | 3/12/2020 | 6/1/2020 Asia / Thailand / Bangkok                             |
| EPI_ISL_455625 | 3/29/2020 | 6/1/2020 Europe / Portugal                                     |
| EPI_ISL_455626 | 3/29/2020 | 6/1/2020 Europe / Portugal                                     |
| EPI_ISL_455627 | 4/3/2020  | 6/1/2020 Europe / Portugal                                     |
| EPI_ISL_455631 | 4/30/2020 | 6/1/2020 Africa / South Africa / KwaZulu-Natal                 |
| EPI_ISL_455632 | 4/30/2020 | 6/1/2020 Africa / South Africa / KwaZulu-Natal                 |
| EPI_ISL_455633 | 4/30/2020 | 6/1/2020 Africa / South Africa / KwaZulu-Natal                 |
| EPI_ISL_455635 | 5/5/2020  | 6/1/2020 Africa / South Africa / KwaZulu-Natal                 |
| EPI_ISL_455636 | 3/31/2020 | 6/1/2020 Africa / South Africa / KwaZulu-Natal                 |
| EPI_ISL_455639 | 3/31/2020 | 6/1/2020 Africa / South Africa / KwaZulu-Natal                 |
| EPI_ISL_455640 | 3/27/2020 | 6/1/2020 Asia / India / West Bengal / East Medinipur           |

|                |           |                                                         |
|----------------|-----------|---------------------------------------------------------|
| EPI_ISL_455641 | 3/31/2020 | 6/1/2020 Asia / India / West Bengal / Kolkata           |
| EPI_ISL_455643 | 3/30/2020 | 6/1/2020 Asia / India / West Bengal / North 24 Parganas |
| EPI_ISL_455644 | 4/2/2020  | 6/1/2020 Asia / India / West Bengal / East Medinipur    |
| EPI_ISL_455645 | 4/3/2020  | 6/1/2020 Asia / India / West Bengal / Kolkata           |
| EPI_ISL_455646 | 4/3/2020  | 6/1/2020 Asia / India / West Bengal / Howrah            |
| EPI_ISL_455647 | 4/19/2020 | 6/1/2020 Asia / India / West Bengal / Kolkata           |
| EPI_ISL_455648 | 4/20/2020 | 6/1/2020 Asia / India / West Bengal / Kolkata           |
| EPI_ISL_455649 | 4/20/2020 | 6/1/2020 Asia / India / West Bengal / Kolkata           |
| EPI_ISL_455650 | 4/20/2020 | 6/1/2020 Asia / India / West Bengal / Kolkata           |
| EPI_ISL_455651 | 4/21/2020 | 6/1/2020 Asia / India / West Bengal / Kolkata           |
| EPI_ISL_455652 | 4/21/2020 | 6/1/2020 Asia / India / West Bengal / South 24 Parganas |
| EPI_ISL_455653 | 4/21/2020 | 6/1/2020 Asia / India / West Bengal / South 24 Parganas |
| EPI_ISL_455654 | 4/21/2020 | 6/1/2020 Asia / India / West Bengal / Kolkata           |
| EPI_ISL_455655 | 4/30/2020 | 6/1/2020 Asia / India / Rajasthan / Bikaner             |
| EPI_ISL_455656 | 4/30/2020 | 6/1/2020 Asia / India / West Bengal / South 24 Parganas |
| EPI_ISL_455657 | 4/30/2020 | 6/1/2020 Asia / India / West Bengal / Kolkata           |
| EPI_ISL_455658 | 4/30/2020 | 6/1/2020 Asia / India / West Bengal / South 24 Parganas |
| EPI_ISL_455659 | 5/1/2020  | 6/1/2020 Asia / India / West Bengal / South 24 Parganas |
| EPI_ISL_455660 | 5/1/2020  | 6/1/2020 Asia / India / West Bengal / South 24 Parganas |
| EPI_ISL_455661 | 5/1/2020  | 6/1/2020 Asia / India / West Bengal / Kolkata           |
| EPI_ISL_455662 | 5/2/2020  | 6/1/2020 Asia / India / West Bengal / Howrah            |
| EPI_ISL_455663 | 5/2/2020  | 6/1/2020 Asia / India / West Bengal / South 24 Parganas |
| EPI_ISL_455664 | 5/3/2020  | 6/1/2020 Asia / India / West Bengal / Kolkata           |
| EPI_ISL_455665 | 5/1/2020  | 6/1/2020 Asia / India / West Bengal / Kolkata           |
| EPI_ISL_455666 | 5/1/2020  | 6/1/2020 Asia / India / West Bengal / Kolkata           |
| EPI_ISL_455667 | 5/3/2020  | 6/1/2020 Asia / India / West Bengal / South 24 Parganas |
| EPI_ISL_455668 | 5/5/2020  | 6/1/2020 Asia / India / West Bengal / North 24 Parganas |
| EPI_ISL_455669 | 5/3/2020  | 6/1/2020 Asia / India / West Bengal / Kolkata           |
| EPI_ISL_455670 | 5/3/2020  | 6/1/2020 Asia / India / West Bengal / Kolkata           |
| EPI_ISL_455671 | 5/3/2020  | 6/1/2020 Asia / India / West Bengal / Kolkata           |
| EPI_ISL_455672 | 5/3/2020  | 6/1/2020 Asia / India / West Bengal / North 24 Parganas |
| EPI_ISL_455673 | 5/2/2020  | 6/1/2020 Asia / India / West Bengal / South 24 Parganas |
| EPI_ISL_455674 | 5/3/2020  | 6/1/2020 Asia / India / West Bengal / Kolkata           |
| EPI_ISL_455675 | 5/3/2020  | 6/1/2020 Asia / India / West Bengal / North 24 Parganas |
| EPI_ISL_455676 | 5/3/2020  | 6/1/2020 Asia / India / West Bengal / Kolkata           |
| EPI_ISL_455678 | 4/30/2020 | 6/1/2020 Asia / India / West Bengal / North 24 Parganas |
| EPI_ISL_455679 | 5/4/2020  | 6/1/2020 Asia / India / West Bengal / East Medinipur    |
| EPI_ISL_455694 | 3/18/2020 | 6/1/2020 Asia / Vietnam / Hanoi                         |
| EPI_ISL_455695 | 3/18/2020 | 6/1/2020 Asia / Vietnam / Hanoi                         |
| EPI_ISL_455696 | 3/18/2020 | 6/1/2020 Asia / Vietnam / Hanoi                         |
| EPI_ISL_455697 | 3/22/2020 | 6/1/2020 Asia / Vietnam / Hanoi                         |
| EPI_ISL_455698 | 3/19/2020 | 6/1/2020 Asia / Vietnam / Hanoi                         |
| EPI_ISL_455699 | 3/21/2020 | 6/1/2020 Asia / Vietnam / Hanoi                         |
| EPI_ISL_455700 | 3/25/2020 | 6/1/2020 Asia / Vietnam / Hanoi                         |
| EPI_ISL_455701 | 3/23/2020 | 6/1/2020 Asia / Vietnam / Hanoi                         |
| EPI_ISL_455702 | 3/27/2020 | 6/1/2020 Asia / Vietnam / Hanoi                         |
| EPI_ISL_455703 | 3/27/2020 | 6/1/2020 Asia / Vietnam / Hanoi                         |

|                |           |                                                           |
|----------------|-----------|-----------------------------------------------------------|
| EPI_ISL_455704 | 3/31/2020 | 6/1/2020 Asia / Vietnam / Hanoi                           |
| EPI_ISL_455705 | 3/31/2020 | 6/1/2020 Asia / Vietnam / Hanoi                           |
| EPI_ISL_455706 | 3/30/2020 | 6/1/2020 Asia / Vietnam / Hanoi                           |
| EPI_ISL_455707 | 4/2/2020  | 6/1/2020 Asia / Vietnam / Hanoi                           |
| EPI_ISL_455708 | 4/10/2020 | 6/1/2020 Asia / Vietnam / Hanoi                           |
| EPI_ISL_455709 | 4/9/2020  | 6/1/2020 Asia / Vietnam / Hanoi                           |
| EPI_ISL_455710 | 4/9/2020  | 6/1/2020 Asia / Vietnam / Hanoi                           |
| EPI_ISL_455711 | 4/8/2020  | 6/1/2020 Asia / Vietnam / Vinhphuc                        |
| EPI_ISL_455712 | 4/10/2020 | 6/1/2020 Asia / Vietnam / Hanoi                           |
| EPI_ISL_455714 | 3/9/2020  | 6/1/2020 Asia / Vietnam / Quangninh                       |
| EPI_ISL_455716 | 3/17/2020 | 6/1/2020 Asia / Vietnam / Hanoi                           |
| EPI_ISL_455717 | 3/17/2020 | 6/1/2020 Asia / Vietnam / Hanoi                           |
| EPI_ISL_455718 | 4/10/2020 | 6/1/2020 Asia / Vietnam / Hanoi                           |
| EPI_ISL_455727 | 3/31/2020 | 6/1/2020 Europe / Spain / Comunitat Valenciana / Gandia   |
| EPI_ISL_455730 | 3/31/2020 | 6/1/2020 Europe / Spain / Comunitat Valenciana / Sagunt   |
| EPI_ISL_455733 | 3/31/2020 | 6/1/2020 Europe / Spain / Comunitat Valenciana / Soneja   |
| EPI_ISL_455735 | 3/20/2020 | 6/1/2020 Europe / Spain / Comunitat Valenciana / Valencia |
| EPI_ISL_455736 | 3/20/2020 | 6/1/2020 Europe / Spain / Comunitat Valenciana / Valencia |
| EPI_ISL_455741 | 3/29/2020 | 6/1/2020 Europe / Spain / Comunitat Valenciana / Valencia |
| EPI_ISL_455742 | 3/20/2020 | 6/1/2020 Europe / Spain / Comunitat Valenciana / Valencia |
| EPI_ISL_455743 | 3/30/2020 | 6/1/2020 Europe / Spain / Comunitat Valenciana / Valencia |
| EPI_ISL_455751 | 5/6/2020  | 6/1/2020 Asia / India / Odisha                            |
| EPI_ISL_455752 | 5/6/2020  | 6/1/2020 Asia / India / Odisha                            |
| EPI_ISL_455754 | 5/6/2020  | 6/1/2020 Asia / India / Odisha                            |
| EPI_ISL_455755 | 5/7/2020  | 6/1/2020 Asia / India / Odisha                            |
| EPI_ISL_455757 | 5/7/2020  | 6/1/2020 Asia / India / Odisha                            |
| EPI_ISL_455758 | 5/7/2020  | 6/1/2020 Asia / India / Odisha                            |
| EPI_ISL_455760 | 5/7/2020  | 6/1/2020 Asia / India / Odisha                            |
| EPI_ISL_455761 | 5/7/2020  | 6/1/2020 Asia / India / Odisha                            |
| EPI_ISL_455763 | 5/7/2020  | 6/1/2020 Asia / India / Odisha                            |
| EPI_ISL_455764 | 5/7/2020  | 6/1/2020 Asia / India / Odisha                            |
| EPI_ISL_455765 | 5/7/2020  | 6/1/2020 Asia / India / Odisha                            |
| EPI_ISL_455766 | 5/7/2020  | 6/1/2020 Asia / India / Odisha                            |
| EPI_ISL_455767 | 5/7/2020  | 6/1/2020 Asia / India / Odisha                            |
| EPI_ISL_455768 | 5/7/2020  | 6/1/2020 Asia / India / Odisha                            |
| EPI_ISL_455770 | 5/7/2020  | 6/1/2020 Asia / India / Odisha                            |
| EPI_ISL_455771 | 3/19/2020 | 6/1/2020 Asia / India / Odisha                            |
| EPI_ISL_455775 | 4/4/2020  | 6/1/2020 Asia / India / Odisha                            |
| EPI_ISL_455776 | 4/4/2020  | 6/1/2020 Asia / India / Odisha                            |
| EPI_ISL_455777 | 4/4/2020  | 6/1/2020 Asia / India / Odisha                            |
| EPI_ISL_455778 | 4/4/2020  | 6/1/2020 Asia / India / Odisha                            |
| EPI_ISL_455779 | 4/4/2020  | 6/1/2020 Asia / India / Odisha                            |
| EPI_ISL_455780 | 4/8/2020  | 6/1/2020 Asia / India / Odisha                            |
| EPI_ISL_455782 | 4/2/2020  | 6/1/2020 Asia / India / Odisha                            |
| EPI_ISL_455783 | 4/2/2020  | 6/1/2020 Asia / India / Odisha                            |
| EPI_ISL_455784 | 4/2/2020  | 6/1/2020 Asia / India / Odisha                            |
| EPI_ISL_455786 | 5/4/2020  | 6/1/2020 Asia / India / Odisha                            |

|                |           |                                            |
|----------------|-----------|--------------------------------------------|
| EPI_ISL_455787 | 5/4/2020  | 6/1/2020 Asia / India / Odisha             |
| EPI_ISL_455790 | 1/30/2020 | 6/1/2020 Asia / Malaysia / Selangor        |
| EPI_ISL_455791 | 2/8/2020  | 6/1/2020 Asia / Malaysia / Selangor        |
| EPI_ISL_455792 | 2/9/2020  | 6/1/2020 Asia / Malaysia / Selangor        |
| EPI_ISL_455793 | 2/29/2020 | 6/1/2020 Asia / Malaysia / Selangor        |
| EPI_ISL_455840 | 3/10/2020 | 6/1/2020 Europe / Sweden / Orebro          |
| EPI_ISL_455841 | 3/10/2020 | 6/1/2020 Europe / Sweden / Varmland        |
| EPI_ISL_455842 | 3/11/2020 | 6/1/2020 Europe / Sweden / Vastra Gotaland |
| EPI_ISL_455843 | 3/10/2020 | 6/1/2020 Europe / Sweden / Sormland        |
| EPI_ISL_455844 | 3/10/2020 | 6/1/2020 Europe / Sweden / Sormland        |
| EPI_ISL_455845 | 3/8/2020  | 6/1/2020 Europe / Sweden / Sormland        |
| EPI_ISL_455846 | 3/4/2020  | 6/1/2020 Europe / Sweden / Stockholm       |
| EPI_ISL_455847 | 3/9/2020  | 6/1/2020 Europe / Sweden / Stockholm       |
| EPI_ISL_455848 | 3/2/2020  | 6/1/2020 Europe / Sweden / Stockholm       |
| EPI_ISL_455849 | 3/4/2020  | 6/1/2020 Europe / Sweden / Stockholm       |
| EPI_ISL_455850 | 3/4/2020  | 6/1/2020 Europe / Sweden / Stockholm       |
| EPI_ISL_455851 | 3/4/2020  | 6/1/2020 Europe / Sweden / Stockholm       |
| EPI_ISL_455852 | 3/4/2020  | 6/1/2020 Europe / Sweden / Stockholm       |
| EPI_ISL_455853 | 3/3/2020  | 6/1/2020 Europe / Sweden / Stockholm       |
| EPI_ISL_455854 | 3/3/2020  | 6/1/2020 Europe / Sweden / Stockholm       |
| EPI_ISL_455855 | 3/3/2020  | 6/1/2020 Europe / Sweden / Stockholm       |
| EPI_ISL_455856 | 3/4/2020  | 6/1/2020 Europe / Sweden / Stockholm       |
| EPI_ISL_455857 | 3/4/2020  | 6/1/2020 Europe / Sweden / Stockholm       |
| EPI_ISL_455858 | 3/5/2020  | 6/1/2020 Europe / Sweden / Stockholm       |
| EPI_ISL_455859 | 3/4/2020  | 6/1/2020 Europe / Sweden / Stockholm       |
| EPI_ISL_455860 | 3/5/2020  | 6/1/2020 Europe / Sweden / Stockholm       |
| EPI_ISL_455861 | 3/5/2020  | 6/1/2020 Europe / Sweden / Stockholm       |
| EPI_ISL_455862 | 3/4/2020  | 6/1/2020 Europe / Sweden / Stockholm       |
| EPI_ISL_455863 | 3/5/2020  | 6/1/2020 Europe / Sweden / Stockholm       |
| EPI_ISL_455864 | 3/5/2020  | 6/1/2020 Europe / Sweden / Stockholm       |
| EPI_ISL_455865 | 3/6/2020  | 6/1/2020 Europe / Sweden / Stockholm       |
| EPI_ISL_455866 | 3/6/2020  | 6/1/2020 Europe / Sweden / Stockholm       |
| EPI_ISL_455867 | 3/5/2020  | 6/1/2020 Europe / Sweden / Stockholm       |
| EPI_ISL_455868 | 3/5/2020  | 6/1/2020 Europe / Sweden / Stockholm       |
| EPI_ISL_455869 | 3/6/2020  | 6/1/2020 Europe / Sweden / Stockholm       |
| EPI_ISL_455870 | 3/6/2020  | 6/1/2020 Europe / Sweden / Stockholm       |
| EPI_ISL_455871 | 3/6/2020  | 6/1/2020 Europe / Sweden / Stockholm       |
| EPI_ISL_455872 | 3/6/2020  | 6/1/2020 Europe / Sweden / Stockholm       |
| EPI_ISL_455873 | 3/4/2020  | 6/1/2020 Europe / Sweden / Stockholm       |
| EPI_ISL_455874 | 3/7/2020  | 6/1/2020 Europe / Sweden / Stockholm       |
| EPI_ISL_455875 | 3/6/2020  | 6/1/2020 Europe / Sweden / Stockholm       |
| EPI_ISL_455876 | 3/6/2020  | 6/1/2020 Europe / Sweden / Stockholm       |
| EPI_ISL_455877 | 3/7/2020  | 6/1/2020 Europe / Sweden / Stockholm       |
| EPI_ISL_455878 | 3/8/2020  | 6/1/2020 Europe / Sweden / Stockholm       |
| EPI_ISL_455879 | 3/7/2020  | 6/1/2020 Europe / Sweden / Stockholm       |
| EPI_ISL_455880 | 3/7/2020  | 6/1/2020 Europe / Sweden / Stockholm       |
| EPI_ISL_455881 | 3/7/2020  | 6/1/2020 Europe / Sweden / Stockholm       |

|                |           |                                      |
|----------------|-----------|--------------------------------------|
| EPI_ISL_455882 | 3/7/2020  | 6/1/2020 Europe / Sweden / Stockholm |
| EPI_ISL_455883 | 3/7/2020  | 6/1/2020 Europe / Sweden / Stockholm |
| EPI_ISL_455884 | 3/8/2020  | 6/1/2020 Europe / Sweden / Stockholm |
| EPI_ISL_455885 | 3/7/2020  | 6/1/2020 Europe / Sweden / Stockholm |
| EPI_ISL_455886 | 3/7/2020  | 6/1/2020 Europe / Sweden / Stockholm |
| EPI_ISL_455887 | 3/8/2020  | 6/1/2020 Europe / Sweden / Stockholm |
| EPI_ISL_455888 | 3/8/2020  | 6/1/2020 Europe / Sweden / Stockholm |
| EPI_ISL_455889 | 3/7/2020  | 6/1/2020 Europe / Sweden / Stockholm |
| EPI_ISL_455890 | 3/7/2020  | 6/1/2020 Europe / Sweden / Stockholm |
| EPI_ISL_455891 | 3/8/2020  | 6/1/2020 Europe / Sweden / Stockholm |
| EPI_ISL_455892 | 3/7/2020  | 6/1/2020 Europe / Sweden / Stockholm |
| EPI_ISL_455893 | 3/7/2020  | 6/1/2020 Europe / Sweden / Stockholm |
| EPI_ISL_455894 | 3/7/2020  | 6/1/2020 Europe / Sweden / Stockholm |
| EPI_ISL_455895 | 3/8/2020  | 6/1/2020 Europe / Sweden / Stockholm |
| EPI_ISL_455896 | 3/8/2020  | 6/1/2020 Europe / Sweden / Stockholm |
| EPI_ISL_455897 | 3/7/2020  | 6/1/2020 Europe / Sweden / Stockholm |
| EPI_ISL_455898 | 3/10/2020 | 6/1/2020 Europe / Sweden / Stockholm |
| EPI_ISL_455899 | 3/10/2020 | 6/1/2020 Europe / Sweden / Stockholm |
| EPI_ISL_455900 | 3/10/2020 | 6/1/2020 Europe / Sweden / Stockholm |
| EPI_ISL_455901 | 3/10/2020 | 6/1/2020 Europe / Sweden / Stockholm |
| EPI_ISL_455902 | 3/9/2020  | 6/1/2020 Europe / Sweden / Halland   |
| EPI_ISL_455903 | 3/11/2020 | 6/1/2020 Europe / Sweden / Orebro    |
| EPI_ISL_455904 | 3/8/2020  | 6/1/2020 Europe / Sweden / Uppsala   |
| EPI_ISL_455905 | 3/9/2020  | 6/1/2020 Europe / Sweden / Uppsala   |
| EPI_ISL_455906 | 3/8/2020  | 6/1/2020 Europe / Sweden / Uppsala   |
| EPI_ISL_455907 | 3/6/2020  | 6/1/2020 Europe / Sweden / Uppsala   |
| EPI_ISL_455909 | 3/9/2020  | 6/1/2020 Asia / Thailand / Bangkok   |
| EPI_ISL_455910 | 3/11/2020 | 6/1/2020 Asia / Thailand / Bangkok   |
| EPI_ISL_455911 | 3/11/2020 | 6/1/2020 Asia / Thailand / Bangkok   |
| EPI_ISL_455912 | 3/11/2020 | 6/1/2020 Asia / Thailand / Bangkok   |
| EPI_ISL_455913 | 3/12/2020 | 6/1/2020 Asia / Thailand / Bangkok   |
| EPI_ISL_455915 | 3/11/2020 | 6/1/2020 Asia / Thailand / Bangkok   |
| EPI_ISL_455917 | 3/12/2020 | 6/1/2020 Asia / Thailand / Bangkok   |
| EPI_ISL_455922 | 3/12/2020 | 6/1/2020 Asia / Thailand / Bangkok   |
| EPI_ISL_455925 | 3/12/2020 | 6/1/2020 Asia / Thailand / Bangkok   |
| EPI_ISL_455926 | 3/12/2020 | 6/1/2020 Asia / Thailand / Bangkok   |
| EPI_ISL_455927 | 3/13/2020 | 6/1/2020 Asia / Thailand / Bangkok   |
| EPI_ISL_455928 | 3/13/2020 | 6/1/2020 Asia / Thailand / Bangkok   |
| EPI_ISL_455931 | 3/13/2020 | 6/1/2020 Asia / Thailand / Bangkok   |
| EPI_ISL_455932 | 3/13/2020 | 6/1/2020 Asia / Thailand / Bangkok   |
| EPI_ISL_455934 | 3/14/2020 | 6/1/2020 Asia / Thailand / Bangkok   |
| EPI_ISL_455935 | 3/14/2020 | 6/1/2020 Asia / Thailand / Bangkok   |
| EPI_ISL_455936 | 3/14/2020 | 6/1/2020 Asia / Thailand / Bangkok   |
| EPI_ISL_455938 | 3/15/2020 | 6/1/2020 Asia / Thailand / Bangkok   |
| EPI_ISL_455939 | 3/15/2020 | 6/1/2020 Asia / Thailand / Bangkok   |
| EPI_ISL_455940 | 3/15/2020 | 6/1/2020 Asia / Thailand / Bangkok   |
| EPI_ISL_455941 | 3/15/2020 | 6/1/2020 Asia / Thailand / Bangkok   |

|                |           |                                                         |
|----------------|-----------|---------------------------------------------------------|
| EPI_ISL_455942 | 3/15/2020 | 6/1/2020 Asia / Thailand / Bangkok                      |
| EPI_ISL_455943 | 3/15/2020 | 6/1/2020 Asia / Thailand / Bangkok                      |
| EPI_ISL_455947 | 3/16/2020 | 6/1/2020 Asia / Thailand / Bangkok                      |
| EPI_ISL_455958 | 5/11/2020 | 6/1/2020 Europe / Belgium / Liège                       |
| EPI_ISL_455961 | 5/8/2020  | 6/1/2020 Europe / Belgium / Liège                       |
| EPI_ISL_455962 | 5/8/2020  | 6/1/2020 Europe / Belgium / Liège                       |
| EPI_ISL_455963 | 5/8/2020  | 6/1/2020 Europe / Belgium / Liège                       |
| EPI_ISL_455965 | 5/9/2020  | 6/1/2020 Europe / Belgium / Liège                       |
| EPI_ISL_455966 | 5/9/2020  | 6/1/2020 Europe / Belgium / Liège                       |
| EPI_ISL_455967 | 5/9/2020  | 6/1/2020 Europe / Belgium / Liège                       |
| EPI_ISL_455968 | 5/9/2020  | 6/1/2020 Europe / Belgium / Liège                       |
| EPI_ISL_455969 | 5/10/2020 | 6/1/2020 Europe / Belgium / Liège                       |
| EPI_ISL_455970 | 5/10/2020 | 6/1/2020 Europe / Belgium / Liège                       |
| EPI_ISL_455972 | 5/10/2020 | 6/1/2020 Europe / Belgium / Liège                       |
| EPI_ISL_455973 | 5/10/2020 | 6/1/2020 Europe / Belgium / Liège                       |
| EPI_ISL_455974 | 5/11/2020 | 6/1/2020 Europe / Belgium / Liège                       |
| EPI_ISL_455975 | 5/11/2020 | 6/1/2020 Europe / Belgium / Liège                       |
| EPI_ISL_455976 | 5/11/2020 | 6/1/2020 Europe / Belgium / Liège                       |
| EPI_ISL_455977 | 5/11/2020 | 6/1/2020 Europe / Belgium / Liège                       |
| EPI_ISL_455978 | 5/10/2020 | 6/1/2020 Europe / Belgium / Liège                       |
| EPI_ISL_455979 | 5/11/2020 | 6/1/2020 Europe / Belgium / Liège                       |
| EPI_ISL_455980 | 3/28/2020 | 6/1/2020 North America / USA / Louisiana / Caddo Parish |
| EPI_ISL_455981 | 3/28/2020 | 6/1/2020 North America / USA / Louisiana / Caddo Parish |
| EPI_ISL_455982 | 3/28/2020 | 6/1/2020 North America / USA / Louisiana / Caddo Parish |
| EPI_ISL_455983 | 3/28/2020 | 6/1/2020 North America / USA / Louisiana / Caddo Parish |
| EPI_ISL_455984 | 3/30/2020 | 6/1/2020 North America / USA / Louisiana / Caddo Parish |
| EPI_ISL_455985 | 3/29/2020 | 6/1/2020 North America / USA / Louisiana / Caddo Parish |
| EPI_ISL_455986 | 3/25/2020 | 6/1/2020 North America / USA / Louisiana / Caddo Parish |
| EPI_ISL_455987 | 3/25/2020 | 6/1/2020 North America / USA / Louisiana / Caddo Parish |
| EPI_ISL_455988 | 3/25/2020 | 6/1/2020 North America / USA / Louisiana / Caddo Parish |
| EPI_ISL_455989 | 3/26/2020 | 6/1/2020 North America / USA / Louisiana / Caddo Parish |
| EPI_ISL_455990 | 3/25/2020 | 6/1/2020 North America / USA / Louisiana / Caddo Parish |
| EPI_ISL_455991 | 3/26/2020 | 6/1/2020 North America / USA / Louisiana / Caddo Parish |
| EPI_ISL_455992 | 3/27/2020 | 6/1/2020 North America / USA / Texas / Panola County    |
| EPI_ISL_455993 | 3/28/2020 | 6/1/2020 North America / USA / Louisiana / Caddo Parish |
| EPI_ISL_455994 | 4/1/2020  | 6/1/2020 North America / USA / Louisiana / Caddo Parish |
| EPI_ISL_455995 | 4/1/2020  | 6/1/2020 North America / USA / Louisiana / Caddo Parish |
| EPI_ISL_455996 | 4/1/2020  | 6/1/2020 North America / USA / Louisiana / Caddo Parish |
| EPI_ISL_455997 | 4/1/2020  | 6/1/2020 North America / USA / Louisiana / Caddo Parish |
| EPI_ISL_455998 | 4/1/2020  | 6/1/2020 North America / USA / Louisiana / Caddo Parish |
| EPI_ISL_455999 | 4/1/2020  | 6/1/2020 North America / USA / Louisiana / Caddo Parish |
| EPI_ISL_456000 | 4/1/2020  | 6/1/2020 North America / USA / Louisiana / Caddo Parish |
| EPI_ISL_456001 | 4/1/2020  | 6/1/2020 North America / USA / Louisiana / Caddo Parish |
| EPI_ISL_456002 | 4/1/2020  | 6/1/2020 North America / USA / Louisiana / Caddo Parish |
| EPI_ISL_456004 | 3/27/2020 | 6/1/2020 North America / USA / New York / Queens        |
| EPI_ISL_456006 | 3/27/2020 | 6/1/2020 North America / USA / New York / Manhattan     |
| EPI_ISL_456007 | 3/26/2020 | 6/1/2020 North America / USA / New York / Brooklyn      |

|                |           |                                                         |
|----------------|-----------|---------------------------------------------------------|
| EPI_ISL_456008 | 3/27/2020 | 6/1/2020 North America / USA / New York / Nassau County |
| EPI_ISL_456010 | 3/27/2020 | 6/1/2020 North America / USA / New York / Nassau County |
| EPI_ISL_456011 | 3/27/2020 | 6/1/2020 North America / USA / New York / Queens        |
| EPI_ISL_456012 | 3/25/2020 | 6/1/2020 North America / USA / New York / Nassau County |
| EPI_ISL_456013 | 3/27/2020 | 6/1/2020 North America / USA / New York / Nassau County |
| EPI_ISL_456014 | 3/27/2020 | 6/1/2020 North America / USA / New York / Nassau County |
| EPI_ISL_456015 | 3/26/2020 | 6/1/2020 North America / USA / New York / Brooklyn      |
| EPI_ISL_456016 | 3/27/2020 | 6/1/2020 North America / USA / New York / Brooklyn      |
| EPI_ISL_456017 | 3/25/2020 | 6/1/2020 North America / USA / New York / Brooklyn      |
| EPI_ISL_456018 | 3/27/2020 | 6/1/2020 North America / USA / New York / Manhattan     |
| EPI_ISL_456019 | 3/26/2020 | 6/1/2020 North America / USA / New York / Brooklyn      |
| EPI_ISL_456020 | 3/25/2020 | 6/1/2020 North America / USA / New York / Brooklyn      |
| EPI_ISL_456021 | 3/27/2020 | 6/1/2020 North America / USA / New York / Nassau County |
| EPI_ISL_456022 | 3/25/2020 | 6/1/2020 North America / USA / New York / Brooklyn      |
| EPI_ISL_456023 | 3/25/2020 | 6/1/2020 North America / USA / New York / Queens        |
| EPI_ISL_456024 | 3/25/2020 | 6/1/2020 North America / USA / New York / Brooklyn      |
| EPI_ISL_456025 | 3/27/2020 | 6/1/2020 North America / USA / New York / Queens        |
| EPI_ISL_456026 | 3/27/2020 | 6/1/2020 North America / USA / New York / Nassau County |
| EPI_ISL_456027 | 3/25/2020 | 6/1/2020 North America / USA / New York / Brooklyn      |
| EPI_ISL_456028 | 3/27/2020 | 6/1/2020 North America / USA / New York / Bronx         |
| EPI_ISL_456029 | 3/26/2020 | 6/1/2020 North America / USA / New York / Nassau County |
| EPI_ISL_456030 | 3/27/2020 | 6/1/2020 North America / USA / New York / Manhattan     |
| EPI_ISL_456031 | 3/26/2020 | 6/1/2020 North America / USA / New York / Brooklyn      |
| EPI_ISL_456032 | 3/27/2020 | 6/1/2020 North America / USA / New York / Brooklyn      |
| EPI_ISL_456033 | 3/25/2020 | 6/1/2020 North America / USA / New York / Nassau County |
| EPI_ISL_456034 | 3/27/2020 | 6/1/2020 North America / USA / New York / Nassau County |
| EPI_ISL_456035 | 3/27/2020 | 6/1/2020 North America / USA / New York / Nassau County |
| EPI_ISL_456036 | 3/27/2020 | 6/1/2020 North America / USA / New York / Nassau County |
| EPI_ISL_456037 | 3/27/2020 | 6/1/2020 North America / USA / New York / Nassau County |
| EPI_ISL_456038 | 3/27/2020 | 6/1/2020 North America / USA / New York / Queens        |
| EPI_ISL_456039 | 3/25/2020 | 6/1/2020 North America / USA / New York / Brooklyn      |
| EPI_ISL_456040 | 3/27/2020 | 6/1/2020 North America / USA / New York / Brooklyn      |
| EPI_ISL_456041 | 3/27/2020 | 6/1/2020 North America / USA / New York / Brooklyn      |
| EPI_ISL_456042 | 3/25/2020 | 6/1/2020 North America / USA / New York / Queens        |
| EPI_ISL_456043 | 3/27/2020 | 6/1/2020 North America / USA / New York / Brooklyn      |
| EPI_ISL_456044 | 3/27/2020 | 6/1/2020 North America / USA / New York / Queens        |
| EPI_ISL_456045 | 3/27/2020 | 6/1/2020 North America / USA / New York / Bronx         |
| EPI_ISL_456046 | 3/25/2020 | 6/1/2020 North America / USA / New York / Brooklyn      |
| EPI_ISL_456047 | 3/27/2020 | 6/1/2020 North America / USA / New York / Queens        |
| EPI_ISL_456049 | 3/25/2020 | 6/1/2020 North America / USA / New York / Brooklyn      |
| EPI_ISL_456050 | 3/26/2020 | 6/1/2020 North America / USA / New York / Suffolk       |
| EPI_ISL_456051 | 3/26/2020 | 6/1/2020 North America / USA / New Jersey               |
| EPI_ISL_456052 | 3/27/2020 | 6/1/2020 North America / USA / New York / Queens        |
| EPI_ISL_456053 | 3/25/2020 | 6/1/2020 North America / USA / New York / Brooklyn      |
| EPI_ISL_456054 | 3/25/2020 | 6/1/2020 North America / USA / New York / Queens        |
| EPI_ISL_456055 | 3/27/2020 | 6/1/2020 North America / USA / New York / Nassau County |
| EPI_ISL_456056 | 3/20/2020 | 6/1/2020 North America / USA / New York / Manhattan     |



|                |           |                                                                    |
|----------------|-----------|--------------------------------------------------------------------|
| EPI_ISL_456058 | 3/27/2020 | 6/1/2020 North America / USA / New York / Nassau County            |
| EPI_ISL_456060 | 3/25/2020 | 6/1/2020 North America / USA / New York / Nassau County            |
| EPI_ISL_456061 | 3/27/2020 | 6/1/2020 North America / USA / New York / Bronx                    |
| EPI_ISL_456062 | 3/25/2020 | 6/1/2020 North America / USA / New York / Brooklyn                 |
| EPI_ISL_456063 | 3/26/2020 | 6/1/2020 North America / USA / New York / Nassau County            |
| EPI_ISL_456065 | 3/27/2020 | 6/1/2020 North America / USA / New York / Nassau County            |
| EPI_ISL_456066 | 3/26/2020 | 6/1/2020 North America / USA / New York / Brooklyn                 |
| EPI_ISL_456071 | 3/30/2020 | 6/1/2020 South America / Brazil / Rio de Janeiro                   |
| EPI_ISL_456072 | 4/1/2020  | 6/1/2020 South America / Brazil / Rio de Janeiro                   |
| EPI_ISL_456073 | 4/1/2020  | 6/1/2020 South America / Brazil / Rio de Janeiro                   |
| EPI_ISL_456074 | 4/1/2020  | 6/1/2020 South America / Brazil / Rio de Janeiro                   |
| EPI_ISL_456075 | 4/2/2020  | 6/1/2020 South America / Brazil / Rio de Janeiro / Belford Roxo    |
| EPI_ISL_456076 | 3/25/2020 | 6/1/2020 South America / Brazil / Rio de Janeiro                   |
| EPI_ISL_456077 | 3/25/2020 | 6/1/2020 South America / Brazil / Rio de Janeiro                   |
| EPI_ISL_456079 | 4/3/2020  | 6/1/2020 South America / Brazil / Rio de Janeiro                   |
| EPI_ISL_456080 | 4/6/2020  | 6/1/2020 South America / Brazil / Rio de Janeiro / Petropolis      |
| EPI_ISL_456081 | 4/6/2020  | 6/1/2020 South America / Brazil / Rio de Janeiro                   |
| EPI_ISL_456082 | 4/2/2020  | 6/1/2020 South America / Brazil / Rio de Janeiro / Teresopolis     |
| EPI_ISL_456083 | 4/3/2020  | 6/1/2020 South America / Brazil / Rio de Janeiro / Nova Iguacu     |
| EPI_ISL_456084 | 4/8/2020  | 6/1/2020 South America / Brazil / Rio de Janeiro                   |
| EPI_ISL_456085 | 4/8/2020  | 6/1/2020 South America / Brazil / Rio de Janeiro                   |
| EPI_ISL_456086 | 4/8/2020  | 6/1/2020 South America / Brazil / Rio de Janeiro                   |
| EPI_ISL_456087 | 4/8/2020  | 6/1/2020 South America / Brazil / Rio de Janeiro                   |
| EPI_ISL_456088 | 4/6/2020  | 6/1/2020 South America / Brazil / Rio de Janeiro / Itaboraai       |
| EPI_ISL_456089 | 4/9/2020  | 6/1/2020 South America / Brazil / Rio de Janeiro                   |
| EPI_ISL_456090 | 4/9/2020  | 6/1/2020 South America / Brazil / Rio de Janeiro                   |
| EPI_ISL_456091 | 4/9/2020  | 6/1/2020 South America / Brazil / Rio de Janeiro                   |
| EPI_ISL_456092 | 4/10/2020 | 6/1/2020 South America / Brazil / Rio de Janeiro                   |
| EPI_ISL_456093 | 4/12/2020 | 6/1/2020 South America / Brazil / Rio de Janeiro                   |
| EPI_ISL_456094 | 4/13/2020 | 6/1/2020 South America / Brazil / Rio de Janeiro                   |
| EPI_ISL_456095 | 4/13/2020 | 6/1/2020 South America / Brazil / Rio de Janeiro                   |
| EPI_ISL_456096 | 4/13/2020 | 6/1/2020 South America / Brazil / Rio de Janeiro                   |
| EPI_ISL_456097 | 4/13/2020 | 6/1/2020 South America / Brazil / Rio de Janeiro                   |
| EPI_ISL_456098 | 4/13/2020 | 6/1/2020 South America / Brazil / Rio de Janeiro                   |
| EPI_ISL_456099 | 4/13/2020 | 6/1/2020 South America / Brazil / Rio de Janeiro                   |
| EPI_ISL_456100 | 4/15/2020 | 6/1/2020 South America / Brazil / Rio de Janeiro                   |
| EPI_ISL_456101 | 4/15/2020 | 6/1/2020 South America / Brazil / Rio de Janeiro / Duque de Caxias |
| EPI_ISL_456102 | 4/16/2020 | 6/1/2020 South America / Brazil / Rio de Janeiro                   |
| EPI_ISL_456103 | 4/16/2020 | 6/1/2020 South America / Brazil / Rio de Janeiro                   |
| EPI_ISL_456104 | 4/16/2020 | 6/1/2020 South America / Brazil / Rio de Janeiro                   |
| EPI_ISL_456105 | 4/16/2020 | 6/1/2020 South America / Brazil / Rio de Janeiro                   |
| EPI_ISL_456106 | 4/16/2020 | 6/1/2020 South America / Brazil / Rio de Janeiro                   |
| EPI_ISL_456107 | 4/25/2020 | 6/1/2020 North America / USA / New York / Manhattan                |
| EPI_ISL_456108 | 4/17/2020 | 6/1/2020 North America / USA / New York / Brooklyn                 |
| EPI_ISL_456109 | 4/21/2020 | 6/1/2020 North America / USA / New York / Queens                   |
| EPI_ISL_456111 | 4/24/2020 | 6/1/2020 North America / USA / New York / Brooklyn                 |
| EPI_ISL_456112 | 4/24/2020 | 6/1/2020 North America / USA / New York / Nassau County            |

|                |           |                                                                 |
|----------------|-----------|-----------------------------------------------------------------|
| EPI_ISL_456113 | 4/26/2020 | 6/1/2020 North America / USA / New Jersey / Hudson County       |
| EPI_ISL_456117 | 3/10/2020 | 6/2/2020 South America / Colombia / Antioquia / Medellin        |
| EPI_ISL_456119 | 3/17/2020 | 6/2/2020 South America / Colombia / Antioquia / Medellin        |
| EPI_ISL_456120 | 3/12/2020 | 6/2/2020 South America / Colombia / Bogota                      |
| EPI_ISL_456126 | 3/18/2020 | 6/2/2020 South America / Colombia / Norte de Santander / Cucuta |
| EPI_ISL_456127 | 3/15/2020 | 6/2/2020 South America / Colombia / Quindio / Armenia           |
| EPI_ISL_456138 | 3/16/2020 | 6/2/2020 South America / Colombia / Valle del Cauca / Cali      |
| EPI_ISL_456144 | 4/23/2020 | 6/2/2020 South America / Colombia / Amazonas / Leticia          |
| EPI_ISL_456145 | 3/14/2020 | 6/2/2020 South America / Colombia / Atlantico / Barranquilla    |
| EPI_ISL_456146 | 3/20/2020 | 6/2/2020 South America / Colombia / Antioquia / Bello           |
| EPI_ISL_456147 | 4/1/2020  | 6/2/2020 South America / Colombia / Valle del Cauca / Cali      |
| EPI_ISL_456148 | 3/16/2020 | 6/2/2020 South America / Colombia / Bolivar / Cartagena         |
| EPI_ISL_456149 | 3/15/2020 | 6/2/2020 South America / Colombia / Santander / Bucaramanga     |
| EPI_ISL_456150 | 3/15/2020 | 6/2/2020 South America / Colombia / Valle del Cauca / Cali      |
| EPI_ISL_456151 | 3/19/2020 | 6/2/2020 South America / Colombia / Valle del Cauca / Cali      |
| EPI_ISL_456152 | 4/1/2020  | 6/2/2020 South America / Colombia / Valle del Cauca / Cali      |
| EPI_ISL_456153 | 4/22/2020 | 6/2/2020 South America / Colombia / Magdalena / Cienaga         |
| EPI_ISL_456154 | 4/26/2020 | 6/2/2020 South America / Colombia / Narino / Tumaco             |
| EPI_ISL_456155 | 3/16/2020 | 6/2/2020 South America / Colombia / Risaralda / Pereira         |
| EPI_ISL_456159 | 3/16/2020 | 6/2/2020 Oceania / New Zealand / Southern                       |
| EPI_ISL_456160 | 3/17/2020 | 6/2/2020 Oceania / New Zealand / Waikato                        |
| EPI_ISL_456161 | 3/17/2020 | 6/2/2020 Oceania / New Zealand / Combined Wellington            |
| EPI_ISL_456163 | 3/11/2020 | 6/2/2020 Oceania / New Zealand / Lakes                          |
| EPI_ISL_456165 | 3/18/2020 | 6/2/2020 Oceania / New Zealand / Combined Wellington            |
| EPI_ISL_456167 | 3/18/2020 | 6/2/2020 Oceania / New Zealand / Southern                       |
| EPI_ISL_456168 | 3/18/2020 | 6/2/2020 Oceania / New Zealand / Waikato                        |
| EPI_ISL_456169 | 3/20/2020 | 6/2/2020 Oceania / New Zealand / Wairarapa                      |
| EPI_ISL_456170 | 3/20/2020 | 6/2/2020 Oceania / New Zealand / Wairarapa                      |
| EPI_ISL_456171 | 3/19/2020 | 6/2/2020 Oceania / New Zealand / Bay of Plenty                  |
| EPI_ISL_456172 | 3/17/2020 | 6/2/2020 Oceania / New Zealand / Auckland                       |
| EPI_ISL_456173 | 3/18/2020 | 6/2/2020 Oceania / New Zealand / Auckland                       |
| EPI_ISL_456174 | 3/17/2020 | 6/2/2020 Oceania / New Zealand / Auckland                       |
| EPI_ISL_456175 | 3/17/2020 | 6/2/2020 Oceania / New Zealand / Auckland                       |
| EPI_ISL_456176 | 3/16/2020 | 6/2/2020 Oceania / New Zealand / Auckland                       |
| EPI_ISL_456177 | 3/17/2020 | 6/2/2020 Oceania / New Zealand / Auckland                       |
| EPI_ISL_456178 | 3/17/2020 | 6/2/2020 Oceania / New Zealand / Auckland                       |
| EPI_ISL_456179 | 3/16/2020 | 6/2/2020 Oceania / New Zealand / Auckland                       |
| EPI_ISL_456180 | 3/16/2020 | 6/2/2020 Oceania / New Zealand / Auckland                       |
| EPI_ISL_456181 | 3/19/2020 | 6/2/2020 Oceania / New Zealand / Southern                       |
| EPI_ISL_456182 | 3/20/2020 | 6/2/2020 Oceania / New Zealand / Combined Wellington            |
| EPI_ISL_456183 | 3/20/2020 | 6/2/2020 Oceania / New Zealand / Combined Wellington            |
| EPI_ISL_456184 | 3/20/2020 | 6/2/2020 Oceania / New Zealand / Combined Wellington            |
| EPI_ISL_456185 | 3/20/2020 | 6/2/2020 Oceania / New Zealand / Combined Wellington            |
| EPI_ISL_456186 | 3/20/2020 | 6/2/2020 Oceania / New Zealand / Combined Wellington            |
| EPI_ISL_456187 | 3/22/2020 | 6/2/2020 Oceania / New Zealand / Wairarapa                      |
| EPI_ISL_456188 | 3/22/2020 | 6/2/2020 Oceania / New Zealand / Wairarapa                      |
| EPI_ISL_456190 | 3/3/2020  | 6/2/2020 Oceania / New Zealand / Waikato                        |

|                |           |                                                     |
|----------------|-----------|-----------------------------------------------------|
| EPI_ISL_456191 | 3/19/2020 | 6/2/2020 Oceania / New Zealand / Waikato            |
| EPI_ISL_456192 | 3/20/2020 | 6/2/2020 Oceania / New Zealand / Waikato            |
| EPI_ISL_456193 | 3/20/2020 | 6/2/2020 Oceania / New Zealand / Waikato            |
| EPI_ISL_456194 | 3/20/2020 | 6/2/2020 Oceania / New Zealand / Bay of Plenty      |
| EPI_ISL_456195 | 3/21/2020 | 6/2/2020 Oceania / New Zealand / Bay of Plenty      |
| EPI_ISL_456197 | 3/21/2020 | 6/2/2020 Oceania / New Zealand / Auckland           |
| EPI_ISL_456198 | 3/21/2020 | 6/2/2020 Oceania / New Zealand / Auckland           |
| EPI_ISL_456199 | 3/21/2020 | 6/2/2020 Oceania / New Zealand / Auckland           |
| EPI_ISL_456200 | 3/20/2020 | 6/2/2020 Oceania / New Zealand / Auckland           |
| EPI_ISL_456201 | 3/20/2020 | 6/2/2020 Oceania / New Zealand / Auckland           |
| EPI_ISL_456202 | 3/20/2020 | 6/2/2020 Oceania / New Zealand / Auckland           |
| EPI_ISL_456203 | 3/20/2020 | 6/2/2020 Oceania / New Zealand / Auckland           |
| EPI_ISL_456205 | 3/20/2020 | 6/2/2020 Oceania / New Zealand / Auckland           |
| EPI_ISL_456206 | 3/20/2020 | 6/2/2020 Oceania / New Zealand / Auckland           |
| EPI_ISL_456210 | 3/19/2020 | 6/2/2020 Oceania / New Zealand / Auckland           |
| EPI_ISL_456212 | 3/21/2020 | 6/2/2020 Oceania / New Zealand / Auckland           |
| EPI_ISL_456213 | 3/20/2020 | 6/2/2020 Oceania / New Zealand / Counties Manukau   |
| EPI_ISL_456214 | 3/20/2020 | 6/2/2020 Oceania / New Zealand / Counties Manukau   |
| EPI_ISL_456215 | 3/22/2020 | 6/2/2020 Oceania / New Zealand / Bay of Plenty      |
| EPI_ISL_456217 | 3/24/2020 | 6/2/2020 Oceania / New Zealand / Southern           |
| EPI_ISL_456218 | 3/23/2020 | 6/2/2020 Oceania / New Zealand / Southern           |
| EPI_ISL_456219 | 3/21/2020 | 6/2/2020 Oceania / New Zealand / Southern           |
| EPI_ISL_456220 | 3/22/2020 | 6/2/2020 Oceania / New Zealand / Southern           |
| EPI_ISL_456221 | 3/22/2020 | 6/2/2020 Oceania / New Zealand / Bay of Plenty      |
| EPI_ISL_456222 | 3/24/2020 | 6/2/2020 Oceania / New Zealand / Bay of Plenty      |
| EPI_ISL_456223 | 3/24/2020 | 6/2/2020 Oceania / New Zealand / Bay of Plenty      |
| EPI_ISL_456224 | 3/24/2020 | 6/2/2020 Oceania / New Zealand / Bay of Plenty      |
| EPI_ISL_456225 | 3/24/2020 | 6/2/2020 Oceania / New Zealand / Southern           |
| EPI_ISL_456228 | 3/23/2020 | 6/2/2020 Oceania / New Zealand / Southern           |
| EPI_ISL_456230 | 3/24/2020 | 6/2/2020 Oceania / New Zealand / Canterbury         |
| EPI_ISL_456233 | 3/24/2020 | 6/2/2020 Oceania / New Zealand / Southern           |
| EPI_ISL_456234 | 3/27/2020 | 6/2/2020 Oceania / New Zealand / Southern           |
| EPI_ISL_456236 | 3/23/2020 | 6/2/2020 Oceania / New Zealand / Southern           |
| EPI_ISL_456237 | 3/23/2020 | 6/2/2020 Oceania / New Zealand / Southern           |
| EPI_ISL_456238 | 3/24/2020 | 6/2/2020 Oceania / New Zealand / Nelson Marlborough |
| EPI_ISL_456242 | 3/26/2020 | 6/2/2020 Oceania / New Zealand / Southern           |
| EPI_ISL_456243 | 3/26/2020 | 6/2/2020 Oceania / New Zealand / Southern           |
| EPI_ISL_456244 | 3/26/2020 | 6/2/2020 Oceania / New Zealand / Southern           |
| EPI_ISL_456245 | 3/26/2020 | 6/2/2020 Oceania / New Zealand / Southern           |
| EPI_ISL_456246 | 3/26/2020 | 6/2/2020 Oceania / New Zealand / Canterbury         |
| EPI_ISL_456247 | 3/25/2020 | 6/2/2020 Oceania / New Zealand / Southern           |
| EPI_ISL_456248 | 3/26/2020 | 6/2/2020 Oceania / New Zealand / Southern           |
| EPI_ISL_456249 | 3/26/2020 | 6/2/2020 Oceania / New Zealand / Southern           |
| EPI_ISL_456250 | 3/26/2020 | 6/2/2020 Oceania / New Zealand / Southern           |
| EPI_ISL_456251 | 3/26/2020 | 6/2/2020 Oceania / New Zealand / Southern           |
| EPI_ISL_456252 | 3/26/2020 | 6/2/2020 Oceania / New Zealand / Southern           |
| EPI_ISL_456253 | 3/26/2020 | 6/2/2020 Oceania / New Zealand / Southern           |

|                |           |                                                   |
|----------------|-----------|---------------------------------------------------|
| EPI_ISL_456254 | 3/26/2020 | 6/2/2020 Oceania / New Zealand / Southern         |
| EPI_ISL_456255 | 3/23/2020 | 6/2/2020 Oceania / New Zealand / Counties Manukau |
| EPI_ISL_456256 | 3/23/2020 | 6/2/2020 Oceania / New Zealand / Counties Manukau |
| EPI_ISL_456257 | 3/22/2020 | 6/2/2020 Oceania / New Zealand / Counties Manukau |
| EPI_ISL_456258 | 3/22/2020 | 6/2/2020 Oceania / New Zealand / Counties Manukau |
| EPI_ISL_456261 | 3/27/2020 | 6/2/2020 Oceania / New Zealand / Southern         |
| EPI_ISL_456262 | 3/27/2020 | 6/2/2020 Oceania / New Zealand / Southern         |
| EPI_ISL_456263 | 3/27/2020 | 6/2/2020 Oceania / New Zealand / Southern         |
| EPI_ISL_456264 | 3/27/2020 | 6/2/2020 Oceania / New Zealand / Southern         |
| EPI_ISL_456265 | 3/27/2020 | 6/2/2020 Oceania / New Zealand / Southern         |
| EPI_ISL_456266 | 3/27/2020 | 6/2/2020 Oceania / New Zealand / Southern         |
| EPI_ISL_456267 | 3/27/2020 | 6/2/2020 Oceania / New Zealand / Southern         |
| EPI_ISL_456268 | 3/27/2020 | 6/2/2020 Oceania / New Zealand / Southern         |
| EPI_ISL_456270 | 3/27/2020 | 6/2/2020 Oceania / New Zealand / Southern         |
| EPI_ISL_456271 | 3/27/2020 | 6/2/2020 Oceania / New Zealand / Southern         |
| EPI_ISL_456272 | 3/27/2020 | 6/2/2020 Oceania / New Zealand / Southern         |
| EPI_ISL_456273 | 3/27/2020 | 6/2/2020 Oceania / New Zealand / Southern         |
| EPI_ISL_456276 | 3/30/2020 | 6/2/2020 Oceania / New Zealand / Southern         |
| EPI_ISL_456278 | 3/29/2020 | 6/2/2020 Oceania / New Zealand / Southern         |
| EPI_ISL_456279 | 3/28/2020 | 6/2/2020 Oceania / New Zealand / Southern         |
| EPI_ISL_456280 | 3/28/2020 | 6/2/2020 Oceania / New Zealand / Southern         |
| EPI_ISL_456281 | 3/28/2020 | 6/2/2020 Oceania / New Zealand / Southern         |
| EPI_ISL_456282 | 3/29/2020 | 6/2/2020 Oceania / New Zealand / Southern         |
| EPI_ISL_456283 | 3/28/2020 | 6/2/2020 Oceania / New Zealand / Southern         |
| EPI_ISL_456284 | 3/30/2020 | 6/2/2020 Oceania / New Zealand / Southern         |
| EPI_ISL_456287 | 3/31/2020 | 6/2/2020 Oceania / New Zealand / Southern         |
| EPI_ISL_456288 | 3/30/2020 | 6/2/2020 Oceania / New Zealand / Southern         |
| EPI_ISL_456289 | 3/30/2020 | 6/2/2020 Oceania / New Zealand / Southern         |
| EPI_ISL_456290 | 3/30/2020 | 6/2/2020 Oceania / New Zealand / Southern         |
| EPI_ISL_456292 | 3/31/2020 | 6/2/2020 Oceania / New Zealand / Southern         |
| EPI_ISL_456294 | 4/2/2020  | 6/2/2020 Oceania / New Zealand / Waitemata        |
| EPI_ISL_456295 | 4/1/2020  | 6/2/2020 Oceania / New Zealand / Southern         |
| EPI_ISL_456296 | 4/1/2020  | 6/2/2020 Oceania / New Zealand / Southern         |
| EPI_ISL_456297 | 4/1/2020  | 6/2/2020 Oceania / New Zealand / Southern         |
| EPI_ISL_456299 | 4/1/2020  | 6/2/2020 Oceania / New Zealand / Southern         |
| EPI_ISL_456300 | 3/31/2020 | 6/2/2020 Oceania / New Zealand / Waikato          |
| EPI_ISL_456302 | 4/2/2020  | 6/2/2020 Oceania / New Zealand / Southern         |
| EPI_ISL_456303 | 4/2/2020  | 6/2/2020 Oceania / New Zealand / Southern         |
| EPI_ISL_456304 | 4/1/2020  | 6/2/2020 Oceania / New Zealand / Southern         |
| EPI_ISL_456305 | 4/2/2020  | 6/2/2020 Oceania / New Zealand / Southern         |
| EPI_ISL_456308 | 3/31/2020 | 6/2/2020 Oceania / New Zealand / Southern         |
| EPI_ISL_456309 | 4/3/2020  | 6/2/2020 Oceania / New Zealand / Southern         |
| EPI_ISL_456310 | 4/2/2020  | 6/2/2020 Oceania / New Zealand / Southern         |
| EPI_ISL_456314 | 4/3/2020  | 6/2/2020 Oceania / New Zealand / Southern         |
| EPI_ISL_456315 | 4/4/2020  | 6/2/2020 Oceania / New Zealand / Southern         |
| EPI_ISL_456316 | 4/1/2020  | 6/2/2020 Oceania / New Zealand / Southern         |
| EPI_ISL_456317 | 4/4/2020  | 6/2/2020 Oceania / New Zealand / Southern         |

|                |           |                                                      |
|----------------|-----------|------------------------------------------------------|
| EPI_ISL_456319 | 3/30/2020 | 6/2/2020 Oceania / New Zealand / Combined Wellington |
| EPI_ISL_456320 | 3/24/2020 | 6/2/2020 Oceania / New Zealand / Combined Wellington |
| EPI_ISL_456321 | 3/25/2020 | 6/2/2020 Oceania / New Zealand / Canterbury          |
| EPI_ISL_456322 | 3/31/2020 | 6/2/2020 Oceania / New Zealand / Canterbury          |
| EPI_ISL_456324 | 4/1/2020  | 6/2/2020 Oceania / New Zealand / Combined Wellington |
| EPI_ISL_456326 | 4/1/2020  | 6/2/2020 Oceania / New Zealand / Combined Wellington |
| EPI_ISL_456327 | 4/1/2020  | 6/2/2020 Oceania / New Zealand / Combined Wellington |
| EPI_ISL_456328 | 4/1/2020  | 6/2/2020 Oceania / New Zealand / Combined Wellington |
| EPI_ISL_456329 | 4/1/2020  | 6/2/2020 Oceania / New Zealand / Combined Wellington |
| EPI_ISL_456330 | 4/1/2020  | 6/2/2020 Oceania / New Zealand / Combined Wellington |
| EPI_ISL_456331 | 4/1/2020  | 6/2/2020 Oceania / New Zealand / Combined Wellington |
| EPI_ISL_456332 | 4/1/2020  | 6/2/2020 Oceania / New Zealand / Combined Wellington |
| EPI_ISL_456334 | 4/1/2020  | 6/2/2020 Oceania / New Zealand / Combined Wellington |
| EPI_ISL_456335 | 4/1/2020  | 6/2/2020 Oceania / New Zealand / Combined Wellington |
| EPI_ISL_456336 | 4/1/2020  | 6/2/2020 Oceania / New Zealand / Combined Wellington |
| EPI_ISL_456338 | 4/1/2020  | 6/2/2020 Oceania / New Zealand / Combined Wellington |
| EPI_ISL_456339 | 4/1/2020  | 6/2/2020 Oceania / New Zealand / Combined Wellington |
| EPI_ISL_456342 | 4/1/2020  | 6/2/2020 Oceania / New Zealand / Combined Wellington |
| EPI_ISL_456344 | 4/10/2020 | 6/2/2020 Oceania / New Zealand / Southern            |
| EPI_ISL_456347 | 4/9/2020  | 6/2/2020 Oceania / New Zealand / Southern            |
| EPI_ISL_456348 | 4/5/2020  | 6/2/2020 Oceania / New Zealand / Canterbury          |
| EPI_ISL_456352 | 4/5/2020  | 6/2/2020 Oceania / New Zealand / Canterbury          |
| EPI_ISL_456353 | 4/5/2020  | 6/2/2020 Oceania / New Zealand / Canterbury          |
| EPI_ISL_456355 | 4/4/2020  | 6/2/2020 Oceania / New Zealand / Canterbury          |
| EPI_ISL_456356 | 4/6/2020  | 6/2/2020 Oceania / New Zealand / Canterbury          |
| EPI_ISL_456358 | 4/6/2020  | 6/2/2020 Oceania / New Zealand / Canterbury          |
| EPI_ISL_456360 | 4/8/2020  | 6/2/2020 Oceania / New Zealand / Canterbury          |
| EPI_ISL_456362 | 4/9/2020  | 6/2/2020 Oceania / New Zealand / Canterbury          |
| EPI_ISL_456363 | 4/9/2020  | 6/2/2020 Oceania / New Zealand / Canterbury          |
| EPI_ISL_456364 | 4/9/2020  | 6/2/2020 Oceania / New Zealand / Canterbury          |
| EPI_ISL_456365 | 4/9/2020  | 6/2/2020 Oceania / New Zealand / Canterbury          |
| EPI_ISL_456366 | 4/10/2020 | 6/2/2020 Oceania / New Zealand / Canterbury          |
| EPI_ISL_456367 | 4/11/2020 | 6/2/2020 Oceania / New Zealand / Canterbury          |
| EPI_ISL_456369 | 4/12/2020 | 6/2/2020 Oceania / New Zealand / Canterbury          |
| EPI_ISL_456370 | 4/11/2020 | 6/2/2020 Oceania / New Zealand / Canterbury          |
| EPI_ISL_456371 | 4/12/2020 | 6/2/2020 Oceania / New Zealand / Canterbury          |
| EPI_ISL_456374 | 4/10/2020 | 6/2/2020 Oceania / New Zealand / Canterbury          |
| EPI_ISL_456375 | 4/8/2020  | 6/2/2020 Oceania / New Zealand / Canterbury          |
| EPI_ISL_456376 | 4/5/2020  | 6/2/2020 Oceania / New Zealand / Counties Manukau    |
| EPI_ISL_456377 | 4/15/2020 | 6/2/2020 Oceania / New Zealand / MidCentral          |
| EPI_ISL_456378 | 4/15/2020 | 6/2/2020 Oceania / New Zealand / MidCentral          |
| EPI_ISL_456379 | 4/15/2020 | 6/2/2020 Oceania / New Zealand / Auckland            |
| EPI_ISL_456380 | 4/15/2020 | 6/2/2020 Oceania / New Zealand / Auckland            |
| EPI_ISL_456381 | 4/15/2020 | 6/2/2020 Oceania / New Zealand / Auckland            |
| EPI_ISL_456382 | 4/15/2020 | 6/2/2020 Oceania / New Zealand / Auckland            |
| EPI_ISL_456383 | 4/15/2020 | 6/2/2020 Oceania / New Zealand / Auckland            |
| EPI_ISL_456384 | 4/15/2020 | 6/2/2020 Oceania / New Zealand / Auckland            |

|                |           |                                                      |
|----------------|-----------|------------------------------------------------------|
| EPI_ISL_456385 | 4/15/2020 | 6/2/2020 Oceania / New Zealand / Counties Manukau    |
| EPI_ISL_456386 | 4/15/2020 | 6/2/2020 Oceania / New Zealand / Counties Manukau    |
| EPI_ISL_456388 | 4/25/2020 | 6/2/2020 Oceania / New Zealand / Auckland            |
| EPI_ISL_456390 | 4/25/2020 | 6/2/2020 Oceania / New Zealand / Auckland            |
| EPI_ISL_456393 | 4/25/2020 | 6/2/2020 Oceania / New Zealand / Auckland            |
| EPI_ISL_456394 | 4/25/2020 | 6/2/2020 Oceania / New Zealand / Auckland            |
| EPI_ISL_456395 | 4/25/2020 | 6/2/2020 Oceania / New Zealand / Waitemata           |
| EPI_ISL_456396 | 4/25/2020 | 6/2/2020 Oceania / New Zealand / Waitemata           |
| EPI_ISL_456397 | 4/25/2020 | 6/2/2020 Oceania / New Zealand / Waitemata           |
| EPI_ISL_456402 | 4/25/2020 | 6/2/2020 Oceania / New Zealand / Combined Wellington |
| EPI_ISL_456403 | 4/28/2020 | 6/2/2020 Oceania / New Zealand / Counties Manukau    |
| EPI_ISL_456410 | 3/26/2020 | 6/2/2020 Oceania / Australia / Victoria              |
| EPI_ISL_456411 | 4/13/2020 | 6/2/2020 Oceania / Australia / Victoria              |
| EPI_ISL_456414 | 4/14/2020 | 6/2/2020 Oceania / Australia / Victoria              |
| EPI_ISL_456417 | 4/14/2020 | 6/2/2020 Oceania / Australia / Victoria              |
| EPI_ISL_456419 | 4/14/2020 | 6/2/2020 Oceania / Australia / Victoria              |
| EPI_ISL_456421 | 4/11/2020 | 6/2/2020 Oceania / Australia / Victoria              |
| EPI_ISL_456426 | 4/16/2020 | 6/2/2020 Oceania / Australia / Victoria              |
| EPI_ISL_456427 | 4/7/2020  | 6/2/2020 Oceania / Australia / Victoria              |
| EPI_ISL_456429 | 4/16/2020 | 6/2/2020 Oceania / Australia / Victoria              |
| EPI_ISL_456433 | 4/15/2020 | 6/2/2020 Oceania / Australia / Victoria              |
| EPI_ISL_456435 | 4/17/2020 | 6/2/2020 Oceania / Australia / Victoria              |
| EPI_ISL_456440 | 4/17/2020 | 6/2/2020 Oceania / Australia / Victoria              |
| EPI_ISL_456441 | 4/17/2020 | 6/2/2020 Oceania / Australia / Victoria              |
| EPI_ISL_456442 | 4/18/2020 | 6/2/2020 Oceania / Australia / Victoria              |
| EPI_ISL_456443 | 4/19/2020 | 6/2/2020 Oceania / Australia / Victoria              |
| EPI_ISL_456445 | 4/21/2020 | 6/2/2020 Oceania / Australia / Victoria              |
| EPI_ISL_456446 | 4/21/2020 | 6/2/2020 Oceania / Australia / Victoria              |
| EPI_ISL_456448 | 4/21/2020 | 6/2/2020 Oceania / Australia / Victoria              |
| EPI_ISL_456451 | 4/22/2020 | 6/2/2020 Oceania / Australia / Victoria              |
| EPI_ISL_456454 | 4/20/2020 | 6/2/2020 Oceania / Australia / Victoria              |
| EPI_ISL_456456 | 4/27/2020 | 6/2/2020 Oceania / Australia / Victoria              |
| EPI_ISL_456457 | 4/27/2020 | 6/2/2020 Oceania / Australia / Victoria              |
| EPI_ISL_456460 | 4/29/2020 | 6/2/2020 Oceania / Australia / Victoria              |
| EPI_ISL_456462 | 4/29/2020 | 6/2/2020 Oceania / Australia / Victoria              |
| EPI_ISL_456463 | 4/27/2020 | 6/2/2020 Oceania / Australia / Victoria              |
| EPI_ISL_456464 | 4/29/2020 | 6/2/2020 Oceania / Australia / Victoria              |
| EPI_ISL_456468 | 4/30/2020 | 6/2/2020 Oceania / Australia / Victoria              |
| EPI_ISL_456471 | 4/28/2020 | 6/2/2020 Oceania / Australia / Victoria              |
| EPI_ISL_456472 | 4/29/2020 | 6/2/2020 Oceania / Australia / Victoria              |
| EPI_ISL_456476 | 5/1/2020  | 6/2/2020 Oceania / Australia / Victoria              |
| EPI_ISL_456477 | 5/2/2020  | 6/2/2020 Oceania / Australia / Victoria              |
| EPI_ISL_456478 | 5/6/2020  | 6/2/2020 Oceania / Australia / Victoria              |
| EPI_ISL_456479 | 5/2/2020  | 6/2/2020 Oceania / Australia / Victoria              |
| EPI_ISL_456480 | 5/4/2020  | 6/2/2020 Oceania / Australia / Victoria              |
| EPI_ISL_456482 | 5/3/2020  | 6/2/2020 Oceania / Australia / Victoria              |
| EPI_ISL_456483 | 5/3/2020  | 6/2/2020 Oceania / Australia / Victoria              |



|                |           |                                            |
|----------------|-----------|--------------------------------------------|
| EPI_ISL_456573 | 5/12/2020 | 6/2/2020 Oceania / Australia / Victoria    |
| EPI_ISL_456574 | 5/9/2020  | 6/2/2020 Oceania / Australia / Victoria    |
| EPI_ISL_456575 | 5/12/2020 | 6/2/2020 Oceania / Australia / Victoria    |
| EPI_ISL_456580 | 5/16/2020 | 6/2/2020 Oceania / Australia / Victoria    |
| EPI_ISL_456581 | 5/16/2020 | 6/2/2020 Oceania / Australia / Victoria    |
| EPI_ISL_456589 | 3/11/2020 | 6/2/2020 Oceania / Australia / Victoria    |
| EPI_ISL_456595 | 5/16/2020 | 6/2/2020 Oceania / Australia / Victoria    |
| EPI_ISL_456596 | 3/19/2020 | 6/2/2020 Asia / Timor-Leste                |
| EPI_ISL_456597 | 4/11/2020 | 6/2/2020 Asia / Timor-Leste                |
| EPI_ISL_456600 | 3/30/2020 | 6/2/2020 Asia / Timor-Leste                |
| EPI_ISL_456606 | 4/11/2020 | 6/2/2020 Asia / Timor-Leste                |
| EPI_ISL_456607 | 4/14/2020 | 6/2/2020 Asia / Timor-Leste                |
| EPI_ISL_456608 | 4/12/2020 | 6/2/2020 Asia / Timor-Leste                |
| EPI_ISL_456611 | 4/18/2020 | 6/2/2020 Asia / Timor-Leste                |
| EPI_ISL_456616 | 5/19/2020 | 6/2/2020 Oceania / Australia / Victoria    |
| EPI_ISL_456617 | 5/19/2020 | 6/2/2020 Oceania / Australia / Victoria    |
| EPI_ISL_456619 | 5/19/2020 | 6/2/2020 Oceania / Australia / Victoria    |
| EPI_ISL_456620 | 5/19/2020 | 6/2/2020 Oceania / Australia / Victoria    |
| EPI_ISL_456630 | 4/29/2020 | 6/2/2020 Oceania / Australia / Victoria    |
| EPI_ISL_456633 | 5/2/2020  | 6/2/2020 Oceania / Australia / Victoria    |
| EPI_ISL_456643 | 5/20/2020 | 6/2/2020 Oceania / Australia / Victoria    |
| EPI_ISL_456647 | 5/26/2020 | 6/2/2020 Oceania / Australia / Victoria    |
| EPI_ISL_456649 | 5/27/2020 | 6/2/2020 Oceania / Australia / Victoria    |
| EPI_ISL_456658 | 2020      | 6/2/2020 Europe / United Kingdom / England |
| EPI_ISL_456659 | 2020      | 6/2/2020 Europe / United Kingdom / England |
| EPI_ISL_456661 | 2020      | 6/2/2020 Europe / United Kingdom / England |
| EPI_ISL_456663 | 2020      | 6/2/2020 Europe / United Kingdom / England |
| EPI_ISL_456664 | 2020      | 6/2/2020 Europe / United Kingdom / England |
| EPI_ISL_456665 | 2020      | 6/2/2020 Europe / United Kingdom / England |
| EPI_ISL_456668 | 5/5/2020  | 6/2/2020 Europe / United Kingdom / England |
| EPI_ISL_456669 | 5/5/2020  | 6/2/2020 Europe / United Kingdom / England |
| EPI_ISL_456671 | 5/4/2020  | 6/2/2020 Europe / United Kingdom / England |
| EPI_ISL_456672 | 5/3/2020  | 6/2/2020 Europe / United Kingdom / England |
| EPI_ISL_456673 | 5/4/2020  | 6/2/2020 Europe / United Kingdom / England |
| EPI_ISL_456675 | 5/5/2020  | 6/2/2020 Europe / United Kingdom / England |
| EPI_ISL_456676 | 5/5/2020  | 6/2/2020 Europe / United Kingdom / England |
| EPI_ISL_456680 | 5/18/2020 | 6/2/2020 Europe / United Kingdom / England |
| EPI_ISL_456688 | 5/18/2020 | 6/2/2020 Europe / United Kingdom / England |
| EPI_ISL_456697 | 5/16/2020 | 6/2/2020 Europe / United Kingdom / England |
| EPI_ISL_456699 | 5/18/2020 | 6/2/2020 Europe / United Kingdom / England |
| EPI_ISL_456702 | 5/19/2020 | 6/2/2020 Europe / United Kingdom / England |
| EPI_ISL_456704 | 5/18/2020 | 6/2/2020 Europe / United Kingdom / England |
| EPI_ISL_456705 | 5/18/2020 | 6/2/2020 Europe / United Kingdom / England |
| EPI_ISL_456707 | 2020      | 6/2/2020 Europe / United Kingdom / England |
| EPI_ISL_456708 | 5/19/2020 | 6/2/2020 Europe / United Kingdom / England |
| EPI_ISL_456709 | 5/19/2020 | 6/2/2020 Europe / United Kingdom / England |
| EPI_ISL_456711 | 5/19/2020 | 6/2/2020 Europe / United Kingdom / England |















|                |           |                                            |
|----------------|-----------|--------------------------------------------|
| EPI_ISL_457095 | 4/17/2020 | 6/2/2020 Europe / United Kingdom / England |
| EPI_ISL_457096 | 4/5/2020  | 6/2/2020 Europe / United Kingdom / England |
| EPI_ISL_457097 | 4/12/2020 | 6/2/2020 Europe / United Kingdom / England |
| EPI_ISL_457098 | 4/11/2020 | 6/2/2020 Europe / United Kingdom / England |
| EPI_ISL_457099 | 3/23/2020 | 6/2/2020 Europe / United Kingdom / England |
| EPI_ISL_457101 | 3/31/2020 | 6/2/2020 Europe / United Kingdom / England |
| EPI_ISL_457102 | 4/13/2020 | 6/2/2020 Europe / United Kingdom / England |
| EPI_ISL_457103 | 4/11/2020 | 6/2/2020 Europe / United Kingdom / England |
| EPI_ISL_457104 | 4/17/2020 | 6/2/2020 Europe / United Kingdom / England |
| EPI_ISL_457105 | 4/10/2020 | 6/2/2020 Europe / United Kingdom / England |
| EPI_ISL_457106 | 4/15/2020 | 6/2/2020 Europe / United Kingdom / England |
| EPI_ISL_457108 | 4/15/2020 | 6/2/2020 Europe / United Kingdom / England |
| EPI_ISL_457109 | 4/15/2020 | 6/2/2020 Europe / United Kingdom / England |
| EPI_ISL_457111 | 4/15/2020 | 6/2/2020 Europe / United Kingdom / England |
| EPI_ISL_457112 | 4/15/2020 | 6/2/2020 Europe / United Kingdom / England |
| EPI_ISL_457114 | 4/16/2020 | 6/2/2020 Europe / United Kingdom / England |
| EPI_ISL_457115 | 4/16/2020 | 6/2/2020 Europe / United Kingdom / England |
| EPI_ISL_457116 | 4/13/2020 | 6/2/2020 Europe / United Kingdom / England |
| EPI_ISL_457117 | 4/14/2020 | 6/2/2020 Europe / United Kingdom / England |
| EPI_ISL_457119 | 4/22/2020 | 6/2/2020 Europe / United Kingdom / England |
| EPI_ISL_457122 | 4/9/2020  | 6/2/2020 Europe / United Kingdom / England |
| EPI_ISL_457123 | 4/10/2020 | 6/2/2020 Europe / United Kingdom / England |
| EPI_ISL_457124 | 3/17/2020 | 6/2/2020 Europe / United Kingdom / England |
| EPI_ISL_457125 | 4/21/2020 | 6/2/2020 Europe / United Kingdom / England |
| EPI_ISL_457126 | 3/31/2020 | 6/2/2020 Europe / United Kingdom / England |
| EPI_ISL_457127 | 3/26/2020 | 6/2/2020 Europe / United Kingdom / England |
| EPI_ISL_457128 | 3/26/2020 | 6/2/2020 Europe / United Kingdom / England |
| EPI_ISL_457129 | 4/10/2020 | 6/2/2020 Europe / United Kingdom / England |
| EPI_ISL_457130 | 4/9/2020  | 6/2/2020 Europe / United Kingdom / England |
| EPI_ISL_457131 | 4/4/2020  | 6/2/2020 Europe / United Kingdom / England |
| EPI_ISL_457132 | 3/26/2020 | 6/2/2020 Europe / United Kingdom / England |
| EPI_ISL_457133 | 4/7/2020  | 6/2/2020 Europe / United Kingdom / England |
| EPI_ISL_457134 | 4/1/2020  | 6/2/2020 Europe / United Kingdom / England |
| EPI_ISL_457135 | 4/9/2020  | 6/2/2020 Europe / United Kingdom / England |
| EPI_ISL_457136 | 4/9/2020  | 6/2/2020 Europe / United Kingdom / England |
| EPI_ISL_457137 | 2020      | 6/2/2020 Europe / United Kingdom / England |
| EPI_ISL_457138 | 4/7/2020  | 6/2/2020 Europe / United Kingdom / England |
| EPI_ISL_457139 | 3/31/2020 | 6/2/2020 Europe / United Kingdom / England |
| EPI_ISL_457140 | 3/17/2020 | 6/2/2020 Europe / United Kingdom / England |
| EPI_ISL_457141 | 4/9/2020  | 6/2/2020 Europe / United Kingdom / England |
| EPI_ISL_457142 | 4/9/2020  | 6/2/2020 Europe / United Kingdom / England |
| EPI_ISL_457143 | 4/10/2020 | 6/2/2020 Europe / United Kingdom / England |
| EPI_ISL_457144 | 3/25/2020 | 6/2/2020 Europe / United Kingdom / England |
| EPI_ISL_457145 | 4/4/2020  | 6/2/2020 Europe / United Kingdom / England |
| EPI_ISL_457146 | 3/28/2020 | 6/2/2020 Europe / United Kingdom / England |
| EPI_ISL_457147 | 3/23/2020 | 6/2/2020 Europe / United Kingdom / England |
| EPI_ISL_457148 | 2020      | 6/2/2020 Europe / United Kingdom / England |

















|                |           |                                            |
|----------------|-----------|--------------------------------------------|
| EPI_ISL_457569 | 5/17/2020 | 6/2/2020 Europe / United Kingdom / England |
| EPI_ISL_457570 | 5/17/2020 | 6/2/2020 Europe / United Kingdom / England |
| EPI_ISL_457571 | 5/17/2020 | 6/2/2020 Europe / United Kingdom / England |
| EPI_ISL_457572 | 5/8/2020  | 6/2/2020 Europe / United Kingdom / England |
| EPI_ISL_457574 | 5/9/2020  | 6/2/2020 Europe / United Kingdom / England |
| EPI_ISL_457575 | 5/1/2020  | 6/2/2020 Europe / United Kingdom / England |
| EPI_ISL_457577 | 5/2/2020  | 6/2/2020 Europe / United Kingdom / England |
| EPI_ISL_457578 | 5/4/2020  | 6/2/2020 Europe / United Kingdom / England |
| EPI_ISL_457579 | 5/5/2020  | 6/2/2020 Europe / United Kingdom / England |
| EPI_ISL_457581 | 5/2/2020  | 6/2/2020 Europe / United Kingdom / England |
| EPI_ISL_457582 | 4/25/2020 | 6/2/2020 Europe / United Kingdom / England |
| EPI_ISL_457583 | 4/23/2020 | 6/2/2020 Europe / United Kingdom / England |
| EPI_ISL_457584 | 4/16/2020 | 6/2/2020 Europe / United Kingdom / England |
| EPI_ISL_457586 | 4/25/2020 | 6/2/2020 Europe / United Kingdom / England |
| EPI_ISL_457592 | 5/1/2020  | 6/2/2020 Europe / United Kingdom / England |
| EPI_ISL_457593 | 5/3/2020  | 6/2/2020 Europe / United Kingdom / England |
| EPI_ISL_457594 | 5/1/2020  | 6/2/2020 Europe / United Kingdom / England |
| EPI_ISL_457596 | 5/2/2020  | 6/2/2020 Europe / United Kingdom / England |
| EPI_ISL_457597 | 4/23/2020 | 6/2/2020 Europe / United Kingdom / England |
| EPI_ISL_457598 | 3/19/2020 | 6/2/2020 Europe / United Kingdom / England |
| EPI_ISL_457599 | 4/30/2020 | 6/2/2020 Europe / United Kingdom / England |
| EPI_ISL_457602 | 4/24/2020 | 6/2/2020 Europe / United Kingdom / England |
| EPI_ISL_457603 | 4/16/2020 | 6/2/2020 Europe / United Kingdom / England |
| EPI_ISL_457604 | 4/14/2020 | 6/2/2020 Europe / United Kingdom / England |
| EPI_ISL_457605 | 5/1/2020  | 6/2/2020 Europe / United Kingdom / England |
| EPI_ISL_457606 | 5/4/2020  | 6/2/2020 Europe / United Kingdom / England |
| EPI_ISL_457611 | 4/14/2020 | 6/2/2020 Europe / United Kingdom / England |
| EPI_ISL_457617 | 5/1/2020  | 6/2/2020 Europe / United Kingdom / England |
| EPI_ISL_457618 | 5/3/2020  | 6/2/2020 Europe / United Kingdom / England |
| EPI_ISL_457620 | 5/2/2020  | 6/2/2020 Europe / United Kingdom / England |
| EPI_ISL_457624 | 4/15/2020 | 6/2/2020 Europe / United Kingdom / England |
| EPI_ISL_457627 | 4/1/2020  | 6/2/2020 Europe / United Kingdom / England |
| EPI_ISL_457631 | 5/4/2020  | 6/2/2020 Europe / United Kingdom / England |
| EPI_ISL_457633 | 5/1/2020  | 6/2/2020 Europe / United Kingdom / England |
| EPI_ISL_457634 | 4/24/2020 | 6/2/2020 Europe / United Kingdom / England |
| EPI_ISL_457636 | 5/1/2020  | 6/2/2020 Europe / United Kingdom / England |
| EPI_ISL_457637 | 5/3/2020  | 6/2/2020 Europe / United Kingdom / England |
| EPI_ISL_457640 | 5/2/2020  | 6/2/2020 Europe / United Kingdom / England |
| EPI_ISL_457641 | 3/21/2020 | 6/2/2020 Europe / United Kingdom / England |
| EPI_ISL_457643 | 4/2/2020  | 6/2/2020 Europe / United Kingdom / England |
| EPI_ISL_457647 | 5/3/2020  | 6/2/2020 Europe / United Kingdom / England |
| EPI_ISL_457648 | 4/14/2020 | 6/2/2020 Europe / United Kingdom / England |
| EPI_ISL_457652 | 4/24/2020 | 6/2/2020 Europe / United Kingdom / England |
| EPI_ISL_457654 | 4/16/2020 | 6/2/2020 Europe / United Kingdom / England |
| EPI_ISL_457655 | 4/30/2020 | 6/2/2020 Europe / United Kingdom / England |
| EPI_ISL_457657 | 5/2/2020  | 6/2/2020 Europe / United Kingdom / England |
| EPI_ISL_457658 | 3/25/2020 | 6/2/2020 Europe / United Kingdom / England |

|                |           |                                               |
|----------------|-----------|-----------------------------------------------|
| EPI_ISL_457659 | 4/1/2020  | 6/2/2020 Europe / United Kingdom / England    |
| EPI_ISL_457660 | 5/1/2020  | 6/2/2020 Europe / United Kingdom / England    |
| EPI_ISL_457661 | 4/17/2020 | 6/2/2020 Europe / United Kingdom / England    |
| EPI_ISL_457667 | 5/4/2020  | 6/2/2020 Europe / United Kingdom / England    |
| EPI_ISL_457670 | 5/4/2020  | 6/2/2020 Europe / United Kingdom / England    |
| EPI_ISL_457672 | 5/2/2020  | 6/2/2020 Europe / United Kingdom / England    |
| EPI_ISL_457675 | 3/30/2020 | 6/2/2020 Europe / United Kingdom / England    |
| EPI_ISL_457676 | 4/14/2020 | 6/2/2020 Europe / United Kingdom / England    |
| EPI_ISL_457678 | 5/2/2020  | 6/2/2020 Europe / United Kingdom / England    |
| EPI_ISL_457679 | 4/16/2020 | 6/2/2020 Europe / United Kingdom / England    |
| EPI_ISL_457680 | 3/31/2020 | 6/2/2020 Europe / United Kingdom / England    |
| EPI_ISL_457683 | 4/14/2020 | 6/2/2020 Europe / United Kingdom / England    |
| EPI_ISL_457685 | 4/14/2020 | 6/2/2020 Europe / United Kingdom / England    |
| EPI_ISL_457687 | 2/11/2020 | 6/2/2020 Asia / China / Guangzhou             |
| EPI_ISL_457688 | 2/11/2020 | 6/2/2020 Asia / China / Guangzhou             |
| EPI_ISL_457689 | 2/11/2020 | 6/2/2020 Asia / China / Guangzhou             |
| EPI_ISL_457690 | 2/11/2020 | 6/2/2020 Asia / China / Guangzhou             |
| EPI_ISL_457691 | 2/11/2020 | 6/2/2020 Asia / China / Guangzhou             |
| EPI_ISL_457692 | 2/14/2020 | 6/2/2020 Asia / China / Guangzhou             |
| EPI_ISL_457693 | 2/14/2020 | 6/2/2020 Asia / China / Guangzhou             |
| EPI_ISL_457694 | 2/17/2020 | 6/2/2020 Asia / China / Guangzhou             |
| EPI_ISL_457695 | 2/17/2020 | 6/2/2020 Asia / China / Guangzhou             |
| EPI_ISL_457696 | 2/20/2020 | 6/2/2020 Asia / China / Guangzhou             |
| EPI_ISL_457697 | 2/20/2020 | 6/2/2020 Asia / China / Guangzhou             |
| EPI_ISL_457698 | 2/26/2020 | 6/2/2020 Asia / China / Guangzhou             |
| EPI_ISL_457699 | 2/22/2020 | 6/2/2020 Europe / Italy / Emilia-Romagna      |
| EPI_ISL_457700 | 3/6/2020  | 6/2/2020 Europe / Italy / Trentino Alto Adige |
| EPI_ISL_457701 | 2/23/2020 | 6/2/2020 Asia / Oman / Muscat                 |
| EPI_ISL_457702 | 4/12/2020 | 6/2/2020 Asia / Oman / Muscat                 |
| EPI_ISL_457703 | 3/25/2020 | 6/2/2020 Asia / Oman / Muscat                 |
| EPI_ISL_457704 | 2/24/2020 | 6/2/2020 Asia / Oman / Muscat                 |
| EPI_ISL_457705 | 5/8/2020  | 6/2/2020 Asia / Oman / Muscat                 |
| EPI_ISL_457706 | 3/2/2020  | 6/2/2020 Asia / Oman / Muscat                 |
| EPI_ISL_457707 | 3/24/2020 | 6/2/2020 Asia / Oman / Muscat                 |
| EPI_ISL_457719 | 2020-03   | 6/2/2020 Europe / Estonia                     |
| EPI_ISL_457721 | 3/12/2020 | 6/2/2020 Europe / Italy / Sicily              |
| EPI_ISL_457722 | 2020-03   | 6/2/2020 Europe / Estonia                     |
| EPI_ISL_457723 | 2020-03   | 6/2/2020 Europe / Estonia                     |
| EPI_ISL_457724 | 3/15/2020 | 6/2/2020 Europe / Italy / Valle d'Aosta       |
| EPI_ISL_457725 | 2020-03   | 6/2/2020 Europe / Estonia                     |
| EPI_ISL_457726 | 2/6/2020  | 6/2/2020 Asia / Taiwan / Taipei               |
| EPI_ISL_457727 | 2020-03   | 6/2/2020 Europe / Estonia                     |
| EPI_ISL_457728 | 3/4/2020  | 6/2/2020 Europe / Italy / Molise              |
| EPI_ISL_457729 | 2020-03   | 6/2/2020 Europe / Estonia                     |
| EPI_ISL_457730 | 2/6/2020  | 6/2/2020 Asia / Taiwan / Taipei               |
| EPI_ISL_457732 | 3/14/2020 | 6/2/2020 Europe / Italy / Valle d'Aosta       |
| EPI_ISL_457733 | 2/8/2020  | 6/2/2020 Asia / Taiwan / Taipei               |



|                |           |          |                                                           |
|----------------|-----------|----------|-----------------------------------------------------------|
| EPI_ISL_457735 | 2020-03   | 6/2/2020 | Europe / Estonia                                          |
| EPI_ISL_457736 | 3/24/2020 | 6/2/2020 | Europe / Italy / Basilicata                               |
| EPI_ISL_457737 | 2020-03   | 6/2/2020 | Europe / Estonia                                          |
| EPI_ISL_457740 | 2020-03   | 6/2/2020 | Europe / Estonia                                          |
| EPI_ISL_457749 | 2/27/2020 | 6/2/2020 | Europe / Italy / Abruzzo                                  |
| EPI_ISL_457750 | 3/26/2020 | 6/2/2020 | Europe / Germany / Mecklenburg-Western Pomerania / Rostoc |
| EPI_ISL_457752 | 3/17/2020 | 6/2/2020 | North America / USA / Maryland                            |
| EPI_ISL_457753 | 3/16/2020 | 6/2/2020 | North America / USA / District of Columbia                |
| EPI_ISL_457754 | 3/16/2020 | 6/2/2020 | North America / USA / Maryland                            |
| EPI_ISL_457755 | 3/17/2020 | 6/2/2020 | North America / USA / Maryland                            |
| EPI_ISL_457756 | 3/20/2020 | 6/2/2020 | North America / USA / Maryland                            |
| EPI_ISL_457757 | 3/20/2020 | 6/2/2020 | North America / USA / District of Columbia                |
| EPI_ISL_457758 | 3/31/2020 | 6/2/2020 | North America / USA / Maryland                            |
| EPI_ISL_457759 | 4/1/2020  | 6/2/2020 | North America / USA / Maryland                            |
| EPI_ISL_457760 | 3/28/2020 | 6/2/2020 | North America / USA / District of Columbia                |
| EPI_ISL_457761 | 3/24/2020 | 6/2/2020 | North America / USA / Maryland                            |
| EPI_ISL_457764 | 3/27/2020 | 6/2/2020 | North America / USA / Maryland                            |
| EPI_ISL_457765 | 3/21/2020 | 6/2/2020 | North America / USA / Maryland                            |
| EPI_ISL_457766 | 3/25/2020 | 6/2/2020 | North America / USA / Maryland                            |
| EPI_ISL_457768 | 3/14/2020 | 6/2/2020 | North America / USA / Maryland                            |
| EPI_ISL_457769 | 3/24/2020 | 6/2/2020 | North America / USA / Maryland                            |
| EPI_ISL_457780 | 3/30/2020 | 6/2/2020 | North America / USA / Maryland                            |
| EPI_ISL_457781 | 3/27/2020 | 6/2/2020 | North America / USA / District of Columbia                |
| EPI_ISL_457782 | 3/24/2020 | 6/2/2020 | North America / USA / Maryland                            |
| EPI_ISL_457783 | 3/29/2020 | 6/2/2020 | North America / USA / Maryland                            |
| EPI_ISL_457784 | 3/22/2020 | 6/2/2020 | North America / USA / Maryland                            |
| EPI_ISL_457785 | 3/18/2020 | 6/2/2020 | North America / USA / Maryland                            |
| EPI_ISL_457787 | 3/30/2020 | 6/2/2020 | North America / USA / Maryland                            |
| EPI_ISL_457788 | 3/23/2020 | 6/2/2020 | North America / USA / Maryland                            |
| EPI_ISL_457789 | 3/16/2020 | 6/2/2020 | North America / USA / Maryland                            |
| EPI_ISL_457790 | 3/20/2020 | 6/2/2020 | North America / USA / Maryland                            |
| EPI_ISL_457791 | 3/17/2020 | 6/2/2020 | North America / USA / Maryland                            |
| EPI_ISL_457792 | 3/15/2020 | 6/2/2020 | North America / USA / Maryland                            |
| EPI_ISL_457795 | 3/19/2020 | 6/2/2020 | North America / USA / Maryland                            |
| EPI_ISL_457796 | 3/7/2020  | 6/2/2020 | North America / USA / District of Columbia                |
| EPI_ISL_457797 | 3/7/2020  | 6/2/2020 | North America / USA / District of Columbia                |
| EPI_ISL_457798 | 3/20/2020 | 6/2/2020 | North America / USA / Maryland                            |
| EPI_ISL_457799 | 3/11/2020 | 6/2/2020 | North America / USA / Maryland                            |
| EPI_ISL_457800 | 3/19/2020 | 6/2/2020 | North America / USA / Maryland                            |
| EPI_ISL_457801 | 3/24/2020 | 6/2/2020 | North America / USA / District of Columbia                |
| EPI_ISL_457802 | 3/10/2020 | 6/2/2020 | North America / USA / Maryland                            |
| EPI_ISL_457803 | 3/16/2020 | 6/2/2020 | North America / USA / Maryland                            |
| EPI_ISL_457804 | 3/13/2020 | 6/2/2020 | North America / USA / Maryland                            |
| EPI_ISL_457805 | 3/13/2020 | 6/2/2020 | North America / USA / District of Columbia                |
| EPI_ISL_457806 | 3/16/2020 | 6/2/2020 | North America / USA / Maryland                            |
| EPI_ISL_457807 | 3/15/2020 | 6/2/2020 | North America / USA / Maryland                            |
| EPI_ISL_457808 | 3/11/2020 | 6/2/2020 | North America / USA / Maryland                            |

|                |           |                                                     |
|----------------|-----------|-----------------------------------------------------|
| EPI_ISL_457809 | 3/26/2020 | 6/2/2020 North America / USA / District of Columbia |
| EPI_ISL_457810 | 3/28/2020 | 6/2/2020 North America / USA / District of Columbia |
| EPI_ISL_457811 | 3/29/2020 | 6/2/2020 North America / USA / Maryland             |
| EPI_ISL_457812 | 3/18/2020 | 6/2/2020 North America / USA / Maryland             |
| EPI_ISL_457813 | 3/19/2020 | 6/2/2020 North America / USA / Maryland             |
| EPI_ISL_457814 | 3/18/2020 | 6/2/2020 North America / USA / District of Columbia |
| EPI_ISL_457816 | 3/24/2020 | 6/2/2020 North America / USA / Maryland             |
| EPI_ISL_457817 | 3/24/2020 | 6/2/2020 North America / USA / Maryland             |
| EPI_ISL_457818 | 3/30/2020 | 6/2/2020 North America / USA / Maryland             |
| EPI_ISL_457819 | 3/18/2020 | 6/2/2020 North America / USA / Maryland             |
| EPI_ISL_457820 | 3/16/2020 | 6/2/2020 North America / USA / Maryland             |
| EPI_ISL_457821 | 3/30/2020 | 6/2/2020 North America / USA / Maryland             |
| EPI_ISL_457822 | 3/25/2020 | 6/2/2020 North America / USA / District of Columbia |
| EPI_ISL_457823 | 3/21/2020 | 6/2/2020 North America / USA / District of Columbia |
| EPI_ISL_457824 | 3/24/2020 | 6/2/2020 Europe / Turkey / Istanbul                 |
| EPI_ISL_457825 | 3/25/2020 | 6/2/2020 Europe / Italy / Sardinia                  |
| EPI_ISL_457826 | 3/8/2020  | 6/2/2020 Europe / Italy / Lombardy                  |
| EPI_ISL_457827 | 2020-03   | 6/2/2020 Africa / Kenya                             |
| EPI_ISL_457828 | 2020-03   | 6/2/2020 Africa / Kenya                             |
| EPI_ISL_457829 | 2020-03   | 6/2/2020 Africa / Kenya                             |
| EPI_ISL_457833 | 3/20/2020 | 6/2/2020 Africa / Kenya                             |
| EPI_ISL_457843 | 3/29/2020 | 6/2/2020 Africa / Kenya                             |
| EPI_ISL_457854 | 4/19/2020 | 6/2/2020 Africa / Kenya                             |
| EPI_ISL_457867 | 4/22/2020 | 6/2/2020 Africa / Kenya                             |
| EPI_ISL_457868 | 4/3/2020  | 6/2/2020 Africa / Kenya                             |
| EPI_ISL_457875 | 4/4/2020  | 6/2/2020 Africa / Kenya                             |
| EPI_ISL_457884 | 4/25/2020 | 6/2/2020 Africa / Kenya                             |
| EPI_ISL_457897 | 4/28/2020 | 6/2/2020 Africa / Kenya                             |
| EPI_ISL_457906 | 4/29/2020 | 6/2/2020 Africa / Kenya                             |
| EPI_ISL_457913 | 4/11/2020 | 6/2/2020 Africa / Kenya                             |
| EPI_ISL_457915 | 4/13/2020 | 6/2/2020 Africa / Kenya                             |
| EPI_ISL_457920 | 4/14/2020 | 6/2/2020 Africa / Kenya                             |
| EPI_ISL_457921 | 4/15/2020 | 6/2/2020 Africa / Kenya                             |
| EPI_ISL_457928 | 4/17/2020 | 6/2/2020 Africa / Kenya                             |
| EPI_ISL_457937 | 3/15/2020 | 6/2/2020 Asia / Oman / Muscat                       |
| EPI_ISL_457938 | 3/15/2020 | 6/2/2020 Asia / Oman / Muscat                       |
| EPI_ISL_457939 | 3/17/2020 | 6/2/2020 Asia / Oman / Muscat                       |
| EPI_ISL_457946 | 3/17/2020 | 6/2/2020 South America / Uruguay / Montevideo       |
| EPI_ISL_457948 | 3/17/2020 | 6/2/2020 South America / Uruguay / Montevideo       |
| EPI_ISL_457952 | 3/21/2020 | 6/2/2020 South America / Uruguay / Montevideo       |
| EPI_ISL_457953 | 3/23/2020 | 6/2/2020 South America / Uruguay / Montevideo       |
| EPI_ISL_457956 | 3/25/2020 | 6/2/2020 South America / Uruguay / Montevideo       |
| EPI_ISL_457957 | 3/25/2020 | 6/2/2020 South America / Uruguay / Montevideo       |
| EPI_ISL_457958 | 3/25/2020 | 6/2/2020 South America / Uruguay / Montevideo       |
| EPI_ISL_457959 | 3/26/2020 | 6/2/2020 South America / Uruguay / Montevideo       |
| EPI_ISL_457961 | 3/28/2020 | 6/2/2020 South America / Uruguay / Montevideo       |
| EPI_ISL_457963 | 3/28/2020 | 6/2/2020 South America / Uruguay / Montevideo       |

|                |           |                                                         |
|----------------|-----------|---------------------------------------------------------|
| EPI_ISL_457965 | 4/3/2020  | 6/2/2020 South America / Uruguay / Montevideo           |
| EPI_ISL_457972 | 4/21/2020 | 6/2/2020 South America / Uruguay / Montevideo           |
| EPI_ISL_457974 | 3/14/2020 | 6/2/2020 Asia / Oman / Muscat                           |
| EPI_ISL_457975 | 3/17/2020 | 6/2/2020 Asia / Oman / Muscat                           |
| EPI_ISL_457976 | 3/17/2020 | 6/2/2020 Asia / Oman / North Batinah                    |
| EPI_ISL_457977 | 3/18/2020 | 6/2/2020 Asia / Oman / Muscat                           |
| EPI_ISL_457978 | 3/18/2020 | 6/2/2020 Asia / Oman / Muscat                           |
| EPI_ISL_457979 | 3/18/2020 | 6/2/2020 Asia / Oman / Muscat                           |
| EPI_ISL_457980 | 3/18/2020 | 6/2/2020 Asia / Oman / Muscat                           |
| EPI_ISL_457981 | 4/3/2020  | 6/2/2020 Asia / Oman / Muscat                           |
| EPI_ISL_457985 | 3/18/2020 | 6/2/2020 Asia / Oman / Muscat                           |
| EPI_ISL_457986 | 3/20/2020 | 6/2/2020 Asia / Oman / Muscat                           |
| EPI_ISL_457987 | 3/20/2020 | 6/2/2020 Asia / Oman / Muscat                           |
| EPI_ISL_457988 | 3/21/2020 | 6/2/2020 Asia / Oman / Muscat                           |
| EPI_ISL_457989 | 3/21/2020 | 6/2/2020 Asia / Oman / Muscat                           |
| EPI_ISL_457990 | 3/21/2020 | 6/2/2020 Asia / Oman / Muscat                           |
| EPI_ISL_457991 | 3/22/2020 | 6/2/2020 Asia / Oman / North Batinah                    |
| EPI_ISL_457992 | 3/22/2020 | 6/2/2020 Asia / Oman / South Batinah                    |
| EPI_ISL_457993 | 3/24/2020 | 6/2/2020 Asia / Oman / Dakhiliyah                       |
| EPI_ISL_457994 | 3/25/2020 | 6/2/2020 Asia / Oman / Muscat                           |
| EPI_ISL_457995 | 3/26/2020 | 6/2/2020 Asia / Oman / Buraimi                          |
| EPI_ISL_457996 | 3/29/2020 | 6/2/2020 Asia / Oman / Muscat                           |
| EPI_ISL_457997 | 3/28/2020 | 6/2/2020 Asia / Oman / Muscat                           |
| EPI_ISL_457998 | 3/28/2020 | 6/2/2020 Asia / Oman / South Batinah                    |
| EPI_ISL_458000 | 3/17/2020 | 6/2/2020 Africa / Kenya                                 |
| EPI_ISL_458002 | 2020-04   | 6/2/2020 North America / USA / North Carolina           |
| EPI_ISL_458003 | 2020-04   | 6/2/2020 North America / USA / North Carolina           |
| EPI_ISL_458004 | 2020-04   | 6/2/2020 North America / USA / North Carolina           |
| EPI_ISL_458005 | 2020-04   | 6/2/2020 North America / USA / North Carolina           |
| EPI_ISL_458006 | 2020-04   | 6/2/2020 North America / USA / North Carolina           |
| EPI_ISL_458007 | 2020-03   | 6/2/2020 North America / USA / North Carolina           |
| EPI_ISL_458017 | 3/18/2020 | 6/3/2020 North America / USA / New York / Nassau County |
| EPI_ISL_458018 | 3/18/2020 | 6/3/2020 North America / USA / New York / Nassau County |
| EPI_ISL_458019 | 3/18/2020 | 6/3/2020 North America / USA / New York / Brooklyn      |
| EPI_ISL_458020 | 3/18/2020 | 6/3/2020 North America / USA / New York / Nassau County |
| EPI_ISL_458021 | 3/18/2020 | 6/3/2020 North America / USA / New York / Queens        |
| EPI_ISL_458024 | 3/30/2020 | 6/3/2020 Asia / Thailand / Bangkok                      |
| EPI_ISL_458029 | 3/24/2020 | 6/3/2020 Asia / Taiwan / Taipei                         |
| EPI_ISL_458030 | 4/26/2020 | 6/3/2020 Asia / India / Tamil Nadu / Chennai            |
| EPI_ISL_458031 | 4/26/2020 | 6/3/2020 Asia / India / Tamil Nadu / Chennai            |
| EPI_ISL_458032 | 4/27/2020 | 6/3/2020 Asia / India / Tamil Nadu / Chennai            |
| EPI_ISL_458033 | 4/29/2020 | 6/3/2020 Asia / India / Tamil Nadu / Chennai            |
| EPI_ISL_458034 | 4/29/2020 | 6/3/2020 Asia / India / Tamil Nadu / Chennai            |
| EPI_ISL_458035 | 4/29/2020 | 6/3/2020 Asia / India / Tamil Nadu / Chennai            |
| EPI_ISL_458036 | 4/29/2020 | 6/3/2020 Asia / India / Tamil Nadu / Chennai            |
| EPI_ISL_458037 | 4/29/2020 | 6/3/2020 Asia / India / Tamil Nadu / Chennai            |
| EPI_ISL_458038 | 4/29/2020 | 6/3/2020 Asia / India / Tamil Nadu / Chennai            |

|                |           |                                                  |
|----------------|-----------|--------------------------------------------------|
| EPI_ISL_458039 | 5/6/2020  | 6/3/2020 Asia / India / Tamil Nadu / Chennai     |
| EPI_ISL_458040 | 5/6/2020  | 6/3/2020 Asia / India / Tamil Nadu / Chennai     |
| EPI_ISL_458041 | 5/6/2020  | 6/3/2020 Asia / India / Tamil Nadu / Chennai     |
| EPI_ISL_458042 | 5/6/2020  | 6/3/2020 Asia / India / Tamil Nadu / Chennai     |
| EPI_ISL_458043 | 5/6/2020  | 6/3/2020 Asia / India / Tamil Nadu / Chennai     |
| EPI_ISL_458044 | 5/6/2020  | 6/3/2020 Asia / India / Tamil Nadu / Chennai     |
| EPI_ISL_458045 | 5/11/2020 | 6/3/2020 Asia / India / Telangana / Hyderabad    |
| EPI_ISL_458046 | 5/11/2020 | 6/3/2020 Asia / India / Telangana / Hyderabad    |
| EPI_ISL_458047 | 5/11/2020 | 6/3/2020 Asia / India / Telangana / Hyderabad    |
| EPI_ISL_458048 | 5/11/2020 | 6/3/2020 Asia / India / Telangana / Hyderabad    |
| EPI_ISL_458049 | 5/11/2020 | 6/3/2020 Asia / India / Telangana / Hyderabad    |
| EPI_ISL_458050 | 5/11/2020 | 6/3/2020 Asia / India / Telangana / Hyderabad    |
| EPI_ISL_458051 | 5/12/2020 | 6/3/2020 Asia / India / Telangana / Mancherial   |
| EPI_ISL_458052 | 5/12/2020 | 6/3/2020 Asia / India / Telangana / Mancherial   |
| EPI_ISL_458053 | 5/12/2020 | 6/3/2020 Asia / India / Telangana / Mancherial   |
| EPI_ISL_458054 | 5/13/2020 | 6/3/2020 Asia / India / Telangana / Hyderabad    |
| EPI_ISL_458055 | 5/13/2020 | 6/3/2020 Asia / India / Telangana / Hyderabad    |
| EPI_ISL_458056 | 5/13/2020 | 6/3/2020 Asia / India / Telangana / Hyderabad    |
| EPI_ISL_458057 | 5/13/2020 | 6/3/2020 Asia / India / Telangana / Hyderabad    |
| EPI_ISL_458058 | 5/13/2020 | 6/3/2020 Asia / India / Telangana / Hyderabad    |
| EPI_ISL_458059 | 5/13/2020 | 6/3/2020 Asia / India / Telangana / Hyderabad    |
| EPI_ISL_458060 | 5/13/2020 | 6/3/2020 Asia / India / Telangana / Hyderabad    |
| EPI_ISL_458061 | 5/13/2020 | 6/3/2020 Asia / India / Telangana / Hyderabad    |
| EPI_ISL_458062 | 4/20/2020 | 6/3/2020 Asia / India / Telangana / Suryapet     |
| EPI_ISL_458063 | 4/20/2020 | 6/3/2020 Asia / India / Telangana / Suryapet     |
| EPI_ISL_458064 | 5/11/2020 | 6/3/2020 Asia / India / Telangana / Hyderabad    |
| EPI_ISL_458065 | 5/11/2020 | 6/3/2020 Asia / India / Telangana / Hyderabad    |
| EPI_ISL_458066 | 4/13/2020 | 6/3/2020 Asia / India / Telangana / Hyderabad    |
| EPI_ISL_458067 | 4/15/2020 | 6/3/2020 Asia / India / Telangana / Hyderabad    |
| EPI_ISL_458068 | 4/14/2020 | 6/3/2020 Asia / India / Telangana / Hyderabad    |
| EPI_ISL_458069 | 4/3/2020  | 6/3/2020 Asia / India / Telangana / Hyderabad    |
| EPI_ISL_458070 | 4/12/2020 | 6/3/2020 Asia / India / Telangana / Nizamabad    |
| EPI_ISL_458071 | 4/1/2020  | 6/3/2020 Asia / India / Telangana / Kamareddy    |
| EPI_ISL_458072 | 4/8/2020  | 6/3/2020 Asia / India / Telangana / Rangaraddy   |
| EPI_ISL_458073 | 4/20/2020 | 6/3/2020 Asia / India / Telangana / Suryapet     |
| EPI_ISL_458074 | 4/20/2020 | 6/3/2020 Asia / India / Telangana / Suryapet     |
| EPI_ISL_458075 | 4/15/2020 | 6/3/2020 Asia / India / Telangana / Hyderabad    |
| EPI_ISL_458076 | 4/20/2020 | 6/3/2020 Asia / India / Telangana / Suryapet     |
| EPI_ISL_458079 | 3/30/2020 | 6/3/2020 Asia / Indonesia / East Java / Surabaya |
| EPI_ISL_458080 | 4/3/2020  | 6/3/2020 Asia / India / Telangana / Adilabad     |
| EPI_ISL_458081 | 3/30/2020 | 6/3/2020 Asia / Indonesia / East Java / Pasuruan |
| EPI_ISL_458083 | 4/11/2020 | 6/3/2020 Asia / Indonesia / East Java / Surabaya |
| EPI_ISL_458084 | 4/3/2020  | 6/3/2020 Europe / Italy / Sardinia               |
| EPI_ISL_458085 | 4/12/2020 | 6/3/2020 Europe / Italy / Sardinia               |
| EPI_ISL_458086 | 5/24/2020 | 6/3/2020 Asia / India / Gujarat / Ahmedabad      |
| EPI_ISL_458087 | 5/24/2020 | 6/3/2020 Asia / India / Gujarat / Ahmedabad      |
| EPI_ISL_458088 | 5/24/2020 | 6/3/2020 Asia / India / Gujarat / Ahmedabad      |

|                |           |                                              |
|----------------|-----------|----------------------------------------------|
| EPI_ISL_458089 | 5/24/2020 | 6/3/2020 Asia / India / Gujarat / Ahmedabad  |
| EPI_ISL_458090 | 5/24/2020 | 6/3/2020 Asia / India / Gujarat / Ahmedabad  |
| EPI_ISL_458091 | 5/24/2020 | 6/3/2020 Asia / India / Gujarat / Ahmedabad  |
| EPI_ISL_458092 | 5/24/2020 | 6/3/2020 Asia / India / Gujarat / Ahmedabad  |
| EPI_ISL_458093 | 5/24/2020 | 6/3/2020 Asia / India / Gujarat / Ahmedabad  |
| EPI_ISL_458094 | 5/24/2020 | 6/3/2020 Asia / India / Gujarat / Ahmedabad  |
| EPI_ISL_458095 | 5/24/2020 | 6/3/2020 Asia / India / Gujarat / Ahmedabad  |
| EPI_ISL_458096 | 5/24/2020 | 6/3/2020 Asia / India / Gujarat / Ahmedabad  |
| EPI_ISL_458097 | 5/24/2020 | 6/3/2020 Asia / India / Gujarat / Ahmedabad  |
| EPI_ISL_458098 | 5/24/2020 | 6/3/2020 Asia / India / Gujarat / Ahmedabad  |
| EPI_ISL_458099 | 5/24/2020 | 6/3/2020 Asia / India / Gujarat / Ahmedabad  |
| EPI_ISL_458100 | 5/24/2020 | 6/3/2020 Asia / India / Gujarat / Ahmedabad  |
| EPI_ISL_458101 | 5/24/2020 | 6/3/2020 Asia / India / Gujarat / Ahmedabad  |
| EPI_ISL_458102 | 5/24/2020 | 6/3/2020 Asia / India / Gujarat / Ahmedabad  |
| EPI_ISL_458103 | 5/5/2020  | 6/3/2020 Asia / India / Gujarat / Bayad      |
| EPI_ISL_458104 | 5/6/2020  | 6/3/2020 Asia / India / Gujarat / Prantij    |
| EPI_ISL_458105 | 5/6/2020  | 6/3/2020 Asia / India / Gujarat / Prantij    |
| EPI_ISL_458106 | 5/16/2020 | 6/3/2020 Asia / India / Gujarat / Himatnagar |
| EPI_ISL_458107 | 5/16/2020 | 6/3/2020 Asia / India / Gujarat / Himatnagar |
| EPI_ISL_458108 | 5/16/2020 | 6/3/2020 Asia / India / Gujarat / Khedbrahma |
| EPI_ISL_458109 | 5/17/2020 | 6/3/2020 Asia / India / Gujarat / Khedbrahma |
| EPI_ISL_458110 | 5/17/2020 | 6/3/2020 Asia / India / Gujarat / Khedbrahma |
| EPI_ISL_458111 | 5/17/2020 | 6/3/2020 Asia / India / Gujarat / Himatnagar |
| EPI_ISL_458112 | 5/18/2020 | 6/3/2020 Asia / India / Gujarat / Himatnagar |
| EPI_ISL_458113 | 5/18/2020 | 6/3/2020 Asia / India / Gujarat / Himatnagar |
| EPI_ISL_458116 | 5/1/2020  | 6/3/2020 Asia / Oman / Muscat                |
| EPI_ISL_458117 | 5/9/2020  | 6/3/2020 Asia / Oman / Muscat                |
| EPI_ISL_458118 | 5/1/2020  | 6/3/2020 Asia / Oman / Muscat                |
| EPI_ISL_458119 | 4/11/2020 | 6/3/2020 Asia / Oman / Muscat                |
| EPI_ISL_458120 | 4/13/2020 | 6/3/2020 Asia / Oman / Muscat                |
| EPI_ISL_458121 | 4/20/2020 | 6/3/2020 Asia / Oman / Muscat                |
| EPI_ISL_458122 | 4/7/2020  | 6/3/2020 Asia / Oman / Muscat                |
| EPI_ISL_458123 | 4/6/2020  | 6/3/2020 Asia / Oman / Muscat                |
| EPI_ISL_458124 | 5/3/2020  | 6/3/2020 Asia / Oman / Muscat                |
| EPI_ISL_458130 | 3/25/2020 | 6/3/2020 Europe / Spain / Catalunya          |
| EPI_ISL_458131 | 4/9/2020  | 6/3/2020 Europe / Spain / Catalunya          |
| EPI_ISL_458132 | 3/26/2020 | 6/3/2020 Europe / Spain / Catalunya          |
| EPI_ISL_458133 | 5/11/2020 | 6/3/2020 Asia / Bangladesh / Dhaka           |
| EPI_ISL_458138 | 4/3/2020  | 6/3/2020 South America / Brazil / Amapa      |
| EPI_ISL_458139 | 3/18/2020 | 6/3/2020 South America / Brazil / Acre       |
| EPI_ISL_458140 | 4/7/2020  | 6/3/2020 South America / Brazil / Para       |
| EPI_ISL_458141 | 4/26/2020 | 6/3/2020 South America / Brazil / Para       |
| EPI_ISL_458142 | 4/5/2020  | 6/3/2020 South America / Brazil / Amapa      |
| EPI_ISL_458143 | 4/15/2020 | 6/3/2020 South America / Brazil / Amapa      |
| EPI_ISL_458144 | 4/15/2020 | 6/3/2020 South America / Brazil / Amapa      |
| EPI_ISL_458145 | 4/20/2020 | 6/3/2020 South America / Brazil / Amapa      |
| EPI_ISL_458146 | 4/23/2020 | 6/3/2020 South America / Brazil / Para       |

|                |           |                                                 |
|----------------|-----------|-------------------------------------------------|
| EPI_ISL_458147 | 4/24/2020 | 6/3/2020 South America / Brazil / Para          |
| EPI_ISL_458148 | 4/27/2020 | 6/3/2020 South America / Brazil / Para          |
| EPI_ISL_458149 | 4/6/2020  | 6/3/2020 South America / Brazil / Maranhao      |
| EPI_ISL_458150 | 5/15/2020 | 6/3/2020 Africa / Morocco / Casablanca          |
| EPI_ISL_458286 | 3/24/2020 | 6/3/2020 Africa / Tunisia / Ben Arous           |
| EPI_ISL_458287 | 4/23/2020 | 6/3/2020 Africa / Morocco / Rabat               |
| EPI_ISL_458291 | 2020-04   | 6/3/2020 North America / USA / North Carolina   |
| EPI_ISL_458292 | 2020-05   | 6/3/2020 North America / USA / North Carolina   |
| EPI_ISL_458293 | 2020-05   | 6/3/2020 North America / USA / North Carolina   |
| EPI_ISL_458294 | 2020-04   | 6/3/2020 North America / USA / North Carolina   |
| EPI_ISL_458295 | 2020-04   | 6/3/2020 North America / USA / North Carolina   |
| EPI_ISL_458296 | 2020-04   | 6/3/2020 North America / USA / North Carolina   |
| EPI_ISL_458297 | 2020-04   | 6/3/2020 North America / USA / North Carolina   |
| EPI_ISL_462439 | 2020-04   | 6/3/2020 Asia / Japan                           |
| EPI_ISL_462440 | 2020-04   | 6/3/2020 Asia / Japan                           |
| EPI_ISL_462441 | 2020-04   | 6/3/2020 Asia / Japan                           |
| EPI_ISL_462442 | 2020-04   | 6/3/2020 Asia / Japan                           |
| EPI_ISL_462443 | 2020-04   | 6/3/2020 Asia / Japan                           |
| EPI_ISL_462444 | 2020-04   | 6/3/2020 Asia / Japan                           |
| EPI_ISL_462445 | 2020-04   | 6/3/2020 Asia / Japan                           |
| EPI_ISL_468724 | 2020-02   | 6/3/2020 Asia / Japan                           |
| EPI_ISL_468725 | 2020-03   | 6/3/2020 Asia / Japan                           |
| EPI_ISL_458156 | 3/28/2020 | 6/4/2020 Europe / Belgium / Kaggevinne          |
| EPI_ISL_458157 | 3/28/2020 | 6/4/2020 Europe / Belgium / Sterrebeek          |
| EPI_ISL_458158 | 3/28/2020 | 6/4/2020 Europe / Belgium / Geetbets            |
| EPI_ISL_458159 | 3/28/2020 | 6/4/2020 Europe / Belgium / Frameries           |
| EPI_ISL_458160 | 3/28/2020 | 6/4/2020 Europe / Belgium / Colfontaine         |
| EPI_ISL_458161 | 3/28/2020 | 6/4/2020 Europe / Belgium / Dour                |
| EPI_ISL_458162 | 3/28/2020 | 6/4/2020 Europe / Belgium / La louvi re         |
| EPI_ISL_458163 | 3/28/2020 | 6/4/2020 Europe / Belgium / Mon                 |
| EPI_ISL_458164 | 3/28/2020 | 6/4/2020 Europe / Belgium / Seneffe             |
| EPI_ISL_458165 | 3/28/2020 | 6/4/2020 Europe / Belgium / Dour                |
| EPI_ISL_458166 | 3/28/2020 | 6/4/2020 Europe / Belgium / Havre               |
| EPI_ISL_458167 | 3/28/2020 | 6/4/2020 Europe / Belgium / Baudour             |
| EPI_ISL_458168 | 3/28/2020 | 6/4/2020 Europe / Belgium / Braine-l Alleud     |
| EPI_ISL_458169 | 3/28/2020 | 6/4/2020 Europe / Belgium / Mons                |
| EPI_ISL_458170 | 3/28/2020 | 6/4/2020 Europe / Belgium / Machelen            |
| EPI_ISL_458171 | 3/28/2020 | 6/4/2020 Europe / Belgium / Zolder              |
| EPI_ISL_458172 | 3/28/2020 | 6/4/2020 Europe / Belgium / Colfontaine         |
| EPI_ISL_458173 | 3/28/2020 | 6/4/2020 Europe / Belgium / Veltem-Beisem       |
| EPI_ISL_458174 | 3/28/2020 | 6/4/2020 Europe / Belgium / Sint-pieters-woluwe |
| EPI_ISL_458175 | 3/28/2020 | 6/4/2020 Europe / Belgium / Laken               |
| EPI_ISL_458176 | 3/28/2020 | 6/4/2020 Europe / Belgium / Shape               |
| EPI_ISL_458177 | 3/28/2020 | 6/4/2020 Europe / Belgium / Oudergem            |
| EPI_ISL_458178 | 3/28/2020 | 6/4/2020 Europe / Belgium / Etterbeek           |
| EPI_ISL_458179 | 3/28/2020 | 6/4/2020 Europe / Belgium / Fl nu               |
| EPI_ISL_458180 | 3/27/2020 | 6/4/2020 Europe / Belgium / Jette               |

|                |           |                                                |
|----------------|-----------|------------------------------------------------|
| EPI_ISL_458181 | 3/27/2020 | 6/4/2020 Europe / Belgium / Molenstede         |
| EPI_ISL_458182 | 3/27/2020 | 6/4/2020 Europe / Belgium / Soignies           |
| EPI_ISL_458183 | 3/27/2020 | 6/4/2020 Europe / Belgium / Luttre             |
| EPI_ISL_458184 | 3/27/2020 | 6/4/2020 Europe / Belgium / Boussu             |
| EPI_ISL_458185 | 3/27/2020 | 6/4/2020 Europe / Belgium / Wilrijk            |
| EPI_ISL_458186 | 3/27/2020 | 6/4/2020 Europe / Belgium / Givry              |
| EPI_ISL_458187 | 3/29/2020 | 6/4/2020 Europe / Belgium / Koersel            |
| EPI_ISL_458188 | 3/29/2020 | 6/4/2020 Europe / Belgium / Mepel              |
| EPI_ISL_458189 | 3/29/2020 | 6/4/2020 Europe / Belgium / Mons               |
| EPI_ISL_458190 | 3/29/2020 | 6/4/2020 Europe / Belgium / Givry              |
| EPI_ISL_458191 | 3/29/2020 | 6/4/2020 Europe / Belgium / Huldenberg         |
| EPI_ISL_458192 | 3/29/2020 | 6/4/2020 Europe / Belgium / Le roeulx          |
| EPI_ISL_458193 | 3/29/2020 | 6/4/2020 Europe / Belgium / Frameries          |
| EPI_ISL_458194 | 3/29/2020 | 6/4/2020 Europe / Belgium / Temse              |
| EPI_ISL_458195 | 3/29/2020 | 6/4/2020 Europe / Belgium / Neufmaison         |
| EPI_ISL_458196 | 3/29/2020 | 6/4/2020 Europe / Belgium / Frameries          |
| EPI_ISL_458197 | 3/29/2020 | 6/4/2020 Europe / Belgium / Jurbise            |
| EPI_ISL_458198 | 3/29/2020 | 6/4/2020 Europe / Belgium / Lotenhulle         |
| EPI_ISL_458199 | 3/29/2020 | 6/4/2020 Europe / Belgium / Saint-Ghislain     |
| EPI_ISL_458200 | 3/29/2020 | 6/4/2020 Europe / Belgium / Edingen            |
| EPI_ISL_458201 | 3/29/2020 | 6/4/2020 Europe / Belgium / Thulin             |
| EPI_ISL_458202 | 3/29/2020 | 6/4/2020 Europe / Belgium / Wilsele            |
| EPI_ISL_458203 | 3/29/2020 | 6/4/2020 Europe / Belgium / Wilsele            |
| EPI_ISL_458204 | 3/29/2020 | 6/4/2020 Europe / Belgium / Paal               |
| EPI_ISL_458205 | 3/29/2020 | 6/4/2020 Europe / Belgium / Wadelincourt       |
| EPI_ISL_458206 | 3/29/2020 | 6/4/2020 Europe / Belgium / Maldegem           |
| EPI_ISL_458207 | 3/29/2020 | 6/4/2020 Europe / Belgium / QuÃ©vy             |
| EPI_ISL_458208 | 3/29/2020 | 6/4/2020 Europe / Belgium / Elsene             |
| EPI_ISL_458209 | 3/29/2020 | 6/4/2020 Europe / Belgium / Boutersem          |
| EPI_ISL_458210 | 3/29/2020 | 6/4/2020 Europe / Belgium / Ghlin              |
| EPI_ISL_458211 | 3/29/2020 | 6/4/2020 Europe / Belgium / Zolder             |
| EPI_ISL_458212 | 3/29/2020 | 6/4/2020 Europe / Belgium / Grand-Leez         |
| EPI_ISL_458213 | 3/29/2020 | 6/4/2020 Europe / Belgium / Mouscron           |
| EPI_ISL_458214 | 3/29/2020 | 6/4/2020 Europe / Belgium / Namur              |
| EPI_ISL_458215 | 3/29/2020 | 6/4/2020 Europe / Belgium / Morlanwelz         |
| EPI_ISL_458216 | 3/29/2020 | 6/4/2020 Europe / Belgium / Tubize             |
| EPI_ISL_458217 | 3/30/2020 | 6/4/2020 Europe / Belgium / Edingen            |
| EPI_ISL_458218 | 3/30/2020 | 6/4/2020 Europe / Belgium / Bury               |
| EPI_ISL_458219 | 3/30/2020 | 6/4/2020 Europe / Belgium / Tienen             |
| EPI_ISL_458220 | 3/30/2020 | 6/4/2020 Europe / Belgium / Kain               |
| EPI_ISL_458221 | 3/30/2020 | 6/4/2020 Europe / Belgium / Malle              |
| EPI_ISL_458222 | 3/30/2020 | 6/4/2020 Europe / Belgium / Holsbeek           |
| EPI_ISL_458223 | 3/30/2020 | 6/4/2020 Europe / Belgium / Sint-Genesius-Rode |
| EPI_ISL_458224 | 3/30/2020 | 6/4/2020 Europe / Belgium / Aarschot           |
| EPI_ISL_458225 | 3/30/2020 | 6/4/2020 Europe / Belgium / Hasselt            |
| EPI_ISL_458226 | 3/30/2020 | 6/4/2020 Europe / Belgium / Wilsele            |
| EPI_ISL_458227 | 3/30/2020 | 6/4/2020 Europe / Belgium / Tessengerlo        |

|                |           |                                                              |
|----------------|-----------|--------------------------------------------------------------|
| EPI_ISL_458228 | 3/20/2020 | 6/4/2020 Europe / Belgium / Tervuren                         |
| EPI_ISL_458229 | 3/19/2020 | 6/4/2020 Europe / Belgium / Scherpenheuvel-Zichem            |
| EPI_ISL_458230 | 3/16/2020 | 6/4/2020 Europe / Belgium / Overijse                         |
| EPI_ISL_458231 | 3/26/2020 | 6/4/2020 Europe / Belgium / Wespelaar                        |
| EPI_ISL_458232 | 3/20/2020 | 6/4/2020 Europe / Belgium / Lubbeek                          |
| EPI_ISL_458233 | 3/31/2020 | 6/4/2020 Europe / Belgium / Ramsel                           |
| EPI_ISL_458234 | 3/31/2020 | 6/4/2020 Europe / Belgium / Leuven                           |
| EPI_ISL_458235 | 3/19/2020 | 6/4/2020 Europe / Belgium / Sint-Truiden                     |
| EPI_ISL_458238 | 4/28/2020 | 6/4/2020 North America / USA / California / San Diego County |
| EPI_ISL_458239 | 4/8/2020  | 6/4/2020 North America / USA / California / San Diego County |
| EPI_ISL_458240 | 4/3/2020  | 6/4/2020 North America / USA / California / San Diego County |
| EPI_ISL_458241 | 4/9/2020  | 6/4/2020 North America / USA / California / San Diego County |
| EPI_ISL_458242 | 4/20/2020 | 6/4/2020 North America / USA / California / San Diego County |
| EPI_ISL_458243 | 4/12/2020 | 6/4/2020 North America / USA / California / San Diego County |
| EPI_ISL_458244 | 4/29/2020 | 6/4/2020 North America / USA / California / San Diego County |
| EPI_ISL_458245 | 4/5/2020  | 6/4/2020 North America / USA / California / San Diego County |
| EPI_ISL_458246 | 4/15/2020 | 6/4/2020 North America / USA / California / San Diego County |
| EPI_ISL_458247 | 4/14/2020 | 6/4/2020 North America / USA / California / San Diego County |
| EPI_ISL_458248 | 5/17/2020 | 6/4/2020 North America / USA / California / San Diego County |
| EPI_ISL_458249 | 4/29/2020 | 6/4/2020 North America / USA / California / San Diego County |
| EPI_ISL_458250 | 4/5/2020  | 6/4/2020 North America / USA / California / San Diego County |
| EPI_ISL_458251 | 4/15/2020 | 6/4/2020 North America / USA / California / San Diego County |
| EPI_ISL_458252 | 4/5/2020  | 6/4/2020 North America / USA / California / San Diego County |
| EPI_ISL_458253 | 4/29/2020 | 6/4/2020 North America / USA / California / San Diego County |
| EPI_ISL_458254 | 4/29/2020 | 6/4/2020 North America / USA / California / San Diego County |
| EPI_ISL_458255 | 4/21/2020 | 6/4/2020 North America / USA / California / San Diego County |
| EPI_ISL_458256 | 4/7/2020  | 6/4/2020 North America / USA / California / San Diego County |
| EPI_ISL_458257 | 4/11/2020 | 6/4/2020 North America / USA / California / San Diego County |
| EPI_ISL_458258 | 4/13/2020 | 6/4/2020 North America / USA / California / San Diego County |
| EPI_ISL_458260 | 4/7/2020  | 6/4/2020 North America / USA / California / San Diego County |
| EPI_ISL_458261 | 4/3/2020  | 6/4/2020 North America / USA / California / San Diego County |
| EPI_ISL_458262 | 4/1/2020  | 6/4/2020 North America / USA / California / San Diego County |
| EPI_ISL_458264 | 4/28/2020 | 6/4/2020 North America / USA / California / San Diego County |
| EPI_ISL_458265 | 4/10/2020 | 6/4/2020 North America / USA / California / San Diego County |
| EPI_ISL_458266 | 4/21/2020 | 6/4/2020 North America / USA / California / San Diego County |
| EPI_ISL_458267 | 4/10/2020 | 6/4/2020 North America / USA / California / San Diego County |
| EPI_ISL_458270 | 4/4/2020  | 6/4/2020 North America / USA / California / San Diego County |
| EPI_ISL_458271 | 4/29/2020 | 6/4/2020 North America / USA / California / San Diego County |
| EPI_ISL_458272 | 4/21/2020 | 6/4/2020 North America / USA / California / San Diego County |
| EPI_ISL_458274 | 4/8/2020  | 6/4/2020 North America / USA / California / San Diego County |
| EPI_ISL_458275 | 4/7/2020  | 6/4/2020 North America / USA / California / San Diego County |
| EPI_ISL_458276 | 4/6/2020  | 6/4/2020 North America / USA / California / San Diego County |
| EPI_ISL_458277 | 4/20/2020 | 6/4/2020 North America / USA / California / San Diego County |
| EPI_ISL_458278 | 4/20/2020 | 6/4/2020 North America / USA / California / San Diego County |
| EPI_ISL_458279 | 4/11/2020 | 6/4/2020 North America / USA / California / San Diego County |
| EPI_ISL_458280 | 4/21/2020 | 6/4/2020 North America / USA / California / San Diego County |
| EPI_ISL_458281 | 4/5/2020  | 6/4/2020 North America / USA / California / San Diego County |



|                |           |                                                              |
|----------------|-----------|--------------------------------------------------------------|
| EPI_ISL_458282 | 4/21/2020 | 6/4/2020 North America / USA / California / San Diego County |
| EPI_ISL_458283 | 3/25/2020 | 6/4/2020 North America / USA / California / San Diego County |
| EPI_ISL_458284 | 4/15/2020 | 6/4/2020 North America / USA / California / San Diego County |
| EPI_ISL_458298 | 4/6/2020  | 6/4/2020 Asia / India / Telangana / Rangaraddy               |
| EPI_ISL_458300 | 5/1/2020  | 6/4/2020 Europe / United Kingdom / England                   |
| EPI_ISL_458301 | 4/29/2020 | 6/4/2020 Europe / United Kingdom / England                   |
| EPI_ISL_458302 | 4/1/2020  | 6/4/2020 Europe / United Kingdom / England                   |
| EPI_ISL_458303 | 4/15/2020 | 6/4/2020 Europe / United Kingdom / England                   |
| EPI_ISL_458304 | 5/1/2020  | 6/4/2020 Europe / United Kingdom / England                   |
| EPI_ISL_458305 | 4/15/2020 | 6/4/2020 Europe / United Kingdom / England                   |
| EPI_ISL_458306 | 4/16/2020 | 6/4/2020 Europe / United Kingdom / England                   |
| EPI_ISL_458308 | 4/30/2020 | 6/4/2020 Europe / United Kingdom / England                   |
| EPI_ISL_458311 | 4/16/2020 | 6/4/2020 Europe / United Kingdom / England                   |
| EPI_ISL_458313 | 5/1/2020  | 6/4/2020 Europe / United Kingdom / England                   |
| EPI_ISL_458316 | 4/16/2020 | 6/4/2020 Europe / United Kingdom / England                   |
| EPI_ISL_458317 | 4/16/2020 | 6/4/2020 Europe / United Kingdom / England                   |
| EPI_ISL_458319 | 5/1/2020  | 6/4/2020 Europe / United Kingdom / England                   |
| EPI_ISL_458320 | 4/15/2020 | 6/4/2020 Europe / United Kingdom / England                   |
| EPI_ISL_458321 | 5/1/2020  | 6/4/2020 Europe / United Kingdom / England                   |
| EPI_ISL_458323 | 5/1/2020  | 6/4/2020 Europe / United Kingdom / England                   |
| EPI_ISL_458324 | 4/30/2020 | 6/4/2020 Europe / United Kingdom / England                   |
| EPI_ISL_458329 | 5/1/2020  | 6/4/2020 Europe / United Kingdom / England                   |
| EPI_ISL_458330 | 5/1/2020  | 6/4/2020 Europe / United Kingdom / England                   |
| EPI_ISL_458332 | 4/16/2020 | 6/4/2020 Europe / United Kingdom / England                   |
| EPI_ISL_458333 | 5/2/2020  | 6/4/2020 Europe / United Kingdom / England                   |
| EPI_ISL_458334 | 5/1/2020  | 6/4/2020 Europe / United Kingdom / England                   |
| EPI_ISL_458337 | 5/1/2020  | 6/4/2020 Europe / United Kingdom / England                   |
| EPI_ISL_458338 | 4/29/2020 | 6/4/2020 Europe / United Kingdom / England                   |
| EPI_ISL_458339 | 4/30/2020 | 6/4/2020 Europe / United Kingdom / England                   |
| EPI_ISL_458341 | 4/15/2020 | 6/4/2020 Europe / United Kingdom / England                   |
| EPI_ISL_458343 | 4/16/2020 | 6/4/2020 Europe / United Kingdom / England                   |
| EPI_ISL_458344 | 5/2/2020  | 6/4/2020 Europe / United Kingdom / England                   |
| EPI_ISL_458345 | 4/29/2020 | 6/4/2020 Europe / United Kingdom / England                   |
| EPI_ISL_458348 | 4/14/2020 | 6/4/2020 Europe / United Kingdom / England                   |
| EPI_ISL_458349 | 4/15/2020 | 6/4/2020 Europe / United Kingdom / England                   |
| EPI_ISL_458350 | 4/30/2020 | 6/4/2020 Europe / United Kingdom / England                   |
| EPI_ISL_458351 | 4/30/2020 | 6/4/2020 Europe / United Kingdom / England                   |
| EPI_ISL_458352 | 5/1/2020  | 6/4/2020 Europe / United Kingdom / England                   |
| EPI_ISL_458353 | 4/16/2020 | 6/4/2020 Europe / United Kingdom / England                   |
| EPI_ISL_458354 | 5/1/2020  | 6/4/2020 Europe / United Kingdom / England                   |
| EPI_ISL_458355 | 5/1/2020  | 6/4/2020 Europe / United Kingdom / England                   |
| EPI_ISL_458357 | 3/31/2020 | 6/4/2020 Europe / United Kingdom / England                   |
| EPI_ISL_458358 | 4/30/2020 | 6/4/2020 Europe / United Kingdom / England                   |
| EPI_ISL_458359 | 4/15/2020 | 6/4/2020 Europe / United Kingdom / England                   |
| EPI_ISL_458360 | 5/1/2020  | 6/4/2020 Europe / United Kingdom / England                   |
| EPI_ISL_458361 | 4/15/2020 | 6/4/2020 Europe / United Kingdom / England                   |
| EPI_ISL_458362 | 4/30/2020 | 6/4/2020 Europe / United Kingdom / England                   |





|                |           |                                            |
|----------------|-----------|--------------------------------------------|
| EPI_ISL_458512 | 4/16/2020 | 6/4/2020 Europe / United Kingdom / England |
| EPI_ISL_458513 | 5/1/2020  | 6/4/2020 Europe / United Kingdom / England |
| EPI_ISL_458515 | 4/30/2020 | 6/4/2020 Europe / United Kingdom / England |
| EPI_ISL_458529 | 5/6/2020  | 6/4/2020 Europe / United Kingdom / England |
| EPI_ISL_458533 | 5/8/2020  | 6/4/2020 Europe / United Kingdom / England |
| EPI_ISL_458537 | 5/6/2020  | 6/4/2020 Europe / United Kingdom / England |
| EPI_ISL_458552 | 5/9/2020  | 6/4/2020 Europe / United Kingdom / England |
| EPI_ISL_458556 | 5/8/2020  | 6/4/2020 Europe / United Kingdom / England |
| EPI_ISL_458559 | 5/6/2020  | 6/4/2020 Europe / United Kingdom / England |
| EPI_ISL_458576 | 5/8/2020  | 6/4/2020 Europe / United Kingdom / England |
| EPI_ISL_458579 | 3/24/2020 | 6/4/2020 Europe / United Kingdom / England |
| EPI_ISL_458580 | 3/24/2020 | 6/4/2020 Europe / United Kingdom / England |
| EPI_ISL_458581 | 3/31/2020 | 6/4/2020 Europe / United Kingdom / England |
| EPI_ISL_458583 | 3/28/2020 | 6/4/2020 Europe / United Kingdom / England |
| EPI_ISL_458584 | 3/27/2020 | 6/4/2020 Europe / United Kingdom / England |
| EPI_ISL_458588 | 3/28/2020 | 6/4/2020 Europe / United Kingdom / England |
| EPI_ISL_458589 | 4/1/2020  | 6/4/2020 Europe / United Kingdom / England |
| EPI_ISL_458591 | 3/22/2020 | 6/4/2020 Europe / United Kingdom / England |
| EPI_ISL_458593 | 3/30/2020 | 6/4/2020 Europe / United Kingdom / England |
| EPI_ISL_458597 | 3/30/2020 | 6/4/2020 Europe / United Kingdom / England |
| EPI_ISL_458600 | 3/29/2020 | 6/4/2020 Europe / United Kingdom / England |
| EPI_ISL_458601 | 3/28/2020 | 6/4/2020 Europe / United Kingdom / England |
| EPI_ISL_458602 | 3/23/2020 | 6/4/2020 Europe / United Kingdom / England |
| EPI_ISL_458603 | 3/24/2020 | 6/4/2020 Europe / United Kingdom / England |
| EPI_ISL_458604 | 3/26/2020 | 6/4/2020 Europe / United Kingdom / England |
| EPI_ISL_458605 | 3/31/2020 | 6/4/2020 Europe / United Kingdom / England |
| EPI_ISL_458606 | 3/29/2020 | 6/4/2020 Europe / United Kingdom / England |
| EPI_ISL_458607 | 3/26/2020 | 6/4/2020 Europe / United Kingdom / England |
| EPI_ISL_458609 | 3/29/2020 | 6/4/2020 Europe / United Kingdom / England |
| EPI_ISL_458610 | 4/2/2020  | 6/4/2020 Europe / United Kingdom / England |
| EPI_ISL_458611 | 3/28/2020 | 6/4/2020 Europe / United Kingdom / England |
| EPI_ISL_458612 | 3/29/2020 | 6/4/2020 Europe / United Kingdom / England |
| EPI_ISL_458613 | 3/26/2020 | 6/4/2020 Europe / United Kingdom / England |
| EPI_ISL_458614 | 3/27/2020 | 6/4/2020 Europe / United Kingdom / England |
| EPI_ISL_458615 | 3/29/2020 | 6/4/2020 Europe / United Kingdom / England |
| EPI_ISL_458616 | 4/1/2020  | 6/4/2020 Europe / United Kingdom / England |
| EPI_ISL_458617 | 3/27/2020 | 6/4/2020 Europe / United Kingdom / England |
| EPI_ISL_458618 | 3/28/2020 | 6/4/2020 Europe / United Kingdom / England |
| EPI_ISL_458619 | 3/24/2020 | 6/4/2020 Europe / United Kingdom / England |
| EPI_ISL_458620 | 3/31/2020 | 6/4/2020 Europe / United Kingdom / England |
| EPI_ISL_458621 | 3/26/2020 | 6/4/2020 Europe / United Kingdom / England |
| EPI_ISL_458622 | 3/26/2020 | 6/4/2020 Europe / United Kingdom / England |
| EPI_ISL_458623 | 3/26/2020 | 6/4/2020 Europe / United Kingdom / England |
| EPI_ISL_458624 | 3/31/2020 | 6/4/2020 Europe / United Kingdom / England |
| EPI_ISL_458625 | 3/20/2020 | 6/4/2020 Europe / United Kingdom / England |
| EPI_ISL_458626 | 3/29/2020 | 6/4/2020 Europe / United Kingdom / England |
| EPI_ISL_458628 | 3/26/2020 | 6/4/2020 Europe / United Kingdom / England |































|                |           |                                                                       |
|----------------|-----------|-----------------------------------------------------------------------|
| EPI_ISL_459686 | 3/24/2020 | 6/4/2020 Europe / United Kingdom / Scotland                           |
| EPI_ISL_459688 | 3/24/2020 | 6/4/2020 Europe / United Kingdom / Scotland                           |
| EPI_ISL_459689 | 3/26/2020 | 6/4/2020 Europe / United Kingdom / Scotland                           |
| EPI_ISL_459690 | 3/23/2020 | 6/4/2020 Europe / United Kingdom / Scotland                           |
| EPI_ISL_459691 | 3/24/2020 | 6/4/2020 Europe / United Kingdom / Scotland                           |
| EPI_ISL_459692 | 3/27/2020 | 6/4/2020 Europe / United Kingdom / Scotland                           |
| EPI_ISL_459693 | 3/27/2020 | 6/4/2020 Europe / United Kingdom / Scotland                           |
| EPI_ISL_459694 | 3/24/2020 | 6/4/2020 Europe / United Kingdom / Scotland                           |
| EPI_ISL_459695 | 3/27/2020 | 6/4/2020 Europe / United Kingdom / Scotland                           |
| EPI_ISL_459696 | 3/23/2020 | 6/4/2020 Europe / United Kingdom / Scotland                           |
| EPI_ISL_459697 | 3/24/2020 | 6/4/2020 Europe / United Kingdom / Scotland                           |
| EPI_ISL_459699 | 3/25/2020 | 6/4/2020 Europe / United Kingdom / Scotland                           |
| EPI_ISL_459700 | 3/24/2020 | 6/4/2020 Europe / United Kingdom / Scotland                           |
| EPI_ISL_459701 | 3/27/2020 | 6/4/2020 Europe / United Kingdom / Scotland                           |
| EPI_ISL_459702 | 3/22/2020 | 6/4/2020 Europe / United Kingdom / Scotland                           |
| EPI_ISL_459703 | 3/25/2020 | 6/4/2020 Europe / United Kingdom / Scotland                           |
| EPI_ISL_459704 | 3/25/2020 | 6/4/2020 Europe / United Kingdom / Scotland                           |
| EPI_ISL_459705 | 3/26/2020 | 6/4/2020 Europe / United Kingdom / Scotland                           |
| EPI_ISL_459707 | 3/24/2020 | 6/4/2020 Europe / United Kingdom / Scotland                           |
| EPI_ISL_459708 | 3/26/2020 | 6/4/2020 Europe / United Kingdom / Scotland                           |
| EPI_ISL_459709 | 3/23/2020 | 6/4/2020 Europe / United Kingdom / Scotland                           |
| EPI_ISL_459710 | 3/24/2020 | 6/4/2020 Europe / United Kingdom / Scotland                           |
| EPI_ISL_459711 | 3/24/2020 | 6/4/2020 Europe / United Kingdom / Scotland                           |
| EPI_ISL_459712 | 3/23/2020 | 6/4/2020 Europe / United Kingdom / Scotland                           |
| EPI_ISL_459713 | 3/25/2020 | 6/4/2020 Europe / United Kingdom / Scotland                           |
| EPI_ISL_459714 | 3/26/2020 | 6/4/2020 Europe / United Kingdom / Scotland                           |
| EPI_ISL_459716 | 3/26/2020 | 6/4/2020 Europe / United Kingdom / Scotland                           |
| EPI_ISL_459718 | 3/25/2020 | 6/4/2020 Europe / United Kingdom / Scotland                           |
| EPI_ISL_459720 | 3/21/2020 | 6/4/2020 Europe / United Kingdom / Scotland                           |
| EPI_ISL_459721 | 3/26/2020 | 6/4/2020 Europe / United Kingdom / Scotland                           |
| EPI_ISL_459724 | 3/24/2020 | 6/4/2020 Europe / United Kingdom / Scotland                           |
| EPI_ISL_459725 | 4/7/2020  | 6/4/2020 Europe / United Kingdom / England                            |
| EPI_ISL_459726 | 4/7/2020  | 6/4/2020 Europe / United Kingdom / England                            |
| EPI_ISL_459856 | 3/18/2020 | 6/4/2020 South America / Chile / Region Metropolitana de Santiago / S |
| EPI_ISL_459857 | 3/15/2020 | 6/4/2020 South America / Chile / Region Metropolitana de Santiago / S |
| EPI_ISL_459858 | 3/17/2020 | 6/4/2020 South America / Chile / Region Metropolitana de Santiago / S |
| EPI_ISL_459859 | 3/27/2020 | 6/4/2020 South America / Chile / Region Metropolitana de Santiago / S |
| EPI_ISL_459860 | 3/21/2020 | 6/4/2020 South America / Chile / Region Metropolitana de Santiago / S |
| EPI_ISL_459861 | 3/25/2020 | 6/4/2020 South America / Chile / Magallanes / Puerto Natales          |
| EPI_ISL_459862 | 3/17/2020 | 6/4/2020 South America / Chile / Region Metropolitana de Santiago / S |
| EPI_ISL_459863 | 3/12/2020 | 6/4/2020 South America / Chile / Maule / Talca                        |
| EPI_ISL_459866 | 3/18/2020 | 6/4/2020 North America / Canada / Ontario                             |
| EPI_ISL_459867 | 3/22/2020 | 6/4/2020 North America / Canada / Ontario                             |
| EPI_ISL_459868 | 3/24/2020 | 6/4/2020 North America / Canada / Ontario                             |
| EPI_ISL_459869 | 3/26/2020 | 6/4/2020 North America / Canada / Ontario                             |
| EPI_ISL_459871 | 3/26/2020 | 6/4/2020 North America / Canada / Ontario                             |
| EPI_ISL_459872 | 3/26/2020 | 6/4/2020 North America / Canada / Ontario                             |

|                |           |                                               |
|----------------|-----------|-----------------------------------------------|
| EPI_ISL_459873 | 3/26/2020 | 6/4/2020 North America / Canada / Ontario     |
| EPI_ISL_459874 | 3/27/2020 | 6/4/2020 North America / Canada / Ontario     |
| EPI_ISL_459875 | 3/27/2020 | 6/4/2020 North America / Canada / Ontario     |
| EPI_ISL_459877 | 3/27/2020 | 6/4/2020 North America / Canada / Ontario     |
| EPI_ISL_459879 | 3/28/2020 | 6/4/2020 North America / Canada / Ontario     |
| EPI_ISL_459880 | 3/28/2020 | 6/4/2020 North America / Canada / Ontario     |
| EPI_ISL_459881 | 3/28/2020 | 6/4/2020 North America / Canada / Ontario     |
| EPI_ISL_459882 | 3/28/2020 | 6/4/2020 North America / Canada / Ontario     |
| EPI_ISL_459883 | 3/28/2020 | 6/4/2020 North America / Canada / Ontario     |
| EPI_ISL_459885 | 3/29/2020 | 6/4/2020 North America / Canada / Ontario     |
| EPI_ISL_459886 | 3/30/2020 | 6/4/2020 North America / Canada / Ontario     |
| EPI_ISL_459887 | 3/30/2020 | 6/4/2020 North America / Canada / Ontario     |
| EPI_ISL_459888 | 3/30/2020 | 6/4/2020 North America / Canada / Ontario     |
| EPI_ISL_459889 | 3/30/2020 | 6/4/2020 North America / Canada / Ontario     |
| EPI_ISL_459890 | 3/29/2020 | 6/4/2020 North America / Canada / Ontario     |
| EPI_ISL_459891 | 3/30/2020 | 6/4/2020 North America / Canada / Ontario     |
| EPI_ISL_459892 | 3/30/2020 | 6/4/2020 North America / Canada / Ontario     |
| EPI_ISL_459893 | 5/15/2020 | 6/4/2020 Europe / Luxembourg                  |
| EPI_ISL_459894 | 5/12/2020 | 6/4/2020 Europe / Luxembourg                  |
| EPI_ISL_459896 | 5/14/2020 | 6/4/2020 Europe / Luxembourg                  |
| EPI_ISL_459898 | 5/13/2020 | 6/4/2020 Europe / Luxembourg                  |
| EPI_ISL_459899 | 5/15/2020 | 6/4/2020 Europe / Luxembourg                  |
| EPI_ISL_459900 | 5/15/2020 | 6/4/2020 Europe / Luxembourg                  |
| EPI_ISL_459901 | 5/19/2020 | 6/4/2020 Europe / Luxembourg                  |
| EPI_ISL_459903 | 5/19/2020 | 6/4/2020 Europe / Luxembourg                  |
| EPI_ISL_459905 | 5/12/2020 | 6/4/2020 Europe / Luxembourg                  |
| EPI_ISL_459906 | 5/18/2020 | 6/4/2020 Europe / Luxembourg                  |
| EPI_ISL_460617 | 4/16/2020 | 6/4/2020 Europe / Turkey                      |
| EPI_ISL_460618 | 4/15/2020 | 6/4/2020 Europe / Turkey                      |
| EPI_ISL_460619 | 4/16/2020 | 6/4/2020 Europe / Turkey                      |
| EPI_ISL_524450 | 2020-04   | 6/4/2020 North America / USA / North Carolina |
| EPI_ISL_459909 | 3/2/2020  | 6/5/2020 Asia / China / Heilongjiang / Harbin |
| EPI_ISL_459911 | 5/9/2020  | 6/5/2020 Asia / India / Delhi                 |
| EPI_ISL_459913 | 5/3/2020  | 6/5/2020 Asia / India / Delhi                 |
| EPI_ISL_459914 | 5/1/2020  | 6/5/2020 Asia / India / Delhi                 |
| EPI_ISL_459915 | 5/12/2020 | 6/5/2020 Asia / India / Delhi                 |
| EPI_ISL_459916 | 5/12/2020 | 6/5/2020 Asia / India / Delhi                 |
| EPI_ISL_459917 | 5/8/2020  | 6/5/2020 Asia / India / Delhi                 |
| EPI_ISL_459918 | 5/9/2020  | 6/5/2020 Asia / India / Delhi                 |
| EPI_ISL_459919 | 5/21/2020 | 6/5/2020 Asia / India / Delhi                 |
| EPI_ISL_459920 | 5/21/2020 | 6/5/2020 Asia / India / Delhi                 |
| EPI_ISL_459921 | 5/8/2020  | 6/5/2020 Asia / India / Delhi                 |
| EPI_ISL_459922 | 5/10/2020 | 6/5/2020 Asia / India / Delhi                 |
| EPI_ISL_459923 | 5/8/2020  | 6/5/2020 Asia / India / Delhi                 |
| EPI_ISL_459924 | 5/8/2020  | 6/5/2020 Asia / India / Delhi                 |
| EPI_ISL_459926 | 2020      | 6/5/2020 Asia / India / Delhi                 |
| EPI_ISL_459927 | 2020      | 6/5/2020 Asia / India / Delhi                 |

|                |           |                                                                   |
|----------------|-----------|-------------------------------------------------------------------|
| EPI_ISL_459932 | 5/13/2020 | 6/5/2020 Asia / India / Delhi                                     |
| EPI_ISL_459933 | 5/5/2020  | 6/5/2020 Asia / India / Delhi                                     |
| EPI_ISL_459934 | 5/5/2020  | 6/5/2020 Asia / India / Delhi                                     |
| EPI_ISL_459935 | 5/6/2020  | 6/5/2020 Asia / India / Delhi                                     |
| EPI_ISL_459936 | 5/10/2020 | 6/5/2020 Asia / India / Delhi                                     |
| EPI_ISL_459937 | 5/10/2020 | 6/5/2020 Asia / India / Delhi                                     |
| EPI_ISL_459938 | 5/11/2020 | 6/5/2020 Asia / India / Delhi                                     |
| EPI_ISL_459939 | 5/11/2020 | 6/5/2020 Asia / India / Delhi                                     |
| EPI_ISL_459940 | 5/10/2020 | 6/5/2020 Asia / India / Delhi                                     |
| EPI_ISL_459941 | 5/11/2020 | 6/5/2020 Asia / India / Delhi                                     |
| EPI_ISL_459942 | 4/27/2020 | 6/5/2020 Asia / India / Delhi                                     |
| EPI_ISL_459943 | 5/1/2020  | 6/5/2020 Asia / India / Delhi                                     |
| EPI_ISL_459953 | 3/16/2020 | 6/5/2020 Asia / Malaysia / Kuala Lumpur                           |
| EPI_ISL_459954 | 3/16/2020 | 6/5/2020 Asia / Malaysia / Kuala Lumpur                           |
| EPI_ISL_459955 | 3/18/2020 | 6/5/2020 Asia / Malaysia                                          |
| EPI_ISL_459956 | 3/30/2020 | 6/5/2020 Asia / Malaysia                                          |
| EPI_ISL_459957 | 4/1/2020  | 6/5/2020 Asia / Malaysia                                          |
| EPI_ISL_459958 | 3/2/2020  | 6/5/2020 Europe / United Kingdom / England                        |
| EPI_ISL_459960 | 2/3/2020  | 6/5/2020 Europe / United Kingdom / England                        |
| EPI_ISL_459961 | 3/2/2020  | 6/5/2020 Europe / United Kingdom / England                        |
| EPI_ISL_459962 | 4/1/2020  | 6/5/2020 Europe / Germany / Mecklenburg-Western Pomerania / Rostc |
| EPI_ISL_459963 | 4/1/2020  | 6/5/2020 Europe / Germany / Mecklenburg-Western Pomerania / Rostc |
| EPI_ISL_459964 | 3/28/2020 | 6/5/2020 Europe / Germany / Mecklenburg-Western Pomerania / Rostc |
| EPI_ISL_459965 | 3/3/2020  | 6/5/2020 Africa / Morocco                                         |
| EPI_ISL_459966 | 3/15/2020 | 6/5/2020 Africa / Morocco                                         |
| EPI_ISL_459967 | 3/15/2020 | 6/5/2020 Africa / Morocco                                         |
| EPI_ISL_459968 | 3/17/2020 | 6/5/2020 Africa / Morocco                                         |
| EPI_ISL_459972 | 3/20/2020 | 6/5/2020 Africa / Morocco                                         |
| EPI_ISL_459973 | 3/20/2020 | 6/5/2020 Africa / Morocco                                         |
| EPI_ISL_459974 | 3/20/2020 | 6/5/2020 Africa / Morocco                                         |
| EPI_ISL_459975 | 3/21/2020 | 6/5/2020 Africa / Morocco                                         |
| EPI_ISL_459976 | 3/16/2020 | 6/5/2020 Africa / Morocco                                         |
| EPI_ISL_459977 | 4/21/2020 | 6/5/2020 Africa / Morocco                                         |
| EPI_ISL_459978 | 4/20/2020 | 6/5/2020 Africa / Morocco                                         |
| EPI_ISL_459979 | 4/19/2020 | 6/5/2020 Africa / Morocco                                         |
| EPI_ISL_459980 | 4/19/2020 | 6/5/2020 Africa / Morocco                                         |
| EPI_ISL_459981 | 4/19/2020 | 6/5/2020 Africa / Morocco                                         |
| EPI_ISL_459982 | 4/18/2020 | 6/5/2020 Africa / Morocco                                         |
| EPI_ISL_459983 | 4/21/2020 | 6/5/2020 Africa / Morocco                                         |
| EPI_ISL_459984 | 4/6/2020  | 6/5/2020 Africa / Morocco                                         |
| EPI_ISL_459994 | 5/6/2020  | 6/5/2020 North America / USA / Michigan                           |
| EPI_ISL_459995 | 5/7/2020  | 6/5/2020 North America / USA / Michigan                           |
| EPI_ISL_459996 | 5/7/2020  | 6/5/2020 North America / USA / Michigan                           |
| EPI_ISL_459997 | 5/6/2020  | 6/5/2020 North America / USA / Michigan                           |
| EPI_ISL_459998 | 5/6/2020  | 6/5/2020 North America / USA / Michigan                           |
| EPI_ISL_459999 | 3/30/2020 | 6/5/2020 North America / USA / Michigan                           |
| EPI_ISL_460003 | 3/30/2020 | 6/5/2020 North America / USA / Michigan                           |



|                |           |                                          |
|----------------|-----------|------------------------------------------|
| EPI_ISL_460073 | 3/15/2020 | 6/5/2020 North America / USA / Minnesota |
| EPI_ISL_460075 | 3/15/2020 | 6/5/2020 North America / USA / Minnesota |
| EPI_ISL_460076 | 3/15/2020 | 6/5/2020 North America / USA / Minnesota |
| EPI_ISL_460077 | 3/16/2020 | 6/5/2020 North America / USA / Minnesota |
| EPI_ISL_460078 | 3/16/2020 | 6/5/2020 North America / USA / Minnesota |
| EPI_ISL_460079 | 2/22/2020 | 6/5/2020 Europe / Italy / Lombardy       |
| EPI_ISL_460080 | 2/28/2020 | 6/5/2020 Europe / Italy / Lombardy       |
| EPI_ISL_460081 | 2/24/2020 | 6/5/2020 Europe / Italy / Lombardy       |
| EPI_ISL_460082 | 2/26/2020 | 6/5/2020 Europe / Italy / Lombardy       |
| EPI_ISL_460083 | 2/26/2020 | 6/5/2020 Europe / Italy / Lombardy       |
| EPI_ISL_460084 | 2/29/2020 | 6/5/2020 Europe / Italy / Lombardy       |
| EPI_ISL_460085 | 3/1/2020  | 6/5/2020 Europe / Italy / Lombardy       |
| EPI_ISL_460086 | 2/24/2020 | 6/5/2020 Europe / Italy / Lombardy       |
| EPI_ISL_460087 | 2/26/2020 | 6/5/2020 Europe / Italy / Lombardy       |
| EPI_ISL_460088 | 2/26/2020 | 6/5/2020 Europe / Italy / Lombardy       |
| EPI_ISL_460089 | 2/26/2020 | 6/5/2020 Europe / Italy / Lombardy       |
| EPI_ISL_460090 | 2/28/2020 | 6/5/2020 Europe / Italy / Lombardy       |
| EPI_ISL_460091 | 2/22/2020 | 6/5/2020 Europe / Italy / Lombardy       |
| EPI_ISL_460092 | 2/28/2020 | 6/5/2020 Europe / Italy / Lombardy       |
| EPI_ISL_460093 | 2/29/2020 | 6/5/2020 Europe / Italy / Lombardy       |
| EPI_ISL_460094 | 2/25/2020 | 6/5/2020 Europe / Italy / Lombardy       |
| EPI_ISL_460095 | 2/26/2020 | 6/5/2020 Europe / Italy / Lombardy       |
| EPI_ISL_460096 | 3/30/2020 | 6/5/2020 Europe / Russia / Moscow        |
| EPI_ISL_460556 | 5/6/2020  | 6/5/2020 North America / USA / Michigan  |
| EPI_ISL_460557 | 5/8/2020  | 6/5/2020 North America / USA / Michigan  |
| EPI_ISL_460558 | 5/8/2020  | 6/5/2020 North America / USA / Michigan  |
| EPI_ISL_460559 | 5/6/2020  | 6/5/2020 North America / USA / Michigan  |
| EPI_ISL_460560 | 5/7/2020  | 6/5/2020 North America / USA / Michigan  |
| EPI_ISL_460569 | 5/14/2020 | 6/5/2020 North America / USA / Michigan  |
| EPI_ISL_460571 | 5/14/2020 | 6/5/2020 North America / USA / Michigan  |
| EPI_ISL_460572 | 4/29/2020 | 6/5/2020 North America / USA / Michigan  |
| EPI_ISL_460573 | 5/7/2020  | 6/5/2020 North America / USA / Michigan  |
| EPI_ISL_460574 | 5/15/2020 | 6/5/2020 North America / USA / Michigan  |
| EPI_ISL_460581 | 5/14/2020 | 6/5/2020 North America / USA / Michigan  |
| EPI_ISL_460582 | 5/14/2020 | 6/5/2020 North America / USA / Michigan  |
| EPI_ISL_460583 | 5/12/2020 | 6/5/2020 North America / USA / Michigan  |
| EPI_ISL_460584 | 4/16/2020 | 6/5/2020 North America / USA / Michigan  |
| EPI_ISL_460585 | 5/14/2020 | 6/5/2020 North America / USA / Michigan  |
| EPI_ISL_460586 | 5/14/2020 | 6/5/2020 North America / USA / Michigan  |
| EPI_ISL_460587 | 5/11/2020 | 6/5/2020 North America / USA / Michigan  |
| EPI_ISL_460588 | 5/14/2020 | 6/5/2020 North America / USA / Michigan  |
| EPI_ISL_460599 | 5/1/2020  | 6/5/2020 North America / USA / Michigan  |
| EPI_ISL_460600 | 4/29/2020 | 6/5/2020 North America / USA / Michigan  |
| EPI_ISL_460601 | 5/3/2020  | 6/5/2020 North America / USA / Michigan  |
| EPI_ISL_460602 | 3/24/2020 | 6/5/2020 North America / USA / Michigan  |
| EPI_ISL_460604 | 3/29/2020 | 6/5/2020 Europe / Russia / Moscow        |
| EPI_ISL_460605 | 3/29/2020 | 6/5/2020 Europe / Russia / Moscow        |

|                |           |                                                           |
|----------------|-----------|-----------------------------------------------------------|
| EPI_ISL_462434 | 4/1/2020  | 6/5/2020 Europe / Serbia / Novi Sad                       |
| EPI_ISL_462435 | 5/10/2020 | 6/5/2020 Europe / Serbia / Kraljevo                       |
| EPI_ISL_462436 | 4/28/2020 | 6/5/2020 Europe / Serbia / Uzice                          |
| EPI_ISL_462437 | 4/23/2020 | 6/5/2020 Europe / Serbia / Kraljevo                       |
| EPI_ISL_462438 | 4/22/2020 | 6/5/2020 Europe / Serbia / Kraljevo                       |
| EPI_ISL_460609 | 2020-03   | 6/6/2020 North America / Canada / British Columbia        |
| EPI_ISL_460610 | 2020-03   | 6/6/2020 North America / Canada / British Columbia        |
| EPI_ISL_460611 | 2020-03   | 6/6/2020 North America / Canada / British Columbia        |
| EPI_ISL_460612 | 2020-03   | 6/6/2020 North America / Canada / British Columbia        |
| EPI_ISL_460614 | 2020-03   | 6/6/2020 North America / Canada / British Columbia        |
| EPI_ISL_460615 | 2020-03   | 6/6/2020 North America / Canada / British Columbia        |
| EPI_ISL_460616 | 2020-03   | 6/6/2020 North America / Canada / British Columbia        |
| EPI_ISL_460621 | 3/29/2020 | 6/6/2020 North America / USA / Washington                 |
| EPI_ISL_460622 | 3/29/2020 | 6/6/2020 North America / USA / Idaho                      |
| EPI_ISL_460623 | 3/31/2020 | 6/6/2020 North America / USA / Washington                 |
| EPI_ISL_460624 | 3/30/2020 | 6/6/2020 North America / USA / Washington                 |
| EPI_ISL_460625 | 3/31/2020 | 6/6/2020 North America / USA / Washington                 |
| EPI_ISL_460626 | 3/31/2020 | 6/6/2020 North America / USA / Washington                 |
| EPI_ISL_460627 | 3/31/2020 | 6/6/2020 North America / USA / Washington                 |
| EPI_ISL_460628 | 3/30/2020 | 6/6/2020 North America / USA / Idaho                      |
| EPI_ISL_460629 | 3/29/2020 | 6/6/2020 North America / USA / Idaho                      |
| EPI_ISL_460630 | 3/29/2020 | 6/6/2020 North America / USA / Washington                 |
| EPI_ISL_460632 | 3/29/2020 | 6/6/2020 North America / USA / Washington                 |
| EPI_ISL_460633 | 4/6/2020  | 6/6/2020 North America / USA / Washington                 |
| EPI_ISL_460635 | 4/9/2020  | 6/6/2020 Europe / United Kingdom / England / Warwickshire |
| EPI_ISL_460636 | 4/4/2020  | 6/6/2020 Europe / Netherlands / Drenthe                   |
| EPI_ISL_460637 | 4/6/2020  | 6/6/2020 Europe / Netherlands / Drenthe                   |
| EPI_ISL_460638 | 4/1/2020  | 6/6/2020 Europe / Netherlands / Flevoland                 |
| EPI_ISL_460639 | 4/15/2020 | 6/6/2020 Europe / Netherlands / Flevoland                 |
| EPI_ISL_460640 | 4/15/2020 | 6/6/2020 Europe / Netherlands / Flevoland                 |
| EPI_ISL_460641 | 4/12/2020 | 6/6/2020 Europe / Netherlands / Friesland                 |
| EPI_ISL_460642 | 4/7/2020  | 6/6/2020 Europe / Netherlands / Friesland                 |
| EPI_ISL_460643 | 4/6/2020  | 6/6/2020 Europe / Netherlands / Friesland                 |
| EPI_ISL_460644 | 4/7/2020  | 6/6/2020 Europe / Netherlands / Friesland                 |
| EPI_ISL_460646 | 4/7/2020  | 6/6/2020 Europe / Netherlands / Friesland                 |
| EPI_ISL_460647 | 4/7/2020  | 6/6/2020 Europe / Netherlands / Friesland                 |
| EPI_ISL_460648 | 4/8/2020  | 6/6/2020 Europe / Netherlands / Friesland                 |
| EPI_ISL_460649 | 4/9/2020  | 6/6/2020 Europe / Netherlands / Friesland                 |
| EPI_ISL_460650 | 4/10/2020 | 6/6/2020 Europe / Netherlands / Friesland                 |
| EPI_ISL_460651 | 4/3/2020  | 6/6/2020 Europe / Netherlands / Gelderland                |
| EPI_ISL_460652 | 4/3/2020  | 6/6/2020 Europe / Netherlands / Gelderland                |
| EPI_ISL_460653 | 4/8/2020  | 6/6/2020 Europe / Netherlands / Gelderland                |
| EPI_ISL_460654 | 4/8/2020  | 6/6/2020 Europe / Netherlands / Gelderland                |
| EPI_ISL_460655 | 3/18/2020 | 6/6/2020 Europe / Netherlands / Gelderland                |
| EPI_ISL_460656 | 3/19/2020 | 6/6/2020 Europe / Netherlands / Gelderland                |
| EPI_ISL_460657 | 4/18/2020 | 6/6/2020 Europe / Netherlands / Gelderland                |
| EPI_ISL_460658 | 4/16/2020 | 6/6/2020 Europe / Netherlands / Gelderland                |

|                |           |                                            |
|----------------|-----------|--------------------------------------------|
| EPI_ISL_460659 | 4/17/2020 | 6/6/2020 Europe / Netherlands / Gelderland |
| EPI_ISL_460660 | 4/2/2020  | 6/6/2020 Europe / Netherlands              |
| EPI_ISL_460661 | 3/24/2020 | 6/6/2020 Europe / Netherlands              |
| EPI_ISL_460662 | 3/24/2020 | 6/6/2020 Europe / Netherlands              |
| EPI_ISL_460663 | 4/5/2020  | 6/6/2020 Europe / Netherlands              |
| EPI_ISL_460664 | 3/29/2020 | 6/6/2020 Europe / Netherlands              |
| EPI_ISL_460666 | 3/17/2020 | 6/6/2020 Europe / Netherlands              |
| EPI_ISL_460667 | 3/18/2020 | 6/6/2020 Europe / Netherlands              |
| EPI_ISL_460668 | 3/20/2020 | 6/6/2020 Europe / Netherlands              |
| EPI_ISL_460669 | 4/7/2020  | 6/6/2020 Europe / Netherlands              |
| EPI_ISL_460670 | 4/6/2020  | 6/6/2020 Europe / Netherlands              |
| EPI_ISL_460671 | 3/26/2020 | 6/6/2020 Europe / Netherlands              |
| EPI_ISL_460672 | 3/20/2020 | 6/6/2020 Europe / Netherlands              |
| EPI_ISL_460673 | 3/27/2020 | 6/6/2020 Europe / Netherlands              |
| EPI_ISL_460674 | 3/24/2020 | 6/6/2020 Europe / Netherlands              |
| EPI_ISL_460675 | 3/31/2020 | 6/6/2020 Europe / Netherlands              |
| EPI_ISL_460676 | 4/2/2020  | 6/6/2020 Europe / Netherlands              |
| EPI_ISL_460677 | 3/23/2020 | 6/6/2020 Europe / Netherlands              |
| EPI_ISL_460682 | 3/26/2020 | 6/6/2020 Europe / Netherlands              |
| EPI_ISL_460683 | 4/2/2020  | 6/6/2020 Europe / Netherlands              |
| EPI_ISL_460684 | 3/24/2020 | 6/6/2020 Europe / Netherlands              |
| EPI_ISL_460685 | 4/1/2020  | 6/6/2020 Europe / Netherlands              |
| EPI_ISL_460686 | 3/24/2020 | 6/6/2020 Europe / Netherlands              |
| EPI_ISL_460687 | 3/29/2020 | 6/6/2020 Europe / Netherlands              |
| EPI_ISL_460688 | 4/1/2020  | 6/6/2020 Europe / Netherlands              |
| EPI_ISL_460690 | 3/24/2020 | 6/6/2020 Europe / Netherlands              |
| EPI_ISL_460691 | 3/30/2020 | 6/6/2020 Europe / Netherlands              |
| EPI_ISL_460692 | 3/30/2020 | 6/6/2020 Europe / Netherlands              |
| EPI_ISL_460693 | 3/27/2020 | 6/6/2020 Europe / Netherlands              |
| EPI_ISL_460694 | 3/29/2020 | 6/6/2020 Europe / Netherlands              |
| EPI_ISL_460695 | 3/22/2020 | 6/6/2020 Europe / Netherlands              |
| EPI_ISL_460696 | 3/19/2020 | 6/6/2020 Europe / Netherlands              |
| EPI_ISL_460697 | 3/22/2020 | 6/6/2020 Europe / Netherlands              |
| EPI_ISL_460698 | 3/18/2020 | 6/6/2020 Europe / Netherlands              |
| EPI_ISL_460699 | 3/27/2020 | 6/6/2020 Europe / Netherlands              |
| EPI_ISL_460700 | 3/22/2020 | 6/6/2020 Europe / Netherlands              |
| EPI_ISL_460701 | 3/25/2020 | 6/6/2020 Europe / Netherlands              |
| EPI_ISL_460702 | 4/8/2020  | 6/6/2020 Europe / Netherlands              |
| EPI_ISL_460703 | 3/26/2020 | 6/6/2020 Europe / Netherlands              |
| EPI_ISL_460704 | 3/30/2020 | 6/6/2020 Europe / Netherlands              |
| EPI_ISL_460705 | 4/3/2020  | 6/6/2020 Europe / Netherlands              |
| EPI_ISL_460706 | 2020      | 6/6/2020 Europe / Netherlands              |
| EPI_ISL_460707 | 2020      | 6/6/2020 Europe / Netherlands              |
| EPI_ISL_460708 | 2020      | 6/6/2020 Europe / Netherlands              |
| EPI_ISL_460709 | 2020      | 6/6/2020 Europe / Netherlands              |
| EPI_ISL_460710 | 2020      | 6/6/2020 Europe / Netherlands              |
| EPI_ISL_460711 | 2020      | 6/6/2020 Europe / Netherlands              |



|                |           |                               |
|----------------|-----------|-------------------------------|
| EPI_ISL_460712 | 2020      | 6/6/2020 Europe / Netherlands |
| EPI_ISL_460713 | 2020      | 6/6/2020 Europe / Netherlands |
| EPI_ISL_460716 | 3/19/2020 | 6/6/2020 Europe / Netherlands |
| EPI_ISL_460717 | 3/27/2020 | 6/6/2020 Europe / Netherlands |
| EPI_ISL_460718 | 3/28/2020 | 6/6/2020 Europe / Netherlands |
| EPI_ISL_460720 | 3/17/2020 | 6/6/2020 Europe / Netherlands |
| EPI_ISL_460722 | 2020      | 6/6/2020 Europe / Netherlands |
| EPI_ISL_460724 | 4/11/2020 | 6/6/2020 Europe / Netherlands |
| EPI_ISL_460725 | 4/11/2020 | 6/6/2020 Europe / Netherlands |
| EPI_ISL_460726 | 4/11/2020 | 6/6/2020 Europe / Netherlands |
| EPI_ISL_460727 | 4/11/2020 | 6/6/2020 Europe / Netherlands |
| EPI_ISL_460728 | 4/11/2020 | 6/6/2020 Europe / Netherlands |
| EPI_ISL_460729 | 4/11/2020 | 6/6/2020 Europe / Netherlands |
| EPI_ISL_460730 | 4/10/2020 | 6/6/2020 Europe / Netherlands |
| EPI_ISL_460731 | 4/11/2020 | 6/6/2020 Europe / Netherlands |
| EPI_ISL_460732 | 4/11/2020 | 6/6/2020 Europe / Netherlands |
| EPI_ISL_460733 | 4/11/2020 | 6/6/2020 Europe / Netherlands |
| EPI_ISL_460734 | 4/11/2020 | 6/6/2020 Europe / Netherlands |
| EPI_ISL_460735 | 4/13/2020 | 6/6/2020 Europe / Netherlands |
| EPI_ISL_460736 | 4/13/2020 | 6/6/2020 Europe / Netherlands |
| EPI_ISL_460737 | 3/27/2020 | 6/6/2020 Europe / Netherlands |
| EPI_ISL_460739 | 2020      | 6/6/2020 Europe / Netherlands |
| EPI_ISL_460740 | 2020      | 6/6/2020 Europe / Netherlands |
| EPI_ISL_460741 | 2020      | 6/6/2020 Europe / Netherlands |
| EPI_ISL_460742 | 2020      | 6/6/2020 Europe / Netherlands |
| EPI_ISL_460743 | 2020      | 6/6/2020 Europe / Netherlands |
| EPI_ISL_460746 | 2020      | 6/6/2020 Europe / Netherlands |
| EPI_ISL_460747 | 2020      | 6/6/2020 Europe / Netherlands |
| EPI_ISL_460748 | 2020      | 6/6/2020 Europe / Netherlands |
| EPI_ISL_460749 | 2020      | 6/6/2020 Europe / Netherlands |
| EPI_ISL_460750 | 2020      | 6/6/2020 Europe / Netherlands |
| EPI_ISL_460752 | 2020      | 6/6/2020 Europe / Netherlands |
| EPI_ISL_460753 | 4/5/2020  | 6/6/2020 Europe / Netherlands |
| EPI_ISL_460754 | 3/27/2020 | 6/6/2020 Europe / Netherlands |
| EPI_ISL_460755 | 3/27/2020 | 6/6/2020 Europe / Netherlands |
| EPI_ISL_460756 | 4/13/2020 | 6/6/2020 Europe / Netherlands |
| EPI_ISL_460757 | 4/14/2020 | 6/6/2020 Europe / Netherlands |
| EPI_ISL_460758 | 4/15/2020 | 6/6/2020 Europe / Netherlands |
| EPI_ISL_460760 | 4/19/2020 | 6/6/2020 Europe / Netherlands |
| EPI_ISL_460762 | 4/18/2020 | 6/6/2020 Europe / Netherlands |
| EPI_ISL_460763 | 3/24/2020 | 6/6/2020 Europe / Netherlands |
| EPI_ISL_460764 | 3/25/2020 | 6/6/2020 Europe / Netherlands |
| EPI_ISL_460766 | 3/25/2020 | 6/6/2020 Europe / Netherlands |
| EPI_ISL_460767 | 3/25/2020 | 6/6/2020 Europe / Netherlands |
| EPI_ISL_460768 | 3/14/2020 | 6/6/2020 Europe / Netherlands |
| EPI_ISL_460770 | 4/20/2020 | 6/6/2020 Europe / Netherlands |
| EPI_ISL_460771 | 4/20/2020 | 6/6/2020 Europe / Netherlands |

|                |           |                                               |
|----------------|-----------|-----------------------------------------------|
| EPI_ISL_460772 | 2020      | 6/6/2020 Europe / Netherlands                 |
| EPI_ISL_460773 | 4/24/2020 | 6/6/2020 Europe / Netherlands                 |
| EPI_ISL_460774 | 4/22/2020 | 6/6/2020 Europe / Netherlands                 |
| EPI_ISL_460775 | 4/22/2020 | 6/6/2020 Europe / Netherlands                 |
| EPI_ISL_460776 | 4/21/2020 | 6/6/2020 Europe / Netherlands                 |
| EPI_ISL_460777 | 4/23/2020 | 6/6/2020 Europe / Netherlands                 |
| EPI_ISL_460778 | 3/16/2020 | 6/6/2020 Europe / Netherlands                 |
| EPI_ISL_460779 | 3/16/2020 | 6/6/2020 Europe / Netherlands                 |
| EPI_ISL_460780 | 3/20/2020 | 6/6/2020 Europe / Netherlands                 |
| EPI_ISL_460781 | 3/20/2020 | 6/6/2020 Europe / Netherlands                 |
| EPI_ISL_460782 | 3/24/2020 | 6/6/2020 Europe / Netherlands                 |
| EPI_ISL_460785 | 4/21/2020 | 6/6/2020 Europe / Netherlands                 |
| EPI_ISL_460786 | 4/22/2020 | 6/6/2020 Europe / Netherlands                 |
| EPI_ISL_460787 | 4/24/2020 | 6/6/2020 Europe / Netherlands                 |
| EPI_ISL_460788 | 4/27/2020 | 6/6/2020 Europe / Netherlands                 |
| EPI_ISL_460789 | 4/10/2020 | 6/6/2020 Europe / Netherlands / Noord-Holland |
| EPI_ISL_460790 | 4/14/2020 | 6/6/2020 Europe / Netherlands / Noord-Holland |
| EPI_ISL_460791 | 4/1/2020  | 6/6/2020 Europe / Netherlands / Noord-Holland |
| EPI_ISL_460792 | 3/30/2020 | 6/6/2020 Europe / Netherlands / Noord-Holland |
| EPI_ISL_460793 | 3/30/2020 | 6/6/2020 Europe / Netherlands / Noord-Holland |
| EPI_ISL_460794 | 3/30/2020 | 6/6/2020 Europe / Netherlands / Noord-Holland |
| EPI_ISL_460795 | 4/2/2020  | 6/6/2020 Europe / Netherlands / Noord-Holland |
| EPI_ISL_460797 | 4/1/2020  | 6/6/2020 Europe / Netherlands / Noord-Holland |
| EPI_ISL_460798 | 4/1/2020  | 6/6/2020 Europe / Netherlands / Noord-Holland |
| EPI_ISL_460799 | 4/8/2020  | 6/6/2020 Europe / Netherlands / Overijssel    |
| EPI_ISL_460800 | 4/8/2020  | 6/6/2020 Europe / Netherlands / Overijssel    |
| EPI_ISL_460801 | 4/8/2020  | 6/6/2020 Europe / Netherlands / Overijssel    |
| EPI_ISL_460802 | 4/9/2020  | 6/6/2020 Europe / Netherlands / Overijssel    |
| EPI_ISL_460803 | 4/13/2020 | 6/6/2020 Europe / Netherlands / Overijssel    |
| EPI_ISL_460804 | 4/13/2020 | 6/6/2020 Europe / Netherlands / Overijssel    |
| EPI_ISL_460805 | 4/13/2020 | 6/6/2020 Europe / Netherlands / Overijssel    |
| EPI_ISL_460806 | 4/13/2020 | 6/6/2020 Europe / Netherlands / Overijssel    |
| EPI_ISL_460807 | 4/13/2020 | 6/6/2020 Europe / Netherlands / Overijssel    |
| EPI_ISL_460808 | 4/13/2020 | 6/6/2020 Europe / Netherlands / Overijssel    |
| EPI_ISL_460809 | 4/13/2020 | 6/6/2020 Europe / Netherlands / Overijssel    |
| EPI_ISL_460810 | 4/14/2020 | 6/6/2020 Europe / Netherlands / Overijssel    |
| EPI_ISL_460811 | 4/14/2020 | 6/6/2020 Europe / Netherlands / Overijssel    |
| EPI_ISL_460813 | 4/14/2020 | 6/6/2020 Europe / Netherlands / Overijssel    |
| EPI_ISL_460814 | 4/14/2020 | 6/6/2020 Europe / Netherlands / Overijssel    |
| EPI_ISL_460815 | 3/16/2020 | 6/6/2020 Europe / Netherlands / Overijssel    |
| EPI_ISL_460816 | 3/15/2020 | 6/6/2020 Europe / Netherlands / Overijssel    |
| EPI_ISL_460817 | 3/16/2020 | 6/6/2020 Europe / Netherlands / Overijssel    |
| EPI_ISL_460818 | 3/17/2020 | 6/6/2020 Europe / Netherlands / Overijssel    |
| EPI_ISL_460819 | 4/15/2020 | 6/6/2020 Europe / Netherlands / Overijssel    |
| EPI_ISL_460820 | 3/22/2020 | 6/6/2020 Europe / Netherlands / Overijssel    |
| EPI_ISL_460821 | 3/10/2020 | 6/6/2020 Europe / Netherlands / Overijssel    |
| EPI_ISL_460822 | 2020      | 6/6/2020 Europe / Netherlands / Overijssel    |

|                |           |                                            |
|----------------|-----------|--------------------------------------------|
| EPI_ISL_460823 | 4/15/2020 | 6/6/2020 Europe / Netherlands / Overijssel |
| EPI_ISL_460824 | 4/5/2020  | 6/6/2020 Europe / Netherlands / Overijssel |
| EPI_ISL_460825 | 4/6/2020  | 6/6/2020 Europe / Netherlands / Overijssel |
| EPI_ISL_460826 | 4/7/2020  | 6/6/2020 Europe / Netherlands / Overijssel |
| EPI_ISL_460827 | 4/7/2020  | 6/6/2020 Europe / Netherlands / Overijssel |
| EPI_ISL_460828 | 4/7/2020  | 6/6/2020 Europe / Netherlands / Overijssel |
| EPI_ISL_460829 | 4/2/2020  | 6/6/2020 Europe / Netherlands / Utrecht    |
| EPI_ISL_460830 | 4/2/2020  | 6/6/2020 Europe / Netherlands / Utrecht    |
| EPI_ISL_460831 | 4/17/2020 | 6/6/2020 Europe / Netherlands / Utrecht    |
| EPI_ISL_460832 | 4/18/2020 | 6/6/2020 Europe / Netherlands / Utrecht    |
| EPI_ISL_460833 | 4/23/2020 | 6/6/2020 Europe / Netherlands / Flevoland  |
| EPI_ISL_460834 | 4/23/2020 | 6/6/2020 Europe / Netherlands / Flevoland  |
| EPI_ISL_460835 | 5/1/2020  | 6/6/2020 Europe / Netherlands / Flevoland  |
| EPI_ISL_460836 | 4/9/2020  | 6/6/2020 Europe / Netherlands / Flevoland  |
| EPI_ISL_460837 | 4/10/2020 | 6/6/2020 Europe / Netherlands / Flevoland  |
| EPI_ISL_460838 | 4/28/2020 | 6/6/2020 Europe / Netherlands / Flevoland  |
| EPI_ISL_460839 | 5/20/2020 | 6/6/2020 Europe / Netherlands / Flevoland  |
| EPI_ISL_460840 | 5/22/2020 | 6/6/2020 Europe / Netherlands / Flevoland  |
| EPI_ISL_460841 | 5/22/2020 | 6/6/2020 Europe / Netherlands / Flevoland  |
| EPI_ISL_460842 | 4/18/2020 | 6/6/2020 Europe / Netherlands / Flevoland  |
| EPI_ISL_460843 | 4/23/2020 | 6/6/2020 Europe / Netherlands / Flevoland  |
| EPI_ISL_460844 | 4/14/2020 | 6/6/2020 Europe / Netherlands / Friesland  |
| EPI_ISL_460845 | 4/18/2020 | 6/6/2020 Europe / Netherlands / Friesland  |
| EPI_ISL_460847 | 4/18/2020 | 6/6/2020 Europe / Netherlands / Friesland  |
| EPI_ISL_460849 | 4/20/2020 | 6/6/2020 Europe / Netherlands / Friesland  |
| EPI_ISL_460850 | 4/14/2020 | 6/6/2020 Europe / Netherlands / Friesland  |
| EPI_ISL_460851 | 4/14/2020 | 6/6/2020 Europe / Netherlands / Friesland  |
| EPI_ISL_460852 | 4/13/2020 | 6/6/2020 Europe / Netherlands / Friesland  |
| EPI_ISL_460853 | 4/14/2020 | 6/6/2020 Europe / Netherlands / Friesland  |
| EPI_ISL_460854 | 4/30/2020 | 6/6/2020 Europe / Netherlands / Friesland  |
| EPI_ISL_460855 | 5/1/2020  | 6/6/2020 Europe / Netherlands / Friesland  |
| EPI_ISL_460856 | 5/3/2020  | 6/6/2020 Europe / Netherlands / Friesland  |
| EPI_ISL_460859 | 5/4/2020  | 6/6/2020 Europe / Netherlands / Friesland  |
| EPI_ISL_460860 | 5/3/2020  | 6/6/2020 Europe / Netherlands / Friesland  |
| EPI_ISL_460866 | 5/21/2020 | 6/6/2020 Europe / Netherlands / Gelderland |
| EPI_ISL_460880 | 5/22/2020 | 6/6/2020 Europe / Netherlands / Gelderland |
| EPI_ISL_460891 | 2020      | 6/6/2020 Europe / Netherlands / Gelderland |
| EPI_ISL_460915 | 5/22/2020 | 6/6/2020 Europe / Netherlands / Gelderland |
| EPI_ISL_460922 | 5/23/2020 | 6/6/2020 Europe / Netherlands / Gelderland |
| EPI_ISL_460923 | 5/26/2020 | 6/6/2020 Europe / Netherlands / Gelderland |
| EPI_ISL_460924 | 4/22/2020 | 6/6/2020 Europe / Netherlands / Gelderland |
| EPI_ISL_460926 | 4/26/2020 | 6/6/2020 Europe / Netherlands / Gelderland |
| EPI_ISL_460927 | 4/14/2020 | 6/6/2020 Europe / Netherlands / Gelderland |
| EPI_ISL_460928 | 4/17/2020 | 6/6/2020 Europe / Netherlands / Gelderland |
| EPI_ISL_460929 | 4/8/2020  | 6/6/2020 Europe / Netherlands / Gelderland |
| EPI_ISL_460930 | 4/6/2020  | 6/6/2020 Europe / Netherlands / Gelderland |
| EPI_ISL_460931 | 4/9/2020  | 6/6/2020 Europe / Netherlands / Gelderland |





|                |           |                               |
|----------------|-----------|-------------------------------|
| EPI_ISL_461068 | 3/29/2020 | 6/6/2020 Europe / Netherlands |
| EPI_ISL_461069 | 4/11/2020 | 6/6/2020 Europe / Netherlands |
| EPI_ISL_461070 | 4/17/2020 | 6/6/2020 Europe / Netherlands |
| EPI_ISL_461071 | 4/2/2020  | 6/6/2020 Europe / Netherlands |
| EPI_ISL_461074 | 4/30/2020 | 6/6/2020 Europe / Netherlands |
| EPI_ISL_461075 | 5/3/2020  | 6/6/2020 Europe / Netherlands |
| EPI_ISL_461076 | 3/31/2020 | 6/6/2020 Europe / Netherlands |
| EPI_ISL_461077 | 3/31/2020 | 6/6/2020 Europe / Netherlands |
| EPI_ISL_461078 | 3/31/2020 | 6/6/2020 Europe / Netherlands |
| EPI_ISL_461079 | 3/31/2020 | 6/6/2020 Europe / Netherlands |
| EPI_ISL_461082 | 3/31/2020 | 6/6/2020 Europe / Netherlands |
| EPI_ISL_461083 | 5/7/2020  | 6/6/2020 Europe / Netherlands |
| EPI_ISL_461084 | 5/7/2020  | 6/6/2020 Europe / Netherlands |
| EPI_ISL_461085 | 5/7/2020  | 6/6/2020 Europe / Netherlands |
| EPI_ISL_461086 | 5/7/2020  | 6/6/2020 Europe / Netherlands |
| EPI_ISL_461087 | 5/8/2020  | 6/6/2020 Europe / Netherlands |
| EPI_ISL_461088 | 2020      | 6/6/2020 Europe / Netherlands |
| EPI_ISL_461089 | 2020      | 6/6/2020 Europe / Netherlands |
| EPI_ISL_461090 | 2020      | 6/6/2020 Europe / Netherlands |
| EPI_ISL_461091 | 2020      | 6/6/2020 Europe / Netherlands |
| EPI_ISL_461092 | 2020      | 6/6/2020 Europe / Netherlands |
| EPI_ISL_461093 | 2020      | 6/6/2020 Europe / Netherlands |
| EPI_ISL_461094 | 2020      | 6/6/2020 Europe / Netherlands |
| EPI_ISL_461095 | 2020      | 6/6/2020 Europe / Netherlands |
| EPI_ISL_461097 | 2020      | 6/6/2020 Europe / Netherlands |
| EPI_ISL_461098 | 2020      | 6/6/2020 Europe / Netherlands |
| EPI_ISL_461100 | 2020      | 6/6/2020 Europe / Netherlands |
| EPI_ISL_461101 | 2/29/2020 | 6/6/2020 Europe / Netherlands |
| EPI_ISL_461102 | 3/8/2020  | 6/6/2020 Europe / Netherlands |
| EPI_ISL_461103 | 3/10/2020 | 6/6/2020 Europe / Netherlands |
| EPI_ISL_461104 | 3/9/2020  | 6/6/2020 Europe / Netherlands |
| EPI_ISL_461105 | 3/9/2020  | 6/6/2020 Europe / Netherlands |
| EPI_ISL_461106 | 3/9/2020  | 6/6/2020 Europe / Netherlands |
| EPI_ISL_461108 | 3/10/2020 | 6/6/2020 Europe / Netherlands |
| EPI_ISL_461109 | 3/10/2020 | 6/6/2020 Europe / Netherlands |
| EPI_ISL_461111 | 3/10/2020 | 6/6/2020 Europe / Netherlands |
| EPI_ISL_461112 | 2020      | 6/6/2020 Europe / Netherlands |
| EPI_ISL_461113 | 3/2/2020  | 6/6/2020 Europe / Netherlands |
| EPI_ISL_461114 | 3/3/2020  | 6/6/2020 Europe / Netherlands |
| EPI_ISL_461115 | 3/13/2020 | 6/6/2020 Europe / Netherlands |
| EPI_ISL_461116 | 3/16/2020 | 6/6/2020 Europe / Netherlands |
| EPI_ISL_461118 | 3/26/2020 | 6/6/2020 Europe / Netherlands |
| EPI_ISL_461120 | 4/5/2020  | 6/6/2020 Europe / Netherlands |
| EPI_ISL_461121 | 4/8/2020  | 6/6/2020 Europe / Netherlands |
| EPI_ISL_461122 | 4/7/2020  | 6/6/2020 Europe / Netherlands |
| EPI_ISL_461123 | 3/30/2020 | 6/6/2020 Europe / Netherlands |
| EPI_ISL_461125 | 3/26/2020 | 6/6/2020 Europe / Netherlands |

|                |           |                                               |
|----------------|-----------|-----------------------------------------------|
| EPI_ISL_461126 | 3/26/2020 | 6/6/2020 Europe / Netherlands                 |
| EPI_ISL_461127 | 3/29/2020 | 6/6/2020 Europe / Netherlands                 |
| EPI_ISL_461128 | 3/31/2020 | 6/6/2020 Europe / Netherlands                 |
| EPI_ISL_461129 | 4/3/2020  | 6/6/2020 Europe / Netherlands                 |
| EPI_ISL_461130 | 4/3/2020  | 6/6/2020 Europe / Netherlands                 |
| EPI_ISL_461131 | 4/5/2020  | 6/6/2020 Europe / Netherlands                 |
| EPI_ISL_461132 | 4/6/2020  | 6/6/2020 Europe / Netherlands                 |
| EPI_ISL_461133 | 4/16/2020 | 6/6/2020 Europe / Netherlands                 |
| EPI_ISL_461134 | 4/16/2020 | 6/6/2020 Europe / Netherlands                 |
| EPI_ISL_461135 | 4/17/2020 | 6/6/2020 Europe / Netherlands                 |
| EPI_ISL_461136 | 4/17/2020 | 6/6/2020 Europe / Netherlands                 |
| EPI_ISL_461137 | 4/19/2020 | 6/6/2020 Europe / Netherlands                 |
| EPI_ISL_461139 | 4/20/2020 | 6/6/2020 Europe / Netherlands                 |
| EPI_ISL_461140 | 4/24/2020 | 6/6/2020 Europe / Netherlands                 |
| EPI_ISL_461141 | 4/28/2020 | 6/6/2020 Europe / Netherlands                 |
| EPI_ISL_461143 | 5/7/2020  | 6/6/2020 Europe / Netherlands                 |
| EPI_ISL_461144 | 5/12/2020 | 6/6/2020 Europe / Netherlands                 |
| EPI_ISL_461145 | 5/13/2020 | 6/6/2020 Europe / Netherlands                 |
| EPI_ISL_461146 | 3/4/2020  | 6/6/2020 Europe / Netherlands / Noord-Brabant |
| EPI_ISL_461147 | 3/11/2020 | 6/6/2020 Europe / Netherlands / Noord-Brabant |
| EPI_ISL_461148 | 3/20/2020 | 6/6/2020 Europe / Netherlands / Noord-Brabant |
| EPI_ISL_461149 | 3/21/2020 | 6/6/2020 Europe / Netherlands / Noord-Brabant |
| EPI_ISL_461150 | 3/22/2020 | 6/6/2020 Europe / Netherlands / Noord-Brabant |
| EPI_ISL_461151 | 3/23/2020 | 6/6/2020 Europe / Netherlands / Noord-Brabant |
| EPI_ISL_461152 | 3/23/2020 | 6/6/2020 Europe / Netherlands / Noord-Brabant |
| EPI_ISL_461153 | 3/22/2020 | 6/6/2020 Europe / Netherlands / Noord-Brabant |
| EPI_ISL_461155 | 3/24/2020 | 6/6/2020 Europe / Netherlands / Noord-Brabant |
| EPI_ISL_461156 | 3/25/2020 | 6/6/2020 Europe / Netherlands / Noord-Brabant |
| EPI_ISL_461157 | 3/25/2020 | 6/6/2020 Europe / Netherlands / Noord-Brabant |
| EPI_ISL_461158 | 3/25/2020 | 6/6/2020 Europe / Netherlands / Noord-Brabant |
| EPI_ISL_461159 | 3/26/2020 | 6/6/2020 Europe / Netherlands / Noord-Brabant |
| EPI_ISL_461160 | 2020      | 6/6/2020 Europe / Netherlands / Noord-Brabant |
| EPI_ISL_461161 | 3/28/2020 | 6/6/2020 Europe / Netherlands / Noord-Brabant |
| EPI_ISL_461162 | 2020      | 6/6/2020 Europe / Netherlands / Noord-Brabant |
| EPI_ISL_461163 | 3/28/2020 | 6/6/2020 Europe / Netherlands / Noord-Brabant |
| EPI_ISL_461164 | 3/31/2020 | 6/6/2020 Europe / Netherlands / Noord-Brabant |
| EPI_ISL_461165 | 4/8/2020  | 6/6/2020 Europe / Netherlands / Noord-Brabant |
| EPI_ISL_461167 | 4/10/2020 | 6/6/2020 Europe / Netherlands / Noord-Brabant |
| EPI_ISL_461168 | 2020      | 6/6/2020 Europe / Netherlands / Noord-Brabant |
| EPI_ISL_461169 | 2020      | 6/6/2020 Europe / Netherlands / Noord-Brabant |
| EPI_ISL_461171 | 2020      | 6/6/2020 Europe / Netherlands / Noord-Brabant |
| EPI_ISL_461172 | 4/15/2020 | 6/6/2020 Europe / Netherlands / Noord-Brabant |
| EPI_ISL_461173 | 2020      | 6/6/2020 Europe / Netherlands / Noord-Brabant |
| EPI_ISL_461174 | 2020      | 6/6/2020 Europe / Netherlands / Noord-Brabant |
| EPI_ISL_461175 | 2020      | 6/6/2020 Europe / Netherlands / Noord-Brabant |
| EPI_ISL_461176 | 2020      | 6/6/2020 Europe / Netherlands / Noord-Brabant |
| EPI_ISL_461177 | 4/22/2020 | 6/6/2020 Europe / Netherlands / Noord-Brabant |

|                |           |          |                                      |
|----------------|-----------|----------|--------------------------------------|
| EPI_ISL_461178 | 2020      | 6/6/2020 | Europe / Netherlands / Noord-Brabant |
| EPI_ISL_461179 | 4/29/2020 | 6/6/2020 | Europe / Netherlands / Noord-Brabant |
| EPI_ISL_461180 | 2020      | 6/6/2020 | Europe / Netherlands / Noord-Brabant |
| EPI_ISL_461181 | 4/5/2020  | 6/6/2020 | Europe / Netherlands / Noord-Brabant |
| EPI_ISL_461182 | 3/24/2020 | 6/6/2020 | Europe / Netherlands / Noord-Brabant |
| EPI_ISL_461183 | 4/26/2020 | 6/6/2020 | Europe / Netherlands / Noord-Brabant |
| EPI_ISL_461184 | 4/27/2020 | 6/6/2020 | Europe / Netherlands / Noord-Brabant |
| EPI_ISL_461185 | 4/28/2020 | 6/6/2020 | Europe / Netherlands / Noord-Brabant |
| EPI_ISL_461186 | 4/29/2020 | 6/6/2020 | Europe / Netherlands / Noord-Brabant |
| EPI_ISL_461188 | 4/28/2020 | 6/6/2020 | Europe / Netherlands / Noord-Brabant |
| EPI_ISL_461189 | 4/28/2020 | 6/6/2020 | Europe / Netherlands / Noord-Brabant |
| EPI_ISL_461191 | 2020      | 6/6/2020 | Europe / Netherlands / Noord-Brabant |
| EPI_ISL_461192 | 2020      | 6/6/2020 | Europe / Netherlands / Noord-Brabant |
| EPI_ISL_461193 | 4/22/2020 | 6/6/2020 | Europe / Netherlands / Noord-Brabant |
| EPI_ISL_461194 | 4/22/2020 | 6/6/2020 | Europe / Netherlands / Noord-Brabant |
| EPI_ISL_461195 | 4/22/2020 | 6/6/2020 | Europe / Netherlands / Noord-Brabant |
| EPI_ISL_461197 | 4/24/2020 | 6/6/2020 | Europe / Netherlands / Noord-Brabant |
| EPI_ISL_461198 | 4/27/2020 | 6/6/2020 | Europe / Netherlands / Noord-Brabant |
| EPI_ISL_461199 | 4/28/2020 | 6/6/2020 | Europe / Netherlands / Noord-Brabant |
| EPI_ISL_461200 | 2020      | 6/6/2020 | Europe / Netherlands / Noord-Brabant |
| EPI_ISL_461201 | 4/28/2020 | 6/6/2020 | Europe / Netherlands / Noord-Brabant |
| EPI_ISL_461202 | 5/26/2020 | 6/6/2020 | Europe / Netherlands / Noord-Brabant |
| EPI_ISL_461204 | 4/26/2020 | 6/6/2020 | Europe / Netherlands / Noord-Holland |
| EPI_ISL_461206 | 4/27/2020 | 6/6/2020 | Europe / Netherlands / Noord-Holland |
| EPI_ISL_461207 | 4/24/2020 | 6/6/2020 | Europe / Netherlands / Noord-Holland |
| EPI_ISL_461208 | 4/27/2020 | 6/6/2020 | Europe / Netherlands / Noord-Holland |
| EPI_ISL_461209 | 4/25/2020 | 6/6/2020 | Europe / Netherlands / Noord-Holland |
| EPI_ISL_461210 | 4/24/2020 | 6/6/2020 | Europe / Netherlands / Noord-Holland |
| EPI_ISL_461211 | 4/24/2020 | 6/6/2020 | Europe / Netherlands / Noord-Holland |
| EPI_ISL_461212 | 5/5/2020  | 6/6/2020 | Europe / Netherlands / Noord-Holland |
| EPI_ISL_461213 | 5/6/2020  | 6/6/2020 | Europe / Netherlands / Noord-Holland |
| EPI_ISL_461214 | 5/6/2020  | 6/6/2020 | Europe / Netherlands / Noord-Holland |
| EPI_ISL_461215 | 5/6/2020  | 6/6/2020 | Europe / Netherlands / Noord-Holland |
| EPI_ISL_461216 | 5/6/2020  | 6/6/2020 | Europe / Netherlands / Noord-Holland |
| EPI_ISL_461217 | 5/6/2020  | 6/6/2020 | Europe / Netherlands / Noord-Holland |
| EPI_ISL_461218 | 4/30/2020 | 6/6/2020 | Europe / Netherlands / Noord-Holland |
| EPI_ISL_461219 | 5/2/2020  | 6/6/2020 | Europe / Netherlands / Noord-Holland |
| EPI_ISL_461221 | 5/19/2020 | 6/6/2020 | Europe / Netherlands / Noord-Holland |
| EPI_ISL_461222 | 5/19/2020 | 6/6/2020 | Europe / Netherlands / Noord-Holland |
| EPI_ISL_461223 | 5/19/2020 | 6/6/2020 | Europe / Netherlands / Noord-Holland |
| EPI_ISL_461224 | 5/15/2020 | 6/6/2020 | Europe / Netherlands / Noord-Holland |
| EPI_ISL_461226 | 5/23/2020 | 6/6/2020 | Europe / Netherlands / Overijssel    |
| EPI_ISL_461227 | 5/26/2020 | 6/6/2020 | Europe / Netherlands / Overijssel    |
| EPI_ISL_461228 | 4/20/2020 | 6/6/2020 | Europe / Netherlands / Utrecht       |
| EPI_ISL_461229 | 4/23/2020 | 6/6/2020 | Europe / Netherlands / Utrecht       |
| EPI_ISL_461230 | 4/23/2020 | 6/6/2020 | Europe / Netherlands / Utrecht       |
| EPI_ISL_461232 | 4/27/2020 | 6/6/2020 | Europe / Netherlands / Utrecht       |









|                |           |                                              |
|----------------|-----------|----------------------------------------------|
| EPI_ISL_461398 | 5/3/2020  | 6/6/2020 Europe / Netherlands / Zuid-Holland |
| EPI_ISL_461399 | 4/6/2020  | 6/6/2020 North America / USA / Washington    |
| EPI_ISL_461402 | 4/6/2020  | 6/6/2020 North America / USA / Washington    |
| EPI_ISL_461403 | 3/28/2020 | 6/6/2020 North America / USA / Washington    |
| EPI_ISL_461404 | 4/7/2020  | 6/6/2020 North America / USA / Washington    |
| EPI_ISL_461405 | 4/8/2020  | 6/6/2020 North America / USA / Washington    |
| EPI_ISL_461406 | 4/30/2020 | 6/6/2020 North America / USA / Washington    |
| EPI_ISL_461407 | 5/4/2020  | 6/6/2020 North America / USA / Washington    |
| EPI_ISL_461408 | 4/2/2020  | 6/6/2020 North America / USA / Connecticut   |
| EPI_ISL_461409 | 4/2/2020  | 6/6/2020 North America / USA / Connecticut   |
| EPI_ISL_461410 | 4/5/2020  | 6/6/2020 North America / USA / Washington    |
| EPI_ISL_461411 | 4/2/2020  | 6/6/2020 North America / USA / Connecticut   |
| EPI_ISL_461412 | 4/3/2020  | 6/6/2020 North America / USA / Connecticut   |
| EPI_ISL_461413 | 4/5/2020  | 6/6/2020 North America / USA / Washington    |
| EPI_ISL_461414 | 4/3/2020  | 6/6/2020 North America / USA / Connecticut   |
| EPI_ISL_461415 | 4/5/2020  | 6/6/2020 North America / USA / Washington    |
| EPI_ISL_461416 | 4/3/2020  | 6/6/2020 North America / USA / Connecticut   |
| EPI_ISL_461417 | 4/2/2020  | 6/6/2020 North America / USA / Connecticut   |
| EPI_ISL_461418 | 4/6/2020  | 6/6/2020 North America / USA / Washington    |
| EPI_ISL_461419 | 4/5/2020  | 6/6/2020 North America / USA / Washington    |
| EPI_ISL_461420 | 4/3/2020  | 6/6/2020 North America / USA / Connecticut   |
| EPI_ISL_461421 | 4/5/2020  | 6/6/2020 North America / USA / Washington    |
| EPI_ISL_461422 | 3/27/2020 | 6/6/2020 North America / USA / Washington    |
| EPI_ISL_461423 | 3/31/2020 | 6/6/2020 North America / USA / Washington    |
| EPI_ISL_461424 | 3/27/2020 | 6/6/2020 North America / USA / Idaho         |
| EPI_ISL_461425 | 3/30/2020 | 6/6/2020 North America / USA / Idaho         |
| EPI_ISL_461426 | 4/6/2020  | 6/6/2020 North America / USA / Washington    |
| EPI_ISL_461427 | 4/5/2020  | 6/6/2020 North America / USA / Washington    |
| EPI_ISL_461428 | 4/6/2020  | 6/6/2020 North America / USA / Washington    |
| EPI_ISL_461429 | 4/6/2020  | 6/6/2020 North America / USA / Washington    |
| EPI_ISL_461430 | 3/27/2020 | 6/6/2020 North America / USA / Washington    |
| EPI_ISL_461432 | 3/29/2020 | 6/6/2020 North America / USA / Washington    |
| EPI_ISL_461434 | 4/7/2020  | 6/6/2020 North America / USA / Washington    |
| EPI_ISL_461435 | 4/5/2020  | 6/6/2020 North America / USA / Connecticut   |
| EPI_ISL_461436 | 3/24/2020 | 6/6/2020 North America / USA / Washington    |
| EPI_ISL_461437 | 4/8/2020  | 6/6/2020 North America / USA                 |
| EPI_ISL_461438 | 4/8/2020  | 6/6/2020 North America / USA                 |
| EPI_ISL_461440 | 4/6/2020  | 6/6/2020 North America / USA / Washington    |
| EPI_ISL_461441 | 4/6/2020  | 6/6/2020 North America / USA / Connecticut   |
| EPI_ISL_461442 | 4/6/2020  | 6/6/2020 North America / USA / Washington    |
| EPI_ISL_461444 | 3/31/2020 | 6/6/2020 North America / USA / Washington    |
| EPI_ISL_461445 | 3/31/2020 | 6/6/2020 North America / USA / Washington    |
| EPI_ISL_461446 | 4/11/2020 | 6/6/2020 North America / USA / Washington    |
| EPI_ISL_461447 | 4/11/2020 | 6/6/2020 North America / USA / Washington    |
| EPI_ISL_461448 | 4/11/2020 | 6/6/2020 North America / USA / Washington    |
| EPI_ISL_461449 | 4/11/2020 | 6/6/2020 North America / USA / Washington    |
| EPI_ISL_461450 | 5/29/2020 | 6/6/2020 North America / USA / Washington    |



















|                |           |                                            |
|----------------|-----------|--------------------------------------------|
| EPI_ISL_462020 | 5/15/2020 | 6/6/2020 Europe / United Kingdom / England |
| EPI_ISL_462021 | 4/29/2020 | 6/6/2020 Europe / United Kingdom / England |
| EPI_ISL_462023 | 4/19/2020 | 6/6/2020 Europe / United Kingdom / England |
| EPI_ISL_462025 | 5/1/2020  | 6/6/2020 Europe / United Kingdom / England |
| EPI_ISL_462029 | 4/18/2020 | 6/6/2020 Europe / United Kingdom / England |
| EPI_ISL_462030 | 5/16/2020 | 6/6/2020 Europe / United Kingdom / England |
| EPI_ISL_462032 | 4/18/2020 | 6/6/2020 Europe / United Kingdom / England |
| EPI_ISL_462034 | 5/13/2020 | 6/6/2020 Europe / United Kingdom / England |
| EPI_ISL_462036 | 4/30/2020 | 6/6/2020 Europe / United Kingdom / England |
| EPI_ISL_462038 | 4/20/2020 | 6/6/2020 Europe / United Kingdom / England |
| EPI_ISL_462039 | 5/11/2020 | 6/6/2020 Europe / United Kingdom / England |
| EPI_ISL_462041 | 4/17/2020 | 6/6/2020 Europe / United Kingdom / England |
| EPI_ISL_462043 | 5/11/2020 | 6/6/2020 Europe / United Kingdom / England |
| EPI_ISL_462044 | 5/12/2020 | 6/6/2020 Europe / United Kingdom / England |
| EPI_ISL_462045 | 4/18/2020 | 6/6/2020 Europe / United Kingdom / England |
| EPI_ISL_462046 | 4/19/2020 | 6/6/2020 Europe / United Kingdom / England |
| EPI_ISL_462047 | 5/1/2020  | 6/6/2020 Europe / United Kingdom / England |
| EPI_ISL_462048 | 4/19/2020 | 6/6/2020 Europe / United Kingdom / England |
| EPI_ISL_462049 | 4/19/2020 | 6/6/2020 Europe / United Kingdom / England |
| EPI_ISL_462050 | 4/19/2020 | 6/6/2020 Europe / United Kingdom / England |
| EPI_ISL_462051 | 5/18/2020 | 6/6/2020 Europe / United Kingdom / England |
| EPI_ISL_462052 | 5/13/2020 | 6/6/2020 Europe / United Kingdom / England |
| EPI_ISL_462053 | 4/18/2020 | 6/6/2020 Europe / United Kingdom / England |
| EPI_ISL_462054 | 4/19/2020 | 6/6/2020 Europe / United Kingdom / England |
| EPI_ISL_462056 | 5/12/2020 | 6/6/2020 Europe / United Kingdom / England |
| EPI_ISL_462058 | 5/16/2020 | 6/6/2020 Europe / United Kingdom / England |
| EPI_ISL_462059 | 5/1/2020  | 6/6/2020 Europe / United Kingdom / England |
| EPI_ISL_462060 | 4/18/2020 | 6/6/2020 Europe / United Kingdom / England |
| EPI_ISL_462061 | 4/18/2020 | 6/6/2020 Europe / United Kingdom / England |
| EPI_ISL_462064 | 4/19/2020 | 6/6/2020 Europe / United Kingdom / England |
| EPI_ISL_462065 | 5/15/2020 | 6/6/2020 Europe / United Kingdom / England |
| EPI_ISL_462066 | 4/19/2020 | 6/6/2020 Europe / United Kingdom / England |
| EPI_ISL_462067 | 4/19/2020 | 6/6/2020 Europe / United Kingdom / England |
| EPI_ISL_462069 | 4/30/2020 | 6/6/2020 Europe / United Kingdom / England |
| EPI_ISL_462070 | 5/18/2020 | 6/6/2020 Europe / United Kingdom / England |
| EPI_ISL_462072 | 4/17/2020 | 6/6/2020 Europe / United Kingdom / England |
| EPI_ISL_462074 | 4/17/2020 | 6/6/2020 Europe / United Kingdom / England |
| EPI_ISL_462075 | 4/18/2020 | 6/6/2020 Europe / United Kingdom / England |
| EPI_ISL_462076 | 5/14/2020 | 6/6/2020 Europe / United Kingdom / England |
| EPI_ISL_462078 | 5/15/2020 | 6/6/2020 Europe / United Kingdom / England |
| EPI_ISL_462079 | 4/17/2020 | 6/6/2020 Europe / United Kingdom / England |
| EPI_ISL_462081 | 4/18/2020 | 6/6/2020 Europe / United Kingdom / England |
| EPI_ISL_462995 | 5/30/2020 | 6/6/2020 Europe / Spain / Asturias         |
| EPI_ISL_462996 | 5/30/2020 | 6/6/2020 Europe / Spain / Asturias         |
| EPI_ISL_462997 | 5/30/2020 | 6/6/2020 Europe / Spain / Asturias         |
| EPI_ISL_462998 | 5/30/2020 | 6/6/2020 Europe / Spain / Asturias         |
| EPI_ISL_462999 | 5/30/2020 | 6/6/2020 Europe / Spain / Asturias         |

|                |           |                                                        |
|----------------|-----------|--------------------------------------------------------|
| EPI_ISL_463000 | 5/30/2020 | 6/6/2020 Europe / Spain / Asturias                     |
| EPI_ISL_462090 | 5/23/2020 | 6/7/2020 Asia / Bangladesh / Dhaka                     |
| EPI_ISL_462091 | 5/23/2020 | 6/7/2020 Asia / Bangladesh / Dhaka                     |
| EPI_ISL_462092 | 5/23/2020 | 6/7/2020 Asia / Bangladesh / Dhaka                     |
| EPI_ISL_462093 | 5/23/2020 | 6/7/2020 Asia / Bangladesh / Dhaka / Dhaka / Mirpur    |
| EPI_ISL_462094 | 5/23/2020 | 6/7/2020 Asia / Bangladesh / Dhaka / Dhaka / Mirpur    |
| EPI_ISL_462095 | 5/23/2020 | 6/7/2020 Asia / Bangladesh / Dhaka / Dhaka / Uttara    |
| EPI_ISL_462096 | 5/23/2020 | 6/7/2020 Asia / Bangladesh / Dhaka / Dhaka / Jatrabari |
| EPI_ISL_462097 | 5/23/2020 | 6/7/2020 Asia / Bangladesh / Dhaka / Dhaka / Uttara    |
| EPI_ISL_462098 | 5/21/2020 | 6/7/2020 Asia / Bangladesh / Dhaka / Dhaka / Jatrabari |
| EPI_ISL_462149 | 3/30/2020 | 6/7/2020 Europe / Russia / Moscow                      |
| EPI_ISL_462150 | 3/31/2020 | 6/7/2020 Europe / Russia / Moscow                      |
| EPI_ISL_462151 | 4/23/2020 | 6/8/2020 Europe / Belgium / La Calamine                |
| EPI_ISL_462152 | 4/23/2020 | 6/8/2020 Europe / Belgium / Eupen                      |
| EPI_ISL_462153 | 4/23/2020 | 6/8/2020 Europe / Belgium / Bullingen                  |
| EPI_ISL_462154 | 4/23/2020 | 6/8/2020 Europe / Belgium / La Calamine                |
| EPI_ISL_462155 | 4/23/2020 | 6/8/2020 Europe / Belgium / La Calamine                |
| EPI_ISL_462156 | 4/23/2020 | 6/8/2020 Europe / Belgium / Eupen                      |
| EPI_ISL_462157 | 4/23/2020 | 6/8/2020 Europe / Belgium / Membach                    |
| EPI_ISL_462158 | 3/30/2020 | 6/8/2020 Europe / Belgium / Kasterlee                  |
| EPI_ISL_462159 | 3/30/2020 | 6/8/2020 Europe / Belgium / Olen                       |
| EPI_ISL_462160 | 3/30/2020 | 6/8/2020 Europe / Belgium / Oevel                      |
| EPI_ISL_462161 | 3/30/2020 | 6/8/2020 Europe / Belgium / Balen                      |
| EPI_ISL_462162 | 3/20/2020 | 6/8/2020 Europe / Belgium / Rijkevorsel                |
| EPI_ISL_462163 | 3/28/2020 | 6/8/2020 Europe / Belgium / Ciney                      |
| EPI_ISL_462164 | 3/28/2020 | 6/8/2020 Europe / Belgium / La Louvière                |
| EPI_ISL_462165 | 3/28/2020 | 6/8/2020 Europe / Belgium / Boussu                     |
| EPI_ISL_462166 | 3/28/2020 | 6/8/2020 Europe / Belgium / Haulchin                   |
| EPI_ISL_462167 | 3/28/2020 | 6/8/2020 Europe / Belgium / Binche                     |
| EPI_ISL_462168 | 3/28/2020 | 6/8/2020 Europe / Belgium / Casteau                    |
| EPI_ISL_462169 | 3/26/2020 | 6/8/2020 Europe / Belgium / Overijse                   |
| EPI_ISL_462170 | 3/26/2020 | 6/8/2020 Europe / Belgium / Genval                     |
| EPI_ISL_462171 | 3/27/2020 | 6/8/2020 Europe / Belgium / Poperinge                  |
| EPI_ISL_462172 | 3/27/2020 | 6/8/2020 Europe / Belgium / Anzegem                    |
| EPI_ISL_462173 | 3/27/2020 | 6/8/2020 Europe / Belgium / Kuurne                     |
| EPI_ISL_462174 | 3/27/2020 | 6/8/2020 Europe / Belgium / Montignies-sur-Sambre      |
| EPI_ISL_462175 | 3/27/2020 | 6/8/2020 Europe / Belgium / Marcinelle                 |
| EPI_ISL_462176 | 3/26/2020 | 6/8/2020 Europe / Belgium / Mellet                     |
| EPI_ISL_462177 | 3/26/2020 | 6/8/2020 Europe / Belgium / Chatelet                   |
| EPI_ISL_462178 | 3/17/2020 | 6/8/2020 Europe / Belgium / Dolembreux                 |
| EPI_ISL_462179 | 3/17/2020 | 6/8/2020 Europe / Belgium / Bressoux                   |
| EPI_ISL_462180 | 3/17/2020 | 6/8/2020 Europe / Belgium / Liège                      |
| EPI_ISL_462181 | 3/17/2020 | 6/8/2020 Europe / Belgium / Voroux-les-Liers           |
| EPI_ISL_462182 | 3/30/2020 | 6/8/2020 Europe / Belgium / Laakdal                    |
| EPI_ISL_462183 | 3/30/2020 | 6/8/2020 Europe / Belgium / Oostmalle                  |
| EPI_ISL_462184 | 3/30/2020 | 6/8/2020 Europe / Belgium / Beerse                     |
| EPI_ISL_462185 | 3/30/2020 | 6/8/2020 Europe / Belgium / Zoersel                    |

|                |           |                                              |
|----------------|-----------|----------------------------------------------|
| EPI_ISL_462186 | 3/30/2020 | 6/8/2020 Europe / Belgium / Wijnegem         |
| EPI_ISL_462187 | 3/24/2020 | 6/8/2020 Europe / Belgium / Gent             |
| EPI_ISL_462188 | 3/25/2020 | 6/8/2020 Europe / Belgium / Bottelare        |
| EPI_ISL_462189 | 3/30/2020 | 6/8/2020 Europe / Belgium / Champion         |
| EPI_ISL_462190 | 3/26/2020 | 6/8/2020 Europe / Belgium / Ettelgem         |
| EPI_ISL_462191 | 3/25/2020 | 6/8/2020 Europe / Belgium / Oostende         |
| EPI_ISL_462192 | 3/28/2020 | 6/8/2020 Europe / Belgium / Asper            |
| EPI_ISL_462193 | 3/25/2020 | 6/8/2020 Europe / Belgium / Blankenberge     |
| EPI_ISL_462194 | 3/25/2020 | 6/8/2020 Europe / Belgium / Berchem          |
| EPI_ISL_462195 | 3/28/2020 | 6/8/2020 Europe / Belgium / Geraardsbergen   |
| EPI_ISL_462196 | 3/28/2020 | 6/8/2020 Europe / Belgium / Genk             |
| EPI_ISL_462197 | 3/28/2020 | 6/8/2020 Europe / Belgium / Maaseik          |
| EPI_ISL_462198 | 3/27/2020 | 6/8/2020 Europe / Belgium / Eisden           |
| EPI_ISL_462199 | 3/27/2020 | 6/8/2020 Europe / Belgium / Beverst          |
| EPI_ISL_462200 | 3/27/2020 | 6/8/2020 Europe / Belgium / Wingene          |
| EPI_ISL_462201 | 3/30/2020 | 6/8/2020 Europe / Belgium / Torhout          |
| EPI_ISL_462202 | 3/27/2020 | 6/8/2020 Europe / Belgium / Assenbroek       |
| EPI_ISL_462203 | 3/27/2020 | 6/8/2020 Europe / Belgium / Brugge           |
| EPI_ISL_462204 | 3/26/2020 | 6/8/2020 Europe / Belgium / Beerst           |
| EPI_ISL_462205 | 3/30/2020 | 6/8/2020 Europe / Belgium / Burdinne         |
| EPI_ISL_462206 | 3/29/2020 | 6/8/2020 Europe / Belgium / Bevel            |
| EPI_ISL_462207 | 3/27/2020 | 6/8/2020 Europe / Belgium / Antheit          |
| EPI_ISL_462208 | 3/28/2020 | 6/8/2020 Europe / Belgium / Andenne          |
| EPI_ISL_462209 | 3/22/2020 | 6/8/2020 Europe / Belgium / Mol              |
| EPI_ISL_462210 | 3/11/2020 | 6/8/2020 Europe / Belgium / Retie            |
| EPI_ISL_462211 | 3/29/2020 | 6/8/2020 Europe / Belgium / Broechem         |
| EPI_ISL_462212 | 3/30/2020 | 6/8/2020 Europe / Belgium / Bevel            |
| EPI_ISL_462213 | 3/31/2020 | 6/8/2020 Europe / Belgium / Arbre            |
| EPI_ISL_462214 | 3/31/2020 | 6/8/2020 Europe / Belgium / Rixensart        |
| EPI_ISL_462215 | 3/31/2020 | 6/8/2020 Europe / Belgium / Buzet            |
| EPI_ISL_462216 | 3/31/2020 | 6/8/2020 Europe / Belgium / Fontaine-Valmont |
| EPI_ISL_462217 | 3/30/2020 | 6/8/2020 Europe / Belgium / Lamine           |
| EPI_ISL_462218 | 4/1/2020  | 6/8/2020 Europe / Belgium / Waasmont         |
| EPI_ISL_462219 | 3/30/2020 | 6/8/2020 Europe / Belgium / Berloz           |
| EPI_ISL_462220 | 4/1/2020  | 6/8/2020 Europe / Belgium / Ploegsteert      |
| EPI_ISL_462221 | 3/30/2020 | 6/8/2020 Europe / Belgium / Ans              |
| EPI_ISL_462222 | 4/1/2020  | 6/8/2020 Europe / Belgium / Lo               |
| EPI_ISL_462223 | 3/27/2020 | 6/8/2020 Europe / Belgium / Deerlijk         |
| EPI_ISL_462224 | 3/28/2020 | 6/8/2020 Europe / Belgium / Bevere           |
| EPI_ISL_462225 | 4/1/2020  | 6/8/2020 Europe / Belgium / Blaasveld        |
| EPI_ISL_462226 | 4/1/2020  | 6/8/2020 Europe / Belgium / Breendonk        |
| EPI_ISL_462227 | 4/1/2020  | 6/8/2020 Europe / Belgium / Bornem           |
| EPI_ISL_462228 | 4/2/2020  | 6/8/2020 Europe / Belgium / Vlamertinge      |
| EPI_ISL_462229 | 4/1/2020  | 6/8/2020 Europe / Belgium / Harelbeke        |
| EPI_ISL_462230 | 4/1/2020  | 6/8/2020 Europe / Belgium / Avelgem          |
| EPI_ISL_462231 | 3/31/2020 | 6/8/2020 Europe / Belgium / Brasschaat       |
| EPI_ISL_462232 | 3/31/2020 | 6/8/2020 Europe / Belgium / Ekeren           |

|                |           |                                                 |
|----------------|-----------|-------------------------------------------------|
| EPI_ISL_462233 | 3/31/2020 | 6/8/2020 Europe / Belgium / Brasschaat          |
| EPI_ISL_462234 | 3/25/2020 | 6/8/2020 Europe / Belgium / Aisemont            |
| EPI_ISL_462235 | 4/3/2020  | 6/8/2020 Europe / Belgium / Goutroux            |
| EPI_ISL_462236 | 4/3/2020  | 6/8/2020 Europe / Belgium / Beuzet              |
| EPI_ISL_462237 | 4/2/2020  | 6/8/2020 Europe / Belgium / Ransart             |
| EPI_ISL_462238 | 3/30/2020 | 6/8/2020 Europe / Belgium / Mariakerke          |
| EPI_ISL_462239 | 3/30/2020 | 6/8/2020 Europe / Belgium / Lovendegem          |
| EPI_ISL_462240 | 3/29/2020 | 6/8/2020 Europe / Belgium / Kalken              |
| EPI_ISL_462241 | 3/30/2020 | 6/8/2020 Europe / Belgium / Gentbrugge          |
| EPI_ISL_462242 | 3/28/2020 | 6/8/2020 Europe / Belgium / Overpelt            |
| EPI_ISL_462243 | 3/29/2020 | 6/8/2020 Europe / Belgium / Lommel              |
| EPI_ISL_462244 | 3/27/2020 | 6/8/2020 Europe / Belgium / Heppen              |
| EPI_ISL_462245 | 3/26/2020 | 6/8/2020 Europe / Belgium / Grote-Brogel        |
| EPI_ISL_462246 | 3/29/2020 | 6/8/2020 Europe / Belgium / Bocholt             |
| EPI_ISL_462247 | 4/7/2020  | 6/8/2020 Europe / Belgium / Hasselt             |
| EPI_ISL_462248 | 4/7/2020  | 6/8/2020 Europe / Belgium / Berg                |
| EPI_ISL_462249 | 4/7/2020  | 6/8/2020 Europe / Belgium / Kermt               |
| EPI_ISL_462250 | 4/7/2020  | 6/8/2020 Europe / Belgium / Deurne              |
| EPI_ISL_462251 | 4/7/2020  | 6/8/2020 Europe / Belgium / Zonhoven            |
| EPI_ISL_462252 | 4/6/2020  | 6/8/2020 Europe / Belgium / Lippelo             |
| EPI_ISL_462253 | 4/8/2020  | 6/8/2020 Europe / Belgium / Buggenhout          |
| EPI_ISL_462254 | 4/6/2020  | 6/8/2020 Europe / Belgium / Hamme               |
| EPI_ISL_462255 | 3/12/2020 | 6/8/2020 Europe / Belgium / Alken               |
| EPI_ISL_462256 | 3/25/2020 | 6/8/2020 Europe / Belgium / Aiseau              |
| EPI_ISL_462257 | 4/7/2020  | 6/8/2020 Europe / Belgium / Anderlecht          |
| EPI_ISL_462258 | 4/7/2020  | 6/8/2020 Europe / Belgium / Sint-Jans-Molenbeek |
| EPI_ISL_462259 | 4/7/2020  | 6/8/2020 Europe / Belgium / Watermaal-Bosvoorde |
| EPI_ISL_462260 | 4/9/2020  | 6/8/2020 Europe / Belgium / Ere                 |
| EPI_ISL_462261 | 4/9/2020  | 6/8/2020 Europe / Belgium / Wezembeek-Oppem     |
| EPI_ISL_462262 | 4/11/2020 | 6/8/2020 Europe / Belgium / Lessines            |
| EPI_ISL_462263 | 3/23/2020 | 6/8/2020 Europe / Belgium / Antwerp             |
| EPI_ISL_462264 | 3/23/2020 | 6/8/2020 Europe / Belgium / Sint-Niklaas        |
| EPI_ISL_462265 | 3/22/2020 | 6/8/2020 Europe / Belgium / Beveren-Waas        |
| EPI_ISL_462266 | 4/8/2020  | 6/8/2020 Europe / Belgium / Basecles            |
| EPI_ISL_462267 | 4/8/2020  | 6/8/2020 Europe / Belgium / Roucourt            |
| EPI_ISL_462268 | 4/8/2020  | 6/8/2020 Europe / Belgium / Bazel               |
| EPI_ISL_462269 | 4/9/2020  | 6/8/2020 Europe / Belgium / Chatelet            |
| EPI_ISL_462270 | 5/6/2020  | 6/8/2020 Europe / Belgium / Bauffe              |
| EPI_ISL_462271 | 5/7/2020  | 6/8/2020 Europe / Belgium / Vorselaar           |
| EPI_ISL_462272 | 5/7/2020  | 6/8/2020 Europe / Belgium / Turnhout            |
| EPI_ISL_462273 | 5/7/2020  | 6/8/2020 Europe / Belgium / Oud-Turnhout        |
| EPI_ISL_462274 | 5/7/2020  | 6/8/2020 Europe / Belgium / Ravels              |
| EPI_ISL_462275 | 5/7/2020  | 6/8/2020 Europe / Belgium / Grobbendonk         |
| EPI_ISL_462276 | 4/15/2020 | 6/8/2020 Asia / Singapore                       |
| EPI_ISL_462277 | 3/19/2020 | 6/8/2020 Asia / Singapore                       |
| EPI_ISL_462278 | 3/19/2020 | 6/8/2020 Asia / Singapore                       |
| EPI_ISL_462279 | 3/19/2020 | 6/8/2020 Asia / Singapore                       |



|                |           |                           |
|----------------|-----------|---------------------------|
| EPI_ISL_462280 | 3/19/2020 | 6/8/2020 Asia / Singapore |
| EPI_ISL_462281 | 3/19/2020 | 6/8/2020 Asia / Singapore |
| EPI_ISL_462282 | 3/19/2020 | 6/8/2020 Asia / Singapore |
| EPI_ISL_462283 | 1/27/2020 | 6/8/2020 Asia / Singapore |
| EPI_ISL_462284 | 3/18/2020 | 6/8/2020 Asia / Singapore |
| EPI_ISL_462285 | 3/19/2020 | 6/8/2020 Asia / Singapore |
| EPI_ISL_462286 | 3/20/2020 | 6/8/2020 Asia / Singapore |
| EPI_ISL_462287 | 3/14/2020 | 6/8/2020 Asia / Singapore |
| EPI_ISL_462288 | 4/15/2020 | 6/8/2020 Asia / Singapore |
| EPI_ISL_462290 | 3/19/2020 | 6/8/2020 Asia / Singapore |
| EPI_ISL_462291 | 3/19/2020 | 6/8/2020 Asia / Singapore |
| EPI_ISL_462292 | 3/17/2020 | 6/8/2020 Asia / Singapore |
| EPI_ISL_462293 | 2/9/2020  | 6/8/2020 Asia / Singapore |
| EPI_ISL_462295 | 3/21/2020 | 6/8/2020 Asia / Singapore |
| EPI_ISL_462296 | 3/21/2020 | 6/8/2020 Asia / Singapore |
| EPI_ISL_462297 | 3/21/2020 | 6/8/2020 Asia / Singapore |
| EPI_ISL_462298 | 3/21/2020 | 6/8/2020 Asia / Singapore |
| EPI_ISL_462299 | 3/21/2020 | 6/8/2020 Asia / Singapore |
| EPI_ISL_462300 | 3/21/2020 | 6/8/2020 Asia / Singapore |
| EPI_ISL_462301 | 3/21/2020 | 6/8/2020 Asia / Singapore |
| EPI_ISL_462302 | 4/27/2020 | 6/8/2020 Asia / Singapore |
| EPI_ISL_462303 | 4/28/2020 | 6/8/2020 Asia / Singapore |
| EPI_ISL_462305 | 2/27/2020 | 6/8/2020 Asia / Singapore |
| EPI_ISL_462306 | 2/14/2020 | 6/8/2020 Asia / Singapore |
| EPI_ISL_462307 | 4/20/2020 | 6/8/2020 Asia / Singapore |
| EPI_ISL_462308 | 4/20/2020 | 6/8/2020 Asia / Singapore |
| EPI_ISL_462309 | 4/20/2020 | 6/8/2020 Asia / Singapore |
| EPI_ISL_462310 | 4/20/2020 | 6/8/2020 Asia / Singapore |
| EPI_ISL_462311 | 4/20/2020 | 6/8/2020 Asia / Singapore |
| EPI_ISL_462312 | 4/20/2020 | 6/8/2020 Asia / Singapore |
| EPI_ISL_462313 | 4/20/2020 | 6/8/2020 Asia / Singapore |
| EPI_ISL_462314 | 4/20/2020 | 6/8/2020 Asia / Singapore |
| EPI_ISL_462315 | 4/22/2020 | 6/8/2020 Asia / Singapore |
| EPI_ISL_462316 | 4/23/2020 | 6/8/2020 Asia / Singapore |
| EPI_ISL_462317 | 4/23/2020 | 6/8/2020 Asia / Singapore |
| EPI_ISL_462318 | 4/23/2020 | 6/8/2020 Asia / Singapore |
| EPI_ISL_462319 | 4/24/2020 | 6/8/2020 Asia / Singapore |
| EPI_ISL_462320 | 4/25/2020 | 6/8/2020 Asia / Singapore |
| EPI_ISL_462321 | 4/27/2020 | 6/8/2020 Asia / Singapore |
| EPI_ISL_462322 | 4/27/2020 | 6/8/2020 Asia / Singapore |
| EPI_ISL_462323 | 4/28/2020 | 6/8/2020 Asia / Singapore |
| EPI_ISL_462324 | 4/28/2020 | 6/8/2020 Asia / Singapore |
| EPI_ISL_462325 | 4/29/2020 | 6/8/2020 Asia / Singapore |
| EPI_ISL_462326 | 4/29/2020 | 6/8/2020 Asia / Singapore |
| EPI_ISL_462328 | 3/9/2020  | 6/8/2020 Asia / Singapore |
| EPI_ISL_462338 | 3/6/2020  | 6/8/2020 Asia / Singapore |
| EPI_ISL_462340 | 4/7/2020  | 6/8/2020 Asia / Singapore |

|                |           |                           |
|----------------|-----------|---------------------------|
| EPI_ISL_462341 | 3/30/2020 | 6/8/2020 Asia / Singapore |
| EPI_ISL_462342 | 3/30/2020 | 6/8/2020 Asia / Singapore |
| EPI_ISL_462343 | 4/20/2020 | 6/8/2020 Asia / Singapore |
| EPI_ISL_462344 | 4/19/2020 | 6/8/2020 Asia / Singapore |
| EPI_ISL_462345 | 3/26/2020 | 6/8/2020 Asia / Singapore |
| EPI_ISL_462346 | 3/30/2020 | 6/8/2020 Asia / Singapore |
| EPI_ISL_462347 | 4/14/2020 | 6/8/2020 Asia / Singapore |
| EPI_ISL_462348 | 4/6/2020  | 6/8/2020 Asia / Singapore |
| EPI_ISL_462349 | 3/27/2020 | 6/8/2020 Asia / Singapore |
| EPI_ISL_462350 | 3/31/2020 | 6/8/2020 Asia / Singapore |
| EPI_ISL_462351 | 3/26/2020 | 6/8/2020 Asia / Singapore |
| EPI_ISL_462352 | 4/9/2020  | 6/8/2020 Asia / Singapore |
| EPI_ISL_462353 | 4/7/2020  | 6/8/2020 Asia / Singapore |
| EPI_ISL_462354 | 4/7/2020  | 6/8/2020 Asia / Singapore |
| EPI_ISL_462355 | 4/3/2020  | 6/8/2020 Asia / Singapore |
| EPI_ISL_462356 | 4/7/2020  | 6/8/2020 Asia / Singapore |
| EPI_ISL_462357 | 4/6/2020  | 6/8/2020 Asia / Singapore |
| EPI_ISL_462358 | 3/24/2020 | 6/8/2020 Asia / Singapore |
| EPI_ISL_462359 | 3/24/2020 | 6/8/2020 Asia / Singapore |
| EPI_ISL_462360 | 4/2/2020  | 6/8/2020 Asia / Singapore |
| EPI_ISL_462361 | 4/30/2020 | 6/8/2020 Asia / Singapore |
| EPI_ISL_462369 | 3/21/2020 | 6/8/2020 Asia / Singapore |
| EPI_ISL_462370 | 3/21/2020 | 6/8/2020 Asia / Singapore |
| EPI_ISL_462371 | 3/21/2020 | 6/8/2020 Asia / Singapore |
| EPI_ISL_462372 | 5/15/2020 | 6/8/2020 Asia / Singapore |
| EPI_ISL_462373 | 3/10/2020 | 6/8/2020 Asia / Singapore |
| EPI_ISL_462374 | 4/8/2020  | 6/8/2020 Asia / Singapore |
| EPI_ISL_462375 | 4/9/2020  | 6/8/2020 Asia / Singapore |
| EPI_ISL_462376 | 3/21/2020 | 6/8/2020 Asia / Singapore |
| EPI_ISL_462377 | 4/7/2020  | 6/8/2020 Asia / Singapore |
| EPI_ISL_462378 | 4/6/2020  | 6/8/2020 Asia / Singapore |
| EPI_ISL_462379 | 4/9/2020  | 6/8/2020 Asia / Singapore |
| EPI_ISL_462380 | 4/14/2020 | 6/8/2020 Asia / Singapore |
| EPI_ISL_462381 | 4/9/2020  | 6/8/2020 Asia / Singapore |
| EPI_ISL_462382 | 5/6/2020  | 6/8/2020 Asia / Singapore |
| EPI_ISL_462383 | 4/7/2020  | 6/8/2020 Asia / Singapore |
| EPI_ISL_462384 | 4/7/2020  | 6/8/2020 Asia / Singapore |
| EPI_ISL_462385 | 3/21/2020 | 6/8/2020 Asia / Singapore |
| EPI_ISL_462386 | 3/21/2020 | 6/8/2020 Asia / Singapore |
| EPI_ISL_462387 | 3/17/2020 | 6/8/2020 Asia / Singapore |
| EPI_ISL_462388 | 4/14/2020 | 6/8/2020 Asia / Singapore |
| EPI_ISL_462389 | 3/20/2020 | 6/8/2020 Asia / Singapore |
| EPI_ISL_462390 | 3/21/2020 | 6/8/2020 Asia / Singapore |
| EPI_ISL_462391 | 3/21/2020 | 6/8/2020 Asia / Singapore |
| EPI_ISL_462392 | 3/21/2020 | 6/8/2020 Asia / Singapore |
| EPI_ISL_462393 | 5/6/2020  | 6/8/2020 Asia / Singapore |
| EPI_ISL_462394 | 4/14/2020 | 6/8/2020 Asia / Singapore |

|                |           |                                                            |
|----------------|-----------|------------------------------------------------------------|
| EPI_ISL_462395 | 4/8/2020  | 6/8/2020 Asia / Singapore                                  |
| EPI_ISL_462396 | 3/21/2020 | 6/8/2020 Asia / Singapore                                  |
| EPI_ISL_462397 | 4/17/2020 | 6/8/2020 Asia / Singapore                                  |
| EPI_ISL_462398 | 4/8/2020  | 6/8/2020 Asia / Singapore                                  |
| EPI_ISL_462399 | 4/14/2020 | 6/8/2020 Asia / Singapore                                  |
| EPI_ISL_462400 | 4/9/2020  | 6/8/2020 Asia / Singapore                                  |
| EPI_ISL_462401 | 3/17/2020 | 6/8/2020 Asia / Singapore                                  |
| EPI_ISL_462402 | 4/9/2020  | 6/8/2020 Asia / Singapore                                  |
| EPI_ISL_462403 | 4/14/2020 | 6/8/2020 Asia / Singapore                                  |
| EPI_ISL_462404 | 3/21/2020 | 6/8/2020 Asia / Singapore                                  |
| EPI_ISL_462405 | 3/18/2020 | 6/8/2020 Asia / Singapore                                  |
| EPI_ISL_462406 | 4/30/2020 | 6/8/2020 Asia / Singapore                                  |
| EPI_ISL_462407 | 4/6/2020  | 6/8/2020 Asia / Singapore                                  |
| EPI_ISL_462408 | 4/14/2020 | 6/8/2020 Asia / Singapore                                  |
| EPI_ISL_462409 | 3/17/2020 | 6/8/2020 Asia / Singapore                                  |
| EPI_ISL_462410 | 3/20/2020 | 6/8/2020 Asia / Singapore                                  |
| EPI_ISL_462411 | 4/30/2020 | 6/8/2020 Asia / Singapore                                  |
| EPI_ISL_462412 | 5/3/2020  | 6/8/2020 Asia / Singapore                                  |
| EPI_ISL_462413 | 4/7/2020  | 6/8/2020 Asia / Singapore                                  |
| EPI_ISL_462414 | 4/9/2020  | 6/8/2020 Asia / Singapore                                  |
| EPI_ISL_462415 | 3/20/2020 | 6/8/2020 Asia / Singapore                                  |
| EPI_ISL_462416 | 3/16/2020 | 6/8/2020 Asia / Singapore                                  |
| EPI_ISL_462417 | 4/14/2020 | 6/8/2020 Asia / Singapore                                  |
| EPI_ISL_462418 | 4/1/2020  | 6/8/2020 Asia / Singapore                                  |
| EPI_ISL_462419 | 4/6/2020  | 6/8/2020 Asia / Singapore                                  |
| EPI_ISL_462420 | 3/21/2020 | 6/8/2020 Asia / Singapore                                  |
| EPI_ISL_462421 | 4/6/2020  | 6/8/2020 Asia / Singapore                                  |
| EPI_ISL_462422 | 3/21/2020 | 6/8/2020 Asia / Singapore                                  |
| EPI_ISL_462423 | 4/14/2020 | 6/8/2020 Asia / Singapore                                  |
| EPI_ISL_462424 | 4/14/2020 | 6/8/2020 Asia / Singapore                                  |
| EPI_ISL_462425 | 4/14/2020 | 6/8/2020 Asia / Singapore                                  |
| EPI_ISL_462426 | 4/14/2020 | 6/8/2020 Asia / Singapore                                  |
| EPI_ISL_462427 | 5/15/2020 | 6/8/2020 Asia / Singapore                                  |
| EPI_ISL_462428 | 4/6/2020  | 6/8/2020 Asia / Singapore                                  |
| EPI_ISL_462429 | 3/17/2020 | 6/8/2020 Asia / Singapore                                  |
| EPI_ISL_462430 | 4/14/2020 | 6/8/2020 Asia / Singapore                                  |
| EPI_ISL_462431 | 3/21/2020 | 6/8/2020 Asia / Singapore                                  |
| EPI_ISL_462432 | 3/17/2020 | 6/8/2020 Asia / Singapore                                  |
| EPI_ISL_462433 | 2/19/2020 | 6/8/2020 Asia / Singapore                                  |
| EPI_ISL_462447 | 3/22/2020 | 6/8/2020 Europe / Spain / Catalunya / Barcelona / Igualada |
| EPI_ISL_462448 | 3/24/2020 | 6/8/2020 Europe / Spain / Cataluna / Barcelona / MatarÃ³   |
| EPI_ISL_462449 | 3/20/2020 | 6/8/2020 Europe / Spain / Catalunya / Barcelona / Igualada |
| EPI_ISL_462450 | 3/17/2020 | 6/8/2020 Europe / Bosnia and Herzegovina / Bihac           |
| EPI_ISL_462451 | 3/19/2020 | 6/8/2020 Europe / Bosnia and Herzegovina / Bihac           |
| EPI_ISL_462452 | 3/19/2020 | 6/8/2020 Europe / Bosnia and Herzegovina / Gorazde         |
| EPI_ISL_462453 | 3/20/2020 | 6/8/2020 Europe / Bosnia and Herzegovina / Gorazde         |
| EPI_ISL_462454 | 3/20/2020 | 6/8/2020 Europe / Bosnia and Herzegovina / Gorazde         |

|                |           |                                                         |
|----------------|-----------|---------------------------------------------------------|
| EPI_ISL_462455 | 3/20/2020 | 6/8/2020 Europe / Bosnia and Herzegovina / Sarajevo     |
| EPI_ISL_462456 | 3/20/2020 | 6/8/2020 Europe / Bosnia and Herzegovina / Sarajevo     |
| EPI_ISL_462457 | 3/20/2020 | 6/8/2020 Europe / Bosnia and Herzegovina / Sarajevo     |
| EPI_ISL_462458 | 3/21/2020 | 6/8/2020 Europe / Bosnia and Herzegovina / Bihac        |
| EPI_ISL_462459 | 3/21/2020 | 6/8/2020 Europe / Bosnia and Herzegovina / Novi Travnik |
| EPI_ISL_462460 | 3/22/2020 | 6/8/2020 Europe / Bosnia and Herzegovina / Gorazde      |
| EPI_ISL_462461 | 4/11/2020 | 6/8/2020 Europe / Bosnia and Herzegovina / Maglaj       |
| EPI_ISL_462462 | 3/23/2020 | 6/8/2020 Europe / Bosnia and Herzegovina / Breza        |
| EPI_ISL_462463 | 3/25/2020 | 6/8/2020 Europe / Bosnia and Herzegovina                |
| EPI_ISL_462464 | 3/25/2020 | 6/8/2020 Europe / Bosnia and Herzegovina / Ilidza       |
| EPI_ISL_462465 | 3/25/2020 | 6/8/2020 Europe / Bosnia and Herzegovina / Ilidza       |
| EPI_ISL_462466 | 4/21/2020 | 6/8/2020 Europe / Bosnia and Herzegovina / Cazin        |
| EPI_ISL_462467 | 3/26/2020 | 6/8/2020 Europe / Bosnia and Herzegovina / Gorazde      |
| EPI_ISL_462468 | 3/27/2020 | 6/8/2020 Europe / Bosnia and Herzegovina / Bihac        |
| EPI_ISL_462469 | 3/27/2020 | 6/8/2020 Europe / Bosnia and Herzegovina / Sarajevo     |
| EPI_ISL_462470 | 4/22/2020 | 6/8/2020 Europe / Bosnia and Herzegovina / Sarajevo     |
| EPI_ISL_462471 | 3/28/2020 | 6/8/2020 Europe / Bosnia and Herzegovina / Ilijas       |
| EPI_ISL_462472 | 4/1/2020  | 6/8/2020 Europe / Bosnia and Herzegovina / DZ Vitez     |
| EPI_ISL_462473 | 3/29/2020 | 6/8/2020 Europe / Bosnia and Herzegovina / Zepce        |
| EPI_ISL_462474 | 3/29/2020 | 6/8/2020 Europe / Bosnia and Herzegovina / Gornji Vakuf |
| EPI_ISL_462475 | 3/30/2020 | 6/8/2020 Europe / Bosnia and Herzegovina / KZ Kakanj    |
| EPI_ISL_462476 | 3/29/2020 | 6/8/2020 Europe / Bosnia and Herzegovina                |
| EPI_ISL_462478 | 3/6/2020  | 6/8/2020 Europe / Spain / Madrid                        |
| EPI_ISL_462479 | 3/2/2020  | 6/8/2020 Europe / Spain / Catalunya                     |
| EPI_ISL_462480 | 5/13/2020 | 6/8/2020 Europe / Poland / Wielkopolska                 |
| EPI_ISL_462673 | 4/30/2020 | 6/8/2020 North America / USA / Michigan                 |
| EPI_ISL_462674 | 4/30/2020 | 6/8/2020 North America / USA / Michigan                 |
| EPI_ISL_462675 | 4/29/2020 | 6/8/2020 North America / USA / Michigan                 |
| EPI_ISL_462678 | 4/29/2020 | 6/8/2020 North America / USA / Michigan                 |
| EPI_ISL_462679 | 4/29/2020 | 6/8/2020 North America / USA / Michigan                 |
| EPI_ISL_462680 | 4/29/2020 | 6/8/2020 North America / USA / Michigan                 |
| EPI_ISL_462681 | 5/1/2020  | 6/8/2020 North America / USA / Michigan                 |
| EPI_ISL_462683 | 4/29/2020 | 6/8/2020 North America / USA / Michigan                 |
| EPI_ISL_462684 | 4/30/2020 | 6/8/2020 North America / USA / Michigan                 |
| EPI_ISL_462685 | 4/29/2020 | 6/8/2020 North America / USA / Michigan                 |
| EPI_ISL_462686 | 4/29/2020 | 6/8/2020 North America / USA / Michigan                 |
| EPI_ISL_462687 | 4/29/2020 | 6/8/2020 North America / USA / Michigan                 |
| EPI_ISL_462688 | 4/29/2020 | 6/8/2020 North America / USA / Michigan                 |
| EPI_ISL_462689 | 4/29/2020 | 6/8/2020 North America / USA / Michigan                 |
| EPI_ISL_462690 | 4/30/2020 | 6/8/2020 North America / USA / Michigan                 |
| EPI_ISL_462691 | 4/30/2020 | 6/8/2020 North America / USA / Michigan                 |
| EPI_ISL_462692 | 4/30/2020 | 6/8/2020 North America / USA / Michigan                 |
| EPI_ISL_462693 | 4/30/2020 | 6/8/2020 North America / USA / Michigan                 |
| EPI_ISL_462694 | 4/29/2020 | 6/8/2020 North America / USA / Michigan                 |
| EPI_ISL_462695 | 4/30/2020 | 6/8/2020 North America / USA / Michigan                 |
| EPI_ISL_462696 | 4/30/2020 | 6/8/2020 North America / USA / Michigan                 |
| EPI_ISL_462697 | 4/29/2020 | 6/8/2020 North America / USA / Michigan                 |







|                |           |                                                               |
|----------------|-----------|---------------------------------------------------------------|
| EPI_ISL_462904 | 5/14/2020 | 6/8/2020 North America / USA / Minnesota                      |
| EPI_ISL_462905 | 5/14/2020 | 6/8/2020 North America / USA / Minnesota                      |
| EPI_ISL_462906 | 5/14/2020 | 6/8/2020 North America / USA / Minnesota                      |
| EPI_ISL_462907 | 5/14/2020 | 6/8/2020 North America / USA / Minnesota                      |
| EPI_ISL_462908 | 5/14/2020 | 6/8/2020 North America / USA / Minnesota                      |
| EPI_ISL_462909 | 5/14/2020 | 6/8/2020 North America / USA / Minnesota                      |
| EPI_ISL_462910 | 5/14/2020 | 6/8/2020 North America / USA / Minnesota                      |
| EPI_ISL_462911 | 5/14/2020 | 6/8/2020 North America / USA / Minnesota                      |
| EPI_ISL_462912 | 3/24/2020 | 6/8/2020 North America / USA / Colorado                       |
| EPI_ISL_462915 | 3/20/2020 | 6/8/2020 North America / USA / Wyoming                        |
| EPI_ISL_462917 | 3/22/2020 | 6/8/2020 North America / USA / Wyoming                        |
| EPI_ISL_462918 | 3/24/2020 | 6/8/2020 North America / USA / Wyoming                        |
| EPI_ISL_462919 | 3/21/2020 | 6/8/2020 North America / USA / Wyoming                        |
| EPI_ISL_462924 | 3/23/2020 | 6/8/2020 North America / USA / Wyoming                        |
| EPI_ISL_462927 | 3/24/2020 | 6/8/2020 North America / USA / Wyoming                        |
| EPI_ISL_462929 | 3/25/2020 | 6/8/2020 North America / USA / Wyoming                        |
| EPI_ISL_462932 | 3/24/2020 | 6/8/2020 North America / USA / Wyoming                        |
| EPI_ISL_462933 | 3/24/2020 | 6/8/2020 North America / USA / Wyoming                        |
| EPI_ISL_462935 | 3/25/2020 | 6/8/2020 North America / USA / Wyoming                        |
| EPI_ISL_462936 | 3/25/2020 | 6/8/2020 North America / USA / Wyoming                        |
| EPI_ISL_462940 | 3/25/2020 | 6/8/2020 North America / USA / Wyoming                        |
| EPI_ISL_462952 | 3/26/2020 | 6/8/2020 North America / USA / Wyoming                        |
| EPI_ISL_462956 | 3/25/2020 | 6/8/2020 North America / USA / Wyoming                        |
| EPI_ISL_462957 | 3/26/2020 | 6/8/2020 North America / USA / Wyoming                        |
| EPI_ISL_462958 | 3/27/2020 | 6/8/2020 North America / USA / Wyoming                        |
| EPI_ISL_462965 | 3/28/2020 | 6/8/2020 North America / USA / Wyoming                        |
| EPI_ISL_462966 | 3/27/2020 | 6/8/2020 North America / USA / Wyoming                        |
| EPI_ISL_462969 | 3/27/2020 | 6/8/2020 North America / USA / Wyoming                        |
| EPI_ISL_462975 | 3/30/2020 | 6/8/2020 North America / USA / Wyoming                        |
| EPI_ISL_462976 | 3/30/2020 | 6/8/2020 North America / USA / Wyoming                        |
| EPI_ISL_462977 | 3/30/2020 | 6/8/2020 North America / USA / Wyoming                        |
| EPI_ISL_462979 | 3/30/2020 | 6/8/2020 North America / USA / Wyoming                        |
| EPI_ISL_462982 | 3/30/2020 | 6/8/2020 North America / USA / Wyoming                        |
| EPI_ISL_462991 | 5/11/2020 | 6/8/2020 North America / USA / South Carolina                 |
| EPI_ISL_462992 | 2020-03   | 6/8/2020 Africa / Nigeria                                     |
| EPI_ISL_463007 | 4/12/2020 | 6/9/2020 Asia / Taiwan / Taipei                               |
| EPI_ISL_463008 | 3/11/2020 | 6/9/2020 Europe / Germany / North Rhine-Westphalia / MÅ¼nster |
| EPI_ISL_463010 | 5/7/2020  | 6/9/2020 Asia / India / Odisha                                |
| EPI_ISL_463013 | 5/9/2020  | 6/9/2020 Asia / India / Odisha                                |
| EPI_ISL_463014 | 5/9/2020  | 6/9/2020 Asia / India / Odisha                                |
| EPI_ISL_463017 | 5/9/2020  | 6/9/2020 Asia / India / Odisha                                |
| EPI_ISL_463018 | 5/9/2020  | 6/9/2020 Asia / India / Odisha                                |
| EPI_ISL_463019 | 5/9/2020  | 6/9/2020 Asia / India / Odisha                                |
| EPI_ISL_463020 | 5/9/2020  | 6/9/2020 Asia / India / Odisha                                |
| EPI_ISL_463022 | 5/9/2020  | 6/9/2020 Asia / India / Odisha                                |
| EPI_ISL_463023 | 5/9/2020  | 6/9/2020 Asia / India / Odisha                                |
| EPI_ISL_463024 | 5/10/2020 | 6/9/2020 Asia / India / Odisha                                |



|                |           |                                         |
|----------------|-----------|-----------------------------------------|
| EPI_ISL_463025 | 5/10/2020 | 6/9/2020 Asia / India / Odisha          |
| EPI_ISL_463026 | 5/10/2020 | 6/9/2020 Asia / India / Odisha          |
| EPI_ISL_463027 | 5/9/2020  | 6/9/2020 Asia / India / Odisha          |
| EPI_ISL_463029 | 5/11/2020 | 6/9/2020 Asia / India / Odisha          |
| EPI_ISL_463031 | 5/10/2020 | 6/9/2020 Asia / India / Odisha          |
| EPI_ISL_463032 | 5/10/2020 | 6/9/2020 Asia / India / Odisha          |
| EPI_ISL_463033 | 5/10/2020 | 6/9/2020 Asia / India / Odisha          |
| EPI_ISL_463034 | 5/10/2020 | 6/9/2020 Asia / India / Odisha          |
| EPI_ISL_463036 | 5/11/2020 | 6/9/2020 Asia / India / Odisha          |
| EPI_ISL_463037 | 5/11/2020 | 6/9/2020 Asia / India / Odisha          |
| EPI_ISL_463038 | 5/11/2020 | 6/9/2020 Asia / India / Odisha          |
| EPI_ISL_463039 | 5/11/2020 | 6/9/2020 Asia / India / Odisha          |
| EPI_ISL_463041 | 5/11/2020 | 6/9/2020 Asia / India / Odisha          |
| EPI_ISL_463043 | 5/11/2020 | 6/9/2020 Asia / India / Odisha          |
| EPI_ISL_463049 | 5/12/2020 | 6/9/2020 Asia / India / Odisha          |
| EPI_ISL_463051 | 5/12/2020 | 6/9/2020 Asia / India / Odisha          |
| EPI_ISL_463052 | 5/12/2020 | 6/9/2020 Asia / India / Odisha          |
| EPI_ISL_463054 | 5/11/2020 | 6/9/2020 Asia / India / Odisha          |
| EPI_ISL_463056 | 5/12/2020 | 6/9/2020 Asia / India / Odisha          |
| EPI_ISL_463058 | 5/13/2020 | 6/9/2020 Asia / India / Odisha          |
| EPI_ISL_463060 | 5/13/2020 | 6/9/2020 Asia / India / Odisha          |
| EPI_ISL_463061 | 5/13/2020 | 6/9/2020 Asia / India / Odisha          |
| EPI_ISL_463063 | 5/13/2020 | 6/9/2020 Asia / India / Odisha          |
| EPI_ISL_463064 | 5/16/2020 | 6/9/2020 Asia / India / Odisha          |
| EPI_ISL_463067 | 5/14/2020 | 6/9/2020 Asia / India / Odisha          |
| EPI_ISL_463073 | 5/5/2020  | 6/9/2020 Asia / India / Odisha          |
| EPI_ISL_463076 | 5/15/2020 | 6/9/2020 Asia / India / Odisha          |
| EPI_ISL_463078 | 5/15/2020 | 6/9/2020 Asia / India / Odisha          |
| EPI_ISL_463081 | 5/15/2020 | 6/9/2020 Asia / India / Odisha          |
| EPI_ISL_463085 | 5/16/2020 | 6/9/2020 Asia / India / Odisha          |
| EPI_ISL_463087 | 5/18/2020 | 6/9/2020 Asia / India / Odisha          |
| EPI_ISL_463088 | 5/18/2020 | 6/9/2020 Asia / India / Odisha          |
| EPI_ISL_463089 | 5/18/2020 | 6/9/2020 Asia / India / Odisha          |
| EPI_ISL_463094 | 4/22/2020 | 6/9/2020 North America / USA / Virginia |
| EPI_ISL_463095 | 4/21/2020 | 6/9/2020 North America / USA / Virginia |
| EPI_ISL_463096 | 4/23/2020 | 6/9/2020 North America / USA / Virginia |
| EPI_ISL_463098 | 4/27/2020 | 6/9/2020 North America / USA / Virginia |
| EPI_ISL_463099 | 4/27/2020 | 6/9/2020 North America / USA / Virginia |
| EPI_ISL_463100 | 4/30/2020 | 6/9/2020 North America / USA / Virginia |
| EPI_ISL_463101 | 4/30/2020 | 6/9/2020 North America / USA / Virginia |
| EPI_ISL_463103 | 5/18/2020 | 6/9/2020 North America / USA / Virginia |
| EPI_ISL_463104 | 5/18/2020 | 6/9/2020 North America / USA / Virginia |
| EPI_ISL_463105 | 5/18/2020 | 6/9/2020 North America / USA / Virginia |
| EPI_ISL_463106 | 5/18/2020 | 6/9/2020 North America / USA / Virginia |
| EPI_ISL_463107 | 5/18/2020 | 6/9/2020 North America / USA / Virginia |
| EPI_ISL_463108 | 5/18/2020 | 6/9/2020 North America / USA / Virginia |
| EPI_ISL_463109 | 5/18/2020 | 6/9/2020 North America / USA / Virginia |

|                |           |                                                                     |
|----------------|-----------|---------------------------------------------------------------------|
| EPI_ISL_463110 | 5/18/2020 | 6/9/2020 North America / USA / Virginia                             |
| EPI_ISL_463111 | 5/18/2020 | 6/9/2020 North America / USA / Virginia                             |
| EPI_ISL_463112 | 5/18/2020 | 6/9/2020 North America / USA / Virginia                             |
| EPI_ISL_463113 | 5/18/2020 | 6/9/2020 North America / USA / Virginia                             |
| EPI_ISL_463114 | 5/8/2020  | 6/9/2020 North America / USA / Virginia                             |
| EPI_ISL_463115 | 5/8/2020  | 6/9/2020 North America / USA / Virginia                             |
| EPI_ISL_463116 | 5/8/2020  | 6/9/2020 North America / USA / Virginia                             |
| EPI_ISL_463117 | 5/8/2020  | 6/9/2020 North America / USA / Virginia                             |
| EPI_ISL_463118 | 5/8/2020  | 6/9/2020 North America / USA / Virginia                             |
| EPI_ISL_463119 | 5/8/2020  | 6/9/2020 North America / USA / Virginia                             |
| EPI_ISL_463120 | 5/8/2020  | 6/9/2020 North America / USA / Virginia                             |
| EPI_ISL_463121 | 5/11/2020 | 6/9/2020 North America / USA / Virginia                             |
| EPI_ISL_463122 | 5/12/2020 | 6/9/2020 North America / USA / Virginia                             |
| EPI_ISL_463123 | 5/12/2020 | 6/9/2020 North America / USA / Virginia                             |
| EPI_ISL_463124 | 4/30/2020 | 6/9/2020 North America / USA / Virginia                             |
| EPI_ISL_463125 | 5/12/2020 | 6/9/2020 North America / USA / Virginia                             |
| EPI_ISL_463126 | 4/30/2020 | 6/9/2020 North America / USA / Virginia                             |
| EPI_ISL_463127 | 5/8/2020  | 6/9/2020 North America / USA / Virginia                             |
| EPI_ISL_463128 | 5/8/2020  | 6/9/2020 North America / USA / Virginia                             |
| EPI_ISL_463129 | 5/8/2020  | 6/9/2020 North America / USA / Virginia                             |
| EPI_ISL_463130 | 5/12/2020 | 6/9/2020 North America / USA / Virginia                             |
| EPI_ISL_463131 | 5/11/2020 | 6/9/2020 North America / USA / Virginia                             |
| EPI_ISL_463132 | 5/12/2020 | 6/9/2020 North America / USA / Virginia                             |
| EPI_ISL_463133 | 5/12/2020 | 6/9/2020 North America / USA / Virginia                             |
| EPI_ISL_463134 | 5/13/2020 | 6/9/2020 North America / USA / Virginia                             |
| EPI_ISL_463135 | 5/13/2020 | 6/9/2020 North America / USA / Virginia                             |
| EPI_ISL_463136 | 5/13/2020 | 6/9/2020 North America / USA / Virginia                             |
| EPI_ISL_463137 | 5/13/2020 | 6/9/2020 North America / USA / Virginia                             |
| EPI_ISL_463138 | 3/30/2020 | 6/9/2020 North America / USA / Connecticut / New Haven County / Me  |
| EPI_ISL_463141 | 3/30/2020 | 6/9/2020 North America / USA / Connecticut / New Haven County / Bet |
| EPI_ISL_463151 | 3/31/2020 | 6/9/2020 North America / USA / Connecticut / New Haven County       |
| EPI_ISL_463156 | 3/31/2020 | 6/9/2020 North America / USA / Connecticut / New Haven County / Sey |
| EPI_ISL_463157 | 3/31/2020 | 6/9/2020 North America / USA / Connecticut / New Haven County / Har |
| EPI_ISL_463158 | 3/31/2020 | 6/9/2020 North America / USA / Connecticut / New Haven County       |
| EPI_ISL_463164 | 3/31/2020 | 6/9/2020 North America / USA / Connecticut / New Haven County       |
| EPI_ISL_605882 | 4/29/2020 | 6/9/2020 Asia / Bangladesh                                          |
| EPI_ISL_605883 | 4/29/2020 | 6/9/2020 Asia / Bangladesh                                          |
| EPI_ISL_605884 | 4/29/2020 | 6/9/2020 Asia / Bangladesh                                          |
| EPI_ISL_605885 | 4/29/2020 | 6/9/2020 Asia / Bangladesh                                          |
| EPI_ISL_605886 | 4/29/2020 | 6/9/2020 Asia / Bangladesh                                          |
| EPI_ISL_605887 | 4/29/2020 | 6/9/2020 Asia / Bangladesh                                          |
| EPI_ISL_605888 | 4/29/2020 | 6/9/2020 Asia / Bangladesh                                          |
| EPI_ISL_605889 | 4/29/2020 | 6/9/2020 Asia / Bangladesh                                          |
| EPI_ISL_605890 | 4/29/2020 | 6/9/2020 Asia / Bangladesh                                          |
| EPI_ISL_605891 | 4/29/2020 | 6/9/2020 Asia / Bangladesh                                          |
| EPI_ISL_605892 | 4/29/2020 | 6/9/2020 Asia / Bangladesh                                          |
| EPI_ISL_605893 | 4/29/2020 | 6/9/2020 Asia / Bangladesh                                          |





|                |           |           |                                                     |
|----------------|-----------|-----------|-----------------------------------------------------|
| EPI_ISL_463274 | 2020-03   | 6/10/2020 | North America / Canada / British Columbia           |
| EPI_ISL_463275 | 2020-03   | 6/10/2020 | North America / Canada / British Columbia           |
| EPI_ISL_463276 | 2020-03   | 6/10/2020 | North America / Canada / British Columbia           |
| EPI_ISL_463277 | 4/6/2020  | 6/10/2020 | North America / USA / Louisiana                     |
| EPI_ISL_463278 | 4/6/2020  | 6/10/2020 | North America / USA / Louisiana                     |
| EPI_ISL_463279 | 4/4/2020  | 6/10/2020 | North America / USA / Louisiana                     |
| EPI_ISL_463280 | 4/6/2020  | 6/10/2020 | North America / USA / Louisiana                     |
| EPI_ISL_463281 | 4/6/2020  | 6/10/2020 | North America / USA / Louisiana                     |
| EPI_ISL_463282 | 4/4/2020  | 6/10/2020 | North America / USA / Louisiana                     |
| EPI_ISL_463283 | 4/4/2020  | 6/10/2020 | North America / USA / Louisiana                     |
| EPI_ISL_463284 | 4/3/2020  | 6/10/2020 | North America / USA / Louisiana                     |
| EPI_ISL_463285 | 4/4/2020  | 6/10/2020 | North America / USA / Louisiana                     |
| EPI_ISL_463286 | 4/4/2020  | 6/10/2020 | North America / USA / Louisiana                     |
| EPI_ISL_463287 | 4/4/2020  | 6/10/2020 | North America / USA / Louisiana                     |
| EPI_ISL_463288 | 4/3/2020  | 6/10/2020 | North America / USA / Louisiana                     |
| EPI_ISL_463289 | 4/6/2020  | 6/10/2020 | North America / USA / Louisiana                     |
| EPI_ISL_463290 | 4/7/2020  | 6/10/2020 | North America / USA / Louisiana                     |
| EPI_ISL_463291 | 4/6/2020  | 6/10/2020 | North America / USA / Louisiana                     |
| EPI_ISL_463292 | 4/7/2020  | 6/10/2020 | North America / USA / Louisiana                     |
| EPI_ISL_463293 | 4/8/2020  | 6/10/2020 | North America / USA / Louisiana                     |
| EPI_ISL_463294 | 4/6/2020  | 6/10/2020 | North America / USA / Louisiana                     |
| EPI_ISL_463295 | 4/4/2020  | 6/10/2020 | North America / USA / Louisiana                     |
| EPI_ISL_463296 | 4/6/2020  | 6/10/2020 | North America / USA / Louisiana                     |
| EPI_ISL_463297 | 4/3/2020  | 6/10/2020 | North America / USA / Louisiana                     |
| EPI_ISL_463298 | 4/4/2020  | 6/10/2020 | North America / USA / Louisiana                     |
| EPI_ISL_463299 | 4/6/2020  | 6/10/2020 | North America / USA / Louisiana                     |
| EPI_ISL_463300 | 4/6/2020  | 6/10/2020 | North America / USA / Louisiana                     |
| EPI_ISL_463325 | 4/21/2020 | 6/10/2020 | North America / USA / Washington / King County      |
| EPI_ISL_463326 | 4/21/2020 | 6/10/2020 | North America / USA / Washington / Snohomish County |
| EPI_ISL_463327 | 4/20/2020 | 6/10/2020 | North America / USA / Washington / Franklin County  |
| EPI_ISL_463328 | 4/22/2020 | 6/10/2020 | North America / USA / Washington / Yakima County    |
| EPI_ISL_463329 | 4/21/2020 | 6/10/2020 | North America / USA / Washington / Yakima County    |
| EPI_ISL_463330 | 4/18/2020 | 6/10/2020 | North America / USA / Washington / Snohomish County |
| EPI_ISL_463331 | 4/21/2020 | 6/10/2020 | North America / USA / Washington / Franklin County  |
| EPI_ISL_463332 | 4/21/2020 | 6/10/2020 | North America / USA / Washington / Franklin County  |
| EPI_ISL_463333 | 4/22/2020 | 6/10/2020 | North America / USA / Washington / Cowlitz County   |
| EPI_ISL_463334 | 4/22/2020 | 6/10/2020 | North America / USA / Washington / Yakima County    |
| EPI_ISL_463335 | 4/23/2020 | 6/10/2020 | North America / USA / Washington / Yakima County    |
| EPI_ISL_463337 | 4/23/2020 | 6/10/2020 | North America / USA / Washington / Snohomish County |
| EPI_ISL_463338 | 4/23/2020 | 6/10/2020 | North America / USA / Washington / Yakima County    |
| EPI_ISL_463339 | 4/23/2020 | 6/10/2020 | North America / USA / Washington / Yakima County    |
| EPI_ISL_463340 | 4/23/2020 | 6/10/2020 | North America / USA / Washington / Yakima County    |
| EPI_ISL_463341 | 4/24/2020 | 6/10/2020 | North America / USA / Washington / Yakima County    |
| EPI_ISL_463342 | 4/24/2020 | 6/10/2020 | North America / USA / Washington / King County      |
| EPI_ISL_463343 | 4/24/2020 | 6/10/2020 | North America / USA / Washington / King County      |
| EPI_ISL_463344 | 4/24/2020 | 6/10/2020 | North America / USA / Washington / King County      |
| EPI_ISL_463346 | 4/24/2020 | 6/10/2020 | North America / USA / Washington / King County      |















|                |           |                                                               |
|----------------|-----------|---------------------------------------------------------------|
| EPI_ISL_463662 | 4/29/2020 | 6/10/2020 North America / USA / Washington / Pierce County    |
| EPI_ISL_463663 | 5/4/2020  | 6/10/2020 North America / USA / Washington / Skagit County    |
| EPI_ISL_463664 | 5/5/2020  | 6/10/2020 North America / USA / Washington / Yakima County    |
| EPI_ISL_463665 | 5/5/2020  | 6/10/2020 North America / USA / Washington / Yakima County    |
| EPI_ISL_463666 | 5/5/2020  | 6/10/2020 North America / USA / Washington / Yakima County    |
| EPI_ISL_463667 | 5/5/2020  | 6/10/2020 North America / USA / Washington / Yakima County    |
| EPI_ISL_463668 | 5/6/2020  | 6/10/2020 North America / USA / Washington / Snohomish County |
| EPI_ISL_463669 | 5/6/2020  | 6/10/2020 North America / USA / Washington / Monterey County  |
| EPI_ISL_463670 | 5/6/2020  | 6/10/2020 North America / USA / Washington / Yakima County    |
| EPI_ISL_463671 | 5/6/2020  | 6/10/2020 North America / USA / Washington / Yakima County    |
| EPI_ISL_463672 | 5/6/2020  | 6/10/2020 North America / USA / Washington / Yakima County    |
| EPI_ISL_463673 | 5/5/2020  | 6/10/2020 North America / USA / Washington / Snohomish County |
| EPI_ISL_463674 | 5/6/2020  | 6/10/2020 North America / USA / Washington / Snohomish County |
| EPI_ISL_463675 | 5/6/2020  | 6/10/2020 North America / USA / Washington / Yakima County    |
| EPI_ISL_463676 | 5/6/2020  | 6/10/2020 North America / USA / Washington / Yakima County    |
| EPI_ISL_463677 | 5/6/2020  | 6/10/2020 North America / USA / Washington / Yakima County    |
| EPI_ISL_463678 | 5/5/2020  | 6/10/2020 North America / USA / Washington / Yakima County    |
| EPI_ISL_463679 | 5/5/2020  | 6/10/2020 North America / USA / Washington / King County      |
| EPI_ISL_463680 | 5/5/2020  | 6/10/2020 North America / USA / Washington / Yakima County    |
| EPI_ISL_463681 | 5/5/2020  | 6/10/2020 North America / USA / Washington / Yakima County    |
| EPI_ISL_463682 | 5/5/2020  | 6/10/2020 North America / USA / Washington / Yakima County    |
| EPI_ISL_463684 | 5/5/2020  | 6/10/2020 North America / USA / Washington / Yakima County    |
| EPI_ISL_463686 | 5/6/2020  | 6/10/2020 North America / USA / Washington / Yakima County    |
| EPI_ISL_463687 | 5/6/2020  | 6/10/2020 North America / USA / Washington / Yakima County    |
| EPI_ISL_463688 | 5/6/2020  | 6/10/2020 North America / USA / Washington / Yakima County    |
| EPI_ISL_463689 | 5/6/2020  | 6/10/2020 North America / USA / Washington / Yakima County    |
| EPI_ISL_463690 | 5/6/2020  | 6/10/2020 North America / USA / Washington / Yakima County    |
| EPI_ISL_463691 | 5/7/2020  | 6/10/2020 North America / USA / Washington / Yakima County    |
| EPI_ISL_463692 | 5/7/2020  | 6/10/2020 North America / USA / Washington / Yakima County    |
| EPI_ISL_463694 | 5/6/2020  | 6/10/2020 North America / USA / Washington / Yakima County    |
| EPI_ISL_463696 | 5/6/2020  | 6/10/2020 North America / USA / Washington / Yakima County    |
| EPI_ISL_463697 | 5/7/2020  | 6/10/2020 North America / USA / Washington / Yakima County    |
| EPI_ISL_463698 | 5/7/2020  | 6/10/2020 North America / USA / Washington / Yakima County    |
| EPI_ISL_463699 | 5/7/2020  | 6/10/2020 North America / USA / Washington / Yakima County    |
| EPI_ISL_463700 | 5/7/2020  | 6/10/2020 North America / USA / Washington / Yakima County    |
| EPI_ISL_463701 | 5/7/2020  | 6/10/2020 North America / USA / Washington / Yakima County    |
| EPI_ISL_463702 | 5/7/2020  | 6/10/2020 North America / USA / Washington / Yakima County    |
| EPI_ISL_463703 | 5/7/2020  | 6/10/2020 North America / USA / Washington / Yakima County    |
| EPI_ISL_463704 | 5/7/2020  | 6/10/2020 North America / USA / Washington / Yakima County    |
| EPI_ISL_463705 | 5/7/2020  | 6/10/2020 North America / USA / Washington / Yakima County    |
| EPI_ISL_463740 | 3/30/2020 | 6/10/2020 Asia / United Arab Emirates                         |
| EPI_ISL_463741 | 3/11/2020 | 6/10/2020 Europe / Cyprus                                     |
| EPI_ISL_463742 | 3/22/2020 | 6/10/2020 Europe / Cyprus                                     |
| EPI_ISL_463743 | 3/25/2020 | 6/10/2020 Europe / Cyprus                                     |
| EPI_ISL_463744 | 3/23/2020 | 6/10/2020 Europe / Cyprus                                     |
| EPI_ISL_463745 | 4/1/2020  | 6/10/2020 Europe / Cyprus                                     |
| EPI_ISL_463746 | 4/11/2020 | 6/10/2020 Europe / Cyprus                                     |

|                |           |                                                       |
|----------------|-----------|-------------------------------------------------------|
| EPI_ISL_463747 | 4/17/2020 | 6/10/2020 Europe / Cyprus                             |
| EPI_ISL_463748 | 4/27/2020 | 6/10/2020 Europe / Cyprus                             |
| EPI_ISL_463889 | 1/27/2020 | 6/10/2020 Asia / China / Zhejiang / Shaoxing / Keqiao |
| EPI_ISL_463894 | 1/30/2020 | 6/10/2020 Asia / China / Zhejiang / Keqiao            |
| EPI_ISL_463895 | 1/30/2020 | 6/10/2020 Asia / China / Zhejiang / Keqiao            |
| EPI_ISL_463896 | 1/31/2020 | 6/10/2020 Asia / China / Zhejiang / Keqiao            |
| EPI_ISL_463897 | 1/31/2020 | 6/10/2020 Asia / China / Zhejiang / Keqiao            |
| EPI_ISL_463901 | 2/5/2020  | 6/10/2020 Asia / China / Zhejiang / Shangyu           |
| EPI_ISL_463904 | 4/5/2020  | 6/11/2020 North America / Canada / Quebec             |
| EPI_ISL_463905 | 4/8/2020  | 6/11/2020 North America / Canada / Quebec             |
| EPI_ISL_463906 | 4/6/2020  | 6/11/2020 North America / Canada / Quebec             |
| EPI_ISL_463908 | 4/6/2020  | 6/11/2020 North America / Canada / Quebec             |
| EPI_ISL_463909 | 4/7/2020  | 6/11/2020 North America / Canada / Quebec             |
| EPI_ISL_463910 | 4/5/2020  | 6/11/2020 North America / Canada / Quebec             |
| EPI_ISL_463912 | 4/6/2020  | 6/11/2020 North America / Canada / Quebec             |
| EPI_ISL_463913 | 4/11/2020 | 6/11/2020 North America / Canada / Quebec             |
| EPI_ISL_463914 | 4/13/2020 | 6/11/2020 North America / Canada / Quebec             |
| EPI_ISL_463917 | 4/9/2020  | 6/11/2020 North America / Canada / Quebec             |
| EPI_ISL_463918 | 4/7/2020  | 6/11/2020 North America / Canada / Quebec             |
| EPI_ISL_463919 | 4/8/2020  | 6/11/2020 North America / Canada / Quebec             |
| EPI_ISL_463920 | 4/9/2020  | 6/11/2020 North America / Canada / Quebec             |
| EPI_ISL_463922 | 4/9/2020  | 6/11/2020 North America / Canada / Quebec             |
| EPI_ISL_463923 | 4/9/2020  | 6/11/2020 North America / Canada / Quebec             |
| EPI_ISL_463927 | 4/2/2020  | 6/11/2020 North America / Canada / Quebec             |
| EPI_ISL_463928 | 4/1/2020  | 6/11/2020 North America / Canada / Quebec             |
| EPI_ISL_463929 | 4/3/2020  | 6/11/2020 North America / Canada / Quebec             |
| EPI_ISL_463930 | 4/2/2020  | 6/11/2020 North America / Canada / Quebec             |
| EPI_ISL_463931 | 4/4/2020  | 6/11/2020 North America / Canada / Quebec             |
| EPI_ISL_463933 | 4/1/2020  | 6/11/2020 North America / Canada / Quebec             |
| EPI_ISL_463934 | 4/5/2020  | 6/11/2020 North America / Canada / Quebec             |
| EPI_ISL_463936 | 4/2/2020  | 6/11/2020 North America / Canada / Quebec             |
| EPI_ISL_463940 | 3/31/2020 | 6/11/2020 North America / Canada / Quebec             |
| EPI_ISL_463941 | 4/6/2020  | 6/11/2020 North America / Canada / Quebec             |
| EPI_ISL_463942 | 4/3/2020  | 6/11/2020 North America / Canada / Quebec             |
| EPI_ISL_463943 | 4/4/2020  | 6/11/2020 North America / Canada / Quebec             |
| EPI_ISL_463946 | 4/3/2020  | 6/11/2020 North America / Canada / Quebec             |
| EPI_ISL_463947 | 4/4/2020  | 6/11/2020 North America / Canada / Quebec             |
| EPI_ISL_463948 | 4/6/2020  | 6/11/2020 North America / Canada / Quebec             |
| EPI_ISL_463953 | 4/13/2020 | 6/11/2020 North America / Canada / Quebec             |
| EPI_ISL_463954 | 4/12/2020 | 6/11/2020 North America / Canada / Quebec             |
| EPI_ISL_463956 | 4/12/2020 | 6/11/2020 North America / Canada / Quebec             |
| EPI_ISL_463957 | 4/11/2020 | 6/11/2020 North America / Canada / Quebec             |
| EPI_ISL_463959 | 4/11/2020 | 6/11/2020 North America / Canada / Quebec             |
| EPI_ISL_463961 | 4/14/2020 | 6/11/2020 North America / Canada / Quebec             |
| EPI_ISL_463962 | 4/7/2020  | 6/11/2020 North America / Canada / Quebec             |
| EPI_ISL_463963 | 4/13/2020 | 6/11/2020 North America / Canada / Quebec             |
| EPI_ISL_463965 | 4/13/2020 | 6/11/2020 North America / Canada / Quebec             |

|                |           |                                                      |
|----------------|-----------|------------------------------------------------------|
| EPI_ISL_463968 | 4/9/2020  | 6/11/2020 North America / Canada / Quebec            |
| EPI_ISL_463970 | 3/13/2020 | 6/11/2020 North America / Canada / Ontario / Toronto |
| EPI_ISL_463971 | 3/14/2020 | 6/11/2020 North America / Canada / Ontario / Toronto |
| EPI_ISL_463975 | 3/16/2020 | 6/11/2020 North America / Canada / Ontario / Toronto |
| EPI_ISL_463976 | 3/28/2020 | 6/11/2020 North America / Canada / Ontario / Toronto |
| EPI_ISL_463977 | 3/16/2020 | 6/11/2020 North America / Canada / Ontario / Toronto |
| EPI_ISL_463979 | 3/28/2020 | 6/11/2020 North America / Canada / Ontario / Toronto |
| EPI_ISL_463980 | 3/29/2020 | 6/11/2020 North America / Canada / Ontario / Toronto |
| EPI_ISL_463981 | 3/29/2020 | 6/11/2020 North America / Canada / Ontario / Toronto |
| EPI_ISL_463982 | 3/29/2020 | 6/11/2020 North America / Canada / Ontario / Toronto |
| EPI_ISL_463984 | 3/17/2020 | 6/11/2020 North America / Canada / Ontario / Toronto |
| EPI_ISL_463988 | 3/13/2020 | 6/11/2020 North America / Canada / Ontario / Toronto |
| EPI_ISL_463989 | 3/17/2020 | 6/11/2020 North America / Canada / Ontario / Toronto |
| EPI_ISL_463991 | 3/19/2020 | 6/11/2020 North America / Canada / Ontario / Toronto |
| EPI_ISL_463992 | 4/9/2020  | 6/11/2020 North America / Canada / Ontario / Toronto |
| EPI_ISL_463993 | 3/13/2020 | 6/11/2020 North America / Canada / Ontario / Toronto |
| EPI_ISL_463994 | 3/19/2020 | 6/11/2020 North America / Canada / Ontario / Toronto |
| EPI_ISL_463995 | 4/17/2020 | 6/11/2020 North America / Canada / Ontario           |
| EPI_ISL_463996 | 4/23/2020 | 6/11/2020 North America / Canada / Ontario           |
| EPI_ISL_463997 | 4/10/2020 | 6/11/2020 North America / Canada / Ontario           |
| EPI_ISL_463998 | 4/15/2020 | 6/11/2020 North America / Canada / Ontario           |
| EPI_ISL_463999 | 4/11/2020 | 6/11/2020 North America / Canada / Ontario           |
| EPI_ISL_464001 | 4/6/2020  | 6/11/2020 North America / Canada / Ontario           |
| EPI_ISL_464004 | 4/7/2020  | 6/11/2020 North America / Canada / Ontario           |
| EPI_ISL_464007 | 4/12/2020 | 6/11/2020 North America / Canada / Ontario           |
| EPI_ISL_464008 | 4/28/2020 | 6/11/2020 North America / Canada / Ontario           |
| EPI_ISL_464011 | 4/11/2020 | 6/11/2020 North America / Canada / Ontario           |
| EPI_ISL_464012 | 4/2/2020  | 6/11/2020 North America / Canada / Ontario           |
| EPI_ISL_464013 | 4/5/2020  | 6/11/2020 North America / Canada / Ontario           |
| EPI_ISL_464016 | 4/1/2020  | 6/11/2020 North America / Canada / Ontario           |
| EPI_ISL_464018 | 4/3/2020  | 6/11/2020 North America / Canada / Ontario           |
| EPI_ISL_464019 | 4/13/2020 | 6/11/2020 North America / Canada / Ontario           |
| EPI_ISL_464020 | 4/2/2020  | 6/11/2020 North America / Canada / Ontario           |
| EPI_ISL_464021 | 4/25/2020 | 6/11/2020 North America / Canada / Ontario           |
| EPI_ISL_464022 | 4/12/2020 | 6/11/2020 North America / Canada / Ontario           |
| EPI_ISL_464024 | 4/3/2020  | 6/11/2020 North America / Canada / Ontario           |
| EPI_ISL_464026 | 4/10/2020 | 6/11/2020 North America / Canada / Ontario           |
| EPI_ISL_464028 | 4/3/2020  | 6/11/2020 North America / Canada / Ontario           |
| EPI_ISL_464029 | 4/27/2020 | 6/11/2020 North America / Canada / Ontario           |
| EPI_ISL_464030 | 4/22/2020 | 6/11/2020 North America / Canada / Ontario           |
| EPI_ISL_464033 | 4/7/2020  | 6/11/2020 North America / Canada / Ontario           |
| EPI_ISL_464036 | 4/8/2020  | 6/11/2020 North America / Canada / Ontario           |
| EPI_ISL_464037 | 4/3/2020  | 6/11/2020 North America / Canada / Ontario           |
| EPI_ISL_464038 | 4/24/2020 | 6/11/2020 North America / Canada / Ontario           |
| EPI_ISL_464040 | 4/10/2020 | 6/11/2020 North America / Canada / Ontario           |
| EPI_ISL_464041 | 4/20/2020 | 6/11/2020 North America / Canada / Ontario           |
| EPI_ISL_464042 | 4/9/2020  | 6/11/2020 North America / Canada / Ontario           |

|                |           |                                                                  |
|----------------|-----------|------------------------------------------------------------------|
| EPI_ISL_464046 | 4/2/2020  | 6/11/2020 North America / Canada / Ontario                       |
| EPI_ISL_464047 | 4/6/2020  | 6/11/2020 North America / Canada / Ontario                       |
| EPI_ISL_464048 | 4/1/2020  | 6/11/2020 North America / Canada / Ontario                       |
| EPI_ISL_464050 | 4/10/2020 | 6/11/2020 North America / Canada / Ontario                       |
| EPI_ISL_464054 | 4/24/2020 | 6/11/2020 North America / Canada / Ontario                       |
| EPI_ISL_464056 | 4/2/2020  | 6/11/2020 North America / Canada / Ontario                       |
| EPI_ISL_464058 | 4/15/2020 | 6/11/2020 North America / Canada / Ontario                       |
| EPI_ISL_464059 | 4/10/2020 | 6/11/2020 North America / Canada / Ontario                       |
| EPI_ISL_464061 | 4/22/2020 | 6/11/2020 North America / Canada / Ontario                       |
| EPI_ISL_464062 | 4/24/2020 | 6/11/2020 North America / Canada / Ontario                       |
| EPI_ISL_464063 | 4/3/2020  | 6/11/2020 North America / Canada / Ontario                       |
| EPI_ISL_464064 | 4/29/2020 | 6/11/2020 North America / Canada / Ontario                       |
| EPI_ISL_464065 | 4/7/2020  | 6/11/2020 Europe / Belgium / Houthalen-Helchteren                |
| EPI_ISL_464066 | 4/7/2020  | 6/11/2020 Europe / Belgium / Linter                              |
| EPI_ISL_464067 | 4/6/2020  | 6/11/2020 Europe / Belgium / Ukkel                               |
| EPI_ISL_464068 | 4/7/2020  | 6/11/2020 Europe / Belgium / Blanden                             |
| EPI_ISL_464069 | 4/6/2020  | 6/11/2020 Europe / Belgium / Hannut                              |
| EPI_ISL_464070 | 4/4/2020  | 6/11/2020 Europe / Belgium / Brugelette                          |
| EPI_ISL_464071 | 4/4/2020  | 6/11/2020 Europe / Belgium / Ciney                               |
| EPI_ISL_464072 | 4/6/2020  | 6/11/2020 Europe / Belgium / Doornik                             |
| EPI_ISL_464073 | 4/6/2020  | 6/11/2020 Europe / Belgium / Vloesberg                           |
| EPI_ISL_464074 | 4/7/2020  | 6/11/2020 Europe / Belgium / Dour                                |
| EPI_ISL_464075 | 4/8/2020  | 6/11/2020 Europe / Belgium / Zolder                              |
| EPI_ISL_464076 | 4/7/2020  | 6/11/2020 Europe / Belgium / Rebecq                              |
| EPI_ISL_464077 | 4/7/2020  | 6/11/2020 Europe / Belgium / Jurbise                             |
| EPI_ISL_464078 | 4/8/2020  | 6/11/2020 Europe / Belgium / Heppen                              |
| EPI_ISL_464079 | 4/6/2020  | 6/11/2020 Europe / Belgium / Soignies                            |
| EPI_ISL_464080 | 4/8/2020  | 6/11/2020 Europe / Belgium / Kortenberg                          |
| EPI_ISL_464081 | 4/7/2020  | 6/11/2020 Europe / Belgium / Buissenal                           |
| EPI_ISL_464082 | 4/7/2020  | 6/11/2020 Europe / Belgium / Monceau-sur-sambre                  |
| EPI_ISL_464083 | 4/5/2020  | 6/11/2020 Europe / Belgium / Edingen                             |
| EPI_ISL_464084 | 4/3/2020  | 6/11/2020 Europe / Belgium / Colfontaine                         |
| EPI_ISL_464085 | 4/9/2020  | 6/11/2020 Europe / Belgium / Houthalen-Helchteren                |
| EPI_ISL_464086 | 4/8/2020  | 6/11/2020 Europe / Belgium / Brunehaut                           |
| EPI_ISL_464087 | 4/8/2020  | 6/11/2020 Europe / Belgium / Frameries                           |
| EPI_ISL_464088 | 4/9/2020  | 6/11/2020 Europe / Belgium / Zolder                              |
| EPI_ISL_464089 | 4/9/2020  | 6/11/2020 Europe / Belgium / Lummen                              |
| EPI_ISL_464090 | 4/9/2020  | 6/11/2020 Europe / Belgium / Lillois-witterzee                   |
| EPI_ISL_464092 | 3/17/2020 | 6/11/2020 Asia / Taiwan / Taoyuan                                |
| EPI_ISL_464093 | 4/2/2020  | 6/11/2020 Asia / Taiwan / Taoyuan                                |
| EPI_ISL_464094 | 4/11/2020 | 6/11/2020 Asia / Taiwan / Taoyuan                                |
| EPI_ISL_464112 | 3/17/2020 | 6/11/2020 Africa / South Africa / Western Cape / Cape Town Metro |
| EPI_ISL_464113 | 3/27/2020 | 6/11/2020 Africa / South Africa / Western Cape / Cape Town Metro |
| EPI_ISL_464114 | 3/27/2020 | 6/11/2020 Africa / South Africa / Western Cape / Cape Town Metro |
| EPI_ISL_464118 | 4/8/2020  | 6/11/2020 Africa / South Africa / Western Cape / Cape Town Metro |
| EPI_ISL_464119 | 4/8/2020  | 6/11/2020 Africa / South Africa / Western Cape / Cape Town Metro |
| EPI_ISL_464121 | 4/8/2020  | 6/11/2020 Africa / South Africa / Western Cape / Cape Town Metro |

|                |           |                                                                  |
|----------------|-----------|------------------------------------------------------------------|
| EPI_ISL_464123 | 4/8/2020  | 6/11/2020 Africa / South Africa / Western Cape / Cape Town Metro |
| EPI_ISL_464126 | 4/8/2020  | 6/11/2020 Africa / South Africa / Western Cape / Cape Town Metro |
| EPI_ISL_464127 | 4/8/2020  | 6/11/2020 Africa / South Africa / Western Cape / Cape Town Metro |
| EPI_ISL_464128 | 4/8/2020  | 6/11/2020 Africa / South Africa / Western Cape / Cape Town Metro |
| EPI_ISL_464129 | 4/8/2020  | 6/11/2020 Africa / South Africa / Western Cape / Cape Town Metro |
| EPI_ISL_464130 | 4/8/2020  | 6/11/2020 Africa / South Africa / Western Cape / Cape Town Metro |
| EPI_ISL_464131 | 4/9/2020  | 6/11/2020 Africa / South Africa / Western Cape / Cape Town Metro |
| EPI_ISL_464132 | 4/9/2020  | 6/11/2020 Africa / South Africa / Western Cape / Cape Town Metro |
| EPI_ISL_464133 | 4/9/2020  | 6/11/2020 Africa / South Africa / Western Cape / Cape Town Metro |
| EPI_ISL_464137 | 4/9/2020  | 6/11/2020 Africa / South Africa / Western Cape / Cape Town Metro |
| EPI_ISL_464138 | 4/9/2020  | 6/11/2020 Africa / South Africa / Western Cape / Cape Town Metro |
| EPI_ISL_464145 | 4/3/2020  | 6/11/2020 Africa / South Africa / Western Cape / Cape Town Metro |
| EPI_ISL_464153 | 4/9/2020  | 6/11/2020 Africa / South Africa / Western Cape / Cape Town Metro |
| EPI_ISL_464155 | 4/8/2020  | 6/11/2020 Africa / South Africa / Western Cape / Cape Town Metro |
| EPI_ISL_464157 | 4/8/2020  | 6/11/2020 Africa / South Africa / Western Cape / Cape Town Metro |
| EPI_ISL_464159 | 5/9/2020  | 6/11/2020 Asia / Bangladesh / Dhaka / Narayanganj                |
| EPI_ISL_464160 | 6/1/2020  | 6/11/2020 Asia / Bangladesh / Dhaka                              |
| EPI_ISL_464161 | 6/1/2020  | 6/11/2020 Asia / Bangladesh / Dhaka                              |
| EPI_ISL_464162 | 6/1/2020  | 6/11/2020 Asia / Bangladesh / Dhaka / Dhaka / Mohammadpur        |
| EPI_ISL_464163 | 5/31/2020 | 6/11/2020 Asia / Bangladesh / Dhaka / Narayanganj                |
| EPI_ISL_464164 | 5/26/2020 | 6/11/2020 Asia / Bangladesh / Chittagong                         |
| EPI_ISL_464165 | 5/10/2020 | 6/11/2020 Asia / Bangladesh / Dhaka / Narayanganj                |
| EPI_ISL_464166 | 5/31/2020 | 6/11/2020 Asia / Bangladesh / Dhaka / Narayanganj                |
| EPI_ISL_464167 | 3/19/2020 | 6/11/2020 North America / USA / Virgin Islands                   |
| EPI_ISL_464168 | 2/9/2020  | 6/11/2020 Europe / United Kingdom / England                      |
| EPI_ISL_464169 | 2/13/2020 | 6/11/2020 Europe / United Kingdom / England                      |
| EPI_ISL_464175 | 2/16/2020 | 6/11/2020 Europe / United Kingdom / England                      |
| EPI_ISL_464178 | 2/18/2020 | 6/11/2020 Europe / United Kingdom / England                      |
| EPI_ISL_464180 | 2/20/2020 | 6/11/2020 Europe / United Kingdom / England                      |
| EPI_ISL_464181 | 2/24/2020 | 6/11/2020 Europe / United Kingdom / England                      |
| EPI_ISL_464182 | 2/24/2020 | 6/11/2020 Europe / United Kingdom / England                      |
| EPI_ISL_464183 | 2/24/2020 | 6/11/2020 Europe / United Kingdom / England                      |
| EPI_ISL_464184 | 2/25/2020 | 6/11/2020 Europe / United Kingdom / England                      |
| EPI_ISL_464185 | 2/25/2020 | 6/11/2020 Europe / United Kingdom / England                      |
| EPI_ISL_464186 | 2/25/2020 | 6/11/2020 Europe / United Kingdom / England                      |
| EPI_ISL_464187 | 2/26/2020 | 6/11/2020 Europe / United Kingdom / England                      |
| EPI_ISL_464188 | 2/26/2020 | 6/11/2020 Europe / United Kingdom / England                      |
| EPI_ISL_464189 | 2/27/2020 | 6/11/2020 Europe / United Kingdom / England                      |
| EPI_ISL_464190 | 2/27/2020 | 6/11/2020 Europe / United Kingdom / England                      |
| EPI_ISL_464192 | 2/27/2020 | 6/11/2020 Europe / United Kingdom / England                      |
| EPI_ISL_464193 | 2/27/2020 | 6/11/2020 Europe / United Kingdom / England                      |
| EPI_ISL_464194 | 2/27/2020 | 6/11/2020 Europe / United Kingdom / England                      |
| EPI_ISL_464195 | 2/26/2020 | 6/11/2020 Europe / United Kingdom / England                      |
| EPI_ISL_464196 | 2/27/2020 | 6/11/2020 Europe / United Kingdom / England                      |
| EPI_ISL_464197 | 2/27/2020 | 6/11/2020 Europe / United Kingdom / England                      |
| EPI_ISL_464198 | 2/28/2020 | 6/11/2020 Europe / United Kingdom / England                      |
| EPI_ISL_464199 | 2/28/2020 | 6/11/2020 Europe / United Kingdom / England                      |





















|                |           |                                                   |
|----------------|-----------|---------------------------------------------------|
| EPI_ISL_465052 | 3/12/2020 | 6/11/2020 Europe / United Kingdom / England       |
| EPI_ISL_465054 | 3/14/2020 | 6/11/2020 Europe / United Kingdom / England       |
| EPI_ISL_465057 | 3/13/2020 | 6/11/2020 Europe / United Kingdom / England       |
| EPI_ISL_465058 | 3/12/2020 | 6/11/2020 Europe / United Kingdom / England       |
| EPI_ISL_465059 | 3/13/2020 | 6/11/2020 Europe / United Kingdom / England       |
| EPI_ISL_465060 | 3/13/2020 | 6/11/2020 Europe / United Kingdom / England       |
| EPI_ISL_465063 | 3/13/2020 | 6/11/2020 Europe / United Kingdom / England       |
| EPI_ISL_465064 | 3/12/2020 | 6/11/2020 Europe / United Kingdom / England       |
| EPI_ISL_465065 | 3/12/2020 | 6/11/2020 Europe / United Kingdom / England       |
| EPI_ISL_465068 | 3/13/2020 | 6/11/2020 Europe / United Kingdom / England       |
| EPI_ISL_465070 | 3/14/2020 | 6/11/2020 Europe / United Kingdom / England       |
| EPI_ISL_465071 | 3/14/2020 | 6/11/2020 Europe / United Kingdom / England       |
| EPI_ISL_465073 | 3/14/2020 | 6/11/2020 Europe / United Kingdom / England       |
| EPI_ISL_465075 | 3/14/2020 | 6/11/2020 Europe / United Kingdom / England       |
| EPI_ISL_465078 | 3/12/2020 | 6/11/2020 Europe / United Kingdom / England       |
| EPI_ISL_465079 | 3/13/2020 | 6/11/2020 Europe / United Kingdom / England       |
| EPI_ISL_465081 | 3/14/2020 | 6/11/2020 Europe / United Kingdom / England       |
| EPI_ISL_465082 | 3/12/2020 | 6/11/2020 Europe / United Kingdom / England       |
| EPI_ISL_465083 | 3/12/2020 | 6/11/2020 Europe / United Kingdom / England       |
| EPI_ISL_465084 | 3/11/2020 | 6/11/2020 Europe / United Kingdom / England       |
| EPI_ISL_465085 | 3/14/2020 | 6/11/2020 Europe / United Kingdom / England       |
| EPI_ISL_465086 | 3/13/2020 | 6/11/2020 Europe / United Kingdom / England       |
| EPI_ISL_465087 | 3/12/2020 | 6/11/2020 Europe / United Kingdom / England       |
| EPI_ISL_465091 | 3/12/2020 | 6/11/2020 Europe / United Kingdom / England       |
| EPI_ISL_465092 | 3/11/2020 | 6/11/2020 Europe / United Kingdom / England       |
| EPI_ISL_465093 | 3/14/2020 | 6/11/2020 Europe / United Kingdom / England       |
| EPI_ISL_465096 | 3/15/2020 | 6/11/2020 Europe / United Kingdom / England       |
| EPI_ISL_465099 | 3/15/2020 | 6/11/2020 Europe / United Kingdom / England       |
| EPI_ISL_465100 | 3/12/2020 | 6/11/2020 Europe / United Kingdom / England       |
| EPI_ISL_465101 | 3/13/2020 | 6/11/2020 Europe / United Kingdom / England       |
| EPI_ISL_465104 | 3/13/2020 | 6/11/2020 Europe / United Kingdom / England       |
| EPI_ISL_465105 | 3/14/2020 | 6/11/2020 Europe / United Kingdom / England       |
| EPI_ISL_465108 | 3/14/2020 | 6/11/2020 Europe / United Kingdom / England       |
| EPI_ISL_465115 | 3/15/2020 | 6/11/2020 Europe / United Kingdom / England       |
| EPI_ISL_465120 | 3/11/2020 | 6/11/2020 Europe / United Kingdom / England       |
| EPI_ISL_465125 | 3/13/2020 | 6/11/2020 Europe / United Kingdom / England       |
| EPI_ISL_465130 | 3/11/2020 | 6/11/2020 Europe / United Kingdom / England       |
| EPI_ISL_465131 | 3/12/2020 | 6/11/2020 Europe / United Kingdom / England       |
| EPI_ISL_465135 | 3/15/2020 | 6/11/2020 Europe / United Kingdom / England       |
| EPI_ISL_465136 | 3/15/2020 | 6/11/2020 Europe / United Kingdom / England       |
| EPI_ISL_465143 | 3/14/2020 | 6/11/2020 Europe / United Kingdom / England       |
| EPI_ISL_465145 | 3/15/2020 | 6/11/2020 Europe / United Kingdom / England       |
| EPI_ISL_465155 | 3/15/2020 | 6/11/2020 Europe / United Kingdom / England       |
| EPI_ISL_465163 | 5/7/2020  | 6/11/2020 Asia / Bangladesh / Dhaka / Narayanganj |
| EPI_ISL_465164 | 5/10/2020 | 6/11/2020 Asia / Bangladesh / Dhaka / Narayanganj |
| EPI_ISL_465167 | 4/17/2020 | 6/11/2020 Europe / United Kingdom / England       |
| EPI_ISL_465168 | 4/17/2020 | 6/11/2020 Europe / United Kingdom / England       |































|                |           |                                                        |
|----------------|-----------|--------------------------------------------------------|
| EPI_ISL_466594 | 4/16/2020 | 6/11/2020 Europe / United Kingdom / England            |
| EPI_ISL_466596 | 4/16/2020 | 6/11/2020 Europe / United Kingdom / England            |
| EPI_ISL_466597 | 4/16/2020 | 6/11/2020 Europe / United Kingdom / England            |
| EPI_ISL_466598 | 4/17/2020 | 6/11/2020 Europe / United Kingdom / England            |
| EPI_ISL_466599 | 4/16/2020 | 6/11/2020 Europe / United Kingdom / England            |
| EPI_ISL_466600 | 4/16/2020 | 6/11/2020 Europe / United Kingdom / England            |
| EPI_ISL_466601 | 4/16/2020 | 6/11/2020 Europe / United Kingdom / England            |
| EPI_ISL_466603 | 4/16/2020 | 6/11/2020 Europe / United Kingdom / England            |
| EPI_ISL_466604 | 4/16/2020 | 6/11/2020 Europe / United Kingdom / England            |
| EPI_ISL_466605 | 4/16/2020 | 6/11/2020 Europe / United Kingdom / England            |
| EPI_ISL_466606 | 4/16/2020 | 6/11/2020 Europe / United Kingdom / England            |
| EPI_ISL_466608 | 4/16/2020 | 6/11/2020 Europe / United Kingdom / England            |
| EPI_ISL_466610 | 4/15/2020 | 6/11/2020 Europe / United Kingdom / England            |
| EPI_ISL_466611 | 4/16/2020 | 6/11/2020 Europe / United Kingdom / England            |
| EPI_ISL_466612 | 4/16/2020 | 6/11/2020 Europe / United Kingdom / England            |
| EPI_ISL_466613 | 4/10/2020 | 6/11/2020 Europe / United Kingdom / England            |
| EPI_ISL_466615 | 2/16/2020 | 6/11/2020 Europe / United Kingdom / England            |
| EPI_ISL_466616 | 4/13/2020 | 6/11/2020 Europe / United Kingdom / England            |
| EPI_ISL_466617 | 4/13/2020 | 6/11/2020 Europe / United Kingdom / England            |
| EPI_ISL_466618 | 4/13/2020 | 6/11/2020 Europe / United Kingdom / England            |
| EPI_ISL_466619 | 4/13/2020 | 6/11/2020 Europe / United Kingdom / England            |
| EPI_ISL_466620 | 4/14/2020 | 6/11/2020 Europe / United Kingdom / England            |
| EPI_ISL_466622 | 4/17/2020 | 6/11/2020 Europe / United Kingdom / England            |
| EPI_ISL_466623 | 4/17/2020 | 6/11/2020 Europe / United Kingdom / England            |
| EPI_ISL_466624 | 4/18/2020 | 6/11/2020 Europe / United Kingdom / England            |
| EPI_ISL_466625 | 4/17/2020 | 6/11/2020 Europe / United Kingdom / England            |
| EPI_ISL_466626 | 5/7/2020  | 6/11/2020 Asia / Bangladesh / Dhaka / Narayanganj      |
| EPI_ISL_466627 | 6/1/2020  | 6/11/2020 Asia / Bangladesh / Dhaka / Narayanganj      |
| EPI_ISL_466628 | 6/1/2020  | 6/11/2020 Asia / Bangladesh / Dhaka / Narayanganj      |
| EPI_ISL_466629 | 5/10/2020 | 6/11/2020 Asia / Bangladesh / Dhaka / Narayanganj      |
| EPI_ISL_466630 | 5/10/2020 | 6/11/2020 Asia / Bangladesh / Dhaka / Narayanganj      |
| EPI_ISL_466636 | 5/10/2020 | 6/11/2020 Asia / Bangladesh / Dhaka / Narayanganj      |
| EPI_ISL_466637 | 5/26/2020 | 6/11/2020 Asia / Bangladesh / Chittagong               |
| EPI_ISL_466638 | 5/26/2020 | 6/11/2020 Asia / Bangladesh / Chittagong               |
| EPI_ISL_466639 | 5/26/2020 | 6/11/2020 Asia / Bangladesh / Chittagong               |
| EPI_ISL_466644 | 6/1/2020  | 6/11/2020 Asia / Bangladesh / Dhaka / Dhaka / Uttara   |
| EPI_ISL_466645 | 6/1/2020  | 6/11/2020 Asia / Bangladesh / Dhaka / Dhaka / Mirpur   |
| EPI_ISL_466648 | 4/29/2020 | 6/11/2020 North America / USA / California             |
| EPI_ISL_466649 | 6/1/2020  | 6/11/2020 Asia / Bangladesh / Dhaka / Dhaka / Agargaon |
| EPI_ISL_466650 | 6/1/2020  | 6/11/2020 Asia / Bangladesh / Dhaka                    |
| EPI_ISL_466652 | 5/5/2020  | 6/11/2020 North America / USA / Nebraska               |
| EPI_ISL_466653 | 5/5/2020  | 6/11/2020 North America / USA / Nebraska               |
| EPI_ISL_466655 | 5/4/2020  | 6/11/2020 North America / USA / Nebraska               |
| EPI_ISL_466658 | 5/4/2020  | 6/11/2020 North America / USA / Nebraska               |
| EPI_ISL_466661 | 5/4/2020  | 6/11/2020 North America / USA / Nebraska               |
| EPI_ISL_466665 | 5/4/2020  | 6/11/2020 North America / USA / Nebraska               |
| EPI_ISL_466666 | 5/4/2020  | 6/11/2020 North America / USA / Nebraska               |



|                |           |                                                       |
|----------------|-----------|-------------------------------------------------------|
| EPI_ISL_466667 | 5/4/2020  | 6/11/2020 North America / USA / Nebraska              |
| EPI_ISL_466668 | 5/4/2020  | 6/11/2020 North America / USA / Nebraska              |
| EPI_ISL_466669 | 5/4/2020  | 6/11/2020 North America / USA / Nebraska              |
| EPI_ISL_466670 | 5/4/2020  | 6/11/2020 North America / USA / Nebraska              |
| EPI_ISL_466671 | 5/4/2020  | 6/11/2020 North America / USA / Nebraska              |
| EPI_ISL_466672 | 5/4/2020  | 6/11/2020 North America / USA / Nebraska              |
| EPI_ISL_466675 | 5/4/2020  | 6/11/2020 North America / USA / Nebraska              |
| EPI_ISL_466677 | 5/4/2020  | 6/11/2020 North America / USA / Nebraska              |
| EPI_ISL_466678 | 5/5/2020  | 6/11/2020 North America / USA / Nebraska              |
| EPI_ISL_466680 | 5/5/2020  | 6/11/2020 North America / USA / Nebraska              |
| EPI_ISL_466686 | 5/9/2020  | 6/11/2020 Asia / Bangladesh / Dhaka / Narayanganj     |
| EPI_ISL_466687 | 5/26/2020 | 6/11/2020 Asia / Bangladesh / Chittagong              |
| EPI_ISL_466688 | 6/1/2020  | 6/11/2020 Asia / Bangladesh / Dhaka                   |
| EPI_ISL_466689 | 6/1/2020  | 6/11/2020 Asia / Bangladesh / Dhaka / Dhaka / Uttara  |
| EPI_ISL_466690 | 6/1/2020  | 6/11/2020 Asia / Bangladesh / Dhaka / Dhaka / Gulshan |
| EPI_ISL_466691 | 6/1/2020  | 6/11/2020 Asia / Bangladesh / Dhaka / Dhaka / Uttara  |
| EPI_ISL_466693 | 6/1/2020  | 6/11/2020 Asia / Bangladesh / Dhaka                   |
| EPI_ISL_466694 | 6/1/2020  | 6/11/2020 Asia / Bangladesh / Dhaka / Dhaka / Mirpur  |
| EPI_ISL_466696 | 2020-04   | 6/11/2020 North America / Canada / British Columbia   |
| EPI_ISL_466697 | 2020-04   | 6/11/2020 North America / Canada / British Columbia   |
| EPI_ISL_466698 | 2020-04   | 6/11/2020 North America / Canada / British Columbia   |
| EPI_ISL_466699 | 2020-04   | 6/11/2020 North America / Canada / British Columbia   |
| EPI_ISL_466700 | 2020-04   | 6/11/2020 North America / Canada / British Columbia   |
| EPI_ISL_466701 | 2020-04   | 6/11/2020 North America / Canada / British Columbia   |
| EPI_ISL_466702 | 2020-04   | 6/11/2020 North America / Canada / British Columbia   |
| EPI_ISL_466703 | 2020-04   | 6/11/2020 North America / Canada / British Columbia   |
| EPI_ISL_466704 | 2020-04   | 6/11/2020 North America / Canada / British Columbia   |
| EPI_ISL_466705 | 2020-04   | 6/11/2020 North America / Canada / British Columbia   |
| EPI_ISL_466706 | 2020-04   | 6/11/2020 North America / Canada / British Columbia   |
| EPI_ISL_466707 | 2020-04   | 6/11/2020 North America / Canada / British Columbia   |
| EPI_ISL_466708 | 2020-04   | 6/11/2020 North America / Canada / British Columbia   |
| EPI_ISL_466709 | 2020-04   | 6/11/2020 North America / Canada / British Columbia   |
| EPI_ISL_466710 | 2020-04   | 6/11/2020 North America / Canada / British Columbia   |
| EPI_ISL_466711 | 2020-04   | 6/11/2020 North America / Canada / British Columbia   |
| EPI_ISL_466712 | 2020-04   | 6/11/2020 North America / Canada / British Columbia   |
| EPI_ISL_466713 | 2020-04   | 6/11/2020 North America / Canada / British Columbia   |
| EPI_ISL_466714 | 2020-04   | 6/11/2020 North America / Canada / British Columbia   |
| EPI_ISL_466715 | 2020-04   | 6/11/2020 North America / Canada / British Columbia   |
| EPI_ISL_466716 | 2020-04   | 6/11/2020 North America / Canada / British Columbia   |
| EPI_ISL_466717 | 2020-04   | 6/11/2020 North America / Canada / British Columbia   |
| EPI_ISL_466718 | 2020-04   | 6/11/2020 North America / Canada / British Columbia   |
| EPI_ISL_466719 | 2020-04   | 6/11/2020 North America / Canada / British Columbia   |
| EPI_ISL_466720 | 2020-04   | 6/11/2020 North America / Canada / British Columbia   |
| EPI_ISL_466721 | 2020-04   | 6/11/2020 North America / Canada / British Columbia   |
| EPI_ISL_466722 | 2020-04   | 6/11/2020 North America / Canada / British Columbia   |
| EPI_ISL_466723 | 2020-04   | 6/11/2020 North America / Canada / British Columbia   |
| EPI_ISL_466724 | 2020-04   | 6/11/2020 North America / Canada / British Columbia   |





|                |           |                                               |
|----------------|-----------|-----------------------------------------------|
| EPI_ISL_466857 | 5/28/2020 | 6/12/2020 Asia / India / Telangana            |
| EPI_ISL_466860 | 5/30/2020 | 6/12/2020 Asia / India / Telangana            |
| EPI_ISL_466863 | 5/30/2020 | 6/12/2020 Asia / India / Telangana            |
| EPI_ISL_466864 | 5/30/2020 | 6/12/2020 Asia / India / Telangana            |
| EPI_ISL_466866 | 5/30/2020 | 6/12/2020 Asia / India / Telangana            |
| EPI_ISL_466867 | 5/30/2020 | 6/12/2020 Asia / India / Telangana            |
| EPI_ISL_466870 | 5/30/2020 | 6/12/2020 Asia / India / Telangana            |
| EPI_ISL_466871 | 5/30/2020 | 6/12/2020 Asia / India / Telangana            |
| EPI_ISL_466872 | 5/30/2020 | 6/12/2020 Asia / India / Telangana            |
| EPI_ISL_466873 | 2020-04   | 6/12/2020 Europe / United Kingdom / England   |
| EPI_ISL_466875 | 4/13/2020 | 6/12/2020 Europe / Germany / Bavaria / Munich |
| EPI_ISL_466877 | 4/13/2020 | 6/12/2020 Europe / Germany / Bavaria / Munich |
| EPI_ISL_466878 | 4/13/2020 | 6/12/2020 Europe / Germany / Bavaria / Munich |
| EPI_ISL_466879 | 4/13/2020 | 6/12/2020 Europe / Germany / Bavaria / Munich |
| EPI_ISL_466880 | 4/13/2020 | 6/12/2020 Europe / Germany / Bavaria / Munich |
| EPI_ISL_466881 | 4/14/2020 | 6/12/2020 Europe / Germany / Bavaria / Munich |
| EPI_ISL_466882 | 4/15/2020 | 6/12/2020 Europe / Germany / Bavaria / Munich |
| EPI_ISL_466883 | 4/15/2020 | 6/12/2020 Europe / Germany / Bavaria / Munich |
| EPI_ISL_466884 | 4/16/2020 | 6/12/2020 Europe / Germany / Bavaria / Munich |
| EPI_ISL_466885 | 4/16/2020 | 6/12/2020 Europe / Germany / Bavaria / Munich |
| EPI_ISL_466888 | 4/20/2020 | 6/12/2020 Europe / Germany / Bavaria / Munich |
| EPI_ISL_466889 | 4/19/2020 | 6/12/2020 Europe / Germany / Bavaria / Munich |
| EPI_ISL_466891 | 4/22/2020 | 6/12/2020 Europe / Germany / Bavaria / Munich |
| EPI_ISL_466892 | 4/22/2020 | 6/12/2020 Europe / Germany / Bavaria / Munich |
| EPI_ISL_466893 | 4/22/2020 | 6/12/2020 Europe / Germany / Bavaria / Munich |
| EPI_ISL_466895 | 4/23/2020 | 6/12/2020 Europe / Germany / Bavaria / Munich |
| EPI_ISL_466896 | 4/23/2020 | 6/12/2020 Europe / Germany / Bavaria / Munich |
| EPI_ISL_466897 | 4/24/2020 | 6/12/2020 Europe / Germany / Bavaria / Munich |
| EPI_ISL_466899 | 4/28/2020 | 6/12/2020 Europe / Germany / Bavaria / Munich |
| EPI_ISL_466900 | 4/30/2020 | 6/12/2020 Europe / Germany / Bavaria / Munich |
| EPI_ISL_466901 | 4/30/2020 | 6/12/2020 Europe / Germany / Bavaria / Munich |
| EPI_ISL_466902 | 4/30/2020 | 6/12/2020 Europe / Germany / Bavaria / Munich |
| EPI_ISL_466903 | 4/30/2020 | 6/12/2020 Europe / Germany / Bavaria / Munich |
| EPI_ISL_466904 | 4/30/2020 | 6/12/2020 Europe / Germany / Bavaria / Munich |
| EPI_ISL_466905 | 5/2/2020  | 6/12/2020 Europe / Germany / Bavaria / Munich |
| EPI_ISL_466906 | 5/4/2020  | 6/12/2020 Europe / Germany / Bavaria / Munich |
| EPI_ISL_466907 | 5/4/2020  | 6/12/2020 Europe / Germany / Bavaria / Munich |
| EPI_ISL_466909 | 5/11/2020 | 6/12/2020 Europe / Germany / Bavaria / Munich |
| EPI_ISL_466910 | 5/17/2020 | 6/12/2020 Europe / Germany / Bavaria / Munich |
| EPI_ISL_466911 | 5/18/2020 | 6/12/2020 Europe / Germany / Bavaria / Munich |
| EPI_ISL_466913 | 5/20/2020 | 6/12/2020 Europe / Germany / Bavaria / Munich |
| EPI_ISL_466916 | 5/22/2020 | 6/12/2020 Europe / Germany / Bavaria / Munich |
| EPI_ISL_466917 | 5/23/2020 | 6/12/2020 Europe / Germany / Bavaria / Munich |
| EPI_ISL_466918 | 5/23/2020 | 6/12/2020 Europe / Germany / Bavaria / Munich |
| EPI_ISL_466919 | 5/25/2020 | 6/12/2020 Europe / Germany / Bavaria / Munich |
| EPI_ISL_466920 | 5/25/2020 | 6/12/2020 Europe / Germany / Bavaria / Munich |
| EPI_ISL_466921 | 5/25/2020 | 6/12/2020 Europe / Germany / Bavaria / Munich |

|                |           |                                                   |
|----------------|-----------|---------------------------------------------------|
| EPI_ISL_466922 | 5/25/2020 | 6/12/2020 Europe / Germany / Bavaria / Munich     |
| EPI_ISL_466923 | 5/25/2020 | 6/12/2020 Europe / Germany / Bavaria / Munich     |
| EPI_ISL_466924 | 5/26/2020 | 6/12/2020 Europe / Germany / Bavaria / Munich     |
| EPI_ISL_466925 | 5/26/2020 | 6/12/2020 Europe / Germany / Bavaria / Munich     |
| EPI_ISL_466927 | 3/5/2020  | 6/12/2020 Europe / Switzerland / Basel-Stadt      |
| EPI_ISL_466928 | 3/4/2020  | 6/12/2020 Europe / Switzerland / Ticino           |
| EPI_ISL_466929 | 3/6/2020  | 6/12/2020 Europe / Switzerland / Bern             |
| EPI_ISL_466930 | 3/6/2020  | 6/12/2020 Europe / Switzerland / Basel-Landschaft |
| EPI_ISL_466931 | 3/6/2020  | 6/12/2020 Europe / Switzerland / Basel-Stadt      |
| EPI_ISL_466932 | 3/5/2020  | 6/12/2020 Europe / Switzerland / Grisons          |
| EPI_ISL_466933 | 3/4/2020  | 6/12/2020 Europe / Switzerland / Grisons          |
| EPI_ISL_466935 | 3/5/2020  | 6/12/2020 Europe / Switzerland / Basel-Landschaft |
| EPI_ISL_466936 | 3/6/2020  | 6/12/2020 Europe / Switzerland / Ticino           |
| EPI_ISL_466937 | 3/6/2020  | 6/12/2020 Europe / Switzerland / Ticino           |
| EPI_ISL_466938 | 3/5/2020  | 6/12/2020 Europe / Switzerland / Grisons          |
| EPI_ISL_466940 | 3/8/2020  | 6/12/2020 Europe / Switzerland / Basel-Stadt      |
| EPI_ISL_466941 | 3/8/2020  | 6/12/2020 Europe / Switzerland / Basel-Stadt      |
| EPI_ISL_466942 | 3/8/2020  | 6/12/2020 Europe / Switzerland / Basel-Stadt      |
| EPI_ISL_466943 | 3/9/2020  | 6/12/2020 Europe / Switzerland / Solothurn        |
| EPI_ISL_466945 | 3/9/2020  | 6/12/2020 Europe / Switzerland / Basel-Landschaft |
| EPI_ISL_466946 | 3/10/2020 | 6/12/2020 Europe / Switzerland / Basel-Stadt      |
| EPI_ISL_466947 | 3/10/2020 | 6/12/2020 Europe / Switzerland / Bern             |
| EPI_ISL_466948 | 3/10/2020 | 6/12/2020 Europe / Switzerland / Wallis           |
| EPI_ISL_466949 | 3/10/2020 | 6/12/2020 Europe / Switzerland / Basel-Stadt      |
| EPI_ISL_466950 | 3/9/2020  | 6/12/2020 Europe / Switzerland / Grisons          |
| EPI_ISL_466951 | 3/10/2020 | 6/12/2020 Europe / Switzerland / Basel-Stadt      |
| EPI_ISL_466952 | 3/10/2020 | 6/12/2020 Europe / Switzerland / Basel-Stadt      |
| EPI_ISL_466953 | 3/10/2020 | 6/12/2020 Europe / Switzerland / Basel-Stadt      |
| EPI_ISL_466954 | 3/10/2020 | 6/12/2020 Europe / Switzerland / Basel-Stadt      |
| EPI_ISL_466955 | 3/10/2020 | 6/12/2020 Europe / Switzerland / Bern             |
| EPI_ISL_466956 | 3/10/2020 | 6/12/2020 Europe / Switzerland / Zurich           |
| EPI_ISL_466958 | 3/11/2020 | 6/12/2020 Europe / Switzerland / Basel-Stadt      |
| EPI_ISL_466959 | 3/11/2020 | 6/12/2020 Europe / Switzerland / Bern             |
| EPI_ISL_466960 | 3/11/2020 | 6/12/2020 Europe / Switzerland / Basel-Stadt      |
| EPI_ISL_466961 | 3/11/2020 | 6/12/2020 Europe / Switzerland / Vaud             |
| EPI_ISL_466962 | 3/11/2020 | 6/12/2020 Europe / Switzerland / Ticino           |
| EPI_ISL_466964 | 3/11/2020 | 6/12/2020 Europe / Switzerland / Zurich           |
| EPI_ISL_466965 | 3/11/2020 | 6/12/2020 Europe / Switzerland / Ticino           |
| EPI_ISL_466966 | 3/11/2020 | 6/12/2020 Europe / Switzerland / Ticino           |
| EPI_ISL_466967 | 3/11/2020 | 6/12/2020 Europe / Switzerland / Grisons          |
| EPI_ISL_466968 | 3/11/2020 | 6/12/2020 Europe / Switzerland / Ticino           |
| EPI_ISL_466969 | 3/11/2020 | 6/12/2020 Europe / Switzerland / Bern             |
| EPI_ISL_466970 | 3/11/2020 | 6/12/2020 Europe / Switzerland / Ticino           |
| EPI_ISL_466971 | 3/11/2020 | 6/12/2020 Europe / Switzerland / Ticino           |
| EPI_ISL_466972 | 3/11/2020 | 6/12/2020 Europe / Switzerland / Ticino           |
| EPI_ISL_466973 | 3/11/2020 | 6/12/2020 Europe / Switzerland / Ticino           |
| EPI_ISL_466974 | 3/12/2020 | 6/12/2020 Europe / Switzerland / Aargau           |

|                |           |                                                   |
|----------------|-----------|---------------------------------------------------|
| EPI_ISL_466975 | 3/12/2020 | 6/12/2020 Europe / Switzerland / Bern             |
| EPI_ISL_466976 | 3/12/2020 | 6/12/2020 Europe / Switzerland / Bern             |
| EPI_ISL_466977 | 3/12/2020 | 6/12/2020 Europe / Switzerland / Bern             |
| EPI_ISL_466979 | 3/12/2020 | 6/12/2020 Europe / Switzerland / Zurich           |
| EPI_ISL_466980 | 3/12/2020 | 6/12/2020 Europe / Switzerland / Vaud             |
| EPI_ISL_466981 | 3/12/2020 | 6/12/2020 Europe / Switzerland / Bern             |
| EPI_ISL_466982 | 3/12/2020 | 6/12/2020 Europe / Switzerland / Vaud             |
| EPI_ISL_466983 | 3/12/2020 | 6/12/2020 Europe / Switzerland / Grisons          |
| EPI_ISL_466984 | 3/12/2020 | 6/12/2020 Europe / Switzerland / Schwyz           |
| EPI_ISL_466985 | 3/12/2020 | 6/12/2020 Europe / Switzerland / Basel-Stadt      |
| EPI_ISL_466986 | 3/12/2020 | 6/12/2020 Europe / Switzerland / Schwyz           |
| EPI_ISL_466987 | 3/12/2020 | 6/12/2020 Europe / Switzerland / Grisons          |
| EPI_ISL_466989 | 3/12/2020 | 6/12/2020 Europe / Switzerland / Zug              |
| EPI_ISL_466990 | 3/12/2020 | 6/12/2020 Europe / Switzerland / Ticino           |
| EPI_ISL_466991 | 3/12/2020 | 6/12/2020 Europe / Switzerland / Ticino           |
| EPI_ISL_466992 | 3/12/2020 | 6/12/2020 Europe / Switzerland / Ticino           |
| EPI_ISL_466995 | 3/12/2020 | 6/12/2020 Europe / Switzerland / Ticino           |
| EPI_ISL_466996 | 3/12/2020 | 6/12/2020 Europe / Switzerland / Ticino           |
| EPI_ISL_466997 | 5/5/2020  | 6/12/2020 Europe / Switzerland / Uri              |
| EPI_ISL_466999 | 5/5/2020  | 6/12/2020 Europe / Switzerland / Vaud             |
| EPI_ISL_467002 | 5/6/2020  | 6/12/2020 Europe / Switzerland / Zurich           |
| EPI_ISL_467003 | 5/6/2020  | 6/12/2020 Europe / Switzerland / Uri              |
| EPI_ISL_467004 | 5/6/2020  | 6/12/2020 Europe / Switzerland / Vaud             |
| EPI_ISL_467006 | 5/7/2020  | 6/12/2020 Europe / Switzerland / Basel-Landschaft |
| EPI_ISL_467009 | 5/7/2020  | 6/12/2020 Europe / Switzerland / Schaffhausen     |
| EPI_ISL_467010 | 5/8/2020  | 6/12/2020 Europe / Switzerland / Geneva           |
| EPI_ISL_467012 | 5/8/2020  | 6/12/2020 Europe / Switzerland / Basel-Stadt      |
| EPI_ISL_467014 | 5/12/2020 | 6/12/2020 Europe / Switzerland / Zurich           |
| EPI_ISL_467016 | 5/13/2020 | 6/12/2020 Europe / Switzerland / Bern             |
| EPI_ISL_467029 | 6/5/2020  | 6/12/2020 Asia / India / Gujarat / Gandhinagar    |
| EPI_ISL_467030 | 6/5/2020  | 6/12/2020 Asia / India / Gujarat / Gandhinagar    |
| EPI_ISL_467031 | 6/5/2020  | 6/12/2020 Asia / India / Gujarat / Kadi           |
| EPI_ISL_467032 | 6/5/2020  | 6/12/2020 Asia / India / Gujarat / Kadi           |
| EPI_ISL_467033 | 6/5/2020  | 6/12/2020 Asia / India / Gujarat / Gandhinagar    |
| EPI_ISL_467034 | 6/5/2020  | 6/12/2020 Asia / India / Gujarat / Kalol          |
| EPI_ISL_467035 | 6/5/2020  | 6/12/2020 Asia / India / Gujarat / Kalol          |
| EPI_ISL_467036 | 6/5/2020  | 6/12/2020 Asia / India / Gujarat / Kalol          |
| EPI_ISL_467037 | 6/5/2020  | 6/12/2020 Asia / India / Gujarat / Gandhinagar    |
| EPI_ISL_467038 | 6/5/2020  | 6/12/2020 Asia / India / Gujarat / Gandhinagar    |
| EPI_ISL_467039 | 6/5/2020  | 6/12/2020 Asia / India / Gujarat / Vadodara       |
| EPI_ISL_467040 | 6/5/2020  | 6/12/2020 Asia / India / Gujarat / Vadodara       |
| EPI_ISL_467041 | 6/3/2020  | 6/12/2020 Asia / India / Gujarat / Ahmedabad      |
| EPI_ISL_467042 | 6/3/2020  | 6/12/2020 Asia / India / Gujarat / Ahmedabad      |
| EPI_ISL_467043 | 6/3/2020  | 6/12/2020 Asia / India / Gujarat / Ahmedabad      |
| EPI_ISL_467044 | 6/3/2020  | 6/12/2020 Asia / India / Gujarat / Ahmedabad      |
| EPI_ISL_467045 | 6/3/2020  | 6/12/2020 Asia / India / Gujarat / Ahmedabad      |
| EPI_ISL_467046 | 6/3/2020  | 6/12/2020 Asia / India / Gujarat / Ahmedabad      |

|                |           |                                                           |
|----------------|-----------|-----------------------------------------------------------|
| EPI_ISL_467047 | 6/3/2020  | 6/12/2020 Asia / India / Gujarat / Ahmedabad              |
| EPI_ISL_467048 | 6/3/2020  | 6/12/2020 Asia / India / Gujarat / Ahmedabad              |
| EPI_ISL_467049 | 6/3/2020  | 6/12/2020 Asia / India / Gujarat / Ahmedabad              |
| EPI_ISL_467050 | 6/3/2020  | 6/12/2020 Asia / India / Gujarat / Ahmedabad              |
| EPI_ISL_467051 | 6/3/2020  | 6/12/2020 Asia / India / Gujarat / Ahmedabad              |
| EPI_ISL_467052 | 6/3/2020  | 6/12/2020 Asia / India / Gujarat / Ahmedabad              |
| EPI_ISL_467053 | 6/3/2020  | 6/12/2020 Asia / India / Gujarat / Ahmedabad              |
| EPI_ISL_467054 | 6/3/2020  | 6/12/2020 Asia / India / Gujarat / Ahmedabad              |
| EPI_ISL_467055 | 3/15/2020 | 6/12/2020 Europe / Spain / Balearic Islands / Manacor     |
| EPI_ISL_467056 | 3/14/2020 | 6/12/2020 Europe / Spain / Balearic Islands / Palma       |
| EPI_ISL_467058 | 3/19/2020 | 6/12/2020 Europe / Spain / Balearic Islands / Marrachi    |
| EPI_ISL_467059 | 4/1/2020  | 6/12/2020 Europe / Spain / Andalusia / Santa Fe           |
| EPI_ISL_467061 | 3/30/2020 | 6/12/2020 Europe / Spain / Andalusia / Granada            |
| EPI_ISL_467062 | 3/18/2020 | 6/12/2020 Europe / Spain / Andalusia / Granada            |
| EPI_ISL_467063 | 4/1/2020  | 6/12/2020 Europe / Spain / Andalusia / Valderrubio        |
| EPI_ISL_467064 | 3/15/2020 | 6/12/2020 Europe / Spain / Andalusia / Puerto Santa Maria |
| EPI_ISL_467066 | 3/16/2020 | 6/12/2020 Europe / Spain / Madrid                         |
| EPI_ISL_467068 | 3/16/2020 | 6/12/2020 Europe / Spain / Andalusia / San Fernando       |
| EPI_ISL_467069 | 3/17/2020 | 6/12/2020 Europe / Spain / Andalusia / Cadiz              |
| EPI_ISL_467070 | 3/15/2020 | 6/12/2020 Europe / Spain / Andalusia / Puerto Santa Maria |
| EPI_ISL_467071 | 3/15/2020 | 6/12/2020 Europe / Spain / Andalusia / Algeciras          |
| EPI_ISL_467072 | 3/16/2020 | 6/12/2020 Europe / Spain / Andalusia / Algeciras          |
| EPI_ISL_467073 | 3/16/2020 | 6/12/2020 Europe / Spain / Andalusia / Tarifa             |
| EPI_ISL_467074 | 3/15/2020 | 6/12/2020 Europe / Spain / Andalusia / Sevilla            |
| EPI_ISL_467075 | 3/17/2020 | 6/12/2020 Europe / Spain / Andalusia / Chiclana           |
| EPI_ISL_467076 | 3/15/2020 | 6/12/2020 Europe / Spain / Andalusia / Chiclana           |
| EPI_ISL_467077 | 3/16/2020 | 6/12/2020 Europe / Spain / Andalusia / Cadiz              |
| EPI_ISL_467078 | 3/17/2020 | 6/12/2020 Europe / Spain / Andalusia / Cadiz              |
| EPI_ISL_467079 | 3/16/2020 | 6/12/2020 Europe / Spain / Andalusia / Puerto Santa Maria |
| EPI_ISL_467080 | 3/17/2020 | 6/12/2020 Europe / Spain / Andalusia / Rio San Pedro      |
| EPI_ISL_467081 | 3/17/2020 | 6/12/2020 Europe / Spain / Andalusia / Cadiz              |
| EPI_ISL_467082 | 3/12/2020 | 6/12/2020 Europe / Spain / Andalusia / Rota               |
| EPI_ISL_467083 | 3/15/2020 | 6/12/2020 Europe / Spain / Madrid                         |
| EPI_ISL_467084 | 3/16/2020 | 6/12/2020 Europe / Spain / Andalusia / San Fernando       |
| EPI_ISL_467085 | 3/16/2020 | 6/12/2020 Europe / Spain / Andalusia / Cadiz              |
| EPI_ISL_467086 | 3/18/2020 | 6/12/2020 Africa / Canary Islands / Las Palmas            |
| EPI_ISL_467087 | 3/16/2020 | 6/12/2020 Africa / Canary Islands / Las Palmas            |
| EPI_ISL_467088 | 3/17/2020 | 6/12/2020 Africa / Canary Islands / Las Palmas            |
| EPI_ISL_467089 | 3/18/2020 | 6/12/2020 Africa / Canary Islands / Las Palmas            |
| EPI_ISL_467090 | 3/12/2020 | 6/12/2020 Africa / Canary Islands / Las Palmas            |
| EPI_ISL_467091 | 3/10/2020 | 6/12/2020 Africa / Canary Islands / Las Palmas            |
| EPI_ISL_467092 | 3/17/2020 | 6/12/2020 Europe / Spain / Basque Country / Vitoria       |
| EPI_ISL_467093 | 3/19/2020 | 6/12/2020 Europe / Spain / Basque Country / Vitoria       |
| EPI_ISL_467094 | 3/16/2020 | 6/12/2020 Europe / Spain / Basque Country / Vitoria       |
| EPI_ISL_467095 | 3/17/2020 | 6/12/2020 Europe / Spain / Basque Country / Vitoria       |
| EPI_ISL_467096 | 3/19/2020 | 6/12/2020 Europe / Spain / Basque Country / Vitoria       |
| EPI_ISL_467097 | 3/12/2020 | 6/12/2020 Europe / Spain / Basque Country / Vitoria       |







|                |          |                                                       |
|----------------|----------|-------------------------------------------------------|
| EPI_ISL_467197 | 4/1/2020 | 6/12/2020 Europe / Spain / Madrid                     |
| EPI_ISL_467198 | 4/2/2020 | 6/12/2020 Europe / Spain / Madrid                     |
| EPI_ISL_467199 | 4/2/2020 | 6/12/2020 Europe / Spain / Madrid / LeganA(c)s        |
| EPI_ISL_467200 | 4/2/2020 | 6/12/2020 Europe / Spain / Madrid                     |
| EPI_ISL_467201 | 4/1/2020 | 6/12/2020 Europe / Spain / Madrid / Campo Real        |
| EPI_ISL_467202 | 4/2/2020 | 6/12/2020 Europe / Spain / Madrid                     |
| EPI_ISL_467205 | 4/1/2020 | 6/12/2020 Europe / Spain / Madrid                     |
| EPI_ISL_467206 | 4/1/2020 | 6/12/2020 Europe / Spain / Madrid                     |
| EPI_ISL_467207 | 4/2/2020 | 6/12/2020 Europe / Spain / Madrid                     |
| EPI_ISL_467208 | 4/1/2020 | 6/12/2020 Europe / Spain / Madrid                     |
| EPI_ISL_467209 | 4/1/2020 | 6/12/2020 Europe / Spain / Madrid / Ambite            |
| EPI_ISL_467211 | 4/2/2020 | 6/12/2020 Europe / Spain / Madrid                     |
| EPI_ISL_467212 | 4/3/2020 | 6/12/2020 Europe / Spain / Madrid                     |
| EPI_ISL_467213 | 4/1/2020 | 6/12/2020 Europe / Spain / Madrid                     |
| EPI_ISL_467214 | 4/1/2020 | 6/12/2020 Europe / Spain / Madrid                     |
| EPI_ISL_467215 | 4/1/2020 | 6/12/2020 Europe / Spain / Madrid                     |
| EPI_ISL_467216 | 4/2/2020 | 6/12/2020 Europe / Spain / Madrid                     |
| EPI_ISL_467217 | 4/2/2020 | 6/12/2020 Europe / Spain / Madrid                     |
| EPI_ISL_467218 | 4/1/2020 | 6/12/2020 Europe / Spain / Madrid                     |
| EPI_ISL_467219 | 4/2/2020 | 6/12/2020 Europe / Spain / Madrid                     |
| EPI_ISL_467220 | 4/2/2020 | 6/12/2020 Europe / Spain / Madrid                     |
| EPI_ISL_467221 | 4/1/2020 | 6/12/2020 Europe / Spain / Madrid                     |
| EPI_ISL_467222 | 4/1/2020 | 6/12/2020 Europe / Spain / Madrid                     |
| EPI_ISL_467223 | 4/1/2020 | 6/12/2020 Europe / Spain / Madrid                     |
| EPI_ISL_467224 | 4/2/2020 | 6/12/2020 Europe / Spain / Madrid                     |
| EPI_ISL_467225 | 4/1/2020 | 6/12/2020 Europe / Spain / Madrid                     |
| EPI_ISL_467226 | 4/1/2020 | 6/12/2020 Europe / Spain / Madrid                     |
| EPI_ISL_467227 | 4/2/2020 | 6/12/2020 Europe / Spain / Madrid / Rivas-Vaciamadrid |
| EPI_ISL_467228 | 4/1/2020 | 6/12/2020 Europe / Spain / Madrid                     |
| EPI_ISL_467229 | 4/2/2020 | 6/12/2020 Europe / Spain / Madrid                     |
| EPI_ISL_467230 | 4/2/2020 | 6/12/2020 Europe / Spain / Madrid                     |
| EPI_ISL_467231 | 4/2/2020 | 6/12/2020 Europe / Spain / Madrid                     |
| EPI_ISL_467232 | 4/1/2020 | 6/12/2020 Europe / Spain / Madrid                     |
| EPI_ISL_467233 | 4/2/2020 | 6/12/2020 Europe / Spain / Madrid                     |
| EPI_ISL_467234 | 5/7/2020 | 6/12/2020 Europe / Spain / Madrid                     |
| EPI_ISL_467235 | 4/2/2020 | 6/12/2020 Europe / Spain / Madrid                     |
| EPI_ISL_467236 | 4/3/2020 | 6/12/2020 Europe / Spain / Madrid                     |
| EPI_ISL_467237 | 4/2/2020 | 6/12/2020 Europe / Spain / Madrid                     |
| EPI_ISL_467238 | 4/3/2020 | 6/12/2020 Europe / Spain / Madrid                     |
| EPI_ISL_467239 | 4/1/2020 | 6/12/2020 Europe / Spain / Madrid                     |
| EPI_ISL_467240 | 4/2/2020 | 6/12/2020 Europe / Spain / Madrid                     |
| EPI_ISL_467241 | 4/3/2020 | 6/12/2020 Europe / Spain / Madrid                     |
| EPI_ISL_467242 | 4/3/2020 | 6/12/2020 Europe / Spain / Madrid                     |
| EPI_ISL_467243 | 4/2/2020 | 6/12/2020 Europe / Spain / Madrid                     |
| EPI_ISL_467244 | 4/1/2020 | 6/12/2020 Europe / Spain / Madrid                     |
| EPI_ISL_467245 | 4/1/2020 | 6/12/2020 Europe / Spain / Madrid                     |
| EPI_ISL_467247 | 4/1/2020 | 6/12/2020 Europe / Spain / Madrid                     |

|                |           |                                                             |
|----------------|-----------|-------------------------------------------------------------|
| EPI_ISL_467248 | 4/2/2020  | 6/12/2020 Europe / Spain / Madrid                           |
| EPI_ISL_467249 | 4/2/2020  | 6/12/2020 Europe / Spain / Madrid                           |
| EPI_ISL_467250 | 4/1/2020  | 6/12/2020 Europe / Spain / Madrid                           |
| EPI_ISL_467251 | 4/2/2020  | 6/12/2020 Europe / Spain / Madrid                           |
| EPI_ISL_467252 | 4/2/2020  | 6/12/2020 Europe / Spain / Madrid                           |
| EPI_ISL_467253 | 4/1/2020  | 6/12/2020 Europe / Spain / Madrid                           |
| EPI_ISL_467254 | 4/1/2020  | 6/12/2020 Europe / Spain / Madrid                           |
| EPI_ISL_467255 | 4/1/2020  | 6/12/2020 Europe / Spain / Madrid                           |
| EPI_ISL_467256 | 4/2/2020  | 6/12/2020 Europe / Spain / Madrid                           |
| EPI_ISL_467257 | 4/2/2020  | 6/12/2020 Europe / Spain / Madrid                           |
| EPI_ISL_467259 | 4/2/2020  | 6/12/2020 Europe / Spain / Madrid / Valdaracete             |
| EPI_ISL_467260 | 4/2/2020  | 6/12/2020 Europe / Spain / Madrid                           |
| EPI_ISL_467261 | 4/2/2020  | 6/12/2020 Europe / Spain / Madrid                           |
| EPI_ISL_467262 | 4/14/2020 | 6/12/2020 Europe / Spain / Galicia / Santiago de Compostela |
| EPI_ISL_467263 | 4/7/2020  | 6/12/2020 Europe / Spain / Galicia / Santiago de Compostela |
| EPI_ISL_467265 | 4/13/2020 | 6/12/2020 Europe / Spain / Galicia / Teo                    |
| EPI_ISL_467266 | 4/15/2020 | 6/12/2020 Europe / Spain / Galicia / Santiago de Compostela |
| EPI_ISL_467267 | 4/13/2020 | 6/12/2020 Europe / Spain / Galicia / Santa Comba            |
| EPI_ISL_467268 | 4/13/2020 | 6/12/2020 Europe / Spain / Galicia / Negreira               |
| EPI_ISL_467269 | 4/13/2020 | 6/12/2020 Europe / Spain / Galicia / Boiro                  |
| EPI_ISL_467271 | 4/8/2020  | 6/12/2020 Europe / Spain / Galicia / Boiro                  |
| EPI_ISL_467272 | 4/13/2020 | 6/12/2020 Europe / Spain / Galicia / Santiago de Compostela |
| EPI_ISL_467273 | 4/7/2020  | 6/12/2020 Europe / Spain / Galicia / Ames                   |
| EPI_ISL_467274 | 4/13/2020 | 6/12/2020 Europe / Spain / Galicia / La Estrada             |
| EPI_ISL_467275 | 4/7/2020  | 6/12/2020 Europe / Spain / Galicia / Lalin                  |
| EPI_ISL_467276 | 4/15/2020 | 6/12/2020 Europe / Spain / Galicia / Santiago de Compostela |
| EPI_ISL_467277 | 4/13/2020 | 6/12/2020 Europe / Spain / Galicia / Noya                   |
| EPI_ISL_467278 | 4/7/2020  | 6/12/2020 Europe / Spain / Galicia / Riveira                |
| EPI_ISL_467279 | 4/7/2020  | 6/12/2020 Europe / Spain / Galicia / Santiago de Compostela |
| EPI_ISL_467280 | 4/15/2020 | 6/12/2020 Europe / Spain / Galicia / Santiago de Compostela |
| EPI_ISL_467281 | 4/14/2020 | 6/12/2020 Europe / Spain / Galicia / Padron                 |
| EPI_ISL_467283 | 4/13/2020 | 6/12/2020 Europe / Spain / Galicia / Riveira                |
| EPI_ISL_467284 | 4/13/2020 | 6/12/2020 Europe / Spain / Galicia / Ames                   |
| EPI_ISL_467285 | 4/13/2020 | 6/12/2020 Europe / Spain / Galicia / Boiro                  |
| EPI_ISL_467288 | 4/13/2020 | 6/12/2020 Europe / Spain / Galicia / Teo                    |
| EPI_ISL_467289 | 4/13/2020 | 6/12/2020 Europe / Spain / Galicia / Muros                  |
| EPI_ISL_467290 | 4/15/2020 | 6/12/2020 Europe / Spain / Galicia / Boiro                  |
| EPI_ISL_467291 | 4/13/2020 | 6/12/2020 Europe / Spain / Galicia / Boqueijon              |
| EPI_ISL_467292 | 4/13/2020 | 6/12/2020 Europe / Spain / Galicia / Teo                    |
| EPI_ISL_467293 | 4/7/2020  | 6/12/2020 Europe / Spain / Galicia / Valga                  |
| EPI_ISL_467294 | 4/8/2020  | 6/12/2020 Europe / Spain / Galicia / Santiago de Compostela |
| EPI_ISL_467295 | 4/7/2020  | 6/12/2020 Europe / Spain / Galicia / Lalin                  |
| EPI_ISL_467296 | 4/13/2020 | 6/12/2020 Europe / Spain / Galicia / Santiago de Compostela |
| EPI_ISL_467297 | 4/7/2020  | 6/12/2020 Europe / Spain / Galicia / Ames                   |
| EPI_ISL_467300 | 4/8/2020  | 6/12/2020 Europe / Bosnia and Herzegovina / Sarajevo        |
| EPI_ISL_467301 | 6/8/2020  | 6/12/2020 North America / USA / Missouri / St. Louis        |
| EPI_ISL_467302 | 6/8/2020  | 6/12/2020 North America / USA / Missouri / St. Louis        |

|                |           |                                                                |
|----------------|-----------|----------------------------------------------------------------|
| EPI_ISL_467304 | 6/8/2020  | 6/12/2020 North America / USA / Missouri / St. Louis           |
| EPI_ISL_467305 | 2020-04   | 6/12/2020 North America / Canada / British Columbia            |
| EPI_ISL_467306 | 2020-04   | 6/12/2020 North America / Canada / British Columbia            |
| EPI_ISL_467309 | 2020-04   | 6/12/2020 North America / Canada / British Columbia            |
| EPI_ISL_467310 | 2020-04   | 6/12/2020 North America / Canada / British Columbia            |
| EPI_ISL_467312 | 2020-04   | 6/12/2020 North America / Canada / British Columbia            |
| EPI_ISL_467313 | 2020-04   | 6/12/2020 North America / Canada / British Columbia            |
| EPI_ISL_467314 | 2020-04   | 6/12/2020 North America / Canada / British Columbia            |
| EPI_ISL_467315 | 2020-04   | 6/12/2020 North America / Canada / British Columbia            |
| EPI_ISL_467317 | 2020-04   | 6/12/2020 North America / Canada / British Columbia            |
| EPI_ISL_467318 | 2020-04   | 6/12/2020 North America / Canada / British Columbia            |
| EPI_ISL_467320 | 2020-04   | 6/12/2020 North America / Canada / British Columbia            |
| EPI_ISL_467321 | 2020-04   | 6/12/2020 North America / Canada / British Columbia            |
| EPI_ISL_467322 | 2020-04   | 6/12/2020 North America / Canada / British Columbia            |
| EPI_ISL_467324 | 2020-04   | 6/12/2020 North America / Canada / British Columbia            |
| EPI_ISL_467327 | 2020-04   | 6/12/2020 North America / Canada / British Columbia            |
| EPI_ISL_467329 | 2020-04   | 6/12/2020 North America / Canada / British Columbia            |
| EPI_ISL_467330 | 2020-04   | 6/12/2020 North America / Canada / British Columbia            |
| EPI_ISL_467331 | 2020-04   | 6/12/2020 North America / Canada / British Columbia            |
| EPI_ISL_467332 | 2020-04   | 6/12/2020 North America / Canada / British Columbia            |
| EPI_ISL_467333 | 2020-04   | 6/12/2020 North America / Canada / British Columbia            |
| EPI_ISL_467334 | 2020-04   | 6/12/2020 North America / Canada / British Columbia            |
| EPI_ISL_467335 | 2020-04   | 6/12/2020 North America / Canada / British Columbia            |
| EPI_ISL_467336 | 2020-04   | 6/12/2020 North America / Canada / British Columbia            |
| EPI_ISL_467337 | 2020-04   | 6/12/2020 North America / Canada / British Columbia            |
| EPI_ISL_467338 | 2020-04   | 6/12/2020 North America / Canada / British Columbia            |
| EPI_ISL_467339 | 2020-04   | 6/12/2020 North America / Canada / British Columbia            |
| EPI_ISL_467340 | 2020-04   | 6/12/2020 North America / Canada / British Columbia            |
| EPI_ISL_467341 | 2020-04   | 6/12/2020 North America / Canada / British Columbia            |
| EPI_ISL_467342 | 2020-04   | 6/12/2020 North America / Canada / British Columbia            |
| EPI_ISL_467343 | 2020-04   | 6/12/2020 North America / Canada / British Columbia            |
| EPI_ISL_467344 | 4/2/2020  | 6/12/2020 South America / Brazil / Rio de Janeiro / Petropolis |
| EPI_ISL_467345 | 4/2/2020  | 6/12/2020 South America / Brazil / Rio de Janeiro              |
| EPI_ISL_467346 | 4/2/2020  | 6/12/2020 South America / Brazil / Rio de Janeiro              |
| EPI_ISL_467347 | 4/16/2020 | 6/12/2020 South America / Brazil / Rio de Janeiro              |
| EPI_ISL_467348 | 4/17/2020 | 6/12/2020 South America / Brazil / Rio de Janeiro              |
| EPI_ISL_467349 | 4/17/2020 | 6/12/2020 South America / Brazil / Rio de Janeiro              |
| EPI_ISL_467350 | 4/17/2020 | 6/12/2020 South America / Brazil / Rio de Janeiro              |
| EPI_ISL_467351 | 4/17/2020 | 6/12/2020 South America / Brazil / Rio de Janeiro              |
| EPI_ISL_467352 | 4/20/2020 | 6/12/2020 South America / Brazil / Rio de Janeiro / Queimados  |
| EPI_ISL_467353 | 4/24/2020 | 6/12/2020 South America / Brazil / Rio de Janeiro / Niteroi    |
| EPI_ISL_467354 | 4/24/2020 | 6/12/2020 South America / Brazil / Rio de Janeiro              |
| EPI_ISL_467355 | 4/24/2020 | 6/12/2020 South America / Brazil / Rio de Janeiro              |
| EPI_ISL_467356 | 4/24/2020 | 6/12/2020 South America / Brazil / Rio de Janeiro              |
| EPI_ISL_467357 | 4/24/2020 | 6/12/2020 South America / Brazil / Rio de Janeiro              |
| EPI_ISL_467358 | 4/24/2020 | 6/12/2020 South America / Brazil / Rio de Janeiro              |
| EPI_ISL_467359 | 4/24/2020 | 6/12/2020 South America / Brazil / Rio de Janeiro              |

|                |           |                                                                     |
|----------------|-----------|---------------------------------------------------------------------|
| EPI_ISL_467360 | 4/25/2020 | 6/12/2020 South America / Brazil / Rio de Janeiro / Duque de Caxias |
| EPI_ISL_467362 | 4/27/2020 | 6/12/2020 South America / Brazil / Rio de Janeiro                   |
| EPI_ISL_467363 | 4/27/2020 | 6/12/2020 South America / Brazil / Rio de Janeiro                   |
| EPI_ISL_467364 | 4/25/2020 | 6/12/2020 South America / Brazil / Rio de Janeiro / Nova Iguacu     |
| EPI_ISL_467365 | 4/27/2020 | 6/12/2020 South America / Brazil / Rio de Janeiro                   |
| EPI_ISL_467366 | 4/27/2020 | 6/12/2020 South America / Brazil / Rio de Janeiro                   |
| EPI_ISL_467367 | 4/27/2020 | 6/12/2020 South America / Brazil / Rio de Janeiro / Niteroi         |
| EPI_ISL_467368 | 4/28/2020 | 6/12/2020 South America / Brazil / Rio de Janeiro                   |
| EPI_ISL_467369 | 4/28/2020 | 6/12/2020 South America / Brazil / Rio de Janeiro                   |
| EPI_ISL_467370 | 4/28/2020 | 6/12/2020 South America / Brazil / Rio de Janeiro                   |
| EPI_ISL_467371 | 4/28/2020 | 6/12/2020 South America / Brazil / Rio de Janeiro                   |
| EPI_ISL_467372 | 3/18/2020 | 6/13/2020 North America / USA / Arizona                             |
| EPI_ISL_467373 | 3/19/2020 | 6/13/2020 North America / USA / Arizona                             |
| EPI_ISL_467374 | 3/18/2020 | 6/13/2020 Asia / Indonesia / East Kalimantan / Samarinda            |
| EPI_ISL_467375 | 3/23/2020 | 6/13/2020 Asia / Indonesia / North Sulawesi / Manado                |
| EPI_ISL_467376 | 4/24/2020 | 6/13/2020 Asia / Indonesia / Jakarta                                |
| EPI_ISL_467377 | 5/3/2020  | 6/13/2020 North America / USA / New York / Manhattan                |
| EPI_ISL_467378 | 4/25/2020 | 6/13/2020 North America / USA / New York / Queens                   |
| EPI_ISL_467379 | 5/8/2020  | 6/13/2020 North America / USA / New York / Brooklyn                 |
| EPI_ISL_467380 | 4/30/2020 | 6/13/2020 North America / USA / New York / Brooklyn                 |
| EPI_ISL_467381 | 4/3/2020  | 6/13/2020 North America / USA / New York / Westchester County       |
| EPI_ISL_467384 | 5/10/2020 | 6/13/2020 North America / USA / New York / Queens                   |
| EPI_ISL_467385 | 4/10/2020 | 6/13/2020 North America / USA / New York / Brooklyn                 |
| EPI_ISL_467387 | 4/30/2020 | 6/13/2020 North America / USA / New York / Brooklyn                 |
| EPI_ISL_467391 | 4/22/2020 | 6/13/2020 North America / USA / New York / Manhattan                |
| EPI_ISL_467394 | 4/26/2020 | 6/13/2020 North America / USA / New York / Manhattan                |
| EPI_ISL_467395 | 4/26/2020 | 6/13/2020 North America / USA / New York / Manhattan                |
| EPI_ISL_467396 | 4/26/2020 | 6/13/2020 North America / USA / New York / Manhattan                |
| EPI_ISL_467398 | 4/28/2020 | 6/13/2020 North America / USA / New York / Nassau County            |
| EPI_ISL_467399 | 4/30/2020 | 6/13/2020 North America / USA / New York / Brooklyn                 |
| EPI_ISL_467400 | 5/7/2020  | 6/13/2020 North America / USA / New York / Manhattan                |
| EPI_ISL_467405 | 5/8/2020  | 6/13/2020 North America / USA / New York / Queens                   |
| EPI_ISL_467409 | 3/20/2020 | 6/13/2020 North America / USA / New York / Staten Island            |
| EPI_ISL_467411 | 3/18/2020 | 6/13/2020 North America / USA / New York / Nassau County            |
| EPI_ISL_467412 | 3/18/2020 | 6/13/2020 North America / USA / New York / Queens                   |
| EPI_ISL_467413 | 3/18/2020 | 6/13/2020 North America / USA / New York / Queens                   |
| EPI_ISL_467414 | 3/18/2020 | 6/13/2020 North America / USA / New York / Manhattan                |
| EPI_ISL_467416 | 3/18/2020 | 6/13/2020 North America / USA / New York / Brooklyn                 |
| EPI_ISL_467417 | 3/18/2020 | 6/13/2020 North America / USA / New York / Brooklyn                 |
| EPI_ISL_467418 | 3/18/2020 | 6/13/2020 North America / USA / New York / Manhattan                |
| EPI_ISL_467420 | 3/17/2020 | 6/13/2020 North America / USA / New York / Manhattan                |
| EPI_ISL_467421 | 3/18/2020 | 6/13/2020 North America / USA / New York / Manhattan                |
| EPI_ISL_467422 | 3/18/2020 | 6/13/2020 North America / USA / New York / Nassau County            |
| EPI_ISL_467423 | 2020-04   | 6/13/2020 North America / Canada / British Columbia                 |
| EPI_ISL_467424 | 2020-04   | 6/13/2020 North America / Canada / British Columbia                 |
| EPI_ISL_467425 | 2020-04   | 6/13/2020 North America / Canada / British Columbia                 |
| EPI_ISL_467426 | 2020-04   | 6/13/2020 North America / Canada / British Columbia                 |

|                |           |           |                                                     |
|----------------|-----------|-----------|-----------------------------------------------------|
| EPI_ISL_467427 | 2020-04   | 6/13/2020 | North America / Canada / British Columbia           |
| EPI_ISL_467428 | 2020-04   | 6/13/2020 | North America / Canada / British Columbia           |
| EPI_ISL_467429 | 2020-04   | 6/13/2020 | North America / Canada / British Columbia           |
| EPI_ISL_467430 | 3/13/2020 | 6/14/2020 | Asia / China / Harbin                               |
| EPI_ISL_467431 | 3/23/2020 | 6/14/2020 | Africa / South Africa / KwaZulu-Natal / Overport    |
| EPI_ISL_467432 | 3/28/2020 | 6/14/2020 | Africa / South Africa / KwaZulu-Natal / Berea       |
| EPI_ISL_467433 | 4/3/2020  | 6/14/2020 | Africa / South Africa / KwaZulu-Natal / Berea       |
| EPI_ISL_467434 | 4/2/2020  | 6/14/2020 | Africa / South Africa / KwaZulu-Natal / Berea       |
| EPI_ISL_467435 | 4/2/2020  | 6/14/2020 | Africa / South Africa / KwaZulu-Natal / Berea       |
| EPI_ISL_467437 | 4/1/2020  | 6/14/2020 | Africa / South Africa / KwaZulu-Natal / Berea       |
| EPI_ISL_467441 | 3/27/2020 | 6/14/2020 | Africa / South Africa / KwaZulu-Natal / Morningside |
| EPI_ISL_467442 | 3/27/2020 | 6/14/2020 | Africa / South Africa / KwaZulu-Natal / Berea       |
| EPI_ISL_467443 | 3/25/2020 | 6/14/2020 | Africa / South Africa / KwaZulu-Natal / Morningside |
| EPI_ISL_467444 | 3/24/2020 | 6/14/2020 | Africa / South Africa / KwaZulu-Natal / Berea       |
| EPI_ISL_467445 | 4/4/2020  | 6/14/2020 | Africa / South Africa / KwaZulu-Natal / Berea       |
| EPI_ISL_467446 | 3/29/2020 | 6/14/2020 | Africa / South Africa / KwaZulu-Natal / Berea       |
| EPI_ISL_467449 | 4/4/2020  | 6/14/2020 | Africa / South Africa / KwaZulu-Natal / Berea       |
| EPI_ISL_467450 | 4/3/2020  | 6/14/2020 | Africa / South Africa / KwaZulu-Natal / Berea       |
| EPI_ISL_467451 | 4/3/2020  | 6/14/2020 | Africa / South Africa / KwaZulu-Natal / Berea       |
| EPI_ISL_467453 | 4/4/2020  | 6/14/2020 | Africa / South Africa / KwaZulu-Natal / Berea       |
| EPI_ISL_467454 | 4/1/2020  | 6/14/2020 | Africa / South Africa / KwaZulu-Natal / Berea       |
| EPI_ISL_467455 | 4/6/2020  | 6/14/2020 | Africa / South Africa / KwaZulu-Natal / Berea       |
| EPI_ISL_467456 | 4/5/2020  | 6/14/2020 | Africa / South Africa / KwaZulu-Natal / Berea       |
| EPI_ISL_467457 | 4/7/2020  | 6/14/2020 | Africa / South Africa / KwaZulu-Natal / Berea       |
| EPI_ISL_467460 | 4/5/2020  | 6/14/2020 | Africa / South Africa / KwaZulu-Natal / Berea       |
| EPI_ISL_467461 | 4/1/2020  | 6/14/2020 | Africa / South Africa / KwaZulu-Natal / Berea       |
| EPI_ISL_467462 | 4/1/2020  | 6/14/2020 | Africa / South Africa / KwaZulu-Natal / Berea       |
| EPI_ISL_467465 | 4/1/2020  | 6/14/2020 | Africa / South Africa / KwaZulu-Natal / Berea       |
| EPI_ISL_467466 | 4/5/2020  | 6/14/2020 | Africa / South Africa / KwaZulu-Natal / Berea       |
| EPI_ISL_467467 | 4/5/2020  | 6/14/2020 | Africa / South Africa / KwaZulu-Natal / Berea       |
| EPI_ISL_467468 | 4/4/2020  | 6/14/2020 | Africa / South Africa / KwaZulu-Natal / Berea       |
| EPI_ISL_467469 | 4/3/2020  | 6/14/2020 | Africa / South Africa / KwaZulu-Natal / Berea       |
| EPI_ISL_467470 | 4/1/2020  | 6/14/2020 | Africa / South Africa / KwaZulu-Natal / Berea       |
| EPI_ISL_467471 | 4/1/2020  | 6/14/2020 | Africa / South Africa / KwaZulu-Natal / Berea       |
| EPI_ISL_467472 | 4/1/2020  | 6/14/2020 | Africa / South Africa / KwaZulu-Natal / Berea       |
| EPI_ISL_467473 | 4/1/2020  | 6/14/2020 | Africa / South Africa / KwaZulu-Natal / Berea       |
| EPI_ISL_467474 | 4/1/2020  | 6/14/2020 | Africa / South Africa / KwaZulu-Natal / Berea       |
| EPI_ISL_467475 | 5/14/2020 | 6/14/2020 | Africa / South Africa / KwaZulu-Natal               |
| EPI_ISL_467476 | 5/13/2020 | 6/14/2020 | Africa / South Africa / KwaZulu-Natal               |
| EPI_ISL_467477 | 5/13/2020 | 6/14/2020 | Africa / South Africa / KwaZulu-Natal               |
| EPI_ISL_467478 | 5/13/2020 | 6/14/2020 | Africa / South Africa / KwaZulu-Natal               |
| EPI_ISL_467479 | 5/13/2020 | 6/14/2020 | Africa / South Africa / KwaZulu-Natal               |
| EPI_ISL_467480 | 5/13/2020 | 6/14/2020 | Africa / South Africa / KwaZulu-Natal               |
| EPI_ISL_467481 | 5/13/2020 | 6/14/2020 | Africa / South Africa / KwaZulu-Natal               |
| EPI_ISL_467482 | 5/13/2020 | 6/14/2020 | Africa / South Africa / KwaZulu-Natal               |
| EPI_ISL_467483 | 5/13/2020 | 6/14/2020 | Africa / South Africa / KwaZulu-Natal               |
| EPI_ISL_467484 | 5/13/2020 | 6/14/2020 | Africa / South Africa / KwaZulu-Natal               |



|                |           |                                             |
|----------------|-----------|---------------------------------------------|
| EPI_ISL_467591 | 3/14/2020 | 6/14/2020 North America / USA / New Mexico  |
| EPI_ISL_467594 | 3/15/2020 | 6/14/2020 North America / USA / New Mexico  |
| EPI_ISL_467596 | 3/14/2020 | 6/14/2020 North America / USA / New Mexico  |
| EPI_ISL_467598 | 3/14/2020 | 6/14/2020 North America / USA / New Mexico  |
| EPI_ISL_467599 | 3/12/2020 | 6/14/2020 North America / USA / New Mexico  |
| EPI_ISL_467600 | 3/12/2020 | 6/14/2020 North America / USA / New Mexico  |
| EPI_ISL_467604 | 3/16/2020 | 6/14/2020 North America / USA / New Mexico  |
| EPI_ISL_467608 | 3/15/2020 | 6/14/2020 North America / USA / New Mexico  |
| EPI_ISL_467610 | 3/17/2020 | 6/14/2020 North America / USA / New Mexico  |
| EPI_ISL_467611 | 3/17/2020 | 6/14/2020 North America / USA / New Mexico  |
| EPI_ISL_467612 | 3/17/2020 | 6/14/2020 North America / USA / New Mexico  |
| EPI_ISL_467624 | 3/18/2020 | 6/14/2020 North America / USA / New Mexico  |
| EPI_ISL_467630 | 4/1/2020  | 6/14/2020 North America / USA / New Mexico  |
| EPI_ISL_467632 | 4/1/2020  | 6/14/2020 North America / USA / New Mexico  |
| EPI_ISL_467633 | 4/1/2020  | 6/14/2020 North America / USA / New Mexico  |
| EPI_ISL_467634 | 4/1/2020  | 6/14/2020 North America / USA / New Mexico  |
| EPI_ISL_467644 | 4/2/2020  | 6/14/2020 North America / USA / New Mexico  |
| EPI_ISL_467651 | 4/2/2020  | 6/14/2020 North America / USA / New Mexico  |
| EPI_ISL_467652 | 4/2/2020  | 6/14/2020 North America / USA / New Mexico  |
| EPI_ISL_467653 | 4/3/2020  | 6/14/2020 North America / USA / New Mexico  |
| EPI_ISL_467654 | 4/3/2020  | 6/14/2020 North America / USA / New Mexico  |
| EPI_ISL_467661 | 4/4/2020  | 6/14/2020 North America / USA / New Mexico  |
| EPI_ISL_467663 | 4/4/2020  | 6/14/2020 North America / USA / New Mexico  |
| EPI_ISL_468066 | 4/16/2020 | 6/14/2020 Europe / Turkey                   |
| EPI_ISL_605909 | 5/24/2020 | 6/14/2020 Asia / Bangladesh                 |
| EPI_ISL_605910 | 5/24/2020 | 6/14/2020 Asia / Bangladesh                 |
| EPI_ISL_605911 | 5/24/2020 | 6/14/2020 Asia / Bangladesh                 |
| EPI_ISL_605912 | 5/24/2020 | 6/14/2020 Asia / Bangladesh                 |
| EPI_ISL_605913 | 5/24/2020 | 6/14/2020 Asia / Bangladesh                 |
| EPI_ISL_467695 | 5/20/2020 | 6/15/2020 Europe / United Kingdom / England |
| EPI_ISL_467699 | 5/18/2020 | 6/15/2020 Europe / United Kingdom / England |
| EPI_ISL_467708 | 5/23/2020 | 6/15/2020 Europe / United Kingdom / England |
| EPI_ISL_467713 | 5/20/2020 | 6/15/2020 Europe / United Kingdom / England |
| EPI_ISL_467718 | 5/23/2020 | 6/15/2020 Europe / United Kingdom / England |
| EPI_ISL_467774 | 3/31/2020 | 6/15/2020 Europe / Russia / Moscow          |
| EPI_ISL_467775 | 3/29/2020 | 6/15/2020 Europe / Russia / Moscow          |
| EPI_ISL_467778 | 4/27/2020 | 6/15/2020 Europe / Romania / Bucuresti      |
| EPI_ISL_467779 | 4/27/2020 | 6/15/2020 Europe / Romania / Bucuresti      |
| EPI_ISL_467780 | 4/26/2020 | 6/15/2020 Europe / Romania / Teleorman      |
| EPI_ISL_467781 | 4/28/2020 | 6/15/2020 Europe / Romania / Constanta      |
| EPI_ISL_467782 | 4/16/2020 | 6/15/2020 North America / USA / Virginia    |
| EPI_ISL_467783 | 4/17/2020 | 6/15/2020 North America / USA / Virginia    |
| EPI_ISL_467784 | 4/18/2020 | 6/15/2020 North America / USA / Virginia    |
| EPI_ISL_467785 | 4/18/2020 | 6/15/2020 North America / USA / Virginia    |
| EPI_ISL_467786 | 4/18/2020 | 6/15/2020 North America / USA / Virginia    |
| EPI_ISL_467787 | 4/18/2020 | 6/15/2020 North America / USA / Virginia    |
| EPI_ISL_467788 | 4/19/2020 | 6/15/2020 North America / USA / Virginia    |







|                |           |           |                                    |
|----------------|-----------|-----------|------------------------------------|
| EPI_ISL_467885 | 3/16/2020 | 6/15/2020 | North America / USA / New York     |
| EPI_ISL_467886 | 3/16/2020 | 6/15/2020 | North America / USA / New York     |
| EPI_ISL_467887 | 3/16/2020 | 6/15/2020 | North America / USA / New York     |
| EPI_ISL_467888 | 3/15/2020 | 6/15/2020 | North America / USA / New York     |
| EPI_ISL_467889 | 3/16/2020 | 6/15/2020 | North America / USA / New York     |
| EPI_ISL_467890 | 3/16/2020 | 6/15/2020 | North America / USA / New York     |
| EPI_ISL_467891 | 3/16/2020 | 6/15/2020 | North America / USA / New York     |
| EPI_ISL_467892 | 3/15/2020 | 6/15/2020 | North America / USA / New York     |
| EPI_ISL_467893 | 3/16/2020 | 6/15/2020 | North America / USA / New York     |
| EPI_ISL_467894 | 3/15/2020 | 6/15/2020 | North America / USA / New York     |
| EPI_ISL_467895 | 3/15/2020 | 6/15/2020 | North America / USA / New York     |
| EPI_ISL_467896 | 3/15/2020 | 6/15/2020 | North America / USA / New York     |
| EPI_ISL_467897 | 3/16/2020 | 6/15/2020 | North America / USA / New York     |
| EPI_ISL_467898 | 3/15/2020 | 6/15/2020 | North America / USA / New York     |
| EPI_ISL_467899 | 3/15/2020 | 6/15/2020 | North America / USA / New York     |
| EPI_ISL_467900 | 3/16/2020 | 6/15/2020 | North America / USA / New York     |
| EPI_ISL_467901 | 3/16/2020 | 6/15/2020 | North America / USA / New York     |
| EPI_ISL_467902 | 3/13/2020 | 6/15/2020 | North America / USA / New York     |
| EPI_ISL_467903 | 3/15/2020 | 6/15/2020 | North America / USA / New York     |
| EPI_ISL_467904 | 3/13/2020 | 6/15/2020 | North America / USA / Pennsylvania |
| EPI_ISL_467905 | 3/13/2020 | 6/15/2020 | North America / USA / Tennessee    |
| EPI_ISL_467906 | 3/15/2020 | 6/15/2020 | North America / USA / Texas        |
| EPI_ISL_467907 | 3/15/2020 | 6/15/2020 | North America / USA / Texas        |
| EPI_ISL_467908 | 3/14/2020 | 6/15/2020 | North America / USA / Texas        |
| EPI_ISL_467909 | 3/13/2020 | 6/15/2020 | North America / USA / Utah         |
| EPI_ISL_467910 | 3/13/2020 | 6/15/2020 | North America / USA / Utah         |
| EPI_ISL_467911 | 3/13/2020 | 6/15/2020 | North America / USA / Utah         |
| EPI_ISL_467912 | 3/13/2020 | 6/15/2020 | North America / USA / Utah         |
| EPI_ISL_467913 | 3/13/2020 | 6/15/2020 | North America / USA / Utah         |
| EPI_ISL_467914 | 3/13/2020 | 6/15/2020 | North America / USA / Utah         |
| EPI_ISL_467915 | 3/12/2020 | 6/15/2020 | North America / USA / Utah         |
| EPI_ISL_467916 | 3/13/2020 | 6/15/2020 | North America / USA / Utah         |
| EPI_ISL_467917 | 3/12/2020 | 6/15/2020 | North America / USA / Utah         |
| EPI_ISL_467918 | 3/13/2020 | 6/15/2020 | North America / USA / Utah         |
| EPI_ISL_467919 | 3/13/2020 | 6/15/2020 | North America / USA / Utah         |
| EPI_ISL_467920 | 3/12/2020 | 6/15/2020 | North America / USA / Utah         |
| EPI_ISL_467921 | 3/13/2020 | 6/15/2020 | North America / USA / Utah         |
| EPI_ISL_467922 | 3/12/2020 | 6/15/2020 | North America / USA / Utah         |
| EPI_ISL_467923 | 3/12/2020 | 6/15/2020 | North America / USA / Utah         |
| EPI_ISL_467924 | 3/13/2020 | 6/15/2020 | North America / USA / Utah         |
| EPI_ISL_467925 | 3/11/2020 | 6/15/2020 | North America / USA / Utah         |
| EPI_ISL_467926 | 3/13/2020 | 6/15/2020 | North America / USA / Washington   |
| EPI_ISL_467927 | 3/13/2020 | 6/15/2020 | North America / USA / Washington   |
| EPI_ISL_467928 | 5/4/2020  | 6/15/2020 | North America / USA / Virginia     |
| EPI_ISL_467929 | 5/4/2020  | 6/15/2020 | North America / USA / Virginia     |
| EPI_ISL_467930 | 5/4/2020  | 6/15/2020 | North America / USA / Virginia     |
| EPI_ISL_467932 | 5/4/2020  | 6/15/2020 | North America / USA / Virginia     |

|                |           |                                                                  |
|----------------|-----------|------------------------------------------------------------------|
| EPI_ISL_467933 | 5/4/2020  | 6/15/2020 North America / USA / Virginia                         |
| EPI_ISL_467934 | 5/4/2020  | 6/15/2020 North America / USA / Virginia                         |
| EPI_ISL_467935 | 5/5/2020  | 6/15/2020 North America / USA / Virginia                         |
| EPI_ISL_467936 | 5/6/2020  | 6/15/2020 North America / USA / Virginia                         |
| EPI_ISL_467937 | 5/6/2020  | 6/15/2020 North America / USA / Virginia                         |
| EPI_ISL_467938 | 5/6/2020  | 6/15/2020 North America / USA / Virginia                         |
| EPI_ISL_467941 | 5/4/2020  | 6/15/2020 North America / USA / Virginia                         |
| EPI_ISL_467942 | 5/5/2020  | 6/15/2020 North America / USA / Virginia                         |
| EPI_ISL_467943 | 4/16/2020 | 6/15/2020 North America / USA / Virginia                         |
| EPI_ISL_467944 | 4/16/2020 | 6/15/2020 North America / USA / Virginia                         |
| EPI_ISL_467945 | 4/21/2020 | 6/15/2020 North America / USA / New York / New York City / Bronx |
| EPI_ISL_467946 | 5/15/2020 | 6/15/2020 North America / USA / California / Alameda County      |
| EPI_ISL_467948 | 5/15/2020 | 6/15/2020 North America / USA / California / Alameda County      |
| EPI_ISL_468718 | 5/6/2020  | 6/15/2020 North America / USA / Florida                          |
| EPI_ISL_468719 | 4/20/2020 | 6/15/2020 North America / USA / Florida                          |
| EPI_ISL_468720 | 4/22/2020 | 6/15/2020 North America / USA / Florida                          |
| EPI_ISL_468721 | 4/17/2020 | 6/15/2020 North America / USA / Florida                          |
| EPI_ISL_468722 | 4/9/2020  | 6/15/2020 North America / USA / Florida                          |
| EPI_ISL_468723 | 4/22/2020 | 6/15/2020 North America / USA / Florida                          |
| EPI_ISL_469241 | 3/15/2020 | 6/15/2020 Asia / Saudi Arabia / Jeddah                           |
| EPI_ISL_469242 | 3/15/2020 | 6/15/2020 Asia / Saudi Arabia / Jeddah                           |
| EPI_ISL_469243 | 3/15/2020 | 6/15/2020 Asia / Saudi Arabia / Jeddah                           |
| EPI_ISL_469244 | 3/15/2020 | 6/15/2020 Asia / Saudi Arabia / Jeddah                           |
| EPI_ISL_469245 | 3/15/2020 | 6/15/2020 Asia / Saudi Arabia / Jeddah                           |
| EPI_ISL_469246 | 3/15/2020 | 6/15/2020 Asia / Saudi Arabia / Jeddah                           |
| EPI_ISL_469247 | 3/15/2020 | 6/15/2020 Asia / Saudi Arabia / Jeddah                           |
| EPI_ISL_469248 | 3/15/2020 | 6/15/2020 Asia / Saudi Arabia / Jeddah                           |
| EPI_ISL_469249 | 3/15/2020 | 6/15/2020 Asia / Saudi Arabia / Jeddah                           |
| EPI_ISL_469250 | 3/15/2020 | 6/15/2020 Asia / Saudi Arabia / Jeddah                           |
| EPI_ISL_469251 | 3/15/2020 | 6/15/2020 Asia / Saudi Arabia / Jeddah                           |
| EPI_ISL_469252 | 3/15/2020 | 6/15/2020 Asia / Saudi Arabia / Jeddah                           |
| EPI_ISL_478672 | 6/2/2020  | 6/15/2020 Africa / Egypt                                         |
| EPI_ISL_479676 | 2020-04   | 6/15/2020 Asia / Japan                                           |
| EPI_ISL_479677 | 2020-04   | 6/15/2020 Asia / Japan                                           |
| EPI_ISL_479678 | 2020-04   | 6/15/2020 Asia / Japan                                           |
| EPI_ISL_479679 | 2020-04   | 6/15/2020 Asia / Japan                                           |
| EPI_ISL_479680 | 2020-04   | 6/15/2020 Asia / Japan                                           |
| EPI_ISL_479681 | 2020-04   | 6/15/2020 Asia / Japan                                           |
| EPI_ISL_479682 | 2020-04   | 6/15/2020 Asia / Japan                                           |
| EPI_ISL_479683 | 2020-04   | 6/15/2020 Asia / Japan                                           |
| EPI_ISL_479684 | 2020-04   | 6/15/2020 Asia / Japan                                           |
| EPI_ISL_479685 | 2020-04   | 6/15/2020 Asia / Japan                                           |
| EPI_ISL_479699 | 6/2/2020  | 6/15/2020 Africa / Egypt                                         |
| EPI_ISL_479700 | 6/2/2020  | 6/15/2020 Africa / Egypt                                         |
| EPI_ISL_479701 | 6/2/2020  | 6/15/2020 Africa / Egypt                                         |
| EPI_ISL_479703 | 6/2/2020  | 6/15/2020 Africa / Egypt                                         |
| EPI_ISL_479704 | 6/2/2020  | 6/15/2020 Africa / Egypt                                         |



|                |           |           |                                                     |
|----------------|-----------|-----------|-----------------------------------------------------|
| EPI_ISL_467974 | 3/12/2020 | 6/16/2020 | North America / USA / California / San Diego County |
| EPI_ISL_467975 | 3/30/2020 | 6/16/2020 | North America / USA / California / San Diego County |
| EPI_ISL_467976 | 5/19/2020 | 6/16/2020 | North America / USA / California / San Diego County |
| EPI_ISL_467978 | 3/16/2020 | 6/16/2020 | North America / USA / California / San Diego County |
| EPI_ISL_467979 | 3/30/2020 | 6/16/2020 | North America / USA / California / San Diego County |
| EPI_ISL_467980 | 4/2/2020  | 6/16/2020 | North America / USA / California / San Diego County |
| EPI_ISL_467981 | 5/19/2020 | 6/16/2020 | North America / USA / California / San Diego County |
| EPI_ISL_467982 | 3/8/2020  | 6/16/2020 | North America / USA / California / San Diego County |
| EPI_ISL_467983 | 3/30/2020 | 6/16/2020 | North America / USA / California / San Diego County |
| EPI_ISL_467984 | 5/19/2020 | 6/16/2020 | North America / USA / California / San Diego County |
| EPI_ISL_467990 | 4/2/2020  | 6/16/2020 | Oceania / Australia / South Australia               |
| EPI_ISL_467991 | 3/25/2020 | 6/16/2020 | Oceania / Australia / South Australia               |
| EPI_ISL_467994 | 4/2/2020  | 6/16/2020 | Oceania / Australia / South Australia               |
| EPI_ISL_467995 | 3/15/2020 | 6/16/2020 | Oceania / Australia / South Australia               |
| EPI_ISL_467996 | 4/4/2020  | 6/16/2020 | Oceania / Australia / South Australia               |
| EPI_ISL_467999 | 3/31/2020 | 6/16/2020 | Oceania / Australia / South Australia               |
| EPI_ISL_468001 | 3/14/2020 | 6/16/2020 | Oceania / Australia / South Australia               |
| EPI_ISL_468003 | 4/2/2020  | 6/16/2020 | Oceania / Australia / South Australia               |
| EPI_ISL_468004 | 3/28/2020 | 6/16/2020 | Oceania / Australia / South Australia               |
| EPI_ISL_468005 | 3/31/2020 | 6/16/2020 | Oceania / Australia / South Australia               |
| EPI_ISL_468006 | 3/31/2020 | 6/16/2020 | Oceania / Australia / South Australia               |
| EPI_ISL_468007 | 4/7/2020  | 6/16/2020 | Oceania / Australia / South Australia               |
| EPI_ISL_468008 | 3/30/2020 | 6/16/2020 | Oceania / Australia / South Australia               |
| EPI_ISL_468009 | 4/6/2020  | 6/16/2020 | Oceania / Australia / South Australia               |
| EPI_ISL_468010 | 4/1/2020  | 6/16/2020 | Oceania / Australia / South Australia               |
| EPI_ISL_468011 | 4/3/2020  | 6/16/2020 | Oceania / Australia / South Australia               |
| EPI_ISL_468012 | 4/2/2020  | 6/16/2020 | Oceania / Australia / South Australia               |
| EPI_ISL_468013 | 3/29/2020 | 6/16/2020 | Oceania / Australia / South Australia               |
| EPI_ISL_468014 | 3/26/2020 | 6/16/2020 | Oceania / Australia / South Australia               |
| EPI_ISL_468015 | 3/25/2020 | 6/16/2020 | Oceania / Australia / South Australia               |
| EPI_ISL_468016 | 3/16/2020 | 6/16/2020 | Oceania / Australia / South Australia               |
| EPI_ISL_468017 | 4/2/2020  | 6/16/2020 | Oceania / Australia / South Australia               |
| EPI_ISL_468018 | 3/25/2020 | 6/16/2020 | Oceania / Australia / South Australia               |
| EPI_ISL_468019 | 4/2/2020  | 6/16/2020 | Oceania / Australia / South Australia               |
| EPI_ISL_468020 | 3/25/2020 | 6/16/2020 | Oceania / Australia / South Australia               |
| EPI_ISL_468021 | 3/25/2020 | 6/16/2020 | Oceania / Australia / South Australia               |
| EPI_ISL_468022 | 3/25/2020 | 6/16/2020 | Oceania / Australia / South Australia               |
| EPI_ISL_468023 | 3/25/2020 | 6/16/2020 | Oceania / Australia / South Australia               |
| EPI_ISL_468024 | 4/3/2020  | 6/16/2020 | Oceania / Australia / South Australia               |
| EPI_ISL_468025 | 4/7/2020  | 6/16/2020 | Oceania / Australia / South Australia               |
| EPI_ISL_468026 | 3/26/2020 | 6/16/2020 | Oceania / Australia / South Australia               |
| EPI_ISL_468027 | 4/7/2020  | 6/16/2020 | Oceania / Australia / South Australia               |
| EPI_ISL_468028 | 3/25/2020 | 6/16/2020 | Oceania / Australia / South Australia               |
| EPI_ISL_468029 | 3/25/2020 | 6/16/2020 | Oceania / Australia / South Australia               |
| EPI_ISL_468030 | 3/25/2020 | 6/16/2020 | Oceania / Australia / South Australia               |
| EPI_ISL_468031 | 3/30/2020 | 6/16/2020 | Oceania / Australia / South Australia               |
| EPI_ISL_468032 | 1/30/2020 | 6/16/2020 | Oceania / Australia / South Australia               |

|                |           |                                                            |
|----------------|-----------|------------------------------------------------------------|
| EPI_ISL_468033 | 3/25/2020 | 6/16/2020 Oceania / Australia / South Australia            |
| EPI_ISL_468034 | 3/25/2020 | 6/16/2020 Oceania / Australia / South Australia            |
| EPI_ISL_468035 | 3/31/2020 | 6/16/2020 Oceania / Australia / South Australia            |
| EPI_ISL_468036 | 3/30/2020 | 6/16/2020 Oceania / Australia / South Australia            |
| EPI_ISL_468037 | 1/30/2020 | 6/16/2020 Oceania / Australia / South Australia            |
| EPI_ISL_468038 | 3/4/2020  | 6/16/2020 Oceania / Australia / South Australia            |
| EPI_ISL_468039 | 2/22/2020 | 6/16/2020 Oceania / Australia / South Australia            |
| EPI_ISL_468040 | 4/1/2020  | 6/16/2020 Oceania / Australia / South Australia            |
| EPI_ISL_468041 | 3/31/2020 | 6/16/2020 Oceania / Australia / South Australia            |
| EPI_ISL_468042 | 3/25/2020 | 6/16/2020 Oceania / Australia / South Australia            |
| EPI_ISL_468043 | 3/31/2020 | 6/16/2020 Oceania / Australia / South Australia            |
| EPI_ISL_468070 | 4/20/2020 | 6/16/2020 Asia / Bangladesh / Dhaka                        |
| EPI_ISL_468071 | 4/17/2020 | 6/16/2020 Asia / Bangladesh / Dhaka                        |
| EPI_ISL_468072 | 4/17/2020 | 6/16/2020 Asia / Bangladesh / Dhaka                        |
| EPI_ISL_468073 | 5/10/2020 | 6/16/2020 Asia / Bangladesh / Dhaka / Tangail              |
| EPI_ISL_468075 | 5/14/2020 | 6/16/2020 Asia / Bangladesh / Dhaka                        |
| EPI_ISL_468076 | 5/16/2020 | 6/16/2020 Asia / Bangladesh / Dhaka                        |
| EPI_ISL_468077 | 4/8/2020  | 6/16/2020 Asia / Bangladesh / Dhaka                        |
| EPI_ISL_468078 | 5/3/2020  | 6/16/2020 Asia / Bangladesh / Dhaka                        |
| EPI_ISL_468081 | 4/17/2020 | 6/16/2020 North America / USA / Washington / Clark County  |
| EPI_ISL_468082 | 4/17/2020 | 6/16/2020 North America / USA / Washington / Clark County  |
| EPI_ISL_468083 | 4/17/2020 | 6/16/2020 North America / USA / Washington / Clark County  |
| EPI_ISL_468084 | 4/17/2020 | 6/16/2020 North America / USA / Washington / Clark County  |
| EPI_ISL_468089 | 4/21/2020 | 6/16/2020 North America / USA / Oregon / Washington County |
| EPI_ISL_468095 | 4/23/2020 | 6/16/2020 North America / USA / Oregon / Washington County |
| EPI_ISL_468103 | 4/27/2020 | 6/16/2020 North America / USA / Oregon / Washington County |
| EPI_ISL_468105 | 5/4/2020  | 6/16/2020 North America / USA / Oregon                     |
| EPI_ISL_468109 | 5/4/2020  | 6/16/2020 North America / USA / Oregon                     |
| EPI_ISL_468110 | 5/5/2020  | 6/16/2020 North America / USA / Oregon / Washington County |
| EPI_ISL_468112 | 5/6/2020  | 6/16/2020 North America / USA / Oregon / Washington County |
| EPI_ISL_468113 | 5/6/2020  | 6/16/2020 North America / USA / Oregon / Washington County |
| EPI_ISL_468117 | 5/6/2020  | 6/16/2020 North America / USA / Oregon / Washington County |
| EPI_ISL_468120 | 5/13/2020 | 6/16/2020 North America / USA / Oregon                     |
| EPI_ISL_468123 | 5/11/2020 | 6/16/2020 North America / USA / Oregon                     |
| EPI_ISL_468125 | 5/11/2020 | 6/16/2020 North America / USA / Oregon                     |
| EPI_ISL_468126 | 5/9/2020  | 6/16/2020 North America / USA / Oregon                     |
| EPI_ISL_468134 | 3/21/2020 | 6/16/2020 Europe / Romania / Bucuresti                     |
| EPI_ISL_468135 | 3/22/2020 | 6/16/2020 Europe / Romania / Bucuresti                     |
| EPI_ISL_468136 | 3/22/2020 | 6/16/2020 Europe / Romania / Bucuresti                     |
| EPI_ISL_468137 | 3/22/2020 | 6/16/2020 Europe / Romania / Suceava                       |
| EPI_ISL_468138 | 3/25/2020 | 6/16/2020 Europe / Romania / Suceava                       |
| EPI_ISL_468139 | 3/25/2020 | 6/16/2020 Europe / Romania / Suceava                       |
| EPI_ISL_468140 | 3/25/2020 | 6/16/2020 Europe / Romania / Suceava                       |
| EPI_ISL_468141 | 3/25/2020 | 6/16/2020 Europe / Romania / Suceava                       |
| EPI_ISL_468142 | 3/25/2020 | 6/16/2020 Europe / Romania / Suceava                       |
| EPI_ISL_468143 | 3/25/2020 | 6/16/2020 Europe / Romania / Suceava                       |
| EPI_ISL_468144 | 3/25/2020 | 6/16/2020 Europe / Romania / Suceava                       |

|                |           |                                                   |
|----------------|-----------|---------------------------------------------------|
| EPI_ISL_468145 | 3/28/2020 | 6/16/2020 Europe / Romania / Bucuresti            |
| EPI_ISL_468146 | 4/8/2020  | 6/16/2020 Europe / Romania / Suceava              |
| EPI_ISL_468147 | 4/11/2020 | 6/16/2020 Europe / Romania / Bucuresti            |
| EPI_ISL_468148 | 4/11/2020 | 6/16/2020 Europe / Romania / Bucuresti            |
| EPI_ISL_468149 | 4/12/2020 | 6/16/2020 Europe / Romania / Bucuresti            |
| EPI_ISL_468150 | 4/12/2020 | 6/16/2020 Europe / Romania / Bucuresti            |
| EPI_ISL_468151 | 4/15/2020 | 6/16/2020 Europe / Romania / Bucuresti            |
| EPI_ISL_468153 | 4/17/2020 | 6/16/2020 Europe / Romania / Bucuresti            |
| EPI_ISL_468154 | 4/17/2020 | 6/16/2020 Europe / Romania / Bucuresti            |
| EPI_ISL_468155 | 4/18/2020 | 6/16/2020 Europe / Romania / Bucuresti            |
| EPI_ISL_468156 | 5/8/2020  | 6/16/2020 Europe / Romania / Mioveni              |
| EPI_ISL_468158 | 5/29/2020 | 6/16/2020 Europe / Romania / Suceava              |
| EPI_ISL_468159 | 6/2/2020  | 6/16/2020 Asia / Pakistan / Islamabad             |
| EPI_ISL_468160 | 6/2/2020  | 6/16/2020 Asia / Pakistan / Rawalpindi            |
| EPI_ISL_468161 | 6/2/2020  | 6/16/2020 Asia / Pakistan / Islamabad             |
| EPI_ISL_468162 | 6/2/2020  | 6/16/2020 Asia / Pakistan / Islamabad             |
| EPI_ISL_468163 | 6/2/2020  | 6/16/2020 Asia / Pakistan / Islamabad             |
| EPI_ISL_468203 | 4/17/2020 | 6/16/2020 Europe / Switzerland / Aargau           |
| EPI_ISL_468207 | 4/17/2020 | 6/16/2020 Europe / Switzerland / Zurich           |
| EPI_ISL_468213 | 4/17/2020 | 6/16/2020 Europe / Switzerland / Basel-Stadt      |
| EPI_ISL_468221 | 4/18/2020 | 6/16/2020 Europe / Switzerland / Basel-Stadt      |
| EPI_ISL_468222 | 4/18/2020 | 6/16/2020 Europe / Switzerland / Bern             |
| EPI_ISL_468224 | 4/18/2020 | 6/16/2020 Europe / Switzerland / Basel-Landschaft |
| EPI_ISL_468226 | 4/20/2020 | 6/16/2020 Europe / Switzerland / Basel-Landschaft |
| EPI_ISL_468227 | 4/20/2020 | 6/16/2020 Europe / Switzerland / Basel-Landschaft |
| EPI_ISL_468228 | 4/20/2020 | 6/16/2020 Europe / Switzerland / Basel-Landschaft |
| EPI_ISL_468229 | 4/20/2020 | 6/16/2020 Europe / Switzerland / St Gall          |
| EPI_ISL_468232 | 4/20/2020 | 6/16/2020 Europe / Switzerland / Basel-Landschaft |
| EPI_ISL_468233 | 4/20/2020 | 6/16/2020 Europe / Switzerland / Zurich           |
| EPI_ISL_468235 | 4/20/2020 | 6/16/2020 Europe / Switzerland / Bern             |
| EPI_ISL_468240 | 4/20/2020 | 6/16/2020 Europe / Switzerland / Bern             |
| EPI_ISL_468241 | 4/20/2020 | 6/16/2020 Europe / Switzerland / Bern             |
| EPI_ISL_468243 | 4/25/2020 | 6/16/2020 Europe / Switzerland / Zurich           |
| EPI_ISL_468244 | 4/26/2020 | 6/16/2020 Europe / Switzerland / Grisons          |
| EPI_ISL_468247 | 4/26/2020 | 6/16/2020 Europe / Switzerland / Bern             |
| EPI_ISL_468248 | 4/26/2020 | 6/16/2020 Europe / Switzerland / Uri              |
| EPI_ISL_468250 | 4/27/2020 | 6/16/2020 Europe / Switzerland / Aargau           |
| EPI_ISL_468254 | 4/27/2020 | 6/16/2020 Europe / Switzerland / Basel-Stadt      |
| EPI_ISL_468255 | 4/27/2020 | 6/16/2020 Europe / Switzerland / Vaud             |
| EPI_ISL_468257 | 4/27/2020 | 6/16/2020 Europe / Switzerland / Bern             |
| EPI_ISL_468263 | 4/27/2020 | 6/16/2020 Europe / Switzerland / Uri              |
| EPI_ISL_468266 | 4/27/2020 | 6/16/2020 Europe / Switzerland / Zurich           |
| EPI_ISL_468268 | 4/27/2020 | 6/16/2020 Europe / Switzerland / Zurich           |
| EPI_ISL_468275 | 4/28/2020 | 6/16/2020 Europe / Switzerland / Ticino           |
| EPI_ISL_468276 | 4/28/2020 | 6/16/2020 Europe / Switzerland / Ticino           |
| EPI_ISL_468279 | 4/27/2020 | 6/16/2020 Europe / Switzerland / Zurich           |
| EPI_ISL_468280 | 4/28/2020 | 6/16/2020 Europe / Switzerland / Basel-Landschaft |



|                |           |                                                                      |
|----------------|-----------|----------------------------------------------------------------------|
| EPI_ISL_468282 | 4/29/2020 | 6/16/2020 Europe / Switzerland / Geneva                              |
| EPI_ISL_468284 | 4/30/2020 | 6/16/2020 Europe / Switzerland / Bern                                |
| EPI_ISL_468285 | 4/30/2020 | 6/16/2020 Europe / Switzerland / Bern                                |
| EPI_ISL_468286 | 4/30/2020 | 6/16/2020 Europe / Switzerland / Bern                                |
| EPI_ISL_468293 | 5/1/2020  | 6/16/2020 Europe / Switzerland / Uri                                 |
| EPI_ISL_468298 | 5/1/2020  | 6/16/2020 Europe / Switzerland / Bern                                |
| EPI_ISL_468299 | 5/1/2020  | 6/16/2020 Europe / Switzerland / Bern                                |
| EPI_ISL_468303 | 5/4/2020  | 6/16/2020 Europe / Switzerland / Zurich                              |
| EPI_ISL_468305 | 4/8/2020  | 6/16/2020 South America / Brazil / Sao Paulo / Diadema               |
| EPI_ISL_468307 | 4/8/2020  | 6/16/2020 South America / Brazil / Sao Paulo / Diadema               |
| EPI_ISL_468308 | 3/23/2020 | 6/16/2020 South America / Brazil / Sao Paulo / Sao Paulo             |
| EPI_ISL_468310 | 3/22/2020 | 6/16/2020 South America / Brazil / Sao Paulo / Sao Paulo             |
| EPI_ISL_468311 | 3/26/2020 | 6/16/2020 South America / Brazil / Sao Paulo / Sao Paulo             |
| EPI_ISL_468312 | 3/26/2020 | 6/16/2020 South America / Brazil / Sao Paulo / Sao Paulo             |
| EPI_ISL_468313 | 3/23/2020 | 6/16/2020 South America / Brazil / Sao Paulo / Sao Bernardo do Campo |
| EPI_ISL_468314 | 3/26/2020 | 6/16/2020 South America / Brazil / Sao Paulo / Caieiras              |
| EPI_ISL_468315 | 4/12/2020 | 6/16/2020 South America / Brazil / Sao Paulo / Sao Paulo             |
| EPI_ISL_468316 | 4/14/2020 | 6/16/2020 South America / Brazil / Sao Paulo / Maua                  |
| EPI_ISL_468318 | 4/15/2020 | 6/16/2020 South America / Brazil / Sao Paulo / Sao Paulo             |
| EPI_ISL_468319 | 4/14/2020 | 6/16/2020 South America / Brazil / Sao Paulo / Sao Bernardo do Campo |
| EPI_ISL_468320 | 4/13/2020 | 6/16/2020 South America / Brazil / Sao Paulo / Hortolandia           |
| EPI_ISL_468321 | 4/22/2020 | 6/16/2020 South America / Brazil / Sao Paulo / Sao Paulo             |
| EPI_ISL_468339 | 4/22/2020 | 6/16/2020 Europe / Spain / Galicia / A Coruna                        |
| EPI_ISL_468340 | 4/22/2020 | 6/16/2020 Europe / Spain / Galicia / A Coruna                        |
| EPI_ISL_468345 | 4/26/2020 | 6/16/2020 North America / USA / California / Santa Clara County      |
| EPI_ISL_468346 | 4/26/2020 | 6/16/2020 North America / USA / California / Santa Clara County      |
| EPI_ISL_468347 | 4/25/2020 | 6/16/2020 North America / USA / California / Santa Clara County      |
| EPI_ISL_468348 | 4/25/2020 | 6/16/2020 North America / USA / California / Santa Clara County      |
| EPI_ISL_468349 | 5/5/2020  | 6/16/2020 North America / USA / California / Santa Clara County      |
| EPI_ISL_468350 | 5/6/2020  | 6/16/2020 North America / USA / California / Santa Clara County      |
| EPI_ISL_468351 | 5/6/2020  | 6/16/2020 North America / USA / California / Santa Clara County      |
| EPI_ISL_468353 | 5/16/2020 | 6/16/2020 North America / USA / California / Santa Clara County      |
| EPI_ISL_468354 | 5/20/2020 | 6/16/2020 North America / USA / California / Santa Clara County      |
| EPI_ISL_468355 | 5/20/2020 | 6/16/2020 North America / USA / California / Santa Clara County      |
| EPI_ISL_468356 | 5/21/2020 | 6/16/2020 North America / USA / California / Santa Clara County      |
| EPI_ISL_468358 | 4/2/2020  | 6/16/2020 North America / USA / California / Alameda County          |
| EPI_ISL_468360 | 4/8/2020  | 6/16/2020 North America / USA / California / Alameda County          |
| EPI_ISL_468361 | 4/8/2020  | 6/16/2020 North America / USA / California / Alameda County          |
| EPI_ISL_468363 | 4/9/2020  | 6/16/2020 North America / USA / California / Alameda County          |
| EPI_ISL_468364 | 4/10/2020 | 6/16/2020 North America / USA / California / Alameda County          |
| EPI_ISL_468365 | 4/11/2020 | 6/16/2020 North America / USA / California / Alameda County          |
| EPI_ISL_468367 | 4/11/2020 | 6/16/2020 North America / USA / California / Alameda County          |
| EPI_ISL_468368 | 4/12/2020 | 6/16/2020 North America / USA / California / Alameda County          |
| EPI_ISL_468370 | 4/12/2020 | 6/16/2020 North America / USA / California / Alameda County          |
| EPI_ISL_468372 | 4/12/2020 | 6/16/2020 North America / USA / California / Alameda County          |
| EPI_ISL_468373 | 4/13/2020 | 6/16/2020 North America / USA / California / Alameda County          |
| EPI_ISL_468374 | 4/13/2020 | 6/16/2020 North America / USA / California / Alameda County          |







|                |           |           |                                                       |
|----------------|-----------|-----------|-------------------------------------------------------|
| EPI_ISL_468542 | 4/11/2020 | 6/16/2020 | North America / USA / California / San Joaquin County |
| EPI_ISL_468543 | 4/14/2020 | 6/16/2020 | North America / USA / California / San Joaquin County |
| EPI_ISL_468544 | 4/14/2020 | 6/16/2020 | North America / USA / California / San Joaquin County |
| EPI_ISL_468545 | 4/16/2020 | 6/16/2020 | North America / USA / California / San Joaquin County |
| EPI_ISL_468546 | 4/17/2020 | 6/16/2020 | North America / USA / California / San Joaquin County |
| EPI_ISL_468547 | 4/18/2020 | 6/16/2020 | North America / USA / California / San Joaquin County |
| EPI_ISL_468548 | 4/20/2020 | 6/16/2020 | North America / USA / California / San Joaquin County |
| EPI_ISL_468549 | 4/21/2020 | 6/16/2020 | North America / USA / California / San Joaquin County |
| EPI_ISL_468551 | 5/7/2020  | 6/16/2020 | North America / USA / California / San Joaquin County |
| EPI_ISL_468552 | 5/7/2020  | 6/16/2020 | North America / USA / California / San Joaquin County |
| EPI_ISL_468553 | 5/7/2020  | 6/16/2020 | North America / USA / California / San Joaquin County |
| EPI_ISL_468554 | 5/7/2020  | 6/16/2020 | North America / USA / California / San Joaquin County |
| EPI_ISL_468557 | 5/8/2020  | 6/16/2020 | North America / USA / California / San Joaquin County |
| EPI_ISL_468558 | 5/9/2020  | 6/16/2020 | North America / USA / California / San Joaquin County |
| EPI_ISL_468560 | 3/13/2020 | 6/16/2020 | North America / USA / California                      |
| EPI_ISL_468561 | 3/13/2020 | 6/16/2020 | North America / USA / California                      |
| EPI_ISL_468562 | 3/13/2020 | 6/16/2020 | North America / USA / California                      |
| EPI_ISL_468563 | 3/13/2020 | 6/16/2020 | North America / USA / California                      |
| EPI_ISL_468564 | 3/13/2020 | 6/16/2020 | North America / USA / California                      |
| EPI_ISL_468565 | 3/13/2020 | 6/16/2020 | North America / USA / California                      |
| EPI_ISL_468566 | 3/13/2020 | 6/16/2020 | North America / USA / California                      |
| EPI_ISL_468567 | 3/13/2020 | 6/16/2020 | North America / USA / California                      |
| EPI_ISL_468568 | 3/13/2020 | 6/16/2020 | North America / USA / California                      |
| EPI_ISL_468569 | 3/13/2020 | 6/16/2020 | North America / USA / California                      |
| EPI_ISL_468570 | 3/13/2020 | 6/16/2020 | North America / USA / California                      |
| EPI_ISL_468571 | 3/13/2020 | 6/16/2020 | North America / USA / Colorado                        |
| EPI_ISL_468572 | 3/12/2020 | 6/16/2020 | North America / USA / Colorado                        |
| EPI_ISL_468573 | 3/12/2020 | 6/16/2020 | North America / USA / Hawaii                          |
| EPI_ISL_468574 | 3/12/2020 | 6/16/2020 | North America / USA / Hawaii                          |
| EPI_ISL_468575 | 3/12/2020 | 6/16/2020 | North America / USA / Indiana                         |
| EPI_ISL_468576 | 3/12/2020 | 6/16/2020 | North America / USA / New York                        |
| EPI_ISL_468577 | 3/12/2020 | 6/16/2020 | North America / USA / New York                        |
| EPI_ISL_468578 | 3/12/2020 | 6/16/2020 | North America / USA / New York                        |
| EPI_ISL_468579 | 3/12/2020 | 6/16/2020 | North America / USA / New York                        |
| EPI_ISL_468580 | 3/12/2020 | 6/16/2020 | North America / USA / New York                        |
| EPI_ISL_468581 | 3/12/2020 | 6/16/2020 | North America / USA / New York                        |
| EPI_ISL_468582 | 3/12/2020 | 6/16/2020 | North America / USA / New York                        |
| EPI_ISL_468583 | 3/12/2020 | 6/16/2020 | North America / USA / New York                        |
| EPI_ISL_468584 | 3/12/2020 | 6/16/2020 | North America / USA / New York                        |
| EPI_ISL_468585 | 3/12/2020 | 6/16/2020 | North America / USA / New York                        |
| EPI_ISL_468586 | 3/12/2020 | 6/16/2020 | North America / USA / New York                        |
| EPI_ISL_468587 | 3/12/2020 | 6/16/2020 | North America / USA / New York                        |
| EPI_ISL_468588 | 3/13/2020 | 6/16/2020 | North America / USA / New York                        |
| EPI_ISL_468589 | 3/13/2020 | 6/16/2020 | North America / USA / Oklahoma                        |
| EPI_ISL_468590 | 3/13/2020 | 6/16/2020 | North America / USA / Washington                      |
| EPI_ISL_468591 | 4/10/2020 | 6/16/2020 | Europe / Croatia / Istria                             |
| EPI_ISL_468592 | 4/18/2020 | 6/16/2020 | North America / USA / California / Orange County      |



|                |           |                                                     |
|----------------|-----------|-----------------------------------------------------|
| EPI_ISL_468656 | 4/9/2020  | 6/16/2020 Europe / Croatia / Istria                 |
| EPI_ISL_468726 | 1/23/2020 | 6/16/2020 Asia / China / Shanghai                   |
| EPI_ISL_469253 | 2/28/2020 | 6/16/2020 Asia / China / Shanghai                   |
| EPI_ISL_479686 | 6/2/2020  | 6/16/2020 Africa / Egypt                            |
| EPI_ISL_479687 | 6/2/2020  | 6/16/2020 Africa / Egypt                            |
| EPI_ISL_479688 | 6/2/2020  | 6/16/2020 Africa / Egypt                            |
| EPI_ISL_479689 | 6/2/2020  | 6/16/2020 Africa / Egypt                            |
| EPI_ISL_479690 | 6/2/2020  | 6/16/2020 Africa / Egypt                            |
| EPI_ISL_479691 | 6/2/2020  | 6/16/2020 Africa / Egypt                            |
| EPI_ISL_479692 | 6/2/2020  | 6/16/2020 Africa / Egypt                            |
| EPI_ISL_479693 | 6/2/2020  | 6/16/2020 Africa / Egypt                            |
| EPI_ISL_479694 | 6/2/2020  | 6/16/2020 Africa / Egypt                            |
| EPI_ISL_479695 | 6/2/2020  | 6/16/2020 Africa / Egypt                            |
| EPI_ISL_479696 | 6/2/2020  | 6/16/2020 Africa / Egypt                            |
| EPI_ISL_479697 | 6/2/2020  | 6/16/2020 Africa / Egypt                            |
| EPI_ISL_479698 | 6/2/2020  | 6/16/2020 Africa / Egypt                            |
| EPI_ISL_468658 | 2020-04   | 6/17/2020 North America / Canada / British Columbia |
| EPI_ISL_468659 | 2020-04   | 6/17/2020 North America / Canada / British Columbia |
| EPI_ISL_468660 | 2020-04   | 6/17/2020 North America / Canada / British Columbia |
| EPI_ISL_468661 | 2020-04   | 6/17/2020 North America / Canada / British Columbia |
| EPI_ISL_468662 | 2020-04   | 6/17/2020 North America / Canada / British Columbia |
| EPI_ISL_468664 | 2020-04   | 6/17/2020 North America / Canada / British Columbia |
| EPI_ISL_468665 | 2020-04   | 6/17/2020 North America / Canada / British Columbia |
| EPI_ISL_468666 | 2020-04   | 6/17/2020 North America / Canada / British Columbia |
| EPI_ISL_468668 | 2020-04   | 6/17/2020 North America / Canada / British Columbia |
| EPI_ISL_468669 | 2020-04   | 6/17/2020 North America / Canada / British Columbia |
| EPI_ISL_468670 | 2020-04   | 6/17/2020 North America / Canada / British Columbia |
| EPI_ISL_468671 | 2020-04   | 6/17/2020 North America / Canada / British Columbia |
| EPI_ISL_468672 | 2020-04   | 6/17/2020 North America / Canada / British Columbia |
| EPI_ISL_468673 | 2020-04   | 6/17/2020 North America / Canada / British Columbia |
| EPI_ISL_468674 | 2020-04   | 6/17/2020 North America / Canada / British Columbia |
| EPI_ISL_468675 | 2020-04   | 6/17/2020 North America / Canada / British Columbia |
| EPI_ISL_468676 | 2020-04   | 6/17/2020 North America / Canada / British Columbia |
| EPI_ISL_468677 | 2020-04   | 6/17/2020 North America / Canada / British Columbia |
| EPI_ISL_468678 | 2020-04   | 6/17/2020 North America / Canada / British Columbia |
| EPI_ISL_468679 | 2020-04   | 6/17/2020 North America / Canada / British Columbia |
| EPI_ISL_468680 | 2020-04   | 6/17/2020 North America / Canada / British Columbia |
| EPI_ISL_468683 | 2020-04   | 6/17/2020 North America / Canada / British Columbia |
| EPI_ISL_468684 | 2020-04   | 6/17/2020 North America / Canada / British Columbia |
| EPI_ISL_468685 | 2020-04   | 6/17/2020 North America / Canada / British Columbia |
| EPI_ISL_468686 | 2020-04   | 6/17/2020 North America / Canada / British Columbia |
| EPI_ISL_468687 | 2020-04   | 6/17/2020 North America / Canada / British Columbia |
| EPI_ISL_468688 | 2020-04   | 6/17/2020 North America / Canada / British Columbia |
| EPI_ISL_468689 | 2020-04   | 6/17/2020 North America / Canada / British Columbia |
| EPI_ISL_468691 | 2020-04   | 6/17/2020 North America / Canada / British Columbia |
| EPI_ISL_468693 | 2020-04   | 6/17/2020 North America / Canada / British Columbia |
| EPI_ISL_468694 | 2020-04   | 6/17/2020 North America / Canada / British Columbia |

|                |           |           |                                                               |
|----------------|-----------|-----------|---------------------------------------------------------------|
| EPI_ISL_468695 | 2020-04   | 6/17/2020 | North America / Canada / British Columbia                     |
| EPI_ISL_468696 | 2020-04   | 6/17/2020 | North America / Canada / British Columbia                     |
| EPI_ISL_468698 | 2020-04   | 6/17/2020 | North America / Canada / British Columbia                     |
| EPI_ISL_468699 | 2020-04   | 6/17/2020 | North America / Canada / British Columbia                     |
| EPI_ISL_468700 | 2020-04   | 6/17/2020 | North America / Canada / British Columbia                     |
| EPI_ISL_468701 | 4/6/2020  | 6/17/2020 | North America / USA / Louisiana / New Orleans / Jefferson Pa  |
| EPI_ISL_468702 | 4/6/2020  | 6/17/2020 | North America / USA / Louisiana / New Orleans / St. James Pa  |
| EPI_ISL_468703 | 4/6/2020  | 6/17/2020 | North America / USA / Louisiana / New Orleans / Jefferson Pa  |
| EPI_ISL_468705 | 4/7/2020  | 6/17/2020 | North America / USA / Louisiana / New Orleans / St. Bernard F |
| EPI_ISL_468706 | 4/8/2020  | 6/17/2020 | North America / USA / Louisiana / New Orleans / Livingston P  |
| EPI_ISL_468707 | 4/8/2020  | 6/17/2020 | North America / USA / Louisiana / New Orleans / St. Bernard F |
| EPI_ISL_468708 | 4/7/2020  | 6/17/2020 | North America / USA / Louisiana / New Orleans / Jefferson Pa  |
| EPI_ISL_468709 | 4/7/2020  | 6/17/2020 | North America / USA / Louisiana / New Orleans / Jefferson Pa  |
| EPI_ISL_468710 | 4/8/2020  | 6/17/2020 | North America / USA / Louisiana / New Orleans / St. Charles P |
| EPI_ISL_468711 | 4/8/2020  | 6/17/2020 | North America / USA / Louisiana / New Orleans / St. Bernard F |
| EPI_ISL_468712 | 4/3/2020  | 6/17/2020 | North America / USA / Louisiana / New Orleans / St. Tammany   |
| EPI_ISL_468713 | 4/6/2020  | 6/17/2020 | North America / USA / Louisiana / New Orleans / Jefferson Pa  |
| EPI_ISL_468714 | 4/6/2020  | 6/17/2020 | North America / USA / Louisiana / New Orleans / St. John The  |
| EPI_ISL_468715 | 4/6/2020  | 6/17/2020 | North America / USA / Louisiana / New Orleans / Lafourche Pa  |
| EPI_ISL_468716 | 4/8/2020  | 6/17/2020 | North America / USA / Louisiana / New Orleans / Jefferson Pa  |
| EPI_ISL_468717 | 4/4/2020  | 6/17/2020 | North America / USA / Louisiana / New Orleans / Jefferson Pa  |
| EPI_ISL_468727 | 3/23/2020 | 6/17/2020 | Europe / Belgium / Ghent                                      |
| EPI_ISL_468728 | 3/25/2020 | 6/17/2020 | Europe / Belgium / Ghent                                      |
| EPI_ISL_468729 | 3/9/2020  | 6/17/2020 | Europe / Belgium / Ghent                                      |
| EPI_ISL_468730 | 3/5/2020  | 6/17/2020 | Europe / Belgium / Ghent                                      |
| EPI_ISL_468731 | 3/11/2020 | 6/17/2020 | Europe / Belgium / Ghent                                      |
| EPI_ISL_468732 | 3/11/2020 | 6/17/2020 | Europe / Belgium / Ghent                                      |
| EPI_ISL_468733 | 3/11/2020 | 6/17/2020 | Europe / Belgium / Ghent                                      |
| EPI_ISL_468734 | 3/11/2020 | 6/17/2020 | Europe / Belgium / Ghent                                      |
| EPI_ISL_468735 | 3/11/2020 | 6/17/2020 | Europe / Belgium / Ghent                                      |
| EPI_ISL_468736 | 3/11/2020 | 6/17/2020 | Europe / Belgium / Ghent                                      |
| EPI_ISL_468737 | 3/17/2020 | 6/17/2020 | Europe / Belgium / Ghent                                      |
| EPI_ISL_468738 | 3/13/2020 | 6/17/2020 | Europe / Belgium / Ghent                                      |
| EPI_ISL_468739 | 3/13/2020 | 6/17/2020 | Europe / Belgium / Ghent                                      |
| EPI_ISL_468740 | 3/13/2020 | 6/17/2020 | Europe / Belgium / Ghent                                      |
| EPI_ISL_468741 | 3/13/2020 | 6/17/2020 | Europe / Belgium / Ghent                                      |
| EPI_ISL_468743 | 3/17/2020 | 6/17/2020 | Europe / Belgium / Ghent                                      |
| EPI_ISL_468744 | 3/17/2020 | 6/17/2020 | Europe / Belgium / Ghent                                      |
| EPI_ISL_468745 | 3/17/2020 | 6/17/2020 | Europe / Belgium / Ghent                                      |
| EPI_ISL_468746 | 3/17/2020 | 6/17/2020 | Europe / Belgium / Ghent                                      |
| EPI_ISL_468747 | 4/30/2020 | 6/17/2020 | South America / Chile / Region Metropolitana de Santiago / S  |
| EPI_ISL_468748 | 4/30/2020 | 6/17/2020 | South America / Chile / Region Metropolitana de Santiago / S  |
| EPI_ISL_468749 | 4/29/2020 | 6/17/2020 | South America / Chile / Region Metropolitana de Santiago / S  |
| EPI_ISL_468750 | 4/30/2020 | 6/17/2020 | South America / Chile / Region Metropolitana de Santiago / S  |
| EPI_ISL_468751 | 4/29/2020 | 6/17/2020 | South America / Chile / Region Metropolitana de Santiago / S  |
| EPI_ISL_468752 | 3/14/2020 | 6/17/2020 | South America / Chile / Region Metropolitana de Santiago / S  |
| EPI_ISL_468757 | 4/30/2020 | 6/17/2020 | South America / Chile / Atacama / Copiapo                     |



|                |           |                                                                |
|----------------|-----------|----------------------------------------------------------------|
| EPI_ISL_468758 | 5/1/2020  | 6/17/2020 South America / Chile / Atacama / Copiapo            |
| EPI_ISL_468759 | 5/1/2020  | 6/17/2020 South America / Chile / Atacama / Copiapo            |
| EPI_ISL_468760 | 3/15/2020 | 6/17/2020 South America / Chile / Biobio / Diguillin / Chillan |
| EPI_ISL_468761 | 4/4/2020  | 6/17/2020 Europe / Spain / La Rioja / Logrono                  |
| EPI_ISL_468763 | 3/2/2020  | 6/17/2020 Europe / Spain / La Rioja / Logrono                  |
| EPI_ISL_468764 | 3/1/2020  | 6/17/2020 Europe / Spain / La Rioja / Logrono                  |
| EPI_ISL_468765 | 3/17/2020 | 6/17/2020 Europe / Spain / Aragon / Zaragoza                   |
| EPI_ISL_468766 | 3/27/2020 | 6/17/2020 Europe / Spain / Aragon / Zaragoza                   |
| EPI_ISL_468768 | 3/21/2020 | 6/17/2020 Europe / Spain / Aragon / Zaragoza                   |
| EPI_ISL_468769 | 3/17/2020 | 6/17/2020 Europe / Spain / Aragon / Zaragoza                   |
| EPI_ISL_468770 | 3/28/2020 | 6/17/2020 Europe / Spain / Aragon / Teruel                     |
| EPI_ISL_468771 | 3/24/2020 | 6/17/2020 Europe / Spain / Aragon / Zaragoza                   |
| EPI_ISL_468772 | 3/24/2020 | 6/17/2020 Europe / Spain / Aragon / Teruel                     |
| EPI_ISL_468773 | 3/28/2020 | 6/17/2020 Europe / Spain / Aragon / Zaragoza                   |
| EPI_ISL_468774 | 3/24/2020 | 6/17/2020 Europe / Spain / Aragon / Teruel                     |
| EPI_ISL_468775 | 3/24/2020 | 6/17/2020 Europe / Spain / Aragon / Zaragoza                   |
| EPI_ISL_468776 | 3/24/2020 | 6/17/2020 Europe / Spain / Aragon / Zaragoza                   |
| EPI_ISL_468778 | 3/17/2020 | 6/17/2020 Europe / Spain / Aragon / Zaragoza                   |
| EPI_ISL_468779 | 3/24/2020 | 6/17/2020 Europe / Spain / Aragon / Zaragoza                   |
| EPI_ISL_468780 | 3/24/2020 | 6/17/2020 Europe / Spain / Aragon / Zaragoza                   |
| EPI_ISL_468781 | 3/29/2020 | 6/17/2020 Europe / Spain / Aragon / Zaragoza                   |
| EPI_ISL_468782 | 3/27/2020 | 6/17/2020 Europe / Spain / Aragon / Zaragoza                   |
| EPI_ISL_468783 | 3/28/2020 | 6/17/2020 Europe / Spain / Aragon / Alcaniz                    |
| EPI_ISL_468784 | 3/8/2020  | 6/17/2020 Europe / Spain / Aragon / Zaragoza                   |
| EPI_ISL_468785 | 3/24/2020 | 6/17/2020 Europe / Spain / Aragon / Zaragoza                   |
| EPI_ISL_468786 | 3/26/2020 | 6/17/2020 Europe / Spain / Aragon / Zaragoza                   |
| EPI_ISL_468788 | 3/24/2020 | 6/17/2020 Europe / Spain / Aragon / Zaragoza                   |
| EPI_ISL_468790 | 3/27/2020 | 6/17/2020 Europe / Spain / Aragon / Alcaniz                    |
| EPI_ISL_468791 | 3/26/2020 | 6/17/2020 Europe / Spain / Aragon / Zaragoza                   |
| EPI_ISL_468792 | 3/23/2020 | 6/17/2020 Europe / Spain / Aragon / Zaragoza                   |
| EPI_ISL_468793 | 3/27/2020 | 6/17/2020 Europe / Spain / Aragon / Zaragoza                   |
| EPI_ISL_468794 | 3/27/2020 | 6/17/2020 Europe / Spain / Aragon / Zaragoza                   |
| EPI_ISL_468795 | 3/26/2020 | 6/17/2020 Europe / Spain / Aragon / Alcaniz                    |
| EPI_ISL_468797 | 3/17/2020 | 6/17/2020 Europe / Spain / Aragon / Teruel                     |
| EPI_ISL_468798 | 3/23/2020 | 6/17/2020 Europe / Spain / Aragon / Zaragoza                   |
| EPI_ISL_468799 | 3/28/2020 | 6/17/2020 Europe / Spain / Aragon / Zaragoza                   |
| EPI_ISL_468800 | 3/27/2020 | 6/17/2020 Europe / Spain / Aragon / Alcaniz                    |
| EPI_ISL_468801 | 3/18/2020 | 6/17/2020 Europe / Spain / Aragon / Zaragoza                   |
| EPI_ISL_468802 | 3/27/2020 | 6/17/2020 Europe / Spain / Aragon / Zaragoza                   |
| EPI_ISL_468803 | 3/17/2020 | 6/17/2020 Europe / Spain / Aragon / Zaragoza                   |
| EPI_ISL_468804 | 3/24/2020 | 6/17/2020 Europe / Spain / Aragon / Zaragoza                   |
| EPI_ISL_468805 | 3/26/2020 | 6/17/2020 Europe / Spain / Aragon / Zaragoza                   |
| EPI_ISL_468806 | 3/21/2020 | 6/17/2020 Europe / Spain / Aragon / Zaragoza                   |
| EPI_ISL_468807 | 3/27/2020 | 6/17/2020 Europe / Spain / Aragon / Alcaniz                    |
| EPI_ISL_468808 | 3/23/2020 | 6/17/2020 Europe / Spain / Aragon / Zaragoza                   |
| EPI_ISL_468809 | 3/28/2020 | 6/17/2020 Europe / Spain / Aragon / Teruel                     |
| EPI_ISL_468810 | 3/24/2020 | 6/17/2020 Europe / Spain / Aragon / Zaragoza                   |

|                |           |           |                                                 |
|----------------|-----------|-----------|-------------------------------------------------|
| EPI_ISL_468811 | 3/24/2020 | 6/17/2020 | Europe / Spain / Aragon / Zaragoza              |
| EPI_ISL_468812 | 3/26/2020 | 6/17/2020 | Europe / Spain / Aragon / Zaragoza              |
| EPI_ISL_468813 | 3/27/2020 | 6/17/2020 | Europe / Spain / Aragon / Alcaniz               |
| EPI_ISL_468814 | 3/24/2020 | 6/17/2020 | Europe / Spain / Aragon / Teruel                |
| EPI_ISL_468815 | 3/24/2020 | 6/17/2020 | Europe / Spain / Aragon / Zaragoza              |
| EPI_ISL_468816 | 3/24/2020 | 6/17/2020 | Europe / Spain / Aragon / Zaragoza              |
| EPI_ISL_468817 | 3/23/2020 | 6/17/2020 | Europe / Spain / Aragon / Zaragoza              |
| EPI_ISL_468818 | 3/18/2020 | 6/17/2020 | Europe / Spain / Aragon / Zaragoza              |
| EPI_ISL_468819 | 3/24/2020 | 6/17/2020 | Europe / Spain / Aragon / Teruel                |
| EPI_ISL_468820 | 3/28/2020 | 6/17/2020 | Europe / Spain / Aragon / Teruel                |
| EPI_ISL_468822 | 3/27/2020 | 6/17/2020 | Europe / Spain / Aragon / Zaragoza              |
| EPI_ISL_468823 | 3/24/2020 | 6/17/2020 | Europe / Spain / Aragon / Teruel                |
| EPI_ISL_468824 | 3/24/2020 | 6/17/2020 | Europe / Spain / Aragon / Alcaniz               |
| EPI_ISL_468825 | 3/28/2020 | 6/17/2020 | Europe / Spain / Aragon / Zaragoza              |
| EPI_ISL_468826 | 3/24/2020 | 6/17/2020 | Europe / Spain / Aragon / Zaragoza              |
| EPI_ISL_468828 | 3/28/2020 | 6/17/2020 | Europe / Spain / Aragon / Zaragoza              |
| EPI_ISL_468829 | 3/24/2020 | 6/17/2020 | Europe / Spain / Aragon / Teruel                |
| EPI_ISL_468830 | 3/17/2020 | 6/17/2020 | Europe / Spain / Aragon / Teruel                |
| EPI_ISL_468831 | 3/24/2020 | 6/17/2020 | Europe / Spain / Aragon / Zaragoza              |
| EPI_ISL_468832 | 3/26/2020 | 6/17/2020 | Europe / Spain / Aragon / Alcaniz               |
| EPI_ISL_468833 | 3/24/2020 | 6/17/2020 | Europe / Spain / Aragon / Alcaniz               |
| EPI_ISL_468834 | 3/17/2020 | 6/17/2020 | Europe / Spain / Aragon / Zaragoza              |
| EPI_ISL_468835 | 3/26/2020 | 6/17/2020 | Europe / Spain / Aragon / Alcaniz               |
| EPI_ISL_468836 | 3/17/2020 | 6/17/2020 | Europe / Spain / Aragon / Teruel                |
| EPI_ISL_468838 | 3/23/2020 | 6/17/2020 | Europe / Spain / Aragon / Zaragoza              |
| EPI_ISL_468840 | 3/17/2020 | 6/17/2020 | Europe / Spain / Aragon / Zaragoza              |
| EPI_ISL_468841 | 3/21/2020 | 6/17/2020 | Europe / Spain / Aragon / Zaragoza              |
| EPI_ISL_468842 | 3/27/2020 | 6/17/2020 | Europe / Spain / Aragon / Teruel                |
| EPI_ISL_468843 | 3/28/2020 | 6/17/2020 | Europe / Spain / Aragon / Zaragoza              |
| EPI_ISL_468845 | 3/23/2020 | 6/17/2020 | Europe / Spain / Aragon / Zaragoza              |
| EPI_ISL_468846 | 3/24/2020 | 6/17/2020 | Europe / Spain / Aragon / Zaragoza              |
| EPI_ISL_468847 | 3/24/2020 | 6/17/2020 | Europe / Spain / Aragon / Zaragoza              |
| EPI_ISL_468849 | 3/27/2020 | 6/17/2020 | Europe / Spain / Aragon / Alcaniz               |
| EPI_ISL_468850 | 3/24/2020 | 6/17/2020 | Europe / Spain / Aragon / Teruel                |
| EPI_ISL_468851 | 3/24/2020 | 6/17/2020 | Europe / Spain / Aragon / Zaragoza              |
| EPI_ISL_468852 | 3/24/2020 | 6/17/2020 | Europe / Spain / Aragon / Alcaniz               |
| EPI_ISL_468853 | 3/23/2020 | 6/17/2020 | Europe / Spain / Aragon / Zaragoza              |
| EPI_ISL_468854 | 3/24/2020 | 6/17/2020 | Europe / Spain / Aragon / Alcaniz               |
| EPI_ISL_468855 | 3/26/2020 | 6/17/2020 | Europe / Spain / Aragon / Zaragoza              |
| EPI_ISL_468856 | 3/18/2020 | 6/17/2020 | Europe / Spain / Aragon / Zaragoza              |
| EPI_ISL_468858 | 3/24/2020 | 6/17/2020 | Europe / Spain / Aragon / Zaragoza              |
| EPI_ISL_468859 | 3/24/2020 | 6/17/2020 | Europe / Spain / Aragon / Zaragoza              |
| EPI_ISL_468860 | 4/12/2020 | 6/17/2020 | Europe / Spain / Basque Country / San Sebastian |
| EPI_ISL_468861 | 4/11/2020 | 6/17/2020 | Europe / Spain / Basque Country / San Sebastian |
| EPI_ISL_468862 | 4/12/2020 | 6/17/2020 | Europe / Spain / Basque Country / San Sebastian |
| EPI_ISL_468863 | 4/11/2020 | 6/17/2020 | Europe / Spain / Basque Country / San Sebastian |
| EPI_ISL_468864 | 4/10/2020 | 6/17/2020 | Europe / Spain / Basque Country / San Sebastian |





|                |           |                                                                 |
|----------------|-----------|-----------------------------------------------------------------|
| EPI_ISL_468975 | 3/19/2020 | 6/17/2020 Europe / Spain / Balearic Islands / Palma             |
| EPI_ISL_468976 | 3/20/2020 | 6/17/2020 Europe / Spain / Balearic Islands / Palma             |
| EPI_ISL_468977 | 3/21/2020 | 6/17/2020 Europe / Spain / Balearic Islands / Palma             |
| EPI_ISL_468979 | 3/20/2020 | 6/17/2020 Europe / Spain / Balearic Islands / Palma             |
| EPI_ISL_468980 | 4/7/2020  | 6/17/2020 Europe / Spain / Balearic Islands / Palma             |
| EPI_ISL_468982 | 3/15/2020 | 6/17/2020 Europe / Spain / Balearic Islands / Palma de Mallorca |
| EPI_ISL_468983 | 3/25/2020 | 6/17/2020 Europe / Spain / Balearic Islands / Palma             |
| EPI_ISL_468984 | 4/15/2020 | 6/17/2020 Europe / Spain / Balearic Islands / Palma             |
| EPI_ISL_468986 | 4/4/2020  | 6/17/2020 Europe / Spain / Balearic Islands / Palma             |
| EPI_ISL_468987 | 3/25/2020 | 6/17/2020 Europe / Spain / Balearic Islands / Palma             |
| EPI_ISL_468988 | 3/20/2020 | 6/17/2020 Europe / Spain / Balearic Islands / Palma             |
| EPI_ISL_468989 | 3/16/2020 | 6/17/2020 Europe / Spain / Balearic Islands / Manacor           |
| EPI_ISL_468990 | 3/17/2020 | 6/17/2020 Europe / Spain / Balearic Islands / Palma             |
| EPI_ISL_468991 | 3/20/2020 | 6/17/2020 Europe / Spain / Balearic Islands / Palma             |
| EPI_ISL_468992 | 3/27/2020 | 6/17/2020 Europe / Spain / Balearic Islands / Lluchmayor        |
| EPI_ISL_468993 | 3/25/2020 | 6/17/2020 Europe / Spain / Balearic Islands / Ibiza             |
| EPI_ISL_468997 | 4/5/2020  | 6/17/2020 Europe / Spain / Balearic Islands / Palma             |
| EPI_ISL_468998 | 3/28/2020 | 6/17/2020 Europe / Spain / Balearic Islands / Manacor           |
| EPI_ISL_468999 | 3/20/2020 | 6/17/2020 Europe / Spain / Balearic Islands / Palma de Mallorca |
| EPI_ISL_469000 | 3/20/2020 | 6/17/2020 Europe / Spain / Balearic Islands / Palma             |
| EPI_ISL_469001 | 3/20/2020 | 6/17/2020 Europe / Spain / Balearic Islands / Palma             |
| EPI_ISL_469003 | 3/27/2020 | 6/17/2020 Europe / Spain / Balearic Islands / Llubí             |
| EPI_ISL_469004 | 3/21/2020 | 6/17/2020 Europe / Spain / Balearic Islands / Palma             |
| EPI_ISL_469006 | 4/8/2020  | 6/17/2020 Europe / Spain / Balearic Islands / Palma             |
| EPI_ISL_469008 | 3/14/2020 | 6/17/2020 Europe / Spain / Balearic Islands / Ibiza             |
| EPI_ISL_469009 | 3/24/2020 | 6/17/2020 Europe / Spain / Balearic Islands / Son Servera       |
| EPI_ISL_469010 | 3/20/2020 | 6/17/2020 Europe / Spain / Balearic Islands / Marrachi          |
| EPI_ISL_469012 | 3/20/2020 | 6/17/2020 Europe / Spain / Balearic Islands / Palma             |
| EPI_ISL_469013 | 3/20/2020 | 6/17/2020 Europe / Spain / Balearic Islands / Ibiza             |
| EPI_ISL_469014 | 3/20/2020 | 6/17/2020 Europe / Spain / Balearic Islands / Palma             |
| EPI_ISL_469015 | 4/14/2020 | 6/17/2020 Europe / Spain / Balearic Islands / Palma             |
| EPI_ISL_469016 | 3/18/2020 | 6/17/2020 Europe / Italy / Apulia                               |
| EPI_ISL_469017 | 4/13/2020 | 6/17/2020 Africa / Morocco                                      |
| EPI_ISL_469018 | 3/19/2020 | 6/17/2020 Europe / Italy / Apulia                               |
| EPI_ISL_469019 | 3/20/2020 | 6/17/2020 Europe / Italy / Apulia / Taranto                     |
| EPI_ISL_469020 | 3/19/2020 | 6/17/2020 Europe / Italy / Apulia / Taranto                     |
| EPI_ISL_469021 | 3/20/2020 | 6/17/2020 Europe / Italy / Apulia / Lecce                       |
| EPI_ISL_469022 | 3/20/2020 | 6/17/2020 Europe / Italy / Apulia / Lecce                       |
| EPI_ISL_469023 | 3/20/2020 | 6/17/2020 Europe / Italy / Apulia / Brindisi                    |
| EPI_ISL_469024 | 5/27/2020 | 6/17/2020 Asia / India / Gujarat / Ahmedabad                    |
| EPI_ISL_469025 | 6/3/2020  | 6/17/2020 Asia / India / Gujarat / Ahmedabad                    |
| EPI_ISL_469026 | 6/3/2020  | 6/17/2020 Asia / India / Gujarat / Ahmedabad                    |
| EPI_ISL_469027 | 6/3/2020  | 6/17/2020 Asia / India / Gujarat / Ahmedabad                    |
| EPI_ISL_469028 | 6/3/2020  | 6/17/2020 Asia / India / Gujarat / Ahmedabad                    |
| EPI_ISL_469029 | 6/5/2020  | 6/17/2020 Asia / India / Gujarat / Vadodara                     |
| EPI_ISL_469030 | 6/5/2020  | 6/17/2020 Asia / India / Gujarat / Vadodara                     |
| EPI_ISL_469031 | 6/5/2020  | 6/17/2020 Asia / India / Gujarat / Vadodara                     |

|                |           |                                               |
|----------------|-----------|-----------------------------------------------|
| EPI_ISL_469032 | 6/2/2020  | 6/17/2020 Asia / India / Gujarat / Vadodara   |
| EPI_ISL_469033 | 6/5/2020  | 6/17/2020 Asia / India / Gujarat / Vadodara   |
| EPI_ISL_469034 | 6/5/2020  | 6/17/2020 Asia / India / Gujarat / Vadodara   |
| EPI_ISL_469035 | 6/5/2020  | 6/17/2020 Asia / India / Gujarat / Vadodara   |
| EPI_ISL_469036 | 6/5/2020  | 6/17/2020 Asia / India / Gujarat / Vadodara   |
| EPI_ISL_469037 | 6/3/2020  | 6/17/2020 Asia / India / Gujarat / Vadodara   |
| EPI_ISL_469038 | 6/3/2020  | 6/17/2020 Asia / India / Gujarat / Vadodara   |
| EPI_ISL_469039 | 6/8/2020  | 6/17/2020 Asia / India / Gujarat / Vadodara   |
| EPI_ISL_469040 | 6/8/2020  | 6/17/2020 Asia / India / Gujarat / Vadodara   |
| EPI_ISL_469041 | 6/8/2020  | 6/17/2020 Asia / India / Gujarat / Vadodara   |
| EPI_ISL_469042 | 6/8/2020  | 6/17/2020 Asia / India / Gujarat / Vadodara   |
| EPI_ISL_469043 | 6/8/2020  | 6/17/2020 Asia / India / Gujarat / Nadiad     |
| EPI_ISL_469044 | 6/8/2020  | 6/17/2020 Asia / India / Gujarat / Nadiad     |
| EPI_ISL_469045 | 6/8/2020  | 6/17/2020 Asia / India / Gujarat / Kapadvanj  |
| EPI_ISL_469046 | 6/8/2020  | 6/17/2020 Asia / India / Gujarat / Mahemdavad |
| EPI_ISL_469047 | 6/8/2020  | 6/17/2020 Asia / India / Gujarat / Mahemdavad |
| EPI_ISL_469048 | 6/5/2020  | 6/17/2020 Asia / India / Gujarat / Dhanera    |
| EPI_ISL_469049 | 3/30/2020 | 6/17/2020 Africa / Morocco                    |
| EPI_ISL_469051 | 4/3/2020  | 6/17/2020 Africa / Morocco                    |
| EPI_ISL_469052 | 3/30/2020 | 6/17/2020 Africa / Morocco                    |
| EPI_ISL_469053 | 3/30/2020 | 6/17/2020 Africa / Morocco                    |
| EPI_ISL_469054 | 4/1/2020  | 6/17/2020 Africa / Morocco                    |
| EPI_ISL_469055 | 5/2/2020  | 6/17/2020 Europe / Sweden / Ostergotland      |
| EPI_ISL_469056 | 5/5/2020  | 6/17/2020 Europe / Sweden / Ostergotland      |
| EPI_ISL_469057 | 5/5/2020  | 6/17/2020 Europe / Sweden / Kalmar            |
| EPI_ISL_469058 | 5/7/2020  | 6/17/2020 Europe / Sweden / Vastra Gotaland   |
| EPI_ISL_469059 | 5/14/2020 | 6/17/2020 Europe / Sweden / Vastra Gotaland   |
| EPI_ISL_469060 | 5/15/2020 | 6/17/2020 Europe / Sweden / Vastra Gotaland   |
| EPI_ISL_469061 | 5/15/2020 | 6/17/2020 Europe / Sweden / Vastra Gotaland   |
| EPI_ISL_469062 | 5/15/2020 | 6/17/2020 Europe / Sweden / Stockholm         |
| EPI_ISL_469063 | 5/19/2020 | 6/17/2020 Europe / Sweden / Uppsala           |
| EPI_ISL_469064 | 5/27/2020 | 6/17/2020 Europe / Sweden / Stockholm         |
| EPI_ISL_469065 | 5/28/2020 | 6/17/2020 Europe / Sweden / Stockholm         |
| EPI_ISL_469066 | 5/11/2020 | 6/17/2020 Europe / Sweden / Stockholm         |
| EPI_ISL_469067 | 5/19/2020 | 6/17/2020 Europe / Sweden / Stockholm         |
| EPI_ISL_469068 | 5/20/2020 | 6/17/2020 Europe / Sweden / Vastra Gotaland   |
| EPI_ISL_469069 | 5/25/2020 | 6/17/2020 Europe / Sweden / Vastra Gotaland   |
| EPI_ISL_469070 | 5/26/2020 | 6/17/2020 Europe / Sweden / Stockholm         |
| EPI_ISL_469071 | 5/27/2020 | 6/17/2020 Europe / Sweden / Vastra Gotaland   |
| EPI_ISL_469072 | 6/3/2020  | 6/17/2020 Europe / Sweden / Uppsala           |
| EPI_ISL_469073 | 3/10/2020 | 6/17/2020 Europe / Sweden / Halland           |
| EPI_ISL_469074 | 3/9/2020  | 6/17/2020 Europe / Sweden / Halland           |
| EPI_ISL_469075 | 3/3/2020  | 6/17/2020 Europe / Sweden / Stockholm         |
| EPI_ISL_469076 | 3/4/2020  | 6/17/2020 Europe / Sweden / Uppsala           |
| EPI_ISL_469077 | 3/6/2020  | 6/17/2020 Europe / Sweden / Stockholm         |
| EPI_ISL_469078 | 3/7/2020  | 6/17/2020 Europe / Sweden / Stockholm         |
| EPI_ISL_469079 | 3/5/2020  | 6/17/2020 Europe / Sweden / Gavleborg         |

|                |           |                            |
|----------------|-----------|----------------------------|
| EPI_ISL_469081 | 4/14/2020 | 6/17/2020 Asia / Singapore |
| EPI_ISL_469082 | 4/17/2020 | 6/17/2020 Asia / Singapore |
| EPI_ISL_469083 | 4/17/2020 | 6/17/2020 Asia / Singapore |
| EPI_ISL_469084 | 4/17/2020 | 6/17/2020 Asia / Singapore |
| EPI_ISL_469085 | 4/17/2020 | 6/17/2020 Asia / Singapore |
| EPI_ISL_469086 | 4/17/2020 | 6/17/2020 Asia / Singapore |
| EPI_ISL_469087 | 4/17/2020 | 6/17/2020 Asia / Singapore |
| EPI_ISL_469088 | 4/17/2020 | 6/17/2020 Asia / Singapore |
| EPI_ISL_469089 | 4/14/2020 | 6/17/2020 Asia / Singapore |
| EPI_ISL_469090 | 4/17/2020 | 6/17/2020 Asia / Singapore |
| EPI_ISL_469091 | 4/17/2020 | 6/17/2020 Asia / Singapore |
| EPI_ISL_469092 | 4/17/2020 | 6/17/2020 Asia / Singapore |
| EPI_ISL_469093 | 4/17/2020 | 6/17/2020 Asia / Singapore |
| EPI_ISL_469094 | 4/17/2020 | 6/17/2020 Asia / Singapore |
| EPI_ISL_469095 | 4/16/2020 | 6/17/2020 Asia / Singapore |
| EPI_ISL_469096 | 5/5/2020  | 6/17/2020 Asia / Singapore |
| EPI_ISL_469098 | 4/1/2020  | 6/17/2020 Asia / Singapore |
| EPI_ISL_469099 | 4/8/2020  | 6/17/2020 Asia / Singapore |
| EPI_ISL_469100 | 3/26/2020 | 6/17/2020 Asia / Singapore |
| EPI_ISL_469101 | 4/8/2020  | 6/17/2020 Asia / Singapore |
| EPI_ISL_469102 | 5/20/2020 | 6/17/2020 Asia / Singapore |
| EPI_ISL_469103 | 3/31/2020 | 6/17/2020 Asia / Singapore |
| EPI_ISL_469104 | 3/31/2020 | 6/17/2020 Asia / Singapore |
| EPI_ISL_469105 | 4/6/2020  | 6/17/2020 Asia / Singapore |
| EPI_ISL_469106 | 3/28/2020 | 6/17/2020 Asia / Singapore |
| EPI_ISL_469107 | 5/28/2020 | 6/17/2020 Asia / Singapore |
| EPI_ISL_469108 | 5/14/2020 | 6/17/2020 Asia / Singapore |
| EPI_ISL_469109 | 4/7/2020  | 6/17/2020 Asia / Singapore |
| EPI_ISL_469110 | 4/8/2020  | 6/17/2020 Asia / Singapore |
| EPI_ISL_469111 | 4/8/2020  | 6/17/2020 Asia / Singapore |
| EPI_ISL_469112 | 4/7/2020  | 6/17/2020 Asia / Singapore |
| EPI_ISL_469113 | 4/6/2020  | 6/17/2020 Asia / Singapore |
| EPI_ISL_469114 | 4/6/2020  | 6/17/2020 Asia / Singapore |
| EPI_ISL_469115 | 5/20/2020 | 6/17/2020 Asia / Singapore |
| EPI_ISL_469116 | 2020      | 6/17/2020 Asia / Singapore |
| EPI_ISL_469117 | 4/13/2020 | 6/17/2020 Asia / Singapore |
| EPI_ISL_469118 | 4/8/2020  | 6/17/2020 Asia / Singapore |
| EPI_ISL_469119 | 4/20/2020 | 6/17/2020 Asia / Singapore |
| EPI_ISL_469120 | 4/6/2020  | 6/17/2020 Asia / Singapore |
| EPI_ISL_469121 | 3/31/2020 | 6/17/2020 Asia / Singapore |
| EPI_ISL_469124 | 3/19/2020 | 6/17/2020 Asia / Singapore |
| EPI_ISL_469125 | 4/4/2020  | 6/17/2020 Asia / Singapore |
| EPI_ISL_469126 | 4/11/2020 | 6/17/2020 Asia / Singapore |
| EPI_ISL_469127 | 3/25/2020 | 6/17/2020 Asia / Singapore |
| EPI_ISL_469128 | 4/17/2020 | 6/17/2020 Asia / Singapore |
| EPI_ISL_469129 | 4/5/2020  | 6/17/2020 Asia / Singapore |
| EPI_ISL_469130 | 4/17/2020 | 6/17/2020 Asia / Singapore |

|                |           |                                                                          |
|----------------|-----------|--------------------------------------------------------------------------|
| EPI_ISL_469131 | 4/17/2020 | 6/17/2020 Asia / Singapore                                               |
| EPI_ISL_469132 | 2/15/2020 | 6/17/2020 Asia / Singapore                                               |
| EPI_ISL_469133 | 4/10/2020 | 6/17/2020 Asia / Singapore                                               |
| EPI_ISL_469134 | 4/17/2020 | 6/17/2020 Asia / Singapore                                               |
| EPI_ISL_469135 | 4/17/2020 | 6/17/2020 Asia / Singapore                                               |
| EPI_ISL_469136 | 4/17/2020 | 6/17/2020 Asia / Singapore                                               |
| EPI_ISL_469137 | 4/17/2020 | 6/17/2020 Asia / Singapore                                               |
| EPI_ISL_469138 | 4/17/2020 | 6/17/2020 Asia / Singapore                                               |
| EPI_ISL_469139 | 6/6/2020  | 6/17/2020 Asia / Singapore                                               |
| EPI_ISL_469140 | 4/17/2020 | 6/17/2020 Asia / Singapore                                               |
| EPI_ISL_469141 | 4/17/2020 | 6/17/2020 Asia / Singapore                                               |
| EPI_ISL_469142 | 4/17/2020 | 6/17/2020 Asia / Singapore                                               |
| EPI_ISL_469143 | 3/9/2020  | 6/17/2020 Asia / Singapore                                               |
| EPI_ISL_469144 | 4/17/2020 | 6/17/2020 Asia / Singapore                                               |
| EPI_ISL_469145 | 4/17/2020 | 6/17/2020 Asia / Singapore                                               |
| EPI_ISL_469146 | 6/6/2020  | 6/17/2020 Asia / Singapore                                               |
| EPI_ISL_469147 | 5/21/2020 | 6/17/2020 Asia / Singapore                                               |
| EPI_ISL_469148 | 4/17/2020 | 6/17/2020 Asia / Singapore                                               |
| EPI_ISL_469149 | 4/17/2020 | 6/17/2020 Asia / Singapore                                               |
| EPI_ISL_469150 | 4/17/2020 | 6/17/2020 Asia / Singapore                                               |
| EPI_ISL_469151 | 4/17/2020 | 6/17/2020 Asia / Singapore                                               |
| EPI_ISL_469152 | 4/17/2020 | 6/17/2020 Asia / Singapore                                               |
| EPI_ISL_469153 | 4/17/2020 | 6/17/2020 Asia / Singapore                                               |
| EPI_ISL_469154 | 4/17/2020 | 6/17/2020 Asia / Singapore                                               |
| EPI_ISL_469155 | 4/17/2020 | 6/17/2020 Asia / Singapore                                               |
| EPI_ISL_469173 | 4/1/2020  | 6/17/2020 North America / USA / Connecticut / New Haven County / We      |
| EPI_ISL_469175 | 4/1/2020  | 6/17/2020 North America / USA / Connecticut / New Haven County / Mil     |
| EPI_ISL_469177 | 4/1/2020  | 6/17/2020 North America / USA / Connecticut / New Haven County           |
| EPI_ISL_469178 | 4/1/2020  | 6/17/2020 North America / USA / Connecticut / New Haven County / Eas     |
| EPI_ISL_469179 | 4/1/2020  | 6/17/2020 North America / USA / Connecticut / New Haven County / Eas     |
| EPI_ISL_469181 | 4/1/2020  | 6/17/2020 North America / USA / Connecticut / New Haven County           |
| EPI_ISL_469182 | 4/1/2020  | 6/17/2020 North America / USA / Connecticut / New Haven County / Har     |
| EPI_ISL_469183 | 4/1/2020  | 6/17/2020 North America / USA / Connecticut / New Haven County / Wa      |
| EPI_ISL_469184 | 4/1/2020  | 6/17/2020 North America / USA / Connecticut / New Haven County / Eas     |
| EPI_ISL_469186 | 4/1/2020  | 6/17/2020 North America / USA / Connecticut / Fairfield County / Bridge  |
| EPI_ISL_469187 | 4/1/2020  | 6/17/2020 North America / USA / Connecticut / New Haven County / We      |
| EPI_ISL_469189 | 4/2/2020  | 6/17/2020 North America / USA / Connecticut / New Haven County           |
| EPI_ISL_469194 | 4/2/2020  | 6/17/2020 North America / USA / Connecticut / New Haven County / Noi     |
| EPI_ISL_469195 | 4/2/2020  | 6/17/2020 North America / USA / Connecticut / New Haven County / We      |
| EPI_ISL_469196 | 4/2/2020  | 6/17/2020 North America / USA / Connecticut / New Haven County           |
| EPI_ISL_469197 | 4/2/2020  | 6/17/2020 North America / USA / Connecticut / New Haven County / We      |
| EPI_ISL_469200 | 4/2/2020  | 6/17/2020 North America / USA / Connecticut / Fairfield County / Shelto  |
| EPI_ISL_469201 | 4/2/2020  | 6/17/2020 North America / USA / Connecticut / New Haven County           |
| EPI_ISL_469203 | 4/2/2020  | 6/17/2020 North America / USA / Connecticut / Fairfield County / Bridge  |
| EPI_ISL_469204 | 4/2/2020  | 6/17/2020 North America / USA / Connecticut / Fairfield County           |
| EPI_ISL_469208 | 4/2/2020  | 6/17/2020 North America / USA / Connecticut / Fairfield County / Stratfo |
| EPI_ISL_469254 | 6/11/2020 | 6/17/2020 Asia / China / Beijing                                         |



|                |           |                                                              |
|----------------|-----------|--------------------------------------------------------------|
| EPI_ISL_469255 | 6/11/2020 | 6/17/2020 Asia / China / Beijing                             |
| EPI_ISL_759859 | 3/24/2020 | 6/17/2020 Asia / Hong Kong                                   |
| EPI_ISL_469209 | 2020-04   | 6/18/2020 North America / Canada / British Columbia          |
| EPI_ISL_469210 | 2020-04   | 6/18/2020 North America / Canada / British Columbia          |
| EPI_ISL_469211 | 2020-04   | 6/18/2020 North America / Canada / British Columbia          |
| EPI_ISL_469212 | 2020-04   | 6/18/2020 North America / Canada / British Columbia          |
| EPI_ISL_469213 | 2020-04   | 6/18/2020 North America / Canada / British Columbia          |
| EPI_ISL_469214 | 2020-04   | 6/18/2020 North America / Canada / British Columbia          |
| EPI_ISL_469215 | 2020-04   | 6/18/2020 North America / Canada / British Columbia          |
| EPI_ISL_469216 | 2020-04   | 6/18/2020 North America / Canada / British Columbia          |
| EPI_ISL_469218 | 2020-04   | 6/18/2020 North America / Canada / British Columbia          |
| EPI_ISL_469222 | 2020-04   | 6/18/2020 North America / Canada / British Columbia          |
| EPI_ISL_469223 | 2020-04   | 6/18/2020 North America / Canada / British Columbia          |
| EPI_ISL_469224 | 3/22/2020 | 6/18/2020 North America / Canada / Newfoundland and Labrador |
| EPI_ISL_469225 | 3/21/2020 | 6/18/2020 North America / Canada / Newfoundland and Labrador |
| EPI_ISL_469226 | 3/22/2020 | 6/18/2020 North America / Canada / Newfoundland and Labrador |
| EPI_ISL_469227 | 3/21/2020 | 6/18/2020 North America / Canada / Newfoundland and Labrador |
| EPI_ISL_469228 | 3/22/2020 | 6/18/2020 North America / Canada / Newfoundland and Labrador |
| EPI_ISL_469229 | 3/20/2020 | 6/18/2020 North America / Canada / Newfoundland and Labrador |
| EPI_ISL_469230 | 3/21/2020 | 6/18/2020 North America / Canada / Newfoundland and Labrador |
| EPI_ISL_469231 | 3/21/2020 | 6/18/2020 North America / Canada / Newfoundland and Labrador |
| EPI_ISL_469232 | 3/21/2020 | 6/18/2020 North America / Canada / Newfoundland and Labrador |
| EPI_ISL_469233 | 3/22/2020 | 6/18/2020 North America / Canada / Newfoundland and Labrador |
| EPI_ISL_469234 | 3/22/2020 | 6/18/2020 North America / Canada / Newfoundland and Labrador |
| EPI_ISL_469235 | 3/22/2020 | 6/18/2020 North America / Canada / Newfoundland and Labrador |
| EPI_ISL_469236 | 3/22/2020 | 6/18/2020 North America / Canada / Newfoundland and Labrador |
| EPI_ISL_469237 | 3/22/2020 | 6/18/2020 North America / Canada / Newfoundland and Labrador |
| EPI_ISL_469238 | 3/22/2020 | 6/18/2020 North America / Canada / Newfoundland and Labrador |
| EPI_ISL_469239 | 3/22/2020 | 6/18/2020 North America / Canada / Newfoundland and Labrador |
| EPI_ISL_469240 | 3/22/2020 | 6/18/2020 North America / Canada / Newfoundland and Labrador |
| EPI_ISL_469274 | 4/6/2020  | 6/18/2020 Asia / Singapore                                   |
| EPI_ISL_469275 | 5/2/2020  | 6/18/2020 Africa / Egypt / Cairo                             |
| EPI_ISL_469276 | 3/27/2020 | 6/18/2020 Asia / United Arab Emirates                        |
| EPI_ISL_469277 | 5/4/2020  | 6/18/2020 Asia / United Arab Emirates                        |
| EPI_ISL_469278 | 3/24/2020 | 6/18/2020 Asia / United Arab Emirates                        |
| EPI_ISL_469279 | 3/31/2020 | 6/18/2020 Asia / United Arab Emirates                        |
| EPI_ISL_469280 | 3/27/2020 | 6/18/2020 Asia / United Arab Emirates                        |
| EPI_ISL_469281 | 3/28/2020 | 6/18/2020 Asia / United Arab Emirates                        |
| EPI_ISL_469282 | 3/11/2020 | 6/18/2020 Europe / France / Île-de-France / Paris            |
| EPI_ISL_469283 | 3/18/2020 | 6/18/2020 Europe / France / Île-de-France / Paris            |
| EPI_ISL_469284 | 3/18/2020 | 6/18/2020 Europe / France / Île-de-France / Paris            |
| EPI_ISL_469286 | 5/23/2020 | 6/18/2020 Asia / Bangladesh / Rangpur                        |
| EPI_ISL_469287 | 5/1/2020  | 6/18/2020 Asia / Japan / Kanto                               |
| EPI_ISL_469288 | 5/1/2020  | 6/18/2020 Asia / Japan / Kanto                               |
| EPI_ISL_469289 | 4/1/2020  | 6/18/2020 Asia / Japan / Kanto                               |
| EPI_ISL_469290 | 5/3/2020  | 6/18/2020 Asia / Japan / Kanto                               |
| EPI_ISL_469291 | 5/7/2020  | 6/18/2020 Asia / Japan / Kanto                               |

|                |           |                                             |
|----------------|-----------|---------------------------------------------|
| EPI_ISL_469292 | 5/7/2020  | 6/18/2020 Asia / Japan / Kanto              |
| EPI_ISL_469293 | 4/3/2020  | 6/18/2020 Asia / Japan / Kanto              |
| EPI_ISL_469294 | 5/11/2020 | 6/18/2020 Asia / Japan / Kanto              |
| EPI_ISL_469295 | 5/14/2020 | 6/18/2020 Asia / Japan / Kanto              |
| EPI_ISL_469296 | 4/15/2020 | 6/18/2020 Asia / Japan / Kanto              |
| EPI_ISL_469297 | 5/23/2020 | 6/18/2020 Asia / Bangladesh / Rangpur       |
| EPI_ISL_469298 | 5/23/2020 | 6/18/2020 Asia / Bangladesh / Rangpur       |
| EPI_ISL_469299 | 5/23/2020 | 6/18/2020 Asia / Bangladesh / Rangpur       |
| EPI_ISL_469300 | 6/2/2020  | 6/18/2020 Asia / Bangladesh / Rangpur       |
| EPI_ISL_469302 | 4/18/2020 | 6/18/2020 Europe / United Kingdom / England |
| EPI_ISL_469303 | 5/19/2020 | 6/18/2020 Europe / United Kingdom / England |
| EPI_ISL_469307 | 4/18/2020 | 6/18/2020 Europe / United Kingdom / England |
| EPI_ISL_469309 | 4/18/2020 | 6/18/2020 Europe / United Kingdom / England |
| EPI_ISL_469312 | 5/19/2020 | 6/18/2020 Europe / United Kingdom / England |
| EPI_ISL_469313 | 5/16/2020 | 6/18/2020 Europe / United Kingdom / England |
| EPI_ISL_469314 | 4/17/2020 | 6/18/2020 Europe / United Kingdom / England |
| EPI_ISL_469315 | 5/15/2020 | 6/18/2020 Europe / United Kingdom / England |
| EPI_ISL_469316 | 5/18/2020 | 6/18/2020 Europe / United Kingdom / England |
| EPI_ISL_469319 | 5/16/2020 | 6/18/2020 Europe / United Kingdom / England |
| EPI_ISL_469324 | 5/17/2020 | 6/18/2020 Europe / United Kingdom / England |
| EPI_ISL_469325 | 5/15/2020 | 6/18/2020 Europe / United Kingdom / England |
| EPI_ISL_469328 | 5/18/2020 | 6/18/2020 Europe / United Kingdom / England |
| EPI_ISL_469329 | 5/18/2020 | 6/18/2020 Europe / United Kingdom / England |
| EPI_ISL_469330 | 5/18/2020 | 6/18/2020 Europe / United Kingdom / England |
| EPI_ISL_469335 | 5/15/2020 | 6/18/2020 Europe / United Kingdom / England |
| EPI_ISL_469336 | 5/15/2020 | 6/18/2020 Europe / United Kingdom / England |
| EPI_ISL_469340 | 5/16/2020 | 6/18/2020 Europe / United Kingdom / England |
| EPI_ISL_469344 | 5/15/2020 | 6/18/2020 Europe / United Kingdom / England |
| EPI_ISL_469345 | 5/11/2020 | 6/18/2020 Europe / United Kingdom / England |
| EPI_ISL_469346 | 5/8/2020  | 6/18/2020 Europe / United Kingdom / England |
| EPI_ISL_469347 | 5/18/2020 | 6/18/2020 Europe / United Kingdom / England |
| EPI_ISL_469348 | 5/9/2020  | 6/18/2020 Europe / United Kingdom / England |
| EPI_ISL_469349 | 5/11/2020 | 6/18/2020 Europe / United Kingdom / England |
| EPI_ISL_469350 | 5/16/2020 | 6/18/2020 Europe / United Kingdom / England |
| EPI_ISL_469353 | 5/15/2020 | 6/18/2020 Europe / United Kingdom / England |
| EPI_ISL_469354 | 5/9/2020  | 6/18/2020 Europe / United Kingdom / England |
| EPI_ISL_469355 | 5/15/2020 | 6/18/2020 Europe / United Kingdom / England |
| EPI_ISL_469356 | 5/16/2020 | 6/18/2020 Europe / United Kingdom / England |
| EPI_ISL_469357 | 5/18/2020 | 6/18/2020 Europe / United Kingdom / England |
| EPI_ISL_469358 | 5/15/2020 | 6/18/2020 Europe / United Kingdom / England |
| EPI_ISL_469359 | 5/18/2020 | 6/18/2020 Europe / United Kingdom / England |
| EPI_ISL_469360 | 5/11/2020 | 6/18/2020 Europe / United Kingdom / England |
| EPI_ISL_469361 | 5/9/2020  | 6/18/2020 Europe / United Kingdom / England |
| EPI_ISL_469362 | 5/16/2020 | 6/18/2020 Europe / United Kingdom / England |
| EPI_ISL_469364 | 5/9/2020  | 6/18/2020 Europe / United Kingdom / England |
| EPI_ISL_469365 | 5/10/2020 | 6/18/2020 Europe / United Kingdom / England |
| EPI_ISL_469366 | 5/10/2020 | 6/18/2020 Europe / United Kingdom / England |















|                |           |           |                                            |
|----------------|-----------|-----------|--------------------------------------------|
| EPI_ISL_469771 | 4/1/2020  | 6/18/2020 | Europe / United Kingdom / England          |
| EPI_ISL_469772 | 4/18/2020 | 6/18/2020 | Europe / United Kingdom / England          |
| EPI_ISL_469773 | 4/16/2020 | 6/18/2020 | Europe / United Kingdom / England          |
| EPI_ISL_469774 | 4/17/2020 | 6/18/2020 | Europe / United Kingdom / England          |
| EPI_ISL_469775 | 4/15/2020 | 6/18/2020 | Europe / United Kingdom / England          |
| EPI_ISL_469777 | 4/23/2020 | 6/18/2020 | Europe / United Kingdom / England          |
| EPI_ISL_469779 | 4/22/2020 | 6/18/2020 | Europe / United Kingdom / England          |
| EPI_ISL_469781 | 4/17/2020 | 6/18/2020 | Europe / United Kingdom / England          |
| EPI_ISL_469782 | 4/17/2020 | 6/18/2020 | Europe / United Kingdom / England          |
| EPI_ISL_469785 | 4/23/2020 | 6/18/2020 | Europe / United Kingdom / England          |
| EPI_ISL_469786 | 4/16/2020 | 6/18/2020 | Europe / United Kingdom / England          |
| EPI_ISL_469787 | 4/16/2020 | 6/18/2020 | Europe / United Kingdom / England          |
| EPI_ISL_469788 | 4/23/2020 | 6/18/2020 | Europe / United Kingdom / England          |
| EPI_ISL_469789 | 4/18/2020 | 6/18/2020 | Europe / United Kingdom / England          |
| EPI_ISL_469792 | 4/22/2020 | 6/18/2020 | Europe / United Kingdom / England          |
| EPI_ISL_469793 | 4/1/2020  | 6/18/2020 | Europe / United Kingdom / England          |
| EPI_ISL_469798 | 4/18/2020 | 6/18/2020 | Europe / United Kingdom / England          |
| EPI_ISL_469799 | 4/16/2020 | 6/18/2020 | Europe / United Kingdom / England          |
| EPI_ISL_469801 | 4/16/2020 | 6/18/2020 | Europe / United Kingdom / England          |
| EPI_ISL_469802 | 4/17/2020 | 6/18/2020 | Europe / United Kingdom / England          |
| EPI_ISL_469803 | 4/18/2020 | 6/18/2020 | Europe / United Kingdom / England          |
| EPI_ISL_469804 | 4/23/2020 | 6/18/2020 | Europe / United Kingdom / England          |
| EPI_ISL_469809 | 5/8/2020  | 6/18/2020 | Europe / United Kingdom / England          |
| EPI_ISL_469810 | 5/23/2020 | 6/18/2020 | Europe / United Kingdom / England          |
| EPI_ISL_469811 | 5/8/2020  | 6/18/2020 | Europe / United Kingdom / England          |
| EPI_ISL_469814 | 5/4/2020  | 6/18/2020 | Europe / United Kingdom / England          |
| EPI_ISL_469818 | 4/11/2020 | 6/18/2020 | Europe / United Kingdom / England          |
| EPI_ISL_469819 | 5/4/2020  | 6/18/2020 | Europe / United Kingdom / England          |
| EPI_ISL_469820 | 5/4/2020  | 6/18/2020 | Europe / United Kingdom / England          |
| EPI_ISL_469822 | 5/18/2020 | 6/18/2020 | Europe / United Kingdom / England          |
| EPI_ISL_469827 | 5/10/2020 | 6/18/2020 | Europe / United Kingdom / England          |
| EPI_ISL_469829 | 5/10/2020 | 6/18/2020 | Europe / United Kingdom / England          |
| EPI_ISL_469831 | 5/4/2020  | 6/18/2020 | Europe / United Kingdom / England          |
| EPI_ISL_469833 | 5/15/2020 | 6/18/2020 | Europe / United Kingdom / England          |
| EPI_ISL_469837 | 5/13/2020 | 6/18/2020 | Europe / United Kingdom / England          |
| EPI_ISL_469840 | 5/8/2020  | 6/18/2020 | Europe / United Kingdom / England          |
| EPI_ISL_469841 | 5/4/2020  | 6/18/2020 | Europe / United Kingdom / England          |
| EPI_ISL_469845 | 4/27/2020 | 6/18/2020 | Europe / United Kingdom / Northern Ireland |
| EPI_ISL_469846 | 4/30/2020 | 6/18/2020 | Europe / United Kingdom / Northern Ireland |
| EPI_ISL_469848 | 5/1/2020  | 6/18/2020 | Europe / United Kingdom / Northern Ireland |
| EPI_ISL_469850 | 4/17/2020 | 6/18/2020 | Europe / United Kingdom / Northern Ireland |
| EPI_ISL_469853 | 4/23/2020 | 6/18/2020 | Europe / United Kingdom / Northern Ireland |
| EPI_ISL_469854 | 4/23/2020 | 6/18/2020 | Europe / United Kingdom / Northern Ireland |
| EPI_ISL_469855 | 4/23/2020 | 6/18/2020 | Europe / United Kingdom / Northern Ireland |
| EPI_ISL_469856 | 4/28/2020 | 6/18/2020 | Europe / United Kingdom / Northern Ireland |
| EPI_ISL_469857 | 4/18/2020 | 6/18/2020 | Europe / United Kingdom / Northern Ireland |
| EPI_ISL_469858 | 4/23/2020 | 6/18/2020 | Europe / United Kingdom / Northern Ireland |





















|                |           |                                             |
|----------------|-----------|---------------------------------------------|
| EPI_ISL_470504 | 4/9/2020  | 6/18/2020 Europe / United Kingdom / England |
| EPI_ISL_470505 | 4/8/2020  | 6/18/2020 Europe / United Kingdom / England |
| EPI_ISL_470506 | 4/10/2020 | 6/18/2020 Europe / United Kingdom / England |
| EPI_ISL_470507 | 4/9/2020  | 6/18/2020 Europe / United Kingdom / England |
| EPI_ISL_470508 | 4/7/2020  | 6/18/2020 Europe / United Kingdom / England |
| EPI_ISL_470510 | 4/9/2020  | 6/18/2020 Europe / United Kingdom / England |
| EPI_ISL_470511 | 4/8/2020  | 6/18/2020 Europe / United Kingdom / England |
| EPI_ISL_470512 | 4/9/2020  | 6/18/2020 Europe / United Kingdom / England |
| EPI_ISL_470513 | 4/6/2020  | 6/18/2020 Europe / United Kingdom / England |
| EPI_ISL_470514 | 4/9/2020  | 6/18/2020 Europe / United Kingdom / England |
| EPI_ISL_470515 | 4/4/2020  | 6/18/2020 Europe / United Kingdom / England |
| EPI_ISL_470516 | 4/9/2020  | 6/18/2020 Europe / United Kingdom / England |
| EPI_ISL_470519 | 4/9/2020  | 6/18/2020 Europe / United Kingdom / England |
| EPI_ISL_470520 | 4/4/2020  | 6/18/2020 Europe / United Kingdom / England |
| EPI_ISL_470521 | 4/7/2020  | 6/18/2020 Europe / United Kingdom / England |
| EPI_ISL_470522 | 4/9/2020  | 6/18/2020 Europe / United Kingdom / England |
| EPI_ISL_470523 | 4/9/2020  | 6/18/2020 Europe / United Kingdom / England |
| EPI_ISL_470524 | 4/9/2020  | 6/18/2020 Europe / United Kingdom / England |
| EPI_ISL_470526 | 4/9/2020  | 6/18/2020 Europe / United Kingdom / England |
| EPI_ISL_470527 | 4/9/2020  | 6/18/2020 Europe / United Kingdom / England |
| EPI_ISL_470528 | 4/9/2020  | 6/18/2020 Europe / United Kingdom / England |
| EPI_ISL_470529 | 4/7/2020  | 6/18/2020 Europe / United Kingdom / England |
| EPI_ISL_470530 | 4/6/2020  | 6/18/2020 Europe / United Kingdom / England |
| EPI_ISL_470531 | 4/5/2020  | 6/18/2020 Europe / United Kingdom / England |
| EPI_ISL_470532 | 4/5/2020  | 6/18/2020 Europe / United Kingdom / England |
| EPI_ISL_470533 | 4/5/2020  | 6/18/2020 Europe / United Kingdom / England |
| EPI_ISL_470535 | 4/3/2020  | 6/18/2020 Europe / United Kingdom / England |
| EPI_ISL_470536 | 4/3/2020  | 6/18/2020 Europe / United Kingdom / England |
| EPI_ISL_470537 | 4/2/2020  | 6/18/2020 Europe / United Kingdom / England |
| EPI_ISL_470539 | 3/27/2020 | 6/18/2020 Europe / Russia / Moscow          |
| EPI_ISL_470540 | 3/15/2020 | 6/18/2020 North America / USA / Wisconsin   |
| EPI_ISL_470544 | 4/13/2020 | 6/18/2020 North America / USA / Utah        |
| EPI_ISL_470549 | 4/21/2020 | 6/18/2020 North America / USA / Utah        |
| EPI_ISL_470550 | 4/21/2020 | 6/18/2020 North America / USA / Utah        |
| EPI_ISL_470551 | 4/22/2020 | 6/18/2020 North America / USA / Utah        |
| EPI_ISL_470552 | 4/21/2020 | 6/18/2020 North America / USA / Utah        |
| EPI_ISL_470553 | 4/21/2020 | 6/18/2020 North America / USA / Utah        |
| EPI_ISL_470554 | 4/13/2020 | 6/18/2020 North America / USA / Utah        |
| EPI_ISL_470559 | 4/13/2020 | 6/18/2020 North America / USA / Utah        |
| EPI_ISL_470565 | 4/21/2020 | 6/18/2020 North America / USA / Utah        |
| EPI_ISL_470566 | 4/19/2020 | 6/18/2020 North America / USA / Utah        |
| EPI_ISL_470656 | 4/13/2020 | 6/18/2020 North America / USA / Utah        |
| EPI_ISL_470657 | 4/13/2020 | 6/18/2020 North America / USA / Utah        |
| EPI_ISL_470659 | 4/13/2020 | 6/18/2020 North America / USA / Utah        |
| EPI_ISL_470660 | 4/17/2020 | 6/18/2020 North America / USA / Utah        |
| EPI_ISL_470662 | 4/17/2020 | 6/18/2020 North America / USA / Utah        |
| EPI_ISL_470664 | 4/14/2020 | 6/18/2020 North America / USA / Utah        |

|                |           |                                           |
|----------------|-----------|-------------------------------------------|
| EPI_ISL_470666 | 4/14/2020 | 6/18/2020 North America / USA / Utah      |
| EPI_ISL_470668 | 4/20/2020 | 6/18/2020 North America / USA / Utah      |
| EPI_ISL_470669 | 4/20/2020 | 6/18/2020 North America / USA / Utah      |
| EPI_ISL_470670 | 4/20/2020 | 6/18/2020 North America / USA / Utah      |
| EPI_ISL_470673 | 4/21/2020 | 6/18/2020 North America / USA / Utah      |
| EPI_ISL_470677 | 4/21/2020 | 6/18/2020 North America / USA / Utah      |
| EPI_ISL_470678 | 4/17/2020 | 6/18/2020 North America / USA / Utah      |
| EPI_ISL_470680 | 4/13/2020 | 6/18/2020 North America / USA / Utah      |
| EPI_ISL_470681 | 4/13/2020 | 6/18/2020 North America / USA / Utah      |
| EPI_ISL_470683 | 4/12/2020 | 6/18/2020 North America / USA / Utah      |
| EPI_ISL_470684 | 4/13/2020 | 6/18/2020 North America / USA / Utah      |
| EPI_ISL_470685 | 4/13/2020 | 6/18/2020 North America / USA / Utah      |
| EPI_ISL_470686 | 4/13/2020 | 6/18/2020 North America / USA / Utah      |
| EPI_ISL_470687 | 4/13/2020 | 6/18/2020 North America / USA / Utah      |
| EPI_ISL_470688 | 4/13/2020 | 6/18/2020 North America / USA / Utah      |
| EPI_ISL_470691 | 4/13/2020 | 6/18/2020 North America / USA / Utah      |
| EPI_ISL_470694 | 4/13/2020 | 6/18/2020 North America / USA / Utah      |
| EPI_ISL_470696 | 4/13/2020 | 6/18/2020 North America / USA / Utah      |
| EPI_ISL_470697 | 4/13/2020 | 6/18/2020 North America / USA / Utah      |
| EPI_ISL_470699 | 4/13/2020 | 6/18/2020 North America / USA / Utah      |
| EPI_ISL_470700 | 4/13/2020 | 6/18/2020 North America / USA / Utah      |
| EPI_ISL_470701 | 4/13/2020 | 6/18/2020 North America / USA / Utah      |
| EPI_ISL_470703 | 4/13/2020 | 6/18/2020 North America / USA / Utah      |
| EPI_ISL_470704 | 4/13/2020 | 6/18/2020 North America / USA / Utah      |
| EPI_ISL_470705 | 4/13/2020 | 6/18/2020 North America / USA / Utah      |
| EPI_ISL_470706 | 4/13/2020 | 6/18/2020 North America / USA / Utah      |
| EPI_ISL_470708 | 4/14/2020 | 6/18/2020 North America / USA / Utah      |
| EPI_ISL_470711 | 4/14/2020 | 6/18/2020 North America / USA / Utah      |
| EPI_ISL_470712 | 4/3/2020  | 6/18/2020 North America / USA / Utah      |
| EPI_ISL_470716 | 4/5/2020  | 6/18/2020 North America / USA / Utah      |
| EPI_ISL_470717 | 4/6/2020  | 6/18/2020 North America / USA / Utah      |
| EPI_ISL_470801 | 6/7/2020  | 6/18/2020 Asia / Bangladesh               |
| EPI_ISL_470721 | 4/8/2020  | 6/19/2020 North America / USA / Utah      |
| EPI_ISL_470724 | 4/5/2020  | 6/19/2020 North America / USA / Utah      |
| EPI_ISL_470725 | 4/5/2020  | 6/19/2020 North America / USA / Utah      |
| EPI_ISL_470728 | 4/8/2020  | 6/19/2020 North America / USA / Utah      |
| EPI_ISL_470732 | 4/14/2020 | 6/19/2020 North America / USA / Utah      |
| EPI_ISL_470734 | 4/14/2020 | 6/19/2020 North America / USA / Utah      |
| EPI_ISL_470738 | 4/23/2020 | 6/19/2020 North America / USA / Utah      |
| EPI_ISL_470740 | 4/22/2020 | 6/19/2020 North America / USA / Utah      |
| EPI_ISL_470741 | 4/21/2020 | 6/19/2020 North America / USA / Utah      |
| EPI_ISL_470743 | 4/13/2020 | 6/19/2020 North America / USA / Utah      |
| EPI_ISL_470745 | 4/11/2020 | 6/19/2020 North America / USA / Utah      |
| EPI_ISL_470747 | 5/21/2020 | 6/19/2020 North America / USA / Minnesota |
| EPI_ISL_470748 | 5/21/2020 | 6/19/2020 North America / USA / Minnesota |
| EPI_ISL_470749 | 5/21/2020 | 6/19/2020 North America / USA / Minnesota |
| EPI_ISL_470750 | 6/3/2020  | 6/19/2020 North America / USA / Minnesota |



|                |           |                                                              |
|----------------|-----------|--------------------------------------------------------------|
| EPI_ISL_470798 | 5/4/2020  | 6/19/2020 North America / USA / Minnesota                    |
| EPI_ISL_470799 | 5/5/2020  | 6/19/2020 North America / USA / Minnesota                    |
| EPI_ISL_470800 | 5/5/2020  | 6/19/2020 North America / USA / Minnesota                    |
| EPI_ISL_470830 | 3/31/2020 | 6/19/2020 Oceania / Australia / Western Australia            |
| EPI_ISL_470831 | 4/3/2020  | 6/19/2020 Oceania / Australia / Western Australia            |
| EPI_ISL_470833 | 4/6/2020  | 6/19/2020 Oceania / Australia / Western Australia            |
| EPI_ISL_470835 | 4/8/2020  | 6/19/2020 Oceania / Australia / Western Australia            |
| EPI_ISL_470839 | 4/28/2020 | 6/19/2020 Oceania / Australia / Western Australia            |
| EPI_ISL_470840 | 3/24/2020 | 6/19/2020 Oceania / Australia / Western Australia            |
| EPI_ISL_470841 | 3/30/2020 | 6/19/2020 Oceania / Australia / Western Australia            |
| EPI_ISL_470843 | 4/1/2020  | 6/19/2020 Oceania / Australia / Western Australia            |
| EPI_ISL_470845 | 3/20/2020 | 6/19/2020 Oceania / Australia / Western Australia            |
| EPI_ISL_470846 | 3/21/2020 | 6/19/2020 Oceania / Australia / Western Australia            |
| EPI_ISL_470847 | 3/21/2020 | 6/19/2020 Oceania / Australia / Western Australia            |
| EPI_ISL_470848 | 3/22/2020 | 6/19/2020 Oceania / Australia / Western Australia            |
| EPI_ISL_470849 | 3/26/2020 | 6/19/2020 Oceania / Australia / Western Australia            |
| EPI_ISL_470851 | 2/27/2020 | 6/19/2020 Oceania / Australia / Western Australia            |
| EPI_ISL_470853 | 3/19/2020 | 6/19/2020 Oceania / Australia / Western Australia            |
| EPI_ISL_470854 | 4/20/2020 | 6/19/2020 Oceania / Australia / Western Australia            |
| EPI_ISL_470855 | 4/14/2020 | 6/19/2020 Oceania / Australia / Western Australia            |
| EPI_ISL_470856 | 3/21/2020 | 6/19/2020 Oceania / Australia / Western Australia            |
| EPI_ISL_470858 | 3/20/2020 | 6/19/2020 Oceania / Australia / Western Australia            |
| EPI_ISL_470861 | 4/7/2020  | 6/19/2020 Oceania / Australia / Western Australia            |
| EPI_ISL_470862 | 4/8/2020  | 6/19/2020 Oceania / Australia / Western Australia            |
| EPI_ISL_470863 | 3/27/2020 | 6/19/2020 Oceania / Australia / Western Australia            |
| EPI_ISL_470864 | 3/24/2020 | 6/19/2020 Oceania / Australia / Western Australia            |
| EPI_ISL_470865 | 3/25/2020 | 6/19/2020 Oceania / Australia / Western Australia            |
| EPI_ISL_470867 | 3/25/2020 | 6/19/2020 Oceania / Australia / Western Australia            |
| EPI_ISL_470868 | 3/20/2020 | 6/19/2020 Oceania / Australia / Western Australia            |
| EPI_ISL_470869 | 3/20/2020 | 6/19/2020 Oceania / Australia / Western Australia            |
| EPI_ISL_470872 | 3/22/2020 | 6/19/2020 Oceania / Australia / Western Australia            |
| EPI_ISL_470873 | 3/24/2020 | 6/19/2020 Oceania / Australia / Western Australia            |
| EPI_ISL_470876 | 5/29/2020 | 6/19/2020 Asia / Georgia / Tbilisi                           |
| EPI_ISL_470877 | 4/15/2020 | 6/19/2020 Asia / Georgia / Tbilisi                           |
| EPI_ISL_470882 | 3/9/2020  | 6/19/2020 Europe / Norway                                    |
| EPI_ISL_470896 | 3/26/2020 | 6/19/2020 Europe / Russia / Moscow                           |
| EPI_ISL_470897 | 5/5/2020  | 6/19/2020 Europe / Russia / Moscow                           |
| EPI_ISL_470898 | 4/8/2020  | 6/19/2020 Europe / Russia / Moscow                           |
| EPI_ISL_470899 | 5/5/2020  | 6/19/2020 Europe / Russia / Moscow                           |
| EPI_ISL_470900 | 3/20/2020 | 6/19/2020 Europe / Russia / Moscow                           |
| EPI_ISL_470901 | 4/2/2020  | 6/19/2020 Europe / Russia / Moscow                           |
| EPI_ISL_470902 | 4/8/2020  | 6/19/2020 Europe / Russia / Moscow                           |
| EPI_ISL_470903 | 4/10/2020 | 6/19/2020 Europe / Russia / Moscow                           |
| EPI_ISL_470904 | 4/10/2020 | 6/19/2020 Europe / Russia / Moscow                           |
| EPI_ISL_471144 | 6/2/2020  | 6/19/2020 North America / USA / Minnesota / Wabasha County   |
| EPI_ISL_471145 | 6/3/2020  | 6/19/2020 North America / USA / Wisconsin / La Crosse County |
| EPI_ISL_471146 | 6/7/2020  | 6/19/2020 North America / USA / Wisconsin / Adams County     |

|                |           |                                                                |
|----------------|-----------|----------------------------------------------------------------|
| EPI_ISL_471147 | 6/8/2020  | 6/19/2020 North America / USA / Wisconsin / La Crosse County   |
| EPI_ISL_471148 | 6/8/2020  | 6/19/2020 North America / USA / Wisconsin / La Crosse County   |
| EPI_ISL_471149 | 6/8/2020  | 6/19/2020 North America / USA / Wisconsin / Monroe County      |
| EPI_ISL_471150 | 6/11/2020 | 6/19/2020 North America / USA / Wisconsin / La Crosse County   |
| EPI_ISL_471151 | 6/12/2020 | 6/19/2020 North America / USA / Wisconsin / Grant County       |
| EPI_ISL_471152 | 6/12/2020 | 6/19/2020 North America / USA / Wisconsin / La Crosse County   |
| EPI_ISL_471153 | 6/13/2020 | 6/19/2020 North America / USA / Wisconsin / Trempealeau County |
| EPI_ISL_471154 | 6/13/2020 | 6/19/2020 North America / USA / Wisconsin / La Crosse County   |
| EPI_ISL_471155 | 6/13/2020 | 6/19/2020 North America / USA / Wisconsin / La Crosse County   |
| EPI_ISL_471156 | 6/14/2020 | 6/19/2020 North America / USA / Wisconsin / La Crosse County   |
| EPI_ISL_471157 | 6/1/2020  | 6/19/2020 North America / USA / Wisconsin / La Crosse County   |
| EPI_ISL_471158 | 3/29/2020 | 6/19/2020 Africa / Gambia / Kombo                              |
| EPI_ISL_471163 | 4/30/2020 | 6/19/2020 Africa / Gambia / Kombo                              |
| EPI_ISL_471164 | 4/30/2020 | 6/19/2020 Africa / Gambia / Kombo                              |
| EPI_ISL_471167 | 5/4/2020  | 6/19/2020 Africa / Gambia / Kombo                              |
| EPI_ISL_471171 | 5/7/2020  | 6/19/2020 Africa / Gambia / Kombo                              |
| EPI_ISL_471172 | 4/17/2020 | 6/19/2020 Europe / Norway                                      |
| EPI_ISL_471173 | 4/21/2020 | 6/19/2020 Europe / Norway                                      |
| EPI_ISL_471176 | 5/4/2020  | 6/19/2020 Europe / Norway                                      |
| EPI_ISL_471177 | 5/4/2020  | 6/19/2020 Europe / Norway                                      |
| EPI_ISL_471178 | 3/19/2020 | 6/19/2020 North America / USA / Wisconsin                      |
| EPI_ISL_471180 | 3/27/2020 | 6/19/2020 North America / USA / Wisconsin                      |
| EPI_ISL_471181 | 3/29/2020 | 6/19/2020 North America / USA / Wisconsin                      |
| EPI_ISL_471183 | 4/6/2020  | 6/19/2020 North America / USA / Wisconsin                      |
| EPI_ISL_471185 | 4/9/2020  | 6/19/2020 North America / USA / Wisconsin                      |
| EPI_ISL_471187 | 4/9/2020  | 6/19/2020 North America / USA / Wisconsin                      |
| EPI_ISL_471188 | 4/10/2020 | 6/19/2020 North America / USA / Wisconsin                      |
| EPI_ISL_471189 | 4/15/2020 | 6/19/2020 North America / USA / Wisconsin                      |
| EPI_ISL_471190 | 4/17/2020 | 6/19/2020 North America / USA / Wisconsin                      |
| EPI_ISL_471191 | 4/17/2020 | 6/19/2020 North America / USA / Wisconsin                      |
| EPI_ISL_471192 | 4/17/2020 | 6/19/2020 North America / USA / Wisconsin                      |
| EPI_ISL_471194 | 4/24/2020 | 6/19/2020 North America / USA / Wisconsin                      |
| EPI_ISL_471196 | 4/24/2020 | 6/19/2020 North America / USA / Wisconsin                      |
| EPI_ISL_471197 | 4/24/2020 | 6/19/2020 North America / USA / Wisconsin                      |
| EPI_ISL_471199 | 3/28/2020 | 6/19/2020 North America / USA / Wisconsin                      |
| EPI_ISL_471200 | 4/22/2020 | 6/19/2020 North America / USA / Wisconsin                      |
| EPI_ISL_471201 | 3/27/2020 | 6/19/2020 North America / USA / Wisconsin                      |
| EPI_ISL_471202 | 3/25/2020 | 6/19/2020 North America / USA / Wisconsin                      |
| EPI_ISL_471203 | 3/27/2020 | 6/19/2020 North America / USA / Wisconsin                      |
| EPI_ISL_471205 | 3/17/2020 | 6/19/2020 North America / USA / Wisconsin                      |
| EPI_ISL_471206 | 4/2/2020  | 6/19/2020 North America / USA / Wisconsin                      |
| EPI_ISL_471207 | 3/17/2020 | 6/19/2020 North America / USA / Wisconsin                      |
| EPI_ISL_471208 | 4/2/2020  | 6/19/2020 North America / USA / Wisconsin                      |
| EPI_ISL_471209 | 4/14/2020 | 6/19/2020 North America / USA / Wisconsin                      |
| EPI_ISL_471211 | 3/22/2020 | 6/19/2020 North America / USA / Wisconsin                      |
| EPI_ISL_471212 | 3/25/2020 | 6/19/2020 North America / USA / Wisconsin                      |
| EPI_ISL_471213 | 3/22/2020 | 6/19/2020 North America / USA / Wisconsin                      |

|                |           |                                                                |
|----------------|-----------|----------------------------------------------------------------|
| EPI_ISL_471214 | 4/2/2020  | 6/19/2020 North America / USA / Wisconsin                      |
| EPI_ISL_471215 | 4/21/2020 | 6/19/2020 North America / USA / Wisconsin                      |
| EPI_ISL_471218 | 4/20/2020 | 6/19/2020 North America / USA / Wisconsin                      |
| EPI_ISL_471219 | 3/26/2020 | 6/19/2020 North America / USA / Wisconsin                      |
| EPI_ISL_471220 | 3/19/2020 | 6/19/2020 North America / USA / Wisconsin                      |
| EPI_ISL_471221 | 3/28/2020 | 6/19/2020 North America / USA / Wisconsin                      |
| EPI_ISL_471222 | 3/21/2020 | 6/19/2020 North America / USA / Wisconsin                      |
| EPI_ISL_471224 | 4/4/2020  | 6/19/2020 North America / USA / Wisconsin                      |
| EPI_ISL_471225 | 3/22/2020 | 6/19/2020 North America / USA / Wisconsin                      |
| EPI_ISL_471227 | 4/2/2020  | 6/19/2020 North America / USA / Wisconsin                      |
| EPI_ISL_471229 | 4/24/2020 | 6/19/2020 North America / USA / Wisconsin                      |
| EPI_ISL_471230 | 3/13/2020 | 6/19/2020 North America / USA / Wisconsin                      |
| EPI_ISL_471231 | 4/15/2020 | 6/19/2020 North America / USA / Wisconsin                      |
| EPI_ISL_471235 | 3/16/2020 | 6/19/2020 North America / USA / Wisconsin                      |
| EPI_ISL_471240 | 4/3/2020  | 6/19/2020 North America / USA / Wisconsin                      |
| EPI_ISL_471241 | 4/4/2020  | 6/19/2020 North America / USA / Wisconsin                      |
| EPI_ISL_471242 | 4/21/2020 | 6/19/2020 North America / USA / Wisconsin                      |
| EPI_ISL_471244 | 4/2/2020  | 6/19/2020 North America / USA / Wisconsin                      |
| EPI_ISL_471245 | 4/10/2020 | 6/19/2020 North America / USA / Wisconsin                      |
| EPI_ISL_471246 | 4/8/2020  | 6/19/2020 North America / USA / Wisconsin                      |
| EPI_ISL_471247 | 4/13/2020 | 6/19/2020 North America / USA / Wisconsin                      |
| EPI_ISL_471248 | 4/4/2020  | 6/19/2020 North America / USA / Wisconsin                      |
| EPI_ISL_471249 | 3/16/2020 | 6/19/2020 North America / USA / Wisconsin                      |
| EPI_ISL_471250 | 3/16/2020 | 6/19/2020 North America / USA / Wisconsin                      |
| EPI_ISL_471251 | 3/16/2020 | 6/19/2020 North America / USA / Wisconsin                      |
| EPI_ISL_471252 | 3/17/2020 | 6/19/2020 North America / USA / Wisconsin                      |
| EPI_ISL_471253 | 3/20/2020 | 6/19/2020 North America / USA / Wisconsin                      |
| EPI_ISL_471254 | 3/21/2020 | 6/19/2020 North America / USA / Wisconsin                      |
| EPI_ISL_471255 | 3/21/2020 | 6/19/2020 North America / USA / Wisconsin                      |
| EPI_ISL_471256 | 3/23/2020 | 6/19/2020 North America / USA / Wisconsin                      |
| EPI_ISL_471258 | 3/26/2020 | 6/19/2020 North America / USA / Wisconsin                      |
| EPI_ISL_471260 | 3/27/2020 | 6/19/2020 North America / USA / Wisconsin                      |
| EPI_ISL_471261 | 3/28/2020 | 6/19/2020 North America / USA / Wisconsin                      |
| EPI_ISL_471262 | 3/27/2020 | 6/19/2020 North America / USA / Wisconsin                      |
| EPI_ISL_471264 | 3/29/2020 | 6/19/2020 North America / USA / Wisconsin                      |
| EPI_ISL_471265 | 3/30/2020 | 6/19/2020 North America / USA / Wisconsin                      |
| EPI_ISL_471266 | 3/31/2020 | 6/19/2020 North America / USA / Wisconsin                      |
| EPI_ISL_471267 | 4/17/2020 | 6/19/2020 South America / Ecuador / Los Rios / Babahoyo        |
| EPI_ISL_471268 | 4/17/2020 | 6/19/2020 South America / Ecuador / Los Rios / Babahoyo        |
| EPI_ISL_471269 | 6/4/2020  | 6/19/2020 South America / Ecuador / Quito                      |
| EPI_ISL_471270 | 5/19/2020 | 6/19/2020 South America / Ecuador / Quito                      |
| EPI_ISL_471271 | 5/19/2020 | 6/19/2020 South America / Ecuador / Quito                      |
| EPI_ISL_471396 | 4/25/2020 | 6/20/2020 Africa / Democratic Republic of the Congo / Kinshasa |
| EPI_ISL_471397 | 4/25/2020 | 6/20/2020 Africa / Democratic Republic of the Congo / Kinshasa |
| EPI_ISL_471398 | 4/25/2020 | 6/20/2020 Africa / Democratic Republic of the Congo / Kinshasa |
| EPI_ISL_471400 | 4/25/2020 | 6/20/2020 Africa / Democratic Republic of the Congo / Kinshasa |
| EPI_ISL_471401 | 4/26/2020 | 6/20/2020 Africa / Democratic Republic of the Congo / Kinshasa |



|                |           |                                                                    |
|----------------|-----------|--------------------------------------------------------------------|
| EPI_ISL_471402 | 4/26/2020 | 6/20/2020 Africa / Democratic Republic of the Congo / Kinshasa     |
| EPI_ISL_471403 | 4/26/2020 | 6/20/2020 Africa / Democratic Republic of the Congo / Kinshasa     |
| EPI_ISL_471404 | 4/27/2020 | 6/20/2020 Africa / Democratic Republic of the Congo / Kinshasa     |
| EPI_ISL_471405 | 4/27/2020 | 6/20/2020 Africa / Democratic Republic of the Congo / Kinshasa     |
| EPI_ISL_471406 | 4/27/2020 | 6/20/2020 Africa / Democratic Republic of the Congo / Kinshasa     |
| EPI_ISL_471407 | 4/27/2020 | 6/20/2020 Africa / Democratic Republic of the Congo / Kinshasa     |
| EPI_ISL_471408 | 4/27/2020 | 6/20/2020 Africa / Democratic Republic of the Congo / Kinshasa     |
| EPI_ISL_471409 | 4/27/2020 | 6/20/2020 Africa / Democratic Republic of the Congo / Kinshasa     |
| EPI_ISL_471410 | 4/27/2020 | 6/20/2020 Africa / Democratic Republic of the Congo / Kinshasa     |
| EPI_ISL_471411 | 4/25/2020 | 6/20/2020 Africa / Democratic Republic of the Congo / Haut-Katanga |
| EPI_ISL_471412 | 4/25/2020 | 6/20/2020 Africa / Democratic Republic of the Congo / Haut-Katanga |
| EPI_ISL_471414 | 4/28/2020 | 6/20/2020 Africa / Democratic Republic of the Congo / Kinshasa     |
| EPI_ISL_471415 | 4/28/2020 | 6/20/2020 Africa / Democratic Republic of the Congo / Kinshasa     |
| EPI_ISL_471416 | 6/1/2020  | 6/21/2020 Europe / Romania / Buzau                                 |
| EPI_ISL_471417 | 6/3/2020  | 6/21/2020 Europe / Romania / Buzau                                 |
| EPI_ISL_471419 | 6/3/2020  | 6/21/2020 Europe / Romania / Buzau                                 |
| EPI_ISL_471420 | 6/4/2020  | 6/21/2020 Europe / Romania / Bucuresti                             |
| EPI_ISL_471422 | 6/7/2020  | 6/21/2020 Europe / Romania / Bucuresti                             |
| EPI_ISL_471423 | 6/4/2020  | 6/21/2020 Europe / Romania / Buzau                                 |
| EPI_ISL_471424 | 6/7/2020  | 6/21/2020 Europe / Romania / Valcea                                |
| EPI_ISL_471425 | 2/18/2020 | 6/21/2020 Asia / South Korea                                       |
| EPI_ISL_471426 | 2/18/2020 | 6/21/2020 Asia / South Korea                                       |
| EPI_ISL_471427 | 5/20/2020 | 6/21/2020 Europe / Belgium / Liege                                 |
| EPI_ISL_471429 | 5/20/2020 | 6/21/2020 Europe / Belgium / Liege                                 |
| EPI_ISL_471430 | 5/18/2020 | 6/21/2020 Europe / Belgium / Liege                                 |
| EPI_ISL_471431 | 5/28/2020 | 6/21/2020 Europe / Belgium / Liege                                 |
| EPI_ISL_471435 | 5/23/2020 | 6/21/2020 Europe / Belgium / Liege                                 |
| EPI_ISL_471436 | 5/23/2020 | 6/21/2020 Europe / Belgium / Liege                                 |
| EPI_ISL_471438 | 2/18/2020 | 6/21/2020 Asia / South Korea                                       |
| EPI_ISL_471439 | 2/19/2020 | 6/21/2020 Asia / South Korea                                       |
| EPI_ISL_471440 | 2/19/2020 | 6/21/2020 Asia / South Korea                                       |
| EPI_ISL_471441 | 2/19/2020 | 6/21/2020 Asia / South Korea                                       |
| EPI_ISL_471442 | 2/19/2020 | 6/21/2020 Asia / South Korea                                       |
| EPI_ISL_471443 | 2/19/2020 | 6/21/2020 Asia / South Korea                                       |
| EPI_ISL_471444 | 2/20/2020 | 6/21/2020 Asia / South Korea                                       |
| EPI_ISL_471445 | 2/20/2020 | 6/21/2020 Asia / South Korea                                       |
| EPI_ISL_471446 | 2/19/2020 | 6/21/2020 Asia / South Korea                                       |
| EPI_ISL_471447 | 2/19/2020 | 6/21/2020 Asia / South Korea                                       |
| EPI_ISL_471448 | 2/19/2020 | 6/21/2020 Asia / South Korea                                       |
| EPI_ISL_471449 | 2/19/2020 | 6/21/2020 Asia / South Korea                                       |
| EPI_ISL_471450 | 2/19/2020 | 6/21/2020 Asia / South Korea                                       |
| EPI_ISL_471451 | 2/20/2020 | 6/21/2020 Asia / South Korea                                       |
| EPI_ISL_471452 | 2/21/2020 | 6/21/2020 Asia / South Korea                                       |
| EPI_ISL_471453 | 2/20/2020 | 6/21/2020 Asia / South Korea                                       |
| EPI_ISL_471454 | 2/21/2020 | 6/21/2020 Asia / South Korea                                       |
| EPI_ISL_471455 | 2/21/2020 | 6/21/2020 Asia / South Korea                                       |
| EPI_ISL_471456 | 3/31/2020 | 6/22/2020 Africa / Morocco / Rabat                                 |

|                |           |                                                                     |
|----------------|-----------|---------------------------------------------------------------------|
| EPI_ISL_471457 | 4/13/2020 | 6/22/2020 Africa / Morocco / Rabat                                  |
| EPI_ISL_471458 | 4/19/2020 | 6/22/2020 Africa / Morocco / Rabat                                  |
| EPI_ISL_471459 | 4/19/2020 | 6/22/2020 Africa / Morocco / Rabat                                  |
| EPI_ISL_471460 | 4/19/2020 | 6/22/2020 Africa / Morocco / Rabat                                  |
| EPI_ISL_471472 | 3/18/2020 | 6/22/2020 Europe / Spain / Catalunya / Barcelona                    |
| EPI_ISL_471510 | 6/3/2020  | 6/22/2020 Europe / United Kingdom / England                         |
| EPI_ISL_471512 | 6/4/2020  | 6/22/2020 Europe / United Kingdom / England                         |
| EPI_ISL_471513 | 6/3/2020  | 6/22/2020 Europe / United Kingdom / England                         |
| EPI_ISL_471515 | 6/4/2020  | 6/22/2020 Europe / United Kingdom / England                         |
| EPI_ISL_471516 | 6/4/2020  | 6/22/2020 Europe / United Kingdom / England                         |
| EPI_ISL_471517 | 6/3/2020  | 6/22/2020 Europe / United Kingdom / England                         |
| EPI_ISL_471518 | 6/5/2020  | 6/22/2020 Europe / United Kingdom / England                         |
| EPI_ISL_471520 | 6/6/2020  | 6/22/2020 Europe / United Kingdom / England                         |
| EPI_ISL_471521 | 6/6/2020  | 6/22/2020 Europe / United Kingdom / England                         |
| EPI_ISL_471524 | 6/6/2020  | 6/22/2020 Europe / United Kingdom / England                         |
| EPI_ISL_471527 | 6/10/2020 | 6/22/2020 Europe / United Kingdom / England                         |
| EPI_ISL_471528 | 3/9/2020  | 6/22/2020 Europe / Czech Republic / Litomerice-Brnay                |
| EPI_ISL_471530 | 3/10/2020 | 6/22/2020 Europe / Czech Republic / Melnik                          |
| EPI_ISL_471539 | 3/19/2020 | 6/22/2020 South America / Brazil / Sao Paulo / Sao Paulo            |
| EPI_ISL_471540 | 3/10/2020 | 6/22/2020 Europe / Czech Republic / Vysocina / Kynice               |
| EPI_ISL_471541 | 4/2/2020  | 6/22/2020 South America / Brazil / Sao Paulo / Sao Paulo            |
| EPI_ISL_471542 | 4/3/2020  | 6/22/2020 South America / Brazil / Sao Paulo / Mogi das Cruzes      |
| EPI_ISL_471543 | 4/4/2020  | 6/22/2020 South America / Brazil / Sao Paulo / Presidente Venceslau |
| EPI_ISL_471544 | 3/14/2020 | 6/22/2020 Europe / Czech Republic / Vysocina / Kynice               |
| EPI_ISL_471545 | 3/22/2020 | 6/22/2020 South America / Brazil / Sao Paulo / Sao Paulo            |
| EPI_ISL_471546 | 3/20/2020 | 6/22/2020 South America / Brazil / Sao Paulo / Sao Paulo            |
| EPI_ISL_471547 | 3/11/2020 | 6/22/2020 Europe / Czech Republic / Prague                          |
| EPI_ISL_471548 | 4/10/2020 | 6/22/2020 South America / Brazil / Sao Paulo / Sao Paulo            |
| EPI_ISL_471549 | 4/13/2020 | 6/22/2020 South America / Brazil / Sao Paulo / Sao Paulo            |
| EPI_ISL_471550 | 3/23/2020 | 6/22/2020 Europe / Czech Republic / Jihlava                         |
| EPI_ISL_471551 | 4/10/2020 | 6/22/2020 South America / Brazil / Sao Paulo / Sao Paulo            |
| EPI_ISL_471552 | 4/1/2020  | 6/22/2020 South America / Brazil / Sao Paulo / Sao Paulo            |
| EPI_ISL_471553 | 3/17/2020 | 6/22/2020 Europe / Czech Republic / Prague                          |
| EPI_ISL_471554 | 3/29/2020 | 6/22/2020 South America / Brazil / Sao Paulo / Sao Paulo            |
| EPI_ISL_471555 | 3/17/2020 | 6/22/2020 Europe / Czech Republic / Prague                          |
| EPI_ISL_471556 | 4/18/2020 | 6/22/2020 South America / Brazil / Sao Paulo / Osasco               |
| EPI_ISL_471562 | 4/29/2020 | 6/22/2020 South America / Brazil / Sao Paulo / Sao Paulo            |
| EPI_ISL_471581 | 4/29/2020 | 6/22/2020 South America / Brazil / Sao Paulo / Sao Paulo            |
| EPI_ISL_471582 | 4/29/2020 | 6/22/2020 South America / Brazil / Sao Paulo / Sao Paulo            |
| EPI_ISL_471583 | 4/29/2020 | 6/22/2020 Asia / India / Tamil Nadu / Chennai                       |
| EPI_ISL_471585 | 4/8/2020  | 6/22/2020 Asia / India / Telangana / Rangaraddy                     |
| EPI_ISL_471588 | 5/21/2020 | 6/22/2020 Asia / India / Telangana / Hyderabad                      |
| EPI_ISL_471589 | 5/21/2020 | 6/22/2020 Asia / India / Telangana / Hyderabad                      |
| EPI_ISL_471590 | 5/25/2020 | 6/22/2020 Asia / India / Telangana / Hyderabad                      |
| EPI_ISL_471591 | 5/25/2020 | 6/22/2020 Asia / India / Telangana / Hyderabad                      |
| EPI_ISL_471592 | 5/25/2020 | 6/22/2020 Asia / India / Telangana / Hyderabad                      |
| EPI_ISL_471593 | 5/25/2020 | 6/22/2020 Asia / India / Telangana / Hyderabad                      |



|                |           |                                                                     |
|----------------|-----------|---------------------------------------------------------------------|
| EPI_ISL_471641 | 4/20/2020 | 6/22/2020 Asia / India / Telangana / Suryapet                       |
| EPI_ISL_471642 | 4/20/2020 | 6/22/2020 Asia / India / Telangana / Suryapet                       |
| EPI_ISL_471643 | 4/20/2020 | 6/22/2020 Asia / India / Telangana / Suryapet                       |
| EPI_ISL_471644 | 5/9/2020  | 6/22/2020 Asia / India / Telangana / Hyderabad                      |
| EPI_ISL_471645 | 4/15/2020 | 6/22/2020 Asia / India / Telangana / Hyderabad                      |
| EPI_ISL_471646 | 4/15/2020 | 6/22/2020 Asia / India / Telangana / Hyderabad                      |
| EPI_ISL_471647 | 4/30/2020 | 6/22/2020 South America / Brazil / Sao Paulo / Barueri              |
| EPI_ISL_471648 | 4/30/2020 | 6/22/2020 South America / Brazil / Sao Paulo / Itapeverica da Serra |
| EPI_ISL_471679 | 4/28/2020 | 6/22/2020 North America / USA / Michigan                            |
| EPI_ISL_471685 | 4/29/2020 | 6/22/2020 North America / USA / Michigan                            |
| EPI_ISL_471686 | 4/29/2020 | 6/22/2020 North America / USA / Michigan                            |
| EPI_ISL_471687 | 4/29/2020 | 6/22/2020 North America / USA / Michigan                            |
| EPI_ISL_471689 | 4/29/2020 | 6/22/2020 North America / USA / Michigan                            |
| EPI_ISL_471691 | 4/29/2020 | 6/22/2020 North America / USA / Michigan                            |
| EPI_ISL_471692 | 4/29/2020 | 6/22/2020 North America / USA / Michigan                            |
| EPI_ISL_471693 | 4/29/2020 | 6/22/2020 North America / USA / Michigan                            |
| EPI_ISL_471695 | 5/14/2020 | 6/22/2020 North America / USA / Michigan                            |
| EPI_ISL_471696 | 5/14/2020 | 6/22/2020 North America / USA / Michigan                            |
| EPI_ISL_471701 | 5/14/2020 | 6/22/2020 North America / USA / Michigan                            |
| EPI_ISL_471702 | 5/14/2020 | 6/22/2020 North America / USA / Michigan                            |
| EPI_ISL_471704 | 5/14/2020 | 6/22/2020 North America / USA / Michigan                            |
| EPI_ISL_471707 | 5/12/2020 | 6/22/2020 North America / USA / Michigan                            |
| EPI_ISL_471708 | 5/15/2020 | 6/22/2020 North America / USA / Michigan                            |
| EPI_ISL_471709 | 5/16/2020 | 6/22/2020 North America / USA / Michigan                            |
| EPI_ISL_471712 | 5/16/2020 | 6/22/2020 North America / USA / Michigan                            |
| EPI_ISL_471713 | 5/19/2020 | 6/22/2020 North America / USA / Michigan                            |
| EPI_ISL_471714 | 5/20/2020 | 6/22/2020 North America / USA / Michigan                            |
| EPI_ISL_471715 | 5/20/2020 | 6/22/2020 North America / USA / Michigan                            |
| EPI_ISL_471716 | 5/20/2020 | 6/22/2020 North America / USA / Michigan                            |
| EPI_ISL_471717 | 5/20/2020 | 6/22/2020 North America / USA / Michigan                            |
| EPI_ISL_471720 | 4/27/2020 | 6/22/2020 North America / USA / Michigan                            |
| EPI_ISL_471721 | 4/27/2020 | 6/22/2020 North America / USA / Michigan                            |
| EPI_ISL_471722 | 4/27/2020 | 6/22/2020 North America / USA / Michigan                            |
| EPI_ISL_471724 | 4/27/2020 | 6/22/2020 North America / USA / Michigan                            |
| EPI_ISL_471725 | 4/27/2020 | 6/22/2020 North America / USA / Michigan                            |
| EPI_ISL_471728 | 4/27/2020 | 6/22/2020 North America / USA / Michigan                            |
| EPI_ISL_471729 | 4/26/2020 | 6/22/2020 North America / USA / Michigan                            |
| EPI_ISL_471731 | 4/27/2020 | 6/22/2020 North America / USA / Michigan                            |
| EPI_ISL_471732 | 4/27/2020 | 6/22/2020 North America / USA / Michigan                            |
| EPI_ISL_471739 | 4/14/2020 | 6/22/2020 North America / USA / Michigan                            |
| EPI_ISL_471740 | 4/14/2020 | 6/22/2020 North America / USA / Michigan                            |
| EPI_ISL_471742 | 4/17/2020 | 6/22/2020 North America / USA / Michigan                            |
| EPI_ISL_471743 | 4/20/2020 | 6/22/2020 North America / USA / Michigan                            |
| EPI_ISL_471745 | 4/20/2020 | 6/22/2020 North America / USA / Michigan                            |
| EPI_ISL_471749 | 4/17/2020 | 6/22/2020 North America / USA / Michigan                            |
| EPI_ISL_471750 | 4/18/2020 | 6/22/2020 North America / USA / Michigan                            |
| EPI_ISL_471754 | 4/21/2020 | 6/22/2020 North America / USA / Michigan                            |





|                |           |                                             |
|----------------|-----------|---------------------------------------------|
| EPI_ISL_471910 | 4/29/2020 | 6/22/2020 North America / USA / Michigan    |
| EPI_ISL_479728 | 6/2/2020  | 6/22/2020 Africa / Egypt                    |
| EPI_ISL_471911 | 4/20/2020 | 6/23/2020 Europe / United Kingdom / England |
| EPI_ISL_471912 | 4/28/2020 | 6/23/2020 Europe / United Kingdom / England |
| EPI_ISL_471913 | 4/24/2020 | 6/23/2020 Europe / United Kingdom / England |
| EPI_ISL_471914 | 4/20/2020 | 6/23/2020 Europe / United Kingdom / England |
| EPI_ISL_471915 | 4/20/2020 | 6/23/2020 Europe / United Kingdom / England |
| EPI_ISL_471916 | 4/6/2020  | 6/23/2020 Europe / United Kingdom / England |
| EPI_ISL_471917 | 4/21/2020 | 6/23/2020 Europe / United Kingdom / England |
| EPI_ISL_471918 | 4/20/2020 | 6/23/2020 Europe / United Kingdom / England |
| EPI_ISL_471919 | 4/23/2020 | 6/23/2020 Europe / United Kingdom / England |
| EPI_ISL_471921 | 4/21/2020 | 6/23/2020 Europe / United Kingdom / England |
| EPI_ISL_471922 | 4/20/2020 | 6/23/2020 Europe / United Kingdom / England |
| EPI_ISL_471924 | 4/7/2020  | 6/23/2020 Europe / United Kingdom / England |
| EPI_ISL_471925 | 4/23/2020 | 6/23/2020 Europe / United Kingdom / England |
| EPI_ISL_471926 | 4/20/2020 | 6/23/2020 Europe / United Kingdom / England |
| EPI_ISL_471927 | 4/22/2020 | 6/23/2020 Europe / United Kingdom / England |
| EPI_ISL_471929 | 4/6/2020  | 6/23/2020 Europe / United Kingdom / England |
| EPI_ISL_471930 | 4/21/2020 | 6/23/2020 Europe / United Kingdom / England |
| EPI_ISL_471931 | 4/22/2020 | 6/23/2020 Europe / United Kingdom / England |
| EPI_ISL_471932 | 4/29/2020 | 6/23/2020 Europe / United Kingdom / England |
| EPI_ISL_471933 | 4/22/2020 | 6/23/2020 Europe / United Kingdom / England |
| EPI_ISL_471934 | 4/20/2020 | 6/23/2020 Europe / United Kingdom / England |
| EPI_ISL_471935 | 4/23/2020 | 6/23/2020 Europe / United Kingdom / England |
| EPI_ISL_471936 | 4/29/2020 | 6/23/2020 Europe / United Kingdom / England |
| EPI_ISL_471937 | 4/21/2020 | 6/23/2020 Europe / United Kingdom / England |
| EPI_ISL_471938 | 4/20/2020 | 6/23/2020 Europe / United Kingdom / England |
| EPI_ISL_471941 | 4/24/2020 | 6/23/2020 Europe / United Kingdom / England |
| EPI_ISL_471943 | 4/20/2020 | 6/23/2020 Europe / United Kingdom / England |
| EPI_ISL_471944 | 4/20/2020 | 6/23/2020 Europe / United Kingdom / England |
| EPI_ISL_471946 | 4/22/2020 | 6/23/2020 Europe / United Kingdom / England |
| EPI_ISL_471947 | 4/20/2020 | 6/23/2020 Europe / United Kingdom / England |
| EPI_ISL_471949 | 4/21/2020 | 6/23/2020 Europe / United Kingdom / England |
| EPI_ISL_471950 | 4/20/2020 | 6/23/2020 Europe / United Kingdom / England |
| EPI_ISL_471951 | 4/27/2020 | 6/23/2020 Europe / United Kingdom / England |
| EPI_ISL_471955 | 4/17/2020 | 6/23/2020 Europe / United Kingdom / England |
| EPI_ISL_471956 | 4/2/2020  | 6/23/2020 Europe / United Kingdom / England |
| EPI_ISL_471957 | 4/1/2020  | 6/23/2020 Europe / United Kingdom / England |
| EPI_ISL_471959 | 3/31/2020 | 6/23/2020 Europe / United Kingdom / England |
| EPI_ISL_471960 | 4/1/2020  | 6/23/2020 Europe / United Kingdom / England |
| EPI_ISL_471963 | 3/31/2020 | 6/23/2020 Europe / United Kingdom / England |
| EPI_ISL_471964 | 3/29/2020 | 6/23/2020 Europe / United Kingdom / England |
| EPI_ISL_471966 | 3/28/2020 | 6/23/2020 Europe / United Kingdom / England |
| EPI_ISL_471967 | 3/27/2020 | 6/23/2020 Europe / United Kingdom / England |
| EPI_ISL_471969 | 3/14/2020 | 6/23/2020 Europe / United Kingdom / England |
| EPI_ISL_471971 | 3/13/2020 | 6/23/2020 Europe / United Kingdom / England |
| EPI_ISL_471972 | 3/25/2020 | 6/23/2020 Europe / United Kingdom / England |









|                |           |           |                                   |
|----------------|-----------|-----------|-----------------------------------|
| EPI_ISL_472410 | 4/15/2020 | 6/23/2020 | Europe / United Kingdom / England |
| EPI_ISL_472411 | 4/28/2020 | 6/23/2020 | Europe / United Kingdom / England |
| EPI_ISL_472412 | 6/10/2020 | 6/23/2020 | Europe / United Kingdom / England |
| EPI_ISL_472413 | 6/10/2020 | 6/23/2020 | Europe / United Kingdom / England |
| EPI_ISL_472414 | 6/10/2020 | 6/23/2020 | Europe / United Kingdom / England |
| EPI_ISL_472415 | 6/14/2020 | 6/23/2020 | Europe / United Kingdom / England |
| EPI_ISL_472416 | 6/11/2020 | 6/23/2020 | Europe / United Kingdom / England |
| EPI_ISL_472418 | 4/26/2020 | 6/23/2020 | Europe / United Kingdom / England |
| EPI_ISL_472419 | 5/4/2020  | 6/23/2020 | Europe / United Kingdom / England |
| EPI_ISL_472420 | 5/4/2020  | 6/23/2020 | Europe / United Kingdom / England |
| EPI_ISL_472422 | 5/2/2020  | 6/23/2020 | Europe / United Kingdom / England |
| EPI_ISL_472423 | 5/3/2020  | 6/23/2020 | Europe / United Kingdom / England |
| EPI_ISL_472424 | 5/5/2020  | 6/23/2020 | Europe / United Kingdom / England |
| EPI_ISL_472425 | 5/4/2020  | 6/23/2020 | Europe / United Kingdom / England |
| EPI_ISL_472426 | 4/30/2020 | 6/23/2020 | Europe / United Kingdom / England |
| EPI_ISL_472427 | 5/3/2020  | 6/23/2020 | Europe / United Kingdom / England |
| EPI_ISL_472428 | 5/2/2020  | 6/23/2020 | Europe / United Kingdom / England |
| EPI_ISL_472429 | 5/3/2020  | 6/23/2020 | Europe / United Kingdom / England |
| EPI_ISL_472437 | 5/4/2020  | 6/23/2020 | Europe / United Kingdom / Wales   |
| EPI_ISL_472439 | 4/20/2020 | 6/23/2020 | Europe / United Kingdom / Wales   |
| EPI_ISL_472445 | 5/7/2020  | 6/23/2020 | Europe / United Kingdom / Wales   |
| EPI_ISL_472450 | 4/6/2020  | 6/23/2020 | Europe / United Kingdom / Wales   |
| EPI_ISL_472452 | 4/13/2020 | 6/23/2020 | Europe / United Kingdom / Wales   |
| EPI_ISL_472454 | 5/5/2020  | 6/23/2020 | Europe / United Kingdom / Wales   |
| EPI_ISL_472459 | 4/21/2020 | 6/23/2020 | Europe / United Kingdom / Wales   |
| EPI_ISL_472461 | 4/21/2020 | 6/23/2020 | Europe / United Kingdom / Wales   |
| EPI_ISL_472479 | 3/29/2020 | 6/23/2020 | Europe / United Kingdom / Wales   |
| EPI_ISL_472480 | 5/7/2020  | 6/23/2020 | Europe / United Kingdom / Wales   |
| EPI_ISL_472482 | 5/5/2020  | 6/23/2020 | Europe / United Kingdom / Wales   |
| EPI_ISL_472489 | 4/21/2020 | 6/23/2020 | Europe / United Kingdom / Wales   |
| EPI_ISL_472498 | 5/7/2020  | 6/23/2020 | Europe / United Kingdom / Wales   |
| EPI_ISL_472509 | 3/29/2020 | 6/23/2020 | Europe / United Kingdom / Wales   |
| EPI_ISL_472513 | 5/4/2020  | 6/23/2020 | Europe / United Kingdom / Wales   |
| EPI_ISL_472516 | 5/4/2020  | 6/23/2020 | Europe / United Kingdom / Wales   |
| EPI_ISL_472522 | 5/7/2020  | 6/23/2020 | Europe / United Kingdom / Wales   |
| EPI_ISL_472523 | 5/9/2020  | 6/23/2020 | Europe / United Kingdom / Wales   |
| EPI_ISL_472530 | 3/31/2020 | 6/23/2020 | Europe / United Kingdom / Wales   |
| EPI_ISL_472538 | 3/30/2020 | 6/23/2020 | Europe / United Kingdom / Wales   |
| EPI_ISL_472541 | 4/19/2020 | 6/23/2020 | Europe / United Kingdom / Wales   |
| EPI_ISL_472542 | 5/7/2020  | 6/23/2020 | Europe / United Kingdom / Wales   |
| EPI_ISL_472545 | 5/7/2020  | 6/23/2020 | Europe / United Kingdom / Wales   |
| EPI_ISL_472547 | 3/29/2020 | 6/23/2020 | Europe / United Kingdom / Wales   |
| EPI_ISL_472553 | 4/18/2020 | 6/23/2020 | Europe / United Kingdom / Wales   |
| EPI_ISL_472561 | 5/5/2020  | 6/23/2020 | Europe / United Kingdom / Wales   |
| EPI_ISL_472565 | 3/31/2020 | 6/23/2020 | Europe / United Kingdom / Wales   |
| EPI_ISL_472579 | 3/27/2020 | 6/23/2020 | Europe / United Kingdom / Wales   |
| EPI_ISL_472580 | 5/7/2020  | 6/23/2020 | Europe / United Kingdom / Wales   |

|                |           |           |                                 |
|----------------|-----------|-----------|---------------------------------|
| EPI_ISL_472589 | 4/21/2020 | 6/23/2020 | Europe / United Kingdom / Wales |
| EPI_ISL_472598 | 5/4/2020  | 6/23/2020 | Europe / United Kingdom / Wales |
| EPI_ISL_472602 | 5/7/2020  | 6/23/2020 | Europe / United Kingdom / Wales |
| EPI_ISL_472603 | 5/6/2020  | 6/23/2020 | Europe / United Kingdom / Wales |
| EPI_ISL_472605 | 4/17/2020 | 6/23/2020 | Europe / United Kingdom / Wales |
| EPI_ISL_472606 | 5/7/2020  | 6/23/2020 | Europe / United Kingdom / Wales |
| EPI_ISL_472615 | 5/4/2020  | 6/23/2020 | Europe / United Kingdom / Wales |
| EPI_ISL_472618 | 4/21/2020 | 6/23/2020 | Europe / United Kingdom / Wales |
| EPI_ISL_472622 | 5/3/2020  | 6/23/2020 | Europe / United Kingdom / Wales |
| EPI_ISL_472623 | 5/9/2020  | 6/23/2020 | Europe / United Kingdom / Wales |
| EPI_ISL_472625 | 5/8/2020  | 6/23/2020 | Europe / United Kingdom / Wales |
| EPI_ISL_472626 | 4/20/2020 | 6/23/2020 | Europe / United Kingdom / Wales |
| EPI_ISL_472636 | 5/7/2020  | 6/23/2020 | Europe / United Kingdom / Wales |
| EPI_ISL_472637 | 4/20/2020 | 6/23/2020 | Europe / United Kingdom / Wales |
| EPI_ISL_472639 | 4/6/2020  | 6/23/2020 | Europe / United Kingdom / Wales |
| EPI_ISL_472653 | 5/6/2020  | 6/23/2020 | Europe / United Kingdom / Wales |
| EPI_ISL_472655 | 5/7/2020  | 6/23/2020 | Europe / United Kingdom / Wales |
| EPI_ISL_472664 | 5/3/2020  | 6/23/2020 | Europe / United Kingdom / Wales |
| EPI_ISL_472666 | 5/8/2020  | 6/23/2020 | Europe / United Kingdom / Wales |
| EPI_ISL_472669 | 5/4/2020  | 6/23/2020 | Europe / United Kingdom / Wales |
| EPI_ISL_472670 | 4/17/2020 | 6/23/2020 | Europe / United Kingdom / Wales |
| EPI_ISL_472676 | 4/19/2020 | 6/23/2020 | Europe / United Kingdom / Wales |
| EPI_ISL_472684 | 5/5/2020  | 6/23/2020 | Europe / United Kingdom / Wales |
| EPI_ISL_472692 | 5/6/2020  | 6/23/2020 | Europe / United Kingdom / Wales |
| EPI_ISL_472693 | 3/27/2020 | 6/23/2020 | Europe / United Kingdom / Wales |
| EPI_ISL_472699 | 5/7/2020  | 6/23/2020 | Europe / United Kingdom / Wales |
| EPI_ISL_472701 | 4/6/2020  | 6/23/2020 | Europe / United Kingdom / Wales |
| EPI_ISL_472716 | 5/4/2020  | 6/23/2020 | Europe / United Kingdom / Wales |
| EPI_ISL_472729 | 5/5/2020  | 6/23/2020 | Europe / United Kingdom / Wales |
| EPI_ISL_472734 | 4/19/2020 | 6/23/2020 | Europe / United Kingdom / Wales |
| EPI_ISL_472735 | 5/12/2020 | 6/23/2020 | Europe / United Kingdom / Wales |
| EPI_ISL_472737 | 5/13/2020 | 6/23/2020 | Europe / United Kingdom / Wales |
| EPI_ISL_472740 | 5/15/2020 | 6/23/2020 | Europe / United Kingdom / Wales |
| EPI_ISL_472742 | 5/13/2020 | 6/23/2020 | Europe / United Kingdom / Wales |
| EPI_ISL_472746 | 5/15/2020 | 6/23/2020 | Europe / United Kingdom / Wales |
| EPI_ISL_472747 | 5/12/2020 | 6/23/2020 | Europe / United Kingdom / Wales |
| EPI_ISL_472749 | 5/13/2020 | 6/23/2020 | Europe / United Kingdom / Wales |
| EPI_ISL_472750 | 5/14/2020 | 6/23/2020 | Europe / United Kingdom / Wales |
| EPI_ISL_472751 | 5/13/2020 | 6/23/2020 | Europe / United Kingdom / Wales |
| EPI_ISL_472753 | 5/14/2020 | 6/23/2020 | Europe / United Kingdom / Wales |
| EPI_ISL_472754 | 5/13/2020 | 6/23/2020 | Europe / United Kingdom / Wales |
| EPI_ISL_472757 | 5/14/2020 | 6/23/2020 | Europe / United Kingdom / Wales |
| EPI_ISL_472758 | 5/13/2020 | 6/23/2020 | Europe / United Kingdom / Wales |
| EPI_ISL_472760 | 5/13/2020 | 6/23/2020 | Europe / United Kingdom / Wales |
| EPI_ISL_472761 | 5/13/2020 | 6/23/2020 | Europe / United Kingdom / Wales |
| EPI_ISL_472762 | 5/15/2020 | 6/23/2020 | Europe / United Kingdom / Wales |
| EPI_ISL_472763 | 5/13/2020 | 6/23/2020 | Europe / United Kingdom / Wales |



|                |           |           |                                 |
|----------------|-----------|-----------|---------------------------------|
| EPI_ISL_472844 | 5/19/2020 | 6/23/2020 | Europe / United Kingdom / Wales |
| EPI_ISL_472845 | 5/21/2020 | 6/23/2020 | Europe / United Kingdom / Wales |
| EPI_ISL_472846 | 5/21/2020 | 6/23/2020 | Europe / United Kingdom / Wales |
| EPI_ISL_472848 | 4/26/2020 | 6/23/2020 | Europe / United Kingdom / Wales |
| EPI_ISL_472850 | 5/25/2020 | 6/23/2020 | Europe / United Kingdom / Wales |
| EPI_ISL_472851 | 4/25/2020 | 6/23/2020 | Europe / United Kingdom / Wales |
| EPI_ISL_472854 | 5/22/2020 | 6/23/2020 | Europe / United Kingdom / Wales |
| EPI_ISL_472856 | 5/26/2020 | 6/23/2020 | Europe / United Kingdom / Wales |
| EPI_ISL_472857 | 5/25/2020 | 6/23/2020 | Europe / United Kingdom / Wales |
| EPI_ISL_472858 | 4/25/2020 | 6/23/2020 | Europe / United Kingdom / Wales |
| EPI_ISL_472861 | 5/23/2020 | 6/23/2020 | Europe / United Kingdom / Wales |
| EPI_ISL_472870 | 5/11/2020 | 6/23/2020 | Europe / United Kingdom / Wales |
| EPI_ISL_472873 | 5/26/2020 | 6/23/2020 | Europe / United Kingdom / Wales |
| EPI_ISL_472874 | 5/26/2020 | 6/23/2020 | Europe / United Kingdom / Wales |
| EPI_ISL_472875 | 5/25/2020 | 6/23/2020 | Europe / United Kingdom / Wales |
| EPI_ISL_472878 | 5/23/2020 | 6/23/2020 | Europe / United Kingdom / Wales |
| EPI_ISL_472879 | 5/17/2020 | 6/23/2020 | Europe / United Kingdom / Wales |
| EPI_ISL_472880 | 5/25/2020 | 6/23/2020 | Europe / United Kingdom / Wales |
| EPI_ISL_472882 | 5/23/2020 | 6/23/2020 | Europe / United Kingdom / Wales |
| EPI_ISL_472883 | 5/24/2020 | 6/23/2020 | Europe / United Kingdom / Wales |
| EPI_ISL_472884 | 4/18/2020 | 6/23/2020 | Europe / United Kingdom / Wales |
| EPI_ISL_472886 | 4/24/2020 | 6/23/2020 | Europe / United Kingdom / Wales |
| EPI_ISL_472889 | 5/20/2020 | 6/23/2020 | Europe / United Kingdom / Wales |
| EPI_ISL_472890 | 4/19/2020 | 6/23/2020 | Europe / United Kingdom / Wales |
| EPI_ISL_472892 | 5/21/2020 | 6/23/2020 | Europe / United Kingdom / Wales |
| EPI_ISL_472895 | 5/15/2020 | 6/23/2020 | Europe / United Kingdom / Wales |
| EPI_ISL_472896 | 5/25/2020 | 6/23/2020 | Europe / United Kingdom / Wales |
| EPI_ISL_472898 | 4/26/2020 | 6/23/2020 | Europe / United Kingdom / Wales |
| EPI_ISL_472899 | 5/23/2020 | 6/23/2020 | Europe / United Kingdom / Wales |
| EPI_ISL_472901 | 5/25/2020 | 6/23/2020 | Europe / United Kingdom / Wales |
| EPI_ISL_472902 | 5/21/2020 | 6/23/2020 | Europe / United Kingdom / Wales |
| EPI_ISL_472904 | 5/15/2020 | 6/23/2020 | Europe / United Kingdom / Wales |
| EPI_ISL_472905 | 5/26/2020 | 6/23/2020 | Europe / United Kingdom / Wales |
| EPI_ISL_472906 | 5/18/2020 | 6/23/2020 | Europe / United Kingdom / Wales |
| EPI_ISL_472913 | 4/19/2020 | 6/23/2020 | Europe / United Kingdom / Wales |
| EPI_ISL_472914 | 5/17/2020 | 6/23/2020 | Europe / United Kingdom / Wales |
| EPI_ISL_472916 | 5/18/2020 | 6/23/2020 | Europe / United Kingdom / Wales |
| EPI_ISL_472922 | 5/22/2020 | 6/23/2020 | Europe / United Kingdom / Wales |
| EPI_ISL_472926 | 5/18/2020 | 6/23/2020 | Europe / United Kingdom / Wales |
| EPI_ISL_472927 | 5/15/2020 | 6/23/2020 | Europe / United Kingdom / Wales |
| EPI_ISL_472934 | 5/26/2020 | 6/23/2020 | Europe / United Kingdom / Wales |
| EPI_ISL_472935 | 4/26/2020 | 6/23/2020 | Europe / United Kingdom / Wales |
| EPI_ISL_472937 | 5/24/2020 | 6/23/2020 | Europe / United Kingdom / Wales |
| EPI_ISL_472938 | 5/16/2020 | 6/23/2020 | Europe / United Kingdom / Wales |
| EPI_ISL_472939 | 5/24/2020 | 6/23/2020 | Europe / United Kingdom / Wales |
| EPI_ISL_472940 | 4/7/2020  | 6/23/2020 | Europe / United Kingdom / Wales |
| EPI_ISL_472942 | 4/19/2020 | 6/23/2020 | Europe / United Kingdom / Wales |

|                |           |                                           |
|----------------|-----------|-------------------------------------------|
| EPI_ISL_472947 | 5/23/2020 | 6/23/2020 Europe / United Kingdom / Wales |
| EPI_ISL_472948 | 4/28/2020 | 6/23/2020 Europe / United Kingdom / Wales |
| EPI_ISL_472949 | 5/26/2020 | 6/23/2020 Europe / United Kingdom / Wales |
| EPI_ISL_472952 | 5/22/2020 | 6/23/2020 Europe / United Kingdom / Wales |
| EPI_ISL_472955 | 4/19/2020 | 6/23/2020 Europe / United Kingdom / Wales |
| EPI_ISL_472956 | 4/19/2020 | 6/23/2020 Europe / United Kingdom / Wales |
| EPI_ISL_472957 | 4/17/2020 | 6/23/2020 Europe / United Kingdom / Wales |
| EPI_ISL_472960 | 4/19/2020 | 6/23/2020 Europe / United Kingdom / Wales |
| EPI_ISL_472961 | 4/9/2020  | 6/23/2020 Europe / United Kingdom / Wales |
| EPI_ISL_472963 | 5/23/2020 | 6/23/2020 Europe / United Kingdom / Wales |
| EPI_ISL_472965 | 5/22/2020 | 6/23/2020 Europe / United Kingdom / Wales |
| EPI_ISL_472966 | 5/23/2020 | 6/23/2020 Europe / United Kingdom / Wales |
| EPI_ISL_472967 | 4/22/2020 | 6/23/2020 Europe / United Kingdom / Wales |
| EPI_ISL_472968 | 5/24/2020 | 6/23/2020 Europe / United Kingdom / Wales |
| EPI_ISL_472972 | 4/19/2020 | 6/23/2020 Europe / United Kingdom / Wales |
| EPI_ISL_472974 | 5/5/2020  | 6/23/2020 Europe / United Kingdom / Wales |
| EPI_ISL_472975 | 5/23/2020 | 6/23/2020 Europe / United Kingdom / Wales |
| EPI_ISL_472976 | 4/18/2020 | 6/23/2020 Europe / United Kingdom / Wales |
| EPI_ISL_472979 | 5/22/2020 | 6/23/2020 Europe / United Kingdom / Wales |
| EPI_ISL_472980 | 5/22/2020 | 6/23/2020 Europe / United Kingdom / Wales |
| EPI_ISL_472983 | 5/24/2020 | 6/23/2020 Europe / United Kingdom / Wales |
| EPI_ISL_472988 | 4/24/2020 | 6/23/2020 Europe / United Kingdom / Wales |
| EPI_ISL_472990 | 4/29/2020 | 6/23/2020 Europe / United Kingdom / Wales |
| EPI_ISL_472991 | 5/25/2020 | 6/23/2020 Europe / United Kingdom / Wales |
| EPI_ISL_472994 | 4/18/2020 | 6/23/2020 Europe / United Kingdom / Wales |
| EPI_ISL_472995 | 5/22/2020 | 6/23/2020 Europe / United Kingdom / Wales |
| EPI_ISL_472997 | 5/18/2020 | 6/23/2020 Europe / United Kingdom / Wales |
| EPI_ISL_472998 | 5/23/2020 | 6/23/2020 Europe / United Kingdom / Wales |
| EPI_ISL_473002 | 5/23/2020 | 6/23/2020 Europe / United Kingdom / Wales |
| EPI_ISL_473004 | 4/9/2020  | 6/23/2020 Europe / United Kingdom / Wales |
| EPI_ISL_473005 | 5/22/2020 | 6/23/2020 Europe / United Kingdom / Wales |
| EPI_ISL_473009 | 4/18/2020 | 6/23/2020 Europe / United Kingdom / Wales |
| EPI_ISL_473010 | 5/22/2020 | 6/23/2020 Europe / United Kingdom / Wales |
| EPI_ISL_473014 | 5/24/2020 | 6/23/2020 Europe / United Kingdom / Wales |
| EPI_ISL_473015 | 5/15/2020 | 6/23/2020 Europe / United Kingdom / Wales |
| EPI_ISL_473019 | 5/22/2020 | 6/23/2020 Europe / United Kingdom / Wales |
| EPI_ISL_473020 | 4/16/2020 | 6/23/2020 Europe / United Kingdom / Wales |
| EPI_ISL_473021 | 5/24/2020 | 6/23/2020 Europe / United Kingdom / Wales |
| EPI_ISL_473024 | 5/26/2020 | 6/23/2020 Europe / United Kingdom / Wales |
| EPI_ISL_473026 | 5/19/2020 | 6/23/2020 Europe / United Kingdom / Wales |
| EPI_ISL_473027 | 5/22/2020 | 6/23/2020 Europe / United Kingdom / Wales |
| EPI_ISL_473029 | 5/14/2020 | 6/23/2020 Europe / United Kingdom / Wales |
| EPI_ISL_473031 | 5/11/2020 | 6/23/2020 Europe / United Kingdom / Wales |
| EPI_ISL_473032 | 5/18/2020 | 6/23/2020 Europe / United Kingdom / Wales |
| EPI_ISL_473033 | 5/23/2020 | 6/23/2020 Europe / United Kingdom / Wales |
| EPI_ISL_473034 | 4/19/2020 | 6/23/2020 Europe / United Kingdom / Wales |
| EPI_ISL_473035 | 5/24/2020 | 6/23/2020 Europe / United Kingdom / Wales |

|                |           |                                           |
|----------------|-----------|-------------------------------------------|
| EPI_ISL_473036 | 5/20/2020 | 6/23/2020 Europe / United Kingdom / Wales |
| EPI_ISL_473037 | 4/21/2020 | 6/23/2020 Europe / United Kingdom / Wales |
| EPI_ISL_473038 | 5/16/2020 | 6/23/2020 Europe / United Kingdom / Wales |
| EPI_ISL_473039 | 5/15/2020 | 6/23/2020 Europe / United Kingdom / Wales |
| EPI_ISL_473044 | 5/23/2020 | 6/23/2020 Europe / United Kingdom / Wales |
| EPI_ISL_473045 | 5/22/2020 | 6/23/2020 Europe / United Kingdom / Wales |
| EPI_ISL_473046 | 5/22/2020 | 6/23/2020 Europe / United Kingdom / Wales |
| EPI_ISL_473048 | 4/8/2020  | 6/23/2020 Europe / United Kingdom / Wales |
| EPI_ISL_473051 | 5/23/2020 | 6/23/2020 Europe / United Kingdom / Wales |
| EPI_ISL_473052 | 4/8/2020  | 6/23/2020 Europe / United Kingdom / Wales |
| EPI_ISL_473053 | 5/20/2020 | 6/23/2020 Europe / United Kingdom / Wales |
| EPI_ISL_473055 | 5/26/2020 | 6/23/2020 Europe / United Kingdom / Wales |
| EPI_ISL_473056 | 5/24/2020 | 6/23/2020 Europe / United Kingdom / Wales |
| EPI_ISL_473059 | 4/23/2020 | 6/23/2020 Europe / United Kingdom / Wales |
| EPI_ISL_473074 | 6/2/2020  | 6/23/2020 Europe / United Kingdom / Wales |
| EPI_ISL_473079 | 6/1/2020  | 6/23/2020 Europe / United Kingdom / Wales |
| EPI_ISL_473081 | 5/12/2020 | 6/23/2020 Europe / United Kingdom / Wales |
| EPI_ISL_473085 | 5/19/2020 | 6/23/2020 Europe / United Kingdom / Wales |
| EPI_ISL_473088 | 6/4/2020  | 6/23/2020 Europe / United Kingdom / Wales |
| EPI_ISL_473090 | 6/4/2020  | 6/23/2020 Europe / United Kingdom / Wales |
| EPI_ISL_473092 | 5/13/2020 | 6/23/2020 Europe / United Kingdom / Wales |
| EPI_ISL_473095 | 6/3/2020  | 6/23/2020 Europe / United Kingdom / Wales |
| EPI_ISL_473097 | 5/29/2020 | 6/23/2020 Europe / United Kingdom / Wales |
| EPI_ISL_473102 | 5/20/2020 | 6/23/2020 Europe / United Kingdom / Wales |
| EPI_ISL_473104 | 5/31/2020 | 6/23/2020 Europe / United Kingdom / Wales |
| EPI_ISL_473105 | 6/4/2020  | 6/23/2020 Europe / United Kingdom / Wales |
| EPI_ISL_473107 | 5/19/2020 | 6/23/2020 Europe / United Kingdom / Wales |
| EPI_ISL_473115 | 5/27/2020 | 6/23/2020 Europe / United Kingdom / Wales |
| EPI_ISL_473119 | 6/4/2020  | 6/23/2020 Europe / United Kingdom / Wales |
| EPI_ISL_473122 | 5/25/2020 | 6/23/2020 Europe / United Kingdom / Wales |
| EPI_ISL_473125 | 5/18/2020 | 6/23/2020 Europe / United Kingdom / Wales |
| EPI_ISL_473126 | 5/29/2020 | 6/23/2020 Europe / United Kingdom / Wales |
| EPI_ISL_473127 | 5/31/2020 | 6/23/2020 Europe / United Kingdom / Wales |
| EPI_ISL_473132 | 5/22/2020 | 6/23/2020 Europe / United Kingdom / Wales |
| EPI_ISL_473134 | 5/19/2020 | 6/23/2020 Europe / United Kingdom / Wales |
| EPI_ISL_473139 | 6/4/2020  | 6/23/2020 Europe / United Kingdom / Wales |
| EPI_ISL_473141 | 5/28/2020 | 6/23/2020 Europe / United Kingdom / Wales |
| EPI_ISL_473146 | 5/28/2020 | 6/23/2020 Europe / United Kingdom / Wales |
| EPI_ISL_473147 | 5/20/2020 | 6/23/2020 Europe / United Kingdom / Wales |
| EPI_ISL_473149 | 5/27/2020 | 6/23/2020 Europe / United Kingdom / Wales |
| EPI_ISL_473155 | 5/13/2020 | 6/23/2020 Europe / United Kingdom / Wales |
| EPI_ISL_473158 | 5/20/2020 | 6/23/2020 Europe / United Kingdom / Wales |
| EPI_ISL_473162 | 5/29/2020 | 6/23/2020 Europe / United Kingdom / Wales |
| EPI_ISL_473163 | 5/29/2020 | 6/23/2020 Europe / United Kingdom / Wales |
| EPI_ISL_473166 | 5/27/2020 | 6/23/2020 Europe / United Kingdom / Wales |
| EPI_ISL_473168 | 5/18/2020 | 6/23/2020 Europe / United Kingdom / Wales |
| EPI_ISL_473170 | 5/30/2020 | 6/23/2020 Europe / United Kingdom / Wales |



|                |           |                                             |
|----------------|-----------|---------------------------------------------|
| EPI_ISL_473173 | 5/29/2020 | 6/23/2020 Europe / United Kingdom / Wales   |
| EPI_ISL_473178 | 5/20/2020 | 6/23/2020 Europe / United Kingdom / Wales   |
| EPI_ISL_473179 | 5/28/2020 | 6/23/2020 Europe / United Kingdom / Wales   |
| EPI_ISL_473183 | 5/27/2020 | 6/23/2020 Europe / United Kingdom / Wales   |
| EPI_ISL_473186 | 5/27/2020 | 6/23/2020 Europe / United Kingdom / Wales   |
| EPI_ISL_473188 | 5/27/2020 | 6/23/2020 Europe / United Kingdom / Wales   |
| EPI_ISL_473189 | 5/27/2020 | 6/23/2020 Europe / United Kingdom / Wales   |
| EPI_ISL_473194 | 5/21/2020 | 6/23/2020 Europe / United Kingdom / Wales   |
| EPI_ISL_473198 | 5/29/2020 | 6/23/2020 Europe / United Kingdom / Wales   |
| EPI_ISL_473199 | 5/28/2020 | 6/23/2020 Europe / United Kingdom / Wales   |
| EPI_ISL_473200 | 5/27/2020 | 6/23/2020 Europe / United Kingdom / Wales   |
| EPI_ISL_473202 | 5/27/2020 | 6/23/2020 Europe / United Kingdom / Wales   |
| EPI_ISL_473206 | 5/27/2020 | 6/23/2020 Europe / United Kingdom / Wales   |
| EPI_ISL_473210 | 5/15/2020 | 6/23/2020 Europe / United Kingdom / Wales   |
| EPI_ISL_473211 | 5/19/2020 | 6/23/2020 Europe / United Kingdom / Wales   |
| EPI_ISL_473223 | 6/3/2020  | 6/23/2020 Europe / United Kingdom / Wales   |
| EPI_ISL_473230 | 5/29/2020 | 6/23/2020 Europe / United Kingdom / Wales   |
| EPI_ISL_473231 | 5/20/2020 | 6/23/2020 Europe / United Kingdom / Wales   |
| EPI_ISL_473232 | 5/13/2020 | 6/23/2020 Europe / United Kingdom / Wales   |
| EPI_ISL_473236 | 5/27/2020 | 6/23/2020 Europe / United Kingdom / Wales   |
| EPI_ISL_473238 | 5/30/2020 | 6/23/2020 Europe / United Kingdom / Wales   |
| EPI_ISL_473239 | 6/1/2020  | 6/23/2020 Europe / United Kingdom / Wales   |
| EPI_ISL_473241 | 5/18/2020 | 6/23/2020 Europe / United Kingdom / Wales   |
| EPI_ISL_473246 | 5/28/2020 | 6/23/2020 Europe / United Kingdom / Wales   |
| EPI_ISL_473249 | 5/29/2020 | 6/23/2020 Europe / United Kingdom / Wales   |
| EPI_ISL_473250 | 5/27/2020 | 6/23/2020 Europe / United Kingdom / Wales   |
| EPI_ISL_473254 | 5/27/2020 | 6/23/2020 Europe / United Kingdom / Wales   |
| EPI_ISL_473259 | 5/27/2020 | 6/23/2020 Europe / United Kingdom / Wales   |
| EPI_ISL_473261 | 5/28/2020 | 6/23/2020 Europe / United Kingdom / Wales   |
| EPI_ISL_473266 | 5/15/2020 | 6/23/2020 Europe / United Kingdom / Wales   |
| EPI_ISL_473283 | 5/2/2020  | 6/23/2020 Europe / United Kingdom / Wales   |
| EPI_ISL_473285 | 4/24/2020 | 6/23/2020 Europe / United Kingdom / Wales   |
| EPI_ISL_473286 | 5/11/2020 | 6/23/2020 Europe / United Kingdom / Wales   |
| EPI_ISL_473287 | 4/27/2020 | 6/23/2020 Europe / United Kingdom / Wales   |
| EPI_ISL_473289 | 5/7/2020  | 6/23/2020 Europe / United Kingdom / Wales   |
| EPI_ISL_473291 | 4/27/2020 | 6/23/2020 Europe / United Kingdom / Wales   |
| EPI_ISL_473292 | 5/10/2020 | 6/23/2020 Europe / United Kingdom / Wales   |
| EPI_ISL_473294 | 4/30/2020 | 6/23/2020 Europe / United Kingdom / Wales   |
| EPI_ISL_473296 | 5/6/2020  | 6/23/2020 Europe / United Kingdom / Wales   |
| EPI_ISL_473297 | 5/6/2020  | 6/23/2020 Europe / United Kingdom / Wales   |
| EPI_ISL_473300 | 4/24/2020 | 6/23/2020 Europe / United Kingdom / Wales   |
| EPI_ISL_473303 | 5/6/2020  | 6/23/2020 Europe / United Kingdom / Wales   |
| EPI_ISL_473305 | 5/8/2020  | 6/23/2020 Europe / United Kingdom / Wales   |
| EPI_ISL_473306 | 5/6/2020  | 6/23/2020 Europe / United Kingdom / England |
| EPI_ISL_473307 | 5/6/2020  | 6/23/2020 Europe / United Kingdom / England |
| EPI_ISL_473308 | 5/5/2020  | 6/23/2020 Europe / United Kingdom / England |
| EPI_ISL_473310 | 5/5/2020  | 6/23/2020 Europe / United Kingdom / England |























|                |           |                                           |
|----------------|-----------|-------------------------------------------|
| EPI_ISL_473958 | 5/8/2020  | 6/23/2020 Europe / United Kingdom / Wales |
| EPI_ISL_473959 | 4/25/2020 | 6/23/2020 Europe / United Kingdom / Wales |
| EPI_ISL_473960 | 5/11/2020 | 6/23/2020 Europe / United Kingdom / Wales |
| EPI_ISL_473961 | 4/25/2020 | 6/23/2020 Europe / United Kingdom / Wales |
| EPI_ISL_473962 | 5/2/2020  | 6/23/2020 Europe / United Kingdom / Wales |
| EPI_ISL_473965 | 4/24/2020 | 6/23/2020 Europe / United Kingdom / Wales |
| EPI_ISL_473966 | 4/22/2020 | 6/23/2020 Europe / United Kingdom / Wales |
| EPI_ISL_473967 | 5/11/2020 | 6/23/2020 Europe / United Kingdom / Wales |
| EPI_ISL_473969 | 5/10/2020 | 6/23/2020 Europe / United Kingdom / Wales |
| EPI_ISL_473970 | 4/26/2020 | 6/23/2020 Europe / United Kingdom / Wales |
| EPI_ISL_473971 | 5/10/2020 | 6/23/2020 Europe / United Kingdom / Wales |
| EPI_ISL_473975 | 5/9/2020  | 6/23/2020 Europe / United Kingdom / Wales |
| EPI_ISL_473976 | 4/29/2020 | 6/23/2020 Europe / United Kingdom / Wales |
| EPI_ISL_473977 | 5/5/2020  | 6/23/2020 Europe / United Kingdom / Wales |
| EPI_ISL_473978 | 4/30/2020 | 6/23/2020 Europe / United Kingdom / Wales |
| EPI_ISL_473981 | 4/29/2020 | 6/23/2020 Europe / United Kingdom / Wales |
| EPI_ISL_473983 | 5/11/2020 | 6/23/2020 Europe / United Kingdom / Wales |
| EPI_ISL_473984 | 4/29/2020 | 6/23/2020 Europe / United Kingdom / Wales |
| EPI_ISL_473986 | 5/1/2020  | 6/23/2020 Europe / United Kingdom / Wales |
| EPI_ISL_473988 | 4/25/2020 | 6/23/2020 Europe / United Kingdom / Wales |
| EPI_ISL_473990 | 5/7/2020  | 6/23/2020 Europe / United Kingdom / Wales |
| EPI_ISL_473991 | 4/25/2020 | 6/23/2020 Europe / United Kingdom / Wales |
| EPI_ISL_473992 | 5/10/2020 | 6/23/2020 Europe / United Kingdom / Wales |
| EPI_ISL_473993 | 4/29/2020 | 6/23/2020 Europe / United Kingdom / Wales |
| EPI_ISL_473994 | 5/9/2020  | 6/23/2020 Europe / United Kingdom / Wales |
| EPI_ISL_473998 | 5/11/2020 | 6/23/2020 Europe / United Kingdom / Wales |
| EPI_ISL_474000 | 5/9/2020  | 6/23/2020 Europe / United Kingdom / Wales |
| EPI_ISL_474001 | 5/9/2020  | 6/23/2020 Europe / United Kingdom / Wales |
| EPI_ISL_474006 | 5/8/2020  | 6/23/2020 Europe / United Kingdom / Wales |
| EPI_ISL_474007 | 4/29/2020 | 6/23/2020 Europe / United Kingdom / Wales |
| EPI_ISL_474009 | 5/7/2020  | 6/23/2020 Europe / United Kingdom / Wales |
| EPI_ISL_474010 | 5/8/2020  | 6/23/2020 Europe / United Kingdom / Wales |
| EPI_ISL_474011 | 4/27/2020 | 6/23/2020 Europe / United Kingdom / Wales |
| EPI_ISL_474012 | 5/2/2020  | 6/23/2020 Europe / United Kingdom / Wales |
| EPI_ISL_474013 | 5/10/2020 | 6/23/2020 Europe / United Kingdom / Wales |
| EPI_ISL_474020 | 5/12/2020 | 6/23/2020 Europe / United Kingdom / Wales |
| EPI_ISL_474021 | 5/11/2020 | 6/23/2020 Europe / United Kingdom / Wales |
| EPI_ISL_474022 | 5/9/2020  | 6/23/2020 Europe / United Kingdom / Wales |
| EPI_ISL_474026 | 4/30/2020 | 6/23/2020 Europe / United Kingdom / Wales |
| EPI_ISL_474030 | 5/10/2020 | 6/23/2020 Europe / United Kingdom / Wales |
| EPI_ISL_474034 | 4/24/2020 | 6/23/2020 Europe / United Kingdom / Wales |
| EPI_ISL_474036 | 5/12/2020 | 6/23/2020 Europe / United Kingdom / Wales |
| EPI_ISL_474040 | 5/9/2020  | 6/23/2020 Europe / United Kingdom / Wales |
| EPI_ISL_474043 | 5/7/2020  | 6/23/2020 Europe / United Kingdom / Wales |
| EPI_ISL_474044 | 4/23/2020 | 6/23/2020 Europe / United Kingdom / Wales |
| EPI_ISL_474046 | 4/29/2020 | 6/23/2020 Europe / United Kingdom / Wales |
| EPI_ISL_474047 | 5/9/2020  | 6/23/2020 Europe / United Kingdom / Wales |

|                |           |           |                                 |
|----------------|-----------|-----------|---------------------------------|
| EPI_ISL_474048 | 5/12/2020 | 6/23/2020 | Europe / United Kingdom / Wales |
| EPI_ISL_474050 | 5/6/2020  | 6/23/2020 | Europe / United Kingdom / Wales |
| EPI_ISL_474052 | 4/26/2020 | 6/23/2020 | Europe / United Kingdom / Wales |
| EPI_ISL_474055 | 5/9/2020  | 6/23/2020 | Europe / United Kingdom / Wales |
| EPI_ISL_474056 | 5/12/2020 | 6/23/2020 | Europe / United Kingdom / Wales |
| EPI_ISL_474058 | 5/9/2020  | 6/23/2020 | Europe / United Kingdom / Wales |
| EPI_ISL_474059 | 4/30/2020 | 6/23/2020 | Europe / United Kingdom / Wales |
| EPI_ISL_474060 | 5/1/2020  | 6/23/2020 | Europe / United Kingdom / Wales |
| EPI_ISL_474061 | 4/30/2020 | 6/23/2020 | Europe / United Kingdom / Wales |
| EPI_ISL_474062 | 4/27/2020 | 6/23/2020 | Europe / United Kingdom / Wales |
| EPI_ISL_474064 | 5/9/2020  | 6/23/2020 | Europe / United Kingdom / Wales |
| EPI_ISL_474065 | 4/23/2020 | 6/23/2020 | Europe / United Kingdom / Wales |
| EPI_ISL_474067 | 4/30/2020 | 6/23/2020 | Europe / United Kingdom / Wales |
| EPI_ISL_474069 | 4/24/2020 | 6/23/2020 | Europe / United Kingdom / Wales |
| EPI_ISL_474071 | 5/9/2020  | 6/23/2020 | Europe / United Kingdom / Wales |
| EPI_ISL_474073 | 5/9/2020  | 6/23/2020 | Europe / United Kingdom / Wales |
| EPI_ISL_474075 | 5/6/2020  | 6/23/2020 | Europe / United Kingdom / Wales |
| EPI_ISL_474077 | 5/6/2020  | 6/23/2020 | Europe / United Kingdom / Wales |
| EPI_ISL_474078 | 5/12/2020 | 6/23/2020 | Europe / United Kingdom / Wales |
| EPI_ISL_474080 | 5/11/2020 | 6/23/2020 | Europe / United Kingdom / Wales |
| EPI_ISL_474081 | 5/8/2020  | 6/23/2020 | Europe / United Kingdom / Wales |
| EPI_ISL_474084 | 5/1/2020  | 6/23/2020 | Europe / United Kingdom / Wales |
| EPI_ISL_474085 | 5/8/2020  | 6/23/2020 | Europe / United Kingdom / Wales |
| EPI_ISL_474095 | 5/9/2020  | 6/23/2020 | Europe / United Kingdom / Wales |
| EPI_ISL_474096 | 4/23/2020 | 6/23/2020 | Europe / United Kingdom / Wales |
| EPI_ISL_474098 | 4/24/2020 | 6/23/2020 | Europe / United Kingdom / Wales |
| EPI_ISL_474099 | 5/8/2020  | 6/23/2020 | Europe / United Kingdom / Wales |
| EPI_ISL_474100 | 4/29/2020 | 6/23/2020 | Europe / United Kingdom / Wales |
| EPI_ISL_474101 | 4/29/2020 | 6/23/2020 | Europe / United Kingdom / Wales |
| EPI_ISL_474103 | 4/24/2020 | 6/23/2020 | Europe / United Kingdom / Wales |
| EPI_ISL_474104 | 5/2/2020  | 6/23/2020 | Europe / United Kingdom / Wales |
| EPI_ISL_474105 | 5/9/2020  | 6/23/2020 | Europe / United Kingdom / Wales |
| EPI_ISL_474110 | 4/29/2020 | 6/23/2020 | Europe / United Kingdom / Wales |
| EPI_ISL_474112 | 5/10/2020 | 6/23/2020 | Europe / United Kingdom / Wales |
| EPI_ISL_474113 | 5/9/2020  | 6/23/2020 | Europe / United Kingdom / Wales |
| EPI_ISL_474115 | 5/8/2020  | 6/23/2020 | Europe / United Kingdom / Wales |
| EPI_ISL_474116 | 5/10/2020 | 6/23/2020 | Europe / United Kingdom / Wales |
| EPI_ISL_474117 | 5/6/2020  | 6/23/2020 | Europe / United Kingdom / Wales |
| EPI_ISL_474118 | 5/2/2020  | 6/23/2020 | Europe / United Kingdom / Wales |
| EPI_ISL_474122 | 5/2/2020  | 6/23/2020 | Europe / United Kingdom / Wales |
| EPI_ISL_474124 | 4/22/2020 | 6/23/2020 | Europe / United Kingdom / Wales |
| EPI_ISL_474125 | 5/10/2020 | 6/23/2020 | Europe / United Kingdom / Wales |
| EPI_ISL_474126 | 5/9/2020  | 6/23/2020 | Europe / United Kingdom / Wales |
| EPI_ISL_474131 | 5/8/2020  | 6/23/2020 | Europe / United Kingdom / Wales |
| EPI_ISL_474135 | 5/12/2020 | 6/23/2020 | Europe / United Kingdom / Wales |
| EPI_ISL_474136 | 5/7/2020  | 6/23/2020 | Europe / United Kingdom / Wales |
| EPI_ISL_474137 | 4/22/2020 | 6/23/2020 | Europe / United Kingdom / Wales |

|                |           |           |                                 |
|----------------|-----------|-----------|---------------------------------|
| EPI_ISL_474140 | 5/7/2020  | 6/23/2020 | Europe / United Kingdom / Wales |
| EPI_ISL_474141 | 4/27/2020 | 6/23/2020 | Europe / United Kingdom / Wales |
| EPI_ISL_474147 | 4/25/2020 | 6/23/2020 | Europe / United Kingdom / Wales |
| EPI_ISL_474150 | 4/22/2020 | 6/23/2020 | Europe / United Kingdom / Wales |
| EPI_ISL_474152 | 5/11/2020 | 6/23/2020 | Europe / United Kingdom / Wales |
| EPI_ISL_474155 | 5/10/2020 | 6/23/2020 | Europe / United Kingdom / Wales |
| EPI_ISL_474156 | 4/29/2020 | 6/23/2020 | Europe / United Kingdom / Wales |
| EPI_ISL_474157 | 5/8/2020  | 6/23/2020 | Europe / United Kingdom / Wales |
| EPI_ISL_474159 | 5/7/2020  | 6/23/2020 | Europe / United Kingdom / Wales |
| EPI_ISL_474160 | 5/6/2020  | 6/23/2020 | Europe / United Kingdom / Wales |
| EPI_ISL_474161 | 4/29/2020 | 6/23/2020 | Europe / United Kingdom / Wales |
| EPI_ISL_474162 | 4/29/2020 | 6/23/2020 | Europe / United Kingdom / Wales |
| EPI_ISL_474164 | 5/3/2020  | 6/23/2020 | Europe / United Kingdom / Wales |
| EPI_ISL_474165 | 5/9/2020  | 6/23/2020 | Europe / United Kingdom / Wales |
| EPI_ISL_474167 | 5/10/2020 | 6/23/2020 | Europe / United Kingdom / Wales |
| EPI_ISL_474168 | 5/6/2020  | 6/23/2020 | Europe / United Kingdom / Wales |
| EPI_ISL_474169 | 4/25/2020 | 6/23/2020 | Europe / United Kingdom / Wales |
| EPI_ISL_474171 | 5/6/2020  | 6/23/2020 | Europe / United Kingdom / Wales |
| EPI_ISL_474173 | 5/11/2020 | 6/23/2020 | Europe / United Kingdom / Wales |
| EPI_ISL_474175 | 4/30/2020 | 6/23/2020 | Europe / United Kingdom / Wales |
| EPI_ISL_474177 | 5/10/2020 | 6/23/2020 | Europe / United Kingdom / Wales |
| EPI_ISL_474178 | 5/10/2020 | 6/23/2020 | Europe / United Kingdom / Wales |
| EPI_ISL_474180 | 5/2/2020  | 6/23/2020 | Europe / United Kingdom / Wales |
| EPI_ISL_474181 | 5/2/2020  | 6/23/2020 | Europe / United Kingdom / Wales |
| EPI_ISL_474182 | 4/28/2020 | 6/23/2020 | Europe / United Kingdom / Wales |
| EPI_ISL_474183 | 5/9/2020  | 6/23/2020 | Europe / United Kingdom / Wales |
| EPI_ISL_474184 | 5/2/2020  | 6/23/2020 | Europe / United Kingdom / Wales |
| EPI_ISL_474187 | 5/6/2020  | 6/23/2020 | Europe / United Kingdom / Wales |
| EPI_ISL_474189 | 4/29/2020 | 6/23/2020 | Europe / United Kingdom / Wales |
| EPI_ISL_474190 | 5/9/2020  | 6/23/2020 | Europe / United Kingdom / Wales |
| EPI_ISL_474193 | 5/6/2020  | 6/23/2020 | Europe / United Kingdom / Wales |
| EPI_ISL_474195 | 4/23/2020 | 6/23/2020 | Europe / United Kingdom / Wales |
| EPI_ISL_474198 | 5/8/2020  | 6/23/2020 | Europe / United Kingdom / Wales |
| EPI_ISL_474201 | 5/11/2020 | 6/23/2020 | Europe / United Kingdom / Wales |
| EPI_ISL_474202 | 5/10/2020 | 6/23/2020 | Europe / United Kingdom / Wales |
| EPI_ISL_474204 | 5/10/2020 | 6/23/2020 | Europe / United Kingdom / Wales |
| EPI_ISL_474205 | 4/30/2020 | 6/23/2020 | Europe / United Kingdom / Wales |
| EPI_ISL_474206 | 5/6/2020  | 6/23/2020 | Europe / United Kingdom / Wales |
| EPI_ISL_474208 | 5/10/2020 | 6/23/2020 | Europe / United Kingdom / Wales |
| EPI_ISL_474209 | 5/10/2020 | 6/23/2020 | Europe / United Kingdom / Wales |
| EPI_ISL_474210 | 5/6/2020  | 6/23/2020 | Europe / United Kingdom / Wales |
| EPI_ISL_474211 | 5/2/2020  | 6/23/2020 | Europe / United Kingdom / Wales |
| EPI_ISL_474212 | 5/6/2020  | 6/23/2020 | Europe / United Kingdom / Wales |
| EPI_ISL_474214 | 5/11/2020 | 6/23/2020 | Europe / United Kingdom / Wales |
| EPI_ISL_474215 | 4/30/2020 | 6/23/2020 | Europe / United Kingdom / Wales |
| EPI_ISL_474216 | 5/5/2020  | 6/23/2020 | Europe / United Kingdom / Wales |
| EPI_ISL_474217 | 4/29/2020 | 6/23/2020 | Europe / United Kingdom / Wales |







|                |           |           |                                                |
|----------------|-----------|-----------|------------------------------------------------|
| EPI_ISL_474608 | 4/27/2020 | 6/23/2020 | Europe / United Kingdom / Wales                |
| EPI_ISL_474609 | 4/28/2020 | 6/23/2020 | Europe / United Kingdom / Wales                |
| EPI_ISL_474615 | 4/29/2020 | 6/23/2020 | Europe / United Kingdom / Wales                |
| EPI_ISL_474616 | 4/29/2020 | 6/23/2020 | Europe / United Kingdom / Wales                |
| EPI_ISL_474622 | 4/26/2020 | 6/23/2020 | Europe / United Kingdom / Wales                |
| EPI_ISL_474624 | 4/28/2020 | 6/23/2020 | Europe / United Kingdom / Wales                |
| EPI_ISL_474626 | 4/29/2020 | 6/23/2020 | Europe / United Kingdom / Wales                |
| EPI_ISL_474631 | 4/28/2020 | 6/23/2020 | Europe / United Kingdom / Wales                |
| EPI_ISL_474634 | 4/29/2020 | 6/23/2020 | Europe / United Kingdom / Wales                |
| EPI_ISL_474637 | 4/28/2020 | 6/23/2020 | Europe / United Kingdom / Wales                |
| EPI_ISL_474639 | 4/29/2020 | 6/23/2020 | Europe / United Kingdom / Wales                |
| EPI_ISL_474650 | 4/29/2020 | 6/23/2020 | Europe / United Kingdom / Wales                |
| EPI_ISL_474651 | 4/30/2020 | 6/23/2020 | Europe / United Kingdom / Wales                |
| EPI_ISL_474656 | 4/29/2020 | 6/23/2020 | Europe / United Kingdom / Wales                |
| EPI_ISL_474657 | 4/29/2020 | 6/23/2020 | Europe / United Kingdom / Wales                |
| EPI_ISL_474658 | 4/29/2020 | 6/23/2020 | Europe / United Kingdom / Wales                |
| EPI_ISL_474660 | 4/29/2020 | 6/23/2020 | Europe / United Kingdom / Wales                |
| EPI_ISL_474664 | 4/30/2020 | 6/23/2020 | Europe / United Kingdom / Wales                |
| EPI_ISL_474671 | 4/30/2020 | 6/23/2020 | Europe / United Kingdom / Wales                |
| EPI_ISL_474675 | 5/1/2020  | 6/23/2020 | Europe / United Kingdom / Wales                |
| EPI_ISL_474676 | 5/1/2020  | 6/23/2020 | Europe / United Kingdom / Wales                |
| EPI_ISL_474677 | 5/1/2020  | 6/23/2020 | Europe / United Kingdom / Wales                |
| EPI_ISL_474680 | 5/1/2020  | 6/23/2020 | Europe / United Kingdom / Wales                |
| EPI_ISL_474682 | 5/1/2020  | 6/23/2020 | Europe / United Kingdom / Wales                |
| EPI_ISL_474684 | 4/30/2020 | 6/23/2020 | Europe / United Kingdom / Wales                |
| EPI_ISL_474686 | 5/1/2020  | 6/23/2020 | Europe / United Kingdom / Wales                |
| EPI_ISL_474689 | 5/1/2020  | 6/23/2020 | Europe / United Kingdom / Wales                |
| EPI_ISL_474692 | 4/30/2020 | 6/23/2020 | Europe / United Kingdom / Wales                |
| EPI_ISL_474693 | 5/1/2020  | 6/23/2020 | Europe / United Kingdom / Wales                |
| EPI_ISL_474699 | 5/2/2020  | 6/23/2020 | Europe / United Kingdom / Wales                |
| EPI_ISL_474704 | 5/2/2020  | 6/23/2020 | Europe / United Kingdom / Wales                |
| EPI_ISL_474740 | 4/24/2020 | 6/23/2020 | Europe / United Kingdom / Wales                |
| EPI_ISL_474748 | 5/2/2020  | 6/23/2020 | Europe / United Kingdom / Wales                |
| EPI_ISL_474755 | 4/30/2020 | 6/23/2020 | Europe / United Kingdom / Wales                |
| EPI_ISL_474768 | 5/1/2020  | 6/23/2020 | Europe / United Kingdom / Wales                |
| EPI_ISL_474779 | 5/2/2020  | 6/23/2020 | Europe / United Kingdom / Wales                |
| EPI_ISL_474780 | 5/2/2020  | 6/23/2020 | Europe / United Kingdom / Wales                |
| EPI_ISL_474785 | 5/1/2020  | 6/23/2020 | Europe / United Kingdom / Wales                |
| EPI_ISL_474794 | 5/3/2020  | 6/23/2020 | Europe / United Kingdom / Wales                |
| EPI_ISL_474795 | 5/3/2020  | 6/23/2020 | Europe / United Kingdom / Wales                |
| EPI_ISL_474797 | 3/23/2020 | 6/23/2020 | Europe / Spain / Andalusia / Alamedilla        |
| EPI_ISL_474798 | 4/1/2020  | 6/23/2020 | Europe / Spain / Castilla-La Mancha / Albacete |
| EPI_ISL_474801 | 4/2/2020  | 6/23/2020 | Europe / Spain / Castilla-La Mancha / Albacete |
| EPI_ISL_474802 | 4/3/2020  | 6/23/2020 | Europe / Spain / Castilla-La Mancha / Albacete |
| EPI_ISL_474803 | 4/2/2020  | 6/23/2020 | Europe / Spain / Castilla-La Mancha / Albacete |
| EPI_ISL_474804 | 4/3/2020  | 6/23/2020 | Europe / Spain / Castilla-La Mancha / Albacete |
| EPI_ISL_474805 | 4/3/2020  | 6/23/2020 | Europe / Spain / Castilla-La Mancha / Albacete |

|                |           |           |                                                   |
|----------------|-----------|-----------|---------------------------------------------------|
| EPI_ISL_474806 | 4/1/2020  | 6/23/2020 | Europe / Spain / Castilla-La Mancha / Albacete    |
| EPI_ISL_474807 | 4/3/2020  | 6/23/2020 | Europe / Spain / Castilla-La Mancha / Albacete    |
| EPI_ISL_474808 | 4/3/2020  | 6/23/2020 | Europe / Spain / Castilla-La Mancha / Albacete    |
| EPI_ISL_474809 | 4/3/2020  | 6/23/2020 | Europe / Spain / Castilla-La Mancha / Albacete    |
| EPI_ISL_474810 | 4/3/2020  | 6/23/2020 | Europe / Spain / Castilla-La Mancha / Albacete    |
| EPI_ISL_474811 | 4/3/2020  | 6/23/2020 | Europe / Spain / Castilla-La Mancha / Albacete    |
| EPI_ISL_474812 | 4/3/2020  | 6/23/2020 | Europe / Spain / Castilla-La Mancha / Albacete    |
| EPI_ISL_474813 | 4/3/2020  | 6/23/2020 | Europe / Spain / Castilla-La Mancha / Albacete    |
| EPI_ISL_474815 | 4/2/2020  | 6/23/2020 | Europe / Spain / Castilla-La Mancha / Albacete    |
| EPI_ISL_474816 | 4/2/2020  | 6/23/2020 | Europe / Spain / Castilla-La Mancha / Albacete    |
| EPI_ISL_474817 | 4/2/2020  | 6/23/2020 | Europe / Spain / Castilla-La Mancha / Albacete    |
| EPI_ISL_474818 | 4/2/2020  | 6/23/2020 | Europe / Spain / Castilla-La Mancha / Albacete    |
| EPI_ISL_474819 | 5/25/2020 | 6/23/2020 | Europe / Spain / Castilla-La Mancha / Albacete    |
| EPI_ISL_474820 | 5/25/2020 | 6/23/2020 | Europe / Spain / Castilla-La Mancha / Albacete    |
| EPI_ISL_474822 | 4/2/2020  | 6/23/2020 | Europe / Spain / Castilla-La Mancha / Albacete    |
| EPI_ISL_474823 | 4/2/2020  | 6/23/2020 | Europe / Spain / Castilla-La Mancha / Albacete    |
| EPI_ISL_474824 | 5/20/2020 | 6/23/2020 | Europe / Spain / Castilla-La Mancha / Albacete    |
| EPI_ISL_474825 | 5/18/2020 | 6/23/2020 | Europe / Spain / Castilla-La Mancha / Albacete    |
| EPI_ISL_474826 | 5/18/2020 | 6/23/2020 | Europe / Spain / Castilla-La Mancha / Albacete    |
| EPI_ISL_474827 | 5/18/2020 | 6/23/2020 | Europe / Spain / Castilla-La Mancha / Albacete    |
| EPI_ISL_474828 | 5/18/2020 | 6/23/2020 | Europe / Spain / Castilla-La Mancha / Albacete    |
| EPI_ISL_474830 | 4/25/2020 | 6/23/2020 | Europe / Spain / Castilla-La Mancha / Albacete    |
| EPI_ISL_474831 | 5/19/2020 | 6/23/2020 | Europe / Spain / Castilla-La Mancha / Albacete    |
| EPI_ISL_474832 | 4/1/2020  | 6/23/2020 | Europe / Spain / Andalusia / Albolote             |
| EPI_ISL_474833 | 3/16/2020 | 6/23/2020 | Europe / Spain / Andalusia / Alcala la Real       |
| EPI_ISL_474834 | 3/18/2020 | 6/23/2020 | Europe / Spain / Andalusia / Alcala la Real       |
| EPI_ISL_474836 | 4/2/2020  | 6/23/2020 | Europe / Spain / Andalusia / Alcala la Real       |
| EPI_ISL_474837 | 4/1/2020  | 6/23/2020 | Europe / Spain / Castilla-La Mancha / Almansa     |
| EPI_ISL_474838 | 4/2/2020  | 6/23/2020 | Europe / Spain / Castilla-La Mancha / Almansa     |
| EPI_ISL_474841 | 3/9/2020  | 6/23/2020 | Europe / Spain / Andalusia / Almeria              |
| EPI_ISL_474842 | 3/13/2020 | 6/23/2020 | Europe / Spain / Andalusia / Almeria              |
| EPI_ISL_474843 | 3/13/2020 | 6/23/2020 | Europe / Spain / Andalusia / Almeria              |
| EPI_ISL_474845 | 3/19/2020 | 6/23/2020 | Europe / Spain / Andalusia / Atarfe               |
| EPI_ISL_474847 | 4/2/2020  | 6/23/2020 | Europe / Spain / Castilla-La Mancha / Ayna        |
| EPI_ISL_474850 | 4/5/2020  | 6/23/2020 | Europe / Spain / Andalusia / Castril              |
| EPI_ISL_474851 | 3/19/2020 | 6/23/2020 | Europe / Spain / Andalusia / Churriana de la Vega |
| EPI_ISL_474852 | 3/16/2020 | 6/23/2020 | Europe / Spain / Andalusia / Cortijos Nuevos      |
| EPI_ISL_474853 | 4/2/2020  | 6/23/2020 | Europe / Spain / Castilla-La Mancha / Cuenca      |
| EPI_ISL_474854 | 3/21/2020 | 6/23/2020 | Europe / Spain / Galicia / El Rosal               |
| EPI_ISL_474855 | 3/28/2020 | 6/23/2020 | Europe / Spain / Andalusia / Fonelas              |
| EPI_ISL_474856 | 3/31/2020 | 6/23/2020 | Europe / Spain / Andalusia / Frailes              |
| EPI_ISL_474857 | 3/13/2020 | 6/23/2020 | Europe / Spain / Andalusia / Granada              |
| EPI_ISL_474859 | 3/14/2020 | 6/23/2020 | Europe / Spain / Andalusia / Granada              |
| EPI_ISL_474860 | 3/16/2020 | 6/23/2020 | Europe / Spain / Andalusia / Granada              |
| EPI_ISL_474862 | 3/17/2020 | 6/23/2020 | Europe / Spain / Andalusia / Granada              |
| EPI_ISL_474864 | 3/16/2020 | 6/23/2020 | Europe / Spain / Andalusia / Granada              |
| EPI_ISL_474867 | 3/17/2020 | 6/23/2020 | Europe / Spain / Andalusia / Granada              |

|                |           |           |                                                   |
|----------------|-----------|-----------|---------------------------------------------------|
| EPI_ISL_474868 | 3/17/2020 | 6/23/2020 | Europe / Spain / Andalusia / Granada              |
| EPI_ISL_474869 | 3/18/2020 | 6/23/2020 | Europe / Spain / Andalusia / Granada              |
| EPI_ISL_474870 | 3/19/2020 | 6/23/2020 | Europe / Spain / Andalusia / Granada              |
| EPI_ISL_474871 | 3/19/2020 | 6/23/2020 | Europe / Spain / Andalusia / Granada              |
| EPI_ISL_474872 | 3/20/2020 | 6/23/2020 | Europe / Spain / Andalusia / Granada              |
| EPI_ISL_474873 | 3/23/2020 | 6/23/2020 | Europe / Spain / Andalusia / Granada              |
| EPI_ISL_474874 | 3/24/2020 | 6/23/2020 | Europe / Spain / Andalusia / Granada              |
| EPI_ISL_474875 | 3/23/2020 | 6/23/2020 | Europe / Spain / Andalusia / Granada              |
| EPI_ISL_474876 | 3/26/2020 | 6/23/2020 | Europe / Spain / Andalusia / Granada              |
| EPI_ISL_474879 | 3/29/2020 | 6/23/2020 | Europe / Spain / Andalusia / Granada              |
| EPI_ISL_474880 | 3/30/2020 | 6/23/2020 | Europe / Spain / Andalusia / Granada              |
| EPI_ISL_474881 | 3/30/2020 | 6/23/2020 | Europe / Spain / Andalusia / Granada              |
| EPI_ISL_474882 | 3/30/2020 | 6/23/2020 | Europe / Spain / Andalusia / Granada              |
| EPI_ISL_474883 | 3/30/2020 | 6/23/2020 | Europe / Spain / Andalusia / Granada              |
| EPI_ISL_474886 | 3/30/2020 | 6/23/2020 | Europe / Spain / Andalusia / Granada              |
| EPI_ISL_474887 | 4/1/2020  | 6/23/2020 | Europe / Spain / Andalusia / Granada              |
| EPI_ISL_474888 | 4/1/2020  | 6/23/2020 | Europe / Spain / Andalusia / Granada              |
| EPI_ISL_474889 | 4/2/2020  | 6/23/2020 | Europe / Spain / Andalusia / Granada              |
| EPI_ISL_474890 | 4/2/2020  | 6/23/2020 | Europe / Spain / Andalusia / Granada              |
| EPI_ISL_474891 | 4/3/2020  | 6/23/2020 | Europe / Spain / Andalusia / Granada              |
| EPI_ISL_474892 | 4/4/2020  | 6/23/2020 | Europe / Spain / Andalusia / Granada              |
| EPI_ISL_474894 | 4/4/2020  | 6/23/2020 | Europe / Spain / Andalusia / Granada              |
| EPI_ISL_474897 | 3/16/2020 | 6/23/2020 | Europe / Spain / Andalusia / Guadix               |
| EPI_ISL_474898 | 4/1/2020  | 6/23/2020 | Europe / Spain / Andalusia / Guadix               |
| EPI_ISL_474900 | 3/23/2020 | 6/23/2020 | Europe / Spain / Andalusia / Guevejar             |
| EPI_ISL_474901 | 4/3/2020  | 6/23/2020 | Europe / Spain / Castilla-La Mancha / Hellin      |
| EPI_ISL_474902 | 4/3/2020  | 6/23/2020 | Europe / Spain / Castilla-La Mancha / Hellin      |
| EPI_ISL_474903 | 4/3/2020  | 6/23/2020 | Europe / Spain / Castilla-La Mancha / Hellin      |
| EPI_ISL_474904 | 4/1/2020  | 6/23/2020 | Europe / Spain / Castilla-La Mancha / Hellin      |
| EPI_ISL_474908 | 3/31/2020 | 6/23/2020 | Europe / Spain / Andalusia / Iznalloz             |
| EPI_ISL_474909 | 3/18/2020 | 6/23/2020 | Europe / Spain / Andalusia / Jun                  |
| EPI_ISL_474910 | 3/12/2020 | 6/23/2020 | Africa / Canary Islands / Las Palmas              |
| EPI_ISL_474911 | 3/12/2020 | 6/23/2020 | Africa / Canary Islands / Las Palmas              |
| EPI_ISL_474912 | 3/15/2020 | 6/23/2020 | Africa / Canary Islands / Las Palmas              |
| EPI_ISL_474913 | 3/15/2020 | 6/23/2020 | Africa / Canary Islands / Las Palmas              |
| EPI_ISL_474914 | 3/15/2020 | 6/23/2020 | Africa / Canary Islands / Las Palmas              |
| EPI_ISL_474915 | 3/16/2020 | 6/23/2020 | Africa / Canary Islands / Las Palmas              |
| EPI_ISL_474916 | 3/17/2020 | 6/23/2020 | Africa / Canary Islands / Las Palmas              |
| EPI_ISL_474917 | 3/18/2020 | 6/23/2020 | Africa / Canary Islands / Las Palmas              |
| EPI_ISL_474919 | 4/3/2020  | 6/23/2020 | Europe / Spain / Castilla-La Mancha / Lezuza      |
| EPI_ISL_474920 | 3/16/2020 | 6/23/2020 | Europe / Spain / Madrid                           |
| EPI_ISL_474921 | 4/2/2020  | 6/23/2020 | Europe / Spain / Castilla-La Mancha / Madrigueras |
| EPI_ISL_474922 | 3/3/2020  | 6/23/2020 | Europe / Spain / Andalusia / Malaga               |
| EPI_ISL_474923 | 3/9/2020  | 6/23/2020 | Europe / Spain / Andalusia / Malaga               |
| EPI_ISL_474926 | 3/13/2020 | 6/23/2020 | Europe / Spain / Andalusia / Malaga               |
| EPI_ISL_474927 | 3/13/2020 | 6/23/2020 | Europe / Spain / Andalusia / Malaga               |
| EPI_ISL_474928 | 3/27/2020 | 6/23/2020 | Europe / Spain / Andalusia / Maracena             |

|                |           |                                                                       |
|----------------|-----------|-----------------------------------------------------------------------|
| EPI_ISL_474930 | 3/29/2020 | 6/23/2020 Europe / Spain / Andalusia / Maracena                       |
| EPI_ISL_474933 | 4/3/2020  | 6/23/2020 Europe / Spain / Castilla-La Mancha / Mingogil              |
| EPI_ISL_474934 | 3/18/2020 | 6/23/2020 Europe / Spain / Murcia / Murcia                            |
| EPI_ISL_474935 | 4/6/2020  | 6/23/2020 Europe / Spain / Andalusia / Ogijares                       |
| EPI_ISL_474936 | 3/17/2020 | 6/23/2020 Europe / Spain / Andalusia / Otura                          |
| EPI_ISL_474939 | 3/19/2020 | 6/23/2020 Europe / Spain / Andalusia / Pulianas                       |
| EPI_ISL_474940 | 4/3/2020  | 6/23/2020 Europe / Spain / Castilla-La Mancha / Riopar                |
| EPI_ISL_474943 | 3/31/2020 | 6/23/2020 Europe / Spain / Andalusia / Santa Fe                       |
| EPI_ISL_474944 | 4/1/2020  | 6/23/2020 Europe / Spain / Andalusia / Santa Fe                       |
| EPI_ISL_474946 | 4/3/2020  | 6/23/2020 Europe / Spain / Castilla-La Mancha / Tazona                |
| EPI_ISL_474947 | 4/3/2020  | 6/23/2020 Europe / Spain / Castilla-La Mancha / Tobarra               |
| EPI_ISL_474948 | 3/18/2020 | 6/23/2020 Europe / Spain / Andalusia / Ubeda                          |
| EPI_ISL_474949 | 4/3/2020  | 6/23/2020 Europe / Spain / Andalusia / Vegas del Genil                |
| EPI_ISL_474950 | 5/5/2020  | 6/23/2020 Europe / Spain / Andalusia / Velez Malaga                   |
| EPI_ISL_474951 | 4/2/2020  | 6/23/2020 Europe / Spain / Castilla-La Mancha / Villanueva de la Jara |
| EPI_ISL_474952 | 4/1/2020  | 6/23/2020 Europe / Spain / Castilla-La Mancha / Villarrobledo         |
| EPI_ISL_474953 | 4/1/2020  | 6/23/2020 Europe / Spain / Castilla-La Mancha / Villarrobledo         |
| EPI_ISL_474954 | 4/3/2020  | 6/23/2020 Europe / Spain / Castilla-La Mancha / Villarrobledo         |
| EPI_ISL_474955 | 4/1/2020  | 6/23/2020 Europe / Spain / Castilla-La Mancha / Villarrobledo         |
| EPI_ISL_474956 | 5/20/2020 | 6/23/2020 Europe / Spain / Castilla-La Mancha / Villarrobledo         |
| EPI_ISL_474958 | 4/9/2020  | 6/23/2020 Asia / Israel / Bat-Yam                                     |
| EPI_ISL_474959 | 4/9/2020  | 6/23/2020 Asia / Israel / Holon                                       |
| EPI_ISL_474960 | 3/15/2020 | 6/23/2020 Asia / Israel / Yehud                                       |
| EPI_ISL_474961 | 4/9/2020  | 6/23/2020 Asia / Israel / Ashdod                                      |
| EPI_ISL_474962 | 4/1/2020  | 6/23/2020 Asia / Israel / Beni-Brak                                   |
| EPI_ISL_474963 | 4/11/2020 | 6/23/2020 Asia / Israel / Tel-Aviv                                    |
| EPI_ISL_474964 | 4/11/2020 | 6/23/2020 Asia / Israel / Beni-Brak                                   |
| EPI_ISL_474965 | 3/15/2020 | 6/23/2020 Asia / Israel / Netanya                                     |
| EPI_ISL_474966 | 4/25/2020 | 6/23/2020 Asia / Israel / Netivot                                     |
| EPI_ISL_474967 | 4/25/2020 | 6/23/2020 Asia / Israel / Beni-Brak                                   |
| EPI_ISL_474968 | 4/1/2020  | 6/23/2020 Asia / Israel / Beni-Brak                                   |
| EPI_ISL_474969 | 3/15/2020 | 6/23/2020 Asia / Israel / Yavne                                       |
| EPI_ISL_474970 | 4/19/2020 | 6/23/2020 Asia / Israel / Gani Tikva                                  |
| EPI_ISL_474971 | 4/19/2020 | 6/23/2020 Asia / Israel                                               |
| EPI_ISL_474972 | 4/25/2020 | 6/23/2020 Asia / Israel / Beni-Brak                                   |
| EPI_ISL_474973 | 3/15/2020 | 6/23/2020 Asia / Israel                                               |
| EPI_ISL_474974 | 3/15/2020 | 6/23/2020 Asia / Israel / Hukuk                                       |
| EPI_ISL_474975 | 3/15/2020 | 6/23/2020 Asia / Israel / Raanana                                     |
| EPI_ISL_474977 | 4/9/2020  | 6/23/2020 Asia / Israel / Bat-Yam                                     |
| EPI_ISL_474978 | 4/11/2020 | 6/23/2020 Asia / Israel                                               |
| EPI_ISL_474979 | 3/15/2020 | 6/23/2020 Asia / Israel / Pardesia                                    |
| EPI_ISL_474980 | 3/15/2020 | 6/23/2020 Asia / Israel                                               |
| EPI_ISL_474981 | 3/15/2020 | 6/23/2020 Asia / Israel / Raanana                                     |
| EPI_ISL_474982 | 4/16/2020 | 6/23/2020 Asia / Israel / Holon                                       |
| EPI_ISL_474983 | 4/16/2020 | 6/23/2020 Asia / Israel / Ramat Gan                                   |
| EPI_ISL_474984 | 4/23/2020 | 6/23/2020 Asia / Israel / Jerusalem                                   |
| EPI_ISL_474985 | 4/25/2020 | 6/23/2020 Asia / Israel / Kiryat-Gat                                  |

|                |           |                                             |
|----------------|-----------|---------------------------------------------|
| EPI_ISL_474986 | 3/15/2020 | 6/23/2020 Asia / Israel / Shoam             |
| EPI_ISL_474987 | 3/15/2020 | 6/23/2020 Asia / Israel / Yavne             |
| EPI_ISL_474988 | 3/15/2020 | 6/23/2020 Asia / Israel / Yehud             |
| EPI_ISL_474989 | 4/11/2020 | 6/23/2020 Asia / Israel / Beit Shemesh      |
| EPI_ISL_474990 | 4/19/2020 | 6/23/2020 Asia / Israel / Holon             |
| EPI_ISL_474991 | 4/21/2020 | 6/23/2020 Asia / Israel                     |
| EPI_ISL_474992 | 3/15/2020 | 6/23/2020 Asia / Israel / Petah-Tikva       |
| EPI_ISL_474993 | 3/15/2020 | 6/23/2020 Asia / Israel / Kfar-Habad        |
| EPI_ISL_474994 | 3/15/2020 | 6/23/2020 Asia / Israel / Kiryat Ono        |
| EPI_ISL_474995 | 2020      | 6/23/2020 Asia / Israel / Kefar Sava        |
| EPI_ISL_474996 | 4/11/2020 | 6/23/2020 Asia / Israel / Jerusalem         |
| EPI_ISL_474997 | 4/11/2020 | 6/23/2020 Asia / Israel / Tveria            |
| EPI_ISL_474998 | 4/13/2020 | 6/23/2020 Asia / Israel / Jerusalem         |
| EPI_ISL_474999 | 3/15/2020 | 6/23/2020 Asia / Israel / Ramat Gan         |
| EPI_ISL_475000 | 3/15/2020 | 6/23/2020 Asia / Israel / Gedera            |
| EPI_ISL_475001 | 3/15/2020 | 6/23/2020 Asia / Israel / Tel-Aviv          |
| EPI_ISL_475002 | 3/15/2020 | 6/23/2020 Asia / Israel / Elad              |
| EPI_ISL_475003 | 3/15/2020 | 6/23/2020 Asia / Israel / Elkana            |
| EPI_ISL_475004 | 4/11/2020 | 6/23/2020 Asia / Israel / Jerusalem         |
| EPI_ISL_475005 | 4/11/2020 | 6/23/2020 Asia / Israel / Jerusalem         |
| EPI_ISL_475006 | 4/13/2020 | 6/23/2020 Asia / Israel / Jerusalem         |
| EPI_ISL_475007 | 4/13/2020 | 6/23/2020 Asia / Israel / Jerusalem         |
| EPI_ISL_475008 | 4/16/2020 | 6/23/2020 Asia / Israel / Maalot-Tarshicha  |
| EPI_ISL_475009 | 4/27/2020 | 6/23/2020 Asia / Israel / Jerusalem         |
| EPI_ISL_475010 | 3/15/2020 | 6/23/2020 Asia / Israel / Ramla             |
| EPI_ISL_475011 | 4/11/2020 | 6/23/2020 Asia / Israel / Jerusalem         |
| EPI_ISL_475012 | 4/11/2020 | 6/23/2020 Asia / Israel                     |
| EPI_ISL_475013 | 3/15/2020 | 6/23/2020 Asia / Israel                     |
| EPI_ISL_475014 | 3/15/2020 | 6/23/2020 Asia / Israel                     |
| EPI_ISL_475015 | 3/15/2020 | 6/23/2020 Asia / Israel / Haifa             |
| EPI_ISL_475016 | 4/21/2020 | 6/23/2020 Asia / Israel                     |
| EPI_ISL_475017 | 4/25/2020 | 6/23/2020 Asia / Israel / Tirat Zvi         |
| EPI_ISL_475018 | 3/15/2020 | 6/23/2020 Asia / Israel / Zefat             |
| EPI_ISL_475019 | 3/15/2020 | 6/23/2020 Asia / Israel                     |
| EPI_ISL_475020 | 4/21/2020 | 6/23/2020 Asia / Israel / Jerusalem         |
| EPI_ISL_475021 | 3/15/2020 | 6/23/2020 Asia / Israel / Tel-Aviv          |
| EPI_ISL_475022 | 3/15/2020 | 6/23/2020 Asia / Israel / Tel-Aviv          |
| EPI_ISL_475023 | 4/11/2020 | 6/23/2020 Asia / Israel                     |
| EPI_ISL_475024 | 4/11/2020 | 6/23/2020 Asia / Israel / Jerusalem         |
| EPI_ISL_475025 | 4/11/2020 | 6/23/2020 Asia / Israel / Jerusalem         |
| EPI_ISL_475026 | 6/7/2020  | 6/23/2020 Asia / India / Gujarat / Palanpur |
| EPI_ISL_475027 | 6/7/2020  | 6/23/2020 Asia / India / Gujarat / Palanpur |
| EPI_ISL_475028 | 6/7/2020  | 6/23/2020 Asia / India / Gujarat / Palanpur |
| EPI_ISL_475029 | 6/7/2020  | 6/23/2020 Asia / India / Gujarat / Palanpur |
| EPI_ISL_475030 | 6/11/2020 | 6/23/2020 Asia / India / Gujarat / Surat    |
| EPI_ISL_475031 | 6/11/2020 | 6/23/2020 Asia / India / Gujarat / Surat    |
| EPI_ISL_475032 | 6/11/2020 | 6/23/2020 Asia / India / Gujarat / Surat    |

|                |           |                                             |
|----------------|-----------|---------------------------------------------|
| EPI_ISL_475033 | 6/11/2020 | 6/23/2020 Asia / India / Gujarat / Surat    |
| EPI_ISL_475034 | 6/11/2020 | 6/23/2020 Asia / India / Gujarat / Surat    |
| EPI_ISL_475035 | 6/11/2020 | 6/23/2020 Asia / India / Gujarat / Surat    |
| EPI_ISL_475036 | 6/11/2020 | 6/23/2020 Asia / India / Gujarat / Surat    |
| EPI_ISL_475037 | 6/11/2020 | 6/23/2020 Asia / India / Gujarat / Surat    |
| EPI_ISL_475038 | 6/11/2020 | 6/23/2020 Asia / India / Gujarat / Surat    |
| EPI_ISL_475039 | 6/11/2020 | 6/23/2020 Asia / India / Gujarat / Surat    |
| EPI_ISL_475040 | 6/11/2020 | 6/23/2020 Asia / India / Gujarat / Surat    |
| EPI_ISL_475043 | 6/11/2020 | 6/23/2020 Asia / India / Gujarat / Surat    |
| EPI_ISL_475044 | 6/11/2020 | 6/23/2020 Asia / India / Gujarat / Surat    |
| EPI_ISL_475045 | 6/11/2020 | 6/23/2020 Asia / India / Gujarat / Surat    |
| EPI_ISL_475046 | 6/11/2020 | 6/23/2020 Asia / India / Gujarat / Surat    |
| EPI_ISL_475047 | 6/5/2020  | 6/23/2020 Asia / India / Gujarat / Savli    |
| EPI_ISL_475048 | 6/5/2020  | 6/23/2020 Asia / India / Gujarat / Savli    |
| EPI_ISL_475049 | 6/5/2020  | 6/23/2020 Asia / India / Gujarat / Bharuch  |
| EPI_ISL_475050 | 6/8/2020  | 6/23/2020 Asia / India / Gujarat / Vadodara |
| EPI_ISL_475051 | 6/8/2020  | 6/23/2020 Asia / India / Gujarat / Vadodara |
| EPI_ISL_475052 | 6/8/2020  | 6/23/2020 Asia / India / Gujarat / Vadodara |
| EPI_ISL_475053 | 6/8/2020  | 6/23/2020 Asia / India / Gujarat / Vadodara |
| EPI_ISL_475054 | 6/8/2020  | 6/23/2020 Asia / India / Gujarat / Vadodara |
| EPI_ISL_475055 | 6/8/2020  | 6/23/2020 Asia / India / Gujarat / Vadodara |
| EPI_ISL_475056 | 6/8/2020  | 6/23/2020 Asia / India / Gujarat / Kheda    |
| EPI_ISL_475057 | 6/8/2020  | 6/23/2020 Asia / India / Gujarat / Kheda    |
| EPI_ISL_475058 | 6/5/2020  | 6/23/2020 Asia / India / Gujarat / Mandvi   |
| EPI_ISL_475059 | 6/5/2020  | 6/23/2020 Asia / India / Gujarat / Bhuj     |
| EPI_ISL_475060 | 3/17/2020 | 6/23/2020 Europe / Belgium / Ghent          |
| EPI_ISL_475061 | 3/17/2020 | 6/23/2020 Europe / Belgium / Ghent          |
| EPI_ISL_475062 | 3/18/2020 | 6/23/2020 Europe / Belgium / Ghent          |
| EPI_ISL_475063 | 3/18/2020 | 6/23/2020 Europe / Belgium / Ghent          |
| EPI_ISL_475064 | 3/18/2020 | 6/23/2020 Europe / Belgium / Ghent          |
| EPI_ISL_475065 | 3/18/2020 | 6/23/2020 Europe / Belgium / Ghent          |
| EPI_ISL_475066 | 3/18/2020 | 6/23/2020 Europe / Belgium / Ghent          |
| EPI_ISL_475067 | 3/18/2020 | 6/23/2020 Europe / Belgium / Ghent          |
| EPI_ISL_475068 | 3/18/2020 | 6/23/2020 Europe / Belgium / Ghent          |
| EPI_ISL_475069 | 3/18/2020 | 6/23/2020 Europe / Belgium / Ghent          |
| EPI_ISL_475070 | 3/18/2020 | 6/23/2020 Europe / Belgium / Ghent          |
| EPI_ISL_475071 | 3/18/2020 | 6/23/2020 Europe / Belgium / Ghent          |
| EPI_ISL_475072 | 3/18/2020 | 6/23/2020 Europe / Belgium / Ghent          |
| EPI_ISL_475073 | 3/20/2020 | 6/23/2020 Europe / Belgium / Ghent          |
| EPI_ISL_475074 | 3/21/2020 | 6/23/2020 Europe / Belgium / Ghent          |
| EPI_ISL_475075 | 3/22/2020 | 6/23/2020 Europe / Belgium / Ghent          |
| EPI_ISL_475076 | 3/23/2020 | 6/23/2020 Europe / Belgium / Ghent          |
| EPI_ISL_475077 | 3/23/2020 | 6/23/2020 Europe / Belgium / Ghent          |
| EPI_ISL_475078 | 3/23/2020 | 6/23/2020 Europe / Belgium / Ghent          |
| EPI_ISL_475079 | 3/23/2020 | 6/23/2020 Europe / Belgium / Ghent          |
| EPI_ISL_475080 | 3/23/2020 | 6/23/2020 Europe / Belgium / Ghent          |
| EPI_ISL_475081 | 5/22/2020 | 6/23/2020 Europe / Belgium / Ghent          |

|                |           |                                                 |
|----------------|-----------|-------------------------------------------------|
| EPI_ISL_475082 | 6/1/2020  | 6/23/2020 Europe / Belgium / Ghent              |
| EPI_ISL_475083 | 6/7/2020  | 6/23/2020 Asia / Bangladesh / Rangpur           |
| EPI_ISL_475084 | 6/7/2020  | 6/23/2020 Asia / Bangladesh / Rangpur           |
| EPI_ISL_475085 | 3/12/2020 | 6/23/2020 Europe / Sweden / Sormland            |
| EPI_ISL_475086 | 3/13/2020 | 6/23/2020 Europe / Sweden / Stockholm           |
| EPI_ISL_475087 | 3/13/2020 | 6/23/2020 Europe / Sweden / Stockholm           |
| EPI_ISL_475088 | 3/13/2020 | 6/23/2020 Europe / Sweden / Stockholm           |
| EPI_ISL_475089 | 3/13/2020 | 6/23/2020 Europe / Sweden / Stockholm           |
| EPI_ISL_475090 | 3/13/2020 | 6/23/2020 Europe / Sweden / Stockholm           |
| EPI_ISL_475091 | 3/13/2020 | 6/23/2020 Europe / Sweden / Stockholm           |
| EPI_ISL_475092 | 3/16/2020 | 6/23/2020 Europe / Sweden / Vastra Gotaland     |
| EPI_ISL_475093 | 3/16/2020 | 6/23/2020 Europe / Sweden / Halland             |
| EPI_ISL_475094 | 3/16/2020 | 6/23/2020 Europe / Sweden / Halland             |
| EPI_ISL_475095 | 3/16/2020 | 6/23/2020 Europe / Sweden / Stockholm           |
| EPI_ISL_475096 | 3/19/2020 | 6/23/2020 Europe / Sweden / Halland             |
| EPI_ISL_475097 | 3/21/2020 | 6/23/2020 Europe / Sweden / Halland             |
| EPI_ISL_475098 | 3/22/2020 | 6/23/2020 Europe / Sweden / Halland             |
| EPI_ISL_475099 | 3/23/2020 | 6/23/2020 Europe / Sweden / Sormland            |
| EPI_ISL_475100 | 3/24/2020 | 6/23/2020 Europe / Sweden / Halland             |
| EPI_ISL_475101 | 3/24/2020 | 6/23/2020 Europe / Sweden / Vastmanland         |
| EPI_ISL_475102 | 3/24/2020 | 6/23/2020 Europe / Sweden / Vastmanland         |
| EPI_ISL_475103 | 3/24/2020 | 6/23/2020 Europe / Sweden / Vastmanland         |
| EPI_ISL_475104 | 3/24/2020 | 6/23/2020 Europe / Sweden / Vastmanland         |
| EPI_ISL_475105 | 3/25/2020 | 6/23/2020 Europe / Sweden / Sormland            |
| EPI_ISL_475106 | 3/25/2020 | 6/23/2020 Europe / Sweden / Vastra Gotaland     |
| EPI_ISL_475107 | 3/25/2020 | 6/23/2020 Europe / Sweden / Vastra Gotaland     |
| EPI_ISL_475108 | 3/28/2020 | 6/23/2020 Europe / Sweden / Sormland            |
| EPI_ISL_475109 | 3/29/2020 | 6/23/2020 Europe / Sweden / Sormland            |
| EPI_ISL_475110 | 3/29/2020 | 6/23/2020 Europe / Sweden / Gavleborg           |
| EPI_ISL_475112 | 3/30/2020 | 6/23/2020 Europe / Sweden / Vastra Gotaland     |
| EPI_ISL_475113 | 3/30/2020 | 6/23/2020 Europe / Sweden / Vastra Gotaland     |
| EPI_ISL_475114 | 3/30/2020 | 6/23/2020 Europe / Sweden / Halland             |
| EPI_ISL_475115 | 3/30/2020 | 6/23/2020 Europe / Sweden / Gavleborg           |
| EPI_ISL_475116 | 3/31/2020 | 6/23/2020 Europe / Sweden / Halland             |
| EPI_ISL_475117 | 4/1/2020  | 6/23/2020 Europe / Sweden / Halland             |
| EPI_ISL_475118 | 4/1/2020  | 6/23/2020 Europe / Sweden / Uppsala             |
| EPI_ISL_475119 | 4/2/2020  | 6/23/2020 Europe / Sweden / Uppsala             |
| EPI_ISL_475120 | 4/4/2020  | 6/23/2020 Europe / Sweden / Halland             |
| EPI_ISL_475121 | 4/5/2020  | 6/23/2020 Europe / Sweden / Halland             |
| EPI_ISL_475122 | 4/7/2020  | 6/23/2020 Europe / Sweden / Vasterbotten        |
| EPI_ISL_475123 | 4/8/2020  | 6/23/2020 Europe / Sweden / Halland             |
| EPI_ISL_475124 | 4/9/2020  | 6/23/2020 Europe / Sweden / Jamtland Harjedalen |
| EPI_ISL_475125 | 4/13/2020 | 6/23/2020 Europe / Sweden / Halland             |
| EPI_ISL_475126 | 4/14/2020 | 6/23/2020 Europe / Sweden / Vasterbotten        |
| EPI_ISL_475127 | 4/22/2020 | 6/23/2020 Europe / Sweden / Vasterbotten        |
| EPI_ISL_475128 | 3/12/2020 | 6/23/2020 Europe / Sweden / Orebro              |
| EPI_ISL_475129 | 3/12/2020 | 6/23/2020 Europe / Sweden / Varmland            |

|                |           |                                            |
|----------------|-----------|--------------------------------------------|
| EPI_ISL_475130 | 3/12/2020 | 6/23/2020 Europe / Sweden / Varmland       |
| EPI_ISL_475131 | 3/12/2020 | 6/23/2020 Europe / Sweden / Ostergotland   |
| EPI_ISL_475132 | 3/12/2020 | 6/23/2020 Europe / Sweden / Ostergotland   |
| EPI_ISL_475133 | 3/12/2020 | 6/23/2020 Europe / Sweden / Ostergotland   |
| EPI_ISL_475134 | 3/12/2020 | 6/23/2020 Europe / Sweden / Ostergotland   |
| EPI_ISL_475135 | 3/12/2020 | 6/23/2020 Europe / Sweden / Vastmanland    |
| EPI_ISL_475136 | 3/13/2020 | 6/23/2020 Europe / Sweden / Stockholm      |
| EPI_ISL_475137 | 3/16/2020 | 6/23/2020 Europe / Sweden / Kalmar         |
| EPI_ISL_475138 | 3/16/2020 | 6/23/2020 Europe / Sweden / Kalmar         |
| EPI_ISL_475139 | 3/18/2020 | 6/23/2020 Europe / Sweden / Varmland       |
| EPI_ISL_475141 | 3/23/2020 | 6/23/2020 Europe / Sweden / Stockholm      |
| EPI_ISL_475142 | 3/26/2020 | 6/23/2020 Europe / Sweden / Stockholm      |
| EPI_ISL_475143 | 3/26/2020 | 6/23/2020 Europe / Sweden / Vasterbotten   |
| EPI_ISL_475144 | 3/30/2020 | 6/23/2020 Europe / Sweden / Vasternorrland |
| EPI_ISL_475145 | 3/30/2020 | 6/23/2020 Europe / Sweden / Vasternorrland |
| EPI_ISL_475146 | 3/31/2020 | 6/23/2020 Europe / Sweden / Vasternorrland |
| EPI_ISL_475147 | 3/31/2020 | 6/23/2020 Europe / Sweden / Vasternorrland |
| EPI_ISL_475148 | 4/1/2020  | 6/23/2020 Europe / Sweden / Vasternorrland |
| EPI_ISL_475149 | 4/2/2020  | 6/23/2020 Europe / Sweden / Stockholm      |
| EPI_ISL_475150 | 4/2/2020  | 6/23/2020 Europe / Sweden / Stockholm      |
| EPI_ISL_475151 | 4/2/2020  | 6/23/2020 Europe / Sweden / Uppsala        |
| EPI_ISL_475152 | 4/5/2020  | 6/23/2020 Europe / Sweden / Stockholm      |
| EPI_ISL_475153 | 4/6/2020  | 6/23/2020 Europe / Sweden / Vasternorrland |
| EPI_ISL_475154 | 4/6/2020  | 6/23/2020 Europe / Sweden / Vasternorrland |
| EPI_ISL_475155 | 4/6/2020  | 6/23/2020 Europe / Sweden / Vasternorrland |
| EPI_ISL_475156 | 4/9/2020  | 6/23/2020 Europe / Sweden / Halland        |
| EPI_ISL_475157 | 4/16/2020 | 6/23/2020 Europe / Sweden / Halland        |
| EPI_ISL_475158 | 4/18/2020 | 6/23/2020 Europe / Sweden / Halland        |
| EPI_ISL_475159 | 4/19/2020 | 6/23/2020 Europe / Sweden / Halland        |
| EPI_ISL_475160 | 4/20/2020 | 6/23/2020 Europe / Sweden / Vasternorrland |
| EPI_ISL_475161 | 4/20/2020 | 6/23/2020 Europe / Sweden / Vasternorrland |
| EPI_ISL_475162 | 4/21/2020 | 6/23/2020 Europe / Sweden / Vasternorrland |
| EPI_ISL_475163 | 4/21/2020 | 6/23/2020 Europe / Sweden / Vasternorrland |
| EPI_ISL_475164 | 4/23/2020 | 6/23/2020 Europe / Sweden / Halland        |
| EPI_ISL_475165 | 6/7/2020  | 6/23/2020 Asia / Bangladesh / Rangpur      |
| EPI_ISL_475166 | 6/7/2020  | 6/23/2020 Asia / Bangladesh / Rangpur      |
| EPI_ISL_475167 | 6/7/2020  | 6/23/2020 Asia / Bangladesh / Rangpur      |
| EPI_ISL_475168 | 6/7/2020  | 6/23/2020 Asia / Bangladesh / Rangpur      |
| EPI_ISL_475169 | 5/24/2020 | 6/23/2020 Asia / Bangladesh / Dhaka        |
| EPI_ISL_475170 | 5/24/2020 | 6/23/2020 Asia / Bangladesh / Dhaka        |
| EPI_ISL_475171 | 6/7/2020  | 6/23/2020 Asia / Bangladesh / Rangpur      |
| EPI_ISL_475172 | 6/7/2020  | 6/23/2020 Asia / Bangladesh / Rangpur      |
| EPI_ISL_475173 | 6/7/2020  | 6/23/2020 Asia / Bangladesh / Rangpur      |
| EPI_ISL_475176 | 5/2/2020  | 6/23/2020 North America / USA / Nebraska   |
| EPI_ISL_475178 | 5/4/2020  | 6/23/2020 North America / USA / Nebraska   |
| EPI_ISL_475180 | 5/4/2020  | 6/23/2020 North America / USA / Nebraska   |
| EPI_ISL_475184 | 5/4/2020  | 6/23/2020 North America / USA / Nebraska   |



|                |           |                                             |
|----------------|-----------|---------------------------------------------|
| EPI_ISL_475185 | 5/4/2020  | 6/23/2020 North America / USA / Nebraska    |
| EPI_ISL_475186 | 5/4/2020  | 6/23/2020 North America / USA / Nebraska    |
| EPI_ISL_475187 | 5/4/2020  | 6/23/2020 North America / USA / Nebraska    |
| EPI_ISL_475188 | 5/4/2020  | 6/23/2020 North America / USA / Nebraska    |
| EPI_ISL_475189 | 5/4/2020  | 6/23/2020 North America / USA / Nebraska    |
| EPI_ISL_475190 | 5/4/2020  | 6/23/2020 North America / USA / Iowa        |
| EPI_ISL_475191 | 5/4/2020  | 6/23/2020 North America / USA / Nebraska    |
| EPI_ISL_475192 | 5/4/2020  | 6/23/2020 North America / USA / Nebraska    |
| EPI_ISL_475194 | 5/4/2020  | 6/23/2020 North America / USA / Nebraska    |
| EPI_ISL_475195 | 5/4/2020  | 6/23/2020 North America / USA / Nebraska    |
| EPI_ISL_475196 | 5/4/2020  | 6/23/2020 North America / USA / Nebraska    |
| EPI_ISL_475197 | 5/4/2020  | 6/23/2020 North America / USA / Nebraska    |
| EPI_ISL_475198 | 5/4/2020  | 6/23/2020 North America / USA / Nebraska    |
| EPI_ISL_475200 | 5/4/2020  | 6/23/2020 North America / USA / Nebraska    |
| EPI_ISL_475201 | 5/4/2020  | 6/23/2020 North America / USA / Nebraska    |
| EPI_ISL_475203 | 5/4/2020  | 6/23/2020 North America / USA / Nebraska    |
| EPI_ISL_475204 | 5/4/2020  | 6/23/2020 North America / USA / Nebraska    |
| EPI_ISL_475205 | 5/4/2020  | 6/23/2020 North America / USA / Nebraska    |
| EPI_ISL_475208 | 5/4/2020  | 6/23/2020 North America / USA / Nebraska    |
| EPI_ISL_475209 | 5/3/2020  | 6/23/2020 North America / USA / Nebraska    |
| EPI_ISL_475210 | 5/5/2020  | 6/23/2020 North America / USA / Nebraska    |
| EPI_ISL_475211 | 5/4/2020  | 6/23/2020 North America / USA / Nebraska    |
| EPI_ISL_475213 | 5/5/2020  | 6/23/2020 North America / USA / Nebraska    |
| EPI_ISL_475214 | 5/5/2020  | 6/23/2020 North America / USA / Nebraska    |
| EPI_ISL_475215 | 5/5/2020  | 6/23/2020 North America / USA / Nebraska    |
| EPI_ISL_475216 | 5/4/2020  | 6/23/2020 North America / USA / Nebraska    |
| EPI_ISL_475217 | 5/5/2020  | 6/23/2020 North America / USA / Nebraska    |
| EPI_ISL_475220 | 5/5/2020  | 6/23/2020 North America / USA / Nebraska    |
| EPI_ISL_475221 | 5/5/2020  | 6/23/2020 North America / USA / Nebraska    |
| EPI_ISL_475222 | 5/5/2020  | 6/23/2020 North America / USA / Nebraska    |
| EPI_ISL_475225 | 5/5/2020  | 6/23/2020 North America / USA / Nebraska    |
| EPI_ISL_475227 | 5/5/2020  | 6/23/2020 North America / USA / Nebraska    |
| EPI_ISL_475228 | 5/5/2020  | 6/23/2020 North America / USA / Nebraska    |
| EPI_ISL_475229 | 5/5/2020  | 6/23/2020 North America / USA / Nebraska    |
| EPI_ISL_475231 | 5/5/2020  | 6/23/2020 North America / USA / Nebraska    |
| EPI_ISL_475232 | 5/5/2020  | 6/23/2020 North America / USA / California  |
| EPI_ISL_475233 | 5/5/2020  | 6/23/2020 North America / USA / Nebraska    |
| EPI_ISL_475236 | 5/5/2020  | 6/23/2020 North America / USA / Nebraska    |
| EPI_ISL_475237 | 5/5/2020  | 6/23/2020 North America / USA / Nebraska    |
| EPI_ISL_475238 | 6/7/2020  | 6/23/2020 Asia / Bangladesh / Rangpur       |
| EPI_ISL_475240 | 5/14/2020 | 6/23/2020 Europe / United Kingdom / England |
| EPI_ISL_475241 | 5/15/2020 | 6/23/2020 Europe / United Kingdom / England |
| EPI_ISL_475242 | 5/5/2020  | 6/23/2020 Europe / United Kingdom / England |
| EPI_ISL_475244 | 5/7/2020  | 6/23/2020 Europe / United Kingdom / England |
| EPI_ISL_475247 | 4/27/2020 | 6/23/2020 Europe / United Kingdom / England |
| EPI_ISL_475263 | 4/30/2020 | 6/23/2020 Europe / United Kingdom / England |
| EPI_ISL_475266 | 2020      | 6/23/2020 Europe / United Kingdom / England |



|                |           |                                             |
|----------------|-----------|---------------------------------------------|
| EPI_ISL_475330 | 3/22/2020 | 6/23/2020 Europe / United Kingdom / England |
| EPI_ISL_475331 | 4/21/2020 | 6/23/2020 Europe / United Kingdom / England |
| EPI_ISL_475333 | 4/17/2020 | 6/23/2020 Europe / United Kingdom / England |
| EPI_ISL_475334 | 4/21/2020 | 6/23/2020 Europe / United Kingdom / England |
| EPI_ISL_475335 | 4/22/2020 | 6/23/2020 Europe / United Kingdom / England |
| EPI_ISL_475337 | 4/21/2020 | 6/23/2020 Europe / United Kingdom / England |
| EPI_ISL_475339 | 4/21/2020 | 6/23/2020 Europe / United Kingdom / England |
| EPI_ISL_475341 | 3/24/2020 | 6/23/2020 Europe / United Kingdom / England |
| EPI_ISL_475343 | 4/28/2020 | 6/23/2020 Europe / United Kingdom / England |
| EPI_ISL_475344 | 5/27/2020 | 6/23/2020 Europe / United Kingdom / England |
| EPI_ISL_475347 | 5/25/2020 | 6/23/2020 Europe / United Kingdom / England |
| EPI_ISL_475348 | 5/30/2020 | 6/23/2020 Europe / United Kingdom / England |
| EPI_ISL_475356 | 5/6/2020  | 6/23/2020 Europe / United Kingdom / England |
| EPI_ISL_475360 | 4/28/2020 | 6/23/2020 Europe / United Kingdom / England |
| EPI_ISL_475367 | 5/7/2020  | 6/23/2020 Europe / United Kingdom / England |
| EPI_ISL_475368 | 4/28/2020 | 6/23/2020 Europe / United Kingdom / England |
| EPI_ISL_475370 | 4/30/2020 | 6/23/2020 Europe / United Kingdom / England |
| EPI_ISL_475371 | 4/27/2020 | 6/23/2020 Europe / United Kingdom / England |
| EPI_ISL_475372 | 4/27/2020 | 6/23/2020 Europe / United Kingdom / England |
| EPI_ISL_475375 | 5/7/2020  | 6/23/2020 Europe / United Kingdom / England |
| EPI_ISL_475378 | 3/23/2020 | 6/23/2020 Europe / United Kingdom / England |
| EPI_ISL_475379 | 5/10/2020 | 6/23/2020 Europe / United Kingdom / England |
| EPI_ISL_475384 | 4/26/2020 | 6/23/2020 Europe / United Kingdom / England |
| EPI_ISL_475389 | 5/22/2020 | 6/23/2020 Europe / United Kingdom / England |
| EPI_ISL_475391 | 5/25/2020 | 6/23/2020 Europe / United Kingdom / England |
| EPI_ISL_475393 | 5/27/2020 | 6/23/2020 Europe / United Kingdom / England |
| EPI_ISL_475401 | 5/26/2020 | 6/23/2020 Europe / United Kingdom / England |
| EPI_ISL_475402 | 4/27/2020 | 6/23/2020 Europe / United Kingdom / England |
| EPI_ISL_475403 | 5/24/2020 | 6/23/2020 Europe / United Kingdom / England |
| EPI_ISL_475407 | 4/27/2020 | 6/23/2020 Europe / United Kingdom / England |
| EPI_ISL_475409 | 4/28/2020 | 6/23/2020 Europe / United Kingdom / England |
| EPI_ISL_475413 | 4/27/2020 | 6/23/2020 Europe / United Kingdom / England |
| EPI_ISL_475415 | 4/27/2020 | 6/23/2020 Europe / United Kingdom / England |
| EPI_ISL_475417 | 5/28/2020 | 6/23/2020 Europe / United Kingdom / England |
| EPI_ISL_475418 | 5/23/2020 | 6/23/2020 Europe / United Kingdom / England |
| EPI_ISL_475419 | 4/27/2020 | 6/23/2020 Europe / United Kingdom / England |
| EPI_ISL_475420 | 5/27/2020 | 6/23/2020 Europe / United Kingdom / England |
| EPI_ISL_475421 | 4/28/2020 | 6/23/2020 Europe / United Kingdom / England |
| EPI_ISL_475423 | 5/24/2020 | 6/23/2020 Europe / United Kingdom / England |
| EPI_ISL_475424 | 4/27/2020 | 6/23/2020 Europe / United Kingdom / England |
| EPI_ISL_475425 | 4/27/2020 | 6/23/2020 Europe / United Kingdom / England |
| EPI_ISL_475429 | 4/27/2020 | 6/23/2020 Europe / United Kingdom / England |
| EPI_ISL_475434 | 6/1/2020  | 6/23/2020 Europe / United Kingdom / England |
| EPI_ISL_475443 | 4/30/2020 | 6/23/2020 Europe / United Kingdom / England |
| EPI_ISL_475445 | 4/29/2020 | 6/23/2020 Europe / United Kingdom / England |
| EPI_ISL_475447 | 4/28/2020 | 6/23/2020 Europe / United Kingdom / England |
| EPI_ISL_475448 | 4/28/2020 | 6/23/2020 Europe / United Kingdom / England |

|                |           |                                             |
|----------------|-----------|---------------------------------------------|
| EPI_ISL_475453 | 5/25/2020 | 6/23/2020 Europe / United Kingdom / England |
| EPI_ISL_475454 | 4/29/2020 | 6/23/2020 Europe / United Kingdom / England |
| EPI_ISL_475456 | 3/20/2020 | 6/23/2020 Europe / United Kingdom / England |
| EPI_ISL_475457 | 5/26/2020 | 6/23/2020 Europe / United Kingdom / England |
| EPI_ISL_475461 | 5/29/2020 | 6/23/2020 Europe / United Kingdom / England |
| EPI_ISL_475466 | 3/19/2020 | 6/23/2020 Europe / United Kingdom / England |
| EPI_ISL_475469 | 5/27/2020 | 6/23/2020 Europe / United Kingdom / England |
| EPI_ISL_475471 | 4/27/2020 | 6/23/2020 Europe / United Kingdom / England |
| EPI_ISL_475473 | 4/28/2020 | 6/23/2020 Europe / United Kingdom / England |
| EPI_ISL_475476 | 5/8/2020  | 6/23/2020 Europe / United Kingdom / England |
| EPI_ISL_475477 | 4/29/2020 | 6/23/2020 Europe / United Kingdom / England |
| EPI_ISL_475478 | 3/22/2020 | 6/23/2020 Europe / United Kingdom / England |
| EPI_ISL_475484 | 4/27/2020 | 6/23/2020 Europe / United Kingdom / England |
| EPI_ISL_475485 | 4/27/2020 | 6/23/2020 Europe / United Kingdom / England |
| EPI_ISL_475492 | 3/24/2020 | 6/23/2020 Europe / United Kingdom / England |
| EPI_ISL_475497 | 5/28/2020 | 6/23/2020 Europe / United Kingdom / England |
| EPI_ISL_475504 | 4/28/2020 | 6/23/2020 Europe / United Kingdom / England |
| EPI_ISL_475507 | 5/23/2020 | 6/23/2020 Europe / United Kingdom / England |
| EPI_ISL_475508 | 4/29/2020 | 6/23/2020 Europe / United Kingdom / England |
| EPI_ISL_475509 | 3/23/2020 | 6/23/2020 Europe / United Kingdom / England |
| EPI_ISL_475511 | 4/30/2020 | 6/23/2020 Europe / Sweden / Skane           |
| EPI_ISL_475512 | 4/30/2020 | 6/23/2020 Europe / Sweden / Vastra Gotaland |
| EPI_ISL_475513 | 4/30/2020 | 6/23/2020 Europe / Sweden / Stockholm       |
| EPI_ISL_475514 | 5/4/2020  | 6/23/2020 Europe / Sweden / Uppsala         |
| EPI_ISL_475515 | 5/12/2020 | 6/23/2020 Europe / Sweden / Vastmanland     |
| EPI_ISL_475516 | 5/10/2020 | 6/23/2020 Europe / Sweden / Uppsala         |
| EPI_ISL_475517 | 5/10/2020 | 6/23/2020 Europe / Sweden / Uppsala         |
| EPI_ISL_475518 | 5/14/2020 | 6/23/2020 Europe / Sweden / Stockholm       |
| EPI_ISL_475519 | 5/14/2020 | 6/23/2020 Europe / Sweden / Dalarna         |
| EPI_ISL_475520 | 5/18/2020 | 6/23/2020 Europe / Sweden / Ostergotland    |
| EPI_ISL_475521 | 5/19/2020 | 6/23/2020 Europe / Sweden / Uppsala         |
| EPI_ISL_475522 | 5/25/2020 | 6/23/2020 Europe / Sweden / Stockholm       |
| EPI_ISL_475523 | 5/25/2020 | 6/23/2020 Europe / Sweden / Stockholm       |
| EPI_ISL_475524 | 5/26/2020 | 6/23/2020 Europe / Sweden / Vastra Gotaland |
| EPI_ISL_475525 | 5/28/2020 | 6/23/2020 Europe / Sweden / Stockholm       |
| EPI_ISL_475526 | 5/17/2020 | 6/23/2020 Europe / Sweden / Uppsala         |
| EPI_ISL_475527 | 5/27/2020 | 6/23/2020 Europe / Sweden / Uppsala         |
| EPI_ISL_475528 | 5/27/2020 | 6/23/2020 Europe / Sweden / Vastra Gotaland |
| EPI_ISL_475529 | 5/28/2020 | 6/23/2020 Europe / Sweden / Vastmanland     |
| EPI_ISL_475530 | 6/3/2020  | 6/23/2020 Europe / Sweden / Vastmanland     |
| EPI_ISL_475531 | 6/2/2020  | 6/23/2020 Europe / Sweden / Vastmanland     |
| EPI_ISL_475532 | 6/2/2020  | 6/23/2020 Europe / Sweden / Vastmanland     |
| EPI_ISL_475533 | 6/4/2020  | 6/23/2020 Europe / Sweden / Vastra Gotaland |
| EPI_ISL_475534 | 6/4/2020  | 6/23/2020 Europe / Sweden / Vastra Gotaland |
| EPI_ISL_475535 | 6/9/2020  | 6/23/2020 Europe / Sweden / Vastra Gotaland |
| EPI_ISL_475536 | 3/20/2020 | 6/23/2020 Europe / Sweden / Jamtland        |
| EPI_ISL_475537 | 4/6/2020  | 6/23/2020 Europe / Sweden / Vastra Gotaland |

|                |           |                                                                      |
|----------------|-----------|----------------------------------------------------------------------|
| EPI_ISL_475538 | 4/6/2020  | 6/23/2020 Europe / Sweden / Vastra Gotaland                          |
| EPI_ISL_475539 | 4/7/2020  | 6/23/2020 Europe / Sweden / Vastra Gotaland                          |
| EPI_ISL_475540 | 4/15/2020 | 6/23/2020 Europe / Sweden / Kalmar                                   |
| EPI_ISL_475541 | 4/28/2020 | 6/23/2020 Europe / Sweden / Jamtland                                 |
| EPI_ISL_475542 | 5/8/2020  | 6/23/2020 Europe / Sweden / Stockholm                                |
| EPI_ISL_475543 | 5/11/2020 | 6/23/2020 Europe / Sweden / Stockholm                                |
| EPI_ISL_475544 | 2/26/2020 | 6/23/2020 Europe / Sweden / Uppsala                                  |
| EPI_ISL_475545 | 2/28/2020 | 6/23/2020 Europe / Sweden / Stockholm                                |
| EPI_ISL_475546 | 2/28/2020 | 6/23/2020 Europe / Sweden / Stockholm                                |
| EPI_ISL_475547 | 2/28/2020 | 6/23/2020 Europe / Sweden / Stockholm                                |
| EPI_ISL_475548 | 3/8/2020  | 6/23/2020 Europe / Sweden / Halland                                  |
| EPI_ISL_475549 | 3/7/2020  | 6/23/2020 Europe / Sweden / Vastra Gotaland                          |
| EPI_ISL_475550 | 3/9/2020  | 6/23/2020 Europe / Sweden / Vastra Gotaland                          |
| EPI_ISL_475551 | 3/2/2020  | 6/23/2020 Europe / Sweden / Stockholm                                |
| EPI_ISL_475552 | 3/4/2020  | 6/23/2020 Europe / Sweden / Stockholm                                |
| EPI_ISL_475553 | 3/10/2020 | 6/23/2020 Europe / Sweden / Halland                                  |
| EPI_ISL_475554 | 3/10/2020 | 6/23/2020 Europe / Sweden / Vastra Gotaland                          |
| EPI_ISL_475555 | 3/10/2020 | 6/23/2020 Europe / Sweden / Sormland                                 |
| EPI_ISL_475556 | 3/29/2020 | 6/23/2020 Europe / Sweden / Halland                                  |
| EPI_ISL_475557 | 4/11/2020 | 6/23/2020 Europe / Sweden / Halland                                  |
| EPI_ISL_475558 | 3/9/2020  | 6/23/2020 Europe / Sweden / Stockholm                                |
| EPI_ISL_475560 | 3/10/2020 | 6/23/2020 Europe / Sweden / Stockholm                                |
| EPI_ISL_475561 | 3/10/2020 | 6/23/2020 Europe / Sweden / Stockholm                                |
| EPI_ISL_475562 | 3/18/2020 | 6/23/2020 Europe / Sweden / Vastra Gotaland                          |
| EPI_ISL_475563 | 3/18/2020 | 6/23/2020 Europe / Sweden / Vastra Gotaland                          |
| EPI_ISL_475564 | 3/26/2020 | 6/23/2020 Europe / Sweden / Stockholm                                |
| EPI_ISL_475566 | 5/13/2020 | 6/23/2020 Europe / Sweden / Ostergotland                             |
| EPI_ISL_475567 | 5/28/2020 | 6/23/2020 Europe / Sweden / Stockholm                                |
| EPI_ISL_475568 | 6/1/2020  | 6/23/2020 Europe / Sweden / Vastmanland                              |
| EPI_ISL_475569 | 6/11/2020 | 6/23/2020 Europe / Sweden / Stockholm                                |
| EPI_ISL_475570 | 5/6/2020  | 6/23/2020 Asia / Bangladesh / Khulna / Jhenaidah / Shailkupa Upazila |
| EPI_ISL_475571 | 6/11/2020 | 6/23/2020 Asia / Bangladesh / Khulna / Narail / Kalia Upazila        |
| EPI_ISL_475572 | 3/17/2020 | 6/23/2020 Europe / United Kingdom / England / London                 |
| EPI_ISL_475573 | 6/11/2020 | 6/23/2020 Asia / Bangladesh / Khulna / Bagerhat                      |
| EPI_ISL_475574 | 3/27/2020 | 6/23/2020 North America / USA / California / Los Angeles County      |
| EPI_ISL_475576 | 4/2/2020  | 6/23/2020 North America / USA / California / Los Angeles County      |
| EPI_ISL_475577 | 4/2/2020  | 6/23/2020 North America / USA / California / Los Angeles County      |
| EPI_ISL_475578 | 3/22/2020 | 6/23/2020 North America / USA / California / Los Angeles County      |
| EPI_ISL_475579 | 4/2/2020  | 6/23/2020 North America / USA / California / Los Angeles County      |
| EPI_ISL_475580 | 4/2/2020  | 6/23/2020 North America / USA / California / Los Angeles County      |
| EPI_ISL_475582 | 4/2/2020  | 6/23/2020 North America / USA / California / Los Angeles County      |
| EPI_ISL_475583 | 4/2/2020  | 6/23/2020 North America / USA / California / Los Angeles County      |
| EPI_ISL_475585 | 4/1/2020  | 6/23/2020 North America / USA / California / Los Angeles County      |
| EPI_ISL_475588 | 4/2/2020  | 6/23/2020 North America / USA / California / Los Angeles County      |
| EPI_ISL_475590 | 4/2/2020  | 6/23/2020 North America / USA / California / Los Angeles County      |
| EPI_ISL_475593 | 4/4/2020  | 6/23/2020 North America / USA / California / Los Angeles County      |
| EPI_ISL_475594 | 4/5/2020  | 6/23/2020 North America / USA / California / Los Angeles County      |





|                |           |                                                                 |
|----------------|-----------|-----------------------------------------------------------------|
| EPI_ISL_475701 | 4/4/2020  | 6/23/2020 North America / USA / California / Los Angeles County |
| EPI_ISL_475702 | 4/4/2020  | 6/23/2020 North America / USA / California / Los Angeles County |
| EPI_ISL_475703 | 3/26/2020 | 6/23/2020 North America / USA / California / Los Angeles County |
| EPI_ISL_475705 | 3/26/2020 | 6/23/2020 North America / USA / California / Los Angeles County |
| EPI_ISL_475706 | 3/27/2020 | 6/23/2020 North America / USA / California / Los Angeles County |
| EPI_ISL_475708 | 3/27/2020 | 6/23/2020 North America / USA / California / Los Angeles County |
| EPI_ISL_475709 | 4/2/2020  | 6/23/2020 North America / USA / California / Los Angeles County |
| EPI_ISL_475710 | 4/11/2020 | 6/23/2020 North America / USA / California / Los Angeles County |
| EPI_ISL_475711 | 4/11/2020 | 6/23/2020 North America / USA / California / Los Angeles County |
| EPI_ISL_475712 | 4/2/2020  | 6/23/2020 North America / USA / California / Los Angeles County |
| EPI_ISL_475713 | 4/2/2020  | 6/23/2020 North America / USA / California / Los Angeles County |
| EPI_ISL_475714 | 4/2/2020  | 6/23/2020 North America / USA / California / Los Angeles County |
| EPI_ISL_475715 | 4/7/2020  | 6/23/2020 North America / USA / California / Los Angeles County |
| EPI_ISL_475716 | 3/22/2020 | 6/23/2020 North America / USA / California / Los Angeles County |
| EPI_ISL_475717 | 3/25/2020 | 6/23/2020 Europe / Spain / Basque Country / San Sebastian       |
| EPI_ISL_475718 | 3/27/2020 | 6/23/2020 Europe / Spain / Basque Country / San Sebastian       |
| EPI_ISL_475719 | 3/25/2020 | 6/23/2020 Europe / Spain / Basque Country / San Sebastian       |
| EPI_ISL_475720 | 3/25/2020 | 6/23/2020 Europe / Spain / Basque Country / San Sebastian       |
| EPI_ISL_475721 | 3/27/2020 | 6/23/2020 Europe / Spain / Basque Country / San Sebastian       |
| EPI_ISL_475723 | 6/2/2020  | 6/23/2020 Africa / Egypt                                        |
| EPI_ISL_475724 | 6/2/2020  | 6/23/2020 Africa / Egypt                                        |
| EPI_ISL_479729 | 6/2/2020  | 6/23/2020 Africa / Egypt                                        |
| EPI_ISL_479730 | 6/2/2020  | 6/23/2020 Africa / Egypt                                        |
| EPI_ISL_479731 | 6/2/2020  | 6/23/2020 Africa / Egypt                                        |
| EPI_ISL_479733 | 6/2/2020  | 6/23/2020 Africa / Egypt                                        |
| EPI_ISL_479734 | 6/2/2020  | 6/23/2020 Africa / Egypt                                        |
| EPI_ISL_479735 | 6/2/2020  | 6/23/2020 Africa / Egypt                                        |
| EPI_ISL_475726 | 5/11/2020 | 6/24/2020 North America / USA / Utah                            |
| EPI_ISL_475727 | 5/11/2020 | 6/24/2020 North America / USA / Utah                            |
| EPI_ISL_475728 | 5/12/2020 | 6/24/2020 North America / USA / Utah                            |
| EPI_ISL_475730 | 5/11/2020 | 6/24/2020 North America / USA / Utah                            |
| EPI_ISL_475743 | 5/12/2020 | 6/24/2020 North America / USA / Utah                            |
| EPI_ISL_475745 | 2020-05   | 6/24/2020 Africa / Egypt                                        |
| EPI_ISL_475746 | 2020-05   | 6/24/2020 Africa / Egypt                                        |
| EPI_ISL_475747 | 2020-05   | 6/24/2020 Africa / Egypt                                        |
| EPI_ISL_475748 | 2020-05   | 6/24/2020 Africa / Egypt                                        |
| EPI_ISL_475749 | 2020-05   | 6/24/2020 Africa / Egypt                                        |
| EPI_ISL_475751 | 2020-05   | 6/24/2020 Africa / Egypt                                        |
| EPI_ISL_475752 | 2020-05   | 6/24/2020 Africa / Egypt                                        |
| EPI_ISL_475753 | 2020-05   | 6/24/2020 Africa / Egypt                                        |
| EPI_ISL_475754 | 5/24/2020 | 6/24/2020 Asia / Bangladesh / Dhaka                             |
| EPI_ISL_475755 | 6/7/2020  | 6/24/2020 Asia / Bangladesh / Rangpur                           |
| EPI_ISL_475756 | 6/7/2020  | 6/24/2020 Asia / Bangladesh / Rangpur                           |
| EPI_ISL_475757 | 6/7/2020  | 6/24/2020 Asia / Bangladesh / Rangpur                           |
| EPI_ISL_475758 | 6/7/2020  | 6/24/2020 Asia / Bangladesh / Rangpur                           |
| EPI_ISL_475759 | 6/7/2020  | 6/24/2020 Asia / Bangladesh / Rangpur                           |
| EPI_ISL_475760 | 5/24/2020 | 6/24/2020 Asia / Bangladesh / Dhaka                             |



|                |           |                                            |
|----------------|-----------|--------------------------------------------|
| EPI_ISL_475761 | 6/7/2020  | 6/24/2020 Asia / Bangladesh / Rangpur      |
| EPI_ISL_475762 | 2020      | 6/24/2020 North America / USA / Oklahoma   |
| EPI_ISL_477161 | 6/2/2020  | 6/24/2020 Africa / Egypt                   |
| EPI_ISL_475766 | 4/3/2020  | 6/25/2020 Europe / Austria / Innsbruck     |
| EPI_ISL_475769 | 3/11/2020 | 6/25/2020 Europe / Austria / Ischgl        |
| EPI_ISL_475770 | 3/12/2020 | 6/25/2020 Europe / Austria / Vienna        |
| EPI_ISL_475771 | 3/18/2020 | 6/25/2020 Europe / Austria / Vienna        |
| EPI_ISL_475772 | 3/19/2020 | 6/25/2020 Europe / Austria / Styria        |
| EPI_ISL_475773 | 3/24/2020 | 6/25/2020 Europe / Austria / Vienna        |
| EPI_ISL_475774 | 3/27/2020 | 6/25/2020 Europe / Austria / Vienna        |
| EPI_ISL_475775 | 3/27/2020 | 6/25/2020 Europe / Austria / Vienna        |
| EPI_ISL_475776 | 3/27/2020 | 6/25/2020 Europe / Austria / Vienna        |
| EPI_ISL_475779 | 3/29/2020 | 6/25/2020 Europe / Austria / Vienna        |
| EPI_ISL_475780 | 3/29/2020 | 6/25/2020 Europe / Austria / Vienna        |
| EPI_ISL_475781 | 3/30/2020 | 6/25/2020 Europe / Austria / Styria        |
| EPI_ISL_475782 | 3/30/2020 | 6/25/2020 Europe / Austria / Tyrol         |
| EPI_ISL_475783 | 3/30/2020 | 6/25/2020 Europe / Austria / Vienna        |
| EPI_ISL_475784 | 3/30/2020 | 6/25/2020 Europe / Austria / Vienna        |
| EPI_ISL_475785 | 3/30/2020 | 6/25/2020 Europe / Austria / Vienna        |
| EPI_ISL_475786 | 3/30/2020 | 6/25/2020 Europe / Austria / Vienna        |
| EPI_ISL_475787 | 3/30/2020 | 6/25/2020 Europe / Austria / Vienna        |
| EPI_ISL_475790 | 3/30/2020 | 6/25/2020 Europe / Austria / Vienna        |
| EPI_ISL_475791 | 3/30/2020 | 6/25/2020 Europe / Austria / Vienna        |
| EPI_ISL_475792 | 3/31/2020 | 6/25/2020 Europe / Austria / Lower Austria |
| EPI_ISL_475793 | 4/1/2020  | 6/25/2020 Europe / Austria / Vienna        |
| EPI_ISL_475794 | 4/1/2020  | 6/25/2020 Europe / Austria / Styria        |
| EPI_ISL_475795 | 4/1/2020  | 6/25/2020 Europe / Austria / Styria        |
| EPI_ISL_475797 | 4/1/2020  | 6/25/2020 Europe / Austria / Vienna        |
| EPI_ISL_475798 | 4/1/2020  | 6/25/2020 Europe / Austria / Vienna        |
| EPI_ISL_475799 | 4/1/2020  | 6/25/2020 Europe / Austria / Vienna        |
| EPI_ISL_475800 | 4/3/2020  | 6/25/2020 Europe / Austria / Styria        |
| EPI_ISL_475801 | 4/3/2020  | 6/25/2020 Europe / Austria / Vienna        |
| EPI_ISL_475802 | 4/3/2020  | 6/25/2020 Europe / Austria / Vienna        |
| EPI_ISL_475803 | 4/3/2020  | 6/25/2020 Europe / Austria / Vienna        |
| EPI_ISL_475804 | 4/3/2020  | 6/25/2020 Europe / Austria / Vienna        |
| EPI_ISL_475805 | 4/3/2020  | 6/25/2020 Europe / Austria / Vienna        |
| EPI_ISL_475806 | 4/6/2020  | 6/25/2020 Europe / Austria / Lower Austria |
| EPI_ISL_475808 | 4/6/2020  | 6/25/2020 Europe / Austria / Vorarlberg    |
| EPI_ISL_475809 | 4/6/2020  | 6/25/2020 Europe / Austria / Styria        |
| EPI_ISL_475810 | 4/6/2020  | 6/25/2020 Europe / Austria / Styria        |
| EPI_ISL_475811 | 4/6/2020  | 6/25/2020 Europe / Austria / Styria        |
| EPI_ISL_475812 | 4/7/2020  | 6/25/2020 Europe / Austria / Vienna        |
| EPI_ISL_475813 | 3/16/2020 | 6/25/2020 Europe / Austria / Mayrhofen     |
| EPI_ISL_475814 | 3/17/2020 | 6/25/2020 Europe / Austria / Mayrhofen     |
| EPI_ISL_475815 | 3/19/2020 | 6/25/2020 Europe / Austria / Mayrhofen     |
| EPI_ISL_475816 | 3/25/2020 | 6/25/2020 Europe / Austria / Mayrhofen     |
| EPI_ISL_475817 | 3/26/2020 | 6/25/2020 Europe / Austria / Mayrhofen     |

|                |           |                                        |
|----------------|-----------|----------------------------------------|
| EPI_ISL_475818 | 3/26/2020 | 6/25/2020 Europe / Austria / Mayrhofen |
| EPI_ISL_475819 | 3/28/2020 | 6/25/2020 Europe / Austria / Mayrhofen |
| EPI_ISL_475820 | 3/28/2020 | 6/25/2020 Europe / Austria / Mayrhofen |
| EPI_ISL_475821 | 3/30/2020 | 6/25/2020 Europe / Austria / Mayrhofen |
| EPI_ISL_475822 | 3/31/2020 | 6/25/2020 Europe / Austria / Mayrhofen |
| EPI_ISL_475823 | 3/31/2020 | 6/25/2020 Europe / Austria / Mayrhofen |
| EPI_ISL_475824 | 4/1/2020  | 6/25/2020 Europe / Austria / Mayrhofen |
| EPI_ISL_475825 | 4/1/2020  | 6/25/2020 Europe / Austria / Mayrhofen |
| EPI_ISL_475826 | 4/1/2020  | 6/25/2020 Europe / Austria / Mayrhofen |
| EPI_ISL_475827 | 4/1/2020  | 6/25/2020 Europe / Austria / Mayrhofen |
| EPI_ISL_475828 | 4/3/2020  | 6/25/2020 Europe / Austria / Mayrhofen |
| EPI_ISL_475829 | 3/19/2020 | 6/25/2020 Europe / Austria / Mayrhofen |
| EPI_ISL_475830 | 3/8/2020  | 6/25/2020 Europe / Austria             |
| EPI_ISL_475831 | 3/10/2020 | 6/25/2020 Europe / Austria             |
| EPI_ISL_475832 | 3/19/2020 | 6/25/2020 Europe / Austria             |
| EPI_ISL_475833 | 3/21/2020 | 6/25/2020 Europe / Austria             |
| EPI_ISL_475834 | 3/25/2020 | 6/25/2020 Europe / Austria             |
| EPI_ISL_475835 | 4/21/2020 | 6/25/2020 Europe / Austria             |
| EPI_ISL_475836 | 2/28/2020 | 6/25/2020 Europe / Austria             |
| EPI_ISL_475837 | 3/9/2020  | 6/25/2020 Europe / Austria             |
| EPI_ISL_475838 | 3/11/2020 | 6/25/2020 Europe / Austria             |
| EPI_ISL_475839 | 3/19/2020 | 6/25/2020 Europe / Austria             |
| EPI_ISL_475840 | 3/25/2020 | 6/25/2020 Europe / Austria             |
| EPI_ISL_475841 | 3/26/2020 | 6/25/2020 Europe / Austria             |
| EPI_ISL_475842 | 4/21/2020 | 6/25/2020 Europe / Austria             |
| EPI_ISL_475843 | 3/5/2020  | 6/25/2020 Europe / Austria             |
| EPI_ISL_475844 | 3/9/2020  | 6/25/2020 Europe / Austria             |
| EPI_ISL_475845 | 3/22/2020 | 6/25/2020 Europe / Austria             |
| EPI_ISL_475848 | 3/25/2020 | 6/25/2020 Europe / Austria             |
| EPI_ISL_475849 | 3/25/2020 | 6/25/2020 Europe / Austria             |
| EPI_ISL_475850 | 3/27/2020 | 6/25/2020 Europe / Austria             |
| EPI_ISL_475851 | 3/6/2020  | 6/25/2020 Europe / Austria             |
| EPI_ISL_475852 | 4/21/2020 | 6/25/2020 Europe / Austria             |
| EPI_ISL_475853 | 3/5/2020  | 6/25/2020 Europe / Austria             |
| EPI_ISL_475854 | 3/10/2020 | 6/25/2020 Europe / Austria             |
| EPI_ISL_475855 | 3/13/2020 | 6/25/2020 Europe / Austria             |
| EPI_ISL_475859 | 3/25/2020 | 6/25/2020 Europe / Austria             |
| EPI_ISL_475860 | 3/26/2020 | 6/25/2020 Europe / Austria             |
| EPI_ISL_475861 | 4/21/2020 | 6/25/2020 Europe / Austria             |
| EPI_ISL_475862 | 4/21/2020 | 6/25/2020 Europe / Austria             |
| EPI_ISL_475863 | 3/16/2020 | 6/25/2020 Europe / Austria             |
| EPI_ISL_475864 | 3/22/2020 | 6/25/2020 Europe / Austria             |
| EPI_ISL_475865 | 4/21/2020 | 6/25/2020 Europe / Austria             |
| EPI_ISL_475866 | 3/5/2020  | 6/25/2020 Europe / Austria             |
| EPI_ISL_475869 | 3/25/2020 | 6/25/2020 Europe / Austria             |
| EPI_ISL_475870 | 4/5/2020  | 6/25/2020 Europe / Austria             |
| EPI_ISL_475871 | 3/6/2020  | 6/25/2020 Europe / Austria             |

|                |           |                                                   |
|----------------|-----------|---------------------------------------------------|
| EPI_ISL_475872 | 3/7/2020  | 6/25/2020 Europe / Austria                        |
| EPI_ISL_475873 | 3/10/2020 | 6/25/2020 Europe / Austria                        |
| EPI_ISL_475874 | 3/16/2020 | 6/25/2020 Europe / Austria                        |
| EPI_ISL_475875 | 3/25/2020 | 6/25/2020 Europe / Austria                        |
| EPI_ISL_475876 | 3/25/2020 | 6/25/2020 Europe / Austria                        |
| EPI_ISL_475878 | 3/7/2020  | 6/25/2020 Europe / Austria                        |
| EPI_ISL_475879 | 3/10/2020 | 6/25/2020 Europe / Austria                        |
| EPI_ISL_475880 | 3/16/2020 | 6/25/2020 Europe / Austria                        |
| EPI_ISL_475882 | 3/25/2020 | 6/25/2020 Europe / Austria                        |
| EPI_ISL_475883 | 3/25/2020 | 6/25/2020 Europe / Austria                        |
| EPI_ISL_475884 | 3/27/2020 | 6/25/2020 Europe / Austria                        |
| EPI_ISL_475885 | 4/21/2020 | 6/25/2020 Europe / Austria                        |
| EPI_ISL_475886 | 3/6/2020  | 6/25/2020 Europe / Austria                        |
| EPI_ISL_475890 | 3/28/2020 | 6/25/2020 Europe / Austria                        |
| EPI_ISL_475891 | 3/30/2020 | 6/25/2020 Europe / Austria                        |
| EPI_ISL_475893 | 3/31/2020 | 6/25/2020 Europe / Austria                        |
| EPI_ISL_475894 | 4/2/2020  | 6/25/2020 Europe / Austria                        |
| EPI_ISL_475895 | 4/3/2020  | 6/25/2020 Europe / Austria                        |
| EPI_ISL_475896 | 4/3/2020  | 6/25/2020 Europe / Austria                        |
| EPI_ISL_475897 | 4/5/2020  | 6/25/2020 Europe / Austria                        |
| EPI_ISL_475899 | 4/7/2020  | 6/25/2020 Europe / Austria                        |
| EPI_ISL_475900 | 4/7/2020  | 6/25/2020 Europe / Austria                        |
| EPI_ISL_475901 | 4/7/2020  | 6/25/2020 Europe / Austria                        |
| EPI_ISL_475902 | 4/8/2020  | 6/25/2020 Europe / Austria                        |
| EPI_ISL_475903 | 4/28/2020 | 6/25/2020 Europe / Austria                        |
| EPI_ISL_475904 | 5/4/2020  | 6/25/2020 Europe / Austria                        |
| EPI_ISL_475905 | 3/17/2020 | 6/25/2020 Europe / Austria                        |
| EPI_ISL_475906 | 3/16/2020 | 6/25/2020 Europe / Austria                        |
| EPI_ISL_475907 | 3/16/2020 | 6/25/2020 Europe / Austria                        |
| EPI_ISL_475908 | 3/16/2020 | 6/25/2020 Europe / Austria                        |
| EPI_ISL_475909 | 3/16/2020 | 6/25/2020 Europe / Austria                        |
| EPI_ISL_475910 | 3/11/2020 | 6/25/2020 Europe / Austria / Ischgl               |
| EPI_ISL_475911 | 3/31/2020 | 6/25/2020 Europe / Austria / Altenhof am Hausruck |
| EPI_ISL_475912 | 3/12/2020 | 6/25/2020 Europe / Austria / Ischgl               |
| EPI_ISL_475913 | 3/10/2020 | 6/25/2020 Europe / Austria / Losenstein           |
| EPI_ISL_475914 | 3/31/2020 | 6/25/2020 Europe / Austria                        |
| EPI_ISL_475915 | 4/15/2020 | 6/25/2020 Europe / Austria                        |
| EPI_ISL_475919 | 3/11/2020 | 6/25/2020 Europe / Austria / Innsbruck            |
| EPI_ISL_475923 | 4/1/2020  | 6/25/2020 Europe / Austria / Innsbruck            |
| EPI_ISL_475924 | 3/16/2020 | 6/25/2020 Europe / Austria / Innsbruck            |
| EPI_ISL_475926 | 3/29/2020 | 6/25/2020 Europe / Austria / Innsbruck            |
| EPI_ISL_475927 | 3/29/2020 | 6/25/2020 Europe / Austria / Innsbruck            |
| EPI_ISL_475928 | 3/14/2020 | 6/25/2020 Europe / Austria / Innsbruck            |
| EPI_ISL_475929 | 4/3/2020  | 6/25/2020 Europe / Austria                        |
| EPI_ISL_475930 | 4/9/2020  | 6/25/2020 Europe / Austria                        |
| EPI_ISL_475931 | 4/9/2020  | 6/25/2020 Europe / Austria                        |
| EPI_ISL_475932 | 4/2/2020  | 6/25/2020 Europe / Austria                        |

|                |           |                                                      |
|----------------|-----------|------------------------------------------------------|
| EPI_ISL_475934 | 4/6/2020  | 6/25/2020 Europe / Austria                           |
| EPI_ISL_475935 | 4/3/2020  | 6/25/2020 Europe / Austria                           |
| EPI_ISL_475936 | 5/7/2020  | 6/25/2020 Europe / Austria                           |
| EPI_ISL_475937 | 5/19/2020 | 6/25/2020 Asia / Singapore                           |
| EPI_ISL_475938 | 4/28/2020 | 6/25/2020 Asia / Singapore                           |
| EPI_ISL_475939 | 4/21/2020 | 6/25/2020 Asia / Singapore                           |
| EPI_ISL_475940 | 4/22/2020 | 6/25/2020 Asia / Singapore                           |
| EPI_ISL_475941 | 4/21/2020 | 6/25/2020 Asia / Singapore                           |
| EPI_ISL_475942 | 4/28/2020 | 6/25/2020 Asia / Singapore                           |
| EPI_ISL_475943 | 5/18/2020 | 6/25/2020 Asia / Singapore                           |
| EPI_ISL_475944 | 4/21/2020 | 6/25/2020 Asia / Singapore                           |
| EPI_ISL_475945 | 4/24/2020 | 6/25/2020 Asia / Singapore                           |
| EPI_ISL_475946 | 4/26/2020 | 6/25/2020 Asia / Singapore                           |
| EPI_ISL_475947 | 4/21/2020 | 6/25/2020 Asia / Singapore                           |
| EPI_ISL_475948 | 3/18/2020 | 6/25/2020 Asia / Singapore                           |
| EPI_ISL_475949 | 3/18/2020 | 6/25/2020 Asia / Singapore                           |
| EPI_ISL_475950 | 3/18/2020 | 6/25/2020 Asia / Singapore                           |
| EPI_ISL_475951 | 4/9/2020  | 6/25/2020 Asia / Singapore                           |
| EPI_ISL_475953 | 4/9/2020  | 6/25/2020 Asia / Singapore                           |
| EPI_ISL_475954 | 3/14/2020 | 6/25/2020 Asia / Singapore                           |
| EPI_ISL_475955 | 3/21/2020 | 6/25/2020 Asia / Singapore                           |
| EPI_ISL_475957 | 3/20/2020 | 6/25/2020 Asia / Singapore                           |
| EPI_ISL_475958 | 3/20/2020 | 6/25/2020 Asia / Singapore                           |
| EPI_ISL_475959 | 3/20/2020 | 6/25/2020 Asia / Singapore                           |
| EPI_ISL_475960 | 3/20/2020 | 6/25/2020 Asia / Singapore                           |
| EPI_ISL_475962 | 3/17/2020 | 6/25/2020 Asia / Singapore                           |
| EPI_ISL_475963 | 3/18/2020 | 6/25/2020 Asia / Singapore                           |
| EPI_ISL_475966 | 3/13/2020 | 6/25/2020 Asia / Singapore                           |
| EPI_ISL_475967 | 4/9/2020  | 6/25/2020 Asia / Singapore                           |
| EPI_ISL_475968 | 3/20/2020 | 6/25/2020 Asia / Singapore                           |
| EPI_ISL_475969 | 3/20/2020 | 6/25/2020 Asia / Singapore                           |
| EPI_ISL_475970 | 3/24/2020 | 6/25/2020 Asia / Singapore                           |
| EPI_ISL_475971 | 4/8/2020  | 6/25/2020 Asia / Singapore                           |
| EPI_ISL_475972 | 4/8/2020  | 6/25/2020 Asia / Singapore                           |
| EPI_ISL_475973 | 4/15/2020 | 6/25/2020 Asia / Singapore                           |
| EPI_ISL_475979 | 4/15/2020 | 6/25/2020 Asia / Singapore                           |
| EPI_ISL_475981 | 3/19/2020 | 6/25/2020 Asia / Singapore                           |
| EPI_ISL_475983 | 3/19/2020 | 6/25/2020 Asia / Singapore                           |
| EPI_ISL_475985 | 3/19/2020 | 6/25/2020 Asia / Singapore                           |
| EPI_ISL_475986 | 3/19/2020 | 6/25/2020 Asia / Singapore                           |
| EPI_ISL_475990 | 4/20/2020 | 6/25/2020 Asia / Singapore                           |
| EPI_ISL_475991 | 4/20/2020 | 6/25/2020 Asia / Singapore                           |
| EPI_ISL_475993 | 4/27/2020 | 6/25/2020 Asia / Singapore                           |
| EPI_ISL_475995 | 5/4/2020  | 6/25/2020 Asia / Singapore                           |
| EPI_ISL_475997 | 1/31/2020 | 6/25/2020 Asia / Singapore                           |
| EPI_ISL_476018 | 6/19/2020 | 6/25/2020 North America / USA / Missouri / St. Louis |
| EPI_ISL_476019 | 6/19/2020 | 6/25/2020 North America / USA / Missouri / St. Louis |

|                |           |                                                                   |
|----------------|-----------|-------------------------------------------------------------------|
| EPI_ISL_476020 | 6/19/2020 | 6/25/2020 North America / USA / Missouri / St. Louis              |
| EPI_ISL_476021 | 6/19/2020 | 6/25/2020 North America / USA / Missouri / St. Louis              |
| EPI_ISL_476022 | 3/25/2020 | 6/25/2020 Asia / India / Madhya Pradesh                           |
| EPI_ISL_476023 | 3/31/2020 | 6/25/2020 Asia / India / Madhya Pradesh                           |
| EPI_ISL_476027 | 5/21/2020 | 6/25/2020 North America / USA / Michigan                          |
| EPI_ISL_476028 | 5/20/2020 | 6/25/2020 North America / USA / Michigan                          |
| EPI_ISL_476029 | 5/22/2020 | 6/25/2020 North America / USA / Michigan                          |
| EPI_ISL_476030 | 5/22/2020 | 6/25/2020 North America / USA / Michigan                          |
| EPI_ISL_476032 | 4/23/2020 | 6/25/2020 North America / USA / Michigan                          |
| EPI_ISL_476033 | 4/23/2020 | 6/25/2020 North America / USA / Michigan                          |
| EPI_ISL_476034 | 4/24/2020 | 6/25/2020 North America / USA / Michigan                          |
| EPI_ISL_476038 | 4/23/2020 | 6/25/2020 North America / USA / Michigan                          |
| EPI_ISL_476039 | 4/23/2020 | 6/25/2020 North America / USA / Michigan                          |
| EPI_ISL_476040 | 4/24/2020 | 6/25/2020 North America / USA / Michigan                          |
| EPI_ISL_476041 | 4/29/2020 | 6/25/2020 North America / USA / Michigan                          |
| EPI_ISL_476042 | 4/29/2020 | 6/25/2020 North America / USA / Michigan                          |
| EPI_ISL_476043 | 4/29/2020 | 6/25/2020 North America / USA / Michigan                          |
| EPI_ISL_476044 | 4/29/2020 | 6/25/2020 North America / USA / Michigan                          |
| EPI_ISL_476045 | 4/29/2020 | 6/25/2020 North America / USA / Michigan                          |
| EPI_ISL_476046 | 4/29/2020 | 6/25/2020 North America / USA / Michigan                          |
| EPI_ISL_476048 | 4/29/2020 | 6/25/2020 North America / USA / Michigan                          |
| EPI_ISL_476049 | 4/29/2020 | 6/25/2020 North America / USA / Michigan                          |
| EPI_ISL_476050 | 4/29/2020 | 6/25/2020 North America / USA / Michigan                          |
| EPI_ISL_476051 | 5/26/2020 | 6/25/2020 North America / USA / Michigan                          |
| EPI_ISL_476053 | 5/26/2020 | 6/25/2020 North America / USA / Michigan                          |
| EPI_ISL_476054 | 5/26/2020 | 6/25/2020 North America / USA / Michigan                          |
| EPI_ISL_476055 | 5/26/2020 | 6/25/2020 North America / USA / Michigan                          |
| EPI_ISL_476056 | 5/26/2020 | 6/25/2020 North America / USA / Michigan                          |
| EPI_ISL_476058 | 5/26/2020 | 6/25/2020 North America / USA / Michigan                          |
| EPI_ISL_476059 | 5/26/2020 | 6/25/2020 North America / USA / Michigan                          |
| EPI_ISL_476060 | 5/26/2020 | 6/25/2020 North America / USA / Michigan                          |
| EPI_ISL_476062 | 5/25/2020 | 6/25/2020 North America / USA / Michigan                          |
| EPI_ISL_476063 | 5/28/2020 | 6/25/2020 North America / USA / Michigan                          |
| EPI_ISL_476064 | 5/28/2020 | 6/25/2020 North America / USA / Michigan                          |
| EPI_ISL_476067 | 3/11/2020 | 6/25/2020 Europe / Czech Republic / Hranice na Morave / Prostejov |
| EPI_ISL_476068 | 4/22/2020 | 6/25/2020 Europe / Hungary / Heves county                         |
| EPI_ISL_476069 | 3/30/2020 | 6/25/2020 Europe / Hungary / Debrecen                             |
| EPI_ISL_476070 | 4/2/2020  | 6/25/2020 Europe / Hungary / Jász-Nagykún-Szolnok county          |
| EPI_ISL_476071 | 4/8/2020  | 6/25/2020 Europe / Hungary / Debrecen                             |
| EPI_ISL_476072 | 4/9/2020  | 6/25/2020 Europe / Hungary / Borsod-Abaúj-Zemplén County          |
| EPI_ISL_476073 | 4/9/2020  | 6/25/2020 Europe / Hungary / Heves county                         |
| EPI_ISL_476074 | 4/8/2020  | 6/25/2020 Europe / Hungary / Heves county                         |
| EPI_ISL_476075 | 4/8/2020  | 6/25/2020 Europe / Hungary / Heves county                         |
| EPI_ISL_476076 | 4/12/2020 | 6/25/2020 Europe / Hungary / Borsod-Abaúj-Zemplén County          |
| EPI_ISL_476077 | 4/14/2020 | 6/25/2020 Europe / Hungary / Heves county                         |
| EPI_ISL_476078 | 3/30/2020 | 6/25/2020 Europe / Hungary / Csongrád County                      |
| EPI_ISL_476079 | 5/15/2020 | 6/25/2020 Europe / Switzerland / Basel-Landschaft                 |

|                |           |           |                                         |
|----------------|-----------|-----------|-----------------------------------------|
| EPI_ISL_476080 | 5/15/2020 | 6/25/2020 | Europe / Switzerland / Zurich           |
| EPI_ISL_476081 | 5/15/2020 | 6/25/2020 | Europe / Switzerland / Zurich           |
| EPI_ISL_476082 | 5/15/2020 | 6/25/2020 | Europe / Switzerland / Bern             |
| EPI_ISL_476083 | 5/16/2020 | 6/25/2020 | Europe / Switzerland / Bern             |
| EPI_ISL_476084 | 5/16/2020 | 6/25/2020 | Europe / Switzerland / Solothurn        |
| EPI_ISL_476085 | 5/16/2020 | 6/25/2020 | Europe / Switzerland / Solothurn        |
| EPI_ISL_476086 | 5/18/2020 | 6/25/2020 | Europe / Switzerland / Lucerne          |
| EPI_ISL_476087 | 5/18/2020 | 6/25/2020 | Europe / Switzerland / Bern             |
| EPI_ISL_476088 | 5/18/2020 | 6/25/2020 | Europe / Switzerland / St Gall          |
| EPI_ISL_476089 | 5/18/2020 | 6/25/2020 | Europe / Switzerland / Ticino           |
| EPI_ISL_476090 | 5/18/2020 | 6/25/2020 | Europe / Switzerland / Basel-Landschaft |
| EPI_ISL_476091 | 5/18/2020 | 6/25/2020 | Europe / Switzerland / Vaud             |
| EPI_ISL_476093 | 5/21/2020 | 6/25/2020 | Europe / Switzerland / Zurich           |
| EPI_ISL_476094 | 5/27/2020 | 6/25/2020 | Europe / Switzerland / Basel-Landschaft |
| EPI_ISL_476095 | 5/27/2020 | 6/25/2020 | Europe / Switzerland / Bern             |
| EPI_ISL_476096 | 5/27/2020 | 6/25/2020 | Europe / Switzerland / Zurich           |
| EPI_ISL_476097 | 5/27/2020 | 6/25/2020 | Europe / Switzerland / Bern             |
| EPI_ISL_476098 | 5/28/2020 | 6/25/2020 | Europe / Switzerland / Ticino           |
| EPI_ISL_476099 | 5/28/2020 | 6/25/2020 | Europe / Switzerland / Bern             |
| EPI_ISL_476100 | 5/28/2020 | 6/25/2020 | Europe / Switzerland / Bern             |
| EPI_ISL_476101 | 5/4/2020  | 6/25/2020 | Europe / Switzerland / Basel-Landschaft |
| EPI_ISL_476102 | 5/4/2020  | 6/25/2020 | Europe / Switzerland / Basel-Landschaft |
| EPI_ISL_476103 | 5/4/2020  | 6/25/2020 | Europe / Switzerland / Vaud             |
| EPI_ISL_476104 | 5/3/2020  | 6/25/2020 | Europe / Switzerland / Uri              |
| EPI_ISL_476105 | 5/1/2020  | 6/25/2020 | Europe / Switzerland / Bern             |
| EPI_ISL_476106 | 5/1/2020  | 6/25/2020 | Europe / Switzerland / Basel-Landschaft |
| EPI_ISL_476107 | 4/30/2020 | 6/25/2020 | Europe / Switzerland / Uri              |
| EPI_ISL_476108 | 4/30/2020 | 6/25/2020 | Europe / Switzerland / Basel-Stadt      |
| EPI_ISL_476110 | 4/30/2020 | 6/25/2020 | Europe / Switzerland / Basel-Landschaft |
| EPI_ISL_476112 | 4/30/2020 | 6/25/2020 | Europe / Switzerland / Lucerne          |
| EPI_ISL_476113 | 4/30/2020 | 6/25/2020 | Europe / Switzerland / Lucerne          |
| EPI_ISL_476114 | 4/30/2020 | 6/25/2020 | Europe / Switzerland / Thurgau          |
| EPI_ISL_476115 | 4/29/2020 | 6/25/2020 | Europe / Switzerland / Vaud             |
| EPI_ISL_476116 | 4/29/2020 | 6/25/2020 | Europe / Switzerland / Bern             |
| EPI_ISL_476117 | 4/29/2020 | 6/25/2020 | Europe / Switzerland / Zurich           |
| EPI_ISL_476118 | 4/28/2020 | 6/25/2020 | Europe / Switzerland / Zurich           |
| EPI_ISL_476119 | 4/27/2020 | 6/25/2020 | Europe / Switzerland / Zurich           |
| EPI_ISL_476120 | 4/24/2020 | 6/25/2020 | Europe / Switzerland / Uri              |
| EPI_ISL_476121 | 4/24/2020 | 6/25/2020 | Europe / Switzerland / Uri              |
| EPI_ISL_476122 | 4/24/2020 | 6/25/2020 | Europe / Switzerland / Solothurn        |
| EPI_ISL_476124 | 4/22/2020 | 6/25/2020 | Europe / Switzerland / Solothurn        |
| EPI_ISL_476126 | 4/21/2020 | 6/25/2020 | Europe / Switzerland / Zurich           |
| EPI_ISL_476127 | 4/20/2020 | 6/25/2020 | Europe / Switzerland / Bern             |
| EPI_ISL_476128 | 4/20/2020 | 6/25/2020 | Europe / Switzerland / Bern             |
| EPI_ISL_476129 | 4/20/2020 | 6/25/2020 | Europe / Switzerland / Aargau           |
| EPI_ISL_476130 | 4/20/2020 | 6/25/2020 | Europe / Switzerland / Geneva           |
| EPI_ISL_476131 | 4/19/2020 | 6/25/2020 | Europe / Switzerland / Basel-Landschaft |

|                |           |                                                                       |
|----------------|-----------|-----------------------------------------------------------------------|
| EPI_ISL_476132 | 4/18/2020 | 6/25/2020 Europe / Switzerland / Grisons                              |
| EPI_ISL_476133 | 4/18/2020 | 6/25/2020 Europe / Switzerland / Zurich                               |
| EPI_ISL_476134 | 4/17/2020 | 6/25/2020 Europe / Switzerland / Geneva                               |
| EPI_ISL_476135 | 5/19/2020 | 6/25/2020 Europe / Sweden / Sodermanland                              |
| EPI_ISL_476136 | 5/22/2020 | 6/25/2020 Europe / Sweden / Stockholm                                 |
| EPI_ISL_476137 | 5/25/2020 | 6/25/2020 Europe / Sweden / Vastra Gotaland                           |
| EPI_ISL_476138 | 5/27/2020 | 6/25/2020 Europe / Sweden / Uppsala                                   |
| EPI_ISL_476139 | 1/31/2020 | 6/25/2020 Europe / Sweden / Jonkoping                                 |
| EPI_ISL_476140 | 3/24/2020 | 6/25/2020 Europe / Sweden / Vastmanland                               |
| EPI_ISL_476141 | 3/24/2020 | 6/25/2020 Europe / Sweden / Vastmanland                               |
| EPI_ISL_476142 | 3/24/2020 | 6/25/2020 Europe / Sweden / Vastmanland                               |
| EPI_ISL_476143 | 3/27/2020 | 6/25/2020 Europe / Sweden / Vastra Gotaland                           |
| EPI_ISL_476144 | 3/27/2020 | 6/25/2020 Europe / Sweden / Vastra Gotaland                           |
| EPI_ISL_476145 | 4/9/2020  | 6/25/2020 Europe / Sweden / Jamtland Harjedalen                       |
| EPI_ISL_476146 | 4/9/2020  | 6/25/2020 Europe / Sweden / Jamtland Harjedalen                       |
| EPI_ISL_476147 | 4/9/2020  | 6/25/2020 Europe / Sweden / Jamtland Harjedalen                       |
| EPI_ISL_476148 | 6/9/2020  | 6/25/2020 Africa / Senegal / Dakar                                    |
| EPI_ISL_476149 | 6/6/2020  | 6/25/2020 Africa / Senegal / Dakar                                    |
| EPI_ISL_476221 | 3/9/2020  | 6/25/2020 South America / Brazil / Sao Paulo                          |
| EPI_ISL_476282 | 3/28/2020 | 6/25/2020 South America / Brazil / Parana                             |
| EPI_ISL_476288 | 3/30/2020 | 6/25/2020 South America / Brazil / Ceara                              |
| EPI_ISL_476289 | 3/30/2020 | 6/25/2020 South America / Brazil / Ceara                              |
| EPI_ISL_476297 | 3/26/2020 | 6/25/2020 South America / Brazil / Santa Catarina                     |
| EPI_ISL_476341 | 4/18/2020 | 6/25/2020 South America / Brazil / Sao Paulo                          |
| EPI_ISL_476373 | 4/1/2020  | 6/25/2020 South America / Brazil / Sao Paulo                          |
| EPI_ISL_476395 | 4/18/2020 | 6/25/2020 South America / Brazil / Sao Paulo                          |
| EPI_ISL_476398 | 4/18/2020 | 6/25/2020 South America / Brazil / Sao Paulo                          |
| EPI_ISL_476435 | 3/19/2020 | 6/25/2020 South America / Brazil / Sao Paulo                          |
| EPI_ISL_476439 | 3/24/2020 | 6/25/2020 South America / Brazil / Sao Paulo                          |
| EPI_ISL_476445 | 3/23/2020 | 6/25/2020 South America / Brazil / Sao Paulo                          |
| EPI_ISL_476446 | 3/24/2020 | 6/25/2020 South America / Brazil / Sao Paulo                          |
| EPI_ISL_476469 | 3/24/2020 | 6/25/2020 South America / Brazil / Sao Paulo                          |
| EPI_ISL_476490 | 3/24/2020 | 6/25/2020 South America / Brazil / Sao Paulo                          |
| EPI_ISL_476492 | 6/10/2020 | 6/25/2020 Africa / Senegal / Dakar                                    |
| EPI_ISL_476493 | 6/10/2020 | 6/25/2020 Africa / Senegal / Dakar                                    |
| EPI_ISL_476494 | 6/11/2020 | 6/25/2020 Africa / Senegal / Dakar                                    |
| EPI_ISL_476495 | 6/11/2020 | 6/25/2020 Africa / Senegal / Dakar                                    |
| EPI_ISL_476496 | 4/22/2020 | 6/25/2020 South America / Argentina / Ciudad Autonoma de Buenos Aires |
| EPI_ISL_476498 | 4/5/2020  | 6/25/2020 North America / Canada / Quebec                             |
| EPI_ISL_476499 | 4/6/2020  | 6/25/2020 North America / Canada / Quebec                             |
| EPI_ISL_476500 | 4/6/2020  | 6/25/2020 North America / Canada / Quebec                             |
| EPI_ISL_476501 | 4/4/2020  | 6/25/2020 North America / Canada / Quebec                             |
| EPI_ISL_476502 | 4/8/2020  | 6/25/2020 North America / Canada / Quebec                             |
| EPI_ISL_476503 | 4/14/2020 | 6/25/2020 North America / Canada / Quebec                             |
| EPI_ISL_476505 | 4/8/2020  | 6/25/2020 North America / Canada / Quebec                             |
| EPI_ISL_476506 | 4/8/2020  | 6/25/2020 North America / Canada / Quebec                             |
| EPI_ISL_476507 | 4/11/2020 | 6/25/2020 North America / Canada / Quebec                             |

|                |           |                                                                          |
|----------------|-----------|--------------------------------------------------------------------------|
| EPI_ISL_476508 | 4/9/2020  | 6/25/2020 North America / Canada / Quebec                                |
| EPI_ISL_476509 | 4/18/2020 | 6/25/2020 North America / Canada / Quebec                                |
| EPI_ISL_476510 | 4/7/2020  | 6/25/2020 North America / Canada / Quebec                                |
| EPI_ISL_476511 | 4/3/2020  | 6/25/2020 North America / Canada / Quebec                                |
| EPI_ISL_476512 | 4/3/2020  | 6/25/2020 North America / Canada / Quebec                                |
| EPI_ISL_476513 | 4/5/2020  | 6/25/2020 North America / Canada / Quebec                                |
| EPI_ISL_476514 | 6/12/2020 | 6/25/2020 Africa / Senegal / Dakar                                       |
| EPI_ISL_476516 | 6/12/2020 | 6/25/2020 Africa / Senegal / Dakar                                       |
| EPI_ISL_476517 | 3/27/2020 | 6/25/2020 North America / USA / Connecticut / Fairfield County / Riversi |
| EPI_ISL_476518 | 3/27/2020 | 6/25/2020 North America / USA / Connecticut / Fairfield County / Green   |
| EPI_ISL_476519 | 3/28/2020 | 6/25/2020 North America / USA / Connecticut / Fairfield County / Shelton |
| EPI_ISL_476521 | 3/28/2020 | 6/25/2020 North America / USA / Connecticut / Fairfield County / Shelton |
| EPI_ISL_476522 | 3/27/2020 | 6/25/2020 North America / USA / Connecticut / New Haven County / Be      |
| EPI_ISL_476523 | 3/28/2020 | 6/25/2020 North America / USA / Connecticut / New Haven County / Che     |
| EPI_ISL_476525 | 3/28/2020 | 6/25/2020 North America / USA / Connecticut / New Haven County           |
| EPI_ISL_476526 | 3/28/2020 | 6/25/2020 North America / USA / Connecticut / Fairfield County           |
| EPI_ISL_476527 | 3/28/2020 | 6/25/2020 North America / USA / Connecticut / New Haven County / Eas     |
| EPI_ISL_476528 | 3/28/2020 | 6/25/2020 North America / USA / Connecticut / Fairfield County / Bridge  |
| EPI_ISL_476531 | 3/28/2020 | 6/25/2020 North America / USA / Connecticut / New Haven County           |
| EPI_ISL_476542 | 3/31/2020 | 6/25/2020 North America / USA / Connecticut / New Haven County / Eas     |
| EPI_ISL_476545 | 3/31/2020 | 6/25/2020 North America / USA / Connecticut / Fairfield County / Bridge  |
| EPI_ISL_476547 | 4/1/2020  | 6/25/2020 North America / USA / Connecticut / Hartford County / Mancl    |
| EPI_ISL_476548 | 4/1/2020  | 6/25/2020 North America / USA / Connecticut                              |
| EPI_ISL_476549 | 4/1/2020  | 6/25/2020 North America / USA / Connecticut / New Haven County / Har     |
| EPI_ISL_476550 | 4/1/2020  | 6/25/2020 North America / USA / Connecticut / Hartford County / Glasto   |
| EPI_ISL_476552 | 4/1/2020  | 6/25/2020 North America / USA / Connecticut / New Haven County / Eas     |
| EPI_ISL_476553 | 4/1/2020  | 6/25/2020 North America / USA / Connecticut / New Haven County           |
| EPI_ISL_476554 | 4/1/2020  | 6/25/2020 North America / USA / Connecticut / Fairfield County / Prospe  |
| EPI_ISL_476556 | 4/1/2020  | 6/25/2020 North America / USA / Connecticut / New Haven County / Mil     |
| EPI_ISL_476558 | 6/12/2020 | 6/25/2020 Africa / Senegal / Dakar                                       |
| EPI_ISL_476559 | 2/27/2020 | 6/25/2020 Africa / Morocco                                               |
| EPI_ISL_476561 | 5/7/2020  | 6/25/2020 South America / Argentina / Ciudad Autonoma de Buenos Air      |
| EPI_ISL_476562 | 6/13/2020 | 6/25/2020 Africa / Senegal / Dakar                                       |
| EPI_ISL_476563 | 5/16/2020 | 6/25/2020 South America / Argentina / Buenos Aires / Lomas de Zamora     |
| EPI_ISL_476564 | 6/13/2020 | 6/25/2020 Africa / Senegal / Dakar                                       |
| EPI_ISL_476565 | 5/9/2020  | 6/25/2020 South America / Argentina / Ciudad Autonoma de Buenos Air      |
| EPI_ISL_476567 | 5/18/2020 | 6/25/2020 South America / Argentina / Ciudad Autonoma de Buenos Air      |
| EPI_ISL_476568 | 5/14/2020 | 6/25/2020 South America / Argentina / Ciudad Autonoma de Buenos Air      |
| EPI_ISL_476569 | 6/13/2020 | 6/25/2020 Africa / Senegal / Dakar                                       |
| EPI_ISL_476571 | 5/19/2020 | 6/25/2020 South America / Argentina / Ciudad Autonoma de Buenos Air      |
| EPI_ISL_476572 | 6/14/2020 | 6/25/2020 Africa / Senegal / Dakar                                       |
| EPI_ISL_476573 | 5/22/2020 | 6/25/2020 South America / Argentina / Tucuman                            |
| EPI_ISL_476574 | 6/13/2020 | 6/25/2020 Africa / Senegal / Dakar                                       |
| EPI_ISL_476702 | 4/2/2020  | 6/25/2020 South America / Venezuela                                      |
| EPI_ISL_476704 | 4/9/2020  | 6/25/2020 South America / Venezuela                                      |
| EPI_ISL_476705 | 5/20/2020 | 6/25/2020 Europe / Germany / North Rhine-Westphalia                      |
| EPI_ISL_476706 | 4/21/2020 | 6/25/2020 North America / USA / Minnesota                                |





|                |           |                                                                 |
|----------------|-----------|-----------------------------------------------------------------|
| EPI_ISL_476754 | 5/14/2020 | 6/25/2020 North America / USA / Minnesota                       |
| EPI_ISL_476755 | 5/14/2020 | 6/25/2020 North America / USA / Minnesota                       |
| EPI_ISL_476756 | 5/18/2020 | 6/25/2020 North America / USA / Minnesota                       |
| EPI_ISL_476757 | 5/21/2020 | 6/25/2020 North America / USA / Minnesota                       |
| EPI_ISL_476758 | 5/21/2020 | 6/25/2020 North America / USA / Minnesota                       |
| EPI_ISL_476759 | 5/21/2020 | 6/25/2020 North America / USA / Minnesota                       |
| EPI_ISL_476760 | 5/21/2020 | 6/25/2020 North America / USA / Minnesota                       |
| EPI_ISL_476761 | 5/21/2020 | 6/25/2020 North America / USA / Minnesota                       |
| EPI_ISL_476762 | 6/1/2020  | 6/25/2020 North America / USA / Minnesota                       |
| EPI_ISL_476763 | 6/3/2020  | 6/25/2020 North America / USA / Minnesota                       |
| EPI_ISL_476764 | 6/3/2020  | 6/25/2020 North America / USA / Minnesota                       |
| EPI_ISL_476765 | 6/3/2020  | 6/25/2020 North America / USA / Minnesota                       |
| EPI_ISL_476766 | 6/3/2020  | 6/25/2020 North America / USA / Minnesota                       |
| EPI_ISL_476768 | 3/25/2020 | 6/25/2020 North America / USA / California / Santa Clara County |
| EPI_ISL_476772 | 3/23/2020 | 6/25/2020 North America / USA / California / Santa Clara County |
| EPI_ISL_476773 | 3/20/2020 | 6/25/2020 North America / USA / California / Santa Clara County |
| EPI_ISL_476774 | 3/19/2020 | 6/25/2020 North America / USA / California / Santa Clara County |
| EPI_ISL_476775 | 3/19/2020 | 6/25/2020 North America / USA / California / Santa Clara County |
| EPI_ISL_476778 | 3/14/2020 | 6/25/2020 North America / USA / California / Santa Clara County |
| EPI_ISL_476780 | 3/15/2020 | 6/25/2020 North America / USA / California / Santa Clara County |
| EPI_ISL_476781 | 3/14/2020 | 6/25/2020 North America / USA / California / Santa Clara County |
| EPI_ISL_476782 | 3/13/2020 | 6/25/2020 North America / USA / California / Santa Clara County |
| EPI_ISL_476783 | 3/13/2020 | 6/25/2020 North America / USA / California / Santa Clara County |
| EPI_ISL_476784 | 3/13/2020 | 6/25/2020 North America / USA / California / Santa Clara County |
| EPI_ISL_476785 | 3/11/2020 | 6/25/2020 North America / USA / California / Santa Clara County |
| EPI_ISL_476786 | 3/27/2020 | 6/25/2020 North America / USA / California / Santa Clara County |
| EPI_ISL_476787 | 3/23/2020 | 6/25/2020 North America / USA / California / Santa Clara County |
| EPI_ISL_476788 | 3/14/2020 | 6/25/2020 North America / USA / California / Santa Clara County |
| EPI_ISL_476790 | 4/2/2020  | 6/25/2020 North America / USA / California / Santa Clara County |
| EPI_ISL_476791 | 4/2/2020  | 6/25/2020 North America / USA / California / Santa Clara County |
| EPI_ISL_476792 | 4/1/2020  | 6/25/2020 North America / USA / California / Santa Clara County |
| EPI_ISL_477163 | 4/13/2020 | 6/25/2020 North America / USA / Florida                         |
| EPI_ISL_476801 | 3/15/2020 | 6/26/2020 Asia / Hong Kong                                      |
| EPI_ISL_476802 | 3/14/2020 | 6/26/2020 Asia / Hong Kong                                      |
| EPI_ISL_476803 | 3/17/2020 | 6/26/2020 Asia / Hong Kong                                      |
| EPI_ISL_476804 | 3/19/2020 | 6/26/2020 Asia / Hong Kong                                      |
| EPI_ISL_476814 | 3/13/2020 | 6/26/2020 Asia / Singapore                                      |
| EPI_ISL_476818 | 3/20/2020 | 6/26/2020 Asia / Singapore                                      |
| EPI_ISL_476819 | 3/22/2020 | 6/26/2020 Asia / Singapore                                      |
| EPI_ISL_476822 | 3/15/2020 | 6/26/2020 Africa / Benin / Oueme                                |
| EPI_ISL_476823 | 3/17/2020 | 6/26/2020 Africa / Benin / Cotonou                              |
| EPI_ISL_476824 | 3/17/2020 | 6/26/2020 Africa / Benin / Cotonou                              |
| EPI_ISL_476825 | 4/4/2020  | 6/26/2020 Africa / Benin / Cotonou                              |
| EPI_ISL_476826 | 3/25/2020 | 6/26/2020 Africa / Benin / Cotonou                              |
| EPI_ISL_476827 | 3/27/2020 | 6/26/2020 Africa / Benin / Cotonou                              |
| EPI_ISL_476828 | 4/6/2020  | 6/26/2020 Africa / Benin / Cotonou                              |
| EPI_ISL_476829 | 3/19/2020 | 6/26/2020 Africa / Benin / Cotonou                              |

|                |           |                                              |
|----------------|-----------|----------------------------------------------|
| EPI_ISL_476830 | 4/15/2020 | 6/26/2020 Africa / Benin / Cotonou           |
| EPI_ISL_476831 | 4/15/2020 | 6/26/2020 Africa / Benin / Cotonou           |
| EPI_ISL_476832 | 4/27/2020 | 6/26/2020 Europe / Turkey / Kocaeli          |
| EPI_ISL_476833 | 3/17/2020 | 6/26/2020 Africa / Benin / Cotonou           |
| EPI_ISL_476834 | 3/17/2020 | 6/26/2020 Africa / Benin / Cotonou           |
| EPI_ISL_476840 | 4/9/2020  | 6/26/2020 Asia / India / Madhya Pradesh      |
| EPI_ISL_476844 | 5/12/2020 | 6/26/2020 Asia / India / Madhya Pradesh      |
| EPI_ISL_476846 | 4/1/2020  | 6/26/2020 Asia / India / Madhya Pradesh      |
| EPI_ISL_476848 | 4/11/2020 | 6/26/2020 Asia / India / Madhya Pradesh      |
| EPI_ISL_476849 | 4/29/2020 | 6/26/2020 Asia / India / Madhya Pradesh      |
| EPI_ISL_476850 | 5/3/2020  | 6/26/2020 Asia / India / Madhya Pradesh      |
| EPI_ISL_476852 | 5/4/2020  | 6/26/2020 Asia / India / Madhya Pradesh      |
| EPI_ISL_476853 | 5/4/2020  | 6/26/2020 Asia / India / Madhya Pradesh      |
| EPI_ISL_476854 | 5/11/2020 | 6/26/2020 Asia / India / Madhya Pradesh      |
| EPI_ISL_476855 | 6/8/2020  | 6/26/2020 Asia / India / Gujarat / Vadodara  |
| EPI_ISL_476856 | 6/8/2020  | 6/26/2020 Asia / India / Gujarat / Vadodara  |
| EPI_ISL_476857 | 6/8/2020  | 6/26/2020 Asia / India / Gujarat / Vadodara  |
| EPI_ISL_476858 | 6/8/2020  | 6/26/2020 Asia / India / Gujarat / Vadodara  |
| EPI_ISL_476859 | 6/8/2020  | 6/26/2020 Asia / India / Gujarat / Vadodara  |
| EPI_ISL_476860 | 6/8/2020  | 6/26/2020 Asia / India / Gujarat / Vadodara  |
| EPI_ISL_476861 | 6/8/2020  | 6/26/2020 Asia / India / Gujarat / Savli     |
| EPI_ISL_476862 | 6/8/2020  | 6/26/2020 Asia / India / Gujarat / Savli     |
| EPI_ISL_476863 | 6/11/2020 | 6/26/2020 Asia / India / Gujarat / Dahegam   |
| EPI_ISL_476864 | 6/11/2020 | 6/26/2020 Asia / India / Gujarat / Ahmedabad |
| EPI_ISL_476865 | 6/11/2020 | 6/26/2020 Asia / India / Gujarat / Ahmedabad |
| EPI_ISL_476866 | 6/11/2020 | 6/26/2020 Asia / India / Gujarat / Ahmedabad |
| EPI_ISL_476867 | 6/12/2020 | 6/26/2020 Asia / India / Gujarat / Palanpur  |
| EPI_ISL_476868 | 6/12/2020 | 6/26/2020 Asia / India / Gujarat / Palanpur  |
| EPI_ISL_476869 | 6/11/2020 | 6/26/2020 Asia / India / Gujarat / Surat     |
| EPI_ISL_476870 | 6/11/2020 | 6/26/2020 Asia / India / Gujarat / Surat     |
| EPI_ISL_476871 | 6/11/2020 | 6/26/2020 Asia / India / Gujarat / Surat     |
| EPI_ISL_476872 | 6/11/2020 | 6/26/2020 Asia / India / Gujarat / Surat     |
| EPI_ISL_476873 | 6/11/2020 | 6/26/2020 Asia / India / Gujarat / Surat     |
| EPI_ISL_476874 | 6/12/2020 | 6/26/2020 Asia / India / Gujarat / Surat     |
| EPI_ISL_476875 | 6/12/2020 | 6/26/2020 Asia / India / Gujarat / Surat     |
| EPI_ISL_476876 | 6/12/2020 | 6/26/2020 Asia / India / Gujarat / Surat     |
| EPI_ISL_476877 | 6/12/2020 | 6/26/2020 Asia / India / Gujarat / Surat     |
| EPI_ISL_476878 | 6/12/2020 | 6/26/2020 Asia / India / Gujarat / Surat     |
| EPI_ISL_476879 | 6/12/2020 | 6/26/2020 Asia / India / Gujarat / Bardoli   |
| EPI_ISL_476880 | 6/12/2020 | 6/26/2020 Asia / India / Gujarat / Bardoli   |
| EPI_ISL_476881 | 6/12/2020 | 6/26/2020 Asia / India / Gujarat / Choryasi  |
| EPI_ISL_476882 | 6/12/2020 | 6/26/2020 Asia / India / Gujarat / Choryasi  |
| EPI_ISL_476883 | 5/13/2020 | 6/26/2020 Asia / India / Madhya Pradesh      |
| EPI_ISL_476884 | 5/16/2020 | 6/26/2020 Asia / India / Madhya Pradesh      |
| EPI_ISL_476885 | 5/17/2020 | 6/26/2020 Asia / India / Madhya Pradesh      |
| EPI_ISL_476886 | 5/17/2020 | 6/26/2020 Asia / India / Madhya Pradesh      |
| EPI_ISL_476887 | 5/17/2020 | 6/26/2020 Asia / India / Madhya Pradesh      |

|                |           |                                                                  |
|----------------|-----------|------------------------------------------------------------------|
| EPI_ISL_476888 | 5/16/2020 | 6/26/2020 Asia / India / Madhya Pradesh                          |
| EPI_ISL_476889 | 5/16/2020 | 6/26/2020 Asia / India / Madhya Pradesh                          |
| EPI_ISL_476890 | 5/16/2020 | 6/26/2020 Asia / India / Madhya Pradesh                          |
| EPI_ISL_476891 | 5/17/2020 | 6/26/2020 Asia / India / Madhya Pradesh                          |
| EPI_ISL_476892 | 5/17/2020 | 6/26/2020 Asia / India / Madhya Pradesh                          |
| EPI_ISL_476893 | 5/17/2020 | 6/26/2020 Asia / India / Madhya Pradesh                          |
| EPI_ISL_476894 | 5/18/2020 | 6/26/2020 Asia / India / Madhya Pradesh                          |
| EPI_ISL_476895 | 5/27/2020 | 6/26/2020 Asia / India / Madhya Pradesh                          |
| EPI_ISL_476896 | 5/25/2020 | 6/26/2020 Asia / India / Madhya Pradesh                          |
| EPI_ISL_476897 | 5/21/2020 | 6/26/2020 North America / USA / South Carolina / Richland County |
| EPI_ISL_476898 | 3/23/2020 | 6/26/2020 North America / USA / Alaska / Anchorage-Mat Su        |
| EPI_ISL_476899 | 3/23/2020 | 6/26/2020 North America / USA / Alaska / Anchorage-Mat Su        |
| EPI_ISL_476900 | 3/28/2020 | 6/27/2020 North America / USA / Washington                       |
| EPI_ISL_476902 | 3/16/2020 | 6/27/2020 North America / USA / Washington                       |
| EPI_ISL_476903 | 3/6/2020  | 6/27/2020 North America / USA / Washington                       |
| EPI_ISL_476905 | 3/17/2020 | 6/27/2020 North America / USA / Washington                       |
| EPI_ISL_476906 | 3/12/2020 | 6/27/2020 North America / USA / Washington                       |
| EPI_ISL_476907 | 3/13/2020 | 6/27/2020 North America / USA / Washington                       |
| EPI_ISL_476908 | 3/13/2020 | 6/27/2020 North America / USA / Washington                       |
| EPI_ISL_476909 | 3/11/2020 | 6/27/2020 North America / USA / Minnesota                        |
| EPI_ISL_476910 | 3/12/2020 | 6/27/2020 North America / USA                                    |
| EPI_ISL_476911 | 3/12/2020 | 6/27/2020 North America / USA / Washington                       |
| EPI_ISL_476912 | 3/13/2020 | 6/27/2020 North America / USA / Connecticut                      |
| EPI_ISL_476914 | 3/12/2020 | 6/27/2020 North America / USA / Connecticut                      |
| EPI_ISL_476915 | 3/13/2020 | 6/27/2020 North America / USA / Connecticut                      |
| EPI_ISL_476916 | 3/13/2020 | 6/27/2020 North America / USA / Connecticut                      |
| EPI_ISL_476917 | 3/13/2020 | 6/27/2020 North America / USA / Connecticut                      |
| EPI_ISL_476918 | 3/13/2020 | 6/27/2020 North America / USA / Connecticut                      |
| EPI_ISL_476919 | 3/12/2020 | 6/27/2020 North America / USA                                    |
| EPI_ISL_476920 | 3/12/2020 | 6/27/2020 North America / USA / Washington                       |
| EPI_ISL_476921 | 3/13/2020 | 6/27/2020 North America / USA / Washington                       |
| EPI_ISL_476922 | 3/12/2020 | 6/27/2020 North America / USA                                    |
| EPI_ISL_476923 | 3/12/2020 | 6/27/2020 North America / USA                                    |
| EPI_ISL_476924 | 3/12/2020 | 6/27/2020 North America / USA / Washington                       |
| EPI_ISL_476925 | 3/12/2020 | 6/27/2020 North America / USA / Washington                       |
| EPI_ISL_476926 | 3/12/2020 | 6/27/2020 North America / USA                                    |
| EPI_ISL_476927 | 3/12/2020 | 6/27/2020 North America / USA / Washington                       |
| EPI_ISL_476928 | 3/13/2020 | 6/27/2020 North America / USA / Washington                       |
| EPI_ISL_476929 | 3/13/2020 | 6/27/2020 North America / USA / Washington                       |
| EPI_ISL_476930 | 3/13/2020 | 6/27/2020 North America / USA / Washington                       |
| EPI_ISL_476931 | 3/12/2020 | 6/27/2020 North America / USA / Connecticut                      |
| EPI_ISL_476932 | 3/12/2020 | 6/27/2020 North America / USA                                    |
| EPI_ISL_476933 | 3/13/2020 | 6/27/2020 North America / USA / Washington                       |
| EPI_ISL_476935 | 3/13/2020 | 6/27/2020 North America / USA / Washington                       |
| EPI_ISL_476936 | 3/12/2020 | 6/27/2020 North America / USA / Washington                       |
| EPI_ISL_476937 | 3/14/2020 | 6/27/2020 North America / USA / Washington                       |
| EPI_ISL_476938 | 3/13/2020 | 6/27/2020 North America / USA / Washington                       |

|                |           |                                                    |
|----------------|-----------|----------------------------------------------------|
| EPI_ISL_476939 | 3/14/2020 | 6/27/2020 North America / USA / Washington         |
| EPI_ISL_476940 | 3/14/2020 | 6/27/2020 North America / USA / Washington         |
| EPI_ISL_476941 | 4/9/2020  | 6/27/2020 Europe / Belgium / Houthalen-Helchteren  |
| EPI_ISL_476942 | 4/9/2020  | 6/27/2020 Europe / Belgium / Landen                |
| EPI_ISL_476943 | 4/9/2020  | 6/27/2020 Europe / Belgium / Strepy-Bracquegnies   |
| EPI_ISL_476944 | 4/9/2020  | 6/27/2020 Europe / Belgium / Tubize                |
| EPI_ISL_476945 | 4/9/2020  | 6/27/2020 Europe / Belgium / Molenbeek-Saint-Jean  |
| EPI_ISL_476946 | 4/9/2020  | 6/27/2020 Europe / Belgium / Heverlee              |
| EPI_ISL_476947 | 4/9/2020  | 6/27/2020 Europe / Belgium / Linter                |
| EPI_ISL_476948 | 4/9/2020  | 6/27/2020 Europe / Belgium / Tienen                |
| EPI_ISL_476949 | 4/9/2020  | 6/27/2020 Europe / Belgium / Steenokkerzeel        |
| EPI_ISL_476950 | 4/11/2020 | 6/27/2020 Europe / Belgium / Kaggevinne            |
| EPI_ISL_476951 | 4/11/2020 | 6/27/2020 Europe / Belgium / Tubize                |
| EPI_ISL_476952 | 4/11/2020 | 6/27/2020 Europe / Belgium / Tubize                |
| EPI_ISL_476953 | 4/11/2020 | 6/27/2020 Europe / Belgium / Heverlee              |
| EPI_ISL_476954 | 4/11/2020 | 6/27/2020 Europe / Belgium / Houthalen-Helchteren  |
| EPI_ISL_476955 | 4/11/2020 | 6/27/2020 Europe / Belgium / Tienen                |
| EPI_ISL_476956 | 4/11/2020 | 6/27/2020 Europe / Belgium / Froyennes             |
| EPI_ISL_476957 | 4/11/2020 | 6/27/2020 Europe / Belgium / Haasrode              |
| EPI_ISL_476958 | 4/11/2020 | 6/27/2020 Europe / Belgium / Tienen                |
| EPI_ISL_476959 | 4/11/2020 | 6/27/2020 Europe / Belgium / Harchies              |
| EPI_ISL_476960 | 4/11/2020 | 6/27/2020 Europe / Belgium / Ath                   |
| EPI_ISL_476961 | 4/11/2020 | 6/27/2020 Europe / Belgium / Tournai               |
| EPI_ISL_476962 | 4/11/2020 | 6/27/2020 Europe / Belgium / Scherpenheuvel-Zichem |
| EPI_ISL_476963 | 4/11/2020 | 6/27/2020 Europe / Belgium / Braffe                |
| EPI_ISL_476964 | 4/11/2020 | 6/27/2020 Europe / Belgium / Peer                  |
| EPI_ISL_476965 | 4/11/2020 | 6/27/2020 Europe / Belgium / Mouscron              |
| EPI_ISL_476966 | 4/11/2020 | 6/27/2020 Europe / Belgium / Heusden-Zolder        |
| EPI_ISL_476967 | 4/11/2020 | 6/27/2020 Europe / Belgium / Chercq                |
| EPI_ISL_476968 | 4/11/2020 | 6/27/2020 Europe / Belgium / Mouscron              |
| EPI_ISL_476969 | 4/11/2020 | 6/27/2020 Europe / Belgium / Sint-Truiden          |
| EPI_ISL_476970 | 4/11/2020 | 6/27/2020 Europe / Belgium / Diest                 |
| EPI_ISL_476971 | 4/11/2020 | 6/27/2020 Europe / Belgium / Soignies              |
| EPI_ISL_476972 | 4/11/2020 | 6/27/2020 Europe / Belgium / Naast                 |
| EPI_ISL_476973 | 4/11/2020 | 6/27/2020 Europe / Belgium / Halle                 |
| EPI_ISL_476974 | 4/11/2020 | 6/27/2020 Europe / Belgium / Braine-le-Comte       |
| EPI_ISL_476975 | 4/11/2020 | 6/27/2020 Europe / Belgium / Ixelles               |
| EPI_ISL_476976 | 4/11/2020 | 6/27/2020 Europe / Belgium / Maurage               |
| EPI_ISL_476977 | 4/11/2020 | 6/27/2020 Europe / Belgium / Kampenhout            |
| EPI_ISL_476978 | 4/11/2020 | 6/27/2020 Europe / Belgium / Leuven                |
| EPI_ISL_476979 | 4/11/2020 | 6/27/2020 Europe / Belgium / Paal                  |
| EPI_ISL_476980 | 4/11/2020 | 6/27/2020 Europe / Belgium / Braine-l'Alleud       |
| EPI_ISL_476981 | 4/11/2020 | 6/27/2020 Europe / Belgium / La Louviere           |
| EPI_ISL_476982 | 4/11/2020 | 6/27/2020 Europe / Belgium / Heusden-Zolder        |
| EPI_ISL_476983 | 4/14/2020 | 6/27/2020 Europe / Belgium / Halen                 |
| EPI_ISL_476984 | 4/14/2020 | 6/27/2020 Europe / Belgium / Herselt               |
| EPI_ISL_476985 | 4/14/2020 | 6/27/2020 Europe / Belgium / Veerle                |

|                |           |           |                                                  |
|----------------|-----------|-----------|--------------------------------------------------|
| EPI_ISL_476986 | 4/14/2020 | 6/27/2020 | Europe / Belgium / Kaggevinne                    |
| EPI_ISL_476987 | 4/14/2020 | 6/27/2020 | Europe / Belgium / Halen                         |
| EPI_ISL_476988 | 4/14/2020 | 6/27/2020 | Europe / Belgium / Tervuren                      |
| EPI_ISL_476989 | 4/14/2020 | 6/27/2020 | Europe / Belgium / Ecaussinnes                   |
| EPI_ISL_476990 | 4/18/2020 | 6/27/2020 | Europe / Belgium / Lummen                        |
| EPI_ISL_476991 | 4/21/2020 | 6/27/2020 | Europe / Belgium / Nossegem                      |
| EPI_ISL_476992 | 4/27/2020 | 6/27/2020 | Europe / Belgium / Kersbeek-miskom               |
| EPI_ISL_476993 | 4/28/2020 | 6/27/2020 | Europe / Belgium / Leuven                        |
| EPI_ISL_476994 | 4/28/2020 | 6/27/2020 | Europe / Belgium / PÃ©ruwelz                     |
| EPI_ISL_476995 | 4/29/2020 | 6/27/2020 | Europe / Belgium / Luvingne                      |
| EPI_ISL_476996 | 5/1/2020  | 6/27/2020 | Europe / Belgium / Neufvilles                    |
| EPI_ISL_476997 | 5/2/2020  | 6/27/2020 | Europe / Belgium / Duisberg                      |
| EPI_ISL_476998 | 5/2/2020  | 6/27/2020 | Europe / Belgium / Koersel                       |
| EPI_ISL_476999 | 5/3/2020  | 6/27/2020 | Europe / Belgium / Holsbeek                      |
| EPI_ISL_477000 | 5/4/2020  | 6/27/2020 | Europe / Belgium / Beverlo                       |
| EPI_ISL_477001 | 5/5/2020  | 6/27/2020 | Europe / Belgium / Zolder                        |
| EPI_ISL_477002 | 5/5/2020  | 6/27/2020 | Europe / Belgium / Sint-Truiden                  |
| EPI_ISL_477003 | 5/5/2020  | 6/27/2020 | Europe / Belgium / Flines-Les-Morta              |
| EPI_ISL_477004 | 5/6/2020  | 6/27/2020 | Europe / Belgium / Laken                         |
| EPI_ISL_477005 | 5/7/2020  | 6/27/2020 | Europe / Belgium / Lummen                        |
| EPI_ISL_477006 | 5/11/2020 | 6/27/2020 | Europe / Belgium / Mouscron                      |
| EPI_ISL_477007 | 5/13/2020 | 6/27/2020 | Europe / Belgium / Heverlee                      |
| EPI_ISL_477008 | 4/21/2020 | 6/27/2020 | Europe / Hungary / Szabolcs-Szatmar-Bereg County |
| EPI_ISL_477009 | 4/22/2020 | 6/27/2020 | Europe / Hungary / Borsod-Abauj-Zemplen County   |
| EPI_ISL_477010 | 4/7/2020  | 6/27/2020 | Europe / Hungary / Debrecen                      |
| EPI_ISL_477011 | 4/8/2020  | 6/27/2020 | Europe / Hungary / Borsod-Abauj-Zemplen County   |
| EPI_ISL_477012 | 4/8/2020  | 6/27/2020 | Europe / Hungary / Borsod-Abauj-Zemplen County   |
| EPI_ISL_477013 | 4/22/2020 | 6/27/2020 | Europe / Hungary / Szabolcs-Szatmar-Bereg County |
| EPI_ISL_477014 | 3/30/2020 | 6/28/2020 | South America / Ecuador / Pichincha              |
| EPI_ISL_477015 | 6/17/2020 | 6/28/2020 | South America / Ecuador / Quito                  |
| EPI_ISL_477016 | 6/17/2020 | 6/28/2020 | South America / Ecuador / Quito                  |
| EPI_ISL_477020 | 2020-04   | 6/28/2020 | North America / Canada / British Columbia        |
| EPI_ISL_477021 | 2020-04   | 6/28/2020 | North America / Canada / British Columbia        |
| EPI_ISL_477022 | 2020-04   | 6/28/2020 | North America / Canada / British Columbia        |
| EPI_ISL_477023 | 2020-04   | 6/28/2020 | North America / Canada / British Columbia        |
| EPI_ISL_477024 | 2020-04   | 6/28/2020 | North America / Canada / British Columbia        |
| EPI_ISL_477029 | 2020-04   | 6/28/2020 | North America / Canada / British Columbia        |
| EPI_ISL_477031 | 2020-04   | 6/28/2020 | North America / Canada / British Columbia        |
| EPI_ISL_477032 | 2020-04   | 6/28/2020 | North America / Canada / British Columbia        |
| EPI_ISL_477033 | 2020-04   | 6/28/2020 | North America / Canada / British Columbia        |
| EPI_ISL_477034 | 2020-04   | 6/28/2020 | North America / Canada / British Columbia        |
| EPI_ISL_477035 | 2020-04   | 6/28/2020 | North America / Canada / British Columbia        |
| EPI_ISL_477036 | 2020-04   | 6/28/2020 | North America / Canada / British Columbia        |
| EPI_ISL_477037 | 2020-04   | 6/28/2020 | North America / Canada / British Columbia        |
| EPI_ISL_477038 | 2020-04   | 6/28/2020 | North America / Canada / British Columbia        |
| EPI_ISL_477039 | 2020-05   | 6/28/2020 | North America / Canada / British Columbia        |
| EPI_ISL_477040 | 2020-05   | 6/28/2020 | North America / Canada / British Columbia        |



|                |           |           |                                                  |
|----------------|-----------|-----------|--------------------------------------------------|
| EPI_ISL_477100 | 2020-04   | 6/28/2020 | North America / Canada / British Columbia        |
| EPI_ISL_477101 | 2020-04   | 6/28/2020 | North America / Canada / British Columbia        |
| EPI_ISL_477102 | 2020-04   | 6/28/2020 | North America / Canada / British Columbia        |
| EPI_ISL_477103 | 2020-04   | 6/28/2020 | North America / Canada / British Columbia        |
| EPI_ISL_477105 | 2020-04   | 6/28/2020 | North America / Canada / British Columbia        |
| EPI_ISL_477106 | 2020-04   | 6/28/2020 | North America / Canada / British Columbia        |
| EPI_ISL_477107 | 2020-04   | 6/28/2020 | North America / Canada / British Columbia        |
| EPI_ISL_477108 | 2020-04   | 6/28/2020 | North America / Canada / British Columbia        |
| EPI_ISL_477109 | 2020-04   | 6/28/2020 | North America / Canada / British Columbia        |
| EPI_ISL_477110 | 2020-04   | 6/28/2020 | North America / Canada / British Columbia        |
| EPI_ISL_477111 | 2020-04   | 6/28/2020 | North America / Canada / British Columbia        |
| EPI_ISL_477112 | 2020-04   | 6/28/2020 | North America / Canada / British Columbia        |
| EPI_ISL_477113 | 2020-04   | 6/28/2020 | North America / Canada / British Columbia        |
| EPI_ISL_477114 | 2020-04   | 6/28/2020 | North America / Canada / British Columbia        |
| EPI_ISL_477115 | 2020-04   | 6/28/2020 | North America / Canada / British Columbia        |
| EPI_ISL_477117 | 2020-04   | 6/28/2020 | North America / Canada / British Columbia        |
| EPI_ISL_477118 | 2020-04   | 6/28/2020 | North America / Canada / British Columbia        |
| EPI_ISL_477119 | 2020-04   | 6/28/2020 | North America / Canada / British Columbia        |
| EPI_ISL_477125 | 5/5/2020  | 6/28/2020 | Asia / Bangladesh                                |
| EPI_ISL_477126 | 5/9/2020  | 6/28/2020 | Asia / Bangladesh                                |
| EPI_ISL_477127 | 5/21/2020 | 6/28/2020 | Asia / Bangladesh                                |
| EPI_ISL_477128 | 5/2/2020  | 6/28/2020 | Asia / Bangladesh                                |
| EPI_ISL_477129 | 5/23/2020 | 6/28/2020 | Asia / Bangladesh                                |
| EPI_ISL_477130 | 5/30/2020 | 6/28/2020 | Asia / Bangladesh                                |
| EPI_ISL_477131 | 5/30/2020 | 6/28/2020 | Asia / Bangladesh                                |
| EPI_ISL_477132 | 6/14/2020 | 6/28/2020 | Asia / Bangladesh                                |
| EPI_ISL_477133 | 6/12/2020 | 6/28/2020 | Asia / Bangladesh                                |
| EPI_ISL_477134 | 6/14/2020 | 6/28/2020 | Asia / Bangladesh                                |
| EPI_ISL_477135 | 6/14/2020 | 6/28/2020 | Asia / Bangladesh                                |
| EPI_ISL_477136 | 6/16/2020 | 6/28/2020 | Asia / Bangladesh                                |
| EPI_ISL_477138 | 6/17/2020 | 6/28/2020 | Asia / Bangladesh                                |
| EPI_ISL_477139 | 6/11/2020 | 6/28/2020 | Asia / Bangladesh                                |
| EPI_ISL_477140 | 6/16/2020 | 6/28/2020 | Asia / Bangladesh                                |
| EPI_ISL_477143 | 6/17/2020 | 6/28/2020 | Africa / Senegal / Dakar                         |
| EPI_ISL_477150 | 6/7/2020  | 6/28/2020 | Africa / Senegal / Dakar                         |
| EPI_ISL_477155 | 6/11/2020 | 6/28/2020 | Africa / Senegal / Dakar                         |
| EPI_ISL_477156 | 6/13/2020 | 6/28/2020 | Africa / Senegal / Dakar                         |
| EPI_ISL_491111 | 2020      | 6/28/2020 | Europe / Germany / Mecklenburg-Western Pomerania |
| EPI_ISL_491112 | 2020      | 6/28/2020 | Europe / Germany / Mecklenburg-Western Pomerania |
| EPI_ISL_477169 | 5/1/2020  | 6/29/2020 | Asia / Georgia / Tbilisi                         |
| EPI_ISL_477170 | 2/16/2020 | 6/29/2020 | Asia / Singapore                                 |
| EPI_ISL_477171 | 3/16/2020 | 6/29/2020 | Asia / Singapore                                 |
| EPI_ISL_477172 | 3/18/2020 | 6/29/2020 | Asia / Singapore                                 |
| EPI_ISL_477174 | 3/20/2020 | 6/29/2020 | Asia / Singapore                                 |
| EPI_ISL_477175 | 3/22/2020 | 6/29/2020 | Asia / Singapore                                 |
| EPI_ISL_477177 | 3/21/2020 | 6/29/2020 | Asia / Singapore                                 |
| EPI_ISL_477178 | 3/22/2020 | 6/29/2020 | Asia / Singapore                                 |



|                |           |                                              |
|----------------|-----------|----------------------------------------------|
| EPI_ISL_477180 | 6/22/2020 | 6/29/2020 Asia / Singapore                   |
| EPI_ISL_477182 | 4/13/2020 | 6/29/2020 Asia / Singapore                   |
| EPI_ISL_477183 | 6/12/2020 | 6/29/2020 Asia / India / Gujarat / Choryasi  |
| EPI_ISL_477184 | 4/13/2020 | 6/29/2020 Asia / Singapore                   |
| EPI_ISL_477187 | 4/26/2020 | 6/29/2020 Asia / Singapore                   |
| EPI_ISL_477188 | 4/26/2020 | 6/29/2020 Asia / Singapore                   |
| EPI_ISL_477189 | 4/26/2020 | 6/29/2020 Asia / Singapore                   |
| EPI_ISL_477190 | 4/26/2020 | 6/29/2020 Asia / Singapore                   |
| EPI_ISL_477191 | 4/26/2020 | 6/29/2020 Asia / Singapore                   |
| EPI_ISL_477192 | 4/27/2020 | 6/29/2020 Asia / Singapore                   |
| EPI_ISL_477193 | 3/16/2020 | 6/29/2020 Europe / Italy / Apulia            |
| EPI_ISL_477194 | 3/16/2020 | 6/29/2020 Europe / Italy / Apulia            |
| EPI_ISL_477195 | 4/7/2020  | 6/29/2020 Europe / Italy / Basilicata        |
| EPI_ISL_477196 | 4/6/2020  | 6/29/2020 Europe / Italy / Basilicata        |
| EPI_ISL_477197 | 4/3/2020  | 6/29/2020 Europe / Italy / Basilicata        |
| EPI_ISL_477198 | 3/20/2020 | 6/29/2020 Europe / Italy / Basilicata        |
| EPI_ISL_477199 | 3/23/2020 | 6/29/2020 Europe / Italy / Basilicata        |
| EPI_ISL_477200 | 3/23/2020 | 6/29/2020 Europe / Italy / Basilicata        |
| EPI_ISL_477201 | 3/23/2020 | 6/29/2020 Europe / Italy / Basilicata        |
| EPI_ISL_477202 | 3/20/2020 | 6/29/2020 Europe / Italy / Apulia            |
| EPI_ISL_477203 | 3/19/2020 | 6/29/2020 Europe / Italy / Apulia            |
| EPI_ISL_477204 | 5/30/2020 | 6/29/2020 Europe / Italy / Campania / Naples |
| EPI_ISL_477205 | 5/26/2020 | 6/29/2020 Asia / India / Karnataka           |
| EPI_ISL_477207 | 5/29/2020 | 6/29/2020 Asia / India / Karnataka           |
| EPI_ISL_477208 | 6/1/2020  | 6/29/2020 Asia / India / Karnataka           |
| EPI_ISL_477210 | 6/2/2020  | 6/29/2020 Asia / India / Karnataka           |
| EPI_ISL_477211 | 6/2/2020  | 6/29/2020 Asia / India / Karnataka           |
| EPI_ISL_477233 | 6/16/2020 | 6/29/2020 Asia / India / Karnataka           |
| EPI_ISL_477237 | 6/16/2020 | 6/29/2020 Asia / India / Karnataka           |
| EPI_ISL_477238 | 6/16/2020 | 6/29/2020 Asia / India / Karnataka           |
| EPI_ISL_477239 | 6/17/2020 | 6/29/2020 Asia / India / Karnataka           |
| EPI_ISL_477241 | 6/17/2020 | 6/29/2020 Asia / India / Karnataka           |
| EPI_ISL_477242 | 6/17/2020 | 6/29/2020 Asia / India / Karnataka           |
| EPI_ISL_477246 | 5/2/2020  | 6/29/2020 Asia / India / Karnataka           |
| EPI_ISL_477249 | 5/7/2020  | 6/29/2020 Asia / India / Karnataka           |
| EPI_ISL_477250 | 5/7/2020  | 6/29/2020 Asia / India / Karnataka           |
| EPI_ISL_477254 | 2020      | 6/29/2020 Asia / India / Karnataka           |
| EPI_ISL_477255 | 5/16/2020 | 6/29/2020 Asia / India / Karnataka           |
| EPI_ISL_477256 | 5/16/2020 | 6/29/2020 Asia / India / Karnataka           |
| EPI_ISL_477258 | 5/16/2020 | 6/29/2020 Asia / India / Karnataka           |
| EPI_ISL_477261 | 5/18/2020 | 6/29/2020 Asia / India / Karnataka           |
| EPI_ISL_477272 | 5/21/2020 | 6/29/2020 North America / USA / Minnesota    |
| EPI_ISL_477273 | 5/20/2020 | 6/29/2020 North America / USA / Minnesota    |
| EPI_ISL_477274 | 5/22/2020 | 6/29/2020 North America / USA / Minnesota    |
| EPI_ISL_477275 | 5/20/2020 | 6/29/2020 North America / USA / Minnesota    |
| EPI_ISL_477276 | 4/20/2020 | 6/29/2020 North America / USA / Minnesota    |
| EPI_ISL_477277 | 4/29/2020 | 6/29/2020 North America / USA / Minnesota    |

|                |           |           |                                       |
|----------------|-----------|-----------|---------------------------------------|
| EPI_ISL_477278 | 5/2/2020  | 6/29/2020 | North America / USA / Minnesota       |
| EPI_ISL_477279 | 5/2/2020  | 6/29/2020 | North America / USA / Minnesota       |
| EPI_ISL_477280 | 5/5/2020  | 6/29/2020 | North America / USA / Minnesota       |
| EPI_ISL_477281 | 5/5/2020  | 6/29/2020 | North America / USA / Minnesota       |
| EPI_ISL_477282 | 5/5/2020  | 6/29/2020 | North America / USA / Minnesota       |
| EPI_ISL_477283 | 5/5/2020  | 6/29/2020 | North America / USA / Minnesota       |
| EPI_ISL_477284 | 5/5/2020  | 6/29/2020 | North America / USA / Minnesota       |
| EPI_ISL_477285 | 5/11/2020 | 6/29/2020 | North America / USA / Minnesota       |
| EPI_ISL_477286 | 5/11/2020 | 6/29/2020 | North America / USA / Minnesota       |
| EPI_ISL_477287 | 5/12/2020 | 6/29/2020 | North America / USA / Minnesota       |
| EPI_ISL_477288 | 5/18/2020 | 6/29/2020 | North America / USA / Minnesota       |
| EPI_ISL_477289 | 5/23/2020 | 6/29/2020 | North America / USA / Minnesota       |
| EPI_ISL_477290 | 5/23/2020 | 6/29/2020 | North America / USA / Minnesota       |
| EPI_ISL_477291 | 3/15/2020 | 6/29/2020 | North America / USA / Minnesota       |
| EPI_ISL_477292 | 3/19/2020 | 6/29/2020 | North America / USA / Minnesota       |
| EPI_ISL_477293 | 4/20/2020 | 6/29/2020 | North America / USA / Minnesota       |
| EPI_ISL_477294 | 4/30/2020 | 6/29/2020 | North America / USA / Minnesota       |
| EPI_ISL_477295 | 5/10/2020 | 6/29/2020 | North America / USA / Minnesota       |
| EPI_ISL_477296 | 5/16/2020 | 6/29/2020 | North America / USA / Minnesota       |
| EPI_ISL_477297 | 5/18/2020 | 6/29/2020 | North America / USA / Minnesota       |
| EPI_ISL_477298 | 5/19/2020 | 6/29/2020 | North America / USA / Minnesota       |
| EPI_ISL_477299 | 5/20/2020 | 6/29/2020 | North America / USA / Minnesota       |
| EPI_ISL_477300 | 5/20/2020 | 6/29/2020 | North America / USA / Minnesota       |
| EPI_ISL_477301 | 5/21/2020 | 6/29/2020 | North America / USA / Minnesota       |
| EPI_ISL_477302 | 5/22/2020 | 6/29/2020 | North America / USA / Minnesota       |
| EPI_ISL_477303 | 5/22/2020 | 6/29/2020 | North America / USA / Minnesota       |
| EPI_ISL_477304 | 5/23/2020 | 6/29/2020 | North America / USA / Minnesota       |
| EPI_ISL_477305 | 5/26/2020 | 6/29/2020 | North America / USA / Minnesota       |
| EPI_ISL_477306 | 5/26/2020 | 6/29/2020 | North America / USA / Minnesota       |
| EPI_ISL_477307 | 5/29/2020 | 6/29/2020 | North America / USA / Minnesota       |
| EPI_ISL_477308 | 5/29/2020 | 6/29/2020 | North America / USA / Minnesota       |
| EPI_ISL_477309 | 6/1/2020  | 6/29/2020 | North America / USA / Minnesota       |
| EPI_ISL_477310 | 6/2/2020  | 6/29/2020 | North America / USA / Minnesota       |
| EPI_ISL_477311 | 6/3/2020  | 6/29/2020 | North America / USA / Minnesota       |
| EPI_ISL_477312 | 6/3/2020  | 6/29/2020 | North America / USA / Minnesota       |
| EPI_ISL_477615 | 3/19/2020 | 6/29/2020 | Europe / Hungary / Csongrad County    |
| EPI_ISL_477616 | 3/20/2020 | 6/29/2020 | Europe / Hungary / Csongrad County    |
| EPI_ISL_477617 | 3/20/2020 | 6/29/2020 | Europe / Hungary / Csongrad County    |
| EPI_ISL_477618 | 3/22/2020 | 6/29/2020 | Europe / Hungary / Csongrad County    |
| EPI_ISL_477619 | 3/25/2020 | 6/29/2020 | Europe / Hungary / Csongrad County    |
| EPI_ISL_477620 | 3/26/2020 | 6/29/2020 | Europe / Hungary / Bács-Kiskun County |
| EPI_ISL_477621 | 3/29/2020 | 6/29/2020 | Europe / Hungary / Csongrad County    |
| EPI_ISL_477622 | 3/30/2020 | 6/29/2020 | Europe / Hungary / Csongrad County    |
| EPI_ISL_477623 | 3/27/2020 | 6/29/2020 | Europe / Hungary / Bács-Kiskun County |
| EPI_ISL_477624 | 3/29/2020 | 6/29/2020 | Europe / Hungary / Bacs-Kiskun County |
| EPI_ISL_477625 | 3/29/2020 | 6/29/2020 | Europe / Hungary / Bacs-Kiskun County |
| EPI_ISL_477631 | 4/22/2020 | 6/29/2020 | North America / USA / Virginia        |



|                |           |                                             |
|----------------|-----------|---------------------------------------------|
| EPI_ISL_477679 | 3/30/2020 | 6/29/2020 North America / USA / Connecticut |
| EPI_ISL_477680 | 3/22/2020 | 6/29/2020 North America / USA / Idaho       |
| EPI_ISL_477681 | 3/22/2020 | 6/29/2020 North America / USA / Idaho       |
| EPI_ISL_477682 | 3/28/2020 | 6/29/2020 North America / USA / Idaho       |
| EPI_ISL_477683 | 3/19/2020 | 6/29/2020 North America / USA               |
| EPI_ISL_477684 | 3/29/2020 | 6/29/2020 North America / USA               |
| EPI_ISL_477685 | 3/17/2020 | 6/29/2020 North America / USA / Washington  |
| EPI_ISL_477686 | 3/18/2020 | 6/29/2020 North America / USA / Washington  |
| EPI_ISL_477687 | 3/18/2020 | 6/29/2020 North America / USA / Washington  |
| EPI_ISL_477689 | 3/19/2020 | 6/29/2020 North America / USA / Washington  |
| EPI_ISL_477690 | 3/18/2020 | 6/29/2020 North America / USA / Washington  |
| EPI_ISL_477691 | 3/20/2020 | 6/29/2020 North America / USA / Washington  |
| EPI_ISL_477692 | 3/20/2020 | 6/29/2020 North America / USA / Washington  |
| EPI_ISL_477693 | 3/20/2020 | 6/29/2020 North America / USA / Washington  |
| EPI_ISL_477694 | 3/19/2020 | 6/29/2020 North America / USA / Washington  |
| EPI_ISL_477695 | 3/23/2020 | 6/29/2020 North America / USA / Washington  |
| EPI_ISL_477696 | 3/23/2020 | 6/29/2020 North America / USA / Washington  |
| EPI_ISL_477697 | 3/23/2020 | 6/29/2020 North America / USA / Washington  |
| EPI_ISL_477698 | 3/24/2020 | 6/29/2020 North America / USA / Washington  |
| EPI_ISL_477699 | 3/24/2020 | 6/29/2020 North America / USA / Washington  |
| EPI_ISL_477700 | 3/24/2020 | 6/29/2020 North America / USA / Washington  |
| EPI_ISL_477701 | 3/24/2020 | 6/29/2020 North America / USA / Washington  |
| EPI_ISL_477702 | 3/20/2020 | 6/29/2020 North America / USA / Washington  |
| EPI_ISL_477703 | 3/25/2020 | 6/29/2020 North America / USA / Washington  |
| EPI_ISL_477704 | 3/25/2020 | 6/29/2020 North America / USA / Washington  |
| EPI_ISL_477705 | 3/30/2020 | 6/29/2020 North America / USA / Washington  |
| EPI_ISL_477706 | 3/31/2020 | 6/29/2020 North America / USA / Washington  |
| EPI_ISL_477707 | 3/30/2020 | 6/29/2020 North America / USA / Washington  |
| EPI_ISL_477708 | 3/30/2020 | 6/29/2020 North America / USA / Washington  |
| EPI_ISL_477709 | 3/30/2020 | 6/29/2020 North America / USA / Washington  |
| EPI_ISL_477710 | 3/30/2020 | 6/29/2020 North America / USA / Washington  |
| EPI_ISL_477711 | 3/30/2020 | 6/29/2020 North America / USA / Washington  |
| EPI_ISL_477712 | 3/30/2020 | 6/29/2020 North America / USA / Washington  |
| EPI_ISL_477713 | 3/30/2020 | 6/29/2020 North America / USA / Washington  |
| EPI_ISL_477714 | 3/30/2020 | 6/29/2020 North America / USA / Washington  |
| EPI_ISL_477715 | 3/30/2020 | 6/29/2020 North America / USA / Washington  |
| EPI_ISL_477716 | 3/30/2020 | 6/29/2020 North America / USA / Washington  |
| EPI_ISL_477717 | 3/30/2020 | 6/29/2020 North America / USA / Washington  |
| EPI_ISL_477718 | 3/30/2020 | 6/29/2020 North America / USA / Washington  |
| EPI_ISL_477719 | 3/30/2020 | 6/29/2020 North America / USA / Washington  |
| EPI_ISL_477720 | 3/30/2020 | 6/29/2020 North America / USA / Washington  |
| EPI_ISL_477721 | 3/29/2020 | 6/29/2020 North America / USA / Washington  |
| EPI_ISL_477723 | 3/29/2020 | 6/29/2020 North America / USA / Washington  |
| EPI_ISL_477724 | 3/29/2020 | 6/29/2020 North America / USA / Washington  |
| EPI_ISL_478669 | 3/27/2020 | 6/29/2020 Europe / Turkey                   |
| EPI_ISL_478670 | 4/8/2020  | 6/29/2020 Europe / Turkey                   |
| EPI_ISL_479664 | 3/17/2020 | 6/29/2020 North America / USA / New York    |

|                |           |                                             |
|----------------|-----------|---------------------------------------------|
| EPI_ISL_479665 | 3/18/2020 | 6/29/2020 North America / USA / New York    |
| EPI_ISL_479667 | 3/23/2020 | 6/29/2020 North America / USA / New York    |
| EPI_ISL_479668 | 3/24/2020 | 6/29/2020 North America / USA / New York    |
| EPI_ISL_479671 | 3/25/2020 | 6/29/2020 North America / USA / New York    |
| EPI_ISL_479672 | 3/24/2020 | 6/29/2020 North America / USA / New York    |
| EPI_ISL_479674 | 4/8/2020  | 6/29/2020 North America / USA / New York    |
| EPI_ISL_605914 | 5/18/2020 | 6/29/2020 Asia / Bangladesh                 |
| EPI_ISL_605915 | 5/18/2020 | 6/29/2020 Asia / Bangladesh                 |
| EPI_ISL_605916 | 5/18/2020 | 6/29/2020 Asia / Bangladesh                 |
| EPI_ISL_605917 | 5/18/2020 | 6/29/2020 Asia / Bangladesh                 |
| EPI_ISL_605918 | 5/18/2020 | 6/29/2020 Asia / Bangladesh                 |
| EPI_ISL_605919 | 5/18/2020 | 6/29/2020 Asia / Bangladesh                 |
| EPI_ISL_605920 | 5/18/2020 | 6/29/2020 Asia / Bangladesh                 |
| EPI_ISL_605921 | 5/18/2020 | 6/29/2020 Asia / Bangladesh                 |
| EPI_ISL_605922 | 5/18/2020 | 6/29/2020 Asia / Bangladesh                 |
| EPI_ISL_605923 | 5/18/2020 | 6/29/2020 Asia / Bangladesh                 |
| EPI_ISL_477730 | 5/27/2020 | 6/30/2020 Europe / United Kingdom / England |
| EPI_ISL_477735 | 5/28/2020 | 6/30/2020 Europe / United Kingdom / England |
| EPI_ISL_477741 | 6/2/2020  | 6/30/2020 Europe / United Kingdom / England |
| EPI_ISL_477742 | 6/1/2020  | 6/30/2020 Europe / United Kingdom / England |
| EPI_ISL_477744 | 4/23/2020 | 6/30/2020 Europe / United Kingdom / England |
| EPI_ISL_477746 | 4/23/2020 | 6/30/2020 Europe / United Kingdom / England |
| EPI_ISL_477747 | 4/23/2020 | 6/30/2020 Europe / United Kingdom / England |
| EPI_ISL_477749 | 4/23/2020 | 6/30/2020 Europe / United Kingdom / England |
| EPI_ISL_477751 | 4/23/2020 | 6/30/2020 Europe / United Kingdom / England |
| EPI_ISL_477752 | 4/23/2020 | 6/30/2020 Europe / United Kingdom / England |
| EPI_ISL_477756 | 6/9/2020  | 6/30/2020 Europe / United Kingdom / England |
| EPI_ISL_477758 | 6/9/2020  | 6/30/2020 Europe / United Kingdom / England |
| EPI_ISL_477762 | 6/13/2020 | 6/30/2020 Europe / United Kingdom / England |
| EPI_ISL_477763 | 4/28/2020 | 6/30/2020 Europe / United Kingdom / England |
| EPI_ISL_477768 | 4/29/2020 | 6/30/2020 Europe / United Kingdom / England |
| EPI_ISL_477769 | 4/29/2020 | 6/30/2020 Europe / United Kingdom / England |
| EPI_ISL_477774 | 4/28/2020 | 6/30/2020 Europe / United Kingdom / England |
| EPI_ISL_477776 | 4/29/2020 | 6/30/2020 Europe / United Kingdom / England |
| EPI_ISL_477779 | 4/28/2020 | 6/30/2020 Europe / United Kingdom / England |
| EPI_ISL_477796 | 6/16/2020 | 6/30/2020 Europe / United Kingdom / England |
| EPI_ISL_477798 | 6/16/2020 | 6/30/2020 Europe / United Kingdom / England |
| EPI_ISL_477800 | 6/18/2020 | 6/30/2020 Europe / United Kingdom / England |
| EPI_ISL_477802 | 6/18/2020 | 6/30/2020 Europe / United Kingdom / England |
| EPI_ISL_477805 | 6/18/2020 | 6/30/2020 Europe / United Kingdom / England |
| EPI_ISL_477806 | 6/18/2020 | 6/30/2020 Europe / United Kingdom / England |
| EPI_ISL_477807 | 6/18/2020 | 6/30/2020 Europe / United Kingdom / England |
| EPI_ISL_477808 | 6/18/2020 | 6/30/2020 Europe / United Kingdom / England |
| EPI_ISL_477809 | 6/17/2020 | 6/30/2020 Europe / United Kingdom / England |
| EPI_ISL_477810 | 6/17/2020 | 6/30/2020 Europe / United Kingdom / England |
| EPI_ISL_477811 | 6/21/2020 | 6/30/2020 Europe / United Kingdom / England |
| EPI_ISL_477812 | 6/21/2020 | 6/30/2020 Europe / United Kingdom / England |



























|                |           |                                                          |
|----------------|-----------|----------------------------------------------------------|
| EPI_ISL_478692 | 3/22/2020 | 6/30/2020 Oceania / Australia / New South Wales / Sydney |
| EPI_ISL_478693 | 3/30/2020 | 6/30/2020 Oceania / Australia / New South Wales / Sydney |
| EPI_ISL_478694 | 3/14/2020 | 6/30/2020 Oceania / Australia / New South Wales / Sydney |
| EPI_ISL_478695 | 3/14/2020 | 6/30/2020 Oceania / Australia / New South Wales / Sydney |
| EPI_ISL_478696 | 3/16/2020 | 6/30/2020 Oceania / Australia / New South Wales / Sydney |
| EPI_ISL_478697 | 3/16/2020 | 6/30/2020 Oceania / Australia / New South Wales / Sydney |
| EPI_ISL_478698 | 3/16/2020 | 6/30/2020 Oceania / Australia / New South Wales / Sydney |
| EPI_ISL_478699 | 3/14/2020 | 6/30/2020 Oceania / Australia / New South Wales / Sydney |
| EPI_ISL_478700 | 3/31/2020 | 6/30/2020 Oceania / Australia / New South Wales / Sydney |
| EPI_ISL_478701 | 4/1/2020  | 6/30/2020 Oceania / Australia / New South Wales / Sydney |
| EPI_ISL_478702 | 3/26/2020 | 6/30/2020 Oceania / Australia / New South Wales / Sydney |
| EPI_ISL_478703 | 3/19/2020 | 6/30/2020 Oceania / Australia / New South Wales / Sydney |
| EPI_ISL_478704 | 3/13/2020 | 6/30/2020 Oceania / Australia / New South Wales / Sydney |
| EPI_ISL_478705 | 4/20/2020 | 6/30/2020 Oceania / Australia / New South Wales / Sydney |
| EPI_ISL_478706 | 3/28/2020 | 6/30/2020 Oceania / Australia / New South Wales / Sydney |
| EPI_ISL_478707 | 4/8/2020  | 6/30/2020 Oceania / Australia / New South Wales / Sydney |
| EPI_ISL_478708 | 3/27/2020 | 6/30/2020 Oceania / Australia / New South Wales / Sydney |
| EPI_ISL_478709 | 6/8/2020  | 6/30/2020 Oceania / Australia / New South Wales / Sydney |
| EPI_ISL_478710 | 6/8/2020  | 6/30/2020 Oceania / Australia / New South Wales / Sydney |
| EPI_ISL_478711 | 6/12/2020 | 6/30/2020 Oceania / Australia / New South Wales / Sydney |
| EPI_ISL_478712 | 4/17/2020 | 6/30/2020 Oceania / Australia / New South Wales / Sydney |
| EPI_ISL_478713 | 4/13/2020 | 6/30/2020 Oceania / Australia / New South Wales / Sydney |
| EPI_ISL_478714 | 4/9/2020  | 6/30/2020 Oceania / Australia / New South Wales / Sydney |
| EPI_ISL_478715 | 4/8/2020  | 6/30/2020 Oceania / Australia / New South Wales / Sydney |
| EPI_ISL_478716 | 4/7/2020  | 6/30/2020 Oceania / Australia / New South Wales / Sydney |
| EPI_ISL_478717 | 6/19/2020 | 6/30/2020 Oceania / Australia / New South Wales / Sydney |
| EPI_ISL_478718 | 6/19/2020 | 6/30/2020 Oceania / Australia / New South Wales / Sydney |
| EPI_ISL_478719 | 6/17/2020 | 6/30/2020 Europe / United Kingdom / England              |
| EPI_ISL_478720 | 6/18/2020 | 6/30/2020 Europe / United Kingdom / England              |
| EPI_ISL_478721 | 6/16/2020 | 6/30/2020 Europe / United Kingdom / England              |
| EPI_ISL_478722 | 6/16/2020 | 6/30/2020 Europe / United Kingdom / England              |
| EPI_ISL_478724 | 4/6/2020  | 6/30/2020 Europe / United Kingdom / England              |
| EPI_ISL_478725 | 4/17/2020 | 6/30/2020 Europe / United Kingdom / England              |
| EPI_ISL_478729 | 4/12/2020 | 6/30/2020 Europe / United Kingdom / England              |
| EPI_ISL_478730 | 2020      | 6/30/2020 Europe / United Kingdom / England              |
| EPI_ISL_478731 | 4/13/2020 | 6/30/2020 Europe / United Kingdom / England              |
| EPI_ISL_478732 | 4/14/2020 | 6/30/2020 Europe / United Kingdom / England              |
| EPI_ISL_478733 | 2020      | 6/30/2020 Europe / United Kingdom / England              |
| EPI_ISL_478734 | 4/13/2020 | 6/30/2020 Europe / United Kingdom / England              |
| EPI_ISL_478735 | 4/8/2020  | 6/30/2020 Europe / United Kingdom / England              |
| EPI_ISL_478736 | 4/13/2020 | 6/30/2020 Europe / United Kingdom / England              |
| EPI_ISL_478737 | 2020      | 6/30/2020 Europe / United Kingdom / England              |
| EPI_ISL_478738 | 4/14/2020 | 6/30/2020 Europe / United Kingdom / England              |
| EPI_ISL_478739 | 4/8/2020  | 6/30/2020 Europe / United Kingdom / England              |
| EPI_ISL_478740 | 4/13/2020 | 6/30/2020 Europe / United Kingdom / England              |
| EPI_ISL_478742 | 4/9/2020  | 6/30/2020 Europe / United Kingdom / England              |
| EPI_ISL_478743 | 4/8/2020  | 6/30/2020 Europe / United Kingdom / England              |











|                |           |           |                                   |
|----------------|-----------|-----------|-----------------------------------|
| EPI_ISL_479018 | 2020      | 6/30/2020 | Europe / United Kingdom / England |
| EPI_ISL_479019 | 2020      | 6/30/2020 | Europe / United Kingdom / England |
| EPI_ISL_479020 | 4/22/2020 | 6/30/2020 | Europe / United Kingdom / England |
| EPI_ISL_479022 | 4/22/2020 | 6/30/2020 | Europe / United Kingdom / England |
| EPI_ISL_479023 | 2020      | 6/30/2020 | Europe / United Kingdom / England |
| EPI_ISL_479024 | 2020      | 6/30/2020 | Europe / United Kingdom / England |
| EPI_ISL_479025 | 2020      | 6/30/2020 | Europe / United Kingdom / England |
| EPI_ISL_479026 | 4/29/2020 | 6/30/2020 | Europe / United Kingdom / England |
| EPI_ISL_479027 | 4/23/2020 | 6/30/2020 | Europe / United Kingdom / England |
| EPI_ISL_479030 | 4/29/2020 | 6/30/2020 | Europe / United Kingdom / England |
| EPI_ISL_479031 | 4/28/2020 | 6/30/2020 | Europe / United Kingdom / England |
| EPI_ISL_479032 | 2020      | 6/30/2020 | Europe / United Kingdom / England |
| EPI_ISL_479033 | 4/19/2020 | 6/30/2020 | Europe / United Kingdom / England |
| EPI_ISL_479035 | 4/14/2020 | 6/30/2020 | Europe / United Kingdom / England |
| EPI_ISL_479036 | 4/30/2020 | 6/30/2020 | Europe / United Kingdom / England |
| EPI_ISL_479037 | 4/17/2020 | 6/30/2020 | Europe / United Kingdom / England |
| EPI_ISL_479038 | 4/19/2020 | 6/30/2020 | Europe / United Kingdom / England |
| EPI_ISL_479040 | 2020      | 6/30/2020 | Europe / United Kingdom / England |
| EPI_ISL_479041 | 4/19/2020 | 6/30/2020 | Europe / United Kingdom / England |
| EPI_ISL_479042 | 4/25/2020 | 6/30/2020 | Europe / United Kingdom / England |
| EPI_ISL_479043 | 4/16/2020 | 6/30/2020 | Europe / United Kingdom / England |
| EPI_ISL_479044 | 5/4/2020  | 6/30/2020 | Europe / United Kingdom / England |
| EPI_ISL_479045 | 4/17/2020 | 6/30/2020 | Europe / United Kingdom / England |
| EPI_ISL_479046 | 4/24/2020 | 6/30/2020 | Europe / United Kingdom / England |
| EPI_ISL_479047 | 4/24/2020 | 6/30/2020 | Europe / United Kingdom / England |
| EPI_ISL_479048 | 4/25/2020 | 6/30/2020 | Europe / United Kingdom / England |
| EPI_ISL_479050 | 4/28/2020 | 6/30/2020 | Europe / United Kingdom / England |
| EPI_ISL_479051 | 4/15/2020 | 6/30/2020 | Europe / United Kingdom / England |
| EPI_ISL_479052 | 4/16/2020 | 6/30/2020 | Europe / United Kingdom / England |
| EPI_ISL_479054 | 4/19/2020 | 6/30/2020 | Europe / United Kingdom / England |
| EPI_ISL_479055 | 2020      | 6/30/2020 | Europe / United Kingdom / England |
| EPI_ISL_479056 | 4/23/2020 | 6/30/2020 | Europe / United Kingdom / England |
| EPI_ISL_479057 | 4/28/2020 | 6/30/2020 | Europe / United Kingdom / England |
| EPI_ISL_479058 | 4/15/2020 | 6/30/2020 | Europe / United Kingdom / England |
| EPI_ISL_479059 | 4/19/2020 | 6/30/2020 | Europe / United Kingdom / England |
| EPI_ISL_479060 | 5/5/2020  | 6/30/2020 | Europe / United Kingdom / England |
| EPI_ISL_479061 | 4/15/2020 | 6/30/2020 | Europe / United Kingdom / England |
| EPI_ISL_479062 | 4/19/2020 | 6/30/2020 | Europe / United Kingdom / England |
| EPI_ISL_479063 | 2020      | 6/30/2020 | Europe / United Kingdom / England |
| EPI_ISL_479064 | 4/23/2020 | 6/30/2020 | Europe / United Kingdom / England |
| EPI_ISL_479066 | 4/28/2020 | 6/30/2020 | Europe / United Kingdom / England |
| EPI_ISL_479067 | 4/14/2020 | 6/30/2020 | Europe / United Kingdom / England |
| EPI_ISL_479068 | 4/16/2020 | 6/30/2020 | Europe / United Kingdom / England |
| EPI_ISL_479069 | 5/2/2020  | 6/30/2020 | Europe / United Kingdom / England |
| EPI_ISL_479070 | 2020      | 6/30/2020 | Europe / United Kingdom / England |
| EPI_ISL_479071 | 4/24/2020 | 6/30/2020 | Europe / United Kingdom / England |
| EPI_ISL_479072 | 4/14/2020 | 6/30/2020 | Europe / United Kingdom / England |

|                |           |           |                                   |
|----------------|-----------|-----------|-----------------------------------|
| EPI_ISL_479073 | 4/16/2020 | 6/30/2020 | Europe / United Kingdom / England |
| EPI_ISL_479074 | 5/3/2020  | 6/30/2020 | Europe / United Kingdom / England |
| EPI_ISL_479076 | 5/3/2020  | 6/30/2020 | Europe / United Kingdom / England |
| EPI_ISL_479077 | 2020      | 6/30/2020 | Europe / United Kingdom / England |
| EPI_ISL_479079 | 4/14/2020 | 6/30/2020 | Europe / United Kingdom / England |
| EPI_ISL_479080 | 5/3/2020  | 6/30/2020 | Europe / United Kingdom / England |
| EPI_ISL_479081 | 2020      | 6/30/2020 | Europe / United Kingdom / England |
| EPI_ISL_479082 | 4/24/2020 | 6/30/2020 | Europe / United Kingdom / England |
| EPI_ISL_479083 | 4/18/2020 | 6/30/2020 | Europe / United Kingdom / England |
| EPI_ISL_479084 | 4/14/2020 | 6/30/2020 | Europe / United Kingdom / England |
| EPI_ISL_479085 | 5/6/2020  | 6/30/2020 | Europe / United Kingdom / England |
| EPI_ISL_479086 | 4/13/2020 | 6/30/2020 | Europe / United Kingdom / England |
| EPI_ISL_479088 | 2020      | 6/30/2020 | Europe / United Kingdom / England |
| EPI_ISL_479089 | 4/18/2020 | 6/30/2020 | Europe / United Kingdom / England |
| EPI_ISL_479090 | 4/13/2020 | 6/30/2020 | Europe / United Kingdom / England |
| EPI_ISL_479091 | 4/25/2020 | 6/30/2020 | Europe / United Kingdom / England |
| EPI_ISL_479092 | 2020      | 6/30/2020 | Europe / United Kingdom / England |
| EPI_ISL_479093 | 5/1/2020  | 6/30/2020 | Europe / United Kingdom / England |
| EPI_ISL_479094 | 2020      | 6/30/2020 | Europe / United Kingdom / England |
| EPI_ISL_479095 | 4/21/2020 | 6/30/2020 | Europe / United Kingdom / England |
| EPI_ISL_479096 | 4/15/2020 | 6/30/2020 | Europe / United Kingdom / England |
| EPI_ISL_479097 | 4/26/2020 | 6/30/2020 | Europe / United Kingdom / England |
| EPI_ISL_479098 | 2020      | 6/30/2020 | Europe / United Kingdom / England |
| EPI_ISL_479099 | 5/2/2020  | 6/30/2020 | Europe / United Kingdom / England |
| EPI_ISL_479100 | 5/1/2020  | 6/30/2020 | Europe / United Kingdom / England |
| EPI_ISL_479101 | 4/15/2020 | 6/30/2020 | Europe / United Kingdom / England |
| EPI_ISL_479102 | 4/26/2020 | 6/30/2020 | Europe / United Kingdom / England |
| EPI_ISL_479103 | 4/15/2020 | 6/30/2020 | Europe / United Kingdom / England |
| EPI_ISL_479104 | 5/1/2020  | 6/30/2020 | Europe / United Kingdom / England |
| EPI_ISL_479105 | 2020      | 6/30/2020 | Europe / United Kingdom / England |
| EPI_ISL_479106 | 2020      | 6/30/2020 | Europe / United Kingdom / England |
| EPI_ISL_479107 | 2020      | 6/30/2020 | Europe / United Kingdom / England |
| EPI_ISL_479108 | 5/1/2020  | 6/30/2020 | Europe / United Kingdom / England |
| EPI_ISL_479110 | 4/14/2020 | 6/30/2020 | Europe / United Kingdom / England |
| EPI_ISL_479111 | 5/1/2020  | 6/30/2020 | Europe / United Kingdom / England |
| EPI_ISL_479113 | 4/25/2020 | 6/30/2020 | Europe / United Kingdom / England |
| EPI_ISL_479114 | 4/21/2020 | 6/30/2020 | Europe / United Kingdom / England |
| EPI_ISL_479115 | 2020      | 6/30/2020 | Europe / United Kingdom / England |
| EPI_ISL_479116 | 4/22/2020 | 6/30/2020 | Europe / United Kingdom / England |
| EPI_ISL_479117 | 4/14/2020 | 6/30/2020 | Europe / United Kingdom / England |
| EPI_ISL_479118 | 5/6/2020  | 6/30/2020 | Europe / United Kingdom / England |
| EPI_ISL_479119 | 4/13/2020 | 6/30/2020 | Europe / United Kingdom / England |
| EPI_ISL_479120 | 4/23/2020 | 6/30/2020 | Europe / United Kingdom / England |
| EPI_ISL_479121 | 4/13/2020 | 6/30/2020 | Europe / United Kingdom / England |
| EPI_ISL_479122 | 4/23/2020 | 6/30/2020 | Europe / United Kingdom / England |
| EPI_ISL_479123 | 4/13/2020 | 6/30/2020 | Europe / United Kingdom / England |
| EPI_ISL_479124 | 4/17/2020 | 6/30/2020 | Europe / United Kingdom / England |



|                |           |           |                                   |
|----------------|-----------|-----------|-----------------------------------|
| EPI_ISL_479126 | 4/21/2020 | 6/30/2020 | Europe / United Kingdom / England |
| EPI_ISL_479127 | 4/19/2020 | 6/30/2020 | Europe / United Kingdom / England |
| EPI_ISL_479130 | 4/14/2020 | 6/30/2020 | Europe / United Kingdom / England |
| EPI_ISL_479131 | 4/17/2020 | 6/30/2020 | Europe / United Kingdom / England |
| EPI_ISL_479132 | 4/29/2020 | 6/30/2020 | Europe / United Kingdom / England |
| EPI_ISL_479133 | 4/23/2020 | 6/30/2020 | Europe / United Kingdom / England |
| EPI_ISL_479134 | 4/10/2020 | 6/30/2020 | Europe / United Kingdom / England |
| EPI_ISL_479135 | 4/19/2020 | 6/30/2020 | Europe / United Kingdom / England |
| EPI_ISL_479136 | 4/18/2020 | 6/30/2020 | Europe / United Kingdom / England |
| EPI_ISL_479137 | 4/2/2020  | 6/30/2020 | Europe / United Kingdom / England |
| EPI_ISL_479138 | 4/21/2020 | 6/30/2020 | Europe / United Kingdom / England |
| EPI_ISL_479140 | 4/18/2020 | 6/30/2020 | Europe / United Kingdom / England |
| EPI_ISL_479141 | 4/2/2020  | 6/30/2020 | Europe / United Kingdom / England |
| EPI_ISL_479142 | 4/2/2020  | 6/30/2020 | Europe / United Kingdom / England |
| EPI_ISL_479143 | 4/19/2020 | 6/30/2020 | Europe / United Kingdom / England |
| EPI_ISL_479144 | 4/21/2020 | 6/30/2020 | Europe / United Kingdom / England |
| EPI_ISL_479146 | 4/22/2020 | 6/30/2020 | Europe / United Kingdom / England |
| EPI_ISL_479147 | 4/14/2020 | 6/30/2020 | Europe / United Kingdom / England |
| EPI_ISL_479148 | 4/2/2020  | 6/30/2020 | Europe / United Kingdom / England |
| EPI_ISL_479149 | 4/19/2020 | 6/30/2020 | Europe / United Kingdom / England |
| EPI_ISL_479150 | 4/3/2020  | 6/30/2020 | Europe / United Kingdom / England |
| EPI_ISL_479152 | 4/10/2020 | 6/30/2020 | Europe / United Kingdom / England |
| EPI_ISL_479153 | 4/18/2020 | 6/30/2020 | Europe / United Kingdom / England |
| EPI_ISL_479154 | 4/25/2020 | 6/30/2020 | Europe / United Kingdom / England |
| EPI_ISL_479155 | 2020      | 6/30/2020 | Europe / United Kingdom / England |
| EPI_ISL_479156 | 4/2/2020  | 6/30/2020 | Europe / United Kingdom / England |
| EPI_ISL_479157 | 4/13/2020 | 6/30/2020 | Europe / United Kingdom / England |
| EPI_ISL_479158 | 4/10/2020 | 6/30/2020 | Europe / United Kingdom / England |
| EPI_ISL_479160 | 4/17/2020 | 6/30/2020 | Europe / United Kingdom / England |
| EPI_ISL_479162 | 4/2/2020  | 6/30/2020 | Europe / United Kingdom / England |
| EPI_ISL_479165 | 4/13/2020 | 6/30/2020 | Europe / United Kingdom / England |
| EPI_ISL_479166 | 4/17/2020 | 6/30/2020 | Europe / United Kingdom / England |
| EPI_ISL_479167 | 4/23/2020 | 6/30/2020 | Europe / United Kingdom / England |
| EPI_ISL_479168 | 2020      | 6/30/2020 | Europe / United Kingdom / England |
| EPI_ISL_479169 | 4/2/2020  | 6/30/2020 | Europe / United Kingdom / England |
| EPI_ISL_479170 | 4/19/2020 | 6/30/2020 | Europe / United Kingdom / England |
| EPI_ISL_479171 | 4/20/2020 | 6/30/2020 | Europe / United Kingdom / England |
| EPI_ISL_479172 | 4/13/2020 | 6/30/2020 | Europe / United Kingdom / England |
| EPI_ISL_479173 | 4/10/2020 | 6/30/2020 | Europe / United Kingdom / England |
| EPI_ISL_479174 | 4/13/2020 | 6/30/2020 | Europe / United Kingdom / England |
| EPI_ISL_479175 | 3/24/2020 | 6/30/2020 | Europe / United Kingdom / England |
| EPI_ISL_479176 | 3/24/2020 | 6/30/2020 | Europe / United Kingdom / England |
| EPI_ISL_479177 | 3/25/2020 | 6/30/2020 | Europe / United Kingdom / England |
| EPI_ISL_479178 | 3/26/2020 | 6/30/2020 | Europe / United Kingdom / England |
| EPI_ISL_479179 | 3/24/2020 | 6/30/2020 | Europe / United Kingdom / England |
| EPI_ISL_479180 | 3/26/2020 | 6/30/2020 | Europe / United Kingdom / England |
| EPI_ISL_479181 | 3/26/2020 | 6/30/2020 | Europe / United Kingdom / England |

|                |           |           |                                   |
|----------------|-----------|-----------|-----------------------------------|
| EPI_ISL_479182 | 2020      | 6/30/2020 | Europe / United Kingdom / England |
| EPI_ISL_479183 | 3/25/2020 | 6/30/2020 | Europe / United Kingdom / England |
| EPI_ISL_479184 | 3/25/2020 | 6/30/2020 | Europe / United Kingdom / England |
| EPI_ISL_479185 | 3/25/2020 | 6/30/2020 | Europe / United Kingdom / England |
| EPI_ISL_479186 | 3/26/2020 | 6/30/2020 | Europe / United Kingdom / England |
| EPI_ISL_479187 | 3/24/2020 | 6/30/2020 | Europe / United Kingdom / England |
| EPI_ISL_479188 | 3/25/2020 | 6/30/2020 | Europe / United Kingdom / England |
| EPI_ISL_479189 | 3/26/2020 | 6/30/2020 | Europe / United Kingdom / England |
| EPI_ISL_479190 | 3/24/2020 | 6/30/2020 | Europe / United Kingdom / England |
| EPI_ISL_479191 | 3/25/2020 | 6/30/2020 | Europe / United Kingdom / England |
| EPI_ISL_479192 | 3/26/2020 | 6/30/2020 | Europe / United Kingdom / England |
| EPI_ISL_479193 | 3/24/2020 | 6/30/2020 | Europe / United Kingdom / England |
| EPI_ISL_479194 | 3/25/2020 | 6/30/2020 | Europe / United Kingdom / England |
| EPI_ISL_479198 | 5/13/2020 | 6/30/2020 | Europe / United Kingdom / England |
| EPI_ISL_479201 | 4/26/2020 | 6/30/2020 | Europe / United Kingdom / England |
| EPI_ISL_479214 | 3/18/2020 | 6/30/2020 | Europe / United Kingdom / England |
| EPI_ISL_479216 | 6/9/2020  | 6/30/2020 | Europe / United Kingdom / England |
| EPI_ISL_479218 | 3/18/2020 | 6/30/2020 | Europe / United Kingdom / England |
| EPI_ISL_479221 | 5/20/2020 | 6/30/2020 | Europe / United Kingdom / England |
| EPI_ISL_479223 | 5/22/2020 | 6/30/2020 | Europe / United Kingdom / England |
| EPI_ISL_479224 | 4/24/2020 | 6/30/2020 | Europe / United Kingdom / England |
| EPI_ISL_479225 | 4/27/2020 | 6/30/2020 | Europe / United Kingdom / England |
| EPI_ISL_479226 | 3/20/2020 | 6/30/2020 | Europe / United Kingdom / England |
| EPI_ISL_479236 | 5/11/2020 | 6/30/2020 | Europe / United Kingdom / England |
| EPI_ISL_479242 | 6/3/2020  | 6/30/2020 | Europe / United Kingdom / England |
| EPI_ISL_479248 | 4/24/2020 | 6/30/2020 | Europe / United Kingdom / England |
| EPI_ISL_479258 | 4/22/2020 | 6/30/2020 | Europe / United Kingdom / England |
| EPI_ISL_479266 | 5/15/2020 | 6/30/2020 | Europe / United Kingdom / England |
| EPI_ISL_479267 | 4/25/2020 | 6/30/2020 | Europe / United Kingdom / England |
| EPI_ISL_479270 | 5/11/2020 | 6/30/2020 | Europe / United Kingdom / England |
| EPI_ISL_479275 | 3/21/2020 | 6/30/2020 | Europe / United Kingdom / England |
| EPI_ISL_479276 | 6/8/2020  | 6/30/2020 | Europe / United Kingdom / England |
| EPI_ISL_479279 | 4/23/2020 | 6/30/2020 | Europe / United Kingdom / England |
| EPI_ISL_479280 | 4/26/2020 | 6/30/2020 | Europe / United Kingdom / England |
| EPI_ISL_479283 | 5/10/2020 | 6/30/2020 | Europe / United Kingdom / England |
| EPI_ISL_479294 | 5/18/2020 | 6/30/2020 | Europe / United Kingdom / Wales   |
| EPI_ISL_479297 | 5/20/2020 | 6/30/2020 | Europe / United Kingdom / Wales   |
| EPI_ISL_479344 | 5/11/2020 | 6/30/2020 | Europe / United Kingdom / Wales   |
| EPI_ISL_479346 | 6/3/2020  | 6/30/2020 | Europe / United Kingdom / Wales   |
| EPI_ISL_479349 | 6/8/2020  | 6/30/2020 | Europe / United Kingdom / Wales   |
| EPI_ISL_479355 | 6/1/2020  | 6/30/2020 | Europe / United Kingdom / Wales   |
| EPI_ISL_479361 | 5/23/2020 | 6/30/2020 | Europe / United Kingdom / Wales   |
| EPI_ISL_479362 | 6/12/2020 | 6/30/2020 | Europe / United Kingdom / Wales   |
| EPI_ISL_479365 | 6/11/2020 | 6/30/2020 | Europe / United Kingdom / Wales   |
| EPI_ISL_479397 | 6/1/2020  | 6/30/2020 | Europe / United Kingdom / Wales   |
| EPI_ISL_479403 | 6/12/2020 | 6/30/2020 | Europe / United Kingdom / Wales   |
| EPI_ISL_479410 | 5/25/2020 | 6/30/2020 | Europe / United Kingdom / Wales   |

|                |           |                                           |
|----------------|-----------|-------------------------------------------|
| EPI_ISL_479412 | 4/25/2020 | 6/30/2020 Europe / United Kingdom / Wales |
| EPI_ISL_479420 | 6/9/2020  | 6/30/2020 Europe / United Kingdom / Wales |
| EPI_ISL_479431 | 5/17/2020 | 6/30/2020 Europe / United Kingdom / Wales |
| EPI_ISL_479436 | 6/9/2020  | 6/30/2020 Europe / United Kingdom / Wales |
| EPI_ISL_479439 | 4/21/2020 | 6/30/2020 Europe / United Kingdom / Wales |
| EPI_ISL_479441 | 6/3/2020  | 6/30/2020 Europe / United Kingdom / Wales |
| EPI_ISL_479442 | 5/11/2020 | 6/30/2020 Europe / United Kingdom / Wales |
| EPI_ISL_479443 | 5/28/2020 | 6/30/2020 Europe / United Kingdom / Wales |
| EPI_ISL_479445 | 4/20/2020 | 6/30/2020 Europe / United Kingdom / Wales |
| EPI_ISL_479451 | 6/7/2020  | 6/30/2020 Europe / United Kingdom / Wales |
| EPI_ISL_479455 | 6/10/2020 | 6/30/2020 Europe / United Kingdom / Wales |
| EPI_ISL_479463 | 5/18/2020 | 6/30/2020 Europe / United Kingdom / Wales |
| EPI_ISL_479480 | 5/18/2020 | 6/30/2020 Europe / United Kingdom / Wales |
| EPI_ISL_479482 | 4/26/2020 | 6/30/2020 Asia / Singapore                |
| EPI_ISL_479483 | 4/26/2020 | 6/30/2020 Asia / Singapore                |
| EPI_ISL_479484 | 4/27/2020 | 6/30/2020 Asia / Singapore                |
| EPI_ISL_479485 | 4/26/2020 | 6/30/2020 Asia / Singapore                |
| EPI_ISL_479486 | 4/26/2020 | 6/30/2020 Asia / Singapore                |
| EPI_ISL_479487 | 4/26/2020 | 6/30/2020 Asia / Singapore                |
| EPI_ISL_479488 | 4/26/2020 | 6/30/2020 Asia / Singapore                |
| EPI_ISL_479489 | 4/26/2020 | 6/30/2020 Asia / Singapore                |
| EPI_ISL_479490 | 4/27/2020 | 6/30/2020 Asia / Singapore                |
| EPI_ISL_479491 | 4/26/2020 | 6/30/2020 Asia / Singapore                |
| EPI_ISL_479492 | 4/26/2020 | 6/30/2020 Asia / Singapore                |
| EPI_ISL_479493 | 4/15/2020 | 6/30/2020 Asia / India / Maharashtra      |
| EPI_ISL_479494 | 4/19/2020 | 6/30/2020 Asia / India / Maharashtra      |
| EPI_ISL_479495 | 4/19/2020 | 6/30/2020 Asia / India / Maharashtra      |
| EPI_ISL_479496 | 4/21/2020 | 6/30/2020 Asia / India / Maharashtra      |
| EPI_ISL_479497 | 4/21/2020 | 6/30/2020 Asia / India / Maharashtra      |
| EPI_ISL_479498 | 4/23/2020 | 6/30/2020 Asia / India / Maharashtra      |
| EPI_ISL_479499 | 4/25/2020 | 6/30/2020 Asia / India / Maharashtra      |
| EPI_ISL_479500 | 4/25/2020 | 6/30/2020 Asia / India / Maharashtra      |
| EPI_ISL_479501 | 4/26/2020 | 6/30/2020 Asia / India / Maharashtra      |
| EPI_ISL_479502 | 4/27/2020 | 6/30/2020 Asia / India / Maharashtra      |
| EPI_ISL_479503 | 4/27/2020 | 6/30/2020 Asia / India / Maharashtra      |
| EPI_ISL_479504 | 4/27/2020 | 6/30/2020 Asia / India / Maharashtra      |
| EPI_ISL_479505 | 4/28/2020 | 6/30/2020 Asia / India / Maharashtra      |
| EPI_ISL_479506 | 4/28/2020 | 6/30/2020 Asia / India / Maharashtra      |
| EPI_ISL_479507 | 4/29/2020 | 6/30/2020 Asia / India / Maharashtra      |
| EPI_ISL_479508 | 4/29/2020 | 6/30/2020 Asia / India / Maharashtra      |
| EPI_ISL_479509 | 4/30/2020 | 6/30/2020 Asia / India / Maharashtra      |
| EPI_ISL_479510 | 4/30/2020 | 6/30/2020 Asia / India / Maharashtra      |
| EPI_ISL_479511 | 5/1/2020  | 6/30/2020 Asia / India / Maharashtra      |
| EPI_ISL_479512 | 5/3/2020  | 6/30/2020 Asia / India / Maharashtra      |
| EPI_ISL_479513 | 5/4/2020  | 6/30/2020 Asia / India / Maharashtra      |
| EPI_ISL_479514 | 5/4/2020  | 6/30/2020 Asia / India / Maharashtra      |
| EPI_ISL_479515 | 5/5/2020  | 6/30/2020 Asia / India / Maharashtra      |



|                |           |                                                  |
|----------------|-----------|--------------------------------------------------|
| EPI_ISL_479566 | 6/16/2020 | 6/30/2020 Asia / India / Maharashtra             |
| EPI_ISL_479567 | 6/16/2020 | 6/30/2020 Asia / India / Maharashtra             |
| EPI_ISL_479568 | 6/16/2020 | 6/30/2020 Asia / India / Maharashtra             |
| EPI_ISL_479570 | 6/16/2020 | 6/30/2020 Asia / India / Maharashtra             |
| EPI_ISL_479571 | 6/16/2020 | 6/30/2020 Asia / India / Maharashtra             |
| EPI_ISL_479572 | 4/4/2020  | 6/30/2020 Asia / India / Maharashtra             |
| EPI_ISL_479574 | 4/20/2020 | 6/30/2020 Asia / Singapore                       |
| EPI_ISL_479575 | 4/19/2020 | 6/30/2020 Asia / Singapore                       |
| EPI_ISL_479576 | 4/18/2020 | 6/30/2020 Asia / Singapore                       |
| EPI_ISL_479577 | 4/17/2020 | 6/30/2020 Asia / Singapore                       |
| EPI_ISL_479578 | 4/16/2020 | 6/30/2020 Asia / Singapore                       |
| EPI_ISL_479580 | 4/6/2020  | 6/30/2020 Asia / Singapore                       |
| EPI_ISL_479581 | 4/6/2020  | 6/30/2020 Asia / Singapore                       |
| EPI_ISL_479582 | 4/20/2020 | 6/30/2020 Asia / Singapore                       |
| EPI_ISL_479583 | 6/6/2020  | 6/30/2020 Asia / Singapore                       |
| EPI_ISL_479584 | 5/15/2020 | 6/30/2020 Asia / Singapore                       |
| EPI_ISL_479585 | 5/15/2020 | 6/30/2020 Asia / Singapore                       |
| EPI_ISL_479586 | 5/15/2020 | 6/30/2020 Asia / Singapore                       |
| EPI_ISL_479587 | 5/20/2020 | 6/30/2020 Asia / Singapore                       |
| EPI_ISL_479588 | 5/22/2020 | 6/30/2020 Asia / Singapore                       |
| EPI_ISL_479589 | 5/22/2020 | 6/30/2020 Asia / Singapore                       |
| EPI_ISL_479590 | 5/23/2020 | 6/30/2020 Asia / Singapore                       |
| EPI_ISL_479591 | 5/23/2020 | 6/30/2020 Asia / Singapore                       |
| EPI_ISL_479592 | 5/24/2020 | 6/30/2020 Asia / Singapore                       |
| EPI_ISL_479593 | 5/26/2020 | 6/30/2020 Asia / Singapore                       |
| EPI_ISL_479594 | 5/27/2020 | 6/30/2020 Asia / Singapore                       |
| EPI_ISL_479595 | 5/27/2020 | 6/30/2020 Asia / Singapore                       |
| EPI_ISL_479596 | 4/15/2020 | 6/30/2020 Asia / Singapore                       |
| EPI_ISL_479597 | 4/15/2020 | 6/30/2020 Asia / Singapore                       |
| EPI_ISL_479598 | 4/15/2020 | 6/30/2020 Asia / Singapore                       |
| EPI_ISL_479599 | 4/15/2020 | 6/30/2020 Asia / Singapore                       |
| EPI_ISL_479600 | 4/15/2020 | 6/30/2020 Asia / Singapore                       |
| EPI_ISL_479601 | 4/15/2020 | 6/30/2020 Asia / Singapore                       |
| EPI_ISL_479602 | 4/14/2020 | 6/30/2020 Asia / Singapore                       |
| EPI_ISL_479603 | 4/14/2020 | 6/30/2020 Asia / Singapore                       |
| EPI_ISL_479616 | 3/27/2020 | 6/30/2020 Europe / Italy / Friuli Venezia Giulia |
| EPI_ISL_479617 | 3/27/2020 | 6/30/2020 Europe / Italy / Friuli Venezia Giulia |
| EPI_ISL_479618 | 4/12/2020 | 6/30/2020 Europe / Italy / Friuli Venezia Giulia |
| EPI_ISL_479619 | 4/12/2020 | 6/30/2020 Europe / Italy / Friuli Venezia Giulia |
| EPI_ISL_479620 | 3/31/2020 | 6/30/2020 Europe / Russia / Moscow               |
| EPI_ISL_479621 | 3/31/2020 | 6/30/2020 Europe / Russia / Moscow               |
| EPI_ISL_479622 | 3/31/2020 | 6/30/2020 Europe / Russia / Moscow               |
| EPI_ISL_479623 | 4/1/2020  | 6/30/2020 Europe / Russia / Moscow               |
| EPI_ISL_479624 | 3/30/2020 | 6/30/2020 Europe / Russia / Moscow               |
| EPI_ISL_486890 | 2020-04   | 6/30/2020 Asia / Japan / Tokyo                   |
| EPI_ISL_486891 | 2020-04   | 6/30/2020 Asia / Japan / Tokyo                   |
| EPI_ISL_486892 | 2020-04   | 6/30/2020 Asia / Japan / Tokyo                   |

|                |           |           |                                                           |
|----------------|-----------|-----------|-----------------------------------------------------------|
| EPI_ISL_486893 | 2020-04   | 6/30/2020 | Asia / Japan / Tokyo                                      |
| EPI_ISL_486894 | 2020-04   | 6/30/2020 | Asia / Japan / Tokyo                                      |
| EPI_ISL_486895 | 2020-04   | 6/30/2020 | Asia / Japan / Tokyo                                      |
| EPI_ISL_486896 | 2020-04   | 6/30/2020 | Asia / Japan / Tokyo                                      |
| EPI_ISL_479625 | 3/22/2020 | 7/1/2020  | North America / Canada / New Brunswick                    |
| EPI_ISL_479626 | 3/29/2020 | 7/1/2020  | North America / Canada / New Brunswick                    |
| EPI_ISL_479627 | 3/27/2020 | 7/1/2020  | North America / Canada / New Brunswick                    |
| EPI_ISL_479628 | 3/29/2020 | 7/1/2020  | North America / Canada / New Brunswick                    |
| EPI_ISL_479629 | 3/30/2020 | 7/1/2020  | North America / Canada / New Brunswick                    |
| EPI_ISL_479630 | 3/27/2020 | 7/1/2020  | North America / Canada / New Brunswick                    |
| EPI_ISL_479631 | 3/27/2020 | 7/1/2020  | North America / Canada / New Brunswick                    |
| EPI_ISL_479632 | 3/30/2020 | 7/1/2020  | North America / Canada / New Brunswick                    |
| EPI_ISL_479633 | 3/30/2020 | 7/1/2020  | North America / Canada / New Brunswick                    |
| EPI_ISL_479634 | 3/25/2020 | 7/1/2020  | North America / Canada / New Brunswick                    |
| EPI_ISL_479635 | 3/25/2020 | 7/1/2020  | North America / Canada / New Brunswick                    |
| EPI_ISL_479636 | 3/25/2020 | 7/1/2020  | North America / Canada / New Brunswick                    |
| EPI_ISL_479637 | 3/26/2020 | 7/1/2020  | North America / Canada / New Brunswick                    |
| EPI_ISL_479638 | 3/25/2020 | 7/1/2020  | North America / Canada / New Brunswick                    |
| EPI_ISL_479639 | 3/26/2020 | 7/1/2020  | North America / Canada / New Brunswick                    |
| EPI_ISL_479640 | 3/26/2020 | 7/1/2020  | North America / Canada / New Brunswick                    |
| EPI_ISL_479641 | 3/26/2020 | 7/1/2020  | North America / Canada / New Brunswick                    |
| EPI_ISL_479642 | 3/23/2020 | 7/1/2020  | North America / Canada / New Brunswick                    |
| EPI_ISL_479643 | 3/30/2020 | 7/1/2020  | North America / Canada / New Brunswick                    |
| EPI_ISL_479644 | 3/24/2020 | 7/1/2020  | North America / Canada / New Brunswick                    |
| EPI_ISL_479645 | 3/25/2020 | 7/1/2020  | North America / Canada / New Brunswick                    |
| EPI_ISL_479646 | 3/24/2020 | 7/1/2020  | North America / Canada / New Brunswick                    |
| EPI_ISL_479647 | 3/25/2020 | 7/1/2020  | North America / Canada / New Brunswick                    |
| EPI_ISL_479648 | 3/31/2020 | 7/1/2020  | North America / Canada / New Brunswick                    |
| EPI_ISL_479649 | 3/31/2020 | 7/1/2020  | North America / Canada / New Brunswick                    |
| EPI_ISL_479650 | 3/31/2020 | 7/1/2020  | North America / Canada / New Brunswick                    |
| EPI_ISL_479651 | 3/25/2020 | 7/1/2020  | North America / Canada / New Brunswick                    |
| EPI_ISL_479657 | 5/9/2020  | 7/1/2020  | Asia / India / Maharashtra                                |
| EPI_ISL_479756 | 3/28/2020 | 7/1/2020  | Asia / Vietnam / Hanoi                                    |
| EPI_ISL_479757 | 3/25/2020 | 7/1/2020  | Asia / Vietnam / Hanoi                                    |
| EPI_ISL_479758 | 3/28/2020 | 7/1/2020  | Asia / Vietnam / Hanoi                                    |
| EPI_ISL_479759 | 4/3/2020  | 7/1/2020  | North America / USA / Florida / Miami-Dade County / Miami |
| EPI_ISL_479760 | 4/6/2020  | 7/1/2020  | North America / USA / Florida / Miami-Dade County / Miami |
| EPI_ISL_479762 | 4/7/2020  | 7/1/2020  | North America / USA / Florida / Miami-Dade County / Miami |
| EPI_ISL_479763 | 4/18/2020 | 7/1/2020  | North America / USA / Florida / Miami-Dade County / Miami |
| EPI_ISL_479764 | 5/21/2020 | 7/1/2020  | North America / USA / Florida / Miami-Dade County / Miami |
| EPI_ISL_479765 | 6/9/2020  | 7/1/2020  | North America / USA / Florida / Miami-Dade County / Miami |
| EPI_ISL_479766 | 4/9/2020  | 7/1/2020  | North America / USA / Florida / Miami-Dade County / Miami |
| EPI_ISL_479767 | 4/12/2020 | 7/1/2020  | North America / USA / Florida / Miami-Dade County / Miami |
| EPI_ISL_479768 | 4/15/2020 | 7/1/2020  | North America / USA / Florida / Miami-Dade County / Miami |
| EPI_ISL_479769 | 4/15/2020 | 7/1/2020  | North America / USA / Florida / Miami-Dade County / Miami |
| EPI_ISL_479771 | 4/15/2020 | 7/1/2020  | North America / USA / Florida / Miami-Dade County / Miami |
| EPI_ISL_479772 | 4/15/2020 | 7/1/2020  | North America / USA / Florida / Miami-Dade County / Miami |

|                |           |                                                                    |
|----------------|-----------|--------------------------------------------------------------------|
| EPI_ISL_479773 | 4/17/2020 | 7/1/2020 North America / USA / Florida / Miami-Dade County / Miami |
| EPI_ISL_479774 | 4/17/2020 | 7/1/2020 North America / USA / Florida / Miami-Dade County / Miami |
| EPI_ISL_479775 | 4/17/2020 | 7/1/2020 North America / USA / Florida / Miami-Dade County / Miami |
| EPI_ISL_479777 | 2020      | 7/1/2020 Europe / United Kingdom / England                         |
| EPI_ISL_479778 | 2020      | 7/1/2020 Europe / United Kingdom / England                         |
| EPI_ISL_479780 | 2020      | 7/1/2020 Europe / United Kingdom / England                         |
| EPI_ISL_479781 | 2020      | 7/1/2020 Europe / United Kingdom / England                         |
| EPI_ISL_479782 | 2020      | 7/1/2020 Europe / United Kingdom / England                         |
| EPI_ISL_479783 | 2020      | 7/1/2020 Europe / United Kingdom / England                         |
| EPI_ISL_479784 | 2020      | 7/1/2020 Europe / United Kingdom / England                         |
| EPI_ISL_479785 | 2020      | 7/1/2020 Europe / United Kingdom / England                         |
| EPI_ISL_479786 | 2020      | 7/1/2020 Europe / United Kingdom / England                         |
| EPI_ISL_479787 | 2020      | 7/1/2020 Europe / United Kingdom / England                         |
| EPI_ISL_479788 | 2020      | 7/1/2020 Europe / United Kingdom / England                         |
| EPI_ISL_479790 | 4/13/2020 | 7/1/2020 Europe / Italy / Friuli Venezia Giulia                    |
| EPI_ISL_479791 | 3/8/2020  | 7/1/2020 Europe / Italy / Friuli Venezia Giulia                    |
| EPI_ISL_479792 | 2020-02   | 7/1/2020 Asia / Japan / Hokkaido                                   |
| EPI_ISL_479793 | 2020-02   | 7/1/2020 Asia / Japan / Hokkaido                                   |
| EPI_ISL_479794 | 2020-02   | 7/1/2020 Asia / Japan / Hokkaido                                   |
| EPI_ISL_479795 | 2020-02   | 7/1/2020 Asia / Japan / Hokkaido                                   |
| EPI_ISL_479796 | 2020-02   | 7/1/2020 Asia / Japan / HokurikuShinsyu                            |
| EPI_ISL_479797 | 2/18/2020 | 7/1/2020 Asia / Japan / Kanto                                      |
| EPI_ISL_479798 | 2/18/2020 | 7/1/2020 Asia / Japan / Kanto                                      |
| EPI_ISL_479799 | 1/20/2020 | 7/1/2020 Asia / Japan / Hokkaido                                   |
| EPI_ISL_479800 | 1/20/2020 | 7/1/2020 Asia / Japan / Hokkaido                                   |
| EPI_ISL_479801 | 2020-02   | 7/1/2020 Asia / Japan / Hokkaido                                   |
| EPI_ISL_479802 | 2/25/2020 | 7/1/2020 Asia / Japan / Kanto                                      |
| EPI_ISL_479803 | 2/28/2020 | 7/1/2020 Asia / Japan / Kanto                                      |
| EPI_ISL_479804 | 2/29/2020 | 7/1/2020 Asia / Japan / Kanto                                      |
| EPI_ISL_479805 | 3/4/2020  | 7/1/2020 Asia / Japan / Kanto                                      |
| EPI_ISL_479806 | 3/4/2020  | 7/1/2020 Asia / Japan / Kanto                                      |
| EPI_ISL_479807 | 3/5/2020  | 7/1/2020 Asia / Japan / Kanto                                      |
| EPI_ISL_479808 | 3/6/2020  | 7/1/2020 Asia / Japan / Kanto                                      |
| EPI_ISL_479809 | 2020-02   | 7/1/2020 Asia / Japan / Kanto                                      |
| EPI_ISL_479810 | 2020-02   | 7/1/2020 Asia / Japan / Kanto                                      |
| EPI_ISL_479811 | 2020-02   | 7/1/2020 Asia / Japan / Kanto                                      |
| EPI_ISL_479812 | 3/1/2020  | 7/1/2020 Asia / Japan / Hokkaido                                   |
| EPI_ISL_479813 | 3/3/2020  | 7/1/2020 Asia / Japan / Hokkaido                                   |
| EPI_ISL_479814 | 3/3/2020  | 7/1/2020 Asia / Japan / Hokkaido                                   |
| EPI_ISL_479815 | 3/5/2020  | 7/1/2020 Asia / Japan / Hokkaido                                   |
| EPI_ISL_479816 | 3/6/2020  | 7/1/2020 Asia / Japan / Hokkaido                                   |
| EPI_ISL_479817 | 3/7/2020  | 7/1/2020 Asia / Japan / Hokkaido                                   |
| EPI_ISL_479818 | 3/7/2020  | 7/1/2020 Asia / Japan / Hokkaido                                   |
| EPI_ISL_479819 | 3/8/2020  | 7/1/2020 Asia / Japan / Hokkaido                                   |
| EPI_ISL_479820 | 3/8/2020  | 7/1/2020 Asia / Japan / Hokkaido                                   |
| EPI_ISL_479821 | 3/2/2020  | 7/1/2020 Asia / Japan / Kansai                                     |
| EPI_ISL_479822 | 3/8/2020  | 7/1/2020 Asia / Japan / Kansai                                     |

|                |           |                                    |
|----------------|-----------|------------------------------------|
| EPI_ISL_479823 | 3/1/2020  | 7/1/2020 Asia / Japan / Chushikoku |
| EPI_ISL_479824 | 2/15/2020 | 7/1/2020 Asia / Japan / Kyusyu     |
| EPI_ISL_479825 | 2020-02   | 7/1/2020 Asia / Japan / Kanto      |
| EPI_ISL_479826 | 2/26/2020 | 7/1/2020 Asia / Japan / Hokkaido   |
| EPI_ISL_479827 | 2/27/2020 | 7/1/2020 Asia / Japan / Hokkaido   |
| EPI_ISL_479828 | 2/27/2020 | 7/1/2020 Asia / Japan / Hokkaido   |
| EPI_ISL_479829 | 2/28/2020 | 7/1/2020 Asia / Japan / Hokkaido   |
| EPI_ISL_479830 | 2/28/2020 | 7/1/2020 Asia / Japan / Hokkaido   |
| EPI_ISL_479831 | 3/2/2020  | 7/1/2020 Asia / Japan / Hokkaido   |
| EPI_ISL_479832 | 3/2/2020  | 7/1/2020 Asia / Japan / Hokkaido   |
| EPI_ISL_479833 | 3/2/2020  | 7/1/2020 Asia / Japan / Hokkaido   |
| EPI_ISL_479834 | 3/4/2020  | 7/1/2020 Asia / Japan / Hokkaido   |
| EPI_ISL_479835 | 3/4/2020  | 7/1/2020 Asia / Japan / Hokkaido   |
| EPI_ISL_479836 | 3/5/2020  | 7/1/2020 Asia / Japan / Hokkaido   |
| EPI_ISL_479837 | 3/6/2020  | 7/1/2020 Asia / Japan / Hokkaido   |
| EPI_ISL_479838 | 3/6/2020  | 7/1/2020 Asia / Japan / Hokkaido   |
| EPI_ISL_479839 | 3/7/2020  | 7/1/2020 Asia / Japan / Hokkaido   |
| EPI_ISL_479840 | 3/7/2020  | 7/1/2020 Asia / Japan / Hokkaido   |
| EPI_ISL_479841 | 3/8/2020  | 7/1/2020 Asia / Japan / Hokkaido   |
| EPI_ISL_479842 | 3/8/2020  | 7/1/2020 Asia / Japan / Hokkaido   |
| EPI_ISL_479843 | 3/9/2020  | 7/1/2020 Asia / Japan / Hokkaido   |
| EPI_ISL_479844 | 3/9/2020  | 7/1/2020 Asia / Japan / Hokkaido   |
| EPI_ISL_479845 | 3/9/2020  | 7/1/2020 Asia / Japan / Hokkaido   |
| EPI_ISL_479846 | 3/9/2020  | 7/1/2020 Asia / Japan / Hokkaido   |
| EPI_ISL_479847 | 3/10/2020 | 7/1/2020 Asia / Japan / Hokkaido   |
| EPI_ISL_479848 | 3/10/2020 | 7/1/2020 Asia / Japan / Hokkaido   |
| EPI_ISL_479849 | 3/10/2020 | 7/1/2020 Asia / Japan / Hokkaido   |
| EPI_ISL_479850 | 2/13/2020 | 7/1/2020 Asia / Japan / Kanto      |
| EPI_ISL_479851 | 2/17/2020 | 7/1/2020 Asia / Japan / Kanto      |
| EPI_ISL_479852 | 2/25/2020 | 7/1/2020 Asia / Japan / Kanto      |
| EPI_ISL_479853 | 3/11/2020 | 7/1/2020 Asia / Japan / Kanto      |
| EPI_ISL_479854 | 3/11/2020 | 7/1/2020 Asia / Japan / Kanto      |
| EPI_ISL_479855 | 3/12/2020 | 7/1/2020 Asia / Japan / Kansai     |
| EPI_ISL_479856 | 3/12/2020 | 7/1/2020 Asia / Japan / Kansai     |
| EPI_ISL_479857 | 3/12/2020 | 7/1/2020 Asia / Japan / Kansai     |
| EPI_ISL_479858 | 3/12/2020 | 7/1/2020 Asia / Japan / Kansai     |
| EPI_ISL_479859 | 3/12/2020 | 7/1/2020 Asia / Japan / Kansai     |
| EPI_ISL_479860 | 3/14/2020 | 7/1/2020 Asia / Japan / Kansai     |
| EPI_ISL_479861 | 3/15/2020 | 7/1/2020 Asia / Japan / Kansai     |
| EPI_ISL_479862 | 3/12/2020 | 7/1/2020 Asia / Japan / Kansai     |
| EPI_ISL_479863 | 2/17/2020 | 7/1/2020 Asia / Japan / Kansai     |
| EPI_ISL_479864 | 2/23/2020 | 7/1/2020 Asia / Japan / Kansai     |
| EPI_ISL_479865 | 2020-02   | 7/1/2020 Asia / Japan / Kansai     |
| EPI_ISL_479866 | 2020-02   | 7/1/2020 Asia / Japan / Kansai     |
| EPI_ISL_479867 | 2020-02   | 7/1/2020 Asia / Japan / Kansai     |
| EPI_ISL_479868 | 3/16/2020 | 7/1/2020 Asia / Japan / Kansai     |
| EPI_ISL_479869 | 3/20/2020 | 7/1/2020 Asia / Japan / Kanto      |



|                |           |                                  |
|----------------|-----------|----------------------------------|
| EPI_ISL_479870 | 2/21/2020 | 7/1/2020 Asia / Japan / Kanto    |
| EPI_ISL_479871 | 2/25/2020 | 7/1/2020 Asia / Japan / Kanto    |
| EPI_ISL_479872 | 3/11/2020 | 7/1/2020 Asia / Japan / Hokkaido |
| EPI_ISL_479873 | 3/12/2020 | 7/1/2020 Asia / Japan / Hokkaido |
| EPI_ISL_479874 | 3/12/2020 | 7/1/2020 Asia / Japan / Hokkaido |
| EPI_ISL_479875 | 3/12/2020 | 7/1/2020 Asia / Japan / Hokkaido |
| EPI_ISL_479876 | 3/12/2020 | 7/1/2020 Asia / Japan / Hokkaido |
| EPI_ISL_479877 | 3/12/2020 | 7/1/2020 Asia / Japan / Hokkaido |
| EPI_ISL_479878 | 3/13/2020 | 7/1/2020 Asia / Japan / Hokkaido |
| EPI_ISL_479879 | 3/14/2020 | 7/1/2020 Asia / Japan / Hokkaido |
| EPI_ISL_479880 | 3/14/2020 | 7/1/2020 Asia / Japan / Hokkaido |
| EPI_ISL_479881 | 3/15/2020 | 7/1/2020 Asia / Japan / Hokkaido |
| EPI_ISL_479882 | 3/17/2020 | 7/1/2020 Asia / Japan / Hokkaido |
| EPI_ISL_479883 | 3/18/2020 | 7/1/2020 Asia / Japan / Hokkaido |
| EPI_ISL_479884 | 3/18/2020 | 7/1/2020 Asia / Japan / Hokkaido |
| EPI_ISL_479885 | 3/19/2020 | 7/1/2020 Asia / Japan / Hokkaido |
| EPI_ISL_479886 | 3/5/2020  | 7/1/2020 Asia / Japan / Kanto    |
| EPI_ISL_479887 | 3/5/2020  | 7/1/2020 Asia / Japan / Kanto    |
| EPI_ISL_479888 | 3/5/2020  | 7/1/2020 Asia / Japan / Kanto    |
| EPI_ISL_479889 | 3/6/2020  | 7/1/2020 Asia / Japan / Kanto    |
| EPI_ISL_479890 | 3/3/2020  | 7/1/2020 Asia / Japan / Kanto    |
| EPI_ISL_479891 | 3/16/2020 | 7/1/2020 Asia / Japan / Kanto    |
| EPI_ISL_479892 | 3/16/2020 | 7/1/2020 Asia / Japan / Kanto    |
| EPI_ISL_479893 | 3/16/2020 | 7/1/2020 Asia / Japan / Kanto    |
| EPI_ISL_479894 | 3/16/2020 | 7/1/2020 Asia / Japan / Kanto    |
| EPI_ISL_479895 | 3/16/2020 | 7/1/2020 Asia / Japan / Kanto    |
| EPI_ISL_479896 | 3/13/2020 | 7/1/2020 Asia / Japan / Kanto    |
| EPI_ISL_479897 | 3/13/2020 | 7/1/2020 Asia / Japan / Kanto    |
| EPI_ISL_479898 | 3/16/2020 | 7/1/2020 Asia / Japan / Kanto    |
| EPI_ISL_479899 | 3/16/2020 | 7/1/2020 Asia / Japan / Kanto    |
| EPI_ISL_479900 | 3/16/2020 | 7/1/2020 Asia / Japan / Kanto    |
| EPI_ISL_479901 | 3/19/2020 | 7/1/2020 Asia / Japan / Kanto    |
| EPI_ISL_479902 | 3/20/2020 | 7/1/2020 Asia / Japan / Kanto    |
| EPI_ISL_479903 | 3/7/2020  | 7/1/2020 Asia / Japan / Kansai   |
| EPI_ISL_479904 | 3/13/2020 | 7/1/2020 Asia / Japan / Kansai   |
| EPI_ISL_479905 | 3/11/2020 | 7/1/2020 Asia / Japan / Kansai   |
| EPI_ISL_479906 | 3/11/2020 | 7/1/2020 Asia / Japan / Kansai   |
| EPI_ISL_479907 | 3/11/2020 | 7/1/2020 Asia / Japan / Kansai   |
| EPI_ISL_479908 | 3/18/2020 | 7/1/2020 Asia / Japan / Kansai   |
| EPI_ISL_479909 | 3/19/2020 | 7/1/2020 Asia / Japan / Kansai   |
| EPI_ISL_479910 | 3/19/2020 | 7/1/2020 Asia / Japan / Kansai   |
| EPI_ISL_479911 | 3/20/2020 | 7/1/2020 Asia / Japan / Kansai   |
| EPI_ISL_479912 | 3/21/2020 | 7/1/2020 Asia / Japan / Kansai   |
| EPI_ISL_479913 | 2/28/2020 | 7/1/2020 Asia / Japan / Kanto    |
| EPI_ISL_479914 | 3/1/2020  | 7/1/2020 Asia / Japan / Kanto    |
| EPI_ISL_479915 | 3/1/2020  | 7/1/2020 Asia / Japan / Kanto    |
| EPI_ISL_479916 | 3/1/2020  | 7/1/2020 Asia / Japan / Kanto    |

|                |           |                                |
|----------------|-----------|--------------------------------|
| EPI_ISL_479917 | 3/4/2020  | 7/1/2020 Asia / Japan / Kanto  |
| EPI_ISL_479918 | 3/8/2020  | 7/1/2020 Asia / Japan / Kanto  |
| EPI_ISL_479919 | 3/8/2020  | 7/1/2020 Asia / Japan / Kanto  |
| EPI_ISL_479920 | 3/9/2020  | 7/1/2020 Asia / Japan / Kanto  |
| EPI_ISL_479921 | 3/9/2020  | 7/1/2020 Asia / Japan / Kanto  |
| EPI_ISL_479922 | 3/11/2020 | 7/1/2020 Asia / Japan / Kanto  |
| EPI_ISL_479923 | 3/12/2020 | 7/1/2020 Asia / Japan / Kanto  |
| EPI_ISL_479924 | 3/15/2020 | 7/1/2020 Asia / Japan / Kanto  |
| EPI_ISL_479925 | 3/5/2020  | 7/1/2020 Asia / Japan / Kansai |
| EPI_ISL_479926 | 3/14/2020 | 7/1/2020 Asia / Japan / Kansai |
| EPI_ISL_479927 | 3/23/2020 | 7/1/2020 Asia / Japan / Kansai |
| EPI_ISL_479928 | 3/9/2020  | 7/1/2020 Asia / Japan / Kanto  |
| EPI_ISL_479929 | 3/9/2020  | 7/1/2020 Asia / Japan / Kanto  |
| EPI_ISL_479930 | 3/9/2020  | 7/1/2020 Asia / Japan / Kanto  |
| EPI_ISL_479931 | 3/11/2020 | 7/1/2020 Asia / Japan / Kanto  |
| EPI_ISL_479932 | 3/13/2020 | 7/1/2020 Asia / Japan / Kanto  |
| EPI_ISL_479933 | 3/16/2020 | 7/1/2020 Asia / Japan / Kanto  |
| EPI_ISL_479934 | 3/18/2020 | 7/1/2020 Asia / Japan / Kanto  |
| EPI_ISL_479935 | 3/18/2020 | 7/1/2020 Asia / Japan / Kanto  |
| EPI_ISL_479936 | 3/23/2020 | 7/1/2020 Asia / Japan / Kanto  |
| EPI_ISL_479937 | 3/16/2020 | 7/1/2020 Asia / Japan / Kanto  |
| EPI_ISL_479938 | 3/17/2020 | 7/1/2020 Asia / Japan / Kanto  |
| EPI_ISL_479939 | 3/17/2020 | 7/1/2020 Asia / Japan / Kanto  |
| EPI_ISL_479940 | 3/17/2020 | 7/1/2020 Asia / Japan / Kanto  |
| EPI_ISL_479941 | 3/21/2020 | 7/1/2020 Asia / Japan / Kanto  |
| EPI_ISL_479942 | 3/24/2020 | 7/1/2020 Asia / Japan / Kanto  |
| EPI_ISL_479943 | 3/23/2020 | 7/1/2020 Asia / Japan / Kanto  |
| EPI_ISL_479944 | 2020-03   | 7/1/2020 Asia / Japan / Kansai |
| EPI_ISL_479945 | 2020-03   | 7/1/2020 Asia / Japan / Kansai |
| EPI_ISL_479946 | 2020-03   | 7/1/2020 Asia / Japan / Kansai |
| EPI_ISL_479947 | 2020-03   | 7/1/2020 Asia / Japan / Kansai |
| EPI_ISL_479948 | 2020-03   | 7/1/2020 Asia / Japan / Kansai |
| EPI_ISL_479949 | 2020-03   | 7/1/2020 Asia / Japan / Kansai |
| EPI_ISL_479950 | 2020-03   | 7/1/2020 Asia / Japan / Kansai |
| EPI_ISL_479951 | 2020-03   | 7/1/2020 Asia / Japan / Kansai |
| EPI_ISL_479952 | 2020-03   | 7/1/2020 Asia / Japan / Kansai |
| EPI_ISL_479953 | 2020-03   | 7/1/2020 Asia / Japan / Kansai |
| EPI_ISL_479954 | 2020-03   | 7/1/2020 Asia / Japan / Kansai |
| EPI_ISL_479955 | 2020-03   | 7/1/2020 Asia / Japan / Kansai |
| EPI_ISL_479956 | 2020-03   | 7/1/2020 Asia / Japan / Kansai |
| EPI_ISL_479957 | 2020-03   | 7/1/2020 Asia / Japan / Kansai |
| EPI_ISL_479958 | 2020-03   | 7/1/2020 Asia / Japan / Kansai |
| EPI_ISL_479959 | 3/19/2020 | 7/1/2020 Asia / Japan / Kanto  |
| EPI_ISL_479960 | 3/19/2020 | 7/1/2020 Asia / Japan / Kanto  |
| EPI_ISL_479961 | 3/19/2020 | 7/1/2020 Asia / Japan / Kanto  |
| EPI_ISL_479962 | 3/23/2020 | 7/1/2020 Asia / Japan / Kanto  |
| EPI_ISL_479963 | 3/23/2020 | 7/1/2020 Asia / Japan / Kanto  |

|                |           |                                         |
|----------------|-----------|-----------------------------------------|
| EPI_ISL_479964 | 3/23/2020 | 7/1/2020 Asia / Japan / Kanto           |
| EPI_ISL_479965 | 3/23/2020 | 7/1/2020 Asia / Japan / Kanto           |
| EPI_ISL_479966 | 2020-03   | 7/1/2020 Asia / Japan / Kansai          |
| EPI_ISL_479967 | 3/18/2020 | 7/1/2020 Asia / Japan / HokurikuShinsyu |
| EPI_ISL_479968 | 3/25/2020 | 7/1/2020 Asia / Japan / HokurikuShinsyu |
| EPI_ISL_479969 | 3/25/2020 | 7/1/2020 Asia / Japan / HokurikuShinsyu |
| EPI_ISL_479970 | 3/25/2020 | 7/1/2020 Asia / Japan / HokurikuShinsyu |
| EPI_ISL_479971 | 3/26/2020 | 7/1/2020 Asia / Japan / HokurikuShinsyu |
| EPI_ISL_479972 | 3/27/2020 | 7/1/2020 Asia / Japan / HokurikuShinsyu |
| EPI_ISL_479973 | 3/27/2020 | 7/1/2020 Asia / Japan / HokurikuShinsyu |
| EPI_ISL_479974 | 3/28/2020 | 7/1/2020 Asia / Japan / HokurikuShinsyu |
| EPI_ISL_479975 | 3/28/2020 | 7/1/2020 Asia / Japan / HokurikuShinsyu |
| EPI_ISL_479976 | 3/28/2020 | 7/1/2020 Asia / Japan / HokurikuShinsyu |
| EPI_ISL_479977 | 3/29/2020 | 7/1/2020 Asia / Japan / HokurikuShinsyu |
| EPI_ISL_479978 | 3/29/2020 | 7/1/2020 Asia / Japan / HokurikuShinsyu |
| EPI_ISL_479979 | 3/2/2020  | 7/1/2020 Asia / Japan / Kyusyu          |
| EPI_ISL_479980 | 3/2/2020  | 7/1/2020 Asia / Japan / Kyusyu          |
| EPI_ISL_479981 | 3/20/2020 | 7/1/2020 Asia / Japan / Kyusyu          |
| EPI_ISL_479982 | 3/21/2020 | 7/1/2020 Asia / Japan / Kyusyu          |
| EPI_ISL_479983 | 3/21/2020 | 7/1/2020 Asia / Japan / Kyusyu          |
| EPI_ISL_479984 | 3/21/2020 | 7/1/2020 Asia / Japan / Kyusyu          |
| EPI_ISL_479985 | 3/24/2020 | 7/1/2020 Asia / Japan / Kanto           |
| EPI_ISL_479986 | 3/28/2020 | 7/1/2020 Asia / Japan / Kansai          |
| EPI_ISL_479987 | 3/28/2020 | 7/1/2020 Asia / Japan / Kansai          |
| EPI_ISL_479988 | 3/28/2020 | 7/1/2020 Asia / Japan / Kansai          |
| EPI_ISL_479989 | 3/28/2020 | 7/1/2020 Asia / Japan / Kansai          |
| EPI_ISL_479990 | 3/23/2020 | 7/1/2020 Asia / Japan / Kyusyu          |
| EPI_ISL_479991 | 3/25/2020 | 7/1/2020 Asia / Japan / Kyusyu          |
| EPI_ISL_479992 | 3/27/2020 | 7/1/2020 Asia / Japan / Kyusyu          |
| EPI_ISL_479993 | 3/27/2020 | 7/1/2020 Asia / Japan / Kyusyu          |
| EPI_ISL_479994 | 3/27/2020 | 7/1/2020 Asia / Japan / Kyusyu          |
| EPI_ISL_479995 | 3/29/2020 | 7/1/2020 Asia / Japan / Kyusyu          |
| EPI_ISL_479996 | 3/30/2020 | 7/1/2020 Asia / Japan / Kyusyu          |
| EPI_ISL_479997 | 2/24/2020 | 7/1/2020 Asia / Japan / HokurikuShinsyu |
| EPI_ISL_479998 | 2/25/2020 | 7/1/2020 Asia / Japan / HokurikuShinsyu |
| EPI_ISL_479999 | 3/12/2020 | 7/1/2020 Asia / Japan / HokurikuShinsyu |
| EPI_ISL_480000 | 3/23/2020 | 7/1/2020 Asia / Japan / HokurikuShinsyu |
| EPI_ISL_480001 | 3/26/2020 | 7/1/2020 Asia / Japan / HokurikuShinsyu |
| EPI_ISL_480002 | 3/13/2020 | 7/1/2020 Asia / Japan / Kyusyu          |
| EPI_ISL_480003 | 3/24/2020 | 7/1/2020 Asia / Japan / Kyusyu          |
| EPI_ISL_480004 | 3/29/2020 | 7/1/2020 Asia / Japan / Kanto           |
| EPI_ISL_480005 | 3/29/2020 | 7/1/2020 Asia / Japan / Kanto           |
| EPI_ISL_480006 | 3/29/2020 | 7/1/2020 Asia / Japan / Kanto           |
| EPI_ISL_480007 | 3/29/2020 | 7/1/2020 Asia / Japan / Kanto           |
| EPI_ISL_480008 | 3/29/2020 | 7/1/2020 Asia / Japan / Kanto           |
| EPI_ISL_480009 | 3/31/2020 | 7/1/2020 Asia / Japan / Kanto           |
| EPI_ISL_480010 | 4/1/2020  | 7/1/2020 Asia / Japan / Kanto           |

|                |           |                               |
|----------------|-----------|-------------------------------|
| EPI_ISL_480011 | 3/29/2020 | 7/1/2020 Asia / Japan / Kanto |
| EPI_ISL_480012 | 3/29/2020 | 7/1/2020 Asia / Japan / Kanto |
| EPI_ISL_480013 | 3/29/2020 | 7/1/2020 Asia / Japan / Kanto |
| EPI_ISL_480014 | 3/30/2020 | 7/1/2020 Asia / Japan / Kanto |
| EPI_ISL_480015 | 3/30/2020 | 7/1/2020 Asia / Japan / Kanto |
| EPI_ISL_480016 | 3/30/2020 | 7/1/2020 Asia / Japan / Kanto |
| EPI_ISL_480017 | 3/23/2020 | 7/1/2020 Asia / Japan / Kanto |
| EPI_ISL_480018 | 3/27/2020 | 7/1/2020 Asia / Japan / Kanto |
| EPI_ISL_480019 | 3/27/2020 | 7/1/2020 Asia / Japan / Kanto |
| EPI_ISL_480020 | 3/27/2020 | 7/1/2020 Asia / Japan / Kanto |
| EPI_ISL_480021 | 3/30/2020 | 7/1/2020 Asia / Japan / Kanto |
| EPI_ISL_480022 | 3/30/2020 | 7/1/2020 Asia / Japan / Kanto |
| EPI_ISL_480023 | 3/27/2020 | 7/1/2020 Asia / Japan / Kanto |
| EPI_ISL_480024 | 3/26/2020 | 7/1/2020 Asia / Japan / Kanto |
| EPI_ISL_480025 | 3/27/2020 | 7/1/2020 Asia / Japan / Kanto |
| EPI_ISL_480026 | 3/31/2020 | 7/1/2020 Asia / Japan / Kanto |
| EPI_ISL_480027 | 3/31/2020 | 7/1/2020 Asia / Japan / Kanto |
| EPI_ISL_480028 | 3/31/2020 | 7/1/2020 Asia / Japan / Kanto |
| EPI_ISL_480029 | 4/1/2020  | 7/1/2020 Asia / Japan / Kanto |
| EPI_ISL_480030 | 2/17/2020 | 7/1/2020 Asia / Japan / Kanto |
| EPI_ISL_480031 | 2/19/2020 | 7/1/2020 Asia / Japan / Kanto |
| EPI_ISL_480032 | 2/21/2020 | 7/1/2020 Asia / Japan / Kanto |
| EPI_ISL_480033 | 2/22/2020 | 7/1/2020 Asia / Japan / Kanto |
| EPI_ISL_480034 | 3/5/2020  | 7/1/2020 Asia / Japan / Kanto |
| EPI_ISL_480035 | 3/20/2020 | 7/1/2020 Asia / Japan / Kanto |
| EPI_ISL_480036 | 3/24/2020 | 7/1/2020 Asia / Japan / Kanto |
| EPI_ISL_480037 | 3/24/2020 | 7/1/2020 Asia / Japan / Kanto |
| EPI_ISL_480038 | 3/25/2020 | 7/1/2020 Asia / Japan / Kanto |
| EPI_ISL_480039 | 3/25/2020 | 7/1/2020 Asia / Japan / Kanto |
| EPI_ISL_480040 | 3/25/2020 | 7/1/2020 Asia / Japan / Kanto |
| EPI_ISL_480041 | 3/29/2020 | 7/1/2020 Asia / Japan / Kanto |
| EPI_ISL_480042 | 2/15/2020 | 7/1/2020 Asia / Japan / Chubu |
| EPI_ISL_480043 | 2/21/2020 | 7/1/2020 Asia / Japan / Chubu |
| EPI_ISL_480044 | 2/22/2020 | 7/1/2020 Asia / Japan / Chubu |
| EPI_ISL_480045 | 2/22/2020 | 7/1/2020 Asia / Japan / Chubu |
| EPI_ISL_480046 | 2/22/2020 | 7/1/2020 Asia / Japan / Chubu |
| EPI_ISL_480047 | 2/25/2020 | 7/1/2020 Asia / Japan / Chubu |
| EPI_ISL_480048 | 2/26/2020 | 7/1/2020 Asia / Japan / Chubu |
| EPI_ISL_480049 | 2/26/2020 | 7/1/2020 Asia / Japan / Chubu |
| EPI_ISL_480050 | 3/1/2020  | 7/1/2020 Asia / Japan / Chubu |
| EPI_ISL_480051 | 3/1/2020  | 7/1/2020 Asia / Japan / Chubu |
| EPI_ISL_480052 | 3/3/2020  | 7/1/2020 Asia / Japan / Chubu |
| EPI_ISL_480053 | 3/3/2020  | 7/1/2020 Asia / Japan / Chubu |
| EPI_ISL_480054 | 3/4/2020  | 7/1/2020 Asia / Japan / Chubu |
| EPI_ISL_480055 | 3/4/2020  | 7/1/2020 Asia / Japan / Chubu |
| EPI_ISL_480056 | 3/4/2020  | 7/1/2020 Asia / Japan / Chubu |
| EPI_ISL_480057 | 3/4/2020  | 7/1/2020 Asia / Japan / Chubu |

|                |           |                                |
|----------------|-----------|--------------------------------|
| EPI_ISL_480058 | 3/5/2020  | 7/1/2020 Asia / Japan / Chubu  |
| EPI_ISL_480059 | 3/5/2020  | 7/1/2020 Asia / Japan / Chubu  |
| EPI_ISL_480060 | 3/5/2020  | 7/1/2020 Asia / Japan / Chubu  |
| EPI_ISL_480061 | 3/6/2020  | 7/1/2020 Asia / Japan / Chubu  |
| EPI_ISL_480062 | 3/6/2020  | 7/1/2020 Asia / Japan / Chubu  |
| EPI_ISL_480063 | 3/6/2020  | 7/1/2020 Asia / Japan / Chubu  |
| EPI_ISL_480064 | 3/6/2020  | 7/1/2020 Asia / Japan / Chubu  |
| EPI_ISL_480065 | 3/28/2020 | 7/1/2020 Asia / Japan / Kansai |
| EPI_ISL_480066 | 3/29/2020 | 7/1/2020 Asia / Japan / Kansai |
| EPI_ISL_480067 | 3/31/2020 | 7/1/2020 Asia / Japan / Kansai |
| EPI_ISL_480068 | 4/1/2020  | 7/1/2020 Asia / Japan / Kansai |
| EPI_ISL_480069 | 4/1/2020  | 7/1/2020 Asia / Japan / Kansai |
| EPI_ISL_480070 | 4/2/2020  | 7/1/2020 Asia / Japan / Kansai |
| EPI_ISL_480071 | 4/2/2020  | 7/1/2020 Asia / Japan / Kansai |
| EPI_ISL_480072 | 4/3/2020  | 7/1/2020 Asia / Japan / Kansai |
| EPI_ISL_480073 | 3/26/2020 | 7/1/2020 Asia / Japan / Kanto  |
| EPI_ISL_480074 | 3/30/2020 | 7/1/2020 Asia / Japan / Kanto  |
| EPI_ISL_480075 | 3/30/2020 | 7/1/2020 Asia / Japan / Kanto  |
| EPI_ISL_480076 | 3/30/2020 | 7/1/2020 Asia / Japan / Kanto  |
| EPI_ISL_480077 | 3/30/2020 | 7/1/2020 Asia / Japan / Kanto  |
| EPI_ISL_480078 | 3/30/2020 | 7/1/2020 Asia / Japan / Kanto  |
| EPI_ISL_480079 | 3/30/2020 | 7/1/2020 Asia / Japan / Kanto  |
| EPI_ISL_480080 | 3/30/2020 | 7/1/2020 Asia / Japan / Kanto  |
| EPI_ISL_480081 | 3/31/2020 | 7/1/2020 Asia / Japan / Kanto  |
| EPI_ISL_480082 | 4/3/2020  | 7/1/2020 Asia / Japan / Kanto  |
| EPI_ISL_480083 | 3/25/2020 | 7/1/2020 Asia / Japan / Chubu  |
| EPI_ISL_480084 | 3/25/2020 | 7/1/2020 Asia / Japan / Chubu  |
| EPI_ISL_480085 | 3/26/2020 | 7/1/2020 Asia / Japan / Chubu  |
| EPI_ISL_480086 | 3/27/2020 | 7/1/2020 Asia / Japan / Chubu  |
| EPI_ISL_480087 | 3/27/2020 | 7/1/2020 Asia / Japan / Chubu  |
| EPI_ISL_480088 | 3/29/2020 | 7/1/2020 Asia / Japan / Chubu  |
| EPI_ISL_480089 | 3/29/2020 | 7/1/2020 Asia / Japan / Chubu  |
| EPI_ISL_480090 | 4/1/2020  | 7/1/2020 Asia / Japan / Kansai |
| EPI_ISL_480091 | 4/2/2020  | 7/1/2020 Asia / Japan / Kansai |
| EPI_ISL_480092 | 4/4/2020  | 7/1/2020 Asia / Japan / Kansai |
| EPI_ISL_480093 | 4/4/2020  | 7/1/2020 Asia / Japan / Kansai |
| EPI_ISL_480094 | 4/4/2020  | 7/1/2020 Asia / Japan / Kansai |
| EPI_ISL_480095 | 4/5/2020  | 7/1/2020 Asia / Japan / Kansai |
| EPI_ISL_480097 | 4/5/2020  | 7/1/2020 Asia / Japan / Kansai |
| EPI_ISL_480098 | 4/5/2020  | 7/1/2020 Asia / Japan / Kansai |
| EPI_ISL_480099 | 4/5/2020  | 7/1/2020 Asia / Japan / Kansai |
| EPI_ISL_480100 | 4/5/2020  | 7/1/2020 Asia / Japan / Kansai |
| EPI_ISL_480101 | 4/5/2020  | 7/1/2020 Asia / Japan / Kansai |
| EPI_ISL_480102 | 4/6/2020  | 7/1/2020 Asia / Japan / Kansai |
| EPI_ISL_480103 | 3/12/2020 | 7/1/2020 Asia / Japan / Kanto  |
| EPI_ISL_480104 | 3/13/2020 | 7/1/2020 Asia / Japan / Kanto  |
| EPI_ISL_480105 | 3/13/2020 | 7/1/2020 Asia / Japan / Kanto  |



|                |           |                                         |
|----------------|-----------|-----------------------------------------|
| EPI_ISL_480153 | 4/7/2020  | 7/1/2020 Asia / Japan / HokurikuShinsyu |
| EPI_ISL_480154 | 4/6/2020  | 7/1/2020 Asia / Japan / HokurikuShinsyu |
| EPI_ISL_480155 | 4/6/2020  | 7/1/2020 Asia / Japan / HokurikuShinsyu |
| EPI_ISL_480156 | 4/6/2020  | 7/1/2020 Asia / Japan / HokurikuShinsyu |
| EPI_ISL_480157 | 4/7/2020  | 7/1/2020 Asia / Japan / HokurikuShinsyu |
| EPI_ISL_480158 | 4/6/2020  | 7/1/2020 Asia / Japan / HokurikuShinsyu |
| EPI_ISL_480159 | 4/3/2020  | 7/1/2020 Asia / Japan / HokurikuShinsyu |
| EPI_ISL_480160 | 4/4/2020  | 7/1/2020 Asia / Japan / HokurikuShinsyu |
| EPI_ISL_480161 | 4/4/2020  | 7/1/2020 Asia / Japan / HokurikuShinsyu |
| EPI_ISL_480162 | 4/4/2020  | 7/1/2020 Asia / Japan / HokurikuShinsyu |
| EPI_ISL_480163 | 4/5/2020  | 7/1/2020 Asia / Japan / HokurikuShinsyu |
| EPI_ISL_480164 | 4/7/2020  | 7/1/2020 Asia / Japan / HokurikuShinsyu |
| EPI_ISL_480165 | 4/7/2020  | 7/1/2020 Asia / Japan / HokurikuShinsyu |
| EPI_ISL_480166 | 4/7/2020  | 7/1/2020 Asia / Japan / HokurikuShinsyu |
| EPI_ISL_480167 | 4/7/2020  | 7/1/2020 Asia / Japan / HokurikuShinsyu |
| EPI_ISL_480168 | 4/7/2020  | 7/1/2020 Asia / Japan / HokurikuShinsyu |
| EPI_ISL_480169 | 4/2/2020  | 7/1/2020 Asia / Japan / Kanto           |
| EPI_ISL_480170 | 4/2/2020  | 7/1/2020 Asia / Japan / Kanto           |
| EPI_ISL_480171 | 4/2/2020  | 7/1/2020 Asia / Japan / Kanto           |
| EPI_ISL_480172 | 4/2/2020  | 7/1/2020 Asia / Japan / Kanto           |
| EPI_ISL_480173 | 4/3/2020  | 7/1/2020 Asia / Japan / Kanto           |
| EPI_ISL_480174 | 4/6/2020  | 7/1/2020 Asia / Japan / Kanto           |
| EPI_ISL_480175 | 4/6/2020  | 7/1/2020 Asia / Japan / Kanto           |
| EPI_ISL_480176 | 4/6/2020  | 7/1/2020 Asia / Japan / Kanto           |
| EPI_ISL_480177 | 4/1/2020  | 7/1/2020 Asia / Japan / Kanto           |
| EPI_ISL_480178 | 3/25/2020 | 7/1/2020 Asia / Japan / Chushikoku      |
| EPI_ISL_480179 | 3/28/2020 | 7/1/2020 Asia / Japan / Chushikoku      |
| EPI_ISL_480180 | 3/27/2020 | 7/1/2020 Asia / Japan / Kanto           |
| EPI_ISL_480181 | 3/27/2020 | 7/1/2020 Asia / Japan / Kanto           |
| EPI_ISL_480182 | 4/1/2020  | 7/1/2020 Asia / Japan / Kanto           |
| EPI_ISL_480183 | 4/3/2020  | 7/1/2020 Asia / Japan / Kanto           |
| EPI_ISL_480184 | 4/4/2020  | 7/1/2020 Asia / Japan / Kanto           |
| EPI_ISL_480185 | 4/2/2020  | 7/1/2020 Asia / Japan / Kanto           |
| EPI_ISL_480186 | 4/2/2020  | 7/1/2020 Asia / Japan / Kanto           |
| EPI_ISL_480187 | 4/3/2020  | 7/1/2020 Asia / Japan / Kanto           |
| EPI_ISL_480188 | 4/4/2020  | 7/1/2020 Asia / Japan / Kanto           |
| EPI_ISL_480189 | 4/5/2020  | 7/1/2020 Asia / Japan / Kanto           |
| EPI_ISL_480190 | 2020-04   | 7/1/2020 Asia / Japan / Kanto           |
| EPI_ISL_480191 | 2020-04   | 7/1/2020 Asia / Japan / Kanto           |
| EPI_ISL_480192 | 2020-04   | 7/1/2020 Asia / Japan / Kanto           |
| EPI_ISL_480193 | 2020-04   | 7/1/2020 Asia / Japan / Kanto           |
| EPI_ISL_480194 | 2020-04   | 7/1/2020 Asia / Japan / Kanto           |
| EPI_ISL_480195 | 2020-04   | 7/1/2020 Asia / Japan / Kanto           |
| EPI_ISL_480196 | 3/30/2020 | 7/1/2020 Asia / Japan / HokurikuShinsyu |
| EPI_ISL_480197 | 4/3/2020  | 7/1/2020 Asia / Japan / HokurikuShinsyu |
| EPI_ISL_480198 | 3/30/2020 | 7/1/2020 Asia / Japan / HokurikuShinsyu |
| EPI_ISL_480199 | 3/31/2020 | 7/1/2020 Asia / Japan / HokurikuShinsyu |

|                |           |                                         |
|----------------|-----------|-----------------------------------------|
| EPI_ISL_480200 | 3/31/2020 | 7/1/2020 Asia / Japan / HokurikuShinsyu |
| EPI_ISL_480201 | 3/31/2020 | 7/1/2020 Asia / Japan / HokurikuShinsyu |
| EPI_ISL_480202 | 4/1/2020  | 7/1/2020 Asia / Japan / HokurikuShinsyu |
| EPI_ISL_480203 | 4/2/2020  | 7/1/2020 Asia / Japan / HokurikuShinsyu |
| EPI_ISL_480204 | 4/11/2020 | 7/1/2020 Asia / Japan / Tohoku          |
| EPI_ISL_480205 | 4/7/2020  | 7/1/2020 Asia / Japan / Kansai          |
| EPI_ISL_480206 | 4/7/2020  | 7/1/2020 Asia / Japan / Kansai          |
| EPI_ISL_480207 | 4/7/2020  | 7/1/2020 Asia / Japan / Kansai          |
| EPI_ISL_480208 | 4/7/2020  | 7/1/2020 Asia / Japan / Kansai          |
| EPI_ISL_480209 | 4/7/2020  | 7/1/2020 Asia / Japan / Kansai          |
| EPI_ISL_480210 | 4/8/2020  | 7/1/2020 Asia / Japan / Kansai          |
| EPI_ISL_480211 | 4/8/2020  | 7/1/2020 Asia / Japan / Kansai          |
| EPI_ISL_480212 | 4/8/2020  | 7/1/2020 Asia / Japan / Kansai          |
| EPI_ISL_480213 | 4/8/2020  | 7/1/2020 Asia / Japan / Kansai          |
| EPI_ISL_480214 | 4/9/2020  | 7/1/2020 Asia / Japan / Kansai          |
| EPI_ISL_480215 | 4/9/2020  | 7/1/2020 Asia / Japan / Kansai          |
| EPI_ISL_480216 | 4/9/2020  | 7/1/2020 Asia / Japan / Kansai          |
| EPI_ISL_480217 | 4/6/2020  | 7/1/2020 Asia / Japan / Kansai          |
| EPI_ISL_480218 | 4/11/2020 | 7/1/2020 Asia / Japan / Kansai          |
| EPI_ISL_480219 | 4/11/2020 | 7/1/2020 Asia / Japan / Kansai          |
| EPI_ISL_480220 | 4/12/2020 | 7/1/2020 Asia / Japan / Kansai          |
| EPI_ISL_480221 | 4/1/2020  | 7/1/2020 Asia / Japan / Kanto           |
| EPI_ISL_480222 | 4/3/2020  | 7/1/2020 Asia / Japan / Kanto           |
| EPI_ISL_480223 | 4/4/2020  | 7/1/2020 Asia / Japan / Kanto           |
| EPI_ISL_480224 | 4/29/2020 | 7/1/2020 Europe / Bulgaria / Vidin      |
| EPI_ISL_480228 | 4/13/2020 | 7/1/2020 Europe / Turkey / Istanbul     |
| EPI_ISL_480229 | 4/13/2020 | 7/1/2020 Europe / Turkey / Istanbul     |
| EPI_ISL_480230 | 4/13/2020 | 7/1/2020 Europe / Turkey / Istanbul     |
| EPI_ISL_480231 | 4/13/2020 | 7/1/2020 Europe / Turkey / Istanbul     |
| EPI_ISL_480232 | 4/17/2020 | 7/1/2020 Europe / Turkey / Istanbul     |
| EPI_ISL_480233 | 4/17/2020 | 7/1/2020 Europe / Turkey / Istanbul     |
| EPI_ISL_480234 | 4/18/2020 | 7/1/2020 Europe / Turkey / Istanbul     |
| EPI_ISL_480235 | 4/22/2020 | 7/1/2020 Europe / Turkey / Istanbul     |
| EPI_ISL_480236 | 4/22/2020 | 7/1/2020 Europe / Turkey / Istanbul     |
| EPI_ISL_480237 | 4/22/2020 | 7/1/2020 Europe / Turkey / Istanbul     |
| EPI_ISL_480238 | 4/22/2020 | 7/1/2020 Europe / Turkey / Istanbul     |
| EPI_ISL_480239 | 4/22/2020 | 7/1/2020 Europe / Turkey / Istanbul     |
| EPI_ISL_480240 | 4/22/2020 | 7/1/2020 Europe / Turkey / Istanbul     |
| EPI_ISL_480241 | 4/23/2020 | 7/1/2020 Europe / Turkey / Istanbul     |
| EPI_ISL_480242 | 4/29/2020 | 7/1/2020 Europe / Turkey / Istanbul     |
| EPI_ISL_480243 | 4/23/2020 | 7/1/2020 Europe / Turkey / Istanbul     |
| EPI_ISL_480244 | 4/23/2020 | 7/1/2020 Europe / Turkey / Istanbul     |
| EPI_ISL_480245 | 4/26/2020 | 7/1/2020 Europe / Turkey / Istanbul     |
| EPI_ISL_480246 | 4/26/2020 | 7/1/2020 Europe / Turkey / Istanbul     |
| EPI_ISL_480247 | 4/26/2020 | 7/1/2020 Europe / Turkey / Istanbul     |
| EPI_ISL_480248 | 4/26/2020 | 7/1/2020 Europe / Turkey / Istanbul     |
| EPI_ISL_480249 | 4/30/2020 | 7/1/2020 Europe / Turkey / Istanbul     |



|                |           |          |                                 |
|----------------|-----------|----------|---------------------------------|
| EPI_ISL_480250 | 5/2/2020  | 7/1/2020 | Europe / Turkey / Istanbul      |
| EPI_ISL_480251 | 5/2/2020  | 7/1/2020 | Europe / Turkey / Istanbul      |
| EPI_ISL_480252 | 5/2/2020  | 7/1/2020 | Europe / Turkey / Istanbul      |
| EPI_ISL_480253 | 5/1/2020  | 7/1/2020 | Europe / Turkey / Istanbul      |
| EPI_ISL_480254 | 5/2/2020  | 7/1/2020 | Europe / Turkey / Istanbul      |
| EPI_ISL_480255 | 5/2/2020  | 7/1/2020 | Europe / Turkey / Istanbul      |
| EPI_ISL_480256 | 5/3/2020  | 7/1/2020 | Europe / Turkey / Istanbul      |
| EPI_ISL_480257 | 5/3/2020  | 7/1/2020 | Europe / Turkey / Istanbul      |
| EPI_ISL_480258 | 5/3/2020  | 7/1/2020 | Europe / Turkey / Istanbul      |
| EPI_ISL_480259 | 5/3/2020  | 7/1/2020 | Europe / Turkey / Istanbul      |
| EPI_ISL_480260 | 5/4/2020  | 7/1/2020 | Europe / Turkey / Istanbul      |
| EPI_ISL_480261 | 5/3/2020  | 7/1/2020 | Europe / Turkey / Istanbul      |
| EPI_ISL_480262 | 5/1/2020  | 7/1/2020 | Europe / Turkey / Istanbul      |
| EPI_ISL_480263 | 5/3/2020  | 7/1/2020 | Europe / Turkey / Istanbul      |
| EPI_ISL_480264 | 4/20/2020 | 7/1/2020 | Europe / Turkey / Istanbul      |
| EPI_ISL_480265 | 5/4/2020  | 7/1/2020 | Europe / Turkey / Istanbul      |
| EPI_ISL_480266 | 5/4/2020  | 7/1/2020 | Europe / Turkey / Istanbul      |
| EPI_ISL_480267 | 5/4/2020  | 7/1/2020 | Europe / Turkey / Istanbul      |
| EPI_ISL_480268 | 5/4/2020  | 7/1/2020 | Europe / Turkey / Istanbul      |
| EPI_ISL_480269 | 5/4/2020  | 7/1/2020 | Europe / Turkey / Istanbul      |
| EPI_ISL_480270 | 5/6/2020  | 7/1/2020 | Europe / Turkey / Istanbul      |
| EPI_ISL_480271 | 5/5/2020  | 7/1/2020 | Europe / Turkey / Istanbul      |
| EPI_ISL_480272 | 5/7/2020  | 7/1/2020 | Europe / Turkey / Istanbul      |
| EPI_ISL_480273 | 5/5/2020  | 7/1/2020 | Europe / Turkey / Istanbul      |
| EPI_ISL_480274 | 5/7/2020  | 7/1/2020 | Europe / Turkey / Istanbul      |
| EPI_ISL_480275 | 5/7/2020  | 7/1/2020 | Europe / Turkey / Istanbul      |
| EPI_ISL_480276 | 5/5/2020  | 7/1/2020 | Europe / Turkey / Istanbul      |
| EPI_ISL_480277 | 5/4/2020  | 7/1/2020 | Europe / Turkey / Istanbul      |
| EPI_ISL_480278 | 5/7/2020  | 7/1/2020 | Europe / Turkey / Istanbul      |
| EPI_ISL_480279 | 5/7/2020  | 7/1/2020 | Europe / Turkey / Istanbul      |
| EPI_ISL_480280 | 5/6/2020  | 7/1/2020 | Europe / Turkey / Istanbul      |
| EPI_ISL_480281 | 5/5/2020  | 7/1/2020 | Europe / Turkey / Istanbul      |
| EPI_ISL_480282 | 5/9/2020  | 7/1/2020 | Europe / Turkey / Istanbul      |
| EPI_ISL_480283 | 5/8/2020  | 7/1/2020 | Europe / Turkey / Istanbul      |
| EPI_ISL_480284 | 5/9/2020  | 7/1/2020 | Europe / Turkey / Istanbul      |
| EPI_ISL_480285 | 5/9/2020  | 7/1/2020 | Europe / Turkey / Istanbul      |
| EPI_ISL_480286 | 5/10/2020 | 7/1/2020 | Europe / Turkey / Istanbul      |
| EPI_ISL_480287 | 5/9/2020  | 7/1/2020 | Europe / Turkey / Istanbul      |
| EPI_ISL_480288 | 5/9/2020  | 7/1/2020 | Europe / Turkey / Istanbul      |
| EPI_ISL_480289 | 5/9/2020  | 7/1/2020 | Europe / Turkey / Istanbul      |
| EPI_ISL_480291 | 5/9/2020  | 7/1/2020 | Europe / Turkey / Istanbul      |
| EPI_ISL_480292 | 5/10/2020 | 7/1/2020 | Europe / Turkey / Istanbul      |
| EPI_ISL_480297 | 3/21/2020 | 7/1/2020 | Europe / Bulgaria / Pleven      |
| EPI_ISL_480298 | 5/13/2020 | 7/1/2020 | Europe / Bulgaria / Blagoevgrad |
| EPI_ISL_480299 | 4/26/2020 | 7/1/2020 | Europe / Bulgaria / Vidin       |
| EPI_ISL_480300 | 4/14/2020 | 7/1/2020 | Europe / Bulgaria / Smolyan     |
| EPI_ISL_480301 | 4/29/2020 | 7/1/2020 | Europe / Bulgaria / Vidin       |

|                |           |                                                             |
|----------------|-----------|-------------------------------------------------------------|
| EPI_ISL_480302 | 5/7/2020  | 7/1/2020 Europe / Bulgaria / Dupnitsa                       |
| EPI_ISL_480303 | 3/30/2020 | 7/1/2020 Europe / Bulgaria / Sofia                          |
| EPI_ISL_480304 | 4/22/2020 | 7/1/2020 Europe / Bulgaria / Kyustendil                     |
| EPI_ISL_480305 | 5/17/2020 | 7/1/2020 Europe / Bulgaria / Vidin                          |
| EPI_ISL_480306 | 4/25/2020 | 7/1/2020 Europe / Bulgaria / Vidin                          |
| EPI_ISL_480307 | 3/30/2020 | 7/1/2020 Europe / Bulgaria / Sofia                          |
| EPI_ISL_480308 | 5/11/2020 | 7/1/2020 Europe / Bulgaria / Pazardzhik                     |
| EPI_ISL_480309 | 4/19/2020 | 7/1/2020 Europe / Bulgaria / Sofia                          |
| EPI_ISL_480310 | 3/10/2020 | 7/1/2020 Europe / Bulgaria / Sofia                          |
| EPI_ISL_480333 | 4/7/2020  | 7/1/2020 South America / Uruguay / Montevideo               |
| EPI_ISL_480351 | 5/20/2020 | 7/1/2020 North America / USA / Wisconsin / Dane County      |
| EPI_ISL_480352 | 5/20/2020 | 7/1/2020 North America / USA / Wisconsin / Dane County      |
| EPI_ISL_480353 | 5/20/2020 | 7/1/2020 North America / USA / Wisconsin / Dane County      |
| EPI_ISL_480354 | 5/20/2020 | 7/1/2020 North America / USA / Wisconsin / Lafayette County |
| EPI_ISL_480355 | 5/20/2020 | 7/1/2020 North America / USA / Wisconsin / Columbia County  |
| EPI_ISL_480356 | 5/20/2020 | 7/1/2020 North America / USA / Wisconsin / Jefferson County |
| EPI_ISL_480357 | 5/20/2020 | 7/1/2020 North America / USA / Wisconsin / Jefferson County |
| EPI_ISL_480358 | 5/20/2020 | 7/1/2020 North America / USA / Illinois / Winnebago County  |
| EPI_ISL_480359 | 5/21/2020 | 7/1/2020 North America / USA / Wisconsin / Dane County      |
| EPI_ISL_480360 | 5/21/2020 | 7/1/2020 North America / USA / Wisconsin / Dane County      |
| EPI_ISL_480361 | 5/22/2020 | 7/1/2020 North America / USA / Illinois / Winnebago County  |
| EPI_ISL_480362 | 5/21/2020 | 7/1/2020 North America / USA / Illinois / Winnebago County  |
| EPI_ISL_480363 | 5/22/2020 | 7/1/2020 North America / USA / Wisconsin / Rock County      |
| EPI_ISL_480364 | 5/22/2020 | 7/1/2020 North America / USA / Wisconsin / Dane County      |
| EPI_ISL_480365 | 5/22/2020 | 7/1/2020 North America / USA / Illinois / Winnebago County  |
| EPI_ISL_480366 | 5/22/2020 | 7/1/2020 North America / USA / Wisconsin / Dane County      |
| EPI_ISL_480367 | 5/23/2020 | 7/1/2020 North America / USA / Illinois / Winnebago County  |
| EPI_ISL_480368 | 5/21/2020 | 7/1/2020 North America / USA / Wisconsin / Dane County      |
| EPI_ISL_480369 | 5/18/2020 | 7/1/2020 North America / USA / Wisconsin / Dane County      |
| EPI_ISL_480370 | 5/21/2020 | 7/1/2020 North America / USA / Wisconsin / Dane County      |
| EPI_ISL_480371 | 5/26/2020 | 7/1/2020 North America / USA / Wisconsin / Dane County      |
| EPI_ISL_480372 | 5/20/2020 | 7/1/2020 North America / USA / Wisconsin / Green County     |
| EPI_ISL_480373 | 5/26/2020 | 7/1/2020 North America / USA / Wisconsin / Dane County      |
| EPI_ISL_480375 | 5/14/2020 | 7/1/2020 North America / USA / Wisconsin / Dane County      |
| EPI_ISL_480376 | 5/9/2020  | 7/1/2020 North America / USA / Wisconsin / Dane County      |
| EPI_ISL_480378 | 3/14/2020 | 7/1/2020 North America / USA / Wisconsin / Milwaukee County |
| EPI_ISL_480379 | 3/15/2020 | 7/1/2020 North America / USA / Wisconsin / Milwaukee County |
| EPI_ISL_480380 | 3/15/2020 | 7/1/2020 North America / USA / Wisconsin / Milwaukee County |
| EPI_ISL_480381 | 3/16/2020 | 7/1/2020 North America / USA / Wisconsin / Ozaukee County   |
| EPI_ISL_480382 | 3/16/2020 | 7/1/2020 North America / USA / Wisconsin / Ozaukee County   |
| EPI_ISL_480383 | 3/17/2020 | 7/1/2020 North America / USA / Wisconsin / Milwaukee County |
| EPI_ISL_480384 | 3/17/2020 | 7/1/2020 North America / USA / Wisconsin / Ozaukee County   |
| EPI_ISL_480385 | 3/17/2020 | 7/1/2020 North America / USA / Wisconsin / Ozaukee County   |
| EPI_ISL_480386 | 3/19/2020 | 7/1/2020 North America / USA / Wisconsin / Milwaukee County |
| EPI_ISL_480387 | 3/18/2020 | 7/1/2020 North America / USA / Wisconsin / Milwaukee County |
| EPI_ISL_480388 | 3/19/2020 | 7/1/2020 North America / USA / Wisconsin / Ozaukee County   |
| EPI_ISL_480389 | 3/23/2020 | 7/1/2020 North America / USA / Wisconsin / Milwaukee County |

|                |           |                                                               |
|----------------|-----------|---------------------------------------------------------------|
| EPI_ISL_480390 | 3/30/2020 | 7/1/2020 North America / USA / Wisconsin / Milwaukee County   |
| EPI_ISL_480391 | 3/31/2020 | 7/1/2020 North America / USA / Wisconsin / Fond du Lac County |
| EPI_ISL_480392 | 3/31/2020 | 7/1/2020 North America / USA / Wisconsin / Milwaukee County   |
| EPI_ISL_480394 | 4/4/2020  | 7/1/2020 North America / USA / Wisconsin / Milwaukee County   |
| EPI_ISL_480395 | 4/7/2020  | 7/1/2020 North America / USA / Wisconsin / Washington County  |
| EPI_ISL_480396 | 4/6/2020  | 7/1/2020 North America / USA / Wisconsin / Milwaukee County   |
| EPI_ISL_480397 | 4/8/2020  | 7/1/2020 North America / USA / Wisconsin / Washington County  |
| EPI_ISL_480398 | 4/9/2020  | 7/1/2020 North America / USA / Wisconsin / Washington County  |
| EPI_ISL_480399 | 4/13/2020 | 7/1/2020 North America / USA / Wisconsin / Waukesha County    |
| EPI_ISL_480400 | 4/13/2020 | 7/1/2020 North America / USA / Wisconsin / Milwaukee County   |
| EPI_ISL_480401 | 4/15/2020 | 7/1/2020 North America / USA / Wisconsin / Milwaukee County   |
| EPI_ISL_480402 | 4/21/2020 | 7/1/2020 North America / USA / Wisconsin / Milwaukee County   |
| EPI_ISL_480403 | 4/26/2020 | 7/1/2020 North America / USA / Wisconsin / Milwaukee County   |
| EPI_ISL_480404 | 4/27/2020 | 7/1/2020 North America / USA / Wisconsin / Milwaukee County   |
| EPI_ISL_480406 | 4/27/2020 | 7/1/2020 North America / USA / Wisconsin / Milwaukee County   |
| EPI_ISL_480407 | 4/27/2020 | 7/1/2020 North America / USA / Wisconsin / Milwaukee County   |
| EPI_ISL_480408 | 4/27/2020 | 7/1/2020 North America / USA / Wisconsin / Milwaukee County   |
| EPI_ISL_480409 | 4/28/2020 | 7/1/2020 North America / USA / Wisconsin / Milwaukee County   |
| EPI_ISL_480410 | 5/1/2020  | 7/1/2020 North America / USA / Wisconsin / Washington County  |
| EPI_ISL_480411 | 5/1/2020  | 7/1/2020 North America / USA / Wisconsin / Waukesha County    |
| EPI_ISL_480412 | 5/1/2020  | 7/1/2020 North America / USA / Wisconsin / Milwaukee County   |
| EPI_ISL_480413 | 5/1/2020  | 7/1/2020 North America / USA / Wisconsin / Waukesha County    |
| EPI_ISL_480414 | 6/17/2020 | 7/2/2020 Asia / Bangladesh / Dhaka / Dhaka / Kadamtali        |
| EPI_ISL_480415 | 6/18/2020 | 7/2/2020 Asia / Bangladesh / Dhaka / Dhaka / Tejgaon          |
| EPI_ISL_480416 | 6/18/2020 | 7/2/2020 Asia / Bangladesh / Dhaka / Dhaka / Mirpur           |
| EPI_ISL_480417 | 6/18/2020 | 7/2/2020 Asia / Bangladesh / Dhaka                            |
| EPI_ISL_480418 | 6/18/2020 | 7/2/2020 Asia / Bangladesh / Dhaka / Narayanganj              |
| EPI_ISL_480419 | 6/18/2020 | 7/2/2020 Asia / Bangladesh / Dhaka / Dhaka / Mohammadpur      |
| EPI_ISL_480420 | 6/18/2020 | 7/2/2020 Asia / Bangladesh / Dhaka / Dhaka / Mirpur           |
| EPI_ISL_480421 | 6/18/2020 | 7/2/2020 Asia / Bangladesh / Dhaka / Dhaka / Mirpur           |
| EPI_ISL_480424 | 6/18/2020 | 7/2/2020 Asia / Bangladesh / Dhaka                            |
| EPI_ISL_480425 | 6/18/2020 | 7/2/2020 Asia / Bangladesh / Dhaka / Dhaka / Jatrabari        |
| EPI_ISL_480426 | 6/18/2020 | 7/2/2020 Asia / Bangladesh / Dhaka / Dhaka / Mirpur           |
| EPI_ISL_480427 | 6/18/2020 | 7/2/2020 Asia / Bangladesh / Dhaka / Dhaka / Tejgaon          |
| EPI_ISL_480439 | 6/18/2020 | 7/2/2020 Asia / Bangladesh / Dhaka / Dhaka / Jatrabari        |
| EPI_ISL_480440 | 6/18/2020 | 7/2/2020 Asia / Bangladesh / Dhaka / Dhaka / Jatrabari        |
| EPI_ISL_480441 | 6/18/2020 | 7/2/2020 Asia / Bangladesh / Dhaka / Dhaka / Jatrabari        |
| EPI_ISL_480442 | 6/18/2020 | 7/2/2020 Asia / Bangladesh / Rajshahi                         |
| EPI_ISL_480443 | 6/17/2020 | 7/2/2020 Asia / Bangladesh / Rajshahi                         |
| EPI_ISL_480444 | 6/17/2020 | 7/2/2020 Asia / Bangladesh / Rajshahi                         |
| EPI_ISL_480445 | 6/18/2020 | 7/2/2020 Asia / Bangladesh / Rajshahi                         |
| EPI_ISL_480446 | 6/18/2020 | 7/2/2020 Asia / Bangladesh / Rajshahi                         |
| EPI_ISL_480447 | 6/18/2020 | 7/2/2020 Asia / Bangladesh / Rajshahi                         |
| EPI_ISL_480448 | 6/18/2020 | 7/2/2020 Asia / Bangladesh / Rajshahi                         |
| EPI_ISL_480449 | 6/18/2020 | 7/2/2020 Asia / Bangladesh / Rajshahi                         |
| EPI_ISL_480450 | 6/18/2020 | 7/2/2020 Asia / Bangladesh / Rajshahi                         |
| EPI_ISL_480554 | 3/21/2020 | 7/2/2020 Africa / Senegal / Dakar                             |

|                |           |                                                   |
|----------------|-----------|---------------------------------------------------|
| EPI_ISL_480556 | 3/28/2020 | 7/2/2020 Africa / Senegal / Saint-Louis           |
| EPI_ISL_480560 | 3/24/2020 | 7/2/2020 Oceania / Australia / Victoria           |
| EPI_ISL_480561 | 3/24/2020 | 7/2/2020 Oceania / Australia / Victoria           |
| EPI_ISL_480592 | 4/16/2020 | 7/2/2020 Oceania / Australia / Victoria           |
| EPI_ISL_480607 | 5/5/2020  | 7/2/2020 Oceania / Australia / Victoria           |
| EPI_ISL_480608 | 5/2/2020  | 7/2/2020 Oceania / Australia / Victoria           |
| EPI_ISL_480616 | 4/2/2020  | 7/2/2020 Oceania / Australia / Victoria           |
| EPI_ISL_480622 | 5/23/2020 | 7/2/2020 Oceania / Australia / Victoria           |
| EPI_ISL_480627 | 5/28/2020 | 7/2/2020 Oceania / Australia / Victoria           |
| EPI_ISL_480630 | 5/28/2020 | 7/2/2020 Oceania / Australia / Victoria           |
| EPI_ISL_480631 | 5/29/2020 | 7/2/2020 Oceania / Australia / Victoria           |
| EPI_ISL_480632 | 5/28/2020 | 7/2/2020 Oceania / Australia / Victoria           |
| EPI_ISL_480636 | 5/27/2020 | 7/2/2020 Oceania / Australia / Victoria           |
| EPI_ISL_480640 | 5/30/2020 | 7/2/2020 Oceania / Australia / Victoria           |
| EPI_ISL_480641 | 5/30/2020 | 7/2/2020 Oceania / Australia / Victoria           |
| EPI_ISL_480642 | 5/30/2020 | 7/2/2020 Oceania / Australia / Victoria           |
| EPI_ISL_480643 | 5/30/2020 | 7/2/2020 Oceania / Australia / Victoria           |
| EPI_ISL_480645 | 6/1/2020  | 7/2/2020 Oceania / Australia / Victoria           |
| EPI_ISL_480650 | 5/31/2020 | 7/2/2020 Oceania / Australia / Victoria           |
| EPI_ISL_480652 | 5/31/2020 | 7/2/2020 Oceania / Australia / Victoria           |
| EPI_ISL_480653 | 6/1/2020  | 7/2/2020 Oceania / Australia / Victoria           |
| EPI_ISL_480654 | 6/1/2020  | 7/2/2020 Oceania / Australia / Victoria           |
| EPI_ISL_480655 | 6/1/2020  | 7/2/2020 Oceania / Australia / Victoria           |
| EPI_ISL_480657 | 5/27/2020 | 7/2/2020 Oceania / Australia / Victoria           |
| EPI_ISL_480660 | 5/15/2020 | 7/2/2020 Oceania / Australia / Victoria           |
| EPI_ISL_480661 | 5/15/2020 | 7/2/2020 Oceania / Australia / Victoria           |
| EPI_ISL_480662 | 6/3/2020  | 7/2/2020 Oceania / Australia / Victoria           |
| EPI_ISL_480665 | 6/5/2020  | 7/2/2020 Oceania / Australia / Victoria           |
| EPI_ISL_480666 | 6/5/2020  | 7/2/2020 Oceania / Australia / Victoria           |
| EPI_ISL_480667 | 6/6/2020  | 7/2/2020 Oceania / Australia / Victoria           |
| EPI_ISL_480668 | 6/6/2020  | 7/2/2020 Oceania / Australia / Victoria           |
| EPI_ISL_480669 | 6/7/2020  | 7/2/2020 Oceania / Australia / Victoria           |
| EPI_ISL_480672 | 6/9/2020  | 7/2/2020 Oceania / Australia / Victoria           |
| EPI_ISL_480673 | 6/9/2020  | 7/2/2020 Oceania / Australia / Victoria           |
| EPI_ISL_480674 | 6/9/2020  | 7/2/2020 Oceania / Australia / Victoria           |
| EPI_ISL_480675 | 6/10/2020 | 7/2/2020 Oceania / Australia / Victoria           |
| EPI_ISL_480676 | 6/9/2020  | 7/2/2020 Oceania / Australia / Victoria           |
| EPI_ISL_480677 | 6/9/2020  | 7/2/2020 Oceania / Australia / Victoria           |
| EPI_ISL_480678 | 6/10/2020 | 7/2/2020 Oceania / Australia / Victoria           |
| EPI_ISL_480679 | 6/11/2020 | 7/2/2020 Oceania / Australia / Victoria           |
| EPI_ISL_480680 | 6/11/2020 | 7/2/2020 Oceania / Australia / Victoria           |
| EPI_ISL_480681 | 6/11/2020 | 7/2/2020 Oceania / Australia / Victoria           |
| EPI_ISL_480682 | 6/11/2020 | 7/2/2020 Oceania / Australia / Victoria           |
| EPI_ISL_480683 | 6/10/2020 | 7/2/2020 Oceania / Australia / Victoria           |
| EPI_ISL_480686 | 6/11/2020 | 7/2/2020 Oceania / Australia / Victoria           |
| EPI_ISL_480687 | 6/12/2020 | 7/2/2020 Oceania / Australia / Victoria           |
| EPI_ISL_480694 | 2020      | 7/2/2020 Oceania / Australia / Northern Territory |



|                |           |                                                         |
|----------------|-----------|---------------------------------------------------------|
| EPI_ISL_480750 | 6/12/2020 | 7/2/2020 Oceania / Australia / Victoria                 |
| EPI_ISL_480752 | 6/13/2020 | 7/2/2020 Oceania / Australia / Victoria                 |
| EPI_ISL_480753 | 6/13/2020 | 7/2/2020 Oceania / Australia / Victoria                 |
| EPI_ISL_480754 | 6/13/2020 | 7/2/2020 Oceania / Australia / Victoria                 |
| EPI_ISL_480755 | 6/15/2020 | 7/2/2020 Oceania / Australia / Victoria                 |
| EPI_ISL_480756 | 6/12/2020 | 7/2/2020 Oceania / Australia / Victoria                 |
| EPI_ISL_480757 | 6/12/2020 | 7/2/2020 Oceania / Australia / Victoria                 |
| EPI_ISL_480758 | 6/14/2020 | 7/2/2020 Oceania / Australia / Victoria                 |
| EPI_ISL_480759 | 6/13/2020 | 7/2/2020 Oceania / Australia / Victoria                 |
| EPI_ISL_480760 | 6/16/2020 | 7/2/2020 Oceania / Australia / Victoria                 |
| EPI_ISL_480761 | 6/14/2020 | 7/2/2020 Oceania / Australia / Victoria                 |
| EPI_ISL_480762 | 6/15/2020 | 7/2/2020 Oceania / Australia / Victoria                 |
| EPI_ISL_480763 | 6/15/2020 | 7/2/2020 Oceania / Australia / Victoria                 |
| EPI_ISL_480764 | 6/17/2020 | 7/2/2020 Oceania / Australia / Victoria                 |
| EPI_ISL_480765 | 6/18/2020 | 7/2/2020 Oceania / Australia / Victoria                 |
| EPI_ISL_480766 | 6/17/2020 | 7/2/2020 Oceania / Australia / Victoria                 |
| EPI_ISL_480767 | 6/16/2020 | 7/2/2020 Oceania / Australia / Victoria                 |
| EPI_ISL_480768 | 6/15/2020 | 7/2/2020 Oceania / Australia / Victoria                 |
| EPI_ISL_480769 | 6/16/2020 | 7/2/2020 Oceania / Australia / Victoria                 |
| EPI_ISL_480770 | 6/17/2020 | 7/2/2020 Oceania / Australia / Victoria                 |
| EPI_ISL_480771 | 6/19/2020 | 7/2/2020 Oceania / Australia / Victoria                 |
| EPI_ISL_480772 | 3/19/2020 | 7/2/2020 Oceania / Australia / Victoria                 |
| EPI_ISL_480773 | 6/19/2020 | 7/2/2020 Oceania / Australia / Victoria                 |
| EPI_ISL_480774 | 6/19/2020 | 7/2/2020 Oceania / Australia / Victoria                 |
| EPI_ISL_480775 | 6/18/2020 | 7/2/2020 Oceania / Australia / Victoria                 |
| EPI_ISL_480776 | 6/17/2020 | 7/2/2020 Oceania / Australia / Victoria                 |
| EPI_ISL_480777 | 6/18/2020 | 7/2/2020 Oceania / Australia / Victoria                 |
| EPI_ISL_480783 | 3/31/2020 | 7/2/2020 Africa / Senegal / Saint-Louis                 |
| EPI_ISL_480784 | 4/6/2020  | 7/2/2020 North America / USA / New York / New York City |
| EPI_ISL_480785 | 4/6/2020  | 7/2/2020 North America / USA / New York / New York City |
| EPI_ISL_480787 | 3/31/2020 | 7/2/2020 Africa / Senegal / Dakar                       |
| EPI_ISL_480789 | 4/1/2020  | 7/2/2020 Africa / Senegal / Kolda / Velingara           |
| EPI_ISL_480791 | 3/9/2020  | 7/2/2020 North America / USA / Florida                  |
| EPI_ISL_480796 | 3/12/2020 | 7/2/2020 North America / USA / Florida                  |
| EPI_ISL_480801 | 3/31/2020 | 7/2/2020 North America / USA / Florida                  |
| EPI_ISL_480802 | 3/31/2020 | 7/2/2020 North America / USA / Florida                  |
| EPI_ISL_480804 | 3/31/2020 | 7/2/2020 North America / USA / Florida                  |
| EPI_ISL_480805 | 3/30/2020 | 7/2/2020 North America / USA / Florida                  |
| EPI_ISL_480806 | 3/31/2020 | 7/2/2020 North America / USA / Florida                  |
| EPI_ISL_480808 | 4/1/2020  | 7/2/2020 North America / USA / Florida                  |
| EPI_ISL_480809 | 4/1/2020  | 7/2/2020 North America / USA / Florida                  |
| EPI_ISL_480810 | 4/1/2020  | 7/2/2020 North America / USA / Florida                  |
| EPI_ISL_480811 | 4/1/2020  | 7/2/2020 North America / USA / Florida                  |
| EPI_ISL_480812 | 3/31/2020 | 7/2/2020 North America / USA / Florida                  |
| EPI_ISL_480815 | 4/2/2020  | 7/2/2020 North America / USA / Florida                  |
| EPI_ISL_480816 | 4/1/2020  | 7/2/2020 North America / USA / Florida                  |
| EPI_ISL_480817 | 4/2/2020  | 7/2/2020 North America / USA / Florida                  |









|                |           |          |                                                 |
|----------------|-----------|----------|-------------------------------------------------|
| EPI_ISL_481007 | 3/12/2020 | 7/2/2020 | Europe / Spain / Basque Country / San Sebastian |
| EPI_ISL_481008 | 3/16/2020 | 7/2/2020 | Europe / Spain / Basque Country / San Sebastian |
| EPI_ISL_481009 | 3/9/2020  | 7/2/2020 | Europe / Spain / Basque Country / San Sebastian |
| EPI_ISL_481010 | 3/11/2020 | 7/2/2020 | Europe / Spain / Basque Country / San Sebastian |
| EPI_ISL_481011 | 3/18/2020 | 7/2/2020 | Europe / Spain / Basque Country / San Sebastian |
| EPI_ISL_481013 | 3/8/2020  | 7/2/2020 | Europe / Spain / Basque Country / San Sebastian |
| EPI_ISL_481014 | 3/15/2020 | 7/2/2020 | Europe / Spain / Basque Country / San Sebastian |
| EPI_ISL_481015 | 3/12/2020 | 7/2/2020 | Europe / Spain / Basque Country / San Sebastian |
| EPI_ISL_481017 | 4/8/2020  | 7/2/2020 | Europe / Spain / Catalunya / Barcelona          |
| EPI_ISL_481018 | 3/14/2020 | 7/2/2020 | Europe / Spain / Basque Country / San Sebastian |
| EPI_ISL_481019 | 3/17/2020 | 7/2/2020 | Europe / Spain / Basque Country / San Sebastian |
| EPI_ISL_481020 | 3/11/2020 | 7/2/2020 | Europe / Spain / Basque Country / San Sebastian |
| EPI_ISL_481022 | 3/16/2020 | 7/2/2020 | Europe / Spain / Basque Country / San Sebastian |
| EPI_ISL_481023 | 3/17/2020 | 7/2/2020 | Europe / Spain / Basque Country / San Sebastian |
| EPI_ISL_481025 | 4/2/2020  | 7/2/2020 | Europe / Spain / Catalunya / Barcelona          |
| EPI_ISL_481027 | 3/10/2020 | 7/2/2020 | Europe / Spain / Basque Country / San Sebastian |
| EPI_ISL_481028 | 3/17/2020 | 7/2/2020 | Europe / Spain / Basque Country / San Sebastian |
| EPI_ISL_481029 | 4/8/2020  | 7/2/2020 | Europe / Spain / Catalunya / Barcelona          |
| EPI_ISL_481030 | 3/12/2020 | 7/2/2020 | Europe / Spain / Basque Country / San Sebastian |
| EPI_ISL_481032 | 3/17/2020 | 7/2/2020 | Europe / Spain / Basque Country / San Sebastian |
| EPI_ISL_481033 | 3/14/2020 | 7/2/2020 | Europe / Spain / Basque Country / San Sebastian |
| EPI_ISL_481034 | 4/9/2020  | 7/2/2020 | Europe / Spain / Catalunya / Barcelona          |
| EPI_ISL_481036 | 3/12/2020 | 7/2/2020 | Europe / Spain / Basque Country / San Sebastian |
| EPI_ISL_481037 | 3/16/2020 | 7/2/2020 | Europe / Spain / Basque Country / San Sebastian |
| EPI_ISL_481038 | 3/14/2020 | 7/2/2020 | Europe / Spain / Basque Country / San Sebastian |
| EPI_ISL_481039 | 3/16/2020 | 7/2/2020 | Europe / Spain / Basque Country / San Sebastian |
| EPI_ISL_481040 | 3/16/2020 | 7/2/2020 | Europe / Spain / Basque Country / San Sebastian |
| EPI_ISL_481041 | 5/7/2020  | 7/2/2020 | Europe / Spain / Madrid                         |
| EPI_ISL_481043 | 3/17/2020 | 7/2/2020 | Europe / Spain / Madrid                         |
| EPI_ISL_481044 | 3/9/2020  | 7/2/2020 | Europe / Spain / Madrid                         |
| EPI_ISL_481045 | 5/15/2020 | 7/2/2020 | Europe / Spain / Madrid                         |
| EPI_ISL_481047 | 5/4/2020  | 7/2/2020 | Europe / Spain / Madrid                         |
| EPI_ISL_481048 | 4/8/2020  | 7/2/2020 | Europe / Spain / Madrid                         |
| EPI_ISL_481049 | 4/28/2020 | 7/2/2020 | Europe / Spain / Madrid                         |
| EPI_ISL_481051 | 3/10/2020 | 7/2/2020 | Europe / Spain / Madrid                         |
| EPI_ISL_481052 | 3/8/2020  | 7/2/2020 | Europe / Spain / Madrid / Parla                 |
| EPI_ISL_481054 | 3/16/2020 | 7/2/2020 | Europe / Spain / Madrid                         |
| EPI_ISL_481055 | 3/11/2020 | 7/2/2020 | Europe / Spain / Madrid                         |
| EPI_ISL_481056 | 3/23/2020 | 7/2/2020 | Europe / Spain / Madrid                         |
| EPI_ISL_481057 | 3/11/2020 | 7/2/2020 | Europe / Spain / Madrid                         |
| EPI_ISL_481058 | 3/9/2020  | 7/2/2020 | Europe / Spain / Madrid                         |
| EPI_ISL_481059 | 3/11/2020 | 7/2/2020 | Europe / Spain / Madrid                         |
| EPI_ISL_481060 | 3/13/2020 | 7/2/2020 | Europe / Spain / Madrid                         |
| EPI_ISL_481062 | 4/9/2020  | 7/2/2020 | Europe / Spain / Madrid                         |
| EPI_ISL_481063 | 5/29/2020 | 7/2/2020 | Europe / Spain / Madrid                         |
| EPI_ISL_481064 | 4/10/2020 | 7/2/2020 | Europe / Spain / Madrid                         |
| EPI_ISL_481065 | 4/7/2020  | 7/2/2020 | Europe / Spain / Madrid                         |

|                |           |                                                      |
|----------------|-----------|------------------------------------------------------|
| EPI_ISL_481066 | 3/11/2020 | 7/2/2020 Europe / Spain / Madrid                     |
| EPI_ISL_481067 | 5/14/2020 | 7/2/2020 Europe / Spain / Madrid                     |
| EPI_ISL_481068 | 5/11/2020 | 7/2/2020 Europe / Spain / Madrid                     |
| EPI_ISL_481069 | 4/20/2020 | 7/2/2020 Europe / Spain / Madrid                     |
| EPI_ISL_481070 | 4/16/2020 | 7/2/2020 Europe / Spain / Madrid                     |
| EPI_ISL_481071 | 4/28/2020 | 7/2/2020 Europe / Spain / Madrid                     |
| EPI_ISL_481072 | 4/7/2020  | 7/2/2020 Europe / Spain / Madrid                     |
| EPI_ISL_481073 | 5/8/2020  | 7/2/2020 Europe / Spain / Madrid                     |
| EPI_ISL_481074 | 4/10/2020 | 7/2/2020 Europe / Spain / Madrid                     |
| EPI_ISL_481075 | 3/8/2020  | 7/2/2020 Europe / Spain / Madrid                     |
| EPI_ISL_481076 | 4/19/2020 | 7/2/2020 Europe / Spain / Madrid                     |
| EPI_ISL_481077 | 3/10/2020 | 7/2/2020 Europe / Spain / Madrid                     |
| EPI_ISL_481078 | 4/9/2020  | 7/2/2020 Europe / Spain / Madrid                     |
| EPI_ISL_481079 | 5/3/2020  | 7/2/2020 Europe / Spain / Madrid                     |
| EPI_ISL_481080 | 4/6/2020  | 7/2/2020 Europe / Spain / Madrid                     |
| EPI_ISL_481081 | 4/10/2020 | 7/2/2020 Europe / Spain / Madrid                     |
| EPI_ISL_481082 | 4/19/2020 | 7/2/2020 Europe / Spain / Madrid                     |
| EPI_ISL_481083 | 3/11/2020 | 7/2/2020 Europe / Spain / Madrid                     |
| EPI_ISL_481084 | 4/22/2020 | 7/2/2020 Europe / Spain / Madrid                     |
| EPI_ISL_481085 | 6/11/2020 | 7/2/2020 Europe / Spain / Madrid                     |
| EPI_ISL_481086 | 3/10/2020 | 7/2/2020 Europe / Spain / Madrid                     |
| EPI_ISL_481087 | 3/11/2020 | 7/2/2020 Europe / Spain / Madrid                     |
| EPI_ISL_481088 | 4/3/2020  | 7/2/2020 Europe / Spain / Madrid                     |
| EPI_ISL_481089 | 3/8/2020  | 7/2/2020 Europe / Spain / Madrid                     |
| EPI_ISL_481090 | 4/12/2020 | 7/2/2020 Europe / Spain / Madrid                     |
| EPI_ISL_481091 | 6/11/2020 | 7/2/2020 Europe / Spain / Madrid                     |
| EPI_ISL_481092 | 4/12/2020 | 7/2/2020 Europe / Spain / Madrid                     |
| EPI_ISL_481093 | 6/3/2020  | 7/2/2020 Europe / Spain / Madrid                     |
| EPI_ISL_481094 | 3/9/2020  | 7/2/2020 Europe / Spain / Madrid                     |
| EPI_ISL_481096 | 3/10/2020 | 7/2/2020 Europe / Spain / Madrid                     |
| EPI_ISL_481097 | 3/10/2020 | 7/2/2020 Europe / Spain / Madrid                     |
| EPI_ISL_481098 | 5/11/2020 | 7/2/2020 Europe / Spain / Madrid / Rivas-Vaciamadrid |
| EPI_ISL_481099 | 5/6/2020  | 7/2/2020 Europe / Spain / Madrid                     |
| EPI_ISL_481100 | 6/1/2020  | 7/2/2020 Europe / Spain / Madrid                     |
| EPI_ISL_481101 | 4/13/2020 | 7/2/2020 Europe / Spain / Madrid                     |
| EPI_ISL_481102 | 4/3/2020  | 7/2/2020 Europe / Spain / Madrid / Arganda del Rey   |
| EPI_ISL_481103 | 3/13/2020 | 7/2/2020 Europe / Spain / Madrid                     |
| EPI_ISL_481104 | 4/9/2020  | 7/2/2020 Europe / Spain / Madrid / Alcala de Henares |
| EPI_ISL_481105 | 5/4/2020  | 7/2/2020 Europe / Spain / Madrid                     |
| EPI_ISL_481106 | 4/7/2020  | 7/2/2020 Europe / Spain / Madrid                     |
| EPI_ISL_481107 | 5/3/2020  | 7/2/2020 Europe / Spain / Madrid                     |
| EPI_ISL_481108 | 5/13/2020 | 7/2/2020 Europe / Spain / Madrid                     |
| EPI_ISL_481109 | 4/10/2020 | 7/2/2020 Europe / Spain / Madrid                     |
| EPI_ISL_481110 | 5/19/2020 | 7/2/2020 Asia / India / Odisha                       |
| EPI_ISL_481111 | 5/19/2020 | 7/2/2020 Asia / India / Odisha                       |
| EPI_ISL_481112 | 5/19/2020 | 7/2/2020 Asia / India / Odisha                       |
| EPI_ISL_481113 | 5/19/2020 | 7/2/2020 Asia / India / Odisha                       |





|                |           |                                                        |
|----------------|-----------|--------------------------------------------------------|
| EPI_ISL_481229 | 4/16/2020 | 7/2/2020 Europe / Belgium / Ghent                      |
| EPI_ISL_481230 | 4/27/2020 | 7/2/2020 Europe / Belgium / Ghent                      |
| EPI_ISL_481231 | 4/29/2020 | 7/2/2020 Europe / Belgium / Ghent                      |
| EPI_ISL_481232 | 4/29/2020 | 7/2/2020 Europe / Belgium / Ghent                      |
| EPI_ISL_481233 | 5/6/2020  | 7/2/2020 Europe / Belgium / Ghent                      |
| EPI_ISL_481235 | 4/9/2020  | 7/2/2020 Africa / Senegal / Dakar                      |
| EPI_ISL_481236 | 4/18/2020 | 7/2/2020 Africa / Senegal / Dakar                      |
| EPI_ISL_481237 | 4/17/2020 | 7/2/2020 Africa / Senegal / Dakar / Yeumbeul           |
| EPI_ISL_481239 | 4/17/2020 | 7/2/2020 Africa / Senegal / Dakar / Guediawaye         |
| EPI_ISL_481240 | 4/18/2020 | 7/2/2020 Africa / Senegal / Dakar / Guediawaye         |
| EPI_ISL_481241 | 5/23/2020 | 7/2/2020 North America / USA / Minnesota               |
| EPI_ISL_481242 | 6/6/2020  | 7/2/2020 North America / USA / Minnesota               |
| EPI_ISL_481243 | 4/18/2020 | 7/2/2020 Africa / Senegal / Dakar                      |
| EPI_ISL_481244 | 4/17/2020 | 7/2/2020 South America / Ecuador / Los Rios / Babahoyo |
| EPI_ISL_481245 | 4/17/2020 | 7/2/2020 South America / Ecuador / Los Rios / Babahoyo |
| EPI_ISL_481246 | 4/17/2020 | 7/2/2020 South America / Ecuador / Los Rios / Babahoyo |
| EPI_ISL_481247 | 4/17/2020 | 7/2/2020 South America / Ecuador / Los Rios / Babahoyo |
| EPI_ISL_481248 | 4/17/2020 | 7/2/2020 South America / Ecuador / Los Rios / Babahoyo |
| EPI_ISL_481265 | 3/31/2020 | 7/2/2020 North America / USA / Maryland                |
| EPI_ISL_481266 | 4/1/2020  | 7/2/2020 North America / USA / Maryland                |
| EPI_ISL_481267 | 4/1/2020  | 7/2/2020 North America / USA / Maryland                |
| EPI_ISL_481268 | 4/1/2020  | 7/2/2020 North America / USA / Maryland                |
| EPI_ISL_481269 | 4/1/2020  | 7/2/2020 North America / USA / Maryland                |
| EPI_ISL_481270 | 4/1/2020  | 7/2/2020 North America / USA / Maryland                |
| EPI_ISL_481271 | 4/2/2020  | 7/2/2020 North America / USA / Maryland                |
| EPI_ISL_481272 | 4/3/2020  | 7/2/2020 North America / USA / Maryland                |
| EPI_ISL_481273 | 4/4/2020  | 7/2/2020 North America / USA / Maryland                |
| EPI_ISL_481274 | 4/4/2020  | 7/2/2020 North America / USA / Maryland                |
| EPI_ISL_481275 | 4/6/2020  | 7/2/2020 North America / USA / Maryland                |
| EPI_ISL_481276 | 4/7/2020  | 7/2/2020 North America / USA / Maryland                |
| EPI_ISL_481277 | 4/7/2020  | 7/2/2020 North America / USA / Maryland                |
| EPI_ISL_481278 | 4/7/2020  | 7/2/2020 North America / USA / Maryland                |
| EPI_ISL_481279 | 4/7/2020  | 7/2/2020 North America / USA / Maryland                |
| EPI_ISL_481280 | 4/7/2020  | 7/2/2020 North America / USA / Maryland                |
| EPI_ISL_481281 | 4/7/2020  | 7/2/2020 North America / USA / Maryland                |
| EPI_ISL_481282 | 4/8/2020  | 7/2/2020 North America / USA / Maryland                |
| EPI_ISL_481283 | 3/11/2020 | 7/2/2020 North America / USA / New York                |
| EPI_ISL_481251 | 3/14/2020 | 7/3/2020 Asia / Japan / Nagasaki                       |
| EPI_ISL_481253 | 3/12/2020 | 7/3/2020 Europe / Germany / Baden-Wurttemberg          |
| EPI_ISL_481254 | 4/1/2020  | 7/3/2020 Asia / Japan / Nagasaki                       |
| EPI_ISL_481255 | 4/23/2020 | 7/3/2020 Asia / Japan / Nagasaki                       |
| EPI_ISL_481256 | 3/19/2020 | 7/3/2020 Europe / Germany / North Rhine-Westphalia     |
| EPI_ISL_481257 | 4/23/2020 | 7/3/2020 Asia / Japan / Nagasaki                       |
| EPI_ISL_481258 | 4/23/2020 | 7/3/2020 Asia / Japan / Nagasaki                       |
| EPI_ISL_481259 | 4/24/2020 | 7/3/2020 Asia / Japan / Nagasaki                       |
| EPI_ISL_481260 | 4/24/2020 | 7/3/2020 Asia / Japan / Nagasaki                       |
| EPI_ISL_481261 | 4/24/2020 | 7/3/2020 Asia / Japan / Nagasaki                       |

|                |           |                                     |
|----------------|-----------|-------------------------------------|
| EPI_ISL_481262 | 3/27/2020 | 7/3/2020 Europe / Germany / Bavaria |
| EPI_ISL_481263 | 4/24/2020 | 7/3/2020 Asia / Japan / Nagasaki    |
| EPI_ISL_481370 | 2/21/2020 | 7/3/2020 Asia / South Korea         |
| EPI_ISL_481371 | 2/21/2020 | 7/3/2020 Asia / South Korea         |
| EPI_ISL_481372 | 2/21/2020 | 7/3/2020 Asia / South Korea         |
| EPI_ISL_481373 | 2/23/2020 | 7/3/2020 Asia / South Korea         |
| EPI_ISL_481374 | 2/21/2020 | 7/3/2020 Asia / South Korea         |
| EPI_ISL_481375 | 2/22/2020 | 7/3/2020 Asia / South Korea         |
| EPI_ISL_481376 | 2/20/2020 | 7/3/2020 Asia / South Korea         |
| EPI_ISL_481377 | 2/23/2020 | 7/3/2020 Asia / South Korea         |
| EPI_ISL_481378 | 2/22/2020 | 7/3/2020 Asia / South Korea         |
| EPI_ISL_481379 | 2/24/2020 | 7/3/2020 Asia / South Korea         |
| EPI_ISL_481380 | 5/1/2020  | 7/3/2020 Asia / Georgia / Tbilisi   |
| EPI_ISL_481483 | 4/25/2020 | 7/3/2020 Asia / Georgia / Tbilisi   |
| EPI_ISL_481513 | 4/16/2020 | 7/3/2020 Europe / Finland / Uusimaa |
| EPI_ISL_481514 | 4/10/2020 | 7/3/2020 Europe / Finland / Uusimaa |
| EPI_ISL_481515 | 4/10/2020 | 7/3/2020 Europe / Finland / Uusimaa |
| EPI_ISL_481516 | 4/10/2020 | 7/3/2020 Europe / Finland / Uusimaa |
| EPI_ISL_481517 | 4/10/2020 | 7/3/2020 Europe / Finland / Uusimaa |
| EPI_ISL_481518 | 4/10/2020 | 7/3/2020 Europe / Finland / Uusimaa |
| EPI_ISL_481519 | 4/10/2020 | 7/3/2020 Europe / Finland / Uusimaa |
| EPI_ISL_481520 | 4/10/2020 | 7/3/2020 Europe / Finland / Uusimaa |
| EPI_ISL_481521 | 4/10/2020 | 7/3/2020 Europe / Finland / Uusimaa |
| EPI_ISL_481522 | 4/10/2020 | 7/3/2020 Europe / Finland / Uusimaa |
| EPI_ISL_481523 | 4/10/2020 | 7/3/2020 Europe / Finland / Uusimaa |
| EPI_ISL_481524 | 4/10/2020 | 7/3/2020 Europe / Finland / Uusimaa |
| EPI_ISL_481525 | 4/10/2020 | 7/3/2020 Europe / Finland / Uusimaa |
| EPI_ISL_481526 | 4/10/2020 | 7/3/2020 Europe / Finland / Uusimaa |
| EPI_ISL_481527 | 4/10/2020 | 7/3/2020 Europe / Finland / Uusimaa |
| EPI_ISL_481528 | 4/10/2020 | 7/3/2020 Europe / Finland / Uusimaa |
| EPI_ISL_481529 | 4/10/2020 | 7/3/2020 Europe / Finland / Uusimaa |
| EPI_ISL_481530 | 4/10/2020 | 7/3/2020 Europe / Finland / Uusimaa |
| EPI_ISL_481531 | 4/10/2020 | 7/3/2020 Europe / Finland / Uusimaa |
| EPI_ISL_481532 | 4/11/2020 | 7/3/2020 Europe / Finland / Uusimaa |
| EPI_ISL_481533 | 4/11/2020 | 7/3/2020 Europe / Finland / Uusimaa |
| EPI_ISL_481534 | 4/11/2020 | 7/3/2020 Europe / Finland / Uusimaa |
| EPI_ISL_481535 | 4/11/2020 | 7/3/2020 Europe / Finland / Uusimaa |
| EPI_ISL_481536 | 5/11/2020 | 7/3/2020 Europe / Finland / Uusimaa |
| EPI_ISL_481537 | 5/11/2020 | 7/3/2020 Europe / Finland / Uusimaa |
| EPI_ISL_481538 | 4/12/2020 | 7/3/2020 Europe / Finland / Uusimaa |
| EPI_ISL_481539 | 4/12/2020 | 7/3/2020 Europe / Finland / Uusimaa |
| EPI_ISL_481540 | 4/12/2020 | 7/3/2020 Europe / Finland / Uusimaa |
| EPI_ISL_481541 | 4/12/2020 | 7/3/2020 Europe / Finland / Uusimaa |
| EPI_ISL_481542 | 4/12/2020 | 7/3/2020 Europe / Finland / Uusimaa |
| EPI_ISL_481543 | 4/12/2020 | 7/3/2020 Europe / Finland / Uusimaa |
| EPI_ISL_481544 | 4/12/2020 | 7/3/2020 Europe / Finland / Uusimaa |
| EPI_ISL_481545 | 4/12/2020 | 7/3/2020 Europe / Finland / Uusimaa |











|                |           |                                                 |
|----------------|-----------|-------------------------------------------------|
| EPI_ISL_481735 | 4/9/2020  | 7/3/2020 Europe / Finland / Uusimaa             |
| EPI_ISL_481736 | 4/9/2020  | 7/3/2020 Europe / Finland / Uusimaa             |
| EPI_ISL_481737 | 4/9/2020  | 7/3/2020 Europe / Finland / Uusimaa             |
| EPI_ISL_481738 | 4/9/2020  | 7/3/2020 Europe / Finland / Uusimaa             |
| EPI_ISL_481739 | 4/9/2020  | 7/3/2020 Europe / Finland / Uusimaa             |
| EPI_ISL_481740 | 4/9/2020  | 7/3/2020 Europe / Finland / Uusimaa             |
| EPI_ISL_481742 | 3/23/2020 | 7/3/2020 North America / Canada / New Brunswick |
| EPI_ISL_481743 | 3/24/2020 | 7/3/2020 North America / Canada / New Brunswick |
| EPI_ISL_481744 | 3/31/2020 | 7/3/2020 North America / Canada / New Brunswick |
| EPI_ISL_481745 | 3/31/2020 | 7/3/2020 North America / Canada / New Brunswick |
| EPI_ISL_481746 | 4/1/2020  | 7/3/2020 North America / Canada / New Brunswick |
| EPI_ISL_481747 | 3/30/2020 | 7/3/2020 North America / Canada / New Brunswick |
| EPI_ISL_481748 | 4/2/2020  | 7/3/2020 North America / Canada / New Brunswick |
| EPI_ISL_481749 | 4/1/2020  | 7/3/2020 North America / Canada / New Brunswick |
| EPI_ISL_481750 | 4/3/2020  | 7/3/2020 North America / Canada / New Brunswick |
| EPI_ISL_481751 | 4/5/2020  | 7/3/2020 North America / Canada / New Brunswick |
| EPI_ISL_481752 | 4/5/2020  | 7/3/2020 North America / Canada / New Brunswick |
| EPI_ISL_481753 | 4/6/2020  | 7/3/2020 North America / Canada / New Brunswick |
| EPI_ISL_481754 | 4/7/2020  | 7/3/2020 North America / Canada / New Brunswick |
| EPI_ISL_481755 | 4/10/2020 | 7/3/2020 North America / Canada / New Brunswick |
| EPI_ISL_481756 | 4/10/2020 | 7/3/2020 North America / Canada / New Brunswick |
| EPI_ISL_481757 | 4/11/2020 | 7/3/2020 North America / Canada / New Brunswick |
| EPI_ISL_481758 | 4/13/2020 | 7/3/2020 North America / Canada / New Brunswick |
| EPI_ISL_481768 | 6/1/2020  | 7/3/2020 Europe / United Kingdom / England      |
| EPI_ISL_481769 | 5/7/2020  | 7/3/2020 Europe / United Kingdom / England      |
| EPI_ISL_481770 | 5/3/2020  | 7/3/2020 Europe / United Kingdom / England      |
| EPI_ISL_481771 | 4/18/2020 | 7/3/2020 Europe / United Kingdom / England      |
| EPI_ISL_481772 | 4/24/2020 | 7/3/2020 Europe / United Kingdom / England      |
| EPI_ISL_481773 | 5/6/2020  | 7/3/2020 Europe / United Kingdom / England      |
| EPI_ISL_481774 | 5/14/2020 | 7/3/2020 Europe / United Kingdom / England      |
| EPI_ISL_481775 | 5/6/2020  | 7/3/2020 Europe / United Kingdom / England      |
| EPI_ISL_481776 | 5/7/2020  | 7/3/2020 Europe / United Kingdom / England      |
| EPI_ISL_481777 | 5/7/2020  | 7/3/2020 Europe / United Kingdom / England      |
| EPI_ISL_481779 | 4/25/2020 | 7/3/2020 Europe / United Kingdom / England      |
| EPI_ISL_481781 | 5/4/2020  | 7/3/2020 Europe / United Kingdom / England      |
| EPI_ISL_481782 | 4/25/2020 | 7/3/2020 Europe / United Kingdom / England      |
| EPI_ISL_481783 | 5/6/2020  | 7/3/2020 Europe / United Kingdom / England      |
| EPI_ISL_481784 | 4/17/2020 | 7/3/2020 Europe / United Kingdom / England      |
| EPI_ISL_481785 | 5/5/2020  | 7/3/2020 Europe / United Kingdom / England      |
| EPI_ISL_481786 | 5/4/2020  | 7/3/2020 Europe / United Kingdom / England      |
| EPI_ISL_481787 | 5/8/2020  | 7/3/2020 Europe / United Kingdom / England      |
| EPI_ISL_481788 | 5/4/2020  | 7/3/2020 Europe / United Kingdom / England      |
| EPI_ISL_481789 | 5/4/2020  | 7/3/2020 Europe / United Kingdom / England      |
| EPI_ISL_481791 | 4/18/2020 | 7/3/2020 Europe / United Kingdom / England      |
| EPI_ISL_481792 | 5/5/2020  | 7/3/2020 Europe / United Kingdom / England      |
| EPI_ISL_481793 | 4/24/2020 | 7/3/2020 Europe / United Kingdom / England      |
| EPI_ISL_481794 | 4/18/2020 | 7/3/2020 Europe / United Kingdom / England      |

|                |           |          |                                   |
|----------------|-----------|----------|-----------------------------------|
| EPI_ISL_481797 | 4/18/2020 | 7/3/2020 | Europe / United Kingdom / England |
| EPI_ISL_481799 | 4/25/2020 | 7/3/2020 | Europe / United Kingdom / England |
| EPI_ISL_481800 | 5/5/2020  | 7/3/2020 | Europe / United Kingdom / England |
| EPI_ISL_481801 | 4/24/2020 | 7/3/2020 | Europe / United Kingdom / England |
| EPI_ISL_481803 | 4/18/2020 | 7/3/2020 | Europe / United Kingdom / England |
| EPI_ISL_481806 | 5/4/2020  | 7/3/2020 | Europe / United Kingdom / England |
| EPI_ISL_481807 | 4/24/2020 | 7/3/2020 | Europe / United Kingdom / England |
| EPI_ISL_481808 | 5/4/2020  | 7/3/2020 | Europe / United Kingdom / England |
| EPI_ISL_481810 | 5/7/2020  | 7/3/2020 | Europe / United Kingdom / England |
| EPI_ISL_481811 | 5/4/2020  | 7/3/2020 | Europe / United Kingdom / England |
| EPI_ISL_481812 | 4/24/2020 | 7/3/2020 | Europe / United Kingdom / England |
| EPI_ISL_481813 | 6/1/2020  | 7/3/2020 | Europe / United Kingdom / England |
| EPI_ISL_481815 | 4/24/2020 | 7/3/2020 | Europe / United Kingdom / England |
| EPI_ISL_481817 | 4/18/2020 | 7/3/2020 | Europe / United Kingdom / England |
| EPI_ISL_481818 | 4/18/2020 | 7/3/2020 | Europe / United Kingdom / England |
| EPI_ISL_481819 | 5/15/2020 | 7/3/2020 | Europe / United Kingdom / England |
| EPI_ISL_481820 | 4/18/2020 | 7/3/2020 | Europe / United Kingdom / England |
| EPI_ISL_481821 | 5/7/2020  | 7/3/2020 | Europe / United Kingdom / England |
| EPI_ISL_481822 | 4/24/2020 | 7/3/2020 | Europe / United Kingdom / England |
| EPI_ISL_481823 | 5/6/2020  | 7/3/2020 | Europe / United Kingdom / England |
| EPI_ISL_481824 | 4/24/2020 | 7/3/2020 | Europe / United Kingdom / England |
| EPI_ISL_481825 | 5/6/2020  | 7/3/2020 | Europe / United Kingdom / England |
| EPI_ISL_481826 | 5/5/2020  | 7/3/2020 | Europe / United Kingdom / England |
| EPI_ISL_481828 | 5/6/2020  | 7/3/2020 | Europe / United Kingdom / England |
| EPI_ISL_481830 | 5/6/2020  | 7/3/2020 | Europe / United Kingdom / England |
| EPI_ISL_481831 | 5/31/2020 | 7/3/2020 | Europe / United Kingdom / England |
| EPI_ISL_481833 | 4/25/2020 | 7/3/2020 | Europe / United Kingdom / England |
| EPI_ISL_481834 | 4/17/2020 | 7/3/2020 | Europe / United Kingdom / England |
| EPI_ISL_481836 | 5/7/2020  | 7/3/2020 | Europe / United Kingdom / England |
| EPI_ISL_481837 | 4/18/2020 | 7/3/2020 | Europe / United Kingdom / England |
| EPI_ISL_481839 | 4/25/2020 | 7/3/2020 | Europe / United Kingdom / England |
| EPI_ISL_481840 | 5/4/2020  | 7/3/2020 | Europe / United Kingdom / England |
| EPI_ISL_481842 | 4/18/2020 | 7/3/2020 | Europe / United Kingdom / England |
| EPI_ISL_481843 | 4/25/2020 | 7/3/2020 | Europe / United Kingdom / England |
| EPI_ISL_481845 | 4/25/2020 | 7/3/2020 | Europe / United Kingdom / England |
| EPI_ISL_481846 | 5/7/2020  | 7/3/2020 | Europe / United Kingdom / England |
| EPI_ISL_481847 | 4/18/2020 | 7/3/2020 | Europe / United Kingdom / England |
| EPI_ISL_481848 | 5/3/2020  | 7/3/2020 | Europe / United Kingdom / England |
| EPI_ISL_481850 | 5/8/2020  | 7/3/2020 | Europe / United Kingdom / England |
| EPI_ISL_481851 | 4/18/2020 | 7/3/2020 | Europe / United Kingdom / England |
| EPI_ISL_481852 | 5/7/2020  | 7/3/2020 | Europe / United Kingdom / England |
| EPI_ISL_481853 | 4/26/2020 | 7/3/2020 | Europe / United Kingdom / England |
| EPI_ISL_481854 | 4/18/2020 | 7/3/2020 | Europe / United Kingdom / England |
| EPI_ISL_481855 | 5/4/2020  | 7/3/2020 | Europe / United Kingdom / England |
| EPI_ISL_481856 | 5/6/2020  | 7/3/2020 | Europe / United Kingdom / England |
| EPI_ISL_481857 | 5/6/2020  | 7/3/2020 | Europe / United Kingdom / England |
| EPI_ISL_481858 | 4/17/2020 | 7/3/2020 | Europe / United Kingdom / England |

|                |           |          |                                   |
|----------------|-----------|----------|-----------------------------------|
| EPI_ISL_481859 | 5/3/2020  | 7/3/2020 | Europe / United Kingdom / England |
| EPI_ISL_481861 | 5/4/2020  | 7/3/2020 | Europe / United Kingdom / England |
| EPI_ISL_481862 | 5/6/2020  | 7/3/2020 | Europe / United Kingdom / England |
| EPI_ISL_481863 | 5/7/2020  | 7/3/2020 | Europe / United Kingdom / England |
| EPI_ISL_481865 | 5/27/2020 | 7/3/2020 | Europe / United Kingdom / England |
| EPI_ISL_481866 | 5/5/2020  | 7/3/2020 | Europe / United Kingdom / England |
| EPI_ISL_481867 | 5/14/2020 | 7/3/2020 | Europe / United Kingdom / England |
| EPI_ISL_481868 | 5/7/2020  | 7/3/2020 | Europe / United Kingdom / England |
| EPI_ISL_481869 | 4/18/2020 | 7/3/2020 | Europe / United Kingdom / England |
| EPI_ISL_481870 | 5/5/2020  | 7/3/2020 | Europe / United Kingdom / England |
| EPI_ISL_481871 | 5/6/2020  | 7/3/2020 | Europe / United Kingdom / England |
| EPI_ISL_481873 | 5/4/2020  | 7/3/2020 | Europe / United Kingdom / England |
| EPI_ISL_481874 | 5/5/2020  | 7/3/2020 | Europe / United Kingdom / England |
| EPI_ISL_481876 | 4/25/2020 | 7/3/2020 | Europe / United Kingdom / England |
| EPI_ISL_481877 | 5/4/2020  | 7/3/2020 | Europe / United Kingdom / England |
| EPI_ISL_481878 | 5/4/2020  | 7/3/2020 | Europe / United Kingdom / England |
| EPI_ISL_481879 | 6/1/2020  | 7/3/2020 | Europe / United Kingdom / England |
| EPI_ISL_481882 | 5/4/2020  | 7/3/2020 | Europe / United Kingdom / England |
| EPI_ISL_481883 | 4/18/2020 | 7/3/2020 | Europe / United Kingdom / England |
| EPI_ISL_481884 | 4/18/2020 | 7/3/2020 | Europe / United Kingdom / England |
| EPI_ISL_481886 | 4/24/2020 | 7/3/2020 | Europe / United Kingdom / England |
| EPI_ISL_481887 | 4/18/2020 | 7/3/2020 | Europe / United Kingdom / England |
| EPI_ISL_481888 | 5/6/2020  | 7/3/2020 | Europe / United Kingdom / England |
| EPI_ISL_481890 | 5/7/2020  | 7/3/2020 | Europe / United Kingdom / England |
| EPI_ISL_481891 | 5/7/2020  | 7/3/2020 | Europe / United Kingdom / England |
| EPI_ISL_481893 | 5/4/2020  | 7/3/2020 | Europe / United Kingdom / England |
| EPI_ISL_481894 | 5/7/2020  | 7/3/2020 | Europe / United Kingdom / England |
| EPI_ISL_481895 | 5/4/2020  | 7/3/2020 | Europe / United Kingdom / England |
| EPI_ISL_481898 | 5/31/2020 | 7/3/2020 | Europe / United Kingdom / England |
| EPI_ISL_481899 | 5/4/2020  | 7/3/2020 | Europe / United Kingdom / England |
| EPI_ISL_481900 | 5/5/2020  | 7/3/2020 | Europe / United Kingdom / England |
| EPI_ISL_481901 | 5/7/2020  | 7/3/2020 | Europe / United Kingdom / England |
| EPI_ISL_481902 | 4/18/2020 | 7/3/2020 | Europe / United Kingdom / England |
| EPI_ISL_481903 | 5/7/2020  | 7/3/2020 | Europe / United Kingdom / England |
| EPI_ISL_481904 | 5/6/2020  | 7/3/2020 | Europe / United Kingdom / England |
| EPI_ISL_481905 | 5/7/2020  | 7/3/2020 | Europe / United Kingdom / England |
| EPI_ISL_481906 | 4/18/2020 | 7/3/2020 | Europe / United Kingdom / England |
| EPI_ISL_481907 | 5/1/2020  | 7/3/2020 | Europe / United Kingdom / England |
| EPI_ISL_481909 | 4/18/2020 | 7/3/2020 | Europe / United Kingdom / England |
| EPI_ISL_481910 | 4/25/2020 | 7/3/2020 | Europe / United Kingdom / England |
| EPI_ISL_481911 | 4/24/2020 | 7/3/2020 | Europe / United Kingdom / England |
| EPI_ISL_481912 | 5/6/2020  | 7/3/2020 | Europe / United Kingdom / England |
| EPI_ISL_481913 | 5/3/2020  | 7/3/2020 | Europe / United Kingdom / England |
| EPI_ISL_481914 | 4/24/2020 | 7/3/2020 | Europe / United Kingdom / England |
| EPI_ISL_481915 | 5/4/2020  | 7/3/2020 | Europe / United Kingdom / England |
| EPI_ISL_481917 | 5/6/2020  | 7/3/2020 | Europe / United Kingdom / England |
| EPI_ISL_481918 | 4/26/2020 | 7/3/2020 | Europe / United Kingdom / England |

|                |           |          |                                   |
|----------------|-----------|----------|-----------------------------------|
| EPI_ISL_481919 | 4/25/2020 | 7/3/2020 | Europe / United Kingdom / England |
| EPI_ISL_481920 | 4/25/2020 | 7/3/2020 | Europe / United Kingdom / England |
| EPI_ISL_481921 | 4/26/2020 | 7/3/2020 | Europe / United Kingdom / England |
| EPI_ISL_481922 | 4/25/2020 | 7/3/2020 | Europe / United Kingdom / England |
| EPI_ISL_481924 | 4/17/2020 | 7/3/2020 | Europe / United Kingdom / England |
| EPI_ISL_481925 | 5/4/2020  | 7/3/2020 | Europe / United Kingdom / England |
| EPI_ISL_481926 | 5/4/2020  | 7/3/2020 | Europe / United Kingdom / England |
| EPI_ISL_481927 | 5/5/2020  | 7/3/2020 | Europe / United Kingdom / England |
| EPI_ISL_481929 | 4/25/2020 | 7/3/2020 | Europe / United Kingdom / England |
| EPI_ISL_481930 | 5/8/2020  | 7/3/2020 | Europe / United Kingdom / England |
| EPI_ISL_481931 | 5/29/2020 | 7/3/2020 | Europe / United Kingdom / England |
| EPI_ISL_481932 | 4/18/2020 | 7/3/2020 | Europe / United Kingdom / England |
| EPI_ISL_481933 | 4/24/2020 | 7/3/2020 | Europe / United Kingdom / England |
| EPI_ISL_481934 | 5/4/2020  | 7/3/2020 | Europe / United Kingdom / England |
| EPI_ISL_481935 | 4/17/2020 | 7/3/2020 | Europe / United Kingdom / England |
| EPI_ISL_481936 | 5/14/2020 | 7/3/2020 | Europe / United Kingdom / England |
| EPI_ISL_481938 | 4/23/2020 | 7/3/2020 | Europe / United Kingdom / England |
| EPI_ISL_481939 | 4/24/2020 | 7/3/2020 | Europe / United Kingdom / England |
| EPI_ISL_481940 | 5/7/2020  | 7/3/2020 | Europe / United Kingdom / England |
| EPI_ISL_481941 | 5/4/2020  | 7/3/2020 | Europe / United Kingdom / England |
| EPI_ISL_481942 | 4/24/2020 | 7/3/2020 | Europe / United Kingdom / England |
| EPI_ISL_481943 | 4/24/2020 | 7/3/2020 | Europe / United Kingdom / England |
| EPI_ISL_481945 | 4/25/2020 | 7/3/2020 | Europe / United Kingdom / England |
| EPI_ISL_481946 | 5/6/2020  | 7/3/2020 | Europe / United Kingdom / England |
| EPI_ISL_481947 | 4/25/2020 | 7/3/2020 | Europe / United Kingdom / England |
| EPI_ISL_481948 | 4/25/2020 | 7/3/2020 | Europe / United Kingdom / England |
| EPI_ISL_481949 | 4/18/2020 | 7/3/2020 | Europe / United Kingdom / England |
| EPI_ISL_481950 | 5/4/2020  | 7/3/2020 | Europe / United Kingdom / England |
| EPI_ISL_481951 | 5/6/2020  | 7/3/2020 | Europe / United Kingdom / England |
| EPI_ISL_481952 | 5/4/2020  | 7/3/2020 | Europe / United Kingdom / England |
| EPI_ISL_481954 | 4/18/2020 | 7/3/2020 | Europe / United Kingdom / England |
| EPI_ISL_481957 | 4/19/2020 | 7/3/2020 | Europe / United Kingdom / England |
| EPI_ISL_481958 | 4/18/2020 | 7/3/2020 | Europe / United Kingdom / England |
| EPI_ISL_481960 | 4/17/2020 | 7/3/2020 | Europe / United Kingdom / England |
| EPI_ISL_481961 | 5/6/2020  | 7/3/2020 | Europe / United Kingdom / England |
| EPI_ISL_481962 | 4/25/2020 | 7/3/2020 | Europe / United Kingdom / England |
| EPI_ISL_481964 | 4/25/2020 | 7/3/2020 | Europe / United Kingdom / England |
| EPI_ISL_481966 | 4/16/2020 | 7/3/2020 | Europe / United Kingdom / England |
| EPI_ISL_481968 | 5/30/2020 | 7/3/2020 | Europe / United Kingdom / England |
| EPI_ISL_481969 | 4/27/2020 | 7/3/2020 | Europe / United Kingdom / England |
| EPI_ISL_481971 | 4/21/2020 | 7/3/2020 | Europe / United Kingdom / England |
| EPI_ISL_481972 | 4/21/2020 | 7/3/2020 | Europe / United Kingdom / England |
| EPI_ISL_481973 | 4/21/2020 | 7/3/2020 | Europe / United Kingdom / England |
| EPI_ISL_481974 | 4/21/2020 | 7/3/2020 | Europe / United Kingdom / England |
| EPI_ISL_481975 | 5/31/2020 | 7/3/2020 | Europe / United Kingdom / England |
| EPI_ISL_481976 | 4/8/2020  | 7/3/2020 | Europe / United Kingdom / England |
| EPI_ISL_481977 | 4/19/2020 | 7/3/2020 | Europe / United Kingdom / England |

|                |           |          |                                            |
|----------------|-----------|----------|--------------------------------------------|
| EPI_ISL_481984 | 5/30/2020 | 7/3/2020 | Europe / United Kingdom / England          |
| EPI_ISL_481991 | 4/20/2020 | 7/3/2020 | Europe / United Kingdom / England          |
| EPI_ISL_481995 | 5/31/2020 | 7/3/2020 | Europe / United Kingdom / England          |
| EPI_ISL_481996 | 6/1/2020  | 7/3/2020 | Europe / United Kingdom / England          |
| EPI_ISL_481998 | 6/1/2020  | 7/3/2020 | Europe / United Kingdom / England          |
| EPI_ISL_481999 | 4/20/2020 | 7/3/2020 | Europe / United Kingdom / England          |
| EPI_ISL_482000 | 4/20/2020 | 7/3/2020 | Europe / United Kingdom / England          |
| EPI_ISL_482001 | 5/3/2020  | 7/3/2020 | Europe / United Kingdom / England          |
| EPI_ISL_482002 | 5/30/2020 | 7/3/2020 | Europe / United Kingdom / England          |
| EPI_ISL_482003 | 4/19/2020 | 7/3/2020 | Europe / United Kingdom / England          |
| EPI_ISL_482004 | 4/21/2020 | 7/3/2020 | Europe / United Kingdom / England          |
| EPI_ISL_482005 | 6/2/2020  | 7/3/2020 | Europe / United Kingdom / England          |
| EPI_ISL_482007 | 5/2/2020  | 7/3/2020 | Europe / United Kingdom / England          |
| EPI_ISL_482009 | 4/13/2020 | 7/3/2020 | Europe / United Kingdom / England          |
| EPI_ISL_482010 | 4/19/2020 | 7/3/2020 | Europe / United Kingdom / England          |
| EPI_ISL_482011 | 5/31/2020 | 7/3/2020 | Europe / United Kingdom / England          |
| EPI_ISL_482013 | 4/10/2020 | 7/3/2020 | Europe / United Kingdom / England          |
| EPI_ISL_482015 | 5/31/2020 | 7/3/2020 | Europe / United Kingdom / England          |
| EPI_ISL_482017 | 4/21/2020 | 7/3/2020 | Europe / United Kingdom / England          |
| EPI_ISL_482018 | 4/20/2020 | 7/3/2020 | Europe / United Kingdom / England          |
| EPI_ISL_482020 | 4/8/2020  | 7/3/2020 | Europe / United Kingdom / England          |
| EPI_ISL_482021 | 4/20/2020 | 7/3/2020 | Europe / United Kingdom / England          |
| EPI_ISL_482025 | 4/22/2020 | 7/3/2020 | Europe / United Kingdom / England          |
| EPI_ISL_482026 | 6/1/2020  | 7/3/2020 | Europe / United Kingdom / England          |
| EPI_ISL_482027 | 4/22/2020 | 7/3/2020 | Europe / United Kingdom / England          |
| EPI_ISL_482028 | 4/27/2020 | 7/3/2020 | Europe / United Kingdom / England          |
| EPI_ISL_482030 | 4/20/2020 | 7/3/2020 | Europe / United Kingdom / England          |
| EPI_ISL_482034 | 4/14/2020 | 7/3/2020 | Europe / United Kingdom / Northern Ireland |
| EPI_ISL_482038 | 4/25/2020 | 7/3/2020 | Europe / United Kingdom / Northern Ireland |
| EPI_ISL_482041 | 4/8/2020  | 7/3/2020 | Europe / United Kingdom / Northern Ireland |
| EPI_ISL_482042 | 4/8/2020  | 7/3/2020 | Europe / United Kingdom / Northern Ireland |
| EPI_ISL_482043 | 4/14/2020 | 7/3/2020 | Europe / United Kingdom / Northern Ireland |
| EPI_ISL_482044 | 4/25/2020 | 7/3/2020 | Europe / United Kingdom / Northern Ireland |
| EPI_ISL_482046 | 4/8/2020  | 7/3/2020 | Europe / United Kingdom / Northern Ireland |
| EPI_ISL_482049 | 4/8/2020  | 7/3/2020 | Europe / United Kingdom / Northern Ireland |
| EPI_ISL_482051 | 4/13/2020 | 7/3/2020 | Europe / United Kingdom / Northern Ireland |
| EPI_ISL_482052 | 4/8/2020  | 7/3/2020 | Europe / United Kingdom / Northern Ireland |
| EPI_ISL_482053 | 4/8/2020  | 7/3/2020 | Europe / United Kingdom / Northern Ireland |
| EPI_ISL_482054 | 4/25/2020 | 7/3/2020 | Europe / United Kingdom / Northern Ireland |
| EPI_ISL_482055 | 4/24/2020 | 7/3/2020 | Europe / United Kingdom / Northern Ireland |
| EPI_ISL_482056 | 4/8/2020  | 7/3/2020 | Europe / United Kingdom / Northern Ireland |
| EPI_ISL_482058 | 4/27/2020 | 7/3/2020 | Europe / United Kingdom / England          |
| EPI_ISL_482060 | 4/26/2020 | 7/3/2020 | Europe / United Kingdom / England          |
| EPI_ISL_482061 | 4/30/2020 | 7/3/2020 | Europe / United Kingdom / England          |
| EPI_ISL_482062 | 4/26/2020 | 7/3/2020 | Europe / United Kingdom / England          |
| EPI_ISL_482064 | 4/26/2020 | 7/3/2020 | Europe / United Kingdom / England          |
| EPI_ISL_482065 | 4/27/2020 | 7/3/2020 | Europe / United Kingdom / England          |



|                |           |          |                                            |
|----------------|-----------|----------|--------------------------------------------|
| EPI_ISL_482067 | 4/26/2020 | 7/3/2020 | Europe / United Kingdom / England          |
| EPI_ISL_482068 | 4/26/2020 | 7/3/2020 | Europe / United Kingdom / England          |
| EPI_ISL_482069 | 5/3/2020  | 7/3/2020 | Europe / United Kingdom / England          |
| EPI_ISL_482070 | 4/14/2020 | 7/3/2020 | Europe / United Kingdom / Northern Ireland |
| EPI_ISL_482071 | 5/14/2020 | 7/3/2020 | Europe / United Kingdom / England          |
| EPI_ISL_482072 | 5/8/2020  | 7/3/2020 | Europe / United Kingdom / England          |
| EPI_ISL_482073 | 5/6/2020  | 7/3/2020 | Europe / United Kingdom / England          |
| EPI_ISL_482074 | 5/8/2020  | 7/3/2020 | Europe / United Kingdom / England          |
| EPI_ISL_482076 | 5/2/2020  | 7/3/2020 | Europe / United Kingdom / England          |
| EPI_ISL_482078 | 5/3/2020  | 7/3/2020 | Europe / United Kingdom / England          |
| EPI_ISL_482079 | 5/5/2020  | 7/3/2020 | Europe / United Kingdom / England          |
| EPI_ISL_482081 | 5/4/2020  | 7/3/2020 | Europe / United Kingdom / England          |
| EPI_ISL_482082 | 4/14/2020 | 7/3/2020 | Europe / United Kingdom / Northern Ireland |
| EPI_ISL_482084 | 5/1/2020  | 7/3/2020 | Europe / United Kingdom / England          |
| EPI_ISL_482085 | 5/4/2020  | 7/3/2020 | Europe / United Kingdom / England          |
| EPI_ISL_482086 | 5/8/2020  | 7/3/2020 | Europe / United Kingdom / England          |
| EPI_ISL_482088 | 5/5/2020  | 7/3/2020 | Europe / United Kingdom / England          |
| EPI_ISL_482089 | 5/6/2020  | 7/3/2020 | Europe / United Kingdom / England          |
| EPI_ISL_482090 | 5/6/2020  | 7/3/2020 | Europe / United Kingdom / England          |
| EPI_ISL_482092 | 5/5/2020  | 7/3/2020 | Europe / United Kingdom / England          |
| EPI_ISL_482093 | 5/18/2020 | 7/3/2020 | Europe / United Kingdom / England          |
| EPI_ISL_482094 | 5/5/2020  | 7/3/2020 | Europe / United Kingdom / England          |
| EPI_ISL_482095 | 5/4/2020  | 7/3/2020 | Europe / United Kingdom / England          |
| EPI_ISL_482096 | 4/30/2020 | 7/3/2020 | Europe / United Kingdom / Northern Ireland |
| EPI_ISL_482099 | 5/15/2020 | 7/3/2020 | Europe / United Kingdom / England          |
| EPI_ISL_482100 | 5/2/2020  | 7/3/2020 | Europe / United Kingdom / England          |
| EPI_ISL_482101 | 4/29/2020 | 7/3/2020 | Europe / United Kingdom / Northern Ireland |
| EPI_ISL_482102 | 4/18/2020 | 7/3/2020 | Europe / United Kingdom / Northern Ireland |
| EPI_ISL_482103 | 5/2/2020  | 7/3/2020 | Europe / United Kingdom / England          |
| EPI_ISL_482104 | 5/6/2020  | 7/3/2020 | Europe / United Kingdom / England          |
| EPI_ISL_482105 | 4/23/2020 | 7/3/2020 | Europe / United Kingdom / Northern Ireland |
| EPI_ISL_482106 | 5/8/2020  | 7/3/2020 | Europe / United Kingdom / England          |
| EPI_ISL_482108 | 5/6/2020  | 7/3/2020 | Europe / United Kingdom / England          |
| EPI_ISL_482109 | 5/5/2020  | 7/3/2020 | Europe / United Kingdom / England          |
| EPI_ISL_482111 | 5/6/2020  | 7/3/2020 | Europe / United Kingdom / England          |
| EPI_ISL_482112 | 5/6/2020  | 7/3/2020 | Europe / United Kingdom / England          |
| EPI_ISL_482113 | 5/6/2020  | 7/3/2020 | Europe / United Kingdom / England          |
| EPI_ISL_482114 | 5/1/2020  | 7/3/2020 | Europe / United Kingdom / England          |
| EPI_ISL_482115 | 4/28/2020 | 7/3/2020 | Europe / United Kingdom / Northern Ireland |
| EPI_ISL_482116 | 5/18/2020 | 7/3/2020 | Europe / United Kingdom / England          |
| EPI_ISL_482117 | 5/4/2020  | 7/3/2020 | Europe / United Kingdom / England          |
| EPI_ISL_482118 | 5/15/2020 | 7/3/2020 | Europe / United Kingdom / England          |
| EPI_ISL_482120 | 4/23/2020 | 7/3/2020 | Europe / United Kingdom / England          |
| EPI_ISL_482128 | 4/18/2020 | 7/3/2020 | Europe / United Kingdom / England          |
| EPI_ISL_482130 | 4/24/2020 | 7/3/2020 | Europe / United Kingdom / England          |
| EPI_ISL_482133 | 4/14/2020 | 7/3/2020 | Europe / United Kingdom / Northern Ireland |
| EPI_ISL_482134 | 4/8/2020  | 7/3/2020 | Europe / United Kingdom / Northern Ireland |

|                |           |                                                     |
|----------------|-----------|-----------------------------------------------------|
| EPI_ISL_482138 | 4/29/2020 | 7/3/2020 Europe / United Kingdom / England          |
| EPI_ISL_482140 | 4/28/2020 | 7/3/2020 Europe / United Kingdom / Northern Ireland |
| EPI_ISL_482142 | 4/30/2020 | 7/3/2020 Europe / United Kingdom / Northern Ireland |
| EPI_ISL_482144 | 4/27/2020 | 7/3/2020 Europe / United Kingdom / Northern Ireland |
| EPI_ISL_482146 | 5/2/2020  | 7/3/2020 Europe / United Kingdom / Northern Ireland |
| EPI_ISL_482149 | 4/30/2020 | 7/3/2020 Europe / United Kingdom / Northern Ireland |
| EPI_ISL_482152 | 4/30/2020 | 7/3/2020 Europe / United Kingdom / Northern Ireland |
| EPI_ISL_482154 | 4/28/2020 | 7/3/2020 Europe / United Kingdom / Northern Ireland |
| EPI_ISL_482160 | 4/20/2020 | 7/3/2020 Europe / United Kingdom / England          |
| EPI_ISL_482161 | 4/20/2020 | 7/3/2020 Europe / United Kingdom / England          |
| EPI_ISL_482163 | 4/20/2020 | 7/3/2020 Europe / United Kingdom / England          |
| EPI_ISL_482165 | 4/24/2020 | 7/3/2020 Europe / United Kingdom / England          |
| EPI_ISL_482166 | 4/23/2020 | 7/3/2020 Europe / United Kingdom / England          |
| EPI_ISL_482168 | 4/20/2020 | 7/3/2020 Europe / United Kingdom / England          |
| EPI_ISL_482170 | 4/20/2020 | 7/3/2020 Europe / United Kingdom / England          |
| EPI_ISL_482171 | 4/21/2020 | 7/3/2020 Europe / United Kingdom / England          |
| EPI_ISL_482175 | 4/23/2020 | 7/3/2020 Europe / United Kingdom / England          |
| EPI_ISL_482176 | 4/23/2020 | 7/3/2020 Europe / United Kingdom / England          |
| EPI_ISL_482178 | 4/20/2020 | 7/3/2020 Europe / United Kingdom / England          |
| EPI_ISL_482182 | 4/20/2020 | 7/3/2020 Europe / United Kingdom / England          |
| EPI_ISL_482183 | 4/20/2020 | 7/3/2020 Europe / United Kingdom / England          |
| EPI_ISL_482184 | 4/21/2020 | 7/3/2020 Europe / United Kingdom / England          |
| EPI_ISL_482186 | 4/24/2020 | 7/3/2020 Europe / United Kingdom / England          |
| EPI_ISL_482187 | 4/23/2020 | 7/3/2020 Europe / United Kingdom / England          |
| EPI_ISL_482188 | 4/20/2020 | 7/3/2020 Europe / United Kingdom / England          |
| EPI_ISL_482191 | 4/20/2020 | 7/3/2020 Europe / United Kingdom / England          |
| EPI_ISL_482192 | 4/21/2020 | 7/3/2020 Europe / United Kingdom / England          |
| EPI_ISL_482196 | 4/24/2020 | 7/3/2020 Europe / United Kingdom / England          |
| EPI_ISL_482197 | 4/24/2020 | 7/3/2020 Europe / United Kingdom / England          |
| EPI_ISL_482200 | 4/24/2020 | 7/3/2020 Europe / United Kingdom / England          |
| EPI_ISL_482201 | 4/20/2020 | 7/3/2020 Europe / United Kingdom / England          |
| EPI_ISL_482202 | 4/20/2020 | 7/3/2020 Europe / United Kingdom / England          |
| EPI_ISL_482203 | 4/21/2020 | 7/3/2020 Europe / United Kingdom / England          |
| EPI_ISL_482204 | 4/21/2020 | 7/3/2020 Europe / United Kingdom / England          |
| EPI_ISL_482205 | 4/21/2020 | 7/3/2020 Europe / United Kingdom / England          |
| EPI_ISL_482206 | 4/20/2020 | 7/3/2020 Europe / United Kingdom / England          |
| EPI_ISL_482208 | 4/21/2020 | 7/3/2020 Europe / United Kingdom / England          |
| EPI_ISL_482209 | 4/23/2020 | 7/3/2020 Europe / United Kingdom / England          |
| EPI_ISL_482210 | 4/24/2020 | 7/3/2020 Europe / United Kingdom / England          |
| EPI_ISL_482211 | 4/21/2020 | 7/3/2020 Europe / United Kingdom / England          |
| EPI_ISL_482212 | 4/23/2020 | 7/3/2020 Europe / United Kingdom / England          |
| EPI_ISL_482213 | 4/25/2020 | 7/3/2020 Europe / United Kingdom / England          |
| EPI_ISL_482215 | 4/20/2020 | 7/3/2020 Europe / United Kingdom / England          |
| EPI_ISL_482217 | 4/20/2020 | 7/3/2020 Europe / United Kingdom / England          |
| EPI_ISL_482292 | 4/1/2020  | 7/3/2020 North America / USA / Oregon               |
| EPI_ISL_482293 | 4/1/2020  | 7/3/2020 North America / USA / Oregon               |
| EPI_ISL_482294 | 4/3/2020  | 7/3/2020 North America / USA / Oregon               |







|                |           |          |                                                    |
|----------------|-----------|----------|----------------------------------------------------|
| EPI_ISL_482439 | 5/18/2020 | 7/3/2020 | North America / USA / Oregon                       |
| EPI_ISL_482440 | 5/3/2020  | 7/3/2020 | North America / USA / Oregon                       |
| EPI_ISL_482441 | 5/8/2020  | 7/3/2020 | North America / USA / Oregon                       |
| EPI_ISL_482442 | 5/8/2020  | 7/3/2020 | North America / USA / Oregon                       |
| EPI_ISL_482443 | 5/8/2020  | 7/3/2020 | North America / USA / Oregon                       |
| EPI_ISL_482444 | 5/10/2020 | 7/3/2020 | North America / USA / Oregon                       |
| EPI_ISL_482445 | 5/10/2020 | 7/3/2020 | North America / USA / Oregon                       |
| EPI_ISL_482446 | 4/18/2020 | 7/3/2020 | North America / USA / Oregon                       |
| EPI_ISL_482447 | 4/18/2020 | 7/3/2020 | North America / USA / Oregon                       |
| EPI_ISL_482448 | 4/3/2020  | 7/3/2020 | North America / USA / Oregon                       |
| EPI_ISL_482449 | 3/23/2020 | 7/3/2020 | North America / USA / Oregon                       |
| EPI_ISL_482450 | 4/2/2020  | 7/3/2020 | North America / USA / Oregon                       |
| EPI_ISL_482451 | 3/9/2020  | 7/3/2020 | North America / USA / Oregon                       |
| EPI_ISL_482452 | 3/30/2020 | 7/3/2020 | North America / USA / Oregon                       |
| EPI_ISL_482453 | 4/4/2020  | 7/3/2020 | North America / USA / Oregon                       |
| EPI_ISL_482454 | 4/2/2020  | 7/3/2020 | North America / USA / Oregon                       |
| EPI_ISL_482455 | 3/27/2020 | 7/3/2020 | North America / USA / Oregon                       |
| EPI_ISL_482456 | 3/27/2020 | 7/3/2020 | North America / USA / Oregon                       |
| EPI_ISL_482457 | 3/26/2020 | 7/3/2020 | North America / USA / Oregon                       |
| EPI_ISL_482458 | 3/27/2020 | 7/3/2020 | North America / USA / Oregon                       |
| EPI_ISL_482459 | 3/28/2020 | 7/3/2020 | North America / USA / Oregon                       |
| EPI_ISL_482460 | 3/27/2020 | 7/3/2020 | North America / USA / Oregon                       |
| EPI_ISL_482461 | 4/7/2020  | 7/3/2020 | North America / USA / Oregon                       |
| EPI_ISL_482462 | 3/25/2020 | 7/3/2020 | North America / USA / Oregon                       |
| EPI_ISL_482463 | 3/18/2020 | 7/3/2020 | North America / USA / Oregon                       |
| EPI_ISL_482464 | 3/18/2020 | 7/3/2020 | North America / USA / Oregon                       |
| EPI_ISL_482465 | 3/25/2020 | 7/3/2020 | North America / USA / Oregon                       |
| EPI_ISL_482466 | 3/30/2020 | 7/3/2020 | North America / USA / Oregon                       |
| EPI_ISL_482467 | 3/23/2020 | 7/3/2020 | North America / USA / Oregon                       |
| EPI_ISL_482468 | 3/5/2020  | 7/3/2020 | South America / Peru / Lima                        |
| EPI_ISL_482469 | 3/5/2020  | 7/3/2020 | North America / Canada / Nova Scotia               |
| EPI_ISL_482470 | 3/16/2020 | 7/3/2020 | North America / Canada / Nova Scotia               |
| EPI_ISL_482471 | 3/17/2020 | 7/3/2020 | North America / Canada / New Brunswick             |
| EPI_ISL_482472 | 3/15/2020 | 7/3/2020 | North America / Canada / New Brunswick             |
| EPI_ISL_482473 | 3/15/2020 | 7/3/2020 | North America / Canada / New Brunswick             |
| EPI_ISL_482474 | 3/19/2020 | 7/3/2020 | North America / Canada / Manitoba                  |
| EPI_ISL_482475 | 3/15/2020 | 7/3/2020 | North America / Canada / Manitoba                  |
| EPI_ISL_482476 | 3/17/2020 | 7/3/2020 | North America / Canada / Nova Scotia               |
| EPI_ISL_482477 | 3/18/2020 | 7/3/2020 | North America / Canada / Nova Scotia               |
| EPI_ISL_482478 | 3/16/2020 | 7/3/2020 | North America / Canada / Manitoba                  |
| EPI_ISL_482479 | 3/19/2020 | 7/3/2020 | North America / Canada / Newfoundland and Labrador |
| EPI_ISL_482480 | 3/23/2020 | 7/3/2020 | North America / Canada / Manitoba                  |
| EPI_ISL_482481 | 3/16/2020 | 7/3/2020 | North America / Canada / Manitoba                  |
| EPI_ISL_482482 | 3/16/2020 | 7/3/2020 | North America / Canada / Manitoba                  |
| EPI_ISL_482483 | 3/11/2020 | 7/3/2020 | North America / Canada / Manitoba                  |
| EPI_ISL_482484 | 3/13/2020 | 7/3/2020 | North America / Canada / Manitoba                  |
| EPI_ISL_482744 | 4/3/2020  | 7/3/2020 | Europe / Serbia                                    |

|                |           |                                                                 |
|----------------|-----------|-----------------------------------------------------------------|
| EPI_ISL_513298 | 3/18/2020 | 7/3/2020 Europe / Germany / Bavaria                             |
| EPI_ISL_513299 | 3/20/2020 | 7/3/2020 Europe / Germany / Bavaria                             |
| EPI_ISL_513300 | 3/19/2020 | 7/3/2020 Europe / Germany / Bavaria                             |
| EPI_ISL_513301 | 3/21/2020 | 7/3/2020 Europe / Germany / Bavaria                             |
| EPI_ISL_513302 | 3/22/2020 | 7/3/2020 Europe / Germany / Bavaria                             |
| EPI_ISL_513303 | 3/22/2020 | 7/3/2020 Europe / Germany / Bavaria                             |
| EPI_ISL_513304 | 3/22/2020 | 7/3/2020 Europe / Germany / Bavaria                             |
| EPI_ISL_513305 | 3/29/2020 | 7/3/2020 Europe / Germany / Bavaria                             |
| EPI_ISL_513306 | 3/29/2020 | 7/3/2020 Europe / Germany / Bavaria                             |
| EPI_ISL_513307 | 3/29/2020 | 7/3/2020 Europe / Germany / Bavaria                             |
| EPI_ISL_482485 | 6/18/2020 | 7/4/2020 Asia / Bangladesh / Rajshahi                           |
| EPI_ISL_482486 | 6/18/2020 | 7/4/2020 Asia / Bangladesh / Rajshahi                           |
| EPI_ISL_482487 | 6/18/2020 | 7/4/2020 Asia / Bangladesh / Dhaka / Dhaka / Keraniganj Upazila |
| EPI_ISL_482488 | 6/18/2020 | 7/4/2020 Asia / Bangladesh / Rajshahi                           |
| EPI_ISL_482489 | 6/18/2020 | 7/4/2020 Asia / Bangladesh / Dhaka / Dhaka / Keraniganj Upazila |
| EPI_ISL_482498 | 5/16/2020 | 7/4/2020 Asia / India / Delhi                                   |
| EPI_ISL_482501 | 5/17/2020 | 7/4/2020 Asia / India / Delhi                                   |
| EPI_ISL_482503 | 5/18/2020 | 7/4/2020 Asia / India / Delhi                                   |
| EPI_ISL_482509 | 5/18/2020 | 7/4/2020 Asia / India / Delhi                                   |
| EPI_ISL_482511 | 5/18/2020 | 7/4/2020 Asia / India / Delhi                                   |
| EPI_ISL_482512 | 5/18/2020 | 7/4/2020 Asia / India / Delhi                                   |
| EPI_ISL_482513 | 5/18/2020 | 7/4/2020 Asia / India / Delhi                                   |
| EPI_ISL_482515 | 5/18/2020 | 7/4/2020 Asia / India / Delhi                                   |
| EPI_ISL_482531 | 5/18/2020 | 7/4/2020 Asia / India / Delhi                                   |
| EPI_ISL_482537 | 5/19/2020 | 7/4/2020 Asia / India / Delhi                                   |
| EPI_ISL_482545 | 5/18/2020 | 7/4/2020 Asia / India / Delhi                                   |
| EPI_ISL_482546 | 5/18/2020 | 7/4/2020 Asia / India / Delhi                                   |
| EPI_ISL_482547 | 5/18/2020 | 7/4/2020 Asia / India / Delhi                                   |
| EPI_ISL_482552 | 5/18/2020 | 7/4/2020 Asia / India / Delhi                                   |
| EPI_ISL_482555 | 5/19/2020 | 7/4/2020 Asia / India / Delhi                                   |
| EPI_ISL_482556 | 5/19/2020 | 7/4/2020 Asia / India / Delhi                                   |
| EPI_ISL_482560 | 5/19/2020 | 7/4/2020 Asia / India / Delhi                                   |
| EPI_ISL_482563 | 5/19/2020 | 7/4/2020 Asia / India / Delhi                                   |
| EPI_ISL_482574 | 5/20/2020 | 7/4/2020 Asia / India / Delhi                                   |
| EPI_ISL_482575 | 3/5/2020  | 7/4/2020 Asia / China / Zhejiang / Hangzhou                     |
| EPI_ISL_482576 | 3/6/2020  | 7/4/2020 Asia / China / Zhejiang / Hangzhou                     |
| EPI_ISL_482577 | 3/7/2020  | 7/4/2020 Asia / China / Zhejiang / Hangzhou                     |
| EPI_ISL_482578 | 3/12/2020 | 7/4/2020 Asia / China / Zhejiang / Hangzhou                     |
| EPI_ISL_482579 | 3/17/2020 | 7/4/2020 Asia / China / Zhejiang / Hangzhou                     |
| EPI_ISL_482580 | 3/18/2020 | 7/4/2020 Asia / China / Zhejiang / Hangzhou                     |
| EPI_ISL_482581 | 3/21/2020 | 7/4/2020 Asia / China / Zhejiang / Hangzhou                     |
| EPI_ISL_482582 | 3/21/2020 | 7/4/2020 Asia / China / Zhejiang / Hangzhou                     |
| EPI_ISL_482583 | 3/22/2020 | 7/4/2020 Asia / China / Zhejiang / Hangzhou                     |
| EPI_ISL_482584 | 3/24/2020 | 7/4/2020 Asia / China / Zhejiang / Hangzhou                     |
| EPI_ISL_482585 | 3/25/2020 | 7/4/2020 Asia / China / Zhejiang / Hangzhou                     |
| EPI_ISL_482586 | 3/25/2020 | 7/4/2020 Asia / China / Zhejiang / Hangzhou                     |
| EPI_ISL_482587 | 5/20/2020 | 7/4/2020 Asia / India / Delhi                                   |

|                |           |                               |
|----------------|-----------|-------------------------------|
| EPI_ISL_482590 | 5/21/2020 | 7/4/2020 Asia / India / Delhi |
| EPI_ISL_482591 | 5/23/2020 | 7/4/2020 Asia / India / Delhi |
| EPI_ISL_482611 | 5/23/2020 | 7/4/2020 Asia / India / Delhi |
| EPI_ISL_482612 | 5/23/2020 | 7/4/2020 Asia / India / Delhi |
| EPI_ISL_482613 | 5/23/2020 | 7/4/2020 Asia / India / Delhi |
| EPI_ISL_482614 | 5/25/2020 | 7/4/2020 Asia / India / Delhi |
| EPI_ISL_482616 | 5/25/2020 | 7/4/2020 Asia / India / Delhi |
| EPI_ISL_482620 | 5/26/2020 | 7/4/2020 Asia / India / Delhi |
| EPI_ISL_482628 | 5/27/2020 | 7/4/2020 Asia / India / Delhi |
| EPI_ISL_482629 | 5/27/2020 | 7/4/2020 Asia / India / Delhi |
| EPI_ISL_482630 | 5/27/2020 | 7/4/2020 Asia / India / Delhi |
| EPI_ISL_482631 | 5/27/2020 | 7/4/2020 Asia / India / Delhi |
| EPI_ISL_482634 | 5/28/2020 | 7/4/2020 Asia / India / Delhi |
| EPI_ISL_482635 | 5/28/2020 | 7/4/2020 Asia / India / Delhi |
| EPI_ISL_482637 | 5/28/2020 | 7/4/2020 Asia / India / Delhi |
| EPI_ISL_482640 | 5/27/2020 | 7/4/2020 Asia / India / Delhi |
| EPI_ISL_482641 | 5/27/2020 | 7/4/2020 Asia / India / Delhi |
| EPI_ISL_482642 | 5/27/2020 | 7/4/2020 Asia / India / Delhi |
| EPI_ISL_482643 | 5/27/2020 | 7/4/2020 Asia / India / Delhi |
| EPI_ISL_482650 | 5/28/2020 | 7/4/2020 Asia / India / Delhi |
| EPI_ISL_482651 | 5/28/2020 | 7/4/2020 Asia / India / Delhi |
| EPI_ISL_482655 | 5/28/2020 | 7/4/2020 Asia / India / Delhi |
| EPI_ISL_482656 | 5/28/2020 | 7/4/2020 Asia / India / Delhi |
| EPI_ISL_482660 | 5/28/2020 | 7/4/2020 Asia / India / Delhi |
| EPI_ISL_482661 | 5/28/2020 | 7/4/2020 Asia / India / Delhi |
| EPI_ISL_482663 | 5/28/2020 | 7/4/2020 Asia / India / Delhi |
| EPI_ISL_482664 | 5/28/2020 | 7/4/2020 Asia / India / Delhi |
| EPI_ISL_482665 | 5/28/2020 | 7/4/2020 Asia / India / Delhi |
| EPI_ISL_482669 | 5/28/2020 | 7/4/2020 Asia / India / Delhi |
| EPI_ISL_482745 | 3/23/2020 | 7/4/2020 Europe / Netherlands |
| EPI_ISL_482746 | 3/3/2020  | 7/4/2020 Europe / Netherlands |
| EPI_ISL_482672 | 3/3/2020  | 7/5/2020 Asia / Singapore     |
| EPI_ISL_482673 | 4/4/2020  | 7/5/2020 Asia / Singapore     |
| EPI_ISL_482674 | 4/6/2020  | 7/5/2020 Asia / Singapore     |
| EPI_ISL_482675 | 4/6/2020  | 7/5/2020 Asia / Singapore     |
| EPI_ISL_482676 | 4/5/2020  | 7/5/2020 Asia / Singapore     |
| EPI_ISL_482677 | 3/17/2020 | 7/5/2020 Asia / Singapore     |
| EPI_ISL_482680 | 2/9/2020  | 7/5/2020 Asia / Singapore     |
| EPI_ISL_482682 | 6/2/2020  | 7/5/2020 Asia / Singapore     |
| EPI_ISL_482683 | 6/2/2020  | 7/5/2020 Asia / Singapore     |
| EPI_ISL_482684 | 6/2/2020  | 7/5/2020 Asia / Singapore     |
| EPI_ISL_482685 | 6/2/2020  | 7/5/2020 Asia / Singapore     |
| EPI_ISL_482686 | 6/2/2020  | 7/5/2020 Asia / Singapore     |
| EPI_ISL_482687 | 6/2/2020  | 7/5/2020 Asia / Singapore     |
| EPI_ISL_482688 | 6/2/2020  | 7/5/2020 Asia / Singapore     |
| EPI_ISL_482689 | 6/2/2020  | 7/5/2020 Asia / Singapore     |
| EPI_ISL_482690 | 6/2/2020  | 7/5/2020 Asia / Singapore     |



|                |           |                                                                 |
|----------------|-----------|-----------------------------------------------------------------|
| EPI_ISL_482691 | 6/2/2020  | 7/5/2020 Asia / Singapore                                       |
| EPI_ISL_482692 | 5/28/2020 | 7/5/2020 Asia / Singapore                                       |
| EPI_ISL_482693 | 5/27/2020 | 7/5/2020 Asia / Singapore                                       |
| EPI_ISL_482694 | 5/27/2020 | 7/5/2020 Asia / Singapore                                       |
| EPI_ISL_482695 | 5/27/2020 | 7/5/2020 Asia / Singapore                                       |
| EPI_ISL_482696 | 5/18/2020 | 7/5/2020 Asia / Singapore                                       |
| EPI_ISL_482697 | 5/18/2020 | 7/5/2020 Asia / Singapore                                       |
| EPI_ISL_482698 | 5/18/2020 | 7/5/2020 Asia / Singapore                                       |
| EPI_ISL_482699 | 6/6/2020  | 7/5/2020 Asia / Singapore                                       |
| EPI_ISL_482700 | 6/18/2020 | 7/5/2020 Asia / Bangladesh / Dhaka / Dhaka / Keraniganj Upazila |
| EPI_ISL_482701 | 5/21/2020 | 7/5/2020 Asia / Bangladesh / Dhaka / Dhaka / Uttara             |
| EPI_ISL_482702 | 6/5/2020  | 7/5/2020 Africa / South Africa / KwaZulu-Natal                  |
| EPI_ISL_482704 | 6/5/2020  | 7/5/2020 Africa / South Africa / KwaZulu-Natal                  |
| EPI_ISL_482705 | 6/6/2020  | 7/5/2020 Africa / South Africa / KwaZulu-Natal                  |
| EPI_ISL_482708 | 6/7/2020  | 7/5/2020 Africa / South Africa / KwaZulu-Natal                  |
| EPI_ISL_482709 | 6/6/2020  | 7/5/2020 Africa / South Africa / KwaZulu-Natal                  |
| EPI_ISL_482710 | 6/4/2020  | 7/5/2020 Africa / South Africa / KwaZulu-Natal / eThekwini      |
| EPI_ISL_482711 | 6/4/2020  | 7/5/2020 Africa / South Africa / KwaZulu-Natal / eThekwini      |
| EPI_ISL_482712 | 6/8/2020  | 7/5/2020 Africa / South Africa / KwaZulu-Natal / eThekwini      |
| EPI_ISL_482716 | 6/11/2020 | 7/5/2020 Africa / South Africa / KwaZulu-Natal                  |
| EPI_ISL_482717 | 6/11/2020 | 7/5/2020 Africa / South Africa / KwaZulu-Natal                  |
| EPI_ISL_482718 | 6/11/2020 | 7/5/2020 Africa / South Africa / KwaZulu-Natal                  |
| EPI_ISL_482719 | 6/11/2020 | 7/5/2020 Africa / South Africa / KwaZulu-Natal                  |
| EPI_ISL_482720 | 6/11/2020 | 7/5/2020 Africa / South Africa / KwaZulu-Natal                  |
| EPI_ISL_482721 | 6/11/2020 | 7/5/2020 Africa / South Africa / KwaZulu-Natal                  |
| EPI_ISL_482722 | 6/11/2020 | 7/5/2020 Africa / South Africa / KwaZulu-Natal                  |
| EPI_ISL_482723 | 6/11/2020 | 7/5/2020 Africa / South Africa / KwaZulu-Natal                  |
| EPI_ISL_482726 | 6/14/2020 | 7/5/2020 Africa / South Africa / KwaZulu-Natal / uThukela       |
| EPI_ISL_483060 | 3/21/2020 | 7/5/2020 Oceania / New Zealand                                  |
| EPI_ISL_482759 | 4/30/2020 | 7/6/2020 Africa / Egypt                                         |
| EPI_ISL_482760 | 4/28/2020 | 7/6/2020 Africa / Egypt                                         |
| EPI_ISL_482761 | 4/30/2020 | 7/6/2020 Africa / Egypt                                         |
| EPI_ISL_482762 | 5/5/2020  | 7/6/2020 Africa / Egypt                                         |
| EPI_ISL_482763 | 5/5/2020  | 7/6/2020 Africa / Egypt                                         |
| EPI_ISL_482764 | 5/5/2020  | 7/6/2020 Africa / Egypt                                         |
| EPI_ISL_482765 | 4/30/2020 | 7/6/2020 Africa / Egypt                                         |
| EPI_ISL_482766 | 5/11/2020 | 7/6/2020 Africa / Egypt                                         |
| EPI_ISL_482767 | 5/11/2020 | 7/6/2020 Africa / Egypt                                         |
| EPI_ISL_482768 | 5/13/2020 | 7/6/2020 Africa / Egypt                                         |
| EPI_ISL_482769 | 5/11/2020 | 7/6/2020 Africa / Egypt                                         |
| EPI_ISL_482770 | 5/11/2020 | 7/6/2020 Africa / Egypt                                         |
| EPI_ISL_482771 | 5/10/2020 | 7/6/2020 Africa / Egypt                                         |
| EPI_ISL_482772 | 5/10/2020 | 7/6/2020 Africa / Egypt                                         |
| EPI_ISL_482773 | 5/8/2020  | 7/6/2020 Africa / Egypt                                         |
| EPI_ISL_482774 | 5/13/2020 | 7/6/2020 Africa / Egypt                                         |
| EPI_ISL_482852 | 6/11/2020 | 7/6/2020 Africa / South Africa / KwaZulu-Natal / eThekwini      |
| EPI_ISL_482853 | 6/17/2020 | 7/6/2020 Africa / South Africa / KwaZulu-Natal / eThekwini      |

|                |           |                                                            |
|----------------|-----------|------------------------------------------------------------|
| EPI_ISL_482862 | 6/18/2020 | 7/6/2020 Africa / South Africa / KwaZulu-Natal / eThekweni |
| EPI_ISL_482867 | 6/16/2020 | 7/6/2020 Africa / South Africa / KwaZulu-Natal / eThekweni |
| EPI_ISL_482874 | 6/13/2020 | 7/6/2020 Africa / Senegal / Dakar / Mbao                   |
| EPI_ISL_482875 | 6/16/2020 | 7/6/2020 Africa / Senegal / Dakar                          |
| EPI_ISL_482876 | 6/17/2020 | 7/6/2020 Africa / Senegal / Dakar                          |
| EPI_ISL_482877 | 6/17/2020 | 7/6/2020 Africa / Senegal / Dakar                          |
| EPI_ISL_482878 | 6/18/2020 | 7/6/2020 Africa / Senegal / Dakar                          |
| EPI_ISL_482879 | 6/8/2020  | 7/6/2020 Europe / France / Occitanie                       |
| EPI_ISL_482880 | 6/8/2020  | 7/6/2020 Europe / France / Occitanie                       |
| EPI_ISL_482881 | 6/9/2020  | 7/6/2020 Europe / France / Occitanie                       |
| EPI_ISL_482882 | 6/10/2020 | 7/6/2020 Europe / France / Occitanie                       |
| EPI_ISL_482883 | 6/10/2020 | 7/6/2020 Europe / France / Occitanie                       |
| EPI_ISL_482884 | 6/10/2020 | 7/6/2020 Europe / France / Occitanie                       |
| EPI_ISL_482885 | 6/15/2020 | 7/6/2020 Europe / France / Occitanie                       |
| EPI_ISL_482886 | 6/12/2020 | 7/6/2020 Europe / France / Occitanie                       |
| EPI_ISL_482887 | 6/18/2020 | 7/6/2020 Europe / France / Occitanie                       |
| EPI_ISL_482888 | 6/10/2020 | 7/6/2020 Europe / France / Occitanie                       |
| EPI_ISL_482889 | 6/12/2020 | 7/6/2020 Europe / France / Occitanie                       |
| EPI_ISL_482946 | 5/8/2020  | 7/6/2020 North America / USA / Minnesota                   |
| EPI_ISL_482947 | 5/18/2020 | 7/6/2020 North America / USA / Minnesota                   |
| EPI_ISL_482948 | 5/18/2020 | 7/6/2020 North America / USA / Minnesota                   |
| EPI_ISL_482949 | 5/18/2020 | 7/6/2020 North America / USA / Minnesota                   |
| EPI_ISL_482950 | 5/18/2020 | 7/6/2020 North America / USA / Minnesota                   |
| EPI_ISL_482951 | 5/18/2020 | 7/6/2020 North America / USA / Minnesota                   |
| EPI_ISL_482952 | 5/18/2020 | 7/6/2020 North America / USA / Minnesota                   |
| EPI_ISL_482953 | 5/18/2020 | 7/6/2020 North America / USA / Minnesota                   |
| EPI_ISL_482954 | 5/18/2020 | 7/6/2020 North America / USA / Minnesota                   |
| EPI_ISL_482955 | 5/18/2020 | 7/6/2020 North America / USA / Minnesota                   |
| EPI_ISL_482956 | 5/18/2020 | 7/6/2020 North America / USA / Minnesota                   |
| EPI_ISL_482957 | 5/19/2020 | 7/6/2020 North America / USA / Minnesota                   |
| EPI_ISL_482958 | 5/19/2020 | 7/6/2020 North America / USA / Minnesota                   |
| EPI_ISL_482959 | 5/19/2020 | 7/6/2020 North America / USA / Minnesota                   |
| EPI_ISL_482960 | 5/20/2020 | 7/6/2020 North America / USA / Minnesota                   |
| EPI_ISL_482961 | 5/20/2020 | 7/6/2020 North America / USA / Minnesota                   |
| EPI_ISL_482962 | 5/20/2020 | 7/6/2020 North America / USA / Minnesota                   |
| EPI_ISL_482963 | 5/26/2020 | 7/6/2020 North America / USA / Minnesota                   |
| EPI_ISL_482964 | 5/26/2020 | 7/6/2020 North America / USA / Minnesota                   |
| EPI_ISL_482965 | 5/27/2020 | 7/6/2020 North America / USA / Minnesota                   |
| EPI_ISL_482966 | 6/2/2020  | 7/6/2020 North America / USA / Minnesota                   |
| EPI_ISL_482967 | 4/17/2020 | 7/6/2020 North America / USA / Minnesota                   |
| EPI_ISL_482968 | 4/21/2020 | 7/6/2020 North America / USA / Minnesota                   |
| EPI_ISL_482969 | 4/20/2020 | 7/6/2020 North America / USA / Minnesota                   |
| EPI_ISL_482970 | 5/27/2020 | 7/6/2020 North America / USA / Minnesota                   |
| EPI_ISL_482971 | 6/2/2020  | 7/6/2020 North America / USA / Minnesota                   |
| EPI_ISL_482972 | 6/2/2020  | 7/6/2020 North America / USA / Minnesota                   |
| EPI_ISL_482973 | 6/9/2020  | 7/6/2020 North America / USA / Minnesota                   |
| EPI_ISL_482974 | 6/9/2020  | 7/6/2020 North America / USA / Minnesota                   |



|                |           |                                                              |
|----------------|-----------|--------------------------------------------------------------|
| EPI_ISL_483035 | 4/30/2020 | 7/7/2020 Africa / Egypt / Cairo                              |
| EPI_ISL_483036 | 5/10/2020 | 7/7/2020 Africa / Egypt / Cairo                              |
| EPI_ISL_483038 | 5/13/2020 | 7/7/2020 Africa / Egypt / Cairo / Al Matariyyah              |
| EPI_ISL_483059 | 3/16/2020 | 7/7/2020 Europe / Spain / Catalunya / Barcelona              |
| EPI_ISL_483066 | 3/3/2020  | 7/7/2020 Oceania / Australia / South Australia               |
| EPI_ISL_483068 | 3/24/2020 | 7/7/2020 Oceania / Australia / South Australia               |
| EPI_ISL_483071 | 3/26/2020 | 7/7/2020 Oceania / Australia / South Australia               |
| EPI_ISL_483078 | 3/24/2020 | 7/7/2020 Oceania / Australia / South Australia               |
| EPI_ISL_483080 | 3/23/2020 | 7/7/2020 Oceania / Australia / South Australia               |
| EPI_ISL_483082 | 3/26/2020 | 7/7/2020 Oceania / Australia / South Australia               |
| EPI_ISL_483086 | 3/31/2020 | 7/7/2020 Oceania / Australia / South Australia               |
| EPI_ISL_483088 | 3/27/2020 | 7/7/2020 Oceania / Australia / South Australia               |
| EPI_ISL_483089 | 3/23/2020 | 7/7/2020 Oceania / Australia / South Australia               |
| EPI_ISL_483090 | 3/22/2020 | 7/7/2020 Oceania / Australia / South Australia               |
| EPI_ISL_483091 | 3/31/2020 | 7/7/2020 Oceania / Australia / South Australia               |
| EPI_ISL_483092 | 3/27/2020 | 7/7/2020 Oceania / Australia / South Australia               |
| EPI_ISL_483093 | 3/27/2020 | 7/7/2020 Oceania / Australia / South Australia               |
| EPI_ISL_483094 | 3/24/2020 | 7/7/2020 Oceania / Australia / South Australia               |
| EPI_ISL_483098 | 3/26/2020 | 7/7/2020 Oceania / Australia / South Australia               |
| EPI_ISL_483099 | 3/26/2020 | 7/7/2020 Oceania / Australia / South Australia               |
| EPI_ISL_483101 | 3/27/2020 | 7/7/2020 Oceania / Australia / South Australia               |
| EPI_ISL_483105 | 3/27/2020 | 7/7/2020 Oceania / Australia / South Australia               |
| EPI_ISL_483108 | 3/27/2020 | 7/7/2020 Oceania / Australia / South Australia               |
| EPI_ISL_483109 | 3/27/2020 | 7/7/2020 Oceania / Australia / South Australia               |
| EPI_ISL_483111 | 3/28/2020 | 7/7/2020 Oceania / Australia / South Australia               |
| EPI_ISL_483113 | 3/23/2020 | 7/7/2020 Oceania / Australia / South Australia               |
| EPI_ISL_483116 | 3/23/2020 | 7/7/2020 Oceania / Australia / South Australia               |
| EPI_ISL_483117 | 3/23/2020 | 7/7/2020 Oceania / Australia / South Australia               |
| EPI_ISL_483119 | 3/23/2020 | 7/7/2020 Oceania / Australia / South Australia               |
| EPI_ISL_483120 | 3/24/2020 | 7/7/2020 Oceania / Australia / South Australia               |
| EPI_ISL_483121 | 3/23/2020 | 7/7/2020 Oceania / Australia / South Australia               |
| EPI_ISL_483122 | 3/22/2020 | 7/7/2020 Oceania / Australia / South Australia               |
| EPI_ISL_483124 | 3/22/2020 | 7/7/2020 Oceania / Australia / South Australia               |
| EPI_ISL_483125 | 3/23/2020 | 7/7/2020 Oceania / Australia / South Australia               |
| EPI_ISL_483126 | 3/23/2020 | 7/7/2020 Oceania / Australia / South Australia               |
| EPI_ISL_483127 | 3/21/2020 | 7/7/2020 Oceania / Australia / South Australia               |
| EPI_ISL_483129 | 3/23/2020 | 7/7/2020 Oceania / Australia / South Australia               |
| EPI_ISL_483132 | 3/23/2020 | 7/7/2020 Oceania / Australia / South Australia               |
| EPI_ISL_483137 | 3/24/2020 | 7/7/2020 Oceania / Australia / South Australia               |
| EPI_ISL_483160 | 4/8/2020  | 7/7/2020 North America / USA / California / San Diego County |
| EPI_ISL_483161 | 4/10/2020 | 7/7/2020 North America / USA / California / San Diego County |
| EPI_ISL_483162 | 4/15/2020 | 7/7/2020 North America / USA / California / San Diego County |
| EPI_ISL_483163 | 4/15/2020 | 7/7/2020 North America / USA / California / San Diego County |
| EPI_ISL_483164 | 4/15/2020 | 7/7/2020 North America / USA / California / San Diego County |
| EPI_ISL_483165 | 4/2/2020  | 7/7/2020 North America / USA / California / San Diego County |
| EPI_ISL_483166 | 4/2/2020  | 7/7/2020 North America / USA / California / San Diego County |
| EPI_ISL_483167 | 3/31/2020 | 7/7/2020 North America / USA / California / San Diego County |

















|                |           |                                                             |
|----------------|-----------|-------------------------------------------------------------|
| EPI_ISL_483545 | 3/13/2020 | 7/7/2020 Asia / Bahrain                                     |
| EPI_ISL_483546 | 3/15/2020 | 7/7/2020 Asia / Bahrain                                     |
| EPI_ISL_483547 | 3/7/2020  | 7/7/2020 Asia / Bahrain                                     |
| EPI_ISL_483548 | 3/14/2020 | 7/7/2020 Asia / Bahrain                                     |
| EPI_ISL_483549 | 3/18/2020 | 7/7/2020 Asia / Bahrain                                     |
| EPI_ISL_483550 | 3/18/2020 | 7/7/2020 Asia / Bahrain                                     |
| EPI_ISL_483551 | 3/30/2020 | 7/7/2020 Asia / Bahrain                                     |
| EPI_ISL_483552 | 3/30/2020 | 7/7/2020 Asia / Bahrain                                     |
| EPI_ISL_483553 | 3/30/2020 | 7/7/2020 Asia / Bahrain                                     |
| EPI_ISL_483554 | 3/30/2020 | 7/7/2020 Asia / Bahrain                                     |
| EPI_ISL_483555 | 4/8/2020  | 7/7/2020 Asia / Bahrain                                     |
| EPI_ISL_483556 | 4/4/2020  | 7/7/2020 Asia / Bahrain                                     |
| EPI_ISL_483557 | 4/8/2020  | 7/7/2020 Asia / Bahrain                                     |
| EPI_ISL_483558 | 4/8/2020  | 7/7/2020 Asia / Bahrain                                     |
| EPI_ISL_483559 | 4/8/2020  | 7/7/2020 Asia / Bahrain                                     |
| EPI_ISL_483562 | 4/5/2020  | 7/7/2020 Asia / Bahrain                                     |
| EPI_ISL_483563 | 4/8/2020  | 7/7/2020 Asia / Bahrain                                     |
| EPI_ISL_483564 | 4/8/2020  | 7/7/2020 Asia / Bahrain                                     |
| EPI_ISL_483565 | 4/7/2020  | 7/7/2020 Asia / Bahrain                                     |
| EPI_ISL_483566 | 6/7/2020  | 7/7/2020 Europe / Spain / Basque Country / Bizkaia / Bilbao |
| EPI_ISL_483570 | 6/8/2020  | 7/7/2020 Europe / Spain / Basque Country / Bizkaia          |
| EPI_ISL_483571 | 6/8/2020  | 7/7/2020 Europe / Spain / Basque Country / Bizkaia          |
| EPI_ISL_483572 | 6/8/2020  | 7/7/2020 Europe / Spain / Basque Country / Bizkaia          |
| EPI_ISL_483573 | 6/10/2020 | 7/7/2020 Europe / Spain / Basque Country / Bizkaia          |
| EPI_ISL_483580 | 5/10/2020 | 7/8/2020 Asia / Singapore                                   |
| EPI_ISL_483581 | 4/11/2020 | 7/8/2020 Asia / Singapore                                   |
| EPI_ISL_483582 | 6/19/2020 | 7/8/2020 Asia / Singapore                                   |
| EPI_ISL_483583 | 4/11/2020 | 7/8/2020 Asia / Singapore                                   |
| EPI_ISL_483584 | 5/11/2020 | 7/8/2020 Asia / Singapore                                   |
| EPI_ISL_483585 | 4/6/2020  | 7/8/2020 Asia / Singapore                                   |
| EPI_ISL_483586 | 5/10/2020 | 7/8/2020 Asia / Singapore                                   |
| EPI_ISL_483587 | 4/3/2020  | 7/8/2020 Asia / Singapore                                   |
| EPI_ISL_483588 | 5/10/2020 | 7/8/2020 Asia / Singapore                                   |
| EPI_ISL_483589 | 4/3/2020  | 7/8/2020 Asia / Singapore                                   |
| EPI_ISL_483590 | 6/24/2020 | 7/8/2020 Asia / Singapore                                   |
| EPI_ISL_483591 | 5/29/2020 | 7/8/2020 Asia / Singapore                                   |
| EPI_ISL_483592 | 5/29/2020 | 7/8/2020 Asia / Singapore                                   |
| EPI_ISL_483596 | 4/15/2020 | 7/8/2020 Asia / Singapore                                   |
| EPI_ISL_483597 | 4/14/2020 | 7/8/2020 Asia / Singapore                                   |
| EPI_ISL_483598 | 5/19/2020 | 7/8/2020 Asia / Singapore                                   |
| EPI_ISL_483599 | 5/20/2020 | 7/8/2020 Asia / Singapore                                   |
| EPI_ISL_483600 | 4/12/2020 | 7/8/2020 Asia / Singapore                                   |
| EPI_ISL_483601 | 4/21/2020 | 7/8/2020 Asia / Singapore                                   |
| EPI_ISL_483602 | 4/6/2020  | 7/8/2020 Asia / Singapore                                   |
| EPI_ISL_483603 | 5/20/2020 | 7/8/2020 Asia / Singapore                                   |
| EPI_ISL_483604 | 4/30/2020 | 7/8/2020 Asia / Singapore                                   |
| EPI_ISL_483605 | 4/4/2020  | 7/8/2020 Asia / Singapore                                   |

|                |           |                                                        |
|----------------|-----------|--------------------------------------------------------|
| EPI_ISL_483606 | 5/19/2020 | 7/8/2020 Asia / Singapore                              |
| EPI_ISL_483607 | 5/11/2020 | 7/8/2020 Asia / Singapore                              |
| EPI_ISL_483608 | 6/26/2020 | 7/8/2020 Asia / Singapore                              |
| EPI_ISL_483609 | 4/14/2020 | 7/8/2020 Asia / Singapore                              |
| EPI_ISL_483610 | 3/27/2020 | 7/8/2020 Asia / Singapore                              |
| EPI_ISL_483611 | 6/27/2020 | 7/8/2020 Asia / Singapore                              |
| EPI_ISL_483612 | 4/3/2020  | 7/8/2020 Asia / Singapore                              |
| EPI_ISL_483613 | 3/26/2020 | 7/8/2020 Asia / Singapore                              |
| EPI_ISL_483614 | 6/26/2020 | 7/8/2020 Asia / Singapore                              |
| EPI_ISL_483615 | 6/26/2020 | 7/8/2020 Asia / Singapore                              |
| EPI_ISL_483616 | 5/19/2020 | 7/8/2020 Asia / Singapore                              |
| EPI_ISL_483617 | 3/27/2020 | 7/8/2020 Asia / Singapore                              |
| EPI_ISL_483618 | 6/26/2020 | 7/8/2020 Asia / Singapore                              |
| EPI_ISL_483619 | 6/22/2020 | 7/8/2020 Asia / Singapore                              |
| EPI_ISL_483620 | 6/24/2020 | 7/8/2020 Asia / Singapore                              |
| EPI_ISL_483621 | 3/31/2020 | 7/8/2020 Asia / Singapore                              |
| EPI_ISL_483622 | 6/12/2020 | 7/8/2020 Asia / Bangladesh / Rajshahi / Pabna          |
| EPI_ISL_483623 | 6/12/2020 | 7/8/2020 Asia / Bangladesh / Rajshahi / Pabna          |
| EPI_ISL_483624 | 6/12/2020 | 7/8/2020 Asia / Bangladesh / Rajshahi / Pabna          |
| EPI_ISL_483626 | 6/15/2020 | 7/8/2020 Asia / Bangladesh / Rajshahi / Pabna          |
| EPI_ISL_483627 | 6/12/2020 | 7/8/2020 Asia / Bangladesh / Rajshahi / Pabna          |
| EPI_ISL_483628 | 6/15/2020 | 7/8/2020 Asia / Bangladesh / Rajshahi / Pabna          |
| EPI_ISL_483629 | 6/20/2020 | 7/8/2020 Asia / Bangladesh / Rajshahi / Pabna          |
| EPI_ISL_483630 | 6/20/2020 | 7/8/2020 Asia / Bangladesh / Rajshahi / Pabna          |
| EPI_ISL_483631 | 6/20/2020 | 7/8/2020 Asia / Bangladesh / Rajshahi / Pabna          |
| EPI_ISL_483632 | 6/16/2020 | 7/8/2020 Asia / Bangladesh / Chittagong / Brahmanbaria |
| EPI_ISL_483633 | 6/16/2020 | 7/8/2020 Asia / Bangladesh / Chittagong / Brahmanbaria |
| EPI_ISL_483634 | 6/17/2020 | 7/8/2020 Asia / Bangladesh / Chittagong / Brahmanbaria |
| EPI_ISL_483635 | 6/17/2020 | 7/8/2020 Asia / Bangladesh / Chittagong / Brahmanbaria |
| EPI_ISL_483636 | 6/20/2020 | 7/8/2020 Asia / Bangladesh / Chittagong / Chandpur     |
| EPI_ISL_483637 | 3/17/2020 | 7/8/2020 Europe / Hungary / Baranya                    |
| EPI_ISL_483639 | 4/8/2020  | 7/8/2020 Asia / Bahrain                                |
| EPI_ISL_483641 | 6/20/2020 | 7/8/2020 Asia / Bangladesh / Chittagong / Chandpur     |
| EPI_ISL_483642 | 6/20/2020 | 7/8/2020 Asia / Bangladesh / Chittagong / Chandpur     |
| EPI_ISL_483643 | 6/20/2020 | 7/8/2020 Asia / Bangladesh / Chittagong / Chandpur     |
| EPI_ISL_483644 | 6/20/2020 | 7/8/2020 Asia / Bangladesh / Chittagong                |
| EPI_ISL_483645 | 6/14/2020 | 7/8/2020 Asia / Bangladesh / Sylhet / Habiganj         |
| EPI_ISL_483646 | 6/14/2020 | 7/8/2020 Asia / Bangladesh / Sylhet / Habiganj         |
| EPI_ISL_483648 | 6/13/2020 | 7/8/2020 Europe / Switzerland / Zurich                 |
| EPI_ISL_483649 | 6/12/2020 | 7/8/2020 Europe / Switzerland / Zurich                 |
| EPI_ISL_483651 | 6/11/2020 | 7/8/2020 Europe / Switzerland / Bern                   |
| EPI_ISL_483652 | 6/10/2020 | 7/8/2020 Europe / Switzerland / Bern                   |
| EPI_ISL_483653 | 6/10/2020 | 7/8/2020 Europe / Switzerland / Basel-Landschaft       |
| EPI_ISL_483654 | 6/8/2020  | 7/8/2020 Europe / Switzerland / Bern                   |
| EPI_ISL_483656 | 6/8/2020  | 7/8/2020 Europe / Switzerland / Vaud                   |
| EPI_ISL_483657 | 6/8/2020  | 7/8/2020 Europe / Switzerland / Zug                    |
| EPI_ISL_483660 | 6/4/2020  | 7/8/2020 Europe / Switzerland / Bern                   |

|                |           |                                                        |
|----------------|-----------|--------------------------------------------------------|
| EPI_ISL_483661 | 6/4/2020  | 7/8/2020 Europe / Switzerland / Zurich                 |
| EPI_ISL_483662 | 6/3/2020  | 7/8/2020 Europe / Switzerland / Zurich                 |
| EPI_ISL_483663 | 6/3/2020  | 7/8/2020 Europe / Switzerland / Geneva                 |
| EPI_ISL_483664 | 6/3/2020  | 7/8/2020 Europe / Switzerland / Vaud                   |
| EPI_ISL_483665 | 6/2/2020  | 7/8/2020 Europe / Switzerland / Zurich                 |
| EPI_ISL_483666 | 6/2/2020  | 7/8/2020 Europe / Switzerland / Zurich                 |
| EPI_ISL_483669 | 4/12/2020 | 7/8/2020 Europe / Switzerland / Zurich                 |
| EPI_ISL_483674 | 4/7/2020  | 7/8/2020 Europe / Switzerland / Zurich                 |
| EPI_ISL_483676 | 4/14/2020 | 7/8/2020 Europe / Switzerland / Zurich                 |
| EPI_ISL_483677 | 4/21/2020 | 7/8/2020 Europe / Switzerland / Zurich                 |
| EPI_ISL_483680 | 4/12/2020 | 7/8/2020 Europe / Switzerland / Zurich                 |
| EPI_ISL_483681 | 4/15/2020 | 7/8/2020 Europe / Switzerland / Zurich                 |
| EPI_ISL_483684 | 4/16/2020 | 7/8/2020 Europe / Switzerland / Zurich                 |
| EPI_ISL_483686 | 6/26/2020 | 7/8/2020 Asia / Bangladesh / Chittagong / Chandpur     |
| EPI_ISL_483687 | 6/26/2020 | 7/8/2020 Asia / Bangladesh / Chittagong / Chandpur     |
| EPI_ISL_483688 | 6/27/2020 | 7/8/2020 Asia / Bangladesh / Chittagong / Chandpur     |
| EPI_ISL_483689 | 6/27/2020 | 7/8/2020 Asia / Bangladesh / Chittagong / Chandpur     |
| EPI_ISL_483690 | 6/27/2020 | 7/8/2020 Asia / Bangladesh / Chittagong / Chandpur     |
| EPI_ISL_483691 | 6/14/2020 | 7/8/2020 Asia / Bangladesh / Sylhet / Habiganj         |
| EPI_ISL_483692 | 6/24/2020 | 7/8/2020 Asia / Bangladesh / Sylhet / Moulvibazar      |
| EPI_ISL_483693 | 6/20/2020 | 7/8/2020 Asia / Bangladesh / Rajshahi / Pabna          |
| EPI_ISL_483694 | 6/16/2020 | 7/8/2020 Asia / Bangladesh / Chittagong / Brahmanbaria |
| EPI_ISL_483695 | 6/17/2020 | 7/8/2020 Asia / Bangladesh / Chittagong / Brahmanbaria |
| EPI_ISL_483699 | 6/20/2020 | 7/8/2020 Asia / Bangladesh / Chittagong / Chandpur     |
| EPI_ISL_483700 | 6/20/2020 | 7/8/2020 Asia / Bangladesh / Chittagong / Chandpur     |
| EPI_ISL_483703 | 6/24/2020 | 7/8/2020 Asia / Bangladesh / Sylhet / Moulvibazar      |
| EPI_ISL_483704 | 3/17/2020 | 7/8/2020 Asia / Israel / Kfar Saba                     |
| EPI_ISL_483705 | 6/24/2020 | 7/8/2020 Asia / Bangladesh / Sylhet / Habiganj         |
| EPI_ISL_483707 | 6/24/2020 | 7/8/2020 Asia / Bangladesh / Sylhet / Habiganj         |
| EPI_ISL_483708 | 3/17/2020 | 7/8/2020 Asia / Israel / Kfar Saba                     |
| EPI_ISL_483709 | 3/26/2020 | 7/8/2020 Asia / Israel / Kfar Saba                     |
| EPI_ISL_483710 | 6/24/2020 | 7/8/2020 Asia / Bangladesh / Sylhet / Habiganj         |
| EPI_ISL_483711 | 3/30/2020 | 7/8/2020 Asia / Israel / Kfar Saba                     |
| EPI_ISL_483712 | 4/10/2020 | 7/8/2020 Asia / Israel / Kfar Saba                     |
| EPI_ISL_483713 | 4/11/2020 | 7/8/2020 Asia / Israel / Kfar Saba                     |
| EPI_ISL_483715 | 3/17/2020 | 7/8/2020 Asia / Israel / Kfar Saba                     |
| EPI_ISL_483717 | 3/18/2020 | 7/8/2020 Asia / Israel / Kfar Saba                     |
| EPI_ISL_483725 | 4/6/2020  | 7/8/2020 Asia / Israel / Kfar Saba                     |
| EPI_ISL_483820 | 6/11/2020 | 7/8/2020 Asia / India / Gujarat / Gandhinagar          |
| EPI_ISL_483821 | 6/5/2020  | 7/8/2020 Asia / India / Gujarat / Vadodara             |
| EPI_ISL_483822 | 6/8/2020  | 7/8/2020 Asia / India / Gujarat / Vadodara             |
| EPI_ISL_483823 | 6/14/2020 | 7/8/2020 Asia / India / Gujarat / Himatnagar           |
| EPI_ISL_483824 | 6/14/2020 | 7/8/2020 Asia / India / Gujarat / Himatnagar           |
| EPI_ISL_483825 | 6/14/2020 | 7/8/2020 Asia / India / Gujarat / Ahmedabad            |
| EPI_ISL_483826 | 6/14/2020 | 7/8/2020 Asia / India / Gujarat / Modasa               |
| EPI_ISL_483827 | 6/19/2020 | 7/8/2020 Asia / India / Gujarat / Prantij              |
| EPI_ISL_483828 | 6/19/2020 | 7/8/2020 Asia / India / Gujarat / Talod                |



|                |           |                                            |
|----------------|-----------|--------------------------------------------|
| EPI_ISL_483876 | 6/13/2020 | 7/8/2020 Asia / India / Gujarat / Surat    |
| EPI_ISL_483877 | 6/13/2020 | 7/8/2020 Asia / India / Gujarat / Surat    |
| EPI_ISL_483878 | 6/13/2020 | 7/8/2020 Asia / India / Gujarat / Olpad    |
| EPI_ISL_483879 | 6/13/2020 | 7/8/2020 Asia / India / Gujarat / Olpad    |
| EPI_ISL_483882 | 6/2/2020  | 7/8/2020 Europe / United Kingdom / England |
| EPI_ISL_483884 | 6/5/2020  | 7/8/2020 Europe / United Kingdom / England |
| EPI_ISL_483887 | 6/5/2020  | 7/8/2020 Europe / United Kingdom / England |
| EPI_ISL_483889 | 6/6/2020  | 7/8/2020 Europe / United Kingdom / England |
| EPI_ISL_483890 | 6/5/2020  | 7/8/2020 Europe / United Kingdom / England |
| EPI_ISL_483891 | 6/18/2020 | 7/8/2020 Europe / United Kingdom / England |
| EPI_ISL_483893 | 6/19/2020 | 7/8/2020 Europe / United Kingdom / England |
| EPI_ISL_483896 | 6/12/2020 | 7/8/2020 Europe / United Kingdom / England |
| EPI_ISL_483897 | 6/11/2020 | 7/8/2020 Europe / United Kingdom / England |
| EPI_ISL_483899 | 6/9/2020  | 7/8/2020 Europe / United Kingdom / England |
| EPI_ISL_483901 | 6/7/2020  | 7/8/2020 Europe / United Kingdom / England |
| EPI_ISL_483905 | 6/8/2020  | 7/8/2020 Europe / United Kingdom / England |
| EPI_ISL_483906 | 6/8/2020  | 7/8/2020 Europe / United Kingdom / England |
| EPI_ISL_483909 | 6/5/2020  | 7/8/2020 Europe / United Kingdom / England |
| EPI_ISL_483911 | 6/16/2020 | 7/8/2020 Europe / United Kingdom / England |
| EPI_ISL_483913 | 6/22/2020 | 7/8/2020 Europe / United Kingdom / England |
| EPI_ISL_483914 | 6/23/2020 | 7/8/2020 Europe / United Kingdom / England |
| EPI_ISL_483915 | 6/23/2020 | 7/8/2020 Europe / United Kingdom / England |
| EPI_ISL_483923 | 3/15/2020 | 7/8/2020 Europe / United Kingdom / England |
| EPI_ISL_483931 | 3/16/2020 | 7/8/2020 Europe / United Kingdom / England |
| EPI_ISL_483937 | 3/17/2020 | 7/8/2020 Europe / United Kingdom / England |
| EPI_ISL_483945 | 3/17/2020 | 7/8/2020 Europe / United Kingdom / England |
| EPI_ISL_483947 | 3/17/2020 | 7/8/2020 Europe / United Kingdom / England |
| EPI_ISL_483948 | 3/18/2020 | 7/8/2020 Europe / United Kingdom / England |
| EPI_ISL_483952 | 3/18/2020 | 7/8/2020 Europe / United Kingdom / England |
| EPI_ISL_483959 | 3/22/2020 | 7/8/2020 Europe / United Kingdom / England |
| EPI_ISL_483961 | 3/30/2020 | 7/8/2020 Europe / United Kingdom / England |
| EPI_ISL_483964 | 3/19/2020 | 7/8/2020 Europe / United Kingdom / England |
| EPI_ISL_483966 | 3/19/2020 | 7/8/2020 Europe / United Kingdom / England |
| EPI_ISL_483967 | 3/19/2020 | 7/8/2020 Europe / United Kingdom / England |
| EPI_ISL_483968 | 3/19/2020 | 7/8/2020 Europe / United Kingdom / England |
| EPI_ISL_483971 | 3/23/2020 | 7/8/2020 Europe / United Kingdom / England |
| EPI_ISL_483973 | 3/23/2020 | 7/8/2020 Europe / United Kingdom / England |
| EPI_ISL_483976 | 3/23/2020 | 7/8/2020 Europe / United Kingdom / England |
| EPI_ISL_483980 | 3/23/2020 | 7/8/2020 Europe / United Kingdom / England |
| EPI_ISL_483982 | 3/23/2020 | 7/8/2020 Europe / United Kingdom / England |
| EPI_ISL_483985 | 3/23/2020 | 7/8/2020 Europe / United Kingdom / England |
| EPI_ISL_483986 | 3/24/2020 | 7/8/2020 Europe / United Kingdom / England |
| EPI_ISL_483987 | 3/23/2020 | 7/8/2020 Europe / United Kingdom / England |
| EPI_ISL_483989 | 3/23/2020 | 7/8/2020 Europe / United Kingdom / England |
| EPI_ISL_483992 | 3/24/2020 | 7/8/2020 Europe / United Kingdom / England |
| EPI_ISL_483995 | 3/24/2020 | 7/8/2020 Europe / United Kingdom / England |
| EPI_ISL_483999 | 3/24/2020 | 7/8/2020 Europe / United Kingdom / England |









|                |           |          |                                   |
|----------------|-----------|----------|-----------------------------------|
| EPI_ISL_484392 | 4/24/2020 | 7/8/2020 | Europe / United Kingdom / England |
| EPI_ISL_484393 | 4/27/2020 | 7/8/2020 | Europe / United Kingdom / England |
| EPI_ISL_484394 | 4/21/2020 | 7/8/2020 | Europe / United Kingdom / England |
| EPI_ISL_484396 | 4/27/2020 | 7/8/2020 | Europe / United Kingdom / England |
| EPI_ISL_484399 | 4/28/2020 | 7/8/2020 | Europe / United Kingdom / England |
| EPI_ISL_484400 | 4/29/2020 | 7/8/2020 | Europe / United Kingdom / England |
| EPI_ISL_484401 | 4/24/2020 | 7/8/2020 | Europe / United Kingdom / England |
| EPI_ISL_484402 | 4/29/2020 | 7/8/2020 | Europe / United Kingdom / England |
| EPI_ISL_484406 | 4/13/2020 | 7/8/2020 | Europe / United Kingdom / England |
| EPI_ISL_484407 | 6/9/2020  | 7/8/2020 | Europe / United Kingdom / England |
| EPI_ISL_484410 | 4/20/2020 | 7/8/2020 | Europe / United Kingdom / England |
| EPI_ISL_484411 | 4/20/2020 | 7/8/2020 | Europe / United Kingdom / England |
| EPI_ISL_484412 | 4/20/2020 | 7/8/2020 | Europe / United Kingdom / England |
| EPI_ISL_484413 | 4/20/2020 | 7/8/2020 | Europe / United Kingdom / England |
| EPI_ISL_484415 | 3/31/2020 | 7/8/2020 | Europe / United Kingdom / England |
| EPI_ISL_484416 | 3/31/2020 | 7/8/2020 | Europe / United Kingdom / England |
| EPI_ISL_484417 | 3/31/2020 | 7/8/2020 | Europe / United Kingdom / England |
| EPI_ISL_484418 | 4/17/2020 | 7/8/2020 | Europe / United Kingdom / England |
| EPI_ISL_484419 | 4/12/2020 | 7/8/2020 | Europe / United Kingdom / England |
| EPI_ISL_484421 | 4/12/2020 | 7/8/2020 | Europe / United Kingdom / England |
| EPI_ISL_484422 | 4/12/2020 | 7/8/2020 | Europe / United Kingdom / England |
| EPI_ISL_484423 | 4/13/2020 | 7/8/2020 | Europe / United Kingdom / England |
| EPI_ISL_484424 | 4/11/2020 | 7/8/2020 | Europe / United Kingdom / England |
| EPI_ISL_484427 | 4/11/2020 | 7/8/2020 | Europe / United Kingdom / England |
| EPI_ISL_484428 | 4/11/2020 | 7/8/2020 | Europe / United Kingdom / England |
| EPI_ISL_484429 | 4/11/2020 | 7/8/2020 | Europe / United Kingdom / England |
| EPI_ISL_484430 | 4/12/2020 | 7/8/2020 | Europe / United Kingdom / England |
| EPI_ISL_484435 | 6/6/2020  | 7/8/2020 | Europe / United Kingdom / England |
| EPI_ISL_484446 | 6/5/2020  | 7/8/2020 | Europe / United Kingdom / England |
| EPI_ISL_484449 | 5/16/2020 | 7/8/2020 | Europe / United Kingdom / England |
| EPI_ISL_484451 | 6/12/2020 | 7/8/2020 | Europe / United Kingdom / England |
| EPI_ISL_484452 | 5/15/2020 | 7/8/2020 | Europe / United Kingdom / England |
| EPI_ISL_484453 | 6/10/2020 | 7/8/2020 | Europe / United Kingdom / England |
| EPI_ISL_484454 | 5/13/2020 | 7/8/2020 | Europe / United Kingdom / England |
| EPI_ISL_484456 | 5/22/2020 | 7/8/2020 | Europe / United Kingdom / England |
| EPI_ISL_484459 | 6/7/2020  | 7/8/2020 | Europe / United Kingdom / England |
| EPI_ISL_484460 | 6/19/2020 | 7/8/2020 | Europe / United Kingdom / England |
| EPI_ISL_484461 | 6/9/2020  | 7/8/2020 | Europe / United Kingdom / England |
| EPI_ISL_484462 | 5/11/2020 | 7/8/2020 | Europe / United Kingdom / England |
| EPI_ISL_484469 | 6/15/2020 | 7/8/2020 | Europe / United Kingdom / England |
| EPI_ISL_484470 | 6/15/2020 | 7/8/2020 | Europe / United Kingdom / England |
| EPI_ISL_484473 | 6/13/2020 | 7/8/2020 | Europe / United Kingdom / England |
| EPI_ISL_484474 | 6/19/2020 | 7/8/2020 | Europe / United Kingdom / England |
| EPI_ISL_484475 | 6/10/2020 | 7/8/2020 | Europe / United Kingdom / England |
| EPI_ISL_484476 | 5/21/2020 | 7/8/2020 | Europe / United Kingdom / England |
| EPI_ISL_484478 | 6/14/2020 | 7/8/2020 | Europe / United Kingdom / England |
| EPI_ISL_484482 | 6/11/2020 | 7/8/2020 | Europe / United Kingdom / England |







|                |           |                                             |
|----------------|-----------|---------------------------------------------|
| EPI_ISL_484654 | 4/23/2020 | 7/8/2020 Europe / United Kingdom / Scotland |
| EPI_ISL_484655 | 4/23/2020 | 7/8/2020 Europe / United Kingdom / Scotland |
| EPI_ISL_484656 | 4/23/2020 | 7/8/2020 Europe / United Kingdom / Scotland |
| EPI_ISL_484657 | 5/13/2020 | 7/8/2020 Europe / United Kingdom / Scotland |
| EPI_ISL_484658 | 6/5/2020  | 7/8/2020 Europe / United Kingdom / Scotland |
| EPI_ISL_484659 | 6/5/2020  | 7/8/2020 Europe / United Kingdom / Scotland |
| EPI_ISL_484660 | 6/8/2020  | 7/8/2020 Europe / United Kingdom / Scotland |
| EPI_ISL_484661 | 6/10/2020 | 7/8/2020 Europe / United Kingdom / Scotland |
| EPI_ISL_484662 | 5/25/2020 | 7/8/2020 Europe / United Kingdom / Scotland |
| EPI_ISL_484663 | 5/25/2020 | 7/8/2020 Europe / United Kingdom / Scotland |
| EPI_ISL_484664 | 5/25/2020 | 7/8/2020 Europe / United Kingdom / Scotland |
| EPI_ISL_484665 | 5/30/2020 | 7/8/2020 Europe / United Kingdom / Scotland |
| EPI_ISL_484666 | 5/30/2020 | 7/8/2020 Europe / United Kingdom / Scotland |
| EPI_ISL_484667 | 5/30/2020 | 7/8/2020 Europe / United Kingdom / Scotland |
| EPI_ISL_484668 | 5/31/2020 | 7/8/2020 Europe / United Kingdom / Scotland |
| EPI_ISL_484669 | 6/1/2020  | 7/8/2020 Europe / United Kingdom / Scotland |
| EPI_ISL_484670 | 5/31/2020 | 7/8/2020 Europe / United Kingdom / Scotland |
| EPI_ISL_484671 | 6/1/2020  | 7/8/2020 Europe / United Kingdom / Scotland |
| EPI_ISL_484672 | 6/3/2020  | 7/8/2020 Europe / United Kingdom / Scotland |
| EPI_ISL_484673 | 6/4/2020  | 7/8/2020 Europe / United Kingdom / Scotland |
| EPI_ISL_484674 | 6/6/2020  | 7/8/2020 Europe / United Kingdom / Scotland |
| EPI_ISL_484675 | 6/15/2020 | 7/8/2020 Europe / United Kingdom / Scotland |
| EPI_ISL_484676 | 6/10/2020 | 7/8/2020 Europe / United Kingdom / Scotland |
| EPI_ISL_484677 | 6/14/2020 | 7/8/2020 Europe / United Kingdom / Scotland |
| EPI_ISL_484678 | 6/16/2020 | 7/8/2020 Europe / United Kingdom / Scotland |
| EPI_ISL_484679 | 6/18/2020 | 7/8/2020 Europe / United Kingdom / Scotland |
| EPI_ISL_484680 | 5/18/2020 | 7/8/2020 Europe / United Kingdom / Scotland |
| EPI_ISL_484681 | 5/12/2020 | 7/8/2020 Europe / United Kingdom / Scotland |
| EPI_ISL_484682 | 5/11/2020 | 7/8/2020 Europe / United Kingdom / Scotland |
| EPI_ISL_484683 | 6/22/2020 | 7/8/2020 Europe / United Kingdom / Scotland |
| EPI_ISL_484684 | 6/22/2020 | 7/8/2020 Europe / United Kingdom / Scotland |
| EPI_ISL_484686 | 6/26/2020 | 7/8/2020 Europe / United Kingdom / Wales    |
| EPI_ISL_484689 | 6/28/2020 | 7/8/2020 Europe / United Kingdom / Wales    |
| EPI_ISL_484691 | 6/27/2020 | 7/8/2020 Europe / United Kingdom / Wales    |
| EPI_ISL_484697 | 5/15/2020 | 7/8/2020 Europe / Belgium                   |
| EPI_ISL_484698 | 5/14/2020 | 7/8/2020 Europe / Belgium                   |
| EPI_ISL_484699 | 6/5/2020  | 7/8/2020 Europe / Belgium                   |
| EPI_ISL_484700 | 6/9/2020  | 7/8/2020 Europe / Belgium                   |
| EPI_ISL_484702 | 3/12/2020 | 7/8/2020 Europe / Belgium                   |
| EPI_ISL_484703 | 3/20/2020 | 7/8/2020 Europe / Belgium                   |
| EPI_ISL_484709 | 3/24/2020 | 7/8/2020 North America / USA / Michigan     |
| EPI_ISL_484710 | 3/31/2020 | 7/8/2020 North America / USA / Michigan     |
| EPI_ISL_484711 | 3/30/2020 | 7/8/2020 North America / USA / Michigan     |
| EPI_ISL_484712 | 3/28/2020 | 7/8/2020 North America / USA / Michigan     |
| EPI_ISL_484713 | 3/31/2020 | 7/8/2020 North America / USA / Michigan     |
| EPI_ISL_484714 | 3/25/2020 | 7/8/2020 North America / USA / Michigan     |
| EPI_ISL_484715 | 3/27/2020 | 7/8/2020 North America / USA / Michigan     |



|                |           |                                                             |
|----------------|-----------|-------------------------------------------------------------|
| EPI_ISL_484718 | 3/31/2020 | 7/8/2020 North America / USA / Michigan                     |
| EPI_ISL_484719 | 3/29/2020 | 7/8/2020 North America / USA / Michigan                     |
| EPI_ISL_484720 | 3/24/2020 | 7/8/2020 North America / USA / Michigan                     |
| EPI_ISL_484721 | 3/27/2020 | 7/8/2020 North America / USA / Michigan                     |
| EPI_ISL_484723 | 3/31/2020 | 7/8/2020 North America / USA / Michigan                     |
| EPI_ISL_484724 | 3/27/2020 | 7/8/2020 North America / USA / Michigan                     |
| EPI_ISL_484726 | 3/26/2020 | 7/8/2020 North America / USA / Michigan                     |
| EPI_ISL_484731 | 3/28/2020 | 7/8/2020 North America / USA / Michigan                     |
| EPI_ISL_484732 | 3/25/2020 | 7/8/2020 North America / USA / Michigan                     |
| EPI_ISL_484733 | 3/24/2020 | 7/8/2020 North America / USA / Michigan                     |
| EPI_ISL_484745 | 3/31/2020 | 7/8/2020 North America / USA / Michigan                     |
| EPI_ISL_484753 | 3/24/2020 | 7/8/2020 North America / USA / Michigan                     |
| EPI_ISL_484754 | 3/29/2020 | 7/8/2020 North America / USA / Michigan                     |
| EPI_ISL_484758 | 3/27/2020 | 7/8/2020 North America / USA / Michigan                     |
| EPI_ISL_484759 | 3/28/2020 | 7/8/2020 North America / USA / Michigan                     |
| EPI_ISL_484760 | 3/31/2020 | 7/8/2020 North America / USA / Michigan                     |
| EPI_ISL_484761 | 3/25/2020 | 7/8/2020 North America / USA / Michigan                     |
| EPI_ISL_484762 | 3/31/2020 | 7/8/2020 North America / USA / Michigan                     |
| EPI_ISL_484763 | 3/22/2020 | 7/8/2020 North America / USA / Michigan                     |
| EPI_ISL_484768 | 3/27/2020 | 7/8/2020 North America / USA / Michigan                     |
| EPI_ISL_484769 | 4/6/2020  | 7/8/2020 North America / USA / Michigan                     |
| EPI_ISL_484770 | 3/27/2020 | 7/8/2020 North America / USA / Michigan                     |
| EPI_ISL_484776 | 3/28/2020 | 7/8/2020 North America / USA / Michigan                     |
| EPI_ISL_484779 | 3/30/2020 | 7/8/2020 North America / USA / Michigan                     |
| EPI_ISL_484785 | 3/30/2020 | 7/8/2020 North America / USA / Michigan                     |
| EPI_ISL_484789 | 4/8/2020  | 7/8/2020 North America / USA / Michigan                     |
| EPI_ISL_484792 | 4/3/2020  | 7/8/2020 North America / USA / Michigan                     |
| EPI_ISL_484794 | 3/31/2020 | 7/8/2020 North America / USA / Michigan                     |
| EPI_ISL_484796 | 4/3/2020  | 7/8/2020 North America / USA / Michigan                     |
| EPI_ISL_484806 | 4/1/2020  | 7/8/2020 North America / USA / Michigan                     |
| EPI_ISL_484807 | 6/17/2020 | 7/8/2020 North America / USA / Wisconsin / Dane County      |
| EPI_ISL_484808 | 6/18/2020 | 7/8/2020 North America / USA / Wisconsin / Dane County      |
| EPI_ISL_484809 | 6/15/2020 | 7/8/2020 North America / USA / Wisconsin / Dane County      |
| EPI_ISL_484810 | 6/15/2020 | 7/8/2020 North America / USA / Wisconsin / Dane County      |
| EPI_ISL_484811 | 6/17/2020 | 7/8/2020 North America / USA / Wisconsin / Dane County      |
| EPI_ISL_484812 | 6/14/2020 | 7/8/2020 North America / USA / Wisconsin / Dane County      |
| EPI_ISL_484813 | 6/15/2020 | 7/8/2020 North America / USA / Wisconsin / Dane County      |
| EPI_ISL_484814 | 6/18/2020 | 7/8/2020 North America / USA / Wisconsin / Dane County      |
| EPI_ISL_484815 | 6/17/2020 | 7/8/2020 North America / USA / Wisconsin / Dane County      |
| EPI_ISL_484817 | 6/14/2020 | 7/8/2020 North America / USA / Wisconsin / Dane County      |
| EPI_ISL_484818 | 6/19/2020 | 7/8/2020 North America / USA / Wisconsin / Dane County      |
| EPI_ISL_484819 | 6/18/2020 | 7/8/2020 North America / USA / Wisconsin / Dane County      |
| EPI_ISL_484820 | 6/16/2020 | 7/8/2020 North America / USA / Wisconsin / Dane County      |
| EPI_ISL_484821 | 6/17/2020 | 7/8/2020 North America / USA / Wisconsin / Rock County      |
| EPI_ISL_484822 | 6/18/2020 | 7/8/2020 North America / USA / Wisconsin / Dane County      |
| EPI_ISL_484823 | 6/17/2020 | 7/8/2020 North America / USA / Wisconsin / Dane County      |
| EPI_ISL_484824 | 6/18/2020 | 7/8/2020 North America / USA / Wisconsin / Manitowoc County |

|                |           |                                                             |
|----------------|-----------|-------------------------------------------------------------|
| EPI_ISL_484825 | 6/17/2020 | 7/8/2020 North America / USA / Wisconsin / Dane County      |
| EPI_ISL_484826 | 6/15/2020 | 7/8/2020 North America / USA / Wisconsin / Dane County      |
| EPI_ISL_484827 | 6/8/2020  | 7/8/2020 North America / USA / Wisconsin / Dane County      |
| EPI_ISL_484828 | 6/17/2020 | 7/8/2020 North America / USA / Wisconsin / Dane County      |
| EPI_ISL_484830 | 6/16/2020 | 7/8/2020 North America / USA / Wisconsin / Dane County      |
| EPI_ISL_484832 | 6/15/2020 | 7/8/2020 North America / USA / Wisconsin / Dane County      |
| EPI_ISL_484833 | 6/18/2020 | 7/8/2020 North America / USA / Wisconsin / Manitowoc County |
| EPI_ISL_484834 | 6/17/2020 | 7/8/2020 North America / USA / Wisconsin / Dane County      |
| EPI_ISL_484835 | 6/17/2020 | 7/8/2020 North America / USA / Wisconsin / Waukesha County  |
| EPI_ISL_484836 | 6/10/2020 | 7/8/2020 North America / USA / Wisconsin / Dane County      |
| EPI_ISL_484837 | 6/6/2020  | 7/8/2020 North America / USA / Wisconsin / Jefferson County |
| EPI_ISL_484838 | 6/8/2020  | 7/8/2020 North America / USA / Wisconsin / Rock County      |
| EPI_ISL_484839 | 6/7/2020  | 7/8/2020 North America / USA / Wisconsin / Dane County      |
| EPI_ISL_484840 | 6/16/2020 | 7/8/2020 North America / USA / Wisconsin / Dane County      |
| EPI_ISL_484841 | 6/11/2020 | 7/8/2020 North America / USA / Wisconsin / Dane County      |
| EPI_ISL_484842 | 6/6/2020  | 7/8/2020 North America / USA / Wisconsin / Dane County      |
| EPI_ISL_484843 | 6/18/2020 | 7/8/2020 North America / USA / Wisconsin / Milwaukee County |
| EPI_ISL_484844 | 6/8/2020  | 7/8/2020 North America / USA / Wisconsin / Dane County      |
| EPI_ISL_484845 | 6/18/2020 | 7/8/2020 North America / USA / Wisconsin / Dane County      |
| EPI_ISL_484846 | 6/17/2020 | 7/8/2020 North America / USA / Wisconsin / Dane County      |
| EPI_ISL_484847 | 6/17/2020 | 7/8/2020 North America / USA / Illinois / Winnebago County  |
| EPI_ISL_484849 | 6/9/2020  | 7/8/2020 North America / USA / Wisconsin / Dane County      |
| EPI_ISL_484850 | 6/9/2020  | 7/8/2020 North America / USA / Wisconsin / Rock County      |
| EPI_ISL_484851 | 6/12/2020 | 7/8/2020 North America / USA / Wisconsin / Dane County      |
| EPI_ISL_484852 | 6/9/2020  | 7/8/2020 North America / USA / Wisconsin / Dane County      |
| EPI_ISL_484853 | 6/7/2020  | 7/8/2020 North America / USA / Illinois / Winnebago County  |
| EPI_ISL_484854 | 6/10/2020 | 7/8/2020 North America / USA / Wisconsin / Dane County      |
| EPI_ISL_484855 | 6/5/2020  | 7/8/2020 North America / USA / Wisconsin / Dane County      |
| EPI_ISL_484856 | 6/18/2020 | 7/8/2020 North America / USA / Wisconsin / Dane County      |
| EPI_ISL_484857 | 6/15/2020 | 7/8/2020 North America / USA / Wisconsin / Dane County      |
| EPI_ISL_484858 | 6/17/2020 | 7/8/2020 North America / USA / Wisconsin / Dane County      |
| EPI_ISL_484860 | 6/1/2020  | 7/8/2020 North America / USA / Wisconsin / Jackson County   |
| EPI_ISL_484861 | 6/11/2020 | 7/8/2020 North America / USA / Wisconsin / Dane County      |
| EPI_ISL_484862 | 6/1/2020  | 7/8/2020 North America / USA / Illinois / Winnebago County  |
| EPI_ISL_484863 | 6/4/2020  | 7/8/2020 North America / USA / Wisconsin / Dane County      |
| EPI_ISL_484864 | 6/5/2020  | 7/8/2020 North America / USA / Wisconsin / Dane County      |
| EPI_ISL_484865 | 6/4/2020  | 7/8/2020 North America / USA / Wisconsin / Dane County      |
| EPI_ISL_484866 | 6/11/2020 | 7/8/2020 North America / USA / Wisconsin / Jefferson County |
| EPI_ISL_484867 | 6/8/2020  | 7/8/2020 North America / USA / Wisconsin / Dane County      |
| EPI_ISL_484868 | 6/3/2020  | 7/8/2020 North America / USA / Wisconsin / Dane County      |
| EPI_ISL_484869 | 6/13/2020 | 7/8/2020 North America / USA / Wisconsin / Dane County      |
| EPI_ISL_484870 | 6/13/2020 | 7/8/2020 North America / USA / Wisconsin / Dane County      |
| EPI_ISL_484871 | 6/11/2020 | 7/8/2020 North America / USA / Wisconsin / Dane County      |
| EPI_ISL_484872 | 6/2/2020  | 7/8/2020 North America / USA / Wisconsin / Dane County      |
| EPI_ISL_484873 | 6/5/2020  | 7/8/2020 North America / USA / Wisconsin / Dane County      |
| EPI_ISL_484874 | 6/8/2020  | 7/8/2020 North America / USA / Wisconsin / Dane County      |
| EPI_ISL_484875 | 6/3/2020  | 7/8/2020 North America / USA / Wisconsin / Jefferson County |

|                |           |                                                                 |
|----------------|-----------|-----------------------------------------------------------------|
| EPI_ISL_484876 | 6/1/2020  | 7/8/2020 North America / USA / Wisconsin / Dane County          |
| EPI_ISL_484877 | 6/3/2020  | 7/8/2020 North America / USA / Wisconsin / Dane County          |
| EPI_ISL_484878 | 5/31/2020 | 7/8/2020 North America / USA / Illinois / Winnebago County      |
| EPI_ISL_484879 | 6/10/2020 | 7/8/2020 North America / USA / Wisconsin / Dane County          |
| EPI_ISL_484880 | 6/1/2020  | 7/8/2020 North America / USA / Wisconsin / Trempealeau County   |
| EPI_ISL_484881 | 6/1/2020  | 7/8/2020 North America / USA / Illinois / Winnebago County      |
| EPI_ISL_484882 | 5/30/2020 | 7/8/2020 North America / USA / Illinois / Winnebago County      |
| EPI_ISL_484883 | 6/5/2020  | 7/8/2020 North America / USA / Wisconsin / Dane County          |
| EPI_ISL_484884 | 6/8/2020  | 7/8/2020 North America / USA / Wisconsin / Jefferson County     |
| EPI_ISL_484885 | 6/8/2020  | 7/8/2020 North America / USA / Connecticut / Fairfield County   |
| EPI_ISL_484886 | 6/5/2020  | 7/8/2020 North America / USA / Wisconsin / Vernon County        |
| EPI_ISL_484888 | 6/7/2020  | 7/8/2020 North America / USA / Wisconsin / Dane County          |
| EPI_ISL_484889 | 6/14/2020 | 7/8/2020 North America / USA / Wisconsin / Rock County          |
| EPI_ISL_484890 | 6/2/2020  | 7/8/2020 North America / USA / Illinois / Winnebago County      |
| EPI_ISL_484892 | 6/24/2020 | 7/8/2020 North America / USA / Wisconsin / Dane County          |
| EPI_ISL_484893 | 6/24/2020 | 7/8/2020 North America / USA / Wisconsin / Dane County          |
| EPI_ISL_484894 | 6/24/2020 | 7/8/2020 North America / USA / Wisconsin / Dane County          |
| EPI_ISL_484895 | 6/24/2020 | 7/8/2020 North America / USA / Wisconsin / Dane County          |
| EPI_ISL_484896 | 6/24/2020 | 7/8/2020 North America / USA / Wisconsin / Dane County          |
| EPI_ISL_484897 | 6/24/2020 | 7/8/2020 North America / USA / Wisconsin / Brown County         |
| EPI_ISL_484898 | 6/24/2020 | 7/8/2020 North America / USA / Wisconsin / Dane County          |
| EPI_ISL_484899 | 6/24/2020 | 7/8/2020 North America / USA / Wisconsin / Dane County          |
| EPI_ISL_484900 | 6/24/2020 | 7/8/2020 North America / USA / Illinois / McHenry County        |
| EPI_ISL_484901 | 6/24/2020 | 7/8/2020 North America / USA / Wisconsin / Dane County          |
| EPI_ISL_484902 | 6/24/2020 | 7/8/2020 North America / USA / Wisconsin / Dane County          |
| EPI_ISL_484903 | 6/23/2020 | 7/8/2020 North America / USA / Wisconsin / Dane County          |
| EPI_ISL_484904 | 6/23/2020 | 7/8/2020 North America / USA / Wisconsin / Dane County          |
| EPI_ISL_484905 | 6/23/2020 | 7/8/2020 North America / USA / Wisconsin / Dane County          |
| EPI_ISL_484906 | 6/24/2020 | 7/8/2020 North America / USA / Illinois / Winnebago County      |
| EPI_ISL_484907 | 6/23/2020 | 7/8/2020 North America / USA / Illinois / Cook County           |
| EPI_ISL_484908 | 6/24/2020 | 7/8/2020 North America / USA / Wisconsin / Dane County          |
| EPI_ISL_484909 | 6/24/2020 | 7/8/2020 North America / USA / Wisconsin / Dane County          |
| EPI_ISL_484910 | 6/23/2020 | 7/8/2020 North America / USA / Wisconsin / Dane County          |
| EPI_ISL_484911 | 6/24/2020 | 7/8/2020 North America / USA / Wisconsin / Dane County          |
| EPI_ISL_484913 | 6/24/2020 | 7/8/2020 North America / USA / Wisconsin / Dane County          |
| EPI_ISL_484914 | 6/20/2020 | 7/8/2020 North America / USA / Wisconsin / Dane County          |
| EPI_ISL_484915 | 6/22/2020 | 7/8/2020 North America / USA / Wisconsin / Dane County          |
| EPI_ISL_484916 | 6/24/2020 | 7/8/2020 North America / USA / Wisconsin / Dane County          |
| EPI_ISL_484917 | 6/23/2020 | 7/8/2020 North America / USA / Illinois / Lake County           |
| EPI_ISL_484918 | 6/21/2020 | 7/8/2020 North America / USA / Wisconsin / Dane County          |
| EPI_ISL_484919 | 6/22/2020 | 7/8/2020 North America / USA / Wisconsin / Dane County          |
| EPI_ISL_484920 | 6/23/2020 | 7/8/2020 North America / USA / Wisconsin / Dane County          |
| EPI_ISL_484921 | 6/19/2020 | 7/8/2020 North America / USA / Wisconsin / Dane County          |
| EPI_ISL_484922 | 6/22/2020 | 7/8/2020 North America / USA / Pennsylvania / Montgomery County |
| EPI_ISL_484923 | 6/22/2020 | 7/8/2020 North America / USA / Wisconsin / Dane County          |
| EPI_ISL_484924 | 6/24/2020 | 7/8/2020 North America / USA / Wisconsin / Dane County          |
| EPI_ISL_484926 | 6/23/2020 | 7/8/2020 North America / USA / Wisconsin / Dane County          |

|                |           |                                                              |
|----------------|-----------|--------------------------------------------------------------|
| EPI_ISL_484927 | 6/23/2020 | 7/8/2020 North America / USA / Wisconsin / Dane County       |
| EPI_ISL_484928 | 6/21/2020 | 7/8/2020 North America / USA / Illinois / Winnebago County   |
| EPI_ISL_484931 | 6/25/2020 | 7/8/2020 North America / USA / Wisconsin / Dane County       |
| EPI_ISL_484932 | 6/25/2020 | 7/8/2020 North America / USA / New Jersey / Bergen County    |
| EPI_ISL_484933 | 6/25/2020 | 7/8/2020 North America / USA / Wisconsin / Dane County       |
| EPI_ISL_484934 | 6/25/2020 | 7/8/2020 North America / USA / Wisconsin / Dane County       |
| EPI_ISL_484935 | 6/25/2020 | 7/8/2020 North America / USA / Wisconsin / Dane County       |
| EPI_ISL_484936 | 6/27/2020 | 7/8/2020 North America / USA / Wisconsin / Dane County       |
| EPI_ISL_484937 | 6/25/2020 | 7/8/2020 North America / USA / Wisconsin / Dane County       |
| EPI_ISL_484938 | 6/25/2020 | 7/8/2020 North America / USA / Wisconsin / Dane County       |
| EPI_ISL_484939 | 6/28/2020 | 7/8/2020 North America / USA / Wisconsin / Sheboygan County  |
| EPI_ISL_484940 | 6/25/2020 | 7/8/2020 North America / USA / Wisconsin / Dane County       |
| EPI_ISL_484941 | 6/28/2020 | 7/8/2020 North America / USA / Wisconsin / Dane County       |
| EPI_ISL_484942 | 6/25/2020 | 7/8/2020 North America / USA / Wisconsin / Dane County       |
| EPI_ISL_484944 | 6/25/2020 | 7/8/2020 North America / USA / Wisconsin / Dane County       |
| EPI_ISL_484945 | 6/25/2020 | 7/8/2020 North America / USA / Wisconsin / Dane County       |
| EPI_ISL_484946 | 6/27/2020 | 7/8/2020 North America / USA / Illinois / Winnebago County   |
| EPI_ISL_484947 | 6/19/2020 | 7/8/2020 North America / USA / Wisconsin / Dane County       |
| EPI_ISL_484948 | 6/19/2020 | 7/8/2020 North America / USA / Wisconsin / Dane County       |
| EPI_ISL_484949 | 6/23/2020 | 7/8/2020 North America / USA / Wisconsin / Outagamie County  |
| EPI_ISL_484950 | 6/23/2020 | 7/8/2020 North America / USA / Wisconsin / Dane County       |
| EPI_ISL_484951 | 6/19/2020 | 7/8/2020 North America / USA / Wisconsin / Dane County       |
| EPI_ISL_484952 | 6/24/2020 | 7/8/2020 North America / USA / Wisconsin / Dane County       |
| EPI_ISL_484953 | 6/24/2020 | 7/8/2020 North America / USA / Wisconsin / Dane County       |
| EPI_ISL_484954 | 6/23/2020 | 7/8/2020 North America / USA / Wisconsin / Dane County       |
| EPI_ISL_484955 | 6/21/2020 | 7/8/2020 North America / USA / Wisconsin / Milwaukee County  |
| EPI_ISL_484956 | 6/21/2020 | 7/8/2020 North America / USA / Wisconsin / Waukesha County   |
| EPI_ISL_484957 | 6/22/2020 | 7/8/2020 North America / USA / Wisconsin / Dodge County      |
| EPI_ISL_484958 | 6/22/2020 | 7/8/2020 North America / USA / Wisconsin / Dane County       |
| EPI_ISL_484959 | 6/23/2020 | 7/8/2020 North America / USA / New York / Westchester County |
| EPI_ISL_484960 | 6/22/2020 | 7/8/2020 North America / USA / Wisconsin / Dodge County      |
| EPI_ISL_484961 | 6/19/2020 | 7/8/2020 North America / USA / Wisconsin / Dane County       |
| EPI_ISL_484962 | 6/24/2020 | 7/8/2020 North America / USA / Wisconsin / Dane County       |
| EPI_ISL_484963 | 6/22/2020 | 7/8/2020 North America / USA / Wisconsin / Dane County       |
| EPI_ISL_484964 | 6/19/2020 | 7/8/2020 North America / USA / Wisconsin / Dane County       |
| EPI_ISL_484965 | 6/20/2020 | 7/8/2020 North America / USA / Wisconsin / Dane County       |
| EPI_ISL_484966 | 6/19/2020 | 7/8/2020 North America / USA / Wisconsin / Dane County       |
| EPI_ISL_484967 | 6/27/2020 | 7/8/2020 North America / USA / Illinois / Cook County        |
| EPI_ISL_484969 | 6/27/2020 | 7/8/2020 North America / USA / Wisconsin / Dane County       |
| EPI_ISL_484970 | 6/25/2020 | 7/8/2020 North America / USA / Wisconsin / Dane County       |
| EPI_ISL_484971 | 6/25/2020 | 7/8/2020 North America / USA / Wisconsin / Dane County       |
| EPI_ISL_484972 | 6/27/2020 | 7/8/2020 North America / USA / New York / Onondaga County    |
| EPI_ISL_484973 | 6/27/2020 | 7/8/2020 North America / USA / Wisconsin / Dane County       |
| EPI_ISL_484974 | 6/28/2020 | 7/8/2020 North America / USA / Wisconsin / Dane County       |
| EPI_ISL_484975 | 6/25/2020 | 7/8/2020 North America / USA / Illinois / Cook County        |
| EPI_ISL_484976 | 6/25/2020 | 7/8/2020 North America / USA / Wisconsin / Dane County       |
| EPI_ISL_484978 | 6/25/2020 | 7/8/2020 North America / USA / Wisconsin / Dane County       |

|                 |           |                                                                    |
|-----------------|-----------|--------------------------------------------------------------------|
| EPI_ISL_484979  | 6/25/2020 | 7/8/2020 North America / USA / Wisconsin / Dane County             |
| EPI_ISL_484981  | 6/27/2020 | 7/8/2020 North America / USA / California / Los Angeles County     |
| EPI_ISL_484982  | 6/24/2020 | 7/8/2020 North America / USA / Wisconsin / Dane County             |
| EPI_ISL_484983  | 6/23/2020 | 7/8/2020 North America / USA / Wisconsin / Dane County             |
| EPI_ISL_484984  | 6/24/2020 | 7/8/2020 North America / USA / Wisconsin / Dane County             |
| EPI_ISL_484985  | 6/23/2020 | 7/8/2020 North America / USA / Wisconsin / Dane County             |
| EPI_ISL_484986  | 6/22/2020 | 7/8/2020 North America / USA / Wisconsin / Winnebago County        |
| EPI_ISL_484987  | 6/22/2020 | 7/8/2020 North America / USA / Wisconsin / Jefferson County        |
| EPI_ISL_484988  | 6/22/2020 | 7/8/2020 North America / USA / Wisconsin / Dane County             |
| EPI_ISL_484989  | 6/23/2020 | 7/8/2020 North America / USA / Wisconsin / Dane County             |
| EPI_ISL_484990  | 6/22/2020 | 7/8/2020 North America / USA / Wisconsin / Dane County             |
| EPI_ISL_484991  | 6/23/2020 | 7/8/2020 North America / USA / Wisconsin / Dane County             |
| EPI_ISL_484992  | 6/23/2020 | 7/8/2020 North America / USA / Wisconsin / Waukesha County         |
| EPI_ISL_484993  | 6/24/2020 | 7/8/2020 North America / USA / Wisconsin / Dane County             |
| EPI_ISL_484994  | 6/24/2020 | 7/8/2020 North America / USA / Wisconsin / Dane County             |
| EPI_ISL_484995  | 6/24/2020 | 7/8/2020 North America / USA / Wisconsin / Dane County             |
| EPI_ISL_484996  | 6/23/2020 | 7/8/2020 North America / USA / Wisconsin / Dane County             |
| EPI_ISL_484997  | 6/23/2020 | 7/8/2020 North America / USA / Wisconsin / Door County             |
| EPI_ISL_484998  | 6/24/2020 | 7/8/2020 North America / USA / Wisconsin / Dane County             |
| EPI_ISL_484999  | 6/24/2020 | 7/8/2020 North America / USA / Wisconsin / Dane County             |
| EPI_ISL_485000  | 6/24/2020 | 7/8/2020 North America / USA / Illinois / Cook County              |
| EPI_ISL_485398  | 2/26/2020 | 7/8/2020 Asia / South Korea                                        |
| EPI_ISL_485401  | 6/23/2020 | 7/8/2020 Asia / Bahrain / Manama                                   |
| EPI_ISL_2629942 | 5/20/2020 | 7/8/2020 Asia / Pakistan                                           |
| EPI_ISL_2629943 | 5/10/2020 | 7/8/2020 Asia / Pakistan                                           |
| EPI_ISL_485001  | 3/8/2020  | 7/9/2020 Asia / South Korea / Seoul                                |
| EPI_ISL_485002  | 3/13/2020 | 7/9/2020 Asia / South Korea / Seoul                                |
| EPI_ISL_485004  | 4/11/2020 | 7/9/2020 North America / USA / Louisiana / East Baton Rouge Parish |
| EPI_ISL_485006  | 4/11/2020 | 7/9/2020 North America / USA / Louisiana / East Baton Rouge Parish |
| EPI_ISL_485008  | 4/11/2020 | 7/9/2020 North America / USA / Louisiana / East Baton Rouge Parish |
| EPI_ISL_485009  | 4/11/2020 | 7/9/2020 North America / USA / Louisiana / East Baton Rouge Parish |
| EPI_ISL_485011  | 4/11/2020 | 7/9/2020 North America / USA / Louisiana / East Baton Rouge Parish |
| EPI_ISL_485012  | 4/11/2020 | 7/9/2020 North America / USA / Louisiana / East Baton Rouge Parish |
| EPI_ISL_485014  | 4/11/2020 | 7/9/2020 North America / USA / Louisiana / East Baton Rouge Parish |
| EPI_ISL_485015  | 4/11/2020 | 7/9/2020 North America / USA / Louisiana / East Baton Rouge Parish |
| EPI_ISL_485018  | 4/11/2020 | 7/9/2020 North America / USA / Louisiana / East Baton Rouge Parish |
| EPI_ISL_485019  | 4/28/2020 | 7/9/2020 North America / USA / Louisiana / East Baton Rouge Parish |
| EPI_ISL_485020  | 4/28/2020 | 7/9/2020 North America / USA / Louisiana / East Baton Rouge Parish |
| EPI_ISL_485022  | 4/28/2020 | 7/9/2020 North America / USA / Louisiana / East Baton Rouge Parish |
| EPI_ISL_485026  | 4/28/2020 | 7/9/2020 North America / USA / Louisiana / East Baton Rouge Parish |
| EPI_ISL_485027  | 4/28/2020 | 7/9/2020 North America / USA / Louisiana / East Baton Rouge Parish |
| EPI_ISL_485029  | 4/28/2020 | 7/9/2020 North America / USA / Louisiana / East Baton Rouge Parish |
| EPI_ISL_485031  | 4/28/2020 | 7/9/2020 North America / USA / Louisiana / East Baton Rouge Parish |
| EPI_ISL_485032  | 4/28/2020 | 7/9/2020 North America / USA / Louisiana / East Baton Rouge Parish |
| EPI_ISL_485034  | 4/28/2020 | 7/9/2020 North America / USA / Louisiana / East Baton Rouge Parish |
| EPI_ISL_485035  | 4/28/2020 | 7/9/2020 North America / USA / Louisiana / East Baton Rouge Parish |
| EPI_ISL_485038  | 4/28/2020 | 7/9/2020 North America / USA / Louisiana / East Baton Rouge Parish |











|                |           |                                                                    |
|----------------|-----------|--------------------------------------------------------------------|
| EPI_ISL_485353 | 4/9/2020  | 7/9/2020 North America / USA / Louisiana / East Baton Rouge Parish |
| EPI_ISL_485354 | 4/7/2020  | 7/9/2020 North America / USA / Louisiana / East Baton Rouge Parish |
| EPI_ISL_485356 | 4/6/2020  | 7/9/2020 North America / USA / Louisiana / East Baton Rouge Parish |
| EPI_ISL_485360 | 4/6/2020  | 7/9/2020 North America / USA / Louisiana / East Baton Rouge Parish |
| EPI_ISL_485361 | 4/6/2020  | 7/9/2020 North America / USA / Louisiana / East Baton Rouge Parish |
| EPI_ISL_485364 | 4/6/2020  | 7/9/2020 North America / USA / Louisiana / East Baton Rouge Parish |
| EPI_ISL_485365 | 4/4/2020  | 7/9/2020 North America / USA / Louisiana / East Baton Rouge Parish |
| EPI_ISL_485367 | 4/4/2020  | 7/9/2020 North America / USA / Louisiana / East Baton Rouge Parish |
| EPI_ISL_485368 | 4/6/2020  | 7/9/2020 North America / USA / Louisiana / East Baton Rouge Parish |
| EPI_ISL_485369 | 4/6/2020  | 7/9/2020 North America / USA / Louisiana / East Baton Rouge Parish |
| EPI_ISL_485370 | 4/6/2020  | 7/9/2020 North America / USA / Louisiana / East Baton Rouge Parish |
| EPI_ISL_485371 | 4/6/2020  | 7/9/2020 North America / USA / Louisiana / East Baton Rouge Parish |
| EPI_ISL_485372 | 4/6/2020  | 7/9/2020 North America / USA / Louisiana / East Baton Rouge Parish |
| EPI_ISL_485374 | 4/6/2020  | 7/9/2020 North America / USA / Louisiana / East Baton Rouge Parish |
| EPI_ISL_485375 | 4/6/2020  | 7/9/2020 North America / USA / Louisiana / East Baton Rouge Parish |
| EPI_ISL_485379 | 4/4/2020  | 7/9/2020 North America / USA / Louisiana / East Baton Rouge Parish |
| EPI_ISL_485380 | 4/4/2020  | 7/9/2020 North America / USA / Louisiana / East Baton Rouge Parish |
| EPI_ISL_485381 | 4/4/2020  | 7/9/2020 North America / USA / Louisiana / East Baton Rouge Parish |
| EPI_ISL_485382 | 4/4/2020  | 7/9/2020 North America / USA / Louisiana / East Baton Rouge Parish |
| EPI_ISL_485383 | 4/4/2020  | 7/9/2020 North America / USA / Louisiana / East Baton Rouge Parish |
| EPI_ISL_485384 | 4/4/2020  | 7/9/2020 North America / USA / Louisiana / East Baton Rouge Parish |
| EPI_ISL_485385 | 4/4/2020  | 7/9/2020 North America / USA / Louisiana / East Baton Rouge Parish |
| EPI_ISL_485386 | 4/4/2020  | 7/9/2020 North America / USA / Louisiana / East Baton Rouge Parish |
| EPI_ISL_485387 | 4/4/2020  | 7/9/2020 North America / USA / Louisiana / East Baton Rouge Parish |
| EPI_ISL_485389 | 4/5/2020  | 7/9/2020 Asia / South Korea / Seoul                                |
| EPI_ISL_485390 | 4/6/2020  | 7/9/2020 Asia / South Korea / Seoul                                |
| EPI_ISL_485391 | 4/17/2020 | 7/9/2020 Asia / South Korea / Seoul                                |
| EPI_ISL_485392 | 3/25/2020 | 7/9/2020 Asia / South Korea / Uijeongbu                            |
| EPI_ISL_485396 | 4/1/2020  | 7/9/2020 Asia / South Korea / Uijeongbu                            |
| EPI_ISL_485399 | 6/1/2020  | 7/9/2020 Europe / Poland / Opolskie                                |
| EPI_ISL_485400 | 6/1/2020  | 7/9/2020 Europe / Poland / Łódźskie                                |
| EPI_ISL_485604 | 2/24/2020 | 7/9/2020 Europe / United Kingdom / England                         |
| EPI_ISL_485605 | 6/2/2020  | 7/9/2020 Europe / United Kingdom / England                         |
| EPI_ISL_485606 | 6/2/2020  | 7/9/2020 Europe / United Kingdom / England                         |
| EPI_ISL_485607 | 6/8/2020  | 7/9/2020 Europe / United Kingdom / England                         |
| EPI_ISL_485608 | 6/9/2020  | 7/9/2020 Europe / United Kingdom / England                         |
| EPI_ISL_485609 | 6/14/2020 | 7/9/2020 Europe / United Kingdom / England                         |
| EPI_ISL_485635 | 6/18/2020 | 7/9/2020 Africa / Senegal / Dakar                                  |
| EPI_ISL_485708 | 6/15/2020 | 7/9/2020 Africa / Senegal / Dakar                                  |
| EPI_ISL_485710 | 6/15/2020 | 7/9/2020 Africa / Senegal / Dakar                                  |
| EPI_ISL_485712 | 6/14/2020 | 7/9/2020 Africa / Senegal / Dakar                                  |
| EPI_ISL_485713 | 6/14/2020 | 7/9/2020 Africa / Senegal / Dakar / Yeumbeul                       |
| EPI_ISL_485715 | 6/12/2020 | 7/9/2020 Africa / Senegal / Dakar                                  |
| EPI_ISL_485716 | 6/12/2020 | 7/9/2020 Africa / Senegal / Dakar / Keur Massar                    |
| EPI_ISL_485717 | 6/12/2020 | 7/9/2020 Africa / Senegal / Dakar / Keur Massar                    |
| EPI_ISL_485809 | 5/13/2020 | 7/9/2020 Europe / Germany / Baden-Wurttemberg / Tuebingen          |
| EPI_ISL_485810 | 5/13/2020 | 7/9/2020 Europe / Germany / Baden-Wurttemberg / Tuebingen          |



|                |           |                                                                    |
|----------------|-----------|--------------------------------------------------------------------|
| EPI_ISL_485862 | 3/17/2020 | 7/9/2020 North America / USA / Virginia                            |
| EPI_ISL_485863 | 3/18/2020 | 7/9/2020 North America / USA / Virginia                            |
| EPI_ISL_485864 | 3/18/2020 | 7/9/2020 North America / USA / Virginia                            |
| EPI_ISL_485865 | 3/18/2020 | 7/9/2020 North America / USA / Virginia                            |
| EPI_ISL_485866 | 3/18/2020 | 7/9/2020 North America / USA / Virginia                            |
| EPI_ISL_485867 | 3/17/2020 | 7/9/2020 North America / USA / Virginia                            |
| EPI_ISL_485868 | 3/17/2020 | 7/9/2020 North America / USA / Virginia                            |
| EPI_ISL_485869 | 3/17/2020 | 7/9/2020 North America / USA / Virginia                            |
| EPI_ISL_485870 | 3/17/2020 | 7/9/2020 North America / USA / Virginia                            |
| EPI_ISL_485871 | 4/1/2020  | 7/9/2020 North America / USA / Virginia                            |
| EPI_ISL_485872 | 4/5/2020  | 7/9/2020 North America / USA / New Mexico                          |
| EPI_ISL_485874 | 4/25/2020 | 7/9/2020 North America / USA / Louisiana / East Baton Rouge Parish |
| EPI_ISL_485876 | 4/25/2020 | 7/9/2020 North America / USA / Louisiana / East Baton Rouge Parish |
| EPI_ISL_485879 | 4/24/2020 | 7/9/2020 North America / USA / Louisiana / East Baton Rouge Parish |
| EPI_ISL_485881 | 4/21/2020 | 7/9/2020 North America / USA / Louisiana / East Baton Rouge Parish |
| EPI_ISL_485885 | 4/20/2020 | 7/9/2020 North America / USA / Louisiana / East Baton Rouge Parish |
| EPI_ISL_485888 | 4/18/2020 | 7/9/2020 North America / USA / Louisiana / East Baton Rouge Parish |
| EPI_ISL_485889 | 4/17/2020 | 7/9/2020 North America / USA / Louisiana / East Baton Rouge Parish |
| EPI_ISL_485890 | 4/15/2020 | 7/9/2020 North America / USA / Louisiana / East Baton Rouge Parish |
| EPI_ISL_485892 | 4/24/2020 | 7/9/2020 North America / USA / Louisiana / East Baton Rouge Parish |
| EPI_ISL_485895 | 4/21/2020 | 7/9/2020 North America / USA / Louisiana / East Baton Rouge Parish |
| EPI_ISL_485896 | 4/21/2020 | 7/9/2020 North America / USA / Louisiana / East Baton Rouge Parish |
| EPI_ISL_485897 | 4/10/2020 | 7/9/2020 North America / USA / Louisiana / East Baton Rouge Parish |
| EPI_ISL_485902 | 4/10/2020 | 7/9/2020 North America / USA / Louisiana / East Baton Rouge Parish |
| EPI_ISL_485903 | 4/10/2020 | 7/9/2020 North America / USA / Louisiana / East Baton Rouge Parish |
| EPI_ISL_485904 | 4/10/2020 | 7/9/2020 North America / USA / Louisiana / East Baton Rouge Parish |
| EPI_ISL_486427 | 3/13/2020 | 7/9/2020 South America / Brazil                                    |
| EPI_ISL_486429 | 3/20/2020 | 7/9/2020 South America / Brazil                                    |
| EPI_ISL_486897 | 2020-05   | 7/9/2020 Asia / Japan / Tokyo                                      |
| EPI_ISL_486898 | 2020-05   | 7/9/2020 Asia / Japan / Tokyo                                      |
| EPI_ISL_486899 | 2020-05   | 7/9/2020 Asia / Japan / Tokyo                                      |
| EPI_ISL_486900 | 2020-05   | 7/9/2020 Asia / Japan / Tokyo                                      |
| EPI_ISL_486901 | 2020-05   | 7/9/2020 Asia / Japan / Tokyo                                      |
| EPI_ISL_486902 | 2020-05   | 7/9/2020 Asia / Japan / Tokyo                                      |
| EPI_ISL_486903 | 2020-05   | 7/9/2020 Asia / Japan / Tokyo                                      |
| EPI_ISL_486904 | 2020-05   | 7/9/2020 Asia / Japan / Tokyo                                      |
| EPI_ISL_486905 | 2020-05   | 7/9/2020 Asia / Japan / Tokyo                                      |
| EPI_ISL_486906 | 2020-05   | 7/9/2020 Asia / Japan / Tokyo                                      |
| EPI_ISL_486907 | 2020-05   | 7/9/2020 Asia / Japan / Tokyo                                      |
| EPI_ISL_486908 | 2020-05   | 7/9/2020 Asia / Japan / Tokyo                                      |
| EPI_ISL_486909 | 2020-05   | 7/9/2020 Asia / Japan / Tokyo                                      |
| EPI_ISL_486910 | 2020-05   | 7/9/2020 Asia / Japan / Tokyo                                      |
| EPI_ISL_486911 | 2020-05   | 7/9/2020 Asia / Japan / Tokyo                                      |
| EPI_ISL_485917 | 3/29/2020 | 7/10/2020 North America / USA / Connecticut                        |
| EPI_ISL_485918 | 3/28/2020 | 7/10/2020 North America / USA / Connecticut                        |
| EPI_ISL_485919 | 3/28/2020 | 7/10/2020 North America / USA / Connecticut                        |
| EPI_ISL_485920 | 3/29/2020 | 7/10/2020 North America / USA / Connecticut                        |

|                |           |                                             |
|----------------|-----------|---------------------------------------------|
| EPI_ISL_485921 | 3/29/2020 | 7/10/2020 North America / USA / Connecticut |
| EPI_ISL_485922 | 3/30/2020 | 7/10/2020 North America / USA / Connecticut |
| EPI_ISL_485923 | 3/30/2020 | 7/10/2020 North America / USA / Connecticut |
| EPI_ISL_485924 | 3/30/2020 | 7/10/2020 North America / USA / Connecticut |
| EPI_ISL_485925 | 3/30/2020 | 7/10/2020 North America / USA / Connecticut |
| EPI_ISL_485926 | 3/27/2020 | 7/10/2020 North America / USA / Connecticut |
| EPI_ISL_485927 | 3/27/2020 | 7/10/2020 North America / USA / Connecticut |
| EPI_ISL_485928 | 3/28/2020 | 7/10/2020 North America / USA / Connecticut |
| EPI_ISL_485929 | 3/27/2020 | 7/10/2020 North America / USA / Connecticut |
| EPI_ISL_485930 | 3/27/2020 | 7/10/2020 North America / USA / Connecticut |
| EPI_ISL_485932 | 3/27/2020 | 7/10/2020 North America / USA / Connecticut |
| EPI_ISL_485933 | 3/27/2020 | 7/10/2020 North America / USA / Connecticut |
| EPI_ISL_485934 | 3/27/2020 | 7/10/2020 North America / USA / Connecticut |
| EPI_ISL_485936 | 3/27/2020 | 7/10/2020 North America / USA / Connecticut |
| EPI_ISL_485937 | 3/26/2020 | 7/10/2020 North America / USA / Connecticut |
| EPI_ISL_485938 | 3/27/2020 | 7/10/2020 North America / USA / Connecticut |
| EPI_ISL_485940 | 3/27/2020 | 7/10/2020 North America / USA / Connecticut |
| EPI_ISL_485941 | 3/26/2020 | 7/10/2020 North America / USA / Connecticut |
| EPI_ISL_485942 | 3/27/2020 | 7/10/2020 North America / USA / Connecticut |
| EPI_ISL_485944 | 3/12/2020 | 7/10/2020 North America / USA / Connecticut |
| EPI_ISL_485945 | 3/22/2020 | 7/10/2020 North America / USA / Idaho       |
| EPI_ISL_485946 | 3/28/2020 | 7/10/2020 North America / USA / Idaho       |
| EPI_ISL_485947 | 3/25/2020 | 7/10/2020 North America / USA / Idaho       |
| EPI_ISL_485948 | 3/12/2020 | 7/10/2020 North America / USA / Oregon      |
| EPI_ISL_485950 | 4/16/2020 | 7/10/2020 North America / USA               |
| EPI_ISL_485951 | 4/16/2020 | 7/10/2020 North America / USA               |
| EPI_ISL_485952 | 4/15/2020 | 7/10/2020 North America / USA               |
| EPI_ISL_485953 | 4/15/2020 | 7/10/2020 North America / USA               |
| EPI_ISL_485954 | 4/15/2020 | 7/10/2020 North America / USA               |
| EPI_ISL_485955 | 4/15/2020 | 7/10/2020 North America / USA               |
| EPI_ISL_485956 | 4/15/2020 | 7/10/2020 North America / USA               |
| EPI_ISL_485958 | 4/15/2020 | 7/10/2020 North America / USA               |
| EPI_ISL_485960 | 4/15/2020 | 7/10/2020 North America / USA               |
| EPI_ISL_485961 | 4/15/2020 | 7/10/2020 North America / USA               |
| EPI_ISL_485963 | 4/15/2020 | 7/10/2020 North America / USA               |
| EPI_ISL_485964 | 4/15/2020 | 7/10/2020 North America / USA               |
| EPI_ISL_485967 | 4/15/2020 | 7/10/2020 North America / USA               |
| EPI_ISL_485968 | 4/15/2020 | 7/10/2020 North America / USA               |
| EPI_ISL_485969 | 4/15/2020 | 7/10/2020 North America / USA               |
| EPI_ISL_485972 | 4/14/2020 | 7/10/2020 North America / USA / Washington  |
| EPI_ISL_485973 | 4/15/2020 | 7/10/2020 North America / USA / Washington  |
| EPI_ISL_485974 | 3/24/2020 | 7/10/2020 North America / USA / Washington  |
| EPI_ISL_485975 | 3/23/2020 | 7/10/2020 North America / USA / Washington  |
| EPI_ISL_485976 | 3/24/2020 | 7/10/2020 North America / USA / Washington  |
| EPI_ISL_485977 | 3/24/2020 | 7/10/2020 North America / USA / Washington  |
| EPI_ISL_485978 | 3/24/2020 | 7/10/2020 North America / USA / Washington  |
| EPI_ISL_485979 | 3/24/2020 | 7/10/2020 North America / USA / Washington  |

















|                |           |                                                           |
|----------------|-----------|-----------------------------------------------------------|
| EPI_ISL_486362 | 5/21/2020 | 7/10/2020 North America / USA / California / Marin County |
| EPI_ISL_486363 | 5/21/2020 | 7/10/2020 North America / USA / California / Marin County |
| EPI_ISL_486365 | 5/21/2020 | 7/10/2020 North America / USA / California / Marin County |
| EPI_ISL_486382 | 4/14/2020 | 7/10/2020 Asia / India / Karnataka                        |
| EPI_ISL_486383 | 4/23/2020 | 7/10/2020 Asia / India / Karnataka                        |
| EPI_ISL_486388 | 5/10/2020 | 7/10/2020 Asia / India / Karnataka                        |
| EPI_ISL_486389 | 5/10/2020 | 7/10/2020 Asia / India / Karnataka                        |
| EPI_ISL_486390 | 5/9/2020  | 7/10/2020 Europe / Latvia                                 |
| EPI_ISL_486391 | 5/3/2020  | 7/10/2020 Europe / Latvia                                 |
| EPI_ISL_486392 | 4/15/2020 | 7/10/2020 Asia / India / Karnataka                        |
| EPI_ISL_486394 | 4/23/2020 | 7/10/2020 Asia / India / Karnataka                        |
| EPI_ISL_486395 | 4/23/2020 | 7/10/2020 Asia / India / Karnataka                        |
| EPI_ISL_486397 | 4/25/2020 | 7/10/2020 Asia / India / Karnataka                        |
| EPI_ISL_486398 | 4/25/2020 | 7/10/2020 Asia / India / Karnataka                        |
| EPI_ISL_486399 | 4/29/2020 | 7/10/2020 Asia / India / Karnataka                        |
| EPI_ISL_486400 | 5/3/2020  | 7/10/2020 Asia / India / Karnataka                        |
| EPI_ISL_486405 | 5/10/2020 | 7/10/2020 Asia / India / Karnataka                        |
| EPI_ISL_486408 | 5/10/2020 | 7/10/2020 Asia / India / Karnataka                        |
| EPI_ISL_486409 | 5/10/2020 | 7/10/2020 Asia / India / Karnataka                        |
| EPI_ISL_486410 | 5/9/2020  | 7/10/2020 Europe / Latvia / Riga                          |
| EPI_ISL_486411 | 5/7/2020  | 7/10/2020 Europe / Latvia                                 |
| EPI_ISL_486412 | 4/29/2020 | 7/10/2020 Europe / Latvia                                 |
| EPI_ISL_486413 | 5/10/2020 | 7/10/2020 Europe / Latvia                                 |
| EPI_ISL_486414 | 5/7/2020  | 7/10/2020 Europe / Latvia                                 |
| EPI_ISL_486415 | 4/27/2020 | 7/10/2020 Europe / Latvia                                 |
| EPI_ISL_486416 | 4/27/2020 | 7/10/2020 Europe / Latvia                                 |
| EPI_ISL_486417 | 5/8/2020  | 7/10/2020 Europe / Latvia / Riga                          |
| EPI_ISL_486418 | 5/9/2020  | 7/10/2020 Europe / Latvia                                 |
| EPI_ISL_486419 | 4/29/2020 | 7/10/2020 Europe / Latvia                                 |
| EPI_ISL_486420 | 4/29/2020 | 7/10/2020 Europe / Latvia                                 |
| EPI_ISL_486421 | 4/27/2020 | 7/10/2020 Europe / Latvia                                 |
| EPI_ISL_486422 | 3/15/2020 | 7/10/2020 Europe / Latvia                                 |
| EPI_ISL_486423 | 3/17/2020 | 7/10/2020 Europe / Latvia                                 |
| EPI_ISL_486424 | 3/22/2020 | 7/10/2020 Europe / Latvia                                 |
| EPI_ISL_486425 | 3/22/2020 | 7/10/2020 Europe / Latvia                                 |
| EPI_ISL_486426 | 3/22/2020 | 7/10/2020 Europe / Latvia                                 |
| EPI_ISL_486428 | 3/22/2020 | 7/10/2020 Europe / Latvia                                 |
| EPI_ISL_486430 | 3/22/2020 | 7/10/2020 Europe / Latvia                                 |
| EPI_ISL_486431 | 3/16/2020 | 7/10/2020 Europe / Latvia                                 |
| EPI_ISL_486432 | 3/16/2020 | 7/10/2020 Europe / Latvia                                 |
| EPI_ISL_486433 | 3/16/2020 | 7/10/2020 Europe / Latvia                                 |
| EPI_ISL_486434 | 3/16/2020 | 7/10/2020 Europe / Latvia                                 |
| EPI_ISL_486435 | 3/23/2020 | 7/10/2020 Europe / Latvia                                 |
| EPI_ISL_486436 | 3/25/2020 | 7/10/2020 Europe / Latvia                                 |
| EPI_ISL_486437 | 4/30/2020 | 7/10/2020 Europe / Latvia                                 |
| EPI_ISL_486438 | 5/28/2020 | 7/10/2020 Europe / Latvia                                 |
| EPI_ISL_486442 | 4/1/2020  | 7/10/2020 Europe / Switzerland / Basel-Stadt              |

|                |           |           |                                         |
|----------------|-----------|-----------|-----------------------------------------|
| EPI_ISL_486443 | 4/1/2020  | 7/10/2020 | Europe / Switzerland / Basel-Stadt      |
| EPI_ISL_486444 | 4/1/2020  | 7/10/2020 | Europe / Switzerland / Basel-Landschaft |
| EPI_ISL_486448 | 4/1/2020  | 7/10/2020 | Europe / Switzerland / Vaud             |
| EPI_ISL_486449 | 4/1/2020  | 7/10/2020 | Europe / Switzerland / Uri              |
| EPI_ISL_486450 | 4/1/2020  | 7/10/2020 | Europe / Switzerland / Wallis           |
| EPI_ISL_486451 | 4/1/2020  | 7/10/2020 | Europe / Switzerland / Wallis           |
| EPI_ISL_486453 | 4/1/2020  | 7/10/2020 | Europe / Switzerland / Vaud             |
| EPI_ISL_486454 | 4/1/2020  | 7/10/2020 | Europe / Switzerland / Uri              |
| EPI_ISL_486455 | 4/1/2020  | 7/10/2020 | Europe / Switzerland / Basel-Landschaft |
| EPI_ISL_486456 | 4/1/2020  | 7/10/2020 | Europe / Switzerland / Basel-Stadt      |
| EPI_ISL_486457 | 4/1/2020  | 7/10/2020 | Europe / Switzerland / Bern             |
| EPI_ISL_486458 | 4/1/2020  | 7/10/2020 | Europe / Switzerland / Bern             |
| EPI_ISL_486460 | 4/1/2020  | 7/10/2020 | Europe / Switzerland / Basel-Landschaft |
| EPI_ISL_486461 | 4/1/2020  | 7/10/2020 | Europe / Switzerland / Basel-Landschaft |
| EPI_ISL_486463 | 4/1/2020  | 7/10/2020 | Europe / Switzerland / Wallis           |
| EPI_ISL_486465 | 4/1/2020  | 7/10/2020 | Europe / Switzerland / Lucerne          |
| EPI_ISL_486466 | 4/1/2020  | 7/10/2020 | Europe / Switzerland / Lucerne          |
| EPI_ISL_486467 | 4/1/2020  | 7/10/2020 | Europe / Switzerland / Wallis           |
| EPI_ISL_486470 | 4/1/2020  | 7/10/2020 | Europe / Switzerland / Basel-Landschaft |
| EPI_ISL_486471 | 4/1/2020  | 7/10/2020 | Europe / Switzerland / Vaud             |
| EPI_ISL_486472 | 4/1/2020  | 7/10/2020 | Europe / Switzerland / Basel-Landschaft |
| EPI_ISL_486475 | 4/1/2020  | 7/10/2020 | Europe / Switzerland / Wallis           |
| EPI_ISL_486476 | 4/1/2020  | 7/10/2020 | Europe / Switzerland / Wallis           |
| EPI_ISL_486478 | 4/1/2020  | 7/10/2020 | Europe / Switzerland / Zurich           |
| EPI_ISL_486479 | 4/1/2020  | 7/10/2020 | Europe / Switzerland / Zurich           |
| EPI_ISL_486481 | 4/1/2020  | 7/10/2020 | Europe / Switzerland / Grisons          |
| EPI_ISL_486482 | 4/1/2020  | 7/10/2020 | Europe / Switzerland / Zurich           |
| EPI_ISL_486484 | 4/1/2020  | 7/10/2020 | Europe / Switzerland / Wallis           |
| EPI_ISL_486485 | 4/1/2020  | 7/10/2020 | Europe / Switzerland / Bern             |
| EPI_ISL_486486 | 4/1/2020  | 7/10/2020 | Europe / Switzerland / St Gall          |
| EPI_ISL_486487 | 4/1/2020  | 7/10/2020 | Europe / Switzerland / Zurich           |
| EPI_ISL_486488 | 4/1/2020  | 7/10/2020 | Europe / Switzerland / Zurich           |
| EPI_ISL_486489 | 4/1/2020  | 7/10/2020 | Europe / Switzerland / Vaud             |
| EPI_ISL_486490 | 4/1/2020  | 7/10/2020 | Europe / Switzerland / Bern             |
| EPI_ISL_486491 | 4/1/2020  | 7/10/2020 | Europe / Switzerland / Ticino           |
| EPI_ISL_486493 | 4/1/2020  | 7/10/2020 | Europe / Switzerland / Vaud             |
| EPI_ISL_486494 | 4/1/2020  | 7/10/2020 | Europe / Switzerland / Aargau           |
| EPI_ISL_486495 | 4/1/2020  | 7/10/2020 | Europe / Switzerland / Aargau           |
| EPI_ISL_486496 | 4/1/2020  | 7/10/2020 | Europe / Switzerland / St Gall          |
| EPI_ISL_486497 | 4/1/2020  | 7/10/2020 | Europe / Switzerland / Bern             |
| EPI_ISL_486499 | 4/1/2020  | 7/10/2020 | Europe / Switzerland / Aargau           |
| EPI_ISL_486501 | 6/22/2020 | 7/10/2020 | Europe / Switzerland / Zurich           |
| EPI_ISL_486503 | 6/20/2020 | 7/10/2020 | Europe / Switzerland / Wallis           |
| EPI_ISL_486504 | 6/20/2020 | 7/10/2020 | Europe / Switzerland / Wallis           |
| EPI_ISL_486505 | 6/19/2020 | 7/10/2020 | Europe / Switzerland / Zurich           |
| EPI_ISL_486507 | 6/19/2020 | 7/10/2020 | Europe / Switzerland / Basel-Landschaft |
| EPI_ISL_486509 | 6/17/2020 | 7/10/2020 | Europe / Switzerland / Zurich           |

|                |           |                                                   |
|----------------|-----------|---------------------------------------------------|
| EPI_ISL_486510 | 6/15/2020 | 7/10/2020 Europe / Switzerland / Bern             |
| EPI_ISL_486511 | 6/15/2020 | 7/10/2020 Europe / Switzerland / Zurich           |
| EPI_ISL_486512 | 6/15/2020 | 7/10/2020 Europe / Switzerland / Zurich           |
| EPI_ISL_486513 | 6/15/2020 | 7/10/2020 Europe / Switzerland / Zurich           |
| EPI_ISL_486514 | 6/15/2020 | 7/10/2020 Europe / Switzerland / Zurich           |
| EPI_ISL_486515 | 6/27/2020 | 7/10/2020 Europe / Switzerland / Grisons          |
| EPI_ISL_486516 | 6/27/2020 | 7/10/2020 Europe / Switzerland / Schwyz           |
| EPI_ISL_486517 | 6/26/2020 | 7/10/2020 Europe / Switzerland / Aargau           |
| EPI_ISL_486518 | 6/26/2020 | 7/10/2020 Europe / Switzerland / Bern             |
| EPI_ISL_486519 | 6/26/2020 | 7/10/2020 Europe / Switzerland / Uri              |
| EPI_ISL_486522 | 6/26/2020 | 7/10/2020 Europe / Switzerland / Basel-Landschaft |
| EPI_ISL_486523 | 6/26/2020 | 7/10/2020 Europe / Switzerland / Zurich           |
| EPI_ISL_486524 | 6/25/2020 | 7/10/2020 Europe / Switzerland / Uri              |
| EPI_ISL_486525 | 6/25/2020 | 7/10/2020 Europe / Switzerland / Zurich           |
| EPI_ISL_486526 | 6/25/2020 | 7/10/2020 Europe / Switzerland / Basel-Landschaft |
| EPI_ISL_486527 | 6/25/2020 | 7/10/2020 Europe / Switzerland / Aargau           |
| EPI_ISL_486529 | 6/25/2020 | 7/10/2020 Europe / Switzerland / Bern             |
| EPI_ISL_486530 | 6/25/2020 | 7/10/2020 Europe / Switzerland / Zurich           |
| EPI_ISL_486531 | 6/24/2020 | 7/10/2020 Europe / Switzerland / Grisons          |
| EPI_ISL_486532 | 6/24/2020 | 7/10/2020 Europe / Switzerland / Zurich           |
| EPI_ISL_486533 | 6/24/2020 | 7/10/2020 Europe / Switzerland / Vaud             |
| EPI_ISL_486534 | 6/24/2020 | 7/10/2020 Europe / Switzerland / St Gall          |
| EPI_ISL_486535 | 6/23/2020 | 7/10/2020 Europe / Switzerland / Bern             |
| EPI_ISL_486537 | 6/23/2020 | 7/10/2020 Europe / Switzerland / Basel-Landschaft |
| EPI_ISL_486538 | 6/23/2020 | 7/10/2020 Europe / Switzerland / Basel-Stadt      |
| EPI_ISL_486646 | 3/9/2020  | 7/10/2020 Europe / Italy / Lombardy               |
| EPI_ISL_486650 | 3/17/2020 | 7/10/2020 Europe / Italy / Lombardy               |
| EPI_ISL_486651 | 3/24/2020 | 7/10/2020 Europe / Italy / Lombardy               |
| EPI_ISL_486652 | 4/2/2020  | 7/10/2020 Europe / Italy / Lombardy               |
| EPI_ISL_486653 | 3/20/2020 | 7/10/2020 Europe / Italy / Lombardy               |
| EPI_ISL_486655 | 4/2/2020  | 7/10/2020 Europe / Italy / Lombardy               |
| EPI_ISL_486657 | 2/26/2020 | 7/10/2020 Europe / Italy / Lombardy               |
| EPI_ISL_486658 | 4/1/2020  | 7/10/2020 Europe / Italy / Lombardy               |
| EPI_ISL_486659 | 2/22/2020 | 7/10/2020 Europe / Italy / Lombardy               |
| EPI_ISL_486660 | 2/23/2020 | 7/10/2020 Europe / Italy / Lombardy               |
| EPI_ISL_486662 | 3/2/2020  | 7/10/2020 Europe / Italy / Lombardy               |
| EPI_ISL_486663 | 3/6/2020  | 7/10/2020 Europe / Italy / Lombardy               |
| EPI_ISL_486664 | 2/26/2020 | 7/10/2020 Europe / Italy / Lombardy               |
| EPI_ISL_486665 | 3/3/2020  | 7/10/2020 Europe / Italy / Lombardy               |
| EPI_ISL_486669 | 2020      | 7/10/2020 Asia / India / Karnataka                |
| EPI_ISL_486670 | 2020      | 7/10/2020 Asia / India / Karnataka                |
| EPI_ISL_486815 | 3/30/2020 | 7/10/2020 Europe / Russia / Moscow                |
| EPI_ISL_486816 | 3/30/2020 | 7/10/2020 Europe / Russia / Moscow                |
| EPI_ISL_486817 | 3/30/2020 | 7/10/2020 Europe / Russia / Moscow                |
| EPI_ISL_486818 | 3/30/2020 | 7/10/2020 Europe / Russia / Moscow                |
| EPI_ISL_486819 | 3/30/2020 | 7/10/2020 Europe / Russia / Moscow                |
| EPI_ISL_486820 | 3/31/2020 | 7/10/2020 Europe / Russia / Moscow                |

|                |           |                                                           |
|----------------|-----------|-----------------------------------------------------------|
| EPI_ISL_486821 | 3/31/2020 | 7/10/2020 Europe / Russia / Moscow                        |
| EPI_ISL_486822 | 3/31/2020 | 7/10/2020 Europe / Russia / Moscow                        |
| EPI_ISL_486823 | 3/31/2020 | 7/10/2020 Europe / Russia / Moscow                        |
| EPI_ISL_486824 | 3/31/2020 | 7/10/2020 Europe / Russia / Moscow                        |
| EPI_ISL_486825 | 3/31/2020 | 7/10/2020 Europe / Russia / Moscow                        |
| EPI_ISL_486826 | 3/31/2020 | 7/10/2020 Europe / Russia / Moscow                        |
| EPI_ISL_486827 | 4/1/2020  | 7/10/2020 Europe / Russia / Moscow                        |
| EPI_ISL_486828 | 4/1/2020  | 7/10/2020 Europe / Russia / Moscow                        |
| EPI_ISL_486829 | 4/1/2020  | 7/10/2020 Europe / Russia / Moscow                        |
| EPI_ISL_486830 | 3/29/2020 | 7/10/2020 North America / USA / Oregon                    |
| EPI_ISL_486831 | 3/26/2020 | 7/10/2020 North America / USA / Oregon                    |
| EPI_ISL_486912 | 4/1/2020  | 7/10/2020 North America / USA / Maryland                  |
| EPI_ISL_486913 | 4/1/2020  | 7/10/2020 North America / USA / Maryland                  |
| EPI_ISL_486914 | 4/1/2020  | 7/10/2020 North America / USA / Maryland                  |
| EPI_ISL_486915 | 4/7/2020  | 7/10/2020 North America / USA / Maryland                  |
| EPI_ISL_486916 | 4/7/2020  | 7/10/2020 North America / USA / Maryland                  |
| EPI_ISL_486917 | 4/9/2020  | 7/10/2020 North America / USA / Maryland                  |
| EPI_ISL_486834 | 5/25/2020 | 7/11/2020 Europe / Romania / Suceava                      |
| EPI_ISL_486836 | 2020      | 7/11/2020 Asia / India / Karnataka                        |
| EPI_ISL_486837 | 2020      | 7/11/2020 Asia / India / Karnataka                        |
| EPI_ISL_486838 | 2020      | 7/11/2020 Asia / India / Karnataka                        |
| EPI_ISL_486839 | 2020      | 7/11/2020 Asia / India / Karnataka                        |
| EPI_ISL_486840 | 2020      | 7/11/2020 Asia / India / Karnataka                        |
| EPI_ISL_486841 | 2020      | 7/11/2020 Asia / India / Karnataka                        |
| EPI_ISL_486842 | 7/1/2020  | 7/11/2020 South America / Ecuador / Chimborazo / Riobamba |
| EPI_ISL_486843 | 7/1/2020  | 7/11/2020 South America / Ecuador / Chimborazo / Riobamba |
| EPI_ISL_486844 | 7/1/2020  | 7/11/2020 South America / Ecuador / Chimborazo / Riobamba |
| EPI_ISL_486845 | 6/30/2020 | 7/11/2020 South America / Ecuador / Pichincha / Cayambe   |
| EPI_ISL_486846 | 6/30/2020 | 7/11/2020 South America / Ecuador / Imbabura / Ibarra     |
| EPI_ISL_486847 | 6/30/2020 | 7/11/2020 South America / Ecuador / Imbabura / Ibarra     |
| EPI_ISL_486848 | 6/30/2020 | 7/11/2020 South America / Ecuador / Imbabura / Ibarra     |
| EPI_ISL_486849 | 6/30/2020 | 7/11/2020 South America / Ecuador / Imbabura / Ibarra     |
| EPI_ISL_486850 | 6/30/2020 | 7/11/2020 South America / Ecuador / Imbabura / Ibarra     |
| EPI_ISL_486851 | 6/30/2020 | 7/11/2020 South America / Ecuador / Imbabura / Urcuqui    |
| EPI_ISL_486852 | 6/10/2020 | 7/11/2020 Asia / India                                    |
| EPI_ISL_486853 | 6/17/2020 | 7/11/2020 Asia / India                                    |
| EPI_ISL_486854 | 6/10/2020 | 7/11/2020 Europe / Romania / Suceava                      |
| EPI_ISL_486856 | 2020      | 7/11/2020 Europe / Romania / Suceava                      |
| EPI_ISL_854983 | 6/30/2020 | 7/11/2020 Asia / Bangladesh                               |
| EPI_ISL_854984 | 6/30/2020 | 7/11/2020 Asia / Bangladesh                               |
| EPI_ISL_854988 | 6/30/2020 | 7/11/2020 Asia / Bangladesh                               |
| EPI_ISL_854989 | 6/30/2020 | 7/11/2020 Asia / Bangladesh                               |
| EPI_ISL_854990 | 6/30/2020 | 7/11/2020 Asia / Bangladesh                               |
| EPI_ISL_486859 | 4/21/2020 | 7/12/2020 Africa / Senegal / Dakar                        |
| EPI_ISL_486860 | 4/25/2020 | 7/12/2020 Africa / Senegal / Dakar / Sangalkam            |
| EPI_ISL_486861 | 4/25/2020 | 7/12/2020 Africa / Senegal / Dakar                        |
| EPI_ISL_486862 | 4/25/2020 | 7/12/2020 Africa / Senegal / Dakar                        |



|                |           |                                                                     |
|----------------|-----------|---------------------------------------------------------------------|
| EPI_ISL_486863 | 4/25/2020 | 7/12/2020 Africa / Senegal / Dakar                                  |
| EPI_ISL_486864 | 4/23/2020 | 7/12/2020 Africa / Senegal / Dakar                                  |
| EPI_ISL_486865 | 4/2/2020  | 7/12/2020 Africa / Senegal / Dakar                                  |
| EPI_ISL_486866 | 4/22/2020 | 7/12/2020 Africa / Senegal / Dakar                                  |
| EPI_ISL_486867 | 4/23/2020 | 7/12/2020 Africa / Senegal / Dakar                                  |
| EPI_ISL_486868 | 4/21/2020 | 7/12/2020 Africa / Senegal / Dakar                                  |
| EPI_ISL_486870 | 4/23/2020 | 7/12/2020 Africa / Senegal / Dakar / Mbao                           |
| EPI_ISL_486871 | 4/21/2020 | 7/12/2020 Africa / Senegal / Dakar                                  |
| EPI_ISL_486872 | 4/11/2020 | 7/12/2020 Africa / Senegal / Dakar                                  |
| EPI_ISL_486873 | 4/20/2020 | 7/12/2020 Africa / Senegal / Dakar                                  |
| EPI_ISL_486876 | 6/6/2020  | 7/12/2020 Europe / Spain / Basque Country / Bizkaia                 |
| EPI_ISL_486887 | 6/23/2020 | 7/12/2020 Asia / Bahrain                                            |
| EPI_ISL_486888 | 6/23/2020 | 7/12/2020 Asia / Bahrain                                            |
| EPI_ISL_486889 | 6/23/2020 | 7/12/2020 Asia / Bahrain                                            |
| EPI_ISL_854977 | 6/30/2020 | 7/12/2020 Asia / Bangladesh                                         |
| EPI_ISL_854978 | 6/30/2020 | 7/12/2020 Asia / Bangladesh                                         |
| EPI_ISL_486881 | 4/23/2020 | 7/13/2020 Asia / India / Karnataka                                  |
| EPI_ISL_487091 | 5/13/2020 | 7/13/2020 Africa / Nigeria / Oyo State                              |
| EPI_ISL_487099 | 4/24/2020 | 7/13/2020 Africa / Nigeria / Oyo State                              |
| EPI_ISL_487101 | 5/16/2020 | 7/13/2020 Africa / Nigeria / Oyo State                              |
| EPI_ISL_487102 | 5/14/2020 | 7/13/2020 Africa / Nigeria / Ekiti State                            |
| EPI_ISL_487103 | 5/9/2020  | 7/13/2020 Africa / Nigeria / Kwara State                            |
| EPI_ISL_487105 | 4/23/2020 | 7/13/2020 Africa / Nigeria / Ekiti State                            |
| EPI_ISL_487106 | 6/30/2020 | 7/13/2020 Africa / Nigeria / Ondo State                             |
| EPI_ISL_487107 | 5/8/2020  | 7/13/2020 Africa / Nigeria / Kwara State                            |
| EPI_ISL_487108 | 4/23/2020 | 7/13/2020 Africa / Nigeria / Ekiti State                            |
| EPI_ISL_487109 | 5/29/2020 | 7/13/2020 Africa / Nigeria / Osun State                             |
| EPI_ISL_487110 | 5/11/2020 | 7/13/2020 Africa / Nigeria / Osun State                             |
| EPI_ISL_487111 | 5/24/2020 | 7/13/2020 Africa / Nigeria / Ondo State                             |
| EPI_ISL_487112 | 5/24/2020 | 7/13/2020 Africa / Nigeria / Ondo State                             |
| EPI_ISL_487113 | 4/23/2020 | 7/13/2020 Africa / Nigeria / Osun State                             |
| EPI_ISL_487192 | 4/28/2020 | 7/13/2020 Africa / Democratic Republic of the Congo / Kongo-Central |
| EPI_ISL_487199 | 4/24/2020 | 7/13/2020 North America / USA / Utah                                |
| EPI_ISL_487200 | 4/24/2020 | 7/13/2020 North America / USA / Utah                                |
| EPI_ISL_487203 | 4/23/2020 | 7/13/2020 North America / USA / Utah                                |
| EPI_ISL_487206 | 4/23/2020 | 7/13/2020 North America / USA / Utah                                |
| EPI_ISL_487208 | 4/24/2020 | 7/13/2020 North America / USA / Utah                                |
| EPI_ISL_487210 | 4/24/2020 | 7/13/2020 North America / USA / Utah                                |
| EPI_ISL_487212 | 4/24/2020 | 7/13/2020 North America / USA / Utah                                |
| EPI_ISL_487215 | 4/24/2020 | 7/13/2020 North America / USA / Utah                                |
| EPI_ISL_487218 | 4/25/2020 | 7/13/2020 North America / USA / Utah                                |
| EPI_ISL_487219 | 4/25/2020 | 7/13/2020 North America / USA / Utah                                |
| EPI_ISL_487220 | 4/25/2020 | 7/13/2020 North America / USA / Utah                                |
| EPI_ISL_487221 | 4/25/2020 | 7/13/2020 North America / USA / Utah                                |
| EPI_ISL_487223 | 4/24/2020 | 7/13/2020 North America / USA / Utah                                |
| EPI_ISL_487224 | 4/24/2020 | 7/13/2020 North America / USA / Utah                                |
| EPI_ISL_487225 | 4/25/2020 | 7/13/2020 North America / USA / Utah                                |

|                |           |                                                 |
|----------------|-----------|-------------------------------------------------|
| EPI_ISL_487226 | 4/24/2020 | 7/13/2020 North America / USA / Utah            |
| EPI_ISL_487230 | 4/7/2020  | 7/13/2020 North America / USA / Michigan        |
| EPI_ISL_487246 | 5/12/2020 | 7/13/2020 North America / USA / Utah            |
| EPI_ISL_487248 | 5/12/2020 | 7/13/2020 North America / USA / Utah            |
| EPI_ISL_487251 | 5/13/2020 | 7/13/2020 North America / USA / Utah            |
| EPI_ISL_487252 | 5/13/2020 | 7/13/2020 North America / USA / Utah            |
| EPI_ISL_487270 | 6/22/2020 | 7/13/2020 Asia / Bahrain                        |
| EPI_ISL_487271 | 6/17/2020 | 7/13/2020 Oceania / Australia / Victoria        |
| EPI_ISL_487272 | 6/22/2020 | 7/13/2020 Asia / Bahrain                        |
| EPI_ISL_487273 | 6/25/2020 | 7/13/2020 Asia / Bahrain                        |
| EPI_ISL_487274 | 6/24/2020 | 7/13/2020 Asia / Bahrain                        |
| EPI_ISL_487276 | 4/4/2020  | 7/13/2020 Europe / Italy / Lombardy / Milan     |
| EPI_ISL_487269 | 3/6/2020  | 7/14/2020 South America / Peru / Lima           |
| EPI_ISL_487277 | 6/26/2020 | 7/14/2020 Africa / South Africa / KwaZulu-Natal |
| EPI_ISL_487280 | 6/26/2020 | 7/14/2020 Africa / South Africa / KwaZulu-Natal |
| EPI_ISL_487281 | 6/26/2020 | 7/14/2020 Africa / South Africa / KwaZulu-Natal |
| EPI_ISL_487288 | 6/25/2020 | 7/14/2020 Africa / South Africa / KwaZulu-Natal |
| EPI_ISL_487295 | 6/24/2020 | 7/14/2020 Africa / South Africa / KwaZulu-Natal |
| EPI_ISL_487297 | 6/23/2020 | 7/14/2020 Africa / South Africa / KwaZulu-Natal |
| EPI_ISL_487304 | 6/18/2020 | 7/14/2020 Africa / South Africa / KwaZulu-Natal |
| EPI_ISL_487308 | 6/18/2020 | 7/14/2020 Africa / South Africa / KwaZulu-Natal |
| EPI_ISL_487311 | 6/17/2020 | 7/14/2020 Africa / South Africa / KwaZulu-Natal |
| EPI_ISL_487312 | 6/17/2020 | 7/14/2020 Africa / South Africa / KwaZulu-Natal |
| EPI_ISL_487313 | 6/25/2020 | 7/14/2020 Africa / South Africa / KwaZulu-Natal |
| EPI_ISL_487314 | 6/19/2020 | 7/14/2020 Africa / South Africa / KwaZulu-Natal |
| EPI_ISL_487316 | 6/25/2020 | 7/14/2020 Africa / South Africa / KwaZulu-Natal |
| EPI_ISL_487318 | 6/25/2020 | 7/14/2020 Africa / South Africa / KwaZulu-Natal |
| EPI_ISL_487319 | 6/18/2020 | 7/14/2020 Africa / South Africa / KwaZulu-Natal |
| EPI_ISL_487320 | 6/25/2020 | 7/14/2020 Africa / South Africa / KwaZulu-Natal |
| EPI_ISL_487321 | 6/25/2020 | 7/14/2020 Africa / South Africa / KwaZulu-Natal |
| EPI_ISL_487322 | 6/18/2020 | 7/14/2020 Africa / South Africa / KwaZulu-Natal |
| EPI_ISL_487324 | 6/19/2020 | 7/14/2020 Africa / South Africa / KwaZulu-Natal |
| EPI_ISL_487325 | 6/25/2020 | 7/14/2020 Africa / South Africa / KwaZulu-Natal |
| EPI_ISL_487328 | 6/25/2020 | 7/14/2020 Africa / South Africa / KwaZulu-Natal |
| EPI_ISL_487329 | 7/1/2020  | 7/14/2020 Africa / South Africa / KwaZulu-Natal |
| EPI_ISL_487330 | 7/1/2020  | 7/14/2020 Africa / South Africa / KwaZulu-Natal |
| EPI_ISL_487332 | 7/1/2020  | 7/14/2020 Africa / South Africa / KwaZulu-Natal |
| EPI_ISL_487334 | 7/1/2020  | 7/14/2020 Africa / South Africa / KwaZulu-Natal |
| EPI_ISL_487336 | 7/1/2020  | 7/14/2020 Africa / South Africa / KwaZulu-Natal |
| EPI_ISL_487337 | 7/1/2020  | 7/14/2020 Africa / South Africa / KwaZulu-Natal |
| EPI_ISL_487338 | 7/1/2020  | 7/14/2020 Africa / South Africa / KwaZulu-Natal |
| EPI_ISL_487339 | 7/1/2020  | 7/14/2020 Africa / South Africa / KwaZulu-Natal |
| EPI_ISL_487340 | 7/1/2020  | 7/14/2020 Africa / South Africa / KwaZulu-Natal |
| EPI_ISL_487362 | 7/6/2020  | 7/14/2020 Asia / Bangladesh / Barisal           |
| EPI_ISL_487363 | 7/6/2020  | 7/14/2020 Asia / Bangladesh / Barisal           |
| EPI_ISL_487364 | 7/6/2020  | 7/14/2020 Asia / Bangladesh / Barisal           |
| EPI_ISL_487366 | 7/6/2020  | 7/14/2020 Asia / Bangladesh / Barisal           |



|                |           |                                                     |
|----------------|-----------|-----------------------------------------------------|
| EPI_ISL_487426 | 5/25/2020 | 7/14/2020 Europe / Germany / North Rhine-Westphalia |
| EPI_ISL_487427 | 5/25/2020 | 7/14/2020 Europe / Germany / North Rhine-Westphalia |
| EPI_ISL_487429 | 5/25/2020 | 7/14/2020 Europe / Germany / North Rhine-Westphalia |
| EPI_ISL_487430 | 5/25/2020 | 7/14/2020 Europe / Germany / North Rhine-Westphalia |
| EPI_ISL_487431 | 5/25/2020 | 7/14/2020 Europe / Germany / North Rhine-Westphalia |
| EPI_ISL_487432 | 6/2/2020  | 7/14/2020 Europe / Belgium                          |
| EPI_ISL_487433 | 5/20/2020 | 7/14/2020 Europe / Belgium                          |
| EPI_ISL_487434 | 5/20/2020 | 7/14/2020 Europe / Belgium                          |
| EPI_ISL_487435 | 5/13/2020 | 7/14/2020 Europe / Belgium                          |
| EPI_ISL_487436 | 5/20/2020 | 7/14/2020 Europe / Belgium                          |
| EPI_ISL_487446 | 4/6/2020  | 7/14/2020 Africa / Mali / Mopti                     |
| EPI_ISL_487447 | 4/6/2020  | 7/14/2020 Africa / Mali / Mopti                     |
| EPI_ISL_487448 | 4/6/2020  | 7/14/2020 Africa / Mali / Bamako                    |
| EPI_ISL_487449 | 4/6/2020  | 7/14/2020 Africa / Mali / Bamako                    |
| EPI_ISL_487450 | 4/8/2020  | 7/14/2020 Africa / Mali / Bamako                    |
| EPI_ISL_487451 | 4/9/2020  | 7/14/2020 Africa / Mali / Bamako                    |
| EPI_ISL_487452 | 4/9/2020  | 7/14/2020 Africa / Mali / Bamako                    |
| EPI_ISL_487453 | 4/10/2020 | 7/14/2020 Africa / Mali / Bamako                    |
| EPI_ISL_487454 | 4/10/2020 | 7/14/2020 Africa / Mali / Bamako                    |
| EPI_ISL_487455 | 4/10/2020 | 7/14/2020 Africa / Mali / Bamako                    |
| EPI_ISL_487456 | 4/10/2020 | 7/14/2020 Africa / Mali / Bamako                    |
| EPI_ISL_487457 | 4/12/2020 | 7/14/2020 Africa / Mali / Bamako                    |
| EPI_ISL_487458 | 4/12/2020 | 7/14/2020 Africa / Mali / Bamako                    |
| EPI_ISL_487459 | 4/12/2020 | 7/14/2020 Africa / Mali / Bamako                    |
| EPI_ISL_487460 | 4/12/2020 | 7/14/2020 Africa / Mali / Bamako                    |
| EPI_ISL_487461 | 4/12/2020 | 7/14/2020 Africa / Mali / Bamako                    |
| EPI_ISL_487462 | 4/13/2020 | 7/14/2020 Africa / Mali / Bamako                    |
| EPI_ISL_487463 | 4/14/2020 | 7/14/2020 Africa / Mali / Bamako                    |
| EPI_ISL_487464 | 4/14/2020 | 7/14/2020 Africa / Mali / Bamako                    |
| EPI_ISL_487465 | 4/14/2020 | 7/14/2020 Africa / Mali / Bamako                    |
| EPI_ISL_487466 | 4/14/2020 | 7/14/2020 Africa / Mali / Bamako                    |
| EPI_ISL_487524 | 5/21/2020 | 7/14/2020 Europe / United Kingdom / England         |
| EPI_ISL_487525 | 4/22/2020 | 7/14/2020 Europe / United Kingdom / England         |
| EPI_ISL_487526 | 5/19/2020 | 7/14/2020 Europe / United Kingdom / England         |
| EPI_ISL_487527 | 5/2/2020  | 7/14/2020 Europe / United Kingdom / England         |
| EPI_ISL_487528 | 5/20/2020 | 7/14/2020 Europe / United Kingdom / England         |
| EPI_ISL_487529 | 4/22/2020 | 7/14/2020 Europe / United Kingdom / England         |
| EPI_ISL_487530 | 5/19/2020 | 7/14/2020 Europe / United Kingdom / England         |
| EPI_ISL_487531 | 5/2/2020  | 7/14/2020 Europe / United Kingdom / England         |
| EPI_ISL_487532 | 5/2/2020  | 7/14/2020 Europe / United Kingdom / England         |
| EPI_ISL_487533 | 5/1/2020  | 7/14/2020 Europe / United Kingdom / England         |
| EPI_ISL_487535 | 5/20/2020 | 7/14/2020 Europe / United Kingdom / England         |
| EPI_ISL_487536 | 5/19/2020 | 7/14/2020 Europe / United Kingdom / England         |
| EPI_ISL_487537 | 4/21/2020 | 7/14/2020 Europe / United Kingdom / England         |
| EPI_ISL_487538 | 5/2/2020  | 7/14/2020 Europe / United Kingdom / England         |
| EPI_ISL_487539 | 5/19/2020 | 7/14/2020 Europe / United Kingdom / England         |
| EPI_ISL_487540 | 4/22/2020 | 7/14/2020 Europe / United Kingdom / England         |





|                |           |           |                                    |
|----------------|-----------|-----------|------------------------------------|
| EPI_ISL_487649 | 4/24/2020 | 7/14/2020 | Europe / United Kingdom / Scotland |
| EPI_ISL_487651 | 4/29/2020 | 7/14/2020 | Europe / United Kingdom / Scotland |
| EPI_ISL_487652 | 3/26/2020 | 7/14/2020 | Europe / United Kingdom / Scotland |
| EPI_ISL_487653 | 4/8/2020  | 7/14/2020 | Europe / United Kingdom / Scotland |
| EPI_ISL_487654 | 3/29/2020 | 7/14/2020 | Europe / United Kingdom / Scotland |
| EPI_ISL_487655 | 4/10/2020 | 7/14/2020 | Europe / United Kingdom / Scotland |
| EPI_ISL_487656 | 4/13/2020 | 7/14/2020 | Europe / United Kingdom / Scotland |
| EPI_ISL_487657 | 5/6/2020  | 7/14/2020 | Europe / United Kingdom / Scotland |
| EPI_ISL_487658 | 4/30/2020 | 7/14/2020 | Europe / United Kingdom / Scotland |
| EPI_ISL_487660 | 4/13/2020 | 7/14/2020 | Europe / United Kingdom / Scotland |
| EPI_ISL_487661 | 4/9/2020  | 7/14/2020 | Europe / United Kingdom / Scotland |
| EPI_ISL_487662 | 4/19/2020 | 7/14/2020 | Europe / United Kingdom / Scotland |
| EPI_ISL_487664 | 5/4/2020  | 7/14/2020 | Europe / United Kingdom / Scotland |
| EPI_ISL_487665 | 5/4/2020  | 7/14/2020 | Europe / United Kingdom / Scotland |
| EPI_ISL_487666 | 4/27/2020 | 7/14/2020 | Europe / United Kingdom / Scotland |
| EPI_ISL_487667 | 5/7/2020  | 7/14/2020 | Europe / United Kingdom / Scotland |
| EPI_ISL_487668 | 4/28/2020 | 7/14/2020 | Europe / United Kingdom / Scotland |
| EPI_ISL_487669 | 4/27/2020 | 7/14/2020 | Europe / United Kingdom / Scotland |
| EPI_ISL_487670 | 4/9/2020  | 7/14/2020 | Europe / United Kingdom / Scotland |
| EPI_ISL_487671 | 4/11/2020 | 7/14/2020 | Europe / United Kingdom / Scotland |
| EPI_ISL_487672 | 4/15/2020 | 7/14/2020 | Europe / United Kingdom / Scotland |
| EPI_ISL_487673 | 3/25/2020 | 7/14/2020 | Europe / United Kingdom / Scotland |
| EPI_ISL_487674 | 5/2/2020  | 7/14/2020 | Europe / United Kingdom / Scotland |
| EPI_ISL_487675 | 4/13/2020 | 7/14/2020 | Europe / United Kingdom / Scotland |
| EPI_ISL_487676 | 4/19/2020 | 7/14/2020 | Europe / United Kingdom / Scotland |
| EPI_ISL_487677 | 4/21/2020 | 7/14/2020 | Europe / United Kingdom / Scotland |
| EPI_ISL_487678 | 3/30/2020 | 7/14/2020 | Europe / United Kingdom / Scotland |
| EPI_ISL_487679 | 4/13/2020 | 7/14/2020 | Europe / United Kingdom / Scotland |
| EPI_ISL_487680 | 4/27/2020 | 7/14/2020 | Europe / United Kingdom / Scotland |
| EPI_ISL_487681 | 4/13/2020 | 7/14/2020 | Europe / United Kingdom / Scotland |
| EPI_ISL_487682 | 5/8/2020  | 7/14/2020 | Europe / United Kingdom / Scotland |
| EPI_ISL_487683 | 5/2/2020  | 7/14/2020 | Europe / United Kingdom / Scotland |
| EPI_ISL_487684 | 3/31/2020 | 7/14/2020 | Europe / United Kingdom / Scotland |
| EPI_ISL_487685 | 3/25/2020 | 7/14/2020 | Europe / United Kingdom / Scotland |
| EPI_ISL_487686 | 4/10/2020 | 7/14/2020 | Europe / United Kingdom / Scotland |
| EPI_ISL_487687 | 4/13/2020 | 7/14/2020 | Europe / United Kingdom / Scotland |
| EPI_ISL_487688 | 4/9/2020  | 7/14/2020 | Europe / United Kingdom / Scotland |
| EPI_ISL_487689 | 4/2/2020  | 7/14/2020 | Europe / United Kingdom / Scotland |
| EPI_ISL_487690 | 4/30/2020 | 7/14/2020 | Europe / United Kingdom / Scotland |
| EPI_ISL_487691 | 4/29/2020 | 7/14/2020 | Europe / United Kingdom / Scotland |
| EPI_ISL_487692 | 4/13/2020 | 7/14/2020 | Europe / United Kingdom / Scotland |
| EPI_ISL_487694 | 4/16/2020 | 7/14/2020 | Europe / United Kingdom / Scotland |
| EPI_ISL_487695 | 3/26/2020 | 7/14/2020 | Europe / United Kingdom / Scotland |
| EPI_ISL_487696 | 4/17/2020 | 7/14/2020 | Europe / United Kingdom / Scotland |
| EPI_ISL_487697 | 4/10/2020 | 7/14/2020 | Europe / United Kingdom / Scotland |
| EPI_ISL_487698 | 3/29/2020 | 7/14/2020 | Europe / United Kingdom / Scotland |
| EPI_ISL_487699 | 4/4/2020  | 7/14/2020 | Europe / United Kingdom / Scotland |

|                |           |           |                                    |
|----------------|-----------|-----------|------------------------------------|
| EPI_ISL_487700 | 4/8/2020  | 7/14/2020 | Europe / United Kingdom / Scotland |
| EPI_ISL_487702 | 4/10/2020 | 7/14/2020 | Europe / United Kingdom / Scotland |
| EPI_ISL_487703 | 4/1/2020  | 7/14/2020 | Europe / United Kingdom / Scotland |
| EPI_ISL_487704 | 4/13/2020 | 7/14/2020 | Europe / United Kingdom / Scotland |
| EPI_ISL_487705 | 4/21/2020 | 7/14/2020 | Europe / United Kingdom / Scotland |
| EPI_ISL_487706 | 4/9/2020  | 7/14/2020 | Europe / United Kingdom / Scotland |
| EPI_ISL_487707 | 4/1/2020  | 7/14/2020 | Europe / United Kingdom / Scotland |
| EPI_ISL_487708 | 4/9/2020  | 7/14/2020 | Europe / United Kingdom / Scotland |
| EPI_ISL_487709 | 4/6/2020  | 7/14/2020 | Europe / United Kingdom / Scotland |
| EPI_ISL_487710 | 3/31/2020 | 7/14/2020 | Europe / United Kingdom / Scotland |
| EPI_ISL_487711 | 4/15/2020 | 7/14/2020 | Europe / United Kingdom / Scotland |
| EPI_ISL_487712 | 4/9/2020  | 7/14/2020 | Europe / United Kingdom / Scotland |
| EPI_ISL_487713 | 4/16/2020 | 7/14/2020 | Europe / United Kingdom / Scotland |
| EPI_ISL_487715 | 4/13/2020 | 7/14/2020 | Europe / United Kingdom / Scotland |
| EPI_ISL_487716 | 4/6/2020  | 7/14/2020 | Europe / United Kingdom / Scotland |
| EPI_ISL_487717 | 4/6/2020  | 7/14/2020 | Europe / United Kingdom / Scotland |
| EPI_ISL_487718 | 4/8/2020  | 7/14/2020 | Europe / United Kingdom / Scotland |
| EPI_ISL_487719 | 4/7/2020  | 7/14/2020 | Europe / United Kingdom / Scotland |
| EPI_ISL_487720 | 4/7/2020  | 7/14/2020 | Europe / United Kingdom / Scotland |
| EPI_ISL_487721 | 4/1/2020  | 7/14/2020 | Europe / United Kingdom / Scotland |
| EPI_ISL_487722 | 4/14/2020 | 7/14/2020 | Europe / United Kingdom / Scotland |
| EPI_ISL_487723 | 4/21/2020 | 7/14/2020 | Europe / United Kingdom / Scotland |
| EPI_ISL_487724 | 4/3/2020  | 7/14/2020 | Europe / United Kingdom / Scotland |
| EPI_ISL_487725 | 4/10/2020 | 7/14/2020 | Europe / United Kingdom / Scotland |
| EPI_ISL_487726 | 4/10/2020 | 7/14/2020 | Europe / United Kingdom / Scotland |
| EPI_ISL_487727 | 4/8/2020  | 7/14/2020 | Europe / United Kingdom / Scotland |
| EPI_ISL_487728 | 3/27/2020 | 7/14/2020 | Europe / United Kingdom / Scotland |
| EPI_ISL_487729 | 4/17/2020 | 7/14/2020 | Europe / United Kingdom / Scotland |
| EPI_ISL_487730 | 4/10/2020 | 7/14/2020 | Europe / United Kingdom / Scotland |
| EPI_ISL_487731 | 5/5/2020  | 7/14/2020 | Europe / United Kingdom / Scotland |
| EPI_ISL_487732 | 5/5/2020  | 7/14/2020 | Europe / United Kingdom / Scotland |
| EPI_ISL_487733 | 4/2/2020  | 7/14/2020 | Europe / United Kingdom / Scotland |
| EPI_ISL_487734 | 5/4/2020  | 7/14/2020 | Europe / United Kingdom / Scotland |
| EPI_ISL_487735 | 4/27/2020 | 7/14/2020 | Europe / United Kingdom / Scotland |
| EPI_ISL_487736 | 4/27/2020 | 7/14/2020 | Europe / United Kingdom / Scotland |
| EPI_ISL_487737 | 4/28/2020 | 7/14/2020 | Europe / United Kingdom / Scotland |
| EPI_ISL_487739 | 4/24/2020 | 7/14/2020 | Europe / United Kingdom / Scotland |
| EPI_ISL_487740 | 4/4/2020  | 7/14/2020 | Europe / United Kingdom / Scotland |
| EPI_ISL_487741 | 4/9/2020  | 7/14/2020 | Europe / United Kingdom / Scotland |
| EPI_ISL_487742 | 4/10/2020 | 7/14/2020 | Europe / United Kingdom / Scotland |
| EPI_ISL_487743 | 4/9/2020  | 7/14/2020 | Europe / United Kingdom / Scotland |
| EPI_ISL_487745 | 4/7/2020  | 7/14/2020 | Europe / United Kingdom / Scotland |
| EPI_ISL_487746 | 4/9/2020  | 7/14/2020 | Europe / United Kingdom / Scotland |
| EPI_ISL_487747 | 4/13/2020 | 7/14/2020 | Europe / United Kingdom / Scotland |
| EPI_ISL_487749 | 4/22/2020 | 7/14/2020 | Europe / United Kingdom / Scotland |
| EPI_ISL_487750 | 4/13/2020 | 7/14/2020 | Europe / United Kingdom / Scotland |
| EPI_ISL_487751 | 5/2/2020  | 7/14/2020 | Europe / United Kingdom / Scotland |



|                |           |           |                                    |
|----------------|-----------|-----------|------------------------------------|
| EPI_ISL_487752 | 4/20/2020 | 7/14/2020 | Europe / United Kingdom / Scotland |
| EPI_ISL_487753 | 4/13/2020 | 7/14/2020 | Europe / United Kingdom / Scotland |
| EPI_ISL_487754 | 4/26/2020 | 7/14/2020 | Europe / United Kingdom / Scotland |
| EPI_ISL_487755 | 4/20/2020 | 7/14/2020 | Europe / United Kingdom / Scotland |
| EPI_ISL_487756 | 4/26/2020 | 7/14/2020 | Europe / United Kingdom / Scotland |
| EPI_ISL_487757 | 4/10/2020 | 7/14/2020 | Europe / United Kingdom / Scotland |
| EPI_ISL_487758 | 4/29/2020 | 7/14/2020 | Europe / United Kingdom / Scotland |
| EPI_ISL_487759 | 4/10/2020 | 7/14/2020 | Europe / United Kingdom / Scotland |
| EPI_ISL_487760 | 4/23/2020 | 7/14/2020 | Europe / United Kingdom / Scotland |
| EPI_ISL_487761 | 4/24/2020 | 7/14/2020 | Europe / United Kingdom / Scotland |
| EPI_ISL_487762 | 4/5/2020  | 7/14/2020 | Europe / United Kingdom / Scotland |
| EPI_ISL_487763 | 4/27/2020 | 7/14/2020 | Europe / United Kingdom / Scotland |
| EPI_ISL_487764 | 3/27/2020 | 7/14/2020 | Europe / United Kingdom / Scotland |
| EPI_ISL_487765 | 4/13/2020 | 7/14/2020 | Europe / United Kingdom / Scotland |
| EPI_ISL_487766 | 4/27/2020 | 7/14/2020 | Europe / United Kingdom / Scotland |
| EPI_ISL_487768 | 4/27/2020 | 7/14/2020 | Europe / United Kingdom / Scotland |
| EPI_ISL_487769 | 4/13/2020 | 7/14/2020 | Europe / United Kingdom / Scotland |
| EPI_ISL_487770 | 4/9/2020  | 7/14/2020 | Europe / United Kingdom / Scotland |
| EPI_ISL_487771 | 4/10/2020 | 7/14/2020 | Europe / United Kingdom / Scotland |
| EPI_ISL_487772 | 4/27/2020 | 7/14/2020 | Europe / United Kingdom / Scotland |
| EPI_ISL_487774 | 5/3/2020  | 7/14/2020 | Europe / United Kingdom / Scotland |
| EPI_ISL_487775 | 4/28/2020 | 7/14/2020 | Europe / United Kingdom / Scotland |
| EPI_ISL_487776 | 5/6/2020  | 7/14/2020 | Europe / United Kingdom / Scotland |
| EPI_ISL_487777 | 4/29/2020 | 7/14/2020 | Europe / United Kingdom / Scotland |
| EPI_ISL_487779 | 4/21/2020 | 7/14/2020 | Europe / United Kingdom / Scotland |
| EPI_ISL_487780 | 4/27/2020 | 7/14/2020 | Europe / United Kingdom / Scotland |
| EPI_ISL_487781 | 4/25/2020 | 7/14/2020 | Europe / United Kingdom / Scotland |
| EPI_ISL_487782 | 4/10/2020 | 7/14/2020 | Europe / United Kingdom / Scotland |
| EPI_ISL_487783 | 5/8/2020  | 7/14/2020 | Europe / United Kingdom / Scotland |
| EPI_ISL_487784 | 4/13/2020 | 7/14/2020 | Europe / United Kingdom / Scotland |
| EPI_ISL_487786 | 4/27/2020 | 7/14/2020 | Europe / United Kingdom / Scotland |
| EPI_ISL_487787 | 5/5/2020  | 7/14/2020 | Europe / United Kingdom / Scotland |
| EPI_ISL_487788 | 3/27/2020 | 7/14/2020 | Europe / United Kingdom / Scotland |
| EPI_ISL_487789 | 4/1/2020  | 7/14/2020 | Europe / United Kingdom / Scotland |
| EPI_ISL_487790 | 4/9/2020  | 7/14/2020 | Europe / United Kingdom / Scotland |
| EPI_ISL_487791 | 4/6/2020  | 7/14/2020 | Europe / United Kingdom / Scotland |
| EPI_ISL_487792 | 4/13/2020 | 7/14/2020 | Europe / United Kingdom / Scotland |
| EPI_ISL_487793 | 4/27/2020 | 7/14/2020 | Europe / United Kingdom / Scotland |
| EPI_ISL_487794 | 3/27/2020 | 7/14/2020 | Europe / United Kingdom / Scotland |
| EPI_ISL_487795 | 5/7/2020  | 7/14/2020 | Europe / United Kingdom / Scotland |
| EPI_ISL_487796 | 4/16/2020 | 7/14/2020 | Europe / United Kingdom / Scotland |
| EPI_ISL_487797 | 4/21/2020 | 7/14/2020 | Europe / United Kingdom / Scotland |
| EPI_ISL_487798 | 5/4/2020  | 7/14/2020 | Europe / United Kingdom / Scotland |
| EPI_ISL_487799 | 4/20/2020 | 7/14/2020 | Europe / United Kingdom / Scotland |
| EPI_ISL_487800 | 5/2/2020  | 7/14/2020 | Europe / United Kingdom / Scotland |
| EPI_ISL_487801 | 4/22/2020 | 7/14/2020 | Europe / United Kingdom / Scotland |
| EPI_ISL_487802 | 3/30/2020 | 7/14/2020 | Europe / United Kingdom / Scotland |

|                |           |           |                                    |
|----------------|-----------|-----------|------------------------------------|
| EPI_ISL_487803 | 4/13/2020 | 7/14/2020 | Europe / United Kingdom / Scotland |
| EPI_ISL_487804 | 4/6/2020  | 7/14/2020 | Europe / United Kingdom / Scotland |
| EPI_ISL_487805 | 4/1/2020  | 7/14/2020 | Europe / United Kingdom / Scotland |
| EPI_ISL_487806 | 4/10/2020 | 7/14/2020 | Europe / United Kingdom / Scotland |
| EPI_ISL_487807 | 4/8/2020  | 7/14/2020 | Europe / United Kingdom / Scotland |
| EPI_ISL_487808 | 4/3/2020  | 7/14/2020 | Europe / United Kingdom / Scotland |
| EPI_ISL_487809 | 4/1/2020  | 7/14/2020 | Europe / United Kingdom / Scotland |
| EPI_ISL_487810 | 4/28/2020 | 7/14/2020 | Europe / United Kingdom / Scotland |
| EPI_ISL_487811 | 3/27/2020 | 7/14/2020 | Europe / United Kingdom / Scotland |
| EPI_ISL_487812 | 3/31/2020 | 7/14/2020 | Europe / United Kingdom / Scotland |
| EPI_ISL_487814 | 4/13/2020 | 7/14/2020 | Europe / United Kingdom / Scotland |
| EPI_ISL_487815 | 4/1/2020  | 7/14/2020 | Europe / United Kingdom / Scotland |
| EPI_ISL_487816 | 4/5/2020  | 7/14/2020 | Europe / United Kingdom / Scotland |
| EPI_ISL_487817 | 3/31/2020 | 7/14/2020 | Europe / United Kingdom / Scotland |
| EPI_ISL_487818 | 4/26/2020 | 7/14/2020 | Europe / United Kingdom / Scotland |
| EPI_ISL_487819 | 4/8/2020  | 7/14/2020 | Europe / United Kingdom / Scotland |
| EPI_ISL_487820 | 4/23/2020 | 7/14/2020 | Europe / United Kingdom / Scotland |
| EPI_ISL_487821 | 4/7/2020  | 7/14/2020 | Europe / United Kingdom / Scotland |
| EPI_ISL_487822 | 3/24/2020 | 7/14/2020 | Europe / United Kingdom / Scotland |
| EPI_ISL_487823 | 4/8/2020  | 7/14/2020 | Europe / United Kingdom / Scotland |
| EPI_ISL_487824 | 3/27/2020 | 7/14/2020 | Europe / United Kingdom / Scotland |
| EPI_ISL_487825 | 4/10/2020 | 7/14/2020 | Europe / United Kingdom / Scotland |
| EPI_ISL_487826 | 4/10/2020 | 7/14/2020 | Europe / United Kingdom / Scotland |
| EPI_ISL_487827 | 4/28/2020 | 7/14/2020 | Europe / United Kingdom / Scotland |
| EPI_ISL_487828 | 3/23/2020 | 7/14/2020 | Europe / United Kingdom / Scotland |
| EPI_ISL_487829 | 4/10/2020 | 7/14/2020 | Europe / United Kingdom / Scotland |
| EPI_ISL_487830 | 4/30/2020 | 7/14/2020 | Europe / United Kingdom / Scotland |
| EPI_ISL_487831 | 4/9/2020  | 7/14/2020 | Europe / United Kingdom / Scotland |
| EPI_ISL_487832 | 4/11/2020 | 7/14/2020 | Europe / United Kingdom / Scotland |
| EPI_ISL_487833 | 4/14/2020 | 7/14/2020 | Europe / United Kingdom / Scotland |
| EPI_ISL_487834 | 4/10/2020 | 7/14/2020 | Europe / United Kingdom / Scotland |
| EPI_ISL_487835 | 4/20/2020 | 7/14/2020 | Europe / United Kingdom / Scotland |
| EPI_ISL_487836 | 4/15/2020 | 7/14/2020 | Europe / United Kingdom / Scotland |
| EPI_ISL_487837 | 4/26/2020 | 7/14/2020 | Europe / United Kingdom / Scotland |
| EPI_ISL_487838 | 4/2/2020  | 7/14/2020 | Europe / United Kingdom / Scotland |
| EPI_ISL_487839 | 4/22/2020 | 7/14/2020 | Europe / United Kingdom / Scotland |
| EPI_ISL_487840 | 4/14/2020 | 7/14/2020 | Europe / United Kingdom / Scotland |
| EPI_ISL_487841 | 4/20/2020 | 7/14/2020 | Europe / United Kingdom / Scotland |
| EPI_ISL_487842 | 4/13/2020 | 7/14/2020 | Europe / United Kingdom / Scotland |
| EPI_ISL_487843 | 4/30/2020 | 7/14/2020 | Europe / United Kingdom / Scotland |
| EPI_ISL_487844 | 4/24/2020 | 7/14/2020 | Europe / United Kingdom / Scotland |
| EPI_ISL_487845 | 3/31/2020 | 7/14/2020 | Europe / United Kingdom / Scotland |
| EPI_ISL_487846 | 3/28/2020 | 7/14/2020 | Europe / United Kingdom / Scotland |
| EPI_ISL_487847 | 4/18/2020 | 7/14/2020 | Europe / United Kingdom / Scotland |
| EPI_ISL_487848 | 4/14/2020 | 7/14/2020 | Europe / United Kingdom / Scotland |
| EPI_ISL_487849 | 4/27/2020 | 7/14/2020 | Europe / United Kingdom / Scotland |
| EPI_ISL_487850 | 4/4/2020  | 7/14/2020 | Europe / United Kingdom / Scotland |

|                |           |           |                                    |
|----------------|-----------|-----------|------------------------------------|
| EPI_ISL_487851 | 4/3/2020  | 7/14/2020 | Europe / United Kingdom / Scotland |
| EPI_ISL_487852 | 4/10/2020 | 7/14/2020 | Europe / United Kingdom / Scotland |
| EPI_ISL_487853 | 4/13/2020 | 7/14/2020 | Europe / United Kingdom / Scotland |
| EPI_ISL_487854 | 4/27/2020 | 7/14/2020 | Europe / United Kingdom / Scotland |
| EPI_ISL_487855 | 4/17/2020 | 7/14/2020 | Europe / United Kingdom / Scotland |
| EPI_ISL_487857 | 4/26/2020 | 7/14/2020 | Europe / United Kingdom / Scotland |
| EPI_ISL_487858 | 4/4/2020  | 7/14/2020 | Europe / United Kingdom / Scotland |
| EPI_ISL_487859 | 4/24/2020 | 7/14/2020 | Europe / United Kingdom / Scotland |
| EPI_ISL_487860 | 4/28/2020 | 7/14/2020 | Europe / United Kingdom / Scotland |
| EPI_ISL_487861 | 5/8/2020  | 7/14/2020 | Europe / United Kingdom / Scotland |
| EPI_ISL_487862 | 4/27/2020 | 7/14/2020 | Europe / United Kingdom / Scotland |
| EPI_ISL_487863 | 4/13/2020 | 7/14/2020 | Europe / United Kingdom / Scotland |
| EPI_ISL_487864 | 4/15/2020 | 7/14/2020 | Europe / United Kingdom / Scotland |
| EPI_ISL_487865 | 3/30/2020 | 7/14/2020 | Europe / United Kingdom / Scotland |
| EPI_ISL_487866 | 5/6/2020  | 7/14/2020 | Europe / United Kingdom / Scotland |
| EPI_ISL_487867 | 4/10/2020 | 7/14/2020 | Europe / United Kingdom / Scotland |
| EPI_ISL_487868 | 5/7/2020  | 7/14/2020 | Europe / United Kingdom / Scotland |
| EPI_ISL_487869 | 3/27/2020 | 7/14/2020 | Europe / United Kingdom / Scotland |
| EPI_ISL_487870 | 4/13/2020 | 7/14/2020 | Europe / United Kingdom / Scotland |
| EPI_ISL_487871 | 4/8/2020  | 7/14/2020 | Europe / United Kingdom / Scotland |
| EPI_ISL_487872 | 5/5/2020  | 7/14/2020 | Europe / United Kingdom / Scotland |
| EPI_ISL_487873 | 4/27/2020 | 7/14/2020 | Europe / United Kingdom / Scotland |
| EPI_ISL_487874 | 4/9/2020  | 7/14/2020 | Europe / United Kingdom / Scotland |
| EPI_ISL_487875 | 4/7/2020  | 7/14/2020 | Europe / United Kingdom / Scotland |
| EPI_ISL_487876 | 3/28/2020 | 7/14/2020 | Europe / United Kingdom / Scotland |
| EPI_ISL_487877 | 5/5/2020  | 7/14/2020 | Europe / United Kingdom / Scotland |
| EPI_ISL_487878 | 4/21/2020 | 7/14/2020 | Europe / United Kingdom / Scotland |
| EPI_ISL_487879 | 4/21/2020 | 7/14/2020 | Europe / United Kingdom / Scotland |
| EPI_ISL_487880 | 4/13/2020 | 7/14/2020 | Europe / United Kingdom / Scotland |
| EPI_ISL_487881 | 5/3/2020  | 7/14/2020 | Europe / United Kingdom / Scotland |
| EPI_ISL_487882 | 4/8/2020  | 7/14/2020 | Europe / United Kingdom / Scotland |
| EPI_ISL_487883 | 3/27/2020 | 7/14/2020 | Europe / United Kingdom / Scotland |
| EPI_ISL_487884 | 4/27/2020 | 7/14/2020 | Europe / United Kingdom / Scotland |
| EPI_ISL_487885 | 5/1/2020  | 7/14/2020 | Europe / United Kingdom / Scotland |
| EPI_ISL_487886 | 4/11/2020 | 7/14/2020 | Europe / United Kingdom / Scotland |
| EPI_ISL_487887 | 4/13/2020 | 7/14/2020 | Europe / United Kingdom / Scotland |
| EPI_ISL_487888 | 4/10/2020 | 7/14/2020 | Europe / United Kingdom / Scotland |
| EPI_ISL_487889 | 4/10/2020 | 7/14/2020 | Europe / United Kingdom / Scotland |
| EPI_ISL_487890 | 4/27/2020 | 7/14/2020 | Europe / United Kingdom / Scotland |
| EPI_ISL_487891 | 4/27/2020 | 7/14/2020 | Europe / United Kingdom / Scotland |
| EPI_ISL_487892 | 4/7/2020  | 7/14/2020 | Europe / United Kingdom / Scotland |
| EPI_ISL_487893 | 4/6/2020  | 7/14/2020 | Europe / United Kingdom / Scotland |
| EPI_ISL_487894 | 4/17/2020 | 7/14/2020 | Europe / United Kingdom / Scotland |
| EPI_ISL_487895 | 4/23/2020 | 7/14/2020 | Europe / United Kingdom / Scotland |
| EPI_ISL_487897 | 4/3/2020  | 7/14/2020 | Europe / United Kingdom / Scotland |
| EPI_ISL_487899 | 5/5/2020  | 7/14/2020 | Europe / United Kingdom / Scotland |
| EPI_ISL_487900 | 4/24/2020 | 7/14/2020 | Europe / United Kingdom / Scotland |

|                |           |           |                                    |
|----------------|-----------|-----------|------------------------------------|
| EPI_ISL_487901 | 4/14/2020 | 7/14/2020 | Europe / United Kingdom / Scotland |
| EPI_ISL_487902 | 4/15/2020 | 7/14/2020 | Europe / United Kingdom / Scotland |
| EPI_ISL_487903 | 5/1/2020  | 7/14/2020 | Europe / United Kingdom / Scotland |
| EPI_ISL_487904 | 5/1/2020  | 7/14/2020 | Europe / United Kingdom / Scotland |
| EPI_ISL_487905 | 4/30/2020 | 7/14/2020 | Europe / United Kingdom / Scotland |
| EPI_ISL_487906 | 4/27/2020 | 7/14/2020 | Europe / United Kingdom / Scotland |
| EPI_ISL_487907 | 4/8/2020  | 7/14/2020 | Europe / United Kingdom / Scotland |
| EPI_ISL_487908 | 4/12/2020 | 7/14/2020 | Europe / United Kingdom / Scotland |
| EPI_ISL_487909 | 4/14/2020 | 7/14/2020 | Europe / United Kingdom / Scotland |
| EPI_ISL_487910 | 4/22/2020 | 7/14/2020 | Europe / United Kingdom / Scotland |
| EPI_ISL_487911 | 4/8/2020  | 7/14/2020 | Europe / United Kingdom / Scotland |
| EPI_ISL_487912 | 4/10/2020 | 7/14/2020 | Europe / United Kingdom / Scotland |
| EPI_ISL_487913 | 5/5/2020  | 7/14/2020 | Europe / United Kingdom / Scotland |
| EPI_ISL_487914 | 4/6/2020  | 7/14/2020 | Europe / United Kingdom / Scotland |
| EPI_ISL_487915 | 4/10/2020 | 7/14/2020 | Europe / United Kingdom / Scotland |
| EPI_ISL_487916 | 4/9/2020  | 7/14/2020 | Europe / United Kingdom / Scotland |
| EPI_ISL_487917 | 4/21/2020 | 7/14/2020 | Europe / United Kingdom / Scotland |
| EPI_ISL_487918 | 3/27/2020 | 7/14/2020 | Europe / United Kingdom / Scotland |
| EPI_ISL_487919 | 3/23/2020 | 7/14/2020 | Europe / United Kingdom / Scotland |
| EPI_ISL_487920 | 5/2/2020  | 7/14/2020 | Europe / United Kingdom / Scotland |
| EPI_ISL_487921 | 4/27/2020 | 7/14/2020 | Europe / United Kingdom / Scotland |
| EPI_ISL_487922 | 4/4/2020  | 7/14/2020 | Europe / United Kingdom / Scotland |
| EPI_ISL_487923 | 4/9/2020  | 7/14/2020 | Europe / United Kingdom / Scotland |
| EPI_ISL_487924 | 4/8/2020  | 7/14/2020 | Europe / United Kingdom / Scotland |
| EPI_ISL_487926 | 5/4/2020  | 7/14/2020 | Europe / United Kingdom / Scotland |
| EPI_ISL_487927 | 4/7/2020  | 7/14/2020 | Europe / United Kingdom / Scotland |
| EPI_ISL_487928 | 4/8/2020  | 7/14/2020 | Europe / United Kingdom / Scotland |
| EPI_ISL_487929 | 4/13/2020 | 7/14/2020 | Europe / United Kingdom / Scotland |
| EPI_ISL_487930 | 4/9/2020  | 7/14/2020 | Europe / United Kingdom / Scotland |
| EPI_ISL_487931 | 4/28/2020 | 7/14/2020 | Europe / United Kingdom / Scotland |
| EPI_ISL_487932 | 4/22/2020 | 7/14/2020 | Europe / United Kingdom / Scotland |
| EPI_ISL_487933 | 3/27/2020 | 7/14/2020 | Europe / United Kingdom / Scotland |
| EPI_ISL_487934 | 4/1/2020  | 7/14/2020 | Europe / United Kingdom / Scotland |
| EPI_ISL_487935 | 4/10/2020 | 7/14/2020 | Europe / United Kingdom / Scotland |
| EPI_ISL_487936 | 4/10/2020 | 7/14/2020 | Europe / United Kingdom / Scotland |
| EPI_ISL_487937 | 4/13/2020 | 7/14/2020 | Europe / United Kingdom / Scotland |
| EPI_ISL_487938 | 4/21/2020 | 7/14/2020 | Europe / United Kingdom / Scotland |
| EPI_ISL_487939 | 5/4/2020  | 7/14/2020 | Europe / United Kingdom / Scotland |
| EPI_ISL_487940 | 3/26/2020 | 7/14/2020 | Europe / United Kingdom / Scotland |
| EPI_ISL_487941 | 4/20/2020 | 7/14/2020 | Europe / United Kingdom / Scotland |
| EPI_ISL_487942 | 4/13/2020 | 7/14/2020 | Europe / United Kingdom / Scotland |
| EPI_ISL_487943 | 4/13/2020 | 7/14/2020 | Europe / United Kingdom / Scotland |
| EPI_ISL_487944 | 4/20/2020 | 7/14/2020 | Europe / United Kingdom / Scotland |
| EPI_ISL_487945 | 4/29/2020 | 7/14/2020 | Europe / United Kingdom / Scotland |
| EPI_ISL_487947 | 4/28/2020 | 7/14/2020 | Europe / United Kingdom / Scotland |
| EPI_ISL_487948 | 5/1/2020  | 7/14/2020 | Europe / United Kingdom / Scotland |
| EPI_ISL_487949 | 4/8/2020  | 7/14/2020 | Europe / United Kingdom / Scotland |

|                |           |           |                                    |
|----------------|-----------|-----------|------------------------------------|
| EPI_ISL_487950 | 4/13/2020 | 7/14/2020 | Europe / United Kingdom / Scotland |
| EPI_ISL_487951 | 5/4/2020  | 7/14/2020 | Europe / United Kingdom / Scotland |
| EPI_ISL_487952 | 4/9/2020  | 7/14/2020 | Europe / United Kingdom / Scotland |
| EPI_ISL_487953 | 4/24/2020 | 7/14/2020 | Europe / United Kingdom / Scotland |
| EPI_ISL_487954 | 4/21/2020 | 7/14/2020 | Europe / United Kingdom / Scotland |
| EPI_ISL_487956 | 4/22/2020 | 7/14/2020 | Europe / United Kingdom / Scotland |
| EPI_ISL_487957 | 3/28/2020 | 7/14/2020 | Europe / United Kingdom / Scotland |
| EPI_ISL_487958 | 4/11/2020 | 7/14/2020 | Europe / United Kingdom / Scotland |
| EPI_ISL_487959 | 4/9/2020  | 7/14/2020 | Europe / United Kingdom / Scotland |
| EPI_ISL_487960 | 4/7/2020  | 7/14/2020 | Europe / United Kingdom / Scotland |
| EPI_ISL_487961 | 4/13/2020 | 7/14/2020 | Europe / United Kingdom / Scotland |
| EPI_ISL_487962 | 4/4/2020  | 7/14/2020 | Europe / United Kingdom / Scotland |
| EPI_ISL_487963 | 4/8/2020  | 7/14/2020 | Europe / United Kingdom / Scotland |
| EPI_ISL_487964 | 4/27/2020 | 7/14/2020 | Europe / United Kingdom / Scotland |
| EPI_ISL_487965 | 3/24/2020 | 7/14/2020 | Europe / United Kingdom / Scotland |
| EPI_ISL_487966 | 4/3/2020  | 7/14/2020 | Europe / United Kingdom / Scotland |
| EPI_ISL_487967 | 4/10/2020 | 7/14/2020 | Europe / United Kingdom / Scotland |
| EPI_ISL_487968 | 4/3/2020  | 7/14/2020 | Europe / United Kingdom / Scotland |
| EPI_ISL_487969 | 3/26/2020 | 7/14/2020 | Europe / United Kingdom / Scotland |
| EPI_ISL_487971 | 4/2/2020  | 7/14/2020 | Europe / United Kingdom / Scotland |
| EPI_ISL_487972 | 4/13/2020 | 7/14/2020 | Europe / United Kingdom / Scotland |
| EPI_ISL_487973 | 4/12/2020 | 7/14/2020 | Europe / United Kingdom / Scotland |
| EPI_ISL_487974 | 4/14/2020 | 7/14/2020 | Europe / United Kingdom / Scotland |
| EPI_ISL_487975 | 4/4/2020  | 7/14/2020 | Europe / United Kingdom / Scotland |
| EPI_ISL_487976 | 4/27/2020 | 7/14/2020 | Europe / United Kingdom / Scotland |
| EPI_ISL_487977 | 5/5/2020  | 7/14/2020 | Europe / United Kingdom / Scotland |
| EPI_ISL_487979 | 4/23/2020 | 7/14/2020 | Europe / United Kingdom / Scotland |
| EPI_ISL_487980 | 4/13/2020 | 7/14/2020 | Europe / United Kingdom / Scotland |
| EPI_ISL_487981 | 5/8/2020  | 7/14/2020 | Europe / United Kingdom / Scotland |
| EPI_ISL_487982 | 4/4/2020  | 7/14/2020 | Europe / United Kingdom / Scotland |
| EPI_ISL_487983 | 4/4/2020  | 7/14/2020 | Europe / United Kingdom / Scotland |
| EPI_ISL_487984 | 4/21/2020 | 7/14/2020 | Europe / United Kingdom / Scotland |
| EPI_ISL_487985 | 4/11/2020 | 7/14/2020 | Europe / United Kingdom / Scotland |
| EPI_ISL_487986 | 4/27/2020 | 7/14/2020 | Europe / United Kingdom / Scotland |
| EPI_ISL_487987 | 4/5/2020  | 7/14/2020 | Europe / United Kingdom / Scotland |
| EPI_ISL_487988 | 4/10/2020 | 7/14/2020 | Europe / United Kingdom / Scotland |
| EPI_ISL_487989 | 5/7/2020  | 7/14/2020 | Europe / United Kingdom / Scotland |
| EPI_ISL_487990 | 4/30/2020 | 7/14/2020 | Europe / United Kingdom / Scotland |
| EPI_ISL_487991 | 3/31/2020 | 7/14/2020 | Europe / United Kingdom / Scotland |
| EPI_ISL_487992 | 4/27/2020 | 7/14/2020 | Europe / United Kingdom / Scotland |
| EPI_ISL_487994 | 4/30/2020 | 7/14/2020 | Europe / United Kingdom / Scotland |
| EPI_ISL_487996 | 4/8/2020  | 7/14/2020 | Europe / United Kingdom / Scotland |
| EPI_ISL_487997 | 4/24/2020 | 7/14/2020 | Europe / United Kingdom / Scotland |
| EPI_ISL_487998 | 4/13/2020 | 7/14/2020 | Europe / United Kingdom / Scotland |
| EPI_ISL_487999 | 4/10/2020 | 7/14/2020 | Europe / United Kingdom / Scotland |
| EPI_ISL_488000 | 4/24/2020 | 7/14/2020 | Europe / United Kingdom / Scotland |
| EPI_ISL_488001 | 4/21/2020 | 7/14/2020 | Europe / United Kingdom / Scotland |



|                |           |           |                                   |
|----------------|-----------|-----------|-----------------------------------|
| EPI_ISL_488071 | 5/5/2020  | 7/14/2020 | Europe / United Kingdom / England |
| EPI_ISL_488075 | 4/28/2020 | 7/14/2020 | Europe / United Kingdom / England |
| EPI_ISL_488076 | 5/7/2020  | 7/14/2020 | Europe / United Kingdom / England |
| EPI_ISL_488077 | 4/28/2020 | 7/14/2020 | Europe / United Kingdom / England |
| EPI_ISL_488078 | 4/22/2020 | 7/14/2020 | Europe / United Kingdom / England |
| EPI_ISL_488080 | 5/6/2020  | 7/14/2020 | Europe / United Kingdom / England |
| EPI_ISL_488081 | 5/7/2020  | 7/14/2020 | Europe / United Kingdom / England |
| EPI_ISL_488084 | 5/7/2020  | 7/14/2020 | Europe / United Kingdom / England |
| EPI_ISL_488085 | 4/24/2020 | 7/14/2020 | Europe / United Kingdom / England |
| EPI_ISL_488087 | 4/28/2020 | 7/14/2020 | Europe / United Kingdom / England |
| EPI_ISL_488088 | 5/10/2020 | 7/14/2020 | Europe / United Kingdom / England |
| EPI_ISL_488089 | 4/29/2020 | 7/14/2020 | Europe / United Kingdom / England |
| EPI_ISL_488090 | 4/23/2020 | 7/14/2020 | Europe / United Kingdom / England |
| EPI_ISL_488091 | 5/5/2020  | 7/14/2020 | Europe / United Kingdom / England |
| EPI_ISL_488092 | 5/11/2020 | 7/14/2020 | Europe / United Kingdom / England |
| EPI_ISL_488093 | 4/24/2020 | 7/14/2020 | Europe / United Kingdom / England |
| EPI_ISL_488095 | 5/11/2020 | 7/14/2020 | Europe / United Kingdom / England |
| EPI_ISL_488096 | 4/28/2020 | 7/14/2020 | Europe / United Kingdom / England |
| EPI_ISL_488099 | 4/23/2020 | 7/14/2020 | Europe / United Kingdom / England |
| EPI_ISL_488101 | 4/24/2020 | 7/14/2020 | Europe / United Kingdom / England |
| EPI_ISL_488102 | 4/23/2020 | 7/14/2020 | Europe / United Kingdom / England |
| EPI_ISL_488103 | 5/11/2020 | 7/14/2020 | Europe / United Kingdom / England |
| EPI_ISL_488104 | 5/8/2020  | 7/14/2020 | Europe / United Kingdom / England |
| EPI_ISL_488105 | 5/7/2020  | 7/14/2020 | Europe / United Kingdom / England |
| EPI_ISL_488106 | 4/24/2020 | 7/14/2020 | Europe / United Kingdom / England |
| EPI_ISL_488107 | 4/24/2020 | 7/14/2020 | Europe / United Kingdom / England |
| EPI_ISL_488108 | 4/27/2020 | 7/14/2020 | Europe / United Kingdom / England |
| EPI_ISL_488110 | 4/29/2020 | 7/14/2020 | Europe / United Kingdom / England |
| EPI_ISL_488111 | 5/12/2020 | 7/14/2020 | Europe / United Kingdom / England |
| EPI_ISL_488113 | 5/11/2020 | 7/14/2020 | Europe / United Kingdom / England |
| EPI_ISL_488114 | 4/24/2020 | 7/14/2020 | Europe / United Kingdom / England |
| EPI_ISL_488115 | 5/12/2020 | 7/14/2020 | Europe / United Kingdom / England |
| EPI_ISL_488116 | 5/3/2020  | 7/14/2020 | Europe / United Kingdom / England |
| EPI_ISL_488117 | 4/23/2020 | 7/14/2020 | Europe / United Kingdom / England |
| EPI_ISL_488118 | 5/6/2020  | 7/14/2020 | Europe / United Kingdom / England |
| EPI_ISL_488119 | 4/28/2020 | 7/14/2020 | Europe / United Kingdom / England |
| EPI_ISL_488120 | 4/28/2020 | 7/14/2020 | Europe / United Kingdom / England |
| EPI_ISL_488123 | 4/23/2020 | 7/14/2020 | Europe / United Kingdom / England |
| EPI_ISL_488124 | 5/3/2020  | 7/14/2020 | Europe / United Kingdom / England |
| EPI_ISL_488126 | 5/10/2020 | 7/14/2020 | Europe / United Kingdom / England |
| EPI_ISL_488127 | 4/30/2020 | 7/14/2020 | Europe / United Kingdom / England |
| EPI_ISL_488128 | 4/28/2020 | 7/14/2020 | Europe / United Kingdom / England |
| EPI_ISL_488129 | 4/24/2020 | 7/14/2020 | Europe / United Kingdom / England |
| EPI_ISL_488130 | 4/24/2020 | 7/14/2020 | Europe / United Kingdom / England |
| EPI_ISL_488131 | 5/7/2020  | 7/14/2020 | Europe / United Kingdom / England |
| EPI_ISL_488132 | 4/23/2020 | 7/14/2020 | Europe / United Kingdom / England |
| EPI_ISL_488133 | 5/6/2020  | 7/14/2020 | Europe / United Kingdom / England |

|                |           |           |                                   |
|----------------|-----------|-----------|-----------------------------------|
| EPI_ISL_488134 | 5/12/2020 | 7/14/2020 | Europe / United Kingdom / England |
| EPI_ISL_488136 | 4/24/2020 | 7/14/2020 | Europe / United Kingdom / England |
| EPI_ISL_488137 | 4/27/2020 | 7/14/2020 | Europe / United Kingdom / England |
| EPI_ISL_488138 | 4/28/2020 | 7/14/2020 | Europe / United Kingdom / England |
| EPI_ISL_488139 | 5/10/2020 | 7/14/2020 | Europe / United Kingdom / England |
| EPI_ISL_488141 | 4/22/2020 | 7/14/2020 | Europe / United Kingdom / England |
| EPI_ISL_488142 | 4/28/2020 | 7/14/2020 | Europe / United Kingdom / England |
| EPI_ISL_488144 | 4/23/2020 | 7/14/2020 | Europe / United Kingdom / England |
| EPI_ISL_488145 | 4/23/2020 | 7/14/2020 | Europe / United Kingdom / England |
| EPI_ISL_488146 | 4/28/2020 | 7/14/2020 | Europe / United Kingdom / England |
| EPI_ISL_488147 | 5/5/2020  | 7/14/2020 | Europe / United Kingdom / England |
| EPI_ISL_488150 | 4/30/2020 | 7/14/2020 | Europe / United Kingdom / England |
| EPI_ISL_488151 | 4/22/2020 | 7/14/2020 | Europe / United Kingdom / England |
| EPI_ISL_488152 | 4/27/2020 | 7/14/2020 | Europe / United Kingdom / England |
| EPI_ISL_488153 | 4/29/2020 | 7/14/2020 | Europe / United Kingdom / England |
| EPI_ISL_488154 | 4/24/2020 | 7/14/2020 | Europe / United Kingdom / England |
| EPI_ISL_488156 | 4/23/2020 | 7/14/2020 | Europe / United Kingdom / England |
| EPI_ISL_488157 | 5/4/2020  | 7/14/2020 | Europe / United Kingdom / England |
| EPI_ISL_488158 | 5/10/2020 | 7/14/2020 | Europe / United Kingdom / England |
| EPI_ISL_488159 | 4/23/2020 | 7/14/2020 | Europe / United Kingdom / England |
| EPI_ISL_488160 | 5/3/2020  | 7/14/2020 | Europe / United Kingdom / England |
| EPI_ISL_488161 | 4/28/2020 | 7/14/2020 | Europe / United Kingdom / England |
| EPI_ISL_488162 | 5/6/2020  | 7/14/2020 | Europe / United Kingdom / England |
| EPI_ISL_488163 | 5/8/2020  | 7/14/2020 | Europe / United Kingdom / England |
| EPI_ISL_488164 | 4/30/2020 | 7/14/2020 | Europe / United Kingdom / England |
| EPI_ISL_488166 | 4/30/2020 | 7/14/2020 | Europe / United Kingdom / England |
| EPI_ISL_488168 | 4/28/2020 | 7/14/2020 | Europe / United Kingdom / England |
| EPI_ISL_488171 | 5/6/2020  | 7/14/2020 | Europe / United Kingdom / England |
| EPI_ISL_488172 | 4/30/2020 | 7/14/2020 | Europe / United Kingdom / England |
| EPI_ISL_488174 | 4/23/2020 | 7/14/2020 | Europe / United Kingdom / England |
| EPI_ISL_488175 | 4/24/2020 | 7/14/2020 | Europe / United Kingdom / England |
| EPI_ISL_488176 | 5/11/2020 | 7/14/2020 | Europe / United Kingdom / England |
| EPI_ISL_488179 | 6/3/2020  | 7/14/2020 | Europe / United Kingdom / England |
| EPI_ISL_488180 | 6/3/2020  | 7/14/2020 | Europe / United Kingdom / England |
| EPI_ISL_488181 | 6/3/2020  | 7/14/2020 | Europe / United Kingdom / England |
| EPI_ISL_488182 | 6/2/2020  | 7/14/2020 | Europe / United Kingdom / England |
| EPI_ISL_488183 | 6/3/2020  | 7/14/2020 | Europe / United Kingdom / England |
| EPI_ISL_488184 | 6/4/2020  | 7/14/2020 | Europe / United Kingdom / England |
| EPI_ISL_488186 | 6/7/2020  | 7/14/2020 | Europe / United Kingdom / England |
| EPI_ISL_488187 | 4/3/2020  | 7/14/2020 | Europe / United Kingdom / England |
| EPI_ISL_488188 | 4/20/2020 | 7/14/2020 | Europe / United Kingdom / England |
| EPI_ISL_488189 | 3/24/2020 | 7/14/2020 | Europe / United Kingdom / England |
| EPI_ISL_488190 | 3/11/2020 | 7/14/2020 | Europe / United Kingdom / England |
| EPI_ISL_488191 | 4/22/2020 | 7/14/2020 | Europe / United Kingdom / England |
| EPI_ISL_488192 | 4/3/2020  | 7/14/2020 | Europe / United Kingdom / England |
| EPI_ISL_488193 | 4/3/2020  | 7/14/2020 | Europe / United Kingdom / England |
| EPI_ISL_488194 | 4/13/2020 | 7/14/2020 | Europe / United Kingdom / England |



|                |           |           |                                   |
|----------------|-----------|-----------|-----------------------------------|
| EPI_ISL_488196 | 4/3/2020  | 7/14/2020 | Europe / United Kingdom / England |
| EPI_ISL_488197 | 4/23/2020 | 7/14/2020 | Europe / United Kingdom / England |
| EPI_ISL_488199 | 3/11/2020 | 7/14/2020 | Europe / United Kingdom / England |
| EPI_ISL_488200 | 4/13/2020 | 7/14/2020 | Europe / United Kingdom / England |
| EPI_ISL_488201 | 3/11/2020 | 7/14/2020 | Europe / United Kingdom / England |
| EPI_ISL_488202 | 3/3/2020  | 7/14/2020 | Europe / United Kingdom / England |
| EPI_ISL_488203 | 4/22/2020 | 7/14/2020 | Europe / United Kingdom / England |
| EPI_ISL_488205 | 4/20/2020 | 7/14/2020 | Europe / United Kingdom / England |
| EPI_ISL_488206 | 4/24/2020 | 7/14/2020 | Europe / United Kingdom / England |
| EPI_ISL_488207 | 4/26/2020 | 7/14/2020 | Europe / United Kingdom / England |
| EPI_ISL_488208 | 4/23/2020 | 7/14/2020 | Europe / United Kingdom / England |
| EPI_ISL_488209 | 4/22/2020 | 7/14/2020 | Europe / United Kingdom / England |
| EPI_ISL_488210 | 4/23/2020 | 7/14/2020 | Europe / United Kingdom / England |
| EPI_ISL_488213 | 4/20/2020 | 7/14/2020 | Europe / United Kingdom / England |
| EPI_ISL_488216 | 3/26/2020 | 7/14/2020 | Europe / United Kingdom / England |
| EPI_ISL_488217 | 4/23/2020 | 7/14/2020 | Europe / United Kingdom / England |
| EPI_ISL_488218 | 4/13/2020 | 7/14/2020 | Europe / United Kingdom / England |
| EPI_ISL_488219 | 3/3/2020  | 7/14/2020 | Europe / United Kingdom / England |
| EPI_ISL_488220 | 4/23/2020 | 7/14/2020 | Europe / United Kingdom / England |
| EPI_ISL_488221 | 3/6/2020  | 7/14/2020 | Europe / United Kingdom / England |
| EPI_ISL_488222 | 4/21/2020 | 7/14/2020 | Europe / United Kingdom / England |
| EPI_ISL_488223 | 3/10/2020 | 7/14/2020 | Europe / United Kingdom / England |
| EPI_ISL_488224 | 4/17/2020 | 7/14/2020 | Europe / United Kingdom / England |
| EPI_ISL_488225 | 4/21/2020 | 7/14/2020 | Europe / United Kingdom / England |
| EPI_ISL_488226 | 4/13/2020 | 7/14/2020 | Europe / United Kingdom / England |
| EPI_ISL_488227 | 4/21/2020 | 7/14/2020 | Europe / United Kingdom / England |
| EPI_ISL_488228 | 3/8/2020  | 7/14/2020 | Europe / United Kingdom / England |
| EPI_ISL_488230 | 4/13/2020 | 7/14/2020 | Europe / United Kingdom / England |
| EPI_ISL_488231 | 4/25/2020 | 7/14/2020 | Europe / United Kingdom / England |
| EPI_ISL_488232 | 4/12/2020 | 7/14/2020 | Europe / United Kingdom / England |
| EPI_ISL_488234 | 4/20/2020 | 7/14/2020 | Europe / United Kingdom / England |
| EPI_ISL_488236 | 4/23/2020 | 7/14/2020 | Europe / United Kingdom / England |
| EPI_ISL_488237 | 4/13/2020 | 7/14/2020 | Europe / United Kingdom / England |
| EPI_ISL_488238 | 4/14/2020 | 7/14/2020 | Europe / United Kingdom / England |
| EPI_ISL_488239 | 4/13/2020 | 7/14/2020 | Europe / United Kingdom / England |
| EPI_ISL_488240 | 4/11/2020 | 7/14/2020 | Europe / United Kingdom / England |
| EPI_ISL_488241 | 3/10/2020 | 7/14/2020 | Europe / United Kingdom / England |
| EPI_ISL_488243 | 4/23/2020 | 7/14/2020 | Europe / United Kingdom / England |
| EPI_ISL_488244 | 3/3/2020  | 7/14/2020 | Europe / United Kingdom / England |
| EPI_ISL_488245 | 4/22/2020 | 7/14/2020 | Europe / United Kingdom / England |
| EPI_ISL_488246 | 4/22/2020 | 7/14/2020 | Europe / United Kingdom / England |
| EPI_ISL_488247 | 4/22/2020 | 7/14/2020 | Europe / United Kingdom / England |
| EPI_ISL_488248 | 4/22/2020 | 7/14/2020 | Europe / United Kingdom / England |
| EPI_ISL_488249 | 4/21/2020 | 7/14/2020 | Europe / United Kingdom / England |
| EPI_ISL_488250 | 3/26/2020 | 7/14/2020 | Europe / United Kingdom / England |
| EPI_ISL_488251 | 4/3/2020  | 7/14/2020 | Europe / United Kingdom / England |
| EPI_ISL_488252 | 4/22/2020 | 7/14/2020 | Europe / United Kingdom / England |



|                |           |           |                                   |
|----------------|-----------|-----------|-----------------------------------|
| EPI_ISL_488310 | 3/8/2020  | 7/14/2020 | Europe / United Kingdom / England |
| EPI_ISL_488311 | 4/17/2020 | 7/14/2020 | Europe / United Kingdom / England |
| EPI_ISL_488312 | 3/30/2020 | 7/14/2020 | Europe / United Kingdom / England |
| EPI_ISL_488314 | 4/21/2020 | 7/14/2020 | Europe / United Kingdom / England |
| EPI_ISL_488315 | 4/3/2020  | 7/14/2020 | Europe / United Kingdom / England |
| EPI_ISL_488316 | 4/24/2020 | 7/14/2020 | Europe / United Kingdom / England |
| EPI_ISL_488317 | 4/23/2020 | 7/14/2020 | Europe / United Kingdom / England |
| EPI_ISL_488318 | 4/23/2020 | 7/14/2020 | Europe / United Kingdom / England |
| EPI_ISL_488319 | 4/25/2020 | 7/14/2020 | Europe / United Kingdom / England |
| EPI_ISL_488321 | 4/12/2020 | 7/14/2020 | Europe / United Kingdom / England |
| EPI_ISL_488322 | 4/22/2020 | 7/14/2020 | Europe / United Kingdom / England |
| EPI_ISL_488323 | 4/21/2020 | 7/14/2020 | Europe / United Kingdom / England |
| EPI_ISL_488324 | 3/6/2020  | 7/14/2020 | Europe / United Kingdom / England |
| EPI_ISL_488325 | 4/3/2020  | 7/14/2020 | Europe / United Kingdom / England |
| EPI_ISL_488326 | 4/13/2020 | 7/14/2020 | Europe / United Kingdom / England |
| EPI_ISL_488327 | 4/25/2020 | 7/14/2020 | Europe / United Kingdom / England |
| EPI_ISL_488328 | 3/4/2020  | 7/14/2020 | Europe / United Kingdom / England |
| EPI_ISL_488330 | 4/20/2020 | 7/14/2020 | Europe / United Kingdom / England |
| EPI_ISL_488331 | 4/10/2020 | 7/14/2020 | Europe / United Kingdom / England |
| EPI_ISL_488337 | 3/5/2020  | 7/14/2020 | Europe / United Kingdom / England |
| EPI_ISL_488338 | 4/22/2020 | 7/14/2020 | Europe / United Kingdom / England |
| EPI_ISL_488339 | 4/21/2020 | 7/14/2020 | Europe / United Kingdom / England |
| EPI_ISL_488341 | 4/3/2020  | 7/14/2020 | Europe / United Kingdom / England |
| EPI_ISL_488343 | 4/23/2020 | 7/14/2020 | Europe / United Kingdom / England |
| EPI_ISL_488344 | 4/21/2020 | 7/14/2020 | Europe / United Kingdom / England |
| EPI_ISL_488345 | 4/13/2020 | 7/14/2020 | Europe / United Kingdom / England |
| EPI_ISL_488346 | 4/21/2020 | 7/14/2020 | Europe / United Kingdom / England |
| EPI_ISL_488347 | 4/3/2020  | 7/14/2020 | Europe / United Kingdom / England |
| EPI_ISL_488348 | 4/23/2020 | 7/14/2020 | Europe / United Kingdom / England |
| EPI_ISL_488349 | 3/9/2020  | 7/14/2020 | Europe / United Kingdom / England |
| EPI_ISL_488351 | 4/9/2020  | 7/14/2020 | Europe / United Kingdom / England |
| EPI_ISL_488352 | 4/21/2020 | 7/14/2020 | Europe / United Kingdom / England |
| EPI_ISL_488353 | 4/22/2020 | 7/14/2020 | Europe / United Kingdom / England |
| EPI_ISL_488354 | 4/21/2020 | 7/14/2020 | Europe / United Kingdom / England |
| EPI_ISL_488355 | 3/7/2020  | 7/14/2020 | Europe / United Kingdom / England |
| EPI_ISL_488356 | 3/11/2020 | 7/14/2020 | Europe / United Kingdom / England |
| EPI_ISL_488357 | 4/23/2020 | 7/14/2020 | Europe / United Kingdom / England |
| EPI_ISL_488358 | 4/12/2020 | 7/14/2020 | Europe / United Kingdom / England |
| EPI_ISL_488359 | 4/13/2020 | 7/14/2020 | Europe / United Kingdom / England |
| EPI_ISL_488360 | 4/24/2020 | 7/14/2020 | Europe / United Kingdom / England |
| EPI_ISL_488361 | 4/14/2020 | 7/14/2020 | Europe / United Kingdom / England |
| EPI_ISL_488362 | 3/30/2020 | 7/14/2020 | Europe / United Kingdom / England |
| EPI_ISL_488363 | 4/10/2020 | 7/14/2020 | Europe / United Kingdom / England |
| EPI_ISL_488364 | 3/6/2020  | 7/14/2020 | Europe / United Kingdom / England |
| EPI_ISL_488365 | 4/13/2020 | 7/14/2020 | Europe / United Kingdom / England |
| EPI_ISL_488367 | 3/10/2020 | 7/14/2020 | Europe / United Kingdom / England |
| EPI_ISL_488369 | 4/23/2020 | 7/14/2020 | Europe / United Kingdom / England |



|                |           |           |                                   |
|----------------|-----------|-----------|-----------------------------------|
| EPI_ISL_488432 | 4/3/2020  | 7/14/2020 | Europe / United Kingdom / England |
| EPI_ISL_488433 | 4/20/2020 | 7/14/2020 | Europe / United Kingdom / England |
| EPI_ISL_488434 | 3/11/2020 | 7/14/2020 | Europe / United Kingdom / England |
| EPI_ISL_488435 | 4/12/2020 | 7/14/2020 | Europe / United Kingdom / England |
| EPI_ISL_488436 | 4/21/2020 | 7/14/2020 | Europe / United Kingdom / England |
| EPI_ISL_488437 | 4/23/2020 | 7/14/2020 | Europe / United Kingdom / England |
| EPI_ISL_488438 | 4/22/2020 | 7/14/2020 | Europe / United Kingdom / England |
| EPI_ISL_488439 | 4/3/2020  | 7/14/2020 | Europe / United Kingdom / England |
| EPI_ISL_488440 | 4/22/2020 | 7/14/2020 | Europe / United Kingdom / England |
| EPI_ISL_488442 | 4/20/2020 | 7/14/2020 | Europe / United Kingdom / England |
| EPI_ISL_488443 | 4/20/2020 | 7/14/2020 | Europe / United Kingdom / England |
| EPI_ISL_488444 | 3/5/2020  | 7/14/2020 | Europe / United Kingdom / England |
| EPI_ISL_488445 | 4/13/2020 | 7/14/2020 | Europe / United Kingdom / England |
| EPI_ISL_488446 | 4/13/2020 | 7/14/2020 | Europe / United Kingdom / England |
| EPI_ISL_488447 | 3/10/2020 | 7/14/2020 | Europe / United Kingdom / England |
| EPI_ISL_488448 | 4/21/2020 | 7/14/2020 | Europe / United Kingdom / England |
| EPI_ISL_488449 | 4/21/2020 | 7/14/2020 | Europe / United Kingdom / England |
| EPI_ISL_488450 | 3/3/2020  | 7/14/2020 | Europe / United Kingdom / England |
| EPI_ISL_488451 | 4/13/2020 | 7/14/2020 | Europe / United Kingdom / England |
| EPI_ISL_488452 | 4/23/2020 | 7/14/2020 | Europe / United Kingdom / England |
| EPI_ISL_488453 | 4/14/2020 | 7/14/2020 | Europe / United Kingdom / England |
| EPI_ISL_488455 | 3/24/2020 | 7/14/2020 | Europe / United Kingdom / England |
| EPI_ISL_488456 | 4/4/2020  | 7/14/2020 | Europe / United Kingdom / England |
| EPI_ISL_488457 | 4/3/2020  | 7/14/2020 | Europe / United Kingdom / England |
| EPI_ISL_488458 | 3/29/2020 | 7/14/2020 | Europe / United Kingdom / England |
| EPI_ISL_488459 | 3/30/2020 | 7/14/2020 | Europe / United Kingdom / England |
| EPI_ISL_488461 | 4/4/2020  | 7/14/2020 | Europe / United Kingdom / England |
| EPI_ISL_488462 | 4/2/2020  | 7/14/2020 | Europe / United Kingdom / England |
| EPI_ISL_488463 | 3/27/2020 | 7/14/2020 | Europe / United Kingdom / England |
| EPI_ISL_488464 | 3/27/2020 | 7/14/2020 | Europe / United Kingdom / England |
| EPI_ISL_488465 | 3/31/2020 | 7/14/2020 | Europe / United Kingdom / England |
| EPI_ISL_488466 | 3/12/2020 | 7/14/2020 | Europe / United Kingdom / England |
| EPI_ISL_488467 | 3/29/2020 | 7/14/2020 | Europe / United Kingdom / England |
| EPI_ISL_488468 | 4/4/2020  | 7/14/2020 | Europe / United Kingdom / England |
| EPI_ISL_488469 | 3/30/2020 | 7/14/2020 | Europe / United Kingdom / England |
| EPI_ISL_488470 | 3/24/2020 | 7/14/2020 | Europe / United Kingdom / England |
| EPI_ISL_488471 | 3/25/2020 | 7/14/2020 | Europe / United Kingdom / England |
| EPI_ISL_488472 | 3/28/2020 | 7/14/2020 | Europe / United Kingdom / England |
| EPI_ISL_488473 | 3/30/2020 | 7/14/2020 | Europe / United Kingdom / England |
| EPI_ISL_488474 | 3/29/2020 | 7/14/2020 | Europe / United Kingdom / England |
| EPI_ISL_488475 | 3/24/2020 | 7/14/2020 | Europe / United Kingdom / England |
| EPI_ISL_488476 | 4/2/2020  | 7/14/2020 | Europe / United Kingdom / England |
| EPI_ISL_488477 | 3/31/2020 | 7/14/2020 | Europe / United Kingdom / England |
| EPI_ISL_488478 | 3/25/2020 | 7/14/2020 | Europe / United Kingdom / England |
| EPI_ISL_488479 | 3/27/2020 | 7/14/2020 | Europe / United Kingdom / England |
| EPI_ISL_488480 | 3/27/2020 | 7/14/2020 | Europe / United Kingdom / England |
| EPI_ISL_488481 | 3/26/2020 | 7/14/2020 | Europe / United Kingdom / England |

|                |           |           |                                   |
|----------------|-----------|-----------|-----------------------------------|
| EPI_ISL_488482 | 3/27/2020 | 7/14/2020 | Europe / United Kingdom / England |
| EPI_ISL_488483 | 3/25/2020 | 7/14/2020 | Europe / United Kingdom / England |
| EPI_ISL_488484 | 4/4/2020  | 7/14/2020 | Europe / United Kingdom / England |
| EPI_ISL_488485 | 3/16/2020 | 7/14/2020 | Europe / United Kingdom / England |
| EPI_ISL_488486 | 3/28/2020 | 7/14/2020 | Europe / United Kingdom / England |
| EPI_ISL_488487 | 3/29/2020 | 7/14/2020 | Europe / United Kingdom / England |
| EPI_ISL_488488 | 3/31/2020 | 7/14/2020 | Europe / United Kingdom / England |
| EPI_ISL_488489 | 4/3/2020  | 7/14/2020 | Europe / United Kingdom / England |
| EPI_ISL_488490 | 3/22/2020 | 7/14/2020 | Europe / United Kingdom / England |
| EPI_ISL_488491 | 3/29/2020 | 7/14/2020 | Europe / United Kingdom / England |
| EPI_ISL_488494 | 3/30/2020 | 7/14/2020 | Europe / United Kingdom / England |
| EPI_ISL_488495 | 3/27/2020 | 7/14/2020 | Europe / United Kingdom / England |
| EPI_ISL_488496 | 3/31/2020 | 7/14/2020 | Europe / United Kingdom / England |
| EPI_ISL_488497 | 3/29/2020 | 7/14/2020 | Europe / United Kingdom / England |
| EPI_ISL_488498 | 3/28/2020 | 7/14/2020 | Europe / United Kingdom / England |
| EPI_ISL_488501 | 3/31/2020 | 7/14/2020 | Europe / United Kingdom / England |
| EPI_ISL_488502 | 4/3/2020  | 7/14/2020 | Europe / United Kingdom / England |
| EPI_ISL_488503 | 3/30/2020 | 7/14/2020 | Europe / United Kingdom / England |
| EPI_ISL_488504 | 4/3/2020  | 7/14/2020 | Europe / United Kingdom / England |
| EPI_ISL_488505 | 4/4/2020  | 7/14/2020 | Europe / United Kingdom / England |
| EPI_ISL_488506 | 3/28/2020 | 7/14/2020 | Europe / United Kingdom / England |
| EPI_ISL_488507 | 3/27/2020 | 7/14/2020 | Europe / United Kingdom / England |
| EPI_ISL_488508 | 3/18/2020 | 7/14/2020 | Europe / United Kingdom / England |
| EPI_ISL_488509 | 5/17/2020 | 7/14/2020 | Europe / United Kingdom / England |
| EPI_ISL_488510 | 3/23/2020 | 7/14/2020 | Europe / United Kingdom / England |
| EPI_ISL_488511 | 3/26/2020 | 7/14/2020 | Europe / United Kingdom / England |
| EPI_ISL_488512 | 3/26/2020 | 7/14/2020 | Europe / United Kingdom / England |
| EPI_ISL_488513 | 3/29/2020 | 7/14/2020 | Europe / United Kingdom / England |
| EPI_ISL_488514 | 3/28/2020 | 7/14/2020 | Europe / United Kingdom / England |
| EPI_ISL_488515 | 3/28/2020 | 7/14/2020 | Europe / United Kingdom / England |
| EPI_ISL_488516 | 4/1/2020  | 7/14/2020 | Europe / United Kingdom / England |
| EPI_ISL_488517 | 3/28/2020 | 7/14/2020 | Europe / United Kingdom / England |
| EPI_ISL_488518 | 3/25/2020 | 7/14/2020 | Europe / United Kingdom / England |
| EPI_ISL_488519 | 3/21/2020 | 7/14/2020 | Europe / United Kingdom / England |
| EPI_ISL_488520 | 3/19/2020 | 7/14/2020 | Europe / United Kingdom / England |
| EPI_ISL_488521 | 3/30/2020 | 7/14/2020 | Europe / United Kingdom / England |
| EPI_ISL_488522 | 4/1/2020  | 7/14/2020 | Europe / United Kingdom / England |
| EPI_ISL_488523 | 3/31/2020 | 7/14/2020 | Europe / United Kingdom / England |
| EPI_ISL_488524 | 4/1/2020  | 7/14/2020 | Europe / United Kingdom / England |
| EPI_ISL_488525 | 3/26/2020 | 7/14/2020 | Europe / United Kingdom / England |
| EPI_ISL_488526 | 3/31/2020 | 7/14/2020 | Europe / United Kingdom / England |
| EPI_ISL_488527 | 3/19/2020 | 7/14/2020 | Europe / United Kingdom / England |
| EPI_ISL_488528 | 3/26/2020 | 7/14/2020 | Europe / United Kingdom / England |
| EPI_ISL_488529 | 3/31/2020 | 7/14/2020 | Europe / United Kingdom / England |
| EPI_ISL_488530 | 4/4/2020  | 7/14/2020 | Europe / United Kingdom / England |
| EPI_ISL_488531 | 3/31/2020 | 7/14/2020 | Europe / United Kingdom / England |
| EPI_ISL_488532 | 4/3/2020  | 7/14/2020 | Europe / United Kingdom / England |



|                |           |           |                                   |
|----------------|-----------|-----------|-----------------------------------|
| EPI_ISL_488584 | 3/30/2020 | 7/14/2020 | Europe / United Kingdom / England |
| EPI_ISL_488585 | 3/27/2020 | 7/14/2020 | Europe / United Kingdom / England |
| EPI_ISL_488586 | 4/3/2020  | 7/14/2020 | Europe / United Kingdom / England |
| EPI_ISL_488587 | 4/4/2020  | 7/14/2020 | Europe / United Kingdom / England |
| EPI_ISL_488588 | 3/17/2020 | 7/14/2020 | Europe / United Kingdom / England |
| EPI_ISL_488589 | 4/4/2020  | 7/14/2020 | Europe / United Kingdom / England |
| EPI_ISL_488590 | 4/4/2020  | 7/14/2020 | Europe / United Kingdom / England |
| EPI_ISL_488591 | 3/28/2020 | 7/14/2020 | Europe / United Kingdom / England |
| EPI_ISL_488592 | 4/3/2020  | 7/14/2020 | Europe / United Kingdom / England |
| EPI_ISL_488593 | 3/29/2020 | 7/14/2020 | Europe / United Kingdom / England |
| EPI_ISL_488594 | 3/26/2020 | 7/14/2020 | Europe / United Kingdom / England |
| EPI_ISL_488595 | 4/3/2020  | 7/14/2020 | Europe / United Kingdom / England |
| EPI_ISL_488596 | 3/28/2020 | 7/14/2020 | Europe / United Kingdom / England |
| EPI_ISL_488598 | 4/3/2020  | 7/14/2020 | Europe / United Kingdom / England |
| EPI_ISL_488599 | 3/27/2020 | 7/14/2020 | Europe / United Kingdom / England |
| EPI_ISL_488600 | 3/20/2020 | 7/14/2020 | Europe / United Kingdom / England |
| EPI_ISL_488601 | 3/30/2020 | 7/14/2020 | Europe / United Kingdom / England |
| EPI_ISL_488602 | 3/26/2020 | 7/14/2020 | Europe / United Kingdom / England |
| EPI_ISL_488603 | 3/29/2020 | 7/14/2020 | Europe / United Kingdom / England |
| EPI_ISL_488604 | 3/31/2020 | 7/14/2020 | Europe / United Kingdom / England |
| EPI_ISL_488605 | 3/28/2020 | 7/14/2020 | Europe / United Kingdom / England |
| EPI_ISL_488606 | 3/28/2020 | 7/14/2020 | Europe / United Kingdom / England |
| EPI_ISL_488607 | 3/31/2020 | 7/14/2020 | Europe / United Kingdom / England |
| EPI_ISL_488608 | 3/14/2020 | 7/14/2020 | Europe / United Kingdom / England |
| EPI_ISL_488609 | 3/26/2020 | 7/14/2020 | Europe / United Kingdom / England |
| EPI_ISL_488610 | 4/3/2020  | 7/14/2020 | Europe / United Kingdom / England |
| EPI_ISL_488611 | 3/24/2020 | 7/14/2020 | Europe / United Kingdom / England |
| EPI_ISL_488612 | 4/4/2020  | 7/14/2020 | Europe / United Kingdom / England |
| EPI_ISL_488613 | 3/30/2020 | 7/14/2020 | Europe / United Kingdom / England |
| EPI_ISL_488614 | 3/28/2020 | 7/14/2020 | Europe / United Kingdom / England |
| EPI_ISL_488615 | 4/1/2020  | 7/14/2020 | Europe / United Kingdom / England |
| EPI_ISL_488616 | 3/30/2020 | 7/14/2020 | Europe / United Kingdom / England |
| EPI_ISL_488617 | 3/29/2020 | 7/14/2020 | Europe / United Kingdom / England |
| EPI_ISL_488618 | 4/2/2020  | 7/14/2020 | Europe / United Kingdom / England |
| EPI_ISL_488619 | 3/30/2020 | 7/14/2020 | Europe / United Kingdom / England |
| EPI_ISL_488620 | 3/26/2020 | 7/14/2020 | Europe / United Kingdom / England |
| EPI_ISL_488621 | 4/2/2020  | 7/14/2020 | Europe / United Kingdom / England |
| EPI_ISL_488622 | 5/4/2020  | 7/14/2020 | Europe / United Kingdom / England |
| EPI_ISL_488624 | 4/4/2020  | 7/14/2020 | Europe / United Kingdom / England |
| EPI_ISL_488625 | 3/31/2020 | 7/14/2020 | Europe / United Kingdom / England |
| EPI_ISL_488626 | 3/25/2020 | 7/14/2020 | Europe / United Kingdom / England |
| EPI_ISL_488627 | 3/30/2020 | 7/14/2020 | Europe / United Kingdom / England |
| EPI_ISL_488628 | 3/15/2020 | 7/14/2020 | Europe / United Kingdom / England |
| EPI_ISL_488629 | 4/3/2020  | 7/14/2020 | Europe / United Kingdom / England |
| EPI_ISL_488630 | 4/2/2020  | 7/14/2020 | Europe / United Kingdom / England |
| EPI_ISL_488631 | 3/29/2020 | 7/14/2020 | Europe / United Kingdom / England |
| EPI_ISL_488632 | 4/24/2020 | 7/14/2020 | Europe / United Kingdom / England |





|                |           |           |                                   |
|----------------|-----------|-----------|-----------------------------------|
| EPI_ISL_488681 | 3/21/2020 | 7/14/2020 | Europe / United Kingdom / England |
| EPI_ISL_488682 | 3/24/2020 | 7/14/2020 | Europe / United Kingdom / England |
| EPI_ISL_488683 | 3/26/2020 | 7/14/2020 | Europe / United Kingdom / England |
| EPI_ISL_488684 | 4/1/2020  | 7/14/2020 | Europe / United Kingdom / England |
| EPI_ISL_488685 | 4/4/2020  | 7/14/2020 | Europe / United Kingdom / England |
| EPI_ISL_488686 | 3/28/2020 | 7/14/2020 | Europe / United Kingdom / England |
| EPI_ISL_488687 | 3/29/2020 | 7/14/2020 | Europe / United Kingdom / England |
| EPI_ISL_488688 | 4/2/2020  | 7/14/2020 | Europe / United Kingdom / England |
| EPI_ISL_488689 | 3/29/2020 | 7/14/2020 | Europe / United Kingdom / England |
| EPI_ISL_488690 | 4/4/2020  | 7/14/2020 | Europe / United Kingdom / England |
| EPI_ISL_488691 | 4/1/2020  | 7/14/2020 | Europe / United Kingdom / England |
| EPI_ISL_488692 | 4/1/2020  | 7/14/2020 | Europe / United Kingdom / England |
| EPI_ISL_488693 | 4/1/2020  | 7/14/2020 | Europe / United Kingdom / England |
| EPI_ISL_488694 | 4/4/2020  | 7/14/2020 | Europe / United Kingdom / England |
| EPI_ISL_488695 | 3/30/2020 | 7/14/2020 | Europe / United Kingdom / England |
| EPI_ISL_488696 | 3/31/2020 | 7/14/2020 | Europe / United Kingdom / England |
| EPI_ISL_488697 | 4/2/2020  | 7/14/2020 | Europe / United Kingdom / England |
| EPI_ISL_488698 | 4/3/2020  | 7/14/2020 | Europe / United Kingdom / England |
| EPI_ISL_488699 | 4/2/2020  | 7/14/2020 | Europe / United Kingdom / England |
| EPI_ISL_488700 | 3/29/2020 | 7/14/2020 | Europe / United Kingdom / England |
| EPI_ISL_488701 | 3/23/2020 | 7/14/2020 | Europe / United Kingdom / England |
| EPI_ISL_488702 | 3/31/2020 | 7/14/2020 | Europe / United Kingdom / England |
| EPI_ISL_488703 | 3/31/2020 | 7/14/2020 | Europe / United Kingdom / England |
| EPI_ISL_488704 | 3/30/2020 | 7/14/2020 | Europe / United Kingdom / England |
| EPI_ISL_488705 | 4/1/2020  | 7/14/2020 | Europe / United Kingdom / England |
| EPI_ISL_488706 | 3/30/2020 | 7/14/2020 | Europe / United Kingdom / England |
| EPI_ISL_488707 | 3/15/2020 | 7/14/2020 | Europe / United Kingdom / England |
| EPI_ISL_488708 | 4/1/2020  | 7/14/2020 | Europe / United Kingdom / England |
| EPI_ISL_488709 | 3/31/2020 | 7/14/2020 | Europe / United Kingdom / England |
| EPI_ISL_488710 | 4/3/2020  | 7/14/2020 | Europe / United Kingdom / England |
| EPI_ISL_488711 | 4/1/2020  | 7/14/2020 | Europe / United Kingdom / England |
| EPI_ISL_488712 | 3/31/2020 | 7/14/2020 | Europe / United Kingdom / England |
| EPI_ISL_488713 | 3/30/2020 | 7/14/2020 | Europe / United Kingdom / England |
| EPI_ISL_488714 | 3/21/2020 | 7/14/2020 | Europe / United Kingdom / England |
| EPI_ISL_488715 | 3/27/2020 | 7/14/2020 | Europe / United Kingdom / England |
| EPI_ISL_488716 | 3/26/2020 | 7/14/2020 | Europe / United Kingdom / England |
| EPI_ISL_488717 | 3/28/2020 | 7/14/2020 | Europe / United Kingdom / England |
| EPI_ISL_488718 | 3/28/2020 | 7/14/2020 | Europe / United Kingdom / England |
| EPI_ISL_488719 | 3/29/2020 | 7/14/2020 | Europe / United Kingdom / England |
| EPI_ISL_488720 | 3/29/2020 | 7/14/2020 | Europe / United Kingdom / England |
| EPI_ISL_488721 | 4/1/2020  | 7/14/2020 | Europe / United Kingdom / England |
| EPI_ISL_488722 | 4/4/2020  | 7/14/2020 | Europe / United Kingdom / England |
| EPI_ISL_488723 | 5/17/2020 | 7/14/2020 | Europe / United Kingdom / England |
| EPI_ISL_488724 | 3/28/2020 | 7/14/2020 | Europe / United Kingdom / England |
| EPI_ISL_488725 | 3/24/2020 | 7/14/2020 | Europe / United Kingdom / England |
| EPI_ISL_488726 | 3/28/2020 | 7/14/2020 | Europe / United Kingdom / England |
| EPI_ISL_488727 | 3/29/2020 | 7/14/2020 | Europe / United Kingdom / England |

|                |           |                                             |
|----------------|-----------|---------------------------------------------|
| EPI_ISL_488728 | 3/28/2020 | 7/14/2020 Europe / United Kingdom / England |
| EPI_ISL_488729 | 3/21/2020 | 7/14/2020 Europe / United Kingdom / England |
| EPI_ISL_488730 | 3/30/2020 | 7/14/2020 Europe / United Kingdom / England |
| EPI_ISL_488731 | 3/25/2020 | 7/14/2020 Europe / United Kingdom / England |
| EPI_ISL_488732 | 3/29/2020 | 7/14/2020 Europe / United Kingdom / England |
| EPI_ISL_488733 | 3/29/2020 | 7/14/2020 Europe / United Kingdom / England |
| EPI_ISL_488734 | 3/30/2020 | 7/14/2020 Europe / United Kingdom / England |
| EPI_ISL_488735 | 4/1/2020  | 7/14/2020 Europe / United Kingdom / England |
| EPI_ISL_488736 | 4/1/2020  | 7/14/2020 Europe / United Kingdom / England |
| EPI_ISL_488737 | 3/12/2020 | 7/14/2020 Europe / United Kingdom / England |
| EPI_ISL_488738 | 3/31/2020 | 7/14/2020 Europe / United Kingdom / England |
| EPI_ISL_488739 | 3/25/2020 | 7/14/2020 Europe / United Kingdom / England |
| EPI_ISL_488740 | 3/28/2020 | 7/14/2020 Europe / United Kingdom / England |
| EPI_ISL_488741 | 3/31/2020 | 7/14/2020 Europe / United Kingdom / England |
| EPI_ISL_488742 | 4/3/2020  | 7/14/2020 Europe / United Kingdom / England |
| EPI_ISL_488743 | 3/20/2020 | 7/14/2020 Europe / United Kingdom / England |
| EPI_ISL_488744 | 3/17/2020 | 7/14/2020 Europe / United Kingdom / England |
| EPI_ISL_488745 | 4/2/2020  | 7/14/2020 Europe / United Kingdom / England |
| EPI_ISL_488746 | 3/29/2020 | 7/14/2020 Europe / United Kingdom / England |
| EPI_ISL_488747 | 3/22/2020 | 7/14/2020 Europe / United Kingdom / England |
| EPI_ISL_488748 | 3/9/2020  | 7/14/2020 Europe / United Kingdom / England |
| EPI_ISL_488749 | 3/15/2020 | 7/14/2020 Europe / United Kingdom / England |
| EPI_ISL_488750 | 3/16/2020 | 7/14/2020 Europe / United Kingdom / England |
| EPI_ISL_488751 | 4/2/2020  | 7/14/2020 Europe / United Kingdom / England |
| EPI_ISL_488752 | 3/20/2020 | 7/14/2020 Europe / United Kingdom / England |
| EPI_ISL_488753 | 3/23/2020 | 7/14/2020 Europe / United Kingdom / England |
| EPI_ISL_488754 | 3/28/2020 | 7/14/2020 Europe / United Kingdom / England |
| EPI_ISL_488755 | 3/20/2020 | 7/14/2020 Europe / United Kingdom / England |
| EPI_ISL_488756 | 3/9/2020  | 7/14/2020 Europe / United Kingdom / England |
| EPI_ISL_488757 | 3/18/2020 | 7/14/2020 Europe / United Kingdom / England |
| EPI_ISL_488758 | 3/13/2020 | 7/14/2020 Europe / United Kingdom / England |
| EPI_ISL_488759 | 3/22/2020 | 7/14/2020 Europe / United Kingdom / England |
| EPI_ISL_488760 | 3/3/2020  | 7/14/2020 Europe / United Kingdom / England |
| EPI_ISL_488761 | 4/4/2020  | 7/14/2020 Europe / United Kingdom / England |
| EPI_ISL_488762 | 3/18/2020 | 7/14/2020 Europe / United Kingdom / England |
| EPI_ISL_488763 | 3/19/2020 | 7/14/2020 Europe / United Kingdom / England |
| EPI_ISL_488764 | 3/12/2020 | 7/14/2020 Europe / United Kingdom / England |
| EPI_ISL_488765 | 3/19/2020 | 7/14/2020 Europe / United Kingdom / England |
| EPI_ISL_488766 | 3/17/2020 | 7/14/2020 Europe / United Kingdom / England |
| EPI_ISL_488767 | 3/16/2020 | 7/14/2020 Europe / United Kingdom / England |
| EPI_ISL_488768 | 3/24/2020 | 7/14/2020 Europe / United Kingdom / England |
| EPI_ISL_488769 | 3/20/2020 | 7/14/2020 Europe / United Kingdom / England |
| EPI_ISL_488771 | 3/12/2020 | 7/14/2020 Europe / United Kingdom / England |
| EPI_ISL_488772 | 3/16/2020 | 7/14/2020 Europe / United Kingdom / England |
| EPI_ISL_488773 | 3/21/2020 | 7/14/2020 Europe / United Kingdom / England |
| EPI_ISL_488774 | 3/17/2020 | 7/14/2020 Europe / United Kingdom / England |
| EPI_ISL_488775 | 3/15/2020 | 7/14/2020 Europe / United Kingdom / England |

|                |           |           |                                   |
|----------------|-----------|-----------|-----------------------------------|
| EPI_ISL_488776 | 4/30/2020 | 7/14/2020 | Europe / United Kingdom / England |
| EPI_ISL_488777 | 3/21/2020 | 7/14/2020 | Europe / United Kingdom / England |
| EPI_ISL_488778 | 3/21/2020 | 7/14/2020 | Europe / United Kingdom / England |
| EPI_ISL_488779 | 3/16/2020 | 7/14/2020 | Europe / United Kingdom / England |
| EPI_ISL_488780 | 3/24/2020 | 7/14/2020 | Europe / United Kingdom / England |
| EPI_ISL_488782 | 3/23/2020 | 7/14/2020 | Europe / United Kingdom / England |
| EPI_ISL_488783 | 3/20/2020 | 7/14/2020 | Europe / United Kingdom / England |
| EPI_ISL_488784 | 4/5/2020  | 7/14/2020 | Europe / United Kingdom / England |
| EPI_ISL_488785 | 3/16/2020 | 7/14/2020 | Europe / United Kingdom / England |
| EPI_ISL_488786 | 3/15/2020 | 7/14/2020 | Europe / United Kingdom / England |
| EPI_ISL_488787 | 3/21/2020 | 7/14/2020 | Europe / United Kingdom / England |
| EPI_ISL_488788 | 3/2/2020  | 7/14/2020 | Europe / United Kingdom / England |
| EPI_ISL_488789 | 3/19/2020 | 7/14/2020 | Europe / United Kingdom / England |
| EPI_ISL_488790 | 3/23/2020 | 7/14/2020 | Europe / United Kingdom / England |
| EPI_ISL_488791 | 3/13/2020 | 7/14/2020 | Europe / United Kingdom / England |
| EPI_ISL_488792 | 3/17/2020 | 7/14/2020 | Europe / United Kingdom / England |
| EPI_ISL_488793 | 3/20/2020 | 7/14/2020 | Europe / United Kingdom / England |
| EPI_ISL_488794 | 3/18/2020 | 7/14/2020 | Europe / United Kingdom / England |
| EPI_ISL_488795 | 3/24/2020 | 7/14/2020 | Europe / United Kingdom / England |
| EPI_ISL_488796 | 3/24/2020 | 7/14/2020 | Europe / United Kingdom / England |
| EPI_ISL_488797 | 3/15/2020 | 7/14/2020 | Europe / United Kingdom / England |
| EPI_ISL_488798 | 3/20/2020 | 7/14/2020 | Europe / United Kingdom / England |
| EPI_ISL_488799 | 3/18/2020 | 7/14/2020 | Europe / United Kingdom / England |
| EPI_ISL_488800 | 3/2/2020  | 7/14/2020 | Europe / United Kingdom / England |
| EPI_ISL_488801 | 3/15/2020 | 7/14/2020 | Europe / United Kingdom / England |
| EPI_ISL_488802 | 3/23/2020 | 7/14/2020 | Europe / United Kingdom / England |
| EPI_ISL_488803 | 3/3/2020  | 7/14/2020 | Europe / United Kingdom / England |
| EPI_ISL_488804 | 3/20/2020 | 7/14/2020 | Europe / United Kingdom / England |
| EPI_ISL_488805 | 3/18/2020 | 7/14/2020 | Europe / United Kingdom / England |
| EPI_ISL_488806 | 3/12/2020 | 7/14/2020 | Europe / United Kingdom / England |
| EPI_ISL_488807 | 3/9/2020  | 7/14/2020 | Europe / United Kingdom / England |
| EPI_ISL_488808 | 4/4/2020  | 7/14/2020 | Europe / United Kingdom / England |
| EPI_ISL_488809 | 3/17/2020 | 7/14/2020 | Europe / United Kingdom / England |
| EPI_ISL_488810 | 3/20/2020 | 7/14/2020 | Europe / United Kingdom / England |
| EPI_ISL_488811 | 3/21/2020 | 7/14/2020 | Europe / United Kingdom / England |
| EPI_ISL_488812 | 3/21/2020 | 7/14/2020 | Europe / United Kingdom / England |
| EPI_ISL_488813 | 3/22/2020 | 7/14/2020 | Europe / United Kingdom / England |
| EPI_ISL_488814 | 3/21/2020 | 7/14/2020 | Europe / United Kingdom / England |
| EPI_ISL_488815 | 3/21/2020 | 7/14/2020 | Europe / United Kingdom / England |
| EPI_ISL_488816 | 3/21/2020 | 7/14/2020 | Europe / United Kingdom / England |
| EPI_ISL_488817 | 3/5/2020  | 7/14/2020 | Europe / United Kingdom / England |
| EPI_ISL_488818 | 3/18/2020 | 7/14/2020 | Europe / United Kingdom / England |
| EPI_ISL_488819 | 3/23/2020 | 7/14/2020 | Europe / United Kingdom / England |
| EPI_ISL_488820 | 3/13/2020 | 7/14/2020 | Europe / United Kingdom / England |
| EPI_ISL_488821 | 3/19/2020 | 7/14/2020 | Europe / United Kingdom / England |
| EPI_ISL_488822 | 3/21/2020 | 7/14/2020 | Europe / United Kingdom / England |
| EPI_ISL_488823 | 3/18/2020 | 7/14/2020 | Europe / United Kingdom / England |

|                |           |           |                                            |
|----------------|-----------|-----------|--------------------------------------------|
| EPI_ISL_488824 | 3/19/2020 | 7/14/2020 | Europe / United Kingdom / England          |
| EPI_ISL_488825 | 3/22/2020 | 7/14/2020 | Europe / United Kingdom / England          |
| EPI_ISL_488826 | 3/14/2020 | 7/14/2020 | Europe / United Kingdom / England          |
| EPI_ISL_488827 | 4/3/2020  | 7/14/2020 | Europe / United Kingdom / England          |
| EPI_ISL_488828 | 3/18/2020 | 7/14/2020 | Europe / United Kingdom / England          |
| EPI_ISL_488829 | 3/6/2020  | 7/14/2020 | Europe / United Kingdom / England          |
| EPI_ISL_488830 | 3/23/2020 | 7/14/2020 | Europe / United Kingdom / England          |
| EPI_ISL_488831 | 3/5/2020  | 7/14/2020 | Europe / United Kingdom / England          |
| EPI_ISL_488832 | 3/21/2020 | 7/14/2020 | Europe / United Kingdom / England          |
| EPI_ISL_488834 | 3/13/2020 | 7/14/2020 | Europe / United Kingdom / England          |
| EPI_ISL_488835 | 4/3/2020  | 7/14/2020 | Europe / United Kingdom / England          |
| EPI_ISL_488836 | 4/4/2020  | 7/14/2020 | Europe / United Kingdom / England          |
| EPI_ISL_488837 | 5/19/2020 | 7/14/2020 | Europe / United Kingdom / England          |
| EPI_ISL_488838 | 5/21/2020 | 7/14/2020 | Europe / United Kingdom / England          |
| EPI_ISL_488839 | 5/18/2020 | 7/14/2020 | Europe / United Kingdom / England          |
| EPI_ISL_488840 | 5/13/2020 | 7/14/2020 | Europe / United Kingdom / England          |
| EPI_ISL_488842 | 5/19/2020 | 7/14/2020 | Europe / United Kingdom / England          |
| EPI_ISL_488843 | 5/20/2020 | 7/14/2020 | Europe / United Kingdom / England          |
| EPI_ISL_488844 | 5/26/2020 | 7/14/2020 | Europe / United Kingdom / England          |
| EPI_ISL_488845 | 4/19/2020 | 7/14/2020 | Europe / United Kingdom / England          |
| EPI_ISL_488848 | 6/9/2020  | 7/14/2020 | Europe / United Kingdom / England          |
| EPI_ISL_488850 | 6/9/2020  | 7/14/2020 | Europe / United Kingdom / England          |
| EPI_ISL_488851 | 5/19/2020 | 7/14/2020 | Europe / United Kingdom / England          |
| EPI_ISL_488852 | 5/19/2020 | 7/14/2020 | Europe / United Kingdom / England          |
| EPI_ISL_488854 | 5/12/2020 | 7/14/2020 | Europe / United Kingdom / England          |
| EPI_ISL_488856 | 5/11/2020 | 7/14/2020 | Europe / United Kingdom / England          |
| EPI_ISL_488857 | 6/2/2020  | 7/14/2020 | Europe / United Kingdom / England          |
| EPI_ISL_488858 | 5/27/2020 | 7/14/2020 | Europe / United Kingdom / England          |
| EPI_ISL_488859 | 6/4/2020  | 7/14/2020 | Europe / United Kingdom / England          |
| EPI_ISL_488860 | 5/24/2020 | 7/14/2020 | Europe / United Kingdom / England          |
| EPI_ISL_488861 | 5/13/2020 | 7/14/2020 | Europe / United Kingdom / England          |
| EPI_ISL_488862 | 5/21/2020 | 7/14/2020 | Europe / United Kingdom / England          |
| EPI_ISL_488863 | 4/24/2020 | 7/14/2020 | Europe / United Kingdom / England          |
| EPI_ISL_488865 | 5/26/2020 | 7/14/2020 | Europe / United Kingdom / England          |
| EPI_ISL_488866 | 6/2/2020  | 7/14/2020 | Europe / United Kingdom / England          |
| EPI_ISL_488867 | 5/26/2020 | 7/14/2020 | Europe / United Kingdom / England          |
| EPI_ISL_488868 | 5/25/2020 | 7/14/2020 | Europe / United Kingdom / England          |
| EPI_ISL_488869 | 5/28/2020 | 7/14/2020 | Europe / United Kingdom / England          |
| EPI_ISL_488870 | 6/3/2020  | 7/14/2020 | Europe / United Kingdom / England          |
| EPI_ISL_488871 | 5/20/2020 | 7/14/2020 | Europe / United Kingdom / England          |
| EPI_ISL_488872 | 4/28/2020 | 7/14/2020 | Europe / United Kingdom / England          |
| EPI_ISL_488873 | 5/14/2020 | 7/14/2020 | Europe / United Kingdom / England          |
| EPI_ISL_488874 | 5/18/2020 | 7/14/2020 | Europe / United Kingdom / Northern Ireland |
| EPI_ISL_488876 | 6/1/2020  | 7/14/2020 | Europe / United Kingdom / Northern Ireland |
| EPI_ISL_488877 | 5/31/2020 | 7/14/2020 | Europe / United Kingdom / England          |
| EPI_ISL_488879 | 4/3/2020  | 7/14/2020 | Europe / United Kingdom / Scotland         |
| EPI_ISL_488880 | 4/4/2020  | 7/14/2020 | Europe / United Kingdom / Scotland         |





|                |           |           |                                    |
|----------------|-----------|-----------|------------------------------------|
| EPI_ISL_488977 | 3/27/2020 | 7/14/2020 | Europe / United Kingdom / Scotland |
| EPI_ISL_488978 | 4/8/2020  | 7/14/2020 | Europe / United Kingdom / Scotland |
| EPI_ISL_488979 | 4/3/2020  | 7/14/2020 | Europe / United Kingdom / Scotland |
| EPI_ISL_488980 | 3/27/2020 | 7/14/2020 | Europe / United Kingdom / Scotland |
| EPI_ISL_488981 | 4/6/2020  | 7/14/2020 | Europe / United Kingdom / Scotland |
| EPI_ISL_488982 | 4/3/2020  | 7/14/2020 | Europe / United Kingdom / Scotland |
| EPI_ISL_488983 | 4/7/2020  | 7/14/2020 | Europe / United Kingdom / Scotland |
| EPI_ISL_488984 | 3/27/2020 | 7/14/2020 | Europe / United Kingdom / Scotland |
| EPI_ISL_488985 | 3/30/2020 | 7/14/2020 | Europe / United Kingdom / Scotland |
| EPI_ISL_488986 | 4/4/2020  | 7/14/2020 | Europe / United Kingdom / Scotland |
| EPI_ISL_488987 | 4/8/2020  | 7/14/2020 | Europe / United Kingdom / Scotland |
| EPI_ISL_488988 | 3/27/2020 | 7/14/2020 | Europe / United Kingdom / Scotland |
| EPI_ISL_488989 | 4/6/2020  | 7/14/2020 | Europe / United Kingdom / Scotland |
| EPI_ISL_488990 | 4/2/2020  | 7/14/2020 | Europe / United Kingdom / Scotland |
| EPI_ISL_488991 | 4/2/2020  | 7/14/2020 | Europe / United Kingdom / Scotland |
| EPI_ISL_488992 | 4/3/2020  | 7/14/2020 | Europe / United Kingdom / Scotland |
| EPI_ISL_488993 | 4/3/2020  | 7/14/2020 | Europe / United Kingdom / Scotland |
| EPI_ISL_488994 | 4/6/2020  | 7/14/2020 | Europe / United Kingdom / Scotland |
| EPI_ISL_488995 | 3/31/2020 | 7/14/2020 | Europe / United Kingdom / Scotland |
| EPI_ISL_488996 | 3/27/2020 | 7/14/2020 | Europe / United Kingdom / Scotland |
| EPI_ISL_488997 | 3/30/2020 | 7/14/2020 | Europe / United Kingdom / Scotland |
| EPI_ISL_488998 | 4/7/2020  | 7/14/2020 | Europe / United Kingdom / Scotland |
| EPI_ISL_488999 | 4/2/2020  | 7/14/2020 | Europe / United Kingdom / Scotland |
| EPI_ISL_489000 | 4/4/2020  | 7/14/2020 | Europe / United Kingdom / Scotland |
| EPI_ISL_489001 | 4/3/2020  | 7/14/2020 | Europe / United Kingdom / Scotland |
| EPI_ISL_489002 | 3/27/2020 | 7/14/2020 | Europe / United Kingdom / Scotland |
| EPI_ISL_489003 | 3/30/2020 | 7/14/2020 | Europe / United Kingdom / Scotland |
| EPI_ISL_489004 | 4/3/2020  | 7/14/2020 | Europe / United Kingdom / Scotland |
| EPI_ISL_489005 | 4/3/2020  | 7/14/2020 | Europe / United Kingdom / Scotland |
| EPI_ISL_489006 | 3/26/2020 | 7/14/2020 | Europe / United Kingdom / Scotland |
| EPI_ISL_489007 | 4/5/2020  | 7/14/2020 | Europe / United Kingdom / Scotland |
| EPI_ISL_489008 | 4/3/2020  | 7/14/2020 | Europe / United Kingdom / Scotland |
| EPI_ISL_489009 | 4/6/2020  | 7/14/2020 | Europe / United Kingdom / Scotland |
| EPI_ISL_489010 | 4/1/2020  | 7/14/2020 | Europe / United Kingdom / Scotland |
| EPI_ISL_489011 | 4/7/2020  | 7/14/2020 | Europe / United Kingdom / Scotland |
| EPI_ISL_489012 | 4/7/2020  | 7/14/2020 | Europe / United Kingdom / Scotland |
| EPI_ISL_489013 | 4/2/2020  | 7/14/2020 | Europe / United Kingdom / Scotland |
| EPI_ISL_489014 | 4/5/2020  | 7/14/2020 | Europe / United Kingdom / Scotland |
| EPI_ISL_489015 | 3/30/2020 | 7/14/2020 | Europe / United Kingdom / Scotland |
| EPI_ISL_489016 | 3/31/2020 | 7/14/2020 | Europe / United Kingdom / Scotland |
| EPI_ISL_489017 | 4/8/2020  | 7/14/2020 | Europe / United Kingdom / Scotland |
| EPI_ISL_489018 | 3/27/2020 | 7/14/2020 | Europe / United Kingdom / Scotland |
| EPI_ISL_489019 | 4/6/2020  | 7/14/2020 | Europe / United Kingdom / Scotland |
| EPI_ISL_489020 | 3/27/2020 | 7/14/2020 | Europe / United Kingdom / Scotland |
| EPI_ISL_489021 | 4/4/2020  | 7/14/2020 | Europe / United Kingdom / Scotland |
| EPI_ISL_489022 | 4/4/2020  | 7/14/2020 | Europe / United Kingdom / Scotland |
| EPI_ISL_489023 | 4/2/2020  | 7/14/2020 | Europe / United Kingdom / Scotland |



|                |           |           |                                    |
|----------------|-----------|-----------|------------------------------------|
| EPI_ISL_489024 | 4/7/2020  | 7/14/2020 | Europe / United Kingdom / Scotland |
| EPI_ISL_489025 | 3/31/2020 | 7/14/2020 | Europe / United Kingdom / Scotland |
| EPI_ISL_489026 | 3/30/2020 | 7/14/2020 | Europe / United Kingdom / Scotland |
| EPI_ISL_489027 | 4/1/2020  | 7/14/2020 | Europe / United Kingdom / Scotland |
| EPI_ISL_489028 | 3/31/2020 | 7/14/2020 | Europe / United Kingdom / Scotland |
| EPI_ISL_489029 | 4/4/2020  | 7/14/2020 | Europe / United Kingdom / Scotland |
| EPI_ISL_489030 | 4/1/2020  | 7/14/2020 | Europe / United Kingdom / Scotland |
| EPI_ISL_489031 | 4/5/2020  | 7/14/2020 | Europe / United Kingdom / Scotland |
| EPI_ISL_489032 | 4/3/2020  | 7/14/2020 | Europe / United Kingdom / Scotland |
| EPI_ISL_489033 | 3/30/2020 | 7/14/2020 | Europe / United Kingdom / Scotland |
| EPI_ISL_489034 | 4/6/2020  | 7/14/2020 | Europe / United Kingdom / Scotland |
| EPI_ISL_489035 | 4/6/2020  | 7/14/2020 | Europe / United Kingdom / Scotland |
| EPI_ISL_489036 | 4/7/2020  | 7/14/2020 | Europe / United Kingdom / Scotland |
| EPI_ISL_489037 | 4/6/2020  | 7/14/2020 | Europe / United Kingdom / Scotland |
| EPI_ISL_489038 | 4/3/2020  | 7/14/2020 | Europe / United Kingdom / Scotland |
| EPI_ISL_489039 | 3/30/2020 | 7/14/2020 | Europe / United Kingdom / Scotland |
| EPI_ISL_489040 | 4/6/2020  | 7/14/2020 | Europe / United Kingdom / Scotland |
| EPI_ISL_489041 | 3/31/2020 | 7/14/2020 | Europe / United Kingdom / Scotland |
| EPI_ISL_489042 | 4/6/2020  | 7/14/2020 | Europe / United Kingdom / Scotland |
| EPI_ISL_489044 | 4/8/2020  | 7/14/2020 | Europe / United Kingdom / Scotland |
| EPI_ISL_489045 | 4/4/2020  | 7/14/2020 | Europe / United Kingdom / Scotland |
| EPI_ISL_489046 | 4/2/2020  | 7/14/2020 | Europe / United Kingdom / Scotland |
| EPI_ISL_489047 | 3/27/2020 | 7/14/2020 | Europe / United Kingdom / Scotland |
| EPI_ISL_489048 | 4/6/2020  | 7/14/2020 | Europe / United Kingdom / Scotland |
| EPI_ISL_489049 | 4/8/2020  | 7/14/2020 | Europe / United Kingdom / Scotland |
| EPI_ISL_489050 | 4/3/2020  | 7/14/2020 | Europe / United Kingdom / Scotland |
| EPI_ISL_489051 | 4/8/2020  | 7/14/2020 | Europe / United Kingdom / Scotland |
| EPI_ISL_489052 | 4/3/2020  | 7/14/2020 | Europe / United Kingdom / Scotland |
| EPI_ISL_489053 | 4/5/2020  | 7/14/2020 | Europe / United Kingdom / Scotland |
| EPI_ISL_489054 | 3/26/2020 | 7/14/2020 | Europe / United Kingdom / Scotland |
| EPI_ISL_489055 | 4/6/2020  | 7/14/2020 | Europe / United Kingdom / Scotland |
| EPI_ISL_489056 | 4/6/2020  | 7/14/2020 | Europe / United Kingdom / Scotland |
| EPI_ISL_489057 | 4/2/2020  | 7/14/2020 | Europe / United Kingdom / Scotland |
| EPI_ISL_489058 | 4/6/2020  | 7/14/2020 | Europe / United Kingdom / Scotland |
| EPI_ISL_489059 | 4/8/2020  | 7/14/2020 | Europe / United Kingdom / Scotland |
| EPI_ISL_489060 | 3/30/2020 | 7/14/2020 | Europe / United Kingdom / Scotland |
| EPI_ISL_489061 | 4/3/2020  | 7/14/2020 | Europe / United Kingdom / Scotland |
| EPI_ISL_489062 | 3/28/2020 | 7/14/2020 | Europe / United Kingdom / Scotland |
| EPI_ISL_489063 | 4/6/2020  | 7/14/2020 | Europe / United Kingdom / Scotland |
| EPI_ISL_489065 | 5/7/2020  | 7/14/2020 | Europe / United Kingdom / England  |
| EPI_ISL_489067 | 5/22/2020 | 7/14/2020 | Europe / United Kingdom / England  |
| EPI_ISL_489068 | 5/5/2020  | 7/14/2020 | Europe / United Kingdom / England  |
| EPI_ISL_489070 | 5/4/2020  | 7/14/2020 | Europe / United Kingdom / England  |
| EPI_ISL_489072 | 5/11/2020 | 7/14/2020 | Europe / United Kingdom / England  |
| EPI_ISL_489073 | 5/19/2020 | 7/14/2020 | Europe / United Kingdom / England  |
| EPI_ISL_489074 | 5/7/2020  | 7/14/2020 | Europe / United Kingdom / England  |
| EPI_ISL_489075 | 5/7/2020  | 7/14/2020 | Europe / United Kingdom / England  |

|                |           |           |                                   |
|----------------|-----------|-----------|-----------------------------------|
| EPI_ISL_489076 | 5/30/2020 | 7/14/2020 | Europe / United Kingdom / England |
| EPI_ISL_489077 | 5/8/2020  | 7/14/2020 | Europe / United Kingdom / England |
| EPI_ISL_489078 | 5/11/2020 | 7/14/2020 | Europe / United Kingdom / England |
| EPI_ISL_489079 | 5/6/2020  | 7/14/2020 | Europe / United Kingdom / England |
| EPI_ISL_489080 | 5/18/2020 | 7/14/2020 | Europe / United Kingdom / England |
| EPI_ISL_489081 | 5/6/2020  | 7/14/2020 | Europe / United Kingdom / England |
| EPI_ISL_489082 | 5/8/2020  | 7/14/2020 | Europe / United Kingdom / England |
| EPI_ISL_489083 | 5/12/2020 | 7/14/2020 | Europe / United Kingdom / England |
| EPI_ISL_489084 | 5/15/2020 | 7/14/2020 | Europe / United Kingdom / England |
| EPI_ISL_489085 | 5/30/2020 | 7/14/2020 | Europe / United Kingdom / England |
| EPI_ISL_489086 | 5/8/2020  | 7/14/2020 | Europe / United Kingdom / England |
| EPI_ISL_489087 | 5/5/2020  | 7/14/2020 | Europe / United Kingdom / England |
| EPI_ISL_489088 | 5/6/2020  | 7/14/2020 | Europe / United Kingdom / England |
| EPI_ISL_489089 | 5/22/2020 | 7/14/2020 | Europe / United Kingdom / England |
| EPI_ISL_489091 | 5/24/2020 | 7/14/2020 | Europe / United Kingdom / England |
| EPI_ISL_489092 | 5/14/2020 | 7/14/2020 | Europe / United Kingdom / England |
| EPI_ISL_489093 | 5/19/2020 | 7/14/2020 | Europe / United Kingdom / England |
| EPI_ISL_489094 | 5/22/2020 | 7/14/2020 | Europe / United Kingdom / England |
| EPI_ISL_489096 | 5/15/2020 | 7/14/2020 | Europe / United Kingdom / England |
| EPI_ISL_489097 | 5/12/2020 | 7/14/2020 | Europe / United Kingdom / England |
| EPI_ISL_489099 | 5/30/2020 | 7/14/2020 | Europe / United Kingdom / England |
| EPI_ISL_489100 | 5/9/2020  | 7/14/2020 | Europe / United Kingdom / England |
| EPI_ISL_489101 | 5/12/2020 | 7/14/2020 | Europe / United Kingdom / England |
| EPI_ISL_489102 | 5/19/2020 | 7/14/2020 | Europe / United Kingdom / England |
| EPI_ISL_489103 | 5/7/2020  | 7/14/2020 | Europe / United Kingdom / England |
| EPI_ISL_489104 | 5/15/2020 | 7/14/2020 | Europe / United Kingdom / England |
| EPI_ISL_489105 | 5/18/2020 | 7/14/2020 | Europe / United Kingdom / England |
| EPI_ISL_489106 | 5/7/2020  | 7/14/2020 | Europe / United Kingdom / England |
| EPI_ISL_489107 | 5/5/2020  | 7/14/2020 | Europe / United Kingdom / England |
| EPI_ISL_489108 | 5/12/2020 | 7/14/2020 | Europe / United Kingdom / England |
| EPI_ISL_489109 | 5/5/2020  | 7/14/2020 | Europe / United Kingdom / England |
| EPI_ISL_489110 | 5/14/2020 | 7/14/2020 | Europe / United Kingdom / England |
| EPI_ISL_489113 | 5/20/2020 | 7/14/2020 | Europe / United Kingdom / England |
| EPI_ISL_489114 | 5/5/2020  | 7/14/2020 | Europe / United Kingdom / England |
| EPI_ISL_489117 | 5/14/2020 | 7/14/2020 | Europe / United Kingdom / England |
| EPI_ISL_489119 | 5/11/2020 | 7/14/2020 | Europe / United Kingdom / England |
| EPI_ISL_489120 | 5/28/2020 | 7/14/2020 | Europe / United Kingdom / England |
| EPI_ISL_489121 | 5/30/2020 | 7/14/2020 | Europe / United Kingdom / England |
| EPI_ISL_489122 | 5/6/2020  | 7/14/2020 | Europe / United Kingdom / England |
| EPI_ISL_489123 | 5/5/2020  | 7/14/2020 | Europe / United Kingdom / England |
| EPI_ISL_489124 | 5/12/2020 | 7/14/2020 | Europe / United Kingdom / England |
| EPI_ISL_489125 | 5/8/2020  | 7/14/2020 | Europe / United Kingdom / England |
| EPI_ISL_489126 | 5/11/2020 | 7/14/2020 | Europe / United Kingdom / England |
| EPI_ISL_489127 | 5/12/2020 | 7/14/2020 | Europe / United Kingdom / England |
| EPI_ISL_489128 | 5/11/2020 | 7/14/2020 | Europe / United Kingdom / England |
| EPI_ISL_489129 | 5/27/2020 | 7/14/2020 | Europe / United Kingdom / England |
| EPI_ISL_489131 | 5/5/2020  | 7/14/2020 | Europe / United Kingdom / England |







|                |           |           |                                            |
|----------------|-----------|-----------|--------------------------------------------|
| EPI_ISL_489356 | 4/20/2020 | 7/14/2020 | Europe / United Kingdom / Northern Ireland |
| EPI_ISL_489359 | 4/27/2020 | 7/14/2020 | Europe / United Kingdom / Northern Ireland |
| EPI_ISL_489360 | 4/17/2020 | 7/14/2020 | Europe / United Kingdom / Northern Ireland |
| EPI_ISL_489361 | 4/24/2020 | 7/14/2020 | Europe / United Kingdom / Northern Ireland |
| EPI_ISL_489362 | 4/21/2020 | 7/14/2020 | Europe / United Kingdom / Northern Ireland |
| EPI_ISL_489365 | 4/21/2020 | 7/14/2020 | Europe / United Kingdom / Northern Ireland |
| EPI_ISL_489366 | 4/17/2020 | 7/14/2020 | Europe / United Kingdom / Northern Ireland |
| EPI_ISL_489367 | 4/24/2020 | 7/14/2020 | Europe / United Kingdom / Northern Ireland |
| EPI_ISL_489369 | 4/17/2020 | 7/14/2020 | Europe / United Kingdom / Northern Ireland |
| EPI_ISL_489371 | 4/24/2020 | 7/14/2020 | Europe / United Kingdom / Northern Ireland |
| EPI_ISL_489373 | 5/2/2020  | 7/14/2020 | Europe / United Kingdom / Northern Ireland |
| EPI_ISL_489375 | 4/17/2020 | 7/14/2020 | Europe / United Kingdom / Northern Ireland |
| EPI_ISL_489377 | 4/17/2020 | 7/14/2020 | Europe / United Kingdom / Northern Ireland |
| EPI_ISL_489378 | 4/27/2020 | 7/14/2020 | Europe / United Kingdom / Northern Ireland |
| EPI_ISL_489379 | 4/27/2020 | 7/14/2020 | Europe / United Kingdom / Northern Ireland |
| EPI_ISL_489380 | 3/27/2020 | 7/14/2020 | Europe / United Kingdom / Scotland         |
| EPI_ISL_489381 | 4/22/2020 | 7/14/2020 | Europe / United Kingdom / England          |
| EPI_ISL_489382 | 4/22/2020 | 7/14/2020 | Europe / United Kingdom / England          |
| EPI_ISL_489383 | 4/22/2020 | 7/14/2020 | Europe / United Kingdom / England          |
| EPI_ISL_489384 | 4/23/2020 | 7/14/2020 | Europe / United Kingdom / England          |
| EPI_ISL_489386 | 4/22/2020 | 7/14/2020 | Europe / United Kingdom / England          |
| EPI_ISL_489387 | 4/26/2020 | 7/14/2020 | Europe / United Kingdom / England          |
| EPI_ISL_489390 | 4/23/2020 | 7/14/2020 | Europe / United Kingdom / England          |
| EPI_ISL_489391 | 3/26/2020 | 7/14/2020 | Europe / United Kingdom / Scotland         |
| EPI_ISL_489392 | 3/25/2020 | 7/14/2020 | Europe / United Kingdom / Scotland         |
| EPI_ISL_489394 | 4/22/2020 | 7/14/2020 | Europe / United Kingdom / England          |
| EPI_ISL_489395 | 4/24/2020 | 7/14/2020 | Europe / United Kingdom / England          |
| EPI_ISL_489396 | 3/27/2020 | 7/14/2020 | Europe / United Kingdom / Scotland         |
| EPI_ISL_489397 | 4/26/2020 | 7/14/2020 | Europe / United Kingdom / England          |
| EPI_ISL_489401 | 3/27/2020 | 7/14/2020 | Europe / United Kingdom / Scotland         |
| EPI_ISL_489407 | 3/27/2020 | 7/14/2020 | Europe / United Kingdom / Scotland         |
| EPI_ISL_489408 | 3/26/2020 | 7/14/2020 | Europe / United Kingdom / Scotland         |
| EPI_ISL_489409 | 4/25/2020 | 7/14/2020 | Europe / United Kingdom / England          |
| EPI_ISL_489411 | 4/22/2020 | 7/14/2020 | Europe / United Kingdom / England          |
| EPI_ISL_489414 | 4/22/2020 | 7/14/2020 | Europe / United Kingdom / England          |
| EPI_ISL_489415 | 4/22/2020 | 7/14/2020 | Europe / United Kingdom / England          |
| EPI_ISL_489416 | 4/25/2020 | 7/14/2020 | Europe / United Kingdom / England          |
| EPI_ISL_489418 | 3/27/2020 | 7/14/2020 | Europe / United Kingdom / Scotland         |
| EPI_ISL_489420 | 4/24/2020 | 7/14/2020 | Europe / United Kingdom / England          |
| EPI_ISL_489427 | 4/21/2020 | 7/14/2020 | Europe / United Kingdom / England          |
| EPI_ISL_489428 | 4/22/2020 | 7/14/2020 | Europe / United Kingdom / England          |
| EPI_ISL_489429 | 3/27/2020 | 7/14/2020 | Europe / United Kingdom / Scotland         |
| EPI_ISL_489430 | 4/22/2020 | 7/14/2020 | Europe / United Kingdom / England          |
| EPI_ISL_489431 | 4/23/2020 | 7/14/2020 | Europe / United Kingdom / England          |
| EPI_ISL_489432 | 4/23/2020 | 7/14/2020 | Europe / United Kingdom / England          |
| EPI_ISL_489435 | 4/25/2020 | 7/14/2020 | Europe / United Kingdom / England          |
| EPI_ISL_489436 | 4/24/2020 | 7/14/2020 | Europe / United Kingdom / England          |











|                |           |           |                                     |
|----------------|-----------|-----------|-------------------------------------|
| EPI_ISL_489703 | 3/28/2020 | 7/14/2020 | Europe / United Kingdom / Scotland  |
| EPI_ISL_489704 | 3/28/2020 | 7/14/2020 | Europe / United Kingdom / Scotland  |
| EPI_ISL_489705 | 3/28/2020 | 7/14/2020 | Europe / United Kingdom / Scotland  |
| EPI_ISL_489706 | 3/28/2020 | 7/14/2020 | Europe / United Kingdom / Scotland  |
| EPI_ISL_489708 | 3/22/2020 | 7/14/2020 | Europe / Czech Republic / Brno      |
| EPI_ISL_489709 | 3/26/2020 | 7/14/2020 | Europe / Czech Republic / Domazlice |
| EPI_ISL_489710 | 4/19/2020 | 7/14/2020 | North America / USA / Florida       |
| EPI_ISL_489711 | 5/29/2020 | 7/14/2020 | North America / USA / Florida       |
| EPI_ISL_489712 | 5/29/2020 | 7/14/2020 | North America / USA / Florida       |
| EPI_ISL_489716 | 6/1/2020  | 7/14/2020 | North America / USA / Florida       |
| EPI_ISL_489717 | 6/2/2020  | 7/14/2020 | North America / USA / Florida       |
| EPI_ISL_489718 | 6/2/2020  | 7/14/2020 | North America / USA / Florida       |
| EPI_ISL_489720 | 6/2/2020  | 7/14/2020 | North America / USA / Florida       |
| EPI_ISL_489722 | 6/2/2020  | 7/14/2020 | North America / USA / Florida       |
| EPI_ISL_489723 | 6/2/2020  | 7/14/2020 | North America / USA / Florida       |
| EPI_ISL_489724 | 6/2/2020  | 7/14/2020 | North America / USA / Florida       |
| EPI_ISL_489727 | 4/13/2020 | 7/14/2020 | North America / USA / Florida       |
| EPI_ISL_489728 | 4/13/2020 | 7/14/2020 | North America / USA / Florida       |
| EPI_ISL_489729 | 4/13/2020 | 7/14/2020 | North America / USA / Florida       |
| EPI_ISL_489730 | 4/13/2020 | 7/14/2020 | North America / USA / Florida       |
| EPI_ISL_489731 | 4/12/2020 | 7/14/2020 | North America / USA / Florida       |
| EPI_ISL_489733 | 4/10/2020 | 7/14/2020 | North America / USA / Florida       |
| EPI_ISL_489734 | 4/13/2020 | 7/14/2020 | North America / USA / Florida       |
| EPI_ISL_489737 | 4/13/2020 | 7/14/2020 | North America / USA / Florida       |
| EPI_ISL_489739 | 4/13/2020 | 7/14/2020 | North America / USA / Florida       |
| EPI_ISL_489741 | 4/15/2020 | 7/14/2020 | North America / USA / Florida       |
| EPI_ISL_489745 | 4/19/2020 | 7/14/2020 | North America / USA / Florida       |
| EPI_ISL_489747 | 4/19/2020 | 7/14/2020 | North America / USA / Florida       |
| EPI_ISL_489752 | 4/11/2020 | 7/14/2020 | North America / USA / Florida       |
| EPI_ISL_489753 | 4/11/2020 | 7/14/2020 | North America / USA / Florida       |
| EPI_ISL_489754 | 4/12/2020 | 7/14/2020 | North America / USA / Florida       |
| EPI_ISL_489756 | 4/13/2020 | 7/14/2020 | North America / USA / Florida       |
| EPI_ISL_489758 | 4/13/2020 | 7/14/2020 | North America / USA / Florida       |
| EPI_ISL_489759 | 4/13/2020 | 7/14/2020 | North America / USA / Florida       |
| EPI_ISL_489760 | 4/13/2020 | 7/14/2020 | North America / USA / Florida       |
| EPI_ISL_489761 | 4/13/2020 | 7/14/2020 | North America / USA / Florida       |
| EPI_ISL_489762 | 4/13/2020 | 7/14/2020 | North America / USA / Florida       |
| EPI_ISL_489763 | 4/12/2020 | 7/14/2020 | North America / USA / Florida       |
| EPI_ISL_489764 | 4/12/2020 | 7/14/2020 | North America / USA / Florida       |
| EPI_ISL_489765 | 4/13/2020 | 7/14/2020 | North America / USA / Florida       |
| EPI_ISL_489767 | 4/13/2020 | 7/14/2020 | North America / USA / Florida       |
| EPI_ISL_489769 | 4/13/2020 | 7/14/2020 | North America / USA / Florida       |
| EPI_ISL_489770 | 4/13/2020 | 7/14/2020 | North America / USA / Florida       |
| EPI_ISL_489772 | 4/13/2020 | 7/14/2020 | North America / USA / Florida       |
| EPI_ISL_489773 | 4/13/2020 | 7/14/2020 | North America / USA / Florida       |
| EPI_ISL_489777 | 4/21/2020 | 7/14/2020 | North America / USA / Florida       |
| EPI_ISL_489778 | 4/21/2020 | 7/14/2020 | North America / USA / Florida       |

|                |           |                                                              |
|----------------|-----------|--------------------------------------------------------------|
| EPI_ISL_489780 | 4/22/2020 | 7/14/2020 North America / USA / Florida                      |
| EPI_ISL_489781 | 4/21/2020 | 7/14/2020 North America / USA / Florida                      |
| EPI_ISL_489782 | 4/21/2020 | 7/14/2020 North America / USA / Florida                      |
| EPI_ISL_489784 | 4/21/2020 | 7/14/2020 North America / USA / Florida                      |
| EPI_ISL_489785 | 4/23/2020 | 7/14/2020 North America / USA / Florida                      |
| EPI_ISL_489786 | 4/23/2020 | 7/14/2020 North America / USA / Florida                      |
| EPI_ISL_489787 | 4/23/2020 | 7/14/2020 North America / USA / Florida                      |
| EPI_ISL_489788 | 4/23/2020 | 7/14/2020 North America / USA / Florida                      |
| EPI_ISL_489789 | 4/23/2020 | 7/14/2020 North America / USA / Florida                      |
| EPI_ISL_489790 | 4/22/2020 | 7/14/2020 North America / USA / Florida                      |
| EPI_ISL_489791 | 4/23/2020 | 7/14/2020 North America / USA / Florida                      |
| EPI_ISL_489792 | 4/23/2020 | 7/14/2020 North America / USA / Florida                      |
| EPI_ISL_489793 | 4/23/2020 | 7/14/2020 North America / USA / Florida                      |
| EPI_ISL_489794 | 4/29/2020 | 7/14/2020 North America / USA / Florida                      |
| EPI_ISL_489795 | 4/29/2020 | 7/14/2020 North America / USA / Florida                      |
| EPI_ISL_489796 | 4/29/2020 | 7/14/2020 North America / USA / Florida                      |
| EPI_ISL_489797 | 4/29/2020 | 7/14/2020 North America / USA / Florida                      |
| EPI_ISL_489799 | 4/29/2020 | 7/14/2020 North America / USA / Florida                      |
| EPI_ISL_489803 | 3/15/2020 | 7/14/2020 North America / USA / Florida                      |
| EPI_ISL_489810 | 5/13/2020 | 7/14/2020 North America / USA / Florida                      |
| EPI_ISL_489817 | 5/14/2020 | 7/14/2020 North America / USA / Florida                      |
| EPI_ISL_489819 | 5/14/2020 | 7/14/2020 North America / USA / Florida                      |
| EPI_ISL_489823 | 5/14/2020 | 7/14/2020 North America / USA / Florida                      |
| EPI_ISL_489827 | 5/14/2020 | 7/14/2020 North America / USA / Florida                      |
| EPI_ISL_489828 | 5/13/2020 | 7/14/2020 North America / USA / Florida                      |
| EPI_ISL_489833 | 6/8/2020  | 7/14/2020 Europe / Spain / Basque Country / Bizkaia          |
| EPI_ISL_489834 | 6/22/2020 | 7/14/2020 Europe / Spain / Basque Country / Bizkaia          |
| EPI_ISL_489835 | 6/8/2020  | 7/14/2020 Europe / Spain / Basque Country / Bizkaia          |
| EPI_ISL_489836 | 3/6/2020  | 7/14/2020 South America / Peru / Lima                        |
| EPI_ISL_489837 | 3/6/2020  | 7/14/2020 South America / Peru / Lima                        |
| EPI_ISL_489838 | 3/11/2020 | 7/14/2020 South America / Peru / Lima                        |
| EPI_ISL_489839 | 3/9/2020  | 7/14/2020 South America / Peru / Huanuco                     |
| EPI_ISL_489896 | 6/29/2020 | 7/14/2020 North America / USA / Iowa / Allamakee County      |
| EPI_ISL_489897 | 7/1/2020  | 7/14/2020 North America / USA / Iowa / Fayette County        |
| EPI_ISL_489898 | 7/1/2020  | 7/14/2020 North America / USA / Iowa / Fayette County        |
| EPI_ISL_489900 | 6/23/2020 | 7/14/2020 North America / USA / Minnesota / Winona County    |
| EPI_ISL_489902 | 7/3/2020  | 7/14/2020 North America / USA / Minnesota / Houston County   |
| EPI_ISL_489903 | 7/5/2020  | 7/14/2020 North America / USA / Minnesota / Winona County    |
| EPI_ISL_489905 | 6/15/2020 | 7/14/2020 North America / USA / Wisconsin / Vernon County    |
| EPI_ISL_489906 | 6/16/2020 | 7/14/2020 North America / USA / Wisconsin / La Crosse County |
| EPI_ISL_489907 | 6/16/2020 | 7/14/2020 North America / USA / Wisconsin / La Crosse County |
| EPI_ISL_489908 | 6/16/2020 | 7/14/2020 North America / USA / Wisconsin / Monroe County    |
| EPI_ISL_489909 | 6/17/2020 | 7/14/2020 North America / USA / Wisconsin / La Crosse County |
| EPI_ISL_489910 | 6/17/2020 | 7/14/2020 North America / USA / Wisconsin / La Crosse County |
| EPI_ISL_489911 | 6/17/2020 | 7/14/2020 North America / USA / Wisconsin / Vernon County    |
| EPI_ISL_489913 | 6/18/2020 | 7/14/2020 North America / USA / Wisconsin / La Crosse County |
| EPI_ISL_489914 | 6/19/2020 | 7/14/2020 North America / USA / Wisconsin / La Crosse County |

|                |           |           |                                                      |
|----------------|-----------|-----------|------------------------------------------------------|
| EPI_ISL_489915 | 6/20/2020 | 7/14/2020 | North America / USA / Wisconsin / Monroe County      |
| EPI_ISL_489916 | 6/19/2020 | 7/14/2020 | North America / USA / Wisconsin / Adams County       |
| EPI_ISL_489917 | 6/21/2020 | 7/14/2020 | North America / USA / Wisconsin / La Crosse County   |
| EPI_ISL_489918 | 6/22/2020 | 7/14/2020 | North America / USA / Wisconsin / La Crosse County   |
| EPI_ISL_489919 | 6/22/2020 | 7/14/2020 | North America / USA / Wisconsin / Vernon County      |
| EPI_ISL_489920 | 6/22/2020 | 7/14/2020 | North America / USA / Wisconsin / La Crosse County   |
| EPI_ISL_489921 | 6/23/2020 | 7/14/2020 | North America / USA / Wisconsin / La Crosse County   |
| EPI_ISL_489922 | 6/23/2020 | 7/14/2020 | North America / USA / Wisconsin / Monroe County      |
| EPI_ISL_489923 | 6/23/2020 | 7/14/2020 | North America / USA / Wisconsin / La Crosse County   |
| EPI_ISL_489925 | 6/24/2020 | 7/14/2020 | North America / USA / Wisconsin / La Crosse County   |
| EPI_ISL_489926 | 6/26/2020 | 7/14/2020 | North America / USA / Wisconsin / La Crosse County   |
| EPI_ISL_489928 | 6/26/2020 | 7/14/2020 | North America / USA / Wisconsin / La Crosse County   |
| EPI_ISL_489930 | 6/28/2020 | 7/14/2020 | North America / USA / Wisconsin / La Crosse County   |
| EPI_ISL_489931 | 6/29/2020 | 7/14/2020 | North America / USA / Wisconsin / La Crosse County   |
| EPI_ISL_489932 | 6/30/2020 | 7/14/2020 | North America / USA / Wisconsin / La Crosse County   |
| EPI_ISL_489933 | 6/30/2020 | 7/14/2020 | North America / USA / Wisconsin / La Crosse County   |
| EPI_ISL_489934 | 7/1/2020  | 7/14/2020 | North America / USA / Wisconsin / La Crosse County   |
| EPI_ISL_489935 | 6/30/2020 | 7/14/2020 | North America / USA / Wisconsin / La Crosse County   |
| EPI_ISL_489936 | 7/1/2020  | 7/14/2020 | North America / USA / Wisconsin / La Crosse County   |
| EPI_ISL_489937 | 7/2/2020  | 7/14/2020 | North America / USA / Wisconsin / La Crosse County   |
| EPI_ISL_489938 | 7/2/2020  | 7/14/2020 | North America / USA / Wisconsin / La Crosse County   |
| EPI_ISL_489939 | 7/2/2020  | 7/14/2020 | North America / USA / Wisconsin / Trempealeau County |
| EPI_ISL_489940 | 7/3/2020  | 7/14/2020 | North America / USA / Wisconsin / Crawford County    |
| EPI_ISL_489941 | 7/4/2020  | 7/14/2020 | North America / USA / Wisconsin / Trempealeau County |
| EPI_ISL_489942 | 7/4/2020  | 7/14/2020 | North America / USA / Wisconsin / Trempealeau County |
| EPI_ISL_489943 | 7/3/2020  | 7/14/2020 | North America / USA / Wisconsin / Trempealeau County |
| EPI_ISL_489945 | 7/6/2020  | 7/14/2020 | North America / USA / Wisconsin / La Crosse County   |
| EPI_ISL_489946 | 7/6/2020  | 7/14/2020 | North America / USA / Wisconsin / Trempealeau County |
| EPI_ISL_489948 | 7/5/2020  | 7/14/2020 | North America / USA / Wisconsin / Trempealeau County |
| EPI_ISL_489949 | 7/6/2020  | 7/14/2020 | North America / USA / Wisconsin / Trempealeau County |
| EPI_ISL_489950 | 7/7/2020  | 7/14/2020 | North America / USA / Wisconsin / La Crosse County   |
| EPI_ISL_489951 | 7/7/2020  | 7/14/2020 | North America / USA / Wisconsin / Trempealeau County |
| EPI_ISL_489952 | 7/7/2020  | 7/14/2020 | North America / USA / Wisconsin / La Crosse County   |
| EPI_ISL_489953 | 7/7/2020  | 7/14/2020 | North America / USA / Wisconsin / Monroe County      |
| EPI_ISL_489954 | 7/7/2020  | 7/14/2020 | North America / USA / Wisconsin / Trempealeau County |
| EPI_ISL_489955 | 7/7/2020  | 7/14/2020 | North America / USA / Wisconsin / Trempealeau County |
| EPI_ISL_489956 | 6/14/2020 | 7/14/2020 | North America / USA / Wisconsin / Trempealeau County |
| EPI_ISL_489957 | 6/11/2020 | 7/14/2020 | North America / USA / Wisconsin / Trempealeau County |
| EPI_ISL_489958 | 6/17/2020 | 7/14/2020 | North America / USA / Wisconsin / La Crosse County   |
| EPI_ISL_489960 | 6/29/2020 | 7/14/2020 | Europe / Switzerland / Aargau                        |
| EPI_ISL_489961 | 6/29/2020 | 7/14/2020 | Europe / Switzerland / Bern                          |
| EPI_ISL_489962 | 6/29/2020 | 7/14/2020 | Europe / Switzerland / Grisons                       |
| EPI_ISL_489963 | 6/29/2020 | 7/14/2020 | Europe / Switzerland / Zurich                        |
| EPI_ISL_489964 | 6/29/2020 | 7/14/2020 | Europe / Switzerland / Freiburg                      |
| EPI_ISL_489965 | 6/30/2020 | 7/14/2020 | Europe / Switzerland / Wallis                        |
| EPI_ISL_489966 | 6/29/2020 | 7/14/2020 | Europe / Switzerland / Aargau                        |
| EPI_ISL_489967 | 6/29/2020 | 7/14/2020 | Europe / Switzerland / Bern                          |

|                |           |                                                   |
|----------------|-----------|---------------------------------------------------|
| EPI_ISL_489968 | 6/29/2020 | 7/14/2020 Europe / Switzerland / St Gall          |
| EPI_ISL_489969 | 6/30/2020 | 7/14/2020 Europe / Switzerland / Schwyz           |
| EPI_ISL_489970 | 6/29/2020 | 7/14/2020 Europe / Switzerland / Aargau           |
| EPI_ISL_489971 | 6/29/2020 | 7/14/2020 Europe / Switzerland / Zurich           |
| EPI_ISL_489972 | 6/30/2020 | 7/14/2020 Europe / Switzerland / St Gall          |
| EPI_ISL_489973 | 7/1/2020  | 7/14/2020 Europe / Switzerland / Zurich           |
| EPI_ISL_489974 | 7/1/2020  | 7/14/2020 Europe / Switzerland / Schaffhausen     |
| EPI_ISL_489975 | 7/1/2020  | 7/14/2020 Europe / Switzerland / Zurich           |
| EPI_ISL_489976 | 7/1/2020  | 7/14/2020 Europe / Switzerland / Basel-Landschaft |
| EPI_ISL_489977 | 7/1/2020  | 7/14/2020 Europe / Switzerland / Vaud             |
| EPI_ISL_489978 | 7/2/2020  | 7/14/2020 Europe / Switzerland / Zurich           |
| EPI_ISL_489979 | 7/2/2020  | 7/14/2020 Europe / Switzerland / Zurich           |
| EPI_ISL_489980 | 7/2/2020  | 7/14/2020 Europe / Switzerland / Zurich           |
| EPI_ISL_489981 | 7/2/2020  | 7/14/2020 Europe / Switzerland / Zurich           |
| EPI_ISL_489982 | 7/2/2020  | 7/14/2020 Europe / Switzerland / Schwyz           |
| EPI_ISL_489983 | 6/29/2020 | 7/14/2020 Europe / Switzerland / Zurich           |
| EPI_ISL_489984 | 6/29/2020 | 7/14/2020 Europe / Switzerland / Uri              |
| EPI_ISL_489985 | 6/29/2020 | 7/14/2020 Europe / Switzerland / Uri              |
| EPI_ISL_489986 | 6/30/2020 | 7/14/2020 Europe / Switzerland / Vaud             |
| EPI_ISL_489987 | 3/8/2020  | 7/14/2020 South America / Peru / Lima             |
| EPI_ISL_489988 | 3/11/2020 | 7/14/2020 South America / Peru / Lima             |
| EPI_ISL_489989 | 3/9/2020  | 7/14/2020 South America / Peru / Ica              |
| EPI_ISL_489990 | 3/10/2020 | 7/14/2020 South America / Peru / Lima             |
| EPI_ISL_489996 | 2/3/2020  | 7/14/2020 Asia / Saudi Arabia                     |
| EPI_ISL_489997 | 2/4/2020  | 7/14/2020 Asia / Saudi Arabia                     |
| EPI_ISL_489998 | 2/9/2020  | 7/14/2020 Asia / Saudi Arabia                     |
| EPI_ISL_489999 | 2/10/2020 | 7/14/2020 Asia / Saudi Arabia                     |
| EPI_ISL_490000 | 2/10/2020 | 7/14/2020 Asia / Saudi Arabia                     |
| EPI_ISL_490001 | 2/13/2020 | 7/14/2020 Asia / Saudi Arabia                     |
| EPI_ISL_490002 | 2/13/2020 | 7/14/2020 Asia / Saudi Arabia                     |
| EPI_ISL_490003 | 2/16/2020 | 7/14/2020 Asia / Saudi Arabia                     |
| EPI_ISL_490004 | 2/17/2020 | 7/14/2020 Asia / Saudi Arabia                     |
| EPI_ISL_490005 | 2/18/2020 | 7/14/2020 Asia / Saudi Arabia                     |
| EPI_ISL_490006 | 2/18/2020 | 7/14/2020 Asia / Saudi Arabia                     |
| EPI_ISL_490007 | 2/20/2020 | 7/14/2020 Asia / Saudi Arabia                     |
| EPI_ISL_490008 | 2/23/2020 | 7/14/2020 Asia / Saudi Arabia                     |
| EPI_ISL_490009 | 2/24/2020 | 7/14/2020 Asia / Saudi Arabia                     |
| EPI_ISL_490010 | 2/26/2020 | 7/14/2020 Asia / Saudi Arabia                     |
| EPI_ISL_490011 | 2/27/2020 | 7/14/2020 Asia / Saudi Arabia                     |
| EPI_ISL_490012 | 3/1/2020  | 7/14/2020 Asia / Saudi Arabia                     |
| EPI_ISL_489991 | 2020-03   | 7/15/2020 Asia / Thailand / Samut Songkhram       |
| EPI_ISL_489992 | 3/4/2020  | 7/15/2020 Asia / Malaysia / Selangor              |
| EPI_ISL_489994 | 3/30/2020 | 7/15/2020 Asia / Malaysia                         |
| EPI_ISL_489995 | 2020      | 7/15/2020 Asia / India                            |
| EPI_ISL_490014 | 4/10/2020 | 7/15/2020 Asia / Malaysia / Selangor              |
| EPI_ISL_490015 | 4/10/2020 | 7/15/2020 Asia / Malaysia / Selangor              |
| EPI_ISL_490016 | 4/10/2020 | 7/15/2020 Asia / Malaysia                         |

|                |           |                                                          |
|----------------|-----------|----------------------------------------------------------|
| EPI_ISL_490017 | 3/13/2020 | 7/15/2020 Oceania / Australia / New South Wales / Sydney |
| EPI_ISL_490018 | 3/16/2020 | 7/15/2020 Oceania / Australia / New South Wales / Sydney |
| EPI_ISL_490019 | 4/14/2020 | 7/15/2020 Oceania / Australia / New South Wales / Sydney |
| EPI_ISL_490020 | 4/8/2020  | 7/15/2020 Oceania / Australia / New South Wales / Sydney |
| EPI_ISL_490021 | 6/10/2020 | 7/15/2020 Oceania / Australia / New South Wales / Sydney |
| EPI_ISL_490022 | 6/7/2020  | 7/15/2020 Oceania / Australia / New South Wales / Sydney |
| EPI_ISL_490023 | 6/13/2020 | 7/15/2020 Oceania / Australia / New South Wales / Sydney |
| EPI_ISL_490024 | 5/27/2020 | 7/15/2020 Oceania / Australia / New South Wales / Sydney |
| EPI_ISL_490025 | 6/16/2020 | 7/15/2020 Oceania / Australia / New South Wales / Sydney |
| EPI_ISL_490026 | 6/12/2020 | 7/15/2020 Oceania / Australia / New South Wales / Sydney |
| EPI_ISL_490027 | 6/19/2020 | 7/15/2020 Oceania / Australia / New South Wales / Sydney |
| EPI_ISL_490028 | 6/19/2020 | 7/15/2020 Oceania / Australia / New South Wales / Sydney |
| EPI_ISL_490029 | 6/19/2020 | 7/15/2020 Oceania / Australia / New South Wales / Sydney |
| EPI_ISL_490030 | 5/31/2020 | 7/15/2020 Oceania / Australia / New South Wales / Sydney |
| EPI_ISL_490031 | 4/1/2020  | 7/15/2020 Oceania / Australia / New South Wales / Sydney |
| EPI_ISL_490032 | 3/25/2020 | 7/15/2020 Oceania / Australia / New South Wales / Sydney |
| EPI_ISL_490033 | 4/2/2020  | 7/15/2020 Oceania / Australia / New South Wales / Sydney |
| EPI_ISL_490034 | 3/25/2020 | 7/15/2020 Oceania / Australia / New South Wales / Sydney |
| EPI_ISL_490035 | 3/30/2020 | 7/15/2020 Oceania / Australia / New South Wales / Sydney |
| EPI_ISL_490036 | 6/24/2020 | 7/15/2020 Oceania / Australia / New South Wales / Sydney |
| EPI_ISL_490037 | 3/19/2020 | 7/15/2020 Oceania / Australia / New South Wales / Sydney |
| EPI_ISL_490038 | 7/7/2020  | 7/15/2020 Oceania / Australia / New South Wales / Sydney |
| EPI_ISL_490039 | 7/7/2020  | 7/15/2020 Oceania / Australia / New South Wales / Sydney |
| EPI_ISL_490040 | 6/9/2020  | 7/15/2020 Oceania / Australia / New South Wales / Sydney |
| EPI_ISL_490041 | 6/16/2020 | 7/15/2020 Oceania / Australia / New South Wales / Sydney |
| EPI_ISL_490042 | 7/1/2020  | 7/15/2020 Oceania / Australia / New South Wales / Sydney |
| EPI_ISL_490043 | 7/5/2020  | 7/15/2020 Oceania / Australia / New South Wales / Sydney |
| EPI_ISL_490044 | 7/8/2020  | 7/15/2020 Oceania / Australia / New South Wales / Sydney |
| EPI_ISL_490045 | 7/5/2020  | 7/15/2020 Oceania / Australia / New South Wales / Sydney |
| EPI_ISL_490046 | 7/10/2020 | 7/15/2020 Oceania / Australia / New South Wales / Sydney |
| EPI_ISL_490047 | 4/10/2020 | 7/15/2020 Asia / Malaysia                                |
| EPI_ISL_490048 | 4/11/2020 | 7/15/2020 Asia / Malaysia                                |
| EPI_ISL_490049 | 6/23/2020 | 7/15/2020 Asia / Singapore                               |
| EPI_ISL_490052 | 5/14/2020 | 7/15/2020 Asia / Singapore                               |
| EPI_ISL_490053 | 6/29/2020 | 7/15/2020 Asia / Singapore                               |
| EPI_ISL_490054 | 6/28/2020 | 7/15/2020 Asia / Singapore                               |
| EPI_ISL_490057 | 7/1/2020  | 7/15/2020 Asia / Singapore                               |
| EPI_ISL_490058 | 3/31/2020 | 7/15/2020 Asia / Singapore                               |
| EPI_ISL_490060 | 5/10/2020 | 7/15/2020 Asia / Singapore                               |
| EPI_ISL_490061 | 5/8/2020  | 7/15/2020 Asia / Singapore                               |
| EPI_ISL_490062 | 5/10/2020 | 7/15/2020 Asia / Singapore                               |
| EPI_ISL_490063 | 5/8/2020  | 7/15/2020 Asia / Singapore                               |
| EPI_ISL_490064 | 5/9/2020  | 7/15/2020 Asia / Singapore                               |
| EPI_ISL_490065 | 5/9/2020  | 7/15/2020 Asia / Singapore                               |
| EPI_ISL_490066 | 5/10/2020 | 7/15/2020 Asia / Singapore                               |
| EPI_ISL_490067 | 5/8/2020  | 7/15/2020 Asia / Singapore                               |
| EPI_ISL_490068 | 5/8/2020  | 7/15/2020 Asia / Singapore                               |

|                |           |                                                     |
|----------------|-----------|-----------------------------------------------------|
| EPI_ISL_490069 | 5/10/2020 | 7/15/2020 Asia / Singapore                          |
| EPI_ISL_490070 | 5/8/2020  | 7/15/2020 Asia / Singapore                          |
| EPI_ISL_490071 | 4/10/2020 | 7/15/2020 Asia / Singapore                          |
| EPI_ISL_490072 | 5/10/2020 | 7/15/2020 Asia / Singapore                          |
| EPI_ISL_490073 | 5/10/2020 | 7/15/2020 Asia / Singapore                          |
| EPI_ISL_490074 | 4/10/2020 | 7/15/2020 Asia / Singapore                          |
| EPI_ISL_490075 | 5/9/2020  | 7/15/2020 Asia / Singapore                          |
| EPI_ISL_490076 | 5/10/2020 | 7/15/2020 Asia / Singapore                          |
| EPI_ISL_490077 | 5/10/2020 | 7/15/2020 Asia / Singapore                          |
| EPI_ISL_490078 | 5/10/2020 | 7/15/2020 Asia / Singapore                          |
| EPI_ISL_490079 | 6/26/2020 | 7/15/2020 Asia / Singapore                          |
| EPI_ISL_490089 | 5/10/2020 | 7/15/2020 Asia / Malaysia / Selangor                |
| EPI_ISL_490090 | 5/23/2020 | 7/15/2020 Asia / Malaysia / Selangor                |
| EPI_ISL_490091 | 5/23/2020 | 7/15/2020 Asia / Malaysia / Selangor                |
| EPI_ISL_490092 | 5/23/2020 | 7/15/2020 Asia / Malaysia                           |
| EPI_ISL_490094 | 5/23/2020 | 7/15/2020 Asia / Malaysia                           |
| EPI_ISL_490095 | 5/23/2020 | 7/15/2020 Asia / Malaysia                           |
| EPI_ISL_490096 | 5/23/2020 | 7/15/2020 Asia / Malaysia                           |
| EPI_ISL_490097 | 5/23/2020 | 7/15/2020 Asia / Malaysia                           |
| EPI_ISL_490098 | 5/23/2020 | 7/15/2020 Asia / Malaysia                           |
| EPI_ISL_490099 | 5/23/2020 | 7/15/2020 Asia / Malaysia                           |
| EPI_ISL_490100 | 5/23/2020 | 7/15/2020 Asia / Malaysia                           |
| EPI_ISL_490101 | 5/29/2020 | 7/15/2020 Asia / Malaysia                           |
| EPI_ISL_490103 | 5/29/2020 | 7/15/2020 Asia / Malaysia                           |
| EPI_ISL_490106 | 2020      | 7/15/2020 Asia / India                              |
| EPI_ISL_490109 | 7/7/2020  | 7/15/2020 Asia / Bangladesh / Khulna                |
| EPI_ISL_490110 | 7/7/2020  | 7/15/2020 Asia / Bangladesh / Khulna                |
| EPI_ISL_490111 | 7/7/2020  | 7/15/2020 Asia / Bangladesh / Khulna                |
| EPI_ISL_490112 | 3/18/2020 | 7/15/2020 Europe / Czech Republic / Litovel         |
| EPI_ISL_490113 | 7/7/2020  | 7/15/2020 Asia / Bangladesh / Khulna                |
| EPI_ISL_490114 | 7/7/2020  | 7/15/2020 Asia / Bangladesh / Khulna                |
| EPI_ISL_490144 | 7/7/2020  | 7/15/2020 Asia / Bangladesh / Khulna                |
| EPI_ISL_490164 | 7/7/2020  | 7/15/2020 Asia / Bangladesh / Khulna / Jessore      |
| EPI_ISL_490165 | 7/7/2020  | 7/15/2020 Asia / Bangladesh / Khulna / Jessore      |
| EPI_ISL_490167 | 7/7/2020  | 7/15/2020 Asia / Bangladesh / Khulna / Jessore      |
| EPI_ISL_490168 | 7/7/2020  | 7/15/2020 Asia / Bangladesh / Khulna / Jessore      |
| EPI_ISL_490202 | 6/16/2020 | 7/15/2020 Europe / Spain / Basque Country / Bizkaia |
| EPI_ISL_490203 | 6/10/2020 | 7/15/2020 Europe / Spain / Basque Country / Bizkaia |
| EPI_ISL_490204 | 6/5/2020  | 7/15/2020 Europe / Spain / Basque Country           |
| EPI_ISL_490205 | 4/19/2020 | 7/15/2020 Europe / Germany / Bavaria / Munich       |
| EPI_ISL_490206 | 4/21/2020 | 7/15/2020 Europe / Germany / Bavaria / Munich       |
| EPI_ISL_490207 | 4/19/2020 | 7/15/2020 Europe / Germany / Bavaria / Munich       |
| EPI_ISL_490208 | 5/11/2020 | 7/15/2020 Europe / Germany / Bavaria / Munich       |
| EPI_ISL_490209 | 3/11/2020 | 7/15/2020 South America / Peru / Lima               |
| EPI_ISL_490210 | 4/1/2020  | 7/15/2020 North America / USA / California          |
| EPI_ISL_490211 | 4/1/2020  | 7/15/2020 North America / USA / California          |
| EPI_ISL_490212 | 4/1/2020  | 7/15/2020 North America / USA / California          |



|                |           |           |                                   |
|----------------|-----------|-----------|-----------------------------------|
| EPI_ISL_490213 | 4/1/2020  | 7/15/2020 | North America / USA / California  |
| EPI_ISL_490214 | 4/1/2020  | 7/15/2020 | North America / USA / California  |
| EPI_ISL_490215 | 4/1/2020  | 7/15/2020 | North America / USA / California  |
| EPI_ISL_490216 | 4/1/2020  | 7/15/2020 | North America / USA / California  |
| EPI_ISL_490217 | 4/1/2020  | 7/15/2020 | North America / USA / California  |
| EPI_ISL_490219 | 4/1/2020  | 7/15/2020 | North America / USA / California  |
| EPI_ISL_490220 | 4/1/2020  | 7/15/2020 | North America / USA / California  |
| EPI_ISL_490221 | 4/1/2020  | 7/15/2020 | North America / USA / California  |
| EPI_ISL_490225 | 6/18/2020 | 7/15/2020 | Europe / United Kingdom / England |
| EPI_ISL_490226 | 6/18/2020 | 7/15/2020 | Europe / United Kingdom / England |
| EPI_ISL_490227 | 5/30/2020 | 7/15/2020 | Europe / United Kingdom / England |
| EPI_ISL_490228 | 5/30/2020 | 7/15/2020 | Europe / United Kingdom / England |
| EPI_ISL_490229 | 5/31/2020 | 7/15/2020 | Europe / United Kingdom / England |
| EPI_ISL_490232 | 6/14/2020 | 7/15/2020 | Europe / United Kingdom / England |
| EPI_ISL_490233 | 6/11/2020 | 7/15/2020 | Europe / United Kingdom / England |
| EPI_ISL_490234 | 6/9/2020  | 7/15/2020 | Europe / United Kingdom / England |
| EPI_ISL_490235 | 6/12/2020 | 7/15/2020 | Europe / United Kingdom / England |
| EPI_ISL_490236 | 6/14/2020 | 7/15/2020 | Europe / United Kingdom / England |
| EPI_ISL_490237 | 6/15/2020 | 7/15/2020 | Europe / United Kingdom / England |
| EPI_ISL_490238 | 6/15/2020 | 7/15/2020 | Europe / United Kingdom / England |
| EPI_ISL_490239 | 6/15/2020 | 7/15/2020 | Europe / United Kingdom / England |
| EPI_ISL_490240 | 6/16/2020 | 7/15/2020 | Europe / United Kingdom / England |
| EPI_ISL_490241 | 6/20/2020 | 7/15/2020 | Europe / United Kingdom / England |
| EPI_ISL_490242 | 6/14/2020 | 7/15/2020 | Europe / United Kingdom / England |
| EPI_ISL_490243 | 6/14/2020 | 7/15/2020 | Europe / United Kingdom / England |
| EPI_ISL_490244 | 6/14/2020 | 7/15/2020 | Europe / United Kingdom / England |
| EPI_ISL_490245 | 6/16/2020 | 7/15/2020 | Europe / United Kingdom / England |
| EPI_ISL_490246 | 6/16/2020 | 7/15/2020 | Europe / United Kingdom / England |
| EPI_ISL_490247 | 5/28/2020 | 7/15/2020 | Europe / United Kingdom / England |
| EPI_ISL_490249 | 5/28/2020 | 7/15/2020 | Europe / United Kingdom / England |
| EPI_ISL_490250 | 5/29/2020 | 7/15/2020 | Europe / United Kingdom / England |
| EPI_ISL_490251 | 5/30/2020 | 7/15/2020 | Europe / United Kingdom / England |
| EPI_ISL_490254 | 6/18/2020 | 7/15/2020 | Europe / United Kingdom / England |
| EPI_ISL_490315 | 3/10/2020 | 7/15/2020 | South America / Peru / Lima       |
| EPI_ISL_490316 | 3/25/2020 | 7/15/2020 | South America / Peru / Lima       |
| EPI_ISL_490327 | 7/1/2020  | 7/15/2020 | Europe / United Kingdom / England |
| EPI_ISL_490328 | 7/1/2020  | 7/15/2020 | Europe / United Kingdom / England |
| EPI_ISL_490329 | 7/1/2020  | 7/15/2020 | Europe / United Kingdom / England |
| EPI_ISL_490330 | 6/30/2020 | 7/15/2020 | Europe / United Kingdom / England |
| EPI_ISL_490336 | 6/22/2020 | 7/15/2020 | Europe / United Kingdom / England |
| EPI_ISL_490337 | 6/22/2020 | 7/15/2020 | Europe / United Kingdom / England |
| EPI_ISL_490338 | 6/19/2020 | 7/15/2020 | Europe / United Kingdom / England |
| EPI_ISL_490339 | 6/19/2020 | 7/15/2020 | Europe / United Kingdom / England |
| EPI_ISL_490343 | 6/20/2020 | 7/15/2020 | Europe / United Kingdom / England |
| EPI_ISL_490345 | 6/9/2020  | 7/15/2020 | Europe / United Kingdom / England |
| EPI_ISL_490346 | 6/8/2020  | 7/15/2020 | Europe / United Kingdom / England |
| EPI_ISL_490347 | 6/9/2020  | 7/15/2020 | Europe / United Kingdom / England |







|                |           |           |                                    |
|----------------|-----------|-----------|------------------------------------|
| EPI_ISL_490637 | 4/20/2020 | 7/15/2020 | Europe / United Kingdom / England  |
| EPI_ISL_490638 | 5/5/2020  | 7/15/2020 | Europe / United Kingdom / England  |
| EPI_ISL_490639 | 4/30/2020 | 7/15/2020 | Europe / United Kingdom / England  |
| EPI_ISL_490642 | 4/26/2020 | 7/15/2020 | Europe / United Kingdom / England  |
| EPI_ISL_490646 | 4/9/2020  | 7/15/2020 | Europe / United Kingdom / Scotland |
| EPI_ISL_490651 | 4/9/2020  | 7/15/2020 | Europe / United Kingdom / Scotland |
| EPI_ISL_490652 | 4/8/2020  | 7/15/2020 | Europe / United Kingdom / Scotland |
| EPI_ISL_490654 | 4/9/2020  | 7/15/2020 | Europe / United Kingdom / Scotland |
| EPI_ISL_490657 | 4/9/2020  | 7/15/2020 | Europe / United Kingdom / Scotland |
| EPI_ISL_490659 | 4/9/2020  | 7/15/2020 | Europe / United Kingdom / Scotland |
| EPI_ISL_490661 | 4/10/2020 | 7/15/2020 | Europe / United Kingdom / Scotland |
| EPI_ISL_490662 | 4/10/2020 | 7/15/2020 | Europe / United Kingdom / Scotland |
| EPI_ISL_490664 | 4/10/2020 | 7/15/2020 | Europe / United Kingdom / Scotland |
| EPI_ISL_490665 | 4/10/2020 | 7/15/2020 | Europe / United Kingdom / Scotland |
| EPI_ISL_490666 | 4/8/2020  | 7/15/2020 | Europe / United Kingdom / Scotland |
| EPI_ISL_490669 | 4/11/2020 | 7/15/2020 | Europe / United Kingdom / Scotland |
| EPI_ISL_490670 | 4/10/2020 | 7/15/2020 | Europe / United Kingdom / Scotland |
| EPI_ISL_490675 | 4/12/2020 | 7/15/2020 | Europe / United Kingdom / Scotland |
| EPI_ISL_490680 | 4/11/2020 | 7/15/2020 | Europe / United Kingdom / Scotland |
| EPI_ISL_490685 | 4/14/2020 | 7/15/2020 | Europe / United Kingdom / Scotland |
| EPI_ISL_490686 | 4/13/2020 | 7/15/2020 | Europe / United Kingdom / Scotland |
| EPI_ISL_490687 | 4/13/2020 | 7/15/2020 | Europe / United Kingdom / Scotland |
| EPI_ISL_490690 | 4/15/2020 | 7/15/2020 | Europe / United Kingdom / Scotland |
| EPI_ISL_490692 | 4/16/2020 | 7/15/2020 | Europe / United Kingdom / Scotland |
| EPI_ISL_490694 | 5/12/2020 | 7/15/2020 | Europe / United Kingdom / Scotland |
| EPI_ISL_490695 | 6/18/2020 | 7/15/2020 | Europe / United Kingdom / Scotland |
| EPI_ISL_490696 | 6/18/2020 | 7/15/2020 | Europe / United Kingdom / Scotland |
| EPI_ISL_490697 | 6/19/2020 | 7/15/2020 | Europe / United Kingdom / Scotland |
| EPI_ISL_490698 | 6/23/2020 | 7/15/2020 | Europe / United Kingdom / Scotland |
| EPI_ISL_490700 | 6/30/2020 | 7/15/2020 | Europe / United Kingdom / Scotland |
| EPI_ISL_490701 | 6/26/2020 | 7/15/2020 | Europe / United Kingdom / Scotland |
| EPI_ISL_490702 | 6/27/2020 | 7/15/2020 | Europe / United Kingdom / Scotland |
| EPI_ISL_490703 | 6/28/2020 | 7/15/2020 | Europe / United Kingdom / Scotland |
| EPI_ISL_490704 | 7/3/2020  | 7/15/2020 | Europe / United Kingdom / Scotland |
| EPI_ISL_490705 | 7/3/2020  | 7/15/2020 | Europe / United Kingdom / Scotland |
| EPI_ISL_490706 | 7/3/2020  | 7/15/2020 | Europe / United Kingdom / Scotland |
| EPI_ISL_490707 | 7/3/2020  | 7/15/2020 | Europe / United Kingdom / Scotland |
| EPI_ISL_490709 | 7/3/2020  | 7/15/2020 | Europe / United Kingdom / Scotland |
| EPI_ISL_490712 | 5/14/2020 | 7/15/2020 | Europe / United Kingdom / Wales    |
| EPI_ISL_490718 | 6/16/2020 | 7/15/2020 | Europe / United Kingdom / Wales    |
| EPI_ISL_490722 | 6/14/2020 | 7/15/2020 | Europe / United Kingdom / Wales    |
| EPI_ISL_490723 | 6/7/2020  | 7/15/2020 | Europe / United Kingdom / Wales    |
| EPI_ISL_490726 | 6/15/2020 | 7/15/2020 | Europe / United Kingdom / Wales    |
| EPI_ISL_490727 | 6/7/2020  | 7/15/2020 | Europe / United Kingdom / Wales    |
| EPI_ISL_490728 | 6/13/2020 | 7/15/2020 | Europe / United Kingdom / Wales    |
| EPI_ISL_490731 | 5/25/2020 | 7/15/2020 | Europe / United Kingdom / Wales    |
| EPI_ISL_490733 | 6/20/2020 | 7/15/2020 | Europe / United Kingdom / Wales    |

|                |           |           |                                 |
|----------------|-----------|-----------|---------------------------------|
| EPI_ISL_490735 | 6/5/2020  | 7/15/2020 | Europe / United Kingdom / Wales |
| EPI_ISL_490739 | 6/8/2020  | 7/15/2020 | Europe / United Kingdom / Wales |
| EPI_ISL_490740 | 5/25/2020 | 7/15/2020 | Europe / United Kingdom / Wales |
| EPI_ISL_490745 | 5/15/2020 | 7/15/2020 | Europe / United Kingdom / Wales |
| EPI_ISL_490747 | 6/14/2020 | 7/15/2020 | Europe / United Kingdom / Wales |
| EPI_ISL_490751 | 6/18/2020 | 7/15/2020 | Europe / United Kingdom / Wales |
| EPI_ISL_490753 | 6/7/2020  | 7/15/2020 | Europe / United Kingdom / Wales |
| EPI_ISL_490755 | 6/13/2020 | 7/15/2020 | Europe / United Kingdom / Wales |
| EPI_ISL_490759 | 6/13/2020 | 7/15/2020 | Europe / United Kingdom / Wales |
| EPI_ISL_490760 | 5/14/2020 | 7/15/2020 | Europe / United Kingdom / Wales |
| EPI_ISL_490762 | 5/22/2020 | 7/15/2020 | Europe / United Kingdom / Wales |
| EPI_ISL_490763 | 6/27/2020 | 7/15/2020 | Europe / United Kingdom / Wales |
| EPI_ISL_490767 | 6/13/2020 | 7/15/2020 | Europe / United Kingdom / Wales |
| EPI_ISL_490769 | 6/5/2020  | 7/15/2020 | Europe / United Kingdom / Wales |
| EPI_ISL_490770 | 6/17/2020 | 7/15/2020 | Europe / United Kingdom / Wales |
| EPI_ISL_490773 | 6/14/2020 | 7/15/2020 | Europe / United Kingdom / Wales |
| EPI_ISL_490781 | 6/14/2020 | 7/15/2020 | Europe / United Kingdom / Wales |
| EPI_ISL_490782 | 6/14/2020 | 7/15/2020 | Europe / United Kingdom / Wales |
| EPI_ISL_490783 | 6/16/2020 | 7/15/2020 | Europe / United Kingdom / Wales |
| EPI_ISL_490787 | 6/7/2020  | 7/15/2020 | Europe / United Kingdom / Wales |
| EPI_ISL_490788 | 5/26/2020 | 7/15/2020 | Europe / United Kingdom / Wales |
| EPI_ISL_490791 | 6/15/2020 | 7/15/2020 | Europe / United Kingdom / Wales |
| EPI_ISL_490795 | 6/7/2020  | 7/15/2020 | Europe / United Kingdom / Wales |
| EPI_ISL_490796 | 6/15/2020 | 7/15/2020 | Europe / United Kingdom / Wales |
| EPI_ISL_490799 | 6/16/2020 | 7/15/2020 | Europe / United Kingdom / Wales |
| EPI_ISL_490800 | 5/17/2020 | 7/15/2020 | Europe / United Kingdom / Wales |
| EPI_ISL_490802 | 5/25/2020 | 7/15/2020 | Europe / United Kingdom / Wales |
| EPI_ISL_490805 | 5/12/2020 | 7/15/2020 | Europe / United Kingdom / Wales |
| EPI_ISL_490806 | 5/18/2020 | 7/15/2020 | Europe / United Kingdom / Wales |
| EPI_ISL_490807 | 5/14/2020 | 7/15/2020 | Europe / United Kingdom / Wales |
| EPI_ISL_490812 | 6/15/2020 | 7/15/2020 | Europe / United Kingdom / Wales |
| EPI_ISL_490815 | 5/28/2020 | 7/15/2020 | Europe / United Kingdom / Wales |
| EPI_ISL_490818 | 6/13/2020 | 7/15/2020 | Europe / United Kingdom / Wales |
| EPI_ISL_490820 | 6/17/2020 | 7/15/2020 | Europe / United Kingdom / Wales |
| EPI_ISL_490825 | 6/12/2020 | 7/15/2020 | Europe / United Kingdom / Wales |
| EPI_ISL_490827 | 6/4/2020  | 7/15/2020 | Europe / United Kingdom / Wales |
| EPI_ISL_490829 | 6/14/2020 | 7/15/2020 | Europe / United Kingdom / Wales |
| EPI_ISL_490830 | 6/16/2020 | 7/15/2020 | Europe / United Kingdom / Wales |
| EPI_ISL_490833 | 6/16/2020 | 7/15/2020 | Europe / United Kingdom / Wales |
| EPI_ISL_490835 | 6/14/2020 | 7/15/2020 | Europe / United Kingdom / Wales |
| EPI_ISL_490838 | 6/15/2020 | 7/15/2020 | Europe / United Kingdom / Wales |
| EPI_ISL_490839 | 6/18/2020 | 7/15/2020 | Europe / United Kingdom / Wales |
| EPI_ISL_490840 | 6/14/2020 | 7/15/2020 | Europe / United Kingdom / Wales |
| EPI_ISL_490845 | 6/19/2020 | 7/15/2020 | Europe / United Kingdom / Wales |
| EPI_ISL_490848 | 6/4/2020  | 7/15/2020 | Europe / United Kingdom / Wales |
| EPI_ISL_490850 | 6/16/2020 | 7/15/2020 | Europe / United Kingdom / Wales |
| EPI_ISL_490851 | 6/12/2020 | 7/15/2020 | Europe / United Kingdom / Wales |

|                |           |                                                     |
|----------------|-----------|-----------------------------------------------------|
| EPI_ISL_490852 | 6/7/2020  | 7/15/2020 Europe / United Kingdom / Wales           |
| EPI_ISL_490855 | 6/16/2020 | 7/15/2020 Europe / United Kingdom / Wales           |
| EPI_ISL_490857 | 6/14/2020 | 7/15/2020 Europe / United Kingdom / Wales           |
| EPI_ISL_490859 | 6/13/2020 | 7/15/2020 Europe / United Kingdom / Wales           |
| EPI_ISL_490861 | 6/13/2020 | 7/15/2020 Europe / United Kingdom / Wales           |
| EPI_ISL_490862 | 6/15/2020 | 7/15/2020 Europe / United Kingdom / Wales           |
| EPI_ISL_490865 | 6/15/2020 | 7/15/2020 Europe / United Kingdom / Wales           |
| EPI_ISL_490866 | 6/17/2020 | 7/15/2020 Europe / United Kingdom / Wales           |
| EPI_ISL_490867 | 6/15/2020 | 7/15/2020 Europe / United Kingdom / Wales           |
| EPI_ISL_490975 | 3/25/2020 | 7/15/2020 South America / Peru / Lima               |
| EPI_ISL_490976 | 3/27/2020 | 7/15/2020 South America / Peru / Lima               |
| EPI_ISL_490977 | 6/9/2020  | 7/15/2020 Europe / Spain / Basque Country / Bizkaia |
| EPI_ISL_490978 | 3/23/2020 | 7/15/2020 North America / USA / Arkansas            |
| EPI_ISL_490979 | 3/27/2020 | 7/15/2020 North America / USA / Connecticut         |
| EPI_ISL_490980 | 3/27/2020 | 7/15/2020 North America / USA / Connecticut         |
| EPI_ISL_490982 | 3/26/2020 | 7/15/2020 North America / USA / Connecticut         |
| EPI_ISL_490983 | 3/26/2020 | 7/15/2020 North America / USA / Connecticut         |
| EPI_ISL_490984 | 3/25/2020 | 7/15/2020 North America / USA / Connecticut         |
| EPI_ISL_490985 | 3/26/2020 | 7/15/2020 North America / USA / Connecticut         |
| EPI_ISL_490986 | 3/26/2020 | 7/15/2020 North America / USA / Connecticut         |
| EPI_ISL_490987 | 3/26/2020 | 7/15/2020 North America / USA / Connecticut         |
| EPI_ISL_490988 | 3/18/2020 | 7/15/2020 North America / USA / Florida             |
| EPI_ISL_490989 | 3/26/2020 | 7/15/2020 North America / USA / Idaho               |
| EPI_ISL_490990 | 3/26/2020 | 7/15/2020 North America / USA / Idaho               |
| EPI_ISL_490991 | 3/26/2020 | 7/15/2020 North America / USA / Idaho               |
| EPI_ISL_490992 | 3/26/2020 | 7/15/2020 North America / USA / Idaho               |
| EPI_ISL_490993 | 3/26/2020 | 7/15/2020 North America / USA / Idaho               |
| EPI_ISL_490994 | 3/25/2020 | 7/15/2020 North America / USA / Idaho               |
| EPI_ISL_490995 | 3/25/2020 | 7/15/2020 North America / USA / Idaho               |
| EPI_ISL_490996 | 3/25/2020 | 7/15/2020 North America / USA / Idaho               |
| EPI_ISL_490997 | 3/17/2020 | 7/15/2020 North America / USA / Louisiana           |
| EPI_ISL_490998 | 3/18/2020 | 7/15/2020 North America / USA / Louisiana           |
| EPI_ISL_490999 | 3/20/2020 | 7/15/2020 North America / USA / Massachusetts       |
| EPI_ISL_491000 | 3/16/2020 | 7/15/2020 North America / USA / Minnesota           |
| EPI_ISL_491001 | 3/25/2020 | 7/15/2020 North America / USA / Oregon              |
| EPI_ISL_491002 | 4/16/2020 | 7/15/2020 North America / USA                       |
| EPI_ISL_491003 | 3/26/2020 | 7/15/2020 North America / USA                       |
| EPI_ISL_491004 | 3/23/2020 | 7/15/2020 North America / USA / Vermont             |
| EPI_ISL_491006 | 3/28/2020 | 7/15/2020 North America / USA / Washington          |
| EPI_ISL_491007 | 3/28/2020 | 7/15/2020 North America / USA / Washington          |
| EPI_ISL_491009 | 3/28/2020 | 7/15/2020 North America / USA / Washington          |
| EPI_ISL_491010 | 3/27/2020 | 7/15/2020 North America / USA / Washington          |
| EPI_ISL_491011 | 3/28/2020 | 7/15/2020 North America / USA / Washington          |
| EPI_ISL_491012 | 3/28/2020 | 7/15/2020 North America / USA / Washington          |
| EPI_ISL_491013 | 3/27/2020 | 7/15/2020 North America / USA / Washington          |
| EPI_ISL_491014 | 3/27/2020 | 7/15/2020 North America / USA / Washington          |
| EPI_ISL_491016 | 3/26/2020 | 7/15/2020 North America / USA / Washington          |

|                |           |           |                                                         |
|----------------|-----------|-----------|---------------------------------------------------------|
| EPI_ISL_491017 | 3/26/2020 | 7/15/2020 | North America / USA / Washington                        |
| EPI_ISL_491018 | 3/26/2020 | 7/15/2020 | North America / USA / Washington                        |
| EPI_ISL_491019 | 3/26/2020 | 7/15/2020 | North America / USA / Washington                        |
| EPI_ISL_491020 | 3/27/2020 | 7/15/2020 | North America / USA / Washington                        |
| EPI_ISL_491021 | 3/27/2020 | 7/15/2020 | North America / USA / Washington                        |
| EPI_ISL_491022 | 3/26/2020 | 7/15/2020 | North America / USA / Washington                        |
| EPI_ISL_491023 | 3/27/2020 | 7/15/2020 | North America / USA / Washington                        |
| EPI_ISL_491024 | 3/27/2020 | 7/15/2020 | North America / USA / Washington                        |
| EPI_ISL_491025 | 3/27/2020 | 7/15/2020 | North America / USA / Washington                        |
| EPI_ISL_491026 | 3/27/2020 | 7/15/2020 | North America / USA / Washington                        |
| EPI_ISL_491027 | 3/27/2020 | 7/15/2020 | North America / USA / Washington                        |
| EPI_ISL_491028 | 3/27/2020 | 7/15/2020 | North America / USA / Washington                        |
| EPI_ISL_491029 | 3/27/2020 | 7/15/2020 | North America / USA / Washington                        |
| EPI_ISL_491030 | 3/26/2020 | 7/15/2020 | North America / USA / Washington                        |
| EPI_ISL_491031 | 3/26/2020 | 7/15/2020 | North America / USA / Washington                        |
| EPI_ISL_491032 | 3/26/2020 | 7/15/2020 | North America / USA / Washington                        |
| EPI_ISL_491033 | 3/24/2020 | 7/15/2020 | North America / USA / Washington                        |
| EPI_ISL_491034 | 3/26/2020 | 7/15/2020 | North America / USA / Washington                        |
| EPI_ISL_491097 | 3/6/2020  | 7/15/2020 | North America / USA / South Carolina / Berkeley County  |
| EPI_ISL_491098 | 3/7/2020  | 7/15/2020 | North America / USA / South Carolina / Berkeley County  |
| EPI_ISL_491099 | 3/10/2020 | 7/15/2020 | North America / USA / South Carolina / Berkeley County  |
| EPI_ISL_491101 | 3/25/2020 | 7/15/2020 | North America / USA / South Carolina / Berkeley County  |
| EPI_ISL_491102 | 3/25/2020 | 7/15/2020 | North America / USA / South Carolina / Berkeley County  |
| EPI_ISL_491103 | 3/26/2020 | 7/15/2020 | North America / USA / South Carolina / Berkeley County  |
| EPI_ISL_491104 | 3/27/2020 | 7/15/2020 | North America / USA / South Carolina / Berkeley County  |
| EPI_ISL_491105 | 4/17/2020 | 7/15/2020 | North America / USA / South Carolina / Richland County  |
| EPI_ISL_491106 | 4/17/2020 | 7/15/2020 | North America / USA / South Carolina / Richland County  |
| EPI_ISL_491107 | 4/24/2020 | 7/15/2020 | North America / USA / South Carolina / Richland County  |
| EPI_ISL_491110 | 5/4/2020  | 7/15/2020 | North America / USA / South Carolina / Fairfield County |
| EPI_ISL_512774 | 7/7/2020  | 7/15/2020 | Asia / Bangladesh / Khulna / Jessore                    |
| EPI_ISL_491036 | 5/26/2020 | 7/16/2020 | Europe / Romania / Suceava                              |
| EPI_ISL_491037 | 5/29/2020 | 7/16/2020 | Europe / Romania / Suceava                              |
| EPI_ISL_491038 | 6/4/2020  | 7/16/2020 | Europe / Romania / Suceava                              |
| EPI_ISL_491039 | 6/5/2020  | 7/16/2020 | Europe / Romania / Suceava                              |
| EPI_ISL_491040 | 6/8/2020  | 7/16/2020 | Europe / Romania / Suceava                              |
| EPI_ISL_491041 | 6/7/2020  | 7/16/2020 | Europe / Romania / Suceava                              |
| EPI_ISL_491042 | 6/8/2020  | 7/16/2020 | Europe / Romania / Suceava                              |
| EPI_ISL_491043 | 6/8/2020  | 7/16/2020 | Europe / Romania / Suceava                              |
| EPI_ISL_491044 | 6/9/2020  | 7/16/2020 | Europe / Romania / Suceava                              |
| EPI_ISL_491045 | 6/9/2020  | 7/16/2020 | Europe / Romania / Suceava                              |
| EPI_ISL_491046 | 6/9/2020  | 7/16/2020 | Europe / Romania / Suceava                              |
| EPI_ISL_491047 | 6/9/2020  | 7/16/2020 | Europe / Romania / Suceava                              |
| EPI_ISL_491048 | 6/10/2020 | 7/16/2020 | Europe / Romania / Suceava                              |
| EPI_ISL_491049 | 6/11/2020 | 7/16/2020 | Europe / Romania / Suceava                              |
| EPI_ISL_491050 | 4/9/2020  | 7/16/2020 | Europe / Romania / Suceava                              |
| EPI_ISL_491051 | 6/15/2020 | 7/16/2020 | Europe / Romania / Suceava                              |
| EPI_ISL_491052 | 4/9/2020  | 7/16/2020 | Europe / Romania / Suceava                              |



|                |           |                                                                   |
|----------------|-----------|-------------------------------------------------------------------|
| EPI_ISL_491053 | 6/17/2020 | 7/16/2020 Europe / Romania / Suceava                              |
| EPI_ISL_491054 | 4/9/2020  | 7/16/2020 Europe / Romania / Suceava                              |
| EPI_ISL_491055 | 4/11/2020 | 7/16/2020 Europe / Romania / Suceava                              |
| EPI_ISL_491056 | 4/11/2020 | 7/16/2020 Europe / Romania / Suceava                              |
| EPI_ISL_491057 | 4/11/2020 | 7/16/2020 Europe / Romania / Suceava                              |
| EPI_ISL_491058 | 4/16/2020 | 7/16/2020 Europe / Romania / Suceava                              |
| EPI_ISL_491059 | 4/16/2020 | 7/16/2020 Europe / Romania / Suceava                              |
| EPI_ISL_491060 | 4/16/2020 | 7/16/2020 Europe / Romania / Suceava                              |
| EPI_ISL_491061 | 4/17/2020 | 7/16/2020 Europe / Romania / Suceava                              |
| EPI_ISL_491062 | 4/17/2020 | 7/16/2020 Europe / Romania / Suceava                              |
| EPI_ISL_491063 | 4/17/2020 | 7/16/2020 Europe / Romania / Suceava                              |
| EPI_ISL_491064 | 4/17/2020 | 7/16/2020 Europe / Romania / Suceava                              |
| EPI_ISL_491065 | 4/18/2020 | 7/16/2020 Europe / Romania / Suceava                              |
| EPI_ISL_491066 | 4/19/2020 | 7/16/2020 Europe / Romania / Suceava                              |
| EPI_ISL_491067 | 4/19/2020 | 7/16/2020 Europe / Romania / Suceava                              |
| EPI_ISL_491069 | 4/20/2020 | 7/16/2020 Europe / Romania / Suceava                              |
| EPI_ISL_491070 | 4/21/2020 | 7/16/2020 Europe / Romania / Suceava                              |
| EPI_ISL_491072 | 4/22/2020 | 7/16/2020 Europe / Romania / Suceava                              |
| EPI_ISL_491073 | 4/23/2020 | 7/16/2020 Europe / Romania / Suceava                              |
| EPI_ISL_491074 | 4/24/2020 | 7/16/2020 Europe / Romania / Suceava                              |
| EPI_ISL_491075 | 4/25/2020 | 7/16/2020 Europe / Romania / Suceava                              |
| EPI_ISL_491076 | 4/25/2020 | 7/16/2020 Europe / Romania / Suceava                              |
| EPI_ISL_491077 | 4/25/2020 | 7/16/2020 Europe / Romania / Suceava                              |
| EPI_ISL_491078 | 4/26/2020 | 7/16/2020 Europe / Romania / Suceava                              |
| EPI_ISL_491079 | 4/26/2020 | 7/16/2020 Europe / Romania / Suceava                              |
| EPI_ISL_491080 | 4/27/2020 | 7/16/2020 Europe / Romania / Suceava                              |
| EPI_ISL_491081 | 4/27/2020 | 7/16/2020 Europe / Romania / Suceava                              |
| EPI_ISL_491082 | 4/27/2020 | 7/16/2020 Europe / Romania / Suceava                              |
| EPI_ISL_491083 | 4/28/2020 | 7/16/2020 Europe / Romania / Suceava                              |
| EPI_ISL_491084 | 4/29/2020 | 7/16/2020 Europe / Romania / Suceava                              |
| EPI_ISL_491085 | 4/5/2020  | 7/16/2020 Europe / Romania / Suceava                              |
| EPI_ISL_491086 | 5/1/2020  | 7/16/2020 Europe / Romania / Suceava                              |
| EPI_ISL_491087 | 5/1/2020  | 7/16/2020 Europe / Romania / Suceava                              |
| EPI_ISL_491088 | 5/12/2020 | 7/16/2020 Europe / Romania / Suceava                              |
| EPI_ISL_491089 | 5/14/2020 | 7/16/2020 Europe / Romania / Suceava                              |
| EPI_ISL_491090 | 5/18/2020 | 7/16/2020 Europe / Romania / Suceava                              |
| EPI_ISL_491091 | 5/22/2020 | 7/16/2020 Europe / Romania / Suceava                              |
| EPI_ISL_491092 | 3/19/2020 | 7/16/2020 Europe / Czech Republic / Litovel                       |
| EPI_ISL_491093 | 3/18/2020 | 7/16/2020 Europe / Czech Republic / Zlin / FryÅitÅik              |
| EPI_ISL_491094 | 3/20/2020 | 7/16/2020 Europe / Czech Republic / PlzeÅ^ / KlenÅ-               |
| EPI_ISL_491095 | 3/20/2020 | 7/16/2020 Europe / Czech Republic / ÅstÅ- nad Labem / VÅjeboÅ™ice |
| EPI_ISL_491096 | 2020      | 7/16/2020 Asia / India                                            |
| EPI_ISL_491115 | 4/27/2020 | 7/16/2020 Europe / Germany / Lower Saxony                         |
| EPI_ISL_491116 | 3/26/2020 | 7/16/2020 Asia / Oman / Muscat                                    |
| EPI_ISL_491117 | 3/18/2020 | 7/16/2020 Europe / Czech Republic / Prague                        |
| EPI_ISL_491118 | 4/1/2020  | 7/16/2020 Europe / Czech Republic / Usti nad Labem                |
| EPI_ISL_491119 | 4/8/2020  | 7/16/2020 Europe / Czech Republic / Breclav                       |

|                |           |                                                   |
|----------------|-----------|---------------------------------------------------|
| EPI_ISL_491121 | 4/2/2020  | 7/16/2020 Asia / Oman / Muscat / Mutrah           |
| EPI_ISL_491122 | 4/28/2020 | 7/16/2020 Asia / Oman / South Batinah / Ar Rustaq |
| EPI_ISL_491123 | 4/13/2020 | 7/16/2020 Asia / Oman / Muscat / Al Amrat         |
| EPI_ISL_491124 | 4/28/2020 | 7/16/2020 Asia / Oman / Muscat / Mutrah           |
| EPI_ISL_491125 | 4/25/2020 | 7/16/2020 Asia / Oman / Dhahirah / Ibri           |
| EPI_ISL_491126 | 4/25/2020 | 7/16/2020 Asia / Oman / Muscat / Al Amrat         |
| EPI_ISL_491127 | 4/26/2020 | 7/16/2020 Asia / Oman / South Batinah / Ar Rustaq |
| EPI_ISL_491128 | 4/3/2020  | 7/16/2020 Asia / Oman / Muscat / As Seeb          |
| EPI_ISL_491129 | 4/17/2020 | 7/16/2020 Asia / Oman / South Batinah / Al Awabi  |
| EPI_ISL_491130 | 4/21/2020 | 7/16/2020 Asia / Oman / South Batinah / Nakhal    |
| EPI_ISL_491131 | 4/25/2020 | 7/16/2020 Asia / Oman / South Batinah / Nakhal    |
| EPI_ISL_491132 | 4/26/2020 | 7/16/2020 Asia / Oman / South Batinah / Ar Rustaq |
| EPI_ISL_491133 | 4/28/2020 | 7/16/2020 Asia / Oman / Dakhiliyah / Manah        |
| EPI_ISL_491134 | 3/30/2020 | 7/16/2020 Asia / Oman / Dakhiliyah / Nizwa        |
| EPI_ISL_491135 | 4/2/2020  | 7/16/2020 Asia / Oman / Muscat / Bawshar          |
| EPI_ISL_491136 | 4/27/2020 | 7/16/2020 Asia / Oman / Dhahirah / Ibri           |
| EPI_ISL_491137 | 4/15/2020 | 7/16/2020 Asia / Oman / Muscat / Al Amrat         |
| EPI_ISL_491138 | 5/15/2020 | 7/16/2020 Asia / Oman / Dakhiliyah / Nizwa        |
| EPI_ISL_491139 | 4/18/2020 | 7/16/2020 Asia / Oman / Dhahirah / Ibri           |
| EPI_ISL_491140 | 4/25/2020 | 7/16/2020 Asia / Oman / Dhahirah / Ibri           |
| EPI_ISL_491141 | 5/7/2020  | 7/16/2020 Asia / Oman / Muscat / Qurayat          |
| EPI_ISL_491142 | 4/25/2020 | 7/16/2020 Asia / Oman / Dhahirah / Ibri           |
| EPI_ISL_491143 | 4/22/2020 | 7/16/2020 Asia / Oman / South Batinah / Ar Rustaq |
| EPI_ISL_491144 | 4/13/2020 | 7/16/2020 Asia / Oman / South Batinah / Al Awabi  |
| EPI_ISL_491145 | 5/6/2020  | 7/16/2020 Asia / Oman / South Batinah / Barka     |
| EPI_ISL_491146 | 4/26/2020 | 7/16/2020 Asia / Oman / Muscat / As Seeb          |
| EPI_ISL_491147 | 4/8/2020  | 7/16/2020 Asia / Oman / Dakhiliyah / Nizwa        |
| EPI_ISL_491148 | 4/13/2020 | 7/16/2020 Asia / Oman / South Batinah / Al Awabi  |
| EPI_ISL_491149 | 4/10/2020 | 7/16/2020 Asia / Oman / South Batinah / Barka     |
| EPI_ISL_491150 | 4/10/2020 | 7/16/2020 Asia / Oman / South Batinah / Barka     |
| EPI_ISL_491151 | 4/17/2020 | 7/16/2020 Asia / Oman / South Batinah / Barka     |
| EPI_ISL_491152 | 4/12/2020 | 7/16/2020 Asia / Oman / South Batinah / Barka     |
| EPI_ISL_491153 | 5/9/2020  | 7/16/2020 Asia / Oman / Buraymi / Buraymi         |
| EPI_ISL_491154 | 3/29/2020 | 7/16/2020 Asia / Oman / Dakhiliyah / Nizwa        |
| EPI_ISL_491155 | 4/7/2020  | 7/16/2020 Asia / Oman / South Batinah / Barka     |
| EPI_ISL_491156 | 4/10/2020 | 7/16/2020 Asia / Oman / South Batinah / Barka     |
| EPI_ISL_491157 | 4/10/2020 | 7/16/2020 Asia / Oman / South Batinah / Barka     |
| EPI_ISL_491158 | 4/15/2020 | 7/16/2020 Asia / Oman / Muscat / Bawshar          |
| EPI_ISL_491159 | 4/12/2020 | 7/16/2020 Asia / Oman / Muscat / Bawshar          |
| EPI_ISL_491160 | 4/10/2020 | 7/16/2020 Asia / Oman / South Batinah / Barka     |
| EPI_ISL_491161 | 4/6/2020  | 7/16/2020 Asia / Oman / North Sharqiyah / Ibra    |
| EPI_ISL_491162 | 4/22/2020 | 7/16/2020 Asia / Oman / Dhahirah / Ibri           |
| EPI_ISL_491163 | 4/22/2020 | 7/16/2020 Asia / Oman / Dhahirah / Ibri           |
| EPI_ISL_491164 | 4/24/2020 | 7/16/2020 Asia / Oman / Dakhiliyah / Bahla        |
| EPI_ISL_491165 | 4/24/2020 | 7/16/2020 Asia / Oman / Dakhiliyah / Samail       |
| EPI_ISL_491166 | 4/26/2020 | 7/16/2020 Asia / Oman / South Batinah / Nakhal    |
| EPI_ISL_491167 | 4/15/2020 | 7/16/2020 Asia / Oman / South Batinah / Al Awabi  |

|                |           |                                               |
|----------------|-----------|-----------------------------------------------|
| EPI_ISL_491168 | 4/21/2020 | 7/16/2020 Asia / Oman / Dhahirah / Ibri       |
| EPI_ISL_491169 | 5/3/2020  | 7/16/2020 Asia / Oman / South Batinah / Barka |
| EPI_ISL_491170 | 5/1/2020  | 7/16/2020 Asia / Oman / South Batinah / Barka |
| EPI_ISL_491171 | 4/22/2020 | 7/16/2020 Asia / Oman / Dakhiliyah / Nizwa    |
| EPI_ISL_491172 | 3/24/2020 | 7/16/2020 South America / Peru / Lima         |
| EPI_ISL_491175 | 5/17/2020 | 7/16/2020 Europe / Portugal                   |
| EPI_ISL_491183 | 5/19/2020 | 7/16/2020 Europe / Portugal                   |
| EPI_ISL_491184 | 5/20/2020 | 7/16/2020 Europe / Portugal                   |
| EPI_ISL_491187 | 5/20/2020 | 7/16/2020 Europe / Portugal                   |
| EPI_ISL_491189 | 5/25/2020 | 7/16/2020 Europe / Portugal                   |
| EPI_ISL_491208 | 5/28/2020 | 7/16/2020 Europe / Portugal                   |
| EPI_ISL_491209 | 5/28/2020 | 7/16/2020 Europe / Portugal                   |
| EPI_ISL_491210 | 5/28/2020 | 7/16/2020 Europe / Portugal                   |
| EPI_ISL_491211 | 5/28/2020 | 7/16/2020 Europe / Portugal                   |
| EPI_ISL_491217 | 6/1/2020  | 7/16/2020 Europe / Portugal                   |
| EPI_ISL_491219 | 5/31/2020 | 7/16/2020 Europe / Portugal                   |
| EPI_ISL_491222 | 6/1/2020  | 7/16/2020 Europe / Portugal                   |
| EPI_ISL_491224 | 5/31/2020 | 7/16/2020 Europe / Portugal                   |
| EPI_ISL_491225 | 6/1/2020  | 7/16/2020 Europe / Portugal                   |
| EPI_ISL_491226 | 6/1/2020  | 7/16/2020 Europe / Portugal                   |
| EPI_ISL_491227 | 6/1/2020  | 7/16/2020 Europe / Portugal                   |
| EPI_ISL_491228 | 6/1/2020  | 7/16/2020 Europe / Portugal                   |
| EPI_ISL_491229 | 6/2/2020  | 7/16/2020 Europe / Portugal                   |
| EPI_ISL_491230 | 6/1/2020  | 7/16/2020 Europe / Portugal                   |
| EPI_ISL_491231 | 6/1/2020  | 7/16/2020 Europe / Portugal                   |
| EPI_ISL_491232 | 6/1/2020  | 7/16/2020 Europe / Portugal                   |
| EPI_ISL_491233 | 6/1/2020  | 7/16/2020 Europe / Portugal                   |
| EPI_ISL_491235 | 6/2/2020  | 7/16/2020 Europe / Portugal                   |
| EPI_ISL_491237 | 6/3/2020  | 7/16/2020 Europe / Portugal                   |
| EPI_ISL_491238 | 6/3/2020  | 7/16/2020 Europe / Portugal                   |
| EPI_ISL_491239 | 6/3/2020  | 7/16/2020 Europe / Portugal                   |
| EPI_ISL_491240 | 6/3/2020  | 7/16/2020 Europe / Portugal                   |
| EPI_ISL_491241 | 6/3/2020  | 7/16/2020 Europe / Portugal                   |
| EPI_ISL_491242 | 6/3/2020  | 7/16/2020 Europe / Portugal                   |
| EPI_ISL_491243 | 6/3/2020  | 7/16/2020 Europe / Portugal                   |
| EPI_ISL_491244 | 6/7/2020  | 7/16/2020 Europe / Portugal                   |
| EPI_ISL_491245 | 6/7/2020  | 7/16/2020 Europe / Portugal                   |
| EPI_ISL_491246 | 6/7/2020  | 7/16/2020 Europe / Portugal                   |
| EPI_ISL_491248 | 6/7/2020  | 7/16/2020 Europe / Portugal                   |
| EPI_ISL_491249 | 6/8/2020  | 7/16/2020 Europe / Portugal                   |
| EPI_ISL_491250 | 6/8/2020  | 7/16/2020 Europe / Portugal                   |
| EPI_ISL_491251 | 6/8/2020  | 7/16/2020 Europe / Portugal                   |
| EPI_ISL_491252 | 6/8/2020  | 7/16/2020 Europe / Portugal                   |
| EPI_ISL_491253 | 6/8/2020  | 7/16/2020 Europe / Portugal                   |
| EPI_ISL_491254 | 6/8/2020  | 7/16/2020 Europe / Portugal                   |
| EPI_ISL_491255 | 6/9/2020  | 7/16/2020 Europe / Portugal                   |
| EPI_ISL_491256 | 6/9/2020  | 7/16/2020 Europe / Portugal                   |

|                |           |                                                                     |
|----------------|-----------|---------------------------------------------------------------------|
| EPI_ISL_491257 | 6/9/2020  | 7/16/2020 Europe / Portugal                                         |
| EPI_ISL_491258 | 6/9/2020  | 7/16/2020 Europe / Portugal                                         |
| EPI_ISL_491259 | 6/8/2020  | 7/16/2020 Europe / Portugal                                         |
| EPI_ISL_491260 | 6/8/2020  | 7/16/2020 Europe / Portugal                                         |
| EPI_ISL_491261 | 6/8/2020  | 7/16/2020 Europe / Portugal                                         |
| EPI_ISL_491262 | 6/12/2020 | 7/16/2020 Europe / Portugal                                         |
| EPI_ISL_491263 | 6/12/2020 | 7/16/2020 Europe / Portugal                                         |
| EPI_ISL_491264 | 6/12/2020 | 7/16/2020 Europe / Portugal                                         |
| EPI_ISL_491268 | 6/9/2020  | 7/16/2020 Europe / Portugal                                         |
| EPI_ISL_491269 | 6/9/2020  | 7/16/2020 Europe / Portugal                                         |
| EPI_ISL_491270 | 6/12/2020 | 7/16/2020 Europe / Portugal                                         |
| EPI_ISL_491271 | 6/12/2020 | 7/16/2020 Europe / Portugal                                         |
| EPI_ISL_491273 | 6/14/2020 | 7/16/2020 Europe / Portugal                                         |
| EPI_ISL_491274 | 6/14/2020 | 7/16/2020 Europe / Portugal                                         |
| EPI_ISL_491275 | 6/15/2020 | 7/16/2020 Europe / Portugal                                         |
| EPI_ISL_491289 | 5/28/2020 | 7/16/2020 Europe / Portugal                                         |
| EPI_ISL_491291 | 5/27/2020 | 7/16/2020 Europe / Portugal                                         |
| EPI_ISL_491292 | 5/27/2020 | 7/16/2020 Europe / Portugal                                         |
| EPI_ISL_491297 | 6/3/2020  | 7/16/2020 Europe / Portugal                                         |
| EPI_ISL_491299 | 6/27/2020 | 7/16/2020 North America / USA / Arizona / Maricopa County           |
| EPI_ISL_491300 | 6/26/2020 | 7/16/2020 North America / USA / California / Santa Clara County     |
| EPI_ISL_491301 | 6/27/2020 | 7/16/2020 North America / USA / California / Los Angeles County     |
| EPI_ISL_491302 | 6/30/2020 | 7/16/2020 North America / USA / California / San Diego County       |
| EPI_ISL_491304 | 6/29/2020 | 7/16/2020 North America / USA / Colorado / Denver County            |
| EPI_ISL_491305 | 6/28/2020 | 7/16/2020 North America / USA / Florida / Miami-Dade County / Miami |
| EPI_ISL_491306 | 6/30/2020 | 7/16/2020 North America / USA / Florida / Palm Beach County         |
| EPI_ISL_491307 | 6/27/2020 | 7/16/2020 North America / USA / Illinois / Cook County              |
| EPI_ISL_491308 | 6/26/2020 | 7/16/2020 North America / USA / Iowa / Jackson County               |
| EPI_ISL_491309 | 6/28/2020 | 7/16/2020 North America / USA / Illinois / Kane County              |
| EPI_ISL_491310 | 6/27/2020 | 7/16/2020 North America / USA / Illinois / Cook County              |
| EPI_ISL_491311 | 6/26/2020 | 7/16/2020 North America / USA / Illinois / Cook County              |
| EPI_ISL_491312 | 6/26/2020 | 7/16/2020 North America / USA / Illinois / Cook County              |
| EPI_ISL_491313 | 6/28/2020 | 7/16/2020 North America / USA / Illinois / Cook County              |
| EPI_ISL_491314 | 6/29/2020 | 7/16/2020 North America / USA / Illinois / Lake County              |
| EPI_ISL_491316 | 6/27/2020 | 7/16/2020 North America / USA / Massachusetts / Norfolk County      |
| EPI_ISL_491317 | 6/26/2020 | 7/16/2020 North America / USA / Massachusetts / Norfolk County      |
| EPI_ISL_491318 | 6/26/2020 | 7/16/2020 North America / USA / Minnesota / Stearns County          |
| EPI_ISL_491319 | 6/28/2020 | 7/16/2020 North America / USA / New Jersey / Essex County           |
| EPI_ISL_491320 | 6/28/2020 | 7/16/2020 North America / USA / New York / Westchester County       |
| EPI_ISL_491321 | 6/26/2020 | 7/16/2020 North America / USA / New York / Rockland County          |
| EPI_ISL_491322 | 6/25/2020 | 7/16/2020 North America / USA / Wisconsin / Dane County             |
| EPI_ISL_491323 | 6/28/2020 | 7/16/2020 North America / USA / Wisconsin / Dane County             |
| EPI_ISL_491324 | 6/26/2020 | 7/16/2020 North America / USA / Wisconsin / Dane County             |
| EPI_ISL_491325 | 6/28/2020 | 7/16/2020 North America / USA / Wisconsin / Dane County             |
| EPI_ISL_491326 | 6/28/2020 | 7/16/2020 North America / USA / Wisconsin / Dane County             |
| EPI_ISL_491327 | 6/28/2020 | 7/16/2020 North America / USA / Wisconsin / Dane County             |
| EPI_ISL_491328 | 6/26/2020 | 7/16/2020 North America / USA / Wisconsin / Dane County             |





|                |           |                                                                  |
|----------------|-----------|------------------------------------------------------------------|
| EPI_ISL_491436 | 4/23/2020 | 7/16/2020 South America / Peru / Lima                            |
| EPI_ISL_492181 | 7/2/2020  | 7/16/2020 North America / USA / Arkansas                         |
| EPI_ISL_492182 | 7/2/2020  | 7/16/2020 North America / USA / Arkansas                         |
| EPI_ISL_491437 | 3/7/2020  | 7/17/2020 North America / Costa Rica / San Jose                  |
| EPI_ISL_491438 | 3/6/2020  | 7/17/2020 North America / Costa Rica / Alajuela                  |
| EPI_ISL_491439 | 3/14/2020 | 7/17/2020 North America / Costa Rica / San Jose                  |
| EPI_ISL_491440 | 3/11/2020 | 7/17/2020 North America / Costa Rica / Alajuela                  |
| EPI_ISL_491441 | 3/14/2020 | 7/17/2020 North America / Costa Rica / San Jose                  |
| EPI_ISL_491442 | 3/14/2020 | 7/17/2020 North America / Costa Rica / San Jose                  |
| EPI_ISL_491443 | 3/14/2020 | 7/17/2020 North America / Costa Rica / San Jose / Perez Zeledon  |
| EPI_ISL_491444 | 3/15/2020 | 7/17/2020 North America / Costa Rica / San Jose                  |
| EPI_ISL_491445 | 3/15/2020 | 7/17/2020 North America / Costa Rica / San Jose                  |
| EPI_ISL_491446 | 3/11/2020 | 7/17/2020 North America / Costa Rica / Alajuela                  |
| EPI_ISL_491447 | 3/15/2020 | 7/17/2020 North America / Costa Rica / San Jose                  |
| EPI_ISL_491448 | 3/18/2020 | 7/17/2020 North America / Costa Rica / Alajuela                  |
| EPI_ISL_491449 | 3/16/2020 | 7/17/2020 North America / Costa Rica / Alajuela                  |
| EPI_ISL_491450 | 3/18/2020 | 7/17/2020 North America / Costa Rica / Guanacaste / Nicoya       |
| EPI_ISL_491451 | 3/19/2020 | 7/17/2020 North America / Costa Rica / San Jose                  |
| EPI_ISL_491452 | 3/20/2020 | 7/17/2020 North America / Costa Rica / Alajuela                  |
| EPI_ISL_491453 | 3/21/2020 | 7/17/2020 North America / Costa Rica / Alajuela                  |
| EPI_ISL_491454 | 3/18/2020 | 7/17/2020 North America / Costa Rica / San Jose / Aserri         |
| EPI_ISL_491455 | 3/20/2020 | 7/17/2020 North America / Costa Rica / Alajuela                  |
| EPI_ISL_491456 | 3/23/2020 | 7/17/2020 North America / Costa Rica / San Jose / Desamparados   |
| EPI_ISL_491457 | 3/25/2020 | 7/17/2020 North America / Costa Rica / San Jose / Tarrazu        |
| EPI_ISL_491458 | 4/13/2020 | 7/17/2020 South America / Peru / Lima                            |
| EPI_ISL_491459 | 4/1/2020  | 7/17/2020 South America / Peru / Lambayeque                      |
| EPI_ISL_491460 | 4/1/2020  | 7/17/2020 South America / Peru / Lambayeque                      |
| EPI_ISL_491461 | 4/1/2020  | 7/17/2020 South America / Peru / Lambayeque                      |
| EPI_ISL_491462 | 3/31/2020 | 7/17/2020 South America / Peru / Ica                             |
| EPI_ISL_491463 | 3/10/2020 | 7/17/2020 South America / Peru / Lima                            |
| EPI_ISL_491464 | 3/31/2020 | 7/17/2020 South America / Peru / Ica                             |
| EPI_ISL_491476 | 3/17/2020 | 7/17/2020 Europe / Turkey / Sakarya                              |
| EPI_ISL_491481 | 4/3/2020  | 7/17/2020 North America / USA / South Carolina / Richland County |
| EPI_ISL_491494 | 5/1/2020  | 7/17/2020 Europe / United Kingdom / Scotland                     |
| EPI_ISL_491495 | 4/12/2020 | 7/17/2020 Europe / United Kingdom / Scotland                     |
| EPI_ISL_491496 | 4/20/2020 | 7/17/2020 Europe / United Kingdom / Scotland                     |
| EPI_ISL_491497 | 4/24/2020 | 7/17/2020 Europe / United Kingdom / Scotland                     |
| EPI_ISL_491498 | 4/21/2020 | 7/17/2020 Europe / United Kingdom / Scotland                     |
| EPI_ISL_491500 | 4/11/2020 | 7/17/2020 Europe / United Kingdom / Scotland                     |
| EPI_ISL_491501 | 4/6/2020  | 7/17/2020 Europe / United Kingdom / Scotland                     |
| EPI_ISL_491502 | 4/17/2020 | 7/17/2020 Europe / United Kingdom / Scotland                     |
| EPI_ISL_491503 | 4/30/2020 | 7/17/2020 Europe / United Kingdom / Scotland                     |
| EPI_ISL_491504 | 4/1/2020  | 7/17/2020 Europe / United Kingdom / Scotland                     |
| EPI_ISL_491506 | 4/20/2020 | 7/17/2020 Europe / United Kingdom / Scotland                     |
| EPI_ISL_491507 | 4/21/2020 | 7/17/2020 Europe / United Kingdom / Scotland                     |
| EPI_ISL_491508 | 4/11/2020 | 7/17/2020 Europe / United Kingdom / Scotland                     |
| EPI_ISL_491509 | 4/24/2020 | 7/17/2020 Europe / United Kingdom / Scotland                     |





|                |           |           |                                    |
|----------------|-----------|-----------|------------------------------------|
| EPI_ISL_491577 | 4/22/2020 | 7/17/2020 | Europe / United Kingdom / Scotland |
| EPI_ISL_491578 | 4/2/2020  | 7/17/2020 | Europe / United Kingdom / Scotland |
| EPI_ISL_491580 | 4/20/2020 | 7/17/2020 | Europe / United Kingdom / Scotland |
| EPI_ISL_491581 | 4/18/2020 | 7/17/2020 | Europe / United Kingdom / Scotland |
| EPI_ISL_491582 | 4/8/2020  | 7/17/2020 | Europe / United Kingdom / Scotland |
| EPI_ISL_491583 | 4/21/2020 | 7/17/2020 | Europe / United Kingdom / Scotland |
| EPI_ISL_491584 | 4/9/2020  | 7/17/2020 | Europe / United Kingdom / Scotland |
| EPI_ISL_491585 | 4/7/2020  | 7/17/2020 | Europe / United Kingdom / Scotland |
| EPI_ISL_491587 | 4/13/2020 | 7/17/2020 | Europe / United Kingdom / Scotland |
| EPI_ISL_491588 | 4/17/2020 | 7/17/2020 | Europe / United Kingdom / Scotland |
| EPI_ISL_491589 | 4/7/2020  | 7/17/2020 | Europe / United Kingdom / Scotland |
| EPI_ISL_491590 | 4/12/2020 | 7/17/2020 | Europe / United Kingdom / Scotland |
| EPI_ISL_491591 | 4/17/2020 | 7/17/2020 | Europe / United Kingdom / Scotland |
| EPI_ISL_491592 | 4/11/2020 | 7/17/2020 | Europe / United Kingdom / Scotland |
| EPI_ISL_491593 | 4/27/2020 | 7/17/2020 | Europe / United Kingdom / Scotland |
| EPI_ISL_491594 | 4/24/2020 | 7/17/2020 | Europe / United Kingdom / Scotland |
| EPI_ISL_491596 | 4/10/2020 | 7/17/2020 | Europe / United Kingdom / Scotland |
| EPI_ISL_491597 | 4/23/2020 | 7/17/2020 | Europe / United Kingdom / Scotland |
| EPI_ISL_491598 | 4/30/2020 | 7/17/2020 | Europe / United Kingdom / Scotland |
| EPI_ISL_491599 | 4/18/2020 | 7/17/2020 | Europe / United Kingdom / Scotland |
| EPI_ISL_491600 | 4/10/2020 | 7/17/2020 | Europe / United Kingdom / Scotland |
| EPI_ISL_491602 | 4/4/2020  | 7/17/2020 | Europe / United Kingdom / Scotland |
| EPI_ISL_491603 | 4/22/2020 | 7/17/2020 | Europe / United Kingdom / Scotland |
| EPI_ISL_491604 | 4/4/2020  | 7/17/2020 | Europe / United Kingdom / Scotland |
| EPI_ISL_491605 | 3/31/2020 | 7/17/2020 | Europe / United Kingdom / Scotland |
| EPI_ISL_491606 | 4/12/2020 | 7/17/2020 | Europe / United Kingdom / Scotland |
| EPI_ISL_491609 | 4/22/2020 | 7/17/2020 | Europe / United Kingdom / Scotland |
| EPI_ISL_491610 | 4/17/2020 | 7/17/2020 | Europe / United Kingdom / Scotland |
| EPI_ISL_491612 | 4/17/2020 | 7/17/2020 | Europe / United Kingdom / Scotland |
| EPI_ISL_491613 | 4/22/2020 | 7/17/2020 | Europe / United Kingdom / Scotland |
| EPI_ISL_491614 | 4/28/2020 | 7/17/2020 | Europe / United Kingdom / Scotland |
| EPI_ISL_491615 | 4/7/2020  | 7/17/2020 | Europe / United Kingdom / Scotland |
| EPI_ISL_491617 | 4/21/2020 | 7/17/2020 | Europe / United Kingdom / Scotland |
| EPI_ISL_491618 | 4/13/2020 | 7/17/2020 | Europe / United Kingdom / Scotland |
| EPI_ISL_491620 | 4/17/2020 | 7/17/2020 | Europe / United Kingdom / Scotland |
| EPI_ISL_491621 | 4/22/2020 | 7/17/2020 | Europe / United Kingdom / Scotland |
| EPI_ISL_491622 | 4/23/2020 | 7/17/2020 | Europe / United Kingdom / Scotland |
| EPI_ISL_491623 | 4/17/2020 | 7/17/2020 | Europe / United Kingdom / Scotland |
| EPI_ISL_491624 | 4/12/2020 | 7/17/2020 | Europe / United Kingdom / Scotland |
| EPI_ISL_491625 | 4/17/2020 | 7/17/2020 | Europe / United Kingdom / Scotland |
| EPI_ISL_491626 | 4/23/2020 | 7/17/2020 | Europe / United Kingdom / Scotland |
| EPI_ISL_491627 | 4/23/2020 | 7/17/2020 | Europe / United Kingdom / Scotland |
| EPI_ISL_491628 | 4/16/2020 | 7/17/2020 | Europe / United Kingdom / Scotland |
| EPI_ISL_491630 | 4/13/2020 | 7/17/2020 | Europe / United Kingdom / Scotland |
| EPI_ISL_491631 | 4/24/2020 | 7/17/2020 | Europe / United Kingdom / Scotland |
| EPI_ISL_491635 | 4/18/2020 | 7/17/2020 | Europe / United Kingdom / Scotland |
| EPI_ISL_491636 | 4/10/2020 | 7/17/2020 | Europe / United Kingdom / Scotland |

|                |           |           |                                    |
|----------------|-----------|-----------|------------------------------------|
| EPI_ISL_491637 | 4/5/2020  | 7/17/2020 | Europe / United Kingdom / Scotland |
| EPI_ISL_491638 | 4/13/2020 | 7/17/2020 | Europe / United Kingdom / Scotland |
| EPI_ISL_491639 | 4/13/2020 | 7/17/2020 | Europe / United Kingdom / Scotland |
| EPI_ISL_491640 | 4/6/2020  | 7/17/2020 | Europe / United Kingdom / Scotland |
| EPI_ISL_491643 | 4/7/2020  | 7/17/2020 | Europe / United Kingdom / Scotland |
| EPI_ISL_491644 | 4/10/2020 | 7/17/2020 | Europe / United Kingdom / Scotland |
| EPI_ISL_491647 | 4/21/2020 | 7/17/2020 | Europe / United Kingdom / Scotland |
| EPI_ISL_491648 | 4/10/2020 | 7/17/2020 | Europe / United Kingdom / Scotland |
| EPI_ISL_491649 | 4/13/2020 | 7/17/2020 | Europe / United Kingdom / Scotland |
| EPI_ISL_491650 | 4/8/2020  | 7/17/2020 | Europe / United Kingdom / Scotland |
| EPI_ISL_491652 | 4/29/2020 | 7/17/2020 | Europe / United Kingdom / Scotland |
| EPI_ISL_491654 | 4/18/2020 | 7/17/2020 | Europe / United Kingdom / Scotland |
| EPI_ISL_491658 | 4/18/2020 | 7/17/2020 | Europe / United Kingdom / Scotland |
| EPI_ISL_491659 | 4/24/2020 | 7/17/2020 | Europe / United Kingdom / Scotland |
| EPI_ISL_491660 | 4/21/2020 | 7/17/2020 | Europe / United Kingdom / Scotland |
| EPI_ISL_491661 | 4/16/2020 | 7/17/2020 | Europe / United Kingdom / Scotland |
| EPI_ISL_491662 | 4/9/2020  | 7/17/2020 | Europe / United Kingdom / Scotland |
| EPI_ISL_491663 | 4/20/2020 | 7/17/2020 | Europe / United Kingdom / Scotland |
| EPI_ISL_491664 | 4/17/2020 | 7/17/2020 | Europe / United Kingdom / Scotland |
| EPI_ISL_491665 | 4/22/2020 | 7/17/2020 | Europe / United Kingdom / Scotland |
| EPI_ISL_491667 | 4/11/2020 | 7/17/2020 | Europe / United Kingdom / Scotland |
| EPI_ISL_491668 | 4/1/2020  | 7/17/2020 | Europe / United Kingdom / Scotland |
| EPI_ISL_491669 | 4/17/2020 | 7/17/2020 | Europe / United Kingdom / Scotland |
| EPI_ISL_491670 | 4/16/2020 | 7/17/2020 | Europe / United Kingdom / Scotland |
| EPI_ISL_491672 | 4/11/2020 | 7/17/2020 | Europe / United Kingdom / Scotland |
| EPI_ISL_491674 | 4/23/2020 | 7/17/2020 | Europe / United Kingdom / Scotland |
| EPI_ISL_491675 | 4/9/2020  | 7/17/2020 | Europe / United Kingdom / Scotland |
| EPI_ISL_491676 | 4/29/2020 | 7/17/2020 | Europe / United Kingdom / Scotland |
| EPI_ISL_491677 | 4/21/2020 | 7/17/2020 | Europe / United Kingdom / Scotland |
| EPI_ISL_491678 | 4/24/2020 | 7/17/2020 | Europe / United Kingdom / Scotland |
| EPI_ISL_491679 | 4/22/2020 | 7/17/2020 | Europe / United Kingdom / Scotland |
| EPI_ISL_491680 | 4/27/2020 | 7/17/2020 | Europe / United Kingdom / Scotland |
| EPI_ISL_491681 | 4/18/2020 | 7/17/2020 | Europe / United Kingdom / Scotland |
| EPI_ISL_491682 | 4/21/2020 | 7/17/2020 | Europe / United Kingdom / Scotland |
| EPI_ISL_491685 | 4/21/2020 | 7/17/2020 | Europe / United Kingdom / Scotland |
| EPI_ISL_491686 | 4/18/2020 | 7/17/2020 | Europe / United Kingdom / Scotland |
| EPI_ISL_491687 | 4/16/2020 | 7/17/2020 | Europe / United Kingdom / Scotland |
| EPI_ISL_491689 | 3/31/2020 | 7/17/2020 | Europe / United Kingdom / Scotland |
| EPI_ISL_491691 | 4/17/2020 | 7/17/2020 | Europe / United Kingdom / Scotland |
| EPI_ISL_491692 | 4/17/2020 | 7/17/2020 | Europe / United Kingdom / Scotland |
| EPI_ISL_491693 | 4/20/2020 | 7/17/2020 | Europe / United Kingdom / Scotland |
| EPI_ISL_491695 | 4/21/2020 | 7/17/2020 | Europe / United Kingdom / Scotland |
| EPI_ISL_491696 | 4/13/2020 | 7/17/2020 | Europe / United Kingdom / Scotland |
| EPI_ISL_491698 | 4/11/2020 | 7/17/2020 | Europe / United Kingdom / Scotland |
| EPI_ISL_491699 | 4/10/2020 | 7/17/2020 | Europe / United Kingdom / Scotland |
| EPI_ISL_491700 | 4/27/2020 | 7/17/2020 | Europe / United Kingdom / Scotland |
| EPI_ISL_491709 | 5/26/2020 | 7/17/2020 | Europe / United Kingdom / England  |



|                |           |                                                                      |
|----------------|-----------|----------------------------------------------------------------------|
| EPI_ISL_491931 | 4/11/2020 | 7/17/2020 North America / USA / Virginia                             |
| EPI_ISL_491932 | 7/3/2020  | 7/17/2020 South America / Ecuador / Carchi / Reciento                |
| EPI_ISL_491933 | 4/7/2020  | 7/17/2020 South America / Ecuador / Guayas / Guayaquil               |
| EPI_ISL_491934 | 4/7/2020  | 7/17/2020 South America / Ecuador / Guayas / Guayaquil               |
| EPI_ISL_491935 | 4/13/2020 | 7/17/2020 South America / Ecuador / Guayas / General Villamil Playas |
| EPI_ISL_491936 | 6/30/2020 | 7/17/2020 South America / Ecuador / Manabi / Portoviejo              |
| EPI_ISL_491937 | 6/30/2020 | 7/17/2020 South America / Ecuador / Manabi / Calceta                 |
| EPI_ISL_491938 | 6/30/2020 | 7/17/2020 South America / Ecuador / Manabi / Manta                   |
| EPI_ISL_491939 | 7/3/2020  | 7/17/2020 South America / Ecuador / Orellana                         |
| EPI_ISL_491940 | 7/3/2020  | 7/17/2020 South America / Ecuador / Orellana                         |
| EPI_ISL_491941 | 5/2/2020  | 7/17/2020 South America / Ecuador / Galapagos / Puerto Baquerizo Mor |
| EPI_ISL_491942 | 4/9/2020  | 7/17/2020 North America / USA / Virginia                             |
| EPI_ISL_491943 | 4/16/2020 | 7/17/2020 North America / USA / Virginia                             |
| EPI_ISL_491944 | 4/25/2020 | 7/17/2020 South America / Ecuador / Daule                            |
| EPI_ISL_491945 | 4/22/2020 | 7/17/2020 South America / Ecuador / Manabi / Puerto Lopez            |
| EPI_ISL_491946 | 5/28/2020 | 7/17/2020 South America / Ecuador / Los Rios / Ventanas              |
| EPI_ISL_491947 | 5/8/2020  | 7/17/2020 South America / Ecuador / Manabi / Jipijapa                |
| EPI_ISL_491949 | 5/26/2020 | 7/17/2020 South America / Ecuador / Manabi / Sucre                   |
| EPI_ISL_491950 | 5/8/2020  | 7/17/2020 South America / Ecuador / Los Rios / Babahoyo              |
| EPI_ISL_491951 | 6/1/2020  | 7/17/2020 South America / Ecuador / Guayas / Guayaquil               |
| EPI_ISL_491952 | 5/29/2020 | 7/17/2020 South America / Ecuador / Guayas / San Jacinto de Yaguachi |
| EPI_ISL_491953 | 5/8/2020  | 7/17/2020 South America / Ecuador / Los Rios / Babahoyo              |
| EPI_ISL_491954 | 5/28/2020 | 7/17/2020 South America / Ecuador / Santa Elena                      |
| EPI_ISL_491968 | 5/10/2020 | 7/18/2020 Asia / Oman / Muscat                                       |
| EPI_ISL_491969 | 5/12/2020 | 7/18/2020 Asia / Oman / Muscat                                       |
| EPI_ISL_491970 | 5/12/2020 | 7/18/2020 Asia / Oman / Muscat                                       |
| EPI_ISL_491973 | 5/15/2020 | 7/18/2020 Asia / Oman / Muscat                                       |
| EPI_ISL_491974 | 5/15/2020 | 7/18/2020 Asia / Oman / Muscat                                       |
| EPI_ISL_491976 | 5/16/2020 | 7/18/2020 Asia / Oman / Muscat                                       |
| EPI_ISL_491978 | 5/17/2020 | 7/18/2020 Asia / Oman / Muscat                                       |
| EPI_ISL_491979 | 5/17/2020 | 7/18/2020 Asia / Oman / Muscat                                       |
| EPI_ISL_491980 | 5/17/2020 | 7/18/2020 Asia / Oman / Muscat                                       |
| EPI_ISL_491981 | 5/17/2020 | 7/18/2020 Asia / Oman / Muscat                                       |
| EPI_ISL_491982 | 5/17/2020 | 7/18/2020 Asia / Oman / Muscat                                       |
| EPI_ISL_491983 | 5/17/2020 | 7/18/2020 Asia / Oman / Muscat                                       |
| EPI_ISL_491984 | 5/17/2020 | 7/18/2020 Asia / Oman / Muscat                                       |
| EPI_ISL_491985 | 5/19/2020 | 7/18/2020 Asia / Oman / Muscat                                       |
| EPI_ISL_491986 | 5/19/2020 | 7/18/2020 Asia / Oman / Muscat                                       |
| EPI_ISL_491988 | 5/21/2020 | 7/18/2020 Asia / Oman / Muscat                                       |
| EPI_ISL_491989 | 5/21/2020 | 7/18/2020 Asia / Oman / Muscat                                       |
| EPI_ISL_491990 | 5/21/2020 | 7/18/2020 Asia / Oman / Muscat                                       |
| EPI_ISL_491991 | 5/21/2020 | 7/18/2020 Asia / Oman / Muscat                                       |
| EPI_ISL_491992 | 5/21/2020 | 7/18/2020 Asia / Oman / Muscat                                       |
| EPI_ISL_491994 | 5/21/2020 | 7/18/2020 Asia / Oman / Muscat                                       |
| EPI_ISL_491995 | 5/22/2020 | 7/18/2020 Asia / Oman / Muscat                                       |
| EPI_ISL_491996 | 5/22/2020 | 7/18/2020 Asia / Oman / Muscat                                       |
| EPI_ISL_491997 | 5/24/2020 | 7/18/2020 Asia / Oman / Muscat                                       |

|                |           |                                                                    |
|----------------|-----------|--------------------------------------------------------------------|
| EPI_ISL_491998 | 5/25/2020 | 7/18/2020 Asia / Oman / Muscat                                     |
| EPI_ISL_491999 | 5/26/2020 | 7/18/2020 Asia / Oman / Muscat                                     |
| EPI_ISL_492000 | 5/26/2020 | 7/18/2020 Asia / Oman / Muscat                                     |
| EPI_ISL_492001 | 5/26/2020 | 7/18/2020 Asia / Oman / Muscat                                     |
| EPI_ISL_492002 | 5/27/2020 | 7/18/2020 Asia / Oman / Muscat                                     |
| EPI_ISL_492003 | 5/27/2020 | 7/18/2020 Asia / Oman / Muscat                                     |
| EPI_ISL_492005 | 5/28/2020 | 7/18/2020 Asia / Oman / Muscat                                     |
| EPI_ISL_492006 | 5/28/2020 | 7/18/2020 Asia / Oman / Muscat                                     |
| EPI_ISL_492007 | 5/29/2020 | 7/18/2020 Asia / Oman / Muscat                                     |
| EPI_ISL_492008 | 5/29/2020 | 7/18/2020 Asia / Oman / Muscat                                     |
| EPI_ISL_492009 | 5/30/2020 | 7/18/2020 Asia / Oman / Muscat                                     |
| EPI_ISL_492010 | 5/31/2020 | 7/18/2020 Asia / Oman / Muscat                                     |
| EPI_ISL_492011 | 5/31/2020 | 7/18/2020 Asia / Oman / Muscat                                     |
| EPI_ISL_492012 | 5/31/2020 | 7/18/2020 Asia / Oman / Muscat                                     |
| EPI_ISL_492014 | 6/3/2020  | 7/18/2020 Asia / Oman / Muscat                                     |
| EPI_ISL_492016 | 6/4/2020  | 7/18/2020 Asia / Oman / Muscat                                     |
| EPI_ISL_492017 | 6/5/2020  | 7/18/2020 Asia / Oman / Muscat                                     |
| EPI_ISL_492019 | 6/8/2020  | 7/18/2020 Asia / Oman / Muscat                                     |
| EPI_ISL_492020 | 6/9/2020  | 7/18/2020 Asia / Oman / Muscat                                     |
| EPI_ISL_492021 | 6/9/2020  | 7/18/2020 Asia / Oman / Muscat                                     |
| EPI_ISL_492022 | 6/9/2020  | 7/18/2020 Asia / Oman / Muscat                                     |
| EPI_ISL_492023 | 6/9/2020  | 7/18/2020 Asia / Oman / Muscat                                     |
| EPI_ISL_492024 | 6/9/2020  | 7/18/2020 Asia / Oman / Muscat                                     |
| EPI_ISL_492025 | 6/10/2020 | 7/18/2020 Asia / Oman / Muscat                                     |
| EPI_ISL_492026 | 6/11/2020 | 7/18/2020 Asia / Oman / Muscat                                     |
| EPI_ISL_492029 | 5/8/2020  | 7/18/2020 Asia / Bangladesh                                        |
| EPI_ISL_492030 | 5/14/2020 | 7/18/2020 Asia / Bangladesh                                        |
| EPI_ISL_492032 | 4/15/2020 | 7/18/2020 South America / Brazil / Rio de Janeiro / Rio de Janeiro |
| EPI_ISL_492033 | 4/29/2020 | 7/18/2020 South America / Brazil / Rio de Janeiro / Rio de Janeiro |
| EPI_ISL_492034 | 4/17/2020 | 7/18/2020 South America / Brazil / Rio de Janeiro / Rio de Janeiro |
| EPI_ISL_492035 | 5/29/2020 | 7/18/2020 South America / Brazil / Rio de Janeiro / Rio de Janeiro |
| EPI_ISL_492036 | 6/1/2020  | 7/18/2020 South America / Brazil / Rio de Janeiro / Resende        |
| EPI_ISL_492037 | 4/29/2020 | 7/18/2020 South America / Brazil / Rio de Janeiro / Niteroi        |
| EPI_ISL_492038 | 4/29/2020 | 7/18/2020 South America / Brazil / Rio de Janeiro / Niteroi        |
| EPI_ISL_492039 | 4/29/2020 | 7/18/2020 South America / Brazil / Rio de Janeiro / Niteroi        |
| EPI_ISL_492040 | 4/30/2020 | 7/18/2020 South America / Brazil / Rio de Janeiro / Rio de Janeiro |
| EPI_ISL_492041 | 4/30/2020 | 7/18/2020 South America / Brazil / Rio de Janeiro / Rio de Janeiro |
| EPI_ISL_492042 | 4/16/2020 | 7/18/2020 South America / Brazil / Rio de Janeiro / Rio de Janeiro |
| EPI_ISL_492043 | 5/25/2020 | 7/18/2020 South America / Brazil / Rio de Janeiro / Rio de Janeiro |
| EPI_ISL_492044 | 5/27/2020 | 7/18/2020 South America / Brazil / Rio de Janeiro / Rio de Janeiro |
| EPI_ISL_492045 | 5/27/2020 | 7/18/2020 South America / Brazil / Rio de Janeiro / Rio de Janeiro |
| EPI_ISL_492046 | 5/29/2020 | 7/18/2020 South America / Brazil / Sao Paulo / Sao Paulo           |
| EPI_ISL_492047 | 5/29/2020 | 7/18/2020 South America / Brazil / Sao Paulo / Sao Paulo           |
| EPI_ISL_492048 | 6/1/2020  | 7/18/2020 South America / Brazil / Rio de Janeiro / Rio de Janeiro |
| EPI_ISL_492059 | 4/4/2020  | 7/18/2020 North America / USA / Alaska                             |
| EPI_ISL_492063 | 4/19/2020 | 7/18/2020 North America / USA / Alaska                             |
| EPI_ISL_492065 | 6/20/2020 | 7/19/2020 Asia / Oman / Muscat / Mutrah                            |

|                |           |                                                                  |
|----------------|-----------|------------------------------------------------------------------|
| EPI_ISL_492066 | 4/2/2020  | 7/19/2020 Europe / Poland / Mazowieckie / Radom                  |
| EPI_ISL_492067 | 3/28/2020 | 7/19/2020 Europe / Poland / Mazowieckie / Brodno-Warszawa        |
| EPI_ISL_492068 | 4/1/2020  | 7/19/2020 Europe / Poland / Mazowieckie / Radom                  |
| EPI_ISL_492069 | 4/2/2020  | 7/19/2020 Europe / Poland / Mazowieckie / Radom                  |
| EPI_ISL_492070 | 4/13/2020 | 7/19/2020 Europe / Poland / Mazowieckie / Radom                  |
| EPI_ISL_492071 | 4/16/2020 | 7/19/2020 Europe / Poland / Mazowieckie / Warszawa               |
| EPI_ISL_492072 | 4/17/2020 | 7/19/2020 Europe / Poland / Mazowieckie / Warszawa               |
| EPI_ISL_492073 | 4/18/2020 | 7/19/2020 Europe / Poland / Mazowieckie / Warszawa               |
| EPI_ISL_492074 | 6/19/2020 | 7/19/2020 North America / USA / South Carolina / Richland County |
| EPI_ISL_492075 | 6/26/2020 | 7/19/2020 Europe / North Macedonia                               |
| EPI_ISL_492076 | 6/25/2020 | 7/19/2020 Europe / North Macedonia                               |
| EPI_ISL_492077 | 6/27/2020 | 7/19/2020 Europe / North Macedonia                               |
| EPI_ISL_492078 | 6/27/2020 | 7/19/2020 Europe / North Macedonia                               |
| EPI_ISL_492079 | 6/26/2020 | 7/19/2020 Europe / North Macedonia                               |
| EPI_ISL_492080 | 6/26/2020 | 7/19/2020 Europe / North Macedonia                               |
| EPI_ISL_492081 | 6/27/2020 | 7/19/2020 Europe / North Macedonia                               |
| EPI_ISL_492082 | 6/25/2020 | 7/19/2020 Europe / North Macedonia                               |
| EPI_ISL_492083 | 6/25/2020 | 7/19/2020 Europe / North Macedonia                               |
| EPI_ISL_492084 | 6/25/2020 | 7/19/2020 Europe / North Macedonia                               |
| EPI_ISL_492085 | 6/25/2020 | 7/19/2020 Europe / North Macedonia                               |
| EPI_ISL_492086 | 6/25/2020 | 7/19/2020 Europe / North Macedonia                               |
| EPI_ISL_492109 | 3/20/2020 | 7/20/2020 Oceania / Australia / South Australia                  |
| EPI_ISL_492110 | 3/19/2020 | 7/20/2020 Oceania / Australia / South Australia                  |
| EPI_ISL_492111 | 3/21/2020 | 7/20/2020 Oceania / Australia / South Australia                  |
| EPI_ISL_492113 | 4/19/2020 | 7/20/2020 Oceania / Australia / South Australia                  |
| EPI_ISL_492116 | 3/18/2020 | 7/20/2020 Oceania / Australia / South Australia                  |
| EPI_ISL_492117 | 3/21/2020 | 7/20/2020 Oceania / Australia / South Australia                  |
| EPI_ISL_492122 | 3/18/2020 | 7/20/2020 Oceania / Australia / South Australia                  |
| EPI_ISL_492123 | 3/19/2020 | 7/20/2020 Oceania / Australia / South Australia                  |
| EPI_ISL_492124 | 3/19/2020 | 7/20/2020 Oceania / Australia / South Australia                  |
| EPI_ISL_492125 | 3/19/2020 | 7/20/2020 Oceania / Australia / South Australia                  |
| EPI_ISL_492126 | 3/19/2020 | 7/20/2020 Oceania / Australia / South Australia                  |
| EPI_ISL_492127 | 3/21/2020 | 7/20/2020 Oceania / Australia / South Australia                  |
| EPI_ISL_492128 | 3/21/2020 | 7/20/2020 Oceania / Australia / South Australia                  |
| EPI_ISL_492129 | 3/30/2020 | 7/20/2020 Oceania / Australia / South Australia                  |
| EPI_ISL_492130 | 3/30/2020 | 7/20/2020 Oceania / Australia / South Australia                  |
| EPI_ISL_492131 | 3/30/2020 | 7/20/2020 Oceania / Australia / South Australia                  |
| EPI_ISL_492133 | 3/19/2020 | 7/20/2020 Oceania / Australia / South Australia                  |
| EPI_ISL_492134 | 3/21/2020 | 7/20/2020 Oceania / Australia / South Australia                  |
| EPI_ISL_492135 | 3/21/2020 | 7/20/2020 Oceania / Australia / South Australia                  |
| EPI_ISL_492136 | 3/22/2020 | 7/20/2020 Oceania / Australia / South Australia                  |
| EPI_ISL_492137 | 3/19/2020 | 7/20/2020 Oceania / Australia / South Australia                  |
| EPI_ISL_492138 | 3/20/2020 | 7/20/2020 Oceania / Australia / South Australia                  |
| EPI_ISL_492139 | 3/20/2020 | 7/20/2020 Oceania / Australia / South Australia                  |
| EPI_ISL_492140 | 3/21/2020 | 7/20/2020 Oceania / Australia / South Australia                  |
| EPI_ISL_492141 | 3/21/2020 | 7/20/2020 Oceania / Australia / South Australia                  |
| EPI_ISL_492142 | 3/22/2020 | 7/20/2020 Oceania / Australia / South Australia                  |

|                |           |                                                 |
|----------------|-----------|-------------------------------------------------|
| EPI_ISL_492143 | 3/21/2020 | 7/20/2020 Oceania / Australia / South Australia |
| EPI_ISL_492144 | 3/22/2020 | 7/20/2020 Oceania / Australia / South Australia |
| EPI_ISL_492145 | 3/20/2020 | 7/20/2020 Oceania / Australia / South Australia |
| EPI_ISL_492146 | 3/21/2020 | 7/20/2020 Oceania / Australia / South Australia |
| EPI_ISL_492147 | 3/21/2020 | 7/20/2020 Oceania / Australia / South Australia |
| EPI_ISL_492148 | 3/22/2020 | 7/20/2020 Oceania / Australia / South Australia |
| EPI_ISL_492149 | 3/30/2020 | 7/20/2020 Oceania / Australia / South Australia |
| EPI_ISL_492150 | 3/21/2020 | 7/20/2020 Oceania / Australia / South Australia |
| EPI_ISL_492151 | 3/20/2020 | 7/20/2020 Oceania / Australia / South Australia |
| EPI_ISL_492152 | 4/1/2020  | 7/20/2020 Oceania / Australia / South Australia |
| EPI_ISL_492153 | 3/21/2020 | 7/20/2020 Oceania / Australia / South Australia |
| EPI_ISL_492154 | 3/22/2020 | 7/20/2020 Oceania / Australia / South Australia |
| EPI_ISL_492155 | 3/19/2020 | 7/20/2020 Oceania / Australia / South Australia |
| EPI_ISL_492156 | 3/20/2020 | 7/20/2020 Oceania / Australia / South Australia |
| EPI_ISL_492157 | 3/20/2020 | 7/20/2020 Oceania / Australia / South Australia |
| EPI_ISL_492158 | 3/21/2020 | 7/20/2020 Oceania / Australia / South Australia |
| EPI_ISL_492159 | 3/21/2020 | 7/20/2020 Oceania / Australia / South Australia |
| EPI_ISL_492160 | 3/19/2020 | 7/20/2020 Oceania / Australia / South Australia |
| EPI_ISL_492161 | 3/19/2020 | 7/20/2020 Oceania / Australia / South Australia |
| EPI_ISL_492162 | 3/20/2020 | 7/20/2020 Oceania / Australia / South Australia |
| EPI_ISL_492163 | 3/22/2020 | 7/20/2020 Oceania / Australia / South Australia |
| EPI_ISL_492164 | 3/21/2020 | 7/20/2020 Oceania / Australia / South Australia |
| EPI_ISL_492165 | 3/20/2020 | 7/20/2020 Oceania / Australia / South Australia |
| EPI_ISL_492166 | 3/31/2020 | 7/20/2020 Oceania / Australia / South Australia |
| EPI_ISL_492184 | 2020      | 7/20/2020 Europe / Italy / Campania             |
| EPI_ISL_492185 | 6/10/2020 | 7/20/2020 Europe / United Kingdom / England     |
| EPI_ISL_492186 | 3/23/2020 | 7/20/2020 Europe / United Kingdom / England     |
| EPI_ISL_492187 | 4/3/2020  | 7/20/2020 Europe / United Kingdom / England     |
| EPI_ISL_492190 | 6/2/2020  | 7/20/2020 Europe / United Kingdom / England     |
| EPI_ISL_492191 | 6/2/2020  | 7/20/2020 Europe / United Kingdom / England     |
| EPI_ISL_492192 | 6/4/2020  | 7/20/2020 Europe / United Kingdom / England     |
| EPI_ISL_492193 | 6/4/2020  | 7/20/2020 Europe / United Kingdom / England     |
| EPI_ISL_492194 | 6/2/2020  | 7/20/2020 Europe / United Kingdom / England     |
| EPI_ISL_492196 | 6/2/2020  | 7/20/2020 Europe / United Kingdom / England     |
| EPI_ISL_492197 | 5/31/2020 | 7/20/2020 Europe / United Kingdom / England     |
| EPI_ISL_492198 | 5/22/2020 | 7/20/2020 Europe / United Kingdom / England     |
| EPI_ISL_492199 | 5/22/2020 | 7/20/2020 Europe / United Kingdom / England     |
| EPI_ISL_492200 | 5/29/2020 | 7/20/2020 Europe / United Kingdom / England     |
| EPI_ISL_492201 | 5/22/2020 | 7/20/2020 Europe / United Kingdom / England     |
| EPI_ISL_492203 | 4/6/2020  | 7/20/2020 Europe / United Kingdom / England     |
| EPI_ISL_492204 | 6/6/2020  | 7/20/2020 Europe / United Kingdom / England     |
| EPI_ISL_492205 | 5/28/2020 | 7/20/2020 Europe / United Kingdom / England     |
| EPI_ISL_492206 | 6/2/2020  | 7/20/2020 Europe / United Kingdom / England     |
| EPI_ISL_492207 | 6/10/2020 | 7/20/2020 Europe / United Kingdom / England     |
| EPI_ISL_492208 | 6/15/2020 | 7/20/2020 Europe / United Kingdom / England     |
| EPI_ISL_492209 | 6/16/2020 | 7/20/2020 Europe / United Kingdom / England     |
| EPI_ISL_492211 | 4/14/2020 | 7/20/2020 Europe / United Kingdom / England     |







|                |           |           |                                   |
|----------------|-----------|-----------|-----------------------------------|
| EPI_ISL_492366 | 4/14/2020 | 7/20/2020 | Europe / United Kingdom / England |
| EPI_ISL_492367 | 4/28/2020 | 7/20/2020 | Europe / United Kingdom / England |
| EPI_ISL_492370 | 4/27/2020 | 7/20/2020 | Europe / United Kingdom / England |
| EPI_ISL_492371 | 4/1/2020  | 7/20/2020 | Europe / United Kingdom / England |
| EPI_ISL_492372 | 4/27/2020 | 7/20/2020 | Europe / United Kingdom / England |
| EPI_ISL_492373 | 4/28/2020 | 7/20/2020 | Europe / United Kingdom / England |
| EPI_ISL_492377 | 4/14/2020 | 7/20/2020 | Europe / United Kingdom / England |
| EPI_ISL_492381 | 4/28/2020 | 7/20/2020 | Europe / United Kingdom / England |
| EPI_ISL_492383 | 4/28/2020 | 7/20/2020 | Europe / United Kingdom / England |
| EPI_ISL_492386 | 4/27/2020 | 7/20/2020 | Europe / United Kingdom / England |
| EPI_ISL_492388 | 4/17/2020 | 7/20/2020 | Europe / United Kingdom / England |
| EPI_ISL_492390 | 4/27/2020 | 7/20/2020 | Europe / United Kingdom / England |
| EPI_ISL_492392 | 4/27/2020 | 7/20/2020 | Europe / United Kingdom / England |
| EPI_ISL_492393 | 4/13/2020 | 7/20/2020 | Europe / United Kingdom / England |
| EPI_ISL_492395 | 4/27/2020 | 7/20/2020 | Europe / United Kingdom / England |
| EPI_ISL_492396 | 4/27/2020 | 7/20/2020 | Europe / United Kingdom / England |
| EPI_ISL_492397 | 3/3/2020  | 7/20/2020 | Europe / United Kingdom / England |
| EPI_ISL_492398 | 4/14/2020 | 7/20/2020 | Europe / United Kingdom / England |
| EPI_ISL_492399 | 4/28/2020 | 7/20/2020 | Europe / United Kingdom / England |
| EPI_ISL_492400 | 4/28/2020 | 7/20/2020 | Europe / United Kingdom / England |
| EPI_ISL_492401 | 4/27/2020 | 7/20/2020 | Europe / United Kingdom / England |
| EPI_ISL_492403 | 4/2/2020  | 7/20/2020 | Europe / United Kingdom / England |
| EPI_ISL_492404 | 4/27/2020 | 7/20/2020 | Europe / United Kingdom / England |
| EPI_ISL_492405 | 4/28/2020 | 7/20/2020 | Europe / United Kingdom / England |
| EPI_ISL_492406 | 4/27/2020 | 7/20/2020 | Europe / United Kingdom / England |
| EPI_ISL_492407 | 4/1/2020  | 7/20/2020 | Europe / United Kingdom / England |
| EPI_ISL_492410 | 4/27/2020 | 7/20/2020 | Europe / United Kingdom / England |
| EPI_ISL_492411 | 4/28/2020 | 7/20/2020 | Europe / United Kingdom / England |
| EPI_ISL_492412 | 4/16/2020 | 7/20/2020 | Europe / United Kingdom / England |
| EPI_ISL_492415 | 4/1/2020  | 7/20/2020 | Europe / United Kingdom / England |
| EPI_ISL_492416 | 4/25/2020 | 7/20/2020 | Europe / United Kingdom / England |
| EPI_ISL_492417 | 4/27/2020 | 7/20/2020 | Europe / United Kingdom / England |
| EPI_ISL_492418 | 4/2/2020  | 7/20/2020 | Europe / United Kingdom / England |
| EPI_ISL_492420 | 4/10/2020 | 7/20/2020 | Europe / United Kingdom / England |
| EPI_ISL_492423 | 4/29/2020 | 7/20/2020 | Europe / United Kingdom / England |
| EPI_ISL_492424 | 4/17/2020 | 7/20/2020 | Europe / United Kingdom / England |
| EPI_ISL_492425 | 3/31/2020 | 7/20/2020 | Europe / United Kingdom / England |
| EPI_ISL_492426 | 4/11/2020 | 7/20/2020 | Europe / United Kingdom / England |
| EPI_ISL_492427 | 4/28/2020 | 7/20/2020 | Europe / United Kingdom / England |
| EPI_ISL_492429 | 3/10/2020 | 7/20/2020 | Europe / United Kingdom / England |
| EPI_ISL_492430 | 4/16/2020 | 7/20/2020 | Europe / United Kingdom / England |
| EPI_ISL_492433 | 4/27/2020 | 7/20/2020 | Europe / United Kingdom / England |
| EPI_ISL_492434 | 4/29/2020 | 7/20/2020 | Europe / United Kingdom / England |
| EPI_ISL_492437 | 4/29/2020 | 7/20/2020 | Europe / United Kingdom / England |
| EPI_ISL_492439 | 4/14/2020 | 7/20/2020 | Europe / United Kingdom / England |
| EPI_ISL_492440 | 4/28/2020 | 7/20/2020 | Europe / United Kingdom / England |
| EPI_ISL_492441 | 4/17/2020 | 7/20/2020 | Europe / United Kingdom / England |

















|                |           |           |                                   |
|----------------|-----------|-----------|-----------------------------------|
| EPI_ISL_492831 | 4/7/2020  | 7/20/2020 | Europe / United Kingdom / England |
| EPI_ISL_492832 | 4/8/2020  | 7/20/2020 | Europe / United Kingdom / England |
| EPI_ISL_492833 | 4/9/2020  | 7/20/2020 | Europe / United Kingdom / England |
| EPI_ISL_492834 | 4/7/2020  | 7/20/2020 | Europe / United Kingdom / England |
| EPI_ISL_492835 | 4/8/2020  | 7/20/2020 | Europe / United Kingdom / England |
| EPI_ISL_492836 | 5/2/2020  | 7/20/2020 | Europe / United Kingdom / England |
| EPI_ISL_492838 | 5/16/2020 | 7/20/2020 | Europe / United Kingdom / England |
| EPI_ISL_492839 | 4/22/2020 | 7/20/2020 | Europe / United Kingdom / England |
| EPI_ISL_492840 | 4/12/2020 | 7/20/2020 | Europe / United Kingdom / England |
| EPI_ISL_492841 | 4/17/2020 | 7/20/2020 | Europe / United Kingdom / England |
| EPI_ISL_492843 | 5/12/2020 | 7/20/2020 | Europe / United Kingdom / England |
| EPI_ISL_492844 | 4/24/2020 | 7/20/2020 | Europe / United Kingdom / England |
| EPI_ISL_492845 | 4/8/2020  | 7/20/2020 | Europe / United Kingdom / England |
| EPI_ISL_492847 | 4/7/2020  | 7/20/2020 | Europe / United Kingdom / England |
| EPI_ISL_492848 | 5/4/2020  | 7/20/2020 | Europe / United Kingdom / England |
| EPI_ISL_492849 | 4/17/2020 | 7/20/2020 | Europe / United Kingdom / England |
| EPI_ISL_492850 | 3/26/2020 | 7/20/2020 | Europe / United Kingdom / England |
| EPI_ISL_492852 | 3/31/2020 | 7/20/2020 | Europe / United Kingdom / England |
| EPI_ISL_492853 | 5/3/2020  | 7/20/2020 | Europe / United Kingdom / England |
| EPI_ISL_492854 | 5/9/2020  | 7/20/2020 | Europe / United Kingdom / England |
| EPI_ISL_492856 | 4/17/2020 | 7/20/2020 | Europe / United Kingdom / England |
| EPI_ISL_492857 | 5/14/2020 | 7/20/2020 | Europe / United Kingdom / England |
| EPI_ISL_492860 | 5/6/2020  | 7/20/2020 | Europe / United Kingdom / England |
| EPI_ISL_492864 | 3/22/2020 | 7/20/2020 | Europe / United Kingdom / England |
| EPI_ISL_492865 | 4/10/2020 | 7/20/2020 | Europe / United Kingdom / England |
| EPI_ISL_492866 | 5/2/2020  | 7/20/2020 | Europe / United Kingdom / England |
| EPI_ISL_492867 | 5/8/2020  | 7/20/2020 | Europe / United Kingdom / England |
| EPI_ISL_492868 | 4/8/2020  | 7/20/2020 | Europe / United Kingdom / England |
| EPI_ISL_492869 | 4/3/2020  | 7/20/2020 | Europe / United Kingdom / England |
| EPI_ISL_492873 | 5/5/2020  | 7/20/2020 | Europe / United Kingdom / England |
| EPI_ISL_492874 | 3/28/2020 | 7/20/2020 | Europe / United Kingdom / England |
| EPI_ISL_492877 | 4/27/2020 | 7/20/2020 | Europe / United Kingdom / England |
| EPI_ISL_492879 | 3/24/2020 | 7/20/2020 | Europe / United Kingdom / England |
| EPI_ISL_492880 | 4/9/2020  | 7/20/2020 | Europe / United Kingdom / England |
| EPI_ISL_492881 | 5/2/2020  | 7/20/2020 | Europe / United Kingdom / England |
| EPI_ISL_492882 | 3/26/2020 | 7/20/2020 | Europe / United Kingdom / England |
| EPI_ISL_492884 | 4/22/2020 | 7/20/2020 | Europe / United Kingdom / England |
| EPI_ISL_492885 | 4/7/2020  | 7/20/2020 | Europe / United Kingdom / England |
| EPI_ISL_492886 | 4/16/2020 | 7/20/2020 | Europe / United Kingdom / England |
| EPI_ISL_492887 | 4/10/2020 | 7/20/2020 | Europe / United Kingdom / England |
| EPI_ISL_492888 | 3/20/2020 | 7/20/2020 | Europe / United Kingdom / England |
| EPI_ISL_492890 | 3/29/2020 | 7/20/2020 | Europe / United Kingdom / England |
| EPI_ISL_492893 | 5/6/2020  | 7/20/2020 | Europe / United Kingdom / England |
| EPI_ISL_492894 | 3/20/2020 | 7/20/2020 | Europe / United Kingdom / England |
| EPI_ISL_492895 | 5/7/2020  | 7/20/2020 | Europe / United Kingdom / England |
| EPI_ISL_492896 | 5/3/2020  | 7/20/2020 | Europe / United Kingdom / England |
| EPI_ISL_492898 | 5/4/2020  | 7/20/2020 | Europe / United Kingdom / England |



|                |           |                                             |
|----------------|-----------|---------------------------------------------|
| EPI_ISL_492959 | 4/16/2020 | 7/20/2020 Europe / United Kingdom / England |
| EPI_ISL_492962 | 4/15/2020 | 7/20/2020 Europe / United Kingdom / England |
| EPI_ISL_492964 | 4/17/2020 | 7/20/2020 Europe / United Kingdom / England |
| EPI_ISL_492965 | 4/15/2020 | 7/20/2020 Europe / United Kingdom / England |
| EPI_ISL_492966 | 4/15/2020 | 7/20/2020 Europe / United Kingdom / England |
| EPI_ISL_492968 | 4/16/2020 | 7/20/2020 Europe / United Kingdom / England |
| EPI_ISL_492969 | 4/16/2020 | 7/20/2020 Europe / United Kingdom / England |
| EPI_ISL_492970 | 4/15/2020 | 7/20/2020 Europe / United Kingdom / England |
| EPI_ISL_492973 | 4/16/2020 | 7/20/2020 Europe / United Kingdom / England |
| EPI_ISL_492974 | 4/17/2020 | 7/20/2020 Europe / United Kingdom / England |
| EPI_ISL_492975 | 5/11/2020 | 7/20/2020 Europe / United Kingdom / England |
| EPI_ISL_492976 | 4/15/2020 | 7/20/2020 Europe / United Kingdom / England |
| EPI_ISL_492977 | 4/16/2020 | 7/20/2020 Europe / United Kingdom / England |
| EPI_ISL_492978 | 3/15/2020 | 7/20/2020 Asia / Singapore                  |
| EPI_ISL_492979 | 3/21/2020 | 7/20/2020 Asia / Singapore                  |
| EPI_ISL_492980 | 3/18/2020 | 7/20/2020 Europe / Italy / Veneto / Verona  |
| EPI_ISL_492981 | 4/7/2020  | 7/20/2020 Europe / Italy / Veneto / Verona  |
| EPI_ISL_492982 | 4/7/2020  | 7/20/2020 Europe / Italy / Veneto / Verona  |
| EPI_ISL_492983 | 4/18/2020 | 7/20/2020 Europe / Italy / Veneto / Verona  |
| EPI_ISL_492984 | 3/11/2020 | 7/20/2020 Europe / Italy / Veneto / Verona  |
| EPI_ISL_492985 | 3/8/2020  | 7/20/2020 Europe / Italy / Veneto / Verona  |
| EPI_ISL_492986 | 3/10/2020 | 7/20/2020 Europe / Italy / Veneto / Verona  |
| EPI_ISL_492987 | 3/5/2020  | 7/20/2020 Europe / Italy / Veneto / Verona  |
| EPI_ISL_492988 | 6/30/2020 | 7/20/2020 Europe / Latvia                   |
| EPI_ISL_492989 | 7/8/2020  | 7/20/2020 Europe / Latvia                   |
| EPI_ISL_492990 | 7/8/2020  | 7/20/2020 Europe / Latvia                   |
| EPI_ISL_492991 | 7/8/2020  | 7/20/2020 Europe / Latvia                   |
| EPI_ISL_492992 | 7/7/2020  | 7/20/2020 Europe / Latvia                   |
| EPI_ISL_492993 | 7/8/2020  | 7/20/2020 Europe / Latvia                   |
| EPI_ISL_492994 | 7/8/2020  | 7/20/2020 Europe / Latvia                   |
| EPI_ISL_492995 | 7/7/2020  | 7/20/2020 Europe / Latvia                   |
| EPI_ISL_492996 | 7/7/2020  | 7/20/2020 Europe / Latvia                   |
| EPI_ISL_492997 | 7/7/2020  | 7/20/2020 Europe / Latvia                   |
| EPI_ISL_492998 | 7/3/2020  | 7/20/2020 Europe / Latvia                   |
| EPI_ISL_492999 | 7/9/2020  | 7/20/2020 Europe / Latvia                   |
| EPI_ISL_493000 | 7/9/2020  | 7/20/2020 Europe / Latvia                   |
| EPI_ISL_493001 | 4/6/2020  | 7/20/2020 North America / USA / Wyoming     |
| EPI_ISL_493002 | 6/23/2020 | 7/20/2020 Europe / United Kingdom / England |
| EPI_ISL_493003 | 6/16/2020 | 7/20/2020 Europe / United Kingdom / England |
| EPI_ISL_493006 | 5/8/2020  | 7/20/2020 North America / USA / Utah        |
| EPI_ISL_493007 | 5/8/2020  | 7/20/2020 North America / USA / Utah        |
| EPI_ISL_493009 | 5/8/2020  | 7/20/2020 North America / USA / Utah        |
| EPI_ISL_493010 | 5/8/2020  | 7/20/2020 North America / USA / Utah        |
| EPI_ISL_493011 | 5/8/2020  | 7/20/2020 North America / USA / Utah        |
| EPI_ISL_493012 | 5/8/2020  | 7/20/2020 North America / USA / Utah        |
| EPI_ISL_493013 | 5/7/2020  | 7/20/2020 North America / USA / Utah        |
| EPI_ISL_493014 | 5/8/2020  | 7/20/2020 North America / USA / Utah        |



|                |           |                                                                    |
|----------------|-----------|--------------------------------------------------------------------|
| EPI_ISL_493116 | 4/24/2020 | 7/20/2020 North America / USA / Utah                               |
| EPI_ISL_493123 | 4/22/2020 | 7/20/2020 North America / USA / Utah                               |
| EPI_ISL_493125 | 4/2/2020  | 7/20/2020 North America / USA / Wyoming                            |
| EPI_ISL_493126 | 4/2/2020  | 7/20/2020 North America / USA / Wyoming                            |
| EPI_ISL_493127 | 4/2/2020  | 7/20/2020 North America / USA / Wyoming                            |
| EPI_ISL_493128 | 4/3/2020  | 7/20/2020 North America / USA / Wyoming                            |
| EPI_ISL_510526 | 6/1/2020  | 7/20/2020 Africa / Egypt / Fayoum                                  |
| EPI_ISL_510527 | 5/1/2020  | 7/20/2020 Europe / France / Provence-Alpes-Cote d'Azur / Marseille |
| EPI_ISL_493129 | 4/4/2020  | 7/21/2020 North America / USA / South Carolina / Richland County   |
| EPI_ISL_493137 | 2/25/2020 | 7/21/2020 Asia / Thailand / Bangkok                                |
| EPI_ISL_493139 | 3/3/2020  | 7/21/2020 Asia / Thailand / Bangkok                                |
| EPI_ISL_493149 | 1/25/2020 | 7/21/2020 Asia / China / Hubei / Wuhan                             |
| EPI_ISL_493150 | 1/25/2020 | 7/21/2020 Asia / China / Hubei / Wuhan                             |
| EPI_ISL_493151 | 1/25/2020 | 7/21/2020 Asia / China / Hubei / Wuhan                             |
| EPI_ISL_493152 | 1/25/2020 | 7/21/2020 Asia / China / Hubei / Wuhan                             |
| EPI_ISL_493153 | 1/25/2020 | 7/21/2020 Asia / China / Hubei / Wuhan                             |
| EPI_ISL_493154 | 1/25/2020 | 7/21/2020 Asia / China / Hubei / Wuhan                             |
| EPI_ISL_493155 | 1/25/2020 | 7/21/2020 Asia / China / Hubei / Wuhan                             |
| EPI_ISL_493156 | 1/25/2020 | 7/21/2020 Asia / China / Hubei / Wuhan                             |
| EPI_ISL_493157 | 1/25/2020 | 7/21/2020 Asia / China / Hubei / Wuhan                             |
| EPI_ISL_493158 | 1/25/2020 | 7/21/2020 Asia / China / Hubei / Wuhan                             |
| EPI_ISL_493159 | 1/25/2020 | 7/21/2020 Asia / China / Hubei / Wuhan                             |
| EPI_ISL_493161 | 1/25/2020 | 7/21/2020 Asia / China / Hubei / Wuhan                             |
| EPI_ISL_493163 | 1/25/2020 | 7/21/2020 Asia / China / Hubei / Wuhan                             |
| EPI_ISL_493164 | 1/25/2020 | 7/21/2020 Asia / China / Hubei / Wuhan                             |
| EPI_ISL_493165 | 1/25/2020 | 7/21/2020 Asia / China / Hubei / Wuhan                             |
| EPI_ISL_493166 | 1/25/2020 | 7/21/2020 Asia / China / Hubei / Wuhan                             |
| EPI_ISL_493167 | 1/26/2020 | 7/21/2020 Asia / China / Hubei / Wuhan                             |
| EPI_ISL_493168 | 1/26/2020 | 7/21/2020 Asia / China / Hubei / Wuhan                             |
| EPI_ISL_493169 | 1/26/2020 | 7/21/2020 Asia / China / Hubei / Wuhan                             |
| EPI_ISL_493170 | 1/26/2020 | 7/21/2020 Asia / China / Hubei / Wuhan                             |
| EPI_ISL_493171 | 1/26/2020 | 7/21/2020 Asia / China / Hubei / Wuhan                             |
| EPI_ISL_493172 | 1/26/2020 | 7/21/2020 Asia / China / Hubei / Wuhan                             |
| EPI_ISL_493173 | 1/26/2020 | 7/21/2020 Asia / China / Hubei / Wuhan                             |
| EPI_ISL_493174 | 1/26/2020 | 7/21/2020 Asia / China / Hubei / Wuhan                             |
| EPI_ISL_493175 | 1/26/2020 | 7/21/2020 Asia / China / Hubei / Wuhan                             |
| EPI_ISL_493176 | 1/26/2020 | 7/21/2020 Asia / China / Hubei / Wuhan                             |
| EPI_ISL_493177 | 1/26/2020 | 7/21/2020 Asia / China / Hubei / Wuhan                             |
| EPI_ISL_493178 | 1/26/2020 | 7/21/2020 Asia / China / Hubei / Wuhan                             |
| EPI_ISL_493179 | 1/26/2020 | 7/21/2020 Asia / China / Hubei / Wuhan                             |
| EPI_ISL_493180 | 1/26/2020 | 7/21/2020 Asia / China / Hubei / Wuhan                             |
| EPI_ISL_493181 | 1/26/2020 | 7/21/2020 Asia / China / Hubei / Wuhan                             |
| EPI_ISL_493182 | 1/26/2020 | 7/21/2020 Asia / China / Hubei / Wuhan                             |
| EPI_ISL_493183 | 1/26/2020 | 7/21/2020 Asia / China / Hubei / Wuhan                             |
| EPI_ISL_493184 | 1/26/2020 | 7/21/2020 Asia / China / Hubei / Wuhan                             |
| EPI_ISL_493185 | 1/26/2020 | 7/21/2020 Asia / China / Hubei / Wuhan                             |
| EPI_ISL_493186 | 1/26/2020 | 7/21/2020 Asia / China / Hubei / Wuhan                             |

|                |           |                                                                  |
|----------------|-----------|------------------------------------------------------------------|
| EPI_ISL_493188 | 1/26/2020 | 7/21/2020 Asia / China / Hubei / Wuhan                           |
| EPI_ISL_493189 | 1/26/2020 | 7/21/2020 Asia / China / Hubei / Wuhan                           |
| EPI_ISL_493198 | 3/16/2020 | 7/21/2020 Asia / Taiwan / Tainan                                 |
| EPI_ISL_493199 | 3/17/2020 | 7/21/2020 Asia / Taiwan / Tainan                                 |
| EPI_ISL_493200 | 3/18/2020 | 7/21/2020 Asia / Taiwan / Tainan                                 |
| EPI_ISL_493202 | 3/20/2020 | 7/21/2020 Asia / Taiwan / Tainan                                 |
| EPI_ISL_493205 | 3/28/2020 | 7/21/2020 Asia / Taiwan / Tainan                                 |
| EPI_ISL_493206 | 3/28/2020 | 7/21/2020 Asia / Taiwan / Tainan                                 |
| EPI_ISL_493207 | 3/30/2020 | 7/21/2020 Asia / Taiwan / Tainan                                 |
| EPI_ISL_493209 | 5/4/2020  | 7/21/2020 North America / USA / South Carolina / Richland County |
| EPI_ISL_493210 | 5/4/2020  | 7/21/2020 North America / USA / South Carolina / Richland County |
| EPI_ISL_493211 | 5/4/2020  | 7/21/2020 North America / USA / South Carolina / Richland County |
| EPI_ISL_493212 | 5/8/2020  | 7/21/2020 North America / USA / South Carolina / Richland County |
| EPI_ISL_493328 | 3/15/2020 | 7/21/2020 Europe / Italy / Lazio                                 |
| EPI_ISL_493329 | 3/4/2020  | 7/21/2020 Europe / Italy / Lazio                                 |
| EPI_ISL_493330 | 5/10/2020 | 7/21/2020 Europe / Italy / Lazio                                 |
| EPI_ISL_493331 | 5/7/2020  | 7/21/2020 Europe / Italy / Lazio                                 |
| EPI_ISL_493332 | 3/28/2020 | 7/21/2020 Europe / Italy / Campania / Benevento                  |
| EPI_ISL_493333 | 3/28/2020 | 7/21/2020 Europe / Italy / Campania / Benevento                  |
| EPI_ISL_493334 | 3/27/2020 | 7/21/2020 North America / Mexico / Guanajuato                    |
| EPI_ISL_493335 | 4/2/2020  | 7/21/2020 North America / Mexico / Guanajuato                    |
| EPI_ISL_493336 | 4/17/2020 | 7/21/2020 North America / Mexico / Sinaloa                       |
| EPI_ISL_493346 | 5/26/2020 | 7/21/2020 North America / Mexico / Baja California Sur           |
| EPI_ISL_493348 | 5/27/2020 | 7/21/2020 North America / Mexico / Yucatan                       |
| EPI_ISL_493352 | 6/22/2020 | 7/21/2020 Europe / Norway                                        |
| EPI_ISL_493353 | 6/22/2020 | 7/21/2020 Europe / Norway                                        |
| EPI_ISL_493354 | 6/23/2020 | 7/21/2020 Europe / Norway                                        |
| EPI_ISL_493355 | 6/23/2020 | 7/21/2020 Europe / Norway                                        |
| EPI_ISL_493356 | 6/26/2020 | 7/21/2020 Europe / Norway                                        |
| EPI_ISL_493357 | 6/26/2020 | 7/21/2020 Europe / Norway                                        |
| EPI_ISL_493358 | 6/23/2020 | 7/21/2020 Europe / Norway                                        |
| EPI_ISL_493359 | 6/25/2020 | 7/21/2020 Europe / Norway                                        |
| EPI_ISL_493360 | 6/25/2020 | 7/21/2020 Europe / Norway                                        |
| EPI_ISL_493362 | 6/25/2020 | 7/21/2020 Europe / Norway                                        |
| EPI_ISL_493363 | 6/26/2020 | 7/21/2020 Europe / Norway                                        |
| EPI_ISL_493364 | 6/26/2020 | 7/21/2020 Europe / Norway                                        |
| EPI_ISL_493365 | 6/26/2020 | 7/21/2020 Europe / Norway                                        |
| EPI_ISL_493366 | 6/26/2020 | 7/21/2020 Europe / Norway                                        |
| EPI_ISL_493367 | 6/26/2020 | 7/21/2020 Europe / Norway                                        |
| EPI_ISL_493368 | 6/26/2020 | 7/21/2020 Europe / Norway                                        |
| EPI_ISL_493370 | 6/27/2020 | 7/21/2020 Europe / Norway                                        |
| EPI_ISL_493371 | 6/26/2020 | 7/21/2020 Europe / Norway                                        |
| EPI_ISL_493372 | 6/29/2020 | 7/21/2020 Europe / Norway                                        |
| EPI_ISL_493373 | 6/29/2020 | 7/21/2020 Europe / Norway                                        |
| EPI_ISL_493375 | 6/29/2020 | 7/21/2020 Europe / Norway                                        |
| EPI_ISL_493376 | 6/29/2020 | 7/21/2020 Europe / Norway                                        |
| EPI_ISL_493377 | 6/29/2020 | 7/21/2020 Europe / Norway                                        |

|                |           |                                                                  |
|----------------|-----------|------------------------------------------------------------------|
| EPI_ISL_493378 | 6/29/2020 | 7/21/2020 Europe / Norway                                        |
| EPI_ISL_493381 | 6/29/2020 | 7/21/2020 Europe / Norway                                        |
| EPI_ISL_493382 | 6/29/2020 | 7/21/2020 Europe / Norway                                        |
| EPI_ISL_493384 | 6/30/2020 | 7/21/2020 Europe / Norway                                        |
| EPI_ISL_493385 | 6/30/2020 | 7/21/2020 Europe / Norway                                        |
| EPI_ISL_493387 | 6/29/2020 | 7/21/2020 Europe / Norway                                        |
| EPI_ISL_493389 | 6/30/2020 | 7/21/2020 Europe / Norway                                        |
| EPI_ISL_493390 | 2/6/2020  | 7/21/2020 Asia / Singapore                                       |
| EPI_ISL_493391 | 4/15/2020 | 7/21/2020 Asia / Singapore                                       |
| EPI_ISL_493392 | 4/15/2020 | 7/21/2020 Asia / Singapore                                       |
| EPI_ISL_493395 | 4/20/2020 | 7/21/2020 Asia / Singapore                                       |
| EPI_ISL_493401 | 4/24/2020 | 7/21/2020 Asia / Singapore                                       |
| EPI_ISL_493408 | 4/24/2020 | 7/21/2020 Asia / Singapore                                       |
| EPI_ISL_493409 | 5/10/2020 | 7/21/2020 Asia / Singapore                                       |
| EPI_ISL_493410 | 4/13/2020 | 7/21/2020 Asia / Singapore                                       |
| EPI_ISL_493411 | 5/8/2020  | 7/21/2020 Asia / Singapore                                       |
| EPI_ISL_493412 | 4/22/2020 | 7/21/2020 Asia / Singapore                                       |
| EPI_ISL_493413 | 4/19/2020 | 7/21/2020 Asia / Singapore                                       |
| EPI_ISL_493414 | 2/18/2020 | 7/21/2020 Asia / Singapore                                       |
| EPI_ISL_493415 | 3/29/2020 | 7/21/2020 Asia / Singapore                                       |
| EPI_ISL_493416 | 4/14/2020 | 7/21/2020 Asia / Singapore                                       |
| EPI_ISL_493417 | 3/29/2020 | 7/21/2020 Asia / Singapore                                       |
| EPI_ISL_493418 | 4/14/2020 | 7/21/2020 Asia / Singapore                                       |
| EPI_ISL_493419 | 3/29/2020 | 7/21/2020 Asia / Singapore                                       |
| EPI_ISL_493420 | 4/21/2020 | 7/21/2020 Asia / Singapore                                       |
| EPI_ISL_493421 | 2/7/2020  | 7/21/2020 Asia / Singapore                                       |
| EPI_ISL_493422 | 4/14/2020 | 7/21/2020 Asia / Singapore                                       |
| EPI_ISL_493423 | 4/14/2020 | 7/21/2020 Asia / Singapore                                       |
| EPI_ISL_493424 | 4/14/2020 | 7/21/2020 Asia / Singapore                                       |
| EPI_ISL_493425 | 3/26/2020 | 7/21/2020 Asia / Singapore                                       |
| EPI_ISL_493426 | 5/8/2020  | 7/21/2020 North America / USA / South Carolina / Richland County |
| EPI_ISL_493427 | 5/13/2020 | 7/21/2020 North America / USA / South Carolina / Richland County |
| EPI_ISL_493429 | 2020      | 7/21/2020 Europe / United Kingdom / England                      |
| EPI_ISL_493432 | 2020      | 7/21/2020 Europe / United Kingdom / England                      |
| EPI_ISL_493437 | 2020      | 7/21/2020 Europe / United Kingdom / England                      |
| EPI_ISL_493439 | 2020      | 7/21/2020 Europe / United Kingdom / England                      |
| EPI_ISL_493444 | 4/30/2020 | 7/21/2020 Europe / United Kingdom / England                      |
| EPI_ISL_493445 | 4/30/2020 | 7/21/2020 Europe / United Kingdom / England                      |
| EPI_ISL_493447 | 4/30/2020 | 7/21/2020 Europe / United Kingdom / England                      |
| EPI_ISL_493448 | 4/30/2020 | 7/21/2020 Europe / United Kingdom / England                      |
| EPI_ISL_493449 | 4/30/2020 | 7/21/2020 Europe / United Kingdom / England                      |
| EPI_ISL_493451 | 4/28/2020 | 7/21/2020 Europe / United Kingdom / England                      |
| EPI_ISL_493452 | 5/13/2020 | 7/21/2020 Europe / United Kingdom / England                      |
| EPI_ISL_493453 | 5/11/2020 | 7/21/2020 Europe / United Kingdom / England                      |
| EPI_ISL_493454 | 5/12/2020 | 7/21/2020 Europe / United Kingdom / England                      |
| EPI_ISL_493455 | 5/21/2020 | 7/21/2020 Europe / United Kingdom / England                      |
| EPI_ISL_493456 | 5/22/2020 | 7/21/2020 Europe / United Kingdom / England                      |







|                |           |           |                                    |
|----------------|-----------|-----------|------------------------------------|
| EPI_ISL_493608 | 7/1/2020  | 7/21/2020 | Europe / United Kingdom / England  |
| EPI_ISL_493609 | 7/9/2020  | 7/21/2020 | Europe / United Kingdom / England  |
| EPI_ISL_493614 | 2020      | 7/21/2020 | Europe / United Kingdom / England  |
| EPI_ISL_493615 | 5/19/2020 | 7/21/2020 | Europe / United Kingdom / England  |
| EPI_ISL_493617 | 5/15/2020 | 7/21/2020 | Europe / United Kingdom / England  |
| EPI_ISL_493620 | 5/15/2020 | 7/21/2020 | Europe / United Kingdom / England  |
| EPI_ISL_493621 | 5/15/2020 | 7/21/2020 | Europe / United Kingdom / England  |
| EPI_ISL_493622 | 5/15/2020 | 7/21/2020 | Europe / United Kingdom / England  |
| EPI_ISL_493624 | 2020      | 7/21/2020 | Europe / United Kingdom / England  |
| EPI_ISL_493626 | 5/18/2020 | 7/21/2020 | Europe / United Kingdom / England  |
| EPI_ISL_493628 | 5/28/2020 | 7/21/2020 | Europe / United Kingdom / England  |
| EPI_ISL_493629 | 5/29/2020 | 7/21/2020 | Europe / United Kingdom / England  |
| EPI_ISL_493633 | 5/5/2020  | 7/21/2020 | Europe / United Kingdom / England  |
| EPI_ISL_493634 | 5/5/2020  | 7/21/2020 | Europe / United Kingdom / England  |
| EPI_ISL_493635 | 5/2/2020  | 7/21/2020 | Europe / United Kingdom / England  |
| EPI_ISL_493669 | 7/1/2020  | 7/21/2020 | Europe / United Kingdom / England  |
| EPI_ISL_493673 | 5/22/2020 | 7/21/2020 | Europe / United Kingdom / England  |
| EPI_ISL_493678 | 5/22/2020 | 7/21/2020 | Europe / United Kingdom / England  |
| EPI_ISL_493682 | 5/18/2020 | 7/21/2020 | Europe / United Kingdom / England  |
| EPI_ISL_493683 | 7/3/2020  | 7/21/2020 | Europe / United Kingdom / England  |
| EPI_ISL_493684 | 7/12/2020 | 7/21/2020 | Europe / United Kingdom / England  |
| EPI_ISL_493693 | 7/4/2020  | 7/21/2020 | Europe / United Kingdom / England  |
| EPI_ISL_493694 | 5/12/2020 | 7/21/2020 | Europe / United Kingdom / England  |
| EPI_ISL_493696 | 6/21/2020 | 7/21/2020 | Europe / United Kingdom / England  |
| EPI_ISL_493699 | 5/13/2020 | 7/21/2020 | Europe / United Kingdom / England  |
| EPI_ISL_493702 | 6/19/2020 | 7/21/2020 | Europe / United Kingdom / England  |
| EPI_ISL_493703 | 5/12/2020 | 7/21/2020 | Europe / United Kingdom / England  |
| EPI_ISL_493704 | 5/12/2020 | 7/21/2020 | Europe / United Kingdom / England  |
| EPI_ISL_493705 | 5/21/2020 | 7/21/2020 | Europe / United Kingdom / England  |
| EPI_ISL_493707 | 5/8/2020  | 7/21/2020 | Europe / United Kingdom / England  |
| EPI_ISL_493709 | 6/21/2020 | 7/21/2020 | Europe / United Kingdom / England  |
| EPI_ISL_493712 | 5/14/2020 | 7/21/2020 | Europe / United Kingdom / England  |
| EPI_ISL_493716 | 7/10/2020 | 7/21/2020 | Europe / United Kingdom / England  |
| EPI_ISL_493720 | 5/5/2020  | 7/21/2020 | Europe / United Kingdom / England  |
| EPI_ISL_493724 | 7/11/2020 | 7/21/2020 | Europe / United Kingdom / England  |
| EPI_ISL_493733 | 4/20/2020 | 7/21/2020 | Europe / United Kingdom / England  |
| EPI_ISL_493735 | 7/6/2020  | 7/21/2020 | Europe / United Kingdom / England  |
| EPI_ISL_493737 | 5/15/2020 | 7/21/2020 | Europe / United Kingdom / England  |
| EPI_ISL_493739 | 5/21/2020 | 7/21/2020 | Europe / United Kingdom / England  |
| EPI_ISL_493741 | 3/16/2020 | 7/21/2020 | Europe / United Kingdom / Scotland |
| EPI_ISL_493742 | 4/3/2020  | 7/21/2020 | Europe / United Kingdom / Scotland |
| EPI_ISL_493744 | 4/7/2020  | 7/21/2020 | Europe / United Kingdom / Scotland |
| EPI_ISL_493745 | 4/6/2020  | 7/21/2020 | Europe / United Kingdom / Scotland |
| EPI_ISL_493746 | 4/7/2020  | 7/21/2020 | Europe / United Kingdom / Scotland |
| EPI_ISL_493747 | 4/8/2020  | 7/21/2020 | Europe / United Kingdom / Scotland |
| EPI_ISL_493748 | 4/8/2020  | 7/21/2020 | Europe / United Kingdom / Scotland |
| EPI_ISL_493752 | 4/8/2020  | 7/21/2020 | Europe / United Kingdom / Scotland |









|                |           |           |                                 |
|----------------|-----------|-----------|---------------------------------|
| EPI_ISL_494091 | 6/27/2020 | 7/21/2020 | Europe / United Kingdom / Wales |
| EPI_ISL_494092 | 6/15/2020 | 7/21/2020 | Europe / United Kingdom / Wales |
| EPI_ISL_494093 | 6/14/2020 | 7/21/2020 | Europe / United Kingdom / Wales |
| EPI_ISL_494094 | 6/27/2020 | 7/21/2020 | Europe / United Kingdom / Wales |
| EPI_ISL_494095 | 6/21/2020 | 7/21/2020 | Europe / United Kingdom / Wales |
| EPI_ISL_494096 | 6/27/2020 | 7/21/2020 | Europe / United Kingdom / Wales |
| EPI_ISL_494098 | 6/20/2020 | 7/21/2020 | Europe / United Kingdom / Wales |
| EPI_ISL_494099 | 6/27/2020 | 7/21/2020 | Europe / United Kingdom / Wales |
| EPI_ISL_494103 | 6/22/2020 | 7/21/2020 | Europe / United Kingdom / Wales |
| EPI_ISL_494104 | 5/25/2020 | 7/21/2020 | Europe / United Kingdom / Wales |
| EPI_ISL_494105 | 6/21/2020 | 7/21/2020 | Europe / United Kingdom / Wales |
| EPI_ISL_494106 | 6/27/2020 | 7/21/2020 | Europe / United Kingdom / Wales |
| EPI_ISL_494107 | 6/23/2020 | 7/21/2020 | Europe / United Kingdom / Wales |
| EPI_ISL_494108 | 6/19/2020 | 7/21/2020 | Europe / United Kingdom / Wales |
| EPI_ISL_494109 | 6/27/2020 | 7/21/2020 | Europe / United Kingdom / Wales |
| EPI_ISL_494111 | 6/19/2020 | 7/21/2020 | Europe / United Kingdom / Wales |
| EPI_ISL_494113 | 6/11/2020 | 7/21/2020 | Europe / United Kingdom / Wales |
| EPI_ISL_494115 | 6/27/2020 | 7/21/2020 | Europe / United Kingdom / Wales |
| EPI_ISL_494117 | 5/25/2020 | 7/21/2020 | Europe / United Kingdom / Wales |
| EPI_ISL_494118 | 6/27/2020 | 7/21/2020 | Europe / United Kingdom / Wales |
| EPI_ISL_494120 | 6/18/2020 | 7/21/2020 | Europe / United Kingdom / Wales |
| EPI_ISL_494121 | 6/27/2020 | 7/21/2020 | Europe / United Kingdom / Wales |
| EPI_ISL_494122 | 6/23/2020 | 7/21/2020 | Europe / United Kingdom / Wales |
| EPI_ISL_494123 | 6/21/2020 | 7/21/2020 | Europe / United Kingdom / Wales |
| EPI_ISL_494124 | 6/11/2020 | 7/21/2020 | Europe / United Kingdom / Wales |
| EPI_ISL_494127 | 6/23/2020 | 7/21/2020 | Europe / United Kingdom / Wales |
| EPI_ISL_494128 | 6/22/2020 | 7/21/2020 | Europe / United Kingdom / Wales |
| EPI_ISL_494129 | 6/16/2020 | 7/21/2020 | Europe / United Kingdom / Wales |
| EPI_ISL_494130 | 6/27/2020 | 7/21/2020 | Europe / United Kingdom / Wales |
| EPI_ISL_494132 | 6/23/2020 | 7/21/2020 | Europe / United Kingdom / Wales |
| EPI_ISL_494133 | 6/27/2020 | 7/21/2020 | Europe / United Kingdom / Wales |
| EPI_ISL_494134 | 6/11/2020 | 7/21/2020 | Europe / United Kingdom / Wales |
| EPI_ISL_494135 | 6/2/2020  | 7/21/2020 | Europe / United Kingdom / Wales |
| EPI_ISL_494138 | 6/20/2020 | 7/21/2020 | Europe / United Kingdom / Wales |
| EPI_ISL_494140 | 6/23/2020 | 7/21/2020 | Europe / United Kingdom / Wales |
| EPI_ISL_494143 | 6/18/2020 | 7/21/2020 | Europe / United Kingdom / Wales |
| EPI_ISL_494144 | 6/21/2020 | 7/21/2020 | Europe / United Kingdom / Wales |
| EPI_ISL_494146 | 6/27/2020 | 7/21/2020 | Europe / United Kingdom / Wales |
| EPI_ISL_494156 | 4/20/2020 | 7/21/2020 | Europe / United Kingdom / Wales |
| EPI_ISL_494159 | 4/19/2020 | 7/21/2020 | Europe / United Kingdom / Wales |
| EPI_ISL_494161 | 5/28/2020 | 7/21/2020 | Europe / United Kingdom / Wales |
| EPI_ISL_494163 | 6/7/2020  | 7/21/2020 | Europe / United Kingdom / Wales |
| EPI_ISL_494165 | 4/27/2020 | 7/21/2020 | Europe / United Kingdom / Wales |
| EPI_ISL_494167 | 6/1/2020  | 7/21/2020 | Europe / United Kingdom / Wales |
| EPI_ISL_494168 | 5/19/2020 | 7/21/2020 | Europe / United Kingdom / Wales |
| EPI_ISL_494173 | 4/20/2020 | 7/21/2020 | Europe / United Kingdom / Wales |
| EPI_ISL_494174 | 6/8/2020  | 7/21/2020 | Europe / United Kingdom / Wales |



|                |           |           |                                 |
|----------------|-----------|-----------|---------------------------------|
| EPI_ISL_494175 | 6/7/2020  | 7/21/2020 | Europe / United Kingdom / Wales |
| EPI_ISL_494176 | 6/9/2020  | 7/21/2020 | Europe / United Kingdom / Wales |
| EPI_ISL_494178 | 4/18/2020 | 7/21/2020 | Europe / United Kingdom / Wales |
| EPI_ISL_494179 | 4/19/2020 | 7/21/2020 | Europe / United Kingdom / Wales |
| EPI_ISL_494181 | 4/19/2020 | 7/21/2020 | Europe / United Kingdom / Wales |
| EPI_ISL_494185 | 3/31/2020 | 7/21/2020 | Europe / United Kingdom / Wales |
| EPI_ISL_494187 | 5/30/2020 | 7/21/2020 | Europe / United Kingdom / Wales |
| EPI_ISL_494195 | 6/6/2020  | 7/21/2020 | Europe / United Kingdom / Wales |
| EPI_ISL_494200 | 5/28/2020 | 7/21/2020 | Europe / United Kingdom / Wales |
| EPI_ISL_494201 | 5/20/2020 | 7/21/2020 | Europe / United Kingdom / Wales |
| EPI_ISL_494202 | 5/27/2020 | 7/21/2020 | Europe / United Kingdom / Wales |
| EPI_ISL_494208 | 5/20/2020 | 7/21/2020 | Europe / United Kingdom / Wales |
| EPI_ISL_494209 | 3/31/2020 | 7/21/2020 | Europe / United Kingdom / Wales |
| EPI_ISL_494211 | 5/28/2020 | 7/21/2020 | Europe / United Kingdom / Wales |
| EPI_ISL_494212 | 4/20/2020 | 7/21/2020 | Europe / United Kingdom / Wales |
| EPI_ISL_494216 | 4/19/2020 | 7/21/2020 | Europe / United Kingdom / Wales |
| EPI_ISL_494217 | 4/18/2020 | 7/21/2020 | Europe / United Kingdom / Wales |
| EPI_ISL_494218 | 3/31/2020 | 7/21/2020 | Europe / United Kingdom / Wales |
| EPI_ISL_494221 | 5/29/2020 | 7/21/2020 | Europe / United Kingdom / Wales |
| EPI_ISL_494224 | 4/20/2020 | 7/21/2020 | Europe / United Kingdom / Wales |
| EPI_ISL_494225 | 5/18/2020 | 7/21/2020 | Europe / United Kingdom / Wales |
| EPI_ISL_494226 | 4/20/2020 | 7/21/2020 | Europe / United Kingdom / Wales |
| EPI_ISL_494227 | 4/18/2020 | 7/21/2020 | Europe / United Kingdom / Wales |
| EPI_ISL_494228 | 5/21/2020 | 7/21/2020 | Europe / United Kingdom / Wales |
| EPI_ISL_494229 | 4/18/2020 | 7/21/2020 | Europe / United Kingdom / Wales |
| EPI_ISL_494230 | 4/2/2020  | 7/21/2020 | Europe / United Kingdom / Wales |
| EPI_ISL_494231 | 3/31/2020 | 7/21/2020 | Europe / United Kingdom / Wales |
| EPI_ISL_494232 | 4/20/2020 | 7/21/2020 | Europe / United Kingdom / Wales |
| EPI_ISL_494241 | 4/22/2020 | 7/21/2020 | Europe / United Kingdom / Wales |
| EPI_ISL_494242 | 6/5/2020  | 7/21/2020 | Europe / United Kingdom / Wales |
| EPI_ISL_494243 | 5/18/2020 | 7/21/2020 | Europe / United Kingdom / Wales |
| EPI_ISL_494244 | 5/22/2020 | 7/21/2020 | Europe / United Kingdom / Wales |
| EPI_ISL_494245 | 4/19/2020 | 7/21/2020 | Europe / United Kingdom / Wales |
| EPI_ISL_494250 | 6/5/2020  | 7/21/2020 | Europe / United Kingdom / Wales |
| EPI_ISL_494251 | 4/17/2020 | 7/21/2020 | Europe / United Kingdom / Wales |
| EPI_ISL_494252 | 4/19/2020 | 7/21/2020 | Europe / United Kingdom / Wales |
| EPI_ISL_494257 | 4/19/2020 | 7/21/2020 | Europe / United Kingdom / Wales |
| EPI_ISL_494259 | 5/18/2020 | 7/21/2020 | Europe / United Kingdom / Wales |
| EPI_ISL_494262 | 6/7/2020  | 7/21/2020 | Europe / United Kingdom / Wales |
| EPI_ISL_494263 | 6/6/2020  | 7/21/2020 | Europe / United Kingdom / Wales |
| EPI_ISL_494265 | 4/27/2020 | 7/21/2020 | Europe / United Kingdom / Wales |
| EPI_ISL_494270 | 5/19/2020 | 7/21/2020 | Europe / United Kingdom / Wales |
| EPI_ISL_494271 | 4/2/2020  | 7/21/2020 | Europe / United Kingdom / Wales |
| EPI_ISL_494273 | 4/20/2020 | 7/21/2020 | Europe / United Kingdom / Wales |
| EPI_ISL_494275 | 5/21/2020 | 7/21/2020 | Europe / United Kingdom / Wales |
| EPI_ISL_494284 | 4/20/2020 | 7/21/2020 | Europe / United Kingdom / Wales |
| EPI_ISL_494286 | 3/30/2020 | 7/21/2020 | Europe / United Kingdom / Wales |

|                |           |           |                                                     |
|----------------|-----------|-----------|-----------------------------------------------------|
| EPI_ISL_494291 | 4/19/2020 | 7/21/2020 | Europe / United Kingdom / Wales                     |
| EPI_ISL_494296 | 4/1/2020  | 7/21/2020 | Europe / United Kingdom / Wales                     |
| EPI_ISL_494299 | 4/18/2020 | 7/21/2020 | Europe / United Kingdom / Wales                     |
| EPI_ISL_494303 | 5/18/2020 | 7/21/2020 | Europe / United Kingdom / Wales                     |
| EPI_ISL_494305 | 4/19/2020 | 7/21/2020 | Europe / United Kingdom / Wales                     |
| EPI_ISL_494308 | 4/20/2020 | 7/21/2020 | Europe / United Kingdom / Wales                     |
| EPI_ISL_494309 | 4/20/2020 | 7/21/2020 | Europe / United Kingdom / Wales                     |
| EPI_ISL_494312 | 4/20/2020 | 7/21/2020 | Europe / United Kingdom / Wales                     |
| EPI_ISL_494319 | 4/19/2020 | 7/21/2020 | Europe / United Kingdom / Wales                     |
| EPI_ISL_494321 | 4/18/2020 | 7/21/2020 | Europe / United Kingdom / Wales                     |
| EPI_ISL_494332 | 4/19/2020 | 7/21/2020 | Europe / United Kingdom / Wales                     |
| EPI_ISL_494336 | 4/19/2020 | 7/21/2020 | Europe / United Kingdom / Wales                     |
| EPI_ISL_494338 | 4/20/2020 | 7/21/2020 | Europe / United Kingdom / Wales                     |
| EPI_ISL_494341 | 4/19/2020 | 7/21/2020 | Europe / United Kingdom / Wales                     |
| EPI_ISL_494344 | 4/1/2020  | 7/21/2020 | Europe / United Kingdom / Wales                     |
| EPI_ISL_494351 | 4/19/2020 | 7/21/2020 | Europe / United Kingdom / Wales                     |
| EPI_ISL_494359 | 5/22/2020 | 7/21/2020 | Europe / United Kingdom / Wales                     |
| EPI_ISL_494360 | 6/8/2020  | 7/21/2020 | Europe / United Kingdom / Wales                     |
| EPI_ISL_494361 | 4/18/2020 | 7/21/2020 | Europe / United Kingdom / Wales                     |
| EPI_ISL_494364 | 4/1/2020  | 7/21/2020 | Europe / United Kingdom / Wales                     |
| EPI_ISL_494368 | 4/20/2020 | 7/21/2020 | Europe / United Kingdom / Wales                     |
| EPI_ISL_494370 | 4/18/2020 | 7/21/2020 | Europe / United Kingdom / Wales                     |
| EPI_ISL_494372 | 4/3/2020  | 7/21/2020 | North America / USA / California                    |
| EPI_ISL_494373 | 4/3/2020  | 7/21/2020 | North America / USA / California                    |
| EPI_ISL_494374 | 4/3/2020  | 7/21/2020 | North America / USA / California                    |
| EPI_ISL_494375 | 4/28/2020 | 7/21/2020 | North America / USA / California / San Diego County |
| EPI_ISL_494376 | 4/27/2020 | 7/21/2020 | North America / USA / California / San Diego County |
| EPI_ISL_494377 | 4/4/2020  | 7/21/2020 | North America / USA / California                    |
| EPI_ISL_494378 | 4/3/2020  | 7/21/2020 | North America / USA / California                    |
| EPI_ISL_494379 | 4/3/2020  | 7/21/2020 | North America / USA / California                    |
| EPI_ISL_494380 | 4/8/2020  | 7/21/2020 | North America / USA / California                    |
| EPI_ISL_494381 | 4/4/2020  | 7/21/2020 | North America / USA / California                    |
| EPI_ISL_494382 | 4/28/2020 | 7/21/2020 | North America / USA / California / San Diego County |
| EPI_ISL_494383 | 4/16/2020 | 7/21/2020 | North America / USA / California / San Diego County |
| EPI_ISL_494384 | 4/27/2020 | 7/21/2020 | North America / USA / California / San Diego County |
| EPI_ISL_494385 | 4/2/2020  | 7/21/2020 | North America / USA / California                    |
| EPI_ISL_494386 | 4/16/2020 | 7/21/2020 | North America / USA / California / San Diego County |
| EPI_ISL_494387 | 4/28/2020 | 7/21/2020 | North America / USA / California / San Diego County |
| EPI_ISL_494388 | 4/28/2020 | 7/21/2020 | North America / USA / California / San Diego County |
| EPI_ISL_494389 | 4/27/2020 | 7/21/2020 | North America / USA / California / San Diego County |
| EPI_ISL_494390 | 4/8/2020  | 7/21/2020 | North America / USA / California                    |
| EPI_ISL_494391 | 4/8/2020  | 7/21/2020 | North America / USA / California                    |
| EPI_ISL_494392 | 4/6/2020  | 7/21/2020 | North America / USA / California                    |
| EPI_ISL_494393 | 4/27/2020 | 7/21/2020 | North America / USA / California / San Diego County |
| EPI_ISL_494394 | 4/2/2020  | 7/21/2020 | North America / USA / California                    |
| EPI_ISL_494396 | 4/27/2020 | 7/21/2020 | North America / USA / California / San Diego County |
| EPI_ISL_494397 | 4/27/2020 | 7/21/2020 | North America / USA / California / San Diego County |





|                |           |           |                                                     |
|----------------|-----------|-----------|-----------------------------------------------------|
| EPI_ISL_494500 | 5/4/2020  | 7/21/2020 | North America / USA / California / San Diego County |
| EPI_ISL_494502 | 4/30/2020 | 7/21/2020 | North America / USA / California / San Diego County |
| EPI_ISL_494503 | 5/7/2020  | 7/21/2020 | North America / USA / California / San Diego County |
| EPI_ISL_494504 | 5/1/2020  | 7/22/2020 | North America / USA / Alabama                       |
| EPI_ISL_494505 | 4/28/2020 | 7/22/2020 | North America / USA / California                    |
| EPI_ISL_494506 | 4/28/2020 | 7/22/2020 | North America / USA / California                    |
| EPI_ISL_494507 | 5/1/2020  | 7/22/2020 | North America / USA / California                    |
| EPI_ISL_494508 | 5/1/2020  | 7/22/2020 | North America / USA / California                    |
| EPI_ISL_494509 | 5/1/2020  | 7/22/2020 | North America / USA / California                    |
| EPI_ISL_494510 | 4/28/2020 | 7/22/2020 | North America / USA / Georgia                       |
| EPI_ISL_494511 | 4/28/2020 | 7/22/2020 | North America / USA / Georgia                       |
| EPI_ISL_494512 | 4/28/2020 | 7/22/2020 | North America / USA / Illinois                      |
| EPI_ISL_494513 | 4/28/2020 | 7/22/2020 | North America / USA / Illinois                      |
| EPI_ISL_494514 | 4/30/2020 | 7/22/2020 | North America / USA / Illinois                      |
| EPI_ISL_494515 | 4/30/2020 | 7/22/2020 | North America / USA / Illinois                      |
| EPI_ISL_494516 | 4/30/2020 | 7/22/2020 | North America / USA / Illinois                      |
| EPI_ISL_494517 | 4/30/2020 | 7/22/2020 | North America / USA / Illinois                      |
| EPI_ISL_494518 | 4/28/2020 | 7/22/2020 | North America / USA / Indiana                       |
| EPI_ISL_494519 | 4/28/2020 | 7/22/2020 | North America / USA / Indiana                       |
| EPI_ISL_494520 | 4/29/2020 | 7/22/2020 | North America / USA / Indiana                       |
| EPI_ISL_494521 | 4/10/2020 | 7/22/2020 | North America / USA / Louisiana                     |
| EPI_ISL_494522 | 4/27/2020 | 7/22/2020 | North America / USA / Michigan                      |
| EPI_ISL_494523 | 4/27/2020 | 7/22/2020 | North America / USA / North Carolina                |
| EPI_ISL_494524 | 4/27/2020 | 7/22/2020 | North America / USA / North Carolina                |
| EPI_ISL_494525 | 4/27/2020 | 7/22/2020 | North America / USA / North Carolina                |
| EPI_ISL_494526 | 4/27/2020 | 7/22/2020 | North America / USA / North Carolina                |
| EPI_ISL_494527 | 4/28/2020 | 7/22/2020 | North America / USA / North Carolina                |
| EPI_ISL_494528 | 4/28/2020 | 7/22/2020 | North America / USA / North Carolina                |
| EPI_ISL_494529 | 4/30/2020 | 7/22/2020 | North America / USA / North Carolina                |
| EPI_ISL_494530 | 4/30/2020 | 7/22/2020 | North America / USA / North Carolina                |
| EPI_ISL_494531 | 4/30/2020 | 7/22/2020 | North America / USA / New Mexico                    |
| EPI_ISL_494532 | 4/30/2020 | 7/22/2020 | North America / USA / New Mexico                    |
| EPI_ISL_494533 | 4/30/2020 | 7/22/2020 | North America / USA / New Mexico                    |
| EPI_ISL_494534 | 4/30/2020 | 7/22/2020 | North America / USA / New Mexico                    |
| EPI_ISL_494535 | 4/30/2020 | 7/22/2020 | North America / USA / New Mexico                    |
| EPI_ISL_494536 | 4/30/2020 | 7/22/2020 | North America / USA / New Mexico                    |
| EPI_ISL_494537 | 5/1/2020  | 7/22/2020 | North America / USA / New Mexico                    |
| EPI_ISL_494538 | 4/10/2020 | 7/22/2020 | North America / USA / Texas                         |
| EPI_ISL_494539 | 4/10/2020 | 7/22/2020 | North America / USA / Texas                         |
| EPI_ISL_494540 | 4/10/2020 | 7/22/2020 | North America / USA / Texas                         |
| EPI_ISL_494541 | 4/10/2020 | 7/22/2020 | North America / USA / Texas                         |
| EPI_ISL_494542 | 4/27/2020 | 7/22/2020 | North America / USA / Texas                         |
| EPI_ISL_494543 | 4/27/2020 | 7/22/2020 | North America / USA / Texas                         |
| EPI_ISL_494544 | 4/27/2020 | 7/22/2020 | North America / USA / Texas                         |
| EPI_ISL_494545 | 4/29/2020 | 7/22/2020 | North America / USA / Texas                         |
| EPI_ISL_494546 | 4/29/2020 | 7/22/2020 | North America / USA / Texas                         |
| EPI_ISL_494547 | 4/30/2020 | 7/22/2020 | North America / USA / Texas                         |









|                |           |                                                               |
|----------------|-----------|---------------------------------------------------------------|
| EPI_ISL_494726 | 4/2/2020  | 7/22/2020 North America / USA / California / San Diego County |
| EPI_ISL_494727 | 3/24/2020 | 7/22/2020 North America / USA / California / San Diego County |
| EPI_ISL_494728 | 3/24/2020 | 7/22/2020 North America / USA / California / San Diego County |
| EPI_ISL_494729 | 3/20/2020 | 7/22/2020 North America / USA / California / San Diego County |
| EPI_ISL_494730 | 4/2/2020  | 7/22/2020 North America / USA / California / San Diego County |
| EPI_ISL_494731 | 4/2/2020  | 7/22/2020 North America / USA / California / San Diego County |
| EPI_ISL_494732 | 3/24/2020 | 7/22/2020 North America / USA / California / San Diego County |
| EPI_ISL_494733 | 3/19/2020 | 7/22/2020 North America / USA / California / San Diego County |
| EPI_ISL_494734 | 3/20/2020 | 7/22/2020 North America / USA / California / San Diego County |
| EPI_ISL_494735 | 3/24/2020 | 7/22/2020 North America / USA / California / San Diego County |
| EPI_ISL_494736 | 4/1/2020  | 7/22/2020 North America / USA / California / San Diego County |
| EPI_ISL_494737 | 4/2/2020  | 7/22/2020 North America / USA / California / San Diego County |
| EPI_ISL_494739 | 4/1/2020  | 7/22/2020 North America / USA / California / San Diego County |
| EPI_ISL_494740 | 3/25/2020 | 7/22/2020 North America / USA / California / San Diego County |
| EPI_ISL_494741 | 4/2/2020  | 7/22/2020 North America / USA / California / San Diego County |
| EPI_ISL_494742 | 4/1/2020  | 7/22/2020 North America / USA / California / San Diego County |
| EPI_ISL_494743 | 3/25/2020 | 7/22/2020 North America / USA / California / San Diego County |
| EPI_ISL_494744 | 3/25/2020 | 7/22/2020 North America / USA / California / San Diego County |
| EPI_ISL_494745 | 4/20/2020 | 7/22/2020 North America / USA / California / San Diego County |
| EPI_ISL_494746 | 4/20/2020 | 7/22/2020 North America / USA / California / San Diego County |
| EPI_ISL_494757 | 2020      | 7/22/2020 Europe / Italy / Campania                           |
| EPI_ISL_494759 | 2020      | 7/22/2020 Europe / Italy / Campania                           |
| EPI_ISL_494761 | 2020      | 7/22/2020 Europe / Italy / Campania                           |
| EPI_ISL_494771 | 2020      | 7/22/2020 Europe / Italy / Campania                           |
| EPI_ISL_494970 | 3/20/2020 | 7/22/2020 North America / Canada / Ontario                    |
| EPI_ISL_495012 | 3/22/2020 | 7/22/2020 North America / Canada / Ontario                    |
| EPI_ISL_495013 | 3/26/2020 | 7/22/2020 North America / Canada / Ontario                    |
| EPI_ISL_495014 | 6/18/2020 | 7/22/2020 Asia / India / Gujarat / Daskroi                    |
| EPI_ISL_495015 | 6/18/2020 | 7/22/2020 Asia / India / Gujarat / Daskroi                    |
| EPI_ISL_495016 | 6/18/2020 | 7/22/2020 Asia / India / Gujarat / Dholka                     |
| EPI_ISL_495017 | 6/18/2020 | 7/22/2020 Asia / India / Gujarat / Ahmedabad                  |
| EPI_ISL_495018 | 6/18/2020 | 7/22/2020 Asia / India / Gujarat / Ahmedabad                  |
| EPI_ISL_495019 | 6/18/2020 | 7/22/2020 Asia / India / Gujarat / Ahmedabad                  |
| EPI_ISL_495020 | 6/28/2020 | 7/22/2020 Asia / India / Gujarat / Botad                      |
| EPI_ISL_495021 | 6/30/2020 | 7/22/2020 Asia / India / Gujarat / Bhavnagar                  |
| EPI_ISL_495022 | 6/30/2020 | 7/22/2020 Asia / India / Gujarat / Bhavnagar                  |
| EPI_ISL_495023 | 7/2/2020  | 7/22/2020 Asia / India / Gujarat / Bhavnagar                  |
| EPI_ISL_495024 | 7/3/2020  | 7/22/2020 Asia / India / Gujarat / Ghogha                     |
| EPI_ISL_495025 | 7/4/2020  | 7/22/2020 Asia / India / Gujarat / Mahuva                     |
| EPI_ISL_495026 | 6/5/2020  | 7/22/2020 Asia / India / Gujarat / Vadodara                   |
| EPI_ISL_495027 | 6/15/2020 | 7/22/2020 Asia / India / Gujarat / Vadodara                   |
| EPI_ISL_495028 | 6/15/2020 | 7/22/2020 Asia / India / Gujarat / Vadodara                   |
| EPI_ISL_495029 | 6/15/2020 | 7/22/2020 Asia / India / Gujarat / Vadodara                   |
| EPI_ISL_495030 | 6/15/2020 | 7/22/2020 Asia / India / Gujarat / Vadodara                   |
| EPI_ISL_495031 | 6/15/2020 | 7/22/2020 Asia / India / Gujarat / Vadodara                   |
| EPI_ISL_495032 | 6/15/2020 | 7/22/2020 Asia / India / Gujarat / Vadodara                   |
| EPI_ISL_495033 | 6/15/2020 | 7/22/2020 Asia / India / Gujarat / Vadodara                   |



|                |           |                                                             |
|----------------|-----------|-------------------------------------------------------------|
| EPI_ISL_495081 | 4/23/2020 | 7/22/2020 Europe / United Kingdom / England                 |
| EPI_ISL_495082 | 4/20/2020 | 7/22/2020 Europe / United Kingdom / England                 |
| EPI_ISL_495084 | 4/23/2020 | 7/22/2020 Europe / United Kingdom / England                 |
| EPI_ISL_495086 | 4/19/2020 | 7/22/2020 Europe / United Kingdom / England                 |
| EPI_ISL_495090 | 4/19/2020 | 7/22/2020 Europe / United Kingdom / England                 |
| EPI_ISL_495093 | 5/10/2020 | 7/22/2020 Europe / United Kingdom / England                 |
| EPI_ISL_495095 | 4/21/2020 | 7/22/2020 Europe / United Kingdom / England                 |
| EPI_ISL_495096 | 4/20/2020 | 7/22/2020 Europe / United Kingdom / England                 |
| EPI_ISL_495097 | 4/27/2020 | 7/22/2020 Europe / United Kingdom / England                 |
| EPI_ISL_495098 | 4/20/2020 | 7/22/2020 Europe / United Kingdom / England                 |
| EPI_ISL_495099 | 5/21/2020 | 7/22/2020 Europe / United Kingdom / England                 |
| EPI_ISL_495100 | 5/20/2020 | 7/22/2020 Europe / United Kingdom / England                 |
| EPI_ISL_495101 | 5/1/2020  | 7/22/2020 Europe / United Kingdom / England                 |
| EPI_ISL_495102 | 4/23/2020 | 7/22/2020 Europe / United Kingdom / England                 |
| EPI_ISL_495103 | 5/26/2020 | 7/22/2020 Europe / United Kingdom / England                 |
| EPI_ISL_495107 | 4/27/2020 | 7/22/2020 Europe / United Kingdom / England                 |
| EPI_ISL_495108 | 4/17/2020 | 7/22/2020 Europe / United Kingdom / England                 |
| EPI_ISL_495109 | 4/21/2020 | 7/22/2020 Europe / United Kingdom / England                 |
| EPI_ISL_495110 | 4/27/2020 | 7/22/2020 Europe / United Kingdom / England                 |
| EPI_ISL_495112 | 4/27/2020 | 7/22/2020 Europe / United Kingdom / England                 |
| EPI_ISL_495113 | 4/30/2020 | 7/22/2020 Europe / United Kingdom / England                 |
| EPI_ISL_495114 | 4/27/2020 | 7/22/2020 Europe / United Kingdom / England                 |
| EPI_ISL_495116 | 3/10/2020 | 7/22/2020 Europe / United Kingdom / England                 |
| EPI_ISL_495117 | 5/20/2020 | 7/22/2020 Europe / United Kingdom / England                 |
| EPI_ISL_495118 | 3/12/2020 | 7/22/2020 Europe / United Kingdom / England                 |
| EPI_ISL_495119 | 4/27/2020 | 7/22/2020 Europe / United Kingdom / England                 |
| EPI_ISL_495122 | 6/11/2020 | 7/22/2020 North America / USA / California / Alameda County |
| EPI_ISL_495123 | 6/3/2020  | 7/22/2020 North America / USA / California / Alameda County |
| EPI_ISL_495131 | 5/22/2020 | 7/22/2020 North America / USA / California / Alameda County |
| EPI_ISL_495136 | 5/26/2020 | 7/22/2020 North America / USA / California / Alameda County |
| EPI_ISL_495142 | 6/5/2020  | 7/22/2020 North America / USA / California / Alameda County |
| EPI_ISL_495144 | 6/8/2020  | 7/22/2020 North America / USA / California / Alameda County |
| EPI_ISL_495149 | 6/3/2020  | 7/22/2020 North America / USA / California / Alameda County |
| EPI_ISL_495150 | 5/20/2020 | 7/22/2020 North America / USA / California / Alameda County |
| EPI_ISL_495161 | 5/11/2020 | 7/22/2020 Asia / India / Telangana / Hyderabad              |
| EPI_ISL_495162 | 5/11/2020 | 7/22/2020 Asia / India / Telangana / Hyderabad              |
| EPI_ISL_495163 | 5/29/2020 | 7/22/2020 Asia / India / Telangana / Hyderabad              |
| EPI_ISL_495164 | 6/2/2020  | 7/22/2020 Asia / India / Telangana / Hyderabad              |
| EPI_ISL_495165 | 6/2/2020  | 7/22/2020 Asia / India / Telangana / Hyderabad              |
| EPI_ISL_495166 | 6/3/2020  | 7/22/2020 Asia / India / Telangana / Hyderabad              |
| EPI_ISL_495167 | 6/3/2020  | 7/22/2020 Asia / India / Telangana / Hyderabad              |
| EPI_ISL_495168 | 6/3/2020  | 7/22/2020 Asia / India / Telangana / Hyderabad              |
| EPI_ISL_495169 | 6/3/2020  | 7/22/2020 Asia / India / Telangana / Hyderabad              |
| EPI_ISL_495170 | 6/4/2020  | 7/22/2020 Asia / India / Telangana / Hyderabad              |
| EPI_ISL_495171 | 6/4/2020  | 7/22/2020 Asia / India / Telangana / Hyderabad              |
| EPI_ISL_495172 | 6/4/2020  | 7/22/2020 Asia / India / Telangana / Hyderabad              |
| EPI_ISL_495173 | 6/4/2020  | 7/22/2020 Asia / India / Telangana / Hyderabad              |









|                |           |                                           |
|----------------|-----------|-------------------------------------------|
| EPI_ISL_495403 | 3/25/2020 | 7/22/2020 North America / USA / Florida   |
| EPI_ISL_495404 | 3/25/2020 | 7/22/2020 North America / USA / Florida   |
| EPI_ISL_495406 | 6/3/2020  | 7/22/2020 North America / USA / Florida   |
| EPI_ISL_495407 | 6/2/2020  | 7/22/2020 North America / USA / Florida   |
| EPI_ISL_495409 | 6/3/2020  | 7/22/2020 North America / USA / Florida   |
| EPI_ISL_495411 | 5/19/2020 | 7/22/2020 Europe / Turkey / Kars Province |
| EPI_ISL_495412 | 5/20/2020 | 7/22/2020 Europe / Turkey / Kars Province |
| EPI_ISL_495413 | 5/22/2020 | 7/22/2020 Europe / Turkey / Kars Province |
| EPI_ISL_495414 | 5/1/2020  | 7/22/2020 Europe / Turkey / Kars Province |
| EPI_ISL_495416 | 5/22/2020 | 7/22/2020 Europe / Turkey / Kars Province |
| EPI_ISL_495417 | 5/4/2020  | 7/22/2020 Europe / Turkey / Kars Province |
| EPI_ISL_495418 | 5/16/2020 | 7/22/2020 Europe / Turkey / Kars Province |
| EPI_ISL_495420 | 5/17/2020 | 7/22/2020 Europe / Turkey / Kars Province |
| EPI_ISL_495421 | 6/6/2020  | 7/22/2020 Europe / Turkey / Kars Province |
| EPI_ISL_495422 | 5/21/2020 | 7/22/2020 Europe / Turkey / Kars Province |
| EPI_ISL_495423 | 5/8/2020  | 7/22/2020 Europe / Turkey / Kars Province |
| EPI_ISL_495425 | 5/27/2020 | 7/22/2020 Europe / Turkey / Kars Province |
| EPI_ISL_495426 | 5/12/2020 | 7/22/2020 Europe / Turkey / Kars Province |
| EPI_ISL_495428 | 4/29/2020 | 7/22/2020 Europe / Turkey / Kars Province |
| EPI_ISL_495429 | 6/5/2020  | 7/22/2020 Europe / Turkey / Kars Province |
| EPI_ISL_495430 | 5/5/2020  | 7/22/2020 Europe / Turkey / Kars Province |
| EPI_ISL_495431 | 5/25/2020 | 7/22/2020 Europe / Turkey / Kars Province |
| EPI_ISL_495432 | 4/27/2020 | 7/22/2020 Europe / Turkey / Kars Province |
| EPI_ISL_495433 | 6/6/2020  | 7/22/2020 Europe / Turkey / Kars Province |
| EPI_ISL_495434 | 5/1/2020  | 7/22/2020 Europe / Turkey / Kars Province |
| EPI_ISL_495435 | 5/5/2020  | 7/22/2020 Europe / Turkey / Kars Province |
| EPI_ISL_495436 | 6/3/2020  | 7/22/2020 Europe / Turkey / Kars Province |
| EPI_ISL_495437 | 5/7/2020  | 7/22/2020 Europe / Turkey / Kars Province |
| EPI_ISL_495438 | 5/28/2020 | 7/22/2020 Europe / Turkey / Kars Province |
| EPI_ISL_495439 | 5/8/2020  | 7/22/2020 Europe / Turkey / Kars Province |
| EPI_ISL_495441 | 4/28/2020 | 7/22/2020 Europe / Turkey / Kars Province |
| EPI_ISL_495442 | 5/2/2020  | 7/22/2020 Europe / Turkey / Kars Province |
| EPI_ISL_495443 | 4/29/2020 | 7/22/2020 Europe / Turkey / Kars Province |
| EPI_ISL_495444 | 5/20/2020 | 7/22/2020 Europe / Turkey / Kars Province |
| EPI_ISL_495445 | 6/17/2020 | 7/22/2020 Europe / Turkey / Kars Province |
| EPI_ISL_495447 | 5/20/2020 | 7/22/2020 Europe / Turkey / Kars Province |
| EPI_ISL_495448 | 4/25/2020 | 7/22/2020 Europe / Turkey / Kars Province |
| EPI_ISL_495449 | 5/26/2020 | 7/22/2020 Europe / Turkey / Kars Province |
| EPI_ISL_495450 | 5/24/2020 | 7/22/2020 Europe / Turkey / Kars Province |
| EPI_ISL_495451 | 5/25/2020 | 7/22/2020 Europe / Turkey / Kars Province |
| EPI_ISL_495452 | 5/17/2020 | 7/22/2020 Europe / Turkey / Kars Province |
| EPI_ISL_495453 | 5/23/2020 | 7/22/2020 Europe / Turkey / Kars Province |
| EPI_ISL_495454 | 5/17/2020 | 7/22/2020 Europe / Turkey / Kars Province |
| EPI_ISL_495455 | 5/10/2020 | 7/22/2020 Europe / Turkey / Kars Province |
| EPI_ISL_495456 | 5/26/2020 | 7/22/2020 Europe / Turkey / Kars Province |
| EPI_ISL_495457 | 5/7/2020  | 7/22/2020 Europe / Turkey / Kars Province |
| EPI_ISL_510528 | 6/23/2020 | 7/22/2020 Asia / Bahrain / Manama         |



|                |           |                                                                    |
|----------------|-----------|--------------------------------------------------------------------|
| EPI_ISL_510529 | 3/16/2020 | 7/22/2020 Africa / Zambia / Lusaka                                 |
| EPI_ISL_510530 | 2020-04   | 7/22/2020 Europe / France / Provence-Alpes-Cote d'Azur / Marseille |
| EPI_ISL_930802 | 2020-01   | 7/22/2020 Asia / Hong Kong                                         |
| EPI_ISL_495459 | 1/24/2020 | 7/23/2020 Asia / China / Zhejiang / Lishui                         |
| EPI_ISL_495460 | 7/7/2020  | 7/23/2020 North America / USA / New Jersey / Burlington County     |
| EPI_ISL_495461 | 7/5/2020  | 7/23/2020 North America / USA / Wisconsin / Dane County            |
| EPI_ISL_495462 | 7/4/2020  | 7/23/2020 North America / USA / Wisconsin / Dane County            |
| EPI_ISL_495463 | 7/7/2020  | 7/23/2020 North America / USA / Wisconsin / Dane County            |
| EPI_ISL_495464 | 7/6/2020  | 7/23/2020 North America / USA / Wisconsin / Dane County            |
| EPI_ISL_495465 | 7/7/2020  | 7/23/2020 North America / USA / Wisconsin / Dane County            |
| EPI_ISL_495467 | 7/5/2020  | 7/23/2020 North America / USA / Wisconsin / Dane County            |
| EPI_ISL_495468 | 7/4/2020  | 7/23/2020 North America / USA / Wisconsin / Monroe County          |
| EPI_ISL_495470 | 7/5/2020  | 7/23/2020 North America / USA / Wisconsin / Dane County            |
| EPI_ISL_495471 | 7/6/2020  | 7/23/2020 North America / USA / Wisconsin / Dane County            |
| EPI_ISL_495472 | 7/3/2020  | 7/23/2020 North America / USA / Wisconsin / Dane County            |
| EPI_ISL_495473 | 7/6/2020  | 7/23/2020 North America / USA / Wisconsin / Dane County            |
| EPI_ISL_495474 | 7/4/2020  | 7/23/2020 North America / USA / Wisconsin / Dane County            |
| EPI_ISL_495475 | 7/7/2020  | 7/23/2020 North America / USA / Wisconsin / Dane County            |
| EPI_ISL_495476 | 7/6/2020  | 7/23/2020 North America / USA / Missouri / Saint Louis County      |
| EPI_ISL_495477 | 7/5/2020  | 7/23/2020 North America / USA / Wisconsin / Dane County            |
| EPI_ISL_495479 | 7/3/2020  | 7/23/2020 North America / USA / Wisconsin / Dane County            |
| EPI_ISL_495480 | 7/4/2020  | 7/23/2020 North America / USA / Wisconsin / Dane County            |
| EPI_ISL_495481 | 7/3/2020  | 7/23/2020 North America / USA / Wisconsin / Dane County            |
| EPI_ISL_495482 | 7/3/2020  | 7/23/2020 North America / USA / Wisconsin / Dane County            |
| EPI_ISL_495483 | 7/3/2020  | 7/23/2020 North America / USA / Wisconsin / Dane County            |
| EPI_ISL_495484 | 7/3/2020  | 7/23/2020 North America / USA / Wisconsin / Dane County            |
| EPI_ISL_495485 | 7/5/2020  | 7/23/2020 North America / USA / Wisconsin / Dane County            |
| EPI_ISL_495486 | 7/3/2020  | 7/23/2020 North America / USA / Wisconsin / Dane County            |
| EPI_ISL_495487 | 7/3/2020  | 7/23/2020 North America / USA / Wisconsin / Dane County            |
| EPI_ISL_495488 | 7/6/2020  | 7/23/2020 North America / USA / Wisconsin / Dane County            |
| EPI_ISL_495489 | 7/7/2020  | 7/23/2020 North America / USA / Wisconsin / Dane County            |
| EPI_ISL_495490 | 7/6/2020  | 7/23/2020 North America / USA / Wisconsin / Dane County            |
| EPI_ISL_495491 | 7/6/2020  | 7/23/2020 North America / USA / Wisconsin / Rock County            |
| EPI_ISL_495492 | 7/3/2020  | 7/23/2020 North America / USA / Wisconsin / Columbia County        |
| EPI_ISL_495493 | 7/4/2020  | 7/23/2020 North America / USA / Wisconsin / Milwaukee County       |
| EPI_ISL_495494 | 7/5/2020  | 7/23/2020 North America / USA / Wisconsin / Dane County            |
| EPI_ISL_495495 | 7/3/2020  | 7/23/2020 North America / USA / Wisconsin / Dane County            |
| EPI_ISL_495496 | 7/5/2020  | 7/23/2020 North America / USA / Wisconsin / Dane County            |
| EPI_ISL_495497 | 7/5/2020  | 7/23/2020 North America / USA / New York / Nassau County           |
| EPI_ISL_495498 | 7/5/2020  | 7/23/2020 North America / USA / Wisconsin / Dane County            |
| EPI_ISL_495499 | 7/4/2020  | 7/23/2020 North America / USA / Wisconsin / Dane County            |
| EPI_ISL_495500 | 7/5/2020  | 7/23/2020 North America / USA / Wisconsin / Dane County            |
| EPI_ISL_495501 | 7/3/2020  | 7/23/2020 North America / USA / Wisconsin / Dane County            |
| EPI_ISL_495502 | 7/6/2020  | 7/23/2020 North America / USA / Wisconsin / Dane County            |
| EPI_ISL_495504 | 7/5/2020  | 7/23/2020 North America / USA / Wisconsin / Dane County            |
| EPI_ISL_495505 | 7/4/2020  | 7/23/2020 North America / USA / Wisconsin / Dane County            |
| EPI_ISL_495506 | 7/3/2020  | 7/23/2020 North America / USA / Wisconsin / Dane County            |

|                |           |                                                                 |
|----------------|-----------|-----------------------------------------------------------------|
| EPI_ISL_495507 | 7/6/2020  | 7/23/2020 North America / USA / Wisconsin / Dane County         |
| EPI_ISL_495508 | 7/3/2020  | 7/23/2020 North America / USA / Illinois / Winnebago County     |
| EPI_ISL_495509 | 7/3/2020  | 7/23/2020 North America / USA / Wisconsin / Dane County         |
| EPI_ISL_495520 | 6/20/2020 | 7/23/2020 Africa / South Africa / KwaZulu-Natal / uMzinyathi    |
| EPI_ISL_495527 | 6/23/2020 | 7/23/2020 Africa / South Africa / KwaZulu-Natal / Harry Gwala   |
| EPI_ISL_495528 | 6/23/2020 | 7/23/2020 Africa / South Africa / KwaZulu-Natal / Amajuba       |
| EPI_ISL_495529 | 6/24/2020 | 7/23/2020 Africa / South Africa / KwaZulu-Natal / Amajuba       |
| EPI_ISL_495530 | 6/23/2020 | 7/23/2020 Africa / South Africa / KwaZulu-Natal / Harry Gwala   |
| EPI_ISL_495534 | 6/23/2020 | 7/23/2020 Africa / South Africa / KwaZulu-Natal / Amajuba       |
| EPI_ISL_495535 | 7/2/2020  | 7/23/2020 Africa / South Africa / KwaZulu-Natal / eThekwini     |
| EPI_ISL_495536 | 7/2/2020  | 7/23/2020 Africa / South Africa / KwaZulu-Natal / eThekwini     |
| EPI_ISL_495537 | 7/2/2020  | 7/23/2020 Africa / South Africa / KwaZulu-Natal / eThekwini     |
| EPI_ISL_495538 | 7/2/2020  | 7/23/2020 Africa / South Africa / KwaZulu-Natal / eThekwini     |
| EPI_ISL_495539 | 7/2/2020  | 7/23/2020 Africa / South Africa / KwaZulu-Natal / eThekwini     |
| EPI_ISL_495540 | 7/2/2020  | 7/23/2020 Africa / South Africa / KwaZulu-Natal / eThekwini     |
| EPI_ISL_495541 | 7/2/2020  | 7/23/2020 Africa / South Africa / KwaZulu-Natal / eThekwini     |
| EPI_ISL_495542 | 7/2/2020  | 7/23/2020 Africa / South Africa / KwaZulu-Natal / eThekwini     |
| EPI_ISL_495543 | 7/1/2020  | 7/23/2020 Africa / South Africa / KwaZulu-Natal / iLembe        |
| EPI_ISL_495544 | 7/1/2020  | 7/23/2020 Africa / South Africa / KwaZulu-Natal / uThungulu     |
| EPI_ISL_495546 | 7/1/2020  | 7/23/2020 Africa / South Africa / KwaZulu-Natal / uMgungundlovu |
| EPI_ISL_495549 | 7/2/2020  | 7/23/2020 Africa / South Africa / KwaZulu-Natal / eThekwini     |
| EPI_ISL_495550 | 7/2/2020  | 7/23/2020 Africa / South Africa / KwaZulu-Natal / eThekwini     |
| EPI_ISL_495557 | 7/6/2020  | 7/23/2020 Africa / South Africa / KwaZulu-Natal / Ugu           |
| EPI_ISL_495558 | 7/6/2020  | 7/23/2020 Africa / South Africa / KwaZulu-Natal / Ugu           |
| EPI_ISL_495559 | 7/5/2020  | 7/23/2020 Africa / South Africa / KwaZulu-Natal / uMgungundlovu |
| EPI_ISL_495561 | 7/3/2020  | 7/23/2020 Africa / South Africa / KwaZulu-Natal / uMkhanyakude  |
| EPI_ISL_495562 | 7/3/2020  | 7/23/2020 Africa / South Africa / KwaZulu-Natal / uMkhanyakude  |
| EPI_ISL_495563 | 4/13/2020 | 7/23/2020 North America / USA / Michigan                        |
| EPI_ISL_495564 | 4/1/2020  | 7/23/2020 North America / USA / Michigan                        |
| EPI_ISL_495566 | 5/5/2020  | 7/23/2020 North America / USA / Michigan                        |
| EPI_ISL_495567 | 4/27/2020 | 7/23/2020 North America / USA / Michigan                        |
| EPI_ISL_495571 | 4/11/2020 | 7/23/2020 North America / USA / Michigan                        |
| EPI_ISL_495572 | 4/14/2020 | 7/23/2020 North America / USA / Michigan                        |
| EPI_ISL_495574 | 4/18/2020 | 7/23/2020 North America / USA / Michigan                        |
| EPI_ISL_495576 | 4/16/2020 | 7/23/2020 North America / USA / Michigan                        |
| EPI_ISL_495577 | 4/17/2020 | 7/23/2020 North America / USA / Michigan                        |
| EPI_ISL_495578 | 4/18/2020 | 7/23/2020 North America / USA / Michigan                        |
| EPI_ISL_495579 | 4/14/2020 | 7/23/2020 North America / USA / Michigan                        |
| EPI_ISL_495580 | 4/15/2020 | 7/23/2020 North America / USA / Michigan                        |
| EPI_ISL_495581 | 4/15/2020 | 7/23/2020 North America / USA / Michigan                        |
| EPI_ISL_495582 | 4/15/2020 | 7/23/2020 North America / USA / Michigan                        |
| EPI_ISL_495583 | 4/18/2020 | 7/23/2020 North America / USA / Michigan                        |
| EPI_ISL_495584 | 4/21/2020 | 7/23/2020 North America / USA / Michigan                        |
| EPI_ISL_495585 | 4/20/2020 | 7/23/2020 North America / USA / Michigan                        |
| EPI_ISL_495586 | 4/20/2020 | 7/23/2020 North America / USA / Michigan                        |
| EPI_ISL_495587 | 4/20/2020 | 7/23/2020 North America / USA / Michigan                        |
| EPI_ISL_495588 | 4/17/2020 | 7/23/2020 North America / USA / Michigan                        |

|                |           |           |                                                      |
|----------------|-----------|-----------|------------------------------------------------------|
| EPI_ISL_495589 | 4/20/2020 | 7/23/2020 | North America / USA / Michigan                       |
| EPI_ISL_495590 | 4/21/2020 | 7/23/2020 | North America / USA / Michigan                       |
| EPI_ISL_495591 | 4/25/2020 | 7/23/2020 | North America / USA / Michigan                       |
| EPI_ISL_495592 | 5/5/2020  | 7/23/2020 | North America / USA / Michigan                       |
| EPI_ISL_495593 | 4/6/2020  | 7/23/2020 | North America / USA / Michigan                       |
| EPI_ISL_495594 | 3/30/2020 | 7/23/2020 | North America / USA / Michigan                       |
| EPI_ISL_495595 | 3/22/2020 | 7/23/2020 | North America / USA / Michigan                       |
| EPI_ISL_495596 | 3/30/2020 | 7/23/2020 | North America / USA / Michigan                       |
| EPI_ISL_495597 | 3/30/2020 | 7/23/2020 | North America / USA / Minnesota                      |
| EPI_ISL_495598 | 4/3/2020  | 7/23/2020 | North America / USA / Minnesota                      |
| EPI_ISL_495599 | 4/7/2020  | 7/23/2020 | North America / USA / Minnesota                      |
| EPI_ISL_495600 | 4/15/2020 | 7/23/2020 | North America / USA / Minnesota                      |
| EPI_ISL_495601 | 4/4/2020  | 7/23/2020 | North America / USA / Minnesota                      |
| EPI_ISL_495602 | 4/9/2020  | 7/23/2020 | North America / USA / Minnesota                      |
| EPI_ISL_495603 | 4/6/2020  | 7/23/2020 | North America / USA / Minnesota                      |
| EPI_ISL_495604 | 4/8/2020  | 7/23/2020 | North America / USA / Minnesota                      |
| EPI_ISL_495605 | 4/18/2020 | 7/23/2020 | North America / USA / Minnesota                      |
| EPI_ISL_495606 | 4/6/2020  | 7/23/2020 | North America / USA / Minnesota                      |
| EPI_ISL_495607 | 4/4/2020  | 7/23/2020 | North America / USA / Minnesota                      |
| EPI_ISL_495608 | 4/6/2020  | 7/23/2020 | North America / USA / Minnesota                      |
| EPI_ISL_495609 | 4/18/2020 | 7/23/2020 | North America / USA / Minnesota                      |
| EPI_ISL_495610 | 3/15/2020 | 7/23/2020 | North America / USA / Minnesota                      |
| EPI_ISL_495611 | 3/23/2020 | 7/23/2020 | North America / USA / Minnesota                      |
| EPI_ISL_495612 | 3/25/2020 | 7/23/2020 | North America / USA / Minnesota                      |
| EPI_ISL_495613 | 3/24/2020 | 7/23/2020 | North America / USA / Minnesota                      |
| EPI_ISL_495614 | 3/24/2020 | 7/23/2020 | North America / USA / Minnesota                      |
| EPI_ISL_495615 | 3/25/2020 | 7/23/2020 | North America / USA / Minnesota                      |
| EPI_ISL_495616 | 3/24/2020 | 7/23/2020 | North America / USA / Minnesota                      |
| EPI_ISL_495617 | 3/25/2020 | 7/23/2020 | North America / USA / Minnesota                      |
| EPI_ISL_495618 | 3/25/2020 | 7/23/2020 | North America / USA / Minnesota                      |
| EPI_ISL_495619 | 3/24/2020 | 7/23/2020 | North America / USA / Minnesota                      |
| EPI_ISL_495620 | 3/25/2020 | 7/23/2020 | North America / USA / Minnesota                      |
| EPI_ISL_495621 | 3/25/2020 | 7/23/2020 | North America / USA / Minnesota                      |
| EPI_ISL_495622 | 3/25/2020 | 7/23/2020 | North America / USA / Minnesota                      |
| EPI_ISL_495623 | 3/25/2020 | 7/23/2020 | North America / USA / Minnesota                      |
| EPI_ISL_495624 | 3/26/2020 | 7/23/2020 | North America / USA / Minnesota                      |
| EPI_ISL_495625 | 3/25/2020 | 7/23/2020 | North America / USA / Minnesota                      |
| EPI_ISL_495626 | 3/25/2020 | 7/23/2020 | North America / USA / Minnesota                      |
| EPI_ISL_495627 | 3/25/2020 | 7/23/2020 | North America / USA / Minnesota                      |
| EPI_ISL_495628 | 3/26/2020 | 7/23/2020 | North America / USA / Minnesota                      |
| EPI_ISL_495634 | 5/11/2020 | 7/23/2020 | Africa / Democratic Republic of the Congo / Kinshasa |
| EPI_ISL_495636 | 5/11/2020 | 7/23/2020 | Africa / Democratic Republic of the Congo / Kinshasa |
| EPI_ISL_495637 | 5/11/2020 | 7/23/2020 | Africa / Democratic Republic of the Congo / Kinshasa |
| EPI_ISL_495641 | 5/15/2020 | 7/23/2020 | Africa / Democratic Republic of the Congo / Kinshasa |
| EPI_ISL_495642 | 5/8/2020  | 7/23/2020 | North America / USA / Washington / Yakima County     |
| EPI_ISL_495643 | 5/11/2020 | 7/23/2020 | North America / USA / Washington / Franklin County   |
| EPI_ISL_495644 | 5/7/2020  | 7/23/2020 | North America / USA / Washington / Yakima County     |































|                |           |                                                                |
|----------------|-----------|----------------------------------------------------------------|
| EPI_ISL_496322 | 5/28/2020 | 7/24/2020 North America / USA / Washington / Whatcom County    |
| EPI_ISL_496323 | 5/28/2020 | 7/24/2020 North America / USA / Washington / Yakima County     |
| EPI_ISL_496324 | 5/28/2020 | 7/24/2020 North America / USA / Washington / Yakima County     |
| EPI_ISL_496325 | 5/28/2020 | 7/24/2020 North America / USA / Washington / Yakima County     |
| EPI_ISL_496326 | 5/28/2020 | 7/24/2020 North America / USA / Washington / Yakima County     |
| EPI_ISL_496327 | 5/28/2020 | 7/24/2020 North America / USA / Washington / Yakima County     |
| EPI_ISL_496328 | 5/28/2020 | 7/24/2020 North America / USA / Washington / Yakima County     |
| EPI_ISL_496329 | 5/29/2020 | 7/24/2020 North America / USA / Washington / Yakima County     |
| EPI_ISL_496330 | 5/29/2020 | 7/24/2020 North America / USA / Washington / Yakima County     |
| EPI_ISL_496331 | 5/29/2020 | 7/24/2020 North America / USA / Washington / Whatcom County    |
| EPI_ISL_496332 | 5/29/2020 | 7/24/2020 North America / USA / Washington / Yakima County     |
| EPI_ISL_496333 | 5/29/2020 | 7/24/2020 North America / USA / Washington / Yakima County     |
| EPI_ISL_496334 | 5/29/2020 | 7/24/2020 North America / USA / Washington / Yakima County     |
| EPI_ISL_496335 | 5/28/2020 | 7/24/2020 North America / USA / Washington / Yakima County     |
| EPI_ISL_496336 | 5/29/2020 | 7/24/2020 North America / USA / Washington / Yakima County     |
| EPI_ISL_496337 | 5/29/2020 | 7/24/2020 North America / USA / Washington / Yakima County     |
| EPI_ISL_496338 | 5/29/2020 | 7/24/2020 North America / USA / Washington / Yakima County     |
| EPI_ISL_496350 | 4/28/2020 | 7/24/2020 North America / Mexico / Baja California / Tijuana   |
| EPI_ISL_496369 | 4/20/2020 | 7/24/2020 North America / Mexico / Baja California / Tijuana   |
| EPI_ISL_496374 | 4/29/2020 | 7/24/2020 North America / Mexico / Baja California / Tijuana   |
| EPI_ISL_496482 | 3/17/2020 | 7/24/2020 Europe / Italy / Veneto / Verona                     |
| EPI_ISL_496492 | 5/3/2020  | 7/24/2020 Africa / Democratic Republic of the Congo / Kinshasa |
| EPI_ISL_496497 | 5/7/2020  | 7/24/2020 Africa / Democratic Republic of the Congo / Kinshasa |
| EPI_ISL_496498 | 5/7/2020  | 7/24/2020 Africa / Democratic Republic of the Congo / Kinshasa |
| EPI_ISL_496499 | 5/7/2020  | 7/24/2020 Africa / Democratic Republic of the Congo / Kinshasa |
| EPI_ISL_496504 | 5/11/2020 | 7/24/2020 Africa / Democratic Republic of the Congo / Kinshasa |
| EPI_ISL_496506 | 4/29/2020 | 7/24/2020 Africa / Democratic Republic of the Congo / Kinshasa |
| EPI_ISL_496509 | 4/29/2020 | 7/24/2020 Africa / Democratic Republic of the Congo / Kinshasa |
| EPI_ISL_496512 | 5/3/2020  | 7/24/2020 Africa / Democratic Republic of the Congo / Kinshasa |
| EPI_ISL_496513 | 5/4/2020  | 7/24/2020 Africa / Democratic Republic of the Congo / Kinshasa |
| EPI_ISL_496514 | 5/8/2020  | 7/24/2020 Africa / Democratic Republic of the Congo / Kinshasa |
| EPI_ISL_496518 | 5/21/2020 | 7/24/2020 Asia / India / Maharashtra                           |
| EPI_ISL_496519 | 5/21/2020 | 7/24/2020 Asia / India / Maharashtra                           |
| EPI_ISL_496520 | 5/23/2020 | 7/24/2020 Asia / India / Maharashtra                           |
| EPI_ISL_496521 | 4/19/2020 | 7/24/2020 Asia / India / Maharashtra                           |
| EPI_ISL_496522 | 4/20/2020 | 7/24/2020 Asia / India / Maharashtra                           |
| EPI_ISL_496523 | 5/26/2020 | 7/24/2020 Asia / India / Maharashtra                           |
| EPI_ISL_496524 | 5/15/2020 | 7/24/2020 Asia / India / Maharashtra                           |
| EPI_ISL_496525 | 5/20/2020 | 7/24/2020 Asia / India / Maharashtra                           |
| EPI_ISL_496526 | 5/21/2020 | 7/24/2020 Asia / India / Maharashtra                           |
| EPI_ISL_496527 | 4/22/2020 | 7/24/2020 Asia / India / Maharashtra                           |
| EPI_ISL_496528 | 5/19/2020 | 7/24/2020 Asia / India / Maharashtra                           |
| EPI_ISL_496529 | 5/23/2020 | 7/24/2020 Asia / India / Maharashtra                           |
| EPI_ISL_496530 | 4/13/2020 | 7/24/2020 Asia / India / Maharashtra                           |
| EPI_ISL_496531 | 5/21/2020 | 7/24/2020 Asia / India / Maharashtra                           |
| EPI_ISL_496532 | 5/22/2020 | 7/24/2020 Asia / India / Maharashtra                           |
| EPI_ISL_496533 | 5/26/2020 | 7/24/2020 Asia / India / Maharashtra                           |







































|                |           |           |                                                  |
|----------------|-----------|-----------|--------------------------------------------------|
| EPI_ISL_497712 | 6/10/2020 | 7/24/2020 | North America / USA / Washington / Yakima County |
| EPI_ISL_497713 | 6/10/2020 | 7/24/2020 | North America / USA / Washington / Yakima County |
| EPI_ISL_497714 | 6/10/2020 | 7/24/2020 | North America / USA / Washington / Yakima County |
| EPI_ISL_497715 | 6/10/2020 | 7/24/2020 | North America / USA / Washington / Yakima County |
| EPI_ISL_497716 | 6/10/2020 | 7/24/2020 | North America / USA / Washington / Yakima County |
| EPI_ISL_497717 | 6/9/2020  | 7/24/2020 | North America / USA / Washington / Pierce County |
| EPI_ISL_497718 | 6/9/2020  | 7/24/2020 | North America / USA / Washington / Pierce County |
| EPI_ISL_497719 | 6/9/2020  | 7/24/2020 | North America / USA / Washington / Pierce County |
| EPI_ISL_497720 | 6/9/2020  | 7/24/2020 | North America / USA / Washington / Pierce County |
| EPI_ISL_497721 | 6/10/2020 | 7/24/2020 | North America / USA / Washington / Yakima County |
| EPI_ISL_497722 | 6/10/2020 | 7/24/2020 | North America / USA / Washington / Yakima County |
| EPI_ISL_497723 | 6/10/2020 | 7/24/2020 | North America / USA / Washington / Yakima County |
| EPI_ISL_497724 | 6/10/2020 | 7/24/2020 | North America / USA / Washington / Yakima County |
| EPI_ISL_497725 | 6/10/2020 | 7/24/2020 | North America / USA / Washington / Yakima County |
| EPI_ISL_497726 | 6/10/2020 | 7/24/2020 | North America / USA / Washington / Yakima County |
| EPI_ISL_529171 | 3/14/2020 | 7/24/2020 | North America / USA / South Carolina             |
| EPI_ISL_529173 | 3/20/2020 | 7/24/2020 | North America / USA / South Carolina             |
| EPI_ISL_529174 | 3/20/2020 | 7/24/2020 | North America / USA / South Carolina             |
| EPI_ISL_529175 | 3/30/2020 | 7/24/2020 | North America / USA / South Carolina             |
| EPI_ISL_529176 | 4/1/2020  | 7/24/2020 | North America / USA / South Carolina             |
| EPI_ISL_529178 | 4/23/2020 | 7/24/2020 | North America / USA / South Carolina             |
| EPI_ISL_529180 | 5/1/2020  | 7/24/2020 | North America / USA / South Carolina             |
| EPI_ISL_529181 | 5/1/2020  | 7/24/2020 | North America / USA / South Carolina             |
| EPI_ISL_529182 | 5/1/2020  | 7/24/2020 | North America / USA / South Carolina             |
| EPI_ISL_529183 | 5/4/2020  | 7/24/2020 | North America / USA / South Carolina             |
| EPI_ISL_529184 | 5/4/2020  | 7/24/2020 | North America / USA / South Carolina             |
| EPI_ISL_529185 | 5/5/2020  | 7/24/2020 | North America / USA / South Carolina             |
| EPI_ISL_529186 | 5/5/2020  | 7/24/2020 | North America / USA / South Carolina             |
| EPI_ISL_529187 | 5/6/2020  | 7/24/2020 | North America / USA / South Carolina             |
| EPI_ISL_529188 | 5/6/2020  | 7/24/2020 | North America / USA / South Carolina             |
| EPI_ISL_529190 | 5/18/2020 | 7/24/2020 | North America / USA / South Carolina             |
| EPI_ISL_529191 | 5/18/2020 | 7/24/2020 | North America / USA / South Carolina             |
| EPI_ISL_529192 | 5/18/2020 | 7/24/2020 | North America / USA / South Carolina             |
| EPI_ISL_529193 | 5/18/2020 | 7/24/2020 | North America / USA / South Carolina             |
| EPI_ISL_529194 | 5/18/2020 | 7/24/2020 | North America / USA / South Carolina             |
| EPI_ISL_529196 | 5/29/2020 | 7/24/2020 | North America / USA / South Carolina             |
| EPI_ISL_529197 | 5/28/2020 | 7/24/2020 | North America / USA / South Carolina             |
| EPI_ISL_529198 | 5/28/2020 | 7/24/2020 | North America / USA / South Carolina             |
| EPI_ISL_497736 | 3/18/2020 | 7/25/2020 | South America / Colombia / Risaralda / Pereira   |
| EPI_ISL_497738 | 3/22/2020 | 7/25/2020 | South America / Colombia / Bolivar / Cartagena   |
| EPI_ISL_497744 | 3/23/2020 | 7/25/2020 | South America / Colombia / Quindio / Armenia     |
| EPI_ISL_497745 | 3/28/2020 | 7/25/2020 | South America / Colombia / Risaralda / Pereira   |
| EPI_ISL_497758 | 2020      | 7/25/2020 | Asia / India                                     |
| EPI_ISL_497760 | 2020      | 7/25/2020 | Asia / India                                     |
| EPI_ISL_497763 | 2020      | 7/25/2020 | Asia / India                                     |
| EPI_ISL_497765 | 2020      | 7/25/2020 | Asia / India                                     |
| EPI_ISL_497766 | 2020      | 7/25/2020 | Asia / India                                     |

|                |           |                            |
|----------------|-----------|----------------------------|
| EPI_ISL_497769 | 3/9/2020  | 7/25/2020 Asia / Hong Kong |
| EPI_ISL_497770 | 6/22/2020 | 7/25/2020 Asia / Hong Kong |
| EPI_ISL_497771 | 1/29/2020 | 7/25/2020 Asia / Hong Kong |
| EPI_ISL_497773 | 3/18/2020 | 7/25/2020 Asia / Hong Kong |
| EPI_ISL_497775 | 3/20/2020 | 7/25/2020 Asia / Hong Kong |
| EPI_ISL_497776 | 7/10/2020 | 7/25/2020 Asia / Hong Kong |
| EPI_ISL_497777 | 7/10/2020 | 7/25/2020 Asia / Hong Kong |
| EPI_ISL_497778 | 7/12/2020 | 7/25/2020 Asia / Hong Kong |
| EPI_ISL_497780 | 7/10/2020 | 7/25/2020 Asia / Hong Kong |
| EPI_ISL_497782 | 7/7/2020  | 7/25/2020 Asia / Hong Kong |
| EPI_ISL_497783 | 2/3/2020  | 7/25/2020 Asia / Hong Kong |
| EPI_ISL_497784 | 2/24/2020 | 7/25/2020 Asia / Hong Kong |
| EPI_ISL_497785 | 7/14/2020 | 7/25/2020 Asia / Hong Kong |
| EPI_ISL_497786 | 3/19/2020 | 7/25/2020 Asia / Hong Kong |
| EPI_ISL_497790 | 7/12/2020 | 7/25/2020 Asia / Hong Kong |
| EPI_ISL_497791 | 3/6/2020  | 7/25/2020 Asia / Hong Kong |
| EPI_ISL_497793 | 7/10/2020 | 7/25/2020 Asia / Hong Kong |
| EPI_ISL_497794 | 7/12/2020 | 7/25/2020 Asia / Hong Kong |
| EPI_ISL_497795 | 7/9/2020  | 7/25/2020 Asia / Hong Kong |
| EPI_ISL_497796 | 3/15/2020 | 7/25/2020 Asia / Hong Kong |
| EPI_ISL_497797 | 1/29/2020 | 7/25/2020 Asia / Hong Kong |
| EPI_ISL_497798 | 3/21/2020 | 7/25/2020 Asia / Hong Kong |
| EPI_ISL_497799 | 3/17/2020 | 7/25/2020 Asia / Hong Kong |
| EPI_ISL_497800 | 7/11/2020 | 7/25/2020 Asia / Hong Kong |
| EPI_ISL_497801 | 7/14/2020 | 7/25/2020 Asia / Hong Kong |
| EPI_ISL_497803 | 7/6/2020  | 7/25/2020 Asia / Hong Kong |
| EPI_ISL_497806 | 3/29/2020 | 7/25/2020 Asia / Hong Kong |
| EPI_ISL_497807 | 7/10/2020 | 7/25/2020 Asia / Hong Kong |
| EPI_ISL_497808 | 3/22/2020 | 7/25/2020 Asia / Hong Kong |
| EPI_ISL_497809 | 7/1/2020  | 7/25/2020 Asia / Hong Kong |
| EPI_ISL_497810 | 3/18/2020 | 7/25/2020 Asia / Hong Kong |
| EPI_ISL_497811 | 3/30/2020 | 7/25/2020 Asia / Hong Kong |
| EPI_ISL_497812 | 2/15/2020 | 7/25/2020 Asia / Hong Kong |
| EPI_ISL_497813 | 3/21/2020 | 7/25/2020 Asia / Hong Kong |
| EPI_ISL_497814 | 7/9/2020  | 7/25/2020 Asia / Hong Kong |
| EPI_ISL_497815 | 7/12/2020 | 7/25/2020 Asia / Hong Kong |
| EPI_ISL_497816 | 7/10/2020 | 7/25/2020 Asia / Hong Kong |
| EPI_ISL_497817 | 7/8/2020  | 7/25/2020 Asia / Hong Kong |
| EPI_ISL_497818 | 4/1/2020  | 7/25/2020 Asia / Hong Kong |
| EPI_ISL_497819 | 3/27/2020 | 7/25/2020 Asia / Hong Kong |
| EPI_ISL_497820 | 3/18/2020 | 7/25/2020 Asia / Hong Kong |
| EPI_ISL_497821 | 3/30/2020 | 7/25/2020 Asia / Hong Kong |
| EPI_ISL_497822 | 7/10/2020 | 7/25/2020 Asia / Hong Kong |
| EPI_ISL_497823 | 4/7/2020  | 7/25/2020 Asia / Hong Kong |
| EPI_ISL_497824 | 3/24/2020 | 7/25/2020 Asia / Hong Kong |
| EPI_ISL_497825 | 7/10/2020 | 7/25/2020 Asia / Hong Kong |
| EPI_ISL_497826 | 3/21/2020 | 7/25/2020 Asia / Hong Kong |

|                |           |                                   |
|----------------|-----------|-----------------------------------|
| EPI_ISL_497827 | 1/29/2020 | 7/25/2020 Asia / Hong Kong        |
| EPI_ISL_497829 | 7/4/2020  | 7/25/2020 Asia / Hong Kong        |
| EPI_ISL_497830 | 7/8/2020  | 7/25/2020 Asia / Hong Kong        |
| EPI_ISL_497831 | 3/13/2020 | 7/25/2020 Asia / Hong Kong        |
| EPI_ISL_497832 | 3/19/2020 | 7/25/2020 Asia / Hong Kong        |
| EPI_ISL_497833 | 3/21/2020 | 7/25/2020 Asia / Hong Kong        |
| EPI_ISL_497835 | 7/8/2020  | 7/25/2020 Asia / Hong Kong        |
| EPI_ISL_497836 | 7/10/2020 | 7/25/2020 Asia / Hong Kong        |
| EPI_ISL_497840 | 3/18/2020 | 7/25/2020 Asia / Hong Kong        |
| EPI_ISL_497841 | 7/7/2020  | 7/25/2020 Asia / Hong Kong        |
| EPI_ISL_497844 | 7/3/2020  | 7/25/2020 Asia / Hong Kong        |
| EPI_ISL_497845 | 3/16/2020 | 7/25/2020 Asia / Hong Kong        |
| EPI_ISL_497846 | 3/20/2020 | 7/25/2020 Asia / Hong Kong        |
| EPI_ISL_497847 | 3/22/2020 | 7/25/2020 Asia / Hong Kong        |
| EPI_ISL_497848 | 2/15/2020 | 7/25/2020 Asia / Hong Kong        |
| EPI_ISL_497849 | 7/12/2020 | 7/25/2020 Asia / Hong Kong        |
| EPI_ISL_497850 | 3/15/2020 | 7/25/2020 Asia / Hong Kong        |
| EPI_ISL_497851 | 7/7/2020  | 7/25/2020 Asia / Hong Kong        |
| EPI_ISL_497853 | 7/12/2020 | 7/25/2020 Asia / Hong Kong        |
| EPI_ISL_497854 | 7/7/2020  | 7/25/2020 Asia / Hong Kong        |
| EPI_ISL_497855 | 7/7/2020  | 7/25/2020 Asia / Hong Kong        |
| EPI_ISL_497856 | 3/9/2020  | 7/25/2020 Asia / Hong Kong        |
| EPI_ISL_497857 | 7/11/2020 | 7/25/2020 Asia / Hong Kong        |
| EPI_ISL_497860 | 1/25/2020 | 7/25/2020 Asia / Hong Kong        |
| EPI_ISL_497861 | 7/8/2020  | 7/25/2020 Asia / Hong Kong        |
| EPI_ISL_497862 | 7/9/2020  | 7/25/2020 Asia / Hong Kong        |
| EPI_ISL_497863 | 7/10/2020 | 7/25/2020 Asia / Hong Kong        |
| EPI_ISL_497864 | 3/18/2020 | 7/25/2020 Asia / Hong Kong        |
| EPI_ISL_497865 | 4/14/2020 | 7/25/2020 Asia / Hong Kong        |
| EPI_ISL_497866 | 7/9/2020  | 7/25/2020 Asia / Hong Kong        |
| EPI_ISL_497867 | 7/12/2020 | 7/25/2020 Asia / Hong Kong        |
| EPI_ISL_497868 | 7/11/2020 | 7/25/2020 Asia / Hong Kong        |
| EPI_ISL_497869 | 7/14/2020 | 7/25/2020 Asia / Hong Kong        |
| EPI_ISL_497870 | 3/18/2020 | 7/25/2020 Asia / Hong Kong        |
| EPI_ISL_510532 | 6/2/2020  | 7/25/2020 Africa / Egypt / Fayoum |
| EPI_ISL_497950 | 7/15/2020 | 7/26/2020 Asia / China / Zhejiang |
| EPI_ISL_497951 | 2/20/2020 | 7/26/2020 Asia / South Korea      |
| EPI_ISL_497953 | 2/20/2020 | 7/26/2020 Asia / South Korea      |
| EPI_ISL_497954 | 2/20/2020 | 7/26/2020 Asia / South Korea      |
| EPI_ISL_497955 | 2/20/2020 | 7/26/2020 Asia / South Korea      |
| EPI_ISL_497956 | 2/20/2020 | 7/26/2020 Asia / South Korea      |
| EPI_ISL_497957 | 2/20/2020 | 7/26/2020 Asia / South Korea      |
| EPI_ISL_497958 | 2/20/2020 | 7/26/2020 Asia / South Korea      |
| EPI_ISL_497959 | 2/20/2020 | 7/26/2020 Asia / South Korea      |
| EPI_ISL_497960 | 2/19/2020 | 7/26/2020 Asia / South Korea      |
| EPI_ISL_497961 | 2/17/2020 | 7/26/2020 Asia / South Korea      |
| EPI_ISL_497962 | 1/30/2020 | 7/26/2020 Asia / South Korea      |

|                |           |                              |
|----------------|-----------|------------------------------|
| EPI_ISL_497963 | 1/31/2020 | 7/26/2020 Asia / South Korea |
| EPI_ISL_497964 | 2/6/2020  | 7/26/2020 Asia / South Korea |
| EPI_ISL_497965 | 2/6/2020  | 7/26/2020 Asia / South Korea |
| EPI_ISL_497966 | 2/9/2020  | 7/26/2020 Asia / South Korea |
| EPI_ISL_497967 | 2/20/2020 | 7/26/2020 Asia / South Korea |
| EPI_ISL_497968 | 2/19/2020 | 7/26/2020 Asia / South Korea |
| EPI_ISL_497969 | 2/19/2020 | 7/26/2020 Asia / South Korea |
| EPI_ISL_497970 | 2/21/2020 | 7/26/2020 Asia / South Korea |
| EPI_ISL_497971 | 2/20/2020 | 7/26/2020 Asia / South Korea |
| EPI_ISL_497972 | 2/20/2020 | 7/26/2020 Asia / South Korea |
| EPI_ISL_497973 | 2/20/2020 | 7/26/2020 Asia / South Korea |
| EPI_ISL_497974 | 2/20/2020 | 7/26/2020 Asia / South Korea |
| EPI_ISL_497975 | 2/21/2020 | 7/26/2020 Asia / South Korea |
| EPI_ISL_497976 | 2/21/2020 | 7/26/2020 Asia / South Korea |
| EPI_ISL_497977 | 2/21/2020 | 7/26/2020 Asia / South Korea |
| EPI_ISL_497978 | 2/21/2020 | 7/26/2020 Asia / South Korea |
| EPI_ISL_497979 | 2/21/2020 | 7/26/2020 Asia / South Korea |
| EPI_ISL_497980 | 2/21/2020 | 7/26/2020 Asia / South Korea |
| EPI_ISL_497981 | 2/21/2020 | 7/26/2020 Asia / South Korea |
| EPI_ISL_497982 | 2/21/2020 | 7/26/2020 Asia / South Korea |
| EPI_ISL_497983 | 2/22/2020 | 7/26/2020 Asia / South Korea |
| EPI_ISL_497984 | 2/21/2020 | 7/26/2020 Asia / South Korea |
| EPI_ISL_497985 | 2/22/2020 | 7/26/2020 Asia / South Korea |
| EPI_ISL_497986 | 2/24/2020 | 7/26/2020 Asia / South Korea |
| EPI_ISL_497987 | 2/22/2020 | 7/26/2020 Asia / South Korea |
| EPI_ISL_497988 | 2/23/2020 | 7/26/2020 Asia / South Korea |
| EPI_ISL_497989 | 2/22/2020 | 7/26/2020 Asia / South Korea |
| EPI_ISL_497990 | 2/24/2020 | 7/26/2020 Asia / South Korea |
| EPI_ISL_497991 | 2/21/2020 | 7/26/2020 Asia / South Korea |
| EPI_ISL_497992 | 2/21/2020 | 7/26/2020 Asia / South Korea |
| EPI_ISL_497993 | 2/21/2020 | 7/26/2020 Asia / South Korea |
| EPI_ISL_497994 | 2/23/2020 | 7/26/2020 Asia / South Korea |
| EPI_ISL_497995 | 2/26/2020 | 7/26/2020 Asia / South Korea |
| EPI_ISL_497996 | 2/27/2020 | 7/26/2020 Asia / South Korea |
| EPI_ISL_497997 | 3/1/2020  | 7/26/2020 Asia / South Korea |
| EPI_ISL_497998 | 2/27/2020 | 7/26/2020 Asia / South Korea |
| EPI_ISL_497999 | 3/4/2020  | 7/26/2020 Asia / South Korea |
| EPI_ISL_498000 | 3/4/2020  | 7/26/2020 Asia / South Korea |
| EPI_ISL_498001 | 3/4/2020  | 7/26/2020 Asia / South Korea |
| EPI_ISL_498002 | 3/5/2020  | 7/26/2020 Asia / South Korea |
| EPI_ISL_498003 | 3/4/2020  | 7/26/2020 Asia / South Korea |
| EPI_ISL_498004 | 3/9/2020  | 7/26/2020 Asia / South Korea |
| EPI_ISL_498005 | 3/9/2020  | 7/26/2020 Asia / South Korea |
| EPI_ISL_498006 | 3/10/2020 | 7/26/2020 Asia / South Korea |
| EPI_ISL_498007 | 3/10/2020 | 7/26/2020 Asia / South Korea |
| EPI_ISL_498008 | 3/10/2020 | 7/26/2020 Asia / South Korea |
| EPI_ISL_498009 | 3/12/2020 | 7/26/2020 Asia / South Korea |

|                |           |                                                                |
|----------------|-----------|----------------------------------------------------------------|
| EPI_ISL_498010 | 3/11/2020 | 7/26/2020 Asia / South Korea                                   |
| EPI_ISL_498011 | 3/12/2020 | 7/26/2020 Asia / South Korea                                   |
| EPI_ISL_498012 | 3/12/2020 | 7/26/2020 Asia / South Korea                                   |
| EPI_ISL_498013 | 3/11/2020 | 7/26/2020 Asia / South Korea                                   |
| EPI_ISL_498014 | 3/12/2020 | 7/26/2020 Asia / South Korea                                   |
| EPI_ISL_498015 | 3/12/2020 | 7/26/2020 Asia / South Korea                                   |
| EPI_ISL_498016 | 3/12/2020 | 7/26/2020 Asia / South Korea                                   |
| EPI_ISL_498017 | 3/14/2020 | 7/26/2020 Asia / South Korea                                   |
| EPI_ISL_498018 | 3/15/2020 | 7/26/2020 Asia / South Korea                                   |
| EPI_ISL_498019 | 3/15/2020 | 7/26/2020 Asia / South Korea                                   |
| EPI_ISL_498020 | 3/15/2020 | 7/26/2020 Asia / South Korea                                   |
| EPI_ISL_498021 | 3/15/2020 | 7/26/2020 Asia / South Korea                                   |
| EPI_ISL_498022 | 3/15/2020 | 7/26/2020 Asia / South Korea                                   |
| EPI_ISL_498023 | 3/15/2020 | 7/26/2020 Asia / South Korea                                   |
| EPI_ISL_498024 | 3/15/2020 | 7/26/2020 Asia / South Korea                                   |
| EPI_ISL_498025 | 3/15/2020 | 7/26/2020 Asia / South Korea                                   |
| EPI_ISL_498026 | 3/15/2020 | 7/26/2020 Asia / South Korea                                   |
| EPI_ISL_498027 | 3/15/2020 | 7/26/2020 Asia / South Korea                                   |
| EPI_ISL_498028 | 3/15/2020 | 7/26/2020 Asia / South Korea                                   |
| EPI_ISL_498029 | 3/15/2020 | 7/26/2020 Asia / South Korea                                   |
| EPI_ISL_498030 | 3/16/2020 | 7/26/2020 Asia / South Korea                                   |
| EPI_ISL_498031 | 3/16/2020 | 7/26/2020 Asia / South Korea                                   |
| EPI_ISL_498032 | 3/17/2020 | 7/26/2020 Asia / South Korea                                   |
| EPI_ISL_498033 | 3/17/2020 | 7/26/2020 Asia / South Korea                                   |
| EPI_ISL_498034 | 3/20/2020 | 7/26/2020 Asia / South Korea                                   |
| EPI_ISL_498035 | 3/20/2020 | 7/26/2020 Asia / South Korea                                   |
| EPI_ISL_498036 | 3/16/2020 | 7/26/2020 Asia / South Korea                                   |
| EPI_ISL_498037 | 3/18/2020 | 7/26/2020 Asia / South Korea                                   |
| EPI_ISL_498038 | 3/20/2020 | 7/26/2020 Asia / South Korea                                   |
| EPI_ISL_498039 | 3/20/2020 | 7/26/2020 Asia / South Korea                                   |
| EPI_ISL_498040 | 3/20/2020 | 7/26/2020 Asia / South Korea                                   |
| EPI_ISL_498041 | 3/19/2020 | 7/26/2020 Asia / South Korea                                   |
| EPI_ISL_498042 | 3/23/2020 | 7/26/2020 Asia / South Korea                                   |
| EPI_ISL_498043 | 3/21/2020 | 7/26/2020 Asia / South Korea                                   |
| EPI_ISL_498044 | 3/22/2020 | 7/26/2020 Asia / South Korea                                   |
| EPI_ISL_498045 | 3/22/2020 | 7/26/2020 Asia / South Korea                                   |
| EPI_ISL_498046 | 3/22/2020 | 7/26/2020 Asia / South Korea                                   |
| EPI_ISL_498047 | 3/21/2020 | 7/26/2020 Asia / South Korea                                   |
| EPI_ISL_498048 | 3/23/2020 | 7/26/2020 Asia / South Korea                                   |
| EPI_ISL_498049 | 3/22/2020 | 7/26/2020 Asia / South Korea                                   |
| EPI_ISL_498050 | 3/22/2020 | 7/26/2020 Asia / South Korea                                   |
| EPI_ISL_498051 | 3/22/2020 | 7/26/2020 Asia / South Korea                                   |
| EPI_ISL_498052 | 3/23/2020 | 7/26/2020 Asia / South Korea                                   |
| EPI_ISL_498053 | 3/23/2020 | 7/26/2020 Asia / South Korea                                   |
| EPI_ISL_498055 | 7/1/2020  | 7/26/2020 Africa / South Africa / KwaZulu-Natal / Ugu          |
| EPI_ISL_498060 | 7/9/2020  | 7/26/2020 Africa / South Africa / KwaZulu-Natal / uMkhanyakude |
| EPI_ISL_498061 | 7/9/2020  | 7/26/2020 Africa / South Africa / KwaZulu-Natal / uMkhanyakude |





|                |           |                                                                     |
|----------------|-----------|---------------------------------------------------------------------|
| EPI_ISL_498114 | 7/7/2020  | 7/26/2020 Africa / South Africa / KwaZulu-Natal / iLembe            |
| EPI_ISL_498115 | 7/9/2020  | 7/26/2020 Africa / South Africa / KwaZulu-Natal / iLembe            |
| EPI_ISL_498116 | 7/9/2020  | 7/26/2020 Africa / South Africa / KwaZulu-Natal / iLembe            |
| EPI_ISL_498117 | 7/8/2020  | 7/26/2020 Africa / South Africa / KwaZulu-Natal / iLembe            |
| EPI_ISL_498118 | 7/7/2020  | 7/26/2020 Africa / South Africa / KwaZulu-Natal / iLembe            |
| EPI_ISL_498119 | 7/9/2020  | 7/26/2020 Africa / South Africa / KwaZulu-Natal / iLembe            |
| EPI_ISL_498120 | 7/9/2020  | 7/26/2020 Africa / South Africa / KwaZulu-Natal / iLembe            |
| EPI_ISL_498121 | 7/9/2020  | 7/26/2020 Africa / South Africa / KwaZulu-Natal / iLembe            |
| EPI_ISL_498122 | 7/7/2020  | 7/26/2020 Africa / South Africa / KwaZulu-Natal / iLembe            |
| EPI_ISL_498123 | 7/8/2020  | 7/26/2020 Africa / South Africa / KwaZulu-Natal / iLembe            |
| EPI_ISL_498124 | 7/8/2020  | 7/26/2020 Africa / South Africa / KwaZulu-Natal / iLembe            |
| EPI_ISL_498125 | 7/9/2020  | 7/26/2020 Africa / South Africa / KwaZulu-Natal / iLembe            |
| EPI_ISL_498126 | 7/8/2020  | 7/26/2020 Africa / South Africa / KwaZulu-Natal / iLembe            |
| EPI_ISL_498127 | 5/14/2020 | 7/26/2020 Europe / Belgium / Liège                                  |
| EPI_ISL_498128 | 5/15/2020 | 7/26/2020 Europe / Belgium / Liège                                  |
| EPI_ISL_498129 | 5/15/2020 | 7/26/2020 Europe / Belgium / Liège                                  |
| EPI_ISL_498130 | 5/15/2020 | 7/26/2020 Europe / Belgium / Liège                                  |
| EPI_ISL_498131 | 5/15/2020 | 7/26/2020 Europe / Belgium / Liège                                  |
| EPI_ISL_498132 | 5/15/2020 | 7/26/2020 Europe / Belgium / Liège                                  |
| EPI_ISL_498133 | 5/16/2020 | 7/26/2020 Europe / Belgium / Liège                                  |
| EPI_ISL_498134 | 5/16/2020 | 7/26/2020 Europe / Belgium / Liège                                  |
| EPI_ISL_498135 | 5/16/2020 | 7/26/2020 Europe / Belgium / Liège                                  |
| EPI_ISL_498136 | 5/16/2020 | 7/26/2020 Europe / Belgium / Liège                                  |
| EPI_ISL_498137 | 5/16/2020 | 7/26/2020 Europe / Belgium / Liège                                  |
| EPI_ISL_498138 | 5/16/2020 | 7/26/2020 Europe / Belgium / Liège                                  |
| EPI_ISL_498139 | 5/16/2020 | 7/26/2020 Europe / Belgium / Liège                                  |
| EPI_ISL_498141 | 6/23/2020 | 7/26/2020 Europe / Belgium / Liège                                  |
| EPI_ISL_498143 | 6/26/2020 | 7/26/2020 Europe / Belgium / Liège                                  |
| EPI_ISL_498144 | 6/26/2020 | 7/26/2020 Europe / Belgium / Liège                                  |
| EPI_ISL_498146 | 6/30/2020 | 7/26/2020 Europe / Belgium / Liège                                  |
| EPI_ISL_498149 | 7/3/2020  | 7/26/2020 Europe / Belgium / Liège                                  |
| EPI_ISL_498150 | 7/6/2020  | 7/26/2020 Europe / Belgium / Liège                                  |
| EPI_ISL_498151 | 7/6/2020  | 7/26/2020 Europe / Belgium / Liège                                  |
| EPI_ISL_498152 | 3/25/2020 | 7/26/2020 South America / Colombia / Magdalena / Santa Marta        |
| EPI_ISL_498153 | 3/23/2020 | 7/26/2020 South America / Colombia / Cesar / Valledupar             |
| EPI_ISL_498154 | 3/25/2020 | 7/26/2020 South America / Colombia / Cundinamarca / Zipaquirá       |
| EPI_ISL_498155 | 3/25/2020 | 7/26/2020 South America / Colombia / Atlantico / Barranquilla       |
| EPI_ISL_498156 | 3/30/2020 | 7/26/2020 South America / Colombia / Atlantico / Soledad            |
| EPI_ISL_498157 | 3/30/2020 | 7/26/2020 South America / Colombia / Boyaca / Tunja                 |
| EPI_ISL_498158 | 3/26/2020 | 7/27/2020 South America / Colombia / Boyaca / Togui                 |
| EPI_ISL_498159 | 3/31/2020 | 7/27/2020 South America / Colombia / Cauca / Santander de quilichao |
| EPI_ISL_498160 | 3/31/2020 | 7/27/2020 South America / Colombia / Cesar / Valledupar             |
| EPI_ISL_498161 | 3/30/2020 | 7/27/2020 South America / Colombia / Bolivar / Cartagena            |
| EPI_ISL_498162 | 3/30/2020 | 7/27/2020 South America / Colombia / Narino / Pasto                 |
| EPI_ISL_498163 | 4/1/2020  | 7/27/2020 South America / Colombia / Cordoba / Ciénaga de Oro       |
| EPI_ISL_498164 | 4/9/2020  | 7/27/2020 South America / Colombia / Meta / Villavicencio           |
| EPI_ISL_498165 | 4/9/2020  | 7/27/2020 South America / Colombia / Risaralda / Pereira            |

|                |           |                                                               |
|----------------|-----------|---------------------------------------------------------------|
| EPI_ISL_498166 | 3/31/2020 | 7/27/2020 South America / Colombia / Magdalena / Santa Marta  |
| EPI_ISL_498167 | 4/3/2020  | 7/27/2020 South America / Colombia / Cundinamarca / Suesca    |
| EPI_ISL_498168 | 3/11/2020 | 7/27/2020 South America / Colombia / Cundinamarca / Tolemaida |
| EPI_ISL_498169 | 3/11/2020 | 7/27/2020 South America / Colombia / Cundinamarca / Tolemaida |
| EPI_ISL_498170 | 3/11/2020 | 7/27/2020 South America / Colombia / Cundinamarca / Tolemaida |
| EPI_ISL_498171 | 3/24/2020 | 7/27/2020 Asia / Vietnam / Ho Chi Minh City                   |
| EPI_ISL_498172 | 3/20/2020 | 7/27/2020 Asia / Vietnam / Ho Chi Minh City                   |
| EPI_ISL_498173 | 3/21/2020 | 7/27/2020 Asia / Vietnam / Ho Chi Minh City                   |
| EPI_ISL_498174 | 3/22/2020 | 7/27/2020 Asia / Vietnam / Ho Chi Minh City                   |
| EPI_ISL_498175 | 3/23/2020 | 7/27/2020 Asia / Vietnam / Ho Chi Minh City                   |
| EPI_ISL_498176 | 3/16/2020 | 7/27/2020 Asia / Vietnam / Ho Chi Minh City                   |
| EPI_ISL_498177 | 3/23/2020 | 7/27/2020 Asia / Vietnam / Ho Chi Minh City                   |
| EPI_ISL_498178 | 3/22/2020 | 7/27/2020 Asia / Vietnam / Ho Chi Minh City                   |
| EPI_ISL_498179 | 3/21/2020 | 7/27/2020 Asia / Vietnam / Ho Chi Minh City                   |
| EPI_ISL_498180 | 3/21/2020 | 7/27/2020 Asia / Vietnam / Ho Chi Minh City                   |
| EPI_ISL_498181 | 3/17/2020 | 7/27/2020 Asia / Vietnam / Ho Chi Minh City                   |
| EPI_ISL_498182 | 3/22/2020 | 7/27/2020 Asia / Vietnam / Ho Chi Minh City                   |
| EPI_ISL_498183 | 3/22/2020 | 7/27/2020 Asia / Vietnam / Ho Chi Minh City                   |
| EPI_ISL_498184 | 3/19/2020 | 7/27/2020 Asia / Vietnam / Ho Chi Minh City                   |
| EPI_ISL_498185 | 3/22/2020 | 7/27/2020 Asia / Vietnam / Ho Chi Minh City                   |
| EPI_ISL_498186 | 3/18/2020 | 7/27/2020 Asia / Vietnam / Ho Chi Minh City                   |
| EPI_ISL_498187 | 3/23/2020 | 7/27/2020 Asia / Vietnam / Ho Chi Minh City                   |
| EPI_ISL_498188 | 3/20/2020 | 7/27/2020 Asia / Vietnam / Ho Chi Minh City                   |
| EPI_ISL_498189 | 3/21/2020 | 7/27/2020 Asia / Vietnam / Ho Chi Minh City                   |
| EPI_ISL_498190 | 3/26/2020 | 7/27/2020 Asia / Vietnam / Ho Chi Minh City                   |
| EPI_ISL_498191 | 3/31/2020 | 7/27/2020 Asia / Vietnam / Ho Chi Minh City                   |
| EPI_ISL_498192 | 3/31/2020 | 7/27/2020 Asia / Vietnam / Ho Chi Minh City                   |
| EPI_ISL_498226 | 6/16/2020 | 7/27/2020 Europe / Latvia                                     |
| EPI_ISL_498227 | 6/18/2020 | 7/27/2020 Asia / Bangladesh / Rajshahi                        |
| EPI_ISL_498228 | 6/18/2020 | 7/27/2020 Asia / Bangladesh / Rajshahi                        |
| EPI_ISL_498229 | 4/21/2020 | 7/27/2020 Africa / Senegal / Dakar                            |
| EPI_ISL_498230 | 4/21/2020 | 7/27/2020 Africa / Senegal / Dakar                            |
| EPI_ISL_498236 | 4/24/2020 | 7/27/2020 Africa / Senegal / Dakar                            |
| EPI_ISL_498238 | 5/27/2020 | 7/27/2020 Africa / Senegal / Dakar                            |
| EPI_ISL_498242 | 6/7/2020  | 7/27/2020 Africa / Senegal / Dakar                            |
| EPI_ISL_498243 | 6/7/2020  | 7/27/2020 Africa / Senegal / Dakar                            |
| EPI_ISL_498249 | 6/11/2020 | 7/27/2020 Africa / Senegal / Dakar                            |
| EPI_ISL_498250 | 6/13/2020 | 7/27/2020 Africa / Senegal / Dakar                            |
| EPI_ISL_498253 | 7/7/2020  | 7/27/2020 Asia / Bangladesh / Khulna / Jessore                |
| EPI_ISL_498254 | 7/7/2020  | 7/27/2020 Asia / Bangladesh / Khulna / Jessore                |
| EPI_ISL_498257 | 3/24/2020 | 7/27/2020 Asia / Thailand / Bangkok                           |
| EPI_ISL_498264 | 3/22/2020 | 7/27/2020 Asia / Thailand / Bangkok                           |
| EPI_ISL_498265 | 3/21/2020 | 7/27/2020 Asia / Thailand / Bangkok                           |
| EPI_ISL_498267 | 7/7/2020  | 7/27/2020 Asia / Bangladesh / Khulna                          |
| EPI_ISL_498268 | 7/19/2020 | 7/27/2020 Asia / Bangladesh / Chittagong                      |
| EPI_ISL_498270 | 5/8/2020  | 7/27/2020 Asia / Hong Kong                                    |
| EPI_ISL_498271 | 5/15/2020 | 7/27/2020 Asia / Hong Kong                                    |



|                |           |                                                              |
|----------------|-----------|--------------------------------------------------------------|
| EPI_ISL_498540 | 3/30/2020 | 7/27/2020 Oceania / Australia / Australian Capital Territory |
| EPI_ISL_498542 | 3/15/2020 | 7/27/2020 Oceania / Australia / Australian Capital Territory |
| EPI_ISL_498543 | 6/15/2020 | 7/27/2020 Oceania / Australia / Australian Capital Territory |
| EPI_ISL_498544 | 7/3/2020  | 7/27/2020 Oceania / Australia / Australian Capital Territory |
| EPI_ISL_498545 | 7/3/2020  | 7/27/2020 Oceania / Australia / Australian Capital Territory |
| EPI_ISL_498546 | 7/3/2020  | 7/27/2020 Oceania / Australia / Australian Capital Territory |
| EPI_ISL_498547 | 7/3/2020  | 7/27/2020 Oceania / Australia / Australian Capital Territory |
| EPI_ISL_498548 | 7/3/2020  | 7/27/2020 Oceania / Australia / Australian Capital Territory |
| EPI_ISL_498549 | 7/14/2020 | 7/27/2020 Asia / Bangladesh / Rangpur / Nilphamari           |
| EPI_ISL_498550 | 7/18/2020 | 7/27/2020 Asia / Bangladesh / Sylhet / Moulvibazar           |
| EPI_ISL_498551 | 3/19/2020 | 7/27/2020 Asia / Lebanon / Beirut                            |
| EPI_ISL_498552 | 3/18/2020 | 7/27/2020 Asia / Lebanon / Beirut                            |
| EPI_ISL_498554 | 3/20/2020 | 7/27/2020 Asia / Lebanon / Beirut                            |
| EPI_ISL_498558 | 2020-07   | 7/27/2020 Europe / Italy / Friuli Venezia Giulia             |
| EPI_ISL_498559 | 7/1/2020  | 7/27/2020 Europe / Italy / Friuli Venezia Giulia             |
| EPI_ISL_498560 | 7/2/2020  | 7/27/2020 Europe / Italy / Friuli Venezia Giulia             |
| EPI_ISL_498561 | 7/1/2020  | 7/27/2020 Europe / Italy / Friuli Venezia Giulia             |
| EPI_ISL_498562 | 7/7/2020  | 7/27/2020 Europe / Italy / Friuli Venezia Giulia             |
| EPI_ISL_498563 | 7/6/2020  | 7/27/2020 Europe / Italy / Friuli Venezia Giulia             |
| EPI_ISL_498564 | 7/3/2020  | 7/27/2020 Asia / Singapore                                   |
| EPI_ISL_498565 | 7/2/2020  | 7/27/2020 Asia / Singapore                                   |
| EPI_ISL_498566 | 5/15/2020 | 7/27/2020 Asia / Singapore                                   |
| EPI_ISL_498567 | 7/2/2020  | 7/27/2020 Asia / Singapore                                   |
| EPI_ISL_498568 | 7/1/2020  | 7/27/2020 Asia / Singapore                                   |
| EPI_ISL_498569 | 6/22/2020 | 7/27/2020 Asia / Singapore                                   |
| EPI_ISL_498570 | 6/23/2020 | 7/27/2020 Asia / Singapore                                   |
| EPI_ISL_498571 | 7/2/2020  | 7/27/2020 Asia / Singapore                                   |
| EPI_ISL_498581 | 7/8/2020  | 7/27/2020 Asia / Singapore                                   |
| EPI_ISL_498582 | 7/9/2020  | 7/27/2020 Asia / Singapore                                   |
| EPI_ISL_498583 | 7/11/2020 | 7/27/2020 Asia / Singapore                                   |
| EPI_ISL_498584 | 7/4/2020  | 7/27/2020 Asia / Singapore                                   |
| EPI_ISL_498585 | 7/9/2020  | 7/27/2020 Asia / Singapore                                   |
| EPI_ISL_498586 | 7/16/2020 | 7/27/2020 Asia / Singapore                                   |
| EPI_ISL_498587 | 7/8/2020  | 7/27/2020 Asia / Singapore                                   |
| EPI_ISL_498588 | 7/6/2020  | 7/27/2020 Asia / Singapore                                   |
| EPI_ISL_498589 | 7/11/2020 | 7/27/2020 Asia / Singapore                                   |
| EPI_ISL_498590 | 7/7/2020  | 7/27/2020 Asia / Singapore                                   |
| EPI_ISL_498591 | 7/8/2020  | 7/27/2020 Asia / Singapore                                   |
| EPI_ISL_498592 | 7/13/2020 | 7/27/2020 Asia / Singapore                                   |
| EPI_ISL_498593 | 7/14/2020 | 7/27/2020 Asia / Singapore                                   |
| EPI_ISL_498594 | 7/16/2020 | 7/27/2020 Asia / Singapore                                   |
| EPI_ISL_498595 | 7/10/2020 | 7/27/2020 Asia / Singapore                                   |
| EPI_ISL_498601 | 6/9/2020  | 7/27/2020 Asia / Singapore                                   |
| EPI_ISL_498602 | 6/7/2020  | 7/27/2020 Asia / Singapore                                   |
| EPI_ISL_498603 | 6/11/2020 | 7/27/2020 Asia / Singapore                                   |
| EPI_ISL_498604 | 6/13/2020 | 7/27/2020 Asia / Singapore                                   |
| EPI_ISL_498605 | 6/11/2020 | 7/27/2020 Asia / Singapore                                   |

|                |           |                                                   |
|----------------|-----------|---------------------------------------------------|
| EPI_ISL_498608 | 7/17/2020 | 7/27/2020 Asia / Singapore                        |
| EPI_ISL_498609 | 7/17/2020 | 7/27/2020 Asia / Singapore                        |
| EPI_ISL_498610 | 7/17/2020 | 7/27/2020 Asia / Singapore                        |
| EPI_ISL_498611 | 7/17/2020 | 7/27/2020 Asia / Singapore                        |
| EPI_ISL_498613 | 7/19/2020 | 7/27/2020 Asia / Singapore                        |
| EPI_ISL_498615 | 7/20/2020 | 7/27/2020 Asia / Singapore                        |
| EPI_ISL_498616 | 7/21/2020 | 7/27/2020 Asia / Singapore                        |
| EPI_ISL_498618 | 7/22/2020 | 7/27/2020 Asia / Singapore                        |
| EPI_ISL_498620 | 7/3/2020  | 7/27/2020 Europe / Switzerland / Schwyz           |
| EPI_ISL_498621 | 7/3/2020  | 7/27/2020 Europe / Switzerland / Schwyz           |
| EPI_ISL_498622 | 7/3/2020  | 7/27/2020 Europe / Switzerland / Zurich           |
| EPI_ISL_498623 | 7/3/2020  | 7/27/2020 Europe / Switzerland / Zurich           |
| EPI_ISL_498624 | 7/3/2020  | 7/27/2020 Europe / Switzerland / Basel-Landschaft |
| EPI_ISL_498626 | 7/3/2020  | 7/27/2020 Europe / Switzerland / Zurich           |
| EPI_ISL_498627 | 7/3/2020  | 7/27/2020 Europe / Switzerland / Bern             |
| EPI_ISL_498628 | 6/18/2020 | 7/27/2020 Europe / Belgium / Liège                |
| EPI_ISL_498629 | 6/18/2020 | 7/27/2020 Europe / Belgium / Liège                |
| EPI_ISL_498630 | 4/13/2020 | 7/27/2020 North America / USA / Utah              |
| EPI_ISL_498631 | 4/13/2020 | 7/27/2020 North America / USA / Utah              |
| EPI_ISL_498632 | 4/13/2020 | 7/27/2020 North America / USA / Utah              |
| EPI_ISL_498633 | 4/13/2020 | 7/27/2020 North America / USA / Utah              |
| EPI_ISL_498634 | 4/13/2020 | 7/27/2020 North America / USA / Utah              |
| EPI_ISL_498635 | 4/12/2020 | 7/27/2020 North America / USA / Utah              |
| EPI_ISL_498637 | 4/13/2020 | 7/27/2020 North America / USA / Utah              |
| EPI_ISL_498638 | 4/13/2020 | 7/27/2020 North America / USA / Utah              |
| EPI_ISL_498639 | 4/12/2020 | 7/27/2020 North America / USA / Utah              |
| EPI_ISL_498640 | 4/21/2020 | 7/27/2020 North America / USA / Utah              |
| EPI_ISL_498641 | 4/21/2020 | 7/27/2020 North America / USA / Utah              |
| EPI_ISL_498642 | 4/23/2020 | 7/27/2020 North America / USA / Utah              |
| EPI_ISL_498643 | 4/23/2020 | 7/27/2020 North America / USA / Utah              |
| EPI_ISL_498644 | 4/22/2020 | 7/27/2020 North America / USA / Utah              |
| EPI_ISL_498645 | 4/22/2020 | 7/27/2020 North America / USA / Utah              |
| EPI_ISL_498646 | 4/22/2020 | 7/27/2020 North America / USA / Utah              |
| EPI_ISL_498647 | 4/22/2020 | 7/27/2020 North America / USA / Utah              |
| EPI_ISL_498648 | 4/21/2020 | 7/27/2020 North America / USA / Utah              |
| EPI_ISL_498649 | 4/22/2020 | 7/27/2020 North America / USA / Utah              |
| EPI_ISL_498650 | 4/23/2020 | 7/27/2020 North America / USA / Utah              |
| EPI_ISL_498651 | 4/23/2020 | 7/27/2020 North America / USA / Utah              |
| EPI_ISL_498652 | 4/23/2020 | 7/27/2020 North America / USA / Utah              |
| EPI_ISL_498653 | 4/23/2020 | 7/27/2020 North America / USA / Utah              |
| EPI_ISL_498654 | 4/23/2020 | 7/27/2020 North America / USA / Utah              |
| EPI_ISL_498655 | 4/23/2020 | 7/27/2020 North America / USA / Utah              |
| EPI_ISL_498656 | 4/23/2020 | 7/27/2020 North America / USA / Utah              |
| EPI_ISL_498657 | 4/23/2020 | 7/27/2020 North America / USA / Utah              |
| EPI_ISL_498658 | 4/20/2020 | 7/27/2020 North America / USA / Utah              |
| EPI_ISL_498659 | 4/21/2020 | 7/27/2020 North America / USA / Utah              |
| EPI_ISL_498660 | 4/21/2020 | 7/27/2020 North America / USA / Utah              |

|                |           |           |                                  |
|----------------|-----------|-----------|----------------------------------|
| EPI_ISL_498661 | 4/20/2020 | 7/27/2020 | North America / USA / Utah       |
| EPI_ISL_498662 | 4/20/2020 | 7/27/2020 | North America / USA / Utah       |
| EPI_ISL_498663 | 4/20/2020 | 7/27/2020 | North America / USA / Utah       |
| EPI_ISL_498664 | 4/20/2020 | 7/27/2020 | North America / USA / Utah       |
| EPI_ISL_498665 | 4/21/2020 | 7/27/2020 | North America / USA / Utah       |
| EPI_ISL_498666 | 4/20/2020 | 7/27/2020 | North America / USA / Utah       |
| EPI_ISL_498667 | 4/20/2020 | 7/27/2020 | North America / USA / Utah       |
| EPI_ISL_498668 | 4/30/2020 | 7/27/2020 | North America / USA / Utah       |
| EPI_ISL_498670 | 4/30/2020 | 7/27/2020 | North America / USA / Utah       |
| EPI_ISL_498671 | 4/30/2020 | 7/27/2020 | North America / USA / Utah       |
| EPI_ISL_498687 | 5/14/2020 | 7/27/2020 | North America / USA / Utah       |
| EPI_ISL_498691 | 7/22/2020 | 7/27/2020 | Asia / China / Liaoning / Dalian |
| EPI_ISL_498692 | 7/22/2020 | 7/27/2020 | Asia / China / Liaoning / Dalian |
| EPI_ISL_498693 | 7/22/2020 | 7/27/2020 | Asia / China / Liaoning / Dalian |
| EPI_ISL_498694 | 7/22/2020 | 7/27/2020 | Asia / China / Liaoning / Dalian |
| EPI_ISL_529141 | 7/19/2020 | 7/27/2020 | Africa / Egypt / Cairo           |
| EPI_ISL_529142 | 7/19/2020 | 7/27/2020 | Africa / Egypt / Cairo           |
| EPI_ISL_529143 | 7/19/2020 | 7/27/2020 | Africa / Egypt / Cairo           |
| EPI_ISL_529144 | 7/19/2020 | 7/27/2020 | Africa / Egypt / Cairo           |
| EPI_ISL_529145 | 7/19/2020 | 7/27/2020 | Africa / Egypt / Cairo           |
| EPI_ISL_854995 | 6/30/2020 | 7/27/2020 | Asia / Bangladesh                |
| EPI_ISL_855000 | 6/30/2020 | 7/27/2020 | Asia / Bangladesh                |
| EPI_ISL_855001 | 6/30/2020 | 7/27/2020 | Asia / Bangladesh                |
| EPI_ISL_855002 | 6/30/2020 | 7/27/2020 | Asia / Bangladesh                |
| EPI_ISL_855004 | 6/30/2020 | 7/27/2020 | Asia / Bangladesh                |
| EPI_ISL_855005 | 6/30/2020 | 7/27/2020 | Asia / Bangladesh                |
| EPI_ISL_855011 | 6/30/2020 | 7/27/2020 | Asia / Bangladesh                |
| EPI_ISL_498695 | 4/28/2020 | 7/28/2020 | North America / USA / Alabama    |
| EPI_ISL_498696 | 4/28/2020 | 7/28/2020 | North America / USA / Alabama    |
| EPI_ISL_498697 | 4/10/2020 | 7/28/2020 | North America / USA / California |
| EPI_ISL_498698 | 4/10/2020 | 7/28/2020 | North America / USA / California |
| EPI_ISL_498699 | 4/11/2020 | 7/28/2020 | North America / USA / California |
| EPI_ISL_498700 | 5/1/2020  | 7/28/2020 | North America / USA / California |
| EPI_ISL_498701 | 5/1/2020  | 7/28/2020 | North America / USA / California |
| EPI_ISL_498702 | 5/1/2020  | 7/28/2020 | North America / USA / California |
| EPI_ISL_498703 | 5/1/2020  | 7/28/2020 | North America / USA / California |
| EPI_ISL_498704 | 5/1/2020  | 7/28/2020 | North America / USA / California |
| EPI_ISL_498705 | 4/16/2020 | 7/28/2020 | North America / USA / Florida    |
| EPI_ISL_498706 | 4/16/2020 | 7/28/2020 | North America / USA / Florida    |
| EPI_ISL_498707 | 4/16/2020 | 7/28/2020 | North America / USA / Florida    |
| EPI_ISL_498708 | 4/16/2020 | 7/28/2020 | North America / USA / Florida    |
| EPI_ISL_498709 | 4/18/2020 | 7/28/2020 | North America / USA / Florida    |
| EPI_ISL_498710 | 4/18/2020 | 7/28/2020 | North America / USA / Florida    |
| EPI_ISL_498711 | 4/18/2020 | 7/28/2020 | North America / USA / Florida    |
| EPI_ISL_498712 | 4/18/2020 | 7/28/2020 | North America / USA / Florida    |
| EPI_ISL_498713 | 4/24/2020 | 7/28/2020 | North America / USA / Georgia    |
| EPI_ISL_498714 | 4/27/2020 | 7/28/2020 | North America / USA / Georgia    |

|                |           |                                                          |
|----------------|-----------|----------------------------------------------------------|
| EPI_ISL_498715 | 4/27/2020 | 7/28/2020 North America / USA / Georgia                  |
| EPI_ISL_498716 | 4/27/2020 | 7/28/2020 North America / USA / Georgia                  |
| EPI_ISL_498717 | 4/27/2020 | 7/28/2020 North America / USA / Georgia                  |
| EPI_ISL_498718 | 4/28/2020 | 7/28/2020 North America / USA / Georgia                  |
| EPI_ISL_498719 | 4/28/2020 | 7/28/2020 North America / USA / Georgia                  |
| EPI_ISL_498720 | 4/28/2020 | 7/28/2020 North America / USA / Georgia                  |
| EPI_ISL_498721 | 4/29/2020 | 7/28/2020 North America / USA / Iowa                     |
| EPI_ISL_498722 | 4/29/2020 | 7/28/2020 North America / USA / Illinois                 |
| EPI_ISL_498723 | 4/30/2020 | 7/28/2020 North America / USA / Illinois                 |
| EPI_ISL_498724 | 4/29/2020 | 7/28/2020 North America / USA / Illinois                 |
| EPI_ISL_498725 | 4/28/2020 | 7/28/2020 North America / USA / Illinois                 |
| EPI_ISL_498726 | 4/29/2020 | 7/28/2020 North America / USA / Indiana                  |
| EPI_ISL_498727 | 4/30/2020 | 7/28/2020 North America / USA / Louisiana                |
| EPI_ISL_498728 | 3/14/2020 | 7/28/2020 North America / USA / Michigan                 |
| EPI_ISL_498729 | 4/30/2020 | 7/28/2020 North America / USA / Minnesota                |
| EPI_ISL_498730 | 4/27/2020 | 7/28/2020 North America / USA / Mississippi              |
| EPI_ISL_498731 | 4/30/2020 | 7/28/2020 North America / USA / North Carolina           |
| EPI_ISL_498732 | 4/30/2020 | 7/28/2020 North America / USA / North Carolina           |
| EPI_ISL_498733 | 4/30/2020 | 7/28/2020 North America / USA / North Carolina           |
| EPI_ISL_498734 | 4/30/2020 | 7/28/2020 North America / USA / New Mexico               |
| EPI_ISL_498735 | 4/30/2020 | 7/28/2020 North America / USA / New Mexico               |
| EPI_ISL_498736 | 4/9/2020  | 7/28/2020 North America / USA / Nevada                   |
| EPI_ISL_498737 | 4/28/2020 | 7/28/2020 North America / USA / Tennessee                |
| EPI_ISL_498738 | 4/10/2020 | 7/28/2020 North America / USA / Texas                    |
| EPI_ISL_498739 | 4/10/2020 | 7/28/2020 North America / USA / Texas                    |
| EPI_ISL_498740 | 4/28/2020 | 7/28/2020 North America / USA / Texas                    |
| EPI_ISL_498741 | 4/30/2020 | 7/28/2020 North America / USA / Texas                    |
| EPI_ISL_498742 | 5/1/2020  | 7/28/2020 North America / USA / Texas                    |
| EPI_ISL_498743 | 4/30/2020 | 7/28/2020 North America / USA / Texas                    |
| EPI_ISL_498744 | 4/27/2020 | 7/28/2020 North America / USA / Washington               |
| EPI_ISL_498745 | 4/27/2020 | 7/28/2020 North America / USA / Washington               |
| EPI_ISL_498746 | 4/27/2020 | 7/28/2020 North America / USA / Washington               |
| EPI_ISL_498747 | 4/27/2020 | 7/28/2020 North America / USA / Washington               |
| EPI_ISL_498748 | 3/24/2020 | 7/28/2020 Oceania / Australia / New South Wales / Sydney |
| EPI_ISL_498749 | 3/24/2020 | 7/28/2020 Oceania / Australia / New South Wales / Sydney |
| EPI_ISL_498750 | 3/26/2020 | 7/28/2020 Oceania / Australia / New South Wales / Sydney |
| EPI_ISL_498751 | 3/20/2020 | 7/28/2020 Oceania / Australia / New South Wales / Sydney |
| EPI_ISL_498761 | 7/10/2020 | 7/28/2020 Oceania / Australia / New South Wales / Sydney |
| EPI_ISL_498762 | 7/10/2020 | 7/28/2020 Oceania / Australia / New South Wales / Sydney |
| EPI_ISL_498763 | 7/10/2020 | 7/28/2020 Oceania / Australia / New South Wales / Sydney |
| EPI_ISL_498764 | 7/12/2020 | 7/28/2020 Oceania / Australia / New South Wales / Sydney |
| EPI_ISL_498765 | 7/1/2020  | 7/28/2020 Oceania / Australia / New South Wales / Sydney |
| EPI_ISL_498766 | 7/12/2020 | 7/28/2020 Oceania / Australia / New South Wales / Sydney |
| EPI_ISL_498767 | 7/12/2020 | 7/28/2020 Oceania / Australia / New South Wales / Sydney |
| EPI_ISL_498768 | 7/12/2020 | 7/28/2020 Oceania / Australia / New South Wales / Sydney |
| EPI_ISL_498769 | 7/11/2020 | 7/28/2020 Oceania / Australia / New South Wales / Sydney |
| EPI_ISL_498770 | 7/11/2020 | 7/28/2020 Oceania / Australia / New South Wales / Sydney |

|                |           |                                                          |
|----------------|-----------|----------------------------------------------------------|
| EPI_ISL_498771 | 7/11/2020 | 7/28/2020 Oceania / Australia / New South Wales / Sydney |
| EPI_ISL_498772 | 7/11/2020 | 7/28/2020 Oceania / Australia / New South Wales / Sydney |
| EPI_ISL_498773 | 7/11/2020 | 7/28/2020 Oceania / Australia / New South Wales / Sydney |
| EPI_ISL_498774 | 7/12/2020 | 7/28/2020 Oceania / Australia / New South Wales / Sydney |
| EPI_ISL_498775 | 7/12/2020 | 7/28/2020 Oceania / Australia / New South Wales / Sydney |
| EPI_ISL_498776 | 7/19/2020 | 7/28/2020 Oceania / Australia / New South Wales / Sydney |
| EPI_ISL_498777 | 7/13/2020 | 7/28/2020 Oceania / Australia / New South Wales / Sydney |
| EPI_ISL_498778 | 7/16/2020 | 7/28/2020 Oceania / Australia / New South Wales / Sydney |
| EPI_ISL_498779 | 7/18/2020 | 7/28/2020 Oceania / Australia / New South Wales / Sydney |
| EPI_ISL_498780 | 7/12/2020 | 7/28/2020 Oceania / Australia / New South Wales / Sydney |
| EPI_ISL_498781 | 7/13/2020 | 7/28/2020 Oceania / Australia / New South Wales / Sydney |
| EPI_ISL_498782 | 7/14/2020 | 7/28/2020 Oceania / Australia / New South Wales / Sydney |
| EPI_ISL_498783 | 5/31/2020 | 7/28/2020 Asia / Bangladesh / Sylhet / Moulvibazar       |
| EPI_ISL_498784 | 7/18/2020 | 7/28/2020 Asia / Bangladesh / Sylhet / Moulvibazar       |
| EPI_ISL_498785 | 7/18/2020 | 7/28/2020 Asia / Bangladesh / Sylhet                     |
| EPI_ISL_498786 | 7/18/2020 | 7/28/2020 Asia / Bangladesh / Sylhet / Moulvibazar       |
| EPI_ISL_498787 | 7/18/2020 | 7/28/2020 Asia / Bangladesh / Sylhet / Moulvibazar       |
| EPI_ISL_498788 | 5/31/2020 | 7/28/2020 Asia / Bangladesh / Mymensingh                 |
| EPI_ISL_498789 | 5/31/2020 | 7/28/2020 Asia / Bangladesh / Mymensingh                 |
| EPI_ISL_498790 | 5/31/2020 | 7/28/2020 Asia / Bangladesh / Mymensingh                 |
| EPI_ISL_498791 | 6/3/2020  | 7/28/2020 Asia / Bangladesh / Mymensingh                 |
| EPI_ISL_498792 | 6/3/2020  | 7/28/2020 Asia / Bangladesh / Mymensingh                 |
| EPI_ISL_498793 | 6/3/2020  | 7/28/2020 Asia / Bangladesh / Mymensingh                 |
| EPI_ISL_498794 | 6/3/2020  | 7/28/2020 Asia / Bangladesh / Mymensingh                 |
| EPI_ISL_498795 | 6/3/2020  | 7/28/2020 Asia / Bangladesh / Mymensingh                 |
| EPI_ISL_498796 | 6/4/2020  | 7/28/2020 Asia / Bangladesh / Mymensingh                 |
| EPI_ISL_498797 | 7/15/2020 | 7/28/2020 Asia / Bangladesh / Rajshahi                   |
| EPI_ISL_498800 | 7/15/2020 | 7/28/2020 Asia / Bangladesh / Rajshahi                   |
| EPI_ISL_498801 | 7/15/2020 | 7/28/2020 Asia / Bangladesh / Rajshahi                   |
| EPI_ISL_498802 | 7/15/2020 | 7/28/2020 Asia / Bangladesh / Rajshahi                   |
| EPI_ISL_498804 | 7/12/2020 | 7/28/2020 Asia / Bangladesh / Rajshahi                   |
| EPI_ISL_498805 | 7/15/2020 | 7/28/2020 Asia / Bangladesh / Rajshahi                   |
| EPI_ISL_498806 | 7/15/2020 | 7/28/2020 Asia / Bangladesh / Khulna                     |
| EPI_ISL_498808 | 7/7/2020  | 7/28/2020 Asia / Bangladesh / Khulna / Jessore           |
| EPI_ISL_498811 | 7/19/2020 | 7/28/2020 Asia / Bangladesh / Chittagong                 |
| EPI_ISL_498814 | 7/21/2020 | 7/28/2020 Asia / Bangladesh / Chittagong / Chandpur      |
| EPI_ISL_498815 | 7/21/2020 | 7/28/2020 Asia / Bangladesh / Chittagong / Chandpur      |
| EPI_ISL_498816 | 7/14/2020 | 7/28/2020 Asia / Bangladesh / Rangpur / Nilphamari       |
| EPI_ISL_498817 | 7/18/2020 | 7/28/2020 Asia / Bangladesh / Sylhet / Moulvibazar       |
| EPI_ISL_498818 | 7/18/2020 | 7/28/2020 Asia / Bangladesh / Sylhet / Moulvibazar       |
| EPI_ISL_498830 | 7/19/2020 | 7/28/2020 Asia / Bangladesh / Sylhet / Moulvibazar       |
| EPI_ISL_498892 | 7/20/2020 | 7/28/2020 Asia / Bangladesh / Sylhet / Moulvibazar       |
| EPI_ISL_498932 | 5/31/2020 | 7/28/2020 Asia / Bangladesh / Mymensingh                 |
| EPI_ISL_498933 | 5/31/2020 | 7/28/2020 Asia / Bangladesh / Mymensingh                 |
| EPI_ISL_499083 | 4/15/2020 | 7/28/2020 South America / Argentina / Cordoba            |
| EPI_ISL_499266 | 7/14/2020 | 7/28/2020 Europe / United Kingdom / England              |
| EPI_ISL_499267 | 7/15/2020 | 7/28/2020 Europe / United Kingdom / England              |





|                |           |           |                                 |
|----------------|-----------|-----------|---------------------------------|
| EPI_ISL_499360 | 6/24/2020 | 7/28/2020 | Europe / United Kingdom / Wales |
| EPI_ISL_499361 | 7/13/2020 | 7/28/2020 | Europe / United Kingdom / Wales |
| EPI_ISL_499362 | 6/24/2020 | 7/28/2020 | Europe / United Kingdom / Wales |
| EPI_ISL_499363 | 5/13/2020 | 7/28/2020 | Europe / United Kingdom / Wales |
| EPI_ISL_499364 | 6/24/2020 | 7/28/2020 | Europe / United Kingdom / Wales |
| EPI_ISL_499366 | 4/3/2020  | 7/28/2020 | Europe / United Kingdom / Wales |
| EPI_ISL_499367 | 6/23/2020 | 7/28/2020 | Europe / United Kingdom / Wales |
| EPI_ISL_499368 | 6/25/2020 | 7/28/2020 | Europe / United Kingdom / Wales |
| EPI_ISL_499369 | 4/1/2020  | 7/28/2020 | Europe / United Kingdom / Wales |
| EPI_ISL_499370 | 4/5/2020  | 7/28/2020 | Europe / United Kingdom / Wales |
| EPI_ISL_499372 | 5/4/2020  | 7/28/2020 | Europe / United Kingdom / Wales |
| EPI_ISL_499374 | 4/1/2020  | 7/28/2020 | Europe / United Kingdom / Wales |
| EPI_ISL_499375 | 6/6/2020  | 7/28/2020 | Europe / United Kingdom / Wales |
| EPI_ISL_499376 | 6/23/2020 | 7/28/2020 | Europe / United Kingdom / Wales |
| EPI_ISL_499377 | 6/27/2020 | 7/28/2020 | Europe / United Kingdom / Wales |
| EPI_ISL_499378 | 6/5/2020  | 7/28/2020 | Europe / United Kingdom / Wales |
| EPI_ISL_499379 | 7/8/2020  | 7/28/2020 | Europe / United Kingdom / Wales |
| EPI_ISL_499380 | 6/25/2020 | 7/28/2020 | Europe / United Kingdom / Wales |
| EPI_ISL_499381 | 7/13/2020 | 7/28/2020 | Europe / United Kingdom / Wales |
| EPI_ISL_499382 | 5/1/2020  | 7/28/2020 | Europe / United Kingdom / Wales |
| EPI_ISL_499384 | 4/3/2020  | 7/28/2020 | Europe / United Kingdom / Wales |
| EPI_ISL_499385 | 6/30/2020 | 7/28/2020 | Europe / United Kingdom / Wales |
| EPI_ISL_499386 | 7/12/2020 | 7/28/2020 | Europe / United Kingdom / Wales |
| EPI_ISL_499387 | 6/14/2020 | 7/28/2020 | Europe / United Kingdom / Wales |
| EPI_ISL_499388 | 7/10/2020 | 7/28/2020 | Europe / United Kingdom / Wales |
| EPI_ISL_499389 | 6/16/2020 | 7/28/2020 | Europe / United Kingdom / Wales |
| EPI_ISL_499390 | 6/23/2020 | 7/28/2020 | Europe / United Kingdom / Wales |
| EPI_ISL_499393 | 7/8/2020  | 7/28/2020 | Europe / United Kingdom / Wales |
| EPI_ISL_499395 | 6/25/2020 | 7/28/2020 | Europe / United Kingdom / Wales |
| EPI_ISL_499396 | 5/15/2020 | 7/28/2020 | Europe / United Kingdom / Wales |
| EPI_ISL_499398 | 7/2/2020  | 7/28/2020 | Europe / United Kingdom / Wales |
| EPI_ISL_499399 | 5/8/2020  | 7/28/2020 | Europe / United Kingdom / Wales |
| EPI_ISL_499400 | 7/13/2020 | 7/28/2020 | Europe / United Kingdom / Wales |
| EPI_ISL_499401 | 6/6/2020  | 7/28/2020 | Europe / United Kingdom / Wales |
| EPI_ISL_499415 | 6/25/2020 | 7/28/2020 | Europe / United Kingdom / Wales |
| EPI_ISL_499416 | 6/8/2020  | 7/28/2020 | Europe / United Kingdom / Wales |
| EPI_ISL_499417 | 6/23/2020 | 7/28/2020 | Europe / United Kingdom / Wales |
| EPI_ISL_499418 | 6/23/2020 | 7/28/2020 | Europe / United Kingdom / Wales |
| EPI_ISL_499419 | 6/25/2020 | 7/28/2020 | Europe / United Kingdom / Wales |
| EPI_ISL_499420 | 6/25/2020 | 7/28/2020 | Europe / United Kingdom / Wales |
| EPI_ISL_499421 | 6/23/2020 | 7/28/2020 | Europe / United Kingdom / Wales |
| EPI_ISL_499422 | 6/9/2020  | 7/28/2020 | Europe / United Kingdom / Wales |
| EPI_ISL_499423 | 6/23/2020 | 7/28/2020 | Europe / United Kingdom / Wales |
| EPI_ISL_499424 | 6/23/2020 | 7/28/2020 | Europe / United Kingdom / Wales |
| EPI_ISL_499425 | 6/25/2020 | 7/28/2020 | Europe / United Kingdom / Wales |
| EPI_ISL_499426 | 6/23/2020 | 7/28/2020 | Europe / United Kingdom / Wales |
| EPI_ISL_499427 | 6/11/2020 | 7/28/2020 | Europe / United Kingdom / Wales |

|                |           |           |                                   |
|----------------|-----------|-----------|-----------------------------------|
| EPI_ISL_499428 | 4/5/2020  | 7/28/2020 | Europe / United Kingdom / Wales   |
| EPI_ISL_499429 | 4/1/2020  | 7/28/2020 | Europe / United Kingdom / Wales   |
| EPI_ISL_499430 | 6/23/2020 | 7/28/2020 | Europe / United Kingdom / Wales   |
| EPI_ISL_499431 | 7/11/2020 | 7/28/2020 | Europe / United Kingdom / Wales   |
| EPI_ISL_499432 | 7/10/2020 | 7/28/2020 | Europe / United Kingdom / Wales   |
| EPI_ISL_499433 | 3/31/2020 | 7/28/2020 | Europe / United Kingdom / Wales   |
| EPI_ISL_499434 | 6/13/2020 | 7/28/2020 | Europe / United Kingdom / Wales   |
| EPI_ISL_499435 | 6/23/2020 | 7/28/2020 | Europe / United Kingdom / Wales   |
| EPI_ISL_499436 | 6/28/2020 | 7/28/2020 | Europe / United Kingdom / Wales   |
| EPI_ISL_499437 | 6/25/2020 | 7/28/2020 | Europe / United Kingdom / Wales   |
| EPI_ISL_499438 | 6/25/2020 | 7/28/2020 | Europe / United Kingdom / Wales   |
| EPI_ISL_499439 | 6/29/2020 | 7/28/2020 | Europe / United Kingdom / Wales   |
| EPI_ISL_499440 | 4/2/2020  | 7/28/2020 | Europe / United Kingdom / Wales   |
| EPI_ISL_499441 | 7/10/2020 | 7/28/2020 | Europe / United Kingdom / Wales   |
| EPI_ISL_499442 | 4/1/2020  | 7/28/2020 | Europe / United Kingdom / Wales   |
| EPI_ISL_499443 | 6/30/2020 | 7/28/2020 | Europe / United Kingdom / Wales   |
| EPI_ISL_499444 | 5/11/2020 | 7/28/2020 | Europe / United Kingdom / Wales   |
| EPI_ISL_499445 | 6/13/2020 | 7/28/2020 | Europe / United Kingdom / Wales   |
| EPI_ISL_499446 | 6/25/2020 | 7/28/2020 | Europe / United Kingdom / Wales   |
| EPI_ISL_499447 | 4/1/2020  | 7/28/2020 | Europe / United Kingdom / Wales   |
| EPI_ISL_499448 | 4/2/2020  | 7/28/2020 | Europe / United Kingdom / Wales   |
| EPI_ISL_499449 | 6/25/2020 | 7/28/2020 | Europe / United Kingdom / Wales   |
| EPI_ISL_499450 | 6/24/2020 | 7/28/2020 | Europe / United Kingdom / Wales   |
| EPI_ISL_499451 | 4/1/2020  | 7/28/2020 | Europe / United Kingdom / Wales   |
| EPI_ISL_499452 | 5/5/2020  | 7/28/2020 | Europe / United Kingdom / Wales   |
| EPI_ISL_499453 | 5/7/2020  | 7/28/2020 | Europe / United Kingdom / Wales   |
| EPI_ISL_499454 | 5/9/2020  | 7/28/2020 | Europe / United Kingdom / Wales   |
| EPI_ISL_499455 | 6/23/2020 | 7/28/2020 | Europe / United Kingdom / Wales   |
| EPI_ISL_499456 | 5/7/2020  | 7/28/2020 | Europe / United Kingdom / Wales   |
| EPI_ISL_499457 | 6/21/2020 | 7/28/2020 | Europe / United Kingdom / Wales   |
| EPI_ISL_499458 | 7/10/2020 | 7/28/2020 | Europe / United Kingdom / Wales   |
| EPI_ISL_499459 | 6/25/2020 | 7/28/2020 | Europe / United Kingdom / Wales   |
| EPI_ISL_499461 | 3/19/2020 | 7/28/2020 | Europe / United Kingdom / England |
| EPI_ISL_499462 | 3/17/2020 | 7/28/2020 | Europe / United Kingdom / England |
| EPI_ISL_499463 | 3/17/2020 | 7/28/2020 | Europe / United Kingdom / England |
| EPI_ISL_499464 | 3/17/2020 | 7/28/2020 | Europe / United Kingdom / England |
| EPI_ISL_499465 | 3/21/2020 | 7/28/2020 | Europe / United Kingdom / England |
| EPI_ISL_499466 | 3/21/2020 | 7/28/2020 | Europe / United Kingdom / England |
| EPI_ISL_499467 | 3/16/2020 | 7/28/2020 | Europe / United Kingdom / England |
| EPI_ISL_499468 | 3/19/2020 | 7/28/2020 | Europe / United Kingdom / England |
| EPI_ISL_499469 | 3/15/2020 | 7/28/2020 | Europe / United Kingdom / England |
| EPI_ISL_499640 | 3/19/2020 | 7/28/2020 | Europe / United Kingdom / England |
| EPI_ISL_499641 | 3/20/2020 | 7/28/2020 | Europe / United Kingdom / England |
| EPI_ISL_499642 | 3/20/2020 | 7/28/2020 | Europe / United Kingdom / England |
| EPI_ISL_499643 | 3/20/2020 | 7/28/2020 | Europe / United Kingdom / England |
| EPI_ISL_499644 | 3/18/2020 | 7/28/2020 | Europe / United Kingdom / England |
| EPI_ISL_499645 | 3/19/2020 | 7/28/2020 | Europe / United Kingdom / England |



















|                |           |           |                                                         |
|----------------|-----------|-----------|---------------------------------------------------------|
| EPI_ISL_500305 | 4/5/2020  | 7/28/2020 | Europe / Spain / Basque Country / San Sebastian         |
| EPI_ISL_500306 | 4/5/2020  | 7/28/2020 | Europe / Spain / Basque Country / San Sebastian         |
| EPI_ISL_500307 | 4/5/2020  | 7/28/2020 | Europe / Spain / Basque Country / San Sebastian         |
| EPI_ISL_500308 | 4/6/2020  | 7/28/2020 | Europe / Spain / Basque Country / San Sebastian         |
| EPI_ISL_500309 | 4/6/2020  | 7/28/2020 | Europe / Spain / Basque Country / San Sebastian         |
| EPI_ISL_500311 | 4/6/2020  | 7/28/2020 | Europe / Spain / Basque Country / San Sebastian         |
| EPI_ISL_500315 | 4/6/2020  | 7/28/2020 | Europe / Spain / Basque Country / San Sebastian         |
| EPI_ISL_500319 | 4/6/2020  | 7/28/2020 | Europe / Spain / Basque Country / San Sebastian         |
| EPI_ISL_500320 | 4/6/2020  | 7/28/2020 | Europe / Spain / Basque Country / San Sebastian         |
| EPI_ISL_500321 | 4/6/2020  | 7/28/2020 | Europe / Spain / Basque Country / San Sebastian         |
| EPI_ISL_500322 | 4/6/2020  | 7/28/2020 | Europe / Spain / Basque Country / San Sebastian         |
| EPI_ISL_500323 | 4/6/2020  | 7/28/2020 | Europe / Spain / Basque Country / San Sebastian         |
| EPI_ISL_500324 | 4/7/2020  | 7/28/2020 | Europe / Spain / Basque Country / San Sebastian         |
| EPI_ISL_500325 | 4/7/2020  | 7/28/2020 | Europe / Spain / Basque Country / San Sebastian         |
| EPI_ISL_500326 | 4/7/2020  | 7/28/2020 | Europe / Spain / Basque Country / San Sebastian         |
| EPI_ISL_500328 | 4/7/2020  | 7/28/2020 | Europe / Spain / Basque Country / San Sebastian         |
| EPI_ISL_500329 | 4/7/2020  | 7/28/2020 | Europe / Spain / Basque Country / San Sebastian         |
| EPI_ISL_500331 | 4/7/2020  | 7/28/2020 | Europe / Spain / Basque Country / San Sebastian         |
| EPI_ISL_500332 | 4/7/2020  | 7/28/2020 | Europe / Spain / Basque Country / San Sebastian         |
| EPI_ISL_500333 | 4/7/2020  | 7/28/2020 | Europe / Spain / Basque Country / San Sebastian         |
| EPI_ISL_500334 | 4/7/2020  | 7/28/2020 | Europe / Spain / Basque Country / San Sebastian         |
| EPI_ISL_500335 | 4/7/2020  | 7/28/2020 | Europe / Spain / Basque Country / San Sebastian         |
| EPI_ISL_500337 | 4/20/2020 | 7/28/2020 | Europe / Spain / Aragon / Zaragoza                      |
| EPI_ISL_500344 | 4/21/2020 | 7/28/2020 | Europe / Spain / Aragon / Zaragoza                      |
| EPI_ISL_500347 | 4/21/2020 | 7/28/2020 | Europe / Spain / Aragon / Zaragoza                      |
| EPI_ISL_500349 | 4/21/2020 | 7/28/2020 | Europe / Spain / Aragon / Zaragoza                      |
| EPI_ISL_500354 | 4/23/2020 | 7/28/2020 | Europe / Spain / Aragon / Zaragoza                      |
| EPI_ISL_500369 | 3/27/2020 | 7/28/2020 | Europe / Spain / La Rioja / Logrono                     |
| EPI_ISL_500372 | 3/25/2020 | 7/28/2020 | Europe / Spain / La Rioja / Logrono                     |
| EPI_ISL_500375 | 3/30/2020 | 7/28/2020 | Europe / Spain / La Rioja / San Vicente de la Sonsierra |
| EPI_ISL_500376 | 4/3/2020  | 7/28/2020 | Europe / Spain / La Rioja / Haro                        |
| EPI_ISL_500379 | 3/22/2020 | 7/28/2020 | Europe / Spain / La Rioja / Logrono                     |
| EPI_ISL_500386 | 3/27/2020 | 7/28/2020 | Europe / Spain / La Rioja / El Villar de Arnedo         |
| EPI_ISL_500391 | 3/5/2020  | 7/28/2020 | Europe / Spain / La Rioja / Haro                        |
| EPI_ISL_500396 | 3/7/2020  | 7/28/2020 | Europe / Spain / La Rioja / Haro                        |
| EPI_ISL_500398 | 3/6/2020  | 7/28/2020 | Europe / Spain / La Rioja / Logrono                     |
| EPI_ISL_500399 | 3/8/2020  | 7/28/2020 | Europe / Spain / La Rioja / Logrono                     |
| EPI_ISL_500400 | 3/7/2020  | 7/28/2020 | Europe / Spain / La Rioja / Logrono                     |
| EPI_ISL_500401 | 3/7/2020  | 7/28/2020 | Europe / Spain / La Rioja / Logrono                     |
| EPI_ISL_500402 | 3/9/2020  | 7/28/2020 | Europe / Spain / La Rioja / Logrono                     |
| EPI_ISL_500407 | 3/10/2020 | 7/28/2020 | Europe / Spain / La Rioja / Logrono                     |
| EPI_ISL_500408 | 3/8/2020  | 7/28/2020 | Europe / Spain / La Rioja / Logrono                     |
| EPI_ISL_500409 | 3/10/2020 | 7/28/2020 | Europe / Spain / La Rioja / Santo Domingo de la Calzada |
| EPI_ISL_500410 | 3/11/2020 | 7/28/2020 | Europe / Spain / La Rioja / Santo Domingo de la Calzada |
| EPI_ISL_500411 | 3/11/2020 | 7/28/2020 | Europe / Spain / La Rioja / Santo Domingo de la Calzada |
| EPI_ISL_500412 | 3/11/2020 | 7/28/2020 | Europe / Spain / La Rioja / Santo Domingo de la Calzada |
| EPI_ISL_500413 | 3/11/2020 | 7/28/2020 | Europe / Spain / La Rioja / Santo Domingo de la Calzada |

|                |           |                                                                      |
|----------------|-----------|----------------------------------------------------------------------|
| EPI_ISL_500416 | 3/21/2020 | 7/28/2020 Europe / Spain / La Rioja / Haro                           |
| EPI_ISL_500417 | 3/21/2020 | 7/28/2020 Europe / Spain / La Rioja / Ojacastró                      |
| EPI_ISL_500418 | 3/22/2020 | 7/28/2020 Europe / Spain / La Rioja / Lardero                        |
| EPI_ISL_500421 | 3/22/2020 | 7/28/2020 Europe / Spain / La Rioja / Logrono                        |
| EPI_ISL_500423 | 3/24/2020 | 7/28/2020 Europe / Spain / La Rioja / Lardero                        |
| EPI_ISL_500425 | 3/26/2020 | 7/28/2020 Europe / Spain / La Rioja / Lardero                        |
| EPI_ISL_500427 | 3/22/2020 | 7/28/2020 Europe / Spain / La Rioja / Albelda de Iregua              |
| EPI_ISL_500428 | 3/22/2020 | 7/28/2020 Europe / Spain / La Rioja / Albelda de Iregua              |
| EPI_ISL_500429 | 3/10/2020 | 7/28/2020 Europe / Spain / La Rioja / Calahorra                      |
| EPI_ISL_500430 | 3/20/2020 | 7/28/2020 Europe / Spain / La Rioja / Autol                          |
| EPI_ISL_500431 | 3/20/2020 | 7/28/2020 Europe / Spain / La Rioja / Calahorra                      |
| EPI_ISL_500433 | 3/28/2020 | 7/28/2020 Europe / Spain / La Rioja / Alfaro                         |
| EPI_ISL_500439 | 3/26/2020 | 7/28/2020 Europe / Spain / La Rioja / Logrono                        |
| EPI_ISL_500445 | 3/29/2020 | 7/28/2020 Europe / Spain / La Rioja / Haro                           |
| EPI_ISL_500449 | 3/11/2020 | 7/28/2020 Europe / Spain / La Rioja / Logrono                        |
| EPI_ISL_500450 | 3/25/2020 | 7/28/2020 Europe / Spain / La Rioja / Logrono                        |
| EPI_ISL_500451 | 3/25/2020 | 7/28/2020 Europe / Spain / La Rioja / Logrono                        |
| EPI_ISL_500454 | 3/29/2020 | 7/28/2020 Europe / Spain / La Rioja / Agoncillo                      |
| EPI_ISL_500455 | 3/28/2020 | 7/28/2020 Europe / Spain / La Rioja / Logrono                        |
| EPI_ISL_500456 | 3/31/2020 | 7/28/2020 Europe / Spain / La Rioja / Logrono                        |
| EPI_ISL_500458 | 3/7/2020  | 7/28/2020 Europe / Spain / La Rioja / Logrono                        |
| EPI_ISL_500459 | 4/10/2020 | 7/28/2020 North America / USA / Texas                                |
| EPI_ISL_500460 | 4/7/2020  | 7/28/2020 South America / Brazil / Pernambuco / Recife               |
| EPI_ISL_500461 | 4/7/2020  | 7/28/2020 South America / Brazil / Pernambuco / Recife               |
| EPI_ISL_500462 | 4/9/2020  | 7/28/2020 South America / Brazil / Pernambuco / Recife               |
| EPI_ISL_500463 | 4/9/2020  | 7/28/2020 South America / Brazil / Pernambuco / Recife               |
| EPI_ISL_500471 | 4/6/2020  | 7/28/2020 South America / Brazil / Pernambuco / Olinda               |
| EPI_ISL_500473 | 4/8/2020  | 7/28/2020 South America / Brazil / Pernambuco / Recife               |
| EPI_ISL_500475 | 4/9/2020  | 7/28/2020 South America / Brazil / Pernambuco / Recife               |
| EPI_ISL_500477 | 4/8/2020  | 7/28/2020 South America / Brazil / Pernambuco / Ipojuca              |
| EPI_ISL_500480 | 4/13/2020 | 7/28/2020 South America / Brazil / Pernambuco / Recife               |
| EPI_ISL_500481 | 4/8/2020  | 7/28/2020 South America / Brazil / Pernambuco / Recife               |
| EPI_ISL_500482 | 4/8/2020  | 7/28/2020 South America / Brazil / Pernambuco / Recife               |
| EPI_ISL_500483 | 4/8/2020  | 7/28/2020 South America / Brazil / Pernambuco / Recife               |
| EPI_ISL_500484 | 4/8/2020  | 7/28/2020 South America / Brazil / Pernambuco / Recife               |
| EPI_ISL_500485 | 4/8/2020  | 7/28/2020 South America / Brazil / Pernambuco / Sao Lourenco da Mata |
| EPI_ISL_500486 | 4/7/2020  | 7/28/2020 South America / Brazil / Pernambuco / Camaragibe           |
| EPI_ISL_510535 | 5/8/2020  | 7/28/2020 South America / Brazil / Parana / Curitiba                 |
| EPI_ISL_500500 | 3/27/2020 | 7/29/2020 North America / USA / Connecticut                          |
| EPI_ISL_500501 | 3/26/2020 | 7/29/2020 North America / USA / Connecticut                          |
| EPI_ISL_500503 | 3/18/2020 | 7/29/2020 North America / USA / New York                             |
| EPI_ISL_500504 | 3/18/2020 | 7/29/2020 North America / USA / New York                             |
| EPI_ISL_500505 | 3/21/2020 | 7/29/2020 North America / USA / New York                             |
| EPI_ISL_500506 | 3/20/2020 | 7/29/2020 North America / USA / New York                             |
| EPI_ISL_500507 | 3/20/2020 | 7/29/2020 North America / USA / New York                             |
| EPI_ISL_500508 | 3/18/2020 | 7/29/2020 North America / USA / Colorado                             |
| EPI_ISL_500509 | 3/18/2020 | 7/29/2020 North America / USA / Colorado                             |

|                |           |                                               |
|----------------|-----------|-----------------------------------------------|
| EPI_ISL_500510 | 3/19/2020 | 7/29/2020 North America / USA / Colorado      |
| EPI_ISL_500511 | 3/17/2020 | 7/29/2020 North America / USA / Massachusetts |
| EPI_ISL_500512 | 3/27/2020 | 7/29/2020 North America / USA / Washington    |
| EPI_ISL_500513 | 3/17/2020 | 7/29/2020 North America / USA / Georgia       |
| EPI_ISL_500514 | 3/18/2020 | 7/29/2020 North America / USA / Georgia       |
| EPI_ISL_500515 | 3/22/2020 | 7/29/2020 North America / USA / Georgia       |
| EPI_ISL_500516 | 3/16/2020 | 7/29/2020 North America / USA / Minnesota     |
| EPI_ISL_500517 | 4/2/2020  | 7/29/2020 North America / USA / South Dakota  |
| EPI_ISL_500518 | 4/2/2020  | 7/29/2020 North America / USA / Minnesota     |
| EPI_ISL_500519 | 3/18/2020 | 7/29/2020 North America / USA / Wisconsin     |
| EPI_ISL_500520 | 3/16/2020 | 7/29/2020 North America / USA / Louisiana     |
| EPI_ISL_500521 | 3/17/2020 | 7/29/2020 North America / USA / Louisiana     |
| EPI_ISL_500522 | 4/16/2020 | 7/29/2020 North America / USA / Alabama       |
| EPI_ISL_500523 | 4/10/2020 | 7/29/2020 North America / USA / Kentucky      |
| EPI_ISL_500524 | 4/11/2020 | 7/29/2020 North America / USA / Kentucky      |
| EPI_ISL_500525 | 3/20/2020 | 7/29/2020 North America / USA / New York      |
| EPI_ISL_500526 | 3/18/2020 | 7/29/2020 North America / USA / Colorado      |
| EPI_ISL_500527 | 3/20/2020 | 7/29/2020 North America / USA / Colorado      |
| EPI_ISL_500528 | 3/18/2020 | 7/29/2020 North America / USA / Colorado      |
| EPI_ISL_500529 | 3/23/2020 | 7/29/2020 North America / USA / Massachusetts |
| EPI_ISL_500530 | 3/23/2020 | 7/29/2020 North America / USA / Vermont       |
| EPI_ISL_500531 | 3/23/2020 | 7/29/2020 North America / USA / Vermont       |
| EPI_ISL_500533 | 3/27/2020 | 7/29/2020 North America / USA / California    |
| EPI_ISL_500534 | 3/27/2020 | 7/29/2020 North America / USA / California    |
| EPI_ISL_500535 | 3/20/2020 | 7/29/2020 North America / USA / Illinois      |
| EPI_ISL_500536 | 3/19/2020 | 7/29/2020 North America / USA / Maryland      |
| EPI_ISL_500537 | 3/16/2020 | 7/29/2020 North America / USA / Minnesota     |
| EPI_ISL_500538 | 3/18/2020 | 7/29/2020 North America / USA / Louisiana     |
| EPI_ISL_500539 | 6/22/2020 | 7/29/2020 Asia / Singapore                    |
| EPI_ISL_500540 | 6/22/2020 | 7/29/2020 Asia / Singapore                    |
| EPI_ISL_500541 | 4/16/2020 | 7/29/2020 Asia / Singapore                    |
| EPI_ISL_500542 | 6/24/2020 | 7/29/2020 Asia / Singapore                    |
| EPI_ISL_500543 | 6/24/2020 | 7/29/2020 Asia / Singapore                    |
| EPI_ISL_500544 | 6/24/2020 | 7/29/2020 Asia / Singapore                    |
| EPI_ISL_500545 | 6/24/2020 | 7/29/2020 Asia / Singapore                    |
| EPI_ISL_500546 | 6/24/2020 | 7/29/2020 Asia / Singapore                    |
| EPI_ISL_500547 | 6/24/2020 | 7/29/2020 Asia / Singapore                    |
| EPI_ISL_500548 | 6/23/2020 | 7/29/2020 Asia / Singapore                    |
| EPI_ISL_500550 | 6/22/2020 | 7/29/2020 Asia / Singapore                    |
| EPI_ISL_500551 | 6/22/2020 | 7/29/2020 Asia / Singapore                    |
| EPI_ISL_500552 | 6/22/2020 | 7/29/2020 Asia / Singapore                    |
| EPI_ISL_500553 | 6/22/2020 | 7/29/2020 Asia / Singapore                    |
| EPI_ISL_500554 | 6/30/2020 | 7/29/2020 Asia / Singapore                    |
| EPI_ISL_500555 | 6/30/2020 | 7/29/2020 Asia / Singapore                    |
| EPI_ISL_500556 | 7/4/2020  | 7/29/2020 Asia / Singapore                    |
| EPI_ISL_500557 | 7/6/2020  | 7/29/2020 Asia / Singapore                    |
| EPI_ISL_500558 | 7/6/2020  | 7/29/2020 Asia / Singapore                    |

|                |           |                                                 |
|----------------|-----------|-------------------------------------------------|
| EPI_ISL_500559 | 7/6/2020  | 7/29/2020 Asia / Singapore                      |
| EPI_ISL_500560 | 7/8/2020  | 7/29/2020 Asia / Singapore                      |
| EPI_ISL_500561 | 7/1/2020  | 7/29/2020 Asia / Singapore                      |
| EPI_ISL_500562 | 6/22/2020 | 7/29/2020 Asia / Singapore                      |
| EPI_ISL_500563 | 6/13/2020 | 7/29/2020 Asia / Singapore                      |
| EPI_ISL_500564 | 6/15/2020 | 7/29/2020 Asia / Singapore                      |
| EPI_ISL_500565 | 6/15/2020 | 7/29/2020 Asia / Singapore                      |
| EPI_ISL_500566 | 6/10/2020 | 7/29/2020 Asia / Singapore                      |
| EPI_ISL_500567 | 6/10/2020 | 7/29/2020 Asia / Singapore                      |
| EPI_ISL_500568 | 6/8/2020  | 7/29/2020 Asia / Singapore                      |
| EPI_ISL_500569 | 6/6/2020  | 7/29/2020 Asia / Singapore                      |
| EPI_ISL_500570 | 6/5/2020  | 7/29/2020 Asia / Singapore                      |
| EPI_ISL_500571 | 6/5/2020  | 7/29/2020 Asia / Singapore                      |
| EPI_ISL_500572 | 7/12/2020 | 7/29/2020 Asia / Singapore                      |
| EPI_ISL_500573 | 7/2/2020  | 7/29/2020 Europe / Ireland / Sligo              |
| EPI_ISL_500574 | 7/4/2020  | 7/29/2020 Europe / Ireland / Dublin             |
| EPI_ISL_500575 | 7/4/2020  | 7/29/2020 Europe / Ireland / Wicklow            |
| EPI_ISL_500576 | 7/4/2020  | 7/29/2020 Europe / Ireland / Waterford          |
| EPI_ISL_500577 | 7/4/2020  | 7/29/2020 Europe / Ireland / Dublin             |
| EPI_ISL_500578 | 7/4/2020  | 7/29/2020 Europe / Ireland / Limerick           |
| EPI_ISL_500580 | 7/6/2020  | 7/29/2020 Europe / Ireland / Dublin             |
| EPI_ISL_500581 | 7/6/2020  | 7/29/2020 Europe / Ireland / Waterford          |
| EPI_ISL_500582 | 7/6/2020  | 7/29/2020 Europe / Ireland / Waterford          |
| EPI_ISL_500583 | 7/7/2020  | 7/29/2020 Europe / Ireland / Kilkenny           |
| EPI_ISL_500584 | 7/7/2020  | 7/29/2020 Europe / Ireland / Leitrim            |
| EPI_ISL_500585 | 7/7/2020  | 7/29/2020 Europe / Ireland / Dublin             |
| EPI_ISL_500586 | 7/7/2020  | 7/29/2020 Europe / Ireland / Dublin             |
| EPI_ISL_500587 | 7/7/2020  | 7/29/2020 Europe / Ireland / Dublin             |
| EPI_ISL_500588 | 7/7/2020  | 7/29/2020 Europe / Ireland / Dublin             |
| EPI_ISL_500589 | 7/7/2020  | 7/29/2020 Europe / Ireland / Dublin             |
| EPI_ISL_500591 | 7/7/2020  | 7/29/2020 Europe / Ireland / Wicklow            |
| EPI_ISL_500593 | 7/9/2020  | 7/29/2020 Europe / Ireland / Cork               |
| EPI_ISL_500594 | 7/8/2020  | 7/29/2020 Europe / Ireland / Dublin             |
| EPI_ISL_500595 | 7/10/2020 | 7/29/2020 Europe / Ireland / Kerry              |
| EPI_ISL_500596 | 3/15/2020 | 7/29/2020 Oceania / Australia / New South Wales |
| EPI_ISL_500597 | 3/14/2020 | 7/29/2020 Oceania / Australia / New South Wales |
| EPI_ISL_500598 | 3/13/2020 | 7/29/2020 Oceania / Australia / New South Wales |
| EPI_ISL_500599 | 3/22/2020 | 7/29/2020 Oceania / Australia / New South Wales |
| EPI_ISL_500600 | 3/22/2020 | 7/29/2020 Oceania / Australia / New South Wales |
| EPI_ISL_500601 | 3/20/2020 | 7/29/2020 Oceania / Australia / New South Wales |
| EPI_ISL_500602 | 3/21/2020 | 7/29/2020 Oceania / Australia / New South Wales |
| EPI_ISL_500603 | 3/21/2020 | 7/29/2020 Oceania / Australia / New South Wales |
| EPI_ISL_500604 | 3/20/2020 | 7/29/2020 Oceania / Australia / New South Wales |
| EPI_ISL_500605 | 3/20/2020 | 7/29/2020 Oceania / Australia / New South Wales |
| EPI_ISL_500606 | 3/20/2020 | 7/29/2020 Oceania / Australia / New South Wales |
| EPI_ISL_500607 | 3/21/2020 | 7/29/2020 Oceania / Australia / New South Wales |
| EPI_ISL_500608 | 3/21/2020 | 7/29/2020 Oceania / Australia / New South Wales |







|                |           |                                                         |
|----------------|-----------|---------------------------------------------------------|
| EPI_ISL_500703 | 5/12/2020 | 7/29/2020 Oceania / Australia / New South Wales         |
| EPI_ISL_500704 | 5/20/2020 | 7/29/2020 Oceania / Australia / New South Wales         |
| EPI_ISL_500705 | 3/27/2020 | 7/29/2020 Oceania / Australia / New South Wales         |
| EPI_ISL_500706 | 5/24/2020 | 7/29/2020 Oceania / Australia / New South Wales         |
| EPI_ISL_500709 | 7/10/2020 | 7/29/2020 Europe / United Kingdom / England             |
| EPI_ISL_500710 | 7/10/2020 | 7/29/2020 Europe / United Kingdom / England             |
| EPI_ISL_500711 | 7/10/2020 | 7/29/2020 Europe / United Kingdom / England             |
| EPI_ISL_500715 | 7/12/2020 | 7/29/2020 Europe / United Kingdom / England             |
| EPI_ISL_500716 | 3/17/2020 | 7/29/2020 Europe / Turkey / Sakarya                     |
| EPI_ISL_500717 | 7/25/2020 | 7/29/2020 Oceania / Australia / New South Wales         |
| EPI_ISL_500751 | 3/31/2020 | 7/29/2020 North America / USA / Louisiana / New Orleans |
| EPI_ISL_500769 | 7/3/2020  | 7/29/2020 Europe / Norway                               |
| EPI_ISL_500770 | 7/3/2020  | 7/29/2020 Europe / Norway                               |
| EPI_ISL_500771 | 7/3/2020  | 7/29/2020 Europe / Norway                               |
| EPI_ISL_500773 | 7/2/2020  | 7/29/2020 Europe / Norway                               |
| EPI_ISL_500774 | 7/2/2020  | 7/29/2020 Europe / Norway                               |
| EPI_ISL_500775 | 7/3/2020  | 7/29/2020 Europe / Norway                               |
| EPI_ISL_500776 | 6/29/2020 | 7/29/2020 Europe / Norway                               |
| EPI_ISL_500777 | 6/29/2020 | 7/29/2020 Europe / Norway                               |
| EPI_ISL_500778 | 6/25/2020 | 7/29/2020 Europe / Norway                               |
| EPI_ISL_500779 | 7/2/2020  | 7/29/2020 Europe / Norway                               |
| EPI_ISL_500780 | 7/2/2020  | 7/29/2020 Europe / Norway                               |
| EPI_ISL_500782 | 7/4/2020  | 7/29/2020 Europe / Norway                               |
| EPI_ISL_500783 | 7/3/2020  | 7/29/2020 Europe / Norway                               |
| EPI_ISL_500785 | 7/6/2020  | 7/29/2020 Europe / Norway                               |
| EPI_ISL_500786 | 7/5/2020  | 7/29/2020 Europe / Norway                               |
| EPI_ISL_500787 | 7/7/2020  | 7/29/2020 Europe / Norway                               |
| EPI_ISL_500789 | 7/9/2020  | 7/29/2020 Europe / Norway                               |
| EPI_ISL_500790 | 7/8/2020  | 7/29/2020 Europe / Norway                               |
| EPI_ISL_500791 | 7/10/2020 | 7/29/2020 Europe / Norway                               |
| EPI_ISL_500792 | 7/10/2020 | 7/29/2020 Europe / Norway                               |
| EPI_ISL_500794 | 7/10/2020 | 7/29/2020 Europe / Norway                               |
| EPI_ISL_500795 | 7/8/2020  | 7/29/2020 Europe / Norway                               |
| EPI_ISL_500796 | 7/11/2020 | 7/29/2020 Europe / Norway                               |
| EPI_ISL_500797 | 7/13/2020 | 7/29/2020 Europe / Norway                               |
| EPI_ISL_500799 | 7/13/2020 | 7/29/2020 Europe / Norway                               |
| EPI_ISL_500831 | 3/18/2020 | 7/29/2020 North America / USA / Virginia                |
| EPI_ISL_500832 | 4/1/2020  | 7/29/2020 North America / USA / Virginia                |
| EPI_ISL_500833 | 4/18/2020 | 7/29/2020 North America / USA / Virginia                |
| EPI_ISL_500834 | 4/17/2020 | 7/29/2020 North America / USA / Virginia                |
| EPI_ISL_500835 | 4/17/2020 | 7/29/2020 North America / USA / Virginia                |
| EPI_ISL_500836 | 4/18/2020 | 7/29/2020 North America / USA / Virginia                |
| EPI_ISL_500838 | 4/18/2020 | 7/29/2020 North America / USA / Virginia                |
| EPI_ISL_500839 | 4/18/2020 | 7/29/2020 North America / USA / Virginia                |
| EPI_ISL_500840 | 4/18/2020 | 7/29/2020 North America / USA / Virginia                |
| EPI_ISL_500841 | 4/18/2020 | 7/29/2020 North America / USA / Virginia                |
| EPI_ISL_500842 | 4/18/2020 | 7/29/2020 North America / USA / Virginia                |





|                |           |                                                         |
|----------------|-----------|---------------------------------------------------------|
| EPI_ISL_524427 | 7/19/2020 | 7/29/2020 Africa / Egypt                                |
| EPI_ISL_524435 | 4/22/2020 | 7/29/2020 North America / USA / California              |
| EPI_ISL_524455 | 4/7/2020  | 7/29/2020 North America / USA / Louisiana / New Orleans |
| EPI_ISL_524456 | 4/2/2020  | 7/29/2020 North America / USA / Louisiana / New Orleans |
| EPI_ISL_524457 | 3/31/2020 | 7/29/2020 North America / USA / Louisiana / New Orleans |
| EPI_ISL_524458 | 4/8/2020  | 7/29/2020 North America / USA / Louisiana / New Orleans |
| EPI_ISL_524459 | 4/4/2020  | 7/29/2020 North America / USA / Louisiana / New Orleans |
| EPI_ISL_524460 | 4/4/2020  | 7/29/2020 North America / USA / Louisiana / New Orleans |
| EPI_ISL_524461 | 4/4/2020  | 7/29/2020 North America / USA / Louisiana / New Orleans |
| EPI_ISL_525456 | 4/6/2020  | 7/29/2020 North America / USA / Louisiana / New Orleans |
| EPI_ISL_525457 | 4/7/2020  | 7/29/2020 North America / USA / Louisiana / New Orleans |
| EPI_ISL_525458 | 4/5/2020  | 7/29/2020 North America / USA / Louisiana / New Orleans |
| EPI_ISL_525460 | 4/5/2020  | 7/29/2020 North America / USA / Louisiana / New Orleans |
| EPI_ISL_526966 | 4/8/2020  | 7/29/2020 North America / USA / Louisiana / New Orleans |
| EPI_ISL_526972 | 4/4/2020  | 7/29/2020 North America / USA / Louisiana / New Orleans |
| EPI_ISL_527065 | 4/4/2020  | 7/29/2020 North America / USA / Louisiana / New Orleans |
| EPI_ISL_527066 | 4/4/2020  | 7/29/2020 North America / USA / Louisiana / New Orleans |
| EPI_ISL_529062 | 4/4/2020  | 7/29/2020 North America / USA / Louisiana / New Orleans |
| EPI_ISL_529151 | 3/25/2020 | 7/29/2020 North America / USA / California              |
| EPI_ISL_529152 | 4/15/2020 | 7/29/2020 North America / USA / California              |
| EPI_ISL_529153 | 4/25/2020 | 7/29/2020 North America / USA / California              |
| EPI_ISL_529154 | 5/1/2020  | 7/29/2020 North America / USA / California              |
| EPI_ISL_529162 | 3/31/2020 | 7/29/2020 North America / USA / Louisiana               |
| EPI_ISL_529164 | 4/8/2020  | 7/29/2020 North America / USA / Louisiana               |
| EPI_ISL_529165 | 4/4/2020  | 7/29/2020 North America / USA / Louisiana               |
| EPI_ISL_529166 | 4/2/2020  | 7/29/2020 North America / USA / Louisiana               |
| EPI_ISL_533435 | 4/4/2020  | 7/29/2020 North America / USA / Louisiana / New Orleans |
| EPI_ISL_533436 | 5/14/2020 | 7/29/2020 North America / USA / Louisiana / New Orleans |
| EPI_ISL_533438 | 5/14/2020 | 7/29/2020 North America / USA / Louisiana / New Orleans |
| EPI_ISL_533440 | 5/14/2020 | 7/29/2020 North America / USA / Louisiana / New Orleans |
| EPI_ISL_533441 | 5/14/2020 | 7/29/2020 North America / USA / Louisiana / New Orleans |
| EPI_ISL_591070 | 5/20/2020 | 7/29/2020 Asia / South Korea                            |
| EPI_ISL_500872 | 4/8/2020  | 7/30/2020 South America / Brazil / Pernambuco / Olinda  |
| EPI_ISL_500877 | 7/3/2020  | 7/30/2020 Europe / Switzerland / Ticino                 |
| EPI_ISL_500878 | 7/6/2020  | 7/30/2020 Europe / Switzerland / St Gall                |
| EPI_ISL_500879 | 7/6/2020  | 7/30/2020 Europe / Switzerland / Zurich                 |
| EPI_ISL_500880 | 7/6/2020  | 7/30/2020 Europe / Switzerland / Zurich                 |
| EPI_ISL_500881 | 7/6/2020  | 7/30/2020 Europe / Switzerland / Basel-Landschaft       |
| EPI_ISL_500882 | 7/6/2020  | 7/30/2020 Europe / Switzerland / Aargau                 |
| EPI_ISL_500883 | 7/6/2020  | 7/30/2020 Europe / Switzerland / Schwyz                 |
| EPI_ISL_500884 | 7/6/2020  | 7/30/2020 Europe / Switzerland / Zurich                 |
| EPI_ISL_500885 | 7/6/2020  | 7/30/2020 Europe / Switzerland / Grisons                |
| EPI_ISL_500886 | 7/7/2020  | 7/30/2020 Europe / Switzerland / Zurich                 |
| EPI_ISL_500887 | 7/7/2020  | 7/30/2020 Europe / Switzerland / Zug                    |
| EPI_ISL_500889 | 7/7/2020  | 7/30/2020 Europe / Switzerland / Zurich                 |
| EPI_ISL_500890 | 7/7/2020  | 7/30/2020 Europe / Switzerland / Bern                   |
| EPI_ISL_500891 | 7/6/2020  | 7/30/2020 Europe / Switzerland / Uri                    |

|                |          |           |                                         |
|----------------|----------|-----------|-----------------------------------------|
| EPI_ISL_500892 | 7/6/2020 | 7/30/2020 | Europe / Switzerland / Wallis           |
| EPI_ISL_500893 | 7/6/2020 | 7/30/2020 | Europe / Switzerland / Vaud             |
| EPI_ISL_500894 | 7/7/2020 | 7/30/2020 | Europe / Switzerland / Zurich           |
| EPI_ISL_500895 | 7/7/2020 | 7/30/2020 | Europe / Switzerland / Zurich           |
| EPI_ISL_500896 | 7/7/2020 | 7/30/2020 | Europe / Switzerland / Schwyz           |
| EPI_ISL_500897 | 7/8/2020 | 7/30/2020 | Europe / Switzerland / Basel-Landschaft |
| EPI_ISL_500898 | 7/8/2020 | 7/30/2020 | Europe / Switzerland / Zurich           |
| EPI_ISL_500899 | 7/8/2020 | 7/30/2020 | Europe / Switzerland / Basel-Landschaft |
| EPI_ISL_500901 | 7/8/2020 | 7/30/2020 | Europe / Switzerland / Zurich           |
| EPI_ISL_500902 | 7/8/2020 | 7/30/2020 | Europe / Switzerland / Vaud             |
| EPI_ISL_500903 | 7/8/2020 | 7/30/2020 | Europe / Switzerland / Bern             |
| EPI_ISL_500904 | 7/8/2020 | 7/30/2020 | Europe / Switzerland / Uri              |
| EPI_ISL_500905 | 7/8/2020 | 7/30/2020 | Europe / Switzerland / Bern             |
| EPI_ISL_500906 | 7/8/2020 | 7/30/2020 | Europe / Switzerland / Vaud             |
| EPI_ISL_500907 | 7/8/2020 | 7/30/2020 | Europe / Switzerland / Aargau           |
| EPI_ISL_500908 | 7/8/2020 | 7/30/2020 | Europe / Switzerland / Bern             |
| EPI_ISL_500909 | 7/8/2020 | 7/30/2020 | Europe / Switzerland / Basel-Landschaft |
| EPI_ISL_500910 | 7/9/2020 | 7/30/2020 | Europe / Switzerland / Basel-Landschaft |
| EPI_ISL_500911 | 7/9/2020 | 7/30/2020 | Europe / Switzerland / Basel-Landschaft |
| EPI_ISL_500912 | 7/9/2020 | 7/30/2020 | Europe / Switzerland / Basel-Landschaft |
| EPI_ISL_500913 | 7/9/2020 | 7/30/2020 | Europe / Switzerland / Basel-Landschaft |
| EPI_ISL_500914 | 7/9/2020 | 7/30/2020 | Europe / Switzerland / Zurich           |
| EPI_ISL_500915 | 7/9/2020 | 7/30/2020 | Europe / Switzerland / Schwyz           |
| EPI_ISL_500916 | 7/9/2020 | 7/30/2020 | Europe / Switzerland / Basel-Landschaft |
| EPI_ISL_500917 | 7/9/2020 | 7/30/2020 | Europe / Switzerland / Zurich           |
| EPI_ISL_500919 | 7/9/2020 | 7/30/2020 | Europe / Switzerland / Aargau           |
| EPI_ISL_500920 | 7/9/2020 | 7/30/2020 | Europe / Switzerland / Basel-Landschaft |
| EPI_ISL_500921 | 7/9/2020 | 7/30/2020 | Europe / Switzerland / Basel-Landschaft |
| EPI_ISL_500922 | 7/9/2020 | 7/30/2020 | Europe / Switzerland / Basel-Landschaft |
| EPI_ISL_500923 | 7/9/2020 | 7/30/2020 | Europe / Switzerland / Bern             |
| EPI_ISL_500924 | 7/9/2020 | 7/30/2020 | Europe / Switzerland / Lucerne          |
| EPI_ISL_500925 | 7/9/2020 | 7/30/2020 | Europe / Switzerland / Bern             |
| EPI_ISL_500927 | 7/3/2020 | 7/30/2020 | Europe / Switzerland / Schwyz           |
| EPI_ISL_500929 | 7/4/2020 | 7/30/2020 | Europe / Switzerland / Basel-Landschaft |
| EPI_ISL_500932 | 7/4/2020 | 7/30/2020 | Europe / Switzerland / Bern             |
| EPI_ISL_500933 | 7/5/2020 | 7/30/2020 | Europe / Switzerland / Basel-Landschaft |
| EPI_ISL_500934 | 7/5/2020 | 7/30/2020 | Europe / Switzerland / Basel-Landschaft |
| EPI_ISL_500935 | 7/5/2020 | 7/30/2020 | Europe / Switzerland / Basel-Landschaft |
| EPI_ISL_500936 | 7/6/2020 | 7/30/2020 | Europe / Switzerland / Bern             |
| EPI_ISL_500937 | 7/6/2020 | 7/30/2020 | Europe / Switzerland / Solothurn        |
| EPI_ISL_500938 | 7/6/2020 | 7/30/2020 | Europe / Switzerland / Aargau           |
| EPI_ISL_500939 | 7/7/2020 | 7/30/2020 | Europe / Switzerland / Basel-Landschaft |
| EPI_ISL_500940 | 7/7/2020 | 7/30/2020 | Europe / Switzerland / Aargau           |
| EPI_ISL_500941 | 7/7/2020 | 7/30/2020 | Europe / Switzerland / Basel-Stadt      |
| EPI_ISL_500942 | 7/7/2020 | 7/30/2020 | Europe / Switzerland / Basel-Landschaft |
| EPI_ISL_500943 | 7/7/2020 | 7/30/2020 | Europe / Switzerland / Vaud             |
| EPI_ISL_500944 | 7/7/2020 | 7/30/2020 | Europe / Switzerland / Basel-Stadt      |

|                |           |                                                      |
|----------------|-----------|------------------------------------------------------|
| EPI_ISL_500945 | 7/8/2020  | 7/30/2020 Europe / Switzerland / Basel-Landschaft    |
| EPI_ISL_500946 | 6/15/2020 | 7/30/2020 Asia / India / Gujarat / Vadodara          |
| EPI_ISL_500947 | 6/17/2020 | 7/30/2020 Asia / India / Gujarat / Surat             |
| EPI_ISL_500948 | 6/17/2020 | 7/30/2020 Asia / India / Gujarat / Surat             |
| EPI_ISL_500949 | 6/17/2020 | 7/30/2020 Asia / India / Gujarat / Surat             |
| EPI_ISL_500950 | 6/17/2020 | 7/30/2020 Asia / India / Gujarat / Surat             |
| EPI_ISL_500952 | 4/24/2020 | 7/30/2020 Europe / United Kingdom / England          |
| EPI_ISL_500953 | 4/30/2020 | 7/30/2020 Europe / United Kingdom / England          |
| EPI_ISL_500954 | 5/18/2020 | 7/30/2020 Europe / United Kingdom / Northern Ireland |
| EPI_ISL_500955 | 5/17/2020 | 7/30/2020 Europe / United Kingdom / Northern Ireland |
| EPI_ISL_500957 | 5/21/2020 | 7/30/2020 Europe / United Kingdom / Northern Ireland |
| EPI_ISL_500958 | 5/19/2020 | 7/30/2020 Europe / United Kingdom / Northern Ireland |
| EPI_ISL_500959 | 5/19/2020 | 7/30/2020 Europe / United Kingdom / Northern Ireland |
| EPI_ISL_500960 | 5/16/2020 | 7/30/2020 Europe / United Kingdom / Northern Ireland |
| EPI_ISL_500961 | 5/10/2020 | 7/30/2020 Europe / United Kingdom / Northern Ireland |
| EPI_ISL_500962 | 5/4/2020  | 7/30/2020 Europe / United Kingdom / Northern Ireland |
| EPI_ISL_500963 | 5/22/2020 | 7/30/2020 Europe / United Kingdom / Northern Ireland |
| EPI_ISL_500964 | 5/16/2020 | 7/30/2020 Europe / United Kingdom / Northern Ireland |
| EPI_ISL_500965 | 5/2/2020  | 7/30/2020 Europe / United Kingdom / Northern Ireland |
| EPI_ISL_500966 | 5/18/2020 | 7/30/2020 Europe / United Kingdom / Northern Ireland |
| EPI_ISL_500967 | 5/17/2020 | 7/30/2020 Europe / United Kingdom / Northern Ireland |
| EPI_ISL_500968 | 5/25/2020 | 7/30/2020 Europe / United Kingdom / Northern Ireland |
| EPI_ISL_500970 | 5/10/2020 | 7/30/2020 Europe / United Kingdom / Northern Ireland |
| EPI_ISL_500971 | 5/5/2020  | 7/30/2020 Europe / United Kingdom / Northern Ireland |
| EPI_ISL_500972 | 5/2/2020  | 7/30/2020 Europe / United Kingdom / Northern Ireland |
| EPI_ISL_500973 | 5/14/2020 | 7/30/2020 Europe / United Kingdom / Northern Ireland |
| EPI_ISL_500974 | 5/16/2020 | 7/30/2020 Europe / United Kingdom / Northern Ireland |
| EPI_ISL_500975 | 5/2/2020  | 7/30/2020 Europe / United Kingdom / Northern Ireland |
| EPI_ISL_500976 | 5/25/2020 | 7/30/2020 Europe / United Kingdom / Northern Ireland |
| EPI_ISL_500977 | 5/10/2020 | 7/30/2020 Europe / United Kingdom / Northern Ireland |
| EPI_ISL_500978 | 5/18/2020 | 7/30/2020 Europe / United Kingdom / Northern Ireland |
| EPI_ISL_500979 | 5/17/2020 | 7/30/2020 Europe / United Kingdom / Northern Ireland |
| EPI_ISL_500980 | 5/20/2020 | 7/30/2020 Europe / United Kingdom / Northern Ireland |
| EPI_ISL_500981 | 5/19/2020 | 7/30/2020 Europe / United Kingdom / Northern Ireland |
| EPI_ISL_500982 | 5/17/2020 | 7/30/2020 Europe / United Kingdom / Northern Ireland |
| EPI_ISL_500983 | 5/14/2020 | 7/30/2020 Europe / United Kingdom / Northern Ireland |
| EPI_ISL_500984 | 5/25/2020 | 7/30/2020 Europe / United Kingdom / Northern Ireland |
| EPI_ISL_500985 | 5/2/2020  | 7/30/2020 Europe / United Kingdom / Northern Ireland |
| EPI_ISL_500986 | 5/23/2020 | 7/30/2020 Europe / United Kingdom / Northern Ireland |
| EPI_ISL_500987 | 5/17/2020 | 7/30/2020 Europe / United Kingdom / Northern Ireland |
| EPI_ISL_500988 | 5/6/2020  | 7/30/2020 Europe / United Kingdom / Northern Ireland |
| EPI_ISL_500989 | 5/18/2020 | 7/30/2020 Europe / United Kingdom / Northern Ireland |
| EPI_ISL_500990 | 5/5/2020  | 7/30/2020 Europe / United Kingdom / Northern Ireland |
| EPI_ISL_500991 | 5/16/2020 | 7/30/2020 Europe / United Kingdom / Northern Ireland |
| EPI_ISL_500992 | 5/10/2020 | 7/30/2020 Europe / United Kingdom / Northern Ireland |
| EPI_ISL_500993 | 5/4/2020  | 7/30/2020 Europe / United Kingdom / Northern Ireland |
| EPI_ISL_500994 | 5/22/2020 | 7/30/2020 Europe / United Kingdom / Northern Ireland |





|                |           |           |                                            |
|----------------|-----------|-----------|--------------------------------------------|
| EPI_ISL_501048 | 5/20/2020 | 7/30/2020 | Europe / United Kingdom / Northern Ireland |
| EPI_ISL_501049 | 5/16/2020 | 7/30/2020 | Europe / United Kingdom / Northern Ireland |
| EPI_ISL_501050 | 5/2/2020  | 7/30/2020 | Europe / United Kingdom / Northern Ireland |
| EPI_ISL_501051 | 5/2/2020  | 7/30/2020 | Europe / United Kingdom / Northern Ireland |
| EPI_ISL_501052 | 5/6/2020  | 7/30/2020 | Europe / United Kingdom / Northern Ireland |
| EPI_ISL_501053 | 5/22/2020 | 7/30/2020 | Europe / United Kingdom / Northern Ireland |
| EPI_ISL_501054 | 5/14/2020 | 7/30/2020 | Europe / United Kingdom / Northern Ireland |
| EPI_ISL_501055 | 5/10/2020 | 7/30/2020 | Europe / United Kingdom / Northern Ireland |
| EPI_ISL_501056 | 5/29/2020 | 7/30/2020 | Europe / United Kingdom / Northern Ireland |
| EPI_ISL_501057 | 5/14/2020 | 7/30/2020 | Europe / United Kingdom / Northern Ireland |
| EPI_ISL_501058 | 5/18/2020 | 7/30/2020 | Europe / United Kingdom / Northern Ireland |
| EPI_ISL_501059 | 5/22/2020 | 7/30/2020 | Europe / United Kingdom / Northern Ireland |
| EPI_ISL_501060 | 5/14/2020 | 7/30/2020 | Europe / United Kingdom / Northern Ireland |
| EPI_ISL_501061 | 5/19/2020 | 7/30/2020 | Europe / United Kingdom / Northern Ireland |
| EPI_ISL_501062 | 5/7/2020  | 7/30/2020 | Europe / United Kingdom / Northern Ireland |
| EPI_ISL_501063 | 5/18/2020 | 7/30/2020 | Europe / United Kingdom / Northern Ireland |
| EPI_ISL_501064 | 5/19/2020 | 7/30/2020 | Europe / United Kingdom / Northern Ireland |
| EPI_ISL_501065 | 5/19/2020 | 7/30/2020 | Europe / United Kingdom / Northern Ireland |
| EPI_ISL_501066 | 5/14/2020 | 7/30/2020 | Europe / United Kingdom / Northern Ireland |
| EPI_ISL_501067 | 5/18/2020 | 7/30/2020 | Europe / United Kingdom / Northern Ireland |
| EPI_ISL_501068 | 5/19/2020 | 7/30/2020 | Europe / United Kingdom / Northern Ireland |
| EPI_ISL_501069 | 5/2/2020  | 7/30/2020 | Europe / United Kingdom / Northern Ireland |
| EPI_ISL_501071 | 5/1/2020  | 7/30/2020 | Europe / United Kingdom / Northern Ireland |
| EPI_ISL_501072 | 4/8/2020  | 7/30/2020 | North America / USA / Alabama              |
| EPI_ISL_501073 | 3/18/2020 | 7/30/2020 | North America / USA / Colorado             |
| EPI_ISL_501074 | 3/20/2020 | 7/30/2020 | North America / USA / Georgia              |
| EPI_ISL_501075 | 3/23/2020 | 7/30/2020 | North America / USA / Illinois             |
| EPI_ISL_501076 | 3/20/2020 | 7/30/2020 | North America / USA / Illinois             |
| EPI_ISL_501077 | 3/20/2020 | 7/30/2020 | North America / USA / Illinois             |
| EPI_ISL_501078 | 3/18/2020 | 7/30/2020 | North America / USA / Louisiana            |
| EPI_ISL_501079 | 3/19/2020 | 7/30/2020 | North America / USA / Maryland             |
| EPI_ISL_501080 | 3/30/2020 | 7/30/2020 | North America / USA / Minnesota            |
| EPI_ISL_501081 | 3/22/2020 | 7/30/2020 | North America / USA / Mississippi          |
| EPI_ISL_501082 | 3/19/2020 | 7/30/2020 | North America / USA / New York             |
| EPI_ISL_501083 | 7/1/2020  | 7/30/2020 | North America / USA / Oregon               |
| EPI_ISL_501084 | 6/30/2020 | 7/30/2020 | North America / USA                        |
| EPI_ISL_501085 | 6/30/2020 | 7/30/2020 | North America / USA                        |
| EPI_ISL_501086 | 6/2/2020  | 7/30/2020 | North America / USA / Washington           |
| EPI_ISL_501087 | 5/31/2020 | 7/30/2020 | North America / USA / Washington           |
| EPI_ISL_501088 | 6/4/2020  | 7/30/2020 | North America / USA / Washington           |
| EPI_ISL_501089 | 6/5/2020  | 7/30/2020 | North America / USA / Washington           |
| EPI_ISL_501090 | 6/11/2020 | 7/30/2020 | North America / USA / Washington           |
| EPI_ISL_501091 | 6/12/2020 | 7/30/2020 | North America / USA / Washington           |
| EPI_ISL_501092 | 6/18/2020 | 7/30/2020 | North America / USA / Washington           |
| EPI_ISL_501093 | 6/20/2020 | 7/30/2020 | North America / USA / Washington           |
| EPI_ISL_501095 | 6/21/2020 | 7/30/2020 | North America / USA / Washington           |
| EPI_ISL_501096 | 6/21/2020 | 7/30/2020 | North America / USA / Washington           |



|                |           |           |                                              |
|----------------|-----------|-----------|----------------------------------------------|
| EPI_ISL_501148 | 7/2/2020  | 7/30/2020 | North America / USA / Washington             |
| EPI_ISL_501149 | 7/2/2020  | 7/30/2020 | North America / USA / Washington             |
| EPI_ISL_501150 | 7/2/2020  | 7/30/2020 | North America / USA / Washington             |
| EPI_ISL_501151 | 4/19/2020 | 7/30/2020 | North America / USA / Washington             |
| EPI_ISL_501152 | 4/20/2020 | 7/30/2020 | North America / USA / Washington             |
| EPI_ISL_501153 | 4/21/2020 | 7/30/2020 | North America / USA / Washington             |
| EPI_ISL_501154 | 4/24/2020 | 7/30/2020 | North America / USA / Washington             |
| EPI_ISL_501155 | 5/6/2020  | 7/30/2020 | North America / USA / Washington             |
| EPI_ISL_501156 | 5/6/2020  | 7/30/2020 | North America / USA / Washington             |
| EPI_ISL_501157 | 5/8/2020  | 7/30/2020 | North America / USA / Washington             |
| EPI_ISL_501158 | 5/10/2020 | 7/30/2020 | North America / USA / Washington             |
| EPI_ISL_501159 | 5/14/2020 | 7/30/2020 | North America / USA / Washington             |
| EPI_ISL_501160 | 5/16/2020 | 7/30/2020 | North America / USA / Washington             |
| EPI_ISL_501161 | 5/19/2020 | 7/30/2020 | North America / USA / Washington             |
| EPI_ISL_501162 | 5/25/2020 | 7/30/2020 | North America / USA / Washington             |
| EPI_ISL_501163 | 5/24/2020 | 7/30/2020 | North America / USA / Washington             |
| EPI_ISL_501164 | 5/26/2020 | 7/30/2020 | North America / USA / Washington             |
| EPI_ISL_501165 | 3/23/2020 | 7/30/2020 | North America / USA / Wisconsin              |
| EPI_ISL_501167 | 3/23/2020 | 7/30/2020 | North America / USA / Texas / Houston County |
| EPI_ISL_501168 | 3/30/2020 | 7/30/2020 | North America / USA / Texas / Houston County |
| EPI_ISL_501169 | 4/2/2020  | 7/30/2020 | North America / USA / Texas / Houston County |
| EPI_ISL_501170 | 4/7/2020  | 7/30/2020 | North America / USA / Texas / Houston County |
| EPI_ISL_501171 | 4/7/2020  | 7/30/2020 | North America / USA / Texas / Houston County |
| EPI_ISL_501172 | 4/13/2020 | 7/30/2020 | North America / USA / Texas / Houston County |
| EPI_ISL_501173 | 4/16/2020 | 7/30/2020 | North America / USA / Texas / Houston County |
| EPI_ISL_501174 | 4/23/2020 | 7/30/2020 | North America / USA / Texas / Houston County |
| EPI_ISL_510545 | 2020-06   | 7/30/2020 | Asia / Japan / Kanagawa                      |
| EPI_ISL_501176 | 3/21/2020 | 7/31/2020 | Asia / Malaysia / Kuala Lumpur               |
| EPI_ISL_501177 | 3/22/2020 | 7/31/2020 | Asia / Malaysia / Kuala Lumpur               |
| EPI_ISL_501178 | 3/23/2020 | 7/31/2020 | Asia / Malaysia / Kuala Lumpur               |
| EPI_ISL_501179 | 3/23/2020 | 7/31/2020 | Asia / Malaysia / Kuala Lumpur               |
| EPI_ISL_501180 | 3/23/2020 | 7/31/2020 | Asia / Malaysia / Kuala Lumpur               |
| EPI_ISL_501181 | 3/4/2020  | 7/31/2020 | Asia / Malaysia / Kuala Lumpur               |
| EPI_ISL_501182 | 3/24/2020 | 7/31/2020 | Asia / Malaysia / Kuala Lumpur               |
| EPI_ISL_501183 | 3/24/2020 | 7/31/2020 | Asia / Malaysia / Kuala Lumpur               |
| EPI_ISL_501184 | 3/25/2020 | 7/31/2020 | Asia / Malaysia / Kuala Lumpur               |
| EPI_ISL_501185 | 3/25/2020 | 7/31/2020 | Asia / Malaysia / Kuala Lumpur               |
| EPI_ISL_501186 | 3/25/2020 | 7/31/2020 | Asia / Malaysia / Kuala Lumpur               |
| EPI_ISL_501187 | 3/25/2020 | 7/31/2020 | Asia / Malaysia / Kuala Lumpur               |
| EPI_ISL_501188 | 3/26/2020 | 7/31/2020 | Asia / Malaysia / Kuala Lumpur               |
| EPI_ISL_501189 | 3/26/2020 | 7/31/2020 | Asia / Malaysia / Kuala Lumpur               |
| EPI_ISL_501190 | 3/26/2020 | 7/31/2020 | Asia / Malaysia / Kuala Lumpur               |
| EPI_ISL_501191 | 4/1/2020  | 7/31/2020 | Asia / Malaysia / Kuala Lumpur               |
| EPI_ISL_501192 | 4/23/2020 | 7/31/2020 | Asia / Malaysia / Kuala Lumpur               |
| EPI_ISL_501193 | 3/27/2020 | 7/31/2020 | Asia / Malaysia / Kuala Lumpur               |
| EPI_ISL_501194 | 3/27/2020 | 7/31/2020 | Asia / Malaysia / Kuala Lumpur               |
| EPI_ISL_501195 | 3/28/2020 | 7/31/2020 | Asia / Malaysia / Kuala Lumpur               |

|                |           |                                          |
|----------------|-----------|------------------------------------------|
| EPI_ISL_501196 | 3/28/2020 | 7/31/2020 Asia / Malaysia / Kuala Lumpur |
| EPI_ISL_501197 | 3/28/2020 | 7/31/2020 Asia / Malaysia / Kuala Lumpur |
| EPI_ISL_501198 | 3/28/2020 | 7/31/2020 Asia / Malaysia / Kuala Lumpur |
| EPI_ISL_501199 | 3/29/2020 | 7/31/2020 Asia / Malaysia / Kuala Lumpur |
| EPI_ISL_501200 | 5/4/2020  | 7/31/2020 Asia / Malaysia / Kuala Lumpur |
| EPI_ISL_501201 | 3/30/2020 | 7/31/2020 Asia / Malaysia / Kuala Lumpur |
| EPI_ISL_501202 | 3/30/2020 | 7/31/2020 Asia / Malaysia / Kuala Lumpur |
| EPI_ISL_501203 | 3/30/2020 | 7/31/2020 Asia / Malaysia / Kuala Lumpur |
| EPI_ISL_501204 | 3/30/2020 | 7/31/2020 Asia / Malaysia / Kuala Lumpur |
| EPI_ISL_501205 | 3/30/2020 | 7/31/2020 Asia / Malaysia / Kuala Lumpur |
| EPI_ISL_501206 | 3/31/2020 | 7/31/2020 Asia / Malaysia / Kuala Lumpur |
| EPI_ISL_501207 | 3/31/2020 | 7/31/2020 Asia / Malaysia / Kuala Lumpur |
| EPI_ISL_501208 | 3/31/2020 | 7/31/2020 Asia / Malaysia / Kuala Lumpur |
| EPI_ISL_501209 | 3/31/2020 | 7/31/2020 Asia / Malaysia / Kuala Lumpur |
| EPI_ISL_501210 | 4/1/2020  | 7/31/2020 Asia / Malaysia / Kuala Lumpur |
| EPI_ISL_501211 | 4/2/2020  | 7/31/2020 Asia / Malaysia / Kuala Lumpur |
| EPI_ISL_501212 | 4/4/2020  | 7/31/2020 Asia / Malaysia / Kuala Lumpur |
| EPI_ISL_501213 | 4/6/2020  | 7/31/2020 Asia / Malaysia / Kuala Lumpur |
| EPI_ISL_501214 | 4/6/2020  | 7/31/2020 Asia / Malaysia / Kuala Lumpur |
| EPI_ISL_501215 | 4/6/2020  | 7/31/2020 Asia / Malaysia / Kuala Lumpur |
| EPI_ISL_501216 | 4/6/2020  | 7/31/2020 Asia / Malaysia / Kuala Lumpur |
| EPI_ISL_501217 | 4/6/2020  | 7/31/2020 Asia / Malaysia / Kuala Lumpur |
| EPI_ISL_501218 | 4/7/2020  | 7/31/2020 Asia / Malaysia / Kuala Lumpur |
| EPI_ISL_501219 | 4/7/2020  | 7/31/2020 Asia / Malaysia / Kuala Lumpur |
| EPI_ISL_501220 | 2/25/2020 | 7/31/2020 Asia / Malaysia / Kuala Lumpur |
| EPI_ISL_501221 | 3/17/2020 | 7/31/2020 Asia / Malaysia / Kuala Lumpur |
| EPI_ISL_501222 | 4/12/2020 | 7/31/2020 Asia / Malaysia / Kuala Lumpur |
| EPI_ISL_501223 | 3/18/2020 | 7/31/2020 Asia / Malaysia / Kuala Lumpur |
| EPI_ISL_501224 | 3/18/2020 | 7/31/2020 Asia / Malaysia / Kuala Lumpur |
| EPI_ISL_501225 | 3/19/2020 | 7/31/2020 Asia / Malaysia / Kuala Lumpur |
| EPI_ISL_501226 | 3/19/2020 | 7/31/2020 Asia / Malaysia / Kuala Lumpur |
| EPI_ISL_501227 | 3/21/2020 | 7/31/2020 Asia / Malaysia / Kuala Lumpur |
| EPI_ISL_501228 | 3/21/2020 | 7/31/2020 Asia / Malaysia / Kuala Lumpur |
| EPI_ISL_501230 | 4/24/2020 | 7/31/2020 Europe / Greece / Livadia      |
| EPI_ISL_501233 | 5/3/2020  | 7/31/2020 Europe / Greece / Athens       |
| EPI_ISL_501236 | 5/13/2020 | 7/31/2020 Europe / Greece / Athens       |
| EPI_ISL_501248 | 4/22/2020 | 7/31/2020 Europe / Greece / Athens       |
| EPI_ISL_501249 | 4/22/2020 | 7/31/2020 Europe / Greece / Athens       |
| EPI_ISL_501250 | 5/8/2020  | 7/31/2020 Europe / Greece / Athens       |
| EPI_ISL_501251 | 4/1/2020  | 7/31/2020 Europe / Greece / Athens       |
| EPI_ISL_501259 | 5/27/2020 | 7/31/2020 Europe / Ireland / Louth       |
| EPI_ISL_501268 | 7/10/2020 | 7/31/2020 Europe / Ireland / Dublin      |
| EPI_ISL_501273 | 7/18/2020 | 7/31/2020 Europe / Ireland / Dublin      |
| EPI_ISL_501274 | 7/19/2020 | 7/31/2020 Europe / Ireland / Dublin      |
| EPI_ISL_501275 | 7/8/2020  | 7/31/2020 Europe / Latvia                |
| EPI_ISL_501284 | 7/10/2020 | 7/31/2020 Europe / Latvia                |
| EPI_ISL_501285 | 7/10/2020 | 7/31/2020 Europe / Latvia                |



|                |           |           |                                               |
|----------------|-----------|-----------|-----------------------------------------------|
| EPI_ISL_501620 | 3/29/2020 | 7/31/2020 | Europe / United Kingdom / England             |
| EPI_ISL_501621 | 4/12/2020 | 7/31/2020 | Europe / United Kingdom / England             |
| EPI_ISL_501622 | 5/17/2020 | 7/31/2020 | Europe / United Kingdom / England             |
| EPI_ISL_501623 | 4/16/2020 | 7/31/2020 | Europe / United Kingdom / England             |
| EPI_ISL_501624 | 3/26/2020 | 7/31/2020 | Europe / United Kingdom / England             |
| EPI_ISL_501625 | 4/22/2020 | 7/31/2020 | Europe / United Kingdom / England             |
| EPI_ISL_501626 | 3/23/2020 | 7/31/2020 | Europe / United Kingdom / England             |
| EPI_ISL_501627 | 5/5/2020  | 7/31/2020 | Europe / United Kingdom / England             |
| EPI_ISL_501628 | 3/30/2020 | 7/31/2020 | Europe / United Kingdom / England             |
| EPI_ISL_501629 | 3/23/2020 | 7/31/2020 | Europe / United Kingdom / England             |
| EPI_ISL_501632 | 3/26/2020 | 7/31/2020 | Europe / United Kingdom / Scotland            |
| EPI_ISL_501633 | 3/25/2020 | 7/31/2020 | Europe / United Kingdom / Scotland            |
| EPI_ISL_501634 | 3/26/2020 | 7/31/2020 | Europe / United Kingdom / Scotland            |
| EPI_ISL_501635 | 3/26/2020 | 7/31/2020 | Europe / United Kingdom / Scotland            |
| EPI_ISL_501808 | 7/6/2020  | 7/31/2020 | Europe / Latvia                               |
| EPI_ISL_501817 | 7/9/2020  | 7/31/2020 | Europe / Latvia                               |
| EPI_ISL_501823 | 7/16/2020 | 7/31/2020 | Europe / Latvia                               |
| EPI_ISL_501829 | 7/16/2020 | 7/31/2020 | Europe / Latvia                               |
| EPI_ISL_501833 | 7/17/2020 | 7/31/2020 | Europe / Latvia                               |
| EPI_ISL_501839 | 7/17/2020 | 7/31/2020 | Europe / Latvia                               |
| EPI_ISL_501849 | 7/18/2020 | 7/31/2020 | Europe / Latvia                               |
| EPI_ISL_501894 | 7/20/2020 | 7/31/2020 | Europe / Latvia                               |
| EPI_ISL_501895 | 7/14/2020 | 7/31/2020 | Europe / Latvia                               |
| EPI_ISL_501896 | 6/15/2020 | 7/31/2020 | Europe / Latvia                               |
| EPI_ISL_501915 | 6/16/2020 | 7/31/2020 | Europe / Latvia                               |
| EPI_ISL_501922 | 6/16/2020 | 7/31/2020 | Europe / Latvia                               |
| EPI_ISL_501929 | 7/9/2020  | 7/31/2020 | Europe / Latvia                               |
| EPI_ISL_501936 | 7/9/2020  | 7/31/2020 | Europe / Latvia                               |
| EPI_ISL_502779 | 6/24/2020 | 7/31/2020 | South America / Brazil / Pernambuco / Caruaru |
| EPI_ISL_502875 | 6/24/2020 | 7/31/2020 | South America / Brazil / Pernambuco / Recife  |
| EPI_ISL_503958 | 7/7/2020  | 8/1/2020  | Asia / Bangladesh / Khulna / Jessore          |
| EPI_ISL_504040 | 7/7/2020  | 8/1/2020  | Asia / Bangladesh / Khulna / Jessore          |
| EPI_ISL_504137 | 7/16/2020 | 8/1/2020  | Asia / Bangladesh / Chittagong / Brahmanbaria |
| EPI_ISL_504176 | 7/21/2020 | 8/1/2020  | Asia / Bangladesh / Chittagong / Chandpur     |
| EPI_ISL_504177 | 7/14/2020 | 8/1/2020  | Asia / Bangladesh / Rangpur / Nilphamari      |
| EPI_ISL_504178 | 7/17/2020 | 8/1/2020  | Asia / Bangladesh / Sylhet / Moulvibazar      |
| EPI_ISL_504179 | 7/18/2020 | 8/1/2020  | Asia / Bangladesh / Sylhet / Moulvibazar      |
| EPI_ISL_504180 | 5/31/2020 | 8/1/2020  | Asia / Bangladesh / Mymensingh                |
| EPI_ISL_504181 | 5/31/2020 | 8/1/2020  | Asia / Bangladesh / Mymensingh                |
| EPI_ISL_504182 | 6/3/2020  | 8/1/2020  | Asia / Bangladesh / Mymensingh                |
| EPI_ISL_504183 | 7/15/2020 | 8/1/2020  | Asia / Bangladesh / Rajshahi                  |
| EPI_ISL_504184 | 7/15/2020 | 8/1/2020  | Asia / Bangladesh / Rajshahi                  |
| EPI_ISL_504185 | 5/13/2020 | 8/1/2020  | North America / Canada / Alberta              |
| EPI_ISL_505003 | 4/10/2020 | 8/2/2020  | Europe / France / Provence-Alpes-Cote d'Azur  |
| EPI_ISL_506947 | 2/24/2020 | 8/2/2020  | Asia / South Korea                            |
| EPI_ISL_506948 | 2/27/2020 | 8/2/2020  | Asia / South Korea                            |
| EPI_ISL_506949 | 2/27/2020 | 8/2/2020  | Asia / South Korea                            |

|                |           |                                         |
|----------------|-----------|-----------------------------------------|
| EPI_ISL_506950 | 2/28/2020 | 8/2/2020 Asia / South Korea             |
| EPI_ISL_506951 | 2/29/2020 | 8/2/2020 Asia / South Korea             |
| EPI_ISL_506952 | 2/28/2020 | 8/2/2020 Asia / South Korea             |
| EPI_ISL_506953 | 2/28/2020 | 8/2/2020 Asia / South Korea             |
| EPI_ISL_506954 | 3/7/2020  | 8/2/2020 Asia / South Korea             |
| EPI_ISL_506955 | 3/6/2020  | 8/2/2020 Asia / South Korea             |
| EPI_ISL_506956 | 3/8/2020  | 8/2/2020 Asia / South Korea             |
| EPI_ISL_506957 | 3/9/2020  | 8/2/2020 Asia / South Korea             |
| EPI_ISL_506958 | 3/9/2020  | 8/2/2020 Asia / South Korea             |
| EPI_ISL_506959 | 3/9/2020  | 8/2/2020 Asia / South Korea             |
| EPI_ISL_506960 | 3/9/2020  | 8/2/2020 Asia / South Korea             |
| EPI_ISL_506961 | 3/9/2020  | 8/2/2020 Asia / South Korea             |
| EPI_ISL_506962 | 3/9/2020  | 8/2/2020 Asia / South Korea             |
| EPI_ISL_506963 | 3/9/2020  | 8/2/2020 Asia / South Korea             |
| EPI_ISL_506964 | 3/9/2020  | 8/2/2020 Asia / South Korea             |
| EPI_ISL_506965 | 3/23/2020 | 8/2/2020 Asia / South Korea             |
| EPI_ISL_506966 | 3/23/2020 | 8/2/2020 Asia / South Korea             |
| EPI_ISL_506967 | 3/23/2020 | 8/2/2020 Asia / South Korea             |
| EPI_ISL_506968 | 3/23/2020 | 8/2/2020 Asia / South Korea             |
| EPI_ISL_506969 | 3/23/2020 | 8/2/2020 Asia / South Korea             |
| EPI_ISL_506970 | 3/23/2020 | 8/2/2020 Asia / South Korea             |
| EPI_ISL_506971 | 3/24/2020 | 8/2/2020 Asia / South Korea             |
| EPI_ISL_506972 | 3/24/2020 | 8/2/2020 Asia / South Korea             |
| EPI_ISL_506973 | 3/24/2020 | 8/2/2020 Asia / South Korea             |
| EPI_ISL_506974 | 3/25/2020 | 8/2/2020 Asia / South Korea             |
| EPI_ISL_506975 | 3/25/2020 | 8/2/2020 Asia / South Korea             |
| EPI_ISL_506976 | 3/26/2020 | 8/2/2020 Asia / South Korea             |
| EPI_ISL_506977 | 3/26/2020 | 8/2/2020 Asia / South Korea             |
| EPI_ISL_506978 | 3/27/2020 | 8/2/2020 Asia / South Korea             |
| EPI_ISL_506979 | 3/26/2020 | 8/2/2020 Asia / South Korea             |
| EPI_ISL_506980 | 3/26/2020 | 8/2/2020 Asia / South Korea             |
| EPI_ISL_506981 | 3/27/2020 | 8/2/2020 Asia / South Korea             |
| EPI_ISL_506982 | 3/28/2020 | 8/2/2020 Asia / South Korea             |
| EPI_ISL_506983 | 3/28/2020 | 8/2/2020 Asia / South Korea             |
| EPI_ISL_506984 | 3/28/2020 | 8/2/2020 Asia / South Korea             |
| EPI_ISL_506985 | 3/29/2020 | 8/2/2020 Asia / South Korea             |
| EPI_ISL_506986 | 3/30/2020 | 8/2/2020 Asia / South Korea             |
| EPI_ISL_506987 | 4/1/2020  | 8/2/2020 Asia / South Korea             |
| EPI_ISL_506988 | 4/2/2020  | 8/2/2020 Asia / South Korea             |
| EPI_ISL_506989 | 4/2/2020  | 8/2/2020 Asia / South Korea             |
| EPI_ISL_506990 | 4/1/2020  | 8/2/2020 Asia / South Korea             |
| EPI_ISL_506991 | 4/2/2020  | 8/2/2020 Asia / South Korea             |
| EPI_ISL_506992 | 4/4/2020  | 8/2/2020 Asia / South Korea             |
| EPI_ISL_506993 | 4/4/2020  | 8/2/2020 Asia / South Korea             |
| EPI_ISL_506994 | 4/8/2020  | 8/2/2020 Asia / South Korea             |
| EPI_ISL_506995 | 4/11/2020 | 8/2/2020 Asia / South Korea             |
| EPI_ISL_506996 | 4/10/2020 | 8/3/2020 Asia / Malaysia / Kuala Lumpur |

|                |           |                                            |
|----------------|-----------|--------------------------------------------|
| EPI_ISL_507002 | 3/14/2020 | 8/3/2020 Asia / Singapore                  |
| EPI_ISL_507003 | 3/14/2020 | 8/3/2020 Asia / Singapore                  |
| EPI_ISL_507004 | 3/14/2020 | 8/3/2020 Asia / Singapore                  |
| EPI_ISL_507005 | 4/26/2020 | 8/3/2020 Asia / Singapore                  |
| EPI_ISL_507006 | 4/27/2020 | 8/3/2020 Asia / Singapore                  |
| EPI_ISL_507008 | 3/27/2020 | 8/3/2020 Europe / Sweden / Uppsala         |
| EPI_ISL_507010 | 3/9/2020  | 8/3/2020 Asia / Saudi Arabia               |
| EPI_ISL_507011 | 3/10/2020 | 8/3/2020 Asia / Saudi Arabia               |
| EPI_ISL_507012 | 3/11/2020 | 8/3/2020 Asia / Saudi Arabia               |
| EPI_ISL_507013 | 3/12/2020 | 8/3/2020 Asia / Saudi Arabia               |
| EPI_ISL_507014 | 3/13/2020 | 8/3/2020 Asia / Saudi Arabia               |
| EPI_ISL_507015 | 3/14/2020 | 8/3/2020 Asia / Saudi Arabia               |
| EPI_ISL_507016 | 3/15/2020 | 8/3/2020 Asia / Saudi Arabia               |
| EPI_ISL_507017 | 3/16/2020 | 8/3/2020 Asia / Saudi Arabia               |
| EPI_ISL_507018 | 3/17/2020 | 8/3/2020 Asia / Saudi Arabia               |
| EPI_ISL_507019 | 3/18/2020 | 8/3/2020 Asia / Saudi Arabia               |
| EPI_ISL_507020 | 3/19/2020 | 8/3/2020 Asia / Saudi Arabia               |
| EPI_ISL_507021 | 3/20/2020 | 8/3/2020 Asia / Saudi Arabia               |
| EPI_ISL_507022 | 3/21/2020 | 8/3/2020 Asia / Saudi Arabia               |
| EPI_ISL_507023 | 3/22/2020 | 8/3/2020 Asia / Saudi Arabia               |
| EPI_ISL_507024 | 3/30/2020 | 8/3/2020 Asia / Saudi Arabia               |
| EPI_ISL_507025 | 3/31/2020 | 8/3/2020 Asia / Saudi Arabia               |
| EPI_ISL_507026 | 4/1/2020  | 8/3/2020 Asia / Saudi Arabia               |
| EPI_ISL_507027 | 4/2/2020  | 8/3/2020 Asia / Saudi Arabia               |
| EPI_ISL_507028 | 4/3/2020  | 8/3/2020 Asia / Saudi Arabia               |
| EPI_ISL_507029 | 4/4/2020  | 8/3/2020 Asia / Saudi Arabia               |
| EPI_ISL_507030 | 4/5/2020  | 8/3/2020 Asia / Saudi Arabia               |
| EPI_ISL_507031 | 4/6/2020  | 8/3/2020 Asia / Saudi Arabia               |
| EPI_ISL_507032 | 3/23/2020 | 8/3/2020 Asia / Saudi Arabia               |
| EPI_ISL_507033 | 3/24/2020 | 8/3/2020 Asia / Saudi Arabia               |
| EPI_ISL_507034 | 3/25/2020 | 8/3/2020 Asia / Saudi Arabia               |
| EPI_ISL_507035 | 3/26/2020 | 8/3/2020 Asia / Saudi Arabia               |
| EPI_ISL_507036 | 3/27/2020 | 8/3/2020 Asia / Saudi Arabia               |
| EPI_ISL_507037 | 3/28/2020 | 8/3/2020 Asia / Saudi Arabia               |
| EPI_ISL_507038 | 3/29/2020 | 8/3/2020 Asia / Saudi Arabia               |
| EPI_ISL_507039 | 2020-02   | 8/3/2020 Asia / South Korea                |
| EPI_ISL_507040 | 4/15/2020 | 8/3/2020 Europe / United Kingdom / England |
| EPI_ISL_507041 | 4/24/2020 | 8/3/2020 Europe / United Kingdom / England |
| EPI_ISL_507042 | 4/24/2020 | 8/3/2020 Europe / United Kingdom / England |
| EPI_ISL_507043 | 3/28/2020 | 8/3/2020 Europe / United Kingdom / England |
| EPI_ISL_507047 | 5/19/2020 | 8/3/2020 Europe / United Kingdom / England |
| EPI_ISL_507048 | 3/11/2020 | 8/3/2020 Europe / United Kingdom / England |
| EPI_ISL_507049 | 3/12/2020 | 8/3/2020 Europe / United Kingdom / England |
| EPI_ISL_507050 | 3/13/2020 | 8/3/2020 Europe / United Kingdom / England |
| EPI_ISL_507052 | 3/15/2020 | 8/3/2020 Europe / United Kingdom / England |
| EPI_ISL_507053 | 3/17/2020 | 8/3/2020 Europe / United Kingdom / England |
| EPI_ISL_507054 | 3/18/2020 | 8/3/2020 Europe / United Kingdom / England |







|                |           |          |                                    |
|----------------|-----------|----------|------------------------------------|
| EPI_ISL_507192 | 5/6/2020  | 8/3/2020 | Europe / United Kingdom / Scotland |
| EPI_ISL_507194 | 5/5/2020  | 8/3/2020 | Europe / United Kingdom / Scotland |
| EPI_ISL_507195 | 5/5/2020  | 8/3/2020 | Europe / United Kingdom / Scotland |
| EPI_ISL_507196 | 5/5/2020  | 8/3/2020 | Europe / United Kingdom / Scotland |
| EPI_ISL_507200 | 4/23/2020 | 8/3/2020 | Europe / United Kingdom / Scotland |
| EPI_ISL_507201 | 4/16/2020 | 8/3/2020 | Europe / United Kingdom / Scotland |
| EPI_ISL_507205 | 2020-05   | 8/3/2020 | Europe / Russia / Bryansk          |
| EPI_ISL_507206 | 4/29/2020 | 8/3/2020 | Europe / Russia / Novosibirsk      |
| EPI_ISL_507207 | 4/29/2020 | 8/3/2020 | Europe / Russia / Novosibirsk      |
| EPI_ISL_507208 | 4/29/2020 | 8/3/2020 | Europe / Russia / Novosibirsk      |
| EPI_ISL_507209 | 4/29/2020 | 8/3/2020 | Europe / Russia / Novosibirsk      |
| EPI_ISL_507210 | 5/4/2020  | 8/3/2020 | Europe / Russia / Novosibirsk      |
| EPI_ISL_507211 | 4/30/2020 | 8/3/2020 | Europe / Russia / Novosibirsk      |
| EPI_ISL_507212 | 4/29/2020 | 8/3/2020 | Europe / Russia / Novosibirsk      |
| EPI_ISL_507213 | 5/7/2020  | 8/3/2020 | Europe / Russia / Novosibirsk      |
| EPI_ISL_507214 | 5/7/2020  | 8/3/2020 | Europe / Russia / Novosibirsk      |
| EPI_ISL_507215 | 5/7/2020  | 8/3/2020 | Europe / Russia / Novosibirsk      |
| EPI_ISL_507216 | 2020-05   | 8/3/2020 | Europe / Russia / Yamalo-Nenets    |
| EPI_ISL_507217 | 2020-05   | 8/3/2020 | Europe / Russia / Yamalo-Nenets    |
| EPI_ISL_507218 | 2020-05   | 8/3/2020 | Europe / Russia / Yamalo-Nenets    |
| EPI_ISL_507219 | 2020-05   | 8/3/2020 | Europe / Russia / Yamalo-Nenets    |
| EPI_ISL_507220 | 2020-05   | 8/3/2020 | Europe / Russia / Yamalo-Nenets    |
| EPI_ISL_507221 | 2020-05   | 8/3/2020 | Europe / Russia / Yamalo-Nenets    |
| EPI_ISL_507222 | 2020-05   | 8/3/2020 | Europe / Russia / Yamalo-Nenets    |
| EPI_ISL_507223 | 2020-05   | 8/3/2020 | Europe / Russia / Yamalo-Nenets    |
| EPI_ISL_507224 | 4/29/2020 | 8/3/2020 | Europe / Russia / Saint Petersburg |
| EPI_ISL_507225 | 4/26/2020 | 8/3/2020 | Europe / Russia / Saint Petersburg |
| EPI_ISL_507226 | 4/26/2020 | 8/3/2020 | Europe / Russia / Saint Petersburg |
| EPI_ISL_507227 | 4/24/2020 | 8/3/2020 | Europe / Russia / Saint Petersburg |
| EPI_ISL_507228 | 2020      | 8/3/2020 | Europe / Russia / Saint Petersburg |
| EPI_ISL_507229 | 4/25/2020 | 8/3/2020 | Europe / Russia / Saint Petersburg |
| EPI_ISL_507230 | 4/25/2020 | 8/3/2020 | Europe / Russia / Saint Petersburg |
| EPI_ISL_507231 | 5/2/2020  | 8/3/2020 | Europe / Russia / Saint Petersburg |
| EPI_ISL_507232 | 5/2/2020  | 8/3/2020 | Europe / Russia / Saint Petersburg |
| EPI_ISL_507233 | 5/3/2020  | 8/3/2020 | Europe / Russia / Saint Petersburg |
| EPI_ISL_507234 | 4/30/2020 | 8/3/2020 | Europe / Russia / Saint Petersburg |
| EPI_ISL_507235 | 4/30/2020 | 8/3/2020 | Europe / Russia / Saint Petersburg |
| EPI_ISL_507236 | 4/30/2020 | 8/3/2020 | Europe / Russia / Saint Petersburg |
| EPI_ISL_507237 | 4/30/2020 | 8/3/2020 | Europe / Russia / Saint Petersburg |
| EPI_ISL_507238 | 4/30/2020 | 8/3/2020 | Europe / Russia / Saint Petersburg |
| EPI_ISL_507239 | 5/3/2020  | 8/3/2020 | Europe / Russia / Saint Petersburg |
| EPI_ISL_507240 | 5/2/2020  | 8/3/2020 | Europe / Russia / Saint Petersburg |
| EPI_ISL_507241 | 5/2/2020  | 8/3/2020 | Europe / Russia / Saint Petersburg |
| EPI_ISL_507242 | 5/2/2020  | 8/3/2020 | Europe / Russia / Saint Petersburg |
| EPI_ISL_507243 | 5/2/2020  | 8/3/2020 | Europe / Russia / Saint Petersburg |
| EPI_ISL_507244 | 5/2/2020  | 8/3/2020 | Europe / Russia / Saint Petersburg |
| EPI_ISL_507245 | 4/30/2020 | 8/3/2020 | Europe / Russia / Saint Petersburg |



|                |           |                                             |
|----------------|-----------|---------------------------------------------|
| EPI_ISL_507293 | 4/21/2020 | 8/3/2020 Europe / Russia / Saint Petersburg |
| EPI_ISL_507294 | 4/21/2020 | 8/3/2020 Europe / Russia / Saint Petersburg |
| EPI_ISL_507295 | 4/24/2020 | 8/3/2020 Europe / Russia / Saint Petersburg |
| EPI_ISL_507296 | 4/23/2020 | 8/3/2020 Europe / Russia / Saint Petersburg |
| EPI_ISL_507297 | 2020      | 8/3/2020 Europe / Russia / Bashkortostan    |
| EPI_ISL_507298 | 2020      | 8/3/2020 Europe / Russia / Bashkortostan    |
| EPI_ISL_507299 | 2020      | 8/3/2020 Europe / Russia / Bashkortostan    |
| EPI_ISL_507300 | 2020-05   | 8/3/2020 Europe / Russia / Yaroslavl        |
| EPI_ISL_507431 | 4/1/2020  | 8/3/2020 North America / USA / Michigan     |
| EPI_ISL_507434 | 7/2/2020  | 8/3/2020 North America / USA / Michigan     |
| EPI_ISL_507435 | 7/6/2020  | 8/3/2020 North America / USA / Michigan     |
| EPI_ISL_507437 | 4/2/2020  | 8/3/2020 North America / USA / Michigan     |
| EPI_ISL_507438 | 6/30/2020 | 8/3/2020 North America / USA / Michigan     |
| EPI_ISL_507441 | 7/3/2020  | 8/3/2020 North America / USA / Michigan     |
| EPI_ISL_507442 | 7/1/2020  | 8/3/2020 North America / USA / Michigan     |
| EPI_ISL_507444 | 4/2/2020  | 8/3/2020 North America / USA / Michigan     |
| EPI_ISL_507445 | 7/6/2020  | 8/3/2020 North America / USA / Michigan     |
| EPI_ISL_507446 | 4/2/2020  | 8/3/2020 North America / USA / Michigan     |
| EPI_ISL_507459 | 3/24/2020 | 8/3/2020 North America / USA / Michigan     |
| EPI_ISL_507460 | 3/31/2020 | 8/3/2020 North America / USA / Michigan     |
| EPI_ISL_507462 | 4/1/2020  | 8/3/2020 North America / USA / Michigan     |
| EPI_ISL_507464 | 3/29/2020 | 8/3/2020 North America / USA / Michigan     |
| EPI_ISL_507465 | 3/29/2020 | 8/3/2020 North America / USA / Michigan     |
| EPI_ISL_507466 | 3/28/2020 | 8/3/2020 North America / USA / Michigan     |
| EPI_ISL_507467 | 3/30/2020 | 8/3/2020 North America / USA / Michigan     |
| EPI_ISL_507468 | 3/30/2020 | 8/3/2020 North America / USA / Michigan     |
| EPI_ISL_507469 | 3/29/2020 | 8/3/2020 North America / USA / Michigan     |
| EPI_ISL_507470 | 3/31/2020 | 8/3/2020 North America / USA / Michigan     |
| EPI_ISL_507471 | 4/1/2020  | 8/3/2020 North America / USA / Michigan     |
| EPI_ISL_507528 | 4/3/2020  | 8/3/2020 North America / USA / Michigan     |
| EPI_ISL_507602 | 4/1/2020  | 8/3/2020 North America / USA / Michigan     |
| EPI_ISL_507603 | 4/4/2020  | 8/3/2020 North America / USA / Michigan     |
| EPI_ISL_507604 | 4/1/2020  | 8/3/2020 North America / USA / Michigan     |
| EPI_ISL_507605 | 4/2/2020  | 8/3/2020 North America / USA / Michigan     |
| EPI_ISL_507606 | 4/3/2020  | 8/3/2020 North America / USA / Michigan     |
| EPI_ISL_507607 | 4/3/2020  | 8/3/2020 North America / USA / Michigan     |
| EPI_ISL_507608 | 4/3/2020  | 8/3/2020 North America / USA / Michigan     |
| EPI_ISL_507609 | 4/1/2020  | 8/3/2020 North America / USA / Michigan     |
| EPI_ISL_507610 | 4/2/2020  | 8/3/2020 North America / USA / Michigan     |
| EPI_ISL_507611 | 4/3/2020  | 8/3/2020 North America / USA / Michigan     |
| EPI_ISL_507612 | 4/1/2020  | 8/3/2020 North America / USA / Michigan     |
| EPI_ISL_507613 | 4/1/2020  | 8/3/2020 North America / USA / Michigan     |
| EPI_ISL_507614 | 4/1/2020  | 8/3/2020 North America / USA / Michigan     |
| EPI_ISL_507615 | 4/2/2020  | 8/3/2020 North America / USA / Michigan     |
| EPI_ISL_507616 | 4/3/2020  | 8/3/2020 North America / USA / Michigan     |
| EPI_ISL_507617 | 4/3/2020  | 8/3/2020 North America / USA / Michigan     |
| EPI_ISL_507618 | 4/4/2020  | 8/3/2020 North America / USA / Michigan     |



|                |           |                                         |
|----------------|-----------|-----------------------------------------|
| EPI_ISL_507746 | 3/23/2020 | 8/3/2020 North America / USA / Michigan |
| EPI_ISL_507747 | 3/24/2020 | 8/3/2020 North America / USA / Michigan |
| EPI_ISL_507748 | 3/23/2020 | 8/3/2020 North America / USA / Michigan |
| EPI_ISL_507760 | 6/9/2020  | 8/3/2020 North America / USA / Michigan |
| EPI_ISL_507761 | 3/26/2020 | 8/3/2020 North America / USA / Michigan |
| EPI_ISL_507763 | 3/27/2020 | 8/3/2020 North America / USA / Michigan |
| EPI_ISL_507764 | 3/26/2020 | 8/3/2020 North America / USA / Michigan |
| EPI_ISL_507777 | 5/19/2020 | 8/3/2020 North America / USA / Michigan |
| EPI_ISL_507778 | 6/10/2020 | 8/3/2020 North America / USA / Michigan |
| EPI_ISL_507779 | 6/5/2020  | 8/3/2020 North America / USA / Michigan |
| EPI_ISL_507780 | 6/10/2020 | 8/3/2020 North America / USA / Michigan |
| EPI_ISL_507781 | 5/27/2020 | 8/3/2020 North America / USA / Michigan |
| EPI_ISL_507782 | 5/31/2020 | 8/3/2020 North America / USA / Michigan |
| EPI_ISL_507783 | 6/4/2020  | 8/3/2020 North America / USA / Michigan |
| EPI_ISL_507784 | 6/4/2020  | 8/3/2020 North America / USA / Michigan |
| EPI_ISL_507785 | 6/4/2020  | 8/3/2020 North America / USA / Michigan |
| EPI_ISL_507786 | 6/10/2020 | 8/3/2020 North America / USA / Michigan |
| EPI_ISL_507787 | 6/11/2020 | 8/3/2020 North America / USA / Michigan |
| EPI_ISL_507788 | 6/9/2020  | 8/3/2020 North America / USA / Michigan |
| EPI_ISL_507789 | 6/10/2020 | 8/3/2020 North America / USA / Michigan |
| EPI_ISL_507870 | 3/26/2020 | 8/3/2020 North America / USA / Michigan |
| EPI_ISL_507871 | 4/2/2020  | 8/3/2020 North America / USA / Michigan |
| EPI_ISL_507874 | 3/27/2020 | 8/3/2020 North America / USA / Michigan |
| EPI_ISL_507879 | 3/27/2020 | 8/3/2020 North America / USA / Michigan |
| EPI_ISL_507881 | 3/26/2020 | 8/3/2020 North America / USA / Michigan |
| EPI_ISL_507882 | 3/24/2020 | 8/3/2020 North America / USA / Michigan |
| EPI_ISL_507883 | 3/29/2020 | 8/3/2020 North America / USA / Michigan |
| EPI_ISL_507884 | 3/31/2020 | 8/3/2020 North America / USA / Michigan |
| EPI_ISL_507885 | 4/3/2020  | 8/3/2020 North America / USA / Michigan |
| EPI_ISL_507886 | 3/25/2020 | 8/3/2020 North America / USA / Michigan |
| EPI_ISL_507887 | 3/25/2020 | 8/3/2020 North America / USA / Michigan |
| EPI_ISL_507888 | 3/27/2020 | 8/3/2020 North America / USA / Michigan |
| EPI_ISL_507889 | 3/30/2020 | 8/3/2020 North America / USA / Michigan |
| EPI_ISL_507890 | 3/24/2020 | 8/3/2020 North America / USA / Michigan |
| EPI_ISL_507891 | 3/29/2020 | 8/3/2020 North America / USA / Michigan |
| EPI_ISL_507892 | 3/23/2020 | 8/3/2020 North America / USA / Michigan |
| EPI_ISL_507893 | 3/26/2020 | 8/3/2020 North America / USA / Michigan |
| EPI_ISL_507894 | 3/27/2020 | 8/3/2020 North America / USA / Michigan |
| EPI_ISL_507895 | 3/27/2020 | 8/3/2020 North America / USA / Michigan |
| EPI_ISL_507896 | 3/27/2020 | 8/3/2020 North America / USA / Michigan |
| EPI_ISL_507897 | 3/24/2020 | 8/3/2020 North America / USA / Michigan |
| EPI_ISL_507898 | 3/30/2020 | 8/3/2020 North America / USA / Michigan |
| EPI_ISL_507899 | 3/30/2020 | 8/3/2020 North America / USA / Michigan |
| EPI_ISL_507900 | 3/24/2020 | 8/3/2020 North America / USA / Michigan |
| EPI_ISL_507901 | 3/26/2020 | 8/3/2020 North America / USA / Michigan |
| EPI_ISL_507902 | 3/26/2020 | 8/3/2020 North America / USA / Michigan |
| EPI_ISL_507903 | 3/27/2020 | 8/3/2020 North America / USA / Michigan |





|                |           |                                           |
|----------------|-----------|-------------------------------------------|
| EPI_ISL_507953 | 4/23/2020 | 8/3/2020 North America / USA / Minnesota  |
| EPI_ISL_507954 | 4/23/2020 | 8/3/2020 North America / USA / Minnesota  |
| EPI_ISL_507955 | 4/23/2020 | 8/3/2020 North America / USA / Minnesota  |
| EPI_ISL_507956 | 4/23/2020 | 8/3/2020 North America / USA / Minnesota  |
| EPI_ISL_507957 | 6/30/2020 | 8/3/2020 North America / USA / Minnesota  |
| EPI_ISL_507958 | 7/1/2020  | 8/3/2020 North America / USA / Minnesota  |
| EPI_ISL_507959 | 6/22/2020 | 8/3/2020 North America / USA / Minnesota  |
| EPI_ISL_507960 | 6/30/2020 | 8/3/2020 North America / USA / Minnesota  |
| EPI_ISL_507961 | 7/6/2020  | 8/3/2020 North America / USA / Minnesota  |
| EPI_ISL_507962 | 5/22/2020 | 8/3/2020 North America / USA / Minnesota  |
| EPI_ISL_507963 | 7/9/2020  | 8/3/2020 North America / USA / Minnesota  |
| EPI_ISL_507964 | 7/9/2020  | 8/3/2020 North America / USA / Minnesota  |
| EPI_ISL_507965 | 7/9/2020  | 8/3/2020 North America / USA / Minnesota  |
| EPI_ISL_507966 | 7/10/2020 | 8/3/2020 North America / USA / Minnesota  |
| EPI_ISL_507967 | 7/9/2020  | 8/3/2020 North America / USA / Minnesota  |
| EPI_ISL_507968 | 7/10/2020 | 8/3/2020 North America / USA / Minnesota  |
| EPI_ISL_507969 | 7/6/2020  | 8/3/2020 North America / USA / Minnesota  |
| EPI_ISL_507970 | 7/9/2020  | 8/3/2020 North America / USA / Minnesota  |
| EPI_ISL_507971 | 7/9/2020  | 8/3/2020 North America / USA / Minnesota  |
| EPI_ISL_507972 | 7/9/2020  | 8/3/2020 North America / USA / Minnesota  |
| EPI_ISL_507973 | 3/19/2020 | 8/3/2020 North America / USA / Minnesota  |
| EPI_ISL_507974 | 3/23/2020 | 8/3/2020 North America / USA / Minnesota  |
| EPI_ISL_507975 | 3/26/2020 | 8/3/2020 North America / USA / Minnesota  |
| EPI_ISL_507976 | 3/26/2020 | 8/3/2020 North America / USA / Minnesota  |
| EPI_ISL_507977 | 3/27/2020 | 8/3/2020 North America / USA / Minnesota  |
| EPI_ISL_507978 | 3/27/2020 | 8/3/2020 North America / USA / Minnesota  |
| EPI_ISL_507979 | 3/27/2020 | 8/3/2020 North America / USA / Minnesota  |
| EPI_ISL_507980 | 3/27/2020 | 8/3/2020 North America / USA / Minnesota  |
| EPI_ISL_507981 | 3/28/2020 | 8/3/2020 North America / USA / Minnesota  |
| EPI_ISL_507982 | 3/28/2020 | 8/3/2020 North America / USA / Minnesota  |
| EPI_ISL_507983 | 3/28/2020 | 8/3/2020 North America / USA / Minnesota  |
| EPI_ISL_507986 | 5/14/2020 | 8/3/2020 North America / USA / New Mexico |
| EPI_ISL_507987 | 5/14/2020 | 8/3/2020 North America / USA / New Mexico |
| EPI_ISL_507991 | 5/8/2020  | 8/3/2020 North America / USA / New Mexico |
| EPI_ISL_507995 | 5/22/2020 | 8/3/2020 North America / USA / New Mexico |
| EPI_ISL_508002 | 5/7/2020  | 8/3/2020 North America / USA / New Mexico |
| EPI_ISL_508013 | 5/11/2020 | 8/3/2020 North America / USA / New Mexico |
| EPI_ISL_508014 | 5/14/2020 | 8/3/2020 North America / USA / New Mexico |
| EPI_ISL_508018 | 4/27/2020 | 8/3/2020 North America / USA / New Mexico |
| EPI_ISL_508026 | 5/7/2020  | 8/3/2020 North America / USA / New Mexico |
| EPI_ISL_508029 | 5/15/2020 | 8/3/2020 North America / USA / New Mexico |
| EPI_ISL_508057 | 5/9/2020  | 8/3/2020 North America / USA / New Mexico |
| EPI_ISL_508063 | 5/12/2020 | 8/3/2020 North America / USA / New Mexico |
| EPI_ISL_508066 | 4/20/2020 | 8/3/2020 North America / USA / New Mexico |
| EPI_ISL_508091 | 5/1/2020  | 8/3/2020 North America / USA / New Mexico |
| EPI_ISL_508093 | 5/7/2020  | 8/3/2020 North America / USA / New Mexico |
| EPI_ISL_508097 | 5/13/2020 | 8/3/2020 North America / USA / New Mexico |

|                |           |                                                       |
|----------------|-----------|-------------------------------------------------------|
| EPI_ISL_508099 | 5/13/2020 | 8/3/2020 North America / USA / New Mexico             |
| EPI_ISL_508100 | 5/13/2020 | 8/3/2020 North America / USA / New Mexico             |
| EPI_ISL_508101 | 5/13/2020 | 8/3/2020 North America / USA / New Mexico             |
| EPI_ISL_508122 | 3/19/2020 | 8/4/2020 Oceania / Australia / South Australia        |
| EPI_ISL_508123 | 3/21/2020 | 8/4/2020 Oceania / Australia / South Australia        |
| EPI_ISL_508124 | 3/18/2020 | 8/4/2020 Oceania / Australia / South Australia        |
| EPI_ISL_508125 | 3/22/2020 | 8/4/2020 Oceania / Australia / South Australia        |
| EPI_ISL_508126 | 3/22/2020 | 8/4/2020 Oceania / Australia / South Australia        |
| EPI_ISL_508127 | 3/21/2020 | 8/4/2020 Oceania / Australia / South Australia        |
| EPI_ISL_508128 | 4/3/2020  | 8/4/2020 Oceania / Australia / South Australia        |
| EPI_ISL_508129 | 3/21/2020 | 8/4/2020 Oceania / Australia / South Australia        |
| EPI_ISL_508130 | 3/16/2020 | 8/4/2020 Oceania / Australia / South Australia        |
| EPI_ISL_508131 | 3/20/2020 | 8/4/2020 Oceania / Australia / South Australia        |
| EPI_ISL_508132 | 4/5/2020  | 8/4/2020 Oceania / Australia / South Australia        |
| EPI_ISL_508133 | 3/21/2020 | 8/4/2020 Oceania / Australia / South Australia        |
| EPI_ISL_508134 | 7/22/2020 | 8/4/2020 Oceania / Australia / South Australia        |
| EPI_ISL_508135 | 3/20/2020 | 8/4/2020 Oceania / Australia / South Australia        |
| EPI_ISL_508136 | 3/20/2020 | 8/4/2020 Oceania / Australia / South Australia        |
| EPI_ISL_508137 | 3/20/2020 | 8/4/2020 Oceania / Australia / South Australia        |
| EPI_ISL_508138 | 3/20/2020 | 8/4/2020 Oceania / Australia / South Australia        |
| EPI_ISL_508139 | 3/22/2020 | 8/4/2020 Oceania / Australia / South Australia        |
| EPI_ISL_508140 | 3/19/2020 | 8/4/2020 Oceania / Australia / South Australia        |
| EPI_ISL_508141 | 3/30/2020 | 8/4/2020 Oceania / Australia / South Australia        |
| EPI_ISL_508142 | 3/21/2020 | 8/4/2020 Oceania / Australia / South Australia        |
| EPI_ISL_508143 | 3/15/2020 | 8/4/2020 Oceania / Australia / South Australia        |
| EPI_ISL_508156 | 6/1/2020  | 8/4/2020 Asia / India / Uttarakhand / Dehradun        |
| EPI_ISL_508157 | 5/29/2020 | 8/4/2020 Asia / India / Uttarakhand / Dehradun        |
| EPI_ISL_508158 | 5/29/2020 | 8/4/2020 Asia / India / Uttarakhand / Dehradun        |
| EPI_ISL_508159 | 5/22/2020 | 8/4/2020 Asia / India / Uttarakhand / Haridwar        |
| EPI_ISL_508160 | 6/6/2020  | 8/4/2020 Asia / India / Uttarakhand / Dehradun        |
| EPI_ISL_508161 | 6/6/2020  | 8/4/2020 Asia / India / Uttarakhand / Dehradun        |
| EPI_ISL_508162 | 5/24/2020 | 8/4/2020 Asia / India / Uttarakhand / Haridwar        |
| EPI_ISL_508163 | 5/27/2020 | 8/4/2020 Asia / India / Uttarakhand / Chamoli         |
| EPI_ISL_508164 | 5/27/2020 | 8/4/2020 Asia / India / Uttarakhand / Pauri Garhwal   |
| EPI_ISL_508165 | 5/23/2020 | 8/4/2020 Asia / India / Uttarakhand / Uttarkashi      |
| EPI_ISL_508166 | 5/30/2020 | 8/4/2020 Asia / India / Uttarakhand / Tehri Garhwal   |
| EPI_ISL_508167 | 5/30/2020 | 8/4/2020 Asia / India / Uttarakhand / Dehradun        |
| EPI_ISL_508168 | 6/2/2020  | 8/4/2020 Asia / India / Uttar Pradesh / Muzaffarnagar |
| EPI_ISL_508169 | 5/21/2020 | 8/4/2020 Asia / India / Uttarakhand / Haridwar        |
| EPI_ISL_508170 | 5/22/2020 | 8/4/2020 Asia / India / Uttarakhand / Haridwar        |
| EPI_ISL_508171 | 5/21/2020 | 8/4/2020 Asia / India / Uttarakhand / Haridwar        |
| EPI_ISL_508172 | 5/30/2020 | 8/4/2020 Asia / India / Uttarakhand / Haridwar        |
| EPI_ISL_508173 | 5/27/2020 | 8/4/2020 Asia / India / Uttarakhand / Haridwar        |
| EPI_ISL_508174 | 6/1/2020  | 8/4/2020 Asia / India / Uttarakhand / Tehri Garhwal   |
| EPI_ISL_508175 | 6/29/2020 | 8/4/2020 Asia / India / Uttarakhand / Haridwar        |
| EPI_ISL_508176 | 5/26/2020 | 8/4/2020 Asia / India / Uttarakhand / Haridwar        |
| EPI_ISL_508177 | 6/1/2020  | 8/4/2020 Asia / India / Uttarakhand / Dehradun        |

|                |           |                                                       |
|----------------|-----------|-------------------------------------------------------|
| EPI_ISL_508178 | 5/29/2020 | 8/4/2020 Asia / India / Uttarakhand / Haridwar        |
| EPI_ISL_508179 | 5/29/2020 | 8/4/2020 Asia / India / Uttarakhand / Rudraprayag     |
| EPI_ISL_508180 | 6/4/2020  | 8/4/2020 Asia / India / Uttarakhand / Uttarkashi      |
| EPI_ISL_508181 | 6/2/2020  | 8/4/2020 Asia / India / Uttarakhand / Tehri Garhwal   |
| EPI_ISL_508182 | 6/8/2020  | 8/4/2020 Asia / India / Uttarakhand / Haridwar        |
| EPI_ISL_508183 | 5/28/2020 | 8/4/2020 Asia / India / Uttarakhand / Tehri Garhwal   |
| EPI_ISL_508184 | 6/1/2020  | 8/4/2020 Asia / India / Uttarakhand / Dehradun        |
| EPI_ISL_508185 | 5/28/2020 | 8/4/2020 Asia / India / Uttarakhand / Tehri Garhwal   |
| EPI_ISL_508186 | 5/28/2020 | 8/4/2020 Asia / India / Uttarakhand / Tehri Garhwal   |
| EPI_ISL_508187 | 5/28/2020 | 8/4/2020 Asia / India / Uttarakhand / Tehri Garhwal   |
| EPI_ISL_508188 | 5/28/2020 | 8/4/2020 Asia / India / Uttarakhand / Tehri Garhwal   |
| EPI_ISL_508189 | 5/23/2020 | 8/4/2020 Asia / India / Uttarakhand / Haridwar        |
| EPI_ISL_508190 | 5/23/2020 | 8/4/2020 Asia / India / Uttarakhand / Haridwar        |
| EPI_ISL_508191 | 6/1/2020  | 8/4/2020 Asia / India / Uttarakhand / Dehradun        |
| EPI_ISL_508193 | 6/4/2020  | 8/4/2020 Asia / India / Uttarakhand / Pauri Garhwal   |
| EPI_ISL_508194 | 5/21/2020 | 8/4/2020 Asia / India / Uttarakhand / Tehri Garhwal   |
| EPI_ISL_508195 | 6/3/2020  | 8/4/2020 Asia / India / Uttarakhand / Tehri Garhwal   |
| EPI_ISL_508196 | 5/22/2020 | 8/4/2020 Asia / India / Uttarakhand / Haridwar        |
| EPI_ISL_508197 | 6/9/2020  | 8/4/2020 Asia / India / Uttarakhand / Tehri Garhwal   |
| EPI_ISL_508198 | 6/9/2020  | 8/4/2020 Asia / India / Uttarakhand / Tehri Garhwal   |
| EPI_ISL_508199 | 6/8/2020  | 8/4/2020 Asia / India / Uttarakhand / Tehri Garhwal   |
| EPI_ISL_508200 | 6/9/2020  | 8/4/2020 Asia / India / Uttarakhand / Dehradun        |
| EPI_ISL_508201 | 6/9/2020  | 8/4/2020 Asia / India / Uttarakhand / Dehradun        |
| EPI_ISL_508202 | 6/9/2020  | 8/4/2020 Asia / India / Uttar Pradesh / Muzaffarnagar |
| EPI_ISL_508203 | 6/8/2020  | 8/4/2020 Asia / India / Uttar Pradesh / Gaziabad      |
| EPI_ISL_508204 | 5/30/2020 | 8/4/2020 Asia / India / Uttarakhand / Dehradun        |
| EPI_ISL_508205 | 5/29/2020 | 8/4/2020 Asia / India / Uttarakhand / Dehradun        |
| EPI_ISL_508206 | 5/22/2020 | 8/4/2020 Asia / India / Uttarakhand / Haridwar        |
| EPI_ISL_508207 | 6/17/2020 | 8/4/2020 Asia / India / Maharashtra / Aurangabad      |
| EPI_ISL_508208 | 6/17/2020 | 8/4/2020 Asia / India / Maharashtra / Aurangabad      |
| EPI_ISL_508209 | 6/17/2020 | 8/4/2020 Asia / India / Maharashtra / Aurangabad      |
| EPI_ISL_508210 | 6/17/2020 | 8/4/2020 Asia / India / Maharashtra / Aurangabad      |
| EPI_ISL_508211 | 6/17/2020 | 8/4/2020 Asia / India / Maharashtra / Aurangabad      |
| EPI_ISL_508212 | 6/17/2020 | 8/4/2020 Asia / India / Maharashtra / Aurangabad      |
| EPI_ISL_508213 | 6/17/2020 | 8/4/2020 Asia / India / Maharashtra / Aurangabad      |
| EPI_ISL_508214 | 6/17/2020 | 8/4/2020 Asia / India / Maharashtra / Aurangabad      |
| EPI_ISL_508215 | 6/17/2020 | 8/4/2020 Asia / India / Maharashtra / Aurangabad      |
| EPI_ISL_508216 | 6/17/2020 | 8/4/2020 Asia / India / Maharashtra / Aurangabad      |
| EPI_ISL_508217 | 6/17/2020 | 8/4/2020 Asia / India / Maharashtra / Aurangabad      |
| EPI_ISL_508218 | 6/17/2020 | 8/4/2020 Asia / India / Maharashtra / Aurangabad      |
| EPI_ISL_508219 | 6/16/2020 | 8/4/2020 Asia / India / Maharashtra / Jalna           |
| EPI_ISL_508220 | 6/16/2020 | 8/4/2020 Asia / India / Maharashtra / Jalna           |
| EPI_ISL_508221 | 6/16/2020 | 8/4/2020 Asia / India / Maharashtra / Jalna           |
| EPI_ISL_508222 | 6/16/2020 | 8/4/2020 Asia / India / Maharashtra / Jalna           |
| EPI_ISL_508223 | 6/17/2020 | 8/4/2020 Asia / India / Maharashtra / Aurangabad      |
| EPI_ISL_508224 | 6/17/2020 | 8/4/2020 Asia / India / Maharashtra / Aurangabad      |
| EPI_ISL_508225 | 6/20/2020 | 8/4/2020 Asia / India / Maharashtra / Aurangabad      |





|                |           |                                                         |
|----------------|-----------|---------------------------------------------------------|
| EPI_ISL_508321 | 6/15/2020 | 8/4/2020 Asia / India / Karnataka / Bengaluru Urban     |
| EPI_ISL_508322 | 6/17/2020 | 8/4/2020 Asia / India / Karnataka / Bengaluru Urban     |
| EPI_ISL_508323 | 6/15/2020 | 8/4/2020 Asia / India / Karnataka / Bengaluru Urban     |
| EPI_ISL_508324 | 5/9/2020  | 8/4/2020 Asia / India / Karnataka / Bengaluru Urban     |
| EPI_ISL_508325 | 6/3/2020  | 8/4/2020 Asia / India / Karnataka / Bengaluru Urban     |
| EPI_ISL_508326 | 6/16/2020 | 8/4/2020 Asia / India / Karnataka / Bengaluru Urban     |
| EPI_ISL_508327 | 6/3/2020  | 8/4/2020 Asia / India / Karnataka / Bengaluru Urban     |
| EPI_ISL_508328 | 5/9/2020  | 8/4/2020 Asia / India / Karnataka / Bengaluru Urban     |
| EPI_ISL_508329 | 6/19/2020 | 8/4/2020 Asia / India / Karnataka / Bengaluru Urban     |
| EPI_ISL_508330 | 6/3/2020  | 8/4/2020 Asia / India / Karnataka / Bengaluru Urban     |
| EPI_ISL_508331 | 6/20/2020 | 8/4/2020 Asia / India / Karnataka / Bengaluru Urban     |
| EPI_ISL_508332 | 5/27/2020 | 8/4/2020 Asia / India / Karnataka / Chikkaballapura     |
| EPI_ISL_508333 | 6/18/2020 | 8/4/2020 Asia / India / Karnataka / Bengaluru Urban     |
| EPI_ISL_508334 | 5/19/2020 | 8/4/2020 Asia / India / Karnataka / Haveri              |
| EPI_ISL_508335 | 6/17/2020 | 8/4/2020 Asia / India / Karnataka / Bengaluru Urban     |
| EPI_ISL_508336 | 6/20/2020 | 8/4/2020 Asia / India / Karnataka / Bengaluru Urban     |
| EPI_ISL_508337 | 6/19/2020 | 8/4/2020 Asia / India / Karnataka / Kolar               |
| EPI_ISL_508338 | 3/30/2020 | 8/4/2020 Asia / India / West Bengal / Kolkata           |
| EPI_ISL_508339 | 4/14/2020 | 8/4/2020 Asia / India / West Bengal / Kolkata           |
| EPI_ISL_508340 | 4/14/2020 | 8/4/2020 Asia / India / West Bengal / Kolkata           |
| EPI_ISL_508341 | 4/20/2020 | 8/4/2020 Asia / India / West Bengal / Kolkata           |
| EPI_ISL_508342 | 4/20/2020 | 8/4/2020 Asia / India / West Bengal / Kolkata           |
| EPI_ISL_508343 | 4/21/2020 | 8/4/2020 Asia / India / West Bengal / Kolkata           |
| EPI_ISL_508344 | 4/21/2020 | 8/4/2020 Asia / India / West Bengal / Kolkata           |
| EPI_ISL_508345 | 4/24/2020 | 8/4/2020 Asia / India / West Bengal / Kolkata           |
| EPI_ISL_508346 | 4/24/2020 | 8/4/2020 Asia / India / West Bengal / Kolkata           |
| EPI_ISL_508347 | 4/24/2020 | 8/4/2020 Asia / India / West Bengal / Kolkata           |
| EPI_ISL_508348 | 4/24/2020 | 8/4/2020 Asia / India / West Bengal / North 24 Parganas |
| EPI_ISL_508349 | 3/30/2020 | 8/4/2020 Asia / India / West Bengal / Howrah            |
| EPI_ISL_508350 | 4/25/2020 | 8/4/2020 Asia / India / West Bengal / Kolkata           |
| EPI_ISL_508351 | 4/25/2020 | 8/4/2020 Asia / India / West Bengal / Kolkata           |
| EPI_ISL_508352 | 4/25/2020 | 8/4/2020 Asia / India / West Bengal / Kolkata           |
| EPI_ISL_508353 | 4/25/2020 | 8/4/2020 Asia / India / West Bengal / Kolkata           |
| EPI_ISL_508354 | 4/25/2020 | 8/4/2020 Asia / India / West Bengal / Kolkata           |
| EPI_ISL_508355 | 4/25/2020 | 8/4/2020 Asia / India / West Bengal / Kolkata           |
| EPI_ISL_508356 | 4/26/2020 | 8/4/2020 Asia / India / West Bengal / Howrah            |
| EPI_ISL_508357 | 4/27/2020 | 8/4/2020 Asia / India / West Bengal / Kolkata           |
| EPI_ISL_508358 | 4/27/2020 | 8/4/2020 Asia / India / West Bengal / Howrah            |
| EPI_ISL_508359 | 4/28/2020 | 8/4/2020 Asia / India / West Bengal / Kolkata           |
| EPI_ISL_508360 | 4/28/2020 | 8/4/2020 Asia / India / West Bengal / Kolkata           |
| EPI_ISL_508361 | 4/28/2020 | 8/4/2020 Asia / India / West Bengal / Kolkata           |
| EPI_ISL_508362 | 5/1/2020  | 8/4/2020 Asia / India / West Bengal / Kolkata           |
| EPI_ISL_508363 | 5/1/2020  | 8/4/2020 Asia / India / West Bengal / Kolkata           |
| EPI_ISL_508364 | 5/1/2020  | 8/4/2020 Asia / India / West Bengal / North 24 Parganas |
| EPI_ISL_508365 | 5/2/2020  | 8/4/2020 Asia / India / West Bengal / Howrah            |
| EPI_ISL_508366 | 5/3/2020  | 8/4/2020 Asia / India / West Bengal / Kolkata           |
| EPI_ISL_508367 | 5/3/2020  | 8/4/2020 Asia / India / West Bengal / Kolkata           |

|                |           |                                                         |
|----------------|-----------|---------------------------------------------------------|
| EPI_ISL_508368 | 3/31/2020 | 8/4/2020 Asia / India / West Bengal / Hooghly           |
| EPI_ISL_508369 | 5/4/2020  | 8/4/2020 Asia / India / West Bengal / Kolkata           |
| EPI_ISL_508370 | 5/4/2020  | 8/4/2020 Asia / India / West Bengal / Kolkata           |
| EPI_ISL_508371 | 5/4/2020  | 8/4/2020 Asia / India / West Bengal / Kolkata           |
| EPI_ISL_508372 | 5/4/2020  | 8/4/2020 Asia / India / West Bengal / North 24 Parganas |
| EPI_ISL_508374 | 5/4/2020  | 8/4/2020 Asia / India / West Bengal / Kolkata           |
| EPI_ISL_508375 | 5/4/2020  | 8/4/2020 Asia / India / West Bengal / Kolkata           |
| EPI_ISL_508376 | 3/31/2020 | 8/4/2020 Asia / India / West Bengal / Hooghly           |
| EPI_ISL_508377 | 5/5/2020  | 8/4/2020 Asia / India / West Bengal / North 24 Parganas |
| EPI_ISL_508378 | 5/5/2020  | 8/4/2020 Asia / India / West Bengal / Kolkata           |
| EPI_ISL_508379 | 5/6/2020  | 8/4/2020 Asia / India / West Bengal / Kolkata           |
| EPI_ISL_508380 | 5/6/2020  | 8/4/2020 Asia / India / West Bengal / Kolkata           |
| EPI_ISL_508381 | 5/6/2020  | 8/4/2020 Asia / India / West Bengal / Kolkata           |
| EPI_ISL_508382 | 5/7/2020  | 8/4/2020 Asia / India / West Bengal / Kolkata           |
| EPI_ISL_508383 | 5/7/2020  | 8/4/2020 Asia / India / West Bengal / Kolkata           |
| EPI_ISL_508384 | 5/7/2020  | 8/4/2020 Asia / India / West Bengal / North 24 Parganas |
| EPI_ISL_508385 | 4/3/2020  | 8/4/2020 Asia / India / West Bengal / Kolkata           |
| EPI_ISL_508386 | 5/7/2020  | 8/4/2020 Asia / India / West Bengal / Kolkata           |
| EPI_ISL_508387 | 5/9/2020  | 8/4/2020 Asia / India / West Bengal / Kolkata           |
| EPI_ISL_508388 | 5/12/2020 | 8/4/2020 Asia / India / West Bengal / Kolkata           |
| EPI_ISL_508389 | 5/12/2020 | 8/4/2020 Asia / India / West Bengal / Howrah            |
| EPI_ISL_508391 | 5/12/2020 | 8/4/2020 Asia / India / West Bengal / Kolkata           |
| EPI_ISL_508392 | 5/14/2020 | 8/4/2020 Asia / India / West Bengal / Kolkata           |
| EPI_ISL_508393 | 5/14/2020 | 8/4/2020 Asia / India / West Bengal / Kolkata           |
| EPI_ISL_508394 | 4/3/2020  | 8/4/2020 Asia / India / West Bengal / North 24 Parganas |
| EPI_ISL_508395 | 5/14/2020 | 8/4/2020 Asia / India / West Bengal / Kolkata           |
| EPI_ISL_508396 | 5/14/2020 | 8/4/2020 Asia / India / West Bengal / Kolkata           |
| EPI_ISL_508397 | 5/14/2020 | 8/4/2020 Asia / India / West Bengal / Kolkata           |
| EPI_ISL_508398 | 5/19/2020 | 8/4/2020 Asia / India / West Bengal / East Medinipur    |
| EPI_ISL_508399 | 5/19/2020 | 8/4/2020 Asia / India / West Bengal / Kolkata           |
| EPI_ISL_508400 | 5/17/2020 | 8/4/2020 Asia / India / West Bengal / Kolkata           |
| EPI_ISL_508401 | 5/17/2020 | 8/4/2020 Asia / India / West Bengal / Kolkata           |
| EPI_ISL_508402 | 5/17/2020 | 8/4/2020 Asia / India / West Bengal / North 24 Parganas |
| EPI_ISL_508403 | 5/17/2020 | 8/4/2020 Asia / India / West Bengal / Kolkata           |
| EPI_ISL_508404 | 5/17/2020 | 8/4/2020 Asia / India / West Bengal / Kolkata           |
| EPI_ISL_508405 | 5/19/2020 | 8/4/2020 Asia / India / West Bengal / North 24 Parganas |
| EPI_ISL_508406 | 5/19/2020 | 8/4/2020 Asia / India / West Bengal / Kolkata           |
| EPI_ISL_508407 | 4/13/2020 | 8/4/2020 Asia / India / West Bengal / Kolkata           |
| EPI_ISL_508408 | 5/20/2020 | 8/4/2020 Asia / India / West Bengal / Kolkata           |
| EPI_ISL_508409 | 5/20/2020 | 8/4/2020 Asia / India / West Bengal / Kolkata           |
| EPI_ISL_508410 | 5/20/2020 | 8/4/2020 Asia / India / West Bengal / Kolkata           |
| EPI_ISL_508411 | 5/24/2020 | 8/4/2020 Asia / India / West Bengal / Kolkata           |
| EPI_ISL_508412 | 5/24/2020 | 8/4/2020 Asia / India / West Bengal / Kolkata           |
| EPI_ISL_508413 | 5/24/2020 | 8/4/2020 Asia / India / West Bengal / North 24 Parganas |
| EPI_ISL_508414 | 5/24/2020 | 8/4/2020 Asia / India / West Bengal / Kolkata           |
| EPI_ISL_508415 | 6/16/2020 | 8/4/2020 Asia / India / Delhi                           |
| EPI_ISL_508416 | 6/18/2020 | 8/4/2020 Asia / India / Delhi                           |

|                |           |                                                         |
|----------------|-----------|---------------------------------------------------------|
| EPI_ISL_508417 | 6/18/2020 | 8/4/2020 Asia / India / Delhi                           |
| EPI_ISL_508418 | 6/20/2020 | 8/4/2020 Asia / India / Delhi                           |
| EPI_ISL_508419 | 6/27/2020 | 8/4/2020 Asia / India / Uttar Pradesh                   |
| EPI_ISL_508420 | 6/18/2020 | 8/4/2020 Asia / India / Delhi                           |
| EPI_ISL_508421 | 6/18/2020 | 8/4/2020 Asia / India / Delhi                           |
| EPI_ISL_508422 | 6/18/2020 | 8/4/2020 Asia / India / Delhi                           |
| EPI_ISL_508423 | 4/29/2020 | 8/4/2020 Asia / India / Maharashtra / Amravati          |
| EPI_ISL_508424 | 5/1/2020  | 8/4/2020 Asia / India / Maharashtra / Yavatmal          |
| EPI_ISL_508427 | 5/15/2020 | 8/4/2020 Asia / India / Maharashtra / Mumbai            |
| EPI_ISL_508428 | 5/17/2020 | 8/4/2020 Asia / India / Uttar Pradesh / Kalwa           |
| EPI_ISL_508429 | 5/21/2020 | 8/4/2020 Asia / India / Maharashtra / Wardha            |
| EPI_ISL_508430 | 5/21/2020 | 8/4/2020 Asia / India / Maharashtra / Wardha            |
| EPI_ISL_508431 | 5/23/2020 | 8/4/2020 Asia / India / Maharashtra / Wardha            |
| EPI_ISL_508432 | 5/23/2020 | 8/4/2020 Asia / India / Maharashtra / Wardha            |
| EPI_ISL_508433 | 4/27/2020 | 8/4/2020 Asia / India / Maharashtra / Amravati          |
| EPI_ISL_508434 | 5/26/2020 | 8/4/2020 Asia / India / Odisha / Ganjam                 |
| EPI_ISL_508435 | 5/25/2020 | 8/4/2020 Asia / India / Maharashtra / Akola             |
| EPI_ISL_508436 | 5/29/2020 | 8/4/2020 Asia / India / Maharashtra / Akola             |
| EPI_ISL_508437 | 6/4/2020  | 8/4/2020 Asia / India / Maharashtra / Wardha            |
| EPI_ISL_508439 | 4/27/2020 | 8/4/2020 Asia / India / Maharashtra / Amravati          |
| EPI_ISL_508440 | 4/27/2020 | 8/4/2020 Asia / India / Maharashtra / Amravati          |
| EPI_ISL_508444 | 5/2/2020  | 8/4/2020 Asia / India / West Bengal / Kolkata           |
| EPI_ISL_508445 | 5/2/2020  | 8/4/2020 Asia / India / West Bengal / Howrah            |
| EPI_ISL_508446 | 5/2/2020  | 8/4/2020 Asia / India / West Bengal / North 24 Parganas |
| EPI_ISL_508447 | 4/28/2020 | 8/4/2020 Asia / India / West Bengal / Kolkata           |
| EPI_ISL_508448 | 5/1/2020  | 8/4/2020 Asia / India / West Bengal / Kolkata           |
| EPI_ISL_508449 | 5/1/2020  | 8/4/2020 Asia / India / West Bengal / Kolkata           |
| EPI_ISL_508450 | 5/3/2020  | 8/4/2020 Asia / India / West Bengal / Kolkata           |
| EPI_ISL_508451 | 5/1/2020  | 8/4/2020 Asia / India / West Bengal / Kolkata           |
| EPI_ISL_508452 | 5/3/2020  | 8/4/2020 Asia / India / West Bengal / Hooghly           |
| EPI_ISL_508453 | 5/24/2020 | 8/4/2020 Asia / India / West Bengal / Nadia             |
| EPI_ISL_508454 | 5/24/2020 | 8/4/2020 Asia / India / West Bengal / North 24 Parganas |
| EPI_ISL_508456 | 5/24/2020 | 8/4/2020 Asia / India / West Bengal / North 24 Parganas |
| EPI_ISL_508457 | 5/28/2020 | 8/4/2020 Asia / India / West Bengal / North 24 Parganas |
| EPI_ISL_508460 | 5/25/2020 | 8/4/2020 Asia / India / West Bengal / North 24 Parganas |
| EPI_ISL_508463 | 5/26/2020 | 8/4/2020 Asia / India / West Bengal / Birbhum           |
| EPI_ISL_508464 | 5/20/2020 | 8/4/2020 Asia / India / West Bengal / Nadia             |
| EPI_ISL_508465 | 5/20/2020 | 8/4/2020 Asia / India / West Bengal / Nadia             |
| EPI_ISL_508468 | 5/26/2020 | 8/4/2020 Asia / India / West Bengal / Birbhum           |
| EPI_ISL_508469 | 5/20/2020 | 8/4/2020 Asia / India / West Bengal / Nadia             |
| EPI_ISL_508471 | 5/26/2020 | 8/4/2020 Asia / India / West Bengal / Nadia             |
| EPI_ISL_508475 | 5/26/2020 | 8/4/2020 Asia / India / West Bengal / North 24 Parganas |
| EPI_ISL_508481 | 5/25/2020 | 8/4/2020 Asia / India / West Bengal / North 24 Parganas |
| EPI_ISL_508482 | 6/2/2020  | 8/4/2020 Asia / India / West Bengal / Hooghly           |
| EPI_ISL_508483 | 6/3/2020  | 8/4/2020 Asia / India / West Bengal / North 24 Parganas |
| EPI_ISL_508487 | 6/10/2020 | 8/4/2020 Asia / India / West Bengal / North 24 Parganas |
| EPI_ISL_508489 | 6/12/2020 | 8/4/2020 Asia / India / Haryana / Faridabad             |



|                |           |                                                           |
|----------------|-----------|-----------------------------------------------------------|
| EPI_ISL_508490 | 6/17/2020 | 8/4/2020 Asia / India / Haryana / Faridabad               |
| EPI_ISL_508491 | 6/17/2020 | 8/4/2020 Asia / India / Haryana / Faridabad               |
| EPI_ISL_508492 | 6/17/2020 | 8/4/2020 Asia / India / Haryana / Faridabad               |
| EPI_ISL_508493 | 6/17/2020 | 8/4/2020 Asia / India / Haryana / Faridabad               |
| EPI_ISL_508494 | 6/17/2020 | 8/4/2020 Asia / India / Haryana / Faridabad               |
| EPI_ISL_508495 | 6/17/2020 | 8/4/2020 Asia / India / Delhi / Tuklakabad                |
| EPI_ISL_508496 | 6/14/2020 | 8/4/2020 Asia / India / Haryana / Palwal                  |
| EPI_ISL_508497 | 6/17/2020 | 8/4/2020 Asia / India / Haryana / Faridabad               |
| EPI_ISL_508498 | 6/19/2020 | 8/4/2020 Asia / India / Haryana / Palwal                  |
| EPI_ISL_508499 | 6/19/2020 | 8/4/2020 Asia / India / Haryana / Faridabad               |
| EPI_ISL_508500 | 6/19/2020 | 8/4/2020 Asia / India / Haryana / Palwal                  |
| EPI_ISL_508501 | 6/22/2020 | 8/4/2020 Asia / India / Haryana / Faridabad               |
| EPI_ISL_508502 | 6/14/2020 | 8/4/2020 Asia / India / Haryana / Palwal                  |
| EPI_ISL_508503 | 6/22/2020 | 8/4/2020 Asia / India / Haryana / Gurugram                |
| EPI_ISL_508504 | 5/6/2020  | 8/4/2020 Asia / India / Haryana / Gurugram                |
| EPI_ISL_508505 | 6/14/2020 | 8/4/2020 Asia / India / Haryana / Palwal                  |
| EPI_ISL_508506 | 5/12/2020 | 8/4/2020 Asia / India / Haryana / Gurugram                |
| EPI_ISL_508507 | 6/14/2020 | 8/4/2020 Asia / India / Haryana / Palwal                  |
| EPI_ISL_508509 | 6/17/2020 | 8/4/2020 Asia / India / Haryana / Faridabad               |
| EPI_ISL_508605 | 7/25/2020 | 8/4/2020 Oceania / Australia / South Australia            |
| EPI_ISL_508606 | 7/28/2020 | 8/4/2020 Oceania / Australia / South Australia            |
| EPI_ISL_508607 | 7/29/2020 | 8/4/2020 Oceania / Australia / South Australia            |
| EPI_ISL_508627 | 3/29/2020 | 8/4/2020 Europe / Spain / Catalunya / Barcelona           |
| EPI_ISL_508639 | 3/17/2020 | 8/4/2020 Europe / Spain / Catalunya / Barcelona           |
| EPI_ISL_508640 | 3/12/2020 | 8/4/2020 Europe / Spain / Catalunya / Barcelona           |
| EPI_ISL_508641 | 3/17/2020 | 8/4/2020 Europe / Spain / Catalunya / Barcelona           |
| EPI_ISL_508642 | 3/18/2020 | 8/4/2020 Europe / Spain / Catalunya / Barcelona           |
| EPI_ISL_508643 | 3/18/2020 | 8/4/2020 Europe / Spain / Catalunya / Barcelona           |
| EPI_ISL_508646 | 3/26/2020 | 8/4/2020 Europe / Spain / Catalunya / Barcelona           |
| EPI_ISL_508647 | 3/26/2020 | 8/4/2020 Europe / Spain / Catalunya / Barcelona           |
| EPI_ISL_508653 | 3/26/2020 | 8/4/2020 Europe / Spain / Catalunya / Barcelona           |
| EPI_ISL_508661 | 3/29/2020 | 8/4/2020 Europe / Spain / Catalunya / Barcelona           |
| EPI_ISL_508663 | 4/10/2020 | 8/4/2020 Europe / Spain / Catalunya / Barcelona           |
| EPI_ISL_508667 | 4/24/2020 | 8/4/2020 Europe / Spain / Catalunya / Barcelona           |
| EPI_ISL_508676 | 3/29/2020 | 8/4/2020 Europe / Spain / Catalunya / Barcelona           |
| EPI_ISL_508688 | 5/20/2020 | 8/4/2020 Europe / Germany / Baden-Wurttemberg / Tuebingen |
| EPI_ISL_508690 | 5/20/2020 | 8/4/2020 Europe / Germany / Baden-Wurttemberg / Tuebingen |
| EPI_ISL_508691 | 5/20/2020 | 8/4/2020 Europe / Germany / Baden-Wurttemberg / Tuebingen |
| EPI_ISL_508693 | 5/20/2020 | 8/4/2020 Europe / Germany / Baden-Wurttemberg / Tuebingen |
| EPI_ISL_508694 | 5/20/2020 | 8/4/2020 Europe / Germany / Baden-Wurttemberg / Tuebingen |
| EPI_ISL_508696 | 5/20/2020 | 8/4/2020 Europe / Germany / Baden-Wurttemberg / Tuebingen |
| EPI_ISL_508697 | 5/20/2020 | 8/4/2020 Europe / Germany / Baden-Wurttemberg / Tuebingen |
| EPI_ISL_508699 | 5/20/2020 | 8/4/2020 Europe / Germany / Baden-Wurttemberg / Tuebingen |
| EPI_ISL_508700 | 5/20/2020 | 8/4/2020 Europe / Germany / Baden-Wurttemberg / Tuebingen |
| EPI_ISL_508701 | 5/20/2020 | 8/4/2020 Europe / Germany / Baden-Wurttemberg / Tuebingen |
| EPI_ISL_508702 | 5/20/2020 | 8/4/2020 Europe / Germany / Baden-Wurttemberg / Tuebingen |
| EPI_ISL_508703 | 5/20/2020 | 8/4/2020 Europe / Germany / Baden-Wurttemberg / Tuebingen |



|                |           |                                                          |
|----------------|-----------|----------------------------------------------------------|
| EPI_ISL_508771 | 3/15/2020 | 8/4/2020 North America / USA / Florida                   |
| EPI_ISL_508772 | 3/13/2020 | 8/4/2020 North America / USA / Florida                   |
| EPI_ISL_508773 | 3/15/2020 | 8/4/2020 North America / USA / Florida                   |
| EPI_ISL_508774 | 3/14/2020 | 8/4/2020 North America / USA / Florida                   |
| EPI_ISL_508775 | 3/14/2020 | 8/4/2020 North America / USA / Florida                   |
| EPI_ISL_508776 | 3/19/2020 | 8/4/2020 North America / USA / Florida                   |
| EPI_ISL_508777 | 3/19/2020 | 8/4/2020 North America / USA / Florida                   |
| EPI_ISL_508778 | 3/19/2020 | 8/4/2020 North America / USA / Florida                   |
| EPI_ISL_508779 | 3/21/2020 | 8/4/2020 North America / USA / Florida                   |
| EPI_ISL_508780 | 3/20/2020 | 8/4/2020 North America / USA / Florida                   |
| EPI_ISL_508781 | 3/21/2020 | 8/4/2020 North America / USA / Florida                   |
| EPI_ISL_508782 | 3/21/2020 | 8/4/2020 North America / USA / Florida                   |
| EPI_ISL_508784 | 3/20/2020 | 8/4/2020 North America / USA / Florida                   |
| EPI_ISL_508786 | 3/21/2020 | 8/4/2020 North America / USA / Florida                   |
| EPI_ISL_508787 | 3/23/2020 | 8/4/2020 North America / USA / Florida                   |
| EPI_ISL_508788 | 3/20/2020 | 8/4/2020 North America / USA / Florida                   |
| EPI_ISL_508790 | 3/21/2020 | 8/4/2020 North America / USA / Florida                   |
| EPI_ISL_508791 | 3/21/2020 | 8/4/2020 North America / USA / Florida                   |
| EPI_ISL_508792 | 3/22/2020 | 8/4/2020 North America / USA / Florida                   |
| EPI_ISL_508793 | 3/21/2020 | 8/4/2020 North America / USA / Florida                   |
| EPI_ISL_508794 | 3/24/2020 | 8/4/2020 North America / USA / Florida                   |
| EPI_ISL_508795 | 3/24/2020 | 8/4/2020 North America / USA / Florida                   |
| EPI_ISL_508796 | 3/24/2020 | 8/4/2020 North America / USA / Florida                   |
| EPI_ISL_508797 | 3/24/2020 | 8/4/2020 North America / USA / Florida                   |
| EPI_ISL_508798 | 3/24/2020 | 8/4/2020 North America / USA / Florida                   |
| EPI_ISL_508799 | 3/24/2020 | 8/4/2020 North America / USA / Florida                   |
| EPI_ISL_508800 | 3/23/2020 | 8/4/2020 North America / USA / Florida                   |
| EPI_ISL_508801 | 3/24/2020 | 8/4/2020 North America / USA / Florida                   |
| EPI_ISL_508802 | 3/23/2020 | 8/4/2020 North America / USA / Florida                   |
| EPI_ISL_508803 | 3/21/2020 | 8/4/2020 North America / USA / Florida                   |
| EPI_ISL_508804 | 3/19/2020 | 8/4/2020 North America / USA / Florida                   |
| EPI_ISL_508805 | 3/18/2020 | 8/4/2020 North America / USA / Florida                   |
| EPI_ISL_508807 | 3/18/2020 | 8/4/2020 North America / USA / Florida                   |
| EPI_ISL_508821 | 4/4/2020  | 8/4/2020 North America / USA / Florida                   |
| EPI_ISL_508836 | 4/6/2020  | 8/4/2020 North America / USA / Florida                   |
| EPI_ISL_508837 | 4/6/2020  | 8/4/2020 North America / USA / Florida                   |
| EPI_ISL_508838 | 4/5/2020  | 8/4/2020 North America / USA / Florida                   |
| EPI_ISL_508839 | 4/6/2020  | 8/4/2020 North America / USA / Florida                   |
| EPI_ISL_508840 | 4/6/2020  | 8/4/2020 North America / USA / Florida                   |
| EPI_ISL_508841 | 4/6/2020  | 8/4/2020 North America / USA / Florida                   |
| EPI_ISL_508862 | 3/20/2020 | 8/4/2020 Africa / Madagascar / Analamanga / Antananarivo |
| EPI_ISL_508863 | 3/22/2020 | 8/4/2020 Africa / Madagascar / Analamanga / Fenoarivo    |
| EPI_ISL_508864 | 3/15/2020 | 8/4/2020 Europe / Switzerland / Zurich                   |
| EPI_ISL_508865 | 3/15/2020 | 8/4/2020 Europe / Switzerland / Zurich                   |
| EPI_ISL_508866 | 3/14/2020 | 8/4/2020 Europe / Switzerland / Zurich                   |
| EPI_ISL_508867 | 3/15/2020 | 8/4/2020 Europe / Switzerland / Zurich                   |
| EPI_ISL_508868 | 3/15/2020 | 8/4/2020 Europe / Switzerland / Zurich                   |

|                |           |                                                                |
|----------------|-----------|----------------------------------------------------------------|
| EPI_ISL_508869 | 3/16/2020 | 8/4/2020 Europe / Switzerland / Zurich                         |
| EPI_ISL_508870 | 3/19/2020 | 8/4/2020 Europe / Switzerland / Zurich                         |
| EPI_ISL_508871 | 3/18/2020 | 8/4/2020 Europe / France / Auvergne-Rhone-Alpes / Craponne     |
| EPI_ISL_508872 | 3/11/2020 | 8/4/2020 Europe / France / Auvergne-Rhone-Alpes / Lyon         |
| EPI_ISL_508873 | 3/12/2020 | 8/4/2020 Europe / France / Auvergne-Rhone-Alpes / Lyon         |
| EPI_ISL_508874 | 3/13/2020 | 8/4/2020 Europe / France / Auvergne-Rhone-Alpes / Lyon         |
| EPI_ISL_508875 | 3/14/2020 | 8/4/2020 Europe / France / Auvergne-Rhone-Alpes / Macon        |
| EPI_ISL_508876 | 3/14/2020 | 8/4/2020 Europe / France / Auvergne-Rhone-Alpes / Macon        |
| EPI_ISL_508877 | 3/15/2020 | 8/4/2020 Europe / France / Auvergne-Rhone-Alpes / Lyon         |
| EPI_ISL_508878 | 3/15/2020 | 8/4/2020 Europe / France / Auvergne-Rhone-Alpes / Venissieux   |
| EPI_ISL_508879 | 3/16/2020 | 8/4/2020 Europe / France / Auvergne-Rhone-Alpes / Lyon         |
| EPI_ISL_508880 | 3/16/2020 | 8/4/2020 Europe / France / Auvergne-Rhone-Alpes / Lyon         |
| EPI_ISL_508881 | 3/16/2020 | 8/4/2020 Europe / France / Auvergne-Rhone-Alpes / Valence      |
| EPI_ISL_508882 | 3/18/2020 | 8/4/2020 Europe / France / Auvergne-Rhone-Alpes / Lyon         |
| EPI_ISL_508883 | 3/18/2020 | 8/4/2020 Europe / France / Auvergne-Rhone-Alpes / Lyon         |
| EPI_ISL_508884 | 3/25/2020 | 8/4/2020 Europe / France / Auvergne-Rhone-Alpes / Lyon         |
| EPI_ISL_508885 | 3/26/2020 | 8/4/2020 Europe / France / Auvergne-Rhone-Alpes / Lyon         |
| EPI_ISL_508886 | 3/24/2020 | 8/4/2020 Europe / France / Auvergne-Rhone-Alpes / Lyon         |
| EPI_ISL_508887 | 3/26/2020 | 8/4/2020 Europe / France / Auvergne-Rhone-Alpes / Lyon         |
| EPI_ISL_508888 | 3/26/2020 | 8/4/2020 Europe / France / Auvergne-Rhone-Alpes / Lyon         |
| EPI_ISL_508889 | 3/26/2020 | 8/4/2020 Europe / France / Auvergne-Rhone-Alpes / Lyon         |
| EPI_ISL_508890 | 3/26/2020 | 8/4/2020 Europe / France / Auvergne-Rhone-Alpes / Lyon         |
| EPI_ISL_508891 | 3/26/2020 | 8/4/2020 Europe / France / Auvergne-Rhone-Alpes / Lyon         |
| EPI_ISL_508892 | 3/26/2020 | 8/4/2020 Europe / France / Auvergne-Rhone-Alpes / Lyon         |
| EPI_ISL_508893 | 3/26/2020 | 8/4/2020 Europe / France / Auvergne-Rhone-Alpes / Lyon         |
| EPI_ISL_508894 | 3/26/2020 | 8/4/2020 Europe / France / Auvergne-Rhone-Alpes / Lyon         |
| EPI_ISL_508895 | 3/26/2020 | 8/4/2020 Europe / France / Auvergne-Rhone-Alpes / Lyon         |
| EPI_ISL_508896 | 3/27/2020 | 8/4/2020 Europe / France / Auvergne-Rhone-Alpes / Lyon         |
| EPI_ISL_508897 | 3/27/2020 | 8/4/2020 Europe / France / Auvergne-Rhone-Alpes / Lyon         |
| EPI_ISL_508898 | 3/27/2020 | 8/4/2020 Europe / France / Auvergne-Rhone-Alpes / Lyon         |
| EPI_ISL_508899 | 3/27/2020 | 8/4/2020 Europe / France / Auvergne-Rhone-Alpes / Lyon         |
| EPI_ISL_508900 | 3/27/2020 | 8/4/2020 Europe / France / Auvergne-Rhone-Alpes / Lyon         |
| EPI_ISL_508901 | 3/27/2020 | 8/4/2020 Europe / France / Auvergne-Rhone-Alpes / Lyon         |
| EPI_ISL_508902 | 3/27/2020 | 8/4/2020 Europe / France / Auvergne-Rhone-Alpes / Lyon         |
| EPI_ISL_508903 | 3/27/2020 | 8/4/2020 Europe / France / Auvergne-Rhone-Alpes / Lyon         |
| EPI_ISL_508904 | 3/29/2020 | 8/4/2020 Europe / France / Auvergne-Rhone-Alpes / Lyon         |
| EPI_ISL_508905 | 3/29/2020 | 8/4/2020 Europe / France / Auvergne-Rhone-Alpes / Lyon         |
| EPI_ISL_508906 | 3/29/2020 | 8/4/2020 Europe / France / Auvergne-Rhone-Alpes / Lyon         |
| EPI_ISL_508907 | 3/29/2020 | 8/4/2020 Europe / France / Auvergne-Rhone-Alpes / Lyon         |
| EPI_ISL_508908 | 3/30/2020 | 8/4/2020 Europe / France / Auvergne-Rhone-Alpes / Lyon         |
| EPI_ISL_508909 | 3/18/2020 | 8/4/2020 Europe / France / Occitanie / Caraman                 |
| EPI_ISL_508910 | 3/11/2020 | 8/4/2020 Europe / France / Nouvelle-Aquitaine / Limoges        |
| EPI_ISL_508911 | 3/25/2020 | 8/4/2020 Europe / France / Provence-Alpes-Cote d'Azur / Embrun |
| EPI_ISL_508912 | 4/6/2020  | 8/4/2020 Europe / France / Auvergne-Rhone-Alpes / Lyon         |
| EPI_ISL_508913 | 4/6/2020  | 8/4/2020 Europe / France / Auvergne-Rhone-Alpes / Lyon         |
| EPI_ISL_508914 | 4/6/2020  | 8/4/2020 Europe / France / Auvergne-Rhone-Alpes / Lyon         |
| EPI_ISL_508915 | 4/6/2020  | 8/4/2020 Europe / France / Auvergne-Rhone-Alpes / Lyon         |

|                |           |                                                                     |
|----------------|-----------|---------------------------------------------------------------------|
| EPI_ISL_508916 | 4/7/2020  | 8/4/2020 Europe / France / Auvergne-Rhone-Alpes / Lyon              |
| EPI_ISL_508917 | 4/8/2020  | 8/4/2020 Europe / France / Auvergne-Rhone-Alpes / Lyon              |
| EPI_ISL_508918 | 4/9/2020  | 8/4/2020 Europe / France / Auvergne-Rhone-Alpes / Lyon              |
| EPI_ISL_508921 | 4/9/2020  | 8/4/2020 Europe / France / Auvergne-Rhone-Alpes / Lyon              |
| EPI_ISL_508922 | 4/9/2020  | 8/4/2020 Europe / France / Auvergne-Rhone-Alpes / Lyon              |
| EPI_ISL_508923 | 4/10/2020 | 8/4/2020 Europe / France / Auvergne-Rhone-Alpes / Lyon              |
| EPI_ISL_508924 | 4/10/2020 | 8/4/2020 Europe / France / Auvergne-Rhone-Alpes / Lyon              |
| EPI_ISL_508925 | 4/10/2020 | 8/4/2020 Europe / France / Auvergne-Rhone-Alpes / Lyon              |
| EPI_ISL_508926 | 4/10/2020 | 8/4/2020 Europe / France / Auvergne-Rhone-Alpes / Lyon              |
| EPI_ISL_508927 | 4/11/2020 | 8/4/2020 Europe / France / Auvergne-Rhone-Alpes / Lyon              |
| EPI_ISL_508928 | 4/11/2020 | 8/4/2020 Europe / France / Auvergne-Rhone-Alpes / Lyon              |
| EPI_ISL_508929 | 4/11/2020 | 8/4/2020 Europe / France / Auvergne-Rhone-Alpes / Lyon              |
| EPI_ISL_508930 | 4/12/2020 | 8/4/2020 Europe / France / Auvergne-Rhone-Alpes / Lyon              |
| EPI_ISL_508931 | 4/11/2020 | 8/4/2020 Europe / France / Auvergne-Rhone-Alpes / Tarare            |
| EPI_ISL_508932 | 4/12/2020 | 8/4/2020 Europe / France / Auvergne-Rhone-Alpes / Villefranche      |
| EPI_ISL_508933 | 2/28/2020 | 8/4/2020 Europe / France / Auvergne-Rhone-Alpes / Lyon              |
| EPI_ISL_508934 | 3/1/2020  | 8/4/2020 Europe / France / Auvergne-Rhone-Alpes / Chambéry          |
| EPI_ISL_508935 | 3/2/2020  | 8/4/2020 Europe / France / Auvergne-Rhone-Alpes / Chambéry          |
| EPI_ISL_508936 | 3/4/2020  | 8/4/2020 Europe / France / Auvergne-Rhone-Alpes / Chambéry          |
| EPI_ISL_508937 | 3/9/2020  | 8/4/2020 Europe / France / Auvergne-Rhone-Alpes / Lyon              |
| EPI_ISL_508938 | 3/9/2020  | 8/4/2020 Europe / France / Auvergne-Rhone-Alpes / Bourg-en-Bresse   |
| EPI_ISL_508939 | 3/9/2020  | 8/4/2020 Europe / France / Auvergne-Rhone-Alpes / Lyon              |
| EPI_ISL_508940 | 3/9/2020  | 8/4/2020 Europe / France / Auvergne-Rhone-Alpes / Lyon              |
| EPI_ISL_508942 | 3/10/2020 | 8/4/2020 Europe / France / Auvergne-Rhone-Alpes / Lyon              |
| EPI_ISL_508943 | 3/11/2020 | 8/4/2020 Europe / France / Auvergne-Rhone-Alpes / Macon             |
| EPI_ISL_508944 | 3/11/2020 | 8/4/2020 Europe / France / Auvergne-Rhone-Alpes / Bourg-en-Bresse   |
| EPI_ISL_508945 | 3/11/2020 | 8/4/2020 Europe / France / Auvergne-Rhone-Alpes / Macon             |
| EPI_ISL_508946 | 3/12/2020 | 8/4/2020 Europe / France / Auvergne-Rhone-Alpes / Macon             |
| EPI_ISL_508947 | 3/12/2020 | 8/4/2020 Europe / France / Auvergne-Rhone-Alpes / Vienne            |
| EPI_ISL_508948 | 3/13/2020 | 8/4/2020 Europe / France / Auvergne-Rhone-Alpes / Lyon              |
| EPI_ISL_508949 | 3/21/2020 | 8/4/2020 Europe / France / Auvergne-Rhone-Alpes / Macon             |
| EPI_ISL_508950 | 3/22/2020 | 8/4/2020 Europe / France / Auvergne-Rhone-Alpes / Macon             |
| EPI_ISL_508951 | 3/22/2020 | 8/4/2020 Europe / France / Auvergne-Rhone-Alpes / Lyon              |
| EPI_ISL_508952 | 3/23/2020 | 8/4/2020 Europe / France / Auvergne-Rhone-Alpes / Macon             |
| EPI_ISL_508953 | 3/23/2020 | 8/4/2020 Europe / France / Auvergne-Rhone-Alpes / Lyon              |
| EPI_ISL_508954 | 3/24/2020 | 8/4/2020 Europe / France / Auvergne-Rhone-Alpes / Lyon              |
| EPI_ISL_508955 | 3/24/2020 | 8/4/2020 Europe / France / Auvergne-Rhone-Alpes / Lyon              |
| EPI_ISL_508956 | 3/24/2020 | 8/4/2020 Europe / France / Auvergne-Rhone-Alpes / Lyon              |
| EPI_ISL_508957 | 3/24/2020 | 8/4/2020 Europe / France / Auvergne-Rhone-Alpes / Lyon              |
| EPI_ISL_508958 | 3/30/2020 | 8/4/2020 Europe / France / Auvergne-Rhone-Alpes / Contamine-sur-Arv |
| EPI_ISL_508959 | 3/31/2020 | 8/4/2020 Europe / France / Auvergne-Rhone-Alpes / Lyon              |
| EPI_ISL_508960 | 3/31/2020 | 8/4/2020 Europe / France / Auvergne-Rhone-Alpes / Lyon              |
| EPI_ISL_508961 | 4/1/2020  | 8/4/2020 Europe / France / Auvergne-Rhone-Alpes / Lyon              |
| EPI_ISL_508962 | 4/1/2020  | 8/4/2020 Europe / France / Auvergne-Rhone-Alpes / Lyon              |
| EPI_ISL_508963 | 4/1/2020  | 8/4/2020 Europe / France / Auvergne-Rhone-Alpes / Lyon              |
| EPI_ISL_508964 | 4/2/2020  | 8/4/2020 Europe / France / Auvergne-Rhone-Alpes / Lyon              |
| EPI_ISL_508965 | 4/2/2020  | 8/4/2020 Europe / France / Auvergne-Rhone-Alpes / Lyon              |

|                |           |          |                                                            |
|----------------|-----------|----------|------------------------------------------------------------|
| EPI_ISL_508966 | 4/2/2020  | 8/4/2020 | Europe / France / Auvergne-Rhone-Alpes / Bourgoin-Jallieu  |
| EPI_ISL_508967 | 4/2/2020  | 8/4/2020 | Europe / France / Auvergne-Rhone-Alpes / Lyon              |
| EPI_ISL_508968 | 4/2/2020  | 8/4/2020 | Europe / France / Auvergne-Rhone-Alpes / Bourg-en-Bresse   |
| EPI_ISL_508969 | 4/2/2020  | 8/4/2020 | Europe / France / Auvergne-Rhone-Alpes / Lyon              |
| EPI_ISL_508970 | 4/2/2020  | 8/4/2020 | Europe / France / Auvergne-Rhone-Alpes / Lyon              |
| EPI_ISL_508972 | 4/2/2020  | 8/4/2020 | Europe / France / Auvergne-Rhone-Alpes / Lyon              |
| EPI_ISL_508973 | 4/2/2020  | 8/4/2020 | Europe / France / Auvergne-Rhone-Alpes / Lyon              |
| EPI_ISL_508974 | 4/3/2020  | 8/4/2020 | Europe / France / Auvergne-Rhone-Alpes / Lyon              |
| EPI_ISL_508975 | 4/2/2020  | 8/4/2020 | Europe / France / Auvergne-Rhone-Alpes / Bourgoin-Jallieu  |
| EPI_ISL_508976 | 4/1/2020  | 8/4/2020 | Europe / France / Auvergne-Rhone-Alpes / Decines           |
| EPI_ISL_508977 | 4/3/2020  | 8/4/2020 | Europe / France / Auvergne-Rhone-Alpes / Lyon              |
| EPI_ISL_508978 | 4/3/2020  | 8/4/2020 | Europe / France / Auvergne-Rhone-Alpes / Villefranche      |
| EPI_ISL_508979 | 4/3/2020  | 8/4/2020 | Europe / France / Auvergne-Rhone-Alpes / Lyon              |
| EPI_ISL_508980 | 4/3/2020  | 8/4/2020 | Europe / France / Auvergne-Rhone-Alpes / Lyon              |
| EPI_ISL_508981 | 4/4/2020  | 8/4/2020 | Europe / France / Auvergne-Rhone-Alpes / Lyon              |
| EPI_ISL_508982 | 4/5/2020  | 8/4/2020 | Europe / France / Auvergne-Rhone-Alpes / Lyon              |
| EPI_ISL_508983 | 4/5/2020  | 8/4/2020 | Europe / France / Auvergne-Rhone-Alpes / Lyon              |
| EPI_ISL_508984 | 4/5/2020  | 8/4/2020 | Europe / France / Auvergne-Rhone-Alpes / Lyon              |
| EPI_ISL_508985 | 4/5/2020  | 8/4/2020 | Europe / France / Auvergne-Rhone-Alpes / Lyon              |
| EPI_ISL_508986 | 3/25/2020 | 8/4/2020 | Europe / France / Auvergne-Rhone-Alpes / Lyon              |
| EPI_ISL_508987 | 3/30/2020 | 8/4/2020 | Europe / France / Auvergne-Rhone-Alpes / Lyon              |
| EPI_ISL_508990 | 4/6/2020  | 8/4/2020 | Europe / France / Auvergne-Rhone-Alpes / Lyon              |
| EPI_ISL_508991 | 4/7/2020  | 8/4/2020 | Europe / France / Auvergne-Rhone-Alpes / Lyon              |
| EPI_ISL_508993 | 4/7/2020  | 8/4/2020 | Europe / France / Auvergne-Rhone-Alpes / Lyon              |
| EPI_ISL_508994 | 4/7/2020  | 8/4/2020 | Europe / France / Auvergne-Rhone-Alpes / Lyon              |
| EPI_ISL_508995 | 4/8/2020  | 8/4/2020 | Europe / France / Auvergne-Rhone-Alpes / Lyon              |
| EPI_ISL_508996 | 4/8/2020  | 8/4/2020 | Europe / France / Auvergne-Rhone-Alpes / Lyon              |
| EPI_ISL_508997 | 4/8/2020  | 8/4/2020 | Europe / France / Auvergne-Rhone-Alpes / Lyon              |
| EPI_ISL_508998 | 3/17/2020 | 8/4/2020 | Europe / France / Auvergne-Rhone-Alpes / Bourgoin-Jallieu  |
| EPI_ISL_508999 | 3/18/2020 | 8/4/2020 | Europe / France / Auvergne-Rhone-Alpes / Lyon              |
| EPI_ISL_509000 | 3/18/2020 | 8/4/2020 | Europe / France / Auvergne-Rhone-Alpes / Lyon              |
| EPI_ISL_509001 | 3/18/2020 | 8/4/2020 | Europe / France / Auvergne-Rhone-Alpes / Lyon              |
| EPI_ISL_509002 | 3/19/2020 | 8/4/2020 | Europe / France / Auvergne-Rhone-Alpes / Lyon              |
| EPI_ISL_509003 | 3/16/2020 | 8/4/2020 | Europe / France / Auvergne-Rhone-Alpes / Venissieux        |
| EPI_ISL_509004 | 3/16/2020 | 8/4/2020 | Europe / France / Auvergne-Rhone-Alpes / Venissieux        |
| EPI_ISL_509005 | 3/21/2020 | 8/4/2020 | Europe / France / Auvergne-Rhone-Alpes / Macon             |
| EPI_ISL_509006 | 3/22/2020 | 8/4/2020 | Europe / France / Auvergne-Rhone-Alpes / Villefranche      |
| EPI_ISL_509007 | 3/23/2020 | 8/4/2020 | Europe / France / Auvergne-Rhone-Alpes / Lyon              |
| EPI_ISL_509008 | 3/23/2020 | 8/4/2020 | Europe / France / Auvergne-Rhone-Alpes / Lyon              |
| EPI_ISL_509009 | 3/25/2020 | 8/4/2020 | Europe / France / Auvergne-Rhone-Alpes / Lyon              |
| EPI_ISL_509010 | 3/30/2020 | 8/4/2020 | Europe / France / Auvergne-Rhone-Alpes / Lyon              |
| EPI_ISL_509011 | 3/31/2020 | 8/4/2020 | Europe / France / Auvergne-Rhone-Alpes / Lyon              |
| EPI_ISL_509012 | 3/30/2020 | 8/4/2020 | Europe / France / Auvergne-Rhone-Alpes / Contamine-sur-Arv |
| EPI_ISL_509013 | 3/31/2020 | 8/4/2020 | Europe / France / Auvergne-Rhone-Alpes / Lyon              |
| EPI_ISL_509014 | 3/31/2020 | 8/4/2020 | Europe / France / Auvergne-Rhone-Alpes / Lyon              |
| EPI_ISL_509015 | 4/1/2020  | 8/4/2020 | Europe / France / Auvergne-Rhone-Alpes / Villefranche      |
| EPI_ISL_509016 | 4/1/2020  | 8/4/2020 | Europe / France / Auvergne-Rhone-Alpes / Oyonnax           |

|                |           |                                                           |
|----------------|-----------|-----------------------------------------------------------|
| EPI_ISL_510536 | 7/20/2020 | 8/4/2020 South America / Brazil / Rio de Janeiro          |
| EPI_ISL_510541 | 7/20/2020 | 8/4/2020 South America / Brazil / Rio de Janeiro          |
| EPI_ISL_529139 | 7/20/2020 | 8/4/2020 South America / Brazil / Rio de Janeiro          |
| EPI_ISL_529140 | 7/20/2020 | 8/4/2020 South America / Brazil / Rio de Janeiro          |
| EPI_ISL_509017 | 2020-06   | 8/5/2020 Europe / Poland / Lodzkie                        |
| EPI_ISL_509018 | 2020-06   | 8/5/2020 Europe / Poland / Lodzkie                        |
| EPI_ISL_509019 | 2020-06   | 8/5/2020 Europe / Poland / Lodzkie                        |
| EPI_ISL_509020 | 2020-06   | 8/5/2020 Europe / Poland / Lodzkie                        |
| EPI_ISL_509021 | 2020-06   | 8/5/2020 Europe / Poland / Lodzkie / Lodz                 |
| EPI_ISL_509022 | 2020-06   | 8/5/2020 Europe / Poland / Lodzkie                        |
| EPI_ISL_509023 | 2020-06   | 8/5/2020 Europe / Poland / Lodzkie / Lodz                 |
| EPI_ISL_509024 | 2020-06   | 8/5/2020 Europe / Poland / Lodzkie                        |
| EPI_ISL_509026 | 2020-06   | 8/5/2020 Europe / Poland / Lodzkie                        |
| EPI_ISL_509028 | 2020-06   | 8/5/2020 Europe / Poland / Lodzkie                        |
| EPI_ISL_509029 | 2020-06   | 8/5/2020 Europe / Poland / Lodzkie                        |
| EPI_ISL_509031 | 2020-06   | 8/5/2020 Europe / Poland / Lodzkie / Belchatow County     |
| EPI_ISL_509033 | 2020-06   | 8/5/2020 Europe / Poland / Lodzkie / Skierniewice County  |
| EPI_ISL_509035 | 2020-06   | 8/5/2020 Europe / Poland / Lodzkie / Pajeczno County      |
| EPI_ISL_509037 | 2020-06   | 8/5/2020 Europe / Poland / Lodzkie / Lodz                 |
| EPI_ISL_509038 | 2020-06   | 8/5/2020 Europe / Poland / Lodzkie / Lodz                 |
| EPI_ISL_509051 | 2020-06   | 8/5/2020 Europe / Poland / Lodzkie / Lodz                 |
| EPI_ISL_509059 | 4/22/2020 | 8/5/2020 North America / USA / Oregon / Washington County |
| EPI_ISL_509060 | 4/27/2020 | 8/5/2020 North America / USA / Oregon / Clackamas County  |
| EPI_ISL_509061 | 4/29/2020 | 8/5/2020 North America / USA / Oregon / Multnomah County  |
| EPI_ISL_509062 | 4/29/2020 | 8/5/2020 North America / USA / Oregon / Washington County |
| EPI_ISL_509064 | 4/21/2020 | 8/5/2020 North America / USA / Oregon / Washington County |
| EPI_ISL_509065 | 4/21/2020 | 8/5/2020 North America / USA / Oregon / Washington County |
| EPI_ISL_509066 | 4/27/2020 | 8/5/2020 North America / USA / Oregon / Washington County |
| EPI_ISL_509067 | 4/28/2020 | 8/5/2020 North America / USA / Oregon / Washington County |
| EPI_ISL_509069 | 3/28/2020 | 8/5/2020 North America / USA / Oregon / Multnomah County  |
| EPI_ISL_509070 | 3/30/2020 | 8/5/2020 North America / USA / Oregon                     |
| EPI_ISL_509071 | 3/30/2020 | 8/5/2020 North America / USA / Oregon / Multnomah County  |
| EPI_ISL_509072 | 4/2/2020  | 8/5/2020 North America / USA / Oregon                     |
| EPI_ISL_509073 | 4/3/2020  | 8/5/2020 North America / USA / Oregon / Multnomah County  |
| EPI_ISL_509074 | 4/3/2020  | 8/5/2020 North America / USA / Oregon / Clackamas County  |
| EPI_ISL_509075 | 4/3/2020  | 8/5/2020 North America / USA / Oregon / Lane County       |
| EPI_ISL_509076 | 4/4/2020  | 8/5/2020 North America / USA / Oregon                     |
| EPI_ISL_509079 | 4/6/2020  | 8/5/2020 North America / USA / Oregon / Washington County |
| EPI_ISL_509080 | 4/6/2020  | 8/5/2020 North America / USA / Oregon / Washington County |
| EPI_ISL_509081 | 4/6/2020  | 8/5/2020 North America / USA / Oregon / Washington County |
| EPI_ISL_509082 | 4/10/2020 | 8/5/2020 North America / USA / Oregon / Washington County |
| EPI_ISL_509083 | 4/11/2020 | 8/5/2020 North America / USA / Oregon / Washington County |
| EPI_ISL_509084 | 4/11/2020 | 8/5/2020 North America / USA / Oregon / Washington County |
| EPI_ISL_509085 | 4/13/2020 | 8/5/2020 North America / USA / Oregon / Washington County |
| EPI_ISL_509086 | 4/11/2020 | 8/5/2020 North America / USA / Oregon                     |
| EPI_ISL_509087 | 4/11/2020 | 8/5/2020 North America / USA / Oregon                     |
| EPI_ISL_509088 | 4/14/2020 | 8/5/2020 North America / USA / Oregon / Washington County |

|                |           |                                                              |
|----------------|-----------|--------------------------------------------------------------|
| EPI_ISL_509089 | 4/14/2020 | 8/5/2020 North America / USA / Oregon / Washington County    |
| EPI_ISL_509090 | 4/15/2020 | 8/5/2020 North America / USA / Oregon / Washington County    |
| EPI_ISL_509091 | 4/15/2020 | 8/5/2020 North America / USA / Oregon / Multnomah County     |
| EPI_ISL_509092 | 5/20/2020 | 8/5/2020 North America / USA / Oregon / Washington County    |
| EPI_ISL_509093 | 5/20/2020 | 8/5/2020 North America / USA / Oregon / Washington County    |
| EPI_ISL_509094 | 5/20/2020 | 8/5/2020 North America / USA / Oregon / Washington County    |
| EPI_ISL_509095 | 5/10/2020 | 8/5/2020 North America / USA / Oregon / Washington County    |
| EPI_ISL_509097 | 5/10/2020 | 8/5/2020 North America / USA / Oregon / Washington County    |
| EPI_ISL_509099 | 5/9/2020  | 8/5/2020 North America / USA / Oregon / Clackamas County     |
| EPI_ISL_509101 | 5/9/2020  | 8/5/2020 North America / USA / Oregon / Clackamas County     |
| EPI_ISL_509102 | 5/14/2020 | 8/5/2020 North America / USA / Oregon / Washington County    |
| EPI_ISL_509103 | 5/14/2020 | 8/5/2020 North America / USA / Washington / Klickitat County |
| EPI_ISL_509104 | 5/15/2020 | 8/5/2020 North America / USA / Oregon / Multnomah County     |
| EPI_ISL_509106 | 5/15/2020 | 8/5/2020 North America / USA / Oregon / Washington County    |
| EPI_ISL_509107 | 5/15/2020 | 8/5/2020 North America / USA / Oregon / Multnomah County     |
| EPI_ISL_509108 | 5/15/2020 | 8/5/2020 North America / USA / Oregon                        |
| EPI_ISL_509109 | 5/16/2020 | 8/5/2020 North America / USA / Oregon / Multnomah County     |
| EPI_ISL_509110 | 5/16/2020 | 8/5/2020 North America / USA / Oregon                        |
| EPI_ISL_509111 | 5/16/2020 | 8/5/2020 North America / USA / Oregon / Washington County    |
| EPI_ISL_509112 | 5/17/2020 | 8/5/2020 North America / USA / Oregon / Washington County    |
| EPI_ISL_509113 | 5/18/2020 | 8/5/2020 North America / USA / Oregon / Multnomah County     |
| EPI_ISL_509114 | 5/18/2020 | 8/5/2020 North America / USA / Oregon / Multnomah County     |
| EPI_ISL_509115 | 5/18/2020 | 8/5/2020 North America / USA / Oregon / Clackamas County     |
| EPI_ISL_509116 | 5/18/2020 | 8/5/2020 North America / USA / Oregon / Washington County    |
| EPI_ISL_509117 | 5/20/2020 | 8/5/2020 North America / USA / Oregon / Washington County    |
| EPI_ISL_509118 | 5/29/2020 | 8/5/2020 North America / USA / Washington / Klickitat County |
| EPI_ISL_509119 | 5/29/2020 | 8/5/2020 North America / USA / Oregon / Washington County    |
| EPI_ISL_509120 | 5/29/2020 | 8/5/2020 North America / USA / Oregon                        |
| EPI_ISL_509121 | 5/8/2020  | 8/5/2020 North America / USA / Oregon / Washington County    |
| EPI_ISL_509122 | 5/8/2020  | 8/5/2020 North America / USA / Oregon / Washington County    |
| EPI_ISL_509123 | 5/9/2020  | 8/5/2020 North America / USA / Oregon / Washington County    |
| EPI_ISL_509124 | 5/8/2020  | 8/5/2020 North America / USA / Washington / Klickitat County |
| EPI_ISL_509125 | 5/9/2020  | 8/5/2020 North America / USA / Oregon / Washington County    |
| EPI_ISL_509126 | 5/10/2020 | 8/5/2020 North America / USA / Oregon                        |
| EPI_ISL_509127 | 5/16/2020 | 8/5/2020 North America / USA / Oregon                        |
| EPI_ISL_509128 | 5/9/2020  | 8/5/2020 North America / USA / Oregon                        |
| EPI_ISL_509129 | 5/10/2020 | 8/5/2020 North America / USA / Oregon                        |
| EPI_ISL_509130 | 5/12/2020 | 8/5/2020 North America / USA / Oregon / Umatilla County      |
| EPI_ISL_509131 | 5/16/2020 | 8/5/2020 North America / USA / Oregon / Multnomah County     |
| EPI_ISL_509132 | 5/23/2020 | 8/5/2020 North America / USA / Oregon / Multnomah County     |
| EPI_ISL_509133 | 5/24/2020 | 8/5/2020 North America / USA / Oregon / Wasco County         |
| EPI_ISL_509134 | 5/25/2020 | 8/5/2020 North America / USA / Oregon / Washington County    |
| EPI_ISL_509135 | 5/25/2020 | 8/5/2020 North America / USA / Oregon / Washington County    |
| EPI_ISL_509136 | 5/26/2020 | 8/5/2020 North America / USA / Oregon / Washington County    |
| EPI_ISL_509137 | 5/26/2020 | 8/5/2020 North America / USA / Oregon / Washington County    |
| EPI_ISL_509138 | 5/24/2020 | 8/5/2020 North America / USA / Washington / Clark County     |
| EPI_ISL_509139 | 5/27/2020 | 8/5/2020 North America / USA / Oregon / Multnomah County     |





|                |           |                                                           |
|----------------|-----------|-----------------------------------------------------------|
| EPI_ISL_509197 | 7/16/2020 | 8/5/2020 North America / USA / Oregon / Washington County |
| EPI_ISL_509198 | 7/16/2020 | 8/5/2020 North America / USA / Oregon / Multnomah County  |
| EPI_ISL_509199 | 7/16/2020 | 8/5/2020 North America / USA / Oregon / Washington County |
| EPI_ISL_509201 | 7/16/2020 | 8/5/2020 North America / USA / Oregon / Washington County |
| EPI_ISL_509202 | 7/16/2020 | 8/5/2020 North America / USA / Oregon                     |
| EPI_ISL_509203 | 7/17/2020 | 8/5/2020 North America / USA / Oregon / Washington County |
| EPI_ISL_509204 | 7/17/2020 | 8/5/2020 North America / USA / Oregon / Multnomah County  |
| EPI_ISL_509205 | 7/17/2020 | 8/5/2020 North America / USA / Oregon / Washington County |
| EPI_ISL_509206 | 7/17/2020 | 8/5/2020 North America / USA / Oregon / Washington County |
| EPI_ISL_509208 | 7/17/2020 | 8/5/2020 North America / USA / Oregon / Multnomah County  |
| EPI_ISL_509209 | 7/17/2020 | 8/5/2020 North America / USA / Oregon / Washington County |
| EPI_ISL_509210 | 7/17/2020 | 8/5/2020 North America / USA / Oregon / Multnomah County  |
| EPI_ISL_509211 | 7/17/2020 | 8/5/2020 North America / USA / Oregon / Columbia County   |
| EPI_ISL_509212 | 7/17/2020 | 8/5/2020 North America / USA / Oregon / Multnomah County  |
| EPI_ISL_509213 | 7/17/2020 | 8/5/2020 North America / USA / Oregon / Multnomah County  |
| EPI_ISL_509214 | 7/17/2020 | 8/5/2020 North America / USA / Oregon / Wasco County      |
| EPI_ISL_509222 | 3/14/2020 | 8/5/2020 Europe / Switzerland / Zurich                    |
| EPI_ISL_509223 | 7/13/2020 | 8/5/2020 Africa / South Africa / KwaZulu-Natal            |
| EPI_ISL_509224 | 7/13/2020 | 8/5/2020 Africa / South Africa / KwaZulu-Natal            |
| EPI_ISL_509225 | 7/11/2020 | 8/5/2020 Africa / South Africa / KwaZulu-Natal            |
| EPI_ISL_509226 | 7/11/2020 | 8/5/2020 Africa / South Africa / KwaZulu-Natal            |
| EPI_ISL_509228 | 7/13/2020 | 8/5/2020 Africa / South Africa / KwaZulu-Natal            |
| EPI_ISL_509229 | 7/10/2020 | 8/5/2020 Africa / South Africa / KwaZulu-Natal            |
| EPI_ISL_509230 | 7/13/2020 | 8/5/2020 Africa / South Africa / KwaZulu-Natal            |
| EPI_ISL_509231 | 7/13/2020 | 8/5/2020 Africa / South Africa / KwaZulu-Natal            |
| EPI_ISL_509232 | 7/13/2020 | 8/5/2020 Africa / South Africa / KwaZulu-Natal            |
| EPI_ISL_509233 | 7/11/2020 | 8/5/2020 Africa / South Africa / KwaZulu-Natal            |
| EPI_ISL_509234 | 7/13/2020 | 8/5/2020 Africa / South Africa / KwaZulu-Natal            |
| EPI_ISL_509235 | 7/10/2020 | 8/5/2020 Africa / South Africa / KwaZulu-Natal            |
| EPI_ISL_509236 | 7/13/2020 | 8/5/2020 Africa / South Africa / KwaZulu-Natal            |
| EPI_ISL_509237 | 7/13/2020 | 8/5/2020 Africa / South Africa / KwaZulu-Natal            |
| EPI_ISL_509238 | 7/13/2020 | 8/5/2020 Africa / South Africa / KwaZulu-Natal            |
| EPI_ISL_509239 | 7/13/2020 | 8/5/2020 Africa / South Africa / KwaZulu-Natal            |
| EPI_ISL_509240 | 7/13/2020 | 8/5/2020 Africa / South Africa / KwaZulu-Natal            |
| EPI_ISL_509241 | 7/13/2020 | 8/5/2020 Africa / South Africa / KwaZulu-Natal            |
| EPI_ISL_509242 | 7/13/2020 | 8/5/2020 Africa / South Africa / KwaZulu-Natal            |
| EPI_ISL_509243 | 7/13/2020 | 8/5/2020 Africa / South Africa / KwaZulu-Natal            |
| EPI_ISL_509244 | 7/13/2020 | 8/5/2020 Africa / South Africa / KwaZulu-Natal            |
| EPI_ISL_509245 | 7/12/2020 | 8/5/2020 Africa / South Africa / KwaZulu-Natal            |
| EPI_ISL_509246 | 7/13/2020 | 8/5/2020 Africa / South Africa / KwaZulu-Natal            |
| EPI_ISL_509247 | 7/2/2020  | 8/5/2020 Africa / South Africa / KwaZulu-Natal            |
| EPI_ISL_509248 | 7/2/2020  | 8/5/2020 Africa / South Africa / KwaZulu-Natal            |
| EPI_ISL_509249 | 7/2/2020  | 8/5/2020 Africa / South Africa / KwaZulu-Natal            |
| EPI_ISL_509250 | 7/13/2020 | 8/5/2020 Africa / South Africa / KwaZulu-Natal            |
| EPI_ISL_509251 | 7/3/2020  | 8/5/2020 Africa / South Africa / KwaZulu-Natal            |
| EPI_ISL_509252 | 7/13/2020 | 8/5/2020 Africa / South Africa / KwaZulu-Natal            |
| EPI_ISL_509253 | 7/1/2020  | 8/5/2020 Africa / South Africa / KwaZulu-Natal            |





|                |           |                                                  |
|----------------|-----------|--------------------------------------------------|
| EPI_ISL_509358 | 7/17/2020 | 8/5/2020 Africa / South Africa / KwaZulu-Natal   |
| EPI_ISL_509360 | 7/17/2020 | 8/5/2020 Africa / South Africa / KwaZulu-Natal   |
| EPI_ISL_509361 | 7/14/2020 | 8/5/2020 Africa / South Africa / KwaZulu-Natal   |
| EPI_ISL_509362 | 7/16/2020 | 8/5/2020 Africa / South Africa / KwaZulu-Natal   |
| EPI_ISL_509363 | 7/17/2020 | 8/5/2020 Africa / South Africa / KwaZulu-Natal   |
| EPI_ISL_509364 | 7/16/2020 | 8/5/2020 Africa / South Africa / KwaZulu-Natal   |
| EPI_ISL_509365 | 7/16/2020 | 8/5/2020 Africa / South Africa / KwaZulu-Natal   |
| EPI_ISL_509366 | 7/15/2020 | 8/5/2020 Africa / South Africa / KwaZulu-Natal   |
| EPI_ISL_509367 | 7/16/2020 | 8/5/2020 Africa / South Africa / KwaZulu-Natal   |
| EPI_ISL_509368 | 7/16/2020 | 8/5/2020 Africa / South Africa / KwaZulu-Natal   |
| EPI_ISL_509369 | 7/16/2020 | 8/5/2020 Africa / South Africa / KwaZulu-Natal   |
| EPI_ISL_509373 | 6/19/2020 | 8/5/2020 Asia / Singapore                        |
| EPI_ISL_509374 | 6/17/2020 | 8/5/2020 Asia / Singapore                        |
| EPI_ISL_509375 | 6/11/2020 | 8/5/2020 Asia / Singapore                        |
| EPI_ISL_509377 | 6/4/2020  | 8/5/2020 Asia / Singapore                        |
| EPI_ISL_509378 | 6/3/2020  | 8/5/2020 Asia / Singapore                        |
| EPI_ISL_509379 | 7/14/2020 | 8/5/2020 Asia / Singapore                        |
| EPI_ISL_509380 | 7/16/2020 | 8/5/2020 Asia / Singapore                        |
| EPI_ISL_509381 | 7/15/2020 | 8/5/2020 Asia / Singapore                        |
| EPI_ISL_509382 | 7/15/2020 | 8/5/2020 Asia / Singapore                        |
| EPI_ISL_509383 | 7/15/2020 | 8/5/2020 Asia / Singapore                        |
| EPI_ISL_509384 | 7/14/2020 | 8/5/2020 Asia / Singapore                        |
| EPI_ISL_509385 | 7/13/2020 | 8/5/2020 Asia / Singapore                        |
| EPI_ISL_509386 | 7/13/2020 | 8/5/2020 Asia / Singapore                        |
| EPI_ISL_509387 | 7/13/2020 | 8/5/2020 Asia / Singapore                        |
| EPI_ISL_509388 | 7/12/2020 | 8/5/2020 Asia / Singapore                        |
| EPI_ISL_509389 | 7/11/2020 | 8/5/2020 Asia / Singapore                        |
| EPI_ISL_509390 | 7/7/2020  | 8/5/2020 Asia / Singapore                        |
| EPI_ISL_509391 | 6/19/2020 | 8/5/2020 Asia / Singapore                        |
| EPI_ISL_509392 | 6/18/2020 | 8/5/2020 Asia / Singapore                        |
| EPI_ISL_509393 | 6/13/2020 | 8/5/2020 Asia / Singapore                        |
| EPI_ISL_509394 | 6/9/2020  | 8/5/2020 Asia / Singapore                        |
| EPI_ISL_509413 | 4/6/2020  | 8/5/2020 Europe / Turkey / Istanbul              |
| EPI_ISL_509416 | 4/22/2020 | 8/5/2020 Europe / Turkey / Istanbul              |
| EPI_ISL_509424 | 5/12/2020 | 8/5/2020 North America / USA / Alabama           |
| EPI_ISL_509425 | 5/12/2020 | 8/5/2020 North America / USA / Alabama           |
| EPI_ISL_509426 | 4/13/2020 | 8/5/2020 North America / USA / Alabama           |
| EPI_ISL_509427 | 5/5/2020  | 8/5/2020 North America / USA / Alabama           |
| EPI_ISL_509428 | 5/10/2020 | 8/5/2020 North America / USA / Alabama           |
| EPI_ISL_509429 | 5/27/2020 | 8/5/2020 North America / USA / Alabama           |
| EPI_ISL_509430 | 7/20/2020 | 8/5/2020 South America / Brazil / Rio de Janeiro |
| EPI_ISL_509431 | 7/20/2020 | 8/5/2020 South America / Brazil / Rio de Janeiro |
| EPI_ISL_509432 | 7/20/2020 | 8/5/2020 South America / Brazil / Rio de Janeiro |
| EPI_ISL_509433 | 7/20/2020 | 8/5/2020 South America / Brazil / Rio de Janeiro |
| EPI_ISL_509434 | 3/23/2020 | 8/5/2020 South America / Brazil / Rio de Janeiro |
| EPI_ISL_509435 | 7/20/2020 | 8/5/2020 South America / Brazil / Rio de Janeiro |
| EPI_ISL_509436 | 4/29/2020 | 8/5/2020 Europe / United Kingdom / England       |



|                |           |                                                |
|----------------|-----------|------------------------------------------------|
| EPI_ISL_509487 | 5/25/2020 | 8/5/2020 North America / USA / Maryland        |
| EPI_ISL_509488 | 5/25/2020 | 8/5/2020 North America / USA / Maryland        |
| EPI_ISL_509489 | 5/26/2020 | 8/5/2020 North America / USA / Maryland        |
| EPI_ISL_509490 | 5/26/2020 | 8/5/2020 North America / USA / Maryland        |
| EPI_ISL_509491 | 5/26/2020 | 8/5/2020 North America / USA / Maryland        |
| EPI_ISL_509492 | 3/20/2020 | 8/5/2020 Oceania / Australia / New South Wales |
| EPI_ISL_509493 | 3/22/2020 | 8/5/2020 Oceania / Australia / New South Wales |
| EPI_ISL_509494 | 3/22/2020 | 8/5/2020 Oceania / Australia / New South Wales |
| EPI_ISL_509495 | 3/19/2020 | 8/5/2020 Oceania / Australia / New South Wales |
| EPI_ISL_509496 | 3/19/2020 | 8/5/2020 Oceania / Australia / New South Wales |
| EPI_ISL_509497 | 3/20/2020 | 8/5/2020 Oceania / Australia / New South Wales |
| EPI_ISL_509498 | 4/13/2020 | 8/5/2020 Oceania / Australia / New South Wales |
| EPI_ISL_509499 | 4/28/2020 | 8/5/2020 Oceania / Australia / New South Wales |
| EPI_ISL_509500 | 4/29/2020 | 8/5/2020 Oceania / Australia / New South Wales |
| EPI_ISL_509501 | 3/15/2020 | 8/5/2020 Oceania / Australia / New South Wales |
| EPI_ISL_509502 | 3/15/2020 | 8/5/2020 Oceania / Australia / New South Wales |
| EPI_ISL_509503 | 3/14/2020 | 8/5/2020 Oceania / Australia / New South Wales |
| EPI_ISL_509504 | 3/15/2020 | 8/5/2020 Oceania / Australia / New South Wales |
| EPI_ISL_509505 | 1/25/2020 | 8/5/2020 Oceania / Australia / New South Wales |
| EPI_ISL_509506 | 3/20/2020 | 8/5/2020 Oceania / Australia / New South Wales |
| EPI_ISL_509507 | 3/20/2020 | 8/5/2020 Oceania / Australia / New South Wales |
| EPI_ISL_509508 | 3/19/2020 | 8/5/2020 Oceania / Australia / New South Wales |
| EPI_ISL_509509 | 3/20/2020 | 8/5/2020 Oceania / Australia / New South Wales |
| EPI_ISL_509510 | 3/19/2020 | 8/5/2020 Oceania / Australia / New South Wales |
| EPI_ISL_509511 | 3/20/2020 | 8/5/2020 Oceania / Australia / New South Wales |
| EPI_ISL_509512 | 3/21/2020 | 8/5/2020 Oceania / Australia / New South Wales |
| EPI_ISL_509513 | 3/21/2020 | 8/5/2020 Oceania / Australia / New South Wales |
| EPI_ISL_509514 | 3/21/2020 | 8/5/2020 Oceania / Australia / New South Wales |
| EPI_ISL_509515 | 3/22/2020 | 8/5/2020 Oceania / Australia / New South Wales |
| EPI_ISL_509516 | 3/22/2020 | 8/5/2020 Oceania / Australia / New South Wales |
| EPI_ISL_509517 | 3/22/2020 | 8/5/2020 Oceania / Australia / New South Wales |
| EPI_ISL_509518 | 3/22/2020 | 8/5/2020 Oceania / Australia / New South Wales |
| EPI_ISL_509519 | 4/3/2020  | 8/5/2020 Oceania / Australia / New South Wales |
| EPI_ISL_509520 | 3/20/2020 | 8/5/2020 Oceania / Australia / New South Wales |
| EPI_ISL_509521 | 7/8/2020  | 8/5/2020 Oceania / Australia / New South Wales |
| EPI_ISL_509522 | 7/14/2020 | 8/5/2020 Oceania / Australia / New South Wales |
| EPI_ISL_509523 | 7/16/2020 | 8/5/2020 Oceania / Australia / New South Wales |
| EPI_ISL_509528 | 4/30/2020 | 8/5/2020 North America / USA / Utah            |
| EPI_ISL_509529 | 4/30/2020 | 8/5/2020 North America / USA / Utah            |
| EPI_ISL_509530 | 4/30/2020 | 8/5/2020 North America / USA / Utah            |
| EPI_ISL_509531 | 4/30/2020 | 8/5/2020 North America / USA / Utah            |
| EPI_ISL_509534 | 4/30/2020 | 8/5/2020 North America / USA / Utah            |
| EPI_ISL_509535 | 4/30/2020 | 8/5/2020 North America / USA / Utah            |
| EPI_ISL_509536 | 4/30/2020 | 8/5/2020 North America / USA / Utah            |
| EPI_ISL_509537 | 4/30/2020 | 8/5/2020 North America / USA / Utah            |
| EPI_ISL_509540 | 4/30/2020 | 8/5/2020 North America / USA / Utah            |
| EPI_ISL_509541 | 4/30/2020 | 8/5/2020 North America / USA / Utah            |

|                |           |                                                          |
|----------------|-----------|----------------------------------------------------------|
| EPI_ISL_509547 | 4/30/2020 | 8/5/2020 North America / USA / Utah                      |
| EPI_ISL_509549 | 4/30/2020 | 8/5/2020 North America / USA / Utah                      |
| EPI_ISL_509550 | 4/30/2020 | 8/5/2020 North America / USA / Utah                      |
| EPI_ISL_509553 | 5/1/2020  | 8/5/2020 North America / USA / Utah                      |
| EPI_ISL_509554 | 5/1/2020  | 8/5/2020 North America / USA / Utah                      |
| EPI_ISL_509558 | 4/30/2020 | 8/5/2020 North America / USA / Utah                      |
| EPI_ISL_509559 | 5/1/2020  | 8/5/2020 North America / USA / Utah                      |
| EPI_ISL_509560 | 5/1/2020  | 8/5/2020 North America / USA / Utah                      |
| EPI_ISL_509563 | 5/1/2020  | 8/5/2020 North America / USA / Utah                      |
| EPI_ISL_509568 | 4/10/2020 | 8/5/2020 North America / USA / Utah                      |
| EPI_ISL_509571 | 4/10/2020 | 8/5/2020 North America / USA / Utah                      |
| EPI_ISL_509572 | 4/10/2020 | 8/5/2020 North America / USA / Utah                      |
| EPI_ISL_509576 | 4/20/2020 | 8/5/2020 North America / USA / Utah                      |
| EPI_ISL_509577 | 4/18/2020 | 8/5/2020 North America / USA / Utah                      |
| EPI_ISL_509580 | 4/6/2020  | 8/5/2020 North America / USA / Utah                      |
| EPI_ISL_509585 | 4/3/2020  | 8/5/2020 North America / USA / Utah                      |
| EPI_ISL_509588 | 4/1/2020  | 8/5/2020 North America / USA / Utah                      |
| EPI_ISL_509589 | 4/1/2020  | 8/5/2020 North America / USA / Utah                      |
| EPI_ISL_509590 | 4/1/2020  | 8/5/2020 North America / USA / Utah                      |
| EPI_ISL_509592 | 4/3/2020  | 8/5/2020 North America / USA / Utah                      |
| EPI_ISL_509601 | 6/22/2020 | 8/5/2020 Europe / Spain / Basque Country / San Sebastian |
| EPI_ISL_509616 | 3/16/2020 | 8/5/2020 Europe / Spain / Basque Country / Vitoria       |
| EPI_ISL_509617 | 3/16/2020 | 8/5/2020 Europe / Spain / Basque Country / Vitoria       |
| EPI_ISL_509618 | 3/15/2020 | 8/5/2020 Europe / Spain / Basque Country / Vitoria       |
| EPI_ISL_509619 | 3/15/2020 | 8/5/2020 Europe / Spain / Andalusia / Malaga             |
| EPI_ISL_509620 | 3/15/2020 | 8/5/2020 Europe / Spain / Andalusia / Malaga             |
| EPI_ISL_509621 | 3/15/2020 | 8/5/2020 Europe / Spain / Andalusia / Malaga             |
| EPI_ISL_509622 | 3/15/2020 | 8/5/2020 Europe / Spain / Andalusia / Malaga             |
| EPI_ISL_509623 | 3/15/2020 | 8/5/2020 Europe / Spain / Andalusia / Malaga             |
| EPI_ISL_509624 | 3/15/2020 | 8/5/2020 Europe / Spain / Andalusia / Malaga             |
| EPI_ISL_509625 | 3/16/2020 | 8/5/2020 Europe / Spain / Andalusia / Torremolinos       |
| EPI_ISL_509626 | 3/16/2020 | 8/5/2020 Europe / Spain / Andalusia / Malaga             |
| EPI_ISL_509627 | 3/16/2020 | 8/5/2020 Europe / Spain / Andalusia / Malaga             |
| EPI_ISL_509628 | 3/16/2020 | 8/5/2020 Europe / Spain / Andalusia / Malaga             |
| EPI_ISL_509629 | 3/16/2020 | 8/5/2020 Europe / Spain / Andalusia / Malaga             |
| EPI_ISL_509630 | 3/16/2020 | 8/5/2020 Europe / Spain / Andalusia / Malaga             |
| EPI_ISL_509631 | 3/16/2020 | 8/5/2020 Europe / Spain / Andalusia / Malaga             |
| EPI_ISL_509632 | 3/17/2020 | 8/5/2020 Europe / Spain / Andalusia / Velez Malaga       |
| EPI_ISL_509633 | 6/12/2020 | 8/5/2020 Europe / Spain / Basque Country / San Sebastian |
| EPI_ISL_509634 | 6/15/2020 | 8/5/2020 Europe / Spain / Basque Country / San Sebastian |
| EPI_ISL_509635 | 6/17/2020 | 8/5/2020 Europe / Spain / Basque Country / San Sebastian |
| EPI_ISL_509636 | 6/18/2020 | 8/5/2020 Europe / Spain / Basque Country / San Sebastian |
| EPI_ISL_509637 | 6/19/2020 | 8/5/2020 Europe / Spain / Basque Country / San Sebastian |
| EPI_ISL_509638 | 6/19/2020 | 8/5/2020 Europe / Spain / Basque Country / San Sebastian |
| EPI_ISL_509639 | 6/19/2020 | 8/5/2020 Europe / Spain / Basque Country / San Sebastian |
| EPI_ISL_509640 | 6/19/2020 | 8/5/2020 Europe / Spain / Basque Country / San Sebastian |
| EPI_ISL_509641 | 6/21/2020 | 8/5/2020 Europe / Spain / Basque Country / San Sebastian |



|                |           |                                                          |
|----------------|-----------|----------------------------------------------------------|
| EPI_ISL_509642 | 6/22/2020 | 8/5/2020 Europe / Spain / Basque Country / San Sebastian |
| EPI_ISL_509643 | 6/23/2020 | 8/5/2020 Europe / Spain / Basque Country / San Sebastian |
| EPI_ISL_509644 | 6/23/2020 | 8/5/2020 Europe / Spain / Basque Country / San Sebastian |
| EPI_ISL_509645 | 6/23/2020 | 8/5/2020 Europe / Spain / Basque Country / San Sebastian |
| EPI_ISL_509646 | 6/23/2020 | 8/5/2020 Europe / Spain / Basque Country / San Sebastian |
| EPI_ISL_509647 | 6/23/2020 | 8/5/2020 Europe / Spain / Basque Country / San Sebastian |
| EPI_ISL_509648 | 6/24/2020 | 8/5/2020 Europe / Spain / Basque Country / San Sebastian |
| EPI_ISL_509649 | 6/24/2020 | 8/5/2020 Europe / Spain / Basque Country / San Sebastian |
| EPI_ISL_509650 | 6/24/2020 | 8/5/2020 Europe / Spain / Basque Country / San Sebastian |
| EPI_ISL_509651 | 6/26/2020 | 8/5/2020 Europe / Spain / Basque Country / San Sebastian |
| EPI_ISL_509652 | 6/27/2020 | 8/5/2020 Europe / Spain / Basque Country / San Sebastian |
| EPI_ISL_509653 | 6/27/2020 | 8/5/2020 Europe / Spain / Basque Country / San Sebastian |
| EPI_ISL_509654 | 6/27/2020 | 8/5/2020 Europe / Spain / Basque Country / San Sebastian |
| EPI_ISL_509662 | 7/6/2020  | 8/5/2020 North America / USA / Georgia                   |
| EPI_ISL_509663 | 7/7/2020  | 8/5/2020 North America / USA / Arkansas                  |
| EPI_ISL_509664 | 7/10/2020 | 8/5/2020 North America / USA / Arkansas                  |
| EPI_ISL_509665 | 7/7/2020  | 8/5/2020 North America / USA / Arkansas                  |
| EPI_ISL_509666 | 7/10/2020 | 8/5/2020 North America / USA / Arkansas                  |
| EPI_ISL_509667 | 7/7/2020  | 8/5/2020 North America / USA / Arkansas                  |
| EPI_ISL_509668 | 7/10/2020 | 8/5/2020 North America / USA / Arkansas                  |
| EPI_ISL_509670 | 7/8/2020  | 8/5/2020 North America / USA / Arkansas                  |
| EPI_ISL_509671 | 7/8/2020  | 8/5/2020 North America / USA / Arkansas                  |
| EPI_ISL_509672 | 7/8/2020  | 8/5/2020 North America / USA / Arkansas                  |
| EPI_ISL_509673 | 7/8/2020  | 8/5/2020 North America / USA / Arkansas                  |
| EPI_ISL_509674 | 7/8/2020  | 8/5/2020 North America / USA / Arkansas                  |
| EPI_ISL_509675 | 7/8/2020  | 8/5/2020 North America / USA / Arkansas                  |
| EPI_ISL_509676 | 7/8/2020  | 8/5/2020 North America / USA / Arkansas                  |
| EPI_ISL_509677 | 7/9/2020  | 8/5/2020 North America / USA / Arkansas                  |
| EPI_ISL_509678 | 7/9/2020  | 8/5/2020 North America / USA / Arkansas                  |
| EPI_ISL_509679 | 7/7/2020  | 8/5/2020 North America / USA / Arkansas                  |
| EPI_ISL_509680 | 7/7/2020  | 8/5/2020 North America / USA / Arkansas                  |
| EPI_ISL_509681 | 7/7/2020  | 8/5/2020 North America / USA / Arkansas                  |
| EPI_ISL_509682 | 7/7/2020  | 8/5/2020 North America / USA / Arkansas                  |
| EPI_ISL_509683 | 7/8/2020  | 8/5/2020 North America / USA / Arkansas                  |
| EPI_ISL_509684 | 7/9/2020  | 8/5/2020 North America / USA / Arkansas                  |
| EPI_ISL_509685 | 7/10/2020 | 8/5/2020 North America / USA / Arkansas                  |
| EPI_ISL_509686 | 5/12/2020 | 8/5/2020 North America / USA / Minnesota                 |
| EPI_ISL_509688 | 5/19/2020 | 8/5/2020 North America / USA / Alabama                   |
| EPI_ISL_509689 | 4/13/2020 | 8/5/2020 North America / USA / Utah                      |
| EPI_ISL_509690 | 4/24/2020 | 8/5/2020 North America / USA / Utah                      |
| EPI_ISL_509691 | 4/25/2020 | 8/5/2020 North America / USA / Utah                      |
| EPI_ISL_509692 | 4/27/2020 | 8/5/2020 North America / USA / Utah                      |
| EPI_ISL_509693 | 4/28/2020 | 8/5/2020 North America / USA / Utah                      |
| EPI_ISL_509694 | 4/29/2020 | 8/5/2020 North America / USA / Utah                      |
| EPI_ISL_509695 | 3/13/2020 | 8/5/2020 North America / Guatemala                       |
| EPI_ISL_509696 | 3/15/2020 | 8/5/2020 North America / Guatemala                       |
| EPI_ISL_509697 | 3/15/2020 | 8/5/2020 North America / Guatemala                       |

|                |           |                                            |
|----------------|-----------|--------------------------------------------|
| EPI_ISL_509698 | 3/15/2020 | 8/5/2020 North America / Guatemala         |
| EPI_ISL_509699 | 3/17/2020 | 8/5/2020 North America / Guatemala         |
| EPI_ISL_509700 | 3/18/2020 | 8/5/2020 North America / Guatemala         |
| EPI_ISL_509701 | 3/19/2020 | 8/5/2020 North America / Guatemala         |
| EPI_ISL_509702 | 3/20/2020 | 8/5/2020 North America / Guatemala         |
| EPI_ISL_509703 | 3/21/2020 | 8/5/2020 North America / Guatemala         |
| EPI_ISL_509704 | 4/16/2020 | 8/5/2020 North America / USA / Wisconsin   |
| EPI_ISL_509705 | 4/21/2020 | 8/5/2020 North America / USA / Wisconsin   |
| EPI_ISL_509706 | 3/24/2020 | 8/5/2020 North America / USA / Wisconsin   |
| EPI_ISL_509707 | 4/18/2020 | 8/5/2020 North America / USA / Utah        |
| EPI_ISL_509708 | 4/21/2020 | 8/5/2020 North America / USA / Utah        |
| EPI_ISL_509709 | 5/6/2020  | 8/5/2020 North America / USA / Utah        |
| EPI_ISL_509710 | 3/15/2020 | 8/5/2020 North America / Guatemala         |
| EPI_ISL_509711 | 3/20/2020 | 8/5/2020 North America / Belize            |
| EPI_ISL_509712 | 3/1/2020  | 8/5/2020 North America / Belize / Belmopan |
| EPI_ISL_509713 | 3/27/2020 | 8/5/2020 North America / Belize / Belmopan |
| EPI_ISL_509714 | 4/9/2020  | 8/5/2020 North America / Belize / Belmopan |
| EPI_ISL_509715 | 4/6/2020  | 8/5/2020 North America / USA / Wisconsin   |
| EPI_ISL_509716 | 3/13/2020 | 8/5/2020 North America / USA / Florida     |
| EPI_ISL_509717 | 3/14/2020 | 8/5/2020 North America / USA / Florida     |
| EPI_ISL_509718 | 3/13/2020 | 8/5/2020 North America / USA / Florida     |
| EPI_ISL_509719 | 3/14/2020 | 8/5/2020 North America / USA / Florida     |
| EPI_ISL_509721 | 3/14/2020 | 8/5/2020 North America / USA / Florida     |
| EPI_ISL_509722 | 3/14/2020 | 8/5/2020 North America / USA / Florida     |
| EPI_ISL_509723 | 3/15/2020 | 8/5/2020 North America / USA / Florida     |
| EPI_ISL_509724 | 3/13/2020 | 8/5/2020 North America / USA / Florida     |
| EPI_ISL_509725 | 3/13/2020 | 8/5/2020 North America / USA / Florida     |
| EPI_ISL_509726 | 3/13/2020 | 8/5/2020 North America / USA / Florida     |
| EPI_ISL_509727 | 3/13/2020 | 8/5/2020 North America / USA / Florida     |
| EPI_ISL_509728 | 3/13/2020 | 8/5/2020 North America / USA / Florida     |
| EPI_ISL_509729 | 3/24/2020 | 8/5/2020 North America / USA / Florida     |
| EPI_ISL_509730 | 3/24/2020 | 8/5/2020 North America / USA / Florida     |
| EPI_ISL_509731 | 3/24/2020 | 8/5/2020 North America / USA / Florida     |
| EPI_ISL_509732 | 3/24/2020 | 8/5/2020 North America / USA / Florida     |
| EPI_ISL_509733 | 3/15/2020 | 8/5/2020 North America / USA / Florida     |
| EPI_ISL_509734 | 3/24/2020 | 8/5/2020 North America / USA / Florida     |
| EPI_ISL_509735 | 3/24/2020 | 8/5/2020 North America / USA / Florida     |
| EPI_ISL_509736 | 3/17/2020 | 8/5/2020 North America / USA / Florida     |
| EPI_ISL_509737 | 3/25/2020 | 8/5/2020 North America / USA / Florida     |
| EPI_ISL_509738 | 3/25/2020 | 8/5/2020 North America / USA / Florida     |
| EPI_ISL_509739 | 3/25/2020 | 8/5/2020 North America / USA / Florida     |
| EPI_ISL_509740 | 3/26/2020 | 8/5/2020 North America / USA / Florida     |
| EPI_ISL_509741 | 3/20/2020 | 8/5/2020 North America / USA / Florida     |
| EPI_ISL_509742 | 3/25/2020 | 8/5/2020 North America / USA / Florida     |
| EPI_ISL_509743 | 3/26/2020 | 8/5/2020 North America / USA / Florida     |
| EPI_ISL_509745 | 3/26/2020 | 8/5/2020 North America / USA / Florida     |
| EPI_ISL_509746 | 3/26/2020 | 8/5/2020 North America / USA / Florida     |

|                |           |                                                              |
|----------------|-----------|--------------------------------------------------------------|
| EPI_ISL_509747 | 3/26/2020 | 8/5/2020 North America / USA / Florida                       |
| EPI_ISL_509748 | 3/26/2020 | 8/5/2020 North America / USA / Florida                       |
| EPI_ISL_509749 | 3/26/2020 | 8/5/2020 North America / USA / Florida                       |
| EPI_ISL_509750 | 3/23/2020 | 8/5/2020 North America / USA / Florida                       |
| EPI_ISL_509751 | 3/23/2020 | 8/5/2020 North America / USA / Florida                       |
| EPI_ISL_509752 | 3/27/2020 | 8/5/2020 North America / USA / Florida                       |
| EPI_ISL_509753 | 3/27/2020 | 8/5/2020 North America / USA / Florida                       |
| EPI_ISL_509754 | 3/29/2020 | 8/5/2020 North America / USA / Florida                       |
| EPI_ISL_509755 | 3/28/2020 | 8/5/2020 North America / USA / Florida                       |
| EPI_ISL_509756 | 3/29/2020 | 8/5/2020 North America / USA / Florida                       |
| EPI_ISL_509757 | 3/29/2020 | 8/5/2020 North America / USA / Florida                       |
| EPI_ISL_509758 | 3/29/2020 | 8/5/2020 North America / USA / Florida                       |
| EPI_ISL_509759 | 3/27/2020 | 8/5/2020 North America / USA / Florida                       |
| EPI_ISL_509760 | 3/28/2020 | 8/5/2020 North America / USA / Florida                       |
| EPI_ISL_509761 | 3/28/2020 | 8/5/2020 North America / USA / Florida                       |
| EPI_ISL_509762 | 3/27/2020 | 8/5/2020 North America / USA / Florida                       |
| EPI_ISL_509763 | 3/27/2020 | 8/5/2020 North America / USA / Florida                       |
| EPI_ISL_509764 | 3/27/2020 | 8/5/2020 North America / USA / Florida                       |
| EPI_ISL_509765 | 3/30/2020 | 8/5/2020 North America / USA / Florida                       |
| EPI_ISL_509766 | 3/30/2020 | 8/5/2020 North America / USA / Florida                       |
| EPI_ISL_509767 | 3/27/2020 | 8/5/2020 North America / USA / Florida                       |
| EPI_ISL_509769 | 3/31/2020 | 8/5/2020 North America / USA / Florida                       |
| EPI_ISL_509771 | 3/30/2020 | 8/5/2020 North America / USA / Florida                       |
| EPI_ISL_509772 | 3/31/2020 | 8/5/2020 North America / USA / Florida                       |
| EPI_ISL_509773 | 3/31/2020 | 8/5/2020 North America / USA / Florida                       |
| EPI_ISL_509774 | 3/31/2020 | 8/5/2020 North America / USA / Florida                       |
| EPI_ISL_509776 | 7/16/2020 | 8/5/2020 North America / USA / Florida                       |
| EPI_ISL_509778 | 7/21/2020 | 8/5/2020 North America / USA / Florida                       |
| EPI_ISL_509780 | 7/21/2020 | 8/5/2020 North America / USA / Florida                       |
| EPI_ISL_509781 | 7/21/2020 | 8/5/2020 North America / USA / Florida                       |
| EPI_ISL_509782 | 7/21/2020 | 8/5/2020 North America / USA / Florida                       |
| EPI_ISL_509783 | 7/14/2020 | 8/5/2020 North America / USA / Florida                       |
| EPI_ISL_509786 | 7/14/2020 | 8/5/2020 North America / USA / Florida                       |
| EPI_ISL_509787 | 7/14/2020 | 8/5/2020 North America / USA / Florida                       |
| EPI_ISL_509788 | 7/14/2020 | 8/5/2020 North America / USA / Florida                       |
| EPI_ISL_509789 | 7/14/2020 | 8/5/2020 North America / USA / Florida                       |
| EPI_ISL_509791 | 7/13/2020 | 8/5/2020 North America / USA / Florida                       |
| EPI_ISL_509792 | 7/14/2020 | 8/5/2020 North America / USA / Florida                       |
| EPI_ISL_509793 | 7/14/2020 | 8/5/2020 North America / USA / Florida                       |
| EPI_ISL_509794 | 7/14/2020 | 8/5/2020 North America / USA / Florida                       |
| EPI_ISL_509795 | 7/16/2020 | 8/5/2020 North America / USA / Florida                       |
| EPI_ISL_509796 | 7/15/2020 | 8/5/2020 North America / USA / Florida                       |
| EPI_ISL_509797 | 7/15/2020 | 8/5/2020 North America / USA / Florida                       |
| EPI_ISL_509799 | 7/8/2020  | 8/5/2020 North America / USA / California / San Diego County |
| EPI_ISL_509800 | 7/8/2020  | 8/5/2020 North America / USA / Illinois / Winnebago County   |
| EPI_ISL_509802 | 6/4/2020  | 8/5/2020 North America / USA / Illinois / Winnebago County   |
| EPI_ISL_509803 | 7/16/2020 | 8/5/2020 North America / USA / Illinois / Cook County        |

|                |           |          |                                                     |
|----------------|-----------|----------|-----------------------------------------------------|
| EPI_ISL_509804 | 7/19/2020 | 8/5/2020 | North America / USA / Illinois / Winnebago County   |
| EPI_ISL_509805 | 7/16/2020 | 8/5/2020 | North America / USA / Illinois / Winnebago County   |
| EPI_ISL_509806 | 7/20/2020 | 8/5/2020 | North America / USA / Illinois / Winnebago County   |
| EPI_ISL_509807 | 7/12/2020 | 8/5/2020 | North America / USA / Ohio / Cuyahoga County        |
| EPI_ISL_509809 | 7/17/2020 | 8/5/2020 | North America / USA / Wisconsin / Dane County       |
| EPI_ISL_509810 | 7/16/2020 | 8/5/2020 | North America / USA / Wisconsin / Dane County       |
| EPI_ISL_509811 | 7/16/2020 | 8/5/2020 | North America / USA / Wisconsin / Dane County       |
| EPI_ISL_509812 | 7/18/2020 | 8/5/2020 | North America / USA / Wisconsin / Dane County       |
| EPI_ISL_509813 | 7/19/2020 | 8/5/2020 | North America / USA / Wisconsin / Dane County       |
| EPI_ISL_509814 | 7/17/2020 | 8/5/2020 | North America / USA / Wisconsin / Columbia County   |
| EPI_ISL_509815 | 7/9/2020  | 8/5/2020 | North America / USA / Wisconsin / Milwaukee County  |
| EPI_ISL_509816 | 5/19/2020 | 8/5/2020 | North America / USA / Wisconsin / Ozaukee County    |
| EPI_ISL_509817 | 7/15/2020 | 8/5/2020 | North America / USA / Wisconsin / Racine County     |
| EPI_ISL_509818 | 6/19/2020 | 8/5/2020 | North America / USA / Wisconsin / Milwaukee County  |
| EPI_ISL_509819 | 6/18/2020 | 8/5/2020 | North America / USA / Wisconsin / Milwaukee County  |
| EPI_ISL_509820 | 6/22/2020 | 8/5/2020 | North America / USA / Wisconsin / Milwaukee County  |
| EPI_ISL_509821 | 6/24/2020 | 8/5/2020 | North America / USA / Wisconsin / Milwaukee County  |
| EPI_ISL_509822 | 6/30/2020 | 8/5/2020 | North America / USA / Wisconsin / Milwaukee County  |
| EPI_ISL_509823 | 7/9/2020  | 8/5/2020 | North America / USA / Wisconsin / Milwaukee County  |
| EPI_ISL_509824 | 5/26/2020 | 8/5/2020 | North America / USA / Wisconsin / Milwaukee County  |
| EPI_ISL_509825 | 5/26/2020 | 8/5/2020 | North America / USA / Wisconsin / Ozaukee County    |
| EPI_ISL_509826 | 5/29/2020 | 8/5/2020 | North America / USA / Wisconsin / Waukesha County   |
| EPI_ISL_509827 | 5/29/2020 | 8/5/2020 | North America / USA / Wisconsin / Waukesha County   |
| EPI_ISL_509828 | 5/29/2020 | 8/5/2020 | North America / USA / Wisconsin / Ozaukee County    |
| EPI_ISL_509829 | 5/30/2020 | 8/5/2020 | North America / USA / Wisconsin / Washington County |
| EPI_ISL_509830 | 6/2/2020  | 8/5/2020 | North America / USA / Wisconsin / Milwaukee County  |
| EPI_ISL_509831 | 6/2/2020  | 8/5/2020 | North America / USA / Wisconsin / Milwaukee County  |
| EPI_ISL_509832 | 6/11/2020 | 8/5/2020 | North America / USA / Wisconsin / Milwaukee County  |
| EPI_ISL_509833 | 6/16/2020 | 8/5/2020 | North America / USA / Wisconsin / Waukesha County   |
| EPI_ISL_509834 | 5/13/2020 | 8/5/2020 | North America / USA / Wisconsin / Milwaukee County  |
| EPI_ISL_509835 | 5/13/2020 | 8/5/2020 | North America / USA / Wisconsin / Washington County |
| EPI_ISL_509836 | 5/12/2020 | 8/5/2020 | North America / USA / Wisconsin / Milwaukee County  |
| EPI_ISL_509837 | 5/12/2020 | 8/5/2020 | North America / USA / Wisconsin / Milwaukee County  |
| EPI_ISL_509838 | 5/14/2020 | 8/5/2020 | North America / USA / Wisconsin / Washington County |
| EPI_ISL_509839 | 5/18/2020 | 8/5/2020 | North America / USA / Wisconsin / Ozaukee County    |
| EPI_ISL_509840 | 5/20/2020 | 8/5/2020 | North America / USA / Wisconsin / Washington County |
| EPI_ISL_509841 | 5/21/2020 | 8/5/2020 | North America / USA / Wisconsin / Ozaukee County    |
| EPI_ISL_509842 | 5/22/2020 | 8/5/2020 | North America / USA / Wisconsin / Washington County |
| EPI_ISL_509843 | 5/23/2020 | 8/5/2020 | North America / USA / Wisconsin / Milwaukee County  |
| EPI_ISL_509844 | 5/3/2020  | 8/5/2020 | North America / USA / Wisconsin / Milwaukee County  |
| EPI_ISL_509845 | 5/4/2020  | 8/5/2020 | North America / USA / Wisconsin / Racine County     |
| EPI_ISL_509847 | 5/6/2020  | 8/5/2020 | North America / USA / Wisconsin / Milwaukee County  |
| EPI_ISL_509848 | 5/7/2020  | 8/5/2020 | North America / USA / Wisconsin / Ozaukee County    |
| EPI_ISL_509849 | 5/7/2020  | 8/5/2020 | North America / USA / Wisconsin / Milwaukee County  |
| EPI_ISL_509850 | 5/7/2020  | 8/5/2020 | North America / USA / Wisconsin / Milwaukee County  |
| EPI_ISL_509851 | 5/7/2020  | 8/5/2020 | North America / USA / Wisconsin / Milwaukee County  |
| EPI_ISL_509852 | 7/9/2020  | 8/5/2020 | North America / USA / Wisconsin / Dane County       |





|                |           |                                                              |
|----------------|-----------|--------------------------------------------------------------|
| EPI_ISL_509952 | 5/19/2020 | 8/5/2020 North America / USA / Wisconsin / Washington County |
| EPI_ISL_509953 | 5/19/2020 | 8/5/2020 North America / USA / Wisconsin / Ozaukee County    |
| EPI_ISL_509954 | 5/18/2020 | 8/5/2020 North America / USA / Wisconsin / Washington County |
| EPI_ISL_509955 | 5/18/2020 | 8/5/2020 North America / USA / Wisconsin / Ozaukee County    |
| EPI_ISL_509956 | 5/18/2020 | 8/5/2020 North America / USA / Wisconsin / Ozaukee County    |
| EPI_ISL_509957 | 5/18/2020 | 8/5/2020 North America / USA / Wisconsin / Washington County |
| EPI_ISL_509958 | 5/16/2020 | 8/5/2020 North America / USA / Wisconsin / Washington County |
| EPI_ISL_509959 | 5/15/2020 | 8/5/2020 North America / USA / Wisconsin / Washington County |
| EPI_ISL_509960 | 6/4/2020  | 8/5/2020 North America / USA / Wisconsin / Milwaukee County  |
| EPI_ISL_509961 | 6/4/2020  | 8/5/2020 North America / USA / Wisconsin / Ozaukee County    |
| EPI_ISL_509962 | 6/4/2020  | 8/5/2020 North America / USA / Wisconsin / Ozaukee County    |
| EPI_ISL_509963 | 5/19/2020 | 8/5/2020 North America / USA / Wisconsin / Racine County     |
| EPI_ISL_509964 | 7/6/2020  | 8/5/2020 North America / USA / Wisconsin / Milwaukee County  |
| EPI_ISL_509965 | 7/7/2020  | 8/5/2020 North America / USA / Wisconsin / Dane County       |
| EPI_ISL_509966 | 7/3/2020  | 8/5/2020 North America / USA / Wisconsin / Columbia County   |
| EPI_ISL_509967 | 7/6/2020  | 8/5/2020 North America / USA / Wisconsin / Dane County       |
| EPI_ISL_509969 | 7/3/2020  | 8/5/2020 North America / USA / Wisconsin / Dane County       |
| EPI_ISL_509970 | 7/6/2020  | 8/5/2020 North America / USA / Wisconsin / Dane County       |
| EPI_ISL_509971 | 7/17/2020 | 8/5/2020 North America / USA / Wisconsin / Dane County       |
| EPI_ISL_509972 | 7/16/2020 | 8/5/2020 North America / USA / Wisconsin / Dane County       |
| EPI_ISL_509973 | 7/21/2020 | 8/5/2020 North America / USA / Wisconsin / Dane County       |
| EPI_ISL_509974 | 7/20/2020 | 8/5/2020 North America / USA / Wisconsin / Jefferson County  |
| EPI_ISL_509975 | 7/21/2020 | 8/5/2020 North America / USA / Wisconsin / Dane County       |
| EPI_ISL_509976 | 7/16/2020 | 8/5/2020 North America / USA / Wisconsin / Dane County       |
| EPI_ISL_509977 | 7/21/2020 | 8/5/2020 North America / USA / Wisconsin / Sauk County       |
| EPI_ISL_509978 | 7/21/2020 | 8/5/2020 North America / USA / Wisconsin / Dane County       |
| EPI_ISL_509979 | 7/22/2020 | 8/5/2020 North America / USA / Wisconsin / Dane County       |
| EPI_ISL_509980 | 7/21/2020 | 8/5/2020 North America / USA / Wisconsin / Dane County       |
| EPI_ISL_509981 | 7/19/2020 | 8/5/2020 North America / USA / Wisconsin / Dane County       |
| EPI_ISL_509982 | 7/16/2020 | 8/5/2020 North America / USA / Wisconsin / Dane County       |
| EPI_ISL_509983 | 7/20/2020 | 8/5/2020 North America / USA / Wisconsin / Dane County       |
| EPI_ISL_509984 | 7/21/2020 | 8/5/2020 North America / USA / Wisconsin / Dane County       |
| EPI_ISL_509985 | 7/22/2020 | 8/5/2020 North America / USA / Wisconsin / Dodge County      |
| EPI_ISL_509986 | 7/16/2020 | 8/5/2020 North America / USA / Wisconsin / Dane County       |
| EPI_ISL_509987 | 7/21/2020 | 8/5/2020 North America / USA / Wisconsin / Jefferson County  |
| EPI_ISL_509988 | 7/19/2020 | 8/5/2020 North America / USA / Wisconsin / Dane County       |
| EPI_ISL_509990 | 7/16/2020 | 8/5/2020 North America / USA / Wisconsin / Dane County       |
| EPI_ISL_509991 | 7/16/2020 | 8/5/2020 North America / USA / Wisconsin / Dane County       |
| EPI_ISL_509992 | 7/21/2020 | 8/5/2020 North America / USA / Wisconsin / Jefferson County  |
| EPI_ISL_509994 | 7/9/2020  | 8/5/2020 North America / USA / Wisconsin / Dane County       |
| EPI_ISL_509995 | 7/10/2020 | 8/5/2020 North America / USA / Illinois / Winnebago County   |
| EPI_ISL_509996 | 6/22/2020 | 8/5/2020 North America / USA / Wisconsin / Milwaukee County  |
| EPI_ISL_509997 | 6/27/2020 | 8/5/2020 North America / USA / Wisconsin / Ozaukee County    |
| EPI_ISL_509998 | 5/8/2020  | 8/5/2020 North America / USA / Wisconsin / Milwaukee County  |
| EPI_ISL_529167 | 5/29/2020 | 8/5/2020 North America / USA / Maryland                      |
| EPI_ISL_529168 | 5/29/2020 | 8/5/2020 North America / USA / Maryland                      |
| EPI_ISL_510052 | 4/17/2020 | 8/6/2020 Europe / Spain / Andalusia / Malaga                 |

|                |           |                                                   |
|----------------|-----------|---------------------------------------------------|
| EPI_ISL_510053 | 4/17/2020 | 8/6/2020 Europe / Spain / Andalusia / Malaga      |
| EPI_ISL_510055 | 4/19/2020 | 8/6/2020 Europe / Spain / Andalusia / Malaga      |
| EPI_ISL_510058 | 6/3/2020  | 8/6/2020 Europe / Spain / Andalusia / Malaga      |
| EPI_ISL_510059 | 4/29/2020 | 8/6/2020 Europe / Spain / Andalusia / Benalmadena |
| EPI_ISL_510066 | 3/24/2020 | 8/6/2020 Europe / Spain / Catalunya / Barcelona   |
| EPI_ISL_510067 | 3/26/2020 | 8/6/2020 Europe / Spain / Catalunya / Barcelona   |
| EPI_ISL_510068 | 4/7/2020  | 8/6/2020 Europe / Spain / Catalunya / Barcelona   |
| EPI_ISL_510069 | 3/26/2020 | 8/6/2020 Europe / Spain / Catalunya / Barcelona   |
| EPI_ISL_510072 | 4/11/2020 | 8/6/2020 Europe / Spain / Catalunya / Barcelona   |
| EPI_ISL_510075 | 4/21/2020 | 8/6/2020 Europe / Spain / Catalunya / Barcelona   |
| EPI_ISL_510077 | 3/26/2020 | 8/6/2020 Europe / Spain / Catalunya / Barcelona   |
| EPI_ISL_510106 | 5/4/2020  | 8/6/2020 Europe / Spain / Madrid                  |
| EPI_ISL_510110 | 6/5/2020  | 8/6/2020 Europe / Spain / Madrid                  |
| EPI_ISL_510111 | 4/2/2020  | 8/6/2020 Europe / Spain / Madrid                  |
| EPI_ISL_510112 | 4/8/2020  | 8/6/2020 Europe / Spain / Madrid                  |
| EPI_ISL_510113 | 3/26/2020 | 8/6/2020 Europe / Spain / Madrid                  |
| EPI_ISL_510117 | 3/19/2020 | 8/6/2020 Europe / Spain / Madrid                  |
| EPI_ISL_510122 | 3/19/2020 | 8/6/2020 Europe / Spain / Madrid                  |
| EPI_ISL_510128 | 4/3/2020  | 8/6/2020 Europe / Spain / Madrid                  |
| EPI_ISL_510129 | 5/19/2020 | 8/6/2020 Europe / Spain / Madrid                  |
| EPI_ISL_510131 | 4/2/2020  | 8/6/2020 Europe / Spain / Madrid                  |
| EPI_ISL_510133 | 5/4/2020  | 8/6/2020 Europe / Spain / Madrid                  |
| EPI_ISL_510135 | 4/5/2020  | 8/6/2020 Europe / Spain / Madrid                  |
| EPI_ISL_510145 | 4/3/2020  | 8/6/2020 Europe / Spain / Madrid                  |
| EPI_ISL_510146 | 3/9/2020  | 8/6/2020 Europe / Spain / Madrid                  |
| EPI_ISL_510149 | 3/17/2020 | 8/6/2020 Europe / Spain / Madrid                  |
| EPI_ISL_510165 | 3/9/2020  | 8/6/2020 Europe / Spain / Madrid                  |
| EPI_ISL_510166 | 3/9/2020  | 8/6/2020 Europe / Spain / Madrid                  |
| EPI_ISL_510167 | 3/10/2020 | 8/6/2020 Europe / Spain / Madrid                  |
| EPI_ISL_510168 | 3/10/2020 | 8/6/2020 Europe / Spain / Madrid                  |
| EPI_ISL_510169 | 3/12/2020 | 8/6/2020 Europe / Spain / Madrid                  |
| EPI_ISL_510170 | 3/13/2020 | 8/6/2020 Europe / Spain / Madrid                  |
| EPI_ISL_510171 | 3/15/2020 | 8/6/2020 Europe / Spain / Madrid                  |
| EPI_ISL_510172 | 3/15/2020 | 8/6/2020 Europe / Spain / Madrid                  |
| EPI_ISL_510173 | 3/15/2020 | 8/6/2020 Europe / Spain / Madrid                  |
| EPI_ISL_510174 | 3/15/2020 | 8/6/2020 Europe / Spain / Madrid                  |
| EPI_ISL_510176 | 3/15/2020 | 8/6/2020 Europe / Spain / Madrid                  |
| EPI_ISL_510178 | 3/15/2020 | 8/6/2020 Europe / Spain / Madrid                  |
| EPI_ISL_510180 | 3/15/2020 | 8/6/2020 Europe / Spain / Madrid                  |
| EPI_ISL_510182 | 3/15/2020 | 8/6/2020 Europe / Spain / Madrid                  |
| EPI_ISL_510183 | 3/15/2020 | 8/6/2020 Europe / Spain / Madrid                  |
| EPI_ISL_510185 | 3/15/2020 | 8/6/2020 Europe / Spain / Madrid                  |
| EPI_ISL_510186 | 3/22/2020 | 8/6/2020 Europe / Spain / Madrid                  |
| EPI_ISL_510190 | 3/16/2020 | 8/6/2020 Europe / Spain / Madrid                  |
| EPI_ISL_510191 | 3/17/2020 | 8/6/2020 Europe / Spain / Madrid                  |
| EPI_ISL_510192 | 3/17/2020 | 8/6/2020 Europe / Spain / Madrid                  |
| EPI_ISL_510193 | 3/17/2020 | 8/6/2020 Europe / Spain / Madrid                  |



|                |           |                                                             |
|----------------|-----------|-------------------------------------------------------------|
| EPI_ISL_510194 | 3/16/2020 | 8/6/2020 Europe / Spain / Madrid                            |
| EPI_ISL_510195 | 3/16/2020 | 8/6/2020 Europe / Spain / Madrid                            |
| EPI_ISL_510196 | 3/16/2020 | 8/6/2020 Europe / Spain / Madrid                            |
| EPI_ISL_510199 | 3/17/2020 | 8/6/2020 Europe / Spain / Madrid                            |
| EPI_ISL_510201 | 3/17/2020 | 8/6/2020 Europe / Spain / Madrid                            |
| EPI_ISL_510202 | 3/17/2020 | 8/6/2020 Europe / Spain / Madrid                            |
| EPI_ISL_510203 | 3/17/2020 | 8/6/2020 Europe / Spain / Madrid                            |
| EPI_ISL_510204 | 3/17/2020 | 8/6/2020 Europe / Spain / Madrid                            |
| EPI_ISL_510205 | 3/17/2020 | 8/6/2020 Europe / Spain / Madrid                            |
| EPI_ISL_510207 | 3/17/2020 | 8/6/2020 Europe / Spain / Madrid                            |
| EPI_ISL_510211 | 3/17/2020 | 8/6/2020 Europe / Spain / Madrid                            |
| EPI_ISL_510212 | 3/17/2020 | 8/6/2020 Europe / Spain / Madrid                            |
| EPI_ISL_510213 | 3/17/2020 | 8/6/2020 Europe / Spain / Madrid                            |
| EPI_ISL_510216 | 3/17/2020 | 8/6/2020 Europe / Spain / Madrid                            |
| EPI_ISL_510217 | 3/18/2020 | 8/6/2020 Europe / Spain / Madrid                            |
| EPI_ISL_510218 | 3/18/2020 | 8/6/2020 Europe / Spain / Madrid                            |
| EPI_ISL_510220 | 3/19/2020 | 8/6/2020 Europe / Spain / Madrid                            |
| EPI_ISL_510221 | 3/19/2020 | 8/6/2020 Europe / Spain / Madrid                            |
| EPI_ISL_510222 | 3/19/2020 | 8/6/2020 Europe / Spain / Madrid                            |
| EPI_ISL_510223 | 3/19/2020 | 8/6/2020 Europe / Spain / Madrid                            |
| EPI_ISL_510224 | 3/19/2020 | 8/6/2020 Europe / Spain / Madrid                            |
| EPI_ISL_510225 | 3/19/2020 | 8/6/2020 Europe / Spain / Madrid                            |
| EPI_ISL_510226 | 3/19/2020 | 8/6/2020 Europe / Spain / Madrid                            |
| EPI_ISL_510227 | 3/19/2020 | 8/6/2020 Europe / Spain / Madrid                            |
| EPI_ISL_510228 | 3/19/2020 | 8/6/2020 Europe / Spain / Madrid                            |
| EPI_ISL_510231 | 3/19/2020 | 8/6/2020 Europe / Spain / Madrid                            |
| EPI_ISL_510232 | 3/19/2020 | 8/6/2020 Europe / Spain / Madrid                            |
| EPI_ISL_510233 | 3/20/2020 | 8/6/2020 Europe / Spain / Madrid                            |
| EPI_ISL_510236 | 3/22/2020 | 8/6/2020 Europe / Spain / Madrid                            |
| EPI_ISL_510237 | 3/22/2020 | 8/6/2020 Europe / Spain / Madrid                            |
| EPI_ISL_510238 | 3/23/2020 | 8/6/2020 Europe / Spain / Madrid                            |
| EPI_ISL_510240 | 3/31/2020 | 8/6/2020 Europe / Spain / Madrid                            |
| EPI_ISL_510243 | 4/3/2020  | 8/6/2020 Europe / Spain / Madrid                            |
| EPI_ISL_510244 | 4/7/2020  | 8/6/2020 Europe / Spain / Madrid                            |
| EPI_ISL_510247 | 3/16/2020 | 8/6/2020 Europe / Spain / Catalunya / Barcelona             |
| EPI_ISL_510248 | 3/16/2020 | 8/6/2020 Europe / Spain / Catalunya / Tiana                 |
| EPI_ISL_510249 | 3/16/2020 | 8/6/2020 Europe / Spain / Catalunya / Barcelona             |
| EPI_ISL_510250 | 3/16/2020 | 8/6/2020 Europe / Spain / Catalunya / Barcelona             |
| EPI_ISL_510251 | 3/16/2020 | 8/6/2020 Europe / Spain / Catalunya / Barcelona             |
| EPI_ISL_510252 | 3/16/2020 | 8/6/2020 Europe / Spain / Catalunya / Barcelona             |
| EPI_ISL_510253 | 3/16/2020 | 8/6/2020 Europe / Spain / Catalunya / Barcelona             |
| EPI_ISL_510256 | 3/16/2020 | 8/6/2020 Europe / Spain / Catalunya / Barcelona             |
| EPI_ISL_510257 | 3/16/2020 | 8/6/2020 Europe / Spain / Catalunya / Barcelona             |
| EPI_ISL_510258 | 3/16/2020 | 8/6/2020 Europe / Spain / Catalunya / Barcelona             |
| EPI_ISL_510259 | 3/16/2020 | 8/6/2020 Europe / Spain / Catalunya / Barcelona             |
| EPI_ISL_510260 | 3/16/2020 | 8/6/2020 Europe / Spain / Catalunya / Sant Cugat del Valles |
| EPI_ISL_510261 | 3/16/2020 | 8/6/2020 Europe / Spain / Catalunya / Badalona              |

|                |           |                                                                   |
|----------------|-----------|-------------------------------------------------------------------|
| EPI_ISL_510262 | 3/16/2020 | 8/6/2020 Europe / Spain / Catalunya / Barcelona                   |
| EPI_ISL_510263 | 3/16/2020 | 8/6/2020 Europe / Spain / Catalunya / Barcelona                   |
| EPI_ISL_510264 | 3/16/2020 | 8/6/2020 Europe / Spain / Catalunya / Barcelona                   |
| EPI_ISL_510265 | 3/7/2020  | 8/6/2020 Europe / Spain / Catalunya / Barcelona                   |
| EPI_ISL_510266 | 3/9/2020  | 8/6/2020 Europe / Spain / Catalunya / Barcelona                   |
| EPI_ISL_510268 | 3/12/2020 | 8/6/2020 Europe / Spain / Galicia / Noya                          |
| EPI_ISL_510269 | 3/13/2020 | 8/6/2020 Europe / Spain / Galicia / Ames                          |
| EPI_ISL_510271 | 3/14/2020 | 8/6/2020 Europe / Spain / Galicia / Noya                          |
| EPI_ISL_510272 | 3/14/2020 | 8/6/2020 Europe / Spain / Galicia / Ames                          |
| EPI_ISL_510273 | 3/14/2020 | 8/6/2020 Europe / Spain / Galicia / Ames                          |
| EPI_ISL_510274 | 3/10/2020 | 8/6/2020 Europe / Spain / Galicia / Teo                           |
| EPI_ISL_510275 | 3/14/2020 | 8/6/2020 Europe / Spain / Galicia / Santiago de Compostela        |
| EPI_ISL_510277 | 3/16/2020 | 8/6/2020 Europe / Spain / Galicia / Santiago de Compostela        |
| EPI_ISL_510279 | 3/16/2020 | 8/6/2020 Europe / Spain / Madrid                                  |
| EPI_ISL_510280 | 3/16/2020 | 8/6/2020 Europe / Spain / Galicia / Boiro                         |
| EPI_ISL_510281 | 3/16/2020 | 8/6/2020 Europe / Spain / Galicia / Boiro                         |
| EPI_ISL_510283 | 3/17/2020 | 8/6/2020 Europe / Spain / Galicia / Santiago de Compostela        |
| EPI_ISL_510284 | 3/17/2020 | 8/6/2020 Europe / Spain / Galicia / Santiago de Compostela        |
| EPI_ISL_510285 | 3/17/2020 | 8/6/2020 Europe / Spain / Galicia / Santiago de Compostela        |
| EPI_ISL_510286 | 3/17/2020 | 8/6/2020 Europe / Spain / Galicia / La Estrada                    |
| EPI_ISL_510288 | 3/17/2020 | 8/6/2020 Europe / Spain / Galicia / Vedra                         |
| EPI_ISL_510290 | 3/18/2020 | 8/6/2020 Europe / Spain / Galicia / Puerto del Son                |
| EPI_ISL_510291 | 3/18/2020 | 8/6/2020 Europe / Spain / Galicia / Boiro                         |
| EPI_ISL_510292 | 3/18/2020 | 8/6/2020 Europe / Spain / Galicia / Riveira                       |
| EPI_ISL_510293 | 3/18/2020 | 8/6/2020 Europe / Spain / Galicia / Bertamirans                   |
| EPI_ISL_510294 | 3/18/2020 | 8/6/2020 Europe / Spain / Galicia / La Estrada                    |
| EPI_ISL_510296 | 3/18/2020 | 8/6/2020 Europe / Spain / Galicia / Ames                          |
| EPI_ISL_510297 | 3/18/2020 | 8/6/2020 Europe / Spain / Galicia / Santiago de Compostela        |
| EPI_ISL_510298 | 3/18/2020 | 8/6/2020 Europe / Spain / Galicia / Santiago de Compostela        |
| EPI_ISL_510300 | 3/18/2020 | 8/6/2020 Europe / Spain / Galicia / Santiago de Compostela        |
| EPI_ISL_510301 | 3/18/2020 | 8/6/2020 Europe / Spain / Galicia / Santiago de Compostela        |
| EPI_ISL_510302 | 3/18/2020 | 8/6/2020 Europe / Spain / Galicia / Santiago de Compostela        |
| EPI_ISL_510303 | 3/18/2020 | 8/6/2020 Europe / Spain / Galicia / Ames                          |
| EPI_ISL_510305 | 5/8/2020  | 8/6/2020 Europe / Spain / Extremadura / Jaraicejo                 |
| EPI_ISL_510306 | 5/8/2020  | 8/6/2020 Europe / Spain / Extremadura / Malpartida de Plasencia   |
| EPI_ISL_510307 | 5/9/2020  | 8/6/2020 Europe / Spain / Extremadura / Caceres                   |
| EPI_ISL_510309 | 6/2/2020  | 8/6/2020 Europe / Spain / Extremadura / Pueblonuevo de Miramontes |
| EPI_ISL_510310 | 6/9/2020  | 8/6/2020 Europe / Spain / Extremadura / Navalmoral de la Mata     |
| EPI_ISL_510311 | 6/9/2020  | 8/6/2020 Europe / Spain / Extremadura / Navalmoral de la Mata     |
| EPI_ISL_510312 | 3/13/2020 | 8/6/2020 Europe / Spain / Extremadura / Villanueva de la Vera     |
| EPI_ISL_510313 | 3/13/2020 | 8/6/2020 Europe / Spain / Extremadura / Caceres                   |
| EPI_ISL_510314 | 3/13/2020 | 8/6/2020 Europe / Spain / Extremadura / Caceres                   |
| EPI_ISL_510315 | 3/13/2020 | 8/6/2020 Europe / Spain / Extremadura / Caceres                   |
| EPI_ISL_510316 | 3/13/2020 | 8/6/2020 Europe / Spain / Extremadura / Caceres                   |
| EPI_ISL_510317 | 3/13/2020 | 8/6/2020 Europe / Spain / Extremadura / Caceres                   |
| EPI_ISL_510318 | 3/13/2020 | 8/6/2020 Europe / Spain / Extremadura / Arroyo de la Luz          |
| EPI_ISL_510319 | 3/13/2020 | 8/6/2020 Europe / Spain / Extremadura / Arroyo de la Luz          |



|                |           |          |                                                    |
|----------------|-----------|----------|----------------------------------------------------|
| EPI_ISL_510391 | 4/7/2020  | 8/6/2020 | Europe / Spain / Basque Country / San Sebastian    |
| EPI_ISL_510392 | 4/7/2020  | 8/6/2020 | Europe / Spain / Basque Country / San Sebastian    |
| EPI_ISL_510393 | 4/7/2020  | 8/6/2020 | Europe / Spain / Basque Country / San Sebastian    |
| EPI_ISL_510394 | 4/7/2020  | 8/6/2020 | Europe / Spain / Basque Country / San Sebastian    |
| EPI_ISL_510395 | 4/8/2020  | 8/6/2020 | Europe / Spain / Basque Country / San Sebastian    |
| EPI_ISL_510396 | 4/8/2020  | 8/6/2020 | Europe / Spain / Basque Country / San Sebastian    |
| EPI_ISL_510397 | 4/8/2020  | 8/6/2020 | Europe / Spain / Basque Country / San Sebastian    |
| EPI_ISL_510398 | 4/8/2020  | 8/6/2020 | Europe / Spain / Basque Country / San Sebastian    |
| EPI_ISL_510399 | 4/8/2020  | 8/6/2020 | Europe / Spain / Basque Country / San Sebastian    |
| EPI_ISL_510400 | 4/8/2020  | 8/6/2020 | Europe / Spain / Basque Country / San Sebastian    |
| EPI_ISL_510401 | 4/8/2020  | 8/6/2020 | Europe / Spain / Basque Country / San Sebastian    |
| EPI_ISL_510402 | 4/8/2020  | 8/6/2020 | Europe / Spain / Basque Country / San Sebastian    |
| EPI_ISL_510403 | 4/8/2020  | 8/6/2020 | Europe / Spain / Basque Country / San Sebastian    |
| EPI_ISL_510404 | 4/8/2020  | 8/6/2020 | Europe / Spain / Basque Country / San Sebastian    |
| EPI_ISL_510405 | 4/8/2020  | 8/6/2020 | Europe / Spain / Basque Country / San Sebastian    |
| EPI_ISL_510406 | 4/8/2020  | 8/6/2020 | Europe / Spain / Basque Country / San Sebastian    |
| EPI_ISL_510407 | 4/8/2020  | 8/6/2020 | Europe / Spain / Basque Country / San Sebastian    |
| EPI_ISL_510409 | 4/9/2020  | 8/6/2020 | Europe / Spain / Basque Country / San Sebastian    |
| EPI_ISL_510410 | 4/9/2020  | 8/6/2020 | Europe / Spain / Basque Country / San Sebastian    |
| EPI_ISL_510411 | 4/9/2020  | 8/6/2020 | Europe / Spain / Basque Country / San Sebastian    |
| EPI_ISL_510413 | 4/9/2020  | 8/6/2020 | Europe / Spain / Basque Country / San Sebastian    |
| EPI_ISL_510415 | 4/9/2020  | 8/6/2020 | Europe / Spain / Basque Country / San Sebastian    |
| EPI_ISL_510416 | 4/9/2020  | 8/6/2020 | Europe / Spain / Basque Country / San Sebastian    |
| EPI_ISL_510418 | 4/9/2020  | 8/6/2020 | Europe / Spain / Basque Country / San Sebastian    |
| EPI_ISL_510419 | 4/9/2020  | 8/6/2020 | Europe / Spain / Basque Country / San Sebastian    |
| EPI_ISL_510420 | 4/9/2020  | 8/6/2020 | Europe / Spain / Basque Country / San Sebastian    |
| EPI_ISL_510421 | 4/9/2020  | 8/6/2020 | Europe / Spain / Basque Country / San Sebastian    |
| EPI_ISL_510422 | 4/9/2020  | 8/6/2020 | Europe / Spain / Basque Country / San Sebastian    |
| EPI_ISL_510423 | 6/11/2020 | 8/6/2020 | Europe / Spain / Basque Country / San Sebastian    |
| EPI_ISL_510424 | 3/12/2020 | 8/6/2020 | Europe / Spain / Andalusia / Torre del Mar         |
| EPI_ISL_510427 | 5/8/2020  | 8/6/2020 | Europe / Spain / Andalusia / Santa Fe              |
| EPI_ISL_510428 | 6/29/2020 | 8/6/2020 | Europe / Spain / Andalusia / Granada               |
| EPI_ISL_510431 | 6/20/2020 | 8/6/2020 | Europe / Spain / Andalusia / Las Gabias            |
| EPI_ISL_510433 | 6/22/2020 | 8/6/2020 | Europe / Spain / Andalusia / Huescar               |
| EPI_ISL_510434 | 6/20/2020 | 8/6/2020 | Europe / Spain / Andalusia / Pinos Puente          |
| EPI_ISL_510435 | 6/29/2020 | 8/6/2020 | Europe / Spain / Andalusia / Granada               |
| EPI_ISL_510436 | 6/29/2020 | 8/6/2020 | Europe / Spain / Andalusia / Granada               |
| EPI_ISL_510437 | 5/26/2020 | 8/6/2020 | Europe / Spain / Andalusia / Guadix                |
| EPI_ISL_510439 | 7/2/2020  | 8/6/2020 | Europe / Spain / Andalusia / Granada               |
| EPI_ISL_510440 | 7/4/2020  | 8/6/2020 | Europe / Spain / Andalusia / Maracena              |
| EPI_ISL_510441 | 4/13/2020 | 8/6/2020 | Europe / Spain / Andalusia / Navas de San Juan     |
| EPI_ISL_510444 | 3/15/2020 | 8/6/2020 | Europe / Spain / Andalusia / Granada               |
| EPI_ISL_510445 | 7/14/2020 | 8/6/2020 | Europe / Spain / Andalusia / Granada               |
| EPI_ISL_510446 | 7/8/2020  | 8/6/2020 | Europe / Spain / Andalusia / La Peza               |
| EPI_ISL_510447 | 7/14/2020 | 8/6/2020 | Europe / Spain / Andalusia / Benalua de las Villas |
| EPI_ISL_510448 | 5/2/2020  | 8/6/2020 | Europe / Spain / Andalusia / Loja                  |
| EPI_ISL_510449 | 4/30/2020 | 8/6/2020 | Europe / Spain / Andalusia / Loja                  |



|                |           |                                                          |
|----------------|-----------|----------------------------------------------------------|
| EPI_ISL_510504 | 4/4/2020  | 8/6/2020 Europe / Spain / Basque Country / San Sebastian |
| EPI_ISL_510505 | 4/4/2020  | 8/6/2020 Europe / Spain / Basque Country / San Sebastian |
| EPI_ISL_510506 | 4/4/2020  | 8/6/2020 Europe / Spain / Basque Country / San Sebastian |
| EPI_ISL_510507 | 4/4/2020  | 8/6/2020 Europe / Spain / Basque Country / San Sebastian |
| EPI_ISL_510508 | 4/4/2020  | 8/6/2020 Europe / Spain / Basque Country / San Sebastian |
| EPI_ISL_510509 | 4/4/2020  | 8/6/2020 Europe / Spain / Basque Country / San Sebastian |
| EPI_ISL_510510 | 5/8/2020  | 8/6/2020 Europe / Spain / Catalunya / Granollers         |
| EPI_ISL_510511 | 5/8/2020  | 8/6/2020 Europe / Spain / Catalunya / Vilassar de Mar    |
| EPI_ISL_510512 | 5/8/2020  | 8/6/2020 Europe / Spain / Catalunya / Badalona           |
| EPI_ISL_510513 | 5/8/2020  | 8/6/2020 Europe / Spain / Catalunya / Granollers         |
| EPI_ISL_510514 | 5/12/2020 | 8/6/2020 Europe / Spain / Catalunya / Mollet del Valles  |
| EPI_ISL_510515 | 5/15/2020 | 8/6/2020 Europe / Spain / Catalunya / Granollers         |
| EPI_ISL_510516 | 5/21/2020 | 8/6/2020 Europe / Spain / Catalunya / Badalona           |
| EPI_ISL_510517 | 5/20/2020 | 8/6/2020 Europe / Spain / Catalunya / Mataro             |
| EPI_ISL_510518 | 5/21/2020 | 8/6/2020 Europe / Spain / Catalunya / Mataro             |
| EPI_ISL_510520 | 5/26/2020 | 8/6/2020 Europe / Spain / Catalunya / Mataro             |
| EPI_ISL_510522 | 5/12/2020 | 8/6/2020 Europe / Spain / Catalunya / Badalona           |
| EPI_ISL_510523 | 5/18/2020 | 8/6/2020 Europe / Spain / Catalunya / Badalona           |
| EPI_ISL_525472 | 3/31/2020 | 8/6/2020 Europe / Germany / Bavaria                      |
| EPI_ISL_525473 | 4/8/2020  | 8/6/2020 Europe / Germany / Bavaria                      |
| EPI_ISL_510538 | 7/21/2020 | 8/7/2020 Asia / Hong Kong                                |
| EPI_ISL_510539 | 7/20/2020 | 8/7/2020 Asia / Hong Kong                                |
| EPI_ISL_510542 | 7/31/2020 | 8/7/2020 Oceania / Australia / South Australia           |
| EPI_ISL_510544 | 8/3/2020  | 8/7/2020 Oceania / Australia / South Australia           |
| EPI_ISL_510547 | 2/26/2020 | 8/7/2020 Asia / South Korea                              |
| EPI_ISL_510548 | 4/13/2020 | 8/7/2020 Asia / South Korea                              |
| EPI_ISL_510549 | 5/3/2020  | 8/7/2020 Asia / South Korea                              |
| EPI_ISL_510550 | 5/5/2020  | 8/7/2020 Asia / South Korea                              |
| EPI_ISL_510551 | 5/6/2020  | 8/7/2020 Asia / South Korea                              |
| EPI_ISL_510552 | 5/8/2020  | 8/7/2020 Asia / South Korea                              |
| EPI_ISL_510553 | 5/8/2020  | 8/7/2020 Asia / South Korea                              |
| EPI_ISL_510554 | 5/7/2020  | 8/7/2020 Asia / South Korea                              |
| EPI_ISL_510555 | 5/7/2020  | 8/7/2020 Asia / South Korea                              |
| EPI_ISL_510556 | 5/7/2020  | 8/7/2020 Asia / South Korea                              |
| EPI_ISL_510557 | 5/7/2020  | 8/7/2020 Asia / South Korea                              |
| EPI_ISL_510558 | 5/7/2020  | 8/7/2020 Asia / South Korea                              |
| EPI_ISL_510559 | 5/7/2020  | 8/7/2020 Asia / South Korea                              |
| EPI_ISL_510560 | 5/7/2020  | 8/7/2020 Asia / South Korea                              |
| EPI_ISL_510561 | 5/7/2020  | 8/7/2020 Asia / South Korea                              |
| EPI_ISL_510562 | 5/5/2020  | 8/7/2020 Asia / South Korea                              |
| EPI_ISL_510563 | 5/8/2020  | 8/7/2020 Asia / South Korea                              |
| EPI_ISL_510564 | 5/8/2020  | 8/7/2020 Asia / South Korea                              |
| EPI_ISL_510565 | 5/8/2020  | 8/7/2020 Asia / South Korea                              |
| EPI_ISL_510566 | 5/8/2020  | 8/7/2020 Asia / South Korea                              |
| EPI_ISL_510567 | 5/9/2020  | 8/7/2020 Asia / South Korea                              |
| EPI_ISL_510568 | 5/8/2020  | 8/7/2020 Asia / South Korea                              |
| EPI_ISL_510569 | 5/8/2020  | 8/7/2020 Asia / South Korea                              |







|                |           |                                                            |
|----------------|-----------|------------------------------------------------------------|
| EPI_ISL_510664 | 5/26/2020 | 8/7/2020 Asia / South Korea                                |
| EPI_ISL_510665 | 5/26/2020 | 8/7/2020 Asia / South Korea                                |
| EPI_ISL_510666 | 5/27/2020 | 8/7/2020 Asia / South Korea                                |
| EPI_ISL_510667 | 5/27/2020 | 8/7/2020 Asia / South Korea                                |
| EPI_ISL_510668 | 5/27/2020 | 8/7/2020 Asia / South Korea                                |
| EPI_ISL_510669 | 5/26/2020 | 8/7/2020 Asia / South Korea                                |
| EPI_ISL_510670 | 5/26/2020 | 8/7/2020 Asia / South Korea                                |
| EPI_ISL_510671 | 5/28/2020 | 8/7/2020 Asia / South Korea                                |
| EPI_ISL_510672 | 5/27/2020 | 8/7/2020 Asia / South Korea                                |
| EPI_ISL_510673 | 5/27/2020 | 8/7/2020 Asia / South Korea                                |
| EPI_ISL_510674 | 5/27/2020 | 8/7/2020 Asia / South Korea                                |
| EPI_ISL_510675 | 5/28/2020 | 8/7/2020 Asia / South Korea                                |
| EPI_ISL_510676 | 5/27/2020 | 8/7/2020 Asia / South Korea                                |
| EPI_ISL_510677 | 5/26/2020 | 8/7/2020 Asia / South Korea                                |
| EPI_ISL_510678 | 5/27/2020 | 8/7/2020 Asia / South Korea                                |
| EPI_ISL_510679 | 5/27/2020 | 8/7/2020 Asia / South Korea                                |
| EPI_ISL_510680 | 5/27/2020 | 8/7/2020 Asia / South Korea                                |
| EPI_ISL_510681 | 5/27/2020 | 8/7/2020 Asia / South Korea                                |
| EPI_ISL_510682 | 5/27/2020 | 8/7/2020 Asia / South Korea                                |
| EPI_ISL_510683 | 5/27/2020 | 8/7/2020 Asia / South Korea                                |
| EPI_ISL_510684 | 5/28/2020 | 8/7/2020 Asia / South Korea                                |
| EPI_ISL_510685 | 5/27/2020 | 8/7/2020 Asia / South Korea                                |
| EPI_ISL_510686 | 5/28/2020 | 8/7/2020 Asia / South Korea                                |
| EPI_ISL_510687 | 5/28/2020 | 8/7/2020 Asia / South Korea                                |
| EPI_ISL_510688 | 5/28/2020 | 8/7/2020 Asia / South Korea                                |
| EPI_ISL_510689 | 3/13/2020 | 8/7/2020 Europe / Spain / Catalunya / Barcelona / Badalona |
| EPI_ISL_510690 | 7/10/2020 | 8/7/2020 Europe / Switzerland / Basel-Landschaft           |
| EPI_ISL_510691 | 7/10/2020 | 8/7/2020 Europe / Switzerland / Basel-Landschaft           |
| EPI_ISL_510692 | 7/10/2020 | 8/7/2020 Europe / Switzerland / Aargau                     |
| EPI_ISL_510693 | 7/10/2020 | 8/7/2020 Europe / Switzerland / Aargau                     |
| EPI_ISL_510694 | 7/10/2020 | 8/7/2020 Europe / Switzerland / Basel-Landschaft           |
| EPI_ISL_510695 | 7/10/2020 | 8/7/2020 Europe / Switzerland / Bern                       |
| EPI_ISL_510696 | 7/10/2020 | 8/7/2020 Europe / Switzerland / Basel-Landschaft           |
| EPI_ISL_510697 | 7/10/2020 | 8/7/2020 Europe / Switzerland / Bern                       |
| EPI_ISL_510698 | 7/11/2020 | 8/7/2020 Europe / Switzerland / Grisons                    |
| EPI_ISL_510699 | 7/13/2020 | 8/7/2020 Europe / Switzerland / Vaud                       |
| EPI_ISL_510701 | 7/13/2020 | 8/7/2020 Europe / Switzerland / Basel-Landschaft           |
| EPI_ISL_510702 | 7/13/2020 | 8/7/2020 Europe / Switzerland / Uri                        |
| EPI_ISL_510703 | 7/13/2020 | 8/7/2020 Europe / Switzerland / Uri                        |
| EPI_ISL_510704 | 7/13/2020 | 8/7/2020 Europe / Switzerland / Basel-Landschaft           |
| EPI_ISL_510705 | 7/13/2020 | 8/7/2020 Europe / Switzerland / Zurich                     |
| EPI_ISL_510706 | 7/14/2020 | 8/7/2020 Europe / Switzerland / Zurich                     |
| EPI_ISL_510707 | 7/14/2020 | 8/7/2020 Europe / Switzerland / Basel-Landschaft           |
| EPI_ISL_510708 | 7/14/2020 | 8/7/2020 Europe / Switzerland / Zurich                     |
| EPI_ISL_510709 | 7/14/2020 | 8/7/2020 Europe / Switzerland / Bern                       |
| EPI_ISL_510710 | 7/14/2020 | 8/7/2020 Europe / Switzerland / Bern                       |
| EPI_ISL_510711 | 7/14/2020 | 8/7/2020 Europe / Switzerland / Ticino                     |

|                |           |                                                  |
|----------------|-----------|--------------------------------------------------|
| EPI_ISL_510712 | 7/14/2020 | 8/7/2020 Europe / Switzerland / Aargau           |
| EPI_ISL_510713 | 7/14/2020 | 8/7/2020 Europe / Switzerland / Basel-Landschaft |
| EPI_ISL_510714 | 7/14/2020 | 8/7/2020 Europe / Switzerland / Bern             |
| EPI_ISL_510715 | 7/14/2020 | 8/7/2020 Europe / Switzerland / Zurich           |
| EPI_ISL_510716 | 7/14/2020 | 8/7/2020 Europe / Switzerland / Zurich           |
| EPI_ISL_510717 | 7/14/2020 | 8/7/2020 Europe / Switzerland / Zurich           |
| EPI_ISL_510718 | 7/14/2020 | 8/7/2020 Europe / Switzerland / St Gall          |
| EPI_ISL_510719 | 7/14/2020 | 8/7/2020 Europe / Switzerland / Aargau           |
| EPI_ISL_510720 | 7/14/2020 | 8/7/2020 Europe / Switzerland / Vaud             |
| EPI_ISL_510721 | 7/15/2020 | 8/7/2020 Europe / Switzerland / Bern             |
| EPI_ISL_510722 | 7/15/2020 | 8/7/2020 Europe / Switzerland / Zurich           |
| EPI_ISL_510723 | 7/15/2020 | 8/7/2020 Europe / Switzerland / Bern             |
| EPI_ISL_510724 | 7/16/2020 | 8/7/2020 Europe / Switzerland / Basel-Landschaft |
| EPI_ISL_510725 | 7/16/2020 | 8/7/2020 Europe / Switzerland / Zurich           |
| EPI_ISL_510726 | 7/16/2020 | 8/7/2020 Europe / Switzerland / Basel-Landschaft |
| EPI_ISL_510727 | 7/16/2020 | 8/7/2020 Europe / Switzerland / Basel-Landschaft |
| EPI_ISL_510728 | 7/16/2020 | 8/7/2020 Europe / Switzerland / Geneva           |
| EPI_ISL_510729 | 7/16/2020 | 8/7/2020 Europe / Switzerland / Bern             |
| EPI_ISL_510730 | 7/10/2020 | 8/7/2020 Europe / Switzerland / Basel-Landschaft |
| EPI_ISL_510731 | 7/10/2020 | 8/7/2020 Europe / Switzerland / Schwyz           |
| EPI_ISL_510732 | 7/10/2020 | 8/7/2020 Europe / Switzerland / Zurich           |
| EPI_ISL_510733 | 7/10/2020 | 8/7/2020 Europe / Switzerland / Zurich           |
| EPI_ISL_510734 | 7/10/2020 | 8/7/2020 Europe / Switzerland / Schwyz           |
| EPI_ISL_510735 | 7/11/2020 | 8/7/2020 Europe / Switzerland / Schaffhausen     |
| EPI_ISL_510736 | 7/11/2020 | 8/7/2020 Europe / Switzerland / Basel-Landschaft |
| EPI_ISL_510737 | 7/11/2020 | 8/7/2020 Europe / Switzerland / Basel-Landschaft |
| EPI_ISL_510738 | 7/12/2020 | 8/7/2020 Europe / Switzerland / Zurich           |
| EPI_ISL_510739 | 7/13/2020 | 8/7/2020 Europe / Switzerland / Basel-Stadt      |
| EPI_ISL_510740 | 7/13/2020 | 8/7/2020 Europe / Switzerland / Basel-Landschaft |
| EPI_ISL_510741 | 7/14/2020 | 8/7/2020 Europe / Switzerland / Basel-Landschaft |
| EPI_ISL_510742 | 7/14/2020 | 8/7/2020 Europe / Switzerland / Bern             |
| EPI_ISL_510743 | 7/14/2020 | 8/7/2020 Europe / Switzerland / Bern             |
| EPI_ISL_510744 | 7/15/2020 | 8/7/2020 Europe / Switzerland / Basel-Landschaft |
| EPI_ISL_510745 | 7/15/2020 | 8/7/2020 Europe / Switzerland / Zurich           |
| EPI_ISL_510746 | 7/14/2020 | 8/7/2020 Europe / Switzerland / Vaud             |
| EPI_ISL_510747 | 7/15/2020 | 8/7/2020 Europe / Switzerland / Basel-Stadt      |
| EPI_ISL_510748 | 7/15/2020 | 8/7/2020 Europe / Switzerland / Geneva           |
| EPI_ISL_510749 | 7/15/2020 | 8/7/2020 Europe / Switzerland / St Gall          |
| EPI_ISL_510750 | 7/15/2020 | 8/7/2020 Europe / Switzerland / Vaud             |
| EPI_ISL_510751 | 7/15/2020 | 8/7/2020 Europe / Switzerland / Vaud             |
| EPI_ISL_510753 | 7/17/2020 | 8/7/2020 Europe / Switzerland / Zurich           |
| EPI_ISL_510754 | 7/17/2020 | 8/7/2020 Europe / Switzerland / Basel-Landschaft |
| EPI_ISL_510755 | 7/17/2020 | 8/7/2020 Europe / Switzerland / Basel-Landschaft |
| EPI_ISL_510756 | 7/17/2020 | 8/7/2020 Europe / Switzerland / Basel-Landschaft |
| EPI_ISL_510757 | 7/20/2020 | 8/7/2020 Europe / Switzerland / Lucerne          |
| EPI_ISL_510758 | 7/20/2020 | 8/7/2020 Europe / Switzerland / Zurich           |
| EPI_ISL_510759 | 7/20/2020 | 8/7/2020 Europe / Switzerland / Zurich           |

|                |           |                                                  |
|----------------|-----------|--------------------------------------------------|
| EPI_ISL_510760 | 7/20/2020 | 8/7/2020 Europe / Switzerland / Zurich           |
| EPI_ISL_510761 | 7/20/2020 | 8/7/2020 Europe / Switzerland / Aargau           |
| EPI_ISL_510762 | 7/20/2020 | 8/7/2020 Europe / Switzerland / Aargau           |
| EPI_ISL_510763 | 7/21/2020 | 8/7/2020 Europe / Switzerland / Geneva           |
| EPI_ISL_510764 | 7/21/2020 | 8/7/2020 Europe / Switzerland / Basel-Landschaft |
| EPI_ISL_510765 | 7/21/2020 | 8/7/2020 Europe / Switzerland / Basel-Landschaft |
| EPI_ISL_510766 | 7/21/2020 | 8/7/2020 Europe / Switzerland / Zurich           |
| EPI_ISL_510767 | 7/21/2020 | 8/7/2020 Europe / Switzerland / Zurich           |
| EPI_ISL_510768 | 7/21/2020 | 8/7/2020 Europe / Switzerland / Zurich           |
| EPI_ISL_510769 | 7/21/2020 | 8/7/2020 Europe / Switzerland / Ticino           |
| EPI_ISL_510770 | 7/21/2020 | 8/7/2020 Europe / Switzerland / Uri              |
| EPI_ISL_510771 | 7/22/2020 | 8/7/2020 Europe / Switzerland / Aargau           |
| EPI_ISL_510772 | 7/22/2020 | 8/7/2020 Europe / Switzerland / Zurich           |
| EPI_ISL_510773 | 7/22/2020 | 8/7/2020 Europe / Switzerland / Zurich           |
| EPI_ISL_510774 | 7/22/2020 | 8/7/2020 Europe / Switzerland / Zurich           |
| EPI_ISL_510775 | 7/22/2020 | 8/7/2020 Europe / Switzerland / Zurich           |
| EPI_ISL_510776 | 7/22/2020 | 8/7/2020 Europe / Switzerland / Bern             |
| EPI_ISL_510777 | 7/22/2020 | 8/7/2020 Europe / Switzerland / Grisons          |
| EPI_ISL_510778 | 7/22/2020 | 8/7/2020 Europe / Switzerland / Zurich           |
| EPI_ISL_510779 | 7/23/2020 | 8/7/2020 Europe / Switzerland / Bern             |
| EPI_ISL_510780 | 7/23/2020 | 8/7/2020 Europe / Switzerland / Bern             |
| EPI_ISL_510781 | 7/23/2020 | 8/7/2020 Europe / Switzerland / Schwyz           |
| EPI_ISL_510782 | 7/23/2020 | 8/7/2020 Europe / Switzerland / Basel-Landschaft |
| EPI_ISL_510783 | 7/23/2020 | 8/7/2020 Europe / Switzerland / Aargau           |
| EPI_ISL_510784 | 7/23/2020 | 8/7/2020 Europe / Switzerland / Grisons          |
| EPI_ISL_510785 | 7/17/2020 | 8/7/2020 Europe / Switzerland / Zurich           |
| EPI_ISL_510786 | 7/17/2020 | 8/7/2020 Europe / Switzerland / Schwyz           |
| EPI_ISL_510787 | 7/19/2020 | 8/7/2020 Europe / Switzerland / Basel-Landschaft |
| EPI_ISL_510788 | 7/19/2020 | 8/7/2020 Europe / Switzerland / Zurich           |
| EPI_ISL_510789 | 7/19/2020 | 8/7/2020 Europe / Switzerland / Uri              |
| EPI_ISL_510793 | 7/20/2020 | 8/7/2020 Europe / Switzerland / Bern             |
| EPI_ISL_510794 | 7/20/2020 | 8/7/2020 Europe / Switzerland / Vaud             |
| EPI_ISL_510795 | 7/20/2020 | 8/7/2020 Europe / Switzerland / Uri              |
| EPI_ISL_510796 | 7/21/2020 | 8/7/2020 Europe / Switzerland / Basel-Landschaft |
| EPI_ISL_510798 | 7/21/2020 | 8/7/2020 Europe / Switzerland / Bern             |
| EPI_ISL_510800 | 7/22/2020 | 8/7/2020 Europe / Switzerland / Solothurn        |
| EPI_ISL_510802 | 7/22/2020 | 8/7/2020 Europe / Switzerland / Bern             |
| EPI_ISL_510804 | 7/22/2020 | 8/7/2020 Europe / Switzerland / Basel-Landschaft |
| EPI_ISL_510805 | 7/22/2020 | 8/7/2020 Europe / Switzerland / Grisons          |
| EPI_ISL_510806 | 7/23/2020 | 8/7/2020 Europe / Switzerland / Grisons          |
| EPI_ISL_510807 | 7/23/2020 | 8/7/2020 Europe / Switzerland / Grisons          |
| EPI_ISL_510808 | 7/23/2020 | 8/7/2020 Europe / Switzerland / Grisons          |
| EPI_ISL_510809 | 7/23/2020 | 8/7/2020 Europe / Switzerland / Geneva           |
| EPI_ISL_510810 | 5/23/2020 | 8/7/2020 Europe / Sweden / Stockholm             |
| EPI_ISL_510811 | 5/23/2020 | 8/7/2020 Europe / Sweden / Stockholm             |
| EPI_ISL_510812 | 5/24/2020 | 8/7/2020 Europe / Sweden / Stockholm             |
| EPI_ISL_510813 | 5/23/2020 | 8/7/2020 Europe / Sweden / Stockholm             |

|                |           |                                            |
|----------------|-----------|--------------------------------------------|
| EPI_ISL_510814 | 5/28/2020 | 8/7/2020 Europe / Sweden / Stockholm       |
| EPI_ISL_510815 | 5/28/2020 | 8/7/2020 Europe / Sweden / Stockholm       |
| EPI_ISL_510816 | 5/28/2020 | 8/7/2020 Europe / Sweden / Stockholm       |
| EPI_ISL_510817 | 3/9/2020  | 8/7/2020 Europe / Sweden / Ostergotland    |
| EPI_ISL_510818 | 3/30/2020 | 8/7/2020 Europe / Sweden / Vasternorrland  |
| EPI_ISL_510819 | 4/21/2020 | 8/7/2020 Europe / Sweden / Vasternorrland  |
| EPI_ISL_510820 | 5/4/2020  | 8/7/2020 Europe / Sweden / Varmland        |
| EPI_ISL_510821 | 5/4/2020  | 8/7/2020 Europe / Sweden / Varmland        |
| EPI_ISL_510822 | 5/4/2020  | 8/7/2020 Europe / Sweden / Varmland        |
| EPI_ISL_510823 | 5/5/2020  | 8/7/2020 Europe / Sweden / Varmland        |
| EPI_ISL_510824 | 5/6/2020  | 8/7/2020 Europe / Sweden / Varmland        |
| EPI_ISL_510825 | 5/8/2020  | 8/7/2020 Europe / Sweden / Kalmar          |
| EPI_ISL_510826 | 5/9/2020  | 8/7/2020 Europe / Sweden / Kalmar          |
| EPI_ISL_510827 | 5/17/2020 | 8/7/2020 Europe / Sweden / Sormland        |
| EPI_ISL_510828 | 5/17/2020 | 8/7/2020 Europe / Sweden / Sormland        |
| EPI_ISL_510829 | 5/14/2020 | 8/7/2020 Europe / Sweden / Sormland        |
| EPI_ISL_510830 | 5/17/2020 | 8/7/2020 Europe / Sweden / Sormland        |
| EPI_ISL_510831 | 5/18/2020 | 8/7/2020 Europe / Sweden / Halland         |
| EPI_ISL_510832 | 5/13/2020 | 8/7/2020 Europe / Sweden / Kalmar          |
| EPI_ISL_510833 | 5/14/2020 | 8/7/2020 Europe / Sweden / Kalmar          |
| EPI_ISL_510834 | 5/23/2020 | 8/7/2020 Europe / Sweden / Stockholm       |
| EPI_ISL_510835 | 5/23/2020 | 8/7/2020 Europe / Sweden / Stockholm       |
| EPI_ISL_510836 | 5/22/2020 | 8/7/2020 Europe / Sweden / Kalmar          |
| EPI_ISL_510837 | 5/24/2020 | 8/7/2020 Europe / Sweden / Kalmar          |
| EPI_ISL_510838 | 5/18/2020 | 8/7/2020 Europe / Sweden / Stockholm       |
| EPI_ISL_510839 | 5/19/2020 | 8/7/2020 Europe / Sweden / Stockholm       |
| EPI_ISL_510840 | 5/19/2020 | 8/7/2020 Europe / Sweden / Stockholm       |
| EPI_ISL_510841 | 5/25/2020 | 8/7/2020 Europe / Sweden / Vastra Gotaland |
| EPI_ISL_510842 | 5/22/2020 | 8/7/2020 Europe / Sweden / Vastra Gotaland |
| EPI_ISL_510843 | 5/22/2020 | 8/7/2020 Europe / Sweden / Vastra Gotaland |
| EPI_ISL_510844 | 5/20/2020 | 8/7/2020 Europe / Sweden / Vastra Gotaland |
| EPI_ISL_510845 | 5/27/2020 | 8/7/2020 Europe / Sweden / Vastra Gotaland |
| EPI_ISL_510846 | 5/27/2020 | 8/7/2020 Europe / Sweden / Vastra Gotaland |
| EPI_ISL_510847 | 5/27/2020 | 8/7/2020 Europe / Sweden / Vastra Gotaland |
| EPI_ISL_510848 | 5/27/2020 | 8/7/2020 Europe / Sweden / Vastra Gotaland |
| EPI_ISL_510849 | 5/27/2020 | 8/7/2020 Europe / Sweden / Vastra Gotaland |
| EPI_ISL_510850 | 5/27/2020 | 8/7/2020 Europe / Sweden / Vastra Gotaland |
| EPI_ISL_510851 | 5/27/2020 | 8/7/2020 Europe / Sweden / Vastra Gotaland |
| EPI_ISL_510852 | 6/1/2020  | 8/7/2020 Europe / Sweden / Stockholm       |
| EPI_ISL_510853 | 6/1/2020  | 8/7/2020 Europe / Sweden / Vasternorrland  |
| EPI_ISL_510854 | 6/1/2020  | 8/7/2020 Europe / Sweden / Vasternorrland  |
| EPI_ISL_510855 | 6/1/2020  | 8/7/2020 Europe / Sweden / Vasternorrland  |
| EPI_ISL_510856 | 6/1/2020  | 8/7/2020 Europe / Sweden / Vasternorrland  |
| EPI_ISL_510857 | 6/1/2020  | 8/7/2020 Europe / Sweden / Vasternorrland  |
| EPI_ISL_510858 | 6/1/2020  | 8/7/2020 Europe / Sweden / Vasternorrland  |
| EPI_ISL_510859 | 5/25/2020 | 8/7/2020 Europe / Sweden / Kalmar          |
| EPI_ISL_510860 | 6/5/2020  | 8/7/2020 Europe / Sweden / Stockholm       |

|                |           |                                            |
|----------------|-----------|--------------------------------------------|
| EPI_ISL_510861 | 6/5/2020  | 8/7/2020 Europe / Sweden / Stockholm       |
| EPI_ISL_510862 | 6/5/2020  | 8/7/2020 Europe / Sweden / Stockholm       |
| EPI_ISL_510863 | 6/5/2020  | 8/7/2020 Europe / Sweden / Stockholm       |
| EPI_ISL_510864 | 6/5/2020  | 8/7/2020 Europe / Sweden / Kalmar          |
| EPI_ISL_510865 | 6/5/2020  | 8/7/2020 Europe / Sweden / Kalmar          |
| EPI_ISL_510866 | 6/12/2020 | 8/7/2020 Europe / Sweden / Halland         |
| EPI_ISL_510867 | 6/13/2020 | 8/7/2020 Europe / Sweden / Varmland        |
| EPI_ISL_510868 | 6/9/2020  | 8/7/2020 Europe / Sweden / Vastra Gotaland |
| EPI_ISL_510869 | 6/8/2020  | 8/7/2020 Europe / Sweden / Vastra Gotaland |
| EPI_ISL_510870 | 6/4/2020  | 8/7/2020 Europe / Sweden / Vastra Gotaland |
| EPI_ISL_510871 | 6/15/2020 | 8/7/2020 Europe / Sweden / Ostergotland    |
| EPI_ISL_510872 | 6/15/2020 | 8/7/2020 Europe / Sweden / Ostergotland    |
| EPI_ISL_510873 | 6/15/2020 | 8/7/2020 Europe / Sweden / Ostergotland    |
| EPI_ISL_510874 | 6/15/2020 | 8/7/2020 Europe / Sweden / Ostergotland    |
| EPI_ISL_510875 | 6/15/2020 | 8/7/2020 Europe / Sweden / Ostergotland    |
| EPI_ISL_510876 | 6/15/2020 | 8/7/2020 Europe / Sweden / Ostergotland    |
| EPI_ISL_510877 | 6/15/2020 | 8/7/2020 Europe / Sweden / Ostergotland    |
| EPI_ISL_510882 | 7/22/2020 | 8/7/2020 North America / USA / New Mexico  |
| EPI_ISL_510883 | 7/22/2020 | 8/7/2020 North America / USA / New Mexico  |
| EPI_ISL_510884 | 7/22/2020 | 8/7/2020 North America / USA / New Mexico  |
| EPI_ISL_510885 | 7/22/2020 | 8/7/2020 North America / USA / New Mexico  |
| EPI_ISL_510886 | 7/22/2020 | 8/7/2020 North America / USA / New Mexico  |
| EPI_ISL_510887 | 7/22/2020 | 8/7/2020 North America / USA / New Mexico  |
| EPI_ISL_510888 | 7/22/2020 | 8/7/2020 North America / USA / New Mexico  |
| EPI_ISL_510889 | 6/19/2020 | 8/7/2020 Europe / Portugal                 |
| EPI_ISL_510890 | 6/22/2020 | 8/7/2020 Europe / Portugal                 |
| EPI_ISL_510891 | 3/24/2020 | 8/7/2020 Europe / Portugal                 |
| EPI_ISL_510892 | 3/24/2020 | 8/7/2020 Europe / Portugal                 |
| EPI_ISL_510893 | 3/24/2020 | 8/7/2020 Europe / Portugal                 |
| EPI_ISL_510896 | 3/25/2020 | 8/7/2020 Europe / Portugal                 |
| EPI_ISL_510898 | 3/28/2020 | 8/7/2020 Europe / Portugal                 |
| EPI_ISL_510900 | 3/28/2020 | 8/7/2020 Europe / Portugal                 |
| EPI_ISL_510901 | 3/29/2020 | 8/7/2020 Europe / Portugal                 |
| EPI_ISL_510902 | 3/29/2020 | 8/7/2020 Europe / Portugal                 |
| EPI_ISL_510903 | 3/29/2020 | 8/7/2020 Europe / Portugal                 |
| EPI_ISL_510904 | 3/29/2020 | 8/7/2020 Europe / Portugal                 |
| EPI_ISL_510905 | 3/29/2020 | 8/7/2020 Europe / Portugal                 |
| EPI_ISL_510906 | 3/29/2020 | 8/7/2020 Europe / Portugal                 |
| EPI_ISL_510907 | 3/30/2020 | 8/7/2020 Europe / Portugal                 |
| EPI_ISL_510909 | 3/31/2020 | 8/7/2020 Europe / Portugal                 |
| EPI_ISL_510912 | 3/31/2020 | 8/7/2020 Europe / Portugal                 |
| EPI_ISL_510915 | 3/26/2020 | 8/7/2020 Europe / Portugal                 |
| EPI_ISL_510916 | 3/28/2020 | 8/7/2020 Europe / Portugal                 |
| EPI_ISL_510921 | 4/4/2020  | 8/7/2020 Europe / Portugal                 |
| EPI_ISL_510923 | 3/23/2020 | 8/7/2020 Europe / Portugal                 |
| EPI_ISL_510924 | 3/24/2020 | 8/7/2020 Europe / Portugal                 |
| EPI_ISL_510925 | 3/26/2020 | 8/7/2020 Europe / Portugal                 |

|                |           |                            |
|----------------|-----------|----------------------------|
| EPI_ISL_510926 | 3/27/2020 | 8/7/2020 Europe / Portugal |
| EPI_ISL_510927 | 3/31/2020 | 8/7/2020 Europe / Portugal |
| EPI_ISL_510928 | 3/24/2020 | 8/7/2020 Europe / Portugal |
| EPI_ISL_510929 | 3/19/2020 | 8/7/2020 Europe / Portugal |
| EPI_ISL_510931 | 4/13/2020 | 8/7/2020 Europe / Portugal |
| EPI_ISL_510932 | 3/25/2020 | 8/7/2020 Europe / Portugal |
| EPI_ISL_510933 | 4/17/2020 | 8/7/2020 Europe / Portugal |
| EPI_ISL_510934 | 4/25/2020 | 8/7/2020 Europe / Portugal |
| EPI_ISL_510935 | 3/24/2020 | 8/7/2020 Europe / Portugal |
| EPI_ISL_510936 | 3/24/2020 | 8/7/2020 Europe / Portugal |
| EPI_ISL_510937 | 3/25/2020 | 8/7/2020 Europe / Portugal |
| EPI_ISL_510938 | 3/25/2020 | 8/7/2020 Europe / Portugal |
| EPI_ISL_510939 | 3/25/2020 | 8/7/2020 Europe / Portugal |
| EPI_ISL_510940 | 3/28/2020 | 8/7/2020 Europe / Portugal |
| EPI_ISL_510941 | 3/25/2020 | 8/7/2020 Europe / Portugal |
| EPI_ISL_510942 | 3/27/2020 | 8/7/2020 Europe / Portugal |
| EPI_ISL_510943 | 3/27/2020 | 8/7/2020 Europe / Portugal |
| EPI_ISL_510944 | 3/30/2020 | 8/7/2020 Europe / Portugal |
| EPI_ISL_510945 | 3/30/2020 | 8/7/2020 Europe / Portugal |
| EPI_ISL_510946 | 3/31/2020 | 8/7/2020 Europe / Portugal |
| EPI_ISL_510947 | 4/15/2020 | 8/7/2020 Europe / Portugal |
| EPI_ISL_510948 | 4/15/2020 | 8/7/2020 Europe / Portugal |
| EPI_ISL_510949 | 4/17/2020 | 8/7/2020 Europe / Portugal |
| EPI_ISL_510950 | 4/19/2020 | 8/7/2020 Europe / Portugal |
| EPI_ISL_510951 | 4/23/2020 | 8/7/2020 Europe / Portugal |
| EPI_ISL_510952 | 4/25/2020 | 8/7/2020 Europe / Portugal |
| EPI_ISL_510953 | 3/14/2020 | 8/7/2020 Europe / Portugal |
| EPI_ISL_510954 | 3/14/2020 | 8/7/2020 Europe / Portugal |
| EPI_ISL_510956 | 3/14/2020 | 8/7/2020 Europe / Portugal |
| EPI_ISL_510958 | 3/14/2020 | 8/7/2020 Europe / Portugal |
| EPI_ISL_510959 | 3/17/2020 | 8/7/2020 Europe / Portugal |
| EPI_ISL_510960 | 3/17/2020 | 8/7/2020 Europe / Portugal |
| EPI_ISL_510961 | 3/17/2020 | 8/7/2020 Europe / Portugal |
| EPI_ISL_510962 | 3/17/2020 | 8/7/2020 Europe / Portugal |
| EPI_ISL_510963 | 3/20/2020 | 8/7/2020 Europe / Portugal |
| EPI_ISL_510964 | 3/21/2020 | 8/7/2020 Europe / Portugal |
| EPI_ISL_510965 | 3/21/2020 | 8/7/2020 Europe / Portugal |
| EPI_ISL_510966 | 3/22/2020 | 8/7/2020 Europe / Portugal |
| EPI_ISL_510967 | 3/23/2020 | 8/7/2020 Europe / Portugal |
| EPI_ISL_510968 | 3/23/2020 | 8/7/2020 Europe / Portugal |
| EPI_ISL_510969 | 3/23/2020 | 8/7/2020 Europe / Portugal |
| EPI_ISL_510970 | 3/24/2020 | 8/7/2020 Europe / Portugal |
| EPI_ISL_510971 | 3/24/2020 | 8/7/2020 Europe / Portugal |
| EPI_ISL_510972 | 3/24/2020 | 8/7/2020 Europe / Portugal |
| EPI_ISL_510973 | 3/24/2020 | 8/7/2020 Europe / Portugal |
| EPI_ISL_510974 | 3/24/2020 | 8/7/2020 Europe / Portugal |
| EPI_ISL_510975 | 3/24/2020 | 8/7/2020 Europe / Portugal |

|                |           |                            |
|----------------|-----------|----------------------------|
| EPI_ISL_510976 | 3/25/2020 | 8/7/2020 Europe / Portugal |
| EPI_ISL_510978 | 3/25/2020 | 8/7/2020 Europe / Portugal |
| EPI_ISL_510981 | 3/27/2020 | 8/7/2020 Europe / Portugal |
| EPI_ISL_510982 | 3/27/2020 | 8/7/2020 Europe / Portugal |
| EPI_ISL_510983 | 3/27/2020 | 8/7/2020 Europe / Portugal |
| EPI_ISL_510984 | 3/27/2020 | 8/7/2020 Europe / Portugal |
| EPI_ISL_510987 | 3/27/2020 | 8/7/2020 Europe / Portugal |
| EPI_ISL_510991 | 3/20/2020 | 8/7/2020 Europe / Portugal |
| EPI_ISL_510992 | 3/21/2020 | 8/7/2020 Europe / Portugal |
| EPI_ISL_510994 | 3/21/2020 | 8/7/2020 Europe / Portugal |
| EPI_ISL_510995 | 3/21/2020 | 8/7/2020 Europe / Portugal |
| EPI_ISL_510997 | 3/22/2020 | 8/7/2020 Europe / Portugal |
| EPI_ISL_510999 | 3/21/2020 | 8/7/2020 Europe / Portugal |
| EPI_ISL_511000 | 3/22/2020 | 8/7/2020 Europe / Portugal |
| EPI_ISL_511001 | 3/22/2020 | 8/7/2020 Europe / Portugal |
| EPI_ISL_511003 | 3/22/2020 | 8/7/2020 Europe / Portugal |
| EPI_ISL_511004 | 3/22/2020 | 8/7/2020 Europe / Portugal |
| EPI_ISL_511006 | 3/22/2020 | 8/7/2020 Europe / Portugal |
| EPI_ISL_511007 | 3/22/2020 | 8/7/2020 Europe / Portugal |
| EPI_ISL_511008 | 3/22/2020 | 8/7/2020 Europe / Portugal |
| EPI_ISL_511009 | 3/23/2020 | 8/7/2020 Europe / Portugal |
| EPI_ISL_511010 | 3/23/2020 | 8/7/2020 Europe / Portugal |
| EPI_ISL_511011 | 3/23/2020 | 8/7/2020 Europe / Portugal |
| EPI_ISL_511012 | 3/23/2020 | 8/7/2020 Europe / Portugal |
| EPI_ISL_511014 | 3/23/2020 | 8/7/2020 Europe / Portugal |
| EPI_ISL_511016 | 3/23/2020 | 8/7/2020 Europe / Portugal |
| EPI_ISL_511017 | 3/24/2020 | 8/7/2020 Europe / Portugal |
| EPI_ISL_511019 | 3/24/2020 | 8/7/2020 Europe / Portugal |
| EPI_ISL_511021 | 3/24/2020 | 8/7/2020 Europe / Portugal |
| EPI_ISL_511022 | 3/24/2020 | 8/7/2020 Europe / Portugal |
| EPI_ISL_511025 | 3/25/2020 | 8/7/2020 Europe / Portugal |
| EPI_ISL_511027 | 3/26/2020 | 8/7/2020 Europe / Portugal |
| EPI_ISL_511028 | 4/1/2020  | 8/7/2020 Europe / Portugal |
| EPI_ISL_511029 | 4/8/2020  | 8/7/2020 Europe / Portugal |
| EPI_ISL_511030 | 5/5/2020  | 8/7/2020 Europe / Portugal |
| EPI_ISL_511031 | 5/17/2020 | 8/7/2020 Europe / Portugal |
| EPI_ISL_511032 | 4/2/2020  | 8/7/2020 Europe / Portugal |
| EPI_ISL_511033 | 4/3/2020  | 8/7/2020 Europe / Portugal |
| EPI_ISL_511034 | 3/19/2020 | 8/7/2020 Europe / Portugal |
| EPI_ISL_511035 | 3/14/2020 | 8/7/2020 Europe / Portugal |
| EPI_ISL_511036 | 3/20/2020 | 8/7/2020 Europe / Portugal |
| EPI_ISL_511037 | 3/16/2020 | 8/7/2020 Europe / Portugal |
| EPI_ISL_511039 | 3/14/2020 | 8/7/2020 Europe / Portugal |
| EPI_ISL_511040 | 3/15/2020 | 8/7/2020 Europe / Portugal |
| EPI_ISL_511041 | 3/15/2020 | 8/7/2020 Europe / Portugal |
| EPI_ISL_511042 | 3/16/2020 | 8/7/2020 Europe / Portugal |
| EPI_ISL_511043 | 3/16/2020 | 8/7/2020 Europe / Portugal |













|                |           |                            |
|----------------|-----------|----------------------------|
| EPI_ISL_511333 | 3/25/2020 | 8/7/2020 Europe / Portugal |
| EPI_ISL_511334 | 3/25/2020 | 8/7/2020 Europe / Portugal |
| EPI_ISL_511336 | 3/26/2020 | 8/7/2020 Europe / Portugal |
| EPI_ISL_511337 | 3/26/2020 | 8/7/2020 Europe / Portugal |
| EPI_ISL_511338 | 3/26/2020 | 8/7/2020 Europe / Portugal |
| EPI_ISL_511339 | 3/26/2020 | 8/7/2020 Europe / Portugal |
| EPI_ISL_511341 | 3/27/2020 | 8/7/2020 Europe / Portugal |
| EPI_ISL_511343 | 3/27/2020 | 8/7/2020 Europe / Portugal |
| EPI_ISL_511345 | 3/27/2020 | 8/7/2020 Europe / Portugal |
| EPI_ISL_511346 | 3/27/2020 | 8/7/2020 Europe / Portugal |
| EPI_ISL_511347 | 3/27/2020 | 8/7/2020 Europe / Portugal |
| EPI_ISL_511348 | 3/27/2020 | 8/7/2020 Europe / Portugal |
| EPI_ISL_511350 | 3/27/2020 | 8/7/2020 Europe / Portugal |
| EPI_ISL_511351 | 3/27/2020 | 8/7/2020 Europe / Portugal |
| EPI_ISL_511352 | 3/27/2020 | 8/7/2020 Europe / Portugal |
| EPI_ISL_511353 | 3/27/2020 | 8/7/2020 Europe / Portugal |
| EPI_ISL_511355 | 3/27/2020 | 8/7/2020 Europe / Portugal |
| EPI_ISL_511357 | 3/28/2020 | 8/7/2020 Europe / Portugal |
| EPI_ISL_511358 | 3/28/2020 | 8/7/2020 Europe / Portugal |
| EPI_ISL_511359 | 3/28/2020 | 8/7/2020 Europe / Portugal |
| EPI_ISL_511360 | 3/29/2020 | 8/7/2020 Europe / Portugal |
| EPI_ISL_511361 | 4/6/2020  | 8/7/2020 Europe / Portugal |
| EPI_ISL_511362 | 3/31/2020 | 8/7/2020 Europe / Portugal |
| EPI_ISL_511363 | 3/24/2020 | 8/7/2020 Europe / Portugal |
| EPI_ISL_511364 | 3/26/2020 | 8/7/2020 Europe / Portugal |
| EPI_ISL_511366 | 3/25/2020 | 8/7/2020 Europe / Portugal |
| EPI_ISL_511367 | 3/23/2020 | 8/7/2020 Europe / Portugal |
| EPI_ISL_511368 | 3/24/2020 | 8/7/2020 Europe / Portugal |
| EPI_ISL_511369 | 3/25/2020 | 8/7/2020 Europe / Portugal |
| EPI_ISL_511370 | 3/28/2020 | 8/7/2020 Europe / Portugal |
| EPI_ISL_511371 | 3/25/2020 | 8/7/2020 Europe / Portugal |
| EPI_ISL_511372 | 3/18/2020 | 8/7/2020 Europe / Portugal |
| EPI_ISL_511373 | 3/26/2020 | 8/7/2020 Europe / Portugal |
| EPI_ISL_511374 | 3/16/2020 | 8/7/2020 Europe / Portugal |
| EPI_ISL_511375 | 3/30/2020 | 8/7/2020 Europe / Portugal |
| EPI_ISL_511376 | 3/27/2020 | 8/7/2020 Europe / Portugal |
| EPI_ISL_511377 | 3/26/2020 | 8/7/2020 Europe / Portugal |
| EPI_ISL_511378 | 3/25/2020 | 8/7/2020 Europe / Portugal |
| EPI_ISL_511379 | 3/26/2020 | 8/7/2020 Europe / Portugal |
| EPI_ISL_511381 | 3/26/2020 | 8/7/2020 Europe / Portugal |
| EPI_ISL_511382 | 3/27/2020 | 8/7/2020 Europe / Portugal |
| EPI_ISL_511383 | 3/27/2020 | 8/7/2020 Europe / Portugal |
| EPI_ISL_511384 | 3/27/2020 | 8/7/2020 Europe / Portugal |
| EPI_ISL_511385 | 3/16/2020 | 8/7/2020 Europe / Portugal |
| EPI_ISL_511386 | 3/25/2020 | 8/7/2020 Europe / Portugal |
| EPI_ISL_511387 | 3/30/2020 | 8/7/2020 Europe / Portugal |
| EPI_ISL_511388 | 3/28/2020 | 8/7/2020 Europe / Portugal |

|                |           |                            |
|----------------|-----------|----------------------------|
| EPI_ISL_511389 | 3/16/2020 | 8/7/2020 Europe / Portugal |
| EPI_ISL_511390 | 3/24/2020 | 8/7/2020 Europe / Portugal |
| EPI_ISL_511391 | 3/26/2020 | 8/7/2020 Europe / Portugal |
| EPI_ISL_511392 | 3/24/2020 | 8/7/2020 Europe / Portugal |
| EPI_ISL_511393 | 3/24/2020 | 8/7/2020 Europe / Portugal |
| EPI_ISL_511394 | 3/26/2020 | 8/7/2020 Europe / Portugal |
| EPI_ISL_511395 | 3/30/2020 | 8/7/2020 Europe / Portugal |
| EPI_ISL_511396 | 3/26/2020 | 8/7/2020 Europe / Portugal |
| EPI_ISL_511397 | 3/21/2020 | 8/7/2020 Europe / Portugal |
| EPI_ISL_511398 | 3/31/2020 | 8/7/2020 Europe / Portugal |
| EPI_ISL_511399 | 3/27/2020 | 8/7/2020 Europe / Portugal |
| EPI_ISL_511400 | 3/24/2020 | 8/7/2020 Europe / Portugal |
| EPI_ISL_511401 | 3/25/2020 | 8/7/2020 Europe / Portugal |
| EPI_ISL_511402 | 3/24/2020 | 8/7/2020 Europe / Portugal |
| EPI_ISL_511403 | 3/25/2020 | 8/7/2020 Europe / Portugal |
| EPI_ISL_511404 | 3/29/2020 | 8/7/2020 Europe / Portugal |
| EPI_ISL_511405 | 3/26/2020 | 8/7/2020 Europe / Portugal |
| EPI_ISL_511406 | 3/27/2020 | 8/7/2020 Europe / Portugal |
| EPI_ISL_511407 | 3/30/2020 | 8/7/2020 Europe / Portugal |
| EPI_ISL_511408 | 3/26/2020 | 8/7/2020 Europe / Portugal |
| EPI_ISL_511409 | 3/27/2020 | 8/7/2020 Europe / Portugal |
| EPI_ISL_511410 | 3/26/2020 | 8/7/2020 Europe / Portugal |
| EPI_ISL_511411 | 3/26/2020 | 8/7/2020 Europe / Portugal |
| EPI_ISL_511412 | 3/17/2020 | 8/7/2020 Europe / Portugal |
| EPI_ISL_511413 | 3/26/2020 | 8/7/2020 Europe / Portugal |
| EPI_ISL_511414 | 3/30/2020 | 8/7/2020 Europe / Portugal |
| EPI_ISL_511415 | 3/30/2020 | 8/7/2020 Europe / Portugal |
| EPI_ISL_511416 | 3/26/2020 | 8/7/2020 Europe / Portugal |
| EPI_ISL_511417 | 3/17/2020 | 8/7/2020 Europe / Portugal |
| EPI_ISL_511418 | 3/26/2020 | 8/7/2020 Europe / Portugal |
| EPI_ISL_511419 | 3/29/2020 | 8/7/2020 Europe / Portugal |
| EPI_ISL_511420 | 3/27/2020 | 8/7/2020 Europe / Portugal |
| EPI_ISL_511422 | 3/30/2020 | 8/7/2020 Europe / Portugal |
| EPI_ISL_511423 | 3/28/2020 | 8/7/2020 Europe / Portugal |
| EPI_ISL_511424 | 3/30/2020 | 8/7/2020 Europe / Portugal |
| EPI_ISL_511425 | 3/24/2020 | 8/7/2020 Europe / Portugal |
| EPI_ISL_511426 | 3/16/2020 | 8/7/2020 Europe / Portugal |
| EPI_ISL_511427 | 3/16/2020 | 8/7/2020 Europe / Portugal |
| EPI_ISL_511428 | 3/17/2020 | 8/7/2020 Europe / Portugal |
| EPI_ISL_511429 | 3/18/2020 | 8/7/2020 Europe / Portugal |
| EPI_ISL_511430 | 3/26/2020 | 8/7/2020 Europe / Portugal |
| EPI_ISL_511431 | 3/31/2020 | 8/7/2020 Europe / Portugal |
| EPI_ISL_511432 | 3/31/2020 | 8/7/2020 Europe / Portugal |
| EPI_ISL_511433 | 3/20/2020 | 8/7/2020 Europe / Portugal |
| EPI_ISL_511434 | 3/15/2020 | 8/7/2020 Europe / Portugal |
| EPI_ISL_511435 | 3/31/2020 | 8/7/2020 Europe / Portugal |
| EPI_ISL_511436 | 3/30/2020 | 8/7/2020 Europe / Portugal |

|                |           |                            |
|----------------|-----------|----------------------------|
| EPI_ISL_511437 | 3/14/2020 | 8/7/2020 Europe / Portugal |
| EPI_ISL_511438 | 3/27/2020 | 8/7/2020 Europe / Portugal |
| EPI_ISL_511439 | 3/30/2020 | 8/7/2020 Europe / Portugal |
| EPI_ISL_511441 | 3/16/2020 | 8/7/2020 Europe / Portugal |
| EPI_ISL_511442 | 3/30/2020 | 8/7/2020 Europe / Portugal |
| EPI_ISL_511444 | 3/17/2020 | 8/7/2020 Europe / Portugal |
| EPI_ISL_511446 | 3/19/2020 | 8/7/2020 Europe / Portugal |
| EPI_ISL_511447 | 3/17/2020 | 8/7/2020 Europe / Portugal |
| EPI_ISL_511448 | 3/19/2020 | 8/7/2020 Europe / Portugal |
| EPI_ISL_511449 | 3/28/2020 | 8/7/2020 Europe / Portugal |
| EPI_ISL_511450 | 3/17/2020 | 8/7/2020 Europe / Portugal |
| EPI_ISL_511451 | 3/31/2020 | 8/7/2020 Europe / Portugal |
| EPI_ISL_511452 | 3/15/2020 | 8/7/2020 Europe / Portugal |
| EPI_ISL_511453 | 3/30/2020 | 8/7/2020 Europe / Portugal |
| EPI_ISL_511455 | 3/17/2020 | 8/7/2020 Europe / Portugal |
| EPI_ISL_511456 | 3/31/2020 | 8/7/2020 Europe / Portugal |
| EPI_ISL_511457 | 3/30/2020 | 8/7/2020 Europe / Portugal |
| EPI_ISL_511458 | 3/20/2020 | 8/7/2020 Europe / Portugal |
| EPI_ISL_511459 | 3/16/2020 | 8/7/2020 Europe / Portugal |
| EPI_ISL_511460 | 3/15/2020 | 8/7/2020 Europe / Portugal |
| EPI_ISL_511461 | 3/30/2020 | 8/7/2020 Europe / Portugal |
| EPI_ISL_511462 | 3/16/2020 | 8/7/2020 Europe / Portugal |
| EPI_ISL_511463 | 3/17/2020 | 8/7/2020 Europe / Portugal |
| EPI_ISL_511465 | 3/16/2020 | 8/7/2020 Europe / Portugal |
| EPI_ISL_511466 | 3/29/2020 | 8/7/2020 Europe / Portugal |
| EPI_ISL_511467 | 3/17/2020 | 8/7/2020 Europe / Portugal |
| EPI_ISL_511469 | 3/28/2020 | 8/7/2020 Europe / Portugal |
| EPI_ISL_511470 | 3/31/2020 | 8/7/2020 Europe / Portugal |
| EPI_ISL_511471 | 3/17/2020 | 8/7/2020 Europe / Portugal |
| EPI_ISL_511472 | 3/18/2020 | 8/7/2020 Europe / Portugal |
| EPI_ISL_511473 | 3/15/2020 | 8/7/2020 Europe / Portugal |
| EPI_ISL_511474 | 3/15/2020 | 8/7/2020 Europe / Portugal |
| EPI_ISL_511477 | 3/16/2020 | 8/7/2020 Europe / Portugal |
| EPI_ISL_511479 | 3/18/2020 | 8/7/2020 Europe / Portugal |
| EPI_ISL_511481 | 4/9/2020  | 8/8/2020 Europe / Portugal |
| EPI_ISL_511483 | 3/23/2020 | 8/8/2020 Europe / Portugal |
| EPI_ISL_511484 | 3/26/2020 | 8/8/2020 Europe / Portugal |
| EPI_ISL_511485 | 3/27/2020 | 8/8/2020 Europe / Portugal |
| EPI_ISL_511486 | 3/27/2020 | 8/8/2020 Europe / Portugal |
| EPI_ISL_511487 | 4/3/2020  | 8/8/2020 Europe / Portugal |
| EPI_ISL_511488 | 4/3/2020  | 8/8/2020 Europe / Portugal |
| EPI_ISL_511489 | 4/3/2020  | 8/8/2020 Europe / Portugal |
| EPI_ISL_511490 | 4/8/2020  | 8/8/2020 Europe / Portugal |
| EPI_ISL_511491 | 4/8/2020  | 8/8/2020 Europe / Portugal |
| EPI_ISL_511492 | 4/9/2020  | 8/8/2020 Europe / Portugal |
| EPI_ISL_511493 | 4/9/2020  | 8/8/2020 Europe / Portugal |
| EPI_ISL_511494 | 4/9/2020  | 8/8/2020 Europe / Portugal |







|                |           |                            |
|----------------|-----------|----------------------------|
| EPI_ISL_511636 | 3/27/2020 | 8/8/2020 Europe / Portugal |
| EPI_ISL_511637 | 3/28/2020 | 8/8/2020 Europe / Portugal |
| EPI_ISL_511638 | 3/28/2020 | 8/8/2020 Europe / Portugal |
| EPI_ISL_511639 | 3/28/2020 | 8/8/2020 Europe / Portugal |
| EPI_ISL_511640 | 3/28/2020 | 8/8/2020 Europe / Portugal |
| EPI_ISL_511642 | 3/16/2020 | 8/8/2020 Europe / Portugal |
| EPI_ISL_511643 | 3/16/2020 | 8/8/2020 Europe / Portugal |
| EPI_ISL_511645 | 3/16/2020 | 8/8/2020 Europe / Portugal |
| EPI_ISL_511646 | 3/16/2020 | 8/8/2020 Europe / Portugal |
| EPI_ISL_511647 | 3/28/2020 | 8/8/2020 Europe / Portugal |
| EPI_ISL_511648 | 3/29/2020 | 8/8/2020 Europe / Portugal |
| EPI_ISL_511649 | 3/27/2020 | 8/8/2020 Europe / Portugal |
| EPI_ISL_511650 | 3/28/2020 | 8/8/2020 Europe / Portugal |
| EPI_ISL_511651 | 3/27/2020 | 8/8/2020 Europe / Portugal |
| EPI_ISL_511652 | 3/27/2020 | 8/8/2020 Europe / Portugal |
| EPI_ISL_511653 | 3/27/2020 | 8/8/2020 Europe / Portugal |
| EPI_ISL_511654 | 3/27/2020 | 8/8/2020 Europe / Portugal |
| EPI_ISL_511655 | 3/27/2020 | 8/8/2020 Europe / Portugal |
| EPI_ISL_511656 | 3/31/2020 | 8/8/2020 Europe / Portugal |
| EPI_ISL_511657 | 3/30/2020 | 8/8/2020 Europe / Portugal |
| EPI_ISL_511658 | 3/27/2020 | 8/8/2020 Europe / Portugal |
| EPI_ISL_511659 | 3/27/2020 | 8/8/2020 Europe / Portugal |
| EPI_ISL_511660 | 3/27/2020 | 8/8/2020 Europe / Portugal |
| EPI_ISL_511661 | 3/27/2020 | 8/8/2020 Europe / Portugal |
| EPI_ISL_511663 | 3/31/2020 | 8/8/2020 Europe / Portugal |
| EPI_ISL_511665 | 3/30/2020 | 8/8/2020 Europe / Portugal |
| EPI_ISL_511667 | 3/30/2020 | 8/8/2020 Europe / Portugal |
| EPI_ISL_511668 | 3/31/2020 | 8/8/2020 Europe / Portugal |
| EPI_ISL_511669 | 3/31/2020 | 8/8/2020 Europe / Portugal |
| EPI_ISL_511670 | 3/30/2020 | 8/8/2020 Europe / Portugal |
| EPI_ISL_511671 | 3/25/2020 | 8/8/2020 Europe / Portugal |
| EPI_ISL_511672 | 3/26/2020 | 8/8/2020 Europe / Portugal |
| EPI_ISL_511673 | 3/26/2020 | 8/8/2020 Europe / Portugal |
| EPI_ISL_511674 | 3/28/2020 | 8/8/2020 Europe / Portugal |
| EPI_ISL_511675 | 3/31/2020 | 8/8/2020 Europe / Portugal |
| EPI_ISL_511676 | 4/1/2020  | 8/8/2020 Europe / Portugal |
| EPI_ISL_511677 | 4/10/2020 | 8/8/2020 Europe / Portugal |
| EPI_ISL_511678 | 4/10/2020 | 8/8/2020 Europe / Portugal |
| EPI_ISL_511679 | 3/27/2020 | 8/8/2020 Europe / Portugal |
| EPI_ISL_511680 | 3/27/2020 | 8/8/2020 Europe / Portugal |
| EPI_ISL_511683 | 5/6/2020  | 8/8/2020 Europe / Portugal |
| EPI_ISL_511684 | 5/6/2020  | 8/8/2020 Europe / Portugal |
| EPI_ISL_511685 | 3/20/2020 | 8/8/2020 Europe / Portugal |
| EPI_ISL_511687 | 3/31/2020 | 8/8/2020 Europe / Portugal |
| EPI_ISL_511688 | 3/31/2020 | 8/8/2020 Europe / Portugal |
| EPI_ISL_511689 | 4/1/2020  | 8/8/2020 Europe / Portugal |
| EPI_ISL_511691 | 4/8/2020  | 8/8/2020 Europe / Portugal |

|                |           |                            |
|----------------|-----------|----------------------------|
| EPI_ISL_511692 | 4/8/2020  | 8/8/2020 Europe / Portugal |
| EPI_ISL_511693 | 4/8/2020  | 8/8/2020 Europe / Portugal |
| EPI_ISL_511695 | 4/8/2020  | 8/8/2020 Europe / Portugal |
| EPI_ISL_511696 | 4/8/2020  | 8/8/2020 Europe / Portugal |
| EPI_ISL_511702 | 4/25/2020 | 8/8/2020 Europe / Portugal |
| EPI_ISL_511706 | 4/2/2020  | 8/8/2020 Europe / Portugal |
| EPI_ISL_511708 | 4/2/2020  | 8/8/2020 Europe / Portugal |
| EPI_ISL_511709 | 4/2/2020  | 8/8/2020 Europe / Portugal |
| EPI_ISL_511710 | 4/2/2020  | 8/8/2020 Europe / Portugal |
| EPI_ISL_511711 | 4/6/2020  | 8/8/2020 Europe / Portugal |
| EPI_ISL_511713 | 4/5/2020  | 8/8/2020 Europe / Portugal |
| EPI_ISL_511714 | 4/5/2020  | 8/8/2020 Europe / Portugal |
| EPI_ISL_511715 | 4/5/2020  | 8/8/2020 Europe / Portugal |
| EPI_ISL_511716 | 3/20/2020 | 8/8/2020 Europe / Portugal |
| EPI_ISL_511717 | 3/20/2020 | 8/8/2020 Europe / Portugal |
| EPI_ISL_511719 | 3/22/2020 | 8/8/2020 Europe / Portugal |
| EPI_ISL_511720 | 3/22/2020 | 8/8/2020 Europe / Portugal |
| EPI_ISL_511721 | 3/23/2020 | 8/8/2020 Europe / Portugal |
| EPI_ISL_511722 | 3/23/2020 | 8/8/2020 Europe / Portugal |
| EPI_ISL_511723 | 3/24/2020 | 8/8/2020 Europe / Portugal |
| EPI_ISL_511724 | 3/24/2020 | 8/8/2020 Europe / Portugal |
| EPI_ISL_511725 | 3/24/2020 | 8/8/2020 Europe / Portugal |
| EPI_ISL_511726 | 3/25/2020 | 8/8/2020 Europe / Portugal |
| EPI_ISL_511727 | 3/25/2020 | 8/8/2020 Europe / Portugal |
| EPI_ISL_511728 | 3/25/2020 | 8/8/2020 Europe / Portugal |
| EPI_ISL_511729 | 3/25/2020 | 8/8/2020 Europe / Portugal |
| EPI_ISL_511730 | 3/25/2020 | 8/8/2020 Europe / Portugal |
| EPI_ISL_511733 | 3/26/2020 | 8/8/2020 Europe / Portugal |
| EPI_ISL_511741 | 3/31/2020 | 8/8/2020 Europe / Portugal |
| EPI_ISL_511748 | 3/30/2020 | 8/8/2020 Europe / Portugal |
| EPI_ISL_511752 | 3/26/2020 | 8/8/2020 Europe / Portugal |
| EPI_ISL_511753 | 3/26/2020 | 8/8/2020 Europe / Portugal |
| EPI_ISL_511754 | 3/26/2020 | 8/8/2020 Europe / Portugal |
| EPI_ISL_511755 | 3/26/2020 | 8/8/2020 Europe / Portugal |
| EPI_ISL_511756 | 3/26/2020 | 8/8/2020 Europe / Portugal |
| EPI_ISL_511757 | 3/26/2020 | 8/8/2020 Europe / Portugal |
| EPI_ISL_511759 | 3/28/2020 | 8/8/2020 Europe / Portugal |
| EPI_ISL_511760 | 3/28/2020 | 8/8/2020 Europe / Portugal |
| EPI_ISL_511761 | 3/28/2020 | 8/8/2020 Europe / Portugal |
| EPI_ISL_511762 | 3/24/2020 | 8/8/2020 Europe / Portugal |
| EPI_ISL_511763 | 3/27/2020 | 8/8/2020 Europe / Portugal |
| EPI_ISL_511764 | 3/28/2020 | 8/8/2020 Europe / Portugal |
| EPI_ISL_511765 | 3/28/2020 | 8/8/2020 Europe / Portugal |
| EPI_ISL_511766 | 3/29/2020 | 8/8/2020 Europe / Portugal |
| EPI_ISL_511767 | 3/29/2020 | 8/8/2020 Europe / Portugal |
| EPI_ISL_511768 | 3/29/2020 | 8/8/2020 Europe / Portugal |
| EPI_ISL_511769 | 3/29/2020 | 8/8/2020 Europe / Portugal |



|                |           |                                                          |
|----------------|-----------|----------------------------------------------------------|
| EPI_ISL_511874 | 4/3/2020  | 8/9/2020 North America / USA / Maryland                  |
| EPI_ISL_511875 | 4/9/2020  | 8/9/2020 North America / USA / Maryland                  |
| EPI_ISL_511879 | 7/8/2020  | 8/10/2020 Asia / Indonesia / West Java / Bandung         |
| EPI_ISL_511891 | 3/8/2020  | 8/10/2020 Asia / Vietnam / Hanoi                         |
| EPI_ISL_511892 | 3/11/2020 | 8/10/2020 Asia / Vietnam / Hanoi                         |
| EPI_ISL_511893 | 3/15/2020 | 8/10/2020 Asia / Vietnam / Hanoi                         |
| EPI_ISL_511894 | 3/16/2020 | 8/10/2020 Asia / Vietnam / Hanoi                         |
| EPI_ISL_511895 | 3/16/2020 | 8/10/2020 Asia / Vietnam / Hanoi                         |
| EPI_ISL_511896 | 3/18/2020 | 8/10/2020 Asia / Vietnam / Hanoi                         |
| EPI_ISL_511897 | 3/23/2020 | 8/10/2020 Asia / Vietnam / Hanoi                         |
| EPI_ISL_511898 | 4/14/2020 | 8/10/2020 Asia / Vietnam / Hanoi                         |
| EPI_ISL_511899 | 5/26/2020 | 8/10/2020 Asia / India / West Bengal / North 24 Parganas |
| EPI_ISL_511900 | 3/31/2020 | 8/10/2020 Asia / India / West Bengal / Kolkata           |
| EPI_ISL_511901 | 4/5/2020  | 8/10/2020 Asia / India / West Bengal / Kolkata           |
| EPI_ISL_511902 | 5/5/2020  | 8/10/2020 Asia / India / West Bengal / Kolkata           |
| EPI_ISL_511903 | 4/9/2020  | 8/10/2020 Asia / India / West Bengal / Kolkata           |
| EPI_ISL_511904 | 5/14/2020 | 8/10/2020 Asia / India / West Bengal / Kolkata           |
| EPI_ISL_511905 | 5/17/2020 | 8/10/2020 Asia / India / West Bengal / North 24 Parganas |
| EPI_ISL_511906 | 5/19/2020 | 8/10/2020 Asia / India / West Bengal / Howrah            |
| EPI_ISL_511907 | 5/24/2020 | 8/10/2020 Asia / India / West Bengal / Kolkata           |
| EPI_ISL_511908 | 5/27/2020 | 8/10/2020 Asia / India / Uttarakhand / Haridwar          |
| EPI_ISL_511909 | 5/28/2020 | 8/10/2020 Asia / India / Uttarakhand / Tehri Garhwal     |
| EPI_ISL_511910 | 5/28/2020 | 8/10/2020 Asia / India / Uttarakhand / Tehri Garhwal     |
| EPI_ISL_511912 | 5/28/2020 | 8/10/2020 Asia / India / Uttarakhand / Tehri Garhwal     |
| EPI_ISL_511921 | 6/2/2020  | 8/10/2020 Asia / India / Uttarakhand / Tehri Garhwal     |
| EPI_ISL_511922 | 6/9/2020  | 8/10/2020 Asia / India / Uttarakhand / Dehradun          |
| EPI_ISL_511924 | 5/15/2020 | 8/10/2020 Asia / India / Maharashtra / Mumbai            |
| EPI_ISL_511926 | 6/6/2020  | 8/10/2020 Asia / India / Maharashtra / Wardha            |
| EPI_ISL_511927 | 6/6/2020  | 8/10/2020 Asia / India / Maharashtra / Wardha            |
| EPI_ISL_511928 | 6/10/2020 | 8/10/2020 Asia / India / Haryana / Gurgaon               |
| EPI_ISL_511929 | 6/17/2020 | 8/10/2020 Asia / India / Maharashtra / Akola             |
| EPI_ISL_511930 | 6/17/2020 | 8/10/2020 Asia / India / Maharashtra / Aurangabad        |
| EPI_ISL_511931 | 6/17/2020 | 8/10/2020 Asia / India / Maharashtra / Aurangabad        |
| EPI_ISL_511932 | 6/20/2020 | 8/10/2020 Asia / India / Maharashtra / Aurangabad        |
| EPI_ISL_511933 | 6/20/2020 | 8/10/2020 Asia / India / Maharashtra / Aurangabad        |
| EPI_ISL_511934 | 6/18/2020 | 8/10/2020 Asia / India / Maharashtra / Aurangabad        |
| EPI_ISL_511935 | 6/16/2020 | 8/10/2020 Asia / India / Maharashtra / Aurangabad        |
| EPI_ISL_511939 | 6/18/2020 | 8/10/2020 Asia / India / Maharashtra / Aurangabad        |
| EPI_ISL_511943 | 6/17/2020 | 8/10/2020 Asia / India / Haryana / Faridabad             |
| EPI_ISL_511944 | 6/17/2020 | 8/10/2020 Asia / India / Haryana / Faridabad             |
| EPI_ISL_511955 | 6/25/2020 | 8/10/2020 Europe / United Kingdom / England              |
| EPI_ISL_511956 | 6/19/2020 | 8/10/2020 Europe / United Kingdom / England              |
| EPI_ISL_511957 | 6/26/2020 | 8/10/2020 Europe / United Kingdom / England              |
| EPI_ISL_511958 | 6/19/2020 | 8/10/2020 Europe / United Kingdom / England              |
| EPI_ISL_511960 | 6/14/2020 | 8/10/2020 Europe / United Kingdom / England              |
| EPI_ISL_511961 | 6/11/2020 | 8/10/2020 Europe / United Kingdom / England              |
| EPI_ISL_511964 | 6/20/2020 | 8/10/2020 Europe / United Kingdom / England              |

|                |           |                                                   |
|----------------|-----------|---------------------------------------------------|
| EPI_ISL_511966 | 6/16/2020 | 8/10/2020 Europe / United Kingdom / England       |
| EPI_ISL_511967 | 6/9/2020  | 8/10/2020 Europe / United Kingdom / England       |
| EPI_ISL_511968 | 6/16/2020 | 8/10/2020 Europe / United Kingdom / England       |
| EPI_ISL_511970 | 5/22/2020 | 8/10/2020 Europe / United Kingdom / England       |
| EPI_ISL_511971 | 6/26/2020 | 8/10/2020 Europe / United Kingdom / England       |
| EPI_ISL_511972 | 6/16/2020 | 8/10/2020 Europe / United Kingdom / England       |
| EPI_ISL_511973 | 6/22/2020 | 8/10/2020 Europe / United Kingdom / England       |
| EPI_ISL_511974 | 6/15/2020 | 8/10/2020 Europe / United Kingdom / England       |
| EPI_ISL_511976 | 6/10/2020 | 8/10/2020 Europe / United Kingdom / England       |
| EPI_ISL_511978 | 6/14/2020 | 8/10/2020 Europe / United Kingdom / England       |
| EPI_ISL_511979 | 6/15/2020 | 8/10/2020 Europe / United Kingdom / England       |
| EPI_ISL_511980 | 6/20/2020 | 8/10/2020 Europe / United Kingdom / England       |
| EPI_ISL_511981 | 6/16/2020 | 8/10/2020 Europe / United Kingdom / England       |
| EPI_ISL_511985 | 7/20/2020 | 8/10/2020 Europe / Switzerland / Thurgau          |
| EPI_ISL_511986 | 7/21/2020 | 8/10/2020 Europe / Switzerland / Aargau           |
| EPI_ISL_511987 | 7/21/2020 | 8/10/2020 Europe / Switzerland / Zurich           |
| EPI_ISL_511988 | 7/22/2020 | 8/10/2020 Europe / Switzerland / Zurich           |
| EPI_ISL_511989 | 7/23/2020 | 8/10/2020 Europe / Switzerland / Zurich           |
| EPI_ISL_511990 | 7/19/2020 | 8/10/2020 Europe / Switzerland / Vaud             |
| EPI_ISL_511991 | 7/19/2020 | 8/10/2020 Europe / Switzerland / Zurich           |
| EPI_ISL_511992 | 7/22/2020 | 8/10/2020 Europe / Switzerland / Bern             |
| EPI_ISL_511994 | 7/24/2020 | 8/10/2020 Europe / Switzerland / Basel-Landschaft |
| EPI_ISL_511995 | 7/24/2020 | 8/10/2020 Europe / Switzerland / Vaud             |
| EPI_ISL_511997 | 7/24/2020 | 8/10/2020 Europe / Switzerland / Zurich           |
| EPI_ISL_511998 | 7/27/2020 | 8/10/2020 Europe / Switzerland / Basel-Landschaft |
| EPI_ISL_511999 | 7/27/2020 | 8/10/2020 Europe / Switzerland / Aargau           |
| EPI_ISL_512000 | 7/27/2020 | 8/10/2020 Europe / Switzerland / Zurich           |
| EPI_ISL_512001 | 7/27/2020 | 8/10/2020 Europe / Switzerland / Zurich           |
| EPI_ISL_512002 | 7/27/2020 | 8/10/2020 Europe / Switzerland / St Gall          |
| EPI_ISL_512003 | 7/27/2020 | 8/10/2020 Europe / Switzerland / Schwyz           |
| EPI_ISL_512004 | 7/27/2020 | 8/10/2020 Europe / Switzerland / Uri              |
| EPI_ISL_512005 | 7/27/2020 | 8/10/2020 Europe / Switzerland / Vaud             |
| EPI_ISL_512006 | 7/28/2020 | 8/10/2020 Europe / Switzerland / Zurich           |
| EPI_ISL_512007 | 7/28/2020 | 8/10/2020 Europe / Switzerland / Zurich           |
| EPI_ISL_512008 | 7/28/2020 | 8/10/2020 Europe / Switzerland / Bern             |
| EPI_ISL_512009 | 7/28/2020 | 8/10/2020 Europe / Switzerland / Bern             |
| EPI_ISL_512010 | 7/28/2020 | 8/10/2020 Europe / Switzerland / Schaffhausen     |
| EPI_ISL_512011 | 7/27/2020 | 8/10/2020 Europe / Switzerland / Lucerne          |
| EPI_ISL_512012 | 7/28/2020 | 8/10/2020 Europe / Switzerland / Zurich           |
| EPI_ISL_512013 | 7/28/2020 | 8/10/2020 Europe / Switzerland / Geneva           |
| EPI_ISL_512014 | 7/29/2020 | 8/10/2020 Europe / Switzerland / Aargau           |
| EPI_ISL_512015 | 7/28/2020 | 8/10/2020 Europe / Switzerland / Bern             |
| EPI_ISL_512016 | 7/28/2020 | 8/10/2020 Europe / Switzerland / Vaud             |
| EPI_ISL_512017 | 7/29/2020 | 8/10/2020 Europe / Switzerland / Basel-Landschaft |
| EPI_ISL_512018 | 7/29/2020 | 8/10/2020 Europe / Switzerland / Bern             |
| EPI_ISL_512020 | 7/30/2020 | 8/10/2020 Europe / Switzerland / Zurich           |
| EPI_ISL_512021 | 7/30/2020 | 8/10/2020 Europe / Switzerland / Basel-Landschaft |

|                |           |                                                   |
|----------------|-----------|---------------------------------------------------|
| EPI_ISL_512023 | 7/30/2020 | 8/10/2020 Europe / Switzerland / St Gall          |
| EPI_ISL_512024 | 7/30/2020 | 8/10/2020 Europe / Switzerland / Basel-Landschaft |
| EPI_ISL_512025 | 7/30/2020 | 8/10/2020 Europe / Switzerland / Zurich           |
| EPI_ISL_512026 | 7/30/2020 | 8/10/2020 Europe / Switzerland / Geneva           |
| EPI_ISL_512027 | 7/24/2020 | 8/10/2020 Europe / Switzerland / Zurich           |
| EPI_ISL_512028 | 7/24/2020 | 8/10/2020 Europe / Switzerland / Bern             |
| EPI_ISL_512029 | 7/25/2020 | 8/10/2020 Europe / Switzerland / Bern             |
| EPI_ISL_512030 | 7/24/2020 | 8/10/2020 Europe / Switzerland / Vaud             |
| EPI_ISL_512031 | 7/25/2020 | 8/10/2020 Europe / Switzerland / Bern             |
| EPI_ISL_512032 | 7/25/2020 | 8/10/2020 Europe / Switzerland / Aargau           |
| EPI_ISL_512033 | 7/25/2020 | 8/10/2020 Europe / Switzerland / Basel-Landschaft |
| EPI_ISL_512034 | 7/25/2020 | 8/10/2020 Europe / Switzerland / Bern             |
| EPI_ISL_512035 | 7/25/2020 | 8/10/2020 Europe / Switzerland / Vaud             |
| EPI_ISL_512036 | 7/26/2020 | 8/10/2020 Europe / Switzerland / Basel-Landschaft |
| EPI_ISL_512037 | 7/26/2020 | 8/10/2020 Europe / Switzerland / Bern             |
| EPI_ISL_512038 | 7/26/2020 | 8/10/2020 Europe / Switzerland / Zurich           |
| EPI_ISL_512039 | 7/26/2020 | 8/10/2020 Europe / Switzerland / Zurich           |
| EPI_ISL_512040 | 7/26/2020 | 8/10/2020 Europe / Switzerland / Zurich           |
| EPI_ISL_512042 | 7/25/2020 | 8/10/2020 Europe / Switzerland / Grisons          |
| EPI_ISL_512043 | 7/27/2020 | 8/10/2020 Europe / Switzerland / Basel-Stadt      |
| EPI_ISL_512044 | 7/27/2020 | 8/10/2020 Europe / Switzerland / Zurich           |
| EPI_ISL_512045 | 7/27/2020 | 8/10/2020 Europe / Switzerland / Grisons          |
| EPI_ISL_512046 | 7/27/2020 | 8/10/2020 Europe / Switzerland / Grisons          |
| EPI_ISL_512047 | 7/27/2020 | 8/10/2020 Europe / Switzerland / Basel-Landschaft |
| EPI_ISL_512048 | 7/27/2020 | 8/10/2020 Europe / Switzerland / Zurich           |
| EPI_ISL_512049 | 7/27/2020 | 8/10/2020 Europe / Switzerland / Zurich           |
| EPI_ISL_512050 | 7/28/2020 | 8/10/2020 Europe / Switzerland / Bern             |
| EPI_ISL_512051 | 7/28/2020 | 8/10/2020 Europe / Switzerland / Bern             |
| EPI_ISL_512052 | 7/28/2020 | 8/10/2020 Europe / Switzerland / Vaud             |
| EPI_ISL_512053 | 7/28/2020 | 8/10/2020 Europe / Switzerland / Basel-Landschaft |
| EPI_ISL_512054 | 7/28/2020 | 8/10/2020 Europe / Switzerland / Grisons          |
| EPI_ISL_512058 | 6/18/2020 | 8/10/2020 Asia / India / Gujarat / Ahmedabad      |
| EPI_ISL_512059 | 6/18/2020 | 8/10/2020 Asia / India / Gujarat / Ahmedabad      |
| EPI_ISL_512060 | 6/25/2020 | 8/10/2020 Asia / India / Gujarat / Ahmedabad      |
| EPI_ISL_512063 | 6/25/2020 | 8/10/2020 Asia / India / Gujarat / Ahmedabad      |
| EPI_ISL_512064 | 6/25/2020 | 8/10/2020 Asia / India / Gujarat / Ahmedabad      |
| EPI_ISL_512065 | 6/25/2020 | 8/10/2020 Asia / India / Gujarat / Ahmedabad      |
| EPI_ISL_512066 | 7/27/2020 | 8/10/2020 Asia / India / Gujarat / Ahmedabad      |
| EPI_ISL_512067 | 7/27/2020 | 8/10/2020 Asia / India / Gujarat / Ahmedabad      |
| EPI_ISL_512068 | 7/27/2020 | 8/10/2020 Asia / India / Gujarat / Ahmedabad      |
| EPI_ISL_512069 | 7/27/2020 | 8/10/2020 Asia / India / Gujarat / Ahmedabad      |
| EPI_ISL_512070 | 6/12/2020 | 8/10/2020 Asia / India / Gujarat / Adajan         |
| EPI_ISL_512071 | 6/12/2020 | 8/10/2020 Asia / India / Gujarat / Adajan         |
| EPI_ISL_512072 | 7/6/2020  | 8/10/2020 Asia / India / Gujarat / Mehsana        |
| EPI_ISL_512073 | 7/6/2020  | 8/10/2020 Asia / India / Gujarat / Mehsana        |
| EPI_ISL_512074 | 7/6/2020  | 8/10/2020 Asia / India / Gujarat / Mehsana        |
| EPI_ISL_512075 | 7/9/2020  | 8/10/2020 Asia / India / Gujarat / Modasa         |

|                |           |                                                               |
|----------------|-----------|---------------------------------------------------------------|
| EPI_ISL_512076 | 7/9/2020  | 8/10/2020 Asia / India / Gujarat / Modasa                     |
| EPI_ISL_512077 | 7/9/2020  | 8/10/2020 Asia / India / Gujarat / Modasa                     |
| EPI_ISL_512086 | 5/29/2020 | 8/10/2020 North America / USA / Washington                    |
| EPI_ISL_512087 | 7/21/2020 | 8/10/2020 Europe / Ireland / Kildare                          |
| EPI_ISL_512088 | 7/22/2020 | 8/10/2020 Europe / Ireland / Meath                            |
| EPI_ISL_512089 | 7/23/2020 | 8/10/2020 Europe / Ireland / Dublin                           |
| EPI_ISL_512091 | 7/22/2020 | 8/10/2020 Europe / Ireland / Kildare                          |
| EPI_ISL_512092 | 7/23/2020 | 8/10/2020 Europe / Ireland / Dublin                           |
| EPI_ISL_512093 | 7/23/2020 | 8/10/2020 Europe / Ireland / Cork                             |
| EPI_ISL_512094 | 7/23/2020 | 8/10/2020 Europe / Ireland / Dublin                           |
| EPI_ISL_512097 | 7/24/2020 | 8/10/2020 Europe / Ireland / Kildare                          |
| EPI_ISL_512098 | 7/24/2020 | 8/10/2020 Europe / Ireland / Louth                            |
| EPI_ISL_512099 | 7/24/2020 | 8/10/2020 Europe / Ireland / Laois                            |
| EPI_ISL_512100 | 7/24/2020 | 8/10/2020 Europe / Ireland / Cork                             |
| EPI_ISL_512101 | 7/20/2020 | 8/10/2020 Europe / Ireland / Dublin                           |
| EPI_ISL_512103 | 7/25/2020 | 8/10/2020 Europe / Ireland / Dublin                           |
| EPI_ISL_512104 | 7/25/2020 | 8/10/2020 Europe / Ireland / Dublin                           |
| EPI_ISL_512105 | 7/25/2020 | 8/10/2020 Europe / Ireland / Kildare                          |
| EPI_ISL_512106 | 7/25/2020 | 8/10/2020 Europe / Ireland / Kildare                          |
| EPI_ISL_512144 | 6/16/2020 | 8/10/2020 North America / USA / Alaska                        |
| EPI_ISL_512148 | 6/22/2020 | 8/10/2020 North America / USA / Alaska                        |
| EPI_ISL_512155 | 6/23/2020 | 8/10/2020 North America / USA / Alaska                        |
| EPI_ISL_512156 | 6/25/2020 | 8/10/2020 North America / USA / Alaska                        |
| EPI_ISL_512157 | 6/25/2020 | 8/10/2020 North America / USA / Alaska                        |
| EPI_ISL_512158 | 5/18/2020 | 8/11/2020 North America / USA / California / San Diego County |
| EPI_ISL_512160 | 5/21/2020 | 8/11/2020 North America / USA / California / San Diego County |
| EPI_ISL_512161 | 5/19/2020 | 8/11/2020 North America / USA / California / San Diego County |
| EPI_ISL_512162 | 5/11/2020 | 8/11/2020 North America / USA / California / San Diego County |
| EPI_ISL_512163 | 5/29/2020 | 8/11/2020 North America / USA / California / San Diego County |
| EPI_ISL_512164 | 5/18/2020 | 8/11/2020 North America / USA / California / San Diego County |
| EPI_ISL_512165 | 5/13/2020 | 8/11/2020 North America / USA / California / San Diego County |
| EPI_ISL_512166 | 5/18/2020 | 8/11/2020 North America / USA / California / San Diego County |
| EPI_ISL_512167 | 5/21/2020 | 8/11/2020 North America / USA / California / San Diego County |
| EPI_ISL_512168 | 5/16/2020 | 8/11/2020 North America / USA / California / San Diego County |
| EPI_ISL_512169 | 5/13/2020 | 8/11/2020 North America / USA / California / San Diego County |
| EPI_ISL_512170 | 5/12/2020 | 8/11/2020 North America / USA / California / San Diego County |
| EPI_ISL_512171 | 5/21/2020 | 8/11/2020 North America / USA / California / San Diego County |
| EPI_ISL_512172 | 5/13/2020 | 8/11/2020 North America / USA / California / San Diego County |
| EPI_ISL_512173 | 5/21/2020 | 8/11/2020 North America / USA / California / San Diego County |
| EPI_ISL_512174 | 5/13/2020 | 8/11/2020 North America / USA / California / San Diego County |
| EPI_ISL_512175 | 5/13/2020 | 8/11/2020 North America / USA / California / San Diego County |
| EPI_ISL_512176 | 5/29/2020 | 8/11/2020 North America / USA / California / San Diego County |
| EPI_ISL_512178 | 5/13/2020 | 8/11/2020 North America / USA / California / San Diego County |
| EPI_ISL_512179 | 5/21/2020 | 8/11/2020 North America / USA / California / San Diego County |
| EPI_ISL_512180 | 5/5/2020  | 8/11/2020 North America / USA / California / San Diego County |
| EPI_ISL_512181 | 5/16/2020 | 8/11/2020 North America / USA / California / San Diego County |
| EPI_ISL_512182 | 5/12/2020 | 8/11/2020 North America / USA / California / San Diego County |





|                |           |           |                                                     |
|----------------|-----------|-----------|-----------------------------------------------------|
| EPI_ISL_512239 | 7/8/2020  | 8/11/2020 | North America / USA / California / San Diego County |
| EPI_ISL_512240 | 7/8/2020  | 8/11/2020 | North America / USA / California / San Diego County |
| EPI_ISL_512241 | 7/8/2020  | 8/11/2020 | North America / USA / California / San Diego County |
| EPI_ISL_512242 | 7/9/2020  | 8/11/2020 | North America / USA / California / San Diego County |
| EPI_ISL_512243 | 7/9/2020  | 8/11/2020 | North America / USA / California / San Diego County |
| EPI_ISL_512244 | 7/8/2020  | 8/11/2020 | North America / USA / California / San Diego County |
| EPI_ISL_512245 | 7/8/2020  | 8/11/2020 | North America / USA / California / San Diego County |
| EPI_ISL_512246 | 6/25/2020 | 8/11/2020 | North America / USA / California / San Diego County |
| EPI_ISL_512247 | 6/25/2020 | 8/11/2020 | North America / USA / California / San Diego County |
| EPI_ISL_512248 | 7/8/2020  | 8/11/2020 | North America / USA / California / San Diego County |
| EPI_ISL_512250 | 7/8/2020  | 8/11/2020 | North America / USA / California / San Diego County |
| EPI_ISL_512251 | 7/8/2020  | 8/11/2020 | North America / USA / California / San Diego County |
| EPI_ISL_512252 | 7/9/2020  | 8/11/2020 | North America / USA / California / San Diego County |
| EPI_ISL_512253 | 6/26/2020 | 8/11/2020 | North America / USA / California / San Diego County |
| EPI_ISL_512254 | 6/26/2020 | 8/11/2020 | North America / USA / California / San Diego County |
| EPI_ISL_512256 | 6/25/2020 | 8/11/2020 | North America / USA / California / San Diego County |
| EPI_ISL_512257 | 6/25/2020 | 8/11/2020 | North America / USA / California / San Diego County |
| EPI_ISL_512259 | 6/25/2020 | 8/11/2020 | North America / USA / California / San Diego County |
| EPI_ISL_512260 | 6/26/2020 | 8/11/2020 | North America / USA / California / San Diego County |
| EPI_ISL_512261 | 6/26/2020 | 8/11/2020 | North America / USA / California / San Diego County |
| EPI_ISL_512262 | 6/26/2020 | 8/11/2020 | North America / USA / California / San Diego County |
| EPI_ISL_512264 | 6/26/2020 | 8/11/2020 | North America / USA / California / San Diego County |
| EPI_ISL_512265 | 6/26/2020 | 8/11/2020 | North America / USA / California / San Diego County |
| EPI_ISL_512266 | 6/25/2020 | 8/11/2020 | North America / USA / California / San Diego County |
| EPI_ISL_512267 | 7/9/2020  | 8/11/2020 | North America / USA / California / San Diego County |
| EPI_ISL_512268 | 6/26/2020 | 8/11/2020 | North America / USA / California / San Diego County |
| EPI_ISL_512269 | 6/26/2020 | 8/11/2020 | North America / USA / California / San Diego County |
| EPI_ISL_512270 | 6/26/2020 | 8/11/2020 | North America / USA / California / San Diego County |
| EPI_ISL_512271 | 4/25/2020 | 8/11/2020 | North America / USA / California / San Diego County |
| EPI_ISL_512273 | 4/22/2020 | 8/11/2020 | North America / USA / California / San Diego County |
| EPI_ISL_512296 | 5/8/2020  | 8/11/2020 | Europe / Poland / Pomorskie                         |
| EPI_ISL_512297 | 5/9/2020  | 8/11/2020 | Europe / Poland / Pomorskie                         |
| EPI_ISL_512298 | 5/19/2020 | 8/11/2020 | Europe / Poland / Pomorskie                         |
| EPI_ISL_512299 | 6/7/2020  | 8/11/2020 | Europe / Poland / Pomorskie                         |
| EPI_ISL_512300 | 6/7/2020  | 8/11/2020 | Europe / Poland / Pomorskie                         |
| EPI_ISL_512301 | 6/8/2020  | 8/11/2020 | Europe / Poland / Pomorskie                         |
| EPI_ISL_512302 | 6/9/2020  | 8/11/2020 | Europe / Poland / Pomorskie                         |
| EPI_ISL_512303 | 6/9/2020  | 8/11/2020 | Europe / Poland / Pomorskie                         |
| EPI_ISL_512313 | 6/17/2020 | 8/11/2020 | Europe / Latvia                                     |
| EPI_ISL_512314 | 7/9/2020  | 8/11/2020 | Europe / Latvia                                     |
| EPI_ISL_512332 | 6/30/2020 | 8/11/2020 | Europe / United Kingdom / England                   |
| EPI_ISL_512333 | 6/16/2020 | 8/11/2020 | Europe / United Kingdom / England                   |
| EPI_ISL_512339 | 5/18/2020 | 8/11/2020 | Europe / United Kingdom / England                   |
| EPI_ISL_512342 | 5/18/2020 | 8/11/2020 | Europe / United Kingdom / England                   |
| EPI_ISL_512344 | 5/20/2020 | 8/11/2020 | Europe / United Kingdom / England                   |
| EPI_ISL_512348 | 7/9/2020  | 8/11/2020 | Europe / United Kingdom / England                   |
| EPI_ISL_512349 | 7/9/2020  | 8/11/2020 | Europe / United Kingdom / England                   |



|                |           |                                              |
|----------------|-----------|----------------------------------------------|
| EPI_ISL_512463 | 6/17/2020 | 8/11/2020 Europe / United Kingdom / Scotland |
| EPI_ISL_512467 | 6/21/2020 | 8/11/2020 Europe / United Kingdom / Scotland |
| EPI_ISL_512468 | 6/2/2020  | 8/11/2020 Europe / United Kingdom / Scotland |
| EPI_ISL_512469 | 6/2/2020  | 8/11/2020 Europe / United Kingdom / Scotland |
| EPI_ISL_512470 | 6/5/2020  | 8/11/2020 Europe / United Kingdom / Scotland |
| EPI_ISL_512471 | 6/5/2020  | 8/11/2020 Europe / United Kingdom / Scotland |
| EPI_ISL_512472 | 6/5/2020  | 8/11/2020 Europe / United Kingdom / Scotland |
| EPI_ISL_512474 | 6/8/2020  | 8/11/2020 Europe / United Kingdom / Scotland |
| EPI_ISL_512475 | 6/24/2020 | 8/11/2020 Europe / United Kingdom / Scotland |
| EPI_ISL_512476 | 7/4/2020  | 8/11/2020 Europe / United Kingdom / Scotland |
| EPI_ISL_512477 | 7/25/2020 | 8/11/2020 Europe / United Kingdom / Scotland |
| EPI_ISL_512478 | 7/29/2020 | 8/11/2020 Europe / United Kingdom / Scotland |
| EPI_ISL_512479 | 7/29/2020 | 8/11/2020 Europe / United Kingdom / Scotland |
| EPI_ISL_512480 | 7/29/2020 | 8/11/2020 Europe / United Kingdom / Scotland |
| EPI_ISL_512481 | 7/20/2020 | 8/11/2020 Europe / United Kingdom / Wales    |
| EPI_ISL_512482 | 3/31/2020 | 8/11/2020 Europe / United Kingdom / Wales    |
| EPI_ISL_512483 | 7/25/2020 | 8/11/2020 Europe / United Kingdom / Wales    |
| EPI_ISL_512484 | 7/22/2020 | 8/11/2020 Europe / United Kingdom / Wales    |
| EPI_ISL_512485 | 7/21/2020 | 8/11/2020 Europe / United Kingdom / Wales    |
| EPI_ISL_512486 | 7/15/2020 | 8/11/2020 Europe / United Kingdom / Wales    |
| EPI_ISL_512487 | 7/9/2020  | 8/11/2020 Europe / United Kingdom / Wales    |
| EPI_ISL_512488 | 7/20/2020 | 8/11/2020 Europe / United Kingdom / Wales    |
| EPI_ISL_512489 | 7/20/2020 | 8/11/2020 Europe / United Kingdom / Wales    |
| EPI_ISL_512490 | 7/20/2020 | 8/11/2020 Europe / United Kingdom / Wales    |
| EPI_ISL_512491 | 3/30/2020 | 8/11/2020 Europe / United Kingdom / Wales    |
| EPI_ISL_512492 | 7/24/2020 | 8/11/2020 Europe / United Kingdom / Wales    |
| EPI_ISL_512493 | 3/28/2020 | 8/11/2020 Europe / United Kingdom / Wales    |
| EPI_ISL_512494 | 7/17/2020 | 8/11/2020 Europe / United Kingdom / Wales    |
| EPI_ISL_512495 | 3/21/2020 | 8/11/2020 Europe / United Kingdom / Wales    |
| EPI_ISL_512496 | 7/20/2020 | 8/11/2020 Europe / United Kingdom / Wales    |
| EPI_ISL_512497 | 7/24/2020 | 8/11/2020 Europe / United Kingdom / Wales    |
| EPI_ISL_512498 | 7/24/2020 | 8/11/2020 Europe / United Kingdom / Wales    |
| EPI_ISL_512499 | 7/25/2020 | 8/11/2020 Europe / United Kingdom / Wales    |
| EPI_ISL_512500 | 3/30/2020 | 8/11/2020 Europe / United Kingdom / Wales    |
| EPI_ISL_512501 | 7/15/2020 | 8/11/2020 Europe / United Kingdom / Wales    |
| EPI_ISL_512502 | 4/12/2020 | 8/11/2020 Europe / United Kingdom / Wales    |
| EPI_ISL_512503 | 7/20/2020 | 8/11/2020 Europe / United Kingdom / Wales    |
| EPI_ISL_512504 | 7/20/2020 | 8/11/2020 Europe / United Kingdom / Wales    |
| EPI_ISL_512505 | 4/18/2020 | 8/11/2020 Europe / United Kingdom / Wales    |
| EPI_ISL_512506 | 7/20/2020 | 8/11/2020 Europe / United Kingdom / Wales    |
| EPI_ISL_512507 | 3/23/2020 | 8/11/2020 Europe / United Kingdom / Wales    |
| EPI_ISL_512508 | 6/23/2020 | 8/11/2020 Europe / United Kingdom / Wales    |
| EPI_ISL_512509 | 7/24/2020 | 8/11/2020 Europe / United Kingdom / Wales    |
| EPI_ISL_512510 | 7/14/2020 | 8/11/2020 Europe / United Kingdom / Wales    |
| EPI_ISL_512511 | 7/19/2020 | 8/11/2020 Europe / United Kingdom / Wales    |
| EPI_ISL_512513 | 7/26/2020 | 8/11/2020 Europe / United Kingdom / Wales    |
| EPI_ISL_512515 | 7/20/2020 | 8/11/2020 Europe / United Kingdom / Wales    |

|                |           |                                           |
|----------------|-----------|-------------------------------------------|
| EPI_ISL_512517 | 7/21/2020 | 8/11/2020 Europe / United Kingdom / Wales |
| EPI_ISL_512518 | 7/24/2020 | 8/11/2020 Europe / United Kingdom / Wales |
| EPI_ISL_512519 | 7/23/2020 | 8/11/2020 Europe / United Kingdom / Wales |
| EPI_ISL_512520 | 7/25/2020 | 8/11/2020 Europe / United Kingdom / Wales |
| EPI_ISL_512521 | 7/25/2020 | 8/11/2020 Europe / United Kingdom / Wales |
| EPI_ISL_512522 | 7/19/2020 | 8/11/2020 Europe / United Kingdom / Wales |
| EPI_ISL_512523 | 7/16/2020 | 8/11/2020 Europe / United Kingdom / Wales |
| EPI_ISL_512524 | 7/15/2020 | 8/11/2020 Europe / United Kingdom / Wales |
| EPI_ISL_512527 | 7/19/2020 | 8/11/2020 Europe / United Kingdom / Wales |
| EPI_ISL_512528 | 7/25/2020 | 8/11/2020 Europe / United Kingdom / Wales |
| EPI_ISL_512531 | 7/19/2020 | 8/11/2020 Europe / United Kingdom / Wales |
| EPI_ISL_512532 | 7/17/2020 | 8/11/2020 Europe / United Kingdom / Wales |
| EPI_ISL_512533 | 7/15/2020 | 8/11/2020 Europe / United Kingdom / Wales |
| EPI_ISL_512535 | 7/21/2020 | 8/11/2020 Europe / United Kingdom / Wales |
| EPI_ISL_512536 | 7/23/2020 | 8/11/2020 Europe / United Kingdom / Wales |
| EPI_ISL_512537 | 7/22/2020 | 8/11/2020 Europe / United Kingdom / Wales |
| EPI_ISL_512538 | 7/18/2020 | 8/11/2020 Europe / United Kingdom / Wales |
| EPI_ISL_512539 | 7/16/2020 | 8/11/2020 Europe / United Kingdom / Wales |
| EPI_ISL_512540 | 7/22/2020 | 8/11/2020 Europe / United Kingdom / Wales |
| EPI_ISL_512541 | 7/19/2020 | 8/11/2020 Europe / United Kingdom / Wales |
| EPI_ISL_512542 | 7/24/2020 | 8/11/2020 Europe / United Kingdom / Wales |
| EPI_ISL_512543 | 7/22/2020 | 8/11/2020 Europe / United Kingdom / Wales |
| EPI_ISL_512544 | 7/23/2020 | 8/11/2020 Europe / United Kingdom / Wales |
| EPI_ISL_512545 | 7/25/2020 | 8/11/2020 Europe / United Kingdom / Wales |
| EPI_ISL_512547 | 6/20/2020 | 8/11/2020 North America / USA / Florida   |
| EPI_ISL_512549 | 6/19/2020 | 8/11/2020 North America / USA / Florida   |
| EPI_ISL_512550 | 6/19/2020 | 8/11/2020 North America / USA / Florida   |
| EPI_ISL_512552 | 6/20/2020 | 8/11/2020 North America / USA / Florida   |
| EPI_ISL_512554 | 6/22/2020 | 8/11/2020 North America / USA / Florida   |
| EPI_ISL_512555 | 6/22/2020 | 8/11/2020 North America / USA / Florida   |
| EPI_ISL_512556 | 6/22/2020 | 8/11/2020 North America / USA / Florida   |
| EPI_ISL_512557 | 6/23/2020 | 8/11/2020 North America / USA / Florida   |
| EPI_ISL_512558 | 6/23/2020 | 8/11/2020 North America / USA / Florida   |
| EPI_ISL_512559 | 6/22/2020 | 8/11/2020 North America / USA / Florida   |
| EPI_ISL_512560 | 6/23/2020 | 8/11/2020 North America / USA / Florida   |
| EPI_ISL_512561 | 6/23/2020 | 8/11/2020 North America / USA / Florida   |
| EPI_ISL_512562 | 6/27/2020 | 8/11/2020 North America / USA / Florida   |
| EPI_ISL_512563 | 6/27/2020 | 8/11/2020 North America / USA / Florida   |
| EPI_ISL_512564 | 6/27/2020 | 8/11/2020 North America / USA / Florida   |
| EPI_ISL_512565 | 6/27/2020 | 8/11/2020 North America / USA / Florida   |
| EPI_ISL_512566 | 6/28/2020 | 8/11/2020 North America / USA / Florida   |
| EPI_ISL_512567 | 6/28/2020 | 8/11/2020 North America / USA / Florida   |
| EPI_ISL_512568 | 6/28/2020 | 8/11/2020 North America / USA / Florida   |
| EPI_ISL_512570 | 6/28/2020 | 8/11/2020 North America / USA / Florida   |
| EPI_ISL_512571 | 6/28/2020 | 8/11/2020 North America / USA / Florida   |
| EPI_ISL_512572 | 6/29/2020 | 8/11/2020 North America / USA / Florida   |
| EPI_ISL_512573 | 6/30/2020 | 8/11/2020 North America / USA / Florida   |

|                |           |                                         |
|----------------|-----------|-----------------------------------------|
| EPI_ISL_512575 | 6/29/2020 | 8/11/2020 North America / USA / Florida |
| EPI_ISL_512578 | 6/29/2020 | 8/11/2020 North America / USA / Florida |
| EPI_ISL_512579 | 6/29/2020 | 8/11/2020 North America / USA / Florida |
| EPI_ISL_512597 | 6/23/2020 | 8/11/2020 Europe / Ukraine              |
| EPI_ISL_512598 | 6/23/2020 | 8/11/2020 Europe / Ukraine              |
| EPI_ISL_512599 | 6/23/2020 | 8/11/2020 Europe / Ukraine              |
| EPI_ISL_512600 | 6/23/2020 | 8/11/2020 Europe / Ukraine              |
| EPI_ISL_512603 | 5/27/2020 | 8/11/2020 Europe / Ukraine              |
| EPI_ISL_512604 | 5/27/2020 | 8/11/2020 Europe / Ukraine              |
| EPI_ISL_512605 | 5/27/2020 | 8/11/2020 Europe / Ukraine              |
| EPI_ISL_512606 | 5/27/2020 | 8/11/2020 Europe / Ukraine              |
| EPI_ISL_512607 | 5/27/2020 | 8/11/2020 Europe / Ukraine              |
| EPI_ISL_512608 | 5/27/2020 | 8/11/2020 Europe / Ukraine              |
| EPI_ISL_512609 | 5/27/2020 | 8/11/2020 Europe / Ukraine              |
| EPI_ISL_512610 | 5/27/2020 | 8/11/2020 Europe / Ukraine              |
| EPI_ISL_512611 | 5/27/2020 | 8/11/2020 Europe / Ukraine              |
| EPI_ISL_512612 | 6/24/2020 | 8/11/2020 Europe / Ukraine              |
| EPI_ISL_512614 | 6/26/2020 | 8/11/2020 Europe / Ukraine              |
| EPI_ISL_512615 | 6/23/2020 | 8/11/2020 Europe / Ukraine              |
| EPI_ISL_512616 | 7/10/2020 | 8/11/2020 Europe / Ukraine              |
| EPI_ISL_512617 | 7/10/2020 | 8/11/2020 Europe / Ukraine              |
| EPI_ISL_512618 | 7/11/2020 | 8/11/2020 Europe / Ukraine              |
| EPI_ISL_512620 | 5/27/2020 | 8/11/2020 Europe / Ukraine              |
| EPI_ISL_512621 | 5/27/2020 | 8/11/2020 Europe / Ukraine              |
| EPI_ISL_512622 | 5/27/2020 | 8/11/2020 Europe / Ukraine              |
| EPI_ISL_512623 | 5/27/2020 | 8/11/2020 Europe / Ukraine              |
| EPI_ISL_512624 | 5/27/2020 | 8/11/2020 Europe / Ukraine              |
| EPI_ISL_512625 | 5/27/2020 | 8/11/2020 Europe / Ukraine              |
| EPI_ISL_512626 | 5/16/2020 | 8/11/2020 Europe / Ukraine              |
| EPI_ISL_512628 | 6/23/2020 | 8/11/2020 Europe / Ukraine              |
| EPI_ISL_512629 | 6/24/2020 | 8/11/2020 Europe / Ukraine              |
| EPI_ISL_512631 | 6/24/2020 | 8/11/2020 Europe / Ukraine              |
| EPI_ISL_512632 | 6/24/2020 | 8/11/2020 Europe / Ukraine              |
| EPI_ISL_512634 | 5/28/2020 | 8/11/2020 Europe / Ukraine              |
| EPI_ISL_512636 | 5/8/2020  | 8/11/2020 Europe / Ukraine              |
| EPI_ISL_512638 | 2020      | 8/11/2020 Europe / Ukraine              |
| EPI_ISL_512640 | 4/24/2020 | 8/11/2020 Europe / Ukraine              |
| EPI_ISL_512641 | 5/16/2020 | 8/11/2020 Europe / Ukraine              |
| EPI_ISL_512642 | 5/15/2020 | 8/11/2020 Europe / Ukraine              |
| EPI_ISL_512643 | 5/15/2020 | 8/11/2020 Europe / Ukraine              |
| EPI_ISL_512645 | 7/22/2020 | 8/11/2020 Europe / Latvia               |
| EPI_ISL_512646 | 7/7/2020  | 8/11/2020 Europe / Latvia               |
| EPI_ISL_512647 | 6/26/2020 | 8/11/2020 Europe / Latvia               |
| EPI_ISL_512648 | 7/14/2020 | 8/11/2020 Europe / Latvia               |
| EPI_ISL_512649 | 7/21/2020 | 8/11/2020 Europe / Latvia               |
| EPI_ISL_512650 | 7/21/2020 | 8/11/2020 Europe / Latvia               |
| EPI_ISL_512651 | 7/23/2020 | 8/11/2020 Europe / Latvia               |

|                |           |                                                                 |
|----------------|-----------|-----------------------------------------------------------------|
| EPI_ISL_512652 | 7/25/2020 | 8/11/2020 Europe / Latvia                                       |
| EPI_ISL_512653 | 3/9/2020  | 8/11/2020 North America / Costa Rica / San Jose / Desamparados  |
| EPI_ISL_512654 | 3/17/2020 | 8/11/2020 North America / Costa Rica / San Jose / Montes de Oca |
| EPI_ISL_512655 | 3/20/2020 | 8/11/2020 North America / Costa Rica / San Jose / Moravia       |
| EPI_ISL_512656 | 3/19/2020 | 8/11/2020 North America / Costa Rica / San Jose / San Jose      |
| EPI_ISL_512657 | 3/22/2020 | 8/11/2020 North America / Costa Rica / San Jose / Tibas         |
| EPI_ISL_512658 | 3/21/2020 | 8/11/2020 North America / Costa Rica / Puntarenas / Garabito    |
| EPI_ISL_512659 | 6/8/2020  | 8/11/2020 North America / Costa Rica / Alajuela / San Carlos    |
| EPI_ISL_512660 | 6/11/2020 | 8/11/2020 North America / Costa Rica / Alajuela / Foreigner     |
| EPI_ISL_512661 | 6/11/2020 | 8/11/2020 North America / Costa Rica / Alajuela / Foreigner     |
| EPI_ISL_512662 | 6/12/2020 | 8/11/2020 North America / Costa Rica / San Jose / San Jose      |
| EPI_ISL_512663 | 6/17/2020 | 8/11/2020 North America / Costa Rica / Alajuela / Alajuela      |
| EPI_ISL_512664 | 6/18/2020 | 8/11/2020 North America / Costa Rica / Alajuela / Alajuela      |
| EPI_ISL_512665 | 6/18/2020 | 8/11/2020 North America / Costa Rica / San Jose / Alajuelita    |
| EPI_ISL_512666 | 6/19/2020 | 8/11/2020 North America / Costa Rica / Guanacaste / La Cruz     |
| EPI_ISL_512667 | 6/20/2020 | 8/11/2020 North America / Costa Rica / Guanacaste / La Cruz     |
| EPI_ISL_512668 | 6/19/2020 | 8/11/2020 North America / Costa Rica / Puntarenas / Corredores  |
| EPI_ISL_512669 | 6/20/2020 | 8/11/2020 North America / Costa Rica / Alajuela / Alajuela      |
| EPI_ISL_512670 | 6/19/2020 | 8/11/2020 North America / Costa Rica / Alajuela / Grecia        |
| EPI_ISL_512671 | 6/21/2020 | 8/11/2020 North America / Costa Rica / San Jose / Escazu        |
| EPI_ISL_512672 | 7/2/2020  | 8/11/2020 North America / Costa Rica / Heredia                  |
| EPI_ISL_512673 | 7/2/2020  | 8/11/2020 North America / Costa Rica / Limon                    |
| EPI_ISL_512674 | 7/2/2020  | 8/11/2020 North America / Costa Rica                            |
| EPI_ISL_512675 | 7/2/2020  | 8/11/2020 North America / Costa Rica / Heredia                  |
| EPI_ISL_512676 | 6/27/2020 | 8/11/2020 North America / USA / Florida                         |
| EPI_ISL_512811 | 3/30/2020 | 8/11/2020 Africa / Sierra Leone                                 |
| EPI_ISL_512812 | 3/31/2020 | 8/11/2020 Africa / Sierra Leone                                 |
| EPI_ISL_512813 | 4/23/2020 | 8/11/2020 Africa / Sierra Leone                                 |
| EPI_ISL_512814 | 4/3/2020  | 8/11/2020 Africa / Sierra Leone                                 |
| EPI_ISL_512815 | 4/3/2020  | 8/11/2020 Africa / Sierra Leone                                 |
| EPI_ISL_512816 | 4/10/2020 | 8/11/2020 Africa / Sierra Leone                                 |
| EPI_ISL_512817 | 4/10/2020 | 8/11/2020 Africa / Sierra Leone                                 |
| EPI_ISL_512818 | 4/8/2020  | 8/11/2020 Africa / Sierra Leone                                 |
| EPI_ISL_512820 | 4/14/2020 | 8/11/2020 Africa / Sierra Leone                                 |
| EPI_ISL_512821 | 4/27/2020 | 8/11/2020 Africa / Sierra Leone                                 |
| EPI_ISL_513310 | 3/18/2020 | 8/11/2020 Europe / United Kingdom                               |
| EPI_ISL_513312 | 3/19/2020 | 8/11/2020 North America / Cuba                                  |
| EPI_ISL_512712 | 4/4/2020  | 8/12/2020 Oceania / Australia / Western Australia               |
| EPI_ISL_512713 | 4/8/2020  | 8/12/2020 Oceania / Australia / Western Australia               |
| EPI_ISL_512714 | 4/8/2020  | 8/12/2020 Oceania / Australia / Western Australia               |
| EPI_ISL_512715 | 5/7/2020  | 8/12/2020 Oceania / Australia / Western Australia               |
| EPI_ISL_512716 | 5/12/2020 | 8/12/2020 Oceania / Australia / Western Australia               |
| EPI_ISL_512717 | 5/30/2020 | 8/12/2020 Oceania / Australia / Western Australia               |
| EPI_ISL_512719 | 6/3/2020  | 8/12/2020 Oceania / Australia / Western Australia               |
| EPI_ISL_512720 | 6/4/2020  | 8/12/2020 Oceania / Australia / Western Australia               |
| EPI_ISL_512722 | 7/3/2020  | 8/12/2020 Oceania / Australia / Western Australia               |
| EPI_ISL_512723 | 7/3/2020  | 8/12/2020 Oceania / Australia / Western Australia               |

|                |           |                                                   |
|----------------|-----------|---------------------------------------------------|
| EPI_ISL_512724 | 7/4/2020  | 8/12/2020 Oceania / Australia / Western Australia |
| EPI_ISL_512725 | 7/7/2020  | 8/12/2020 Oceania / Australia / Western Australia |
| EPI_ISL_512727 | 7/7/2020  | 8/12/2020 Oceania / Australia / Western Australia |
| EPI_ISL_512728 | 7/8/2020  | 8/12/2020 Oceania / Australia / Western Australia |
| EPI_ISL_512730 | 7/9/2020  | 8/12/2020 Oceania / Australia / Western Australia |
| EPI_ISL_512732 | 7/13/2020 | 8/12/2020 Oceania / Australia / Western Australia |
| EPI_ISL_512734 | 7/13/2020 | 8/12/2020 Oceania / Australia / Western Australia |
| EPI_ISL_512735 | 7/13/2020 | 8/12/2020 Oceania / Australia / Western Australia |
| EPI_ISL_512737 | 5/11/2020 | 8/12/2020 Oceania / Australia / Western Australia |
| EPI_ISL_512738 | 3/30/2020 | 8/12/2020 Oceania / Australia / Western Australia |
| EPI_ISL_512739 | 3/30/2020 | 8/12/2020 Oceania / Australia / Western Australia |
| EPI_ISL_512741 | 3/20/2020 | 8/12/2020 Oceania / Australia / Western Australia |
| EPI_ISL_512742 | 3/21/2020 | 8/12/2020 Oceania / Australia / Western Australia |
| EPI_ISL_512743 | 3/24/2020 | 8/12/2020 Oceania / Australia / Western Australia |
| EPI_ISL_512744 | 3/26/2020 | 8/12/2020 Oceania / Australia / Western Australia |
| EPI_ISL_512748 | 4/9/2020  | 8/12/2020 Oceania / Australia / Western Australia |
| EPI_ISL_512749 | 3/27/2020 | 8/12/2020 Oceania / Australia / Western Australia |
| EPI_ISL_512750 | 3/27/2020 | 8/12/2020 Oceania / Australia / Western Australia |
| EPI_ISL_512752 | 4/5/2020  | 8/12/2020 Oceania / Australia / Western Australia |
| EPI_ISL_512754 | 4/5/2020  | 8/12/2020 Oceania / Australia / Western Australia |
| EPI_ISL_512755 | 3/25/2020 | 8/12/2020 Oceania / Australia / Western Australia |
| EPI_ISL_512756 | 3/27/2020 | 8/12/2020 Oceania / Australia / Western Australia |
| EPI_ISL_512757 | 4/8/2020  | 8/12/2020 Oceania / Australia / Western Australia |
| EPI_ISL_512758 | 4/16/2020 | 8/12/2020 Oceania / Australia / Western Australia |
| EPI_ISL_512759 | 3/17/2020 | 8/12/2020 Oceania / Australia / Western Australia |
| EPI_ISL_512760 | 3/17/2020 | 8/12/2020 Oceania / Australia / Western Australia |
| EPI_ISL_512761 | 3/18/2020 | 8/12/2020 Oceania / Australia / Western Australia |
| EPI_ISL_512762 | 3/20/2020 | 8/12/2020 Oceania / Australia / Western Australia |
| EPI_ISL_512764 | 3/29/2020 | 8/12/2020 Oceania / Australia / Western Australia |
| EPI_ISL_512765 | 7/15/2020 | 8/12/2020 Oceania / Australia / Western Australia |
| EPI_ISL_512785 | 3/19/2020 | 8/12/2020 North America / USA / Florida           |
| EPI_ISL_512787 | 3/27/2020 | 8/12/2020 North America / USA / Florida           |
| EPI_ISL_512789 | 3/26/2020 | 8/12/2020 North America / USA / Wyoming           |
| EPI_ISL_512790 | 3/28/2020 | 8/12/2020 North America / USA / Wyoming           |
| EPI_ISL_512795 | 3/19/2020 | 8/12/2020 North America / USA / Mississippi       |
| EPI_ISL_512797 | 3/25/2020 | 8/12/2020 North America / USA / Mississippi       |
| EPI_ISL_512798 | 3/30/2020 | 8/12/2020 North America / USA / Mississippi       |
| EPI_ISL_512799 | 3/31/2020 | 8/12/2020 North America / USA / Idaho             |
| EPI_ISL_512800 | 4/1/2020  | 8/12/2020 North America / USA / Idaho             |
| EPI_ISL_512801 | 3/25/2020 | 8/12/2020 North America / USA / Florida           |
| EPI_ISL_512802 | 3/25/2020 | 8/12/2020 North America / USA / Florida           |
| EPI_ISL_512803 | 3/27/2020 | 8/12/2020 North America / USA / Florida           |
| EPI_ISL_512805 | 3/27/2020 | 8/12/2020 North America / USA / Colorado          |
| EPI_ISL_512806 | 3/22/2020 | 8/12/2020 North America / USA / Ohio              |
| EPI_ISL_512807 | 3/26/2020 | 8/12/2020 North America / USA / Ohio              |
| EPI_ISL_512808 | 3/27/2020 | 8/12/2020 North America / USA / Ohio              |
| EPI_ISL_512809 | 4/1/2020  | 8/12/2020 North America / USA / Ohio              |



|                |           |                                                           |
|----------------|-----------|-----------------------------------------------------------|
| EPI_ISL_512810 | 5/15/2020 | 8/12/2020 Europe / Ukraine                                |
| EPI_ISL_512822 | 4/10/2020 | 8/12/2020 Asia / Singapore                                |
| EPI_ISL_512823 | 4/6/2020  | 8/12/2020 Asia / Singapore                                |
| EPI_ISL_512824 | 4/6/2020  | 8/12/2020 Asia / Singapore                                |
| EPI_ISL_512825 | 4/6/2020  | 8/12/2020 Asia / Singapore                                |
| EPI_ISL_512826 | 4/8/2020  | 8/12/2020 Asia / Singapore                                |
| EPI_ISL_512827 | 6/4/2020  | 8/12/2020 Asia / Singapore                                |
| EPI_ISL_512828 | 6/4/2020  | 8/12/2020 Asia / Singapore                                |
| EPI_ISL_512829 | 6/4/2020  | 8/12/2020 Asia / Singapore                                |
| EPI_ISL_512830 | 4/10/2020 | 8/12/2020 Asia / Singapore                                |
| EPI_ISL_512832 | 7/22/2020 | 8/12/2020 Asia / Singapore                                |
| EPI_ISL_512833 | 7/23/2020 | 8/12/2020 Asia / Singapore                                |
| EPI_ISL_512834 | 7/17/2020 | 8/12/2020 Asia / Singapore                                |
| EPI_ISL_512835 | 7/17/2020 | 8/12/2020 Asia / Singapore                                |
| EPI_ISL_512836 | 7/17/2020 | 8/12/2020 Asia / Singapore                                |
| EPI_ISL_512837 | 7/25/2020 | 8/12/2020 Asia / Singapore                                |
| EPI_ISL_512838 | 7/26/2020 | 8/12/2020 Asia / Singapore                                |
| EPI_ISL_512839 | 7/27/2020 | 8/12/2020 Asia / Singapore                                |
| EPI_ISL_512840 | 7/27/2020 | 8/12/2020 Asia / Singapore                                |
| EPI_ISL_512841 | 7/29/2020 | 8/12/2020 Asia / Singapore                                |
| EPI_ISL_512842 | 8/2/2020  | 8/12/2020 Asia / Singapore                                |
| EPI_ISL_512844 | 4/22/2020 | 8/12/2020 Asia / Myanmar / Yangon                         |
| EPI_ISL_512846 | 7/2/2020  | 8/12/2020 North America / Costa Rica / Cartago / La Union |
| EPI_ISL_512849 | 3/23/2020 | 8/12/2020 Asia / Thailand / Bangkok                       |
| EPI_ISL_512851 | 3/16/2020 | 8/12/2020 Asia / Thailand / Bangkok                       |
| EPI_ISL_512852 | 3/16/2020 | 8/12/2020 Asia / Thailand / Bangkok                       |
| EPI_ISL_512856 | 3/18/2020 | 8/12/2020 Asia / Thailand / Bangkok                       |
| EPI_ISL_512857 | 3/18/2020 | 8/12/2020 Asia / Thailand / Bangkok                       |
| EPI_ISL_512858 | 3/18/2020 | 8/12/2020 Asia / Thailand / Bangkok                       |
| EPI_ISL_512859 | 3/18/2020 | 8/12/2020 Asia / Thailand / Bangkok                       |
| EPI_ISL_512860 | 3/18/2020 | 8/12/2020 Asia / Thailand / Bangkok                       |
| EPI_ISL_512861 | 3/18/2020 | 8/12/2020 Asia / Thailand / Bangkok                       |
| EPI_ISL_512862 | 3/18/2020 | 8/12/2020 Asia / Thailand / Bangkok                       |
| EPI_ISL_512863 | 3/18/2020 | 8/12/2020 Asia / Thailand / Bangkok                       |
| EPI_ISL_512864 | 3/18/2020 | 8/12/2020 Asia / Thailand / Bangkok                       |
| EPI_ISL_512866 | 3/25/2020 | 8/12/2020 Asia / Thailand / Bangkok                       |
| EPI_ISL_512869 | 3/25/2020 | 8/12/2020 Asia / Thailand / Bangkok                       |
| EPI_ISL_512874 | 6/23/2020 | 8/12/2020 Asia / Saudi Arabia / Jeddah                    |
| EPI_ISL_512875 | 6/23/2020 | 8/12/2020 Asia / Saudi Arabia / Jeddah                    |
| EPI_ISL_512876 | 6/23/2020 | 8/12/2020 Asia / Saudi Arabia / Jeddah                    |
| EPI_ISL_512877 | 6/23/2020 | 8/12/2020 Asia / Saudi Arabia / Jeddah                    |
| EPI_ISL_512878 | 6/17/2020 | 8/12/2020 Asia / Saudi Arabia / Jeddah                    |
| EPI_ISL_512879 | 6/17/2020 | 8/12/2020 Asia / Saudi Arabia / Jeddah                    |
| EPI_ISL_512880 | 6/17/2020 | 8/12/2020 Asia / Saudi Arabia / Jeddah                    |
| EPI_ISL_512881 | 6/17/2020 | 8/12/2020 Asia / Saudi Arabia / Jeddah                    |
| EPI_ISL_512882 | 6/23/2020 | 8/12/2020 Asia / Saudi Arabia / Jeddah                    |
| EPI_ISL_512883 | 6/23/2020 | 8/12/2020 Asia / Saudi Arabia / Jeddah                    |



















|                |           |                                                                     |
|----------------|-----------|---------------------------------------------------------------------|
| EPI_ISL_513291 | 7/5/2020  | 8/12/2020 North America / USA / Florida / Miami-Dade County / Miami |
| EPI_ISL_513292 | 6/29/2020 | 8/12/2020 North America / USA / Puerto Rico / Ponce                 |
| EPI_ISL_513293 | 6/30/2020 | 8/12/2020 North America / USA / Puerto Rico / Ponce                 |
| EPI_ISL_513314 | 3/6/2020  | 8/13/2020 Europe / Czech Republic / Prague                          |
| EPI_ISL_513315 | 4/2/2020  | 8/13/2020 Oceania / Australia / New South Wales / Sydney            |
| EPI_ISL_513316 | 4/9/2020  | 8/13/2020 Oceania / Australia / New South Wales / Sydney            |
| EPI_ISL_513317 | 3/26/2020 | 8/13/2020 Oceania / Australia / New South Wales / Sydney            |
| EPI_ISL_513318 | 7/12/2020 | 8/13/2020 Oceania / Australia / New South Wales / Sydney            |
| EPI_ISL_513319 | 7/12/2020 | 8/13/2020 Oceania / Australia / New South Wales / Sydney            |
| EPI_ISL_513320 | 7/16/2020 | 8/13/2020 Oceania / Australia / New South Wales / Sydney            |
| EPI_ISL_513321 | 7/18/2020 | 8/13/2020 Oceania / Australia / New South Wales / Sydney            |
| EPI_ISL_513322 | 7/17/2020 | 8/13/2020 Oceania / Australia / New South Wales / Sydney            |
| EPI_ISL_513323 | 7/16/2020 | 8/13/2020 Oceania / Australia / New South Wales / Sydney            |
| EPI_ISL_513324 | 7/15/2020 | 8/13/2020 Oceania / Australia / New South Wales / Sydney            |
| EPI_ISL_513325 | 7/17/2020 | 8/13/2020 Oceania / Australia / New South Wales / Sydney            |
| EPI_ISL_513326 | 7/18/2020 | 8/13/2020 Oceania / Australia / New South Wales / Sydney            |
| EPI_ISL_513327 | 7/18/2020 | 8/13/2020 Oceania / Australia / New South Wales / Sydney            |
| EPI_ISL_513328 | 7/17/2020 | 8/13/2020 Oceania / Australia / New South Wales / Sydney            |
| EPI_ISL_513329 | 7/15/2020 | 8/13/2020 Oceania / Australia / New South Wales / Sydney            |
| EPI_ISL_513330 | 7/13/2020 | 8/13/2020 Oceania / Australia / New South Wales / Sydney            |
| EPI_ISL_513331 | 7/18/2020 | 8/13/2020 Oceania / Australia / New South Wales / Sydney            |
| EPI_ISL_513332 | 7/18/2020 | 8/13/2020 Oceania / Australia / New South Wales / Sydney            |
| EPI_ISL_513333 | 7/20/2020 | 8/13/2020 Oceania / Australia / New South Wales / Sydney            |
| EPI_ISL_513334 | 7/20/2020 | 8/13/2020 Oceania / Australia / New South Wales / Sydney            |
| EPI_ISL_513335 | 7/20/2020 | 8/13/2020 Oceania / Australia / New South Wales / Sydney            |
| EPI_ISL_513336 | 7/20/2020 | 8/13/2020 Oceania / Australia / New South Wales / Sydney            |
| EPI_ISL_513337 | 7/20/2020 | 8/13/2020 Oceania / Australia / New South Wales / Sydney            |
| EPI_ISL_513338 | 7/20/2020 | 8/13/2020 Oceania / Australia / New South Wales / Sydney            |
| EPI_ISL_513339 | 7/21/2020 | 8/13/2020 Oceania / Australia / New South Wales / Sydney            |
| EPI_ISL_513340 | 7/22/2020 | 8/13/2020 Oceania / Australia / New South Wales / Sydney            |
| EPI_ISL_513341 | 7/22/2020 | 8/13/2020 Oceania / Australia / New South Wales / Sydney            |
| EPI_ISL_513342 | 7/22/2020 | 8/13/2020 Oceania / Australia / New South Wales / Sydney            |
| EPI_ISL_513343 | 7/24/2020 | 8/13/2020 Oceania / Australia / New South Wales / Sydney            |
| EPI_ISL_513344 | 7/24/2020 | 8/13/2020 Oceania / Australia / New South Wales / Sydney            |
| EPI_ISL_513345 | 7/25/2020 | 8/13/2020 Oceania / Australia / New South Wales / Sydney            |
| EPI_ISL_513346 | 7/25/2020 | 8/13/2020 Oceania / Australia / New South Wales / Sydney            |
| EPI_ISL_513347 | 7/21/2020 | 8/13/2020 Oceania / Australia / New South Wales / Sydney            |
| EPI_ISL_513348 | 7/25/2020 | 8/13/2020 Oceania / Australia / New South Wales / Sydney            |
| EPI_ISL_513349 | 7/25/2020 | 8/13/2020 Oceania / Australia / New South Wales / Sydney            |
| EPI_ISL_513350 | 7/25/2020 | 8/13/2020 Oceania / Australia / New South Wales / Sydney            |
| EPI_ISL_513351 | 7/25/2020 | 8/13/2020 Oceania / Australia / New South Wales / Sydney            |
| EPI_ISL_513352 | 7/25/2020 | 8/13/2020 Oceania / Australia / New South Wales / Sydney            |
| EPI_ISL_513353 | 7/26/2020 | 8/13/2020 Oceania / Australia / New South Wales / Sydney            |
| EPI_ISL_513354 | 7/26/2020 | 8/13/2020 Oceania / Australia / New South Wales / Sydney            |
| EPI_ISL_513355 | 7/26/2020 | 8/13/2020 Oceania / Australia / New South Wales / Sydney            |
| EPI_ISL_513356 | 7/26/2020 | 8/13/2020 Oceania / Australia / New South Wales / Sydney            |
| EPI_ISL_513357 | 7/30/2020 | 8/13/2020 Oceania / Australia / New South Wales / Sydney            |









|                |           |                                                                     |
|----------------|-----------|---------------------------------------------------------------------|
| EPI_ISL_513553 | 4/20/2020 | 8/13/2020 South America / Brazil / Rio de Janeiro                   |
| EPI_ISL_513556 | 4/22/2020 | 8/13/2020 South America / Brazil / Rio de Janeiro                   |
| EPI_ISL_513557 | 4/22/2020 | 8/13/2020 South America / Brazil / Rio de Janeiro                   |
| EPI_ISL_513558 | 4/22/2020 | 8/13/2020 South America / Brazil / Rio de Janeiro                   |
| EPI_ISL_513559 | 4/22/2020 | 8/13/2020 South America / Brazil / Rio de Janeiro                   |
| EPI_ISL_513560 | 4/22/2020 | 8/13/2020 South America / Brazil / Rio de Janeiro                   |
| EPI_ISL_513561 | 4/22/2020 | 8/13/2020 South America / Brazil / Rio de Janeiro                   |
| EPI_ISL_513562 | 4/22/2020 | 8/13/2020 South America / Brazil / Rio de Janeiro                   |
| EPI_ISL_513563 | 4/24/2020 | 8/13/2020 South America / Brazil / Rio de Janeiro                   |
| EPI_ISL_513564 | 4/24/2020 | 8/13/2020 South America / Brazil / Rio de Janeiro                   |
| EPI_ISL_513567 | 4/24/2020 | 8/13/2020 South America / Brazil / Rio de Janeiro                   |
| EPI_ISL_513568 | 4/24/2020 | 8/13/2020 South America / Brazil / Rio de Janeiro                   |
| EPI_ISL_513571 | 4/24/2020 | 8/13/2020 South America / Brazil / Rio de Janeiro                   |
| EPI_ISL_513572 | 4/24/2020 | 8/13/2020 South America / Brazil / Rio de Janeiro                   |
| EPI_ISL_513573 | 5/4/2020  | 8/13/2020 South America / Brazil / Rio de Janeiro                   |
| EPI_ISL_513574 | 5/4/2020  | 8/13/2020 South America / Brazil / Rio de Janeiro                   |
| EPI_ISL_513575 | 5/4/2020  | 8/13/2020 South America / Brazil / Rio de Janeiro                   |
| EPI_ISL_513576 | 5/4/2020  | 8/13/2020 South America / Brazil / Rio de Janeiro                   |
| EPI_ISL_513577 | 5/4/2020  | 8/13/2020 South America / Brazil / Rio de Janeiro                   |
| EPI_ISL_513578 | 5/4/2020  | 8/13/2020 South America / Brazil / Rio de Janeiro                   |
| EPI_ISL_513579 | 5/4/2020  | 8/13/2020 South America / Brazil / Rio de Janeiro                   |
| EPI_ISL_513580 | 5/4/2020  | 8/13/2020 South America / Brazil / Rio de Janeiro                   |
| EPI_ISL_513581 | 5/5/2020  | 8/13/2020 South America / Brazil / Rio de Janeiro                   |
| EPI_ISL_513582 | 5/5/2020  | 8/13/2020 South America / Brazil / Rio de Janeiro                   |
| EPI_ISL_513583 | 5/5/2020  | 8/13/2020 South America / Brazil / Rio de Janeiro                   |
| EPI_ISL_513584 | 7/16/2020 | 8/13/2020 Europe / United Kingdom / England                         |
| EPI_ISL_513585 | 6/21/2020 | 8/13/2020 Europe / United Kingdom / England                         |
| EPI_ISL_513587 | 6/17/2020 | 8/13/2020 Europe / United Kingdom / England                         |
| EPI_ISL_513588 | 6/21/2020 | 8/13/2020 Europe / United Kingdom / England                         |
| EPI_ISL_513592 | 5/12/2020 | 8/13/2020 Africa / Democratic Republic of the Congo / Kinshasa      |
| EPI_ISL_513597 | 4/30/2020 | 8/13/2020 Africa / Democratic Republic of the Congo / Haut-Katanga  |
| EPI_ISL_513598 | 4/30/2020 | 8/13/2020 Africa / Democratic Republic of the Congo / Kinshasa      |
| EPI_ISL_513600 | 4/30/2020 | 8/13/2020 Africa / Democratic Republic of the Congo / Kinshasa      |
| EPI_ISL_513601 | 4/30/2020 | 8/13/2020 Africa / Democratic Republic of the Congo / Kinshasa      |
| EPI_ISL_513602 | 4/30/2020 | 8/13/2020 Africa / Democratic Republic of the Congo / Kinshasa      |
| EPI_ISL_513604 | 4/30/2020 | 8/13/2020 Africa / Democratic Republic of the Congo / Kinshasa      |
| EPI_ISL_513605 | 4/30/2020 | 8/13/2020 Africa / Democratic Republic of the Congo / Kinshasa      |
| EPI_ISL_513606 | 4/30/2020 | 8/13/2020 Africa / Democratic Republic of the Congo / Kinshasa      |
| EPI_ISL_513607 | 4/30/2020 | 8/13/2020 Africa / Democratic Republic of the Congo / Kinshasa      |
| EPI_ISL_513608 | 4/30/2020 | 8/13/2020 Africa / Democratic Republic of the Congo / Kinshasa      |
| EPI_ISL_513609 | 4/30/2020 | 8/13/2020 Africa / Democratic Republic of the Congo / Kinshasa      |
| EPI_ISL_513610 | 4/30/2020 | 8/13/2020 Africa / Democratic Republic of the Congo / Kinshasa      |
| EPI_ISL_513613 | 5/7/2020  | 8/13/2020 Africa / Democratic Republic of the Congo / Kongo-Central |
| EPI_ISL_513615 | 5/4/2020  | 8/13/2020 Africa / Democratic Republic of the Congo / Kongo-Central |
| EPI_ISL_513616 | 5/4/2020  | 8/13/2020 Africa / Democratic Republic of the Congo / Kongo-Central |
| EPI_ISL_513617 | 5/7/2020  | 8/13/2020 Africa / Democratic Republic of the Congo / Kongo-Central |
| EPI_ISL_513618 | 5/7/2020  | 8/13/2020 Africa / Democratic Republic of the Congo / Kongo-Central |

|                |           |                                                                |
|----------------|-----------|----------------------------------------------------------------|
| EPI_ISL_513630 | 5/23/2020 | 8/13/2020 Africa / Democratic Republic of the Congo / Kinshasa |
| EPI_ISL_513632 | 3/31/2020 | 8/13/2020 North America / USA / Washington                     |
| EPI_ISL_513634 | 4/6/2020  | 8/13/2020 North America / USA / Washington                     |
| EPI_ISL_513635 | 4/6/2020  | 8/13/2020 North America / USA / Washington                     |
| EPI_ISL_513637 | 3/28/2020 | 8/13/2020 North America / USA / Washington                     |
| EPI_ISL_513645 | 4/29/2020 | 8/13/2020 North America / USA / Utah                           |
| EPI_ISL_513647 | 4/29/2020 | 8/13/2020 North America / USA / Utah                           |
| EPI_ISL_513648 | 4/29/2020 | 8/13/2020 North America / USA / Utah                           |
| EPI_ISL_513652 | 4/29/2020 | 8/13/2020 North America / USA / Utah                           |
| EPI_ISL_513657 | 4/29/2020 | 8/13/2020 North America / USA / Utah                           |
| EPI_ISL_513671 | 4/29/2020 | 8/13/2020 North America / USA / Utah                           |
| EPI_ISL_513675 | 4/29/2020 | 8/13/2020 North America / USA / Utah                           |
| EPI_ISL_513677 | 4/29/2020 | 8/13/2020 North America / USA / Utah                           |
| EPI_ISL_513678 | 4/29/2020 | 8/13/2020 North America / USA / Utah                           |
| EPI_ISL_513680 | 4/30/2020 | 8/13/2020 North America / USA / Utah                           |
| EPI_ISL_513683 | 4/29/2020 | 8/13/2020 North America / USA / Utah                           |
| EPI_ISL_513684 | 4/29/2020 | 8/13/2020 North America / USA / Utah                           |
| EPI_ISL_513685 | 4/30/2020 | 8/13/2020 North America / USA / Utah                           |
| EPI_ISL_513686 | 4/29/2020 | 8/13/2020 North America / USA / Utah                           |
| EPI_ISL_513687 | 4/30/2020 | 8/13/2020 North America / USA / Utah                           |
| EPI_ISL_513688 | 4/30/2020 | 8/13/2020 North America / USA / Utah                           |
| EPI_ISL_513690 | 4/30/2020 | 8/13/2020 North America / USA / Utah                           |
| EPI_ISL_513691 | 4/30/2020 | 8/13/2020 North America / USA / Utah                           |
| EPI_ISL_513692 | 4/30/2020 | 8/13/2020 North America / USA / Utah                           |
| EPI_ISL_513696 | 4/30/2020 | 8/13/2020 North America / USA / Utah                           |
| EPI_ISL_513697 | 4/30/2020 | 8/13/2020 North America / USA / Utah                           |
| EPI_ISL_513700 | 5/1/2020  | 8/13/2020 North America / USA / Utah                           |
| EPI_ISL_513701 | 4/30/2020 | 8/13/2020 North America / USA / Utah                           |
| EPI_ISL_513704 | 5/1/2020  | 8/13/2020 North America / USA / Utah                           |
| EPI_ISL_513707 | 5/22/2020 | 8/13/2020 North America / USA / California / Orange County     |
| EPI_ISL_513708 | 5/22/2020 | 8/13/2020 North America / USA / California / Orange County     |
| EPI_ISL_513709 | 5/21/2020 | 8/13/2020 North America / USA / California / Orange County     |
| EPI_ISL_513710 | 5/22/2020 | 8/13/2020 North America / USA / California / Orange County     |
| EPI_ISL_513711 | 5/22/2020 | 8/13/2020 North America / USA / California / Orange County     |
| EPI_ISL_513712 | 5/22/2020 | 8/13/2020 North America / USA / California / Orange County     |
| EPI_ISL_513713 | 5/22/2020 | 8/13/2020 North America / USA / California / Orange County     |
| EPI_ISL_513714 | 5/22/2020 | 8/13/2020 North America / USA / California / Orange County     |
| EPI_ISL_513715 | 5/22/2020 | 8/13/2020 North America / USA / California / Orange County     |
| EPI_ISL_513716 | 5/22/2020 | 8/13/2020 North America / USA / California / Orange County     |
| EPI_ISL_513717 | 5/23/2020 | 8/13/2020 North America / USA / California / Orange County     |
| EPI_ISL_513718 | 5/24/2020 | 8/13/2020 North America / USA / California / Orange County     |
| EPI_ISL_513719 | 5/24/2020 | 8/13/2020 North America / USA / California / Orange County     |
| EPI_ISL_513720 | 5/24/2020 | 8/13/2020 North America / USA / California / Orange County     |
| EPI_ISL_513721 | 5/24/2020 | 8/13/2020 North America / USA / California / Orange County     |
| EPI_ISL_513723 | 5/24/2020 | 8/13/2020 North America / USA / California / Orange County     |
| EPI_ISL_513724 | 5/24/2020 | 8/13/2020 North America / USA / California / Orange County     |
| EPI_ISL_513725 | 5/25/2020 | 8/13/2020 North America / USA / California / Orange County     |









|                |           |                                                                |
|----------------|-----------|----------------------------------------------------------------|
| EPI_ISL_513903 | 5/8/2020  | 8/13/2020 North America / USA / California / Marin County      |
| EPI_ISL_513905 | 5/20/2020 | 8/13/2020 North America / USA / California / Marin County      |
| EPI_ISL_513907 | 5/19/2020 | 8/13/2020 North America / USA / California / Marin County      |
| EPI_ISL_513908 | 5/7/2020  | 8/13/2020 North America / USA / California / Marin County      |
| EPI_ISL_513909 | 5/7/2020  | 8/13/2020 North America / USA / California / Marin County      |
| EPI_ISL_513910 | 5/7/2020  | 8/13/2020 North America / USA / California / Marin County      |
| EPI_ISL_513925 | 5/15/2020 | 8/13/2020 Asia / Pakistan                                      |
| EPI_ISL_513911 | 8/5/2020  | 8/14/2020 Oceania / Australia / South Australia                |
| EPI_ISL_514062 | 4/20/2020 | 8/14/2020 North America / USA                                  |
| EPI_ISL_514063 | 4/20/2020 | 8/14/2020 North America / USA                                  |
| EPI_ISL_514064 | 4/20/2020 | 8/14/2020 North America / USA                                  |
| EPI_ISL_514065 | 4/20/2020 | 8/14/2020 North America / USA                                  |
| EPI_ISL_514066 | 4/20/2020 | 8/14/2020 North America / USA                                  |
| EPI_ISL_514067 | 4/20/2020 | 8/14/2020 North America / USA                                  |
| EPI_ISL_514068 | 4/20/2020 | 8/14/2020 North America / USA                                  |
| EPI_ISL_514069 | 4/20/2020 | 8/14/2020 North America / USA                                  |
| EPI_ISL_514070 | 4/21/2020 | 8/14/2020 North America / USA                                  |
| EPI_ISL_514071 | 4/21/2020 | 8/14/2020 North America / USA                                  |
| EPI_ISL_514072 | 4/21/2020 | 8/14/2020 North America / USA                                  |
| EPI_ISL_514073 | 4/21/2020 | 8/14/2020 North America / USA                                  |
| EPI_ISL_514074 | 4/22/2020 | 8/14/2020 North America / USA                                  |
| EPI_ISL_514075 | 4/22/2020 | 8/14/2020 North America / USA                                  |
| EPI_ISL_514077 | 4/22/2020 | 8/14/2020 North America / USA                                  |
| EPI_ISL_514078 | 4/22/2020 | 8/14/2020 North America / USA                                  |
| EPI_ISL_514079 | 4/22/2020 | 8/14/2020 North America / USA                                  |
| EPI_ISL_514080 | 4/22/2020 | 8/14/2020 North America / USA                                  |
| EPI_ISL_514081 | 4/22/2020 | 8/14/2020 North America / USA                                  |
| EPI_ISL_514082 | 4/23/2020 | 8/14/2020 North America / USA                                  |
| EPI_ISL_514083 | 4/24/2020 | 8/14/2020 North America / USA                                  |
| EPI_ISL_514084 | 4/24/2020 | 8/14/2020 North America / USA                                  |
| EPI_ISL_514085 | 4/24/2020 | 8/14/2020 North America / USA                                  |
| EPI_ISL_514086 | 4/24/2020 | 8/14/2020 North America / USA                                  |
| EPI_ISL_514087 | 4/24/2020 | 8/14/2020 North America / USA                                  |
| EPI_ISL_514088 | 4/24/2020 | 8/14/2020 North America / USA                                  |
| EPI_ISL_514089 | 4/24/2020 | 8/14/2020 North America / USA                                  |
| EPI_ISL_514090 | 4/24/2020 | 8/14/2020 North America / USA                                  |
| EPI_ISL_514091 | 4/24/2020 | 8/14/2020 North America / USA                                  |
| EPI_ISL_514092 | 4/24/2020 | 8/14/2020 North America / USA                                  |
| EPI_ISL_514114 | 4/28/2020 | 8/14/2020 Africa / Democratic Republic of the Congo / Kinshasa |
| EPI_ISL_514115 | 4/28/2020 | 8/14/2020 Africa / Democratic Republic of the Congo / Kinshasa |
| EPI_ISL_514117 | 4/30/2020 | 8/14/2020 Africa / Democratic Republic of the Congo / Kinshasa |
| EPI_ISL_514118 | 4/30/2020 | 8/14/2020 Africa / Democratic Republic of the Congo / Kinshasa |
| EPI_ISL_514119 | 5/1/2020  | 8/14/2020 Africa / Democratic Republic of the Congo / Kinshasa |
| EPI_ISL_514122 | 5/13/2020 | 8/14/2020 Africa / Democratic Republic of the Congo / Kinshasa |
| EPI_ISL_514128 | 4/24/2020 | 8/14/2020 North America / USA                                  |
| EPI_ISL_514129 | 7/24/2020 | 8/14/2020 Asia / Bangladesh / Chittagong / Brahmanbaria        |
| EPI_ISL_514130 | 7/24/2020 | 8/14/2020 Asia / Bangladesh / Chittagong / Brahmanbaria        |



|                |           |                                                           |
|----------------|-----------|-----------------------------------------------------------|
| EPI_ISL_514205 | 6/29/2020 | 8/14/2020 North America / USA / Florida                   |
| EPI_ISL_514207 | 6/29/2020 | 8/14/2020 North America / USA / Florida                   |
| EPI_ISL_514211 | 7/2/2020  | 8/14/2020 North America / USA / Florida                   |
| EPI_ISL_514212 | 7/2/2020  | 8/14/2020 North America / USA / Florida                   |
| EPI_ISL_514213 | 7/6/2020  | 8/14/2020 North America / USA / Florida                   |
| EPI_ISL_514214 | 7/6/2020  | 8/14/2020 North America / USA / Florida                   |
| EPI_ISL_514215 | 7/6/2020  | 8/14/2020 North America / USA / Florida                   |
| EPI_ISL_514216 | 7/7/2020  | 8/14/2020 North America / USA / Florida                   |
| EPI_ISL_514219 | 7/9/2020  | 8/14/2020 North America / USA / Florida                   |
| EPI_ISL_514220 | 7/8/2020  | 8/14/2020 North America / USA / Florida                   |
| EPI_ISL_514222 | 7/9/2020  | 8/14/2020 North America / USA / Florida                   |
| EPI_ISL_514223 | 7/14/2020 | 8/14/2020 North America / USA / Florida                   |
| EPI_ISL_514224 | 7/14/2020 | 8/14/2020 North America / USA / Florida                   |
| EPI_ISL_514225 | 7/14/2020 | 8/14/2020 North America / USA / Florida                   |
| EPI_ISL_514226 | 4/11/2020 | 8/14/2020 South America / Peru / Lima                     |
| EPI_ISL_514227 | 4/12/2020 | 8/14/2020 South America / Peru / Lima                     |
| EPI_ISL_514228 | 7/15/2020 | 8/15/2020 Asia / Bangladesh / Khulna                      |
| EPI_ISL_514229 | 7/15/2020 | 8/15/2020 Asia / Bangladesh / Khulna                      |
| EPI_ISL_514230 | 7/15/2020 | 8/15/2020 Asia / Bangladesh / Khulna                      |
| EPI_ISL_514231 | 7/15/2020 | 8/15/2020 Asia / Bangladesh / Khulna                      |
| EPI_ISL_514232 | 7/15/2020 | 8/15/2020 Asia / Bangladesh / Khulna                      |
| EPI_ISL_514233 | 7/24/2020 | 8/15/2020 Asia / Bangladesh / Chittagong / Brahmanbaria   |
| EPI_ISL_514234 | 7/24/2020 | 8/15/2020 Asia / Bangladesh / Chittagong / Brahmanbaria   |
| EPI_ISL_514235 | 7/24/2020 | 8/15/2020 Asia / Bangladesh / Chittagong / Brahmanbaria   |
| EPI_ISL_514236 | 7/24/2020 | 8/15/2020 Asia / Bangladesh / Chittagong / Brahmanbaria   |
| EPI_ISL_514237 | 7/24/2020 | 8/15/2020 Asia / Bangladesh / Chittagong / Brahmanbaria   |
| EPI_ISL_514238 | 7/21/2020 | 8/15/2020 Asia / Bangladesh / Chittagong / Brahmanbaria   |
| EPI_ISL_514239 | 7/21/2020 | 8/15/2020 Asia / Bangladesh / Chittagong / Brahmanbaria   |
| EPI_ISL_514240 | 7/21/2020 | 8/15/2020 Asia / Bangladesh / Chittagong / Brahmanbaria   |
| EPI_ISL_514241 | 7/21/2020 | 8/15/2020 Asia / Bangladesh / Chittagong / Brahmanbaria   |
| EPI_ISL_514242 | 7/21/2020 | 8/15/2020 Asia / Bangladesh / Chittagong / Chandpur       |
| EPI_ISL_514243 | 7/21/2020 | 8/15/2020 Asia / Bangladesh / Chittagong / Chandpur       |
| EPI_ISL_514244 | 7/18/2020 | 8/15/2020 Asia / Bangladesh / Chittagong / Chandpur       |
| EPI_ISL_514245 | 7/21/2020 | 8/15/2020 Asia / Bangladesh / Chittagong / Brahmanbaria   |
| EPI_ISL_514246 | 7/21/2020 | 8/15/2020 Asia / Bangladesh / Chittagong / Chandpur       |
| EPI_ISL_514247 | 7/21/2020 | 8/15/2020 Asia / Bangladesh / Chittagong / Chandpur       |
| EPI_ISL_514248 | 7/31/2020 | 8/15/2020 Asia / Bangladesh / Dhaka / Narayanganj         |
| EPI_ISL_514249 | 7/31/2020 | 8/15/2020 Asia / Bangladesh / Dhaka / Narayanganj         |
| EPI_ISL_514250 | 7/31/2020 | 8/15/2020 Asia / Bangladesh / Dhaka / Narayanganj         |
| EPI_ISL_514251 | 7/21/2020 | 8/15/2020 Asia / Bangladesh / Chittagong / Chandpur       |
| EPI_ISL_514252 | 7/21/2020 | 8/15/2020 Asia / Bangladesh / Chittagong / Chandpur       |
| EPI_ISL_514253 | 7/12/2020 | 8/15/2020 Asia / Bangladesh / Dhaka / Dhaka / Mohammadpur |
| EPI_ISL_515082 | 3/29/2020 | 8/15/2020 Africa / Ghana                                  |
| EPI_ISL_515084 | 3/28/2020 | 8/15/2020 Africa / Ghana                                  |
| EPI_ISL_515090 | 5/23/2020 | 8/15/2020 Africa / Ghana                                  |
| EPI_ISL_515096 | 5/24/2020 | 8/15/2020 Africa / Ghana                                  |
| EPI_ISL_515098 | 5/20/2020 | 8/15/2020 Africa / Ghana                                  |

|                |           |                                              |
|----------------|-----------|----------------------------------------------|
| EPI_ISL_515100 | 5/20/2020 | 8/15/2020 Africa / Ghana                     |
| EPI_ISL_515101 | 5/22/2020 | 8/15/2020 Africa / Ghana                     |
| EPI_ISL_515102 | 5/25/2020 | 8/15/2020 Africa / Ghana                     |
| EPI_ISL_515108 | 5/25/2020 | 8/15/2020 Africa / Ghana                     |
| EPI_ISL_515110 | 5/25/2020 | 8/15/2020 Africa / Ghana                     |
| EPI_ISL_515111 | 5/24/2020 | 8/15/2020 Africa / Ghana                     |
| EPI_ISL_514264 | 3/31/2020 | 8/16/2020 South America / Peru / Lambayeque  |
| EPI_ISL_514265 | 4/8/2020  | 8/16/2020 South America / Peru / Lambayeque  |
| EPI_ISL_514266 | 2020-07   | 8/16/2020 Asia / Israel / Jerusalem District |
| EPI_ISL_514268 | 7/19/2020 | 8/16/2020 Asia / Israel / Jerusalem District |
| EPI_ISL_514269 | 7/20/2020 | 8/16/2020 Asia / Israel / Jerusalem District |
| EPI_ISL_514270 | 7/20/2020 | 8/16/2020 Asia / Israel / Jerusalem District |
| EPI_ISL_514271 | 7/20/2020 | 8/16/2020 Asia / Israel / Jerusalem District |
| EPI_ISL_514272 | 7/20/2020 | 8/16/2020 Asia / Israel / Jerusalem District |
| EPI_ISL_514274 | 7/20/2020 | 8/16/2020 Asia / Israel / Jerusalem District |
| EPI_ISL_514275 | 7/19/2020 | 8/16/2020 Asia / Israel / Jerusalem District |
| EPI_ISL_514278 | 7/20/2020 | 8/16/2020 Asia / Israel / Jerusalem District |
| EPI_ISL_514279 | 7/20/2020 | 8/16/2020 Asia / Israel / Jerusalem District |
| EPI_ISL_514280 | 7/20/2020 | 8/16/2020 Asia / Israel / Jerusalem District |
| EPI_ISL_514281 | 7/20/2020 | 8/16/2020 Asia / Israel / Jerusalem District |
| EPI_ISL_514283 | 7/20/2020 | 8/16/2020 Asia / Israel / Jerusalem District |
| EPI_ISL_514284 | 7/20/2020 | 8/16/2020 Asia / Israel / Jerusalem District |
| EPI_ISL_514286 | 7/20/2020 | 8/16/2020 Asia / Israel / Jerusalem District |
| EPI_ISL_514287 | 7/20/2020 | 8/16/2020 Asia / Israel / Jerusalem District |
| EPI_ISL_514288 | 7/20/2020 | 8/16/2020 Asia / Israel / Jerusalem District |
| EPI_ISL_514289 | 7/20/2020 | 8/16/2020 Asia / Israel / Jerusalem District |
| EPI_ISL_514290 | 7/20/2020 | 8/16/2020 Asia / Israel / Jerusalem District |
| EPI_ISL_514291 | 7/20/2020 | 8/16/2020 Asia / Israel / Jerusalem District |
| EPI_ISL_514292 | 7/20/2020 | 8/16/2020 Asia / Israel / Jerusalem District |
| EPI_ISL_514293 | 7/20/2020 | 8/16/2020 Asia / Israel / Jerusalem District |
| EPI_ISL_514294 | 7/20/2020 | 8/16/2020 Asia / Israel / Jerusalem District |
| EPI_ISL_514295 | 7/20/2020 | 8/16/2020 Asia / Israel / Jerusalem District |
| EPI_ISL_514296 | 7/20/2020 | 8/16/2020 Asia / Israel / Jerusalem District |
| EPI_ISL_514299 | 7/21/2020 | 8/16/2020 Asia / Israel / Tel Aviv District  |
| EPI_ISL_514300 | 7/21/2020 | 8/16/2020 Asia / Israel / Jerusalem District |
| EPI_ISL_514301 | 7/21/2020 | 8/16/2020 Asia / Israel / Jerusalem District |
| EPI_ISL_514302 | 7/21/2020 | 8/16/2020 Asia / Israel / Jerusalem District |
| EPI_ISL_514303 | 7/21/2020 | 8/16/2020 Asia / Israel / Jerusalem District |
| EPI_ISL_514305 | 7/23/2020 | 8/16/2020 Asia / Israel / Central District   |
| EPI_ISL_514306 | 7/24/2020 | 8/16/2020 Asia / Israel                      |
| EPI_ISL_514308 | 3/17/2020 | 8/16/2020 Asia / Israel / Central District   |
| EPI_ISL_514309 | 3/17/2020 | 8/16/2020 Asia / Israel / Central District   |
| EPI_ISL_514310 | 3/17/2020 | 8/16/2020 Asia / Israel / Central District   |
| EPI_ISL_514311 | 3/18/2020 | 8/16/2020 Asia / Israel / Tel Aviv District  |
| EPI_ISL_514313 | 3/26/2020 | 8/16/2020 Asia / Israel                      |
| EPI_ISL_514314 | 3/30/2020 | 8/16/2020 Asia / Israel / Northern District  |
| EPI_ISL_514315 | 4/10/2020 | 8/16/2020 Asia / Israel / Southern District  |

|                |           |                                                                        |
|----------------|-----------|------------------------------------------------------------------------|
| EPI_ISL_514316 | 4/11/2020 | 8/16/2020 Asia / Israel                                                |
| EPI_ISL_514317 | 4/2/2020  | 8/16/2020 South America / Peru / Loreto                                |
| EPI_ISL_514338 | 3/10/2020 | 8/16/2020 South America / Peru / Cusco                                 |
| EPI_ISL_514753 | 5/1/2020  | 8/16/2020 Asia / Iran / Tehran                                         |
| EPI_ISL_516079 | 3/8/2020  | 8/16/2020 Europe / Italy / Marche / Ancona                             |
| EPI_ISL_516080 | 3/9/2020  | 8/16/2020 Europe / Italy / Marche / Ancona                             |
| EPI_ISL_516081 | 3/9/2020  | 8/16/2020 Europe / Italy / Marche / Ancona                             |
| EPI_ISL_516082 | 3/18/2020 | 8/16/2020 Europe / Italy / Marche / Ancona                             |
| EPI_ISL_516083 | 2/26/2020 | 8/16/2020 Europe / Italy / Marche / Ancona                             |
| EPI_ISL_516084 | 2/28/2020 | 8/16/2020 Europe / Italy / Marche / Ancona                             |
| EPI_ISL_516085 | 2/28/2020 | 8/16/2020 Europe / Italy / Marche / Ancona                             |
| EPI_ISL_516086 | 3/4/2020  | 8/16/2020 Europe / Italy / Marche / Ancona                             |
| EPI_ISL_516087 | 3/4/2020  | 8/16/2020 Europe / Italy / Marche / Ancona                             |
| EPI_ISL_516088 | 3/4/2020  | 8/16/2020 Europe / Italy / Marche / Ancona                             |
| EPI_ISL_514339 | 4/22/2020 | 8/17/2020 South America / Peru / Loreto                                |
| EPI_ISL_514340 | 4/22/2020 | 8/17/2020 South America / Peru / Loreto                                |
| EPI_ISL_514341 | 4/22/2020 | 8/17/2020 South America / Peru / Loreto                                |
| EPI_ISL_514342 | 4/22/2020 | 8/17/2020 South America / Peru / Loreto                                |
| EPI_ISL_514343 | 7/28/2020 | 8/17/2020 Europe / United Kingdom / England                            |
| EPI_ISL_514344 | 7/31/2020 | 8/17/2020 Europe / United Kingdom / England                            |
| EPI_ISL_514345 | 8/3/2020  | 8/17/2020 Europe / United Kingdom / England                            |
| EPI_ISL_514346 | 8/1/2020  | 8/17/2020 Europe / United Kingdom / England                            |
| EPI_ISL_514347 | 8/4/2020  | 8/17/2020 Europe / United Kingdom / England                            |
| EPI_ISL_514348 | 8/5/2020  | 8/17/2020 Europe / United Kingdom / England                            |
| EPI_ISL_514349 | 8/3/2020  | 8/17/2020 Europe / United Kingdom / England                            |
| EPI_ISL_514350 | 7/31/2020 | 8/17/2020 Europe / United Kingdom / England                            |
| EPI_ISL_514351 | 8/5/2020  | 8/17/2020 Europe / United Kingdom / England                            |
| EPI_ISL_514352 | 8/1/2020  | 8/17/2020 Europe / United Kingdom / England                            |
| EPI_ISL_514354 | 6/2/2020  | 8/17/2020 Europe / North Macedonia / Prilep                            |
| EPI_ISL_514355 | 7/20/2020 | 8/17/2020 Africa / South Africa / Gauteng                              |
| EPI_ISL_514360 | 7/20/2020 | 8/17/2020 Africa / South Africa / Gauteng                              |
| EPI_ISL_514367 | 7/20/2020 | 8/17/2020 Africa / South Africa / Gauteng                              |
| EPI_ISL_514375 | 7/13/2020 | 8/17/2020 Africa / South Africa / Gauteng                              |
| EPI_ISL_514382 | 7/13/2020 | 8/17/2020 Africa / South Africa / Gauteng                              |
| EPI_ISL_514424 | 7/26/2020 | 8/17/2020 Africa / South Africa / Gauteng                              |
| EPI_ISL_514425 | 7/14/2020 | 8/17/2020 Europe / Serbia                                              |
| EPI_ISL_514426 | 5/11/2020 | 8/17/2020 Europe / Serbia                                              |
| EPI_ISL_514427 | 7/11/2020 | 8/17/2020 Europe / Serbia                                              |
| EPI_ISL_514428 | 7/15/2020 | 8/17/2020 Europe / Serbia                                              |
| EPI_ISL_514429 | 7/14/2020 | 8/17/2020 Europe / Serbia                                              |
| EPI_ISL_514430 | 4/27/2020 | 8/17/2020 Europe / Serbia                                              |
| EPI_ISL_514431 | 4/21/2020 | 8/17/2020 Europe / Serbia                                              |
| EPI_ISL_514432 | 4/15/2020 | 8/17/2020 Europe / Italy / Campania / Benevento                        |
| EPI_ISL_514434 | 7/22/2020 | 8/17/2020 Asia / Bangladesh / Chittagong / Noakhali / Companiganj Upa: |
| EPI_ISL_514435 | 7/9/2020  | 8/17/2020 Asia / India / Gujarat / Modasa                              |
| EPI_ISL_514436 | 7/9/2020  | 8/17/2020 Asia / India / Gujarat / Modasa                              |
| EPI_ISL_514437 | 7/9/2020  | 8/17/2020 Asia / India / Gujarat / Modasa                              |



|                |           |           |                                                         |
|----------------|-----------|-----------|---------------------------------------------------------|
| EPI_ISL_514440 | 7/22/2020 | 8/17/2020 | Asia / Bangladesh / Chittagong / Noakhali / Companigonj |
| EPI_ISL_514441 | 7/23/2020 | 8/17/2020 | Asia / Bangladesh / Chittagong / Noakhali / Begumganj   |
| EPI_ISL_514443 | 8/2/2020  | 8/17/2020 | Europe / United Kingdom / England                       |
| EPI_ISL_514445 | 7/27/2020 | 8/17/2020 | Europe / United Kingdom / England                       |
| EPI_ISL_514448 | 8/6/2020  | 8/17/2020 | Europe / United Kingdom / England                       |
| EPI_ISL_514449 | 8/6/2020  | 8/17/2020 | Europe / United Kingdom / England                       |
| EPI_ISL_514450 | 7/6/2020  | 8/17/2020 | Europe / United Kingdom / England                       |
| EPI_ISL_514451 | 8/6/2020  | 8/17/2020 | Europe / United Kingdom / England                       |
| EPI_ISL_514452 | 8/4/2020  | 8/17/2020 | Europe / United Kingdom / England                       |
| EPI_ISL_514453 | 8/7/2020  | 8/17/2020 | Europe / United Kingdom / England                       |
| EPI_ISL_514454 | 8/10/2020 | 8/17/2020 | Europe / United Kingdom / England                       |
| EPI_ISL_514457 | 3/17/2020 | 8/17/2020 | Europe / United Kingdom / England                       |
| EPI_ISL_514458 | 2020      | 8/17/2020 | Europe / United Kingdom / England                       |
| EPI_ISL_514459 | 3/17/2020 | 8/17/2020 | Europe / United Kingdom / England                       |
| EPI_ISL_514460 | 3/18/2020 | 8/17/2020 | Europe / United Kingdom / England                       |
| EPI_ISL_514461 | 3/19/2020 | 8/17/2020 | Europe / United Kingdom / England                       |
| EPI_ISL_514462 | 3/18/2020 | 8/17/2020 | Europe / United Kingdom / England                       |
| EPI_ISL_514463 | 3/18/2020 | 8/17/2020 | Europe / United Kingdom / England                       |
| EPI_ISL_514465 | 3/22/2020 | 8/17/2020 | Europe / United Kingdom / England                       |
| EPI_ISL_514466 | 3/23/2020 | 8/17/2020 | Europe / United Kingdom / England                       |
| EPI_ISL_514467 | 2020      | 8/17/2020 | Europe / United Kingdom / England                       |
| EPI_ISL_514468 | 4/6/2020  | 8/17/2020 | Europe / United Kingdom / England                       |
| EPI_ISL_514469 | 4/10/2020 | 8/17/2020 | Europe / United Kingdom / England                       |
| EPI_ISL_514472 | 4/10/2020 | 8/17/2020 | Europe / United Kingdom / England                       |
| EPI_ISL_514473 | 4/10/2020 | 8/17/2020 | Europe / United Kingdom / England                       |
| EPI_ISL_514474 | 4/10/2020 | 8/17/2020 | Europe / United Kingdom / England                       |
| EPI_ISL_514475 | 4/6/2020  | 8/17/2020 | Europe / United Kingdom / England                       |
| EPI_ISL_514476 | 4/12/2020 | 8/17/2020 | Europe / United Kingdom / England                       |
| EPI_ISL_514477 | 4/10/2020 | 8/17/2020 | Europe / United Kingdom / England                       |
| EPI_ISL_514478 | 4/10/2020 | 8/17/2020 | Europe / United Kingdom / England                       |
| EPI_ISL_514479 | 4/10/2020 | 8/17/2020 | Europe / United Kingdom / England                       |
| EPI_ISL_514480 | 4/4/2020  | 8/17/2020 | Europe / United Kingdom / England                       |
| EPI_ISL_514482 | 4/7/2020  | 8/17/2020 | Europe / United Kingdom / England                       |
| EPI_ISL_514484 | 4/13/2020 | 8/17/2020 | Europe / United Kingdom / England                       |
| EPI_ISL_514485 | 3/20/2020 | 8/17/2020 | Europe / United Kingdom / England                       |
| EPI_ISL_514486 | 3/21/2020 | 8/17/2020 | Europe / United Kingdom / England                       |
| EPI_ISL_514490 | 3/27/2020 | 8/17/2020 | Europe / United Kingdom / England                       |
| EPI_ISL_514505 | 4/22/2020 | 8/17/2020 | Europe / United Kingdom / England                       |
| EPI_ISL_514506 | 4/22/2020 | 8/17/2020 | Europe / United Kingdom / England                       |
| EPI_ISL_514508 | 4/22/2020 | 8/17/2020 | Europe / United Kingdom / England                       |
| EPI_ISL_514510 | 4/22/2020 | 8/17/2020 | Europe / United Kingdom / England                       |
| EPI_ISL_514514 | 8/3/2020  | 8/17/2020 | Europe / United Kingdom / Scotland                      |
| EPI_ISL_514515 | 8/5/2020  | 8/17/2020 | Europe / United Kingdom / Scotland                      |
| EPI_ISL_514516 | 8/4/2020  | 8/17/2020 | Europe / United Kingdom / Scotland                      |
| EPI_ISL_514517 | 8/3/2020  | 8/17/2020 | Europe / United Kingdom / Scotland                      |
| EPI_ISL_514518 | 8/2/2020  | 8/17/2020 | Europe / United Kingdom / Scotland                      |
| EPI_ISL_514519 | 8/2/2020  | 8/17/2020 | Europe / United Kingdom / Scotland                      |



|                |           |                                                                    |
|----------------|-----------|--------------------------------------------------------------------|
| EPI_ISL_514571 | 7/28/2020 | 8/17/2020 Europe / United Kingdom / Wales                          |
| EPI_ISL_514572 | 7/29/2020 | 8/17/2020 Europe / United Kingdom / Wales                          |
| EPI_ISL_514573 | 7/28/2020 | 8/17/2020 Europe / United Kingdom / Wales                          |
| EPI_ISL_514574 | 7/28/2020 | 8/17/2020 Europe / United Kingdom / Wales                          |
| EPI_ISL_514575 | 7/30/2020 | 8/17/2020 Europe / United Kingdom / Wales                          |
| EPI_ISL_514576 | 7/29/2020 | 8/17/2020 Europe / United Kingdom / Wales                          |
| EPI_ISL_514577 | 8/1/2020  | 8/17/2020 Europe / United Kingdom / Wales                          |
| EPI_ISL_514578 | 7/27/2020 | 8/17/2020 Europe / United Kingdom / Wales                          |
| EPI_ISL_514579 | 8/3/2020  | 8/17/2020 Europe / United Kingdom / Wales                          |
| EPI_ISL_514580 | 7/21/2020 | 8/17/2020 Asia / Bangladesh / Chittagong / Noakhali / Kabirhat     |
| EPI_ISL_514581 | 6/18/2020 | 8/17/2020 Asia / India / Gujarat / Ahmedabad                       |
| EPI_ISL_514582 | 6/18/2020 | 8/17/2020 Asia / India / Gujarat / Ahmedabad                       |
| EPI_ISL_514583 | 6/18/2020 | 8/17/2020 Asia / India / Gujarat / Ahmedabad                       |
| EPI_ISL_514584 | 6/18/2020 | 8/17/2020 Asia / India / Gujarat / Ahmedabad                       |
| EPI_ISL_514585 | 6/18/2020 | 8/17/2020 Asia / India / Gujarat / Ahmedabad                       |
| EPI_ISL_514586 | 6/18/2020 | 8/17/2020 Asia / India / Gujarat / Ahmedabad                       |
| EPI_ISL_514587 | 6/18/2020 | 8/17/2020 Asia / India / Gujarat / Ahmedabad                       |
| EPI_ISL_514588 | 6/18/2020 | 8/17/2020 Asia / India / Gujarat / Daskroi                         |
| EPI_ISL_514589 | 6/18/2020 | 8/17/2020 Asia / India / Gujarat / Daskroi                         |
| EPI_ISL_514590 | 6/18/2020 | 8/17/2020 Asia / India / Gujarat / Daskroi                         |
| EPI_ISL_514591 | 6/18/2020 | 8/17/2020 Asia / India / Gujarat / Ahmedabad                       |
| EPI_ISL_514592 | 6/18/2020 | 8/17/2020 Asia / India / Gujarat / Ahmedabad                       |
| EPI_ISL_514593 | 6/18/2020 | 8/17/2020 Asia / India / Gujarat / Ahmedabad                       |
| EPI_ISL_514594 | 6/18/2020 | 8/17/2020 Asia / India / Gujarat / Ahmedabad                       |
| EPI_ISL_514595 | 6/18/2020 | 8/17/2020 Asia / India / Gujarat / Ahmedabad                       |
| EPI_ISL_514596 | 6/18/2020 | 8/17/2020 Asia / India / Gujarat / Ahmedabad                       |
| EPI_ISL_514597 | 6/18/2020 | 8/17/2020 Asia / India / Gujarat / Ahmedabad                       |
| EPI_ISL_514598 | 6/18/2020 | 8/17/2020 Asia / India / Gujarat / Ahmedabad                       |
| EPI_ISL_514599 | 6/18/2020 | 8/17/2020 Asia / India / Gujarat / Ahmedabad                       |
| EPI_ISL_514600 | 6/25/2020 | 8/17/2020 Asia / India / Gujarat / Ahmedabad                       |
| EPI_ISL_514601 | 6/25/2020 | 8/17/2020 Asia / India / Gujarat / Ahmedabad                       |
| EPI_ISL_514602 | 6/25/2020 | 8/17/2020 Asia / India / Gujarat / Ahmedabad                       |
| EPI_ISL_514603 | 6/25/2020 | 8/17/2020 Asia / India / Gujarat / Ahmedabad                       |
| EPI_ISL_514604 | 6/25/2020 | 8/17/2020 Asia / India / Gujarat / Ahmedabad                       |
| EPI_ISL_514605 | 6/25/2020 | 8/17/2020 Asia / India / Gujarat / Ahmedabad                       |
| EPI_ISL_514606 | 6/25/2020 | 8/17/2020 Asia / India / Gujarat / Ahmedabad                       |
| EPI_ISL_514607 | 6/25/2020 | 8/17/2020 Asia / India / Gujarat / Ahmedabad                       |
| EPI_ISL_514608 | 6/25/2020 | 8/17/2020 Asia / India / Gujarat / Ahmedabad                       |
| EPI_ISL_514609 | 6/25/2020 | 8/17/2020 Asia / India / Gujarat / Ahmedabad                       |
| EPI_ISL_514610 | 6/15/2020 | 8/17/2020 Asia / India / Gujarat / Vadodara                        |
| EPI_ISL_514611 | 6/5/2020  | 8/17/2020 Asia / India / Gujarat / Kalol                           |
| EPI_ISL_514612 | 6/5/2020  | 8/17/2020 Asia / India / Gujarat / Kalol                           |
| EPI_ISL_514613 | 7/21/2020 | 8/17/2020 Asia / Bangladesh / Chittagong / Noakhali / Kabirhat     |
| EPI_ISL_514615 | 7/20/2020 | 8/17/2020 Asia / Bangladesh / Chittagong / Lakshmipur / Lakshmipur |
| EPI_ISL_514616 | 4/29/2020 | 8/17/2020 North America / USA / Minnesota                          |
| EPI_ISL_514617 | 4/30/2020 | 8/17/2020 North America / USA / Minnesota                          |
| EPI_ISL_514618 | 5/6/2020  | 8/17/2020 North America / USA / Minnesota                          |



|                |           |                                                 |
|----------------|-----------|-------------------------------------------------|
| EPI_ISL_514666 | 3/26/2020 | 8/17/2020 North America / USA / Minnesota       |
| EPI_ISL_514667 | 3/26/2020 | 8/17/2020 North America / USA / Minnesota       |
| EPI_ISL_514668 | 3/26/2020 | 8/17/2020 North America / USA / Minnesota       |
| EPI_ISL_514669 | 3/26/2020 | 8/17/2020 North America / USA / Minnesota       |
| EPI_ISL_514670 | 3/26/2020 | 8/17/2020 North America / USA / Minnesota       |
| EPI_ISL_514671 | 3/26/2020 | 8/17/2020 North America / USA / Minnesota       |
| EPI_ISL_514672 | 3/26/2020 | 8/17/2020 North America / USA / Minnesota       |
| EPI_ISL_514673 | 4/18/2020 | 8/17/2020 North America / USA / Nevada          |
| EPI_ISL_514750 | 4/17/2020 | 8/17/2020 Europe / Russia / Moscow              |
| EPI_ISL_514751 | 4/15/2020 | 8/17/2020 Europe / Italy / Campania / Benevento |
| EPI_ISL_514756 | 5/28/2020 | 8/18/2020 Asia / South Korea                    |
| EPI_ISL_514757 | 5/28/2020 | 8/18/2020 Asia / South Korea                    |
| EPI_ISL_514758 | 5/28/2020 | 8/18/2020 Asia / South Korea                    |
| EPI_ISL_514759 | 5/28/2020 | 8/18/2020 Asia / South Korea                    |
| EPI_ISL_514760 | 5/29/2020 | 8/18/2020 Asia / South Korea                    |
| EPI_ISL_514761 | 5/29/2020 | 8/18/2020 Asia / South Korea                    |
| EPI_ISL_514762 | 5/29/2020 | 8/18/2020 Asia / South Korea                    |
| EPI_ISL_514763 | 5/29/2020 | 8/18/2020 Asia / South Korea                    |
| EPI_ISL_514764 | 5/30/2020 | 8/18/2020 Asia / South Korea                    |
| EPI_ISL_514765 | 5/30/2020 | 8/18/2020 Asia / South Korea                    |
| EPI_ISL_514766 | 5/30/2020 | 8/18/2020 Asia / South Korea                    |
| EPI_ISL_514767 | 5/30/2020 | 8/18/2020 Asia / South Korea                    |
| EPI_ISL_514768 | 5/30/2020 | 8/18/2020 Asia / South Korea                    |
| EPI_ISL_514769 | 5/30/2020 | 8/18/2020 Asia / South Korea                    |
| EPI_ISL_514770 | 5/31/2020 | 8/18/2020 Asia / South Korea                    |
| EPI_ISL_514771 | 5/30/2020 | 8/18/2020 Asia / South Korea                    |
| EPI_ISL_514772 | 5/30/2020 | 8/18/2020 Asia / South Korea                    |
| EPI_ISL_514773 | 5/31/2020 | 8/18/2020 Asia / South Korea                    |
| EPI_ISL_514774 | 5/31/2020 | 8/18/2020 Asia / South Korea                    |
| EPI_ISL_514775 | 5/31/2020 | 8/18/2020 Asia / South Korea                    |
| EPI_ISL_514776 | 5/31/2020 | 8/18/2020 Asia / South Korea                    |
| EPI_ISL_514777 | 5/31/2020 | 8/18/2020 Asia / South Korea                    |
| EPI_ISL_514778 | 5/31/2020 | 8/18/2020 Asia / South Korea                    |
| EPI_ISL_514779 | 5/31/2020 | 8/18/2020 Asia / South Korea                    |
| EPI_ISL_514780 | 5/31/2020 | 8/18/2020 Asia / South Korea                    |
| EPI_ISL_514781 | 5/31/2020 | 8/18/2020 Asia / South Korea                    |
| EPI_ISL_514782 | 5/31/2020 | 8/18/2020 Asia / South Korea                    |
| EPI_ISL_514783 | 5/31/2020 | 8/18/2020 Asia / South Korea                    |
| EPI_ISL_514784 | 5/31/2020 | 8/18/2020 Asia / South Korea                    |
| EPI_ISL_514785 | 5/31/2020 | 8/18/2020 Asia / South Korea                    |
| EPI_ISL_514786 | 5/31/2020 | 8/18/2020 Asia / South Korea                    |
| EPI_ISL_514787 | 5/31/2020 | 8/18/2020 Asia / South Korea                    |
| EPI_ISL_514788 | 5/31/2020 | 8/18/2020 Asia / South Korea                    |
| EPI_ISL_514789 | 6/1/2020  | 8/18/2020 Asia / South Korea                    |
| EPI_ISL_514790 | 5/28/2020 | 8/18/2020 Asia / South Korea                    |
| EPI_ISL_514791 | 5/31/2020 | 8/18/2020 Asia / South Korea                    |
| EPI_ISL_514792 | 5/31/2020 | 8/18/2020 Asia / South Korea                    |













|                |           |                                    |
|----------------|-----------|------------------------------------|
| EPI_ISL_515028 | 7/3/2020  | 8/18/2020 Asia / South Korea       |
| EPI_ISL_515029 | 7/3/2020  | 8/18/2020 Asia / South Korea       |
| EPI_ISL_515030 | 7/3/2020  | 8/18/2020 Asia / South Korea       |
| EPI_ISL_515031 | 7/4/2020  | 8/18/2020 Asia / South Korea       |
| EPI_ISL_515032 | 7/5/2020  | 8/18/2020 Asia / South Korea       |
| EPI_ISL_515033 | 7/6/2020  | 8/18/2020 Asia / South Korea       |
| EPI_ISL_515034 | 7/2/2020  | 8/18/2020 Asia / South Korea       |
| EPI_ISL_515035 | 7/6/2020  | 8/18/2020 Asia / South Korea       |
| EPI_ISL_515036 | 7/6/2020  | 8/18/2020 Asia / South Korea       |
| EPI_ISL_515037 | 7/7/2020  | 8/18/2020 Asia / South Korea       |
| EPI_ISL_515038 | 7/7/2020  | 8/18/2020 Asia / South Korea       |
| EPI_ISL_515039 | 7/8/2020  | 8/18/2020 Asia / South Korea       |
| EPI_ISL_515040 | 7/8/2020  | 8/18/2020 Asia / South Korea       |
| EPI_ISL_515041 | 7/9/2020  | 8/18/2020 Asia / South Korea       |
| EPI_ISL_515042 | 7/9/2020  | 8/18/2020 Asia / South Korea       |
| EPI_ISL_515043 | 7/9/2020  | 8/18/2020 Asia / South Korea       |
| EPI_ISL_515044 | 7/9/2020  | 8/18/2020 Asia / South Korea       |
| EPI_ISL_515045 | 7/9/2020  | 8/18/2020 Asia / South Korea       |
| EPI_ISL_515046 | 7/10/2020 | 8/18/2020 Asia / South Korea       |
| EPI_ISL_515047 | 7/10/2020 | 8/18/2020 Asia / South Korea       |
| EPI_ISL_515048 | 7/10/2020 | 8/18/2020 Asia / South Korea       |
| EPI_ISL_515049 | 7/11/2020 | 8/18/2020 Asia / South Korea       |
| EPI_ISL_515050 | 7/11/2020 | 8/18/2020 Asia / South Korea       |
| EPI_ISL_515052 | 7/11/2020 | 8/18/2020 Asia / South Korea       |
| EPI_ISL_515053 | 7/12/2020 | 8/18/2020 Asia / South Korea       |
| EPI_ISL_515054 | 7/12/2020 | 8/18/2020 Asia / South Korea       |
| EPI_ISL_515055 | 7/14/2020 | 8/18/2020 Europe / Belgium / Liege |
| EPI_ISL_515056 | 7/17/2020 | 8/18/2020 Europe / Belgium / Liege |
| EPI_ISL_515057 | 7/20/2020 | 8/18/2020 Europe / Belgium / Liege |
| EPI_ISL_515058 | 7/10/2020 | 8/18/2020 Europe / Belgium / Liege |
| EPI_ISL_515059 | 7/14/2020 | 8/18/2020 Europe / Belgium / Liege |
| EPI_ISL_515060 | 7/18/2020 | 8/18/2020 Europe / Belgium / Liege |
| EPI_ISL_515061 | 7/16/2020 | 8/18/2020 Europe / Belgium / Liege |
| EPI_ISL_515062 | 7/17/2020 | 8/18/2020 Europe / Belgium / Liege |
| EPI_ISL_515063 | 7/17/2020 | 8/18/2020 Europe / Belgium / Liege |
| EPI_ISL_515064 | 7/17/2020 | 8/18/2020 Europe / Belgium / Liege |
| EPI_ISL_515065 | 7/10/2020 | 8/18/2020 Europe / Belgium / Liege |
| EPI_ISL_515066 | 7/11/2020 | 8/18/2020 Europe / Belgium / Liege |
| EPI_ISL_515067 | 7/18/2020 | 8/18/2020 Europe / Belgium / Liege |
| EPI_ISL_515068 | 7/14/2020 | 8/18/2020 Europe / Belgium / Liege |
| EPI_ISL_515069 | 7/20/2020 | 8/18/2020 Europe / Belgium / Liege |
| EPI_ISL_515070 | 7/20/2020 | 8/18/2020 Europe / Belgium / Liege |
| EPI_ISL_515071 | 7/11/2020 | 8/18/2020 Europe / Belgium / Liege |
| EPI_ISL_515073 | 7/14/2020 | 8/18/2020 Europe / Belgium / Liege |
| EPI_ISL_515074 | 7/7/2020  | 8/18/2020 Europe / Belgium / Liege |
| EPI_ISL_515075 | 7/19/2020 | 8/18/2020 Europe / Belgium / Liege |
| EPI_ISL_515076 | 7/20/2020 | 8/18/2020 Europe / Belgium / Liege |

|                |           |                                           |
|----------------|-----------|-------------------------------------------|
| EPI_ISL_515077 | 7/20/2020 | 8/18/2020 Europe / Belgium / Liege        |
| EPI_ISL_515078 | 7/18/2020 | 8/18/2020 Europe / Belgium / Liege        |
| EPI_ISL_515079 | 7/15/2020 | 8/18/2020 Europe / Belgium / Liege        |
| EPI_ISL_515080 | 7/9/2020  | 8/18/2020 Europe / Belgium / Liege        |
| EPI_ISL_515081 | 7/10/2020 | 8/18/2020 Europe / Belgium / Liege        |
| EPI_ISL_515156 | 7/1/2020  | 8/18/2020 Africa / South Africa / Gauteng |
| EPI_ISL_515166 | 7/5/2020  | 8/18/2020 Africa / South Africa / Gauteng |
| EPI_ISL_515172 | 7/10/2020 | 8/18/2020 Africa / South Africa / Gauteng |
| EPI_ISL_515181 | 3/22/2020 | 8/18/2020 Africa / Ghana                  |
| EPI_ISL_515182 | 3/27/2020 | 8/18/2020 Africa / Ghana                  |
| EPI_ISL_515183 | 3/27/2020 | 8/18/2020 Africa / Ghana                  |
| EPI_ISL_515185 | 7/29/2020 | 8/18/2020 Europe / Latvia                 |
| EPI_ISL_515186 | 7/31/2020 | 8/18/2020 Europe / Latvia                 |
| EPI_ISL_515187 | 8/4/2020  | 8/18/2020 Europe / Latvia                 |
| EPI_ISL_515188 | 8/4/2020  | 8/18/2020 Europe / Latvia                 |
| EPI_ISL_515189 | 8/5/2020  | 8/18/2020 Europe / Latvia                 |
| EPI_ISL_515190 | 8/5/2020  | 8/18/2020 Europe / Latvia                 |
| EPI_ISL_515191 | 8/5/2020  | 8/18/2020 Europe / Latvia                 |
| EPI_ISL_515192 | 8/5/2020  | 8/18/2020 Europe / Latvia                 |
| EPI_ISL_515193 | 8/5/2020  | 8/18/2020 Europe / Latvia                 |
| EPI_ISL_515194 | 8/5/2020  | 8/18/2020 Europe / Latvia                 |
| EPI_ISL_515195 | 8/5/2020  | 8/18/2020 Europe / Latvia                 |
| EPI_ISL_515196 | 8/3/2020  | 8/18/2020 Europe / Latvia                 |
| EPI_ISL_515197 | 4/5/2020  | 8/18/2020 North America / Canada / Quebec |
| EPI_ISL_515202 | 4/4/2020  | 8/18/2020 North America / Canada / Quebec |
| EPI_ISL_515203 | 4/11/2020 | 8/18/2020 North America / Canada / Quebec |
| EPI_ISL_515209 | 4/17/2020 | 8/18/2020 North America / Canada / Quebec |
| EPI_ISL_515210 | 4/17/2020 | 8/18/2020 North America / Canada / Quebec |
| EPI_ISL_515211 | 4/7/2020  | 8/18/2020 North America / Canada / Quebec |
| EPI_ISL_515212 | 4/18/2020 | 8/18/2020 North America / Canada / Quebec |
| EPI_ISL_515214 | 4/9/2020  | 8/18/2020 North America / Canada / Quebec |
| EPI_ISL_515216 | 4/9/2020  | 8/18/2020 North America / Canada / Quebec |
| EPI_ISL_515220 | 4/8/2020  | 8/18/2020 North America / Canada / Quebec |
| EPI_ISL_515222 | 4/7/2020  | 8/18/2020 North America / Canada / Quebec |
| EPI_ISL_515224 | 4/18/2020 | 8/18/2020 North America / Canada / Quebec |
| EPI_ISL_515225 | 4/6/2020  | 8/18/2020 North America / Canada / Quebec |
| EPI_ISL_515226 | 4/4/2020  | 8/18/2020 North America / Canada / Quebec |
| EPI_ISL_515227 | 4/5/2020  | 8/18/2020 North America / Canada / Quebec |
| EPI_ISL_515228 | 4/4/2020  | 8/18/2020 North America / Canada / Quebec |
| EPI_ISL_515229 | 4/5/2020  | 8/18/2020 North America / Canada / Quebec |
| EPI_ISL_515230 | 4/5/2020  | 8/18/2020 North America / Canada / Quebec |
| EPI_ISL_515231 | 4/2/2020  | 8/18/2020 North America / Canada / Quebec |
| EPI_ISL_515233 | 4/13/2020 | 8/18/2020 North America / Canada / Quebec |
| EPI_ISL_515234 | 4/9/2020  | 8/18/2020 North America / Canada / Quebec |
| EPI_ISL_515235 | 4/7/2020  | 8/18/2020 North America / Canada / Quebec |
| EPI_ISL_515237 | 4/14/2020 | 8/18/2020 North America / Canada / Quebec |
| EPI_ISL_515238 | 4/14/2020 | 8/18/2020 North America / Canada / Quebec |

|                |           |                                                          |
|----------------|-----------|----------------------------------------------------------|
| EPI_ISL_515241 | 4/14/2020 | 8/18/2020 North America / Canada / Quebec                |
| EPI_ISL_515243 | 4/11/2020 | 8/18/2020 North America / Canada / Quebec                |
| EPI_ISL_515244 | 4/13/2020 | 8/18/2020 North America / Canada / Quebec                |
| EPI_ISL_515245 | 4/11/2020 | 8/18/2020 North America / Canada / Quebec                |
| EPI_ISL_515250 | 5/7/2020  | 8/18/2020 North America / USA / Texas / Parker County    |
| EPI_ISL_515251 | 5/8/2020  | 8/18/2020 North America / USA / Texas / Parker County    |
| EPI_ISL_515252 | 5/8/2020  | 8/18/2020 North America / USA / Texas / Parker County    |
| EPI_ISL_515253 | 5/7/2020  | 8/18/2020 North America / USA / Texas / Ochiltree County |
| EPI_ISL_515254 | 5/8/2020  | 8/18/2020 North America / USA / Texas / Ochiltree County |
| EPI_ISL_515259 | 5/8/2020  | 8/18/2020 North America / USA / Texas / Ochiltree County |
| EPI_ISL_515262 | 4/23/2020 | 8/18/2020 North America / USA / Minnesota                |
| EPI_ISL_515263 | 6/22/2020 | 8/18/2020 North America / USA / Minnesota                |
| EPI_ISL_515264 | 6/24/2020 | 8/18/2020 North America / USA / Minnesota                |
| EPI_ISL_515265 | 6/24/2020 | 8/18/2020 North America / USA / Minnesota                |
| EPI_ISL_515266 | 6/24/2020 | 8/18/2020 North America / USA / Minnesota                |
| EPI_ISL_515267 | 6/21/2020 | 8/18/2020 North America / USA / Minnesota                |
| EPI_ISL_515268 | 6/24/2020 | 8/18/2020 North America / USA / Minnesota                |
| EPI_ISL_515269 | 3/26/2020 | 8/18/2020 North America / USA / Minnesota                |
| EPI_ISL_515270 | 3/29/2020 | 8/18/2020 North America / USA / Idaho                    |
| EPI_ISL_515271 | 3/30/2020 | 8/18/2020 North America / USA / Washington               |
| EPI_ISL_515272 | 3/31/2020 | 8/18/2020 North America / USA / Washington               |
| EPI_ISL_515273 | 3/31/2020 | 8/18/2020 North America / USA / Washington               |
| EPI_ISL_515274 | 3/31/2020 | 8/18/2020 North America / USA / Washington               |
| EPI_ISL_515275 | 4/1/2020  | 8/18/2020 North America / USA / Washington               |
| EPI_ISL_515276 | 3/31/2020 | 8/18/2020 North America / USA / Washington               |
| EPI_ISL_515277 | 3/29/2020 | 8/18/2020 North America / USA / Washington               |
| EPI_ISL_515278 | 3/31/2020 | 8/18/2020 North America / USA / Washington               |
| EPI_ISL_515279 | 3/26/2020 | 8/18/2020 North America / USA / Washington               |
| EPI_ISL_515280 | 3/26/2020 | 8/18/2020 North America / USA / Washington               |
| EPI_ISL_515281 | 3/26/2020 | 8/18/2020 North America / USA / Washington               |
| EPI_ISL_515282 | 3/26/2020 | 8/18/2020 North America / USA / Washington               |
| EPI_ISL_515283 | 3/28/2020 | 8/18/2020 North America / USA / Washington               |
| EPI_ISL_515284 | 3/29/2020 | 8/18/2020 North America / USA / Washington               |
| EPI_ISL_515285 | 3/29/2020 | 8/18/2020 North America / USA / Washington               |
| EPI_ISL_515287 | 2020-03   | 8/19/2020 Asia / Thailand                                |
| EPI_ISL_515288 | 2020-03   | 8/19/2020 Asia / Thailand                                |
| EPI_ISL_515289 | 2020-03   | 8/19/2020 Asia / Thailand                                |
| EPI_ISL_515290 | 2020-03   | 8/19/2020 Asia / Thailand                                |
| EPI_ISL_515291 | 2020-03   | 8/19/2020 Asia / Thailand                                |
| EPI_ISL_515292 | 2020-03   | 8/19/2020 Asia / Thailand / Bangkok                      |
| EPI_ISL_515293 | 3/6/2020  | 8/19/2020 North America / USA / Nevada                   |
| EPI_ISL_515294 | 3/11/2020 | 8/19/2020 North America / USA / Nevada                   |
| EPI_ISL_515295 | 3/12/2020 | 8/19/2020 North America / USA / Nevada                   |
| EPI_ISL_515296 | 3/12/2020 | 8/19/2020 North America / USA / Nevada                   |
| EPI_ISL_515297 | 3/14/2020 | 8/19/2020 North America / USA / Nevada                   |
| EPI_ISL_515299 | 3/14/2020 | 8/19/2020 North America / USA / Nevada                   |
| EPI_ISL_515300 | 3/15/2020 | 8/19/2020 North America / USA / Nevada                   |









|                |           |                                                            |
|----------------|-----------|------------------------------------------------------------|
| EPI_ISL_515457 | 5/27/2020 | 8/19/2020 North America / USA / Nevada                     |
| EPI_ISL_515459 | 6/2/2020  | 8/19/2020 North America / USA / Nevada                     |
| EPI_ISL_515460 | 6/2/2020  | 8/19/2020 North America / USA / Nevada                     |
| EPI_ISL_515461 | 5/7/2020  | 8/19/2020 North America / USA / Nevada                     |
| EPI_ISL_515462 | 5/4/2020  | 8/19/2020 North America / USA / Nevada                     |
| EPI_ISL_515463 | 2020-03   | 8/19/2020 Asia / Thailand / Bangkok                        |
| EPI_ISL_515464 | 2020-03   | 8/19/2020 Asia / Thailand / Bangkok                        |
| EPI_ISL_515465 | 2020-03   | 8/19/2020 Asia / Thailand / Bangkok                        |
| EPI_ISL_515466 | 7/15/2020 | 8/19/2020 North America / Canada / Alberta                 |
| EPI_ISL_515468 | 2020-03   | 8/19/2020 Asia / Thailand / Bangkok                        |
| EPI_ISL_515469 | 2020-03   | 8/19/2020 Asia / Thailand / Nonthaburi                     |
| EPI_ISL_515470 | 2020-03   | 8/19/2020 Asia / Thailand / Nonthaburi                     |
| EPI_ISL_515472 | 2020-03   | 8/19/2020 Asia / Thailand / Bangkok                        |
| EPI_ISL_515473 | 2020-03   | 8/19/2020 Asia / Thailand / Bangkok                        |
| EPI_ISL_515474 | 2020-03   | 8/19/2020 Asia / Thailand / Bangkok                        |
| EPI_ISL_515475 | 2020-03   | 8/19/2020 Asia / Thailand / Bangkok                        |
| EPI_ISL_515476 | 2020-03   | 8/19/2020 Asia / Thailand / Bangkok                        |
| EPI_ISL_515477 | 2020-03   | 8/19/2020 Asia / Thailand / Bangkok                        |
| EPI_ISL_515520 | 3/30/2020 | 8/19/2020 South America / Brazil / Sao Paulo / Sao Paulo   |
| EPI_ISL_515521 | 3/28/2020 | 8/19/2020 South America / Brazil / Sao Paulo / Americana   |
| EPI_ISL_515522 | 3/31/2020 | 8/19/2020 South America / Brazil / Sao Paulo / Itatiba     |
| EPI_ISL_515523 | 4/2/2020  | 8/19/2020 South America / Brazil / Sao Paulo / Sao Paulo   |
| EPI_ISL_515524 | 4/1/2020  | 8/19/2020 South America / Brazil / Sao Paulo / Sao Paulo   |
| EPI_ISL_515525 | 6/30/2020 | 8/19/2020 South America / Brazil / Sao Paulo / Sao Paulo   |
| EPI_ISL_515526 | 3/23/2020 | 8/19/2020 South America / Brazil / Sao Paulo / Sao Paulo   |
| EPI_ISL_515527 | 3/18/2020 | 8/19/2020 South America / Brazil / Sao Paulo / Sao Paulo   |
| EPI_ISL_515528 | 3/25/2020 | 8/19/2020 South America / Brazil / Sao Paulo / Sao Paulo   |
| EPI_ISL_515529 | 3/24/2020 | 8/19/2020 South America / Brazil / Sao Paulo / Sao Paulo   |
| EPI_ISL_515541 | 3/23/2020 | 8/19/2020 South America / Brazil / Sao Paulo / Sao Paulo   |
| EPI_ISL_515542 | 4/20/2020 | 8/19/2020 South America / Brazil / Sao Paulo / Peruibe     |
| EPI_ISL_515543 | 4/1/2020  | 8/19/2020 South America / Brazil / Sao Paulo / Guaruja     |
| EPI_ISL_515544 | 3/23/2020 | 8/19/2020 South America / Brazil / Sao Paulo / Sao Paulo   |
| EPI_ISL_515545 | 3/22/2020 | 8/19/2020 South America / Brazil / Sao Paulo / Sao Paulo   |
| EPI_ISL_515546 | 3/19/2020 | 8/19/2020 South America / Brazil / Sao Paulo / Sao Paulo   |
| EPI_ISL_515547 | 3/20/2020 | 8/19/2020 South America / Brazil / Sao Paulo / Sao Paulo   |
| EPI_ISL_515548 | 3/20/2020 | 8/19/2020 South America / Brazil / Sao Paulo / Sao Paulo   |
| EPI_ISL_515550 | 3/25/2020 | 8/19/2020 South America / Brazil / Sao Paulo / Sao Paulo   |
| EPI_ISL_515551 | 3/22/2020 | 8/19/2020 South America / Brazil / Sao Paulo / Sao Paulo   |
| EPI_ISL_515552 | 4/16/2020 | 8/19/2020 South America / Brazil / Sao Paulo / Sao Paulo   |
| EPI_ISL_515553 | 4/16/2020 | 8/19/2020 South America / Brazil / Sao Paulo / Sao Paulo   |
| EPI_ISL_515554 | 3/19/2020 | 8/19/2020 South America / Brazil / Sao Paulo / Sao Paulo   |
| EPI_ISL_515555 | 3/24/2020 | 8/19/2020 South America / Brazil / Sao Paulo / Sao Paulo   |
| EPI_ISL_515557 | 4/15/2020 | 8/19/2020 South America / Brazil / Sao Paulo / Sao Paulo   |
| EPI_ISL_515559 | 4/18/2020 | 8/19/2020 South America / Brazil / Sao Paulo / Sao Paulo   |
| EPI_ISL_515560 | 4/19/2020 | 8/19/2020 South America / Brazil / Sao Paulo / Sao Paulo   |
| EPI_ISL_515561 | 4/16/2020 | 8/19/2020 South America / Brazil / Sao Paulo / Sao Paulo   |
| EPI_ISL_515562 | 4/13/2020 | 8/19/2020 South America / Brazil / Sao Paulo / Sao Vicente |

|                |           |           |                                                        |
|----------------|-----------|-----------|--------------------------------------------------------|
| EPI_ISL_515563 | 4/16/2020 | 8/19/2020 | South America / Brazil / Sao Paulo / Sao Paulo         |
| EPI_ISL_515564 | 3/24/2020 | 8/19/2020 | South America / Brazil / Sao Paulo / Sao Paulo         |
| EPI_ISL_515565 | 3/24/2020 | 8/19/2020 | South America / Brazil / Sao Paulo / Sao Paulo         |
| EPI_ISL_515566 | 4/23/2020 | 8/19/2020 | South America / Brazil / Sao Paulo / Sao Paulo         |
| EPI_ISL_515568 | 7/8/2020  | 8/19/2020 | Africa / South Africa / KwaZulu-Natal / eThekwini      |
| EPI_ISL_515569 | 7/22/2020 | 8/19/2020 | Africa / South Africa / KwaZulu-Natal / eThekwini      |
| EPI_ISL_515570 | 7/22/2020 | 8/19/2020 | Africa / South Africa / KwaZulu-Natal / eThekwini      |
| EPI_ISL_515573 | 7/8/2020  | 8/19/2020 | Africa / South Africa / KwaZulu-Natal / eThekwini      |
| EPI_ISL_515574 | 7/8/2020  | 8/19/2020 | Africa / South Africa / KwaZulu-Natal / eThekwini      |
| EPI_ISL_515575 | 7/8/2020  | 8/19/2020 | Africa / South Africa / KwaZulu-Natal / eThekwini      |
| EPI_ISL_515579 | 7/9/2020  | 8/19/2020 | Africa / South Africa / KwaZulu-Natal / eThekwini      |
| EPI_ISL_515580 | 7/8/2020  | 8/19/2020 | Africa / South Africa / KwaZulu-Natal / eThekwini      |
| EPI_ISL_515582 | 7/9/2020  | 8/19/2020 | Africa / South Africa / KwaZulu-Natal / eThekwini      |
| EPI_ISL_515584 | 6/30/2020 | 8/19/2020 | Africa / South Africa / KwaZulu-Natal / eThekwini      |
| EPI_ISL_515585 | 6/30/2020 | 8/19/2020 | Africa / South Africa / KwaZulu-Natal / eThekwini      |
| EPI_ISL_515586 | 7/8/2020  | 8/19/2020 | Africa / South Africa / KwaZulu-Natal / eThekwini      |
| EPI_ISL_515589 | 7/14/2020 | 8/19/2020 | Africa / South Africa / KwaZulu-Natal / eThekwini      |
| EPI_ISL_515592 | 7/16/2020 | 8/19/2020 | Africa / South Africa / KwaZulu-Natal / eThekwini      |
| EPI_ISL_515593 | 7/10/2020 | 8/19/2020 | Africa / South Africa / KwaZulu-Natal / eThekwini      |
| EPI_ISL_515594 | 7/5/2020  | 8/19/2020 | Africa / South Africa / KwaZulu-Natal / eThekwini      |
| EPI_ISL_515596 | 7/17/2020 | 8/19/2020 | Africa / South Africa / KwaZulu-Natal / eThekwini      |
| EPI_ISL_515597 | 7/14/2020 | 8/19/2020 | Africa / South Africa / KwaZulu-Natal / eThekwini      |
| EPI_ISL_515600 | 7/16/2020 | 8/19/2020 | Africa / South Africa / KwaZulu-Natal / eThekwini      |
| EPI_ISL_515601 | 7/9/2020  | 8/19/2020 | Africa / South Africa / KwaZulu-Natal / eThekwini      |
| EPI_ISL_515602 | 7/18/2020 | 8/19/2020 | Africa / South Africa / KwaZulu-Natal / eThekwini      |
| EPI_ISL_515603 | 7/16/2020 | 8/19/2020 | Africa / South Africa / KwaZulu-Natal / eThekwini      |
| EPI_ISL_515604 | 7/17/2020 | 8/19/2020 | Africa / South Africa / KwaZulu-Natal / eThekwini      |
| EPI_ISL_515606 | 7/24/2020 | 8/19/2020 | Africa / South Africa / KwaZulu-Natal / eThekwini      |
| EPI_ISL_515607 | 7/24/2020 | 8/19/2020 | Africa / South Africa / KwaZulu-Natal / eThekwini      |
| EPI_ISL_515610 | 7/30/2020 | 8/19/2020 | Africa / South Africa / KwaZulu-Natal / uMgungundlovu  |
| EPI_ISL_515612 | 7/30/2020 | 8/19/2020 | Africa / South Africa / KwaZulu-Natal / uMgungundlovu  |
| EPI_ISL_515613 | 7/18/2020 | 8/19/2020 | Africa / South Africa / KwaZulu-Natal / uMkhanyakude   |
| EPI_ISL_515615 | 7/17/2020 | 8/19/2020 | Africa / South Africa / KwaZulu-Natal / uMkhanyakude   |
| EPI_ISL_515616 | 7/21/2020 | 8/19/2020 | Africa / South Africa / KwaZulu-Natal / King Cetshwayo |
| EPI_ISL_515619 | 7/21/2020 | 8/19/2020 | Africa / South Africa / KwaZulu-Natal / Amajuba        |
| EPI_ISL_515622 | 7/21/2020 | 8/19/2020 | Africa / South Africa / KwaZulu-Natal / Amajuba        |
| EPI_ISL_515623 | 7/21/2020 | 8/19/2020 | Africa / South Africa / KwaZulu-Natal / Amajuba        |
| EPI_ISL_515627 | 7/18/2020 | 8/19/2020 | Africa / South Africa / KwaZulu-Natal / Zululand       |
| EPI_ISL_515628 | 7/21/2020 | 8/19/2020 | Africa / South Africa / KwaZulu-Natal / Amajuba        |
| EPI_ISL_515631 | 7/20/2020 | 8/19/2020 | Africa / South Africa / KwaZulu-Natal / uThukela       |
| EPI_ISL_515633 | 7/21/2020 | 8/19/2020 | Africa / South Africa / KwaZulu-Natal / Amajuba        |
| EPI_ISL_515634 | 7/21/2020 | 8/19/2020 | Africa / South Africa / KwaZulu-Natal / Zululand       |
| EPI_ISL_515635 | 7/20/2020 | 8/19/2020 | Africa / South Africa / KwaZulu-Natal / King Cetshwayo |
| EPI_ISL_515639 | 7/21/2020 | 8/19/2020 | Africa / South Africa / KwaZulu-Natal / Amajuba        |
| EPI_ISL_515640 | 7/21/2020 | 8/19/2020 | Africa / South Africa / KwaZulu-Natal / Amajuba        |
| EPI_ISL_515641 | 7/21/2020 | 8/19/2020 | Africa / South Africa / KwaZulu-Natal / Ugu            |
| EPI_ISL_515642 | 7/19/2020 | 8/19/2020 | Africa / South Africa / KwaZulu-Natal / uMzinyathi     |





|                |           |                                                                  |
|----------------|-----------|------------------------------------------------------------------|
| EPI_ISL_515754 | 7/22/2020 | 8/19/2020 Africa / South Africa / KwaZulu-Natal / uMkhanyakude   |
| EPI_ISL_515756 | 7/21/2020 | 8/19/2020 Africa / South Africa / KwaZulu-Natal / Ugu            |
| EPI_ISL_515757 | 7/27/2020 | 8/19/2020 Africa / South Africa / KwaZulu-Natal / Ugu            |
| EPI_ISL_515758 | 7/28/2020 | 8/19/2020 Africa / South Africa / KwaZulu-Natal / King Cetshwayo |
| EPI_ISL_515759 | 7/28/2020 | 8/19/2020 Africa / South Africa / KwaZulu-Natal / King Cetshwayo |
| EPI_ISL_515760 | 7/28/2020 | 8/19/2020 Africa / South Africa / KwaZulu-Natal / Ugu            |
| EPI_ISL_515762 | 7/27/2020 | 8/19/2020 Africa / South Africa / KwaZulu-Natal / Ugu            |
| EPI_ISL_515763 | 7/30/2020 | 8/19/2020 Africa / South Africa / KwaZulu-Natal / iLembe         |
| EPI_ISL_515764 | 7/30/2020 | 8/19/2020 Africa / South Africa / KwaZulu-Natal / iLembe         |
| EPI_ISL_515767 | 7/24/2020 | 8/19/2020 Africa / South Africa / KwaZulu-Natal / Ugu            |
| EPI_ISL_515769 | 7/27/2020 | 8/19/2020 Africa / South Africa / KwaZulu-Natal / Ugu            |
| EPI_ISL_515771 | 7/30/2020 | 8/19/2020 Africa / South Africa / KwaZulu-Natal / iLembe         |
| EPI_ISL_515773 | 7/29/2020 | 8/19/2020 Africa / South Africa / KwaZulu-Natal / uMkhanyakude   |
| EPI_ISL_515775 | 7/24/2020 | 8/19/2020 Africa / South Africa / KwaZulu-Natal / Ugu            |
| EPI_ISL_515776 | 7/24/2020 | 8/19/2020 Africa / South Africa / KwaZulu-Natal / eThekwini      |
| EPI_ISL_515777 | 7/29/2020 | 8/19/2020 Africa / South Africa / KwaZulu-Natal / uMgungundlovu  |
| EPI_ISL_515778 | 7/30/2020 | 8/19/2020 Africa / South Africa / KwaZulu-Natal / uMgungundlovu  |
| EPI_ISL_515780 | 7/30/2020 | 8/19/2020 Africa / South Africa / KwaZulu-Natal / Amajuba        |
| EPI_ISL_515781 | 7/30/2020 | 8/19/2020 Africa / South Africa / KwaZulu-Natal / Zululand       |
| EPI_ISL_515782 | 7/30/2020 | 8/19/2020 Africa / South Africa / KwaZulu-Natal / Harry Gwala    |
| EPI_ISL_515783 | 7/30/2020 | 8/19/2020 Africa / South Africa / KwaZulu-Natal / uMzinyathi     |
| EPI_ISL_515784 | 7/30/2020 | 8/19/2020 Africa / South Africa / KwaZulu-Natal / Amajuba        |
| EPI_ISL_515787 | 7/29/2020 | 8/19/2020 Africa / South Africa / KwaZulu-Natal / eThekwini      |
| EPI_ISL_515789 | 7/30/2020 | 8/19/2020 Africa / South Africa / KwaZulu-Natal / uMgungundlovu  |
| EPI_ISL_515790 | 7/30/2020 | 8/19/2020 Africa / South Africa / KwaZulu-Natal / Amajuba        |
| EPI_ISL_515791 | 7/30/2020 | 8/19/2020 Africa / South Africa / KwaZulu-Natal / uMgungundlovu  |
| EPI_ISL_515792 | 7/29/2020 | 8/19/2020 Africa / South Africa / KwaZulu-Natal / Zululand       |
| EPI_ISL_515794 | 7/30/2020 | 8/19/2020 Africa / South Africa / KwaZulu-Natal / Harry Gwala    |
| EPI_ISL_515796 | 7/29/2020 | 8/19/2020 Africa / South Africa / KwaZulu-Natal / uMgungundlovu  |
| EPI_ISL_515797 | 7/30/2020 | 8/19/2020 Africa / South Africa / KwaZulu-Natal / Harry Gwala    |
| EPI_ISL_515799 | 7/29/2020 | 8/19/2020 Africa / South Africa / KwaZulu-Natal / Zululand       |
| EPI_ISL_515801 | 7/16/2020 | 8/19/2020 Africa / South Africa / KwaZulu-Natal / iLembe         |
| EPI_ISL_515802 | 7/17/2020 | 8/19/2020 Africa / South Africa / KwaZulu-Natal / eThekwini      |
| EPI_ISL_515803 | 7/18/2020 | 8/19/2020 Africa / South Africa / KwaZulu-Natal / eThekwini      |
| EPI_ISL_515804 | 7/18/2020 | 8/19/2020 Africa / South Africa / KwaZulu-Natal / eThekwini      |
| EPI_ISL_515805 | 7/18/2020 | 8/19/2020 Africa / South Africa / KwaZulu-Natal / eThekwini      |
| EPI_ISL_515806 | 7/18/2020 | 8/19/2020 Africa / South Africa / KwaZulu-Natal / eThekwini      |
| EPI_ISL_515807 | 7/18/2020 | 8/19/2020 Africa / South Africa / KwaZulu-Natal / eThekwini      |
| EPI_ISL_515808 | 7/18/2020 | 8/19/2020 Africa / South Africa / KwaZulu-Natal / eThekwini      |
| EPI_ISL_515809 | 7/18/2020 | 8/19/2020 Africa / South Africa / KwaZulu-Natal / eThekwini      |
| EPI_ISL_515810 | 7/18/2020 | 8/19/2020 Africa / South Africa / KwaZulu-Natal / eThekwini      |
| EPI_ISL_515811 | 7/18/2020 | 8/19/2020 Africa / South Africa / KwaZulu-Natal / eThekwini      |
| EPI_ISL_515812 | 7/18/2020 | 8/19/2020 Africa / South Africa / KwaZulu-Natal / eThekwini      |
| EPI_ISL_515813 | 7/18/2020 | 8/19/2020 Africa / South Africa / KwaZulu-Natal / eThekwini      |
| EPI_ISL_515814 | 7/18/2020 | 8/19/2020 Africa / South Africa / KwaZulu-Natal / eThekwini      |
| EPI_ISL_515815 | 7/18/2020 | 8/19/2020 Africa / South Africa / KwaZulu-Natal / eThekwini      |
| EPI_ISL_515816 | 7/19/2020 | 8/19/2020 Africa / South Africa / KwaZulu-Natal / eThekwini      |



|                |           |                                                                 |
|----------------|-----------|-----------------------------------------------------------------|
| EPI_ISL_515865 | 7/19/2020 | 8/19/2020 Africa / South Africa / KwaZulu-Natal / uThukela      |
| EPI_ISL_515866 | 7/19/2020 | 8/19/2020 Africa / South Africa / KwaZulu-Natal / uThukela      |
| EPI_ISL_515867 | 7/17/2020 | 8/19/2020 Africa / South Africa / KwaZulu-Natal / Zululand      |
| EPI_ISL_515868 | 7/17/2020 | 8/19/2020 Africa / South Africa / KwaZulu-Natal / Zululand      |
| EPI_ISL_515869 | 7/9/2020  | 8/19/2020 Africa / South Africa / KwaZulu-Natal / uThukela      |
| EPI_ISL_515870 | 7/17/2020 | 8/19/2020 Africa / South Africa / KwaZulu-Natal / Zululand      |
| EPI_ISL_515871 | 7/9/2020  | 8/19/2020 Africa / South Africa / KwaZulu-Natal / uThukela      |
| EPI_ISL_515872 | 7/18/2020 | 8/19/2020 Africa / South Africa / KwaZulu-Natal / uMgungundlovu |
| EPI_ISL_515873 | 7/9/2020  | 8/19/2020 Africa / South Africa / KwaZulu-Natal / uThukela      |
| EPI_ISL_515874 | 7/20/2020 | 8/19/2020 Africa / South Africa / KwaZulu-Natal / uMgungundlovu |
| EPI_ISL_515875 | 7/18/2020 | 8/19/2020 Africa / South Africa / KwaZulu-Natal / uMkhanyakude  |
| EPI_ISL_515876 | 7/17/2020 | 8/19/2020 Africa / South Africa / KwaZulu-Natal / Zululand      |
| EPI_ISL_515877 | 7/16/2020 | 8/19/2020 Africa / South Africa / KwaZulu-Natal / uMkhanyakude  |
| EPI_ISL_515878 | 7/18/2020 | 8/19/2020 Africa / South Africa / KwaZulu-Natal / uMkhanyakude  |
| EPI_ISL_515880 | 7/18/2020 | 8/19/2020 Africa / South Africa / KwaZulu-Natal / uMkhanyakude  |
| EPI_ISL_515881 | 7/18/2020 | 8/19/2020 Africa / South Africa / KwaZulu-Natal / uMkhanyakude  |
| EPI_ISL_515882 | 7/18/2020 | 8/19/2020 Africa / South Africa / KwaZulu-Natal / uMkhanyakude  |
| EPI_ISL_515883 | 7/17/2020 | 8/19/2020 Africa / South Africa / KwaZulu-Natal / uMkhanyakude  |
| EPI_ISL_515884 | 7/17/2020 | 8/19/2020 Africa / South Africa / KwaZulu-Natal / uMkhanyakude  |
| EPI_ISL_515885 | 7/18/2020 | 8/19/2020 Africa / South Africa / KwaZulu-Natal / uMkhanyakude  |
| EPI_ISL_515886 | 7/18/2020 | 8/19/2020 Africa / South Africa / KwaZulu-Natal / uMkhanyakude  |
| EPI_ISL_515887 | 7/18/2020 | 8/19/2020 Africa / South Africa / KwaZulu-Natal / uMkhanyakude  |
| EPI_ISL_515888 | 7/18/2020 | 8/19/2020 Africa / South Africa / KwaZulu-Natal / uMkhanyakude  |
| EPI_ISL_515889 | 7/17/2020 | 8/19/2020 Africa / South Africa / KwaZulu-Natal / uMkhanyakude  |
| EPI_ISL_515890 | 7/18/2020 | 8/19/2020 Africa / South Africa / KwaZulu-Natal / uMkhanyakude  |
| EPI_ISL_515891 | 7/18/2020 | 8/19/2020 Africa / South Africa / KwaZulu-Natal / uMkhanyakude  |
| EPI_ISL_515892 | 7/17/2020 | 8/19/2020 Africa / South Africa / KwaZulu-Natal / uMkhanyakude  |
| EPI_ISL_515893 | 7/17/2020 | 8/19/2020 Africa / South Africa / KwaZulu-Natal / uMgungundlovu |
| EPI_ISL_515894 | 3/15/2020 | 8/19/2020 North America / USA / California                      |
| EPI_ISL_515896 | 3/20/2020 | 8/20/2020 North America / USA / California                      |
| EPI_ISL_515897 | 3/23/2020 | 8/20/2020 North America / USA / California                      |
| EPI_ISL_515898 | 3/24/2020 | 8/20/2020 North America / USA / California                      |
| EPI_ISL_515899 | 3/24/2020 | 8/20/2020 North America / USA / California                      |
| EPI_ISL_515900 | 3/25/2020 | 8/20/2020 North America / USA / California                      |
| EPI_ISL_515901 | 3/26/2020 | 8/20/2020 North America / USA / California / Sacramento County  |
| EPI_ISL_515902 | 3/27/2020 | 8/20/2020 North America / USA / California / Alameda County     |
| EPI_ISL_515903 | 3/28/2020 | 8/20/2020 North America / USA / California                      |
| EPI_ISL_515905 | 3/25/2020 | 8/20/2020 North America / USA / California                      |
| EPI_ISL_515906 | 3/20/2020 | 8/20/2020 North America / USA / California / Los Angeles County |
| EPI_ISL_515907 | 3/30/2020 | 8/20/2020 North America / USA / California / Sacramento County  |
| EPI_ISL_515908 | 4/9/2020  | 8/20/2020 North America / USA / California                      |
| EPI_ISL_515909 | 2/28/2020 | 8/20/2020 North America / USA / California                      |
| EPI_ISL_515910 | 2/27/2020 | 8/20/2020 North America / USA / California                      |
| EPI_ISL_515911 | 2/27/2020 | 8/20/2020 North America / USA / California                      |
| EPI_ISL_515913 | 3/7/2020  | 8/20/2020 North America / USA / California                      |
| EPI_ISL_515917 | 5/19/2020 | 8/20/2020 North America / USA / California / Los Angeles County |
| EPI_ISL_515918 | 5/25/2020 | 8/20/2020 North America / USA / California                      |

|                |           |                                                                 |
|----------------|-----------|-----------------------------------------------------------------|
| EPI_ISL_515919 | 5/22/2020 | 8/20/2020 North America / USA / California                      |
| EPI_ISL_515920 | 5/26/2020 | 8/20/2020 North America / USA / California / Los Angeles County |
| EPI_ISL_515922 | 6/22/2020 | 8/20/2020 North America / USA / California / Madera County      |
| EPI_ISL_515923 | 6/22/2020 | 8/20/2020 North America / USA / California / Madera County      |
| EPI_ISL_515924 | 6/19/2020 | 8/20/2020 North America / USA / California / Imperial County    |
| EPI_ISL_515925 | 6/19/2020 | 8/20/2020 North America / USA / California / Kings County       |
| EPI_ISL_515928 | 6/25/2020 | 8/20/2020 North America / USA / California                      |
| EPI_ISL_515929 | 6/26/2020 | 8/20/2020 North America / USA / California                      |
| EPI_ISL_515938 | 4/22/2020 | 8/20/2020 Asia / India / Karnataka                              |
| EPI_ISL_515941 | 4/23/2020 | 8/20/2020 Asia / India / Karnataka                              |
| EPI_ISL_515942 | 4/23/2020 | 8/20/2020 Asia / India / Karnataka                              |
| EPI_ISL_515945 | 5/4/2020  | 8/20/2020 Asia / India / Karnataka                              |
| EPI_ISL_515947 | 5/4/2020  | 8/20/2020 Asia / India / Karnataka                              |
| EPI_ISL_515952 | 5/6/2020  | 8/20/2020 Asia / India / Karnataka                              |
| EPI_ISL_515954 | 5/9/2020  | 8/20/2020 Asia / India / Karnataka                              |
| EPI_ISL_515957 | 5/10/2020 | 8/20/2020 Asia / India / Karnataka                              |
| EPI_ISL_515958 | 5/8/2020  | 8/20/2020 Asia / India / Karnataka                              |
| EPI_ISL_515959 | 5/8/2020  | 8/20/2020 Asia / India / Karnataka                              |
| EPI_ISL_515961 | 5/10/2020 | 8/20/2020 Asia / India / Karnataka                              |
| EPI_ISL_515963 | 5/12/2020 | 8/20/2020 Asia / India / Karnataka                              |
| EPI_ISL_515964 | 5/12/2020 | 8/20/2020 Asia / India / Karnataka                              |
| EPI_ISL_515966 | 5/14/2020 | 8/20/2020 Asia / India / Karnataka                              |
| EPI_ISL_515967 | 5/14/2020 | 8/20/2020 Asia / India / Karnataka                              |
| EPI_ISL_515968 | 5/16/2020 | 8/20/2020 Asia / India / Karnataka                              |
| EPI_ISL_515969 | 5/16/2020 | 8/20/2020 Asia / India / Karnataka                              |
| EPI_ISL_515970 | 5/16/2020 | 8/20/2020 Asia / India / Karnataka                              |
| EPI_ISL_515971 | 5/16/2020 | 8/20/2020 Asia / India / Karnataka                              |
| EPI_ISL_515972 | 5/16/2020 | 8/20/2020 Asia / India / Karnataka                              |
| EPI_ISL_515973 | 5/16/2020 | 8/20/2020 Asia / India / Karnataka                              |
| EPI_ISL_515974 | 3/11/2020 | 8/20/2020 Europe / Denmark                                      |
| EPI_ISL_516267 | 3/13/2020 | 8/20/2020 North America / USA / Michigan                        |
| EPI_ISL_516268 | 3/14/2020 | 8/20/2020 North America / USA / Michigan                        |
| EPI_ISL_516269 | 3/15/2020 | 8/20/2020 North America / USA / Michigan                        |
| EPI_ISL_516270 | 3/19/2020 | 8/20/2020 North America / USA / Michigan                        |
| EPI_ISL_516272 | 3/20/2020 | 8/20/2020 North America / USA / Michigan                        |
| EPI_ISL_516273 | 3/20/2020 | 8/20/2020 North America / USA / Michigan                        |
| EPI_ISL_516274 | 3/19/2020 | 8/20/2020 North America / USA / Michigan                        |
| EPI_ISL_516275 | 3/19/2020 | 8/20/2020 North America / USA / Michigan                        |
| EPI_ISL_516277 | 3/19/2020 | 8/20/2020 North America / USA / Michigan                        |
| EPI_ISL_516278 | 3/19/2020 | 8/20/2020 North America / USA / Michigan                        |
| EPI_ISL_516281 | 3/18/2020 | 8/20/2020 North America / USA / Michigan                        |
| EPI_ISL_516282 | 3/18/2020 | 8/20/2020 North America / USA / Michigan                        |
| EPI_ISL_516283 | 3/19/2020 | 8/20/2020 North America / USA / Michigan                        |
| EPI_ISL_516285 | 3/19/2020 | 8/20/2020 North America / USA / Michigan                        |
| EPI_ISL_516287 | 3/20/2020 | 8/20/2020 North America / USA / Michigan                        |
| EPI_ISL_516294 | 3/22/2020 | 8/20/2020 North America / USA / Michigan                        |
| EPI_ISL_516295 | 3/22/2020 | 8/20/2020 North America / USA / Michigan                        |



|                |           |                                               |
|----------------|-----------|-----------------------------------------------|
| EPI_ISL_516296 | 3/21/2020 | 8/20/2020 North America / USA / Michigan      |
| EPI_ISL_516297 | 3/21/2020 | 8/20/2020 North America / USA / Michigan      |
| EPI_ISL_516302 | 3/22/2020 | 8/20/2020 North America / USA / Michigan      |
| EPI_ISL_516306 | 3/22/2020 | 8/20/2020 North America / USA / Michigan      |
| EPI_ISL_516308 | 3/23/2020 | 8/20/2020 North America / USA / Michigan      |
| EPI_ISL_516311 | 3/23/2020 | 8/20/2020 North America / USA / Michigan      |
| EPI_ISL_516314 | 3/23/2020 | 8/20/2020 North America / USA / Michigan      |
| EPI_ISL_516316 | 3/26/2020 | 8/20/2020 North America / USA / Michigan      |
| EPI_ISL_516317 | 3/25/2020 | 8/20/2020 North America / USA / Michigan      |
| EPI_ISL_516321 | 3/26/2020 | 8/20/2020 North America / USA / Michigan      |
| EPI_ISL_516322 | 3/26/2020 | 8/20/2020 North America / USA / Michigan      |
| EPI_ISL_516324 | 3/26/2020 | 8/20/2020 North America / USA / Michigan      |
| EPI_ISL_516329 | 3/27/2020 | 8/20/2020 North America / USA / Michigan      |
| EPI_ISL_516330 | 3/27/2020 | 8/20/2020 North America / USA / Michigan      |
| EPI_ISL_516331 | 3/27/2020 | 8/20/2020 North America / USA / Michigan      |
| EPI_ISL_516332 | 3/27/2020 | 8/20/2020 North America / USA / Michigan      |
| EPI_ISL_516334 | 3/28/2020 | 8/20/2020 North America / USA / Michigan      |
| EPI_ISL_516335 | 3/28/2020 | 8/20/2020 North America / USA / Michigan      |
| EPI_ISL_516348 | 3/29/2020 | 8/20/2020 North America / USA / Michigan      |
| EPI_ISL_516351 | 3/29/2020 | 8/20/2020 North America / USA / Michigan      |
| EPI_ISL_516359 | 3/29/2020 | 8/20/2020 North America / USA / Michigan      |
| EPI_ISL_516360 | 3/29/2020 | 8/20/2020 North America / USA / Michigan      |
| EPI_ISL_516361 | 3/30/2020 | 8/20/2020 North America / USA / Michigan      |
| EPI_ISL_516362 | 3/30/2020 | 8/20/2020 North America / USA / Michigan      |
| EPI_ISL_516363 | 3/29/2020 | 8/20/2020 North America / USA / Michigan      |
| EPI_ISL_516365 | 3/31/2020 | 8/20/2020 North America / USA / Michigan      |
| EPI_ISL_516367 | 3/31/2020 | 8/20/2020 North America / USA / Michigan      |
| EPI_ISL_516371 | 3/31/2020 | 8/20/2020 North America / USA / Michigan      |
| EPI_ISL_516372 | 3/31/2020 | 8/20/2020 North America / USA / Michigan      |
| EPI_ISL_516373 | 3/31/2020 | 8/20/2020 North America / USA / Michigan      |
| EPI_ISL_516376 | 3/30/2020 | 8/20/2020 North America / USA / Michigan      |
| EPI_ISL_516380 | 4/1/2020  | 8/20/2020 North America / USA / Michigan      |
| EPI_ISL_516412 | 7/8/2020  | 8/20/2020 North America / USA / Michigan      |
| EPI_ISL_516413 | 6/6/2020  | 8/20/2020 Europe / North Macedonia / Kumanovo |
| EPI_ISL_516414 | 6/6/2020  | 8/20/2020 Europe / North Macedonia / Skopje   |
| EPI_ISL_516415 | 6/9/2020  | 8/20/2020 Europe / North Macedonia / Skopje   |
| EPI_ISL_516416 | 6/9/2020  | 8/20/2020 Europe / North Macedonia / Skopje   |
| EPI_ISL_516417 | 6/9/2020  | 8/20/2020 Europe / North Macedonia / Skopje   |
| EPI_ISL_516418 | 6/10/2020 | 8/20/2020 Europe / North Macedonia / Skopje   |
| EPI_ISL_516419 | 6/10/2020 | 8/20/2020 Europe / North Macedonia / Skopje   |
| EPI_ISL_516420 | 6/10/2020 | 8/20/2020 Europe / North Macedonia / Skopje   |
| EPI_ISL_516421 | 6/11/2020 | 8/20/2020 Europe / North Macedonia / Skopje   |
| EPI_ISL_516422 | 6/12/2020 | 8/20/2020 Europe / North Macedonia / Skopje   |
| EPI_ISL_516423 | 6/13/2020 | 8/20/2020 Europe / North Macedonia / Skopje   |
| EPI_ISL_516424 | 6/17/2020 | 8/20/2020 Europe / North Macedonia / Skopje   |
| EPI_ISL_516425 | 6/18/2020 | 8/20/2020 Europe / North Macedonia / Skopje   |
| EPI_ISL_516426 | 6/25/2020 | 8/20/2020 Europe / North Macedonia / Shtip    |

|                |           |                                                              |
|----------------|-----------|--------------------------------------------------------------|
| EPI_ISL_516427 | 6/27/2020 | 8/20/2020 Europe / North Macedonia / Shtip                   |
| EPI_ISL_516428 | 7/8/2020  | 8/20/2020 Europe / North Macedonia / Shtip                   |
| EPI_ISL_516429 | 7/14/2020 | 8/20/2020 Europe / North Macedonia / Shtip                   |
| EPI_ISL_516430 | 7/14/2020 | 8/20/2020 Europe / North Macedonia / Shtip                   |
| EPI_ISL_516431 | 7/20/2020 | 8/20/2020 Europe / North Macedonia / Shtip                   |
| EPI_ISL_516432 | 7/17/2020 | 8/21/2020 North America / USA / Wisconsin / Dane County      |
| EPI_ISL_516433 | 7/19/2020 | 8/21/2020 North America / USA / Wisconsin / Dane County      |
| EPI_ISL_516434 | 7/20/2020 | 8/21/2020 North America / USA / Wisconsin / Columbia County  |
| EPI_ISL_516435 | 7/20/2020 | 8/21/2020 North America / USA / Illinois / Winnebago County  |
| EPI_ISL_516436 | 7/22/2020 | 8/21/2020 North America / USA / Wisconsin / Dane County      |
| EPI_ISL_516437 | 7/17/2020 | 8/21/2020 North America / USA / Wisconsin / Dane County      |
| EPI_ISL_516438 | 7/17/2020 | 8/21/2020 North America / USA / Wisconsin / Dane County      |
| EPI_ISL_516439 | 7/22/2020 | 8/21/2020 North America / USA / Wisconsin / Dane County      |
| EPI_ISL_516440 | 7/22/2020 | 8/21/2020 North America / USA / Wisconsin / Dane County      |
| EPI_ISL_516441 | 7/22/2020 | 8/21/2020 North America / USA / Wisconsin / Dane County      |
| EPI_ISL_516442 | 7/21/2020 | 8/21/2020 North America / USA / Wisconsin / Dane County      |
| EPI_ISL_516443 | 7/17/2020 | 8/21/2020 North America / USA / Wisconsin / Dane County      |
| EPI_ISL_516444 | 7/21/2020 | 8/21/2020 North America / USA / Wisconsin / Dane County      |
| EPI_ISL_516445 | 7/16/2020 | 8/21/2020 North America / USA / Wisconsin / Rock County      |
| EPI_ISL_516446 | 8/4/2020  | 8/21/2020 North America / USA / Wisconsin / Dane County      |
| EPI_ISL_516447 | 7/31/2020 | 8/21/2020 North America / USA / Wisconsin / Dane County      |
| EPI_ISL_516448 | 7/31/2020 | 8/21/2020 North America / USA / Wisconsin / Dane County      |
| EPI_ISL_516449 | 8/2/2020  | 8/21/2020 North America / USA / Wisconsin / Adams County     |
| EPI_ISL_516451 | 8/4/2020  | 8/21/2020 North America / USA / Wisconsin / Dane County      |
| EPI_ISL_516452 | 8/4/2020  | 8/21/2020 North America / USA / Wisconsin / Dane County      |
| EPI_ISL_516453 | 8/5/2020  | 8/21/2020 North America / USA / Wisconsin / Dane County      |
| EPI_ISL_516454 | 8/4/2020  | 8/21/2020 North America / USA / Wisconsin / Dane County      |
| EPI_ISL_516455 | 8/3/2020  | 8/21/2020 North America / USA / Wisconsin / Iowa County      |
| EPI_ISL_516456 | 8/1/2020  | 8/21/2020 North America / USA / Wisconsin / Dane County      |
| EPI_ISL_516457 | 7/30/2020 | 8/21/2020 North America / USA / Wisconsin / Dane County      |
| EPI_ISL_516458 | 7/31/2020 | 8/21/2020 North America / USA / Wisconsin / Dane County      |
| EPI_ISL_516459 | 7/30/2020 | 8/21/2020 North America / USA / Wisconsin / Dane County      |
| EPI_ISL_516460 | 8/3/2020  | 8/21/2020 North America / USA / Wisconsin / Dane County      |
| EPI_ISL_516461 | 8/4/2020  | 8/21/2020 North America / USA / Wisconsin / Jefferson County |
| EPI_ISL_516462 | 8/3/2020  | 8/21/2020 North America / USA / Wisconsin / Waukesha County  |
| EPI_ISL_516463 | 8/4/2020  | 8/21/2020 North America / USA / Wisconsin / Dane County      |
| EPI_ISL_516464 | 7/31/2020 | 8/21/2020 North America / USA / Wisconsin / Dane County      |
| EPI_ISL_516465 | 8/1/2020  | 8/21/2020 North America / USA / Illinois / Winnebago County  |
| EPI_ISL_516466 | 7/30/2020 | 8/21/2020 North America / USA / Wisconsin / Milwaukee County |
| EPI_ISL_516467 | 8/3/2020  | 8/21/2020 North America / USA / Wisconsin / Dane County      |
| EPI_ISL_516468 | 8/2/2020  | 8/21/2020 North America / USA / Wisconsin / Dane County      |
| EPI_ISL_516469 | 8/1/2020  | 8/21/2020 North America / USA / Wisconsin / Dane County      |
| EPI_ISL_516470 | 8/1/2020  | 8/21/2020 North America / USA / Wisconsin / Dane County      |
| EPI_ISL_516471 | 7/29/2020 | 8/21/2020 North America / USA / Wisconsin / Dane County      |
| EPI_ISL_516472 | 7/29/2020 | 8/21/2020 North America / USA / Wisconsin / Dane County      |
| EPI_ISL_516473 | 8/1/2020  | 8/21/2020 North America / USA / Wisconsin / Dane County      |
| EPI_ISL_516474 | 7/31/2020 | 8/21/2020 North America / USA / Wisconsin / Dane County      |

|                |           |           |                                                    |
|----------------|-----------|-----------|----------------------------------------------------|
| EPI_ISL_516475 | 8/1/2020  | 8/21/2020 | North America / USA / Wisconsin / Dane County      |
| EPI_ISL_516476 | 7/29/2020 | 8/21/2020 | North America / USA / Wisconsin / Dane County      |
| EPI_ISL_516477 | 8/4/2020  | 8/21/2020 | North America / USA / Wisconsin / Dane County      |
| EPI_ISL_516478 | 8/3/2020  | 8/21/2020 | North America / USA / Wisconsin / Jefferson County |
| EPI_ISL_516479 | 7/30/2020 | 8/21/2020 | North America / USA / Wisconsin / Dane County      |
| EPI_ISL_516480 | 7/30/2020 | 8/21/2020 | North America / USA / Wisconsin / Dane County      |
| EPI_ISL_516481 | 7/24/2020 | 8/21/2020 | North America / USA / Wisconsin / Dane County      |
| EPI_ISL_516482 | 7/30/2020 | 8/21/2020 | North America / USA / Wisconsin / Dane County      |
| EPI_ISL_516483 | 7/24/2020 | 8/21/2020 | North America / USA / Wisconsin / Dane County      |
| EPI_ISL_516484 | 7/29/2020 | 8/21/2020 | North America / USA / Wisconsin / Green County     |
| EPI_ISL_516485 | 7/30/2020 | 8/21/2020 | North America / USA / Wisconsin / Dane County      |
| EPI_ISL_516486 | 7/29/2020 | 8/21/2020 | North America / USA / Wisconsin / Dane County      |
| EPI_ISL_516487 | 7/29/2020 | 8/21/2020 | North America / USA / Wisconsin / Dane County      |
| EPI_ISL_516488 | 7/31/2020 | 8/21/2020 | North America / USA / Wisconsin / Dane County      |
| EPI_ISL_516489 | 7/29/2020 | 8/21/2020 | North America / USA / Wisconsin / Dane County      |
| EPI_ISL_516490 | 7/26/2020 | 8/21/2020 | North America / USA / Illinois / Winnebago County  |
| EPI_ISL_516491 | 4/20/2020 | 8/21/2020 | North America / USA / Illinois / Winnebago County  |
| EPI_ISL_516492 | 7/30/2020 | 8/21/2020 | North America / USA / Wisconsin / Dane County      |
| EPI_ISL_516493 | 7/30/2020 | 8/21/2020 | North America / USA / Wisconsin / Milwaukee County |
| EPI_ISL_516494 | 7/30/2020 | 8/21/2020 | North America / USA / Wisconsin / Green County     |
| EPI_ISL_516495 | 7/31/2020 | 8/21/2020 | North America / USA / Wisconsin / Dane County      |
| EPI_ISL_516496 | 8/5/2020  | 8/21/2020 | North America / USA / Wisconsin / Grant County     |
| EPI_ISL_516497 | 7/29/2020 | 8/21/2020 | North America / USA / Wisconsin / Dane County      |
| EPI_ISL_516498 | 7/24/2020 | 8/21/2020 | North America / USA / Wisconsin / Dane County      |
| EPI_ISL_516499 | 7/26/2020 | 8/21/2020 | North America / USA / Wisconsin / Dane County      |
| EPI_ISL_516500 | 7/24/2020 | 8/21/2020 | North America / USA / Wisconsin / Dane County      |
| EPI_ISL_516501 | 7/27/2020 | 8/21/2020 | North America / USA / Illinois / Winnebago County  |
| EPI_ISL_516502 | 7/27/2020 | 8/21/2020 | North America / USA / Wisconsin / Dane County      |
| EPI_ISL_516503 | 7/26/2020 | 8/21/2020 | North America / USA / Wisconsin / Dane County      |
| EPI_ISL_516504 | 7/26/2020 | 8/21/2020 | North America / USA / Wisconsin / Rock County      |
| EPI_ISL_516505 | 7/28/2020 | 8/21/2020 | North America / USA / Wisconsin / Dane County      |
| EPI_ISL_516506 | 8/3/2020  | 8/21/2020 | North America / USA / Wisconsin / Dane County      |
| EPI_ISL_516507 | 7/28/2020 | 8/21/2020 | North America / USA / Wisconsin / Dane County      |
| EPI_ISL_516509 | 7/24/2020 | 8/21/2020 | North America / USA / Wisconsin / Dane County      |
| EPI_ISL_516510 | 7/31/2020 | 8/21/2020 | North America / USA / Wisconsin / Dane County      |
| EPI_ISL_516511 | 7/25/2020 | 8/21/2020 | North America / USA / Illinois / Winnebago County  |
| EPI_ISL_516512 | 7/25/2020 | 8/21/2020 | North America / USA / Wisconsin / Dane County      |
| EPI_ISL_516513 | 7/31/2020 | 8/21/2020 | North America / USA / Wisconsin / Dane County      |
| EPI_ISL_516514 | 7/27/2020 | 8/21/2020 | North America / USA / District of Columbia         |
| EPI_ISL_516515 | 7/30/2020 | 8/21/2020 | North America / USA / Wisconsin / Sauk County      |
| EPI_ISL_516516 | 7/28/2020 | 8/21/2020 | North America / USA / Wisconsin / Dane County      |
| EPI_ISL_516517 | 7/27/2020 | 8/21/2020 | North America / USA / Wisconsin / Jefferson County |
| EPI_ISL_516518 | 7/29/2020 | 8/21/2020 | North America / USA / Wisconsin / Dane County      |
| EPI_ISL_516519 | 7/30/2020 | 8/21/2020 | North America / USA / Wisconsin / Dane County      |
| EPI_ISL_516520 | 8/2/2020  | 8/21/2020 | North America / USA / Wisconsin / Dane County      |
| EPI_ISL_516521 | 7/25/2020 | 8/21/2020 | North America / USA / Wisconsin / Dane County      |
| EPI_ISL_516522 | 7/29/2020 | 8/21/2020 | North America / USA / Wisconsin / Dane County      |

|                |           |                                                                 |
|----------------|-----------|-----------------------------------------------------------------|
| EPI_ISL_516523 | 7/23/2020 | 8/21/2020 North America / USA / Wisconsin / Dane County         |
| EPI_ISL_516524 | 8/2/2020  | 8/21/2020 North America / USA / Wisconsin / Dane County         |
| EPI_ISL_516525 | 7/28/2020 | 8/21/2020 North America / USA / Wisconsin / Racine County       |
| EPI_ISL_516526 | 7/24/2020 | 8/21/2020 North America / USA / Wisconsin / Dane County         |
| EPI_ISL_516527 | 7/26/2020 | 8/21/2020 North America / USA / Wisconsin / Dane County         |
| EPI_ISL_516528 | 7/24/2020 | 8/21/2020 North America / USA / Wisconsin / Dane County         |
| EPI_ISL_516529 | 7/23/2020 | 8/21/2020 North America / USA / Wisconsin / Dane County         |
| EPI_ISL_516530 | 7/24/2020 | 8/21/2020 North America / USA / Wisconsin / Dane County         |
| EPI_ISL_516531 | 7/24/2020 | 8/21/2020 North America / USA / Pennsylvania / Allegheny County |
| EPI_ISL_516532 | 7/27/2020 | 8/21/2020 North America / USA / Wisconsin / Dane County         |
| EPI_ISL_516533 | 7/27/2020 | 8/21/2020 North America / USA / Wisconsin / Eau Claire County   |
| EPI_ISL_516534 | 7/27/2020 | 8/21/2020 North America / USA / Wisconsin / Dane County         |
| EPI_ISL_516535 | 7/28/2020 | 8/21/2020 North America / USA / Wisconsin / Dane County         |
| EPI_ISL_516536 | 7/30/2020 | 8/21/2020 North America / USA / Wisconsin / Columbia County     |
| EPI_ISL_516537 | 7/27/2020 | 8/21/2020 North America / USA / Wisconsin / Dane County         |
| EPI_ISL_516538 | 7/29/2020 | 8/21/2020 North America / USA / Wisconsin / Dane County         |
| EPI_ISL_516539 | 7/30/2020 | 8/21/2020 North America / USA / Illinois / Jo Daviess County    |
| EPI_ISL_516540 | 7/27/2020 | 8/21/2020 North America / USA / Wisconsin / Green County        |
| EPI_ISL_516541 | 7/28/2020 | 8/21/2020 North America / USA / Wisconsin / Dane County         |
| EPI_ISL_516542 | 7/27/2020 | 8/21/2020 North America / USA / Wisconsin / Dane County         |
| EPI_ISL_516543 | 7/28/2020 | 8/21/2020 North America / USA / Wisconsin / Dane County         |
| EPI_ISL_516544 | 7/27/2020 | 8/21/2020 North America / USA / Wisconsin / Dane County         |
| EPI_ISL_516545 | 7/27/2020 | 8/21/2020 North America / USA / Wisconsin / Dane County         |
| EPI_ISL_516546 | 7/23/2020 | 8/21/2020 North America / USA / Wisconsin / Dane County         |
| EPI_ISL_516547 | 7/30/2020 | 8/21/2020 North America / USA / Wisconsin / Dane County         |
| EPI_ISL_516548 | 7/24/2020 | 8/21/2020 North America / USA / Wisconsin / Dane County         |
| EPI_ISL_516549 | 7/23/2020 | 8/21/2020 North America / USA / Wisconsin / Green County        |
| EPI_ISL_516551 | 8/15/2020 | 8/21/2020 Oceania / Australia / South Australia                 |
| EPI_ISL_516552 | 7/31/2020 | 8/21/2020 Europe / Switzerland / Zurich                         |
| EPI_ISL_516553 | 7/31/2020 | 8/21/2020 Europe / Switzerland / Zurich                         |
| EPI_ISL_516554 | 7/31/2020 | 8/21/2020 Europe / Switzerland / Aargau                         |
| EPI_ISL_516555 | 7/31/2020 | 8/21/2020 Europe / Switzerland / Aargau                         |
| EPI_ISL_516556 | 7/31/2020 | 8/21/2020 Europe / Switzerland / Schwyz                         |
| EPI_ISL_516558 | 8/2/2020  | 8/21/2020 Europe / Switzerland / Vaud                           |
| EPI_ISL_516559 | 8/2/2020  | 8/21/2020 Europe / Switzerland / Basel-Landschaft               |
| EPI_ISL_516560 | 8/2/2020  | 8/21/2020 Europe / Switzerland / Basel-Landschaft               |
| EPI_ISL_516561 | 8/2/2020  | 8/21/2020 Europe / Switzerland / Basel-Landschaft               |
| EPI_ISL_516562 | 8/2/2020  | 8/21/2020 Europe / Switzerland / Basel-Landschaft               |
| EPI_ISL_516563 | 8/3/2020  | 8/21/2020 Europe / Switzerland / Basel-Stadt                    |
| EPI_ISL_516564 | 8/3/2020  | 8/21/2020 Europe / Switzerland / Basel-Landschaft               |
| EPI_ISL_516565 | 8/3/2020  | 8/21/2020 Europe / Switzerland / Basel-Landschaft               |
| EPI_ISL_516566 | 8/3/2020  | 8/21/2020 Europe / Switzerland / Basel-Landschaft               |
| EPI_ISL_516568 | 8/3/2020  | 8/21/2020 Europe / Switzerland / Basel-Landschaft               |
| EPI_ISL_516570 | 8/4/2020  | 8/21/2020 Europe / Switzerland / Basel-Landschaft               |
| EPI_ISL_516571 | 8/4/2020  | 8/21/2020 Europe / Switzerland / Zurich                         |
| EPI_ISL_516572 | 8/4/2020  | 8/21/2020 Europe / Switzerland / Zurich                         |
| EPI_ISL_516573 | 8/4/2020  | 8/21/2020 Europe / Switzerland / Zurich                         |

|                |           |                                                    |
|----------------|-----------|----------------------------------------------------|
| EPI_ISL_516574 | 8/4/2020  | 8/21/2020 Europe / Switzerland / Zurich            |
| EPI_ISL_516575 | 8/4/2020  | 8/21/2020 Europe / Switzerland / Geneva            |
| EPI_ISL_516576 | 8/4/2020  | 8/21/2020 Europe / Switzerland / Zurich            |
| EPI_ISL_516578 | 8/4/2020  | 8/21/2020 Europe / Switzerland / Basel-Landschaft  |
| EPI_ISL_516580 | 8/4/2020  | 8/21/2020 Europe / Switzerland / Vaud              |
| EPI_ISL_516581 | 8/3/2020  | 8/21/2020 Europe / Switzerland / Zurich            |
| EPI_ISL_516582 | 8/3/2020  | 8/21/2020 Europe / Switzerland / Zurich            |
| EPI_ISL_516583 | 8/3/2020  | 8/21/2020 Europe / Switzerland / Schwyz            |
| EPI_ISL_516584 | 8/3/2020  | 8/21/2020 Europe / Switzerland / Zurich            |
| EPI_ISL_516585 | 8/4/2020  | 8/21/2020 Europe / Switzerland / Basel-Landschaft  |
| EPI_ISL_516586 | 8/4/2020  | 8/21/2020 Europe / Switzerland / Basel-Landschaft  |
| EPI_ISL_516587 | 8/4/2020  | 8/21/2020 Europe / Switzerland / Basel-Landschaft  |
| EPI_ISL_516588 | 8/4/2020  | 8/21/2020 Europe / Switzerland / Zurich            |
| EPI_ISL_516589 | 8/4/2020  | 8/21/2020 Europe / Switzerland / Bern              |
| EPI_ISL_516590 | 8/4/2020  | 8/21/2020 Europe / Switzerland / Bern              |
| EPI_ISL_516591 | 8/4/2020  | 8/21/2020 Europe / Switzerland / Bern              |
| EPI_ISL_516592 | 8/5/2020  | 8/21/2020 Europe / Switzerland / Zurich            |
| EPI_ISL_516593 | 8/5/2020  | 8/21/2020 Europe / Switzerland / Zurich            |
| EPI_ISL_516594 | 8/5/2020  | 8/21/2020 Europe / Switzerland / Zurich            |
| EPI_ISL_516595 | 8/5/2020  | 8/21/2020 Europe / Switzerland / Zurich            |
| EPI_ISL_516596 | 8/5/2020  | 8/21/2020 Europe / Switzerland / Zurich            |
| EPI_ISL_516597 | 8/5/2020  | 8/21/2020 Europe / Switzerland / Bern              |
| EPI_ISL_516598 | 8/5/2020  | 8/21/2020 Europe / Switzerland / Bern              |
| EPI_ISL_516599 | 8/5/2020  | 8/21/2020 Europe / Switzerland / Vaud              |
| EPI_ISL_516600 | 8/5/2020  | 8/21/2020 Europe / Switzerland / Geneva            |
| EPI_ISL_516601 | 8/5/2020  | 8/21/2020 Europe / Switzerland / Vaud              |
| EPI_ISL_516604 | 8/5/2020  | 8/21/2020 Europe / Switzerland / Zurich            |
| EPI_ISL_516605 | 8/5/2020  | 8/21/2020 Europe / Switzerland / Zurich            |
| EPI_ISL_516606 | 8/6/2020  | 8/21/2020 Europe / Switzerland / Zurich            |
| EPI_ISL_516609 | 6/27/2020 | 8/21/2020 North America / Mexico / Baja California |
| EPI_ISL_516611 | 7/5/2020  | 8/21/2020 North America / Mexico / Baja California |
| EPI_ISL_516613 | 6/26/2020 | 8/21/2020 North America / Mexico / Chihuahua       |
| EPI_ISL_516618 | 6/13/2020 | 8/21/2020 North America / Mexico / Coahuila        |
| EPI_ISL_516620 | 6/19/2020 | 8/21/2020 North America / Mexico / Coahuila        |
| EPI_ISL_516622 | 5/15/2020 | 8/21/2020 North America / Mexico / Sonora          |
| EPI_ISL_516624 | 6/19/2020 | 8/21/2020 North America / Mexico / Tamaulipas      |
| EPI_ISL_516625 | 6/15/2020 | 8/21/2020 North America / Mexico / Tamaulipas      |
| EPI_ISL_516626 | 3/7/2020  | 8/21/2020 South America / Peru / Arequipa          |
| EPI_ISL_516627 | 2020-03   | 8/21/2020 Europe / Estonia                         |
| EPI_ISL_516628 | 4/11/2020 | 8/21/2020 South America / Peru / Ancash            |
| EPI_ISL_516629 | 3/7/2020  | 8/21/2020 Europe / Germany / Berlin                |
| EPI_ISL_516630 | 3/7/2020  | 8/21/2020 Europe / Germany / Berlin                |
| EPI_ISL_516631 | 3/7/2020  | 8/21/2020 Europe / Germany / Berlin                |
| EPI_ISL_516632 | 3/7/2020  | 8/21/2020 Europe / Germany / Berlin                |
| EPI_ISL_516633 | 3/8/2020  | 8/21/2020 Europe / Germany / Berlin                |
| EPI_ISL_516634 | 3/6/2020  | 8/21/2020 Europe / Germany / Berlin                |
| EPI_ISL_516635 | 3/7/2020  | 8/21/2020 Europe / Germany / Berlin                |

|                |           |                                                                 |
|----------------|-----------|-----------------------------------------------------------------|
| EPI_ISL_516636 | 3/7/2020  | 8/21/2020 Europe / Germany / Berlin                             |
| EPI_ISL_516637 | 3/7/2020  | 8/21/2020 Europe / Germany / Berlin                             |
| EPI_ISL_516638 | 3/7/2020  | 8/21/2020 Europe / Germany / Berlin                             |
| EPI_ISL_516639 | 3/7/2020  | 8/21/2020 Europe / Germany / Berlin                             |
| EPI_ISL_516640 | 3/7/2020  | 8/21/2020 Europe / Germany / Berlin                             |
| EPI_ISL_516641 | 3/8/2020  | 8/21/2020 Europe / Germany / Berlin                             |
| EPI_ISL_516642 | 3/4/2020  | 8/21/2020 Europe / Germany / Berlin                             |
| EPI_ISL_516644 | 3/7/2020  | 8/21/2020 Europe / Germany / Berlin                             |
| EPI_ISL_516645 | 3/6/2020  | 8/21/2020 Europe / Germany / Berlin                             |
| EPI_ISL_516646 | 4/12/2020 | 8/21/2020 South America / Peru / Lima                           |
| EPI_ISL_516647 | 4/11/2020 | 8/21/2020 South America / Peru / Junin                          |
| EPI_ISL_516648 | 7/14/2020 | 8/21/2020 South America / Ecuador / Zamora-Chinchipe / Yantzaza |
| EPI_ISL_516649 | 7/14/2020 | 8/21/2020 South America / Ecuador / Zamora-Chinchipe / Yantzaza |
| EPI_ISL_516650 | 7/22/2020 | 8/21/2020 South America / Ecuador / Pichincha / Quito           |
| EPI_ISL_516651 | 7/25/2020 | 8/21/2020 South America / Ecuador / Los Rios / Quevedo          |
| EPI_ISL_516652 | 7/29/2020 | 8/21/2020 South America / Ecuador / Orellana / Coca             |
| EPI_ISL_516653 | 4/10/2020 | 8/21/2020 South America / Peru / Ancash                         |
| EPI_ISL_516654 | 4/11/2020 | 8/21/2020 South America / Peru / Ancash                         |
| EPI_ISL_516655 | 4/30/2020 | 8/21/2020 North America / USA / Virginia                        |
| EPI_ISL_516656 | 4/30/2020 | 8/21/2020 North America / USA / Virginia                        |
| EPI_ISL_516657 | 4/30/2020 | 8/21/2020 North America / USA / Virginia                        |
| EPI_ISL_516659 | 4/30/2020 | 8/21/2020 North America / USA / Virginia                        |
| EPI_ISL_516660 | 4/30/2020 | 8/21/2020 North America / USA / Virginia                        |
| EPI_ISL_516661 | 4/29/2020 | 8/21/2020 North America / USA / Virginia                        |
| EPI_ISL_516662 | 4/30/2020 | 8/21/2020 North America / USA / Virginia                        |
| EPI_ISL_516663 | 4/30/2020 | 8/21/2020 North America / USA / Virginia                        |
| EPI_ISL_516664 | 4/30/2020 | 8/21/2020 North America / USA / Virginia                        |
| EPI_ISL_516665 | 4/29/2020 | 8/21/2020 North America / USA / Virginia                        |
| EPI_ISL_516666 | 4/30/2020 | 8/21/2020 North America / USA / Virginia                        |
| EPI_ISL_516667 | 4/30/2020 | 8/21/2020 North America / USA / Virginia                        |
| EPI_ISL_516668 | 4/30/2020 | 8/21/2020 North America / USA / Virginia                        |
| EPI_ISL_516669 | 4/30/2020 | 8/21/2020 North America / USA / Virginia                        |
| EPI_ISL_516670 | 4/30/2020 | 8/21/2020 North America / USA / Virginia                        |
| EPI_ISL_516671 | 4/30/2020 | 8/21/2020 North America / USA / Virginia                        |
| EPI_ISL_516672 | 4/30/2020 | 8/21/2020 North America / USA / Virginia                        |
| EPI_ISL_516673 | 4/30/2020 | 8/21/2020 North America / USA / Virginia                        |
| EPI_ISL_516674 | 4/30/2020 | 8/21/2020 North America / USA / Virginia                        |
| EPI_ISL_516675 | 4/30/2020 | 8/21/2020 North America / USA / Virginia                        |
| EPI_ISL_516676 | 4/30/2020 | 8/21/2020 North America / USA / Virginia                        |
| EPI_ISL_516677 | 5/13/2020 | 8/21/2020 North America / USA / Virginia                        |
| EPI_ISL_516678 | 5/12/2020 | 8/21/2020 North America / USA / Virginia                        |
| EPI_ISL_516679 | 5/12/2020 | 8/21/2020 North America / USA / Virginia                        |
| EPI_ISL_516680 | 5/13/2020 | 8/21/2020 North America / USA / Virginia                        |
| EPI_ISL_516681 | 5/13/2020 | 8/21/2020 North America / USA / Virginia                        |
| EPI_ISL_516682 | 5/13/2020 | 8/21/2020 North America / USA / Virginia                        |
| EPI_ISL_516683 | 5/13/2020 | 8/21/2020 North America / USA / Virginia                        |
| EPI_ISL_516684 | 5/13/2020 | 8/21/2020 North America / USA / Virginia                        |



|                |           |                                                            |
|----------------|-----------|------------------------------------------------------------|
| EPI_ISL_516733 | 7/18/2020 | 8/21/2020 North America / USA / California / Madera County |
| EPI_ISL_516734 | 7/18/2020 | 8/21/2020 North America / USA / California / Madera County |
| EPI_ISL_516735 | 7/7/2020  | 8/21/2020 North America / USA / California / Madera County |
| EPI_ISL_516736 | 7/7/2020  | 8/21/2020 North America / USA / California / Madera County |
| EPI_ISL_516738 | 7/7/2020  | 8/21/2020 North America / USA / California / Madera County |
| EPI_ISL_516739 | 7/7/2020  | 8/21/2020 North America / USA / California / Madera County |
| EPI_ISL_516740 | 7/7/2020  | 8/21/2020 North America / USA / California / Madera County |
| EPI_ISL_516741 | 7/8/2020  | 8/21/2020 North America / USA / California / Madera County |
| EPI_ISL_516742 | 7/3/2020  | 8/21/2020 North America / USA / California / Madera County |
| EPI_ISL_516743 | 7/3/2020  | 8/21/2020 North America / USA / California / Madera County |
| EPI_ISL_516744 | 7/3/2020  | 8/21/2020 North America / USA / California / Madera County |
| EPI_ISL_516745 | 8/11/2020 | 8/21/2020 North America / USA / California / Madera County |
| EPI_ISL_516746 | 8/11/2020 | 8/21/2020 North America / USA / California / Madera County |
| EPI_ISL_516747 | 8/11/2020 | 8/21/2020 North America / USA / California / Madera County |
| EPI_ISL_522407 | 3/20/2020 | 8/21/2020 Europe / Germany / Bavaria                       |
| EPI_ISL_516748 | 5/27/2020 | 8/22/2020 North America / USA / South Carolina             |
| EPI_ISL_516749 | 6/17/2020 | 8/22/2020 North America / USA / South Carolina             |
| EPI_ISL_516750 | 6/20/2020 | 8/22/2020 North America / USA / South Carolina             |
| EPI_ISL_516752 | 6/24/2020 | 8/22/2020 North America / USA / South Carolina             |
| EPI_ISL_516753 | 6/30/2020 | 8/22/2020 North America / USA / South Carolina             |
| EPI_ISL_516755 | 7/3/2020  | 8/22/2020 North America / USA / South Carolina             |
| EPI_ISL_516756 | 7/7/2020  | 8/22/2020 North America / USA / South Carolina             |
| EPI_ISL_516757 | 7/7/2020  | 8/22/2020 North America / USA / South Carolina             |
| EPI_ISL_516758 | 7/7/2020  | 8/22/2020 North America / USA / South Carolina             |
| EPI_ISL_516762 | 7/3/2020  | 8/22/2020 North America / USA / South Carolina             |
| EPI_ISL_516763 | 7/3/2020  | 8/22/2020 North America / USA / South Carolina             |
| EPI_ISL_516764 | 7/1/2020  | 8/22/2020 North America / USA / South Carolina             |
| EPI_ISL_516765 | 7/8/2020  | 8/22/2020 North America / USA / South Carolina             |
| EPI_ISL_516766 | 7/8/2020  | 8/22/2020 North America / USA / South Carolina             |
| EPI_ISL_516767 | 7/3/2020  | 8/22/2020 North America / USA / South Carolina             |
| EPI_ISL_516768 | 7/7/2020  | 8/22/2020 North America / USA / South Carolina             |
| EPI_ISL_516770 | 7/7/2020  | 8/22/2020 North America / USA / South Carolina             |
| EPI_ISL_516771 | 7/7/2020  | 8/22/2020 North America / USA / South Carolina             |
| EPI_ISL_516772 | 7/14/2020 | 8/22/2020 North America / USA / South Carolina             |
| EPI_ISL_516773 | 7/3/2020  | 8/22/2020 North America / USA / South Carolina             |
| EPI_ISL_516774 | 7/7/2020  | 8/22/2020 North America / USA / South Carolina             |
| EPI_ISL_516775 | 7/14/2020 | 8/22/2020 North America / USA / South Carolina             |
| EPI_ISL_516776 | 7/7/2020  | 8/22/2020 North America / USA / South Carolina             |
| EPI_ISL_516777 | 7/21/2020 | 8/22/2020 North America / USA / South Carolina             |
| EPI_ISL_516778 | 7/21/2020 | 8/22/2020 North America / USA / South Carolina             |
| EPI_ISL_516779 | 7/15/2020 | 8/22/2020 North America / USA / South Carolina             |
| EPI_ISL_516783 | 7/13/2020 | 8/23/2020 Asia / South Korea                               |
| EPI_ISL_516784 | 7/21/2020 | 8/23/2020 Asia / South Korea                               |
| EPI_ISL_516785 | 7/21/2020 | 8/23/2020 Asia / South Korea                               |
| EPI_ISL_516798 | 3/26/2020 | 8/23/2020 Asia / Hong Kong                                 |
| EPI_ISL_516799 | 8/17/2020 | 8/23/2020 Asia / Hong Kong                                 |
| EPI_ISL_516800 | 6/22/2020 | 8/23/2020 Asia / Indonesia / Special Region of Yogyakarta  |



|                |           |                                                           |
|----------------|-----------|-----------------------------------------------------------|
| EPI_ISL_516801 | 3/10/2020 | 8/24/2020 Asia / Singapore                                |
| EPI_ISL_516802 | 3/12/2020 | 8/24/2020 Asia / Singapore                                |
| EPI_ISL_516803 | 3/22/2020 | 8/24/2020 Asia / Singapore                                |
| EPI_ISL_516804 | 3/24/2020 | 8/24/2020 Asia / Singapore                                |
| EPI_ISL_516805 | 3/25/2020 | 8/24/2020 Asia / Singapore                                |
| EPI_ISL_516806 | 5/16/2020 | 8/24/2020 Asia / Indonesia / Special Region of Yogyakarta |
| EPI_ISL_516807 | 4/10/2020 | 8/24/2020 Asia / Singapore                                |
| EPI_ISL_516808 | 8/11/2020 | 8/24/2020 Asia / Singapore                                |
| EPI_ISL_516809 | 7/8/2020  | 8/24/2020 Asia / Singapore                                |
| EPI_ISL_516810 | 8/11/2020 | 8/24/2020 Asia / Singapore                                |
| EPI_ISL_516811 | 8/11/2020 | 8/24/2020 Asia / Singapore                                |
| EPI_ISL_516812 | 8/11/2020 | 8/24/2020 Asia / Singapore                                |
| EPI_ISL_516813 | 8/10/2020 | 8/24/2020 Asia / Singapore                                |
| EPI_ISL_516814 | 8/10/2020 | 8/24/2020 Asia / Singapore                                |
| EPI_ISL_516815 | 8/11/2020 | 8/24/2020 Asia / Singapore                                |
| EPI_ISL_516816 | 8/11/2020 | 8/24/2020 Asia / Singapore                                |
| EPI_ISL_516817 | 8/11/2020 | 8/24/2020 Asia / Singapore                                |
| EPI_ISL_516818 | 7/6/2020  | 8/24/2020 Asia / Singapore                                |
| EPI_ISL_516819 | 8/11/2020 | 8/24/2020 Asia / Singapore                                |
| EPI_ISL_516820 | 8/13/2020 | 8/24/2020 Asia / Singapore                                |
| EPI_ISL_516821 | 7/6/2020  | 8/24/2020 Asia / Singapore                                |
| EPI_ISL_516822 | 7/7/2020  | 8/24/2020 Asia / Singapore                                |
| EPI_ISL_516823 | 8/11/2020 | 8/24/2020 Asia / Singapore                                |
| EPI_ISL_516824 | 8/11/2020 | 8/24/2020 Asia / Singapore                                |
| EPI_ISL_516825 | 8/11/2020 | 8/24/2020 Asia / Singapore                                |
| EPI_ISL_516826 | 8/11/2020 | 8/24/2020 Asia / Singapore                                |
| EPI_ISL_516829 | 8/10/2020 | 8/24/2020 Asia / Indonesia / Special Region of Yogyakarta |
| EPI_ISL_516831 | 3/11/2020 | 8/24/2020 Europe / United Kingdom / England               |
| EPI_ISL_516832 | 4/4/2020  | 8/24/2020 Europe / United Kingdom / England               |
| EPI_ISL_516833 | 3/17/2020 | 8/24/2020 Europe / United Kingdom / England               |
| EPI_ISL_516834 | 4/4/2020  | 8/24/2020 Europe / United Kingdom / England               |
| EPI_ISL_516835 | 3/16/2020 | 8/24/2020 Europe / United Kingdom / England               |
| EPI_ISL_516836 | 3/11/2020 | 8/24/2020 Europe / United Kingdom / England               |
| EPI_ISL_516841 | 3/17/2020 | 8/24/2020 Europe / United Kingdom / England               |
| EPI_ISL_516842 | 3/10/2020 | 8/24/2020 Europe / United Kingdom / England               |
| EPI_ISL_516843 | 4/4/2020  | 8/24/2020 Europe / United Kingdom / England               |
| EPI_ISL_516844 | 4/7/2020  | 8/24/2020 Europe / United Kingdom / England               |
| EPI_ISL_516846 | 4/4/2020  | 8/24/2020 Europe / United Kingdom / England               |
| EPI_ISL_516848 | 3/8/2020  | 8/24/2020 Europe / United Kingdom / England               |
| EPI_ISL_516852 | 3/17/2020 | 8/24/2020 Europe / United Kingdom / England               |
| EPI_ISL_516857 | 3/17/2020 | 8/24/2020 Europe / United Kingdom / England               |
| EPI_ISL_516858 | 4/4/2020  | 8/24/2020 Europe / United Kingdom / England               |
| EPI_ISL_516863 | 3/16/2020 | 8/24/2020 Europe / United Kingdom / England               |
| EPI_ISL_516864 | 3/19/2020 | 8/24/2020 Europe / United Kingdom / England               |
| EPI_ISL_516865 | 3/10/2020 | 8/24/2020 Europe / United Kingdom / England               |
| EPI_ISL_516866 | 4/4/2020  | 8/24/2020 Europe / United Kingdom / England               |
| EPI_ISL_516868 | 3/18/2020 | 8/24/2020 Europe / United Kingdom / England               |

|                |           |                                             |
|----------------|-----------|---------------------------------------------|
| EPI_ISL_516870 | 3/10/2020 | 8/24/2020 Europe / United Kingdom / England |
| EPI_ISL_516873 | 4/6/2020  | 8/24/2020 Europe / United Kingdom / England |
| EPI_ISL_516874 | 4/6/2020  | 8/24/2020 Europe / United Kingdom / England |
| EPI_ISL_516876 | 4/6/2020  | 8/24/2020 Europe / United Kingdom / England |
| EPI_ISL_516877 | 4/6/2020  | 8/24/2020 Europe / United Kingdom / England |
| EPI_ISL_516878 | 4/6/2020  | 8/24/2020 Europe / United Kingdom / England |
| EPI_ISL_516880 | 4/6/2020  | 8/24/2020 Europe / United Kingdom / England |
| EPI_ISL_516883 | 4/6/2020  | 8/24/2020 Europe / United Kingdom / England |
| EPI_ISL_516884 | 6/1/2020  | 8/24/2020 Asia / Israel / Tel Aviv          |
| EPI_ISL_516885 | 6/1/2020  | 8/24/2020 Asia / Israel / Tel Aviv          |
| EPI_ISL_516886 | 6/1/2020  | 8/24/2020 Asia / Israel / Tel Aviv          |
| EPI_ISL_516887 | 6/2/2020  | 8/24/2020 Asia / Israel / Tel Aviv          |
| EPI_ISL_516888 | 6/2/2020  | 8/24/2020 Asia / Israel / Tel Aviv          |
| EPI_ISL_516889 | 6/2/2020  | 8/24/2020 Asia / Israel / Tel Aviv          |
| EPI_ISL_516890 | 6/3/2020  | 8/24/2020 Asia / Israel / Tel Aviv          |
| EPI_ISL_516891 | 6/3/2020  | 8/24/2020 Asia / Israel / Tel Aviv          |
| EPI_ISL_516892 | 6/4/2020  | 8/24/2020 Asia / Israel / Tel Aviv          |
| EPI_ISL_516893 | 6/4/2020  | 8/24/2020 Asia / Israel / Tel Aviv          |
| EPI_ISL_516894 | 6/4/2020  | 8/24/2020 Asia / Israel / Tel Aviv          |
| EPI_ISL_516895 | 6/4/2020  | 8/24/2020 Asia / Israel / Tel Aviv          |
| EPI_ISL_516896 | 6/4/2020  | 8/24/2020 Asia / Israel / Tel Aviv          |
| EPI_ISL_516897 | 6/5/2020  | 8/24/2020 Asia / Israel / Tel Aviv          |
| EPI_ISL_516898 | 6/5/2020  | 8/24/2020 Asia / Israel / Tel Aviv          |
| EPI_ISL_516899 | 6/5/2020  | 8/24/2020 Asia / Israel / Tel Aviv          |
| EPI_ISL_516900 | 6/8/2020  | 8/24/2020 Asia / Israel / Tel Aviv          |
| EPI_ISL_516901 | 6/29/2020 | 8/24/2020 Asia / Israel                     |
| EPI_ISL_516902 | 6/29/2020 | 8/24/2020 Asia / Israel / Haifa District    |
| EPI_ISL_516903 | 6/29/2020 | 8/24/2020 Asia / Israel / Northern District |
| EPI_ISL_516905 | 6/29/2020 | 8/24/2020 Asia / Israel / Northern District |
| EPI_ISL_516906 | 6/28/2020 | 8/24/2020 Asia / Israel / Northern District |
| EPI_ISL_516913 | 6/15/2020 | 8/24/2020 Asia / Israel / Haifa District    |
| EPI_ISL_516915 | 6/15/2020 | 8/24/2020 Asia / Israel / Haifa District    |
| EPI_ISL_516917 | 6/21/2020 | 8/24/2020 Asia / Israel / Northern District |
| EPI_ISL_516919 | 6/25/2020 | 8/24/2020 Asia / Israel / Northern District |
| EPI_ISL_516920 | 6/26/2020 | 8/24/2020 Asia / Israel / Northern District |
| EPI_ISL_516921 | 6/28/2020 | 8/24/2020 Asia / Israel / Northern District |
| EPI_ISL_516922 | 3/17/2020 | 8/24/2020 Europe / Montenegro               |
| EPI_ISL_516923 | 3/18/2020 | 8/24/2020 Europe / Montenegro               |
| EPI_ISL_516924 | 3/19/2020 | 8/24/2020 Europe / Montenegro               |
| EPI_ISL_516925 | 7/17/2020 | 8/24/2020 Europe / Montenegro               |
| EPI_ISL_516926 | 7/17/2020 | 8/24/2020 Europe / Montenegro               |
| EPI_ISL_516927 | 7/17/2020 | 8/24/2020 Europe / Montenegro               |
| EPI_ISL_516928 | 7/18/2020 | 8/24/2020 Europe / Montenegro               |
| EPI_ISL_516929 | 7/18/2020 | 8/24/2020 Europe / Montenegro               |
| EPI_ISL_516930 | 7/18/2020 | 8/24/2020 Europe / Montenegro               |
| EPI_ISL_516931 | 7/19/2020 | 8/24/2020 Europe / Montenegro               |
| EPI_ISL_516932 | 7/19/2020 | 8/24/2020 Europe / Montenegro               |

|                |           |                                                              |
|----------------|-----------|--------------------------------------------------------------|
| EPI_ISL_516933 | 7/19/2020 | 8/24/2020 Europe / Montenegro                                |
| EPI_ISL_516934 | 6/18/2020 | 8/24/2020 Europe / Moldova / Chisinau                        |
| EPI_ISL_516938 | 6/17/2020 | 8/24/2020 Europe / Moldova / Rabnita                         |
| EPI_ISL_516940 | 4/2/2020  | 8/24/2020 Asia / India / Uttar Pradesh / Lucknow / Balrampur |
| EPI_ISL_516942 | 4/2/2020  | 8/24/2020 Asia / India / Uttar Pradesh / Lucknow / Balrampur |
| EPI_ISL_516943 | 4/2/2020  | 8/24/2020 Asia / India / Uttar Pradesh / Lucknow / Balrampur |
| EPI_ISL_516946 | 3/11/2020 | 8/24/2020 Asia / India / Uttar Pradesh / Lucknow             |
| EPI_ISL_516948 | 3/18/2020 | 8/24/2020 Asia / India / Uttar Pradesh / Lucknow             |
| EPI_ISL_516949 | 5/14/2020 | 8/24/2020 Asia / India / Uttar Pradesh / Lakhimpur           |
| EPI_ISL_516969 | 3/28/2020 | 8/24/2020 Asia / India / Uttar Pradesh / Agra                |
| EPI_ISL_516974 | 3/24/2020 | 8/24/2020 Asia / India / Uttar Pradesh / Pilibhit            |
| EPI_ISL_516976 | 5/25/2020 | 8/24/2020 Asia / India / Uttar Pradesh / Sambhal             |
| EPI_ISL_516977 | 5/26/2020 | 8/24/2020 Asia / India / Uttar Pradesh / Barabanki           |
| EPI_ISL_516980 | 5/25/2020 | 8/24/2020 Asia / India / Uttar Pradesh / Kannauj             |
| EPI_ISL_516981 | 5/25/2020 | 8/24/2020 Asia / India / Uttar Pradesh / Kannauj             |
| EPI_ISL_516982 | 5/25/2020 | 8/24/2020 Asia / India / Uttar Pradesh / Moradabad           |
| EPI_ISL_516983 | 5/25/2020 | 8/24/2020 Asia / India / Uttar Pradesh / Moradabad           |
| EPI_ISL_516984 | 5/25/2020 | 8/24/2020 Asia / India / Uttar Pradesh / Moradabad           |
| EPI_ISL_516986 | 5/24/2020 | 8/24/2020 Asia / India / Uttar Pradesh / Moradabad           |
| EPI_ISL_516987 | 3/16/2020 | 8/24/2020 South America / Peru / Ancash                      |
| EPI_ISL_516988 | 2020-03   | 8/24/2020 Europe / Slovakia / Bratislava                     |
| EPI_ISL_516989 | 2020-03   | 8/24/2020 Europe / Slovakia / Bratislava                     |
| EPI_ISL_516993 | 8/13/2020 | 8/24/2020 Europe / United Kingdom / England                  |
| EPI_ISL_516995 | 8/13/2020 | 8/24/2020 Europe / United Kingdom / England                  |
| EPI_ISL_516996 | 8/13/2020 | 8/24/2020 Europe / United Kingdom / England                  |
| EPI_ISL_516999 | 8/13/2020 | 8/24/2020 Europe / United Kingdom / England                  |
| EPI_ISL_517000 | 8/13/2020 | 8/24/2020 Europe / United Kingdom / England                  |
| EPI_ISL_517001 | 3/28/2020 | 8/24/2020 Europe / United Kingdom / England                  |
| EPI_ISL_517002 | 3/28/2020 | 8/24/2020 Europe / United Kingdom / England                  |
| EPI_ISL_517003 | 3/27/2020 | 8/24/2020 Europe / United Kingdom / England                  |
| EPI_ISL_517004 | 3/27/2020 | 8/24/2020 Europe / United Kingdom / England                  |
| EPI_ISL_517005 | 3/28/2020 | 8/24/2020 Europe / United Kingdom / England                  |
| EPI_ISL_517006 | 3/28/2020 | 8/24/2020 Europe / United Kingdom / England                  |
| EPI_ISL_517007 | 3/28/2020 | 8/24/2020 Europe / United Kingdom / England                  |
| EPI_ISL_517008 | 3/28/2020 | 8/24/2020 Europe / United Kingdom / England                  |
| EPI_ISL_517010 | 3/28/2020 | 8/24/2020 Europe / United Kingdom / England                  |
| EPI_ISL_517011 | 3/28/2020 | 8/24/2020 Europe / United Kingdom / England                  |
| EPI_ISL_517012 | 3/27/2020 | 8/24/2020 Europe / United Kingdom / England                  |
| EPI_ISL_517013 | 3/27/2020 | 8/24/2020 Europe / United Kingdom / England                  |
| EPI_ISL_517014 | 3/28/2020 | 8/24/2020 Europe / United Kingdom / England                  |
| EPI_ISL_517015 | 3/28/2020 | 8/24/2020 Europe / United Kingdom / England                  |
| EPI_ISL_517016 | 3/28/2020 | 8/24/2020 Europe / United Kingdom / England                  |
| EPI_ISL_517017 | 3/28/2020 | 8/24/2020 Europe / United Kingdom / England                  |
| EPI_ISL_517018 | 3/28/2020 | 8/24/2020 Europe / United Kingdom / England                  |
| EPI_ISL_517020 | 3/28/2020 | 8/24/2020 Europe / United Kingdom / England                  |
| EPI_ISL_517021 | 3/27/2020 | 8/24/2020 Europe / United Kingdom / England                  |
| EPI_ISL_517022 | 3/27/2020 | 8/24/2020 Europe / United Kingdom / England                  |

















|                |           |           |                                    |
|----------------|-----------|-----------|------------------------------------|
| EPI_ISL_517576 | 8/10/2020 | 8/24/2020 | Europe / United Kingdom / England  |
| EPI_ISL_517580 | 8/9/2020  | 8/24/2020 | Europe / United Kingdom / Scotland |
| EPI_ISL_517581 | 8/10/2020 | 8/24/2020 | Europe / United Kingdom / Scotland |
| EPI_ISL_517582 | 8/10/2020 | 8/24/2020 | Europe / United Kingdom / Scotland |
| EPI_ISL_517583 | 5/1/2020  | 8/24/2020 | Europe / United Kingdom / Scotland |
| EPI_ISL_517584 | 5/1/2020  | 8/24/2020 | Europe / United Kingdom / Scotland |
| EPI_ISL_517585 | 5/1/2020  | 8/24/2020 | Europe / United Kingdom / Scotland |
| EPI_ISL_517586 | 5/1/2020  | 8/24/2020 | Europe / United Kingdom / Scotland |
| EPI_ISL_517587 | 5/1/2020  | 8/24/2020 | Europe / United Kingdom / Scotland |
| EPI_ISL_517588 | 8/4/2020  | 8/24/2020 | Europe / United Kingdom / Scotland |
| EPI_ISL_517589 | 8/7/2020  | 8/24/2020 | Europe / United Kingdom / Scotland |
| EPI_ISL_517590 | 7/24/2020 | 8/24/2020 | Europe / United Kingdom / Wales    |
| EPI_ISL_517591 | 7/21/2020 | 8/24/2020 | Europe / United Kingdom / Wales    |
| EPI_ISL_517592 | 8/4/2020  | 8/24/2020 | Europe / United Kingdom / Wales    |
| EPI_ISL_517593 | 7/28/2020 | 8/24/2020 | Europe / United Kingdom / Wales    |
| EPI_ISL_517594 | 8/6/2020  | 8/24/2020 | Europe / United Kingdom / Wales    |
| EPI_ISL_517595 | 7/29/2020 | 8/24/2020 | Europe / United Kingdom / Wales    |
| EPI_ISL_517596 | 8/3/2020  | 8/24/2020 | Europe / United Kingdom / Wales    |
| EPI_ISL_517597 | 7/29/2020 | 8/24/2020 | Europe / United Kingdom / Wales    |
| EPI_ISL_517598 | 7/29/2020 | 8/24/2020 | Europe / United Kingdom / Wales    |
| EPI_ISL_517599 | 7/29/2020 | 8/24/2020 | Europe / United Kingdom / Wales    |
| EPI_ISL_517600 | 8/10/2020 | 8/24/2020 | Europe / United Kingdom / Wales    |
| EPI_ISL_517601 | 8/1/2020  | 8/24/2020 | Europe / United Kingdom / Wales    |
| EPI_ISL_517605 | 7/31/2020 | 8/24/2020 | Europe / United Kingdom / Wales    |
| EPI_ISL_517607 | 8/13/2020 | 8/24/2020 | Europe / United Kingdom / Wales    |
| EPI_ISL_517609 | 8/15/2020 | 8/24/2020 | Europe / United Kingdom / Wales    |
| EPI_ISL_517611 | 2020      | 8/24/2020 | Europe / Germany / Lower Saxony    |
| EPI_ISL_517613 | 2020-05   | 8/24/2020 | South America / Suriname           |
| EPI_ISL_517615 | 2020-05   | 8/24/2020 | South America / Suriname           |
| EPI_ISL_517616 | 5/7/2020  | 8/24/2020 | South America / Suriname           |
| EPI_ISL_517621 | 6/14/2020 | 8/24/2020 | South America / Suriname           |
| EPI_ISL_517622 | 6/17/2020 | 8/24/2020 | South America / Suriname           |
| EPI_ISL_517623 | 6/20/2020 | 8/24/2020 | South America / Suriname           |
| EPI_ISL_517624 | 6/24/2020 | 8/24/2020 | South America / Suriname           |
| EPI_ISL_517625 | 6/25/2020 | 8/24/2020 | South America / Suriname           |
| EPI_ISL_517626 | 6/25/2020 | 8/24/2020 | South America / Suriname           |
| EPI_ISL_517627 | 6/25/2020 | 8/24/2020 | South America / Suriname           |
| EPI_ISL_517628 | 6/25/2020 | 8/24/2020 | South America / Suriname           |
| EPI_ISL_517629 | 6/25/2020 | 8/24/2020 | South America / Suriname           |
| EPI_ISL_517630 | 6/25/2020 | 8/24/2020 | South America / Suriname           |
| EPI_ISL_517631 | 6/25/2020 | 8/24/2020 | South America / Suriname           |
| EPI_ISL_517633 | 6/25/2020 | 8/24/2020 | South America / Suriname           |
| EPI_ISL_517636 | 6/25/2020 | 8/24/2020 | South America / Suriname           |
| EPI_ISL_517637 | 6/25/2020 | 8/24/2020 | South America / Suriname           |
| EPI_ISL_517638 | 6/25/2020 | 8/24/2020 | South America / Suriname           |
| EPI_ISL_517639 | 6/25/2020 | 8/24/2020 | South America / Suriname           |
| EPI_ISL_517640 | 6/25/2020 | 8/24/2020 | South America / Suriname           |

|                |           |                                              |
|----------------|-----------|----------------------------------------------|
| EPI_ISL_517641 | 6/25/2020 | 8/24/2020 South America / Suriname           |
| EPI_ISL_517644 | 6/25/2020 | 8/24/2020 South America / Suriname           |
| EPI_ISL_517645 | 6/25/2020 | 8/24/2020 South America / Suriname           |
| EPI_ISL_517646 | 6/26/2020 | 8/24/2020 South America / Suriname           |
| EPI_ISL_517647 | 6/26/2020 | 8/24/2020 South America / Suriname           |
| EPI_ISL_517648 | 6/26/2020 | 8/24/2020 South America / Suriname           |
| EPI_ISL_517650 | 6/26/2020 | 8/24/2020 South America / Suriname           |
| EPI_ISL_517651 | 6/26/2020 | 8/24/2020 South America / Suriname           |
| EPI_ISL_517652 | 6/26/2020 | 8/24/2020 South America / Suriname           |
| EPI_ISL_517653 | 6/26/2020 | 8/24/2020 South America / Suriname           |
| EPI_ISL_517654 | 6/27/2020 | 8/24/2020 South America / Suriname           |
| EPI_ISL_517657 | 7/7/2020  | 8/24/2020 South America / Suriname           |
| EPI_ISL_517658 | 7/13/2020 | 8/24/2020 South America / Suriname           |
| EPI_ISL_517659 | 7/14/2020 | 8/24/2020 South America / Suriname           |
| EPI_ISL_517686 | 4/12/2020 | 8/24/2020 South America / Peru / La Libertad |
| EPI_ISL_517687 | 4/2/2020  | 8/24/2020 South America / Peru / Ancash      |
| EPI_ISL_517713 | 4/1/2020  | 8/24/2020 South America / Peru / Cajamarca   |
| EPI_ISL_517770 | 3/13/2020 | 8/24/2020 South America / Peru / Cajamarca   |
| EPI_ISL_517772 | 4/3/2020  | 8/24/2020 North America / USA / Florida      |
| EPI_ISL_517778 | 5/6/2020  | 8/24/2020 North America / USA / Florida      |
| EPI_ISL_517788 | 3/24/2020 | 8/24/2020 North America / USA / Florida      |
| EPI_ISL_517790 | 6/12/2020 | 8/24/2020 North America / USA / Florida      |
| EPI_ISL_517791 | 6/12/2020 | 8/24/2020 North America / USA / Florida      |
| EPI_ISL_517792 | 6/23/2020 | 8/24/2020 North America / USA / Florida      |
| EPI_ISL_517794 | 6/23/2020 | 8/24/2020 North America / USA / Florida      |
| EPI_ISL_517795 | 6/23/2020 | 8/24/2020 North America / USA / Florida      |
| EPI_ISL_517797 | 6/29/2020 | 8/24/2020 North America / USA / Florida      |
| EPI_ISL_517798 | 6/30/2020 | 8/24/2020 North America / USA / Florida      |
| EPI_ISL_517800 | 6/30/2020 | 8/24/2020 North America / USA / Florida      |
| EPI_ISL_517801 | 6/30/2020 | 8/24/2020 North America / USA / Florida      |
| EPI_ISL_517802 | 6/30/2020 | 8/24/2020 North America / USA / Florida      |
| EPI_ISL_517803 | 6/30/2020 | 8/24/2020 North America / USA / Florida      |
| EPI_ISL_517804 | 7/2/2020  | 8/24/2020 North America / USA / Florida      |
| EPI_ISL_517805 | 7/1/2020  | 8/24/2020 North America / USA / Florida      |
| EPI_ISL_517806 | 7/2/2020  | 8/24/2020 North America / USA / Florida      |
| EPI_ISL_517807 | 7/2/2020  | 8/24/2020 North America / USA / Florida      |
| EPI_ISL_517808 | 7/2/2020  | 8/24/2020 North America / USA / Florida      |
| EPI_ISL_517809 | 7/2/2020  | 8/24/2020 North America / USA / Florida      |
| EPI_ISL_517810 | 7/2/2020  | 8/24/2020 North America / USA / Florida      |
| EPI_ISL_517812 | 7/11/2020 | 8/24/2020 North America / USA / Florida      |
| EPI_ISL_517813 | 7/13/2020 | 8/24/2020 North America / USA / Florida      |
| EPI_ISL_517814 | 7/10/2020 | 8/24/2020 North America / USA / Florida      |
| EPI_ISL_517815 | 7/10/2020 | 8/24/2020 North America / USA / Florida      |
| EPI_ISL_517816 | 7/10/2020 | 8/24/2020 North America / USA / Florida      |
| EPI_ISL_517817 | 7/10/2020 | 8/24/2020 North America / USA / Florida      |
| EPI_ISL_517819 | 7/10/2020 | 8/24/2020 North America / USA / Florida      |
| EPI_ISL_517821 | 7/13/2020 | 8/24/2020 North America / USA / Florida      |





|                |           |                                                             |
|----------------|-----------|-------------------------------------------------------------|
| EPI_ISL_517946 | 6/4/2020  | 8/24/2020 North America / USA / Florida                     |
| EPI_ISL_517947 | 6/4/2020  | 8/24/2020 North America / USA / Florida                     |
| EPI_ISL_517949 | 7/17/2020 | 8/24/2020 North America / USA / Florida                     |
| EPI_ISL_517950 | 7/17/2020 | 8/24/2020 North America / USA / Florida                     |
| EPI_ISL_517951 | 7/17/2020 | 8/24/2020 North America / USA / Florida                     |
| EPI_ISL_517952 | 7/17/2020 | 8/24/2020 North America / USA / Florida                     |
| EPI_ISL_517953 | 7/17/2020 | 8/24/2020 North America / USA / Florida                     |
| EPI_ISL_517954 | 7/17/2020 | 8/24/2020 North America / USA / Florida                     |
| EPI_ISL_517956 | 7/20/2020 | 8/24/2020 North America / USA / Florida                     |
| EPI_ISL_517958 | 3/10/2020 | 8/24/2020 South America / Peru / Cusco                      |
| EPI_ISL_517959 | 4/12/2020 | 8/24/2020 South America / Peru / Lima                       |
| EPI_ISL_517969 | 5/7/2020  | 8/24/2020 North America / USA / Texas / Panola County       |
| EPI_ISL_517996 | 7/8/2020  | 8/25/2020 Asia / Singapore                                  |
| EPI_ISL_517997 | 6/15/2020 | 8/25/2020 Asia / Singapore                                  |
| EPI_ISL_517998 | 6/17/2020 | 8/25/2020 Asia / Singapore                                  |
| EPI_ISL_517999 | 6/16/2020 | 8/25/2020 Asia / Singapore                                  |
| EPI_ISL_518001 | 7/29/2020 | 8/25/2020 Asia / Singapore                                  |
| EPI_ISL_518002 | 7/26/2020 | 8/25/2020 Asia / Singapore                                  |
| EPI_ISL_518003 | 7/26/2020 | 8/25/2020 Asia / Singapore                                  |
| EPI_ISL_518004 | 7/22/2020 | 8/25/2020 Asia / Singapore                                  |
| EPI_ISL_518005 | 7/22/2020 | 8/25/2020 Asia / Singapore                                  |
| EPI_ISL_518006 | 7/19/2020 | 8/25/2020 Asia / Singapore                                  |
| EPI_ISL_518007 | 7/19/2020 | 8/25/2020 Asia / Singapore                                  |
| EPI_ISL_518008 | 7/18/2020 | 8/25/2020 Asia / Singapore                                  |
| EPI_ISL_518009 | 7/19/2020 | 8/25/2020 Asia / Singapore                                  |
| EPI_ISL_518010 | 7/12/2020 | 8/25/2020 Asia / Singapore                                  |
| EPI_ISL_518011 | 7/12/2020 | 8/25/2020 Asia / Singapore                                  |
| EPI_ISL_518013 | 6/15/2020 | 8/25/2020 Asia / Singapore                                  |
| EPI_ISL_518014 | 6/14/2020 | 8/25/2020 Asia / Singapore                                  |
| EPI_ISL_518015 | 6/17/2020 | 8/25/2020 Asia / Singapore                                  |
| EPI_ISL_518016 | 6/16/2020 | 8/25/2020 Asia / Singapore                                  |
| EPI_ISL_518034 | 7/7/2020  | 8/25/2020 Africa / South Africa / KwaZulu-Natal / eThekwini |
| EPI_ISL_518035 | 7/7/2020  | 8/25/2020 Africa / South Africa / KwaZulu-Natal / eThekwini |
| EPI_ISL_518037 | 7/17/2020 | 8/25/2020 Africa / South Africa / KwaZulu-Natal / eThekwini |
| EPI_ISL_518038 | 7/17/2020 | 8/25/2020 Africa / South Africa / KwaZulu-Natal / eThekwini |
| EPI_ISL_518039 | 7/18/2020 | 8/25/2020 Africa / South Africa / KwaZulu-Natal / eThekwini |
| EPI_ISL_518040 | 7/13/2020 | 8/25/2020 Africa / South Africa / KwaZulu-Natal / eThekwini |
| EPI_ISL_518041 | 7/13/2020 | 8/25/2020 Africa / South Africa / KwaZulu-Natal / eThekwini |
| EPI_ISL_518042 | 7/9/2020  | 8/25/2020 Africa / South Africa / KwaZulu-Natal / eThekwini |
| EPI_ISL_518043 | 7/7/2020  | 8/25/2020 Africa / South Africa / KwaZulu-Natal / eThekwini |
| EPI_ISL_518044 | 7/6/2020  | 8/25/2020 Africa / South Africa / KwaZulu-Natal / eThekwini |
| EPI_ISL_518045 | 7/6/2020  | 8/25/2020 Africa / South Africa / KwaZulu-Natal / eThekwini |
| EPI_ISL_518046 | 7/15/2020 | 8/25/2020 Africa / South Africa / KwaZulu-Natal / eThekwini |
| EPI_ISL_518047 | 7/14/2020 | 8/25/2020 Africa / South Africa / KwaZulu-Natal / eThekwini |
| EPI_ISL_518048 | 6/25/2020 | 8/25/2020 Africa / South Africa / KwaZulu-Natal / eThekwini |
| EPI_ISL_518049 | 6/23/2020 | 8/25/2020 Africa / South Africa / KwaZulu-Natal / eThekwini |
| EPI_ISL_518050 | 7/1/2020  | 8/25/2020 Africa / South Africa / KwaZulu-Natal / eThekwini |

































|                |           |                                                 |
|----------------|-----------|-------------------------------------------------|
| EPI_ISL_518819 | 8/13/2020 | 8/25/2020 Asia / Indonesia / Banten / Tangerang |
| EPI_ISL_518821 | 4/13/2020 | 8/25/2020 Asia / Oman / Muscat                  |
| EPI_ISL_518822 | 3/21/2020 | 8/25/2020 Asia / Oman / Muscat                  |
| EPI_ISL_518823 | 3/23/2020 | 8/25/2020 Asia / Oman / Muscat                  |
| EPI_ISL_518824 | 5/20/2020 | 8/25/2020 Asia / Oman / Muscat                  |
| EPI_ISL_518825 | 5/21/2020 | 8/25/2020 Asia / Oman / Muscat                  |
| EPI_ISL_518826 | 5/21/2020 | 8/25/2020 Asia / Oman / Muscat                  |
| EPI_ISL_518827 | 5/21/2020 | 8/25/2020 Asia / Oman / Muscat                  |
| EPI_ISL_518828 | 5/21/2020 | 8/25/2020 Asia / Oman / Muscat                  |
| EPI_ISL_518829 | 5/21/2020 | 8/25/2020 Asia / Oman / Muscat                  |
| EPI_ISL_518831 | 5/21/2020 | 8/25/2020 Asia / Oman / Muscat                  |
| EPI_ISL_518833 | 5/22/2020 | 8/25/2020 Asia / Oman / Muscat                  |
| EPI_ISL_518834 | 5/22/2020 | 8/25/2020 Asia / Oman / Muscat                  |
| EPI_ISL_518835 | 5/22/2020 | 8/25/2020 Asia / Oman / Muscat                  |
| EPI_ISL_518836 | 5/22/2020 | 8/25/2020 Asia / Oman / Muscat                  |
| EPI_ISL_518837 | 5/22/2020 | 8/25/2020 Asia / Oman / Muscat                  |
| EPI_ISL_518838 | 5/22/2020 | 8/25/2020 Asia / Oman / Muscat                  |
| EPI_ISL_518839 | 5/22/2020 | 8/25/2020 Asia / Oman / Muscat                  |
| EPI_ISL_518840 | 5/22/2020 | 8/25/2020 Asia / Oman / Muscat                  |
| EPI_ISL_518841 | 5/22/2020 | 8/25/2020 Asia / Oman / Muscat                  |
| EPI_ISL_518842 | 5/22/2020 | 8/25/2020 Asia / Oman / Muscat                  |
| EPI_ISL_518843 | 4/24/2020 | 8/25/2020 Asia / Oman / Muscat                  |
| EPI_ISL_518844 | 4/24/2020 | 8/25/2020 Asia / Oman / Muscat                  |
| EPI_ISL_518845 | 4/24/2020 | 8/25/2020 Asia / Oman / Muscat                  |
| EPI_ISL_518847 | 4/24/2020 | 8/25/2020 Asia / Oman / Muscat                  |
| EPI_ISL_518848 | 4/24/2020 | 8/25/2020 Asia / Oman / Muscat                  |
| EPI_ISL_518849 | 4/24/2020 | 8/25/2020 Asia / Oman / Muscat                  |
| EPI_ISL_518850 | 4/24/2020 | 8/25/2020 Asia / Oman / Muscat                  |
| EPI_ISL_518851 | 4/27/2020 | 8/25/2020 Asia / Oman / Muscat                  |
| EPI_ISL_518852 | 4/27/2020 | 8/25/2020 Asia / Oman / Muscat                  |
| EPI_ISL_518853 | 4/27/2020 | 8/25/2020 Asia / Oman / Muscat                  |
| EPI_ISL_518854 | 4/27/2020 | 8/25/2020 Asia / Oman / Muscat                  |
| EPI_ISL_518855 | 5/6/2020  | 8/25/2020 North America / USA / Minnesota       |
| EPI_ISL_518856 | 3/27/2020 | 8/25/2020 North America / USA / Minnesota       |
| EPI_ISL_518857 | 3/27/2020 | 8/25/2020 North America / USA / Minnesota       |
| EPI_ISL_518858 | 3/24/2020 | 8/25/2020 North America / USA / Minnesota       |
| EPI_ISL_518859 | 3/27/2020 | 8/25/2020 North America / USA / Minnesota       |
| EPI_ISL_518860 | 3/23/2020 | 8/25/2020 North America / USA / Minnesota       |
| EPI_ISL_518861 | 3/19/2020 | 8/25/2020 North America / USA / Minnesota       |
| EPI_ISL_518862 | 3/26/2020 | 8/25/2020 North America / USA / Minnesota       |
| EPI_ISL_518863 | 3/23/2020 | 8/25/2020 North America / USA / Minnesota       |
| EPI_ISL_518864 | 3/25/2020 | 8/25/2020 North America / USA / Minnesota       |
| EPI_ISL_518865 | 3/26/2020 | 8/25/2020 North America / USA / Minnesota       |
| EPI_ISL_518866 | 3/27/2020 | 8/25/2020 North America / USA / Minnesota       |
| EPI_ISL_518867 | 3/29/2020 | 8/25/2020 North America / USA / Minnesota       |
| EPI_ISL_518868 | 3/18/2020 | 8/25/2020 North America / USA / Minnesota       |
| EPI_ISL_518869 | 3/23/2020 | 8/25/2020 North America / USA / Minnesota       |

|                |           |                                           |
|----------------|-----------|-------------------------------------------|
| EPI_ISL_518870 | 3/27/2020 | 8/25/2020 North America / USA / Minnesota |
| EPI_ISL_518871 | 3/24/2020 | 8/25/2020 North America / USA / Minnesota |
| EPI_ISL_518872 | 3/25/2020 | 8/25/2020 North America / USA / Minnesota |
| EPI_ISL_518873 | 3/25/2020 | 8/25/2020 North America / USA / Minnesota |
| EPI_ISL_518874 | 3/16/2020 | 8/25/2020 North America / USA / Minnesota |
| EPI_ISL_518875 | 3/18/2020 | 8/25/2020 North America / USA / Minnesota |
| EPI_ISL_518876 | 3/21/2020 | 8/25/2020 North America / USA / Minnesota |
| EPI_ISL_518877 | 3/17/2020 | 8/25/2020 North America / USA / Minnesota |
| EPI_ISL_518878 | 3/21/2020 | 8/25/2020 North America / USA / Minnesota |
| EPI_ISL_518879 | 3/18/2020 | 8/25/2020 North America / USA / Minnesota |
| EPI_ISL_518880 | 3/16/2020 | 8/25/2020 North America / USA / Minnesota |
| EPI_ISL_518881 | 3/17/2020 | 8/25/2020 North America / USA / Minnesota |
| EPI_ISL_518882 | 3/22/2020 | 8/25/2020 North America / USA / Minnesota |
| EPI_ISL_518883 | 3/22/2020 | 8/25/2020 North America / USA / Minnesota |
| EPI_ISL_518884 | 3/22/2020 | 8/25/2020 North America / USA / Minnesota |
| EPI_ISL_518885 | 3/21/2020 | 8/25/2020 North America / USA / Minnesota |
| EPI_ISL_518886 | 3/21/2020 | 8/25/2020 North America / USA / Minnesota |
| EPI_ISL_518887 | 3/23/2020 | 8/25/2020 North America / USA / Minnesota |
| EPI_ISL_518888 | 3/23/2020 | 8/25/2020 North America / USA / Minnesota |
| EPI_ISL_518889 | 3/21/2020 | 8/25/2020 North America / USA / Minnesota |
| EPI_ISL_518890 | 3/20/2020 | 8/25/2020 North America / USA / Minnesota |
| EPI_ISL_518891 | 3/21/2020 | 8/25/2020 North America / USA / Minnesota |
| EPI_ISL_518892 | 3/17/2020 | 8/25/2020 North America / USA / Minnesota |
| EPI_ISL_518893 | 3/24/2020 | 8/25/2020 North America / USA / Minnesota |
| EPI_ISL_518894 | 3/19/2020 | 8/25/2020 North America / USA / Minnesota |
| EPI_ISL_518895 | 3/19/2020 | 8/25/2020 North America / USA / Minnesota |
| EPI_ISL_518896 | 3/25/2020 | 8/25/2020 North America / USA / Minnesota |
| EPI_ISL_518897 | 3/25/2020 | 8/25/2020 North America / USA / Minnesota |
| EPI_ISL_518898 | 3/25/2020 | 8/25/2020 North America / USA / Minnesota |
| EPI_ISL_518899 | 3/30/2020 | 8/25/2020 North America / USA / Minnesota |
| EPI_ISL_518900 | 5/5/2020  | 8/25/2020 North America / USA / Minnesota |
| EPI_ISL_518901 | 7/16/2020 | 8/25/2020 Oceania / Australia / Victoria  |
| EPI_ISL_518902 | 7/16/2020 | 8/25/2020 Oceania / Australia / Victoria  |
| EPI_ISL_518903 | 7/16/2020 | 8/25/2020 Oceania / Australia / Victoria  |
| EPI_ISL_518904 | 7/15/2020 | 8/25/2020 Oceania / Australia / Victoria  |
| EPI_ISL_518905 | 2020      | 8/25/2020 Oceania / Australia / Victoria  |
| EPI_ISL_518906 | 7/16/2020 | 8/25/2020 Oceania / Australia / Victoria  |
| EPI_ISL_518907 | 7/16/2020 | 8/25/2020 Oceania / Australia / Victoria  |
| EPI_ISL_518908 | 7/16/2020 | 8/25/2020 Oceania / Australia / Victoria  |
| EPI_ISL_518909 | 7/16/2020 | 8/25/2020 Oceania / Australia / Victoria  |
| EPI_ISL_518910 | 7/13/2020 | 8/25/2020 Oceania / Australia / Victoria  |
| EPI_ISL_518911 | 7/14/2020 | 8/25/2020 Oceania / Australia / Victoria  |
| EPI_ISL_518912 | 7/14/2020 | 8/25/2020 Oceania / Australia / Victoria  |
| EPI_ISL_518913 | 7/14/2020 | 8/25/2020 Oceania / Australia / Victoria  |
| EPI_ISL_518914 | 7/12/2020 | 8/25/2020 Oceania / Australia / Victoria  |
| EPI_ISL_518915 | 7/14/2020 | 8/25/2020 Oceania / Australia / Victoria  |
| EPI_ISL_518917 | 7/14/2020 | 8/25/2020 Oceania / Australia / Victoria  |



























































































































|                |           |                                                    |
|----------------|-----------|----------------------------------------------------|
| EPI_ISL_521850 | 7/3/2020  | 8/25/2020 Oceania / Australia / Victoria           |
| EPI_ISL_521851 | 7/1/2020  | 8/25/2020 Oceania / Australia / Victoria           |
| EPI_ISL_521852 | 7/1/2020  | 8/25/2020 Oceania / Australia / Victoria           |
| EPI_ISL_521853 | 6/30/2020 | 8/25/2020 Oceania / Australia / Victoria           |
| EPI_ISL_521854 | 7/1/2020  | 8/25/2020 Oceania / Australia / Victoria           |
| EPI_ISL_521856 | 7/1/2020  | 8/25/2020 Oceania / Australia / Victoria           |
| EPI_ISL_521857 | 7/1/2020  | 8/25/2020 Oceania / Australia / Victoria           |
| EPI_ISL_521858 | 7/1/2020  | 8/25/2020 Oceania / Australia / Victoria           |
| EPI_ISL_521859 | 7/1/2020  | 8/25/2020 Oceania / Australia / Victoria           |
| EPI_ISL_521860 | 7/2/2020  | 8/25/2020 Oceania / Australia / Northern Territory |
| EPI_ISL_521861 | 7/8/2020  | 8/25/2020 Oceania / Australia / Northern Territory |
| EPI_ISL_521862 | 6/30/2020 | 8/25/2020 Oceania / Australia / Northern Territory |
| EPI_ISL_521871 | 4/14/2020 | 8/25/2020 Oceania / Australia / Victoria           |
| EPI_ISL_521872 | 5/28/2020 | 8/25/2020 Oceania / Australia / Victoria           |
| EPI_ISL_521873 | 5/28/2020 | 8/25/2020 Oceania / Australia / Victoria           |
| EPI_ISL_521874 | 5/28/2020 | 8/25/2020 Oceania / Australia / Victoria           |
| EPI_ISL_521875 | 5/29/2020 | 8/25/2020 Oceania / Australia / Victoria           |
| EPI_ISL_521876 | 5/28/2020 | 8/25/2020 Oceania / Australia / Victoria           |
| EPI_ISL_521877 | 5/28/2020 | 8/25/2020 Oceania / Australia / Victoria           |
| EPI_ISL_521878 | 5/27/2020 | 8/25/2020 Oceania / Australia / Victoria           |
| EPI_ISL_521879 | 5/29/2020 | 8/25/2020 Oceania / Australia / Victoria           |
| EPI_ISL_521880 | 5/27/2020 | 8/25/2020 Oceania / Australia / Victoria           |
| EPI_ISL_521881 | 5/28/2020 | 8/25/2020 Oceania / Australia / Victoria           |
| EPI_ISL_521882 | 5/28/2020 | 8/25/2020 Oceania / Australia / Victoria           |
| EPI_ISL_521883 | 5/28/2020 | 8/25/2020 Oceania / Australia / Victoria           |
| EPI_ISL_521884 | 5/30/2020 | 8/25/2020 Oceania / Australia / Victoria           |
| EPI_ISL_521887 | 3/22/2020 | 8/25/2020 Oceania / Australia / Victoria           |
| EPI_ISL_521892 | 6/11/2020 | 8/25/2020 Oceania / Australia / Victoria           |
| EPI_ISL_521893 | 5/27/2020 | 8/25/2020 Oceania / Australia / Victoria           |
| EPI_ISL_521894 | 6/5/2020  | 8/25/2020 Oceania / Australia / Victoria           |
| EPI_ISL_521895 | 6/11/2020 | 8/25/2020 Oceania / Australia / Victoria           |
| EPI_ISL_521897 | 3/26/2020 | 8/25/2020 Oceania / Australia / Victoria           |
| EPI_ISL_521898 | 3/26/2020 | 8/25/2020 Oceania / Australia / Victoria           |
| EPI_ISL_521900 | 3/26/2020 | 8/25/2020 Oceania / Australia / Victoria           |
| EPI_ISL_521901 | 3/26/2020 | 8/25/2020 Oceania / Australia / Victoria           |
| EPI_ISL_521902 | 3/26/2020 | 8/25/2020 Oceania / Australia / Victoria           |
| EPI_ISL_521903 | 5/2/2020  | 8/25/2020 Oceania / Australia / Victoria           |
| EPI_ISL_521904 | 5/8/2020  | 8/25/2020 Oceania / Australia / Victoria           |
| EPI_ISL_521906 | 6/10/2020 | 8/25/2020 Oceania / Australia / Victoria           |
| EPI_ISL_521907 | 6/12/2020 | 8/25/2020 Oceania / Australia / Victoria           |
| EPI_ISL_521909 | 6/13/2020 | 8/25/2020 Oceania / Australia / Victoria           |
| EPI_ISL_521910 | 4/1/2020  | 8/25/2020 Oceania / Australia / Victoria           |
| EPI_ISL_521912 | 6/19/2020 | 8/25/2020 Oceania / Australia / Victoria           |
| EPI_ISL_521913 | 6/21/2020 | 8/25/2020 Oceania / Australia / Victoria           |
| EPI_ISL_521914 | 6/20/2020 | 8/25/2020 Oceania / Australia / Victoria           |
| EPI_ISL_521916 | 6/19/2020 | 8/25/2020 Oceania / Australia / Victoria           |
| EPI_ISL_521917 | 6/20/2020 | 8/25/2020 Oceania / Australia / Victoria           |

















|                |           |                                                           |
|----------------|-----------|-----------------------------------------------------------|
| EPI_ISL_522296 | 5/1/2020  | 8/25/2020 North America / USA / Utah                      |
| EPI_ISL_522300 | 5/1/2020  | 8/25/2020 North America / USA / Utah                      |
| EPI_ISL_522302 | 5/1/2020  | 8/25/2020 North America / USA / Utah                      |
| EPI_ISL_522303 | 5/1/2020  | 8/25/2020 North America / USA / Utah                      |
| EPI_ISL_522304 | 5/1/2020  | 8/25/2020 North America / USA / Utah                      |
| EPI_ISL_522305 | 5/1/2020  | 8/25/2020 North America / USA / Utah                      |
| EPI_ISL_522307 | 5/1/2020  | 8/25/2020 North America / USA / Utah                      |
| EPI_ISL_522311 | 5/1/2020  | 8/25/2020 North America / USA / Utah                      |
| EPI_ISL_522312 | 5/1/2020  | 8/25/2020 North America / USA / Utah                      |
| EPI_ISL_522315 | 5/1/2020  | 8/25/2020 North America / USA / Utah                      |
| EPI_ISL_522322 | 5/15/2020 | 8/25/2020 North America / USA / Utah                      |
| EPI_ISL_522323 | 5/15/2020 | 8/25/2020 North America / USA / Utah                      |
| EPI_ISL_522331 | 5/15/2020 | 8/25/2020 North America / USA / Utah                      |
| EPI_ISL_522336 | 5/14/2020 | 8/25/2020 North America / USA / Utah                      |
| EPI_ISL_522337 | 5/14/2020 | 8/25/2020 North America / USA / Utah                      |
| EPI_ISL_522340 | 5/15/2020 | 8/25/2020 North America / USA / Utah                      |
| EPI_ISL_522341 | 5/21/2020 | 8/25/2020 North America / USA / Utah                      |
| EPI_ISL_522343 | 5/21/2020 | 8/25/2020 North America / USA / Utah                      |
| EPI_ISL_522349 | 3/9/2020  | 8/25/2020 Europe / Belgium / Leuven                       |
| EPI_ISL_522350 | 6/10/2020 | 8/25/2020 Europe / Belgium / Leuven                       |
| EPI_ISL_522378 | 5/24/2020 | 8/25/2020 North America / USA / Texas / El Paso County    |
| EPI_ISL_522393 | 5/28/2020 | 8/25/2020 North America / USA / Texas / El Paso County    |
| EPI_ISL_522394 | 5/28/2020 | 8/25/2020 North America / USA / Texas / El Paso County    |
| EPI_ISL_522396 | 5/27/2020 | 8/25/2020 North America / USA / Alaska                    |
| EPI_ISL_522397 | 6/1/2020  | 8/25/2020 North America / USA / Alaska / Anchorage-Mat Su |
| EPI_ISL_522398 | 6/3/2020  | 8/25/2020 North America / USA / Alaska / Anchorage-Mat Su |
| EPI_ISL_522399 | 6/7/2020  | 8/25/2020 North America / USA / Alaska                    |
| EPI_ISL_522400 | 6/8/2020  | 8/25/2020 North America / USA / Alaska                    |
| EPI_ISL_522401 | 6/10/2020 | 8/25/2020 North America / USA / Alaska / Anchorage-Mat Su |
| EPI_ISL_522402 | 6/11/2020 | 8/25/2020 North America / USA / Alaska / Interior         |
| EPI_ISL_522403 | 6/17/2020 | 8/25/2020 North America / USA / Alaska                    |
| EPI_ISL_522404 | 6/16/2020 | 8/25/2020 North America / USA / Alaska / Southwest        |
| EPI_ISL_522405 | 6/20/2020 | 8/25/2020 North America / USA / Alaska                    |
| EPI_ISL_522440 | 5/4/2020  | 8/26/2020 Asia / South Korea                              |
| EPI_ISL_522441 | 5/5/2020  | 8/26/2020 Asia / South Korea                              |
| EPI_ISL_522442 | 5/7/2020  | 8/26/2020 Asia / South Korea                              |
| EPI_ISL_522443 | 5/16/2020 | 8/26/2020 Asia / South Korea                              |
| EPI_ISL_522444 | 5/19/2020 | 8/26/2020 Asia / South Korea                              |
| EPI_ISL_522445 | 5/19/2020 | 8/26/2020 Asia / South Korea                              |
| EPI_ISL_522446 | 5/23/2020 | 8/26/2020 Asia / South Korea                              |
| EPI_ISL_522447 | 5/25/2020 | 8/26/2020 Asia / South Korea                              |
| EPI_ISL_522448 | 5/27/2020 | 8/26/2020 Asia / South Korea                              |
| EPI_ISL_522449 | 5/27/2020 | 8/26/2020 Asia / South Korea                              |
| EPI_ISL_522450 | 5/27/2020 | 8/26/2020 Asia / South Korea                              |
| EPI_ISL_522451 | 5/29/2020 | 8/26/2020 Asia / South Korea                              |
| EPI_ISL_522452 | 6/4/2020  | 8/26/2020 Asia / South Korea                              |
| EPI_ISL_522453 | 6/6/2020  | 8/26/2020 Asia / South Korea                              |



|                |           |                                          |
|----------------|-----------|------------------------------------------|
| EPI_ISL_522507 | 7/13/2020 | 8/26/2020 Asia / South Korea             |
| EPI_ISL_522509 | 7/14/2020 | 8/26/2020 Asia / South Korea             |
| EPI_ISL_522510 | 7/14/2020 | 8/26/2020 Asia / South Korea             |
| EPI_ISL_522511 | 7/14/2020 | 8/26/2020 Asia / South Korea             |
| EPI_ISL_522512 | 7/15/2020 | 8/26/2020 Asia / South Korea             |
| EPI_ISL_522513 | 7/15/2020 | 8/26/2020 Asia / South Korea             |
| EPI_ISL_522514 | 7/16/2020 | 8/26/2020 Asia / South Korea             |
| EPI_ISL_522515 | 7/16/2020 | 8/26/2020 Asia / South Korea             |
| EPI_ISL_522516 | 7/17/2020 | 8/26/2020 Asia / South Korea             |
| EPI_ISL_522517 | 7/16/2020 | 8/26/2020 Asia / South Korea             |
| EPI_ISL_522518 | 7/16/2020 | 8/26/2020 Asia / South Korea             |
| EPI_ISL_522519 | 7/18/2020 | 8/26/2020 Asia / South Korea             |
| EPI_ISL_522520 | 7/17/2020 | 8/26/2020 Asia / South Korea             |
| EPI_ISL_522521 | 7/18/2020 | 8/26/2020 Asia / South Korea             |
| EPI_ISL_522522 | 7/18/2020 | 8/26/2020 Asia / South Korea             |
| EPI_ISL_522523 | 7/18/2020 | 8/26/2020 Asia / South Korea             |
| EPI_ISL_522524 | 7/18/2020 | 8/26/2020 Asia / South Korea             |
| EPI_ISL_522525 | 7/18/2020 | 8/26/2020 Asia / South Korea             |
| EPI_ISL_522526 | 7/19/2020 | 8/26/2020 Asia / South Korea             |
| EPI_ISL_522527 | 7/19/2020 | 8/26/2020 Asia / South Korea             |
| EPI_ISL_522528 | 7/19/2020 | 8/26/2020 Asia / South Korea             |
| EPI_ISL_522529 | 7/19/2020 | 8/26/2020 Asia / South Korea             |
| EPI_ISL_522530 | 7/19/2020 | 8/26/2020 Asia / South Korea             |
| EPI_ISL_522531 | 7/20/2020 | 8/26/2020 Asia / South Korea             |
| EPI_ISL_522532 | 7/20/2020 | 8/26/2020 Asia / South Korea             |
| EPI_ISL_522533 | 7/20/2020 | 8/26/2020 Asia / South Korea             |
| EPI_ISL_522534 | 7/19/2020 | 8/26/2020 Asia / South Korea             |
| EPI_ISL_522535 | 7/20/2020 | 8/26/2020 Asia / South Korea             |
| EPI_ISL_522536 | 7/20/2020 | 8/26/2020 Asia / South Korea             |
| EPI_ISL_522537 | 7/20/2020 | 8/26/2020 Asia / South Korea             |
| EPI_ISL_522538 | 7/20/2020 | 8/26/2020 Asia / South Korea             |
| EPI_ISL_522539 | 7/21/2020 | 8/26/2020 Asia / South Korea             |
| EPI_ISL_522540 | 7/21/2020 | 8/26/2020 Asia / South Korea             |
| EPI_ISL_522541 | 7/21/2020 | 8/26/2020 Asia / South Korea             |
| EPI_ISL_522542 | 7/22/2020 | 8/26/2020 Asia / South Korea             |
| EPI_ISL_522543 | 7/21/2020 | 8/26/2020 Asia / South Korea             |
| EPI_ISL_522544 | 7/22/2020 | 8/26/2020 Asia / South Korea             |
| EPI_ISL_522547 | 3/24/2020 | 8/26/2020 Africa / Reunion               |
| EPI_ISL_522548 | 3/24/2020 | 8/26/2020 Africa / Reunion               |
| EPI_ISL_522549 | 3/31/2020 | 8/26/2020 Africa / Reunion               |
| EPI_ISL_522550 | 3/24/2020 | 8/26/2020 Africa / Reunion               |
| EPI_ISL_522556 | 4/10/2020 | 8/26/2020 Oceania / Australia / Tasmania |
| EPI_ISL_522558 | 4/11/2020 | 8/26/2020 Oceania / Australia / Tasmania |
| EPI_ISL_522559 | 4/12/2020 | 8/26/2020 Oceania / Australia / Tasmania |
| EPI_ISL_522563 | 4/13/2020 | 8/26/2020 Oceania / Australia / Tasmania |
| EPI_ISL_522564 | 4/13/2020 | 8/26/2020 Oceania / Australia / Tasmania |
| EPI_ISL_522565 | 4/13/2020 | 8/26/2020 Oceania / Australia / Tasmania |









|                |           |                                                              |
|----------------|-----------|--------------------------------------------------------------|
| EPI_ISL_522862 | 4/8/2020  | 8/26/2020 Europe / Italy / Veneto / Verona                   |
| EPI_ISL_522863 | 4/8/2020  | 8/26/2020 Europe / Italy / Veneto / Verona                   |
| EPI_ISL_522864 | 4/8/2020  | 8/26/2020 Europe / Italy / Veneto / Verona                   |
| EPI_ISL_522865 | 4/8/2020  | 8/26/2020 Europe / Italy / Veneto / Verona                   |
| EPI_ISL_522866 | 4/9/2020  | 8/26/2020 Europe / Italy / Veneto / Verona                   |
| EPI_ISL_522867 | 4/10/2020 | 8/26/2020 Europe / Italy / Veneto / Verona                   |
| EPI_ISL_522868 | 4/17/2020 | 8/26/2020 Europe / Italy / Veneto / Verona                   |
| EPI_ISL_522869 | 5/29/2020 | 8/26/2020 North America / USA / Maryland                     |
| EPI_ISL_522870 | 5/29/2020 | 8/26/2020 North America / USA / Maryland                     |
| EPI_ISL_522871 | 5/28/2020 | 8/26/2020 North America / USA / Maryland                     |
| EPI_ISL_522874 | 7/31/2020 | 8/26/2020 North America / Mexico / Mexico City               |
| EPI_ISL_522877 | 8/1/2020  | 8/26/2020 North America / Mexico / Mexico City               |
| EPI_ISL_522878 | 8/1/2020  | 8/26/2020 North America / Mexico / Mexico City               |
| EPI_ISL_522880 | 8/1/2020  | 8/26/2020 North America / Mexico / Mexico City               |
| EPI_ISL_522881 | 8/5/2020  | 8/26/2020 North America / USA / Illinois / Winnebago County  |
| EPI_ISL_522882 | 8/13/2020 | 8/26/2020 North America / USA / Minnesota / Houston County   |
| EPI_ISL_522883 | 8/5/2020  | 8/26/2020 North America / USA / Wisconsin / Dodge County     |
| EPI_ISL_522884 | 8/13/2020 | 8/26/2020 North America / USA / Wisconsin / Dane County      |
| EPI_ISL_522885 | 8/13/2020 | 8/26/2020 North America / USA / Wisconsin / Rock County      |
| EPI_ISL_522886 | 8/13/2020 | 8/26/2020 North America / USA / Wisconsin / Dane County      |
| EPI_ISL_522887 | 8/13/2020 | 8/26/2020 North America / USA / Wisconsin / Dane County      |
| EPI_ISL_522888 | 8/12/2020 | 8/26/2020 North America / USA / Wisconsin / Jefferson County |
| EPI_ISL_522889 | 8/13/2020 | 8/26/2020 North America / USA / Wisconsin / Dane County      |
| EPI_ISL_522890 | 8/13/2020 | 8/26/2020 North America / USA / Wisconsin / Dane County      |
| EPI_ISL_522891 | 8/11/2020 | 8/26/2020 North America / USA / Wisconsin / Dane County      |
| EPI_ISL_522892 | 8/11/2020 | 8/26/2020 North America / USA / Wisconsin / Dane County      |
| EPI_ISL_522893 | 8/13/2020 | 8/26/2020 North America / USA / Wisconsin / Dane County      |
| EPI_ISL_522895 | 8/12/2020 | 8/26/2020 North America / USA / Wisconsin / Dane County      |
| EPI_ISL_522896 | 8/13/2020 | 8/26/2020 North America / USA / Wisconsin / Dane County      |
| EPI_ISL_522898 | 8/13/2020 | 8/26/2020 North America / USA / Wisconsin / Green County     |
| EPI_ISL_522899 | 8/13/2020 | 8/26/2020 North America / USA / Wisconsin / Dane County      |
| EPI_ISL_522900 | 8/13/2020 | 8/26/2020 North America / USA / Wisconsin / Columbia County  |
| EPI_ISL_522901 | 8/8/2020  | 8/26/2020 North America / USA / Wisconsin / Dane County      |
| EPI_ISL_522902 | 8/13/2020 | 8/26/2020 North America / USA / Wisconsin / Dane County      |
| EPI_ISL_522903 | 8/12/2020 | 8/26/2020 North America / USA / Wisconsin / Dane County      |
| EPI_ISL_522904 | 8/12/2020 | 8/26/2020 North America / USA / Wisconsin / Dane County      |
| EPI_ISL_522905 | 8/12/2020 | 8/26/2020 North America / USA / Wisconsin / Dane County      |
| EPI_ISL_522906 | 8/7/2020  | 8/26/2020 North America / USA / Wisconsin / Dane County      |
| EPI_ISL_522907 | 8/13/2020 | 8/26/2020 North America / USA / Wisconsin / Green County     |
| EPI_ISL_522908 | 8/13/2020 | 8/26/2020 North America / USA / Wisconsin / Dane County      |
| EPI_ISL_522909 | 8/13/2020 | 8/26/2020 North America / USA / Wisconsin / Green County     |
| EPI_ISL_522910 | 8/11/2020 | 8/26/2020 North America / USA / Wisconsin / Dane County      |
| EPI_ISL_522911 | 8/11/2020 | 8/26/2020 North America / USA / Wisconsin / Jefferson County |
| EPI_ISL_522912 | 8/11/2020 | 8/26/2020 North America / USA / Wisconsin / Dane County      |
| EPI_ISL_522913 | 8/11/2020 | 8/26/2020 North America / USA / Wisconsin / Dane County      |
| EPI_ISL_522914 | 8/13/2020 | 8/26/2020 North America / USA / Wisconsin / Green County     |
| EPI_ISL_522915 | 8/6/2020  | 8/26/2020 North America / USA / Wisconsin / Dane County      |

|                |           |                                                              |
|----------------|-----------|--------------------------------------------------------------|
| EPI_ISL_522917 | 8/5/2020  | 8/26/2020 North America / USA / Wisconsin / Dodge County     |
| EPI_ISL_522918 | 8/8/2020  | 8/26/2020 North America / USA / Wisconsin / Dane County      |
| EPI_ISL_522924 | 8/8/2020  | 8/26/2020 North America / USA / Wisconsin / Lafayette County |
| EPI_ISL_522925 | 8/9/2020  | 8/26/2020 North America / USA / Wisconsin / Columbia County  |
| EPI_ISL_522926 | 8/8/2020  | 8/26/2020 North America / USA / Wisconsin / Dane County      |
| EPI_ISL_522927 | 8/12/2020 | 8/26/2020 North America / USA / Wisconsin / Dane County      |
| EPI_ISL_522928 | 8/11/2020 | 8/26/2020 North America / USA / Wisconsin / Dane County      |
| EPI_ISL_522929 | 8/7/2020  | 8/26/2020 North America / USA / Wisconsin / Dane County      |
| EPI_ISL_522931 | 8/1/2020  | 8/26/2020 North America / USA / Wisconsin / Dane County      |
| EPI_ISL_522932 | 8/9/2020  | 8/26/2020 North America / USA / Wisconsin / Dane County      |
| EPI_ISL_522933 | 8/9/2020  | 8/26/2020 North America / USA / Wisconsin / Dane County      |
| EPI_ISL_522935 | 8/12/2020 | 8/26/2020 North America / USA / Wisconsin / Dane County      |
| EPI_ISL_522936 | 8/7/2020  | 8/26/2020 North America / USA / Wisconsin / Dane County      |
| EPI_ISL_522937 | 8/7/2020  | 8/26/2020 North America / USA / Wisconsin / Dane County      |
| EPI_ISL_522938 | 7/29/2020 | 8/26/2020 North America / USA / Wisconsin / Grant County     |
| EPI_ISL_522939 | 8/7/2020  | 8/26/2020 North America / USA / Wisconsin / Dane County      |
| EPI_ISL_522940 | 8/1/2020  | 8/26/2020 North America / Mexico / Mexico City               |
| EPI_ISL_522941 | 7/31/2020 | 8/26/2020 North America / Mexico / Mexico City               |
| EPI_ISL_522942 | 8/6/2020  | 8/26/2020 North America / Mexico / Mexico City               |
| EPI_ISL_522949 | 6/11/2020 | 8/26/2020 North America / USA / Texas / Dallas County        |
| EPI_ISL_522953 | 6/11/2020 | 8/26/2020 North America / USA / Texas / El Paso County       |
| EPI_ISL_522960 | 6/11/2020 | 8/26/2020 North America / USA / Texas / Brewster County      |
| EPI_ISL_522966 | 6/11/2020 | 8/26/2020 North America / USA / Texas / Brewster County      |
| EPI_ISL_522969 | 5/8/2020  | 8/26/2020 North America / USA / Texas / Bexar County         |
| EPI_ISL_522971 | 5/28/2020 | 8/26/2020 North America / USA / Texas / El Paso County       |
| EPI_ISL_522978 | 8/6/2020  | 8/26/2020 North America / Mexico / Mexico City               |
| EPI_ISL_522980 | 8/6/2020  | 8/26/2020 North America / Mexico / Mexico City               |
| EPI_ISL_522981 | 8/6/2020  | 8/26/2020 North America / Mexico / Mexico City               |
| EPI_ISL_522982 | 8/6/2020  | 8/26/2020 North America / Mexico / Mexico City               |
| EPI_ISL_522984 | 8/6/2020  | 8/26/2020 North America / Mexico / Mexico City               |
| EPI_ISL_522986 | 8/6/2020  | 8/26/2020 North America / Mexico / Mexico City               |
| EPI_ISL_523121 | 7/7/2020  | 8/26/2020 Europe / Netherlands / Drenthe                     |
| EPI_ISL_523122 | 4/17/2020 | 8/26/2020 Europe / Netherlands / Drenthe                     |
| EPI_ISL_523123 | 4/28/2020 | 8/26/2020 Europe / Netherlands / Drenthe                     |
| EPI_ISL_523124 | 5/29/2020 | 8/26/2020 Europe / Netherlands / Drenthe                     |
| EPI_ISL_523125 | 5/29/2020 | 8/26/2020 Europe / Netherlands / Drenthe                     |
| EPI_ISL_523126 | 5/30/2020 | 8/26/2020 Europe / Netherlands / Drenthe                     |
| EPI_ISL_523127 | 6/3/2020  | 8/26/2020 Europe / Netherlands / Drenthe                     |
| EPI_ISL_523128 | 5/20/2020 | 8/26/2020 Europe / Netherlands / Flevoland                   |
| EPI_ISL_523129 | 5/22/2020 | 8/26/2020 Europe / Netherlands / Flevoland                   |
| EPI_ISL_523130 | 5/24/2020 | 8/26/2020 Europe / Netherlands / Flevoland                   |
| EPI_ISL_523131 | 5/24/2020 | 8/26/2020 Europe / Netherlands / Flevoland                   |
| EPI_ISL_523132 | 5/25/2020 | 8/26/2020 Europe / Netherlands / Flevoland                   |
| EPI_ISL_523133 | 5/26/2020 | 8/26/2020 Europe / Netherlands / Flevoland                   |
| EPI_ISL_523134 | 6/1/2020  | 8/26/2020 Europe / Netherlands / Flevoland                   |
| EPI_ISL_523138 | 5/27/2020 | 8/26/2020 Europe / Netherlands / Friesland                   |
| EPI_ISL_523139 | 6/1/2020  | 8/26/2020 Europe / Netherlands / Friesland                   |











|                |           |           |                                      |
|----------------|-----------|-----------|--------------------------------------|
| EPI_ISL_523369 | 5/16/2020 | 8/26/2020 | Europe / Netherlands / Noord-Brabant |
| EPI_ISL_523370 | 5/16/2020 | 8/26/2020 | Europe / Netherlands / Noord-Brabant |
| EPI_ISL_523371 | 5/16/2020 | 8/26/2020 | Europe / Netherlands / Noord-Brabant |
| EPI_ISL_523372 | 7/6/2020  | 8/26/2020 | Europe / Netherlands / Noord-Brabant |
| EPI_ISL_523373 | 5/17/2020 | 8/26/2020 | Europe / Netherlands / Noord-Brabant |
| EPI_ISL_523374 | 5/19/2020 | 8/26/2020 | Europe / Netherlands / Noord-Brabant |
| EPI_ISL_523375 | 5/20/2020 | 8/26/2020 | Europe / Netherlands / Noord-Brabant |
| EPI_ISL_523376 | 5/22/2020 | 8/26/2020 | Europe / Netherlands / Noord-Brabant |
| EPI_ISL_523377 | 5/22/2020 | 8/26/2020 | Europe / Netherlands / Noord-Brabant |
| EPI_ISL_523378 | 6/16/2020 | 8/26/2020 | Europe / Netherlands / Noord-Brabant |
| EPI_ISL_523380 | 7/8/2020  | 8/26/2020 | Europe / Netherlands / Noord-Brabant |
| EPI_ISL_523381 | 7/8/2020  | 8/26/2020 | Europe / Netherlands / Noord-Brabant |
| EPI_ISL_523382 | 5/23/2020 | 8/26/2020 | Europe / Netherlands / Noord-Brabant |
| EPI_ISL_523383 | 5/31/2020 | 8/26/2020 | Europe / Netherlands / Noord-Brabant |
| EPI_ISL_523384 | 6/9/2020  | 8/26/2020 | Europe / Netherlands / Noord-Brabant |
| EPI_ISL_523385 | 6/15/2020 | 8/26/2020 | Europe / Netherlands / Noord-Brabant |
| EPI_ISL_523386 | 2020      | 8/26/2020 | Europe / Netherlands / Noord-Brabant |
| EPI_ISL_523388 | 2020      | 8/26/2020 | Europe / Netherlands / Noord-Brabant |
| EPI_ISL_523389 | 2020      | 8/26/2020 | Europe / Netherlands / Noord-Brabant |
| EPI_ISL_523394 | 2020      | 8/26/2020 | Europe / Netherlands / Noord-Brabant |
| EPI_ISL_523395 | 2020      | 8/26/2020 | Europe / Netherlands / Noord-Brabant |
| EPI_ISL_523396 | 2020      | 8/26/2020 | Europe / Netherlands / Noord-Brabant |
| EPI_ISL_523397 | 2020      | 8/26/2020 | Europe / Netherlands / Noord-Brabant |
| EPI_ISL_523401 | 5/8/2020  | 8/26/2020 | Europe / Netherlands / Noord-Brabant |
| EPI_ISL_523402 | 5/1/2020  | 8/26/2020 | Europe / Netherlands / Noord-Brabant |
| EPI_ISL_523403 | 5/11/2020 | 8/26/2020 | Europe / Netherlands / Noord-Brabant |
| EPI_ISL_523405 | 5/26/2020 | 8/26/2020 | Europe / Netherlands / Noord-Holland |
| EPI_ISL_523407 | 5/18/2020 | 8/26/2020 | Europe / Netherlands / Noord-Holland |
| EPI_ISL_523408 | 5/15/2020 | 8/26/2020 | Europe / Netherlands / Noord-Holland |
| EPI_ISL_523409 | 6/12/2020 | 8/26/2020 | Europe / Netherlands / Noord-Holland |
| EPI_ISL_523410 | 6/8/2020  | 8/26/2020 | Europe / Netherlands / Noord-Holland |
| EPI_ISL_523412 | 6/12/2020 | 8/26/2020 | Europe / Netherlands / Noord-Holland |
| EPI_ISL_523413 | 6/9/2020  | 8/26/2020 | Europe / Netherlands / Noord-Holland |
| EPI_ISL_523414 | 6/9/2020  | 8/26/2020 | Europe / Netherlands / Noord-Holland |
| EPI_ISL_523415 | 6/11/2020 | 8/26/2020 | Europe / Netherlands / Noord-Holland |
| EPI_ISL_523416 | 7/4/2020  | 8/26/2020 | Europe / Netherlands / Noord-Holland |
| EPI_ISL_523417 | 7/3/2020  | 8/26/2020 | Europe / Netherlands / Noord-Holland |
| EPI_ISL_523420 | 4/16/2020 | 8/26/2020 | Europe / Netherlands / Overijssel    |
| EPI_ISL_523421 | 4/16/2020 | 8/26/2020 | Europe / Netherlands / Overijssel    |
| EPI_ISL_523422 | 4/17/2020 | 8/26/2020 | Europe / Netherlands / Overijssel    |
| EPI_ISL_523423 | 4/17/2020 | 8/26/2020 | Europe / Netherlands / Overijssel    |
| EPI_ISL_523424 | 5/27/2020 | 8/26/2020 | Europe / Netherlands / Overijssel    |
| EPI_ISL_523425 | 4/21/2020 | 8/26/2020 | Europe / Netherlands / Overijssel    |
| EPI_ISL_523426 | 4/22/2020 | 8/26/2020 | Europe / Netherlands / Overijssel    |
| EPI_ISL_523427 | 4/28/2020 | 8/26/2020 | Europe / Netherlands / Overijssel    |
| EPI_ISL_523428 | 4/18/2020 | 8/26/2020 | Europe / Netherlands / Overijssel    |
| EPI_ISL_523429 | 4/20/2020 | 8/26/2020 | Europe / Netherlands / Overijssel    |



|                |           |                                                |
|----------------|-----------|------------------------------------------------|
| EPI_ISL_523484 | 4/22/2020 | 8/26/2020 Europe / Netherlands                 |
| EPI_ISL_523485 | 4/23/2020 | 8/26/2020 Europe / Netherlands                 |
| EPI_ISL_523486 | 6/15/2020 | 8/26/2020 Europe / Netherlands                 |
| EPI_ISL_523487 | 6/12/2020 | 8/26/2020 Europe / Netherlands                 |
| EPI_ISL_523490 | 3/14/2020 | 8/26/2020 Europe / Netherlands                 |
| EPI_ISL_523491 | 6/7/2020  | 8/26/2020 Europe / Netherlands                 |
| EPI_ISL_523493 | 6/10/2020 | 8/26/2020 Europe / Netherlands                 |
| EPI_ISL_523494 | 6/10/2020 | 8/26/2020 Europe / Netherlands                 |
| EPI_ISL_523495 | 4/29/2020 | 8/26/2020 Europe / Netherlands                 |
| EPI_ISL_523497 | 5/6/2020  | 8/26/2020 Europe / Netherlands                 |
| EPI_ISL_523498 | 5/8/2020  | 8/26/2020 Europe / Netherlands                 |
| EPI_ISL_523499 | 5/13/2020 | 8/26/2020 Europe / Netherlands                 |
| EPI_ISL_523500 | 8/6/2020  | 8/26/2020 North America / Mexico / Mexico City |
| EPI_ISL_523501 | 5/19/2020 | 8/26/2020 Europe / Netherlands                 |
| EPI_ISL_523502 | 6/11/2020 | 8/26/2020 Europe / Netherlands                 |
| EPI_ISL_523503 | 3/1/2020  | 8/26/2020 Europe / Netherlands                 |
| EPI_ISL_523504 | 3/27/2020 | 8/26/2020 Europe / Netherlands                 |
| EPI_ISL_523505 | 3/30/2020 | 8/26/2020 Europe / Netherlands                 |
| EPI_ISL_523506 | 4/15/2020 | 8/26/2020 Europe / Netherlands                 |
| EPI_ISL_523507 | 4/6/2020  | 8/26/2020 Europe / Netherlands                 |
| EPI_ISL_523508 | 6/27/2020 | 8/26/2020 Europe / Netherlands                 |
| EPI_ISL_523509 | 6/1/2020  | 8/26/2020 Europe / Netherlands                 |
| EPI_ISL_523513 | 7/2/2020  | 8/26/2020 Europe / Netherlands                 |
| EPI_ISL_523514 | 7/6/2020  | 8/26/2020 Europe / Netherlands                 |
| EPI_ISL_523515 | 7/5/2020  | 8/26/2020 Europe / Netherlands                 |
| EPI_ISL_523516 | 6/24/2020 | 8/26/2020 Europe / Netherlands                 |
| EPI_ISL_523517 | 7/31/2020 | 8/26/2020 Europe / Netherlands                 |
| EPI_ISL_523518 | 2020      | 8/26/2020 Europe / Netherlands                 |
| EPI_ISL_523520 | 2020      | 8/26/2020 Europe / Netherlands                 |
| EPI_ISL_523521 | 2020      | 8/26/2020 Europe / Netherlands                 |
| EPI_ISL_523523 | 3/12/2020 | 8/26/2020 Europe / Netherlands                 |
| EPI_ISL_523524 | 3/12/2020 | 8/26/2020 Europe / Netherlands                 |
| EPI_ISL_523525 | 3/16/2020 | 8/26/2020 Europe / Netherlands                 |
| EPI_ISL_523526 | 3/12/2020 | 8/26/2020 Europe / Netherlands                 |
| EPI_ISL_523527 | 2020      | 8/26/2020 Europe / Netherlands                 |
| EPI_ISL_523528 | 5/26/2020 | 8/26/2020 Europe / Netherlands / Utrecht       |
| EPI_ISL_523529 | 4/22/2020 | 8/26/2020 Europe / Netherlands / Utrecht       |
| EPI_ISL_523530 | 5/22/2020 | 8/26/2020 Europe / Netherlands / Utrecht       |
| EPI_ISL_523531 | 5/23/2020 | 8/26/2020 Europe / Netherlands / Utrecht       |
| EPI_ISL_523532 | 6/3/2020  | 8/26/2020 Europe / Netherlands / Utrecht       |
| EPI_ISL_523533 | 6/28/2020 | 8/26/2020 Europe / Netherlands / Utrecht       |
| EPI_ISL_523534 | 7/11/2020 | 8/26/2020 Europe / Netherlands / Utrecht       |
| EPI_ISL_523536 | 7/27/2020 | 8/26/2020 Europe / Netherlands / Utrecht       |
| EPI_ISL_523537 | 7/27/2020 | 8/26/2020 Europe / Netherlands / Utrecht       |
| EPI_ISL_523539 | 8/2/2020  | 8/26/2020 Europe / Netherlands / Utrecht       |
| EPI_ISL_523540 | 8/2/2020  | 8/26/2020 Europe / Netherlands / Utrecht       |
| EPI_ISL_523541 | 8/2/2020  | 8/26/2020 Europe / Netherlands / Utrecht       |













|                |           |                                                   |
|----------------|-----------|---------------------------------------------------|
| EPI_ISL_523799 | 8/12/2020 | 8/26/2020 Europe / Netherlands / Zuid-Holland     |
| EPI_ISL_523800 | 8/12/2020 | 8/26/2020 Europe / Netherlands / Zuid-Holland     |
| EPI_ISL_523802 | 8/16/2020 | 8/26/2020 Europe / Netherlands / Zuid-Holland     |
| EPI_ISL_523803 | 8/17/2020 | 8/26/2020 Europe / Netherlands / Zuid-Holland     |
| EPI_ISL_523804 | 8/16/2020 | 8/26/2020 Europe / Netherlands / Zuid-Holland     |
| EPI_ISL_523805 | 8/17/2020 | 8/26/2020 Europe / Netherlands / Zuid-Holland     |
| EPI_ISL_523806 | 8/17/2020 | 8/26/2020 Europe / Netherlands / Zuid-Holland     |
| EPI_ISL_523807 | 8/17/2020 | 8/26/2020 Europe / Netherlands / Zuid-Holland     |
| EPI_ISL_523808 | 8/16/2020 | 8/26/2020 Europe / Netherlands / Zuid-Holland     |
| EPI_ISL_523809 | 8/8/2020  | 8/26/2020 Europe / Netherlands / Zuid-Holland     |
| EPI_ISL_523810 | 3/11/2020 | 8/26/2020 South America / Peru / La Libertad      |
| EPI_ISL_523811 | 3/1/2020  | 8/27/2020 North America / Dominican Republic      |
| EPI_ISL_523856 | 8/7/2020  | 8/27/2020 Europe / Switzerland / Basel-Landschaft |
| EPI_ISL_523857 | 8/7/2020  | 8/27/2020 Europe / Switzerland / Geneva           |
| EPI_ISL_523858 | 8/7/2020  | 8/27/2020 Europe / Switzerland / Zurich           |
| EPI_ISL_523859 | 8/7/2020  | 8/27/2020 Europe / Switzerland / Zurich           |
| EPI_ISL_523860 | 8/7/2020  | 8/27/2020 Europe / Switzerland / Zurich           |
| EPI_ISL_523861 | 8/7/2020  | 8/27/2020 Europe / Switzerland / St Gall          |
| EPI_ISL_523862 | 8/7/2020  | 8/27/2020 Europe / Switzerland / Zurich           |
| EPI_ISL_523863 | 8/7/2020  | 8/27/2020 Europe / Switzerland / Ticino           |
| EPI_ISL_523864 | 8/7/2020  | 8/27/2020 Europe / Switzerland / Aargau           |
| EPI_ISL_523865 | 8/7/2020  | 8/27/2020 Europe / Switzerland / Basel-Landschaft |
| EPI_ISL_523867 | 8/8/2020  | 8/27/2020 Europe / Switzerland / Zurich           |
| EPI_ISL_523868 | 8/10/2020 | 8/27/2020 Europe / Switzerland / Basel-Landschaft |
| EPI_ISL_523869 | 8/10/2020 | 8/27/2020 Europe / Switzerland / Basel-Landschaft |
| EPI_ISL_523871 | 8/10/2020 | 8/27/2020 Europe / Switzerland / Basel-Landschaft |
| EPI_ISL_523872 | 8/10/2020 | 8/27/2020 Europe / Switzerland / Basel-Landschaft |
| EPI_ISL_523873 | 8/10/2020 | 8/27/2020 Europe / Switzerland / Basel-Landschaft |
| EPI_ISL_523874 | 8/10/2020 | 8/27/2020 Europe / Switzerland / Basel-Landschaft |
| EPI_ISL_523875 | 8/10/2020 | 8/27/2020 Europe / Switzerland / St Gall          |
| EPI_ISL_523876 | 8/10/2020 | 8/27/2020 Europe / Switzerland / St Gall          |
| EPI_ISL_523879 | 8/10/2020 | 8/27/2020 Europe / Switzerland / Geneva           |
| EPI_ISL_523880 | 8/11/2020 | 8/27/2020 Europe / Switzerland / Zurich           |
| EPI_ISL_523881 | 8/11/2020 | 8/27/2020 Europe / Switzerland / Zurich           |
| EPI_ISL_523882 | 8/11/2020 | 8/27/2020 Europe / Switzerland / Zurich           |
| EPI_ISL_523883 | 8/11/2020 | 8/27/2020 Europe / Switzerland / Basel-Landschaft |
| EPI_ISL_523884 | 8/11/2020 | 8/27/2020 Europe / Switzerland / Zurich           |
| EPI_ISL_523885 | 8/11/2020 | 8/27/2020 Europe / Switzerland / Geneva           |
| EPI_ISL_523887 | 8/12/2020 | 8/27/2020 Europe / Switzerland / Basel-Landschaft |
| EPI_ISL_523888 | 8/12/2020 | 8/27/2020 Europe / Switzerland / Basel-Landschaft |
| EPI_ISL_523889 | 8/12/2020 | 8/27/2020 Europe / Switzerland / Zurich           |
| EPI_ISL_523891 | 8/12/2020 | 8/27/2020 Europe / Switzerland / Basel-Landschaft |
| EPI_ISL_523892 | 8/12/2020 | 8/27/2020 Europe / Switzerland / Zurich           |
| EPI_ISL_523894 | 8/12/2020 | 8/27/2020 Europe / Switzerland / Zurich           |
| EPI_ISL_523895 | 8/12/2020 | 8/27/2020 Europe / Switzerland / Zurich           |
| EPI_ISL_523896 | 8/12/2020 | 8/27/2020 Europe / Switzerland / Bern             |
| EPI_ISL_523898 | 8/12/2020 | 8/27/2020 Europe / Switzerland / Geneva           |

|                |           |                                                                 |
|----------------|-----------|-----------------------------------------------------------------|
| EPI_ISL_523899 | 8/12/2020 | 8/27/2020 Europe / Switzerland / Geneva                         |
| EPI_ISL_523900 | 8/12/2020 | 8/27/2020 Europe / Switzerland / Zurich                         |
| EPI_ISL_523902 | 8/13/2020 | 8/27/2020 Europe / Switzerland / Basel-Landschaft               |
| EPI_ISL_523903 | 8/13/2020 | 8/27/2020 Europe / Switzerland / Zurich                         |
| EPI_ISL_523905 | 8/13/2020 | 8/27/2020 Europe / Switzerland / Bern                           |
| EPI_ISL_523906 | 8/13/2020 | 8/27/2020 Europe / Switzerland / Bern                           |
| EPI_ISL_523907 | 8/9/2020  | 8/27/2020 Europe / Switzerland / Basel-Stadt                    |
| EPI_ISL_523908 | 8/8/2020  | 8/27/2020 Europe / Switzerland / Zurich                         |
| EPI_ISL_523909 | 8/9/2020  | 8/27/2020 Europe / Switzerland / Zurich                         |
| EPI_ISL_523910 | 8/10/2020 | 8/27/2020 Europe / Switzerland / Basel-Landschaft               |
| EPI_ISL_523911 | 8/10/2020 | 8/27/2020 Europe / Switzerland / Solothurn                      |
| EPI_ISL_523913 | 8/10/2020 | 8/27/2020 Europe / Switzerland / Zurich                         |
| EPI_ISL_523915 | 8/10/2020 | 8/27/2020 Europe / Switzerland / Uri                            |
| EPI_ISL_523916 | 8/10/2020 | 8/27/2020 Europe / Switzerland / Uri                            |
| EPI_ISL_523917 | 8/10/2020 | 8/27/2020 Europe / Switzerland / Geneva                         |
| EPI_ISL_523918 | 8/11/2020 | 8/27/2020 Europe / Switzerland / Bern                           |
| EPI_ISL_523919 | 8/11/2020 | 8/27/2020 Europe / Switzerland / Uri                            |
| EPI_ISL_523920 | 8/12/2020 | 8/27/2020 Europe / Switzerland / Wallis                         |
| EPI_ISL_523921 | 8/12/2020 | 8/27/2020 Europe / Switzerland / Basel-Landschaft               |
| EPI_ISL_523923 | 8/12/2020 | 8/27/2020 Europe / Switzerland / Uri                            |
| EPI_ISL_523924 | 8/13/2020 | 8/27/2020 Europe / Switzerland / Bern                           |
| EPI_ISL_523925 | 8/13/2020 | 8/27/2020 Europe / Switzerland / Basel-Stadt                    |
| EPI_ISL_523926 | 8/13/2020 | 8/27/2020 Europe / Switzerland / Zurich                         |
| EPI_ISL_523927 | 3/7/2020  | 8/27/2020 Europe / Germany / North Rhine-Westphalia / Heinsberg |
| EPI_ISL_523929 | 3/27/2020 | 8/27/2020 Europe / Germany / North Rhine-Westphalia / Heinsberg |
| EPI_ISL_523931 | 3/8/2020  | 8/27/2020 Europe / Germany / North Rhine-Westphalia / Heinsberg |
| EPI_ISL_523932 | 3/9/2020  | 8/27/2020 Europe / Germany / North Rhine-Westphalia / Heinsberg |
| EPI_ISL_523933 | 3/16/2020 | 8/27/2020 Europe / Germany / North Rhine-Westphalia / Heinsberg |
| EPI_ISL_523934 | 3/11/2020 | 8/27/2020 Europe / Germany / North Rhine-Westphalia / Heinsberg |
| EPI_ISL_523935 | 3/6/2020  | 8/27/2020 Europe / Germany / North Rhine-Westphalia / Heinsberg |
| EPI_ISL_523937 | 3/12/2020 | 8/27/2020 Europe / Germany / North Rhine-Westphalia / Heinsberg |
| EPI_ISL_523938 | 3/25/2020 | 8/27/2020 Europe / Germany / North Rhine-Westphalia / Heinsberg |
| EPI_ISL_523939 | 3/18/2020 | 8/27/2020 Europe / Germany / North Rhine-Westphalia / Heinsberg |
| EPI_ISL_523940 | 3/9/2020  | 8/27/2020 Europe / Germany / North Rhine-Westphalia / Heinsberg |
| EPI_ISL_523941 | 3/27/2020 | 8/27/2020 Europe / Germany / North Rhine-Westphalia / Heinsberg |
| EPI_ISL_523942 | 3/25/2020 | 8/27/2020 Europe / Germany / North Rhine-Westphalia / Heinsberg |
| EPI_ISL_523943 | 3/7/2020  | 8/27/2020 Europe / Germany / North Rhine-Westphalia / Heinsberg |
| EPI_ISL_523944 | 3/30/2020 | 8/27/2020 Europe / Germany / North Rhine-Westphalia / Heinsberg |
| EPI_ISL_523945 | 4/1/2020  | 8/27/2020 Europe / Germany / North Rhine-Westphalia / Heinsberg |
| EPI_ISL_523947 | 4/6/2020  | 8/27/2020 Europe / Germany / North Rhine-Westphalia / Heinsberg |
| EPI_ISL_523948 | 3/12/2020 | 8/27/2020 Europe / Germany / North Rhine-Westphalia / Heinsberg |
| EPI_ISL_523949 | 3/7/2020  | 8/27/2020 Europe / Germany / North Rhine-Westphalia / Heinsberg |
| EPI_ISL_523950 | 3/20/2020 | 8/27/2020 Europe / Germany / North Rhine-Westphalia / Heinsberg |
| EPI_ISL_523951 | 3/27/2020 | 8/27/2020 Europe / United Kingdom / England                     |
| EPI_ISL_523952 | 5/20/2020 | 8/27/2020 Asia / United Arab Emirates                           |
| EPI_ISL_523954 | 3/16/2020 | 8/27/2020 South America / Peru / Lambayeque                     |
| EPI_ISL_523955 | 4/2/2020  | 8/27/2020 South America / Brazil / Sao Paulo / Sao Paulo        |

|                |           |                                                          |
|----------------|-----------|----------------------------------------------------------|
| EPI_ISL_523956 | 3/31/2020 | 8/27/2020 South America / Brazil / Sao Paulo / Assis     |
| EPI_ISL_523957 | 4/4/2020  | 8/27/2020 South America / Brazil / Sao Paulo / Sao Paulo |
| EPI_ISL_523958 | 4/15/2020 | 8/27/2020 South America / Brazil / Sao Paulo / Sao Paulo |
| EPI_ISL_523959 | 8/15/2020 | 8/27/2020 South America / Brazil / Sao Paulo / Sao Paulo |
| EPI_ISL_523960 | 3/13/2020 | 8/27/2020 Europe / Moldova / Soroca                      |
| EPI_ISL_523961 | 4/17/2020 | 8/27/2020 South America / Brazil / Sao Paulo / Sao Paulo |
| EPI_ISL_523962 | 3/14/2020 | 8/27/2020 Europe / Moldova / Chisinau                    |
| EPI_ISL_523963 | 3/24/2020 | 8/27/2020 South America / Brazil / Sao Paulo / Sao Paulo |
| EPI_ISL_523964 | 3/14/2020 | 8/27/2020 Europe / Moldova / Cahul                       |
| EPI_ISL_523965 | 3/19/2020 | 8/27/2020 South America / Brazil / Sao Paulo / Sao Paulo |
| EPI_ISL_523966 | 3/12/2020 | 8/27/2020 Europe / Moldova / Chisinau                    |
| EPI_ISL_523967 | 4/18/2020 | 8/27/2020 South America / Brazil / Sao Paulo / Sao Paulo |
| EPI_ISL_523968 | 3/11/2020 | 8/27/2020 Europe / Moldova / Chisinau                    |
| EPI_ISL_523969 | 3/31/2020 | 8/27/2020 South America / Brazil / Sao Paulo / Sao Paulo |
| EPI_ISL_523970 | 4/2/2020  | 8/27/2020 South America / Brazil / Sao Paulo / Sao Paulo |
| EPI_ISL_523971 | 3/25/2020 | 8/27/2020 South America / Brazil / Sao Paulo / Sao Paulo |
| EPI_ISL_523972 | 4/11/2020 | 8/27/2020 South America / Brazil / Sao Paulo / Sao Paulo |
| EPI_ISL_523973 | 4/3/2020  | 8/27/2020 South America / Brazil / Sao Paulo / Sao Paulo |
| EPI_ISL_523974 | 4/2/2020  | 8/27/2020 South America / Brazil / Sao Paulo / Sao Paulo |
| EPI_ISL_523975 | 4/3/2020  | 8/27/2020 South America / Brazil / Sao Paulo / Sao Paulo |
| EPI_ISL_523976 | 4/10/2020 | 8/27/2020 South America / Brazil / Sao Paulo / Sao Paulo |
| EPI_ISL_523977 | 4/10/2020 | 8/27/2020 South America / Brazil / Sao Paulo / Sao Paulo |
| EPI_ISL_523978 | 4/10/2020 | 8/27/2020 South America / Brazil / Sao Paulo / Sao Paulo |
| EPI_ISL_523979 | 3/18/2020 | 8/27/2020 South America / Peru / Arequipa                |
| EPI_ISL_523980 | 4/2/2020  | 8/27/2020 South America / Brazil / Sao Paulo / Sao Paulo |
| EPI_ISL_523981 | 4/10/2020 | 8/27/2020 South America / Brazil / Sao Paulo / Sao Paulo |
| EPI_ISL_523982 | 3/25/2020 | 8/27/2020 South America / Brazil / Sao Paulo / Sao Paulo |
| EPI_ISL_523983 | 4/16/2020 | 8/27/2020 South America / Brazil / Sao Paulo / Sao Paulo |
| EPI_ISL_523984 | 4/19/2020 | 8/27/2020 South America / Brazil / Sao Paulo / Sao Paulo |
| EPI_ISL_523985 | 4/18/2020 | 8/27/2020 South America / Brazil / Sao Paulo / Sao Paulo |
| EPI_ISL_523986 | 4/23/2020 | 8/27/2020 South America / Brazil / Sao Paulo / Sao Paulo |
| EPI_ISL_523988 | 4/21/2020 | 8/27/2020 South America / Brazil / Sao Paulo / Sao Paulo |
| EPI_ISL_523989 | 4/20/2020 | 8/27/2020 South America / Brazil / Sao Paulo / Sao Paulo |
| EPI_ISL_523990 | 4/19/2020 | 8/27/2020 South America / Brazil / Sao Paulo / Sao Paulo |
| EPI_ISL_523991 | 4/22/2020 | 8/27/2020 South America / Brazil / Sao Paulo / Sao Paulo |
| EPI_ISL_523992 | 4/23/2020 | 8/27/2020 South America / Brazil / Sao Paulo / Sao Paulo |
| EPI_ISL_523994 | 3/13/2020 | 8/27/2020 South America / Peru / Lambayeque              |
| EPI_ISL_523995 | 4/26/2020 | 8/27/2020 Europe / Russia / Saint Petersburg             |
| EPI_ISL_523996 | 4/25/2020 | 8/27/2020 Europe / Russia / Saint Petersburg             |
| EPI_ISL_523997 | 4/29/2020 | 8/27/2020 Europe / Russia / Saint Petersburg             |
| EPI_ISL_523998 | 5/4/2020  | 8/27/2020 Europe / Russia / Saint Petersburg             |
| EPI_ISL_523999 | 5/6/2020  | 8/27/2020 Europe / Russia / Saint Petersburg             |
| EPI_ISL_524000 | 5/8/2020  | 8/27/2020 Europe / Russia / Saint Petersburg             |
| EPI_ISL_524001 | 5/8/2020  | 8/27/2020 Europe / Russia / Saint Petersburg             |
| EPI_ISL_524002 | 5/8/2020  | 8/27/2020 Europe / Russia / Saint Petersburg             |
| EPI_ISL_524003 | 5/12/2020 | 8/27/2020 Europe / Russia / Saint Petersburg             |
| EPI_ISL_524004 | 5/12/2020 | 8/27/2020 Europe / Russia / Saint Petersburg             |



|                |           |                                              |
|----------------|-----------|----------------------------------------------|
| EPI_ISL_524052 | 4/27/2020 | 8/27/2020 Europe / Russia / Saint Petersburg |
| EPI_ISL_524074 | 5/19/2020 | 8/27/2020 North America / USA / Utah         |
| EPI_ISL_524075 | 5/20/2020 | 8/27/2020 North America / USA / Utah         |
| EPI_ISL_524076 | 5/20/2020 | 8/27/2020 North America / USA / Utah         |
| EPI_ISL_524077 | 5/22/2020 | 8/27/2020 North America / USA / Utah         |
| EPI_ISL_524078 | 5/21/2020 | 8/27/2020 North America / USA / Utah         |
| EPI_ISL_524080 | 5/19/2020 | 8/27/2020 North America / USA / Utah         |
| EPI_ISL_524081 | 5/20/2020 | 8/27/2020 North America / USA / Utah         |
| EPI_ISL_524082 | 5/19/2020 | 8/27/2020 North America / USA / Utah         |
| EPI_ISL_524084 | 5/22/2020 | 8/27/2020 North America / USA / Utah         |
| EPI_ISL_524086 | 5/21/2020 | 8/27/2020 North America / USA / Utah         |
| EPI_ISL_524087 | 5/26/2020 | 8/27/2020 North America / USA / Utah         |
| EPI_ISL_524089 | 5/19/2020 | 8/27/2020 North America / USA / Utah         |
| EPI_ISL_524090 | 5/19/2020 | 8/27/2020 North America / USA / Utah         |
| EPI_ISL_524093 | 5/22/2020 | 8/27/2020 North America / USA / Utah         |
| EPI_ISL_524096 | 5/26/2020 | 8/27/2020 North America / USA / Utah         |
| EPI_ISL_524098 | 5/19/2020 | 8/27/2020 North America / USA / Utah         |
| EPI_ISL_524100 | 5/19/2020 | 8/27/2020 North America / USA / Utah         |
| EPI_ISL_524101 | 5/20/2020 | 8/27/2020 North America / USA / Utah         |
| EPI_ISL_524102 | 5/21/2020 | 8/27/2020 North America / USA / Utah         |
| EPI_ISL_524104 | 5/21/2020 | 8/27/2020 North America / USA / Utah         |
| EPI_ISL_524105 | 5/21/2020 | 8/27/2020 North America / USA / Utah         |
| EPI_ISL_524107 | 5/24/2020 | 8/27/2020 North America / USA / Utah         |
| EPI_ISL_524108 | 5/13/2020 | 8/27/2020 North America / USA / Utah         |
| EPI_ISL_524109 | 5/13/2020 | 8/27/2020 North America / USA / Utah         |
| EPI_ISL_524111 | 5/13/2020 | 8/27/2020 North America / USA / Utah         |
| EPI_ISL_524113 | 5/14/2020 | 8/27/2020 North America / USA / Utah         |
| EPI_ISL_524114 | 5/14/2020 | 8/27/2020 North America / USA / Utah         |
| EPI_ISL_524115 | 5/15/2020 | 8/27/2020 North America / USA / Utah         |
| EPI_ISL_524117 | 5/12/2020 | 8/27/2020 North America / USA / Utah         |
| EPI_ISL_524118 | 5/12/2020 | 8/27/2020 North America / USA / Utah         |
| EPI_ISL_524121 | 5/14/2020 | 8/27/2020 North America / USA / Utah         |
| EPI_ISL_524122 | 5/14/2020 | 8/27/2020 North America / USA / Utah         |
| EPI_ISL_524123 | 5/26/2020 | 8/27/2020 North America / USA / Utah         |
| EPI_ISL_524124 | 5/26/2020 | 8/27/2020 North America / USA / Utah         |
| EPI_ISL_524125 | 5/13/2020 | 8/27/2020 North America / USA / Utah         |
| EPI_ISL_524126 | 5/15/2020 | 8/27/2020 North America / USA / Utah         |
| EPI_ISL_524127 | 5/14/2020 | 8/27/2020 North America / USA / Utah         |
| EPI_ISL_524128 | 5/15/2020 | 8/27/2020 North America / USA / Utah         |
| EPI_ISL_524129 | 5/14/2020 | 8/27/2020 North America / USA / Utah         |
| EPI_ISL_524130 | 5/15/2020 | 8/27/2020 North America / USA / Utah         |
| EPI_ISL_524133 | 5/12/2020 | 8/27/2020 North America / USA / Utah         |
| EPI_ISL_524134 | 5/14/2020 | 8/27/2020 North America / USA / Utah         |
| EPI_ISL_524135 | 5/14/2020 | 8/27/2020 North America / USA / Utah         |
| EPI_ISL_524136 | 5/15/2020 | 8/27/2020 North America / USA / Utah         |
| EPI_ISL_524138 | 5/12/2020 | 8/27/2020 North America / USA / Utah         |
| EPI_ISL_524139 | 5/26/2020 | 8/27/2020 North America / USA / Utah         |









|                |           |           |                                      |
|----------------|-----------|-----------|--------------------------------------|
| EPI_ISL_524365 | 5/21/2020 | 8/28/2020 | North America / USA / Utah           |
| EPI_ISL_524367 | 5/19/2020 | 8/28/2020 | North America / USA / Utah           |
| EPI_ISL_524368 | 5/19/2020 | 8/28/2020 | North America / USA / Utah           |
| EPI_ISL_524370 | 5/20/2020 | 8/28/2020 | North America / USA / Utah           |
| EPI_ISL_524371 | 5/20/2020 | 8/28/2020 | North America / USA / Utah           |
| EPI_ISL_524372 | 5/19/2020 | 8/28/2020 | North America / USA / Utah           |
| EPI_ISL_524373 | 5/7/2020  | 8/28/2020 | North America / USA / Utah           |
| EPI_ISL_524374 | 5/8/2020  | 8/28/2020 | North America / USA / Utah           |
| EPI_ISL_524375 | 5/8/2020  | 8/28/2020 | North America / USA / Utah           |
| EPI_ISL_524376 | 5/8/2020  | 8/28/2020 | North America / USA / Utah           |
| EPI_ISL_524377 | 5/26/2020 | 8/28/2020 | North America / USA / Utah           |
| EPI_ISL_524378 | 5/26/2020 | 8/28/2020 | North America / USA / Utah           |
| EPI_ISL_524381 | 5/6/2020  | 8/28/2020 | North America / USA / Utah           |
| EPI_ISL_524382 | 5/7/2020  | 8/28/2020 | North America / USA / Utah           |
| EPI_ISL_524384 | 5/10/2020 | 8/28/2020 | North America / USA / Utah           |
| EPI_ISL_524385 | 5/8/2020  | 8/28/2020 | North America / USA / Utah           |
| EPI_ISL_524387 | 5/24/2020 | 8/28/2020 | North America / USA / Utah           |
| EPI_ISL_524388 | 5/7/2020  | 8/28/2020 | North America / USA / Utah           |
| EPI_ISL_524389 | 5/8/2020  | 8/28/2020 | North America / USA / Utah           |
| EPI_ISL_524392 | 5/7/2020  | 8/28/2020 | North America / USA / Utah           |
| EPI_ISL_524393 | 5/7/2020  | 8/28/2020 | North America / USA / Utah           |
| EPI_ISL_524394 | 5/26/2020 | 8/28/2020 | North America / USA / Utah           |
| EPI_ISL_524396 | 5/7/2020  | 8/28/2020 | North America / USA / Utah           |
| EPI_ISL_524398 | 5/8/2020  | 8/28/2020 | North America / USA / Utah           |
| EPI_ISL_524400 | 5/26/2020 | 8/28/2020 | North America / USA / Utah           |
| EPI_ISL_524401 | 5/26/2020 | 8/28/2020 | North America / USA / Utah           |
| EPI_ISL_524402 | 5/7/2020  | 8/28/2020 | North America / USA / Utah           |
| EPI_ISL_524403 | 5/7/2020  | 8/28/2020 | North America / USA / Utah           |
| EPI_ISL_524404 | 5/8/2020  | 8/28/2020 | North America / USA / Utah           |
| EPI_ISL_524405 | 5/9/2020  | 8/28/2020 | North America / USA / Utah           |
| EPI_ISL_524408 | 5/12/2020 | 8/28/2020 | North America / USA / Utah           |
| EPI_ISL_524412 | 5/8/2020  | 8/28/2020 | North America / USA / Utah           |
| EPI_ISL_524413 | 5/26/2020 | 8/28/2020 | North America / USA / Utah           |
| EPI_ISL_524414 | 5/26/2020 | 8/28/2020 | North America / USA / Utah           |
| EPI_ISL_524415 | 5/10/2020 | 8/28/2020 | North America / USA / Utah           |
| EPI_ISL_524416 | 5/8/2020  | 8/28/2020 | North America / USA / Utah           |
| EPI_ISL_524417 | 5/8/2020  | 8/28/2020 | North America / USA / Utah           |
| EPI_ISL_524418 | 5/8/2020  | 8/28/2020 | North America / USA / Utah           |
| EPI_ISL_524419 | 5/8/2020  | 8/28/2020 | North America / USA / Utah           |
| EPI_ISL_524420 | 5/7/2020  | 8/28/2020 | North America / USA / Utah           |
| EPI_ISL_524421 | 5/26/2020 | 8/28/2020 | North America / USA / Utah           |
| EPI_ISL_524424 | 5/21/2020 | 8/28/2020 | North America / USA / Utah           |
| EPI_ISL_524425 | 5/21/2020 | 8/28/2020 | North America / USA / Utah           |
| EPI_ISL_524428 | 4/8/2020  | 8/28/2020 | North America / USA / North Carolina |
| EPI_ISL_524429 | 4/7/2020  | 8/28/2020 | North America / USA / North Carolina |
| EPI_ISL_524430 | 3/24/2020 | 8/28/2020 | North America / USA / North Carolina |
| EPI_ISL_524431 | 4/8/2020  | 8/28/2020 | North America / USA / North Carolina |

|                |           |                                                             |
|----------------|-----------|-------------------------------------------------------------|
| EPI_ISL_524432 | 4/3/2020  | 8/28/2020 North America / USA / North Carolina              |
| EPI_ISL_524445 | 7/4/2020  | 8/28/2020 Asia / Singapore                                  |
| EPI_ISL_524447 | 7/6/2020  | 8/28/2020 Asia / Singapore                                  |
| EPI_ISL_524448 | 7/6/2020  | 8/28/2020 Asia / Singapore                                  |
| EPI_ISL_524449 | 6/3/2020  | 8/28/2020 Asia / Singapore                                  |
| EPI_ISL_524462 | 3/17/2020 | 8/28/2020 South America / Brazil / Sao Paulo / Sao Paulo    |
| EPI_ISL_524463 | 3/20/2020 | 8/28/2020 South America / Brazil / Sao Paulo / Sao Paulo    |
| EPI_ISL_524464 | 3/21/2020 | 8/28/2020 South America / Brazil / Sao Paulo / Santa Isabel |
| EPI_ISL_524465 | 4/17/2020 | 8/28/2020 South America / Brazil / Sao Paulo / Sao Paulo    |
| EPI_ISL_524466 | 4/22/2020 | 8/28/2020 South America / Brazil / Sao Paulo / Sao Paulo    |
| EPI_ISL_524467 | 4/22/2020 | 8/28/2020 South America / Brazil / Sao Paulo / Sao Paulo    |
| EPI_ISL_524468 | 5/1/2020  | 8/28/2020 South America / Brazil / Sao Paulo / Sao Paulo    |
| EPI_ISL_524469 | 5/5/2020  | 8/28/2020 South America / Brazil / Sao Paulo / Sao Paulo    |
| EPI_ISL_524470 | 5/6/2020  | 8/28/2020 South America / Brazil / Sao Paulo / Sao Paulo    |
| EPI_ISL_524471 | 3/17/2020 | 8/28/2020 South America / Peru / Junin                      |
| EPI_ISL_524473 | 4/1/2020  | 8/28/2020 South America / Peru / Lima                       |
| EPI_ISL_524474 | 3/1/2020  | 8/28/2020 Europe / Switzerland / Aargau                     |
| EPI_ISL_524475 | 3/1/2020  | 8/28/2020 Europe / Switzerland / Zurich                     |
| EPI_ISL_524476 | 3/2/2020  | 8/28/2020 Europe / Switzerland / Aargau                     |
| EPI_ISL_524477 | 3/3/2020  | 8/28/2020 Europe / Switzerland / Zurich                     |
| EPI_ISL_524478 | 3/2/2020  | 8/28/2020 Europe / Switzerland / Zurich                     |
| EPI_ISL_524479 | 3/3/2020  | 8/28/2020 Europe / Switzerland / Zurich                     |
| EPI_ISL_524480 | 3/3/2020  | 8/28/2020 Europe / Switzerland / Aargau                     |
| EPI_ISL_524481 | 3/4/2020  | 8/28/2020 Europe / Switzerland / Aargau                     |
| EPI_ISL_524482 | 3/3/2020  | 8/28/2020 Europe / Switzerland / Zurich                     |
| EPI_ISL_524483 | 3/4/2020  | 8/28/2020 Europe / Switzerland / Zurich                     |
| EPI_ISL_524484 | 3/3/2020  | 8/28/2020 Europe / Switzerland / Schwyz                     |
| EPI_ISL_524485 | 3/5/2020  | 8/28/2020 Europe / Switzerland / Zurich                     |
| EPI_ISL_524486 | 7/31/2020 | 8/28/2020 Europe / United Kingdom / England                 |
| EPI_ISL_524487 | 8/6/2020  | 8/28/2020 Europe / United Kingdom / England                 |
| EPI_ISL_524488 | 8/6/2020  | 8/28/2020 Europe / United Kingdom / England                 |
| EPI_ISL_524489 | 7/30/2020 | 8/28/2020 Europe / United Kingdom / England                 |
| EPI_ISL_524490 | 8/6/2020  | 8/28/2020 Europe / United Kingdom / England                 |
| EPI_ISL_524491 | 8/5/2020  | 8/28/2020 Europe / United Kingdom / England                 |
| EPI_ISL_524492 | 8/4/2020  | 8/28/2020 Europe / United Kingdom / England                 |
| EPI_ISL_524494 | 3/30/2020 | 8/28/2020 Europe / United Kingdom / Scotland                |
| EPI_ISL_524495 | 4/7/2020  | 8/28/2020 Europe / United Kingdom / England                 |
| EPI_ISL_524497 | 4/9/2020  | 8/28/2020 Europe / United Kingdom / England                 |
| EPI_ISL_524498 | 4/9/2020  | 8/28/2020 Europe / United Kingdom / England                 |
| EPI_ISL_524500 | 3/30/2020 | 8/28/2020 Europe / United Kingdom / Scotland                |
| EPI_ISL_524501 | 4/8/2020  | 8/28/2020 Europe / United Kingdom / England                 |
| EPI_ISL_524509 | 4/7/2020  | 8/28/2020 Europe / United Kingdom / England                 |
| EPI_ISL_524513 | 3/29/2020 | 8/28/2020 Europe / United Kingdom / Scotland                |
| EPI_ISL_524514 | 4/4/2020  | 8/28/2020 Europe / United Kingdom / Scotland                |
| EPI_ISL_524516 | 4/6/2020  | 8/28/2020 Europe / United Kingdom / Scotland                |
| EPI_ISL_524518 | 3/29/2020 | 8/28/2020 Europe / United Kingdom / Scotland                |
| EPI_ISL_524519 | 3/29/2020 | 8/28/2020 Europe / United Kingdom / Scotland                |





|                |           |                                              |
|----------------|-----------|----------------------------------------------|
| EPI_ISL_524680 | 4/4/2020  | 8/28/2020 Europe / United Kingdom / England  |
| EPI_ISL_524682 | 4/3/2020  | 8/28/2020 Europe / United Kingdom / England  |
| EPI_ISL_524683 | 3/28/2020 | 8/28/2020 Europe / United Kingdom / England  |
| EPI_ISL_524684 | 4/2/2020  | 8/28/2020 Europe / United Kingdom / England  |
| EPI_ISL_524686 | 4/4/2020  | 8/28/2020 Europe / United Kingdom / England  |
| EPI_ISL_524688 | 4/4/2020  | 8/28/2020 Europe / United Kingdom / England  |
| EPI_ISL_524689 | 4/4/2020  | 8/28/2020 Europe / United Kingdom / England  |
| EPI_ISL_524690 | 4/2/2020  | 8/28/2020 Europe / United Kingdom / England  |
| EPI_ISL_524691 | 4/5/2020  | 8/28/2020 Europe / United Kingdom / England  |
| EPI_ISL_524692 | 4/5/2020  | 8/28/2020 Europe / United Kingdom / England  |
| EPI_ISL_524693 | 4/3/2020  | 8/28/2020 Europe / United Kingdom / England  |
| EPI_ISL_524694 | 4/4/2020  | 8/28/2020 Europe / United Kingdom / England  |
| EPI_ISL_524696 | 3/29/2020 | 8/28/2020 Europe / United Kingdom / England  |
| EPI_ISL_524698 | 4/5/2020  | 8/28/2020 Europe / United Kingdom / England  |
| EPI_ISL_524699 | 4/5/2020  | 8/28/2020 Europe / United Kingdom / England  |
| EPI_ISL_524700 | 4/5/2020  | 8/28/2020 Europe / United Kingdom / England  |
| EPI_ISL_524702 | 3/28/2020 | 8/28/2020 Europe / United Kingdom / England  |
| EPI_ISL_524703 | 4/7/2020  | 8/28/2020 Europe / United Kingdom / England  |
| EPI_ISL_524704 | 4/3/2020  | 8/28/2020 Europe / United Kingdom / England  |
| EPI_ISL_524705 | 4/3/2020  | 8/28/2020 Europe / United Kingdom / England  |
| EPI_ISL_524706 | 3/29/2020 | 8/28/2020 Europe / United Kingdom / England  |
| EPI_ISL_524707 | 3/28/2020 | 8/28/2020 Europe / United Kingdom / England  |
| EPI_ISL_524708 | 4/6/2020  | 8/28/2020 Europe / United Kingdom / England  |
| EPI_ISL_524709 | 4/4/2020  | 8/28/2020 Europe / United Kingdom / England  |
| EPI_ISL_524710 | 4/5/2020  | 8/28/2020 Europe / United Kingdom / England  |
| EPI_ISL_524711 | 4/2/2020  | 8/28/2020 Europe / United Kingdom / England  |
| EPI_ISL_524712 | 4/3/2020  | 8/28/2020 Europe / United Kingdom / England  |
| EPI_ISL_524713 | 6/18/2020 | 8/28/2020 Asia / India / Gujarat / Ahmedabad |
| EPI_ISL_524714 | 6/18/2020 | 8/28/2020 Asia / India / Gujarat / Ahmedabad |
| EPI_ISL_524715 | 6/18/2020 | 8/28/2020 Asia / India / Gujarat / Ahmedabad |
| EPI_ISL_524716 | 6/18/2020 | 8/28/2020 Asia / India / Gujarat / Daskroi   |
| EPI_ISL_524717 | 6/18/2020 | 8/28/2020 Asia / India / Gujarat / Daskroi   |
| EPI_ISL_524718 | 6/18/2020 | 8/28/2020 Asia / India / Gujarat / Daskroi   |
| EPI_ISL_524719 | 6/18/2020 | 8/28/2020 Asia / India / Gujarat / Dhandhuka |
| EPI_ISL_524720 | 6/18/2020 | 8/28/2020 Asia / India / Gujarat / Dhandhuka |
| EPI_ISL_524721 | 6/18/2020 | 8/28/2020 Asia / India / Gujarat / Ahmedabad |
| EPI_ISL_524722 | 6/18/2020 | 8/28/2020 Asia / India / Gujarat / Ahmedabad |
| EPI_ISL_524723 | 6/18/2020 | 8/28/2020 Asia / India / Gujarat / Dahegam   |
| EPI_ISL_524724 | 6/18/2020 | 8/28/2020 Asia / India / Gujarat / Dahegam   |
| EPI_ISL_524725 | 6/18/2020 | 8/28/2020 Asia / India / Gujarat / Daskroi   |
| EPI_ISL_524726 | 6/18/2020 | 8/28/2020 Asia / India / Gujarat / Ahmedabad |
| EPI_ISL_524727 | 6/18/2020 | 8/28/2020 Asia / India / Gujarat / Ahmedabad |
| EPI_ISL_524728 | 6/18/2020 | 8/28/2020 Asia / India / Gujarat / Ahmedabad |
| EPI_ISL_524729 | 6/18/2020 | 8/28/2020 Asia / India / Gujarat / Ahmedabad |
| EPI_ISL_524730 | 6/15/2020 | 8/28/2020 Asia / India / Gujarat / Vadodara  |
| EPI_ISL_524731 | 6/15/2020 | 8/28/2020 Asia / India / Gujarat / Vadodara  |
| EPI_ISL_524732 | 7/9/2020  | 8/28/2020 Asia / India / Gujarat / Modasa    |

|                |           |                                                |
|----------------|-----------|------------------------------------------------|
| EPI_ISL_524733 | 7/6/2020  | 8/28/2020 Asia / India / Gujarat / Patan       |
| EPI_ISL_524734 | 7/6/2020  | 8/28/2020 Asia / India / Gujarat / Patan       |
| EPI_ISL_524735 | 7/11/2020 | 8/28/2020 Asia / India / Gujarat / Khambhaliya |
| EPI_ISL_524736 | 7/11/2020 | 8/28/2020 Asia / India / Gujarat / Khambhaliya |
| EPI_ISL_524737 | 6/18/2020 | 8/28/2020 Asia / India / Gujarat / Gandhinagar |
| EPI_ISL_524738 | 6/18/2020 | 8/28/2020 Asia / India / Gujarat / Mansa       |
| EPI_ISL_524739 | 6/18/2020 | 8/28/2020 Asia / India / Gujarat / Gandhinagar |
| EPI_ISL_524740 | 6/18/2020 | 8/28/2020 Asia / India / Gujarat / Gandhinagar |
| EPI_ISL_524741 | 6/18/2020 | 8/28/2020 Asia / India / Gujarat / Gandhinagar |
| EPI_ISL_524742 | 6/18/2020 | 8/28/2020 Asia / India / Gujarat / Gandhinagar |
| EPI_ISL_524743 | 6/18/2020 | 8/28/2020 Asia / India / Gujarat / Gandhinagar |
| EPI_ISL_524744 | 6/22/2020 | 8/28/2020 Asia / India / Gujarat / Gandhinagar |
| EPI_ISL_524745 | 6/22/2020 | 8/28/2020 Asia / India / Gujarat / Gandhinagar |
| EPI_ISL_524746 | 7/11/2020 | 8/28/2020 Asia / India / Gujarat / Jamnagar    |
| EPI_ISL_524747 | 7/11/2020 | 8/28/2020 Asia / India / Gujarat / Jamnagar    |
| EPI_ISL_524748 | 7/11/2020 | 8/28/2020 Asia / India / Gujarat / Jamnagar    |
| EPI_ISL_524749 | 7/11/2020 | 8/28/2020 Asia / India / Gujarat / Jamnagar    |
| EPI_ISL_524750 | 7/11/2020 | 8/28/2020 Asia / India / Gujarat / Jamnagar    |
| EPI_ISL_524751 | 7/11/2020 | 8/28/2020 Asia / India / Gujarat / Jamnagar    |
| EPI_ISL_524752 | 7/6/2020  | 8/28/2020 Asia / India / Gujarat / Patan       |
| EPI_ISL_524753 | 7/6/2020  | 8/28/2020 Asia / India / Gujarat / Patan       |
| EPI_ISL_524754 | 7/6/2020  | 8/28/2020 Asia / India / Gujarat / Patan       |
| EPI_ISL_524755 | 7/6/2020  | 8/28/2020 Asia / India / Gujarat / Patan       |
| EPI_ISL_524756 | 7/6/2020  | 8/28/2020 Asia / India / Gujarat / Patan       |
| EPI_ISL_524757 | 7/6/2020  | 8/28/2020 Asia / India / Gujarat / Patan       |
| EPI_ISL_524758 | 7/6/2020  | 8/28/2020 Asia / India / Gujarat / Patan       |
| EPI_ISL_524759 | 7/6/2020  | 8/28/2020 Asia / India / Gujarat / Patan       |
| EPI_ISL_524760 | 7/6/2020  | 8/28/2020 Asia / India / Gujarat / Radhanpur   |
| EPI_ISL_524761 | 7/6/2020  | 8/28/2020 Asia / India / Gujarat / Radhanpur   |
| EPI_ISL_524762 | 7/6/2020  | 8/28/2020 Asia / India / Gujarat / Patan       |
| EPI_ISL_524763 | 7/6/2020  | 8/28/2020 Asia / India / Gujarat / Patan       |
| EPI_ISL_524764 | 7/6/2020  | 8/28/2020 Asia / India / Gujarat / Patan       |
| EPI_ISL_524765 | 7/6/2020  | 8/28/2020 Asia / India / Gujarat / Patan       |
| EPI_ISL_524766 | 7/6/2020  | 8/28/2020 Asia / India / Gujarat / Siddhpur    |
| EPI_ISL_524767 | 5/17/2020 | 8/28/2020 North America / USA / Utah           |
| EPI_ISL_524768 | 5/18/2020 | 8/28/2020 North America / USA / Utah           |
| EPI_ISL_524769 | 5/18/2020 | 8/28/2020 North America / USA / Utah           |
| EPI_ISL_524770 | 5/18/2020 | 8/28/2020 North America / USA / Utah           |
| EPI_ISL_524771 | 5/18/2020 | 8/28/2020 North America / USA / Utah           |
| EPI_ISL_524772 | 5/18/2020 | 8/28/2020 North America / USA / Utah           |
| EPI_ISL_524773 | 5/19/2020 | 8/28/2020 North America / USA / Utah           |
| EPI_ISL_524774 | 5/21/2020 | 8/28/2020 North America / USA / Utah           |
| EPI_ISL_524775 | 5/21/2020 | 8/28/2020 North America / USA / Utah           |
| EPI_ISL_524776 | 5/21/2020 | 8/28/2020 North America / USA / Utah           |
| EPI_ISL_524778 | 5/26/2020 | 8/28/2020 North America / USA / Utah           |
| EPI_ISL_524779 | 5/26/2020 | 8/28/2020 North America / USA / Utah           |
| EPI_ISL_524780 | 5/26/2020 | 8/28/2020 North America / USA / Utah           |

|                |           |                                                        |
|----------------|-----------|--------------------------------------------------------|
| EPI_ISL_524782 | 3/1/2020  | 8/28/2020 Europe / Switzerland / Zurich                |
| EPI_ISL_524783 | 4/28/2020 | 8/28/2020 South America / Brazil / Para                |
| EPI_ISL_524784 | 4/29/2020 | 8/28/2020 South America / Brazil / Amapa               |
| EPI_ISL_524785 | 5/5/2020  | 8/28/2020 South America / Brazil / Para                |
| EPI_ISL_524786 | 5/1/2020  | 8/28/2020 South America / Brazil / Para                |
| EPI_ISL_524787 | 4/15/2020 | 8/28/2020 South America / Brazil / Para                |
| EPI_ISL_524788 | 4/24/2020 | 8/28/2020 South America / Brazil / Maranhao            |
| EPI_ISL_524789 | 5/5/2020  | 8/28/2020 South America / Brazil / Maranhao            |
| EPI_ISL_524790 | 4/28/2020 | 8/28/2020 South America / Brazil / Maranhao            |
| EPI_ISL_524791 | 4/29/2020 | 8/28/2020 South America / Brazil / Maranhao            |
| EPI_ISL_524792 | 4/3/2020  | 8/28/2020 South America / Brazil / Amapa               |
| EPI_ISL_524793 | 4/29/2020 | 8/28/2020 South America / Brazil / Amapa               |
| EPI_ISL_524794 | 4/25/2020 | 8/28/2020 South America / Brazil / Maranhao            |
| EPI_ISL_524795 | 4/9/2020  | 8/28/2020 South America / Brazil / Amapa               |
| EPI_ISL_524796 | 4/23/2020 | 8/28/2020 South America / Brazil / Amapa               |
| EPI_ISL_524797 | 3/24/2020 | 8/28/2020 South America / Brazil / Maranhao            |
| EPI_ISL_524798 | 3/14/2020 | 8/28/2020 South America / Brazil / Rio Grande do Norte |
| EPI_ISL_524799 | 5/8/2020  | 8/28/2020 South America / Brazil / Maranhao            |
| EPI_ISL_524800 | 5/13/2020 | 8/28/2020 South America / Brazil / Para                |
| EPI_ISL_524801 | 3/19/2020 | 8/28/2020 South America / Brazil / Paraiba             |
| EPI_ISL_524802 | 6/1/2020  | 8/28/2020 North America / USA / Utah                   |
| EPI_ISL_524804 | 6/1/2020  | 8/28/2020 North America / USA / Utah                   |
| EPI_ISL_524805 | 5/30/2020 | 8/28/2020 North America / USA / Utah                   |
| EPI_ISL_524806 | 6/1/2020  | 8/28/2020 North America / USA / Utah                   |
| EPI_ISL_524807 | 5/20/2020 | 8/28/2020 North America / USA / Utah                   |
| EPI_ISL_524808 | 6/1/2020  | 8/28/2020 North America / USA / Utah                   |
| EPI_ISL_524809 | 5/29/2020 | 8/28/2020 North America / USA / Utah                   |
| EPI_ISL_524810 | 6/1/2020  | 8/28/2020 North America / USA / Utah                   |
| EPI_ISL_524811 | 6/1/2020  | 8/28/2020 North America / USA / Utah                   |
| EPI_ISL_524812 | 6/1/2020  | 8/28/2020 North America / USA / Utah                   |
| EPI_ISL_524813 | 5/23/2020 | 8/28/2020 North America / USA / Utah                   |
| EPI_ISL_524814 | 5/22/2020 | 8/28/2020 North America / USA / Utah                   |
| EPI_ISL_524815 | 5/29/2020 | 8/28/2020 North America / USA / Utah                   |
| EPI_ISL_524817 | 5/23/2020 | 8/28/2020 North America / USA / Utah                   |
| EPI_ISL_524818 | 5/22/2020 | 8/28/2020 North America / USA / Utah                   |
| EPI_ISL_524819 | 5/17/2020 | 8/28/2020 North America / USA / Utah                   |
| EPI_ISL_524821 | 5/23/2020 | 8/28/2020 North America / USA / Utah                   |
| EPI_ISL_524822 | 5/22/2020 | 8/28/2020 North America / USA / Utah                   |
| EPI_ISL_524824 | 5/27/2020 | 8/28/2020 North America / USA / Utah                   |
| EPI_ISL_524825 | 5/25/2020 | 8/28/2020 North America / USA / Utah                   |
| EPI_ISL_524826 | 5/29/2020 | 8/28/2020 North America / USA / Utah                   |
| EPI_ISL_524828 | 5/26/2020 | 8/28/2020 North America / USA / Utah                   |
| EPI_ISL_524829 | 5/29/2020 | 8/28/2020 North America / USA / Utah                   |
| EPI_ISL_524830 | 5/31/2020 | 8/28/2020 North America / USA / Utah                   |
| EPI_ISL_524831 | 5/29/2020 | 8/28/2020 North America / USA / Utah                   |
| EPI_ISL_524832 | 5/29/2020 | 8/28/2020 North America / USA / Utah                   |
| EPI_ISL_524833 | 5/26/2020 | 8/28/2020 North America / USA / Utah                   |











|                |           |                                              |
|----------------|-----------|----------------------------------------------|
| EPI_ISL_525173 | 5/27/2020 | 8/28/2020 North America / USA / Utah         |
| EPI_ISL_525177 | 5/31/2020 | 8/28/2020 North America / USA / Utah         |
| EPI_ISL_525180 | 5/31/2020 | 8/28/2020 North America / USA / Utah         |
| EPI_ISL_525183 | 5/11/2020 | 8/28/2020 North America / USA / Utah         |
| EPI_ISL_525186 | 5/23/2020 | 8/28/2020 North America / USA / Utah         |
| EPI_ISL_525187 | 5/28/2020 | 8/28/2020 North America / USA / Utah         |
| EPI_ISL_525189 | 7/7/2020  | 8/28/2020 North America / USA / Virginia     |
| EPI_ISL_525190 | 7/7/2020  | 8/28/2020 North America / USA / Virginia     |
| EPI_ISL_525191 | 7/7/2020  | 8/28/2020 North America / USA / Virginia     |
| EPI_ISL_525192 | 7/7/2020  | 8/28/2020 North America / USA / Virginia     |
| EPI_ISL_525193 | 7/18/2020 | 8/28/2020 North America / USA / Virginia     |
| EPI_ISL_525194 | 7/18/2020 | 8/28/2020 North America / USA / Virginia     |
| EPI_ISL_525195 | 7/18/2020 | 8/28/2020 North America / USA / Virginia     |
| EPI_ISL_525196 | 7/18/2020 | 8/28/2020 North America / USA / Virginia     |
| EPI_ISL_525197 | 7/18/2020 | 8/28/2020 North America / USA / Virginia     |
| EPI_ISL_525198 | 7/18/2020 | 8/28/2020 North America / USA / Virginia     |
| EPI_ISL_525199 | 7/18/2020 | 8/28/2020 North America / USA / Virginia     |
| EPI_ISL_525200 | 7/8/2020  | 8/28/2020 North America / USA / Virginia     |
| EPI_ISL_525201 | 7/8/2020  | 8/28/2020 North America / USA / Virginia     |
| EPI_ISL_525202 | 7/8/2020  | 8/28/2020 North America / USA / Virginia     |
| EPI_ISL_525203 | 7/23/2020 | 8/28/2020 North America / USA / Virginia     |
| EPI_ISL_525204 | 7/23/2020 | 8/28/2020 North America / USA / Virginia     |
| EPI_ISL_525205 | 7/23/2020 | 8/28/2020 North America / USA / Virginia     |
| EPI_ISL_525206 | 3/14/2020 | 8/28/2020 South America / Peru / La Libertad |
| EPI_ISL_525208 | 5/15/2020 | 8/28/2020 North America / USA / Utah         |
| EPI_ISL_525209 | 5/16/2020 | 8/28/2020 North America / USA / Utah         |
| EPI_ISL_525211 | 5/15/2020 | 8/28/2020 North America / USA / Utah         |
| EPI_ISL_525213 | 5/14/2020 | 8/28/2020 North America / USA / Utah         |
| EPI_ISL_525215 | 5/14/2020 | 8/28/2020 North America / USA / Utah         |
| EPI_ISL_525216 | 5/16/2020 | 8/28/2020 North America / USA / Utah         |
| EPI_ISL_525217 | 5/15/2020 | 8/28/2020 North America / USA / Utah         |
| EPI_ISL_525219 | 5/14/2020 | 8/28/2020 North America / USA / Utah         |
| EPI_ISL_525221 | 5/12/2020 | 8/28/2020 North America / USA / Utah         |
| EPI_ISL_525223 | 5/15/2020 | 8/28/2020 North America / USA / Utah         |
| EPI_ISL_525224 | 5/14/2020 | 8/28/2020 North America / USA / Utah         |
| EPI_ISL_525225 | 5/14/2020 | 8/28/2020 North America / USA / Utah         |
| EPI_ISL_525227 | 5/14/2020 | 8/28/2020 North America / USA / Utah         |
| EPI_ISL_525228 | 5/15/2020 | 8/28/2020 North America / USA / Utah         |
| EPI_ISL_525229 | 5/14/2020 | 8/28/2020 North America / USA / Utah         |
| EPI_ISL_525231 | 5/13/2020 | 8/28/2020 North America / USA / Utah         |
| EPI_ISL_525233 | 5/12/2020 | 8/28/2020 North America / USA / Utah         |
| EPI_ISL_525236 | 5/16/2020 | 8/28/2020 North America / USA / Utah         |
| EPI_ISL_525237 | 5/14/2020 | 8/28/2020 North America / USA / Utah         |
| EPI_ISL_525239 | 5/13/2020 | 8/28/2020 North America / USA / Utah         |
| EPI_ISL_525241 | 5/15/2020 | 8/28/2020 North America / USA / Utah         |
| EPI_ISL_525242 | 5/18/2020 | 8/28/2020 North America / USA / Utah         |
| EPI_ISL_525244 | 5/14/2020 | 8/28/2020 North America / USA / Utah         |



|                |           |                                      |
|----------------|-----------|--------------------------------------|
| EPI_ISL_525317 | 5/15/2020 | 8/28/2020 North America / USA / Utah |
| EPI_ISL_525319 | 5/11/2020 | 8/28/2020 North America / USA / Utah |
| EPI_ISL_525320 | 5/11/2020 | 8/28/2020 North America / USA / Utah |
| EPI_ISL_525321 | 5/11/2020 | 8/28/2020 North America / USA / Utah |
| EPI_ISL_525322 | 5/11/2020 | 8/28/2020 North America / USA / Utah |
| EPI_ISL_525325 | 5/15/2020 | 8/28/2020 North America / USA / Utah |
| EPI_ISL_525326 | 5/14/2020 | 8/28/2020 North America / USA / Utah |
| EPI_ISL_525328 | 5/12/2020 | 8/28/2020 North America / USA / Utah |
| EPI_ISL_525330 | 5/14/2020 | 8/28/2020 North America / USA / Utah |
| EPI_ISL_525334 | 5/11/2020 | 8/28/2020 North America / USA / Utah |
| EPI_ISL_525338 | 5/21/2020 | 8/29/2020 North America / USA / Utah |
| EPI_ISL_525339 | 5/20/2020 | 8/29/2020 North America / USA / Utah |
| EPI_ISL_525340 | 5/21/2020 | 8/29/2020 North America / USA / Utah |
| EPI_ISL_525343 | 5/21/2020 | 8/29/2020 North America / USA / Utah |
| EPI_ISL_525344 | 5/20/2020 | 8/29/2020 North America / USA / Utah |
| EPI_ISL_525345 | 5/20/2020 | 8/29/2020 North America / USA / Utah |
| EPI_ISL_525346 | 5/20/2020 | 8/29/2020 North America / USA / Utah |
| EPI_ISL_525347 | 8/13/2020 | 8/29/2020 North America / USA / Utah |
| EPI_ISL_525348 | 8/14/2020 | 8/29/2020 North America / USA / Utah |
| EPI_ISL_525350 | 8/13/2020 | 8/29/2020 North America / USA / Utah |
| EPI_ISL_525351 | 8/13/2020 | 8/29/2020 North America / USA / Utah |
| EPI_ISL_525352 | 7/28/2020 | 8/29/2020 Europe / Ireland / Laois   |
| EPI_ISL_525353 | 7/28/2020 | 8/29/2020 Europe / Ireland / Laois   |
| EPI_ISL_525356 | 7/29/2020 | 8/29/2020 Europe / Ireland / Kildare |
| EPI_ISL_525357 | 7/29/2020 | 8/29/2020 Europe / Ireland / Kildare |
| EPI_ISL_525358 | 7/29/2020 | 8/29/2020 Europe / Ireland / Dublin  |
| EPI_ISL_525359 | 7/29/2020 | 8/29/2020 Europe / Ireland / Dublin  |
| EPI_ISL_525360 | 7/30/2020 | 8/29/2020 Europe / Ireland / Offaly  |
| EPI_ISL_525361 | 7/30/2020 | 8/29/2020 Europe / Ireland / Meath   |
| EPI_ISL_525362 | 7/30/2020 | 8/29/2020 Europe / Ireland / Dublin  |
| EPI_ISL_525364 | 7/31/2020 | 8/29/2020 Europe / Ireland / Louth   |
| EPI_ISL_525365 | 7/31/2020 | 8/29/2020 Europe / Ireland / Meath   |
| EPI_ISL_525366 | 7/31/2020 | 8/29/2020 Europe / Ireland / Dublin  |
| EPI_ISL_525367 | 7/31/2020 | 8/29/2020 Europe / Ireland / Dublin  |
| EPI_ISL_525368 | 7/31/2020 | 8/29/2020 Europe / Ireland / Dublin  |
| EPI_ISL_525369 | 7/31/2020 | 8/29/2020 Europe / Ireland / Wexford |
| EPI_ISL_525370 | 7/31/2020 | 8/29/2020 Europe / Ireland / Wexford |
| EPI_ISL_525371 | 8/1/2020  | 8/29/2020 Europe / Ireland / Cavan   |
| EPI_ISL_525372 | 8/1/2020  | 8/29/2020 Europe / Ireland / Dublin  |
| EPI_ISL_525373 | 8/1/2020  | 8/29/2020 Europe / Ireland / Dublin  |
| EPI_ISL_525374 | 8/1/2020  | 8/29/2020 Europe / Ireland / Dublin  |
| EPI_ISL_525375 | 8/1/2020  | 8/29/2020 Europe / Ireland / Kildare |
| EPI_ISL_525376 | 8/1/2020  | 8/29/2020 Europe / Ireland / Laois   |
| EPI_ISL_525382 | 8/1/2020  | 8/29/2020 Europe / Ireland / Kildare |
| EPI_ISL_525383 | 8/1/2020  | 8/29/2020 Europe / Ireland / Kildare |
| EPI_ISL_525384 | 8/1/2020  | 8/29/2020 Europe / Ireland / Kildare |
| EPI_ISL_525385 | 8/1/2020  | 8/29/2020 Europe / Ireland / Kildare |

|                |           |                                                                   |
|----------------|-----------|-------------------------------------------------------------------|
| EPI_ISL_525386 | 8/1/2020  | 8/29/2020 Europe / Ireland / Laois                                |
| EPI_ISL_525387 | 8/1/2020  | 8/29/2020 Europe / Ireland / Kildare                              |
| EPI_ISL_525388 | 8/1/2020  | 8/29/2020 Europe / Ireland / Kildare                              |
| EPI_ISL_525390 | 8/2/2020  | 8/29/2020 Europe / Ireland / Kildare                              |
| EPI_ISL_525394 | 8/3/2020  | 8/29/2020 Europe / Ireland / Kildare                              |
| EPI_ISL_525396 | 8/3/2020  | 8/29/2020 Europe / Ireland / Kildare                              |
| EPI_ISL_525397 | 8/5/2020  | 8/29/2020 Europe / Ireland / Laois                                |
| EPI_ISL_525398 | 8/5/2020  | 8/29/2020 Europe / Ireland / Offaly                               |
| EPI_ISL_525399 | 8/5/2020  | 8/29/2020 Europe / Ireland / Offaly                               |
| EPI_ISL_525400 | 8/5/2020  | 8/29/2020 Europe / Ireland / Kildare                              |
| EPI_ISL_525401 | 8/5/2020  | 8/29/2020 Europe / Ireland / Kildare                              |
| EPI_ISL_525402 | 8/5/2020  | 8/29/2020 Europe / Ireland / Offaly                               |
| EPI_ISL_525403 | 8/5/2020  | 8/29/2020 Europe / Ireland / Offaly                               |
| EPI_ISL_525404 | 8/5/2020  | 8/29/2020 Europe / Ireland / Kildare                              |
| EPI_ISL_525405 | 8/5/2020  | 8/29/2020 Europe / Ireland / Offaly                               |
| EPI_ISL_525406 | 8/5/2020  | 8/29/2020 Europe / Ireland / Offaly                               |
| EPI_ISL_525407 | 8/5/2020  | 8/29/2020 Europe / Ireland / Kildare                              |
| EPI_ISL_525408 | 8/5/2020  | 8/29/2020 Europe / Ireland / Offaly                               |
| EPI_ISL_525409 | 8/5/2020  | 8/29/2020 Europe / Ireland / Offaly                               |
| EPI_ISL_525410 | 8/5/2020  | 8/29/2020 Europe / Ireland / Offaly                               |
| EPI_ISL_525411 | 8/5/2020  | 8/29/2020 Europe / Ireland / Offaly                               |
| EPI_ISL_525412 | 8/5/2020  | 8/29/2020 Europe / Ireland / Offaly                               |
| EPI_ISL_525413 | 8/5/2020  | 8/29/2020 Europe / Ireland / Offaly                               |
| EPI_ISL_525414 | 8/5/2020  | 8/29/2020 Europe / Ireland / Kildare                              |
| EPI_ISL_525415 | 8/5/2020  | 8/29/2020 Europe / Ireland / Offaly                               |
| EPI_ISL_525416 | 8/5/2020  | 8/29/2020 Europe / Ireland / Offaly                               |
| EPI_ISL_525417 | 8/8/2020  | 8/29/2020 Europe / Ireland / Offaly                               |
| EPI_ISL_525418 | 8/9/2020  | 8/29/2020 Europe / Ireland / Kildare                              |
| EPI_ISL_525419 | 6/18/2020 | 8/29/2020 Asia / India / Gujarat / Ahmedabad                      |
| EPI_ISL_525420 | 6/18/2020 | 8/29/2020 Asia / India / Gujarat / Ahmedabad                      |
| EPI_ISL_525421 | 6/25/2020 | 8/29/2020 Asia / India / Gujarat / Ahmedabad                      |
| EPI_ISL_525422 | 6/25/2020 | 8/29/2020 Asia / India / Gujarat / Ahmedabad                      |
| EPI_ISL_525423 | 4/12/2020 | 8/29/2020 Asia / Oman / South Batinah / Barka                     |
| EPI_ISL_525424 | 4/21/2020 | 8/29/2020 Asia / Oman / South Batinah / Nakhal                    |
| EPI_ISL_525425 | 3/23/2020 | 8/29/2020 Asia / Oman / Muscat                                    |
| EPI_ISL_525426 | 5/21/2020 | 8/29/2020 Asia / Oman / Muscat                                    |
| EPI_ISL_525427 | 5/21/2020 | 8/29/2020 Asia / Oman / Muscat                                    |
| EPI_ISL_525428 | 5/22/2020 | 8/29/2020 Asia / Oman / Muscat                                    |
| EPI_ISL_525429 | 6/5/2020  | 8/29/2020 Asia / Oman / Muscat                                    |
| EPI_ISL_525430 | 5/20/2020 | 8/29/2020 South America / Ecuador / Pichincha / Quito             |
| EPI_ISL_525431 | 8/12/2020 | 8/29/2020 South America / Ecuador / Zamora-Chinchiipe / Zamora    |
| EPI_ISL_525432 | 8/12/2020 | 8/29/2020 South America / Ecuador / Zamora-Chinchiipe / El-Pangui |
| EPI_ISL_525433 | 8/13/2020 | 8/29/2020 South America / Ecuador / Los Rios / Quevedo            |
| EPI_ISL_525434 | 8/13/2020 | 8/29/2020 South America / Ecuador / Los Rios / Quevedo            |
| EPI_ISL_525435 | 8/14/2020 | 8/29/2020 South America / Ecuador / Orellana / Orellana           |
| EPI_ISL_525436 | 8/12/2020 | 8/29/2020 South America / Ecuador / Imbabura / Otavalo            |
| EPI_ISL_525437 | 8/12/2020 | 8/29/2020 South America / Ecuador / Imbabura / Otavalo            |



|                |           |                                                                    |
|----------------|-----------|--------------------------------------------------------------------|
| EPI_ISL_525438 | 8/14/2020 | 8/29/2020 South America / Ecuador / Pichincha / Quito              |
| EPI_ISL_525466 | 5/22/2020 | 8/30/2020 Asia / Oman / Muscat                                     |
| EPI_ISL_525467 | 5/5/2020  | 8/30/2020 North America / Dominican Republic                       |
| EPI_ISL_525468 | 5/6/2020  | 8/30/2020 North America / Dominican Republic                       |
| EPI_ISL_525469 | 5/6/2020  | 8/30/2020 North America / Dominican Republic                       |
| EPI_ISL_525474 | 4/19/2020 | 8/31/2020 Asia / Sri Lanka / Colombo                               |
| EPI_ISL_525476 | 4/28/2020 | 8/31/2020 Asia / Sri Lanka / Colombo                               |
| EPI_ISL_525478 | 3/22/2020 | 8/31/2020 Asia / Sri Lanka / Kalutara                              |
| EPI_ISL_525479 | 3/31/2020 | 8/31/2020 Asia / Sri Lanka / Kalutara                              |
| EPI_ISL_525481 | 6/16/2020 | 8/31/2020 Asia / Sri Lanka / Colombo                               |
| EPI_ISL_525486 | 7/21/2020 | 8/31/2020 Asia / Sri Lanka                                         |
| EPI_ISL_525489 | 7/21/2020 | 8/31/2020 Asia / Sri Lanka / KK                                    |
| EPI_ISL_525492 | 6/26/2020 | 8/31/2020 Asia / Indonesia / Central Java                          |
| EPI_ISL_525495 | 6/11/2020 | 8/31/2020 Europe / Italy / Friuli Venezia Giulia                   |
| EPI_ISL_525496 | 6/11/2020 | 8/31/2020 Europe / Italy / Friuli Venezia Giulia                   |
| EPI_ISL_525536 | 3/6/2020  | 8/31/2020 Europe / France / Auvergne-Rhone-Alpes / Lyon            |
| EPI_ISL_525537 | 3/17/2020 | 8/31/2020 Europe / France / Auvergne-Rhone-Alpes / Lyon            |
| EPI_ISL_525539 | 3/16/2020 | 8/31/2020 Europe / France / Auvergne-Rhone-Alpes / Bourg-en-Bresse |
| EPI_ISL_525540 | 3/18/2020 | 8/31/2020 Europe / France / Auvergne-Rhone-Alpes / Lyon            |
| EPI_ISL_525541 | 3/18/2020 | 8/31/2020 Europe / France / Auvergne-Rhone-Alpes / Lyon            |
| EPI_ISL_525542 | 3/18/2020 | 8/31/2020 Europe / France / Auvergne-Rhone-Alpes / Lyon            |
| EPI_ISL_525543 | 3/19/2020 | 8/31/2020 Europe / France / Auvergne-Rhone-Alpes / Lyon            |
| EPI_ISL_525553 | 3/16/2020 | 8/31/2020 Europe / Italy / Apulia / Bari                           |
| EPI_ISL_525554 | 7/20/2020 | 8/31/2020 Europe / Italy / Apulia / Lecce                          |
| EPI_ISL_525555 | 4/7/2020  | 8/31/2020 Europe / Italy / Apulia / Lecce                          |
| EPI_ISL_525556 | 3/16/2020 | 8/31/2020 Europe / Italy / Apulia / Brindisi                       |
| EPI_ISL_525557 | 3/17/2020 | 8/31/2020 Europe / Italy / Apulia / Brindisi                       |
| EPI_ISL_525558 | 4/9/2020  | 8/31/2020 Europe / Italy / Apulia / Brindisi                       |
| EPI_ISL_525559 | 4/9/2020  | 8/31/2020 Europe / Italy / Apulia / Brindisi                       |
| EPI_ISL_525560 | 4/11/2020 | 8/31/2020 Europe / Italy / Apulia / Brindisi                       |
| EPI_ISL_525561 | 4/11/2020 | 8/31/2020 Europe / Italy / Apulia / Brindisi                       |
| EPI_ISL_525562 | 4/11/2020 | 8/31/2020 Europe / Italy / Apulia / Brindisi                       |
| EPI_ISL_525563 | 4/11/2020 | 8/31/2020 Europe / Italy / Apulia / Brindisi                       |
| EPI_ISL_525564 | 4/11/2020 | 8/31/2020 Europe / Italy / Apulia / Brindisi                       |
| EPI_ISL_525565 | 4/11/2020 | 8/31/2020 Europe / Italy / Apulia / Brindisi                       |
| EPI_ISL_525566 | 4/11/2020 | 8/31/2020 Europe / Italy / Apulia / Brindisi                       |
| EPI_ISL_525567 | 4/11/2020 | 8/31/2020 Europe / Italy / Apulia / Brindisi                       |
| EPI_ISL_525568 | 4/11/2020 | 8/31/2020 Europe / Italy / Apulia / Brindisi                       |
| EPI_ISL_525569 | 4/11/2020 | 8/31/2020 Europe / Italy / Apulia / Brindisi                       |
| EPI_ISL_525570 | 3/16/2020 | 8/31/2020 Europe / Italy / Apulia / Brindisi                       |
| EPI_ISL_525571 | 3/28/2020 | 8/31/2020 Europe / Italy / Apulia / Lecce                          |
| EPI_ISL_525572 | 6/1/2020  | 8/31/2020 Europe / Italy / Apulia / Lecce                          |
| EPI_ISL_525573 | 3/27/2020 | 8/31/2020 Europe / Italy / Basilicata / Potenza                    |
| EPI_ISL_525574 | 4/8/2020  | 8/31/2020 Europe / Italy / Basilicata / Potenza                    |
| EPI_ISL_525575 | 2/29/2020 | 8/31/2020 North America / USA / New York                           |
| EPI_ISL_525576 | 3/5/2020  | 8/31/2020 North America / USA / New York                           |
| EPI_ISL_525577 | 3/5/2020  | 8/31/2020 North America / USA / New York                           |







|                |           |                                                                |
|----------------|-----------|----------------------------------------------------------------|
| EPI_ISL_525739 | 7/21/2020 | 9/1/2020 North America / USA / Washington / King County        |
| EPI_ISL_525741 | 7/27/2020 | 9/1/2020 North America / USA / Washington / King County        |
| EPI_ISL_525742 | 7/27/2020 | 9/1/2020 North America / USA / Washington                      |
| EPI_ISL_525743 | 7/27/2020 | 9/1/2020 North America / USA / Washington / King County        |
| EPI_ISL_525744 | 7/27/2020 | 9/1/2020 North America / USA / Washington / King County        |
| EPI_ISL_525746 | 7/28/2020 | 9/1/2020 North America / USA / Washington / King County        |
| EPI_ISL_525747 | 7/28/2020 | 9/1/2020 North America / USA / Washington / King County        |
| EPI_ISL_525748 | 7/28/2020 | 9/1/2020 North America / USA / Washington / King County        |
| EPI_ISL_525749 | 7/28/2020 | 9/1/2020 North America / USA / Washington / King County        |
| EPI_ISL_525751 | 7/29/2020 | 9/1/2020 North America / USA / Washington / King County        |
| EPI_ISL_525753 | 7/30/2020 | 9/1/2020 North America / USA / Washington / King County        |
| EPI_ISL_525754 | 7/30/2020 | 9/1/2020 North America / USA / Washington / King County        |
| EPI_ISL_525755 | 8/3/2020  | 9/1/2020 North America / USA / Washington / King County        |
| EPI_ISL_525756 | 7/29/2020 | 9/1/2020 North America / USA / Washington / King County        |
| EPI_ISL_525758 | 6/6/2020  | 9/1/2020 North America / USA / Alaska / Anchorage-Mat Su       |
| EPI_ISL_525759 | 6/20/2020 | 9/1/2020 North America / USA / Alaska                          |
| EPI_ISL_525760 | 6/22/2020 | 9/1/2020 North America / USA / Alaska                          |
| EPI_ISL_525763 | 3/11/2020 | 9/1/2020 North America / USA / Texas / Lavaca County           |
| EPI_ISL_525788 | 4/25/2020 | 9/1/2020 North America / USA / Texas / Washington County       |
| EPI_ISL_525802 | 7/22/2020 | 9/1/2020 North America / USA / Alaska / Anchorage              |
| EPI_ISL_525803 | 6/17/2020 | 9/1/2020 North America / USA / California / Tulare County      |
| EPI_ISL_525804 | 6/27/2020 | 9/1/2020 North America / USA / California / San Joaquin County |
| EPI_ISL_525805 | 6/30/2020 | 9/1/2020 North America / USA / California / Tulare County      |
| EPI_ISL_525806 | 7/30/2020 | 9/1/2020 North America / USA / Idaho / Madison County          |
| EPI_ISL_525807 | 5/16/2020 | 9/1/2020 North America / USA / Oregon                          |
| EPI_ISL_525808 | 6/8/2020  | 9/1/2020 North America / USA / Oregon / Marion County          |
| EPI_ISL_525809 | 6/8/2020  | 9/1/2020 North America / USA / Oregon / Washington County      |
| EPI_ISL_525813 | 6/9/2020  | 9/1/2020 North America / USA / Oregon / Multnomah County       |
| EPI_ISL_525815 | 6/9/2020  | 9/1/2020 North America / USA / Oregon / Multnomah County       |
| EPI_ISL_525816 | 6/10/2020 | 9/1/2020 North America / USA / Oregon / Washington County      |
| EPI_ISL_525817 | 6/10/2020 | 9/1/2020 North America / USA / Oregon / Multnomah County       |
| EPI_ISL_525818 | 6/10/2020 | 9/1/2020 North America / USA / Oregon / Multnomah County       |
| EPI_ISL_525823 | 6/15/2020 | 9/1/2020 North America / USA / Oregon / Washington County      |
| EPI_ISL_525825 | 6/8/2020  | 9/1/2020 North America / USA / Oregon                          |
| EPI_ISL_525826 | 6/5/2020  | 9/1/2020 North America / USA / Oregon / Washington County      |
| EPI_ISL_525827 | 6/5/2020  | 9/1/2020 North America / USA / Oregon / Washington County      |
| EPI_ISL_525828 | 6/5/2020  | 9/1/2020 North America / USA / Oregon / Clackamas County       |
| EPI_ISL_525829 | 6/5/2020  | 9/1/2020 North America / USA / Oregon / Washington County      |
| EPI_ISL_525830 | 6/5/2020  | 9/1/2020 North America / USA / Oregon / Yamhill County         |
| EPI_ISL_525831 | 6/15/2020 | 9/1/2020 North America / USA / Oregon / Washington County      |
| EPI_ISL_525832 | 6/15/2020 | 9/1/2020 North America / USA / Oregon / Washington County      |
| EPI_ISL_525833 | 6/15/2020 | 9/1/2020 North America / USA / Oregon / Multnomah County       |
| EPI_ISL_525841 | 6/16/2020 | 9/1/2020 North America / USA / Oregon / Multnomah County       |
| EPI_ISL_525842 | 6/16/2020 | 9/1/2020 North America / USA / Oregon / Washington County      |
| EPI_ISL_525843 | 6/13/2020 | 9/1/2020 North America / USA / Oregon / Multnomah County       |
| EPI_ISL_525845 | 6/13/2020 | 9/1/2020 North America / USA / Oregon / Washington County      |
| EPI_ISL_525846 | 6/13/2020 | 9/1/2020 North America / USA / Oregon / Washington County      |



|                |           |          |                                                  |
|----------------|-----------|----------|--------------------------------------------------|
| EPI_ISL_525913 | 6/28/2020 | 9/1/2020 | North America / USA / Oregon / Washington County |
| EPI_ISL_525914 | 6/29/2020 | 9/1/2020 | North America / USA / Oregon                     |
| EPI_ISL_525915 | 6/29/2020 | 9/1/2020 | North America / USA / Oregon / Washington County |
| EPI_ISL_525916 | 6/29/2020 | 9/1/2020 | North America / USA / Oregon / Washington County |
| EPI_ISL_525917 | 6/29/2020 | 9/1/2020 | North America / USA / Oregon / Multnomah County  |
| EPI_ISL_525918 | 6/29/2020 | 9/1/2020 | North America / USA / Oregon / Washington County |
| EPI_ISL_525919 | 6/29/2020 | 9/1/2020 | North America / USA / Oregon / Washington County |
| EPI_ISL_525920 | 6/29/2020 | 9/1/2020 | North America / USA / Oregon / Washington County |
| EPI_ISL_525921 | 6/29/2020 | 9/1/2020 | North America / USA / Oregon / Clackamas County  |
| EPI_ISL_525922 | 6/30/2020 | 9/1/2020 | North America / USA / Oregon / Washington County |
| EPI_ISL_525923 | 6/30/2020 | 9/1/2020 | North America / USA / Oregon / Washington County |
| EPI_ISL_525924 | 6/4/2020  | 9/1/2020 | North America / USA / Oregon / Washington County |
| EPI_ISL_525925 | 6/1/2020  | 9/1/2020 | North America / USA / Oregon / Hood River County |
| EPI_ISL_525927 | 7/2/2020  | 9/1/2020 | North America / USA / Oregon / Multnomah County  |
| EPI_ISL_525928 | 7/3/2020  | 9/1/2020 | North America / USA / Oregon                     |
| EPI_ISL_525929 | 7/3/2020  | 9/1/2020 | North America / USA / Oregon / Clackamas County  |
| EPI_ISL_525930 | 6/30/2020 | 9/1/2020 | North America / USA / Oregon / Multnomah County  |
| EPI_ISL_525931 | 7/2/2020  | 9/1/2020 | North America / USA / Oregon / Multnomah County  |
| EPI_ISL_525932 | 7/2/2020  | 9/1/2020 | North America / USA / Oregon / Washington County |
| EPI_ISL_525933 | 7/3/2020  | 9/1/2020 | North America / USA / Oregon / Washington County |
| EPI_ISL_525934 | 7/3/2020  | 9/1/2020 | North America / USA / Oregon / Washington County |
| EPI_ISL_525935 | 7/3/2020  | 9/1/2020 | North America / USA / Oregon / Marion County     |
| EPI_ISL_525936 | 7/3/2020  | 9/1/2020 | North America / USA / Oregon / Wasco County      |
| EPI_ISL_525937 | 7/4/2020  | 9/1/2020 | North America / USA / Oregon / Multnomah County  |
| EPI_ISL_525938 | 7/4/2020  | 9/1/2020 | North America / USA / Oregon / Yamhill County    |
| EPI_ISL_525939 | 6/30/2020 | 9/1/2020 | North America / USA / Oregon / Clackamas County  |
| EPI_ISL_525940 | 7/6/2020  | 9/1/2020 | North America / USA / Oregon / Washington County |
| EPI_ISL_525941 | 7/6/2020  | 9/1/2020 | North America / USA / Oregon / Yamhill County    |
| EPI_ISL_525942 | 7/6/2020  | 9/1/2020 | North America / USA / Oregon / Washington County |
| EPI_ISL_525943 | 7/6/2020  | 9/1/2020 | North America / USA / Oregon / Wasco County      |
| EPI_ISL_525944 | 7/7/2020  | 9/1/2020 | North America / USA / Oregon                     |
| EPI_ISL_525945 | 7/7/2020  | 9/1/2020 | North America / USA / Oregon / Multnomah County  |
| EPI_ISL_525947 | 7/8/2020  | 9/1/2020 | North America / USA / Oregon / Yamhill County    |
| EPI_ISL_525948 | 7/8/2020  | 9/1/2020 | North America / USA / Oregon / Multnomah County  |
| EPI_ISL_525949 | 7/9/2020  | 9/1/2020 | North America / USA / Oregon / Multnomah County  |
| EPI_ISL_525950 | 7/7/2020  | 9/1/2020 | North America / USA / Oregon / Marion County     |
| EPI_ISL_525951 | 7/7/2020  | 9/1/2020 | North America / USA / Oregon / Multnomah County  |
| EPI_ISL_525952 | 7/7/2020  | 9/1/2020 | North America / USA / Oregon / Wasco County      |
| EPI_ISL_525953 | 7/7/2020  | 9/1/2020 | North America / USA / Oregon / Wasco County      |
| EPI_ISL_525954 | 7/7/2020  | 9/1/2020 | North America / USA / Oregon / Washington County |
| EPI_ISL_525955 | 7/7/2020  | 9/1/2020 | North America / USA / Oregon / Washington County |
| EPI_ISL_525956 | 7/8/2020  | 9/1/2020 | North America / USA / Oregon / Clackamas County  |
| EPI_ISL_525957 | 7/8/2020  | 9/1/2020 | North America / USA / Oregon / Multnomah County  |
| EPI_ISL_525958 | 7/8/2020  | 9/1/2020 | North America / USA / Oregon / Multnomah County  |
| EPI_ISL_525959 | 7/8/2020  | 9/1/2020 | North America / USA / Oregon / Multnomah County  |
| EPI_ISL_525960 | 7/8/2020  | 9/1/2020 | North America / USA / Oregon / Clackamas County  |
| EPI_ISL_525961 | 7/9/2020  | 9/1/2020 | North America / USA / Oregon / Multnomah County  |







|                |           |          |                                                     |
|----------------|-----------|----------|-----------------------------------------------------|
| EPI_ISL_526060 | 7/28/2020 | 9/1/2020 | North America / USA / Oregon / Washington County    |
| EPI_ISL_526061 | 7/28/2020 | 9/1/2020 | North America / USA / Oregon / Washington County    |
| EPI_ISL_526062 | 7/28/2020 | 9/1/2020 | North America / USA / Oregon / Multnomah County     |
| EPI_ISL_526063 | 7/28/2020 | 9/1/2020 | North America / USA / Oregon / Washington County    |
| EPI_ISL_526064 | 7/28/2020 | 9/1/2020 | North America / USA / Oregon / Multnomah County     |
| EPI_ISL_526065 | 7/28/2020 | 9/1/2020 | North America / USA / Oregon / Yamhill County       |
| EPI_ISL_526066 | 7/28/2020 | 9/1/2020 | North America / USA / Oregon / Multnomah County     |
| EPI_ISL_526067 | 7/28/2020 | 9/1/2020 | North America / USA / Oregon / Sherman County       |
| EPI_ISL_526068 | 7/28/2020 | 9/1/2020 | North America / USA / Oregon / Wasco County         |
| EPI_ISL_526069 | 7/27/2020 | 9/1/2020 | North America / USA / Oregon / Wasco County         |
| EPI_ISL_526071 | 7/29/2020 | 9/1/2020 | North America / USA / Oregon / Multnomah County     |
| EPI_ISL_526072 | 7/29/2020 | 9/1/2020 | North America / USA / Oregon / Multnomah County     |
| EPI_ISL_526073 | 7/29/2020 | 9/1/2020 | North America / USA / Oregon / Marion County        |
| EPI_ISL_526074 | 7/29/2020 | 9/1/2020 | North America / USA / Oregon / Multnomah County     |
| EPI_ISL_526075 | 7/29/2020 | 9/1/2020 | North America / USA / Oregon / Columbia County      |
| EPI_ISL_526076 | 7/29/2020 | 9/1/2020 | North America / USA / Oregon / Washington County    |
| EPI_ISL_526078 | 7/30/2020 | 9/1/2020 | North America / USA / Oregon / Yamhill County       |
| EPI_ISL_526079 | 7/30/2020 | 9/1/2020 | North America / USA / Oregon / Multnomah County     |
| EPI_ISL_526080 | 7/30/2020 | 9/1/2020 | North America / USA / Oregon / Washington County    |
| EPI_ISL_526082 | 7/30/2020 | 9/1/2020 | North America / USA / Oregon / Multnomah County     |
| EPI_ISL_526083 | 7/30/2020 | 9/1/2020 | North America / USA / Oregon / Marion County        |
| EPI_ISL_526084 | 7/31/2020 | 9/1/2020 | North America / USA / Oregon / Clackamas County     |
| EPI_ISL_526085 | 7/31/2020 | 9/1/2020 | North America / USA / Oregon                        |
| EPI_ISL_526086 | 7/22/2020 | 9/1/2020 | North America / USA / Texas / Bexar County          |
| EPI_ISL_526087 | 6/8/2020  | 9/1/2020 | North America / USA / Washington / Clark County     |
| EPI_ISL_526088 | 6/9/2020  | 9/1/2020 | North America / USA / Washington / Clark County     |
| EPI_ISL_526089 | 6/9/2020  | 9/1/2020 | North America / USA / Washington / Clark County     |
| EPI_ISL_526091 | 6/5/2020  | 9/1/2020 | North America / USA / Washington / Clark County     |
| EPI_ISL_526092 | 6/5/2020  | 9/1/2020 | North America / USA / Washington / Clark County     |
| EPI_ISL_526093 | 6/5/2020  | 9/1/2020 | North America / USA / Washington / Clark County     |
| EPI_ISL_526094 | 6/5/2020  | 9/1/2020 | North America / USA / Washington / Clark County     |
| EPI_ISL_526095 | 6/5/2020  | 9/1/2020 | North America / USA / Washington / Clark County     |
| EPI_ISL_526096 | 6/5/2020  | 9/1/2020 | North America / USA / Washington / Clark County     |
| EPI_ISL_526097 | 6/12/2020 | 9/1/2020 | North America / USA / Washington / Clark County     |
| EPI_ISL_526098 | 6/15/2020 | 9/1/2020 | North America / USA / Washington / Clark County     |
| EPI_ISL_526099 | 6/23/2020 | 9/1/2020 | North America / USA / Washington / Clark County     |
| EPI_ISL_526100 | 7/3/2020  | 9/1/2020 | North America / USA / Washington / Clark County     |
| EPI_ISL_526101 | 7/3/2020  | 9/1/2020 | North America / USA / Washington / Clark County     |
| EPI_ISL_526102 | 7/6/2020  | 9/1/2020 | North America / USA / Washington / Clark County     |
| EPI_ISL_526103 | 7/20/2020 | 9/1/2020 | North America / USA / Washington / Clark County     |
| EPI_ISL_526104 | 7/21/2020 | 9/1/2020 | North America / USA / Washington / King County      |
| EPI_ISL_526105 | 7/22/2020 | 9/1/2020 | North America / USA / Washington / Clark County     |
| EPI_ISL_526106 | 7/22/2020 | 9/1/2020 | North America / USA / Washington / Clark County     |
| EPI_ISL_526107 | 7/24/2020 | 9/1/2020 | North America / USA / Washington / Cowlitz County   |
| EPI_ISL_526108 | 7/25/2020 | 9/1/2020 | North America / USA / Washington / Klickitat County |
| EPI_ISL_526109 | 7/27/2020 | 9/1/2020 | North America / USA / Washington / Clark County     |
| EPI_ISL_526110 | 7/28/2020 | 9/1/2020 | North America / USA / Washington / Clark County     |





|                |           |                                                         |
|----------------|-----------|---------------------------------------------------------|
| EPI_ISL_526205 | 8/9/2020  | 9/1/2020 Oceania / Australia / New South Wales / Sydney |
| EPI_ISL_526206 | 8/15/2020 | 9/1/2020 Oceania / Australia / New South Wales / Sydney |
| EPI_ISL_526207 | 8/14/2020 | 9/1/2020 Oceania / Australia / New South Wales / Sydney |
| EPI_ISL_526208 | 8/14/2020 | 9/1/2020 Oceania / Australia / New South Wales / Sydney |
| EPI_ISL_526209 | 8/14/2020 | 9/1/2020 Oceania / Australia / New South Wales / Sydney |
| EPI_ISL_526210 | 8/12/2020 | 9/1/2020 Oceania / Australia / New South Wales / Sydney |
| EPI_ISL_526211 | 8/12/2020 | 9/1/2020 Oceania / Australia / New South Wales / Sydney |
| EPI_ISL_526212 | 8/14/2020 | 9/1/2020 Oceania / Australia / New South Wales / Sydney |
| EPI_ISL_526213 | 8/14/2020 | 9/1/2020 Oceania / Australia / New South Wales / Sydney |
| EPI_ISL_526214 | 8/14/2020 | 9/1/2020 Oceania / Australia / New South Wales / Sydney |
| EPI_ISL_526215 | 4/10/2020 | 9/1/2020 Europe / Hungary / Pest county                 |
| EPI_ISL_526216 | 4/14/2020 | 9/1/2020 Europe / Hungary / Pest county                 |
| EPI_ISL_526217 | 4/15/2020 | 9/1/2020 Europe / Hungary / Pest county                 |
| EPI_ISL_526218 | 4/23/2020 | 9/1/2020 Europe / Hungary / Pest county                 |
| EPI_ISL_526219 | 4/30/2020 | 9/1/2020 Europe / Hungary / Pest county                 |
| EPI_ISL_526220 | 5/11/2020 | 9/1/2020 Europe / Hungary / Pest county                 |
| EPI_ISL_526221 | 5/11/2020 | 9/1/2020 Europe / Hungary / Pest county                 |
| EPI_ISL_526222 | 5/14/2020 | 9/1/2020 Europe / Hungary / Pest county                 |
| EPI_ISL_526223 | 5/25/2020 | 9/1/2020 Europe / Hungary / Pest county                 |
| EPI_ISL_526224 | 6/4/2020  | 9/1/2020 Europe / Hungary / Pest county                 |
| EPI_ISL_526225 | 7/6/2020  | 9/1/2020 Europe / Hungary / Pest county                 |
| EPI_ISL_526226 | 4/23/2020 | 9/1/2020 Europe / Hungary / Pest county                 |
| EPI_ISL_526227 | 4/28/2020 | 9/1/2020 Europe / Hungary / Borsod-Abauj-Zemplen County |
| EPI_ISL_526228 | 4/25/2020 | 9/1/2020 Europe / Hungary / Pest county                 |
| EPI_ISL_526229 | 4/15/2020 | 9/1/2020 Europe / Hungary / Pest county                 |
| EPI_ISL_526230 | 4/17/2020 | 9/1/2020 Europe / Hungary / Pest county                 |
| EPI_ISL_526231 | 4/20/2020 | 9/1/2020 Europe / Hungary / Pest county                 |
| EPI_ISL_526232 | 4/16/2020 | 9/1/2020 Europe / Hungary / Pest county                 |
| EPI_ISL_526233 | 4/16/2020 | 9/1/2020 Europe / Hungary / Pest county                 |
| EPI_ISL_526234 | 4/15/2020 | 9/1/2020 Europe / Hungary / Pest county                 |
| EPI_ISL_526235 | 4/21/2020 | 9/1/2020 Europe / Hungary / Pest county                 |
| EPI_ISL_526236 | 5/8/2020  | 9/1/2020 Europe / Hungary / Pest county                 |
| EPI_ISL_526237 | 4/29/2020 | 9/1/2020 Europe / Hungary / Pest county                 |
| EPI_ISL_526238 | 4/21/2020 | 9/1/2020 Europe / Hungary / Pest county                 |
| EPI_ISL_526259 | 5/11/2020 | 9/1/2020 North America / Canada / Ontario               |
| EPI_ISL_526268 | 5/20/2020 | 9/1/2020 North America / Canada / Ontario               |
| EPI_ISL_526275 | 5/31/2020 | 9/1/2020 North America / Canada / Ontario               |
| EPI_ISL_526284 | 6/9/2020  | 9/1/2020 North America / Canada / Ontario               |
| EPI_ISL_526288 | 7/11/2020 | 9/1/2020 Europe / United Kingdom / England              |
| EPI_ISL_526289 | 7/11/2020 | 9/1/2020 Europe / United Kingdom / England              |
| EPI_ISL_526290 | 7/11/2020 | 9/1/2020 Europe / United Kingdom / England              |
| EPI_ISL_526291 | 7/11/2020 | 9/1/2020 Europe / United Kingdom / England              |
| EPI_ISL_526294 | 7/14/2020 | 9/1/2020 Europe / United Kingdom / England              |
| EPI_ISL_526295 | 7/14/2020 | 9/1/2020 Europe / United Kingdom / England              |
| EPI_ISL_526296 | 7/14/2020 | 9/1/2020 Europe / United Kingdom / England              |
| EPI_ISL_526298 | 7/14/2020 | 9/1/2020 Europe / United Kingdom / England              |
| EPI_ISL_526300 | 7/14/2020 | 9/1/2020 Europe / United Kingdom / England              |









|                |           |                                                           |
|----------------|-----------|-----------------------------------------------------------|
| EPI_ISL_526510 | 5/1/2020  | 9/1/2020 Europe / United Kingdom / Scotland               |
| EPI_ISL_526511 | 5/1/2020  | 9/1/2020 Europe / United Kingdom / Scotland               |
| EPI_ISL_526512 | 5/1/2020  | 9/1/2020 Europe / United Kingdom / Scotland               |
| EPI_ISL_526513 | 5/9/2020  | 9/1/2020 Europe / United Kingdom / Scotland               |
| EPI_ISL_526514 | 5/1/2020  | 9/1/2020 Europe / United Kingdom / Scotland               |
| EPI_ISL_526515 | 5/2/2020  | 9/1/2020 Europe / United Kingdom / Scotland               |
| EPI_ISL_526521 | 8/11/2020 | 9/1/2020 Europe / United Kingdom / Scotland               |
| EPI_ISL_526526 | 8/14/2020 | 9/1/2020 Europe / United Kingdom / Scotland               |
| EPI_ISL_526532 | 8/12/2020 | 9/1/2020 Europe / United Kingdom / Scotland               |
| EPI_ISL_526533 | 8/13/2020 | 9/1/2020 Europe / United Kingdom / Scotland               |
| EPI_ISL_526534 | 8/14/2020 | 9/1/2020 Europe / United Kingdom / Scotland               |
| EPI_ISL_526536 | 4/18/2020 | 9/1/2020 Europe / United Kingdom / Scotland               |
| EPI_ISL_526537 | 4/14/2020 | 9/1/2020 Europe / United Kingdom / England                |
| EPI_ISL_526538 | 4/14/2020 | 9/1/2020 Europe / United Kingdom / England                |
| EPI_ISL_526539 | 4/14/2020 | 9/1/2020 Europe / United Kingdom / England                |
| EPI_ISL_526545 | 5/2/2020  | 9/1/2020 Europe / United Kingdom / England                |
| EPI_ISL_526547 | 5/7/2020  | 9/1/2020 Europe / United Kingdom / England                |
| EPI_ISL_526550 | 5/13/2020 | 9/1/2020 Europe / United Kingdom / England                |
| EPI_ISL_526551 | 7/21/2020 | 9/1/2020 North America / USA / Oregon / Washington County |
| EPI_ISL_526553 | 5/4/2020  | 9/1/2020 North America / USA / Florida                    |
| EPI_ISL_526554 | 4/21/2020 | 9/1/2020 North America / USA / Florida                    |
| EPI_ISL_526555 | 4/22/2020 | 9/1/2020 North America / USA / Florida                    |
| EPI_ISL_526556 | 4/22/2020 | 9/1/2020 North America / USA / Florida                    |
| EPI_ISL_526563 | 4/26/2020 | 9/1/2020 North America / USA / Florida                    |
| EPI_ISL_526567 | 5/18/2020 | 9/1/2020 North America / USA / Florida                    |
| EPI_ISL_526568 | 5/18/2020 | 9/1/2020 North America / USA / Florida                    |
| EPI_ISL_526569 | 5/21/2020 | 9/1/2020 North America / USA / Florida                    |
| EPI_ISL_526570 | 5/22/2020 | 9/1/2020 North America / USA / Florida                    |
| EPI_ISL_526571 | 5/22/2020 | 9/1/2020 North America / USA / Florida                    |
| EPI_ISL_526572 | 5/23/2020 | 9/1/2020 North America / USA / Florida                    |
| EPI_ISL_526573 | 5/25/2020 | 9/1/2020 North America / USA / Florida                    |
| EPI_ISL_526575 | 6/8/2020  | 9/1/2020 North America / USA / Florida                    |
| EPI_ISL_526580 | 3/13/2020 | 9/1/2020 North America / USA / Florida                    |
| EPI_ISL_526581 | 3/16/2020 | 9/1/2020 North America / USA / Florida                    |
| EPI_ISL_526583 | 8/19/2020 | 9/1/2020 North America / USA / Florida                    |
| EPI_ISL_526585 | 7/31/2020 | 9/1/2020 North America / USA / Florida                    |
| EPI_ISL_526586 | 7/31/2020 | 9/1/2020 North America / USA / Florida                    |
| EPI_ISL_526588 | 8/4/2020  | 9/1/2020 North America / USA / Florida                    |
| EPI_ISL_526589 | 8/3/2020  | 9/1/2020 North America / USA / Florida                    |
| EPI_ISL_526590 | 8/4/2020  | 9/1/2020 North America / USA / Florida                    |
| EPI_ISL_526591 | 8/3/2020  | 9/1/2020 North America / USA / Florida                    |
| EPI_ISL_526592 | 8/4/2020  | 9/1/2020 North America / USA / Florida                    |
| EPI_ISL_526593 | 8/4/2020  | 9/1/2020 North America / USA / Florida                    |
| EPI_ISL_526594 | 8/4/2020  | 9/1/2020 North America / USA / Florida                    |
| EPI_ISL_526595 | 8/5/2020  | 9/1/2020 North America / USA / Florida                    |
| EPI_ISL_526596 | 8/3/2020  | 9/1/2020 North America / USA / Florida                    |
| EPI_ISL_526597 | 8/4/2020  | 9/1/2020 North America / USA / Florida                    |



|                |           |                                         |
|----------------|-----------|-----------------------------------------|
| EPI_ISL_526660 | 8/20/2020 | 9/1/2020 North America / USA / Florida  |
| EPI_ISL_526661 | 8/19/2020 | 9/1/2020 North America / USA / Florida  |
| EPI_ISL_526662 | 8/20/2020 | 9/1/2020 North America / USA / Florida  |
| EPI_ISL_526663 | 8/19/2020 | 9/1/2020 North America / USA / Florida  |
| EPI_ISL_526664 | 8/20/2020 | 9/1/2020 North America / USA / Florida  |
| EPI_ISL_526665 | 8/20/2020 | 9/1/2020 North America / USA / Florida  |
| EPI_ISL_526666 | 8/20/2020 | 9/1/2020 North America / USA / Florida  |
| EPI_ISL_526667 | 8/20/2020 | 9/1/2020 North America / USA / Florida  |
| EPI_ISL_526669 | 8/20/2020 | 9/1/2020 North America / USA / Florida  |
| EPI_ISL_526670 | 8/20/2020 | 9/1/2020 North America / USA / Florida  |
| EPI_ISL_526671 | 8/20/2020 | 9/1/2020 North America / USA / Florida  |
| EPI_ISL_526672 | 8/20/2020 | 9/1/2020 North America / USA / Florida  |
| EPI_ISL_526673 | 8/20/2020 | 9/1/2020 North America / USA / Florida  |
| EPI_ISL_526674 | 8/20/2020 | 9/1/2020 North America / USA / Florida  |
| EPI_ISL_526675 | 8/20/2020 | 9/1/2020 North America / USA / Florida  |
| EPI_ISL_526676 | 8/20/2020 | 9/1/2020 North America / USA / Florida  |
| EPI_ISL_526677 | 8/20/2020 | 9/1/2020 North America / USA / Florida  |
| EPI_ISL_526678 | 8/21/2020 | 9/1/2020 North America / USA / Florida  |
| EPI_ISL_526679 | 8/22/2020 | 9/1/2020 North America / USA / Florida  |
| EPI_ISL_526680 | 8/22/2020 | 9/1/2020 North America / USA / Florida  |
| EPI_ISL_526681 | 8/21/2020 | 9/1/2020 North America / USA / Florida  |
| EPI_ISL_526682 | 8/21/2020 | 9/1/2020 North America / USA / Florida  |
| EPI_ISL_526686 | 5/10/2020 | 9/1/2020 North America / USA / New York |
| EPI_ISL_526687 | 4/16/2020 | 9/1/2020 North America / USA / New York |
| EPI_ISL_526688 | 5/6/2020  | 9/1/2020 North America / USA / New York |
| EPI_ISL_526975 | 8/14/2020 | 9/1/2020 Africa / Egypt                 |
| EPI_ISL_526976 | 8/14/2020 | 9/1/2020 Africa / Egypt                 |
| EPI_ISL_526977 | 8/14/2020 | 9/1/2020 Africa / Egypt                 |
| EPI_ISL_526978 | 8/14/2020 | 9/1/2020 Africa / Egypt                 |
| EPI_ISL_526979 | 8/14/2020 | 9/1/2020 Africa / Egypt                 |
| EPI_ISL_526980 | 8/14/2020 | 9/1/2020 Africa / Egypt                 |
| EPI_ISL_526981 | 8/14/2020 | 9/1/2020 Africa / Egypt                 |
| EPI_ISL_526982 | 8/14/2020 | 9/1/2020 Africa / Egypt                 |
| EPI_ISL_526983 | 8/14/2020 | 9/1/2020 Africa / Egypt                 |
| EPI_ISL_526984 | 8/14/2020 | 9/1/2020 Africa / Egypt                 |
| EPI_ISL_526985 | 8/14/2020 | 9/1/2020 Africa / Egypt                 |
| EPI_ISL_526986 | 8/17/2020 | 9/1/2020 Africa / Egypt                 |
| EPI_ISL_526987 | 8/17/2020 | 9/1/2020 Africa / Egypt                 |
| EPI_ISL_526988 | 8/17/2020 | 9/1/2020 Africa / Egypt                 |
| EPI_ISL_526989 | 8/17/2020 | 9/1/2020 Africa / Egypt                 |
| EPI_ISL_526990 | 8/17/2020 | 9/1/2020 Africa / Egypt                 |
| EPI_ISL_526991 | 8/17/2020 | 9/1/2020 Africa / Egypt                 |
| EPI_ISL_526992 | 8/17/2020 | 9/1/2020 Africa / Egypt                 |
| EPI_ISL_526993 | 8/17/2020 | 9/1/2020 Africa / Egypt                 |
| EPI_ISL_526994 | 8/17/2020 | 9/1/2020 Africa / Egypt                 |
| EPI_ISL_526995 | 8/17/2020 | 9/1/2020 Africa / Egypt                 |
| EPI_ISL_526996 | 8/17/2020 | 9/1/2020 Africa / Egypt                 |

|                |           |                                                         |
|----------------|-----------|---------------------------------------------------------|
| EPI_ISL_526997 | 8/22/2020 | 9/1/2020 Africa / Egypt                                 |
| EPI_ISL_526998 | 8/22/2020 | 9/1/2020 Africa / Egypt                                 |
| EPI_ISL_526999 | 8/22/2020 | 9/1/2020 Africa / Egypt                                 |
| EPI_ISL_527000 | 8/22/2020 | 9/1/2020 Africa / Egypt                                 |
| EPI_ISL_527001 | 8/22/2020 | 9/1/2020 Africa / Egypt                                 |
| EPI_ISL_527002 | 8/22/2020 | 9/1/2020 Africa / Egypt                                 |
| EPI_ISL_527003 | 8/22/2020 | 9/1/2020 Africa / Egypt                                 |
| EPI_ISL_527004 | 8/22/2020 | 9/1/2020 Africa / Egypt                                 |
| EPI_ISL_527005 | 8/22/2020 | 9/1/2020 Africa / Egypt                                 |
| EPI_ISL_527006 | 8/22/2020 | 9/1/2020 Africa / Egypt                                 |
| EPI_ISL_527007 | 8/22/2020 | 9/1/2020 Africa / Egypt                                 |
| EPI_ISL_526689 | 7/24/2020 | 9/2/2020 Oceania / Australia / New South Wales / Sydney |
| EPI_ISL_526697 | 3/20/2020 | 9/2/2020 Oceania / Australia / New South Wales / Sydney |
| EPI_ISL_526700 | 7/22/2020 | 9/2/2020 Asia / South Korea                             |
| EPI_ISL_526701 | 7/22/2020 | 9/2/2020 Asia / South Korea                             |
| EPI_ISL_526702 | 7/22/2020 | 9/2/2020 Asia / South Korea                             |
| EPI_ISL_526703 | 7/22/2020 | 9/2/2020 Asia / South Korea                             |
| EPI_ISL_526704 | 7/22/2020 | 9/2/2020 Asia / South Korea                             |
| EPI_ISL_526705 | 7/22/2020 | 9/2/2020 Asia / South Korea                             |
| EPI_ISL_526706 | 7/22/2020 | 9/2/2020 Asia / South Korea                             |
| EPI_ISL_526707 | 7/23/2020 | 9/2/2020 Asia / South Korea                             |
| EPI_ISL_526708 | 7/23/2020 | 9/2/2020 Asia / South Korea                             |
| EPI_ISL_526709 | 7/24/2020 | 9/2/2020 Asia / South Korea                             |
| EPI_ISL_526710 | 7/24/2020 | 9/2/2020 Asia / South Korea                             |
| EPI_ISL_526711 | 7/24/2020 | 9/2/2020 Asia / South Korea                             |
| EPI_ISL_526712 | 7/24/2020 | 9/2/2020 Asia / South Korea                             |
| EPI_ISL_526713 | 7/24/2020 | 9/2/2020 Asia / South Korea                             |
| EPI_ISL_526714 | 7/24/2020 | 9/2/2020 Asia / South Korea                             |
| EPI_ISL_526715 | 7/24/2020 | 9/2/2020 Asia / South Korea                             |
| EPI_ISL_526716 | 7/24/2020 | 9/2/2020 Asia / South Korea                             |
| EPI_ISL_526717 | 7/24/2020 | 9/2/2020 Asia / South Korea                             |
| EPI_ISL_526718 | 7/24/2020 | 9/2/2020 Asia / South Korea                             |
| EPI_ISL_526719 | 7/24/2020 | 9/2/2020 Asia / South Korea                             |
| EPI_ISL_526720 | 7/24/2020 | 9/2/2020 Asia / South Korea                             |
| EPI_ISL_526721 | 7/24/2020 | 9/2/2020 Asia / South Korea                             |
| EPI_ISL_526722 | 7/24/2020 | 9/2/2020 Asia / South Korea                             |
| EPI_ISL_526723 | 7/23/2020 | 9/2/2020 Asia / South Korea                             |
| EPI_ISL_526724 | 7/24/2020 | 9/2/2020 Asia / South Korea                             |
| EPI_ISL_526725 | 7/25/2020 | 9/2/2020 Asia / South Korea                             |
| EPI_ISL_526726 | 7/25/2020 | 9/2/2020 Asia / South Korea                             |
| EPI_ISL_526727 | 7/26/2020 | 9/2/2020 Asia / South Korea                             |
| EPI_ISL_526728 | 7/25/2020 | 9/2/2020 Asia / South Korea                             |
| EPI_ISL_526729 | 7/27/2020 | 9/2/2020 Asia / South Korea                             |
| EPI_ISL_526730 | 7/27/2020 | 9/2/2020 Asia / South Korea                             |
| EPI_ISL_526731 | 7/27/2020 | 9/2/2020 Asia / South Korea                             |
| EPI_ISL_526732 | 7/27/2020 | 9/2/2020 Asia / South Korea                             |
| EPI_ISL_526733 | 7/27/2020 | 9/2/2020 Asia / South Korea                             |

|                |           |                                            |
|----------------|-----------|--------------------------------------------|
| EPI_ISL_526734 | 7/28/2020 | 9/2/2020 Asia / South Korea                |
| EPI_ISL_526735 | 7/29/2020 | 9/2/2020 Asia / South Korea                |
| EPI_ISL_526736 | 7/29/2020 | 9/2/2020 Asia / South Korea                |
| EPI_ISL_526737 | 7/29/2020 | 9/2/2020 Asia / South Korea                |
| EPI_ISL_526738 | 7/29/2020 | 9/2/2020 Asia / South Korea                |
| EPI_ISL_526739 | 7/30/2020 | 9/2/2020 Asia / South Korea                |
| EPI_ISL_526740 | 7/30/2020 | 9/2/2020 Asia / South Korea                |
| EPI_ISL_526741 | 7/30/2020 | 9/2/2020 Asia / South Korea                |
| EPI_ISL_526742 | 7/30/2020 | 9/2/2020 Asia / South Korea                |
| EPI_ISL_526743 | 7/30/2020 | 9/2/2020 Asia / South Korea                |
| EPI_ISL_526744 | 7/31/2020 | 9/2/2020 Asia / South Korea                |
| EPI_ISL_526745 | 8/1/2020  | 9/2/2020 Asia / South Korea                |
| EPI_ISL_526746 | 8/11/2020 | 9/2/2020 Asia / South Korea                |
| EPI_ISL_526754 | 4/16/2020 | 9/2/2020 Europe / United Kingdom / England |
| EPI_ISL_526755 | 4/21/2020 | 9/2/2020 Europe / United Kingdom / England |
| EPI_ISL_526756 | 4/21/2020 | 9/2/2020 Europe / United Kingdom / England |
| EPI_ISL_526757 | 4/23/2020 | 9/2/2020 Europe / United Kingdom / England |
| EPI_ISL_526758 | 4/22/2020 | 9/2/2020 Europe / United Kingdom / England |
| EPI_ISL_526759 | 4/22/2020 | 9/2/2020 Europe / United Kingdom / England |
| EPI_ISL_526762 | 4/25/2020 | 9/2/2020 Europe / United Kingdom / England |
| EPI_ISL_526763 | 4/25/2020 | 9/2/2020 Europe / United Kingdom / England |
| EPI_ISL_526764 | 4/24/2020 | 9/2/2020 Europe / United Kingdom / England |
| EPI_ISL_526766 | 4/25/2020 | 9/2/2020 Europe / United Kingdom / England |
| EPI_ISL_526767 | 4/25/2020 | 9/2/2020 Europe / United Kingdom / England |
| EPI_ISL_526769 | 4/25/2020 | 9/2/2020 Europe / United Kingdom / England |
| EPI_ISL_526770 | 4/25/2020 | 9/2/2020 Europe / United Kingdom / England |
| EPI_ISL_526772 | 4/29/2020 | 9/2/2020 Europe / United Kingdom / England |
| EPI_ISL_526773 | 4/30/2020 | 9/2/2020 Europe / United Kingdom / England |
| EPI_ISL_526775 | 5/6/2020  | 9/2/2020 North America / USA / Virginia    |
| EPI_ISL_526776 | 5/6/2020  | 9/2/2020 North America / USA / Virginia    |
| EPI_ISL_526777 | 5/6/2020  | 9/2/2020 North America / USA / Virginia    |
| EPI_ISL_526778 | 5/6/2020  | 9/2/2020 North America / USA / Virginia    |
| EPI_ISL_526779 | 5/6/2020  | 9/2/2020 North America / USA / Virginia    |
| EPI_ISL_526780 | 5/6/2020  | 9/2/2020 North America / USA / Virginia    |
| EPI_ISL_526781 | 5/6/2020  | 9/2/2020 North America / USA / Virginia    |
| EPI_ISL_526782 | 5/7/2020  | 9/2/2020 North America / USA / Virginia    |
| EPI_ISL_526783 | 5/7/2020  | 9/2/2020 North America / USA / Virginia    |
| EPI_ISL_526784 | 5/6/2020  | 9/2/2020 North America / USA / Virginia    |
| EPI_ISL_526785 | 5/7/2020  | 9/2/2020 North America / USA / Virginia    |
| EPI_ISL_526786 | 5/7/2020  | 9/2/2020 North America / USA / Virginia    |
| EPI_ISL_526787 | 5/7/2020  | 9/2/2020 North America / USA / Virginia    |
| EPI_ISL_526788 | 5/8/2020  | 9/2/2020 North America / USA / Virginia    |
| EPI_ISL_526789 | 5/8/2020  | 9/2/2020 North America / USA / Virginia    |
| EPI_ISL_526790 | 5/10/2020 | 9/2/2020 North America / USA / Virginia    |
| EPI_ISL_526791 | 5/10/2020 | 9/2/2020 North America / USA / Virginia    |
| EPI_ISL_526792 | 5/11/2020 | 9/2/2020 North America / USA / Virginia    |
| EPI_ISL_526793 | 5/11/2020 | 9/2/2020 North America / USA / Virginia    |









|                |           |                                                          |
|----------------|-----------|----------------------------------------------------------|
| EPI_ISL_526938 | 3/13/2020 | 9/2/2020 Europe / Faroe Islands                          |
| EPI_ISL_526939 | 3/13/2020 | 9/2/2020 Europe / Faroe Islands                          |
| EPI_ISL_526940 | 3/13/2020 | 9/2/2020 Europe / Faroe Islands                          |
| EPI_ISL_526941 | 3/14/2020 | 9/2/2020 Europe / Faroe Islands                          |
| EPI_ISL_526943 | 3/15/2020 | 9/2/2020 Europe / Faroe Islands                          |
| EPI_ISL_526946 | 3/16/2020 | 9/2/2020 Europe / Faroe Islands                          |
| EPI_ISL_526949 | 5/11/2020 | 9/2/2020 South America / Colombia / Amazonas             |
| EPI_ISL_526950 | 5/3/2020  | 9/2/2020 South America / Colombia / Amazonas             |
| EPI_ISL_526951 | 4/28/2020 | 9/2/2020 South America / Colombia / Amazonas             |
| EPI_ISL_526955 | 4/28/2020 | 9/2/2020 South America / Colombia / Narino               |
| EPI_ISL_526956 | 4/28/2020 | 9/2/2020 South America / Colombia / Narino               |
| EPI_ISL_526958 | 7/17/2020 | 9/2/2020 South America / Colombia / Cundinamarca / Chia  |
| EPI_ISL_526959 | 4/12/2020 | 9/2/2020 South America / Colombia / Antioquia / Medellin |
| EPI_ISL_526963 | 4/14/2020 | 9/2/2020 South America / Colombia / Tolima / Tolemaida   |
| EPI_ISL_526964 | 4/14/2020 | 9/2/2020 South America / Colombia / Tolima / Tolemaida   |
| EPI_ISL_526965 | 4/14/2020 | 9/2/2020 South America / Colombia / Tolima / Tolemaida   |
| EPI_ISL_526967 | 7/7/2020  | 9/2/2020 South America / Colombia / Bogota               |
| EPI_ISL_526971 | 8/18/2020 | 9/2/2020 South America / Colombia / Bogota               |
| EPI_ISL_527401 | 5/8/2020  | 9/2/2020 North America / USA / Colorado                  |
| EPI_ISL_527402 | 4/8/2020  | 9/2/2020 North America / USA / Colorado                  |
| EPI_ISL_527403 | 4/15/2020 | 9/2/2020 North America / USA / Colorado                  |
| EPI_ISL_527404 | 4/8/2020  | 9/2/2020 North America / USA / Colorado                  |
| EPI_ISL_527405 | 4/8/2020  | 9/2/2020 North America / USA / Colorado                  |
| EPI_ISL_527406 | 4/15/2020 | 9/2/2020 North America / USA / Colorado                  |
| EPI_ISL_527407 | 4/15/2020 | 9/2/2020 North America / USA / Colorado                  |
| EPI_ISL_527408 | 4/2/2020  | 9/2/2020 North America / USA / Colorado                  |
| EPI_ISL_527409 | 4/8/2020  | 9/2/2020 North America / USA / Colorado                  |
| EPI_ISL_527410 | 4/2/2020  | 9/2/2020 North America / USA / Colorado                  |
| EPI_ISL_527411 | 4/8/2020  | 9/2/2020 North America / USA / Colorado                  |
| EPI_ISL_527412 | 4/15/2020 | 9/2/2020 North America / USA / Colorado                  |
| EPI_ISL_527413 | 4/15/2020 | 9/2/2020 North America / USA / Colorado                  |
| EPI_ISL_527414 | 4/8/2020  | 9/2/2020 North America / USA / Colorado                  |
| EPI_ISL_527415 | 4/8/2020  | 9/2/2020 North America / USA / Colorado                  |
| EPI_ISL_527416 | 4/2/2020  | 9/2/2020 North America / USA / Colorado                  |
| EPI_ISL_527417 | 4/8/2020  | 9/2/2020 North America / USA / Colorado                  |
| EPI_ISL_527418 | 4/15/2020 | 9/2/2020 North America / USA / Colorado                  |
| EPI_ISL_527419 | 4/15/2020 | 9/2/2020 North America / USA / Colorado                  |
| EPI_ISL_527420 | 4/29/2020 | 9/2/2020 North America / USA / Colorado                  |
| EPI_ISL_527421 | 4/8/2020  | 9/2/2020 North America / USA / Colorado                  |
| EPI_ISL_527422 | 4/15/2020 | 9/2/2020 North America / USA / Colorado                  |
| EPI_ISL_527423 | 4/22/2020 | 9/2/2020 North America / USA / Colorado                  |
| EPI_ISL_527424 | 4/22/2020 | 9/2/2020 North America / USA / Colorado                  |
| EPI_ISL_527425 | 4/29/2020 | 9/2/2020 North America / USA / Colorado                  |
| EPI_ISL_527426 | 4/29/2020 | 9/2/2020 North America / USA / Colorado                  |
| EPI_ISL_527427 | 5/6/2020  | 9/2/2020 North America / USA / Colorado                  |
| EPI_ISL_527428 | 4/8/2020  | 9/2/2020 North America / USA / Colorado                  |
| EPI_ISL_527429 | 4/15/2020 | 9/2/2020 North America / USA / Colorado                  |



|                |           |                                                |
|----------------|-----------|------------------------------------------------|
| EPI_ISL_527479 | 5/6/2020  | 9/2/2020 North America / USA / Colorado        |
| EPI_ISL_527480 | 5/13/2020 | 9/2/2020 North America / USA / Colorado        |
| EPI_ISL_527481 | 4/22/2020 | 9/2/2020 North America / USA / Colorado        |
| EPI_ISL_527482 | 4/22/2020 | 9/2/2020 North America / USA / Colorado        |
| EPI_ISL_527483 | 4/8/2020  | 9/2/2020 North America / USA / Colorado        |
| EPI_ISL_527484 | 4/15/2020 | 9/2/2020 North America / USA / Colorado        |
| EPI_ISL_527485 | 4/22/2020 | 9/2/2020 North America / USA / Colorado        |
| EPI_ISL_527486 | 4/22/2020 | 9/2/2020 North America / USA / Colorado        |
| EPI_ISL_527487 | 4/29/2020 | 9/2/2020 North America / USA / Colorado        |
| EPI_ISL_527488 | 4/22/2020 | 9/2/2020 North America / USA / Colorado        |
| EPI_ISL_527008 | 3/15/2020 | 9/3/2020 Oceania / Australia / New South Wales |
| EPI_ISL_527009 | 3/20/2020 | 9/3/2020 Oceania / Australia / New South Wales |
| EPI_ISL_527010 | 3/22/2020 | 9/3/2020 Oceania / Australia / New South Wales |
| EPI_ISL_527011 | 6/12/2020 | 9/3/2020 Oceania / Australia / New South Wales |
| EPI_ISL_527012 | 6/13/2020 | 9/3/2020 Oceania / Australia / New South Wales |
| EPI_ISL_527013 | 6/19/2020 | 9/3/2020 Oceania / Australia / New South Wales |
| EPI_ISL_527014 | 6/21/2020 | 9/3/2020 Oceania / Australia / New South Wales |
| EPI_ISL_527015 | 4/2/2020  | 9/3/2020 Oceania / Australia / New South Wales |
| EPI_ISL_527016 | 3/26/2020 | 9/3/2020 Oceania / Australia / New South Wales |
| EPI_ISL_527017 | 4/9/2020  | 9/3/2020 Oceania / Australia / New South Wales |
| EPI_ISL_527018 | 6/26/2020 | 9/3/2020 Oceania / Australia / New South Wales |
| EPI_ISL_527019 | 7/2/2020  | 9/3/2020 Oceania / Australia / New South Wales |
| EPI_ISL_527020 | 7/1/2020  | 9/3/2020 Oceania / Australia / New South Wales |
| EPI_ISL_527021 | 7/2/2020  | 9/3/2020 Oceania / Australia / New South Wales |
| EPI_ISL_527022 | 6/30/2020 | 9/3/2020 Oceania / Australia / New South Wales |
| EPI_ISL_527023 | 6/30/2020 | 9/3/2020 Oceania / Australia / New South Wales |
| EPI_ISL_527024 | 6/30/2020 | 9/3/2020 Oceania / Australia / New South Wales |
| EPI_ISL_527025 | 6/29/2020 | 9/3/2020 Oceania / Australia / New South Wales |
| EPI_ISL_527026 | 6/29/2020 | 9/3/2020 Oceania / Australia / New South Wales |
| EPI_ISL_527027 | 7/4/2020  | 9/3/2020 Oceania / Australia / New South Wales |
| EPI_ISL_527028 | 7/4/2020  | 9/3/2020 Oceania / Australia / New South Wales |
| EPI_ISL_527029 | 7/4/2020  | 9/3/2020 Oceania / Australia / New South Wales |
| EPI_ISL_527030 | 7/4/2020  | 9/3/2020 Oceania / Australia / New South Wales |
| EPI_ISL_527031 | 7/4/2020  | 9/3/2020 Oceania / Australia / New South Wales |
| EPI_ISL_527032 | 7/4/2020  | 9/3/2020 Oceania / Australia / New South Wales |
| EPI_ISL_527033 | 7/5/2020  | 9/3/2020 Oceania / Australia / New South Wales |
| EPI_ISL_527034 | 7/4/2020  | 9/3/2020 Oceania / Australia / New South Wales |
| EPI_ISL_527035 | 3/23/2020 | 9/3/2020 Oceania / Australia / New South Wales |
| EPI_ISL_527036 | 7/11/2020 | 9/3/2020 Oceania / Australia / New South Wales |
| EPI_ISL_527037 | 4/9/2020  | 9/3/2020 Oceania / Australia / New South Wales |
| EPI_ISL_527038 | 4/9/2020  | 9/3/2020 Oceania / Australia / New South Wales |
| EPI_ISL_527039 | 4/4/2020  | 9/3/2020 Oceania / Australia / New South Wales |
| EPI_ISL_527040 | 4/4/2020  | 9/3/2020 Oceania / Australia / New South Wales |
| EPI_ISL_527041 | 4/4/2020  | 9/3/2020 Oceania / Australia / New South Wales |
| EPI_ISL_527042 | 4/4/2020  | 9/3/2020 Oceania / Australia / New South Wales |
| EPI_ISL_527043 | 4/4/2020  | 9/3/2020 Oceania / Australia / New South Wales |
| EPI_ISL_527044 | 4/4/2020  | 9/3/2020 Oceania / Australia / New South Wales |

|                |           |                                                |
|----------------|-----------|------------------------------------------------|
| EPI_ISL_527045 | 4/4/2020  | 9/3/2020 Oceania / Australia / New South Wales |
| EPI_ISL_527046 | 4/4/2020  | 9/3/2020 Oceania / Australia / New South Wales |
| EPI_ISL_527047 | 4/4/2020  | 9/3/2020 Oceania / Australia / New South Wales |
| EPI_ISL_527048 | 4/4/2020  | 9/3/2020 Oceania / Australia / New South Wales |
| EPI_ISL_527049 | 4/4/2020  | 9/3/2020 Oceania / Australia / New South Wales |
| EPI_ISL_527050 | 4/4/2020  | 9/3/2020 Oceania / Australia / New South Wales |
| EPI_ISL_527051 | 4/4/2020  | 9/3/2020 Oceania / Australia / New South Wales |
| EPI_ISL_527052 | 4/4/2020  | 9/3/2020 Oceania / Australia / New South Wales |
| EPI_ISL_527053 | 4/6/2020  | 9/3/2020 Oceania / Australia / New South Wales |
| EPI_ISL_527054 | 4/6/2020  | 9/3/2020 Oceania / Australia / New South Wales |
| EPI_ISL_527055 | 4/5/2020  | 9/3/2020 Oceania / Australia / New South Wales |
| EPI_ISL_527056 | 4/5/2020  | 9/3/2020 Oceania / Australia / New South Wales |
| EPI_ISL_527057 | 4/11/2020 | 9/3/2020 Oceania / Australia / New South Wales |
| EPI_ISL_527058 | 4/12/2020 | 9/3/2020 Oceania / Australia / New South Wales |
| EPI_ISL_527059 | 4/17/2020 | 9/3/2020 Oceania / Australia / New South Wales |
| EPI_ISL_527060 | 4/21/2020 | 9/3/2020 Oceania / Australia / New South Wales |
| EPI_ISL_527061 | 4/10/2020 | 9/3/2020 Oceania / Australia / New South Wales |
| EPI_ISL_527062 | 4/6/2020  | 9/3/2020 Oceania / Australia / New South Wales |
| EPI_ISL_527063 | 7/27/2020 | 9/3/2020 Oceania / Australia / New South Wales |
| EPI_ISL_527064 | 7/30/2020 | 9/3/2020 Oceania / Australia / New South Wales |
| EPI_ISL_527179 | 8/24/2020 | 9/3/2020 Oceania / Australia / New South Wales |
| EPI_ISL_527180 | 8/25/2020 | 9/3/2020 Oceania / Australia / New South Wales |
| EPI_ISL_527329 | 4/13/2020 | 9/3/2020 Europe / United Kingdom / England     |
| EPI_ISL_527331 | 4/13/2020 | 9/3/2020 Europe / United Kingdom / England     |
| EPI_ISL_527332 | 4/13/2020 | 9/3/2020 Europe / United Kingdom / England     |
| EPI_ISL_527333 | 4/13/2020 | 9/3/2020 Europe / United Kingdom / England     |
| EPI_ISL_527334 | 4/13/2020 | 9/3/2020 Europe / United Kingdom / England     |
| EPI_ISL_527335 | 4/14/2020 | 9/3/2020 Europe / United Kingdom / England     |
| EPI_ISL_527336 | 4/14/2020 | 9/3/2020 Europe / United Kingdom / England     |
| EPI_ISL_527337 | 4/16/2020 | 9/3/2020 Europe / United Kingdom / England     |
| EPI_ISL_527339 | 4/13/2020 | 9/3/2020 Europe / United Kingdom / England     |
| EPI_ISL_527343 | 4/24/2020 | 9/3/2020 Europe / United Kingdom / England     |
| EPI_ISL_527344 | 4/24/2020 | 9/3/2020 Europe / United Kingdom / England     |
| EPI_ISL_527345 | 4/25/2020 | 9/3/2020 Europe / United Kingdom / England     |
| EPI_ISL_527346 | 4/24/2020 | 9/3/2020 Europe / United Kingdom / England     |
| EPI_ISL_527347 | 4/24/2020 | 9/3/2020 Europe / United Kingdom / England     |
| EPI_ISL_527348 | 4/25/2020 | 9/3/2020 Europe / United Kingdom / England     |
| EPI_ISL_527349 | 4/25/2020 | 9/3/2020 Europe / United Kingdom / England     |
| EPI_ISL_527351 | 4/24/2020 | 9/3/2020 Europe / United Kingdom / England     |
| EPI_ISL_527352 | 4/25/2020 | 9/3/2020 Europe / United Kingdom / England     |
| EPI_ISL_527353 | 4/25/2020 | 9/3/2020 Europe / United Kingdom / England     |
| EPI_ISL_527354 | 4/24/2020 | 9/3/2020 Europe / United Kingdom / England     |
| EPI_ISL_527355 | 4/24/2020 | 9/3/2020 Europe / United Kingdom / England     |
| EPI_ISL_527356 | 4/25/2020 | 9/3/2020 Europe / United Kingdom / England     |
| EPI_ISL_527357 | 4/24/2020 | 9/3/2020 Europe / United Kingdom / England     |
| EPI_ISL_527358 | 4/29/2020 | 9/3/2020 Europe / United Kingdom / England     |
| EPI_ISL_527359 | 8/17/2020 | 9/3/2020 Asia / Singapore                      |

|                |           |                                                                    |
|----------------|-----------|--------------------------------------------------------------------|
| EPI_ISL_527360 | 8/17/2020 | 9/3/2020 Asia / Singapore                                          |
| EPI_ISL_527361 | 8/20/2020 | 9/3/2020 Asia / Singapore                                          |
| EPI_ISL_527362 | 8/21/2020 | 9/3/2020 Asia / Singapore                                          |
| EPI_ISL_527363 | 8/23/2020 | 9/3/2020 Asia / Singapore                                          |
| EPI_ISL_527364 | 8/17/2020 | 9/3/2020 Asia / Singapore                                          |
| EPI_ISL_527365 | 8/17/2020 | 9/3/2020 Asia / Singapore                                          |
| EPI_ISL_527366 | 8/17/2020 | 9/3/2020 Asia / Singapore                                          |
| EPI_ISL_527367 | 8/17/2020 | 9/3/2020 Asia / Singapore                                          |
| EPI_ISL_527368 | 8/17/2020 | 9/3/2020 Asia / Singapore                                          |
| EPI_ISL_527370 | 4/12/2020 | 9/3/2020 Asia / Singapore                                          |
| EPI_ISL_527371 | 4/12/2020 | 9/3/2020 Asia / Singapore                                          |
| EPI_ISL_527372 | 4/12/2020 | 9/3/2020 Asia / Singapore                                          |
| EPI_ISL_527373 | 8/20/2020 | 9/3/2020 Asia / Singapore                                          |
| EPI_ISL_527374 | 8/20/2020 | 9/3/2020 Asia / Singapore                                          |
| EPI_ISL_527375 | 4/28/2020 | 9/3/2020 Asia / Singapore                                          |
| EPI_ISL_527376 | 4/26/2020 | 9/3/2020 Asia / Singapore                                          |
| EPI_ISL_527377 | 4/23/2020 | 9/3/2020 Asia / Singapore                                          |
| EPI_ISL_527379 | 8/25/2020 | 9/3/2020 Asia / Singapore                                          |
| EPI_ISL_527380 | 4/10/2020 | 9/3/2020 Europe / Italy / Apulia / Brindisi                        |
| EPI_ISL_527382 | 8/4/2020  | 9/3/2020 North America / USA / Puerto Rico / Ponce                 |
| EPI_ISL_527383 | 8/4/2020  | 9/3/2020 North America / USA / Puerto Rico / Ponce                 |
| EPI_ISL_527384 | 8/4/2020  | 9/3/2020 North America / USA / Puerto Rico / Ponce                 |
| EPI_ISL_527385 | 8/5/2020  | 9/3/2020 North America / USA / Puerto Rico / Ponce                 |
| EPI_ISL_527386 | 8/5/2020  | 9/3/2020 North America / USA / Puerto Rico / Ponce                 |
| EPI_ISL_527387 | 8/6/2020  | 9/3/2020 North America / USA / Puerto Rico / Ponce                 |
| EPI_ISL_527388 | 8/6/2020  | 9/3/2020 North America / USA / Puerto Rico / Ponce                 |
| EPI_ISL_527389 | 8/8/2020  | 9/3/2020 North America / USA / Puerto Rico / Ponce                 |
| EPI_ISL_527390 | 8/11/2020 | 9/3/2020 North America / USA / Puerto Rico / Ponce                 |
| EPI_ISL_527391 | 8/11/2020 | 9/3/2020 North America / USA / Puerto Rico / Ponce                 |
| EPI_ISL_527392 | 8/11/2020 | 9/3/2020 North America / USA / Puerto Rico / Ponce                 |
| EPI_ISL_527393 | 8/11/2020 | 9/3/2020 North America / USA / Puerto Rico / Ponce                 |
| EPI_ISL_527394 | 8/11/2020 | 9/3/2020 North America / USA / Puerto Rico / Ponce                 |
| EPI_ISL_527395 | 8/11/2020 | 9/3/2020 North America / USA / Puerto Rico / Ponce                 |
| EPI_ISL_527396 | 8/11/2020 | 9/3/2020 North America / USA / Puerto Rico / Ponce                 |
| EPI_ISL_527397 | 8/12/2020 | 9/3/2020 North America / USA / Puerto Rico / Ponce                 |
| EPI_ISL_527398 | 8/12/2020 | 9/3/2020 North America / USA / Puerto Rico / Ponce                 |
| EPI_ISL_527399 | 8/12/2020 | 9/3/2020 North America / USA / Puerto Rico / Ponce                 |
| EPI_ISL_527400 | 8/26/2020 | 9/4/2020 Oceania / Australia / New South Wales                     |
| EPI_ISL_527489 | 5/22/2020 | 9/4/2020 Africa / Democratic Republic of the Congo / Kinshasa      |
| EPI_ISL_527490 | 5/23/2020 | 9/4/2020 Africa / Democratic Republic of the Congo / Kinshasa      |
| EPI_ISL_527491 | 5/22/2020 | 9/4/2020 Africa / Democratic Republic of the Congo / Kinshasa      |
| EPI_ISL_527543 | 5/22/2020 | 9/4/2020 Africa / Democratic Republic of the Congo / Kongo-Central |
| EPI_ISL_527544 | 5/22/2020 | 9/4/2020 Africa / Democratic Republic of the Congo / Kongo-Central |
| EPI_ISL_527545 | 5/22/2020 | 9/4/2020 Africa / Democratic Republic of the Congo / Kinshasa      |
| EPI_ISL_527546 | 5/22/2020 | 9/4/2020 Africa / Democratic Republic of the Congo / Kinshasa      |
| EPI_ISL_527547 | 5/20/2020 | 9/4/2020 Africa / Democratic Republic of the Congo / Nord-Kivu     |
| EPI_ISL_527548 | 5/20/2020 | 9/4/2020 Africa / Democratic Republic of the Congo / Sud Kivu      |











|                |           |                                                               |
|----------------|-----------|---------------------------------------------------------------|
| EPI_ISL_527737 | 4/9/2020  | 9/4/2020 North America / USA / Wisconsin                      |
| EPI_ISL_527739 | 3/6/2020  | 9/4/2020 North America / Costa Rica                           |
| EPI_ISL_527740 | 6/19/2020 | 9/4/2020 North America / Costa Rica / Alajuela / Alajuela     |
| EPI_ISL_527741 | 6/29/2020 | 9/4/2020 North America / Costa Rica / Alajuela / Alajuela     |
| EPI_ISL_527742 | 6/30/2020 | 9/4/2020 North America / Costa Rica / San Jose / Alajuelita   |
| EPI_ISL_527743 | 6/29/2020 | 9/4/2020 North America / Costa Rica / San Jose / San Jose     |
| EPI_ISL_527744 | 6/29/2020 | 9/4/2020 North America / Costa Rica / San Jose / Desamparados |
| EPI_ISL_527746 | 7/3/2020  | 9/4/2020 North America / Costa Rica / Alajuela / Alajuela     |
| EPI_ISL_527747 | 7/3/2020  | 9/4/2020 North America / Costa Rica / Guanacaste / La Cruz    |
| EPI_ISL_527748 | 7/5/2020  | 9/4/2020 North America / Costa Rica / Limon / Siquirres       |
| EPI_ISL_527749 | 7/7/2020  | 9/4/2020 North America / Costa Rica / San Jose / San Jose     |
| EPI_ISL_527750 | 7/2/2020  | 9/4/2020 North America / Costa Rica / Heredia                 |
| EPI_ISL_527751 | 7/6/2020  | 9/4/2020 North America / Costa Rica / Puntarenas / Coto Brus  |
| EPI_ISL_527752 | 7/8/2020  | 9/4/2020 North America / Costa Rica / San Jose / Curridabat   |
| EPI_ISL_527753 | 7/9/2020  | 9/4/2020 North America / Costa Rica / Heredia / Heredia       |
| EPI_ISL_527754 | 7/9/2020  | 9/4/2020 North America / Costa Rica / Heredia / Barva         |
| EPI_ISL_527755 | 7/11/2020 | 9/4/2020 North America / Costa Rica / San Jose / San Jose     |
| EPI_ISL_527756 | 7/10/2020 | 9/4/2020 North America / Costa Rica / San Jose / Aserri       |
| EPI_ISL_527757 | 7/10/2020 | 9/4/2020 North America / Costa Rica / San Jose / Goicoechea   |
| EPI_ISL_527787 | 4/16/2020 | 9/4/2020 South America / Peru / Arequipa                      |
| EPI_ISL_527789 | 4/13/2020 | 9/4/2020 South America / Peru / Arequipa                      |
| EPI_ISL_527794 | 8/4/2020  | 9/5/2020 North America / USA / Illinois / Stephenson County   |
| EPI_ISL_527795 | 8/8/2020  | 9/5/2020 North America / USA / Wisconsin / Jefferson County   |
| EPI_ISL_527796 | 8/6/2020  | 9/5/2020 North America / USA / Wisconsin / Dane County        |
| EPI_ISL_527797 | 8/6/2020  | 9/5/2020 North America / USA / Wisconsin / Marquette County   |
| EPI_ISL_527799 | 8/6/2020  | 9/5/2020 North America / USA / Wisconsin / Dane County        |
| EPI_ISL_527801 | 8/7/2020  | 9/5/2020 North America / USA / Wisconsin / Dane County        |
| EPI_ISL_527802 | 8/11/2020 | 9/5/2020 North America / USA / Wisconsin / Dane County        |
| EPI_ISL_527803 | 8/12/2020 | 9/5/2020 North America / USA / Wisconsin / Jefferson County   |
| EPI_ISL_527804 | 8/11/2020 | 9/5/2020 North America / USA / Wisconsin / Columbia County    |
| EPI_ISL_527806 | 8/10/2020 | 9/5/2020 North America / USA / Wisconsin / Dane County        |
| EPI_ISL_527808 | 8/10/2020 | 9/5/2020 North America / USA / Wisconsin / Green County       |
| EPI_ISL_527809 | 8/4/2020  | 9/5/2020 South America / Ecuador / Bolivar / Guaranda         |
| EPI_ISL_527810 | 8/4/2020  | 9/5/2020 South America / Ecuador / Bolivar / Guaranda         |
| EPI_ISL_527811 | 8/4/2020  | 9/5/2020 South America / Ecuador / Bolivar / Guaranda         |
| EPI_ISL_527812 | 8/20/2020 | 9/5/2020 South America / Ecuador / Esmeraldas / Esmeraldas    |
| EPI_ISL_527813 | 8/20/2020 | 9/5/2020 South America / Ecuador / Esmeraldas / Esmeraldas    |
| EPI_ISL_527814 | 8/20/2020 | 9/5/2020 South America / Ecuador / Esmeraldas / Esmeraldas    |
| EPI_ISL_527815 | 8/20/2020 | 9/5/2020 South America / Ecuador / Esmeraldas / Esmeraldas    |
| EPI_ISL_527816 | 8/20/2020 | 9/5/2020 South America / Ecuador / Esmeraldas / Esmeraldas    |
| EPI_ISL_527817 | 8/20/2020 | 9/5/2020 South America / Ecuador / Esmeraldas / Esmeraldas    |
| EPI_ISL_527818 | 8/14/2020 | 9/5/2020 South America / Ecuador / Guayas / Guayaquil         |
| EPI_ISL_527819 | 4/7/2020  | 9/5/2020 South America / Ecuador / Guayas / Guayaquil         |
| EPI_ISL_527838 | 6/13/2020 | 9/5/2020 North America / USA / Texas / Harris County          |
| EPI_ISL_527856 | 4/16/2020 | 9/5/2020 South America / Brazil / Sao Paulo / Sao Paulo       |
| EPI_ISL_527857 | 4/17/2020 | 9/5/2020 South America / Brazil / Sao Paulo / Itariri         |
| EPI_ISL_527858 | 3/23/2020 | 9/5/2020 South America / Brazil / Sao Paulo / Sao Paulo       |

|                |           |                                                         |
|----------------|-----------|---------------------------------------------------------|
| EPI_ISL_527859 | 4/21/2020 | 9/5/2020 South America / Brazil / Sao Paulo / Sao Paulo |
| EPI_ISL_527860 | 4/17/2020 | 9/5/2020 South America / Brazil / Sao Paulo / Sao Paulo |
| EPI_ISL_527861 | 4/20/2020 | 9/5/2020 South America / Brazil / Sao Paulo / Campinas  |
| EPI_ISL_527862 | 3/30/2020 | 9/5/2020 South America / Brazil / Sao Paulo / Guarulhos |
| EPI_ISL_527863 | 4/12/2020 | 9/5/2020 South America / Brazil / Sao Paulo / Sao Paulo |
| EPI_ISL_527864 | 4/24/2020 | 9/5/2020 South America / Brazil / Sao Paulo / Sao Paulo |
| EPI_ISL_527865 | 4/22/2020 | 9/5/2020 South America / Brazil / Sao Paulo / Sao Paulo |
| EPI_ISL_527866 | 4/21/2020 | 9/5/2020 South America / Brazil / Sao Paulo / Sao Paulo |
| EPI_ISL_527867 | 4/22/2020 | 9/5/2020 South America / Brazil / Sao Paulo / Sao Paulo |
| EPI_ISL_527868 | 4/17/2020 | 9/5/2020 South America / Brazil / Sao Paulo / Sao Paulo |
| EPI_ISL_527869 | 4/22/2020 | 9/5/2020 South America / Brazil / Sao Paulo / Sao Paulo |
| EPI_ISL_527870 | 4/26/2020 | 9/5/2020 South America / Brazil / Sao Paulo / Campinas  |
| EPI_ISL_527873 | 2/21/2020 | 9/5/2020 Africa / Nigeria / Edo                         |
| EPI_ISL_527874 | 3/23/2020 | 9/5/2020 Africa / Nigeria / Rivers                      |
| EPI_ISL_527876 | 3/25/2020 | 9/5/2020 Africa / Nigeria / Enugu                       |
| EPI_ISL_527878 | 3/31/2020 | 9/5/2020 Africa / Nigeria / Edo                         |
| EPI_ISL_527879 | 5/4/2020  | 9/5/2020 Africa / Nigeria / Edo                         |
| EPI_ISL_527880 | 3/25/2020 | 9/5/2020 Africa / Nigeria / Edo                         |
| EPI_ISL_527881 | 3/30/2020 | 9/5/2020 Africa / Nigeria / Delta                       |
| EPI_ISL_527882 | 5/9/2020  | 9/5/2020 Africa / Nigeria / Edo                         |
| EPI_ISL_527883 | 5/18/2020 | 9/5/2020 Africa / Nigeria / Akwa-Ibom                   |
| EPI_ISL_527884 | 4/24/2020 | 9/5/2020 Africa / Nigeria / Edo                         |
| EPI_ISL_527887 | 6/2/2020  | 9/5/2020 Africa / Nigeria / Ekiti                       |
| EPI_ISL_527888 | 6/3/2020  | 9/5/2020 Africa / Nigeria / Ondo                        |
| EPI_ISL_527889 | 6/9/2020  | 9/5/2020 Africa / Nigeria / Ondo                        |
| EPI_ISL_527890 | 6/11/2020 | 9/5/2020 Africa / Nigeria / Ondo                        |
| EPI_ISL_527891 | 6/16/2020 | 9/5/2020 Africa / Nigeria / Ondo                        |
| EPI_ISL_527892 | 6/17/2020 | 9/5/2020 Africa / Nigeria / Ondo                        |
| EPI_ISL_527893 | 5/11/2020 | 9/5/2020 Africa / Nigeria / Osun                        |
| EPI_ISL_527898 | 6/10/2020 | 9/5/2020 Africa / Nigeria / Oyo                         |
| EPI_ISL_527901 | 6/12/2020 | 9/5/2020 Africa / Nigeria / Oyo                         |
| EPI_ISL_527903 | 6/11/2020 | 9/5/2020 Africa / Nigeria / Oyo                         |
| EPI_ISL_527904 | 6/13/2020 | 9/5/2020 Africa / Nigeria / Oyo                         |
| EPI_ISL_527905 | 6/12/2020 | 9/5/2020 Africa / Nigeria / Oyo                         |
| EPI_ISL_527910 | 6/13/2020 | 9/5/2020 Africa / Nigeria / Oyo                         |
| EPI_ISL_527911 | 6/13/2020 | 9/5/2020 Africa / Nigeria / Oyo                         |
| EPI_ISL_527912 | 6/13/2020 | 9/5/2020 Africa / Nigeria / Oyo                         |
| EPI_ISL_527914 | 6/16/2020 | 9/5/2020 Africa / Nigeria / Oyo                         |
| EPI_ISL_527915 | 6/17/2020 | 9/5/2020 Africa / Nigeria / Oyo                         |
| EPI_ISL_528386 | 8/22/2020 | 9/5/2020 Africa / Egypt                                 |
| EPI_ISL_527916 | 2/26/2020 | 9/6/2020 Europe / Switzerland / Basel-Stadt             |
| EPI_ISL_527917 | 2/26/2020 | 9/6/2020 Europe / Switzerland / Basel-Landschaft        |
| EPI_ISL_527926 | 3/4/2020  | 9/6/2020 Europe / Switzerland / Basel-Landschaft        |
| EPI_ISL_527928 | 3/4/2020  | 9/6/2020 Europe / Switzerland / Basel-Stadt             |
| EPI_ISL_527929 | 3/4/2020  | 9/6/2020 Europe / Switzerland / Basel-Landschaft        |
| EPI_ISL_527930 | 3/5/2020  | 9/6/2020 Europe / Switzerland / Basel-Stadt             |
| EPI_ISL_527931 | 3/5/2020  | 9/6/2020 Europe / Switzerland / Basel-Stadt             |















|                |           |                                                  |
|----------------|-----------|--------------------------------------------------|
| EPI_ISL_528328 | 3/22/2020 | 9/6/2020 Europe / Switzerland / Basel-Landschaft |
| EPI_ISL_528330 | 3/22/2020 | 9/6/2020 Europe / Switzerland / Basel-Stadt      |
| EPI_ISL_528331 | 3/22/2020 | 9/6/2020 Europe / Switzerland / Basel-Stadt      |
| EPI_ISL_528332 | 3/22/2020 | 9/6/2020 Europe / Switzerland / Basel-Stadt      |
| EPI_ISL_528337 | 3/22/2020 | 9/6/2020 Europe / Switzerland / Basel-Stadt      |
| EPI_ISL_528340 | 3/23/2020 | 9/6/2020 Europe / Switzerland / Basel-Stadt      |
| EPI_ISL_528341 | 3/23/2020 | 9/6/2020 Europe / Switzerland / Basel-Stadt      |
| EPI_ISL_528343 | 3/23/2020 | 9/6/2020 Europe / Switzerland / Basel-Stadt      |
| EPI_ISL_528344 | 3/23/2020 | 9/6/2020 Europe / Switzerland / Basel-Stadt      |
| EPI_ISL_528345 | 3/23/2020 | 9/6/2020 Europe / Switzerland / Basel-Stadt      |
| EPI_ISL_528347 | 3/23/2020 | 9/6/2020 Europe / Switzerland / Basel-Stadt      |
| EPI_ISL_528348 | 3/23/2020 | 9/6/2020 Europe / Switzerland / Basel-Stadt      |
| EPI_ISL_528349 | 3/23/2020 | 9/6/2020 Europe / Switzerland / Basel-Stadt      |
| EPI_ISL_528350 | 3/23/2020 | 9/6/2020 Europe / Switzerland / Basel-Stadt      |
| EPI_ISL_528351 | 3/23/2020 | 9/6/2020 Europe / Switzerland / Basel-Stadt      |
| EPI_ISL_528352 | 3/22/2020 | 9/6/2020 Europe / Switzerland / Basel-Landschaft |
| EPI_ISL_528354 | 3/23/2020 | 9/6/2020 Europe / Switzerland / Basel-Stadt      |
| EPI_ISL_528355 | 3/23/2020 | 9/6/2020 Europe / Switzerland / Basel-Stadt      |
| EPI_ISL_528359 | 3/23/2020 | 9/6/2020 Europe / Switzerland / Basel-Stadt      |
| EPI_ISL_528360 | 3/23/2020 | 9/6/2020 Europe / Switzerland / Basel-Stadt      |
| EPI_ISL_528362 | 3/23/2020 | 9/6/2020 Europe / Switzerland / Basel-Stadt      |
| EPI_ISL_528363 | 3/23/2020 | 9/6/2020 Europe / Switzerland / Basel-Stadt      |
| EPI_ISL_528364 | 3/23/2020 | 9/6/2020 Europe / Switzerland / Basel-Stadt      |
| EPI_ISL_528365 | 3/23/2020 | 9/6/2020 Europe / Switzerland / Basel-Stadt      |
| EPI_ISL_528366 | 3/23/2020 | 9/6/2020 Europe / Switzerland / Basel-Stadt      |
| EPI_ISL_528367 | 3/23/2020 | 9/6/2020 Europe / Switzerland / Basel-Stadt      |
| EPI_ISL_528368 | 3/23/2020 | 9/6/2020 Europe / Switzerland / Basel-Landschaft |
| EPI_ISL_528369 | 3/23/2020 | 9/6/2020 Europe / Switzerland / Basel-Stadt      |
| EPI_ISL_528370 | 3/23/2020 | 9/6/2020 Europe / Switzerland / Basel-Stadt      |
| EPI_ISL_528371 | 3/23/2020 | 9/6/2020 Europe / Switzerland / Basel-Stadt      |
| EPI_ISL_528373 | 3/23/2020 | 9/6/2020 Europe / Switzerland / Basel-Stadt      |
| EPI_ISL_528374 | 3/20/2020 | 9/6/2020 Europe / Switzerland / Basel-Landschaft |
| EPI_ISL_528377 | 3/17/2020 | 9/6/2020 Europe / Switzerland / Basel-Stadt      |
| EPI_ISL_528381 | 3/23/2020 | 9/6/2020 Europe / Switzerland / Aargau           |
| EPI_ISL_528382 | 4/27/2020 | 9/7/2020 Asia / India / Haryana                  |
| EPI_ISL_528383 | 4/27/2020 | 9/7/2020 Asia / India / Haryana                  |
| EPI_ISL_528384 | 4/27/2020 | 9/7/2020 Asia / India / Haryana                  |
| EPI_ISL_528385 | 4/27/2020 | 9/7/2020 Asia / India / Haryana                  |
| EPI_ISL_528388 | 4/13/2020 | 9/7/2020 Europe / United Kingdom / England       |
| EPI_ISL_528389 | 4/13/2020 | 9/7/2020 Europe / United Kingdom / England       |
| EPI_ISL_528391 | 5/1/2020  | 9/7/2020 Europe / United Kingdom / England       |
| EPI_ISL_528392 | 5/13/2020 | 9/7/2020 Europe / United Kingdom / England       |
| EPI_ISL_528398 | 4/15/2020 | 9/7/2020 Europe / United Kingdom / England       |
| EPI_ISL_528399 | 4/14/2020 | 9/7/2020 Europe / United Kingdom / England       |
| EPI_ISL_528400 | 4/16/2020 | 9/7/2020 Europe / United Kingdom / England       |
| EPI_ISL_528401 | 4/16/2020 | 9/7/2020 Europe / United Kingdom / England       |
| EPI_ISL_528403 | 4/14/2020 | 9/7/2020 Europe / United Kingdom / England       |

|                |           |                                            |
|----------------|-----------|--------------------------------------------|
| EPI_ISL_528404 | 4/16/2020 | 9/7/2020 Europe / United Kingdom / England |
| EPI_ISL_528405 | 4/20/2020 | 9/7/2020 Europe / United Kingdom / England |
| EPI_ISL_528406 | 4/14/2020 | 9/7/2020 Europe / United Kingdom / England |
| EPI_ISL_528407 | 4/24/2020 | 9/7/2020 Europe / United Kingdom / England |
| EPI_ISL_528409 | 4/29/2020 | 9/7/2020 Europe / United Kingdom / England |
| EPI_ISL_528411 | 4/29/2020 | 9/7/2020 Europe / United Kingdom / England |
| EPI_ISL_528413 | 5/2/2020  | 9/7/2020 Europe / United Kingdom / England |
| EPI_ISL_528414 | 4/28/2020 | 9/7/2020 Europe / United Kingdom / England |
| EPI_ISL_528415 | 5/4/2020  | 9/7/2020 Europe / United Kingdom / England |
| EPI_ISL_528430 | 4/15/2020 | 9/7/2020 Europe / United Kingdom / England |
| EPI_ISL_528432 | 4/24/2020 | 9/7/2020 Europe / United Kingdom / England |
| EPI_ISL_528433 | 4/25/2020 | 9/7/2020 Europe / United Kingdom / England |
| EPI_ISL_528434 | 4/25/2020 | 9/7/2020 Europe / United Kingdom / England |
| EPI_ISL_528435 | 4/24/2020 | 9/7/2020 Europe / United Kingdom / England |
| EPI_ISL_528438 | 8/12/2020 | 9/7/2020 Europe / United Kingdom / England |
| EPI_ISL_528440 | 8/9/2020  | 9/7/2020 Europe / Ireland / Dublin         |
| EPI_ISL_528441 | 8/9/2020  | 9/7/2020 Europe / Ireland / Kildare        |
| EPI_ISL_528442 | 8/9/2020  | 9/7/2020 Europe / Ireland / Kildare        |
| EPI_ISL_528443 | 8/9/2020  | 9/7/2020 Europe / Ireland / Limerick       |
| EPI_ISL_528444 | 8/9/2020  | 9/7/2020 Europe / Ireland / Limerick       |
| EPI_ISL_528445 | 8/9/2020  | 9/7/2020 Europe / Ireland / Limerick       |
| EPI_ISL_528446 | 8/10/2020 | 9/7/2020 Europe / Ireland / Limerick       |
| EPI_ISL_528447 | 8/10/2020 | 9/7/2020 Europe / Ireland / Dublin         |
| EPI_ISL_528449 | 8/10/2020 | 9/7/2020 Europe / Ireland / Kilkenny       |
| EPI_ISL_528450 | 8/10/2020 | 9/7/2020 Europe / Ireland / Kilkenny       |
| EPI_ISL_528451 | 8/10/2020 | 9/7/2020 Europe / Ireland / Kilkenny       |
| EPI_ISL_528452 | 8/10/2020 | 9/7/2020 Europe / Ireland / Waterford      |
| EPI_ISL_528456 | 8/11/2020 | 9/7/2020 Europe / Ireland / Meath          |
| EPI_ISL_528457 | 8/11/2020 | 9/7/2020 Europe / Ireland / Meath          |
| EPI_ISL_528459 | 8/11/2020 | 9/7/2020 Europe / Ireland / Galway         |
| EPI_ISL_528460 | 8/12/2020 | 9/7/2020 Europe / Ireland / Kilkenny       |
| EPI_ISL_528461 | 8/12/2020 | 9/7/2020 Europe / Ireland / Kilkenny       |
| EPI_ISL_528462 | 8/12/2020 | 9/7/2020 Europe / Ireland / Kilkenny       |
| EPI_ISL_528463 | 8/12/2020 | 9/7/2020 Europe / Ireland / Kilkenny       |
| EPI_ISL_528464 | 8/12/2020 | 9/7/2020 Europe / Ireland / Kilkenny       |
| EPI_ISL_528467 | 8/12/2020 | 9/7/2020 Europe / Ireland / Kildare        |
| EPI_ISL_528468 | 8/12/2020 | 9/7/2020 Europe / Ireland / Kildare        |
| EPI_ISL_528471 | 8/12/2020 | 9/7/2020 Europe / Ireland / Cork           |
| EPI_ISL_528472 | 8/12/2020 | 9/7/2020 Europe / Ireland / Waterford      |
| EPI_ISL_528473 | 8/12/2020 | 9/7/2020 Europe / Ireland / Meath          |
| EPI_ISL_528475 | 8/12/2020 | 9/7/2020 Europe / Ireland / Limerick       |
| EPI_ISL_528477 | 8/13/2020 | 9/7/2020 Europe / Ireland / Offaly         |
| EPI_ISL_528479 | 8/13/2020 | 9/7/2020 Europe / Ireland / Kildare        |
| EPI_ISL_528480 | 8/13/2020 | 9/7/2020 Europe / Ireland / Cork           |
| EPI_ISL_528481 | 8/13/2020 | 9/7/2020 Europe / Ireland / Cork           |
| EPI_ISL_528482 | 8/13/2020 | 9/7/2020 Europe / Ireland / Meath          |
| EPI_ISL_528483 | 8/13/2020 | 9/7/2020 Europe / Ireland / Kilkenny       |

|                |           |                                                  |
|----------------|-----------|--------------------------------------------------|
| EPI_ISL_528484 | 8/13/2020 | 9/7/2020 Europe / Ireland / Dublin               |
| EPI_ISL_528486 | 7/8/2020  | 9/7/2020 North America / USA / Alaska            |
| EPI_ISL_528493 | 7/14/2020 | 9/7/2020 North America / USA / Alaska            |
| EPI_ISL_528494 | 7/17/2020 | 9/7/2020 North America / USA / Alaska            |
| EPI_ISL_528495 | 7/17/2020 | 9/7/2020 North America / USA / Alaska            |
| EPI_ISL_528498 | 7/21/2020 | 9/7/2020 North America / USA / Alaska            |
| EPI_ISL_528513 | 7/22/2020 | 9/7/2020 North America / USA / Alaska            |
| EPI_ISL_528526 | 7/3/2020  | 9/7/2020 North America / USA / Alaska            |
| EPI_ISL_528538 | 4/3/2020  | 9/8/2020 Asia / United Arab Emirates / Abu Dhabi |
| EPI_ISL_528539 | 3/19/2020 | 9/8/2020 South America / Brazil / Rio de Janeiro |
| EPI_ISL_528548 | 5/30/2020 | 9/8/2020 Asia / India / Telangana                |
| EPI_ISL_528549 | 5/30/2020 | 9/8/2020 Asia / India / Telangana                |
| EPI_ISL_528555 | 6/6/2020  | 9/8/2020 Asia / India / Telangana                |
| EPI_ISL_528556 | 6/6/2020  | 9/8/2020 Asia / India / Telangana                |
| EPI_ISL_528560 | 6/8/2020  | 9/8/2020 Asia / India / Telangana                |
| EPI_ISL_528562 | 6/8/2020  | 9/8/2020 Asia / India / Telangana                |
| EPI_ISL_528576 | 6/17/2020 | 9/8/2020 Asia / India / Telangana                |
| EPI_ISL_528581 | 6/18/2020 | 9/8/2020 Asia / India / Telangana                |
| EPI_ISL_528586 | 6/19/2020 | 9/8/2020 Asia / India / Telangana                |
| EPI_ISL_528626 | 5/31/2020 | 9/8/2020 Asia / India / Telangana                |
| EPI_ISL_528637 | 3/16/2020 | 9/8/2020 South America / Brazil / Rio de Janeiro |
| EPI_ISL_528638 | 3/16/2020 | 9/8/2020 South America / Brazil / Rio de Janeiro |
| EPI_ISL_528639 | 7/29/2020 | 9/8/2020 North America / USA / Virginia          |
| EPI_ISL_528640 | 7/29/2020 | 9/8/2020 North America / USA / Virginia          |
| EPI_ISL_528641 | 7/29/2020 | 9/8/2020 North America / USA / Virginia          |
| EPI_ISL_528642 | 7/29/2020 | 9/8/2020 North America / USA / Virginia          |
| EPI_ISL_528643 | 7/29/2020 | 9/8/2020 North America / USA / Virginia          |
| EPI_ISL_528644 | 7/29/2020 | 9/8/2020 North America / USA / Virginia          |
| EPI_ISL_528645 | 7/29/2020 | 9/8/2020 North America / USA / Virginia          |
| EPI_ISL_528646 | 7/27/2020 | 9/8/2020 North America / USA / Virginia          |
| EPI_ISL_528647 | 7/27/2020 | 9/8/2020 North America / USA / Virginia          |
| EPI_ISL_528648 | 7/27/2020 | 9/8/2020 North America / USA / Virginia          |
| EPI_ISL_528649 | 7/28/2020 | 9/8/2020 North America / USA / Virginia          |
| EPI_ISL_528650 | 7/29/2020 | 9/8/2020 North America / USA / Virginia          |
| EPI_ISL_528651 | 8/4/2020  | 9/8/2020 North America / USA / Virginia          |
| EPI_ISL_528652 | 8/5/2020  | 9/8/2020 North America / USA / Virginia          |
| EPI_ISL_528654 | 8/5/2020  | 9/8/2020 North America / USA / Virginia          |
| EPI_ISL_528655 | 7/30/2020 | 9/8/2020 North America / USA / Virginia          |
| EPI_ISL_528656 | 7/30/2020 | 9/8/2020 North America / USA / Virginia          |
| EPI_ISL_528657 | 7/30/2020 | 9/8/2020 North America / USA / Virginia          |
| EPI_ISL_528658 | 7/30/2020 | 9/8/2020 North America / USA / Virginia          |
| EPI_ISL_528659 | 7/30/2020 | 9/8/2020 North America / USA / Virginia          |
| EPI_ISL_528660 | 7/30/2020 | 9/8/2020 North America / USA / Virginia          |
| EPI_ISL_528661 | 7/30/2020 | 9/8/2020 North America / USA / Virginia          |
| EPI_ISL_528662 | 7/30/2020 | 9/8/2020 North America / USA / Virginia          |
| EPI_ISL_528663 | 6/10/2020 | 9/8/2020 North America / USA / Virginia          |
| EPI_ISL_528664 | 6/10/2020 | 9/8/2020 North America / USA / Virginia          |

|                |           |                                                  |
|----------------|-----------|--------------------------------------------------|
| EPI_ISL_528665 | 6/10/2020 | 9/8/2020 North America / USA / Virginia          |
| EPI_ISL_528666 | 6/10/2020 | 9/8/2020 North America / USA / Virginia          |
| EPI_ISL_528667 | 6/10/2020 | 9/8/2020 North America / USA / Virginia          |
| EPI_ISL_528668 | 6/10/2020 | 9/8/2020 North America / USA / Virginia          |
| EPI_ISL_528669 | 6/10/2020 | 9/8/2020 North America / USA / Virginia          |
| EPI_ISL_528670 | 6/10/2020 | 9/8/2020 North America / USA / Virginia          |
| EPI_ISL_528671 | 6/10/2020 | 9/8/2020 North America / USA / Virginia          |
| EPI_ISL_528672 | 6/10/2020 | 9/8/2020 North America / USA / Virginia          |
| EPI_ISL_528673 | 6/8/2020  | 9/8/2020 North America / USA / Virginia          |
| EPI_ISL_528674 | 6/10/2020 | 9/8/2020 North America / USA / Virginia          |
| EPI_ISL_528675 | 6/10/2020 | 9/8/2020 North America / USA / Virginia          |
| EPI_ISL_528676 | 6/10/2020 | 9/8/2020 North America / USA / Virginia          |
| EPI_ISL_528677 | 6/10/2020 | 9/8/2020 North America / USA / Virginia          |
| EPI_ISL_528678 | 6/18/2020 | 9/8/2020 North America / USA / Virginia          |
| EPI_ISL_528679 | 6/18/2020 | 9/8/2020 North America / USA / Virginia          |
| EPI_ISL_528680 | 6/18/2020 | 9/8/2020 North America / USA / Virginia          |
| EPI_ISL_528681 | 6/18/2020 | 9/8/2020 North America / USA / Virginia          |
| EPI_ISL_528682 | 6/19/2020 | 9/8/2020 North America / USA / Virginia          |
| EPI_ISL_528683 | 8/24/2020 | 9/8/2020 Asia / India / Delhi                    |
| EPI_ISL_528686 | 4/28/2020 | 9/8/2020 Asia / United Arab Emirates / Abu Dhabi |
| EPI_ISL_528687 | 5/5/2020  | 9/8/2020 Asia / United Arab Emirates / Abu Dhabi |
| EPI_ISL_528688 | 4/28/2020 | 9/8/2020 Asia / United Arab Emirates / Abu Dhabi |
| EPI_ISL_528689 | 5/5/2020  | 9/8/2020 Asia / United Arab Emirates / Abu Dhabi |
| EPI_ISL_528690 | 4/28/2020 | 9/8/2020 Asia / United Arab Emirates / Abu Dhabi |
| EPI_ISL_528691 | 6/7/2020  | 9/8/2020 Asia / United Arab Emirates / Abu Dhabi |
| EPI_ISL_528692 | 5/2/2020  | 9/8/2020 Asia / United Arab Emirates / Abu Dhabi |
| EPI_ISL_528693 | 5/5/2020  | 9/8/2020 Asia / United Arab Emirates / Abu Dhabi |
| EPI_ISL_528694 | 6/2/2020  | 9/8/2020 Asia / United Arab Emirates / Dubai     |
| EPI_ISL_528695 | 6/2/2020  | 9/8/2020 Asia / United Arab Emirates / Dubai     |
| EPI_ISL_528696 | 6/2/2020  | 9/8/2020 Asia / United Arab Emirates / Dubai     |
| EPI_ISL_528697 | 4/29/2020 | 9/8/2020 Asia / United Arab Emirates / Abu Dhabi |
| EPI_ISL_528698 | 5/12/2020 | 9/8/2020 Asia / United Arab Emirates / Abu Dhabi |
| EPI_ISL_528699 | 5/12/2020 | 9/8/2020 Asia / United Arab Emirates / Abu Dhabi |
| EPI_ISL_528700 | 6/13/2020 | 9/8/2020 Asia / United Arab Emirates / Abu Dhabi |
| EPI_ISL_528701 | 5/11/2020 | 9/8/2020 Asia / United Arab Emirates / Abu Dhabi |
| EPI_ISL_528702 | 6/15/2020 | 9/8/2020 Asia / United Arab Emirates / Dubai     |
| EPI_ISL_528703 | 6/26/2020 | 9/8/2020 Asia / United Arab Emirates / Sharja    |
| EPI_ISL_528704 | 5/14/2020 | 9/8/2020 Asia / United Arab Emirates / Abu Dhabi |
| EPI_ISL_528705 | 6/30/2020 | 9/8/2020 Asia / United Arab Emirates / Abu Dhabi |
| EPI_ISL_528706 | 5/14/2020 | 9/8/2020 Asia / United Arab Emirates / Abu Dhabi |
| EPI_ISL_528707 | 7/1/2020  | 9/8/2020 Asia / United Arab Emirates / Abu Dhabi |
| EPI_ISL_528708 | 6/3/2020  | 9/8/2020 Asia / United Arab Emirates / Abu Dhabi |
| EPI_ISL_528709 | 4/30/2020 | 9/8/2020 Asia / United Arab Emirates / Abu Dhabi |
| EPI_ISL_528710 | 4/25/2020 | 9/8/2020 Asia / United Arab Emirates / Abu Dhabi |
| EPI_ISL_528711 | 4/26/2020 | 9/8/2020 Asia / United Arab Emirates / Abu Dhabi |
| EPI_ISL_528712 | 4/26/2020 | 9/8/2020 Asia / United Arab Emirates / Abu Dhabi |
| EPI_ISL_528713 | 4/24/2020 | 9/8/2020 Asia / United Arab Emirates / Abu Dhabi |

|                |           |                                                  |
|----------------|-----------|--------------------------------------------------|
| EPI_ISL_528714 | 4/26/2020 | 9/8/2020 Asia / United Arab Emirates / Abu Dhabi |
| EPI_ISL_528715 | 4/26/2020 | 9/8/2020 Asia / United Arab Emirates / Abu Dhabi |
| EPI_ISL_528716 | 4/25/2020 | 9/8/2020 Asia / United Arab Emirates / Abu Dhabi |
| EPI_ISL_528717 | 4/26/2020 | 9/8/2020 Asia / United Arab Emirates / Abu Dhabi |
| EPI_ISL_528718 | 4/30/2020 | 9/8/2020 Asia / United Arab Emirates / Abu Dhabi |
| EPI_ISL_528719 | 4/25/2020 | 9/8/2020 Asia / United Arab Emirates / Abu Dhabi |
| EPI_ISL_528720 | 4/24/2020 | 9/8/2020 Asia / United Arab Emirates / Abu Dhabi |
| EPI_ISL_528721 | 4/24/2020 | 9/8/2020 Asia / United Arab Emirates / Abu Dhabi |
| EPI_ISL_528738 | 4/7/2020  | 9/8/2020 Asia / Malaysia / Selangor              |
| EPI_ISL_528739 | 4/2/2020  | 9/8/2020 Asia / Malaysia / Selangor              |
| EPI_ISL_528740 | 4/2/2020  | 9/8/2020 Asia / Malaysia / Selangor              |
| EPI_ISL_528741 | 4/2/2020  | 9/8/2020 Asia / Malaysia / Selangor              |
| EPI_ISL_528742 | 4/2/2020  | 9/8/2020 Asia / Malaysia / Selangor              |
| EPI_ISL_528743 | 6/4/2020  | 9/8/2020 Asia / Malaysia / Selangor              |
| EPI_ISL_528744 | 6/4/2020  | 9/8/2020 Asia / Malaysia / Selangor              |
| EPI_ISL_529080 | 5/27/2020 | 9/8/2020 North America / USA / South Carolina    |
| EPI_ISL_529081 | 6/4/2020  | 9/8/2020 North America / USA / South Carolina    |
| EPI_ISL_529082 | 6/4/2020  | 9/8/2020 North America / USA / South Carolina    |
| EPI_ISL_529083 | 6/4/2020  | 9/8/2020 North America / USA / South Carolina    |
| EPI_ISL_529084 | 6/4/2020  | 9/8/2020 North America / USA / South Carolina    |
| EPI_ISL_529085 | 6/19/2020 | 9/8/2020 North America / USA / South Carolina    |
| EPI_ISL_529086 | 6/19/2020 | 9/8/2020 North America / USA / South Carolina    |
| EPI_ISL_529087 | 6/19/2020 | 9/8/2020 North America / USA / South Carolina    |
| EPI_ISL_529088 | 6/19/2020 | 9/8/2020 North America / USA / South Carolina    |
| EPI_ISL_529089 | 6/19/2020 | 9/8/2020 North America / USA / South Carolina    |
| EPI_ISL_529090 | 6/19/2020 | 9/8/2020 North America / USA / South Carolina    |
| EPI_ISL_529091 | 6/19/2020 | 9/8/2020 North America / USA / South Carolina    |
| EPI_ISL_529092 | 6/19/2020 | 9/8/2020 North America / USA / South Carolina    |
| EPI_ISL_529093 | 6/19/2020 | 9/8/2020 North America / USA / South Carolina    |
| EPI_ISL_529094 | 6/19/2020 | 9/8/2020 North America / USA / South Carolina    |
| EPI_ISL_529095 | 6/19/2020 | 9/8/2020 North America / USA / South Carolina    |
| EPI_ISL_529096 | 6/19/2020 | 9/8/2020 North America / USA / South Carolina    |
| EPI_ISL_529097 | 6/19/2020 | 9/8/2020 North America / USA / South Carolina    |
| EPI_ISL_529098 | 6/19/2020 | 9/8/2020 North America / USA / South Carolina    |
| EPI_ISL_529099 | 6/19/2020 | 9/8/2020 North America / USA / South Carolina    |
| EPI_ISL_529100 | 6/19/2020 | 9/8/2020 North America / USA / South Carolina    |
| EPI_ISL_529101 | 6/19/2020 | 9/8/2020 North America / USA / South Carolina    |
| EPI_ISL_529103 | 6/19/2020 | 9/8/2020 North America / USA / South Carolina    |
| EPI_ISL_529105 | 6/23/2020 | 9/8/2020 North America / USA / South Carolina    |
| EPI_ISL_529106 | 6/26/2020 | 9/8/2020 North America / USA / South Carolina    |
| EPI_ISL_529107 | 6/26/2020 | 9/8/2020 North America / USA / South Carolina    |
| EPI_ISL_529108 | 6/26/2020 | 9/8/2020 North America / USA / South Carolina    |
| EPI_ISL_582135 | 2020-03   | 9/8/2020 Asia / Japan / Tokyo                    |
| EPI_ISL_582136 | 2020-03   | 9/8/2020 Asia / Japan / Tokyo                    |
| EPI_ISL_582137 | 2020-03   | 9/8/2020 Asia / Japan / Tokyo                    |
| EPI_ISL_582138 | 2020-03   | 9/8/2020 Asia / Japan / Tokyo                    |
| EPI_ISL_582139 | 2020-03   | 9/8/2020 Asia / Japan / Tokyo                    |

|                |           |                                                         |
|----------------|-----------|---------------------------------------------------------|
| EPI_ISL_582140 | 2020-03   | 9/8/2020 Asia / Japan / Tokyo                           |
| EPI_ISL_582141 | 2020-03   | 9/8/2020 Asia / Japan / Tokyo                           |
| EPI_ISL_582142 | 2020-03   | 9/8/2020 Asia / Japan / Tokyo                           |
| EPI_ISL_582143 | 2020-03   | 9/8/2020 Asia / Japan / Tokyo                           |
| EPI_ISL_582144 | 2020-03   | 9/8/2020 Asia / Japan / Tokyo                           |
| EPI_ISL_582145 | 2020-03   | 9/8/2020 Asia / Japan / Tokyo                           |
| EPI_ISL_582146 | 2020-03   | 9/8/2020 Asia / Japan / Tokyo                           |
| EPI_ISL_582147 | 2020-03   | 9/8/2020 Asia / Japan / Tokyo                           |
| EPI_ISL_641312 | 4/20/2020 | 9/8/2020 North America / USA / Washington / King County |
| EPI_ISL_641313 | 5/11/2020 | 9/8/2020 North America / USA / Washington / King County |
| EPI_ISL_641314 | 4/20/2020 | 9/8/2020 North America / USA / Washington / King County |
| EPI_ISL_641315 | 5/11/2020 | 9/8/2020 North America / USA / Washington / King County |
| EPI_ISL_641316 | 5/26/2020 | 9/8/2020 North America / USA / Washington / King County |
| EPI_ISL_641317 | 6/15/2020 | 9/8/2020 North America / USA / Washington / King County |
| EPI_ISL_528745 | 6/22/2020 | 9/9/2020 Asia / Indonesia / West Java                   |
| EPI_ISL_528746 | 7/21/2020 | 9/9/2020 Asia / Indonesia / West Java                   |
| EPI_ISL_528747 | 6/28/2020 | 9/9/2020 Asia / Indonesia / West Java                   |
| EPI_ISL_528748 | 7/23/2020 | 9/9/2020 Asia / Indonesia / West Java                   |
| EPI_ISL_528749 | 5/7/2020  | 9/9/2020 Asia / Indonesia / West Java                   |
| EPI_ISL_528750 | 7/25/2020 | 9/9/2020 Asia / Indonesia / West Java                   |
| EPI_ISL_528751 | 7/23/2020 | 9/9/2020 Asia / Indonesia / West Java                   |
| EPI_ISL_528752 | 7/23/2020 | 9/9/2020 Asia / Indonesia / West Java                   |
| EPI_ISL_528753 | 8/4/2020  | 9/9/2020 Asia / Indonesia / West Java                   |
| EPI_ISL_528759 | 7/25/2020 | 9/9/2020 Asia / Indonesia / West Java                   |
| EPI_ISL_528788 | 5/11/2020 | 9/9/2020 Europe / United Kingdom / England              |
| EPI_ISL_528790 | 5/21/2020 | 9/9/2020 Europe / United Kingdom / England              |
| EPI_ISL_528791 | 5/28/2020 | 9/9/2020 Europe / United Kingdom / England              |
| EPI_ISL_528793 | 5/11/2020 | 9/9/2020 Europe / United Kingdom / England              |
| EPI_ISL_528795 | 5/20/2020 | 9/9/2020 Europe / United Kingdom / England              |
| EPI_ISL_528796 | 5/17/2020 | 9/9/2020 Europe / United Kingdom / England              |
| EPI_ISL_528797 | 5/17/2020 | 9/9/2020 Europe / United Kingdom / England              |
| EPI_ISL_528799 | 5/14/2020 | 9/9/2020 Europe / United Kingdom / England              |
| EPI_ISL_528801 | 5/9/2020  | 9/9/2020 Europe / United Kingdom / England              |
| EPI_ISL_528802 | 5/12/2020 | 9/9/2020 Europe / United Kingdom / England              |
| EPI_ISL_528803 | 5/16/2020 | 9/9/2020 Europe / United Kingdom / England              |
| EPI_ISL_528805 | 5/12/2020 | 9/9/2020 Europe / United Kingdom / England              |
| EPI_ISL_528806 | 5/9/2020  | 9/9/2020 Europe / United Kingdom / England              |
| EPI_ISL_528807 | 5/27/2020 | 9/9/2020 Europe / United Kingdom / England              |
| EPI_ISL_528808 | 5/17/2020 | 9/9/2020 Europe / United Kingdom / England              |
| EPI_ISL_528809 | 5/29/2020 | 9/9/2020 Asia / India / Andhra Pradesh / Kurnool        |
| EPI_ISL_528810 | 5/24/2020 | 9/9/2020 Asia / India / Telangana / Hyderabad           |
| EPI_ISL_528811 | 5/19/2020 | 9/9/2020 Asia / India / Telangana / Hyderabad           |
| EPI_ISL_528812 | 5/24/2020 | 9/9/2020 Asia / India / Telangana / Hyderabad           |
| EPI_ISL_528813 | 7/19/2020 | 9/9/2020 Asia / India / Telangana / Hyderabad           |
| EPI_ISL_528814 | 5/22/2020 | 9/9/2020 Asia / India / Telangana / Hyderabad           |
| EPI_ISL_528815 | 5/30/2020 | 9/9/2020 Asia / India / Telangana / Hyderabad           |
| EPI_ISL_528816 | 5/23/2020 | 9/9/2020 Asia / India / Telangana / Rangaraddy          |





|                |           |                                              |
|----------------|-----------|----------------------------------------------|
| EPI_ISL_528864 | 7/14/2020 | 9/9/2020 Asia / India / Telangana / Nalgonda |
| EPI_ISL_528865 | 7/14/2020 | 9/9/2020 Asia / India / Telangana / Nalgonda |
| EPI_ISL_528866 | 7/14/2020 | 9/9/2020 Asia / India / Telangana / Nalgonda |
| EPI_ISL_528867 | 7/14/2020 | 9/9/2020 Asia / India / Telangana / Nalgonda |
| EPI_ISL_528868 | 7/14/2020 | 9/9/2020 Asia / India / Telangana / Nalgonda |
| EPI_ISL_528869 | 7/14/2020 | 9/9/2020 Asia / India / Telangana / Nalgonda |
| EPI_ISL_528919 | 3/17/2020 | 9/9/2020 Europe / Italy / Abruzzo            |
| EPI_ISL_528920 | 3/17/2020 | 9/9/2020 Europe / Italy / Abruzzo            |
| EPI_ISL_528921 | 3/17/2020 | 9/9/2020 Europe / Italy / Abruzzo            |
| EPI_ISL_528922 | 3/17/2020 | 9/9/2020 Europe / Italy / Abruzzo            |
| EPI_ISL_528924 | 3/18/2020 | 9/9/2020 Europe / Italy / Abruzzo            |
| EPI_ISL_528925 | 3/18/2020 | 9/9/2020 Europe / Italy / Abruzzo            |
| EPI_ISL_528926 | 3/19/2020 | 9/9/2020 Europe / Italy / Abruzzo            |
| EPI_ISL_528927 | 3/23/2020 | 9/9/2020 Europe / Italy / Abruzzo            |
| EPI_ISL_528928 | 3/23/2020 | 9/9/2020 Europe / Italy / Abruzzo            |
| EPI_ISL_528929 | 3/26/2020 | 9/9/2020 Europe / Italy / Abruzzo            |
| EPI_ISL_528930 | 5/11/2020 | 9/9/2020 Europe / United Kingdom / England   |
| EPI_ISL_528934 | 5/2/2020  | 9/9/2020 Europe / Italy / Lombardy           |
| EPI_ISL_528935 | 5/2/2020  | 9/9/2020 Europe / Italy / Lombardy           |
| EPI_ISL_528936 | 5/2/2020  | 9/9/2020 Europe / Italy / Lombardy           |
| EPI_ISL_528937 | 5/2/2020  | 9/9/2020 Europe / Italy / Lombardy           |
| EPI_ISL_528938 | 5/2/2020  | 9/9/2020 Europe / Italy / Lombardy           |
| EPI_ISL_528939 | 5/2/2020  | 9/9/2020 Europe / Italy / Lombardy           |
| EPI_ISL_528940 | 5/2/2020  | 9/9/2020 Europe / Italy / Lombardy           |
| EPI_ISL_528941 | 5/8/2020  | 9/9/2020 Europe / Italy / Lombardy           |
| EPI_ISL_528943 | 5/8/2020  | 9/9/2020 Europe / Italy / Lombardy           |
| EPI_ISL_528944 | 5/8/2020  | 9/9/2020 Europe / Italy / Lombardy           |
| EPI_ISL_528945 | 5/8/2020  | 9/9/2020 Europe / Italy / Lombardy           |
| EPI_ISL_528946 | 5/8/2020  | 9/9/2020 Europe / Italy / Lombardy           |
| EPI_ISL_528947 | 5/10/2020 | 9/9/2020 Europe / Italy / Lombardy           |
| EPI_ISL_528948 | 5/10/2020 | 9/9/2020 Europe / Italy / Lombardy           |
| EPI_ISL_528949 | 5/10/2020 | 9/9/2020 Europe / Italy / Lombardy           |
| EPI_ISL_528950 | 4/14/2020 | 9/9/2020 Europe / United Kingdom / England   |
| EPI_ISL_528990 | 4/1/2020  | 9/9/2020 Europe / Italy / Abruzzo            |
| EPI_ISL_528991 | 4/2/2020  | 9/9/2020 Europe / Italy / Abruzzo            |
| EPI_ISL_528993 | 5/4/2020  | 9/9/2020 Europe / Italy / Abruzzo            |
| EPI_ISL_528994 | 5/13/2020 | 9/9/2020 Europe / Italy / Abruzzo            |
| EPI_ISL_528995 | 5/14/2020 | 9/9/2020 Europe / Italy / Abruzzo            |
| EPI_ISL_528996 | 5/14/2020 | 9/9/2020 Europe / Italy / Abruzzo            |
| EPI_ISL_528997 | 5/14/2020 | 9/9/2020 Europe / Italy / Abruzzo            |
| EPI_ISL_528998 | 5/14/2020 | 9/9/2020 Europe / Italy / Abruzzo            |
| EPI_ISL_528999 | 5/14/2020 | 9/9/2020 Europe / Italy / Abruzzo            |
| EPI_ISL_529000 | 5/14/2020 | 9/9/2020 Europe / Italy / Abruzzo            |
| EPI_ISL_529001 | 5/14/2020 | 9/9/2020 Europe / Italy / Abruzzo            |
| EPI_ISL_529003 | 5/16/2020 | 9/9/2020 Europe / Italy / Abruzzo            |
| EPI_ISL_529004 | 5/16/2020 | 9/9/2020 Europe / Italy / Abruzzo            |
| EPI_ISL_529005 | 5/16/2020 | 9/9/2020 Europe / Italy / Abruzzo            |

|                |           |                                                        |
|----------------|-----------|--------------------------------------------------------|
| EPI_ISL_529006 | 6/9/2020  | 9/9/2020 Europe / Italy / Abruzzo                      |
| EPI_ISL_529007 | 6/13/2020 | 9/9/2020 Europe / Italy / Abruzzo                      |
| EPI_ISL_529009 | 4/1/2020  | 9/9/2020 Europe / Italy / Abruzzo                      |
| EPI_ISL_529010 | 7/7/2020  | 9/9/2020 Europe / Italy / Abruzzo                      |
| EPI_ISL_529011 | 7/7/2020  | 9/9/2020 Europe / Italy / Abruzzo                      |
| EPI_ISL_529012 | 7/9/2020  | 9/9/2020 Europe / Italy / Abruzzo                      |
| EPI_ISL_529013 | 7/10/2020 | 9/9/2020 Europe / Italy / Abruzzo                      |
| EPI_ISL_529014 | 7/20/2020 | 9/9/2020 Europe / Italy / Abruzzo                      |
| EPI_ISL_529015 | 7/20/2020 | 9/9/2020 Europe / Italy / Abruzzo                      |
| EPI_ISL_529016 | 4/2/2020  | 9/9/2020 Europe / Italy / Abruzzo                      |
| EPI_ISL_529018 | 4/17/2020 | 9/9/2020 Europe / Italy / Abruzzo                      |
| EPI_ISL_529019 | 4/27/2020 | 9/9/2020 Europe / Italy / Abruzzo                      |
| EPI_ISL_529020 | 4/29/2020 | 9/9/2020 Europe / Italy / Abruzzo                      |
| EPI_ISL_529021 | 4/29/2020 | 9/9/2020 Europe / Italy / Abruzzo                      |
| EPI_ISL_529022 | 5/6/2020  | 9/9/2020 Europe / Italy / Abruzzo                      |
| EPI_ISL_529026 | 3/30/2020 | 9/9/2020 Europe / Italy / Abruzzo                      |
| EPI_ISL_529028 | 8/3/2020  | 9/9/2020 Europe / United Kingdom / England             |
| EPI_ISL_529031 | 5/19/2020 | 9/9/2020 Africa / Egypt / Cairo                        |
| EPI_ISL_529032 | 6/19/2020 | 9/9/2020 Africa / Egypt / Cairo                        |
| EPI_ISL_529033 | 3/7/2020  | 9/9/2020 North America / USA / New York                |
| EPI_ISL_529034 | 3/8/2020  | 9/9/2020 North America / USA / New York                |
| EPI_ISL_529035 | 4/13/2020 | 9/9/2020 North America / USA / New York                |
| EPI_ISL_529036 | 4/11/2020 | 9/9/2020 North America / USA / New York                |
| EPI_ISL_529065 | 6/17/2020 | 9/10/2020 South America / Peru / Lima / Cañete         |
| EPI_ISL_529066 | 6/17/2020 | 9/10/2020 South America / Peru / Lima / Lima           |
| EPI_ISL_529067 | 6/8/2020  | 9/10/2020 South America / Peru / Lambayeque / Chiclayo |
| EPI_ISL_529068 | 3/20/2020 | 9/10/2020 South America / Peru / Lima / Lima           |
| EPI_ISL_529069 | 6/17/2020 | 9/10/2020 South America / Peru / Lima / Lima           |
| EPI_ISL_529070 | 6/17/2020 | 9/10/2020 South America / Peru / Callao                |
| EPI_ISL_529071 | 6/16/2020 | 9/10/2020 South America / Peru / Lima / Lima           |
| EPI_ISL_529072 | 6/17/2020 | 9/10/2020 South America / Peru / Lima / Lima           |
| EPI_ISL_529073 | 6/18/2020 | 9/10/2020 South America / Peru / Callao                |
| EPI_ISL_529074 | 6/17/2020 | 9/10/2020 South America / Peru / Callao                |
| EPI_ISL_529075 | 6/16/2020 | 9/10/2020 South America / Peru / Lima / Lima           |
| EPI_ISL_529076 | 6/18/2020 | 9/10/2020 South America / Peru / Lima / Lima           |
| EPI_ISL_529077 | 6/17/2020 | 9/10/2020 South America / Peru / Lima / Lima           |
| EPI_ISL_529078 | 6/17/2020 | 9/10/2020 South America / Peru / Ancash / Huaraz       |
| EPI_ISL_529079 | 6/16/2020 | 9/10/2020 South America / Peru / Callao                |
| EPI_ISL_529135 | 3/29/2020 | 9/10/2020 Asia / Japan                                 |
| EPI_ISL_529138 | 5/11/2020 | 9/10/2020 Asia / Indonesia / East Java / Surabaya      |
| EPI_ISL_529218 | 3/23/2020 | 9/10/2020 Europe / United Kingdom / England            |
| EPI_ISL_529219 | 3/25/2020 | 9/10/2020 Europe / United Kingdom / England            |
| EPI_ISL_529220 | 3/25/2020 | 9/10/2020 Europe / United Kingdom / England            |
| EPI_ISL_529221 | 3/24/2020 | 9/10/2020 Europe / United Kingdom / England            |
| EPI_ISL_529222 | 3/26/2020 | 9/10/2020 Europe / United Kingdom / England            |
| EPI_ISL_529223 | 3/27/2020 | 9/10/2020 Europe / United Kingdom / England            |
| EPI_ISL_529224 | 8/18/2020 | 9/10/2020 Europe / United Kingdom / England            |









|                |           |           |                                                        |
|----------------|-----------|-----------|--------------------------------------------------------|
| EPI_ISL_529687 | 8/25/2020 | 9/10/2020 | Europe / United Kingdom / Scotland                     |
| EPI_ISL_529688 | 8/27/2020 | 9/10/2020 | Europe / United Kingdom / Scotland                     |
| EPI_ISL_529689 | 4/27/2020 | 9/10/2020 | Europe / United Kingdom / Scotland                     |
| EPI_ISL_529690 | 5/25/2020 | 9/10/2020 | Europe / United Kingdom / Scotland                     |
| EPI_ISL_529691 | 4/2/2020  | 9/10/2020 | Europe / United Kingdom / Scotland                     |
| EPI_ISL_529692 | 4/3/2020  | 9/10/2020 | Europe / United Kingdom / Scotland                     |
| EPI_ISL_529693 | 8/23/2020 | 9/10/2020 | Europe / United Kingdom / Scotland                     |
| EPI_ISL_529694 | 8/19/2020 | 9/10/2020 | Europe / United Kingdom / Scotland                     |
| EPI_ISL_529695 | 8/24/2020 | 9/10/2020 | Europe / United Kingdom / Scotland                     |
| EPI_ISL_529696 | 8/31/2020 | 9/10/2020 | Europe / United Kingdom / Scotland                     |
| EPI_ISL_529697 | 7/30/2020 | 9/10/2020 | Europe / United Kingdom / Wales                        |
| EPI_ISL_529698 | 8/16/2020 | 9/10/2020 | Europe / United Kingdom / Wales                        |
| EPI_ISL_529699 | 8/18/2020 | 9/10/2020 | Europe / United Kingdom / Wales                        |
| EPI_ISL_529700 | 8/6/2020  | 9/10/2020 | Europe / United Kingdom / Wales                        |
| EPI_ISL_529701 | 8/18/2020 | 9/10/2020 | Europe / United Kingdom / Wales                        |
| EPI_ISL_529702 | 8/18/2020 | 9/10/2020 | Europe / United Kingdom / Wales                        |
| EPI_ISL_529703 | 8/18/2020 | 9/10/2020 | Europe / United Kingdom / Wales                        |
| EPI_ISL_529704 | 8/7/2020  | 9/10/2020 | Europe / United Kingdom / Wales                        |
| EPI_ISL_529705 | 8/20/2020 | 9/10/2020 | Europe / United Kingdom / Wales                        |
| EPI_ISL_529706 | 8/25/2020 | 9/10/2020 | Europe / United Kingdom / Wales                        |
| EPI_ISL_529707 | 8/19/2020 | 9/10/2020 | Europe / United Kingdom / Wales                        |
| EPI_ISL_529708 | 8/29/2020 | 9/10/2020 | Europe / United Kingdom / Wales                        |
| EPI_ISL_529709 | 8/30/2020 | 9/10/2020 | Europe / United Kingdom / Wales                        |
| EPI_ISL_529710 | 8/30/2020 | 9/10/2020 | Europe / United Kingdom / Wales                        |
| EPI_ISL_529711 | 8/25/2020 | 9/10/2020 | Europe / United Kingdom / Wales                        |
| EPI_ISL_529712 | 8/30/2020 | 9/10/2020 | Europe / United Kingdom / Wales                        |
| EPI_ISL_529713 | 8/28/2020 | 9/10/2020 | Europe / United Kingdom / Wales                        |
| EPI_ISL_529714 | 8/25/2020 | 9/10/2020 | Europe / United Kingdom / Wales                        |
| EPI_ISL_529715 | 8/21/2020 | 9/10/2020 | Europe / United Kingdom / Wales                        |
| EPI_ISL_529716 | 8/25/2020 | 9/10/2020 | Europe / United Kingdom / Wales                        |
| EPI_ISL_529717 | 8/20/2020 | 9/10/2020 | Europe / United Kingdom / Wales                        |
| EPI_ISL_529720 | 8/14/2020 | 9/10/2020 | Africa / South Africa / KwaZulu-Natal / Amajuba        |
| EPI_ISL_529721 | 8/16/2020 | 9/10/2020 | Africa / South Africa / KwaZulu-Natal / King Cetshwayo |
| EPI_ISL_529723 | 8/15/2020 | 9/10/2020 | Africa / South Africa / KwaZulu-Natal / uThungulu      |
| EPI_ISL_529724 | 8/12/2020 | 9/10/2020 | Africa / South Africa / KwaZulu-Natal / Amajuba        |
| EPI_ISL_529726 | 8/14/2020 | 9/10/2020 | Africa / South Africa / KwaZulu-Natal / Amajuba        |
| EPI_ISL_529728 | 8/14/2020 | 9/10/2020 | Africa / South Africa / KwaZulu-Natal / Amajuba        |
| EPI_ISL_529729 | 8/16/2020 | 9/10/2020 | Africa / South Africa / KwaZulu-Natal / eThekwini      |
| EPI_ISL_529730 | 8/15/2020 | 9/10/2020 | Africa / South Africa / KwaZulu-Natal / Ugu            |
| EPI_ISL_529731 | 8/16/2020 | 9/10/2020 | Africa / South Africa / KwaZulu-Natal / eThekwini      |
| EPI_ISL_529732 | 8/16/2020 | 9/10/2020 | Africa / South Africa / KwaZulu-Natal / eThekwini      |
| EPI_ISL_529733 | 8/16/2020 | 9/10/2020 | Africa / South Africa / KwaZulu-Natal / Harry Gwala    |
| EPI_ISL_529734 | 8/15/2020 | 9/10/2020 | Africa / South Africa / KwaZulu-Natal / Ugu            |
| EPI_ISL_529735 | 8/14/2020 | 9/10/2020 | Africa / South Africa / KwaZulu-Natal / uThungulu      |
| EPI_ISL_529736 | 8/14/2020 | 9/10/2020 | Africa / South Africa / KwaZulu-Natal / Ugu            |
| EPI_ISL_529737 | 8/13/2020 | 9/10/2020 | Africa / South Africa / KwaZulu-Natal / Ugu            |
| EPI_ISL_529738 | 8/14/2020 | 9/10/2020 | Africa / South Africa / KwaZulu-Natal / uThungulu      |





|                |           |                                                            |
|----------------|-----------|------------------------------------------------------------|
| EPI_ISL_529790 | 8/24/2020 | 9/10/2020 Africa / South Africa / KwaZulu-Natal / iLembe   |
| EPI_ISL_529791 | 8/24/2020 | 9/10/2020 Africa / South Africa / KwaZulu-Natal / iLembe   |
| EPI_ISL_529792 | 8/24/2020 | 9/10/2020 Africa / South Africa / KwaZulu-Natal / iLembe   |
| EPI_ISL_529793 | 8/24/2020 | 9/10/2020 Africa / South Africa / KwaZulu-Natal / iLembe   |
| EPI_ISL_529794 | 8/24/2020 | 9/10/2020 Africa / South Africa / KwaZulu-Natal / iLembe   |
| EPI_ISL_529796 | 8/20/2020 | 9/10/2020 Africa / South Africa / KwaZulu-Natal / Zululand |
| EPI_ISL_529797 | 8/24/2020 | 9/10/2020 Africa / South Africa / KwaZulu-Natal / iLembe   |
| EPI_ISL_529798 | 8/24/2020 | 9/10/2020 Africa / South Africa / KwaZulu-Natal / iLembe   |
| EPI_ISL_529799 | 8/24/2020 | 9/10/2020 Africa / South Africa / KwaZulu-Natal / uThukela |
| EPI_ISL_529800 | 8/25/2020 | 9/10/2020 Africa / South Africa / KwaZulu-Natal / uThukela |
| EPI_ISL_529801 | 8/25/2020 | 9/10/2020 Africa / South Africa / KwaZulu-Natal / Amajuba  |
| EPI_ISL_529802 | 8/25/2020 | 9/10/2020 Africa / South Africa / KwaZulu-Natal / uThukela |
| EPI_ISL_529818 | 3/25/2020 | 9/10/2020 North America / USA / Michigan                   |
| EPI_ISL_529830 | 6/23/2020 | 9/10/2020 North America / USA / Michigan                   |
| EPI_ISL_529832 | 6/26/2020 | 9/10/2020 North America / USA / Michigan                   |
| EPI_ISL_529850 | 8/8/2020  | 9/10/2020 North America / USA / Michigan                   |
| EPI_ISL_529874 | 8/5/2020  | 9/10/2020 North America / USA / Michigan                   |
| EPI_ISL_529888 | 8/13/2020 | 9/10/2020 North America / USA / Michigan                   |
| EPI_ISL_529908 | 6/18/2020 | 9/10/2020 North America / USA / Virginia                   |
| EPI_ISL_529909 | 6/21/2020 | 9/10/2020 North America / USA / Virginia                   |
| EPI_ISL_529910 | 6/21/2020 | 9/10/2020 North America / USA / Virginia                   |
| EPI_ISL_529911 | 6/19/2020 | 9/10/2020 North America / USA / Virginia                   |
| EPI_ISL_529912 | 6/18/2020 | 9/10/2020 North America / USA / Virginia                   |
| EPI_ISL_529913 | 6/20/2020 | 9/10/2020 North America / USA / Virginia                   |
| EPI_ISL_529914 | 6/18/2020 | 9/10/2020 North America / USA / Virginia                   |
| EPI_ISL_529915 | 6/17/2020 | 9/10/2020 North America / USA / Virginia                   |
| EPI_ISL_529916 | 6/15/2020 | 9/10/2020 North America / USA / Virginia                   |
| EPI_ISL_529917 | 6/19/2020 | 9/10/2020 North America / USA / Virginia                   |
| EPI_ISL_529918 | 6/19/2020 | 9/10/2020 North America / USA / Virginia                   |
| EPI_ISL_529919 | 6/18/2020 | 9/10/2020 North America / USA / Virginia                   |
| EPI_ISL_529920 | 6/18/2020 | 9/10/2020 North America / USA / Virginia                   |
| EPI_ISL_529921 | 6/18/2020 | 9/10/2020 North America / USA / Virginia                   |
| EPI_ISL_529922 | 4/25/2020 | 9/10/2020 North America / USA / Virginia                   |
| EPI_ISL_529923 | 4/24/2020 | 9/10/2020 North America / USA / Virginia                   |
| EPI_ISL_529924 | 4/25/2020 | 9/10/2020 North America / USA / Virginia                   |
| EPI_ISL_529925 | 4/25/2020 | 9/10/2020 North America / USA / Virginia                   |
| EPI_ISL_529926 | 4/24/2020 | 9/10/2020 North America / USA / Virginia                   |
| EPI_ISL_529927 | 4/25/2020 | 9/10/2020 North America / USA / Virginia                   |
| EPI_ISL_529928 | 4/25/2020 | 9/10/2020 North America / USA / Virginia                   |
| EPI_ISL_529929 | 4/25/2020 | 9/10/2020 North America / USA / Virginia                   |
| EPI_ISL_529930 | 4/25/2020 | 9/10/2020 North America / USA / Virginia                   |
| EPI_ISL_529931 | 4/25/2020 | 9/10/2020 North America / USA / Virginia                   |
| EPI_ISL_529932 | 4/25/2020 | 9/10/2020 North America / USA / Virginia                   |
| EPI_ISL_529933 | 4/25/2020 | 9/10/2020 North America / USA / Virginia                   |
| EPI_ISL_529934 | 4/25/2020 | 9/10/2020 North America / USA / Virginia                   |
| EPI_ISL_529935 | 4/25/2020 | 9/10/2020 North America / USA / Virginia                   |
| EPI_ISL_529936 | 6/23/2020 | 9/10/2020 North America / USA / Virginia                   |

|                |           |                                                   |
|----------------|-----------|---------------------------------------------------|
| EPI_ISL_529937 | 7/30/2020 | 9/10/2020 North America / USA / Virginia          |
| EPI_ISL_529938 | 7/30/2020 | 9/10/2020 North America / USA / Virginia          |
| EPI_ISL_529939 | 7/30/2020 | 9/10/2020 North America / USA / Virginia          |
| EPI_ISL_529940 | 7/30/2020 | 9/10/2020 North America / USA / Virginia          |
| EPI_ISL_529941 | 7/30/2020 | 9/10/2020 North America / USA / Virginia          |
| EPI_ISL_529942 | 7/30/2020 | 9/10/2020 North America / USA / Virginia          |
| EPI_ISL_529943 | 8/6/2020  | 9/10/2020 North America / USA / Virginia          |
| EPI_ISL_529944 | 8/6/2020  | 9/10/2020 North America / USA / Virginia          |
| EPI_ISL_529945 | 8/6/2020  | 9/10/2020 North America / USA / Virginia          |
| EPI_ISL_529946 | 8/6/2020  | 9/10/2020 North America / USA / Virginia          |
| EPI_ISL_529947 | 8/6/2020  | 9/10/2020 North America / USA / Virginia          |
| EPI_ISL_529948 | 8/6/2020  | 9/10/2020 North America / USA / Virginia          |
| EPI_ISL_529949 | 8/6/2020  | 9/10/2020 North America / USA / Virginia          |
| EPI_ISL_529950 | 8/6/2020  | 9/10/2020 North America / USA / Virginia          |
| EPI_ISL_529951 | 8/6/2020  | 9/10/2020 North America / USA / Virginia          |
| EPI_ISL_529952 | 8/6/2020  | 9/10/2020 North America / USA / Virginia          |
| EPI_ISL_529953 | 8/6/2020  | 9/10/2020 North America / USA / Virginia          |
| EPI_ISL_529954 | 8/12/2020 | 9/10/2020 North America / USA / Virginia          |
| EPI_ISL_529955 | 8/12/2020 | 9/10/2020 North America / USA / Virginia          |
| EPI_ISL_529956 | 8/12/2020 | 9/10/2020 North America / USA / Virginia          |
| EPI_ISL_529957 | 8/12/2020 | 9/10/2020 North America / USA / Virginia          |
| EPI_ISL_529958 | 8/12/2020 | 9/10/2020 North America / USA / Virginia          |
| EPI_ISL_529959 | 8/12/2020 | 9/10/2020 North America / USA / Virginia          |
| EPI_ISL_529960 | 8/12/2020 | 9/10/2020 North America / USA / Virginia          |
| EPI_ISL_529961 | 3/12/2020 | 9/10/2020 Asia / Indonesia / East Java / Surabaya |
| EPI_ISL_529962 | 3/16/2020 | 9/10/2020 Asia / Indonesia / East Java / Surabaya |
| EPI_ISL_529963 | 7/18/2020 | 9/10/2020 Asia / Indonesia / East Java / Surabaya |
| EPI_ISL_529964 | 3/30/2020 | 9/10/2020 Asia / Indonesia / East Java / Pasuruan |
| EPI_ISL_529965 | 4/22/2020 | 9/10/2020 Asia / Indonesia / East Java / Surabaya |
| EPI_ISL_529966 | 5/5/2020  | 9/10/2020 Asia / Indonesia / East Java / Sidoarjo |
| EPI_ISL_529967 | 6/9/2020  | 9/10/2020 Asia / Indonesia / East Java / Sidoarjo |
| EPI_ISL_529972 | 4/1/2020  | 9/10/2020 Europe / Spain / Madrid                 |
| EPI_ISL_529973 | 4/1/2020  | 9/10/2020 Europe / Spain / Madrid                 |
| EPI_ISL_529974 | 4/2/2020  | 9/10/2020 Europe / Spain / Madrid                 |
| EPI_ISL_529975 | 4/5/2020  | 9/10/2020 Europe / Spain / Madrid                 |
| EPI_ISL_529976 | 4/5/2020  | 9/10/2020 Europe / Spain / Madrid                 |
| EPI_ISL_529977 | 4/6/2020  | 9/10/2020 Europe / Spain / Madrid                 |
| EPI_ISL_529978 | 4/6/2020  | 9/10/2020 Europe / Spain / Madrid                 |
| EPI_ISL_529979 | 4/8/2020  | 9/10/2020 Europe / Spain / Madrid                 |
| EPI_ISL_529980 | 4/9/2020  | 9/10/2020 Europe / Spain / Madrid                 |
| EPI_ISL_529981 | 4/10/2020 | 9/10/2020 Europe / Spain / Madrid                 |
| EPI_ISL_529982 | 3/27/2020 | 9/10/2020 Europe / Spain / Madrid                 |
| EPI_ISL_529983 | 3/27/2020 | 9/10/2020 Europe / Spain / Madrid                 |
| EPI_ISL_529984 | 4/11/2020 | 9/10/2020 Europe / Spain / Madrid                 |
| EPI_ISL_529985 | 4/12/2020 | 9/10/2020 Europe / Spain / Madrid                 |
| EPI_ISL_529986 | 4/13/2020 | 9/10/2020 Europe / Spain / Madrid                 |
| EPI_ISL_529987 | 4/14/2020 | 9/10/2020 Europe / Spain / Madrid                 |





|                |           |           |                                                |
|----------------|-----------|-----------|------------------------------------------------|
| EPI_ISL_530083 | 4/30/2020 | 9/10/2020 | Europe / Spain / Madrid                        |
| EPI_ISL_530084 | 4/30/2020 | 9/10/2020 | Europe / Spain / Madrid                        |
| EPI_ISL_530085 | 4/22/2020 | 9/10/2020 | Europe / Spain / Madrid                        |
| EPI_ISL_530086 | 5/2/2020  | 9/10/2020 | Europe / Spain / Madrid                        |
| EPI_ISL_530087 | 5/2/2020  | 9/10/2020 | Europe / Spain / Madrid                        |
| EPI_ISL_530088 | 5/3/2020  | 9/10/2020 | Europe / Spain / Madrid                        |
| EPI_ISL_530089 | 5/6/2020  | 9/10/2020 | Europe / Spain / Madrid                        |
| EPI_ISL_530090 | 5/13/2020 | 9/10/2020 | Europe / Spain / Madrid                        |
| EPI_ISL_530091 | 5/21/2020 | 9/10/2020 | Europe / Spain / Madrid                        |
| EPI_ISL_530092 | 4/20/2020 | 9/10/2020 | Europe / Spain / Madrid                        |
| EPI_ISL_530093 | 5/3/2020  | 9/10/2020 | Europe / Spain / Madrid                        |
| EPI_ISL_530094 | 3/6/2020  | 9/10/2020 | Europe / Spain / Madrid                        |
| EPI_ISL_530095 | 3/4/2020  | 9/10/2020 | Europe / Spain / Madrid                        |
| EPI_ISL_530096 | 3/13/2020 | 9/10/2020 | Europe / Spain / Madrid                        |
| EPI_ISL_530097 | 3/6/2020  | 9/10/2020 | Europe / Spain / Madrid                        |
| EPI_ISL_530098 | 3/13/2020 | 9/10/2020 | Europe / Spain / Madrid                        |
| EPI_ISL_530099 | 3/4/2020  | 9/10/2020 | Europe / Spain / Madrid                        |
| EPI_ISL_530100 | 4/20/2020 | 9/10/2020 | Europe / Spain / Madrid                        |
| EPI_ISL_530101 | 4/20/2020 | 9/10/2020 | Europe / Spain / Madrid                        |
| EPI_ISL_530102 | 4/20/2020 | 9/10/2020 | Europe / Spain / Madrid                        |
| EPI_ISL_530103 | 4/20/2020 | 9/10/2020 | Europe / Spain / Madrid                        |
| EPI_ISL_530104 | 4/20/2020 | 9/10/2020 | Europe / Spain / Madrid                        |
| EPI_ISL_530105 | 4/17/2020 | 9/10/2020 | Europe / Spain / Madrid                        |
| EPI_ISL_530106 | 4/17/2020 | 9/10/2020 | Europe / Spain / Madrid                        |
| EPI_ISL_530107 | 4/17/2020 | 9/10/2020 | Europe / Spain / Madrid                        |
| EPI_ISL_530108 | 4/21/2020 | 9/10/2020 | Europe / Spain / Madrid                        |
| EPI_ISL_530109 | 3/17/2020 | 9/10/2020 | Europe / Spain / Madrid                        |
| EPI_ISL_530110 | 3/17/2020 | 9/10/2020 | Europe / Spain / Madrid                        |
| EPI_ISL_530111 | 4/16/2020 | 9/10/2020 | Europe / Spain / Madrid                        |
| EPI_ISL_530112 | 3/17/2020 | 9/10/2020 | Europe / Spain / Madrid                        |
| EPI_ISL_530113 | 3/17/2020 | 9/10/2020 | Europe / Spain / Madrid                        |
| EPI_ISL_530114 | 5/7/2020  | 9/10/2020 | Europe / Spain / Madrid                        |
| EPI_ISL_530115 | 5/7/2020  | 9/10/2020 | Europe / Spain / Madrid                        |
| EPI_ISL_530116 | 5/11/2020 | 9/10/2020 | Europe / Spain / Madrid                        |
| EPI_ISL_530117 | 5/14/2020 | 9/10/2020 | Europe / Spain / Madrid                        |
| EPI_ISL_530118 | 5/14/2020 | 9/10/2020 | Europe / Spain / Madrid                        |
| EPI_ISL_530119 | 5/21/2020 | 9/10/2020 | Europe / Spain / Madrid                        |
| EPI_ISL_530122 | 3/11/2020 | 9/10/2020 | Europe / Switzerland / Basel-Stadt             |
| EPI_ISL_530124 | 5/11/2020 | 9/10/2020 | North America / USA / Washington               |
| EPI_ISL_530125 | 5/19/2020 | 9/10/2020 | North America / USA / Washington               |
| EPI_ISL_530126 | 7/13/2020 | 9/10/2020 | North America / USA / Washington / King County |
| EPI_ISL_530127 | 8/1/2020  | 9/10/2020 | North America / USA / Washington / King County |
| EPI_ISL_530128 | 8/1/2020  | 9/10/2020 | North America / USA / Washington / King County |
| EPI_ISL_530129 | 8/3/2020  | 9/10/2020 | North America / USA / Washington / King County |
| EPI_ISL_530131 | 8/5/2020  | 9/10/2020 | North America / USA / Washington / King County |
| EPI_ISL_530132 | 8/6/2020  | 9/10/2020 | North America / USA / Washington               |
| EPI_ISL_530136 | 8/9/2020  | 9/10/2020 | North America / USA / Washington / King County |



|                |           |           |                                  |
|----------------|-----------|-----------|----------------------------------|
| EPI_ISL_530186 | 5/20/2020 | 9/10/2020 | North America / USA / Minnesota  |
| EPI_ISL_530187 | 5/19/2020 | 9/10/2020 | North America / USA / Minnesota  |
| EPI_ISL_530188 | 5/18/2020 | 9/10/2020 | North America / USA / Minnesota  |
| EPI_ISL_530189 | 5/18/2020 | 9/10/2020 | North America / USA / Minnesota  |
| EPI_ISL_530190 | 5/15/2020 | 9/10/2020 | North America / USA / Minnesota  |
| EPI_ISL_530191 | 5/13/2020 | 9/10/2020 | North America / USA / Minnesota  |
| EPI_ISL_530192 | 5/12/2020 | 9/10/2020 | North America / USA / Minnesota  |
| EPI_ISL_530193 | 5/11/2020 | 9/10/2020 | North America / USA / Minnesota  |
| EPI_ISL_530194 | 5/11/2020 | 9/10/2020 | North America / USA / Minnesota  |
| EPI_ISL_530195 | 5/8/2020  | 9/10/2020 | North America / USA / Minnesota  |
| EPI_ISL_530196 | 5/5/2020  | 9/10/2020 | North America / USA / Minnesota  |
| EPI_ISL_530197 | 5/5/2020  | 9/10/2020 | North America / USA / Minnesota  |
| EPI_ISL_530198 | 5/5/2020  | 9/10/2020 | North America / USA / Minnesota  |
| EPI_ISL_530199 | 5/4/2020  | 9/10/2020 | North America / USA / Minnesota  |
| EPI_ISL_530200 | 5/3/2020  | 9/10/2020 | North America / USA / Minnesota  |
| EPI_ISL_530201 | 5/2/2020  | 9/10/2020 | North America / USA / Minnesota  |
| EPI_ISL_530202 | 5/1/2020  | 9/10/2020 | North America / USA / Minnesota  |
| EPI_ISL_530203 | 4/29/2020 | 9/10/2020 | North America / USA / Minnesota  |
| EPI_ISL_530204 | 4/29/2020 | 9/10/2020 | North America / USA / Minnesota  |
| EPI_ISL_530205 | 4/29/2020 | 9/10/2020 | North America / USA / Minnesota  |
| EPI_ISL_530206 | 4/28/2020 | 9/10/2020 | North America / USA / Minnesota  |
| EPI_ISL_530207 | 4/27/2020 | 9/10/2020 | North America / USA / Minnesota  |
| EPI_ISL_530208 | 4/26/2020 | 9/10/2020 | North America / USA / Minnesota  |
| EPI_ISL_530209 | 4/25/2020 | 9/10/2020 | North America / USA / Minnesota  |
| EPI_ISL_530210 | 4/25/2020 | 9/10/2020 | North America / USA / Minnesota  |
| EPI_ISL_530211 | 4/25/2020 | 9/10/2020 | North America / USA / Minnesota  |
| EPI_ISL_530212 | 4/24/2020 | 9/10/2020 | North America / USA / Minnesota  |
| EPI_ISL_530213 | 4/24/2020 | 9/10/2020 | North America / USA / Minnesota  |
| EPI_ISL_530215 | 4/20/2020 | 9/10/2020 | North America / USA / Minnesota  |
| EPI_ISL_530216 | 4/9/2020  | 9/10/2020 | North America / USA / Minnesota  |
| EPI_ISL_530217 | 4/7/2020  | 9/10/2020 | North America / USA / Minnesota  |
| EPI_ISL_530218 | 4/8/2020  | 9/10/2020 | North America / USA / Minnesota  |
| EPI_ISL_530219 | 4/5/2020  | 9/10/2020 | North America / USA / Minnesota  |
| EPI_ISL_530220 | 4/1/2020  | 9/10/2020 | North America / USA / Minnesota  |
| EPI_ISL_530221 | 4/2/2020  | 9/10/2020 | North America / USA / Minnesota  |
| EPI_ISL_530222 | 3/31/2020 | 9/10/2020 | North America / USA / Minnesota  |
| EPI_ISL_530223 | 3/31/2020 | 9/10/2020 | North America / USA / Minnesota  |
| EPI_ISL_530224 | 3/29/2020 | 9/10/2020 | North America / USA / Minnesota  |
| EPI_ISL_530225 | 8/19/2020 | 9/11/2020 | Oceania / Australia / Queensland |
| EPI_ISL_530226 | 3/31/2020 | 9/11/2020 | Oceania / Australia / Queensland |
| EPI_ISL_530227 | 4/1/2020  | 9/11/2020 | Oceania / Australia / Queensland |
| EPI_ISL_530228 | 4/1/2020  | 9/11/2020 | Oceania / Australia / Queensland |
| EPI_ISL_530229 | 4/1/2020  | 9/11/2020 | Oceania / Australia / Queensland |
| EPI_ISL_530230 | 4/1/2020  | 9/11/2020 | Oceania / Australia / Queensland |
| EPI_ISL_530231 | 4/2/2020  | 9/11/2020 | Oceania / Australia / Queensland |
| EPI_ISL_530232 | 4/3/2020  | 9/11/2020 | Oceania / Australia / Queensland |
| EPI_ISL_530233 | 4/8/2020  | 9/11/2020 | Oceania / Australia / Queensland |





|                |           |                                                               |
|----------------|-----------|---------------------------------------------------------------|
| EPI_ISL_530281 | 8/30/2020 | 9/11/2020 Oceania / Australia / Queensland                    |
| EPI_ISL_530282 | 8/30/2020 | 9/11/2020 Oceania / Australia / Queensland                    |
| EPI_ISL_530283 | 8/28/2020 | 9/11/2020 Oceania / Australia / Queensland                    |
| EPI_ISL_530334 | 8/31/2020 | 9/11/2020 Oceania / Australia / New South Wales               |
| EPI_ISL_530335 | 8/31/2020 | 9/11/2020 Oceania / Australia / New South Wales               |
| EPI_ISL_530336 | 9/2/2020  | 9/11/2020 Oceania / Australia / New South Wales               |
| EPI_ISL_530337 | 8/29/2020 | 9/11/2020 Oceania / Australia / New South Wales               |
| EPI_ISL_530338 | 8/26/2020 | 9/11/2020 Oceania / Australia / New South Wales               |
| EPI_ISL_530339 | 9/1/2020  | 9/11/2020 Oceania / Australia / New South Wales               |
| EPI_ISL_530340 | 9/2/2020  | 9/11/2020 Oceania / Australia / New South Wales               |
| EPI_ISL_530347 | 3/18/2020 | 9/11/2020 Europe / Czech Republic / Zlin / Frystak            |
| EPI_ISL_530348 | 3/20/2020 | 9/11/2020 Europe / Czech Republic / Plzen / Domazlice         |
| EPI_ISL_530349 | 3/20/2020 | 9/11/2020 Europe / Czech Republic / Usti nad Labem / Litvinov |
| EPI_ISL_530350 | 3/18/2020 | 9/11/2020 Europe / Czech Republic / Brno                      |
| EPI_ISL_530352 | 8/29/2020 | 9/11/2020 Europe / United Kingdom / England                   |
| EPI_ISL_530353 | 8/29/2020 | 9/11/2020 Europe / United Kingdom / England                   |
| EPI_ISL_530358 | 8/30/2020 | 9/11/2020 Europe / United Kingdom / England                   |
| EPI_ISL_530360 | 8/26/2020 | 9/11/2020 Europe / United Kingdom / England                   |
| EPI_ISL_530361 | 8/29/2020 | 9/11/2020 Europe / United Kingdom / Scotland                  |
| EPI_ISL_530362 | 8/29/2020 | 9/11/2020 Europe / United Kingdom / England                   |
| EPI_ISL_530363 | 8/26/2020 | 9/11/2020 Europe / United Kingdom / Northern Ireland          |
| EPI_ISL_530366 | 8/29/2020 | 9/11/2020 Europe / United Kingdom / Scotland                  |
| EPI_ISL_530374 | 8/26/2020 | 9/11/2020 Europe / United Kingdom / England                   |
| EPI_ISL_530375 | 8/29/2020 | 9/11/2020 Europe / United Kingdom / England                   |
| EPI_ISL_530378 | 8/29/2020 | 9/11/2020 Europe / United Kingdom / England                   |
| EPI_ISL_530380 | 8/26/2020 | 9/11/2020 Europe / United Kingdom / England                   |
| EPI_ISL_530382 | 8/29/2020 | 9/11/2020 Europe / United Kingdom / England                   |
| EPI_ISL_530383 | 8/26/2020 | 9/11/2020 Europe / United Kingdom / England                   |
| EPI_ISL_530384 | 8/29/2020 | 9/11/2020 Europe / United Kingdom / England                   |
| EPI_ISL_530386 | 8/29/2020 | 9/11/2020 Europe / United Kingdom / Scotland                  |
| EPI_ISL_530387 | 8/29/2020 | 9/11/2020 Europe / United Kingdom / England                   |
| EPI_ISL_530390 | 8/25/2020 | 9/11/2020 Europe / United Kingdom / England                   |
| EPI_ISL_530394 | 8/19/2020 | 9/11/2020 Europe / United Kingdom / Northern Ireland          |
| EPI_ISL_530395 | 8/17/2020 | 9/11/2020 Europe / United Kingdom / England                   |
| EPI_ISL_530396 | 8/17/2020 | 9/11/2020 Europe / United Kingdom / England                   |
| EPI_ISL_530397 | 8/19/2020 | 9/11/2020 Europe / United Kingdom / Northern Ireland          |
| EPI_ISL_530399 | 8/20/2020 | 9/11/2020 Europe / United Kingdom / England                   |
| EPI_ISL_530400 | 8/17/2020 | 9/11/2020 Europe / United Kingdom / England                   |
| EPI_ISL_530401 | 8/17/2020 | 9/11/2020 Europe / United Kingdom / England                   |
| EPI_ISL_530402 | 8/17/2020 | 9/11/2020 Europe / United Kingdom / England                   |
| EPI_ISL_530403 | 8/18/2020 | 9/11/2020 Europe / United Kingdom / England                   |
| EPI_ISL_530404 | 8/17/2020 | 9/11/2020 Europe / United Kingdom / England                   |
| EPI_ISL_530406 | 8/17/2020 | 9/11/2020 Europe / United Kingdom / England                   |
| EPI_ISL_530407 | 8/17/2020 | 9/11/2020 Europe / United Kingdom / England                   |
| EPI_ISL_530408 | 8/17/2020 | 9/11/2020 Europe / United Kingdom / England                   |
| EPI_ISL_530409 | 8/17/2020 | 9/11/2020 Europe / United Kingdom / England                   |
| EPI_ISL_530410 | 8/20/2020 | 9/11/2020 Europe / United Kingdom / Scotland                  |



















|                |           |           |                                            |
|----------------|-----------|-----------|--------------------------------------------|
| EPI_ISL_530877 | 8/12/2020 | 9/11/2020 | Europe / United Kingdom / England          |
| EPI_ISL_530878 | 8/13/2020 | 9/11/2020 | Europe / United Kingdom / England          |
| EPI_ISL_530879 | 8/13/2020 | 9/11/2020 | Europe / United Kingdom / England          |
| EPI_ISL_530880 | 8/14/2020 | 9/11/2020 | Europe / United Kingdom / Northern Ireland |
| EPI_ISL_530881 | 8/15/2020 | 9/11/2020 | Europe / United Kingdom / Northern Ireland |
| EPI_ISL_530882 | 8/13/2020 | 9/11/2020 | Europe / United Kingdom / England          |
| EPI_ISL_530883 | 8/15/2020 | 9/11/2020 | Europe / United Kingdom / Northern Ireland |
| EPI_ISL_530884 | 8/14/2020 | 9/11/2020 | Europe / United Kingdom / Northern Ireland |
| EPI_ISL_530885 | 8/7/2020  | 9/11/2020 | Europe / United Kingdom / England          |
| EPI_ISL_530886 | 8/13/2020 | 9/11/2020 | Europe / United Kingdom / England          |
| EPI_ISL_530887 | 8/12/2020 | 9/11/2020 | Europe / United Kingdom / England          |
| EPI_ISL_530888 | 8/15/2020 | 9/11/2020 | Europe / United Kingdom / Northern Ireland |
| EPI_ISL_530890 | 8/13/2020 | 9/11/2020 | Europe / United Kingdom / Northern Ireland |
| EPI_ISL_530891 | 8/11/2020 | 9/11/2020 | Europe / United Kingdom / England          |
| EPI_ISL_530892 | 8/12/2020 | 9/11/2020 | Europe / United Kingdom / England          |
| EPI_ISL_530893 | 8/14/2020 | 9/11/2020 | Europe / United Kingdom / Northern Ireland |
| EPI_ISL_530894 | 8/14/2020 | 9/11/2020 | Europe / United Kingdom / Northern Ireland |
| EPI_ISL_530895 | 8/12/2020 | 9/11/2020 | Europe / United Kingdom / England          |
| EPI_ISL_530896 | 8/11/2020 | 9/11/2020 | Europe / United Kingdom / England          |
| EPI_ISL_530897 | 8/12/2020 | 9/11/2020 | Europe / United Kingdom / England          |
| EPI_ISL_530900 | 8/12/2020 | 9/11/2020 | Europe / United Kingdom / England          |
| EPI_ISL_530901 | 8/15/2020 | 9/11/2020 | Europe / United Kingdom / England          |
| EPI_ISL_530902 | 8/7/2020  | 9/11/2020 | Europe / United Kingdom / Scotland         |
| EPI_ISL_530903 | 8/13/2020 | 9/11/2020 | Europe / United Kingdom / England          |
| EPI_ISL_530905 | 8/15/2020 | 9/11/2020 | Europe / United Kingdom / Northern Ireland |
| EPI_ISL_530906 | 8/15/2020 | 9/11/2020 | Europe / United Kingdom / Scotland         |
| EPI_ISL_530908 | 8/14/2020 | 9/11/2020 | Europe / United Kingdom / England          |
| EPI_ISL_530909 | 8/12/2020 | 9/11/2020 | Europe / United Kingdom / England          |
| EPI_ISL_530910 | 8/15/2020 | 9/11/2020 | Europe / United Kingdom / Northern Ireland |
| EPI_ISL_530911 | 8/13/2020 | 9/11/2020 | Europe / United Kingdom / England          |
| EPI_ISL_530912 | 8/15/2020 | 9/11/2020 | Europe / United Kingdom / Northern Ireland |
| EPI_ISL_530913 | 8/12/2020 | 9/11/2020 | Europe / United Kingdom / England          |
| EPI_ISL_530914 | 8/15/2020 | 9/11/2020 | Europe / United Kingdom / Northern Ireland |
| EPI_ISL_530915 | 8/10/2020 | 9/11/2020 | Europe / United Kingdom / England          |
| EPI_ISL_530916 | 8/13/2020 | 9/11/2020 | Europe / United Kingdom / England          |
| EPI_ISL_530917 | 8/12/2020 | 9/11/2020 | Europe / United Kingdom / England          |
| EPI_ISL_530919 | 8/14/2020 | 9/11/2020 | Europe / United Kingdom / England          |
| EPI_ISL_530920 | 8/15/2020 | 9/11/2020 | Europe / United Kingdom / Northern Ireland |
| EPI_ISL_530922 | 8/13/2020 | 9/11/2020 | Europe / United Kingdom / England          |
| EPI_ISL_530923 | 8/15/2020 | 9/11/2020 | Europe / United Kingdom / Scotland         |
| EPI_ISL_530924 | 8/13/2020 | 9/11/2020 | Europe / United Kingdom / England          |
| EPI_ISL_530926 | 8/13/2020 | 9/11/2020 | Europe / United Kingdom / England          |
| EPI_ISL_530927 | 8/13/2020 | 9/11/2020 | Europe / United Kingdom / England          |
| EPI_ISL_530928 | 8/12/2020 | 9/11/2020 | Europe / United Kingdom / England          |
| EPI_ISL_530929 | 8/7/2020  | 9/11/2020 | Europe / United Kingdom / Scotland         |
| EPI_ISL_530930 | 8/12/2020 | 9/11/2020 | Europe / United Kingdom / England          |
| EPI_ISL_530932 | 8/4/2020  | 9/11/2020 | Europe / United Kingdom / England          |



|                |           |           |                                            |
|----------------|-----------|-----------|--------------------------------------------|
| EPI_ISL_530989 | 8/12/2020 | 9/11/2020 | Europe / United Kingdom / England          |
| EPI_ISL_530991 | 8/13/2020 | 9/11/2020 | Europe / United Kingdom / England          |
| EPI_ISL_530992 | 8/11/2020 | 9/11/2020 | Europe / United Kingdom / England          |
| EPI_ISL_530993 | 8/13/2020 | 9/11/2020 | Europe / United Kingdom / Northern Ireland |
| EPI_ISL_530994 | 8/13/2020 | 9/11/2020 | Europe / United Kingdom / England          |
| EPI_ISL_530995 | 8/12/2020 | 9/11/2020 | Europe / United Kingdom / England          |
| EPI_ISL_530997 | 8/14/2020 | 9/11/2020 | Europe / United Kingdom / Scotland         |
| EPI_ISL_530998 | 8/13/2020 | 9/11/2020 | Europe / United Kingdom / England          |
| EPI_ISL_530999 | 8/11/2020 | 9/11/2020 | Europe / United Kingdom / England          |
| EPI_ISL_531000 | 8/14/2020 | 9/11/2020 | Europe / United Kingdom / England          |
| EPI_ISL_531001 | 8/12/2020 | 9/11/2020 | Europe / United Kingdom / England          |
| EPI_ISL_531002 | 8/13/2020 | 9/11/2020 | Europe / United Kingdom / Scotland         |
| EPI_ISL_531003 | 8/11/2020 | 9/11/2020 | Europe / United Kingdom / England          |
| EPI_ISL_531004 | 8/11/2020 | 9/11/2020 | Europe / United Kingdom / Scotland         |
| EPI_ISL_531005 | 8/12/2020 | 9/11/2020 | Europe / United Kingdom / England          |
| EPI_ISL_531006 | 8/14/2020 | 9/11/2020 | Europe / United Kingdom / Scotland         |
| EPI_ISL_531007 | 8/12/2020 | 9/11/2020 | Europe / United Kingdom / England          |
| EPI_ISL_531009 | 8/11/2020 | 9/11/2020 | Europe / United Kingdom / England          |
| EPI_ISL_531010 | 8/12/2020 | 9/11/2020 | Europe / United Kingdom / England          |
| EPI_ISL_531011 | 8/11/2020 | 9/11/2020 | Europe / United Kingdom / England          |
| EPI_ISL_531013 | 8/12/2020 | 9/11/2020 | Europe / United Kingdom / England          |
| EPI_ISL_531014 | 8/14/2020 | 9/11/2020 | Europe / United Kingdom / England          |
| EPI_ISL_531015 | 8/12/2020 | 9/11/2020 | Europe / United Kingdom / England          |
| EPI_ISL_531016 | 8/11/2020 | 9/11/2020 | Europe / United Kingdom / England          |
| EPI_ISL_531017 | 8/11/2020 | 9/11/2020 | Europe / United Kingdom / Scotland         |
| EPI_ISL_531018 | 8/12/2020 | 9/11/2020 | Europe / United Kingdom / England          |
| EPI_ISL_531020 | 8/14/2020 | 9/11/2020 | Europe / United Kingdom / Scotland         |
| EPI_ISL_531021 | 8/12/2020 | 9/11/2020 | Europe / United Kingdom / England          |
| EPI_ISL_531022 | 8/11/2020 | 9/11/2020 | Europe / United Kingdom / England          |
| EPI_ISL_531023 | 8/12/2020 | 9/11/2020 | Europe / United Kingdom / England          |
| EPI_ISL_531024 | 8/12/2020 | 9/11/2020 | Europe / United Kingdom / England          |
| EPI_ISL_531026 | 8/12/2020 | 9/11/2020 | Europe / United Kingdom / England          |
| EPI_ISL_531027 | 8/12/2020 | 9/11/2020 | Europe / United Kingdom / England          |
| EPI_ISL_531028 | 8/12/2020 | 9/11/2020 | Europe / United Kingdom / England          |
| EPI_ISL_531030 | 8/14/2020 | 9/11/2020 | Europe / United Kingdom / Northern Ireland |
| EPI_ISL_531032 | 8/14/2020 | 9/11/2020 | Europe / United Kingdom / Scotland         |
| EPI_ISL_531033 | 8/14/2020 | 9/11/2020 | Europe / United Kingdom / Scotland         |
| EPI_ISL_531034 | 8/13/2020 | 9/11/2020 | Europe / United Kingdom / England          |
| EPI_ISL_531035 | 8/11/2020 | 9/11/2020 | Europe / United Kingdom / England          |
| EPI_ISL_531036 | 8/11/2020 | 9/11/2020 | Europe / United Kingdom / England          |
| EPI_ISL_531037 | 8/11/2020 | 9/11/2020 | Europe / United Kingdom / England          |
| EPI_ISL_531038 | 8/13/2020 | 9/11/2020 | Europe / United Kingdom / Scotland         |
| EPI_ISL_531039 | 8/12/2020 | 9/11/2020 | Europe / United Kingdom / England          |
| EPI_ISL_531040 | 8/14/2020 | 9/11/2020 | Europe / United Kingdom / Scotland         |
| EPI_ISL_531041 | 8/13/2020 | 9/11/2020 | Europe / United Kingdom / England          |
| EPI_ISL_531042 | 8/13/2020 | 9/11/2020 | Europe / United Kingdom / England          |
| EPI_ISL_531043 | 8/13/2020 | 9/11/2020 | Europe / United Kingdom / Northern Ireland |



|                |           |                                                      |
|----------------|-----------|------------------------------------------------------|
| EPI_ISL_531099 | 8/13/2020 | 9/11/2020 Europe / United Kingdom / Scotland         |
| EPI_ISL_531100 | 8/14/2020 | 9/11/2020 Europe / United Kingdom / Scotland         |
| EPI_ISL_531101 | 8/12/2020 | 9/11/2020 Europe / United Kingdom / England          |
| EPI_ISL_531102 | 8/12/2020 | 9/11/2020 Europe / United Kingdom / Wales            |
| EPI_ISL_531103 | 8/13/2020 | 9/11/2020 Europe / United Kingdom / Scotland         |
| EPI_ISL_531104 | 8/14/2020 | 9/11/2020 Europe / United Kingdom / Scotland         |
| EPI_ISL_531105 | 8/14/2020 | 9/11/2020 Europe / United Kingdom / Northern Ireland |
| EPI_ISL_531106 | 8/12/2020 | 9/11/2020 Europe / United Kingdom / England          |
| EPI_ISL_531107 | 8/14/2020 | 9/11/2020 Europe / United Kingdom / Northern Ireland |
| EPI_ISL_531108 | 8/12/2020 | 9/11/2020 Europe / United Kingdom / England          |
| EPI_ISL_531109 | 8/12/2020 | 9/11/2020 Europe / United Kingdom / England          |
| EPI_ISL_531111 | 8/13/2020 | 9/11/2020 Europe / United Kingdom / Northern Ireland |
| EPI_ISL_531112 | 8/11/2020 | 9/11/2020 Europe / United Kingdom / England          |
| EPI_ISL_531113 | 8/14/2020 | 9/11/2020 Europe / United Kingdom / England          |
| EPI_ISL_531116 | 8/12/2020 | 9/11/2020 Europe / United Kingdom / Scotland         |
| EPI_ISL_531117 | 8/12/2020 | 9/11/2020 Europe / United Kingdom / England          |
| EPI_ISL_531118 | 8/14/2020 | 9/11/2020 Europe / United Kingdom / Scotland         |
| EPI_ISL_531119 | 8/11/2020 | 9/11/2020 Europe / United Kingdom / England          |
| EPI_ISL_531120 | 8/14/2020 | 9/11/2020 Europe / United Kingdom / Northern Ireland |
| EPI_ISL_531122 | 8/13/2020 | 9/11/2020 Europe / United Kingdom / Northern Ireland |
| EPI_ISL_531123 | 8/13/2020 | 9/11/2020 Europe / United Kingdom / Scotland         |
| EPI_ISL_531124 | 8/13/2020 | 9/11/2020 Europe / United Kingdom / England          |
| EPI_ISL_531125 | 8/13/2020 | 9/11/2020 Europe / United Kingdom / England          |
| EPI_ISL_531126 | 8/14/2020 | 9/11/2020 Europe / United Kingdom / Scotland         |
| EPI_ISL_531127 | 8/11/2020 | 9/11/2020 Europe / United Kingdom / Wales            |
| EPI_ISL_531128 | 8/13/2020 | 9/11/2020 Europe / United Kingdom / Northern Ireland |
| EPI_ISL_531129 | 8/14/2020 | 9/11/2020 Europe / United Kingdom / England          |
| EPI_ISL_531130 | 8/13/2020 | 9/11/2020 Europe / United Kingdom / Scotland         |
| EPI_ISL_531133 | 8/11/2020 | 9/11/2020 Europe / United Kingdom / England          |
| EPI_ISL_531134 | 8/13/2020 | 9/11/2020 Europe / United Kingdom / Northern Ireland |
| EPI_ISL_531135 | 8/12/2020 | 9/11/2020 Europe / United Kingdom / England          |
| EPI_ISL_531136 | 8/12/2020 | 9/11/2020 Europe / United Kingdom / England          |
| EPI_ISL_531137 | 8/11/2020 | 9/11/2020 Europe / United Kingdom / England          |
| EPI_ISL_531138 | 8/11/2020 | 9/11/2020 Europe / United Kingdom / Wales            |
| EPI_ISL_531139 | 8/11/2020 | 9/11/2020 Europe / United Kingdom / England          |
| EPI_ISL_531140 | 8/12/2020 | 9/11/2020 Europe / United Kingdom / England          |
| EPI_ISL_531141 | 8/11/2020 | 9/11/2020 Europe / United Kingdom / England          |
| EPI_ISL_531142 | 8/13/2020 | 9/11/2020 Europe / United Kingdom / Scotland         |
| EPI_ISL_531145 | 8/12/2020 | 9/11/2020 Europe / United Kingdom / England          |
| EPI_ISL_531146 | 8/13/2020 | 9/11/2020 Europe / United Kingdom / England          |
| EPI_ISL_531147 | 8/14/2020 | 9/11/2020 Europe / United Kingdom / Scotland         |
| EPI_ISL_531150 | 8/12/2020 | 9/11/2020 Europe / United Kingdom / England          |
| EPI_ISL_531151 | 8/11/2020 | 9/11/2020 Europe / United Kingdom / England          |
| EPI_ISL_531152 | 8/11/2020 | 9/11/2020 Europe / United Kingdom / England          |
| EPI_ISL_531154 | 8/13/2020 | 9/11/2020 Europe / United Kingdom / Scotland         |
| EPI_ISL_531155 | 8/14/2020 | 9/11/2020 Europe / United Kingdom / Scotland         |
| EPI_ISL_531156 | 8/13/2020 | 9/11/2020 Europe / United Kingdom / Scotland         |

|                |           |           |                                            |
|----------------|-----------|-----------|--------------------------------------------|
| EPI_ISL_531157 | 8/11/2020 | 9/11/2020 | Europe / United Kingdom / Scotland         |
| EPI_ISL_531158 | 8/12/2020 | 9/11/2020 | Europe / United Kingdom / England          |
| EPI_ISL_531161 | 8/13/2020 | 9/11/2020 | Europe / United Kingdom / England          |
| EPI_ISL_531163 | 8/12/2020 | 9/11/2020 | Europe / United Kingdom / England          |
| EPI_ISL_531164 | 8/11/2020 | 9/11/2020 | Europe / United Kingdom / England          |
| EPI_ISL_531165 | 8/11/2020 | 9/11/2020 | Europe / United Kingdom / England          |
| EPI_ISL_531166 | 8/14/2020 | 9/11/2020 | Europe / United Kingdom / Scotland         |
| EPI_ISL_531167 | 8/13/2020 | 9/11/2020 | Europe / United Kingdom / England          |
| EPI_ISL_531168 | 8/13/2020 | 9/11/2020 | Europe / United Kingdom / Northern Ireland |
| EPI_ISL_531169 | 8/12/2020 | 9/11/2020 | Europe / United Kingdom / England          |
| EPI_ISL_531170 | 8/12/2020 | 9/11/2020 | Europe / United Kingdom / England          |
| EPI_ISL_531171 | 8/12/2020 | 9/11/2020 | Europe / United Kingdom / England          |
| EPI_ISL_531173 | 8/14/2020 | 9/11/2020 | Europe / United Kingdom / Northern Ireland |
| EPI_ISL_531174 | 8/14/2020 | 9/11/2020 | Europe / United Kingdom / Scotland         |
| EPI_ISL_531175 | 8/14/2020 | 9/11/2020 | Europe / United Kingdom / Scotland         |
| EPI_ISL_531176 | 8/12/2020 | 9/11/2020 | Europe / United Kingdom / England          |
| EPI_ISL_531177 | 8/12/2020 | 9/11/2020 | Europe / United Kingdom / England          |
| EPI_ISL_531178 | 8/12/2020 | 9/11/2020 | Europe / United Kingdom / England          |
| EPI_ISL_531179 | 8/11/2020 | 9/11/2020 | Europe / United Kingdom / England          |
| EPI_ISL_531180 | 8/12/2020 | 9/11/2020 | Europe / United Kingdom / England          |
| EPI_ISL_531181 | 8/11/2020 | 9/11/2020 | Europe / United Kingdom / England          |
| EPI_ISL_531183 | 8/14/2020 | 9/11/2020 | Europe / United Kingdom / England          |
| EPI_ISL_531184 | 8/13/2020 | 9/11/2020 | Europe / United Kingdom / Northern Ireland |
| EPI_ISL_531185 | 8/12/2020 | 9/11/2020 | Europe / United Kingdom / England          |
| EPI_ISL_531186 | 8/12/2020 | 9/11/2020 | Europe / United Kingdom / England          |
| EPI_ISL_531189 | 8/14/2020 | 9/11/2020 | Europe / United Kingdom / Scotland         |
| EPI_ISL_531192 | 8/12/2020 | 9/11/2020 | Europe / United Kingdom / England          |
| EPI_ISL_531193 | 8/13/2020 | 9/11/2020 | Europe / United Kingdom / Northern Ireland |
| EPI_ISL_531194 | 8/13/2020 | 9/11/2020 | Europe / United Kingdom / Northern Ireland |
| EPI_ISL_531195 | 8/11/2020 | 9/11/2020 | Europe / United Kingdom / England          |
| EPI_ISL_531196 | 8/13/2020 | 9/11/2020 | Europe / United Kingdom / England          |
| EPI_ISL_531197 | 8/13/2020 | 9/11/2020 | Europe / United Kingdom / Northern Ireland |
| EPI_ISL_531198 | 8/14/2020 | 9/11/2020 | Europe / United Kingdom / Scotland         |
| EPI_ISL_531199 | 8/13/2020 | 9/11/2020 | Europe / United Kingdom / England          |
| EPI_ISL_531200 | 8/12/2020 | 9/11/2020 | Europe / United Kingdom / England          |
| EPI_ISL_531201 | 8/11/2020 | 9/11/2020 | Europe / United Kingdom / England          |
| EPI_ISL_531203 | 8/12/2020 | 9/11/2020 | Europe / United Kingdom / England          |
| EPI_ISL_531206 | 8/12/2020 | 9/11/2020 | Europe / United Kingdom / England          |
| EPI_ISL_531207 | 8/11/2020 | 9/11/2020 | Europe / United Kingdom / Scotland         |
| EPI_ISL_531209 | 8/11/2020 | 9/11/2020 | Europe / United Kingdom / England          |
| EPI_ISL_531210 | 8/12/2020 | 9/11/2020 | Europe / United Kingdom / Wales            |
| EPI_ISL_531212 | 8/14/2020 | 9/11/2020 | Europe / United Kingdom / Scotland         |
| EPI_ISL_531213 | 8/11/2020 | 9/11/2020 | Europe / United Kingdom / England          |
| EPI_ISL_531214 | 8/13/2020 | 9/11/2020 | Europe / United Kingdom / Scotland         |
| EPI_ISL_531215 | 8/14/2020 | 9/11/2020 | Europe / United Kingdom / England          |
| EPI_ISL_531216 | 8/11/2020 | 9/11/2020 | Europe / United Kingdom / England          |
| EPI_ISL_531217 | 8/12/2020 | 9/11/2020 | Europe / United Kingdom / England          |

|                |           |           |                                            |
|----------------|-----------|-----------|--------------------------------------------|
| EPI_ISL_531218 | 8/14/2020 | 9/11/2020 | Europe / United Kingdom / England          |
| EPI_ISL_531219 | 8/11/2020 | 9/11/2020 | Europe / United Kingdom / Wales            |
| EPI_ISL_531220 | 8/14/2020 | 9/11/2020 | Europe / United Kingdom / Northern Ireland |
| EPI_ISL_531222 | 8/13/2020 | 9/11/2020 | Europe / United Kingdom / England          |
| EPI_ISL_531223 | 8/13/2020 | 9/11/2020 | Europe / United Kingdom / Scotland         |
| EPI_ISL_531226 | 8/14/2020 | 9/11/2020 | Europe / United Kingdom / England          |
| EPI_ISL_531227 | 8/14/2020 | 9/11/2020 | Europe / United Kingdom / England          |
| EPI_ISL_531229 | 8/16/2020 | 9/11/2020 | Europe / United Kingdom / England          |
| EPI_ISL_531230 | 8/17/2020 | 9/11/2020 | Europe / United Kingdom / Northern Ireland |
| EPI_ISL_531232 | 8/14/2020 | 9/11/2020 | Europe / United Kingdom / England          |
| EPI_ISL_531233 | 8/16/2020 | 9/11/2020 | Europe / United Kingdom / Northern Ireland |
| EPI_ISL_531235 | 8/17/2020 | 9/11/2020 | Europe / United Kingdom / Northern Ireland |
| EPI_ISL_531236 | 8/14/2020 | 9/11/2020 | Europe / United Kingdom / England          |
| EPI_ISL_531237 | 8/17/2020 | 9/11/2020 | Europe / United Kingdom / Northern Ireland |
| EPI_ISL_531239 | 8/17/2020 | 9/11/2020 | Europe / United Kingdom / Northern Ireland |
| EPI_ISL_531240 | 8/15/2020 | 9/11/2020 | Europe / United Kingdom / England          |
| EPI_ISL_531241 | 8/14/2020 | 9/11/2020 | Europe / United Kingdom / England          |
| EPI_ISL_531242 | 8/17/2020 | 9/11/2020 | Europe / United Kingdom / England          |
| EPI_ISL_531244 | 8/14/2020 | 9/11/2020 | Europe / United Kingdom / England          |
| EPI_ISL_531245 | 8/17/2020 | 9/11/2020 | Europe / United Kingdom / England          |
| EPI_ISL_531247 | 8/14/2020 | 9/11/2020 | Europe / United Kingdom / England          |
| EPI_ISL_531249 | 8/17/2020 | 9/11/2020 | Europe / United Kingdom / Scotland         |
| EPI_ISL_531250 | 8/14/2020 | 9/11/2020 | Europe / United Kingdom / Wales            |
| EPI_ISL_531251 | 8/16/2020 | 9/11/2020 | Europe / United Kingdom / Northern Ireland |
| EPI_ISL_531253 | 8/18/2020 | 9/11/2020 | Europe / United Kingdom / England          |
| EPI_ISL_531254 | 8/14/2020 | 9/11/2020 | Europe / United Kingdom / England          |
| EPI_ISL_531255 | 8/14/2020 | 9/11/2020 | Europe / United Kingdom / England          |
| EPI_ISL_531256 | 8/17/2020 | 9/11/2020 | Europe / United Kingdom / Northern Ireland |
| EPI_ISL_531257 | 8/16/2020 | 9/11/2020 | Europe / United Kingdom / England          |
| EPI_ISL_531258 | 8/15/2020 | 9/11/2020 | Europe / United Kingdom / England          |
| EPI_ISL_531259 | 8/14/2020 | 9/11/2020 | Europe / United Kingdom / England          |
| EPI_ISL_531260 | 8/15/2020 | 9/11/2020 | Europe / United Kingdom / England          |
| EPI_ISL_531261 | 8/16/2020 | 9/11/2020 | Europe / United Kingdom / Northern Ireland |
| EPI_ISL_531262 | 8/12/2020 | 9/11/2020 | Europe / United Kingdom / England          |
| EPI_ISL_531263 | 8/15/2020 | 9/11/2020 | Europe / United Kingdom / England          |
| EPI_ISL_531264 | 8/17/2020 | 9/11/2020 | Europe / United Kingdom / Northern Ireland |
| EPI_ISL_531265 | 8/16/2020 | 9/11/2020 | Europe / United Kingdom / Northern Ireland |
| EPI_ISL_531266 | 8/17/2020 | 9/11/2020 | Europe / United Kingdom / Scotland         |
| EPI_ISL_531267 | 8/16/2020 | 9/11/2020 | Europe / United Kingdom / Wales            |
| EPI_ISL_531268 | 8/14/2020 | 9/11/2020 | Europe / United Kingdom / England          |
| EPI_ISL_531269 | 8/14/2020 | 9/11/2020 | Europe / United Kingdom / England          |
| EPI_ISL_531270 | 8/14/2020 | 9/11/2020 | Europe / United Kingdom / England          |
| EPI_ISL_531271 | 8/14/2020 | 9/11/2020 | Europe / United Kingdom / England          |
| EPI_ISL_531272 | 8/14/2020 | 9/11/2020 | Europe / United Kingdom / England          |
| EPI_ISL_531273 | 8/14/2020 | 9/11/2020 | Europe / United Kingdom / England          |
| EPI_ISL_531274 | 8/14/2020 | 9/11/2020 | Europe / United Kingdom / England          |
| EPI_ISL_531275 | 8/14/2020 | 9/11/2020 | Europe / United Kingdom / England          |





|                |           |           |                                            |
|----------------|-----------|-----------|--------------------------------------------|
| EPI_ISL_531329 | 8/14/2020 | 9/11/2020 | Europe / United Kingdom / England          |
| EPI_ISL_531330 | 8/18/2020 | 9/11/2020 | Europe / United Kingdom / Scotland         |
| EPI_ISL_531331 | 8/16/2020 | 9/11/2020 | Europe / United Kingdom / Northern Ireland |
| EPI_ISL_531332 | 8/15/2020 | 9/11/2020 | Europe / United Kingdom / England          |
| EPI_ISL_531334 | 8/16/2020 | 9/11/2020 | Europe / United Kingdom / England          |
| EPI_ISL_531338 | 8/14/2020 | 9/11/2020 | Europe / United Kingdom / England          |
| EPI_ISL_531339 | 8/14/2020 | 9/11/2020 | Europe / United Kingdom / England          |
| EPI_ISL_531340 | 8/17/2020 | 9/11/2020 | Europe / United Kingdom / Northern Ireland |
| EPI_ISL_531341 | 8/14/2020 | 9/11/2020 | Europe / United Kingdom / England          |
| EPI_ISL_531342 | 8/17/2020 | 9/11/2020 | Europe / United Kingdom / Northern Ireland |
| EPI_ISL_531343 | 8/17/2020 | 9/11/2020 | Europe / United Kingdom / England          |
| EPI_ISL_531344 | 8/14/2020 | 9/11/2020 | Europe / United Kingdom / England          |
| EPI_ISL_531345 | 8/14/2020 | 9/11/2020 | Europe / United Kingdom / England          |
| EPI_ISL_531346 | 8/14/2020 | 9/11/2020 | Europe / United Kingdom / England          |
| EPI_ISL_531347 | 8/15/2020 | 9/11/2020 | Europe / United Kingdom / England          |
| EPI_ISL_531348 | 8/14/2020 | 9/11/2020 | Europe / United Kingdom / England          |
| EPI_ISL_531349 | 8/18/2020 | 9/11/2020 | Europe / United Kingdom / England          |
| EPI_ISL_531350 | 8/14/2020 | 9/11/2020 | Europe / United Kingdom / England          |
| EPI_ISL_531351 | 8/13/2020 | 9/11/2020 | Europe / United Kingdom / England          |
| EPI_ISL_531353 | 8/13/2020 | 9/11/2020 | Europe / United Kingdom / England          |
| EPI_ISL_531354 | 8/13/2020 | 9/11/2020 | Europe / United Kingdom / England          |
| EPI_ISL_531356 | 8/14/2020 | 9/11/2020 | Europe / United Kingdom / England          |
| EPI_ISL_531357 | 8/17/2020 | 9/11/2020 | Europe / United Kingdom / Northern Ireland |
| EPI_ISL_531358 | 8/13/2020 | 9/11/2020 | Europe / United Kingdom / England          |
| EPI_ISL_531359 | 8/13/2020 | 9/11/2020 | Europe / United Kingdom / England          |
| EPI_ISL_531360 | 8/16/2020 | 9/11/2020 | Europe / United Kingdom / Northern Ireland |
| EPI_ISL_531362 | 8/14/2020 | 9/11/2020 | Europe / United Kingdom / England          |
| EPI_ISL_531363 | 8/15/2020 | 9/11/2020 | Europe / United Kingdom / England          |
| EPI_ISL_531364 | 8/14/2020 | 9/11/2020 | Europe / United Kingdom / England          |
| EPI_ISL_531365 | 8/17/2020 | 9/11/2020 | Europe / United Kingdom / Scotland         |
| EPI_ISL_531366 | 8/15/2020 | 9/11/2020 | Europe / United Kingdom / England          |
| EPI_ISL_531367 | 8/17/2020 | 9/11/2020 | Europe / United Kingdom / England          |
| EPI_ISL_531368 | 8/17/2020 | 9/11/2020 | Europe / United Kingdom / England          |
| EPI_ISL_531369 | 8/16/2020 | 9/11/2020 | Europe / United Kingdom / England          |
| EPI_ISL_531370 | 8/15/2020 | 9/11/2020 | Europe / United Kingdom / England          |
| EPI_ISL_531371 | 8/14/2020 | 9/11/2020 | Europe / United Kingdom / England          |
| EPI_ISL_531372 | 8/15/2020 | 9/11/2020 | Europe / United Kingdom / England          |
| EPI_ISL_531373 | 8/14/2020 | 9/11/2020 | Europe / United Kingdom / England          |
| EPI_ISL_531374 | 8/17/2020 | 9/11/2020 | Europe / United Kingdom / Scotland         |
| EPI_ISL_531375 | 8/14/2020 | 9/11/2020 | Europe / United Kingdom / Wales            |
| EPI_ISL_531376 | 8/15/2020 | 9/11/2020 | Europe / United Kingdom / England          |
| EPI_ISL_531377 | 8/14/2020 | 9/11/2020 | Europe / United Kingdom / England          |
| EPI_ISL_531378 | 8/17/2020 | 9/11/2020 | Europe / United Kingdom / Northern Ireland |
| EPI_ISL_531380 | 8/14/2020 | 9/11/2020 | Europe / United Kingdom / England          |
| EPI_ISL_531382 | 8/17/2020 | 9/11/2020 | Europe / United Kingdom / Scotland         |
| EPI_ISL_531383 | 8/15/2020 | 9/11/2020 | Europe / United Kingdom / England          |
| EPI_ISL_531385 | 8/14/2020 | 9/11/2020 | Europe / United Kingdom / England          |









|                |           |           |                                            |
|----------------|-----------|-----------|--------------------------------------------|
| EPI_ISL_531606 | 8/10/2020 | 9/11/2020 | Europe / United Kingdom / England          |
| EPI_ISL_531607 | 8/10/2020 | 9/11/2020 | Europe / United Kingdom / Scotland         |
| EPI_ISL_531608 | 8/11/2020 | 9/11/2020 | Europe / United Kingdom / Northern Ireland |
| EPI_ISL_531610 | 8/11/2020 | 9/11/2020 | Europe / United Kingdom / England          |
| EPI_ISL_531611 | 8/11/2020 | 9/11/2020 | Europe / United Kingdom / Northern Ireland |
| EPI_ISL_531612 | 8/10/2020 | 9/11/2020 | Europe / United Kingdom / England          |
| EPI_ISL_531613 | 8/10/2020 | 9/11/2020 | Europe / United Kingdom / Wales            |
| EPI_ISL_531614 | 8/10/2020 | 9/11/2020 | Europe / United Kingdom / England          |
| EPI_ISL_531616 | 8/10/2020 | 9/11/2020 | Europe / United Kingdom / England          |
| EPI_ISL_531617 | 8/11/2020 | 9/11/2020 | Europe / United Kingdom / Scotland         |
| EPI_ISL_531619 | 8/10/2020 | 9/11/2020 | Europe / United Kingdom / England          |
| EPI_ISL_531621 | 8/10/2020 | 9/11/2020 | Europe / United Kingdom / England          |
| EPI_ISL_531622 | 8/11/2020 | 9/11/2020 | Europe / United Kingdom / Northern Ireland |
| EPI_ISL_531623 | 8/10/2020 | 9/11/2020 | Europe / United Kingdom / England          |
| EPI_ISL_531624 | 8/10/2020 | 9/11/2020 | Europe / United Kingdom / Northern Ireland |
| EPI_ISL_531625 | 8/11/2020 | 9/11/2020 | Europe / United Kingdom / Scotland         |
| EPI_ISL_531627 | 8/10/2020 | 9/11/2020 | Europe / United Kingdom / Northern Ireland |
| EPI_ISL_531628 | 8/11/2020 | 9/11/2020 | Europe / United Kingdom / England          |
| EPI_ISL_531629 | 8/11/2020 | 9/11/2020 | Europe / United Kingdom / England          |
| EPI_ISL_531630 | 8/10/2020 | 9/11/2020 | Europe / United Kingdom / Wales            |
| EPI_ISL_531631 | 8/10/2020 | 9/11/2020 | Europe / United Kingdom / Scotland         |
| EPI_ISL_531632 | 8/10/2020 | 9/11/2020 | Europe / United Kingdom / England          |
| EPI_ISL_531633 | 8/8/2020  | 9/11/2020 | Europe / United Kingdom / England          |
| EPI_ISL_531634 | 8/11/2020 | 9/11/2020 | Europe / United Kingdom / Scotland         |
| EPI_ISL_531635 | 8/9/2020  | 9/11/2020 | Europe / United Kingdom / England          |
| EPI_ISL_531636 | 8/8/2020  | 9/11/2020 | Europe / United Kingdom / Northern Ireland |
| EPI_ISL_531638 | 8/10/2020 | 9/11/2020 | Europe / United Kingdom / Scotland         |
| EPI_ISL_531639 | 8/10/2020 | 9/11/2020 | Europe / United Kingdom / Scotland         |
| EPI_ISL_531642 | 8/10/2020 | 9/11/2020 | Europe / United Kingdom / England          |
| EPI_ISL_531643 | 8/11/2020 | 9/11/2020 | Europe / United Kingdom / Northern Ireland |
| EPI_ISL_531644 | 8/10/2020 | 9/11/2020 | Europe / United Kingdom / Northern Ireland |
| EPI_ISL_531645 | 8/10/2020 | 9/11/2020 | Europe / United Kingdom / England          |
| EPI_ISL_531647 | 8/10/2020 | 9/11/2020 | Europe / United Kingdom / England          |
| EPI_ISL_531649 | 8/11/2020 | 9/11/2020 | Europe / United Kingdom / Scotland         |
| EPI_ISL_531650 | 8/10/2020 | 9/11/2020 | Europe / United Kingdom / England          |
| EPI_ISL_531651 | 8/10/2020 | 9/11/2020 | Europe / United Kingdom / England          |
| EPI_ISL_531652 | 8/10/2020 | 9/11/2020 | Europe / United Kingdom / Northern Ireland |
| EPI_ISL_531654 | 8/10/2020 | 9/11/2020 | Europe / United Kingdom / Northern Ireland |
| EPI_ISL_531656 | 8/10/2020 | 9/11/2020 | Europe / United Kingdom / England          |
| EPI_ISL_531658 | 8/10/2020 | 9/11/2020 | Europe / United Kingdom / England          |
| EPI_ISL_531660 | 8/10/2020 | 9/11/2020 | Europe / United Kingdom / Scotland         |
| EPI_ISL_531661 | 8/10/2020 | 9/11/2020 | Europe / United Kingdom / Northern Ireland |
| EPI_ISL_531662 | 8/10/2020 | 9/11/2020 | Europe / United Kingdom / England          |
| EPI_ISL_531663 | 8/10/2020 | 9/11/2020 | Europe / United Kingdom / Northern Ireland |
| EPI_ISL_531664 | 8/10/2020 | 9/11/2020 | Europe / United Kingdom / England          |
| EPI_ISL_531665 | 8/10/2020 | 9/11/2020 | Europe / United Kingdom / England          |
| EPI_ISL_531666 | 8/10/2020 | 9/11/2020 | Europe / United Kingdom / England          |











|                |           |           |                                            |
|----------------|-----------|-----------|--------------------------------------------|
| EPI_ISL_531899 | 8/3/2020  | 9/11/2020 | Europe / United Kingdom / England          |
| EPI_ISL_531900 | 8/5/2020  | 9/11/2020 | Europe / United Kingdom / England          |
| EPI_ISL_531901 | 8/3/2020  | 9/11/2020 | Europe / United Kingdom / England          |
| EPI_ISL_531903 | 8/3/2020  | 9/11/2020 | Europe / United Kingdom / England          |
| EPI_ISL_531905 | 8/6/2020  | 9/11/2020 | Europe / United Kingdom / Scotland         |
| EPI_ISL_531906 | 8/3/2020  | 9/11/2020 | Europe / United Kingdom / England          |
| EPI_ISL_531907 | 8/5/2020  | 9/11/2020 | Europe / United Kingdom / England          |
| EPI_ISL_531908 | 8/5/2020  | 9/11/2020 | Europe / United Kingdom / England          |
| EPI_ISL_531909 | 8/6/2020  | 9/11/2020 | Europe / United Kingdom / England          |
| EPI_ISL_531910 | 8/4/2020  | 9/11/2020 | Europe / United Kingdom / England          |
| EPI_ISL_531912 | 8/6/2020  | 9/11/2020 | Europe / United Kingdom / Scotland         |
| EPI_ISL_531913 | 8/7/2020  | 9/11/2020 | Europe / United Kingdom / Scotland         |
| EPI_ISL_531916 | 8/3/2020  | 9/11/2020 | Europe / United Kingdom / England          |
| EPI_ISL_531917 | 8/7/2020  | 9/11/2020 | Europe / United Kingdom / England          |
| EPI_ISL_531918 | 8/7/2020  | 9/11/2020 | Europe / United Kingdom / Scotland         |
| EPI_ISL_531919 | 8/7/2020  | 9/11/2020 | Europe / United Kingdom / Scotland         |
| EPI_ISL_531920 | 8/7/2020  | 9/11/2020 | Europe / United Kingdom / England          |
| EPI_ISL_531921 | 8/5/2020  | 9/11/2020 | Europe / United Kingdom / Northern Ireland |
| EPI_ISL_531922 | 8/6/2020  | 9/11/2020 | Europe / United Kingdom / England          |
| EPI_ISL_531923 | 8/7/2020  | 9/11/2020 | Europe / United Kingdom / England          |
| EPI_ISL_531924 | 8/7/2020  | 9/11/2020 | Europe / United Kingdom / Northern Ireland |
| EPI_ISL_531925 | 8/6/2020  | 9/11/2020 | Europe / United Kingdom / Scotland         |
| EPI_ISL_531926 | 8/2/2020  | 9/11/2020 | Europe / United Kingdom / England          |
| EPI_ISL_531927 | 8/6/2020  | 9/11/2020 | Europe / United Kingdom / England          |
| EPI_ISL_531929 | 8/6/2020  | 9/11/2020 | Europe / United Kingdom / Scotland         |
| EPI_ISL_531930 | 8/6/2020  | 9/11/2020 | Europe / United Kingdom / England          |
| EPI_ISL_531931 | 8/6/2020  | 9/11/2020 | Europe / United Kingdom / England          |
| EPI_ISL_531932 | 8/6/2020  | 9/11/2020 | Europe / United Kingdom / Scotland         |
| EPI_ISL_531933 | 8/5/2020  | 9/11/2020 | Europe / United Kingdom / Scotland         |
| EPI_ISL_531934 | 8/5/2020  | 9/11/2020 | Europe / United Kingdom / England          |
| EPI_ISL_531935 | 8/4/2020  | 9/11/2020 | Europe / United Kingdom / Scotland         |
| EPI_ISL_531936 | 8/7/2020  | 9/11/2020 | Europe / United Kingdom / Scotland         |
| EPI_ISL_531937 | 8/4/2020  | 9/11/2020 | Europe / United Kingdom / England          |
| EPI_ISL_531938 | 8/4/2020  | 9/11/2020 | Europe / United Kingdom / England          |
| EPI_ISL_531939 | 8/2/2020  | 9/11/2020 | Europe / United Kingdom / England          |
| EPI_ISL_531940 | 8/2/2020  | 9/11/2020 | Europe / United Kingdom / England          |
| EPI_ISL_531942 | 8/7/2020  | 9/11/2020 | Europe / United Kingdom / England          |
| EPI_ISL_531943 | 8/5/2020  | 9/11/2020 | Europe / United Kingdom / Scotland         |
| EPI_ISL_531944 | 7/31/2020 | 9/11/2020 | Europe / United Kingdom / England          |
| EPI_ISL_531945 | 8/5/2020  | 9/11/2020 | Europe / United Kingdom / Scotland         |
| EPI_ISL_531947 | 8/4/2020  | 9/11/2020 | Europe / United Kingdom / Northern Ireland |
| EPI_ISL_531948 | 8/3/2020  | 9/11/2020 | Europe / United Kingdom / England          |
| EPI_ISL_531949 | 8/3/2020  | 9/11/2020 | Europe / United Kingdom / England          |
| EPI_ISL_531950 | 8/3/2020  | 9/11/2020 | Europe / United Kingdom / England          |
| EPI_ISL_531951 | 8/5/2020  | 9/11/2020 | Europe / United Kingdom / Scotland         |
| EPI_ISL_531952 | 8/2/2020  | 9/11/2020 | Europe / United Kingdom / England          |
| EPI_ISL_531953 | 8/5/2020  | 9/11/2020 | Europe / United Kingdom / England          |

|                |          |           |                                            |
|----------------|----------|-----------|--------------------------------------------|
| EPI_ISL_531954 | 8/5/2020 | 9/11/2020 | Europe / United Kingdom / Scotland         |
| EPI_ISL_531955 | 8/2/2020 | 9/11/2020 | Europe / United Kingdom / England          |
| EPI_ISL_531956 | 8/4/2020 | 9/11/2020 | Europe / United Kingdom / England          |
| EPI_ISL_531957 | 8/2/2020 | 9/11/2020 | Europe / United Kingdom / England          |
| EPI_ISL_531958 | 8/5/2020 | 9/11/2020 | Europe / United Kingdom / Northern Ireland |
| EPI_ISL_531959 | 8/2/2020 | 9/11/2020 | Europe / United Kingdom / England          |
| EPI_ISL_531960 | 8/2/2020 | 9/11/2020 | Europe / United Kingdom / England          |
| EPI_ISL_531961 | 8/3/2020 | 9/11/2020 | Europe / United Kingdom / England          |
| EPI_ISL_531962 | 8/4/2020 | 9/11/2020 | Europe / United Kingdom / England          |
| EPI_ISL_531963 | 8/4/2020 | 9/11/2020 | Europe / United Kingdom / Scotland         |
| EPI_ISL_531964 | 8/4/2020 | 9/11/2020 | Europe / United Kingdom / England          |
| EPI_ISL_531965 | 8/5/2020 | 9/11/2020 | Europe / United Kingdom / England          |
| EPI_ISL_531966 | 8/5/2020 | 9/11/2020 | Europe / United Kingdom / England          |
| EPI_ISL_531967 | 8/7/2020 | 9/11/2020 | Europe / United Kingdom / England          |
| EPI_ISL_531968 | 8/5/2020 | 9/11/2020 | Europe / United Kingdom / England          |
| EPI_ISL_531969 | 8/4/2020 | 9/11/2020 | Europe / United Kingdom / England          |
| EPI_ISL_531970 | 8/5/2020 | 9/11/2020 | Europe / United Kingdom / England          |
| EPI_ISL_531971 | 8/4/2020 | 9/11/2020 | Europe / United Kingdom / England          |
| EPI_ISL_531972 | 8/4/2020 | 9/11/2020 | Europe / United Kingdom / England          |
| EPI_ISL_531973 | 8/5/2020 | 9/11/2020 | Europe / United Kingdom / Scotland         |
| EPI_ISL_531974 | 8/3/2020 | 9/11/2020 | Europe / United Kingdom / England          |
| EPI_ISL_531975 | 8/5/2020 | 9/11/2020 | Europe / United Kingdom / England          |
| EPI_ISL_531976 | 8/4/2020 | 9/11/2020 | Europe / United Kingdom / England          |
| EPI_ISL_531978 | 8/5/2020 | 9/11/2020 | Europe / United Kingdom / Scotland         |
| EPI_ISL_531979 | 8/6/2020 | 9/11/2020 | Europe / United Kingdom / Scotland         |
| EPI_ISL_531980 | 8/2/2020 | 9/11/2020 | Europe / United Kingdom / England          |
| EPI_ISL_531981 | 8/3/2020 | 9/11/2020 | Europe / United Kingdom / England          |
| EPI_ISL_531982 | 8/5/2020 | 9/11/2020 | Europe / United Kingdom / Scotland         |
| EPI_ISL_531983 | 8/5/2020 | 9/11/2020 | Europe / United Kingdom / England          |
| EPI_ISL_531984 | 8/4/2020 | 9/11/2020 | Europe / United Kingdom / Scotland         |
| EPI_ISL_531985 | 8/4/2020 | 9/11/2020 | Europe / United Kingdom / Northern Ireland |
| EPI_ISL_531986 | 8/5/2020 | 9/11/2020 | Europe / United Kingdom / Northern Ireland |
| EPI_ISL_531988 | 8/5/2020 | 9/11/2020 | Europe / United Kingdom / England          |
| EPI_ISL_531989 | 8/3/2020 | 9/11/2020 | Europe / United Kingdom / England          |
| EPI_ISL_531990 | 8/5/2020 | 9/11/2020 | Europe / United Kingdom / Scotland         |
| EPI_ISL_531991 | 8/7/2020 | 9/11/2020 | Europe / United Kingdom / England          |
| EPI_ISL_531993 | 8/6/2020 | 9/11/2020 | Europe / United Kingdom / England          |
| EPI_ISL_531994 | 8/5/2020 | 9/11/2020 | Europe / United Kingdom / England          |
| EPI_ISL_531995 | 8/6/2020 | 9/11/2020 | Europe / United Kingdom / Scotland         |
| EPI_ISL_531996 | 8/2/2020 | 9/11/2020 | Europe / United Kingdom / England          |
| EPI_ISL_531997 | 8/3/2020 | 9/11/2020 | Europe / United Kingdom / England          |
| EPI_ISL_531998 | 8/2/2020 | 9/11/2020 | Europe / United Kingdom / England          |
| EPI_ISL_531999 | 8/6/2020 | 9/11/2020 | Europe / United Kingdom / England          |
| EPI_ISL_532001 | 8/6/2020 | 9/11/2020 | Europe / United Kingdom / England          |
| EPI_ISL_532003 | 8/6/2020 | 9/11/2020 | Europe / United Kingdom / Scotland         |
| EPI_ISL_532004 | 8/5/2020 | 9/11/2020 | Europe / United Kingdom / Scotland         |
| EPI_ISL_532005 | 8/5/2020 | 9/11/2020 | Europe / United Kingdom / Scotland         |

|                |          |           |                                            |
|----------------|----------|-----------|--------------------------------------------|
| EPI_ISL_532006 | 8/4/2020 | 9/11/2020 | Europe / United Kingdom / England          |
| EPI_ISL_532008 | 8/5/2020 | 9/11/2020 | Europe / United Kingdom / England          |
| EPI_ISL_532009 | 8/3/2020 | 9/11/2020 | Europe / United Kingdom / England          |
| EPI_ISL_532010 | 8/6/2020 | 9/11/2020 | Europe / United Kingdom / England          |
| EPI_ISL_532011 | 8/2/2020 | 9/11/2020 | Europe / United Kingdom / England          |
| EPI_ISL_532014 | 8/7/2020 | 9/11/2020 | Europe / United Kingdom / England          |
| EPI_ISL_532015 | 8/5/2020 | 9/11/2020 | Europe / United Kingdom / England          |
| EPI_ISL_532017 | 8/4/2020 | 9/11/2020 | Europe / United Kingdom / Northern Ireland |
| EPI_ISL_532018 | 8/5/2020 | 9/11/2020 | Europe / United Kingdom / Scotland         |
| EPI_ISL_532019 | 8/4/2020 | 9/11/2020 | Europe / United Kingdom / Northern Ireland |
| EPI_ISL_532020 | 8/2/2020 | 9/11/2020 | Europe / United Kingdom / England          |
| EPI_ISL_532021 | 8/6/2020 | 9/11/2020 | Europe / United Kingdom / England          |
| EPI_ISL_532022 | 8/4/2020 | 9/11/2020 | Europe / United Kingdom / England          |
| EPI_ISL_532023 | 8/4/2020 | 9/11/2020 | Europe / United Kingdom / England          |
| EPI_ISL_532024 | 8/5/2020 | 9/11/2020 | Europe / United Kingdom / Scotland         |
| EPI_ISL_532025 | 8/3/2020 | 9/11/2020 | Europe / United Kingdom / England          |
| EPI_ISL_532026 | 8/2/2020 | 9/11/2020 | Europe / United Kingdom / England          |
| EPI_ISL_532027 | 8/5/2020 | 9/11/2020 | Europe / United Kingdom / England          |
| EPI_ISL_532028 | 8/4/2020 | 9/11/2020 | Europe / United Kingdom / Northern Ireland |
| EPI_ISL_532029 | 8/7/2020 | 9/11/2020 | Europe / United Kingdom / England          |
| EPI_ISL_532030 | 8/3/2020 | 9/11/2020 | Europe / United Kingdom / Wales            |
| EPI_ISL_532031 | 8/5/2020 | 9/11/2020 | Europe / United Kingdom / Northern Ireland |
| EPI_ISL_532033 | 8/4/2020 | 9/11/2020 | Europe / United Kingdom / England          |
| EPI_ISL_532034 | 8/4/2020 | 9/11/2020 | Europe / United Kingdom / England          |
| EPI_ISL_532035 | 8/4/2020 | 9/11/2020 | Europe / United Kingdom / England          |
| EPI_ISL_532036 | 8/5/2020 | 9/11/2020 | Europe / United Kingdom / England          |
| EPI_ISL_532037 | 8/4/2020 | 9/11/2020 | Europe / United Kingdom / England          |
| EPI_ISL_532038 | 8/5/2020 | 9/11/2020 | Europe / United Kingdom / Scotland         |
| EPI_ISL_532039 | 8/4/2020 | 9/11/2020 | Europe / United Kingdom / Northern Ireland |
| EPI_ISL_532040 | 8/4/2020 | 9/11/2020 | Europe / United Kingdom / England          |
| EPI_ISL_532041 | 8/3/2020 | 9/11/2020 | Europe / United Kingdom / England          |
| EPI_ISL_532042 | 8/2/2020 | 9/11/2020 | Europe / United Kingdom / England          |
| EPI_ISL_532043 | 8/3/2020 | 9/11/2020 | Europe / United Kingdom / England          |
| EPI_ISL_532044 | 8/4/2020 | 9/11/2020 | Europe / United Kingdom / England          |
| EPI_ISL_532045 | 8/3/2020 | 9/11/2020 | Europe / United Kingdom / England          |
| EPI_ISL_532046 | 8/3/2020 | 9/11/2020 | Europe / United Kingdom / England          |
| EPI_ISL_532047 | 8/3/2020 | 9/11/2020 | Europe / United Kingdom / England          |
| EPI_ISL_532049 | 8/5/2020 | 9/11/2020 | Europe / United Kingdom / Scotland         |
| EPI_ISL_532050 | 8/3/2020 | 9/11/2020 | Europe / United Kingdom / England          |
| EPI_ISL_532052 | 8/6/2020 | 9/11/2020 | Europe / United Kingdom / England          |
| EPI_ISL_532053 | 8/7/2020 | 9/11/2020 | Europe / United Kingdom / Scotland         |
| EPI_ISL_532054 | 8/7/2020 | 9/11/2020 | Europe / United Kingdom / England          |
| EPI_ISL_532055 | 8/5/2020 | 9/11/2020 | Europe / United Kingdom / Scotland         |
| EPI_ISL_532056 | 8/3/2020 | 9/11/2020 | Europe / United Kingdom / England          |
| EPI_ISL_532057 | 8/4/2020 | 9/11/2020 | Europe / United Kingdom / Scotland         |
| EPI_ISL_532058 | 8/3/2020 | 9/11/2020 | Europe / United Kingdom / England          |
| EPI_ISL_532059 | 8/4/2020 | 9/11/2020 | Europe / United Kingdom / England          |

|                |           |           |                                            |
|----------------|-----------|-----------|--------------------------------------------|
| EPI_ISL_532060 | 8/5/2020  | 9/11/2020 | Europe / United Kingdom / Northern Ireland |
| EPI_ISL_532062 | 8/5/2020  | 9/11/2020 | Europe / United Kingdom / Scotland         |
| EPI_ISL_532063 | 8/7/2020  | 9/11/2020 | Europe / United Kingdom / England          |
| EPI_ISL_532064 | 8/5/2020  | 9/11/2020 | Europe / United Kingdom / England          |
| EPI_ISL_532065 | 7/31/2020 | 9/11/2020 | Europe / United Kingdom / England          |
| EPI_ISL_532066 | 8/4/2020  | 9/11/2020 | Europe / United Kingdom / England          |
| EPI_ISL_532067 | 8/4/2020  | 9/11/2020 | Europe / United Kingdom / England          |
| EPI_ISL_532068 | 8/5/2020  | 9/11/2020 | Europe / United Kingdom / England          |
| EPI_ISL_532069 | 8/4/2020  | 9/11/2020 | Europe / United Kingdom / England          |
| EPI_ISL_532070 | 8/3/2020  | 9/11/2020 | Europe / United Kingdom / Scotland         |
| EPI_ISL_532072 | 8/7/2020  | 9/11/2020 | Europe / United Kingdom / England          |
| EPI_ISL_532073 | 8/2/2020  | 9/11/2020 | Europe / United Kingdom / England          |
| EPI_ISL_532074 | 8/4/2020  | 9/11/2020 | Europe / United Kingdom / England          |
| EPI_ISL_532075 | 8/3/2020  | 9/11/2020 | Europe / United Kingdom / England          |
| EPI_ISL_532076 | 8/5/2020  | 9/11/2020 | Europe / United Kingdom / Scotland         |
| EPI_ISL_532077 | 8/4/2020  | 9/11/2020 | Europe / United Kingdom / Scotland         |
| EPI_ISL_532078 | 8/5/2020  | 9/11/2020 | Europe / United Kingdom / Scotland         |
| EPI_ISL_532079 | 8/3/2020  | 9/11/2020 | Europe / United Kingdom / England          |
| EPI_ISL_532080 | 8/5/2020  | 9/11/2020 | Europe / United Kingdom / Scotland         |
| EPI_ISL_532081 | 8/5/2020  | 9/11/2020 | Europe / United Kingdom / Scotland         |
| EPI_ISL_532082 | 8/4/2020  | 9/11/2020 | Europe / United Kingdom / England          |
| EPI_ISL_532083 | 8/5/2020  | 9/11/2020 | Europe / United Kingdom / England          |
| EPI_ISL_532084 | 8/5/2020  | 9/11/2020 | Europe / United Kingdom / England          |
| EPI_ISL_532086 | 8/6/2020  | 9/11/2020 | Europe / United Kingdom / England          |
| EPI_ISL_532087 | 8/4/2020  | 9/11/2020 | Europe / United Kingdom / Northern Ireland |
| EPI_ISL_532088 | 8/3/2020  | 9/11/2020 | Europe / United Kingdom / England          |
| EPI_ISL_532089 | 8/3/2020  | 9/11/2020 | Europe / United Kingdom / England          |
| EPI_ISL_532090 | 8/3/2020  | 9/11/2020 | Europe / United Kingdom / England          |
| EPI_ISL_532091 | 8/5/2020  | 9/11/2020 | Europe / United Kingdom / England          |
| EPI_ISL_532092 | 8/3/2020  | 9/11/2020 | Europe / United Kingdom / England          |
| EPI_ISL_532093 | 8/6/2020  | 9/11/2020 | Europe / United Kingdom / Scotland         |
| EPI_ISL_532094 | 8/5/2020  | 9/11/2020 | Europe / United Kingdom / Scotland         |
| EPI_ISL_532095 | 8/2/2020  | 9/11/2020 | Europe / United Kingdom / England          |
| EPI_ISL_532096 | 8/4/2020  | 9/11/2020 | Europe / United Kingdom / England          |
| EPI_ISL_532097 | 8/4/2020  | 9/11/2020 | Europe / United Kingdom / England          |
| EPI_ISL_532098 | 8/5/2020  | 9/11/2020 | Europe / United Kingdom / Scotland         |
| EPI_ISL_532099 | 8/5/2020  | 9/11/2020 | Europe / United Kingdom / England          |
| EPI_ISL_532101 | 8/4/2020  | 9/11/2020 | Europe / United Kingdom / England          |
| EPI_ISL_532102 | 8/5/2020  | 9/11/2020 | Europe / United Kingdom / Scotland         |
| EPI_ISL_532103 | 8/4/2020  | 9/11/2020 | Europe / United Kingdom / England          |
| EPI_ISL_532104 | 8/5/2020  | 9/11/2020 | Europe / United Kingdom / England          |
| EPI_ISL_532105 | 8/7/2020  | 9/11/2020 | Europe / United Kingdom / Scotland         |
| EPI_ISL_532106 | 8/3/2020  | 9/11/2020 | Europe / United Kingdom / England          |
| EPI_ISL_532107 | 8/4/2020  | 9/11/2020 | Europe / United Kingdom / England          |
| EPI_ISL_532109 | 8/2/2020  | 9/11/2020 | Europe / United Kingdom / England          |
| EPI_ISL_532110 | 8/4/2020  | 9/11/2020 | Europe / United Kingdom / England          |
| EPI_ISL_532111 | 8/2/2020  | 9/11/2020 | Europe / United Kingdom / England          |











|                |          |           |                                            |
|----------------|----------|-----------|--------------------------------------------|
| EPI_ISL_532357 | 8/6/2020 | 9/11/2020 | Europe / United Kingdom / England          |
| EPI_ISL_532359 | 8/6/2020 | 9/11/2020 | Europe / United Kingdom / England          |
| EPI_ISL_532360 | 8/9/2020 | 9/11/2020 | Europe / United Kingdom / Northern Ireland |
| EPI_ISL_532362 | 8/6/2020 | 9/11/2020 | Europe / United Kingdom / Northern Ireland |
| EPI_ISL_532363 | 8/6/2020 | 9/11/2020 | Europe / United Kingdom / Scotland         |
| EPI_ISL_532364 | 8/9/2020 | 9/11/2020 | Europe / United Kingdom / Scotland         |
| EPI_ISL_532366 | 8/2/2020 | 9/11/2020 | Europe / United Kingdom / England          |
| EPI_ISL_532367 | 8/9/2020 | 9/11/2020 | Europe / United Kingdom / Northern Ireland |
| EPI_ISL_532368 | 8/6/2020 | 9/11/2020 | Europe / United Kingdom / Northern Ireland |
| EPI_ISL_532369 | 8/3/2020 | 9/11/2020 | Europe / United Kingdom / England          |
| EPI_ISL_532371 | 8/8/2020 | 9/11/2020 | Europe / United Kingdom / Northern Ireland |
| EPI_ISL_532372 | 8/9/2020 | 9/11/2020 | Europe / United Kingdom / England          |
| EPI_ISL_532373 | 8/6/2020 | 9/11/2020 | Europe / United Kingdom / England          |
| EPI_ISL_532374 | 8/5/2020 | 9/11/2020 | Europe / United Kingdom / England          |
| EPI_ISL_532375 | 8/7/2020 | 9/11/2020 | Europe / United Kingdom / England          |
| EPI_ISL_532377 | 8/6/2020 | 9/11/2020 | Europe / United Kingdom / England          |
| EPI_ISL_532378 | 8/5/2020 | 9/11/2020 | Europe / United Kingdom / Wales            |
| EPI_ISL_532380 | 8/7/2020 | 9/11/2020 | Europe / United Kingdom / England          |
| EPI_ISL_532381 | 8/9/2020 | 9/11/2020 | Europe / United Kingdom / Northern Ireland |
| EPI_ISL_532382 | 8/6/2020 | 9/11/2020 | Europe / United Kingdom / England          |
| EPI_ISL_532383 | 8/6/2020 | 9/11/2020 | Europe / United Kingdom / England          |
| EPI_ISL_532384 | 8/6/2020 | 9/11/2020 | Europe / United Kingdom / Scotland         |
| EPI_ISL_532386 | 8/2/2020 | 9/11/2020 | Europe / United Kingdom / England          |
| EPI_ISL_532387 | 8/6/2020 | 9/11/2020 | Europe / United Kingdom / England          |
| EPI_ISL_532388 | 8/9/2020 | 9/11/2020 | Europe / United Kingdom / Scotland         |
| EPI_ISL_532389 | 8/6/2020 | 9/11/2020 | Europe / United Kingdom / England          |
| EPI_ISL_532390 | 8/6/2020 | 9/11/2020 | Europe / United Kingdom / Scotland         |
| EPI_ISL_532391 | 8/7/2020 | 9/11/2020 | Europe / United Kingdom / England          |
| EPI_ISL_532392 | 8/8/2020 | 9/11/2020 | Europe / United Kingdom / Northern Ireland |
| EPI_ISL_532393 | 8/7/2020 | 9/11/2020 | Europe / United Kingdom / England          |
| EPI_ISL_532394 | 8/9/2020 | 9/11/2020 | Europe / United Kingdom / Scotland         |
| EPI_ISL_532395 | 8/6/2020 | 9/11/2020 | Europe / United Kingdom / England          |
| EPI_ISL_532396 | 8/6/2020 | 9/11/2020 | Europe / United Kingdom / England          |
| EPI_ISL_532397 | 8/9/2020 | 9/11/2020 | Europe / United Kingdom / Northern Ireland |
| EPI_ISL_532398 | 8/7/2020 | 9/11/2020 | Europe / United Kingdom / England          |
| EPI_ISL_532399 | 8/6/2020 | 9/11/2020 | Europe / United Kingdom / Scotland         |
| EPI_ISL_532400 | 8/5/2020 | 9/11/2020 | Europe / United Kingdom / England          |
| EPI_ISL_532401 | 8/9/2020 | 9/11/2020 | Europe / United Kingdom / Northern Ireland |
| EPI_ISL_532402 | 8/9/2020 | 9/11/2020 | Europe / United Kingdom / Scotland         |
| EPI_ISL_532403 | 8/5/2020 | 9/11/2020 | Europe / United Kingdom / England          |
| EPI_ISL_532404 | 8/6/2020 | 9/11/2020 | Europe / United Kingdom / Scotland         |
| EPI_ISL_532406 | 8/6/2020 | 9/11/2020 | Europe / United Kingdom / England          |
| EPI_ISL_532407 | 8/9/2020 | 9/11/2020 | Europe / United Kingdom / Northern Ireland |
| EPI_ISL_532408 | 8/7/2020 | 9/11/2020 | Europe / United Kingdom / England          |
| EPI_ISL_532409 | 8/6/2020 | 9/11/2020 | Europe / United Kingdom / England          |
| EPI_ISL_532410 | 8/5/2020 | 9/11/2020 | Europe / United Kingdom / England          |
| EPI_ISL_532411 | 8/7/2020 | 9/11/2020 | Europe / United Kingdom / England          |

|                |          |           |                                            |
|----------------|----------|-----------|--------------------------------------------|
| EPI_ISL_532412 | 8/6/2020 | 9/11/2020 | Europe / United Kingdom / England          |
| EPI_ISL_532413 | 8/7/2020 | 9/11/2020 | Europe / United Kingdom / England          |
| EPI_ISL_532414 | 8/8/2020 | 9/11/2020 | Europe / United Kingdom / Scotland         |
| EPI_ISL_532415 | 8/3/2020 | 9/11/2020 | Europe / United Kingdom / England          |
| EPI_ISL_532416 | 8/8/2020 | 9/11/2020 | Europe / United Kingdom / Northern Ireland |
| EPI_ISL_532417 | 8/4/2020 | 9/11/2020 | Europe / United Kingdom / England          |
| EPI_ISL_532418 | 8/6/2020 | 9/11/2020 | Europe / United Kingdom / England          |
| EPI_ISL_532419 | 8/8/2020 | 9/11/2020 | Europe / United Kingdom / Northern Ireland |
| EPI_ISL_532420 | 8/6/2020 | 9/11/2020 | Europe / United Kingdom / Northern Ireland |
| EPI_ISL_532421 | 8/6/2020 | 9/11/2020 | Europe / United Kingdom / England          |
| EPI_ISL_532424 | 8/6/2020 | 9/11/2020 | Europe / United Kingdom / England          |
| EPI_ISL_532425 | 8/6/2020 | 9/11/2020 | Europe / United Kingdom / England          |
| EPI_ISL_532426 | 8/5/2020 | 9/11/2020 | Europe / United Kingdom / England          |
| EPI_ISL_532428 | 8/5/2020 | 9/11/2020 | Europe / United Kingdom / England          |
| EPI_ISL_532429 | 8/5/2020 | 9/11/2020 | Europe / United Kingdom / England          |
| EPI_ISL_532430 | 8/8/2020 | 9/11/2020 | Europe / United Kingdom / Scotland         |
| EPI_ISL_532432 | 8/6/2020 | 9/11/2020 | Europe / United Kingdom / Scotland         |
| EPI_ISL_532433 | 8/6/2020 | 9/11/2020 | Europe / United Kingdom / England          |
| EPI_ISL_532436 | 8/6/2020 | 9/11/2020 | Europe / United Kingdom / England          |
| EPI_ISL_532437 | 8/6/2020 | 9/11/2020 | Europe / United Kingdom / England          |
| EPI_ISL_532439 | 8/6/2020 | 9/11/2020 | Europe / United Kingdom / England          |
| EPI_ISL_532440 | 8/9/2020 | 9/11/2020 | Europe / United Kingdom / Scotland         |
| EPI_ISL_532442 | 8/5/2020 | 9/11/2020 | Europe / United Kingdom / England          |
| EPI_ISL_532444 | 8/8/2020 | 9/11/2020 | Europe / United Kingdom / Scotland         |
| EPI_ISL_532446 | 8/8/2020 | 9/11/2020 | Europe / United Kingdom / Scotland         |
| EPI_ISL_532447 | 8/8/2020 | 9/11/2020 | Europe / United Kingdom / Northern Ireland |
| EPI_ISL_532449 | 8/5/2020 | 9/11/2020 | Europe / United Kingdom / England          |
| EPI_ISL_532450 | 8/8/2020 | 9/11/2020 | Europe / United Kingdom / Northern Ireland |
| EPI_ISL_532451 | 8/6/2020 | 9/11/2020 | Europe / United Kingdom / Northern Ireland |
| EPI_ISL_532452 | 8/8/2020 | 9/11/2020 | Europe / United Kingdom / Scotland         |
| EPI_ISL_532453 | 8/9/2020 | 9/11/2020 | Europe / United Kingdom / England          |
| EPI_ISL_532454 | 8/9/2020 | 9/11/2020 | Europe / United Kingdom / Scotland         |
| EPI_ISL_532455 | 8/5/2020 | 9/11/2020 | Europe / United Kingdom / England          |
| EPI_ISL_532456 | 8/6/2020 | 9/11/2020 | Europe / United Kingdom / Scotland         |
| EPI_ISL_532457 | 8/6/2020 | 9/11/2020 | Europe / United Kingdom / England          |
| EPI_ISL_532458 | 8/5/2020 | 9/11/2020 | Europe / United Kingdom / England          |
| EPI_ISL_532459 | 8/8/2020 | 9/11/2020 | Europe / United Kingdom / England          |
| EPI_ISL_532461 | 8/6/2020 | 9/11/2020 | Europe / United Kingdom / England          |
| EPI_ISL_532462 | 8/9/2020 | 9/11/2020 | Europe / United Kingdom / England          |
| EPI_ISL_532463 | 8/6/2020 | 9/11/2020 | Europe / United Kingdom / Scotland         |
| EPI_ISL_532464 | 8/6/2020 | 9/11/2020 | Europe / United Kingdom / Scotland         |
| EPI_ISL_532465 | 8/7/2020 | 9/11/2020 | Europe / United Kingdom / England          |
| EPI_ISL_532466 | 8/7/2020 | 9/11/2020 | Europe / United Kingdom / England          |
| EPI_ISL_532467 | 8/6/2020 | 9/11/2020 | Europe / United Kingdom / England          |
| EPI_ISL_532468 | 8/8/2020 | 9/11/2020 | Europe / United Kingdom / Northern Ireland |
| EPI_ISL_532470 | 8/6/2020 | 9/11/2020 | Europe / United Kingdom / England          |
| EPI_ISL_532471 | 8/9/2020 | 9/11/2020 | Europe / United Kingdom / England          |

|                |          |           |                                            |
|----------------|----------|-----------|--------------------------------------------|
| EPI_ISL_532472 | 8/5/2020 | 9/11/2020 | Europe / United Kingdom / Scotland         |
| EPI_ISL_532473 | 8/2/2020 | 9/11/2020 | Europe / United Kingdom / Scotland         |
| EPI_ISL_532474 | 8/8/2020 | 9/11/2020 | Europe / United Kingdom / Northern Ireland |
| EPI_ISL_532476 | 8/8/2020 | 9/11/2020 | Europe / United Kingdom / Northern Ireland |
| EPI_ISL_532477 | 8/4/2020 | 9/11/2020 | Europe / United Kingdom / England          |
| EPI_ISL_532478 | 8/5/2020 | 9/11/2020 | Europe / United Kingdom / England          |
| EPI_ISL_532480 | 8/8/2020 | 9/11/2020 | Europe / United Kingdom / Scotland         |
| EPI_ISL_532481 | 8/9/2020 | 9/11/2020 | Europe / United Kingdom / Northern Ireland |
| EPI_ISL_532482 | 8/9/2020 | 9/11/2020 | Europe / United Kingdom / Northern Ireland |
| EPI_ISL_532483 | 8/4/2020 | 9/11/2020 | Europe / United Kingdom / England          |
| EPI_ISL_532484 | 8/9/2020 | 9/11/2020 | Europe / United Kingdom / Scotland         |
| EPI_ISL_532485 | 8/5/2020 | 9/11/2020 | Europe / United Kingdom / England          |
| EPI_ISL_532487 | 8/3/2020 | 9/11/2020 | Europe / United Kingdom / England          |
| EPI_ISL_532488 | 8/9/2020 | 9/11/2020 | Europe / United Kingdom / England          |
| EPI_ISL_532489 | 8/6/2020 | 9/11/2020 | Europe / United Kingdom / England          |
| EPI_ISL_532491 | 8/6/2020 | 9/11/2020 | Europe / United Kingdom / England          |
| EPI_ISL_532492 | 8/6/2020 | 9/11/2020 | Europe / United Kingdom / Scotland         |
| EPI_ISL_532493 | 8/9/2020 | 9/11/2020 | Europe / United Kingdom / Scotland         |
| EPI_ISL_532494 | 8/6/2020 | 9/11/2020 | Europe / United Kingdom / England          |
| EPI_ISL_532495 | 8/6/2020 | 9/11/2020 | Europe / United Kingdom / England          |
| EPI_ISL_532496 | 8/8/2020 | 9/11/2020 | Europe / United Kingdom / Northern Ireland |
| EPI_ISL_532497 | 8/6/2020 | 9/11/2020 | Europe / United Kingdom / England          |
| EPI_ISL_532498 | 8/9/2020 | 9/11/2020 | Europe / United Kingdom / Northern Ireland |
| EPI_ISL_532499 | 8/6/2020 | 9/11/2020 | Europe / United Kingdom / England          |
| EPI_ISL_532500 | 8/7/2020 | 9/11/2020 | Europe / United Kingdom / England          |
| EPI_ISL_532501 | 8/6/2020 | 9/11/2020 | Europe / United Kingdom / England          |
| EPI_ISL_532502 | 8/8/2020 | 9/11/2020 | Europe / United Kingdom / Northern Ireland |
| EPI_ISL_532503 | 8/6/2020 | 9/11/2020 | Europe / United Kingdom / England          |
| EPI_ISL_532504 | 8/7/2020 | 9/11/2020 | Europe / United Kingdom / England          |
| EPI_ISL_532505 | 8/2/2020 | 9/11/2020 | Europe / United Kingdom / England          |
| EPI_ISL_532506 | 8/9/2020 | 9/11/2020 | Europe / United Kingdom / Scotland         |
| EPI_ISL_532507 | 8/7/2020 | 9/11/2020 | Europe / United Kingdom / England          |
| EPI_ISL_532508 | 8/6/2020 | 9/11/2020 | Europe / United Kingdom / Northern Ireland |
| EPI_ISL_532509 | 8/5/2020 | 9/11/2020 | Europe / United Kingdom / England          |
| EPI_ISL_532510 | 8/9/2020 | 9/11/2020 | Europe / United Kingdom / Scotland         |
| EPI_ISL_532512 | 8/9/2020 | 9/11/2020 | Europe / United Kingdom / Scotland         |
| EPI_ISL_532513 | 8/5/2020 | 9/11/2020 | Europe / United Kingdom / England          |
| EPI_ISL_532514 | 8/9/2020 | 9/11/2020 | Europe / United Kingdom / Scotland         |
| EPI_ISL_532515 | 8/8/2020 | 9/11/2020 | Europe / United Kingdom / Scotland         |
| EPI_ISL_532516 | 8/6/2020 | 9/11/2020 | Europe / United Kingdom / England          |
| EPI_ISL_532517 | 8/8/2020 | 9/11/2020 | Europe / United Kingdom / England          |
| EPI_ISL_532518 | 8/7/2020 | 9/11/2020 | Europe / United Kingdom / Scotland         |
| EPI_ISL_532520 | 8/9/2020 | 9/11/2020 | Europe / United Kingdom / Northern Ireland |
| EPI_ISL_532521 | 8/6/2020 | 9/11/2020 | Europe / United Kingdom / England          |
| EPI_ISL_532522 | 8/5/2020 | 9/11/2020 | Europe / United Kingdom / England          |
| EPI_ISL_532523 | 8/7/2020 | 9/11/2020 | Europe / United Kingdom / Scotland         |
| EPI_ISL_532524 | 8/6/2020 | 9/11/2020 | Europe / United Kingdom / England          |

|                |           |           |                                            |
|----------------|-----------|-----------|--------------------------------------------|
| EPI_ISL_532525 | 8/7/2020  | 9/11/2020 | Europe / United Kingdom / England          |
| EPI_ISL_532526 | 8/5/2020  | 9/11/2020 | Europe / United Kingdom / England          |
| EPI_ISL_532527 | 8/4/2020  | 9/11/2020 | Europe / United Kingdom / England          |
| EPI_ISL_532528 | 8/7/2020  | 9/11/2020 | Europe / United Kingdom / England          |
| EPI_ISL_532529 | 8/6/2020  | 9/11/2020 | Europe / United Kingdom / England          |
| EPI_ISL_532530 | 8/5/2020  | 9/11/2020 | Europe / United Kingdom / England          |
| EPI_ISL_532531 | 8/8/2020  | 9/11/2020 | Europe / United Kingdom / Scotland         |
| EPI_ISL_532532 | 8/6/2020  | 9/11/2020 | Europe / United Kingdom / England          |
| EPI_ISL_532533 | 8/6/2020  | 9/11/2020 | Europe / United Kingdom / England          |
| EPI_ISL_532534 | 8/6/2020  | 9/11/2020 | Europe / United Kingdom / England          |
| EPI_ISL_532535 | 8/4/2020  | 9/11/2020 | Europe / United Kingdom / England          |
| EPI_ISL_532536 | 8/6/2020  | 9/11/2020 | Europe / United Kingdom / England          |
| EPI_ISL_532537 | 8/9/2020  | 9/11/2020 | Europe / United Kingdom / Northern Ireland |
| EPI_ISL_532538 | 8/7/2020  | 9/11/2020 | Europe / United Kingdom / Scotland         |
| EPI_ISL_532539 | 8/1/2020  | 9/11/2020 | Europe / United Kingdom / England          |
| EPI_ISL_532540 | 8/1/2020  | 9/11/2020 | Europe / United Kingdom / Scotland         |
| EPI_ISL_532541 | 7/30/2020 | 9/11/2020 | Europe / United Kingdom / England          |
| EPI_ISL_532542 | 7/13/2020 | 9/11/2020 | Europe / United Kingdom / Northern Ireland |
| EPI_ISL_532543 | 7/26/2020 | 9/11/2020 | Europe / United Kingdom / England          |
| EPI_ISL_532544 | 7/29/2020 | 9/11/2020 | Europe / United Kingdom / England          |
| EPI_ISL_532545 | 7/27/2020 | 9/11/2020 | Europe / United Kingdom / England          |
| EPI_ISL_532548 | 7/31/2020 | 9/11/2020 | Europe / United Kingdom / England          |
| EPI_ISL_532550 | 7/29/2020 | 9/11/2020 | Europe / United Kingdom / England          |
| EPI_ISL_532553 | 7/28/2020 | 9/11/2020 | Europe / United Kingdom / England          |
| EPI_ISL_532554 | 7/31/2020 | 9/11/2020 | Europe / United Kingdom / England          |
| EPI_ISL_532555 | 7/28/2020 | 9/11/2020 | Europe / United Kingdom / Northern Ireland |
| EPI_ISL_532556 | 7/26/2020 | 9/11/2020 | Europe / United Kingdom / England          |
| EPI_ISL_532557 | 7/12/2020 | 9/11/2020 | Europe / United Kingdom / England          |
| EPI_ISL_532558 | 7/12/2020 | 9/11/2020 | Europe / United Kingdom / Northern Ireland |
| EPI_ISL_532559 | 7/31/2020 | 9/11/2020 | Europe / United Kingdom / England          |
| EPI_ISL_532561 | 8/1/2020  | 9/11/2020 | Europe / United Kingdom / Northern Ireland |
| EPI_ISL_532562 | 7/12/2020 | 9/11/2020 | Europe / United Kingdom / Northern Ireland |
| EPI_ISL_532563 | 8/1/2020  | 9/11/2020 | Europe / United Kingdom / Scotland         |
| EPI_ISL_532564 | 8/2/2020  | 9/11/2020 | Europe / United Kingdom / Scotland         |
| EPI_ISL_532565 | 7/28/2020 | 9/11/2020 | Europe / United Kingdom / England          |
| EPI_ISL_532567 | 7/13/2020 | 9/11/2020 | Europe / United Kingdom / Northern Ireland |
| EPI_ISL_532569 | 8/1/2020  | 9/11/2020 | Europe / United Kingdom / Northern Ireland |
| EPI_ISL_532570 | 7/28/2020 | 9/11/2020 | Europe / United Kingdom / England          |
| EPI_ISL_532571 | 7/29/2020 | 9/11/2020 | Europe / United Kingdom / England          |
| EPI_ISL_532572 | 8/2/2020  | 9/11/2020 | Europe / United Kingdom / Scotland         |
| EPI_ISL_532573 | 7/31/2020 | 9/11/2020 | Europe / United Kingdom / England          |
| EPI_ISL_532574 | 7/29/2020 | 9/11/2020 | Europe / United Kingdom / England          |
| EPI_ISL_532575 | 7/28/2020 | 9/11/2020 | Europe / United Kingdom / Northern Ireland |
| EPI_ISL_532576 | 7/30/2020 | 9/11/2020 | Europe / United Kingdom / England          |
| EPI_ISL_532577 | 7/28/2020 | 9/11/2020 | Europe / United Kingdom / England          |
| EPI_ISL_532578 | 7/11/2020 | 9/11/2020 | Europe / United Kingdom / Northern Ireland |
| EPI_ISL_532579 | 7/11/2020 | 9/11/2020 | Europe / United Kingdom / Northern Ireland |

|                |           |                                                      |
|----------------|-----------|------------------------------------------------------|
| EPI_ISL_532581 | 7/9/2020  | 9/11/2020 Europe / United Kingdom / England          |
| EPI_ISL_532582 | 7/13/2020 | 9/11/2020 Europe / United Kingdom / Scotland         |
| EPI_ISL_532584 | 7/29/2020 | 9/11/2020 Europe / United Kingdom / England          |
| EPI_ISL_532585 | 7/29/2020 | 9/11/2020 Europe / United Kingdom / England          |
| EPI_ISL_532586 | 7/27/2020 | 9/11/2020 Europe / United Kingdom / England          |
| EPI_ISL_532587 | 8/1/2020  | 9/11/2020 Europe / United Kingdom / Scotland         |
| EPI_ISL_532588 | 8/1/2020  | 9/11/2020 Europe / United Kingdom / Northern Ireland |
| EPI_ISL_532589 | 7/12/2020 | 9/11/2020 Europe / United Kingdom / England          |
| EPI_ISL_532590 | 7/31/2020 | 9/11/2020 Europe / United Kingdom / England          |
| EPI_ISL_532591 | 7/28/2020 | 9/11/2020 Europe / United Kingdom / England          |
| EPI_ISL_532592 | 7/28/2020 | 9/11/2020 Europe / United Kingdom / England          |
| EPI_ISL_532593 | 7/31/2020 | 9/11/2020 Europe / United Kingdom / England          |
| EPI_ISL_532594 | 7/31/2020 | 9/11/2020 Europe / United Kingdom / Scotland         |
| EPI_ISL_532595 | 7/12/2020 | 9/11/2020 Europe / United Kingdom / Northern Ireland |
| EPI_ISL_532597 | 7/30/2020 | 9/11/2020 Europe / United Kingdom / England          |
| EPI_ISL_532598 | 8/2/2020  | 9/11/2020 Europe / United Kingdom / Scotland         |
| EPI_ISL_532599 | 7/30/2020 | 9/11/2020 Europe / United Kingdom / England          |
| EPI_ISL_532600 | 8/1/2020  | 9/11/2020 Europe / United Kingdom / Northern Ireland |
| EPI_ISL_532601 | 7/31/2020 | 9/11/2020 Europe / United Kingdom / England          |
| EPI_ISL_532602 | 7/31/2020 | 9/11/2020 Europe / United Kingdom / England          |
| EPI_ISL_532603 | 7/30/2020 | 9/11/2020 Europe / United Kingdom / England          |
| EPI_ISL_532604 | 7/29/2020 | 9/11/2020 Europe / United Kingdom / England          |
| EPI_ISL_532605 | 7/30/2020 | 9/11/2020 Europe / United Kingdom / England          |
| EPI_ISL_532607 | 7/25/2020 | 9/11/2020 Europe / United Kingdom / England          |
| EPI_ISL_532608 | 7/30/2020 | 9/11/2020 Europe / United Kingdom / England          |
| EPI_ISL_532609 | 7/30/2020 | 9/11/2020 Europe / United Kingdom / England          |
| EPI_ISL_532610 | 7/31/2020 | 9/11/2020 Europe / United Kingdom / England          |
| EPI_ISL_532613 | 7/27/2020 | 9/11/2020 Europe / United Kingdom / England          |
| EPI_ISL_532614 | 7/28/2020 | 9/11/2020 Europe / United Kingdom / Northern Ireland |
| EPI_ISL_532615 | 8/1/2020  | 9/11/2020 Europe / United Kingdom / Northern Ireland |
| EPI_ISL_532616 | 7/30/2020 | 9/11/2020 Europe / United Kingdom / England          |
| EPI_ISL_532617 | 7/11/2020 | 9/11/2020 Europe / United Kingdom / England          |
| EPI_ISL_532618 | 7/30/2020 | 9/11/2020 Europe / United Kingdom / England          |
| EPI_ISL_532619 | 7/30/2020 | 9/11/2020 Europe / United Kingdom / England          |
| EPI_ISL_532620 | 8/2/2020  | 9/11/2020 Europe / United Kingdom / Scotland         |
| EPI_ISL_532621 | 8/1/2020  | 9/11/2020 Europe / United Kingdom / Scotland         |
| EPI_ISL_532622 | 7/27/2020 | 9/11/2020 Europe / United Kingdom / England          |
| EPI_ISL_532623 | 7/31/2020 | 9/11/2020 Europe / United Kingdom / England          |
| EPI_ISL_532624 | 7/11/2020 | 9/11/2020 Europe / United Kingdom / Northern Ireland |
| EPI_ISL_532625 | 7/28/2020 | 9/11/2020 Europe / United Kingdom / Scotland         |
| EPI_ISL_532626 | 8/1/2020  | 9/11/2020 Europe / United Kingdom / Scotland         |
| EPI_ISL_532627 | 7/12/2020 | 9/11/2020 Europe / United Kingdom / England          |
| EPI_ISL_532628 | 7/28/2020 | 9/11/2020 Europe / United Kingdom / England          |
| EPI_ISL_532629 | 7/30/2020 | 9/11/2020 Europe / United Kingdom / England          |
| EPI_ISL_532630 | 7/29/2020 | 9/11/2020 Europe / United Kingdom / England          |
| EPI_ISL_532631 | 7/25/2020 | 9/11/2020 Europe / United Kingdom / Wales            |
| EPI_ISL_532632 | 7/27/2020 | 9/11/2020 Europe / United Kingdom / England          |



|                |           |           |                                            |
|----------------|-----------|-----------|--------------------------------------------|
| EPI_ISL_532634 | 7/29/2020 | 9/11/2020 | Europe / United Kingdom / Northern Ireland |
| EPI_ISL_532635 | 7/29/2020 | 9/11/2020 | Europe / United Kingdom / England          |
| EPI_ISL_532637 | 7/29/2020 | 9/11/2020 | Europe / United Kingdom / England          |
| EPI_ISL_532641 | 7/24/2020 | 9/11/2020 | Europe / United Kingdom / England          |
| EPI_ISL_532642 | 7/29/2020 | 9/11/2020 | Europe / United Kingdom / England          |
| EPI_ISL_532643 | 7/29/2020 | 9/11/2020 | Europe / United Kingdom / Northern Ireland |
| EPI_ISL_532644 | 7/29/2020 | 9/11/2020 | Europe / United Kingdom / England          |
| EPI_ISL_532647 | 7/26/2020 | 9/11/2020 | Europe / United Kingdom / Wales            |
| EPI_ISL_532648 | 7/27/2020 | 9/11/2020 | Europe / United Kingdom / Scotland         |
| EPI_ISL_532649 | 7/26/2020 | 9/11/2020 | Europe / United Kingdom / Wales            |
| EPI_ISL_532650 | 8/4/2020  | 9/11/2020 | Europe / United Kingdom / England          |
| EPI_ISL_532651 | 7/21/2020 | 9/11/2020 | Europe / United Kingdom / England          |
| EPI_ISL_532652 | 7/19/2020 | 9/11/2020 | Europe / United Kingdom / England          |
| EPI_ISL_532654 | 7/26/2020 | 9/11/2020 | Europe / United Kingdom / England          |
| EPI_ISL_532656 | 7/27/2020 | 9/11/2020 | Europe / United Kingdom / Northern Ireland |
| EPI_ISL_532657 | 7/24/2020 | 9/11/2020 | Europe / United Kingdom / England          |
| EPI_ISL_532659 | 7/19/2020 | 9/11/2020 | Europe / United Kingdom / Scotland         |
| EPI_ISL_532660 | 7/26/2020 | 9/11/2020 | Europe / United Kingdom / England          |
| EPI_ISL_532662 | 7/24/2020 | 9/11/2020 | Europe / United Kingdom / Northern Ireland |
| EPI_ISL_532663 | 7/25/2020 | 9/11/2020 | Europe / United Kingdom / England          |
| EPI_ISL_532665 | 7/23/2020 | 9/11/2020 | Europe / United Kingdom / England          |
| EPI_ISL_532666 | 7/20/2020 | 9/11/2020 | Europe / United Kingdom / England          |
| EPI_ISL_532667 | 7/22/2020 | 9/11/2020 | Europe / United Kingdom / England          |
| EPI_ISL_532668 | 7/24/2020 | 9/11/2020 | Europe / United Kingdom / England          |
| EPI_ISL_532670 | 7/27/2020 | 9/11/2020 | Europe / United Kingdom / Scotland         |
| EPI_ISL_532671 | 7/24/2020 | 9/11/2020 | Europe / United Kingdom / England          |
| EPI_ISL_532674 | 7/26/2020 | 9/11/2020 | Europe / United Kingdom / Northern Ireland |
| EPI_ISL_532675 | 7/25/2020 | 9/11/2020 | Europe / United Kingdom / England          |
| EPI_ISL_532676 | 7/26/2020 | 9/11/2020 | Europe / United Kingdom / Northern Ireland |
| EPI_ISL_532677 | 7/22/2020 | 9/11/2020 | Europe / United Kingdom / England          |
| EPI_ISL_532678 | 7/24/2020 | 9/11/2020 | Europe / United Kingdom / England          |
| EPI_ISL_532679 | 7/23/2020 | 9/11/2020 | Europe / United Kingdom / England          |
| EPI_ISL_532680 | 7/23/2020 | 9/11/2020 | Europe / United Kingdom / England          |
| EPI_ISL_532681 | 7/26/2020 | 9/11/2020 | Europe / United Kingdom / England          |
| EPI_ISL_532682 | 7/27/2020 | 9/11/2020 | Europe / United Kingdom / England          |
| EPI_ISL_532683 | 7/19/2020 | 9/11/2020 | Europe / United Kingdom / Scotland         |
| EPI_ISL_532685 | 7/29/2020 | 9/11/2020 | Europe / United Kingdom / England          |
| EPI_ISL_532686 | 7/29/2020 | 9/11/2020 | Europe / United Kingdom / England          |
| EPI_ISL_532687 | 7/25/2020 | 9/11/2020 | Europe / United Kingdom / Northern Ireland |
| EPI_ISL_532688 | 7/27/2020 | 9/11/2020 | Europe / United Kingdom / England          |
| EPI_ISL_532689 | 7/19/2020 | 9/11/2020 | Europe / United Kingdom / Scotland         |
| EPI_ISL_532690 | 7/27/2020 | 9/11/2020 | Europe / United Kingdom / England          |
| EPI_ISL_532691 | 7/22/2020 | 9/11/2020 | Europe / United Kingdom / England          |
| EPI_ISL_532692 | 7/24/2020 | 9/11/2020 | Europe / United Kingdom / England          |
| EPI_ISL_532693 | 7/22/2020 | 9/11/2020 | Europe / United Kingdom / Wales            |
| EPI_ISL_532694 | 7/27/2020 | 9/11/2020 | Europe / United Kingdom / Northern Ireland |
| EPI_ISL_532695 | 7/23/2020 | 9/11/2020 | Europe / United Kingdom / England          |

|                |           |           |                                            |
|----------------|-----------|-----------|--------------------------------------------|
| EPI_ISL_532696 | 7/26/2020 | 9/11/2020 | Europe / United Kingdom / Northern Ireland |
| EPI_ISL_532697 | 7/28/2020 | 9/11/2020 | Europe / United Kingdom / Scotland         |
| EPI_ISL_532698 | 7/27/2020 | 9/11/2020 | Europe / United Kingdom / Northern Ireland |
| EPI_ISL_532699 | 7/27/2020 | 9/11/2020 | Europe / United Kingdom / England          |
| EPI_ISL_532700 | 7/26/2020 | 9/11/2020 | Europe / United Kingdom / England          |
| EPI_ISL_532701 | 7/24/2020 | 9/11/2020 | Europe / United Kingdom / England          |
| EPI_ISL_532702 | 7/27/2020 | 9/11/2020 | Europe / United Kingdom / England          |
| EPI_ISL_532703 | 7/27/2020 | 9/11/2020 | Europe / United Kingdom / England          |
| EPI_ISL_532704 | 7/24/2020 | 9/11/2020 | Europe / United Kingdom / England          |
| EPI_ISL_532705 | 7/17/2020 | 9/11/2020 | Europe / United Kingdom / Scotland         |
| EPI_ISL_532706 | 7/21/2020 | 9/11/2020 | Europe / United Kingdom / England          |
| EPI_ISL_532708 | 7/28/2020 | 9/11/2020 | Europe / United Kingdom / England          |
| EPI_ISL_532711 | 7/24/2020 | 9/11/2020 | Europe / United Kingdom / England          |
| EPI_ISL_532712 | 7/26/2020 | 9/11/2020 | Europe / United Kingdom / England          |
| EPI_ISL_532713 | 7/26/2020 | 9/11/2020 | Europe / United Kingdom / England          |
| EPI_ISL_532714 | 7/23/2020 | 9/11/2020 | Europe / United Kingdom / England          |
| EPI_ISL_532715 | 7/25/2020 | 9/11/2020 | Europe / United Kingdom / Scotland         |
| EPI_ISL_532716 | 7/22/2020 | 9/11/2020 | Europe / United Kingdom / England          |
| EPI_ISL_532717 | 7/24/2020 | 9/11/2020 | Europe / United Kingdom / England          |
| EPI_ISL_532718 | 7/24/2020 | 9/11/2020 | Europe / United Kingdom / England          |
| EPI_ISL_532719 | 7/22/2020 | 9/11/2020 | Europe / United Kingdom / England          |
| EPI_ISL_532721 | 7/24/2020 | 9/11/2020 | Europe / United Kingdom / England          |
| EPI_ISL_532722 | 7/25/2020 | 9/11/2020 | Europe / United Kingdom / England          |
| EPI_ISL_532724 | 7/24/2020 | 9/11/2020 | Europe / United Kingdom / Northern Ireland |
| EPI_ISL_532725 | 7/26/2020 | 9/11/2020 | Europe / United Kingdom / England          |
| EPI_ISL_532726 | 7/26/2020 | 9/11/2020 | Europe / United Kingdom / England          |
| EPI_ISL_532727 | 7/24/2020 | 9/11/2020 | Europe / United Kingdom / England          |
| EPI_ISL_532729 | 7/24/2020 | 9/11/2020 | Europe / United Kingdom / England          |
| EPI_ISL_532730 | 7/21/2020 | 9/11/2020 | Europe / United Kingdom / England          |
| EPI_ISL_532731 | 7/25/2020 | 9/11/2020 | Europe / United Kingdom / England          |
| EPI_ISL_532732 | 7/25/2020 | 9/11/2020 | Europe / United Kingdom / England          |
| EPI_ISL_532733 | 7/28/2020 | 9/11/2020 | Europe / United Kingdom / Scotland         |
| EPI_ISL_532734 | 7/24/2020 | 9/11/2020 | Europe / United Kingdom / England          |
| EPI_ISL_532735 | 7/24/2020 | 9/11/2020 | Europe / United Kingdom / England          |
| EPI_ISL_532736 | 7/27/2020 | 9/11/2020 | Europe / United Kingdom / England          |
| EPI_ISL_532737 | 7/23/2020 | 9/11/2020 | Europe / United Kingdom / England          |
| EPI_ISL_532738 | 7/28/2020 | 9/11/2020 | Europe / United Kingdom / Scotland         |
| EPI_ISL_532740 | 7/25/2020 | 9/11/2020 | Europe / United Kingdom / England          |
| EPI_ISL_532741 | 7/27/2020 | 9/11/2020 | Europe / United Kingdom / Northern Ireland |
| EPI_ISL_532742 | 7/27/2020 | 9/11/2020 | Europe / United Kingdom / England          |
| EPI_ISL_532743 | 7/27/2020 | 9/11/2020 | Europe / United Kingdom / England          |
| EPI_ISL_532744 | 7/28/2020 | 9/11/2020 | Europe / United Kingdom / Scotland         |
| EPI_ISL_532745 | 7/19/2020 | 9/11/2020 | Europe / United Kingdom / England          |
| EPI_ISL_532746 | 7/27/2020 | 9/11/2020 | Europe / United Kingdom / Scotland         |
| EPI_ISL_532747 | 7/27/2020 | 9/11/2020 | Europe / United Kingdom / England          |
| EPI_ISL_532748 | 7/23/2020 | 9/11/2020 | Europe / United Kingdom / England          |
| EPI_ISL_532749 | 7/23/2020 | 9/11/2020 | Europe / United Kingdom / England          |

|                |           |                                                      |
|----------------|-----------|------------------------------------------------------|
| EPI_ISL_532750 | 7/26/2020 | 9/11/2020 Europe / United Kingdom / Scotland         |
| EPI_ISL_532751 | 7/27/2020 | 9/11/2020 Europe / United Kingdom / England          |
| EPI_ISL_532752 | 7/23/2020 | 9/11/2020 Europe / United Kingdom / England          |
| EPI_ISL_532753 | 7/28/2020 | 9/11/2020 Europe / United Kingdom / Scotland         |
| EPI_ISL_532754 | 7/27/2020 | 9/11/2020 Europe / United Kingdom / England          |
| EPI_ISL_532755 | 7/28/2020 | 9/11/2020 Europe / United Kingdom / Scotland         |
| EPI_ISL_532756 | 7/23/2020 | 9/11/2020 Europe / United Kingdom / England          |
| EPI_ISL_532757 | 7/26/2020 | 9/11/2020 Europe / United Kingdom / Northern Ireland |
| EPI_ISL_532758 | 7/27/2020 | 9/11/2020 Europe / United Kingdom / Northern Ireland |
| EPI_ISL_532760 | 7/26/2020 | 9/11/2020 Europe / United Kingdom / England          |
| EPI_ISL_532761 | 7/22/2020 | 9/11/2020 Europe / United Kingdom / Wales            |
| EPI_ISL_532762 | 7/27/2020 | 9/11/2020 Europe / United Kingdom / England          |
| EPI_ISL_532763 | 7/25/2020 | 9/11/2020 Europe / United Kingdom / Northern Ireland |
| EPI_ISL_532764 | 7/27/2020 | 9/11/2020 Europe / United Kingdom / England          |
| EPI_ISL_532766 | 7/27/2020 | 9/11/2020 Europe / United Kingdom / England          |
| EPI_ISL_532767 | 7/28/2020 | 9/11/2020 Europe / United Kingdom / Scotland         |
| EPI_ISL_532768 | 7/24/2020 | 9/11/2020 Europe / United Kingdom / Northern Ireland |
| EPI_ISL_532769 | 7/27/2020 | 9/11/2020 Europe / United Kingdom / England          |
| EPI_ISL_532771 | 7/23/2020 | 9/11/2020 Europe / United Kingdom / England          |
| EPI_ISL_532772 | 7/26/2020 | 9/11/2020 Europe / United Kingdom / England          |
| EPI_ISL_532773 | 7/24/2020 | 9/11/2020 Europe / United Kingdom / Northern Ireland |
| EPI_ISL_532774 | 7/27/2020 | 9/11/2020 Europe / United Kingdom / England          |
| EPI_ISL_532775 | 7/26/2020 | 9/11/2020 Europe / United Kingdom / England          |
| EPI_ISL_532776 | 7/23/2020 | 9/11/2020 Europe / United Kingdom / England          |
| EPI_ISL_532777 | 7/24/2020 | 9/11/2020 Europe / United Kingdom / England          |
| EPI_ISL_532778 | 7/27/2020 | 9/11/2020 Europe / United Kingdom / England          |
| EPI_ISL_532779 | 7/24/2020 | 9/11/2020 Europe / United Kingdom / England          |
| EPI_ISL_532780 | 7/25/2020 | 9/11/2020 Europe / United Kingdom / Northern Ireland |
| EPI_ISL_532783 | 7/23/2020 | 9/11/2020 Europe / United Kingdom / England          |
| EPI_ISL_532784 | 7/27/2020 | 9/11/2020 Europe / United Kingdom / Scotland         |
| EPI_ISL_532785 | 7/24/2020 | 9/11/2020 Europe / United Kingdom / England          |
| EPI_ISL_532786 | 7/24/2020 | 9/11/2020 Europe / United Kingdom / Scotland         |
| EPI_ISL_532787 | 7/23/2020 | 9/11/2020 Europe / United Kingdom / England          |
| EPI_ISL_532788 | 7/22/2020 | 9/11/2020 Europe / United Kingdom / Wales            |
| EPI_ISL_532790 | 7/24/2020 | 9/11/2020 Europe / United Kingdom / England          |
| EPI_ISL_532791 | 7/26/2020 | 9/11/2020 Europe / United Kingdom / Scotland         |
| EPI_ISL_532792 | 7/25/2020 | 9/11/2020 Europe / United Kingdom / England          |
| EPI_ISL_532793 | 7/26/2020 | 9/11/2020 Europe / United Kingdom / England          |
| EPI_ISL_532794 | 7/24/2020 | 9/11/2020 Europe / United Kingdom / England          |
| EPI_ISL_532795 | 7/26/2020 | 9/11/2020 Europe / United Kingdom / England          |
| EPI_ISL_532796 | 7/24/2020 | 9/11/2020 Europe / United Kingdom / England          |
| EPI_ISL_532797 | 7/27/2020 | 9/11/2020 Europe / United Kingdom / England          |
| EPI_ISL_532798 | 7/25/2020 | 9/11/2020 Europe / United Kingdom / England          |
| EPI_ISL_532799 | 7/27/2020 | 9/11/2020 Europe / United Kingdom / England          |
| EPI_ISL_532800 | 7/24/2020 | 9/11/2020 Europe / United Kingdom / England          |
| EPI_ISL_532802 | 7/25/2020 | 9/11/2020 Europe / United Kingdom / England          |
| EPI_ISL_532803 | 7/27/2020 | 9/11/2020 Europe / United Kingdom / England          |

|                |           |           |                                            |
|----------------|-----------|-----------|--------------------------------------------|
| EPI_ISL_532804 | 7/27/2020 | 9/11/2020 | Europe / United Kingdom / Northern Ireland |
| EPI_ISL_532805 | 7/26/2020 | 9/11/2020 | Europe / United Kingdom / England          |
| EPI_ISL_532806 | 7/22/2020 | 9/11/2020 | Europe / United Kingdom / England          |
| EPI_ISL_532807 | 7/24/2020 | 9/11/2020 | Europe / United Kingdom / England          |
| EPI_ISL_532808 | 7/23/2020 | 9/11/2020 | Europe / United Kingdom / England          |
| EPI_ISL_532809 | 7/25/2020 | 9/11/2020 | Europe / United Kingdom / England          |
| EPI_ISL_532810 | 7/24/2020 | 9/11/2020 | Europe / United Kingdom / England          |
| EPI_ISL_532811 | 7/28/2020 | 9/11/2020 | Europe / United Kingdom / Scotland         |
| EPI_ISL_532812 | 7/28/2020 | 9/11/2020 | Europe / United Kingdom / England          |
| EPI_ISL_532813 | 7/25/2020 | 9/11/2020 | Europe / United Kingdom / England          |
| EPI_ISL_532815 | 7/25/2020 | 9/11/2020 | Europe / United Kingdom / England          |
| EPI_ISL_532816 | 7/25/2020 | 9/11/2020 | Europe / United Kingdom / England          |
| EPI_ISL_532817 | 7/27/2020 | 9/11/2020 | Europe / United Kingdom / England          |
| EPI_ISL_532819 | 7/23/2020 | 9/11/2020 | Europe / United Kingdom / Wales            |
| EPI_ISL_532820 | 7/24/2020 | 9/11/2020 | Europe / United Kingdom / England          |
| EPI_ISL_532822 | 7/27/2020 | 9/11/2020 | Europe / United Kingdom / England          |
| EPI_ISL_532823 | 7/27/2020 | 9/11/2020 | Europe / United Kingdom / England          |
| EPI_ISL_532825 | 7/25/2020 | 9/11/2020 | Europe / United Kingdom / England          |
| EPI_ISL_532826 | 7/27/2020 | 9/11/2020 | Europe / United Kingdom / Northern Ireland |
| EPI_ISL_532827 | 7/25/2020 | 9/11/2020 | Europe / United Kingdom / Northern Ireland |
| EPI_ISL_532828 | 7/25/2020 | 9/11/2020 | Europe / United Kingdom / England          |
| EPI_ISL_532829 | 7/27/2020 | 9/11/2020 | Europe / United Kingdom / England          |
| EPI_ISL_532830 | 7/27/2020 | 9/11/2020 | Europe / United Kingdom / Northern Ireland |
| EPI_ISL_532831 | 7/23/2020 | 9/11/2020 | Europe / United Kingdom / England          |
| EPI_ISL_532832 | 7/24/2020 | 9/11/2020 | Europe / United Kingdom / England          |
| EPI_ISL_532833 | 7/24/2020 | 9/11/2020 | Europe / United Kingdom / Northern Ireland |
| EPI_ISL_532834 | 7/24/2020 | 9/11/2020 | Europe / United Kingdom / England          |
| EPI_ISL_532836 | 7/19/2020 | 9/11/2020 | Europe / United Kingdom / England          |
| EPI_ISL_532837 | 7/20/2020 | 9/11/2020 | Europe / United Kingdom / England          |
| EPI_ISL_532838 | 7/23/2020 | 9/11/2020 | Europe / United Kingdom / Scotland         |
| EPI_ISL_532840 | 7/19/2020 | 9/11/2020 | Europe / United Kingdom / England          |
| EPI_ISL_532842 | 7/22/2020 | 9/11/2020 | Europe / United Kingdom / Northern Ireland |
| EPI_ISL_532845 | 7/18/2020 | 9/11/2020 | Europe / United Kingdom / England          |
| EPI_ISL_532847 | 7/17/2020 | 9/11/2020 | Europe / United Kingdom / England          |
| EPI_ISL_532848 | 7/21/2020 | 9/11/2020 | Europe / United Kingdom / England          |
| EPI_ISL_532849 | 7/23/2020 | 9/11/2020 | Europe / United Kingdom / England          |
| EPI_ISL_532853 | 7/22/2020 | 9/11/2020 | Europe / United Kingdom / England          |
| EPI_ISL_532854 | 7/23/2020 | 9/11/2020 | Europe / United Kingdom / Northern Ireland |
| EPI_ISL_532855 | 7/23/2020 | 9/11/2020 | Europe / United Kingdom / England          |
| EPI_ISL_532856 | 7/16/2020 | 9/11/2020 | Europe / United Kingdom / England          |
| EPI_ISL_532860 | 7/17/2020 | 9/11/2020 | Europe / United Kingdom / England          |
| EPI_ISL_532861 | 7/22/2020 | 9/11/2020 | Europe / United Kingdom / England          |
| EPI_ISL_532863 | 7/18/2020 | 9/11/2020 | Europe / United Kingdom / England          |
| EPI_ISL_532865 | 7/20/2020 | 9/11/2020 | Europe / United Kingdom / Scotland         |
| EPI_ISL_532866 | 7/17/2020 | 9/11/2020 | Europe / United Kingdom / England          |
| EPI_ISL_532867 | 7/19/2020 | 9/11/2020 | Europe / United Kingdom / England          |
| EPI_ISL_532868 | 7/18/2020 | 9/11/2020 | Europe / United Kingdom / England          |

|                |           |           |                                            |
|----------------|-----------|-----------|--------------------------------------------|
| EPI_ISL_532869 | 7/20/2020 | 9/11/2020 | Europe / United Kingdom / England          |
| EPI_ISL_532870 | 7/18/2020 | 9/11/2020 | Europe / United Kingdom / England          |
| EPI_ISL_532871 | 7/21/2020 | 9/11/2020 | Europe / United Kingdom / England          |
| EPI_ISL_532872 | 7/18/2020 | 9/11/2020 | Europe / United Kingdom / England          |
| EPI_ISL_532874 | 7/20/2020 | 9/11/2020 | Europe / United Kingdom / Scotland         |
| EPI_ISL_532876 | 7/19/2020 | 9/11/2020 | Europe / United Kingdom / Scotland         |
| EPI_ISL_532877 | 7/21/2020 | 9/11/2020 | Europe / United Kingdom / England          |
| EPI_ISL_532878 | 7/24/2020 | 9/11/2020 | Europe / United Kingdom / Scotland         |
| EPI_ISL_532879 | 7/18/2020 | 9/11/2020 | Europe / United Kingdom / England          |
| EPI_ISL_532882 | 7/21/2020 | 9/11/2020 | Europe / United Kingdom / England          |
| EPI_ISL_532883 | 7/19/2020 | 9/11/2020 | Europe / United Kingdom / England          |
| EPI_ISL_532884 | 7/21/2020 | 9/11/2020 | Europe / United Kingdom / England          |
| EPI_ISL_532885 | 7/23/2020 | 9/11/2020 | Europe / United Kingdom / Scotland         |
| EPI_ISL_532887 | 7/17/2020 | 9/11/2020 | Europe / United Kingdom / England          |
| EPI_ISL_532888 | 7/22/2020 | 9/11/2020 | Europe / United Kingdom / England          |
| EPI_ISL_532889 | 7/20/2020 | 9/11/2020 | Europe / United Kingdom / England          |
| EPI_ISL_532890 | 7/22/2020 | 9/11/2020 | Europe / United Kingdom / England          |
| EPI_ISL_532891 | 7/23/2020 | 9/11/2020 | Europe / United Kingdom / Scotland         |
| EPI_ISL_532892 | 7/20/2020 | 9/11/2020 | Europe / United Kingdom / England          |
| EPI_ISL_532893 | 7/20/2020 | 9/11/2020 | Europe / United Kingdom / England          |
| EPI_ISL_532894 | 7/19/2020 | 9/11/2020 | Europe / United Kingdom / Scotland         |
| EPI_ISL_532895 | 7/22/2020 | 9/11/2020 | Europe / United Kingdom / England          |
| EPI_ISL_532896 | 7/24/2020 | 9/11/2020 | Europe / United Kingdom / Scotland         |
| EPI_ISL_532897 | 7/21/2020 | 9/11/2020 | Europe / United Kingdom / Northern Ireland |
| EPI_ISL_532898 | 7/20/2020 | 9/11/2020 | Europe / United Kingdom / England          |
| EPI_ISL_532899 | 7/18/2020 | 9/11/2020 | Europe / United Kingdom / England          |
| EPI_ISL_532900 | 7/21/2020 | 9/11/2020 | Europe / United Kingdom / England          |
| EPI_ISL_532901 | 7/19/2020 | 9/11/2020 | Europe / United Kingdom / England          |
| EPI_ISL_532903 | 7/23/2020 | 9/11/2020 | Europe / United Kingdom / Northern Ireland |
| EPI_ISL_532904 | 7/22/2020 | 9/11/2020 | Europe / United Kingdom / England          |
| EPI_ISL_532905 | 7/19/2020 | 9/11/2020 | Europe / United Kingdom / Scotland         |
| EPI_ISL_532906 | 7/21/2020 | 9/11/2020 | Europe / United Kingdom / Scotland         |
| EPI_ISL_532907 | 7/22/2020 | 9/11/2020 | Europe / United Kingdom / Northern Ireland |
| EPI_ISL_532908 | 7/19/2020 | 9/11/2020 | Europe / United Kingdom / England          |
| EPI_ISL_532911 | 7/22/2020 | 9/11/2020 | Europe / United Kingdom / England          |
| EPI_ISL_532912 | 7/23/2020 | 9/11/2020 | Europe / United Kingdom / England          |
| EPI_ISL_532915 | 7/20/2020 | 9/11/2020 | Europe / United Kingdom / Scotland         |
| EPI_ISL_532917 | 7/22/2020 | 9/11/2020 | Europe / United Kingdom / England          |
| EPI_ISL_532918 | 7/20/2020 | 9/11/2020 | Europe / United Kingdom / England          |
| EPI_ISL_532922 | 7/21/2020 | 9/11/2020 | Europe / United Kingdom / Northern Ireland |
| EPI_ISL_532923 | 7/22/2020 | 9/11/2020 | Europe / United Kingdom / England          |
| EPI_ISL_532924 | 7/23/2020 | 9/11/2020 | Europe / United Kingdom / Northern Ireland |
| EPI_ISL_532927 | 7/17/2020 | 9/11/2020 | Europe / United Kingdom / England          |
| EPI_ISL_532928 | 7/21/2020 | 9/11/2020 | Europe / United Kingdom / England          |
| EPI_ISL_532930 | 7/22/2020 | 9/11/2020 | Europe / United Kingdom / England          |
| EPI_ISL_532931 | 7/18/2020 | 9/11/2020 | Europe / United Kingdom / England          |
| EPI_ISL_532932 | 7/20/2020 | 9/11/2020 | Europe / United Kingdom / Scotland         |

|                |           |                                                      |
|----------------|-----------|------------------------------------------------------|
| EPI_ISL_532933 | 7/21/2020 | 9/11/2020 Europe / United Kingdom / Scotland         |
| EPI_ISL_532934 | 7/18/2020 | 9/11/2020 Europe / United Kingdom / England          |
| EPI_ISL_532935 | 7/20/2020 | 9/11/2020 Europe / United Kingdom / England          |
| EPI_ISL_532938 | 7/23/2020 | 9/11/2020 Europe / United Kingdom / England          |
| EPI_ISL_532939 | 7/22/2020 | 9/11/2020 Europe / United Kingdom / England          |
| EPI_ISL_532941 | 7/22/2020 | 9/11/2020 Europe / United Kingdom / England          |
| EPI_ISL_532942 | 7/19/2020 | 9/11/2020 Europe / United Kingdom / England          |
| EPI_ISL_532944 | 7/20/2020 | 9/11/2020 Europe / United Kingdom / Northern Ireland |
| EPI_ISL_532945 | 7/23/2020 | 9/11/2020 Europe / United Kingdom / England          |
| EPI_ISL_532947 | 7/22/2020 | 9/11/2020 Europe / United Kingdom / England          |
| EPI_ISL_532949 | 7/21/2020 | 9/11/2020 Europe / United Kingdom / Northern Ireland |
| EPI_ISL_532950 | 7/21/2020 | 9/11/2020 Europe / United Kingdom / Northern Ireland |
| EPI_ISL_532952 | 7/24/2020 | 9/11/2020 Europe / United Kingdom / England          |
| EPI_ISL_532953 | 7/23/2020 | 9/11/2020 Europe / United Kingdom / England          |
| EPI_ISL_532954 | 7/22/2020 | 9/11/2020 Europe / United Kingdom / England          |
| EPI_ISL_532955 | 7/19/2020 | 9/11/2020 Europe / United Kingdom / England          |
| EPI_ISL_532956 | 7/22/2020 | 9/11/2020 Europe / United Kingdom / England          |
| EPI_ISL_532957 | 7/20/2020 | 9/11/2020 Europe / United Kingdom / England          |
| EPI_ISL_532958 | 7/20/2020 | 9/11/2020 Europe / United Kingdom / England          |
| EPI_ISL_532959 | 7/19/2020 | 9/11/2020 Europe / United Kingdom / England          |
| EPI_ISL_532960 | 7/22/2020 | 9/11/2020 Europe / United Kingdom / England          |
| EPI_ISL_532961 | 7/22/2020 | 9/11/2020 Europe / United Kingdom / England          |
| EPI_ISL_532962 | 7/24/2020 | 9/11/2020 Europe / United Kingdom / Scotland         |
| EPI_ISL_532963 | 7/22/2020 | 9/11/2020 Europe / United Kingdom / England          |
| EPI_ISL_532964 | 7/18/2020 | 9/11/2020 Europe / United Kingdom / England          |
| EPI_ISL_532965 | 7/15/2020 | 9/11/2020 Europe / United Kingdom / England          |
| EPI_ISL_532966 | 7/15/2020 | 9/11/2020 Europe / United Kingdom / England          |
| EPI_ISL_532967 | 7/18/2020 | 9/11/2020 Europe / United Kingdom / England          |
| EPI_ISL_532968 | 7/15/2020 | 9/11/2020 Europe / United Kingdom / England          |
| EPI_ISL_532970 | 7/15/2020 | 9/11/2020 Europe / United Kingdom / England          |
| EPI_ISL_532971 | 7/17/2020 | 9/11/2020 Europe / United Kingdom / England          |
| EPI_ISL_532972 | 7/16/2020 | 9/11/2020 Europe / United Kingdom / England          |
| EPI_ISL_532973 | 7/16/2020 | 9/11/2020 Europe / United Kingdom / England          |
| EPI_ISL_532974 | 7/15/2020 | 9/11/2020 Europe / United Kingdom / England          |
| EPI_ISL_532975 | 7/16/2020 | 9/11/2020 Europe / United Kingdom / England          |
| EPI_ISL_532977 | 7/16/2020 | 9/11/2020 Europe / United Kingdom / England          |
| EPI_ISL_532978 | 7/18/2020 | 9/11/2020 Europe / United Kingdom / Scotland         |
| EPI_ISL_532979 | 7/17/2020 | 9/11/2020 Europe / United Kingdom / Northern Ireland |
| EPI_ISL_532980 | 7/19/2020 | 9/11/2020 Europe / United Kingdom / England          |
| EPI_ISL_532981 | 7/16/2020 | 9/11/2020 Europe / United Kingdom / England          |
| EPI_ISL_532982 | 7/17/2020 | 9/11/2020 Europe / United Kingdom / Northern Ireland |
| EPI_ISL_532983 | 7/18/2020 | 9/11/2020 Europe / United Kingdom / Scotland         |
| EPI_ISL_532984 | 7/14/2020 | 9/11/2020 Europe / United Kingdom / England          |
| EPI_ISL_532985 | 7/18/2020 | 9/11/2020 Europe / United Kingdom / Northern Ireland |
| EPI_ISL_532986 | 7/15/2020 | 9/11/2020 Europe / United Kingdom / England          |
| EPI_ISL_532987 | 7/14/2020 | 9/11/2020 Europe / United Kingdom / England          |
| EPI_ISL_532988 | 7/18/2020 | 9/11/2020 Europe / United Kingdom / Scotland         |

|                |           |                                                      |
|----------------|-----------|------------------------------------------------------|
| EPI_ISL_532989 | 7/15/2020 | 9/11/2020 Europe / United Kingdom / England          |
| EPI_ISL_532990 | 7/18/2020 | 9/11/2020 Europe / United Kingdom / Scotland         |
| EPI_ISL_532991 | 7/18/2020 | 9/11/2020 Europe / United Kingdom / England          |
| EPI_ISL_532992 | 7/18/2020 | 9/11/2020 Europe / United Kingdom / Scotland         |
| EPI_ISL_532993 | 7/17/2020 | 9/11/2020 Europe / United Kingdom / England          |
| EPI_ISL_532994 | 7/18/2020 | 9/11/2020 Europe / United Kingdom / Scotland         |
| EPI_ISL_532995 | 7/14/2020 | 9/11/2020 Europe / United Kingdom / England          |
| EPI_ISL_532996 | 7/18/2020 | 9/11/2020 Europe / United Kingdom / England          |
| EPI_ISL_532997 | 7/17/2020 | 9/11/2020 Europe / United Kingdom / Northern Ireland |
| EPI_ISL_532998 | 7/16/2020 | 9/11/2020 Europe / United Kingdom / England          |
| EPI_ISL_532999 | 7/15/2020 | 9/11/2020 Europe / United Kingdom / England          |
| EPI_ISL_533001 | 7/17/2020 | 9/11/2020 Europe / United Kingdom / Northern Ireland |
| EPI_ISL_533002 | 7/15/2020 | 9/11/2020 Europe / United Kingdom / England          |
| EPI_ISL_533003 | 7/11/2020 | 9/11/2020 Europe / United Kingdom / England          |
| EPI_ISL_533004 | 7/15/2020 | 9/11/2020 Europe / United Kingdom / England          |
| EPI_ISL_533005 | 7/15/2020 | 9/11/2020 Europe / United Kingdom / England          |
| EPI_ISL_533007 | 7/18/2020 | 9/11/2020 Europe / United Kingdom / Northern Ireland |
| EPI_ISL_533008 | 7/15/2020 | 9/11/2020 Europe / United Kingdom / England          |
| EPI_ISL_533009 | 7/11/2020 | 9/11/2020 Europe / United Kingdom / England          |
| EPI_ISL_533010 | 7/8/2020  | 9/11/2020 Europe / United Kingdom / England          |
| EPI_ISL_533011 | 7/15/2020 | 9/11/2020 Europe / United Kingdom / England          |
| EPI_ISL_533013 | 7/15/2020 | 9/11/2020 Europe / United Kingdom / Northern Ireland |
| EPI_ISL_533014 | 7/14/2020 | 9/11/2020 Europe / United Kingdom / England          |
| EPI_ISL_533015 | 7/16/2020 | 9/11/2020 Europe / United Kingdom / Northern Ireland |
| EPI_ISL_533016 | 7/16/2020 | 9/11/2020 Europe / United Kingdom / Scotland         |
| EPI_ISL_533018 | 7/15/2020 | 9/11/2020 Europe / United Kingdom / England          |
| EPI_ISL_533019 | 7/15/2020 | 9/11/2020 Europe / United Kingdom / England          |
| EPI_ISL_533020 | 7/15/2020 | 9/11/2020 Europe / United Kingdom / England          |
| EPI_ISL_533021 | 7/11/2020 | 9/11/2020 Europe / United Kingdom / England          |
| EPI_ISL_533022 | 7/15/2020 | 9/11/2020 Europe / United Kingdom / England          |
| EPI_ISL_533023 | 7/15/2020 | 9/11/2020 Europe / United Kingdom / England          |
| EPI_ISL_533025 | 7/16/2020 | 9/11/2020 Europe / United Kingdom / Northern Ireland |
| EPI_ISL_533026 | 7/16/2020 | 9/11/2020 Europe / United Kingdom / Northern Ireland |
| EPI_ISL_533027 | 7/16/2020 | 9/11/2020 Europe / United Kingdom / Scotland         |
| EPI_ISL_533028 | 7/15/2020 | 9/11/2020 Europe / United Kingdom / England          |
| EPI_ISL_533031 | 7/15/2020 | 9/11/2020 Europe / United Kingdom / England          |
| EPI_ISL_533032 | 7/9/2020  | 9/11/2020 Europe / United Kingdom / England          |
| EPI_ISL_533033 | 7/16/2020 | 9/11/2020 Europe / United Kingdom / England          |
| EPI_ISL_533034 | 7/15/2020 | 9/11/2020 Europe / United Kingdom / England          |
| EPI_ISL_533035 | 7/16/2020 | 9/11/2020 Europe / United Kingdom / England          |
| EPI_ISL_533036 | 7/15/2020 | 9/11/2020 Europe / United Kingdom / England          |
| EPI_ISL_533037 | 7/16/2020 | 9/11/2020 Europe / United Kingdom / England          |
| EPI_ISL_533038 | 7/14/2020 | 9/11/2020 Europe / United Kingdom / Northern Ireland |
| EPI_ISL_533039 | 7/15/2020 | 9/11/2020 Europe / United Kingdom / England          |
| EPI_ISL_533040 | 7/15/2020 | 9/11/2020 Europe / United Kingdom / England          |
| EPI_ISL_533041 | 7/15/2020 | 9/11/2020 Europe / United Kingdom / England          |
| EPI_ISL_533042 | 7/8/2020  | 9/11/2020 Europe / United Kingdom / England          |















|                |           |           |                                    |
|----------------|-----------|-----------|------------------------------------|
| EPI_ISL_533389 | 5/12/2020 | 9/11/2020 | Europe / United Kingdom / England  |
| EPI_ISL_533390 | 5/14/2020 | 9/11/2020 | Europe / United Kingdom / England  |
| EPI_ISL_533391 | 5/14/2020 | 9/11/2020 | Europe / United Kingdom / England  |
| EPI_ISL_533392 | 5/12/2020 | 9/11/2020 | Europe / United Kingdom / England  |
| EPI_ISL_533393 | 5/14/2020 | 9/11/2020 | Europe / United Kingdom / England  |
| EPI_ISL_533394 | 5/12/2020 | 9/11/2020 | Europe / United Kingdom / Scotland |
| EPI_ISL_533395 | 5/13/2020 | 9/11/2020 | Europe / United Kingdom / England  |
| EPI_ISL_533397 | 5/14/2020 | 9/11/2020 | Europe / United Kingdom / England  |
| EPI_ISL_533398 | 5/12/2020 | 9/11/2020 | Europe / United Kingdom / England  |
| EPI_ISL_533400 | 5/13/2020 | 9/11/2020 | Europe / United Kingdom / England  |
| EPI_ISL_533401 | 5/14/2020 | 9/11/2020 | Europe / United Kingdom / England  |
| EPI_ISL_533402 | 5/12/2020 | 9/11/2020 | Europe / United Kingdom / England  |
| EPI_ISL_533404 | 5/13/2020 | 9/11/2020 | Europe / United Kingdom / England  |
| EPI_ISL_533405 | 5/14/2020 | 9/11/2020 | Europe / United Kingdom / England  |
| EPI_ISL_533406 | 5/13/2020 | 9/11/2020 | Europe / United Kingdom / Scotland |
| EPI_ISL_533407 | 5/14/2020 | 9/11/2020 | Europe / United Kingdom / England  |
| EPI_ISL_533408 | 5/12/2020 | 9/11/2020 | Europe / United Kingdom / England  |
| EPI_ISL_533409 | 5/14/2020 | 9/11/2020 | Europe / United Kingdom / England  |
| EPI_ISL_533410 | 5/12/2020 | 9/11/2020 | Europe / United Kingdom / England  |
| EPI_ISL_533412 | 5/12/2020 | 9/11/2020 | Europe / United Kingdom / England  |
| EPI_ISL_533413 | 5/12/2020 | 9/11/2020 | Europe / United Kingdom / Wales    |
| EPI_ISL_533414 | 5/14/2020 | 9/11/2020 | Europe / United Kingdom / England  |
| EPI_ISL_533415 | 5/12/2020 | 9/11/2020 | Europe / United Kingdom / England  |
| EPI_ISL_533416 | 5/14/2020 | 9/11/2020 | Europe / United Kingdom / England  |
| EPI_ISL_533417 | 5/14/2020 | 9/11/2020 | Europe / United Kingdom / England  |
| EPI_ISL_533418 | 5/12/2020 | 9/11/2020 | Europe / United Kingdom / Wales    |
| EPI_ISL_533419 | 5/13/2020 | 9/11/2020 | Europe / United Kingdom / Scotland |
| EPI_ISL_533420 | 5/14/2020 | 9/11/2020 | Europe / United Kingdom / England  |
| EPI_ISL_533421 | 5/14/2020 | 9/11/2020 | Europe / United Kingdom / Scotland |
| EPI_ISL_533422 | 5/12/2020 | 9/11/2020 | Europe / United Kingdom / England  |
| EPI_ISL_533424 | 5/12/2020 | 9/11/2020 | Europe / United Kingdom / England  |
| EPI_ISL_533425 | 5/12/2020 | 9/11/2020 | Europe / United Kingdom / England  |
| EPI_ISL_533426 | 5/14/2020 | 9/11/2020 | Europe / United Kingdom / England  |
| EPI_ISL_533428 | 5/14/2020 | 9/11/2020 | Europe / United Kingdom / England  |
| EPI_ISL_533429 | 5/12/2020 | 9/11/2020 | Europe / United Kingdom / England  |
| EPI_ISL_533430 | 5/14/2020 | 9/11/2020 | Europe / United Kingdom / England  |
| EPI_ISL_533431 | 5/14/2020 | 9/11/2020 | Europe / United Kingdom / England  |
| EPI_ISL_533433 | 5/12/2020 | 9/11/2020 | Europe / United Kingdom / England  |
| EPI_ISL_534199 | 8/6/2020  | 9/11/2020 | Europe / Latvia                    |
| EPI_ISL_534200 | 8/7/2020  | 9/11/2020 | Europe / Latvia                    |
| EPI_ISL_534201 | 8/10/2020 | 9/11/2020 | Europe / Latvia                    |
| EPI_ISL_534202 | 8/7/2020  | 9/11/2020 | Europe / Latvia                    |
| EPI_ISL_534203 | 8/8/2020  | 9/11/2020 | Europe / Latvia                    |
| EPI_ISL_534204 | 8/5/2020  | 9/11/2020 | Europe / Latvia                    |
| EPI_ISL_534205 | 8/6/2020  | 9/11/2020 | Europe / Latvia                    |
| EPI_ISL_534206 | 8/5/2020  | 9/11/2020 | Europe / Latvia                    |
| EPI_ISL_534207 | 7/29/2020 | 9/11/2020 | Europe / Latvia                    |

|                |           |                                             |
|----------------|-----------|---------------------------------------------|
| EPI_ISL_534208 | 7/29/2020 | 9/11/2020 Europe / Latvia                   |
| EPI_ISL_534209 | 7/31/2020 | 9/11/2020 Europe / Latvia                   |
| EPI_ISL_534210 | 8/24/2020 | 9/11/2020 Europe / Latvia                   |
| EPI_ISL_534211 | 8/24/2020 | 9/11/2020 Europe / Latvia                   |
| EPI_ISL_534212 | 8/22/2020 | 9/11/2020 Europe / Latvia                   |
| EPI_ISL_534213 | 8/24/2020 | 9/11/2020 Europe / Latvia                   |
| EPI_ISL_534214 | 8/25/2020 | 9/11/2020 Europe / Latvia                   |
| EPI_ISL_534215 | 8/25/2020 | 9/11/2020 Europe / Latvia                   |
| EPI_ISL_534216 | 8/25/2020 | 9/11/2020 Europe / Latvia                   |
| EPI_ISL_534218 | 8/25/2020 | 9/11/2020 Europe / Latvia                   |
| EPI_ISL_534219 | 8/25/2020 | 9/11/2020 Europe / Latvia                   |
| EPI_ISL_534220 | 8/25/2020 | 9/11/2020 Europe / Latvia                   |
| EPI_ISL_534221 | 8/24/2020 | 9/11/2020 Europe / Latvia                   |
| EPI_ISL_534222 | 8/22/2020 | 9/11/2020 Europe / Latvia                   |
| EPI_ISL_534223 | 8/26/2020 | 9/11/2020 Europe / Latvia                   |
| EPI_ISL_534224 | 7/12/2020 | 9/11/2020 Europe / Sweden / Ostergotland    |
| EPI_ISL_534225 | 7/13/2020 | 9/11/2020 Europe / Sweden / Skane           |
| EPI_ISL_534226 | 7/14/2020 | 9/11/2020 Europe / Sweden / Skane           |
| EPI_ISL_534227 | 7/14/2020 | 9/11/2020 Europe / Sweden / Skane           |
| EPI_ISL_534228 | 7/13/2020 | 9/11/2020 Europe / Sweden / Skane           |
| EPI_ISL_534229 | 7/15/2020 | 9/11/2020 Europe / Sweden / Skane           |
| EPI_ISL_534230 | 8/9/2020  | 9/11/2020 Europe / Sweden / Stockholm       |
| EPI_ISL_534231 | 8/6/2020  | 9/11/2020 Europe / Sweden / Stockholm       |
| EPI_ISL_534232 | 8/2/2020  | 9/11/2020 Europe / Sweden / Stockholm       |
| EPI_ISL_534233 | 7/31/2020 | 9/11/2020 Europe / Sweden / Stockholm       |
| EPI_ISL_534234 | 7/2/2020  | 9/11/2020 Europe / Sweden / Stockholm       |
| EPI_ISL_534235 | 7/1/2020  | 9/11/2020 Europe / Sweden / Stockholm       |
| EPI_ISL_534236 | 7/6/2020  | 9/11/2020 Europe / Sweden / Stockholm       |
| EPI_ISL_534237 | 6/26/2020 | 9/11/2020 Europe / Sweden / Kalmar          |
| EPI_ISL_534238 | 6/27/2020 | 9/11/2020 Europe / Sweden / Kalmar          |
| EPI_ISL_534239 | 7/2/2020  | 9/11/2020 Europe / Sweden / Vastra Gotaland |
| EPI_ISL_534240 | 7/14/2020 | 9/11/2020 Europe / Sweden / Vastra Gotaland |
| EPI_ISL_534241 | 7/6/2020  | 9/11/2020 Europe / Sweden / Vastra Gotaland |
| EPI_ISL_534242 | 7/6/2020  | 9/11/2020 Europe / Sweden / Vastra Gotaland |
| EPI_ISL_534243 | 7/6/2020  | 9/11/2020 Europe / Sweden / Vastra Gotaland |
| EPI_ISL_534244 | 7/20/2020 | 9/11/2020 Europe / Sweden / Vasternorrland  |
| EPI_ISL_534245 | 7/14/2020 | 9/11/2020 Europe / Sweden / Norrbotten      |
| EPI_ISL_534246 | 7/28/2020 | 9/11/2020 Europe / Sweden / Ostergotland    |
| EPI_ISL_534247 | 7/28/2020 | 9/11/2020 Europe / Sweden / Ostergotland    |
| EPI_ISL_534248 | 7/31/2020 | 9/11/2020 Europe / Sweden / Vasternorrland  |
| EPI_ISL_534249 | 7/31/2020 | 9/11/2020 Europe / Sweden / Gavleborg       |
| EPI_ISL_534250 | 8/5/2020  | 9/11/2020 Europe / Sweden / Gavleborg       |
| EPI_ISL_534251 | 7/29/2020 | 9/11/2020 Europe / Sweden / Gavleborg       |
| EPI_ISL_534252 | 8/11/2020 | 9/11/2020 Europe / Sweden / Vasternorrland  |
| EPI_ISL_534253 | 8/11/2020 | 9/11/2020 Europe / Sweden / Vasternorrland  |
| EPI_ISL_534254 | 8/10/2020 | 9/11/2020 Europe / Sweden / Vasternorrland  |
| EPI_ISL_534255 | 8/10/2020 | 9/11/2020 Europe / Sweden / Vasternorrland  |

|                |           |                                                          |
|----------------|-----------|----------------------------------------------------------|
| EPI_ISL_534256 | 8/13/2020 | 9/11/2020 Europe / Sweden / Gavleborg                    |
| EPI_ISL_534257 | 8/21/2020 | 9/11/2020 Europe / Sweden / Vasternorrland               |
| EPI_ISL_534258 | 8/19/2020 | 9/11/2020 Europe / Sweden / Vasternorrland               |
| EPI_ISL_534259 | 8/6/2020  | 9/11/2020 Europe / Sweden / Gotland                      |
| EPI_ISL_538514 | 6/12/2020 | 9/12/2020 North America / USA / North Carolina           |
| EPI_ISL_538515 | 6/12/2020 | 9/12/2020 North America / USA / North Carolina           |
| EPI_ISL_538516 | 6/12/2020 | 9/12/2020 North America / USA / North Carolina           |
| EPI_ISL_538517 | 7/30/2020 | 9/12/2020 North America / USA / North Carolina           |
| EPI_ISL_538519 | 7/31/2020 | 9/12/2020 North America / USA / North Carolina           |
| EPI_ISL_538520 | 7/31/2020 | 9/12/2020 North America / USA / North Carolina           |
| EPI_ISL_538521 | 8/8/2020  | 9/12/2020 North America / USA / North Carolina           |
| EPI_ISL_538522 | 8/8/2020  | 9/12/2020 North America / USA / North Carolina           |
| EPI_ISL_538523 | 7/31/2020 | 9/12/2020 North America / USA / North Carolina           |
| EPI_ISL_654794 | 3/22/2020 | 9/12/2020 Africa / Nigeria                               |
| EPI_ISL_534311 | 4/27/2020 | 9/13/2020 South America / Brazil / Sao Paulo / Sao Paulo |
| EPI_ISL_534312 | 5/1/2020  | 9/13/2020 South America / Brazil / Sao Paulo / Campinas  |
| EPI_ISL_534313 | 4/2/2020  | 9/13/2020 South America / Brazil / Sao Paulo / Sao Paulo |
| EPI_ISL_534314 | 5/4/2020  | 9/13/2020 South America / Brazil / Sao Paulo / Sao Paulo |
| EPI_ISL_534315 | 5/2/2020  | 9/13/2020 South America / Brazil / Sao Paulo / Guarulhos |
| EPI_ISL_534316 | 5/2/2020  | 9/13/2020 South America / Brazil / Sao Paulo             |
| EPI_ISL_534317 | 5/5/2020  | 9/13/2020 South America / Brazil / Sao Paulo / Jandira   |
| EPI_ISL_534318 | 5/3/2020  | 9/13/2020 South America / Brazil / Sao Paulo / Osasco    |
| EPI_ISL_534319 | 5/6/2020  | 9/13/2020 South America / Brazil / Sao Paulo / Sao Paulo |
| EPI_ISL_534320 | 5/5/2020  | 9/13/2020 South America / Brazil / Sao Paulo / Sao Paulo |
| EPI_ISL_534321 | 5/7/2020  | 9/13/2020 South America / Brazil / Sao Paulo / Barueri   |
| EPI_ISL_534322 | 4/24/2020 | 9/13/2020 South America / Brazil / Sao Paulo / Sao Paulo |
| EPI_ISL_534323 | 4/25/2020 | 9/13/2020 South America / Brazil / Sao Paulo / Sao Paulo |
| EPI_ISL_534324 | 4/25/2020 | 9/13/2020 South America / Brazil / Sao Paulo / Sao Paulo |
| EPI_ISL_534325 | 4/25/2020 | 9/13/2020 South America / Brazil / Sao Paulo / Guarulhos |
| EPI_ISL_534326 | 5/1/2020  | 9/13/2020 South America / Brazil / Sao Paulo / Cotia     |
| EPI_ISL_534327 | 6/4/2020  | 9/13/2020 Europe / Spain / Madrid                        |
| EPI_ISL_534328 | 8/4/2020  | 9/13/2020 Europe / Spain / Madrid                        |
| EPI_ISL_534329 | 4/18/2020 | 9/13/2020 Europe / Spain / Madrid                        |
| EPI_ISL_534330 | 5/14/2020 | 9/13/2020 Europe / Spain / Madrid                        |
| EPI_ISL_534331 | 5/4/2020  | 9/13/2020 Europe / Spain / Madrid                        |
| EPI_ISL_534332 | 5/2/2020  | 9/13/2020 Europe / Spain / Madrid                        |
| EPI_ISL_534333 | 4/21/2020 | 9/13/2020 Europe / Spain / Madrid                        |
| EPI_ISL_534334 | 5/20/2020 | 9/13/2020 Europe / Spain / Madrid                        |
| EPI_ISL_534336 | 8/11/2020 | 9/14/2020 Asia / Taiwan / Taipei                         |
| EPI_ISL_534337 | 7/15/2020 | 9/14/2020 Europe / Russia / Moscow                       |
| EPI_ISL_534338 | 7/16/2020 | 9/14/2020 Europe / Russia / Moscow                       |
| EPI_ISL_534339 | 7/16/2020 | 9/14/2020 Europe / Russia / Moscow                       |
| EPI_ISL_534340 | 7/16/2020 | 9/14/2020 Europe / Russia / Moscow                       |
| EPI_ISL_534341 | 7/16/2020 | 9/14/2020 Europe / Russia / Moscow                       |
| EPI_ISL_534342 | 7/16/2020 | 9/14/2020 Europe / Russia / Moscow                       |
| EPI_ISL_534343 | 7/16/2020 | 9/14/2020 Europe / Russia / Moscow                       |
| EPI_ISL_534344 | 7/16/2020 | 9/14/2020 Europe / Russia / Moscow                       |















|                |           |                                             |
|----------------|-----------|---------------------------------------------|
| EPI_ISL_534701 | 7/9/2020  | 9/14/2020 North America / USA / Maryland    |
| EPI_ISL_534702 | 7/9/2020  | 9/14/2020 North America / USA / Maryland    |
| EPI_ISL_534703 | 7/9/2020  | 9/14/2020 North America / USA / Maryland    |
| EPI_ISL_534704 | 6/3/2020  | 9/14/2020 North America / USA / Maryland    |
| EPI_ISL_534705 | 6/2/2020  | 9/14/2020 North America / USA / Maryland    |
| EPI_ISL_534706 | 6/3/2020  | 9/14/2020 North America / USA / Maryland    |
| EPI_ISL_534708 | 6/3/2020  | 9/14/2020 North America / USA / Maryland    |
| EPI_ISL_534709 | 6/3/2020  | 9/14/2020 North America / USA / Maryland    |
| EPI_ISL_534710 | 6/1/2020  | 9/14/2020 North America / USA / Maryland    |
| EPI_ISL_534711 | 6/3/2020  | 9/14/2020 North America / USA / Maryland    |
| EPI_ISL_534713 | 6/2/2020  | 9/14/2020 North America / USA / Maryland    |
| EPI_ISL_534714 | 6/4/2020  | 9/14/2020 North America / USA / Maryland    |
| EPI_ISL_534716 | 6/4/2020  | 9/14/2020 North America / USA / Maryland    |
| EPI_ISL_534717 | 6/3/2020  | 9/14/2020 Europe / United Kingdom / England |
| EPI_ISL_534723 | 9/5/2020  | 9/14/2020 Europe / United Kingdom / England |
| EPI_ISL_534724 | 9/5/2020  | 9/14/2020 Europe / United Kingdom / England |
| EPI_ISL_534725 | 9/5/2020  | 9/14/2020 Europe / United Kingdom / England |
| EPI_ISL_534726 | 9/5/2020  | 9/14/2020 Europe / United Kingdom / England |
| EPI_ISL_534727 | 9/5/2020  | 9/14/2020 Europe / United Kingdom / England |
| EPI_ISL_534728 | 9/5/2020  | 9/14/2020 Europe / United Kingdom / England |
| EPI_ISL_534729 | 9/5/2020  | 9/14/2020 Europe / United Kingdom / England |
| EPI_ISL_534731 | 3/12/2020 | 9/14/2020 North America / USA / New York    |
| EPI_ISL_534732 | 7/23/2020 | 9/14/2020 Europe / United Kingdom / England |
| EPI_ISL_534748 | 8/21/2020 | 9/14/2020 Europe / United Kingdom / England |
| EPI_ISL_534749 | 7/23/2020 | 9/14/2020 Europe / United Kingdom / England |
| EPI_ISL_534750 | 7/24/2020 | 9/14/2020 Europe / United Kingdom / England |
| EPI_ISL_534751 | 7/23/2020 | 9/14/2020 Europe / United Kingdom / England |
| EPI_ISL_534752 | 6/2/2020  | 9/14/2020 Europe / United Kingdom / England |
| EPI_ISL_534753 | 6/18/2020 | 9/14/2020 Europe / United Kingdom / England |
| EPI_ISL_534754 | 6/26/2020 | 9/14/2020 Europe / United Kingdom / England |
| EPI_ISL_534755 | 7/7/2020  | 9/14/2020 Europe / United Kingdom / England |
| EPI_ISL_534756 | 9/7/2020  | 9/14/2020 Europe / United Kingdom / England |
| EPI_ISL_534763 | 4/13/2020 | 9/14/2020 Europe / United Kingdom / England |
| EPI_ISL_534764 | 4/14/2020 | 9/14/2020 Europe / United Kingdom / England |
| EPI_ISL_534765 | 4/14/2020 | 9/14/2020 Europe / United Kingdom / England |
| EPI_ISL_534766 | 4/17/2020 | 9/14/2020 Europe / United Kingdom / England |
| EPI_ISL_534767 | 4/17/2020 | 9/14/2020 Europe / United Kingdom / England |
| EPI_ISL_534768 | 4/18/2020 | 9/14/2020 Europe / United Kingdom / England |
| EPI_ISL_534769 | 4/10/2020 | 9/14/2020 Europe / United Kingdom / England |
| EPI_ISL_534770 | 4/30/2020 | 9/14/2020 Europe / United Kingdom / England |
| EPI_ISL_534771 | 4/13/2020 | 9/14/2020 Europe / United Kingdom / England |
| EPI_ISL_534772 | 4/14/2020 | 9/14/2020 Europe / United Kingdom / England |
| EPI_ISL_534774 | 5/3/2020  | 9/14/2020 Europe / United Kingdom / England |
| EPI_ISL_534775 | 4/9/2020  | 9/14/2020 Europe / United Kingdom / England |
| EPI_ISL_534776 | 5/7/2020  | 9/14/2020 Europe / United Kingdom / England |
| EPI_ISL_534777 | 4/14/2020 | 9/14/2020 Europe / United Kingdom / England |
| EPI_ISL_534778 | 4/13/2020 | 9/14/2020 Europe / United Kingdom / England |

|                |           |           |                                   |
|----------------|-----------|-----------|-----------------------------------|
| EPI_ISL_534779 | 4/15/2020 | 9/14/2020 | Europe / United Kingdom / England |
| EPI_ISL_534780 | 4/10/2020 | 9/14/2020 | Europe / United Kingdom / England |
| EPI_ISL_534781 | 4/13/2020 | 9/14/2020 | Europe / United Kingdom / England |
| EPI_ISL_534782 | 4/6/2020  | 9/14/2020 | Europe / United Kingdom / England |
| EPI_ISL_534783 | 4/8/2020  | 9/14/2020 | Europe / United Kingdom / England |
| EPI_ISL_534784 | 4/9/2020  | 9/14/2020 | Europe / United Kingdom / England |
| EPI_ISL_534785 | 4/16/2020 | 9/14/2020 | Europe / United Kingdom / England |
| EPI_ISL_534786 | 4/13/2020 | 9/14/2020 | Europe / United Kingdom / England |
| EPI_ISL_534787 | 4/12/2020 | 9/14/2020 | Europe / United Kingdom / England |
| EPI_ISL_534789 | 4/9/2020  | 9/14/2020 | Europe / United Kingdom / England |
| EPI_ISL_534790 | 3/9/2020  | 9/14/2020 | Europe / United Kingdom / England |
| EPI_ISL_534791 | 4/11/2020 | 9/14/2020 | Europe / United Kingdom / England |
| EPI_ISL_534792 | 4/13/2020 | 9/14/2020 | Europe / United Kingdom / England |
| EPI_ISL_534793 | 4/13/2020 | 9/14/2020 | Europe / United Kingdom / England |
| EPI_ISL_534795 | 4/9/2020  | 9/14/2020 | Europe / United Kingdom / England |
| EPI_ISL_534796 | 4/10/2020 | 9/14/2020 | Europe / United Kingdom / England |
| EPI_ISL_534797 | 3/14/2020 | 9/14/2020 | Europe / United Kingdom / England |
| EPI_ISL_534798 | 4/6/2020  | 9/14/2020 | Europe / United Kingdom / England |
| EPI_ISL_534799 | 4/8/2020  | 9/14/2020 | Europe / United Kingdom / England |
| EPI_ISL_534800 | 4/10/2020 | 9/14/2020 | Europe / United Kingdom / England |
| EPI_ISL_534801 | 5/2/2020  | 9/14/2020 | Europe / United Kingdom / England |
| EPI_ISL_534802 | 4/14/2020 | 9/14/2020 | Europe / United Kingdom / England |
| EPI_ISL_534803 | 4/16/2020 | 9/14/2020 | Europe / United Kingdom / England |
| EPI_ISL_534804 | 4/9/2020  | 9/14/2020 | Europe / United Kingdom / England |
| EPI_ISL_534805 | 5/2/2020  | 9/14/2020 | Europe / United Kingdom / England |
| EPI_ISL_534806 | 4/13/2020 | 9/14/2020 | Europe / United Kingdom / England |
| EPI_ISL_534807 | 4/30/2020 | 9/14/2020 | Europe / United Kingdom / England |
| EPI_ISL_534808 | 4/14/2020 | 9/14/2020 | Europe / United Kingdom / England |
| EPI_ISL_534809 | 4/14/2020 | 9/14/2020 | Europe / United Kingdom / England |
| EPI_ISL_534810 | 4/14/2020 | 9/14/2020 | Europe / United Kingdom / England |
| EPI_ISL_534811 | 4/5/2020  | 9/14/2020 | Europe / United Kingdom / England |
| EPI_ISL_534812 | 4/8/2020  | 9/14/2020 | Europe / United Kingdom / England |
| EPI_ISL_534813 | 3/25/2020 | 9/14/2020 | Europe / United Kingdom / England |
| EPI_ISL_534814 | 4/19/2020 | 9/14/2020 | Europe / United Kingdom / England |
| EPI_ISL_534815 | 3/30/2020 | 9/14/2020 | Europe / United Kingdom / England |
| EPI_ISL_534816 | 3/27/2020 | 9/14/2020 | Europe / United Kingdom / England |
| EPI_ISL_534817 | 3/31/2020 | 9/14/2020 | Europe / United Kingdom / England |
| EPI_ISL_534819 | 4/10/2020 | 9/14/2020 | Europe / United Kingdom / England |
| EPI_ISL_534820 | 3/24/2020 | 9/14/2020 | Europe / United Kingdom / England |
| EPI_ISL_534821 | 3/31/2020 | 9/14/2020 | Europe / United Kingdom / England |
| EPI_ISL_534822 | 3/28/2020 | 9/14/2020 | Europe / United Kingdom / England |
| EPI_ISL_534823 | 4/22/2020 | 9/14/2020 | Europe / United Kingdom / England |
| EPI_ISL_534825 | 4/21/2020 | 9/14/2020 | Europe / United Kingdom / England |
| EPI_ISL_534826 | 5/22/2020 | 9/14/2020 | Europe / United Kingdom / England |
| EPI_ISL_534827 | 3/20/2020 | 9/14/2020 | Europe / United Kingdom / England |
| EPI_ISL_534828 | 4/18/2020 | 9/14/2020 | Europe / United Kingdom / England |
| EPI_ISL_534829 | 4/20/2020 | 9/14/2020 | Europe / United Kingdom / England |



|                |           |           |                                   |
|----------------|-----------|-----------|-----------------------------------|
| EPI_ISL_534830 | 3/24/2020 | 9/14/2020 | Europe / United Kingdom / England |
| EPI_ISL_534831 | 4/6/2020  | 9/14/2020 | Europe / United Kingdom / England |
| EPI_ISL_534833 | 5/24/2020 | 9/14/2020 | Europe / United Kingdom / England |
| EPI_ISL_534834 | 4/18/2020 | 9/14/2020 | Europe / United Kingdom / England |
| EPI_ISL_534835 | 3/23/2020 | 9/14/2020 | Europe / United Kingdom / England |
| EPI_ISL_534836 | 5/15/2020 | 9/14/2020 | Europe / United Kingdom / England |
| EPI_ISL_534837 | 4/3/2020  | 9/14/2020 | Europe / United Kingdom / England |
| EPI_ISL_534838 | 4/7/2020  | 9/14/2020 | Europe / United Kingdom / England |
| EPI_ISL_534839 | 3/23/2020 | 9/14/2020 | Europe / United Kingdom / England |
| EPI_ISL_534840 | 3/30/2020 | 9/14/2020 | Europe / United Kingdom / England |
| EPI_ISL_534841 | 4/1/2020  | 9/14/2020 | Europe / United Kingdom / England |
| EPI_ISL_534842 | 5/20/2020 | 9/14/2020 | Europe / United Kingdom / England |
| EPI_ISL_534843 | 4/23/2020 | 9/14/2020 | Europe / United Kingdom / England |
| EPI_ISL_534844 | 3/21/2020 | 9/14/2020 | Europe / United Kingdom / England |
| EPI_ISL_534845 | 5/20/2020 | 9/14/2020 | Europe / United Kingdom / England |
| EPI_ISL_534846 | 3/27/2020 | 9/14/2020 | Europe / United Kingdom / England |
| EPI_ISL_534847 | 4/22/2020 | 9/14/2020 | Europe / United Kingdom / England |
| EPI_ISL_534848 | 4/22/2020 | 9/14/2020 | Europe / United Kingdom / England |
| EPI_ISL_534849 | 3/19/2020 | 9/14/2020 | Europe / United Kingdom / England |
| EPI_ISL_534850 | 3/19/2020 | 9/14/2020 | Europe / United Kingdom / England |
| EPI_ISL_534851 | 3/30/2020 | 9/14/2020 | Europe / United Kingdom / England |
| EPI_ISL_534852 | 4/1/2020  | 9/14/2020 | Europe / United Kingdom / England |
| EPI_ISL_534853 | 3/24/2020 | 9/14/2020 | Europe / United Kingdom / England |
| EPI_ISL_534854 | 3/20/2020 | 9/14/2020 | Europe / United Kingdom / England |
| EPI_ISL_534855 | 3/25/2020 | 9/14/2020 | Europe / United Kingdom / England |
| EPI_ISL_534856 | 5/22/2020 | 9/14/2020 | Europe / United Kingdom / England |
| EPI_ISL_534857 | 3/24/2020 | 9/14/2020 | Europe / United Kingdom / England |
| EPI_ISL_534858 | 5/25/2020 | 9/14/2020 | Europe / United Kingdom / England |
| EPI_ISL_534859 | 3/27/2020 | 9/14/2020 | Europe / United Kingdom / England |
| EPI_ISL_534860 | 3/21/2020 | 9/14/2020 | Europe / United Kingdom / England |
| EPI_ISL_534861 | 5/26/2020 | 9/14/2020 | Europe / United Kingdom / England |
| EPI_ISL_534862 | 3/27/2020 | 9/14/2020 | Europe / United Kingdom / England |
| EPI_ISL_534863 | 4/4/2020  | 9/14/2020 | Europe / United Kingdom / England |
| EPI_ISL_534864 | 4/9/2020  | 9/14/2020 | Europe / United Kingdom / England |
| EPI_ISL_534865 | 3/27/2020 | 9/14/2020 | Europe / United Kingdom / England |
| EPI_ISL_534866 | 4/25/2020 | 9/14/2020 | Europe / United Kingdom / England |
| EPI_ISL_534867 | 3/24/2020 | 9/14/2020 | Europe / United Kingdom / England |
| EPI_ISL_534868 | 3/31/2020 | 9/14/2020 | Europe / United Kingdom / England |
| EPI_ISL_534870 | 3/24/2020 | 9/14/2020 | Europe / United Kingdom / England |
| EPI_ISL_534871 | 3/21/2020 | 9/14/2020 | Europe / United Kingdom / England |
| EPI_ISL_534872 | 3/23/2020 | 9/14/2020 | Europe / United Kingdom / England |
| EPI_ISL_534873 | 4/7/2020  | 9/14/2020 | Europe / United Kingdom / England |
| EPI_ISL_534874 | 4/6/2020  | 9/14/2020 | Europe / United Kingdom / England |
| EPI_ISL_534875 | 4/2/2020  | 9/14/2020 | Europe / United Kingdom / England |
| EPI_ISL_534876 | 4/7/2020  | 9/14/2020 | Europe / United Kingdom / England |
| EPI_ISL_534878 | 3/22/2020 | 9/14/2020 | Europe / United Kingdom / England |
| EPI_ISL_534879 | 3/20/2020 | 9/14/2020 | Europe / United Kingdom / England |

|                |           |           |                                   |
|----------------|-----------|-----------|-----------------------------------|
| EPI_ISL_534880 | 4/4/2020  | 9/14/2020 | Europe / United Kingdom / England |
| EPI_ISL_534881 | 4/25/2020 | 9/14/2020 | Europe / United Kingdom / England |
| EPI_ISL_534882 | 3/30/2020 | 9/14/2020 | Europe / United Kingdom / England |
| EPI_ISL_534883 | 4/1/2020  | 9/14/2020 | Europe / United Kingdom / England |
| EPI_ISL_534884 | 4/1/2020  | 9/14/2020 | Europe / United Kingdom / England |
| EPI_ISL_534885 | 6/7/2020  | 9/14/2020 | Europe / United Kingdom / England |
| EPI_ISL_534886 | 3/24/2020 | 9/14/2020 | Europe / United Kingdom / England |
| EPI_ISL_534887 | 3/28/2020 | 9/14/2020 | Europe / United Kingdom / England |
| EPI_ISL_534888 | 4/10/2020 | 9/14/2020 | Europe / United Kingdom / England |
| EPI_ISL_534889 | 3/21/2020 | 9/14/2020 | Europe / United Kingdom / England |
| EPI_ISL_534890 | 3/24/2020 | 9/14/2020 | Europe / United Kingdom / England |
| EPI_ISL_534891 | 3/17/2020 | 9/14/2020 | Europe / United Kingdom / England |
| EPI_ISL_534892 | 4/7/2020  | 9/14/2020 | Europe / United Kingdom / England |
| EPI_ISL_534893 | 3/28/2020 | 9/14/2020 | Europe / United Kingdom / England |
| EPI_ISL_534894 | 4/4/2020  | 9/14/2020 | Europe / United Kingdom / England |
| EPI_ISL_534895 | 4/13/2020 | 9/14/2020 | Europe / United Kingdom / England |
| EPI_ISL_534896 | 5/22/2020 | 9/14/2020 | Europe / United Kingdom / England |
| EPI_ISL_534897 | 3/24/2020 | 9/14/2020 | Europe / United Kingdom / England |
| EPI_ISL_534898 | 3/22/2020 | 9/14/2020 | Europe / United Kingdom / England |
| EPI_ISL_534899 | 3/31/2020 | 9/14/2020 | Europe / United Kingdom / England |
| EPI_ISL_534900 | 3/29/2020 | 9/14/2020 | Europe / United Kingdom / England |
| EPI_ISL_534901 | 4/5/2020  | 9/14/2020 | Europe / United Kingdom / England |
| EPI_ISL_534902 | 3/20/2020 | 9/14/2020 | Europe / United Kingdom / England |
| EPI_ISL_534903 | 3/23/2020 | 9/14/2020 | Europe / United Kingdom / England |
| EPI_ISL_534904 | 4/1/2020  | 9/14/2020 | Europe / United Kingdom / England |
| EPI_ISL_534905 | 3/27/2020 | 9/14/2020 | Europe / United Kingdom / England |
| EPI_ISL_534906 | 3/25/2020 | 9/14/2020 | Europe / United Kingdom / England |
| EPI_ISL_534907 | 3/23/2020 | 9/14/2020 | Europe / United Kingdom / England |
| EPI_ISL_534909 | 4/21/2020 | 9/14/2020 | Europe / United Kingdom / England |
| EPI_ISL_534910 | 3/23/2020 | 9/14/2020 | Europe / United Kingdom / England |
| EPI_ISL_534911 | 3/20/2020 | 9/14/2020 | Europe / United Kingdom / England |
| EPI_ISL_534912 | 4/21/2020 | 9/14/2020 | Europe / United Kingdom / England |
| EPI_ISL_534913 | 5/3/2020  | 9/14/2020 | Europe / United Kingdom / England |
| EPI_ISL_534914 | 4/2/2020  | 9/14/2020 | Europe / United Kingdom / England |
| EPI_ISL_534915 | 3/29/2020 | 9/14/2020 | Europe / United Kingdom / England |
| EPI_ISL_534917 | 4/9/2020  | 9/14/2020 | Europe / United Kingdom / England |
| EPI_ISL_534918 | 4/1/2020  | 9/14/2020 | Europe / United Kingdom / England |
| EPI_ISL_534920 | 5/8/2020  | 9/14/2020 | Europe / United Kingdom / England |
| EPI_ISL_534921 | 5/24/2020 | 9/14/2020 | Europe / United Kingdom / England |
| EPI_ISL_534922 | 4/22/2020 | 9/14/2020 | Europe / United Kingdom / England |
| EPI_ISL_534924 | 4/1/2020  | 9/14/2020 | Europe / United Kingdom / England |
| EPI_ISL_534925 | 3/23/2020 | 9/14/2020 | Europe / United Kingdom / England |
| EPI_ISL_534926 | 4/3/2020  | 9/14/2020 | Europe / United Kingdom / England |
| EPI_ISL_534927 | 4/21/2020 | 9/14/2020 | Europe / United Kingdom / England |
| EPI_ISL_534928 | 5/20/2020 | 9/14/2020 | Europe / United Kingdom / England |
| EPI_ISL_534929 | 3/28/2020 | 9/14/2020 | Europe / United Kingdom / England |
| EPI_ISL_534930 | 5/16/2020 | 9/14/2020 | Europe / United Kingdom / England |



|                |           |           |                                   |
|----------------|-----------|-----------|-----------------------------------|
| EPI_ISL_534994 | 4/23/2020 | 9/14/2020 | Europe / United Kingdom / England |
| EPI_ISL_534995 | 4/26/2020 | 9/14/2020 | Europe / United Kingdom / England |
| EPI_ISL_534996 | 4/30/2020 | 9/14/2020 | Europe / United Kingdom / England |
| EPI_ISL_534997 | 4/23/2020 | 9/14/2020 | Europe / United Kingdom / England |
| EPI_ISL_534998 | 4/23/2020 | 9/14/2020 | Europe / United Kingdom / England |
| EPI_ISL_535000 | 5/12/2020 | 9/14/2020 | Europe / United Kingdom / England |
| EPI_ISL_535001 | 4/1/2020  | 9/14/2020 | Europe / United Kingdom / England |
| EPI_ISL_535002 | 4/12/2020 | 9/14/2020 | Europe / United Kingdom / England |
| EPI_ISL_535003 | 4/30/2020 | 9/14/2020 | Europe / United Kingdom / England |
| EPI_ISL_535004 | 4/26/2020 | 9/14/2020 | Europe / United Kingdom / England |
| EPI_ISL_535005 | 5/2/2020  | 9/14/2020 | Europe / United Kingdom / England |
| EPI_ISL_535006 | 3/31/2020 | 9/14/2020 | Europe / United Kingdom / England |
| EPI_ISL_535007 | 3/23/2020 | 9/14/2020 | Europe / United Kingdom / England |
| EPI_ISL_535008 | 4/30/2020 | 9/14/2020 | Europe / United Kingdom / England |
| EPI_ISL_535009 | 5/3/2020  | 9/14/2020 | Europe / United Kingdom / England |
| EPI_ISL_535010 | 4/1/2020  | 9/14/2020 | Europe / United Kingdom / England |
| EPI_ISL_535011 | 5/2/2020  | 9/14/2020 | Europe / United Kingdom / England |
| EPI_ISL_535012 | 4/23/2020 | 9/14/2020 | Europe / United Kingdom / England |
| EPI_ISL_535013 | 4/26/2020 | 9/14/2020 | Europe / United Kingdom / England |
| EPI_ISL_535014 | 4/23/2020 | 9/14/2020 | Europe / United Kingdom / England |
| EPI_ISL_535015 | 5/3/2020  | 9/14/2020 | Europe / United Kingdom / England |
| EPI_ISL_535017 | 5/3/2020  | 9/14/2020 | Europe / United Kingdom / England |
| EPI_ISL_535018 | 4/9/2020  | 9/14/2020 | Europe / United Kingdom / England |
| EPI_ISL_535019 | 4/21/2020 | 9/14/2020 | Europe / United Kingdom / England |
| EPI_ISL_535020 | 3/13/2020 | 9/14/2020 | Europe / United Kingdom / England |
| EPI_ISL_535021 | 3/20/2020 | 9/14/2020 | Europe / United Kingdom / England |
| EPI_ISL_535022 | 4/13/2020 | 9/14/2020 | Europe / United Kingdom / England |
| EPI_ISL_535023 | 4/13/2020 | 9/14/2020 | Europe / United Kingdom / England |
| EPI_ISL_535024 | 3/20/2020 | 9/14/2020 | Europe / United Kingdom / England |
| EPI_ISL_535025 | 3/21/2020 | 9/14/2020 | Europe / United Kingdom / England |
| EPI_ISL_535027 | 4/13/2020 | 9/14/2020 | Europe / United Kingdom / England |
| EPI_ISL_535028 | 4/13/2020 | 9/14/2020 | Europe / United Kingdom / England |
| EPI_ISL_535029 | 4/13/2020 | 9/14/2020 | Europe / United Kingdom / England |
| EPI_ISL_535031 | 4/14/2020 | 9/14/2020 | Europe / United Kingdom / England |
| EPI_ISL_535032 | 4/14/2020 | 9/14/2020 | Europe / United Kingdom / England |
| EPI_ISL_535036 | 4/14/2020 | 9/14/2020 | Europe / United Kingdom / England |
| EPI_ISL_535038 | 4/15/2020 | 9/14/2020 | Europe / United Kingdom / England |
| EPI_ISL_535043 | 5/29/2020 | 9/14/2020 | Europe / United Kingdom / England |
| EPI_ISL_535044 | 5/27/2020 | 9/14/2020 | Europe / United Kingdom / England |
| EPI_ISL_535047 | 5/29/2020 | 9/14/2020 | Europe / United Kingdom / England |
| EPI_ISL_535051 | 5/28/2020 | 9/14/2020 | Europe / United Kingdom / England |
| EPI_ISL_535052 | 5/27/2020 | 9/14/2020 | Europe / United Kingdom / England |
| EPI_ISL_535056 | 5/27/2020 | 9/14/2020 | Europe / United Kingdom / England |
| EPI_ISL_535060 | 5/28/2020 | 9/14/2020 | Europe / United Kingdom / England |
| EPI_ISL_535061 | 5/26/2020 | 9/14/2020 | Europe / United Kingdom / England |
| EPI_ISL_535062 | 5/27/2020 | 9/14/2020 | Europe / United Kingdom / England |
| EPI_ISL_535063 | 5/27/2020 | 9/14/2020 | Europe / United Kingdom / England |





|                |           |                                            |
|----------------|-----------|--------------------------------------------|
| EPI_ISL_535204 | 9/4/2020  | 9/14/2020 Europe / United Kingdom / Wales  |
| EPI_ISL_535206 | 9/5/2020  | 9/14/2020 Europe / United Kingdom / Wales  |
| EPI_ISL_535207 | 9/5/2020  | 9/14/2020 Europe / United Kingdom / Wales  |
| EPI_ISL_535208 | 8/17/2020 | 9/14/2020 Europe / United Kingdom / Wales  |
| EPI_ISL_535209 | 9/5/2020  | 9/14/2020 Europe / United Kingdom / Wales  |
| EPI_ISL_535210 | 9/5/2020  | 9/14/2020 Europe / United Kingdom / Wales  |
| EPI_ISL_535212 | 8/31/2020 | 9/14/2020 Europe / United Kingdom / Wales  |
| EPI_ISL_535213 | 9/6/2020  | 9/14/2020 Europe / United Kingdom / Wales  |
| EPI_ISL_535214 | 9/3/2020  | 9/14/2020 Europe / United Kingdom / Wales  |
| EPI_ISL_535215 | 9/5/2020  | 9/14/2020 Europe / United Kingdom / Wales  |
| EPI_ISL_535217 | 9/2/2020  | 9/14/2020 Europe / United Kingdom / Wales  |
| EPI_ISL_535218 | 9/5/2020  | 9/14/2020 Europe / United Kingdom / Wales  |
| EPI_ISL_535219 | 9/4/2020  | 9/14/2020 Europe / United Kingdom / Wales  |
| EPI_ISL_535220 | 9/7/2020  | 9/14/2020 Europe / United Kingdom / Wales  |
| EPI_ISL_535225 | 9/7/2020  | 9/14/2020 Europe / United Kingdom / Wales  |
| EPI_ISL_535226 | 9/7/2020  | 9/14/2020 Europe / United Kingdom / Wales  |
| EPI_ISL_535227 | 9/6/2020  | 9/14/2020 Europe / United Kingdom / Wales  |
| EPI_ISL_535228 | 9/4/2020  | 9/14/2020 Europe / United Kingdom / Wales  |
| EPI_ISL_535230 | 9/4/2020  | 9/14/2020 Europe / United Kingdom / Wales  |
| EPI_ISL_535233 | 9/5/2020  | 9/14/2020 Europe / United Kingdom / Wales  |
| EPI_ISL_535234 | 9/6/2020  | 9/14/2020 Europe / United Kingdom / Wales  |
| EPI_ISL_535236 | 9/6/2020  | 9/14/2020 Europe / United Kingdom / Wales  |
| EPI_ISL_535238 | 9/7/2020  | 9/14/2020 Europe / United Kingdom / Wales  |
| EPI_ISL_535239 | 9/4/2020  | 9/14/2020 Europe / United Kingdom / Wales  |
| EPI_ISL_535242 | 9/6/2020  | 9/14/2020 Europe / United Kingdom / Wales  |
| EPI_ISL_535245 | 9/6/2020  | 9/14/2020 Europe / United Kingdom / Wales  |
| EPI_ISL_535246 | 9/5/2020  | 9/14/2020 Europe / United Kingdom / Wales  |
| EPI_ISL_535247 | 9/4/2020  | 9/14/2020 Europe / United Kingdom / Wales  |
| EPI_ISL_535248 | 9/7/2020  | 9/14/2020 Europe / United Kingdom / Wales  |
| EPI_ISL_535249 | 9/7/2020  | 9/14/2020 Europe / United Kingdom / Wales  |
| EPI_ISL_535250 | 9/4/2020  | 9/14/2020 Europe / United Kingdom / Wales  |
| EPI_ISL_535251 | 9/7/2020  | 9/14/2020 Europe / United Kingdom / Wales  |
| EPI_ISL_535254 | 9/6/2020  | 9/14/2020 Europe / United Kingdom / Wales  |
| EPI_ISL_535257 | 9/7/2020  | 9/14/2020 Europe / United Kingdom / Wales  |
| EPI_ISL_535260 | 9/7/2020  | 9/14/2020 Europe / United Kingdom / Wales  |
| EPI_ISL_535261 | 9/6/2020  | 9/14/2020 Europe / United Kingdom / Wales  |
| EPI_ISL_535264 | 6/1/2020  | 9/14/2020 North America / USA / New Mexico |
| EPI_ISL_535265 | 6/1/2020  | 9/14/2020 North America / USA / New Mexico |
| EPI_ISL_535266 | 6/1/2020  | 9/14/2020 North America / USA / New Mexico |
| EPI_ISL_535268 | 6/1/2020  | 9/14/2020 North America / USA / New Mexico |
| EPI_ISL_535269 | 6/15/2020 | 9/14/2020 North America / USA / New Mexico |
| EPI_ISL_535270 | 6/15/2020 | 9/14/2020 North America / USA / New Mexico |
| EPI_ISL_535271 | 6/15/2020 | 9/14/2020 North America / USA / New Mexico |
| EPI_ISL_535272 | 6/15/2020 | 9/14/2020 North America / USA / New Mexico |
| EPI_ISL_535273 | 6/15/2020 | 9/14/2020 North America / USA / New Mexico |
| EPI_ISL_535274 | 6/15/2020 | 9/14/2020 North America / USA / New Mexico |
| EPI_ISL_535276 | 6/15/2020 | 9/14/2020 North America / USA / New Mexico |





|                |           |           |                                       |
|----------------|-----------|-----------|---------------------------------------|
| EPI_ISL_535328 | 6/10/2020 | 9/14/2020 | North America / USA / Louisiana       |
| EPI_ISL_535329 | 6/11/2020 | 9/14/2020 | North America / USA / Louisiana       |
| EPI_ISL_535330 | 6/14/2020 | 9/14/2020 | North America / USA / Louisiana       |
| EPI_ISL_535331 | 6/11/2020 | 9/14/2020 | North America / USA / Louisiana       |
| EPI_ISL_535332 | 6/12/2020 | 9/14/2020 | North America / USA / Louisiana       |
| EPI_ISL_535333 | 6/11/2020 | 9/14/2020 | North America / USA / Louisiana       |
| EPI_ISL_535334 | 6/10/2020 | 9/14/2020 | North America / USA / Louisiana       |
| EPI_ISL_535335 | 6/11/2020 | 9/14/2020 | North America / USA / Louisiana       |
| EPI_ISL_535336 | 6/11/2020 | 9/14/2020 | North America / USA / Louisiana       |
| EPI_ISL_535337 | 6/10/2020 | 9/14/2020 | North America / USA / Louisiana       |
| EPI_ISL_535338 | 6/10/2020 | 9/14/2020 | North America / USA / Louisiana       |
| EPI_ISL_535339 | 6/10/2020 | 9/14/2020 | North America / USA / Louisiana       |
| EPI_ISL_535340 | 6/10/2020 | 9/14/2020 | North America / USA / Louisiana       |
| EPI_ISL_535341 | 5/7/2020  | 9/14/2020 | North America / USA / Louisiana       |
| EPI_ISL_535342 | 5/7/2020  | 9/14/2020 | North America / USA / Louisiana       |
| EPI_ISL_535343 | 5/7/2020  | 9/14/2020 | North America / USA / Louisiana       |
| EPI_ISL_535344 | 5/7/2020  | 9/14/2020 | North America / USA / Louisiana       |
| EPI_ISL_535345 | 5/7/2020  | 9/14/2020 | North America / USA / Louisiana       |
| EPI_ISL_535346 | 5/21/2020 | 9/14/2020 | North America / USA / Louisiana       |
| EPI_ISL_535347 | 5/27/2020 | 9/14/2020 | North America / USA / Louisiana       |
| EPI_ISL_535348 | 5/27/2020 | 9/14/2020 | North America / USA / Louisiana       |
| EPI_ISL_535349 | 5/29/2020 | 9/14/2020 | North America / USA / Louisiana       |
| EPI_ISL_535350 | 5/29/2020 | 9/14/2020 | North America / USA / Louisiana       |
| EPI_ISL_535351 | 5/29/2020 | 9/14/2020 | North America / USA / Louisiana       |
| EPI_ISL_535352 | 5/29/2020 | 9/14/2020 | North America / USA / Louisiana       |
| EPI_ISL_535353 | 5/29/2020 | 9/14/2020 | North America / USA / Louisiana       |
| EPI_ISL_535354 | 5/29/2020 | 9/14/2020 | North America / USA / Louisiana       |
| EPI_ISL_535355 | 5/29/2020 | 9/14/2020 | North America / USA / Louisiana       |
| EPI_ISL_535356 | 5/29/2020 | 9/14/2020 | North America / USA / Louisiana       |
| EPI_ISL_535357 | 5/29/2020 | 9/14/2020 | North America / USA / Louisiana       |
| EPI_ISL_535358 | 5/29/2020 | 9/14/2020 | North America / USA / Louisiana       |
| EPI_ISL_535359 | 7/30/2020 | 9/14/2020 | North America / USA / Rhode Island    |
| EPI_ISL_535360 | 7/30/2020 | 9/14/2020 | North America / USA / Rhode Island    |
| EPI_ISL_535361 | 5/27/2020 | 9/14/2020 | North America / USA / Oklahoma        |
| EPI_ISL_535362 | 5/27/2020 | 9/14/2020 | North America / USA / Oklahoma        |
| EPI_ISL_535363 | 5/27/2020 | 9/14/2020 | North America / USA / Oklahoma        |
| EPI_ISL_535364 | 4/10/2020 | 9/14/2020 | North America / USA / Oklahoma        |
| EPI_ISL_535390 | 8/7/2020  | 9/15/2020 | Africa / South Africa / KwaZulu-Natal |
| EPI_ISL_535392 | 8/7/2020  | 9/15/2020 | Africa / South Africa / KwaZulu-Natal |
| EPI_ISL_535393 | 8/7/2020  | 9/15/2020 | Africa / South Africa / KwaZulu-Natal |
| EPI_ISL_535394 | 8/7/2020  | 9/15/2020 | Africa / South Africa / KwaZulu-Natal |
| EPI_ISL_535395 | 8/7/2020  | 9/15/2020 | Africa / South Africa / KwaZulu-Natal |
| EPI_ISL_535396 | 8/6/2020  | 9/15/2020 | Africa / South Africa / KwaZulu-Natal |
| EPI_ISL_535397 | 8/5/2020  | 9/15/2020 | Africa / South Africa / KwaZulu-Natal |
| EPI_ISL_535398 | 8/7/2020  | 9/15/2020 | Africa / South Africa / KwaZulu-Natal |
| EPI_ISL_535399 | 8/5/2020  | 9/15/2020 | Africa / South Africa / KwaZulu-Natal |
| EPI_ISL_535400 | 8/6/2020  | 9/15/2020 | Africa / South Africa / KwaZulu-Natal |







|                |           |                                                         |
|----------------|-----------|---------------------------------------------------------|
| EPI_ISL_535572 | 7/30/2020 | 9/15/2020 Africa / South Africa / KwaZulu-Natal         |
| EPI_ISL_535575 | 8/31/2020 | 9/15/2020 Europe / Spain / Catalunya / Gerona / Palamos |
| EPI_ISL_535585 | 8/17/2020 | 9/15/2020 Europe / Switzerland / Basel-Stadt            |
| EPI_ISL_535586 | 8/18/2020 | 9/15/2020 Europe / Switzerland / Aargau                 |
| EPI_ISL_535587 | 8/18/2020 | 9/15/2020 Europe / Switzerland / Basel-Stadt            |
| EPI_ISL_535588 | 8/17/2020 | 9/15/2020 Europe / Switzerland / Bern                   |
| EPI_ISL_535589 | 8/17/2020 | 9/15/2020 Europe / Switzerland / Bern                   |
| EPI_ISL_535590 | 8/18/2020 | 9/15/2020 Europe / Switzerland / Basel-Landschaft       |
| EPI_ISL_535593 | 8/18/2020 | 9/15/2020 Europe / Switzerland / Grisons                |
| EPI_ISL_535595 | 8/18/2020 | 9/15/2020 Europe / Switzerland / Zurich                 |
| EPI_ISL_535596 | 8/18/2020 | 9/15/2020 Europe / Switzerland / Vaud                   |
| EPI_ISL_535597 | 8/18/2020 | 9/15/2020 Europe / Switzerland / Uri                    |
| EPI_ISL_535598 | 8/19/2020 | 9/15/2020 Europe / Switzerland / Basel-Landschaft       |
| EPI_ISL_535599 | 8/19/2020 | 9/15/2020 Europe / Switzerland / Basel-Landschaft       |
| EPI_ISL_535600 | 8/19/2020 | 9/15/2020 Europe / Switzerland / Basel-Landschaft       |
| EPI_ISL_535602 | 8/18/2020 | 9/15/2020 Europe / Switzerland / Grisons                |
| EPI_ISL_535604 | 8/19/2020 | 9/15/2020 Europe / Switzerland / Bern                   |
| EPI_ISL_535606 | 8/19/2020 | 9/15/2020 Europe / Switzerland / Basel-Landschaft       |
| EPI_ISL_535607 | 8/19/2020 | 9/15/2020 Europe / Switzerland / Basel-Landschaft       |
| EPI_ISL_535608 | 8/19/2020 | 9/15/2020 Europe / Switzerland / Basel-Landschaft       |
| EPI_ISL_535609 | 8/19/2020 | 9/15/2020 Europe / Switzerland / Zurich                 |
| EPI_ISL_535610 | 8/19/2020 | 9/15/2020 Europe / Switzerland / Basel-Stadt            |
| EPI_ISL_535612 | 8/19/2020 | 9/15/2020 Europe / Switzerland / Bern                   |
| EPI_ISL_535613 | 8/19/2020 | 9/15/2020 Europe / Switzerland / Bern                   |
| EPI_ISL_535614 | 8/19/2020 | 9/15/2020 Europe / Switzerland / Bern                   |
| EPI_ISL_535615 | 8/20/2020 | 9/15/2020 Europe / Switzerland / Zurich                 |
| EPI_ISL_535618 | 8/20/2020 | 9/15/2020 Europe / Switzerland / Wallis                 |
| EPI_ISL_535621 | 8/20/2020 | 9/15/2020 Europe / Switzerland / Basel-Landschaft       |
| EPI_ISL_535623 | 8/20/2020 | 9/15/2020 Europe / Switzerland / Zurich                 |
| EPI_ISL_535624 | 8/20/2020 | 9/15/2020 Europe / Switzerland / Aargau                 |
| EPI_ISL_535625 | 8/20/2020 | 9/15/2020 Europe / Switzerland / Bern                   |
| EPI_ISL_535627 | 8/14/2020 | 9/15/2020 Europe / Switzerland / Bern                   |
| EPI_ISL_535629 | 8/14/2020 | 9/15/2020 Europe / Switzerland / Basel-Stadt            |
| EPI_ISL_535630 | 8/14/2020 | 9/15/2020 Europe / Switzerland / Bern                   |
| EPI_ISL_535631 | 8/14/2020 | 9/15/2020 Europe / Switzerland / Basel-Landschaft       |
| EPI_ISL_535632 | 8/14/2020 | 9/15/2020 Europe / Switzerland / Basel-Stadt            |
| EPI_ISL_535633 | 8/14/2020 | 9/15/2020 Europe / Switzerland / Basel-Landschaft       |
| EPI_ISL_535634 | 8/14/2020 | 9/15/2020 Europe / Switzerland / Basel-Landschaft       |
| EPI_ISL_535635 | 8/15/2020 | 9/15/2020 Europe / Switzerland / Geneva                 |
| EPI_ISL_535639 | 8/15/2020 | 9/15/2020 Europe / Switzerland / Vaud                   |
| EPI_ISL_535640 | 8/16/2020 | 9/15/2020 Europe / Switzerland / Basel-Stadt            |
| EPI_ISL_535641 | 8/16/2020 | 9/15/2020 Europe / Switzerland / Grisons                |
| EPI_ISL_535643 | 8/17/2020 | 9/15/2020 Europe / Switzerland / Zurich                 |
| EPI_ISL_535644 | 8/17/2020 | 9/15/2020 Europe / Switzerland / Solothurn              |
| EPI_ISL_535645 | 8/17/2020 | 9/15/2020 Europe / Switzerland / Zurich                 |
| EPI_ISL_535646 | 8/17/2020 | 9/15/2020 Europe / Switzerland / Vaud                   |
| EPI_ISL_535647 | 8/17/2020 | 9/15/2020 Europe / Switzerland / Vaud                   |





























|                |           |                                                           |
|----------------|-----------|-----------------------------------------------------------|
| EPI_ISL_536378 | 3/31/2020 | 9/15/2020 North America / Canada / Quebec                 |
| EPI_ISL_536379 | 3/31/2020 | 9/15/2020 North America / Canada / Quebec                 |
| EPI_ISL_536381 | 3/31/2020 | 9/15/2020 North America / Canada / Quebec                 |
| EPI_ISL_536383 | 3/31/2020 | 9/15/2020 North America / Canada / Quebec                 |
| EPI_ISL_536385 | 3/31/2020 | 9/15/2020 North America / Canada / Quebec                 |
| EPI_ISL_536386 | 3/31/2020 | 9/15/2020 North America / Canada / Quebec                 |
| EPI_ISL_536387 | 3/31/2020 | 9/15/2020 North America / Canada / Quebec                 |
| EPI_ISL_536388 | 3/31/2020 | 9/15/2020 North America / Canada / Quebec                 |
| EPI_ISL_536389 | 3/31/2020 | 9/15/2020 North America / Canada / Quebec                 |
| EPI_ISL_536390 | 3/31/2020 | 9/15/2020 North America / Canada / Quebec                 |
| EPI_ISL_536391 | 3/31/2020 | 9/15/2020 North America / Canada / Quebec                 |
| EPI_ISL_536392 | 3/31/2020 | 9/15/2020 North America / Canada / Quebec                 |
| EPI_ISL_536393 | 3/31/2020 | 9/15/2020 North America / Canada / Quebec                 |
| EPI_ISL_536395 | 3/31/2020 | 9/15/2020 North America / Canada / Quebec                 |
| EPI_ISL_536397 | 3/31/2020 | 9/15/2020 North America / Canada / Quebec                 |
| EPI_ISL_536398 | 4/18/2020 | 9/15/2020 Europe / Lithuania / Marijampoles apskritis     |
| EPI_ISL_536399 | 3/25/2020 | 9/15/2020 South America / Colombia / Antioquia / Medellin |
| EPI_ISL_538390 | 6/26/2020 | 9/15/2020 North America / USA / South Carolina            |
| EPI_ISL_538391 | 6/26/2020 | 9/15/2020 North America / USA / South Carolina            |
| EPI_ISL_538392 | 6/26/2020 | 9/15/2020 North America / USA / South Carolina            |
| EPI_ISL_538393 | 6/26/2020 | 9/15/2020 North America / USA / South Carolina            |
| EPI_ISL_538395 | 6/26/2020 | 9/15/2020 North America / USA / South Carolina            |
| EPI_ISL_538396 | 6/26/2020 | 9/15/2020 North America / USA / South Carolina            |
| EPI_ISL_538397 | 6/26/2020 | 9/15/2020 North America / USA / South Carolina            |
| EPI_ISL_538399 | 6/26/2020 | 9/15/2020 North America / USA / South Carolina            |
| EPI_ISL_538400 | 6/26/2020 | 9/15/2020 North America / USA / South Carolina            |
| EPI_ISL_538401 | 6/26/2020 | 9/15/2020 North America / USA / South Carolina            |
| EPI_ISL_538402 | 6/26/2020 | 9/15/2020 North America / USA / South Carolina            |
| EPI_ISL_538404 | 6/26/2020 | 9/15/2020 North America / USA / South Carolina            |
| EPI_ISL_538406 | 6/26/2020 | 9/15/2020 North America / USA / South Carolina            |
| EPI_ISL_538407 | 6/26/2020 | 9/15/2020 North America / USA / South Carolina            |
| EPI_ISL_538410 | 6/26/2020 | 9/15/2020 North America / USA / South Carolina            |
| EPI_ISL_538411 | 6/26/2020 | 9/15/2020 North America / USA / South Carolina            |
| EPI_ISL_538412 | 6/26/2020 | 9/15/2020 North America / USA / South Carolina            |
| EPI_ISL_538413 | 6/26/2020 | 9/15/2020 North America / USA / South Carolina            |
| EPI_ISL_538415 | 6/26/2020 | 9/15/2020 North America / USA / South Carolina            |
| EPI_ISL_538417 | 6/26/2020 | 9/15/2020 North America / USA / South Carolina            |
| EPI_ISL_538418 | 6/26/2020 | 9/15/2020 North America / USA / South Carolina            |
| EPI_ISL_538420 | 6/26/2020 | 9/15/2020 North America / USA / South Carolina            |
| EPI_ISL_538421 | 6/26/2020 | 9/15/2020 North America / USA / South Carolina            |
| EPI_ISL_538422 | 6/19/2020 | 9/15/2020 North America / USA / South Carolina            |
| EPI_ISL_538423 | 6/19/2020 | 9/15/2020 North America / USA / South Carolina            |
| EPI_ISL_538425 | 6/19/2020 | 9/15/2020 North America / USA / South Carolina            |
| EPI_ISL_538426 | 6/19/2020 | 9/15/2020 North America / USA / South Carolina            |
| EPI_ISL_538427 | 6/19/2020 | 9/15/2020 North America / USA / South Carolina            |
| EPI_ISL_538428 | 6/19/2020 | 9/15/2020 North America / USA / South Carolina            |
| EPI_ISL_538430 | 6/19/2020 | 9/15/2020 North America / USA / South Carolina            |

|                |           |                                                |
|----------------|-----------|------------------------------------------------|
| EPI_ISL_538431 | 6/19/2020 | 9/15/2020 North America / USA / South Carolina |
| EPI_ISL_538432 | 6/26/2020 | 9/15/2020 North America / USA / South Carolina |
| EPI_ISL_538433 | 6/26/2020 | 9/15/2020 North America / USA / South Carolina |
| EPI_ISL_538434 | 6/26/2020 | 9/15/2020 North America / USA / South Carolina |
| EPI_ISL_536411 | 8/8/2020  | 9/16/2020 Asia / Hong Kong                     |
| EPI_ISL_536412 | 4/3/2020  | 9/16/2020 Asia / Singapore                     |
| EPI_ISL_536413 | 5/26/2020 | 9/16/2020 Asia / Singapore                     |
| EPI_ISL_536414 | 4/5/2020  | 9/16/2020 Asia / Singapore                     |
| EPI_ISL_536415 | 4/17/2020 | 9/16/2020 Asia / Singapore                     |
| EPI_ISL_536416 | 4/17/2020 | 9/16/2020 Asia / Singapore                     |
| EPI_ISL_536417 | 8/28/2020 | 9/16/2020 Asia / Singapore                     |
| EPI_ISL_536418 | 8/28/2020 | 9/16/2020 Asia / Singapore                     |
| EPI_ISL_536419 | 8/29/2020 | 9/16/2020 Asia / Singapore                     |
| EPI_ISL_536420 | 8/29/2020 | 9/16/2020 Asia / Singapore                     |
| EPI_ISL_536421 | 8/30/2020 | 9/16/2020 Asia / Singapore                     |
| EPI_ISL_536422 | 4/19/2020 | 9/16/2020 Asia / Singapore                     |
| EPI_ISL_536423 | 8/31/2020 | 9/16/2020 Asia / Singapore                     |
| EPI_ISL_536424 | 8/31/2020 | 9/16/2020 Asia / Singapore                     |
| EPI_ISL_536425 | 8/31/2020 | 9/16/2020 Asia / Singapore                     |
| EPI_ISL_536426 | 5/6/2020  | 9/16/2020 Asia / Singapore                     |
| EPI_ISL_536427 | 8/31/2020 | 9/16/2020 Asia / Singapore                     |
| EPI_ISL_536428 | 8/31/2020 | 9/16/2020 Asia / Singapore                     |
| EPI_ISL_536429 | 9/3/2020  | 9/16/2020 Asia / Singapore                     |
| EPI_ISL_536430 | 9/3/2020  | 9/16/2020 Asia / Singapore                     |
| EPI_ISL_536431 | 9/3/2020  | 9/16/2020 Asia / Singapore                     |
| EPI_ISL_536432 | 9/6/2020  | 9/16/2020 Asia / Singapore                     |
| EPI_ISL_536433 | 9/4/2020  | 9/16/2020 Asia / Singapore                     |
| EPI_ISL_536434 | 9/7/2020  | 9/16/2020 Asia / Singapore                     |
| EPI_ISL_536435 | 2/2/2020  | 9/16/2020 Asia / Singapore                     |
| EPI_ISL_536436 | 3/11/2020 | 9/16/2020 Asia / Singapore                     |
| EPI_ISL_536437 | 3/13/2020 | 9/16/2020 Asia / Singapore                     |
| EPI_ISL_536438 | 9/6/2020  | 9/16/2020 Asia / Singapore                     |
| EPI_ISL_536439 | 2/3/2020  | 9/16/2020 Asia / Singapore                     |
| EPI_ISL_536440 | 3/12/2020 | 9/16/2020 Asia / Singapore                     |
| EPI_ISL_536441 | 2/5/2020  | 9/16/2020 Asia / Singapore                     |
| EPI_ISL_536442 | 9/4/2020  | 9/16/2020 Asia / Singapore                     |
| EPI_ISL_536443 | 8/28/2020 | 9/16/2020 Asia / Singapore                     |
| EPI_ISL_536444 | 9/3/2020  | 9/16/2020 Asia / Singapore                     |
| EPI_ISL_536445 | 9/3/2020  | 9/16/2020 Asia / Singapore                     |
| EPI_ISL_536446 | 9/7/2020  | 9/16/2020 Asia / Singapore                     |
| EPI_ISL_536447 | 1/25/2020 | 9/16/2020 Asia / Singapore                     |
| EPI_ISL_536448 | 4/12/2020 | 9/16/2020 Asia / Singapore                     |
| EPI_ISL_536449 | 9/8/2020  | 9/16/2020 Asia / Singapore                     |
| EPI_ISL_536450 | 4/12/2020 | 9/16/2020 Asia / Singapore                     |
| EPI_ISL_536477 | 7/3/2020  | 9/16/2020 South America / Peru / Lima          |
| EPI_ISL_536478 | 7/2/2020  | 9/16/2020 South America / Peru / Lima          |
| EPI_ISL_536479 | 7/1/2020  | 9/16/2020 South America / Peru / Callao        |

|                |           |           |                                   |
|----------------|-----------|-----------|-----------------------------------|
| EPI_ISL_536480 | 7/1/2020  | 9/16/2020 | South America / Peru / Callao     |
| EPI_ISL_536481 | 7/1/2020  | 9/16/2020 | South America / Peru / Callao     |
| EPI_ISL_536482 | 6/30/2020 | 9/16/2020 | South America / Peru / Ancash     |
| EPI_ISL_536483 | 7/2/2020  | 9/16/2020 | South America / Peru / Ancash     |
| EPI_ISL_536484 | 7/2/2020  | 9/16/2020 | South America / Peru / Ancash     |
| EPI_ISL_536485 | 7/4/2020  | 9/16/2020 | South America / Peru / Lima       |
| EPI_ISL_536486 | 7/4/2020  | 9/16/2020 | South America / Peru / Lima       |
| EPI_ISL_536487 | 7/4/2020  | 9/16/2020 | South America / Peru / Lima       |
| EPI_ISL_536488 | 7/4/2020  | 9/16/2020 | South America / Peru / Lima       |
| EPI_ISL_536489 | 7/4/2020  | 9/16/2020 | South America / Peru / Lima       |
| EPI_ISL_536490 | 7/3/2020  | 9/16/2020 | South America / Peru / Lima       |
| EPI_ISL_536491 | 7/3/2020  | 9/16/2020 | South America / Peru / Ancash     |
| EPI_ISL_536492 | 7/4/2020  | 9/16/2020 | South America / Peru / Lima       |
| EPI_ISL_536493 | 7/3/2020  | 9/16/2020 | South America / Peru / Lima       |
| EPI_ISL_536494 | 7/3/2020  | 9/16/2020 | South America / Peru / Lima       |
| EPI_ISL_536495 | 7/3/2020  | 9/16/2020 | South America / Peru / Lima       |
| EPI_ISL_536496 | 7/1/2020  | 9/16/2020 | South America / Peru / Lima       |
| EPI_ISL_536498 | 7/4/2020  | 9/16/2020 | South America / Peru / Lima       |
| EPI_ISL_536499 | 7/4/2020  | 9/16/2020 | South America / Peru / Lima       |
| EPI_ISL_536500 | 7/4/2020  | 9/16/2020 | South America / Peru / Lima       |
| EPI_ISL_536501 | 5/2/2020  | 9/16/2020 | South America / Peru / Lima       |
| EPI_ISL_536502 | 5/2/2020  | 9/16/2020 | South America / Peru / Callao     |
| EPI_ISL_536503 | 5/2/2020  | 9/16/2020 | South America / Peru / Callao     |
| EPI_ISL_536504 | 5/2/2020  | 9/16/2020 | South America / Peru / Callao     |
| EPI_ISL_536505 | 5/4/2020  | 9/16/2020 | South America / Peru / Ica        |
| EPI_ISL_536506 | 5/4/2020  | 9/16/2020 | South America / Peru / Ica        |
| EPI_ISL_536507 | 5/4/2020  | 9/16/2020 | South America / Peru / Ica        |
| EPI_ISL_536508 | 5/4/2020  | 9/16/2020 | South America / Peru / Lima       |
| EPI_ISL_536509 | 5/4/2020  | 9/16/2020 | South America / Peru / Lima       |
| EPI_ISL_536510 | 5/4/2020  | 9/16/2020 | South America / Peru / Lima       |
| EPI_ISL_536511 | 5/4/2020  | 9/16/2020 | South America / Peru / Lima       |
| EPI_ISL_536512 | 5/4/2020  | 9/16/2020 | South America / Peru / Lima       |
| EPI_ISL_536513 | 5/4/2020  | 9/16/2020 | South America / Peru / Lima       |
| EPI_ISL_536514 | 5/5/2020  | 9/16/2020 | South America / Peru / Lima       |
| EPI_ISL_536515 | 5/4/2020  | 9/16/2020 | South America / Peru / Lima       |
| EPI_ISL_536516 | 5/4/2020  | 9/16/2020 | South America / Peru / Lima       |
| EPI_ISL_536517 | 5/5/2020  | 9/16/2020 | South America / Peru / Lima       |
| EPI_ISL_536518 | 5/5/2020  | 9/16/2020 | South America / Peru / Lima       |
| EPI_ISL_536519 | 5/4/2020  | 9/16/2020 | South America / Peru / Lima       |
| EPI_ISL_536520 | 5/5/2020  | 9/16/2020 | South America / Peru / Lima       |
| EPI_ISL_536521 | 5/6/2020  | 9/16/2020 | South America / Peru / Lima       |
| EPI_ISL_536522 | 6/24/2020 | 9/16/2020 | South America / Peru / Lima       |
| EPI_ISL_536523 | 4/1/2020  | 9/16/2020 | South America / Peru / Lambayeque |
| EPI_ISL_536524 | 4/1/2020  | 9/16/2020 | South America / Peru / Lambayeque |
| EPI_ISL_536527 | 3/18/2020 | 9/16/2020 | South America / Peru / Lima       |
| EPI_ISL_536528 | 4/1/2020  | 9/16/2020 | South America / Peru / Junin      |
| EPI_ISL_536529 | 3/31/2020 | 9/16/2020 | South America / Peru / Ancash     |

|                |           |                                                              |
|----------------|-----------|--------------------------------------------------------------|
| EPI_ISL_536531 | 3/17/2020 | 9/16/2020 South America / Peru / Lima                        |
| EPI_ISL_536533 | 3/17/2020 | 9/16/2020 South America / Peru / Lima                        |
| EPI_ISL_536534 | 3/17/2020 | 9/16/2020 South America / Peru / Lima                        |
| EPI_ISL_536537 | 3/16/2020 | 9/16/2020 South America / Peru / Lima                        |
| EPI_ISL_536538 | 3/16/2020 | 9/16/2020 South America / Peru / Lima                        |
| EPI_ISL_536539 | 3/18/2020 | 9/16/2020 South America / Peru / Lima                        |
| EPI_ISL_536540 | 3/18/2020 | 9/16/2020 South America / Peru / Lima                        |
| EPI_ISL_536541 | 3/18/2020 | 9/16/2020 South America / Peru / Lima                        |
| EPI_ISL_536542 | 3/14/2020 | 9/16/2020 South America / Peru / Lima                        |
| EPI_ISL_536543 | 3/17/2020 | 9/16/2020 South America / Peru / Lima                        |
| EPI_ISL_536545 | 3/13/2020 | 9/16/2020 South America / Peru / Lima                        |
| EPI_ISL_536548 | 3/19/2020 | 9/16/2020 South America / Peru / Lima                        |
| EPI_ISL_536549 | 3/20/2020 | 9/16/2020 South America / Peru / Lima                        |
| EPI_ISL_536550 | 3/19/2020 | 9/16/2020 South America / Peru / Lima                        |
| EPI_ISL_536551 | 3/18/2020 | 9/16/2020 South America / Peru / Lima                        |
| EPI_ISL_536552 | 3/14/2020 | 9/16/2020 South America / Peru / Lima                        |
| EPI_ISL_536553 | 3/11/2020 | 9/16/2020 South America / Peru / Lima                        |
| EPI_ISL_536554 | 3/18/2020 | 9/16/2020 South America / Peru / Lima                        |
| EPI_ISL_536555 | 3/19/2020 | 9/16/2020 South America / Peru / Lima                        |
| EPI_ISL_536556 | 3/21/2020 | 9/16/2020 South America / Peru / Callao                      |
| EPI_ISL_536557 | 3/20/2020 | 9/16/2020 South America / Peru / Arequipa                    |
| EPI_ISL_536558 | 3/20/2020 | 9/16/2020 South America / Peru / Arequipa                    |
| EPI_ISL_536559 | 3/20/2020 | 9/16/2020 South America / Peru / Ica                         |
| EPI_ISL_536560 | 3/17/2020 | 9/16/2020 South America / Peru / Lima                        |
| EPI_ISL_536561 | 3/22/2020 | 9/16/2020 South America / Peru / Lima                        |
| EPI_ISL_536562 | 4/1/2020  | 9/16/2020 South America / Peru / Lambayeque                  |
| EPI_ISL_536572 | 8/5/2020  | 9/16/2020 North America / USA / Wisconsin / Dane County      |
| EPI_ISL_536573 | 8/5/2020  | 9/16/2020 North America / USA / Wisconsin / Dane County      |
| EPI_ISL_536574 | 7/28/2020 | 9/16/2020 North America / USA / Wisconsin / Dane County      |
| EPI_ISL_536575 | 8/6/2020  | 9/16/2020 North America / USA / Wisconsin / Dane County      |
| EPI_ISL_536576 | 8/6/2020  | 9/16/2020 North America / USA / Wisconsin / Marquette County |
| EPI_ISL_536577 | 8/6/2020  | 9/16/2020 North America / USA / Wisconsin / Dane County      |
| EPI_ISL_536578 | 7/30/2020 | 9/16/2020 North America / USA / Wisconsin / Dane County      |
| EPI_ISL_536579 | 8/10/2020 | 9/16/2020 North America / USA / Wisconsin / Green County     |
| EPI_ISL_536580 | 8/10/2020 | 9/16/2020 North America / USA / Wisconsin / Dane County      |
| EPI_ISL_536581 | 8/5/2020  | 9/16/2020 North America / USA / Wisconsin / Dane County      |
| EPI_ISL_536582 | 8/5/2020  | 9/16/2020 North America / USA / Wisconsin / Dane County      |
| EPI_ISL_536583 | 8/7/2020  | 9/16/2020 North America / USA / Wisconsin / Lafayette County |
| EPI_ISL_536584 | 8/5/2020  | 9/16/2020 North America / USA / Wisconsin / Dane County      |
| EPI_ISL_536585 | 8/19/2020 | 9/16/2020 North America / USA / Wisconsin / Dodge County     |
| EPI_ISL_536586 | 8/19/2020 | 9/16/2020 North America / USA / Wisconsin / Dane County      |
| EPI_ISL_536587 | 8/18/2020 | 9/16/2020 North America / USA / Wisconsin / Dane County      |
| EPI_ISL_536588 | 8/20/2020 | 9/16/2020 North America / USA / Wisconsin / Dane County      |
| EPI_ISL_536589 | 8/19/2020 | 9/16/2020 North America / USA / Wisconsin / Dane County      |
| EPI_ISL_536590 | 8/20/2020 | 9/16/2020 North America / USA / Wisconsin / Green County     |
| EPI_ISL_536591 | 8/20/2020 | 9/16/2020 North America / USA / Wisconsin / Dane County      |
| EPI_ISL_536592 | 8/19/2020 | 9/16/2020 North America / USA / Wisconsin / Dane County      |



|                |           |           |                                                       |
|----------------|-----------|-----------|-------------------------------------------------------|
| EPI_ISL_536642 | 8/24/2020 | 9/16/2020 | North America / USA / Wisconsin / Dane County         |
| EPI_ISL_536643 | 8/21/2020 | 9/16/2020 | North America / USA / Wisconsin / Dane County         |
| EPI_ISL_536644 | 8/21/2020 | 9/16/2020 | North America / USA / Wisconsin / Columbia County     |
| EPI_ISL_536645 | 8/22/2020 | 9/16/2020 | North America / USA / Wisconsin / Dane County         |
| EPI_ISL_536646 | 8/25/2020 | 9/16/2020 | North America / USA / Wisconsin / Dane County         |
| EPI_ISL_536647 | 8/24/2020 | 9/16/2020 | North America / USA / Wisconsin / Dane County         |
| EPI_ISL_536648 | 8/24/2020 | 9/16/2020 | North America / USA / Wisconsin / Dane County         |
| EPI_ISL_536649 | 8/24/2020 | 9/16/2020 | North America / USA / Wisconsin / Dane County         |
| EPI_ISL_536650 | 8/21/2020 | 9/16/2020 | North America / USA / Wisconsin / Dane County         |
| EPI_ISL_536651 | 8/21/2020 | 9/16/2020 | North America / USA / Wisconsin / Dane County         |
| EPI_ISL_536652 | 8/25/2020 | 9/16/2020 | North America / USA / Wisconsin / Dane County         |
| EPI_ISL_536653 | 8/22/2020 | 9/16/2020 | North America / USA / Wisconsin / Dane County         |
| EPI_ISL_536654 | 8/25/2020 | 9/16/2020 | North America / USA / Wisconsin / Dodge County        |
| EPI_ISL_536655 | 8/21/2020 | 9/16/2020 | North America / USA / Wisconsin / Dane County         |
| EPI_ISL_536656 | 9/11/2020 | 9/16/2020 | North America / USA / Wisconsin / Dane County         |
| EPI_ISL_536657 | 9/12/2020 | 9/16/2020 | North America / USA / Wisconsin / Dane County         |
| EPI_ISL_536658 | 8/31/2020 | 9/16/2020 | North America / USA / Wisconsin / Jefferson County    |
| EPI_ISL_536660 | 9/2/2020  | 9/16/2020 | North America / USA / Wisconsin / Jefferson County    |
| EPI_ISL_536661 | 9/1/2020  | 9/16/2020 | North America / USA / New York / Nassau County        |
| EPI_ISL_536662 | 9/2/2020  | 9/16/2020 | North America / USA / Wisconsin / Dane County         |
| EPI_ISL_536663 | 8/31/2020 | 9/16/2020 | North America / USA / Wisconsin / Jefferson County    |
| EPI_ISL_536664 | 9/1/2020  | 9/16/2020 | North America / USA / Wisconsin / Dane County         |
| EPI_ISL_536665 | 9/1/2020  | 9/16/2020 | North America / USA / Wisconsin / Dane County         |
| EPI_ISL_536666 | 9/2/2020  | 9/16/2020 | North America / USA / Wisconsin / Dane County         |
| EPI_ISL_536667 | 9/1/2020  | 9/16/2020 | North America / USA / Wisconsin / Dodge County        |
| EPI_ISL_536668 | 9/2/2020  | 9/16/2020 | North America / USA / California / San Diego County   |
| EPI_ISL_536669 | 8/28/2020 | 9/16/2020 | North America / USA / Wisconsin / Dane County         |
| EPI_ISL_536670 | 8/31/2020 | 9/16/2020 | North America / USA / Wisconsin / Adams County        |
| EPI_ISL_536671 | 8/31/2020 | 9/16/2020 | North America / USA / Wisconsin / Iowa County         |
| EPI_ISL_536673 | 8/31/2020 | 9/16/2020 | North America / USA / Wisconsin / Dane County         |
| EPI_ISL_536674 | 9/1/2020  | 9/16/2020 | North America / USA / Wisconsin / Dane County         |
| EPI_ISL_536675 | 8/29/2020 | 9/16/2020 | North America / USA / Wisconsin / Dane County         |
| EPI_ISL_536676 | 9/1/2020  | 9/16/2020 | North America / USA / Wisconsin / Dane County         |
| EPI_ISL_536677 | 8/31/2020 | 9/16/2020 | North America / USA / Wisconsin / Columbia County     |
| EPI_ISL_536678 | 9/2/2020  | 9/16/2020 | North America / USA / California / Los Angeles County |
| EPI_ISL_536679 | 8/30/2020 | 9/16/2020 | North America / USA / Wisconsin / Jefferson County    |
| EPI_ISL_536680 | 9/2/2020  | 9/16/2020 | North America / USA / Wisconsin / Dane County         |
| EPI_ISL_536681 | 8/31/2020 | 9/16/2020 | North America / USA / Wisconsin / Dane County         |
| EPI_ISL_536682 | 8/31/2020 | 9/16/2020 | North America / USA / Wisconsin / Rock County         |
| EPI_ISL_536683 | 8/27/2020 | 9/16/2020 | North America / USA / Nevada / Clark County           |
| EPI_ISL_536685 | 8/26/2020 | 9/16/2020 | North America / USA / Wisconsin / Dane County         |
| EPI_ISL_536686 | 8/27/2020 | 9/16/2020 | North America / USA / Wisconsin / Dane County         |
| EPI_ISL_536687 | 8/31/2020 | 9/16/2020 | North America / USA / Wisconsin / Dane County         |
| EPI_ISL_536688 | 8/27/2020 | 9/16/2020 | North America / USA / Wisconsin / Dane County         |
| EPI_ISL_536689 | 8/28/2020 | 9/16/2020 | North America / USA / Wisconsin / Dane County         |
| EPI_ISL_536694 | 8/27/2020 | 9/16/2020 | North America / USA / Wisconsin / Iowa County         |
| EPI_ISL_536697 | 8/29/2020 | 9/16/2020 | North America / USA / Wisconsin / Sauk County         |

|                |           |           |                                                     |
|----------------|-----------|-----------|-----------------------------------------------------|
| EPI_ISL_536698 | 8/27/2020 | 9/16/2020 | North America / USA / Wisconsin / Dane County       |
| EPI_ISL_536699 | 8/26/2020 | 9/16/2020 | North America / USA / Wisconsin / Dane County       |
| EPI_ISL_536700 | 8/30/2020 | 9/16/2020 | North America / USA / Wisconsin / Milwaukee County  |
| EPI_ISL_536701 | 8/31/2020 | 9/16/2020 | North America / USA / Wisconsin / Dane County       |
| EPI_ISL_536702 | 8/30/2020 | 9/16/2020 | North America / USA / New York / Nassau County      |
| EPI_ISL_536703 | 8/31/2020 | 9/16/2020 | North America / USA / Wisconsin / Dane County       |
| EPI_ISL_536704 | 8/29/2020 | 9/16/2020 | North America / USA / Wisconsin / Jefferson County  |
| EPI_ISL_536705 | 8/27/2020 | 9/16/2020 | North America / USA / Wisconsin / Dane County       |
| EPI_ISL_536706 | 8/30/2020 | 9/16/2020 | North America / USA / Wisconsin / Dane County       |
| EPI_ISL_536707 | 9/4/2020  | 9/16/2020 | North America / USA / Wisconsin / Jefferson County  |
| EPI_ISL_536708 | 9/4/2020  | 9/16/2020 | North America / USA / Wisconsin / Monroe County     |
| EPI_ISL_536709 | 9/8/2020  | 9/16/2020 | North America / USA / Wisconsin / Dane County       |
| EPI_ISL_536710 | 9/7/2020  | 9/16/2020 | North America / USA / Wisconsin / Dane County       |
| EPI_ISL_536711 | 9/8/2020  | 9/16/2020 | North America / USA / Wisconsin / Dane County       |
| EPI_ISL_536712 | 9/8/2020  | 9/16/2020 | North America / USA / Wisconsin / Dodge County      |
| EPI_ISL_536713 | 9/9/2020  | 9/16/2020 | North America / USA / Wisconsin / Dane County       |
| EPI_ISL_536714 | 9/9/2020  | 9/16/2020 | North America / USA / New York / New York County    |
| EPI_ISL_536715 | 9/9/2020  | 9/16/2020 | North America / USA / Wisconsin / Dane County       |
| EPI_ISL_536717 | 9/9/2020  | 9/16/2020 | North America / USA / Wisconsin / Dodge County      |
| EPI_ISL_536718 | 9/9/2020  | 9/16/2020 | North America / USA / Wisconsin / Dane County       |
| EPI_ISL_536719 | 9/8/2020  | 9/16/2020 | North America / USA / Wisconsin / Dane County       |
| EPI_ISL_536720 | 9/9/2020  | 9/16/2020 | North America / USA / Wisconsin / Dane County       |
| EPI_ISL_536721 | 9/8/2020  | 9/16/2020 | North America / USA / Wisconsin / Dane County       |
| EPI_ISL_536722 | 9/8/2020  | 9/16/2020 | North America / USA / New York / Westchester County |
| EPI_ISL_536723 | 9/9/2020  | 9/16/2020 | North America / USA / Wisconsin / Rock County       |
| EPI_ISL_536724 | 9/7/2020  | 9/16/2020 | North America / USA / Wisconsin / Dane County       |
| EPI_ISL_536725 | 9/9/2020  | 9/16/2020 | North America / USA / Wisconsin / Dane County       |
| EPI_ISL_536727 | 9/9/2020  | 9/16/2020 | North America / USA / Wisconsin / Dane County       |
| EPI_ISL_536728 | 9/8/2020  | 9/16/2020 | North America / USA / Wisconsin / Sauk County       |
| EPI_ISL_536729 | 9/8/2020  | 9/16/2020 | North America / USA / Wisconsin / Dane County       |
| EPI_ISL_536730 | 9/8/2020  | 9/16/2020 | North America / USA / Wisconsin / Dane County       |
| EPI_ISL_536731 | 9/9/2020  | 9/16/2020 | North America / USA / Wisconsin / Dane County       |
| EPI_ISL_536732 | 9/7/2020  | 9/16/2020 | North America / USA / Wisconsin / Dane County       |
| EPI_ISL_536733 | 9/7/2020  | 9/16/2020 | North America / USA / Wisconsin / Dane County       |
| EPI_ISL_536734 | 9/8/2020  | 9/16/2020 | North America / USA / Wisconsin / Dane County       |
| EPI_ISL_536735 | 9/8/2020  | 9/16/2020 | North America / USA / Wisconsin / Columbia County   |
| EPI_ISL_536736 | 9/6/2020  | 9/16/2020 | North America / USA / New Jersey / Morris County    |
| EPI_ISL_536737 | 9/7/2020  | 9/16/2020 | North America / USA / Wisconsin / Dane County       |
| EPI_ISL_536738 | 9/7/2020  | 9/16/2020 | North America / USA / Wisconsin / Columbia County   |
| EPI_ISL_536739 | 9/8/2020  | 9/16/2020 | North America / USA / Wisconsin / Dane County       |
| EPI_ISL_536740 | 9/8/2020  | 9/16/2020 | North America / USA / Wisconsin / Dane County       |
| EPI_ISL_536741 | 9/5/2020  | 9/16/2020 | North America / USA / Wisconsin / Dane County       |
| EPI_ISL_536742 | 9/6/2020  | 9/16/2020 | North America / USA / Wisconsin / Dane County       |
| EPI_ISL_536743 | 9/8/2020  | 9/16/2020 | North America / USA / Wisconsin / Rock County       |
| EPI_ISL_536744 | 9/6/2020  | 9/16/2020 | North America / USA / Wisconsin / Dane County       |
| EPI_ISL_536745 | 9/4/2020  | 9/16/2020 | North America / USA / Wisconsin / Dane County       |
| EPI_ISL_536746 | 9/5/2020  | 9/16/2020 | North America / USA / Wisconsin / Dane County       |



|                |           |                                                               |
|----------------|-----------|---------------------------------------------------------------|
| EPI_ISL_536747 | 9/6/2020  | 9/16/2020 North America / USA / Wisconsin / Lincoln County    |
| EPI_ISL_536748 | 9/6/2020  | 9/16/2020 North America / USA / Illinois / Winnebago County   |
| EPI_ISL_536749 | 9/8/2020  | 9/16/2020 North America / USA / Wisconsin / Dane County       |
| EPI_ISL_536750 | 9/4/2020  | 9/16/2020 North America / USA / Wisconsin / Dane County       |
| EPI_ISL_536752 | 9/6/2020  | 9/16/2020 North America / USA / New York / Putnam County      |
| EPI_ISL_536753 | 9/5/2020  | 9/16/2020 North America / USA / Wisconsin / Dane County       |
| EPI_ISL_536754 | 9/4/2020  | 9/16/2020 North America / USA / Wisconsin / Rock County       |
| EPI_ISL_536755 | 9/5/2020  | 9/16/2020 North America / USA / Wisconsin / Dane County       |
| EPI_ISL_536756 | 9/6/2020  | 9/16/2020 North America / USA / Wisconsin / Dane County       |
| EPI_ISL_536757 | 9/4/2020  | 9/16/2020 North America / USA / Wisconsin / Dodge County      |
| EPI_ISL_536758 | 9/5/2020  | 9/16/2020 North America / USA / Florida                       |
| EPI_ISL_536759 | 9/4/2020  | 9/16/2020 North America / USA / Wisconsin / Dane County       |
| EPI_ISL_536760 | 9/6/2020  | 9/16/2020 North America / USA / New York / New York County    |
| EPI_ISL_536761 | 9/7/2020  | 9/16/2020 North America / USA / Wisconsin / Dane County       |
| EPI_ISL_536762 | 9/6/2020  | 9/16/2020 North America / USA / Wisconsin / Dane County       |
| EPI_ISL_536763 | 9/7/2020  | 9/16/2020 North America / USA / Missouri / Saint Louis County |
| EPI_ISL_536764 | 9/4/2020  | 9/16/2020 North America / USA / Wisconsin / Dane County       |
| EPI_ISL_536765 | 9/3/2020  | 9/16/2020 North America / USA / Wisconsin / Columbia County   |
| EPI_ISL_536766 | 9/3/2020  | 9/16/2020 North America / USA / Wisconsin / Rock County       |
| EPI_ISL_536767 | 9/3/2020  | 9/16/2020 North America / USA / Wisconsin / Dane County       |
| EPI_ISL_536768 | 9/4/2020  | 9/16/2020 North America / USA / Wisconsin / Jefferson County  |
| EPI_ISL_536769 | 9/3/2020  | 9/16/2020 North America / USA / Wisconsin / Jefferson County  |
| EPI_ISL_536772 | 9/6/2020  | 9/16/2020 North America / USA / Wisconsin / Dane County       |
| EPI_ISL_536773 | 9/6/2020  | 9/16/2020 North America / USA / New York / New York County    |
| EPI_ISL_536774 | 9/7/2020  | 9/16/2020 North America / USA / Wisconsin / Dane County       |
| EPI_ISL_536775 | 9/9/2020  | 9/16/2020 North America / USA / Wisconsin / Dane County       |
| EPI_ISL_536776 | 9/3/2020  | 9/16/2020 North America / USA / Wisconsin / Sheboygan County  |
| EPI_ISL_536777 | 9/6/2020  | 9/16/2020 North America / USA / Wisconsin / Dane County       |
| EPI_ISL_536778 | 9/5/2020  | 9/16/2020 North America / USA / Wisconsin / Marathon County   |
| EPI_ISL_536779 | 9/3/2020  | 9/16/2020 North America / USA / Wisconsin / Dane County       |
| EPI_ISL_536780 | 9/6/2020  | 9/16/2020 North America / USA / Wisconsin / Dane County       |
| EPI_ISL_536781 | 9/4/2020  | 9/16/2020 North America / USA / Wisconsin / Dodge County      |
| EPI_ISL_536782 | 9/4/2020  | 9/16/2020 North America / USA / Wisconsin / Dane County       |
| EPI_ISL_536783 | 9/3/2020  | 9/16/2020 North America / USA / Wisconsin / Dane County       |
| EPI_ISL_536784 | 9/3/2020  | 9/16/2020 North America / USA / Wisconsin / Dane County       |
| EPI_ISL_536785 | 8/26/2020 | 9/16/2020 North America / USA / Wisconsin / Dane County       |
| EPI_ISL_536786 | 9/2/2020  | 9/16/2020 North America / USA / Wisconsin / Dane County       |
| EPI_ISL_536789 | 3/25/2020 | 9/16/2020 Oceania / New Zealand / Southern                    |
| EPI_ISL_536793 | 8/14/2020 | 9/16/2020 Asia / Hong Kong                                    |
| EPI_ISL_536819 | 8/11/2020 | 9/16/2020 Europe / United Kingdom / England                   |
| EPI_ISL_536820 | 8/13/2020 | 9/16/2020 Europe / United Kingdom / England                   |
| EPI_ISL_536821 | 8/12/2020 | 9/16/2020 Europe / United Kingdom / England                   |
| EPI_ISL_536822 | 8/13/2020 | 9/16/2020 Europe / United Kingdom / Northern Ireland          |
| EPI_ISL_536825 | 8/12/2020 | 9/16/2020 Europe / United Kingdom / England                   |
| EPI_ISL_536826 | 8/13/2020 | 9/16/2020 Europe / United Kingdom / England                   |
| EPI_ISL_536827 | 8/11/2020 | 9/16/2020 Europe / United Kingdom / Northern Ireland          |
| EPI_ISL_536828 | 8/11/2020 | 9/16/2020 Europe / United Kingdom / England                   |





|                |           |           |                                            |
|----------------|-----------|-----------|--------------------------------------------|
| EPI_ISL_536945 | 8/13/2020 | 9/16/2020 | Europe / United Kingdom / England          |
| EPI_ISL_536947 | 8/12/2020 | 9/16/2020 | Europe / United Kingdom / England          |
| EPI_ISL_536948 | 8/11/2020 | 9/16/2020 | Europe / United Kingdom / England          |
| EPI_ISL_536949 | 8/12/2020 | 9/16/2020 | Europe / United Kingdom / Northern Ireland |
| EPI_ISL_536950 | 8/12/2020 | 9/16/2020 | Europe / United Kingdom / England          |
| EPI_ISL_536952 | 8/11/2020 | 9/16/2020 | Europe / United Kingdom / England          |
| EPI_ISL_536953 | 8/13/2020 | 9/16/2020 | Europe / United Kingdom / England          |
| EPI_ISL_536954 | 8/11/2020 | 9/16/2020 | Europe / United Kingdom / England          |
| EPI_ISL_536958 | 8/15/2020 | 9/16/2020 | Europe / United Kingdom / England          |
| EPI_ISL_536959 | 8/11/2020 | 9/16/2020 | Europe / United Kingdom / England          |
| EPI_ISL_536960 | 8/12/2020 | 9/16/2020 | Europe / United Kingdom / England          |
| EPI_ISL_536961 | 8/11/2020 | 9/16/2020 | Europe / United Kingdom / England          |
| EPI_ISL_536962 | 7/31/2020 | 9/16/2020 | Europe / United Kingdom / England          |
| EPI_ISL_536963 | 8/9/2020  | 9/16/2020 | Europe / United Kingdom / England          |
| EPI_ISL_536964 | 8/1/2020  | 9/16/2020 | Europe / United Kingdom / England          |
| EPI_ISL_536966 | 8/5/2020  | 9/16/2020 | Europe / United Kingdom / England          |
| EPI_ISL_536967 | 7/31/2020 | 9/16/2020 | Europe / United Kingdom / England          |
| EPI_ISL_536968 | 8/3/2020  | 9/16/2020 | Europe / United Kingdom / England          |
| EPI_ISL_536969 | 8/8/2020  | 9/16/2020 | Europe / United Kingdom / England          |
| EPI_ISL_536970 | 8/7/2020  | 9/16/2020 | Europe / United Kingdom / England          |
| EPI_ISL_536971 | 8/7/2020  | 9/16/2020 | Europe / United Kingdom / England          |
| EPI_ISL_536972 | 7/29/2020 | 9/16/2020 | Europe / United Kingdom / England          |
| EPI_ISL_536973 | 8/3/2020  | 9/16/2020 | Europe / United Kingdom / England          |
| EPI_ISL_536974 | 8/7/2020  | 9/16/2020 | Europe / United Kingdom / England          |
| EPI_ISL_536975 | 8/2/2020  | 9/16/2020 | Europe / United Kingdom / England          |
| EPI_ISL_536976 | 8/2/2020  | 9/16/2020 | Europe / United Kingdom / England          |
| EPI_ISL_536977 | 8/3/2020  | 9/16/2020 | Europe / United Kingdom / Northern Ireland |
| EPI_ISL_536978 | 7/28/2020 | 9/16/2020 | Europe / United Kingdom / England          |
| EPI_ISL_536979 | 8/3/2020  | 9/16/2020 | Europe / United Kingdom / England          |
| EPI_ISL_536980 | 7/31/2020 | 9/16/2020 | Europe / United Kingdom / England          |
| EPI_ISL_536981 | 8/1/2020  | 9/16/2020 | Europe / United Kingdom / England          |
| EPI_ISL_536982 | 8/7/2020  | 9/16/2020 | Europe / United Kingdom / England          |
| EPI_ISL_536983 | 8/7/2020  | 9/16/2020 | Europe / United Kingdom / England          |
| EPI_ISL_536984 | 8/3/2020  | 9/16/2020 | Europe / United Kingdom / England          |
| EPI_ISL_536985 | 8/1/2020  | 9/16/2020 | Europe / United Kingdom / England          |
| EPI_ISL_536986 | 8/2/2020  | 9/16/2020 | Europe / United Kingdom / England          |
| EPI_ISL_536987 | 8/7/2020  | 9/16/2020 | Europe / United Kingdom / England          |
| EPI_ISL_536988 | 8/1/2020  | 9/16/2020 | Europe / United Kingdom / England          |
| EPI_ISL_536989 | 7/30/2020 | 9/16/2020 | Europe / United Kingdom / England          |
| EPI_ISL_536990 | 8/8/2020  | 9/16/2020 | Europe / United Kingdom / England          |
| EPI_ISL_536991 | 8/10/2020 | 9/16/2020 | Europe / United Kingdom / England          |
| EPI_ISL_536993 | 8/2/2020  | 9/16/2020 | Europe / United Kingdom / Northern Ireland |
| EPI_ISL_536994 | 8/2/2020  | 9/16/2020 | Europe / United Kingdom / Northern Ireland |
| EPI_ISL_536996 | 8/5/2020  | 9/16/2020 | Europe / United Kingdom / England          |
| EPI_ISL_536997 | 7/31/2020 | 9/16/2020 | Europe / United Kingdom / England          |
| EPI_ISL_536998 | 7/31/2020 | 9/16/2020 | Europe / United Kingdom / England          |
| EPI_ISL_536999 | 7/31/2020 | 9/16/2020 | Europe / United Kingdom / England          |

|                |           |           |                                            |
|----------------|-----------|-----------|--------------------------------------------|
| EPI_ISL_537000 | 8/7/2020  | 9/16/2020 | Europe / United Kingdom / England          |
| EPI_ISL_537001 | 8/8/2020  | 9/16/2020 | Europe / United Kingdom / England          |
| EPI_ISL_537002 | 7/30/2020 | 9/16/2020 | Europe / United Kingdom / England          |
| EPI_ISL_537003 | 8/7/2020  | 9/16/2020 | Europe / United Kingdom / England          |
| EPI_ISL_537004 | 8/10/2020 | 9/16/2020 | Europe / United Kingdom / England          |
| EPI_ISL_537005 | 8/10/2020 | 9/16/2020 | Europe / United Kingdom / England          |
| EPI_ISL_537006 | 8/8/2020  | 9/16/2020 | Europe / United Kingdom / England          |
| EPI_ISL_537007 | 7/30/2020 | 9/16/2020 | Europe / United Kingdom / England          |
| EPI_ISL_537008 | 8/8/2020  | 9/16/2020 | Europe / United Kingdom / England          |
| EPI_ISL_537009 | 8/3/2020  | 9/16/2020 | Europe / United Kingdom / England          |
| EPI_ISL_537010 | 8/3/2020  | 9/16/2020 | Europe / United Kingdom / England          |
| EPI_ISL_537011 | 8/10/2020 | 9/16/2020 | Europe / United Kingdom / England          |
| EPI_ISL_537012 | 8/2/2020  | 9/16/2020 | Europe / United Kingdom / England          |
| EPI_ISL_537013 | 8/1/2020  | 9/16/2020 | Europe / United Kingdom / England          |
| EPI_ISL_537014 | 8/10/2020 | 9/16/2020 | Europe / United Kingdom / England          |
| EPI_ISL_537015 | 8/8/2020  | 9/16/2020 | Europe / United Kingdom / England          |
| EPI_ISL_537016 | 8/3/2020  | 9/16/2020 | Europe / United Kingdom / Wales            |
| EPI_ISL_537018 | 8/3/2020  | 9/16/2020 | Europe / United Kingdom / England          |
| EPI_ISL_537019 | 8/7/2020  | 9/16/2020 | Europe / United Kingdom / England          |
| EPI_ISL_537021 | 8/8/2020  | 9/16/2020 | Europe / United Kingdom / England          |
| EPI_ISL_537022 | 8/7/2020  | 9/16/2020 | Europe / United Kingdom / England          |
| EPI_ISL_537023 | 8/8/2020  | 9/16/2020 | Europe / United Kingdom / England          |
| EPI_ISL_537024 | 8/3/2020  | 9/16/2020 | Europe / United Kingdom / Northern Ireland |
| EPI_ISL_537025 | 8/1/2020  | 9/16/2020 | Europe / United Kingdom / England          |
| EPI_ISL_537026 | 8/2/2020  | 9/16/2020 | Europe / United Kingdom / England          |
| EPI_ISL_537027 | 7/31/2020 | 9/16/2020 | Europe / United Kingdom / England          |
| EPI_ISL_537028 | 8/3/2020  | 9/16/2020 | Europe / United Kingdom / Northern Ireland |
| EPI_ISL_537029 | 8/3/2020  | 9/16/2020 | Europe / United Kingdom / England          |
| EPI_ISL_537030 | 8/1/2020  | 9/16/2020 | Europe / United Kingdom / England          |
| EPI_ISL_537031 | 8/1/2020  | 9/16/2020 | Europe / United Kingdom / England          |
| EPI_ISL_537032 | 8/2/2020  | 9/16/2020 | Europe / United Kingdom / England          |
| EPI_ISL_537033 | 7/31/2020 | 9/16/2020 | Europe / United Kingdom / England          |
| EPI_ISL_537034 | 8/2/2020  | 9/16/2020 | Europe / United Kingdom / England          |
| EPI_ISL_537036 | 8/7/2020  | 9/16/2020 | Europe / United Kingdom / England          |
| EPI_ISL_537037 | 8/7/2020  | 9/16/2020 | Europe / United Kingdom / England          |
| EPI_ISL_537038 | 8/3/2020  | 9/16/2020 | Europe / United Kingdom / England          |
| EPI_ISL_537039 | 8/2/2020  | 9/16/2020 | Europe / United Kingdom / England          |
| EPI_ISL_537042 | 8/8/2020  | 9/16/2020 | Europe / United Kingdom / England          |
| EPI_ISL_537043 | 8/8/2020  | 9/16/2020 | Europe / United Kingdom / England          |
| EPI_ISL_537044 | 8/8/2020  | 9/16/2020 | Europe / United Kingdom / England          |
| EPI_ISL_537048 | 8/10/2020 | 9/16/2020 | Europe / United Kingdom / England          |
| EPI_ISL_537049 | 8/3/2020  | 9/16/2020 | Europe / United Kingdom / England          |
| EPI_ISL_537050 | 8/2/2020  | 9/16/2020 | Europe / United Kingdom / England          |
| EPI_ISL_537051 | 8/6/2020  | 9/16/2020 | Europe / United Kingdom / England          |
| EPI_ISL_537052 | 8/6/2020  | 9/16/2020 | Europe / United Kingdom / England          |
| EPI_ISL_537053 | 8/7/2020  | 9/16/2020 | Europe / United Kingdom / England          |
| EPI_ISL_537055 | 8/3/2020  | 9/16/2020 | Europe / United Kingdom / England          |

|                |           |           |                                            |
|----------------|-----------|-----------|--------------------------------------------|
| EPI_ISL_537056 | 8/3/2020  | 9/16/2020 | Europe / United Kingdom / England          |
| EPI_ISL_537057 | 8/2/2020  | 9/16/2020 | Europe / United Kingdom / England          |
| EPI_ISL_537058 | 8/7/2020  | 9/16/2020 | Europe / United Kingdom / England          |
| EPI_ISL_537059 | 7/31/2020 | 9/16/2020 | Europe / United Kingdom / England          |
| EPI_ISL_537060 | 8/2/2020  | 9/16/2020 | Europe / United Kingdom / England          |
| EPI_ISL_537062 | 8/2/2020  | 9/16/2020 | Europe / United Kingdom / England          |
| EPI_ISL_537064 | 8/3/2020  | 9/16/2020 | Europe / United Kingdom / England          |
| EPI_ISL_537065 | 8/2/2020  | 9/16/2020 | Europe / United Kingdom / Northern Ireland |
| EPI_ISL_537066 | 8/2/2020  | 9/16/2020 | Europe / United Kingdom / Northern Ireland |
| EPI_ISL_537067 | 8/7/2020  | 9/16/2020 | Europe / United Kingdom / England          |
| EPI_ISL_537068 | 8/7/2020  | 9/16/2020 | Europe / United Kingdom / England          |
| EPI_ISL_537069 | 8/3/2020  | 9/16/2020 | Europe / United Kingdom / England          |
| EPI_ISL_537070 | 7/30/2020 | 9/16/2020 | Europe / United Kingdom / England          |
| EPI_ISL_537071 | 8/10/2020 | 9/16/2020 | Europe / United Kingdom / England          |
| EPI_ISL_537072 | 8/2/2020  | 9/16/2020 | Europe / United Kingdom / England          |
| EPI_ISL_537073 | 8/6/2020  | 9/16/2020 | Europe / United Kingdom / England          |
| EPI_ISL_537075 | 8/1/2020  | 9/16/2020 | Europe / United Kingdom / England          |
| EPI_ISL_537076 | 8/7/2020  | 9/16/2020 | Europe / United Kingdom / England          |
| EPI_ISL_537078 | 8/7/2020  | 9/16/2020 | Europe / United Kingdom / England          |
| EPI_ISL_537079 | 8/2/2020  | 9/16/2020 | Europe / United Kingdom / England          |
| EPI_ISL_537080 | 8/3/2020  | 9/16/2020 | Europe / United Kingdom / England          |
| EPI_ISL_537081 | 7/30/2020 | 9/16/2020 | Europe / United Kingdom / England          |
| EPI_ISL_537082 | 8/6/2020  | 9/16/2020 | Europe / United Kingdom / England          |
| EPI_ISL_537083 | 8/5/2020  | 9/16/2020 | Europe / United Kingdom / England          |
| EPI_ISL_537084 | 8/1/2020  | 9/16/2020 | Europe / United Kingdom / England          |
| EPI_ISL_537085 | 8/4/2020  | 9/16/2020 | Europe / United Kingdom / England          |
| EPI_ISL_537086 | 8/7/2020  | 9/16/2020 | Europe / United Kingdom / England          |
| EPI_ISL_537087 | 8/7/2020  | 9/16/2020 | Europe / United Kingdom / England          |
| EPI_ISL_537088 | 8/7/2020  | 9/16/2020 | Europe / United Kingdom / England          |
| EPI_ISL_537089 | 7/31/2020 | 9/16/2020 | Europe / United Kingdom / England          |
| EPI_ISL_537090 | 8/7/2020  | 9/16/2020 | Europe / United Kingdom / England          |
| EPI_ISL_537091 | 8/8/2020  | 9/16/2020 | Europe / United Kingdom / England          |
| EPI_ISL_537092 | 8/1/2020  | 9/16/2020 | Europe / United Kingdom / England          |
| EPI_ISL_537093 | 8/1/2020  | 9/16/2020 | Europe / United Kingdom / Wales            |
| EPI_ISL_537094 | 8/2/2020  | 9/16/2020 | Europe / United Kingdom / Northern Ireland |
| EPI_ISL_537095 | 8/7/2020  | 9/16/2020 | Europe / United Kingdom / England          |
| EPI_ISL_537096 | 8/2/2020  | 9/16/2020 | Europe / United Kingdom / Northern Ireland |
| EPI_ISL_537097 | 8/1/2020  | 9/16/2020 | Europe / United Kingdom / England          |
| EPI_ISL_537098 | 8/10/2020 | 9/16/2020 | Europe / United Kingdom / England          |
| EPI_ISL_537099 | 8/5/2020  | 9/16/2020 | Europe / United Kingdom / England          |
| EPI_ISL_537100 | 8/2/2020  | 9/16/2020 | Europe / United Kingdom / England          |
| EPI_ISL_537101 | 8/7/2020  | 9/16/2020 | Europe / United Kingdom / England          |
| EPI_ISL_537102 | 8/2/2020  | 9/16/2020 | Europe / United Kingdom / Northern Ireland |
| EPI_ISL_537103 | 7/31/2020 | 9/16/2020 | Europe / United Kingdom / England          |
| EPI_ISL_537104 | 7/30/2020 | 9/16/2020 | Europe / United Kingdom / England          |
| EPI_ISL_537105 | 8/3/2020  | 9/16/2020 | Europe / United Kingdom / England          |
| EPI_ISL_537106 | 8/2/2020  | 9/16/2020 | Europe / United Kingdom / England          |







|                |           |           |                                         |
|----------------|-----------|-----------|-----------------------------------------|
| EPI_ISL_537223 | 5/2/2020  | 9/16/2020 | Europe / United Kingdom / England       |
| EPI_ISL_537224 | 5/5/2020  | 9/16/2020 | Europe / United Kingdom / England       |
| EPI_ISL_537225 | 5/16/2020 | 9/16/2020 | Europe / United Kingdom / England       |
| EPI_ISL_537226 | 6/3/2020  | 9/16/2020 | Europe / United Kingdom / England       |
| EPI_ISL_537227 | 5/4/2020  | 9/16/2020 | Europe / United Kingdom / England       |
| EPI_ISL_537229 | 5/3/2020  | 9/16/2020 | Europe / United Kingdom / England       |
| EPI_ISL_537230 | 5/16/2020 | 9/16/2020 | Europe / United Kingdom / England       |
| EPI_ISL_537231 | 5/2/2020  | 9/16/2020 | Europe / United Kingdom / England       |
| EPI_ISL_537237 | 5/16/2020 | 9/16/2020 | Europe / United Kingdom / England       |
| EPI_ISL_537238 | 5/15/2020 | 9/16/2020 | Europe / United Kingdom / England       |
| EPI_ISL_537239 | 5/16/2020 | 9/16/2020 | Europe / United Kingdom / England       |
| EPI_ISL_537241 | 5/12/2020 | 9/16/2020 | Europe / United Kingdom / England       |
| EPI_ISL_537243 | 6/2/2020  | 9/16/2020 | Europe / United Kingdom / England       |
| EPI_ISL_537244 | 5/11/2020 | 9/16/2020 | Europe / United Kingdom / England       |
| EPI_ISL_537246 | 5/5/2020  | 9/16/2020 | Europe / United Kingdom / England       |
| EPI_ISL_537248 | 5/16/2020 | 9/16/2020 | Europe / United Kingdom / England       |
| EPI_ISL_537249 | 5/11/2020 | 9/16/2020 | Europe / United Kingdom / England       |
| EPI_ISL_537251 | 5/16/2020 | 9/16/2020 | Europe / United Kingdom / England       |
| EPI_ISL_537252 | 6/2/2020  | 9/16/2020 | Europe / United Kingdom / England       |
| EPI_ISL_537253 | 5/16/2020 | 9/16/2020 | Europe / United Kingdom / England       |
| EPI_ISL_537255 | 5/16/2020 | 9/16/2020 | Europe / United Kingdom / England       |
| EPI_ISL_537256 | 5/4/2020  | 9/16/2020 | Europe / United Kingdom / England       |
| EPI_ISL_537257 | 5/25/2020 | 9/16/2020 | Europe / United Kingdom / England       |
| EPI_ISL_537258 | 6/13/2020 | 9/16/2020 | Europe / United Kingdom / England       |
| EPI_ISL_537259 | 5/24/2020 | 9/16/2020 | Europe / United Kingdom / England       |
| EPI_ISL_537261 | 5/16/2020 | 9/16/2020 | Europe / United Kingdom / England       |
| EPI_ISL_537263 | 5/11/2020 | 9/16/2020 | Europe / United Kingdom / England       |
| EPI_ISL_537264 | 5/16/2020 | 9/16/2020 | Europe / United Kingdom / England       |
| EPI_ISL_537265 | 5/16/2020 | 9/16/2020 | Europe / United Kingdom / England       |
| EPI_ISL_537266 | 5/21/2020 | 9/16/2020 | Europe / United Kingdom / England       |
| EPI_ISL_537267 | 5/20/2020 | 9/16/2020 | Europe / United Kingdom / England       |
| EPI_ISL_537269 | 5/15/2020 | 9/16/2020 | Europe / United Kingdom / England       |
| EPI_ISL_537270 | 5/26/2020 | 9/16/2020 | Europe / United Kingdom / England       |
| EPI_ISL_537272 | 5/11/2020 | 9/16/2020 | Europe / United Kingdom / England       |
| EPI_ISL_537273 | 5/3/2020  | 9/16/2020 | Europe / United Kingdom / England       |
| EPI_ISL_537274 | 5/4/2020  | 9/16/2020 | Europe / United Kingdom / England       |
| EPI_ISL_537275 | 4/28/2020 | 9/16/2020 | Europe / United Kingdom / England       |
| EPI_ISL_537277 | 4/29/2020 | 9/16/2020 | Europe / United Kingdom / England       |
| EPI_ISL_537280 | 4/29/2020 | 9/16/2020 | Europe / United Kingdom / England       |
| EPI_ISL_537282 | 4/28/2020 | 9/16/2020 | Europe / United Kingdom / England       |
| EPI_ISL_537283 | 4/27/2020 | 9/16/2020 | Europe / United Kingdom / England       |
| EPI_ISL_537284 | 4/28/2020 | 9/16/2020 | Europe / United Kingdom / England       |
| EPI_ISL_537286 | 9/8/2020  | 9/16/2020 | Oceania / Australia / New South Wales   |
| EPI_ISL_537287 | 9/9/2020  | 9/16/2020 | Oceania / Australia / New South Wales   |
| EPI_ISL_537288 | 3/31/2020 | 9/16/2020 | Europe / Spain / Castilla y Leon / Leon |
| EPI_ISL_537289 | 3/31/2020 | 9/16/2020 | Europe / Spain / Castilla y Leon / Leon |
| EPI_ISL_537290 | 4/1/2020  | 9/16/2020 | Europe / Spain / Castilla y Leon / Leon |











|                |           |                                                                |
|----------------|-----------|----------------------------------------------------------------|
| EPI_ISL_537645 | 4/21/2020 | 9/16/2020 Europe / Spain / Castilla y Leon / Leon              |
| EPI_ISL_537646 | 4/21/2020 | 9/16/2020 Europe / Spain / Castilla y Leon / Leon              |
| EPI_ISL_537651 | 4/21/2020 | 9/16/2020 Europe / Spain / Castilla y Leon / Leon              |
| EPI_ISL_537652 | 4/21/2020 | 9/16/2020 Europe / Spain / Castilla y Leon / Leon              |
| EPI_ISL_537663 | 4/21/2020 | 9/16/2020 Europe / Spain / Castilla y Leon / Leon              |
| EPI_ISL_537676 | 4/25/2020 | 9/16/2020 Europe / Spain / Castilla y Leon / Leon              |
| EPI_ISL_537693 | 3/24/2020 | 9/16/2020 Africa / Canary Islands / Las Palmas de Gran Canaria |
| EPI_ISL_537697 | 3/25/2020 | 9/16/2020 Africa / Canary Islands / Las Palmas de Gran Canaria |
| EPI_ISL_537700 | 3/25/2020 | 9/16/2020 Africa / Canary Islands / Las Palmas de Gran Canaria |
| EPI_ISL_537703 | 3/25/2020 | 9/16/2020 Africa / Canary Islands / Las Palmas de Gran Canaria |
| EPI_ISL_537706 | 3/27/2020 | 9/16/2020 Africa / Canary Islands / Las Palmas de Gran Canaria |
| EPI_ISL_537708 | 3/27/2020 | 9/16/2020 Africa / Canary Islands / Las Palmas de Gran Canaria |
| EPI_ISL_537709 | 3/27/2020 | 9/16/2020 Africa / Canary Islands / Las Palmas de Gran Canaria |
| EPI_ISL_537713 | 3/29/2020 | 9/16/2020 Africa / Canary Islands / Las Palmas de Gran Canaria |
| EPI_ISL_537715 | 3/30/2020 | 9/16/2020 Africa / Canary Islands / Las Palmas de Gran Canaria |
| EPI_ISL_537716 | 3/30/2020 | 9/16/2020 Africa / Canary Islands / Las Palmas de Gran Canaria |
| EPI_ISL_537718 | 3/30/2020 | 9/16/2020 Africa / Canary Islands / Las Palmas de Gran Canaria |
| EPI_ISL_537720 | 4/2/2020  | 9/16/2020 Africa / Canary Islands / Las Palmas de Gran Canaria |
| EPI_ISL_537721 | 4/2/2020  | 9/16/2020 Africa / Canary Islands / Las Palmas de Gran Canaria |
| EPI_ISL_537724 | 4/5/2020  | 9/16/2020 Africa / Canary Islands / Las Palmas de Gran Canaria |
| EPI_ISL_537809 | 3/22/2020 | 9/16/2020 Europe / Spain / Cantabria / Santander               |
| EPI_ISL_537810 | 3/22/2020 | 9/16/2020 Europe / Spain / Cantabria / Santander               |
| EPI_ISL_537811 | 3/3/2020  | 9/16/2020 Europe / Spain / La Rioja / Logrono                  |
| EPI_ISL_537822 | 3/7/2020  | 9/16/2020 Europe / Spain / La Rioja / Logrono                  |
| EPI_ISL_537828 | 3/10/2020 | 9/16/2020 Europe / Spain / La Rioja / Logrono                  |
| EPI_ISL_537829 | 3/10/2020 | 9/16/2020 Europe / Spain / La Rioja / Logrono                  |
| EPI_ISL_537831 | 3/10/2020 | 9/16/2020 Europe / Spain / La Rioja / Logrono                  |
| EPI_ISL_537836 | 3/12/2020 | 9/16/2020 Europe / Spain / La Rioja / Logrono                  |
| EPI_ISL_537837 | 3/12/2020 | 9/16/2020 Europe / Spain / La Rioja / Logrono                  |
| EPI_ISL_537838 | 3/19/2020 | 9/16/2020 Europe / Spain / La Rioja / Logrono                  |
| EPI_ISL_537839 | 3/20/2020 | 9/16/2020 Europe / Spain / La Rioja / Logrono                  |
| EPI_ISL_537840 | 3/20/2020 | 9/16/2020 Europe / Spain / La Rioja / Logrono                  |
| EPI_ISL_537841 | 3/21/2020 | 9/16/2020 Europe / Spain / La Rioja / Logrono                  |
| EPI_ISL_537842 | 3/21/2020 | 9/16/2020 Europe / Spain / La Rioja / Logrono                  |
| EPI_ISL_537844 | 3/22/2020 | 9/16/2020 Europe / Spain / La Rioja / Logrono                  |
| EPI_ISL_537845 | 3/24/2020 | 9/16/2020 Europe / Spain / La Rioja / Logrono                  |
| EPI_ISL_537847 | 3/25/2020 | 9/16/2020 Europe / Spain / La Rioja / Logrono                  |
| EPI_ISL_537849 | 3/26/2020 | 9/16/2020 Europe / Spain / La Rioja / Logrono                  |
| EPI_ISL_537850 | 3/26/2020 | 9/16/2020 Europe / Spain / La Rioja / Logrono                  |
| EPI_ISL_537852 | 3/27/2020 | 9/16/2020 Europe / Spain / La Rioja / Logrono                  |
| EPI_ISL_537853 | 3/28/2020 | 9/16/2020 Europe / Spain / La Rioja / Logrono                  |
| EPI_ISL_537855 | 3/29/2020 | 9/16/2020 Europe / Spain / La Rioja / Logrono                  |
| EPI_ISL_537856 | 3/29/2020 | 9/16/2020 Europe / Spain / La Rioja / Logrono                  |
| EPI_ISL_537857 | 3/31/2020 | 9/16/2020 Europe / Spain / La Rioja / Logrono                  |
| EPI_ISL_537858 | 4/1/2020  | 9/16/2020 Europe / Spain / La Rioja / Logrono                  |
| EPI_ISL_537859 | 4/3/2020  | 9/16/2020 Europe / Spain / La Rioja / Logrono                  |
| EPI_ISL_537863 | 3/11/2020 | 9/16/2020 Europe / Spain / La Rioja / Logrono                  |





|                |           |           |                                              |
|----------------|-----------|-----------|----------------------------------------------|
| EPI_ISL_538123 | 4/7/2020  | 9/16/2020 | Europe / Spain / Andalusia / Sevilla         |
| EPI_ISL_538124 | 4/6/2020  | 9/16/2020 | Europe / Spain / Andalusia / Sevilla         |
| EPI_ISL_538125 | 4/5/2020  | 9/16/2020 | Europe / Spain / Andalusia / Sevilla         |
| EPI_ISL_538127 | 4/12/2020 | 9/16/2020 | Europe / Spain / Andalusia / Sevilla         |
| EPI_ISL_538128 | 4/9/2020  | 9/16/2020 | Europe / Spain / Andalusia / Sevilla         |
| EPI_ISL_538129 | 4/13/2020 | 9/16/2020 | Europe / Spain / Andalusia / Sevilla         |
| EPI_ISL_538131 | 4/13/2020 | 9/16/2020 | Europe / Spain / Andalusia / Sevilla         |
| EPI_ISL_538134 | 4/11/2020 | 9/16/2020 | Europe / Spain / Andalusia / Sevilla         |
| EPI_ISL_538135 | 4/12/2020 | 9/16/2020 | Europe / Spain / Andalusia / Sevilla         |
| EPI_ISL_538137 | 4/10/2020 | 9/16/2020 | Europe / Spain / Andalusia / Sevilla         |
| EPI_ISL_538141 | 4/12/2020 | 9/16/2020 | Europe / Spain / Andalusia / Sevilla         |
| EPI_ISL_538147 | 4/10/2020 | 9/16/2020 | Europe / Spain / Andalusia / Sevilla         |
| EPI_ISL_538150 | 4/2/2020  | 9/16/2020 | Europe / Spain / Andalusia / Sevilla         |
| EPI_ISL_538151 | 4/2/2020  | 9/16/2020 | Europe / Spain / Andalusia / Sevilla         |
| EPI_ISL_538152 | 4/2/2020  | 9/16/2020 | Europe / Spain / Andalusia / Sevilla         |
| EPI_ISL_538153 | 4/4/2020  | 9/16/2020 | Europe / Spain / Andalusia / Sevilla         |
| EPI_ISL_538154 | 4/4/2020  | 9/16/2020 | Europe / Spain / Andalusia / Sevilla         |
| EPI_ISL_538156 | 4/4/2020  | 9/16/2020 | Europe / Spain / Andalusia / Sevilla         |
| EPI_ISL_538157 | 4/4/2020  | 9/16/2020 | Europe / Spain / Andalusia / Sevilla         |
| EPI_ISL_538160 | 4/1/2020  | 9/16/2020 | Europe / Spain / Andalusia / Sevilla         |
| EPI_ISL_538161 | 4/2/2020  | 9/16/2020 | Europe / Spain / Andalusia / Sevilla         |
| EPI_ISL_538162 | 4/3/2020  | 9/16/2020 | Europe / Spain / Andalusia / Sevilla         |
| EPI_ISL_538163 | 4/1/2020  | 9/16/2020 | Europe / Spain / Andalusia / Sevilla         |
| EPI_ISL_538165 | 4/2/2020  | 9/16/2020 | Europe / Spain / Andalusia / Sevilla         |
| EPI_ISL_538167 | 4/1/2020  | 9/16/2020 | Europe / Spain / Andalusia / Sevilla         |
| EPI_ISL_538265 | 3/11/2020 | 9/16/2020 | North America / USA / Maryland               |
| EPI_ISL_538266 | 3/11/2020 | 9/16/2020 | North America / USA / Maryland               |
| EPI_ISL_538267 | 3/8/2020  | 9/16/2020 | North America / USA / Maryland               |
| EPI_ISL_538268 | 3/9/2020  | 9/16/2020 | North America / USA / Maryland               |
| EPI_ISL_538269 | 6/6/2020  | 9/16/2020 | North America / USA / Maryland               |
| EPI_ISL_538270 | 6/5/2020  | 9/16/2020 | North America / USA / Maryland               |
| EPI_ISL_538271 | 6/5/2020  | 9/16/2020 | North America / USA / Maryland               |
| EPI_ISL_538272 | 6/5/2020  | 9/16/2020 | North America / USA / Maryland               |
| EPI_ISL_538273 | 6/5/2020  | 9/16/2020 | North America / USA / Maryland               |
| EPI_ISL_538274 | 6/5/2020  | 9/16/2020 | North America / USA / Maryland               |
| EPI_ISL_538280 | 6/13/2020 | 9/16/2020 | North America / USA / Texas / Harris County  |
| EPI_ISL_538307 | 6/14/2020 | 9/16/2020 | North America / USA / Texas / El Paso County |
| EPI_ISL_538321 | 3/25/2020 | 9/16/2020 | North America / Canada / Ontario             |
| EPI_ISL_538322 | 3/25/2020 | 9/16/2020 | North America / Canada / Ontario             |
| EPI_ISL_538323 | 3/25/2020 | 9/16/2020 | North America / Canada / Ontario             |
| EPI_ISL_538324 | 3/25/2020 | 9/16/2020 | North America / Canada / Ontario             |
| EPI_ISL_538325 | 3/25/2020 | 9/16/2020 | North America / Canada / Ontario             |
| EPI_ISL_538326 | 3/26/2020 | 9/16/2020 | North America / Canada / Ontario             |
| EPI_ISL_538327 | 3/27/2020 | 9/16/2020 | North America / Canada / Ontario             |
| EPI_ISL_538328 | 3/28/2020 | 9/16/2020 | North America / Canada / Ontario             |
| EPI_ISL_538329 | 3/28/2020 | 9/16/2020 | North America / Canada / Ontario             |
| EPI_ISL_538330 | 3/28/2020 | 9/16/2020 | North America / Canada / Ontario             |



|                |           |                                            |
|----------------|-----------|--------------------------------------------|
| EPI_ISL_538385 | 4/10/2020 | 9/16/2020 North America / Canada / Ontario |
| EPI_ISL_538386 | 4/11/2020 | 9/16/2020 North America / Canada / Ontario |
| EPI_ISL_539333 | 1/17/2020 | 9/16/2020 Asia / China / Hunan / Huaihua   |
| EPI_ISL_539334 | 1/25/2020 | 9/16/2020 Asia / China / Hunan / Huaihua   |
| EPI_ISL_539335 | 1/28/2020 | 9/16/2020 Asia / China / Hunan / Huaihua   |
| EPI_ISL_539336 | 1/27/2020 | 9/16/2020 Asia / China / Hunan / Shaoyang  |
| EPI_ISL_539337 | 1/26/2020 | 9/16/2020 Asia / China / Hunan / Shaoyang  |
| EPI_ISL_539338 | 1/29/2020 | 9/16/2020 Asia / China / Hunan / Shaoyang  |
| EPI_ISL_539339 | 1/29/2020 | 9/16/2020 Asia / China / Hunan / Shaoyang  |
| EPI_ISL_538435 | 2/16/2020 | 9/17/2020 Asia / Singapore                 |
| EPI_ISL_538436 | 2/20/2020 | 9/17/2020 Asia / Singapore                 |
| EPI_ISL_538437 | 3/16/2020 | 9/17/2020 Asia / Singapore                 |
| EPI_ISL_538438 | 3/16/2020 | 9/17/2020 Asia / Singapore                 |
| EPI_ISL_538439 | 3/17/2020 | 9/17/2020 Asia / Singapore                 |
| EPI_ISL_538440 | 3/18/2020 | 9/17/2020 Asia / Singapore                 |
| EPI_ISL_538441 | 3/20/2020 | 9/17/2020 Asia / Singapore                 |
| EPI_ISL_538442 | 3/20/2020 | 9/17/2020 Asia / Singapore                 |
| EPI_ISL_538443 | 3/21/2020 | 9/17/2020 Asia / Singapore                 |
| EPI_ISL_538444 | 3/24/2020 | 9/17/2020 Asia / Singapore                 |
| EPI_ISL_538445 | 4/9/2020  | 9/17/2020 Asia / Singapore                 |
| EPI_ISL_538446 | 3/6/2020  | 9/17/2020 Asia / Singapore                 |
| EPI_ISL_538447 | 3/16/2020 | 9/17/2020 Asia / Singapore                 |
| EPI_ISL_538448 | 3/17/2020 | 9/17/2020 Asia / Singapore                 |
| EPI_ISL_538449 | 3/20/2020 | 9/17/2020 Asia / Singapore                 |
| EPI_ISL_538450 | 3/21/2020 | 9/17/2020 Asia / Singapore                 |
| EPI_ISL_538451 | 3/22/2020 | 9/17/2020 Asia / Singapore                 |
| EPI_ISL_538452 | 3/23/2020 | 9/17/2020 Asia / Singapore                 |
| EPI_ISL_538453 | 3/24/2020 | 9/17/2020 Asia / Singapore                 |
| EPI_ISL_538454 | 3/24/2020 | 9/17/2020 Asia / Singapore                 |
| EPI_ISL_538455 | 3/25/2020 | 9/17/2020 Asia / Singapore                 |
| EPI_ISL_538456 | 3/25/2020 | 9/17/2020 Asia / Singapore                 |
| EPI_ISL_538457 | 3/25/2020 | 9/17/2020 Asia / Singapore                 |
| EPI_ISL_538458 | 3/26/2020 | 9/17/2020 Asia / Singapore                 |
| EPI_ISL_538459 | 3/26/2020 | 9/17/2020 Asia / Singapore                 |
| EPI_ISL_538460 | 3/28/2020 | 9/17/2020 Asia / Singapore                 |
| EPI_ISL_538461 | 3/28/2020 | 9/17/2020 Asia / Singapore                 |
| EPI_ISL_538462 | 3/29/2020 | 9/17/2020 Asia / Singapore                 |
| EPI_ISL_538463 | 3/29/2020 | 9/17/2020 Asia / Singapore                 |
| EPI_ISL_538464 | 3/29/2020 | 9/17/2020 Asia / Singapore                 |
| EPI_ISL_538465 | 3/31/2020 | 9/17/2020 Asia / Singapore                 |
| EPI_ISL_538466 | 3/31/2020 | 9/17/2020 Asia / Singapore                 |
| EPI_ISL_538467 | 4/1/2020  | 9/17/2020 Asia / Singapore                 |
| EPI_ISL_538468 | 4/1/2020  | 9/17/2020 Asia / Singapore                 |
| EPI_ISL_538469 | 4/2/2020  | 9/17/2020 Asia / Singapore                 |
| EPI_ISL_538470 | 4/2/2020  | 9/17/2020 Asia / Singapore                 |
| EPI_ISL_538471 | 4/2/2020  | 9/17/2020 Asia / Singapore                 |
| EPI_ISL_538472 | 4/2/2020  | 9/17/2020 Asia / Singapore                 |

|                |           |                                                 |
|----------------|-----------|-------------------------------------------------|
| EPI_ISL_538473 | 4/3/2020  | 9/17/2020 Asia / Singapore                      |
| EPI_ISL_538474 | 4/3/2020  | 9/17/2020 Asia / Singapore                      |
| EPI_ISL_538475 | 4/4/2020  | 9/17/2020 Asia / Singapore                      |
| EPI_ISL_538476 | 4/4/2020  | 9/17/2020 Asia / Singapore                      |
| EPI_ISL_538477 | 4/4/2020  | 9/17/2020 Asia / Singapore                      |
| EPI_ISL_538478 | 4/5/2020  | 9/17/2020 Asia / Singapore                      |
| EPI_ISL_538479 | 4/5/2020  | 9/17/2020 Asia / Singapore                      |
| EPI_ISL_538480 | 4/6/2020  | 9/17/2020 Asia / Singapore                      |
| EPI_ISL_538481 | 4/6/2020  | 9/17/2020 Asia / Singapore                      |
| EPI_ISL_538482 | 4/6/2020  | 9/17/2020 Asia / Singapore                      |
| EPI_ISL_538483 | 4/6/2020  | 9/17/2020 Asia / Singapore                      |
| EPI_ISL_538484 | 4/6/2020  | 9/17/2020 Asia / Singapore                      |
| EPI_ISL_538485 | 4/7/2020  | 9/17/2020 Asia / Singapore                      |
| EPI_ISL_538486 | 4/7/2020  | 9/17/2020 Asia / Singapore                      |
| EPI_ISL_538487 | 4/7/2020  | 9/17/2020 Asia / Singapore                      |
| EPI_ISL_538488 | 4/7/2020  | 9/17/2020 Asia / Singapore                      |
| EPI_ISL_538489 | 4/7/2020  | 9/17/2020 Asia / Singapore                      |
| EPI_ISL_538490 | 4/7/2020  | 9/17/2020 Asia / Singapore                      |
| EPI_ISL_538491 | 4/8/2020  | 9/17/2020 Asia / Singapore                      |
| EPI_ISL_538492 | 4/8/2020  | 9/17/2020 Asia / Singapore                      |
| EPI_ISL_538493 | 4/9/2020  | 9/17/2020 Asia / Singapore                      |
| EPI_ISL_538494 | 4/9/2020  | 9/17/2020 Asia / Singapore                      |
| EPI_ISL_538495 | 4/10/2020 | 9/17/2020 Asia / Singapore                      |
| EPI_ISL_538496 | 4/10/2020 | 9/17/2020 Asia / Singapore                      |
| EPI_ISL_538497 | 4/10/2020 | 9/17/2020 Asia / Singapore                      |
| EPI_ISL_538498 | 6/11/2020 | 9/17/2020 Asia / Indonesia / East Java          |
| EPI_ISL_538499 | 6/29/2020 | 9/17/2020 Asia / Indonesia / East Java          |
| EPI_ISL_538500 | 8/5/2020  | 9/17/2020 Asia / Indonesia / North Sumatra      |
| EPI_ISL_538501 | 8/1/2020  | 9/17/2020 Asia / Indonesia / North Sumatra      |
| EPI_ISL_538502 | 7/24/2020 | 9/17/2020 Asia / Indonesia / Central Kalimantan |
| EPI_ISL_538503 | 2020-07   | 9/17/2020 Asia / Indonesia / Bali               |
| EPI_ISL_538504 | 7/27/2020 | 9/17/2020 Asia / Indonesia / Jakarta            |
| EPI_ISL_538505 | 8/20/2020 | 9/17/2020 Asia / Indonesia / Jakarta            |
| EPI_ISL_538506 | 6/13/2020 | 9/17/2020 Asia / Indonesia / Papua              |
| EPI_ISL_538507 | 6/13/2020 | 9/17/2020 Asia / Indonesia / Papua              |
| EPI_ISL_538508 | 5/17/2020 | 9/17/2020 Asia / Indonesia / Jakarta            |
| EPI_ISL_538509 | 8/20/2020 | 9/17/2020 Asia / Indonesia / Jakarta            |
| EPI_ISL_538510 | 8/6/2020  | 9/17/2020 Asia / Indonesia / South Kalimantan   |
| EPI_ISL_538511 | 8/1/2020  | 9/17/2020 Asia / Indonesia / East Java          |
| EPI_ISL_538512 | 7/30/2020 | 9/17/2020 Asia / Indonesia / Papua              |
| EPI_ISL_538513 | 7/24/2020 | 9/17/2020 Asia / Indonesia / West Java          |
| EPI_ISL_538552 | 8/31/2020 | 9/17/2020 Europe / Spain / Catalunya / Palamos  |
| EPI_ISL_538748 | 4/8/2020  | 9/17/2020 Europe / United Kingdom / England     |
| EPI_ISL_538749 | 4/11/2020 | 9/17/2020 Europe / United Kingdom / England     |
| EPI_ISL_538750 | 4/9/2020  | 9/17/2020 Europe / United Kingdom / England     |
| EPI_ISL_538751 | 4/13/2020 | 9/17/2020 Europe / United Kingdom / England     |
| EPI_ISL_538752 | 4/12/2020 | 9/17/2020 Europe / United Kingdom / England     |



|                |           |           |                                   |
|----------------|-----------|-----------|-----------------------------------|
| EPI_ISL_538804 | 4/5/2020  | 9/17/2020 | Europe / United Kingdom / England |
| EPI_ISL_538805 | 4/6/2020  | 9/17/2020 | Europe / United Kingdom / England |
| EPI_ISL_538806 | 4/8/2020  | 9/17/2020 | Europe / United Kingdom / England |
| EPI_ISL_538807 | 4/5/2020  | 9/17/2020 | Europe / United Kingdom / England |
| EPI_ISL_538808 | 4/22/2020 | 9/17/2020 | Europe / United Kingdom / England |
| EPI_ISL_538809 | 4/10/2020 | 9/17/2020 | Europe / United Kingdom / England |
| EPI_ISL_538810 | 4/9/2020  | 9/17/2020 | Europe / United Kingdom / England |
| EPI_ISL_538812 | 4/13/2020 | 9/17/2020 | Europe / United Kingdom / England |
| EPI_ISL_538813 | 4/12/2020 | 9/17/2020 | Europe / United Kingdom / England |
| EPI_ISL_538814 | 4/6/2020  | 9/17/2020 | Europe / United Kingdom / England |
| EPI_ISL_538815 | 4/3/2020  | 9/17/2020 | Europe / United Kingdom / England |
| EPI_ISL_538816 | 3/31/2020 | 9/17/2020 | Europe / United Kingdom / England |
| EPI_ISL_538817 | 4/9/2020  | 9/17/2020 | Europe / United Kingdom / England |
| EPI_ISL_538819 | 3/29/2020 | 9/17/2020 | Europe / United Kingdom / England |
| EPI_ISL_538820 | 3/31/2020 | 9/17/2020 | Europe / United Kingdom / England |
| EPI_ISL_538821 | 4/13/2020 | 9/17/2020 | Europe / United Kingdom / England |
| EPI_ISL_538822 | 3/22/2020 | 9/17/2020 | Europe / United Kingdom / England |
| EPI_ISL_538823 | 3/10/2020 | 9/17/2020 | Europe / United Kingdom / England |
| EPI_ISL_538824 | 4/7/2020  | 9/17/2020 | Europe / United Kingdom / England |
| EPI_ISL_538825 | 4/6/2020  | 9/17/2020 | Europe / United Kingdom / England |
| EPI_ISL_538826 | 4/9/2020  | 9/17/2020 | Europe / United Kingdom / England |
| EPI_ISL_538827 | 4/5/2020  | 9/17/2020 | Europe / United Kingdom / England |
| EPI_ISL_538828 | 4/10/2020 | 9/17/2020 | Europe / United Kingdom / England |
| EPI_ISL_538829 | 4/8/2020  | 9/17/2020 | Europe / United Kingdom / England |
| EPI_ISL_538830 | 4/6/2020  | 9/17/2020 | Europe / United Kingdom / England |
| EPI_ISL_538831 | 4/14/2020 | 9/17/2020 | Europe / United Kingdom / England |
| EPI_ISL_538832 | 4/1/2020  | 9/17/2020 | Europe / United Kingdom / England |
| EPI_ISL_538833 | 4/9/2020  | 9/17/2020 | Europe / United Kingdom / England |
| EPI_ISL_538834 | 4/11/2020 | 9/17/2020 | Europe / United Kingdom / England |
| EPI_ISL_538835 | 4/27/2020 | 9/17/2020 | Europe / United Kingdom / England |
| EPI_ISL_538836 | 4/8/2020  | 9/17/2020 | Europe / United Kingdom / England |
| EPI_ISL_538837 | 4/14/2020 | 9/17/2020 | Europe / United Kingdom / England |
| EPI_ISL_538838 | 4/10/2020 | 9/17/2020 | Europe / United Kingdom / England |
| EPI_ISL_538839 | 4/12/2020 | 9/17/2020 | Europe / United Kingdom / England |
| EPI_ISL_538840 | 4/2/2020  | 9/17/2020 | Europe / United Kingdom / England |
| EPI_ISL_538842 | 3/12/2020 | 9/17/2020 | Europe / United Kingdom / England |
| EPI_ISL_538843 | 4/7/2020  | 9/17/2020 | Europe / United Kingdom / England |
| EPI_ISL_538844 | 3/31/2020 | 9/17/2020 | Europe / United Kingdom / England |
| EPI_ISL_538845 | 4/8/2020  | 9/17/2020 | Europe / United Kingdom / England |
| EPI_ISL_538846 | 4/12/2020 | 9/17/2020 | Europe / United Kingdom / England |
| EPI_ISL_538847 | 3/31/2020 | 9/17/2020 | Europe / United Kingdom / England |
| EPI_ISL_538848 | 4/13/2020 | 9/17/2020 | Europe / United Kingdom / England |
| EPI_ISL_538849 | 4/27/2020 | 9/17/2020 | Europe / United Kingdom / England |
| EPI_ISL_538852 | 3/30/2020 | 9/17/2020 | Europe / United Kingdom / England |
| EPI_ISL_538853 | 4/11/2020 | 9/17/2020 | Europe / United Kingdom / England |
| EPI_ISL_538854 | 4/8/2020  | 9/17/2020 | Europe / United Kingdom / England |
| EPI_ISL_538855 | 4/12/2020 | 9/17/2020 | Europe / United Kingdom / England |

|                |           |           |                                   |
|----------------|-----------|-----------|-----------------------------------|
| EPI_ISL_538856 | 4/9/2020  | 9/17/2020 | Europe / United Kingdom / England |
| EPI_ISL_538857 | 4/3/2020  | 9/17/2020 | Europe / United Kingdom / England |
| EPI_ISL_538858 | 4/12/2020 | 9/17/2020 | Europe / United Kingdom / England |
| EPI_ISL_538859 | 4/7/2020  | 9/17/2020 | Europe / United Kingdom / England |
| EPI_ISL_538860 | 4/12/2020 | 9/17/2020 | Europe / United Kingdom / England |
| EPI_ISL_538861 | 4/11/2020 | 9/17/2020 | Europe / United Kingdom / England |
| EPI_ISL_538862 | 4/9/2020  | 9/17/2020 | Europe / United Kingdom / England |
| EPI_ISL_538864 | 4/9/2020  | 9/17/2020 | Europe / United Kingdom / England |
| EPI_ISL_538865 | 4/8/2020  | 9/17/2020 | Europe / United Kingdom / England |
| EPI_ISL_538867 | 4/12/2020 | 9/17/2020 | Europe / United Kingdom / England |
| EPI_ISL_538868 | 4/21/2020 | 9/17/2020 | Europe / United Kingdom / England |
| EPI_ISL_538869 | 3/30/2020 | 9/17/2020 | Europe / United Kingdom / England |
| EPI_ISL_538870 | 4/8/2020  | 9/17/2020 | Europe / United Kingdom / England |
| EPI_ISL_538871 | 4/13/2020 | 9/17/2020 | Europe / United Kingdom / England |
| EPI_ISL_538872 | 4/9/2020  | 9/17/2020 | Europe / United Kingdom / England |
| EPI_ISL_538874 | 4/12/2020 | 9/17/2020 | Europe / United Kingdom / England |
| EPI_ISL_538877 | 4/12/2020 | 9/17/2020 | Europe / United Kingdom / England |
| EPI_ISL_538878 | 4/12/2020 | 9/17/2020 | Europe / United Kingdom / England |
| EPI_ISL_538879 | 4/16/2020 | 9/17/2020 | Europe / United Kingdom / England |
| EPI_ISL_538880 | 4/6/2020  | 9/17/2020 | Europe / United Kingdom / England |
| EPI_ISL_538881 | 3/17/2020 | 9/17/2020 | Europe / United Kingdom / England |
| EPI_ISL_538882 | 4/6/2020  | 9/17/2020 | Europe / United Kingdom / England |
| EPI_ISL_538883 | 4/9/2020  | 9/17/2020 | Europe / United Kingdom / England |
| EPI_ISL_538885 | 4/11/2020 | 9/17/2020 | Europe / United Kingdom / England |
| EPI_ISL_538886 | 4/3/2020  | 9/17/2020 | Europe / United Kingdom / England |
| EPI_ISL_538887 | 4/9/2020  | 9/17/2020 | Europe / United Kingdom / England |
| EPI_ISL_538888 | 4/9/2020  | 9/17/2020 | Europe / United Kingdom / England |
| EPI_ISL_538889 | 4/8/2020  | 9/17/2020 | Europe / United Kingdom / England |
| EPI_ISL_538890 | 4/9/2020  | 9/17/2020 | Europe / United Kingdom / England |
| EPI_ISL_538891 | 4/14/2020 | 9/17/2020 | Europe / United Kingdom / England |
| EPI_ISL_538892 | 4/8/2020  | 9/17/2020 | Europe / United Kingdom / England |
| EPI_ISL_538893 | 4/3/2020  | 9/17/2020 | Europe / United Kingdom / England |
| EPI_ISL_538894 | 4/6/2020  | 9/17/2020 | Europe / United Kingdom / England |
| EPI_ISL_538895 | 4/4/2020  | 9/17/2020 | Europe / United Kingdom / England |
| EPI_ISL_538896 | 4/8/2020  | 9/17/2020 | Europe / United Kingdom / England |
| EPI_ISL_538897 | 4/5/2020  | 9/17/2020 | Europe / United Kingdom / England |
| EPI_ISL_538900 | 3/30/2020 | 9/17/2020 | Europe / United Kingdom / England |
| EPI_ISL_538901 | 3/31/2020 | 9/17/2020 | Europe / United Kingdom / England |
| EPI_ISL_538902 | 4/7/2020  | 9/17/2020 | Europe / United Kingdom / England |
| EPI_ISL_538903 | 4/3/2020  | 9/17/2020 | Europe / United Kingdom / England |
| EPI_ISL_538904 | 4/4/2020  | 9/17/2020 | Europe / United Kingdom / England |
| EPI_ISL_538905 | 4/5/2020  | 9/17/2020 | Europe / United Kingdom / England |
| EPI_ISL_538906 | 3/30/2020 | 9/17/2020 | Europe / United Kingdom / England |
| EPI_ISL_538907 | 4/13/2020 | 9/17/2020 | Europe / United Kingdom / England |
| EPI_ISL_538908 | 4/8/2020  | 9/17/2020 | Europe / United Kingdom / England |
| EPI_ISL_538909 | 4/8/2020  | 9/17/2020 | Europe / United Kingdom / England |
| EPI_ISL_538910 | 4/9/2020  | 9/17/2020 | Europe / United Kingdom / England |

|                |           |                                             |
|----------------|-----------|---------------------------------------------|
| EPI_ISL_538911 | 4/10/2020 | 9/17/2020 Europe / United Kingdom / England |
| EPI_ISL_538912 | 3/28/2020 | 9/17/2020 Europe / United Kingdom / England |
| EPI_ISL_538913 | 3/14/2020 | 9/17/2020 Europe / United Kingdom / England |
| EPI_ISL_538914 | 4/11/2020 | 9/17/2020 Europe / United Kingdom / England |
| EPI_ISL_538915 | 3/30/2020 | 9/17/2020 Europe / United Kingdom / England |
| EPI_ISL_538916 | 4/28/2020 | 9/17/2020 Europe / United Kingdom / England |
| EPI_ISL_538918 | 4/12/2020 | 9/17/2020 Europe / United Kingdom / England |
| EPI_ISL_538919 | 4/10/2020 | 9/17/2020 Europe / United Kingdom / England |
| EPI_ISL_538920 | 4/24/2020 | 9/17/2020 Europe / United Kingdom / England |
| EPI_ISL_538921 | 4/8/2020  | 9/17/2020 Europe / United Kingdom / England |
| EPI_ISL_538922 | 4/8/2020  | 9/17/2020 Europe / United Kingdom / England |
| EPI_ISL_538923 | 4/11/2020 | 9/17/2020 Europe / United Kingdom / England |
| EPI_ISL_538924 | 4/11/2020 | 9/17/2020 Europe / United Kingdom / England |
| EPI_ISL_538925 | 3/28/2020 | 9/17/2020 Europe / United Kingdom / England |
| EPI_ISL_538926 | 4/5/2020  | 9/17/2020 Europe / United Kingdom / England |
| EPI_ISL_538928 | 3/29/2020 | 9/17/2020 Europe / United Kingdom / England |
| EPI_ISL_538929 | 4/11/2020 | 9/17/2020 Europe / United Kingdom / England |
| EPI_ISL_538930 | 4/13/2020 | 9/17/2020 Europe / United Kingdom / England |
| EPI_ISL_538931 | 4/7/2020  | 9/17/2020 Europe / United Kingdom / England |
| EPI_ISL_538932 | 3/30/2020 | 9/17/2020 Europe / United Kingdom / England |
| EPI_ISL_538933 | 3/12/2020 | 9/17/2020 Europe / United Kingdom / England |
| EPI_ISL_538934 | 3/25/2020 | 9/17/2020 Europe / United Kingdom / England |
| EPI_ISL_538935 | 3/26/2020 | 9/17/2020 Europe / United Kingdom / England |
| EPI_ISL_538936 | 4/13/2020 | 9/17/2020 Europe / United Kingdom / England |
| EPI_ISL_538937 | 4/12/2020 | 9/17/2020 Europe / United Kingdom / England |
| EPI_ISL_538938 | 3/28/2020 | 9/17/2020 Europe / United Kingdom / England |
| EPI_ISL_538939 | 3/27/2020 | 9/17/2020 Europe / United Kingdom / England |
| EPI_ISL_538940 | 3/27/2020 | 9/17/2020 Europe / United Kingdom / England |
| EPI_ISL_538941 | 3/26/2020 | 9/17/2020 Europe / United Kingdom / England |
| EPI_ISL_538942 | 4/11/2020 | 9/17/2020 Europe / United Kingdom / England |
| EPI_ISL_538943 | 4/8/2020  | 9/17/2020 Europe / United Kingdom / England |
| EPI_ISL_538944 | 3/30/2020 | 9/17/2020 Europe / United Kingdom / England |
| EPI_ISL_538946 | 4/13/2020 | 9/17/2020 Europe / United Kingdom / England |
| EPI_ISL_538947 | 3/27/2020 | 9/17/2020 Europe / United Kingdom / England |
| EPI_ISL_538948 | 3/29/2020 | 9/17/2020 Europe / United Kingdom / England |
| EPI_ISL_538949 | 4/8/2020  | 9/17/2020 Europe / United Kingdom / England |
| EPI_ISL_538950 | 3/26/2020 | 9/17/2020 Europe / United Kingdom / England |
| EPI_ISL_538951 | 3/27/2020 | 9/17/2020 Europe / United Kingdom / England |
| EPI_ISL_538952 | 4/5/2020  | 9/17/2020 Europe / United Kingdom / England |
| EPI_ISL_538953 | 4/13/2020 | 9/17/2020 Europe / United Kingdom / England |
| EPI_ISL_538954 | 3/26/2020 | 9/17/2020 Europe / United Kingdom / England |
| EPI_ISL_538955 | 3/28/2020 | 9/17/2020 Europe / United Kingdom / England |
| EPI_ISL_538956 | 3/24/2020 | 9/17/2020 Europe / United Kingdom / England |
| EPI_ISL_538957 | 3/24/2020 | 9/17/2020 Europe / United Kingdom / England |
| EPI_ISL_538958 | 4/5/2020  | 9/17/2020 Europe / United Kingdom / England |
| EPI_ISL_538959 | 4/9/2020  | 9/17/2020 Europe / United Kingdom / England |
| EPI_ISL_538960 | 4/13/2020 | 9/17/2020 Europe / United Kingdom / England |



|                |           |           |                                   |
|----------------|-----------|-----------|-----------------------------------|
| EPI_ISL_538961 | 3/29/2020 | 9/17/2020 | Europe / United Kingdom / England |
| EPI_ISL_538962 | 3/28/2020 | 9/17/2020 | Europe / United Kingdom / England |
| EPI_ISL_538963 | 3/26/2020 | 9/17/2020 | Europe / United Kingdom / England |
| EPI_ISL_538964 | 4/9/2020  | 9/17/2020 | Europe / United Kingdom / England |
| EPI_ISL_538965 | 3/22/2020 | 9/17/2020 | Europe / United Kingdom / England |
| EPI_ISL_538966 | 3/29/2020 | 9/17/2020 | Europe / United Kingdom / England |
| EPI_ISL_538967 | 4/8/2020  | 9/17/2020 | Europe / United Kingdom / England |
| EPI_ISL_538968 | 3/29/2020 | 9/17/2020 | Europe / United Kingdom / England |
| EPI_ISL_538969 | 4/8/2020  | 9/17/2020 | Europe / United Kingdom / England |
| EPI_ISL_538970 | 4/9/2020  | 9/17/2020 | Europe / United Kingdom / England |
| EPI_ISL_538971 | 3/25/2020 | 9/17/2020 | Europe / United Kingdom / England |
| EPI_ISL_538972 | 3/29/2020 | 9/17/2020 | Europe / United Kingdom / England |
| EPI_ISL_538973 | 4/10/2020 | 9/17/2020 | Europe / United Kingdom / England |
| EPI_ISL_538974 | 3/28/2020 | 9/17/2020 | Europe / United Kingdom / England |
| EPI_ISL_538975 | 3/26/2020 | 9/17/2020 | Europe / United Kingdom / England |
| EPI_ISL_538976 | 3/27/2020 | 9/17/2020 | Europe / United Kingdom / England |
| EPI_ISL_538977 | 4/9/2020  | 9/17/2020 | Europe / United Kingdom / England |
| EPI_ISL_538978 | 4/7/2020  | 9/17/2020 | Europe / United Kingdom / England |
| EPI_ISL_538979 | 4/1/2020  | 9/17/2020 | Europe / United Kingdom / England |
| EPI_ISL_538980 | 4/6/2020  | 9/17/2020 | Europe / United Kingdom / England |
| EPI_ISL_538981 | 4/7/2020  | 9/17/2020 | Europe / United Kingdom / England |
| EPI_ISL_538982 | 4/7/2020  | 9/17/2020 | Europe / United Kingdom / England |
| EPI_ISL_538983 | 4/1/2020  | 9/17/2020 | Europe / United Kingdom / England |
| EPI_ISL_538984 | 4/7/2020  | 9/17/2020 | Europe / United Kingdom / England |
| EPI_ISL_538985 | 4/7/2020  | 9/17/2020 | Europe / United Kingdom / England |
| EPI_ISL_538986 | 4/1/2020  | 9/17/2020 | Europe / United Kingdom / England |
| EPI_ISL_538988 | 4/1/2020  | 9/17/2020 | Europe / United Kingdom / England |
| EPI_ISL_538989 | 4/1/2020  | 9/17/2020 | Europe / United Kingdom / England |
| EPI_ISL_538990 | 4/1/2020  | 9/17/2020 | Europe / United Kingdom / England |
| EPI_ISL_538991 | 3/21/2020 | 9/17/2020 | Europe / United Kingdom / England |
| EPI_ISL_538992 | 4/28/2020 | 9/17/2020 | Europe / United Kingdom / England |
| EPI_ISL_538993 | 3/28/2020 | 9/17/2020 | Europe / United Kingdom / England |
| EPI_ISL_538995 | 3/30/2020 | 9/17/2020 | Europe / United Kingdom / England |
| EPI_ISL_538996 | 3/28/2020 | 9/17/2020 | Europe / United Kingdom / England |
| EPI_ISL_538998 | 3/29/2020 | 9/17/2020 | Europe / United Kingdom / England |
| EPI_ISL_538999 | 4/27/2020 | 9/17/2020 | Europe / United Kingdom / England |
| EPI_ISL_539000 | 4/2/2020  | 9/17/2020 | Europe / United Kingdom / England |
| EPI_ISL_539001 | 3/20/2020 | 9/17/2020 | Europe / United Kingdom / England |
| EPI_ISL_539002 | 3/31/2020 | 9/17/2020 | Europe / United Kingdom / England |
| EPI_ISL_539003 | 3/30/2020 | 9/17/2020 | Europe / United Kingdom / England |
| EPI_ISL_539004 | 3/31/2020 | 9/17/2020 | Europe / United Kingdom / England |
| EPI_ISL_539007 | 4/3/2020  | 9/17/2020 | Europe / United Kingdom / England |
| EPI_ISL_539008 | 3/25/2020 | 9/17/2020 | Europe / United Kingdom / England |
| EPI_ISL_539010 | 4/3/2020  | 9/17/2020 | Europe / United Kingdom / England |
| EPI_ISL_539013 | 3/29/2020 | 9/17/2020 | Europe / United Kingdom / England |
| EPI_ISL_539014 | 3/24/2020 | 9/17/2020 | Europe / United Kingdom / England |
| EPI_ISL_539015 | 3/14/2020 | 9/17/2020 | Europe / United Kingdom / England |



|                |           |           |                                   |
|----------------|-----------|-----------|-----------------------------------|
| EPI_ISL_539080 | 3/24/2020 | 9/17/2020 | Europe / United Kingdom / England |
| EPI_ISL_539081 | 3/27/2020 | 9/17/2020 | Europe / United Kingdom / England |
| EPI_ISL_539082 | 4/4/2020  | 9/17/2020 | Europe / United Kingdom / England |
| EPI_ISL_539083 | 3/30/2020 | 9/17/2020 | Europe / United Kingdom / England |
| EPI_ISL_539084 | 4/5/2020  | 9/17/2020 | Europe / United Kingdom / England |
| EPI_ISL_539085 | 3/24/2020 | 9/17/2020 | Europe / United Kingdom / England |
| EPI_ISL_539086 | 3/29/2020 | 9/17/2020 | Europe / United Kingdom / England |
| EPI_ISL_539087 | 3/22/2020 | 9/17/2020 | Europe / United Kingdom / England |
| EPI_ISL_539089 | 3/26/2020 | 9/17/2020 | Europe / United Kingdom / England |
| EPI_ISL_539090 | 4/1/2020  | 9/17/2020 | Europe / United Kingdom / England |
| EPI_ISL_539091 | 4/7/2020  | 9/17/2020 | Europe / United Kingdom / England |
| EPI_ISL_539092 | 4/3/2020  | 9/17/2020 | Europe / United Kingdom / England |
| EPI_ISL_539093 | 4/5/2020  | 9/17/2020 | Europe / United Kingdom / England |
| EPI_ISL_539096 | 4/3/2020  | 9/17/2020 | Europe / United Kingdom / England |
| EPI_ISL_539097 | 3/25/2020 | 9/17/2020 | Europe / United Kingdom / England |
| EPI_ISL_539099 | 3/31/2020 | 9/17/2020 | Europe / United Kingdom / England |
| EPI_ISL_539100 | 3/28/2020 | 9/17/2020 | Europe / United Kingdom / England |
| EPI_ISL_539102 | 4/4/2020  | 9/17/2020 | Europe / United Kingdom / England |
| EPI_ISL_539103 | 4/6/2020  | 9/17/2020 | Europe / United Kingdom / England |
| EPI_ISL_539104 | 4/4/2020  | 9/17/2020 | Europe / United Kingdom / England |
| EPI_ISL_539106 | 4/3/2020  | 9/17/2020 | Europe / United Kingdom / England |
| EPI_ISL_539107 | 4/4/2020  | 9/17/2020 | Europe / United Kingdom / England |
| EPI_ISL_539108 | 4/5/2020  | 9/17/2020 | Europe / United Kingdom / England |
| EPI_ISL_539109 | 3/25/2020 | 9/17/2020 | Europe / United Kingdom / England |
| EPI_ISL_539110 | 4/4/2020  | 9/17/2020 | Europe / United Kingdom / England |
| EPI_ISL_539111 | 4/1/2020  | 9/17/2020 | Europe / United Kingdom / England |
| EPI_ISL_539113 | 4/3/2020  | 9/17/2020 | Europe / United Kingdom / England |
| EPI_ISL_539114 | 3/9/2020  | 9/17/2020 | Europe / United Kingdom / England |
| EPI_ISL_539115 | 4/4/2020  | 9/17/2020 | Europe / United Kingdom / England |
| EPI_ISL_539118 | 3/31/2020 | 9/17/2020 | Europe / United Kingdom / England |
| EPI_ISL_539119 | 3/31/2020 | 9/17/2020 | Europe / United Kingdom / England |
| EPI_ISL_539121 | 3/30/2020 | 9/17/2020 | Europe / United Kingdom / England |
| EPI_ISL_539122 | 4/14/2020 | 9/17/2020 | Europe / United Kingdom / England |
| EPI_ISL_539123 | 4/4/2020  | 9/17/2020 | Europe / United Kingdom / England |
| EPI_ISL_539124 | 4/3/2020  | 9/17/2020 | Europe / United Kingdom / England |
| EPI_ISL_539126 | 4/7/2020  | 9/17/2020 | Europe / United Kingdom / England |
| EPI_ISL_539127 | 3/25/2020 | 9/17/2020 | Europe / United Kingdom / England |
| EPI_ISL_539128 | 4/5/2020  | 9/17/2020 | Europe / United Kingdom / England |
| EPI_ISL_539129 | 3/30/2020 | 9/17/2020 | Europe / United Kingdom / England |
| EPI_ISL_539130 | 3/24/2020 | 9/17/2020 | Europe / United Kingdom / England |
| EPI_ISL_539131 | 3/20/2020 | 9/17/2020 | Europe / United Kingdom / England |
| EPI_ISL_539132 | 3/30/2020 | 9/17/2020 | Europe / United Kingdom / England |
| EPI_ISL_539133 | 4/4/2020  | 9/17/2020 | Europe / United Kingdom / England |
| EPI_ISL_539134 | 3/31/2020 | 9/17/2020 | Europe / United Kingdom / England |
| EPI_ISL_539135 | 4/5/2020  | 9/17/2020 | Europe / United Kingdom / England |
| EPI_ISL_539137 | 4/1/2020  | 9/17/2020 | Europe / United Kingdom / England |
| EPI_ISL_539138 | 4/6/2020  | 9/17/2020 | Europe / United Kingdom / England |

|                |           |           |                                   |
|----------------|-----------|-----------|-----------------------------------|
| EPI_ISL_539142 | 4/4/2020  | 9/17/2020 | Europe / United Kingdom / England |
| EPI_ISL_539144 | 3/12/2020 | 9/17/2020 | Europe / United Kingdom / England |
| EPI_ISL_539145 | 4/3/2020  | 9/17/2020 | Europe / United Kingdom / England |
| EPI_ISL_539146 | 4/6/2020  | 9/17/2020 | Europe / United Kingdom / England |
| EPI_ISL_539147 | 3/24/2020 | 9/17/2020 | Europe / United Kingdom / England |
| EPI_ISL_539148 | 3/23/2020 | 9/17/2020 | Europe / United Kingdom / England |
| EPI_ISL_539153 | 3/25/2020 | 9/17/2020 | Europe / United Kingdom / England |
| EPI_ISL_539156 | 3/25/2020 | 9/17/2020 | Europe / United Kingdom / England |
| EPI_ISL_539158 | 3/30/2020 | 9/17/2020 | Europe / United Kingdom / England |
| EPI_ISL_539159 | 3/27/2020 | 9/17/2020 | Europe / United Kingdom / England |
| EPI_ISL_539160 | 3/27/2020 | 9/17/2020 | Europe / United Kingdom / England |
| EPI_ISL_539162 | 3/27/2020 | 9/17/2020 | Europe / United Kingdom / England |
| EPI_ISL_539163 | 3/31/2020 | 9/17/2020 | Europe / United Kingdom / England |
| EPI_ISL_539165 | 4/7/2020  | 9/17/2020 | Europe / United Kingdom / England |
| EPI_ISL_539166 | 3/26/2020 | 9/17/2020 | Europe / United Kingdom / England |
| EPI_ISL_539167 | 4/6/2020  | 9/17/2020 | Europe / United Kingdom / England |
| EPI_ISL_539169 | 3/28/2020 | 9/17/2020 | Europe / United Kingdom / England |
| EPI_ISL_539170 | 3/23/2020 | 9/17/2020 | Europe / United Kingdom / England |
| EPI_ISL_539171 | 4/1/2020  | 9/17/2020 | Europe / United Kingdom / England |
| EPI_ISL_539172 | 3/29/2020 | 9/17/2020 | Europe / United Kingdom / England |
| EPI_ISL_539173 | 3/24/2020 | 9/17/2020 | Europe / United Kingdom / England |
| EPI_ISL_539174 | 3/18/2020 | 9/17/2020 | Europe / United Kingdom / England |
| EPI_ISL_539175 | 4/7/2020  | 9/17/2020 | Europe / United Kingdom / England |
| EPI_ISL_539176 | 3/31/2020 | 9/17/2020 | Europe / United Kingdom / England |
| EPI_ISL_539178 | 3/30/2020 | 9/17/2020 | Europe / United Kingdom / England |
| EPI_ISL_539179 | 4/6/2020  | 9/17/2020 | Europe / United Kingdom / England |
| EPI_ISL_539180 | 4/7/2020  | 9/17/2020 | Europe / United Kingdom / England |
| EPI_ISL_539183 | 4/7/2020  | 9/17/2020 | Europe / United Kingdom / England |
| EPI_ISL_539184 | 4/4/2020  | 9/17/2020 | Europe / United Kingdom / England |
| EPI_ISL_539186 | 3/27/2020 | 9/17/2020 | Europe / United Kingdom / England |
| EPI_ISL_539187 | 3/29/2020 | 9/17/2020 | Europe / United Kingdom / England |
| EPI_ISL_539193 | 4/7/2020  | 9/17/2020 | Europe / United Kingdom / England |
| EPI_ISL_539194 | 3/31/2020 | 9/17/2020 | Europe / United Kingdom / England |
| EPI_ISL_539195 | 3/28/2020 | 9/17/2020 | Europe / United Kingdom / England |
| EPI_ISL_539196 | 3/27/2020 | 9/17/2020 | Europe / United Kingdom / England |
| EPI_ISL_539198 | 4/5/2020  | 9/17/2020 | Europe / United Kingdom / England |
| EPI_ISL_539199 | 4/7/2020  | 9/17/2020 | Europe / United Kingdom / England |
| EPI_ISL_539200 | 3/29/2020 | 9/17/2020 | Europe / United Kingdom / England |
| EPI_ISL_539202 | 4/6/2020  | 9/17/2020 | Europe / United Kingdom / England |
| EPI_ISL_539203 | 4/1/2020  | 9/17/2020 | Europe / United Kingdom / England |
| EPI_ISL_539205 | 4/8/2020  | 9/17/2020 | Europe / United Kingdom / England |
| EPI_ISL_539206 | 3/30/2020 | 9/17/2020 | Europe / United Kingdom / England |
| EPI_ISL_539207 | 4/6/2020  | 9/17/2020 | Europe / United Kingdom / England |
| EPI_ISL_539208 | 3/9/2020  | 9/17/2020 | Europe / United Kingdom / England |
| EPI_ISL_539209 | 4/6/2020  | 9/17/2020 | Europe / United Kingdom / England |
| EPI_ISL_539211 | 3/30/2020 | 9/17/2020 | Europe / United Kingdom / England |
| EPI_ISL_539212 | 4/5/2020  | 9/17/2020 | Europe / United Kingdom / England |

|                 |           |           |                                                               |
|-----------------|-----------|-----------|---------------------------------------------------------------|
| EPI_ISL_539214  | 4/7/2020  | 9/17/2020 | Europe / United Kingdom / England                             |
| EPI_ISL_539215  | 3/23/2020 | 9/17/2020 | Europe / United Kingdom / England                             |
| EPI_ISL_539216  | 4/7/2020  | 9/17/2020 | Europe / United Kingdom / England                             |
| EPI_ISL_539217  | 3/30/2020 | 9/17/2020 | Europe / United Kingdom / England                             |
| EPI_ISL_539218  | 4/4/2020  | 9/17/2020 | Europe / United Kingdom / England                             |
| EPI_ISL_539219  | 4/1/2020  | 9/17/2020 | Europe / United Kingdom / England                             |
| EPI_ISL_539251  | 4/2/2020  | 9/17/2020 | Europe / Spain / Comunitat Valenciana / Alzira                |
| EPI_ISL_539252  | 4/2/2020  | 9/17/2020 | Europe / Spain / Comunitat Valenciana / Alzira                |
| EPI_ISL_539253  | 4/2/2020  | 9/17/2020 | Europe / Spain / Comunitat Valenciana / Alzira                |
| EPI_ISL_539254  | 4/3/2020  | 9/17/2020 | Europe / Spain / Comunitat Valenciana / Alzira                |
| EPI_ISL_539255  | 4/3/2020  | 9/17/2020 | Europe / Spain / Comunitat Valenciana / Alzira                |
| EPI_ISL_539256  | 4/3/2020  | 9/17/2020 | Europe / Spain / Comunitat Valenciana / Alzira                |
| EPI_ISL_539257  | 4/3/2020  | 9/17/2020 | Europe / Spain / Comunitat Valenciana / Alzira                |
| EPI_ISL_539258  | 4/3/2020  | 9/17/2020 | Europe / Spain / Comunitat Valenciana / Alzira                |
| EPI_ISL_539281  | 4/8/2020  | 9/17/2020 | Europe / Spain / Comunitat Valenciana / Alzira                |
| EPI_ISL_539282  | 4/8/2020  | 9/17/2020 | Europe / Spain / Comunitat Valenciana / Alzira                |
| EPI_ISL_539283  | 4/8/2020  | 9/17/2020 | Europe / Spain / Comunitat Valenciana / Alzira                |
| EPI_ISL_539284  | 3/22/2020 | 9/17/2020 | Europe / Spain / Comunitat Valenciana / Castellon de la Plana |
| EPI_ISL_539286  | 3/22/2020 | 9/17/2020 | Europe / Spain / Comunitat Valenciana / Castellon de la Plana |
| EPI_ISL_539287  | 3/23/2020 | 9/17/2020 | Europe / Spain / Comunitat Valenciana / Castellon de la Plana |
| EPI_ISL_539879  | 3/11/2020 | 9/17/2020 | North America / USA / South Carolina                          |
| EPI_ISL_541649  | 7/8/2020  | 9/17/2020 | Europe / Serbia / Novi Pazar                                  |
| EPI_ISL_541650  | 7/12/2020 | 9/17/2020 | Europe / Serbia / Novi Pazar                                  |
| EPI_ISL_541651  | 7/6/2020  | 9/17/2020 | Europe / Kosovo / Mitrovica                                   |
| EPI_ISL_541652  | 7/14/2020 | 9/17/2020 | Europe / Serbia / Novi Pazar                                  |
| EPI_ISL_541653  | 7/19/2020 | 9/17/2020 | Europe / Serbia / Novi Pazar                                  |
| EPI_ISL_541654  | 7/21/2020 | 9/17/2020 | Europe / Serbia / Novi Pazar                                  |
| EPI_ISL_541655  | 7/23/2020 | 9/17/2020 | Europe / Kosovo / Mitrovica                                   |
| EPI_ISL_541656  | 7/6/2020  | 9/17/2020 | Europe / Serbia / Kraljevo                                    |
| EPI_ISL_541657  | 7/6/2020  | 9/17/2020 | Europe / Kosovo / Mitrovica                                   |
| EPI_ISL_541658  | 7/6/2020  | 9/17/2020 | Europe / Kosovo / Mitrovica                                   |
| EPI_ISL_541659  | 7/8/2020  | 9/17/2020 | Europe / Serbia / Novi Pazar                                  |
| EPI_ISL_541660  | 7/20/2020 | 9/17/2020 | Europe / Serbia / Kraljevo                                    |
| EPI_ISL_541661  | 7/9/2020  | 9/17/2020 | Europe / Serbia / Novi Pazar                                  |
| EPI_ISL_541662  | 7/15/2020 | 9/17/2020 | Europe / Serbia / Kraljevo                                    |
| EPI_ISL_2649891 | 2020-06   | 9/17/2020 | Africa / Libya                                                |
| EPI_ISL_2649892 | 2020-06   | 9/17/2020 | Africa / Libya                                                |
| EPI_ISL_2649893 | 2020-06   | 9/17/2020 | Africa / Libya                                                |
| EPI_ISL_2649894 | 2020-06   | 9/17/2020 | Africa / Libya                                                |
| EPI_ISL_2649895 | 2020-06   | 9/17/2020 | Africa / Libya                                                |
| EPI_ISL_2649896 | 2020-06   | 9/17/2020 | Africa / Libya                                                |
| EPI_ISL_2649897 | 2020-06   | 9/17/2020 | Africa / Libya                                                |
| EPI_ISL_2649898 | 2020-06   | 9/17/2020 | Africa / Libya                                                |
| EPI_ISL_2649899 | 2020-06   | 9/17/2020 | Africa / Libya                                                |
| EPI_ISL_2649900 | 2020-06   | 9/17/2020 | Africa / Libya                                                |
| EPI_ISL_539327  | 9/12/2020 | 9/18/2020 | Oceania / Australia / New South Wales                         |
| EPI_ISL_539341  | 8/21/2020 | 9/18/2020 | Europe / Switzerland / Zurich                                 |

|                |           |           |                                         |
|----------------|-----------|-----------|-----------------------------------------|
| EPI_ISL_539342 | 8/21/2020 | 9/18/2020 | Europe / Switzerland / Schwyz           |
| EPI_ISL_539343 | 8/21/2020 | 9/18/2020 | Europe / Switzerland / Zurich           |
| EPI_ISL_539344 | 8/21/2020 | 9/18/2020 | Europe / Switzerland / Zurich           |
| EPI_ISL_539345 | 8/21/2020 | 9/18/2020 | Europe / Switzerland / Zurich           |
| EPI_ISL_539346 | 8/21/2020 | 9/18/2020 | Europe / Switzerland / Zurich           |
| EPI_ISL_539347 | 8/21/2020 | 9/18/2020 | Europe / Switzerland / Basel-Landschaft |
| EPI_ISL_539348 | 8/21/2020 | 9/18/2020 | Europe / Switzerland / Zurich           |
| EPI_ISL_539349 | 8/21/2020 | 9/18/2020 | Europe / Switzerland / Aargau           |
| EPI_ISL_539350 | 8/21/2020 | 9/18/2020 | Europe / Switzerland / Uri              |
| EPI_ISL_539351 | 8/21/2020 | 9/18/2020 | Europe / Switzerland / Vaud             |
| EPI_ISL_539353 | 8/21/2020 | 9/18/2020 | Europe / Switzerland / Uri              |
| EPI_ISL_539354 | 8/21/2020 | 9/18/2020 | Europe / Switzerland / Vaud             |
| EPI_ISL_539356 | 8/22/2020 | 9/18/2020 | Europe / Switzerland / Bern             |
| EPI_ISL_539357 | 8/22/2020 | 9/18/2020 | Europe / Switzerland / Zurich           |
| EPI_ISL_539358 | 8/22/2020 | 9/18/2020 | Europe / Switzerland / Basel-Landschaft |
| EPI_ISL_539359 | 8/22/2020 | 9/18/2020 | Europe / Switzerland / Bern             |
| EPI_ISL_539360 | 8/22/2020 | 9/18/2020 | Europe / Switzerland / Bern             |
| EPI_ISL_539361 | 8/22/2020 | 9/18/2020 | Europe / Switzerland / Zurich           |
| EPI_ISL_539362 | 8/22/2020 | 9/18/2020 | Europe / Switzerland / Zurich           |
| EPI_ISL_539364 | 8/22/2020 | 9/18/2020 | Europe / Switzerland / Basel-Landschaft |
| EPI_ISL_539365 | 8/22/2020 | 9/18/2020 | Europe / Switzerland / Basel-Landschaft |
| EPI_ISL_539366 | 8/22/2020 | 9/18/2020 | Europe / Switzerland / Bern             |
| EPI_ISL_539367 | 8/22/2020 | 9/18/2020 | Europe / Switzerland / Grisons          |
| EPI_ISL_539368 | 8/23/2020 | 9/18/2020 | Europe / Switzerland / Vaud             |
| EPI_ISL_539369 | 8/23/2020 | 9/18/2020 | Europe / Switzerland / Vaud             |
| EPI_ISL_539370 | 8/23/2020 | 9/18/2020 | Europe / Switzerland / Vaud             |
| EPI_ISL_539371 | 8/23/2020 | 9/18/2020 | Europe / Switzerland / Grisons          |
| EPI_ISL_539372 | 8/22/2020 | 9/18/2020 | Europe / Switzerland / Wallis           |
| EPI_ISL_539373 | 8/24/2020 | 9/18/2020 | Europe / Switzerland / Bern             |
| EPI_ISL_539374 | 8/24/2020 | 9/18/2020 | Europe / Switzerland / Basel-Landschaft |
| EPI_ISL_539375 | 8/24/2020 | 9/18/2020 | Europe / Switzerland / Bern             |
| EPI_ISL_539376 | 8/24/2020 | 9/18/2020 | Europe / Switzerland / Basel-Landschaft |
| EPI_ISL_539377 | 8/24/2020 | 9/18/2020 | Europe / Switzerland / Basel-Stadt      |
| EPI_ISL_539378 | 8/24/2020 | 9/18/2020 | Europe / Switzerland / Basel-Stadt      |
| EPI_ISL_539379 | 8/24/2020 | 9/18/2020 | Europe / Switzerland / Zurich           |
| EPI_ISL_539380 | 8/24/2020 | 9/18/2020 | Europe / Switzerland / Vaud             |
| EPI_ISL_539381 | 8/24/2020 | 9/18/2020 | Europe / Switzerland / Basel-Landschaft |
| EPI_ISL_539382 | 8/24/2020 | 9/18/2020 | Europe / Switzerland / Zurich           |
| EPI_ISL_539383 | 8/23/2020 | 9/18/2020 | Europe / Switzerland / Aargau           |
| EPI_ISL_539384 | 8/23/2020 | 9/18/2020 | Europe / Switzerland / Basel-Landschaft |
| EPI_ISL_539386 | 8/23/2020 | 9/18/2020 | Europe / Switzerland / Aargau           |
| EPI_ISL_539387 | 8/24/2020 | 9/18/2020 | Europe / Switzerland / Bern             |
| EPI_ISL_539389 | 8/23/2020 | 9/18/2020 | Europe / Switzerland / Zurich           |
| EPI_ISL_539392 | 8/24/2020 | 9/18/2020 | Europe / Switzerland / Vaud             |
| EPI_ISL_539393 | 8/24/2020 | 9/18/2020 | Europe / Switzerland / Vaud             |
| EPI_ISL_539397 | 8/25/2020 | 9/18/2020 | Europe / Switzerland / Basel-Landschaft |
| EPI_ISL_539398 | 8/25/2020 | 9/18/2020 | Europe / Switzerland / Vaud             |

|                |           |           |                                         |
|----------------|-----------|-----------|-----------------------------------------|
| EPI_ISL_539399 | 8/25/2020 | 9/18/2020 | Europe / Switzerland / Vaud             |
| EPI_ISL_539400 | 8/25/2020 | 9/18/2020 | Europe / Switzerland / Vaud             |
| EPI_ISL_539401 | 8/25/2020 | 9/18/2020 | Europe / Switzerland / Basel-Landschaft |
| EPI_ISL_539402 | 8/24/2020 | 9/18/2020 | Europe / Switzerland / Aargau           |
| EPI_ISL_539403 | 8/24/2020 | 9/18/2020 | Europe / Switzerland / Bern             |
| EPI_ISL_539405 | 8/25/2020 | 9/18/2020 | Europe / Switzerland / Bern             |
| EPI_ISL_539406 | 8/25/2020 | 9/18/2020 | Europe / Switzerland / Bern             |
| EPI_ISL_539410 | 8/25/2020 | 9/18/2020 | Europe / Switzerland / Zurich           |
| EPI_ISL_539411 | 8/25/2020 | 9/18/2020 | Europe / Switzerland / Vaud             |
| EPI_ISL_539412 | 8/24/2020 | 9/18/2020 | Europe / Switzerland / Aargau           |
| EPI_ISL_539414 | 8/24/2020 | 9/18/2020 | Europe / Switzerland / Bern             |
| EPI_ISL_539417 | 8/24/2020 | 9/18/2020 | Europe / Switzerland / Vaud             |
| EPI_ISL_539418 | 8/24/2020 | 9/18/2020 | Europe / Switzerland / Vaud             |
| EPI_ISL_539419 | 8/24/2020 | 9/18/2020 | Europe / Switzerland / Vaud             |
| EPI_ISL_539421 | 8/26/2020 | 9/18/2020 | Europe / Switzerland / Basel-Landschaft |
| EPI_ISL_539422 | 8/26/2020 | 9/18/2020 | Europe / Switzerland / Basel-Landschaft |
| EPI_ISL_539423 | 8/26/2020 | 9/18/2020 | Europe / Switzerland / Basel-Landschaft |
| EPI_ISL_539425 | 8/26/2020 | 9/18/2020 | Europe / Switzerland / Basel-Landschaft |
| EPI_ISL_539426 | 8/26/2020 | 9/18/2020 | Europe / Switzerland / Aargau           |
| EPI_ISL_539427 | 8/26/2020 | 9/18/2020 | Europe / Switzerland / Geneva           |
| EPI_ISL_539429 | 8/26/2020 | 9/18/2020 | Europe / Switzerland / Zurich           |
| EPI_ISL_539430 | 8/26/2020 | 9/18/2020 | Europe / Switzerland / Zurich           |
| EPI_ISL_539432 | 8/26/2020 | 9/18/2020 | Europe / Switzerland / Bern             |
| EPI_ISL_539435 | 8/25/2020 | 9/18/2020 | Europe / Switzerland / Bern             |
| EPI_ISL_539436 | 8/25/2020 | 9/18/2020 | Europe / Switzerland / Aargau           |
| EPI_ISL_539437 | 8/25/2020 | 9/18/2020 | Europe / Switzerland / Bern             |
| EPI_ISL_539438 | 8/26/2020 | 9/18/2020 | Europe / Switzerland / Bern             |
| EPI_ISL_539439 | 8/25/2020 | 9/18/2020 | Europe / Switzerland / Zurich           |
| EPI_ISL_539440 | 8/26/2020 | 9/18/2020 | Europe / Switzerland / Vaud             |
| EPI_ISL_539441 | 8/25/2020 | 9/18/2020 | Europe / Switzerland / Vaud             |
| EPI_ISL_539442 | 8/25/2020 | 9/18/2020 | Europe / Switzerland / Bern             |
| EPI_ISL_539443 | 8/25/2020 | 9/18/2020 | Europe / Switzerland / Bern             |
| EPI_ISL_539444 | 8/26/2020 | 9/18/2020 | Europe / Switzerland / Aargau           |
| EPI_ISL_539445 | 8/26/2020 | 9/18/2020 | Europe / Switzerland / Aargau           |
| EPI_ISL_539446 | 8/26/2020 | 9/18/2020 | Europe / Switzerland / Zurich           |
| EPI_ISL_539447 | 8/26/2020 | 9/18/2020 | Europe / Switzerland / Bern             |
| EPI_ISL_539448 | 8/26/2020 | 9/18/2020 | Europe / Switzerland / Aargau           |
| EPI_ISL_539450 | 8/26/2020 | 9/18/2020 | Europe / Switzerland / Bern             |
| EPI_ISL_539451 | 8/26/2020 | 9/18/2020 | Europe / Switzerland / Ticino           |
| EPI_ISL_539452 | 8/26/2020 | 9/18/2020 | Europe / Switzerland / Aargau           |
| EPI_ISL_539454 | 8/27/2020 | 9/18/2020 | Europe / Switzerland / Zurich           |
| EPI_ISL_539455 | 8/27/2020 | 9/18/2020 | Europe / Switzerland / Basel-Landschaft |
| EPI_ISL_539456 | 8/27/2020 | 9/18/2020 | Europe / Switzerland / Basel-Landschaft |
| EPI_ISL_539457 | 8/27/2020 | 9/18/2020 | Europe / Switzerland / Basel-Landschaft |
| EPI_ISL_539458 | 8/27/2020 | 9/18/2020 | Europe / Switzerland / Bern             |
| EPI_ISL_539459 | 8/26/2020 | 9/18/2020 | Europe / Switzerland / Bern             |
| EPI_ISL_539460 | 8/27/2020 | 9/18/2020 | Europe / Switzerland / Bern             |

|                |           |                                                                        |
|----------------|-----------|------------------------------------------------------------------------|
| EPI_ISL_539461 | 8/27/2020 | 9/18/2020 Europe / Switzerland / Bern                                  |
| EPI_ISL_539462 | 8/27/2020 | 9/18/2020 Europe / Switzerland / Basel-Landschaft                      |
| EPI_ISL_539464 | 8/27/2020 | 9/18/2020 Europe / Switzerland / St Gall                               |
| EPI_ISL_539465 | 8/27/2020 | 9/18/2020 Europe / Switzerland / Schwyz                                |
| EPI_ISL_539467 | 8/27/2020 | 9/18/2020 Europe / Switzerland / Wallis                                |
| EPI_ISL_539468 | 8/27/2020 | 9/18/2020 Europe / Switzerland / Vaud                                  |
| EPI_ISL_539471 | 8/27/2020 | 9/18/2020 Europe / Switzerland / Bern                                  |
| EPI_ISL_539472 | 8/27/2020 | 9/18/2020 Europe / Switzerland / Vaud                                  |
| EPI_ISL_539473 | 8/27/2020 | 9/18/2020 Europe / Switzerland / Zurich                                |
| EPI_ISL_539474 | 8/27/2020 | 9/18/2020 Europe / Switzerland / Zurich                                |
| EPI_ISL_539476 | 8/27/2020 | 9/18/2020 Europe / Switzerland / Bern                                  |
| EPI_ISL_539477 | 8/27/2020 | 9/18/2020 Europe / Switzerland / Solothurn                             |
| EPI_ISL_539478 | 8/27/2020 | 9/18/2020 Europe / Switzerland / Solothurn                             |
| EPI_ISL_539479 | 8/27/2020 | 9/18/2020 Europe / Switzerland / Vaud                                  |
| EPI_ISL_539480 | 8/27/2020 | 9/18/2020 Europe / Switzerland / Vaud                                  |
| EPI_ISL_539481 | 8/27/2020 | 9/18/2020 Europe / Switzerland / Vaud                                  |
| EPI_ISL_539482 | 8/27/2020 | 9/18/2020 Europe / Switzerland / Vaud                                  |
| EPI_ISL_539483 | 4/27/2020 | 9/18/2020 Asia / India / Punjab / Rupnagar                             |
| EPI_ISL_539486 | 4/30/2020 | 9/18/2020 Asia / India / Punjab / Rupnagar                             |
| EPI_ISL_539487 | 5/30/2020 | 9/18/2020 Asia / India / Punjab / Rupnagar                             |
| EPI_ISL_539491 | 6/18/2020 | 9/18/2020 Asia / India / Uttarakhand / Dehradun                        |
| EPI_ISL_539493 | 3/23/2020 | 9/18/2020 Europe / Czech Republic / South Moravian Region / Znojmo     |
| EPI_ISL_539494 | 3/31/2020 | 9/18/2020 Europe / Czech Republic / Usti nad Labem / Litomerice / Sned |
| EPI_ISL_539495 | 7/6/2020  | 9/18/2020 North America / USA / Puerto Rico                            |
| EPI_ISL_539496 | 3/13/2020 | 9/18/2020 Europe / Andorra                                             |
| EPI_ISL_539497 | 2/28/2020 | 9/18/2020 Europe / Spain / Andalusia                                   |
| EPI_ISL_539498 | 3/5/2020  | 9/18/2020 Europe / Spain / Andalusia                                   |
| EPI_ISL_539500 | 3/3/2020  | 9/18/2020 Europe / Spain / Aragon                                      |
| EPI_ISL_539501 | 3/5/2020  | 9/18/2020 Europe / Spain / Aragon                                      |
| EPI_ISL_539502 | 3/5/2020  | 9/18/2020 Europe / Spain / Aragon                                      |
| EPI_ISL_539503 | 3/6/2020  | 9/18/2020 Europe / Spain / Aragon                                      |
| EPI_ISL_539504 | 3/6/2020  | 9/18/2020 Europe / Spain / Aragon                                      |
| EPI_ISL_539505 | 3/4/2020  | 9/18/2020 Europe / Spain / Aragon                                      |
| EPI_ISL_539506 | 3/7/2020  | 9/18/2020 Europe / Spain / Aragon                                      |
| EPI_ISL_539507 | 3/7/2020  | 9/18/2020 Europe / Spain / Aragon                                      |
| EPI_ISL_539508 | 3/7/2020  | 9/18/2020 Europe / Spain / Aragon                                      |
| EPI_ISL_539509 | 3/6/2020  | 9/18/2020 Europe / Spain / Aragon                                      |
| EPI_ISL_539510 | 3/6/2020  | 9/18/2020 Europe / Spain / Aragon                                      |
| EPI_ISL_539511 | 3/7/2020  | 9/18/2020 Europe / Spain / Aragon                                      |
| EPI_ISL_539512 | 3/7/2020  | 9/18/2020 Europe / Spain / Aragon                                      |
| EPI_ISL_539513 | 3/7/2020  | 9/18/2020 Europe / Spain / Aragon                                      |
| EPI_ISL_539514 | 3/7/2020  | 9/18/2020 Europe / Spain / Aragon                                      |
| EPI_ISL_539515 | 3/8/2020  | 9/18/2020 Europe / Spain / Aragon                                      |
| EPI_ISL_539516 | 3/8/2020  | 9/18/2020 Europe / Spain / Aragon                                      |
| EPI_ISL_539517 | 3/8/2020  | 9/18/2020 Europe / Spain / Aragon                                      |
| EPI_ISL_539518 | 3/9/2020  | 9/18/2020 Europe / Spain / Aragon                                      |
| EPI_ISL_539519 | 3/9/2020  | 9/18/2020 Europe / Spain / Aragon                                      |



|                |           |           |                                     |
|----------------|-----------|-----------|-------------------------------------|
| EPI_ISL_539520 | 3/12/2020 | 9/18/2020 | Europe / Spain / Ceuta              |
| EPI_ISL_539521 | 3/16/2020 | 9/18/2020 | Europe / Spain / Ceuta              |
| EPI_ISL_539522 | 3/18/2020 | 9/18/2020 | Europe / Spain / Ceuta              |
| EPI_ISL_539523 | 3/13/2020 | 9/18/2020 | Europe / Spain / Castilla y Leon    |
| EPI_ISL_539524 | 3/15/2020 | 9/18/2020 | Europe / Spain / Castilla y Leon    |
| EPI_ISL_539525 | 3/19/2020 | 9/18/2020 | Europe / Spain / Castilla y Leon    |
| EPI_ISL_539526 | 3/21/2020 | 9/18/2020 | Europe / Spain / Castilla-La Mancha |
| EPI_ISL_539527 | 3/22/2020 | 9/18/2020 | Europe / Spain / Castilla-La Mancha |
| EPI_ISL_539528 | 3/22/2020 | 9/18/2020 | Europe / Spain / Castilla-La Mancha |
| EPI_ISL_539529 | 3/22/2020 | 9/18/2020 | Europe / Spain / Castilla-La Mancha |
| EPI_ISL_539530 | 3/22/2020 | 9/18/2020 | Europe / Spain / Castilla-La Mancha |
| EPI_ISL_539531 | 2/24/2020 | 9/18/2020 | Africa / Canary Islands             |
| EPI_ISL_539532 | 3/6/2020  | 9/18/2020 | Africa / Canary Islands             |
| EPI_ISL_539534 | 5/13/2020 | 9/18/2020 | Europe / Spain / Catalunya          |
| EPI_ISL_539535 | 5/15/2020 | 9/18/2020 | Europe / Spain / Catalunya          |
| EPI_ISL_539536 | 5/15/2020 | 9/18/2020 | Europe / Spain / Catalunya          |
| EPI_ISL_539537 | 5/15/2020 | 9/18/2020 | Europe / Spain / Catalunya          |
| EPI_ISL_539538 | 5/20/2020 | 9/18/2020 | Europe / Spain / Catalunya          |
| EPI_ISL_539539 | 5/21/2020 | 9/18/2020 | Europe / Spain / Catalunya          |
| EPI_ISL_539540 | 5/21/2020 | 9/18/2020 | Europe / Spain / Catalunya          |
| EPI_ISL_539541 | 6/29/2020 | 9/18/2020 | Europe / Spain / Catalunya          |
| EPI_ISL_539542 | 6/29/2020 | 9/18/2020 | Europe / Spain / Catalunya          |
| EPI_ISL_539543 | 6/11/2020 | 9/18/2020 | Europe / Spain / Catalunya          |
| EPI_ISL_539544 | 6/11/2020 | 9/18/2020 | Europe / Spain / Catalunya          |
| EPI_ISL_539547 | 6/28/2020 | 9/18/2020 | Europe / Spain / Catalunya          |
| EPI_ISL_539548 | 6/26/2020 | 9/18/2020 | Europe / Spain / Catalunya          |
| EPI_ISL_539549 | 3/3/2020  | 9/18/2020 | Europe / Spain / Catalunya          |
| EPI_ISL_539550 | 3/1/2020  | 9/18/2020 | Europe / Spain / Catalunya          |
| EPI_ISL_539551 | 3/1/2020  | 9/18/2020 | Europe / Spain / Catalunya          |
| EPI_ISL_539552 | 3/20/2020 | 9/18/2020 | Europe / Spain / Catalunya          |
| EPI_ISL_539553 | 3/24/2020 | 9/18/2020 | Europe / Spain / Catalunya          |
| EPI_ISL_539554 | 3/24/2020 | 9/18/2020 | Europe / Spain / Catalunya          |
| EPI_ISL_539555 | 3/9/2020  | 9/18/2020 | Europe / Spain / Catalunya          |
| EPI_ISL_539556 | 3/2/2020  | 9/18/2020 | Europe / Spain / Catalunya          |
| EPI_ISL_539557 | 2/28/2020 | 9/18/2020 | Europe / Spain / Extremadura        |
| EPI_ISL_539558 | 2/28/2020 | 9/18/2020 | Europe / Spain / Extremadura        |
| EPI_ISL_539559 | 3/7/2020  | 9/18/2020 | Europe / Spain / Extremadura        |
| EPI_ISL_539560 | 3/7/2020  | 9/18/2020 | Europe / Spain / Extremadura        |
| EPI_ISL_539561 | 3/9/2020  | 9/18/2020 | Europe / Spain / Extremadura        |
| EPI_ISL_539562 | 3/10/2020 | 9/18/2020 | Europe / Spain / Extremadura        |
| EPI_ISL_539567 | 8/1/2020  | 9/18/2020 | Europe / Spain / Melilla            |
| EPI_ISL_539568 | 8/1/2020  | 9/18/2020 | Europe / Spain / Melilla            |
| EPI_ISL_539569 | 3/9/2020  | 9/18/2020 | Europe / Spain / Navarra            |
| EPI_ISL_539570 | 3/9/2020  | 9/18/2020 | Europe / Spain / Navarra            |
| EPI_ISL_539571 | 3/9/2020  | 9/18/2020 | Europe / Spain / Navarra            |
| EPI_ISL_539572 | 3/9/2020  | 9/18/2020 | Europe / Spain / Navarra            |
| EPI_ISL_539573 | 3/22/2020 | 9/19/2020 | Africa / Gabon / Libreville         |









|                |           |                                                                         |
|----------------|-----------|-------------------------------------------------------------------------|
| EPI_ISL_539770 | 8/14/2020 | 9/19/2020 Asia / India / Telangana                                      |
| EPI_ISL_539771 | 8/14/2020 | 9/19/2020 Asia / India / Telangana                                      |
| EPI_ISL_539772 | 8/19/2020 | 9/19/2020 Asia / India / Telangana                                      |
| EPI_ISL_539773 | 8/19/2020 | 9/19/2020 Asia / India / Telangana                                      |
| EPI_ISL_539774 | 8/9/2020  | 9/19/2020 Asia / India / Telangana                                      |
| EPI_ISL_539775 | 8/9/2020  | 9/19/2020 Asia / India / Telangana                                      |
| EPI_ISL_539776 | 3/30/2020 | 9/19/2020 Europe / Czech Republic / Central Bohemian Region / Mlada B   |
| EPI_ISL_539777 | 4/1/2020  | 9/19/2020 Europe / Czech Republic / Usti nad Labem Region / Litomerice  |
| EPI_ISL_539778 | 4/8/2020  | 9/19/2020 Europe / Czech Republic / Moravian-Silesian Region / Cesky Te |
| EPI_ISL_539779 | 4/8/2020  | 9/19/2020 Europe / Czech Republic / Moravian-Silesian Region / Cesky Te |
| EPI_ISL_539780 | 4/21/2020 | 9/19/2020 Europe / Czech Republic / Prague                              |
| EPI_ISL_539781 | 3/18/2020 | 9/19/2020 Europe / Czech Republic / Olomouc Region / Litovel            |
| EPI_ISL_539782 | 5/24/2020 | 9/19/2020 Europe / Czech Republic / Moravian-Silesian Region / Albrecht |
| EPI_ISL_539783 | 6/15/2020 | 9/20/2020 South America / Ecuador / Napo / Tena                         |
| EPI_ISL_539784 | 8/19/2020 | 9/20/2020 South America / Ecuador / Napo / Tena                         |
| EPI_ISL_539785 | 8/4/2020  | 9/20/2020 South America / Ecuador / Azuay / Cuenca                      |
| EPI_ISL_539786 | 8/5/2020  | 9/20/2020 South America / Ecuador / Azuay / Cuenca                      |
| EPI_ISL_539787 | 8/5/2020  | 9/20/2020 South America / Ecuador / Azuay / Cuenca                      |
| EPI_ISL_539788 | 8/5/2020  | 9/20/2020 South America / Ecuador / Azuay / Cuenca                      |
| EPI_ISL_539789 | 8/15/2020 | 9/20/2020 South America / Ecuador / Loja / Macara                       |
| EPI_ISL_539790 | 8/15/2020 | 9/20/2020 South America / Ecuador / Loja / Macara                       |
| EPI_ISL_539791 | 8/15/2020 | 9/20/2020 South America / Ecuador / Loja / Macara                       |
| EPI_ISL_539792 | 8/15/2020 | 9/20/2020 South America / Ecuador / Loja / Catamayo                     |
| EPI_ISL_539793 | 8/15/2020 | 9/20/2020 South America / Ecuador / Loja / Catamayo                     |
| EPI_ISL_539794 | 4/9/2020  | 9/20/2020 North America / USA / Wyoming                                 |
| EPI_ISL_539795 | 4/13/2020 | 9/20/2020 North America / USA / Wyoming                                 |
| EPI_ISL_539796 | 4/16/2020 | 9/20/2020 North America / USA / Wyoming                                 |
| EPI_ISL_539797 | 4/20/2020 | 9/20/2020 North America / USA / Wyoming                                 |
| EPI_ISL_539798 | 4/22/2020 | 9/20/2020 North America / USA / Wyoming                                 |
| EPI_ISL_539799 | 4/24/2020 | 9/20/2020 North America / USA / Wyoming                                 |
| EPI_ISL_539800 | 4/24/2020 | 9/20/2020 North America / USA / Wyoming                                 |
| EPI_ISL_539801 | 4/28/2020 | 9/20/2020 North America / USA / Wyoming                                 |
| EPI_ISL_539802 | 4/30/2020 | 9/20/2020 North America / USA / Wyoming                                 |
| EPI_ISL_539803 | 7/20/2020 | 9/21/2020 Asia / Hong Kong                                              |
| EPI_ISL_539804 | 7/5/2020  | 9/21/2020 Asia / Hong Kong                                              |
| EPI_ISL_539805 | 7/6/2020  | 9/21/2020 Asia / Hong Kong                                              |
| EPI_ISL_539806 | 7/5/2020  | 9/21/2020 Asia / Hong Kong                                              |
| EPI_ISL_539807 | 7/6/2020  | 9/21/2020 Asia / Hong Kong                                              |
| EPI_ISL_539808 | 7/6/2020  | 9/21/2020 Asia / Hong Kong                                              |
| EPI_ISL_539809 | 7/14/2020 | 9/21/2020 Asia / Hong Kong                                              |
| EPI_ISL_539810 | 7/18/2020 | 9/21/2020 Asia / Hong Kong                                              |
| EPI_ISL_539811 | 7/19/2020 | 9/21/2020 Asia / Hong Kong                                              |
| EPI_ISL_539812 | 7/19/2020 | 9/21/2020 Asia / Hong Kong                                              |
| EPI_ISL_539813 | 7/20/2020 | 9/21/2020 Asia / Hong Kong                                              |
| EPI_ISL_539814 | 7/21/2020 | 9/21/2020 Asia / Hong Kong                                              |
| EPI_ISL_539815 | 7/21/2020 | 9/21/2020 Asia / Hong Kong                                              |
| EPI_ISL_539816 | 8/12/2020 | 9/21/2020 Asia / Hong Kong                                              |

|                |           |                                             |
|----------------|-----------|---------------------------------------------|
| EPI_ISL_539817 | 8/14/2020 | 9/21/2020 Asia / Hong Kong                  |
| EPI_ISL_539818 | 8/13/2020 | 9/21/2020 Asia / Hong Kong                  |
| EPI_ISL_539819 | 8/13/2020 | 9/21/2020 Asia / Hong Kong                  |
| EPI_ISL_539820 | 3/29/2020 | 9/21/2020 Asia / Hong Kong                  |
| EPI_ISL_539821 | 8/15/2020 | 9/21/2020 Asia / Hong Kong                  |
| EPI_ISL_539822 | 8/14/2020 | 9/21/2020 Asia / Hong Kong                  |
| EPI_ISL_539823 | 8/14/2020 | 9/21/2020 Asia / Hong Kong                  |
| EPI_ISL_539824 | 4/28/2020 | 9/21/2020 North America / USA / Minnesota   |
| EPI_ISL_539825 | 4/28/2020 | 9/21/2020 North America / USA / Minnesota   |
| EPI_ISL_539826 | 4/28/2020 | 9/21/2020 North America / USA / Minnesota   |
| EPI_ISL_539827 | 4/28/2020 | 9/21/2020 North America / USA / Minnesota   |
| EPI_ISL_539828 | 5/1/2020  | 9/21/2020 North America / USA / Minnesota   |
| EPI_ISL_539829 | 5/5/2020  | 9/21/2020 North America / USA / Minnesota   |
| EPI_ISL_539830 | 5/8/2020  | 9/21/2020 North America / USA / Minnesota   |
| EPI_ISL_539831 | 5/12/2020 | 9/21/2020 North America / USA / Minnesota   |
| EPI_ISL_539832 | 5/21/2020 | 9/21/2020 North America / USA / Minnesota   |
| EPI_ISL_539833 | 5/21/2020 | 9/21/2020 North America / USA / Minnesota   |
| EPI_ISL_539834 | 5/21/2020 | 9/21/2020 North America / USA / Minnesota   |
| EPI_ISL_539835 | 5/21/2020 | 9/21/2020 North America / USA / Minnesota   |
| EPI_ISL_539836 | 5/21/2020 | 9/21/2020 North America / USA / Minnesota   |
| EPI_ISL_539837 | 6/8/2020  | 9/21/2020 North America / USA / Minnesota   |
| EPI_ISL_539838 | 6/15/2020 | 9/21/2020 North America / USA / Minnesota   |
| EPI_ISL_539839 | 6/15/2020 | 9/21/2020 North America / USA / Minnesota   |
| EPI_ISL_539840 | 6/16/2020 | 9/21/2020 North America / USA / Minnesota   |
| EPI_ISL_539841 | 8/3/2020  | 9/21/2020 North America / USA / Minnesota   |
| EPI_ISL_539842 | 8/17/2020 | 9/21/2020 North America / USA / Minnesota   |
| EPI_ISL_539843 | 8/18/2020 | 9/21/2020 North America / USA / Minnesota   |
| EPI_ISL_539844 | 8/18/2020 | 9/21/2020 North America / USA / Minnesota   |
| EPI_ISL_539846 | 8/18/2020 | 9/21/2020 North America / USA / Minnesota   |
| EPI_ISL_539847 | 8/12/2020 | 9/21/2020 North America / USA / Minnesota   |
| EPI_ISL_539848 | 8/20/2020 | 9/21/2020 North America / USA / Minnesota   |
| EPI_ISL_539849 | 8/19/2020 | 9/21/2020 North America / USA / Minnesota   |
| EPI_ISL_539850 | 3/25/2020 | 9/21/2020 Asia / Hong Kong                  |
| EPI_ISL_539851 | 4/3/2020  | 9/21/2020 Asia / Hong Kong                  |
| EPI_ISL_539880 | 8/27/2020 | 9/21/2020 Europe / United Kingdom / England |
| EPI_ISL_539881 | 6/24/2020 | 9/21/2020 Europe / Sweden / Halland         |
| EPI_ISL_539882 | 6/9/2020  | 9/21/2020 Europe / Sweden / Vastra Gotaland |
| EPI_ISL_539883 | 6/24/2020 | 9/21/2020 Europe / Sweden / Vastra Gotaland |
| EPI_ISL_539884 | 7/22/2020 | 9/21/2020 Europe / Sweden / Vastra Gotaland |
| EPI_ISL_539885 | 7/28/2020 | 9/21/2020 Europe / Sweden / Vastra Gotaland |
| EPI_ISL_539886 | 8/3/2020  | 9/21/2020 Europe / Sweden / Halland         |
| EPI_ISL_539894 | 7/5/2020  | 9/21/2020 Europe / United Kingdom / England |
| EPI_ISL_539896 | 6/28/2020 | 9/21/2020 Europe / United Kingdom / England |
| EPI_ISL_539897 | 8/26/2020 | 9/21/2020 Europe / United Kingdom / England |
| EPI_ISL_539898 | 8/26/2020 | 9/21/2020 Europe / United Kingdom / England |
| EPI_ISL_539900 | 8/22/2020 | 9/21/2020 Europe / United Kingdom / England |
| EPI_ISL_539901 | 8/25/2020 | 9/21/2020 Europe / United Kingdom / England |







|                |           |           |                                            |
|----------------|-----------|-----------|--------------------------------------------|
| EPI_ISL_540006 | 8/26/2020 | 9/21/2020 | Europe / United Kingdom / England          |
| EPI_ISL_540007 | 8/26/2020 | 9/21/2020 | Europe / United Kingdom / England          |
| EPI_ISL_540008 | 8/26/2020 | 9/21/2020 | Europe / United Kingdom / Scotland         |
| EPI_ISL_540009 | 8/26/2020 | 9/21/2020 | Europe / United Kingdom / England          |
| EPI_ISL_540010 | 8/30/2020 | 9/21/2020 | Europe / United Kingdom / Scotland         |
| EPI_ISL_540011 | 8/26/2020 | 9/21/2020 | Europe / United Kingdom / England          |
| EPI_ISL_540012 | 8/25/2020 | 9/21/2020 | Europe / United Kingdom / England          |
| EPI_ISL_540013 | 8/27/2020 | 9/21/2020 | Europe / United Kingdom / England          |
| EPI_ISL_540014 | 8/24/2020 | 9/21/2020 | Europe / United Kingdom / England          |
| EPI_ISL_540016 | 8/24/2020 | 9/21/2020 | Europe / United Kingdom / England          |
| EPI_ISL_540017 | 8/24/2020 | 9/21/2020 | Europe / United Kingdom / England          |
| EPI_ISL_540018 | 8/26/2020 | 9/21/2020 | Europe / United Kingdom / England          |
| EPI_ISL_540019 | 8/27/2020 | 9/21/2020 | Europe / United Kingdom / England          |
| EPI_ISL_540022 | 8/27/2020 | 9/21/2020 | Europe / United Kingdom / England          |
| EPI_ISL_540023 | 8/25/2020 | 9/21/2020 | Europe / United Kingdom / England          |
| EPI_ISL_540025 | 8/26/2020 | 9/21/2020 | Europe / United Kingdom / England          |
| EPI_ISL_540026 | 8/26/2020 | 9/21/2020 | Europe / United Kingdom / England          |
| EPI_ISL_540027 | 8/24/2020 | 9/21/2020 | Europe / United Kingdom / England          |
| EPI_ISL_540028 | 8/26/2020 | 9/21/2020 | Europe / United Kingdom / England          |
| EPI_ISL_540029 | 8/26/2020 | 9/21/2020 | Europe / United Kingdom / England          |
| EPI_ISL_540031 | 8/24/2020 | 9/21/2020 | Europe / United Kingdom / Wales            |
| EPI_ISL_540032 | 8/27/2020 | 9/21/2020 | Europe / United Kingdom / England          |
| EPI_ISL_540033 | 8/24/2020 | 9/21/2020 | Europe / United Kingdom / England          |
| EPI_ISL_540034 | 8/22/2020 | 9/21/2020 | Europe / United Kingdom / England          |
| EPI_ISL_540035 | 8/24/2020 | 9/21/2020 | Europe / United Kingdom / Scotland         |
| EPI_ISL_540036 | 8/22/2020 | 9/21/2020 | Europe / United Kingdom / England          |
| EPI_ISL_540037 | 8/27/2020 | 9/21/2020 | Europe / United Kingdom / England          |
| EPI_ISL_540038 | 8/24/2020 | 9/21/2020 | Europe / United Kingdom / England          |
| EPI_ISL_540039 | 8/30/2020 | 9/21/2020 | Europe / United Kingdom / Scotland         |
| EPI_ISL_540040 | 8/26/2020 | 9/21/2020 | Europe / United Kingdom / Scotland         |
| EPI_ISL_540041 | 8/24/2020 | 9/21/2020 | Europe / United Kingdom / England          |
| EPI_ISL_540042 | 8/22/2020 | 9/21/2020 | Europe / United Kingdom / England          |
| EPI_ISL_540043 | 8/26/2020 | 9/21/2020 | Europe / United Kingdom / England          |
| EPI_ISL_540044 | 8/28/2020 | 9/21/2020 | Europe / United Kingdom / Scotland         |
| EPI_ISL_540045 | 8/24/2020 | 9/21/2020 | Europe / United Kingdom / England          |
| EPI_ISL_540046 | 8/26/2020 | 9/21/2020 | Europe / United Kingdom / England          |
| EPI_ISL_540047 | 8/26/2020 | 9/21/2020 | Europe / United Kingdom / England          |
| EPI_ISL_540048 | 8/24/2020 | 9/21/2020 | Europe / United Kingdom / England          |
| EPI_ISL_540050 | 8/26/2020 | 9/21/2020 | Europe / United Kingdom / Northern Ireland |
| EPI_ISL_540051 | 8/26/2020 | 9/21/2020 | Europe / United Kingdom / England          |
| EPI_ISL_540052 | 8/26/2020 | 9/21/2020 | Europe / United Kingdom / England          |
| EPI_ISL_540054 | 8/30/2020 | 9/21/2020 | Europe / United Kingdom / England          |
| EPI_ISL_540055 | 8/23/2020 | 9/21/2020 | Europe / United Kingdom / England          |
| EPI_ISL_540056 | 8/26/2020 | 9/21/2020 | Europe / United Kingdom / England          |
| EPI_ISL_540057 | 8/27/2020 | 9/21/2020 | Europe / United Kingdom / England          |
| EPI_ISL_540058 | 8/26/2020 | 9/21/2020 | Europe / United Kingdom / England          |
| EPI_ISL_540060 | 8/26/2020 | 9/21/2020 | Europe / United Kingdom / England          |











|                |           |           |                                            |
|----------------|-----------|-----------|--------------------------------------------|
| EPI_ISL_540331 | 8/19/2020 | 9/21/2020 | Europe / United Kingdom / Scotland         |
| EPI_ISL_540335 | 8/18/2020 | 9/21/2020 | Europe / United Kingdom / Northern Ireland |
| EPI_ISL_540336 | 8/19/2020 | 9/21/2020 | Europe / United Kingdom / Scotland         |
| EPI_ISL_540337 | 8/17/2020 | 9/21/2020 | Europe / United Kingdom / England          |
| EPI_ISL_540338 | 8/18/2020 | 9/21/2020 | Europe / United Kingdom / Northern Ireland |
| EPI_ISL_540339 | 8/16/2020 | 9/21/2020 | Europe / United Kingdom / England          |
| EPI_ISL_540340 | 8/19/2020 | 9/21/2020 | Europe / United Kingdom / England          |
| EPI_ISL_540341 | 8/17/2020 | 9/21/2020 | Europe / United Kingdom / England          |
| EPI_ISL_540342 | 8/25/2020 | 9/21/2020 | Europe / United Kingdom / England          |
| EPI_ISL_540343 | 8/29/2020 | 9/21/2020 | Europe / United Kingdom / Scotland         |
| EPI_ISL_540344 | 8/25/2020 | 9/21/2020 | Europe / United Kingdom / England          |
| EPI_ISL_540345 | 8/28/2020 | 9/21/2020 | Europe / United Kingdom / England          |
| EPI_ISL_540346 | 8/25/2020 | 9/21/2020 | Europe / United Kingdom / England          |
| EPI_ISL_540347 | 8/28/2020 | 9/21/2020 | Europe / United Kingdom / England          |
| EPI_ISL_540348 | 8/25/2020 | 9/21/2020 | Europe / United Kingdom / England          |
| EPI_ISL_540349 | 8/25/2020 | 9/21/2020 | Europe / United Kingdom / Scotland         |
| EPI_ISL_540350 | 8/28/2020 | 9/21/2020 | Europe / United Kingdom / England          |
| EPI_ISL_540352 | 8/25/2020 | 9/21/2020 | Europe / United Kingdom / England          |
| EPI_ISL_540353 | 8/28/2020 | 9/21/2020 | Europe / United Kingdom / England          |
| EPI_ISL_540354 | 8/28/2020 | 9/21/2020 | Europe / United Kingdom / England          |
| EPI_ISL_540355 | 8/28/2020 | 9/21/2020 | Europe / United Kingdom / Scotland         |
| EPI_ISL_540356 | 8/27/2020 | 9/21/2020 | Europe / United Kingdom / Scotland         |
| EPI_ISL_540357 | 8/25/2020 | 9/21/2020 | Europe / United Kingdom / England          |
| EPI_ISL_540358 | 8/25/2020 | 9/21/2020 | Europe / United Kingdom / England          |
| EPI_ISL_540359 | 8/25/2020 | 9/21/2020 | Europe / United Kingdom / England          |
| EPI_ISL_540360 | 8/24/2020 | 9/21/2020 | Europe / United Kingdom / England          |
| EPI_ISL_540361 | 8/28/2020 | 9/21/2020 | Europe / United Kingdom / England          |
| EPI_ISL_540362 | 8/29/2020 | 9/21/2020 | Europe / United Kingdom / Scotland         |
| EPI_ISL_540363 | 8/25/2020 | 9/21/2020 | Europe / United Kingdom / England          |
| EPI_ISL_540364 | 8/25/2020 | 9/21/2020 | Europe / United Kingdom / England          |
| EPI_ISL_540365 | 8/28/2020 | 9/21/2020 | Europe / United Kingdom / Scotland         |
| EPI_ISL_540366 | 8/25/2020 | 9/21/2020 | Europe / United Kingdom / Scotland         |
| EPI_ISL_540367 | 8/28/2020 | 9/21/2020 | Europe / United Kingdom / Scotland         |
| EPI_ISL_540368 | 8/27/2020 | 9/21/2020 | Europe / United Kingdom / Scotland         |
| EPI_ISL_540369 | 8/27/2020 | 9/21/2020 | Europe / United Kingdom / England          |
| EPI_ISL_540370 | 8/25/2020 | 9/21/2020 | Europe / United Kingdom / England          |
| EPI_ISL_540372 | 8/28/2020 | 9/21/2020 | Europe / United Kingdom / Scotland         |
| EPI_ISL_540373 | 8/28/2020 | 9/21/2020 | Europe / United Kingdom / England          |
| EPI_ISL_540376 | 8/29/2020 | 9/21/2020 | Europe / United Kingdom / Scotland         |
| EPI_ISL_540377 | 8/28/2020 | 9/21/2020 | Europe / United Kingdom / Scotland         |
| EPI_ISL_540378 | 8/25/2020 | 9/21/2020 | Europe / United Kingdom / England          |
| EPI_ISL_540379 | 8/21/2020 | 9/21/2020 | Europe / United Kingdom / England          |
| EPI_ISL_540380 | 8/28/2020 | 9/21/2020 | Europe / United Kingdom / England          |
| EPI_ISL_540381 | 8/28/2020 | 9/21/2020 | Europe / United Kingdom / Scotland         |
| EPI_ISL_540382 | 8/28/2020 | 9/21/2020 | Europe / United Kingdom / Scotland         |
| EPI_ISL_540383 | 8/27/2020 | 9/21/2020 | Europe / United Kingdom / Scotland         |
| EPI_ISL_540384 | 8/28/2020 | 9/21/2020 | Europe / United Kingdom / England          |



|                |           |           |                                     |
|----------------|-----------|-----------|-------------------------------------|
| EPI_ISL_540385 | 8/25/2020 | 9/21/2020 | Europe / United Kingdom / England   |
| EPI_ISL_540386 | 8/28/2020 | 9/21/2020 | Europe / United Kingdom / Scotland  |
| EPI_ISL_540387 | 8/25/2020 | 9/21/2020 | Europe / United Kingdom / England   |
| EPI_ISL_540389 | 8/25/2020 | 9/21/2020 | Europe / United Kingdom / England   |
| EPI_ISL_540390 | 8/25/2020 | 9/21/2020 | Europe / United Kingdom / England   |
| EPI_ISL_540391 | 8/25/2020 | 9/21/2020 | Europe / United Kingdom / Scotland  |
| EPI_ISL_540392 | 8/25/2020 | 9/21/2020 | Europe / United Kingdom / England   |
| EPI_ISL_540393 | 8/28/2020 | 9/21/2020 | Europe / United Kingdom / England   |
| EPI_ISL_540394 | 8/28/2020 | 9/21/2020 | Europe / United Kingdom / England   |
| EPI_ISL_540395 | 8/28/2020 | 9/21/2020 | Europe / United Kingdom / England   |
| EPI_ISL_540396 | 8/25/2020 | 9/21/2020 | Europe / United Kingdom / England   |
| EPI_ISL_540397 | 8/28/2020 | 9/21/2020 | Europe / United Kingdom / Scotland  |
| EPI_ISL_540398 | 8/25/2020 | 9/21/2020 | Europe / United Kingdom / England   |
| EPI_ISL_540399 | 8/28/2020 | 9/21/2020 | Europe / United Kingdom / England   |
| EPI_ISL_540401 | 8/25/2020 | 9/21/2020 | Europe / United Kingdom / England   |
| EPI_ISL_540402 | 8/24/2020 | 9/21/2020 | Europe / United Kingdom / England   |
| EPI_ISL_540403 | 8/25/2020 | 9/21/2020 | Europe / United Kingdom / England   |
| EPI_ISL_540404 | 8/28/2020 | 9/21/2020 | Europe / United Kingdom / England   |
| EPI_ISL_540405 | 8/24/2020 | 9/21/2020 | Europe / United Kingdom / England   |
| EPI_ISL_540406 | 8/29/2020 | 9/21/2020 | Europe / United Kingdom / Scotland  |
| EPI_ISL_540407 | 8/25/2020 | 9/21/2020 | Europe / United Kingdom / England   |
| EPI_ISL_540408 | 8/28/2020 | 9/21/2020 | Europe / United Kingdom / England   |
| EPI_ISL_540409 | 8/25/2020 | 9/21/2020 | Europe / United Kingdom / England   |
| EPI_ISL_540410 | 8/28/2020 | 9/21/2020 | Europe / United Kingdom / England   |
| EPI_ISL_540411 | 8/28/2020 | 9/21/2020 | Europe / United Kingdom / England   |
| EPI_ISL_540413 | 8/27/2020 | 9/21/2020 | Europe / United Kingdom / Scotland  |
| EPI_ISL_540414 | 8/25/2020 | 9/21/2020 | Europe / United Kingdom / England   |
| EPI_ISL_540416 | 8/28/2020 | 9/21/2020 | Europe / United Kingdom / England   |
| EPI_ISL_540419 | 8/18/2020 | 9/21/2020 | Europe / United Kingdom / England   |
| EPI_ISL_540420 | 8/16/2020 | 9/21/2020 | Europe / United Kingdom / England   |
| EPI_ISL_540421 | 5/2/2020  | 9/21/2020 | North America / USA / Wyoming       |
| EPI_ISL_540422 | 5/1/2020  | 9/21/2020 | North America / USA / Wyoming       |
| EPI_ISL_540431 | 4/5/2020  | 9/21/2020 | North America / USA / Indiana       |
| EPI_ISL_540432 | 3/24/2020 | 9/21/2020 | North America / USA / Tennessee     |
| EPI_ISL_540433 | 3/24/2020 | 9/21/2020 | North America / USA / Tennessee     |
| EPI_ISL_540434 | 3/12/2020 | 9/21/2020 | North America / USA / Tennessee     |
| EPI_ISL_540435 | 5/3/2020  | 9/21/2020 | North America / USA / Virginia      |
| EPI_ISL_540436 | 4/20/2020 | 9/21/2020 | North America / USA / Wisconsin     |
| EPI_ISL_540437 | 4/15/2020 | 9/21/2020 | North America / USA / Wisconsin     |
| EPI_ISL_540438 | 5/31/2020 | 9/21/2020 | North America / USA / Wisconsin     |
| EPI_ISL_540439 | 4/17/2020 | 9/21/2020 | North America / USA / West Virginia |
| EPI_ISL_540442 | 7/23/2020 | 9/21/2020 | Europe / Belgium / Anvers           |
| EPI_ISL_540443 | 7/23/2020 | 9/21/2020 | Europe / Belgium / Liège            |
| EPI_ISL_540444 | 7/9/2020  | 9/21/2020 | Europe / Belgium / Bruxelles        |
| EPI_ISL_540445 | 7/10/2020 | 9/21/2020 | Europe / Belgium / Bruxelles        |
| EPI_ISL_540446 | 7/7/2020  | 9/21/2020 | Europe / Belgium / Limburg          |
| EPI_ISL_540447 | 7/24/2020 | 9/21/2020 | Europe / Belgium / Anvers           |

|                |           |           |                                      |
|----------------|-----------|-----------|--------------------------------------|
| EPI_ISL_540448 | 7/26/2020 | 9/21/2020 | Europe / Belgium / Brabant Wallon    |
| EPI_ISL_540449 | 7/25/2020 | 9/21/2020 | Europe / Belgium / Limburg           |
| EPI_ISL_540450 | 7/26/2020 | 9/21/2020 | Europe / Belgium / Liège             |
| EPI_ISL_540452 | 7/23/2020 | 9/21/2020 | Europe / Belgium / Liège             |
| EPI_ISL_540453 | 7/25/2020 | 9/21/2020 | Europe / Belgium / Hainaut           |
| EPI_ISL_540454 | 7/23/2020 | 9/21/2020 | Europe / Belgium / Anvers            |
| EPI_ISL_540455 | 7/8/2020  | 9/21/2020 | Europe / Belgium / Anvers            |
| EPI_ISL_540457 | 7/23/2020 | 9/21/2020 | Europe / Belgium / Hainaut           |
| EPI_ISL_540458 | 7/23/2020 | 9/21/2020 | Europe / Belgium / Hainaut           |
| EPI_ISL_540459 | 7/23/2020 | 9/21/2020 | Europe / Belgium / Namur             |
| EPI_ISL_540460 | 7/23/2020 | 9/21/2020 | Europe / Belgium / Hainaut           |
| EPI_ISL_540461 | 7/23/2020 | 9/21/2020 | Europe / Belgium / Hainaut           |
| EPI_ISL_540462 | 7/24/2020 | 9/21/2020 | Europe / Belgium / Anvers            |
| EPI_ISL_540463 | 7/24/2020 | 9/21/2020 | Europe / Belgium / Anvers            |
| EPI_ISL_540464 | 7/24/2020 | 9/21/2020 | Europe / Belgium / Anvers            |
| EPI_ISL_540465 | 7/23/2020 | 9/21/2020 | Europe / Belgium / Anvers            |
| EPI_ISL_540466 | 7/25/2020 | 9/21/2020 | Europe / Belgium / Anvers            |
| EPI_ISL_540467 | 7/23/2020 | 9/21/2020 | Europe / Belgium / Flandre-Orientale |
| EPI_ISL_540469 | 7/23/2020 | 9/21/2020 | Europe / Belgium / Liège             |
| EPI_ISL_540470 | 7/23/2020 | 9/21/2020 | Europe / Belgium / Liège             |
| EPI_ISL_540471 | 7/23/2020 | 9/21/2020 | Europe / Belgium / Liège             |
| EPI_ISL_540472 | 7/23/2020 | 9/21/2020 | Europe / Belgium / Liège             |
| EPI_ISL_540473 | 7/24/2020 | 9/21/2020 | Europe / Belgium / Liège             |
| EPI_ISL_540474 | 7/24/2020 | 9/21/2020 | Europe / Belgium / Liège             |
| EPI_ISL_540475 | 7/24/2020 | 9/21/2020 | Europe / Belgium / Liège             |
| EPI_ISL_540476 | 7/24/2020 | 9/21/2020 | Europe / Belgium / Liège             |
| EPI_ISL_540477 | 7/24/2020 | 9/21/2020 | Europe / Belgium / Liège             |
| EPI_ISL_540478 | 7/27/2020 | 9/21/2020 | Europe / Belgium / Liège             |
| EPI_ISL_540479 | 7/27/2020 | 9/21/2020 | Europe / Belgium / Liège             |
| EPI_ISL_540480 | 7/27/2020 | 9/21/2020 | Europe / Belgium / Liège             |
| EPI_ISL_540481 | 7/27/2020 | 9/21/2020 | Europe / Belgium / Liège             |
| EPI_ISL_540482 | 7/27/2020 | 9/21/2020 | Europe / Belgium / Liège             |
| EPI_ISL_540484 | 7/27/2020 | 9/21/2020 | Europe / Belgium / Liège             |
| EPI_ISL_540486 | 7/27/2020 | 9/21/2020 | Europe / Belgium / Liège             |
| EPI_ISL_540487 | 7/27/2020 | 9/21/2020 | Europe / Belgium / Liège             |
| EPI_ISL_540488 | 7/29/2020 | 9/21/2020 | Europe / Belgium / Liège             |
| EPI_ISL_540489 | 7/29/2020 | 9/21/2020 | Europe / Belgium / Liège             |
| EPI_ISL_540490 | 7/29/2020 | 9/21/2020 | Europe / Belgium / Liège             |
| EPI_ISL_540491 | 7/29/2020 | 9/21/2020 | Europe / Belgium / Liège             |
| EPI_ISL_540492 | 7/29/2020 | 9/21/2020 | Europe / Belgium / Liège             |
| EPI_ISL_540493 | 7/29/2020 | 9/21/2020 | Europe / Belgium / Namur             |
| EPI_ISL_540494 | 7/30/2020 | 9/21/2020 | Europe / Belgium / Liège             |
| EPI_ISL_540495 | 7/30/2020 | 9/21/2020 | Europe / Belgium / Liège             |
| EPI_ISL_540496 | 7/30/2020 | 9/21/2020 | Europe / Belgium / Liège             |
| EPI_ISL_540497 | 7/30/2020 | 9/21/2020 | Europe / Belgium / Liège             |
| EPI_ISL_540498 | 7/30/2020 | 9/21/2020 | Europe / Belgium / Liège             |
| EPI_ISL_540499 | 7/30/2020 | 9/21/2020 | Europe / Belgium / Liège             |









|                |           |           |                                    |
|----------------|-----------|-----------|------------------------------------|
| EPI_ISL_540872 | 8/31/2020 | 9/21/2020 | Europe / United Kingdom / Scotland |
| EPI_ISL_540880 | 9/3/2020  | 9/21/2020 | Europe / United Kingdom / Scotland |
| EPI_ISL_540882 | 9/4/2020  | 9/21/2020 | Europe / United Kingdom / Scotland |
| EPI_ISL_540883 | 9/7/2020  | 9/21/2020 | Europe / United Kingdom / Scotland |
| EPI_ISL_540884 | 9/7/2020  | 9/21/2020 | Europe / United Kingdom / Scotland |
| EPI_ISL_540885 | 9/9/2020  | 9/21/2020 | Europe / United Kingdom / Scotland |
| EPI_ISL_540886 | 9/10/2020 | 9/21/2020 | Europe / United Kingdom / Scotland |
| EPI_ISL_540889 | 9/11/2020 | 9/21/2020 | Europe / United Kingdom / Scotland |
| EPI_ISL_540892 | 9/13/2020 | 9/21/2020 | Europe / United Kingdom / Scotland |
| EPI_ISL_540893 | 9/13/2020 | 9/21/2020 | Europe / United Kingdom / Scotland |
| EPI_ISL_540894 | 8/27/2020 | 9/21/2020 | Europe / United Kingdom / Wales    |
| EPI_ISL_540895 | 8/27/2020 | 9/21/2020 | Europe / United Kingdom / Wales    |
| EPI_ISL_540898 | 6/9/2020  | 9/21/2020 | Europe / United Kingdom / Wales    |
| EPI_ISL_540899 | 9/1/2020  | 9/21/2020 | Europe / United Kingdom / Wales    |
| EPI_ISL_540900 | 9/9/2020  | 9/21/2020 | Europe / United Kingdom / Wales    |
| EPI_ISL_540901 | 9/6/2020  | 9/21/2020 | Europe / United Kingdom / Wales    |
| EPI_ISL_540902 | 9/8/2020  | 9/21/2020 | Europe / United Kingdom / Wales    |
| EPI_ISL_540903 | 9/6/2020  | 9/21/2020 | Europe / United Kingdom / Wales    |
| EPI_ISL_540904 | 9/7/2020  | 9/21/2020 | Europe / United Kingdom / Wales    |
| EPI_ISL_540905 | 9/6/2020  | 9/21/2020 | Europe / United Kingdom / Wales    |
| EPI_ISL_540906 | 9/7/2020  | 9/21/2020 | Europe / United Kingdom / Wales    |
| EPI_ISL_540907 | 9/9/2020  | 9/21/2020 | Europe / United Kingdom / Wales    |
| EPI_ISL_540908 | 9/7/2020  | 9/21/2020 | Europe / United Kingdom / Wales    |
| EPI_ISL_540909 | 9/9/2020  | 9/21/2020 | Europe / United Kingdom / Wales    |
| EPI_ISL_540910 | 9/8/2020  | 9/21/2020 | Europe / United Kingdom / Wales    |
| EPI_ISL_540911 | 9/8/2020  | 9/21/2020 | Europe / United Kingdom / Wales    |
| EPI_ISL_540912 | 9/7/2020  | 9/21/2020 | Europe / United Kingdom / Wales    |
| EPI_ISL_540913 | 9/8/2020  | 9/21/2020 | Europe / United Kingdom / Wales    |
| EPI_ISL_540914 | 9/8/2020  | 9/21/2020 | Europe / United Kingdom / Wales    |
| EPI_ISL_540915 | 9/8/2020  | 9/21/2020 | Europe / United Kingdom / Wales    |
| EPI_ISL_540916 | 9/9/2020  | 9/21/2020 | Europe / United Kingdom / Wales    |
| EPI_ISL_540917 | 9/8/2020  | 9/21/2020 | Europe / United Kingdom / Wales    |
| EPI_ISL_540918 | 9/8/2020  | 9/21/2020 | Europe / United Kingdom / Wales    |
| EPI_ISL_540919 | 9/6/2020  | 9/21/2020 | Europe / United Kingdom / Wales    |
| EPI_ISL_540920 | 9/7/2020  | 9/21/2020 | Europe / United Kingdom / Wales    |
| EPI_ISL_540921 | 5/18/2020 | 9/21/2020 | North America / USA / Wyoming      |
| EPI_ISL_541144 | 3/24/2020 | 9/21/2020 | North America / USA / Florida      |
| EPI_ISL_541150 | 4/13/2020 | 9/21/2020 | North America / USA / Florida      |
| EPI_ISL_541154 | 4/19/2020 | 9/21/2020 | North America / USA / Florida      |
| EPI_ISL_541155 | 4/20/2020 | 9/21/2020 | North America / USA / Florida      |
| EPI_ISL_541158 | 5/28/2020 | 9/21/2020 | North America / USA / Florida      |
| EPI_ISL_541164 | 6/1/2020  | 9/21/2020 | North America / USA / Florida      |
| EPI_ISL_541168 | 6/4/2020  | 9/21/2020 | North America / USA / Florida      |
| EPI_ISL_541173 | 6/17/2020 | 9/21/2020 | North America / USA / Florida      |
| EPI_ISL_541174 | 6/17/2020 | 9/21/2020 | North America / USA / Florida      |
| EPI_ISL_541175 | 7/22/2020 | 9/21/2020 | North America / USA / Florida      |
| EPI_ISL_541176 | 7/22/2020 | 9/21/2020 | North America / USA / Florida      |







|                |           |                                                               |
|----------------|-----------|---------------------------------------------------------------|
| EPI_ISL_541674 | 6/26/2020 | 9/21/2020 North America / USA / South Carolina / Horry County |
| EPI_ISL_541675 | 6/26/2020 | 9/21/2020 North America / USA / South Carolina / Horry County |
| EPI_ISL_541677 | 6/26/2020 | 9/21/2020 North America / USA / South Carolina / Horry County |
| EPI_ISL_541678 | 6/26/2020 | 9/21/2020 North America / USA / South Carolina / Horry County |
| EPI_ISL_541679 | 6/26/2020 | 9/21/2020 North America / USA / South Carolina / Horry County |
| EPI_ISL_545955 | 4/1/2020  | 9/21/2020 South America / Peru / Lima                         |
| EPI_ISL_540923 | 6/17/2020 | 9/22/2020 South America / Peru / Ancash / Huarvey             |
| EPI_ISL_540924 | 3/19/2020 | 9/22/2020 South America / Peru / Arequipa / Arequipa          |
| EPI_ISL_540925 | 6/17/2020 | 9/22/2020 South America / Peru / Lima / Lima                  |
| EPI_ISL_540926 | 6/17/2020 | 9/22/2020 South America / Peru / Lima / Lima                  |
| EPI_ISL_540927 | 6/16/2020 | 9/22/2020 South America / Peru / Callao / Callao              |
| EPI_ISL_540928 | 6/17/2020 | 9/22/2020 South America / Peru / Callao / Callao              |
| EPI_ISL_540929 | 6/15/2020 | 9/22/2020 South America / Peru / Lima / Lima                  |
| EPI_ISL_540930 | 6/17/2020 | 9/22/2020 South America / Peru / Lima / Lima                  |
| EPI_ISL_540931 | 6/18/2020 | 9/22/2020 South America / Peru / Lima / Lima                  |
| EPI_ISL_540932 | 6/17/2020 | 9/22/2020 South America / Peru / Lima / Lima                  |
| EPI_ISL_540933 | 6/17/2020 | 9/22/2020 South America / Peru / Lima / Lima                  |
| EPI_ISL_540934 | 6/17/2020 | 9/22/2020 South America / Peru / Lima / Lima                  |
| EPI_ISL_540935 | 6/17/2020 | 9/22/2020 South America / Peru / Callao / Callao              |
| EPI_ISL_540936 | 6/17/2020 | 9/22/2020 South America / Peru / Lima / Cañete                |
| EPI_ISL_540937 | 6/16/2020 | 9/22/2020 South America / Peru / Callao / Callao              |
| EPI_ISL_540938 | 6/18/2020 | 9/22/2020 South America / Peru / Callao / Callao              |
| EPI_ISL_540939 | 6/17/2020 | 9/22/2020 South America / Peru / Lima / Lima                  |
| EPI_ISL_540940 | 6/16/2020 | 9/22/2020 South America / Peru / Ancash / Santa               |
| EPI_ISL_540941 | 6/16/2020 | 9/22/2020 South America / Peru / Callao / Callao              |
| EPI_ISL_540942 | 6/18/2020 | 9/22/2020 South America / Peru / Lima / Lima                  |
| EPI_ISL_540943 | 6/17/2020 | 9/22/2020 South America / Peru / Lima / Lima                  |
| EPI_ISL_540944 | 6/17/2020 | 9/22/2020 South America / Peru / Lima / Lima                  |
| EPI_ISL_540945 | 6/17/2020 | 9/22/2020 South America / Peru / Lima / Lima                  |
| EPI_ISL_540946 | 6/17/2020 | 9/22/2020 South America / Peru / Callao / Callao              |
| EPI_ISL_540947 | 6/17/2020 | 9/22/2020 South America / Peru / Lima / Cañete                |
| EPI_ISL_540948 | 6/18/2020 | 9/22/2020 South America / Peru / Lima / Lima                  |
| EPI_ISL_540949 | 6/17/2020 | 9/22/2020 South America / Peru / Lima / Lima                  |
| EPI_ISL_540950 | 6/11/2020 | 9/22/2020 South America / Peru / Ucayali / Coronel Portillo   |
| EPI_ISL_540951 | 6/18/2020 | 9/22/2020 South America / Peru / Lima / Lima                  |
| EPI_ISL_540952 | 6/17/2020 | 9/22/2020 South America / Peru / Lima / Lima                  |
| EPI_ISL_540953 | 6/17/2020 | 9/22/2020 South America / Peru / Callao / Callao              |
| EPI_ISL_540954 | 6/17/2020 | 9/22/2020 South America / Peru / Lima / Lima                  |
| EPI_ISL_540955 | 6/18/2020 | 9/22/2020 South America / Peru / Lima / Lima                  |
| EPI_ISL_540956 | 6/17/2020 | 9/22/2020 South America / Peru / Lima / Lima                  |
| EPI_ISL_540957 | 6/17/2020 | 9/22/2020 South America / Peru / Lima / Lima                  |
| EPI_ISL_540958 | 6/17/2020 | 9/22/2020 South America / Peru / Callao / Callao              |
| EPI_ISL_540959 | 6/22/2020 | 9/22/2020 South America / Peru / Lima / Lima                  |
| EPI_ISL_540960 | 6/17/2020 | 9/22/2020 South America / Peru / Lima / Lima                  |
| EPI_ISL_540961 | 6/18/2020 | 9/22/2020 South America / Peru / Lima / Lima                  |
| EPI_ISL_540962 | 6/17/2020 | 9/22/2020 South America / Peru / Lima / Lima                  |
| EPI_ISL_540963 | 6/17/2020 | 9/22/2020 South America / Peru / Lima / Huarochiri            |

|                |           |                                                                       |
|----------------|-----------|-----------------------------------------------------------------------|
| EPI_ISL_540964 | 6/18/2020 | 9/22/2020 South America / Peru / Lima / Lima                          |
| EPI_ISL_540965 | 6/17/2020 | 9/22/2020 South America / Peru / Lima / Lima                          |
| EPI_ISL_540966 | 6/17/2020 | 9/22/2020 South America / Peru / Lima / Lima                          |
| EPI_ISL_540967 | 6/16/2020 | 9/22/2020 South America / Peru / Callao / Callao                      |
| EPI_ISL_540968 | 6/17/2020 | 9/22/2020 South America / Peru / Lima / Lima                          |
| EPI_ISL_540969 | 6/17/2020 | 9/22/2020 South America / Peru / Lima / Lima                          |
| EPI_ISL_540970 | 6/17/2020 | 9/22/2020 South America / Peru / Callao / Callao                      |
| EPI_ISL_540971 | 6/17/2020 | 9/22/2020 South America / Peru / Lima / Lima                          |
| EPI_ISL_540972 | 6/17/2020 | 9/22/2020 South America / Peru / Lima / Lima                          |
| EPI_ISL_540973 | 6/18/2020 | 9/22/2020 South America / Peru / Lima / Lima                          |
| EPI_ISL_540974 | 6/17/2020 | 9/22/2020 South America / Peru / Lima / Lima                          |
| EPI_ISL_540975 | 6/16/2020 | 9/22/2020 South America / Peru / Callao / Callao                      |
| EPI_ISL_540976 | 6/17/2020 | 9/22/2020 South America / Peru / Callao / Callao                      |
| EPI_ISL_540977 | 6/17/2020 | 9/22/2020 South America / Peru / Lima / Lima                          |
| EPI_ISL_540978 | 6/16/2020 | 9/22/2020 South America / Peru / Lima / Lima                          |
| EPI_ISL_540979 | 6/17/2020 | 9/22/2020 South America / Peru / Lima / Lima                          |
| EPI_ISL_540980 | 6/17/2020 | 9/22/2020 South America / Peru / Lima / Lima                          |
| EPI_ISL_540981 | 6/17/2020 | 9/22/2020 South America / Peru / Lima / Lima                          |
| EPI_ISL_540982 | 6/17/2020 | 9/22/2020 South America / Peru / Lima / Lima                          |
| EPI_ISL_540983 | 6/16/2020 | 9/22/2020 South America / Peru / Ancash / Santa                       |
| EPI_ISL_540984 | 6/16/2020 | 9/22/2020 South America / Peru / Ancash / Santa                       |
| EPI_ISL_540985 | 6/17/2020 | 9/22/2020 South America / Peru / Ancash / Santa                       |
| EPI_ISL_540986 | 3/23/2020 | 9/22/2020 South America / Peru / La Libertad / La Libertad            |
| EPI_ISL_540987 | 3/20/2020 | 9/22/2020 South America / Peru / Arequipa / Arequipa                  |
| EPI_ISL_540988 | 3/20/2020 | 9/22/2020 South America / Peru / Arequipa / Arequipa                  |
| EPI_ISL_540989 | 6/18/2020 | 9/22/2020 South America / Peru / Lima / Lima                          |
| EPI_ISL_540990 | 6/18/2020 | 9/22/2020 South America / Peru / Lima / Lima                          |
| EPI_ISL_540991 | 6/15/2020 | 9/22/2020 South America / Peru / Lima / Lima                          |
| EPI_ISL_540992 | 6/18/2020 | 9/22/2020 South America / Peru / Lima / Lima                          |
| EPI_ISL_540993 | 2/20/2020 | 9/22/2020 Asia / South Korea / Gwangju                                |
| EPI_ISL_540994 | 2/20/2020 | 9/22/2020 Asia / South Korea / Gwangju                                |
| EPI_ISL_540995 | 2/21/2020 | 9/22/2020 Asia / South Korea / Gwangju                                |
| EPI_ISL_540996 | 2/22/2020 | 9/22/2020 Asia / South Korea / Gwangju                                |
| EPI_ISL_540997 | 2/23/2020 | 9/22/2020 Asia / South Korea / Gwangju                                |
| EPI_ISL_540998 | 3/3/2020  | 9/22/2020 Asia / South Korea / Gwangju                                |
| EPI_ISL_540999 | 3/3/2020  | 9/22/2020 Asia / South Korea / Gwangju                                |
| EPI_ISL_541000 | 3/14/2020 | 9/22/2020 Asia / South Korea / Gwangju                                |
| EPI_ISL_541001 | 3/26/2020 | 9/22/2020 Asia / South Korea / Gwangju                                |
| EPI_ISL_541002 | 6/27/2020 | 9/22/2020 Asia / South Korea / Gwangju                                |
| EPI_ISL_541003 | 6/29/2020 | 9/22/2020 Asia / South Korea / Gwangju                                |
| EPI_ISL_541004 | 6/30/2020 | 9/22/2020 Asia / South Korea / Gwangju                                |
| EPI_ISL_541005 | 7/1/2020  | 9/22/2020 Asia / South Korea / Gwangju                                |
| EPI_ISL_541006 | 7/1/2020  | 9/22/2020 Asia / South Korea / Gwangju                                |
| EPI_ISL_541007 | 7/2/2020  | 9/22/2020 Asia / South Korea / Gwangju                                |
| EPI_ISL_541082 | 6/10/2020 | 9/22/2020 Europe / Czech Republic / Prague / Kvetnice                 |
| EPI_ISL_541138 | 3/11/2020 | 9/22/2020 Europe / Czech Republic / Pardubice Region / Pardubice      |
| EPI_ISL_541332 | 5/24/2020 | 9/22/2020 Europe / Czech Republic / Moravian-Silesian Region / HavÅŠt |

|                |           |           |                                                              |
|----------------|-----------|-----------|--------------------------------------------------------------|
| EPI_ISL_541333 | 5/23/2020 | 9/22/2020 | Europe / Czech Republic / Moravian-Silesian Region / Karviná |
| EPI_ISL_541334 | 5/23/2020 | 9/22/2020 | Europe / Czech Republic / Moravian-Silesian Region / Karviná |
| EPI_ISL_541335 | 5/13/2020 | 9/22/2020 | Europe / Czech Republic / Prague / Sedlec                    |
| EPI_ISL_541336 | 7/27/2020 | 9/22/2020 | Europe / Czech Republic / South Moravian Region / Ratiborice |
| EPI_ISL_541337 | 7/27/2020 | 9/22/2020 | Europe / Czech Republic / South Moravian Region / Hodonín    |
| EPI_ISL_541340 | 3/17/2020 | 9/22/2020 | South America / Brazil / Parana / Cianorte                   |
| EPI_ISL_541341 | 3/17/2020 | 9/22/2020 | South America / Brazil / Parana / Curitiba                   |
| EPI_ISL_541342 | 3/16/2020 | 9/22/2020 | South America / Brazil / Parana / Ponta Grossa               |
| EPI_ISL_541343 | 3/20/2020 | 9/22/2020 | South America / Brazil / Parana / Maringa                    |
| EPI_ISL_541344 | 3/19/2020 | 9/22/2020 | South America / Brazil / Parana / Vere                       |
| EPI_ISL_541345 | 3/28/2020 | 9/22/2020 | South America / Brazil / Parana / Curitiba                   |
| EPI_ISL_541346 | 3/26/2020 | 9/22/2020 | South America / Brazil / Parana / Medianeira                 |
| EPI_ISL_541347 | 4/4/2020  | 9/22/2020 | South America / Brazil / Rio de Janeiro / Rio de Janeiro     |
| EPI_ISL_541348 | 4/6/2020  | 9/22/2020 | South America / Brazil / Rio de Janeiro / Mesquita           |
| EPI_ISL_541349 | 4/4/2020  | 9/22/2020 | South America / Brazil / Rio de Janeiro / Sao Goncalo        |
| EPI_ISL_541350 | 4/4/2020  | 9/22/2020 | South America / Brazil / Rio de Janeiro / Rio de Janeiro     |
| EPI_ISL_541351 | 4/5/2020  | 9/22/2020 | South America / Brazil / Rio de Janeiro / Rio de Janeiro     |
| EPI_ISL_541352 | 4/13/2020 | 9/22/2020 | South America / Brazil / Rio de Janeiro / Rio de Janeiro     |
| EPI_ISL_541353 | 4/16/2020 | 9/22/2020 | South America / Brazil / Rio de Janeiro / Rio de Janeiro     |
| EPI_ISL_541354 | 4/7/2020  | 9/22/2020 | South America / Brazil / Rio de Janeiro / Niteroi            |
| EPI_ISL_541355 | 4/13/2020 | 9/22/2020 | South America / Brazil / Rio de Janeiro / Rio de Janeiro     |
| EPI_ISL_541356 | 4/17/2020 | 9/22/2020 | South America / Brazil / Rio de Janeiro / Rio de Janeiro     |
| EPI_ISL_541357 | 4/20/2020 | 9/22/2020 | South America / Brazil / Rio de Janeiro                      |
| EPI_ISL_541358 | 4/20/2020 | 9/22/2020 | South America / Brazil / Rio de Janeiro                      |
| EPI_ISL_541359 | 4/20/2020 | 9/22/2020 | South America / Brazil / Rio de Janeiro / Rio de Janeiro     |
| EPI_ISL_541360 | 4/20/2020 | 9/22/2020 | South America / Brazil / Rio de Janeiro / Niteroi            |
| EPI_ISL_541361 | 4/20/2020 | 9/22/2020 | South America / Brazil / Rio de Janeiro / Rio de Janeiro     |
| EPI_ISL_541362 | 4/28/2020 | 9/22/2020 | South America / Brazil / Rio de Janeiro / Rio de Janeiro     |
| EPI_ISL_541363 | 4/28/2020 | 9/22/2020 | South America / Brazil / Rio de Janeiro / Rio de Janeiro     |
| EPI_ISL_541364 | 4/29/2020 | 9/22/2020 | South America / Brazil / Rio de Janeiro / Rio de Janeiro     |
| EPI_ISL_541365 | 4/29/2020 | 9/22/2020 | South America / Brazil / Rio de Janeiro / Rio de Janeiro     |
| EPI_ISL_541366 | 4/29/2020 | 9/22/2020 | South America / Brazil / Rio de Janeiro / Rio de Janeiro     |
| EPI_ISL_541367 | 4/29/2020 | 9/22/2020 | South America / Brazil / Rio de Janeiro / Rio de Janeiro     |
| EPI_ISL_541368 | 4/30/2020 | 9/22/2020 | South America / Brazil / Rio de Janeiro / Niteroi            |
| EPI_ISL_541369 | 4/30/2020 | 9/22/2020 | South America / Brazil / Rio de Janeiro / Rio de Janeiro     |
| EPI_ISL_541370 | 3/12/2020 | 9/22/2020 | South America / Brazil / Santa Catarina / Braco do Norte     |
| EPI_ISL_541371 | 3/13/2020 | 9/22/2020 | South America / Brazil / Santa Catarina / Balneario Camburiu |
| EPI_ISL_541372 | 3/27/2020 | 9/22/2020 | South America / Brazil / Sergipe / Aracaju                   |
| EPI_ISL_541373 | 3/20/2020 | 9/22/2020 | South America / Brazil / Sergipe / Aracaju                   |
| EPI_ISL_541374 | 3/19/2020 | 9/22/2020 | South America / Brazil / Sergipe / Aracaju                   |
| EPI_ISL_541375 | 3/12/2020 | 9/22/2020 | South America / Brazil / Sergipe / Aracaju                   |
| EPI_ISL_541376 | 3/19/2020 | 9/22/2020 | South America / Brazil / Sergipe / Nossa Senhora da Gloria   |
| EPI_ISL_541377 | 4/26/2020 | 9/22/2020 | South America / Brazil / Sergipe / Aracaju                   |
| EPI_ISL_541378 | 4/26/2020 | 9/22/2020 | South America / Brazil / Sergipe / Estancia                  |
| EPI_ISL_541379 | 4/26/2020 | 9/22/2020 | South America / Brazil / Sergipe / Aracaju                   |
| EPI_ISL_541380 | 4/27/2020 | 9/22/2020 | South America / Brazil / Sergipe / Aracaju                   |
| EPI_ISL_541381 | 4/27/2020 | 9/22/2020 | South America / Brazil / Sergipe / Riachuelo                 |

|                |           |                                                                       |
|----------------|-----------|-----------------------------------------------------------------------|
| EPI_ISL_541382 | 4/27/2020 | 9/22/2020 South America / Brazil / Sergipe / Itaporanga Dajuda        |
| EPI_ISL_541383 | 4/27/2020 | 9/22/2020 South America / Brazil / Sergipe / Laranjeiras              |
| EPI_ISL_541384 | 4/27/2020 | 9/22/2020 South America / Brazil / Sergipe / Nossa Senhora do Socorro |
| EPI_ISL_541385 | 4/26/2020 | 9/22/2020 South America / Brazil / Sergipe / Aracaju                  |
| EPI_ISL_541386 | 4/24/2020 | 9/22/2020 South America / Brazil / Sergipe / Aracaju                  |
| EPI_ISL_541387 | 4/24/2020 | 9/22/2020 South America / Brazil / Sergipe / Jaboatiana               |
| EPI_ISL_541388 | 4/20/2020 | 9/22/2020 South America / Brazil / Sergipe / Aracaju                  |
| EPI_ISL_541389 | 4/20/2020 | 9/22/2020 South America / Brazil / Sergipe / Aracaju                  |
| EPI_ISL_541390 | 4/29/2020 | 9/22/2020 South America / Brazil / Sergipe / Aracaju                  |
| EPI_ISL_541391 | 4/29/2020 | 9/22/2020 South America / Brazil / Sergipe / Aracaju                  |
| EPI_ISL_541393 | 4/21/2020 | 9/22/2020 South America / Brazil / Sergipe / Tomar do Geru            |
| EPI_ISL_541394 | 4/20/2020 | 9/22/2020 South America / Brazil / Sergipe / Aracaju                  |
| EPI_ISL_541395 | 4/20/2020 | 9/22/2020 South America / Brazil / Sergipe / Cabedelo                 |
| EPI_ISL_541396 | 4/20/2020 | 9/22/2020 South America / Brazil / Sergipe / Aracaju                  |
| EPI_ISL_541401 | 9/1/2020  | 9/22/2020 Europe / Switzerland / Aargau                               |
| EPI_ISL_541402 | 9/1/2020  | 9/22/2020 Europe / Switzerland / Aargau                               |
| EPI_ISL_541403 | 9/2/2020  | 9/22/2020 Europe / Switzerland / Aargau                               |
| EPI_ISL_541404 | 9/2/2020  | 9/22/2020 Europe / Switzerland / Aargau                               |
| EPI_ISL_541405 | 9/2/2020  | 9/22/2020 Europe / Switzerland / Aargau                               |
| EPI_ISL_541407 | 9/2/2020  | 9/22/2020 Europe / Switzerland / Aargau                               |
| EPI_ISL_541408 | 9/2/2020  | 9/22/2020 Europe / Switzerland / Aargau                               |
| EPI_ISL_541409 | 9/3/2020  | 9/22/2020 Europe / Switzerland / Aargau                               |
| EPI_ISL_541410 | 9/3/2020  | 9/22/2020 Europe / Switzerland / Aargau                               |
| EPI_ISL_541411 | 8/28/2020 | 9/22/2020 Europe / Switzerland / Aargau                               |
| EPI_ISL_541412 | 8/28/2020 | 9/22/2020 Europe / Switzerland / Aargau                               |
| EPI_ISL_541413 | 8/28/2020 | 9/22/2020 Europe / Switzerland / Aargau                               |
| EPI_ISL_541414 | 8/29/2020 | 9/22/2020 Europe / Switzerland / Aargau                               |
| EPI_ISL_541416 | 9/2/2020  | 9/22/2020 Europe / Switzerland / Bern                                 |
| EPI_ISL_541417 | 9/1/2020  | 9/22/2020 Europe / Switzerland / Bern                                 |
| EPI_ISL_541418 | 9/1/2020  | 9/22/2020 Europe / Switzerland / Bern                                 |
| EPI_ISL_541419 | 9/1/2020  | 9/22/2020 Europe / Switzerland / Bern                                 |
| EPI_ISL_541420 | 9/2/2020  | 9/22/2020 Europe / Switzerland / Bern                                 |
| EPI_ISL_541421 | 9/2/2020  | 9/22/2020 Europe / Switzerland / Bern                                 |
| EPI_ISL_541422 | 9/2/2020  | 9/22/2020 Europe / Switzerland / Bern                                 |
| EPI_ISL_541423 | 9/2/2020  | 9/22/2020 Europe / Switzerland / Bern                                 |
| EPI_ISL_541424 | 9/2/2020  | 9/22/2020 Europe / Switzerland / Bern                                 |
| EPI_ISL_541425 | 9/2/2020  | 9/22/2020 Europe / Switzerland / Bern                                 |
| EPI_ISL_541426 | 9/2/2020  | 9/22/2020 Europe / Switzerland / Bern                                 |
| EPI_ISL_541427 | 9/3/2020  | 9/22/2020 Europe / Switzerland / Bern                                 |
| EPI_ISL_541428 | 9/3/2020  | 9/22/2020 Europe / Switzerland / Bern                                 |
| EPI_ISL_541429 | 9/3/2020  | 9/22/2020 Europe / Switzerland / Bern                                 |
| EPI_ISL_541430 | 9/3/2020  | 9/22/2020 Europe / Switzerland / Bern                                 |
| EPI_ISL_541432 | 9/3/2020  | 9/22/2020 Europe / Switzerland / Bern                                 |
| EPI_ISL_541433 | 9/3/2020  | 9/22/2020 Europe / Switzerland / Bern                                 |
| EPI_ISL_541434 | 9/3/2020  | 9/22/2020 Europe / Switzerland / Bern                                 |
| EPI_ISL_541435 | 9/3/2020  | 9/22/2020 Europe / Switzerland / Bern                                 |
| EPI_ISL_541436 | 8/28/2020 | 9/22/2020 Europe / Switzerland / Bern                                 |

|                |           |           |                                         |
|----------------|-----------|-----------|-----------------------------------------|
| EPI_ISL_541437 | 8/28/2020 | 9/22/2020 | Europe / Switzerland / Bern             |
| EPI_ISL_541438 | 8/28/2020 | 9/22/2020 | Europe / Switzerland / Bern             |
| EPI_ISL_541439 | 8/29/2020 | 9/22/2020 | Europe / Switzerland / Bern             |
| EPI_ISL_541440 | 8/29/2020 | 9/22/2020 | Europe / Switzerland / Bern             |
| EPI_ISL_541441 | 8/29/2020 | 9/22/2020 | Europe / Switzerland / Bern             |
| EPI_ISL_541442 | 8/30/2020 | 9/22/2020 | Europe / Switzerland / Bern             |
| EPI_ISL_541443 | 8/31/2020 | 9/22/2020 | Europe / Switzerland / Bern             |
| EPI_ISL_541444 | 8/31/2020 | 9/22/2020 | Europe / Switzerland / Bern             |
| EPI_ISL_541445 | 8/31/2020 | 9/22/2020 | Europe / Switzerland / Bern             |
| EPI_ISL_541446 | 8/31/2020 | 9/22/2020 | Europe / Switzerland / Bern             |
| EPI_ISL_541447 | 9/3/2020  | 9/22/2020 | Europe / Switzerland / Basel-Landschaft |
| EPI_ISL_541448 | 9/3/2020  | 9/22/2020 | Europe / Switzerland / Basel-Landschaft |
| EPI_ISL_541449 | 9/3/2020  | 9/22/2020 | Europe / Switzerland / Basel-Landschaft |
| EPI_ISL_541450 | 8/28/2020 | 9/22/2020 | Europe / Switzerland / Basel-Landschaft |
| EPI_ISL_541451 | 8/28/2020 | 9/22/2020 | Europe / Switzerland / Basel-Landschaft |
| EPI_ISL_541452 | 8/28/2020 | 9/22/2020 | Europe / Switzerland / Basel-Landschaft |
| EPI_ISL_541453 | 8/28/2020 | 9/22/2020 | Europe / Switzerland / Basel-Landschaft |
| EPI_ISL_541454 | 8/28/2020 | 9/22/2020 | Europe / Switzerland / Basel-Landschaft |
| EPI_ISL_541455 | 8/28/2020 | 9/22/2020 | Europe / Switzerland / Basel-Landschaft |
| EPI_ISL_541456 | 8/28/2020 | 9/22/2020 | Europe / Switzerland / Basel-Landschaft |
| EPI_ISL_541457 | 8/29/2020 | 9/22/2020 | Europe / Switzerland / Basel-Landschaft |
| EPI_ISL_541458 | 8/31/2020 | 9/22/2020 | Europe / Switzerland / Basel-Landschaft |
| EPI_ISL_541459 | 8/30/2020 | 9/22/2020 | Europe / Switzerland / Basel-Landschaft |
| EPI_ISL_541460 | 8/30/2020 | 9/22/2020 | Europe / Switzerland / Basel-Landschaft |
| EPI_ISL_541461 | 8/30/2020 | 9/22/2020 | Europe / Switzerland / Basel-Landschaft |
| EPI_ISL_541462 | 8/30/2020 | 9/22/2020 | Europe / Switzerland / Basel-Landschaft |
| EPI_ISL_541463 | 8/31/2020 | 9/22/2020 | Europe / Switzerland / Basel-Stadt      |
| EPI_ISL_541464 | 8/28/2020 | 9/22/2020 | Europe / Switzerland / Geneva           |
| EPI_ISL_541465 | 9/3/2020  | 9/22/2020 | Europe / Switzerland / Grisons          |
| EPI_ISL_541466 | 9/2/2020  | 9/22/2020 | Europe / Switzerland / Lucerne          |
| EPI_ISL_541467 | 9/2/2020  | 9/22/2020 | Europe / Switzerland / Lucerne          |
| EPI_ISL_541468 | 9/2/2020  | 9/22/2020 | Europe / Switzerland / St Gall          |
| EPI_ISL_541469 | 8/31/2020 | 9/22/2020 | Europe / Switzerland / St Gall          |
| EPI_ISL_541470 | 9/1/2020  | 9/22/2020 | Europe / Switzerland / Vaud             |
| EPI_ISL_541471 | 9/1/2020  | 9/22/2020 | Europe / Switzerland / Vaud             |
| EPI_ISL_541472 | 9/2/2020  | 9/22/2020 | Europe / Switzerland / Vaud             |
| EPI_ISL_541473 | 9/2/2020  | 9/22/2020 | Europe / Switzerland / Vaud             |
| EPI_ISL_541474 | 9/2/2020  | 9/22/2020 | Europe / Switzerland / Vaud             |
| EPI_ISL_541475 | 9/2/2020  | 9/22/2020 | Europe / Switzerland / Vaud             |
| EPI_ISL_541476 | 9/3/2020  | 9/22/2020 | Europe / Switzerland / Vaud             |
| EPI_ISL_541477 | 9/3/2020  | 9/22/2020 | Europe / Switzerland / Vaud             |
| EPI_ISL_541478 | 9/3/2020  | 9/22/2020 | Europe / Switzerland / Vaud             |
| EPI_ISL_541479 | 9/3/2020  | 9/22/2020 | Europe / Switzerland / Vaud             |
| EPI_ISL_541481 | 9/3/2020  | 9/22/2020 | Europe / Switzerland / Vaud             |
| EPI_ISL_541482 | 9/2/2020  | 9/22/2020 | Europe / Switzerland / Vaud             |
| EPI_ISL_541483 | 9/3/2020  | 9/22/2020 | Europe / Switzerland / Vaud             |
| EPI_ISL_541484 | 9/3/2020  | 9/22/2020 | Europe / Switzerland / Vaud             |







|                |           |           |                                                      |
|----------------|-----------|-----------|------------------------------------------------------|
| EPI_ISL_541586 | 9/12/2020 | 9/22/2020 | North America / USA / Wisconsin / Dane County        |
| EPI_ISL_541587 | 9/10/2020 | 9/22/2020 | North America / USA / Wisconsin / Columbia County    |
| EPI_ISL_541588 | 9/11/2020 | 9/22/2020 | North America / USA / Wisconsin / Dane County        |
| EPI_ISL_541589 | 9/11/2020 | 9/22/2020 | North America / USA / Wisconsin / Milwaukee County   |
| EPI_ISL_541590 | 9/12/2020 | 9/22/2020 | North America / USA / Wisconsin / Portage County     |
| EPI_ISL_541591 | 9/11/2020 | 9/22/2020 | North America / USA / Wisconsin / Dane County        |
| EPI_ISL_541592 | 9/11/2020 | 9/22/2020 | North America / USA / Wisconsin / Richland County    |
| EPI_ISL_541593 | 9/10/2020 | 9/22/2020 | North America / USA / Wisconsin / Dane County        |
| EPI_ISL_541594 | 9/10/2020 | 9/22/2020 | North America / USA / Wisconsin / Dane County        |
| EPI_ISL_541595 | 9/12/2020 | 9/22/2020 | North America / USA / Wisconsin / Dane County        |
| EPI_ISL_541596 | 9/11/2020 | 9/22/2020 | North America / USA / Wisconsin / Fond du Lac County |
| EPI_ISL_541597 | 9/10/2020 | 9/22/2020 | North America / USA / Wisconsin / Dane County        |
| EPI_ISL_541598 | 9/12/2020 | 9/22/2020 | North America / USA / Wisconsin / Dane County        |
| EPI_ISL_541599 | 9/10/2020 | 9/22/2020 | North America / USA / Wisconsin / Dane County        |
| EPI_ISL_541600 | 9/12/2020 | 9/22/2020 | North America / USA / Wisconsin / Dane County        |
| EPI_ISL_541601 | 9/10/2020 | 9/22/2020 | North America / USA / Wisconsin / Dane County        |
| EPI_ISL_541602 | 9/11/2020 | 9/22/2020 | North America / USA / Wisconsin / Dane County        |
| EPI_ISL_541603 | 9/10/2020 | 9/22/2020 | North America / USA / Wisconsin / Dane County        |
| EPI_ISL_541604 | 9/11/2020 | 9/22/2020 | North America / USA / Wisconsin / Dane County        |
| EPI_ISL_541605 | 9/10/2020 | 9/22/2020 | North America / USA / Wisconsin / Dane County        |
| EPI_ISL_541606 | 9/13/2020 | 9/22/2020 | North America / USA / Wisconsin / Dane County        |
| EPI_ISL_541607 | 9/10/2020 | 9/22/2020 | North America / USA / Wisconsin / Dane County        |
| EPI_ISL_541608 | 9/10/2020 | 9/22/2020 | North America / USA / Wisconsin / Dane County        |
| EPI_ISL_541609 | 9/10/2020 | 9/22/2020 | North America / USA / Wisconsin / Waukesha County    |
| EPI_ISL_541610 | 9/10/2020 | 9/22/2020 | North America / USA / Wisconsin / Grant County       |
| EPI_ISL_541611 | 9/12/2020 | 9/22/2020 | North America / USA / Wisconsin / Dane County        |
| EPI_ISL_541612 | 9/10/2020 | 9/22/2020 | North America / USA / Wisconsin / Dane County        |
| EPI_ISL_541613 | 9/16/2020 | 9/22/2020 | North America / USA / Wisconsin / Rock County        |
| EPI_ISL_541614 | 9/14/2020 | 9/22/2020 | North America / USA / Wisconsin / Dane County        |
| EPI_ISL_541615 | 9/15/2020 | 9/22/2020 | North America / USA / Wisconsin / Dane County        |
| EPI_ISL_541616 | 9/16/2020 | 9/22/2020 | North America / USA / Wisconsin / Dane County        |
| EPI_ISL_541617 | 9/16/2020 | 9/22/2020 | North America / USA / Wisconsin / Dane County        |
| EPI_ISL_541618 | 9/16/2020 | 9/22/2020 | North America / USA / Wisconsin / Walworth County    |
| EPI_ISL_541619 | 9/16/2020 | 9/22/2020 | North America / USA / Wisconsin / Dane County        |
| EPI_ISL_541620 | 9/16/2020 | 9/22/2020 | North America / USA / Wisconsin / Dane County        |
| EPI_ISL_541621 | 9/16/2020 | 9/22/2020 | North America / USA / Wisconsin / Dane County        |
| EPI_ISL_541623 | 9/14/2020 | 9/22/2020 | North America / USA / Wisconsin / Dane County        |
| EPI_ISL_541624 | 9/16/2020 | 9/22/2020 | North America / USA / Wisconsin / Dane County        |
| EPI_ISL_541625 | 9/15/2020 | 9/22/2020 | North America / USA / Wisconsin / Dane County        |
| EPI_ISL_541626 | 9/11/2020 | 9/22/2020 | North America / USA / Wisconsin / Dane County        |
| EPI_ISL_541627 | 9/15/2020 | 9/22/2020 | North America / USA / Wisconsin / Dane County        |
| EPI_ISL_541628 | 9/14/2020 | 9/22/2020 | North America / USA / Wisconsin / Dane County        |
| EPI_ISL_541629 | 9/15/2020 | 9/22/2020 | North America / USA / Wisconsin / Dane County        |
| EPI_ISL_541630 | 9/15/2020 | 9/22/2020 | North America / USA / Wisconsin / Dane County        |
| EPI_ISL_541631 | 9/14/2020 | 9/22/2020 | North America / USA / Wisconsin / Iowa County        |
| EPI_ISL_541632 | 9/16/2020 | 9/22/2020 | North America / USA / Wisconsin / Dane County        |
| EPI_ISL_541633 | 9/14/2020 | 9/22/2020 | North America / USA / Wisconsin / Marquette County   |

|                |           |                                                          |
|----------------|-----------|----------------------------------------------------------|
| EPI_ISL_541635 | 9/14/2020 | 9/22/2020 North America / USA / Wisconsin / Dodge County |
| EPI_ISL_541636 | 9/16/2020 | 9/22/2020 North America / USA / Wisconsin / Dane County  |
| EPI_ISL_541637 | 9/16/2020 | 9/22/2020 North America / USA / Wisconsin / Dane County  |
| EPI_ISL_541638 | 9/16/2020 | 9/22/2020 North America / USA / Wisconsin / Green County |
| EPI_ISL_541639 | 9/16/2020 | 9/22/2020 North America / USA / Wisconsin / Dane County  |
| EPI_ISL_541640 | 9/14/2020 | 9/22/2020 North America / USA / Wisconsin / Dane County  |
| EPI_ISL_541641 | 9/16/2020 | 9/22/2020 North America / USA / Wisconsin / Dane County  |
| EPI_ISL_541642 | 9/14/2020 | 9/22/2020 North America / USA / Wisconsin / Dane County  |
| EPI_ISL_541643 | 9/15/2020 | 9/22/2020 North America / USA / Wisconsin / Grant County |
| EPI_ISL_541644 | 9/16/2020 | 9/22/2020 North America / USA / Wisconsin / Dane County  |
| EPI_ISL_541645 | 9/14/2020 | 9/22/2020 North America / USA / Wisconsin / Dane County  |
| EPI_ISL_541646 | 9/15/2020 | 9/22/2020 North America / USA / Wisconsin / Dane County  |
| EPI_ISL_541647 | 9/14/2020 | 9/22/2020 North America / USA / Wisconsin / Dane County  |
| EPI_ISL_541648 | 9/14/2020 | 9/22/2020 North America / USA / Wisconsin / Dane County  |
| EPI_ISL_541681 | 7/6/2020  | 9/23/2020 Asia / India / Maharashtra                     |
| EPI_ISL_541682 | 4/16/2020 | 9/23/2020 Asia / India / Maharashtra                     |
| EPI_ISL_541683 | 4/16/2020 | 9/23/2020 Asia / India / Maharashtra                     |
| EPI_ISL_541684 | 7/13/2020 | 9/23/2020 Asia / India / Maharashtra                     |
| EPI_ISL_541685 | 7/14/2020 | 9/23/2020 Asia / India / Maharashtra                     |
| EPI_ISL_541687 | 7/15/2020 | 9/23/2020 Asia / India / Maharashtra                     |
| EPI_ISL_541688 | 7/17/2020 | 9/23/2020 Asia / India / Maharashtra                     |
| EPI_ISL_541689 | 7/17/2020 | 9/23/2020 Asia / India / Maharashtra                     |
| EPI_ISL_541690 | 7/18/2020 | 9/23/2020 Asia / India / Maharashtra                     |
| EPI_ISL_541691 | 7/18/2020 | 9/23/2020 Asia / India / Maharashtra                     |
| EPI_ISL_541692 | 7/20/2020 | 9/23/2020 Asia / India / Maharashtra                     |
| EPI_ISL_541693 | 7/20/2020 | 9/23/2020 Asia / India / Maharashtra                     |
| EPI_ISL_541694 | 7/21/2020 | 9/23/2020 Asia / India / Maharashtra                     |
| EPI_ISL_541695 | 7/26/2020 | 9/23/2020 Asia / India / Maharashtra                     |
| EPI_ISL_541696 | 7/27/2020 | 9/23/2020 Asia / India / Maharashtra                     |
| EPI_ISL_541697 | 4/23/2020 | 9/23/2020 Asia / India / Maharashtra                     |
| EPI_ISL_541698 | 4/23/2020 | 9/23/2020 Asia / India / Maharashtra                     |
| EPI_ISL_541699 | 7/27/2020 | 9/23/2020 Asia / India / Maharashtra                     |
| EPI_ISL_541700 | 4/23/2020 | 9/23/2020 Asia / India / Maharashtra                     |
| EPI_ISL_541701 | 8/4/2020  | 9/23/2020 Asia / India / Maharashtra                     |
| EPI_ISL_541702 | 8/5/2020  | 9/23/2020 Asia / India / Maharashtra                     |
| EPI_ISL_541704 | 8/7/2020  | 9/23/2020 Asia / India / Maharashtra                     |
| EPI_ISL_541705 | 8/8/2020  | 9/23/2020 Asia / India / Maharashtra                     |
| EPI_ISL_541706 | 8/8/2020  | 9/23/2020 Asia / India / Maharashtra                     |
| EPI_ISL_541707 | 8/10/2020 | 9/23/2020 Asia / India / Maharashtra                     |
| EPI_ISL_541708 | 8/10/2020 | 9/23/2020 Asia / India / Maharashtra                     |
| EPI_ISL_541710 | 8/11/2020 | 9/23/2020 Asia / India / Maharashtra                     |
| EPI_ISL_541711 | 8/14/2020 | 9/23/2020 Asia / India / Maharashtra                     |
| EPI_ISL_541713 | 8/20/2020 | 9/23/2020 Asia / India / Maharashtra                     |
| EPI_ISL_541714 | 8/21/2020 | 9/23/2020 Asia / India / Maharashtra                     |
| EPI_ISL_541715 | 8/23/2020 | 9/23/2020 Asia / India / Maharashtra                     |
| EPI_ISL_541716 | 8/24/2020 | 9/23/2020 Asia / India / Maharashtra                     |
| EPI_ISL_541717 | 8/24/2020 | 9/23/2020 Asia / India / Maharashtra                     |

|                |           |                                             |
|----------------|-----------|---------------------------------------------|
| EPI_ISL_541718 | 8/28/2020 | 9/23/2020 Asia / India / Maharashtra        |
| EPI_ISL_541719 | 8/29/2020 | 9/23/2020 Asia / India / Maharashtra        |
| EPI_ISL_541720 | 8/31/2020 | 9/23/2020 Asia / India / Maharashtra        |
| EPI_ISL_541721 | 8/31/2020 | 9/23/2020 Asia / India / Maharashtra        |
| EPI_ISL_541723 | 9/2/2020  | 9/23/2020 Asia / India / Maharashtra        |
| EPI_ISL_541724 | 9/3/2020  | 9/23/2020 Asia / India / Maharashtra        |
| EPI_ISL_541725 | 6/4/2020  | 9/23/2020 Asia / India / Maharashtra        |
| EPI_ISL_541726 | 6/10/2020 | 9/23/2020 Asia / India / Maharashtra        |
| EPI_ISL_541727 | 6/10/2020 | 9/23/2020 Asia / India / Maharashtra        |
| EPI_ISL_541728 | 6/10/2020 | 9/23/2020 Asia / India / Maharashtra        |
| EPI_ISL_541729 | 6/11/2020 | 9/23/2020 Asia / India / Maharashtra        |
| EPI_ISL_541730 | 6/11/2020 | 9/23/2020 Asia / India / Maharashtra        |
| EPI_ISL_541731 | 6/12/2020 | 9/23/2020 Asia / India / Maharashtra        |
| EPI_ISL_541733 | 6/19/2020 | 9/23/2020 Asia / India / Maharashtra        |
| EPI_ISL_541734 | 6/20/2020 | 9/23/2020 Asia / India / Maharashtra        |
| EPI_ISL_541735 | 6/20/2020 | 9/23/2020 Asia / India / Maharashtra        |
| EPI_ISL_541736 | 6/20/2020 | 9/23/2020 Asia / India / Maharashtra        |
| EPI_ISL_541737 | 6/22/2020 | 9/23/2020 Asia / India / Maharashtra        |
| EPI_ISL_541738 | 6/22/2020 | 9/23/2020 Asia / India / Maharashtra        |
| EPI_ISL_541739 | 6/22/2020 | 9/23/2020 Asia / India / Maharashtra        |
| EPI_ISL_541740 | 7/3/2020  | 9/23/2020 Asia / India / Maharashtra        |
| EPI_ISL_541741 | 6/23/2020 | 9/23/2020 Asia / India / Maharashtra        |
| EPI_ISL_541742 | 6/23/2020 | 9/23/2020 Asia / India / Maharashtra        |
| EPI_ISL_541743 | 6/24/2020 | 9/23/2020 Asia / India / Maharashtra        |
| EPI_ISL_541744 | 6/24/2020 | 9/23/2020 Asia / India / Maharashtra        |
| EPI_ISL_541745 | 6/25/2020 | 9/23/2020 Asia / India / Maharashtra        |
| EPI_ISL_541746 | 6/25/2020 | 9/23/2020 Asia / India / Maharashtra        |
| EPI_ISL_541747 | 6/25/2020 | 9/23/2020 Asia / India / Maharashtra        |
| EPI_ISL_541748 | 7/3/2020  | 9/23/2020 Asia / India / Maharashtra        |
| EPI_ISL_541751 | 7/6/2020  | 9/23/2020 Asia / India / Maharashtra        |
| EPI_ISL_541752 | 4/8/2020  | 9/23/2020 Europe / United Kingdom / England |
| EPI_ISL_541754 | 4/13/2020 | 9/23/2020 Europe / United Kingdom / England |
| EPI_ISL_541755 | 4/7/2020  | 9/23/2020 Europe / United Kingdom / England |
| EPI_ISL_541756 | 8/24/2020 | 9/23/2020 Europe / United Kingdom / England |
| EPI_ISL_541757 | 4/13/2020 | 9/23/2020 Europe / United Kingdom / England |
| EPI_ISL_541759 | 4/15/2020 | 9/23/2020 Europe / United Kingdom / England |
| EPI_ISL_541760 | 3/26/2020 | 9/23/2020 Europe / United Kingdom / England |
| EPI_ISL_541761 | 3/31/2020 | 9/23/2020 Europe / United Kingdom / England |
| EPI_ISL_541762 | 4/10/2020 | 9/23/2020 Europe / United Kingdom / England |
| EPI_ISL_541763 | 4/22/2020 | 9/23/2020 Europe / United Kingdom / England |
| EPI_ISL_541764 | 5/7/2020  | 9/23/2020 Europe / United Kingdom / England |
| EPI_ISL_541765 | 4/23/2020 | 9/23/2020 Europe / United Kingdom / England |
| EPI_ISL_541766 | 4/11/2020 | 9/23/2020 Europe / United Kingdom / England |
| EPI_ISL_541767 | 8/11/2020 | 9/23/2020 Europe / United Kingdom / England |
| EPI_ISL_541768 | 6/14/2020 | 9/23/2020 Europe / United Kingdom / England |
| EPI_ISL_541769 | 3/27/2020 | 9/23/2020 Europe / United Kingdom / England |
| EPI_ISL_541770 | 3/31/2020 | 9/23/2020 Europe / United Kingdom / England |



|                |           |           |                                             |
|----------------|-----------|-----------|---------------------------------------------|
| EPI_ISL_541827 | 8/24/2020 | 9/23/2020 | Europe / United Kingdom / England           |
| EPI_ISL_541828 | 8/24/2020 | 9/23/2020 | Europe / United Kingdom / England           |
| EPI_ISL_541829 | 8/24/2020 | 9/23/2020 | Europe / United Kingdom / England           |
| EPI_ISL_541830 | 8/24/2020 | 9/23/2020 | Europe / United Kingdom / England           |
| EPI_ISL_541831 | 8/24/2020 | 9/23/2020 | Europe / United Kingdom / England           |
| EPI_ISL_541832 | 8/24/2020 | 9/23/2020 | Europe / United Kingdom / England           |
| EPI_ISL_541833 | 8/24/2020 | 9/23/2020 | Europe / United Kingdom / Wales             |
| EPI_ISL_541834 | 8/24/2020 | 9/23/2020 | Europe / United Kingdom / England           |
| EPI_ISL_541835 | 8/24/2020 | 9/23/2020 | Europe / United Kingdom / England           |
| EPI_ISL_541836 | 8/24/2020 | 9/23/2020 | Europe / United Kingdom / England           |
| EPI_ISL_541837 | 8/24/2020 | 9/23/2020 | Europe / United Kingdom / England           |
| EPI_ISL_541838 | 8/24/2020 | 9/23/2020 | Europe / United Kingdom / Scotland          |
| EPI_ISL_541839 | 8/23/2020 | 9/23/2020 | Europe / United Kingdom / England           |
| EPI_ISL_541840 | 8/24/2020 | 9/23/2020 | Europe / United Kingdom / England           |
| EPI_ISL_541841 | 8/24/2020 | 9/23/2020 | Europe / United Kingdom / England           |
| EPI_ISL_541842 | 8/22/2020 | 9/23/2020 | Europe / United Kingdom / England           |
| EPI_ISL_541844 | 8/24/2020 | 9/23/2020 | Europe / United Kingdom / England           |
| EPI_ISL_541846 | 8/23/2020 | 9/23/2020 | Europe / United Kingdom / England           |
| EPI_ISL_541847 | 4/19/2020 | 9/23/2020 | Europe / Lithuania / Marijampoles apskritis |
| EPI_ISL_541848 | 4/5/2020  | 9/23/2020 | Europe / Lithuania / Alytaus apskritis      |
| EPI_ISL_541849 | 4/5/2020  | 9/23/2020 | Europe / Lithuania / Marijampoles apskritis |
| EPI_ISL_541850 | 4/5/2020  | 9/23/2020 | Europe / Lithuania / Marijampoles apskritis |
| EPI_ISL_541851 | 4/5/2020  | 9/23/2020 | Europe / Lithuania / Marijampoles apskritis |
| EPI_ISL_541852 | 4/6/2020  | 9/23/2020 | Europe / Lithuania / Alytaus apskritis      |
| EPI_ISL_541853 | 4/6/2020  | 9/23/2020 | Europe / Lithuania / Alytaus apskritis      |
| EPI_ISL_541854 | 4/6/2020  | 9/23/2020 | Europe / Lithuania / Marijampoles apskritis |
| EPI_ISL_541855 | 4/6/2020  | 9/23/2020 | Europe / Lithuania / Marijampoles apskritis |
| EPI_ISL_541856 | 4/7/2020  | 9/23/2020 | Europe / Lithuania / Marijampoles apskritis |
| EPI_ISL_541857 | 4/7/2020  | 9/23/2020 | Europe / Lithuania / Marijampoles apskritis |
| EPI_ISL_541858 | 4/7/2020  | 9/23/2020 | Europe / Lithuania / Marijampoles apskritis |
| EPI_ISL_541859 | 4/8/2020  | 9/23/2020 | Europe / Lithuania / Marijampoles apskritis |
| EPI_ISL_541860 | 4/8/2020  | 9/23/2020 | Europe / Lithuania / Marijampoles apskritis |
| EPI_ISL_541861 | 4/8/2020  | 9/23/2020 | Europe / Lithuania / Marijampoles apskritis |
| EPI_ISL_541862 | 4/8/2020  | 9/23/2020 | Europe / Lithuania / Marijampoles apskritis |
| EPI_ISL_541863 | 4/8/2020  | 9/23/2020 | Europe / Lithuania / Marijampoles apskritis |
| EPI_ISL_541864 | 4/8/2020  | 9/23/2020 | Europe / Lithuania / Kauno apskritis        |
| EPI_ISL_541865 | 4/8/2020  | 9/23/2020 | Europe / Lithuania / Marijampoles apskritis |
| EPI_ISL_541866 | 4/9/2020  | 9/23/2020 | Europe / Lithuania / Marijampoles apskritis |
| EPI_ISL_541867 | 4/9/2020  | 9/23/2020 | Europe / Lithuania / Marijampoles apskritis |
| EPI_ISL_541868 | 4/2/2020  | 9/23/2020 | Europe / Lithuania / Taurages apskritis     |
| EPI_ISL_541869 | 4/11/2020 | 9/23/2020 | Europe / Lithuania / Marijampoles apskritis |
| EPI_ISL_541870 | 4/4/2020  | 9/23/2020 | Europe / Lithuania / Kauno apskritis        |
| EPI_ISL_541871 | 4/14/2020 | 9/23/2020 | Europe / Lithuania / Marijampoles apskritis |
| EPI_ISL_541872 | 4/14/2020 | 9/23/2020 | Europe / Lithuania / Marijampoles apskritis |
| EPI_ISL_541873 | 4/16/2020 | 9/23/2020 | Europe / Lithuania / Kauno apskritis        |
| EPI_ISL_541874 | 4/16/2020 | 9/23/2020 | Europe / Lithuania / Marijampoles apskritis |
| EPI_ISL_541875 | 4/17/2020 | 9/23/2020 | Europe / Lithuania / Marijampoles apskritis |

|                |           |           |                                                       |
|----------------|-----------|-----------|-------------------------------------------------------|
| EPI_ISL_541876 | 4/18/2020 | 9/23/2020 | Europe / Lithuania / Marijampoles apskritis           |
| EPI_ISL_541877 | 4/18/2020 | 9/23/2020 | Europe / Lithuania / Marijampoles apskritis           |
| EPI_ISL_541878 | 3/20/2020 | 9/23/2020 | Europe / Spain / Madrid / Madrid                      |
| EPI_ISL_541884 | 6/12/2020 | 9/23/2020 | Europe / Spain / Madrid / Madrid                      |
| EPI_ISL_541886 | 7/21/2020 | 9/23/2020 | Europe / Spain / Madrid / Madrid                      |
| EPI_ISL_541887 | 7/21/2020 | 9/23/2020 | Europe / Spain / Madrid / Madrid                      |
| EPI_ISL_541889 | 7/22/2020 | 9/23/2020 | Europe / Spain / Madrid / Madrid                      |
| EPI_ISL_541890 | 7/22/2020 | 9/23/2020 | Europe / Spain / Madrid / Madrid                      |
| EPI_ISL_541892 | 7/27/2020 | 9/23/2020 | Europe / Spain / Madrid / Madrid                      |
| EPI_ISL_541894 | 7/28/2020 | 9/23/2020 | Europe / Spain / Madrid / Madrid                      |
| EPI_ISL_541895 | 7/28/2020 | 9/23/2020 | Europe / Spain / Madrid / Madrid                      |
| EPI_ISL_541896 | 7/29/2020 | 9/23/2020 | Europe / Spain / Madrid / Madrid                      |
| EPI_ISL_541897 | 7/30/2020 | 9/23/2020 | Europe / Spain / Madrid / Madrid                      |
| EPI_ISL_541898 | 7/30/2020 | 9/23/2020 | Europe / Spain / Madrid / Madrid                      |
| EPI_ISL_541899 | 7/31/2020 | 9/23/2020 | Europe / Spain / Madrid / Madrid                      |
| EPI_ISL_541900 | 7/31/2020 | 9/23/2020 | Europe / Spain / Madrid / Madrid                      |
| EPI_ISL_541902 | 7/31/2020 | 9/23/2020 | Europe / Spain / Madrid / Madrid                      |
| EPI_ISL_541903 | 7/31/2020 | 9/23/2020 | Europe / Spain / Madrid / Madrid                      |
| EPI_ISL_541904 | 8/1/2020  | 9/23/2020 | Europe / Spain / Madrid / Madrid                      |
| EPI_ISL_541905 | 8/1/2020  | 9/23/2020 | Europe / Spain / Madrid / Madrid                      |
| EPI_ISL_541906 | 8/2/2020  | 9/23/2020 | Europe / Spain / Madrid / Madrid                      |
| EPI_ISL_541907 | 8/3/2020  | 9/23/2020 | Europe / Spain / Madrid / Madrid                      |
| EPI_ISL_541908 | 8/3/2020  | 9/23/2020 | Europe / Spain / Madrid / Madrid                      |
| EPI_ISL_541911 | 8/4/2020  | 9/23/2020 | Europe / Spain / Madrid / Madrid                      |
| EPI_ISL_541912 | 8/4/2020  | 9/23/2020 | Europe / Spain / Madrid / Madrid                      |
| EPI_ISL_541913 | 8/4/2020  | 9/23/2020 | Europe / Spain / Madrid / Madrid                      |
| EPI_ISL_541915 | 8/4/2020  | 9/23/2020 | Europe / Spain / Madrid / Madrid                      |
| EPI_ISL_541916 | 8/4/2020  | 9/23/2020 | Europe / Spain / Madrid / Madrid                      |
| EPI_ISL_541917 | 8/6/2020  | 9/23/2020 | Europe / Spain / Madrid / Madrid                      |
| EPI_ISL_541918 | 8/7/2020  | 9/23/2020 | Europe / Spain / Madrid / Madrid                      |
| EPI_ISL_541919 | 8/7/2020  | 9/23/2020 | Europe / Spain / Madrid / Madrid                      |
| EPI_ISL_541920 | 8/11/2020 | 9/23/2020 | Europe / Spain / Madrid / Madrid                      |
| EPI_ISL_541921 | 8/12/2020 | 9/23/2020 | Europe / Spain / Madrid / Madrid                      |
| EPI_ISL_541922 | 8/12/2020 | 9/23/2020 | Europe / Spain / Madrid / Madrid                      |
| EPI_ISL_541924 | 8/13/2020 | 9/23/2020 | Europe / Spain / Madrid / Madrid                      |
| EPI_ISL_541925 | 8/14/2020 | 9/23/2020 | Europe / Spain / Madrid / Madrid                      |
| EPI_ISL_541926 | 8/14/2020 | 9/23/2020 | Europe / Spain / Madrid / Madrid                      |
| EPI_ISL_541927 | 8/18/2020 | 9/23/2020 | Europe / Spain / Madrid / Madrid                      |
| EPI_ISL_541928 | 8/17/2020 | 9/23/2020 | Europe / Spain / Madrid / Madrid                      |
| EPI_ISL_541929 | 8/18/2020 | 9/23/2020 | Europe / Spain / Madrid / Madrid                      |
| EPI_ISL_541933 | 8/19/2020 | 9/23/2020 | Europe / Spain / Madrid / Madrid                      |
| EPI_ISL_541934 | 8/19/2020 | 9/23/2020 | Europe / Spain / Madrid / Madrid                      |
| EPI_ISL_541936 | 8/23/2020 | 9/23/2020 | Europe / Spain / Madrid / Madrid                      |
| EPI_ISL_541938 | 8/24/2020 | 9/23/2020 | Europe / Spain / Madrid / Madrid                      |
| EPI_ISL_541939 | 8/24/2020 | 9/23/2020 | Europe / Spain / Madrid / Madrid                      |
| EPI_ISL_541941 | 8/30/2020 | 9/23/2020 | Europe / Spain / Madrid / Madrid                      |
| EPI_ISL_541949 | 3/14/2020 | 9/23/2020 | Europe / Spain / Balearic Islands / Palma de Mallorca |

|                |           |           |                                                       |
|----------------|-----------|-----------|-------------------------------------------------------|
| EPI_ISL_541950 | 3/2/2020  | 9/23/2020 | Europe / Spain / Balearic Islands / Palma de Mallorca |
| EPI_ISL_541951 | 3/8/2020  | 9/23/2020 | Europe / Spain / Balearic Islands / Palma de Mallorca |
| EPI_ISL_541953 | 4/1/2020  | 9/23/2020 | Europe / Spain / Balearic Islands / Palma de Mallorca |
| EPI_ISL_541956 | 5/28/2020 | 9/23/2020 | Europe / Spain / Balearic Islands / Palma de Mallorca |
| EPI_ISL_541958 | 3/17/2020 | 9/23/2020 | Europe / Spain / Balearic Islands / Palma de Mallorca |
| EPI_ISL_541963 | 3/16/2020 | 9/23/2020 | Europe / Spain / Balearic Islands / Palma de Mallorca |
| EPI_ISL_541964 | 5/28/2020 | 9/23/2020 | Europe / Spain / Balearic Islands / Palma de Mallorca |
| EPI_ISL_541965 | 3/5/2020  | 9/23/2020 | Europe / Spain / Balearic Islands / Palma de Mallorca |
| EPI_ISL_541970 | 3/18/2020 | 9/23/2020 | Europe / Norway / Vestland / Bergen                   |
| EPI_ISL_542014 | 6/9/2020  | 9/23/2020 | North America / USA / New Mexico                      |
| EPI_ISL_542016 | 6/9/2020  | 9/23/2020 | North America / USA / New Mexico                      |
| EPI_ISL_542017 | 6/9/2020  | 9/23/2020 | North America / USA / New Mexico                      |
| EPI_ISL_542018 | 6/9/2020  | 9/23/2020 | North America / USA / New Mexico                      |
| EPI_ISL_542019 | 6/9/2020  | 9/23/2020 | North America / USA / New Mexico                      |
| EPI_ISL_542020 | 6/16/2020 | 9/23/2020 | North America / USA / New Mexico                      |
| EPI_ISL_542021 | 6/16/2020 | 9/23/2020 | North America / USA / New Mexico                      |
| EPI_ISL_542022 | 6/18/2020 | 9/23/2020 | North America / USA / Texas                           |
| EPI_ISL_542023 | 6/25/2020 | 9/23/2020 | North America / USA / Texas                           |
| EPI_ISL_542024 | 7/1/2020  | 9/23/2020 | North America / USA / New Mexico                      |
| EPI_ISL_542025 | 7/2/2020  | 9/23/2020 | North America / USA / Texas                           |
| EPI_ISL_542026 | 7/1/2020  | 9/23/2020 | North America / USA / New Mexico                      |
| EPI_ISL_542027 | 7/1/2020  | 9/23/2020 | North America / USA / New Mexico                      |
| EPI_ISL_542029 | 7/7/2020  | 9/23/2020 | North America / USA / New Mexico                      |
| EPI_ISL_542030 | 7/7/2020  | 9/23/2020 | North America / USA / New Mexico                      |
| EPI_ISL_542031 | 7/7/2020  | 9/23/2020 | North America / USA / Texas                           |
| EPI_ISL_542032 | 7/7/2020  | 9/23/2020 | North America / USA / New Mexico                      |
| EPI_ISL_542033 | 7/7/2020  | 9/23/2020 | North America / USA / Texas                           |
| EPI_ISL_542035 | 7/7/2020  | 9/23/2020 | North America / USA / Texas                           |
| EPI_ISL_542038 | 7/22/2020 | 9/23/2020 | North America / USA / Texas                           |
| EPI_ISL_542039 | 7/23/2020 | 9/23/2020 | North America / USA / New Mexico                      |
| EPI_ISL_542040 | 7/23/2020 | 9/23/2020 | North America / USA / New Mexico                      |
| EPI_ISL_542041 | 8/21/2020 | 9/23/2020 | North America / USA / New Mexico                      |
| EPI_ISL_542042 | 8/21/2020 | 9/23/2020 | North America / USA / New Mexico                      |
| EPI_ISL_542043 | 8/21/2020 | 9/23/2020 | North America / USA / New Mexico                      |
| EPI_ISL_542044 | 8/21/2020 | 9/23/2020 | North America / USA / New Mexico                      |
| EPI_ISL_542045 | 8/21/2020 | 9/23/2020 | North America / USA / New Mexico                      |
| EPI_ISL_542046 | 8/21/2020 | 9/23/2020 | North America / USA / New Mexico                      |
| EPI_ISL_542047 | 8/21/2020 | 9/23/2020 | North America / USA / New Mexico                      |
| EPI_ISL_542048 | 8/21/2020 | 9/23/2020 | North America / USA / New Mexico                      |
| EPI_ISL_542049 | 8/21/2020 | 9/23/2020 | North America / USA / New Mexico                      |
| EPI_ISL_542050 | 8/21/2020 | 9/23/2020 | North America / USA / New Mexico                      |
| EPI_ISL_542051 | 8/21/2020 | 9/23/2020 | North America / USA / New Mexico                      |
| EPI_ISL_542052 | 8/21/2020 | 9/23/2020 | North America / USA / New Mexico                      |
| EPI_ISL_542053 | 8/21/2020 | 9/23/2020 | North America / USA / New Mexico                      |
| EPI_ISL_542054 | 8/21/2020 | 9/23/2020 | North America / USA / New Mexico                      |
| EPI_ISL_542055 | 8/21/2020 | 9/23/2020 | North America / USA / New Mexico                      |
| EPI_ISL_542056 | 8/21/2020 | 9/23/2020 | North America / USA / New Mexico                      |

















|                |           |           |                           |
|----------------|-----------|-----------|---------------------------|
| EPI_ISL_542393 | 3/17/2020 | 9/23/2020 | Europe / Italy / Lombardy |
| EPI_ISL_542394 | 3/17/2020 | 9/23/2020 | Europe / Italy / Lombardy |
| EPI_ISL_542395 | 3/27/2020 | 9/23/2020 | Europe / Italy / Lombardy |
| EPI_ISL_542396 | 3/20/2020 | 9/23/2020 | Europe / Italy / Lombardy |
| EPI_ISL_542397 | 3/20/2020 | 9/23/2020 | Europe / Italy / Lombardy |
| EPI_ISL_542398 | 3/21/2020 | 9/23/2020 | Europe / Italy / Lombardy |
| EPI_ISL_542399 | 3/21/2020 | 9/23/2020 | Europe / Italy / Lombardy |
| EPI_ISL_542400 | 3/2/2020  | 9/23/2020 | Europe / Italy / Lombardy |
| EPI_ISL_542401 | 2/26/2020 | 9/23/2020 | Europe / Italy / Lombardy |
| EPI_ISL_542402 | 3/2/2020  | 9/23/2020 | Europe / Italy / Lombardy |
| EPI_ISL_542403 | 3/3/2020  | 9/23/2020 | Europe / Italy / Lombardy |
| EPI_ISL_542404 | 3/4/2020  | 9/23/2020 | Europe / Italy / Lombardy |
| EPI_ISL_542405 | 3/4/2020  | 9/23/2020 | Europe / Italy / Lombardy |
| EPI_ISL_542406 | 2/27/2020 | 9/23/2020 | Europe / Italy / Lombardy |
| EPI_ISL_542407 | 3/2/2020  | 9/23/2020 | Europe / Italy / Lombardy |
| EPI_ISL_542408 | 3/4/2020  | 9/23/2020 | Europe / Italy / Lombardy |
| EPI_ISL_542409 | 3/3/2020  | 9/23/2020 | Europe / Italy / Lombardy |
| EPI_ISL_542410 | 2/25/2020 | 9/23/2020 | Europe / Italy / Lombardy |
| EPI_ISL_542411 | 3/2/2020  | 9/23/2020 | Europe / Italy / Lombardy |
| EPI_ISL_542412 | 2/29/2020 | 9/23/2020 | Europe / Italy / Lombardy |
| EPI_ISL_542413 | 3/5/2020  | 9/23/2020 | Europe / Italy / Lombardy |
| EPI_ISL_542414 | 3/4/2020  | 9/23/2020 | Europe / Italy / Lombardy |
| EPI_ISL_542415 | 3/1/2020  | 9/23/2020 | Europe / Italy / Lombardy |
| EPI_ISL_542416 | 3/6/2020  | 9/23/2020 | Europe / Italy / Lombardy |
| EPI_ISL_542417 | 3/4/2020  | 9/23/2020 | Europe / Italy / Lombardy |
| EPI_ISL_542418 | 3/9/2020  | 9/23/2020 | Europe / Italy / Lombardy |
| EPI_ISL_542419 | 3/8/2020  | 9/23/2020 | Europe / Italy / Lombardy |
| EPI_ISL_542420 | 3/3/2020  | 9/23/2020 | Europe / Italy / Lombardy |
| EPI_ISL_542421 | 3/5/2020  | 9/23/2020 | Europe / Italy / Lombardy |
| EPI_ISL_542422 | 3/6/2020  | 9/23/2020 | Europe / Italy / Lombardy |
| EPI_ISL_542423 | 3/6/2020  | 9/23/2020 | Europe / Italy / Lombardy |
| EPI_ISL_542424 | 3/3/2020  | 9/23/2020 | Europe / Italy / Lombardy |
| EPI_ISL_542425 | 3/10/2020 | 9/23/2020 | Europe / Italy / Lombardy |
| EPI_ISL_542426 | 3/8/2020  | 9/23/2020 | Europe / Italy / Lombardy |
| EPI_ISL_542427 | 3/11/2020 | 9/23/2020 | Europe / Italy / Lombardy |
| EPI_ISL_542428 | 3/10/2020 | 9/23/2020 | Europe / Italy / Lombardy |
| EPI_ISL_542429 | 3/2/2020  | 9/23/2020 | Europe / Italy / Lombardy |
| EPI_ISL_542430 | 3/4/2020  | 9/23/2020 | Europe / Italy / Lombardy |
| EPI_ISL_542431 | 3/10/2020 | 9/23/2020 | Europe / Italy / Lombardy |
| EPI_ISL_542432 | 3/8/2020  | 9/23/2020 | Europe / Italy / Lombardy |
| EPI_ISL_542433 | 3/10/2020 | 9/23/2020 | Europe / Italy / Lombardy |
| EPI_ISL_542434 | 3/9/2020  | 9/23/2020 | Europe / Italy / Lombardy |
| EPI_ISL_542435 | 3/11/2020 | 9/23/2020 | Europe / Italy / Lombardy |
| EPI_ISL_542436 | 3/10/2020 | 9/23/2020 | Europe / Italy / Lombardy |
| EPI_ISL_542437 | 3/8/2020  | 9/23/2020 | Europe / Italy / Lombardy |
| EPI_ISL_542438 | 3/10/2020 | 9/23/2020 | Europe / Italy / Lombardy |
| EPI_ISL_542439 | 3/8/2020  | 9/23/2020 | Europe / Italy / Lombardy |

|                |           |                                                        |
|----------------|-----------|--------------------------------------------------------|
| EPI_ISL_542440 | 3/6/2020  | 9/23/2020 Europe / Italy / Lombardy                    |
| EPI_ISL_542441 | 3/9/2020  | 9/23/2020 Europe / Italy / Lombardy                    |
| EPI_ISL_542442 | 2/26/2020 | 9/23/2020 Europe / Italy / Lombardy                    |
| EPI_ISL_542443 | 3/10/2020 | 9/23/2020 Europe / Italy / Lombardy                    |
| EPI_ISL_542464 | 6/1/2020  | 9/23/2020 North America / USA / Texas / El Paso County |
| EPI_ISL_542487 | 4/10/2020 | 9/23/2020 North America / USA / Texas / Houston        |
| EPI_ISL_542488 | 4/9/2020  | 9/23/2020 North America / USA / Texas / Houston        |
| EPI_ISL_542491 | 4/14/2020 | 9/23/2020 North America / USA / Texas / Houston        |
| EPI_ISL_542492 | 4/10/2020 | 9/23/2020 North America / USA / Texas / Houston        |
| EPI_ISL_542493 | 4/13/2020 | 9/23/2020 North America / USA / Texas / Houston        |
| EPI_ISL_542494 | 4/8/2020  | 9/23/2020 North America / USA / Texas / Houston        |
| EPI_ISL_542495 | 4/5/2020  | 9/23/2020 North America / USA / Texas / Houston        |
| EPI_ISL_542496 | 4/13/2020 | 9/23/2020 North America / USA / Texas / Houston        |
| EPI_ISL_542497 | 4/9/2020  | 9/23/2020 North America / USA / Texas / Houston        |
| EPI_ISL_542498 | 4/5/2020  | 9/23/2020 North America / USA / Texas / Houston        |
| EPI_ISL_542500 | 4/5/2020  | 9/23/2020 North America / USA / Texas / Houston        |
| EPI_ISL_542502 | 4/5/2020  | 9/23/2020 North America / USA / Texas / Houston        |
| EPI_ISL_542503 | 4/6/2020  | 9/23/2020 North America / USA / Texas / Houston        |
| EPI_ISL_542504 | 4/11/2020 | 9/23/2020 North America / USA / Texas / Houston        |
| EPI_ISL_542505 | 4/9/2020  | 9/23/2020 North America / USA / Texas / Houston        |
| EPI_ISL_542506 | 4/6/2020  | 9/23/2020 North America / USA / Texas / Houston        |
| EPI_ISL_542507 | 4/5/2020  | 9/23/2020 North America / USA / Texas / Houston        |
| EPI_ISL_542508 | 4/11/2020 | 9/23/2020 North America / USA / Texas / Houston        |
| EPI_ISL_542509 | 4/6/2020  | 9/23/2020 North America / USA / Texas / Houston        |
| EPI_ISL_542510 | 4/5/2020  | 9/23/2020 North America / USA / Texas / Houston        |
| EPI_ISL_542511 | 4/6/2020  | 9/23/2020 North America / USA / Texas / Houston        |
| EPI_ISL_542512 | 4/9/2020  | 9/23/2020 North America / USA / Texas / Houston        |
| EPI_ISL_542513 | 4/10/2020 | 9/23/2020 North America / USA / Texas / Houston        |
| EPI_ISL_542514 | 4/11/2020 | 9/23/2020 North America / USA / Texas / Houston        |
| EPI_ISL_542515 | 4/5/2020  | 9/23/2020 North America / USA / Texas / Houston        |
| EPI_ISL_542516 | 4/13/2020 | 9/23/2020 North America / USA / Texas / Houston        |
| EPI_ISL_542517 | 4/11/2020 | 9/23/2020 North America / USA / Texas / Houston        |
| EPI_ISL_542518 | 4/10/2020 | 9/23/2020 North America / USA / Texas / Houston        |
| EPI_ISL_542519 | 4/8/2020  | 9/23/2020 North America / USA / Texas / Houston        |
| EPI_ISL_542520 | 4/10/2020 | 9/23/2020 North America / USA / Texas / Houston        |
| EPI_ISL_542521 | 4/5/2020  | 9/23/2020 North America / USA / Texas / Houston        |
| EPI_ISL_542522 | 4/7/2020  | 9/23/2020 North America / USA / Texas / Houston        |
| EPI_ISL_542523 | 4/12/2020 | 9/23/2020 North America / USA / Texas / Houston        |
| EPI_ISL_542524 | 4/23/2020 | 9/23/2020 North America / USA / Texas / Houston        |
| EPI_ISL_542526 | 4/18/2020 | 9/23/2020 North America / USA / Texas / Houston        |
| EPI_ISL_542527 | 4/26/2020 | 9/23/2020 North America / USA / Texas / Houston        |
| EPI_ISL_542528 | 4/24/2020 | 9/23/2020 North America / USA / Texas / Houston        |
| EPI_ISL_542529 | 4/20/2020 | 9/23/2020 North America / USA / Texas / Houston        |
| EPI_ISL_542530 | 4/25/2020 | 9/23/2020 North America / USA / Texas / Houston        |
| EPI_ISL_542531 | 4/22/2020 | 9/23/2020 North America / USA / Texas / Houston        |
| EPI_ISL_542533 | 4/22/2020 | 9/23/2020 North America / USA / Texas / Houston        |
| EPI_ISL_542534 | 4/25/2020 | 9/23/2020 North America / USA / Texas / Houston        |















|                |           |           |                                       |
|----------------|-----------|-----------|---------------------------------------|
| EPI_ISL_542862 | 5/14/2020 | 9/23/2020 | North America / USA / Texas / Houston |
| EPI_ISL_542863 | 5/13/2020 | 9/23/2020 | North America / USA / Texas / Houston |
| EPI_ISL_542864 | 5/15/2020 | 9/23/2020 | North America / USA / Texas / Houston |
| EPI_ISL_542865 | 5/16/2020 | 9/23/2020 | North America / USA / Texas / Houston |
| EPI_ISL_542866 | 5/12/2020 | 9/23/2020 | North America / USA / Texas / Houston |
| EPI_ISL_542868 | 5/13/2020 | 9/23/2020 | North America / USA / Texas / Houston |
| EPI_ISL_542869 | 5/12/2020 | 9/23/2020 | North America / USA / Texas / Houston |
| EPI_ISL_542871 | 5/13/2020 | 9/23/2020 | North America / USA / Texas / Houston |
| EPI_ISL_542872 | 5/14/2020 | 9/23/2020 | North America / USA / Texas / Houston |
| EPI_ISL_542873 | 5/13/2020 | 9/23/2020 | North America / USA / Texas / Houston |
| EPI_ISL_542875 | 5/1/2020  | 9/23/2020 | North America / USA / Texas / Houston |
| EPI_ISL_542876 | 4/25/2020 | 9/23/2020 | North America / USA / Texas / Houston |
| EPI_ISL_542878 | 4/18/2020 | 9/23/2020 | North America / USA / Texas / Houston |
| EPI_ISL_542880 | 4/19/2020 | 9/23/2020 | North America / USA / Texas / Houston |
| EPI_ISL_542881 | 5/10/2020 | 9/23/2020 | North America / USA / Texas / Houston |
| EPI_ISL_542882 | 4/28/2020 | 9/23/2020 | North America / USA / Texas / Houston |
| EPI_ISL_542883 | 5/5/2020  | 9/23/2020 | North America / USA / Texas / Houston |
| EPI_ISL_542885 | 5/7/2020  | 9/23/2020 | North America / USA / Texas / Houston |
| EPI_ISL_542886 | 5/5/2020  | 9/23/2020 | North America / USA / Texas / Houston |
| EPI_ISL_542887 | 5/5/2020  | 9/23/2020 | North America / USA / Texas / Houston |
| EPI_ISL_542888 | 5/2/2020  | 9/23/2020 | North America / USA / Texas / Houston |
| EPI_ISL_542889 | 5/8/2020  | 9/23/2020 | North America / USA / Texas / Houston |
| EPI_ISL_542890 | 5/9/2020  | 9/23/2020 | North America / USA / Texas / Houston |
| EPI_ISL_542891 | 5/4/2020  | 9/23/2020 | North America / USA / Texas / Houston |
| EPI_ISL_542892 | 5/7/2020  | 9/23/2020 | North America / USA / Texas / Houston |
| EPI_ISL_542893 | 4/29/2020 | 9/23/2020 | North America / USA / Texas / Houston |
| EPI_ISL_542894 | 5/6/2020  | 9/23/2020 | North America / USA / Texas / Houston |
| EPI_ISL_542895 | 5/8/2020  | 9/23/2020 | North America / USA / Texas / Houston |
| EPI_ISL_542896 | 5/15/2020 | 9/23/2020 | North America / USA / Texas / Houston |
| EPI_ISL_542897 | 5/14/2020 | 9/23/2020 | North America / USA / Texas / Houston |
| EPI_ISL_542898 | 5/16/2020 | 9/23/2020 | North America / USA / Texas / Houston |
| EPI_ISL_542899 | 5/13/2020 | 9/23/2020 | North America / USA / Texas / Houston |
| EPI_ISL_542900 | 4/17/2020 | 9/23/2020 | North America / USA / Texas / Houston |
| EPI_ISL_542901 | 4/17/2020 | 9/23/2020 | North America / USA / Texas / Houston |
| EPI_ISL_542902 | 4/15/2020 | 9/23/2020 | North America / USA / Texas / Houston |
| EPI_ISL_542904 | 4/13/2020 | 9/23/2020 | North America / USA / Texas / Houston |
| EPI_ISL_542905 | 4/20/2020 | 9/23/2020 | North America / USA / Texas / Houston |
| EPI_ISL_542906 | 4/15/2020 | 9/23/2020 | North America / USA / Texas / Houston |
| EPI_ISL_542907 | 4/20/2020 | 9/23/2020 | North America / USA / Texas / Houston |
| EPI_ISL_542908 | 4/29/2020 | 9/23/2020 | North America / USA / Texas / Houston |
| EPI_ISL_542909 | 5/18/2020 | 9/23/2020 | North America / USA / Texas / Houston |
| EPI_ISL_542910 | 5/13/2020 | 9/23/2020 | North America / USA / Texas / Houston |
| EPI_ISL_542911 | 4/28/2020 | 9/23/2020 | North America / USA / Texas / Houston |
| EPI_ISL_542913 | 5/19/2020 | 9/23/2020 | North America / USA / Texas / Houston |
| EPI_ISL_542914 | 4/28/2020 | 9/23/2020 | North America / USA / Texas / Houston |
| EPI_ISL_542915 | 5/16/2020 | 9/23/2020 | North America / USA / Texas / Houston |
| EPI_ISL_542916 | 4/29/2020 | 9/23/2020 | North America / USA / Texas / Houston |

















































































































|                |           |                                                              |
|----------------|-----------|--------------------------------------------------------------|
| EPI_ISL_545940 | 4/10/2020 | 9/24/2020 North America / USA / Texas / Houston              |
| EPI_ISL_545941 | 4/10/2020 | 9/24/2020 North America / USA / Texas / Houston              |
| EPI_ISL_545942 | 4/7/2020  | 9/24/2020 North America / USA / Texas / Houston              |
| EPI_ISL_545943 | 4/9/2020  | 9/24/2020 North America / USA / Texas / Houston              |
| EPI_ISL_545945 | 4/10/2020 | 9/24/2020 North America / USA / Texas / Houston              |
| EPI_ISL_545946 | 4/10/2020 | 9/24/2020 North America / USA / Texas / Houston              |
| EPI_ISL_545947 | 4/10/2020 | 9/24/2020 North America / USA / Texas / Houston              |
| EPI_ISL_545948 | 4/10/2020 | 9/24/2020 North America / USA / Texas / Houston              |
| EPI_ISL_545949 | 4/10/2020 | 9/24/2020 North America / USA / Texas / Houston              |
| EPI_ISL_545951 | 4/7/2020  | 9/24/2020 North America / USA / Texas / Houston              |
| EPI_ISL_545952 | 4/5/2020  | 9/24/2020 North America / USA / Texas / Houston              |
| EPI_ISL_545953 | 4/3/2020  | 9/24/2020 North America / USA / Texas / Houston              |
| EPI_ISL_545954 | 7/27/2020 | 9/24/2020 Europe / Czech Republic / Liberec Region           |
| EPI_ISL_545956 | 7/28/2020 | 9/24/2020 Europe / Czech Republic / Olomouc Region / Písařov |
| EPI_ISL_545957 | 7/28/2020 | 9/24/2020 Europe / Czech Republic / Olomouc Region / Písařov |
| EPI_ISL_545958 | 7/5/2020  | 9/24/2020 North America / USA / Texas / Houston              |
| EPI_ISL_545960 | 7/4/2020  | 9/24/2020 North America / USA / Texas / Houston              |
| EPI_ISL_545961 | 7/4/2020  | 9/24/2020 North America / USA / Texas / Houston              |
| EPI_ISL_545963 | 7/5/2020  | 9/24/2020 North America / USA / Texas / Houston              |
| EPI_ISL_545964 | 7/5/2020  | 9/24/2020 North America / USA / Texas / Houston              |
| EPI_ISL_545965 | 7/6/2020  | 9/24/2020 North America / USA / Texas / Houston              |
| EPI_ISL_545967 | 7/4/2020  | 9/24/2020 North America / USA / Texas / Houston              |
| EPI_ISL_545968 | 7/5/2020  | 9/24/2020 North America / USA / Texas / Houston              |
| EPI_ISL_545970 | 7/5/2020  | 9/24/2020 North America / USA / Texas / Houston              |
| EPI_ISL_545973 | 7/4/2020  | 9/24/2020 North America / USA / Texas / Houston              |
| EPI_ISL_545974 | 7/5/2020  | 9/24/2020 North America / USA / Texas / Houston              |
| EPI_ISL_545976 | 7/5/2020  | 9/24/2020 North America / USA / Texas / Houston              |
| EPI_ISL_545977 | 7/5/2020  | 9/24/2020 North America / USA / Texas / Houston              |
| EPI_ISL_545981 | 7/5/2020  | 9/24/2020 North America / USA / Texas / Houston              |
| EPI_ISL_545982 | 7/5/2020  | 9/24/2020 North America / USA / Texas / Houston              |
| EPI_ISL_545983 | 7/4/2020  | 9/24/2020 North America / USA / Texas / Houston              |
| EPI_ISL_545985 | 7/4/2020  | 9/24/2020 North America / USA / Texas / Houston              |
| EPI_ISL_545986 | 7/5/2020  | 9/24/2020 North America / USA / Texas / Houston              |
| EPI_ISL_545987 | 7/4/2020  | 9/24/2020 North America / USA / Texas / Houston              |
| EPI_ISL_545988 | 7/4/2020  | 9/24/2020 North America / USA / Texas / Houston              |
| EPI_ISL_545989 | 7/5/2020  | 9/24/2020 North America / USA / Texas / Houston              |
| EPI_ISL_545991 | 7/4/2020  | 9/24/2020 North America / USA / Texas / Houston              |
| EPI_ISL_545992 | 7/4/2020  | 9/24/2020 North America / USA / Texas / Houston              |
| EPI_ISL_545994 | 7/4/2020  | 9/24/2020 North America / USA / Texas / Houston              |
| EPI_ISL_545995 | 6/25/2020 | 9/24/2020 North America / USA / Texas / Houston              |
| EPI_ISL_545998 | 7/6/2020  | 9/24/2020 North America / USA / Texas / Houston              |
| EPI_ISL_545999 | 7/5/2020  | 9/24/2020 North America / USA / Texas / Houston              |
| EPI_ISL_546000 | 7/5/2020  | 9/24/2020 North America / USA / Texas / Houston              |
| EPI_ISL_546001 | 7/4/2020  | 9/24/2020 North America / USA / Texas / Houston              |
| EPI_ISL_546002 | 6/27/2020 | 9/24/2020 North America / USA / Texas / Houston              |
| EPI_ISL_546004 | 6/27/2020 | 9/24/2020 North America / USA / Texas / Houston              |
| EPI_ISL_546005 | 6/27/2020 | 9/24/2020 North America / USA / Texas / Houston              |































|                |           |           |                                                              |
|----------------|-----------|-----------|--------------------------------------------------------------|
| EPI_ISL_546936 | 8/7/2020  | 9/24/2020 | Europe / Czech Republic / Středočeský územní úřad / Rašovice |
| EPI_ISL_546937 | 6/30/2020 | 9/24/2020 | North America / USA / Texas / Houston                        |
| EPI_ISL_546938 | 6/18/2020 | 9/24/2020 | North America / USA / Texas / Houston                        |
| EPI_ISL_546940 | 4/9/2020  | 9/24/2020 | North America / USA / Texas / Houston                        |
| EPI_ISL_546941 | 6/23/2020 | 9/24/2020 | North America / USA / Texas / Houston                        |
| EPI_ISL_546945 | 6/26/2020 | 9/24/2020 | North America / USA / Texas / Houston                        |
| EPI_ISL_546946 | 6/26/2020 | 9/24/2020 | North America / USA / Texas / Houston                        |
| EPI_ISL_546948 | 6/24/2020 | 9/24/2020 | North America / USA / Texas / Houston                        |
| EPI_ISL_546949 | 6/20/2020 | 9/24/2020 | North America / USA / Texas / Houston                        |
| EPI_ISL_546950 | 6/30/2020 | 9/24/2020 | North America / USA / Texas / Houston                        |
| EPI_ISL_546951 | 6/23/2020 | 9/24/2020 | North America / USA / Texas / Houston                        |
| EPI_ISL_546952 | 4/6/2020  | 9/24/2020 | North America / USA / Texas / Houston                        |
| EPI_ISL_546953 | 6/23/2020 | 9/24/2020 | North America / USA / Texas / Houston                        |
| EPI_ISL_546954 | 6/25/2020 | 9/24/2020 | North America / USA / Texas / Houston                        |
| EPI_ISL_546955 | 6/18/2020 | 9/24/2020 | North America / USA / Texas / Houston                        |
| EPI_ISL_546956 | 6/23/2020 | 9/24/2020 | North America / USA / Texas / Houston                        |
| EPI_ISL_546957 | 6/26/2020 | 9/24/2020 | North America / USA / Texas / Houston                        |
| EPI_ISL_546958 | 6/25/2020 | 9/24/2020 | North America / USA / Texas / Houston                        |
| EPI_ISL_546961 | 6/29/2020 | 9/24/2020 | North America / USA / Texas / Houston                        |
| EPI_ISL_546962 | 6/20/2020 | 9/24/2020 | North America / USA / Texas / Houston                        |
| EPI_ISL_546963 | 6/23/2020 | 9/24/2020 | North America / USA / Texas / Houston                        |
| EPI_ISL_546964 | 6/19/2020 | 9/24/2020 | North America / USA / Texas / Houston                        |
| EPI_ISL_546966 | 6/19/2020 | 9/24/2020 | North America / USA / Texas / Houston                        |
| EPI_ISL_546967 | 6/19/2020 | 9/24/2020 | North America / USA / Texas / Houston                        |
| EPI_ISL_546968 | 6/26/2020 | 9/24/2020 | North America / USA / Texas / Houston                        |
| EPI_ISL_546973 | 6/19/2020 | 9/24/2020 | North America / USA / Texas / Houston                        |
| EPI_ISL_546974 | 6/23/2020 | 9/24/2020 | North America / USA / Texas / Houston                        |
| EPI_ISL_546975 | 6/30/2020 | 9/24/2020 | North America / USA / Texas / Houston                        |
| EPI_ISL_546976 | 6/29/2020 | 9/24/2020 | North America / USA / Texas / Houston                        |
| EPI_ISL_546977 | 6/23/2020 | 9/24/2020 | North America / USA / Texas / Houston                        |
| EPI_ISL_546979 | 6/24/2020 | 9/24/2020 | North America / USA / Texas / Houston                        |
| EPI_ISL_546980 | 6/30/2020 | 9/24/2020 | North America / USA / Texas / Houston                        |
| EPI_ISL_546981 | 6/30/2020 | 9/24/2020 | North America / USA / Texas / Houston                        |
| EPI_ISL_546983 | 6/20/2020 | 9/24/2020 | North America / USA / Texas / Houston                        |
| EPI_ISL_546984 | 6/30/2020 | 9/24/2020 | North America / USA / Texas / Houston                        |
| EPI_ISL_546985 | 6/19/2020 | 9/24/2020 | North America / USA / Texas / Houston                        |
| EPI_ISL_546988 | 6/23/2020 | 9/24/2020 | North America / USA / Texas / Houston                        |
| EPI_ISL_546989 | 6/19/2020 | 9/24/2020 | North America / USA / Texas / Houston                        |
| EPI_ISL_546990 | 6/24/2020 | 9/24/2020 | North America / USA / Texas / Houston                        |
| EPI_ISL_546991 | 6/18/2020 | 9/24/2020 | North America / USA / Texas / Houston                        |
| EPI_ISL_546992 | 6/24/2020 | 9/24/2020 | North America / USA / Texas / Houston                        |
| EPI_ISL_546995 | 6/30/2020 | 9/24/2020 | North America / USA / Texas / Houston                        |
| EPI_ISL_546996 | 6/18/2020 | 9/24/2020 | North America / USA / Texas / Houston                        |
| EPI_ISL_546997 | 6/29/2020 | 9/24/2020 | North America / USA / Texas / Houston                        |
| EPI_ISL_546999 | 6/26/2020 | 9/24/2020 | North America / USA / Texas / Houston                        |
| EPI_ISL_547000 | 6/26/2020 | 9/24/2020 | North America / USA / Texas / Houston                        |
| EPI_ISL_547001 | 4/6/2020  | 9/24/2020 | North America / USA / Texas / Houston                        |















|                |           |           |                                       |
|----------------|-----------|-----------|---------------------------------------|
| EPI_ISL_547387 | 7/4/2020  | 9/24/2020 | North America / USA / Texas / Houston |
| EPI_ISL_547388 | 7/6/2020  | 9/24/2020 | North America / USA / Texas / Houston |
| EPI_ISL_547390 | 6/27/2020 | 9/24/2020 | North America / USA / Texas / Houston |
| EPI_ISL_547394 | 6/26/2020 | 9/24/2020 | North America / USA / Texas / Houston |
| EPI_ISL_547395 | 6/29/2020 | 9/24/2020 | North America / USA / Texas / Houston |
| EPI_ISL_547396 | 7/4/2020  | 9/24/2020 | North America / USA / Texas / Houston |
| EPI_ISL_547397 | 6/21/2020 | 9/24/2020 | North America / USA / Texas / Houston |
| EPI_ISL_547399 | 6/23/2020 | 9/24/2020 | North America / USA / Texas / Houston |
| EPI_ISL_547402 | 6/26/2020 | 9/24/2020 | North America / USA / Texas / Houston |
| EPI_ISL_547403 | 7/3/2020  | 9/24/2020 | North America / USA / Texas / Houston |
| EPI_ISL_547404 | 6/22/2020 | 9/24/2020 | North America / USA / Texas / Houston |
| EPI_ISL_547405 | 6/28/2020 | 9/24/2020 | North America / USA / Texas / Houston |
| EPI_ISL_547408 | 6/24/2020 | 9/24/2020 | North America / USA / Texas / Houston |
| EPI_ISL_547409 | 7/5/2020  | 9/24/2020 | North America / USA / Texas / Houston |
| EPI_ISL_547410 | 7/5/2020  | 9/24/2020 | North America / USA / Texas / Houston |
| EPI_ISL_547411 | 7/5/2020  | 9/24/2020 | North America / USA / Texas / Houston |
| EPI_ISL_547412 | 7/5/2020  | 9/24/2020 | North America / USA / Texas / Houston |
| EPI_ISL_547413 | 7/5/2020  | 9/24/2020 | North America / USA / Texas / Houston |
| EPI_ISL_547414 | 7/5/2020  | 9/24/2020 | North America / USA / Texas / Houston |
| EPI_ISL_547416 | 4/11/2020 | 9/24/2020 | North America / USA / Texas / Houston |
| EPI_ISL_547418 | 7/5/2020  | 9/24/2020 | North America / USA / Texas / Houston |
| EPI_ISL_547419 | 7/5/2020  | 9/24/2020 | North America / USA / Texas / Houston |
| EPI_ISL_547420 | 7/7/2020  | 9/24/2020 | North America / USA / Texas / Houston |
| EPI_ISL_547421 | 7/7/2020  | 9/24/2020 | North America / USA / Texas / Houston |
| EPI_ISL_547423 | 7/5/2020  | 9/24/2020 | North America / USA / Texas / Houston |
| EPI_ISL_547424 | 7/7/2020  | 9/24/2020 | North America / USA / Texas / Houston |
| EPI_ISL_547426 | 7/6/2020  | 9/24/2020 | North America / USA / Texas / Houston |
| EPI_ISL_547427 | 7/5/2020  | 9/24/2020 | North America / USA / Texas / Houston |
| EPI_ISL_547431 | 7/5/2020  | 9/24/2020 | North America / USA / Texas / Houston |
| EPI_ISL_547432 | 7/5/2020  | 9/24/2020 | North America / USA / Texas / Houston |
| EPI_ISL_547433 | 7/24/2020 | 9/24/2020 | Europe / Gibraltar                    |
| EPI_ISL_547434 | 7/22/2020 | 9/24/2020 | Europe / Gibraltar                    |
| EPI_ISL_547435 | 7/27/2020 | 9/24/2020 | Europe / Gibraltar                    |
| EPI_ISL_547436 | 8/3/2020  | 9/24/2020 | Europe / Gibraltar                    |
| EPI_ISL_547437 | 7/22/2020 | 9/24/2020 | Europe / Gibraltar                    |
| EPI_ISL_547438 | 8/10/2020 | 9/24/2020 | Europe / Gibraltar                    |
| EPI_ISL_547439 | 8/7/2020  | 9/24/2020 | Europe / Gibraltar                    |
| EPI_ISL_547440 | 8/7/2020  | 9/24/2020 | Europe / Gibraltar                    |
| EPI_ISL_547441 | 8/6/2020  | 9/24/2020 | Europe / Gibraltar                    |
| EPI_ISL_547442 | 8/6/2020  | 9/24/2020 | Europe / Gibraltar                    |
| EPI_ISL_547443 | 8/6/2020  | 9/24/2020 | Europe / Gibraltar                    |
| EPI_ISL_547444 | 7/21/2020 | 9/24/2020 | Europe / Gibraltar                    |
| EPI_ISL_547445 | 3/13/2020 | 9/24/2020 | South America / Aruba                 |
| EPI_ISL_547446 | 3/17/2020 | 9/24/2020 | South America / Aruba                 |
| EPI_ISL_547447 | 3/18/2020 | 9/24/2020 | South America / Aruba                 |
| EPI_ISL_547448 | 3/20/2020 | 9/24/2020 | South America / Aruba                 |
| EPI_ISL_547449 | 3/22/2020 | 9/24/2020 | South America / Aruba                 |

|                |           |                                                |
|----------------|-----------|------------------------------------------------|
| EPI_ISL_547450 | 3/10/2020 | 9/24/2020 South America / Curacao              |
| EPI_ISL_547451 | 3/10/2020 | 9/24/2020 South America / Curacao              |
| EPI_ISL_547452 | 3/10/2020 | 9/24/2020 South America / Curacao              |
| EPI_ISL_547453 | 3/12/2020 | 9/24/2020 South America / Curacao              |
| EPI_ISL_547454 | 2020      | 9/24/2020 Europe / Netherlands / Flevoland     |
| EPI_ISL_547455 | 4/30/2020 | 9/24/2020 Europe / Netherlands / Flevoland     |
| EPI_ISL_547456 | 4/30/2020 | 9/24/2020 Europe / Netherlands / Flevoland     |
| EPI_ISL_547457 | 3/8/2020  | 9/24/2020 Europe / Netherlands / Friesland     |
| EPI_ISL_547458 | 3/8/2020  | 9/24/2020 Europe / Netherlands / Friesland     |
| EPI_ISL_547459 | 2020      | 9/24/2020 Europe / Netherlands / Gelderland    |
| EPI_ISL_547460 | 3/8/2020  | 9/24/2020 Europe / Netherlands / Gelderland    |
| EPI_ISL_547461 | 3/10/2020 | 9/24/2020 Europe / Netherlands / Gelderland    |
| EPI_ISL_547462 | 3/12/2020 | 9/24/2020 Europe / Netherlands / Gelderland    |
| EPI_ISL_547463 | 3/15/2020 | 9/24/2020 Europe / Netherlands / Gelderland    |
| EPI_ISL_547464 | 3/16/2020 | 9/24/2020 Europe / Netherlands / Gelderland    |
| EPI_ISL_547465 | 3/23/2020 | 9/24/2020 Europe / Netherlands / Gelderland    |
| EPI_ISL_547466 | 2020      | 9/24/2020 Europe / Netherlands / Groningen     |
| EPI_ISL_547467 | 2020      | 9/24/2020 Europe / Netherlands / Groningen     |
| EPI_ISL_547468 | 2020      | 9/24/2020 Europe / Netherlands / Groningen     |
| EPI_ISL_547469 | 3/13/2020 | 9/24/2020 Europe / Netherlands / Limburg       |
| EPI_ISL_547470 | 3/13/2020 | 9/24/2020 Europe / Netherlands / Limburg       |
| EPI_ISL_547471 | 2020      | 9/24/2020 Europe / Netherlands / Limburg       |
| EPI_ISL_547472 | 2020      | 9/24/2020 Europe / Netherlands / Limburg       |
| EPI_ISL_547473 | 3/23/2020 | 9/24/2020 Europe / Netherlands / Limburg       |
| EPI_ISL_547474 | 3/30/2020 | 9/24/2020 Europe / Netherlands / Limburg       |
| EPI_ISL_547475 | 3/30/2020 | 9/24/2020 Europe / Netherlands / Limburg       |
| EPI_ISL_547476 | 4/30/2020 | 9/24/2020 Europe / Netherlands / Limburg       |
| EPI_ISL_547477 | 4/29/2020 | 9/24/2020 Europe / Netherlands / Limburg       |
| EPI_ISL_547478 | 7/14/2020 | 9/24/2020 Europe / Netherlands / Limburg       |
| EPI_ISL_547479 | 4/24/2020 | 9/24/2020 Europe / Netherlands / Limburg       |
| EPI_ISL_547480 | 3/11/2020 | 9/24/2020 Europe / Netherlands / Noord-Brabant |
| EPI_ISL_547481 | 3/11/2020 | 9/24/2020 Europe / Netherlands / Noord-Brabant |
| EPI_ISL_547482 | 3/18/2020 | 9/24/2020 Europe / Netherlands / Noord-Brabant |
| EPI_ISL_547483 | 3/19/2020 | 9/24/2020 Europe / Netherlands / Noord-Brabant |
| EPI_ISL_547484 | 3/27/2020 | 9/24/2020 Europe / Netherlands / Noord-Brabant |
| EPI_ISL_547485 | 3/27/2020 | 9/24/2020 Europe / Netherlands / Noord-Brabant |
| EPI_ISL_547486 | 4/23/2020 | 9/24/2020 Europe / Netherlands / Noord-Brabant |
| EPI_ISL_547487 | 2020      | 9/24/2020 Europe / Netherlands / Noord-Brabant |
| EPI_ISL_547488 | 2020      | 9/24/2020 Europe / Netherlands / Noord-Brabant |
| EPI_ISL_547489 | 2020      | 9/24/2020 Europe / Netherlands / Noord-Brabant |
| EPI_ISL_547490 | 2020      | 9/24/2020 Europe / Netherlands / Noord-Brabant |
| EPI_ISL_547491 | 3/10/2020 | 9/24/2020 Europe / Netherlands / Noord-Holland |
| EPI_ISL_547492 | 3/17/2020 | 9/24/2020 Europe / Netherlands / Noord-Holland |
| EPI_ISL_547493 | 3/30/2020 | 9/24/2020 Europe / Netherlands / Noord-Holland |
| EPI_ISL_547494 | 4/1/2020  | 9/24/2020 Europe / Netherlands / Noord-Holland |
| EPI_ISL_547495 | 4/3/2020  | 9/24/2020 Europe / Netherlands / Noord-Holland |
| EPI_ISL_547496 | 4/21/2020 | 9/24/2020 Europe / Netherlands / Noord-Holland |



|                |           |           |                                      |
|----------------|-----------|-----------|--------------------------------------|
| EPI_ISL_547497 | 5/1/2020  | 9/24/2020 | Europe / Netherlands / Noord-Holland |
| EPI_ISL_547498 | 5/1/2020  | 9/24/2020 | Europe / Netherlands / Noord-Holland |
| EPI_ISL_547499 | 2/27/2020 | 9/24/2020 | Europe / Netherlands / Noord-Holland |
| EPI_ISL_547500 | 2020      | 9/24/2020 | Europe / Netherlands / Noord-Holland |
| EPI_ISL_547501 | 3/10/2020 | 9/24/2020 | Europe / Netherlands / Noord-Holland |
| EPI_ISL_547502 | 3/10/2020 | 9/24/2020 | Europe / Netherlands / Noord-Holland |
| EPI_ISL_547503 | 3/16/2020 | 9/24/2020 | Europe / Netherlands / Noord-Holland |
| EPI_ISL_547504 | 3/16/2020 | 9/24/2020 | Europe / Netherlands / Noord-Holland |
| EPI_ISL_547505 | 4/1/2020  | 9/24/2020 | Europe / Netherlands / Noord-Holland |
| EPI_ISL_547506 | 4/22/2020 | 9/24/2020 | Europe / Netherlands / Noord-Holland |
| EPI_ISL_547507 | 4/22/2020 | 9/24/2020 | Europe / Netherlands / Noord-Holland |
| EPI_ISL_547508 | 4/22/2020 | 9/24/2020 | Europe / Netherlands / Noord-Holland |
| EPI_ISL_547509 | 4/30/2020 | 9/24/2020 | Europe / Netherlands / Noord-Holland |
| EPI_ISL_547510 | 2020      | 9/24/2020 | Europe / Netherlands / Overijssel    |
| EPI_ISL_547511 | 4/30/2020 | 9/24/2020 | Europe / Netherlands / Overijssel    |
| EPI_ISL_547512 | 2020      | 9/24/2020 | Europe / Netherlands / Overijssel    |
| EPI_ISL_547513 | 7/21/2020 | 9/24/2020 | Europe / Netherlands / Overijssel    |
| EPI_ISL_547514 | 3/9/2020  | 9/24/2020 | Europe / Netherlands / Utrecht       |
| EPI_ISL_547515 | 3/23/2020 | 9/24/2020 | Europe / Netherlands / Utrecht       |
| EPI_ISL_547516 | 3/26/2020 | 9/24/2020 | Europe / Netherlands / Utrecht       |
| EPI_ISL_547517 | 3/30/2020 | 9/24/2020 | Europe / Netherlands / Utrecht       |
| EPI_ISL_547518 | 3/30/2020 | 9/24/2020 | Europe / Netherlands / Utrecht       |
| EPI_ISL_547519 | 4/8/2020  | 9/24/2020 | Europe / Netherlands / Utrecht       |
| EPI_ISL_547520 | 4/16/2020 | 9/24/2020 | Europe / Netherlands / Utrecht       |
| EPI_ISL_547521 | 4/15/2020 | 9/24/2020 | Europe / Netherlands / Utrecht       |
| EPI_ISL_547522 | 4/22/2020 | 9/24/2020 | Europe / Netherlands / Utrecht       |
| EPI_ISL_547523 | 2020      | 9/24/2020 | Europe / Netherlands / Utrecht       |
| EPI_ISL_547524 | 3/6/2020  | 9/24/2020 | Europe / Netherlands / Utrecht       |
| EPI_ISL_547525 | 3/5/2020  | 9/24/2020 | Europe / Netherlands / Utrecht       |
| EPI_ISL_547526 | 3/6/2020  | 9/24/2020 | Europe / Netherlands / Utrecht       |
| EPI_ISL_547527 | 3/9/2020  | 9/24/2020 | Europe / Netherlands / Utrecht       |
| EPI_ISL_547528 | 3/9/2020  | 9/24/2020 | Europe / Netherlands / Utrecht       |
| EPI_ISL_547529 | 3/16/2020 | 9/24/2020 | Europe / Netherlands / Utrecht       |
| EPI_ISL_547530 | 2020      | 9/24/2020 | Europe / Netherlands / Utrecht       |
| EPI_ISL_547531 | 3/24/2020 | 9/24/2020 | Europe / Netherlands / Utrecht       |
| EPI_ISL_547532 | 3/23/2020 | 9/24/2020 | Europe / Netherlands / Utrecht       |
| EPI_ISL_547533 | 3/27/2020 | 9/24/2020 | Europe / Netherlands / Utrecht       |
| EPI_ISL_547534 | 4/1/2020  | 9/24/2020 | Europe / Netherlands / Utrecht       |
| EPI_ISL_547535 | 2020      | 9/24/2020 | Europe / Netherlands / Utrecht       |
| EPI_ISL_547536 | 4/4/2020  | 9/24/2020 | Europe / Netherlands / Utrecht       |
| EPI_ISL_547537 | 4/4/2020  | 9/24/2020 | Europe / Netherlands / Utrecht       |
| EPI_ISL_547538 | 4/22/2020 | 9/24/2020 | Europe / Netherlands / Utrecht       |
| EPI_ISL_547539 | 6/9/2020  | 9/24/2020 | Europe / Netherlands / Utrecht       |
| EPI_ISL_547540 | 2020      | 9/24/2020 | Europe / Netherlands / Utrecht       |
| EPI_ISL_547541 | 7/31/2020 | 9/24/2020 | Europe / Netherlands / Utrecht       |
| EPI_ISL_547542 | 2020      | 9/24/2020 | Europe / Netherlands / Utrecht       |
| EPI_ISL_547543 | 2020      | 9/24/2020 | Europe / Netherlands / Utrecht       |

|                |           |           |                                                                 |
|----------------|-----------|-----------|-----------------------------------------------------------------|
| EPI_ISL_547544 | 2020      | 9/24/2020 | Europe / Netherlands / Utrecht                                  |
| EPI_ISL_547545 | 2020      | 9/24/2020 | Europe / Netherlands / Utrecht                                  |
| EPI_ISL_547546 | 2020      | 9/24/2020 | Europe / Netherlands / Utrecht                                  |
| EPI_ISL_547547 | 2020      | 9/24/2020 | Europe / Netherlands / Utrecht                                  |
| EPI_ISL_547548 | 2020      | 9/24/2020 | Europe / Netherlands / Utrecht                                  |
| EPI_ISL_547549 | 2020      | 9/24/2020 | Europe / Netherlands / Utrecht                                  |
| EPI_ISL_547550 | 2020      | 9/24/2020 | Europe / Netherlands / Utrecht                                  |
| EPI_ISL_547551 | 2020      | 9/24/2020 | Europe / Netherlands / Utrecht                                  |
| EPI_ISL_547552 | 2020      | 9/24/2020 | Europe / Netherlands / Utrecht                                  |
| EPI_ISL_547553 | 2020      | 9/24/2020 | Europe / Netherlands / Utrecht                                  |
| EPI_ISL_547554 | 2020      | 9/24/2020 | Europe / Netherlands / Utrecht                                  |
| EPI_ISL_547555 | 2020      | 9/24/2020 | Europe / Netherlands / Utrecht                                  |
| EPI_ISL_547556 | 2020      | 9/24/2020 | Europe / Netherlands / Utrecht                                  |
| EPI_ISL_547557 | 3/13/2020 | 9/24/2020 | Europe / Netherlands / Zuid-Holland                             |
| EPI_ISL_547558 | 4/7/2020  | 9/24/2020 | Europe / Netherlands / Zuid-Holland                             |
| EPI_ISL_547559 | 3/5/2020  | 9/24/2020 | Europe / Netherlands / Zuid-Holland                             |
| EPI_ISL_547560 | 3/4/2020  | 9/24/2020 | Europe / Netherlands / Zuid-Holland                             |
| EPI_ISL_547561 | 2020      | 9/24/2020 | Europe / Netherlands / Zuid-Holland                             |
| EPI_ISL_547562 | 2020      | 9/24/2020 | Europe / Netherlands / Zuid-Holland                             |
| EPI_ISL_547563 | 2020      | 9/24/2020 | Europe / Netherlands / Zuid-Holland                             |
| EPI_ISL_547564 | 2020      | 9/24/2020 | Europe / Netherlands / Zuid-Holland                             |
| EPI_ISL_547565 | 2020      | 9/24/2020 | Europe / Netherlands / Zuid-Holland                             |
| EPI_ISL_547566 | 2020      | 9/24/2020 | Europe / Netherlands / Zuid-Holland                             |
| EPI_ISL_547567 | 2020      | 9/24/2020 | Europe / Netherlands / Zuid-Holland                             |
| EPI_ISL_547568 | 2020      | 9/24/2020 | Europe / Netherlands / Zuid-Holland                             |
| EPI_ISL_547570 | 4/30/2020 | 9/24/2020 | South America / Brazil / Sao Paulo / Sao Paulo                  |
| EPI_ISL_547571 | 6/1/2020  | 9/24/2020 | South America / Brazil / Sao Paulo / Maua                       |
| EPI_ISL_547573 | 6/1/2020  | 9/24/2020 | South America / Brazil / Sao Paulo / Cajamar                    |
| EPI_ISL_547574 | 6/19/2020 | 9/24/2020 | South America / Brazil / Sao Paulo / Taboao da Serra            |
| EPI_ISL_547575 | 6/16/2020 | 9/24/2020 | South America / Brazil / Sao Paulo / Jundiiai                   |
| EPI_ISL_547576 | 6/23/2020 | 9/24/2020 | South America / Brazil / Sao Paulo / Birigui                    |
| EPI_ISL_547577 | 7/6/2020  | 9/24/2020 | South America / Brazil / Sao Paulo / Presidente Prudente        |
| EPI_ISL_547578 | 7/5/2020  | 9/24/2020 | South America / Brazil / Sao Paulo / Presidente Prudente        |
| EPI_ISL_547579 | 7/7/2020  | 9/24/2020 | South America / Brazil / Sao Paulo / Aracatuba                  |
| EPI_ISL_547580 | 7/9/2020  | 9/24/2020 | South America / Brazil / Sao Paulo / Euclides da Cunha Paulista |
| EPI_ISL_547584 | 8/24/2020 | 9/24/2020 | Asia / India / Uttarakhand                                      |
| EPI_ISL_547585 | 8/25/2020 | 9/24/2020 | Asia / India / Haryana                                          |
| EPI_ISL_547586 | 8/25/2020 | 9/24/2020 | Asia / India / Haryana                                          |
| EPI_ISL_547588 | 8/25/2020 | 9/24/2020 | Asia / India / Haryana                                          |
| EPI_ISL_547589 | 8/27/2020 | 9/24/2020 | Asia / India / Haryana                                          |
| EPI_ISL_547590 | 8/27/2020 | 9/24/2020 | Asia / India / Haryana                                          |
| EPI_ISL_547591 | 8/27/2020 | 9/24/2020 | Asia / India / Haryana                                          |
| EPI_ISL_547592 | 8/27/2020 | 9/24/2020 | Asia / India / Haryana                                          |
| EPI_ISL_547593 | 8/27/2020 | 9/24/2020 | Asia / India / Haryana                                          |
| EPI_ISL_547594 | 9/4/2020  | 9/24/2020 | Oceania / Australia / New South Wales / Sydney                  |
| EPI_ISL_547595 | 9/3/2020  | 9/24/2020 | Oceania / Australia / New South Wales / Sydney                  |
| EPI_ISL_547596 | 9/6/2020  | 9/24/2020 | Oceania / Australia / New South Wales / Sydney                  |

|                |           |                                                                |
|----------------|-----------|----------------------------------------------------------------|
| EPI_ISL_547597 | 9/6/2020  | 9/24/2020 Oceania / Australia / New South Wales / Sydney       |
| EPI_ISL_547598 | 9/7/2020  | 9/24/2020 Oceania / Australia / New South Wales / Sydney       |
| EPI_ISL_547599 | 9/7/2020  | 9/24/2020 Oceania / Australia / New South Wales / Sydney       |
| EPI_ISL_547600 | 9/7/2020  | 9/24/2020 Oceania / Australia / New South Wales / Sydney       |
| EPI_ISL_547601 | 8/31/2020 | 9/24/2020 Oceania / Australia / New South Wales / Sydney       |
| EPI_ISL_547602 | 7/8/2020  | 9/24/2020 North America / USA / Wisconsin / Monroe County      |
| EPI_ISL_547603 | 7/8/2020  | 9/24/2020 North America / USA / Wisconsin / La Crosse County   |
| EPI_ISL_547604 | 7/8/2020  | 9/24/2020 North America / USA / Iowa / Fayette County          |
| EPI_ISL_547605 | 7/8/2020  | 9/24/2020 North America / USA / Wisconsin / Trempealeau County |
| EPI_ISL_547606 | 7/8/2020  | 9/24/2020 North America / USA / Wisconsin / Monroe County      |
| EPI_ISL_547607 | 7/10/2020 | 9/24/2020 North America / USA / Iowa / Fayette County          |
| EPI_ISL_547608 | 7/12/2020 | 9/24/2020 North America / USA / Wisconsin / La Crosse County   |
| EPI_ISL_547609 | 7/12/2020 | 9/24/2020 North America / USA / Wisconsin / La Crosse County   |
| EPI_ISL_547610 | 7/13/2020 | 9/24/2020 North America / USA / Wisconsin / Trempealeau County |
| EPI_ISL_547611 | 7/14/2020 | 9/24/2020 North America / USA / Wisconsin / La Crosse County   |
| EPI_ISL_547612 | 7/14/2020 | 9/24/2020 North America / USA / Wisconsin / La Crosse County   |
| EPI_ISL_547613 | 7/14/2020 | 9/24/2020 North America / USA / Wisconsin / Trempealeau County |
| EPI_ISL_547614 | 7/14/2020 | 9/24/2020 North America / USA / Wisconsin / Monroe County      |
| EPI_ISL_547615 | 7/15/2020 | 9/24/2020 North America / USA / Wisconsin / La Crosse County   |
| EPI_ISL_547616 | 7/15/2020 | 9/24/2020 North America / USA / Wisconsin / Trempealeau County |
| EPI_ISL_547617 | 7/15/2020 | 9/24/2020 North America / USA / Wisconsin / La Crosse County   |
| EPI_ISL_547618 | 7/15/2020 | 9/24/2020 North America / USA / Wisconsin / Monroe County      |
| EPI_ISL_547619 | 7/15/2020 | 9/24/2020 North America / USA / Wisconsin / Vernon County      |
| EPI_ISL_547620 | 7/15/2020 | 9/24/2020 North America / USA / Wisconsin / La Crosse County   |
| EPI_ISL_547621 | 7/16/2020 | 9/24/2020 North America / USA / Wisconsin / La Crosse County   |
| EPI_ISL_547622 | 7/16/2020 | 9/24/2020 North America / USA / Wisconsin / Trempealeau County |
| EPI_ISL_547623 | 7/17/2020 | 9/24/2020 North America / USA / Wisconsin / La Crosse County   |
| EPI_ISL_547624 | 7/17/2020 | 9/24/2020 North America / USA / Wisconsin / Trempealeau County |
| EPI_ISL_547626 | 7/17/2020 | 9/24/2020 North America / USA / Wisconsin / La Crosse County   |
| EPI_ISL_547627 | 7/18/2020 | 9/24/2020 North America / USA / Iowa / Winneshiek County       |
| EPI_ISL_547628 | 7/19/2020 | 9/24/2020 North America / USA / Wisconsin / La Crosse County   |
| EPI_ISL_547629 | 7/19/2020 | 9/24/2020 North America / USA / Wisconsin / La Crosse County   |
| EPI_ISL_547630 | 7/19/2020 | 9/24/2020 North America / USA / Wisconsin / La Crosse County   |
| EPI_ISL_547631 | 7/20/2020 | 9/24/2020 North America / USA / Wisconsin / La Crosse County   |
| EPI_ISL_547632 | 7/21/2020 | 9/24/2020 North America / USA / Wisconsin / La Crosse County   |
| EPI_ISL_547633 | 7/21/2020 | 9/24/2020 North America / USA / Wisconsin / La Crosse County   |
| EPI_ISL_547634 | 7/21/2020 | 9/24/2020 North America / USA / Wisconsin / Trempealeau County |
| EPI_ISL_547635 | 7/21/2020 | 9/24/2020 North America / USA / Wisconsin / Monroe County      |
| EPI_ISL_547636 | 7/22/2020 | 9/24/2020 North America / USA / Wisconsin / La Crosse County   |
| EPI_ISL_547637 | 7/22/2020 | 9/24/2020 North America / USA / Wisconsin / La Crosse County   |
| EPI_ISL_547638 | 7/23/2020 | 9/24/2020 North America / USA / Wisconsin / La Crosse County   |
| EPI_ISL_547639 | 7/23/2020 | 9/24/2020 North America / USA / Wisconsin / Trempealeau County |
| EPI_ISL_547640 | 7/24/2020 | 9/24/2020 North America / USA / Wisconsin / Trempealeau County |
| EPI_ISL_547641 | 7/24/2020 | 9/24/2020 North America / USA / Wisconsin / Trempealeau County |
| EPI_ISL_547642 | 7/27/2020 | 9/24/2020 North America / USA / Wisconsin / La Crosse County   |
| EPI_ISL_547643 | 7/27/2020 | 9/24/2020 North America / USA / Iowa / Winneshiek County       |
| EPI_ISL_547644 | 7/27/2020 | 9/24/2020 North America / USA / Wisconsin / Trempealeau County |

|                |           |           |                                                      |
|----------------|-----------|-----------|------------------------------------------------------|
| EPI_ISL_547645 | 7/28/2020 | 9/24/2020 | North America / USA / Wisconsin / La Crosse County   |
| EPI_ISL_547646 | 7/28/2020 | 9/24/2020 | North America / USA / Wisconsin / La Crosse County   |
| EPI_ISL_547647 | 7/28/2020 | 9/24/2020 | North America / USA / Wisconsin / Juneau County      |
| EPI_ISL_547648 | 7/28/2020 | 9/24/2020 | North America / USA / Wisconsin / Vernon County      |
| EPI_ISL_547649 | 7/29/2020 | 9/24/2020 | North America / USA / Wisconsin / Vernon County      |
| EPI_ISL_547650 | 7/29/2020 | 9/24/2020 | North America / USA / Wisconsin / Trempealeau County |
| EPI_ISL_547651 | 7/29/2020 | 9/24/2020 | North America / USA / Wisconsin / Trempealeau County |
| EPI_ISL_547652 | 7/29/2020 | 9/24/2020 | North America / USA / Wisconsin / Trempealeau County |
| EPI_ISL_547653 | 7/29/2020 | 9/24/2020 | North America / USA / Wisconsin / Trempealeau County |
| EPI_ISL_547654 | 7/31/2020 | 9/24/2020 | North America / USA / Wisconsin / La Crosse County   |
| EPI_ISL_547655 | 8/1/2020  | 9/24/2020 | North America / USA / Wisconsin / Monroe County      |
| EPI_ISL_547656 | 8/1/2020  | 9/24/2020 | North America / USA / Wisconsin / La Crosse County   |
| EPI_ISL_547657 | 8/1/2020  | 9/24/2020 | North America / USA / Iowa / Clayton County          |
| EPI_ISL_547658 | 8/4/2020  | 9/24/2020 | North America / USA / Wisconsin / Trempealeau County |
| EPI_ISL_547659 | 8/4/2020  | 9/24/2020 | North America / USA / Minnesota / Fillmore County    |
| EPI_ISL_547660 | 8/4/2020  | 9/24/2020 | North America / USA / Wisconsin / La Crosse County   |
| EPI_ISL_547661 | 8/4/2020  | 9/24/2020 | North America / USA / Minnesota / Winona County      |
| EPI_ISL_547662 | 8/4/2020  | 9/24/2020 | North America / USA / Iowa / Allamakee County        |
| EPI_ISL_547664 | 8/5/2020  | 9/24/2020 | North America / USA / Wisconsin / Monroe County      |
| EPI_ISL_547665 | 8/5/2020  | 9/24/2020 | North America / USA / Iowa / Allamakee County        |
| EPI_ISL_547666 | 7/11/2020 | 9/24/2020 | North America / USA / Wisconsin / Monroe County      |
| EPI_ISL_547667 | 7/16/2020 | 9/24/2020 | North America / USA / Wisconsin / La Crosse County   |
| EPI_ISL_547668 | 7/5/2020  | 9/24/2020 | North America / USA / Wisconsin / Trempealeau County |
| EPI_ISL_547669 | 7/6/2020  | 9/24/2020 | North America / USA / Wisconsin / La Crosse County   |
| EPI_ISL_547670 | 7/3/2020  | 9/24/2020 | North America / USA / Wisconsin / La Crosse County   |
| EPI_ISL_547671 | 7/1/2020  | 9/24/2020 | North America / USA / Wisconsin / La Crosse County   |
| EPI_ISL_547672 | 6/19/2020 | 9/24/2020 | North America / USA / Wisconsin / Vernon County      |
| EPI_ISL_547673 | 7/1/2020  | 9/24/2020 | North America / USA / Wisconsin / Trempealeau County |
| EPI_ISL_547674 | 7/23/2020 | 9/24/2020 | North America / USA / Wisconsin / Trempealeau County |
| EPI_ISL_547675 | 7/25/2020 | 9/24/2020 | North America / USA / Wisconsin / La Crosse County   |
| EPI_ISL_547676 | 8/2/2020  | 9/24/2020 | North America / USA / Wisconsin / Juneau County      |
| EPI_ISL_547678 | 8/6/2020  | 9/24/2020 | North America / USA / Wisconsin / La Crosse County   |
| EPI_ISL_547680 | 8/9/2020  | 9/24/2020 | North America / USA / Wisconsin / Vernon County      |
| EPI_ISL_547681 | 8/10/2020 | 9/24/2020 | North America / USA / Wisconsin / Vernon County      |
| EPI_ISL_547682 | 8/10/2020 | 9/24/2020 | North America / USA / Wisconsin / Monroe County      |
| EPI_ISL_547683 | 8/9/2020  | 9/24/2020 | North America / USA / Wisconsin / Trempealeau County |
| EPI_ISL_547685 | 8/10/2020 | 9/24/2020 | North America / USA / Wisconsin / La Crosse County   |
| EPI_ISL_547687 | 8/9/2020  | 9/24/2020 | North America / USA / Wisconsin / Trempealeau County |
| EPI_ISL_547688 | 8/10/2020 | 9/24/2020 | North America / USA / Wisconsin / La Crosse County   |
| EPI_ISL_547689 | 8/11/2020 | 9/24/2020 | North America / USA / Wisconsin / Jackson County     |
| EPI_ISL_547690 | 8/11/2020 | 9/24/2020 | North America / USA / Wisconsin / Juneau County      |
| EPI_ISL_547691 | 8/11/2020 | 9/24/2020 | North America / USA / Wisconsin / Juneau County      |
| EPI_ISL_547692 | 8/11/2020 | 9/24/2020 | North America / USA / Minnesota / Houston County     |
| EPI_ISL_547693 | 8/12/2020 | 9/24/2020 | North America / USA / Minnesota / Houston County     |
| EPI_ISL_547694 | 8/12/2020 | 9/24/2020 | North America / USA / Wisconsin / Juneau County      |
| EPI_ISL_547695 | 8/12/2020 | 9/24/2020 | North America / USA / Wisconsin / Juneau County      |
| EPI_ISL_547696 | 8/12/2020 | 9/24/2020 | North America / USA / Minnesota / Winona County      |

|                |           |           |                                                      |
|----------------|-----------|-----------|------------------------------------------------------|
| EPI_ISL_547697 | 8/12/2020 | 9/24/2020 | North America / USA / Wisconsin / Trempealeau County |
| EPI_ISL_547698 | 8/11/2020 | 9/24/2020 | North America / USA / Wisconsin / Trempealeau County |
| EPI_ISL_547701 | 8/14/2020 | 9/24/2020 | North America / USA / Wisconsin / La Crosse County   |
| EPI_ISL_547702 | 8/14/2020 | 9/24/2020 | North America / USA / Wisconsin / Vernon County      |
| EPI_ISL_547703 | 8/14/2020 | 9/24/2020 | North America / USA / Minnesota / Houston County     |
| EPI_ISL_547704 | 8/14/2020 | 9/24/2020 | North America / USA / Iowa / Fayette County          |
| EPI_ISL_547705 | 8/12/2020 | 9/24/2020 | North America / USA / Minnesota / Winona County      |
| EPI_ISL_547706 | 8/15/2020 | 9/24/2020 | North America / USA / Wisconsin / Trempealeau County |
| EPI_ISL_547708 | 8/16/2020 | 9/24/2020 | North America / USA / Wisconsin / Juneau County      |
| EPI_ISL_547709 | 8/16/2020 | 9/24/2020 | North America / USA / Wisconsin / La Crosse County   |
| EPI_ISL_547710 | 8/17/2020 | 9/24/2020 | North America / USA / Minnesota / Houston County     |
| EPI_ISL_547711 | 8/17/2020 | 9/24/2020 | North America / USA / Iowa / Fayette County          |
| EPI_ISL_547712 | 8/18/2020 | 9/24/2020 | North America / USA / Wisconsin / Monroe County      |
| EPI_ISL_547713 | 8/18/2020 | 9/24/2020 | North America / USA / Minnesota / Winona County      |
| EPI_ISL_547714 | 8/18/2020 | 9/24/2020 | North America / USA / Wisconsin / La Crosse County   |
| EPI_ISL_547715 | 8/18/2020 | 9/24/2020 | North America / USA / Wisconsin / La Crosse County   |
| EPI_ISL_547717 | 8/18/2020 | 9/24/2020 | North America / USA / Wisconsin / La Crosse County   |
| EPI_ISL_547718 | 8/20/2020 | 9/24/2020 | North America / USA / Wisconsin / Vernon County      |
| EPI_ISL_547719 | 8/19/2020 | 9/24/2020 | North America / USA / Wisconsin / Trempealeau County |
| EPI_ISL_547720 | 8/20/2020 | 9/24/2020 | North America / USA / Wisconsin / La Crosse County   |
| EPI_ISL_547721 | 8/20/2020 | 9/24/2020 | North America / USA / Wisconsin / Monroe County      |
| EPI_ISL_547722 | 8/20/2020 | 9/24/2020 | North America / USA / Iowa / Winneshiek County       |
| EPI_ISL_547723 | 8/20/2020 | 9/24/2020 | North America / USA / Wisconsin / La Crosse County   |
| EPI_ISL_547724 | 8/19/2020 | 9/24/2020 | North America / USA / Iowa / Fayette County          |
| EPI_ISL_547725 | 8/21/2020 | 9/24/2020 | North America / USA / Wisconsin / Shawano County     |
| EPI_ISL_547726 | 8/21/2020 | 9/24/2020 | North America / USA / Iowa / Fayette County          |
| EPI_ISL_547727 | 8/22/2020 | 9/24/2020 | North America / USA / Wisconsin / La Crosse County   |
| EPI_ISL_547728 | 8/23/2020 | 9/24/2020 | North America / USA / Minnesota / Winona County      |
| EPI_ISL_547729 | 8/22/2020 | 9/24/2020 | North America / USA / Wisconsin / Trempealeau County |
| EPI_ISL_547730 | 8/24/2020 | 9/24/2020 | North America / USA / Wisconsin / La Crosse County   |
| EPI_ISL_547731 | 8/24/2020 | 9/24/2020 | North America / USA / Wisconsin / Trempealeau County |
| EPI_ISL_547732 | 8/24/2020 | 9/24/2020 | North America / USA / Wisconsin / La Crosse County   |
| EPI_ISL_547733 | 8/24/2020 | 9/24/2020 | North America / USA / Minnesota / Houston County     |
| EPI_ISL_547734 | 8/24/2020 | 9/24/2020 | North America / USA / Wisconsin / Vernon County      |
| EPI_ISL_547735 | 8/24/2020 | 9/24/2020 | North America / USA / Iowa / Allamakee County        |
| EPI_ISL_547736 | 8/26/2020 | 9/24/2020 | North America / USA / Wisconsin / Trempealeau County |
| EPI_ISL_547740 | 8/28/2020 | 9/24/2020 | North America / USA / Wisconsin / La Crosse County   |
| EPI_ISL_547741 | 8/28/2020 | 9/24/2020 | North America / USA / Minnesota / Houston County     |
| EPI_ISL_547742 | 8/28/2020 | 9/24/2020 | North America / USA / Minnesota / Fillmore County    |
| EPI_ISL_547743 | 8/28/2020 | 9/24/2020 | North America / USA / Wisconsin / La Crosse County   |
| EPI_ISL_547744 | 8/28/2020 | 9/24/2020 | North America / USA / Wisconsin / Trempealeau County |
| EPI_ISL_547746 | 8/28/2020 | 9/24/2020 | North America / USA / Wisconsin / La Crosse County   |
| EPI_ISL_547747 | 8/28/2020 | 9/24/2020 | North America / USA / Wisconsin / Trempealeau County |
| EPI_ISL_547748 | 8/29/2020 | 9/24/2020 | North America / USA / Wisconsin / Juneau County      |
| EPI_ISL_547749 | 8/30/2020 | 9/24/2020 | North America / USA / Wisconsin / Pepin County       |
| EPI_ISL_547750 | 8/30/2020 | 9/24/2020 | North America / USA / Wisconsin / La Crosse County   |
| EPI_ISL_547751 | 8/31/2020 | 9/24/2020 | North America / USA / Wisconsin / La Crosse County   |

|                |           |           |                                                      |
|----------------|-----------|-----------|------------------------------------------------------|
| EPI_ISL_547752 | 8/31/2020 | 9/24/2020 | North America / USA / Wisconsin / La Crosse County   |
| EPI_ISL_547753 | 8/31/2020 | 9/24/2020 | North America / USA / Wisconsin / La Crosse County   |
| EPI_ISL_547754 | 8/31/2020 | 9/24/2020 | North America / USA / Iowa / Fayette County          |
| EPI_ISL_547755 | 9/1/2020  | 9/24/2020 | North America / USA / Wisconsin / La Crosse County   |
| EPI_ISL_547756 | 9/1/2020  | 9/24/2020 | North America / USA / Wisconsin / Dane County        |
| EPI_ISL_547757 | 9/1/2020  | 9/24/2020 | North America / USA / Wisconsin / La Crosse County   |
| EPI_ISL_547758 | 9/1/2020  | 9/24/2020 | North America / USA / Iowa / Fayette County          |
| EPI_ISL_547759 | 9/2/2020  | 9/24/2020 | North America / USA / Wisconsin / Trempealeau County |
| EPI_ISL_547760 | 9/2/2020  | 9/24/2020 | North America / USA / Wisconsin / Winnebago County   |
| EPI_ISL_547761 | 9/2/2020  | 9/24/2020 | North America / USA / Wisconsin / La Crosse County   |
| EPI_ISL_547762 | 9/2/2020  | 9/24/2020 | North America / USA / Wisconsin / La Crosse County   |
| EPI_ISL_547763 | 9/2/2020  | 9/24/2020 | North America / USA / Wisconsin / Trempealeau County |
| EPI_ISL_547764 | 9/2/2020  | 9/24/2020 | North America / USA / Iowa / Winneshiek County       |
| EPI_ISL_547765 | 9/2/2020  | 9/24/2020 | North America / USA / Wisconsin / Vernon County      |
| EPI_ISL_547766 | 9/3/2020  | 9/24/2020 | North America / USA / Wisconsin / La Crosse County   |
| EPI_ISL_547767 | 9/3/2020  | 9/24/2020 | North America / USA / Wisconsin / Monroe County      |
| EPI_ISL_547768 | 9/3/2020  | 9/24/2020 | North America / USA / Wisconsin / Vernon County      |
| EPI_ISL_547769 | 9/3/2020  | 9/24/2020 | North America / USA / Wisconsin / La Crosse County   |
| EPI_ISL_547770 | 9/3/2020  | 9/24/2020 | North America / USA / Wisconsin / La Crosse County   |
| EPI_ISL_547771 | 9/3/2020  | 9/24/2020 | North America / USA / Wisconsin / Vernon County      |
| EPI_ISL_547772 | 9/3/2020  | 9/24/2020 | North America / USA / Wisconsin / Crawford County    |
| EPI_ISL_547773 | 9/2/2020  | 9/24/2020 | North America / USA / Wisconsin / Adams County       |
| EPI_ISL_547774 | 9/3/2020  | 9/24/2020 | North America / USA / Illinois / Winnebago County    |
| EPI_ISL_547775 | 9/4/2020  | 9/24/2020 | North America / USA / Wisconsin / Dane County        |
| EPI_ISL_547776 | 9/4/2020  | 9/24/2020 | North America / USA / Wisconsin / La Crosse County   |
| EPI_ISL_547777 | 9/4/2020  | 9/24/2020 | North America / USA / Wisconsin / La Crosse County   |
| EPI_ISL_547778 | 9/4/2020  | 9/24/2020 | North America / USA / Wisconsin / La Crosse County   |
| EPI_ISL_547779 | 9/4/2020  | 9/24/2020 | North America / USA / Wisconsin / Marathon County    |
| EPI_ISL_547780 | 9/4/2020  | 9/24/2020 | North America / USA / Wisconsin / La Crosse County   |
| EPI_ISL_547781 | 9/4/2020  | 9/24/2020 | North America / USA / Wisconsin / Juneau County      |
| EPI_ISL_547782 | 9/4/2020  | 9/24/2020 | North America / USA / Wisconsin / La Crosse County   |
| EPI_ISL_547783 | 9/4/2020  | 9/24/2020 | North America / USA / Minnesota / Winona County      |
| EPI_ISL_547784 | 9/4/2020  | 9/24/2020 | North America / USA / Wisconsin / La Crosse County   |
| EPI_ISL_547785 | 9/4/2020  | 9/24/2020 | North America / USA / Wisconsin / La Crosse County   |
| EPI_ISL_547786 | 9/5/2020  | 9/24/2020 | North America / USA / Iowa / Howard County           |
| EPI_ISL_547787 | 9/5/2020  | 9/24/2020 | North America / USA / Iowa / Clayton County          |
| EPI_ISL_547788 | 9/4/2020  | 9/24/2020 | North America / USA / Iowa / Fayette County          |
| EPI_ISL_547789 | 9/5/2020  | 9/24/2020 | North America / USA / Wisconsin / Crawford County    |
| EPI_ISL_547790 | 9/6/2020  | 9/24/2020 | North America / USA / Wisconsin / La Crosse County   |
| EPI_ISL_547791 | 9/8/2020  | 9/24/2020 | North America / USA / Minnesota / Winona County      |
| EPI_ISL_547792 | 9/7/2020  | 9/24/2020 | North America / USA / Wisconsin / Vernon County      |
| EPI_ISL_547793 | 9/8/2020  | 9/24/2020 | North America / USA / Wisconsin / La Crosse County   |
| EPI_ISL_547794 | 9/8/2020  | 9/24/2020 | North America / USA / Wisconsin / La Crosse County   |
| EPI_ISL_547795 | 9/8/2020  | 9/24/2020 | North America / USA / Wisconsin / La Crosse County   |
| EPI_ISL_547796 | 9/8/2020  | 9/24/2020 | North America / USA / Wisconsin / La Crosse County   |
| EPI_ISL_547797 | 9/8/2020  | 9/24/2020 | North America / USA / Iowa / Johnson County          |
| EPI_ISL_547798 | 9/8/2020  | 9/24/2020 | North America / USA / Wisconsin / La Crosse County   |



|                |           |                                                                          |
|----------------|-----------|--------------------------------------------------------------------------|
| EPI_ISL_547851 | 9/14/2020 | 9/24/2020 North America / USA / Wisconsin / Vernon County                |
| EPI_ISL_547853 | 9/14/2020 | 9/24/2020 North America / USA / Wisconsin / Trempealeau County           |
| EPI_ISL_547855 | 9/14/2020 | 9/24/2020 North America / USA / Wisconsin / Walworth County              |
| EPI_ISL_547856 | 9/14/2020 | 9/24/2020 North America / USA / Wisconsin / La Crosse County             |
| EPI_ISL_547857 | 9/14/2020 | 9/24/2020 North America / USA / Iowa / Allamakee County                  |
| EPI_ISL_547858 | 9/14/2020 | 9/24/2020 North America / USA / Wisconsin / Vernon County                |
| EPI_ISL_547859 | 9/14/2020 | 9/24/2020 North America / USA / Wisconsin / La Crosse County             |
| EPI_ISL_547860 | 9/14/2020 | 9/24/2020 North America / USA / Wisconsin / La Crosse County             |
| EPI_ISL_547861 | 9/14/2020 | 9/24/2020 North America / USA / Wisconsin / La Crosse County             |
| EPI_ISL_547862 | 9/15/2020 | 9/24/2020 North America / USA / Wisconsin / La Crosse County             |
| EPI_ISL_547863 | 9/14/2020 | 9/24/2020 North America / USA / Wisconsin / La Crosse County             |
| EPI_ISL_547864 | 9/15/2020 | 9/24/2020 North America / USA / Wisconsin / Monroe County                |
| EPI_ISL_547865 | 9/15/2020 | 9/24/2020 North America / USA / Wisconsin / Juneau County                |
| EPI_ISL_547866 | 9/15/2020 | 9/24/2020 North America / USA / Wisconsin / La Crosse County             |
| EPI_ISL_547867 | 9/15/2020 | 9/24/2020 North America / USA / Wisconsin / Trempealeau County           |
| EPI_ISL_547868 | 9/15/2020 | 9/24/2020 North America / USA / Wisconsin / Juneau County                |
| EPI_ISL_547869 | 9/15/2020 | 9/24/2020 North America / USA / Wisconsin / La Crosse County             |
| EPI_ISL_547966 | 8/6/2020  | 9/25/2020 Europe / Czech Republic / Středočeský územní úřad / Litoměřice |
| EPI_ISL_547967 | 8/7/2020  | 9/25/2020 Europe / Czech Republic / Středočeský územní úřad / Litoměřice |
| EPI_ISL_547968 | 8/7/2020  | 9/25/2020 Europe / Czech Republic / Středočeský územní úřad / Liboň      |
| EPI_ISL_547969 | 8/13/2020 | 9/25/2020 Oceania / New Zealand / Combined Auckland                      |
| EPI_ISL_547970 | 8/14/2020 | 9/25/2020 Oceania / New Zealand / Combined Auckland                      |
| EPI_ISL_547971 | 8/14/2020 | 9/25/2020 Oceania / New Zealand / Auckland                               |
| EPI_ISL_547972 | 8/13/2020 | 9/25/2020 Oceania / New Zealand / Combined Auckland                      |
| EPI_ISL_547973 | 8/13/2020 | 9/25/2020 Oceania / New Zealand / Combined Auckland                      |
| EPI_ISL_547974 | 8/13/2020 | 9/25/2020 Oceania / New Zealand / Combined Auckland                      |
| EPI_ISL_547975 | 8/13/2020 | 9/25/2020 Oceania / New Zealand / Combined Auckland                      |
| EPI_ISL_547976 | 8/13/2020 | 9/25/2020 Oceania / New Zealand / Combined Auckland                      |
| EPI_ISL_547977 | 8/12/2020 | 9/25/2020 Oceania / New Zealand / Combined Auckland                      |
| EPI_ISL_547978 | 8/16/2020 | 9/25/2020 Oceania / New Zealand / Combined Auckland                      |
| EPI_ISL_547979 | 8/15/2020 | 9/25/2020 Oceania / New Zealand / Combined Auckland                      |
| EPI_ISL_547981 | 8/14/2020 | 9/25/2020 Oceania / New Zealand / Combined Auckland                      |
| EPI_ISL_547982 | 8/14/2020 | 9/25/2020 Oceania / New Zealand / Combined Auckland                      |
| EPI_ISL_547983 | 8/14/2020 | 9/25/2020 Oceania / New Zealand / Combined Auckland                      |
| EPI_ISL_547984 | 8/15/2020 | 9/25/2020 Oceania / New Zealand / Combined Auckland                      |
| EPI_ISL_547985 | 8/14/2020 | 9/25/2020 Oceania / New Zealand / Canterbury                             |
| EPI_ISL_547993 | 8/17/2020 | 9/25/2020 Oceania / New Zealand / Combined Auckland                      |
| EPI_ISL_547994 | 8/17/2020 | 9/25/2020 Oceania / New Zealand / Combined Auckland                      |
| EPI_ISL_547995 | 8/17/2020 | 9/25/2020 Oceania / New Zealand / Combined Auckland                      |
| EPI_ISL_547996 | 2020      | 9/25/2020 Oceania / New Zealand / Auckland                               |
| EPI_ISL_547997 | 2020      | 9/25/2020 Oceania / New Zealand / Auckland                               |
| EPI_ISL_547998 | 2020      | 9/25/2020 Oceania / New Zealand / Auckland                               |
| EPI_ISL_547999 | 2020      | 9/25/2020 Oceania / New Zealand / Combined Auckland                      |
| EPI_ISL_548000 | 2020      | 9/25/2020 Oceania / New Zealand / Combined Auckland                      |
| EPI_ISL_548002 | 8/17/2020 | 9/25/2020 Oceania / New Zealand / Combined Auckland                      |
| EPI_ISL_548004 | 8/16/2020 | 9/25/2020 Oceania / New Zealand / Combined Auckland                      |
| EPI_ISL_548005 | 8/16/2020 | 9/25/2020 Oceania / New Zealand / Combined Auckland                      |



|                |           |                                                               |
|----------------|-----------|---------------------------------------------------------------|
| EPI_ISL_548006 | 8/16/2020 | 9/25/2020 Oceania / New Zealand / Combined Auckland           |
| EPI_ISL_548008 | 8/19/2020 | 9/25/2020 Oceania / New Zealand / Auckland / Counties Manukau |
| EPI_ISL_548009 | 8/19/2020 | 9/25/2020 Oceania / New Zealand / Auckland / Counties Manukau |
| EPI_ISL_548010 | 8/19/2020 | 9/25/2020 Oceania / New Zealand / Auckland / Counties Manukau |
| EPI_ISL_548011 | 8/19/2020 | 9/25/2020 Oceania / New Zealand / Auckland / Counties Manukau |
| EPI_ISL_548013 | 8/20/2020 | 9/25/2020 Oceania / New Zealand / Combined Auckland           |
| EPI_ISL_548014 | 8/18/2020 | 9/25/2020 Oceania / New Zealand / Combined Auckland           |
| EPI_ISL_548015 | 8/18/2020 | 9/25/2020 Oceania / New Zealand / Combined Auckland           |
| EPI_ISL_548016 | 8/18/2020 | 9/25/2020 Oceania / New Zealand / Combined Auckland           |
| EPI_ISL_548017 | 8/19/2020 | 9/25/2020 Oceania / New Zealand / Auckland                    |
| EPI_ISL_548021 | 8/23/2020 | 9/25/2020 Oceania / New Zealand / Auckland                    |
| EPI_ISL_548022 | 8/23/2020 | 9/25/2020 Oceania / New Zealand / Auckland                    |
| EPI_ISL_548023 | 8/23/2020 | 9/25/2020 Oceania / New Zealand / Auckland                    |
| EPI_ISL_548024 | 8/22/2020 | 9/25/2020 Oceania / New Zealand / Auckland                    |
| EPI_ISL_548025 | 8/25/2020 | 9/25/2020 Oceania / New Zealand / Auckland                    |
| EPI_ISL_548030 | 8/24/2020 | 9/25/2020 Oceania / New Zealand / Auckland / Waitemata        |
| EPI_ISL_548040 | 8/25/2020 | 9/25/2020 Oceania / New Zealand / Auckland                    |
| EPI_ISL_548041 | 8/25/2020 | 9/25/2020 Oceania / New Zealand / Auckland                    |
| EPI_ISL_548045 | 2020      | 9/25/2020 Oceania / New Zealand / Auckland / Waitemata        |
| EPI_ISL_548046 | 8/27/2020 | 9/25/2020 Oceania / New Zealand / Combined Auckland           |
| EPI_ISL_548047 | 8/27/2020 | 9/25/2020 Oceania / New Zealand / Auckland / Waitemata        |
| EPI_ISL_548048 | 8/28/2020 | 9/25/2020 Oceania / New Zealand / Auckland / Waitemata        |
| EPI_ISL_548049 | 8/27/2020 | 9/25/2020 Oceania / New Zealand / Auckland                    |
| EPI_ISL_548050 | 8/27/2020 | 9/25/2020 Oceania / New Zealand / Auckland                    |
| EPI_ISL_548057 | 8/29/2020 | 9/25/2020 Oceania / New Zealand / Auckland / Waitemata        |
| EPI_ISL_548064 | 8/29/2020 | 9/25/2020 Oceania / New Zealand / Waikato                     |
| EPI_ISL_548067 | 9/1/2020  | 9/25/2020 Oceania / New Zealand / Auckland / Waitemata        |
| EPI_ISL_548069 | 9/5/2020  | 9/25/2020 Oceania / New Zealand / Auckland                    |
| EPI_ISL_548075 | 9/6/2020  | 9/25/2020 Oceania / New Zealand / Auckland / Waitemata        |
| EPI_ISL_548077 | 9/3/2020  | 9/25/2020 Oceania / New Zealand / Auckland                    |
| EPI_ISL_548081 | 8/29/2020 | 9/25/2020 Oceania / New Zealand / Auckland / Counties Manukau |
| EPI_ISL_548082 | 9/11/2020 | 9/25/2020 Oceania / New Zealand / Auckland / Counties Manukau |
| EPI_ISL_548100 | 2020      | 9/25/2020 Oceania / New Zealand / Auckland / Waitemata        |
| EPI_ISL_548101 | 8/13/2020 | 9/25/2020 Oceania / New Zealand / Waikato                     |
| EPI_ISL_548104 | 6/19/2020 | 9/25/2020 Oceania / New Zealand / Combined Auckland           |
| EPI_ISL_548106 | 8/13/2020 | 9/25/2020 Oceania / New Zealand / Combined Auckland           |
| EPI_ISL_548108 | 8/24/2020 | 9/25/2020 Oceania / New Zealand / Auckland                    |
| EPI_ISL_548110 | 8/28/2020 | 9/25/2020 Oceania / New Zealand / Auckland                    |
| EPI_ISL_548111 | 8/28/2020 | 9/25/2020 Oceania / New Zealand / Auckland                    |
| EPI_ISL_548120 | 9/3/2020  | 9/25/2020 Oceania / New Zealand / Auckland                    |
| EPI_ISL_548123 | 4/2/2020  | 9/25/2020 Oceania / New Zealand / Auckland / Counties Manukau |
| EPI_ISL_548124 | 4/3/2020  | 9/25/2020 Oceania / New Zealand / Auckland / Counties Manukau |
| EPI_ISL_548127 | 3/27/2020 | 9/25/2020 Oceania / New Zealand / Auckland / Counties Manukau |
| EPI_ISL_548129 | 3/26/2020 | 9/25/2020 Oceania / New Zealand / Canterbury                  |
| EPI_ISL_548132 | 6/21/2020 | 9/25/2020 Oceania / New Zealand / Auckland / Counties Manukau |
| EPI_ISL_548139 | 7/10/2020 | 9/25/2020 Oceania / New Zealand / Canterbury                  |
| EPI_ISL_548140 | 7/14/2020 | 9/25/2020 Oceania / New Zealand / Canterbury                  |





|                |           |                                                                     |
|----------------|-----------|---------------------------------------------------------------------|
| EPI_ISL_548247 | 3/23/2020 | 9/25/2020 Europe / Sweden / Halland                                 |
| EPI_ISL_548248 | 4/8/2020  | 9/25/2020 Europe / Sweden / Jamtland Harjedalen                     |
| EPI_ISL_548249 | 4/14/2020 | 9/25/2020 Europe / Sweden / Halland                                 |
| EPI_ISL_548250 | 5/25/2020 | 9/25/2020 Europe / Sweden / Vastra Gotaland                         |
| EPI_ISL_548251 | 5/22/2020 | 9/25/2020 Europe / Sweden / Vastra Gotaland                         |
| EPI_ISL_548252 | 6/14/2020 | 9/25/2020 Europe / Sweden / Varmland                                |
| EPI_ISL_548253 | 6/5/2020  | 9/25/2020 Europe / Sweden / Vastra Gotaland                         |
| EPI_ISL_548254 | 6/4/2020  | 9/25/2020 Europe / Sweden / Vastra Gotaland                         |
| EPI_ISL_548255 | 7/3/2020  | 9/25/2020 Europe / Sweden / Kalmar                                  |
| EPI_ISL_548256 | 7/7/2020  | 9/25/2020 Europe / Sweden / Varmland                                |
| EPI_ISL_548257 | 8/13/2020 | 9/25/2020 Europe / Sweden / Stockholm                               |
| EPI_ISL_548258 | 8/10/2020 | 9/25/2020 Europe / Sweden / Stockholm                               |
| EPI_ISL_548264 | 7/20/2020 | 9/26/2020 North America / USA / California / Santa Clara County     |
| EPI_ISL_548265 | 7/21/2020 | 9/26/2020 North America / USA / California / San Luis Obispo County |
| EPI_ISL_548266 | 7/17/2020 | 9/26/2020 North America / USA / California / Santa Clara County     |
| EPI_ISL_548267 | 7/15/2020 | 9/26/2020 North America / USA / California / Santa Clara County     |
| EPI_ISL_548268 | 7/17/2020 | 9/26/2020 North America / USA / California / San Luis Obispo County |
| EPI_ISL_548269 | 7/17/2020 | 9/26/2020 North America / USA / California / San Luis Obispo County |
| EPI_ISL_548270 | 7/13/2020 | 9/26/2020 North America / USA / California / Orange County          |
| EPI_ISL_548271 | 7/12/2020 | 9/26/2020 North America / USA / California / Orange County          |
| EPI_ISL_548272 | 7/10/2020 | 9/26/2020 North America / USA / California / Orange County          |
| EPI_ISL_548273 | 7/13/2020 | 9/26/2020 North America / USA / California / Orange County          |
| EPI_ISL_548274 | 7/15/2020 | 9/26/2020 North America / USA / California / Orange County          |
| EPI_ISL_548275 | 7/13/2020 | 9/26/2020 North America / USA / California / Orange County          |
| EPI_ISL_548276 | 7/10/2020 | 9/26/2020 North America / USA / California / Orange County          |
| EPI_ISL_548279 | 7/16/2020 | 9/26/2020 North America / USA / California / Santa Clara County     |
| EPI_ISL_548280 | 7/17/2020 | 9/26/2020 North America / USA / California / San Luis Obispo County |
| EPI_ISL_548281 | 7/21/2020 | 9/26/2020 North America / USA / California / San Luis Obispo County |
| EPI_ISL_548282 | 7/16/2020 | 9/26/2020 North America / USA / California / Santa Clara County     |
| EPI_ISL_548283 | 7/14/2020 | 9/26/2020 North America / USA / California / Orange County          |
| EPI_ISL_548284 | 7/21/2020 | 9/26/2020 North America / USA / California / San Luis Obispo County |
| EPI_ISL_548285 | 7/13/2020 | 9/26/2020 North America / USA / California / Orange County          |
| EPI_ISL_548286 | 7/17/2020 | 9/26/2020 North America / USA / California / San Luis Obispo County |
| EPI_ISL_548288 | 7/21/2020 | 9/26/2020 North America / USA / California / San Luis Obispo County |
| EPI_ISL_548289 | 7/15/2020 | 9/26/2020 North America / USA / California / Orange County          |
| EPI_ISL_548292 | 7/17/2020 | 9/26/2020 North America / USA / California / San Luis Obispo County |
| EPI_ISL_548294 | 7/21/2020 | 9/26/2020 North America / USA / California / San Luis Obispo County |
| EPI_ISL_548295 | 7/21/2020 | 9/26/2020 North America / USA / California / San Luis Obispo County |
| EPI_ISL_548296 | 7/14/2020 | 9/26/2020 North America / USA / California / Orange County          |
| EPI_ISL_548298 | 7/13/2020 | 9/26/2020 North America / USA / California / Orange County          |
| EPI_ISL_548299 | 7/17/2020 | 9/26/2020 North America / USA / California / Santa Clara County     |
| EPI_ISL_548300 | 7/13/2020 | 9/26/2020 North America / USA / California / Orange County          |
| EPI_ISL_548301 | 7/14/2020 | 9/26/2020 North America / USA / California / Orange County          |
| EPI_ISL_548302 | 7/19/2020 | 9/26/2020 North America / USA / California / Santa Clara County     |
| EPI_ISL_548303 | 7/19/2020 | 9/26/2020 North America / USA / California / Santa Clara County     |
| EPI_ISL_548304 | 7/17/2020 | 9/26/2020 North America / USA / California / San Luis Obispo County |
| EPI_ISL_548305 | 7/10/2020 | 9/26/2020 North America / USA / California / Orange County          |



|                |           |           |                                                           |
|----------------|-----------|-----------|-----------------------------------------------------------|
| EPI_ISL_548361 | 7/23/2020 | 9/26/2020 | North America / USA / California / San Luis Obispo County |
| EPI_ISL_548362 | 3/25/2020 | 9/26/2020 | North America / USA / California / Ventura County         |
| EPI_ISL_548363 | 7/13/2020 | 9/26/2020 | North America / USA / California / Tuolumne County        |
| EPI_ISL_548364 | 4/1/2020  | 9/26/2020 | North America / USA / California / Ventura County         |
| EPI_ISL_548365 | 7/27/2020 | 9/26/2020 | North America / USA / California / San Luis Obispo County |
| EPI_ISL_548366 | 7/30/2020 | 9/26/2020 | North America / USA / California / San Luis Obispo County |
| EPI_ISL_548367 | 3/9/2020  | 9/26/2020 | North America / USA / California / Ventura County         |
| EPI_ISL_548368 | 3/20/2020 | 9/26/2020 | North America / USA / California / Ventura County         |
| EPI_ISL_548369 | 7/23/2020 | 9/26/2020 | North America / USA / California / San Luis Obispo County |
| EPI_ISL_548370 | 7/27/2020 | 9/26/2020 | North America / USA / California / San Luis Obispo County |
| EPI_ISL_548373 | 7/22/2020 | 9/26/2020 | North America / USA / California / Orange County          |
| EPI_ISL_548374 | 7/20/2020 | 9/26/2020 | North America / USA / California / Yolo County            |
| EPI_ISL_548375 | 7/27/2020 | 9/26/2020 | North America / USA / California / Orange County          |
| EPI_ISL_548376 | 6/7/2020  | 9/26/2020 | North America / USA / California / Ventura County         |
| EPI_ISL_548377 | 7/21/2020 | 9/26/2020 | North America / USA / California / Orange County          |
| EPI_ISL_548378 | 7/24/2020 | 9/26/2020 | North America / USA / California / Orange County          |
| EPI_ISL_548379 | 7/21/2020 | 9/26/2020 | North America / USA / California / Santa Clara County     |
| EPI_ISL_548381 | 7/27/2020 | 9/26/2020 | North America / USA / California / Orange County          |
| EPI_ISL_548382 | 7/1/2020  | 9/26/2020 | North America / USA / California / Yolo County            |
| EPI_ISL_548386 | 7/21/2020 | 9/26/2020 | North America / USA / California / Orange County          |
| EPI_ISL_548387 | 7/28/2020 | 9/26/2020 | North America / USA / California / Orange County          |
| EPI_ISL_548394 | 7/21/2020 | 9/26/2020 | North America / USA / California / Santa Clara County     |
| EPI_ISL_548395 | 7/22/2020 | 9/26/2020 | North America / USA / California / Santa Clara County     |
| EPI_ISL_548398 | 6/4/2020  | 9/26/2020 | North America / USA / California / Ventura County         |
| EPI_ISL_548401 | 7/17/2020 | 9/26/2020 | North America / USA / California / Santa Clara County     |
| EPI_ISL_548402 | 6/5/2020  | 9/26/2020 | North America / USA / California / Ventura County         |
| EPI_ISL_548404 | 7/21/2020 | 9/26/2020 | North America / USA / California / Orange County          |
| EPI_ISL_548406 | 6/4/2020  | 9/26/2020 | North America / USA / California / Ventura County         |
| EPI_ISL_548408 | 7/22/2020 | 9/26/2020 | North America / USA / California / Orange County          |
| EPI_ISL_548409 | 6/12/2020 | 9/26/2020 | North America / USA / California / Ventura County         |
| EPI_ISL_548410 | 6/4/2020  | 9/26/2020 | North America / USA / California / Ventura County         |
| EPI_ISL_548414 | 7/22/2020 | 9/26/2020 | North America / USA / California / Yolo County            |
| EPI_ISL_548417 | 7/23/2020 | 9/26/2020 | North America / USA / California / Santa Clara County     |
| EPI_ISL_548420 | 8/1/2020  | 9/26/2020 | North America / USA / California / Santa Clara County     |
| EPI_ISL_548423 | 7/17/2020 | 9/26/2020 | North America / USA / California / Santa Clara County     |
| EPI_ISL_548425 | 7/24/2020 | 9/26/2020 | North America / USA / California / San Luis Obispo County |
| EPI_ISL_548426 | 7/17/2020 | 9/26/2020 | North America / USA / California / Santa Clara County     |
| EPI_ISL_548428 | 7/24/2020 | 9/26/2020 | North America / USA / California / San Luis Obispo County |
| EPI_ISL_548429 | 7/16/2020 | 9/26/2020 | North America / USA / California / Santa Clara County     |
| EPI_ISL_548430 | 6/14/2020 | 9/26/2020 | North America / USA / California / Ventura County         |
| EPI_ISL_548431 | 7/24/2020 | 9/26/2020 | North America / USA / California / Orange County          |
| EPI_ISL_548433 | 7/22/2020 | 9/26/2020 | North America / USA / California / Santa Clara County     |
| EPI_ISL_548434 | 8/1/2020  | 9/26/2020 | North America / USA / California / Santa Clara County     |
| EPI_ISL_548439 | 7/20/2020 | 9/26/2020 | North America / USA / California / Orange County          |
| EPI_ISL_548442 | 5/13/2020 | 9/26/2020 | North America / USA / California / Ventura County         |
| EPI_ISL_548443 | 5/24/2020 | 9/26/2020 | North America / USA / California / Ventura County         |
| EPI_ISL_548444 | 7/21/2020 | 9/26/2020 | North America / USA / California / Orange County          |

|                |           |                                                                     |
|----------------|-----------|---------------------------------------------------------------------|
| EPI_ISL_548447 | 7/9/2020  | 9/26/2020 North America / USA / California / Yolo County            |
| EPI_ISL_548450 | 6/4/2020  | 9/26/2020 North America / USA / California / Ventura County         |
| EPI_ISL_548452 | 7/4/2020  | 9/26/2020 North America / USA / California / Yolo County            |
| EPI_ISL_548453 | 7/24/2020 | 9/26/2020 North America / USA / California / San Luis Obispo County |
| EPI_ISL_548455 | 6/28/2020 | 9/26/2020 North America / USA / California / Ventura County         |
| EPI_ISL_548457 | 7/24/2020 | 9/26/2020 North America / USA / California / San Luis Obispo County |
| EPI_ISL_548459 | 5/30/2020 | 9/26/2020 North America / USA / California / Ventura County         |
| EPI_ISL_548460 | 7/22/2020 | 9/26/2020 North America / USA / California / Orange County          |
| EPI_ISL_548461 | 6/5/2020  | 9/26/2020 North America / USA / California / Ventura County         |
| EPI_ISL_548463 | 7/24/2020 | 9/26/2020 North America / USA / California / Orange County          |
| EPI_ISL_548464 | 7/21/2020 | 9/26/2020 North America / USA / California / Orange County          |
| EPI_ISL_548470 | 8/1/2020  | 9/26/2020 North America / USA / California / Santa Clara County     |
| EPI_ISL_548471 | 6/4/2020  | 9/26/2020 North America / USA / California / Ventura County         |
| EPI_ISL_548473 | 4/14/2020 | 9/26/2020 North America / USA / California / Ventura County         |
| EPI_ISL_548475 | 6/5/2020  | 9/26/2020 North America / USA / California / Ventura County         |
| EPI_ISL_548476 | 6/4/2020  | 9/26/2020 North America / USA / California / Ventura County         |
| EPI_ISL_548477 | 7/15/2020 | 9/26/2020 North America / USA / California / Yolo County            |
| EPI_ISL_548478 | 7/17/2020 | 9/26/2020 North America / USA / California / Santa Clara County     |
| EPI_ISL_548479 | 7/13/2020 | 9/26/2020 North America / USA / California / Yolo County            |
| EPI_ISL_548480 | 4/14/2020 | 9/26/2020 North America / USA / California / Ventura County         |
| EPI_ISL_548481 | 6/4/2020  | 9/26/2020 North America / USA / California / Ventura County         |
| EPI_ISL_548482 | 7/16/2020 | 9/26/2020 North America / USA / California / Santa Clara County     |
| EPI_ISL_548483 | 6/8/2020  | 9/26/2020 North America / USA / California / Ventura County         |
| EPI_ISL_548484 | 7/29/2020 | 9/26/2020 North America / USA / California / Orange County          |
| EPI_ISL_548485 | 7/24/2020 | 9/26/2020 North America / USA / California / Orange County          |
| EPI_ISL_548486 | 7/20/2020 | 9/26/2020 North America / USA / California / Yolo County            |
| EPI_ISL_548487 | 6/4/2020  | 9/26/2020 North America / USA / California / Ventura County         |
| EPI_ISL_548488 | 7/24/2020 | 9/26/2020 North America / USA / California / Orange County          |
| EPI_ISL_548489 | 6/5/2020  | 9/26/2020 North America / USA / California / Ventura County         |
| EPI_ISL_548490 | 7/23/2020 | 9/26/2020 North America / USA / California / Yolo County            |
| EPI_ISL_548491 | 7/28/2020 | 9/26/2020 North America / USA / California / Contra Costa County    |
| EPI_ISL_548492 | 7/27/2020 | 9/26/2020 North America / USA / California / Contra Costa County    |
| EPI_ISL_548493 | 7/24/2020 | 9/26/2020 North America / USA / California / San Luis Obispo County |
| EPI_ISL_548494 | 7/21/2020 | 9/26/2020 North America / USA / California / Santa Clara County     |
| EPI_ISL_548495 | 7/26/2020 | 9/26/2020 North America / USA / California / Contra Costa County    |
| EPI_ISL_548496 | 7/21/2020 | 9/26/2020 North America / USA / California / Santa Clara County     |
| EPI_ISL_548497 | 7/20/2020 | 9/26/2020 North America / USA / California / Santa Clara County     |
| EPI_ISL_548498 | 7/21/2020 | 9/26/2020 North America / USA / California / Santa Clara County     |
| EPI_ISL_548499 | 7/24/2020 | 9/26/2020 North America / USA / California / Contra Costa County    |
| EPI_ISL_548500 | 7/21/2020 | 9/26/2020 North America / USA / California / Santa Clara County     |
| EPI_ISL_548501 | 7/26/2020 | 9/26/2020 North America / USA / California / Contra Costa County    |
| EPI_ISL_548502 | 7/27/2020 | 9/26/2020 North America / USA / California / San Luis Obispo County |
| EPI_ISL_548504 | 7/27/2020 | 9/26/2020 North America / USA / California / San Luis Obispo County |
| EPI_ISL_548505 | 7/28/2020 | 9/26/2020 North America / USA / California / Marin County           |
| EPI_ISL_548506 | 7/30/2020 | 9/26/2020 North America / USA / California / Contra Costa County    |
| EPI_ISL_548507 | 7/31/2020 | 9/26/2020 North America / USA / California / Contra Costa County    |
| EPI_ISL_548508 | 7/29/2020 | 9/26/2020 North America / USA / California / Contra Costa County    |





|                |           |           |                                                           |
|----------------|-----------|-----------|-----------------------------------------------------------|
| EPI_ISL_548559 | 7/16/2020 | 9/26/2020 | North America / USA / California / Santa Clara County     |
| EPI_ISL_548560 | 7/24/2020 | 9/26/2020 | North America / USA / California / San Luis Obispo County |
| EPI_ISL_548561 | 7/23/2020 | 9/26/2020 | North America / USA / California / Contra Costa County    |
| EPI_ISL_548562 | 7/17/2020 | 9/26/2020 | North America / USA / California / Santa Clara County     |
| EPI_ISL_548563 | 7/20/2020 | 9/26/2020 | North America / USA / California / Santa Clara County     |
| EPI_ISL_548564 | 7/25/2020 | 9/26/2020 | North America / USA / California / Contra Costa County    |
| EPI_ISL_548565 | 7/26/2020 | 9/26/2020 | North America / USA / California / Contra Costa County    |
| EPI_ISL_548566 | 7/30/2020 | 9/26/2020 | North America / USA / California / Contra Costa County    |
| EPI_ISL_548567 | 7/22/2020 | 9/26/2020 | North America / USA / California / Contra Costa County    |
| EPI_ISL_548568 | 7/26/2020 | 9/26/2020 | North America / USA / California / Santa Clara County     |
| EPI_ISL_548569 | 7/31/2020 | 9/26/2020 | North America / USA / California / Contra Costa County    |
| EPI_ISL_548570 | 7/17/2020 | 9/26/2020 | North America / USA / California / Santa Clara County     |
| EPI_ISL_548571 | 7/28/2020 | 9/26/2020 | North America / USA / California / Marin County           |
| EPI_ISL_548572 | 7/24/2020 | 9/26/2020 | North America / USA / California / Contra Costa County    |
| EPI_ISL_548573 | 7/31/2020 | 9/26/2020 | North America / USA / California / Contra Costa County    |
| EPI_ISL_548574 | 7/30/2020 | 9/26/2020 | North America / USA / California / Contra Costa County    |
| EPI_ISL_548575 | 7/24/2020 | 9/26/2020 | North America / USA / California / Contra Costa County    |
| EPI_ISL_548576 | 7/17/2020 | 9/26/2020 | North America / USA / California / Santa Clara County     |
| EPI_ISL_548577 | 8/5/2020  | 9/26/2020 | North America / USA / California / Contra Costa County    |
| EPI_ISL_548578 | 7/21/2020 | 9/26/2020 | North America / USA / California / Santa Clara County     |
| EPI_ISL_548579 | 7/24/2020 | 9/26/2020 | North America / USA / California / Contra Costa County    |
| EPI_ISL_548580 | 8/4/2020  | 9/26/2020 | North America / USA / California / Orange County          |
| EPI_ISL_548581 | 8/5/2020  | 9/26/2020 | North America / USA / California / Orange County          |
| EPI_ISL_548582 | 8/5/2020  | 9/26/2020 | North America / USA / California / Santa Clara County     |
| EPI_ISL_548583 | 8/12/2020 | 9/26/2020 | North America / USA / California / Santa Clara County     |
| EPI_ISL_548584 | 8/1/2020  | 9/26/2020 | North America / USA / California / Santa Clara County     |
| EPI_ISL_548585 | 8/5/2020  | 9/26/2020 | North America / USA / California / Orange County          |
| EPI_ISL_548586 | 8/4/2020  | 9/26/2020 | North America / USA / California / Orange County          |
| EPI_ISL_548588 | 8/1/2020  | 9/26/2020 | North America / USA / California / Santa Clara County     |
| EPI_ISL_548590 | 8/16/2020 | 9/26/2020 | North America / USA / California / Orange County          |
| EPI_ISL_548591 | 8/11/2020 | 9/26/2020 | North America / USA / California / Orange County          |
| EPI_ISL_548592 | 8/4/2020  | 9/26/2020 | North America / USA / California / Orange County          |
| EPI_ISL_548593 | 8/14/2020 | 9/26/2020 | North America / USA / California / Santa Clara County     |
| EPI_ISL_548594 | 8/5/2020  | 9/26/2020 | North America / USA / California / Orange County          |
| EPI_ISL_548595 | 8/9/2020  | 9/26/2020 | North America / USA / California / Santa Clara County     |
| EPI_ISL_548596 | 8/12/2020 | 9/26/2020 | North America / USA / California / Santa Clara County     |
| EPI_ISL_548597 | 8/12/2020 | 9/26/2020 | North America / USA / California / Santa Clara County     |
| EPI_ISL_548598 | 7/29/2020 | 9/26/2020 | North America / USA / California / Santa Clara County     |
| EPI_ISL_548599 | 8/22/2020 | 9/26/2020 | North America / USA / California / Tuolumne County        |
| EPI_ISL_548601 | 8/14/2020 | 9/26/2020 | North America / USA / California / Orange County          |
| EPI_ISL_548602 | 8/21/2020 | 9/26/2020 | North America / USA / California / Santa Clara County     |
| EPI_ISL_548603 | 7/16/2020 | 9/26/2020 | North America / USA / California / San Luis Obispo County |
| EPI_ISL_548604 | 7/29/2020 | 9/26/2020 | North America / USA / California / Santa Clara County     |
| EPI_ISL_548605 | 7/30/2020 | 9/26/2020 | North America / USA / California / Santa Clara County     |
| EPI_ISL_548606 | 8/10/2020 | 9/26/2020 | North America / USA / California / Santa Clara County     |
| EPI_ISL_548607 | 8/16/2020 | 9/26/2020 | North America / USA / California / Santa Clara County     |
| EPI_ISL_548608 | 8/14/2020 | 9/26/2020 | North America / USA / California / Orange County          |













|                |           |           |                                     |
|----------------|-----------|-----------|-------------------------------------|
| EPI_ISL_548923 | 2020-06   | 9/27/2020 | North America / Canada / Ontario    |
| EPI_ISL_548924 | 2020-06   | 9/27/2020 | North America / Canada / Ontario    |
| EPI_ISL_548925 | 2020-06   | 9/27/2020 | North America / Canada / Ontario    |
| EPI_ISL_548926 | 2020-06   | 9/27/2020 | North America / Canada / Ontario    |
| EPI_ISL_548927 | 2020-06   | 9/27/2020 | North America / Canada / Ontario    |
| EPI_ISL_548928 | 2020-06   | 9/27/2020 | North America / Canada / Ontario    |
| EPI_ISL_548929 | 2020-06   | 9/27/2020 | North America / Canada / Ontario    |
| EPI_ISL_548930 | 2020-06   | 9/27/2020 | North America / Canada / Ontario    |
| EPI_ISL_548931 | 2020-04   | 9/27/2020 | North America / Canada / Ontario    |
| EPI_ISL_548932 | 2020-03   | 9/27/2020 | North America / Canada / Ontario    |
| EPI_ISL_548933 | 2020-03   | 9/27/2020 | North America / Canada / Ontario    |
| EPI_ISL_548934 | 2020-03   | 9/27/2020 | North America / Canada / Ontario    |
| EPI_ISL_548935 | 2020-03   | 9/27/2020 | North America / Canada / Ontario    |
| EPI_ISL_548937 | 2020-03   | 9/27/2020 | North America / Canada / Ontario    |
| EPI_ISL_548938 | 2020-03   | 9/27/2020 | North America / Canada / Ontario    |
| EPI_ISL_548939 | 2020-03   | 9/27/2020 | North America / Canada / Ontario    |
| EPI_ISL_548940 | 2020-03   | 9/27/2020 | North America / Canada / Ontario    |
| EPI_ISL_548941 | 2020-03   | 9/27/2020 | North America / Canada / Ontario    |
| EPI_ISL_548962 | 4/27/2020 | 9/28/2020 | Europe / Sweden / Vasterbotten      |
| EPI_ISL_548963 | 4/28/2020 | 9/28/2020 | Europe / Sweden / Vasterbotten      |
| EPI_ISL_548966 | 4/23/2020 | 9/28/2020 | Asia / United Arab Emirates / Dubai |
| EPI_ISL_548967 | 4/23/2020 | 9/28/2020 | Asia / United Arab Emirates / Dubai |
| EPI_ISL_548968 | 4/23/2020 | 9/28/2020 | Asia / United Arab Emirates / Dubai |
| EPI_ISL_548970 | 4/23/2020 | 9/28/2020 | Asia / United Arab Emirates / Dubai |
| EPI_ISL_548971 | 4/23/2020 | 9/28/2020 | Asia / United Arab Emirates / Dubai |
| EPI_ISL_548972 | 9/14/2020 | 9/28/2020 | Asia / Singapore                    |
| EPI_ISL_548973 | 9/9/2020  | 9/28/2020 | Asia / Singapore                    |
| EPI_ISL_548974 | 9/13/2020 | 9/28/2020 | Asia / Singapore                    |
| EPI_ISL_548977 | 3/22/2020 | 9/28/2020 | Asia / Singapore                    |
| EPI_ISL_548978 | 3/14/2020 | 9/28/2020 | Asia / Singapore                    |
| EPI_ISL_548979 | 3/21/2020 | 9/28/2020 | Asia / Singapore                    |
| EPI_ISL_548980 | 3/22/2020 | 9/28/2020 | Asia / Singapore                    |
| EPI_ISL_548981 | 3/14/2020 | 9/28/2020 | Asia / Singapore                    |
| EPI_ISL_548982 | 3/11/2020 | 9/28/2020 | Asia / Singapore                    |
| EPI_ISL_548983 | 3/23/2020 | 9/28/2020 | Asia / Singapore                    |
| EPI_ISL_548984 | 3/15/2020 | 9/28/2020 | Asia / Singapore                    |
| EPI_ISL_548985 | 3/22/2020 | 9/28/2020 | Asia / Singapore                    |
| EPI_ISL_548986 | 3/14/2020 | 9/28/2020 | Asia / Singapore                    |
| EPI_ISL_548987 | 3/11/2020 | 9/28/2020 | Asia / Singapore                    |
| EPI_ISL_548988 | 3/22/2020 | 9/28/2020 | Asia / Singapore                    |
| EPI_ISL_548989 | 3/15/2020 | 9/28/2020 | Asia / Singapore                    |
| EPI_ISL_548990 | 3/22/2020 | 9/28/2020 | Asia / Singapore                    |
| EPI_ISL_548991 | 3/22/2020 | 9/28/2020 | Asia / Singapore                    |
| EPI_ISL_548992 | 3/22/2020 | 9/28/2020 | Asia / Singapore                    |
| EPI_ISL_548993 | 3/28/2020 | 9/28/2020 | Asia / Singapore                    |
| EPI_ISL_548994 | 3/23/2020 | 9/28/2020 | Asia / Singapore                    |
| EPI_ISL_548995 | 3/22/2020 | 9/28/2020 | Asia / Singapore                    |



|                |           |                                          |
|----------------|-----------|------------------------------------------|
| EPI_ISL_548996 | 3/20/2020 | 9/28/2020 Asia / Singapore               |
| EPI_ISL_548997 | 3/23/2020 | 9/28/2020 Asia / Singapore               |
| EPI_ISL_548998 | 3/15/2020 | 9/28/2020 Asia / Singapore               |
| EPI_ISL_548999 | 3/22/2020 | 9/28/2020 Asia / Singapore               |
| EPI_ISL_549000 | 3/22/2020 | 9/28/2020 Asia / Singapore               |
| EPI_ISL_549001 | 3/14/2020 | 9/28/2020 Asia / Singapore               |
| EPI_ISL_549002 | 3/22/2020 | 9/28/2020 Asia / Singapore               |
| EPI_ISL_549003 | 3/22/2020 | 9/28/2020 Asia / Singapore               |
| EPI_ISL_549004 | 3/23/2020 | 9/28/2020 Asia / Singapore               |
| EPI_ISL_549005 | 3/15/2020 | 9/28/2020 Asia / Singapore               |
| EPI_ISL_549024 | 3/19/2020 | 9/28/2020 Europe / Sweden / Vasterbotten |
| EPI_ISL_549027 | 7/31/2020 | 9/28/2020 Europe / Norway / Oslo         |
| EPI_ISL_549028 | 8/26/2020 | 9/28/2020 Europe / Norway / Viken        |
| EPI_ISL_549029 | 8/19/2020 | 9/28/2020 Europe / Norway / Viken        |
| EPI_ISL_549030 | 8/20/2020 | 9/28/2020 Europe / Norway / Viken        |
| EPI_ISL_549031 | 8/18/2020 | 9/28/2020 Europe / Norway / Viken        |
| EPI_ISL_549032 | 8/8/2020  | 9/28/2020 Europe / Norway / Viken        |
| EPI_ISL_549033 | 8/13/2020 | 9/28/2020 Europe / Norway / Viken        |
| EPI_ISL_549034 | 8/15/2020 | 9/28/2020 Europe / Norway / Viken        |
| EPI_ISL_549035 | 8/15/2020 | 9/28/2020 Europe / Norway / Viken        |
| EPI_ISL_549036 | 8/26/2020 | 9/28/2020 Europe / Norway / Viken        |
| EPI_ISL_549037 | 8/26/2020 | 9/28/2020 Europe / Norway / Viken        |
| EPI_ISL_549038 | 7/29/2020 | 9/28/2020 Europe / Norway / Viken        |
| EPI_ISL_549039 | 8/24/2020 | 9/28/2020 Europe / Norway / Viken        |
| EPI_ISL_549040 | 8/24/2020 | 9/28/2020 Europe / Norway / Viken        |
| EPI_ISL_549041 | 8/24/2020 | 9/28/2020 Europe / Norway / Viken        |
| EPI_ISL_549042 | 8/8/2020  | 9/28/2020 Europe / Norway / Viken        |
| EPI_ISL_549043 | 8/9/2020  | 9/28/2020 Europe / Norway / Viken        |
| EPI_ISL_549044 | 8/9/2020  | 9/28/2020 Europe / Norway / Viken        |
| EPI_ISL_549045 | 8/9/2020  | 9/28/2020 Europe / Norway / Viken        |
| EPI_ISL_549046 | 8/7/2020  | 9/28/2020 Europe / Norway / Viken        |
| EPI_ISL_549047 | 8/9/2020  | 9/28/2020 Europe / Norway / Oslo         |
| EPI_ISL_549048 | 7/30/2020 | 9/28/2020 Europe / Norway / Agder        |
| EPI_ISL_549049 | 8/17/2020 | 9/28/2020 Europe / Norway / Oslo         |
| EPI_ISL_549050 | 8/17/2020 | 9/28/2020 Europe / Norway / Oslo         |
| EPI_ISL_549051 | 7/27/2020 | 9/28/2020 Europe / Norway / Oslo         |
| EPI_ISL_549052 | 8/10/2020 | 9/28/2020 Europe / Norway / Oslo         |
| EPI_ISL_549053 | 8/4/2020  | 9/28/2020 Europe / Norway / Oslo         |
| EPI_ISL_549054 | 8/5/2020  | 9/28/2020 Europe / Norway / Oslo         |
| EPI_ISL_549055 | 8/6/2020  | 9/28/2020 Europe / Norway / Oslo         |
| EPI_ISL_549056 | 8/4/2020  | 9/28/2020 Europe / Norway / Oslo         |
| EPI_ISL_549057 | 8/5/2020  | 9/28/2020 Europe / Norway / Oslo         |
| EPI_ISL_549058 | 8/5/2020  | 9/28/2020 Europe / Norway / Oslo         |
| EPI_ISL_549059 | 8/1/2020  | 9/28/2020 Europe / Norway / Vestlandet   |
| EPI_ISL_549060 | 8/5/2020  | 9/28/2020 Europe / Norway / Oslo         |
| EPI_ISL_549061 | 8/6/2020  | 9/28/2020 Europe / Norway / Oslo         |
| EPI_ISL_549062 | 8/4/2020  | 9/28/2020 Europe / Norway / Viken        |

|                |           |                                               |
|----------------|-----------|-----------------------------------------------|
| EPI_ISL_549063 | 8/1/2020  | 9/28/2020 Europe / Norway / Viken             |
| EPI_ISL_549064 | 8/2/2020  | 9/28/2020 Europe / Norway / Viken             |
| EPI_ISL_549065 | 8/1/2020  | 9/28/2020 Europe / Norway / Oslo              |
| EPI_ISL_549066 | 8/2/2020  | 9/28/2020 Europe / Norway / Oslo              |
| EPI_ISL_549067 | 8/3/2020  | 9/28/2020 Europe / Norway / Viken             |
| EPI_ISL_549068 | 8/3/2020  | 9/28/2020 Europe / Norway / Oslo              |
| EPI_ISL_549069 | 7/31/2020 | 9/28/2020 Europe / Norway / Oslo              |
| EPI_ISL_549070 | 7/29/2020 | 9/28/2020 Europe / Norway / Vestlandet        |
| EPI_ISL_549071 | 7/31/2020 | 9/28/2020 Europe / Norway / Viken             |
| EPI_ISL_549072 | 8/4/2020  | 9/28/2020 Europe / Norway / Viken             |
| EPI_ISL_549073 | 8/3/2020  | 9/28/2020 Europe / Norway / Viken             |
| EPI_ISL_549074 | 8/4/2020  | 9/28/2020 Europe / Norway / Viken             |
| EPI_ISL_549075 | 8/4/2020  | 9/28/2020 Europe / Norway / Oslo              |
| EPI_ISL_549076 | 8/5/2020  | 9/28/2020 Europe / Norway / Oslo              |
| EPI_ISL_549077 | 8/5/2020  | 9/28/2020 Europe / Norway / Oslo              |
| EPI_ISL_549078 | 8/5/2020  | 9/28/2020 Europe / Norway / Viken             |
| EPI_ISL_549079 | 8/5/2020  | 9/28/2020 Europe / Norway / Oslo              |
| EPI_ISL_549080 | 8/5/2020  | 9/28/2020 Europe / Norway / Oslo              |
| EPI_ISL_549081 | 7/29/2020 | 9/28/2020 Europe / Norway / Vestlandet        |
| EPI_ISL_549082 | 8/7/2020  | 9/28/2020 Europe / Norway / Oslo              |
| EPI_ISL_549083 | 8/10/2020 | 9/28/2020 Europe / Norway / Viken             |
| EPI_ISL_549084 | 8/10/2020 | 9/28/2020 Europe / Norway / Oslo              |
| EPI_ISL_549085 | 8/7/2020  | 9/28/2020 Europe / Norway / Oslo              |
| EPI_ISL_549086 | 8/7/2020  | 9/28/2020 Europe / Norway / Viken             |
| EPI_ISL_549087 | 8/4/2020  | 9/28/2020 Europe / Norway / Viken             |
| EPI_ISL_549088 | 8/8/2020  | 9/28/2020 Europe / Norway / Viken             |
| EPI_ISL_549089 | 7/30/2020 | 9/28/2020 Europe / Norway / Viken             |
| EPI_ISL_549090 | 8/2/2020  | 9/28/2020 Europe / Norway / Viken             |
| EPI_ISL_549091 | 7/30/2020 | 9/28/2020 Europe / Norway / Viken             |
| EPI_ISL_549092 | 7/26/2020 | 9/28/2020 Europe / Norway / Viken             |
| EPI_ISL_549093 | 7/22/2020 | 9/28/2020 Europe / Norway / Oslo              |
| EPI_ISL_549094 | 7/24/2020 | 9/28/2020 Europe / Norway / Viken             |
| EPI_ISL_549095 | 7/24/2020 | 9/28/2020 Europe / Norway / Viken             |
| EPI_ISL_549096 | 7/24/2020 | 9/28/2020 Europe / Norway / Oslo              |
| EPI_ISL_549097 | 7/22/2020 | 9/28/2020 Europe / Norway / More og Romsdal   |
| EPI_ISL_549098 | 7/24/2020 | 9/28/2020 Europe / Norway / Viken             |
| EPI_ISL_549099 | 7/31/2020 | 9/28/2020 Europe / Norway / Viken             |
| EPI_ISL_549100 | 7/27/2020 | 9/28/2020 Europe / Norway / Oslo              |
| EPI_ISL_549101 | 8/1/2020  | 9/28/2020 Europe / Norway / Viken             |
| EPI_ISL_549102 | 7/22/2020 | 9/28/2020 Europe / Norway / Viken             |
| EPI_ISL_549103 | 7/26/2020 | 9/28/2020 Europe / Norway / Agder             |
| EPI_ISL_549104 | 7/24/2020 | 9/28/2020 Europe / Norway / Agder             |
| EPI_ISL_549105 | 7/24/2020 | 9/28/2020 Europe / Norway / Viken             |
| EPI_ISL_549106 | 7/24/2020 | 9/28/2020 Europe / Norway / Viken             |
| EPI_ISL_549107 | 7/26/2020 | 9/28/2020 Europe / Norway / Troms og Finnmark |
| EPI_ISL_549108 | 7/24/2020 | 9/28/2020 Europe / Norway / Oslo              |
| EPI_ISL_549109 | 7/22/2020 | 9/28/2020 Europe / Norway / Oslo              |

|                |           |                                             |
|----------------|-----------|---------------------------------------------|
| EPI_ISL_549110 | 7/24/2020 | 9/28/2020 Europe / Norway / Agder           |
| EPI_ISL_549111 | 7/24/2020 | 9/28/2020 Europe / Norway / Agder           |
| EPI_ISL_549112 | 8/5/2020  | 9/28/2020 Europe / Norway / Viken           |
| EPI_ISL_549113 | 7/30/2020 | 9/28/2020 Europe / Norway / Viken           |
| EPI_ISL_549114 | 7/22/2020 | 9/28/2020 Europe / Norway / More og Romsdal |
| EPI_ISL_549116 | 7/22/2020 | 9/28/2020 Europe / Norway / Oslo            |
| EPI_ISL_549119 | 8/4/2020  | 9/28/2020 Europe / Norway / Oslo            |
| EPI_ISL_549120 | 8/5/2020  | 9/28/2020 Europe / Norway / Oslo            |
| EPI_ISL_549121 | 8/6/2020  | 9/28/2020 Europe / Norway / Viken           |
| EPI_ISL_549122 | 7/7/2020  | 9/28/2020 Europe / Norway / Innlandet       |
| EPI_ISL_549123 | 8/6/2020  | 9/28/2020 Europe / Norway / Viken           |
| EPI_ISL_549124 | 7/31/2020 | 9/28/2020 Europe / Norway / Vestlandet      |
| EPI_ISL_549125 | 8/10/2020 | 9/28/2020 Europe / Norway / Oslo            |
| EPI_ISL_549126 | 8/4/2020  | 9/28/2020 Europe / Norway / Viken           |
| EPI_ISL_549127 | 8/4/2020  | 9/28/2020 Europe / Norway / Viken           |
| EPI_ISL_549128 | 8/4/2020  | 9/28/2020 Europe / Norway / Viken           |
| EPI_ISL_549129 | 8/4/2020  | 9/28/2020 Europe / Norway / Viken           |
| EPI_ISL_549130 | 8/4/2020  | 9/28/2020 Europe / Norway / Viken           |
| EPI_ISL_549131 | 8/5/2020  | 9/28/2020 Europe / Norway / Viken           |
| EPI_ISL_549132 | 7/14/2020 | 9/28/2020 Europe / Norway / Oslo            |
| EPI_ISL_549133 | 8/5/2020  | 9/28/2020 Europe / Norway / Viken           |
| EPI_ISL_549134 | 8/5/2020  | 9/28/2020 Europe / Norway / Viken           |
| EPI_ISL_549135 | 8/5/2020  | 9/28/2020 Europe / Norway / Viken           |
| EPI_ISL_549136 | 8/5/2020  | 9/28/2020 Europe / Norway / Viken           |
| EPI_ISL_549137 | 8/6/2020  | 9/28/2020 Europe / Norway / Viken           |
| EPI_ISL_549138 | 8/6/2020  | 9/28/2020 Europe / Norway / Oslo            |
| EPI_ISL_549139 | 8/6/2020  | 9/28/2020 Europe / Norway / Oslo            |
| EPI_ISL_549140 | 8/6/2020  | 9/28/2020 Europe / Norway / Oslo            |
| EPI_ISL_549141 | 8/6/2020  | 9/28/2020 Europe / Norway / Viken           |
| EPI_ISL_549142 | 8/6/2020  | 9/28/2020 Europe / Norway / Oslo            |
| EPI_ISL_549143 | 7/31/2020 | 9/28/2020 Europe / Norway / Viken           |
| EPI_ISL_549144 | 8/6/2020  | 9/28/2020 Europe / Norway / Oslo            |
| EPI_ISL_549145 | 8/6/2020  | 9/28/2020 Europe / Norway / Viken           |
| EPI_ISL_549146 | 8/7/2020  | 9/28/2020 Europe / Norway / Viken           |
| EPI_ISL_549147 | 8/7/2020  | 9/28/2020 Europe / Norway / Viken           |
| EPI_ISL_549148 | 8/7/2020  | 9/28/2020 Europe / Norway / Viken           |
| EPI_ISL_549149 | 8/7/2020  | 9/28/2020 Europe / Norway / Rogaland        |
| EPI_ISL_549150 | 8/7/2020  | 9/28/2020 Europe / Norway / Rogaland        |
| EPI_ISL_549151 | 8/7/2020  | 9/28/2020 Europe / Norway / Rogaland        |
| EPI_ISL_549152 | 8/7/2020  | 9/28/2020 Europe / Norway / Rogaland        |
| EPI_ISL_549153 | 8/7/2020  | 9/28/2020 Europe / Norway / Viken           |
| EPI_ISL_549154 | 7/31/2020 | 9/28/2020 Europe / Norway / Viken           |
| EPI_ISL_549155 | 8/7/2020  | 9/28/2020 Europe / Norway / Oslo            |
| EPI_ISL_549156 | 8/7/2020  | 9/28/2020 Europe / Norway / Oslo            |
| EPI_ISL_549157 | 8/8/2020  | 9/28/2020 Europe / Norway / Viken           |
| EPI_ISL_549158 | 8/8/2020  | 9/28/2020 Europe / Norway / Viken           |
| EPI_ISL_549159 | 8/8/2020  | 9/28/2020 Europe / Norway / Viken           |

|                |           |                                          |
|----------------|-----------|------------------------------------------|
| EPI_ISL_549160 | 8/8/2020  | 9/28/2020 Europe / Norway / Viken        |
| EPI_ISL_549161 | 8/8/2020  | 9/28/2020 Europe / Norway / Viken        |
| EPI_ISL_549162 | 8/8/2020  | 9/28/2020 Europe / Norway / Viken        |
| EPI_ISL_549163 | 8/7/2020  | 9/28/2020 Europe / Norway / Viken        |
| EPI_ISL_549164 | 8/12/2020 | 9/28/2020 Europe / Norway / Viken        |
| EPI_ISL_549165 | 7/31/2020 | 9/28/2020 Europe / Norway / Viken        |
| EPI_ISL_549166 | 8/12/2020 | 9/28/2020 Europe / Norway / Viken        |
| EPI_ISL_549167 | 8/17/2020 | 9/28/2020 Europe / Norway / Viken        |
| EPI_ISL_549168 | 7/13/2020 | 9/28/2020 Europe / Norway / Viken        |
| EPI_ISL_549169 | 7/18/2020 | 9/28/2020 Europe / Norway / Viken        |
| EPI_ISL_549170 | 7/15/2020 | 9/28/2020 Europe / Norway / Viken        |
| EPI_ISL_549171 | 7/15/2020 | 9/28/2020 Europe / Norway / Viken        |
| EPI_ISL_549172 | 7/13/2020 | 9/28/2020 Europe / Norway / Viken        |
| EPI_ISL_549173 | 6/19/2020 | 9/28/2020 Europe / Norway / Viken        |
| EPI_ISL_549174 | 7/6/2020  | 9/28/2020 Europe / Norway / Viken        |
| EPI_ISL_549175 | 8/18/2020 | 9/28/2020 Europe / Norway / Viken        |
| EPI_ISL_549176 | 3/10/2020 | 9/28/2020 Europe / Sweden / Vasterbotten |
| EPI_ISL_549184 | 7/30/2020 | 9/28/2020 North America / USA / Florida  |
| EPI_ISL_549189 | 5/27/2020 | 9/28/2020 North America / USA / Florida  |
| EPI_ISL_549193 | 8/5/2020  | 9/28/2020 North America / USA / Florida  |
| EPI_ISL_549194 | 8/5/2020  | 9/28/2020 North America / USA / Florida  |
| EPI_ISL_549195 | 8/6/2020  | 9/28/2020 North America / USA / Florida  |
| EPI_ISL_549196 | 8/6/2020  | 9/28/2020 North America / USA / Florida  |
| EPI_ISL_549197 | 8/6/2020  | 9/28/2020 North America / USA / Florida  |
| EPI_ISL_549199 | 8/6/2020  | 9/28/2020 North America / USA / Florida  |
| EPI_ISL_549200 | 8/13/2020 | 9/28/2020 North America / USA / Florida  |
| EPI_ISL_549201 | 9/1/2020  | 9/28/2020 North America / USA / Florida  |
| EPI_ISL_549202 | 8/31/2020 | 9/28/2020 North America / USA / Florida  |
| EPI_ISL_549203 | 8/31/2020 | 9/28/2020 North America / USA / Florida  |
| EPI_ISL_549204 | 8/31/2020 | 9/28/2020 North America / USA / Florida  |
| EPI_ISL_549205 | 8/31/2020 | 9/28/2020 North America / USA / Florida  |
| EPI_ISL_549206 | 8/31/2020 | 9/28/2020 North America / USA / Florida  |
| EPI_ISL_549207 | 8/31/2020 | 9/28/2020 North America / USA / Florida  |
| EPI_ISL_549208 | 8/31/2020 | 9/28/2020 North America / USA / Florida  |
| EPI_ISL_549210 | 9/1/2020  | 9/28/2020 North America / USA / Florida  |
| EPI_ISL_549211 | 9/1/2020  | 9/28/2020 North America / USA / Florida  |
| EPI_ISL_549212 | 9/1/2020  | 9/28/2020 North America / USA / Florida  |
| EPI_ISL_549213 | 8/31/2020 | 9/28/2020 North America / USA / Florida  |
| EPI_ISL_549214 | 8/31/2020 | 9/28/2020 North America / USA / Florida  |
| EPI_ISL_549215 | 9/3/2020  | 9/28/2020 North America / USA / Florida  |
| EPI_ISL_549216 | 9/3/2020  | 9/28/2020 North America / USA / Florida  |
| EPI_ISL_549217 | 9/3/2020  | 9/28/2020 North America / USA / Florida  |
| EPI_ISL_549218 | 9/3/2020  | 9/28/2020 North America / USA / Florida  |
| EPI_ISL_549219 | 9/3/2020  | 9/28/2020 North America / USA / Florida  |
| EPI_ISL_549220 | 9/4/2020  | 9/28/2020 North America / USA / Florida  |
| EPI_ISL_549221 | 9/4/2020  | 9/28/2020 North America / USA / Florida  |
| EPI_ISL_549222 | 9/8/2020  | 9/28/2020 North America / USA / Florida  |

|                |           |                                             |
|----------------|-----------|---------------------------------------------|
| EPI_ISL_549223 | 9/8/2020  | 9/28/2020 North America / USA / Florida     |
| EPI_ISL_549224 | 9/7/2020  | 9/28/2020 North America / USA / Florida     |
| EPI_ISL_549225 | 9/8/2020  | 9/28/2020 North America / USA / Florida     |
| EPI_ISL_549226 | 9/8/2020  | 9/28/2020 North America / USA / Florida     |
| EPI_ISL_549227 | 9/8/2020  | 9/28/2020 North America / USA / Florida     |
| EPI_ISL_549231 | 4/7/2020  | 9/28/2020 North America / USA / Florida     |
| EPI_ISL_549232 | 4/7/2020  | 9/28/2020 North America / USA / Florida     |
| EPI_ISL_549236 | 4/8/2020  | 9/28/2020 North America / USA / Florida     |
| EPI_ISL_549237 | 4/7/2020  | 9/28/2020 North America / USA / Florida     |
| EPI_ISL_549238 | 4/8/2020  | 9/28/2020 North America / USA / Florida     |
| EPI_ISL_549239 | 4/8/2020  | 9/28/2020 North America / USA / Florida     |
| EPI_ISL_549240 | 4/8/2020  | 9/28/2020 North America / USA / Florida     |
| EPI_ISL_549241 | 4/9/2020  | 9/28/2020 North America / USA / Florida     |
| EPI_ISL_549245 | 4/24/2020 | 9/28/2020 North America / USA / Florida     |
| EPI_ISL_549247 | 5/7/2020  | 9/28/2020 North America / USA / Florida     |
| EPI_ISL_549248 | 5/7/2020  | 9/28/2020 North America / USA / Florida     |
| EPI_ISL_549249 | 5/7/2020  | 9/28/2020 North America / USA / Florida     |
| EPI_ISL_549250 | 5/8/2020  | 9/28/2020 North America / USA / Florida     |
| EPI_ISL_549251 | 5/9/2020  | 9/28/2020 North America / USA / Florida     |
| EPI_ISL_549253 | 5/12/2020 | 9/28/2020 North America / USA / Florida     |
| EPI_ISL_549255 | 5/12/2020 | 9/28/2020 North America / USA / Florida     |
| EPI_ISL_549258 | 6/25/2020 | 9/28/2020 North America / USA / Florida     |
| EPI_ISL_549259 | 6/25/2020 | 9/28/2020 North America / USA / Florida     |
| EPI_ISL_549262 | 6/27/2020 | 9/28/2020 North America / USA / Florida     |
| EPI_ISL_549264 | 6/27/2020 | 9/28/2020 North America / USA / Florida     |
| EPI_ISL_549265 | 6/28/2020 | 9/28/2020 North America / USA / Florida     |
| EPI_ISL_549266 | 6/28/2020 | 9/28/2020 North America / USA / Florida     |
| EPI_ISL_549267 | 6/28/2020 | 9/28/2020 North America / USA / Florida     |
| EPI_ISL_549268 | 6/29/2020 | 9/28/2020 North America / USA / Florida     |
| EPI_ISL_549269 | 6/30/2020 | 9/28/2020 North America / USA / Florida     |
| EPI_ISL_549329 | 9/1/2020  | 9/28/2020 Europe / United Kingdom / England |
| EPI_ISL_549331 | 9/4/2020  | 9/28/2020 Europe / United Kingdom / England |
| EPI_ISL_549332 | 8/31/2020 | 9/28/2020 Europe / United Kingdom / England |
| EPI_ISL_549333 | 9/1/2020  | 9/28/2020 Europe / United Kingdom / England |
| EPI_ISL_549334 | 9/16/2020 | 9/28/2020 Europe / United Kingdom / England |
| EPI_ISL_549336 | 4/1/2020  | 9/28/2020 Europe / United Kingdom / England |
| EPI_ISL_549342 | 8/31/2020 | 9/28/2020 Europe / United Kingdom / England |
| EPI_ISL_549343 | 9/7/2020  | 9/28/2020 Europe / United Kingdom / England |
| EPI_ISL_549344 | 9/7/2020  | 9/28/2020 Europe / United Kingdom / England |
| EPI_ISL_549345 | 8/28/2020 | 9/28/2020 Europe / United Kingdom / England |
| EPI_ISL_549346 | 8/28/2020 | 9/28/2020 Europe / United Kingdom / England |
| EPI_ISL_549347 | 9/4/2020  | 9/28/2020 Europe / United Kingdom / England |
| EPI_ISL_549348 | 8/31/2020 | 9/28/2020 Europe / United Kingdom / England |
| EPI_ISL_549349 | 4/1/2020  | 9/28/2020 Europe / United Kingdom / England |
| EPI_ISL_549350 | 9/9/2020  | 9/28/2020 Europe / United Kingdom / England |
| EPI_ISL_549351 | 9/8/2020  | 9/28/2020 Europe / United Kingdom / England |
| EPI_ISL_549389 | 9/1/2020  | 9/28/2020 Europe / United Kingdom / England |















































|                |           |           |                                   |
|----------------|-----------|-----------|-----------------------------------|
| EPI_ISL_550452 | 7/24/2020 | 9/28/2020 | Europe / United Kingdom / England |
| EPI_ISL_550453 | 8/1/2020  | 9/28/2020 | Europe / United Kingdom / England |
| EPI_ISL_550454 | 7/23/2020 | 9/28/2020 | Europe / United Kingdom / England |
| EPI_ISL_550456 | 7/30/2020 | 9/28/2020 | Europe / United Kingdom / England |
| EPI_ISL_550457 | 7/31/2020 | 9/28/2020 | Europe / United Kingdom / England |
| EPI_ISL_550458 | 7/24/2020 | 9/28/2020 | Europe / United Kingdom / Wales   |
| EPI_ISL_550459 | 7/24/2020 | 9/28/2020 | Europe / United Kingdom / England |
| EPI_ISL_550460 | 7/31/2020 | 9/28/2020 | Europe / United Kingdom / England |
| EPI_ISL_550461 | 7/30/2020 | 9/28/2020 | Europe / United Kingdom / England |
| EPI_ISL_550462 | 7/24/2020 | 9/28/2020 | Europe / United Kingdom / England |
| EPI_ISL_550463 | 7/31/2020 | 9/28/2020 | Europe / United Kingdom / England |
| EPI_ISL_550464 | 7/24/2020 | 9/28/2020 | Europe / United Kingdom / England |
| EPI_ISL_550465 | 7/30/2020 | 9/28/2020 | Europe / United Kingdom / England |
| EPI_ISL_550466 | 7/25/2020 | 9/28/2020 | Europe / United Kingdom / England |
| EPI_ISL_550468 | 8/1/2020  | 9/28/2020 | Europe / United Kingdom / England |
| EPI_ISL_550469 | 7/29/2020 | 9/28/2020 | Europe / United Kingdom / England |
| EPI_ISL_550470 | 8/1/2020  | 9/28/2020 | Europe / United Kingdom / England |
| EPI_ISL_550471 | 7/24/2020 | 9/28/2020 | Europe / United Kingdom / England |
| EPI_ISL_550472 | 7/27/2020 | 9/28/2020 | Europe / United Kingdom / England |
| EPI_ISL_550473 | 7/23/2020 | 9/28/2020 | Europe / United Kingdom / England |
| EPI_ISL_550475 | 7/31/2020 | 9/28/2020 | Europe / United Kingdom / England |
| EPI_ISL_550478 | 8/1/2020  | 9/28/2020 | Europe / United Kingdom / England |
| EPI_ISL_550479 | 7/25/2020 | 9/28/2020 | Europe / United Kingdom / England |
| EPI_ISL_550480 | 7/24/2020 | 9/28/2020 | Europe / United Kingdom / England |
| EPI_ISL_550481 | 7/29/2020 | 9/28/2020 | Europe / United Kingdom / England |
| EPI_ISL_550486 | 7/31/2020 | 9/28/2020 | Europe / United Kingdom / England |
| EPI_ISL_550487 | 7/27/2020 | 9/28/2020 | Europe / United Kingdom / England |
| EPI_ISL_550488 | 7/24/2020 | 9/28/2020 | Europe / United Kingdom / England |
| EPI_ISL_550490 | 7/24/2020 | 9/28/2020 | Europe / United Kingdom / England |
| EPI_ISL_550491 | 7/30/2020 | 9/28/2020 | Europe / United Kingdom / England |
| EPI_ISL_550492 | 7/29/2020 | 9/28/2020 | Europe / United Kingdom / England |
| EPI_ISL_550496 | 7/27/2020 | 9/28/2020 | Europe / United Kingdom / England |
| EPI_ISL_550498 | 8/1/2020  | 9/28/2020 | Europe / United Kingdom / England |
| EPI_ISL_550500 | 7/27/2020 | 9/28/2020 | Europe / United Kingdom / England |
| EPI_ISL_550503 | 8/1/2020  | 9/28/2020 | Europe / United Kingdom / England |
| EPI_ISL_550504 | 7/24/2020 | 9/28/2020 | Europe / United Kingdom / England |
| EPI_ISL_550505 | 7/31/2020 | 9/28/2020 | Europe / United Kingdom / England |
| EPI_ISL_550506 | 7/25/2020 | 9/28/2020 | Europe / United Kingdom / England |
| EPI_ISL_550507 | 7/25/2020 | 9/28/2020 | Europe / United Kingdom / England |
| EPI_ISL_550508 | 7/31/2020 | 9/28/2020 | Europe / United Kingdom / England |
| EPI_ISL_550509 | 7/31/2020 | 9/28/2020 | Europe / United Kingdom / England |
| EPI_ISL_550510 | 7/31/2020 | 9/28/2020 | Europe / United Kingdom / England |
| EPI_ISL_550511 | 8/1/2020  | 9/28/2020 | Europe / United Kingdom / England |
| EPI_ISL_550514 | 7/29/2020 | 9/28/2020 | Europe / United Kingdom / England |
| EPI_ISL_550515 | 7/24/2020 | 9/28/2020 | Europe / United Kingdom / England |
| EPI_ISL_550516 | 7/24/2020 | 9/28/2020 | Europe / United Kingdom / England |
| EPI_ISL_550518 | 8/30/2020 | 9/28/2020 | Europe / United Kingdom / England |







































































































































|                |           |           |                                   |
|----------------|-----------|-----------|-----------------------------------|
| EPI_ISL_553973 | 6/12/2020 | 9/28/2020 | Europe / United Kingdom / England |
| EPI_ISL_553975 | 6/11/2020 | 9/28/2020 | Europe / United Kingdom / England |
| EPI_ISL_553976 | 6/11/2020 | 9/28/2020 | Europe / United Kingdom / Wales   |
| EPI_ISL_553977 | 6/9/2020  | 9/28/2020 | Europe / United Kingdom / England |
| EPI_ISL_553978 | 6/11/2020 | 9/28/2020 | Europe / United Kingdom / England |
| EPI_ISL_553979 | 6/8/2020  | 9/28/2020 | Europe / United Kingdom / England |
| EPI_ISL_553980 | 6/7/2020  | 9/28/2020 | Europe / United Kingdom / England |
| EPI_ISL_553981 | 6/9/2020  | 9/28/2020 | Europe / United Kingdom / England |
| EPI_ISL_553982 | 6/8/2020  | 9/28/2020 | Europe / United Kingdom / England |
| EPI_ISL_553983 | 6/10/2020 | 9/28/2020 | Europe / United Kingdom / England |
| EPI_ISL_553984 | 6/13/2020 | 9/28/2020 | Europe / United Kingdom / England |
| EPI_ISL_553986 | 6/12/2020 | 9/28/2020 | Europe / United Kingdom / England |
| EPI_ISL_553987 | 6/9/2020  | 9/28/2020 | Europe / United Kingdom / England |
| EPI_ISL_553988 | 6/12/2020 | 9/28/2020 | Europe / United Kingdom / England |
| EPI_ISL_553989 | 6/12/2020 | 9/28/2020 | Europe / United Kingdom / England |
| EPI_ISL_553991 | 6/8/2020  | 9/28/2020 | Europe / United Kingdom / England |
| EPI_ISL_553992 | 6/11/2020 | 9/28/2020 | Europe / United Kingdom / Wales   |
| EPI_ISL_553993 | 6/8/2020  | 9/28/2020 | Europe / United Kingdom / England |
| EPI_ISL_553994 | 6/11/2020 | 9/28/2020 | Europe / United Kingdom / England |
| EPI_ISL_553995 | 6/12/2020 | 9/28/2020 | Europe / United Kingdom / England |
| EPI_ISL_553996 | 6/8/2020  | 9/28/2020 | Europe / United Kingdom / England |
| EPI_ISL_553998 | 6/8/2020  | 9/28/2020 | Europe / United Kingdom / England |
| EPI_ISL_553999 | 6/8/2020  | 9/28/2020 | Europe / United Kingdom / England |
| EPI_ISL_554000 | 6/8/2020  | 9/28/2020 | Europe / United Kingdom / England |
| EPI_ISL_554001 | 6/12/2020 | 9/28/2020 | Europe / United Kingdom / England |
| EPI_ISL_554006 | 6/9/2020  | 9/28/2020 | Europe / United Kingdom / England |
| EPI_ISL_554007 | 6/8/2020  | 9/28/2020 | Europe / United Kingdom / England |
| EPI_ISL_554008 | 6/8/2020  | 9/28/2020 | Europe / United Kingdom / England |
| EPI_ISL_554009 | 6/10/2020 | 9/28/2020 | Europe / United Kingdom / England |
| EPI_ISL_554010 | 6/12/2020 | 9/28/2020 | Europe / United Kingdom / England |
| EPI_ISL_554013 | 6/8/2020  | 9/28/2020 | Europe / United Kingdom / England |
| EPI_ISL_554014 | 6/8/2020  | 9/28/2020 | Europe / United Kingdom / England |
| EPI_ISL_554015 | 6/9/2020  | 9/28/2020 | Europe / United Kingdom / England |
| EPI_ISL_554016 | 6/8/2020  | 9/28/2020 | Europe / United Kingdom / England |
| EPI_ISL_554017 | 6/11/2020 | 9/28/2020 | Europe / United Kingdom / England |
| EPI_ISL_554018 | 6/12/2020 | 9/28/2020 | Europe / United Kingdom / England |
| EPI_ISL_554019 | 6/8/2020  | 9/28/2020 | Europe / United Kingdom / England |
| EPI_ISL_554021 | 6/8/2020  | 9/28/2020 | Europe / United Kingdom / England |
| EPI_ISL_554022 | 6/8/2020  | 9/28/2020 | Europe / United Kingdom / England |
| EPI_ISL_554023 | 6/11/2020 | 9/28/2020 | Europe / United Kingdom / England |
| EPI_ISL_554024 | 6/11/2020 | 9/28/2020 | Europe / United Kingdom / England |
| EPI_ISL_554025 | 6/13/2020 | 9/28/2020 | Europe / United Kingdom / England |
| EPI_ISL_554026 | 6/11/2020 | 9/28/2020 | Europe / United Kingdom / England |
| EPI_ISL_554027 | 6/8/2020  | 9/28/2020 | Europe / United Kingdom / England |
| EPI_ISL_554028 | 6/9/2020  | 9/28/2020 | Europe / United Kingdom / England |
| EPI_ISL_554029 | 6/8/2020  | 9/28/2020 | Europe / United Kingdom / England |
| EPI_ISL_554030 | 6/8/2020  | 9/28/2020 | Europe / United Kingdom / England |











|                |           |                                             |
|----------------|-----------|---------------------------------------------|
| EPI_ISL_554265 | 6/14/2020 | 9/28/2020 Europe / United Kingdom / England |
| EPI_ISL_554266 | 6/13/2020 | 9/28/2020 Europe / United Kingdom / England |
| EPI_ISL_554267 | 6/7/2020  | 9/28/2020 Europe / United Kingdom / England |
| EPI_ISL_554269 | 6/10/2020 | 9/28/2020 Europe / United Kingdom / England |
| EPI_ISL_554270 | 6/13/2020 | 9/28/2020 Europe / United Kingdom / England |
| EPI_ISL_554271 | 6/6/2020  | 9/28/2020 Europe / United Kingdom / England |
| EPI_ISL_554272 | 6/6/2020  | 9/28/2020 Europe / United Kingdom / England |
| EPI_ISL_554274 | 6/6/2020  | 9/28/2020 Europe / United Kingdom / England |
| EPI_ISL_554275 | 6/13/2020 | 9/28/2020 Europe / United Kingdom / England |
| EPI_ISL_554276 | 6/10/2020 | 9/28/2020 Europe / United Kingdom / England |
| EPI_ISL_554278 | 6/13/2020 | 9/28/2020 Europe / United Kingdom / England |
| EPI_ISL_554279 | 6/13/2020 | 9/28/2020 Europe / United Kingdom / England |
| EPI_ISL_554280 | 6/13/2020 | 9/28/2020 Europe / United Kingdom / England |
| EPI_ISL_554282 | 6/13/2020 | 9/28/2020 Europe / United Kingdom / England |
| EPI_ISL_554283 | 6/12/2020 | 9/28/2020 Europe / United Kingdom / England |
| EPI_ISL_554284 | 6/5/2020  | 9/28/2020 Europe / United Kingdom / England |
| EPI_ISL_554285 | 6/13/2020 | 9/28/2020 Europe / United Kingdom / England |
| EPI_ISL_554286 | 6/6/2020  | 9/28/2020 Europe / United Kingdom / England |
| EPI_ISL_554287 | 6/9/2020  | 9/28/2020 Europe / United Kingdom / England |
| EPI_ISL_554288 | 6/13/2020 | 9/28/2020 Europe / United Kingdom / England |
| EPI_ISL_554289 | 6/10/2020 | 9/28/2020 Europe / United Kingdom / England |
| EPI_ISL_554290 | 6/7/2020  | 9/28/2020 Europe / United Kingdom / England |
| EPI_ISL_554291 | 6/8/2020  | 9/28/2020 Europe / United Kingdom / England |
| EPI_ISL_554292 | 6/12/2020 | 9/28/2020 Europe / United Kingdom / England |
| EPI_ISL_554294 | 6/12/2020 | 9/28/2020 Europe / United Kingdom / England |
| EPI_ISL_554296 | 6/14/2020 | 9/28/2020 Europe / United Kingdom / England |
| EPI_ISL_554297 | 6/10/2020 | 9/28/2020 Europe / United Kingdom / England |
| EPI_ISL_554298 | 6/12/2020 | 9/28/2020 Europe / United Kingdom / England |
| EPI_ISL_554299 | 6/12/2020 | 9/28/2020 Europe / United Kingdom / England |
| EPI_ISL_554300 | 6/6/2020  | 9/28/2020 Europe / United Kingdom / England |
| EPI_ISL_554301 | 6/13/2020 | 9/28/2020 Europe / United Kingdom / Wales   |
| EPI_ISL_554302 | 6/13/2020 | 9/28/2020 Europe / United Kingdom / England |
| EPI_ISL_554304 | 6/12/2020 | 9/28/2020 Europe / United Kingdom / England |
| EPI_ISL_554305 | 6/13/2020 | 9/28/2020 Europe / United Kingdom / England |
| EPI_ISL_554306 | 6/10/2020 | 9/28/2020 Europe / United Kingdom / England |
| EPI_ISL_554308 | 6/7/2020  | 9/28/2020 Europe / United Kingdom / England |
| EPI_ISL_554309 | 6/13/2020 | 9/28/2020 Europe / United Kingdom / England |
| EPI_ISL_554310 | 6/8/2020  | 9/28/2020 Europe / United Kingdom / England |
| EPI_ISL_554312 | 6/10/2020 | 9/28/2020 Europe / United Kingdom / England |
| EPI_ISL_554313 | 6/5/2020  | 9/28/2020 Europe / United Kingdom / Wales   |
| EPI_ISL_554314 | 6/6/2020  | 9/28/2020 Europe / United Kingdom / England |
| EPI_ISL_554315 | 6/10/2020 | 9/28/2020 Europe / United Kingdom / England |
| EPI_ISL_554317 | 6/10/2020 | 9/28/2020 Europe / United Kingdom / England |
| EPI_ISL_554318 | 6/14/2020 | 9/28/2020 Europe / United Kingdom / England |
| EPI_ISL_554319 | 6/2/2020  | 9/28/2020 Europe / United Kingdom / England |
| EPI_ISL_554320 | 6/14/2020 | 9/28/2020 Europe / United Kingdom / England |
| EPI_ISL_554322 | 6/14/2020 | 9/28/2020 Europe / United Kingdom / England |

























|                |           |                                             |
|----------------|-----------|---------------------------------------------|
| EPI_ISL_554981 | 6/8/2020  | 9/28/2020 Europe / United Kingdom / England |
| EPI_ISL_554982 | 6/13/2020 | 9/28/2020 Europe / United Kingdom / England |
| EPI_ISL_554985 | 6/20/2020 | 9/28/2020 Europe / United Kingdom / England |
| EPI_ISL_554986 | 6/21/2020 | 9/28/2020 Europe / United Kingdom / England |
| EPI_ISL_554988 | 6/17/2020 | 9/28/2020 Europe / United Kingdom / England |
| EPI_ISL_554989 | 6/18/2020 | 9/28/2020 Europe / United Kingdom / England |
| EPI_ISL_554991 | 6/16/2020 | 9/28/2020 Europe / United Kingdom / England |
| EPI_ISL_554992 | 6/16/2020 | 9/28/2020 Europe / United Kingdom / England |
| EPI_ISL_554993 | 6/16/2020 | 9/28/2020 Europe / United Kingdom / Wales   |
| EPI_ISL_554994 | 6/11/2020 | 9/28/2020 Europe / United Kingdom / England |
| EPI_ISL_554995 | 6/14/2020 | 9/28/2020 Europe / United Kingdom / England |
| EPI_ISL_554997 | 6/13/2020 | 9/28/2020 Europe / United Kingdom / England |
| EPI_ISL_554998 | 6/20/2020 | 9/28/2020 Europe / United Kingdom / England |
| EPI_ISL_554999 | 6/16/2020 | 9/28/2020 Europe / United Kingdom / England |
| EPI_ISL_555001 | 6/12/2020 | 9/28/2020 Europe / United Kingdom / England |
| EPI_ISL_555002 | 6/18/2020 | 9/28/2020 Europe / United Kingdom / England |
| EPI_ISL_555004 | 6/16/2020 | 9/28/2020 Europe / United Kingdom / England |
| EPI_ISL_555005 | 6/11/2020 | 9/28/2020 Europe / United Kingdom / Wales   |
| EPI_ISL_555006 | 6/14/2020 | 9/28/2020 Europe / United Kingdom / England |
| EPI_ISL_555007 | 6/16/2020 | 9/28/2020 Europe / United Kingdom / England |
| EPI_ISL_555008 | 6/12/2020 | 9/28/2020 Europe / United Kingdom / England |
| EPI_ISL_555009 | 6/18/2020 | 9/28/2020 Europe / United Kingdom / England |
| EPI_ISL_555010 | 6/19/2020 | 9/28/2020 Europe / United Kingdom / England |
| EPI_ISL_555013 | 6/17/2020 | 9/28/2020 Europe / United Kingdom / England |
| EPI_ISL_555014 | 6/15/2020 | 9/28/2020 Europe / United Kingdom / England |
| EPI_ISL_555015 | 6/16/2020 | 9/28/2020 Europe / United Kingdom / England |
| EPI_ISL_555017 | 6/15/2020 | 9/28/2020 Europe / United Kingdom / England |
| EPI_ISL_555020 | 6/19/2020 | 9/28/2020 Europe / United Kingdom / England |
| EPI_ISL_555021 | 6/18/2020 | 9/28/2020 Europe / United Kingdom / England |
| EPI_ISL_555022 | 6/17/2020 | 9/28/2020 Europe / United Kingdom / England |
| EPI_ISL_555024 | 6/20/2020 | 9/28/2020 Europe / United Kingdom / England |
| EPI_ISL_555025 | 6/16/2020 | 9/28/2020 Europe / United Kingdom / England |
| EPI_ISL_555026 | 6/14/2020 | 9/28/2020 Europe / United Kingdom / England |
| EPI_ISL_555027 | 6/12/2020 | 9/28/2020 Europe / United Kingdom / England |
| EPI_ISL_555028 | 6/10/2020 | 9/28/2020 Europe / United Kingdom / England |
| EPI_ISL_555029 | 6/14/2020 | 9/28/2020 Europe / United Kingdom / England |
| EPI_ISL_555030 | 6/14/2020 | 9/28/2020 Europe / United Kingdom / England |
| EPI_ISL_555032 | 6/21/2020 | 9/28/2020 Europe / United Kingdom / England |
| EPI_ISL_555033 | 6/18/2020 | 9/28/2020 Europe / United Kingdom / England |
| EPI_ISL_555034 | 6/23/2020 | 9/28/2020 Europe / United Kingdom / England |
| EPI_ISL_555035 | 6/17/2020 | 9/28/2020 Europe / United Kingdom / England |
| EPI_ISL_555037 | 6/20/2020 | 9/28/2020 Europe / United Kingdom / England |
| EPI_ISL_555038 | 6/20/2020 | 9/28/2020 Europe / United Kingdom / England |
| EPI_ISL_555039 | 6/20/2020 | 9/28/2020 Europe / United Kingdom / England |
| EPI_ISL_555040 | 6/12/2020 | 9/28/2020 Europe / United Kingdom / England |
| EPI_ISL_555042 | 6/13/2020 | 9/28/2020 Europe / United Kingdom / England |
| EPI_ISL_555043 | 6/13/2020 | 9/28/2020 Europe / United Kingdom / England |























|                |           |           |                                   |
|----------------|-----------|-----------|-----------------------------------|
| EPI_ISL_555566 | 6/16/2020 | 9/28/2020 | Europe / United Kingdom / England |
| EPI_ISL_555567 | 6/17/2020 | 9/28/2020 | Europe / United Kingdom / England |
| EPI_ISL_555569 | 7/3/2020  | 9/28/2020 | Europe / United Kingdom / England |
| EPI_ISL_555570 | 6/15/2020 | 9/28/2020 | Europe / United Kingdom / England |
| EPI_ISL_555572 | 6/15/2020 | 9/28/2020 | Europe / United Kingdom / England |
| EPI_ISL_555574 | 6/7/2020  | 9/28/2020 | Europe / United Kingdom / England |
| EPI_ISL_555576 | 6/18/2020 | 9/28/2020 | Europe / United Kingdom / England |
| EPI_ISL_555577 | 6/7/2020  | 9/28/2020 | Europe / United Kingdom / England |
| EPI_ISL_555579 | 6/20/2020 | 9/28/2020 | Europe / United Kingdom / England |
| EPI_ISL_555580 | 6/10/2020 | 9/28/2020 | Europe / United Kingdom / England |
| EPI_ISL_555581 | 6/9/2020  | 9/28/2020 | Europe / United Kingdom / England |
| EPI_ISL_555582 | 6/10/2020 | 9/28/2020 | Europe / United Kingdom / England |
| EPI_ISL_555583 | 6/19/2020 | 9/28/2020 | Europe / United Kingdom / England |
| EPI_ISL_555585 | 6/15/2020 | 9/28/2020 | Europe / United Kingdom / England |
| EPI_ISL_555586 | 7/2/2020  | 9/28/2020 | Europe / United Kingdom / England |
| EPI_ISL_555587 | 6/15/2020 | 9/28/2020 | Europe / United Kingdom / England |
| EPI_ISL_555590 | 6/7/2020  | 9/28/2020 | Europe / United Kingdom / England |
| EPI_ISL_555591 | 7/3/2020  | 9/28/2020 | Europe / United Kingdom / England |
| EPI_ISL_555592 | 6/15/2020 | 9/28/2020 | Europe / United Kingdom / England |
| EPI_ISL_555593 | 6/10/2020 | 9/28/2020 | Europe / United Kingdom / England |
| EPI_ISL_555594 | 6/17/2020 | 9/28/2020 | Europe / United Kingdom / England |
| EPI_ISL_555595 | 6/7/2020  | 9/28/2020 | Europe / United Kingdom / England |
| EPI_ISL_555596 | 6/17/2020 | 9/28/2020 | Europe / United Kingdom / England |
| EPI_ISL_555599 | 6/7/2020  | 9/28/2020 | Europe / United Kingdom / England |
| EPI_ISL_555600 | 6/14/2020 | 9/28/2020 | Europe / United Kingdom / England |
| EPI_ISL_555601 | 6/16/2020 | 9/28/2020 | Europe / United Kingdom / England |
| EPI_ISL_555602 | 6/17/2020 | 9/28/2020 | Europe / United Kingdom / England |
| EPI_ISL_555603 | 7/3/2020  | 9/28/2020 | Europe / United Kingdom / England |
| EPI_ISL_555604 | 6/19/2020 | 9/28/2020 | Europe / United Kingdom / England |
| EPI_ISL_555605 | 7/3/2020  | 9/28/2020 | Europe / United Kingdom / England |
| EPI_ISL_555608 | 6/17/2020 | 9/28/2020 | Europe / United Kingdom / England |
| EPI_ISL_555610 | 7/3/2020  | 9/28/2020 | Europe / United Kingdom / England |
| EPI_ISL_555611 | 6/7/2020  | 9/28/2020 | Europe / United Kingdom / England |
| EPI_ISL_555612 | 7/3/2020  | 9/28/2020 | Europe / United Kingdom / England |
| EPI_ISL_555615 | 6/20/2020 | 9/28/2020 | Europe / United Kingdom / England |
| EPI_ISL_555616 | 6/7/2020  | 9/28/2020 | Europe / United Kingdom / England |
| EPI_ISL_555617 | 6/9/2020  | 9/28/2020 | Europe / United Kingdom / Wales   |
| EPI_ISL_555618 | 6/7/2020  | 9/28/2020 | Europe / United Kingdom / England |
| EPI_ISL_555619 | 6/19/2020 | 9/28/2020 | Europe / United Kingdom / England |
| EPI_ISL_555620 | 6/19/2020 | 9/28/2020 | Europe / United Kingdom / England |
| EPI_ISL_555621 | 7/3/2020  | 9/28/2020 | Europe / United Kingdom / England |
| EPI_ISL_555622 | 6/9/2020  | 9/28/2020 | Europe / United Kingdom / England |
| EPI_ISL_555623 | 6/11/2020 | 9/28/2020 | Europe / United Kingdom / England |
| EPI_ISL_555624 | 7/3/2020  | 9/28/2020 | Europe / United Kingdom / England |
| EPI_ISL_555625 | 7/3/2020  | 9/28/2020 | Europe / United Kingdom / England |
| EPI_ISL_555626 | 6/14/2020 | 9/28/2020 | Europe / United Kingdom / England |
| EPI_ISL_555627 | 6/18/2020 | 9/28/2020 | Europe / United Kingdom / England |



|                |           |           |                                   |
|----------------|-----------|-----------|-----------------------------------|
| EPI_ISL_555685 | 6/15/2020 | 9/28/2020 | Europe / United Kingdom / England |
| EPI_ISL_555686 | 7/3/2020  | 9/28/2020 | Europe / United Kingdom / England |
| EPI_ISL_555688 | 7/3/2020  | 9/28/2020 | Europe / United Kingdom / England |
| EPI_ISL_555690 | 6/7/2020  | 9/28/2020 | Europe / United Kingdom / England |
| EPI_ISL_555691 | 7/3/2020  | 9/28/2020 | Europe / United Kingdom / England |
| EPI_ISL_555693 | 6/7/2020  | 9/28/2020 | Europe / United Kingdom / England |
| EPI_ISL_555694 | 6/13/2020 | 9/28/2020 | Europe / United Kingdom / England |
| EPI_ISL_555695 | 6/13/2020 | 9/28/2020 | Europe / United Kingdom / England |
| EPI_ISL_555696 | 6/17/2020 | 9/28/2020 | Europe / United Kingdom / England |
| EPI_ISL_555697 | 7/4/2020  | 9/28/2020 | Europe / United Kingdom / England |
| EPI_ISL_555698 | 6/15/2020 | 9/28/2020 | Europe / United Kingdom / England |
| EPI_ISL_555699 | 6/7/2020  | 9/28/2020 | Europe / United Kingdom / England |
| EPI_ISL_555701 | 7/3/2020  | 9/28/2020 | Europe / United Kingdom / England |
| EPI_ISL_555702 | 6/13/2020 | 9/28/2020 | Europe / United Kingdom / England |
| EPI_ISL_555704 | 7/3/2020  | 9/28/2020 | Europe / United Kingdom / England |
| EPI_ISL_555708 | 6/19/2020 | 9/28/2020 | Europe / United Kingdom / England |
| EPI_ISL_555709 | 6/9/2020  | 9/28/2020 | Europe / United Kingdom / England |
| EPI_ISL_555710 | 6/7/2020  | 9/28/2020 | Europe / United Kingdom / England |
| EPI_ISL_555711 | 6/9/2020  | 9/28/2020 | Europe / United Kingdom / England |
| EPI_ISL_555712 | 6/17/2020 | 9/28/2020 | Europe / United Kingdom / England |
| EPI_ISL_555713 | 6/14/2020 | 9/28/2020 | Europe / United Kingdom / England |
| EPI_ISL_555715 | 6/17/2020 | 9/28/2020 | Europe / United Kingdom / England |
| EPI_ISL_555720 | 6/7/2020  | 9/28/2020 | Europe / United Kingdom / England |
| EPI_ISL_555721 | 6/7/2020  | 9/28/2020 | Europe / United Kingdom / England |
| EPI_ISL_555722 | 7/3/2020  | 9/28/2020 | Europe / United Kingdom / England |
| EPI_ISL_555723 | 7/3/2020  | 9/28/2020 | Europe / United Kingdom / Wales   |
| EPI_ISL_555724 | 6/7/2020  | 9/28/2020 | Europe / United Kingdom / England |
| EPI_ISL_555725 | 6/19/2020 | 9/28/2020 | Europe / United Kingdom / England |
| EPI_ISL_555726 | 6/18/2020 | 9/28/2020 | Europe / United Kingdom / Wales   |
| EPI_ISL_555727 | 6/19/2020 | 9/28/2020 | Europe / United Kingdom / England |
| EPI_ISL_555728 | 6/11/2020 | 9/28/2020 | Europe / United Kingdom / England |
| EPI_ISL_555730 | 7/3/2020  | 9/28/2020 | Europe / United Kingdom / England |
| EPI_ISL_555731 | 6/11/2020 | 9/28/2020 | Europe / United Kingdom / England |
| EPI_ISL_555732 | 6/13/2020 | 9/28/2020 | Europe / United Kingdom / England |
| EPI_ISL_555733 | 7/3/2020  | 9/28/2020 | Europe / United Kingdom / England |
| EPI_ISL_555734 | 6/7/2020  | 9/28/2020 | Europe / United Kingdom / England |
| EPI_ISL_555735 | 6/9/2020  | 9/28/2020 | Europe / United Kingdom / England |
| EPI_ISL_555737 | 7/3/2020  | 9/28/2020 | Europe / United Kingdom / England |
| EPI_ISL_555738 | 6/7/2020  | 9/28/2020 | Europe / United Kingdom / England |
| EPI_ISL_555739 | 6/17/2020 | 9/28/2020 | Europe / United Kingdom / England |
| EPI_ISL_555740 | 6/7/2020  | 9/28/2020 | Europe / United Kingdom / England |
| EPI_ISL_555741 | 6/13/2020 | 9/28/2020 | Europe / United Kingdom / England |
| EPI_ISL_555743 | 7/3/2020  | 9/28/2020 | Europe / United Kingdom / England |
| EPI_ISL_555744 | 6/15/2020 | 9/28/2020 | Europe / United Kingdom / England |
| EPI_ISL_555747 | 7/3/2020  | 9/28/2020 | Europe / United Kingdom / England |
| EPI_ISL_555748 | 6/12/2020 | 9/28/2020 | Europe / United Kingdom / England |
| EPI_ISL_555750 | 6/7/2020  | 9/28/2020 | Europe / United Kingdom / England |













|                |           |           |                                   |
|----------------|-----------|-----------|-----------------------------------|
| EPI_ISL_556036 | 6/15/2020 | 9/28/2020 | Europe / United Kingdom / England |
| EPI_ISL_556037 | 6/15/2020 | 9/28/2020 | Europe / United Kingdom / England |
| EPI_ISL_556038 | 6/15/2020 | 9/28/2020 | Europe / United Kingdom / England |
| EPI_ISL_556039 | 7/27/2020 | 9/28/2020 | Europe / United Kingdom / England |
| EPI_ISL_556040 | 6/14/2020 | 9/28/2020 | Europe / United Kingdom / England |
| EPI_ISL_556042 | 6/16/2020 | 9/28/2020 | Europe / United Kingdom / England |
| EPI_ISL_556044 | 6/16/2020 | 9/28/2020 | Europe / United Kingdom / England |
| EPI_ISL_556045 | 6/18/2020 | 9/28/2020 | Europe / United Kingdom / England |
| EPI_ISL_556047 | 7/25/2020 | 9/28/2020 | Europe / United Kingdom / England |
| EPI_ISL_556048 | 6/15/2020 | 9/28/2020 | Europe / United Kingdom / England |
| EPI_ISL_556049 | 6/15/2020 | 9/28/2020 | Europe / United Kingdom / Wales   |
| EPI_ISL_556050 | 6/18/2020 | 9/28/2020 | Europe / United Kingdom / England |
| EPI_ISL_556051 | 6/15/2020 | 9/28/2020 | Europe / United Kingdom / England |
| EPI_ISL_556052 | 6/14/2020 | 9/28/2020 | Europe / United Kingdom / England |
| EPI_ISL_556053 | 6/15/2020 | 9/28/2020 | Europe / United Kingdom / England |
| EPI_ISL_556054 | 6/16/2020 | 9/28/2020 | Europe / United Kingdom / England |
| EPI_ISL_556055 | 6/15/2020 | 9/28/2020 | Europe / United Kingdom / England |
| EPI_ISL_556056 | 6/15/2020 | 9/28/2020 | Europe / United Kingdom / England |
| EPI_ISL_556057 | 6/15/2020 | 9/28/2020 | Europe / United Kingdom / England |
| EPI_ISL_556058 | 7/27/2020 | 9/28/2020 | Europe / United Kingdom / England |
| EPI_ISL_556059 | 6/16/2020 | 9/28/2020 | Europe / United Kingdom / England |
| EPI_ISL_556060 | 6/20/2020 | 9/28/2020 | Europe / United Kingdom / England |
| EPI_ISL_556061 | 6/15/2020 | 9/28/2020 | Europe / United Kingdom / England |
| EPI_ISL_556062 | 6/14/2020 | 9/28/2020 | Europe / United Kingdom / England |
| EPI_ISL_556063 | 7/27/2020 | 9/28/2020 | Europe / United Kingdom / England |
| EPI_ISL_556064 | 6/18/2020 | 9/28/2020 | Europe / United Kingdom / England |
| EPI_ISL_556065 | 6/15/2020 | 9/28/2020 | Europe / United Kingdom / England |
| EPI_ISL_556067 | 6/14/2020 | 9/28/2020 | Europe / United Kingdom / England |
| EPI_ISL_556068 | 6/15/2020 | 9/28/2020 | Europe / United Kingdom / England |
| EPI_ISL_556070 | 6/15/2020 | 9/28/2020 | Europe / United Kingdom / England |
| EPI_ISL_556071 | 6/15/2020 | 9/28/2020 | Europe / United Kingdom / England |
| EPI_ISL_556072 | 6/15/2020 | 9/28/2020 | Europe / United Kingdom / Wales   |
| EPI_ISL_556073 | 6/16/2020 | 9/28/2020 | Europe / United Kingdom / England |
| EPI_ISL_556074 | 7/2/2020  | 9/28/2020 | Europe / United Kingdom / England |
| EPI_ISL_556075 | 6/23/2020 | 9/28/2020 | Europe / United Kingdom / England |
| EPI_ISL_556076 | 6/19/2020 | 9/28/2020 | Europe / United Kingdom / England |
| EPI_ISL_556077 | 6/21/2020 | 9/28/2020 | Europe / United Kingdom / England |
| EPI_ISL_556078 | 7/2/2020  | 9/28/2020 | Europe / United Kingdom / England |
| EPI_ISL_556079 | 6/21/2020 | 9/28/2020 | Europe / United Kingdom / England |
| EPI_ISL_556080 | 7/1/2020  | 9/28/2020 | Europe / United Kingdom / England |
| EPI_ISL_556081 | 6/30/2020 | 9/28/2020 | Europe / United Kingdom / England |
| EPI_ISL_556082 | 7/2/2020  | 9/28/2020 | Europe / United Kingdom / England |
| EPI_ISL_556083 | 6/19/2020 | 9/28/2020 | Europe / United Kingdom / Wales   |
| EPI_ISL_556084 | 6/30/2020 | 9/28/2020 | Europe / United Kingdom / England |
| EPI_ISL_556085 | 6/17/2020 | 9/28/2020 | Europe / United Kingdom / England |
| EPI_ISL_556086 | 7/2/2020  | 9/28/2020 | Europe / United Kingdom / England |
| EPI_ISL_556087 | 6/19/2020 | 9/28/2020 | Europe / United Kingdom / England |

|                |           |                                             |
|----------------|-----------|---------------------------------------------|
| EPI_ISL_556088 | 7/2/2020  | 9/28/2020 Europe / United Kingdom / Wales   |
| EPI_ISL_556089 | 6/30/2020 | 9/28/2020 Europe / United Kingdom / England |
| EPI_ISL_556090 | 6/23/2020 | 9/28/2020 Europe / United Kingdom / England |
| EPI_ISL_556092 | 6/21/2020 | 9/28/2020 Europe / United Kingdom / England |
| EPI_ISL_556093 | 7/5/2020  | 9/28/2020 Europe / United Kingdom / England |
| EPI_ISL_556095 | 6/20/2020 | 9/28/2020 Europe / United Kingdom / England |
| EPI_ISL_556097 | 6/21/2020 | 9/28/2020 Europe / United Kingdom / England |
| EPI_ISL_556099 | 7/2/2020  | 9/28/2020 Europe / United Kingdom / England |
| EPI_ISL_556100 | 7/2/2020  | 9/28/2020 Europe / United Kingdom / England |
| EPI_ISL_556101 | 6/30/2020 | 9/28/2020 Europe / United Kingdom / England |
| EPI_ISL_556102 | 7/4/2020  | 9/28/2020 Europe / United Kingdom / England |
| EPI_ISL_556103 | 7/2/2020  | 9/28/2020 Europe / United Kingdom / England |
| EPI_ISL_556104 | 6/20/2020 | 9/28/2020 Europe / United Kingdom / England |
| EPI_ISL_556105 | 7/1/2020  | 9/28/2020 Europe / United Kingdom / England |
| EPI_ISL_556106 | 6/30/2020 | 9/28/2020 Europe / United Kingdom / England |
| EPI_ISL_556107 | 6/30/2020 | 9/28/2020 Europe / United Kingdom / England |
| EPI_ISL_556108 | 7/2/2020  | 9/28/2020 Europe / United Kingdom / England |
| EPI_ISL_556109 | 7/4/2020  | 9/28/2020 Europe / United Kingdom / England |
| EPI_ISL_556110 | 6/14/2020 | 9/28/2020 Europe / United Kingdom / England |
| EPI_ISL_556111 | 6/17/2020 | 9/28/2020 Europe / United Kingdom / England |
| EPI_ISL_556112 | 7/4/2020  | 9/28/2020 Europe / United Kingdom / England |
| EPI_ISL_556114 | 7/1/2020  | 9/28/2020 Europe / United Kingdom / England |
| EPI_ISL_556116 | 7/4/2020  | 9/28/2020 Europe / United Kingdom / England |
| EPI_ISL_556118 | 6/17/2020 | 9/28/2020 Europe / United Kingdom / England |
| EPI_ISL_556119 | 7/1/2020  | 9/28/2020 Europe / United Kingdom / England |
| EPI_ISL_556120 | 7/1/2020  | 9/28/2020 Europe / United Kingdom / England |
| EPI_ISL_556121 | 7/2/2020  | 9/28/2020 Europe / United Kingdom / England |
| EPI_ISL_556122 | 6/30/2020 | 9/28/2020 Europe / United Kingdom / England |
| EPI_ISL_556125 | 7/4/2020  | 9/28/2020 Europe / United Kingdom / England |
| EPI_ISL_556126 | 7/5/2020  | 9/28/2020 Europe / United Kingdom / England |
| EPI_ISL_556127 | 7/1/2020  | 9/28/2020 Europe / United Kingdom / England |
| EPI_ISL_556128 | 7/2/2020  | 9/28/2020 Europe / United Kingdom / England |
| EPI_ISL_556129 | 7/2/2020  | 9/28/2020 Europe / United Kingdom / England |
| EPI_ISL_556130 | 6/30/2020 | 9/28/2020 Europe / United Kingdom / Wales   |
| EPI_ISL_556131 | 6/17/2020 | 9/28/2020 Europe / United Kingdom / England |
| EPI_ISL_556132 | 7/2/2020  | 9/28/2020 Europe / United Kingdom / England |
| EPI_ISL_556136 | 6/17/2020 | 9/28/2020 Europe / United Kingdom / England |
| EPI_ISL_556138 | 7/7/2020  | 9/28/2020 Europe / United Kingdom / England |
| EPI_ISL_556139 | 7/4/2020  | 9/28/2020 Europe / United Kingdom / England |
| EPI_ISL_556142 | 7/2/2020  | 9/28/2020 Europe / United Kingdom / England |
| EPI_ISL_556143 | 7/2/2020  | 9/28/2020 Europe / United Kingdom / England |
| EPI_ISL_556144 | 7/2/2020  | 9/28/2020 Europe / United Kingdom / England |
| EPI_ISL_556145 | 7/2/2020  | 9/28/2020 Europe / United Kingdom / England |
| EPI_ISL_556146 | 6/19/2020 | 9/28/2020 Europe / United Kingdom / England |
| EPI_ISL_556147 | 7/2/2020  | 9/28/2020 Europe / United Kingdom / England |
| EPI_ISL_556148 | 7/5/2020  | 9/28/2020 Europe / United Kingdom / England |
| EPI_ISL_556149 | 7/2/2020  | 9/28/2020 Europe / United Kingdom / England |

|                |           |           |                                   |
|----------------|-----------|-----------|-----------------------------------|
| EPI_ISL_556153 | 7/2/2020  | 9/28/2020 | Europe / United Kingdom / England |
| EPI_ISL_556155 | 7/4/2020  | 9/28/2020 | Europe / United Kingdom / England |
| EPI_ISL_556157 | 7/7/2020  | 9/28/2020 | Europe / United Kingdom / England |
| EPI_ISL_556160 | 6/17/2020 | 9/28/2020 | Europe / United Kingdom / England |
| EPI_ISL_556161 | 7/2/2020  | 9/28/2020 | Europe / United Kingdom / England |
| EPI_ISL_556162 | 7/2/2020  | 9/28/2020 | Europe / United Kingdom / England |
| EPI_ISL_556163 | 7/4/2020  | 9/28/2020 | Europe / United Kingdom / England |
| EPI_ISL_556166 | 7/4/2020  | 9/28/2020 | Europe / United Kingdom / England |
| EPI_ISL_556167 | 7/1/2020  | 9/28/2020 | Europe / United Kingdom / England |
| EPI_ISL_556168 | 7/2/2020  | 9/28/2020 | Europe / United Kingdom / England |
| EPI_ISL_556169 | 7/2/2020  | 9/28/2020 | Europe / United Kingdom / England |
| EPI_ISL_556170 | 6/21/2020 | 9/28/2020 | Europe / United Kingdom / England |
| EPI_ISL_556171 | 7/1/2020  | 9/28/2020 | Europe / United Kingdom / England |
| EPI_ISL_556172 | 7/5/2020  | 9/28/2020 | Europe / United Kingdom / England |
| EPI_ISL_556174 | 7/2/2020  | 9/28/2020 | Europe / United Kingdom / England |
| EPI_ISL_556175 | 7/2/2020  | 9/28/2020 | Europe / United Kingdom / England |
| EPI_ISL_556176 | 6/20/2020 | 9/28/2020 | Europe / United Kingdom / England |
| EPI_ISL_556179 | 7/3/2020  | 9/28/2020 | Europe / United Kingdom / England |
| EPI_ISL_556181 | 7/2/2020  | 9/28/2020 | Europe / United Kingdom / England |
| EPI_ISL_556185 | 7/1/2020  | 9/28/2020 | Europe / United Kingdom / England |
| EPI_ISL_556187 | 6/18/2020 | 9/28/2020 | Europe / United Kingdom / England |
| EPI_ISL_556190 | 7/4/2020  | 9/28/2020 | Europe / United Kingdom / England |
| EPI_ISL_556193 | 7/2/2020  | 9/28/2020 | Europe / United Kingdom / England |
| EPI_ISL_556194 | 7/2/2020  | 9/28/2020 | Europe / United Kingdom / England |
| EPI_ISL_556195 | 7/5/2020  | 9/28/2020 | Europe / United Kingdom / England |
| EPI_ISL_556196 | 7/4/2020  | 9/28/2020 | Europe / United Kingdom / England |
| EPI_ISL_556197 | 7/4/2020  | 9/28/2020 | Europe / United Kingdom / Wales   |
| EPI_ISL_556198 | 7/4/2020  | 9/28/2020 | Europe / United Kingdom / Wales   |
| EPI_ISL_556199 | 6/18/2020 | 9/28/2020 | Europe / United Kingdom / England |
| EPI_ISL_556200 | 7/2/2020  | 9/28/2020 | Europe / United Kingdom / England |
| EPI_ISL_556202 | 6/30/2020 | 9/28/2020 | Europe / United Kingdom / England |
| EPI_ISL_556203 | 6/17/2020 | 9/28/2020 | Europe / United Kingdom / England |
| EPI_ISL_556204 | 7/4/2020  | 9/28/2020 | Europe / United Kingdom / England |
| EPI_ISL_556206 | 7/4/2020  | 9/28/2020 | Europe / United Kingdom / England |
| EPI_ISL_556208 | 6/21/2020 | 9/28/2020 | Europe / United Kingdom / England |
| EPI_ISL_556209 | 7/1/2020  | 9/28/2020 | Europe / United Kingdom / England |
| EPI_ISL_556210 | 7/1/2020  | 9/28/2020 | Europe / United Kingdom / England |
| EPI_ISL_556211 | 6/20/2020 | 9/28/2020 | Europe / United Kingdom / England |
| EPI_ISL_556212 | 7/2/2020  | 9/28/2020 | Europe / United Kingdom / England |
| EPI_ISL_556214 | 6/21/2020 | 9/28/2020 | Europe / United Kingdom / England |
| EPI_ISL_556215 | 7/2/2020  | 9/28/2020 | Europe / United Kingdom / England |
| EPI_ISL_556216 | 7/2/2020  | 9/28/2020 | Europe / United Kingdom / England |
| EPI_ISL_556217 | 7/5/2020  | 9/28/2020 | Europe / United Kingdom / England |
| EPI_ISL_556219 | 7/2/2020  | 9/28/2020 | Europe / United Kingdom / England |
| EPI_ISL_556220 | 7/1/2020  | 9/28/2020 | Europe / United Kingdom / England |
| EPI_ISL_556221 | 7/4/2020  | 9/28/2020 | Europe / United Kingdom / England |
| EPI_ISL_556222 | 7/2/2020  | 9/28/2020 | Europe / United Kingdom / England |

|                |           |           |                                            |
|----------------|-----------|-----------|--------------------------------------------|
| EPI_ISL_556223 | 7/4/2020  | 9/28/2020 | Europe / United Kingdom / England          |
| EPI_ISL_556225 | 7/2/2020  | 9/28/2020 | Europe / United Kingdom / England          |
| EPI_ISL_556227 | 7/1/2020  | 9/28/2020 | Europe / United Kingdom / Wales            |
| EPI_ISL_556228 | 7/2/2020  | 9/28/2020 | Europe / United Kingdom / England          |
| EPI_ISL_556229 | 7/2/2020  | 9/28/2020 | Europe / United Kingdom / England          |
| EPI_ISL_556230 | 6/30/2020 | 9/28/2020 | Europe / United Kingdom / England          |
| EPI_ISL_556231 | 6/17/2020 | 9/28/2020 | Europe / United Kingdom / England          |
| EPI_ISL_556232 | 6/21/2020 | 9/28/2020 | Europe / United Kingdom / England          |
| EPI_ISL_556233 | 6/19/2020 | 9/28/2020 | Europe / United Kingdom / Northern Ireland |
| EPI_ISL_556234 | 6/17/2020 | 9/28/2020 | Europe / United Kingdom / England          |
| EPI_ISL_556235 | 6/19/2020 | 9/28/2020 | Europe / United Kingdom / Wales            |
| EPI_ISL_556237 | 7/4/2020  | 9/28/2020 | Europe / United Kingdom / England          |
| EPI_ISL_556238 | 7/1/2020  | 9/28/2020 | Europe / United Kingdom / England          |
| EPI_ISL_556239 | 7/2/2020  | 9/28/2020 | Europe / United Kingdom / England          |
| EPI_ISL_556240 | 7/1/2020  | 9/28/2020 | Europe / United Kingdom / England          |
| EPI_ISL_556241 | 7/2/2020  | 9/28/2020 | Europe / United Kingdom / England          |
| EPI_ISL_556243 | 7/2/2020  | 9/28/2020 | Europe / United Kingdom / England          |
| EPI_ISL_556244 | 6/19/2020 | 9/28/2020 | Europe / United Kingdom / England          |
| EPI_ISL_556245 | 7/2/2020  | 9/28/2020 | Europe / United Kingdom / England          |
| EPI_ISL_556246 | 7/2/2020  | 9/28/2020 | Europe / United Kingdom / England          |
| EPI_ISL_556247 | 7/2/2020  | 9/28/2020 | Europe / United Kingdom / England          |
| EPI_ISL_556248 | 7/4/2020  | 9/28/2020 | Europe / United Kingdom / England          |
| EPI_ISL_556249 | 7/2/2020  | 9/28/2020 | Europe / United Kingdom / England          |
| EPI_ISL_556251 | 6/21/2020 | 9/28/2020 | Europe / United Kingdom / England          |
| EPI_ISL_556252 | 7/1/2020  | 9/28/2020 | Europe / United Kingdom / England          |
| EPI_ISL_556253 | 7/5/2020  | 9/28/2020 | Europe / United Kingdom / England          |
| EPI_ISL_556254 | 7/1/2020  | 9/28/2020 | Europe / United Kingdom / England          |
| EPI_ISL_556256 | 6/16/2020 | 9/28/2020 | Europe / United Kingdom / England          |
| EPI_ISL_556258 | 6/30/2020 | 9/28/2020 | Europe / United Kingdom / England          |
| EPI_ISL_556260 | 7/2/2020  | 9/28/2020 | Europe / United Kingdom / England          |
| EPI_ISL_556261 | 7/4/2020  | 9/28/2020 | Europe / United Kingdom / England          |
| EPI_ISL_556262 | 6/17/2020 | 9/28/2020 | Europe / United Kingdom / England          |
| EPI_ISL_556263 | 7/4/2020  | 9/28/2020 | Europe / United Kingdom / England          |
| EPI_ISL_556264 | 7/2/2020  | 9/28/2020 | Europe / United Kingdom / England          |
| EPI_ISL_556265 | 7/4/2020  | 9/28/2020 | Europe / United Kingdom / England          |
| EPI_ISL_556266 | 7/4/2020  | 9/28/2020 | Europe / United Kingdom / England          |
| EPI_ISL_556272 | 7/2/2020  | 9/28/2020 | Europe / United Kingdom / England          |
| EPI_ISL_556273 | 7/2/2020  | 9/28/2020 | Europe / United Kingdom / England          |
| EPI_ISL_556274 | 7/2/2020  | 9/28/2020 | Europe / United Kingdom / England          |
| EPI_ISL_556275 | 7/4/2020  | 9/28/2020 | Europe / United Kingdom / England          |
| EPI_ISL_556276 | 7/4/2020  | 9/28/2020 | Europe / United Kingdom / England          |
| EPI_ISL_556278 | 7/2/2020  | 9/28/2020 | Europe / United Kingdom / England          |
| EPI_ISL_556279 | 7/4/2020  | 9/28/2020 | Europe / United Kingdom / England          |
| EPI_ISL_556280 | 6/15/2020 | 9/28/2020 | Europe / United Kingdom / England          |
| EPI_ISL_556281 | 7/4/2020  | 9/28/2020 | Europe / United Kingdom / England          |
| EPI_ISL_556283 | 6/17/2020 | 9/28/2020 | Europe / United Kingdom / England          |
| EPI_ISL_556285 | 6/19/2020 | 9/28/2020 | Europe / United Kingdom / England          |

|                |           |           |                                   |
|----------------|-----------|-----------|-----------------------------------|
| EPI_ISL_556286 | 7/1/2020  | 9/28/2020 | Europe / United Kingdom / England |
| EPI_ISL_556288 | 7/4/2020  | 9/28/2020 | Europe / United Kingdom / England |
| EPI_ISL_556289 | 7/4/2020  | 9/28/2020 | Europe / United Kingdom / England |
| EPI_ISL_556290 | 7/2/2020  | 9/28/2020 | Europe / United Kingdom / England |
| EPI_ISL_556292 | 7/2/2020  | 9/28/2020 | Europe / United Kingdom / England |
| EPI_ISL_556293 | 6/21/2020 | 9/28/2020 | Europe / United Kingdom / England |
| EPI_ISL_556294 | 7/4/2020  | 9/28/2020 | Europe / United Kingdom / England |
| EPI_ISL_556295 | 7/2/2020  | 9/28/2020 | Europe / United Kingdom / England |
| EPI_ISL_556297 | 6/17/2020 | 9/28/2020 | Europe / United Kingdom / England |
| EPI_ISL_556298 | 6/19/2020 | 9/28/2020 | Europe / United Kingdom / England |
| EPI_ISL_556300 | 7/5/2020  | 9/28/2020 | Europe / United Kingdom / England |
| EPI_ISL_556301 | 7/4/2020  | 9/28/2020 | Europe / United Kingdom / England |
| EPI_ISL_556302 | 7/3/2020  | 9/28/2020 | Europe / United Kingdom / England |
| EPI_ISL_556303 | 7/2/2020  | 9/28/2020 | Europe / United Kingdom / England |
| EPI_ISL_556304 | 6/19/2020 | 9/28/2020 | Europe / United Kingdom / Wales   |
| EPI_ISL_556306 | 6/11/2020 | 9/28/2020 | Europe / United Kingdom / England |
| EPI_ISL_556307 | 6/16/2020 | 9/28/2020 | Europe / United Kingdom / England |
| EPI_ISL_556309 | 7/27/2020 | 9/28/2020 | Europe / United Kingdom / England |
| EPI_ISL_556310 | 6/11/2020 | 9/28/2020 | Europe / United Kingdom / England |
| EPI_ISL_556311 | 6/11/2020 | 9/28/2020 | Europe / United Kingdom / England |
| EPI_ISL_556312 | 6/16/2020 | 9/28/2020 | Europe / United Kingdom / England |
| EPI_ISL_556314 | 6/10/2020 | 9/28/2020 | Europe / United Kingdom / England |
| EPI_ISL_556315 | 6/15/2020 | 9/28/2020 | Europe / United Kingdom / England |
| EPI_ISL_556318 | 7/25/2020 | 9/28/2020 | Europe / United Kingdom / England |
| EPI_ISL_556319 | 6/15/2020 | 9/28/2020 | Europe / United Kingdom / England |
| EPI_ISL_556320 | 6/15/2020 | 9/28/2020 | Europe / United Kingdom / England |
| EPI_ISL_556321 | 7/25/2020 | 9/28/2020 | Europe / United Kingdom / England |
| EPI_ISL_556323 | 6/12/2020 | 9/28/2020 | Europe / United Kingdom / England |
| EPI_ISL_556325 | 6/16/2020 | 9/28/2020 | Europe / United Kingdom / England |
| EPI_ISL_556326 | 6/16/2020 | 9/28/2020 | Europe / United Kingdom / England |
| EPI_ISL_556327 | 6/11/2020 | 9/28/2020 | Europe / United Kingdom / England |
| EPI_ISL_556328 | 6/20/2020 | 9/28/2020 | Europe / United Kingdom / England |
| EPI_ISL_556329 | 6/17/2020 | 9/28/2020 | Europe / United Kingdom / England |
| EPI_ISL_556331 | 6/11/2020 | 9/28/2020 | Europe / United Kingdom / England |
| EPI_ISL_556332 | 6/19/2020 | 9/28/2020 | Europe / United Kingdom / England |
| EPI_ISL_556333 | 6/11/2020 | 9/28/2020 | Europe / United Kingdom / England |
| EPI_ISL_556334 | 6/14/2020 | 9/28/2020 | Europe / United Kingdom / England |
| EPI_ISL_556335 | 6/11/2020 | 9/28/2020 | Europe / United Kingdom / England |
| EPI_ISL_556336 | 6/11/2020 | 9/28/2020 | Europe / United Kingdom / England |
| EPI_ISL_556337 | 6/17/2020 | 9/28/2020 | Europe / United Kingdom / England |
| EPI_ISL_556338 | 7/25/2020 | 9/28/2020 | Europe / United Kingdom / England |
| EPI_ISL_556339 | 6/12/2020 | 9/28/2020 | Europe / United Kingdom / England |
| EPI_ISL_556341 | 6/16/2020 | 9/28/2020 | Europe / United Kingdom / England |
| EPI_ISL_556342 | 6/14/2020 | 9/28/2020 | Europe / United Kingdom / England |
| EPI_ISL_556343 | 6/11/2020 | 9/28/2020 | Europe / United Kingdom / England |
| EPI_ISL_556344 | 7/26/2020 | 9/28/2020 | Europe / United Kingdom / England |
| EPI_ISL_556345 | 6/11/2020 | 9/28/2020 | Europe / United Kingdom / England |



























































































































|                |           |           |                                   |
|----------------|-----------|-----------|-----------------------------------|
| EPI_ISL_559672 | 4/29/2020 | 9/28/2020 | Europe / United Kingdom / England |
| EPI_ISL_559674 | 4/30/2020 | 9/28/2020 | Europe / United Kingdom / England |
| EPI_ISL_559675 | 4/29/2020 | 9/28/2020 | Europe / United Kingdom / England |
| EPI_ISL_559676 | 4/29/2020 | 9/28/2020 | Europe / United Kingdom / England |
| EPI_ISL_559677 | 5/15/2020 | 9/28/2020 | Europe / United Kingdom / England |
| EPI_ISL_559678 | 5/10/2020 | 9/28/2020 | Europe / United Kingdom / England |
| EPI_ISL_559679 | 4/28/2020 | 9/28/2020 | Europe / United Kingdom / England |
| EPI_ISL_559680 | 5/13/2020 | 9/28/2020 | Europe / United Kingdom / England |
| EPI_ISL_559681 | 6/5/2020  | 9/28/2020 | Europe / United Kingdom / England |
| EPI_ISL_559682 | 5/11/2020 | 9/28/2020 | Europe / United Kingdom / England |
| EPI_ISL_559683 | 4/29/2020 | 9/28/2020 | Europe / United Kingdom / England |
| EPI_ISL_559684 | 5/6/2020  | 9/28/2020 | Europe / United Kingdom / England |
| EPI_ISL_559685 | 5/17/2020 | 9/28/2020 | Europe / United Kingdom / England |
| EPI_ISL_559686 | 5/14/2020 | 9/28/2020 | Europe / United Kingdom / England |
| EPI_ISL_559687 | 4/30/2020 | 9/28/2020 | Europe / United Kingdom / England |
| EPI_ISL_559688 | 5/7/2020  | 9/28/2020 | Europe / United Kingdom / England |
| EPI_ISL_559689 | 5/16/2020 | 9/28/2020 | Europe / United Kingdom / England |
| EPI_ISL_559690 | 4/30/2020 | 9/28/2020 | Europe / United Kingdom / England |
| EPI_ISL_559691 | 5/15/2020 | 9/28/2020 | Europe / United Kingdom / England |
| EPI_ISL_559692 | 5/10/2020 | 9/28/2020 | Europe / United Kingdom / England |
| EPI_ISL_559694 | 4/28/2020 | 9/28/2020 | Europe / United Kingdom / England |
| EPI_ISL_559695 | 4/29/2020 | 9/28/2020 | Europe / United Kingdom / England |
| EPI_ISL_559696 | 4/26/2020 | 9/28/2020 | Europe / United Kingdom / England |
| EPI_ISL_559697 | 4/28/2020 | 9/28/2020 | Europe / United Kingdom / England |
| EPI_ISL_559698 | 5/15/2020 | 9/28/2020 | Europe / United Kingdom / England |
| EPI_ISL_559699 | 5/14/2020 | 9/28/2020 | Europe / United Kingdom / England |
| EPI_ISL_559701 | 5/15/2020 | 9/28/2020 | Europe / United Kingdom / England |
| EPI_ISL_559702 | 5/14/2020 | 9/28/2020 | Europe / United Kingdom / England |
| EPI_ISL_559703 | 6/4/2020  | 9/28/2020 | Europe / United Kingdom / England |
| EPI_ISL_559704 | 5/13/2020 | 9/28/2020 | Europe / United Kingdom / England |
| EPI_ISL_559705 | 5/13/2020 | 9/28/2020 | Europe / United Kingdom / England |
| EPI_ISL_559707 | 5/12/2020 | 9/28/2020 | Europe / United Kingdom / England |
| EPI_ISL_559708 | 5/31/2020 | 9/28/2020 | Europe / United Kingdom / England |
| EPI_ISL_559710 | 5/20/2020 | 9/28/2020 | Europe / United Kingdom / England |
| EPI_ISL_559711 | 6/5/2020  | 9/28/2020 | Europe / United Kingdom / England |
| EPI_ISL_559712 | 5/21/2020 | 9/28/2020 | Europe / United Kingdom / England |
| EPI_ISL_559713 | 5/14/2020 | 9/28/2020 | Europe / United Kingdom / England |
| EPI_ISL_559714 | 5/24/2020 | 9/28/2020 | Europe / United Kingdom / England |
| EPI_ISL_559716 | 5/8/2020  | 9/28/2020 | Europe / United Kingdom / England |
| EPI_ISL_559718 | 5/22/2020 | 9/28/2020 | Europe / United Kingdom / England |
| EPI_ISL_559719 | 5/21/2020 | 9/28/2020 | Europe / United Kingdom / England |
| EPI_ISL_559720 | 5/22/2020 | 9/28/2020 | Europe / United Kingdom / England |
| EPI_ISL_559721 | 5/22/2020 | 9/28/2020 | Europe / United Kingdom / England |
| EPI_ISL_559722 | 6/4/2020  | 9/28/2020 | Europe / United Kingdom / England |
| EPI_ISL_559723 | 5/20/2020 | 9/28/2020 | Europe / United Kingdom / England |
| EPI_ISL_559725 | 5/24/2020 | 9/28/2020 | Europe / United Kingdom / England |
| EPI_ISL_559726 | 5/22/2020 | 9/28/2020 | Europe / United Kingdom / England |























|                |           |                                                            |
|----------------|-----------|------------------------------------------------------------|
| EPI_ISL_560297 | 9/16/2020 | 9/28/2020 Europe / United Kingdom / Wales                  |
| EPI_ISL_560299 | 9/14/2020 | 9/28/2020 Europe / United Kingdom / Wales                  |
| EPI_ISL_560300 | 9/13/2020 | 9/28/2020 Europe / United Kingdom / Wales                  |
| EPI_ISL_560301 | 9/15/2020 | 9/28/2020 Europe / United Kingdom / Wales                  |
| EPI_ISL_560302 | 9/16/2020 | 9/28/2020 Europe / United Kingdom / Wales                  |
| EPI_ISL_560304 | 9/16/2020 | 9/28/2020 Europe / United Kingdom / Wales                  |
| EPI_ISL_560305 | 8/28/2020 | 9/28/2020 Europe / United Kingdom / Wales                  |
| EPI_ISL_560306 | 8/27/2020 | 9/28/2020 Europe / United Kingdom / Wales                  |
| EPI_ISL_560308 | 6/26/2020 | 9/28/2020 Europe / Russia / Sverdlovsk / Ekaterinburg      |
| EPI_ISL_560309 | 7/8/2020  | 9/28/2020 Europe / Russia / Sverdlovsk / Verkhnyaya Pyshma |
| EPI_ISL_560310 | 7/8/2020  | 9/28/2020 Europe / Russia / Sverdlovsk / Ekaterinburg      |
| EPI_ISL_560311 | 7/16/2020 | 9/28/2020 Europe / Russia / Sverdlovsk / Ekaterinburg      |
| EPI_ISL_560312 | 7/17/2020 | 9/28/2020 Europe / Russia / Sverdlovsk / Ekaterinburg      |
| EPI_ISL_560313 | 7/16/2020 | 9/28/2020 Europe / Russia / Sverdlovsk / Ekaterinburg      |
| EPI_ISL_560314 | 7/17/2020 | 9/28/2020 Europe / Russia / Sverdlovsk / Ekaterinburg      |
| EPI_ISL_560315 | 7/17/2020 | 9/28/2020 Europe / Russia / Sverdlovsk / Ekaterinburg      |
| EPI_ISL_560316 | 7/22/2020 | 9/28/2020 Europe / Russia / Sverdlovsk / Ekaterinburg      |
| EPI_ISL_560317 | 8/8/2020  | 9/28/2020 Europe / Russia / Sverdlovsk / Ekaterinburg      |
| EPI_ISL_560318 | 5/28/2020 | 9/28/2020 Asia / India / Haryana                           |
| EPI_ISL_560319 | 6/16/2020 | 9/28/2020 Asia / India / Uttarakhand                       |
| EPI_ISL_560320 | 7/3/2020  | 9/28/2020 Asia / India / Uttarakhand                       |
| EPI_ISL_560321 | 7/17/2020 | 9/28/2020 Asia / India / Uttarakhand                       |
| EPI_ISL_560322 | 8/25/2020 | 9/28/2020 Asia / India / Haryana                           |
| EPI_ISL_560323 | 8/25/2020 | 9/28/2020 Asia / India / Haryana                           |
| EPI_ISL_560324 | 8/27/2020 | 9/28/2020 Asia / India / Haryana                           |
| EPI_ISL_560325 | 5/11/2020 | 9/29/2020 North America / USA / New Mexico                 |
| EPI_ISL_560326 | 5/8/2020  | 9/29/2020 North America / USA / New Mexico                 |
| EPI_ISL_560330 | 7/1/2020  | 9/29/2020 North America / USA / New Mexico                 |
| EPI_ISL_560332 | 5/8/2020  | 9/29/2020 North America / USA / New Mexico                 |
| EPI_ISL_560333 | 7/2/2020  | 9/29/2020 North America / USA / New Mexico                 |
| EPI_ISL_560334 | 5/9/2020  | 9/29/2020 North America / USA / New Mexico                 |
| EPI_ISL_560336 | 5/8/2020  | 9/29/2020 North America / USA / New Mexico                 |
| EPI_ISL_560338 | 5/8/2020  | 9/29/2020 North America / USA / New Mexico                 |
| EPI_ISL_560340 | 5/8/2020  | 9/29/2020 North America / USA / New Mexico                 |
| EPI_ISL_560347 | 5/13/2020 | 9/29/2020 North America / USA / New Mexico                 |
| EPI_ISL_560348 | 5/13/2020 | 9/29/2020 North America / USA / New Mexico                 |
| EPI_ISL_560350 | 5/10/2020 | 9/29/2020 North America / USA / New Mexico                 |
| EPI_ISL_560354 | 6/3/2020  | 9/29/2020 North America / USA / New Mexico                 |
| EPI_ISL_560386 | 3/28/2020 | 9/29/2020 Africa / Botswana / Gaborone                     |
| EPI_ISL_560391 | 5/20/2020 | 9/29/2020 Europe / Lithuania / Vilnius r.                  |
| EPI_ISL_560392 | 5/18/2020 | 9/29/2020 Europe / Lithuania / Vilnius                     |
| EPI_ISL_560393 | 5/23/2020 | 9/29/2020 Europe / Lithuania / Vilnius r.                  |
| EPI_ISL_560394 | 5/22/2020 | 9/29/2020 Europe / Lithuania / Vilnius                     |
| EPI_ISL_560395 | 5/21/2020 | 9/29/2020 Europe / Lithuania / Vilnius                     |
| EPI_ISL_560396 | 5/25/2020 | 9/29/2020 Europe / Lithuania / Vilnius                     |
| EPI_ISL_560397 | 5/21/2020 | 9/29/2020 Europe / Lithuania / Vilnius                     |
| EPI_ISL_560399 | 5/18/2020 | 9/29/2020 Europe / Lithuania / Vilnius r.                  |



|                |           |                                                                  |
|----------------|-----------|------------------------------------------------------------------|
| EPI_ISL_560400 | 5/21/2020 | 9/29/2020 Europe / Lithuania / Vilnius                           |
| EPI_ISL_560401 | 5/18/2020 | 9/29/2020 Europe / Lithuania / Vilnius r.                        |
| EPI_ISL_560402 | 5/18/2020 | 9/29/2020 Europe / Lithuania / Vilnius                           |
| EPI_ISL_560403 | 5/21/2020 | 9/29/2020 Europe / Lithuania / Vilnius r.                        |
| EPI_ISL_560404 | 5/20/2020 | 9/29/2020 Europe / Lithuania / Vilnius                           |
| EPI_ISL_560405 | 6/3/2020  | 9/29/2020 Europe / Lithuania / Vilnius                           |
| EPI_ISL_560406 | 3/24/2020 | 9/29/2020 North America / USA / Delaware / New Castle County     |
| EPI_ISL_560407 | 5/13/2020 | 9/29/2020 Europe / Italy / Campania / Benevento                  |
| EPI_ISL_560408 | 7/24/2020 | 9/29/2020 Europe / Czech Republic / South Moravian Region / Brno |
| EPI_ISL_560409 | 7/24/2020 | 9/29/2020 Europe / Czech Republic / South Moravian Region / Brno |
| EPI_ISL_560410 | 7/24/2020 | 9/29/2020 Europe / Czech Republic / South Moravian Region / Brno |
| EPI_ISL_560411 | 7/24/2020 | 9/29/2020 Europe / Czech Republic / South Moravian Region / Brno |
| EPI_ISL_560412 | 7/25/2020 | 9/29/2020 Europe / Czech Republic / South Moravian Region / Brno |
| EPI_ISL_560413 | 3/22/2020 | 9/29/2020 North America / Canada / Quebec                        |
| EPI_ISL_560414 | 3/22/2020 | 9/29/2020 North America / Canada / Quebec                        |
| EPI_ISL_560415 | 3/23/2020 | 9/29/2020 North America / Canada / Quebec                        |
| EPI_ISL_560416 | 9/7/2020  | 9/29/2020 Europe / Switzerland / Aargau                          |
| EPI_ISL_560417 | 9/7/2020  | 9/29/2020 Europe / Switzerland / Aargau                          |
| EPI_ISL_560418 | 9/7/2020  | 9/29/2020 Europe / Switzerland / Solothurn                       |
| EPI_ISL_560419 | 9/7/2020  | 9/29/2020 Europe / Switzerland / Aargau                          |
| EPI_ISL_560420 | 9/8/2020  | 9/29/2020 Europe / Switzerland / Aargau                          |
| EPI_ISL_560421 | 9/7/2020  | 9/29/2020 Europe / Switzerland / Aargau                          |
| EPI_ISL_560422 | 9/8/2020  | 9/29/2020 Europe / Switzerland / Aargau                          |
| EPI_ISL_560423 | 9/9/2020  | 9/29/2020 Europe / Switzerland / Aargau                          |
| EPI_ISL_560424 | 9/8/2020  | 9/29/2020 Europe / Switzerland / Aargau                          |
| EPI_ISL_560425 | 9/9/2020  | 9/29/2020 Europe / Switzerland / Aargau                          |
| EPI_ISL_560426 | 9/10/2020 | 9/29/2020 Europe / Switzerland / Aargau                          |
| EPI_ISL_560427 | 9/9/2020  | 9/29/2020 Europe / Switzerland / Aargau                          |
| EPI_ISL_560428 | 9/10/2020 | 9/29/2020 Europe / Switzerland / Aargau                          |
| EPI_ISL_560429 | 9/7/2020  | 9/29/2020 Europe / Switzerland / Bern                            |
| EPI_ISL_560430 | 9/7/2020  | 9/29/2020 Europe / Switzerland / Bern                            |
| EPI_ISL_560431 | 9/7/2020  | 9/29/2020 Europe / Switzerland / Bern                            |
| EPI_ISL_560432 | 9/7/2020  | 9/29/2020 Europe / Switzerland / Bern                            |
| EPI_ISL_560433 | 9/7/2020  | 9/29/2020 Europe / Switzerland / Bern                            |
| EPI_ISL_560434 | 9/8/2020  | 9/29/2020 Europe / Switzerland / Bern                            |
| EPI_ISL_560435 | 9/7/2020  | 9/29/2020 Europe / Switzerland / Bern                            |
| EPI_ISL_560436 | 9/7/2020  | 9/29/2020 Europe / Switzerland / Bern                            |
| EPI_ISL_560437 | 9/8/2020  | 9/29/2020 Europe / Switzerland / Bern                            |
| EPI_ISL_560438 | 9/8/2020  | 9/29/2020 Europe / Switzerland / Bern                            |
| EPI_ISL_560439 | 9/9/2020  | 9/29/2020 Europe / Switzerland / Bern                            |
| EPI_ISL_560440 | 9/8/2020  | 9/29/2020 Europe / Switzerland / Bern                            |
| EPI_ISL_560441 | 9/9/2020  | 9/29/2020 Europe / Switzerland / Bern                            |
| EPI_ISL_560442 | 9/9/2020  | 9/29/2020 Europe / Switzerland / Bern                            |
| EPI_ISL_560443 | 9/9/2020  | 9/29/2020 Europe / Switzerland / Bern                            |
| EPI_ISL_560444 | 9/9/2020  | 9/29/2020 Europe / Switzerland / Bern                            |
| EPI_ISL_560445 | 9/9/2020  | 9/29/2020 Europe / Switzerland / Bern                            |
| EPI_ISL_560446 | 9/10/2020 | 9/29/2020 Europe / Switzerland / Bern                            |

|                |           |           |                                         |
|----------------|-----------|-----------|-----------------------------------------|
| EPI_ISL_560447 | 9/10/2020 | 9/29/2020 | Europe / Switzerland / Bern             |
| EPI_ISL_560448 | 9/10/2020 | 9/29/2020 | Europe / Switzerland / Bern             |
| EPI_ISL_560449 | 9/10/2020 | 9/29/2020 | Europe / Switzerland / Bern             |
| EPI_ISL_560450 | 9/10/2020 | 9/29/2020 | Europe / Switzerland / Bern             |
| EPI_ISL_560451 | 9/10/2020 | 9/29/2020 | Europe / Switzerland / Bern             |
| EPI_ISL_560452 | 9/10/2020 | 9/29/2020 | Europe / Switzerland / Bern             |
| EPI_ISL_560453 | 9/10/2020 | 9/29/2020 | Europe / Switzerland / Bern             |
| EPI_ISL_560454 | 9/10/2020 | 9/29/2020 | Europe / Switzerland / Bern             |
| EPI_ISL_560455 | 9/7/2020  | 9/29/2020 | Europe / Switzerland / Basel-Landschaft |
| EPI_ISL_560456 | 9/7/2020  | 9/29/2020 | Europe / Switzerland / Basel-Landschaft |
| EPI_ISL_560457 | 9/7/2020  | 9/29/2020 | Europe / Switzerland / Basel-Landschaft |
| EPI_ISL_560458 | 9/8/2020  | 9/29/2020 | Europe / Switzerland / Basel-Landschaft |
| EPI_ISL_560459 | 9/9/2020  | 9/29/2020 | Europe / Switzerland / Basel-Landschaft |
| EPI_ISL_560460 | 9/9/2020  | 9/29/2020 | Europe / Switzerland / Basel-Landschaft |
| EPI_ISL_560461 | 9/9/2020  | 9/29/2020 | Europe / Switzerland / Basel-Landschaft |
| EPI_ISL_560462 | 9/9/2020  | 9/29/2020 | Europe / Switzerland / Basel-Landschaft |
| EPI_ISL_560463 | 9/8/2020  | 9/29/2020 | Europe / Switzerland / Basel-Landschaft |
| EPI_ISL_560464 | 9/10/2020 | 9/29/2020 | Europe / Switzerland / Basel-Landschaft |
| EPI_ISL_560465 | 9/10/2020 | 9/29/2020 | Europe / Switzerland / Basel-Landschaft |
| EPI_ISL_560466 | 9/10/2020 | 9/29/2020 | Europe / Switzerland / Basel-Landschaft |
| EPI_ISL_560467 | 9/10/2020 | 9/29/2020 | Europe / Switzerland / Basel-Landschaft |
| EPI_ISL_560468 | 9/9/2020  | 9/29/2020 | Europe / Switzerland / Basel-Landschaft |
| EPI_ISL_560469 | 9/10/2020 | 9/29/2020 | Europe / Switzerland / Basel-Landschaft |
| EPI_ISL_560470 | 9/5/2020  | 9/29/2020 | Europe / Switzerland / Basel-Stadt      |
| EPI_ISL_560471 | 9/8/2020  | 9/29/2020 | Europe / Switzerland / Basel-Stadt      |
| EPI_ISL_560473 | 9/10/2020 | 9/29/2020 | Europe / Switzerland / Basel-Stadt      |
| EPI_ISL_560474 | 9/10/2020 | 9/29/2020 | Europe / Switzerland / Basel-Stadt      |
| EPI_ISL_560475 | 9/10/2020 | 9/29/2020 | Europe / Switzerland / Geneva           |
| EPI_ISL_560476 | 9/7/2020  | 9/29/2020 | Europe / Switzerland / Grisons          |
| EPI_ISL_560477 | 9/6/2020  | 9/29/2020 | Europe / Switzerland / Grisons          |
| EPI_ISL_560479 | 9/8/2020  | 9/29/2020 | Europe / Switzerland / Grisons          |
| EPI_ISL_560480 | 9/10/2020 | 9/29/2020 | Europe / Switzerland / St Gall          |
| EPI_ISL_560481 | 9/8/2020  | 9/29/2020 | Europe / Switzerland / Schwyz           |
| EPI_ISL_560482 | 9/10/2020 | 9/29/2020 | Europe / Switzerland / Schwyz           |
| EPI_ISL_560483 | 9/9/2020  | 9/29/2020 | Europe / Switzerland / Ticino           |
| EPI_ISL_560484 | 9/9/2020  | 9/29/2020 | Europe / Switzerland / Ticino           |
| EPI_ISL_560485 | 9/7/2020  | 9/29/2020 | Europe / Switzerland / Vaud             |
| EPI_ISL_560486 | 9/7/2020  | 9/29/2020 | Europe / Switzerland / Vaud             |
| EPI_ISL_560487 | 9/7/2020  | 9/29/2020 | Europe / Switzerland / Vaud             |
| EPI_ISL_560488 | 9/7/2020  | 9/29/2020 | Europe / Switzerland / Vaud             |
| EPI_ISL_560489 | 9/7/2020  | 9/29/2020 | Europe / Switzerland / Vaud             |
| EPI_ISL_560490 | 9/7/2020  | 9/29/2020 | Europe / Switzerland / Vaud             |
| EPI_ISL_560491 | 9/7/2020  | 9/29/2020 | Europe / Switzerland / Vaud             |
| EPI_ISL_560492 | 9/7/2020  | 9/29/2020 | Europe / Switzerland / Vaud             |
| EPI_ISL_560493 | 9/7/2020  | 9/29/2020 | Europe / Switzerland / Vaud             |
| EPI_ISL_560494 | 9/7/2020  | 9/29/2020 | Europe / Switzerland / Vaud             |
| EPI_ISL_560495 | 9/7/2020  | 9/29/2020 | Europe / Switzerland / Vaud             |



|                |           |                                                           |
|----------------|-----------|-----------------------------------------------------------|
| EPI_ISL_560545 | 9/7/2020  | 9/29/2020 Europe / Switzerland / Zurich                   |
| EPI_ISL_560546 | 9/8/2020  | 9/29/2020 Europe / Switzerland / Zurich                   |
| EPI_ISL_560547 | 9/8/2020  | 9/29/2020 Europe / Switzerland / Zurich                   |
| EPI_ISL_560548 | 9/8/2020  | 9/29/2020 Europe / Switzerland / Zurich                   |
| EPI_ISL_560549 | 9/8/2020  | 9/29/2020 Europe / Switzerland / Zurich                   |
| EPI_ISL_560550 | 9/9/2020  | 9/29/2020 Europe / Switzerland / Zurich                   |
| EPI_ISL_560551 | 9/9/2020  | 9/29/2020 Europe / Switzerland / Zurich                   |
| EPI_ISL_560552 | 9/9/2020  | 9/29/2020 Europe / Switzerland / Zurich                   |
| EPI_ISL_560553 | 9/10/2020 | 9/29/2020 Europe / Switzerland / Zurich                   |
| EPI_ISL_560554 | 5/31/2020 | 9/29/2020 North America / USA / Alaska / Anchorage-Mat Su |
| EPI_ISL_560555 | 6/1/2020  | 9/29/2020 North America / USA / Alaska / Anchorage-Mat Su |
| EPI_ISL_560556 | 6/1/2020  | 9/29/2020 North America / USA / Alaska / Gulf Coast       |
| EPI_ISL_560557 | 6/7/2020  | 9/29/2020 North America / USA / Alaska / Gulf Coast       |
| EPI_ISL_560558 | 6/8/2020  | 9/29/2020 North America / USA / Alaska / Anchorage-Mat Su |
| EPI_ISL_560559 | 6/8/2020  | 9/29/2020 North America / USA / Alaska / Anchorage-Mat Su |
| EPI_ISL_560560 | 6/11/2020 | 9/29/2020 North America / USA / Alaska / Anchorage-Mat Su |
| EPI_ISL_560561 | 6/11/2020 | 9/29/2020 North America / USA / Alaska / Anchorage-Mat Su |
| EPI_ISL_560562 | 6/12/2020 | 9/29/2020 North America / USA / Alaska / Anchorage-Mat Su |
| EPI_ISL_560563 | 6/11/2020 | 9/29/2020 North America / USA / Alaska / Anchorage-Mat Su |
| EPI_ISL_560564 | 6/12/2020 | 9/29/2020 North America / USA / Alaska / Anchorage-Mat Su |
| EPI_ISL_560565 | 6/14/2020 | 9/29/2020 North America / USA / Alaska / Anchorage-Mat Su |
| EPI_ISL_560566 | 6/18/2020 | 9/29/2020 North America / USA / Alaska / Anchorage-Mat Su |
| EPI_ISL_560568 | 4/7/2020  | 9/29/2020 Europe / France / Centre-Val de Loire / Angers  |
| EPI_ISL_560569 | 3/31/2020 | 9/29/2020 Europe / France / Centre-Val de Loire / Angers  |
| EPI_ISL_560570 | 3/30/2020 | 9/29/2020 Europe / France / Centre-Val de Loire / Angers  |
| EPI_ISL_560571 | 4/6/2020  | 9/29/2020 Europe / France / Centre-Val de Loire / Angers  |
| EPI_ISL_560572 | 4/26/2020 | 9/29/2020 Europe / France / Centre-Val de Loire / Angers  |
| EPI_ISL_560573 | 3/27/2020 | 9/29/2020 Europe / France / Centre-Val de Loire / Angers  |
| EPI_ISL_560574 | 3/25/2020 | 9/29/2020 Europe / France / Centre-Val de Loire / Angers  |
| EPI_ISL_560575 | 4/7/2020  | 9/29/2020 Europe / France / Centre-Val de Loire / Angers  |
| EPI_ISL_560576 | 4/3/2020  | 9/29/2020 Europe / France / Centre-Val de Loire / Angers  |
| EPI_ISL_560577 | 3/25/2020 | 9/29/2020 Europe / France / Centre-Val de Loire / Angers  |
| EPI_ISL_560578 | 3/28/2020 | 9/29/2020 Europe / France / Centre-Val de Loire / Angers  |
| EPI_ISL_560579 | 4/7/2020  | 9/29/2020 Europe / France / Centre-Val de Loire / Angers  |
| EPI_ISL_560580 | 4/21/2020 | 9/29/2020 Europe / France / Centre-Val de Loire / Angers  |
| EPI_ISL_560581 | 3/25/2020 | 9/29/2020 Europe / France / Grand Est / Ensisheim         |
| EPI_ISL_560582 | 3/31/2020 | 9/29/2020 Europe / France / Grand Est / Biesheim          |
| EPI_ISL_560583 | 3/31/2020 | 9/29/2020 Europe / France / Grand Est / Munster           |
| EPI_ISL_560584 | 4/22/2020 | 9/29/2020 Europe / France / Grand Est / Reguisheim        |
| EPI_ISL_560585 | 4/16/2020 | 9/29/2020 Europe / France / Grand Est / Ingersheim        |
| EPI_ISL_560586 | 4/23/2020 | 9/29/2020 Europe / France / Grand Est / Guebwiller        |
| EPI_ISL_560587 | 5/26/2020 | 9/29/2020 Europe / France / Grand Est / Soultzeren        |
| EPI_ISL_560588 | 5/28/2020 | 9/29/2020 Europe / France / Grand Est / Soultz Haut Rhin  |
| EPI_ISL_560589 | 5/22/2020 | 9/29/2020 Europe / France / Grand Est / Murbach           |
| EPI_ISL_560590 | 5/22/2020 | 9/29/2020 Europe / France / Grand Est / Liepvre           |
| EPI_ISL_560591 | 3/26/2020 | 9/29/2020 Europe / France / Hauts-de-France / Lille       |
| EPI_ISL_560592 | 3/23/2020 | 9/29/2020 Europe / France / Hauts-de-France / Lille       |

|                |           |           |                                                    |
|----------------|-----------|-----------|----------------------------------------------------|
| EPI_ISL_560593 | 3/24/2020 | 9/29/2020 | Europe / France / Hauts-de-France / Lille          |
| EPI_ISL_560594 | 3/19/2020 | 9/29/2020 | Europe / France / Hauts-de-France / Lille          |
| EPI_ISL_560595 | 4/2/2020  | 9/29/2020 | Europe / France / Hauts-de-France / Lille          |
| EPI_ISL_560596 | 3/31/2020 | 9/29/2020 | Europe / France / Hauts-de-France / Lille          |
| EPI_ISL_560597 | 4/3/2020  | 9/29/2020 | Europe / France / Hauts-de-France / Lille          |
| EPI_ISL_560598 | 7/24/2020 | 9/29/2020 | Europe / France / Bretagne                         |
| EPI_ISL_560599 | 7/24/2020 | 9/29/2020 | Europe / France / Bretagne / Saint-Pierre-Quiberon |
| EPI_ISL_560600 | 7/26/2020 | 9/29/2020 | Europe / France / Bretagne / La Rochelle           |
| EPI_ISL_560601 | 7/27/2020 | 9/29/2020 | Europe / France / Bretagne / Pordic                |
| EPI_ISL_560602 | 7/28/2020 | 9/29/2020 | Europe / France / Bretagne / Brest                 |
| EPI_ISL_560603 | 7/29/2020 | 9/29/2020 | Europe / France / Bretagne / Santes                |
| EPI_ISL_560604 | 7/29/2020 | 9/29/2020 | Europe / France / Bretagne / Sene                  |
| EPI_ISL_560605 | 7/29/2020 | 9/29/2020 | Europe / France / Bretagne / Cayenne               |
| EPI_ISL_560606 | 7/29/2020 | 9/29/2020 | Europe / France / Bretagne / Vannes                |
| EPI_ISL_560607 | 8/1/2020  | 9/29/2020 | Europe / France / Bretagne / Brest                 |
| EPI_ISL_560608 | 8/1/2020  | 9/29/2020 | Europe / France / Bretagne / Vannes                |
| EPI_ISL_560609 | 8/2/2020  | 9/29/2020 | Europe / France / Bretagne / Vannes                |
| EPI_ISL_560610 | 8/3/2020  | 9/29/2020 | Europe / France / Bretagne / Brest                 |
| EPI_ISL_560611 | 8/3/2020  | 9/29/2020 | Europe / France / Bretagne / Morlaix               |
| EPI_ISL_560612 | 8/4/2020  | 9/29/2020 | Europe / France / Bretagne / Montagnieu            |
| EPI_ISL_560613 | 8/6/2020  | 9/29/2020 | Europe / France / Bretagne / Lannilis              |
| EPI_ISL_560614 | 8/6/2020  | 9/29/2020 | Europe / France / Bretagne / Lannilis              |
| EPI_ISL_560615 | 8/6/2020  | 9/29/2020 | Europe / France / Bretagne / Brest                 |
| EPI_ISL_560616 | 8/7/2020  | 9/29/2020 | Europe / France / Bretagne / Lannilis              |
| EPI_ISL_560617 | 8/7/2020  | 9/29/2020 | Europe / France / Bretagne / Arradon               |
| EPI_ISL_560618 | 8/7/2020  | 9/29/2020 | Europe / France / Bretagne / Rennes                |
| EPI_ISL_560620 | 3/5/2020  | 9/29/2020 | Europe / France / Grand Est / Talange              |
| EPI_ISL_560621 | 3/10/2020 | 9/29/2020 | Europe / France / Grand Est / Metz                 |
| EPI_ISL_560622 | 3/13/2020 | 9/29/2020 | Europe / France / Grand Est / Amneville            |
| EPI_ISL_560623 | 3/17/2020 | 9/29/2020 | Europe / France / Grand Est / Sarreguemines        |
| EPI_ISL_560624 | 3/21/2020 | 9/29/2020 | Europe / France / Grand Est / Metz                 |
| EPI_ISL_560625 | 3/22/2020 | 9/29/2020 | Europe / France / Grand Est / Montigny les Metz    |
| EPI_ISL_560626 | 3/25/2020 | 9/29/2020 | Europe / France / Grand Est / Joeuf                |
| EPI_ISL_560627 | 3/28/2020 | 9/29/2020 | Europe / France / Grand Est / Ottonville           |
| EPI_ISL_560628 | 4/2/2020  | 9/29/2020 | Europe / France / Grand Est / Metz                 |
| EPI_ISL_560629 | 4/8/2020  | 9/29/2020 | Europe / France / Grand Est / Fameck               |
| EPI_ISL_560630 | 4/14/2020 | 9/29/2020 | Europe / France / Grand Est / Metz                 |
| EPI_ISL_560631 | 4/16/2020 | 9/29/2020 | Europe / France / Grand Est / Crusnes              |
| EPI_ISL_560632 | 4/18/2020 | 9/29/2020 | Europe / France / Grand Est / Maizières les Metz   |
| EPI_ISL_560633 | 4/23/2020 | 9/29/2020 | Europe / France / Grand Est / Maizières les Metz   |
| EPI_ISL_560634 | 4/27/2020 | 9/29/2020 | Europe / France / Grand Est / Metz                 |
| EPI_ISL_560636 | 6/29/2020 | 9/29/2020 | Europe / France / Île-de-France / Argenteuil       |
| EPI_ISL_560637 | 6/25/2020 | 9/29/2020 | Europe / France / Île-de-France / Sarcelles        |
| EPI_ISL_560638 | 6/25/2020 | 9/29/2020 | Europe / France / Île-de-France / Sarcelles        |
| EPI_ISL_560639 | 6/30/2020 | 9/29/2020 | Europe / France / Île-de-France / Sarcelles        |
| EPI_ISL_560640 | 6/29/2020 | 9/29/2020 | Europe / France / Île-de-France / Sarcelles        |
| EPI_ISL_560641 | 6/29/2020 | 9/29/2020 | Europe / France / Île-de-France / Sarcelles        |

|                |           |                                                                  |
|----------------|-----------|------------------------------------------------------------------|
| EPI_ISL_560642 | 6/29/2020 | 9/29/2020 Europe / France / Île-de-France / Sarcelles            |
| EPI_ISL_560643 | 7/16/2020 | 9/29/2020 Europe / France / Île-de-France / Boulogne Billancourt |
| EPI_ISL_560644 | 5/9/2020  | 9/29/2020 Europe / France / Île-de-France / Le Chesnay           |
| EPI_ISL_560645 | 7/19/2020 | 9/29/2020 Europe / France / Île-de-France / Boulogne Billancourt |
| EPI_ISL_560646 | 7/19/2020 | 9/29/2020 Europe / France / Île-de-France / Boulogne Billancourt |
| EPI_ISL_560647 | 3/21/2020 | 9/29/2020 North America / USA / Delaware / New Castle County     |
| EPI_ISL_560650 | 3/10/2020 | 9/29/2020 Europe / United Kingdom / England / London             |
| EPI_ISL_560651 | 3/18/2020 | 9/29/2020 Europe / United Kingdom / England / London             |
| EPI_ISL_560652 | 3/18/2020 | 9/29/2020 Europe / United Kingdom / England / London             |
| EPI_ISL_560656 | 3/18/2020 | 9/29/2020 Europe / United Kingdom / England / London             |
| EPI_ISL_560658 | 3/18/2020 | 9/29/2020 Europe / United Kingdom / England / London             |
| EPI_ISL_560660 | 3/18/2020 | 9/29/2020 Europe / United Kingdom / England / London             |
| EPI_ISL_560661 | 3/19/2020 | 9/29/2020 Europe / United Kingdom / England / London             |
| EPI_ISL_560668 | 3/19/2020 | 9/29/2020 Europe / United Kingdom / England / London             |
| EPI_ISL_560671 | 3/19/2020 | 9/29/2020 Europe / United Kingdom / England / London             |
| EPI_ISL_560672 | 3/19/2020 | 9/29/2020 Europe / United Kingdom / England / London             |
| EPI_ISL_560673 | 3/19/2020 | 9/29/2020 Europe / United Kingdom / England / London             |
| EPI_ISL_560676 | 3/20/2020 | 9/29/2020 Europe / United Kingdom / England / London             |
| EPI_ISL_560678 | 3/19/2020 | 9/29/2020 Europe / United Kingdom / England / London             |
| EPI_ISL_560679 | 3/19/2020 | 9/29/2020 Europe / United Kingdom / England / London             |
| EPI_ISL_560684 | 3/20/2020 | 9/29/2020 Europe / United Kingdom / England / London             |
| EPI_ISL_560695 | 3/22/2020 | 9/29/2020 Europe / United Kingdom / England / London             |
| EPI_ISL_560696 | 3/22/2020 | 9/29/2020 Europe / United Kingdom / England / London             |
| EPI_ISL_560697 | 3/22/2020 | 9/29/2020 Europe / United Kingdom / England / London             |
| EPI_ISL_560698 | 3/22/2020 | 9/29/2020 Europe / United Kingdom / England / London             |
| EPI_ISL_560699 | 3/22/2020 | 9/29/2020 Europe / United Kingdom / England / London             |
| EPI_ISL_560700 | 3/22/2020 | 9/29/2020 Europe / United Kingdom / England / London             |
| EPI_ISL_560701 | 3/22/2020 | 9/29/2020 Europe / United Kingdom / England / London             |
| EPI_ISL_560702 | 3/22/2020 | 9/29/2020 Europe / United Kingdom / England / London             |
| EPI_ISL_560705 | 3/22/2020 | 9/29/2020 Europe / United Kingdom / England / London             |
| EPI_ISL_560712 | 3/23/2020 | 9/29/2020 Europe / United Kingdom / England / London             |
| EPI_ISL_560719 | 3/30/2020 | 9/29/2020 Europe / United Kingdom / England / London             |
| EPI_ISL_560722 | 3/29/2020 | 9/29/2020 Europe / United Kingdom / England / London             |
| EPI_ISL_560723 | 3/29/2020 | 9/29/2020 Europe / United Kingdom / England / London             |
| EPI_ISL_560724 | 3/30/2020 | 9/29/2020 Europe / United Kingdom / England / London             |
| EPI_ISL_560725 | 3/30/2020 | 9/29/2020 Europe / United Kingdom / England / London             |
| EPI_ISL_560726 | 3/29/2020 | 9/29/2020 Europe / United Kingdom / England / London             |
| EPI_ISL_560727 | 3/29/2020 | 9/29/2020 Europe / United Kingdom / England / London             |
| EPI_ISL_560729 | 3/30/2020 | 9/29/2020 Europe / United Kingdom / England / London             |
| EPI_ISL_560730 | 3/30/2020 | 9/29/2020 Europe / United Kingdom / England / London             |
| EPI_ISL_560731 | 3/30/2020 | 9/29/2020 Europe / United Kingdom / England / London             |
| EPI_ISL_560733 | 3/30/2020 | 9/29/2020 Europe / United Kingdom / England / London             |
| EPI_ISL_560734 | 3/30/2020 | 9/29/2020 Europe / United Kingdom / England / London             |
| EPI_ISL_560736 | 3/30/2020 | 9/29/2020 Europe / United Kingdom / England / London             |
| EPI_ISL_560737 | 3/30/2020 | 9/29/2020 Europe / United Kingdom / England / London             |
| EPI_ISL_560739 | 3/31/2020 | 9/29/2020 Europe / United Kingdom / England / London             |
| EPI_ISL_560740 | 3/30/2020 | 9/29/2020 Europe / United Kingdom / England / London             |







|                |           |           |                                                 |
|----------------|-----------|-----------|-------------------------------------------------|
| EPI_ISL_560844 | 4/3/2020  | 9/29/2020 | North America / USA / Utah                      |
| EPI_ISL_560845 | 4/3/2020  | 9/29/2020 | North America / USA / Utah                      |
| EPI_ISL_560851 | 4/7/2020  | 9/29/2020 | North America / USA / Utah                      |
| EPI_ISL_560852 | 4/8/2020  | 9/29/2020 | North America / USA / Utah                      |
| EPI_ISL_560853 | 4/8/2020  | 9/29/2020 | North America / USA / Utah                      |
| EPI_ISL_560856 | 4/9/2020  | 9/29/2020 | North America / USA / Utah                      |
| EPI_ISL_560857 | 4/7/2020  | 9/29/2020 | North America / USA / Utah                      |
| EPI_ISL_560858 | 4/8/2020  | 9/29/2020 | North America / USA / Utah                      |
| EPI_ISL_560859 | 4/8/2020  | 9/29/2020 | North America / USA / Utah                      |
| EPI_ISL_560860 | 4/8/2020  | 9/29/2020 | North America / USA / Utah                      |
| EPI_ISL_560861 | 4/1/2020  | 9/29/2020 | North America / USA / Utah                      |
| EPI_ISL_560862 | 5/30/2020 | 9/29/2020 | North America / USA / Utah                      |
| EPI_ISL_560863 | 5/30/2020 | 9/29/2020 | North America / USA / Utah                      |
| EPI_ISL_560865 | 5/30/2020 | 9/29/2020 | North America / USA / Utah                      |
| EPI_ISL_560870 | 6/2/2020  | 9/29/2020 | North America / USA / Utah                      |
| EPI_ISL_560875 | 5/30/2020 | 9/29/2020 | North America / USA / Utah                      |
| EPI_ISL_560878 | 5/31/2020 | 9/29/2020 | North America / USA / Utah                      |
| EPI_ISL_560880 | 6/2/2020  | 9/29/2020 | North America / USA / Utah                      |
| EPI_ISL_560882 | 5/30/2020 | 9/29/2020 | North America / USA / Utah                      |
| EPI_ISL_560884 | 5/29/2020 | 9/29/2020 | North America / USA / Utah                      |
| EPI_ISL_560886 | 6/1/2020  | 9/29/2020 | North America / USA / Utah                      |
| EPI_ISL_560888 | 6/1/2020  | 9/29/2020 | North America / USA / Utah                      |
| EPI_ISL_560889 | 6/2/2020  | 9/29/2020 | North America / USA / Utah                      |
| EPI_ISL_560892 | 6/1/2020  | 9/29/2020 | North America / USA / Utah                      |
| EPI_ISL_560894 | 6/1/2020  | 9/29/2020 | North America / USA / Utah                      |
| EPI_ISL_560897 | 5/2/2020  | 9/29/2020 | North America / USA / Utah                      |
| EPI_ISL_560899 | 5/2/2020  | 9/29/2020 | North America / USA / Utah                      |
| EPI_ISL_560903 | 5/1/2020  | 9/29/2020 | North America / USA / Utah                      |
| EPI_ISL_560907 | 5/4/2020  | 9/29/2020 | North America / USA / Utah                      |
| EPI_ISL_560908 | 5/4/2020  | 9/29/2020 | North America / USA / Utah                      |
| EPI_ISL_560912 | 5/4/2020  | 9/29/2020 | North America / USA / Utah                      |
| EPI_ISL_560913 | 5/4/2020  | 9/29/2020 | North America / USA / Utah                      |
| EPI_ISL_560914 | 5/4/2020  | 9/29/2020 | North America / USA / Utah                      |
| EPI_ISL_560916 | 5/4/2020  | 9/29/2020 | North America / USA / Utah                      |
| EPI_ISL_560917 | 5/4/2020  | 9/29/2020 | North America / USA / Utah                      |
| EPI_ISL_560918 | 5/4/2020  | 9/29/2020 | North America / USA / Utah                      |
| EPI_ISL_560920 | 4/3/2020  | 9/29/2020 | North America / USA / Utah                      |
| EPI_ISL_560921 | 4/3/2020  | 9/29/2020 | North America / USA / Utah                      |
| EPI_ISL_560922 | 4/3/2020  | 9/29/2020 | North America / USA / Utah                      |
| EPI_ISL_560923 | 4/4/2020  | 9/29/2020 | North America / USA / Utah                      |
| EPI_ISL_560924 | 4/4/2020  | 9/29/2020 | North America / USA / Utah                      |
| EPI_ISL_560926 | 5/1/2020  | 9/29/2020 | North America / USA / Texas / Williamson County |
| EPI_ISL_560927 | 5/14/2020 | 9/29/2020 | North America / USA / Texas / Harris County     |
| EPI_ISL_560929 | 6/19/2020 | 9/29/2020 | North America / USA / Texas / Wharton County    |
| EPI_ISL_560930 | 6/21/2020 | 9/29/2020 | North America / USA / Texas / Hidalgo County    |
| EPI_ISL_560931 | 6/21/2020 | 9/29/2020 | North America / USA / Texas / Hidalgo County    |
| EPI_ISL_560932 | 6/21/2020 | 9/29/2020 | North America / USA / Texas / Hidalgo County    |

|                |           |           |                                              |
|----------------|-----------|-----------|----------------------------------------------|
| EPI_ISL_560933 | 6/21/2020 | 9/29/2020 | North America / USA / Texas / Hidalgo County |
| EPI_ISL_560935 | 6/21/2020 | 9/29/2020 | North America / USA / Texas / Hidalgo County |
| EPI_ISL_560936 | 6/21/2020 | 9/29/2020 | North America / USA / Texas / Hidalgo County |
| EPI_ISL_560937 | 6/21/2020 | 9/29/2020 | North America / USA / Texas / Hidalgo County |
| EPI_ISL_560938 | 6/21/2020 | 9/29/2020 | North America / USA / Texas / Hidalgo County |
| EPI_ISL_560939 | 6/21/2020 | 9/29/2020 | North America / USA / Texas / Hidalgo County |
| EPI_ISL_560941 | 6/21/2020 | 9/29/2020 | North America / USA / Texas / Hidalgo County |
| EPI_ISL_560944 | 6/21/2020 | 9/29/2020 | North America / USA / Texas / Hidalgo County |
| EPI_ISL_560947 | 6/21/2020 | 9/29/2020 | North America / USA / Texas / Hidalgo County |
| EPI_ISL_560948 | 6/21/2020 | 9/29/2020 | North America / USA / Texas / Hidalgo County |
| EPI_ISL_560949 | 6/21/2020 | 9/29/2020 | North America / USA / Texas / Hidalgo County |
| EPI_ISL_560951 | 6/21/2020 | 9/29/2020 | North America / USA / Texas / Hidalgo County |
| EPI_ISL_560955 | 6/21/2020 | 9/29/2020 | North America / USA / Texas / Hidalgo County |
| EPI_ISL_560959 | 6/21/2020 | 9/29/2020 | North America / USA / Texas / Hidalgo County |
| EPI_ISL_560960 | 6/23/2020 | 9/29/2020 | North America / USA / Texas / Harris County  |
| EPI_ISL_560962 | 6/23/2020 | 9/29/2020 | North America / USA / Texas / Harris County  |
| EPI_ISL_560965 | 6/23/2020 | 9/29/2020 | North America / USA / Texas / Harris County  |
| EPI_ISL_560966 | 6/23/2020 | 9/29/2020 | North America / USA / Texas / Harris County  |
| EPI_ISL_560967 | 6/23/2020 | 9/29/2020 | North America / USA / Texas / Harris County  |
| EPI_ISL_560968 | 6/23/2020 | 9/29/2020 | North America / USA / Texas / Harris County  |
| EPI_ISL_560969 | 6/23/2020 | 9/29/2020 | North America / USA / Texas / Harris County  |
| EPI_ISL_560972 | 3/10/2020 | 9/30/2020 | Europe / Sweden / Vastmanland                |
| EPI_ISL_560973 | 5/20/2020 | 9/30/2020 | Europe / Sweden / Vastra Gotaland            |
| EPI_ISL_560974 | 6/5/2020  | 9/30/2020 | Europe / Sweden / Stockholm                  |
| EPI_ISL_560975 | 6/13/2020 | 9/30/2020 | Europe / Sweden / Varmland                   |
| EPI_ISL_560976 | 6/15/2020 | 9/30/2020 | Europe / Sweden / Ostergotland               |
| EPI_ISL_560977 | 7/13/2020 | 9/30/2020 | Europe / Sweden / Ostergotland               |
| EPI_ISL_560978 | 7/12/2020 | 9/30/2020 | Europe / Sweden / Ostergotland               |
| EPI_ISL_560979 | 7/11/2020 | 9/30/2020 | Europe / Sweden / Ostergotland               |
| EPI_ISL_560980 | 7/14/2020 | 9/30/2020 | Europe / Sweden / Skane                      |
| EPI_ISL_560981 | 8/9/2020  | 9/30/2020 | Europe / Sweden / Stockholm                  |
| EPI_ISL_560982 | 7/5/2020  | 9/30/2020 | Europe / Sweden / Stockholm                  |
| EPI_ISL_560983 | 7/1/2020  | 9/30/2020 | Europe / Sweden / Stockholm                  |
| EPI_ISL_560984 | 7/3/2020  | 9/30/2020 | Europe / Sweden / Stockholm                  |
| EPI_ISL_560985 | 7/2/2020  | 9/30/2020 | Europe / Sweden / Stockholm                  |
| EPI_ISL_560986 | 7/17/2020 | 9/30/2020 | Europe / Sweden / Vasternorrland             |
| EPI_ISL_560987 | 7/17/2020 | 9/30/2020 | Europe / Sweden / Norrbotten                 |
| EPI_ISL_560988 | 8/11/2020 | 9/30/2020 | Europe / Sweden / Gavleborg                  |
| EPI_ISL_560989 | 8/7/2020  | 9/30/2020 | Europe / Sweden / Stockholm                  |
| EPI_ISL_560990 | 8/6/2020  | 9/30/2020 | Europe / Sweden / Stockholm                  |
| EPI_ISL_560991 | 4/14/2020 | 9/30/2020 | Asia / Indonesia / East Java / Surabaya      |
| EPI_ISL_560992 | 7/30/2020 | 9/30/2020 | Africa / Gambia / Kombo                      |
| EPI_ISL_560994 | 7/30/2020 | 9/30/2020 | Africa / Gambia / Kombo                      |
| EPI_ISL_560995 | 7/30/2020 | 9/30/2020 | Africa / Gambia / Kombo                      |
| EPI_ISL_560997 | 7/30/2020 | 9/30/2020 | Africa / Gambia / Kombo                      |
| EPI_ISL_561000 | 7/30/2020 | 9/30/2020 | Africa / Gambia / Kombo                      |
| EPI_ISL_561001 | 7/30/2020 | 9/30/2020 | Africa / Gambia / Kombo                      |









|                |           |                                                              |
|----------------|-----------|--------------------------------------------------------------|
| EPI_ISL_561279 | 2020      | 9/30/2020 Africa / Gambia / Kombo                            |
| EPI_ISL_561282 | 2020      | 9/30/2020 Africa / Gambia / Kombo                            |
| EPI_ISL_561283 | 8/18/2020 | 9/30/2020 Africa / Gambia / Kombo                            |
| EPI_ISL_561284 | 2020      | 9/30/2020 Africa / Gambia / Kombo                            |
| EPI_ISL_561285 | 6/17/2020 | 9/30/2020 Africa / Gambia / Kombo                            |
| EPI_ISL_561287 | 2020      | 9/30/2020 Africa / Gambia / Kombo                            |
| EPI_ISL_561288 | 8/3/2020  | 9/30/2020 Africa / Gambia / Kombo                            |
| EPI_ISL_561289 | 8/4/2020  | 9/30/2020 Africa / Gambia / Kombo                            |
| EPI_ISL_561290 | 7/23/2020 | 9/30/2020 Africa / Gambia / Kombo                            |
| EPI_ISL_561291 | 7/25/2020 | 9/30/2020 Africa / Gambia / Kombo                            |
| EPI_ISL_561292 | 8/7/2020  | 9/30/2020 Africa / Gambia / Kombo                            |
| EPI_ISL_561293 | 7/25/2020 | 9/30/2020 Africa / Gambia / Kombo                            |
| EPI_ISL_561294 | 7/25/2020 | 9/30/2020 Africa / Gambia / Kombo                            |
| EPI_ISL_561295 | 7/27/2020 | 9/30/2020 Africa / Gambia / Kombo                            |
| EPI_ISL_561296 | 2020      | 9/30/2020 Africa / Gambia / Kombo                            |
| EPI_ISL_561297 | 7/27/2020 | 9/30/2020 Africa / Gambia / Kombo                            |
| EPI_ISL_561298 | 2020      | 9/30/2020 Africa / Gambia / Kombo                            |
| EPI_ISL_561299 | 2020      | 9/30/2020 Africa / Gambia / Kombo                            |
| EPI_ISL_561300 | 2020      | 9/30/2020 Africa / Gambia / Kombo                            |
| EPI_ISL_561303 | 2020      | 9/30/2020 Africa / Gambia / Kombo                            |
| EPI_ISL_561304 | 7/26/2020 | 9/30/2020 Africa / Gambia / Kombo                            |
| EPI_ISL_561305 | 2020      | 9/30/2020 Africa / Gambia / Kombo                            |
| EPI_ISL_561306 | 2020      | 9/30/2020 Africa / Gambia / Kombo                            |
| EPI_ISL_561307 | 2020      | 9/30/2020 Africa / Gambia / Kombo                            |
| EPI_ISL_561308 | 2020      | 9/30/2020 Africa / Gambia / Kombo                            |
| EPI_ISL_561309 | 7/28/2020 | 9/30/2020 Africa / Gambia / Kombo                            |
| EPI_ISL_561310 | 7/17/2020 | 9/30/2020 Africa / Gambia / Kombo                            |
| EPI_ISL_561311 | 2020      | 9/30/2020 Africa / Gambia / Kombo                            |
| EPI_ISL_561313 | 2020      | 9/30/2020 Africa / Gambia / Kombo                            |
| EPI_ISL_561314 | 2020      | 9/30/2020 Africa / Gambia / Kombo                            |
| EPI_ISL_561315 | 7/28/2020 | 9/30/2020 Africa / Gambia / Kombo                            |
| EPI_ISL_561324 | 2020      | 9/30/2020 Africa / Gambia / Kombo                            |
| EPI_ISL_561327 | 2020      | 9/30/2020 Africa / Gambia / Kombo                            |
| EPI_ISL_561330 | 2020      | 9/30/2020 Africa / Gambia / Kombo                            |
| EPI_ISL_561332 | 2020      | 9/30/2020 Africa / Gambia / Kombo                            |
| EPI_ISL_561333 | 2020      | 9/30/2020 Africa / Gambia / Kombo                            |
| EPI_ISL_561335 | 3/22/2020 | 9/30/2020 North America / USA / Delaware / Sussex County     |
| EPI_ISL_561339 | 8/25/2020 | 9/30/2020 Asia / India / Haryana                             |
| EPI_ISL_561340 | 8/25/2020 | 9/30/2020 Asia / India / Haryana                             |
| EPI_ISL_561341 | 8/25/2020 | 9/30/2020 Asia / India / Haryana                             |
| EPI_ISL_561343 | 8/27/2020 | 9/30/2020 Asia / India / Haryana                             |
| EPI_ISL_561344 | 4/30/2020 | 9/30/2020 Asia / India / Punjab                              |
| EPI_ISL_561345 | 3/23/2020 | 9/30/2020 North America / USA / Delaware / New Castle County |
| EPI_ISL_561346 | 3/24/2020 | 9/30/2020 North America / USA / Delaware / New Castle County |
| EPI_ISL_561351 | 3/21/2020 | 9/30/2020 North America / USA / Delaware / New Castle County |
| EPI_ISL_561352 | 3/21/2020 | 9/30/2020 North America / USA / Delaware / New Castle County |
| EPI_ISL_561353 | 3/11/2020 | 9/30/2020 North America / USA / Delaware / New Castle County |

|                |           |                                                                |
|----------------|-----------|----------------------------------------------------------------|
| EPI_ISL_561356 | 3/16/2020 | 9/30/2020 North America / USA / Delaware / Kent County         |
| EPI_ISL_561358 | 3/17/2020 | 9/30/2020 North America / USA / Delaware / Kent County         |
| EPI_ISL_561370 | 3/26/2020 | 9/30/2020 Africa / Canary Islands / Las Palmas de Gran Canaria |
| EPI_ISL_561371 | 4/6/2020  | 9/30/2020 Africa / Canary Islands / Las Palmas de Gran Canaria |
| EPI_ISL_561372 | 6/18/2020 | 9/30/2020 Africa / Canary Islands / Las Palmas de Gran Canaria |
| EPI_ISL_561373 | 3/12/2020 | 9/30/2020 Europe / United Kingdom / England / London           |
| EPI_ISL_562168 | 8/3/2020  | 9/30/2020 Oceania / Australia / Victoria                       |
| EPI_ISL_562169 | 8/19/2020 | 9/30/2020 Oceania / Australia / Victoria                       |
| EPI_ISL_562170 | 7/24/2020 | 9/30/2020 Oceania / Australia / Victoria                       |
| EPI_ISL_562171 | 7/22/2020 | 9/30/2020 Oceania / Australia / Victoria                       |
| EPI_ISL_562172 | 8/29/2020 | 9/30/2020 Oceania / Australia / Victoria                       |
| EPI_ISL_562173 | 9/3/2020  | 9/30/2020 Oceania / Australia / Victoria                       |
| EPI_ISL_562174 | 8/26/2020 | 9/30/2020 Oceania / Australia / Victoria                       |
| EPI_ISL_562591 | 9/1/2020  | 9/30/2020 Oceania / Australia / Victoria                       |
| EPI_ISL_562592 | 9/1/2020  | 9/30/2020 Oceania / Australia / Victoria                       |
| EPI_ISL_562593 | 9/3/2020  | 9/30/2020 Oceania / Australia / Victoria                       |
| EPI_ISL_562594 | 9/11/2020 | 9/30/2020 Oceania / Australia / Victoria                       |
| EPI_ISL_562595 | 9/4/2020  | 9/30/2020 Oceania / Australia / Victoria                       |
| EPI_ISL_562596 | 8/22/2020 | 9/30/2020 Oceania / Australia / Victoria                       |
| EPI_ISL_562597 | 8/26/2020 | 9/30/2020 Oceania / Australia / Victoria                       |
| EPI_ISL_562598 | 9/1/2020  | 9/30/2020 Oceania / Australia / Victoria                       |
| EPI_ISL_562599 | 9/5/2020  | 9/30/2020 Oceania / Australia / Victoria                       |
| EPI_ISL_562600 | 8/13/2020 | 9/30/2020 Oceania / Australia / Victoria                       |
| EPI_ISL_562601 | 8/7/2020  | 9/30/2020 Oceania / Australia / Victoria                       |
| EPI_ISL_562602 | 8/2/2020  | 9/30/2020 Oceania / Australia / Victoria                       |
| EPI_ISL_562603 | 9/3/2020  | 9/30/2020 Oceania / Australia / Victoria                       |
| EPI_ISL_562604 | 9/7/2020  | 9/30/2020 Oceania / Australia / Victoria                       |
| EPI_ISL_562605 | 9/4/2020  | 9/30/2020 Oceania / Australia / Victoria                       |
| EPI_ISL_562606 | 7/30/2020 | 9/30/2020 Oceania / Australia / Victoria                       |
| EPI_ISL_562607 | 7/30/2020 | 9/30/2020 Oceania / Australia / Victoria                       |
| EPI_ISL_562608 | 7/30/2020 | 9/30/2020 Oceania / Australia / Victoria                       |
| EPI_ISL_562609 | 9/8/2020  | 9/30/2020 Oceania / Australia / Victoria                       |
| EPI_ISL_562610 | 8/12/2020 | 9/30/2020 Oceania / Australia / Victoria                       |
| EPI_ISL_562611 | 8/4/2020  | 9/30/2020 Oceania / Australia / Victoria                       |
| EPI_ISL_562612 | 8/24/2020 | 9/30/2020 Oceania / Australia / Victoria                       |
| EPI_ISL_562613 | 8/29/2020 | 9/30/2020 Oceania / Australia / Victoria                       |
| EPI_ISL_562614 | 8/22/2020 | 9/30/2020 Oceania / Australia / Victoria                       |
| EPI_ISL_562615 | 9/13/2020 | 9/30/2020 Oceania / Australia / Victoria                       |
| EPI_ISL_562616 | 9/9/2020  | 9/30/2020 Oceania / Australia / Victoria                       |
| EPI_ISL_562617 | 8/15/2020 | 9/30/2020 Oceania / Australia / Victoria                       |
| EPI_ISL_562618 | 8/2/2020  | 9/30/2020 Oceania / Australia / Victoria                       |
| EPI_ISL_562619 | 8/3/2020  | 9/30/2020 Oceania / Australia / Victoria                       |
| EPI_ISL_562620 | 9/14/2020 | 9/30/2020 Oceania / Australia / Victoria                       |
| EPI_ISL_562621 | 8/18/2020 | 9/30/2020 Oceania / Australia / Victoria                       |
| EPI_ISL_562622 | 9/17/2020 | 9/30/2020 Oceania / Australia / Victoria                       |
| EPI_ISL_562623 | 8/16/2020 | 9/30/2020 Oceania / Australia / Victoria                       |
| EPI_ISL_562624 | 8/18/2020 | 9/30/2020 Oceania / Australia / Victoria                       |















|                |           |                                          |
|----------------|-----------|------------------------------------------|
| EPI_ISL_562910 | 9/2/2020  | 9/30/2020 Oceania / Australia / Victoria |
| EPI_ISL_562911 | 9/5/2020  | 9/30/2020 Oceania / Australia / Victoria |
| EPI_ISL_562912 | 9/4/2020  | 9/30/2020 Oceania / Australia / Victoria |
| EPI_ISL_562913 | 9/5/2020  | 9/30/2020 Oceania / Australia / Victoria |
| EPI_ISL_562914 | 9/4/2020  | 9/30/2020 Oceania / Australia / Victoria |
| EPI_ISL_562915 | 7/27/2020 | 9/30/2020 Oceania / Australia / Victoria |
| EPI_ISL_562916 | 9/4/2020  | 9/30/2020 Oceania / Australia / Victoria |
| EPI_ISL_562917 | 8/31/2020 | 9/30/2020 Oceania / Australia / Victoria |
| EPI_ISL_562918 | 9/1/2020  | 9/30/2020 Oceania / Australia / Victoria |
| EPI_ISL_562919 | 7/13/2020 | 9/30/2020 Oceania / Australia / Victoria |
| EPI_ISL_562920 | 9/4/2020  | 9/30/2020 Oceania / Australia / Victoria |
| EPI_ISL_562921 | 7/14/2020 | 9/30/2020 Oceania / Australia / Victoria |
| EPI_ISL_562922 | 7/21/2020 | 9/30/2020 Oceania / Australia / Victoria |
| EPI_ISL_562923 | 7/18/2020 | 9/30/2020 Oceania / Australia / Victoria |
| EPI_ISL_562924 | 8/24/2020 | 9/30/2020 Oceania / Australia / Victoria |
| EPI_ISL_562925 | 8/28/2020 | 9/30/2020 Oceania / Australia / Victoria |
| EPI_ISL_562926 | 8/31/2020 | 9/30/2020 Oceania / Australia / Victoria |
| EPI_ISL_562927 | 7/18/2020 | 9/30/2020 Oceania / Australia / Victoria |
| EPI_ISL_562928 | 7/17/2020 | 9/30/2020 Oceania / Australia / Victoria |
| EPI_ISL_562929 | 8/24/2020 | 9/30/2020 Oceania / Australia / Victoria |
| EPI_ISL_562930 | 8/28/2020 | 9/30/2020 Oceania / Australia / Victoria |
| EPI_ISL_562931 | 7/13/2020 | 9/30/2020 Oceania / Australia / Victoria |
| EPI_ISL_562932 | 9/2/2020  | 9/30/2020 Oceania / Australia / Victoria |
| EPI_ISL_562933 | 9/7/2020  | 9/30/2020 Oceania / Australia / Victoria |
| EPI_ISL_562934 | 9/4/2020  | 9/30/2020 Oceania / Australia / Victoria |
| EPI_ISL_562935 | 9/4/2020  | 9/30/2020 Oceania / Australia / Victoria |
| EPI_ISL_562936 | 8/31/2020 | 9/30/2020 Oceania / Australia / Victoria |
| EPI_ISL_562937 | 8/10/2020 | 9/30/2020 Oceania / Australia / Victoria |
| EPI_ISL_562938 | 9/7/2020  | 9/30/2020 Oceania / Australia / Victoria |
| EPI_ISL_562939 | 8/31/2020 | 9/30/2020 Oceania / Australia / Victoria |
| EPI_ISL_562940 | 9/1/2020  | 9/30/2020 Oceania / Australia / Victoria |
| EPI_ISL_562941 | 9/6/2020  | 9/30/2020 Oceania / Australia / Victoria |
| EPI_ISL_562942 | 9/2/2020  | 9/30/2020 Oceania / Australia / Victoria |
| EPI_ISL_562943 | 9/4/2020  | 9/30/2020 Oceania / Australia / Victoria |
| EPI_ISL_562944 | 9/6/2020  | 9/30/2020 Oceania / Australia / Victoria |
| EPI_ISL_562945 | 8/7/2020  | 9/30/2020 Oceania / Australia / Victoria |
| EPI_ISL_562946 | 8/27/2020 | 9/30/2020 Oceania / Australia / Victoria |
| EPI_ISL_562947 | 7/13/2020 | 9/30/2020 Oceania / Australia / Victoria |
| EPI_ISL_562948 | 8/2/2020  | 9/30/2020 Oceania / Australia / Victoria |
| EPI_ISL_562949 | 7/17/2020 | 9/30/2020 Oceania / Australia / Victoria |
| EPI_ISL_562950 | 8/30/2020 | 9/30/2020 Oceania / Australia / Victoria |
| EPI_ISL_562951 | 8/25/2020 | 9/30/2020 Oceania / Australia / Victoria |
| EPI_ISL_562952 | 9/7/2020  | 9/30/2020 Oceania / Australia / Victoria |
| EPI_ISL_562953 | 8/3/2020  | 9/30/2020 Oceania / Australia / Victoria |
| EPI_ISL_562954 | 7/29/2020 | 9/30/2020 Oceania / Australia / Victoria |
| EPI_ISL_562955 | 9/4/2020  | 9/30/2020 Oceania / Australia / Victoria |
| EPI_ISL_562956 | 7/16/2020 | 9/30/2020 Oceania / Australia / Victoria |







|                |           |                                          |
|----------------|-----------|------------------------------------------|
| EPI_ISL_563051 | 8/3/2020  | 9/30/2020 Oceania / Australia / Victoria |
| EPI_ISL_563052 | 2020      | 9/30/2020 Oceania / Australia / Victoria |
| EPI_ISL_563053 | 9/3/2020  | 9/30/2020 Oceania / Australia / Victoria |
| EPI_ISL_563054 | 9/1/2020  | 9/30/2020 Oceania / Australia / Victoria |
| EPI_ISL_563055 | 9/6/2020  | 9/30/2020 Oceania / Australia / Victoria |
| EPI_ISL_563056 | 7/31/2020 | 9/30/2020 Oceania / Australia / Victoria |
| EPI_ISL_563057 | 7/30/2020 | 9/30/2020 Oceania / Australia / Victoria |
| EPI_ISL_563058 | 8/2/2020  | 9/30/2020 Oceania / Australia / Victoria |
| EPI_ISL_563059 | 9/5/2020  | 9/30/2020 Oceania / Australia / Victoria |
| EPI_ISL_563060 | 9/3/2020  | 9/30/2020 Oceania / Australia / Victoria |
| EPI_ISL_563061 | 9/5/2020  | 9/30/2020 Oceania / Australia / Victoria |
| EPI_ISL_563062 | 9/2/2020  | 9/30/2020 Oceania / Australia / Victoria |
| EPI_ISL_563063 | 9/4/2020  | 9/30/2020 Oceania / Australia / Victoria |
| EPI_ISL_563064 | 8/31/2020 | 9/30/2020 Oceania / Australia / Victoria |
| EPI_ISL_563065 | 8/31/2020 | 9/30/2020 Oceania / Australia / Victoria |
| EPI_ISL_563066 | 7/30/2020 | 9/30/2020 Oceania / Australia / Victoria |
| EPI_ISL_563067 | 7/31/2020 | 9/30/2020 Oceania / Australia / Victoria |
| EPI_ISL_563068 | 9/1/2020  | 9/30/2020 Oceania / Australia / Victoria |
| EPI_ISL_563069 | 8/3/2020  | 9/30/2020 Oceania / Australia / Victoria |
| EPI_ISL_563070 | 8/3/2020  | 9/30/2020 Oceania / Australia / Victoria |
| EPI_ISL_563071 | 9/1/2020  | 9/30/2020 Oceania / Australia / Victoria |
| EPI_ISL_563072 | 7/30/2020 | 9/30/2020 Oceania / Australia / Victoria |
| EPI_ISL_563073 | 7/31/2020 | 9/30/2020 Oceania / Australia / Victoria |
| EPI_ISL_563074 | 9/3/2020  | 9/30/2020 Oceania / Australia / Victoria |
| EPI_ISL_563075 | 9/2/2020  | 9/30/2020 Oceania / Australia / Victoria |
| EPI_ISL_563076 | 9/6/2020  | 9/30/2020 Oceania / Australia / Victoria |
| EPI_ISL_563077 | 9/1/2020  | 9/30/2020 Oceania / Australia / Victoria |
| EPI_ISL_563078 | 7/30/2020 | 9/30/2020 Oceania / Australia / Victoria |
| EPI_ISL_563079 | 9/1/2020  | 9/30/2020 Oceania / Australia / Victoria |
| EPI_ISL_563080 | 9/3/2020  | 9/30/2020 Oceania / Australia / Victoria |
| EPI_ISL_563081 | 8/2/2020  | 9/30/2020 Oceania / Australia / Victoria |
| EPI_ISL_563082 | 8/31/2020 | 9/30/2020 Oceania / Australia / Victoria |
| EPI_ISL_563083 | 9/2/2020  | 9/30/2020 Oceania / Australia / Victoria |
| EPI_ISL_563084 | 9/5/2020  | 9/30/2020 Oceania / Australia / Victoria |
| EPI_ISL_563085 | 9/6/2020  | 9/30/2020 Oceania / Australia / Victoria |
| EPI_ISL_563086 | 9/3/2020  | 9/30/2020 Oceania / Australia / Victoria |
| EPI_ISL_563087 | 8/31/2020 | 9/30/2020 Oceania / Australia / Victoria |
| EPI_ISL_563088 | 9/1/2020  | 9/30/2020 Oceania / Australia / Victoria |
| EPI_ISL_563089 | 7/30/2020 | 9/30/2020 Oceania / Australia / Victoria |
| EPI_ISL_563090 | 9/2/2020  | 9/30/2020 Oceania / Australia / Victoria |
| EPI_ISL_563091 | 7/31/2020 | 9/30/2020 Oceania / Australia / Victoria |
| EPI_ISL_563092 | 7/30/2020 | 9/30/2020 Oceania / Australia / Victoria |
| EPI_ISL_563093 | 9/1/2020  | 9/30/2020 Oceania / Australia / Victoria |
| EPI_ISL_563094 | 7/31/2020 | 9/30/2020 Oceania / Australia / Victoria |
| EPI_ISL_563095 | 9/6/2020  | 9/30/2020 Oceania / Australia / Victoria |
| EPI_ISL_563096 | 7/30/2020 | 9/30/2020 Oceania / Australia / Victoria |
| EPI_ISL_563097 | 7/30/2020 | 9/30/2020 Oceania / Australia / Victoria |



































|                |           |                                          |
|----------------|-----------|------------------------------------------|
| EPI_ISL_563804 | 8/14/2020 | 9/30/2020 Oceania / Australia / Victoria |
| EPI_ISL_563805 | 8/13/2020 | 9/30/2020 Oceania / Australia / Victoria |
| EPI_ISL_563806 | 8/14/2020 | 9/30/2020 Oceania / Australia / Victoria |
| EPI_ISL_563807 | 8/20/2020 | 9/30/2020 Oceania / Australia / Victoria |
| EPI_ISL_563808 | 4/13/2020 | 9/30/2020 Oceania / Australia / Victoria |
| EPI_ISL_563809 | 9/15/2020 | 9/30/2020 Oceania / Australia / Victoria |
| EPI_ISL_563810 | 9/2/2020  | 9/30/2020 Oceania / Australia / Victoria |
| EPI_ISL_563811 | 9/14/2020 | 9/30/2020 Oceania / Australia / Victoria |
| EPI_ISL_563812 | 8/20/2020 | 9/30/2020 Oceania / Australia / Victoria |
| EPI_ISL_563813 | 9/4/2020  | 9/30/2020 Oceania / Australia / Victoria |
| EPI_ISL_563814 | 8/20/2020 | 9/30/2020 Oceania / Australia / Victoria |
| EPI_ISL_563815 | 8/17/2020 | 9/30/2020 Oceania / Australia / Victoria |
| EPI_ISL_563816 | 8/17/2020 | 9/30/2020 Oceania / Australia / Victoria |
| EPI_ISL_563817 | 3/19/2020 | 9/30/2020 Oceania / Australia / Victoria |
| EPI_ISL_563818 | 8/18/2020 | 9/30/2020 Oceania / Australia / Victoria |
| EPI_ISL_563819 | 8/26/2020 | 9/30/2020 Oceania / Australia / Victoria |
| EPI_ISL_563820 | 3/24/2020 | 9/30/2020 Oceania / Australia / Victoria |
| EPI_ISL_563821 | 9/16/2020 | 9/30/2020 Oceania / Australia / Victoria |
| EPI_ISL_563822 | 8/27/2020 | 9/30/2020 Oceania / Australia / Victoria |
| EPI_ISL_563823 | 9/15/2020 | 9/30/2020 Oceania / Australia / Victoria |
| EPI_ISL_563824 | 8/26/2020 | 9/30/2020 Oceania / Australia / Victoria |
| EPI_ISL_563825 | 9/14/2020 | 9/30/2020 Oceania / Australia / Victoria |
| EPI_ISL_563826 | 8/30/2020 | 9/30/2020 Oceania / Australia / Victoria |
| EPI_ISL_563827 | 9/4/2020  | 9/30/2020 Oceania / Australia / Victoria |
| EPI_ISL_563828 | 9/3/2020  | 9/30/2020 Oceania / Australia / Victoria |
| EPI_ISL_563829 | 9/16/2020 | 9/30/2020 Oceania / Australia / Victoria |
| EPI_ISL_563830 | 7/20/2020 | 9/30/2020 Oceania / Australia / Victoria |
| EPI_ISL_563831 | 8/18/2020 | 9/30/2020 Oceania / Australia / Victoria |
| EPI_ISL_563832 | 3/24/2020 | 9/30/2020 Oceania / Australia / Victoria |
| EPI_ISL_563833 | 8/25/2020 | 9/30/2020 Oceania / Australia / Victoria |
| EPI_ISL_563834 | 9/16/2020 | 9/30/2020 Oceania / Australia / Victoria |
| EPI_ISL_563835 | 9/16/2020 | 9/30/2020 Oceania / Australia / Victoria |
| EPI_ISL_563836 | 8/26/2020 | 9/30/2020 Oceania / Australia / Victoria |
| EPI_ISL_563837 | 8/17/2020 | 9/30/2020 Oceania / Australia / Victoria |
| EPI_ISL_563838 | 8/21/2020 | 9/30/2020 Oceania / Australia / Victoria |
| EPI_ISL_563839 | 8/28/2020 | 9/30/2020 Oceania / Australia / Victoria |
| EPI_ISL_563840 | 9/13/2020 | 9/30/2020 Oceania / Australia / Victoria |
| EPI_ISL_563841 | 9/14/2020 | 9/30/2020 Oceania / Australia / Victoria |
| EPI_ISL_563842 | 9/14/2020 | 9/30/2020 Oceania / Australia / Victoria |
| EPI_ISL_563843 | 9/15/2020 | 9/30/2020 Oceania / Australia / Victoria |
| EPI_ISL_563844 | 9/15/2020 | 9/30/2020 Oceania / Australia / Victoria |
| EPI_ISL_563845 | 8/27/2020 | 9/30/2020 Oceania / Australia / Victoria |
| EPI_ISL_563846 | 9/15/2020 | 9/30/2020 Oceania / Australia / Victoria |
| EPI_ISL_563847 | 8/20/2020 | 9/30/2020 Oceania / Australia / Victoria |
| EPI_ISL_563848 | 8/26/2020 | 9/30/2020 Oceania / Australia / Victoria |
| EPI_ISL_563849 | 9/14/2020 | 9/30/2020 Oceania / Australia / Victoria |
| EPI_ISL_563850 | 9/13/2020 | 9/30/2020 Oceania / Australia / Victoria |































































































|                |           |                                                              |
|----------------|-----------|--------------------------------------------------------------|
| EPI_ISL_565829 | 8/25/2020 | 9/30/2020 Oceania / Australia / Victoria                     |
| EPI_ISL_565830 | 3/23/2020 | 9/30/2020 North America / USA / Delaware / New Castle County |
| EPI_ISL_565832 | 3/24/2020 | 9/30/2020 North America / USA / Delaware / Kent County       |
| EPI_ISL_565837 | 4/13/2020 | 9/30/2020 North America / USA / Michigan                     |
| EPI_ISL_565838 | 4/13/2020 | 9/30/2020 North America / USA / Michigan                     |
| EPI_ISL_565843 | 7/6/2020  | 9/30/2020 North America / USA / Michigan                     |
| EPI_ISL_565846 | 7/6/2020  | 9/30/2020 North America / USA / Michigan                     |
| EPI_ISL_565849 | 7/7/2020  | 9/30/2020 North America / USA / Michigan                     |
| EPI_ISL_565853 | 7/15/2020 | 9/30/2020 North America / USA / Michigan                     |
| EPI_ISL_565855 | 7/21/2020 | 9/30/2020 North America / USA / Michigan                     |
| EPI_ISL_565873 | 3/24/2020 | 9/30/2020 North America / USA / Michigan                     |
| EPI_ISL_565881 | 4/16/2020 | 9/30/2020 North America / USA / Michigan                     |
| EPI_ISL_565884 | 4/15/2020 | 9/30/2020 North America / USA / Michigan                     |
| EPI_ISL_565949 | 4/13/2020 | 9/30/2020 North America / USA / Michigan                     |
| EPI_ISL_565951 | 4/2/2020  | 9/30/2020 North America / USA / Michigan                     |
| EPI_ISL_565953 | 4/1/2020  | 9/30/2020 North America / USA / Michigan                     |
| EPI_ISL_565954 | 4/6/2020  | 9/30/2020 North America / USA / Michigan                     |
| EPI_ISL_565955 | 4/3/2020  | 9/30/2020 North America / USA / Michigan                     |
| EPI_ISL_565956 | 3/30/2020 | 9/30/2020 North America / USA / Michigan                     |
| EPI_ISL_565957 | 4/3/2020  | 9/30/2020 North America / USA / Michigan                     |
| EPI_ISL_565958 | 3/25/2020 | 9/30/2020 North America / USA / Michigan                     |
| EPI_ISL_565959 | 3/28/2020 | 9/30/2020 North America / USA / Michigan                     |
| EPI_ISL_565960 | 4/7/2020  | 9/30/2020 North America / USA / Michigan                     |
| EPI_ISL_565961 | 3/15/2020 | 9/30/2020 North America / USA / Michigan                     |
| EPI_ISL_565962 | 3/29/2020 | 9/30/2020 North America / USA / Michigan                     |
| EPI_ISL_565963 | 4/6/2020  | 9/30/2020 North America / USA / Michigan                     |
| EPI_ISL_565964 | 4/14/2020 | 9/30/2020 North America / USA / Michigan                     |
| EPI_ISL_565965 | 3/26/2020 | 9/30/2020 North America / USA / Michigan                     |
| EPI_ISL_565966 | 4/6/2020  | 9/30/2020 North America / USA / Michigan                     |
| EPI_ISL_565967 | 4/3/2020  | 9/30/2020 North America / USA / Michigan                     |
| EPI_ISL_565968 | 4/9/2020  | 9/30/2020 North America / USA / Michigan                     |
| EPI_ISL_565969 | 4/11/2020 | 9/30/2020 North America / USA / Michigan                     |
| EPI_ISL_565970 | 4/13/2020 | 9/30/2020 North America / USA / Michigan                     |
| EPI_ISL_565971 | 3/9/2020  | 9/30/2020 North America / USA / Michigan                     |
| EPI_ISL_565972 | 3/27/2020 | 9/30/2020 North America / USA / Michigan                     |
| EPI_ISL_565973 | 3/31/2020 | 9/30/2020 North America / USA / Michigan                     |
| EPI_ISL_565974 | 3/31/2020 | 9/30/2020 North America / USA / Michigan                     |
| EPI_ISL_565975 | 4/6/2020  | 9/30/2020 North America / USA / Michigan                     |
| EPI_ISL_565976 | 4/3/2020  | 9/30/2020 North America / USA / Michigan                     |
| EPI_ISL_565977 | 4/13/2020 | 9/30/2020 North America / USA / Michigan                     |
| EPI_ISL_565978 | 3/31/2020 | 9/30/2020 North America / USA / Michigan                     |
| EPI_ISL_565979 | 4/12/2020 | 9/30/2020 North America / USA / Michigan                     |
| EPI_ISL_565980 | 4/6/2020  | 9/30/2020 North America / USA / Michigan                     |
| EPI_ISL_565981 | 3/20/2020 | 9/30/2020 North America / USA / Michigan                     |
| EPI_ISL_565982 | 4/6/2020  | 9/30/2020 North America / USA / Michigan                     |
| EPI_ISL_565983 | 4/8/2020  | 9/30/2020 North America / USA / Michigan                     |
| EPI_ISL_565984 | 3/19/2020 | 9/30/2020 North America / USA / Michigan                     |

|                |           |                                             |
|----------------|-----------|---------------------------------------------|
| EPI_ISL_565985 | 4/8/2020  | 9/30/2020 North America / USA / Michigan    |
| EPI_ISL_565986 | 4/9/2020  | 9/30/2020 North America / USA / Michigan    |
| EPI_ISL_565987 | 4/2/2020  | 9/30/2020 North America / USA / Michigan    |
| EPI_ISL_565988 | 4/12/2020 | 9/30/2020 North America / USA / Michigan    |
| EPI_ISL_565989 | 4/6/2020  | 9/30/2020 North America / USA / Michigan    |
| EPI_ISL_566019 | 4/6/2020  | 9/30/2020 North America / USA / Michigan    |
| EPI_ISL_566020 | 8/23/2020 | 9/30/2020 North America / USA / Michigan    |
| EPI_ISL_566021 | 3/14/2020 | 9/30/2020 North America / USA / Michigan    |
| EPI_ISL_566022 | 8/17/2020 | 9/30/2020 North America / USA / Michigan    |
| EPI_ISL_566023 | 8/18/2020 | 9/30/2020 North America / USA / Michigan    |
| EPI_ISL_566024 | 3/15/2020 | 9/30/2020 North America / USA / Michigan    |
| EPI_ISL_566025 | 6/26/2020 | 9/30/2020 North America / USA / Michigan    |
| EPI_ISL_566026 | 8/25/2020 | 9/30/2020 North America / USA / Michigan    |
| EPI_ISL_566027 | 8/12/2020 | 9/30/2020 North America / USA / Michigan    |
| EPI_ISL_566028 | 3/16/2020 | 9/30/2020 North America / USA / Michigan    |
| EPI_ISL_566029 | 8/15/2020 | 9/30/2020 North America / USA / Michigan    |
| EPI_ISL_566030 | 6/15/2020 | 9/30/2020 North America / USA / Michigan    |
| EPI_ISL_566031 | 8/10/2020 | 9/30/2020 North America / USA / Michigan    |
| EPI_ISL_566032 | 8/15/2020 | 9/30/2020 North America / USA / Michigan    |
| EPI_ISL_566033 | 8/23/2020 | 9/30/2020 North America / USA / Michigan    |
| EPI_ISL_566034 | 8/24/2020 | 9/30/2020 North America / USA / Michigan    |
| EPI_ISL_566035 | 7/31/2020 | 9/30/2020 North America / USA / Michigan    |
| EPI_ISL_566047 | 3/6/2020  | 10/1/2020 Europe / United Kingdom / England |
| EPI_ISL_566048 | 3/7/2020  | 10/1/2020 Europe / United Kingdom / England |
| EPI_ISL_566049 | 3/8/2020  | 10/1/2020 Europe / United Kingdom / England |
| EPI_ISL_566050 | 6/1/2020  | 10/1/2020 Europe / United Kingdom / England |
| EPI_ISL_566051 | 6/2/2020  | 10/1/2020 Europe / United Kingdom / England |
| EPI_ISL_566052 | 6/15/2020 | 10/1/2020 Europe / United Kingdom / England |
| EPI_ISL_566053 | 6/18/2020 | 10/1/2020 Europe / United Kingdom / England |
| EPI_ISL_566054 | 6/5/2020  | 10/1/2020 Europe / United Kingdom / England |
| EPI_ISL_566055 | 6/22/2020 | 10/1/2020 Europe / United Kingdom / England |
| EPI_ISL_566056 | 6/23/2020 | 10/1/2020 Europe / United Kingdom / England |
| EPI_ISL_566057 | 6/24/2020 | 10/1/2020 Europe / United Kingdom / England |
| EPI_ISL_566058 | 7/30/2020 | 10/1/2020 Europe / United Kingdom / England |
| EPI_ISL_566059 | 7/1/2020  | 10/1/2020 Europe / United Kingdom / England |
| EPI_ISL_566060 | 7/7/2020  | 10/1/2020 Europe / United Kingdom / England |
| EPI_ISL_566061 | 7/2/2020  | 10/1/2020 Europe / United Kingdom / England |
| EPI_ISL_566062 | 7/10/2020 | 10/1/2020 Europe / United Kingdom / England |
| EPI_ISL_566063 | 7/21/2020 | 10/1/2020 Europe / United Kingdom / England |
| EPI_ISL_566064 | 7/29/2020 | 10/1/2020 Europe / United Kingdom / England |
| EPI_ISL_566065 | 8/8/2020  | 10/1/2020 Europe / United Kingdom / England |
| EPI_ISL_566066 | 8/13/2020 | 10/1/2020 Europe / United Kingdom / England |
| EPI_ISL_566067 | 8/18/2020 | 10/1/2020 Europe / United Kingdom / England |
| EPI_ISL_566068 | 8/19/2020 | 10/1/2020 Europe / United Kingdom / England |
| EPI_ISL_566069 | 8/27/2020 | 10/1/2020 Europe / United Kingdom / England |
| EPI_ISL_566070 | 8/27/2020 | 10/1/2020 Europe / United Kingdom / England |
| EPI_ISL_566071 | 8/27/2020 | 10/1/2020 Europe / United Kingdom / England |

|                |           |                                                              |
|----------------|-----------|--------------------------------------------------------------|
| EPI_ISL_566072 | 8/26/2020 | 10/1/2020 Europe / United Kingdom / England                  |
| EPI_ISL_566073 | 8/27/2020 | 10/1/2020 Europe / United Kingdom / England                  |
| EPI_ISL_566074 | 9/2/2020  | 10/1/2020 Europe / United Kingdom / England                  |
| EPI_ISL_566077 | 6/16/2020 | 10/1/2020 Europe / Russia / Moscow                           |
| EPI_ISL_566078 | 6/22/2020 | 10/1/2020 Europe / Russia / Moscow                           |
| EPI_ISL_566079 | 6/19/2020 | 10/1/2020 Europe / Russia / Moscow                           |
| EPI_ISL_566080 | 6/25/2020 | 10/1/2020 Europe / Russia / Moscow                           |
| EPI_ISL_566081 | 6/8/2020  | 10/1/2020 Europe / Russia / Moscow                           |
| EPI_ISL_566082 | 6/18/2020 | 10/1/2020 Europe / Russia / Moscow                           |
| EPI_ISL_566083 | 6/18/2020 | 10/1/2020 Europe / Russia / Moscow                           |
| EPI_ISL_566084 | 3/19/2020 | 10/1/2020 North America / USA / Delaware / Sussex County     |
| EPI_ISL_566085 | 6/29/2020 | 10/1/2020 North America / USA / Georgia                      |
| EPI_ISL_566086 | 6/29/2020 | 10/1/2020 North America / USA / Georgia                      |
| EPI_ISL_566087 | 6/25/2020 | 10/1/2020 North America / USA / Georgia                      |
| EPI_ISL_566088 | 6/25/2020 | 10/1/2020 North America / USA / Georgia                      |
| EPI_ISL_566089 | 6/29/2020 | 10/1/2020 North America / USA / Georgia                      |
| EPI_ISL_566090 | 6/29/2020 | 10/1/2020 North America / USA / Georgia                      |
| EPI_ISL_566091 | 7/1/2020  | 10/1/2020 North America / USA / Georgia                      |
| EPI_ISL_566092 | 6/30/2020 | 10/1/2020 North America / USA / Georgia                      |
| EPI_ISL_566093 | 6/30/2020 | 10/1/2020 North America / USA / Georgia                      |
| EPI_ISL_566094 | 6/29/2020 | 10/1/2020 North America / USA / Georgia                      |
| EPI_ISL_566095 | 7/3/2020  | 10/1/2020 North America / USA / Georgia                      |
| EPI_ISL_566096 | 6/27/2020 | 10/1/2020 North America / USA / Georgia                      |
| EPI_ISL_566097 | 6/29/2020 | 10/1/2020 North America / USA / Georgia                      |
| EPI_ISL_566098 | 6/29/2020 | 10/1/2020 North America / USA / Georgia                      |
| EPI_ISL_566099 | 6/30/2020 | 10/1/2020 North America / USA / Georgia                      |
| EPI_ISL_566100 | 6/30/2020 | 10/1/2020 North America / USA / Georgia                      |
| EPI_ISL_566101 | 7/3/2020  | 10/1/2020 North America / USA / Georgia                      |
| EPI_ISL_566102 | 6/26/2020 | 10/1/2020 North America / USA / Georgia                      |
| EPI_ISL_566103 | 7/1/2020  | 10/1/2020 North America / USA / Georgia                      |
| EPI_ISL_566104 | 6/27/2020 | 10/1/2020 North America / USA / Georgia                      |
| EPI_ISL_566105 | 6/29/2020 | 10/1/2020 North America / USA / Georgia                      |
| EPI_ISL_566106 | 7/2/2020  | 10/1/2020 North America / USA / Georgia                      |
| EPI_ISL_566107 | 7/2/2020  | 10/1/2020 North America / USA / Georgia                      |
| EPI_ISL_566108 | 3/21/2020 | 10/1/2020 North America / USA / Delaware / New Castle County |
| EPI_ISL_566111 | 9/16/2020 | 10/1/2020 Europe / United Kingdom / England                  |
| EPI_ISL_566113 | 9/16/2020 | 10/1/2020 Europe / United Kingdom / England                  |
| EPI_ISL_566114 | 9/16/2020 | 10/1/2020 Europe / United Kingdom / England                  |
| EPI_ISL_566115 | 9/16/2020 | 10/1/2020 Europe / United Kingdom / England                  |
| EPI_ISL_566116 | 9/16/2020 | 10/1/2020 Europe / United Kingdom / England                  |
| EPI_ISL_566117 | 9/15/2020 | 10/1/2020 Europe / United Kingdom / England                  |
| EPI_ISL_566118 | 9/16/2020 | 10/1/2020 Europe / United Kingdom / England                  |
| EPI_ISL_566119 | 9/16/2020 | 10/1/2020 Europe / United Kingdom / England                  |
| EPI_ISL_566120 | 9/16/2020 | 10/1/2020 Europe / United Kingdom / England                  |
| EPI_ISL_566121 | 9/16/2020 | 10/1/2020 Europe / United Kingdom / England                  |
| EPI_ISL_566122 | 9/16/2020 | 10/1/2020 Europe / United Kingdom / England                  |
| EPI_ISL_566123 | 9/16/2020 | 10/1/2020 Europe / United Kingdom / England                  |



















|                |           |                                             |
|----------------|-----------|---------------------------------------------|
| EPI_ISL_566560 | 9/9/2020  | 10/1/2020 Europe / United Kingdom / Wales   |
| EPI_ISL_566561 | 9/10/2020 | 10/1/2020 Europe / United Kingdom / England |
| EPI_ISL_566562 | 9/10/2020 | 10/1/2020 Europe / United Kingdom / England |
| EPI_ISL_566564 | 9/11/2020 | 10/1/2020 Europe / United Kingdom / England |
| EPI_ISL_566565 | 9/10/2020 | 10/1/2020 Europe / United Kingdom / England |
| EPI_ISL_566566 | 9/10/2020 | 10/1/2020 Europe / United Kingdom / Wales   |
| EPI_ISL_566567 | 9/3/2020  | 10/1/2020 Europe / United Kingdom / England |
| EPI_ISL_566568 | 9/10/2020 | 10/1/2020 Europe / United Kingdom / England |
| EPI_ISL_566569 | 9/10/2020 | 10/1/2020 Europe / United Kingdom / England |
| EPI_ISL_566570 | 9/11/2020 | 10/1/2020 Europe / United Kingdom / England |
| EPI_ISL_566571 | 9/11/2020 | 10/1/2020 Europe / United Kingdom / Wales   |
| EPI_ISL_566572 | 9/10/2020 | 10/1/2020 Europe / United Kingdom / Wales   |
| EPI_ISL_566573 | 9/9/2020  | 10/1/2020 Europe / United Kingdom / England |
| EPI_ISL_566574 | 9/10/2020 | 10/1/2020 Europe / United Kingdom / England |
| EPI_ISL_566576 | 8/31/2020 | 10/1/2020 Europe / United Kingdom / England |
| EPI_ISL_566577 | 9/10/2020 | 10/1/2020 Europe / United Kingdom / England |
| EPI_ISL_566578 | 9/10/2020 | 10/1/2020 Europe / United Kingdom / England |
| EPI_ISL_566579 | 9/7/2020  | 10/1/2020 Europe / United Kingdom / England |
| EPI_ISL_566580 | 9/5/2020  | 10/1/2020 Europe / United Kingdom / England |
| EPI_ISL_566581 | 9/10/2020 | 10/1/2020 Europe / United Kingdom / England |
| EPI_ISL_566582 | 9/7/2020  | 10/1/2020 Europe / United Kingdom / England |
| EPI_ISL_566583 | 9/6/2020  | 10/1/2020 Europe / United Kingdom / England |
| EPI_ISL_566584 | 9/10/2020 | 10/1/2020 Europe / United Kingdom / England |
| EPI_ISL_566585 | 9/9/2020  | 10/1/2020 Europe / United Kingdom / Wales   |
| EPI_ISL_566586 | 9/4/2020  | 10/1/2020 Europe / United Kingdom / England |
| EPI_ISL_566589 | 9/4/2020  | 10/1/2020 Europe / United Kingdom / England |
| EPI_ISL_566590 | 9/10/2020 | 10/1/2020 Europe / United Kingdom / England |
| EPI_ISL_566591 | 9/7/2020  | 10/1/2020 Europe / United Kingdom / England |
| EPI_ISL_566592 | 9/10/2020 | 10/1/2020 Europe / United Kingdom / Wales   |
| EPI_ISL_566593 | 9/11/2020 | 10/1/2020 Europe / United Kingdom / England |
| EPI_ISL_566594 | 9/10/2020 | 10/1/2020 Europe / United Kingdom / England |
| EPI_ISL_566595 | 9/11/2020 | 10/1/2020 Europe / United Kingdom / England |
| EPI_ISL_566596 | 9/10/2020 | 10/1/2020 Europe / United Kingdom / England |
| EPI_ISL_566597 | 9/11/2020 | 10/1/2020 Europe / United Kingdom / England |
| EPI_ISL_566598 | 9/11/2020 | 10/1/2020 Europe / United Kingdom / England |
| EPI_ISL_566599 | 9/10/2020 | 10/1/2020 Europe / United Kingdom / England |
| EPI_ISL_566600 | 9/10/2020 | 10/1/2020 Europe / United Kingdom / England |
| EPI_ISL_566601 | 9/10/2020 | 10/1/2020 Europe / United Kingdom / England |
| EPI_ISL_566602 | 9/10/2020 | 10/1/2020 Europe / United Kingdom / England |
| EPI_ISL_566603 | 9/7/2020  | 10/1/2020 Europe / United Kingdom / England |
| EPI_ISL_566604 | 9/10/2020 | 10/1/2020 Europe / United Kingdom / England |
| EPI_ISL_566605 | 9/9/2020  | 10/1/2020 Europe / United Kingdom / Wales   |
| EPI_ISL_566606 | 9/10/2020 | 10/1/2020 Europe / United Kingdom / England |
| EPI_ISL_566607 | 9/10/2020 | 10/1/2020 Europe / United Kingdom / England |
| EPI_ISL_566608 | 9/9/2020  | 10/1/2020 Europe / United Kingdom / Wales   |
| EPI_ISL_566609 | 9/9/2020  | 10/1/2020 Europe / United Kingdom / England |
| EPI_ISL_566610 | 9/4/2020  | 10/1/2020 Europe / United Kingdom / England |















































































|                |           |                                                   |
|----------------|-----------|---------------------------------------------------|
| EPI_ISL_568441 | 8/29/2020 | 10/1/2020 Europe / United Kingdom / Scotland      |
| EPI_ISL_568442 | 8/29/2020 | 10/1/2020 Europe / United Kingdom / Scotland      |
| EPI_ISL_568443 | 8/29/2020 | 10/1/2020 Europe / United Kingdom / Scotland      |
| EPI_ISL_568444 | 8/28/2020 | 10/1/2020 Europe / United Kingdom / Scotland      |
| EPI_ISL_568445 | 8/24/2020 | 10/1/2020 Europe / United Kingdom / Scotland      |
| EPI_ISL_568446 | 8/27/2020 | 10/1/2020 Europe / United Kingdom / Scotland      |
| EPI_ISL_568447 | 8/28/2020 | 10/1/2020 Europe / United Kingdom / Scotland      |
| EPI_ISL_568448 | 8/29/2020 | 10/1/2020 Europe / United Kingdom / Scotland      |
| EPI_ISL_568449 | 8/27/2020 | 10/1/2020 Europe / United Kingdom / Scotland      |
| EPI_ISL_568450 | 8/28/2020 | 10/1/2020 Europe / United Kingdom / Scotland      |
| EPI_ISL_568451 | 8/28/2020 | 10/1/2020 Europe / United Kingdom / Scotland      |
| EPI_ISL_568453 | 8/26/2020 | 10/1/2020 Europe / United Kingdom / Scotland      |
| EPI_ISL_568454 | 8/26/2020 | 10/1/2020 Europe / United Kingdom / Scotland      |
| EPI_ISL_568455 | 8/28/2020 | 10/1/2020 Europe / United Kingdom / Scotland      |
| EPI_ISL_568456 | 8/28/2020 | 10/1/2020 Europe / United Kingdom / Scotland      |
| EPI_ISL_568457 | 8/27/2020 | 10/1/2020 Europe / United Kingdom / Scotland      |
| EPI_ISL_568458 | 8/27/2020 | 10/1/2020 Europe / United Kingdom / Scotland      |
| EPI_ISL_568459 | 8/25/2020 | 10/1/2020 Europe / United Kingdom / Scotland      |
| EPI_ISL_568461 | 8/26/2020 | 10/1/2020 Europe / United Kingdom / Scotland      |
| EPI_ISL_568462 | 8/28/2020 | 10/1/2020 Europe / United Kingdom / Scotland      |
| EPI_ISL_568463 | 8/27/2020 | 10/1/2020 Europe / United Kingdom / Scotland      |
| EPI_ISL_568464 | 8/27/2020 | 10/1/2020 Europe / United Kingdom / Scotland      |
| EPI_ISL_568467 | 6/23/2020 | 10/1/2020 Europe / United Kingdom / Scotland      |
| EPI_ISL_568470 | 6/8/2020  | 10/1/2020 Europe / United Kingdom / Scotland      |
| EPI_ISL_568471 | 6/20/2020 | 10/1/2020 Europe / United Kingdom / Scotland      |
| EPI_ISL_568473 | 7/20/2020 | 10/1/2020 Europe / United Kingdom / Scotland      |
| EPI_ISL_568476 | 6/11/2020 | 10/1/2020 Europe / United Kingdom / Scotland      |
| EPI_ISL_568510 | 6/17/2020 | 10/2/2020 South America / Peru / Lima             |
| EPI_ISL_568511 | 6/17/2020 | 10/2/2020 South America / Peru / Lima / Canete    |
| EPI_ISL_568512 | 6/18/2020 | 10/2/2020 South America / Peru / Lima             |
| EPI_ISL_568513 | 6/18/2020 | 10/2/2020 South America / Peru / Lima             |
| EPI_ISL_568514 | 6/9/2020  | 10/2/2020 South America / Peru / Lima             |
| EPI_ISL_568515 | 3/19/2020 | 10/2/2020 South America / Peru / Junin / Huancayo |
| EPI_ISL_568516 | 3/21/2020 | 10/2/2020 South America / Peru / Lima             |
| EPI_ISL_568517 | 6/18/2020 | 10/2/2020 South America / Peru / Lima             |
| EPI_ISL_568518 | 8/27/2020 | 10/2/2020 South America / Peru / Lima             |
| EPI_ISL_568519 | 8/27/2020 | 10/2/2020 South America / Peru / Lima             |
| EPI_ISL_568520 | 8/27/2020 | 10/2/2020 South America / Peru / Lima             |
| EPI_ISL_568521 | 8/27/2020 | 10/2/2020 South America / Peru / Lima             |
| EPI_ISL_568522 | 8/27/2020 | 10/2/2020 South America / Peru / Lima             |
| EPI_ISL_568523 | 8/28/2020 | 10/2/2020 South America / Peru / Lima             |
| EPI_ISL_568524 | 8/28/2020 | 10/2/2020 South America / Peru / Lima             |
| EPI_ISL_568525 | 8/28/2020 | 10/2/2020 South America / Peru / Lima             |
| EPI_ISL_568526 | 8/28/2020 | 10/2/2020 South America / Peru / Lima             |
| EPI_ISL_568527 | 8/28/2020 | 10/2/2020 South America / Peru / Lima             |
| EPI_ISL_568528 | 8/27/2020 | 10/2/2020 South America / Peru / Lima             |
| EPI_ISL_568529 | 8/27/2020 | 10/2/2020 South America / Peru / Lima             |



|                |           |                                             |
|----------------|-----------|---------------------------------------------|
| EPI_ISL_568577 | 9/4/2020  | 10/2/2020 Europe / Czech Republic / Prague  |
| EPI_ISL_568579 | 2/24/2020 | 10/2/2020 Europe / Italy / Lombardy / Pavia |
| EPI_ISL_568580 | 3/18/2020 | 10/2/2020 Asia / Thailand / Bangkok         |
| EPI_ISL_568581 | 3/19/2020 | 10/2/2020 Asia / Thailand / Bangkok         |
| EPI_ISL_568582 | 3/19/2020 | 10/2/2020 Asia / Thailand / Bangkok         |
| EPI_ISL_568583 | 3/19/2020 | 10/2/2020 Asia / Thailand / Bangkok         |
| EPI_ISL_568584 | 3/20/2020 | 10/2/2020 Asia / Thailand / Bangkok         |
| EPI_ISL_568585 | 3/20/2020 | 10/2/2020 Asia / Thailand / Bangkok         |
| EPI_ISL_568586 | 3/20/2020 | 10/2/2020 Asia / Thailand / Bangkok         |
| EPI_ISL_568587 | 8/10/2020 | 10/2/2020 North America / USA / Florida     |
| EPI_ISL_568590 | 9/11/2020 | 10/2/2020 North America / USA / Florida     |
| EPI_ISL_568591 | 9/11/2020 | 10/2/2020 North America / USA / Florida     |
| EPI_ISL_568595 | 9/14/2020 | 10/2/2020 North America / USA / Florida     |
| EPI_ISL_568597 | 7/23/2020 | 10/2/2020 North America / USA / Florida     |
| EPI_ISL_568598 | 7/23/2020 | 10/2/2020 North America / USA / Florida     |
| EPI_ISL_568599 | 7/23/2020 | 10/2/2020 North America / USA / Florida     |
| EPI_ISL_568600 | 7/23/2020 | 10/2/2020 North America / USA / Florida     |
| EPI_ISL_568601 | 7/23/2020 | 10/2/2020 North America / USA / Florida     |
| EPI_ISL_568602 | 7/23/2020 | 10/2/2020 North America / USA / Florida     |
| EPI_ISL_568603 | 7/24/2020 | 10/2/2020 North America / USA / Florida     |
| EPI_ISL_568604 | 7/24/2020 | 10/2/2020 North America / USA / Florida     |
| EPI_ISL_568606 | 7/24/2020 | 10/2/2020 North America / USA / Florida     |
| EPI_ISL_568607 | 7/24/2020 | 10/2/2020 North America / USA / Florida     |
| EPI_ISL_568608 | 7/24/2020 | 10/2/2020 North America / USA / Florida     |
| EPI_ISL_568610 | 7/24/2020 | 10/2/2020 North America / USA / Florida     |
| EPI_ISL_568612 | 7/22/2020 | 10/2/2020 North America / USA / Florida     |
| EPI_ISL_568616 | 7/27/2020 | 10/2/2020 North America / USA / Florida     |
| EPI_ISL_568617 | 7/27/2020 | 10/2/2020 North America / USA / Florida     |
| EPI_ISL_568618 | 7/28/2020 | 10/2/2020 North America / USA / Florida     |
| EPI_ISL_568619 | 7/28/2020 | 10/2/2020 North America / USA / Florida     |
| EPI_ISL_568620 | 7/28/2020 | 10/2/2020 North America / USA / Florida     |
| EPI_ISL_568621 | 7/28/2020 | 10/2/2020 North America / USA / Florida     |
| EPI_ISL_568622 | 7/28/2020 | 10/2/2020 North America / USA / Florida     |
| EPI_ISL_568623 | 7/28/2020 | 10/2/2020 North America / USA / Florida     |
| EPI_ISL_568624 | 7/28/2020 | 10/2/2020 North America / USA / Florida     |
| EPI_ISL_568625 | 7/28/2020 | 10/2/2020 North America / USA / Florida     |
| EPI_ISL_568626 | 7/28/2020 | 10/2/2020 North America / USA / Florida     |
| EPI_ISL_568627 | 7/28/2020 | 10/2/2020 North America / USA / Florida     |
| EPI_ISL_568628 | 7/29/2020 | 10/2/2020 North America / USA / Florida     |
| EPI_ISL_568633 | 5/14/2020 | 10/2/2020 North America / USA / Florida     |
| EPI_ISL_568637 | 5/14/2020 | 10/2/2020 North America / USA / Florida     |
| EPI_ISL_568638 | 8/28/2020 | 10/2/2020 North America / USA / Florida     |
| EPI_ISL_568639 | 8/28/2020 | 10/2/2020 North America / USA / Florida     |
| EPI_ISL_568640 | 8/28/2020 | 10/2/2020 North America / USA / Florida     |
| EPI_ISL_568644 | 9/3/2020  | 10/2/2020 North America / USA / Florida     |
| EPI_ISL_568645 | 9/3/2020  | 10/2/2020 North America / USA / Florida     |
| EPI_ISL_568648 | 9/9/2020  | 10/2/2020 North America / USA / Florida     |

|                |           |                                                                    |
|----------------|-----------|--------------------------------------------------------------------|
| EPI_ISL_568649 | 9/9/2020  | 10/2/2020 North America / USA / Florida                            |
| EPI_ISL_568651 | 9/9/2020  | 10/2/2020 North America / USA / Florida                            |
| EPI_ISL_568652 | 9/9/2020  | 10/2/2020 North America / USA / Florida                            |
| EPI_ISL_568654 | 9/9/2020  | 10/2/2020 North America / USA / Florida                            |
| EPI_ISL_568656 | 9/9/2020  | 10/2/2020 North America / USA / Florida                            |
| EPI_ISL_568657 | 9/9/2020  | 10/2/2020 North America / USA / Florida                            |
| EPI_ISL_568658 | 9/10/2020 | 10/2/2020 North America / USA / Florida                            |
| EPI_ISL_568659 | 9/10/2020 | 10/2/2020 North America / USA / Florida                            |
| EPI_ISL_568660 | 9/10/2020 | 10/2/2020 North America / USA / Florida                            |
| EPI_ISL_568661 | 9/10/2020 | 10/2/2020 North America / USA / Florida                            |
| EPI_ISL_568662 | 9/10/2020 | 10/2/2020 North America / USA / Florida                            |
| EPI_ISL_568663 | 9/10/2020 | 10/2/2020 North America / USA / Florida                            |
| EPI_ISL_568664 | 9/14/2020 | 10/2/2020 North America / USA / Florida                            |
| EPI_ISL_568665 | 9/14/2020 | 10/2/2020 North America / USA / Florida                            |
| EPI_ISL_568666 | 9/14/2020 | 10/2/2020 North America / USA / Florida                            |
| EPI_ISL_568667 | 9/14/2020 | 10/2/2020 North America / USA / Florida                            |
| EPI_ISL_568668 | 9/14/2020 | 10/2/2020 North America / USA / Florida                            |
| EPI_ISL_568669 | 9/14/2020 | 10/2/2020 North America / USA / Florida                            |
| EPI_ISL_568671 | 9/15/2020 | 10/2/2020 North America / USA / Florida                            |
| EPI_ISL_568675 | 9/16/2020 | 10/2/2020 North America / USA / Florida                            |
| EPI_ISL_568676 | 9/16/2020 | 10/2/2020 North America / USA / Florida                            |
| EPI_ISL_568677 | 9/16/2020 | 10/2/2020 North America / USA / Florida                            |
| EPI_ISL_568678 | 9/16/2020 | 10/2/2020 North America / USA / Florida                            |
| EPI_ISL_568679 | 9/15/2020 | 10/2/2020 North America / USA / Florida                            |
| EPI_ISL_568681 | 3/23/2020 | 10/2/2020 North America / USA / Florida                            |
| EPI_ISL_568686 | 3/26/2020 | 10/2/2020 Asia / Indonesia / Central Java / Purwokerto             |
| EPI_ISL_568687 | 4/11/2020 | 10/2/2020 Asia / Indonesia / Jakarta                               |
| EPI_ISL_568688 | 4/22/2020 | 10/2/2020 Asia / Indonesia / Jakarta                               |
| EPI_ISL_568689 | 5/20/2020 | 10/2/2020 Asia / Indonesia / Jakarta                               |
| EPI_ISL_568690 | 5/26/2020 | 10/2/2020 Asia / Indonesia / Jakarta                               |
| EPI_ISL_568691 | 5/27/2020 | 10/2/2020 Asia / Indonesia / Jakarta                               |
| EPI_ISL_568692 | 6/4/2020  | 10/2/2020 Asia / Indonesia / Jakarta                               |
| EPI_ISL_568693 | 3/28/2020 | 10/2/2020 Asia / Indonesia / Papua / Timika                        |
| EPI_ISL_568694 | 3/27/2020 | 10/2/2020 Asia / Indonesia / North Sulawesi / Manado               |
| EPI_ISL_568702 | 4/12/2020 | 10/2/2020 Africa / Kenya / Mombasa                                 |
| EPI_ISL_568725 | 6/5/2020  | 10/2/2020 Africa / Kenya / Mombasa                                 |
| EPI_ISL_568727 | 5/7/2020  | 10/2/2020 Africa / Kenya / Mombasa                                 |
| EPI_ISL_568735 | 5/8/2020  | 10/2/2020 Africa / Kenya / Mombasa                                 |
| EPI_ISL_568764 | 5/10/2020 | 10/2/2020 Africa / Kenya / Mombasa                                 |
| EPI_ISL_568847 | 5/16/2020 | 10/2/2020 Africa / Kenya / Kwale                                   |
| EPI_ISL_568872 | 6/22/2020 | 10/2/2020 Africa / Kenya / Mombasa                                 |
| EPI_ISL_568873 | 4/2/2020  | 10/2/2020 Asia / Malaysia / Selangor                               |
| EPI_ISL_568874 | 4/7/2020  | 10/2/2020 Asia / Malaysia / Selangor                               |
| EPI_ISL_568875 | 5/4/2020  | 10/2/2020 Asia / Malaysia / Selangor                               |
| EPI_ISL_568877 | 4/10/2020 | 10/2/2020 Europe / France / Provence-Alpes-Cote d'Azur / Marseille |
| EPI_ISL_568878 | 4/10/2020 | 10/2/2020 Europe / France / Provence-Alpes-Cote d'Azur / Marseille |
| EPI_ISL_568879 | 4/10/2020 | 10/2/2020 Europe / France / Provence-Alpes-Cote d'Azur / Marseille |

































|                |           |                                                        |
|----------------|-----------|--------------------------------------------------------|
| EPI_ISL_569638 | 9/3/2020  | 10/2/2020 North America / USA / New Mexico             |
| EPI_ISL_569639 | 9/3/2020  | 10/2/2020 North America / USA / New Mexico             |
| EPI_ISL_569640 | 9/3/2020  | 10/2/2020 North America / USA / New Mexico             |
| EPI_ISL_569641 | 9/3/2020  | 10/2/2020 North America / USA / New Mexico             |
| EPI_ISL_569642 | 9/3/2020  | 10/2/2020 North America / USA / New Mexico             |
| EPI_ISL_569643 | 9/3/2020  | 10/2/2020 North America / USA / New Mexico             |
| EPI_ISL_569644 | 9/3/2020  | 10/2/2020 North America / USA / New Mexico             |
| EPI_ISL_569645 | 9/3/2020  | 10/2/2020 North America / USA / New Mexico             |
| EPI_ISL_569646 | 9/3/2020  | 10/2/2020 North America / USA / New Mexico             |
| EPI_ISL_569647 | 9/3/2020  | 10/2/2020 North America / USA / New Mexico             |
| EPI_ISL_569648 | 9/3/2020  | 10/2/2020 North America / USA / New Mexico             |
| EPI_ISL_569649 | 9/2/2020  | 10/2/2020 North America / USA / New Mexico             |
| EPI_ISL_569650 | 9/2/2020  | 10/2/2020 North America / USA / New Mexico             |
| EPI_ISL_569651 | 9/3/2020  | 10/2/2020 North America / USA / New Mexico             |
| EPI_ISL_569652 | 9/3/2020  | 10/2/2020 North America / USA / New Mexico             |
| EPI_ISL_569653 | 9/4/2020  | 10/2/2020 North America / USA / New Mexico             |
| EPI_ISL_569654 | 9/4/2020  | 10/2/2020 North America / USA / New Mexico             |
| EPI_ISL_569655 | 9/4/2020  | 10/2/2020 North America / USA / New Mexico             |
| EPI_ISL_569656 | 9/3/2020  | 10/2/2020 North America / USA / New Mexico             |
| EPI_ISL_569657 | 9/1/2020  | 10/2/2020 North America / USA / New Mexico             |
| EPI_ISL_569658 | 9/2/2020  | 10/2/2020 North America / USA / New Mexico             |
| EPI_ISL_569659 | 9/3/2020  | 10/2/2020 North America / USA / New Mexico             |
| EPI_ISL_569660 | 9/4/2020  | 10/2/2020 North America / USA / New Mexico             |
| EPI_ISL_569661 | 9/4/2020  | 10/2/2020 North America / USA / New Mexico             |
| EPI_ISL_569662 | 9/1/2020  | 10/2/2020 North America / USA / New Mexico             |
| EPI_ISL_569663 | 9/2/2020  | 10/2/2020 North America / USA / New Mexico             |
| EPI_ISL_569720 | 6/4/2020  | 10/3/2020 North America / USA / Texas / El Paso County |
| EPI_ISL_569735 | 5/8/2020  | 10/3/2020 Europe / Russia / Omsk / Omsk                |
| EPI_ISL_569736 | 5/8/2020  | 10/3/2020 Europe / Russia / Omsk / Kalachinsk          |
| EPI_ISL_569737 | 5/8/2020  | 10/3/2020 Europe / Russia / Omsk / Omsk                |
| EPI_ISL_569738 | 5/10/2020 | 10/3/2020 Europe / Russia / Omsk / Kalachinsk          |
| EPI_ISL_569739 | 5/11/2020 | 10/3/2020 Europe / Russia / Omsk / Omsk                |
| EPI_ISL_569740 | 5/12/2020 | 10/3/2020 Europe / Russia / Omsk / Omsk                |
| EPI_ISL_569741 | 5/13/2020 | 10/3/2020 Europe / Russia / Omsk / Omsk                |
| EPI_ISL_569742 | 5/14/2020 | 10/3/2020 Europe / Russia / Omsk / Omsk                |
| EPI_ISL_569743 | 5/14/2020 | 10/3/2020 Europe / Russia / Omsk / Omsk                |
| EPI_ISL_569744 | 5/14/2020 | 10/3/2020 Europe / Russia / Omsk / Omsk                |
| EPI_ISL_569745 | 5/14/2020 | 10/3/2020 Europe / Russia / Omsk / Omsk                |
| EPI_ISL_569746 | 5/19/2020 | 10/3/2020 Europe / Russia / Omsk / Omsk                |
| EPI_ISL_569747 | 5/21/2020 | 10/3/2020 Europe / Russia / Omsk / Omsk                |
| EPI_ISL_569748 | 5/21/2020 | 10/3/2020 Europe / Russia / Omsk / Omsk                |
| EPI_ISL_569749 | 5/21/2020 | 10/3/2020 Europe / Russia / Omsk / Omsk                |
| EPI_ISL_569750 | 5/19/2020 | 10/3/2020 Europe / Russia / Omsk / Moskalenki          |
| EPI_ISL_569751 | 5/23/2020 | 10/3/2020 Europe / Russia / Omsk / Omsk                |
| EPI_ISL_569752 | 5/24/2020 | 10/3/2020 Europe / Russia / Omsk / Russkaya Polyana    |
| EPI_ISL_569753 | 5/21/2020 | 10/3/2020 Europe / Russia / Omsk / Omsk                |
| EPI_ISL_569754 | 5/21/2020 | 10/3/2020 Europe / Russia / Omsk / Omsk                |

|                |           |                                                   |
|----------------|-----------|---------------------------------------------------|
| EPI_ISL_569755 | 5/21/2020 | 10/3/2020 Europe / Russia / Omsk / Omsk           |
| EPI_ISL_569756 | 5/21/2020 | 10/3/2020 Europe / Russia / Omsk / Omsk           |
| EPI_ISL_569757 | 5/21/2020 | 10/3/2020 Europe / Russia / Omsk / Omsk           |
| EPI_ISL_569758 | 5/24/2020 | 10/3/2020 Europe / Russia / Omsk / Moskalenki     |
| EPI_ISL_569759 | 5/26/2020 | 10/3/2020 Europe / Russia / Omsk / Omsk           |
| EPI_ISL_569760 | 5/28/2020 | 10/3/2020 Europe / Russia / Omsk / Omsk           |
| EPI_ISL_569761 | 5/29/2020 | 10/3/2020 Europe / Russia / Omsk / Maryanovka     |
| EPI_ISL_569762 | 5/27/2020 | 10/3/2020 Europe / Russia / Omsk / Omsk           |
| EPI_ISL_569763 | 5/13/2020 | 10/3/2020 Europe / Russia / Omsk / Omsk           |
| EPI_ISL_569764 | 6/2/2020  | 10/3/2020 Europe / Russia / Omsk / Omsk           |
| EPI_ISL_569765 | 6/2/2020  | 10/3/2020 Europe / Russia / Omsk / Omsk           |
| EPI_ISL_569766 | 5/28/2020 | 10/3/2020 Europe / Russia / Omsk / Omsk           |
| EPI_ISL_569767 | 6/3/2020  | 10/3/2020 Europe / Russia / Omsk / Omsk           |
| EPI_ISL_569768 | 6/7/2020  | 10/3/2020 Europe / Russia / Omsk / Nizhnyaya Omka |
| EPI_ISL_569769 | 6/5/2020  | 10/3/2020 Europe / Russia / Omsk / Omsk           |
| EPI_ISL_569770 | 6/5/2020  | 10/3/2020 Europe / Russia / Omsk / Omsk           |
| EPI_ISL_569771 | 6/5/2020  | 10/3/2020 Europe / Russia / Omsk / Omsk           |
| EPI_ISL_569772 | 6/1/2020  | 10/3/2020 Europe / Russia / Omsk / Omsk           |
| EPI_ISL_569773 | 6/7/2020  | 10/3/2020 Europe / Russia / Omsk / Omsk           |
| EPI_ISL_569774 | 6/7/2020  | 10/3/2020 Europe / Russia / Omsk / Omsk           |
| EPI_ISL_569775 | 6/17/2020 | 10/3/2020 Europe / Russia / Omsk / Omsk           |
| EPI_ISL_569776 | 6/26/2020 | 10/3/2020 Europe / Russia / Omsk / Novovarshevka  |
| EPI_ISL_569777 | 7/2/2020  | 10/3/2020 Europe / Russia / Omsk / Azovo          |
| EPI_ISL_569778 | 7/4/2020  | 10/3/2020 Europe / Russia / Omsk / Moskalenki     |
| EPI_ISL_569779 | 7/6/2020  | 10/3/2020 Europe / Russia / Omsk / Azovo          |
| EPI_ISL_569780 | 7/6/2020  | 10/3/2020 Europe / Russia / Omsk / Ust-Ishim      |
| EPI_ISL_569781 | 7/8/2020  | 10/3/2020 Europe / Russia / Omsk / Moskalenki     |
| EPI_ISL_569782 | 7/8/2020  | 10/3/2020 Europe / Russia / Omsk / Novovarshevka  |
| EPI_ISL_569783 | 6/30/2020 | 10/3/2020 Europe / Russia / Omsk / Sedelnikovo    |
| EPI_ISL_569784 | 7/11/2020 | 10/3/2020 Europe / Russia / Omsk / Azovo          |
| EPI_ISL_569785 | 7/11/2020 | 10/3/2020 Europe / Russia / Omsk / Muromtsevo     |
| EPI_ISL_569786 | 7/13/2020 | 10/3/2020 Europe / Russia / Omsk / Azovo          |
| EPI_ISL_569787 | 7/13/2020 | 10/3/2020 Europe / Russia / Omsk / Moskalenki     |
| EPI_ISL_569788 | 7/13/2020 | 10/3/2020 Europe / Russia / Omsk / Novovarshevka  |
| EPI_ISL_569789 | 7/21/2020 | 10/3/2020 Europe / Russia / Omsk / Muromtsevo     |
| EPI_ISL_569790 | 7/22/2020 | 10/3/2020 Europe / Russia / Omsk / Novovarshevka  |
| EPI_ISL_569791 | 7/23/2020 | 10/3/2020 Europe / Russia / Omsk / Maryanovka     |
| EPI_ISL_569792 | 7/23/2020 | 10/3/2020 Europe / Russia / Omsk / Moskalenki     |
| EPI_ISL_569793 | 7/25/2020 | 10/3/2020 Europe / Russia / Omsk / Omsk           |
| EPI_ISL_569794 | 7/27/2020 | 10/3/2020 Europe / Russia / Omsk / Lyubinsky      |
| EPI_ISL_569795 | 7/27/2020 | 10/3/2020 Europe / Russia / Omsk / Ust-Ishim      |
| EPI_ISL_569796 | 5/2/2020  | 10/3/2020 Europe / Russia / Omsk / Omsk           |
| EPI_ISL_569797 | 5/2/2020  | 10/3/2020 Europe / Russia / Omsk / Omsk           |
| EPI_ISL_569798 | 7/8/2020  | 10/3/2020 Europe / Russia / Omsk / Novovarshevka  |
| EPI_ISL_569799 | 9/2/2020  | 10/3/2020 Europe / Russia / Omsk / Omsk           |
| EPI_ISL_569800 | 7/10/2020 | 10/3/2020 Europe / Russia / Omsk / Azovo          |
| EPI_ISL_569801 | 7/23/2020 | 10/3/2020 Europe / Russia / Omsk / Moskalenki     |

|                |           |                                                  |
|----------------|-----------|--------------------------------------------------|
| EPI_ISL_569802 | 5/14/2020 | 10/3/2020 Europe / Russia / Omsk / Omsk          |
| EPI_ISL_569803 | 6/7/2020  | 10/3/2020 Europe / Russia / Omsk / Azovo         |
| EPI_ISL_569804 | 7/10/2020 | 10/3/2020 Europe / Russia / Omsk / Novovarshevka |
| EPI_ISL_569805 | 7/6/2020  | 10/3/2020 Europe / Russia / Omsk / Azovo         |
| EPI_ISL_569806 | 7/10/2020 | 10/3/2020 Europe / Russia / Omsk / Azovo         |
| EPI_ISL_569807 | 7/15/2020 | 10/3/2020 Europe / Russia / Omsk / Azovo         |
| EPI_ISL_569808 | 7/23/2020 | 10/3/2020 Europe / Russia / Omsk / Moskalenki    |
| EPI_ISL_569809 | 5/14/2020 | 10/3/2020 Europe / Russia / Omsk / Omsk          |
| EPI_ISL_569810 | 6/17/2020 | 10/3/2020 Europe / Russia / Omsk / Omsk          |
| EPI_ISL_569811 | 5/3/2020  | 10/3/2020 Europe / Russia / Omsk / Omsk          |
| EPI_ISL_569812 | 5/14/2020 | 10/3/2020 Europe / Russia / Omsk / Omsk          |
| EPI_ISL_569813 | 7/13/2020 | 10/3/2020 Europe / Russia / Omsk / Omsk          |
| EPI_ISL_569814 | 7/8/2020  | 10/3/2020 Europe / Russia / Omsk / Novovarshevka |
| EPI_ISL_569815 | 7/8/2020  | 10/3/2020 Europe / Russia / Omsk / Moskalenki    |
| EPI_ISL_569816 | 7/10/2020 | 10/3/2020 Europe / Russia / Omsk / Azovo         |
| EPI_ISL_569817 | 5/14/2020 | 10/3/2020 Europe / Russia / Omsk / Omsk          |
| EPI_ISL_569818 | 5/14/2020 | 10/3/2020 Europe / Russia / Omsk / Omsk          |
| EPI_ISL_569819 | 6/29/2020 | 10/3/2020 Europe / Russia / Omsk / Okoneshnikov  |
| EPI_ISL_569820 | 7/10/2020 | 10/3/2020 Europe / Russia / Omsk / Omsk          |
| EPI_ISL_569821 | 5/13/2020 | 10/3/2020 Europe / Russia / Omsk / Omsk          |
| EPI_ISL_569822 | 5/13/2020 | 10/3/2020 Europe / Russia / Omsk / Omsk          |
| EPI_ISL_569823 | 7/13/2020 | 10/3/2020 Europe / Russia / Omsk / Azovo         |
| EPI_ISL_569824 | 7/17/2020 | 10/3/2020 Europe / Russia / Omsk / Moskalenki    |
| EPI_ISL_569825 | 5/14/2020 | 10/3/2020 Europe / Russia / Omsk / Omsk          |
| EPI_ISL_569826 | 4/8/2020  | 10/3/2020 Europe / Russia / Omsk / Omsk          |
| EPI_ISL_569827 | 6/29/2020 | 10/3/2020 Europe / Russia / Omsk / Moskalenki    |
| EPI_ISL_569828 | 7/2/2020  | 10/3/2020 Europe / Russia / Omsk / Omsk          |
| EPI_ISL_569829 | 7/10/2020 | 10/3/2020 Europe / Russia / Omsk / Azovo         |
| EPI_ISL_569830 | 7/13/2020 | 10/3/2020 Europe / Russia / Omsk / Azovo         |
| EPI_ISL_569831 | 7/22/2020 | 10/3/2020 Europe / Russia / Omsk / Moskalenki    |
| EPI_ISL_569832 | 5/14/2020 | 10/3/2020 Europe / Russia / Omsk / Omsk          |
| EPI_ISL_569833 | 6/29/2020 | 10/3/2020 Europe / Russia / Omsk / Moskalenki    |
| EPI_ISL_569834 | 7/8/2020  | 10/3/2020 Europe / Russia / Omsk / Novovarshevka |
| EPI_ISL_569835 | 7/3/2020  | 10/3/2020 Europe / Russia / Omsk / Omsk          |
| EPI_ISL_569836 | 8/18/2020 | 10/3/2020 Europe / Russia / Omsk / Omsk          |
| EPI_ISL_569837 | 5/13/2020 | 10/3/2020 Europe / Russia / Omsk / Omsk          |
| EPI_ISL_569838 | 7/13/2020 | 10/3/2020 Europe / Russia / Omsk / Azovo         |
| EPI_ISL_569839 | 7/22/2020 | 10/3/2020 Europe / Russia / Omsk / Azovo         |
| EPI_ISL_569840 | 5/14/2020 | 10/3/2020 Europe / Russia / Omsk / Omsk          |
| EPI_ISL_569841 | 4/14/2020 | 10/3/2020 Europe / Russia / Omsk / Omsk          |
| EPI_ISL_569842 | 6/17/2020 | 10/3/2020 Europe / Russia / Omsk / Moskalenki    |
| EPI_ISL_569843 | 6/22/2020 | 10/3/2020 Europe / Russia / Omsk / Omsk          |
| EPI_ISL_569844 | 7/20/2020 | 10/3/2020 Europe / Russia / Omsk / Omsk          |
| EPI_ISL_569845 | 7/10/2020 | 10/3/2020 Europe / Russia / Omsk / Azovo         |
| EPI_ISL_569846 | 7/13/2020 | 10/3/2020 Europe / Russia / Omsk / Azovo         |
| EPI_ISL_569847 | 7/22/2020 | 10/3/2020 Europe / Russia / Omsk / Azovo         |
| EPI_ISL_569848 | 5/14/2020 | 10/3/2020 Europe / Russia / Omsk / Omsk          |

|                |           |                                                                  |
|----------------|-----------|------------------------------------------------------------------|
| EPI_ISL_569849 | 4/20/2020 | 10/3/2020 Europe / Russia / Omsk / Cherlak                       |
| EPI_ISL_569850 | 7/8/2020  | 10/3/2020 Europe / Russia / Omsk / Novovarshavka                 |
| EPI_ISL_569851 | 6/12/2020 | 10/3/2020 Europe / Russia / Omsk / Omsk                          |
| EPI_ISL_569852 | 6/22/2020 | 10/3/2020 Europe / Russia / Omsk / Omsk                          |
| EPI_ISL_569853 | 7/8/2020  | 10/3/2020 Europe / Russia / Omsk / Novovarshavka                 |
| EPI_ISL_569854 | 5/3/2020  | 10/3/2020 Europe / Russia / Omsk / Omsk                          |
| EPI_ISL_569855 | 5/13/2020 | 10/3/2020 Europe / Russia / Omsk / Omsk                          |
| EPI_ISL_569856 | 5/19/2020 | 10/3/2020 Europe / Russia / Omsk / Moskalenki                    |
| EPI_ISL_569857 | 5/3/2020  | 10/3/2020 Europe / Russia / Omsk / Omsk                          |
| EPI_ISL_569858 | 9/15/2020 | 10/3/2020 Oceania / Australia / New South Wales                  |
| EPI_ISL_569859 | 9/10/2020 | 10/3/2020 Asia / India / West Bengal                             |
| EPI_ISL_569860 | 9/10/2020 | 10/3/2020 Asia / India / West Bengal                             |
| EPI_ISL_569861 | 9/10/2020 | 10/3/2020 Asia / India / West Bengal                             |
| EPI_ISL_569862 | 9/10/2020 | 10/3/2020 Asia / India / West Bengal                             |
| EPI_ISL_569863 | 8/4/2020  | 10/3/2020 Asia / India / West Bengal                             |
| EPI_ISL_569865 | 4/8/2020  | 10/3/2020 Europe / Italy / Piedmont / Turin                      |
| EPI_ISL_569866 | 2/25/2020 | 10/3/2020 Europe / Italy / Piedmont / Turin                      |
| EPI_ISL_569867 | 2/22/2020 | 10/3/2020 Europe / Italy / Piedmont / Turin                      |
| EPI_ISL_569868 | 4/1/2020  | 10/3/2020 Europe / Italy / Piedmont / Turin                      |
| EPI_ISL_569869 | 3/31/2020 | 10/3/2020 Europe / Italy / Piedmont / Turin                      |
| EPI_ISL_569870 | 3/31/2020 | 10/3/2020 Europe / Italy / Piedmont / Turin                      |
| EPI_ISL_569871 | 3/31/2020 | 10/3/2020 Europe / Italy / Piedmont / Turin                      |
| EPI_ISL_569872 | 3/31/2020 | 10/3/2020 Europe / Italy / Piedmont / Turin                      |
| EPI_ISL_569873 | 3/31/2020 | 10/3/2020 Europe / Italy / Piedmont / Turin                      |
| EPI_ISL_569874 | 3/31/2020 | 10/3/2020 Europe / Italy / Piedmont / Turin                      |
| EPI_ISL_569875 | 3/31/2020 | 10/3/2020 Europe / Italy / Piedmont / Turin                      |
| EPI_ISL_569876 | 3/31/2020 | 10/3/2020 Europe / Italy / Piedmont / Turin                      |
| EPI_ISL_569877 | 3/31/2020 | 10/3/2020 Europe / Italy / Piedmont / Turin                      |
| EPI_ISL_569878 | 4/1/2020  | 10/3/2020 Europe / Italy / Piedmont / Turin                      |
| EPI_ISL_569879 | 4/1/2020  | 10/3/2020 Europe / Italy / Piedmont / Turin                      |
| EPI_ISL_569880 | 3/31/2020 | 10/3/2020 Europe / Italy / Piedmont / Turin                      |
| EPI_ISL_569881 | 4/1/2020  | 10/3/2020 Europe / Italy / Piedmont / Turin                      |
| EPI_ISL_569882 | 4/1/2020  | 10/3/2020 Europe / Italy / Piedmont / Turin                      |
| EPI_ISL_569883 | 4/8/2020  | 10/3/2020 Europe / Italy / Piedmont / Turin                      |
| EPI_ISL_569884 | 4/8/2020  | 10/3/2020 Europe / Italy / Piedmont / Turin                      |
| EPI_ISL_569885 | 4/8/2020  | 10/3/2020 Europe / Italy / Piedmont / Turin                      |
| EPI_ISL_569886 | 4/8/2020  | 10/3/2020 Europe / Italy / Piedmont / Turin                      |
| EPI_ISL_569887 | 7/2/2020  | 10/3/2020 North America / USA / California / Alameda County      |
| EPI_ISL_569888 | 7/2/2020  | 10/3/2020 North America / USA / California / Contra Costa County |
| EPI_ISL_569889 | 7/9/2020  | 10/3/2020 North America / USA / California / Contra Costa County |
| EPI_ISL_569890 | 7/2/2020  | 10/3/2020 North America / USA / California / Alameda County      |
| EPI_ISL_569891 | 7/2/2020  | 10/3/2020 North America / USA / California / Alameda County      |
| EPI_ISL_569892 | 7/2/2020  | 10/3/2020 North America / USA / California / Alameda County      |
| EPI_ISL_569893 | 6/30/2020 | 10/3/2020 North America / USA / California / Alameda County      |
| EPI_ISL_569894 | 7/1/2020  | 10/3/2020 North America / USA / California / Alameda County      |
| EPI_ISL_569895 | 7/9/2020  | 10/3/2020 North America / USA / California / Alameda County      |
| EPI_ISL_569896 | 7/1/2020  | 10/3/2020 North America / USA / California / Alameda County      |



|                |           |           |                                                        |
|----------------|-----------|-----------|--------------------------------------------------------|
| EPI_ISL_569898 | 7/6/2020  | 10/3/2020 | North America / USA / California / Alameda County      |
| EPI_ISL_569899 | 7/9/2020  | 10/3/2020 | North America / USA / California / Alameda County      |
| EPI_ISL_569900 | 7/1/2020  | 10/3/2020 | North America / USA / California / Alameda County      |
| EPI_ISL_569901 | 7/6/2020  | 10/3/2020 | North America / USA / California / Alameda County      |
| EPI_ISL_569902 | 7/1/2020  | 10/3/2020 | North America / USA / California / Alameda County      |
| EPI_ISL_569904 | 7/2/2020  | 10/3/2020 | North America / USA / California / Contra Costa County |
| EPI_ISL_569905 | 7/2/2020  | 10/3/2020 | North America / USA / California / Contra Costa County |
| EPI_ISL_569906 | 7/9/2020  | 10/3/2020 | North America / USA / California / Alameda County      |
| EPI_ISL_569907 | 7/6/2020  | 10/3/2020 | North America / USA / California / Alameda County      |
| EPI_ISL_569909 | 7/1/2020  | 10/3/2020 | North America / USA / California / Alameda County      |
| EPI_ISL_569911 | 7/2/2020  | 10/3/2020 | North America / USA / California / Alameda County      |
| EPI_ISL_569913 | 7/1/2020  | 10/3/2020 | North America / USA / California / Alameda County      |
| EPI_ISL_569915 | 6/30/2020 | 10/3/2020 | North America / USA / California / Alameda County      |
| EPI_ISL_569932 | 7/9/2020  | 10/3/2020 | North America / USA / California / Alameda County      |
| EPI_ISL_569933 | 7/2/2020  | 10/3/2020 | North America / USA / California / Alameda County      |
| EPI_ISL_569934 | 7/2/2020  | 10/3/2020 | North America / USA / California / Alameda County      |
| EPI_ISL_569935 | 7/10/2020 | 10/3/2020 | North America / USA / California / Alameda County      |
| EPI_ISL_569939 | 6/30/2020 | 10/3/2020 | North America / USA / California / Alameda County      |
| EPI_ISL_569940 | 7/1/2020  | 10/3/2020 | North America / USA / California / Alameda County      |
| EPI_ISL_569941 | 7/1/2020  | 10/3/2020 | North America / USA / California / Alameda County      |
| EPI_ISL_569942 | 6/30/2020 | 10/3/2020 | North America / USA / California / Alameda County      |
| EPI_ISL_569943 | 7/6/2020  | 10/3/2020 | North America / USA / California / Alameda County      |
| EPI_ISL_569945 | 7/2/2020  | 10/3/2020 | North America / USA / California / Alameda County      |
| EPI_ISL_569947 | 7/1/2020  | 10/3/2020 | North America / USA / California / Alameda County      |
| EPI_ISL_569949 | 5/23/2020 | 10/3/2020 | North America / Canada / Ontario                       |
| EPI_ISL_569954 | 5/25/2020 | 10/3/2020 | North America / Canada / Ontario                       |
| EPI_ISL_569955 | 5/26/2020 | 10/3/2020 | North America / Canada / Ontario                       |
| EPI_ISL_569958 | 5/27/2020 | 10/3/2020 | North America / Canada / Ontario                       |
| EPI_ISL_569961 | 6/10/2020 | 10/3/2020 | North America / Canada / Ontario                       |
| EPI_ISL_569965 | 5/26/2020 | 10/3/2020 | North America / Canada / Ontario                       |
| EPI_ISL_569966 | 5/24/2020 | 10/3/2020 | North America / Canada / Ontario                       |
| EPI_ISL_569968 | 5/23/2020 | 10/3/2020 | North America / Canada / Ontario                       |
| EPI_ISL_569969 | 6/10/2020 | 10/3/2020 | North America / Canada / Ontario                       |
| EPI_ISL_569970 | 5/23/2020 | 10/3/2020 | North America / Canada / Ontario                       |
| EPI_ISL_569971 | 5/23/2020 | 10/3/2020 | North America / Canada / Ontario                       |
| EPI_ISL_569972 | 6/10/2020 | 10/3/2020 | North America / Canada / Ontario                       |
| EPI_ISL_569973 | 5/23/2020 | 10/3/2020 | North America / Canada / Ontario                       |
| EPI_ISL_569975 | 6/10/2020 | 10/3/2020 | North America / Canada / Ontario                       |
| EPI_ISL_569976 | 5/24/2020 | 10/3/2020 | North America / Canada / Ontario                       |
| EPI_ISL_569978 | 5/29/2020 | 10/3/2020 | North America / Canada / Ontario                       |
| EPI_ISL_569980 | 7/30/2020 | 10/3/2020 | North America / Canada / Ontario                       |
| EPI_ISL_569981 | 7/6/2020  | 10/3/2020 | North America / Canada / Ontario                       |
| EPI_ISL_569982 | 7/16/2020 | 10/3/2020 | North America / Canada / Ontario                       |
| EPI_ISL_569983 | 7/14/2020 | 10/3/2020 | North America / Canada / Ontario                       |
| EPI_ISL_569986 | 5/20/2020 | 10/3/2020 | North America / Canada / Ontario                       |
| EPI_ISL_569987 | 7/22/2020 | 10/3/2020 | North America / Canada / Ontario                       |
| EPI_ISL_569991 | 7/29/2020 | 10/3/2020 | North America / Canada / Ontario                       |

|                |           |                                             |
|----------------|-----------|---------------------------------------------|
| EPI_ISL_569992 | 7/6/2020  | 10/3/2020 North America / Canada / Ontario  |
| EPI_ISL_569993 | 7/26/2020 | 10/3/2020 North America / Canada / Ontario  |
| EPI_ISL_569995 | 6/14/2020 | 10/3/2020 North America / Canada / Ontario  |
| EPI_ISL_569996 | 6/21/2020 | 10/3/2020 North America / Canada / Ontario  |
| EPI_ISL_569998 | 8/17/2020 | 10/3/2020 North America / Canada / Ontario  |
| EPI_ISL_570000 | 8/10/2020 | 10/3/2020 North America / Canada / Ontario  |
| EPI_ISL_570001 | 6/16/2020 | 10/3/2020 North America / Canada / Ontario  |
| EPI_ISL_570002 | 6/19/2020 | 10/3/2020 North America / Canada / Ontario  |
| EPI_ISL_570003 | 6/23/2020 | 10/3/2020 North America / Canada / Ontario  |
| EPI_ISL_570004 | 6/14/2020 | 10/3/2020 North America / Canada / Ontario  |
| EPI_ISL_570005 | 6/22/2020 | 10/3/2020 North America / Canada / Ontario  |
| EPI_ISL_570006 | 6/16/2020 | 10/3/2020 North America / Canada / Ontario  |
| EPI_ISL_570007 | 6/13/2020 | 10/3/2020 North America / Canada / Ontario  |
| EPI_ISL_570008 | 6/29/2020 | 10/3/2020 North America / Canada / Ontario  |
| EPI_ISL_570009 | 6/8/2020  | 10/3/2020 North America / Canada / Ontario  |
| EPI_ISL_570011 | 6/4/2020  | 10/3/2020 North America / Canada / Ontario  |
| EPI_ISL_570012 | 6/8/2020  | 10/3/2020 North America / Canada / Ontario  |
| EPI_ISL_570014 | 6/8/2020  | 10/3/2020 North America / Canada / Ontario  |
| EPI_ISL_570016 | 6/12/2020 | 10/3/2020 North America / Canada / Ontario  |
| EPI_ISL_570017 | 6/1/2020  | 10/3/2020 North America / Canada / Ontario  |
| EPI_ISL_570019 | 6/7/2020  | 10/3/2020 North America / Canada / Ontario  |
| EPI_ISL_570020 | 6/5/2020  | 10/3/2020 North America / Canada / Ontario  |
| EPI_ISL_570021 | 6/2/2020  | 10/3/2020 North America / Canada / Ontario  |
| EPI_ISL_570023 | 6/1/2020  | 10/3/2020 North America / Canada / Ontario  |
| EPI_ISL_570025 | 6/12/2020 | 10/3/2020 North America / Canada / Ontario  |
| EPI_ISL_570028 | 3/10/2020 | 10/4/2020 North America / USA / Washington  |
| EPI_ISL_570029 | 3/25/2020 | 10/4/2020 North America / USA / Washington  |
| EPI_ISL_570030 | 3/24/2020 | 10/4/2020 North America / USA / Washington  |
| EPI_ISL_570032 | 3/25/2020 | 10/4/2020 North America / USA / Washington  |
| EPI_ISL_570033 | 3/25/2020 | 10/4/2020 North America / USA / Washington  |
| EPI_ISL_570034 | 3/25/2020 | 10/4/2020 North America / USA / Washington  |
| EPI_ISL_570037 | 4/28/2020 | 10/4/2020 North America / USA / Washington  |
| EPI_ISL_570038 | 4/29/2020 | 10/4/2020 North America / USA / Washington  |
| EPI_ISL_570040 | 3/25/2020 | 10/4/2020 North America / USA / Washington  |
| EPI_ISL_570041 | 3/25/2020 | 10/4/2020 North America / USA / Washington  |
| EPI_ISL_570042 | 3/25/2020 | 10/4/2020 North America / USA / Connecticut |
| EPI_ISL_570043 | 4/29/2020 | 10/4/2020 North America / USA / Washington  |
| EPI_ISL_570044 | 3/11/2020 | 10/4/2020 North America / USA / Washington  |
| EPI_ISL_570046 | 3/31/2020 | 10/4/2020 North America / USA / Washington  |
| EPI_ISL_570047 | 3/30/2020 | 10/4/2020 North America / USA / Washington  |
| EPI_ISL_570048 | 3/28/2020 | 10/4/2020 North America / USA / Idaho       |
| EPI_ISL_570049 | 5/2/2020  | 10/4/2020 North America / USA / Washington  |
| EPI_ISL_570050 | 3/28/2020 | 10/4/2020 North America / USA / Washington  |
| EPI_ISL_570051 | 3/31/2020 | 10/4/2020 North America / USA / Washington  |
| EPI_ISL_570052 | 3/28/2020 | 10/4/2020 North America / USA / Washington  |
| EPI_ISL_570053 | 3/29/2020 | 10/4/2020 North America / USA / Washington  |
| EPI_ISL_570054 | 4/6/2020  | 10/4/2020 North America / USA / Washington  |

|                |           |           |                                   |
|----------------|-----------|-----------|-----------------------------------|
| EPI_ISL_570056 | 4/6/2020  | 10/4/2020 | North America / USA / Washington  |
| EPI_ISL_570057 | 4/6/2020  | 10/4/2020 | North America / USA / Washington  |
| EPI_ISL_570059 | 3/28/2020 | 10/4/2020 | North America / USA / Washington  |
| EPI_ISL_570060 | 3/28/2020 | 10/4/2020 | North America / USA / Washington  |
| EPI_ISL_570061 | 4/2/2020  | 10/4/2020 | North America / USA / Washington  |
| EPI_ISL_570062 | 3/12/2020 | 10/4/2020 | North America / USA / Washington  |
| EPI_ISL_570063 | 4/2/2020  | 10/4/2020 | North America / USA / Washington  |
| EPI_ISL_570064 | 3/12/2020 | 10/4/2020 | North America / USA / Washington  |
| EPI_ISL_570065 | 3/12/2020 | 10/4/2020 | North America / USA / Washington  |
| EPI_ISL_570066 | 4/5/2020  | 10/4/2020 | North America / USA / Washington  |
| EPI_ISL_570067 | 4/5/2020  | 10/4/2020 | North America / USA / Washington  |
| EPI_ISL_570068 | 3/25/2020 | 10/4/2020 | North America / USA / Washington  |
| EPI_ISL_570069 | 3/26/2020 | 10/4/2020 | North America / USA / Washington  |
| EPI_ISL_570071 | 4/8/2020  | 10/4/2020 | North America / USA / Washington  |
| EPI_ISL_570072 | 4/9/2020  | 10/4/2020 | North America / USA / Washington  |
| EPI_ISL_570073 | 4/6/2020  | 10/4/2020 | North America / USA / Washington  |
| EPI_ISL_570074 | 4/7/2020  | 10/4/2020 | North America / USA / Washington  |
| EPI_ISL_570075 | 4/7/2020  | 10/4/2020 | North America / USA / Washington  |
| EPI_ISL_570076 | 4/4/2020  | 10/4/2020 | North America / USA / Connecticut |
| EPI_ISL_570078 | 4/7/2020  | 10/4/2020 | North America / USA / Washington  |
| EPI_ISL_570079 | 4/5/2020  | 10/4/2020 | North America / USA / Idaho       |
| EPI_ISL_570080 | 3/12/2020 | 10/4/2020 | North America / USA / Washington  |
| EPI_ISL_570081 | 3/12/2020 | 10/4/2020 | North America / USA / Washington  |
| EPI_ISL_570082 | 4/1/2020  | 10/4/2020 | North America / USA / Washington  |
| EPI_ISL_570083 | 4/1/2020  | 10/4/2020 | North America / USA / Washington  |
| EPI_ISL_570084 | 4/1/2020  | 10/4/2020 | North America / USA / Washington  |
| EPI_ISL_570086 | 4/1/2020  | 10/4/2020 | North America / USA / Washington  |
| EPI_ISL_570087 | 4/1/2020  | 10/4/2020 | North America / USA / Washington  |
| EPI_ISL_570088 | 4/1/2020  | 10/4/2020 | North America / USA / Idaho       |
| EPI_ISL_570089 | 4/1/2020  | 10/4/2020 | North America / USA / Washington  |
| EPI_ISL_570090 | 4/2/2020  | 10/4/2020 | North America / USA / Washington  |
| EPI_ISL_570091 | 4/2/2020  | 10/4/2020 | North America / USA / Washington  |
| EPI_ISL_570092 | 4/1/2020  | 10/4/2020 | North America / USA / Connecticut |
| EPI_ISL_570093 | 4/1/2020  | 10/4/2020 | North America / USA / Connecticut |
| EPI_ISL_570094 | 4/1/2020  | 10/4/2020 | North America / USA / Connecticut |
| EPI_ISL_570095 | 4/1/2020  | 10/4/2020 | North America / USA / Connecticut |
| EPI_ISL_570096 | 4/2/2020  | 10/4/2020 | North America / USA / Washington  |
| EPI_ISL_570097 | 4/2/2020  | 10/4/2020 | North America / USA / Washington  |
| EPI_ISL_570098 | 4/2/2020  | 10/4/2020 | North America / USA / Washington  |
| EPI_ISL_570099 | 4/1/2020  | 10/4/2020 | North America / USA / Idaho       |
| EPI_ISL_570100 | 4/1/2020  | 10/4/2020 | North America / USA / Idaho       |
| EPI_ISL_570101 | 4/2/2020  | 10/4/2020 | North America / USA / Washington  |
| EPI_ISL_570102 | 4/2/2020  | 10/4/2020 | North America / USA / Washington  |
| EPI_ISL_570103 | 4/3/2020  | 10/4/2020 | North America / USA / Washington  |
| EPI_ISL_570104 | 4/1/2020  | 10/4/2020 | North America / USA / Connecticut |
| EPI_ISL_570105 | 4/1/2020  | 10/4/2020 | North America / USA / Idaho       |
| EPI_ISL_570106 | 4/1/2020  | 10/4/2020 | North America / USA / Idaho       |





















|                |           |           |                                   |
|----------------|-----------|-----------|-----------------------------------|
| EPI_ISL_570569 | 8/5/2020  | 10/4/2020 | North America / USA / Washington  |
| EPI_ISL_570570 | 8/4/2020  | 10/4/2020 | North America / USA / Washington  |
| EPI_ISL_570571 | 8/3/2020  | 10/4/2020 | North America / USA / Washington  |
| EPI_ISL_570572 | 8/5/2020  | 10/4/2020 | North America / USA / Washington  |
| EPI_ISL_570573 | 8/10/2020 | 10/4/2020 | North America / USA / Washington  |
| EPI_ISL_570574 | 9/6/2020  | 10/4/2020 | North America / USA / Washington  |
| EPI_ISL_570575 | 8/11/2020 | 10/4/2020 | North America / USA / Washington  |
| EPI_ISL_570576 | 8/5/2020  | 10/4/2020 | North America / USA / Washington  |
| EPI_ISL_570577 | 9/1/2020  | 10/4/2020 | North America / USA / Washington  |
| EPI_ISL_570578 | 8/5/2020  | 10/4/2020 | North America / USA / Washington  |
| EPI_ISL_570579 | 9/2/2020  | 10/4/2020 | North America / USA / Washington  |
| EPI_ISL_570580 | 8/11/2020 | 10/4/2020 | North America / USA / Washington  |
| EPI_ISL_570581 | 8/12/2020 | 10/4/2020 | North America / USA / Washington  |
| EPI_ISL_570582 | 8/5/2020  | 10/4/2020 | North America / USA / Washington  |
| EPI_ISL_570583 | 8/12/2020 | 10/4/2020 | North America / USA / Washington  |
| EPI_ISL_570584 | 8/13/2020 | 10/4/2020 | North America / USA / Oregon      |
| EPI_ISL_570585 | 8/3/2020  | 10/4/2020 | North America / USA / Washington  |
| EPI_ISL_570586 | 8/6/2020  | 10/4/2020 | North America / USA / Washington  |
| EPI_ISL_570587 | 8/2/2020  | 10/4/2020 | North America / USA / Washington  |
| EPI_ISL_570588 | 8/3/2020  | 10/4/2020 | North America / USA / Washington  |
| EPI_ISL_570589 | 8/3/2020  | 10/4/2020 | North America / USA / Washington  |
| EPI_ISL_570590 | 8/3/2020  | 10/4/2020 | North America / USA / Washington  |
| EPI_ISL_570591 | 8/7/2020  | 10/4/2020 | North America / USA / Washington  |
| EPI_ISL_570592 | 8/4/2020  | 10/4/2020 | North America / USA / Washington  |
| EPI_ISL_570593 | 8/4/2020  | 10/4/2020 | North America / USA / Washington  |
| EPI_ISL_570594 | 8/8/2020  | 10/4/2020 | North America / USA / Washington  |
| EPI_ISL_570595 | 8/11/2020 | 10/4/2020 | North America / USA / Washington  |
| EPI_ISL_570596 | 8/11/2020 | 10/4/2020 | North America / USA / Washington  |
| EPI_ISL_570597 | 8/8/2020  | 10/4/2020 | North America / USA / Washington  |
| EPI_ISL_570598 | 8/10/2020 | 10/4/2020 | North America / USA / Washington  |
| EPI_ISL_570599 | 8/14/2020 | 10/4/2020 | North America / USA / Washington  |
| EPI_ISL_570600 | 8/13/2020 | 10/4/2020 | North America / USA / Washington  |
| EPI_ISL_570601 | 8/13/2020 | 10/4/2020 | North America / USA / Washington  |
| EPI_ISL_570602 | 8/12/2020 | 10/4/2020 | North America / USA / Washington  |
| EPI_ISL_570603 | 8/11/2020 | 10/4/2020 | North America / USA / Washington  |
| EPI_ISL_570604 | 9/1/2020  | 10/4/2020 | North America / USA / Washington  |
| EPI_ISL_570605 | 8/5/2020  | 10/4/2020 | North America / USA / Washington  |
| EPI_ISL_570606 | 8/5/2020  | 10/4/2020 | North America / USA / Washington  |
| EPI_ISL_570607 | 8/4/2020  | 10/4/2020 | North America / USA / Washington  |
| EPI_ISL_570608 | 8/10/2020 | 10/4/2020 | North America / USA / Washington  |
| EPI_ISL_570609 | 8/7/2020  | 10/4/2020 | North America / USA / Washington  |
| EPI_ISL_570610 | 8/5/2020  | 10/4/2020 | North America / USA / Washington  |
| EPI_ISL_570611 | 8/10/2020 | 10/4/2020 | North America / USA / Washington  |
| EPI_ISL_570612 | 3/28/2020 | 10/4/2020 | North America / USA / Connecticut |
| EPI_ISL_570613 | 8/6/2020  | 10/4/2020 | North America / USA / Oregon      |
| EPI_ISL_570614 | 8/6/2020  | 10/4/2020 | North America / USA / Oregon      |
| EPI_ISL_570615 | 8/3/2020  | 10/4/2020 | North America / USA / Oregon      |











|                |           |                                            |
|----------------|-----------|--------------------------------------------|
| EPI_ISL_570825 | 6/29/2020 | 10/4/2020 North America / USA / Washington |
| EPI_ISL_570826 | 8/4/2020  | 10/4/2020 North America / USA / Washington |
| EPI_ISL_570827 | 8/4/2020  | 10/4/2020 North America / USA / Washington |
| EPI_ISL_570828 | 8/6/2020  | 10/4/2020 North America / USA / Washington |
| EPI_ISL_570829 | 8/6/2020  | 10/4/2020 North America / USA / Washington |
| EPI_ISL_570830 | 8/6/2020  | 10/4/2020 North America / USA / Washington |
| EPI_ISL_570831 | 6/30/2020 | 10/4/2020 North America / USA / Washington |
| EPI_ISL_570832 | 8/3/2020  | 10/4/2020 North America / USA / Washington |
| EPI_ISL_570833 | 6/28/2020 | 10/4/2020 North America / USA / Washington |
| EPI_ISL_570834 | 7/1/2020  | 10/4/2020 North America / USA / Washington |
| EPI_ISL_570835 | 7/30/2020 | 10/4/2020 North America / USA / Washington |
| EPI_ISL_570836 | 6/29/2020 | 10/4/2020 North America / USA / Washington |
| EPI_ISL_570837 | 6/30/2020 | 10/4/2020 North America / USA / Washington |
| EPI_ISL_570838 | 8/6/2020  | 10/4/2020 North America / USA / Washington |
| EPI_ISL_570839 | 8/4/2020  | 10/4/2020 North America / USA / Washington |
| EPI_ISL_570840 | 8/4/2020  | 10/4/2020 North America / USA / Washington |
| EPI_ISL_570841 | 6/29/2020 | 10/4/2020 North America / USA / Washington |
| EPI_ISL_570842 | 6/27/2020 | 10/4/2020 North America / USA / Oregon     |
| EPI_ISL_570843 | 8/4/2020  | 10/4/2020 North America / USA / Washington |
| EPI_ISL_570844 | 6/30/2020 | 10/4/2020 North America / USA / Washington |
| EPI_ISL_570846 | 8/6/2020  | 10/4/2020 North America / USA / Washington |
| EPI_ISL_570847 | 6/29/2020 | 10/4/2020 North America / USA / Washington |
| EPI_ISL_570848 | 8/1/2020  | 10/4/2020 North America / USA / Idaho      |
| EPI_ISL_570849 | 6/26/2020 | 10/4/2020 North America / USA / Oregon     |
| EPI_ISL_570850 | 7/1/2020  | 10/4/2020 North America / USA / Washington |
| EPI_ISL_570851 | 6/30/2020 | 10/4/2020 North America / USA / Washington |
| EPI_ISL_570852 | 8/1/2020  | 10/4/2020 North America / USA / Washington |
| EPI_ISL_570853 | 8/1/2020  | 10/4/2020 North America / USA / Washington |
| EPI_ISL_570854 | 8/1/2020  | 10/4/2020 North America / USA / Washington |
| EPI_ISL_570855 | 8/5/2020  | 10/4/2020 North America / USA / Washington |
| EPI_ISL_570856 | 8/5/2020  | 10/4/2020 North America / USA / Washington |
| EPI_ISL_570857 | 8/6/2020  | 10/4/2020 North America / USA / Washington |
| EPI_ISL_570858 | 6/29/2020 | 10/4/2020 North America / USA / Washington |
| EPI_ISL_570859 | 6/28/2020 | 10/4/2020 North America / USA / Washington |
| EPI_ISL_570860 | 7/1/2020  | 10/4/2020 North America / USA / Washington |
| EPI_ISL_570861 | 8/6/2020  | 10/4/2020 North America / USA / Washington |
| EPI_ISL_570862 | 6/26/2020 | 10/4/2020 North America / USA / Oregon     |
| EPI_ISL_570863 | 6/26/2020 | 10/4/2020 North America / USA / Washington |
| EPI_ISL_570864 | 6/26/2020 | 10/4/2020 North America / USA / Washington |
| EPI_ISL_570865 | 6/26/2020 | 10/4/2020 North America / USA / Washington |
| EPI_ISL_570866 | 6/26/2020 | 10/4/2020 North America / USA / Washington |
| EPI_ISL_570867 | 6/27/2020 | 10/4/2020 North America / USA / Washington |
| EPI_ISL_570868 | 6/26/2020 | 10/4/2020 North America / USA / Washington |
| EPI_ISL_570869 | 6/26/2020 | 10/4/2020 North America / USA / Washington |
| EPI_ISL_570870 | 6/27/2020 | 10/4/2020 North America / USA / Washington |
| EPI_ISL_570871 | 6/27/2020 | 10/4/2020 North America / USA / Washington |
| EPI_ISL_570872 | 6/28/2020 | 10/4/2020 North America / USA / Washington |







|                |           |           |                                  |
|----------------|-----------|-----------|----------------------------------|
| EPI_ISL_571015 | 8/3/2020  | 10/4/2020 | North America / USA / Washington |
| EPI_ISL_571016 | 3/23/2020 | 10/5/2020 | North America / USA / Alabama    |
| EPI_ISL_571017 | 3/23/2020 | 10/5/2020 | North America / USA / Alabama    |
| EPI_ISL_571018 | 3/23/2020 | 10/5/2020 | North America / USA / Arkansas   |
| EPI_ISL_571019 | 3/19/2020 | 10/5/2020 | North America / USA / Arizona    |
| EPI_ISL_571020 | 3/20/2020 | 10/5/2020 | North America / USA / California |
| EPI_ISL_571021 | 3/21/2020 | 10/5/2020 | North America / USA / California |
| EPI_ISL_571022 | 3/21/2020 | 10/5/2020 | North America / USA / California |
| EPI_ISL_571023 | 3/20/2020 | 10/5/2020 | North America / USA / California |
| EPI_ISL_571024 | 3/20/2020 | 10/5/2020 | North America / USA / California |
| EPI_ISL_571025 | 3/20/2020 | 10/5/2020 | North America / USA / California |
| EPI_ISL_571026 | 3/20/2020 | 10/5/2020 | North America / USA / California |
| EPI_ISL_571027 | 3/17/2020 | 10/5/2020 | North America / USA / Florida    |
| EPI_ISL_571028 | 3/18/2020 | 10/5/2020 | North America / USA / Florida    |
| EPI_ISL_571029 | 3/19/2020 | 10/5/2020 | North America / USA / Florida    |
| EPI_ISL_571030 | 3/19/2020 | 10/5/2020 | North America / USA / Illinois   |
| EPI_ISL_571031 | 3/19/2020 | 10/5/2020 | North America / USA / Illinois   |
| EPI_ISL_571033 | 3/18/2020 | 10/5/2020 | North America / USA / Illinois   |
| EPI_ISL_571034 | 3/19/2020 | 10/5/2020 | North America / USA / Illinois   |
| EPI_ISL_571035 | 3/19/2020 | 10/5/2020 | North America / USA / Illinois   |
| EPI_ISL_571036 | 3/17/2020 | 10/5/2020 | North America / USA / Michigan   |
| EPI_ISL_571037 | 3/17/2020 | 10/5/2020 | North America / USA / Michigan   |
| EPI_ISL_571038 | 3/21/2020 | 10/5/2020 | North America / USA / Michigan   |
| EPI_ISL_571039 | 3/20/2020 | 10/5/2020 | North America / USA / Michigan   |
| EPI_ISL_571040 | 3/21/2020 | 10/5/2020 | North America / USA / Michigan   |
| EPI_ISL_571041 | 3/21/2020 | 10/5/2020 | North America / USA / Michigan   |
| EPI_ISL_571042 | 3/21/2020 | 10/5/2020 | North America / USA / Michigan   |
| EPI_ISL_571043 | 3/21/2020 | 10/5/2020 | North America / USA / Michigan   |
| EPI_ISL_571044 | 3/21/2020 | 10/5/2020 | North America / USA / Michigan   |
| EPI_ISL_571045 | 3/21/2020 | 10/5/2020 | North America / USA / Michigan   |
| EPI_ISL_571046 | 3/21/2020 | 10/5/2020 | North America / USA / Michigan   |
| EPI_ISL_571047 | 3/21/2020 | 10/5/2020 | North America / USA / Michigan   |
| EPI_ISL_571048 | 3/22/2020 | 10/5/2020 | North America / USA / Michigan   |
| EPI_ISL_571049 | 3/22/2020 | 10/5/2020 | North America / USA / Michigan   |
| EPI_ISL_571050 | 3/22/2020 | 10/5/2020 | North America / USA / Michigan   |
| EPI_ISL_571051 | 3/21/2020 | 10/5/2020 | North America / USA / Michigan   |
| EPI_ISL_571052 | 3/22/2020 | 10/5/2020 | North America / USA / Michigan   |
| EPI_ISL_571053 | 3/21/2020 | 10/5/2020 | North America / USA / Michigan   |
| EPI_ISL_571054 | 3/22/2020 | 10/5/2020 | North America / USA / Michigan   |
| EPI_ISL_571055 | 3/21/2020 | 10/5/2020 | North America / USA / Michigan   |
| EPI_ISL_571056 | 3/22/2020 | 10/5/2020 | North America / USA / Michigan   |
| EPI_ISL_571057 | 3/22/2020 | 10/5/2020 | North America / USA / Michigan   |
| EPI_ISL_571058 | 3/22/2020 | 10/5/2020 | North America / USA / Michigan   |
| EPI_ISL_571059 | 3/22/2020 | 10/5/2020 | North America / USA / Michigan   |
| EPI_ISL_571060 | 3/22/2020 | 10/5/2020 | North America / USA / Michigan   |
| EPI_ISL_571061 | 3/22/2020 | 10/5/2020 | North America / USA / Michigan   |
| EPI_ISL_571062 | 3/21/2020 | 10/5/2020 | North America / USA / Michigan   |







|                |           |                                             |
|----------------|-----------|---------------------------------------------|
| EPI_ISL_571159 | 3/20/2020 | 10/5/2020 North America / USA / California  |
| EPI_ISL_571160 | 3/20/2020 | 10/5/2020 North America / USA / California  |
| EPI_ISL_571161 | 3/22/2020 | 10/5/2020 North America / USA / California  |
| EPI_ISL_571162 | 3/21/2020 | 10/5/2020 North America / USA / California  |
| EPI_ISL_571163 | 3/21/2020 | 10/5/2020 North America / USA / California  |
| EPI_ISL_571164 | 3/22/2020 | 10/5/2020 North America / USA / California  |
| EPI_ISL_571165 | 3/21/2020 | 10/5/2020 North America / USA / California  |
| EPI_ISL_571166 | 3/22/2020 | 10/5/2020 North America / USA / California  |
| EPI_ISL_571167 | 3/21/2020 | 10/5/2020 North America / USA / California  |
| EPI_ISL_571168 | 3/22/2020 | 10/5/2020 North America / USA / California  |
| EPI_ISL_571169 | 3/22/2020 | 10/5/2020 North America / USA / California  |
| EPI_ISL_571170 | 3/21/2020 | 10/5/2020 North America / USA / California  |
| EPI_ISL_571171 | 3/21/2020 | 10/5/2020 North America / USA / California  |
| EPI_ISL_571172 | 3/21/2020 | 10/5/2020 North America / USA / California  |
| EPI_ISL_571174 | 3/22/2020 | 10/5/2020 North America / USA / California  |
| EPI_ISL_571175 | 3/23/2020 | 10/5/2020 North America / USA / California  |
| EPI_ISL_571176 | 3/27/2020 | 10/5/2020 North America / USA / California  |
| EPI_ISL_571177 | 3/26/2020 | 10/5/2020 North America / USA / California  |
| EPI_ISL_571178 | 3/17/2020 | 10/5/2020 North America / USA / Connecticut |
| EPI_ISL_571179 | 3/17/2020 | 10/5/2020 North America / USA / Connecticut |
| EPI_ISL_571180 | 3/17/2020 | 10/5/2020 North America / USA / Connecticut |
| EPI_ISL_571181 | 3/17/2020 | 10/5/2020 North America / USA / Connecticut |
| EPI_ISL_571182 | 3/17/2020 | 10/5/2020 North America / USA / Florida     |
| EPI_ISL_571183 | 3/17/2020 | 10/5/2020 North America / USA / Hawaii      |
| EPI_ISL_571184 | 3/16/2020 | 10/5/2020 North America / USA / Hawaii      |
| EPI_ISL_571185 | 3/18/2020 | 10/5/2020 North America / USA / Hawaii      |
| EPI_ISL_571186 | 3/17/2020 | 10/5/2020 North America / USA / Illinois    |
| EPI_ISL_571187 | 3/17/2020 | 10/5/2020 North America / USA / Louisiana   |
| EPI_ISL_571188 | 3/18/2020 | 10/5/2020 North America / USA / Louisiana   |
| EPI_ISL_571189 | 3/21/2020 | 10/5/2020 North America / USA / Michigan    |
| EPI_ISL_571190 | 3/21/2020 | 10/5/2020 North America / USA / Michigan    |
| EPI_ISL_571191 | 3/21/2020 | 10/5/2020 North America / USA / Michigan    |
| EPI_ISL_571192 | 3/22/2020 | 10/5/2020 North America / USA / Michigan    |
| EPI_ISL_571193 | 3/21/2020 | 10/5/2020 North America / USA / Michigan    |
| EPI_ISL_571194 | 3/22/2020 | 10/5/2020 North America / USA / Michigan    |
| EPI_ISL_571195 | 3/22/2020 | 10/5/2020 North America / USA / Michigan    |
| EPI_ISL_571196 | 3/23/2020 | 10/5/2020 North America / USA / Michigan    |
| EPI_ISL_571197 | 3/22/2020 | 10/5/2020 North America / USA / Michigan    |
| EPI_ISL_571198 | 3/22/2020 | 10/5/2020 North America / USA / Michigan    |
| EPI_ISL_571199 | 3/22/2020 | 10/5/2020 North America / USA / Michigan    |
| EPI_ISL_571200 | 3/22/2020 | 10/5/2020 North America / USA / Michigan    |
| EPI_ISL_571201 | 3/22/2020 | 10/5/2020 North America / USA / Michigan    |
| EPI_ISL_571202 | 3/23/2020 | 10/5/2020 North America / USA / Michigan    |
| EPI_ISL_571203 | 3/23/2020 | 10/5/2020 North America / USA / Michigan    |
| EPI_ISL_571204 | 3/22/2020 | 10/5/2020 North America / USA / Michigan    |
| EPI_ISL_571205 | 3/23/2020 | 10/5/2020 North America / USA / Michigan    |
| EPI_ISL_571206 | 3/23/2020 | 10/5/2020 North America / USA / Michigan    |



|                |           |                                            |
|----------------|-----------|--------------------------------------------|
| EPI_ISL_571255 | 3/18/2020 | 10/5/2020 North America / USA / Texas      |
| EPI_ISL_571256 | 3/18/2020 | 10/5/2020 North America / USA / Texas      |
| EPI_ISL_571257 | 3/19/2020 | 10/5/2020 North America / USA / Texas      |
| EPI_ISL_571258 | 3/19/2020 | 10/5/2020 North America / USA / Wisconsin  |
| EPI_ISL_571259 | 3/18/2020 | 10/5/2020 North America / USA / Wisconsin  |
| EPI_ISL_571260 | 3/20/2020 | 10/5/2020 North America / USA / Wisconsin  |
| EPI_ISL_571261 | 3/18/2020 | 10/5/2020 North America / USA / Arkansas   |
| EPI_ISL_571262 | 3/18/2020 | 10/5/2020 North America / USA / Arkansas   |
| EPI_ISL_571263 | 3/17/2020 | 10/5/2020 North America / USA / Arizona    |
| EPI_ISL_571264 | 3/18/2020 | 10/5/2020 North America / USA / Arizona    |
| EPI_ISL_571265 | 3/18/2020 | 10/5/2020 North America / USA / Arizona    |
| EPI_ISL_571266 | 3/17/2020 | 10/5/2020 North America / USA / Arizona    |
| EPI_ISL_571267 | 3/18/2020 | 10/5/2020 North America / USA / Arizona    |
| EPI_ISL_571268 | 3/18/2020 | 10/5/2020 North America / USA / California |
| EPI_ISL_571269 | 3/19/2020 | 10/5/2020 North America / USA / California |
| EPI_ISL_571270 | 3/18/2020 | 10/5/2020 North America / USA / California |
| EPI_ISL_571271 | 3/20/2020 | 10/5/2020 North America / USA / California |
| EPI_ISL_571272 | 3/19/2020 | 10/5/2020 North America / USA / California |
| EPI_ISL_571273 | 3/19/2020 | 10/5/2020 North America / USA / California |
| EPI_ISL_571274 | 3/19/2020 | 10/5/2020 North America / USA / California |
| EPI_ISL_571275 | 3/19/2020 | 10/5/2020 North America / USA / California |
| EPI_ISL_571276 | 3/19/2020 | 10/5/2020 North America / USA / California |
| EPI_ISL_571277 | 3/19/2020 | 10/5/2020 North America / USA / California |
| EPI_ISL_571278 | 3/19/2020 | 10/5/2020 North America / USA / California |
| EPI_ISL_571279 | 3/19/2020 | 10/5/2020 North America / USA / California |
| EPI_ISL_571280 | 3/19/2020 | 10/5/2020 North America / USA / California |
| EPI_ISL_571281 | 3/19/2020 | 10/5/2020 North America / USA / California |
| EPI_ISL_571283 | 3/22/2020 | 10/5/2020 North America / USA / California |
| EPI_ISL_571284 | 3/24/2020 | 10/5/2020 North America / USA / California |
| EPI_ISL_571285 | 3/24/2020 | 10/5/2020 North America / USA / California |
| EPI_ISL_571286 | 3/18/2020 | 10/5/2020 North America / USA / Florida    |
| EPI_ISL_571287 | 3/17/2020 | 10/5/2020 North America / USA / Georgia    |
| EPI_ISL_571288 | 3/18/2020 | 10/5/2020 North America / USA / Georgia    |
| EPI_ISL_571289 | 3/17/2020 | 10/5/2020 North America / USA / Georgia    |
| EPI_ISL_571290 | 3/16/2020 | 10/5/2020 North America / USA / Georgia    |
| EPI_ISL_571291 | 3/18/2020 | 10/5/2020 North America / USA / Georgia    |
| EPI_ISL_571292 | 3/18/2020 | 10/5/2020 North America / USA / Georgia    |
| EPI_ISL_571293 | 3/17/2020 | 10/5/2020 North America / USA / Georgia    |
| EPI_ISL_571295 | 3/18/2020 | 10/5/2020 North America / USA / Georgia    |
| EPI_ISL_571296 | 3/17/2020 | 10/5/2020 North America / USA / Georgia    |
| EPI_ISL_571299 | 3/18/2020 | 10/5/2020 North America / USA / Idaho      |
| EPI_ISL_571300 | 3/18/2020 | 10/5/2020 North America / USA / Idaho      |
| EPI_ISL_571301 | 3/18/2020 | 10/5/2020 North America / USA / Idaho      |
| EPI_ISL_571302 | 3/18/2020 | 10/5/2020 North America / USA / Idaho      |
| EPI_ISL_571303 | 3/18/2020 | 10/5/2020 North America / USA / Idaho      |
| EPI_ISL_571304 | 3/18/2020 | 10/5/2020 North America / USA / Idaho      |
| EPI_ISL_571305 | 3/18/2020 | 10/5/2020 North America / USA / Idaho      |





|                |           |           |                                  |
|----------------|-----------|-----------|----------------------------------|
| EPI_ISL_571404 | 3/18/2020 | 10/5/2020 | North America / USA / Washington |
| EPI_ISL_571405 | 3/18/2020 | 10/5/2020 | North America / USA / Washington |
| EPI_ISL_571406 | 3/18/2020 | 10/5/2020 | North America / USA / Washington |
| EPI_ISL_571407 | 3/18/2020 | 10/5/2020 | North America / USA / Wisconsin  |
| EPI_ISL_571408 | 3/18/2020 | 10/5/2020 | North America / USA / Arkansas   |
| EPI_ISL_571409 | 3/18/2020 | 10/5/2020 | North America / USA / Arkansas   |
| EPI_ISL_571410 | 3/19/2020 | 10/5/2020 | North America / USA / California |
| EPI_ISL_571411 | 3/20/2020 | 10/5/2020 | North America / USA / California |
| EPI_ISL_571412 | 3/20/2020 | 10/5/2020 | North America / USA / California |
| EPI_ISL_571413 | 3/20/2020 | 10/5/2020 | North America / USA / California |
| EPI_ISL_571414 | 3/20/2020 | 10/5/2020 | North America / USA / California |
| EPI_ISL_571415 | 3/20/2020 | 10/5/2020 | North America / USA / California |
| EPI_ISL_571416 | 3/20/2020 | 10/5/2020 | North America / USA / California |
| EPI_ISL_571417 | 3/20/2020 | 10/5/2020 | North America / USA / California |
| EPI_ISL_571418 | 3/20/2020 | 10/5/2020 | North America / USA / California |
| EPI_ISL_571419 | 3/20/2020 | 10/5/2020 | North America / USA / California |
| EPI_ISL_571420 | 3/20/2020 | 10/5/2020 | North America / USA / California |
| EPI_ISL_571421 | 3/20/2020 | 10/5/2020 | North America / USA / California |
| EPI_ISL_571422 | 3/19/2020 | 10/5/2020 | North America / USA / California |
| EPI_ISL_571423 | 3/20/2020 | 10/5/2020 | North America / USA / California |
| EPI_ISL_571424 | 3/18/2020 | 10/5/2020 | North America / USA / Colorado   |
| EPI_ISL_571425 | 3/18/2020 | 10/5/2020 | North America / USA / Colorado   |
| EPI_ISL_571426 | 3/18/2020 | 10/5/2020 | North America / USA / Colorado   |
| EPI_ISL_571427 | 3/17/2020 | 10/5/2020 | North America / USA / Colorado   |
| EPI_ISL_571428 | 3/18/2020 | 10/5/2020 | North America / USA / Colorado   |
| EPI_ISL_571429 | 3/17/2020 | 10/5/2020 | North America / USA / Georgia    |
| EPI_ISL_571430 | 3/16/2020 | 10/5/2020 | North America / USA / Idaho      |
| EPI_ISL_571431 | 3/18/2020 | 10/5/2020 | North America / USA / Idaho      |
| EPI_ISL_571432 | 3/18/2020 | 10/5/2020 | North America / USA / Idaho      |
| EPI_ISL_571433 | 3/19/2020 | 10/5/2020 | North America / USA / Idaho      |
| EPI_ISL_571434 | 3/18/2020 | 10/5/2020 | North America / USA / Illinois   |
| EPI_ISL_571435 | 3/18/2020 | 10/5/2020 | North America / USA / Illinois   |
| EPI_ISL_571436 | 3/18/2020 | 10/5/2020 | North America / USA / Illinois   |
| EPI_ISL_571437 | 3/17/2020 | 10/5/2020 | North America / USA / Maine      |
| EPI_ISL_571438 | 3/17/2020 | 10/5/2020 | North America / USA / Michigan   |
| EPI_ISL_571439 | 3/19/2020 | 10/5/2020 | North America / USA / Michigan   |
| EPI_ISL_571440 | 3/18/2020 | 10/5/2020 | North America / USA / Michigan   |
| EPI_ISL_571441 | 3/20/2020 | 10/5/2020 | North America / USA / Michigan   |
| EPI_ISL_571442 | 3/20/2020 | 10/5/2020 | North America / USA / Michigan   |
| EPI_ISL_571443 | 3/20/2020 | 10/5/2020 | North America / USA / Michigan   |
| EPI_ISL_571444 | 3/20/2020 | 10/5/2020 | North America / USA / Michigan   |
| EPI_ISL_571445 | 3/21/2020 | 10/5/2020 | North America / USA / Michigan   |
| EPI_ISL_571446 | 3/20/2020 | 10/5/2020 | North America / USA / Michigan   |
| EPI_ISL_571447 | 3/20/2020 | 10/5/2020 | North America / USA / Michigan   |
| EPI_ISL_571448 | 3/21/2020 | 10/5/2020 | North America / USA / Michigan   |
| EPI_ISL_571449 | 3/22/2020 | 10/5/2020 | North America / USA / Michigan   |
| EPI_ISL_571450 | 3/20/2020 | 10/5/2020 | North America / USA / Michigan   |



|                |           |                                             |
|----------------|-----------|---------------------------------------------|
| EPI_ISL_571499 | 3/23/2020 | 10/5/2020 North America / USA / California  |
| EPI_ISL_571500 | 3/23/2020 | 10/5/2020 North America / USA / California  |
| EPI_ISL_571501 | 3/23/2020 | 10/5/2020 North America / USA / California  |
| EPI_ISL_571502 | 3/23/2020 | 10/5/2020 North America / USA / California  |
| EPI_ISL_571503 | 3/23/2020 | 10/5/2020 North America / USA / California  |
| EPI_ISL_571504 | 3/23/2020 | 10/5/2020 North America / USA / California  |
| EPI_ISL_571505 | 3/23/2020 | 10/5/2020 North America / USA / California  |
| EPI_ISL_571506 | 3/23/2020 | 10/5/2020 North America / USA / California  |
| EPI_ISL_571507 | 3/23/2020 | 10/5/2020 North America / USA / California  |
| EPI_ISL_571508 | 3/23/2020 | 10/5/2020 North America / USA / California  |
| EPI_ISL_571509 | 3/18/2020 | 10/5/2020 North America / USA / Connecticut |
| EPI_ISL_571510 | 3/18/2020 | 10/5/2020 North America / USA / Connecticut |
| EPI_ISL_571511 | 3/18/2020 | 10/5/2020 North America / USA / Connecticut |
| EPI_ISL_571512 | 3/18/2020 | 10/5/2020 North America / USA / Connecticut |
| EPI_ISL_571514 | 3/18/2020 | 10/5/2020 North America / USA / Connecticut |
| EPI_ISL_571515 | 3/18/2020 | 10/5/2020 North America / USA / Connecticut |
| EPI_ISL_571516 | 3/18/2020 | 10/5/2020 North America / USA / Connecticut |
| EPI_ISL_571517 | 3/18/2020 | 10/5/2020 North America / USA / Connecticut |
| EPI_ISL_571518 | 3/18/2020 | 10/5/2020 North America / USA / Connecticut |
| EPI_ISL_571519 | 3/19/2020 | 10/5/2020 North America / USA / Florida     |
| EPI_ISL_571520 | 3/21/2020 | 10/5/2020 North America / USA / Florida     |
| EPI_ISL_571521 | 3/21/2020 | 10/5/2020 North America / USA / Florida     |
| EPI_ISL_571522 | 3/21/2020 | 10/5/2020 North America / USA / Florida     |
| EPI_ISL_571523 | 3/21/2020 | 10/5/2020 North America / USA / Florida     |
| EPI_ISL_571524 | 3/20/2020 | 10/5/2020 North America / USA / Florida     |
| EPI_ISL_571525 | 3/21/2020 | 10/5/2020 North America / USA / Florida     |
| EPI_ISL_571526 | 3/21/2020 | 10/5/2020 North America / USA / Florida     |
| EPI_ISL_571527 | 3/19/2020 | 10/5/2020 North America / USA / Hawaii      |
| EPI_ISL_571528 | 3/18/2020 | 10/5/2020 North America / USA / Hawaii      |
| EPI_ISL_571529 | 3/18/2020 | 10/5/2020 North America / USA / Louisiana   |
| EPI_ISL_571530 | 3/17/2020 | 10/5/2020 North America / USA / Louisiana   |
| EPI_ISL_571531 | 3/17/2020 | 10/5/2020 North America / USA / Louisiana   |
| EPI_ISL_571532 | 3/18/2020 | 10/5/2020 North America / USA / Michigan    |
| EPI_ISL_571533 | 3/19/2020 | 10/5/2020 North America / USA / Michigan    |
| EPI_ISL_571534 | 3/19/2020 | 10/5/2020 North America / USA / Michigan    |
| EPI_ISL_571535 | 3/20/2020 | 10/5/2020 North America / USA / Michigan    |
| EPI_ISL_571536 | 3/20/2020 | 10/5/2020 North America / USA / Michigan    |
| EPI_ISL_571537 | 3/23/2020 | 10/5/2020 North America / USA / Michigan    |
| EPI_ISL_571538 | 3/20/2020 | 10/5/2020 North America / USA / Michigan    |
| EPI_ISL_571539 | 3/22/2020 | 10/5/2020 North America / USA / Michigan    |
| EPI_ISL_571540 | 3/22/2020 | 10/5/2020 North America / USA / Michigan    |
| EPI_ISL_571541 | 3/22/2020 | 10/5/2020 North America / USA / Michigan    |
| EPI_ISL_571543 | 3/22/2020 | 10/5/2020 North America / USA / Michigan    |
| EPI_ISL_571544 | 3/23/2020 | 10/5/2020 North America / USA / Michigan    |
| EPI_ISL_571545 | 3/17/2020 | 10/5/2020 North America / USA / Minnesota   |
| EPI_ISL_571546 | 3/18/2020 | 10/5/2020 North America / USA / Minnesota   |
| EPI_ISL_571547 | 3/19/2020 | 10/5/2020 North America / USA / Minnesota   |



|                |           |                                            |
|----------------|-----------|--------------------------------------------|
| EPI_ISL_571548 | 3/17/2020 | 10/5/2020 North America / USA / Minnesota  |
| EPI_ISL_571549 | 3/20/2020 | 10/5/2020 North America / USA / Nevada     |
| EPI_ISL_571550 | 3/22/2020 | 10/5/2020 North America / USA / New York   |
| EPI_ISL_571551 | 3/17/2020 | 10/5/2020 North America / USA / Oklahoma   |
| EPI_ISL_571552 | 3/16/2020 | 10/5/2020 North America / USA / Oklahoma   |
| EPI_ISL_571553 | 3/18/2020 | 10/5/2020 North America / USA / Oklahoma   |
| EPI_ISL_571554 | 3/18/2020 | 10/5/2020 North America / USA / Oklahoma   |
| EPI_ISL_571555 | 3/18/2020 | 10/5/2020 North America / USA / Oklahoma   |
| EPI_ISL_571556 | 3/18/2020 | 10/5/2020 North America / USA / Oklahoma   |
| EPI_ISL_571557 | 3/19/2020 | 10/5/2020 North America / USA / Texas      |
| EPI_ISL_571558 | 3/19/2020 | 10/5/2020 North America / USA / Texas      |
| EPI_ISL_571559 | 3/19/2020 | 10/5/2020 North America / USA / Texas      |
| EPI_ISL_571560 | 3/19/2020 | 10/5/2020 North America / USA / Texas      |
| EPI_ISL_571561 | 3/21/2020 | 10/5/2020 North America / USA / Washington |
| EPI_ISL_571562 | 3/20/2020 | 10/5/2020 North America / USA / Washington |
| EPI_ISL_571563 | 3/16/2020 | 10/5/2020 North America / USA / Wisconsin  |
| EPI_ISL_571564 | 3/19/2020 | 10/5/2020 North America / USA / Wisconsin  |
| EPI_ISL_571565 | 3/16/2020 | 10/5/2020 North America / USA / Wisconsin  |
| EPI_ISL_571566 | 3/19/2020 | 10/5/2020 North America / USA / Wisconsin  |
| EPI_ISL_571567 | 3/18/2020 | 10/5/2020 North America / USA / Wisconsin  |
| EPI_ISL_571568 | 3/16/2020 | 10/5/2020 North America / USA / Wisconsin  |
| EPI_ISL_571569 | 3/19/2020 | 10/5/2020 North America / USA / Wisconsin  |
| EPI_ISL_571570 | 3/20/2020 | 10/5/2020 North America / USA / Wisconsin  |
| EPI_ISL_571571 | 3/19/2020 | 10/5/2020 North America / USA / Wisconsin  |
| EPI_ISL_571572 | 3/23/2020 | 10/5/2020 North America / USA / Alabama    |
| EPI_ISL_571573 | 3/16/2020 | 10/5/2020 North America / USA / California |
| EPI_ISL_571574 | 3/23/2020 | 10/5/2020 North America / USA / California |
| EPI_ISL_571575 | 3/23/2020 | 10/5/2020 North America / USA / California |
| EPI_ISL_571576 | 3/22/2020 | 10/5/2020 North America / USA / California |
| EPI_ISL_571577 | 3/23/2020 | 10/5/2020 North America / USA / California |
| EPI_ISL_571578 | 3/23/2020 | 10/5/2020 North America / USA / California |
| EPI_ISL_571579 | 3/23/2020 | 10/5/2020 North America / USA / California |
| EPI_ISL_571580 | 3/23/2020 | 10/5/2020 North America / USA / California |
| EPI_ISL_571581 | 3/23/2020 | 10/5/2020 North America / USA / California |
| EPI_ISL_571582 | 3/24/2020 | 10/5/2020 North America / USA / California |
| EPI_ISL_571583 | 3/24/2020 | 10/5/2020 North America / USA / California |
| EPI_ISL_571584 | 3/23/2020 | 10/5/2020 North America / USA / California |
| EPI_ISL_571585 | 3/23/2020 | 10/5/2020 North America / USA / California |
| EPI_ISL_571586 | 3/23/2020 | 10/5/2020 North America / USA / California |
| EPI_ISL_571587 | 3/23/2020 | 10/5/2020 North America / USA / California |
| EPI_ISL_571588 | 3/24/2020 | 10/5/2020 North America / USA / California |
| EPI_ISL_571589 | 3/24/2020 | 10/5/2020 North America / USA / California |
| EPI_ISL_571590 | 3/24/2020 | 10/5/2020 North America / USA / California |
| EPI_ISL_571591 | 3/24/2020 | 10/5/2020 North America / USA / California |
| EPI_ISL_571592 | 3/16/2020 | 10/5/2020 North America / USA / Colorado   |
| EPI_ISL_571593 | 3/21/2020 | 10/5/2020 North America / USA / Florida    |
| EPI_ISL_571594 | 3/21/2020 | 10/5/2020 North America / USA / Florida    |





|                |           |                                            |
|----------------|-----------|--------------------------------------------|
| EPI_ISL_571689 | 3/16/2020 | 10/5/2020 North America / USA / Texas      |
| EPI_ISL_571691 | 3/21/2020 | 10/5/2020 North America / USA / Washington |
| EPI_ISL_571692 | 3/17/2020 | 10/5/2020 North America / USA / Arizona    |
| EPI_ISL_571694 | 3/16/2020 | 10/5/2020 North America / USA / California |
| EPI_ISL_571695 | 3/16/2020 | 10/5/2020 North America / USA / California |
| EPI_ISL_571696 | 3/17/2020 | 10/5/2020 North America / USA / California |
| EPI_ISL_571697 | 3/17/2020 | 10/5/2020 North America / USA / California |
| EPI_ISL_571698 | 3/17/2020 | 10/5/2020 North America / USA / California |
| EPI_ISL_571699 | 3/16/2020 | 10/5/2020 North America / USA / California |
| EPI_ISL_571700 | 3/17/2020 | 10/5/2020 North America / USA / California |
| EPI_ISL_571701 | 3/16/2020 | 10/5/2020 North America / USA / California |
| EPI_ISL_571702 | 3/17/2020 | 10/5/2020 North America / USA / California |
| EPI_ISL_571703 | 3/17/2020 | 10/5/2020 North America / USA / California |
| EPI_ISL_571704 | 3/18/2020 | 10/5/2020 North America / USA / California |
| EPI_ISL_571705 | 3/17/2020 | 10/5/2020 North America / USA / California |
| EPI_ISL_571706 | 3/17/2020 | 10/5/2020 North America / USA / California |
| EPI_ISL_571707 | 3/17/2020 | 10/5/2020 North America / USA / California |
| EPI_ISL_571708 | 3/17/2020 | 10/5/2020 North America / USA / California |
| EPI_ISL_571709 | 3/17/2020 | 10/5/2020 North America / USA / California |
| EPI_ISL_571710 | 3/17/2020 | 10/5/2020 North America / USA / California |
| EPI_ISL_571711 | 3/17/2020 | 10/5/2020 North America / USA / California |
| EPI_ISL_571712 | 3/16/2020 | 10/5/2020 North America / USA / California |
| EPI_ISL_571713 | 3/17/2020 | 10/5/2020 North America / USA / California |
| EPI_ISL_571714 | 3/18/2020 | 10/5/2020 North America / USA / California |
| EPI_ISL_571715 | 3/17/2020 | 10/5/2020 North America / USA / California |
| EPI_ISL_571716 | 3/17/2020 | 10/5/2020 North America / USA / Colorado   |
| EPI_ISL_571717 | 3/16/2020 | 10/5/2020 North America / USA / Indiana    |
| EPI_ISL_571718 | 3/16/2020 | 10/5/2020 North America / USA / Indiana    |
| EPI_ISL_571719 | 3/17/2020 | 10/5/2020 North America / USA / Indiana    |
| EPI_ISL_571720 | 3/16/2020 | 10/5/2020 North America / USA / Indiana    |
| EPI_ISL_571721 | 3/16/2020 | 10/5/2020 North America / USA / Indiana    |
| EPI_ISL_571722 | 3/16/2020 | 10/5/2020 North America / USA / Michigan   |
| EPI_ISL_571723 | 3/17/2020 | 10/5/2020 North America / USA / Michigan   |
| EPI_ISL_571724 | 3/17/2020 | 10/5/2020 North America / USA / Michigan   |
| EPI_ISL_571725 | 3/17/2020 | 10/5/2020 North America / USA / Michigan   |
| EPI_ISL_571726 | 3/16/2020 | 10/5/2020 North America / USA / Michigan   |
| EPI_ISL_571727 | 3/13/2020 | 10/5/2020 North America / USA / Minnesota  |
| EPI_ISL_571728 | 3/15/2020 | 10/5/2020 North America / USA / Minnesota  |
| EPI_ISL_571729 | 3/14/2020 | 10/5/2020 North America / USA / Minnesota  |
| EPI_ISL_571730 | 3/14/2020 | 10/5/2020 North America / USA / Minnesota  |
| EPI_ISL_571731 | 3/15/2020 | 10/5/2020 North America / USA / Minnesota  |
| EPI_ISL_571732 | 3/15/2020 | 10/5/2020 North America / USA / Minnesota  |
| EPI_ISL_571733 | 3/16/2020 | 10/5/2020 North America / USA / Minnesota  |
| EPI_ISL_571734 | 3/15/2020 | 10/5/2020 North America / USA / Minnesota  |
| EPI_ISL_571735 | 3/15/2020 | 10/5/2020 North America / USA / Minnesota  |
| EPI_ISL_571736 | 3/14/2020 | 10/5/2020 North America / USA / Minnesota  |
| EPI_ISL_571737 | 3/14/2020 | 10/5/2020 North America / USA / Minnesota  |



|                |           |                                              |
|----------------|-----------|----------------------------------------------|
| EPI_ISL_571786 | 3/14/2020 | 10/5/2020 North America / USA / Minnesota    |
| EPI_ISL_571787 | 3/14/2020 | 10/5/2020 North America / USA / Minnesota    |
| EPI_ISL_571788 | 3/13/2020 | 10/5/2020 North America / USA / Minnesota    |
| EPI_ISL_571789 | 3/15/2020 | 10/5/2020 North America / USA / Minnesota    |
| EPI_ISL_571790 | 3/13/2020 | 10/5/2020 North America / USA / Minnesota    |
| EPI_ISL_571791 | 3/14/2020 | 10/5/2020 North America / USA / Minnesota    |
| EPI_ISL_571792 | 3/14/2020 | 10/5/2020 North America / USA / Minnesota    |
| EPI_ISL_571793 | 3/14/2020 | 10/5/2020 North America / USA / Minnesota    |
| EPI_ISL_571794 | 3/14/2020 | 10/5/2020 North America / USA / Minnesota    |
| EPI_ISL_571795 | 3/14/2020 | 10/5/2020 North America / USA / Minnesota    |
| EPI_ISL_571796 | 3/14/2020 | 10/5/2020 North America / USA / Minnesota    |
| EPI_ISL_571797 | 3/17/2020 | 10/5/2020 North America / USA / Nevada       |
| EPI_ISL_571798 | 3/16/2020 | 10/5/2020 North America / USA / Nevada       |
| EPI_ISL_571799 | 3/16/2020 | 10/5/2020 North America / USA / New York     |
| EPI_ISL_571800 | 3/16/2020 | 10/5/2020 North America / USA / Texas        |
| EPI_ISL_571801 | 3/17/2020 | 10/5/2020 North America / USA / Washington   |
| EPI_ISL_571802 | 3/17/2020 | 10/5/2020 North America / USA / Washington   |
| EPI_ISL_571803 | 3/20/2020 | 10/5/2020 North America / USA / Arizona      |
| EPI_ISL_571804 | 3/20/2020 | 10/5/2020 North America / USA / California   |
| EPI_ISL_571805 | 3/19/2020 | 10/5/2020 North America / USA / California   |
| EPI_ISL_571806 | 3/19/2020 | 10/5/2020 North America / USA / California   |
| EPI_ISL_571807 | 3/20/2020 | 10/5/2020 North America / USA / California   |
| EPI_ISL_571808 | 3/19/2020 | 10/5/2020 North America / USA / California   |
| EPI_ISL_571809 | 3/20/2020 | 10/5/2020 North America / USA / California   |
| EPI_ISL_571810 | 3/20/2020 | 10/5/2020 North America / USA / California   |
| EPI_ISL_571811 | 3/21/2020 | 10/5/2020 North America / USA / California   |
| EPI_ISL_571812 | 3/20/2020 | 10/5/2020 North America / USA / California   |
| EPI_ISL_571813 | 3/20/2020 | 10/5/2020 North America / USA / California   |
| EPI_ISL_571814 | 3/20/2020 | 10/5/2020 North America / USA / California   |
| EPI_ISL_571815 | 3/29/2020 | 10/5/2020 North America / USA / California   |
| EPI_ISL_571816 | 3/28/2020 | 10/5/2020 North America / USA / California   |
| EPI_ISL_571817 | 3/28/2020 | 10/5/2020 North America / USA / California   |
| EPI_ISL_571818 | 3/28/2020 | 10/5/2020 North America / USA / California   |
| EPI_ISL_571819 | 3/28/2020 | 10/5/2020 North America / USA / California   |
| EPI_ISL_571820 | 3/28/2020 | 10/5/2020 North America / USA / California   |
| EPI_ISL_571821 | 3/18/2020 | 10/5/2020 North America / USA / Pennsylvania |
| EPI_ISL_571822 | 3/20/2020 | 10/5/2020 North America / USA / Florida      |
| EPI_ISL_571823 | 3/18/2020 | 10/5/2020 North America / USA / Georgia      |
| EPI_ISL_571824 | 3/19/2020 | 10/5/2020 North America / USA / Idaho        |
| EPI_ISL_571825 | 3/19/2020 | 10/5/2020 North America / USA / Idaho        |
| EPI_ISL_571826 | 3/19/2020 | 10/5/2020 North America / USA / Idaho        |
| EPI_ISL_571827 | 3/19/2020 | 10/5/2020 North America / USA / Idaho        |
| EPI_ISL_571828 | 3/19/2020 | 10/5/2020 North America / USA / Idaho        |
| EPI_ISL_571829 | 3/19/2020 | 10/5/2020 North America / USA / Idaho        |
| EPI_ISL_571830 | 3/20/2020 | 10/5/2020 North America / USA / Idaho        |
| EPI_ISL_571831 | 3/19/2020 | 10/5/2020 North America / USA / Idaho        |
| EPI_ISL_571832 | 3/19/2020 | 10/5/2020 North America / USA / Idaho        |



|                |           |                                             |
|----------------|-----------|---------------------------------------------|
| EPI_ISL_571882 | 3/23/2020 | 10/5/2020 North America / USA / Michigan    |
| EPI_ISL_571883 | 3/24/2020 | 10/5/2020 North America / USA / Michigan    |
| EPI_ISL_571884 | 3/24/2020 | 10/5/2020 North America / USA / Michigan    |
| EPI_ISL_571885 | 3/24/2020 | 10/5/2020 North America / USA / Michigan    |
| EPI_ISL_571886 | 3/24/2020 | 10/5/2020 North America / USA / Michigan    |
| EPI_ISL_571887 | 3/24/2020 | 10/5/2020 North America / USA / Michigan    |
| EPI_ISL_571888 | 3/24/2020 | 10/5/2020 North America / USA / Michigan    |
| EPI_ISL_571889 | 3/24/2020 | 10/5/2020 North America / USA / Michigan    |
| EPI_ISL_571890 | 3/24/2020 | 10/5/2020 North America / USA / Michigan    |
| EPI_ISL_571891 | 3/24/2020 | 10/5/2020 North America / USA / Michigan    |
| EPI_ISL_571892 | 3/24/2020 | 10/5/2020 North America / USA / Michigan    |
| EPI_ISL_571893 | 3/24/2020 | 10/5/2020 North America / USA / Michigan    |
| EPI_ISL_571894 | 3/24/2020 | 10/5/2020 North America / USA / Michigan    |
| EPI_ISL_571895 | 3/24/2020 | 10/5/2020 North America / USA / Michigan    |
| EPI_ISL_571896 | 3/24/2020 | 10/5/2020 North America / USA / Michigan    |
| EPI_ISL_571897 | 3/24/2020 | 10/5/2020 North America / USA / Michigan    |
| EPI_ISL_571898 | 3/20/2020 | 10/5/2020 North America / USA / Mississippi |
| EPI_ISL_571899 | 3/20/2020 | 10/5/2020 North America / USA / Puerto Rico |
| EPI_ISL_571900 | 3/19/2020 | 10/5/2020 North America / USA / Tennessee   |
| EPI_ISL_571901 | 3/18/2020 | 10/5/2020 North America / USA / Texas       |
| EPI_ISL_571902 | 3/20/2020 | 10/5/2020 North America / USA / Texas       |
| EPI_ISL_571903 | 3/20/2020 | 10/5/2020 North America / USA / Texas       |
| EPI_ISL_571905 | 3/19/2020 | 10/5/2020 North America / USA / Washington  |
| EPI_ISL_571906 | 3/19/2020 | 10/5/2020 North America / USA / Washington  |
| EPI_ISL_571907 | 3/19/2020 | 10/5/2020 North America / USA / Washington  |
| EPI_ISL_571908 | 3/19/2020 | 10/5/2020 North America / USA / Washington  |
| EPI_ISL_571909 | 3/20/2020 | 10/5/2020 North America / USA / Washington  |
| EPI_ISL_571910 | 3/19/2020 | 10/5/2020 North America / USA / Wisconsin   |
| EPI_ISL_571912 | 3/18/2020 | 10/5/2020 North America / USA / Wisconsin   |
| EPI_ISL_571913 | 3/18/2020 | 10/5/2020 North America / USA / Wisconsin   |
| EPI_ISL_571915 | 3/20/2020 | 10/5/2020 North America / USA / Wyoming     |
| EPI_ISL_571916 | 3/16/2020 | 10/5/2020 North America / USA / Arkansas    |
| EPI_ISL_571917 | 3/16/2020 | 10/5/2020 North America / USA / California  |
| EPI_ISL_571918 | 3/16/2020 | 10/5/2020 North America / USA / California  |
| EPI_ISL_571919 | 3/16/2020 | 10/5/2020 North America / USA / California  |
| EPI_ISL_571920 | 3/16/2020 | 10/5/2020 North America / USA / California  |
| EPI_ISL_571921 | 3/14/2020 | 10/5/2020 North America / USA / California  |
| EPI_ISL_571922 | 3/17/2020 | 10/5/2020 North America / USA / California  |
| EPI_ISL_571923 | 3/17/2020 | 10/5/2020 North America / USA / California  |
| EPI_ISL_571924 | 3/17/2020 | 10/5/2020 North America / USA / California  |
| EPI_ISL_571925 | 3/20/2020 | 10/5/2020 North America / USA / Colorado    |
| EPI_ISL_571926 | 3/14/2020 | 10/5/2020 North America / USA / Connecticut |
| EPI_ISL_571928 | 3/16/2020 | 10/5/2020 North America / USA / Idaho       |
| EPI_ISL_571929 | 3/17/2020 | 10/5/2020 North America / USA / Idaho       |
| EPI_ISL_571930 | 3/17/2020 | 10/5/2020 North America / USA / Idaho       |
| EPI_ISL_571931 | 3/17/2020 | 10/5/2020 North America / USA / Idaho       |
| EPI_ISL_571932 | 3/16/2020 | 10/5/2020 North America / USA / Idaho       |







|                |           |                                               |
|----------------|-----------|-----------------------------------------------|
| EPI_ISL_572028 | 3/15/2020 | 10/5/2020 North America / USA / New York      |
| EPI_ISL_572029 | 3/16/2020 | 10/5/2020 North America / USA / New York      |
| EPI_ISL_572031 | 3/16/2020 | 10/5/2020 North America / USA / New York      |
| EPI_ISL_572032 | 3/16/2020 | 10/5/2020 North America / USA / Ohio          |
| EPI_ISL_572033 | 3/16/2020 | 10/5/2020 North America / USA / Oregon        |
| EPI_ISL_572034 | 3/16/2020 | 10/5/2020 North America / USA / Pennsylvania  |
| EPI_ISL_572035 | 3/16/2020 | 10/5/2020 North America / USA / Texas         |
| EPI_ISL_572036 | 3/16/2020 | 10/5/2020 North America / USA / Texas         |
| EPI_ISL_572037 | 3/15/2020 | 10/5/2020 North America / USA / Texas         |
| EPI_ISL_572038 | 3/16/2020 | 10/5/2020 North America / USA / Texas         |
| EPI_ISL_572039 | 3/17/2020 | 10/5/2020 North America / USA / Texas         |
| EPI_ISL_572040 | 3/15/2020 | 10/5/2020 North America / USA / Texas         |
| EPI_ISL_572041 | 3/14/2020 | 10/5/2020 North America / USA / Utah          |
| EPI_ISL_572042 | 3/15/2020 | 10/5/2020 North America / USA / Utah          |
| EPI_ISL_572043 | 3/14/2020 | 10/5/2020 North America / USA / Utah          |
| EPI_ISL_572044 | 3/16/2020 | 10/5/2020 North America / USA / Utah          |
| EPI_ISL_572045 | 3/15/2020 | 10/5/2020 North America / USA / Utah          |
| EPI_ISL_572046 | 3/15/2020 | 10/5/2020 North America / USA / Utah          |
| EPI_ISL_572047 | 3/17/2020 | 10/5/2020 North America / USA / Utah          |
| EPI_ISL_572048 | 3/14/2020 | 10/5/2020 North America / USA / Utah          |
| EPI_ISL_572049 | 3/16/2020 | 10/5/2020 North America / USA / Utah          |
| EPI_ISL_572050 | 3/16/2020 | 10/5/2020 North America / USA / Washington    |
| EPI_ISL_572051 | 3/16/2020 | 10/5/2020 North America / USA / Washington    |
| EPI_ISL_572052 | 3/16/2020 | 10/5/2020 North America / USA / Washington    |
| EPI_ISL_572053 | 3/17/2020 | 10/5/2020 North America / USA / West Virginia |
| EPI_ISL_572054 | 3/15/2020 | 10/5/2020 North America / USA / Arkansas      |
| EPI_ISL_572055 | 3/18/2020 | 10/5/2020 North America / USA / California    |
| EPI_ISL_572056 | 3/18/2020 | 10/5/2020 North America / USA / California    |
| EPI_ISL_572057 | 3/17/2020 | 10/5/2020 North America / USA / California    |
| EPI_ISL_572058 | 3/17/2020 | 10/5/2020 North America / USA / California    |
| EPI_ISL_572059 | 3/18/2020 | 10/5/2020 North America / USA / California    |
| EPI_ISL_572060 | 3/18/2020 | 10/5/2020 North America / USA / California    |
| EPI_ISL_572061 | 3/18/2020 | 10/5/2020 North America / USA / California    |
| EPI_ISL_572062 | 3/18/2020 | 10/5/2020 North America / USA / California    |
| EPI_ISL_572063 | 3/18/2020 | 10/5/2020 North America / USA / California    |
| EPI_ISL_572064 | 3/18/2020 | 10/5/2020 North America / USA / California    |
| EPI_ISL_572065 | 3/17/2020 | 10/5/2020 North America / USA / California    |
| EPI_ISL_572066 | 3/17/2020 | 10/5/2020 North America / USA / California    |
| EPI_ISL_572067 | 3/17/2020 | 10/5/2020 North America / USA / California    |
| EPI_ISL_572068 | 3/17/2020 | 10/5/2020 North America / USA / California    |
| EPI_ISL_572069 | 3/18/2020 | 10/5/2020 North America / USA / California    |
| EPI_ISL_572070 | 3/18/2020 | 10/5/2020 North America / USA / California    |
| EPI_ISL_572071 | 3/18/2020 | 10/5/2020 North America / USA / California    |
| EPI_ISL_572072 | 3/18/2020 | 10/5/2020 North America / USA / California    |
| EPI_ISL_572073 | 3/18/2020 | 10/5/2020 North America / USA / California    |
| EPI_ISL_572074 | 3/18/2020 | 10/5/2020 North America / USA / California    |
| EPI_ISL_572075 | 3/18/2020 | 10/5/2020 North America / USA / California    |









|                |           |                                                                      |
|----------------|-----------|----------------------------------------------------------------------|
| EPI_ISL_572277 | 6/23/2020 | 10/5/2020 North America / USA / Virginia                             |
| EPI_ISL_572278 | 6/23/2020 | 10/5/2020 North America / USA / Virginia                             |
| EPI_ISL_572279 | 6/23/2020 | 10/5/2020 North America / USA / Virginia                             |
| EPI_ISL_572280 | 6/23/2020 | 10/5/2020 North America / USA / Virginia                             |
| EPI_ISL_572281 | 6/22/2020 | 10/5/2020 North America / USA / Virginia                             |
| EPI_ISL_572282 | 6/23/2020 | 10/5/2020 North America / USA / Virginia                             |
| EPI_ISL_572283 | 6/24/2020 | 10/5/2020 North America / USA / Virginia                             |
| EPI_ISL_572284 | 6/23/2020 | 10/5/2020 North America / USA / Virginia                             |
| EPI_ISL_572285 | 7/23/2020 | 10/5/2020 North America / USA / Virginia                             |
| EPI_ISL_572287 | 7/23/2020 | 10/5/2020 North America / USA / Virginia                             |
| EPI_ISL_572289 | 7/23/2020 | 10/5/2020 North America / USA / Virginia                             |
| EPI_ISL_572290 | 7/23/2020 | 10/5/2020 North America / USA / Virginia                             |
| EPI_ISL_572291 | 8/12/2020 | 10/5/2020 North America / USA / Virginia                             |
| EPI_ISL_572292 | 8/12/2020 | 10/5/2020 North America / USA / Virginia                             |
| EPI_ISL_572293 | 8/12/2020 | 10/5/2020 North America / USA / Virginia                             |
| EPI_ISL_572294 | 8/14/2020 | 10/5/2020 North America / USA / Virginia                             |
| EPI_ISL_572295 | 8/14/2020 | 10/5/2020 North America / USA / Virginia                             |
| EPI_ISL_572296 | 8/14/2020 | 10/5/2020 North America / USA / Virginia                             |
| EPI_ISL_572297 | 8/14/2020 | 10/5/2020 North America / USA / Virginia                             |
| EPI_ISL_572298 | 8/14/2020 | 10/5/2020 North America / USA / Virginia                             |
| EPI_ISL_572299 | 8/14/2020 | 10/5/2020 North America / USA / Virginia                             |
| EPI_ISL_572300 | 8/14/2020 | 10/5/2020 North America / USA / Virginia                             |
| EPI_ISL_572301 | 8/14/2020 | 10/5/2020 North America / USA / Virginia                             |
| EPI_ISL_572302 | 8/14/2020 | 10/5/2020 North America / USA / Virginia                             |
| EPI_ISL_572303 | 8/14/2020 | 10/5/2020 North America / USA / Virginia                             |
| EPI_ISL_572304 | 8/18/2020 | 10/5/2020 North America / USA / Virginia                             |
| EPI_ISL_572305 | 8/18/2020 | 10/5/2020 North America / USA / Virginia                             |
| EPI_ISL_572306 | 8/18/2020 | 10/5/2020 North America / USA / Virginia                             |
| EPI_ISL_572307 | 8/18/2020 | 10/5/2020 North America / USA / Virginia                             |
| EPI_ISL_572308 | 8/18/2020 | 10/5/2020 North America / USA / Virginia                             |
| EPI_ISL_572309 | 8/18/2020 | 10/5/2020 North America / USA / Virginia                             |
| EPI_ISL_572310 | 8/18/2020 | 10/5/2020 North America / USA / Virginia                             |
| EPI_ISL_572311 | 8/18/2020 | 10/5/2020 North America / USA / Virginia                             |
| EPI_ISL_572312 | 8/18/2020 | 10/5/2020 North America / USA / Virginia                             |
| EPI_ISL_572313 | 8/18/2020 | 10/5/2020 North America / USA / Virginia                             |
| EPI_ISL_572314 | 8/19/2020 | 10/5/2020 North America / USA / Virginia                             |
| EPI_ISL_572315 | 8/19/2020 | 10/5/2020 North America / USA / Virginia                             |
| EPI_ISL_572316 | 8/19/2020 | 10/5/2020 North America / USA / Virginia                             |
| EPI_ISL_572317 | 8/19/2020 | 10/5/2020 North America / USA / Virginia                             |
| EPI_ISL_572318 | 8/19/2020 | 10/5/2020 North America / USA / Virginia                             |
| EPI_ISL_572320 | 9/12/2020 | 10/5/2020 Europe / Italy / Campania                                  |
| EPI_ISL_572321 | 9/12/2020 | 10/5/2020 Europe / Italy / Campania                                  |
| EPI_ISL_572322 | 9/12/2020 | 10/5/2020 Europe / Italy / Campania                                  |
| EPI_ISL_572323 | 9/12/2020 | 10/5/2020 Europe / Italy / Campania                                  |
| EPI_ISL_572324 | 3/28/2020 | 10/5/2020 Europe / Italy / Campania                                  |
| EPI_ISL_572329 | 4/3/2020  | 10/5/2020 Europe / Slovakia / Bratislava                             |
| EPI_ISL_572330 | 5/3/2020  | 10/5/2020 Europe / Germany / North Rhine-Westphalia / Duesseldorf ar |



|                |           |                                                                       |
|----------------|-----------|-----------------------------------------------------------------------|
| EPI_ISL_572331 | 5/21/2020 | 10/5/2020 Europe / Germany / North Rhine-Westphalia / Duesseldorf ar  |
| EPI_ISL_572334 | 4/8/2020  | 10/5/2020 South America / Brazil / Pernambuco / Olinda                |
| EPI_ISL_572335 | 4/20/2020 | 10/5/2020 South America / Brazil / Pernambuco / Jaboatao dos Guararaj |
| EPI_ISL_572351 | 4/26/2020 | 10/5/2020 South America / Brazil / Pernambuco / Recife                |
| EPI_ISL_572353 | 4/27/2020 | 10/5/2020 South America / Brazil / Pernambuco / Recife                |
| EPI_ISL_572366 | 5/2/2020  | 10/5/2020 South America / Brazil / Pernambuco / Carpina               |
| EPI_ISL_572371 | 5/6/2020  | 10/5/2020 South America / Brazil / Pernambuco / Recife                |
| EPI_ISL_572386 | 5/10/2020 | 10/5/2020 South America / Brazil / Pernambuco / Ipojuca               |
| EPI_ISL_572397 | 6/24/2020 | 10/5/2020 Europe / Germany / North Rhine-Westphalia / Duesseldorf ar  |
| EPI_ISL_572398 | 5/18/2020 | 10/5/2020 Europe / Russia / Moscow                                    |
| EPI_ISL_572710 | 5/13/2020 | 10/5/2020 Europe / United Kingdom / England                           |
| EPI_ISL_572711 | 9/16/2020 | 10/5/2020 Europe / United Kingdom / England                           |
| EPI_ISL_572712 | 9/8/2020  | 10/5/2020 Europe / United Kingdom / England                           |
| EPI_ISL_572713 | 9/17/2020 | 10/5/2020 Europe / United Kingdom / England                           |
| EPI_ISL_572714 | 9/10/2020 | 10/5/2020 Europe / United Kingdom / England                           |
| EPI_ISL_572715 | 9/7/2020  | 10/5/2020 Europe / United Kingdom / England                           |
| EPI_ISL_572716 | 9/10/2020 | 10/5/2020 Europe / United Kingdom / England                           |
| EPI_ISL_572717 | 9/13/2020 | 10/5/2020 Europe / United Kingdom / England                           |
| EPI_ISL_572718 | 9/13/2020 | 10/5/2020 Europe / United Kingdom / England                           |
| EPI_ISL_572719 | 9/18/2020 | 10/5/2020 Europe / United Kingdom / England                           |
| EPI_ISL_572720 | 9/18/2020 | 10/5/2020 Europe / United Kingdom / England                           |
| EPI_ISL_572721 | 9/10/2020 | 10/5/2020 Europe / United Kingdom / England                           |
| EPI_ISL_572722 | 9/2/2020  | 10/5/2020 Europe / United Kingdom / England                           |
| EPI_ISL_572723 | 9/7/2020  | 10/5/2020 Europe / United Kingdom / England                           |
| EPI_ISL_572724 | 9/7/2020  | 10/5/2020 Europe / United Kingdom / England                           |
| EPI_ISL_572725 | 9/14/2020 | 10/5/2020 Europe / United Kingdom / England                           |
| EPI_ISL_572726 | 9/7/2020  | 10/5/2020 Europe / United Kingdom / England                           |
| EPI_ISL_572727 | 9/7/2020  | 10/5/2020 Europe / United Kingdom / England                           |
| EPI_ISL_572728 | 9/7/2020  | 10/5/2020 Europe / United Kingdom / England                           |
| EPI_ISL_572729 | 8/26/2020 | 10/5/2020 Europe / United Kingdom / England                           |
| EPI_ISL_572846 | 9/9/2020  | 10/5/2020 Europe / United Kingdom / Scotland                          |
| EPI_ISL_572847 | 9/16/2020 | 10/5/2020 Europe / United Kingdom / England                           |
| EPI_ISL_572848 | 9/22/2020 | 10/5/2020 Europe / United Kingdom / England                           |
| EPI_ISL_572849 | 8/28/2020 | 10/5/2020 Europe / United Kingdom / England                           |
| EPI_ISL_572850 | 9/9/2020  | 10/5/2020 Europe / United Kingdom / England                           |
| EPI_ISL_572851 | 9/14/2020 | 10/5/2020 Europe / United Kingdom / England                           |
| EPI_ISL_572852 | 9/17/2020 | 10/5/2020 Europe / United Kingdom / England                           |
| EPI_ISL_572853 | 9/23/2020 | 10/5/2020 Europe / United Kingdom / Wales                             |
| EPI_ISL_572854 | 9/23/2020 | 10/5/2020 Europe / United Kingdom / Wales                             |
| EPI_ISL_572855 | 9/23/2020 | 10/5/2020 Europe / United Kingdom / Wales                             |
| EPI_ISL_572856 | 9/22/2020 | 10/5/2020 Europe / United Kingdom / Wales                             |
| EPI_ISL_572857 | 8/28/2020 | 10/5/2020 Europe / United Kingdom / England                           |
| EPI_ISL_572858 | 8/29/2020 | 10/5/2020 Europe / United Kingdom / England                           |
| EPI_ISL_572859 | 8/28/2020 | 10/5/2020 Europe / United Kingdom / England                           |
| EPI_ISL_572860 | 9/10/2020 | 10/5/2020 Europe / United Kingdom / England                           |
| EPI_ISL_572861 | 9/10/2020 | 10/5/2020 Europe / United Kingdom / England                           |
| EPI_ISL_572862 | 9/14/2020 | 10/5/2020 Europe / United Kingdom / England                           |

|                |           |           |                                    |
|----------------|-----------|-----------|------------------------------------|
| EPI_ISL_572863 | 9/14/2020 | 10/5/2020 | Europe / United Kingdom / England  |
| EPI_ISL_572864 | 9/14/2020 | 10/5/2020 | Europe / United Kingdom / England  |
| EPI_ISL_572865 | 9/14/2020 | 10/5/2020 | Europe / United Kingdom / England  |
| EPI_ISL_572866 | 9/14/2020 | 10/5/2020 | Europe / United Kingdom / England  |
| EPI_ISL_572867 | 9/17/2020 | 10/5/2020 | Europe / United Kingdom / England  |
| EPI_ISL_572868 | 9/17/2020 | 10/5/2020 | Europe / United Kingdom / England  |
| EPI_ISL_572869 | 9/9/2020  | 10/5/2020 | Europe / United Kingdom / England  |
| EPI_ISL_572870 | 9/8/2020  | 10/5/2020 | Europe / United Kingdom / England  |
| EPI_ISL_572871 | 9/2/2020  | 10/5/2020 | Europe / United Kingdom / England  |
| EPI_ISL_572872 | 9/22/2020 | 10/5/2020 | Europe / United Kingdom / England  |
| EPI_ISL_572873 | 9/7/2020  | 10/5/2020 | Europe / United Kingdom / England  |
| EPI_ISL_572874 | 9/2/2020  | 10/5/2020 | Europe / United Kingdom / Wales    |
| EPI_ISL_572875 | 9/18/2020 | 10/5/2020 | Europe / United Kingdom / Wales    |
| EPI_ISL_572876 | 9/18/2020 | 10/5/2020 | Europe / United Kingdom / Wales    |
| EPI_ISL_572877 | 9/17/2020 | 10/5/2020 | Europe / United Kingdom / Wales    |
| EPI_ISL_572878 | 9/14/2020 | 10/5/2020 | Europe / United Kingdom / Wales    |
| EPI_ISL_572879 | 9/22/2020 | 10/5/2020 | Europe / United Kingdom / Wales    |
| EPI_ISL_572880 | 9/23/2020 | 10/5/2020 | Europe / United Kingdom / Wales    |
| EPI_ISL_572881 | 9/25/2020 | 10/5/2020 | Europe / United Kingdom / Wales    |
| EPI_ISL_572882 | 9/25/2020 | 10/5/2020 | Europe / United Kingdom / Wales    |
| EPI_ISL_572883 | 9/19/2020 | 10/5/2020 | Europe / United Kingdom / Wales    |
| EPI_ISL_572884 | 9/24/2020 | 10/5/2020 | Europe / United Kingdom / Wales    |
| EPI_ISL_572885 | 9/21/2020 | 10/5/2020 | Europe / United Kingdom / Wales    |
| EPI_ISL_572886 | 9/25/2020 | 10/5/2020 | Europe / United Kingdom / Wales    |
| EPI_ISL_572887 | 9/22/2020 | 10/5/2020 | Europe / United Kingdom / Wales    |
| EPI_ISL_572888 | 9/25/2020 | 10/5/2020 | Europe / United Kingdom / Wales    |
| EPI_ISL_572889 | 9/21/2020 | 10/5/2020 | Europe / United Kingdom / Wales    |
| EPI_ISL_572890 | 9/22/2020 | 10/5/2020 | Europe / United Kingdom / Wales    |
| EPI_ISL_572938 | 9/19/2020 | 10/5/2020 | Europe / United Kingdom / England  |
| EPI_ISL_572939 | 9/16/2020 | 10/5/2020 | Europe / United Kingdom / England  |
| EPI_ISL_572940 | 9/16/2020 | 10/5/2020 | Europe / United Kingdom / England  |
| EPI_ISL_572941 | 9/16/2020 | 10/5/2020 | Europe / United Kingdom / England  |
| EPI_ISL_572942 | 9/11/2020 | 10/5/2020 | Europe / United Kingdom / England  |
| EPI_ISL_572943 | 9/15/2020 | 10/5/2020 | Europe / United Kingdom / England  |
| EPI_ISL_572944 | 9/17/2020 | 10/5/2020 | Europe / United Kingdom / England  |
| EPI_ISL_572945 | 9/8/2020  | 10/5/2020 | Europe / United Kingdom / England  |
| EPI_ISL_572946 | 9/4/2020  | 10/5/2020 | Europe / United Kingdom / England  |
| EPI_ISL_572947 | 9/7/2020  | 10/5/2020 | Europe / United Kingdom / England  |
| EPI_ISL_572948 | 9/25/2020 | 10/5/2020 | Europe / United Kingdom / England  |
| EPI_ISL_572949 | 9/22/2020 | 10/5/2020 | Europe / United Kingdom / England  |
| EPI_ISL_572950 | 9/8/2020  | 10/5/2020 | Europe / United Kingdom / Wales    |
| EPI_ISL_572951 | 9/17/2020 | 10/5/2020 | Europe / United Kingdom / Wales    |
| EPI_ISL_572953 | 8/28/2020 | 10/5/2020 | Europe / United Kingdom / England  |
| EPI_ISL_572954 | 9/16/2020 | 10/5/2020 | Europe / United Kingdom / England  |
| EPI_ISL_572955 | 9/18/2020 | 10/5/2020 | Europe / United Kingdom / Scotland |
| EPI_ISL_572957 | 8/31/2020 | 10/5/2020 | Europe / United Kingdom / England  |
| EPI_ISL_572958 | 8/29/2020 | 10/5/2020 | Europe / United Kingdom / England  |





















































|                |           |           |                                 |
|----------------|-----------|-----------|---------------------------------|
| EPI_ISL_574042 | 9/24/2020 | 10/5/2020 | Europe / United Kingdom / Wales |
| EPI_ISL_574043 | 9/24/2020 | 10/5/2020 | Europe / United Kingdom / Wales |
| EPI_ISL_574044 | 9/22/2020 | 10/5/2020 | Europe / United Kingdom / Wales |
| EPI_ISL_574045 | 9/23/2020 | 10/5/2020 | Europe / United Kingdom / Wales |
| EPI_ISL_574046 | 9/20/2020 | 10/5/2020 | Europe / United Kingdom / Wales |
| EPI_ISL_574047 | 9/22/2020 | 10/5/2020 | Europe / United Kingdom / Wales |
| EPI_ISL_574048 | 9/21/2020 | 10/5/2020 | Europe / United Kingdom / Wales |
| EPI_ISL_574049 | 9/23/2020 | 10/5/2020 | Europe / United Kingdom / Wales |
| EPI_ISL_574050 | 9/26/2020 | 10/5/2020 | Europe / United Kingdom / Wales |
| EPI_ISL_574051 | 9/22/2020 | 10/5/2020 | Europe / United Kingdom / Wales |
| EPI_ISL_574052 | 9/19/2020 | 10/5/2020 | Europe / United Kingdom / Wales |
| EPI_ISL_574053 | 9/6/2020  | 10/5/2020 | Europe / United Kingdom / Wales |
| EPI_ISL_574054 | 9/25/2020 | 10/5/2020 | Europe / United Kingdom / Wales |
| EPI_ISL_574055 | 9/25/2020 | 10/5/2020 | Europe / United Kingdom / Wales |
| EPI_ISL_574056 | 9/19/2020 | 10/5/2020 | Europe / United Kingdom / Wales |
| EPI_ISL_574057 | 9/23/2020 | 10/5/2020 | Europe / United Kingdom / Wales |
| EPI_ISL_574058 | 9/13/2020 | 10/5/2020 | Europe / United Kingdom / Wales |
| EPI_ISL_574059 | 9/5/2020  | 10/5/2020 | Europe / United Kingdom / Wales |
| EPI_ISL_574060 | 5/30/2020 | 10/5/2020 | Europe / United Kingdom / Wales |
| EPI_ISL_574061 | 9/25/2020 | 10/5/2020 | Europe / United Kingdom / Wales |
| EPI_ISL_574062 | 9/26/2020 | 10/5/2020 | Europe / United Kingdom / Wales |
| EPI_ISL_574063 | 9/18/2020 | 10/5/2020 | Europe / United Kingdom / Wales |
| EPI_ISL_574064 | 9/25/2020 | 10/5/2020 | Europe / United Kingdom / Wales |
| EPI_ISL_574065 | 9/12/2020 | 10/5/2020 | Europe / United Kingdom / Wales |
| EPI_ISL_574066 | 9/13/2020 | 10/5/2020 | Europe / United Kingdom / Wales |
| EPI_ISL_574067 | 9/27/2020 | 10/5/2020 | Europe / United Kingdom / Wales |
| EPI_ISL_574068 | 9/15/2020 | 10/5/2020 | Europe / United Kingdom / Wales |
| EPI_ISL_574069 | 9/25/2020 | 10/5/2020 | Europe / United Kingdom / Wales |
| EPI_ISL_574070 | 9/26/2020 | 10/5/2020 | Europe / United Kingdom / Wales |
| EPI_ISL_574071 | 9/24/2020 | 10/5/2020 | Europe / United Kingdom / Wales |
| EPI_ISL_574072 | 9/15/2020 | 10/5/2020 | Europe / United Kingdom / Wales |
| EPI_ISL_574073 | 9/21/2020 | 10/5/2020 | Europe / United Kingdom / Wales |
| EPI_ISL_574074 | 9/17/2020 | 10/5/2020 | Europe / United Kingdom / Wales |
| EPI_ISL_574075 | 9/20/2020 | 10/5/2020 | Europe / United Kingdom / Wales |
| EPI_ISL_574076 | 9/24/2020 | 10/5/2020 | Europe / United Kingdom / Wales |
| EPI_ISL_574077 | 9/24/2020 | 10/5/2020 | Europe / United Kingdom / Wales |
| EPI_ISL_574078 | 9/20/2020 | 10/5/2020 | Europe / United Kingdom / Wales |
| EPI_ISL_574079 | 9/21/2020 | 10/5/2020 | Europe / United Kingdom / Wales |
| EPI_ISL_574080 | 9/16/2020 | 10/5/2020 | Europe / United Kingdom / Wales |
| EPI_ISL_574081 | 9/21/2020 | 10/5/2020 | Europe / United Kingdom / Wales |
| EPI_ISL_574082 | 9/22/2020 | 10/5/2020 | Europe / United Kingdom / Wales |
| EPI_ISL_574083 | 9/22/2020 | 10/5/2020 | Europe / United Kingdom / Wales |
| EPI_ISL_574084 | 9/24/2020 | 10/5/2020 | Europe / United Kingdom / Wales |
| EPI_ISL_574085 | 6/9/2020  | 10/5/2020 | Europe / United Kingdom / Wales |
| EPI_ISL_574086 | 9/23/2020 | 10/5/2020 | Europe / United Kingdom / Wales |
| EPI_ISL_574087 | 9/25/2020 | 10/5/2020 | Europe / United Kingdom / Wales |
| EPI_ISL_574088 | 6/14/2020 | 10/5/2020 | Europe / United Kingdom / Wales |

|                |           |                                           |
|----------------|-----------|-------------------------------------------|
| EPI_ISL_574089 | 9/23/2020 | 10/5/2020 Europe / United Kingdom / Wales |
| EPI_ISL_574090 | 9/26/2020 | 10/5/2020 Europe / United Kingdom / Wales |
| EPI_ISL_574091 | 9/17/2020 | 10/5/2020 Europe / United Kingdom / Wales |
| EPI_ISL_574092 | 9/17/2020 | 10/5/2020 Europe / United Kingdom / Wales |
| EPI_ISL_574093 | 9/22/2020 | 10/5/2020 Europe / United Kingdom / Wales |
| EPI_ISL_574094 | 9/25/2020 | 10/5/2020 Europe / United Kingdom / Wales |
| EPI_ISL_574095 | 9/22/2020 | 10/5/2020 Europe / United Kingdom / Wales |
| EPI_ISL_574096 | 9/23/2020 | 10/5/2020 Europe / United Kingdom / Wales |
| EPI_ISL_574097 | 9/23/2020 | 10/5/2020 Europe / United Kingdom / Wales |
| EPI_ISL_574098 | 9/23/2020 | 10/5/2020 Europe / United Kingdom / Wales |
| EPI_ISL_574099 | 9/13/2020 | 10/5/2020 Europe / United Kingdom / Wales |
| EPI_ISL_574100 | 9/16/2020 | 10/5/2020 Europe / United Kingdom / Wales |
| EPI_ISL_574101 | 9/22/2020 | 10/5/2020 Europe / United Kingdom / Wales |
| EPI_ISL_574102 | 9/27/2020 | 10/5/2020 Europe / United Kingdom / Wales |
| EPI_ISL_574103 | 9/23/2020 | 10/5/2020 Europe / United Kingdom / Wales |
| EPI_ISL_574104 | 9/22/2020 | 10/5/2020 Europe / United Kingdom / Wales |
| EPI_ISL_574105 | 5/31/2020 | 10/5/2020 Europe / United Kingdom / Wales |
| EPI_ISL_574106 | 9/23/2020 | 10/5/2020 Europe / United Kingdom / Wales |
| EPI_ISL_574107 | 9/22/2020 | 10/5/2020 Europe / United Kingdom / Wales |
| EPI_ISL_574108 | 9/26/2020 | 10/5/2020 Europe / United Kingdom / Wales |
| EPI_ISL_574109 | 9/21/2020 | 10/5/2020 Europe / United Kingdom / Wales |
| EPI_ISL_574110 | 6/4/2020  | 10/5/2020 Europe / United Kingdom / Wales |
| EPI_ISL_574111 | 9/23/2020 | 10/5/2020 Europe / United Kingdom / Wales |
| EPI_ISL_574112 | 9/25/2020 | 10/5/2020 Europe / United Kingdom / Wales |
| EPI_ISL_574113 | 9/25/2020 | 10/5/2020 Europe / United Kingdom / Wales |
| EPI_ISL_574114 | 9/22/2020 | 10/5/2020 Europe / United Kingdom / Wales |
| EPI_ISL_574115 | 9/24/2020 | 10/5/2020 Europe / United Kingdom / Wales |
| EPI_ISL_574116 | 9/16/2020 | 10/5/2020 Europe / United Kingdom / Wales |
| EPI_ISL_574117 | 9/23/2020 | 10/5/2020 Europe / United Kingdom / Wales |
| EPI_ISL_574118 | 9/26/2020 | 10/5/2020 Europe / United Kingdom / Wales |
| EPI_ISL_574119 | 9/24/2020 | 10/5/2020 Europe / United Kingdom / Wales |
| EPI_ISL_574120 | 6/26/2020 | 10/5/2020 Europe / United Kingdom / Wales |
| EPI_ISL_574121 | 9/25/2020 | 10/5/2020 Europe / United Kingdom / Wales |
| EPI_ISL_574122 | 9/23/2020 | 10/5/2020 Europe / United Kingdom / Wales |
| EPI_ISL_574123 | 6/27/2020 | 10/5/2020 Europe / United Kingdom / Wales |
| EPI_ISL_574124 | 9/22/2020 | 10/5/2020 Europe / United Kingdom / Wales |
| EPI_ISL_574125 | 9/26/2020 | 10/5/2020 Europe / United Kingdom / Wales |
| EPI_ISL_574126 | 9/22/2020 | 10/5/2020 Europe / United Kingdom / Wales |
| EPI_ISL_574127 | 9/23/2020 | 10/5/2020 Europe / United Kingdom / Wales |
| EPI_ISL_574128 | 9/22/2020 | 10/5/2020 Europe / United Kingdom / Wales |
| EPI_ISL_574129 | 9/26/2020 | 10/5/2020 Europe / United Kingdom / Wales |
| EPI_ISL_574130 | 9/19/2020 | 10/5/2020 Europe / United Kingdom / Wales |
| EPI_ISL_574131 | 9/24/2020 | 10/5/2020 Europe / United Kingdom / Wales |
| EPI_ISL_574132 | 9/8/2020  | 10/5/2020 Europe / United Kingdom / Wales |
| EPI_ISL_574133 | 9/22/2020 | 10/5/2020 Europe / United Kingdom / Wales |
| EPI_ISL_574134 | 6/12/2020 | 10/5/2020 Europe / United Kingdom / Wales |
| EPI_ISL_574135 | 9/24/2020 | 10/5/2020 Europe / United Kingdom / Wales |



|                |           |           |                                 |
|----------------|-----------|-----------|---------------------------------|
| EPI_ISL_574183 | 9/25/2020 | 10/5/2020 | Europe / United Kingdom / Wales |
| EPI_ISL_574184 | 9/17/2020 | 10/5/2020 | Europe / United Kingdom / Wales |
| EPI_ISL_574185 | 9/26/2020 | 10/5/2020 | Europe / United Kingdom / Wales |
| EPI_ISL_574186 | 6/3/2020  | 10/5/2020 | Europe / United Kingdom / Wales |
| EPI_ISL_574187 | 9/25/2020 | 10/5/2020 | Europe / United Kingdom / Wales |
| EPI_ISL_574188 | 9/22/2020 | 10/5/2020 | Europe / United Kingdom / Wales |
| EPI_ISL_574189 | 9/24/2020 | 10/5/2020 | Europe / United Kingdom / Wales |
| EPI_ISL_574190 | 9/26/2020 | 10/5/2020 | Europe / United Kingdom / Wales |
| EPI_ISL_574191 | 9/12/2020 | 10/5/2020 | Europe / United Kingdom / Wales |
| EPI_ISL_574192 | 9/27/2020 | 10/5/2020 | Europe / United Kingdom / Wales |
| EPI_ISL_574193 | 9/16/2020 | 10/5/2020 | Europe / United Kingdom / Wales |
| EPI_ISL_574194 | 9/21/2020 | 10/5/2020 | Europe / United Kingdom / Wales |
| EPI_ISL_574195 | 9/23/2020 | 10/5/2020 | Europe / United Kingdom / Wales |
| EPI_ISL_574196 | 9/19/2020 | 10/5/2020 | Europe / United Kingdom / Wales |
| EPI_ISL_574197 | 9/23/2020 | 10/5/2020 | Europe / United Kingdom / Wales |
| EPI_ISL_574198 | 9/20/2020 | 10/5/2020 | Europe / United Kingdom / Wales |
| EPI_ISL_574199 | 9/25/2020 | 10/5/2020 | Europe / United Kingdom / Wales |
| EPI_ISL_574200 | 9/23/2020 | 10/5/2020 | Europe / United Kingdom / Wales |
| EPI_ISL_574201 | 9/25/2020 | 10/5/2020 | Europe / United Kingdom / Wales |
| EPI_ISL_574202 | 9/23/2020 | 10/5/2020 | Europe / United Kingdom / Wales |
| EPI_ISL_574203 | 9/19/2020 | 10/5/2020 | Europe / United Kingdom / Wales |
| EPI_ISL_574204 | 9/23/2020 | 10/5/2020 | Europe / United Kingdom / Wales |
| EPI_ISL_574205 | 9/23/2020 | 10/5/2020 | Europe / United Kingdom / Wales |
| EPI_ISL_574206 | 9/25/2020 | 10/5/2020 | Europe / United Kingdom / Wales |
| EPI_ISL_574207 | 9/22/2020 | 10/5/2020 | Europe / United Kingdom / Wales |
| EPI_ISL_574208 | 9/25/2020 | 10/5/2020 | Europe / United Kingdom / Wales |
| EPI_ISL_574209 | 9/24/2020 | 10/5/2020 | Europe / United Kingdom / Wales |
| EPI_ISL_574210 | 9/18/2020 | 10/5/2020 | Europe / United Kingdom / Wales |
| EPI_ISL_574211 | 9/26/2020 | 10/5/2020 | Europe / United Kingdom / Wales |
| EPI_ISL_574212 | 9/24/2020 | 10/5/2020 | Europe / United Kingdom / Wales |
| EPI_ISL_574213 | 9/26/2020 | 10/5/2020 | Europe / United Kingdom / Wales |
| EPI_ISL_574214 | 9/22/2020 | 10/5/2020 | Europe / United Kingdom / Wales |
| EPI_ISL_574215 | 9/23/2020 | 10/5/2020 | Europe / United Kingdom / Wales |
| EPI_ISL_574216 | 9/20/2020 | 10/5/2020 | Europe / United Kingdom / Wales |
| EPI_ISL_574217 | 9/13/2020 | 10/5/2020 | Europe / United Kingdom / Wales |
| EPI_ISL_574218 | 9/23/2020 | 10/5/2020 | Europe / United Kingdom / Wales |
| EPI_ISL_574219 | 6/1/2020  | 10/5/2020 | Europe / United Kingdom / Wales |
| EPI_ISL_574220 | 6/4/2020  | 10/5/2020 | Europe / United Kingdom / Wales |
| EPI_ISL_574221 | 9/19/2020 | 10/5/2020 | Europe / United Kingdom / Wales |
| EPI_ISL_574222 | 9/26/2020 | 10/5/2020 | Europe / United Kingdom / Wales |
| EPI_ISL_574223 | 9/24/2020 | 10/5/2020 | Europe / United Kingdom / Wales |
| EPI_ISL_574224 | 9/13/2020 | 10/5/2020 | Europe / United Kingdom / Wales |
| EPI_ISL_574225 | 9/21/2020 | 10/5/2020 | Europe / United Kingdom / Wales |
| EPI_ISL_574226 | 9/22/2020 | 10/5/2020 | Europe / United Kingdom / Wales |
| EPI_ISL_574227 | 9/22/2020 | 10/5/2020 | Europe / United Kingdom / Wales |
| EPI_ISL_574228 | 9/10/2020 | 10/5/2020 | Europe / United Kingdom / Wales |
| EPI_ISL_574229 | 9/27/2020 | 10/5/2020 | Europe / United Kingdom / Wales |

|                |           |                                                                      |
|----------------|-----------|----------------------------------------------------------------------|
| EPI_ISL_574230 | 9/17/2020 | 10/5/2020 Europe / United Kingdom / Wales                            |
| EPI_ISL_574231 | 6/4/2020  | 10/5/2020 Europe / United Kingdom / Wales                            |
| EPI_ISL_574232 | 9/18/2020 | 10/5/2020 Europe / United Kingdom / Wales                            |
| EPI_ISL_574233 | 9/22/2020 | 10/5/2020 Europe / United Kingdom / Wales                            |
| EPI_ISL_574234 | 9/25/2020 | 10/5/2020 Europe / United Kingdom / Wales                            |
| EPI_ISL_574235 | 9/23/2020 | 10/5/2020 Europe / United Kingdom / Wales                            |
| EPI_ISL_574236 | 6/2/2020  | 10/5/2020 Europe / United Kingdom / Wales                            |
| EPI_ISL_574237 | 9/14/2020 | 10/5/2020 Europe / United Kingdom / Wales                            |
| EPI_ISL_574238 | 9/24/2020 | 10/5/2020 Europe / United Kingdom / Wales                            |
| EPI_ISL_574239 | 9/21/2020 | 10/5/2020 Europe / United Kingdom / Wales                            |
| EPI_ISL_574240 | 6/1/2020  | 10/5/2020 Europe / United Kingdom / Wales                            |
| EPI_ISL_574241 | 9/25/2020 | 10/5/2020 Europe / United Kingdom / Wales                            |
| EPI_ISL_574242 | 9/21/2020 | 10/5/2020 Europe / United Kingdom / Wales                            |
| EPI_ISL_574243 | 9/22/2020 | 10/5/2020 Europe / United Kingdom / Wales                            |
| EPI_ISL_574244 | 9/17/2020 | 10/5/2020 Europe / United Kingdom / Wales                            |
| EPI_ISL_574245 | 9/22/2020 | 10/5/2020 Europe / United Kingdom / Wales                            |
| EPI_ISL_574246 | 9/26/2020 | 10/5/2020 Europe / United Kingdom / Wales                            |
| EPI_ISL_574247 | 9/20/2020 | 10/5/2020 Europe / United Kingdom / Wales                            |
| EPI_ISL_574248 | 9/23/2020 | 10/5/2020 Europe / United Kingdom / Wales                            |
| EPI_ISL_574249 | 9/25/2020 | 10/5/2020 Europe / United Kingdom / Wales                            |
| EPI_ISL_574250 | 9/22/2020 | 10/5/2020 Europe / United Kingdom / Wales                            |
| EPI_ISL_574251 | 6/26/2020 | 10/5/2020 Europe / United Kingdom / Wales                            |
| EPI_ISL_574252 | 9/22/2020 | 10/5/2020 Europe / United Kingdom / Wales                            |
| EPI_ISL_574253 | 9/25/2020 | 10/5/2020 Europe / United Kingdom / Wales                            |
| EPI_ISL_574254 | 9/20/2020 | 10/5/2020 Europe / United Kingdom / Wales                            |
| EPI_ISL_574255 | 9/23/2020 | 10/5/2020 Europe / United Kingdom / Wales                            |
| EPI_ISL_574256 | 9/25/2020 | 10/5/2020 Europe / United Kingdom / Wales                            |
| EPI_ISL_574257 | 9/7/2020  | 10/5/2020 Europe / United Kingdom / Wales                            |
| EPI_ISL_574258 | 9/15/2020 | 10/5/2020 Europe / United Kingdom / Wales                            |
| EPI_ISL_574259 | 6/26/2020 | 10/5/2020 Europe / Germany / North Rhine-Westphalia / Duesseldorf ar |
| EPI_ISL_574260 | 8/26/2020 | 10/5/2020 North America / USA / New Mexico                           |
| EPI_ISL_574261 | 8/26/2020 | 10/5/2020 North America / USA / New Mexico                           |
| EPI_ISL_574262 | 8/26/2020 | 10/5/2020 North America / USA / New Mexico                           |
| EPI_ISL_574263 | 8/26/2020 | 10/5/2020 North America / USA / New Mexico                           |
| EPI_ISL_574264 | 8/26/2020 | 10/5/2020 North America / USA / New Mexico                           |
| EPI_ISL_574265 | 8/26/2020 | 10/5/2020 North America / USA / New Mexico                           |
| EPI_ISL_574266 | 8/26/2020 | 10/5/2020 North America / USA / New Mexico                           |
| EPI_ISL_574267 | 8/26/2020 | 10/5/2020 North America / USA / New Mexico                           |
| EPI_ISL_574268 | 8/26/2020 | 10/5/2020 North America / USA / New Mexico                           |
| EPI_ISL_574269 | 8/26/2020 | 10/5/2020 North America / USA / New Mexico                           |
| EPI_ISL_574270 | 8/26/2020 | 10/5/2020 North America / USA / New Mexico                           |
| EPI_ISL_574271 | 8/26/2020 | 10/5/2020 North America / USA / New Mexico                           |
| EPI_ISL_574272 | 8/26/2020 | 10/5/2020 North America / USA / New Mexico                           |
| EPI_ISL_574273 | 8/26/2020 | 10/5/2020 North America / USA / New Mexico                           |
| EPI_ISL_574274 | 8/26/2020 | 10/5/2020 North America / USA / New Mexico                           |
| EPI_ISL_574275 | 8/26/2020 | 10/5/2020 North America / USA / New Mexico                           |
| EPI_ISL_574276 | 8/26/2020 | 10/5/2020 North America / USA / New Mexico                           |









|                |           |                                                                      |
|----------------|-----------|----------------------------------------------------------------------|
| EPI_ISL_574424 | 8/26/2020 | 10/5/2020 North America / USA / Louisiana / Madison Parish           |
| EPI_ISL_574425 | 8/26/2020 | 10/5/2020 North America / USA / Louisiana / Madison Parish           |
| EPI_ISL_574426 | 8/26/2020 | 10/5/2020 North America / USA / Louisiana / Madison Parish           |
| EPI_ISL_574427 | 8/26/2020 | 10/5/2020 North America / USA / Louisiana / Madison Parish           |
| EPI_ISL_574428 | 8/26/2020 | 10/5/2020 North America / USA / Louisiana / Madison Parish           |
| EPI_ISL_574429 | 8/26/2020 | 10/5/2020 North America / USA / Louisiana / Madison Parish           |
| EPI_ISL_574430 | 8/26/2020 | 10/5/2020 North America / USA / Louisiana / Madison Parish           |
| EPI_ISL_574543 | 7/10/2020 | 10/5/2020 North America / USA / South Carolina / Georgetown County   |
| EPI_ISL_574544 | 7/10/2020 | 10/5/2020 North America / USA / South Carolina / Horry County        |
| EPI_ISL_574545 | 7/10/2020 | 10/5/2020 North America / USA / South Carolina / Georgetown County   |
| EPI_ISL_574546 | 7/10/2020 | 10/5/2020 North America / USA / South Carolina / Georgetown County   |
| EPI_ISL_574547 | 7/11/2020 | 10/5/2020 North America / USA / South Carolina / Georgetown County   |
| EPI_ISL_574550 | 6/19/2020 | 10/5/2020 North America / USA / South Carolina / Georgetown County   |
| EPI_ISL_574551 | 6/19/2020 | 10/5/2020 North America / USA / South Carolina / Horry County        |
| EPI_ISL_574552 | 6/19/2020 | 10/5/2020 North America / USA / South Carolina / Georgetown County   |
| EPI_ISL_574553 | 6/19/2020 | 10/5/2020 North America / USA / South Carolina / Horry County        |
| EPI_ISL_574554 | 7/10/2020 | 10/5/2020 North America / USA / South Carolina / Williamsburg County |
| EPI_ISL_574555 | 7/10/2020 | 10/5/2020 North America / USA / South Carolina / Horry County        |
| EPI_ISL_574557 | 7/10/2020 | 10/5/2020 North America / USA / South Carolina / Georgetown County   |
| EPI_ISL_574558 | 7/10/2020 | 10/5/2020 North America / USA / South Carolina / Georgetown County   |
| EPI_ISL_574559 | 7/10/2020 | 10/5/2020 North America / USA / South Carolina / Georgetown County   |
| EPI_ISL_574560 | 7/10/2020 | 10/5/2020 North America / USA / South Carolina / Horry County        |
| EPI_ISL_574561 | 7/10/2020 | 10/5/2020 North America / USA / South Carolina / Georgetown County   |
| EPI_ISL_574562 | 7/10/2020 | 10/5/2020 North America / USA / South Carolina / Georgetown County   |
| EPI_ISL_574563 | 7/10/2020 | 10/5/2020 North America / USA / South Carolina / Horry County        |
| EPI_ISL_574564 | 7/10/2020 | 10/5/2020 North America / USA / South Carolina / Georgetown County   |
| EPI_ISL_574565 | 7/10/2020 | 10/5/2020 North America / USA / South Carolina / Georgetown County   |
| EPI_ISL_574566 | 7/10/2020 | 10/5/2020 North America / USA / South Carolina / Horry County        |
| EPI_ISL_574567 | 7/10/2020 | 10/5/2020 North America / USA / South Carolina / Georgetown County   |
| EPI_ISL_574568 | 7/10/2020 | 10/5/2020 North America / USA / South Carolina / Williamsburg County |
| EPI_ISL_574569 | 7/10/2020 | 10/5/2020 North America / USA / South Carolina / Georgetown County   |
| EPI_ISL_574570 | 7/9/2020  | 10/5/2020 North America / USA / South Carolina / Georgetown County   |
| EPI_ISL_574571 | 7/10/2020 | 10/5/2020 North America / USA / South Carolina / Georgetown County   |
| EPI_ISL_574573 | 7/10/2020 | 10/5/2020 North America / USA / South Carolina / Georgetown County   |
| EPI_ISL_574574 | 7/10/2020 | 10/5/2020 North America / USA / South Carolina / Georgetown County   |
| EPI_ISL_574575 | 7/10/2020 | 10/5/2020 North America / USA / South Carolina / Georgetown County   |
| EPI_ISL_574431 | 9/14/2020 | 10/6/2020 South America / Ecuador / Los Rios / Babahoyo              |
| EPI_ISL_574433 | 7/3/2020  | 10/6/2020 Asia / Indonesia / Jakarta                                 |
| EPI_ISL_574435 | 5/14/2020 | 10/6/2020 North America / USA / Texas / Harris County                |
| EPI_ISL_574436 | 5/14/2020 | 10/6/2020 North America / USA / Texas / Harris County                |
| EPI_ISL_574438 | 5/14/2020 | 10/6/2020 North America / USA / Texas / Harris County                |
| EPI_ISL_574439 | 5/14/2020 | 10/6/2020 North America / USA / Texas / Harris County                |
| EPI_ISL_574440 | 5/14/2020 | 10/6/2020 North America / USA / Texas / Harris County                |
| EPI_ISL_574441 | 5/14/2020 | 10/6/2020 North America / USA / Texas / Harris County                |
| EPI_ISL_574443 | 5/14/2020 | 10/6/2020 North America / USA / Texas / Harris County                |
| EPI_ISL_574445 | 5/14/2020 | 10/6/2020 North America / USA / Texas / Harris County                |
| EPI_ISL_574446 | 5/14/2020 | 10/6/2020 North America / USA / Texas / Harris County                |

|                |           |                                                          |
|----------------|-----------|----------------------------------------------------------|
| EPI_ISL_574447 | 5/14/2020 | 10/6/2020 North America / USA / Texas / Harris County    |
| EPI_ISL_574448 | 5/14/2020 | 10/6/2020 North America / USA / Texas / Harris County    |
| EPI_ISL_574452 | 5/14/2020 | 10/6/2020 North America / USA / Texas / Harris County    |
| EPI_ISL_574454 | 5/14/2020 | 10/6/2020 North America / USA / Texas / Harris County    |
| EPI_ISL_574456 | 5/14/2020 | 10/6/2020 North America / USA / Texas / Harris County    |
| EPI_ISL_574457 | 5/14/2020 | 10/6/2020 North America / USA / Texas / Harris County    |
| EPI_ISL_574458 | 5/14/2020 | 10/6/2020 North America / USA / Texas / Harris County    |
| EPI_ISL_574460 | 5/14/2020 | 10/6/2020 North America / USA / Texas / Harris County    |
| EPI_ISL_574461 | 5/14/2020 | 10/6/2020 North America / USA / Texas / Harris County    |
| EPI_ISL_574462 | 5/14/2020 | 10/6/2020 North America / USA / Texas / Harris County    |
| EPI_ISL_574463 | 5/14/2020 | 10/6/2020 North America / USA / Texas / Harris County    |
| EPI_ISL_574464 | 5/14/2020 | 10/6/2020 North America / USA / Texas / Harris County    |
| EPI_ISL_574465 | 5/14/2020 | 10/6/2020 North America / USA / Texas / Harris County    |
| EPI_ISL_574466 | 5/14/2020 | 10/6/2020 North America / USA / Texas / Harris County    |
| EPI_ISL_574467 | 5/14/2020 | 10/6/2020 North America / USA / Texas / Harris County    |
| EPI_ISL_574468 | 5/14/2020 | 10/6/2020 North America / USA / Texas / Harris County    |
| EPI_ISL_574470 | 5/14/2020 | 10/6/2020 North America / USA / Texas / Harris County    |
| EPI_ISL_574471 | 5/14/2020 | 10/6/2020 North America / USA / Texas / Harris County    |
| EPI_ISL_574472 | 5/14/2020 | 10/6/2020 North America / USA / Texas / Harris County    |
| EPI_ISL_574473 | 5/14/2020 | 10/6/2020 North America / USA / Texas / Harris County    |
| EPI_ISL_574474 | 6/18/2020 | 10/6/2020 North America / USA / Texas / Crosby County    |
| EPI_ISL_574475 | 6/18/2020 | 10/6/2020 North America / USA / Texas / Ector County     |
| EPI_ISL_574476 | 6/25/2020 | 10/6/2020 North America / USA / Texas / Kaufman County   |
| EPI_ISL_574477 | 6/25/2020 | 10/6/2020 North America / USA / Texas / Jefferson County |
| EPI_ISL_574478 | 6/25/2020 | 10/6/2020 North America / USA / Texas / Taylor County    |
| EPI_ISL_574479 | 3/20/2020 | 10/6/2020 Asia / Singapore                               |
| EPI_ISL_574480 | 6/5/2020  | 10/6/2020 Asia / Singapore                               |
| EPI_ISL_574481 | 3/21/2020 | 10/6/2020 Asia / Singapore                               |
| EPI_ISL_574482 | 3/23/2020 | 10/6/2020 Asia / Singapore                               |
| EPI_ISL_574483 | 3/23/2020 | 10/6/2020 Asia / Singapore                               |
| EPI_ISL_574484 | 3/23/2020 | 10/6/2020 Asia / Singapore                               |
| EPI_ISL_574485 | 4/6/2020  | 10/6/2020 Asia / Singapore                               |
| EPI_ISL_574486 | 6/3/2020  | 10/6/2020 Asia / Singapore                               |
| EPI_ISL_574487 | 3/11/2020 | 10/6/2020 Asia / Singapore                               |
| EPI_ISL_574488 | 3/21/2020 | 10/6/2020 Asia / Singapore                               |
| EPI_ISL_574489 | 3/23/2020 | 10/6/2020 Asia / Singapore                               |
| EPI_ISL_574490 | 3/23/2020 | 10/6/2020 Asia / Singapore                               |
| EPI_ISL_574491 | 6/3/2020  | 10/6/2020 Asia / Singapore                               |
| EPI_ISL_574492 | 6/3/2020  | 10/6/2020 Asia / Singapore                               |
| EPI_ISL_574493 | 3/25/2020 | 10/6/2020 Asia / Singapore                               |
| EPI_ISL_574494 | 9/29/2020 | 10/6/2020 Asia / Singapore                               |
| EPI_ISL_574495 | 3/23/2020 | 10/6/2020 Asia / Singapore                               |
| EPI_ISL_574496 | 3/24/2020 | 10/6/2020 Asia / Singapore                               |
| EPI_ISL_574497 | 3/23/2020 | 10/6/2020 Asia / Singapore                               |
| EPI_ISL_574498 | 3/24/2020 | 10/6/2020 Asia / Singapore                               |
| EPI_ISL_574499 | 3/23/2020 | 10/6/2020 Asia / Singapore                               |
| EPI_ISL_574500 | 3/23/2020 | 10/6/2020 Asia / Singapore                               |

|                |           |                                                              |
|----------------|-----------|--------------------------------------------------------------|
| EPI_ISL_574501 | 3/22/2020 | 10/6/2020 Asia / Singapore                                   |
| EPI_ISL_574502 | 3/22/2020 | 10/6/2020 Asia / Singapore                                   |
| EPI_ISL_574503 | 9/24/2020 | 10/6/2020 Asia / Singapore                                   |
| EPI_ISL_574504 | 3/23/2020 | 10/6/2020 Asia / Singapore                                   |
| EPI_ISL_574505 | 3/24/2020 | 10/6/2020 Asia / Singapore                                   |
| EPI_ISL_574506 | 3/24/2020 | 10/6/2020 Asia / Singapore                                   |
| EPI_ISL_574507 | 3/23/2020 | 10/6/2020 Asia / Singapore                                   |
| EPI_ISL_574508 | 3/24/2020 | 10/6/2020 Asia / Singapore                                   |
| EPI_ISL_574509 | 3/23/2020 | 10/6/2020 Asia / Singapore                                   |
| EPI_ISL_574510 | 3/23/2020 | 10/6/2020 Asia / Singapore                                   |
| EPI_ISL_574511 | 3/22/2020 | 10/6/2020 Asia / Singapore                                   |
| EPI_ISL_574512 | 3/23/2020 | 10/6/2020 Asia / Singapore                                   |
| EPI_ISL_574513 | 3/24/2020 | 10/6/2020 Asia / Singapore                                   |
| EPI_ISL_574514 | 3/22/2020 | 10/6/2020 Asia / Singapore                                   |
| EPI_ISL_574515 | 3/24/2020 | 10/6/2020 Asia / Singapore                                   |
| EPI_ISL_574516 | 3/23/2020 | 10/6/2020 Asia / Singapore                                   |
| EPI_ISL_574517 | 3/23/2020 | 10/6/2020 Asia / Singapore                                   |
| EPI_ISL_574518 | 3/24/2020 | 10/6/2020 Asia / Singapore                                   |
| EPI_ISL_574519 | 9/28/2020 | 10/6/2020 Asia / Singapore                                   |
| EPI_ISL_574520 | 3/23/2020 | 10/6/2020 Asia / Singapore                                   |
| EPI_ISL_574521 | 3/22/2020 | 10/6/2020 Asia / Singapore                                   |
| EPI_ISL_574522 | 3/24/2020 | 10/6/2020 Asia / Singapore                                   |
| EPI_ISL_574523 | 3/22/2020 | 10/6/2020 Asia / Singapore                                   |
| EPI_ISL_574524 | 3/24/2020 | 10/6/2020 Asia / Singapore                                   |
| EPI_ISL_574525 | 3/23/2020 | 10/6/2020 Asia / Singapore                                   |
| EPI_ISL_574526 | 3/22/2020 | 10/6/2020 Asia / Singapore                                   |
| EPI_ISL_574527 | 3/22/2020 | 10/6/2020 Asia / Singapore                                   |
| EPI_ISL_574528 | 3/24/2020 | 10/6/2020 Asia / Singapore                                   |
| EPI_ISL_574529 | 3/23/2020 | 10/6/2020 Asia / Singapore                                   |
| EPI_ISL_574530 | 3/24/2020 | 10/6/2020 Asia / Singapore                                   |
| EPI_ISL_574531 | 3/23/2020 | 10/6/2020 Asia / Singapore                                   |
| EPI_ISL_574532 | 3/22/2020 | 10/6/2020 Asia / Singapore                                   |
| EPI_ISL_574533 | 3/24/2020 | 10/6/2020 Asia / Singapore                                   |
| EPI_ISL_574534 | 3/23/2020 | 10/6/2020 Asia / Singapore                                   |
| EPI_ISL_574535 | 3/24/2020 | 10/6/2020 Asia / Singapore                                   |
| EPI_ISL_574536 | 3/22/2020 | 10/6/2020 Asia / Singapore                                   |
| EPI_ISL_574537 | 3/23/2020 | 10/6/2020 Asia / Singapore                                   |
| EPI_ISL_574538 | 3/23/2020 | 10/6/2020 Asia / Singapore                                   |
| EPI_ISL_574539 | 3/24/2020 | 10/6/2020 Asia / Singapore                                   |
| EPI_ISL_574540 | 3/24/2020 | 10/6/2020 Asia / Singapore                                   |
| EPI_ISL_574577 | 4/16/2020 | 10/6/2020 South America / Brazil / Sao Paulo / Sao Paulo     |
| EPI_ISL_574578 | 4/25/2020 | 10/6/2020 South America / Brazil / Sao Paulo / Campinas      |
| EPI_ISL_574579 | 4/24/2020 | 10/6/2020 South America / Brazil / Sao Paulo / Sao Paulo     |
| EPI_ISL_574580 | 4/20/2020 | 10/6/2020 South America / Brazil / Sao Paulo / Sao Paulo     |
| EPI_ISL_574582 | 4/24/2020 | 10/6/2020 South America / Brazil / Sao Paulo / Sao Paulo     |
| EPI_ISL_574583 | 4/27/2020 | 10/6/2020 South America / Brazil / Sao Paulo / Jandira       |
| EPI_ISL_574585 | 3/14/2020 | 10/6/2020 North America / USA / Delaware / New Castle County |

|                |           |                                                                    |
|----------------|-----------|--------------------------------------------------------------------|
| EPI_ISL_574586 | 3/23/2020 | 10/6/2020 North America / USA / Delaware / New Castle County       |
| EPI_ISL_574588 | 4/27/2020 | 10/6/2020 South America / Brazil / Sao Paulo / Sumare              |
| EPI_ISL_574589 | 4/26/2020 | 10/6/2020 South America / Brazil / Sao Paulo / Sao Paulo           |
| EPI_ISL_574590 | 4/26/2020 | 10/6/2020 South America / Brazil / Sao Paulo / Santa Isabel        |
| EPI_ISL_574591 | 4/1/2020  | 10/6/2020 South America / Brazil / Sao Paulo / Presidente Prudente |
| EPI_ISL_574592 | 3/31/2020 | 10/6/2020 South America / Brazil / Sao Paulo / Presidente Prudente |
| EPI_ISL_574593 | 4/30/2020 | 10/6/2020 South America / Brazil / Sao Paulo / Sumare              |
| EPI_ISL_574594 | 7/10/2020 | 10/6/2020 South America / Brazil / Sao Paulo / Taubate             |
| EPI_ISL_574595 | 3/23/2020 | 10/6/2020 South America / Brazil / Sao Paulo / Sao Paulo           |
| EPI_ISL_574596 | 6/19/2020 | 10/6/2020 South America / Brazil / Sao Paulo / Sumare              |
| EPI_ISL_574597 | 6/18/2020 | 10/6/2020 South America / Brazil / Sao Paulo / Jarinu              |
| EPI_ISL_574598 | 6/20/2020 | 10/6/2020 South America / Brazil / Sao Paulo / Jundiai             |
| EPI_ISL_574599 | 3/20/2020 | 10/6/2020 North America / USA / Delaware / New Castle County       |
| EPI_ISL_574603 | 3/23/2020 | 10/6/2020 Asia / Indonesia / Papua / Timika                        |
| EPI_ISL_574604 | 3/24/2020 | 10/6/2020 Asia / Indonesia / North Sulawesi / Manado               |
| EPI_ISL_574605 | 3/30/2020 | 10/6/2020 Asia / Indonesia / Special Region of Yogyakarta / Sleman |
| EPI_ISL_574606 | 4/6/2020  | 10/6/2020 Asia / Indonesia / West Java / Purwakarta                |
| EPI_ISL_574607 | 4/9/2020  | 10/6/2020 Asia / Indonesia / Jakarta                               |
| EPI_ISL_574608 | 4/9/2020  | 10/6/2020 Asia / Indonesia / Jakarta                               |
| EPI_ISL_574609 | 4/13/2020 | 10/6/2020 Asia / Indonesia / Jakarta                               |
| EPI_ISL_574610 | 4/23/2020 | 10/6/2020 Asia / Indonesia / Jakarta                               |
| EPI_ISL_574611 | 5/6/2020  | 10/6/2020 Asia / Indonesia / Banten / South Tangerang              |
| EPI_ISL_574612 | 5/31/2020 | 10/6/2020 Asia / Indonesia / West Java / Bogor Regency             |
| EPI_ISL_574613 | 6/3/2020  | 10/6/2020 Asia / Indonesia / Jakarta                               |
| EPI_ISL_574614 | 6/4/2020  | 10/6/2020 Asia / Indonesia / Jakarta                               |
| EPI_ISL_574615 | 6/5/2020  | 10/6/2020 Asia / Indonesia / Jakarta                               |
| EPI_ISL_574616 | 6/8/2020  | 10/6/2020 Asia / Indonesia / Jakarta                               |
| EPI_ISL_574617 | 6/8/2020  | 10/6/2020 Asia / Indonesia / Jakarta                               |
| EPI_ISL_574618 | 6/8/2020  | 10/6/2020 Asia / Indonesia / Jakarta                               |
| EPI_ISL_574619 | 6/16/2020 | 10/6/2020 Asia / Indonesia / North Sulawesi / Manado               |
| EPI_ISL_574620 | 6/17/2020 | 10/6/2020 Asia / Indonesia / North Sulawesi / Manado               |
| EPI_ISL_574621 | 6/16/2020 | 10/6/2020 Asia / Indonesia / North Sulawesi / Manado               |
| EPI_ISL_574622 | 6/17/2020 | 10/6/2020 Asia / Indonesia / North Sulawesi / Manado               |
| EPI_ISL_574623 | 6/18/2020 | 10/6/2020 Asia / Indonesia / North Sulawesi / Manado               |
| EPI_ISL_574648 | 5/15/2020 | 10/6/2020 North America / USA / Washington                         |
| EPI_ISL_574649 | 8/28/2020 | 10/6/2020 North America / USA / Washington / King County           |
| EPI_ISL_574650 | 8/31/2020 | 10/6/2020 North America / USA / Washington / King County           |
| EPI_ISL_574652 | 9/1/2020  | 10/6/2020 North America / USA / Washington / King County           |
| EPI_ISL_574653 | 9/2/2020  | 10/6/2020 North America / USA / Washington / King County           |
| EPI_ISL_574654 | 9/2/2020  | 10/6/2020 North America / USA / Washington / King County           |
| EPI_ISL_574655 | 9/2/2020  | 10/6/2020 North America / USA / Washington / King County           |
| EPI_ISL_574657 | 9/5/2020  | 10/6/2020 North America / USA / Washington / King County           |
| EPI_ISL_574658 | 9/5/2020  | 10/6/2020 North America / USA / Washington / King County           |
| EPI_ISL_574660 | 9/6/2020  | 10/6/2020 North America / USA / Washington / King County           |
| EPI_ISL_574661 | 9/7/2020  | 10/6/2020 North America / USA / Washington / King County           |
| EPI_ISL_574662 | 9/9/2020  | 10/6/2020 North America / USA / Washington / King County           |
| EPI_ISL_574663 | 9/9/2020  | 10/6/2020 North America / USA / Washington                         |

|                |           |                                                          |
|----------------|-----------|----------------------------------------------------------|
| EPI_ISL_574664 | 9/9/2020  | 10/6/2020 North America / USA / Washington               |
| EPI_ISL_574665 | 9/9/2020  | 10/6/2020 North America / USA / Washington               |
| EPI_ISL_574666 | 9/9/2020  | 10/6/2020 North America / USA / Washington               |
| EPI_ISL_574667 | 9/9/2020  | 10/6/2020 North America / USA / Washington               |
| EPI_ISL_574668 | 9/9/2020  | 10/6/2020 North America / USA / Washington / King County |
| EPI_ISL_574669 | 9/7/2020  | 10/6/2020 North America / USA / Washington / King County |
| EPI_ISL_574670 | 9/8/2020  | 10/6/2020 North America / USA / Washington / King County |
| EPI_ISL_574672 | 9/8/2020  | 10/6/2020 North America / USA / Washington / King County |
| EPI_ISL_574673 | 9/8/2020  | 10/6/2020 North America / USA / Washington / King County |
| EPI_ISL_574674 | 9/9/2020  | 10/6/2020 North America / USA / Washington               |
| EPI_ISL_574675 | 9/9/2020  | 10/6/2020 North America / USA / Washington / King County |
| EPI_ISL_574676 | 9/13/2020 | 10/6/2020 North America / USA / Washington / King County |
| EPI_ISL_574677 | 9/13/2020 | 10/6/2020 North America / USA / Washington / King County |
| EPI_ISL_574678 | 9/13/2020 | 10/6/2020 North America / USA / Washington / King County |
| EPI_ISL_574679 | 9/14/2020 | 10/6/2020 North America / USA / Washington               |
| EPI_ISL_574680 | 9/13/2020 | 10/6/2020 North America / USA / Washington / King County |
| EPI_ISL_574681 | 9/14/2020 | 10/6/2020 North America / USA / Washington / King County |
| EPI_ISL_574682 | 9/15/2020 | 10/6/2020 North America / USA / Washington               |
| EPI_ISL_574684 | 9/16/2020 | 10/6/2020 North America / USA / Washington               |
| EPI_ISL_574685 | 9/16/2020 | 10/6/2020 North America / USA / Washington / King County |
| EPI_ISL_574686 | 9/16/2020 | 10/6/2020 North America / USA / Washington / King County |
| EPI_ISL_574687 | 9/16/2020 | 10/6/2020 North America / USA / Washington / King County |
| EPI_ISL_574688 | 9/16/2020 | 10/6/2020 North America / USA / Washington / King County |
| EPI_ISL_574689 | 9/18/2020 | 10/6/2020 North America / USA / Washington / King County |
| EPI_ISL_574690 | 9/18/2020 | 10/6/2020 North America / USA / Washington / King County |
| EPI_ISL_574691 | 9/18/2020 | 10/6/2020 North America / USA / Washington / King County |
| EPI_ISL_574697 | 9/17/2020 | 10/7/2020 Europe / United Kingdom / England              |
| EPI_ISL_574698 | 9/19/2020 | 10/7/2020 Europe / United Kingdom / England              |
| EPI_ISL_574699 | 9/19/2020 | 10/7/2020 Europe / United Kingdom / England              |
| EPI_ISL_574700 | 9/21/2020 | 10/7/2020 Europe / United Kingdom / England              |
| EPI_ISL_574701 | 9/21/2020 | 10/7/2020 Europe / United Kingdom / England              |
| EPI_ISL_574702 | 9/22/2020 | 10/7/2020 Europe / United Kingdom / England              |
| EPI_ISL_574703 | 9/23/2020 | 10/7/2020 Europe / United Kingdom / England              |
| EPI_ISL_574704 | 9/23/2020 | 10/7/2020 Europe / United Kingdom / England              |
| EPI_ISL_574779 | 8/12/2020 | 10/7/2020 Europe / Netherlands / Drenthe                 |
| EPI_ISL_574780 | 8/16/2020 | 10/7/2020 Europe / Netherlands / Drenthe                 |
| EPI_ISL_574781 | 8/14/2020 | 10/7/2020 Europe / Netherlands / Drenthe                 |
| EPI_ISL_574782 | 2020      | 10/7/2020 Europe / Netherlands / Noord-Brabant           |
| EPI_ISL_574783 | 2020      | 10/7/2020 Europe / Netherlands / Noord-Brabant           |
| EPI_ISL_574784 | 2020      | 10/7/2020 Europe / Netherlands / Noord-Brabant           |
| EPI_ISL_574785 | 2020      | 10/7/2020 Europe / Netherlands / Noord-Brabant           |
| EPI_ISL_574786 | 8/24/2020 | 10/7/2020 Europe / Netherlands / Zuid-Holland            |
| EPI_ISL_574787 | 8/25/2020 | 10/7/2020 Europe / Netherlands / Zuid-Holland            |
| EPI_ISL_574788 | 8/24/2020 | 10/7/2020 Europe / Netherlands / Zuid-Holland            |
| EPI_ISL_574789 | 8/25/2020 | 10/7/2020 Europe / Netherlands / Zuid-Holland            |
| EPI_ISL_574790 | 5/21/2020 | 10/7/2020 Europe / Switzerland / Bern                    |
| EPI_ISL_574791 | 3/8/2020  | 10/7/2020 Europe / Switzerland / Bern                    |











|                |           |                                                          |
|----------------|-----------|----------------------------------------------------------|
| EPI_ISL_575000 | 3/18/2020 | 10/7/2020 Europe / Switzerland / Vaud                    |
| EPI_ISL_575001 | 3/19/2020 | 10/7/2020 Europe / Switzerland / Vaud                    |
| EPI_ISL_575002 | 3/19/2020 | 10/7/2020 Europe / Switzerland / Vaud                    |
| EPI_ISL_575004 | 3/18/2020 | 10/7/2020 Europe / Switzerland / Vaud                    |
| EPI_ISL_575005 | 3/18/2020 | 10/7/2020 Europe / Switzerland / Vaud                    |
| EPI_ISL_575006 | 3/18/2020 | 10/7/2020 Europe / Switzerland / Vaud                    |
| EPI_ISL_575007 | 3/18/2020 | 10/7/2020 Europe / Switzerland / Vaud                    |
| EPI_ISL_575008 | 3/18/2020 | 10/7/2020 Europe / Switzerland / Vaud                    |
| EPI_ISL_575009 | 3/18/2020 | 10/7/2020 Europe / Switzerland / Vaud                    |
| EPI_ISL_575010 | 3/18/2020 | 10/7/2020 Europe / Switzerland / Vaud                    |
| EPI_ISL_575011 | 3/18/2020 | 10/7/2020 Europe / Switzerland / Vaud                    |
| EPI_ISL_575012 | 3/19/2020 | 10/7/2020 Europe / Switzerland / Vaud                    |
| EPI_ISL_575013 | 3/17/2020 | 10/7/2020 Europe / Switzerland / Zurich                  |
| EPI_ISL_575014 | 3/17/2020 | 10/7/2020 Europe / Switzerland / Zurich                  |
| EPI_ISL_575015 | 3/17/2020 | 10/7/2020 Europe / Switzerland / Zurich                  |
| EPI_ISL_575016 | 3/18/2020 | 10/7/2020 Europe / Switzerland / Zurich                  |
| EPI_ISL_575017 | 3/18/2020 | 10/7/2020 Europe / Switzerland / Zurich                  |
| EPI_ISL_575018 | 3/18/2020 | 10/7/2020 Europe / Switzerland / Zurich                  |
| EPI_ISL_575019 | 3/19/2020 | 10/7/2020 Europe / Switzerland / Zurich                  |
| EPI_ISL_575028 | 9/1/2020  | 10/7/2020 North America / USA / Washington / King County |
| EPI_ISL_575029 | 8/31/2020 | 10/7/2020 North America / USA / Washington / King County |
| EPI_ISL_575030 | 9/1/2020  | 10/7/2020 North America / USA / Washington / King County |
| EPI_ISL_575031 | 8/31/2020 | 10/7/2020 North America / USA / Washington / King County |
| EPI_ISL_575032 | 9/3/2020  | 10/7/2020 North America / USA / Washington / King County |
| EPI_ISL_575033 | 3/3/2020  | 10/7/2020 North America / USA / Washington               |
| EPI_ISL_575035 | 3/13/2020 | 10/7/2020 North America / USA / Utah                     |
| EPI_ISL_575036 | 3/13/2020 | 10/7/2020 North America / USA / Utah                     |
| EPI_ISL_575038 | 4/1/2020  | 10/7/2020 North America / USA / Utah                     |
| EPI_ISL_575039 | 4/1/2020  | 10/7/2020 North America / USA / Utah                     |
| EPI_ISL_575040 | 3/31/2020 | 10/7/2020 North America / USA / Utah                     |
| EPI_ISL_575041 | 4/1/2020  | 10/7/2020 North America / USA / Utah                     |
| EPI_ISL_575043 | 4/4/2020  | 10/7/2020 North America / USA / Utah                     |
| EPI_ISL_575044 | 4/1/2020  | 10/7/2020 North America / USA / Utah                     |
| EPI_ISL_575045 | 3/31/2020 | 10/7/2020 North America / USA / Utah                     |
| EPI_ISL_575046 | 4/1/2020  | 10/7/2020 North America / USA / Utah                     |
| EPI_ISL_575047 | 4/1/2020  | 10/7/2020 North America / USA / Utah                     |
| EPI_ISL_575048 | 4/4/2020  | 10/7/2020 North America / USA / Utah                     |
| EPI_ISL_575049 | 4/4/2020  | 10/7/2020 North America / USA / Utah                     |
| EPI_ISL_575050 | 4/4/2020  | 10/7/2020 North America / USA / Utah                     |
| EPI_ISL_575052 | 4/4/2020  | 10/7/2020 North America / USA / Utah                     |
| EPI_ISL_575053 | 4/3/2020  | 10/7/2020 North America / USA / Utah                     |
| EPI_ISL_575054 | 4/3/2020  | 10/7/2020 North America / USA / Utah                     |
| EPI_ISL_575055 | 4/3/2020  | 10/7/2020 North America / USA / Utah                     |
| EPI_ISL_575057 | 4/1/2020  | 10/7/2020 North America / USA / Utah                     |
| EPI_ISL_575058 | 4/1/2020  | 10/7/2020 North America / USA / Utah                     |
| EPI_ISL_575059 | 4/1/2020  | 10/7/2020 North America / USA / Utah                     |
| EPI_ISL_575060 | 4/3/2020  | 10/7/2020 North America / USA / Utah                     |





|                |           |                                                           |
|----------------|-----------|-----------------------------------------------------------|
| EPI_ISL_575228 | 6/1/2020  | 10/7/2020 North America / USA / Utah                      |
| EPI_ISL_575230 | 6/1/2020  | 10/7/2020 North America / USA / Utah                      |
| EPI_ISL_575231 | 6/1/2020  | 10/7/2020 North America / USA / Utah                      |
| EPI_ISL_575232 | 6/1/2020  | 10/7/2020 North America / USA / Utah                      |
| EPI_ISL_575234 | 6/1/2020  | 10/7/2020 North America / USA / Utah                      |
| EPI_ISL_575236 | 6/1/2020  | 10/7/2020 North America / USA / Utah                      |
| EPI_ISL_575237 | 6/1/2020  | 10/7/2020 North America / USA / Utah                      |
| EPI_ISL_575239 | 7/9/2020  | 10/7/2020 North America / USA / Utah                      |
| EPI_ISL_576117 | 8/19/2020 | 10/7/2020 Europe / Malta                                  |
| EPI_ISL_576118 | 9/4/2020  | 10/7/2020 Europe / Malta                                  |
| EPI_ISL_576120 | 9/7/2020  | 10/7/2020 Europe / Malta                                  |
| EPI_ISL_576121 | 8/20/2020 | 10/7/2020 Europe / Malta                                  |
| EPI_ISL_576125 | 9/7/2020  | 10/7/2020 Europe / Malta                                  |
| EPI_ISL_576371 | 7/19/2020 | 10/7/2020 Africa / Egypt                                  |
| EPI_ISL_576372 | 7/19/2020 | 10/7/2020 Africa / Egypt                                  |
| EPI_ISL_576373 | 7/19/2020 | 10/7/2020 Africa / Egypt                                  |
| EPI_ISL_575330 | 4/15/2020 | 10/8/2020 Asia / China / Beijing                          |
| EPI_ISL_575331 | 6/16/2020 | 10/8/2020 Asia / Indonesia / Special Region of Yogyakarta |
| EPI_ISL_575332 | 9/1/2020  | 10/8/2020 Asia / Israel / Central region                  |
| EPI_ISL_575333 | 9/1/2020  | 10/8/2020 Asia / Israel / Central region                  |
| EPI_ISL_575334 | 9/1/2020  | 10/8/2020 Asia / Israel / Northern District               |
| EPI_ISL_575338 | 9/22/2020 | 10/8/2020 Europe / United Kingdom / Scotland              |
| EPI_ISL_575339 | 9/22/2020 | 10/8/2020 Europe / United Kingdom / Scotland              |
| EPI_ISL_575340 | 9/22/2020 | 10/8/2020 Europe / United Kingdom / Scotland              |
| EPI_ISL_575341 | 9/22/2020 | 10/8/2020 Europe / United Kingdom / Scotland              |
| EPI_ISL_575342 | 9/22/2020 | 10/8/2020 Europe / United Kingdom / Scotland              |
| EPI_ISL_575343 | 9/22/2020 | 10/8/2020 Europe / United Kingdom / Scotland              |
| EPI_ISL_575344 | 9/22/2020 | 10/8/2020 Europe / United Kingdom / Scotland              |
| EPI_ISL_575345 | 9/22/2020 | 10/8/2020 Europe / United Kingdom / Scotland              |
| EPI_ISL_575346 | 9/22/2020 | 10/8/2020 Europe / United Kingdom / Scotland              |
| EPI_ISL_575348 | 9/22/2020 | 10/8/2020 Europe / United Kingdom / Scotland              |
| EPI_ISL_575349 | 9/22/2020 | 10/8/2020 Europe / United Kingdom / Scotland              |
| EPI_ISL_575350 | 9/22/2020 | 10/8/2020 Europe / United Kingdom / Scotland              |
| EPI_ISL_575351 | 9/22/2020 | 10/8/2020 Europe / United Kingdom / Scotland              |
| EPI_ISL_575352 | 9/22/2020 | 10/8/2020 Europe / United Kingdom / Scotland              |
| EPI_ISL_575353 | 9/22/2020 | 10/8/2020 Europe / United Kingdom / Scotland              |
| EPI_ISL_575354 | 9/22/2020 | 10/8/2020 Europe / United Kingdom / Scotland              |
| EPI_ISL_575355 | 9/22/2020 | 10/8/2020 Europe / United Kingdom / Scotland              |
| EPI_ISL_575356 | 9/22/2020 | 10/8/2020 Europe / United Kingdom / Scotland              |
| EPI_ISL_575357 | 9/22/2020 | 10/8/2020 Europe / United Kingdom / Scotland              |
| EPI_ISL_575358 | 9/22/2020 | 10/8/2020 Europe / United Kingdom / Scotland              |
| EPI_ISL_575359 | 9/22/2020 | 10/8/2020 Europe / United Kingdom / Scotland              |
| EPI_ISL_575360 | 9/22/2020 | 10/8/2020 Europe / United Kingdom / Scotland              |
| EPI_ISL_575361 | 9/22/2020 | 10/8/2020 Europe / United Kingdom / Scotland              |
| EPI_ISL_575362 | 9/22/2020 | 10/8/2020 Europe / United Kingdom / Scotland              |
| EPI_ISL_575363 | 9/22/2020 | 10/8/2020 Europe / United Kingdom / Scotland              |
| EPI_ISL_575364 | 9/22/2020 | 10/8/2020 Europe / United Kingdom / Scotland              |































|                |           |                                                           |
|----------------|-----------|-----------------------------------------------------------|
| EPI_ISL_576066 | 9/14/2020 | 10/8/2020 Europe / United Kingdom / Scotland              |
| EPI_ISL_576069 | 9/13/2020 | 10/8/2020 Europe / United Kingdom / Scotland              |
| EPI_ISL_576071 | 9/10/2020 | 10/8/2020 Europe / United Kingdom / Scotland              |
| EPI_ISL_576072 | 9/14/2020 | 10/8/2020 Europe / United Kingdom / Scotland              |
| EPI_ISL_576073 | 9/14/2020 | 10/8/2020 Europe / United Kingdom / Scotland              |
| EPI_ISL_576074 | 9/10/2020 | 10/8/2020 Europe / United Kingdom / Scotland              |
| EPI_ISL_576075 | 9/13/2020 | 10/8/2020 Europe / United Kingdom / Scotland              |
| EPI_ISL_576076 | 9/9/2020  | 10/8/2020 Europe / United Kingdom / Scotland              |
| EPI_ISL_576077 | 9/14/2020 | 10/8/2020 Europe / United Kingdom / Scotland              |
| EPI_ISL_576078 | 9/14/2020 | 10/8/2020 Europe / United Kingdom / Scotland              |
| EPI_ISL_576079 | 9/14/2020 | 10/8/2020 Europe / United Kingdom / Scotland              |
| EPI_ISL_576080 | 9/13/2020 | 10/8/2020 Europe / United Kingdom / Scotland              |
| EPI_ISL_576082 | 9/9/2020  | 10/8/2020 Europe / United Kingdom / Scotland              |
| EPI_ISL_576083 | 9/14/2020 | 10/8/2020 Europe / United Kingdom / Scotland              |
| EPI_ISL_576084 | 9/14/2020 | 10/8/2020 Europe / United Kingdom / Scotland              |
| EPI_ISL_576085 | 9/13/2020 | 10/8/2020 Europe / United Kingdom / Scotland              |
| EPI_ISL_576086 | 9/14/2020 | 10/8/2020 Europe / United Kingdom / Scotland              |
| EPI_ISL_576087 | 9/14/2020 | 10/8/2020 Europe / United Kingdom / Scotland              |
| EPI_ISL_576089 | 9/14/2020 | 10/8/2020 Europe / United Kingdom / Scotland              |
| EPI_ISL_576090 | 9/10/2020 | 10/8/2020 Europe / United Kingdom / Scotland              |
| EPI_ISL_576091 | 9/14/2020 | 10/8/2020 Europe / United Kingdom / Scotland              |
| EPI_ISL_576092 | 9/14/2020 | 10/8/2020 Europe / United Kingdom / Scotland              |
| EPI_ISL_576093 | 9/14/2020 | 10/8/2020 Europe / United Kingdom / Scotland              |
| EPI_ISL_576094 | 8/30/2020 | 10/8/2020 Europe / United Kingdom / England               |
| EPI_ISL_576111 | 6/1/2020  | 10/8/2020 North America / USA / Alaska / Anchorage-Mat Su |
| EPI_ISL_576112 | 6/2/2020  | 10/8/2020 North America / USA / Alaska / Anchorage-Mat Su |
| EPI_ISL_576113 | 8/18/2020 | 10/8/2020 Asia / Indonesia / Special Region of Yogyakarta |
| EPI_ISL_576114 | 8/20/2020 | 10/8/2020 Asia / Indonesia / Special Region of Yogyakarta |
| EPI_ISL_576115 | 8/16/2020 | 10/8/2020 Asia / Indonesia / Special Region of Yogyakarta |
| EPI_ISL_576116 | 8/13/2020 | 10/8/2020 Asia / Indonesia / Special Region of Yogyakarta |
| EPI_ISL_576128 | 8/21/2020 | 10/9/2020 Asia / Indonesia / Special Region of Yogyakarta |
| EPI_ISL_576130 | 8/18/2020 | 10/9/2020 Asia / Indonesia / Special Region of Yogyakarta |
| EPI_ISL_576131 | 8/31/2020 | 10/9/2020 Oceania / Australia / Queensland                |
| EPI_ISL_576132 | 9/1/2020  | 10/9/2020 Oceania / Australia / Queensland                |
| EPI_ISL_576133 | 9/1/2020  | 10/9/2020 Oceania / Australia / Queensland                |
| EPI_ISL_576134 | 9/5/2020  | 10/9/2020 Oceania / Australia / Queensland                |
| EPI_ISL_576135 | 9/6/2020  | 10/9/2020 Oceania / Australia / Queensland                |
| EPI_ISL_576136 | 9/7/2020  | 10/9/2020 Oceania / Australia / Queensland                |
| EPI_ISL_576137 | 9/6/2020  | 10/9/2020 Oceania / Australia / Queensland                |
| EPI_ISL_576138 | 9/2/2020  | 10/9/2020 Oceania / Australia / Queensland                |
| EPI_ISL_576139 | 9/4/2020  | 10/9/2020 Oceania / Australia / Queensland                |
| EPI_ISL_576140 | 9/8/2020  | 10/9/2020 Oceania / Australia / Queensland                |
| EPI_ISL_576141 | 9/9/2020  | 10/9/2020 Oceania / Australia / Queensland                |
| EPI_ISL_576142 | 9/10/2020 | 10/9/2020 Oceania / Australia / Queensland                |
| EPI_ISL_576143 | 9/12/2020 | 10/9/2020 Oceania / Australia / Queensland                |
| EPI_ISL_576144 | 9/15/2020 | 10/9/2020 Oceania / Australia / Queensland                |
| EPI_ISL_576145 | 7/30/2020 | 10/9/2020 Asia / Indonesia / Special Region of Yogyakarta |

|                |           |                                                              |
|----------------|-----------|--------------------------------------------------------------|
| EPI_ISL_576146 | 7/28/2020 | 10/9/2020 Europe / Ukraine / Kharkiv                         |
| EPI_ISL_576147 | 7/28/2020 | 10/9/2020 Europe / Ukraine / Ivano-Frankivsk                 |
| EPI_ISL_576148 | 8/3/2020  | 10/9/2020 Europe / Ukraine / Kyiv                            |
| EPI_ISL_576149 | 8/6/2020  | 10/9/2020 Europe / Ukraine / Lutsk                           |
| EPI_ISL_576150 | 3/27/2020 | 10/9/2020 North America / USA / Delaware / Sussex County     |
| EPI_ISL_576151 | 3/27/2020 | 10/9/2020 North America / USA / Delaware / Sussex County     |
| EPI_ISL_576152 | 3/26/2020 | 10/9/2020 North America / USA / Delaware / Kent County       |
| EPI_ISL_576153 | 3/25/2020 | 10/9/2020 North America / USA / Delaware / New Castle County |
| EPI_ISL_576154 | 3/25/2020 | 10/9/2020 North America / USA / Delaware / New Castle County |
| EPI_ISL_576155 | 3/25/2020 | 10/9/2020 North America / USA / Delaware / New Castle County |
| EPI_ISL_576156 | 3/25/2020 | 10/9/2020 North America / USA / Delaware / New Castle County |
| EPI_ISL_576157 | 3/25/2020 | 10/9/2020 North America / USA / Delaware / Kent County       |
| EPI_ISL_576158 | 3/26/2020 | 10/9/2020 North America / USA / Delaware / Kent County       |
| EPI_ISL_576160 | 3/25/2020 | 10/9/2020 North America / USA / Delaware / New Castle County |
| EPI_ISL_576161 | 3/27/2020 | 10/9/2020 North America / USA / Delaware / New Castle County |
| EPI_ISL_576162 | 3/25/2020 | 10/9/2020 North America / USA / Delaware / Sussex County     |
| EPI_ISL_576164 | 3/25/2020 | 10/9/2020 North America / USA / Delaware / New Castle County |
| EPI_ISL_576165 | 3/25/2020 | 10/9/2020 North America / USA / Delaware / New Castle County |
| EPI_ISL_576166 | 3/26/2020 | 10/9/2020 North America / USA / Delaware / New Castle County |
| EPI_ISL_576167 | 3/25/2020 | 10/9/2020 North America / USA / Delaware / New Castle County |
| EPI_ISL_576169 | 3/24/2020 | 10/9/2020 North America / USA / Delaware / Kent County       |
| EPI_ISL_576170 | 3/12/2020 | 10/9/2020 North America / USA / Pennsylvania                 |
| EPI_ISL_576171 | 3/16/2020 | 10/9/2020 North America / USA / Pennsylvania                 |
| EPI_ISL_576172 | 3/11/2020 | 10/9/2020 North America / USA / Tennessee                    |
| EPI_ISL_576173 | 9/6/2020  | 10/9/2020 North America / USA / Florida                      |
| EPI_ISL_576174 | 4/2/2020  | 10/9/2020 North America / USA / Virginia                     |
| EPI_ISL_576175 | 3/9/2020  | 10/9/2020 North America / USA / Tennessee                    |
| EPI_ISL_576176 | 3/9/2020  | 10/9/2020 North America / USA / Tennessee                    |
| EPI_ISL_576177 | 3/10/2020 | 10/9/2020 North America / USA / California                   |
| EPI_ISL_576178 | 4/21/2020 | 10/9/2020 North America / USA / District of Columbia         |
| EPI_ISL_576179 | 3/24/2020 | 10/9/2020 North America / USA / Wisconsin                    |
| EPI_ISL_576180 | 3/25/2020 | 10/9/2020 North America / USA / Wisconsin                    |
| EPI_ISL_576181 | 3/25/2020 | 10/9/2020 North America / USA / Wisconsin                    |
| EPI_ISL_576182 | 3/26/2020 | 10/9/2020 North America / USA / Wisconsin                    |
| EPI_ISL_576183 | 3/24/2020 | 10/9/2020 North America / USA / Wisconsin                    |
| EPI_ISL_576184 | 3/24/2020 | 10/9/2020 North America / USA / Wisconsin                    |
| EPI_ISL_576185 | 3/25/2020 | 10/9/2020 North America / USA / Wisconsin                    |
| EPI_ISL_576186 | 3/26/2020 | 10/9/2020 North America / USA / Wisconsin                    |
| EPI_ISL_576187 | 3/26/2020 | 10/9/2020 North America / USA / Wisconsin                    |
| EPI_ISL_576188 | 4/2/2020  | 10/9/2020 North America / USA / Wisconsin                    |
| EPI_ISL_576189 | 9/11/2020 | 10/9/2020 North America / USA / Georgia                      |
| EPI_ISL_576190 | 9/11/2020 | 10/9/2020 North America / USA / Georgia                      |
| EPI_ISL_576191 | 9/12/2020 | 10/9/2020 North America / USA / Georgia                      |
| EPI_ISL_576192 | 9/19/2020 | 10/9/2020 North America / USA / Georgia                      |
| EPI_ISL_576193 | 9/19/2020 | 10/9/2020 North America / USA / Georgia                      |
| EPI_ISL_576194 | 9/19/2020 | 10/9/2020 North America / USA / Georgia                      |
| EPI_ISL_576195 | 9/19/2020 | 10/9/2020 North America / USA / Georgia                      |



|                |           |                                                          |
|----------------|-----------|----------------------------------------------------------|
| EPI_ISL_576254 | 4/10/2020 | 10/9/2020 North America / USA / Minnesota                |
| EPI_ISL_576255 | 4/10/2020 | 10/9/2020 North America / USA / Minnesota                |
| EPI_ISL_576256 | 9/16/2020 | 10/9/2020 North America / USA / Minnesota                |
| EPI_ISL_576257 | 7/22/2020 | 10/9/2020 North America / Mexico / Hidalgo               |
| EPI_ISL_576258 | 6/15/2020 | 10/9/2020 North America / Mexico / Aguascalientes        |
| EPI_ISL_576259 | 8/13/2020 | 10/9/2020 North America / Mexico / Tlaxcala              |
| EPI_ISL_576260 | 8/13/2020 | 10/9/2020 North America / Mexico / Tlaxcala              |
| EPI_ISL_576261 | 8/7/2020  | 10/9/2020 North America / Mexico / Aguascalientes        |
| EPI_ISL_576262 | 8/14/2020 | 10/9/2020 North America / Mexico / Nuevo Leon            |
| EPI_ISL_576263 | 8/14/2020 | 10/9/2020 North America / Mexico / Nuevo Leon            |
| EPI_ISL_576264 | 8/18/2020 | 10/9/2020 North America / Mexico / Oaxaca                |
| EPI_ISL_576265 | 8/21/2020 | 10/9/2020 North America / Mexico / Campeche              |
| EPI_ISL_576266 | 8/21/2020 | 10/9/2020 North America / Mexico / Campeche              |
| EPI_ISL_576267 | 8/21/2020 | 10/9/2020 North America / Mexico / Campeche              |
| EPI_ISL_576268 | 8/25/2020 | 10/9/2020 North America / Mexico / Hidalgo               |
| EPI_ISL_576269 | 8/16/2020 | 10/9/2020 North America / Mexico / Veracruz              |
| EPI_ISL_576270 | 8/14/2020 | 10/9/2020 North America / Mexico / Veracruz              |
| EPI_ISL_576271 | 8/17/2020 | 10/9/2020 North America / Mexico / Michoacan             |
| EPI_ISL_576272 | 8/21/2020 | 10/9/2020 North America / Mexico / San Luis Potosi       |
| EPI_ISL_576273 | 8/21/2020 | 10/9/2020 North America / Mexico / Zacatecas             |
| EPI_ISL_576274 | 8/21/2020 | 10/9/2020 North America / Mexico / Zacatecas             |
| EPI_ISL_576275 | 8/14/2020 | 10/9/2020 North America / Mexico / Zacatecas             |
| EPI_ISL_576276 | 8/20/2020 | 10/9/2020 North America / Mexico / Michoacan             |
| EPI_ISL_576277 | 8/20/2020 | 10/9/2020 North America / Mexico / Michoacan             |
| EPI_ISL_576278 | 8/24/2020 | 10/9/2020 North America / Mexico / Colima                |
| EPI_ISL_576279 | 8/24/2020 | 10/9/2020 North America / Mexico / Colima                |
| EPI_ISL_576300 | 7/16/2020 | 10/10/2020 North America / USA / Texas / Dallas County   |
| EPI_ISL_576353 | 9/8/2020  | 10/10/2020 North America / USA / Texas / McLennan County |
| EPI_ISL_576383 | 9/1/2020  | 10/11/2020 Asia / Indonesia / Central Java               |
| EPI_ISL_576386 | 7/30/2020 | 10/11/2020 Asia / Indonesia / Jakarta                    |
| EPI_ISL_576387 | 8/20/2020 | 10/11/2020 Asia / Indonesia / Jakarta                    |
| EPI_ISL_576399 | 6/5/2020  | 10/11/2020 North America / USA                           |
| EPI_ISL_576401 | 6/15/2020 | 10/11/2020 North America / USA                           |
| EPI_ISL_576402 | 6/20/2020 | 10/11/2020 North America / USA                           |
| EPI_ISL_576403 | 6/29/2020 | 10/11/2020 North America / USA                           |
| EPI_ISL_576404 | 6/29/2020 | 10/11/2020 North America / USA                           |
| EPI_ISL_576405 | 6/29/2020 | 10/11/2020 North America / USA / Washington              |
| EPI_ISL_576408 | 8/7/2020  | 10/11/2020 North America / USA / Washington              |
| EPI_ISL_576409 | 8/7/2020  | 10/11/2020 North America / USA / Washington              |
| EPI_ISL_576410 | 8/6/2020  | 10/11/2020 North America / USA / Washington              |
| EPI_ISL_576411 | 8/7/2020  | 10/11/2020 North America / USA / Washington              |
| EPI_ISL_576412 | 8/7/2020  | 10/11/2020 North America / USA / Washington              |
| EPI_ISL_576414 | 8/7/2020  | 10/11/2020 North America / USA / Washington              |
| EPI_ISL_576415 | 8/7/2020  | 10/11/2020 North America / USA / Washington              |
| EPI_ISL_576416 | 8/7/2020  | 10/11/2020 North America / USA / Washington              |
| EPI_ISL_576417 | 8/5/2020  | 10/11/2020 North America / USA / Washington              |
| EPI_ISL_576418 | 8/7/2020  | 10/11/2020 North America / USA / Washington              |







|                |           |            |                                                        |
|----------------|-----------|------------|--------------------------------------------------------|
| EPI_ISL_576519 | 7/17/2020 | 10/12/2020 | North America / USA / California / Alameda County      |
| EPI_ISL_576520 | 6/29/2020 | 10/12/2020 | North America / USA / California / Alameda County      |
| EPI_ISL_576521 | 7/15/2020 | 10/12/2020 | North America / USA / California / Contra Costa County |
| EPI_ISL_576522 | 6/26/2020 | 10/12/2020 | North America / USA / California / Alameda County      |
| EPI_ISL_576523 | 7/16/2020 | 10/12/2020 | North America / USA / California / Alameda County      |
| EPI_ISL_576524 | 6/26/2020 | 10/12/2020 | North America / USA / California / Alameda County      |
| EPI_ISL_576525 | 7/15/2020 | 10/12/2020 | North America / USA / California / Alameda County      |
| EPI_ISL_576526 | 7/9/2020  | 10/12/2020 | North America / USA / California / Contra Costa County |
| EPI_ISL_576527 | 7/16/2020 | 10/12/2020 | North America / USA / California / Contra Costa County |
| EPI_ISL_576528 | 7/9/2020  | 10/12/2020 | North America / USA / California / Alameda County      |
| EPI_ISL_576529 | 6/29/2020 | 10/12/2020 | North America / USA / California / Contra Costa County |
| EPI_ISL_576530 | 6/29/2020 | 10/12/2020 | North America / USA / California / Alameda County      |
| EPI_ISL_576531 | 6/29/2020 | 10/12/2020 | North America / USA / California / San Joaquin County  |
| EPI_ISL_576532 | 7/15/2020 | 10/12/2020 | North America / USA / California / Alameda County      |
| EPI_ISL_576533 | 7/10/2020 | 10/12/2020 | North America / USA / California / San Joaquin County  |
| EPI_ISL_576534 | 6/29/2020 | 10/12/2020 | North America / USA / California / Contra Costa County |
| EPI_ISL_576535 | 6/8/2020  | 10/12/2020 | North America / USA / California / Alameda County      |
| EPI_ISL_576536 | 7/15/2020 | 10/12/2020 | North America / USA / California / Alameda County      |
| EPI_ISL_576537 | 6/26/2020 | 10/12/2020 | North America / USA / California / Alameda County      |
| EPI_ISL_576538 | 7/15/2020 | 10/12/2020 | North America / USA / California / Contra Costa County |
| EPI_ISL_576539 | 6/26/2020 | 10/12/2020 | North America / USA / California / Alameda County      |
| EPI_ISL_576540 | 7/15/2020 | 10/12/2020 | North America / USA / California / Contra Costa County |
| EPI_ISL_576541 | 6/29/2020 | 10/12/2020 | North America / USA / California / Alameda County      |
| EPI_ISL_576543 | 7/10/2020 | 10/12/2020 | North America / USA / California / Contra Costa County |
| EPI_ISL_576550 | 7/16/2020 | 10/12/2020 | North America / USA / California / Contra Costa County |
| EPI_ISL_576551 | 6/26/2020 | 10/12/2020 | North America / USA / California / Alameda County      |
| EPI_ISL_576557 | 9/29/2020 | 10/12/2020 | North America / USA / Washington                       |
| EPI_ISL_576558 | 10/4/2020 | 10/12/2020 | North America / USA / Washington                       |
| EPI_ISL_576559 | 10/3/2020 | 10/12/2020 | North America / USA / Washington                       |
| EPI_ISL_576560 | 10/4/2020 | 10/12/2020 | North America / USA / Washington                       |
| EPI_ISL_576561 | 10/3/2020 | 10/12/2020 | North America / USA / Washington                       |
| EPI_ISL_576562 | 10/2/2020 | 10/12/2020 | North America / USA / Washington                       |
| EPI_ISL_576563 | 10/2/2020 | 10/12/2020 | North America / USA / Washington                       |
| EPI_ISL_576564 | 10/2/2020 | 10/12/2020 | North America / USA / Washington                       |
| EPI_ISL_576569 | 9/18/2020 | 10/12/2020 | Europe / United Kingdom / England                      |
| EPI_ISL_576570 | 9/18/2020 | 10/12/2020 | Europe / United Kingdom / England                      |
| EPI_ISL_576571 | 9/18/2020 | 10/12/2020 | Europe / United Kingdom / England                      |
| EPI_ISL_576572 | 9/18/2020 | 10/12/2020 | Europe / United Kingdom / England                      |
| EPI_ISL_576573 | 9/18/2020 | 10/12/2020 | Europe / United Kingdom / England                      |
| EPI_ISL_576574 | 9/18/2020 | 10/12/2020 | Europe / United Kingdom / England                      |
| EPI_ISL_576575 | 9/18/2020 | 10/12/2020 | Europe / United Kingdom / England                      |
| EPI_ISL_576576 | 9/18/2020 | 10/12/2020 | Europe / United Kingdom / England                      |
| EPI_ISL_576577 | 9/18/2020 | 10/12/2020 | Europe / United Kingdom / England                      |
| EPI_ISL_576578 | 9/18/2020 | 10/12/2020 | Europe / United Kingdom / England                      |
| EPI_ISL_576579 | 9/18/2020 | 10/12/2020 | Europe / United Kingdom / England                      |
| EPI_ISL_576580 | 9/18/2020 | 10/12/2020 | Europe / United Kingdom / England                      |
| EPI_ISL_576581 | 9/18/2020 | 10/12/2020 | Europe / United Kingdom / England                      |

































|                |           |            |                                 |
|----------------|-----------|------------|---------------------------------|
| EPI_ISL_577508 | 9/27/2020 | 10/12/2020 | Europe / United Kingdom / Wales |
| EPI_ISL_577509 | 9/25/2020 | 10/12/2020 | Europe / United Kingdom / Wales |
| EPI_ISL_577510 | 9/22/2020 | 10/12/2020 | Europe / United Kingdom / Wales |
| EPI_ISL_577512 | 9/27/2020 | 10/12/2020 | Europe / United Kingdom / Wales |
| EPI_ISL_577513 | 9/28/2020 | 10/12/2020 | Europe / United Kingdom / Wales |
| EPI_ISL_577515 | 9/25/2020 | 10/12/2020 | Europe / United Kingdom / Wales |
| EPI_ISL_577517 | 9/27/2020 | 10/12/2020 | Europe / United Kingdom / Wales |
| EPI_ISL_577518 | 9/21/2020 | 10/12/2020 | Europe / United Kingdom / Wales |
| EPI_ISL_577519 | 9/22/2020 | 10/12/2020 | Europe / United Kingdom / Wales |
| EPI_ISL_577520 | 9/21/2020 | 10/12/2020 | Europe / United Kingdom / Wales |
| EPI_ISL_577521 | 9/25/2020 | 10/12/2020 | Europe / United Kingdom / Wales |
| EPI_ISL_577522 | 9/26/2020 | 10/12/2020 | Europe / United Kingdom / Wales |
| EPI_ISL_577523 | 9/25/2020 | 10/12/2020 | Europe / United Kingdom / Wales |
| EPI_ISL_577524 | 9/22/2020 | 10/12/2020 | Europe / United Kingdom / Wales |
| EPI_ISL_577525 | 9/21/2020 | 10/12/2020 | Europe / United Kingdom / Wales |
| EPI_ISL_577526 | 9/28/2020 | 10/12/2020 | Europe / United Kingdom / Wales |
| EPI_ISL_577527 | 9/25/2020 | 10/12/2020 | Europe / United Kingdom / Wales |
| EPI_ISL_577528 | 9/27/2020 | 10/12/2020 | Europe / United Kingdom / Wales |
| EPI_ISL_577529 | 9/25/2020 | 10/12/2020 | Europe / United Kingdom / Wales |
| EPI_ISL_577530 | 9/28/2020 | 10/12/2020 | Europe / United Kingdom / Wales |
| EPI_ISL_577531 | 9/28/2020 | 10/12/2020 | Europe / United Kingdom / Wales |
| EPI_ISL_577532 | 9/27/2020 | 10/12/2020 | Europe / United Kingdom / Wales |
| EPI_ISL_577533 | 9/22/2020 | 10/12/2020 | Europe / United Kingdom / Wales |
| EPI_ISL_577534 | 9/27/2020 | 10/12/2020 | Europe / United Kingdom / Wales |
| EPI_ISL_577535 | 9/27/2020 | 10/12/2020 | Europe / United Kingdom / Wales |
| EPI_ISL_577537 | 9/27/2020 | 10/12/2020 | Europe / United Kingdom / Wales |
| EPI_ISL_577539 | 9/26/2020 | 10/12/2020 | Europe / United Kingdom / Wales |
| EPI_ISL_577540 | 9/25/2020 | 10/12/2020 | Europe / United Kingdom / Wales |
| EPI_ISL_577541 | 9/27/2020 | 10/12/2020 | Europe / United Kingdom / Wales |
| EPI_ISL_577542 | 9/25/2020 | 10/12/2020 | Europe / United Kingdom / Wales |
| EPI_ISL_577543 | 9/27/2020 | 10/12/2020 | Europe / United Kingdom / Wales |
| EPI_ISL_577565 | 3/29/2020 | 10/12/2020 | North America / USA / Michigan  |
| EPI_ISL_577566 | 4/15/2020 | 10/12/2020 | North America / USA / Michigan  |
| EPI_ISL_577567 | 8/20/2020 | 10/12/2020 | North America / USA / Michigan  |
| EPI_ISL_577568 | 8/26/2020 | 10/12/2020 | North America / USA / Michigan  |
| EPI_ISL_577569 | 8/26/2020 | 10/12/2020 | North America / USA / Michigan  |
| EPI_ISL_577570 | 8/28/2020 | 10/12/2020 | North America / USA / Michigan  |
| EPI_ISL_577571 | 8/31/2020 | 10/12/2020 | North America / USA / Michigan  |
| EPI_ISL_577572 | 9/1/2020  | 10/12/2020 | North America / USA / Michigan  |
| EPI_ISL_577573 | 8/28/2020 | 10/12/2020 | North America / USA / Michigan  |
| EPI_ISL_577574 | 9/1/2020  | 10/12/2020 | North America / USA / Michigan  |
| EPI_ISL_577575 | 9/2/2020  | 10/12/2020 | North America / USA / Michigan  |
| EPI_ISL_577576 | 9/2/2020  | 10/12/2020 | North America / USA / Michigan  |
| EPI_ISL_577577 | 9/2/2020  | 10/12/2020 | North America / USA / Michigan  |
| EPI_ISL_577578 | 9/2/2020  | 10/12/2020 | North America / USA / Michigan  |
| EPI_ISL_577579 | 9/2/2020  | 10/12/2020 | North America / USA / Michigan  |
| EPI_ISL_577580 | 9/3/2020  | 10/12/2020 | North America / USA / Michigan  |

|                |           |                                                                        |
|----------------|-----------|------------------------------------------------------------------------|
| EPI_ISL_577581 | 9/3/2020  | 10/12/2020 North America / USA / Michigan                              |
| EPI_ISL_577582 | 9/8/2020  | 10/12/2020 North America / USA / Michigan                              |
| EPI_ISL_577583 | 9/9/2020  | 10/12/2020 North America / USA / Michigan                              |
| EPI_ISL_577584 | 9/9/2020  | 10/12/2020 North America / USA / Michigan                              |
| EPI_ISL_577585 | 9/14/2020 | 10/12/2020 North America / USA / Michigan                              |
| EPI_ISL_577586 | 9/10/2020 | 10/12/2020 North America / USA / Michigan                              |
| EPI_ISL_577587 | 9/10/2020 | 10/12/2020 North America / USA / Michigan                              |
| EPI_ISL_577588 | 9/1/2020  | 10/12/2020 North America / USA / Michigan                              |
| EPI_ISL_577589 | 9/1/2020  | 10/12/2020 North America / USA / Michigan                              |
| EPI_ISL_577590 | 9/1/2020  | 10/12/2020 North America / USA / Michigan                              |
| EPI_ISL_577591 | 9/15/2020 | 10/12/2020 North America / USA / Michigan                              |
| EPI_ISL_577592 | 9/15/2020 | 10/12/2020 North America / USA / Michigan                              |
| EPI_ISL_577593 | 9/16/2020 | 10/12/2020 North America / USA / Michigan                              |
| EPI_ISL_577594 | 9/9/2020  | 10/12/2020 North America / USA / Michigan                              |
| EPI_ISL_577595 | 9/17/2020 | 10/12/2020 North America / USA / Michigan                              |
| EPI_ISL_577596 | 9/13/2020 | 10/12/2020 North America / USA / Michigan                              |
| EPI_ISL_577597 | 10/4/2020 | 10/12/2020 Oceania / Australia / New South Wales                       |
| EPI_ISL_577604 | 10/4/2020 | 10/13/2020 Oceania / Australia / New South Wales                       |
| EPI_ISL_577607 | 8/9/2020  | 10/13/2020 Oceania / Australia / Tasmania                              |
| EPI_ISL_577623 | 4/28/2020 | 10/13/2020 Europe / Czech Republic / Central Bohemian Region / Prague  |
| EPI_ISL_577624 | 7/24/2020 | 10/13/2020 Europe / Czech Republic / Northern Bohemia Region / Litome  |
| EPI_ISL_577625 | 7/27/2020 | 10/13/2020 Europe / Czech Republic / Northern Bohemia Region / Litome  |
| EPI_ISL_577626 | 7/24/2020 | 10/13/2020 Europe / Czech Republic / Northern Bohemia Region / Usti na |
| EPI_ISL_577627 | 8/6/2020  | 10/13/2020 Europe / Czech Republic / Northern Bohemia Region / Litome  |
| EPI_ISL_577628 | 8/6/2020  | 10/13/2020 Europe / Czech Republic / Northern Bohemia Region / Litome  |
| EPI_ISL_577629 | 4/2/2020  | 10/13/2020 Europe / Czech Republic / Central Bohemian Region / Prague  |
| EPI_ISL_577630 | 9/15/2020 | 10/13/2020 Europe / Czech Republic / Central Bohemian Region / Prague  |
| EPI_ISL_577631 | 5/14/2020 | 10/13/2020 Europe / Czech Republic / Central Bohemian Region / Prague  |
| EPI_ISL_577632 | 5/16/2020 | 10/13/2020 Europe / Czech Republic / Central Bohemian Region / Prague  |
| EPI_ISL_577633 | 6/16/2020 | 10/13/2020 Europe / Czech Republic / Central Bohemian Region / Prague  |
| EPI_ISL_577634 | 8/24/2020 | 10/13/2020 Europe / Czech Republic / Central Bohemian Region / Prague  |
| EPI_ISL_577635 | 8/24/2020 | 10/13/2020 Europe / Czech Republic / Central Bohemian Region / Prague  |
| EPI_ISL_577636 | 8/25/2020 | 10/13/2020 Europe / Czech Republic / Central Bohemian Region / Prague  |
| EPI_ISL_577637 | 8/26/2020 | 10/13/2020 Europe / Czech Republic / Central Bohemian Region / Prague  |
| EPI_ISL_577638 | 8/31/2020 | 10/13/2020 Europe / Czech Republic / Central Bohemian Region / Prague  |
| EPI_ISL_577640 | 9/25/2020 | 10/13/2020 Asia / India / Maharashtra                                  |
| EPI_ISL_577643 | 9/15/2020 | 10/13/2020 Asia / India / Maharashtra                                  |
| EPI_ISL_577644 | 9/16/2020 | 10/13/2020 Asia / India / Maharashtra                                  |
| EPI_ISL_577645 | 9/16/2020 | 10/13/2020 Asia / India / Maharashtra                                  |
| EPI_ISL_577647 | 9/23/2020 | 10/13/2020 Asia / India / Maharashtra                                  |
| EPI_ISL_577648 | 9/14/2020 | 10/13/2020 Asia / India / Maharashtra                                  |
| EPI_ISL_577649 | 9/23/2020 | 10/13/2020 Asia / India / Maharashtra                                  |
| EPI_ISL_577651 | 9/21/2020 | 10/13/2020 Asia / India / Maharashtra                                  |
| EPI_ISL_577652 | 9/22/2020 | 10/13/2020 Asia / India / Maharashtra                                  |
| EPI_ISL_577655 | 9/21/2020 | 10/13/2020 Asia / India / Maharashtra                                  |
| EPI_ISL_577658 | 9/23/2020 | 10/13/2020 Asia / India / Maharashtra                                  |
| EPI_ISL_577659 | 9/18/2020 | 10/13/2020 Asia / India / Maharashtra                                  |



|                |           |            |                                      |
|----------------|-----------|------------|--------------------------------------|
| EPI_ISL_577725 | 7/21/2020 | 10/13/2020 | Asia / India / Maharashtra           |
| EPI_ISL_577726 | 7/22/2020 | 10/13/2020 | Asia / India / Maharashtra           |
| EPI_ISL_577727 | 9/8/2020  | 10/13/2020 | Asia / India / Maharashtra           |
| EPI_ISL_577728 | 9/8/2020  | 10/13/2020 | Asia / India / Maharashtra           |
| EPI_ISL_577729 | 7/25/2020 | 10/13/2020 | Asia / India / Maharashtra           |
| EPI_ISL_577730 | 9/15/2020 | 10/13/2020 | Asia / India / Maharashtra           |
| EPI_ISL_577731 | 9/13/2020 | 10/13/2020 | Asia / India / Maharashtra           |
| EPI_ISL_577732 | 2020-09   | 10/13/2020 | Asia / India / Maharashtra           |
| EPI_ISL_577733 | 2020-09   | 10/13/2020 | Asia / India / Maharashtra           |
| EPI_ISL_577734 | 7/9/2020  | 10/13/2020 | Europe / Slovakia / Martincek        |
| EPI_ISL_577735 | 4/6/2020  | 10/13/2020 | Europe / Slovakia / Zehra            |
| EPI_ISL_577736 | 4/6/2020  | 10/13/2020 | Europe / Slovakia / Bratislava       |
| EPI_ISL_577737 | 4/13/2020 | 10/13/2020 | Europe / Slovakia / Zehra            |
| EPI_ISL_577738 | 4/29/2020 | 10/13/2020 | Europe / Slovakia / Pezinok          |
| EPI_ISL_577739 | 5/6/2020  | 10/13/2020 | Europe / Slovakia / Pezinok          |
| EPI_ISL_577740 | 6/30/2020 | 10/13/2020 | Europe / Slovakia / Bratislava       |
| EPI_ISL_577741 | 6/30/2020 | 10/13/2020 | Europe / Slovakia / Bratislava       |
| EPI_ISL_577742 | 3/31/2020 | 10/13/2020 | Europe / Slovakia / Bratislava       |
| EPI_ISL_577743 | 4/28/2020 | 10/13/2020 | Europe / Belgium                     |
| EPI_ISL_577744 | 5/2/2020  | 10/13/2020 | Europe / Belgium                     |
| EPI_ISL_577746 | 4/27/2020 | 10/13/2020 | Europe / Belgium                     |
| EPI_ISL_577747 | 8/4/2020  | 10/13/2020 | Europe / Belgium                     |
| EPI_ISL_577829 | 9/19/2020 | 10/13/2020 | Europe / Netherlands / Gelderland    |
| EPI_ISL_577830 | 9/19/2020 | 10/13/2020 | Europe / Netherlands / Gelderland    |
| EPI_ISL_577832 | 9/19/2020 | 10/13/2020 | Europe / Netherlands / Gelderland    |
| EPI_ISL_577833 | 9/22/2020 | 10/13/2020 | Europe / Netherlands / Limburg       |
| EPI_ISL_577834 | 9/25/2020 | 10/13/2020 | Europe / Netherlands / Limburg       |
| EPI_ISL_577835 | 9/25/2020 | 10/13/2020 | Europe / Netherlands / Limburg       |
| EPI_ISL_577837 | 8/24/2020 | 10/13/2020 | Europe / Netherlands / Noord-Brabant |
| EPI_ISL_577838 | 8/24/2020 | 10/13/2020 | Europe / Netherlands / Noord-Brabant |
| EPI_ISL_577839 | 8/24/2020 | 10/13/2020 | Europe / Netherlands / Noord-Brabant |
| EPI_ISL_577840 | 8/24/2020 | 10/13/2020 | Europe / Netherlands / Noord-Brabant |
| EPI_ISL_577841 | 8/24/2020 | 10/13/2020 | Europe / Netherlands / Noord-Brabant |
| EPI_ISL_577842 | 8/24/2020 | 10/13/2020 | Europe / Netherlands / Noord-Brabant |
| EPI_ISL_577843 | 7/29/2020 | 10/13/2020 | Europe / Netherlands / Noord-Brabant |
| EPI_ISL_577844 | 8/10/2020 | 10/13/2020 | Europe / Netherlands / Noord-Brabant |
| EPI_ISL_577845 | 2020      | 10/13/2020 | Europe / Netherlands / Noord-Brabant |
| EPI_ISL_577846 | 2020      | 10/13/2020 | Europe / Netherlands / Noord-Brabant |
| EPI_ISL_577847 | 8/26/2020 | 10/13/2020 | Europe / Netherlands / Noord-Holland |
| EPI_ISL_577848 | 8/31/2020 | 10/13/2020 | Europe / Netherlands / Noord-Holland |
| EPI_ISL_577850 | 8/25/2020 | 10/13/2020 | Europe / Netherlands / Noord-Holland |
| EPI_ISL_577851 | 2020      | 10/13/2020 | Europe / Netherlands / Noord-Holland |
| EPI_ISL_577852 | 2020      | 10/13/2020 | Europe / Netherlands / Noord-Holland |
| EPI_ISL_577853 | 8/31/2020 | 10/13/2020 | Europe / Netherlands / Noord-Holland |
| EPI_ISL_577854 | 8/27/2020 | 10/13/2020 | Europe / Netherlands / Noord-Holland |
| EPI_ISL_577855 | 8/27/2020 | 10/13/2020 | Europe / Netherlands / Noord-Holland |
| EPI_ISL_577856 | 8/25/2020 | 10/13/2020 | Europe / Netherlands / Noord-Holland |

|                |           |            |                                      |
|----------------|-----------|------------|--------------------------------------|
| EPI_ISL_577857 | 8/20/2020 | 10/13/2020 | Europe / Netherlands / Noord-Holland |
| EPI_ISL_577858 | 8/18/2020 | 10/13/2020 | Europe / Netherlands / Noord-Holland |
| EPI_ISL_577859 | 8/18/2020 | 10/13/2020 | Europe / Netherlands / Noord-Holland |
| EPI_ISL_577861 | 8/31/2020 | 10/13/2020 | Europe / Netherlands / Noord-Holland |
| EPI_ISL_577863 | 9/11/2020 | 10/13/2020 | Europe / Netherlands / Noord-Holland |
| EPI_ISL_577864 | 9/16/2020 | 10/13/2020 | Europe / Netherlands / Noord-Holland |
| EPI_ISL_577865 | 9/11/2020 | 10/13/2020 | Europe / Netherlands / Noord-Holland |
| EPI_ISL_577866 | 9/16/2020 | 10/13/2020 | Europe / Netherlands / Noord-Holland |
| EPI_ISL_577868 | 2020      | 10/13/2020 | Europe / Netherlands                 |
| EPI_ISL_577869 | 2020      | 10/13/2020 | Europe / Netherlands                 |
| EPI_ISL_577870 | 2020      | 10/13/2020 | Europe / Netherlands                 |
| EPI_ISL_577871 | 2020      | 10/13/2020 | Europe / Netherlands                 |
| EPI_ISL_577873 | 5/13/2020 | 10/13/2020 | Europe / Netherlands                 |
| EPI_ISL_577879 | 6/2/2020  | 10/13/2020 | Europe / Netherlands                 |
| EPI_ISL_577880 | 6/12/2020 | 10/13/2020 | Europe / Netherlands                 |
| EPI_ISL_577882 | 6/13/2020 | 10/13/2020 | Europe / Netherlands                 |
| EPI_ISL_577884 | 2020      | 10/13/2020 | Europe / Netherlands                 |
| EPI_ISL_577886 | 8/24/2020 | 10/13/2020 | Europe / Netherlands / Utrecht       |
| EPI_ISL_577887 | 8/25/2020 | 10/13/2020 | Europe / Netherlands / Utrecht       |
| EPI_ISL_577888 | 8/25/2020 | 10/13/2020 | Europe / Netherlands / Utrecht       |
| EPI_ISL_577889 | 8/25/2020 | 10/13/2020 | Europe / Netherlands / Utrecht       |
| EPI_ISL_577890 | 8/27/2020 | 10/13/2020 | Europe / Netherlands / Utrecht       |
| EPI_ISL_577891 | 8/27/2020 | 10/13/2020 | Europe / Netherlands / Utrecht       |
| EPI_ISL_577892 | 8/27/2020 | 10/13/2020 | Europe / Netherlands / Utrecht       |
| EPI_ISL_577893 | 8/27/2020 | 10/13/2020 | Europe / Netherlands / Utrecht       |
| EPI_ISL_577894 | 8/27/2020 | 10/13/2020 | Europe / Netherlands / Utrecht       |
| EPI_ISL_577895 | 8/28/2020 | 10/13/2020 | Europe / Netherlands / Utrecht       |
| EPI_ISL_577896 | 8/25/2020 | 10/13/2020 | Europe / Netherlands / Utrecht       |
| EPI_ISL_577897 | 8/26/2020 | 10/13/2020 | Europe / Netherlands / Utrecht       |
| EPI_ISL_577898 | 8/26/2020 | 10/13/2020 | Europe / Netherlands / Utrecht       |
| EPI_ISL_577899 | 8/26/2020 | 10/13/2020 | Europe / Netherlands / Utrecht       |
| EPI_ISL_577900 | 8/26/2020 | 10/13/2020 | Europe / Netherlands / Utrecht       |
| EPI_ISL_577901 | 8/30/2020 | 10/13/2020 | Europe / Netherlands / Utrecht       |
| EPI_ISL_577903 | 8/30/2020 | 10/13/2020 | Europe / Netherlands / Utrecht       |
| EPI_ISL_577904 | 8/30/2020 | 10/13/2020 | Europe / Netherlands / Utrecht       |
| EPI_ISL_577905 | 8/30/2020 | 10/13/2020 | Europe / Netherlands / Utrecht       |
| EPI_ISL_577906 | 2020      | 10/13/2020 | Europe / Netherlands / Utrecht       |
| EPI_ISL_577909 | 8/15/2020 | 10/13/2020 | Europe / Netherlands / Zuid-Holland  |
| EPI_ISL_577910 | 8/10/2020 | 10/13/2020 | Europe / Netherlands / Zuid-Holland  |
| EPI_ISL_577911 | 8/10/2020 | 10/13/2020 | Europe / Netherlands / Zuid-Holland  |
| EPI_ISL_577912 | 8/9/2020  | 10/13/2020 | Europe / Netherlands / Zuid-Holland  |
| EPI_ISL_577913 | 8/9/2020  | 10/13/2020 | Europe / Netherlands / Zuid-Holland  |
| EPI_ISL_577914 | 8/14/2020 | 10/13/2020 | Europe / Netherlands / Zuid-Holland  |
| EPI_ISL_577916 | 8/22/2020 | 10/13/2020 | Europe / Netherlands / Zuid-Holland  |
| EPI_ISL_577918 | 2020      | 10/13/2020 | Europe / Netherlands / Zuid-Holland  |
| EPI_ISL_577919 | 2020      | 10/13/2020 | Europe / Netherlands / Zuid-Holland  |
| EPI_ISL_577920 | 2020      | 10/13/2020 | Europe / Netherlands / Zuid-Holland  |





|                |           |            |                                     |
|----------------|-----------|------------|-------------------------------------|
| EPI_ISL_578037 | 9/19/2020 | 10/13/2020 | Europe / Netherlands / Zuid-Holland |
| EPI_ISL_578038 | 9/21/2020 | 10/13/2020 | Europe / Netherlands / Zuid-Holland |
| EPI_ISL_578039 | 9/21/2020 | 10/13/2020 | Europe / Netherlands / Zuid-Holland |
| EPI_ISL_578040 | 9/22/2020 | 10/13/2020 | Europe / Netherlands / Zuid-Holland |
| EPI_ISL_578041 | 9/23/2020 | 10/13/2020 | Europe / Netherlands / Zuid-Holland |
| EPI_ISL_578042 | 9/8/2020  | 10/13/2020 | Europe / Netherlands / Zuid-Holland |
| EPI_ISL_578043 | 9/17/2020 | 10/13/2020 | Europe / Netherlands / Zuid-Holland |
| EPI_ISL_578044 | 9/16/2020 | 10/13/2020 | Europe / Netherlands / Zuid-Holland |
| EPI_ISL_578045 | 9/18/2020 | 10/13/2020 | Europe / Netherlands / Zuid-Holland |
| EPI_ISL_578046 | 9/22/2020 | 10/13/2020 | Europe / Netherlands / Zuid-Holland |
| EPI_ISL_578047 | 9/14/2020 | 10/13/2020 | Europe / Netherlands / Zuid-Holland |
| EPI_ISL_578048 | 9/16/2020 | 10/13/2020 | Europe / Netherlands / Zuid-Holland |
| EPI_ISL_578050 | 9/24/2020 | 10/13/2020 | Europe / Netherlands / Zuid-Holland |
| EPI_ISL_578051 | 9/20/2020 | 10/13/2020 | Europe / Netherlands / Zuid-Holland |
| EPI_ISL_578053 | 9/20/2020 | 10/13/2020 | Europe / Netherlands / Zuid-Holland |
| EPI_ISL_578054 | 9/21/2020 | 10/13/2020 | Europe / Netherlands / Zuid-Holland |
| EPI_ISL_578057 | 9/20/2020 | 10/13/2020 | Europe / Netherlands / Zuid-Holland |
| EPI_ISL_578058 | 9/20/2020 | 10/13/2020 | Europe / Netherlands / Zuid-Holland |
| EPI_ISL_578059 | 9/21/2020 | 10/13/2020 | Europe / Netherlands / Zuid-Holland |
| EPI_ISL_578060 | 9/21/2020 | 10/13/2020 | Europe / Netherlands / Zuid-Holland |
| EPI_ISL_578061 | 9/21/2020 | 10/13/2020 | Europe / Netherlands / Zuid-Holland |
| EPI_ISL_578062 | 9/21/2020 | 10/13/2020 | Europe / Netherlands / Zuid-Holland |
| EPI_ISL_578063 | 9/21/2020 | 10/13/2020 | Europe / Netherlands / Zuid-Holland |
| EPI_ISL_578064 | 9/21/2020 | 10/13/2020 | Europe / Netherlands / Zuid-Holland |
| EPI_ISL_578065 | 9/21/2020 | 10/13/2020 | Europe / Netherlands / Zuid-Holland |
| EPI_ISL_578067 | 9/21/2020 | 10/13/2020 | Europe / Netherlands / Zuid-Holland |
| EPI_ISL_578068 | 9/21/2020 | 10/13/2020 | Europe / Netherlands / Zuid-Holland |
| EPI_ISL_578069 | 9/21/2020 | 10/13/2020 | Europe / Netherlands / Zuid-Holland |
| EPI_ISL_578070 | 9/21/2020 | 10/13/2020 | Europe / Netherlands / Zuid-Holland |
| EPI_ISL_578071 | 9/19/2020 | 10/13/2020 | Europe / Netherlands / Zuid-Holland |
| EPI_ISL_578072 | 2020      | 10/13/2020 | Europe / Netherlands / Zuid-Holland |
| EPI_ISL_578073 | 9/28/2020 | 10/13/2020 | Europe / Netherlands / Zuid-Holland |
| EPI_ISL_578074 | 9/27/2020 | 10/13/2020 | Europe / Netherlands / Zuid-Holland |
| EPI_ISL_578077 | 9/27/2020 | 10/13/2020 | Europe / Netherlands / Zuid-Holland |
| EPI_ISL_578078 | 9/27/2020 | 10/13/2020 | Europe / Netherlands / Zuid-Holland |
| EPI_ISL_578079 | 9/27/2020 | 10/13/2020 | Europe / Netherlands / Zuid-Holland |
| EPI_ISL_578080 | 9/10/2020 | 10/13/2020 | Asia / India / West Bengal          |
| EPI_ISL_578081 | 9/10/2020 | 10/13/2020 | Asia / India / West Bengal          |
| EPI_ISL_578089 | 4/2/2020  | 10/13/2020 | North America / USA / Michigan      |
| EPI_ISL_578090 | 3/23/2020 | 10/13/2020 | North America / USA / Michigan      |
| EPI_ISL_578091 | 4/4/2020  | 10/13/2020 | North America / USA / Michigan      |
| EPI_ISL_578092 | 4/4/2020  | 10/13/2020 | North America / USA / Michigan      |
| EPI_ISL_578093 | 3/28/2020 | 10/13/2020 | North America / USA / Michigan      |
| EPI_ISL_578094 | 3/31/2020 | 10/13/2020 | North America / USA / Michigan      |
| EPI_ISL_578095 | 3/23/2020 | 10/13/2020 | North America / USA / Michigan      |
| EPI_ISL_578096 | 3/23/2020 | 10/13/2020 | North America / USA / Michigan      |
| EPI_ISL_578097 | 3/24/2020 | 10/13/2020 | North America / USA / Michigan      |





|                |           |            |                                                |
|----------------|-----------|------------|------------------------------------------------|
| EPI_ISL_578145 | 4/7/2020  | 10/13/2020 | North America / USA / Michigan                 |
| EPI_ISL_578146 | 4/7/2020  | 10/13/2020 | North America / USA / Michigan                 |
| EPI_ISL_578147 | 4/7/2020  | 10/13/2020 | North America / USA / Michigan                 |
| EPI_ISL_578148 | 4/7/2020  | 10/13/2020 | North America / USA / Michigan                 |
| EPI_ISL_578149 | 4/7/2020  | 10/13/2020 | North America / USA / Michigan                 |
| EPI_ISL_578150 | 4/7/2020  | 10/13/2020 | North America / USA / Michigan                 |
| EPI_ISL_578151 | 4/8/2020  | 10/13/2020 | North America / USA / Michigan                 |
| EPI_ISL_578152 | 4/10/2020 | 10/13/2020 | North America / USA / Michigan                 |
| EPI_ISL_578153 | 4/10/2020 | 10/13/2020 | North America / USA / Michigan                 |
| EPI_ISL_578154 | 4/11/2020 | 10/13/2020 | North America / USA / Michigan                 |
| EPI_ISL_578155 | 4/11/2020 | 10/13/2020 | North America / USA / Michigan                 |
| EPI_ISL_578156 | 4/13/2020 | 10/13/2020 | North America / USA / Michigan                 |
| EPI_ISL_578157 | 4/13/2020 | 10/13/2020 | North America / USA / Michigan                 |
| EPI_ISL_578158 | 4/13/2020 | 10/13/2020 | North America / USA / Michigan                 |
| EPI_ISL_578159 | 4/14/2020 | 10/13/2020 | North America / USA / Michigan                 |
| EPI_ISL_578160 | 4/20/2020 | 10/13/2020 | North America / USA / Michigan                 |
| EPI_ISL_578161 | 4/20/2020 | 10/13/2020 | North America / USA / Michigan                 |
| EPI_ISL_578162 | 4/21/2020 | 10/13/2020 | North America / USA / Michigan                 |
| EPI_ISL_578163 | 4/23/2020 | 10/13/2020 | North America / USA / Michigan                 |
| EPI_ISL_578164 | 4/23/2020 | 10/13/2020 | North America / USA / Michigan                 |
| EPI_ISL_578165 | 4/23/2020 | 10/13/2020 | North America / USA / Michigan                 |
| EPI_ISL_578166 | 4/24/2020 | 10/13/2020 | North America / USA / Michigan                 |
| EPI_ISL_578167 | 4/24/2020 | 10/13/2020 | North America / USA / Michigan                 |
| EPI_ISL_578168 | 9/10/2020 | 10/13/2020 | Asia / India / West Bengal                     |
| EPI_ISL_578169 | 4/29/2020 | 10/13/2020 | North America / USA / Michigan                 |
| EPI_ISL_578170 | 5/5/2020  | 10/13/2020 | North America / USA / Michigan                 |
| EPI_ISL_578171 | 5/7/2020  | 10/13/2020 | North America / USA / Michigan                 |
| EPI_ISL_578172 | 5/8/2020  | 10/13/2020 | North America / USA / Michigan                 |
| EPI_ISL_578173 | 5/18/2020 | 10/13/2020 | North America / USA / Michigan                 |
| EPI_ISL_578174 | 3/25/2020 | 10/13/2020 | North America / USA / Michigan                 |
| EPI_ISL_578175 | 9/10/2020 | 10/13/2020 | Asia / India / West Bengal                     |
| EPI_ISL_578176 | 3/14/2020 | 10/13/2020 | Europe / France / Auvergne-Rhone-Alpes / Macon |
| EPI_ISL_578177 | 3/14/2020 | 10/13/2020 | Europe / France / Auvergne-Rhone-Alpes / Lyon  |
| EPI_ISL_578178 | 9/10/2020 | 10/13/2020 | Asia / India / West Bengal                     |
| EPI_ISL_578179 | 9/10/2020 | 10/13/2020 | Asia / India / West Bengal                     |
| EPI_ISL_578180 | 9/10/2020 | 10/13/2020 | Asia / India / West Bengal                     |
| EPI_ISL_578181 | 9/10/2020 | 10/13/2020 | Asia / India / West Bengal                     |
| EPI_ISL_578182 | 9/10/2020 | 10/13/2020 | Asia / India / West Bengal                     |
| EPI_ISL_578183 | 9/10/2020 | 10/13/2020 | Asia / India / West Bengal                     |
| EPI_ISL_578184 | 9/10/2020 | 10/13/2020 | Asia / India / West Bengal                     |
| EPI_ISL_578185 | 4/22/2020 | 10/13/2020 | North America / USA / Michigan                 |
| EPI_ISL_578186 | 5/5/2020  | 10/13/2020 | Europe / Spain / Andalusia                     |
| EPI_ISL_578187 | 6/8/2020  | 10/13/2020 | Europe / Spain / Andalusia                     |
| EPI_ISL_578188 | 7/13/2020 | 10/13/2020 | Europe / Spain / Andalusia                     |
| EPI_ISL_578189 | 3/4/2020  | 10/13/2020 | Europe / Spain / Aragon                        |
| EPI_ISL_578190 | 3/6/2020  | 10/13/2020 | Europe / Spain / Aragon                        |
| EPI_ISL_578191 | 3/5/2020  | 10/13/2020 | Europe / Spain / Aragon                        |

|                |           |            |                              |
|----------------|-----------|------------|------------------------------|
| EPI_ISL_578192 | 3/8/2020  | 10/13/2020 | Europe / Spain / Aragon      |
| EPI_ISL_578193 | 3/8/2020  | 10/13/2020 | Europe / Spain / Aragon      |
| EPI_ISL_578194 | 3/9/2020  | 10/13/2020 | Europe / Spain / Galicia     |
| EPI_ISL_578195 | 3/10/2020 | 10/13/2020 | Europe / Spain / Galicia     |
| EPI_ISL_578196 | 3/4/2020  | 10/13/2020 | Europe / Spain / La Rioja    |
| EPI_ISL_578197 | 3/4/2020  | 10/13/2020 | Europe / Spain / La Rioja    |
| EPI_ISL_578198 | 3/3/2020  | 10/13/2020 | Europe / Spain / La Rioja    |
| EPI_ISL_578199 | 3/3/2020  | 10/13/2020 | Europe / Spain / La Rioja    |
| EPI_ISL_578200 | 3/3/2020  | 10/13/2020 | Europe / Spain / La Rioja    |
| EPI_ISL_578201 | 3/3/2020  | 10/13/2020 | Europe / Spain / La Rioja    |
| EPI_ISL_578241 | 9/7/2020  | 10/13/2020 | Europe / Ireland / Waterford |
| EPI_ISL_578242 | 8/18/2020 | 10/13/2020 | Europe / Ireland / Dublin    |
| EPI_ISL_578243 | 8/22/2020 | 10/13/2020 | Europe / Ireland / Dublin    |
| EPI_ISL_578244 | 9/16/2020 | 10/13/2020 | Europe / Ireland / Meath     |
| EPI_ISL_578245 | 9/7/2020  | 10/13/2020 | Europe / Ireland / Mayo      |
| EPI_ISL_578246 | 8/15/2020 | 10/13/2020 | Europe / Ireland / Clare     |
| EPI_ISL_578247 | 9/16/2020 | 10/13/2020 | Europe / Ireland / Clare     |
| EPI_ISL_578248 | 9/6/2020  | 10/13/2020 | Europe / Ireland / Clare     |
| EPI_ISL_578249 | 8/14/2020 | 10/13/2020 | Europe / Ireland / Cork      |
| EPI_ISL_578250 | 8/15/2020 | 10/13/2020 | Europe / Ireland / Cork      |
| EPI_ISL_578251 | 9/4/2020  | 10/13/2020 | Europe / Ireland / Cork      |
| EPI_ISL_578252 | 9/4/2020  | 10/13/2020 | Europe / Ireland / Cork      |
| EPI_ISL_578253 | 9/9/2020  | 10/13/2020 | Europe / Ireland / Cork      |
| EPI_ISL_578254 | 2020-08   | 10/13/2020 | Europe / Ireland / Dublin    |
| EPI_ISL_578255 | 2020-08   | 10/13/2020 | Europe / Ireland / Dublin    |
| EPI_ISL_578256 | 8/15/2020 | 10/13/2020 | Europe / Ireland / Dublin    |
| EPI_ISL_578257 | 8/17/2020 | 10/13/2020 | Europe / Ireland / Dublin    |
| EPI_ISL_578258 | 8/17/2020 | 10/13/2020 | Europe / Ireland / Dublin    |
| EPI_ISL_578259 | 9/16/2020 | 10/13/2020 | Europe / Ireland / Dublin    |
| EPI_ISL_578260 | 9/4/2020  | 10/13/2020 | Europe / Ireland / Dublin    |
| EPI_ISL_578261 | 9/16/2020 | 10/13/2020 | Europe / Ireland / Dublin    |
| EPI_ISL_578262 | 9/5/2020  | 10/13/2020 | Europe / Ireland / Dublin    |
| EPI_ISL_578263 | 9/16/2020 | 10/13/2020 | Europe / Ireland / Dublin    |
| EPI_ISL_578264 | 9/5/2020  | 10/13/2020 | Europe / Ireland / Dublin    |
| EPI_ISL_578265 | 9/5/2020  | 10/13/2020 | Europe / Ireland / Dublin    |
| EPI_ISL_578266 | 9/16/2020 | 10/13/2020 | Europe / Ireland / Dublin    |
| EPI_ISL_578267 | 9/16/2020 | 10/13/2020 | Europe / Ireland / Dublin    |
| EPI_ISL_578268 | 9/16/2020 | 10/13/2020 | Europe / Ireland / Dublin    |
| EPI_ISL_578269 | 9/16/2020 | 10/13/2020 | Europe / Ireland / Dublin    |
| EPI_ISL_578270 | 9/16/2020 | 10/13/2020 | Europe / Ireland / Dublin    |
| EPI_ISL_578271 | 9/16/2020 | 10/13/2020 | Europe / Ireland / Dublin    |
| EPI_ISL_578272 | 9/8/2020  | 10/13/2020 | Europe / Ireland / Dublin    |
| EPI_ISL_578273 | 9/16/2020 | 10/13/2020 | Europe / Ireland / Dublin    |
| EPI_ISL_578274 | 9/16/2020 | 10/13/2020 | Europe / Ireland / Dublin    |
| EPI_ISL_578275 | 9/9/2020  | 10/13/2020 | Europe / Ireland / Dublin    |
| EPI_ISL_578276 | 7/7/2020  | 10/13/2020 | Europe / Ireland / Galway    |
| EPI_ISL_578277 | 8/20/2020 | 10/13/2020 | Europe / Ireland / Galway    |

|                |           |            |                              |
|----------------|-----------|------------|------------------------------|
| EPI_ISL_578278 | 9/4/2020  | 10/13/2020 | Europe / Ireland / Galway    |
| EPI_ISL_578279 | 9/5/2020  | 10/13/2020 | Europe / Ireland / Galway    |
| EPI_ISL_578280 | 9/16/2020 | 10/13/2020 | Europe / Ireland / Galway    |
| EPI_ISL_578281 | 9/16/2020 | 10/13/2020 | Europe / Ireland / Galway    |
| EPI_ISL_578282 | 8/13/2020 | 10/13/2020 | Europe / Ireland / Kildare   |
| EPI_ISL_578283 | 8/17/2020 | 10/13/2020 | Europe / Ireland / Kildare   |
| EPI_ISL_578284 | 9/16/2020 | 10/13/2020 | Europe / Ireland / Kildare   |
| EPI_ISL_578285 | 9/16/2020 | 10/13/2020 | Europe / Ireland / Kildare   |
| EPI_ISL_578286 | 9/16/2020 | 10/13/2020 | Europe / Ireland / Kildare   |
| EPI_ISL_578287 | 9/16/2020 | 10/13/2020 | Europe / Ireland / Kildare   |
| EPI_ISL_578288 | 9/16/2020 | 10/13/2020 | Europe / Ireland / Kildare   |
| EPI_ISL_578289 | 9/16/2020 | 10/13/2020 | Europe / Ireland / Kildare   |
| EPI_ISL_578290 | 9/16/2020 | 10/13/2020 | Europe / Ireland / Kildare   |
| EPI_ISL_578291 | 9/16/2020 | 10/13/2020 | Europe / Ireland / Kildare   |
| EPI_ISL_578292 | 9/16/2020 | 10/13/2020 | Europe / Ireland / Kildare   |
| EPI_ISL_578293 | 9/16/2020 | 10/13/2020 | Europe / Ireland / Kildare   |
| EPI_ISL_578294 | 9/16/2020 | 10/13/2020 | Europe / Ireland / Kildare   |
| EPI_ISL_578295 | 9/5/2020  | 10/13/2020 | Europe / Ireland / Kildare   |
| EPI_ISL_578296 | 9/16/2020 | 10/13/2020 | Europe / Ireland / Kildare   |
| EPI_ISL_578297 | 9/7/2020  | 10/13/2020 | Europe / Ireland / Kildare   |
| EPI_ISL_578298 | 9/7/2020  | 10/13/2020 | Europe / Ireland / Kildare   |
| EPI_ISL_578299 | 9/16/2020 | 10/13/2020 | Europe / Ireland / Kildare   |
| EPI_ISL_578300 | 9/16/2020 | 10/13/2020 | Europe / Ireland / Kildare   |
| EPI_ISL_578301 | 9/16/2020 | 10/13/2020 | Europe / Ireland / Kildare   |
| EPI_ISL_578302 | 8/13/2020 | 10/13/2020 | Europe / Ireland / Kilkenny  |
| EPI_ISL_578303 | 8/14/2020 | 10/13/2020 | Europe / Ireland / Kilkenny  |
| EPI_ISL_578304 | 8/17/2020 | 10/13/2020 | Europe / Ireland / Kilkenny  |
| EPI_ISL_578305 | 8/17/2020 | 10/13/2020 | Europe / Ireland / Kilkenny  |
| EPI_ISL_578306 | 8/18/2020 | 10/13/2020 | Europe / Ireland / Kilkenny  |
| EPI_ISL_578307 | 8/19/2020 | 10/13/2020 | Europe / Ireland / Kilkenny  |
| EPI_ISL_578308 | 9/4/2020  | 10/13/2020 | Europe / Ireland / Kilkenny  |
| EPI_ISL_578309 | 9/6/2020  | 10/13/2020 | Europe / Ireland / Louth     |
| EPI_ISL_578310 | 8/15/2020 | 10/13/2020 | Europe / Ireland / Limerick  |
| EPI_ISL_578311 | 9/16/2020 | 10/13/2020 | Europe / Ireland / Limerick  |
| EPI_ISL_578312 | 9/5/2020  | 10/13/2020 | Europe / Ireland / Limerick  |
| EPI_ISL_578313 | 9/6/2020  | 10/13/2020 | Europe / Ireland / Limerick  |
| EPI_ISL_578314 | 9/16/2020 | 10/13/2020 | Europe / Ireland / Limerick  |
| EPI_ISL_578315 | 9/6/2020  | 10/13/2020 | Europe / Ireland / Limerick  |
| EPI_ISL_578316 | 9/6/2020  | 10/13/2020 | Europe / Ireland / Meath     |
| EPI_ISL_578317 | 8/20/2020 | 10/13/2020 | Europe / Ireland / Offaly    |
| EPI_ISL_578318 | 9/7/2020  | 10/13/2020 | Europe / Ireland / Offaly    |
| EPI_ISL_578319 | 9/16/2020 | 10/13/2020 | Europe / Ireland / Roscommon |
| EPI_ISL_578320 | 9/16/2020 | 10/13/2020 | Europe / Ireland / Sligo     |
| EPI_ISL_578321 | 8/17/2020 | 10/13/2020 | Europe / Ireland / Waterford |
| EPI_ISL_578322 | 8/14/2020 | 10/13/2020 | Europe / Ireland / Waterford |
| EPI_ISL_578323 | 8/14/2020 | 10/13/2020 | Europe / Ireland / Waterford |
| EPI_ISL_578324 | 8/20/2020 | 10/13/2020 | Europe / Ireland / Waterford |

|                |           |            |                                                      |
|----------------|-----------|------------|------------------------------------------------------|
| EPI_ISL_578325 | 8/20/2020 | 10/13/2020 | Europe / Ireland / Waterford                         |
| EPI_ISL_578326 | 8/20/2020 | 10/13/2020 | Europe / Ireland / Waterford                         |
| EPI_ISL_578327 | 8/20/2020 | 10/13/2020 | Europe / Ireland / Waterford                         |
| EPI_ISL_578328 | 9/5/2020  | 10/13/2020 | Europe / Ireland / Wicklow                           |
| EPI_ISL_578329 | 9/5/2020  | 10/13/2020 | Europe / Ireland / Wicklow                           |
| EPI_ISL_578330 | 9/5/2020  | 10/13/2020 | Europe / Ireland / Wicklow                           |
| EPI_ISL_578331 | 9/7/2020  | 10/13/2020 | Europe / Ireland / Wicklow                           |
| EPI_ISL_578332 | 9/7/2020  | 10/13/2020 | Europe / Ireland / Wicklow                           |
| EPI_ISL_578333 | 8/15/2020 | 10/13/2020 | Europe / Ireland / Wexford                           |
| EPI_ISL_578334 | 8/15/2020 | 10/13/2020 | Europe / Ireland / Wexford                           |
| EPI_ISL_578335 | 3/31/2020 | 10/13/2020 | North America / USA / Wisconsin / Dane County        |
| EPI_ISL_578336 | 4/1/2020  | 10/13/2020 | North America / USA / Wisconsin / Sauk County        |
| EPI_ISL_578337 | 3/31/2020 | 10/13/2020 | North America / USA / Wisconsin / Kenosha County     |
| EPI_ISL_578338 | 4/2/2020  | 10/13/2020 | North America / USA / Wisconsin / Brown County       |
| EPI_ISL_578339 | 4/3/2020  | 10/13/2020 | North America / USA / Wisconsin / Racine County      |
| EPI_ISL_578340 | 4/3/2020  | 10/13/2020 | North America / USA / Wisconsin / Walworth County    |
| EPI_ISL_578341 | 4/5/2020  | 10/13/2020 | North America / USA / Wisconsin / Brown County       |
| EPI_ISL_578342 | 4/3/2020  | 10/13/2020 | North America / USA / Wisconsin / Winnebago County   |
| EPI_ISL_578343 | 4/4/2020  | 10/13/2020 | North America / USA / Wisconsin / Kenosha County     |
| EPI_ISL_578344 | 4/6/2020  | 10/13/2020 | North America / USA / Wisconsin / Dane County        |
| EPI_ISL_578345 | 4/7/2020  | 10/13/2020 | North America / USA / Wisconsin / Grant County       |
| EPI_ISL_578346 | 4/7/2020  | 10/13/2020 | North America / USA / Wisconsin / Waukesha County    |
| EPI_ISL_578347 | 4/9/2020  | 10/13/2020 | North America / USA / Wisconsin / Jefferson County   |
| EPI_ISL_578348 | 4/9/2020  | 10/13/2020 | North America / USA / Wisconsin / Waukesha County    |
| EPI_ISL_578349 | 4/10/2020 | 10/13/2020 | North America / USA / Wisconsin / Dane County        |
| EPI_ISL_578350 | 4/13/2020 | 10/13/2020 | North America / USA / Wisconsin / Winnebago County   |
| EPI_ISL_578351 | 4/14/2020 | 10/13/2020 | North America / USA / Wisconsin / Walworth County    |
| EPI_ISL_578352 | 4/14/2020 | 10/13/2020 | North America / USA / Wisconsin / Grant County       |
| EPI_ISL_578353 | 4/17/2020 | 10/13/2020 | North America / USA / Wisconsin / Sheboygan County   |
| EPI_ISL_578354 | 4/17/2020 | 10/13/2020 | North America / USA / Wisconsin / Rock County        |
| EPI_ISL_578355 | 4/18/2020 | 10/13/2020 | North America / USA / Wisconsin / Grant County       |
| EPI_ISL_578356 | 4/20/2020 | 10/13/2020 | North America / USA / Wisconsin / Brown County       |
| EPI_ISL_578357 | 4/21/2020 | 10/13/2020 | North America / USA / Wisconsin / Brown County       |
| EPI_ISL_578358 | 4/21/2020 | 10/13/2020 | North America / USA / Wisconsin / Columbia County    |
| EPI_ISL_578359 | 4/22/2020 | 10/13/2020 | North America / USA / Wisconsin / Milwaukee County   |
| EPI_ISL_578360 | 4/23/2020 | 10/13/2020 | North America / USA / Wisconsin / Door County        |
| EPI_ISL_578361 | 4/23/2020 | 10/13/2020 | North America / USA / Wisconsin / Racine County      |
| EPI_ISL_578362 | 4/24/2020 | 10/13/2020 | North America / USA / Wisconsin / Grant County       |
| EPI_ISL_578363 | 4/24/2020 | 10/13/2020 | North America / USA / Wisconsin / Brown County       |
| EPI_ISL_578364 | 4/24/2020 | 10/13/2020 | North America / USA / Wisconsin / Brown County       |
| EPI_ISL_578365 | 4/24/2020 | 10/13/2020 | North America / USA / Wisconsin / Outagamie County   |
| EPI_ISL_578366 | 3/9/2020  | 10/13/2020 | North America / USA / Wisconsin / Milwaukee County   |
| EPI_ISL_578367 | 3/12/2020 | 10/13/2020 | North America / USA / Wisconsin / Fond du Lac County |
| EPI_ISL_578368 | 3/12/2020 | 10/13/2020 | North America / USA / Wisconsin / Fond du Lac County |
| EPI_ISL_578369 | 3/12/2020 | 10/13/2020 | North America / USA / Wisconsin / Fond du Lac County |
| EPI_ISL_578370 | 3/12/2020 | 10/13/2020 | North America / USA / Wisconsin / Milwaukee County   |
| EPI_ISL_578371 | 3/11/2020 | 10/13/2020 | North America / USA / Wisconsin / Winnebago County   |

|                |           |            |                                                      |
|----------------|-----------|------------|------------------------------------------------------|
| EPI_ISL_578372 | 3/12/2020 | 10/13/2020 | North America / USA / Wisconsin / Milwaukee County   |
| EPI_ISL_578373 | 3/12/2020 | 10/13/2020 | North America / USA / Wisconsin / Milwaukee County   |
| EPI_ISL_578374 | 3/13/2020 | 10/13/2020 | North America / USA / Wisconsin / Fond du Lac County |
| EPI_ISL_578375 | 3/13/2020 | 10/13/2020 | North America / USA / Wisconsin / Fond du Lac County |
| EPI_ISL_578376 | 3/13/2020 | 10/13/2020 | North America / USA / Wisconsin / Fond du Lac County |
| EPI_ISL_578377 | 3/13/2020 | 10/13/2020 | North America / USA / Wisconsin / Fond du Lac County |
| EPI_ISL_578378 | 3/28/2020 | 10/13/2020 | North America / USA / Wisconsin / Waukesha County    |
| EPI_ISL_578379 | 3/30/2020 | 10/13/2020 | North America / USA / Wisconsin / Jefferson County   |
| EPI_ISL_578380 | 3/29/2020 | 10/13/2020 | North America / USA / Wisconsin / Columbia County    |
| EPI_ISL_578381 | 3/29/2020 | 10/13/2020 | North America / USA / Wisconsin / Waukesha County    |
| EPI_ISL_578382 | 3/30/2020 | 10/13/2020 | North America / USA / Wisconsin / Walworth County    |
| EPI_ISL_578383 | 3/31/2020 | 10/13/2020 | North America / USA / Wisconsin / Columbia County    |
| EPI_ISL_578384 | 3/31/2020 | 10/13/2020 | North America / USA / Wisconsin / Columbia County    |
| EPI_ISL_578385 | 3/31/2020 | 10/13/2020 | North America / USA / Wisconsin / Waukesha County    |
| EPI_ISL_578386 | 3/31/2020 | 10/13/2020 | North America / USA / Wisconsin / Waukesha County    |
| EPI_ISL_578387 | 3/30/2020 | 10/13/2020 | North America / USA / Wisconsin / Racine County      |
| EPI_ISL_578388 | 3/31/2020 | 10/13/2020 | North America / USA / Wisconsin / Racine County      |
| EPI_ISL_578389 | 3/31/2020 | 10/13/2020 | North America / USA / Wisconsin / Brown County       |
| EPI_ISL_578390 | 3/31/2020 | 10/13/2020 | North America / USA / Wisconsin / Dane County        |
| EPI_ISL_578391 | 4/1/2020  | 10/13/2020 | North America / USA / Wisconsin / Racine County      |
| EPI_ISL_578392 | 3/31/2020 | 10/13/2020 | North America / USA / Wisconsin / Racine County      |
| EPI_ISL_578393 | 3/31/2020 | 10/13/2020 | North America / USA / Wisconsin / Waukesha County    |
| EPI_ISL_578394 | 3/31/2020 | 10/13/2020 | North America / USA / Wisconsin / Waukesha County    |
| EPI_ISL_578395 | 4/1/2020  | 10/13/2020 | North America / USA / Wisconsin / Kenosha County     |
| EPI_ISL_578396 | 4/1/2020  | 10/13/2020 | North America / USA / Wisconsin / Brown County       |
| EPI_ISL_578397 | 4/1/2020  | 10/13/2020 | North America / USA / Wisconsin / Waukesha County    |
| EPI_ISL_578398 | 4/2/2020  | 10/13/2020 | North America / USA / Wisconsin / Racine County      |
| EPI_ISL_578399 | 4/3/2020  | 10/13/2020 | North America / USA / Wisconsin / Rock County        |
| EPI_ISL_578400 | 4/3/2020  | 10/13/2020 | North America / USA / Wisconsin / Brown County       |
| EPI_ISL_578401 | 4/4/2020  | 10/13/2020 | North America / USA / Wisconsin / Dane County        |
| EPI_ISL_578402 | 4/4/2020  | 10/13/2020 | North America / USA / Wisconsin / Rock County        |
| EPI_ISL_578403 | 4/3/2020  | 10/13/2020 | North America / USA / Wisconsin / Waukesha County    |
| EPI_ISL_578404 | 4/4/2020  | 10/13/2020 | North America / USA / Wisconsin / Racine County      |
| EPI_ISL_578405 | 4/6/2020  | 10/13/2020 | North America / USA / Wisconsin / Walworth County    |
| EPI_ISL_578406 | 4/6/2020  | 10/13/2020 | North America / USA / Wisconsin / Walworth County    |
| EPI_ISL_578407 | 4/6/2020  | 10/13/2020 | North America / USA / Wisconsin / Waukesha County    |
| EPI_ISL_578408 | 4/5/2020  | 10/13/2020 | North America / USA / Wisconsin / Brown County       |
| EPI_ISL_578409 | 4/6/2020  | 10/13/2020 | North America / USA / Wisconsin / Brown County       |
| EPI_ISL_578410 | 4/7/2020  | 10/13/2020 | North America / USA / Wisconsin / Rock County        |
| EPI_ISL_578411 | 4/8/2020  | 10/13/2020 | North America / USA / Wisconsin / Rock County        |
| EPI_ISL_578412 | 4/8/2020  | 10/13/2020 | North America / USA / Wisconsin / Walworth County    |
| EPI_ISL_578413 | 4/8/2020  | 10/13/2020 | North America / USA / Wisconsin / Walworth County    |
| EPI_ISL_578414 | 4/8/2020  | 10/13/2020 | North America / USA / Wisconsin / Walworth County    |
| EPI_ISL_578415 | 4/8/2020  | 10/13/2020 | North America / USA / Wisconsin / Walworth County    |
| EPI_ISL_578416 | 4/8/2020  | 10/13/2020 | North America / USA / Wisconsin / Waukesha County    |
| EPI_ISL_578417 | 4/10/2020 | 10/13/2020 | North America / USA / Wisconsin / Rock County        |
| EPI_ISL_578418 | 4/10/2020 | 10/13/2020 | North America / USA / Wisconsin / Walworth County    |

|                |           |            |                                                      |
|----------------|-----------|------------|------------------------------------------------------|
| EPI_ISL_578419 | 3/13/2020 | 10/13/2020 | North America / USA / Wisconsin / Monroe County      |
| EPI_ISL_578420 | 3/15/2020 | 10/13/2020 | North America / USA / Wisconsin / Milwaukee County   |
| EPI_ISL_578421 | 3/14/2020 | 10/13/2020 | North America / USA / Wisconsin / Fond du Lac County |
| EPI_ISL_578422 | 3/16/2020 | 10/13/2020 | North America / USA / Wisconsin / Dane County        |
| EPI_ISL_578423 | 3/16/2020 | 10/13/2020 | North America / USA / Wisconsin / Milwaukee County   |
| EPI_ISL_578424 | 3/17/2020 | 10/13/2020 | North America / USA / Wisconsin / Dane County        |
| EPI_ISL_578425 | 3/18/2020 | 10/13/2020 | North America / USA / Wisconsin / Kenosha County     |
| EPI_ISL_578426 | 3/19/2020 | 10/13/2020 | North America / USA / Wisconsin / Milwaukee County   |
| EPI_ISL_578427 | 3/23/2020 | 10/13/2020 | North America / USA / Wisconsin / Winnebago County   |
| EPI_ISL_578428 | 3/25/2020 | 10/13/2020 | North America / USA / Wisconsin / Dane County        |
| EPI_ISL_578429 | 3/24/2020 | 10/13/2020 | North America / USA / Wisconsin / Dane County        |
| EPI_ISL_578430 | 3/25/2020 | 10/13/2020 | North America / USA / Wisconsin / Waukesha County    |
| EPI_ISL_578431 | 3/27/2020 | 10/13/2020 | North America / USA / Wisconsin / Kenosha County     |
| EPI_ISL_578432 | 3/27/2020 | 10/13/2020 | North America / USA / Wisconsin / Rock County        |
| EPI_ISL_578433 | 3/28/2020 | 10/13/2020 | North America / USA / Wisconsin / Rock County        |
| EPI_ISL_578434 | 3/28/2020 | 10/13/2020 | North America / USA / Wisconsin / Racine County      |
| EPI_ISL_578435 | 3/27/2020 | 10/13/2020 | North America / USA / Wisconsin / Waukesha County    |
| EPI_ISL_578436 | 3/28/2020 | 10/13/2020 | North America / USA / Wisconsin / Waukesha County    |
| EPI_ISL_578437 | 3/28/2020 | 10/13/2020 | North America / USA / Wisconsin / Waukesha County    |
| EPI_ISL_578438 | 4/10/2020 | 10/13/2020 | North America / USA / Wisconsin / Walworth County    |
| EPI_ISL_578439 | 4/10/2020 | 10/13/2020 | North America / USA / Wisconsin / Walworth County    |
| EPI_ISL_578440 | 4/10/2020 | 10/13/2020 | North America / USA / Wisconsin / Walworth County    |
| EPI_ISL_578441 | 4/10/2020 | 10/13/2020 | North America / USA / Wisconsin / Walworth County    |
| EPI_ISL_578442 | 4/11/2020 | 10/13/2020 | North America / USA / Wisconsin / Grant County       |
| EPI_ISL_578443 | 4/11/2020 | 10/13/2020 | North America / USA / Wisconsin / Grant County       |
| EPI_ISL_578444 | 4/12/2020 | 10/13/2020 | North America / USA / Wisconsin / Brown County       |
| EPI_ISL_578445 | 4/13/2020 | 10/13/2020 | North America / USA / Wisconsin / Walworth County    |
| EPI_ISL_578446 | 4/13/2020 | 10/13/2020 | North America / USA / Wisconsin / Brown County       |
| EPI_ISL_578447 | 4/13/2020 | 10/13/2020 | North America / USA / Wisconsin / Walworth County    |
| EPI_ISL_578448 | 4/13/2020 | 10/13/2020 | North America / USA / Wisconsin / Walworth County    |
| EPI_ISL_578449 | 4/13/2020 | 10/13/2020 | North America / USA / Wisconsin / Walworth County    |
| EPI_ISL_578450 | 4/13/2020 | 10/13/2020 | North America / USA / Wisconsin / Walworth County    |
| EPI_ISL_578451 | 4/12/2020 | 10/13/2020 | North America / USA / Wisconsin / Rock County        |
| EPI_ISL_578452 | 4/13/2020 | 10/13/2020 | North America / USA / Wisconsin / Sauk County        |
| EPI_ISL_578453 | 4/13/2020 | 10/13/2020 | North America / USA / Wisconsin / Sheboygan County   |
| EPI_ISL_578454 | 4/14/2020 | 10/13/2020 | North America / USA / Wisconsin / Walworth County    |
| EPI_ISL_578455 | 4/14/2020 | 10/13/2020 | North America / USA / Wisconsin / Walworth County    |
| EPI_ISL_578456 | 4/13/2020 | 10/13/2020 | North America / USA / Wisconsin / Walworth County    |
| EPI_ISL_578457 | 4/14/2020 | 10/13/2020 | North America / USA / Wisconsin / Walworth County    |
| EPI_ISL_578458 | 4/14/2020 | 10/13/2020 | North America / USA / Wisconsin / Walworth County    |
| EPI_ISL_578459 | 4/13/2020 | 10/13/2020 | North America / USA / Wisconsin / Racine County      |
| EPI_ISL_578460 | 4/14/2020 | 10/13/2020 | North America / USA / Wisconsin / Walworth County    |
| EPI_ISL_578461 | 4/14/2020 | 10/13/2020 | North America / USA / Wisconsin / Walworth County    |
| EPI_ISL_578462 | 4/14/2020 | 10/13/2020 | North America / USA / Wisconsin / Walworth County    |
| EPI_ISL_578463 | 4/14/2020 | 10/13/2020 | North America / USA / Wisconsin / Walworth County    |
| EPI_ISL_578464 | 4/14/2020 | 10/13/2020 | North America / USA / Wisconsin / Walworth County    |
| EPI_ISL_578465 | 4/14/2020 | 10/13/2020 | North America / USA / Wisconsin / Grant County       |











|                |           |            |                                                    |
|----------------|-----------|------------|----------------------------------------------------|
| EPI_ISL_578656 | 5/21/2020 | 10/13/2020 | North America / USA / Wisconsin / Walworth County  |
| EPI_ISL_578657 | 5/26/2020 | 10/13/2020 | North America / USA / Wisconsin / Racine County    |
| EPI_ISL_578658 | 5/25/2020 | 10/13/2020 | North America / USA / Wisconsin / Racine County    |
| EPI_ISL_578659 | 5/26/2020 | 10/13/2020 | North America / USA / Wisconsin / Milwaukee County |
| EPI_ISL_578660 | 5/27/2020 | 10/13/2020 | North America / USA / Wisconsin / Winnebago County |
| EPI_ISL_578661 | 5/27/2020 | 10/13/2020 | North America / USA / Wisconsin / Winnebago County |
| EPI_ISL_578662 | 5/26/2020 | 10/13/2020 | North America / USA / Wisconsin / Jefferson County |
| EPI_ISL_578663 | 5/27/2020 | 10/13/2020 | North America / USA / Wisconsin / Racine County    |
| EPI_ISL_578664 | 5/27/2020 | 10/13/2020 | North America / USA / Wisconsin / Racine County    |
| EPI_ISL_578665 | 5/28/2020 | 10/13/2020 | North America / USA / Wisconsin / Columbia County  |
| EPI_ISL_578666 | 5/27/2020 | 10/13/2020 | North America / USA / Wisconsin / Racine County    |
| EPI_ISL_578667 | 5/27/2020 | 10/13/2020 | North America / USA / Wisconsin / Racine County    |
| EPI_ISL_578668 | 5/27/2020 | 10/13/2020 | North America / USA / Wisconsin / Racine County    |
| EPI_ISL_578669 | 5/28/2020 | 10/13/2020 | North America / USA / Wisconsin / Grant County     |
| EPI_ISL_578670 | 5/27/2020 | 10/13/2020 | North America / USA / Wisconsin / Winnebago County |
| EPI_ISL_578671 | 5/27/2020 | 10/13/2020 | North America / USA / Wisconsin / Winnebago County |
| EPI_ISL_578672 | 5/30/2020 | 10/13/2020 | North America / USA / Wisconsin / Barron County    |
| EPI_ISL_578673 | 5/29/2020 | 10/13/2020 | North America / USA / Wisconsin / Winnebago County |
| EPI_ISL_578674 | 5/29/2020 | 10/13/2020 | North America / USA / Wisconsin / Winnebago County |
| EPI_ISL_578675 | 7/28/2020 | 10/13/2020 | North America / USA / Wisconsin / Walworth County  |
| EPI_ISL_578676 | 7/28/2020 | 10/13/2020 | North America / USA / Wisconsin / Walworth County  |
| EPI_ISL_578677 | 7/28/2020 | 10/13/2020 | North America / USA / Wisconsin / Walworth County  |
| EPI_ISL_578678 | 5/29/2020 | 10/13/2020 | North America / USA / Wisconsin / Racine County    |
| EPI_ISL_578679 | 5/31/2020 | 10/13/2020 | North America / USA / Wisconsin / Racine County    |
| EPI_ISL_578680 | 6/1/2020  | 10/13/2020 | North America / USA / Wisconsin / Racine County    |
| EPI_ISL_578681 | 6/1/2020  | 10/13/2020 | North America / USA / Wisconsin / Racine County    |
| EPI_ISL_578682 | 6/1/2020  | 10/13/2020 | North America / USA / Wisconsin / Racine County    |
| EPI_ISL_578683 | 6/2/2020  | 10/13/2020 | North America / USA / Wisconsin / Racine County    |
| EPI_ISL_578684 | 6/2/2020  | 10/13/2020 | North America / USA / Wisconsin / Ashland County   |
| EPI_ISL_578685 | 6/4/2020  | 10/13/2020 | North America / USA / Wisconsin / Milwaukee County |
| EPI_ISL_578686 | 6/5/2020  | 10/13/2020 | North America / USA / Wisconsin / Sawyer County    |
| EPI_ISL_578687 | 6/6/2020  | 10/13/2020 | North America / USA / Wisconsin / Brown County     |
| EPI_ISL_578688 | 6/7/2020  | 10/13/2020 | North America / USA / Wisconsin / Lafayette County |
| EPI_ISL_578689 | 6/7/2020  | 10/13/2020 | North America / USA / Wisconsin / Milwaukee County |
| EPI_ISL_578690 | 6/8/2020  | 10/13/2020 | North America / USA / Wisconsin / Chippewa County  |
| EPI_ISL_578691 | 6/5/2020  | 10/13/2020 | North America / USA / Wisconsin / Milwaukee County |
| EPI_ISL_578692 | 6/8/2020  | 10/13/2020 | North America / USA / Wisconsin / Racine County    |
| EPI_ISL_578693 | 6/8/2020  | 10/13/2020 | North America / USA / Wisconsin / Kenosha County   |
| EPI_ISL_578694 | 6/8/2020  | 10/13/2020 | North America / USA / Wisconsin / Kenosha County   |
| EPI_ISL_578695 | 6/8/2020  | 10/13/2020 | North America / USA / Wisconsin / Kenosha County   |
| EPI_ISL_594134 | 8/6/2020  | 10/13/2020 | Oceania / Australia / Victoria                     |
| EPI_ISL_594144 | 7/27/2020 | 10/13/2020 | Oceania / Australia / Victoria                     |
| EPI_ISL_594147 | 8/1/2020  | 10/13/2020 | Oceania / Australia / Victoria                     |
| EPI_ISL_578698 | 5/18/2020 | 10/14/2020 | North America / USA / Louisiana / Caddo Parish     |
| EPI_ISL_578699 | 6/11/2020 | 10/14/2020 | North America / USA / Louisiana / Ouachita Parish  |
| EPI_ISL_578700 | 6/11/2020 | 10/14/2020 | North America / USA / Louisiana / Ouachita Parish  |
| EPI_ISL_578704 | 5/9/2020  | 10/14/2020 | North America / USA / Louisiana / Caddo Parish     |

















|                |           |            |                                                  |
|----------------|-----------|------------|--------------------------------------------------|
| EPI_ISL_579045 | 8/6/2020  | 10/14/2020 | North America / USA / Louisiana / Bossier Parish |
| EPI_ISL_579046 | 8/6/2020  | 10/14/2020 | North America / USA / Louisiana / Bossier Parish |
| EPI_ISL_579047 | 8/6/2020  | 10/14/2020 | North America / USA / Louisiana / DeSoto Parish  |
| EPI_ISL_579048 | 8/6/2020  | 10/14/2020 | North America / USA / Louisiana / DeSoto Parish  |
| EPI_ISL_579049 | 8/6/2020  | 10/14/2020 | North America / USA / Louisiana / DeSoto Parish  |
| EPI_ISL_579050 | 8/6/2020  | 10/14/2020 | North America / USA / Louisiana / Caddo Parish   |
| EPI_ISL_579051 | 8/6/2020  | 10/14/2020 | North America / USA / Louisiana / Caddo Parish   |
| EPI_ISL_579052 | 8/6/2020  | 10/14/2020 | North America / USA / Louisiana / Caddo Parish   |
| EPI_ISL_579053 | 8/6/2020  | 10/14/2020 | North America / USA / Louisiana / Caddo Parish   |
| EPI_ISL_579054 | 8/6/2020  | 10/14/2020 | North America / USA / Louisiana / Caddo Parish   |
| EPI_ISL_579055 | 8/6/2020  | 10/14/2020 | North America / USA / Louisiana / Caddo Parish   |
| EPI_ISL_579056 | 8/7/2020  | 10/14/2020 | North America / USA / Louisiana / Caddo Parish   |
| EPI_ISL_579057 | 8/7/2020  | 10/14/2020 | North America / USA / Louisiana / Caddo Parish   |
| EPI_ISL_579060 | 3/16/2020 | 10/14/2020 | Oceania / New Zealand / Taranaki                 |
| EPI_ISL_579061 | 3/18/2020 | 10/14/2020 | Oceania / New Zealand / Canterbury               |
| EPI_ISL_579063 | 3/21/2020 | 10/14/2020 | Oceania / New Zealand / Hawkes Bay               |
| EPI_ISL_579064 | 3/21/2020 | 10/14/2020 | Oceania / New Zealand / Hawkes Bay               |
| EPI_ISL_579065 | 3/23/2020 | 10/14/2020 | Oceania / New Zealand / Canterbury               |
| EPI_ISL_579066 | 3/23/2020 | 10/14/2020 | Oceania / New Zealand / Nelson Marlborough       |
| EPI_ISL_579067 | 3/22/2020 | 10/14/2020 | Oceania / New Zealand / Hawkes Bay               |
| EPI_ISL_579068 | 3/24/2020 | 10/14/2020 | Oceania / New Zealand / Hawkes Bay               |
| EPI_ISL_579069 | 3/24/2020 | 10/14/2020 | Oceania / New Zealand / Hawkes Bay               |
| EPI_ISL_579070 | 3/24/2020 | 10/14/2020 | Oceania / New Zealand / Canterbury               |
| EPI_ISL_579071 | 3/25/2020 | 10/14/2020 | Oceania / New Zealand / Hawkes Bay               |
| EPI_ISL_579072 | 3/25/2020 | 10/14/2020 | Oceania / New Zealand / Taranaki                 |
| EPI_ISL_579073 | 3/26/2020 | 10/14/2020 | Oceania / New Zealand / Canterbury               |
| EPI_ISL_579074 | 3/25/2020 | 10/14/2020 | Oceania / New Zealand / Auckland                 |
| EPI_ISL_579075 | 3/25/2020 | 10/14/2020 | Oceania / New Zealand / Taranaki                 |
| EPI_ISL_579077 | 3/26/2020 | 10/14/2020 | Oceania / New Zealand / Taranaki                 |
| EPI_ISL_579078 | 3/26/2020 | 10/14/2020 | Oceania / New Zealand / Canterbury               |
| EPI_ISL_579079 | 3/26/2020 | 10/14/2020 | Oceania / New Zealand / Canterbury               |
| EPI_ISL_579080 | 3/26/2020 | 10/14/2020 | Oceania / New Zealand / Canterbury               |
| EPI_ISL_579081 | 3/27/2020 | 10/14/2020 | Oceania / New Zealand / Canterbury               |
| EPI_ISL_579082 | 3/26/2020 | 10/14/2020 | Oceania / New Zealand / Auckland                 |
| EPI_ISL_579083 | 3/26/2020 | 10/14/2020 | Oceania / New Zealand / Auckland                 |
| EPI_ISL_579084 | 3/26/2020 | 10/14/2020 | Oceania / New Zealand / Auckland                 |
| EPI_ISL_579085 | 3/26/2020 | 10/14/2020 | Oceania / New Zealand / Auckland                 |
| EPI_ISL_579090 | 4/2/2020  | 10/14/2020 | Oceania / New Zealand / MidCentral               |
| EPI_ISL_579092 | 9/8/2020  | 10/14/2020 | Oceania / New Zealand / Canterbury               |
| EPI_ISL_579099 | 9/17/2020 | 10/14/2020 | Oceania / New Zealand / Combined Auckland        |
| EPI_ISL_579100 | 9/18/2020 | 10/14/2020 | Oceania / New Zealand / Counties Manukau         |
| EPI_ISL_579102 | 9/15/2020 | 10/14/2020 | Oceania / New Zealand / Counties Manukau         |
| EPI_ISL_579103 | 9/19/2020 | 10/14/2020 | Oceania / New Zealand / Counties Manukau         |
| EPI_ISL_579104 | 9/19/2020 | 10/14/2020 | Oceania / New Zealand / Counties Manukau         |
| EPI_ISL_579105 | 9/21/2020 | 10/14/2020 | Oceania / New Zealand / Canterbury               |
| EPI_ISL_579106 | 9/21/2020 | 10/14/2020 | Oceania / New Zealand / Canterbury               |
| EPI_ISL_579107 | 9/21/2020 | 10/14/2020 | Oceania / New Zealand / Auckland                 |

|                |           |            |                                          |
|----------------|-----------|------------|------------------------------------------|
| EPI_ISL_579109 | 9/22/2020 | 10/14/2020 | Oceania / New Zealand / Auckland         |
| EPI_ISL_579111 | 9/24/2020 | 10/14/2020 | Oceania / New Zealand / Auckland         |
| EPI_ISL_579113 | 9/29/2020 | 10/14/2020 | Oceania / New Zealand / Auckland         |
| EPI_ISL_579115 | 9/29/2020 | 10/14/2020 | Oceania / New Zealand / Auckland         |
| EPI_ISL_579116 | 10/4/2020 | 10/14/2020 | Oceania / New Zealand / Auckland         |
| EPI_ISL_579118 | 3/18/2020 | 10/14/2020 | Oceania / New Zealand / Waikato          |
| EPI_ISL_579119 | 3/15/2020 | 10/14/2020 | Oceania / New Zealand / Auckland         |
| EPI_ISL_579121 | 3/20/2020 | 10/14/2020 | Oceania / New Zealand / Waikato          |
| EPI_ISL_579122 | 3/21/2020 | 10/14/2020 | Oceania / New Zealand / Auckland         |
| EPI_ISL_579123 | 3/21/2020 | 10/14/2020 | Oceania / New Zealand / Auckland         |
| EPI_ISL_579125 | 3/25/2020 | 10/14/2020 | Oceania / New Zealand / Southern         |
| EPI_ISL_579126 | 3/25/2020 | 10/14/2020 | Oceania / New Zealand / Southern         |
| EPI_ISL_579127 | 3/26/2020 | 10/14/2020 | Oceania / New Zealand / Southern         |
| EPI_ISL_579128 | 3/25/2020 | 10/14/2020 | Oceania / New Zealand / Southern         |
| EPI_ISL_579129 | 3/22/2020 | 10/14/2020 | Oceania / New Zealand / Counties Manukau |
| EPI_ISL_579130 | 3/20/2020 | 10/14/2020 | Oceania / New Zealand / Counties Manukau |
| EPI_ISL_579131 | 3/22/2020 | 10/14/2020 | Oceania / New Zealand / Counties Manukau |
| EPI_ISL_579132 | 3/22/2020 | 10/14/2020 | Oceania / New Zealand / Counties Manukau |
| EPI_ISL_579133 | 3/28/2020 | 10/14/2020 | Oceania / New Zealand / Southern         |
| EPI_ISL_579134 | 3/28/2020 | 10/14/2020 | Oceania / New Zealand / Southern         |
| EPI_ISL_579135 | 3/28/2020 | 10/14/2020 | Oceania / New Zealand / Southern         |
| EPI_ISL_579136 | 3/28/2020 | 10/14/2020 | Oceania / New Zealand / Southern         |
| EPI_ISL_579138 | 3/27/2020 | 10/14/2020 | Oceania / New Zealand / Southern         |
| EPI_ISL_579139 | 3/27/2020 | 10/14/2020 | Oceania / New Zealand / Southern         |
| EPI_ISL_579140 | 3/26/2020 | 10/14/2020 | Oceania / New Zealand / Southern         |
| EPI_ISL_579141 | 3/27/2020 | 10/14/2020 | Oceania / New Zealand / Southern         |
| EPI_ISL_579142 | 3/29/2020 | 10/14/2020 | Oceania / New Zealand / Southern         |
| EPI_ISL_579143 | 3/30/2020 | 10/14/2020 | Oceania / New Zealand / Southern         |
| EPI_ISL_579144 | 3/28/2020 | 10/14/2020 | Oceania / New Zealand / Southern         |
| EPI_ISL_579145 | 3/27/2020 | 10/14/2020 | Oceania / New Zealand / Southern         |
| EPI_ISL_579146 | 3/29/2020 | 10/14/2020 | Oceania / New Zealand / Southern         |
| EPI_ISL_579147 | 3/28/2020 | 10/14/2020 | Oceania / New Zealand / Southern         |
| EPI_ISL_579148 | 3/26/2020 | 10/14/2020 | Oceania / New Zealand / Southern         |
| EPI_ISL_579149 | 3/26/2020 | 10/14/2020 | Oceania / New Zealand / Southern         |
| EPI_ISL_579150 | 3/27/2020 | 10/14/2020 | Oceania / New Zealand / Southern         |
| EPI_ISL_579151 | 3/27/2020 | 10/14/2020 | Oceania / New Zealand / Southern         |
| EPI_ISL_579152 | 3/27/2020 | 10/14/2020 | Oceania / New Zealand / Southern         |
| EPI_ISL_579153 | 3/31/2020 | 10/14/2020 | Oceania / New Zealand / Southern         |
| EPI_ISL_579154 | 3/30/2020 | 10/14/2020 | Oceania / New Zealand / Southern         |
| EPI_ISL_579155 | 3/31/2020 | 10/14/2020 | Oceania / New Zealand / Southern         |
| EPI_ISL_579156 | 3/23/2020 | 10/14/2020 | Oceania / New Zealand / Auckland         |
| EPI_ISL_579157 | 4/1/2020  | 10/14/2020 | Oceania / New Zealand / Southern         |
| EPI_ISL_579158 | 4/1/2020  | 10/14/2020 | Oceania / New Zealand / Southern         |
| EPI_ISL_579159 | 4/2/2020  | 10/14/2020 | Oceania / New Zealand / Southern         |
| EPI_ISL_579160 | 4/2/2020  | 10/14/2020 | Oceania / New Zealand / Southern         |
| EPI_ISL_579163 | 3/31/2020 | 10/14/2020 | Oceania / New Zealand / Southern         |
| EPI_ISL_579165 | 4/3/2020  | 10/14/2020 | Oceania / New Zealand / Southern         |













|                |           |            |                                             |
|----------------|-----------|------------|---------------------------------------------|
| EPI_ISL_579463 | 3/24/2020 | 10/14/2020 | Oceania / New Zealand / Canterbury          |
| EPI_ISL_579464 | 3/25/2020 | 10/14/2020 | Oceania / New Zealand / Canterbury          |
| EPI_ISL_579465 | 3/25/2020 | 10/14/2020 | Oceania / New Zealand / Canterbury          |
| EPI_ISL_579466 | 3/25/2020 | 10/14/2020 | Oceania / New Zealand / Canterbury          |
| EPI_ISL_579467 | 3/23/2020 | 10/14/2020 | Oceania / New Zealand / Canterbury          |
| EPI_ISL_579468 | 3/26/2020 | 10/14/2020 | Oceania / New Zealand / Canterbury          |
| EPI_ISL_579469 | 3/25/2020 | 10/14/2020 | Oceania / New Zealand / Canterbury          |
| EPI_ISL_579470 | 3/25/2020 | 10/14/2020 | Oceania / New Zealand / Canterbury          |
| EPI_ISL_579471 | 3/25/2020 | 10/14/2020 | Oceania / New Zealand / Canterbury          |
| EPI_ISL_579474 | 3/27/2020 | 10/14/2020 | Oceania / New Zealand / Canterbury          |
| EPI_ISL_579475 | 3/26/2020 | 10/14/2020 | Oceania / New Zealand / Canterbury          |
| EPI_ISL_579478 | 3/26/2020 | 10/14/2020 | Oceania / New Zealand / Canterbury          |
| EPI_ISL_579479 | 3/26/2020 | 10/14/2020 | Oceania / New Zealand / Canterbury          |
| EPI_ISL_579480 | 3/26/2020 | 10/14/2020 | Oceania / New Zealand / Canterbury          |
| EPI_ISL_579481 | 3/27/2020 | 10/14/2020 | Oceania / New Zealand / Canterbury          |
| EPI_ISL_579482 | 3/27/2020 | 10/14/2020 | Oceania / New Zealand / Canterbury          |
| EPI_ISL_579483 | 3/28/2020 | 10/14/2020 | Oceania / New Zealand / Canterbury          |
| EPI_ISL_579484 | 3/28/2020 | 10/14/2020 | Oceania / New Zealand / Canterbury          |
| EPI_ISL_579485 | 3/30/2020 | 10/14/2020 | Oceania / New Zealand / Canterbury          |
| EPI_ISL_579486 | 3/29/2020 | 10/14/2020 | Oceania / New Zealand / Canterbury          |
| EPI_ISL_579487 | 3/31/2020 | 10/14/2020 | Oceania / New Zealand / Canterbury          |
| EPI_ISL_579488 | 3/31/2020 | 10/14/2020 | Oceania / New Zealand / Canterbury          |
| EPI_ISL_579489 | 3/31/2020 | 10/14/2020 | Oceania / New Zealand / Canterbury          |
| EPI_ISL_579491 | 4/1/2020  | 10/14/2020 | Oceania / New Zealand / Canterbury          |
| EPI_ISL_579492 | 4/1/2020  | 10/14/2020 | Oceania / New Zealand / Canterbury          |
| EPI_ISL_579494 | 4/1/2020  | 10/14/2020 | Oceania / New Zealand / Canterbury          |
| EPI_ISL_579495 | 4/1/2020  | 10/14/2020 | Oceania / New Zealand / Canterbury          |
| EPI_ISL_579496 | 6/22/2020 | 10/14/2020 | Oceania / New Zealand / Canterbury          |
| EPI_ISL_579497 | 4/4/2020  | 10/14/2020 | Oceania / New Zealand / Canterbury          |
| EPI_ISL_579498 | 4/4/2020  | 10/14/2020 | Oceania / New Zealand / Canterbury          |
| EPI_ISL_579499 | 4/3/2020  | 10/14/2020 | Oceania / New Zealand / Canterbury          |
| EPI_ISL_579500 | 4/3/2020  | 10/14/2020 | Oceania / New Zealand / Canterbury          |
| EPI_ISL_579501 | 4/5/2020  | 10/14/2020 | Oceania / New Zealand / Canterbury          |
| EPI_ISL_579503 | 4/17/2020 | 10/14/2020 | Oceania / New Zealand / Canterbury          |
| EPI_ISL_579504 | 4/17/2020 | 10/14/2020 | Oceania / New Zealand / Canterbury          |
| EPI_ISL_579505 | 4/23/2020 | 10/14/2020 | Oceania / New Zealand / Canterbury          |
| EPI_ISL_579506 | 4/20/2020 | 10/14/2020 | Oceania / New Zealand / Canterbury          |
| EPI_ISL_579507 | 2020      | 10/14/2020 | Oceania / New Zealand / Combined Wellington |
| EPI_ISL_579508 | 2020      | 10/14/2020 | Oceania / New Zealand / Combined Wellington |
| EPI_ISL_579509 | 2020      | 10/14/2020 | Oceania / New Zealand / Combined Wellington |
| EPI_ISL_579510 | 2020      | 10/14/2020 | Oceania / New Zealand / Combined Wellington |
| EPI_ISL_579512 | 2020      | 10/14/2020 | Oceania / New Zealand / Combined Wellington |
| EPI_ISL_579513 | 2020      | 10/14/2020 | Oceania / New Zealand / Combined Wellington |
| EPI_ISL_579515 | 3/13/2020 | 10/14/2020 | North America / Canada / Nova Scotia        |
| EPI_ISL_579516 | 3/13/2020 | 10/14/2020 | North America / Canada / Nova Scotia        |
| EPI_ISL_579517 | 3/16/2020 | 10/14/2020 | North America / Canada / Nova Scotia        |
| EPI_ISL_579530 | 4/18/2020 | 10/14/2020 | North America / Canada / Nova Scotia        |



|                |           |            |                                            |
|----------------|-----------|------------|--------------------------------------------|
| EPI_ISL_579585 | 3/27/2020 | 10/14/2020 | North America / Canada / Nova Scotia       |
| EPI_ISL_579586 | 3/28/2020 | 10/14/2020 | North America / Canada / Nova Scotia       |
| EPI_ISL_579587 | 3/29/2020 | 10/14/2020 | North America / Canada / Nova Scotia       |
| EPI_ISL_579588 | 3/29/2020 | 10/14/2020 | North America / Canada / Nova Scotia       |
| EPI_ISL_579589 | 3/29/2020 | 10/14/2020 | North America / Canada / Nova Scotia       |
| EPI_ISL_579590 | 3/29/2020 | 10/14/2020 | North America / Canada / Nova Scotia       |
| EPI_ISL_579591 | 3/30/2020 | 10/14/2020 | North America / Canada / Nova Scotia       |
| EPI_ISL_579592 | 3/30/2020 | 10/14/2020 | North America / Canada / Nova Scotia       |
| EPI_ISL_579593 | 3/30/2020 | 10/14/2020 | North America / Canada / Nova Scotia       |
| EPI_ISL_579597 | 3/31/2020 | 10/14/2020 | North America / Canada / Nova Scotia       |
| EPI_ISL_579598 | 3/31/2020 | 10/14/2020 | North America / Canada / Nova Scotia       |
| EPI_ISL_579600 | 4/2/2020  | 10/14/2020 | North America / Canada / Nova Scotia       |
| EPI_ISL_579604 | 4/2/2020  | 10/14/2020 | North America / Canada / Nova Scotia       |
| EPI_ISL_579605 | 4/2/2020  | 10/14/2020 | North America / Canada / Nova Scotia       |
| EPI_ISL_579607 | 4/2/2020  | 10/14/2020 | North America / Canada / Nova Scotia       |
| EPI_ISL_579613 | 4/3/2020  | 10/14/2020 | North America / Canada / Nova Scotia       |
| EPI_ISL_579616 | 4/3/2020  | 10/14/2020 | North America / Canada / Nova Scotia       |
| EPI_ISL_579619 | 4/4/2020  | 10/14/2020 | North America / Canada / Nova Scotia       |
| EPI_ISL_579636 | 4/5/2020  | 10/14/2020 | North America / Canada / Nova Scotia       |
| EPI_ISL_579638 | 4/5/2020  | 10/14/2020 | North America / Canada / Nova Scotia       |
| EPI_ISL_579640 | 4/6/2020  | 10/14/2020 | North America / Canada / Nova Scotia       |
| EPI_ISL_579649 | 4/6/2020  | 10/14/2020 | North America / Canada / Nova Scotia       |
| EPI_ISL_579664 | 4/7/2020  | 10/14/2020 | North America / Canada / Nova Scotia       |
| EPI_ISL_579669 | 4/7/2020  | 10/14/2020 | North America / Canada / Nova Scotia       |
| EPI_ISL_579679 | 4/8/2020  | 10/14/2020 | North America / Canada / Nova Scotia       |
| EPI_ISL_579696 | 4/9/2020  | 10/14/2020 | North America / Canada / Nova Scotia       |
| EPI_ISL_579759 | 9/22/2020 | 10/14/2020 | Europe / United Kingdom / England          |
| EPI_ISL_579760 | 9/22/2020 | 10/14/2020 | Europe / United Kingdom / England          |
| EPI_ISL_579761 | 9/24/2020 | 10/14/2020 | Europe / United Kingdom / England          |
| EPI_ISL_579762 | 9/23/2020 | 10/14/2020 | Europe / United Kingdom / England          |
| EPI_ISL_579763 | 9/22/2020 | 10/14/2020 | Europe / United Kingdom / England          |
| EPI_ISL_579764 | 9/24/2020 | 10/14/2020 | Europe / United Kingdom / England          |
| EPI_ISL_579765 | 9/22/2020 | 10/14/2020 | Europe / United Kingdom / England          |
| EPI_ISL_579766 | 9/22/2020 | 10/14/2020 | Europe / United Kingdom / England          |
| EPI_ISL_579767 | 9/23/2020 | 10/14/2020 | Europe / United Kingdom / England          |
| EPI_ISL_579768 | 9/21/2020 | 10/14/2020 | Europe / United Kingdom / Northern Ireland |
| EPI_ISL_579769 | 9/21/2020 | 10/14/2020 | Europe / United Kingdom / England          |
| EPI_ISL_579770 | 9/22/2020 | 10/14/2020 | Europe / United Kingdom / England          |
| EPI_ISL_579771 | 9/22/2020 | 10/14/2020 | Europe / United Kingdom / England          |
| EPI_ISL_579773 | 9/23/2020 | 10/14/2020 | Europe / United Kingdom / England          |
| EPI_ISL_579774 | 9/21/2020 | 10/14/2020 | Europe / United Kingdom / England          |
| EPI_ISL_579775 | 9/22/2020 | 10/14/2020 | Europe / United Kingdom / England          |
| EPI_ISL_579776 | 9/21/2020 | 10/14/2020 | Europe / United Kingdom / England          |
| EPI_ISL_579777 | 9/19/2020 | 10/14/2020 | Europe / United Kingdom / England          |
| EPI_ISL_579778 | 9/22/2020 | 10/14/2020 | Europe / United Kingdom / England          |
| EPI_ISL_579779 | 9/22/2020 | 10/14/2020 | Europe / United Kingdom / England          |
| EPI_ISL_579780 | 9/22/2020 | 10/14/2020 | Europe / United Kingdom / England          |









































|                |           |            |                                   |
|----------------|-----------|------------|-----------------------------------|
| EPI_ISL_580762 | 9/24/2020 | 10/14/2020 | Europe / United Kingdom / England |
| EPI_ISL_580763 | 5/9/2020  | 10/14/2020 | Europe / United Kingdom / England |
| EPI_ISL_580764 | 5/9/2020  | 10/14/2020 | Europe / United Kingdom / England |
| EPI_ISL_580766 | 9/23/2020 | 10/14/2020 | Europe / United Kingdom / Wales   |
| EPI_ISL_580767 | 9/23/2020 | 10/14/2020 | Europe / United Kingdom / England |
| EPI_ISL_580768 | 9/24/2020 | 10/14/2020 | Europe / United Kingdom / Wales   |
| EPI_ISL_580769 | 5/9/2020  | 10/14/2020 | Europe / United Kingdom / England |
| EPI_ISL_580770 | 9/23/2020 | 10/14/2020 | Europe / United Kingdom / England |
| EPI_ISL_580771 | 5/8/2020  | 10/14/2020 | Europe / United Kingdom / England |
| EPI_ISL_580773 | 9/25/2020 | 10/14/2020 | Europe / United Kingdom / Wales   |
| EPI_ISL_580775 | 9/23/2020 | 10/14/2020 | Europe / United Kingdom / England |
| EPI_ISL_580776 | 9/24/2020 | 10/14/2020 | Europe / United Kingdom / Wales   |
| EPI_ISL_580777 | 9/25/2020 | 10/14/2020 | Europe / United Kingdom / England |
| EPI_ISL_580778 | 9/23/2020 | 10/14/2020 | Europe / United Kingdom / England |
| EPI_ISL_580779 | 9/23/2020 | 10/14/2020 | Europe / United Kingdom / England |
| EPI_ISL_580781 | 9/23/2020 | 10/14/2020 | Europe / United Kingdom / England |
| EPI_ISL_580782 | 9/23/2020 | 10/14/2020 | Europe / United Kingdom / England |
| EPI_ISL_580784 | 5/9/2020  | 10/14/2020 | Europe / United Kingdom / England |
| EPI_ISL_580786 | 9/25/2020 | 10/14/2020 | Europe / United Kingdom / England |
| EPI_ISL_580787 | 5/9/2020  | 10/14/2020 | Europe / United Kingdom / England |
| EPI_ISL_580788 | 5/9/2020  | 10/14/2020 | Europe / United Kingdom / England |
| EPI_ISL_580789 | 5/9/2020  | 10/14/2020 | Europe / United Kingdom / England |
| EPI_ISL_580791 | 5/5/2020  | 10/14/2020 | Europe / United Kingdom / England |
| EPI_ISL_580794 | 9/24/2020 | 10/14/2020 | Europe / United Kingdom / England |
| EPI_ISL_580795 | 9/24/2020 | 10/14/2020 | Europe / United Kingdom / England |
| EPI_ISL_580796 | 9/23/2020 | 10/14/2020 | Europe / United Kingdom / England |
| EPI_ISL_580797 | 9/24/2020 | 10/14/2020 | Europe / United Kingdom / Wales   |
| EPI_ISL_580800 | 9/24/2020 | 10/14/2020 | Europe / United Kingdom / England |
| EPI_ISL_580801 | 9/23/2020 | 10/14/2020 | Europe / United Kingdom / England |
| EPI_ISL_580802 | 9/23/2020 | 10/14/2020 | Europe / United Kingdom / England |
| EPI_ISL_580803 | 9/24/2020 | 10/14/2020 | Europe / United Kingdom / England |
| EPI_ISL_580804 | 9/23/2020 | 10/14/2020 | Europe / United Kingdom / England |
| EPI_ISL_580806 | 9/24/2020 | 10/14/2020 | Europe / United Kingdom / England |
| EPI_ISL_580807 | 9/23/2020 | 10/14/2020 | Europe / United Kingdom / England |
| EPI_ISL_580808 | 9/23/2020 | 10/14/2020 | Europe / United Kingdom / England |
| EPI_ISL_580809 | 9/23/2020 | 10/14/2020 | Europe / United Kingdom / England |
| EPI_ISL_580810 | 9/23/2020 | 10/14/2020 | Europe / United Kingdom / England |
| EPI_ISL_580812 | 9/25/2020 | 10/14/2020 | Europe / United Kingdom / Wales   |
| EPI_ISL_580814 | 9/23/2020 | 10/14/2020 | Europe / United Kingdom / England |
| EPI_ISL_580815 | 9/23/2020 | 10/14/2020 | Europe / United Kingdom / England |
| EPI_ISL_580817 | 9/24/2020 | 10/14/2020 | Europe / United Kingdom / England |
| EPI_ISL_580818 | 9/25/2020 | 10/14/2020 | Europe / United Kingdom / England |
| EPI_ISL_580819 | 9/24/2020 | 10/14/2020 | Europe / United Kingdom / Wales   |
| EPI_ISL_580820 | 9/23/2020 | 10/14/2020 | Europe / United Kingdom / England |
| EPI_ISL_580821 | 5/9/2020  | 10/14/2020 | Europe / United Kingdom / England |
| EPI_ISL_580823 | 5/8/2020  | 10/14/2020 | Europe / United Kingdom / England |
| EPI_ISL_580826 | 10/1/2020 | 10/14/2020 | Europe / United Kingdom / England |



























|                |           |            |                                   |
|----------------|-----------|------------|-----------------------------------|
| EPI_ISL_581390 | 8/26/2020 | 10/14/2020 | Europe / United Kingdom / England |
| EPI_ISL_581392 | 8/25/2020 | 10/14/2020 | Europe / United Kingdom / England |
| EPI_ISL_581394 | 8/27/2020 | 10/14/2020 | Europe / United Kingdom / England |
| EPI_ISL_581395 | 8/25/2020 | 10/14/2020 | Europe / United Kingdom / England |
| EPI_ISL_581396 | 8/27/2020 | 10/14/2020 | Europe / United Kingdom / England |
| EPI_ISL_581397 | 8/20/2020 | 10/14/2020 | Europe / United Kingdom / England |
| EPI_ISL_581398 | 8/17/2020 | 10/14/2020 | Europe / United Kingdom / England |
| EPI_ISL_581399 | 8/18/2020 | 10/14/2020 | Europe / United Kingdom / England |
| EPI_ISL_581401 | 8/17/2020 | 10/14/2020 | Europe / United Kingdom / England |
| EPI_ISL_581402 | 8/19/2020 | 10/14/2020 | Europe / United Kingdom / England |
| EPI_ISL_581403 | 8/11/2020 | 10/14/2020 | Europe / United Kingdom / England |
| EPI_ISL_581405 | 8/11/2020 | 10/14/2020 | Europe / United Kingdom / England |
| EPI_ISL_581407 | 8/14/2020 | 10/14/2020 | Europe / United Kingdom / England |
| EPI_ISL_581408 | 8/15/2020 | 10/14/2020 | Europe / United Kingdom / England |
| EPI_ISL_581409 | 6/16/2020 | 10/14/2020 | Europe / United Kingdom / England |
| EPI_ISL_581410 | 8/10/2020 | 10/14/2020 | Europe / United Kingdom / England |
| EPI_ISL_581411 | 6/12/2020 | 10/14/2020 | Europe / United Kingdom / England |
| EPI_ISL_581412 | 6/24/2020 | 10/14/2020 | Europe / United Kingdom / England |
| EPI_ISL_581413 | 6/16/2020 | 10/14/2020 | Europe / United Kingdom / England |
| EPI_ISL_581414 | 6/17/2020 | 10/14/2020 | Europe / United Kingdom / England |
| EPI_ISL_581416 | 6/16/2020 | 10/14/2020 | Europe / United Kingdom / England |
| EPI_ISL_581417 | 6/9/2020  | 10/14/2020 | Europe / United Kingdom / England |
| EPI_ISL_581418 | 8/6/2020  | 10/14/2020 | Europe / United Kingdom / England |
| EPI_ISL_581419 | 8/2/2020  | 10/14/2020 | Europe / United Kingdom / England |
| EPI_ISL_581420 | 8/6/2020  | 10/14/2020 | Europe / United Kingdom / England |
| EPI_ISL_581421 | 6/20/2020 | 10/14/2020 | Europe / United Kingdom / England |
| EPI_ISL_581422 | 6/20/2020 | 10/14/2020 | Europe / United Kingdom / England |
| EPI_ISL_581426 | 6/26/2020 | 10/14/2020 | Europe / United Kingdom / England |
| EPI_ISL_581427 | 6/29/2020 | 10/14/2020 | Europe / United Kingdom / England |
| EPI_ISL_581428 | 7/17/2020 | 10/14/2020 | Europe / United Kingdom / England |
| EPI_ISL_581429 | 6/29/2020 | 10/14/2020 | Europe / United Kingdom / England |
| EPI_ISL_581430 | 6/29/2020 | 10/14/2020 | Europe / United Kingdom / England |
| EPI_ISL_581431 | 6/29/2020 | 10/14/2020 | Europe / United Kingdom / England |
| EPI_ISL_581432 | 6/30/2020 | 10/14/2020 | Europe / United Kingdom / England |
| EPI_ISL_581434 | 7/7/2020  | 10/14/2020 | Europe / United Kingdom / England |
| EPI_ISL_581435 | 7/4/2020  | 10/14/2020 | Europe / United Kingdom / England |
| EPI_ISL_581436 | 6/8/2020  | 10/14/2020 | Europe / United Kingdom / England |
| EPI_ISL_581437 | 6/16/2020 | 10/14/2020 | Europe / United Kingdom / England |
| EPI_ISL_581438 | 6/10/2020 | 10/14/2020 | Europe / United Kingdom / England |
| EPI_ISL_581439 | 6/16/2020 | 10/14/2020 | Europe / United Kingdom / England |
| EPI_ISL_581441 | 6/16/2020 | 10/14/2020 | Europe / United Kingdom / England |
| EPI_ISL_581442 | 6/20/2020 | 10/14/2020 | Europe / United Kingdom / England |
| EPI_ISL_581443 | 6/17/2020 | 10/14/2020 | Europe / United Kingdom / England |
| EPI_ISL_581444 | 6/2/2020  | 10/14/2020 | Europe / United Kingdom / England |
| EPI_ISL_581446 | 6/24/2020 | 10/14/2020 | Europe / United Kingdom / England |
| EPI_ISL_581447 | 6/4/2020  | 10/14/2020 | Europe / United Kingdom / England |
| EPI_ISL_581448 | 6/24/2020 | 10/14/2020 | Europe / United Kingdom / England |

|                |           |                                                             |
|----------------|-----------|-------------------------------------------------------------|
| EPI_ISL_581449 | 8/4/2020  | 10/14/2020 Asia / India / West Bengal                       |
| EPI_ISL_581450 | 8/12/2020 | 10/14/2020 Asia / India / West Bengal                       |
| EPI_ISL_581451 | 8/12/2020 | 10/14/2020 Asia / India / West Bengal                       |
| EPI_ISL_581478 | 3/22/2020 | 10/14/2020 Europe / Germany / Baden-Wurttemberg / Tuebingen |
| EPI_ISL_581479 | 3/23/2020 | 10/14/2020 Europe / Germany / Baden-Wurttemberg / Tuebingen |
| EPI_ISL_581480 | 3/26/2020 | 10/14/2020 Europe / Germany / Baden-Wurttemberg / Tuebingen |
| EPI_ISL_581481 | 3/30/2020 | 10/14/2020 Europe / Germany / Baden-Wurttemberg / Tuebingen |
| EPI_ISL_581482 | 3/31/2020 | 10/14/2020 Europe / Germany / Baden-Wurttemberg / Tuebingen |
| EPI_ISL_581483 | 3/31/2020 | 10/14/2020 Europe / Germany / Baden-Wurttemberg / Tuebingen |
| EPI_ISL_581484 | 4/3/2020  | 10/14/2020 Europe / Germany / Baden-Wurttemberg / Tuebingen |
| EPI_ISL_581485 | 4/20/2020 | 10/14/2020 Europe / Germany / Baden-Wurttemberg / Tuebingen |
| EPI_ISL_581486 | 2020-04   | 10/14/2020 Africa / Republic of the Congo / Brazzaville     |
| EPI_ISL_581487 | 7/4/2020  | 10/14/2020 Africa / Republic of the Congo / Brazzaville     |
| EPI_ISL_581488 | 2020-05   | 10/14/2020 Africa / Republic of the Congo / Brazzaville     |
| EPI_ISL_581490 | 6/6/2020  | 10/14/2020 Africa / Republic of the Congo / Brazzaville     |
| EPI_ISL_581491 | 6/24/2020 | 10/14/2020 Africa / Republic of the Congo / Brazzaville     |
| EPI_ISL_581492 | 7/3/2020  | 10/14/2020 Africa / Republic of the Congo / Brazzaville     |
| EPI_ISL_581493 | 6/25/2020 | 10/14/2020 Africa / Republic of the Congo / Brazzaville     |
| EPI_ISL_581494 | 8/12/2020 | 10/14/2020 Asia / India / West Bengal                       |
| EPI_ISL_581495 | 8/12/2020 | 10/14/2020 Asia / India / West Bengal                       |
| EPI_ISL_581496 | 8/4/2020  | 10/14/2020 Asia / India / West Bengal                       |
| EPI_ISL_581497 | 8/4/2020  | 10/14/2020 Asia / India / West Bengal                       |
| EPI_ISL_581499 | 8/12/2020 | 10/14/2020 Asia / India / West Bengal                       |
| EPI_ISL_581500 | 8/12/2020 | 10/14/2020 Asia / India / West Bengal                       |
| EPI_ISL_581501 | 8/12/2020 | 10/14/2020 Asia / India / West Bengal                       |
| EPI_ISL_581502 | 8/12/2020 | 10/14/2020 Asia / India / West Bengal                       |
| EPI_ISL_581503 | 8/12/2020 | 10/14/2020 Asia / India / West Bengal                       |
| EPI_ISL_581504 | 8/12/2020 | 10/14/2020 Asia / India / West Bengal                       |
| EPI_ISL_581506 | 8/24/2020 | 10/14/2020 Asia / India / Delhi                             |
| EPI_ISL_581507 | 8/25/2020 | 10/14/2020 Asia / India / Delhi                             |
| EPI_ISL_581508 | 7/28/2020 | 10/14/2020 North America / USA / Virginia                   |
| EPI_ISL_581509 | 7/28/2020 | 10/14/2020 North America / USA / Virginia                   |
| EPI_ISL_581510 | 7/28/2020 | 10/14/2020 North America / USA / Virginia                   |
| EPI_ISL_581511 | 7/26/2020 | 10/14/2020 North America / USA / Virginia                   |
| EPI_ISL_581512 | 7/28/2020 | 10/14/2020 North America / USA / Virginia                   |
| EPI_ISL_581513 | 7/25/2020 | 10/14/2020 North America / USA / Virginia                   |
| EPI_ISL_581514 | 7/28/2020 | 10/14/2020 North America / USA / Virginia                   |
| EPI_ISL_581515 | 7/24/2020 | 10/14/2020 North America / USA / Virginia                   |
| EPI_ISL_581516 | 7/28/2020 | 10/14/2020 North America / USA / Virginia                   |
| EPI_ISL_581518 | 8/8/2020  | 10/14/2020 North America / USA / Virginia                   |
| EPI_ISL_581520 | 8/7/2020  | 10/14/2020 North America / USA / Virginia                   |
| EPI_ISL_581523 | 8/8/2020  | 10/14/2020 North America / USA / Virginia                   |
| EPI_ISL_581524 | 8/7/2020  | 10/14/2020 North America / USA / Virginia                   |
| EPI_ISL_581525 | 8/7/2020  | 10/14/2020 North America / USA / Virginia                   |
| EPI_ISL_581526 | 8/8/2020  | 10/14/2020 North America / USA / Virginia                   |
| EPI_ISL_581527 | 8/7/2020  | 10/14/2020 North America / USA / Virginia                   |
| EPI_ISL_581528 | 8/8/2020  | 10/14/2020 North America / USA / Virginia                   |













|                |           |            |                                         |
|----------------|-----------|------------|-----------------------------------------|
| EPI_ISL_581853 | 4/4/2020  | 10/14/2020 | Europe / Switzerland / Basel-Stadt      |
| EPI_ISL_581855 | 4/5/2020  | 10/14/2020 | Europe / Switzerland / Basel-Stadt      |
| EPI_ISL_581857 | 4/5/2020  | 10/14/2020 | Europe / Switzerland / Basel-Stadt      |
| EPI_ISL_581859 | 4/5/2020  | 10/14/2020 | Europe / Switzerland / Basel-Stadt      |
| EPI_ISL_581865 | 4/6/2020  | 10/14/2020 | Europe / Switzerland / Basel-Landschaft |
| EPI_ISL_581867 | 4/6/2020  | 10/14/2020 | Europe / Switzerland / Basel-Stadt      |
| EPI_ISL_581869 | 4/3/2020  | 10/14/2020 | Europe / Switzerland / Basel-Landschaft |
| EPI_ISL_581871 | 4/4/2020  | 10/14/2020 | Europe / Switzerland / Basel-Landschaft |
| EPI_ISL_581872 | 4/6/2020  | 10/14/2020 | Europe / Switzerland / Basel-Landschaft |
| EPI_ISL_581873 | 4/6/2020  | 10/14/2020 | Europe / Switzerland / Basel-Landschaft |
| EPI_ISL_581877 | 7/6/2020  | 10/14/2020 | Europe / Switzerland / Basel-Stadt      |
| EPI_ISL_581880 | 7/7/2020  | 10/14/2020 | Europe / Switzerland / Basel-Stadt      |
| EPI_ISL_581883 | 7/9/2020  | 10/14/2020 | Europe / Switzerland / Basel-Stadt      |
| EPI_ISL_581891 | 6/8/2020  | 10/14/2020 | Europe / Switzerland / Basel-Stadt      |
| EPI_ISL_581893 | 7/1/2020  | 10/14/2020 | Europe / Switzerland / Basel-Stadt      |
| EPI_ISL_581894 | 7/3/2020  | 10/14/2020 | Europe / Switzerland / Basel-Stadt      |
| EPI_ISL_581895 | 7/6/2020  | 10/14/2020 | Europe / Switzerland / Basel-Stadt      |
| EPI_ISL_581896 | 7/6/2020  | 10/14/2020 | Europe / Switzerland / Basel-Landschaft |
| EPI_ISL_581897 | 7/6/2020  | 10/14/2020 | Europe / Switzerland / Basel-Stadt      |
| EPI_ISL_581898 | 7/6/2020  | 10/14/2020 | Europe / Switzerland / Basel-Stadt      |
| EPI_ISL_581899 | 7/9/2020  | 10/14/2020 | Europe / Switzerland / Basel-Stadt      |
| EPI_ISL_581901 | 7/13/2020 | 10/14/2020 | Europe / Switzerland / Basel-Stadt      |
| EPI_ISL_581902 | 7/13/2020 | 10/14/2020 | Europe / Switzerland / Basel-Stadt      |
| EPI_ISL_581903 | 5/27/2020 | 10/14/2020 | Europe / Switzerland / Basel-Stadt      |
| EPI_ISL_581904 | 6/2/2020  | 10/14/2020 | Europe / Switzerland / Basel-Stadt      |
| EPI_ISL_581905 | 7/13/2020 | 10/14/2020 | Europe / Switzerland / Basel-Landschaft |
| EPI_ISL_581906 | 7/21/2020 | 10/14/2020 | Europe / Switzerland / Basel-Stadt      |
| EPI_ISL_581907 | 6/1/2020  | 10/14/2020 | Europe / Switzerland / Basel-Landschaft |
| EPI_ISL_581913 | 7/21/2020 | 10/14/2020 | Europe / Switzerland / Basel-Stadt      |
| EPI_ISL_581915 | 3/4/2020  | 10/14/2020 | Europe / Switzerland / Basel-Landschaft |
| EPI_ISL_581917 | 4/22/2020 | 10/14/2020 | Europe / Switzerland / Basel-Stadt      |
| EPI_ISL_581919 | 4/24/2020 | 10/14/2020 | Europe / Switzerland / Basel-Stadt      |
| EPI_ISL_581920 | 4/24/2020 | 10/14/2020 | Europe / Switzerland / Basel-Stadt      |
| EPI_ISL_581921 | 4/28/2020 | 10/14/2020 | Europe / Switzerland / Basel-Stadt      |
| EPI_ISL_581922 | 5/1/2020  | 10/14/2020 | Europe / Switzerland / Basel-Stadt      |
| EPI_ISL_581924 | 5/2/2020  | 10/14/2020 | Europe / Switzerland / Basel-Landschaft |
| EPI_ISL_581926 | 5/5/2020  | 10/14/2020 | Europe / Switzerland / Basel-Stadt      |
| EPI_ISL_581927 | 5/7/2020  | 10/14/2020 | Europe / Switzerland / Basel-Stadt      |
| EPI_ISL_581928 | 5/19/2020 | 10/14/2020 | Europe / Switzerland / Basel-Stadt      |
| EPI_ISL_581929 | 5/25/2020 | 10/14/2020 | Europe / Switzerland / Basel-Landschaft |
| EPI_ISL_581930 | 7/30/2020 | 10/14/2020 | Europe / Switzerland / Basel-Stadt      |
| EPI_ISL_581931 | 7/30/2020 | 10/14/2020 | Europe / Switzerland / Basel-Stadt      |
| EPI_ISL_581932 | 7/31/2020 | 10/14/2020 | Europe / Switzerland / Basel-Stadt      |
| EPI_ISL_581933 | 8/1/2020  | 10/14/2020 | Europe / Switzerland / Basel-Stadt      |
| EPI_ISL_581934 | 8/3/2020  | 10/14/2020 | Europe / Switzerland / Basel-Stadt      |
| EPI_ISL_581935 | 8/3/2020  | 10/14/2020 | Europe / Switzerland / Basel-Stadt      |
| EPI_ISL_581936 | 8/3/2020  | 10/14/2020 | Europe / Switzerland / Basel-Stadt      |

|                |           |            |                                         |
|----------------|-----------|------------|-----------------------------------------|
| EPI_ISL_581937 | 8/6/2020  | 10/14/2020 | Europe / Switzerland / Basel-Stadt      |
| EPI_ISL_581938 | 8/6/2020  | 10/14/2020 | Europe / Switzerland / Basel-Landschaft |
| EPI_ISL_581939 | 8/6/2020  | 10/14/2020 | Europe / Switzerland / Basel-Landschaft |
| EPI_ISL_581940 | 8/7/2020  | 10/14/2020 | Europe / Switzerland / Basel-Stadt      |
| EPI_ISL_581941 | 8/7/2020  | 10/14/2020 | Europe / Switzerland / Basel-Stadt      |
| EPI_ISL_581942 | 8/8/2020  | 10/14/2020 | Europe / Switzerland / Basel-Stadt      |
| EPI_ISL_581943 | 8/9/2020  | 10/14/2020 | Europe / Switzerland / Basel-Stadt      |
| EPI_ISL_581944 | 8/10/2020 | 10/14/2020 | Europe / Switzerland / Basel-Stadt      |
| EPI_ISL_581945 | 8/10/2020 | 10/14/2020 | Europe / Switzerland / Basel-Stadt      |
| EPI_ISL_581946 | 8/11/2020 | 10/14/2020 | Europe / Switzerland / Basel-Stadt      |
| EPI_ISL_581947 | 8/11/2020 | 10/14/2020 | Europe / Switzerland / Basel-Stadt      |
| EPI_ISL_581948 | 8/11/2020 | 10/14/2020 | Europe / Switzerland / Basel-Stadt      |
| EPI_ISL_581949 | 8/11/2020 | 10/14/2020 | Europe / Switzerland / Basel-Stadt      |
| EPI_ISL_581950 | 8/12/2020 | 10/14/2020 | Europe / Switzerland / Basel-Stadt      |
| EPI_ISL_581951 | 8/12/2020 | 10/14/2020 | Europe / Switzerland / Basel-Stadt      |
| EPI_ISL_581952 | 8/13/2020 | 10/14/2020 | Europe / Switzerland / Basel-Stadt      |
| EPI_ISL_581953 | 8/13/2020 | 10/14/2020 | Europe / Switzerland / Basel-Stadt      |
| EPI_ISL_581954 | 8/14/2020 | 10/14/2020 | Europe / Switzerland / Basel-Stadt      |
| EPI_ISL_581955 | 8/14/2020 | 10/14/2020 | Europe / Switzerland / Basel-Stadt      |
| EPI_ISL_581956 | 8/14/2020 | 10/14/2020 | Europe / Switzerland / Basel-Stadt      |
| EPI_ISL_581957 | 8/14/2020 | 10/14/2020 | Europe / Switzerland / Basel-Stadt      |
| EPI_ISL_581958 | 8/15/2020 | 10/14/2020 | Europe / Switzerland / Basel-Stadt      |
| EPI_ISL_581959 | 4/27/2020 | 10/14/2020 | Europe / Switzerland / Basel-Stadt      |
| EPI_ISL_581961 | 8/3/2020  | 10/14/2020 | Europe / Switzerland / Basel-Stadt      |
| EPI_ISL_581962 | 8/5/2020  | 10/14/2020 | Europe / Switzerland / Basel-Landschaft |
| EPI_ISL_581963 | 8/9/2020  | 10/14/2020 | Europe / Switzerland / Basel-Stadt      |
| EPI_ISL_581965 | 8/16/2020 | 10/14/2020 | Europe / Switzerland / Basel-Stadt      |
| EPI_ISL_581970 | 8/18/2020 | 10/14/2020 | Europe / Switzerland / Basel-Stadt      |
| EPI_ISL_581973 | 8/19/2020 | 10/14/2020 | Europe / Switzerland / Basel-Landschaft |
| EPI_ISL_581979 | 8/21/2020 | 10/14/2020 | Europe / Switzerland / Basel-Stadt      |
| EPI_ISL_581980 | 8/21/2020 | 10/14/2020 | Europe / Switzerland / Basel-Stadt      |
| EPI_ISL_581981 | 8/22/2020 | 10/14/2020 | Europe / Switzerland / Basel-Stadt      |
| EPI_ISL_581984 | 8/24/2020 | 10/14/2020 | Europe / Switzerland / Basel-Stadt      |
| EPI_ISL_581985 | 8/26/2020 | 10/14/2020 | Europe / Switzerland / Basel-Landschaft |
| EPI_ISL_581986 | 8/26/2020 | 10/14/2020 | Europe / Switzerland / Basel-Stadt      |
| EPI_ISL_582000 | 8/17/2020 | 10/14/2020 | Europe / Switzerland / Basel-Stadt      |
| EPI_ISL_582001 | 8/20/2020 | 10/14/2020 | Europe / Switzerland / Basel-Stadt      |
| EPI_ISL_582017 | 10/6/2020 | 10/15/2020 | Oceania / New Zealand / Auckland        |
| EPI_ISL_582018 | 10/7/2020 | 10/15/2020 | Oceania / New Zealand / Bay of Plenty   |
| EPI_ISL_582019 | 10/2/2020 | 10/15/2020 | Oceania / New Zealand / Bay of Plenty   |
| EPI_ISL_582020 | 10/2/2020 | 10/15/2020 | Oceania / New Zealand / Bay of Plenty   |
| EPI_ISL_582022 | 10/8/2020 | 10/15/2020 | Oceania / New Zealand / Auckland        |
| EPI_ISL_582023 | 10/8/2020 | 10/15/2020 | Oceania / New Zealand / Auckland        |
| EPI_ISL_582027 | 8/31/2020 | 10/15/2020 | Europe / Belgium / Liège                |
| EPI_ISL_582028 | 8/12/2020 | 10/15/2020 | Asia / India / West Bengal              |
| EPI_ISL_582030 | 6/30/2020 | 10/15/2020 | Asia / Iraq / Al-Muthanna Province      |
| EPI_ISL_582031 | 9/5/2020  | 10/15/2020 | Europe / Poland / Dolnośląskie          |



|                |           |            |                                                          |
|----------------|-----------|------------|----------------------------------------------------------|
| EPI_ISL_582102 | 9/3/2020  | 10/15/2020 | Europe / Spain / Cantabria / Santander                   |
| EPI_ISL_582103 | 9/3/2020  | 10/15/2020 | Europe / Spain / Cantabria / Santander                   |
| EPI_ISL_582104 | 9/3/2020  | 10/15/2020 | Europe / Spain / Cantabria / Santander                   |
| EPI_ISL_582105 | 9/3/2020  | 10/15/2020 | Europe / Spain / Cantabria / Santander                   |
| EPI_ISL_582106 | 9/3/2020  | 10/15/2020 | Europe / Spain / Cantabria / Santander                   |
| EPI_ISL_582107 | 9/3/2020  | 10/15/2020 | Europe / Spain / Cantabria / Santander                   |
| EPI_ISL_582108 | 9/3/2020  | 10/15/2020 | Europe / Spain / Cantabria / Santander                   |
| EPI_ISL_582109 | 4/3/2020  | 10/15/2020 | Europe / Spain / Cantabria / Santander                   |
| EPI_ISL_582110 | 9/7/2020  | 10/15/2020 | Europe / France / Auvergne-Rhone-Alpes / Lyon            |
| EPI_ISL_582111 | 9/16/2020 | 10/15/2020 | Europe / France / Auvergne-Rhone-Alpes / Lyon            |
| EPI_ISL_582112 | 9/1/2020  | 10/15/2020 | Europe / France / Auvergne-Rhone-Alpes / Lyon            |
| EPI_ISL_582114 | 8/28/2020 | 10/15/2020 | Europe / France / Auvergne-Rhone-Alpes / Lyon            |
| EPI_ISL_582115 | 8/31/2020 | 10/15/2020 | Europe / France / Auvergne-Rhone-Alpes / Lyon            |
| EPI_ISL_582116 | 9/16/2020 | 10/15/2020 | Europe / France / Auvergne-Rhone-Alpes / Lyon            |
| EPI_ISL_582118 | 9/9/2020  | 10/15/2020 | Europe / France / Auvergne-Rhone-Alpes / Lyon            |
| EPI_ISL_582119 | 9/9/2020  | 10/15/2020 | Europe / France / Auvergne-Rhone-Alpes / Lyon            |
| EPI_ISL_582120 | 9/7/2020  | 10/15/2020 | Europe / France / Auvergne-Rhone-Alpes / Lyon            |
| EPI_ISL_582121 | 8/7/2020  | 10/15/2020 | Europe / France / Auvergne-Rhone-Alpes / Bourg-en-Bresse |
| EPI_ISL_582122 | 9/13/2020 | 10/15/2020 | Europe / France / Auvergne-Rhone-Alpes / Lyon            |
| EPI_ISL_582123 | 3/1/2020  | 10/15/2020 | Europe / Italy / Tuscany                                 |
| EPI_ISL_582124 | 6/3/2020  | 10/15/2020 | Asia / Malaysia / Selangor                               |
| EPI_ISL_582125 | 1/28/2020 | 10/15/2020 | Asia / United Arab Emirates                              |
| EPI_ISL_582126 | 1/28/2020 | 10/15/2020 | Asia / United Arab Emirates                              |
| EPI_ISL_582127 | 3/16/2020 | 10/15/2020 | Europe / Belgium / Edegem                                |
| EPI_ISL_582128 | 9/17/2020 | 10/15/2020 | Europe / Belgium / Edegem                                |
| EPI_ISL_582129 | 9/13/2020 | 10/15/2020 | Europe / Belgium / Edegem                                |
| EPI_ISL_582130 | 9/16/2020 | 10/15/2020 | Europe / Belgium / Edegem                                |
| EPI_ISL_582131 | 9/16/2020 | 10/15/2020 | Europe / Belgium / Edegem                                |
| EPI_ISL_582132 | 9/17/2020 | 10/15/2020 | Europe / Belgium / Edegem                                |
| EPI_ISL_582241 | 9/28/2020 | 10/16/2020 | Asia / India / Maharashtra                               |
| EPI_ISL_582242 | 3/31/2020 | 10/16/2020 | North America / Canada / Manitoba                        |
| EPI_ISL_582243 | 3/30/2020 | 10/16/2020 | North America / Canada / Manitoba                        |
| EPI_ISL_582244 | 3/31/2020 | 10/16/2020 | North America / Canada / Manitoba                        |
| EPI_ISL_582245 | 3/28/2020 | 10/16/2020 | North America / Canada / Manitoba                        |
| EPI_ISL_582246 | 3/22/2020 | 10/16/2020 | North America / Canada / Manitoba                        |
| EPI_ISL_582247 | 4/7/2020  | 10/16/2020 | North America / Canada / Manitoba                        |
| EPI_ISL_582248 | 4/7/2020  | 10/16/2020 | North America / Canada / Manitoba                        |
| EPI_ISL_582249 | 4/7/2020  | 10/16/2020 | North America / Canada / Manitoba                        |
| EPI_ISL_582251 | 4/3/2020  | 10/16/2020 | North America / Canada / Manitoba                        |
| EPI_ISL_582252 | 4/2/2020  | 10/16/2020 | North America / Canada / Manitoba                        |
| EPI_ISL_582253 | 3/30/2020 | 10/16/2020 | North America / Canada / Manitoba                        |
| EPI_ISL_582254 | 3/29/2020 | 10/16/2020 | North America / Canada / Manitoba                        |
| EPI_ISL_582255 | 3/29/2020 | 10/16/2020 | North America / Canada / Manitoba                        |
| EPI_ISL_582256 | 3/31/2020 | 10/16/2020 | North America / Canada / Manitoba                        |
| EPI_ISL_582257 | 4/1/2020  | 10/16/2020 | North America / Canada / Manitoba                        |
| EPI_ISL_582258 | 4/1/2020  | 10/16/2020 | North America / Canada / Manitoba                        |
| EPI_ISL_582259 | 3/30/2020 | 10/16/2020 | North America / Canada / Manitoba                        |













|                |           |                                                          |
|----------------|-----------|----------------------------------------------------------|
| EPI_ISL_582505 | 7/20/2020 | 10/16/2020 North America / Canada / Manitoba             |
| EPI_ISL_582506 | 4/9/2020  | 10/16/2020 North America / Canada / Manitoba             |
| EPI_ISL_582507 | 4/25/2020 | 10/16/2020 North America / Canada / Manitoba             |
| EPI_ISL_582508 | 9/11/2020 | 10/16/2020 Europe / France / Auvergne-Rhone-Alpes / Lyon |
| EPI_ISL_582509 | 8/4/2020  | 10/16/2020 Europe / Ukraine / Kharkiv                    |
| EPI_ISL_582510 | 8/7/2020  | 10/16/2020 Europe / Ukraine / Kharkiv                    |
| EPI_ISL_582511 | 8/7/2020  | 10/16/2020 Europe / Ukraine / Kharkiv                    |
| EPI_ISL_582512 | 8/7/2020  | 10/16/2020 Europe / Ukraine / Kharkiv                    |
| EPI_ISL_582513 | 7/31/2020 | 10/16/2020 Europe / Ukraine / Kharkiv                    |
| EPI_ISL_582514 | 4/8/2020  | 10/16/2020 Europe / Portugal                             |
| EPI_ISL_582515 | 4/17/2020 | 10/16/2020 Europe / Portugal                             |
| EPI_ISL_582516 | 3/22/2020 | 10/16/2020 Europe / Portugal                             |
| EPI_ISL_582517 | 3/24/2020 | 10/16/2020 Europe / Portugal                             |
| EPI_ISL_582518 | 4/6/2020  | 10/16/2020 Europe / Portugal                             |
| EPI_ISL_582519 | 3/24/2020 | 10/16/2020 Europe / Portugal                             |
| EPI_ISL_582522 | 3/24/2020 | 10/16/2020 Europe / Portugal                             |
| EPI_ISL_582523 | 3/24/2020 | 10/16/2020 Europe / Portugal                             |
| EPI_ISL_582524 | 4/2/2020  | 10/16/2020 Europe / Serbia / Kragujevac                  |
| EPI_ISL_582525 | 4/3/2020  | 10/16/2020 Europe / Serbia / Cuprija                     |
| EPI_ISL_582526 | 4/5/2020  | 10/16/2020 Europe / Serbia / Krusevac                    |
| EPI_ISL_582527 | 4/12/2020 | 10/16/2020 Europe / Serbia / Krusevac                    |
| EPI_ISL_582528 | 4/15/2020 | 10/16/2020 Europe / Serbia / Krusevac                    |
| EPI_ISL_582529 | 4/16/2020 | 10/16/2020 Europe / Serbia / Krusevac                    |
| EPI_ISL_582530 | 7/20/2020 | 10/16/2020 Europe / Kosovo / Mitrovica                   |
| EPI_ISL_582531 | 7/24/2020 | 10/16/2020 Europe / Serbia / Kraljevo                    |
| EPI_ISL_582532 | 7/24/2020 | 10/16/2020 Europe / Serbia / Kraljevo                    |
| EPI_ISL_582533 | 7/24/2020 | 10/16/2020 Europe / Serbia / Kraljevo                    |
| EPI_ISL_582534 | 7/24/2020 | 10/16/2020 Europe / Serbia / Kraljevo                    |
| EPI_ISL_582608 | 1/30/2020 | 10/16/2020 Asia / United Arab Emirates                   |
| EPI_ISL_582613 | 2/21/2020 | 10/16/2020 Asia / United Arab Emirates                   |
| EPI_ISL_582620 | 2/22/2020 | 10/16/2020 Asia / United Arab Emirates                   |
| EPI_ISL_582624 | 2/27/2020 | 10/16/2020 Asia / United Arab Emirates                   |
| EPI_ISL_582625 | 2/27/2020 | 10/16/2020 Asia / United Arab Emirates                   |
| EPI_ISL_582632 | 4/19/2020 | 10/16/2020 Asia / United Arab Emirates                   |
| EPI_ISL_582642 | 8/25/2020 | 10/16/2020 Asia / United Arab Emirates                   |
| EPI_ISL_582643 | 8/26/2020 | 10/16/2020 Asia / United Arab Emirates                   |
| EPI_ISL_582644 | 8/28/2020 | 10/16/2020 Asia / United Arab Emirates                   |
| EPI_ISL_582645 | 8/28/2020 | 10/16/2020 Asia / United Arab Emirates                   |
| EPI_ISL_582646 | 8/28/2020 | 10/16/2020 Asia / United Arab Emirates                   |
| EPI_ISL_582647 | 8/29/2020 | 10/16/2020 Asia / United Arab Emirates                   |
| EPI_ISL_582648 | 8/29/2020 | 10/16/2020 Asia / United Arab Emirates                   |
| EPI_ISL_582649 | 8/29/2020 | 10/16/2020 Asia / United Arab Emirates                   |
| EPI_ISL_582650 | 8/29/2020 | 10/16/2020 Asia / United Arab Emirates                   |
| EPI_ISL_582651 | 8/29/2020 | 10/16/2020 Asia / United Arab Emirates                   |
| EPI_ISL_582652 | 8/29/2020 | 10/16/2020 Asia / United Arab Emirates                   |
| EPI_ISL_582653 | 8/29/2020 | 10/16/2020 Asia / United Arab Emirates                   |
| EPI_ISL_582657 | 8/29/2020 | 10/16/2020 Asia / United Arab Emirates                   |

|                |           |                                              |
|----------------|-----------|----------------------------------------------|
| EPI_ISL_582659 | 9/3/2020  | 10/16/2020 Asia / United Arab Emirates       |
| EPI_ISL_582662 | 9/9/2020  | 10/16/2020 Asia / United Arab Emirates       |
| EPI_ISL_582663 | 9/9/2020  | 10/16/2020 Asia / United Arab Emirates       |
| EPI_ISL_582674 | 9/16/2020 | 10/16/2020 Asia / United Arab Emirates       |
| EPI_ISL_582675 | 9/17/2020 | 10/16/2020 Asia / United Arab Emirates       |
| EPI_ISL_582679 | 9/22/2020 | 10/16/2020 Asia / United Arab Emirates       |
| EPI_ISL_582680 | 9/23/2020 | 10/16/2020 Asia / United Arab Emirates       |
| EPI_ISL_582681 | 9/23/2020 | 10/16/2020 Asia / United Arab Emirates       |
| EPI_ISL_582683 | 9/23/2020 | 10/16/2020 Asia / United Arab Emirates       |
| EPI_ISL_582688 | 9/24/2020 | 10/16/2020 Asia / United Arab Emirates       |
| EPI_ISL_582692 | 2020-06   | 10/16/2020 Europe / Italy / Sicily / Palermo |
| EPI_ISL_582693 | 2020-06   | 10/16/2020 Europe / Italy / Sicily / Palermo |
| EPI_ISL_582694 | 2020-06   | 10/16/2020 Europe / Italy / Sicily / Palermo |
| EPI_ISL_582767 | 2020-06   | 10/16/2020 Europe / Italy / Sicily / Palermo |
| EPI_ISL_582769 | 2020-06   | 10/16/2020 Europe / Italy / Sicily / Palermo |
| EPI_ISL_582771 | 9/16/2020 | 10/16/2020 Europe / Sweden / Ostergotland    |
| EPI_ISL_582772 | 9/16/2020 | 10/16/2020 Europe / Sweden / Ostergotland    |
| EPI_ISL_582773 | 9/16/2020 | 10/16/2020 Europe / Sweden / Ostergotland    |
| EPI_ISL_582774 | 9/16/2020 | 10/16/2020 Europe / Sweden / Ostergotland    |
| EPI_ISL_582775 | 9/16/2020 | 10/16/2020 Europe / Sweden / Ostergotland    |
| EPI_ISL_582776 | 5/20/2020 | 10/16/2020 Europe / Sweden / Uppsala         |
| EPI_ISL_582777 | 5/28/2020 | 10/16/2020 Europe / Sweden / Uppsala         |
| EPI_ISL_582778 | 6/4/2020  | 10/16/2020 Europe / Sweden / Uppsala         |
| EPI_ISL_582779 | 6/12/2020 | 10/16/2020 Europe / Sweden / Uppsala         |
| EPI_ISL_582780 | 7/11/2020 | 10/16/2020 Europe / Sweden / Uppsala         |
| EPI_ISL_582781 | 7/4/2020  | 10/16/2020 Europe / Sweden / Uppsala         |
| EPI_ISL_582782 | 7/7/2020  | 10/16/2020 Europe / Sweden / Uppsala         |
| EPI_ISL_582783 | 8/6/2020  | 10/16/2020 Europe / Sweden / Uppsala         |
| EPI_ISL_582784 | 8/2/2020  | 10/16/2020 Europe / Sweden / Uppsala         |
| EPI_ISL_582785 | 6/1/2020  | 10/16/2020 Europe / Sweden / Orebro          |
| EPI_ISL_582786 | 6/1/2020  | 10/16/2020 Europe / Sweden / Orebro          |
| EPI_ISL_582787 | 6/2/2020  | 10/16/2020 Europe / Sweden / Orebro          |
| EPI_ISL_582788 | 6/3/2020  | 10/16/2020 Europe / Sweden / Orebro          |
| EPI_ISL_582789 | 6/4/2020  | 10/16/2020 Europe / Sweden / Orebro          |
| EPI_ISL_582791 | 7/4/2020  | 10/16/2020 Europe / Sweden / Orebro          |
| EPI_ISL_582792 | 5/4/2020  | 10/16/2020 Europe / Sweden / Orebro          |
| EPI_ISL_582793 | 7/3/2020  | 10/16/2020 Europe / Sweden / Orebro          |
| EPI_ISL_582794 | 6/10/2020 | 10/16/2020 Europe / Sweden / Sormland        |
| EPI_ISL_582795 | 6/7/2020  | 10/16/2020 Europe / Sweden / Sormland        |
| EPI_ISL_582796 | 6/7/2020  | 10/16/2020 Europe / Sweden / Sormland        |
| EPI_ISL_582797 | 7/3/2020  | 10/16/2020 Europe / Sweden / Vasternorrland  |
| EPI_ISL_582798 | 7/5/2020  | 10/16/2020 Europe / Sweden / Vasternorrland  |
| EPI_ISL_582799 | 7/3/2020  | 10/16/2020 Europe / Sweden / Stockholm       |
| EPI_ISL_582800 | 7/10/2020 | 10/16/2020 Europe / Sweden / Vasternorrland  |
| EPI_ISL_582801 | 8/5/2020  | 10/16/2020 Europe / Sweden / Gavleborg       |
| EPI_ISL_582803 | 8/20/2020 | 10/16/2020 Europe / Sweden / Halland         |
| EPI_ISL_582804 | 8/19/2020 | 10/16/2020 Europe / Sweden / Halland         |

|                |           |            |                                                       |
|----------------|-----------|------------|-------------------------------------------------------|
| EPI_ISL_582805 | 8/17/2020 | 10/16/2020 | Europe / Sweden / Halland                             |
| EPI_ISL_582806 | 8/12/2020 | 10/16/2020 | Europe / Sweden / Vastra Gotaland                     |
| EPI_ISL_582807 | 8/8/2020  | 10/16/2020 | Europe / Sweden / Vastra Gotaland                     |
| EPI_ISL_582808 | 8/24/2020 | 10/16/2020 | Europe / Sweden / Vastmanland                         |
| EPI_ISL_582809 | 6/29/2020 | 10/16/2020 | Europe / Sweden / Gavleborg                           |
| EPI_ISL_582810 | 2020-06   | 10/16/2020 | Europe / Italy / Sicily / Palermo                     |
| EPI_ISL_582811 | 2020-06   | 10/16/2020 | Europe / Italy / Sicily / Palermo                     |
| EPI_ISL_582814 | 8/17/2020 | 10/16/2020 | Europe / Spain / Madrid / Madrid                      |
| EPI_ISL_582826 | 8/25/2020 | 10/16/2020 | Europe / Spain / Madrid / Madrid                      |
| EPI_ISL_582827 | 8/27/2020 | 10/16/2020 | Europe / Spain / Madrid / Madrid                      |
| EPI_ISL_582833 | 2020-06   | 10/16/2020 | Europe / Italy / Sicily / Palermo                     |
| EPI_ISL_582834 | 5/29/2020 | 10/16/2020 | Europe / Sweden / Gavleborg                           |
| EPI_ISL_582835 | 6/22/2020 | 10/16/2020 | Europe / Sweden / Vasternorrland                      |
| EPI_ISL_582836 | 6/28/2020 | 10/16/2020 | Europe / Sweden / Vasternorrland                      |
| EPI_ISL_582837 | 6/28/2020 | 10/16/2020 | Europe / Sweden / Vasternorrland                      |
| EPI_ISL_582838 | 6/28/2020 | 10/16/2020 | Europe / Sweden / Vasternorrland                      |
| EPI_ISL_582839 | 8/14/2020 | 10/16/2020 | Europe / Sweden / Stockholm                           |
| EPI_ISL_582840 | 9/3/2020  | 10/16/2020 | Europe / Sweden / Vastra Gotaland                     |
| EPI_ISL_582841 | 8/27/2020 | 10/16/2020 | Europe / Sweden / Orebro                              |
| EPI_ISL_582842 | 2020-06   | 10/16/2020 | Europe / Italy / Sicily / Palermo                     |
| EPI_ISL_582843 | 8/11/2020 | 10/16/2020 | Europe / Spain / Madrid / Madrid                      |
| EPI_ISL_582844 | 8/22/2020 | 10/16/2020 | Europe / Spain / Madrid / Madrid                      |
| EPI_ISL_582845 | 2020-06   | 10/16/2020 | Europe / Italy / Sicily / Palermo                     |
| EPI_ISL_582846 | 2020-06   | 10/16/2020 | Europe / Italy / Sicily / Palermo                     |
| EPI_ISL_582847 | 2020-06   | 10/16/2020 | Europe / Italy / Sicily / Palermo                     |
| EPI_ISL_582848 | 2020-06   | 10/16/2020 | Europe / Italy / Sicily / Palermo                     |
| EPI_ISL_582849 | 2020-06   | 10/16/2020 | Europe / Italy / Sicily / Palermo                     |
| EPI_ISL_582850 | 2020-06   | 10/16/2020 | Europe / Italy / Sicily / Palermo                     |
| EPI_ISL_582851 | 6/27/2020 | 10/16/2020 | North America / USA / California / Santa Clara County |
| EPI_ISL_582852 | 6/27/2020 | 10/16/2020 | North America / USA / California / Santa Clara County |
| EPI_ISL_582853 | 6/27/2020 | 10/16/2020 | North America / USA / California / Santa Clara County |
| EPI_ISL_582854 | 6/27/2020 | 10/16/2020 | North America / USA / California / Santa Clara County |
| EPI_ISL_582855 | 6/27/2020 | 10/16/2020 | North America / USA / California / Santa Clara County |
| EPI_ISL_582856 | 6/27/2020 | 10/16/2020 | North America / USA / California / Santa Clara County |
| EPI_ISL_582857 | 6/27/2020 | 10/16/2020 | North America / USA / California / Santa Clara County |
| EPI_ISL_582858 | 6/27/2020 | 10/16/2020 | North America / USA / California / Santa Clara County |
| EPI_ISL_582859 | 6/27/2020 | 10/16/2020 | North America / USA / California / Santa Clara County |
| EPI_ISL_582860 | 6/27/2020 | 10/16/2020 | North America / USA / California / Santa Clara County |
| EPI_ISL_582861 | 6/27/2020 | 10/16/2020 | North America / USA / California / Santa Clara County |
| EPI_ISL_582862 | 6/27/2020 | 10/16/2020 | North America / USA / California / Santa Clara County |
| EPI_ISL_582863 | 6/27/2020 | 10/16/2020 | North America / USA / California / Santa Clara County |
| EPI_ISL_582864 | 6/27/2020 | 10/16/2020 | North America / USA / California / Santa Clara County |
| EPI_ISL_582865 | 6/27/2020 | 10/16/2020 | North America / USA / California / Santa Clara County |
| EPI_ISL_582866 | 6/27/2020 | 10/16/2020 | North America / USA / California / Santa Clara County |
| EPI_ISL_582867 | 6/27/2020 | 10/16/2020 | North America / USA / California / Santa Clara County |
| EPI_ISL_582868 | 6/27/2020 | 10/16/2020 | North America / USA / California / Santa Clara County |
| EPI_ISL_582869 | 6/27/2020 | 10/16/2020 | North America / USA / California / Santa Clara County |

























|                |           |            |                                |
|----------------|-----------|------------|--------------------------------|
| EPI_ISL_583417 | 9/21/2020 | 10/16/2020 | North America / USA / Michigan |
| EPI_ISL_583418 | 9/22/2020 | 10/16/2020 | North America / USA / Michigan |
| EPI_ISL_583419 | 9/22/2020 | 10/16/2020 | North America / USA / Michigan |
| EPI_ISL_583420 | 9/24/2020 | 10/16/2020 | North America / USA / Michigan |
| EPI_ISL_583422 | 9/25/2020 | 10/16/2020 | North America / USA / Michigan |
| EPI_ISL_583423 | 9/25/2020 | 10/16/2020 | North America / USA / Michigan |
| EPI_ISL_583424 | 9/23/2020 | 10/16/2020 | North America / USA / Michigan |
| EPI_ISL_583425 | 9/25/2020 | 10/16/2020 | North America / USA / Michigan |
| EPI_ISL_583426 | 4/14/2020 | 10/16/2020 | North America / USA / New York |
| EPI_ISL_583427 | 4/14/2020 | 10/16/2020 | North America / USA / New York |
| EPI_ISL_583428 | 3/30/2020 | 10/16/2020 | North America / USA / New York |
| EPI_ISL_583429 | 3/30/2020 | 10/16/2020 | North America / USA / New York |
| EPI_ISL_583430 | 4/23/2020 | 10/16/2020 | North America / USA / New York |
| EPI_ISL_583431 | 3/19/2020 | 10/16/2020 | North America / USA / New York |
| EPI_ISL_583432 | 4/2/2020  | 10/16/2020 | North America / USA / New York |
| EPI_ISL_583433 | 4/13/2020 | 10/16/2020 | North America / USA / New York |
| EPI_ISL_583434 | 3/19/2020 | 10/16/2020 | North America / USA / New York |
| EPI_ISL_583435 | 4/2/2020  | 10/16/2020 | North America / USA / New York |
| EPI_ISL_583436 | 4/13/2020 | 10/16/2020 | North America / USA / New York |
| EPI_ISL_583437 | 4/21/2020 | 10/16/2020 | North America / USA / New York |
| EPI_ISL_583438 | 5/11/2020 | 10/16/2020 | North America / USA / New York |
| EPI_ISL_583439 | 4/13/2020 | 10/16/2020 | North America / USA / New York |
| EPI_ISL_583440 | 5/6/2020  | 10/16/2020 | North America / USA / New York |
| EPI_ISL_583441 | 4/13/2020 | 10/16/2020 | North America / USA / New York |
| EPI_ISL_583442 | 5/6/2020  | 10/16/2020 | North America / USA / New York |
| EPI_ISL_583443 | 5/28/2020 | 10/16/2020 | North America / USA / New York |
| EPI_ISL_583445 | 4/29/2020 | 10/16/2020 | North America / USA / New York |
| EPI_ISL_583446 | 4/30/2020 | 10/16/2020 | North America / USA / New York |
| EPI_ISL_583447 | 5/6/2020  | 10/16/2020 | North America / USA / New York |
| EPI_ISL_583448 | 5/12/2020 | 10/16/2020 | North America / USA / New York |
| EPI_ISL_583449 | 5/19/2020 | 10/16/2020 | North America / USA / New York |
| EPI_ISL_583450 | 5/25/2020 | 10/16/2020 | North America / USA / New York |
| EPI_ISL_583451 | 6/4/2020  | 10/16/2020 | North America / USA / New York |
| EPI_ISL_583452 | 7/22/2020 | 10/16/2020 | North America / USA / New York |
| EPI_ISL_583453 | 7/22/2020 | 10/16/2020 | North America / USA / New York |
| EPI_ISL_583454 | 7/22/2020 | 10/16/2020 | North America / USA / New York |
| EPI_ISL_583456 | 4/20/2020 | 10/16/2020 | North America / USA / New York |
| EPI_ISL_583457 | 5/7/2020  | 10/16/2020 | North America / USA / New York |
| EPI_ISL_583458 | 4/20/2020 | 10/16/2020 | North America / USA / New York |
| EPI_ISL_583459 | 5/7/2020  | 10/16/2020 | North America / USA / New York |
| EPI_ISL_583460 | 5/12/2020 | 10/16/2020 | North America / USA / New York |
| EPI_ISL_583461 | 3/15/2020 | 10/16/2020 | North America / USA / New York |
| EPI_ISL_583462 | 3/19/2020 | 10/16/2020 | North America / USA / New York |
| EPI_ISL_583463 | 3/15/2020 | 10/16/2020 | North America / USA / New York |
| EPI_ISL_583464 | 3/19/2020 | 10/16/2020 | North America / USA / New York |
| EPI_ISL_583465 | 5/2/2020  | 10/16/2020 | North America / USA / New York |
| EPI_ISL_583466 | 3/24/2020 | 10/16/2020 | North America / USA / New York |

|                |           |                                                                       |
|----------------|-----------|-----------------------------------------------------------------------|
| EPI_ISL_583467 | 3/24/2020 | 10/16/2020 North America / USA / New York                             |
| EPI_ISL_583468 | 4/16/2020 | 10/16/2020 North America / USA / New York                             |
| EPI_ISL_583469 | 3/17/2020 | 10/16/2020 North America / USA / New York                             |
| EPI_ISL_583470 | 5/4/2020  | 10/16/2020 North America / USA / New York                             |
| EPI_ISL_583472 | 3/31/2020 | 10/16/2020 North America / USA / New York                             |
| EPI_ISL_583473 | 7/18/2020 | 10/16/2020 North America / USA / New York                             |
| EPI_ISL_583475 | 4/2/2020  | 10/16/2020 North America / USA / New York                             |
| EPI_ISL_583476 | 6/4/2020  | 10/16/2020 North America / USA / New York                             |
| EPI_ISL_583477 | 7/18/2020 | 10/16/2020 North America / USA / New York                             |
| EPI_ISL_583478 | 5/2/2020  | 10/16/2020 North America / USA / New York                             |
| EPI_ISL_583479 | 3/29/2020 | 10/16/2020 North America / USA / New York                             |
| EPI_ISL_583480 | 5/13/2020 | 10/16/2020 North America / USA / New York                             |
| EPI_ISL_583481 | 9/10/2020 | 10/17/2020 Europe / Slovakia / Tvrdosovce                             |
| EPI_ISL_583482 | 9/10/2020 | 10/17/2020 Europe / Slovakia / Jatov                                  |
| EPI_ISL_583483 | 9/10/2020 | 10/17/2020 Europe / Slovakia / Kamenicna                              |
| EPI_ISL_583484 | 9/10/2020 | 10/17/2020 Europe / Slovakia / Bratislava                             |
| EPI_ISL_583485 | 9/16/2020 | 10/17/2020 Europe / Slovakia / Surany                                 |
| EPI_ISL_583486 | 9/16/2020 | 10/17/2020 Europe / Slovakia / Surany                                 |
| EPI_ISL_583487 | 9/16/2020 | 10/17/2020 Europe / Slovakia / Bratislava                             |
| EPI_ISL_583488 | 9/16/2020 | 10/17/2020 Europe / Slovakia / Bratislava                             |
| EPI_ISL_583489 | 9/16/2020 | 10/17/2020 Europe / Slovakia / Levice                                 |
| EPI_ISL_583490 | 4/15/2020 | 10/17/2020 South America / Brazil / Sao Paulo / Sumare                |
| EPI_ISL_583491 | 4/15/2020 | 10/17/2020 South America / Brazil / Sao Paulo / Sao Jose do Rio Pardo |
| EPI_ISL_583492 | 4/15/2020 | 10/17/2020 South America / Brazil / Sao Paulo / Amparo                |
| EPI_ISL_583493 | 4/28/2020 | 10/17/2020 South America / Brazil / Sao Paulo / Cajamar               |
| EPI_ISL_583494 | 4/24/2020 | 10/17/2020 South America / Brazil / Sao Paulo / Sumare                |
| EPI_ISL_583495 | 6/13/2020 | 10/17/2020 South America / Brazil / Sao Paulo / Guarulhos             |
| EPI_ISL_583496 | 6/20/2020 | 10/17/2020 South America / Brazil / Sao Paulo / Jandira               |
| EPI_ISL_583497 | 6/17/2020 | 10/17/2020 South America / Brazil / Sao Paulo / Campinas              |
| EPI_ISL_583498 | 6/22/2020 | 10/17/2020 South America / Brazil / Sao Paulo / Americana             |
| EPI_ISL_583499 | 6/24/2020 | 10/17/2020 South America / Brazil / Sao Paulo / Campinas              |
| EPI_ISL_583500 | 6/29/2020 | 10/17/2020 South America / Brazil / Sao Paulo / Presidente Venceslau  |
| EPI_ISL_583501 | 7/8/2020  | 10/17/2020 South America / Brazil / Sao Paulo / Sao Paulo             |
| EPI_ISL_583502 | 6/21/2020 | 10/17/2020 South America / Brazil / Sao Paulo / Guaruja               |
| EPI_ISL_583503 | 6/22/2020 | 10/17/2020 South America / Brazil / Sao Paulo / Caieiras              |
| EPI_ISL_583504 | 6/20/2020 | 10/17/2020 South America / Brazil / Sao Paulo / Caraguatatuba         |
| EPI_ISL_583505 | 6/26/2020 | 10/17/2020 South America / Brazil / Sao Paulo / Caraguatatuba         |
| EPI_ISL_583506 | 8/26/2020 | 10/17/2020 North America / USA / Michigan                             |
| EPI_ISL_583507 | 9/21/2020 | 10/17/2020 North America / USA / Michigan                             |
| EPI_ISL_583508 | 9/18/2020 | 10/17/2020 North America / USA / Michigan                             |
| EPI_ISL_583511 | 9/24/2020 | 10/17/2020 North America / USA / Michigan                             |
| EPI_ISL_583515 | 9/28/2020 | 10/17/2020 North America / USA / Michigan                             |
| EPI_ISL_583517 | 9/28/2020 | 10/17/2020 North America / USA / Michigan                             |
| EPI_ISL_583518 | 9/28/2020 | 10/17/2020 North America / USA / Michigan                             |
| EPI_ISL_583519 | 9/28/2020 | 10/17/2020 North America / USA / Michigan                             |
| EPI_ISL_583521 | 9/28/2020 | 10/17/2020 North America / USA / Michigan                             |
| EPI_ISL_583522 | 9/21/2020 | 10/17/2020 North America / USA / Michigan                             |

|                |           |            |                                  |
|----------------|-----------|------------|----------------------------------|
| EPI_ISL_583523 | 9/22/2020 | 10/17/2020 | North America / USA / Michigan   |
| EPI_ISL_583525 | 9/29/2020 | 10/17/2020 | North America / USA / Michigan   |
| EPI_ISL_583530 | 9/23/2020 | 10/17/2020 | North America / USA / Michigan   |
| EPI_ISL_583531 | 9/23/2020 | 10/17/2020 | North America / USA / Michigan   |
| EPI_ISL_583532 | 9/30/2020 | 10/17/2020 | North America / USA / Michigan   |
| EPI_ISL_583557 | 3/30/2020 | 10/18/2020 | Europe / Austria / Innsbruck     |
| EPI_ISL_583565 | 3/8/2020  | 10/18/2020 | Europe / Austria / Vienna        |
| EPI_ISL_583569 | 3/30/2020 | 10/18/2020 | Europe / Austria / Vienna        |
| EPI_ISL_583577 | 3/18/2020 | 10/18/2020 | Europe / Austria / Lower Austria |
| EPI_ISL_583578 | 3/22/2020 | 10/18/2020 | Europe / Austria / Vienna        |
| EPI_ISL_583579 | 3/21/2020 | 10/18/2020 | Europe / Austria / Hochficht     |
| EPI_ISL_583580 | 3/27/2020 | 10/18/2020 | Europe / Austria / Linz          |
| EPI_ISL_583581 | 3/26/2020 | 10/18/2020 | Europe / Austria / Linz          |
| EPI_ISL_583582 | 3/26/2020 | 10/18/2020 | Europe / Austria / Linz          |
| EPI_ISL_583583 | 3/17/2020 | 10/18/2020 | Europe / Austria / Linz          |
| EPI_ISL_583584 | 3/26/2020 | 10/18/2020 | Europe / Austria / Linz          |
| EPI_ISL_583585 | 3/17/2020 | 10/18/2020 | Europe / Austria / Linz          |
| EPI_ISL_583586 | 3/26/2020 | 10/18/2020 | Europe / Austria                 |
| EPI_ISL_583587 | 3/26/2020 | 10/18/2020 | Europe / Austria                 |
| EPI_ISL_583588 | 3/25/2020 | 10/18/2020 | Europe / Austria / Linz          |
| EPI_ISL_583589 | 4/1/2020  | 10/18/2020 | Europe / Austria                 |
| EPI_ISL_583590 | 4/8/2020  | 10/18/2020 | Europe / Austria / Linz          |
| EPI_ISL_583591 | 3/28/2020 | 10/18/2020 | Europe / Austria                 |
| EPI_ISL_583592 | 3/22/2020 | 10/18/2020 | Europe / Austria                 |
| EPI_ISL_583593 | 3/13/2020 | 10/18/2020 | Europe / Austria                 |
| EPI_ISL_583594 | 3/28/2020 | 10/18/2020 | Europe / Austria / Linz          |
| EPI_ISL_583595 | 3/23/2020 | 10/18/2020 | Europe / Austria                 |
| EPI_ISL_583596 | 3/17/2020 | 10/18/2020 | Europe / Austria / Linz          |
| EPI_ISL_583597 | 3/11/2020 | 10/18/2020 | Europe / Austria                 |
| EPI_ISL_583598 | 3/18/2020 | 10/18/2020 | Europe / Austria                 |
| EPI_ISL_583601 | 3/26/2020 | 10/18/2020 | Europe / Austria / Innsbruck     |
| EPI_ISL_583602 | 3/12/2020 | 10/18/2020 | Europe / Austria / Innsbruck     |
| EPI_ISL_583603 | 3/25/2020 | 10/18/2020 | Europe / Austria / Innsbruck     |
| EPI_ISL_583605 | 3/16/2020 | 10/18/2020 | Europe / Austria / Innsbruck     |
| EPI_ISL_583606 | 3/20/2020 | 10/18/2020 | Europe / Austria / Innsbruck     |
| EPI_ISL_583607 | 4/2/2020  | 10/18/2020 | Europe / Austria / Innsbruck     |
| EPI_ISL_583608 | 4/5/2020  | 10/18/2020 | Europe / Austria / Innsbruck     |
| EPI_ISL_583609 | 3/15/2020 | 10/18/2020 | Europe / Austria / Kufstein      |
| EPI_ISL_583610 | 3/16/2020 | 10/18/2020 | Europe / Austria / Kufstein      |
| EPI_ISL_583611 | 3/17/2020 | 10/18/2020 | Europe / Austria / Kufstein      |
| EPI_ISL_583612 | 3/18/2020 | 10/18/2020 | Europe / Austria / Kufstein      |
| EPI_ISL_583613 | 3/27/2020 | 10/18/2020 | Europe / Austria / Kufstein      |
| EPI_ISL_583614 | 3/27/2020 | 10/18/2020 | Europe / Austria / Kufstein      |
| EPI_ISL_583615 | 4/24/2020 | 10/18/2020 | Europe / Austria / Ischgl        |
| EPI_ISL_583616 | 4/22/2020 | 10/18/2020 | Europe / Austria / Ischgl        |
| EPI_ISL_583619 | 3/24/2020 | 10/18/2020 | Europe / Austria / See           |
| EPI_ISL_583620 | 3/29/2020 | 10/18/2020 | Europe / Austria / Kappl         |

|                |           |                                         |
|----------------|-----------|-----------------------------------------|
| EPI_ISL_583621 | 3/29/2020 | 10/18/2020 Europe / Austria / See       |
| EPI_ISL_583622 | 3/24/2020 | 10/18/2020 Europe / Austria / SÄ¶lden   |
| EPI_ISL_583623 | 3/30/2020 | 10/18/2020 Europe / Austria / SÄ¶lden   |
| EPI_ISL_583624 | 3/30/2020 | 10/18/2020 Europe / Austria / Pfunden   |
| EPI_ISL_583625 | 3/25/2020 | 10/18/2020 Europe / Austria / GaltÄ¼r   |
| EPI_ISL_583626 | 3/26/2020 | 10/18/2020 Europe / Austria / Nauders   |
| EPI_ISL_583627 | 3/27/2020 | 10/18/2020 Europe / Austria / TÄ¶sens   |
| EPI_ISL_583629 | 3/26/2020 | 10/18/2020 Europe / Austria / St. Anton |
| EPI_ISL_583630 | 5/14/2020 | 10/18/2020 Europe / Austria             |
| EPI_ISL_583631 | 5/15/2020 | 10/18/2020 Europe / Austria             |
| EPI_ISL_583633 | 3/31/2020 | 10/18/2020 Europe / Austria             |
| EPI_ISL_583634 | 4/13/2020 | 10/18/2020 Europe / Austria             |
| EPI_ISL_583635 | 4/21/2020 | 10/18/2020 Europe / Austria             |
| EPI_ISL_583636 | 5/23/2020 | 10/18/2020 Europe / Austria             |
| EPI_ISL_583637 | 5/14/2020 | 10/18/2020 Europe / Austria             |
| EPI_ISL_583639 | 5/16/2020 | 10/18/2020 Europe / Austria             |
| EPI_ISL_583640 | 3/31/2020 | 10/18/2020 Europe / Austria             |
| EPI_ISL_583641 | 4/13/2020 | 10/18/2020 Europe / Austria             |
| EPI_ISL_583642 | 4/18/2020 | 10/18/2020 Europe / Austria             |
| EPI_ISL_583643 | 4/19/2020 | 10/18/2020 Europe / Austria             |
| EPI_ISL_583644 | 4/21/2020 | 10/18/2020 Europe / Austria             |
| EPI_ISL_583645 | 5/23/2020 | 10/18/2020 Europe / Austria             |
| EPI_ISL_583646 | 5/14/2020 | 10/18/2020 Europe / Austria             |
| EPI_ISL_583647 | 5/15/2020 | 10/18/2020 Europe / Austria             |
| EPI_ISL_583648 | 3/31/2020 | 10/18/2020 Europe / Austria             |
| EPI_ISL_583649 | 3/31/2020 | 10/18/2020 Europe / Austria             |
| EPI_ISL_583650 | 4/13/2020 | 10/18/2020 Europe / Austria             |
| EPI_ISL_583651 | 4/18/2020 | 10/18/2020 Europe / Austria             |
| EPI_ISL_583652 | 4/22/2020 | 10/18/2020 Europe / Austria             |
| EPI_ISL_583653 | 5/23/2020 | 10/18/2020 Europe / Austria             |
| EPI_ISL_583654 | 5/14/2020 | 10/18/2020 Europe / Austria             |
| EPI_ISL_583655 | 5/15/2020 | 10/18/2020 Europe / Austria             |
| EPI_ISL_583656 | 5/16/2020 | 10/18/2020 Europe / Austria             |
| EPI_ISL_583657 | 5/17/2020 | 10/18/2020 Europe / Austria             |
| EPI_ISL_583658 | 3/31/2020 | 10/18/2020 Europe / Austria             |
| EPI_ISL_583659 | 4/13/2020 | 10/18/2020 Europe / Austria             |
| EPI_ISL_583660 | 4/19/2020 | 10/18/2020 Europe / Austria             |
| EPI_ISL_583661 | 4/19/2020 | 10/18/2020 Europe / Austria             |
| EPI_ISL_583662 | 5/23/2020 | 10/18/2020 Europe / Austria             |
| EPI_ISL_583663 | 5/14/2020 | 10/18/2020 Europe / Austria             |
| EPI_ISL_583664 | 5/15/2020 | 10/18/2020 Europe / Austria             |
| EPI_ISL_583665 | 5/17/2020 | 10/18/2020 Europe / Austria             |
| EPI_ISL_583666 | 5/24/2020 | 10/18/2020 Europe / Austria             |
| EPI_ISL_583667 | 4/18/2020 | 10/18/2020 Europe / Austria             |
| EPI_ISL_583668 | 4/19/2020 | 10/18/2020 Europe / Austria             |
| EPI_ISL_583669 | 5/14/2020 | 10/18/2020 Europe / Austria             |
| EPI_ISL_583670 | 5/17/2020 | 10/18/2020 Europe / Austria             |

|                |           |                                      |
|----------------|-----------|--------------------------------------|
| EPI_ISL_583671 | 5/24/2020 | 10/18/2020 Europe / Austria          |
| EPI_ISL_583672 | 4/13/2020 | 10/18/2020 Europe / Austria          |
| EPI_ISL_583673 | 4/18/2020 | 10/18/2020 Europe / Austria          |
| EPI_ISL_583674 | 4/21/2020 | 10/18/2020 Europe / Austria          |
| EPI_ISL_583675 | 5/23/2020 | 10/18/2020 Europe / Austria          |
| EPI_ISL_583676 | 5/14/2020 | 10/18/2020 Europe / Austria          |
| EPI_ISL_583678 | 3/31/2020 | 10/18/2020 Europe / Austria          |
| EPI_ISL_583679 | 4/13/2020 | 10/18/2020 Europe / Austria          |
| EPI_ISL_583680 | 4/18/2020 | 10/18/2020 Europe / Austria          |
| EPI_ISL_583681 | 4/21/2020 | 10/18/2020 Europe / Austria          |
| EPI_ISL_583682 | 5/24/2020 | 10/18/2020 Europe / Austria          |
| EPI_ISL_583683 | 5/14/2020 | 10/18/2020 Europe / Austria          |
| EPI_ISL_583684 | 5/15/2020 | 10/18/2020 Europe / Austria          |
| EPI_ISL_583685 | 5/16/2020 | 10/18/2020 Europe / Austria          |
| EPI_ISL_583686 | 3/31/2020 | 10/18/2020 Europe / Austria          |
| EPI_ISL_583687 | 4/13/2020 | 10/18/2020 Europe / Austria          |
| EPI_ISL_583688 | 4/15/2020 | 10/18/2020 Europe / Austria          |
| EPI_ISL_583689 | 4/21/2020 | 10/18/2020 Europe / Austria          |
| EPI_ISL_583690 | 4/23/2020 | 10/18/2020 Europe / Austria          |
| EPI_ISL_583691 | 3/9/2020  | 10/18/2020 Europe / Austria / Ischgl |
| EPI_ISL_583692 | 5/18/2020 | 10/18/2020 Europe / Austria          |
| EPI_ISL_583693 | 5/11/2020 | 10/18/2020 Europe / Austria          |
| EPI_ISL_583694 | 4/27/2020 | 10/18/2020 Europe / Austria          |
| EPI_ISL_583696 | 4/24/2020 | 10/18/2020 Europe / Austria          |
| EPI_ISL_583697 | 4/27/2020 | 10/18/2020 Europe / Austria          |
| EPI_ISL_583698 | 4/17/2020 | 10/18/2020 Europe / Austria          |
| EPI_ISL_583700 | 4/15/2020 | 10/18/2020 Europe / Austria          |
| EPI_ISL_583701 | 4/24/2020 | 10/18/2020 Europe / Austria          |
| EPI_ISL_583702 | 5/15/2020 | 10/18/2020 Europe / Austria          |
| EPI_ISL_583703 | 5/22/2020 | 10/18/2020 Europe / Austria          |
| EPI_ISL_583704 | 5/20/2020 | 10/18/2020 Europe / Austria          |
| EPI_ISL_583705 | 5/18/2020 | 10/18/2020 Europe / Austria          |
| EPI_ISL_583706 | 5/8/2020  | 10/18/2020 Europe / Austria          |
| EPI_ISL_583707 | 5/15/2020 | 10/18/2020 Europe / Austria          |
| EPI_ISL_583709 | 4/17/2020 | 10/18/2020 Europe / Austria          |
| EPI_ISL_583710 | 5/4/2020  | 10/18/2020 Europe / Austria          |
| EPI_ISL_583711 | 4/27/2020 | 10/18/2020 Europe / Austria          |
| EPI_ISL_583712 | 4/6/2020  | 10/18/2020 Europe / Austria          |
| EPI_ISL_583713 | 4/8/2020  | 10/18/2020 Europe / Austria          |
| EPI_ISL_583714 | 4/10/2020 | 10/18/2020 Europe / Austria          |
| EPI_ISL_583715 | 4/15/2020 | 10/18/2020 Europe / Austria          |
| EPI_ISL_583716 | 5/4/2020  | 10/18/2020 Europe / Austria          |
| EPI_ISL_583718 | 4/29/2020 | 10/18/2020 Europe / Austria          |
| EPI_ISL_583719 | 5/6/2020  | 10/18/2020 Europe / Austria          |
| EPI_ISL_583720 | 4/27/2020 | 10/18/2020 Europe / Austria          |
| EPI_ISL_583721 | 4/24/2020 | 10/18/2020 Europe / Austria          |
| EPI_ISL_583722 | 4/8/2020  | 10/18/2020 Europe / Austria          |

|                |           |            |                  |
|----------------|-----------|------------|------------------|
| EPI_ISL_583723 | 5/13/2020 | 10/18/2020 | Europe / Austria |
| EPI_ISL_583724 | 4/15/2020 | 10/18/2020 | Europe / Austria |
| EPI_ISL_583725 | 4/20/2020 | 10/18/2020 | Europe / Austria |
| EPI_ISL_583726 | 4/27/2020 | 10/18/2020 | Europe / Austria |
| EPI_ISL_583727 | 4/4/2020  | 10/18/2020 | Europe / Austria |
| EPI_ISL_583728 | 4/4/2020  | 10/18/2020 | Europe / Austria |
| EPI_ISL_583729 | 3/23/2020 | 10/18/2020 | Europe / Austria |
| EPI_ISL_583730 | 3/23/2020 | 10/18/2020 | Europe / Austria |
| EPI_ISL_583731 | 3/23/2020 | 10/18/2020 | Europe / Austria |
| EPI_ISL_583732 | 4/26/2020 | 10/18/2020 | Europe / Austria |
| EPI_ISL_583733 | 4/28/2020 | 10/18/2020 | Europe / Austria |
| EPI_ISL_583735 | 4/29/2020 | 10/18/2020 | Europe / Austria |
| EPI_ISL_583736 | 4/30/2020 | 10/18/2020 | Europe / Austria |
| EPI_ISL_583737 | 4/30/2020 | 10/18/2020 | Europe / Austria |
| EPI_ISL_583738 | 4/30/2020 | 10/18/2020 | Europe / Austria |
| EPI_ISL_583739 | 5/6/2020  | 10/18/2020 | Europe / Austria |
| EPI_ISL_583740 | 5/6/2020  | 10/18/2020 | Europe / Austria |
| EPI_ISL_583741 | 4/28/2020 | 10/18/2020 | Europe / Austria |
| EPI_ISL_583742 | 4/28/2020 | 10/18/2020 | Europe / Austria |
| EPI_ISL_583743 | 4/29/2020 | 10/18/2020 | Europe / Austria |
| EPI_ISL_583744 | 3/17/2020 | 10/18/2020 | Europe / Austria |
| EPI_ISL_583745 | 3/17/2020 | 10/18/2020 | Europe / Austria |
| EPI_ISL_583746 | 3/17/2020 | 10/18/2020 | Europe / Austria |
| EPI_ISL_583747 | 3/18/2020 | 10/18/2020 | Europe / Austria |
| EPI_ISL_583748 | 3/20/2020 | 10/18/2020 | Europe / Austria |
| EPI_ISL_583749 | 3/20/2020 | 10/18/2020 | Europe / Austria |
| EPI_ISL_583750 | 3/22/2020 | 10/18/2020 | Europe / Austria |
| EPI_ISL_583751 | 3/23/2020 | 10/18/2020 | Europe / Austria |
| EPI_ISL_583752 | 3/25/2020 | 10/18/2020 | Europe / Austria |
| EPI_ISL_583753 | 3/29/2020 | 10/18/2020 | Europe / Austria |
| EPI_ISL_583754 | 3/30/2020 | 10/18/2020 | Europe / Austria |
| EPI_ISL_583755 | 3/30/2020 | 10/18/2020 | Europe / Austria |
| EPI_ISL_583756 | 3/31/2020 | 10/18/2020 | Europe / Austria |
| EPI_ISL_583757 | 3/31/2020 | 10/18/2020 | Europe / Austria |
| EPI_ISL_583758 | 3/31/2020 | 10/18/2020 | Europe / Austria |
| EPI_ISL_583759 | 3/31/2020 | 10/18/2020 | Europe / Austria |
| EPI_ISL_583760 | 3/31/2020 | 10/18/2020 | Europe / Austria |
| EPI_ISL_583761 | 4/2/2020  | 10/18/2020 | Europe / Austria |
| EPI_ISL_583762 | 4/2/2020  | 10/18/2020 | Europe / Austria |
| EPI_ISL_583763 | 4/5/2020  | 10/18/2020 | Europe / Austria |
| EPI_ISL_583764 | 4/10/2020 | 10/18/2020 | Europe / Austria |
| EPI_ISL_583766 | 3/15/2020 | 10/18/2020 | Europe / Austria |
| EPI_ISL_583767 | 3/15/2020 | 10/18/2020 | Europe / Austria |
| EPI_ISL_583768 | 3/16/2020 | 10/18/2020 | Europe / Austria |
| EPI_ISL_583769 | 3/16/2020 | 10/18/2020 | Europe / Austria |
| EPI_ISL_583770 | 3/16/2020 | 10/18/2020 | Europe / Austria |
| EPI_ISL_583771 | 3/16/2020 | 10/18/2020 | Europe / Austria |



|                |           |            |                  |
|----------------|-----------|------------|------------------|
| EPI_ISL_583819 | 4/1/2020  | 10/18/2020 | Europe / Austria |
| EPI_ISL_583820 | 4/1/2020  | 10/18/2020 | Europe / Austria |
| EPI_ISL_583821 | 4/1/2020  | 10/18/2020 | Europe / Austria |
| EPI_ISL_583822 | 4/1/2020  | 10/18/2020 | Europe / Austria |
| EPI_ISL_583823 | 4/2/2020  | 10/18/2020 | Europe / Austria |
| EPI_ISL_583824 | 4/6/2020  | 10/18/2020 | Europe / Austria |
| EPI_ISL_583825 | 4/6/2020  | 10/18/2020 | Europe / Austria |
| EPI_ISL_583826 | 4/6/2020  | 10/18/2020 | Europe / Austria |
| EPI_ISL_583827 | 4/6/2020  | 10/18/2020 | Europe / Austria |
| EPI_ISL_583828 | 4/9/2020  | 10/18/2020 | Europe / Austria |
| EPI_ISL_583829 | 4/9/2020  | 10/18/2020 | Europe / Austria |
| EPI_ISL_583830 | 4/9/2020  | 10/18/2020 | Europe / Austria |
| EPI_ISL_583831 | 4/9/2020  | 10/18/2020 | Europe / Austria |
| EPI_ISL_583832 | 4/9/2020  | 10/18/2020 | Europe / Austria |
| EPI_ISL_583833 | 4/10/2020 | 10/18/2020 | Europe / Austria |
| EPI_ISL_583834 | 4/11/2020 | 10/18/2020 | Europe / Austria |
| EPI_ISL_583835 | 4/11/2020 | 10/18/2020 | Europe / Austria |
| EPI_ISL_583836 | 4/11/2020 | 10/18/2020 | Europe / Austria |
| EPI_ISL_583837 | 4/11/2020 | 10/18/2020 | Europe / Austria |
| EPI_ISL_583838 | 4/12/2020 | 10/18/2020 | Europe / Austria |
| EPI_ISL_583839 | 4/12/2020 | 10/18/2020 | Europe / Austria |
| EPI_ISL_583840 | 4/13/2020 | 10/18/2020 | Europe / Austria |
| EPI_ISL_583841 | 4/13/2020 | 10/18/2020 | Europe / Austria |
| EPI_ISL_583842 | 4/14/2020 | 10/18/2020 | Europe / Austria |
| EPI_ISL_583843 | 4/14/2020 | 10/18/2020 | Europe / Austria |
| EPI_ISL_583844 | 4/15/2020 | 10/18/2020 | Europe / Austria |
| EPI_ISL_583845 | 4/23/2020 | 10/18/2020 | Europe / Austria |
| EPI_ISL_583847 | 5/2/2020  | 10/18/2020 | Europe / Austria |
| EPI_ISL_583848 | 5/17/2020 | 10/18/2020 | Europe / Austria |
| EPI_ISL_583849 | 3/26/2020 | 10/18/2020 | Europe / Austria |
| EPI_ISL_583850 | 3/26/2020 | 10/18/2020 | Europe / Austria |
| EPI_ISL_583851 | 3/27/2020 | 10/18/2020 | Europe / Austria |
| EPI_ISL_583852 | 3/23/2020 | 10/18/2020 | Europe / Austria |
| EPI_ISL_583853 | 4/6/2020  | 10/18/2020 | Europe / Austria |
| EPI_ISL_583855 | 4/14/2020 | 10/18/2020 | Europe / Austria |
| EPI_ISL_583857 | 4/8/2020  | 10/18/2020 | Europe / Austria |
| EPI_ISL_583858 | 4/8/2020  | 10/18/2020 | Europe / Austria |
| EPI_ISL_583859 | 4/8/2020  | 10/18/2020 | Europe / Austria |
| EPI_ISL_583860 | 4/10/2020 | 10/18/2020 | Europe / Austria |
| EPI_ISL_583862 | 4/6/2020  | 10/18/2020 | Europe / Austria |
| EPI_ISL_583863 | 4/14/2020 | 10/18/2020 | Europe / Austria |
| EPI_ISL_583864 | 4/15/2020 | 10/18/2020 | Europe / Austria |
| EPI_ISL_583865 | 4/14/2020 | 10/18/2020 | Europe / Austria |
| EPI_ISL_583866 | 4/14/2020 | 10/18/2020 | Europe / Austria |
| EPI_ISL_583868 | 4/14/2020 | 10/18/2020 | Europe / Austria |
| EPI_ISL_583869 | 3/4/2020  | 10/18/2020 | Europe / Austria |
| EPI_ISL_583870 | 3/6/2020  | 10/18/2020 | Europe / Austria |



|                |           |                                              |
|----------------|-----------|----------------------------------------------|
| EPI_ISL_583871 | 3/8/2020  | 10/18/2020 Europe / Austria                  |
| EPI_ISL_583872 | 3/11/2020 | 10/18/2020 Europe / Austria                  |
| EPI_ISL_583873 | 3/12/2020 | 10/18/2020 Europe / Austria                  |
| EPI_ISL_583874 | 3/13/2020 | 10/18/2020 Europe / Austria                  |
| EPI_ISL_583875 | 3/13/2020 | 10/18/2020 Europe / Austria                  |
| EPI_ISL_583876 | 3/13/2020 | 10/18/2020 Europe / Austria                  |
| EPI_ISL_583877 | 3/13/2020 | 10/18/2020 Europe / Austria                  |
| EPI_ISL_583878 | 3/13/2020 | 10/18/2020 Europe / Austria                  |
| EPI_ISL_583879 | 3/15/2020 | 10/18/2020 Europe / Austria                  |
| EPI_ISL_583880 | 3/15/2020 | 10/18/2020 Europe / Austria                  |
| EPI_ISL_583881 | 3/16/2020 | 10/18/2020 Europe / Austria                  |
| EPI_ISL_583883 | 6/30/2020 | 10/18/2020 Europe / Austria                  |
| EPI_ISL_583884 | 6/30/2020 | 10/18/2020 Europe / Austria                  |
| EPI_ISL_583885 | 7/19/2020 | 10/18/2020 Europe / Austria                  |
| EPI_ISL_583886 | 7/19/2020 | 10/18/2020 Europe / Austria                  |
| EPI_ISL_583887 | 8/3/2020  | 10/18/2020 Europe / Austria / St. Wolfgang   |
| EPI_ISL_583888 | 8/3/2020  | 10/18/2020 Europe / Austria / St. Wolfgang   |
| EPI_ISL_583889 | 8/3/2020  | 10/18/2020 Europe / Austria / St. Wolfgang   |
| EPI_ISL_583890 | 8/3/2020  | 10/18/2020 Europe / Austria / St. Wolfgang   |
| EPI_ISL_583891 | 8/3/2020  | 10/18/2020 Europe / Austria / St. Wolfgang   |
| EPI_ISL_583892 | 8/3/2020  | 10/18/2020 Europe / Austria / St. Wolfgang   |
| EPI_ISL_583893 | 9/25/2020 | 10/19/2020 Asia / Singapore                  |
| EPI_ISL_583894 | 8/29/2020 | 10/19/2020 Asia / Singapore                  |
| EPI_ISL_583895 | 8/31/2020 | 10/19/2020 Asia / Singapore                  |
| EPI_ISL_583896 | 8/17/2020 | 10/19/2020 Asia / Singapore                  |
| EPI_ISL_583897 | 8/17/2020 | 10/19/2020 Asia / Singapore                  |
| EPI_ISL_583898 | 8/17/2020 | 10/19/2020 Asia / Singapore                  |
| EPI_ISL_583899 | 8/17/2020 | 10/19/2020 Asia / Singapore                  |
| EPI_ISL_583900 | 8/17/2020 | 10/19/2020 Asia / Singapore                  |
| EPI_ISL_583953 | 2020-03   | 10/19/2020 Europe / Italy / Tuscany / Siena  |
| EPI_ISL_583954 | 3/21/2020 | 10/19/2020 Europe / Italy / Tuscany / Siena  |
| EPI_ISL_583955 | 3/21/2020 | 10/19/2020 Europe / Italy / Tuscany / Siena  |
| EPI_ISL_583956 | 6/7/2020  | 10/19/2020 Europe / Italy / Tuscany / Siena  |
| EPI_ISL_583957 | 6/7/2020  | 10/19/2020 Europe / Italy / Tuscany / Siena  |
| EPI_ISL_583958 | 4/27/2020 | 10/19/2020 Europe / Italy / Tuscany / Siena  |
| EPI_ISL_583959 | 3/23/2020 | 10/19/2020 Europe / Italy / Tuscany / Siena  |
| EPI_ISL_583960 | 3/21/2020 | 10/19/2020 Europe / Italy / Tuscany / Siena  |
| EPI_ISL_583961 | 3/20/2020 | 10/19/2020 Europe / Italy / Tuscany / Siena  |
| EPI_ISL_583962 | 3/20/2020 | 10/19/2020 Europe / Italy / Tuscany / Siena  |
| EPI_ISL_583968 | 9/25/2020 | 10/19/2020 Europe / United Kingdom / England |
| EPI_ISL_583969 | 9/24/2020 | 10/19/2020 Europe / United Kingdom / England |
| EPI_ISL_583972 | 9/25/2020 | 10/19/2020 Europe / United Kingdom / England |
| EPI_ISL_583974 | 10/1/2020 | 10/19/2020 Europe / United Kingdom / England |
| EPI_ISL_583976 | 10/2/2020 | 10/19/2020 Europe / United Kingdom / England |
| EPI_ISL_583977 | 10/2/2020 | 10/19/2020 Europe / United Kingdom / England |
| EPI_ISL_583978 | 10/2/2020 | 10/19/2020 Europe / United Kingdom / England |
| EPI_ISL_583981 | 10/2/2020 | 10/19/2020 Europe / United Kingdom / England |

|                |           |            |                                                             |
|----------------|-----------|------------|-------------------------------------------------------------|
| EPI_ISL_583983 | 9/27/2020 | 10/19/2020 | Europe / United Kingdom / England                           |
| EPI_ISL_583984 | 9/27/2020 | 10/19/2020 | Europe / United Kingdom / England                           |
| EPI_ISL_583985 | 9/30/2020 | 10/19/2020 | Europe / United Kingdom / England                           |
| EPI_ISL_583986 | 10/1/2020 | 10/19/2020 | Europe / United Kingdom / England                           |
| EPI_ISL_583987 | 9/30/2020 | 10/19/2020 | Europe / United Kingdom / England                           |
| EPI_ISL_583988 | 10/5/2020 | 10/19/2020 | Europe / United Kingdom / England                           |
| EPI_ISL_583989 | 10/5/2020 | 10/19/2020 | Europe / United Kingdom / England                           |
| EPI_ISL_583990 | 9/28/2020 | 10/19/2020 | Europe / United Kingdom / England                           |
| EPI_ISL_583991 | 9/25/2020 | 10/19/2020 | Europe / United Kingdom / England                           |
| EPI_ISL_583992 | 10/4/2020 | 10/19/2020 | Europe / United Kingdom / England                           |
| EPI_ISL_583993 | 9/17/2020 | 10/19/2020 | Europe / United Kingdom / England                           |
| EPI_ISL_583994 | 3/26/2020 | 10/19/2020 | North America / USA / Delaware / New Castle County          |
| EPI_ISL_584013 | 3/25/2020 | 10/19/2020 | North America / USA / Delaware / New Castle County          |
| EPI_ISL_584014 | 3/27/2020 | 10/19/2020 | North America / USA / Delaware / Sussex County              |
| EPI_ISL_584048 | 3/21/2020 | 10/19/2020 | Europe / Italy / Lombardy                                   |
| EPI_ISL_584049 | 3/24/2020 | 10/19/2020 | Europe / Italy / Lombardy                                   |
| EPI_ISL_584051 | 4/5/2020  | 10/19/2020 | Europe / Italy / Lombardy                                   |
| EPI_ISL_584052 | 4/5/2020  | 10/19/2020 | Europe / Italy / Lombardy                                   |
| EPI_ISL_584053 | 2020-09   | 10/19/2020 | Europe / United Kingdom / England                           |
| EPI_ISL_584054 | 2020-09   | 10/19/2020 | Europe / United Kingdom / England                           |
| EPI_ISL_584055 | 2020-09   | 10/19/2020 | Europe / United Kingdom / England                           |
| EPI_ISL_584056 | 2020-09   | 10/19/2020 | Europe / United Kingdom / England                           |
| EPI_ISL_584057 | 2020-09   | 10/19/2020 | Europe / United Kingdom / England                           |
| EPI_ISL_584058 | 2020-09   | 10/19/2020 | Europe / United Kingdom / England                           |
| EPI_ISL_584060 | 2020-09   | 10/19/2020 | Europe / United Kingdom / England                           |
| EPI_ISL_584061 | 9/20/2020 | 10/19/2020 | Europe / United Kingdom / England                           |
| EPI_ISL_584062 | 2020-09   | 10/19/2020 | Europe / United Kingdom / England                           |
| EPI_ISL_584063 | 2020-09   | 10/19/2020 | Europe / United Kingdom / England                           |
| EPI_ISL_584064 | 2020-09   | 10/19/2020 | Europe / United Kingdom / England                           |
| EPI_ISL_584065 | 2020-09   | 10/19/2020 | Europe / United Kingdom / England                           |
| EPI_ISL_584066 | 9/28/2020 | 10/19/2020 | Europe / United Kingdom / England                           |
| EPI_ISL_584068 | 2020-09   | 10/19/2020 | Europe / United Kingdom / England                           |
| EPI_ISL_584069 | 10/1/2020 | 10/19/2020 | Europe / Italy / Campania                                   |
| EPI_ISL_584071 | 10/1/2020 | 10/19/2020 | Europe / Italy / Campania                                   |
| EPI_ISL_584072 | 9/12/2020 | 10/19/2020 | Europe / Italy / Campania                                   |
| EPI_ISL_584073 | 5/10/2020 | 10/19/2020 | Europe / Czech Republic / Northern Bohemia Region / Litome  |
| EPI_ISL_584074 | 6/19/2020 | 10/19/2020 | Europe / Czech Republic / Northern Bohemia Region / Liberec |
| EPI_ISL_584075 | 6/19/2020 | 10/19/2020 | Europe / Czech Republic / Northern Bohemia Region / Liberec |
| EPI_ISL_584076 | 6/21/2020 | 10/19/2020 | Europe / Czech Republic / Northern Bohemia Region / Liberec |
| EPI_ISL_584077 | 6/21/2020 | 10/19/2020 | Europe / Czech Republic / Northern Bohemia Region / Liberec |
| EPI_ISL_584078 | 7/29/2020 | 10/19/2020 | Europe / Czech Republic / Central Bohemian Region / Prague  |
| EPI_ISL_584079 | 4/1/2020  | 10/19/2020 | Europe / Czech Republic / Southern Bohemia Region / Pisek   |
| EPI_ISL_584080 | 5/28/2020 | 10/19/2020 | Europe / Czech Republic / Northern Bohemia Region / Litome  |
| EPI_ISL_584081 | 9/3/2020  | 10/19/2020 | Europe / Czech Republic / Central Bohemian Region / Prague  |
| EPI_ISL_584082 | 9/4/2020  | 10/19/2020 | Europe / Czech Republic / Central Bohemian Region / Prague  |
| EPI_ISL_584131 | 5/14/2020 | 10/19/2020 | North America / USA / Texas / Hidalgo County                |
| EPI_ISL_584155 | 5/14/2020 | 10/19/2020 | North America / USA / Texas / Harris County                 |































































|                |            |            |                                                 |
|----------------|------------|------------|-------------------------------------------------|
| EPI_ISL_586221 | 10/6/2020  | 10/19/2020 | Europe / United Kingdom / Wales                 |
| EPI_ISL_586222 | 10/8/2020  | 10/19/2020 | Europe / United Kingdom / Wales                 |
| EPI_ISL_586223 | 10/9/2020  | 10/19/2020 | Europe / United Kingdom / Wales                 |
| EPI_ISL_586224 | 10/7/2020  | 10/19/2020 | Europe / United Kingdom / Wales                 |
| EPI_ISL_586226 | 10/9/2020  | 10/19/2020 | Europe / United Kingdom / Wales                 |
| EPI_ISL_586228 | 10/9/2020  | 10/19/2020 | Europe / United Kingdom / Wales                 |
| EPI_ISL_586231 | 10/10/2020 | 10/19/2020 | Europe / United Kingdom / Wales                 |
| EPI_ISL_586233 | 10/8/2020  | 10/19/2020 | Europe / United Kingdom / Wales                 |
| EPI_ISL_586234 | 10/7/2020  | 10/19/2020 | Europe / United Kingdom / Wales                 |
| EPI_ISL_586235 | 10/5/2020  | 10/19/2020 | Europe / United Kingdom / Wales                 |
| EPI_ISL_586237 | 10/6/2020  | 10/19/2020 | Europe / United Kingdom / Wales                 |
| EPI_ISL_586238 | 10/10/2020 | 10/19/2020 | Europe / United Kingdom / Wales                 |
| EPI_ISL_586239 | 10/7/2020  | 10/19/2020 | Europe / United Kingdom / Wales                 |
| EPI_ISL_586243 | 6/22/2020  | 10/19/2020 | North America / USA / Alaska / Anchorage-Mat Su |
| EPI_ISL_586244 | 6/23/2020  | 10/19/2020 | North America / USA / Alaska / Anchorage-Mat Su |
| EPI_ISL_586245 | 6/24/2020  | 10/19/2020 | North America / USA / Alaska / Anchorage-Mat Su |
| EPI_ISL_586246 | 6/26/2020  | 10/19/2020 | North America / USA / Alaska / Gulf Coast       |
| EPI_ISL_586247 | 6/25/2020  | 10/19/2020 | North America / USA / Alaska / Gulf Coast       |
| EPI_ISL_586248 | 6/26/2020  | 10/19/2020 | North America / USA / Alaska / Anchorage-Mat Su |
| EPI_ISL_586249 | 6/27/2020  | 10/19/2020 | North America / USA / Alaska / Anchorage-Mat Su |
| EPI_ISL_586250 | 6/26/2020  | 10/19/2020 | North America / USA / Alaska / Anchorage-Mat Su |
| EPI_ISL_586251 | 6/26/2020  | 10/19/2020 | North America / USA / Alaska / Anchorage-Mat Su |
| EPI_ISL_586252 | 6/27/2020  | 10/19/2020 | North America / USA / Alaska / Gulf Coast       |
| EPI_ISL_586253 | 6/27/2020  | 10/19/2020 | North America / USA / Alaska / Anchorage-Mat Su |
| EPI_ISL_586254 | 6/29/2020  | 10/19/2020 | North America / USA / Alaska / Anchorage-Mat Su |
| EPI_ISL_586255 | 6/29/2020  | 10/19/2020 | North America / USA / Alaska / Anchorage-Mat Su |
| EPI_ISL_586256 | 6/29/2020  | 10/19/2020 | North America / USA / Alaska / Anchorage-Mat Su |
| EPI_ISL_586257 | 6/29/2020  | 10/19/2020 | North America / USA / Alaska / Gulf Coast       |
| EPI_ISL_586258 | 6/29/2020  | 10/19/2020 | North America / USA / Alaska / Gulf Coast       |
| EPI_ISL_586259 | 6/29/2020  | 10/19/2020 | North America / USA / Alaska / Gulf Coast       |
| EPI_ISL_586260 | 6/22/2020  | 10/19/2020 | North America / USA / Alaska / Southwest        |
| EPI_ISL_586261 | 6/30/2020  | 10/19/2020 | North America / USA / Alaska / Gulf Coast       |
| EPI_ISL_586262 | 6/30/2020  | 10/19/2020 | North America / USA / Alaska / Anchorage-Mat Su |
| EPI_ISL_586263 | 7/1/2020   | 10/19/2020 | North America / USA / Alaska / Anchorage-Mat Su |
| EPI_ISL_586264 | 7/2/2020   | 10/19/2020 | North America / USA / Alaska / Gulf Coast       |
| EPI_ISL_586265 | 7/2/2020   | 10/19/2020 | North America / USA / Alaska / Anchorage-Mat Su |
| EPI_ISL_586266 | 7/2/2020   | 10/19/2020 | North America / USA / Alaska / Gulf Coast       |
| EPI_ISL_586268 | 3/23/2020  | 10/19/2020 | North America / Canada / Ontario / Toronto      |
| EPI_ISL_586271 | 4/9/2020   | 10/19/2020 | North America / Canada / Ontario / Toronto      |
| EPI_ISL_586274 | 4/20/2020  | 10/19/2020 | North America / Canada / Ontario / Toronto      |
| EPI_ISL_586276 | 4/29/2020  | 10/19/2020 | North America / Canada / Ontario / Toronto      |
| EPI_ISL_586281 | 4/16/2020  | 10/19/2020 | North America / Canada / Ontario / Toronto      |
| EPI_ISL_586293 | 3/22/2020  | 10/19/2020 | North America / Canada / Ontario / Toronto      |
| EPI_ISL_586295 | 3/14/2020  | 10/19/2020 | North America / Canada / Ontario / Toronto      |
| EPI_ISL_586297 | 3/16/2020  | 10/19/2020 | North America / Canada / Ontario / Toronto      |
| EPI_ISL_586299 | 3/18/2020  | 10/19/2020 | North America / Canada / Ontario / Toronto      |
| EPI_ISL_586300 | 3/27/2020  | 10/19/2020 | North America / Canada / Ontario / Toronto      |







|                |           |                                                           |
|----------------|-----------|-----------------------------------------------------------|
| EPI_ISL_591055 | 7/19/2020 | 10/19/2020 North America / USA / Montana / Ravalli County |
| EPI_ISL_591056 | 7/20/2020 | 10/19/2020 North America / USA / Montana / Ravalli County |
| EPI_ISL_586513 | 6/25/2020 | 10/20/2020 Asia / India / Gujarat / Ahmedabad             |
| EPI_ISL_586514 | 6/25/2020 | 10/20/2020 Asia / India / Gujarat / Ahmedabad             |
| EPI_ISL_586515 | 6/25/2020 | 10/20/2020 Asia / India / Gujarat / Daskroi               |
| EPI_ISL_586516 | 6/25/2020 | 10/20/2020 Asia / India / Gujarat / Daskroi               |
| EPI_ISL_586517 | 6/25/2020 | 10/20/2020 Asia / India / Gujarat / Ahmedabad             |
| EPI_ISL_586518 | 6/25/2020 | 10/20/2020 Asia / India / Gujarat / Ahmedabad             |
| EPI_ISL_586519 | 6/25/2020 | 10/20/2020 Asia / India / Gujarat / Ahmedabad             |
| EPI_ISL_586520 | 6/25/2020 | 10/20/2020 Asia / India / Gujarat / Ahmedabad             |
| EPI_ISL_586521 | 6/25/2020 | 10/20/2020 Asia / India / Gujarat / Ahmedabad             |
| EPI_ISL_586522 | 6/25/2020 | 10/20/2020 Asia / India / Gujarat / Ahmedabad             |
| EPI_ISL_586523 | 6/25/2020 | 10/20/2020 Asia / India / Gujarat / Ahmedabad             |
| EPI_ISL_586524 | 6/25/2020 | 10/20/2020 Asia / India / Gujarat / Ahmedabad             |
| EPI_ISL_586525 | 6/25/2020 | 10/20/2020 Asia / India / Gujarat / Ahmedabad             |
| EPI_ISL_586526 | 6/25/2020 | 10/20/2020 Asia / India / Gujarat / Ahmedabad             |
| EPI_ISL_586527 | 6/25/2020 | 10/20/2020 Asia / India / Gujarat / Ahmedabad             |
| EPI_ISL_586528 | 6/25/2020 | 10/20/2020 Asia / India / Gujarat / Ahmedabad             |
| EPI_ISL_586529 | 6/25/2020 | 10/20/2020 Asia / India / Gujarat / Ahmedabad             |
| EPI_ISL_586530 | 6/25/2020 | 10/20/2020 Asia / India / Gujarat / Ahmedabad             |
| EPI_ISL_586531 | 7/18/2020 | 10/20/2020 Asia / India / Gujarat / Bodeli                |
| EPI_ISL_586532 | 7/18/2020 | 10/20/2020 Asia / India / Gujarat / Bodeli                |
| EPI_ISL_586533 | 7/18/2020 | 10/20/2020 Asia / India / Gujarat / Bodeli                |
| EPI_ISL_586534 | 7/18/2020 | 10/20/2020 Asia / India / Gujarat / Bodeli                |
| EPI_ISL_586535 | 7/18/2020 | 10/20/2020 Asia / India / Gujarat / Bodeli                |
| EPI_ISL_586536 | 7/18/2020 | 10/20/2020 Asia / India / Gujarat / Limkheda              |
| EPI_ISL_586537 | 7/18/2020 | 10/20/2020 Asia / India / Gujarat / Fatepura              |
| EPI_ISL_586538 | 7/18/2020 | 10/20/2020 Asia / India / Gujarat / Fatepura              |
| EPI_ISL_586539 | 7/18/2020 | 10/20/2020 Asia / India / Gujarat / Dahod                 |
| EPI_ISL_586540 | 7/18/2020 | 10/20/2020 Asia / India / Gujarat / Dahod                 |
| EPI_ISL_586541 | 7/18/2020 | 10/20/2020 Asia / India / Gujarat / Dahod                 |
| EPI_ISL_586542 | 7/11/2020 | 10/20/2020 Asia / India / Gujarat / Jamkhambhaliya        |
| EPI_ISL_586543 | 7/11/2020 | 10/20/2020 Asia / India / Gujarat / Jamkhambhaliya        |
| EPI_ISL_586544 | 7/11/2020 | 10/20/2020 Asia / India / Gujarat / Kalyanpur             |
| EPI_ISL_586545 | 7/11/2020 | 10/20/2020 Asia / India / Gujarat / Kalyanpur             |
| EPI_ISL_586546 | 7/18/2020 | 10/20/2020 Asia / India / Gujarat / Godhra                |
| EPI_ISL_586547 | 7/18/2020 | 10/20/2020 Asia / India / Gujarat / Godhra                |
| EPI_ISL_586548 | 7/18/2020 | 10/20/2020 Asia / India / Gujarat / Godhra                |
| EPI_ISL_586549 | 7/14/2020 | 10/20/2020 Asia / India / Gujarat / Sutrapada             |
| EPI_ISL_586550 | 7/14/2020 | 10/20/2020 Asia / India / Gujarat / Sutrapada             |
| EPI_ISL_586551 | 7/14/2020 | 10/20/2020 Asia / India / Gujarat / Sutrapada             |
| EPI_ISL_586552 | 7/14/2020 | 10/20/2020 Asia / India / Gujarat / Sutrapada             |
| EPI_ISL_586553 | 7/14/2020 | 10/20/2020 Asia / India / Gujarat / Veraval               |
| EPI_ISL_586554 | 7/14/2020 | 10/20/2020 Asia / India / Gujarat / Veraval               |
| EPI_ISL_586555 | 7/14/2020 | 10/20/2020 Asia / India / Gujarat / Talala                |
| EPI_ISL_586556 | 7/14/2020 | 10/20/2020 Asia / India / Gujarat / Talala                |
| EPI_ISL_586557 | 7/14/2020 | 10/20/2020 Asia / India / Gujarat / Una                   |

|                |              |                                                  |
|----------------|--------------|--------------------------------------------------|
| EPI_ISL_586558 | 7/14/2020    | 10/20/2020 Asia / India / Gujarat / Sutrapada    |
| EPI_ISL_586559 | 7/14/2020    | 10/20/2020 Asia / India / Gujarat / Sutrapada    |
| EPI_ISL_586560 | 7/14/2020    | 10/20/2020 Asia / India / Gujarat / Kodinar      |
| EPI_ISL_586561 | 7/14/2020    | 10/20/2020 Asia / India / Gujarat / Kodinar      |
| EPI_ISL_586562 | 7/15/2020    | 10/20/2020 Asia / India / Gujarat / Mangrol      |
| EPI_ISL_586563 | 7/15/2020    | 10/20/2020 Asia / India / Gujarat / Mangrol      |
| EPI_ISL_586564 | 7/15/2020    | 10/20/2020 Asia / India / Gujarat / Junagadh     |
| EPI_ISL_586565 | 7/15/2020    | 10/20/2020 Asia / India / Gujarat / Mangrol      |
| EPI_ISL_586566 | 7/15/2020    | 10/20/2020 Asia / India / Gujarat / Mangrol      |
| EPI_ISL_586567 | 7/6/2020     | 10/20/2020 Asia / India / Gujarat / Mehsana      |
| EPI_ISL_586568 | 7/6/2020     | 10/20/2020 Asia / India / Gujarat / Mehsana      |
| EPI_ISL_586569 | 9/3/2020     | 10/20/2020 Asia / India / Gujarat / Ahmedabad    |
| EPI_ISL_586570 | 9/1/2020     | 10/20/2020 Asia / India / Gujarat / Ahmedabad    |
| EPI_ISL_586571 | 2012/12/2020 | 10/20/2020 Oceania / Australia / New South Wales |
| EPI_ISL_586574 | 10/5/2020    | 10/20/2020 Europe / United Kingdom / England     |
| EPI_ISL_586575 | 10/5/2020    | 10/20/2020 Europe / United Kingdom / England     |
| EPI_ISL_586576 | 10/6/2020    | 10/20/2020 Europe / United Kingdom / England     |
| EPI_ISL_586577 | 10/6/2020    | 10/20/2020 Europe / United Kingdom / England     |
| EPI_ISL_586578 | 10/6/2020    | 10/20/2020 Europe / United Kingdom / England     |
| EPI_ISL_586579 | 10/6/2020    | 10/20/2020 Europe / United Kingdom / England     |
| EPI_ISL_586580 | 10/5/2020    | 10/20/2020 Europe / United Kingdom / England     |
| EPI_ISL_586581 | 10/6/2020    | 10/20/2020 Europe / United Kingdom / England     |
| EPI_ISL_586582 | 10/6/2020    | 10/20/2020 Europe / United Kingdom / England     |
| EPI_ISL_586583 | 10/6/2020    | 10/20/2020 Europe / United Kingdom / England     |
| EPI_ISL_586584 | 10/5/2020    | 10/20/2020 Europe / United Kingdom / England     |
| EPI_ISL_586585 | 10/6/2020    | 10/20/2020 Europe / United Kingdom / England     |
| EPI_ISL_586586 | 10/5/2020    | 10/20/2020 Europe / United Kingdom / England     |
| EPI_ISL_586588 | 10/6/2020    | 10/20/2020 Europe / United Kingdom / England     |
| EPI_ISL_586589 | 10/5/2020    | 10/20/2020 Europe / United Kingdom / England     |
| EPI_ISL_586590 | 10/6/2020    | 10/20/2020 Europe / United Kingdom / England     |
| EPI_ISL_586591 | 10/6/2020    | 10/20/2020 Europe / United Kingdom / England     |
| EPI_ISL_586592 | 10/5/2020    | 10/20/2020 Europe / United Kingdom / England     |
| EPI_ISL_586593 | 10/6/2020    | 10/20/2020 Europe / United Kingdom / England     |
| EPI_ISL_586595 | 10/6/2020    | 10/20/2020 Europe / United Kingdom / England     |
| EPI_ISL_586596 | 10/6/2020    | 10/20/2020 Europe / United Kingdom / England     |
| EPI_ISL_586597 | 10/6/2020    | 10/20/2020 Europe / United Kingdom / England     |
| EPI_ISL_586598 | 10/6/2020    | 10/20/2020 Europe / United Kingdom / England     |
| EPI_ISL_586599 | 10/5/2020    | 10/20/2020 Europe / United Kingdom / England     |
| EPI_ISL_586600 | 10/6/2020    | 10/20/2020 Europe / United Kingdom / England     |
| EPI_ISL_586601 | 10/6/2020    | 10/20/2020 Europe / United Kingdom / England     |
| EPI_ISL_586602 | 10/6/2020    | 10/20/2020 Europe / United Kingdom / England     |
| EPI_ISL_586603 | 10/5/2020    | 10/20/2020 Europe / United Kingdom / England     |
| EPI_ISL_586605 | 10/6/2020    | 10/20/2020 Europe / United Kingdom / England     |
| EPI_ISL_586606 | 10/5/2020    | 10/20/2020 Europe / United Kingdom / England     |
| EPI_ISL_586607 | 10/5/2020    | 10/20/2020 Europe / United Kingdom / England     |
| EPI_ISL_586608 | 10/6/2020    | 10/20/2020 Europe / United Kingdom / England     |
| EPI_ISL_586609 | 10/5/2020    | 10/20/2020 Europe / United Kingdom / England     |



















































































































































































|                |           |            |                                 |
|----------------|-----------|------------|---------------------------------|
| EPI_ISL_590794 | 4/14/2020 | 10/20/2020 | North America / USA / Minnesota |
| EPI_ISL_590795 | 4/14/2020 | 10/20/2020 | North America / USA / Minnesota |
| EPI_ISL_590796 | 4/14/2020 | 10/20/2020 | North America / USA / Minnesota |
| EPI_ISL_590797 | 4/14/2020 | 10/20/2020 | North America / USA / Minnesota |
| EPI_ISL_590798 | 4/14/2020 | 10/20/2020 | North America / USA / Minnesota |
| EPI_ISL_590799 | 4/14/2020 | 10/20/2020 | North America / USA / Minnesota |
| EPI_ISL_590800 | 4/14/2020 | 10/20/2020 | North America / USA / Minnesota |
| EPI_ISL_590801 | 4/14/2020 | 10/20/2020 | North America / USA / Minnesota |
| EPI_ISL_590802 | 4/14/2020 | 10/20/2020 | North America / USA / Minnesota |
| EPI_ISL_590803 | 4/14/2020 | 10/20/2020 | North America / USA / Minnesota |
| EPI_ISL_590804 | 4/14/2020 | 10/20/2020 | North America / USA / Minnesota |
| EPI_ISL_590805 | 4/14/2020 | 10/20/2020 | North America / USA / Minnesota |
| EPI_ISL_590806 | 4/14/2020 | 10/20/2020 | North America / USA / Minnesota |
| EPI_ISL_590807 | 4/14/2020 | 10/20/2020 | North America / USA / Minnesota |
| EPI_ISL_590808 | 4/14/2020 | 10/20/2020 | North America / USA / Minnesota |
| EPI_ISL_590809 | 4/14/2020 | 10/20/2020 | North America / USA / Minnesota |
| EPI_ISL_590810 | 4/14/2020 | 10/20/2020 | North America / USA / Minnesota |
| EPI_ISL_590811 | 4/14/2020 | 10/20/2020 | North America / USA / Minnesota |
| EPI_ISL_590812 | 4/14/2020 | 10/20/2020 | North America / USA / Minnesota |
| EPI_ISL_590813 | 4/14/2020 | 10/20/2020 | North America / USA / Minnesota |
| EPI_ISL_590814 | 4/14/2020 | 10/20/2020 | North America / USA / Minnesota |
| EPI_ISL_590815 | 4/14/2020 | 10/20/2020 | North America / USA / Minnesota |
| EPI_ISL_590816 | 4/14/2020 | 10/20/2020 | North America / USA / Minnesota |
| EPI_ISL_590817 | 4/14/2020 | 10/20/2020 | North America / USA / Minnesota |
| EPI_ISL_590818 | 4/14/2020 | 10/20/2020 | North America / USA / Minnesota |
| EPI_ISL_590819 | 4/14/2020 | 10/20/2020 | North America / USA / Minnesota |
| EPI_ISL_590820 | 4/15/2020 | 10/20/2020 | North America / USA / Minnesota |
| EPI_ISL_590821 | 4/15/2020 | 10/20/2020 | North America / USA / Minnesota |
| EPI_ISL_590822 | 4/15/2020 | 10/20/2020 | North America / USA / Minnesota |
| EPI_ISL_590823 | 3/10/2020 | 10/20/2020 | Europe / Switzerland / Zurich   |
| EPI_ISL_590824 | 3/9/2020  | 10/20/2020 | Europe / Switzerland / Zurich   |
| EPI_ISL_590825 | 3/11/2020 | 10/20/2020 | Europe / Switzerland / Zurich   |
| EPI_ISL_590826 | 3/11/2020 | 10/20/2020 | Europe / Switzerland / Zurich   |
| EPI_ISL_590827 | 3/11/2020 | 10/20/2020 | Europe / Switzerland / Zurich   |
| EPI_ISL_590828 | 3/29/2020 | 10/20/2020 | Europe / Switzerland / Zurich   |
| EPI_ISL_590829 | 3/29/2020 | 10/20/2020 | Europe / Switzerland / Zurich   |
| EPI_ISL_590830 | 3/30/2020 | 10/20/2020 | Europe / Switzerland / Zurich   |
| EPI_ISL_590831 | 4/7/2020  | 10/20/2020 | Europe / Switzerland / Zurich   |
| EPI_ISL_590832 | 4/14/2020 | 10/20/2020 | Europe / Switzerland / Thurgau  |
| EPI_ISL_590833 | 5/4/2020  | 10/20/2020 | Europe / Switzerland / Aargau   |
| EPI_ISL_590834 | 5/4/2020  | 10/20/2020 | Europe / Switzerland / Aargau   |
| EPI_ISL_590835 | 5/4/2020  | 10/20/2020 | Europe / Switzerland / Aargau   |
| EPI_ISL_590836 | 5/3/2020  | 10/20/2020 | Europe / Switzerland / Zurich   |
| EPI_ISL_590837 | 4/13/2020 | 10/20/2020 | North America / USA / Minnesota |
| EPI_ISL_590877 | 9/28/2020 | 10/20/2020 | Europe / Norway / Rogaland      |
| EPI_ISL_590878 | 9/5/2020  | 10/20/2020 | Europe / Norway / Oslo          |
| EPI_ISL_590879 | 9/4/2020  | 10/20/2020 | Europe / Norway / Viken         |

|                |           |            |                                        |
|----------------|-----------|------------|----------------------------------------|
| EPI_ISL_590880 | 9/4/2020  | 10/20/2020 | Europe / Norway / Viken                |
| EPI_ISL_590881 | 9/8/2020  | 10/20/2020 | Europe / Norway / Oslo                 |
| EPI_ISL_590882 | 9/3/2020  | 10/20/2020 | Europe / Norway / Viken                |
| EPI_ISL_590883 | 9/9/2020  | 10/20/2020 | Europe / Norway / More og Romsdal      |
| EPI_ISL_590884 | 9/9/2020  | 10/20/2020 | Europe / Norway / Vestland             |
| EPI_ISL_590885 | 8/26/2020 | 10/20/2020 | Europe / Norway / Vestfold og Telemark |
| EPI_ISL_590886 | 8/27/2020 | 10/20/2020 | Europe / Norway / Vestfold og Telemark |
| EPI_ISL_590887 | 9/11/2020 | 10/20/2020 | Europe / Norway / Vestfold og Telemark |
| EPI_ISL_590888 | 9/13/2020 | 10/20/2020 | Europe / Norway / Vestfold og Telemark |
| EPI_ISL_590889 | 9/10/2020 | 10/20/2020 | Europe / Norway / Viken                |
| EPI_ISL_590890 | 9/14/2020 | 10/20/2020 | Europe / Norway / Viken                |
| EPI_ISL_590891 | 9/11/2020 | 10/20/2020 | Europe / Norway / Viken                |
| EPI_ISL_590892 | 9/11/2020 | 10/20/2020 | Europe / Norway / Viken                |
| EPI_ISL_590893 | 9/13/2020 | 10/20/2020 | Europe / Norway / Trondelag            |
| EPI_ISL_590894 | 9/9/2020  | 10/20/2020 | Europe / Norway / Viken                |
| EPI_ISL_590895 | 9/9/2020  | 10/20/2020 | Europe / Norway / Viken                |
| EPI_ISL_590896 | 9/10/2020 | 10/20/2020 | Europe / Norway / Viken                |
| EPI_ISL_590897 | 9/13/2020 | 10/20/2020 | Europe / Norway / Viken                |
| EPI_ISL_590898 | 9/9/2020  | 10/20/2020 | Europe / Norway / Viken                |
| EPI_ISL_590899 | 9/9/2020  | 10/20/2020 | Europe / Norway / Vestland             |
| EPI_ISL_590900 | 9/2/2020  | 10/20/2020 | Europe / Norway / Oslo                 |
| EPI_ISL_590901 | 9/2/2020  | 10/20/2020 | Europe / Norway / Oslo                 |
| EPI_ISL_590902 | 9/2/2020  | 10/20/2020 | Europe / Norway / Oslo                 |
| EPI_ISL_590903 | 9/2/2020  | 10/20/2020 | Europe / Norway / Oslo                 |
| EPI_ISL_590904 | 8/31/2020 | 10/20/2020 | Europe / Norway / Agder                |
| EPI_ISL_590905 | 8/31/2020 | 10/20/2020 | Europe / Norway / Agder                |
| EPI_ISL_590906 | 8/31/2020 | 10/20/2020 | Europe / Norway / Agder                |
| EPI_ISL_590907 | 9/1/2020  | 10/20/2020 | Europe / Norway / Agder                |
| EPI_ISL_590908 | 8/23/2020 | 10/20/2020 | Europe / Norway / Oslo                 |
| EPI_ISL_590909 | 8/29/2020 | 10/20/2020 | Europe / Norway / Oslo                 |
| EPI_ISL_590910 | 8/24/2020 | 10/20/2020 | Europe / Norway / Oslo                 |
| EPI_ISL_590911 | 9/7/2020  | 10/20/2020 | Europe / Norway / Vestland             |
| EPI_ISL_590912 | 9/2/2020  | 10/20/2020 | Europe / Norway / Oslo                 |
| EPI_ISL_590913 | 8/29/2020 | 10/20/2020 | Europe / Norway / Oslo                 |
| EPI_ISL_590914 | 3/27/2020 | 10/20/2020 | Europe / Norway / Oslo                 |
| EPI_ISL_590915 | 3/10/2020 | 10/20/2020 | Europe / Norway / Agder                |
| EPI_ISL_590916 | 3/9/2020  | 10/20/2020 | Europe / Norway / Oslo                 |
| EPI_ISL_590917 | 3/17/2020 | 10/20/2020 | Europe / Norway / Vestfold og Telemark |
| EPI_ISL_590918 | 3/30/2020 | 10/20/2020 | Europe / Norway / Oslo                 |
| EPI_ISL_590919 | 8/5/2020  | 10/20/2020 | Europe / Norway / Vestfold og Telemark |
| EPI_ISL_590920 | 8/3/2020  | 10/20/2020 | Europe / Norway / Vestfold og Telemark |
| EPI_ISL_590921 | 8/7/2020  | 10/20/2020 | Europe / Norway / Viken                |
| EPI_ISL_590922 | 8/7/2020  | 10/20/2020 | Europe / Norway / Viken                |
| EPI_ISL_590923 | 9/18/2020 | 10/20/2020 | Europe / Norway / Oslo                 |
| EPI_ISL_590924 | 7/31/2020 | 10/20/2020 | Europe / Norway                        |
| EPI_ISL_590925 | 7/31/2020 | 10/20/2020 | Europe / Norway                        |
| EPI_ISL_590926 | 7/31/2020 | 10/20/2020 | Europe / Norway                        |

|                |           |            |                             |
|----------------|-----------|------------|-----------------------------|
| EPI_ISL_590927 | 9/15/2020 | 10/20/2020 | Europe / Norway / Oslo      |
| EPI_ISL_590928 | 9/13/2020 | 10/20/2020 | Europe / Norway / Oslo      |
| EPI_ISL_590929 | 9/18/2020 | 10/20/2020 | Europe / Norway / Viken     |
| EPI_ISL_590930 | 9/10/2020 | 10/20/2020 | Europe / Norway / Oslo      |
| EPI_ISL_590931 | 9/21/2020 | 10/20/2020 | Europe / Norway / Viken     |
| EPI_ISL_590932 | 9/16/2020 | 10/20/2020 | Europe / Norway / Viken     |
| EPI_ISL_590933 | 9/19/2020 | 10/20/2020 | Europe / Norway / Viken     |
| EPI_ISL_590934 | 9/5/2020  | 10/20/2020 | Europe / Norway / Oslo      |
| EPI_ISL_590935 | 9/10/2020 | 10/20/2020 | Europe / Norway / Oslo      |
| EPI_ISL_590936 | 9/17/2020 | 10/20/2020 | Europe / Norway / Agder     |
| EPI_ISL_590937 | 9/18/2020 | 10/20/2020 | Europe / Norway / Agder     |
| EPI_ISL_590938 | 8/3/2020  | 10/20/2020 | Europe / Norway             |
| EPI_ISL_590939 | 7/31/2020 | 10/20/2020 | Europe / Norway             |
| EPI_ISL_590940 | 7/31/2020 | 10/20/2020 | Europe / Norway             |
| EPI_ISL_590941 | 8/2/2020  | 10/20/2020 | Europe / Norway             |
| EPI_ISL_590942 | 8/2/2020  | 10/20/2020 | Europe / Norway             |
| EPI_ISL_590943 | 8/4/2020  | 10/20/2020 | Europe / Norway             |
| EPI_ISL_590944 | 9/23/2020 | 10/20/2020 | Europe / Norway             |
| EPI_ISL_590945 | 9/19/2020 | 10/20/2020 | Europe / Norway / Viken     |
| EPI_ISL_590946 | 8/6/2020  | 10/20/2020 | Europe / Norway             |
| EPI_ISL_590947 | 7/31/2020 | 10/20/2020 | Europe / Norway             |
| EPI_ISL_590948 | 9/21/2020 | 10/20/2020 | Europe / Norway / Viken     |
| EPI_ISL_590949 | 7/31/2020 | 10/20/2020 | Europe / Norway             |
| EPI_ISL_590950 | 7/31/2020 | 10/20/2020 | Europe / Norway             |
| EPI_ISL_590951 | 9/23/2020 | 10/20/2020 | Europe / Norway / Innlandet |
| EPI_ISL_590952 | 9/24/2020 | 10/20/2020 | Europe / Norway / Innlandet |
| EPI_ISL_590953 | 9/21/2020 | 10/20/2020 | Europe / Norway / Rogaland  |
| EPI_ISL_590954 | 9/24/2020 | 10/20/2020 | Europe / Norway / Rogaland  |
| EPI_ISL_590955 | 9/25/2020 | 10/20/2020 | Europe / Norway / Rogaland  |
| EPI_ISL_590956 | 9/21/2020 | 10/20/2020 | Europe / Norway / Rogaland  |
| EPI_ISL_590957 | 9/21/2020 | 10/20/2020 | Europe / Norway / Rogaland  |
| EPI_ISL_590958 | 9/21/2020 | 10/20/2020 | Europe / Norway / Rogaland  |
| EPI_ISL_590959 | 9/21/2020 | 10/20/2020 | Europe / Norway / Rogaland  |
| EPI_ISL_590960 | 9/21/2020 | 10/20/2020 | Europe / Norway / Rogaland  |
| EPI_ISL_590961 | 9/21/2020 | 10/20/2020 | Europe / Norway / Rogaland  |
| EPI_ISL_590962 | 9/21/2020 | 10/20/2020 | Europe / Norway / Rogaland  |
| EPI_ISL_590963 | 9/21/2020 | 10/20/2020 | Europe / Norway / Rogaland  |
| EPI_ISL_590964 | 9/21/2020 | 10/20/2020 | Europe / Norway / Rogaland  |
| EPI_ISL_590965 | 9/21/2020 | 10/20/2020 | Europe / Norway / Rogaland  |
| EPI_ISL_590966 | 9/21/2020 | 10/20/2020 | Europe / Norway / Rogaland  |
| EPI_ISL_590967 | 9/21/2020 | 10/20/2020 | Europe / Norway / Rogaland  |
| EPI_ISL_590968 | 9/21/2020 | 10/20/2020 | Europe / Norway / Rogaland  |
| EPI_ISL_590969 | 9/21/2020 | 10/20/2020 | Europe / Norway / Rogaland  |
| EPI_ISL_590970 | 9/21/2020 | 10/20/2020 | Europe / Norway / Rogaland  |
| EPI_ISL_590971 | 9/21/2020 | 10/20/2020 | Europe / Norway / Rogaland  |
| EPI_ISL_590972 | 9/21/2020 | 10/20/2020 | Europe / Norway / Rogaland  |
| EPI_ISL_590973 | 9/21/2020 | 10/20/2020 | Europe / Norway / Rogaland  |

|                |           |            |                                        |
|----------------|-----------|------------|----------------------------------------|
| EPI_ISL_590974 | 9/21/2020 | 10/20/2020 | Europe / Norway / Rogaland             |
| EPI_ISL_590975 | 9/21/2020 | 10/20/2020 | Europe / Norway / Rogaland             |
| EPI_ISL_590976 | 9/23/2020 | 10/20/2020 | Europe / Norway / Rogaland             |
| EPI_ISL_590977 | 9/24/2020 | 10/20/2020 | Europe / Norway / Rogaland             |
| EPI_ISL_590978 | 9/24/2020 | 10/20/2020 | Europe / Norway / Oslo                 |
| EPI_ISL_590979 | 9/25/2020 | 10/20/2020 | Europe / Norway / Oslo                 |
| EPI_ISL_590980 | 9/25/2020 | 10/20/2020 | Europe / Norway / Oslo                 |
| EPI_ISL_590981 | 9/25/2020 | 10/20/2020 | Europe / Norway / Vestland             |
| EPI_ISL_590982 | 9/14/2020 | 10/20/2020 | Europe / Norway / Viken                |
| EPI_ISL_590983 | 9/23/2020 | 10/20/2020 | Europe / Norway / Vestfold og Telemark |
| EPI_ISL_590984 | 9/24/2020 | 10/20/2020 | Europe / Norway / Agder                |
| EPI_ISL_590985 | 9/21/2020 | 10/20/2020 | Europe / Norway / Vestland             |
| EPI_ISL_590986 | 8/7/2020  | 10/20/2020 | Europe / Norway / Viken                |
| EPI_ISL_590987 | 9/3/2020  | 10/20/2020 | Europe / Norway / Viken                |
| EPI_ISL_590988 | 8/29/2020 | 10/20/2020 | Europe / Norway / Viken                |
| EPI_ISL_590989 | 9/3/2020  | 10/20/2020 | Europe / Norway / Viken                |
| EPI_ISL_590990 | 9/7/2020  | 10/20/2020 | Europe / Norway / Viken                |
| EPI_ISL_590991 | 9/1/2020  | 10/20/2020 | Europe / Norway / Viken                |
| EPI_ISL_590992 | 8/31/2020 | 10/20/2020 | Europe / Norway / Viken                |
| EPI_ISL_590993 | 8/31/2020 | 10/20/2020 | Europe / Norway / Viken                |
| EPI_ISL_590994 | 8/31/2020 | 10/20/2020 | Europe / Norway / Viken                |
| EPI_ISL_590995 | 9/2/2020  | 10/20/2020 | Europe / Norway / Viken                |
| EPI_ISL_590996 | 9/4/2020  | 10/20/2020 | Europe / Norway / Viken                |
| EPI_ISL_590997 | 8/30/2020 | 10/20/2020 | Europe / Norway / Viken                |
| EPI_ISL_590998 | 9/1/2020  | 10/20/2020 | Europe / Norway / Viken                |
| EPI_ISL_590999 | 9/4/2020  | 10/20/2020 | Europe / Norway / Viken                |
| EPI_ISL_591000 | 9/4/2020  | 10/20/2020 | Europe / Norway / Viken                |
| EPI_ISL_591001 | 9/3/2020  | 10/20/2020 | Europe / Norway / Viken                |
| EPI_ISL_591002 | 9/5/2020  | 10/20/2020 | Europe / Norway / Viken                |
| EPI_ISL_591003 | 9/8/2020  | 10/20/2020 | Europe / Norway / Viken                |
| EPI_ISL_591004 | 9/6/2020  | 10/20/2020 | Europe / Norway / Viken                |
| EPI_ISL_591005 | 9/7/2020  | 10/20/2020 | Europe / Norway / Viken                |
| EPI_ISL_591006 | 8/14/2020 | 10/20/2020 | Europe / Norway / Viken                |
| EPI_ISL_591007 | 8/6/2020  | 10/20/2020 | Europe / Norway                        |
| EPI_ISL_591008 | 9/28/2020 | 10/20/2020 | Europe / Norway / Vestland             |
| EPI_ISL_591009 | 9/28/2020 | 10/20/2020 | Europe / Norway / Viken                |
| EPI_ISL_591010 | 9/24/2020 | 10/20/2020 | Europe / Norway / Vestfold og Telemark |
| EPI_ISL_591011 | 9/27/2020 | 10/20/2020 | Europe / Norway / Oslo                 |
| EPI_ISL_591012 | 9/26/2020 | 10/20/2020 | Europe / Norway / More og Romsdal      |
| EPI_ISL_591013 | 9/22/2020 | 10/20/2020 | Europe / Norway / Vestfold og Telemark |
| EPI_ISL_591014 | 9/30/2020 | 10/20/2020 | Europe / Norway / Trondelag            |
| EPI_ISL_591015 | 9/1/2020  | 10/20/2020 | Europe / Norway / Viken                |
| EPI_ISL_591016 | 8/29/2020 | 10/20/2020 | Europe / Norway / Viken                |
| EPI_ISL_591017 | 8/29/2020 | 10/20/2020 | Europe / Norway / Viken                |
| EPI_ISL_591018 | 9/28/2020 | 10/20/2020 | Europe / Norway / More og Romsdal      |
| EPI_ISL_591019 | 9/29/2020 | 10/20/2020 | Europe / Norway / More og Romsdal      |
| EPI_ISL_591020 | 9/3/2020  | 10/20/2020 | Europe / Norway / Oslo                 |

|                |           |            |                                                      |
|----------------|-----------|------------|------------------------------------------------------|
| EPI_ISL_591021 | 8/1/2020  | 10/20/2020 | Europe / Norway / Rogaland                           |
| EPI_ISL_591022 | 9/21/2020 | 10/20/2020 | North America / USA / Maryland                       |
| EPI_ISL_591023 | 9/19/2020 | 10/20/2020 | North America / USA / Maryland                       |
| EPI_ISL_591024 | 9/21/2020 | 10/20/2020 | North America / USA / Maryland                       |
| EPI_ISL_591025 | 9/21/2020 | 10/20/2020 | North America / USA / Maryland                       |
| EPI_ISL_591026 | 9/21/2020 | 10/20/2020 | North America / USA / Maryland                       |
| EPI_ISL_591027 | 9/21/2020 | 10/20/2020 | North America / USA / Maryland                       |
| EPI_ISL_591028 | 9/21/2020 | 10/20/2020 | North America / USA / Maryland                       |
| EPI_ISL_591029 | 9/23/2020 | 10/20/2020 | North America / USA / Maryland                       |
| EPI_ISL_591030 | 9/23/2020 | 10/20/2020 | North America / USA / Maryland                       |
| EPI_ISL_591031 | 9/23/2020 | 10/20/2020 | North America / USA / Maryland                       |
| EPI_ISL_591032 | 9/23/2020 | 10/20/2020 | North America / USA / Maryland                       |
| EPI_ISL_591033 | 9/28/2020 | 10/20/2020 | North America / USA / Maryland                       |
| EPI_ISL_591034 | 9/28/2020 | 10/20/2020 | North America / USA / Maryland                       |
| EPI_ISL_591035 | 9/28/2020 | 10/20/2020 | North America / USA / Maryland                       |
| EPI_ISL_591036 | 9/28/2020 | 10/20/2020 | North America / USA / Maryland                       |
| EPI_ISL_591326 | 2020-03   | 10/20/2020 | Europe / Italy / Tuscany / Siena                     |
| EPI_ISL_591327 | 3/21/2020 | 10/20/2020 | Europe / Italy / Tuscany / Siena                     |
| EPI_ISL_591328 | 3/21/2020 | 10/20/2020 | Europe / Italy / Tuscany / Siena                     |
| EPI_ISL_591329 | 6/7/2020  | 10/20/2020 | Europe / Italy / Tuscany / Siena                     |
| EPI_ISL_591330 | 6/7/2020  | 10/20/2020 | Europe / Italy / Tuscany / Siena                     |
| EPI_ISL_591331 | 4/27/2020 | 10/20/2020 | Europe / Italy / Tuscany / Siena                     |
| EPI_ISL_591332 | 3/23/2020 | 10/20/2020 | Europe / Italy / Tuscany / Siena                     |
| EPI_ISL_591333 | 3/21/2020 | 10/20/2020 | Europe / Italy / Tuscany / Siena                     |
| EPI_ISL_591334 | 3/20/2020 | 10/20/2020 | Europe / Italy / Tuscany / Siena                     |
| EPI_ISL_591335 | 3/20/2020 | 10/20/2020 | Europe / Italy / Tuscany / Siena                     |
| EPI_ISL_591086 | 6/3/2020  | 10/21/2020 | Africa / Democratic Republic of the Congo / Kinshasa |
| EPI_ISL_591087 | 5/22/2020 | 10/21/2020 | Africa / Democratic Republic of the Congo / Kinshasa |
| EPI_ISL_591099 | 6/8/2020  | 10/21/2020 | Europe / France / Occitanie                          |
| EPI_ISL_591101 | 8/24/2020 | 10/21/2020 | North America / Canada / Ontario / Toronto           |
| EPI_ISL_591103 | 8/26/2020 | 10/21/2020 | North America / Canada / Ontario / Toronto           |
| EPI_ISL_591104 | 8/27/2020 | 10/21/2020 | North America / Canada / Ontario / Toronto           |
| EPI_ISL_591107 | 8/28/2020 | 10/21/2020 | North America / Canada / Ontario / Toronto           |
| EPI_ISL_591108 | 8/28/2020 | 10/21/2020 | North America / Canada / Ontario / Toronto           |
| EPI_ISL_591109 | 8/28/2020 | 10/21/2020 | North America / Canada / Ontario / Toronto           |
| EPI_ISL_591110 | 8/27/2020 | 10/21/2020 | North America / Canada / Ontario / Toronto           |
| EPI_ISL_591112 | 8/27/2020 | 10/21/2020 | North America / Canada / Ontario / Toronto           |
| EPI_ISL_591115 | 8/28/2020 | 10/21/2020 | North America / Canada / Ontario / Toronto           |
| EPI_ISL_591116 | 8/28/2020 | 10/21/2020 | North America / Canada / Ontario / Toronto           |
| EPI_ISL_591117 | 8/29/2020 | 10/21/2020 | North America / Canada / Ontario / Toronto           |
| EPI_ISL_591122 | 3/26/2020 | 10/21/2020 | North America / Canada / Ontario / Toronto           |
| EPI_ISL_591137 | 3/30/2020 | 10/21/2020 | North America / Canada / Ontario / Toronto           |
| EPI_ISL_591141 | 4/9/2020  | 10/21/2020 | North America / Canada / Ontario / Toronto           |
| EPI_ISL_591142 | 2020-04   | 10/21/2020 | North America / Canada / Ontario / Toronto           |
| EPI_ISL_591144 | 2020-04   | 10/21/2020 | North America / Canada / Ontario / Toronto           |
| EPI_ISL_591145 | 2020-04   | 10/21/2020 | North America / Canada / Ontario / Toronto           |
| EPI_ISL_591147 | 2020-04   | 10/21/2020 | North America / Canada / Ontario / Toronto           |







|                |           |            |                                            |
|----------------|-----------|------------|--------------------------------------------|
| EPI_ISL_591266 | 4/14/2020 | 10/21/2020 | North America / Canada / Ontario / Toronto |
| EPI_ISL_591267 | 4/14/2020 | 10/21/2020 | North America / Canada / Ontario / Toronto |
| EPI_ISL_591268 | 4/14/2020 | 10/21/2020 | North America / Canada / Ontario / Toronto |
| EPI_ISL_591270 | 9/24/2020 | 10/21/2020 | Asia / China / Shandong / Qingdao          |
| EPI_ISL_591271 | 9/24/2020 | 10/21/2020 | Asia / China / Shandong / Qingdao          |
| EPI_ISL_591281 | 5/15/2020 | 10/21/2020 | North America / USA / Utah                 |
| EPI_ISL_591284 | 5/15/2020 | 10/21/2020 | North America / USA / Utah                 |
| EPI_ISL_591285 | 5/15/2020 | 10/21/2020 | North America / USA / Utah                 |
| EPI_ISL_591287 | 5/15/2020 | 10/21/2020 | North America / USA / Utah                 |
| EPI_ISL_591288 | 5/15/2020 | 10/21/2020 | North America / USA / Utah                 |
| EPI_ISL_591289 | 5/14/2020 | 10/21/2020 | North America / USA / Utah                 |
| EPI_ISL_591291 | 5/14/2020 | 10/21/2020 | North America / USA / Utah                 |
| EPI_ISL_591292 | 5/14/2020 | 10/21/2020 | North America / USA / Utah                 |
| EPI_ISL_591297 | 5/15/2020 | 10/21/2020 | North America / USA / Utah                 |
| EPI_ISL_591298 | 5/15/2020 | 10/21/2020 | North America / USA / Utah                 |
| EPI_ISL_591300 | 5/15/2020 | 10/21/2020 | North America / USA / Utah                 |
| EPI_ISL_591302 | 5/15/2020 | 10/21/2020 | North America / USA / Utah                 |
| EPI_ISL_591303 | 5/15/2020 | 10/21/2020 | North America / USA / Utah                 |
| EPI_ISL_591304 | 5/15/2020 | 10/21/2020 | North America / USA / Utah                 |
| EPI_ISL_591305 | 5/15/2020 | 10/21/2020 | North America / USA / Utah                 |
| EPI_ISL_591308 | 5/18/2020 | 10/21/2020 | North America / USA / Utah                 |
| EPI_ISL_591309 | 5/16/2020 | 10/21/2020 | North America / USA / Utah                 |
| EPI_ISL_591315 | 5/18/2020 | 10/21/2020 | North America / USA / Utah                 |
| EPI_ISL_591347 | 3/4/2020  | 10/22/2020 | Asia / Japan                               |
| EPI_ISL_591348 | 3/19/2020 | 10/22/2020 | Asia / Japan                               |
| EPI_ISL_591349 | 3/26/2020 | 10/22/2020 | Asia / Japan                               |
| EPI_ISL_591350 | 3/26/2020 | 10/22/2020 | Asia / Japan                               |
| EPI_ISL_591351 | 4/5/2020  | 10/22/2020 | Asia / Japan                               |
| EPI_ISL_591352 | 6/13/2020 | 10/22/2020 | Asia / Japan                               |
| EPI_ISL_591353 | 6/14/2020 | 10/22/2020 | Asia / Japan                               |
| EPI_ISL_591354 | 3/14/2020 | 10/22/2020 | Asia / Japan                               |
| EPI_ISL_591355 | 3/19/2020 | 10/22/2020 | Asia / Japan                               |
| EPI_ISL_591356 | 3/20/2020 | 10/22/2020 | Asia / Japan                               |
| EPI_ISL_591357 | 3/24/2020 | 10/22/2020 | Asia / Japan                               |
| EPI_ISL_591358 | 3/26/2020 | 10/22/2020 | Asia / Japan                               |
| EPI_ISL_591359 | 3/31/2020 | 10/22/2020 | Asia / Japan                               |
| EPI_ISL_591360 | 3/31/2020 | 10/22/2020 | Asia / Japan                               |
| EPI_ISL_591361 | 4/1/2020  | 10/22/2020 | Asia / Japan                               |
| EPI_ISL_591362 | 4/3/2020  | 10/22/2020 | Asia / Japan                               |
| EPI_ISL_591363 | 4/4/2020  | 10/22/2020 | Asia / Japan                               |
| EPI_ISL_591364 | 4/6/2020  | 10/22/2020 | Asia / Japan                               |
| EPI_ISL_591365 | 4/6/2020  | 10/22/2020 | Asia / Japan                               |
| EPI_ISL_591366 | 4/6/2020  | 10/22/2020 | Asia / Japan                               |
| EPI_ISL_591367 | 4/20/2020 | 10/22/2020 | Asia / Japan                               |
| EPI_ISL_591368 | 4/20/2020 | 10/22/2020 | Asia / Japan                               |
| EPI_ISL_591369 | 4/27/2020 | 10/22/2020 | Asia / Japan                               |
| EPI_ISL_591370 | 5/25/2020 | 10/22/2020 | Asia / Japan                               |

|                |           |                         |
|----------------|-----------|-------------------------|
| EPI_ISL_591371 | 5/25/2020 | 10/22/2020 Asia / Japan |
| EPI_ISL_591372 | 5/25/2020 | 10/22/2020 Asia / Japan |
| EPI_ISL_591373 | 5/26/2020 | 10/22/2020 Asia / Japan |
| EPI_ISL_591374 | 5/29/2020 | 10/22/2020 Asia / Japan |
| EPI_ISL_591375 | 6/11/2020 | 10/22/2020 Asia / Japan |
| EPI_ISL_591376 | 3/29/2020 | 10/22/2020 Asia / Japan |
| EPI_ISL_591377 | 4/5/2020  | 10/22/2020 Asia / Japan |
| EPI_ISL_591378 | 4/28/2020 | 10/22/2020 Asia / Japan |
| EPI_ISL_591379 | 5/5/2020  | 10/22/2020 Asia / Japan |
| EPI_ISL_591380 | 5/6/2020  | 10/22/2020 Asia / Japan |
| EPI_ISL_591381 | 5/28/2020 | 10/22/2020 Asia / Japan |
| EPI_ISL_591382 | 5/28/2020 | 10/22/2020 Asia / Japan |
| EPI_ISL_591383 | 5/28/2020 | 10/22/2020 Asia / Japan |
| EPI_ISL_591384 | 5/28/2020 | 10/22/2020 Asia / Japan |
| EPI_ISL_591385 | 5/28/2020 | 10/22/2020 Asia / Japan |
| EPI_ISL_591386 | 5/28/2020 | 10/22/2020 Asia / Japan |
| EPI_ISL_591387 | 5/29/2020 | 10/22/2020 Asia / Japan |
| EPI_ISL_591388 | 5/29/2020 | 10/22/2020 Asia / Japan |
| EPI_ISL_591389 | 5/30/2020 | 10/22/2020 Asia / Japan |
| EPI_ISL_591390 | 5/30/2020 | 10/22/2020 Asia / Japan |
| EPI_ISL_591391 | 6/3/2020  | 10/22/2020 Asia / Japan |
| EPI_ISL_591392 | 6/3/2020  | 10/22/2020 Asia / Japan |
| EPI_ISL_591393 | 6/7/2020  | 10/22/2020 Asia / Japan |
| EPI_ISL_591394 | 6/7/2020  | 10/22/2020 Asia / Japan |
| EPI_ISL_591395 | 6/7/2020  | 10/22/2020 Asia / Japan |
| EPI_ISL_591396 | 6/7/2020  | 10/22/2020 Asia / Japan |
| EPI_ISL_591397 | 6/7/2020  | 10/22/2020 Asia / Japan |
| EPI_ISL_591398 | 6/8/2020  | 10/22/2020 Asia / Japan |
| EPI_ISL_591399 | 6/8/2020  | 10/22/2020 Asia / Japan |
| EPI_ISL_591400 | 6/9/2020  | 10/22/2020 Asia / Japan |
| EPI_ISL_591401 | 6/12/2020 | 10/22/2020 Asia / Japan |
| EPI_ISL_591402 | 6/13/2020 | 10/22/2020 Asia / Japan |
| EPI_ISL_591403 | 6/14/2020 | 10/22/2020 Asia / Japan |
| EPI_ISL_591404 | 6/17/2020 | 10/22/2020 Asia / Japan |
| EPI_ISL_591405 | 6/18/2020 | 10/22/2020 Asia / Japan |
| EPI_ISL_591406 | 6/20/2020 | 10/22/2020 Asia / Japan |
| EPI_ISL_591407 | 6/22/2020 | 10/22/2020 Asia / Japan |
| EPI_ISL_591408 | 6/22/2020 | 10/22/2020 Asia / Japan |
| EPI_ISL_591409 | 6/23/2020 | 10/22/2020 Asia / Japan |
| EPI_ISL_591410 | 6/24/2020 | 10/22/2020 Asia / Japan |
| EPI_ISL_591411 | 7/2/2020  | 10/22/2020 Asia / Japan |
| EPI_ISL_591412 | 7/4/2020  | 10/22/2020 Asia / Japan |
| EPI_ISL_591413 | 7/6/2020  | 10/22/2020 Asia / Japan |
| EPI_ISL_591414 | 7/8/2020  | 10/22/2020 Asia / Japan |
| EPI_ISL_591415 | 7/8/2020  | 10/22/2020 Asia / Japan |
| EPI_ISL_591416 | 7/8/2020  | 10/22/2020 Asia / Japan |
| EPI_ISL_591417 | 7/8/2020  | 10/22/2020 Asia / Japan |

|                |           |                         |
|----------------|-----------|-------------------------|
| EPI_ISL_591418 | 7/8/2020  | 10/22/2020 Asia / Japan |
| EPI_ISL_591419 | 7/9/2020  | 10/22/2020 Asia / Japan |
| EPI_ISL_591420 | 7/10/2020 | 10/22/2020 Asia / Japan |
| EPI_ISL_591421 | 7/11/2020 | 10/22/2020 Asia / Japan |
| EPI_ISL_591422 | 7/11/2020 | 10/22/2020 Asia / Japan |
| EPI_ISL_591423 | 7/11/2020 | 10/22/2020 Asia / Japan |
| EPI_ISL_591424 | 7/12/2020 | 10/22/2020 Asia / Japan |
| EPI_ISL_591425 | 7/11/2020 | 10/22/2020 Asia / Japan |
| EPI_ISL_591426 | 7/12/2020 | 10/22/2020 Asia / Japan |
| EPI_ISL_591427 | 7/13/2020 | 10/22/2020 Asia / Japan |
| EPI_ISL_591428 | 7/13/2020 | 10/22/2020 Asia / Japan |
| EPI_ISL_591429 | 7/14/2020 | 10/22/2020 Asia / Japan |
| EPI_ISL_591430 | 7/15/2020 | 10/22/2020 Asia / Japan |
| EPI_ISL_591431 | 7/15/2020 | 10/22/2020 Asia / Japan |
| EPI_ISL_591432 | 7/15/2020 | 10/22/2020 Asia / Japan |
| EPI_ISL_591434 | 7/16/2020 | 10/22/2020 Asia / Japan |
| EPI_ISL_591435 | 7/17/2020 | 10/22/2020 Asia / Japan |
| EPI_ISL_591436 | 7/18/2020 | 10/22/2020 Asia / Japan |
| EPI_ISL_591437 | 7/19/2020 | 10/22/2020 Asia / Japan |
| EPI_ISL_591438 | 7/19/2020 | 10/22/2020 Asia / Japan |
| EPI_ISL_591439 | 7/20/2020 | 10/22/2020 Asia / Japan |
| EPI_ISL_591440 | 7/20/2020 | 10/22/2020 Asia / Japan |
| EPI_ISL_591441 | 7/20/2020 | 10/22/2020 Asia / Japan |
| EPI_ISL_591442 | 7/20/2020 | 10/22/2020 Asia / Japan |
| EPI_ISL_591443 | 7/20/2020 | 10/22/2020 Asia / Japan |
| EPI_ISL_591444 | 7/21/2020 | 10/22/2020 Asia / Japan |
| EPI_ISL_591445 | 7/22/2020 | 10/22/2020 Asia / Japan |
| EPI_ISL_591446 | 7/22/2020 | 10/22/2020 Asia / Japan |
| EPI_ISL_591447 | 7/22/2020 | 10/22/2020 Asia / Japan |
| EPI_ISL_591448 | 7/23/2020 | 10/22/2020 Asia / Japan |
| EPI_ISL_591449 | 7/24/2020 | 10/22/2020 Asia / Japan |
| EPI_ISL_591450 | 7/25/2020 | 10/22/2020 Asia / Japan |
| EPI_ISL_591451 | 7/25/2020 | 10/22/2020 Asia / Japan |
| EPI_ISL_591452 | 7/26/2020 | 10/22/2020 Asia / Japan |
| EPI_ISL_591453 | 7/26/2020 | 10/22/2020 Asia / Japan |
| EPI_ISL_591454 | 7/27/2020 | 10/22/2020 Asia / Japan |
| EPI_ISL_591455 | 7/28/2020 | 10/22/2020 Asia / Japan |
| EPI_ISL_591456 | 7/28/2020 | 10/22/2020 Asia / Japan |
| EPI_ISL_591457 | 7/28/2020 | 10/22/2020 Asia / Japan |
| EPI_ISL_591458 | 7/28/2020 | 10/22/2020 Asia / Japan |
| EPI_ISL_591459 | 7/28/2020 | 10/22/2020 Asia / Japan |
| EPI_ISL_591460 | 8/2/2020  | 10/22/2020 Asia / Japan |
| EPI_ISL_591461 | 8/4/2020  | 10/22/2020 Asia / Japan |
| EPI_ISL_591462 | 8/6/2020  | 10/22/2020 Asia / Japan |
| EPI_ISL_591463 | 8/7/2020  | 10/22/2020 Asia / Japan |
| EPI_ISL_591464 | 8/10/2020 | 10/22/2020 Asia / Japan |
| EPI_ISL_591465 | 8/14/2020 | 10/22/2020 Asia / Japan |

|                |            |                                                           |
|----------------|------------|-----------------------------------------------------------|
| EPI_ISL_591466 | 8/14/2020  | 10/22/2020 Asia / Japan                                   |
| EPI_ISL_591467 | 8/19/2020  | 10/22/2020 Asia / Japan                                   |
| EPI_ISL_591468 | 8/19/2020  | 10/22/2020 Asia / Japan                                   |
| EPI_ISL_591469 | 8/19/2020  | 10/22/2020 Asia / Japan                                   |
| EPI_ISL_591470 | 8/30/2020  | 10/22/2020 Asia / Japan                                   |
| EPI_ISL_591471 | 2020-03    | 10/22/2020 Asia / Japan                                   |
| EPI_ISL_591472 | 2020-03    | 10/22/2020 Asia / Japan                                   |
| EPI_ISL_591473 | 2020-03    | 10/22/2020 Asia / Japan                                   |
| EPI_ISL_591474 | 2020-03    | 10/22/2020 Asia / Japan                                   |
| EPI_ISL_591475 | 2020-03    | 10/22/2020 Asia / Japan                                   |
| EPI_ISL_591476 | 2020-03    | 10/22/2020 Asia / Japan                                   |
| EPI_ISL_591477 | 2020-03    | 10/22/2020 Asia / Japan                                   |
| EPI_ISL_591478 | 2020-03    | 10/22/2020 Asia / Japan                                   |
| EPI_ISL_591479 | 2020-04    | 10/22/2020 Asia / Japan                                   |
| EPI_ISL_591480 | 2020-04    | 10/22/2020 Asia / Japan                                   |
| EPI_ISL_591481 | 2020-04    | 10/22/2020 Asia / Japan                                   |
| EPI_ISL_591482 | 2020-04    | 10/22/2020 Asia / Japan                                   |
| EPI_ISL_591483 | 2020-04    | 10/22/2020 Asia / Japan                                   |
| EPI_ISL_591484 | 8/13/2020  | 10/22/2020 Oceania / Australia / New South Wales / Sydney |
| EPI_ISL_591485 | 10/12/2020 | 10/22/2020 Oceania / Australia / New South Wales / Sydney |
| EPI_ISL_591486 | 10/13/2020 | 10/22/2020 Oceania / Australia / New South Wales / Sydney |
| EPI_ISL_591487 | 9/4/2020   | 10/22/2020 Oceania / Australia / New South Wales / Sydney |
| EPI_ISL_591488 | 10/6/2020  | 10/22/2020 Oceania / Australia / New South Wales / Sydney |
| EPI_ISL_591489 | 10/12/2020 | 10/22/2020 Oceania / Australia / New South Wales / Sydney |
| EPI_ISL_591490 | 10/12/2020 | 10/22/2020 Oceania / Australia / New South Wales / Sydney |
| EPI_ISL_591491 | 10/12/2020 | 10/22/2020 Oceania / Australia / New South Wales / Sydney |
| EPI_ISL_591492 | 10/10/2020 | 10/22/2020 Oceania / Australia / New South Wales / Sydney |
| EPI_ISL_591493 | 9/17/2020  | 10/22/2020 Oceania / Australia / New South Wales / Sydney |
| EPI_ISL_591494 | 7/17/2020  | 10/22/2020 Oceania / Australia / New South Wales / Sydney |
| EPI_ISL_591495 | 7/18/2020  | 10/22/2020 Oceania / Australia / New South Wales / Sydney |
| EPI_ISL_591496 | 9/14/2020  | 10/22/2020 Oceania / Australia / New South Wales / Sydney |
| EPI_ISL_591497 | 10/8/2020  | 10/22/2020 Oceania / Australia / New South Wales / Sydney |
| EPI_ISL_591498 | 10/7/2020  | 10/22/2020 Oceania / Australia / New South Wales / Sydney |
| EPI_ISL_591499 | 10/7/2020  | 10/22/2020 Oceania / Australia / New South Wales / Sydney |
| EPI_ISL_591500 | 10/11/2020 | 10/22/2020 Oceania / Australia / New South Wales / Sydney |
| EPI_ISL_591501 | 10/12/2020 | 10/22/2020 Oceania / Australia / New South Wales / Sydney |
| EPI_ISL_591502 | 9/15/2020  | 10/22/2020 Oceania / Australia / New South Wales / Sydney |
| EPI_ISL_591503 | 7/12/2020  | 10/22/2020 Oceania / Australia / New South Wales / Sydney |
| EPI_ISL_591504 | 7/23/2020  | 10/22/2020 Oceania / Australia / New South Wales / Sydney |
| EPI_ISL_591505 | 10/8/2020  | 10/22/2020 Oceania / Australia / New South Wales / Sydney |
| EPI_ISL_591506 | 10/8/2020  | 10/22/2020 Oceania / Australia / New South Wales / Sydney |
| EPI_ISL_591507 | 9/7/2020   | 10/22/2020 Oceania / Australia / New South Wales / Sydney |
| EPI_ISL_591508 | 7/17/2020  | 10/22/2020 Oceania / Australia / New South Wales / Sydney |
| EPI_ISL_591509 | 8/2/2020   | 10/22/2020 Oceania / Australia / New South Wales / Sydney |
| EPI_ISL_591510 | 10/6/2020  | 10/22/2020 Oceania / Australia / New South Wales / Sydney |
| EPI_ISL_591511 | 10/7/2020  | 10/22/2020 Oceania / Australia / New South Wales / Sydney |
| EPI_ISL_591512 | 10/7/2020  | 10/22/2020 Oceania / Australia / New South Wales / Sydney |

|                |            |                                                                         |
|----------------|------------|-------------------------------------------------------------------------|
| EPI_ISL_591513 | 10/11/2020 | 10/22/2020 Oceania / Australia / New South Wales / Sydney               |
| EPI_ISL_591514 | 10/11/2020 | 10/22/2020 Oceania / Australia / New South Wales / Sydney               |
| EPI_ISL_591515 | 10/11/2020 | 10/22/2020 Oceania / Australia / New South Wales / Sydney               |
| EPI_ISL_591516 | 10/14/2020 | 10/22/2020 Oceania / Australia / New South Wales / Sydney               |
| EPI_ISL_591517 | 9/25/2020  | 10/22/2020 Oceania / Australia / New South Wales / Sydney               |
| EPI_ISL_591518 | 7/27/2020  | 10/22/2020 Oceania / Australia / New South Wales / Sydney               |
| EPI_ISL_591522 | 5/29/2020  | 10/22/2020 South America / Chile / Region Metropolitana de Santiago / S |
| EPI_ISL_591523 | 5/26/2020  | 10/22/2020 South America / Chile / Region Metropolitana de Santiago / S |
| EPI_ISL_591526 | 5/29/2020  | 10/22/2020 South America / Chile / Region Metropolitana de Santiago / S |
| EPI_ISL_591527 | 7/28/2020  | 10/22/2020 South America / Chile / Region Metropolitana de Santiago / S |
| EPI_ISL_591528 | 6/8/2020   | 10/22/2020 South America / Chile / Region Metropolitana de Santiago / S |
| EPI_ISL_591529 | 6/11/2020  | 10/22/2020 South America / Chile / Region Metropolitana de Santiago / S |
| EPI_ISL_591530 | 6/16/2020  | 10/22/2020 South America / Chile / Region Metropolitana de Santiago / S |
| EPI_ISL_591531 | 8/24/2020  | 10/22/2020 South America / Chile / Region Metropolitana de Santiago / S |
| EPI_ISL_591532 | 8/24/2020  | 10/22/2020 South America / Chile / Region Metropolitana de Santiago / S |
| EPI_ISL_591533 | 8/25/2020  | 10/22/2020 South America / Chile / Region Metropolitana de Santiago / S |
| EPI_ISL_591534 | 8/26/2020  | 10/22/2020 South America / Chile / Region Metropolitana de Santiago / S |
| EPI_ISL_591535 | 3/26/2020  | 10/22/2020 Asia / Japan                                                 |
| EPI_ISL_591536 | 4/18/2020  | 10/22/2020 Asia / Japan                                                 |
| EPI_ISL_591537 | 6/6/2020   | 10/22/2020 Asia / Japan                                                 |
| EPI_ISL_591538 | 6/6/2020   | 10/22/2020 Asia / Japan                                                 |
| EPI_ISL_591539 | 7/15/2020  | 10/22/2020 Asia / Japan                                                 |
| EPI_ISL_591541 | 6/8/2020   | 10/22/2020 Europe / France / Occitanie                                  |
| EPI_ISL_591542 | 6/9/2020   | 10/22/2020 Europe / France / Occitanie                                  |
| EPI_ISL_591543 | 6/10/2020  | 10/22/2020 Europe / France / Occitanie                                  |
| EPI_ISL_591544 | 6/10/2020  | 10/22/2020 Europe / France / Occitanie                                  |
| EPI_ISL_591545 | 6/23/2020  | 10/22/2020 Europe / France / Occitanie                                  |
| EPI_ISL_591546 | 6/12/2020  | 10/22/2020 Europe / France / Occitanie                                  |
| EPI_ISL_591547 | 6/12/2020  | 10/22/2020 Europe / France / Occitanie                                  |
| EPI_ISL_591718 | 8/4/2020   | 10/22/2020 Oceania / Australia / Victoria                               |
| EPI_ISL_591791 | 8/11/2020  | 10/22/2020 Oceania / Australia / Victoria                               |
| EPI_ISL_591792 | 8/4/2020   | 10/22/2020 Oceania / Australia / Victoria                               |
| EPI_ISL_591793 | 7/30/2020  | 10/22/2020 Oceania / Australia / Victoria                               |
| EPI_ISL_591794 | 8/22/2020  | 10/22/2020 Oceania / Australia / Victoria                               |
| EPI_ISL_591795 | 9/9/2020   | 10/22/2020 Oceania / Australia / Victoria                               |
| EPI_ISL_591796 | 7/29/2020  | 10/22/2020 Oceania / Australia / Victoria                               |
| EPI_ISL_591797 | 7/24/2020  | 10/22/2020 Oceania / Australia / Victoria                               |
| EPI_ISL_591798 | 7/28/2020  | 10/22/2020 Oceania / Australia / Victoria                               |
| EPI_ISL_591799 | 8/6/2020   | 10/22/2020 Oceania / Australia / Victoria                               |
| EPI_ISL_591800 | 8/7/2020   | 10/22/2020 Oceania / Australia / Victoria                               |
| EPI_ISL_591801 | 9/5/2020   | 10/22/2020 Oceania / Australia / Victoria                               |
| EPI_ISL_591802 | 8/30/2020  | 10/22/2020 Oceania / Australia / Victoria                               |
| EPI_ISL_591803 | 9/5/2020   | 10/22/2020 Oceania / Australia / Victoria                               |
| EPI_ISL_591804 | 7/30/2020  | 10/22/2020 Oceania / Australia / Victoria                               |
| EPI_ISL_591805 | 7/30/2020  | 10/22/2020 Oceania / Australia / Victoria                               |
| EPI_ISL_591806 | 7/29/2020  | 10/22/2020 Oceania / Australia / Victoria                               |
| EPI_ISL_591807 | 8/23/2020  | 10/22/2020 Oceania / Australia / Victoria                               |













































|                |           |            |                                |
|----------------|-----------|------------|--------------------------------|
| EPI_ISL_592999 | 8/17/2020 | 10/22/2020 | Oceania / Australia / Victoria |
| EPI_ISL_593000 | 8/18/2020 | 10/22/2020 | Oceania / Australia / Victoria |
| EPI_ISL_593001 | 9/2/2020  | 10/22/2020 | Oceania / Australia / Victoria |
| EPI_ISL_593002 | 9/2/2020  | 10/22/2020 | Oceania / Australia / Victoria |
| EPI_ISL_593003 | 9/21/2020 | 10/22/2020 | Oceania / Australia / Victoria |
| EPI_ISL_593004 | 9/5/2020  | 10/22/2020 | Oceania / Australia / Victoria |
| EPI_ISL_593005 | 9/19/2020 | 10/22/2020 | Oceania / Australia / Victoria |
| EPI_ISL_593006 | 9/4/2020  | 10/22/2020 | Oceania / Australia / Victoria |
| EPI_ISL_593007 | 8/25/2020 | 10/22/2020 | Oceania / Australia / Victoria |
| EPI_ISL_593008 | 9/20/2020 | 10/22/2020 | Oceania / Australia / Victoria |
| EPI_ISL_593009 | 8/20/2020 | 10/22/2020 | Oceania / Australia / Victoria |
| EPI_ISL_593010 | 8/20/2020 | 10/22/2020 | Oceania / Australia / Victoria |
| EPI_ISL_593011 | 8/20/2020 | 10/22/2020 | Oceania / Australia / Victoria |
| EPI_ISL_593012 | 8/19/2020 | 10/22/2020 | Oceania / Australia / Victoria |
| EPI_ISL_593013 | 9/25/2020 | 10/22/2020 | Oceania / Australia / Victoria |
| EPI_ISL_593014 | 9/26/2020 | 10/22/2020 | Oceania / Australia / Victoria |
| EPI_ISL_593015 | 8/7/2020  | 10/22/2020 | Oceania / Australia / Victoria |
| EPI_ISL_593016 | 9/26/2020 | 10/22/2020 | Oceania / Australia / Victoria |
| EPI_ISL_593017 | 7/22/2020 | 10/22/2020 | Oceania / Australia / Victoria |
| EPI_ISL_593018 | 9/20/2020 | 10/22/2020 | Oceania / Australia / Victoria |
| EPI_ISL_593019 | 9/22/2020 | 10/22/2020 | Oceania / Australia / Victoria |
| EPI_ISL_593020 | 9/20/2020 | 10/22/2020 | Oceania / Australia / Victoria |
| EPI_ISL_593021 | 8/30/2020 | 10/22/2020 | Oceania / Australia / Victoria |
| EPI_ISL_593022 | 7/31/2020 | 10/22/2020 | Oceania / Australia / Victoria |
| EPI_ISL_593023 | 8/17/2020 | 10/22/2020 | Oceania / Australia / Victoria |
| EPI_ISL_593024 | 8/20/2020 | 10/22/2020 | Oceania / Australia / Victoria |
| EPI_ISL_593025 | 9/24/2020 | 10/22/2020 | Oceania / Australia / Victoria |
| EPI_ISL_593026 | 9/20/2020 | 10/22/2020 | Oceania / Australia / Victoria |
| EPI_ISL_593027 | 8/21/2020 | 10/22/2020 | Oceania / Australia / Victoria |
| EPI_ISL_593028 | 8/17/2020 | 10/22/2020 | Oceania / Australia / Victoria |
| EPI_ISL_593029 | 8/7/2020  | 10/22/2020 | Oceania / Australia / Victoria |
| EPI_ISL_593030 | 8/20/2020 | 10/22/2020 | Oceania / Australia / Victoria |
| EPI_ISL_593031 | 8/10/2020 | 10/22/2020 | Oceania / Australia / Victoria |
| EPI_ISL_593032 | 8/13/2020 | 10/22/2020 | Oceania / Australia / Victoria |
| EPI_ISL_593033 | 8/25/2020 | 10/22/2020 | Oceania / Australia / Victoria |
| EPI_ISL_593034 | 7/28/2020 | 10/22/2020 | Oceania / Australia / Victoria |
| EPI_ISL_593035 | 8/24/2020 | 10/22/2020 | Oceania / Australia / Victoria |
| EPI_ISL_593036 | 8/21/2020 | 10/22/2020 | Oceania / Australia / Victoria |
| EPI_ISL_593037 | 8/20/2020 | 10/22/2020 | Oceania / Australia / Victoria |
| EPI_ISL_593038 | 7/24/2020 | 10/22/2020 | Oceania / Australia / Victoria |
| EPI_ISL_593039 | 9/2/2020  | 10/22/2020 | Oceania / Australia / Victoria |
| EPI_ISL_593040 | 7/28/2020 | 10/22/2020 | Oceania / Australia / Victoria |
| EPI_ISL_593041 | 9/3/2020  | 10/22/2020 | Oceania / Australia / Victoria |
| EPI_ISL_593042 | 8/17/2020 | 10/22/2020 | Oceania / Australia / Victoria |
| EPI_ISL_593043 | 8/10/2020 | 10/22/2020 | Oceania / Australia / Victoria |
| EPI_ISL_593044 | 7/29/2020 | 10/22/2020 | Oceania / Australia / Victoria |
| EPI_ISL_593045 | 8/30/2020 | 10/22/2020 | Oceania / Australia / Victoria |

|                |           |            |                                |
|----------------|-----------|------------|--------------------------------|
| EPI_ISL_593046 | 8/7/2020  | 10/22/2020 | Oceania / Australia / Victoria |
| EPI_ISL_593047 | 8/21/2020 | 10/22/2020 | Oceania / Australia / Victoria |
| EPI_ISL_593048 | 9/22/2020 | 10/22/2020 | Oceania / Australia / Victoria |
| EPI_ISL_593049 | 8/31/2020 | 10/22/2020 | Oceania / Australia / Victoria |
| EPI_ISL_593050 | 9/24/2020 | 10/22/2020 | Oceania / Australia / Victoria |
| EPI_ISL_593051 | 8/31/2020 | 10/22/2020 | Oceania / Australia / Victoria |
| EPI_ISL_593052 | 9/1/2020  | 10/22/2020 | Oceania / Australia / Victoria |
| EPI_ISL_593053 | 9/1/2020  | 10/22/2020 | Oceania / Australia / Victoria |
| EPI_ISL_593054 | 8/17/2020 | 10/22/2020 | Oceania / Australia / Victoria |
| EPI_ISL_593055 | 9/2/2020  | 10/22/2020 | Oceania / Australia / Victoria |
| EPI_ISL_593056 | 9/21/2020 | 10/22/2020 | Oceania / Australia / Victoria |
| EPI_ISL_593057 | 9/22/2020 | 10/22/2020 | Oceania / Australia / Victoria |
| EPI_ISL_593058 | 8/18/2020 | 10/22/2020 | Oceania / Australia / Victoria |
| EPI_ISL_593059 | 8/18/2020 | 10/22/2020 | Oceania / Australia / Victoria |
| EPI_ISL_593060 | 8/19/2020 | 10/22/2020 | Oceania / Australia / Victoria |
| EPI_ISL_593061 | 9/2/2020  | 10/22/2020 | Oceania / Australia / Victoria |
| EPI_ISL_593062 | 8/18/2020 | 10/22/2020 | Oceania / Australia / Victoria |
| EPI_ISL_593063 | 9/6/2020  | 10/22/2020 | Oceania / Australia / Victoria |
| EPI_ISL_593064 | 8/19/2020 | 10/22/2020 | Oceania / Australia / Victoria |
| EPI_ISL_593065 | 8/17/2020 | 10/22/2020 | Oceania / Australia / Victoria |
| EPI_ISL_593066 | 8/19/2020 | 10/22/2020 | Oceania / Australia / Victoria |
| EPI_ISL_593067 | 8/18/2020 | 10/22/2020 | Oceania / Australia / Victoria |
| EPI_ISL_593068 | 8/31/2020 | 10/22/2020 | Oceania / Australia / Victoria |
| EPI_ISL_593069 | 9/1/2020  | 10/22/2020 | Oceania / Australia / Victoria |
| EPI_ISL_593070 | 9/6/2020  | 10/22/2020 | Oceania / Australia / Victoria |
| EPI_ISL_593071 | 9/1/2020  | 10/22/2020 | Oceania / Australia / Victoria |
| EPI_ISL_593072 | 8/31/2020 | 10/22/2020 | Oceania / Australia / Victoria |
| EPI_ISL_593073 | 9/22/2020 | 10/22/2020 | Oceania / Australia / Victoria |
| EPI_ISL_593074 | 9/24/2020 | 10/22/2020 | Oceania / Australia / Victoria |
| EPI_ISL_593075 | 9/23/2020 | 10/22/2020 | Oceania / Australia / Victoria |
| EPI_ISL_593076 | 8/18/2020 | 10/22/2020 | Oceania / Australia / Victoria |
| EPI_ISL_593078 | 9/22/2020 | 10/22/2020 | Oceania / Australia / Victoria |
| EPI_ISL_593079 | 9/23/2020 | 10/22/2020 | Oceania / Australia / Victoria |
| EPI_ISL_593080 | 8/31/2020 | 10/22/2020 | Oceania / Australia / Victoria |
| EPI_ISL_593081 | 9/23/2020 | 10/22/2020 | Oceania / Australia / Victoria |
| EPI_ISL_593082 | 8/18/2020 | 10/22/2020 | Oceania / Australia / Victoria |
| EPI_ISL_593083 | 8/21/2020 | 10/22/2020 | Oceania / Australia / Victoria |
| EPI_ISL_593084 | 9/23/2020 | 10/22/2020 | Oceania / Australia / Victoria |
| EPI_ISL_593085 | 8/18/2020 | 10/22/2020 | Oceania / Australia / Victoria |
| EPI_ISL_593086 | 8/19/2020 | 10/22/2020 | Oceania / Australia / Victoria |
| EPI_ISL_593087 | 8/17/2020 | 10/22/2020 | Oceania / Australia / Victoria |
| EPI_ISL_593088 | 8/16/2020 | 10/22/2020 | Oceania / Australia / Victoria |
| EPI_ISL_593089 | 8/31/2020 | 10/22/2020 | Oceania / Australia / Victoria |
| EPI_ISL_593090 | 9/22/2020 | 10/22/2020 | Oceania / Australia / Victoria |
| EPI_ISL_593091 | 9/6/2020  | 10/22/2020 | Oceania / Australia / Victoria |
| EPI_ISL_593092 | 8/15/2020 | 10/22/2020 | Oceania / Australia / Victoria |
| EPI_ISL_593093 | 8/31/2020 | 10/22/2020 | Oceania / Australia / Victoria |















|                |           |            |                                |
|----------------|-----------|------------|--------------------------------|
| EPI_ISL_593376 | 8/2/2020  | 10/22/2020 | Oceania / Australia / Victoria |
| EPI_ISL_593377 | 8/6/2020  | 10/22/2020 | Oceania / Australia / Victoria |
| EPI_ISL_593378 | 7/29/2020 | 10/22/2020 | Oceania / Australia / Victoria |
| EPI_ISL_593379 | 7/27/2020 | 10/22/2020 | Oceania / Australia / Victoria |
| EPI_ISL_593380 | 7/29/2020 | 10/22/2020 | Oceania / Australia / Victoria |
| EPI_ISL_593381 | 8/6/2020  | 10/22/2020 | Oceania / Australia / Victoria |
| EPI_ISL_593382 | 8/8/2020  | 10/22/2020 | Oceania / Australia / Victoria |
| EPI_ISL_593383 | 7/28/2020 | 10/22/2020 | Oceania / Australia / Victoria |
| EPI_ISL_593384 | 7/27/2020 | 10/22/2020 | Oceania / Australia / Victoria |
| EPI_ISL_593385 | 8/12/2020 | 10/22/2020 | Oceania / Australia / Victoria |
| EPI_ISL_593386 | 8/4/2020  | 10/22/2020 | Oceania / Australia / Victoria |
| EPI_ISL_593387 | 8/11/2020 | 10/22/2020 | Oceania / Australia / Victoria |
| EPI_ISL_593388 | 7/30/2020 | 10/22/2020 | Oceania / Australia / Victoria |
| EPI_ISL_593389 | 8/2/2020  | 10/22/2020 | Oceania / Australia / Victoria |
| EPI_ISL_593390 | 8/3/2020  | 10/22/2020 | Oceania / Australia / Victoria |
| EPI_ISL_593391 | 8/6/2020  | 10/22/2020 | Oceania / Australia / Victoria |
| EPI_ISL_593392 | 8/1/2020  | 10/22/2020 | Oceania / Australia / Victoria |
| EPI_ISL_593393 | 7/31/2020 | 10/22/2020 | Oceania / Australia / Victoria |
| EPI_ISL_593394 | 7/28/2020 | 10/22/2020 | Oceania / Australia / Victoria |
| EPI_ISL_593395 | 8/1/2020  | 10/22/2020 | Oceania / Australia / Victoria |
| EPI_ISL_593396 | 8/2/2020  | 10/22/2020 | Oceania / Australia / Victoria |
| EPI_ISL_593397 | 8/6/2020  | 10/22/2020 | Oceania / Australia / Victoria |
| EPI_ISL_593398 | 8/3/2020  | 10/22/2020 | Oceania / Australia / Victoria |
| EPI_ISL_593399 | 8/4/2020  | 10/22/2020 | Oceania / Australia / Victoria |
| EPI_ISL_593400 | 8/2/2020  | 10/22/2020 | Oceania / Australia / Victoria |
| EPI_ISL_593401 | 7/30/2020 | 10/22/2020 | Oceania / Australia / Victoria |
| EPI_ISL_593402 | 8/11/2020 | 10/22/2020 | Oceania / Australia / Victoria |
| EPI_ISL_593403 | 8/2/2020  | 10/22/2020 | Oceania / Australia / Victoria |
| EPI_ISL_593404 | 8/2/2020  | 10/22/2020 | Oceania / Australia / Victoria |
| EPI_ISL_593405 | 8/2/2020  | 10/22/2020 | Oceania / Australia / Victoria |
| EPI_ISL_593406 | 7/27/2020 | 10/22/2020 | Oceania / Australia / Victoria |
| EPI_ISL_593407 | 8/2/2020  | 10/22/2020 | Oceania / Australia / Victoria |
| EPI_ISL_593408 | 7/29/2020 | 10/22/2020 | Oceania / Australia / Victoria |
| EPI_ISL_593409 | 8/5/2020  | 10/22/2020 | Oceania / Australia / Victoria |
| EPI_ISL_593410 | 10/5/2020 | 10/22/2020 | Oceania / Australia / Victoria |
| EPI_ISL_593411 | 10/3/2020 | 10/22/2020 | Oceania / Australia / Victoria |
| EPI_ISL_593412 | 10/3/2020 | 10/22/2020 | Oceania / Australia / Victoria |
| EPI_ISL_593413 | 9/23/2020 | 10/22/2020 | Oceania / Australia / Victoria |
| EPI_ISL_593414 | 8/4/2020  | 10/22/2020 | Oceania / Australia / Victoria |
| EPI_ISL_593415 | 8/3/2020  | 10/22/2020 | Oceania / Australia / Victoria |
| EPI_ISL_593416 | 8/3/2020  | 10/22/2020 | Oceania / Australia / Victoria |
| EPI_ISL_593417 | 8/3/2020  | 10/22/2020 | Oceania / Australia / Victoria |
| EPI_ISL_593418 | 8/4/2020  | 10/22/2020 | Oceania / Australia / Victoria |
| EPI_ISL_593419 | 8/1/2020  | 10/22/2020 | Oceania / Australia / Victoria |
| EPI_ISL_593420 | 8/4/2020  | 10/22/2020 | Oceania / Australia / Victoria |
| EPI_ISL_593421 | 8/3/2020  | 10/22/2020 | Oceania / Australia / Victoria |
| EPI_ISL_593422 | 8/4/2020  | 10/22/2020 | Oceania / Australia / Victoria |



|                |           |                                                      |
|----------------|-----------|------------------------------------------------------|
| EPI_ISL_593470 | 8/9/2020  | 10/22/2020 Oceania / Australia / Victoria            |
| EPI_ISL_593471 | 8/6/2020  | 10/22/2020 Oceania / Australia / Victoria            |
| EPI_ISL_593472 | 8/7/2020  | 10/22/2020 Oceania / Australia / Victoria            |
| EPI_ISL_593473 | 8/9/2020  | 10/22/2020 Oceania / Australia / Victoria            |
| EPI_ISL_593474 | 9/24/2020 | 10/22/2020 Oceania / Australia / Victoria            |
| EPI_ISL_593475 | 10/2/2020 | 10/22/2020 Oceania / Australia / Victoria            |
| EPI_ISL_593476 | 7/7/2020  | 10/22/2020 Oceania / Australia / Victoria            |
| EPI_ISL_593477 | 7/9/2020  | 10/22/2020 Oceania / Australia / Victoria            |
| EPI_ISL_593478 | 4/28/2020 | 10/22/2020 North America / USA / Massachusetts       |
| EPI_ISL_593479 | 5/5/2020  | 10/22/2020 North America / USA / Massachusetts       |
| EPI_ISL_593480 | 6/24/2020 | 10/22/2020 North America / USA / Massachusetts       |
| EPI_ISL_593481 | 4/11/2020 | 10/22/2020 North America / Canada / Ontario / Ottawa |
| EPI_ISL_593487 | 4/25/2020 | 10/22/2020 North America / Canada / Ontario / Ottawa |
| EPI_ISL_593489 | 4/26/2020 | 10/22/2020 North America / Canada / Ontario / Ottawa |
| EPI_ISL_593490 | 4/30/2020 | 10/22/2020 North America / Canada / Ontario / Ottawa |
| EPI_ISL_593491 | 5/4/2020  | 10/22/2020 North America / Canada / Ontario / Ottawa |
| EPI_ISL_593492 | 5/4/2020  | 10/22/2020 North America / Canada / Ontario / Ottawa |
| EPI_ISL_593493 | 5/5/2020  | 10/22/2020 North America / Canada / Ontario / Ottawa |
| EPI_ISL_593494 | 5/7/2020  | 10/22/2020 North America / Canada / Ontario / Ottawa |
| EPI_ISL_593495 | 5/8/2020  | 10/22/2020 North America / Canada / Ontario / Ottawa |
| EPI_ISL_593496 | 5/9/2020  | 10/22/2020 North America / Canada / Ontario / Ottawa |
| EPI_ISL_593497 | 5/9/2020  | 10/22/2020 North America / Canada / Ontario / Ottawa |
| EPI_ISL_593498 | 5/11/2020 | 10/22/2020 North America / Canada / Ontario / Ottawa |
| EPI_ISL_593499 | 5/13/2020 | 10/22/2020 North America / Canada / Ontario / Ottawa |
| EPI_ISL_593501 | 5/13/2020 | 10/22/2020 North America / Canada / Ontario / Ottawa |
| EPI_ISL_593502 | 5/14/2020 | 10/22/2020 North America / Canada / Ontario / Ottawa |
| EPI_ISL_593503 | 5/14/2020 | 10/22/2020 North America / Canada / Ontario / Ottawa |
| EPI_ISL_593504 | 5/23/2020 | 10/22/2020 North America / Canada / Ontario / Ottawa |
| EPI_ISL_593506 | 5/24/2020 | 10/22/2020 North America / Canada / Ontario / Ottawa |
| EPI_ISL_593507 | 5/25/2020 | 10/22/2020 North America / Canada / Ontario / Ottawa |
| EPI_ISL_593508 | 5/25/2020 | 10/22/2020 North America / Canada / Ontario / Ottawa |
| EPI_ISL_593509 | 5/25/2020 | 10/22/2020 North America / Canada / Ontario / Ottawa |
| EPI_ISL_593511 | 5/25/2020 | 10/22/2020 North America / Canada / Ontario / Ottawa |
| EPI_ISL_593512 | 5/25/2020 | 10/22/2020 North America / Canada / Ontario / Ottawa |
| EPI_ISL_593514 | 5/26/2020 | 10/22/2020 North America / Canada / Ontario / Ottawa |
| EPI_ISL_593515 | 5/26/2020 | 10/22/2020 North America / Canada / Ontario / Ottawa |
| EPI_ISL_593517 | 5/26/2020 | 10/22/2020 North America / Canada / Ontario / Ottawa |
| EPI_ISL_593518 | 5/27/2020 | 10/22/2020 North America / Canada / Ontario / Ottawa |
| EPI_ISL_593523 | 5/28/2020 | 10/22/2020 North America / Canada / Ontario / Ottawa |
| EPI_ISL_593524 | 5/28/2020 | 10/22/2020 North America / Canada / Ontario / Ottawa |
| EPI_ISL_593525 | 5/29/2020 | 10/22/2020 North America / Canada / Ontario / Ottawa |
| EPI_ISL_593526 | 5/29/2020 | 10/22/2020 North America / Canada / Ontario / Ottawa |
| EPI_ISL_593528 | 5/29/2020 | 10/22/2020 North America / Canada / Ontario / Ottawa |
| EPI_ISL_593529 | 5/29/2020 | 10/22/2020 North America / Canada / Ontario / Ottawa |
| EPI_ISL_593532 | 6/1/2020  | 10/22/2020 North America / Canada / Ontario / Ottawa |
| EPI_ISL_593536 | 6/2/2020  | 10/22/2020 North America / Canada / Ontario / Ottawa |
| EPI_ISL_593537 | 6/6/2020  | 10/22/2020 North America / Canada / Ontario / Ottawa |

|                |           |            |                                              |
|----------------|-----------|------------|----------------------------------------------|
| EPI_ISL_593538 | 6/7/2020  | 10/22/2020 | North America / Canada / Ontario / Ottawa    |
| EPI_ISL_593539 | 6/9/2020  | 10/22/2020 | North America / Canada / Ontario / Ottawa    |
| EPI_ISL_593540 | 6/10/2020 | 10/22/2020 | North America / Canada / Ontario / Ottawa    |
| EPI_ISL_593541 | 6/11/2020 | 10/22/2020 | North America / Canada / Ontario / Ottawa    |
| EPI_ISL_593543 | 3/28/2020 | 10/22/2020 | North America / Canada / Ontario / Ottawa    |
| EPI_ISL_593545 | 4/3/2020  | 10/22/2020 | North America / Canada / Ontario / Ottawa    |
| EPI_ISL_593546 | 4/3/2020  | 10/22/2020 | North America / Canada / Ontario / Ottawa    |
| EPI_ISL_593547 | 4/10/2020 | 10/22/2020 | North America / Canada / Ontario / Ottawa    |
| EPI_ISL_593548 | 4/13/2020 | 10/22/2020 | North America / Canada / Ontario / Ottawa    |
| EPI_ISL_593549 | 5/6/2020  | 10/22/2020 | North America / Canada / Ontario / Ottawa    |
| EPI_ISL_593550 | 5/13/2020 | 10/22/2020 | North America / Canada / Ontario / Ottawa    |
| EPI_ISL_593551 | 5/29/2020 | 10/22/2020 | North America / Canada / Ontario / Ottawa    |
| EPI_ISL_593553 | 6/30/2020 | 10/22/2020 | North America / USA / Massachusetts          |
| EPI_ISL_593554 | 8/16/2020 | 10/22/2020 | North America / USA / Massachusetts          |
| EPI_ISL_593555 | 8/18/2020 | 10/22/2020 | North America / USA / Massachusetts          |
| EPI_ISL_593556 | 8/31/2020 | 10/22/2020 | North America / USA / Massachusetts          |
| EPI_ISL_593558 | 9/9/2020  | 10/22/2020 | North America / USA / Massachusetts          |
| EPI_ISL_593572 | 6/6/2020  | 10/22/2020 | North America / USA / Texas / El Paso County |
| EPI_ISL_593581 | 6/7/2020  | 10/22/2020 | North America / USA / Texas / El Paso County |
| EPI_ISL_593596 | 2020-07   | 10/22/2020 | North America / USA / Washington             |
| EPI_ISL_593597 | 3/19/2020 | 10/23/2020 | Oceania / Australia / Queensland             |
| EPI_ISL_593598 | 3/20/2020 | 10/23/2020 | Oceania / Australia / Queensland             |
| EPI_ISL_593599 | 3/25/2020 | 10/23/2020 | Oceania / Australia / Queensland             |
| EPI_ISL_593600 | 3/25/2020 | 10/23/2020 | Oceania / Australia / Queensland             |
| EPI_ISL_593601 | 3/25/2020 | 10/23/2020 | Oceania / Australia / Queensland             |
| EPI_ISL_593602 | 3/26/2020 | 10/23/2020 | Oceania / Australia / Queensland             |
| EPI_ISL_593603 | 3/26/2020 | 10/23/2020 | Oceania / Australia / Queensland             |
| EPI_ISL_593604 | 3/27/2020 | 10/23/2020 | Oceania / Australia / Queensland             |
| EPI_ISL_593605 | 3/27/2020 | 10/23/2020 | Oceania / Australia / Queensland             |
| EPI_ISL_593606 | 3/26/2020 | 10/23/2020 | Oceania / Australia / Queensland             |
| EPI_ISL_593607 | 3/27/2020 | 10/23/2020 | Oceania / Australia / Queensland             |
| EPI_ISL_593608 | 3/27/2020 | 10/23/2020 | Oceania / Australia / Queensland             |
| EPI_ISL_593609 | 3/27/2020 | 10/23/2020 | Oceania / Australia / Queensland             |
| EPI_ISL_593610 | 3/26/2020 | 10/23/2020 | Oceania / Australia / Queensland             |
| EPI_ISL_593611 | 3/28/2020 | 10/23/2020 | Oceania / Australia / Queensland             |
| EPI_ISL_593612 | 3/28/2020 | 10/23/2020 | Oceania / Australia / Queensland             |
| EPI_ISL_593613 | 4/1/2020  | 10/23/2020 | Oceania / Australia / Queensland             |
| EPI_ISL_593614 | 4/2/2020  | 10/23/2020 | Oceania / Australia / Queensland             |
| EPI_ISL_593615 | 4/2/2020  | 10/23/2020 | Oceania / Australia / Queensland             |
| EPI_ISL_593616 | 9/7/2020  | 10/23/2020 | Oceania / Australia / Queensland             |
| EPI_ISL_593618 | 3/22/2020 | 10/23/2020 | Oceania / Australia / Queensland             |
| EPI_ISL_593619 | 3/22/2020 | 10/23/2020 | Oceania / Australia / Queensland             |
| EPI_ISL_593620 | 3/22/2020 | 10/23/2020 | Oceania / Australia / Queensland             |
| EPI_ISL_593621 | 3/22/2020 | 10/23/2020 | Oceania / Australia / Queensland             |
| EPI_ISL_593622 | 3/22/2020 | 10/23/2020 | Oceania / Australia / Queensland             |
| EPI_ISL_593623 | 3/22/2020 | 10/23/2020 | Oceania / Australia / Queensland             |
| EPI_ISL_593624 | 3/22/2020 | 10/23/2020 | Oceania / Australia / Queensland             |

|                |           |                                                           |
|----------------|-----------|-----------------------------------------------------------|
| EPI_ISL_593625 | 3/26/2020 | 10/23/2020 Oceania / Australia / Queensland               |
| EPI_ISL_593626 | 3/26/2020 | 10/23/2020 Oceania / Australia / Queensland               |
| EPI_ISL_593627 | 3/27/2020 | 10/23/2020 Oceania / Australia / Queensland               |
| EPI_ISL_593628 | 3/26/2020 | 10/23/2020 Oceania / Australia / Queensland               |
| EPI_ISL_593629 | 3/27/2020 | 10/23/2020 Oceania / Australia / Queensland               |
| EPI_ISL_593630 | 3/26/2020 | 10/23/2020 Oceania / Australia / Queensland               |
| EPI_ISL_593631 | 3/27/2020 | 10/23/2020 Oceania / Australia / Queensland               |
| EPI_ISL_593632 | 3/27/2020 | 10/23/2020 Oceania / Australia / Queensland               |
| EPI_ISL_593633 | 4/1/2020  | 10/23/2020 Oceania / Australia / Queensland               |
| EPI_ISL_593634 | 4/3/2020  | 10/23/2020 Oceania / Australia / Queensland               |
| EPI_ISL_593635 | 9/7/2020  | 10/23/2020 Oceania / Australia / Queensland               |
| EPI_ISL_593636 | 9/23/2020 | 10/23/2020 Oceania / Australia / Queensland               |
| EPI_ISL_593638 | 9/19/2020 | 10/23/2020 Oceania / Australia / Queensland               |
| EPI_ISL_593639 | 9/6/2020  | 10/23/2020 Oceania / Australia / Queensland               |
| EPI_ISL_593640 | 8/31/2020 | 10/23/2020 Oceania / Australia / Queensland               |
| EPI_ISL_593641 | 8/28/2020 | 10/23/2020 Oceania / Australia / Queensland               |
| EPI_ISL_593642 | 8/28/2020 | 10/23/2020 Oceania / Australia / Queensland               |
| EPI_ISL_593643 | 8/29/2020 | 10/23/2020 Oceania / Australia / Queensland               |
| EPI_ISL_593644 | 9/10/2020 | 10/23/2020 Oceania / Australia / Queensland               |
| EPI_ISL_593645 | 8/28/2020 | 10/23/2020 Oceania / Australia / Queensland               |
| EPI_ISL_593646 | 7/14/2020 | 10/23/2020 Oceania / Australia / New South Wales / Sydney |
| EPI_ISL_593647 | 8/24/2020 | 10/23/2020 Oceania / Australia / New South Wales / Sydney |
| EPI_ISL_593648 | 8/24/2020 | 10/23/2020 Oceania / Australia / New South Wales / Sydney |
| EPI_ISL_593649 | 7/20/2020 | 10/23/2020 Oceania / Australia / New South Wales / Sydney |
| EPI_ISL_593650 | 7/17/2020 | 10/23/2020 Oceania / Australia / New South Wales / Sydney |
| EPI_ISL_593651 | 8/20/2020 | 10/23/2020 Oceania / Australia / New South Wales / Sydney |
| EPI_ISL_593652 | 8/29/2020 | 10/23/2020 Oceania / Australia / New South Wales / Sydney |
| EPI_ISL_593653 | 8/10/2020 | 10/23/2020 Oceania / Australia / New South Wales / Sydney |
| EPI_ISL_593654 | 8/14/2020 | 10/23/2020 Oceania / Australia / New South Wales / Sydney |
| EPI_ISL_593655 | 7/12/2020 | 10/23/2020 Oceania / Australia / New South Wales / Sydney |
| EPI_ISL_593656 | 8/4/2020  | 10/23/2020 Oceania / Australia / New South Wales / Sydney |
| EPI_ISL_593657 | 8/8/2020  | 10/23/2020 Oceania / Australia / New South Wales / Sydney |
| EPI_ISL_593658 | 8/30/2020 | 10/23/2020 Oceania / Australia / New South Wales / Sydney |
| EPI_ISL_593659 | 8/9/2020  | 10/23/2020 Oceania / Australia / New South Wales / Sydney |
| EPI_ISL_593660 | 3/22/2020 | 10/23/2020 Oceania / Australia / New South Wales / Sydney |
| EPI_ISL_593661 | 3/26/2020 | 10/23/2020 Oceania / Australia / New South Wales / Sydney |
| EPI_ISL_593662 | 3/25/2020 | 10/23/2020 Oceania / Australia / New South Wales / Sydney |
| EPI_ISL_593664 | 3/29/2020 | 10/23/2020 Oceania / Australia / New South Wales / Sydney |
| EPI_ISL_593665 | 3/26/2020 | 10/23/2020 Oceania / Australia / New South Wales / Sydney |
| EPI_ISL_593667 | 4/28/2020 | 10/23/2020 Oceania / Australia / New South Wales / Sydney |
| EPI_ISL_593668 | 7/7/2020  | 10/23/2020 Oceania / Australia / New South Wales / Sydney |
| EPI_ISL_593669 | 7/13/2020 | 10/23/2020 Oceania / Australia / New South Wales / Sydney |
| EPI_ISL_593670 | 7/19/2020 | 10/23/2020 Oceania / Australia / New South Wales / Sydney |
| EPI_ISL_593671 | 7/28/2020 | 10/23/2020 Oceania / Australia / New South Wales / Sydney |
| EPI_ISL_593672 | 7/30/2020 | 10/23/2020 Oceania / Australia / New South Wales / Sydney |
| EPI_ISL_593673 | 8/2/2020  | 10/23/2020 Oceania / Australia / New South Wales / Sydney |
| EPI_ISL_593674 | 8/2/2020  | 10/23/2020 Oceania / Australia / New South Wales / Sydney |







|                |           |                                                                        |
|----------------|-----------|------------------------------------------------------------------------|
| EPI_ISL_593770 | 9/15/2020 | 10/23/2020 Oceania / Australia / New South Wales / Sydney              |
| EPI_ISL_593771 | 4/9/2020  | 10/23/2020 Oceania / Australia / New South Wales / Sydney              |
| EPI_ISL_593772 | 4/12/2020 | 10/23/2020 South America / Peru / Lambayeque                           |
| EPI_ISL_593773 | 4/10/2020 | 10/23/2020 South America / Peru / Lambayeque / Chiclayo / Jose Leonard |
| EPI_ISL_593774 | 4/7/2020  | 10/23/2020 South America / Peru / Lambayeque / Chiclayo / MonsefÃº     |
| EPI_ISL_593775 | 4/8/2020  | 10/23/2020 South America / Peru / Lambayeque / Chiclayo / La Victoria  |
| EPI_ISL_593787 | 2020      | 10/23/2020 Europe / United Kingdom / England                           |
| EPI_ISL_593790 | 2020      | 10/23/2020 Europe / United Kingdom / England                           |
| EPI_ISL_593791 | 2020      | 10/23/2020 Europe / United Kingdom / England                           |
| EPI_ISL_593792 | 2020      | 10/23/2020 Europe / United Kingdom / England                           |
| EPI_ISL_593793 | 2020      | 10/23/2020 Europe / United Kingdom / England                           |
| EPI_ISL_593794 | 2020      | 10/23/2020 Europe / United Kingdom / England                           |
| EPI_ISL_593796 | 2020      | 10/23/2020 Europe / United Kingdom / England                           |
| EPI_ISL_593797 | 2020      | 10/23/2020 Europe / United Kingdom / England                           |
| EPI_ISL_593798 | 2020      | 10/23/2020 Europe / United Kingdom / England                           |
| EPI_ISL_593800 | 2020      | 10/23/2020 Europe / United Kingdom / England                           |
| EPI_ISL_593801 | 2020      | 10/23/2020 Europe / United Kingdom / England                           |
| EPI_ISL_593803 | 2020      | 10/23/2020 Europe / United Kingdom / England                           |
| EPI_ISL_593804 | 9/30/2020 | 10/23/2020 Europe / United Kingdom / England                           |
| EPI_ISL_593806 | 2020      | 10/23/2020 Europe / United Kingdom / England                           |
| EPI_ISL_593807 | 2020      | 10/23/2020 Europe / United Kingdom / England                           |
| EPI_ISL_593808 | 2020      | 10/23/2020 Europe / United Kingdom / England                           |
| EPI_ISL_593809 | 2020      | 10/23/2020 Europe / United Kingdom / England                           |
| EPI_ISL_593810 | 10/4/2020 | 10/23/2020 Europe / United Kingdom / England                           |
| EPI_ISL_593811 | 2020      | 10/23/2020 Europe / United Kingdom / England                           |
| EPI_ISL_593813 | 2020      | 10/23/2020 Europe / United Kingdom / England                           |
| EPI_ISL_593814 | 2020      | 10/23/2020 Europe / United Kingdom / England                           |
| EPI_ISL_593815 | 2020      | 10/23/2020 Europe / United Kingdom / England                           |
| EPI_ISL_593816 | 2020      | 10/23/2020 Europe / United Kingdom / England                           |
| EPI_ISL_593817 | 2020      | 10/23/2020 Europe / United Kingdom / England                           |
| EPI_ISL_593818 | 2020      | 10/23/2020 Europe / United Kingdom / England                           |
| EPI_ISL_593819 | 2020      | 10/23/2020 Europe / United Kingdom / England                           |
| EPI_ISL_593820 | 2020      | 10/23/2020 Europe / United Kingdom / England                           |
| EPI_ISL_593822 | 2020      | 10/23/2020 Europe / United Kingdom / England                           |
| EPI_ISL_593824 | 9/19/2020 | 10/23/2020 Europe / United Kingdom / England                           |
| EPI_ISL_593825 | 9/19/2020 | 10/23/2020 Europe / United Kingdom / England                           |
| EPI_ISL_593826 | 2020      | 10/23/2020 Europe / United Kingdom / England                           |
| EPI_ISL_593827 | 2020      | 10/23/2020 Europe / United Kingdom / England                           |
| EPI_ISL_593828 | 2020      | 10/23/2020 Europe / United Kingdom / England                           |
| EPI_ISL_593829 | 9/17/2020 | 10/23/2020 Europe / United Kingdom / England                           |
| EPI_ISL_593832 | 2020      | 10/23/2020 Europe / United Kingdom / England                           |
| EPI_ISL_593833 | 2020      | 10/23/2020 Europe / United Kingdom / England                           |
| EPI_ISL_593834 | 9/16/2020 | 10/23/2020 Europe / United Kingdom / England                           |
| EPI_ISL_593835 | 2020      | 10/23/2020 Europe / United Kingdom / England                           |
| EPI_ISL_593836 | 2020      | 10/23/2020 Europe / United Kingdom / England                           |
| EPI_ISL_593839 | 2020      | 10/23/2020 Europe / United Kingdom / England                           |
| EPI_ISL_593840 | 2020      | 10/23/2020 Europe / United Kingdom / England                           |

|                |           |            |                                   |
|----------------|-----------|------------|-----------------------------------|
| EPI_ISL_593841 | 2020      | 10/23/2020 | Europe / United Kingdom / England |
| EPI_ISL_593842 | 2020      | 10/23/2020 | Europe / United Kingdom / England |
| EPI_ISL_593843 | 9/11/2020 | 10/23/2020 | Europe / United Kingdom / England |
| EPI_ISL_593844 | 2020      | 10/23/2020 | Europe / United Kingdom / England |
| EPI_ISL_593845 | 2020      | 10/23/2020 | Europe / United Kingdom / England |
| EPI_ISL_593847 | 2020      | 10/23/2020 | Europe / United Kingdom / England |
| EPI_ISL_593848 | 9/15/2020 | 10/23/2020 | Europe / United Kingdom / England |
| EPI_ISL_593851 | 2020      | 10/23/2020 | Europe / United Kingdom / England |
| EPI_ISL_593855 | 6/11/2020 | 10/23/2020 | Europe / France / Occitanie       |
| EPI_ISL_593856 | 6/17/2020 | 10/23/2020 | Europe / France / Occitanie       |
| EPI_ISL_593857 | 6/22/2020 | 10/23/2020 | Europe / France / Occitanie       |
| EPI_ISL_593858 | 6/19/2020 | 10/23/2020 | Europe / France / Occitanie       |
| EPI_ISL_593859 | 6/19/2020 | 10/23/2020 | Europe / France / Occitanie       |
| EPI_ISL_593860 | 6/19/2020 | 10/23/2020 | Europe / France / Occitanie       |
| EPI_ISL_593861 | 6/19/2020 | 10/23/2020 | Europe / France / Occitanie       |
| EPI_ISL_593862 | 6/19/2020 | 10/23/2020 | Europe / France / Occitanie       |
| EPI_ISL_593863 | 6/19/2020 | 10/23/2020 | Europe / France / Occitanie       |
| EPI_ISL_593864 | 6/19/2020 | 10/23/2020 | Europe / France / Occitanie       |
| EPI_ISL_593865 | 6/30/2020 | 10/23/2020 | Europe / France / Occitanie       |
| EPI_ISL_593866 | 6/24/2020 | 10/23/2020 | Europe / France / Occitanie       |
| EPI_ISL_593867 | 7/10/2020 | 10/23/2020 | Europe / France / Occitanie       |
| EPI_ISL_593868 | 7/13/2020 | 10/23/2020 | Europe / France / Occitanie       |
| EPI_ISL_593869 | 7/13/2020 | 10/23/2020 | Europe / France / Occitanie       |
| EPI_ISL_593870 | 7/13/2020 | 10/23/2020 | Europe / France / Occitanie       |
| EPI_ISL_593871 | 7/14/2020 | 10/23/2020 | Europe / France / Occitanie       |
| EPI_ISL_593872 | 7/15/2020 | 10/23/2020 | Europe / France / Occitanie       |
| EPI_ISL_593873 | 7/16/2020 | 10/23/2020 | Europe / France / Occitanie       |
| EPI_ISL_593874 | 7/27/2020 | 10/23/2020 | Europe / France / Occitanie       |
| EPI_ISL_593875 | 7/29/2020 | 10/23/2020 | Europe / France / Occitanie       |
| EPI_ISL_593876 | 7/29/2020 | 10/23/2020 | Europe / France / Occitanie       |
| EPI_ISL_593877 | 7/29/2020 | 10/23/2020 | Europe / France / Occitanie       |
| EPI_ISL_593878 | 8/1/2020  | 10/23/2020 | Europe / France / Occitanie       |
| EPI_ISL_593879 | 8/1/2020  | 10/23/2020 | Europe / France / Occitanie       |
| EPI_ISL_593880 | 8/2/2020  | 10/23/2020 | Europe / France / Occitanie       |
| EPI_ISL_593881 | 6/11/2020 | 10/23/2020 | Europe / France / Occitanie       |
| EPI_ISL_593882 | 8/28/2020 | 10/23/2020 | Europe / France / Occitanie       |
| EPI_ISL_593883 | 7/22/2020 | 10/23/2020 | Europe / France / Occitanie       |
| EPI_ISL_593884 | 8/2/2020  | 10/23/2020 | Europe / France / Occitanie       |
| EPI_ISL_593885 | 8/1/2020  | 10/23/2020 | Europe / France / Occitanie       |
| EPI_ISL_593886 | 8/1/2020  | 10/23/2020 | Europe / France / Occitanie       |
| EPI_ISL_593887 | 8/31/2020 | 10/23/2020 | Europe / France / Occitanie       |
| EPI_ISL_593888 | 9/2/2020  | 10/23/2020 | Europe / France / Occitanie       |
| EPI_ISL_593889 | 8/24/2020 | 10/23/2020 | Europe / France / Occitanie       |
| EPI_ISL_593890 | 6/10/2020 | 10/23/2020 | Europe / France / Occitanie       |
| EPI_ISL_593891 | 6/19/2020 | 10/23/2020 | Europe / France / Occitanie       |
| EPI_ISL_593892 | 6/15/2020 | 10/23/2020 | Europe / France / Occitanie       |
| EPI_ISL_593893 | 9/30/2020 | 10/23/2020 | Europe / France / Occitanie       |

|                |           |            |                                                      |
|----------------|-----------|------------|------------------------------------------------------|
| EPI_ISL_593894 | 9/30/2020 | 10/23/2020 | Europe / France / Occitanie                          |
| EPI_ISL_593895 | 10/5/2020 | 10/23/2020 | Europe / France / Occitanie                          |
| EPI_ISL_593896 | 10/4/2020 | 10/23/2020 | Europe / France / Occitanie                          |
| EPI_ISL_593897 | 10/3/2020 | 10/23/2020 | Europe / France / Occitanie                          |
| EPI_ISL_593898 | 10/3/2020 | 10/23/2020 | Europe / France / Occitanie                          |
| EPI_ISL_593899 | 10/3/2020 | 10/23/2020 | Europe / France / Occitanie                          |
| EPI_ISL_593900 | 10/2/2020 | 10/23/2020 | Europe / France / Occitanie                          |
| EPI_ISL_593901 | 9/30/2020 | 10/23/2020 | Europe / France / Occitanie                          |
| EPI_ISL_593902 | 9/15/2020 | 10/23/2020 | Europe / France / Île-de-France / Limay              |
| EPI_ISL_593903 | 9/9/2020  | 10/23/2020 | Europe / France / Île-de-France / Puteaux            |
| EPI_ISL_593904 | 9/14/2020 | 10/23/2020 | Europe / France / Île-de-France / Puteaux            |
| EPI_ISL_593905 | 9/14/2020 | 10/23/2020 | Europe / France / Île-de-France / Puteaux            |
| EPI_ISL_593906 | 9/15/2020 | 10/23/2020 | Europe / France / Île-de-France / Puteaux            |
| EPI_ISL_593907 | 9/15/2020 | 10/23/2020 | Europe / France / Île-de-France / Puteaux            |
| EPI_ISL_593908 | 9/9/2020  | 10/23/2020 | Europe / France / Île-de-France / Puteaux            |
| EPI_ISL_593909 | 9/14/2020 | 10/23/2020 | Europe / France / Île-de-France / Puteaux            |
| EPI_ISL_593910 | 9/14/2020 | 10/23/2020 | Europe / France / Île-de-France / Puteaux            |
| EPI_ISL_593911 | 9/1/2020  | 10/23/2020 | Europe / France / Île-de-France / Puteaux            |
| EPI_ISL_593912 | 8/31/2020 | 10/23/2020 | Europe / France / Île-de-France / Puteaux            |
| EPI_ISL_593913 | 9/2/2020  | 10/23/2020 | Europe / France / Île-de-France / Puteaux            |
| EPI_ISL_593914 | 9/1/2020  | 10/23/2020 | Europe / France / Île-de-France / Puteaux            |
| EPI_ISL_593915 | 9/2/2020  | 10/23/2020 | Europe / France / Île-de-France / Puteaux            |
| EPI_ISL_593916 | 9/1/2020  | 10/23/2020 | Europe / France / Île-de-France / Puteaux            |
| EPI_ISL_593917 | 8/31/2020 | 10/23/2020 | Europe / France / Île-de-France / Puteaux            |
| EPI_ISL_593918 | 9/1/2020  | 10/23/2020 | Europe / France / Île-de-France / Puteaux            |
| EPI_ISL_593919 | 9/1/2020  | 10/23/2020 | Europe / France / Île-de-France / Puteaux            |
| EPI_ISL_593920 | 9/1/2020  | 10/23/2020 | Europe / France / Île-de-France / Puteaux            |
| EPI_ISL_593921 | 9/1/2020  | 10/23/2020 | Europe / France / Île-de-France / Puteaux            |
| EPI_ISL_593922 | 9/1/2020  | 10/23/2020 | Europe / France / Île-de-France / Puteaux            |
| EPI_ISL_593923 | 9/1/2020  | 10/23/2020 | Europe / France / Île-de-France / Puteaux            |
| EPI_ISL_593924 | 9/14/2020 | 10/23/2020 | Europe / France / Île-de-France / Puteaux            |
| EPI_ISL_593925 | 9/9/2020  | 10/23/2020 | Europe / France / Île-de-France / Puteaux            |
| EPI_ISL_593926 | 9/14/2020 | 10/23/2020 | Europe / France / Île-de-France / Puteaux            |
| EPI_ISL_593927 | 9/14/2020 | 10/23/2020 | Europe / France / Île-de-France / Puteaux            |
| EPI_ISL_593928 | 9/15/2020 | 10/23/2020 | Europe / France / Île-de-France / Puteaux            |
| EPI_ISL_593929 | 9/1/2020  | 10/23/2020 | Europe / France / Île-de-France / Puteaux            |
| EPI_ISL_593930 | 9/1/2020  | 10/23/2020 | Europe / France / Île-de-France / Puteaux            |
| EPI_ISL_593932 | 8/31/2020 | 10/23/2020 | Europe / France / Île-de-France / Puteaux            |
| EPI_ISL_593933 | 9/1/2020  | 10/23/2020 | Europe / France / Île-de-France / Puteaux            |
| EPI_ISL_593934 | 9/21/2020 | 10/23/2020 | Europe / France / Île-de-France / Chanteloup-en-Brie |
| EPI_ISL_593935 | 9/29/2020 | 10/23/2020 | Europe / France / Île-de-France / Plessis Trevisé    |
| EPI_ISL_593936 | 10/1/2020 | 10/23/2020 | Europe / France / Centre Val de Loire / Fondettes    |
| EPI_ISL_593938 | 3/22/2020 | 10/23/2020 | North America / USA / Delaware / New Castle County   |
| EPI_ISL_593940 | 3/26/2020 | 10/23/2020 | North America / USA / Delaware / Kent County         |
| EPI_ISL_593945 | 3/27/2020 | 10/23/2020 | North America / USA / Delaware / Kent County         |
| EPI_ISL_593949 | 3/30/2020 | 10/23/2020 | North America / USA / Delaware / Kent County         |
| EPI_ISL_593950 | 3/30/2020 | 10/23/2020 | North America / USA / Delaware / New Castle County   |

|                |           |            |                                                    |
|----------------|-----------|------------|----------------------------------------------------|
| EPI_ISL_593951 | 3/30/2020 | 10/23/2020 | North America / USA / Delaware / New Castle County |
| EPI_ISL_593952 | 3/30/2020 | 10/23/2020 | North America / USA / Delaware / New Castle County |
| EPI_ISL_593953 | 3/30/2020 | 10/23/2020 | North America / USA / Delaware / New Castle County |
| EPI_ISL_593955 | 3/30/2020 | 10/23/2020 | North America / USA / Delaware / Sussex County     |
| EPI_ISL_593956 | 3/30/2020 | 10/23/2020 | North America / USA / Delaware / Kent County       |
| EPI_ISL_593957 | 3/31/2020 | 10/23/2020 | North America / USA / Delaware / New Castle County |
| EPI_ISL_593958 | 3/31/2020 | 10/23/2020 | North America / USA / Delaware / New Castle County |
| EPI_ISL_593963 | 3/31/2020 | 10/23/2020 | North America / USA / Delaware / Kent County       |
| EPI_ISL_593965 | 3/30/2020 | 10/23/2020 | North America / USA / Delaware / Kent County       |
| EPI_ISL_593966 | 3/31/2020 | 10/23/2020 | North America / USA / Delaware / Kent County       |
| EPI_ISL_593967 | 3/31/2020 | 10/23/2020 | North America / USA / Delaware / New Castle County |
| EPI_ISL_593969 | 3/31/2020 | 10/23/2020 | North America / USA / Delaware / Sussex County     |
| EPI_ISL_593970 | 3/31/2020 | 10/23/2020 | North America / USA / Delaware / Sussex County     |
| EPI_ISL_593971 | 4/1/2020  | 10/23/2020 | North America / USA / Delaware / Kent County       |
| EPI_ISL_593973 | 4/1/2020  | 10/23/2020 | North America / USA / Delaware / New Castle County |
| EPI_ISL_593974 | 4/1/2020  | 10/23/2020 | North America / USA / Delaware / New Castle County |
| EPI_ISL_593976 | 4/2/2020  | 10/23/2020 | North America / USA / Delaware / Sussex County     |
| EPI_ISL_593979 | 4/5/2020  | 10/23/2020 | North America / USA / Delaware / Sussex County     |
| EPI_ISL_593980 | 9/25/2020 | 10/23/2020 | North America / USA / Delaware / Kent County       |
| EPI_ISL_593981 | 9/19/2020 | 10/23/2020 | North America / USA / Delaware / Kent County       |
| EPI_ISL_593984 | 2020      | 10/23/2020 | Europe / United Kingdom / England                  |
| EPI_ISL_593985 | 2020      | 10/23/2020 | Europe / United Kingdom / England                  |
| EPI_ISL_593986 | 2020      | 10/23/2020 | Europe / United Kingdom / England                  |
| EPI_ISL_593987 | 2020      | 10/23/2020 | Europe / United Kingdom / England                  |
| EPI_ISL_593989 | 2020      | 10/23/2020 | Europe / United Kingdom / England                  |
| EPI_ISL_593990 | 2020      | 10/23/2020 | Europe / United Kingdom / England                  |
| EPI_ISL_593991 | 2020      | 10/23/2020 | Europe / United Kingdom / England                  |
| EPI_ISL_593993 | 2020      | 10/23/2020 | Europe / United Kingdom / England                  |
| EPI_ISL_593994 | 2020      | 10/23/2020 | Europe / United Kingdom / England                  |
| EPI_ISL_593995 | 2020      | 10/23/2020 | Europe / United Kingdom / England                  |
| EPI_ISL_593996 | 2020      | 10/23/2020 | Europe / United Kingdom / England                  |
| EPI_ISL_593997 | 2020      | 10/23/2020 | Europe / United Kingdom / England                  |
| EPI_ISL_594007 | 6/2/2020  | 10/23/2020 | North America / USA / Utah                         |
| EPI_ISL_594008 | 5/31/2020 | 10/23/2020 | North America / USA / Utah                         |
| EPI_ISL_594009 | 5/30/2020 | 10/23/2020 | North America / USA / Utah                         |
| EPI_ISL_594010 | 5/31/2020 | 10/23/2020 | North America / USA / Utah                         |
| EPI_ISL_594013 | 5/31/2020 | 10/23/2020 | North America / USA / Utah                         |
| EPI_ISL_594014 | 5/31/2020 | 10/23/2020 | North America / USA / Utah                         |
| EPI_ISL_594015 | 5/30/2020 | 10/23/2020 | North America / USA / Utah                         |
| EPI_ISL_594017 | 5/30/2020 | 10/23/2020 | North America / USA / Utah                         |
| EPI_ISL_594018 | 5/30/2020 | 10/23/2020 | North America / USA / Utah                         |
| EPI_ISL_594021 | 5/29/2020 | 10/23/2020 | North America / USA / Utah                         |
| EPI_ISL_594026 | 6/1/2020  | 10/23/2020 | North America / USA / Utah                         |
| EPI_ISL_594027 | 6/1/2020  | 10/23/2020 | North America / USA / Utah                         |
| EPI_ISL_594034 | 6/1/2020  | 10/23/2020 | North America / USA / Utah                         |
| EPI_ISL_594035 | 6/1/2020  | 10/23/2020 | North America / USA / Utah                         |
| EPI_ISL_594038 | 6/22/2020 | 10/23/2020 | North America / USA / Utah                         |

|                |           |            |                                              |
|----------------|-----------|------------|----------------------------------------------|
| EPI_ISL_594039 | 6/22/2020 | 10/23/2020 | North America / USA / Utah                   |
| EPI_ISL_594040 | 6/22/2020 | 10/23/2020 | North America / USA / Utah                   |
| EPI_ISL_594042 | 6/23/2020 | 10/23/2020 | North America / USA / Utah                   |
| EPI_ISL_594043 | 7/6/2020  | 10/23/2020 | North America / USA / Utah                   |
| EPI_ISL_594045 | 7/6/2020  | 10/23/2020 | North America / USA / Utah                   |
| EPI_ISL_594046 | 7/6/2020  | 10/23/2020 | North America / USA / Utah                   |
| EPI_ISL_594053 | 7/6/2020  | 10/23/2020 | North America / USA / Utah                   |
| EPI_ISL_594054 | 7/6/2020  | 10/23/2020 | North America / USA / Utah                   |
| EPI_ISL_594057 | 7/6/2020  | 10/23/2020 | North America / USA / Utah                   |
| EPI_ISL_594058 | 7/6/2020  | 10/23/2020 | North America / USA / Utah                   |
| EPI_ISL_594059 | 7/6/2020  | 10/23/2020 | North America / USA / Utah                   |
| EPI_ISL_594060 | 7/6/2020  | 10/23/2020 | North America / USA / Utah                   |
| EPI_ISL_594062 | 10/1/2020 | 10/23/2020 | North America / USA / Utah                   |
| EPI_ISL_594063 | 5/28/2020 | 10/23/2020 | North America / USA / Utah                   |
| EPI_ISL_594064 | 5/29/2020 | 10/23/2020 | North America / USA / Utah                   |
| EPI_ISL_594066 | 5/29/2020 | 10/23/2020 | North America / USA / Utah                   |
| EPI_ISL_594067 | 5/29/2020 | 10/23/2020 | North America / USA / Utah                   |
| EPI_ISL_594069 | 5/29/2020 | 10/23/2020 | North America / USA / Utah                   |
| EPI_ISL_594070 | 5/29/2020 | 10/23/2020 | North America / USA / Utah                   |
| EPI_ISL_594071 | 5/29/2020 | 10/23/2020 | North America / USA / Utah                   |
| EPI_ISL_594072 | 5/30/2020 | 10/23/2020 | North America / USA / Utah                   |
| EPI_ISL_594074 | 5/30/2020 | 10/23/2020 | North America / USA / Utah                   |
| EPI_ISL_594079 | 5/29/2020 | 10/23/2020 | North America / USA / Utah                   |
| EPI_ISL_594081 | 5/29/2020 | 10/23/2020 | North America / USA / Utah                   |
| EPI_ISL_594083 | 5/30/2020 | 10/23/2020 | North America / USA / Utah                   |
| EPI_ISL_594084 | 5/31/2020 | 10/23/2020 | North America / USA / Utah                   |
| EPI_ISL_594086 | 4/5/2020  | 10/23/2020 | North America / USA / Utah                   |
| EPI_ISL_594091 | 4/8/2020  | 10/23/2020 | North America / USA / Utah                   |
| EPI_ISL_594095 | 4/9/2020  | 10/23/2020 | North America / USA / Utah                   |
| EPI_ISL_594097 | 4/9/2020  | 10/23/2020 | North America / USA / Utah                   |
| EPI_ISL_594098 | 4/10/2020 | 10/23/2020 | North America / USA / Utah                   |
| EPI_ISL_594099 | 4/10/2020 | 10/23/2020 | North America / USA / Utah                   |
| EPI_ISL_594101 | 4/11/2020 | 10/23/2020 | North America / USA / Utah                   |
| EPI_ISL_594102 | 4/18/2020 | 10/23/2020 | North America / USA / Utah                   |
| EPI_ISL_594103 | 4/18/2020 | 10/23/2020 | North America / USA / Utah                   |
| EPI_ISL_594104 | 4/18/2020 | 10/23/2020 | North America / USA / Utah                   |
| EPI_ISL_594106 | 4/18/2020 | 10/23/2020 | North America / USA / Utah                   |
| EPI_ISL_594107 | 4/18/2020 | 10/23/2020 | North America / USA / Utah                   |
| EPI_ISL_594110 | 4/18/2020 | 10/23/2020 | North America / USA / Utah                   |
| EPI_ISL_594111 | 4/17/2020 | 10/23/2020 | North America / USA / Utah                   |
| EPI_ISL_594112 | 4/18/2020 | 10/23/2020 | North America / USA / Utah                   |
| EPI_ISL_594113 | 4/18/2020 | 10/23/2020 | North America / USA / Utah                   |
| EPI_ISL_594114 | 4/18/2020 | 10/23/2020 | North America / USA / Utah                   |
| EPI_ISL_594115 | 4/18/2020 | 10/23/2020 | North America / USA / Utah                   |
| EPI_ISL_594118 | 8/14/2020 | 10/23/2020 | South America / Ecuador / Guayas / Guayaquil |
| EPI_ISL_596386 | 1/19/2020 | 10/23/2020 | North America / USA / Washington             |
| EPI_ISL_594148 | 8/20/2020 | 10/24/2020 | Europe / Sweden / Halland                    |

|                |           |            |                                         |
|----------------|-----------|------------|-----------------------------------------|
| EPI_ISL_594149 | 9/16/2020 | 10/24/2020 | Europe / Sweden / Ostergotland          |
| EPI_ISL_594150 | 9/16/2020 | 10/24/2020 | Europe / Sweden / Ostergotland          |
| EPI_ISL_594151 | 9/16/2020 | 10/24/2020 | Europe / Sweden / Ostergotland          |
| EPI_ISL_594152 | 9/16/2020 | 10/24/2020 | Europe / Sweden / Ostergotland          |
| EPI_ISL_594153 | 9/16/2020 | 10/24/2020 | Europe / Sweden / Ostergotland          |
| EPI_ISL_594154 | 6/1/2020  | 10/24/2020 | Europe / Sweden / Sormland              |
| EPI_ISL_594155 | 6/14/2020 | 10/25/2020 | Asia / Israel                           |
| EPI_ISL_594156 | 6/14/2020 | 10/25/2020 | Asia / Israel                           |
| EPI_ISL_594157 | 6/25/2020 | 10/25/2020 | Asia / Israel                           |
| EPI_ISL_594158 | 7/27/2020 | 10/25/2020 | Asia / Israel                           |
| EPI_ISL_594159 | 7/14/2020 | 10/25/2020 | Asia / Israel                           |
| EPI_ISL_594160 | 7/14/2020 | 10/25/2020 | Asia / Israel                           |
| EPI_ISL_594161 | 7/20/2020 | 10/25/2020 | Asia / Israel                           |
| EPI_ISL_594162 | 7/26/2020 | 10/25/2020 | Asia / Israel                           |
| EPI_ISL_594167 | 8/21/2020 | 10/26/2020 | Oceania / Australia / Western Australia |
| EPI_ISL_594175 | 9/26/2020 | 10/26/2020 | Oceania / Australia / Western Australia |
| EPI_ISL_594185 | 4/13/2020 | 10/26/2020 | Asia / Iran / Tehran                    |
| EPI_ISL_594186 | 3/28/2020 | 10/26/2020 | Asia / Iran / Tehran                    |
| EPI_ISL_594187 | 4/11/2020 | 10/26/2020 | Asia / Iran / Tehran                    |
| EPI_ISL_594188 | 6/26/2020 | 10/26/2020 | Asia / Iran / Tehran                    |
| EPI_ISL_594248 | 5/28/2020 | 10/26/2020 | North America / USA / Utah              |
| EPI_ISL_594252 | 5/29/2020 | 10/26/2020 | North America / USA / Utah              |
| EPI_ISL_594253 | 5/29/2020 | 10/26/2020 | North America / USA / Utah              |
| EPI_ISL_594255 | 6/22/2020 | 10/26/2020 | North America / USA / Utah              |
| EPI_ISL_594256 | 6/22/2020 | 10/26/2020 | North America / USA / Utah              |
| EPI_ISL_594258 | 6/22/2020 | 10/26/2020 | North America / USA / Utah              |
| EPI_ISL_594259 | 6/22/2020 | 10/26/2020 | North America / USA / Utah              |
| EPI_ISL_594260 | 6/22/2020 | 10/26/2020 | North America / USA / Utah              |
| EPI_ISL_594263 | 6/22/2020 | 10/26/2020 | North America / USA / Utah              |
| EPI_ISL_594266 | 6/22/2020 | 10/26/2020 | North America / USA / Utah              |
| EPI_ISL_594267 | 6/22/2020 | 10/26/2020 | North America / USA / Utah              |
| EPI_ISL_594268 | 6/22/2020 | 10/26/2020 | North America / USA / Utah              |
| EPI_ISL_594270 | 6/22/2020 | 10/26/2020 | North America / USA / Utah              |
| EPI_ISL_594271 | 6/22/2020 | 10/26/2020 | North America / USA / Utah              |
| EPI_ISL_594273 | 6/22/2020 | 10/26/2020 | North America / USA / Utah              |
| EPI_ISL_594274 | 6/22/2020 | 10/26/2020 | North America / USA / Utah              |
| EPI_ISL_594275 | 6/22/2020 | 10/26/2020 | North America / USA / Utah              |
| EPI_ISL_594279 | 5/21/2020 | 10/26/2020 | North America / USA / Florida           |
| EPI_ISL_594280 | 5/21/2020 | 10/26/2020 | North America / USA / Florida           |
| EPI_ISL_594281 | 5/20/2020 | 10/26/2020 | North America / USA / Florida           |
| EPI_ISL_594282 | 5/21/2020 | 10/26/2020 | North America / USA / Florida           |
| EPI_ISL_594284 | 5/21/2020 | 10/26/2020 | North America / USA / Florida           |
| EPI_ISL_594288 | 7/5/2020  | 10/26/2020 | North America / USA / Florida           |
| EPI_ISL_594289 | 7/5/2020  | 10/26/2020 | North America / USA / Florida           |
| EPI_ISL_594290 | 7/5/2020  | 10/26/2020 | North America / USA / Florida           |
| EPI_ISL_594291 | 7/5/2020  | 10/26/2020 | North America / USA / Florida           |
| EPI_ISL_594293 | 7/5/2020  | 10/26/2020 | North America / USA / Florida           |







|                |           |            |                                            |
|----------------|-----------|------------|--------------------------------------------|
| EPI_ISL_594444 | 6/22/2020 | 10/26/2020 | North America / USA / Utah                 |
| EPI_ISL_594450 | 3/3/2020  | 10/26/2020 | North America / USA / Washington           |
| EPI_ISL_594451 | 3/3/2020  | 10/26/2020 | North America / USA / Washington           |
| EPI_ISL_594452 | 3/3/2020  | 10/26/2020 | North America / USA / Washington           |
| EPI_ISL_594453 | 3/3/2020  | 10/26/2020 | North America / USA / Washington           |
| EPI_ISL_594454 | 3/3/2020  | 10/26/2020 | North America / USA / Washington           |
| EPI_ISL_594456 | 3/6/2020  | 10/26/2020 | North America / USA / Georgia              |
| EPI_ISL_594457 | 3/19/2020 | 10/26/2020 | North America / USA / New York             |
| EPI_ISL_594458 | 3/27/2020 | 10/26/2020 | North America / USA / California           |
| EPI_ISL_594459 | 2/26/2020 | 10/26/2020 | North America / USA / Washington           |
| EPI_ISL_594460 | 3/20/2020 | 10/26/2020 | North America / USA / District of Columbia |
| EPI_ISL_594462 | 5/22/2020 | 10/26/2020 | North America / USA / New Mexico           |
| EPI_ISL_594463 | 4/25/2020 | 10/26/2020 | North America / USA / Minnesota            |
| EPI_ISL_594465 | 6/27/2020 | 10/26/2020 | North America / USA / Florida              |
| EPI_ISL_594468 | 9/24/2020 | 10/26/2020 | Europe / United Kingdom / England          |
| EPI_ISL_594469 | 9/24/2020 | 10/26/2020 | Europe / United Kingdom / England          |
| EPI_ISL_594470 | 9/24/2020 | 10/26/2020 | Europe / United Kingdom / England          |
| EPI_ISL_594472 | 9/24/2020 | 10/26/2020 | Europe / United Kingdom / England          |
| EPI_ISL_594474 | 9/24/2020 | 10/26/2020 | Europe / United Kingdom / England          |
| EPI_ISL_594475 | 9/24/2020 | 10/26/2020 | Europe / United Kingdom / England          |
| EPI_ISL_594477 | 9/24/2020 | 10/26/2020 | Europe / United Kingdom / England          |
| EPI_ISL_594478 | 9/25/2020 | 10/26/2020 | Europe / United Kingdom / England          |
| EPI_ISL_594479 | 9/25/2020 | 10/26/2020 | Europe / United Kingdom / England          |
| EPI_ISL_594480 | 9/25/2020 | 10/26/2020 | Europe / United Kingdom / England          |
| EPI_ISL_594481 | 9/25/2020 | 10/26/2020 | Europe / United Kingdom / England          |
| EPI_ISL_594482 | 9/25/2020 | 10/26/2020 | Europe / United Kingdom / England          |
| EPI_ISL_594483 | 9/25/2020 | 10/26/2020 | Europe / United Kingdom / England          |
| EPI_ISL_594484 | 9/29/2020 | 10/26/2020 | Europe / United Kingdom / England          |
| EPI_ISL_594485 | 9/18/2020 | 10/26/2020 | Europe / United Kingdom / England          |
| EPI_ISL_594486 | 9/18/2020 | 10/26/2020 | Europe / United Kingdom / England          |
| EPI_ISL_594488 | 9/19/2020 | 10/26/2020 | Europe / United Kingdom / England          |
| EPI_ISL_594489 | 9/19/2020 | 10/26/2020 | Europe / United Kingdom / England          |
| EPI_ISL_594490 | 9/19/2020 | 10/26/2020 | Europe / United Kingdom / England          |
| EPI_ISL_594491 | 9/19/2020 | 10/26/2020 | Europe / United Kingdom / England          |
| EPI_ISL_594494 | 9/19/2020 | 10/26/2020 | Europe / United Kingdom / England          |
| EPI_ISL_594496 | 9/22/2020 | 10/26/2020 | Europe / United Kingdom / England          |
| EPI_ISL_594497 | 9/22/2020 | 10/26/2020 | Europe / United Kingdom / England          |
| EPI_ISL_594499 | 9/22/2020 | 10/26/2020 | Europe / United Kingdom / England          |
| EPI_ISL_594500 | 9/22/2020 | 10/26/2020 | Europe / United Kingdom / England          |
| EPI_ISL_594502 | 9/23/2020 | 10/26/2020 | Europe / United Kingdom / England          |
| EPI_ISL_594504 | 9/23/2020 | 10/26/2020 | Europe / United Kingdom / England          |
| EPI_ISL_594506 | 9/23/2020 | 10/26/2020 | Europe / United Kingdom / England          |
| EPI_ISL_594510 | 9/23/2020 | 10/26/2020 | Europe / United Kingdom / England          |
| EPI_ISL_594511 | 9/23/2020 | 10/26/2020 | Europe / United Kingdom / England          |
| EPI_ISL_594512 | 9/24/2020 | 10/26/2020 | Europe / United Kingdom / England          |
| EPI_ISL_594513 | 9/24/2020 | 10/26/2020 | Europe / United Kingdom / England          |
| EPI_ISL_594519 | 9/15/2020 | 10/26/2020 | Europe / United Kingdom / England          |



























|                |            |            |                                 |
|----------------|------------|------------|---------------------------------|
| EPI_ISL_595383 | 10/9/2020  | 10/26/2020 | Europe / United Kingdom / Wales |
| EPI_ISL_595386 | 10/6/2020  | 10/26/2020 | Europe / United Kingdom / Wales |
| EPI_ISL_595388 | 9/25/2020  | 10/26/2020 | Europe / United Kingdom / Wales |
| EPI_ISL_595389 | 10/10/2020 | 10/26/2020 | Europe / United Kingdom / Wales |
| EPI_ISL_595390 | 10/12/2020 | 10/26/2020 | Europe / United Kingdom / Wales |
| EPI_ISL_595391 | 9/29/2020  | 10/26/2020 | Europe / United Kingdom / Wales |
| EPI_ISL_595392 | 10/13/2020 | 10/26/2020 | Europe / United Kingdom / Wales |
| EPI_ISL_595393 | 10/8/2020  | 10/26/2020 | Europe / United Kingdom / Wales |
| EPI_ISL_595394 | 10/12/2020 | 10/26/2020 | Europe / United Kingdom / Wales |
| EPI_ISL_595396 | 10/11/2020 | 10/26/2020 | Europe / United Kingdom / Wales |
| EPI_ISL_595397 | 9/25/2020  | 10/26/2020 | Europe / United Kingdom / Wales |
| EPI_ISL_595398 | 10/9/2020  | 10/26/2020 | Europe / United Kingdom / Wales |
| EPI_ISL_595399 | 10/11/2020 | 10/26/2020 | Europe / United Kingdom / Wales |
| EPI_ISL_595400 | 10/12/2020 | 10/26/2020 | Europe / United Kingdom / Wales |
| EPI_ISL_595401 | 10/14/2020 | 10/26/2020 | Europe / United Kingdom / Wales |
| EPI_ISL_595402 | 9/25/2020  | 10/26/2020 | Europe / United Kingdom / Wales |
| EPI_ISL_595403 | 9/29/2020  | 10/26/2020 | Europe / United Kingdom / Wales |
| EPI_ISL_595404 | 9/26/2020  | 10/26/2020 | Europe / United Kingdom / Wales |
| EPI_ISL_595405 | 9/29/2020  | 10/26/2020 | Europe / United Kingdom / Wales |
| EPI_ISL_595406 | 10/6/2020  | 10/26/2020 | Europe / United Kingdom / Wales |
| EPI_ISL_595407 | 9/29/2020  | 10/26/2020 | Europe / United Kingdom / Wales |
| EPI_ISL_595408 | 9/26/2020  | 10/26/2020 | Europe / United Kingdom / Wales |
| EPI_ISL_595409 | 10/15/2020 | 10/26/2020 | Europe / United Kingdom / Wales |
| EPI_ISL_595410 | 10/11/2020 | 10/26/2020 | Europe / United Kingdom / Wales |
| EPI_ISL_595412 | 9/29/2020  | 10/26/2020 | Europe / United Kingdom / Wales |
| EPI_ISL_595413 | 9/29/2020  | 10/26/2020 | Europe / United Kingdom / Wales |
| EPI_ISL_595414 | 9/30/2020  | 10/26/2020 | Europe / United Kingdom / Wales |
| EPI_ISL_595416 | 10/11/2020 | 10/26/2020 | Europe / United Kingdom / Wales |
| EPI_ISL_595417 | 9/25/2020  | 10/26/2020 | Europe / United Kingdom / Wales |
| EPI_ISL_595421 | 10/9/2020  | 10/26/2020 | Europe / United Kingdom / Wales |
| EPI_ISL_595423 | 10/12/2020 | 10/26/2020 | Europe / United Kingdom / Wales |
| EPI_ISL_595424 | 9/27/2020  | 10/26/2020 | Europe / United Kingdom / Wales |
| EPI_ISL_595426 | 9/29/2020  | 10/26/2020 | Europe / United Kingdom / Wales |
| EPI_ISL_595427 | 9/27/2020  | 10/26/2020 | Europe / United Kingdom / Wales |
| EPI_ISL_595428 | 10/14/2020 | 10/26/2020 | Europe / United Kingdom / Wales |
| EPI_ISL_595429 | 10/11/2020 | 10/26/2020 | Europe / United Kingdom / Wales |
| EPI_ISL_595430 | 9/26/2020  | 10/26/2020 | Europe / United Kingdom / Wales |
| EPI_ISL_595431 | 10/11/2020 | 10/26/2020 | Europe / United Kingdom / Wales |
| EPI_ISL_595433 | 10/9/2020  | 10/26/2020 | Europe / United Kingdom / Wales |
| EPI_ISL_595434 | 10/8/2020  | 10/26/2020 | Europe / United Kingdom / Wales |
| EPI_ISL_595435 | 9/28/2020  | 10/26/2020 | Europe / United Kingdom / Wales |
| EPI_ISL_595438 | 10/11/2020 | 10/26/2020 | Europe / United Kingdom / Wales |
| EPI_ISL_595441 | 9/29/2020  | 10/26/2020 | Europe / United Kingdom / Wales |
| EPI_ISL_595443 | 10/10/2020 | 10/26/2020 | Europe / United Kingdom / Wales |
| EPI_ISL_595444 | 9/26/2020  | 10/26/2020 | Europe / United Kingdom / Wales |
| EPI_ISL_595445 | 10/13/2020 | 10/26/2020 | Europe / United Kingdom / Wales |
| EPI_ISL_595446 | 10/7/2020  | 10/26/2020 | Europe / United Kingdom / Wales |

|                |            |            |                                 |
|----------------|------------|------------|---------------------------------|
| EPI_ISL_595447 | 10/9/2020  | 10/26/2020 | Europe / United Kingdom / Wales |
| EPI_ISL_595448 | 9/29/2020  | 10/26/2020 | Europe / United Kingdom / Wales |
| EPI_ISL_595449 | 10/12/2020 | 10/26/2020 | Europe / United Kingdom / Wales |
| EPI_ISL_595450 | 10/10/2020 | 10/26/2020 | Europe / United Kingdom / Wales |
| EPI_ISL_595451 | 10/9/2020  | 10/26/2020 | Europe / United Kingdom / Wales |
| EPI_ISL_595452 | 9/28/2020  | 10/26/2020 | Europe / United Kingdom / Wales |
| EPI_ISL_595453 | 10/13/2020 | 10/26/2020 | Europe / United Kingdom / Wales |
| EPI_ISL_595454 | 10/8/2020  | 10/26/2020 | Europe / United Kingdom / Wales |
| EPI_ISL_595455 | 9/30/2020  | 10/26/2020 | Europe / United Kingdom / Wales |
| EPI_ISL_595457 | 9/29/2020  | 10/26/2020 | Europe / United Kingdom / Wales |
| EPI_ISL_595459 | 9/28/2020  | 10/26/2020 | Europe / United Kingdom / Wales |
| EPI_ISL_595463 | 10/12/2020 | 10/26/2020 | Europe / United Kingdom / Wales |
| EPI_ISL_595464 | 10/12/2020 | 10/26/2020 | Europe / United Kingdom / Wales |
| EPI_ISL_595465 | 10/7/2020  | 10/26/2020 | Europe / United Kingdom / Wales |
| EPI_ISL_595467 | 10/12/2020 | 10/26/2020 | Europe / United Kingdom / Wales |
| EPI_ISL_595470 | 10/6/2020  | 10/26/2020 | Europe / United Kingdom / Wales |
| EPI_ISL_595471 | 9/27/2020  | 10/26/2020 | Europe / United Kingdom / Wales |
| EPI_ISL_595473 | 9/27/2020  | 10/26/2020 | Europe / United Kingdom / Wales |
| EPI_ISL_595475 | 9/24/2020  | 10/26/2020 | Europe / United Kingdom / Wales |
| EPI_ISL_595476 | 9/30/2020  | 10/26/2020 | Europe / United Kingdom / Wales |
| EPI_ISL_595478 | 9/30/2020  | 10/26/2020 | Europe / United Kingdom / Wales |
| EPI_ISL_595483 | 9/30/2020  | 10/26/2020 | Europe / United Kingdom / Wales |
| EPI_ISL_595484 | 10/15/2020 | 10/26/2020 | Europe / United Kingdom / Wales |
| EPI_ISL_595485 | 10/14/2020 | 10/26/2020 | Europe / United Kingdom / Wales |
| EPI_ISL_595486 | 10/12/2020 | 10/26/2020 | Europe / United Kingdom / Wales |
| EPI_ISL_595488 | 10/8/2020  | 10/26/2020 | Europe / United Kingdom / Wales |
| EPI_ISL_595489 | 10/8/2020  | 10/26/2020 | Europe / United Kingdom / Wales |
| EPI_ISL_595490 | 10/12/2020 | 10/26/2020 | Europe / United Kingdom / Wales |
| EPI_ISL_595491 | 9/30/2020  | 10/26/2020 | Europe / United Kingdom / Wales |
| EPI_ISL_595492 | 10/4/2020  | 10/26/2020 | Europe / United Kingdom / Wales |
| EPI_ISL_595493 | 9/27/2020  | 10/26/2020 | Europe / United Kingdom / Wales |
| EPI_ISL_595494 | 9/28/2020  | 10/26/2020 | Europe / United Kingdom / Wales |
| EPI_ISL_595495 | 9/25/2020  | 10/26/2020 | Europe / United Kingdom / Wales |
| EPI_ISL_595496 | 9/29/2020  | 10/26/2020 | Europe / United Kingdom / Wales |
| EPI_ISL_595497 | 9/25/2020  | 10/26/2020 | Europe / United Kingdom / Wales |
| EPI_ISL_595498 | 9/26/2020  | 10/26/2020 | Europe / United Kingdom / Wales |
| EPI_ISL_595500 | 9/26/2020  | 10/26/2020 | Europe / United Kingdom / Wales |
| EPI_ISL_595501 | 9/26/2020  | 10/26/2020 | Europe / United Kingdom / Wales |
| EPI_ISL_595502 | 10/7/2020  | 10/26/2020 | Europe / United Kingdom / Wales |
| EPI_ISL_595504 | 9/27/2020  | 10/26/2020 | Europe / United Kingdom / Wales |
| EPI_ISL_595505 | 9/30/2020  | 10/26/2020 | Europe / United Kingdom / Wales |
| EPI_ISL_595506 | 10/14/2020 | 10/26/2020 | Europe / United Kingdom / Wales |
| EPI_ISL_595507 | 10/9/2020  | 10/26/2020 | Europe / United Kingdom / Wales |
| EPI_ISL_595509 | 10/12/2020 | 10/26/2020 | Europe / United Kingdom / Wales |
| EPI_ISL_595512 | 10/6/2020  | 10/26/2020 | Europe / United Kingdom / Wales |
| EPI_ISL_595513 | 10/9/2020  | 10/26/2020 | Europe / United Kingdom / Wales |
| EPI_ISL_595514 | 9/29/2020  | 10/26/2020 | Europe / United Kingdom / Wales |



























|                |            |            |                                            |
|----------------|------------|------------|--------------------------------------------|
| EPI_ISL_596169 | 10/9/2020  | 10/26/2020 | Europe / United Kingdom / Scotland         |
| EPI_ISL_596170 | 10/9/2020  | 10/26/2020 | Europe / United Kingdom / Scotland         |
| EPI_ISL_596171 | 10/9/2020  | 10/26/2020 | Europe / United Kingdom / Scotland         |
| EPI_ISL_596172 | 10/9/2020  | 10/26/2020 | Europe / United Kingdom / Scotland         |
| EPI_ISL_596174 | 10/9/2020  | 10/26/2020 | Europe / United Kingdom / Scotland         |
| EPI_ISL_596176 | 10/9/2020  | 10/26/2020 | Europe / United Kingdom / Scotland         |
| EPI_ISL_596177 | 10/9/2020  | 10/26/2020 | Europe / United Kingdom / Scotland         |
| EPI_ISL_596178 | 10/9/2020  | 10/26/2020 | Europe / United Kingdom / Scotland         |
| EPI_ISL_596179 | 10/9/2020  | 10/26/2020 | Europe / United Kingdom / Scotland         |
| EPI_ISL_596180 | 10/9/2020  | 10/26/2020 | Europe / United Kingdom / Scotland         |
| EPI_ISL_596181 | 10/9/2020  | 10/26/2020 | Europe / United Kingdom / Scotland         |
| EPI_ISL_596182 | 10/9/2020  | 10/26/2020 | Europe / United Kingdom / Scotland         |
| EPI_ISL_596183 | 10/13/2020 | 10/26/2020 | Europe / United Kingdom / Scotland         |
| EPI_ISL_596184 | 10/9/2020  | 10/26/2020 | Europe / United Kingdom / Scotland         |
| EPI_ISL_596185 | 10/9/2020  | 10/26/2020 | Europe / United Kingdom / Scotland         |
| EPI_ISL_596188 | 10/9/2020  | 10/26/2020 | Europe / United Kingdom / Scotland         |
| EPI_ISL_596189 | 10/12/2020 | 10/26/2020 | Europe / United Kingdom / Scotland         |
| EPI_ISL_596191 | 10/5/2020  | 10/26/2020 | Europe / United Kingdom / England          |
| EPI_ISL_596192 | 10/8/2020  | 10/26/2020 | Europe / United Kingdom / England          |
| EPI_ISL_596193 | 10/11/2020 | 10/26/2020 | Europe / United Kingdom / England          |
| EPI_ISL_596195 | 10/6/2020  | 10/26/2020 | Europe / United Kingdom / England          |
| EPI_ISL_596197 | 10/5/2020  | 10/26/2020 | Europe / United Kingdom / England          |
| EPI_ISL_596198 | 10/6/2020  | 10/26/2020 | Europe / United Kingdom / England          |
| EPI_ISL_596202 | 9/30/2020  | 10/26/2020 | Europe / United Kingdom / England          |
| EPI_ISL_596205 | 10/1/2020  | 10/26/2020 | Europe / United Kingdom / England          |
| EPI_ISL_596206 | 10/6/2020  | 10/26/2020 | Europe / United Kingdom / England          |
| EPI_ISL_596207 | 10/8/2020  | 10/26/2020 | Europe / United Kingdom / England          |
| EPI_ISL_596209 | 9/30/2020  | 10/26/2020 | Europe / United Kingdom / England          |
| EPI_ISL_596210 | 10/5/2020  | 10/26/2020 | Europe / United Kingdom / England          |
| EPI_ISL_596213 | 9/29/2020  | 10/26/2020 | Europe / United Kingdom / England          |
| EPI_ISL_596215 | 9/29/2020  | 10/26/2020 | Europe / United Kingdom / England          |
| EPI_ISL_596216 | 10/11/2020 | 10/26/2020 | Europe / United Kingdom / England          |
| EPI_ISL_596218 | 9/30/2020  | 10/26/2020 | Europe / United Kingdom / England          |
| EPI_ISL_596220 | 9/29/2020  | 10/26/2020 | Europe / United Kingdom / England          |
| EPI_ISL_596221 | 10/8/2020  | 10/26/2020 | Europe / United Kingdom / England          |
| EPI_ISL_596222 | 10/8/2020  | 10/26/2020 | Europe / United Kingdom / England          |
| EPI_ISL_596223 | 10/8/2020  | 10/26/2020 | Europe / United Kingdom / England          |
| EPI_ISL_596224 | 10/7/2020  | 10/26/2020 | Europe / United Kingdom / England          |
| EPI_ISL_596225 | 10/4/2020  | 10/26/2020 | Europe / United Kingdom / England          |
| EPI_ISL_596228 | 8/20/2020  | 10/26/2020 | Europe / Russia / Saint Petersburg         |
| EPI_ISL_596229 | 8/24/2020  | 10/26/2020 | Europe / Russia / Saint Petersburg         |
| EPI_ISL_596230 | 8/31/2020  | 10/26/2020 | Europe / Russia / Saint Petersburg         |
| EPI_ISL_596231 | 9/4/2020   | 10/26/2020 | Europe / Russia / Saint Petersburg         |
| EPI_ISL_596232 | 9/10/2020  | 10/26/2020 | Europe / Russia / Saint Petersburg         |
| EPI_ISL_596233 | 2020-09    | 10/26/2020 | Europe / Russia / Leningrad / Sosnovyi Bor |
| EPI_ISL_596234 | 2020-09    | 10/26/2020 | Europe / Russia / Leningrad / Sosnovyi Bor |
| EPI_ISL_596235 | 9/17/2020  | 10/26/2020 | Europe / Russia / Saint Petersburg         |

|                |           |            |                                             |
|----------------|-----------|------------|---------------------------------------------|
| EPI_ISL_596236 | 9/17/2020 | 10/26/2020 | Europe / Russia / Saint Petersburg          |
| EPI_ISL_596237 | 9/18/2020 | 10/26/2020 | Europe / Russia / Saint Petersburg          |
| EPI_ISL_596238 | 9/18/2020 | 10/26/2020 | Europe / Russia / Saint Petersburg          |
| EPI_ISL_596239 | 9/18/2020 | 10/26/2020 | Europe / Russia / Saint Petersburg          |
| EPI_ISL_596240 | 9/22/2020 | 10/26/2020 | Europe / Russia / Saint Petersburg          |
| EPI_ISL_596241 | 9/23/2020 | 10/26/2020 | Europe / Russia / Saint Petersburg          |
| EPI_ISL_596242 | 9/24/2020 | 10/26/2020 | Europe / Russia / Saint Petersburg          |
| EPI_ISL_596243 | 9/24/2020 | 10/26/2020 | Europe / Russia / Saint Petersburg          |
| EPI_ISL_596244 | 9/24/2020 | 10/26/2020 | Europe / Russia / Saint Petersburg          |
| EPI_ISL_596245 | 9/24/2020 | 10/26/2020 | Europe / Russia / Saint Petersburg          |
| EPI_ISL_596246 | 9/25/2020 | 10/26/2020 | Europe / Russia / Saint Petersburg          |
| EPI_ISL_596247 | 9/28/2020 | 10/26/2020 | Europe / Russia / Saint Petersburg          |
| EPI_ISL_596248 | 9/28/2020 | 10/26/2020 | Europe / Russia / Saint Petersburg          |
| EPI_ISL_596249 | 9/28/2020 | 10/26/2020 | Europe / Russia / Saint Petersburg          |
| EPI_ISL_596250 | 9/4/2020  | 10/26/2020 | Europe / Russia / Saint Petersburg          |
| EPI_ISL_596251 | 9/4/2020  | 10/26/2020 | Europe / Russia / Saint Petersburg          |
| EPI_ISL_596252 | 9/5/2020  | 10/26/2020 | Europe / Russia / Saint Petersburg          |
| EPI_ISL_596253 | 9/5/2020  | 10/26/2020 | Europe / Russia / Sverdlovsk / Revda        |
| EPI_ISL_596254 | 9/6/2020  | 10/26/2020 | Europe / Russia / Saint Petersburg          |
| EPI_ISL_596255 | 9/6/2020  | 10/26/2020 | Europe / Russia / Saint Petersburg          |
| EPI_ISL_596256 | 9/6/2020  | 10/26/2020 | Europe / Russia / Saint Petersburg          |
| EPI_ISL_596257 | 9/6/2020  | 10/26/2020 | Europe / Russia / Saint Petersburg          |
| EPI_ISL_596258 | 9/6/2020  | 10/26/2020 | Europe / Russia / Saint Petersburg          |
| EPI_ISL_596259 | 9/6/2020  | 10/26/2020 | Europe / Russia / Saint Petersburg          |
| EPI_ISL_596260 | 9/6/2020  | 10/26/2020 | Europe / Russia / Saint Petersburg          |
| EPI_ISL_596262 | 9/6/2020  | 10/26/2020 | Europe / Russia / Saint Petersburg          |
| EPI_ISL_596263 | 9/6/2020  | 10/26/2020 | Europe / Russia / Saint Petersburg          |
| EPI_ISL_596264 | 7/22/2020 | 10/26/2020 | Europe / Russia / Novosibirsk / Novosibirsk |
| EPI_ISL_596265 | 7/29/2020 | 10/26/2020 | Europe / Russia / Novosibirsk / Novosibirsk |
| EPI_ISL_596266 | 7/30/2020 | 10/26/2020 | Europe / Russia / Novosibirsk / Novosibirsk |
| EPI_ISL_596267 | 8/9/2020  | 10/26/2020 | Europe / Russia / Novosibirsk / Novosibirsk |
| EPI_ISL_596268 | 9/12/2020 | 10/26/2020 | Europe / Russia / Saint Petersburg          |
| EPI_ISL_596269 | 9/10/2020 | 10/26/2020 | Europe / Russia / Novgorod / Borovichi      |
| EPI_ISL_596270 | 9/3/2020  | 10/26/2020 | Europe / Russia / Sverdlovsk / Ekaterinburg |
| EPI_ISL_596271 | 9/7/2020  | 10/26/2020 | Europe / Russia / Sverdlovsk / Ekaterinburg |
| EPI_ISL_596272 | 9/11/2020 | 10/26/2020 | Europe / Russia / Sverdlovsk / Ekaterinburg |
| EPI_ISL_596273 | 9/10/2020 | 10/26/2020 | Europe / Russia / Sverdlovsk / Ekaterinburg |
| EPI_ISL_596274 | 9/12/2020 | 10/26/2020 | Europe / Russia / Sverdlovsk / Ekaterinburg |
| EPI_ISL_596275 | 9/6/2020  | 10/26/2020 | Europe / Russia / Sverdlovsk / Ekaterinburg |
| EPI_ISL_596276 | 9/6/2020  | 10/26/2020 | Europe / Russia / Sverdlovsk / Ekaterinburg |
| EPI_ISL_596277 | 9/8/2020  | 10/26/2020 | Europe / Russia / Sverdlovsk / Ekaterinburg |
| EPI_ISL_596278 | 9/8/2020  | 10/26/2020 | Europe / Russia / Sverdlovsk / Ekaterinburg |
| EPI_ISL_596279 | 9/8/2020  | 10/26/2020 | Europe / Russia / Sverdlovsk / Ekaterinburg |
| EPI_ISL_596280 | 9/13/2020 | 10/26/2020 | Europe / Russia / Saint Petersburg          |
| EPI_ISL_596281 | 9/11/2020 | 10/26/2020 | Europe / Russia / Saint Petersburg          |
| EPI_ISL_596282 | 9/11/2020 | 10/26/2020 | Europe / Russia / Saint Petersburg          |
| EPI_ISL_596283 | 9/8/2020  | 10/26/2020 | Europe / Russia / Saint Petersburg          |

|                |           |            |                                                     |
|----------------|-----------|------------|-----------------------------------------------------|
| EPI_ISL_596284 | 9/10/2020 | 10/26/2020 | Europe / Russia / Saint Petersburg                  |
| EPI_ISL_596285 | 9/11/2020 | 10/26/2020 | Europe / Russia / Saint Petersburg                  |
| EPI_ISL_596286 | 9/11/2020 | 10/26/2020 | Europe / Russia / Saint Petersburg                  |
| EPI_ISL_596288 | 9/11/2020 | 10/26/2020 | Europe / Russia / Saint Petersburg                  |
| EPI_ISL_596289 | 9/12/2020 | 10/26/2020 | Europe / Russia / Saint Petersburg                  |
| EPI_ISL_596291 | 9/12/2020 | 10/26/2020 | Europe / Russia / Saint Petersburg                  |
| EPI_ISL_596292 | 9/13/2020 | 10/26/2020 | Europe / Russia / Saint Petersburg                  |
| EPI_ISL_596293 | 9/10/2020 | 10/26/2020 | Europe / Russia / Saint Petersburg                  |
| EPI_ISL_596294 | 9/13/2020 | 10/26/2020 | Europe / Russia / Saint Petersburg                  |
| EPI_ISL_596295 | 9/8/2020  | 10/26/2020 | Europe / Russia / Sverdlovsk / Ekaterinburg         |
| EPI_ISL_596296 | 9/7/2020  | 10/26/2020 | Europe / Russia / Sverdlovsk / Ekaterinburg         |
| EPI_ISL_596297 | 9/7/2020  | 10/26/2020 | Europe / Russia / Saint Petersburg                  |
| EPI_ISL_596298 | 9/7/2020  | 10/26/2020 | Europe / Russia / Sverdlovsk / Nizhniy Tagil        |
| EPI_ISL_596299 | 9/8/2020  | 10/26/2020 | Europe / Russia / Sverdlovsk / Verkhny Tagil        |
| EPI_ISL_596300 | 9/8/2020  | 10/26/2020 | Europe / Russia / Sverdlovsk / Verkhny Tagil        |
| EPI_ISL_596301 | 9/7/2020  | 10/26/2020 | Europe / Russia / Saint Petersburg                  |
| EPI_ISL_596302 | 9/8/2020  | 10/26/2020 | Europe / Russia / Sverdlovsk / Revda                |
| EPI_ISL_596303 | 9/12/2020 | 10/26/2020 | Europe / Russia / Sverdlovsk / Revda                |
| EPI_ISL_596304 | 9/11/2020 | 10/26/2020 | Europe / Russia / Sverdlovsk / Kirovgrad            |
| EPI_ISL_596305 | 9/3/2020  | 10/26/2020 | Europe / Russia / Sverdlovsk / Ekaterinburg         |
| EPI_ISL_596306 | 9/3/2020  | 10/26/2020 | Europe / Russia / Sverdlovsk / Ekaterinburg         |
| EPI_ISL_596307 | 9/8/2020  | 10/26/2020 | Europe / Russia / Sverdlovsk / Shalya               |
| EPI_ISL_596308 | 9/9/2020  | 10/26/2020 | Europe / Russia / Sverdlovsk / Nizhniy Tagil        |
| EPI_ISL_596309 | 9/11/2020 | 10/26/2020 | Europe / Russia / Sverdlovsk / Ekaterinburg         |
| EPI_ISL_596310 | 9/6/2020  | 10/26/2020 | Europe / Russia / Perm / Perm                       |
| EPI_ISL_596311 | 9/3/2020  | 10/26/2020 | Europe / Russia / Khakassia / Abakan                |
| EPI_ISL_596312 | 9/3/2020  | 10/26/2020 | Europe / Russia / Khakassia / Abakan                |
| EPI_ISL_596313 | 9/2/2020  | 10/26/2020 | Europe / Russia / Nizhny Novgorod / Nizhny Novgorod |
| EPI_ISL_596314 | 9/4/2020  | 10/26/2020 | Europe / Russia / Nizhny Novgorod / Nizhny Novgorod |
| EPI_ISL_596315 | 9/9/2020  | 10/26/2020 | Europe / Russia / Adygea / Maykop                   |
| EPI_ISL_596316 | 9/4/2020  | 10/26/2020 | Europe / Russia / Krasnodar / Sochi                 |
| EPI_ISL_596317 | 9/3/2020  | 10/26/2020 | Europe / Russia / Kalmykia / Elista                 |
| EPI_ISL_596318 | 5/15/2020 | 10/26/2020 | Europe / Russia / Moscow                            |
| EPI_ISL_596319 | 5/18/2020 | 10/26/2020 | Europe / Russia / Moscow                            |
| EPI_ISL_596320 | 5/18/2020 | 10/26/2020 | Europe / Russia / Moscow                            |
| EPI_ISL_596321 | 5/20/2020 | 10/26/2020 | Europe / Russia / Moscow                            |
| EPI_ISL_596322 | 5/21/2020 | 10/26/2020 | Europe / Russia / Moscow                            |
| EPI_ISL_596323 | 5/28/2020 | 10/26/2020 | Europe / Russia / Moscow                            |
| EPI_ISL_596324 | 5/28/2020 | 10/26/2020 | Europe / Russia / Moscow                            |
| EPI_ISL_596325 | 5/28/2020 | 10/26/2020 | Europe / Russia / Moscow                            |
| EPI_ISL_596326 | 5/29/2020 | 10/26/2020 | Europe / Russia / Moscow                            |
| EPI_ISL_596327 | 5/30/2020 | 10/26/2020 | Europe / Russia / Moscow                            |
| EPI_ISL_596328 | 6/1/2020  | 10/26/2020 | Europe / Russia / Moscow                            |
| EPI_ISL_596329 | 6/1/2020  | 10/26/2020 | Europe / Russia / Moscow                            |
| EPI_ISL_596330 | 6/1/2020  | 10/26/2020 | Europe / Russia / Moscow                            |
| EPI_ISL_596331 | 6/1/2020  | 10/26/2020 | Europe / Russia / Moscow                            |
| EPI_ISL_596332 | 5/25/2020 | 10/26/2020 | Europe / Russia / Moscow                            |

|                |           |            |                                           |
|----------------|-----------|------------|-------------------------------------------|
| EPI_ISL_596333 | 5/25/2020 | 10/26/2020 | Europe / Russia / Moscow                  |
| EPI_ISL_596334 | 5/25/2020 | 10/26/2020 | Europe / Russia / Moscow                  |
| EPI_ISL_596335 | 5/25/2020 | 10/26/2020 | Europe / Russia / Moscow                  |
| EPI_ISL_596336 | 6/5/2020  | 10/26/2020 | Europe / Russia / Moscow                  |
| EPI_ISL_596337 | 6/5/2020  | 10/26/2020 | Europe / Russia / Moscow                  |
| EPI_ISL_596338 | 6/8/2020  | 10/26/2020 | Europe / Russia / Moscow                  |
| EPI_ISL_596339 | 6/6/2020  | 10/26/2020 | Europe / Russia / Moscow                  |
| EPI_ISL_596340 | 6/9/2020  | 10/26/2020 | Europe / Russia / Moscow                  |
| EPI_ISL_596341 | 6/10/2020 | 10/26/2020 | Europe / Russia / Moscow                  |
| EPI_ISL_596342 | 6/10/2020 | 10/26/2020 | Europe / Russia / Moscow                  |
| EPI_ISL_596343 | 6/11/2020 | 10/26/2020 | Europe / Russia / Moscow                  |
| EPI_ISL_596344 | 6/15/2020 | 10/26/2020 | Europe / Russia / Moscow                  |
| EPI_ISL_596345 | 6/19/2020 | 10/26/2020 | Europe / Russia / Moscow                  |
| EPI_ISL_596346 | 5/27/2020 | 10/26/2020 | Europe / Russia / Moscow                  |
| EPI_ISL_596347 | 5/25/2020 | 10/26/2020 | Europe / Russia / Moscow                  |
| EPI_ISL_596348 | 5/28/2020 | 10/26/2020 | Europe / Russia / Moscow                  |
| EPI_ISL_596349 | 5/15/2020 | 10/26/2020 | Europe / Russia / Moscow                  |
| EPI_ISL_596350 | 5/18/2020 | 10/26/2020 | Europe / Russia / Moscow                  |
| EPI_ISL_596351 | 6/5/2020  | 10/26/2020 | Europe / Russia / Moscow                  |
| EPI_ISL_596352 | 5/15/2020 | 10/26/2020 | Europe / Russia / Moscow                  |
| EPI_ISL_596353 | 8/6/2020  | 10/26/2020 | Europe / Russia / Primorsky / Vladivostok |
| EPI_ISL_596354 | 8/7/2020  | 10/26/2020 | Europe / Russia / Primorsky / Vladivostok |
| EPI_ISL_596355 | 8/7/2020  | 10/26/2020 | Europe / Russia / Primorsky / Vladivostok |
| EPI_ISL_596356 | 8/8/2020  | 10/26/2020 | Europe / Russia / Primorsky / Vladivostok |
| EPI_ISL_596357 | 9/6/2020  | 10/26/2020 | Europe / Russia / Saint Petersburg        |
| EPI_ISL_596358 | 9/6/2020  | 10/26/2020 | Europe / Russia / Saint Petersburg        |
| EPI_ISL_596359 | 9/6/2020  | 10/26/2020 | Europe / Russia / Saint Petersburg        |
| EPI_ISL_596360 | 9/6/2020  | 10/26/2020 | Europe / Russia / Saint Petersburg        |
| EPI_ISL_596361 | 9/4/2020  | 10/26/2020 | Europe / Russia / Saint Petersburg        |
| EPI_ISL_596362 | 9/3/2020  | 10/26/2020 | Europe / Russia / Saint Petersburg        |
| EPI_ISL_596363 | 9/3/2020  | 10/26/2020 | Europe / Russia / Saint Petersburg        |
| EPI_ISL_596364 | 9/3/2020  | 10/26/2020 | Europe / Russia / Saint Petersburg        |
| EPI_ISL_596365 | 9/3/2020  | 10/26/2020 | Europe / Russia / Saint Petersburg        |
| EPI_ISL_596366 | 9/3/2020  | 10/26/2020 | Europe / Russia / Saint Petersburg        |
| EPI_ISL_596367 | 9/4/2020  | 10/26/2020 | Europe / Russia / Saint Petersburg        |
| EPI_ISL_596368 | 9/4/2020  | 10/26/2020 | Europe / Russia / Saint Petersburg        |
| EPI_ISL_596369 | 9/4/2020  | 10/26/2020 | Europe / Russia / Saint Petersburg        |
| EPI_ISL_596370 | 9/4/2020  | 10/26/2020 | Europe / Russia / Saint Petersburg        |
| EPI_ISL_596371 | 9/4/2020  | 10/26/2020 | Europe / Russia / Saint Petersburg        |
| EPI_ISL_596372 | 9/4/2020  | 10/26/2020 | Europe / Russia / Saint Petersburg        |
| EPI_ISL_596373 | 9/4/2020  | 10/26/2020 | Europe / Russia / Saint Petersburg        |
| EPI_ISL_596374 | 9/3/2020  | 10/26/2020 | Europe / Russia / Saint Petersburg        |
| EPI_ISL_596375 | 9/5/2020  | 10/26/2020 | Europe / Russia / Saint Petersburg        |
| EPI_ISL_596376 | 9/5/2020  | 10/26/2020 | Europe / Russia / Saint Petersburg        |
| EPI_ISL_596377 | 9/5/2020  | 10/26/2020 | Europe / Russia / Saint Petersburg        |
| EPI_ISL_602559 | 6/25/2020 | 10/26/2020 | North America / USA / Alaska              |
| EPI_ISL_602560 | 6/25/2020 | 10/26/2020 | North America / USA / Alaska              |

|                |           |            |                                                |
|----------------|-----------|------------|------------------------------------------------|
| EPI_ISL_602561 | 7/2/2020  | 10/26/2020 | North America / USA / Alaska                   |
| EPI_ISL_596388 | 9/11/2020 | 10/27/2020 | North America / USA / Washington / King County |
| EPI_ISL_596389 | 9/16/2020 | 10/27/2020 | North America / USA / Washington / King County |
| EPI_ISL_596391 | 9/17/2020 | 10/27/2020 | North America / USA / Washington / King County |
| EPI_ISL_596394 | 9/18/2020 | 10/27/2020 | North America / USA / Washington / King County |
| EPI_ISL_596395 | 9/19/2020 | 10/27/2020 | North America / USA / Washington / King County |
| EPI_ISL_596396 | 9/19/2020 | 10/27/2020 | North America / USA / Washington / King County |
| EPI_ISL_596397 | 9/20/2020 | 10/27/2020 | North America / USA / Washington / King County |
| EPI_ISL_596398 | 9/20/2020 | 10/27/2020 | North America / USA / Washington / King County |
| EPI_ISL_596400 | 9/21/2020 | 10/27/2020 | North America / USA / Washington / King County |
| EPI_ISL_596402 | 9/22/2020 | 10/27/2020 | North America / USA / Washington / King County |
| EPI_ISL_596403 | 9/22/2020 | 10/27/2020 | North America / USA / Washington / King County |
| EPI_ISL_596405 | 9/22/2020 | 10/27/2020 | North America / USA / Washington / King County |
| EPI_ISL_596406 | 9/22/2020 | 10/27/2020 | North America / USA / Washington / King County |
| EPI_ISL_596407 | 9/24/2020 | 10/27/2020 | North America / USA / Washington / King County |
| EPI_ISL_596410 | 9/27/2020 | 10/27/2020 | North America / USA / Washington               |
| EPI_ISL_596415 | 9/24/2020 | 10/27/2020 | North America / USA / Washington / King County |
| EPI_ISL_596417 | 9/29/2020 | 10/27/2020 | North America / USA / Washington / King County |
| EPI_ISL_596418 | 9/29/2020 | 10/27/2020 | North America / USA / Washington / King County |
| EPI_ISL_596419 | 10/1/2020 | 10/27/2020 | North America / USA / Washington / King County |
| EPI_ISL_596420 | 10/1/2020 | 10/27/2020 | North America / USA / Washington / King County |
| EPI_ISL_596422 | 10/1/2020 | 10/27/2020 | North America / USA / Washington / King County |
| EPI_ISL_596423 | 10/1/2020 | 10/27/2020 | North America / USA / Washington / King County |
| EPI_ISL_596426 | 10/1/2020 | 10/27/2020 | North America / USA / Washington / King County |
| EPI_ISL_596427 | 10/1/2020 | 10/27/2020 | North America / USA / Washington / King County |
| EPI_ISL_596430 | 10/2/2020 | 10/27/2020 | North America / USA / Washington / King County |
| EPI_ISL_596431 | 10/2/2020 | 10/27/2020 | North America / USA / Washington / King County |
| EPI_ISL_596435 | 10/4/2020 | 10/27/2020 | North America / USA / Washington / King County |
| EPI_ISL_596436 | 10/4/2020 | 10/27/2020 | North America / USA / Washington / King County |
| EPI_ISL_596440 | 10/5/2020 | 10/27/2020 | North America / USA / Washington / King County |
| EPI_ISL_596442 | 10/5/2020 | 10/27/2020 | North America / USA / Washington / King County |
| EPI_ISL_596444 | 10/5/2020 | 10/27/2020 | North America / USA / Washington / King County |
| EPI_ISL_596445 | 10/5/2020 | 10/27/2020 | North America / USA / Washington / King County |
| EPI_ISL_596446 | 10/4/2020 | 10/27/2020 | North America / USA / Washington / King County |
| EPI_ISL_596447 | 4/7/2020  | 10/27/2020 | North America / USA / New Mexico               |
| EPI_ISL_596448 | 4/7/2020  | 10/27/2020 | North America / USA / New Mexico               |
| EPI_ISL_596449 | 7/27/2020 | 10/27/2020 | Asia / Malaysia                                |
| EPI_ISL_596451 | 6/16/2020 | 10/27/2020 | Asia / Iran / Tehran                           |
| EPI_ISL_596453 | 3/2/2020  | 10/27/2020 | Asia / Iran / Qom                              |
| EPI_ISL_596454 | 3/8/2020  | 10/27/2020 | Asia / Iran / Zahedan                          |
| EPI_ISL_596455 | 6/11/2020 | 10/27/2020 | Asia / Iran / Tehran                           |
| EPI_ISL_596456 | 10/3/2020 | 10/27/2020 | Asia / Singapore                               |
| EPI_ISL_596457 | 10/3/2020 | 10/27/2020 | Asia / Singapore                               |
| EPI_ISL_596458 | 10/5/2020 | 10/27/2020 | Asia / Singapore                               |
| EPI_ISL_596459 | 10/5/2020 | 10/27/2020 | Asia / Singapore                               |
| EPI_ISL_596460 | 10/5/2020 | 10/27/2020 | Asia / Singapore                               |
| EPI_ISL_596461 | 10/2/2020 | 10/27/2020 | Asia / Singapore                               |

|                |            |                                         |
|----------------|------------|-----------------------------------------|
| EPI_ISL_596462 | 10/5/2020  | 10/27/2020 Asia / Singapore             |
| EPI_ISL_596463 | 9/30/2020  | 10/27/2020 Asia / Singapore             |
| EPI_ISL_596464 | 10/6/2020  | 10/27/2020 Asia / Singapore             |
| EPI_ISL_596465 | 4/8/2020   | 10/27/2020 Asia / Singapore             |
| EPI_ISL_596466 | 10/5/2020  | 10/27/2020 Asia / Singapore             |
| EPI_ISL_596467 | 10/5/2020  | 10/27/2020 Asia / Singapore             |
| EPI_ISL_596468 | 9/26/2020  | 10/27/2020 Asia / Singapore             |
| EPI_ISL_596469 | 10/5/2020  | 10/27/2020 Asia / Singapore             |
| EPI_ISL_596470 | 9/22/2020  | 10/27/2020 Asia / Singapore             |
| EPI_ISL_596471 | 10/6/2020  | 10/27/2020 Asia / Singapore             |
| EPI_ISL_596472 | 4/9/2020   | 10/27/2020 Asia / Singapore             |
| EPI_ISL_596473 | 10/2/2020  | 10/27/2020 Asia / Singapore             |
| EPI_ISL_596474 | 9/21/2020  | 10/27/2020 Asia / Singapore             |
| EPI_ISL_596475 | 9/21/2020  | 10/27/2020 Asia / Singapore             |
| EPI_ISL_596476 | 8/5/2020   | 10/27/2020 Asia / Singapore             |
| EPI_ISL_596477 | 9/25/2020  | 10/27/2020 Asia / Singapore             |
| EPI_ISL_596478 | 10/6/2020  | 10/27/2020 Asia / Singapore             |
| EPI_ISL_596479 | 9/21/2020  | 10/27/2020 Asia / Singapore             |
| EPI_ISL_596480 | 10/2/2020  | 10/27/2020 Asia / Singapore             |
| EPI_ISL_596481 | 9/26/2020  | 10/27/2020 Asia / Singapore             |
| EPI_ISL_596482 | 10/5/2020  | 10/27/2020 Asia / Singapore             |
| EPI_ISL_596483 | 10/10/2020 | 10/27/2020 Asia / Singapore             |
| EPI_ISL_596485 | 10/10/2020 | 10/27/2020 Asia / Singapore             |
| EPI_ISL_596486 | 10/14/2020 | 10/27/2020 Asia / Singapore             |
| EPI_ISL_596487 | 10/14/2020 | 10/27/2020 Asia / Singapore             |
| EPI_ISL_596488 | 10/15/2020 | 10/27/2020 Asia / Singapore             |
| EPI_ISL_596489 | 10/16/2020 | 10/27/2020 Asia / Singapore             |
| EPI_ISL_596490 | 10/10/2020 | 10/27/2020 Asia / Singapore             |
| EPI_ISL_596491 | 10/16/2020 | 10/27/2020 Asia / Singapore             |
| EPI_ISL_596492 | 10/8/2020  | 10/27/2020 Asia / Singapore             |
| EPI_ISL_596493 | 10/14/2020 | 10/27/2020 Asia / Singapore             |
| EPI_ISL_596494 | 10/14/2020 | 10/27/2020 Asia / Singapore             |
| EPI_ISL_596495 | 10/14/2020 | 10/27/2020 Asia / Singapore             |
| EPI_ISL_596496 | 10/6/2020  | 10/27/2020 Asia / Singapore             |
| EPI_ISL_596500 | 7/16/2020  | 10/27/2020 Asia / Palestine / Jerusalem |
| EPI_ISL_596501 | 7/16/2020  | 10/27/2020 Asia / Palestine / Jerusalem |
| EPI_ISL_596502 | 3/4/2020   | 10/27/2020 Asia / Palestine / Bethlehem |
| EPI_ISL_596503 | 3/10/2020  | 10/27/2020 Asia / Palestine / Bethlehem |
| EPI_ISL_596504 | 3/7/2020   | 10/27/2020 Asia / Palestine / Bethlehem |
| EPI_ISL_596506 | 3/16/2020  | 10/27/2020 Asia / Palestine / Bethlehem |
| EPI_ISL_596507 | 7/15/2020  | 10/27/2020 Asia / Palestine / Ramallah  |
| EPI_ISL_596508 | 3/19/2020  | 10/27/2020 Asia / Palestine / Ramallah  |
| EPI_ISL_596509 | 3/21/2020  | 10/27/2020 Asia / Palestine / Bethlehem |
| EPI_ISL_596510 | 3/22/2020  | 10/27/2020 Asia / Palestine / Ramallah  |
| EPI_ISL_596511 | 3/22/2020  | 10/27/2020 Asia / Palestine / Ramallah  |
| EPI_ISL_596512 | 3/29/2020  | 10/27/2020 Asia / Palestine / Ramallah  |
| EPI_ISL_596513 | 3/31/2020  | 10/27/2020 Asia / Palestine / Bethlehem |



|                |           |                                         |
|----------------|-----------|-----------------------------------------|
| EPI_ISL_596514 | 7/15/2020 | 10/27/2020 Asia / Palestine / Ramallah  |
| EPI_ISL_596515 | 3/31/2020 | 10/27/2020 Asia / Palestine / Bethlehem |
| EPI_ISL_596516 | 3/31/2020 | 10/27/2020 Asia / Palestine / Jerusalem |
| EPI_ISL_596517 | 3/31/2020 | 10/27/2020 Asia / Palestine / Ramallah  |
| EPI_ISL_596518 | 3/31/2020 | 10/27/2020 Asia / Palestine / Jerusalem |
| EPI_ISL_596520 | 7/27/2020 | 10/27/2020 Asia / Palestine / Ramallah  |
| EPI_ISL_596521 | 7/27/2020 | 10/27/2020 Asia / Palestine / Hebron    |
| EPI_ISL_596523 | 8/15/2020 | 10/27/2020 Asia / Palestine / Jerusalem |
| EPI_ISL_596525 | 8/17/2020 | 10/27/2020 Asia / Palestine / Jerusalem |
| EPI_ISL_596526 | 8/17/2020 | 10/27/2020 Asia / Palestine / Jerusalem |
| EPI_ISL_596527 | 8/17/2020 | 10/27/2020 Asia / Palestine / Jerusalem |
| EPI_ISL_596528 | 8/17/2020 | 10/27/2020 Asia / Palestine / Jerusalem |
| EPI_ISL_596529 | 8/17/2020 | 10/27/2020 Asia / Palestine / Jerusalem |
| EPI_ISL_596530 | 8/17/2020 | 10/27/2020 Asia / Palestine / Jerusalem |
| EPI_ISL_596531 | 8/18/2020 | 10/27/2020 Asia / Palestine / Jericho   |
| EPI_ISL_596532 | 8/18/2020 | 10/27/2020 Asia / Palestine / Jericho   |
| EPI_ISL_596533 | 7/17/2020 | 10/27/2020 Asia / Palestine / Jerusalem |
| EPI_ISL_596534 | 8/18/2020 | 10/27/2020 Asia / Palestine / Jericho   |
| EPI_ISL_596535 | 8/19/2020 | 10/27/2020 Asia / Palestine / Jerusalem |
| EPI_ISL_596536 | 8/19/2020 | 10/27/2020 Asia / Palestine / Ramallah  |
| EPI_ISL_596537 | 8/19/2020 | 10/27/2020 Asia / Palestine / Ramallah  |
| EPI_ISL_596538 | 8/19/2020 | 10/27/2020 Asia / Palestine / Jerusalem |
| EPI_ISL_596539 | 2020-03   | 10/27/2020 Asia / Palestine / Ramallah  |
| EPI_ISL_596540 | 2020-03   | 10/27/2020 Asia / Palestine / Jenin     |
| EPI_ISL_596541 | 2020-03   | 10/27/2020 Asia / Palestine / Jenin     |
| EPI_ISL_596542 | 6/25/2020 | 10/27/2020 Asia / Palestine / Nablus    |
| EPI_ISL_596543 | 6/23/2020 | 10/27/2020 Asia / Palestine / Nablus    |
| EPI_ISL_596544 | 7/9/2020  | 10/27/2020 Asia / Palestine / Nablus    |
| EPI_ISL_596545 | 6/28/2020 | 10/27/2020 Asia / Palestine / Nablus    |
| EPI_ISL_596547 | 7/10/2020 | 10/27/2020 Asia / Palestine / Nablus    |
| EPI_ISL_596548 | 6/26/2020 | 10/27/2020 Asia / Palestine / Nablus    |
| EPI_ISL_596549 | 6/28/2020 | 10/27/2020 Asia / Palestine / Nablus    |
| EPI_ISL_596550 | 6/27/2020 | 10/27/2020 Asia / Palestine / Nablus    |
| EPI_ISL_596551 | 7/10/2020 | 10/27/2020 Asia / Palestine / Nablus    |
| EPI_ISL_596552 | 6/26/2020 | 10/27/2020 Asia / Palestine / Nablus    |
| EPI_ISL_596553 | 6/26/2020 | 10/27/2020 Asia / Palestine / Nablus    |
| EPI_ISL_596554 | 6/27/2020 | 10/27/2020 Asia / Palestine / Nablus    |
| EPI_ISL_596555 | 7/17/2020 | 10/27/2020 Asia / Palestine / Jerusalem |
| EPI_ISL_596556 | 7/9/2020  | 10/27/2020 Asia / Palestine / Nablus    |
| EPI_ISL_596557 | 7/5/2020  | 10/27/2020 Asia / Palestine / Hebron    |
| EPI_ISL_596558 | 6/22/2020 | 10/27/2020 Asia / Palestine / Hebron    |
| EPI_ISL_596559 | 6/22/2020 | 10/27/2020 Asia / Palestine / Hebron    |
| EPI_ISL_596560 | 6/22/2020 | 10/27/2020 Asia / Palestine / Hebron    |
| EPI_ISL_596561 | 6/22/2020 | 10/27/2020 Asia / Palestine / Hebron    |
| EPI_ISL_596562 | 6/25/2020 | 10/27/2020 Asia / Palestine / Nablus    |
| EPI_ISL_596563 | 6/22/2020 | 10/27/2020 Asia / Palestine / Hebron    |
| EPI_ISL_596564 | 7/11/2020 | 10/27/2020 Asia / Palestine / Nablus    |

|                |            |            |                                |
|----------------|------------|------------|--------------------------------|
| EPI_ISL_596565 | 7/11/2020  | 10/27/2020 | Asia / Palestine / Nablus      |
| EPI_ISL_596566 | 2020-07    | 10/27/2020 | Asia / Palestine / Ramallah    |
| EPI_ISL_596567 | 7/17/2020  | 10/27/2020 | Asia / Palestine / Jerusalem   |
| EPI_ISL_596569 | 8/31/2020  | 10/27/2020 | North America / USA / Michigan |
| EPI_ISL_596570 | 10/5/2020  | 10/27/2020 | North America / USA / Michigan |
| EPI_ISL_596571 | 10/5/2020  | 10/27/2020 | North America / USA / Michigan |
| EPI_ISL_596572 | 10/1/2020  | 10/27/2020 | North America / USA / Michigan |
| EPI_ISL_596574 | 10/2/2020  | 10/27/2020 | North America / USA / Michigan |
| EPI_ISL_596576 | 10/2/2020  | 10/27/2020 | North America / USA / Michigan |
| EPI_ISL_596577 | 10/2/2020  | 10/27/2020 | North America / USA / Michigan |
| EPI_ISL_596578 | 10/5/2020  | 10/27/2020 | North America / USA / Michigan |
| EPI_ISL_596579 | 10/2/2020  | 10/27/2020 | North America / USA / Michigan |
| EPI_ISL_596580 | 10/5/2020  | 10/27/2020 | North America / USA / Michigan |
| EPI_ISL_596582 | 10/2/2020  | 10/27/2020 | North America / USA / Michigan |
| EPI_ISL_596583 | 10/5/2020  | 10/27/2020 | North America / USA / Michigan |
| EPI_ISL_596584 | 10/7/2020  | 10/27/2020 | North America / USA / Michigan |
| EPI_ISL_596585 | 10/6/2020  | 10/27/2020 | North America / USA / Michigan |
| EPI_ISL_596586 | 10/6/2020  | 10/27/2020 | North America / USA / Michigan |
| EPI_ISL_596588 | 10/5/2020  | 10/27/2020 | North America / USA / Michigan |
| EPI_ISL_596589 | 10/6/2020  | 10/27/2020 | North America / USA / Michigan |
| EPI_ISL_596593 | 10/5/2020  | 10/27/2020 | North America / USA / Michigan |
| EPI_ISL_596594 | 10/7/2020  | 10/27/2020 | North America / USA / Michigan |
| EPI_ISL_596596 | 10/6/2020  | 10/27/2020 | North America / USA / Michigan |
| EPI_ISL_596597 | 10/5/2020  | 10/27/2020 | North America / USA / Michigan |
| EPI_ISL_596598 | 10/6/2020  | 10/27/2020 | North America / USA / Michigan |
| EPI_ISL_596599 | 10/6/2020  | 10/27/2020 | North America / USA / Michigan |
| EPI_ISL_596601 | 10/7/2020  | 10/27/2020 | North America / USA / Michigan |
| EPI_ISL_596602 | 10/5/2020  | 10/27/2020 | North America / USA / Michigan |
| EPI_ISL_596603 | 10/6/2020  | 10/27/2020 | North America / USA / Michigan |
| EPI_ISL_596604 | 10/6/2020  | 10/27/2020 | North America / USA / Michigan |
| EPI_ISL_596605 | 10/6/2020  | 10/27/2020 | North America / USA / Michigan |
| EPI_ISL_596607 | 10/6/2020  | 10/27/2020 | North America / USA / Michigan |
| EPI_ISL_596608 | 10/5/2020  | 10/27/2020 | North America / USA / Michigan |
| EPI_ISL_596609 | 10/7/2020  | 10/27/2020 | North America / USA / Michigan |
| EPI_ISL_596610 | 10/6/2020  | 10/27/2020 | North America / USA / Michigan |
| EPI_ISL_596611 | 10/9/2020  | 10/27/2020 | North America / USA / Michigan |
| EPI_ISL_596612 | 10/9/2020  | 10/27/2020 | North America / USA / Michigan |
| EPI_ISL_596614 | 10/7/2020  | 10/27/2020 | North America / USA / Michigan |
| EPI_ISL_596615 | 10/7/2020  | 10/27/2020 | North America / USA / Michigan |
| EPI_ISL_596616 | 10/9/2020  | 10/27/2020 | North America / USA / Michigan |
| EPI_ISL_596617 | 10/8/2020  | 10/27/2020 | North America / USA / Michigan |
| EPI_ISL_596618 | 10/9/2020  | 10/27/2020 | North America / USA / Michigan |
| EPI_ISL_596619 | 10/9/2020  | 10/27/2020 | North America / USA / Michigan |
| EPI_ISL_596620 | 10/9/2020  | 10/27/2020 | North America / USA / Michigan |
| EPI_ISL_596621 | 10/10/2020 | 10/27/2020 | North America / USA / Michigan |
| EPI_ISL_596626 | 10/13/2020 | 10/27/2020 | North America / USA / Michigan |
| EPI_ISL_596628 | 4/29/2020  | 10/27/2020 | Europe / Ireland / Dublin      |

|                |           |            |                                         |
|----------------|-----------|------------|-----------------------------------------|
| EPI_ISL_596629 | 4/27/2020 | 10/27/2020 | Europe / Ireland / Dublin               |
| EPI_ISL_596630 | 4/28/2020 | 10/27/2020 | Europe / Ireland / Dublin               |
| EPI_ISL_596631 | 4/29/2020 | 10/27/2020 | Europe / Ireland / Dublin               |
| EPI_ISL_596632 | 4/29/2020 | 10/27/2020 | Europe / Ireland / Dublin               |
| EPI_ISL_596636 | 4/29/2020 | 10/27/2020 | Europe / Ireland / Dublin               |
| EPI_ISL_596637 | 4/29/2020 | 10/27/2020 | Europe / Ireland / Dublin               |
| EPI_ISL_596639 | 4/27/2020 | 10/27/2020 | Europe / Ireland / Dublin               |
| EPI_ISL_596640 | 4/29/2020 | 10/27/2020 | Europe / Ireland / Dublin               |
| EPI_ISL_596645 | 4/3/2020  | 10/27/2020 | Europe / Ireland / Dublin               |
| EPI_ISL_596646 | 3/29/2020 | 10/27/2020 | Europe / Ireland / Dublin               |
| EPI_ISL_596648 | 3/24/2020 | 10/27/2020 | Europe / Ireland / Dublin               |
| EPI_ISL_596650 | 4/4/2020  | 10/27/2020 | Europe / Ireland / Dublin               |
| EPI_ISL_596651 | 4/9/2020  | 10/27/2020 | Europe / Ireland / Dublin               |
| EPI_ISL_596652 | 4/9/2020  | 10/27/2020 | Europe / Ireland / Dublin               |
| EPI_ISL_596653 | 3/27/2020 | 10/27/2020 | Europe / Ireland / Dublin               |
| EPI_ISL_596654 | 4/3/2020  | 10/27/2020 | Europe / Ireland / Dublin               |
| EPI_ISL_596655 | 4/8/2020  | 10/27/2020 | Europe / Ireland / Dublin               |
| EPI_ISL_596659 | 4/5/2020  | 10/27/2020 | Europe / Ireland / Dublin               |
| EPI_ISL_596660 | 4/6/2020  | 10/27/2020 | Europe / Ireland / Dublin               |
| EPI_ISL_596661 | 4/6/2020  | 10/27/2020 | Europe / Ireland / Dublin               |
| EPI_ISL_596663 | 4/11/2020 | 10/27/2020 | Europe / Ireland / Dublin               |
| EPI_ISL_596664 | 4/5/2020  | 10/27/2020 | Europe / Ireland / Dublin               |
| EPI_ISL_596665 | 3/31/2020 | 10/27/2020 | Europe / Ireland / Dublin               |
| EPI_ISL_596666 | 4/7/2020  | 10/27/2020 | Europe / Ireland / Dublin               |
| EPI_ISL_596668 | 3/27/2020 | 10/27/2020 | Europe / Ireland / Dublin               |
| EPI_ISL_596669 | 4/3/2020  | 10/27/2020 | Europe / Ireland / Dublin               |
| EPI_ISL_596673 | 4/4/2020  | 10/27/2020 | Europe / Ireland / Dublin               |
| EPI_ISL_596674 | 4/5/2020  | 10/27/2020 | Europe / Ireland / Dublin               |
| EPI_ISL_596675 | 3/31/2020 | 10/27/2020 | Europe / Ireland / Dublin               |
| EPI_ISL_596676 | 4/29/2020 | 10/27/2020 | Europe / Ireland / Dublin               |
| EPI_ISL_596677 | 3/31/2020 | 10/27/2020 | Oceania / Australia / Western Australia |
| EPI_ISL_596678 | 4/7/2020  | 10/27/2020 | Oceania / Australia / Western Australia |
| EPI_ISL_596679 | 3/28/2020 | 10/27/2020 | Oceania / Australia / Western Australia |
| EPI_ISL_596680 | 4/7/2020  | 10/27/2020 | Oceania / Australia / Western Australia |
| EPI_ISL_596681 | 4/15/2020 | 10/27/2020 | Oceania / Australia / Western Australia |
| EPI_ISL_596682 | 3/28/2020 | 10/27/2020 | Oceania / Australia / Western Australia |
| EPI_ISL_596683 | 4/6/2020  | 10/27/2020 | Oceania / Australia / Western Australia |
| EPI_ISL_596684 | 4/1/2020  | 10/27/2020 | Oceania / Australia / Western Australia |
| EPI_ISL_596685 | 3/25/2020 | 10/27/2020 | Oceania / Australia / Western Australia |
| EPI_ISL_596686 | 3/28/2020 | 10/27/2020 | Oceania / Australia / Western Australia |
| EPI_ISL_596687 | 3/28/2020 | 10/27/2020 | Oceania / Australia / Western Australia |
| EPI_ISL_596688 | 3/28/2020 | 10/27/2020 | Oceania / Australia / Western Australia |
| EPI_ISL_596689 | 3/26/2020 | 10/27/2020 | Oceania / Australia / Western Australia |
| EPI_ISL_596690 | 4/10/2020 | 10/27/2020 | Oceania / Australia / Western Australia |
| EPI_ISL_596691 | 8/26/2020 | 10/27/2020 | Oceania / Australia / Western Australia |
| EPI_ISL_596692 | 4/2/2020  | 10/27/2020 | Oceania / Australia / Western Australia |
| EPI_ISL_596693 | 3/26/2020 | 10/27/2020 | Oceania / Australia / Western Australia |

|                |           |            |                                         |
|----------------|-----------|------------|-----------------------------------------|
| EPI_ISL_596694 | 8/26/2020 | 10/27/2020 | Oceania / Australia / Western Australia |
| EPI_ISL_596695 | 3/25/2020 | 10/27/2020 | Oceania / Australia / Western Australia |
| EPI_ISL_596696 | 4/2/2020  | 10/27/2020 | Oceania / Australia / Western Australia |
| EPI_ISL_596697 | 3/23/2020 | 10/27/2020 | Oceania / Australia / Western Australia |
| EPI_ISL_596698 | 5/28/2020 | 10/27/2020 | Oceania / Australia / Western Australia |
| EPI_ISL_596699 | 8/11/2020 | 10/27/2020 | Oceania / Australia / Western Australia |
| EPI_ISL_596700 | 3/23/2020 | 10/27/2020 | Oceania / Australia / Western Australia |
| EPI_ISL_596701 | 3/27/2020 | 10/27/2020 | Oceania / Australia / Western Australia |
| EPI_ISL_596702 | 9/5/2020  | 10/27/2020 | Oceania / Australia / Western Australia |
| EPI_ISL_596703 | 8/22/2020 | 10/27/2020 | Oceania / Australia / Western Australia |
| EPI_ISL_596704 | 4/13/2020 | 10/27/2020 | Oceania / Australia / Western Australia |
| EPI_ISL_596705 | 3/27/2020 | 10/27/2020 | Oceania / Australia / Western Australia |
| EPI_ISL_596706 | 3/22/2020 | 10/27/2020 | Oceania / Australia / Western Australia |
| EPI_ISL_596707 | 4/1/2020  | 10/27/2020 | Oceania / Australia / Western Australia |
| EPI_ISL_596708 | 7/12/2020 | 10/27/2020 | Oceania / Australia / Western Australia |
| EPI_ISL_596709 | 3/28/2020 | 10/27/2020 | Oceania / Australia / Western Australia |
| EPI_ISL_596710 | 3/27/2020 | 10/27/2020 | Oceania / Australia / Western Australia |
| EPI_ISL_596711 | 3/28/2020 | 10/27/2020 | Oceania / Australia / Western Australia |
| EPI_ISL_596712 | 7/11/2020 | 10/27/2020 | Oceania / Australia / Western Australia |
| EPI_ISL_596713 | 4/9/2020  | 10/27/2020 | Oceania / Australia / Western Australia |
| EPI_ISL_596819 | 10/7/2020 | 10/27/2020 | Oceania / Australia / Western Australia |
| EPI_ISL_596820 | 3/23/2020 | 10/27/2020 | Oceania / Australia / Western Australia |
| EPI_ISL_596821 | 10/2/2020 | 10/27/2020 | Oceania / Australia / Western Australia |
| EPI_ISL_596822 | 3/25/2020 | 10/27/2020 | Oceania / Australia / Western Australia |
| EPI_ISL_596823 | 3/7/2020  | 10/27/2020 | Oceania / Australia / Western Australia |
| EPI_ISL_596824 | 3/17/2020 | 10/27/2020 | Oceania / Australia / Western Australia |
| EPI_ISL_596825 | 4/1/2020  | 10/27/2020 | Oceania / Australia / Western Australia |
| EPI_ISL_596826 | 4/3/2020  | 10/27/2020 | Oceania / Australia / Western Australia |
| EPI_ISL_596827 | 3/17/2020 | 10/27/2020 | Oceania / Australia / Western Australia |
| EPI_ISL_596828 | 4/7/2020  | 10/27/2020 | Oceania / Australia / Western Australia |
| EPI_ISL_596829 | 3/17/2020 | 10/27/2020 | Oceania / Australia / Western Australia |
| EPI_ISL_596830 | 3/26/2020 | 10/27/2020 | Oceania / Australia / Western Australia |
| EPI_ISL_596832 | 4/6/2020  | 10/27/2020 | Oceania / Australia / Western Australia |
| EPI_ISL_596833 | 4/4/2020  | 10/27/2020 | Oceania / Australia / Western Australia |
| EPI_ISL_596834 | 3/23/2020 | 10/27/2020 | Oceania / Australia / Western Australia |
| EPI_ISL_596835 | 3/26/2020 | 10/27/2020 | Oceania / Australia / Western Australia |
| EPI_ISL_596836 | 3/21/2020 | 10/27/2020 | Oceania / Australia / Western Australia |
| EPI_ISL_596837 | 4/4/2020  | 10/27/2020 | Oceania / Australia / Western Australia |
| EPI_ISL_596838 | 4/8/2020  | 10/27/2020 | Oceania / Australia / Western Australia |
| EPI_ISL_596839 | 3/22/2020 | 10/27/2020 | Oceania / Australia / Western Australia |
| EPI_ISL_596840 | 4/9/2020  | 10/27/2020 | Oceania / Australia / Western Australia |
| EPI_ISL_596841 | 4/10/2020 | 10/27/2020 | Oceania / Australia / Western Australia |
| EPI_ISL_596842 | 10/6/2020 | 10/27/2020 | Oceania / Australia / Western Australia |
| EPI_ISL_596843 | 4/4/2020  | 10/27/2020 | Oceania / Australia / Western Australia |
| EPI_ISL_596844 | 4/5/2020  | 10/27/2020 | Oceania / Australia / Western Australia |
| EPI_ISL_596845 | 3/12/2020 | 10/27/2020 | Oceania / Australia / Western Australia |
| EPI_ISL_596846 | 3/17/2020 | 10/27/2020 | Oceania / Australia / Western Australia |

|                |           |                                                    |
|----------------|-----------|----------------------------------------------------|
| EPI_ISL_596847 | 3/15/2020 | 10/27/2020 Oceania / Australia / Western Australia |
| EPI_ISL_596848 | 3/25/2020 | 10/27/2020 Oceania / Australia / Western Australia |
| EPI_ISL_596849 | 4/1/2020  | 10/27/2020 Oceania / Australia / Western Australia |
| EPI_ISL_596850 | 3/9/2020  | 10/27/2020 Oceania / Australia / Western Australia |
| EPI_ISL_596851 | 4/3/2020  | 10/27/2020 Oceania / Australia / Western Australia |
| EPI_ISL_596852 | 4/1/2020  | 10/27/2020 Oceania / Australia / Western Australia |
| EPI_ISL_596853 | 3/9/2020  | 10/27/2020 Oceania / Australia / Western Australia |
| EPI_ISL_596854 | 3/17/2020 | 10/27/2020 Oceania / Australia / Western Australia |
| EPI_ISL_596855 | 3/26/2020 | 10/27/2020 Oceania / Australia / Western Australia |
| EPI_ISL_596856 | 3/22/2020 | 10/27/2020 Oceania / Australia / Western Australia |
| EPI_ISL_596857 | 4/9/2020  | 10/27/2020 Oceania / Australia / Western Australia |
| EPI_ISL_596858 | 3/27/2020 | 10/27/2020 Oceania / Australia / Western Australia |
| EPI_ISL_596859 | 3/3/2020  | 10/27/2020 Oceania / Australia / Western Australia |
| EPI_ISL_596860 | 3/22/2020 | 10/27/2020 Oceania / Australia / Western Australia |
| EPI_ISL_596861 | 4/10/2020 | 10/27/2020 Oceania / Australia / Western Australia |
| EPI_ISL_596862 | 4/9/2020  | 10/27/2020 Oceania / Australia / Western Australia |
| EPI_ISL_596889 | 9/8/2020  | 10/27/2020 Europe / Ireland / Offaly               |
| EPI_ISL_596890 | 9/11/2020 | 10/27/2020 Europe / Ireland / Kildare              |
| EPI_ISL_596891 | 9/8/2020  | 10/27/2020 Europe / Ireland / Limerick             |
| EPI_ISL_596893 | 9/12/2020 | 10/27/2020 Europe / Ireland / Dublin               |
| EPI_ISL_596894 | 9/8/2020  | 10/27/2020 Europe / Ireland / Dublin               |
| EPI_ISL_596895 | 9/10/2020 | 10/27/2020 Europe / Ireland / Kildare              |
| EPI_ISL_596896 | 9/9/2020  | 10/27/2020 Europe / Ireland / Offaly               |
| EPI_ISL_596897 | 9/15/2020 | 10/27/2020 Europe / Ireland / Dublin               |
| EPI_ISL_596898 | 9/10/2020 | 10/27/2020 Europe / Ireland / Wexford              |
| EPI_ISL_596899 | 9/15/2020 | 10/27/2020 Europe / Ireland / Dublin               |
| EPI_ISL_596900 | 9/15/2020 | 10/27/2020 Europe / Ireland / Dublin               |
| EPI_ISL_596901 | 9/15/2020 | 10/27/2020 Europe / Ireland / Dublin               |
| EPI_ISL_596902 | 9/15/2020 | 10/27/2020 Europe / Ireland / Dublin               |
| EPI_ISL_596903 | 9/8/2020  | 10/27/2020 Europe / Ireland / Dublin               |
| EPI_ISL_596904 | 9/15/2020 | 10/27/2020 Europe / Ireland / Dublin               |
| EPI_ISL_596905 | 9/9/2020  | 10/27/2020 Europe / Ireland / Tipperary            |
| EPI_ISL_596906 | 9/8/2020  | 10/27/2020 Europe / Ireland / Dublin               |
| EPI_ISL_596907 | 9/9/2020  | 10/27/2020 Europe / Ireland / Louth                |
| EPI_ISL_596908 | 9/9/2020  | 10/27/2020 Europe / Ireland / Louth                |
| EPI_ISL_596909 | 9/15/2020 | 10/27/2020 Europe / Ireland / Dublin               |
| EPI_ISL_596910 | 9/15/2020 | 10/27/2020 Europe / Ireland / Kerry                |
| EPI_ISL_596911 | 9/15/2020 | 10/27/2020 Europe / Ireland / Dublin               |
| EPI_ISL_596912 | 9/15/2020 | 10/27/2020 Europe / Ireland / Limerick             |
| EPI_ISL_596913 | 9/15/2020 | 10/27/2020 Europe / Ireland / Dublin               |
| EPI_ISL_596914 | 9/16/2020 | 10/27/2020 Europe / Ireland / Dublin               |
| EPI_ISL_596915 | 9/16/2020 | 10/27/2020 Europe / Ireland / Dublin               |
| EPI_ISL_596917 | 9/15/2020 | 10/27/2020 Europe / Ireland / Dublin               |
| EPI_ISL_596918 | 9/15/2020 | 10/27/2020 Europe / Ireland / Kildare              |
| EPI_ISL_596919 | 9/16/2020 | 10/27/2020 Europe / Ireland / Dublin               |
| EPI_ISL_596920 | 9/16/2020 | 10/27/2020 Europe / Ireland / Dublin               |
| EPI_ISL_596921 | 9/15/2020 | 10/27/2020 Europe / Ireland / Dublin               |

































































































































































































































|                |           |            |                                                       |
|----------------|-----------|------------|-------------------------------------------------------|
| EPI_ISL_602200 | 8/24/2020 | 10/27/2020 | North America / USA / New Mexico                      |
| EPI_ISL_602201 | 8/24/2020 | 10/27/2020 | North America / USA / New Mexico                      |
| EPI_ISL_602202 | 8/24/2020 | 10/27/2020 | North America / USA / New Mexico                      |
| EPI_ISL_602203 | 8/25/2020 | 10/27/2020 | North America / USA / New Mexico                      |
| EPI_ISL_602204 | 8/24/2020 | 10/27/2020 | North America / USA / New Mexico                      |
| EPI_ISL_602205 | 8/24/2020 | 10/27/2020 | North America / USA / New Mexico                      |
| EPI_ISL_602206 | 8/21/2020 | 10/27/2020 | North America / USA / New Mexico                      |
| EPI_ISL_602207 | 8/25/2020 | 10/27/2020 | North America / USA / New Mexico                      |
| EPI_ISL_602208 | 4/7/2020  | 10/27/2020 | North America / USA / New Mexico                      |
| EPI_ISL_602209 | 4/7/2020  | 10/27/2020 | North America / USA / New Mexico                      |
| EPI_ISL_602226 | 6/15/2020 | 10/27/2020 | North America / USA / Texas / Harris County           |
| EPI_ISL_602258 | 9/27/2020 | 10/27/2020 | North America / USA / Maryland                        |
| EPI_ISL_602259 | 9/27/2020 | 10/27/2020 | North America / USA / Maryland                        |
| EPI_ISL_602260 | 9/29/2020 | 10/27/2020 | North America / USA / Maryland                        |
| EPI_ISL_602262 | 9/29/2020 | 10/27/2020 | North America / USA / Maryland                        |
| EPI_ISL_602263 | 10/1/2020 | 10/27/2020 | North America / USA / Maryland                        |
| EPI_ISL_602264 | 10/2/2020 | 10/27/2020 | North America / USA / Maryland                        |
| EPI_ISL_602265 | 10/2/2020 | 10/27/2020 | North America / USA / Maryland                        |
| EPI_ISL_602266 | 10/3/2020 | 10/27/2020 | North America / USA / Maryland                        |
| EPI_ISL_602267 | 10/2/2020 | 10/27/2020 | North America / USA / Maryland                        |
| EPI_ISL_602268 | 10/2/2020 | 10/27/2020 | North America / USA / Maryland                        |
| EPI_ISL_602269 | 10/2/2020 | 10/27/2020 | North America / USA / Maryland                        |
| EPI_ISL_602270 | 10/2/2020 | 10/27/2020 | North America / USA / Maryland                        |
| EPI_ISL_602271 | 10/3/2020 | 10/27/2020 | North America / USA / Maryland                        |
| EPI_ISL_602272 | 10/3/2020 | 10/27/2020 | North America / USA / Maryland                        |
| EPI_ISL_602273 | 10/5/2020 | 10/27/2020 | North America / USA / Maryland                        |
| EPI_ISL_602274 | 10/5/2020 | 10/27/2020 | North America / USA / Maryland                        |
| EPI_ISL_602275 | 10/5/2020 | 10/27/2020 | North America / USA / Maryland                        |
| EPI_ISL_602276 | 10/5/2020 | 10/27/2020 | North America / USA / Maryland                        |
| EPI_ISL_602277 | 10/5/2020 | 10/27/2020 | North America / USA / Maryland                        |
| EPI_ISL_602278 | 4/7/2020  | 10/27/2020 | North America / USA / New Mexico                      |
| EPI_ISL_603050 | 3/14/2020 | 10/27/2020 | North America / USA / Utah                            |
| EPI_ISL_603051 | 3/11/2020 | 10/27/2020 | North America / USA / Utah                            |
| EPI_ISL_603052 | 3/11/2020 | 10/27/2020 | North America / USA / Utah                            |
| EPI_ISL_602279 | 4/7/2020  | 10/28/2020 | North America / USA / New Mexico                      |
| EPI_ISL_602280 | 4/7/2020  | 10/28/2020 | North America / USA / New Mexico                      |
| EPI_ISL_602281 | 4/7/2020  | 10/28/2020 | North America / USA / New Mexico                      |
| EPI_ISL_602282 | 3/31/2020 | 10/28/2020 | Europe / Germany / North Rhine-Westphalia / Bielefeld |
| EPI_ISL_602283 | 4/1/2020  | 10/28/2020 | Europe / Germany / North Rhine-Westphalia / Bielefeld |
| EPI_ISL_602284 | 3/26/2020 | 10/28/2020 | Europe / Germany / North Rhine-Westphalia / Bielefeld |
| EPI_ISL_602285 | 4/2/2020  | 10/28/2020 | Europe / Germany / North Rhine-Westphalia / Bielefeld |
| EPI_ISL_602286 | 4/9/2020  | 10/28/2020 | Europe / Germany / North Rhine-Westphalia / Bielefeld |
| EPI_ISL_602287 | 4/1/2020  | 10/28/2020 | Europe / Germany / North Rhine-Westphalia / Bielefeld |
| EPI_ISL_602288 | 4/3/2020  | 10/28/2020 | Europe / Germany / North Rhine-Westphalia / Bielefeld |
| EPI_ISL_602289 | 4/3/2020  | 10/28/2020 | Europe / Germany / North Rhine-Westphalia / Bielefeld |
| EPI_ISL_602290 | 3/27/2020 | 10/28/2020 | Europe / Germany / North Rhine-Westphalia / Bielefeld |
| EPI_ISL_602291 | 4/3/2020  | 10/28/2020 | Europe / Germany / North Rhine-Westphalia / Bielefeld |

|                |           |            |                                                       |
|----------------|-----------|------------|-------------------------------------------------------|
| EPI_ISL_602292 | 3/27/2020 | 10/28/2020 | Europe / Germany / North Rhine-Westphalia / Bielefeld |
| EPI_ISL_602293 | 4/6/2020  | 10/28/2020 | Europe / Germany / North Rhine-Westphalia / Bielefeld |
| EPI_ISL_602294 | 4/14/2020 | 10/28/2020 | Europe / Germany / North Rhine-Westphalia / Bielefeld |
| EPI_ISL_602295 | 4/15/2020 | 10/28/2020 | Europe / Germany / North Rhine-Westphalia / Bielefeld |
| EPI_ISL_602296 | 4/14/2020 | 10/28/2020 | Europe / Germany / North Rhine-Westphalia / Bielefeld |
| EPI_ISL_602297 | 4/8/2020  | 10/28/2020 | Europe / Germany / North Rhine-Westphalia / Bielefeld |
| EPI_ISL_602298 | 4/17/2020 | 10/28/2020 | Europe / Germany / North Rhine-Westphalia / Bielefeld |
| EPI_ISL_602299 | 4/8/2020  | 10/28/2020 | Europe / Germany / North Rhine-Westphalia / Bielefeld |
| EPI_ISL_602300 | 4/2/2020  | 10/28/2020 | Europe / Germany / North Rhine-Westphalia / Bielefeld |
| EPI_ISL_602301 | 4/3/2020  | 10/28/2020 | Europe / Germany / North Rhine-Westphalia / Bielefeld |
| EPI_ISL_602302 | 4/7/2020  | 10/28/2020 | Europe / Germany / North Rhine-Westphalia / Bielefeld |
| EPI_ISL_602303 | 6/20/2020 | 10/28/2020 | Europe / Germany / North Rhine-Westphalia / Bielefeld |
| EPI_ISL_602304 | 10/1/2020 | 10/28/2020 | Europe / Italy / Campania                             |
| EPI_ISL_602306 | 8/31/2020 | 10/28/2020 | North America / USA / Florida / Miami-Dade County     |
| EPI_ISL_602307 | 8/3/2020  | 10/28/2020 | North America / USA / Florida / Miami-Dade County     |
| EPI_ISL_602308 | 8/3/2020  | 10/28/2020 | North America / USA / Florida / Miami-Dade County     |
| EPI_ISL_602309 | 8/14/2020 | 10/28/2020 | North America / USA / Florida / Miami-Dade County     |
| EPI_ISL_602310 | 8/2/2020  | 10/28/2020 | North America / USA / Florida / Miami-Dade County     |
| EPI_ISL_602311 | 8/18/2020 | 10/28/2020 | North America / USA / Florida / Miami-Dade County     |
| EPI_ISL_602312 | 8/2/2020  | 10/28/2020 | North America / USA / Florida / Miami-Dade County     |
| EPI_ISL_602313 | 8/28/2020 | 10/28/2020 | North America / USA / Florida / Miami-Dade County     |
| EPI_ISL_602314 | 8/12/2020 | 10/28/2020 | North America / USA / Florida / Miami-Dade County     |
| EPI_ISL_602315 | 8/5/2020  | 10/28/2020 | North America / USA / Florida / Miami-Dade County     |
| EPI_ISL_602316 | 8/2/2020  | 10/28/2020 | North America / USA / Florida / Miami-Dade County     |
| EPI_ISL_602317 | 8/3/2020  | 10/28/2020 | North America / USA / Florida / Miami-Dade County     |
| EPI_ISL_602318 | 7/29/2020 | 10/28/2020 | North America / USA / Florida / Miami-Dade County     |
| EPI_ISL_602319 | 8/9/2020  | 10/28/2020 | North America / USA / Florida / Miami-Dade County     |
| EPI_ISL_602320 | 8/31/2020 | 10/28/2020 | North America / USA / Florida / Miami-Dade County     |
| EPI_ISL_602322 | 8/5/2020  | 10/28/2020 | North America / USA / Florida / Miami-Dade County     |
| EPI_ISL_602323 | 8/12/2020 | 10/28/2020 | North America / USA / Florida / Miami-Dade County     |
| EPI_ISL_602324 | 8/12/2020 | 10/28/2020 | North America / USA / Puerto Rico / Ponce             |
| EPI_ISL_602325 | 8/3/2020  | 10/28/2020 | North America / USA / Puerto Rico / Ponce             |
| EPI_ISL_602326 | 8/2/2020  | 10/28/2020 | North America / USA / Puerto Rico / Ponce             |
| EPI_ISL_602327 | 8/3/2020  | 10/28/2020 | North America / USA / Puerto Rico / Ponce             |
| EPI_ISL_602328 | 8/1/2020  | 10/28/2020 | North America / USA / Puerto Rico / Ponce             |
| EPI_ISL_602329 | 9/5/2020  | 10/28/2020 | Europe / Russia / Saint Petersburg                    |
| EPI_ISL_602330 | 9/6/2020  | 10/28/2020 | Europe / Russia / Saint Petersburg                    |
| EPI_ISL_602331 | 9/6/2020  | 10/28/2020 | Europe / Russia / Sverdlovsk / Ekaterinburg           |
| EPI_ISL_602332 | 9/8/2020  | 10/28/2020 | Europe / Russia / Sverdlovsk / Ekaterinburg           |
| EPI_ISL_602333 | 9/8/2020  | 10/28/2020 | Europe / Russia / Sverdlovsk / Ekaterinburg           |
| EPI_ISL_602334 | 9/8/2020  | 10/28/2020 | Europe / Russia / Sverdlovsk / Ekaterinburg           |
| EPI_ISL_602335 | 9/8/2020  | 10/28/2020 | Europe / Russia / Sverdlovsk / Ekaterinburg           |
| EPI_ISL_602336 | 9/12/2020 | 10/28/2020 | Europe / Russia / Saint Petersburg                    |
| EPI_ISL_602337 | 9/13/2020 | 10/28/2020 | Europe / Russia / Saint Petersburg                    |
| EPI_ISL_602338 | 9/11/2020 | 10/28/2020 | Europe / Russia / Saint Petersburg                    |
| EPI_ISL_602339 | 9/12/2020 | 10/28/2020 | Europe / Russia / Saint Petersburg                    |
| EPI_ISL_602340 | 9/13/2020 | 10/28/2020 | Europe / Russia / Saint Petersburg                    |

|                |           |            |                                                  |
|----------------|-----------|------------|--------------------------------------------------|
| EPI_ISL_602341 | 9/9/2020  | 10/28/2020 | Europe / Russia / Saint Petersburg               |
| EPI_ISL_602342 | 9/13/2020 | 10/28/2020 | Europe / Russia / Sverdlovsk / Zarechny          |
| EPI_ISL_602343 | 9/20/2020 | 10/28/2020 | Europe / Russia / Sverdlovsk / Ekaterinburg      |
| EPI_ISL_602344 | 9/17/2020 | 10/28/2020 | Europe / Russia / Murmansk / Murmansk            |
| EPI_ISL_602345 | 9/17/2020 | 10/28/2020 | Europe / Russia / Murmansk / Murmansk            |
| EPI_ISL_602346 | 9/18/2020 | 10/28/2020 | Europe / Russia / Novgorod / Veliky Novgorod     |
| EPI_ISL_602347 | 9/19/2020 | 10/28/2020 | Europe / Russia / Novgorod / Veliky Novgorod     |
| EPI_ISL_602348 | 9/17/2020 | 10/28/2020 | Europe / Russia / Sverdlovsk / Ekaterinburg      |
| EPI_ISL_602349 | 9/17/2020 | 10/28/2020 | Europe / Russia / Sverdlovsk / Ekaterinburg      |
| EPI_ISL_602350 | 9/17/2020 | 10/28/2020 | Europe / Russia / Sverdlovsk / Ekaterinburg      |
| EPI_ISL_602351 | 9/17/2020 | 10/28/2020 | Europe / Russia / Sverdlovsk / Ekaterinburg      |
| EPI_ISL_602352 | 9/17/2020 | 10/28/2020 | Europe / Russia / Sverdlovsk / Ekaterinburg      |
| EPI_ISL_602353 | 9/17/2020 | 10/28/2020 | Europe / Russia / Sverdlovsk / Ekaterinburg      |
| EPI_ISL_602354 | 9/19/2020 | 10/28/2020 | Europe / Russia / Sverdlovsk / Ekaterinburg      |
| EPI_ISL_602355 | 9/19/2020 | 10/28/2020 | Europe / Russia / Sverdlovsk / Ekaterinburg      |
| EPI_ISL_602356 | 9/19/2020 | 10/28/2020 | Europe / Russia / Sverdlovsk / Ekaterinburg      |
| EPI_ISL_602357 | 9/18/2020 | 10/28/2020 | Europe / Russia / Sverdlovsk / Ekaterinburg      |
| EPI_ISL_602358 | 9/18/2020 | 10/28/2020 | Europe / Russia / Sverdlovsk / Ekaterinburg      |
| EPI_ISL_602359 | 9/18/2020 | 10/28/2020 | Europe / Russia / Sverdlovsk / Ekaterinburg      |
| EPI_ISL_602360 | 9/17/2020 | 10/28/2020 | Europe / Russia / Sverdlovsk / Ekaterinburg      |
| EPI_ISL_602361 | 9/16/2020 | 10/28/2020 | Europe / Russia / Sverdlovsk / Ekaterinburg      |
| EPI_ISL_602362 | 9/17/2020 | 10/28/2020 | Europe / Russia / Sverdlovsk / Ekaterinburg      |
| EPI_ISL_602363 | 9/12/2020 | 10/28/2020 | Europe / Russia / Sverdlovsk / Ekaterinburg      |
| EPI_ISL_602364 | 9/11/2020 | 10/28/2020 | Europe / Russia / Khanty-Mansi / Khanty-Mansiysk |
| EPI_ISL_602365 | 9/16/2020 | 10/28/2020 | Europe / Russia / Perm / Perm                    |
| EPI_ISL_602366 | 9/17/2020 | 10/28/2020 | Europe / Russia / Sverdlovsk / Pervouralsk       |
| EPI_ISL_602367 | 9/16/2020 | 10/28/2020 | Europe / Russia / Sverdlovsk / Revda             |
| EPI_ISL_602368 | 9/17/2020 | 10/28/2020 | Europe / Russia / Sverdlovsk / Nizhny Tagil      |
| EPI_ISL_602369 | 9/17/2020 | 10/28/2020 | Europe / Russia / Sverdlovsk / Nizhny Tagil      |
| EPI_ISL_602370 | 9/17/2020 | 10/28/2020 | Europe / Russia / Sverdlovsk / Nizhny Tagil      |
| EPI_ISL_602371 | 9/17/2020 | 10/28/2020 | Europe / Russia / Sverdlovsk / Krasnouralsk      |
| EPI_ISL_602372 | 9/16/2020 | 10/28/2020 | Europe / Russia / Sverdlovsk / Nizhny Tagil      |
| EPI_ISL_602373 | 9/19/2020 | 10/28/2020 | Europe / Russia / Sverdlovsk / Krasnouralsk      |
| EPI_ISL_602374 | 9/17/2020 | 10/28/2020 | Europe / Russia / Sverdlovsk / Kachkanar         |
| EPI_ISL_602375 | 9/16/2020 | 10/28/2020 | Europe / Russia / Perm / Perm                    |
| EPI_ISL_602376 | 9/16/2020 | 10/28/2020 | Europe / Russia / Perm / Perm                    |
| EPI_ISL_602377 | 9/23/2020 | 10/28/2020 | Europe / Russia / Pskov / Velikiye Luki          |
| EPI_ISL_602378 | 9/24/2020 | 10/28/2020 | Europe / Russia / Pskov / Velikiye Luki          |
| EPI_ISL_602379 | 9/26/2020 | 10/28/2020 | Europe / Russia / Novgorod / Veliky Novgorod     |
| EPI_ISL_602380 | 9/24/2020 | 10/28/2020 | Europe / Russia / Leningrad / Vsevolozhsk        |
| EPI_ISL_602381 | 9/18/2020 | 10/28/2020 | Europe / Russia / Sverdlovsk / Ekaterinburg      |
| EPI_ISL_602382 | 9/18/2020 | 10/28/2020 | Europe / Russia / Sverdlovsk / Ekaterinburg      |
| EPI_ISL_602383 | 9/20/2020 | 10/28/2020 | Europe / Russia / Sverdlovsk / Ekaterinburg      |
| EPI_ISL_602384 | 9/20/2020 | 10/28/2020 | Europe / Russia / Sverdlovsk / Ekaterinburg      |
| EPI_ISL_602385 | 9/21/2020 | 10/28/2020 | Europe / Russia / Sverdlovsk / Ekaterinburg      |
| EPI_ISL_602386 | 9/21/2020 | 10/28/2020 | Europe / Russia / Sverdlovsk / Ekaterinburg      |
| EPI_ISL_602387 | 9/21/2020 | 10/28/2020 | Europe / Russia / Sverdlovsk / Ekaterinburg      |

|                |           |            |                                                      |
|----------------|-----------|------------|------------------------------------------------------|
| EPI_ISL_602388 | 9/21/2020 | 10/28/2020 | Europe / Russia / Sverdlovsk / Ekaterinburg          |
| EPI_ISL_602389 | 9/18/2020 | 10/28/2020 | Europe / Russia / Leningrad / Kirishi                |
| EPI_ISL_602390 | 9/28/2020 | 10/28/2020 | Europe / Russia / Leningrad / Kirovsk                |
| EPI_ISL_602391 | 9/24/2020 | 10/28/2020 | Europe / Russia / Moscow                             |
| EPI_ISL_602392 | 9/24/2020 | 10/28/2020 | Europe / Russia / Moscow                             |
| EPI_ISL_602393 | 9/24/2020 | 10/28/2020 | Europe / Russia / Moscow                             |
| EPI_ISL_602394 | 9/25/2020 | 10/28/2020 | Europe / Russia / Moscow                             |
| EPI_ISL_602395 | 9/25/2020 | 10/28/2020 | Europe / Russia / Moscow                             |
| EPI_ISL_602396 | 9/25/2020 | 10/28/2020 | Europe / Russia / Moscow                             |
| EPI_ISL_602397 | 9/21/2020 | 10/28/2020 | Europe / Russia / Murmansk / Murmansk                |
| EPI_ISL_602398 | 9/23/2020 | 10/28/2020 | Europe / Russia / Murmansk / Murmansk                |
| EPI_ISL_602399 | 9/24/2020 | 10/28/2020 | Europe / Russia / Murmansk / Murmansk                |
| EPI_ISL_602400 | 9/24/2020 | 10/28/2020 | Europe / Russia / Murmansk / Murmansk                |
| EPI_ISL_602401 | 9/21/2020 | 10/28/2020 | Europe / Russia / Sverdlovsk / Nizhny Tagil          |
| EPI_ISL_602402 | 9/21/2020 | 10/28/2020 | Europe / Russia / Sverdlovsk / Nizhny Tagil          |
| EPI_ISL_602403 | 9/22/2020 | 10/28/2020 | Europe / Russia / Sverdlovsk / Nizhny Tagil          |
| EPI_ISL_602404 | 9/16/2020 | 10/28/2020 | Europe / Russia / Perm / Perm                        |
| EPI_ISL_602405 | 9/25/2020 | 10/28/2020 | Europe / Russia / Karelia / Petrozavodsk             |
| EPI_ISL_602406 | 9/22/2020 | 10/28/2020 | Europe / Russia / Murmansk / Severomorsk             |
| EPI_ISL_602407 | 9/25/2020 | 10/28/2020 | Europe / Russia / Murmansk / Severomorsk             |
| EPI_ISL_602408 | 9/25/2020 | 10/28/2020 | Europe / Russia / Murmansk / Severomorsk             |
| EPI_ISL_602409 | 9/21/2020 | 10/28/2020 | Europe / Russia / Komi / Ukhta                       |
| EPI_ISL_602410 | 9/20/2020 | 10/28/2020 | Europe / Russia / Leningrad / Yanino                 |
| EPI_ISL_602411 | 9/22/2020 | 10/28/2020 | Europe / Russia / Saint Petersburg                   |
| EPI_ISL_602412 | 2020      | 10/28/2020 | Europe / Russia / Chechen / Grozny                   |
| EPI_ISL_602413 | 9/11/2020 | 10/28/2020 | Europe / Russia / Chechen / Grozny                   |
| EPI_ISL_602414 | 9/11/2020 | 10/28/2020 | Europe / Russia / Chechen / Grozny                   |
| EPI_ISL_602415 | 9/11/2020 | 10/28/2020 | Europe / Russia / Chechen / Grozny                   |
| EPI_ISL_602416 | 9/11/2020 | 10/28/2020 | Europe / Russia / Chechen / Grozny                   |
| EPI_ISL_602417 | 9/17/2020 | 10/28/2020 | Europe / Russia / Adygea / Maykop                    |
| EPI_ISL_602418 | 9/17/2020 | 10/28/2020 | Europe / Russia / Dagestan / Mahachkala              |
| EPI_ISL_602419 | 9/26/2020 | 10/28/2020 | Europe / Russia / Dagestan / Derbent                 |
| EPI_ISL_602420 | 9/23/2020 | 10/28/2020 | Europe / Russia / Dagestan / Mahachkala              |
| EPI_ISL_602421 | 9/25/2020 | 10/28/2020 | Europe / Russia / Dagestan / Mahachkala              |
| EPI_ISL_602422 | 9/25/2020 | 10/28/2020 | Europe / Russia / Dagestan / Mahachkala              |
| EPI_ISL_602423 | 9/21/2020 | 10/28/2020 | Europe / Russia / Ingushetia / Nazran                |
| EPI_ISL_602424 | 9/17/2020 | 10/28/2020 | Europe / Russia / Karachay-Cherkess / Cherkessk      |
| EPI_ISL_602425 | 9/19/2020 | 10/28/2020 | Europe / Russia / Karachay-Cherkess / Cherkessk      |
| EPI_ISL_602426 | 9/21/2020 | 10/28/2020 | Europe / Russia / Karachay-Cherkess / Zelenchukskaya |
| EPI_ISL_602427 | 9/17/2020 | 10/28/2020 | Europe / Russia / Karachay-Cherkess / Cherkessk      |
| EPI_ISL_602428 | 9/17/2020 | 10/28/2020 | Europe / Russia / Karachay-Cherkess / Karachaevsk    |
| EPI_ISL_602429 | 9/17/2020 | 10/28/2020 | Europe / Russia / Komi / Sosnogorsk                  |
| EPI_ISL_602430 | 9/23/2020 | 10/28/2020 | Europe / Russia / Mari El / Kozmodemyansk            |
| EPI_ISL_602431 | 9/25/2020 | 10/28/2020 | Europe / Russia / Khakassia / Abakan                 |
| EPI_ISL_602432 | 9/25/2020 | 10/28/2020 | Europe / Russia / Khakassia / Abakan                 |
| EPI_ISL_602433 | 9/18/2020 | 10/28/2020 | Europe / Russia / Khakassia / Abakan                 |
| EPI_ISL_602434 | 9/22/2020 | 10/28/2020 | Europe / Russia / Altai K / Barnaul                  |

|                |           |            |                                                   |
|----------------|-----------|------------|---------------------------------------------------|
| EPI_ISL_602435 | 9/26/2020 | 10/28/2020 | Europe / Russia / Altai K / Barnaul               |
| EPI_ISL_602436 | 9/25/2020 | 10/28/2020 | Europe / Russia / Altai K / Barnaul               |
| EPI_ISL_602437 | 9/26/2020 | 10/28/2020 | Europe / Russia / Altai K / Barnaul               |
| EPI_ISL_602438 | 9/22/2020 | 10/28/2020 | Europe / Russia / Krasnodar / Krasnodar           |
| EPI_ISL_602439 | 9/21/2020 | 10/28/2020 | Europe / Russia / Krasnodar / Anapa               |
| EPI_ISL_602440 | 9/23/2020 | 10/28/2020 | Europe / Russia / Krasnodar / Krasnodar           |
| EPI_ISL_602441 | 9/23/2020 | 10/28/2020 | Europe / Russia / Krasnodar / Anapa               |
| EPI_ISL_602442 | 9/17/2020 | 10/28/2020 | Europe / Russia / Krasnodar / Anapa               |
| EPI_ISL_602443 | 9/17/2020 | 10/28/2020 | Europe / Russia / Krasnodar / Krasnodar           |
| EPI_ISL_602444 | 9/20/2020 | 10/28/2020 | Europe / Russia / Krasnodar / Krasnodar           |
| EPI_ISL_602445 | 9/21/2020 | 10/28/2020 | Europe / Russia / Stavropol / Stavropol           |
| EPI_ISL_602446 | 9/23/2020 | 10/28/2020 | Europe / Russia / Stavropol / Yessentuki          |
| EPI_ISL_602447 | 9/23/2020 | 10/28/2020 | Europe / Russia / Stavropol / Stavropol           |
| EPI_ISL_602448 | 9/28/2020 | 10/28/2020 | Europe / Russia / Stavropol / Yessentuki          |
| EPI_ISL_602449 | 9/19/2020 | 10/28/2020 | Europe / Russia / Stavropol / Stavropol           |
| EPI_ISL_602450 | 9/20/2020 | 10/28/2020 | Europe / Russia / Stavropol / Yessentuki          |
| EPI_ISL_602451 | 9/19/2020 | 10/28/2020 | Europe / Russia / Stavropol / Stavropol           |
| EPI_ISL_602452 | 9/19/2020 | 10/28/2020 | Europe / Russia / Stavropol / Stavropol           |
| EPI_ISL_602453 | 9/17/2020 | 10/28/2020 | Europe / Russia / Bryansk / Bryansk               |
| EPI_ISL_602454 | 9/26/2020 | 10/28/2020 | Europe / Russia / Voronezh / Voronezh             |
| EPI_ISL_602455 | 9/28/2020 | 10/28/2020 | Europe / Russia / Voronezh / Voronezh             |
| EPI_ISL_602456 | 9/23/2020 | 10/28/2020 | Europe / Russia / Ivanovo / Ivanovo               |
| EPI_ISL_602457 | 9/16/2020 | 10/28/2020 | Europe / Russia / Kaluga / Tovarkovo              |
| EPI_ISL_602458 | 9/25/2020 | 10/28/2020 | Europe / Russia / Kemerovo / Kemerovo             |
| EPI_ISL_602459 | 9/20/2020 | 10/28/2020 | Europe / Russia / Moscow Region / Lapino          |
| EPI_ISL_602460 | 9/17/2020 | 10/28/2020 | Europe / Russia / Moscow Region / Uvarovka        |
| EPI_ISL_602461 | 9/23/2020 | 10/28/2020 | Europe / Russia / Moscow Region / Bronnitsy       |
| EPI_ISL_602463 | 3/29/2020 | 10/28/2020 | Europe / Germany / North Rhine-Westphalia / Essen |
| EPI_ISL_602464 | 3/29/2020 | 10/28/2020 | Europe / Germany / North Rhine-Westphalia / Essen |
| EPI_ISL_602465 | 3/29/2020 | 10/28/2020 | Europe / Germany / North Rhine-Westphalia / Essen |
| EPI_ISL_602466 | 3/30/2020 | 10/28/2020 | Europe / Germany / North Rhine-Westphalia / Essen |
| EPI_ISL_602467 | 3/31/2020 | 10/28/2020 | Europe / Germany / North Rhine-Westphalia / Essen |
| EPI_ISL_602468 | 4/2/2020  | 10/28/2020 | Europe / Germany / North Rhine-Westphalia / Essen |
| EPI_ISL_602469 | 4/2/2020  | 10/28/2020 | Europe / Germany / North Rhine-Westphalia / Essen |
| EPI_ISL_602470 | 4/4/2020  | 10/28/2020 | Europe / Germany / North Rhine-Westphalia / Essen |
| EPI_ISL_602471 | 4/4/2020  | 10/28/2020 | Europe / Germany / North Rhine-Westphalia / Essen |
| EPI_ISL_602472 | 4/4/2020  | 10/28/2020 | Europe / Germany / North Rhine-Westphalia / Essen |
| EPI_ISL_602473 | 4/5/2020  | 10/28/2020 | Europe / Germany / North Rhine-Westphalia / Essen |
| EPI_ISL_602474 | 4/5/2020  | 10/28/2020 | Europe / Germany / North Rhine-Westphalia / Essen |
| EPI_ISL_602475 | 4/5/2020  | 10/28/2020 | Europe / Germany / North Rhine-Westphalia / Essen |
| EPI_ISL_602476 | 4/6/2020  | 10/28/2020 | Europe / Germany / North Rhine-Westphalia / Essen |
| EPI_ISL_602477 | 4/7/2020  | 10/28/2020 | Europe / Germany / North Rhine-Westphalia / Essen |
| EPI_ISL_602478 | 4/7/2020  | 10/28/2020 | Europe / Germany / North Rhine-Westphalia / Essen |
| EPI_ISL_602479 | 4/8/2020  | 10/28/2020 | Europe / Germany / North Rhine-Westphalia / Essen |
| EPI_ISL_602480 | 4/9/2020  | 10/28/2020 | Europe / Germany / North Rhine-Westphalia / Essen |
| EPI_ISL_602481 | 4/11/2020 | 10/28/2020 | Europe / Germany / North Rhine-Westphalia / Essen |
| EPI_ISL_602482 | 4/12/2020 | 10/28/2020 | Europe / Germany / North Rhine-Westphalia / Essen |



|                |            |                                       |
|----------------|------------|---------------------------------------|
| EPI_ISL_610172 | 3/20/2020  | 10/28/2020 Asia / Hong Kong           |
| EPI_ISL_610173 | 3/26/2020  | 10/28/2020 Asia / Hong Kong           |
| EPI_ISL_610174 | 3/29/2020  | 10/28/2020 Asia / Hong Kong           |
| EPI_ISL_610175 | 3/26/2020  | 10/28/2020 Asia / Hong Kong           |
| EPI_ISL_610177 | 3/29/2020  | 10/28/2020 Asia / Hong Kong           |
| EPI_ISL_610179 | 7/9/2020   | 10/28/2020 Asia / Hong Kong           |
| EPI_ISL_610180 | 7/9/2020   | 10/28/2020 Asia / Hong Kong           |
| EPI_ISL_610181 | 7/8/2020   | 10/28/2020 Asia / Hong Kong           |
| EPI_ISL_610182 | 7/12/2020  | 10/28/2020 Asia / Hong Kong           |
| EPI_ISL_610183 | 7/12/2020  | 10/28/2020 Asia / Hong Kong           |
| EPI_ISL_610184 | 7/14/2020  | 10/28/2020 Asia / Hong Kong           |
| EPI_ISL_610185 | 7/7/2020   | 10/28/2020 Asia / Hong Kong           |
| EPI_ISL_610186 | 7/9/2020   | 10/28/2020 Asia / Hong Kong           |
| EPI_ISL_610187 | 7/10/2020  | 10/28/2020 Asia / Hong Kong           |
| EPI_ISL_610188 | 7/11/2020  | 10/28/2020 Asia / Hong Kong           |
| EPI_ISL_610189 | 7/12/2020  | 10/28/2020 Asia / Hong Kong           |
| EPI_ISL_610190 | 7/14/2020  | 10/28/2020 Asia / Hong Kong           |
| EPI_ISL_610191 | 7/12/2020  | 10/28/2020 Asia / Hong Kong           |
| EPI_ISL_610192 | 7/12/2020  | 10/28/2020 Asia / Hong Kong           |
| EPI_ISL_610194 | 9/24/2020  | 10/28/2020 Asia / Hong Kong           |
| EPI_ISL_610198 | 9/28/2020  | 10/28/2020 Asia / Hong Kong           |
| EPI_ISL_610199 | 10/5/2020  | 10/28/2020 Asia / Hong Kong           |
| EPI_ISL_610201 | 10/7/2020  | 10/28/2020 Asia / Hong Kong           |
| EPI_ISL_610202 | 10/7/2020  | 10/28/2020 Asia / Hong Kong           |
| EPI_ISL_610203 | 10/7/2020  | 10/28/2020 Asia / Hong Kong           |
| EPI_ISL_610204 | 10/1/2020  | 10/28/2020 Asia / Hong Kong           |
| EPI_ISL_610205 | 8/30/2020  | 10/28/2020 Asia / Hong Kong           |
| EPI_ISL_610206 | 8/13/2020  | 10/28/2020 Asia / Hong Kong           |
| EPI_ISL_610207 | 8/14/2020  | 10/28/2020 Asia / Hong Kong           |
| EPI_ISL_610208 | 7/30/2020  | 10/28/2020 Asia / Hong Kong           |
| EPI_ISL_610209 | 7/26/2020  | 10/28/2020 Asia / Hong Kong           |
| EPI_ISL_610210 | 6/22/2020  | 10/28/2020 Asia / Hong Kong           |
| EPI_ISL_610211 | 6/23/2020  | 10/28/2020 Asia / Hong Kong           |
| EPI_ISL_610212 | 7/30/2020  | 10/28/2020 Asia / Hong Kong           |
| EPI_ISL_610213 | 8/16/2020  | 10/28/2020 Asia / Hong Kong           |
| EPI_ISL_610214 | 10/6/2020  | 10/28/2020 Asia / Hong Kong           |
| EPI_ISL_610215 | 10/2/2020  | 10/28/2020 Asia / Hong Kong           |
| EPI_ISL_610217 | 9/8/2020   | 10/28/2020 Asia / Hong Kong           |
| EPI_ISL_610218 | 9/13/2020  | 10/28/2020 Asia / Hong Kong           |
| EPI_ISL_610219 | 9/15/2020  | 10/28/2020 Asia / Hong Kong           |
| EPI_ISL_610220 | 9/19/2020  | 10/28/2020 Asia / Hong Kong           |
| EPI_ISL_610221 | 9/19/2020  | 10/28/2020 Asia / Hong Kong           |
| EPI_ISL_610222 | 10/6/2020  | 10/28/2020 Asia / Hong Kong           |
| EPI_ISL_610223 | 10/8/2020  | 10/28/2020 Asia / Hong Kong           |
| EPI_ISL_610224 | 10/11/2020 | 10/28/2020 Asia / Hong Kong           |
| EPI_ISL_610225 | 10/11/2020 | 10/28/2020 Asia / Hong Kong           |
| EPI_ISL_602564 | 10/3/2020  | 10/29/2020 Asia / Sri Lanka / Gampaha |

















|                |            |                                                                       |
|----------------|------------|-----------------------------------------------------------------------|
| EPI_ISL_603009 | 10/14/2020 | 10/29/2020 North America / USA / Minnesota                            |
| EPI_ISL_603010 | 9/24/2020  | 10/29/2020 North America / USA / Minnesota                            |
| EPI_ISL_603011 | 9/27/2020  | 10/29/2020 North America / USA / Minnesota                            |
| EPI_ISL_603012 | 10/9/2020  | 10/29/2020 North America / USA / Minnesota                            |
| EPI_ISL_603013 | 10/8/2020  | 10/29/2020 North America / USA / Minnesota                            |
| EPI_ISL_603014 | 10/6/2020  | 10/29/2020 North America / USA / Minnesota                            |
| EPI_ISL_603015 | 10/15/2020 | 10/29/2020 North America / USA / Minnesota                            |
| EPI_ISL_603016 | 10/2/2020  | 10/29/2020 North America / USA / Minnesota                            |
| EPI_ISL_603017 | 10/12/2020 | 10/29/2020 North America / USA / Minnesota                            |
| EPI_ISL_603018 | 10/16/2020 | 10/29/2020 North America / USA / Minnesota                            |
| EPI_ISL_603019 | 10/17/2020 | 10/29/2020 North America / USA / Minnesota                            |
| EPI_ISL_603020 | 10/17/2020 | 10/29/2020 North America / USA / Minnesota                            |
| EPI_ISL_603021 | 7/15/2020  | 10/29/2020 South America / Brazil / Sao Paulo / Osasco                |
| EPI_ISL_603022 | 7/16/2020  | 10/29/2020 South America / Brazil / Sao Paulo / Diadema               |
| EPI_ISL_603023 | 6/7/2020   | 10/29/2020 South America / Brazil / Sao Paulo / Campinas              |
| EPI_ISL_603024 | 6/20/2020  | 10/29/2020 South America / Brazil / Sao Paulo / Aracatuba             |
| EPI_ISL_603025 | 6/11/2020  | 10/29/2020 South America / Brazil / Sao Paulo / Caraguatatuba         |
| EPI_ISL_603026 | 6/21/2020  | 10/29/2020 South America / Brazil / Sao Paulo / Emilianopolis         |
| EPI_ISL_603027 | 6/20/2020  | 10/29/2020 South America / Brazil / Sao Paulo / Aracatuba             |
| EPI_ISL_603028 | 6/30/2020  | 10/29/2020 South America / Brazil / Sao Paulo / Santos                |
| EPI_ISL_603029 | 6/22/2020  | 10/29/2020 South America / Brazil / Sao Paulo / Campinas              |
| EPI_ISL_603030 | 7/11/2020  | 10/29/2020 South America / Brazil / Sao Paulo / Presidente Epitacio   |
| EPI_ISL_603031 | 7/12/2020  | 10/29/2020 South America / Brazil / Sao Paulo / Presidente Epitacio   |
| EPI_ISL_603032 | 7/13/2020  | 10/29/2020 South America / Brazil / Sao Paulo / Santo Anastacio       |
| EPI_ISL_603033 | 7/13/2020  | 10/29/2020 South America / Brazil / Sao Paulo / Sao Bernardo do Campo |
| EPI_ISL_603034 | 7/11/2020  | 10/29/2020 South America / Brazil / Sao Paulo / Diadema               |
| EPI_ISL_603035 | 7/10/2020  | 10/29/2020 South America / Brazil / Sao Paulo / Birigui               |
| EPI_ISL_603036 | 7/10/2020  | 10/29/2020 South America / Brazil / Sao Paulo / Santo Andre           |
| EPI_ISL_603037 | 7/20/2020  | 10/29/2020 South America / Brazil / Sao Paulo / Sao Paulo             |
| EPI_ISL_603038 | 7/20/2020  | 10/29/2020 South America / Brazil / Sao Paulo / Aracatuba             |
| EPI_ISL_603039 | 7/17/2020  | 10/29/2020 South America / Brazil / Sao Paulo / Campinas              |
| EPI_ISL_605780 | 3/13/2020  | 10/29/2020 Africa / Egypt / Cairo                                     |
| EPI_ISL_603082 | 4/2/2020   | 10/30/2020 Europe / Lithuania / Alytaus apskritis                     |
| EPI_ISL_603083 | 4/2/2020   | 10/30/2020 Europe / Lithuania / Alytaus apskritis                     |
| EPI_ISL_603084 | 4/2/2020   | 10/30/2020 Europe / Lithuania / Kauno apskritis                       |
| EPI_ISL_603085 | 4/5/2020   | 10/30/2020 Europe / Lithuania / Kauno apskritis                       |
| EPI_ISL_603086 | 4/5/2020   | 10/30/2020 Europe / Lithuania / Marijampoles apskritis                |
| EPI_ISL_603087 | 4/6/2020   | 10/30/2020 Europe / Lithuania / Marijampoles apskritis                |
| EPI_ISL_603088 | 4/6/2020   | 10/30/2020 Europe / Lithuania / Kauno apskritis                       |
| EPI_ISL_603089 | 4/6/2020   | 10/30/2020 Europe / Lithuania / Kauno apskritis                       |
| EPI_ISL_603090 | 4/6/2020   | 10/30/2020 Europe / Lithuania / Marijampoles apskritis                |
| EPI_ISL_603091 | 4/6/2020   | 10/30/2020 Europe / Lithuania / Marijampoles apskritis                |
| EPI_ISL_603092 | 4/7/2020   | 10/30/2020 Europe / Lithuania / Marijampoles apskritis                |
| EPI_ISL_603093 | 4/6/2020   | 10/30/2020 Europe / Lithuania / Marijampoles apskritis                |
| EPI_ISL_603094 | 4/8/2020   | 10/30/2020 Europe / Lithuania / Marijampoles apskritis                |
| EPI_ISL_603095 | 4/10/2020  | 10/30/2020 Europe / Lithuania / Klaipedos apskritis                   |
| EPI_ISL_603096 | 4/10/2020  | 10/30/2020 Europe / Lithuania / Kauno apskritis                       |

|                |            |            |                                             |
|----------------|------------|------------|---------------------------------------------|
| EPI_ISL_603097 | 4/13/2020  | 10/30/2020 | Europe / Lithuania / Marijampoles apskritis |
| EPI_ISL_603098 | 4/13/2020  | 10/30/2020 | Europe / Lithuania / Marijampoles apskritis |
| EPI_ISL_603099 | 4/14/2020  | 10/30/2020 | Europe / Lithuania / Marijampoles apskritis |
| EPI_ISL_603100 | 4/14/2020  | 10/30/2020 | Europe / Lithuania / Marijampoles apskritis |
| EPI_ISL_603101 | 4/15/2020  | 10/30/2020 | Europe / Lithuania / Marijampoles apskritis |
| EPI_ISL_603102 | 4/15/2020  | 10/30/2020 | Europe / Lithuania / Marijampoles apskritis |
| EPI_ISL_603103 | 4/16/2020  | 10/30/2020 | Europe / Lithuania / Marijampoles apskritis |
| EPI_ISL_603104 | 4/17/2020  | 10/30/2020 | Europe / Lithuania / Marijampoles apskritis |
| EPI_ISL_603105 | 4/17/2020  | 10/30/2020 | Europe / Lithuania / Marijampoles apskritis |
| EPI_ISL_603106 | 4/17/2020  | 10/30/2020 | Europe / Lithuania / Marijampoles apskritis |
| EPI_ISL_603107 | 4/17/2020  | 10/30/2020 | Europe / Lithuania / Marijampoles apskritis |
| EPI_ISL_603108 | 4/18/2020  | 10/30/2020 | Europe / Lithuania / Marijampoles apskritis |
| EPI_ISL_603109 | 4/19/2020  | 10/30/2020 | Europe / Lithuania / Marijampoles apskritis |
| EPI_ISL_603110 | 4/19/2020  | 10/30/2020 | Europe / Lithuania / Marijampoles apskritis |
| EPI_ISL_603111 | 4/19/2020  | 10/30/2020 | Europe / Lithuania / Marijampoles apskritis |
| EPI_ISL_603112 | 4/20/2020  | 10/30/2020 | Europe / Lithuania / Kauno apskritis        |
| EPI_ISL_603113 | 4/20/2020  | 10/30/2020 | Europe / Lithuania / Marijampoles apskritis |
| EPI_ISL_603114 | 4/21/2020  | 10/30/2020 | Europe / Lithuania / Marijampoles apskritis |
| EPI_ISL_603115 | 4/21/2020  | 10/30/2020 | Europe / Lithuania / Kauno apskritis        |
| EPI_ISL_603116 | 4/24/2020  | 10/30/2020 | Europe / Lithuania / Kauno apskritis        |
| EPI_ISL_603117 | 4/26/2020  | 10/30/2020 | Europe / Lithuania / Marijampoles apskritis |
| EPI_ISL_603118 | 4/5/2020   | 10/30/2020 | Europe / Lithuania / Kauno apskritis        |
| EPI_ISL_603120 | 4/9/2020   | 10/30/2020 | Europe / Lithuania / Klaipedos apskritis    |
| EPI_ISL_603123 | 10/23/2020 | 10/30/2020 | Oceania / Australia / South Australia       |
| EPI_ISL_603124 | 10/24/2020 | 10/30/2020 | Oceania / Australia / South Australia       |
| EPI_ISL_603125 | 10/24/2020 | 10/30/2020 | Oceania / Australia / South Australia       |
| EPI_ISL_603128 | 10/23/2020 | 10/30/2020 | Oceania / Australia / South Australia       |
| EPI_ISL_603137 | 6/6/2020   | 10/30/2020 | Europe / Italy / Lazio                      |
| EPI_ISL_603138 | 6/6/2020   | 10/30/2020 | Europe / Italy / Lazio                      |
| EPI_ISL_603139 | 6/6/2020   | 10/30/2020 | Europe / Italy / Lazio                      |
| EPI_ISL_603140 | 6/15/2020  | 10/30/2020 | Europe / Italy / Lazio                      |
| EPI_ISL_603141 | 6/12/2020  | 10/30/2020 | Europe / Italy / Lazio                      |
| EPI_ISL_603142 | 6/17/2020  | 10/30/2020 | Europe / Italy / Lazio                      |
| EPI_ISL_603143 | 6/12/2020  | 10/30/2020 | Europe / Italy / Lazio                      |
| EPI_ISL_603144 | 6/12/2020  | 10/30/2020 | Europe / Italy / Lazio                      |
| EPI_ISL_603145 | 6/12/2020  | 10/30/2020 | Europe / Italy / Lazio                      |
| EPI_ISL_603146 | 6/12/2020  | 10/30/2020 | Europe / Italy / Lazio                      |
| EPI_ISL_603147 | 6/12/2020  | 10/30/2020 | Europe / Italy / Lazio                      |
| EPI_ISL_603148 | 6/12/2020  | 10/30/2020 | Europe / Italy / Lazio                      |
| EPI_ISL_603149 | 6/6/2020   | 10/30/2020 | Europe / Italy / Lazio                      |
| EPI_ISL_603150 | 6/6/2020   | 10/30/2020 | Europe / Italy / Lazio                      |
| EPI_ISL_603151 | 6/11/2020  | 10/30/2020 | Europe / Italy / Lazio                      |
| EPI_ISL_603152 | 6/13/2020  | 10/30/2020 | Europe / Italy / Lazio                      |
| EPI_ISL_603153 | 6/9/2020   | 10/30/2020 | Europe / Italy / Lazio                      |
| EPI_ISL_603154 | 6/12/2020  | 10/30/2020 | Europe / Italy / Lazio                      |
| EPI_ISL_603155 | 6/12/2020  | 10/30/2020 | Europe / Italy / Lazio                      |
| EPI_ISL_603156 | 6/12/2020  | 10/30/2020 | Europe / Italy / Lazio                      |



|                |            |            |                                   |
|----------------|------------|------------|-----------------------------------|
| EPI_ISL_603157 | 6/2/2020   | 10/30/2020 | Europe / Italy / Lazio            |
| EPI_ISL_603158 | 6/3/2020   | 10/30/2020 | Europe / Italy / Lazio            |
| EPI_ISL_603159 | 6/4/2020   | 10/30/2020 | Europe / Italy / Lazio            |
| EPI_ISL_603160 | 6/4/2020   | 10/30/2020 | Europe / Italy / Lazio            |
| EPI_ISL_603161 | 6/4/2020   | 10/30/2020 | Europe / Italy / Lazio            |
| EPI_ISL_603162 | 6/4/2020   | 10/30/2020 | Europe / Italy / Lazio            |
| EPI_ISL_603163 | 6/4/2020   | 10/30/2020 | Europe / Italy / Lazio            |
| EPI_ISL_603164 | 6/4/2020   | 10/30/2020 | Europe / Italy / Lazio            |
| EPI_ISL_603165 | 6/4/2020   | 10/30/2020 | Europe / Italy / Lazio            |
| EPI_ISL_603166 | 6/5/2020   | 10/30/2020 | Europe / Italy / Lazio            |
| EPI_ISL_603167 | 6/7/2020   | 10/30/2020 | Europe / Italy / Lazio            |
| EPI_ISL_603168 | 6/7/2020   | 10/30/2020 | Europe / Italy / Lazio            |
| EPI_ISL_603169 | 6/7/2020   | 10/30/2020 | Europe / Italy / Lazio            |
| EPI_ISL_603170 | 6/22/2020  | 10/30/2020 | Europe / Italy / Lazio            |
| EPI_ISL_603171 | 6/10/2020  | 10/30/2020 | Europe / Italy / Lazio            |
| EPI_ISL_603172 | 6/19/2020  | 10/30/2020 | Europe / Italy / Lazio            |
| EPI_ISL_603173 | 6/10/2020  | 10/30/2020 | Europe / Italy / Lazio            |
| EPI_ISL_603174 | 6/8/2020   | 10/30/2020 | Europe / Italy / Lazio            |
| EPI_ISL_603175 | 6/8/2020   | 10/30/2020 | Europe / Italy / Lazio            |
| EPI_ISL_603176 | 6/6/2020   | 10/30/2020 | Europe / Italy / Lazio            |
| EPI_ISL_603177 | 5/20/2020  | 10/30/2020 | Europe / Italy / Lazio            |
| EPI_ISL_603178 | 5/16/2020  | 10/30/2020 | Europe / Italy / Lazio            |
| EPI_ISL_603179 | 5/17/2020  | 10/30/2020 | Europe / Italy / Lazio            |
| EPI_ISL_603180 | 5/17/2020  | 10/30/2020 | Europe / Italy / Lazio            |
| EPI_ISL_603181 | 5/23/2020  | 10/30/2020 | Europe / Italy / Lazio            |
| EPI_ISL_603182 | 5/23/2020  | 10/30/2020 | Europe / Italy / Lazio            |
| EPI_ISL_603183 | 5/24/2020  | 10/30/2020 | Europe / Italy / Lazio            |
| EPI_ISL_603184 | 5/23/2020  | 10/30/2020 | Europe / Italy / Lazio            |
| EPI_ISL_603185 | 5/22/2020  | 10/30/2020 | Europe / Italy / Lazio            |
| EPI_ISL_603186 | 5/19/2020  | 10/30/2020 | Europe / Italy / Lazio            |
| EPI_ISL_603187 | 5/15/2020  | 10/30/2020 | Europe / Italy / Lazio            |
| EPI_ISL_603188 | 10/10/2020 | 10/30/2020 | Europe / United Kingdom / England |
| EPI_ISL_603189 | 10/9/2020  | 10/30/2020 | Europe / United Kingdom / England |
| EPI_ISL_603190 | 10/9/2020  | 10/30/2020 | Europe / United Kingdom / England |
| EPI_ISL_603191 | 10/10/2020 | 10/30/2020 | Europe / United Kingdom / England |
| EPI_ISL_603193 | 10/11/2020 | 10/30/2020 | Europe / United Kingdom / England |
| EPI_ISL_603194 | 10/11/2020 | 10/30/2020 | Europe / United Kingdom / England |
| EPI_ISL_603195 | 10/11/2020 | 10/30/2020 | Europe / United Kingdom / England |
| EPI_ISL_603196 | 10/11/2020 | 10/30/2020 | Europe / United Kingdom / England |
| EPI_ISL_603197 | 10/11/2020 | 10/30/2020 | Europe / United Kingdom / England |
| EPI_ISL_603198 | 10/11/2020 | 10/30/2020 | Europe / United Kingdom / England |
| EPI_ISL_603199 | 10/11/2020 | 10/30/2020 | Europe / United Kingdom / England |
| EPI_ISL_603200 | 10/12/2020 | 10/30/2020 | Europe / United Kingdom / England |
| EPI_ISL_603201 | 10/9/2020  | 10/30/2020 | Europe / United Kingdom / England |
| EPI_ISL_603202 | 10/12/2020 | 10/30/2020 | Europe / United Kingdom / England |
| EPI_ISL_603203 | 10/12/2020 | 10/30/2020 | Europe / United Kingdom / England |
| EPI_ISL_603204 | 10/12/2020 | 10/30/2020 | Europe / United Kingdom / England |

|                |            |                                                       |
|----------------|------------|-------------------------------------------------------|
| EPI_ISL_603205 | 10/13/2020 | 10/30/2020 Europe / United Kingdom / England          |
| EPI_ISL_603206 | 10/12/2020 | 10/30/2020 Europe / United Kingdom / England          |
| EPI_ISL_603207 | 10/15/2020 | 10/30/2020 Europe / United Kingdom / England          |
| EPI_ISL_603208 | 10/14/2020 | 10/30/2020 Europe / United Kingdom / England          |
| EPI_ISL_603209 | 10/14/2020 | 10/30/2020 Europe / United Kingdom / England          |
| EPI_ISL_603210 | 10/14/2020 | 10/30/2020 Europe / United Kingdom / England          |
| EPI_ISL_603211 | 10/15/2020 | 10/30/2020 Europe / United Kingdom / England          |
| EPI_ISL_603212 | 10/9/2020  | 10/30/2020 Europe / United Kingdom / England          |
| EPI_ISL_603213 | 10/15/2020 | 10/30/2020 Europe / United Kingdom / England          |
| EPI_ISL_603214 | 10/15/2020 | 10/30/2020 Europe / United Kingdom / England          |
| EPI_ISL_603216 | 9/2/2020   | 10/30/2020 Europe / France / Occitanie                |
| EPI_ISL_603217 | 9/2/2020   | 10/30/2020 Europe / France / Occitanie                |
| EPI_ISL_603218 | 9/30/2020  | 10/30/2020 Europe / France / Occitanie                |
| EPI_ISL_603219 | 9/30/2020  | 10/30/2020 Europe / France / Occitanie                |
| EPI_ISL_603220 | 9/30/2020  | 10/30/2020 Europe / France / Occitanie                |
| EPI_ISL_603221 | 10/14/2020 | 10/30/2020 Asia / Bangladesh / Dhaka                  |
| EPI_ISL_603222 | 10/8/2020  | 10/30/2020 Asia / Bangladesh / Dhaka                  |
| EPI_ISL_603223 | 7/31/2020  | 10/30/2020 Asia / Bangladesh / Dhaka / Narayanganj    |
| EPI_ISL_603224 | 7/31/2020  | 10/30/2020 Asia / Bangladesh / Dhaka                  |
| EPI_ISL_603225 | 7/31/2020  | 10/30/2020 Asia / Bangladesh / Dhaka                  |
| EPI_ISL_603238 | 10/14/2020 | 10/30/2020 Asia / Bangladesh / Dhaka                  |
| EPI_ISL_603239 | 10/8/2020  | 10/30/2020 Asia / Bangladesh / Dhaka                  |
| EPI_ISL_603240 | 10/8/2020  | 10/30/2020 Asia / Bangladesh / Dhaka                  |
| EPI_ISL_603241 | 10/18/2020 | 10/30/2020 Asia / Bangladesh / Dhaka / Narayanganj    |
| EPI_ISL_603242 | 10/10/2020 | 10/30/2020 Asia / Bangladesh / Dhaka                  |
| EPI_ISL_603243 | 10/10/2020 | 10/30/2020 Asia / Bangladesh / Dhaka                  |
| EPI_ISL_603244 | 10/10/2020 | 10/30/2020 Asia / Bangladesh / Dhaka                  |
| EPI_ISL_603245 | 10/10/2020 | 10/30/2020 Asia / Bangladesh / Dhaka                  |
| EPI_ISL_603246 | 10/5/2020  | 10/30/2020 Asia / Bangladesh / Dhaka                  |
| EPI_ISL_603247 | 10/5/2020  | 10/30/2020 Asia / Bangladesh / Dhaka                  |
| EPI_ISL_603248 | 10/2/2020  | 10/30/2020 North America / USA / District of Columbia |
| EPI_ISL_603249 | 10/5/2020  | 10/30/2020 Asia / Bangladesh / Dhaka                  |
| EPI_ISL_603250 | 10/5/2020  | 10/30/2020 Asia / Bangladesh / Dhaka                  |
| EPI_ISL_603251 | 8/10/2020  | 10/30/2020 North America / USA / Washington           |
| EPI_ISL_603252 | 9/28/2020  | 10/30/2020 North America / USA / Washington           |
| EPI_ISL_603254 | 9/28/2020  | 10/30/2020 North America / USA / Washington           |
| EPI_ISL_603255 | 9/28/2020  | 10/30/2020 North America / USA / Washington           |
| EPI_ISL_603267 | 9/30/2020  | 10/30/2020 Europe / Switzerland / Bern                |
| EPI_ISL_603268 | 9/30/2020  | 10/30/2020 Europe / Switzerland / Zurich              |
| EPI_ISL_603269 | 9/30/2020  | 10/30/2020 Europe / Switzerland / Zurich              |
| EPI_ISL_603270 | 10/1/2020  | 10/30/2020 Europe / Switzerland / Basel-Landschaft    |
| EPI_ISL_603272 | 10/1/2020  | 10/30/2020 Europe / Switzerland / Grisons             |
| EPI_ISL_603273 | 10/1/2020  | 10/30/2020 Europe / Switzerland / Zurich              |
| EPI_ISL_603274 | 10/1/2020  | 10/30/2020 Europe / Switzerland / Grisons             |
| EPI_ISL_603275 | 10/1/2020  | 10/30/2020 Europe / Switzerland / Zurich              |
| EPI_ISL_603276 | 10/1/2020  | 10/30/2020 Europe / Switzerland / St Gall             |
| EPI_ISL_603277 | 10/1/2020  | 10/30/2020 Europe / Switzerland / Schwyz              |

|                |           |            |                                  |
|----------------|-----------|------------|----------------------------------|
| EPI_ISL_603278 | 9/30/2020 | 10/30/2020 | Europe / Switzerland / St Gall   |
| EPI_ISL_603279 | 9/30/2020 | 10/30/2020 | Europe / Switzerland / Zurich    |
| EPI_ISL_603280 | 9/30/2020 | 10/30/2020 | Europe / Switzerland / Vaud      |
| EPI_ISL_603281 | 9/30/2020 | 10/30/2020 | Europe / Switzerland / Grisons   |
| EPI_ISL_603282 | 9/30/2020 | 10/30/2020 | Europe / Switzerland / Vaud      |
| EPI_ISL_603283 | 9/30/2020 | 10/30/2020 | Europe / Switzerland / Vaud      |
| EPI_ISL_603284 | 9/30/2020 | 10/30/2020 | Europe / Switzerland / Vaud      |
| EPI_ISL_603288 | 9/30/2020 | 10/30/2020 | Europe / Switzerland / Vaud      |
| EPI_ISL_603289 | 10/1/2020 | 10/30/2020 | Europe / Switzerland / Aargau    |
| EPI_ISL_603290 | 10/1/2020 | 10/30/2020 | Europe / Switzerland / Solothurn |
| EPI_ISL_603291 | 10/1/2020 | 10/30/2020 | Europe / Switzerland / Zurich    |
| EPI_ISL_603292 | 10/1/2020 | 10/30/2020 | Europe / Switzerland / Zurich    |
| EPI_ISL_603293 | 10/1/2020 | 10/30/2020 | Europe / Switzerland / Zurich    |
| EPI_ISL_603294 | 10/1/2020 | 10/30/2020 | Europe / Switzerland / Zurich    |
| EPI_ISL_603295 | 10/1/2020 | 10/30/2020 | Europe / Switzerland / Vaud      |
| EPI_ISL_603296 | 10/1/2020 | 10/30/2020 | Europe / Switzerland / Bern      |
| EPI_ISL_603297 | 9/30/2020 | 10/30/2020 | Europe / Switzerland / Uri       |
| EPI_ISL_603298 | 10/1/2020 | 10/30/2020 | Europe / Switzerland / Vaud      |
| EPI_ISL_603299 | 10/1/2020 | 10/30/2020 | Europe / Switzerland / Vaud      |
| EPI_ISL_603300 | 10/1/2020 | 10/30/2020 | Europe / Switzerland / Vaud      |
| EPI_ISL_603301 | 10/1/2020 | 10/30/2020 | Europe / Switzerland / Vaud      |
| EPI_ISL_603302 | 10/1/2020 | 10/30/2020 | Europe / Switzerland / Vaud      |
| EPI_ISL_603303 | 10/1/2020 | 10/30/2020 | Europe / Switzerland / Vaud      |
| EPI_ISL_603305 | 10/1/2020 | 10/30/2020 | Europe / Switzerland / Vaud      |
| EPI_ISL_603306 | 10/1/2020 | 10/30/2020 | Europe / Switzerland / Vaud      |
| EPI_ISL_603308 | 10/1/2020 | 10/30/2020 | Europe / Switzerland / Bern      |
| EPI_ISL_603309 | 10/1/2020 | 10/30/2020 | Europe / Switzerland / Bern      |
| EPI_ISL_603310 | 10/1/2020 | 10/30/2020 | Europe / Switzerland / Bern      |
| EPI_ISL_603311 | 10/1/2020 | 10/30/2020 | Europe / Switzerland / Bern      |
| EPI_ISL_603312 | 10/1/2020 | 10/30/2020 | Europe / Switzerland / Bern      |
| EPI_ISL_603313 | 10/1/2020 | 10/30/2020 | Europe / Switzerland / Bern      |
| EPI_ISL_603314 | 10/1/2020 | 10/30/2020 | Europe / Switzerland / Geneva    |
| EPI_ISL_603315 | 10/1/2020 | 10/30/2020 | Europe / Switzerland / Zurich    |
| EPI_ISL_603316 | 10/1/2020 | 10/30/2020 | Europe / Switzerland / Zurich    |
| EPI_ISL_603318 | 10/1/2020 | 10/30/2020 | Europe / Switzerland / Freiburg  |
| EPI_ISL_603319 | 10/1/2020 | 10/30/2020 | Europe / Switzerland / Bern      |
| EPI_ISL_603320 | 10/1/2020 | 10/30/2020 | Europe / Switzerland / Bern      |
| EPI_ISL_603321 | 10/1/2020 | 10/30/2020 | Europe / Switzerland / Bern      |
| EPI_ISL_603322 | 10/1/2020 | 10/30/2020 | Europe / Switzerland / St Gall   |
| EPI_ISL_603323 | 10/1/2020 | 10/30/2020 | Europe / Switzerland / Bern      |
| EPI_ISL_603324 | 10/1/2020 | 10/30/2020 | Europe / Switzerland / Geneva    |
| EPI_ISL_603325 | 10/1/2020 | 10/30/2020 | Europe / Switzerland / Geneva    |
| EPI_ISL_603327 | 10/1/2020 | 10/30/2020 | Europe / Switzerland / Vaud      |
| EPI_ISL_603328 | 9/25/2020 | 10/30/2020 | Europe / Switzerland / Bern      |
| EPI_ISL_603330 | 9/25/2020 | 10/30/2020 | Europe / Switzerland / Vaud      |
| EPI_ISL_603331 | 9/25/2020 | 10/30/2020 | Europe / Switzerland / Zurich    |
| EPI_ISL_603332 | 9/25/2020 | 10/30/2020 | Europe / Switzerland / Bern      |

|                |           |            |                                         |
|----------------|-----------|------------|-----------------------------------------|
| EPI_ISL_603333 | 9/25/2020 | 10/30/2020 | Europe / Switzerland / Vaud             |
| EPI_ISL_603334 | 9/25/2020 | 10/30/2020 | Europe / Switzerland / Vaud             |
| EPI_ISL_603335 | 9/25/2020 | 10/30/2020 | Europe / Switzerland / Vaud             |
| EPI_ISL_603336 | 9/25/2020 | 10/30/2020 | Europe / Switzerland / Zurich           |
| EPI_ISL_603337 | 9/25/2020 | 10/30/2020 | Europe / Switzerland / Vaud             |
| EPI_ISL_603338 | 9/25/2020 | 10/30/2020 | Europe / Switzerland / Bern             |
| EPI_ISL_603339 | 9/25/2020 | 10/30/2020 | Europe / Switzerland / Bern             |
| EPI_ISL_603340 | 9/25/2020 | 10/30/2020 | Europe / Switzerland / Vaud             |
| EPI_ISL_603341 | 9/25/2020 | 10/30/2020 | Europe / Switzerland / Basel-Landschaft |
| EPI_ISL_603342 | 9/25/2020 | 10/30/2020 | Europe / Switzerland / Basel-Landschaft |
| EPI_ISL_603343 | 9/25/2020 | 10/30/2020 | Europe / Switzerland / Basel-Stadt      |
| EPI_ISL_603344 | 9/25/2020 | 10/30/2020 | Europe / Switzerland / Aargau           |
| EPI_ISL_603345 | 9/25/2020 | 10/30/2020 | Europe / Switzerland / Basel-Landschaft |
| EPI_ISL_603346 | 9/25/2020 | 10/30/2020 | Europe / Switzerland / Geneva           |
| EPI_ISL_603348 | 9/25/2020 | 10/30/2020 | Europe / Switzerland / Vaud             |
| EPI_ISL_603350 | 9/25/2020 | 10/30/2020 | Europe / Switzerland / Vaud             |
| EPI_ISL_603351 | 9/25/2020 | 10/30/2020 | Europe / Switzerland / Vaud             |
| EPI_ISL_603352 | 9/25/2020 | 10/30/2020 | Europe / Switzerland / Zurich           |
| EPI_ISL_603353 | 9/25/2020 | 10/30/2020 | Europe / Switzerland / St Gall          |
| EPI_ISL_603354 | 9/25/2020 | 10/30/2020 | Europe / Switzerland / Zurich           |
| EPI_ISL_603355 | 9/26/2020 | 10/30/2020 | Europe / Switzerland / Basel-Landschaft |
| EPI_ISL_603357 | 9/26/2020 | 10/30/2020 | Europe / Switzerland / Bern             |
| EPI_ISL_603358 | 9/29/2020 | 10/30/2020 | Europe / Switzerland / Zurich           |
| EPI_ISL_603359 | 9/29/2020 | 10/30/2020 | Europe / Switzerland / Bern             |
| EPI_ISL_603360 | 9/29/2020 | 10/30/2020 | Europe / Switzerland / Bern             |
| EPI_ISL_603361 | 9/29/2020 | 10/30/2020 | Europe / Switzerland / Bern             |
| EPI_ISL_603362 | 9/29/2020 | 10/30/2020 | Europe / Switzerland / Bern             |
| EPI_ISL_603363 | 9/29/2020 | 10/30/2020 | Europe / Switzerland / Bern             |
| EPI_ISL_603364 | 9/29/2020 | 10/30/2020 | Europe / Switzerland / Bern             |
| EPI_ISL_603365 | 9/28/2020 | 10/30/2020 | Europe / Switzerland / Zurich           |
| EPI_ISL_603366 | 9/28/2020 | 10/30/2020 | Europe / Switzerland / Zurich           |
| EPI_ISL_603367 | 9/29/2020 | 10/30/2020 | Europe / Switzerland / Zurich           |
| EPI_ISL_603368 | 9/29/2020 | 10/30/2020 | Europe / Switzerland / Basel-Landschaft |
| EPI_ISL_603369 | 9/29/2020 | 10/30/2020 | Europe / Switzerland / Zurich           |
| EPI_ISL_603370 | 9/29/2020 | 10/30/2020 | Europe / Switzerland / Bern             |
| EPI_ISL_603371 | 9/29/2020 | 10/30/2020 | Europe / Switzerland / Zurich           |
| EPI_ISL_603372 | 9/28/2020 | 10/30/2020 | Europe / Switzerland / Geneva           |
| EPI_ISL_603373 | 9/29/2020 | 10/30/2020 | Europe / Switzerland / Wallis           |
| EPI_ISL_603374 | 9/29/2020 | 10/30/2020 | Europe / Switzerland / Solothurn        |
| EPI_ISL_603375 | 9/29/2020 | 10/30/2020 | Europe / Switzerland / Aargau           |
| EPI_ISL_603376 | 9/29/2020 | 10/30/2020 | Europe / Switzerland / Bern             |
| EPI_ISL_603377 | 9/29/2020 | 10/30/2020 | Europe / Switzerland / Bern             |
| EPI_ISL_603378 | 9/29/2020 | 10/30/2020 | Europe / Switzerland / Vaud             |
| EPI_ISL_603379 | 9/29/2020 | 10/30/2020 | Europe / Switzerland / Vaud             |
| EPI_ISL_603380 | 9/29/2020 | 10/30/2020 | Europe / Switzerland / Vaud             |
| EPI_ISL_603381 | 9/29/2020 | 10/30/2020 | Europe / Switzerland / Vaud             |
| EPI_ISL_603382 | 9/30/2020 | 10/30/2020 | Europe / Switzerland / Vaud             |

|                |           |            |                                         |
|----------------|-----------|------------|-----------------------------------------|
| EPI_ISL_603383 | 9/29/2020 | 10/30/2020 | Europe / Switzerland / Vaud             |
| EPI_ISL_603384 | 9/29/2020 | 10/30/2020 | Europe / Switzerland / Bern             |
| EPI_ISL_603385 | 9/30/2020 | 10/30/2020 | Europe / Switzerland / Bern             |
| EPI_ISL_603386 | 9/30/2020 | 10/30/2020 | Europe / Switzerland / Bern             |
| EPI_ISL_603387 | 9/30/2020 | 10/30/2020 | Europe / Switzerland / Bern             |
| EPI_ISL_603388 | 9/29/2020 | 10/30/2020 | Europe / Switzerland / Vaud             |
| EPI_ISL_603389 | 9/29/2020 | 10/30/2020 | Europe / Switzerland / Vaud             |
| EPI_ISL_603390 | 9/29/2020 | 10/30/2020 | Europe / Switzerland / Wallis           |
| EPI_ISL_603391 | 9/29/2020 | 10/30/2020 | Europe / Switzerland / Uri              |
| EPI_ISL_603392 | 9/29/2020 | 10/30/2020 | Europe / Switzerland / Geneva           |
| EPI_ISL_603393 | 9/29/2020 | 10/30/2020 | Europe / Switzerland / Wallis           |
| EPI_ISL_603394 | 9/30/2020 | 10/30/2020 | Europe / Switzerland / Bern             |
| EPI_ISL_603395 | 9/30/2020 | 10/30/2020 | Europe / Switzerland / Bern             |
| EPI_ISL_603396 | 9/30/2020 | 10/30/2020 | Europe / Switzerland / Bern             |
| EPI_ISL_603397 | 9/30/2020 | 10/30/2020 | Europe / Switzerland / Bern             |
| EPI_ISL_603398 | 9/30/2020 | 10/30/2020 | Europe / Switzerland / Aargau           |
| EPI_ISL_603399 | 9/30/2020 | 10/30/2020 | Europe / Switzerland / Bern             |
| EPI_ISL_603400 | 9/30/2020 | 10/30/2020 | Europe / Switzerland / Geneva           |
| EPI_ISL_603401 | 9/30/2020 | 10/30/2020 | Europe / Switzerland / Geneva           |
| EPI_ISL_603402 | 9/30/2020 | 10/30/2020 | Europe / Switzerland / Bern             |
| EPI_ISL_603403 | 9/30/2020 | 10/30/2020 | Europe / Switzerland / Zug              |
| EPI_ISL_603404 | 9/30/2020 | 10/30/2020 | Europe / Switzerland / Grisons          |
| EPI_ISL_603405 | 9/30/2020 | 10/30/2020 | Europe / Switzerland / Bern             |
| EPI_ISL_603406 | 9/30/2020 | 10/30/2020 | Europe / Switzerland / Bern             |
| EPI_ISL_603407 | 9/30/2020 | 10/30/2020 | Europe / Switzerland / Bern             |
| EPI_ISL_603408 | 9/30/2020 | 10/30/2020 | Europe / Switzerland / Grisons          |
| EPI_ISL_603409 | 9/30/2020 | 10/30/2020 | Europe / Switzerland / Zurich           |
| EPI_ISL_603410 | 9/30/2020 | 10/30/2020 | Europe / Switzerland / Bern             |
| EPI_ISL_603411 | 9/30/2020 | 10/30/2020 | Europe / Switzerland / Bern             |
| EPI_ISL_603412 | 9/30/2020 | 10/30/2020 | Europe / Switzerland / Bern             |
| EPI_ISL_603413 | 9/30/2020 | 10/30/2020 | Europe / Switzerland / Vaud             |
| EPI_ISL_603414 | 9/30/2020 | 10/30/2020 | Europe / Switzerland / Vaud             |
| EPI_ISL_603415 | 9/30/2020 | 10/30/2020 | Europe / Switzerland / Basel-Landschaft |
| EPI_ISL_603416 | 9/30/2020 | 10/30/2020 | Europe / Switzerland / Vaud             |
| EPI_ISL_603417 | 9/30/2020 | 10/30/2020 | Europe / Switzerland / Vaud             |
| EPI_ISL_603418 | 9/30/2020 | 10/30/2020 | Europe / Switzerland / Vaud             |
| EPI_ISL_603419 | 9/30/2020 | 10/30/2020 | Europe / Switzerland / Uri              |
| EPI_ISL_603420 | 9/30/2020 | 10/30/2020 | Europe / Switzerland / Basel-Stadt      |
| EPI_ISL_603421 | 9/30/2020 | 10/30/2020 | Europe / Switzerland / Basel-Stadt      |
| EPI_ISL_603422 | 9/30/2020 | 10/30/2020 | Europe / Switzerland / Vaud             |
| EPI_ISL_603423 | 10/7/2020 | 10/30/2020 | Europe / Switzerland / Zurich           |
| EPI_ISL_603424 | 10/7/2020 | 10/30/2020 | Europe / Switzerland / Zurich           |
| EPI_ISL_603425 | 10/7/2020 | 10/30/2020 | Europe / Switzerland / Zurich           |
| EPI_ISL_603426 | 10/7/2020 | 10/30/2020 | Europe / Switzerland / Vaud             |
| EPI_ISL_603427 | 10/7/2020 | 10/30/2020 | Europe / Switzerland / Vaud             |
| EPI_ISL_603428 | 10/7/2020 | 10/30/2020 | Europe / Switzerland / Vaud             |
| EPI_ISL_603429 | 10/7/2020 | 10/30/2020 | Europe / Switzerland / Vaud             |

|                |           |            |                                         |
|----------------|-----------|------------|-----------------------------------------|
| EPI_ISL_603430 | 10/7/2020 | 10/30/2020 | Europe / Switzerland / Vaud             |
| EPI_ISL_603431 | 10/7/2020 | 10/30/2020 | Europe / Switzerland / Vaud             |
| EPI_ISL_603432 | 10/7/2020 | 10/30/2020 | Europe / Switzerland / Vaud             |
| EPI_ISL_603433 | 10/7/2020 | 10/30/2020 | Europe / Switzerland / Vaud             |
| EPI_ISL_603434 | 10/7/2020 | 10/30/2020 | Europe / Switzerland / Vaud             |
| EPI_ISL_603436 | 10/7/2020 | 10/30/2020 | Europe / Switzerland / Vaud             |
| EPI_ISL_603437 | 10/7/2020 | 10/30/2020 | Europe / Switzerland / Vaud             |
| EPI_ISL_603438 | 10/7/2020 | 10/30/2020 | Europe / Switzerland / Vaud             |
| EPI_ISL_603439 | 10/7/2020 | 10/30/2020 | Europe / Switzerland / Zurich           |
| EPI_ISL_603440 | 10/7/2020 | 10/30/2020 | Europe / Switzerland / Zurich           |
| EPI_ISL_603441 | 10/7/2020 | 10/30/2020 | Europe / Switzerland / Zurich           |
| EPI_ISL_603442 | 10/7/2020 | 10/30/2020 | Europe / Switzerland / Zurich           |
| EPI_ISL_603443 | 10/8/2020 | 10/30/2020 | Europe / Switzerland / Vaud             |
| EPI_ISL_603444 | 10/8/2020 | 10/30/2020 | Europe / Switzerland / Vaud             |
| EPI_ISL_603445 | 10/8/2020 | 10/30/2020 | Europe / Switzerland / Wallis           |
| EPI_ISL_603446 | 10/8/2020 | 10/30/2020 | Europe / Switzerland / Vaud             |
| EPI_ISL_603447 | 10/8/2020 | 10/30/2020 | Europe / Switzerland / Vaud             |
| EPI_ISL_603448 | 10/8/2020 | 10/30/2020 | Europe / Switzerland / Wallis           |
| EPI_ISL_603449 | 10/8/2020 | 10/30/2020 | Europe / Switzerland / Vaud             |
| EPI_ISL_603450 | 10/8/2020 | 10/30/2020 | Europe / Switzerland / Wallis           |
| EPI_ISL_603451 | 10/8/2020 | 10/30/2020 | Europe / Switzerland / Vaud             |
| EPI_ISL_603452 | 10/8/2020 | 10/30/2020 | Europe / Switzerland / Wallis           |
| EPI_ISL_603453 | 10/8/2020 | 10/30/2020 | Europe / Switzerland / Vaud             |
| EPI_ISL_603454 | 10/8/2020 | 10/30/2020 | Europe / Switzerland / Wallis           |
| EPI_ISL_603455 | 10/8/2020 | 10/30/2020 | Europe / Switzerland / Basel-Landschaft |
| EPI_ISL_603456 | 10/8/2020 | 10/30/2020 | Europe / Switzerland / Basel-Landschaft |
| EPI_ISL_603457 | 10/8/2020 | 10/30/2020 | Europe / Switzerland / Basel-Landschaft |
| EPI_ISL_603458 | 10/8/2020 | 10/30/2020 | Europe / Switzerland / Schwyz           |
| EPI_ISL_603459 | 10/8/2020 | 10/30/2020 | Europe / Switzerland / Basel-Landschaft |
| EPI_ISL_603460 | 10/8/2020 | 10/30/2020 | Europe / Switzerland / Basel-Landschaft |
| EPI_ISL_603461 | 10/8/2020 | 10/30/2020 | Europe / Switzerland / Basel-Landschaft |
| EPI_ISL_603462 | 10/8/2020 | 10/30/2020 | Europe / Switzerland / Basel-Landschaft |
| EPI_ISL_603463 | 10/8/2020 | 10/30/2020 | Europe / Switzerland / Schwyz           |
| EPI_ISL_603464 | 10/8/2020 | 10/30/2020 | Europe / Switzerland / Schwyz           |
| EPI_ISL_603465 | 10/8/2020 | 10/30/2020 | Europe / Switzerland / Schwyz           |
| EPI_ISL_603466 | 10/8/2020 | 10/30/2020 | Europe / Switzerland / Nidwalden        |
| EPI_ISL_603468 | 10/8/2020 | 10/30/2020 | Europe / Switzerland / Schwyz           |
| EPI_ISL_603469 | 10/8/2020 | 10/30/2020 | Europe / Switzerland / Aargau           |
| EPI_ISL_603470 | 10/8/2020 | 10/30/2020 | Europe / Switzerland / Aargau           |
| EPI_ISL_603471 | 10/8/2020 | 10/30/2020 | Europe / Switzerland / Lucerne          |
| EPI_ISL_603472 | 10/8/2020 | 10/30/2020 | Europe / Switzerland / Schwyz           |
| EPI_ISL_603473 | 10/8/2020 | 10/30/2020 | Europe / Switzerland / Schwyz           |
| EPI_ISL_603474 | 10/8/2020 | 10/30/2020 | Europe / Switzerland / Schwyz           |
| EPI_ISL_603475 | 10/8/2020 | 10/30/2020 | Europe / Switzerland / Aargau           |
| EPI_ISL_603476 | 10/8/2020 | 10/30/2020 | Europe / Switzerland / Schwyz           |
| EPI_ISL_603477 | 10/8/2020 | 10/30/2020 | Europe / Switzerland / Schwyz           |
| EPI_ISL_603478 | 10/8/2020 | 10/30/2020 | Europe / Switzerland / Aargau           |

|                |           |            |                                |
|----------------|-----------|------------|--------------------------------|
| EPI_ISL_603479 | 10/8/2020 | 10/30/2020 | Europe / Switzerland / Grisons |
| EPI_ISL_603480 | 10/8/2020 | 10/30/2020 | Europe / Switzerland / Grisons |
| EPI_ISL_603481 | 10/8/2020 | 10/30/2020 | Europe / Switzerland / Aargau  |
| EPI_ISL_603482 | 10/8/2020 | 10/30/2020 | Europe / Switzerland / Grisons |
| EPI_ISL_603483 | 10/8/2020 | 10/30/2020 | Europe / Switzerland / Schwyz  |
| EPI_ISL_603484 | 10/8/2020 | 10/30/2020 | Europe / Switzerland / Schwyz  |
| EPI_ISL_603485 | 10/8/2020 | 10/30/2020 | Europe / Switzerland / Grisons |
| EPI_ISL_603486 | 10/8/2020 | 10/30/2020 | Europe / Switzerland / Schwyz  |
| EPI_ISL_603488 | 10/8/2020 | 10/30/2020 | Europe / Switzerland / Grisons |
| EPI_ISL_603489 | 10/8/2020 | 10/30/2020 | Europe / Switzerland / Zurich  |
| EPI_ISL_603490 | 10/8/2020 | 10/30/2020 | Europe / Switzerland / Zurich  |
| EPI_ISL_603491 | 10/8/2020 | 10/30/2020 | Europe / Switzerland / Zurich  |
| EPI_ISL_603492 | 10/8/2020 | 10/30/2020 | Europe / Switzerland / Zurich  |
| EPI_ISL_603493 | 10/8/2020 | 10/30/2020 | Europe / Switzerland / Zurich  |
| EPI_ISL_603494 | 10/8/2020 | 10/30/2020 | Europe / Switzerland / Zurich  |
| EPI_ISL_603495 | 10/8/2020 | 10/30/2020 | Europe / Switzerland / Zurich  |
| EPI_ISL_603496 | 10/8/2020 | 10/30/2020 | Europe / Switzerland / Zurich  |
| EPI_ISL_603497 | 10/8/2020 | 10/30/2020 | Europe / Switzerland / Zurich  |
| EPI_ISL_603498 | 10/8/2020 | 10/30/2020 | Europe / Switzerland / Zurich  |
| EPI_ISL_603499 | 10/8/2020 | 10/30/2020 | Europe / Switzerland / Zurich  |
| EPI_ISL_603500 | 10/8/2020 | 10/30/2020 | Europe / Switzerland / Zurich  |
| EPI_ISL_603501 | 10/8/2020 | 10/30/2020 | Europe / Switzerland / Bern    |
| EPI_ISL_603502 | 10/8/2020 | 10/30/2020 | Europe / Switzerland / Zurich  |
| EPI_ISL_603503 | 10/8/2020 | 10/30/2020 | Europe / Switzerland / Zurich  |
| EPI_ISL_603504 | 10/8/2020 | 10/30/2020 | Europe / Switzerland / St Gall |
| EPI_ISL_603505 | 10/8/2020 | 10/30/2020 | Europe / Switzerland / Zurich  |
| EPI_ISL_603506 | 10/8/2020 | 10/30/2020 | Europe / Switzerland / Zurich  |
| EPI_ISL_603507 | 10/8/2020 | 10/30/2020 | Europe / Switzerland / Zurich  |
| EPI_ISL_603508 | 10/8/2020 | 10/30/2020 | Europe / Switzerland / Zurich  |
| EPI_ISL_603509 | 10/8/2020 | 10/30/2020 | Europe / Switzerland / Zurich  |
| EPI_ISL_603511 | 10/8/2020 | 10/30/2020 | Europe / Switzerland / Bern    |
| EPI_ISL_603512 | 10/8/2020 | 10/30/2020 | Europe / Switzerland / Zurich  |
| EPI_ISL_603513 | 10/8/2020 | 10/30/2020 | Europe / Switzerland / Bern    |
| EPI_ISL_603514 | 10/8/2020 | 10/30/2020 | Europe / Switzerland / Zurich  |
| EPI_ISL_603515 | 10/8/2020 | 10/30/2020 | Europe / Switzerland / Zurich  |
| EPI_ISL_603516 | 10/8/2020 | 10/30/2020 | Europe / Switzerland / Bern    |
| EPI_ISL_603517 | 10/8/2020 | 10/30/2020 | Europe / Switzerland / Zurich  |
| EPI_ISL_603518 | 10/8/2020 | 10/30/2020 | Europe / Switzerland / Bern    |
| EPI_ISL_603519 | 10/8/2020 | 10/30/2020 | Europe / Switzerland / Vaud    |
| EPI_ISL_603520 | 10/8/2020 | 10/30/2020 | Europe / Switzerland / Bern    |
| EPI_ISL_603521 | 10/7/2020 | 10/30/2020 | Europe / Switzerland / Bern    |
| EPI_ISL_603522 | 10/7/2020 | 10/30/2020 | Europe / Switzerland / Bern    |
| EPI_ISL_603523 | 10/7/2020 | 10/30/2020 | Europe / Switzerland / Vaud    |
| EPI_ISL_603524 | 10/7/2020 | 10/30/2020 | Europe / Switzerland / Bern    |
| EPI_ISL_603525 | 10/7/2020 | 10/30/2020 | Europe / Switzerland / Zurich  |
| EPI_ISL_603526 | 10/7/2020 | 10/30/2020 | Europe / Switzerland / Ticino  |
| EPI_ISL_603527 | 10/7/2020 | 10/30/2020 | Europe / Switzerland / Bern    |

|                |           |            |                                               |
|----------------|-----------|------------|-----------------------------------------------|
| EPI_ISL_603529 | 10/7/2020 | 10/30/2020 | Europe / Switzerland / Appenzell Ausserrhoden |
| EPI_ISL_603531 | 10/7/2020 | 10/30/2020 | Europe / Switzerland / St Gall                |
| EPI_ISL_603534 | 10/7/2020 | 10/30/2020 | Europe / Switzerland / Grisons                |
| EPI_ISL_603536 | 10/7/2020 | 10/30/2020 | Europe / Switzerland / Bern                   |
| EPI_ISL_603537 | 10/7/2020 | 10/30/2020 | Europe / Switzerland / Bern                   |
| EPI_ISL_603538 | 10/7/2020 | 10/30/2020 | Europe / Switzerland / Bern                   |
| EPI_ISL_603540 | 10/7/2020 | 10/30/2020 | Europe / Switzerland / Uri                    |
| EPI_ISL_603541 | 10/7/2020 | 10/30/2020 | Europe / Switzerland / Geneva                 |
| EPI_ISL_603542 | 10/7/2020 | 10/30/2020 | Europe / Switzerland / Geneva                 |
| EPI_ISL_603543 | 10/7/2020 | 10/30/2020 | Europe / Switzerland / Geneva                 |
| EPI_ISL_603544 | 10/7/2020 | 10/30/2020 | Europe / Switzerland / Zurich                 |
| EPI_ISL_603545 | 10/7/2020 | 10/30/2020 | Europe / Switzerland / Geneva                 |
| EPI_ISL_603547 | 10/8/2020 | 10/30/2020 | Europe / Switzerland / Basel-Landschaft       |
| EPI_ISL_603548 | 10/8/2020 | 10/30/2020 | Europe / Switzerland / Aargau                 |
| EPI_ISL_603549 | 10/8/2020 | 10/30/2020 | Europe / Switzerland / Basel-Landschaft       |
| EPI_ISL_603550 | 10/8/2020 | 10/30/2020 | Europe / Switzerland / Basel-Landschaft       |
| EPI_ISL_603551 | 10/8/2020 | 10/30/2020 | Europe / Switzerland / Aargau                 |
| EPI_ISL_603552 | 10/8/2020 | 10/30/2020 | Europe / Switzerland / Basel-Landschaft       |
| EPI_ISL_603553 | 10/8/2020 | 10/30/2020 | Europe / Switzerland / Basel-Landschaft       |
| EPI_ISL_603554 | 10/8/2020 | 10/30/2020 | Europe / Switzerland / Zurich                 |
| EPI_ISL_603555 | 10/8/2020 | 10/30/2020 | Europe / Switzerland / Zurich                 |
| EPI_ISL_603556 | 10/8/2020 | 10/30/2020 | Europe / Switzerland / Bern                   |
| EPI_ISL_603557 | 10/8/2020 | 10/30/2020 | Europe / Switzerland / Bern                   |
| EPI_ISL_603558 | 10/8/2020 | 10/30/2020 | Europe / Switzerland / Thurgau                |
| EPI_ISL_603559 | 10/8/2020 | 10/30/2020 | Europe / Switzerland / Schwyz                 |
| EPI_ISL_603560 | 10/8/2020 | 10/30/2020 | Europe / Switzerland / Zurich                 |
| EPI_ISL_603561 | 10/8/2020 | 10/30/2020 | Europe / Switzerland / Bern                   |
| EPI_ISL_603562 | 10/8/2020 | 10/30/2020 | Europe / Switzerland / Wallis                 |
| EPI_ISL_603563 | 10/8/2020 | 10/30/2020 | Europe / Switzerland / Wallis                 |
| EPI_ISL_603564 | 10/8/2020 | 10/30/2020 | Europe / Switzerland / Vaud                   |
| EPI_ISL_603565 | 10/8/2020 | 10/30/2020 | Europe / Switzerland / Vaud                   |
| EPI_ISL_603566 | 10/8/2020 | 10/30/2020 | Europe / Switzerland / Vaud                   |
| EPI_ISL_603567 | 10/8/2020 | 10/30/2020 | Europe / Switzerland / Basel-Landschaft       |
| EPI_ISL_603568 | 10/8/2020 | 10/30/2020 | Europe / Switzerland / Vaud                   |
| EPI_ISL_603569 | 10/8/2020 | 10/30/2020 | Europe / Switzerland / Basel-Landschaft       |
| EPI_ISL_603570 | 10/8/2020 | 10/30/2020 | Europe / Switzerland / Vaud                   |
| EPI_ISL_603571 | 10/8/2020 | 10/30/2020 | Europe / Switzerland / Bern                   |
| EPI_ISL_603572 | 10/8/2020 | 10/30/2020 | Europe / Switzerland / Bern                   |
| EPI_ISL_603573 | 10/8/2020 | 10/30/2020 | Europe / Switzerland / Vaud                   |
| EPI_ISL_603574 | 10/8/2020 | 10/30/2020 | Europe / Switzerland / Vaud                   |
| EPI_ISL_603575 | 10/8/2020 | 10/30/2020 | Europe / Switzerland / Vaud                   |
| EPI_ISL_603576 | 10/8/2020 | 10/30/2020 | Europe / Switzerland / Vaud                   |
| EPI_ISL_603577 | 10/8/2020 | 10/30/2020 | Europe / Switzerland / Wallis                 |
| EPI_ISL_603578 | 10/8/2020 | 10/30/2020 | Europe / Switzerland / Bern                   |
| EPI_ISL_603579 | 10/8/2020 | 10/30/2020 | Europe / Switzerland / Bern                   |
| EPI_ISL_603580 | 10/8/2020 | 10/30/2020 | Europe / Switzerland / Bern                   |
| EPI_ISL_603581 | 10/8/2020 | 10/30/2020 | Europe / Switzerland / Bern                   |



|                |            |            |                                    |
|----------------|------------|------------|------------------------------------|
| EPI_ISL_603582 | 10/8/2020  | 10/30/2020 | Europe / Switzerland / Grisons     |
| EPI_ISL_603583 | 10/8/2020  | 10/30/2020 | Europe / Switzerland / Bern        |
| EPI_ISL_603584 | 10/8/2020  | 10/30/2020 | Europe / Switzerland / Ticino      |
| EPI_ISL_603585 | 10/8/2020  | 10/30/2020 | Europe / Switzerland / Ticino      |
| EPI_ISL_603586 | 10/8/2020  | 10/30/2020 | Europe / Switzerland / Bern        |
| EPI_ISL_603587 | 10/8/2020  | 10/30/2020 | Europe / Switzerland / Bern        |
| EPI_ISL_603588 | 10/8/2020  | 10/30/2020 | Europe / Switzerland / Bern        |
| EPI_ISL_603589 | 10/8/2020  | 10/30/2020 | Europe / Switzerland / Grisons     |
| EPI_ISL_603590 | 10/8/2020  | 10/30/2020 | Europe / Switzerland / Bern        |
| EPI_ISL_603591 | 10/8/2020  | 10/30/2020 | Europe / Switzerland / Bern        |
| EPI_ISL_603592 | 10/8/2020  | 10/30/2020 | Europe / Switzerland / Bern        |
| EPI_ISL_603593 | 10/8/2020  | 10/30/2020 | Europe / Switzerland / Bern        |
| EPI_ISL_603594 | 10/8/2020  | 10/30/2020 | Europe / Switzerland / Bern        |
| EPI_ISL_603595 | 10/8/2020  | 10/30/2020 | Europe / Switzerland / Geneva      |
| EPI_ISL_603596 | 10/8/2020  | 10/30/2020 | Europe / Switzerland / Bern        |
| EPI_ISL_603597 | 10/8/2020  | 10/30/2020 | Europe / Switzerland / Geneva      |
| EPI_ISL_603598 | 10/8/2020  | 10/30/2020 | Europe / Switzerland / Bern        |
| EPI_ISL_603599 | 10/8/2020  | 10/30/2020 | Europe / Switzerland / Bern        |
| EPI_ISL_603600 | 10/13/2020 | 10/30/2020 | Europe / Switzerland / Schwyz      |
| EPI_ISL_603601 | 10/13/2020 | 10/30/2020 | Europe / Switzerland / Schwyz      |
| EPI_ISL_603602 | 10/13/2020 | 10/30/2020 | Europe / Switzerland / Bern        |
| EPI_ISL_603603 | 10/13/2020 | 10/30/2020 | Europe / Switzerland / Schwyz      |
| EPI_ISL_603604 | 10/13/2020 | 10/30/2020 | Europe / Switzerland / Schwyz      |
| EPI_ISL_603606 | 10/13/2020 | 10/30/2020 | Europe / Switzerland / Aargau      |
| EPI_ISL_603607 | 10/13/2020 | 10/30/2020 | Europe / Switzerland / Vaud        |
| EPI_ISL_603608 | 10/13/2020 | 10/30/2020 | Europe / Switzerland / Vaud        |
| EPI_ISL_603609 | 10/13/2020 | 10/30/2020 | Europe / Switzerland / Vaud        |
| EPI_ISL_603610 | 10/13/2020 | 10/30/2020 | Europe / Switzerland / Vaud        |
| EPI_ISL_603611 | 10/13/2020 | 10/30/2020 | Europe / Switzerland / Vaud        |
| EPI_ISL_603612 | 10/13/2020 | 10/30/2020 | Europe / Switzerland / Vaud        |
| EPI_ISL_603613 | 10/13/2020 | 10/30/2020 | Europe / Switzerland / Vaud        |
| EPI_ISL_603614 | 10/13/2020 | 10/30/2020 | Europe / Switzerland / Vaud        |
| EPI_ISL_603615 | 10/13/2020 | 10/30/2020 | Europe / Switzerland / Vaud        |
| EPI_ISL_603616 | 10/13/2020 | 10/30/2020 | Europe / Switzerland / Vaud        |
| EPI_ISL_603617 | 10/13/2020 | 10/30/2020 | Europe / Switzerland / Vaud        |
| EPI_ISL_603618 | 10/13/2020 | 10/30/2020 | Europe / Switzerland / Vaud        |
| EPI_ISL_603619 | 10/13/2020 | 10/30/2020 | Europe / Switzerland / Zurich      |
| EPI_ISL_603620 | 10/13/2020 | 10/30/2020 | Europe / Switzerland / Basel-Stadt |
| EPI_ISL_603621 | 10/13/2020 | 10/30/2020 | Europe / Switzerland / Schwyz      |
| EPI_ISL_603622 | 10/13/2020 | 10/30/2020 | Europe / Switzerland / Ticino      |
| EPI_ISL_603623 | 10/13/2020 | 10/30/2020 | Europe / Switzerland / Uri         |
| EPI_ISL_603624 | 10/13/2020 | 10/30/2020 | Europe / Switzerland / Uri         |
| EPI_ISL_603625 | 10/13/2020 | 10/30/2020 | Europe / Switzerland / Vaud        |
| EPI_ISL_603626 | 10/13/2020 | 10/30/2020 | Europe / Switzerland / Vaud        |
| EPI_ISL_603627 | 10/13/2020 | 10/30/2020 | Europe / Switzerland / Vaud        |
| EPI_ISL_603628 | 10/13/2020 | 10/30/2020 | Europe / Switzerland / Uri         |
| EPI_ISL_603629 | 10/13/2020 | 10/30/2020 | Europe / Switzerland / Vaud        |

|                |            |            |                                         |
|----------------|------------|------------|-----------------------------------------|
| EPI_ISL_603630 | 10/13/2020 | 10/30/2020 | Europe / Switzerland / Vaud             |
| EPI_ISL_603631 | 10/13/2020 | 10/30/2020 | Europe / Switzerland / Wallis           |
| EPI_ISL_603632 | 10/13/2020 | 10/30/2020 | Europe / Switzerland / Vaud             |
| EPI_ISL_603633 | 10/13/2020 | 10/30/2020 | Europe / Switzerland / Vaud             |
| EPI_ISL_603634 | 10/13/2020 | 10/30/2020 | Europe / Switzerland / Vaud             |
| EPI_ISL_603635 | 10/13/2020 | 10/30/2020 | Europe / Switzerland / Vaud             |
| EPI_ISL_603636 | 10/13/2020 | 10/30/2020 | Europe / Switzerland / Ticino           |
| EPI_ISL_603637 | 10/13/2020 | 10/30/2020 | Europe / Switzerland / Bern             |
| EPI_ISL_603638 | 10/13/2020 | 10/30/2020 | Europe / Switzerland / Bern             |
| EPI_ISL_603639 | 10/13/2020 | 10/30/2020 | Europe / Switzerland / Vaud             |
| EPI_ISL_603640 | 10/13/2020 | 10/30/2020 | Europe / Switzerland / Vaud             |
| EPI_ISL_603641 | 10/13/2020 | 10/30/2020 | Europe / Switzerland / Jura             |
| EPI_ISL_603642 | 10/14/2020 | 10/30/2020 | Europe / Switzerland / Wallis           |
| EPI_ISL_603643 | 10/14/2020 | 10/30/2020 | Europe / Switzerland / Wallis           |
| EPI_ISL_603644 | 10/14/2020 | 10/30/2020 | Europe / Switzerland / Thurgau          |
| EPI_ISL_603645 | 10/14/2020 | 10/30/2020 | Europe / Switzerland / Wallis           |
| EPI_ISL_603646 | 10/14/2020 | 10/30/2020 | Europe / Switzerland / Wallis           |
| EPI_ISL_603647 | 10/14/2020 | 10/30/2020 | Europe / Switzerland / Bern             |
| EPI_ISL_603648 | 10/14/2020 | 10/30/2020 | Europe / Switzerland / Bern             |
| EPI_ISL_603649 | 10/13/2020 | 10/30/2020 | Europe / Switzerland / Vaud             |
| EPI_ISL_603650 | 10/14/2020 | 10/30/2020 | Europe / Switzerland / Basel-Landschaft |
| EPI_ISL_603651 | 10/14/2020 | 10/30/2020 | Europe / Switzerland / Bern             |
| EPI_ISL_603652 | 10/14/2020 | 10/30/2020 | Europe / Switzerland / Basel-Landschaft |
| EPI_ISL_603653 | 10/14/2020 | 10/30/2020 | Europe / Switzerland / Bern             |
| EPI_ISL_603654 | 10/14/2020 | 10/30/2020 | Europe / Switzerland / Basel-Landschaft |
| EPI_ISL_603655 | 10/14/2020 | 10/30/2020 | Europe / Switzerland / Basel-Landschaft |
| EPI_ISL_603656 | 10/14/2020 | 10/30/2020 | Europe / Switzerland / Wallis           |
| EPI_ISL_603657 | 10/14/2020 | 10/30/2020 | Europe / Switzerland / Basel-Landschaft |
| EPI_ISL_603658 | 10/14/2020 | 10/30/2020 | Europe / Switzerland / Zurich           |
| EPI_ISL_603659 | 10/14/2020 | 10/30/2020 | Europe / Switzerland / Vaud             |
| EPI_ISL_603660 | 10/14/2020 | 10/30/2020 | Europe / Switzerland / Zurich           |
| EPI_ISL_603661 | 10/14/2020 | 10/30/2020 | Europe / Switzerland / Vaud             |
| EPI_ISL_603662 | 10/14/2020 | 10/30/2020 | Europe / Switzerland / Zurich           |
| EPI_ISL_603663 | 10/14/2020 | 10/30/2020 | Europe / Switzerland / Vaud             |
| EPI_ISL_603664 | 10/14/2020 | 10/30/2020 | Europe / Switzerland / Wallis           |
| EPI_ISL_603665 | 10/14/2020 | 10/30/2020 | Europe / Switzerland / Vaud             |
| EPI_ISL_603666 | 10/14/2020 | 10/30/2020 | Europe / Switzerland / Wallis           |
| EPI_ISL_603667 | 10/14/2020 | 10/30/2020 | Europe / Switzerland / Uri              |
| EPI_ISL_603668 | 10/14/2020 | 10/30/2020 | Europe / Switzerland / Bern             |
| EPI_ISL_603669 | 10/14/2020 | 10/30/2020 | Europe / Switzerland / Grisons          |
| EPI_ISL_603670 | 10/14/2020 | 10/30/2020 | Europe / Switzerland / Vaud             |
| EPI_ISL_603671 | 10/14/2020 | 10/30/2020 | Europe / Switzerland / Ticino           |
| EPI_ISL_603672 | 10/14/2020 | 10/30/2020 | Europe / Switzerland / Uri              |
| EPI_ISL_603673 | 10/14/2020 | 10/30/2020 | Europe / Switzerland / Uri              |
| EPI_ISL_603674 | 10/14/2020 | 10/30/2020 | Europe / Switzerland / Uri              |
| EPI_ISL_603675 | 10/14/2020 | 10/30/2020 | Europe / Switzerland / Wallis           |
| EPI_ISL_603676 | 10/14/2020 | 10/30/2020 | Europe / Switzerland / Basel-Landschaft |

|                |            |            |                                         |
|----------------|------------|------------|-----------------------------------------|
| EPI_ISL_603677 | 10/14/2020 | 10/30/2020 | Europe / Switzerland / Vaud             |
| EPI_ISL_603678 | 10/14/2020 | 10/30/2020 | Europe / Switzerland / Vaud             |
| EPI_ISL_603679 | 10/14/2020 | 10/30/2020 | Europe / Switzerland / Grisons          |
| EPI_ISL_603680 | 10/14/2020 | 10/30/2020 | Europe / Switzerland / Vaud             |
| EPI_ISL_603681 | 10/14/2020 | 10/30/2020 | Europe / Switzerland / Vaud             |
| EPI_ISL_603682 | 10/14/2020 | 10/30/2020 | Europe / Switzerland / Basel-Stadt      |
| EPI_ISL_603683 | 10/14/2020 | 10/30/2020 | Europe / Switzerland / Vaud             |
| EPI_ISL_603684 | 10/14/2020 | 10/30/2020 | Europe / Switzerland / Geneva           |
| EPI_ISL_603685 | 10/14/2020 | 10/30/2020 | Europe / Switzerland / Geneva           |
| EPI_ISL_603686 | 10/14/2020 | 10/30/2020 | Europe / Switzerland / Geneva           |
| EPI_ISL_603687 | 10/14/2020 | 10/30/2020 | Europe / Switzerland / Geneva           |
| EPI_ISL_603688 | 10/14/2020 | 10/30/2020 | Europe / Switzerland / Bern             |
| EPI_ISL_603689 | 10/14/2020 | 10/30/2020 | Europe / Switzerland / Vaud             |
| EPI_ISL_603690 | 10/15/2020 | 10/30/2020 | Europe / Switzerland / Wallis           |
| EPI_ISL_603691 | 10/15/2020 | 10/30/2020 | Europe / Switzerland / Wallis           |
| EPI_ISL_603692 | 10/14/2020 | 10/30/2020 | Europe / Switzerland / Geneva           |
| EPI_ISL_603693 | 10/15/2020 | 10/30/2020 | Europe / Switzerland / Bern             |
| EPI_ISL_603694 | 10/15/2020 | 10/30/2020 | Europe / Switzerland / Wallis           |
| EPI_ISL_603695 | 10/15/2020 | 10/30/2020 | Europe / Switzerland / Wallis           |
| EPI_ISL_603696 | 10/14/2020 | 10/30/2020 | Europe / Switzerland / Geneva           |
| EPI_ISL_603697 | 10/14/2020 | 10/30/2020 | Europe / Switzerland / Vaud             |
| EPI_ISL_603698 | 10/14/2020 | 10/30/2020 | Europe / Switzerland / Vaud             |
| EPI_ISL_603699 | 10/15/2020 | 10/30/2020 | Europe / Switzerland / Bern             |
| EPI_ISL_603700 | 10/15/2020 | 10/30/2020 | Europe / Switzerland / Bern             |
| EPI_ISL_603702 | 10/15/2020 | 10/30/2020 | Europe / Switzerland / Bern             |
| EPI_ISL_603703 | 10/15/2020 | 10/30/2020 | Europe / Switzerland / Bern             |
| EPI_ISL_603704 | 10/15/2020 | 10/30/2020 | Europe / Switzerland / Bern             |
| EPI_ISL_603705 | 10/15/2020 | 10/30/2020 | Europe / Switzerland / Bern             |
| EPI_ISL_603706 | 10/15/2020 | 10/30/2020 | Europe / Switzerland / Bern             |
| EPI_ISL_603707 | 10/15/2020 | 10/30/2020 | Europe / Switzerland / Vaud             |
| EPI_ISL_603708 | 10/15/2020 | 10/30/2020 | Europe / Switzerland / Solothurn        |
| EPI_ISL_603709 | 10/15/2020 | 10/30/2020 | Europe / Switzerland / Vaud             |
| EPI_ISL_603710 | 10/15/2020 | 10/30/2020 | Europe / Switzerland / Vaud             |
| EPI_ISL_603711 | 10/15/2020 | 10/30/2020 | Europe / Switzerland / Vaud             |
| EPI_ISL_603712 | 10/15/2020 | 10/30/2020 | Europe / Switzerland / Basel-Landschaft |
| EPI_ISL_603713 | 10/15/2020 | 10/30/2020 | Europe / Switzerland / Vaud             |
| EPI_ISL_603714 | 10/15/2020 | 10/30/2020 | Europe / Switzerland / Vaud             |
| EPI_ISL_603715 | 10/15/2020 | 10/30/2020 | Europe / Switzerland / Vaud             |
| EPI_ISL_603716 | 10/15/2020 | 10/30/2020 | Europe / Switzerland / Vaud             |
| EPI_ISL_603717 | 10/15/2020 | 10/30/2020 | Europe / Switzerland / Schwyz           |
| EPI_ISL_603718 | 10/15/2020 | 10/30/2020 | Europe / Switzerland / Aargau           |
| EPI_ISL_603719 | 10/15/2020 | 10/30/2020 | Europe / Switzerland / Zurich           |
| EPI_ISL_603720 | 10/15/2020 | 10/30/2020 | Europe / Switzerland / Zurich           |
| EPI_ISL_603721 | 10/15/2020 | 10/30/2020 | Europe / Switzerland / Zurich           |
| EPI_ISL_603722 | 10/15/2020 | 10/30/2020 | Europe / Switzerland / Zurich           |
| EPI_ISL_603723 | 10/15/2020 | 10/30/2020 | Europe / Switzerland / Aargau           |
| EPI_ISL_603724 | 10/15/2020 | 10/30/2020 | Europe / Switzerland / Bern             |

|                |            |            |                                    |
|----------------|------------|------------|------------------------------------|
| EPI_ISL_603725 | 10/14/2020 | 10/30/2020 | Europe / Switzerland / Zug         |
| EPI_ISL_603726 | 10/15/2020 | 10/30/2020 | Europe / Switzerland / Uri         |
| EPI_ISL_603727 | 10/15/2020 | 10/30/2020 | Europe / Switzerland / Zug         |
| EPI_ISL_603728 | 10/15/2020 | 10/30/2020 | Europe / Switzerland / Uri         |
| EPI_ISL_603729 | 10/15/2020 | 10/30/2020 | Europe / Switzerland / Aargau      |
| EPI_ISL_603730 | 10/15/2020 | 10/30/2020 | Europe / Switzerland / Uri         |
| EPI_ISL_603731 | 10/15/2020 | 10/30/2020 | Europe / Switzerland / Bern        |
| EPI_ISL_603732 | 10/15/2020 | 10/30/2020 | Europe / Switzerland / Basel-Stadt |
| EPI_ISL_603733 | 10/15/2020 | 10/30/2020 | Europe / Switzerland / Zurich      |
| EPI_ISL_603734 | 10/15/2020 | 10/30/2020 | Europe / Switzerland / Solothurn   |
| EPI_ISL_603735 | 10/15/2020 | 10/30/2020 | Europe / Switzerland / Ticino      |
| EPI_ISL_603736 | 10/15/2020 | 10/30/2020 | Europe / Switzerland / Zurich      |
| EPI_ISL_603737 | 10/15/2020 | 10/30/2020 | Europe / Switzerland / Zurich      |
| EPI_ISL_603738 | 10/15/2020 | 10/30/2020 | Europe / Switzerland / Solothurn   |
| EPI_ISL_603739 | 10/15/2020 | 10/30/2020 | Europe / Switzerland / Solothurn   |
| EPI_ISL_603740 | 10/15/2020 | 10/30/2020 | Europe / Switzerland / Geneva      |
| EPI_ISL_603741 | 10/15/2020 | 10/30/2020 | Europe / Switzerland / Vaud        |
| EPI_ISL_603742 | 10/15/2020 | 10/30/2020 | Europe / Switzerland / Vaud        |
| EPI_ISL_603743 | 10/15/2020 | 10/30/2020 | Europe / Switzerland / Uri         |
| EPI_ISL_603744 | 10/15/2020 | 10/30/2020 | Europe / Switzerland / Uri         |
| EPI_ISL_603745 | 10/15/2020 | 10/30/2020 | Europe / Switzerland / Uri         |
| EPI_ISL_603746 | 10/15/2020 | 10/30/2020 | Europe / Switzerland / Vaud        |
| EPI_ISL_603747 | 10/15/2020 | 10/30/2020 | Europe / Switzerland / Vaud        |
| EPI_ISL_603748 | 10/15/2020 | 10/30/2020 | Europe / Switzerland / Uri         |
| EPI_ISL_603749 | 10/15/2020 | 10/30/2020 | Europe / Switzerland / Vaud        |
| EPI_ISL_603750 | 10/15/2020 | 10/30/2020 | Europe / Switzerland / Uri         |
| EPI_ISL_603751 | 10/15/2020 | 10/30/2020 | Europe / Switzerland / Uri         |
| EPI_ISL_603752 | 10/15/2020 | 10/30/2020 | Europe / Switzerland / Geneva      |
| EPI_ISL_603753 | 10/15/2020 | 10/30/2020 | Europe / Switzerland / Vaud        |
| EPI_ISL_603754 | 10/15/2020 | 10/30/2020 | Europe / Switzerland / Vaud        |
| EPI_ISL_603755 | 10/15/2020 | 10/30/2020 | Europe / Switzerland / Vaud        |
| EPI_ISL_603756 | 10/15/2020 | 10/30/2020 | Europe / Switzerland / Bern        |
| EPI_ISL_603758 | 10/15/2020 | 10/30/2020 | Europe / Switzerland / Vaud        |
| EPI_ISL_603759 | 3/17/2020  | 10/30/2020 | North America / USA / Arizona      |
| EPI_ISL_603760 | 3/18/2020  | 10/30/2020 | North America / USA / Arizona      |
| EPI_ISL_603761 | 3/17/2020  | 10/30/2020 | North America / USA / California   |
| EPI_ISL_603762 | 3/17/2020  | 10/30/2020 | North America / USA / California   |
| EPI_ISL_603763 | 3/17/2020  | 10/30/2020 | North America / USA / California   |
| EPI_ISL_603764 | 3/17/2020  | 10/30/2020 | North America / USA / California   |
| EPI_ISL_603765 | 3/17/2020  | 10/30/2020 | North America / USA / California   |
| EPI_ISL_603766 | 3/17/2020  | 10/30/2020 | North America / USA / California   |
| EPI_ISL_603767 | 3/17/2020  | 10/30/2020 | North America / USA / California   |
| EPI_ISL_603768 | 3/17/2020  | 10/30/2020 | North America / USA / California   |
| EPI_ISL_603769 | 3/17/2020  | 10/30/2020 | North America / USA / California   |
| EPI_ISL_603770 | 3/17/2020  | 10/30/2020 | North America / USA / California   |
| EPI_ISL_603771 | 3/17/2020  | 10/30/2020 | North America / USA / California   |
| EPI_ISL_603772 | 3/17/2020  | 10/30/2020 | North America / USA / California   |













|                |           |            |                                   |
|----------------|-----------|------------|-----------------------------------|
| EPI_ISL_604010 | 3/17/2020 | 10/30/2020 | North America / USA / Minnesota   |
| EPI_ISL_604011 | 3/16/2020 | 10/30/2020 | North America / USA / Minnesota   |
| EPI_ISL_604012 | 3/18/2020 | 10/30/2020 | North America / USA / Oregon      |
| EPI_ISL_604013 | 3/18/2020 | 10/30/2020 | North America / USA / Washington  |
| EPI_ISL_604014 | 3/17/2020 | 10/30/2020 | North America / USA / Arizona     |
| EPI_ISL_604015 | 3/17/2020 | 10/30/2020 | North America / USA / Arizona     |
| EPI_ISL_604016 | 3/17/2020 | 10/30/2020 | North America / USA / Arizona     |
| EPI_ISL_604017 | 3/15/2020 | 10/30/2020 | North America / USA / California  |
| EPI_ISL_604018 | 3/15/2020 | 10/30/2020 | North America / USA / California  |
| EPI_ISL_604019 | 3/23/2020 | 10/30/2020 | North America / USA / California  |
| EPI_ISL_604020 | 3/15/2020 | 10/30/2020 | North America / USA / California  |
| EPI_ISL_604021 | 3/15/2020 | 10/30/2020 | North America / USA / Connecticut |
| EPI_ISL_604022 | 3/17/2020 | 10/30/2020 | North America / USA / Florida     |
| EPI_ISL_604023 | 3/16/2020 | 10/30/2020 | North America / USA / Florida     |
| EPI_ISL_604024 | 3/16/2020 | 10/30/2020 | North America / USA / Georgia     |
| EPI_ISL_604025 | 3/16/2020 | 10/30/2020 | North America / USA / Georgia     |
| EPI_ISL_604026 | 3/16/2020 | 10/30/2020 | North America / USA / Georgia     |
| EPI_ISL_604027 | 3/16/2020 | 10/30/2020 | North America / USA / Georgia     |
| EPI_ISL_604028 | 3/16/2020 | 10/30/2020 | North America / USA / Idaho       |
| EPI_ISL_604029 | 3/17/2020 | 10/30/2020 | North America / USA / Idaho       |
| EPI_ISL_604030 | 3/18/2020 | 10/30/2020 | North America / USA / Idaho       |
| EPI_ISL_604031 | 3/17/2020 | 10/30/2020 | North America / USA / Idaho       |
| EPI_ISL_604032 | 3/16/2020 | 10/30/2020 | North America / USA / Idaho       |
| EPI_ISL_604033 | 3/18/2020 | 10/30/2020 | North America / USA / Idaho       |
| EPI_ISL_604034 | 3/18/2020 | 10/30/2020 | North America / USA / Idaho       |
| EPI_ISL_604035 | 3/17/2020 | 10/30/2020 | North America / USA / Idaho       |
| EPI_ISL_604036 | 3/17/2020 | 10/30/2020 | North America / USA / Indiana     |
| EPI_ISL_604037 | 3/16/2020 | 10/30/2020 | North America / USA / Maine       |
| EPI_ISL_604038 | 3/18/2020 | 10/30/2020 | North America / USA / Michigan    |
| EPI_ISL_604039 | 3/18/2020 | 10/30/2020 | North America / USA / Michigan    |
| EPI_ISL_604040 | 3/18/2020 | 10/30/2020 | North America / USA / Michigan    |
| EPI_ISL_604041 | 3/18/2020 | 10/30/2020 | North America / USA / Michigan    |
| EPI_ISL_604042 | 3/18/2020 | 10/30/2020 | North America / USA / Michigan    |
| EPI_ISL_604043 | 3/17/2020 | 10/30/2020 | North America / USA / Michigan    |
| EPI_ISL_604044 | 3/18/2020 | 10/30/2020 | North America / USA / Michigan    |
| EPI_ISL_604045 | 3/18/2020 | 10/30/2020 | North America / USA / Michigan    |
| EPI_ISL_604046 | 3/17/2020 | 10/30/2020 | North America / USA / Michigan    |
| EPI_ISL_604047 | 3/17/2020 | 10/30/2020 | North America / USA / Michigan    |
| EPI_ISL_604048 | 3/17/2020 | 10/30/2020 | North America / USA / Michigan    |
| EPI_ISL_604049 | 3/18/2020 | 10/30/2020 | North America / USA / Michigan    |
| EPI_ISL_604050 | 3/17/2020 | 10/30/2020 | North America / USA / Michigan    |
| EPI_ISL_604051 | 3/18/2020 | 10/30/2020 | North America / USA / Michigan    |
| EPI_ISL_604052 | 3/17/2020 | 10/30/2020 | North America / USA / Michigan    |
| EPI_ISL_604053 | 3/18/2020 | 10/30/2020 | North America / USA / Michigan    |
| EPI_ISL_604054 | 3/17/2020 | 10/30/2020 | North America / USA / Michigan    |
| EPI_ISL_604055 | 3/17/2020 | 10/30/2020 | North America / USA / Michigan    |
| EPI_ISL_604056 | 3/17/2020 | 10/30/2020 | North America / USA / Michigan    |



|                |           |            |                                     |
|----------------|-----------|------------|-------------------------------------|
| EPI_ISL_604104 | 3/17/2020 | 10/30/2020 | North America / USA / California    |
| EPI_ISL_604105 | 3/17/2020 | 10/30/2020 | North America / USA / Connecticut   |
| EPI_ISL_604106 | 3/17/2020 | 10/30/2020 | North America / USA / Florida       |
| EPI_ISL_604107 | 3/17/2020 | 10/30/2020 | North America / USA / Massachusetts |
| EPI_ISL_604108 | 3/17/2020 | 10/30/2020 | North America / USA / Massachusetts |
| EPI_ISL_604109 | 3/17/2020 | 10/30/2020 | North America / USA / Massachusetts |
| EPI_ISL_604110 | 3/17/2020 | 10/30/2020 | North America / USA / Massachusetts |
| EPI_ISL_604111 | 3/17/2020 | 10/30/2020 | North America / USA / Massachusetts |
| EPI_ISL_604112 | 3/17/2020 | 10/30/2020 | North America / USA / Maine         |
| EPI_ISL_604113 | 3/17/2020 | 10/30/2020 | North America / USA / Maine         |
| EPI_ISL_604114 | 3/17/2020 | 10/30/2020 | North America / USA / Maine         |
| EPI_ISL_604115 | 3/16/2020 | 10/30/2020 | North America / USA / Utah          |
| EPI_ISL_604116 | 3/16/2020 | 10/30/2020 | North America / USA / Utah          |
| EPI_ISL_604117 | 3/14/2020 | 10/30/2020 | North America / USA / Utah          |
| EPI_ISL_604118 | 3/16/2020 | 10/30/2020 | North America / USA / Utah          |
| EPI_ISL_604119 | 3/12/2020 | 10/30/2020 | North America / USA / Utah          |
| EPI_ISL_604121 | 3/15/2020 | 10/30/2020 | North America / USA / Utah          |
| EPI_ISL_604122 | 3/14/2020 | 10/30/2020 | North America / USA / Utah          |
| EPI_ISL_604123 | 3/13/2020 | 10/30/2020 | North America / USA / Utah          |
| EPI_ISL_604124 | 3/16/2020 | 10/30/2020 | North America / USA / Utah          |
| EPI_ISL_604125 | 3/16/2020 | 10/30/2020 | North America / USA / Utah          |
| EPI_ISL_604126 | 3/15/2020 | 10/30/2020 | North America / USA / Utah          |
| EPI_ISL_604127 | 3/16/2020 | 10/30/2020 | North America / USA / Utah          |
| EPI_ISL_604128 | 3/15/2020 | 10/30/2020 | North America / USA / Utah          |
| EPI_ISL_604129 | 3/14/2020 | 10/30/2020 | North America / USA / Utah          |
| EPI_ISL_604130 | 3/15/2020 | 10/30/2020 | North America / USA / Utah          |
| EPI_ISL_604131 | 3/14/2020 | 10/30/2020 | North America / USA / Utah          |
| EPI_ISL_604132 | 3/14/2020 | 10/30/2020 | North America / USA / Utah          |
| EPI_ISL_604133 | 3/15/2020 | 10/30/2020 | North America / USA / Utah          |
| EPI_ISL_604134 | 3/14/2020 | 10/30/2020 | North America / USA / Utah          |
| EPI_ISL_604135 | 3/16/2020 | 10/30/2020 | North America / USA / Utah          |
| EPI_ISL_604136 | 3/14/2020 | 10/30/2020 | North America / USA / Utah          |
| EPI_ISL_604137 | 3/16/2020 | 10/30/2020 | North America / USA / Utah          |
| EPI_ISL_604138 | 3/16/2020 | 10/30/2020 | North America / USA / Utah          |
| EPI_ISL_604139 | 3/14/2020 | 10/30/2020 | North America / USA / Utah          |
| EPI_ISL_604140 | 3/16/2020 | 10/30/2020 | North America / USA / Utah          |
| EPI_ISL_604141 | 3/15/2020 | 10/30/2020 | North America / USA / Utah          |
| EPI_ISL_604142 | 3/16/2020 | 10/30/2020 | North America / USA / Utah          |
| EPI_ISL_604143 | 3/16/2020 | 10/30/2020 | North America / USA / Utah          |
| EPI_ISL_604144 | 3/14/2020 | 10/30/2020 | North America / USA / Utah          |
| EPI_ISL_604145 | 3/14/2020 | 10/30/2020 | North America / USA / Utah          |
| EPI_ISL_604146 | 3/15/2020 | 10/30/2020 | North America / USA / Utah          |
| EPI_ISL_604147 | 3/16/2020 | 10/30/2020 | North America / USA / Utah          |
| EPI_ISL_604148 | 3/16/2020 | 10/30/2020 | North America / USA / Utah          |
| EPI_ISL_604149 | 3/13/2020 | 10/30/2020 | North America / USA / Utah          |
| EPI_ISL_604150 | 3/14/2020 | 10/30/2020 | North America / USA / Utah          |
| EPI_ISL_604151 | 3/14/2020 | 10/30/2020 | North America / USA / Utah          |



|                |           |            |                                  |
|----------------|-----------|------------|----------------------------------|
| EPI_ISL_604200 | 3/16/2020 | 10/30/2020 | North America / USA / California |
| EPI_ISL_604201 | 3/15/2020 | 10/30/2020 | North America / USA / California |
| EPI_ISL_604202 | 3/16/2020 | 10/30/2020 | North America / USA / California |
| EPI_ISL_604203 | 3/16/2020 | 10/30/2020 | North America / USA / California |
| EPI_ISL_604204 | 3/15/2020 | 10/30/2020 | North America / USA / California |
| EPI_ISL_604205 | 3/16/2020 | 10/30/2020 | North America / USA / California |
| EPI_ISL_604206 | 3/16/2020 | 10/30/2020 | North America / USA / California |
| EPI_ISL_604207 | 3/15/2020 | 10/30/2020 | North America / USA / California |
| EPI_ISL_604208 | 3/14/2020 | 10/30/2020 | North America / USA / California |
| EPI_ISL_604209 | 3/16/2020 | 10/30/2020 | North America / USA / California |
| EPI_ISL_604211 | 3/15/2020 | 10/30/2020 | North America / USA / California |
| EPI_ISL_604212 | 3/16/2020 | 10/30/2020 | North America / USA / California |
| EPI_ISL_604213 | 3/16/2020 | 10/30/2020 | North America / USA / California |
| EPI_ISL_604214 | 3/15/2020 | 10/30/2020 | North America / USA / California |
| EPI_ISL_604215 | 3/16/2020 | 10/30/2020 | North America / USA / California |
| EPI_ISL_604216 | 3/16/2020 | 10/30/2020 | North America / USA / California |
| EPI_ISL_604217 | 3/15/2020 | 10/30/2020 | North America / USA / California |
| EPI_ISL_604218 | 3/16/2020 | 10/30/2020 | North America / USA / California |
| EPI_ISL_604219 | 3/14/2020 | 10/30/2020 | North America / USA / California |
| EPI_ISL_604220 | 3/16/2020 | 10/30/2020 | North America / USA / Colorado   |
| EPI_ISL_604221 | 3/15/2020 | 10/30/2020 | North America / USA / Colorado   |
| EPI_ISL_604222 | 3/13/2020 | 10/30/2020 | North America / USA / Georgia    |
| EPI_ISL_604223 | 3/14/2020 | 10/30/2020 | North America / USA / Indiana    |
| EPI_ISL_604224 | 3/15/2020 | 10/30/2020 | North America / USA / Louisiana  |
| EPI_ISL_604225 | 3/14/2020 | 10/30/2020 | North America / USA / Michigan   |
| EPI_ISL_604226 | 3/15/2020 | 10/30/2020 | North America / USA / Michigan   |
| EPI_ISL_604227 | 3/15/2020 | 10/30/2020 | North America / USA / Michigan   |
| EPI_ISL_604228 | 3/14/2020 | 10/30/2020 | North America / USA / New Jersey |
| EPI_ISL_604229 | 3/14/2020 | 10/30/2020 | North America / USA / New Jersey |
| EPI_ISL_604230 | 3/15/2020 | 10/30/2020 | North America / USA / New Jersey |
| EPI_ISL_604231 | 3/13/2020 | 10/30/2020 | North America / USA / New Jersey |
| EPI_ISL_604232 | 3/15/2020 | 10/30/2020 | North America / USA / New Jersey |
| EPI_ISL_604233 | 3/13/2020 | 10/30/2020 | North America / USA / New Jersey |
| EPI_ISL_604234 | 3/15/2020 | 10/30/2020 | North America / USA / New Jersey |
| EPI_ISL_604235 | 3/16/2020 | 10/30/2020 | North America / USA / New York   |
| EPI_ISL_604236 | 3/15/2020 | 10/30/2020 | North America / USA / New York   |
| EPI_ISL_604237 | 3/15/2020 | 10/30/2020 | North America / USA / New York   |
| EPI_ISL_604238 | 3/16/2020 | 10/30/2020 | North America / USA / New York   |
| EPI_ISL_604239 | 3/16/2020 | 10/30/2020 | North America / USA / New York   |
| EPI_ISL_604240 | 3/15/2020 | 10/30/2020 | North America / USA / New York   |
| EPI_ISL_604241 | 3/16/2020 | 10/30/2020 | North America / USA / New York   |
| EPI_ISL_604242 | 3/13/2020 | 10/30/2020 | North America / USA / New York   |
| EPI_ISL_604243 | 3/16/2020 | 10/30/2020 | North America / USA / New York   |
| EPI_ISL_604244 | 3/15/2020 | 10/30/2020 | North America / USA / New York   |
| EPI_ISL_604245 | 3/15/2020 | 10/30/2020 | North America / USA / New York   |
| EPI_ISL_604246 | 3/15/2020 | 10/30/2020 | North America / USA / New York   |
| EPI_ISL_604247 | 3/16/2020 | 10/30/2020 | North America / USA / New York   |







|                |           |            |                                     |
|----------------|-----------|------------|-------------------------------------|
| EPI_ISL_604343 | 3/17/2020 | 10/30/2020 | North America / USA / Massachusetts |
| EPI_ISL_604344 | 3/17/2020 | 10/30/2020 | North America / USA / Massachusetts |
| EPI_ISL_604345 | 3/17/2020 | 10/30/2020 | North America / USA / Massachusetts |
| EPI_ISL_604346 | 3/17/2020 | 10/30/2020 | North America / USA / Massachusetts |
| EPI_ISL_604347 | 3/15/2020 | 10/30/2020 | North America / USA / Minnesota     |
| EPI_ISL_604348 | 3/14/2020 | 10/30/2020 | North America / USA / Minnesota     |
| EPI_ISL_604349 | 3/15/2020 | 10/30/2020 | North America / USA / Minnesota     |
| EPI_ISL_604350 | 3/15/2020 | 10/30/2020 | North America / USA / Minnesota     |
| EPI_ISL_604351 | 3/16/2020 | 10/30/2020 | North America / USA / Minnesota     |
| EPI_ISL_604352 | 3/14/2020 | 10/30/2020 | North America / USA / Minnesota     |
| EPI_ISL_604353 | 3/15/2020 | 10/30/2020 | North America / USA / Minnesota     |
| EPI_ISL_604354 | 3/15/2020 | 10/30/2020 | North America / USA / Minnesota     |
| EPI_ISL_604355 | 3/15/2020 | 10/30/2020 | North America / USA / Minnesota     |
| EPI_ISL_604356 | 3/14/2020 | 10/30/2020 | North America / USA / Minnesota     |
| EPI_ISL_604357 | 3/17/2020 | 10/30/2020 | North America / USA / New York      |
| EPI_ISL_604358 | 3/18/2020 | 10/30/2020 | North America / USA / New York      |
| EPI_ISL_604359 | 3/18/2020 | 10/30/2020 | North America / USA / New York      |
| EPI_ISL_604360 | 3/16/2020 | 10/30/2020 | North America / USA / New York      |
| EPI_ISL_604361 | 3/17/2020 | 10/30/2020 | North America / USA / New York      |
| EPI_ISL_604362 | 3/17/2020 | 10/30/2020 | North America / USA / New York      |
| EPI_ISL_604363 | 3/18/2020 | 10/30/2020 | North America / USA / New York      |
| EPI_ISL_604364 | 3/17/2020 | 10/30/2020 | North America / USA / New York      |
| EPI_ISL_604365 | 3/18/2020 | 10/30/2020 | North America / USA / New York      |
| EPI_ISL_604366 | 3/16/2020 | 10/30/2020 | North America / USA / New York      |
| EPI_ISL_604367 | 3/18/2020 | 10/30/2020 | North America / USA / New York      |
| EPI_ISL_604368 | 3/17/2020 | 10/30/2020 | North America / USA / New York      |
| EPI_ISL_604369 | 3/18/2020 | 10/30/2020 | North America / USA / New York      |
| EPI_ISL_604370 | 3/17/2020 | 10/30/2020 | North America / USA / New York      |
| EPI_ISL_604371 | 3/18/2020 | 10/30/2020 | North America / USA / New York      |
| EPI_ISL_604372 | 3/18/2020 | 10/30/2020 | North America / USA / Ohio          |
| EPI_ISL_604373 | 3/18/2020 | 10/30/2020 | North America / USA / Pennsylvania  |
| EPI_ISL_604374 | 3/18/2020 | 10/30/2020 | North America / USA / Pennsylvania  |
| EPI_ISL_604375 | 3/17/2020 | 10/30/2020 | North America / USA / Pennsylvania  |
| EPI_ISL_604376 | 3/17/2020 | 10/30/2020 | North America / USA / Texas         |
| EPI_ISL_604377 | 3/17/2020 | 10/30/2020 | North America / USA / Texas         |
| EPI_ISL_604378 | 3/15/2020 | 10/30/2020 | North America / USA / Utah          |
| EPI_ISL_604379 | 3/15/2020 | 10/30/2020 | North America / USA / Utah          |
| EPI_ISL_604380 | 3/14/2020 | 10/30/2020 | North America / USA / Utah          |
| EPI_ISL_604381 | 3/16/2020 | 10/30/2020 | North America / USA / Utah          |
| EPI_ISL_604382 | 3/16/2020 | 10/30/2020 | North America / USA / Utah          |
| EPI_ISL_604383 | 3/14/2020 | 10/30/2020 | North America / USA / Utah          |
| EPI_ISL_604384 | 3/15/2020 | 10/30/2020 | North America / USA / Utah          |
| EPI_ISL_604385 | 3/15/2020 | 10/30/2020 | North America / USA / Utah          |
| EPI_ISL_604386 | 3/17/2020 | 10/30/2020 | North America / USA / Arkansas      |
| EPI_ISL_604387 | 3/18/2020 | 10/30/2020 | North America / USA / Arizona       |
| EPI_ISL_604388 | 3/18/2020 | 10/30/2020 | North America / USA / Arizona       |
| EPI_ISL_604389 | 3/18/2020 | 10/30/2020 | North America / USA / Arizona       |



|                |           |            |                                     |
|----------------|-----------|------------|-------------------------------------|
| EPI_ISL_604437 | 3/18/2020 | 10/30/2020 | North America / USA / California    |
| EPI_ISL_604438 | 3/18/2020 | 10/30/2020 | North America / USA / California    |
| EPI_ISL_604440 | 3/19/2020 | 10/30/2020 | North America / USA / California    |
| EPI_ISL_604441 | 3/18/2020 | 10/30/2020 | North America / USA / California    |
| EPI_ISL_604442 | 3/19/2020 | 10/30/2020 | North America / USA / California    |
| EPI_ISL_604443 | 3/18/2020 | 10/30/2020 | North America / USA / California    |
| EPI_ISL_604444 | 3/17/2020 | 10/30/2020 | North America / USA / California    |
| EPI_ISL_604445 | 3/19/2020 | 10/30/2020 | North America / USA / California    |
| EPI_ISL_604446 | 3/18/2020 | 10/30/2020 | North America / USA / California    |
| EPI_ISL_604447 | 3/14/2020 | 10/30/2020 | North America / USA / Connecticut   |
| EPI_ISL_604448 | 3/14/2020 | 10/30/2020 | North America / USA / Florida       |
| EPI_ISL_604449 | 3/14/2020 | 10/30/2020 | North America / USA / Georgia       |
| EPI_ISL_604450 | 3/14/2020 | 10/30/2020 | North America / USA / Georgia       |
| EPI_ISL_604451 | 3/14/2020 | 10/30/2020 | North America / USA / Georgia       |
| EPI_ISL_604452 | 3/13/2020 | 10/30/2020 | North America / USA / Hawaii        |
| EPI_ISL_604453 | 3/14/2020 | 10/30/2020 | North America / USA / Louisiana     |
| EPI_ISL_604454 | 3/14/2020 | 10/30/2020 | North America / USA / Louisiana     |
| EPI_ISL_604455 | 3/18/2020 | 10/30/2020 | North America / USA / Louisiana     |
| EPI_ISL_604456 | 3/14/2020 | 10/30/2020 | North America / USA / Massachusetts |
| EPI_ISL_604457 | 3/17/2020 | 10/30/2020 | North America / USA / Michigan      |
| EPI_ISL_604458 | 3/17/2020 | 10/30/2020 | North America / USA / Michigan      |
| EPI_ISL_604459 | 3/18/2020 | 10/30/2020 | North America / USA / Michigan      |
| EPI_ISL_604460 | 3/17/2020 | 10/30/2020 | North America / USA / Michigan      |
| EPI_ISL_604461 | 3/17/2020 | 10/30/2020 | North America / USA / Michigan      |
| EPI_ISL_604462 | 3/18/2020 | 10/30/2020 | North America / USA / Michigan      |
| EPI_ISL_604463 | 3/18/2020 | 10/30/2020 | North America / USA / Michigan      |
| EPI_ISL_604464 | 3/17/2020 | 10/30/2020 | North America / USA / Michigan      |
| EPI_ISL_604465 | 3/17/2020 | 10/30/2020 | North America / USA / Michigan      |
| EPI_ISL_604466 | 3/16/2020 | 10/30/2020 | North America / USA / Michigan      |
| EPI_ISL_604467 | 3/16/2020 | 10/30/2020 | North America / USA / Michigan      |
| EPI_ISL_604468 | 3/17/2020 | 10/30/2020 | North America / USA / Michigan      |
| EPI_ISL_604469 | 3/17/2020 | 10/30/2020 | North America / USA / Michigan      |
| EPI_ISL_604470 | 3/18/2020 | 10/30/2020 | North America / USA / Michigan      |
| EPI_ISL_604471 | 3/17/2020 | 10/30/2020 | North America / USA / Michigan      |
| EPI_ISL_604472 | 3/17/2020 | 10/30/2020 | North America / USA / Michigan      |
| EPI_ISL_604473 | 3/17/2020 | 10/30/2020 | North America / USA / Michigan      |
| EPI_ISL_604474 | 3/17/2020 | 10/30/2020 | North America / USA / Michigan      |
| EPI_ISL_604475 | 3/17/2020 | 10/30/2020 | North America / USA / Michigan      |
| EPI_ISL_604476 | 3/17/2020 | 10/30/2020 | North America / USA / Michigan      |
| EPI_ISL_604477 | 3/17/2020 | 10/30/2020 | North America / USA / Michigan      |
| EPI_ISL_604478 | 3/18/2020 | 10/30/2020 | North America / USA / Michigan      |
| EPI_ISL_604479 | 3/18/2020 | 10/30/2020 | North America / USA / Michigan      |
| EPI_ISL_604480 | 3/16/2020 | 10/30/2020 | North America / USA / Minnesota     |
| EPI_ISL_604481 | 3/17/2020 | 10/30/2020 | North America / USA / Missouri      |
| EPI_ISL_604482 | 3/17/2020 | 10/30/2020 | North America / USA / Nevada        |
| EPI_ISL_604483 | 3/17/2020 | 10/30/2020 | North America / USA / Nevada        |
| EPI_ISL_604484 | 3/14/2020 | 10/30/2020 | North America / USA / New York      |

|                |           |            |                                   |
|----------------|-----------|------------|-----------------------------------|
| EPI_ISL_604485 | 3/14/2020 | 10/30/2020 | North America / USA / Texas       |
| EPI_ISL_604486 | 3/20/2020 | 10/30/2020 | North America / USA / Texas       |
| EPI_ISL_604487 | 3/14/2020 | 10/30/2020 | North America / USA / Texas       |
| EPI_ISL_604488 | 3/17/2020 | 10/30/2020 | North America / USA / Texas       |
| EPI_ISL_604489 | 3/12/2020 | 10/30/2020 | North America / USA / Utah        |
| EPI_ISL_604490 | 3/13/2020 | 10/30/2020 | North America / USA / Utah        |
| EPI_ISL_604491 | 3/12/2020 | 10/30/2020 | North America / USA / Utah        |
| EPI_ISL_604492 | 3/12/2020 | 10/30/2020 | North America / USA / Utah        |
| EPI_ISL_604493 | 3/11/2020 | 10/30/2020 | North America / USA / Utah        |
| EPI_ISL_604494 | 3/14/2020 | 10/30/2020 | North America / USA / Utah        |
| EPI_ISL_604495 | 3/13/2020 | 10/30/2020 | North America / USA / Utah        |
| EPI_ISL_604496 | 3/16/2020 | 10/30/2020 | North America / USA / Utah        |
| EPI_ISL_604497 | 3/16/2020 | 10/30/2020 | North America / USA / Utah        |
| EPI_ISL_604498 | 3/13/2020 | 10/30/2020 | North America / USA / Utah        |
| EPI_ISL_604499 | 3/21/2020 | 10/30/2020 | North America / USA / Washington  |
| EPI_ISL_604500 | 3/21/2020 | 10/30/2020 | North America / USA / Wisconsin   |
| EPI_ISL_604501 | 3/15/2020 | 10/30/2020 | North America / USA / Arizona     |
| EPI_ISL_604502 | 3/12/2020 | 10/30/2020 | North America / USA / Arizona     |
| EPI_ISL_604503 | 3/15/2020 | 10/30/2020 | North America / USA / Arizona     |
| EPI_ISL_604504 | 3/15/2020 | 10/30/2020 | North America / USA / Arizona     |
| EPI_ISL_604505 | 3/15/2020 | 10/30/2020 | North America / USA / California  |
| EPI_ISL_604506 | 3/15/2020 | 10/30/2020 | North America / USA / California  |
| EPI_ISL_604507 | 3/15/2020 | 10/30/2020 | North America / USA / California  |
| EPI_ISL_604508 | 3/14/2020 | 10/30/2020 | North America / USA / California  |
| EPI_ISL_604509 | 3/15/2020 | 10/30/2020 | North America / USA / California  |
| EPI_ISL_604510 | 3/15/2020 | 10/30/2020 | North America / USA / California  |
| EPI_ISL_604511 | 3/15/2020 | 10/30/2020 | North America / USA / California  |
| EPI_ISL_604512 | 3/13/2020 | 10/30/2020 | North America / USA / California  |
| EPI_ISL_604513 | 3/14/2020 | 10/30/2020 | North America / USA / California  |
| EPI_ISL_604514 | 3/15/2020 | 10/30/2020 | North America / USA / California  |
| EPI_ISL_604515 | 3/15/2020 | 10/30/2020 | North America / USA / California  |
| EPI_ISL_604516 | 3/16/2020 | 10/30/2020 | North America / USA / Colorado    |
| EPI_ISL_604517 | 3/16/2020 | 10/30/2020 | North America / USA / Colorado    |
| EPI_ISL_604518 | 3/16/2020 | 10/30/2020 | North America / USA / Colorado    |
| EPI_ISL_604519 | 3/16/2020 | 10/30/2020 | North America / USA / Colorado    |
| EPI_ISL_604520 | 3/16/2020 | 10/30/2020 | North America / USA / Colorado    |
| EPI_ISL_604521 | 3/16/2020 | 10/30/2020 | North America / USA / Colorado    |
| EPI_ISL_604522 | 3/16/2020 | 10/30/2020 | North America / USA / Colorado    |
| EPI_ISL_604523 | 3/16/2020 | 10/30/2020 | North America / USA / Colorado    |
| EPI_ISL_604524 | 3/14/2020 | 10/30/2020 | North America / USA / Connecticut |
| EPI_ISL_604525 | 3/14/2020 | 10/30/2020 | North America / USA / Connecticut |
| EPI_ISL_604526 | 3/13/2020 | 10/30/2020 | North America / USA / Connecticut |
| EPI_ISL_604527 | 3/13/2020 | 10/30/2020 | North America / USA / Georgia     |
| EPI_ISL_604528 | 3/15/2020 | 10/30/2020 | North America / USA / Georgia     |
| EPI_ISL_604529 | 3/15/2020 | 10/30/2020 | North America / USA / Georgia     |
| EPI_ISL_604530 | 3/15/2020 | 10/30/2020 | North America / USA / Georgia     |
| EPI_ISL_604531 | 3/13/2020 | 10/30/2020 | North America / USA / Georgia     |

|                |           |            |                                  |
|----------------|-----------|------------|----------------------------------|
| EPI_ISL_604532 | 3/14/2020 | 10/30/2020 | North America / USA / Indiana    |
| EPI_ISL_604533 | 3/14/2020 | 10/30/2020 | North America / USA / Indiana    |
| EPI_ISL_604534 | 3/16/2020 | 10/30/2020 | North America / USA / Maryland   |
| EPI_ISL_604535 | 3/13/2020 | 10/30/2020 | North America / USA / Michigan   |
| EPI_ISL_604536 | 3/12/2020 | 10/30/2020 | North America / USA / Michigan   |
| EPI_ISL_604537 | 3/13/2020 | 10/30/2020 | North America / USA / Michigan   |
| EPI_ISL_604538 | 3/14/2020 | 10/30/2020 | North America / USA / Michigan   |
| EPI_ISL_604539 | 3/15/2020 | 10/30/2020 | North America / USA / Michigan   |
| EPI_ISL_604540 | 3/13/2020 | 10/30/2020 | North America / USA / Michigan   |
| EPI_ISL_604541 | 3/15/2020 | 10/30/2020 | North America / USA / Michigan   |
| EPI_ISL_604542 | 3/15/2020 | 10/30/2020 | North America / USA / Michigan   |
| EPI_ISL_604543 | 3/14/2020 | 10/30/2020 | North America / USA / Michigan   |
| EPI_ISL_604544 | 3/15/2020 | 10/30/2020 | North America / USA / Michigan   |
| EPI_ISL_604545 | 3/14/2020 | 10/30/2020 | North America / USA / Michigan   |
| EPI_ISL_604546 | 3/14/2020 | 10/30/2020 | North America / USA / Michigan   |
| EPI_ISL_604547 | 3/15/2020 | 10/30/2020 | North America / USA / Michigan   |
| EPI_ISL_604548 | 3/14/2020 | 10/30/2020 | North America / USA / Michigan   |
| EPI_ISL_604549 | 3/15/2020 | 10/30/2020 | North America / USA / Michigan   |
| EPI_ISL_604550 | 3/14/2020 | 10/30/2020 | North America / USA / Michigan   |
| EPI_ISL_604551 | 3/14/2020 | 10/30/2020 | North America / USA / Minnesota  |
| EPI_ISL_604552 | 3/13/2020 | 10/30/2020 | North America / USA / Minnesota  |
| EPI_ISL_604553 | 3/15/2020 | 10/30/2020 | North America / USA / New Jersey |
| EPI_ISL_604554 | 3/15/2020 | 10/30/2020 | North America / USA / New Jersey |
| EPI_ISL_604555 | 3/14/2020 | 10/30/2020 | North America / USA / New Jersey |
| EPI_ISL_604556 | 3/14/2020 | 10/30/2020 | North America / USA / New Jersey |
| EPI_ISL_604557 | 3/14/2020 | 10/30/2020 | North America / USA / New Jersey |
| EPI_ISL_604558 | 3/14/2020 | 10/30/2020 | North America / USA / New Jersey |
| EPI_ISL_604559 | 3/14/2020 | 10/30/2020 | North America / USA / New Jersey |
| EPI_ISL_604560 | 3/14/2020 | 10/30/2020 | North America / USA / New Jersey |
| EPI_ISL_604561 | 3/16/2020 | 10/30/2020 | North America / USA / New Jersey |
| EPI_ISL_604564 | 3/14/2020 | 10/30/2020 | North America / USA / New Jersey |
| EPI_ISL_604565 | 3/15/2020 | 10/30/2020 | North America / USA / New York   |
| EPI_ISL_604566 | 3/15/2020 | 10/30/2020 | North America / USA / New York   |
| EPI_ISL_604567 | 3/16/2020 | 10/30/2020 | North America / USA / New York   |
| EPI_ISL_604568 | 3/15/2020 | 10/30/2020 | North America / USA / New York   |
| EPI_ISL_604569 | 3/16/2020 | 10/30/2020 | North America / USA / New York   |
| EPI_ISL_604570 | 3/15/2020 | 10/30/2020 | North America / USA / New York   |
| EPI_ISL_604571 | 3/15/2020 | 10/30/2020 | North America / USA / New York   |
| EPI_ISL_604572 | 3/13/2020 | 10/30/2020 | North America / USA / New York   |
| EPI_ISL_604573 | 3/15/2020 | 10/30/2020 | North America / USA / New York   |
| EPI_ISL_604574 | 3/15/2020 | 10/30/2020 | North America / USA / New York   |
| EPI_ISL_604575 | 3/15/2020 | 10/30/2020 | North America / USA / New York   |
| EPI_ISL_604576 | 3/15/2020 | 10/30/2020 | North America / USA / New York   |
| EPI_ISL_604577 | 3/15/2020 | 10/30/2020 | North America / USA / New York   |
| EPI_ISL_604578 | 3/12/2020 | 10/30/2020 | North America / USA / Utah       |
| EPI_ISL_604579 | 3/14/2020 | 10/30/2020 | North America / USA / Utah       |
| EPI_ISL_604580 | 3/12/2020 | 10/30/2020 | North America / USA / Utah       |





|                |           |            |                                   |
|----------------|-----------|------------|-----------------------------------|
| EPI_ISL_604677 | 3/16/2020 | 10/30/2020 | North America / USA / California  |
| EPI_ISL_604678 | 3/16/2020 | 10/30/2020 | North America / USA / California  |
| EPI_ISL_604679 | 3/17/2020 | 10/30/2020 | North America / USA / California  |
| EPI_ISL_604680 | 3/17/2020 | 10/30/2020 | North America / USA / California  |
| EPI_ISL_604681 | 3/16/2020 | 10/30/2020 | North America / USA / California  |
| EPI_ISL_604682 | 3/17/2020 | 10/30/2020 | North America / USA / California  |
| EPI_ISL_604683 | 3/15/2020 | 10/30/2020 | North America / USA / California  |
| EPI_ISL_604684 | 3/16/2020 | 10/30/2020 | North America / USA / Colorado    |
| EPI_ISL_604685 | 3/16/2020 | 10/30/2020 | North America / USA / Colorado    |
| EPI_ISL_604686 | 3/16/2020 | 10/30/2020 | North America / USA / Colorado    |
| EPI_ISL_604687 | 3/16/2020 | 10/30/2020 | North America / USA / Colorado    |
| EPI_ISL_604688 | 3/18/2020 | 10/30/2020 | North America / USA / Colorado    |
| EPI_ISL_604689 | 3/16/2020 | 10/30/2020 | North America / USA / Colorado    |
| EPI_ISL_604690 | 3/16/2020 | 10/30/2020 | North America / USA / Colorado    |
| EPI_ISL_604691 | 3/16/2020 | 10/30/2020 | North America / USA / Colorado    |
| EPI_ISL_604692 | 3/16/2020 | 10/30/2020 | North America / USA / Georgia     |
| EPI_ISL_604693 | 3/16/2020 | 10/30/2020 | North America / USA / Georgia     |
| EPI_ISL_604694 | 3/16/2020 | 10/30/2020 | North America / USA / Georgia     |
| EPI_ISL_604695 | 3/16/2020 | 10/30/2020 | North America / USA / Georgia     |
| EPI_ISL_604696 | 3/16/2020 | 10/30/2020 | North America / USA / Georgia     |
| EPI_ISL_604697 | 3/16/2020 | 10/30/2020 | North America / USA / Georgia     |
| EPI_ISL_604698 | 3/16/2020 | 10/30/2020 | North America / USA / Georgia     |
| EPI_ISL_604699 | 3/15/2020 | 10/30/2020 | North America / USA / Michigan    |
| EPI_ISL_604700 | 3/15/2020 | 10/30/2020 | North America / USA / Michigan    |
| EPI_ISL_604701 | 3/15/2020 | 10/30/2020 | North America / USA / Michigan    |
| EPI_ISL_604702 | 3/15/2020 | 10/30/2020 | North America / USA / Michigan    |
| EPI_ISL_604703 | 3/16/2020 | 10/30/2020 | North America / USA / New Jersey  |
| EPI_ISL_604704 | 3/16/2020 | 10/30/2020 | North America / USA / New Jersey  |
| EPI_ISL_604705 | 3/16/2020 | 10/30/2020 | North America / USA / New York    |
| EPI_ISL_604706 | 3/17/2020 | 10/30/2020 | North America / USA / New York    |
| EPI_ISL_604707 | 3/16/2020 | 10/30/2020 | North America / USA / New York    |
| EPI_ISL_604708 | 3/14/2020 | 10/30/2020 | North America / USA / New York    |
| EPI_ISL_604709 | 3/16/2020 | 10/30/2020 | North America / USA / New York    |
| EPI_ISL_604710 | 3/17/2020 | 10/30/2020 | North America / USA / New York    |
| EPI_ISL_604711 | 3/17/2020 | 10/30/2020 | North America / USA / New York    |
| EPI_ISL_604712 | 3/16/2020 | 10/30/2020 | North America / USA / New York    |
| EPI_ISL_604713 | 3/16/2020 | 10/30/2020 | North America / USA / New York    |
| EPI_ISL_604714 | 3/16/2020 | 10/30/2020 | North America / USA / New York    |
| EPI_ISL_604715 | 3/16/2020 | 10/30/2020 | North America / USA / New York    |
| EPI_ISL_604716 | 3/16/2020 | 10/30/2020 | North America / USA / New York    |
| EPI_ISL_604717 | 3/17/2020 | 10/30/2020 | North America / USA / New York    |
| EPI_ISL_604718 | 3/16/2020 | 10/30/2020 | North America / USA / Ohio        |
| EPI_ISL_604719 | 3/16/2020 | 10/30/2020 | North America / USA / Puerto Rico |
| EPI_ISL_604720 | 3/16/2020 | 10/30/2020 | North America / USA / Texas       |
| EPI_ISL_604721 | 3/16/2020 | 10/30/2020 | North America / USA / Texas       |
| EPI_ISL_604722 | 3/16/2020 | 10/30/2020 | North America / USA / Utah        |
| EPI_ISL_604723 | 3/15/2020 | 10/30/2020 | North America / USA / Utah        |





|                |           |            |                                     |
|----------------|-----------|------------|-------------------------------------|
| EPI_ISL_604772 | 3/16/2020 | 10/30/2020 | North America / USA / California    |
| EPI_ISL_604773 | 3/16/2020 | 10/30/2020 | North America / USA / Florida       |
| EPI_ISL_604774 | 3/16/2020 | 10/30/2020 | North America / USA / Florida       |
| EPI_ISL_604775 | 3/17/2020 | 10/30/2020 | North America / USA / Florida       |
| EPI_ISL_604776 | 3/16/2020 | 10/30/2020 | North America / USA / Florida       |
| EPI_ISL_604777 | 3/13/2020 | 10/30/2020 | North America / USA / Georgia       |
| EPI_ISL_604778 | 3/13/2020 | 10/30/2020 | North America / USA / Georgia       |
| EPI_ISL_604779 | 3/14/2020 | 10/30/2020 | North America / USA / Georgia       |
| EPI_ISL_604780 | 3/13/2020 | 10/30/2020 | North America / USA / Georgia       |
| EPI_ISL_604781 | 3/14/2020 | 10/30/2020 | North America / USA / Georgia       |
| EPI_ISL_604782 | 3/14/2020 | 10/30/2020 | North America / USA / Georgia       |
| EPI_ISL_604783 | 3/14/2020 | 10/30/2020 | North America / USA / Massachusetts |
| EPI_ISL_604784 | 3/14/2020 | 10/30/2020 | North America / USA / Missouri      |
| EPI_ISL_604785 | 3/14/2020 | 10/30/2020 | North America / USA / Missouri      |
| EPI_ISL_604786 | 3/16/2020 | 10/30/2020 | North America / USA / New Jersey    |
| EPI_ISL_604787 | 3/14/2020 | 10/30/2020 | North America / USA / New Jersey    |
| EPI_ISL_604788 | 3/14/2020 | 10/30/2020 | North America / USA / New Jersey    |
| EPI_ISL_604789 | 3/14/2020 | 10/30/2020 | North America / USA / New Jersey    |
| EPI_ISL_604790 | 3/14/2020 | 10/30/2020 | North America / USA / New Jersey    |
| EPI_ISL_604791 | 3/14/2020 | 10/30/2020 | North America / USA / New Jersey    |
| EPI_ISL_604792 | 3/16/2020 | 10/30/2020 | North America / USA / New Jersey    |
| EPI_ISL_604793 | 3/13/2020 | 10/30/2020 | North America / USA / New Mexico    |
| EPI_ISL_604794 | 3/16/2020 | 10/30/2020 | North America / USA / New York      |
| EPI_ISL_604795 | 3/14/2020 | 10/30/2020 | North America / USA / New York      |
| EPI_ISL_604796 | 3/16/2020 | 10/30/2020 | North America / USA / New York      |
| EPI_ISL_604797 | 3/15/2020 | 10/30/2020 | North America / USA / New York      |
| EPI_ISL_604798 | 3/15/2020 | 10/30/2020 | North America / USA / New York      |
| EPI_ISL_604799 | 3/16/2020 | 10/30/2020 | North America / USA / New York      |
| EPI_ISL_604800 | 3/14/2020 | 10/30/2020 | North America / USA / New York      |
| EPI_ISL_604801 | 3/14/2020 | 10/30/2020 | North America / USA / New York      |
| EPI_ISL_604802 | 3/16/2020 | 10/30/2020 | North America / USA / New York      |
| EPI_ISL_604803 | 3/16/2020 | 10/30/2020 | North America / USA / New York      |
| EPI_ISL_604804 | 3/15/2020 | 10/30/2020 | North America / USA / New York      |
| EPI_ISL_604805 | 3/14/2020 | 10/30/2020 | North America / USA / New York      |
| EPI_ISL_604806 | 3/16/2020 | 10/30/2020 | North America / USA / New York      |
| EPI_ISL_604807 | 3/15/2020 | 10/30/2020 | North America / USA / New York      |
| EPI_ISL_604808 | 3/15/2020 | 10/30/2020 | North America / USA / New York      |
| EPI_ISL_604809 | 3/14/2020 | 10/30/2020 | North America / USA / New York      |
| EPI_ISL_604810 | 3/15/2020 | 10/30/2020 | North America / USA / New York      |
| EPI_ISL_604811 | 3/14/2020 | 10/30/2020 | North America / USA / New York      |
| EPI_ISL_604812 | 3/16/2020 | 10/30/2020 | North America / USA / New York      |
| EPI_ISL_604813 | 3/16/2020 | 10/30/2020 | North America / USA / New York      |
| EPI_ISL_604814 | 3/13/2020 | 10/30/2020 | North America / USA / New York      |
| EPI_ISL_604815 | 3/15/2020 | 10/30/2020 | North America / USA / New York      |
| EPI_ISL_604816 | 3/15/2020 | 10/30/2020 | North America / USA / New York      |
| EPI_ISL_604817 | 3/15/2020 | 10/30/2020 | North America / USA / New York      |
| EPI_ISL_604818 | 3/15/2020 | 10/30/2020 | North America / USA / New York      |

|                |           |            |                                      |
|----------------|-----------|------------|--------------------------------------|
| EPI_ISL_604819 | 3/14/2020 | 10/30/2020 | North America / USA / New York       |
| EPI_ISL_604820 | 3/15/2020 | 10/30/2020 | North America / USA / New York       |
| EPI_ISL_604821 | 3/16/2020 | 10/30/2020 | North America / USA / New York       |
| EPI_ISL_604822 | 3/15/2020 | 10/30/2020 | North America / USA / New York       |
| EPI_ISL_604823 | 3/14/2020 | 10/30/2020 | North America / USA / New York       |
| EPI_ISL_604824 | 3/15/2020 | 10/30/2020 | North America / USA / New York       |
| EPI_ISL_604825 | 3/15/2020 | 10/30/2020 | North America / USA / New York       |
| EPI_ISL_604826 | 3/16/2020 | 10/30/2020 | North America / USA / New York       |
| EPI_ISL_604827 | 3/16/2020 | 10/30/2020 | North America / USA / New York       |
| EPI_ISL_604828 | 3/16/2020 | 10/30/2020 | North America / USA / New York       |
| EPI_ISL_604829 | 3/14/2020 | 10/30/2020 | North America / USA / New York       |
| EPI_ISL_604830 | 3/16/2020 | 10/30/2020 | North America / USA / New York       |
| EPI_ISL_604831 | 3/14/2020 | 10/30/2020 | North America / USA / New York       |
| EPI_ISL_604832 | 3/14/2020 | 10/30/2020 | North America / USA / New York       |
| EPI_ISL_604833 | 3/15/2020 | 10/30/2020 | North America / USA / New York       |
| EPI_ISL_604834 | 3/15/2020 | 10/30/2020 | North America / USA / New York       |
| EPI_ISL_604835 | 3/13/2020 | 10/30/2020 | North America / USA / Pennsylvania   |
| EPI_ISL_604836 | 3/14/2020 | 10/30/2020 | North America / USA / Pennsylvania   |
| EPI_ISL_604837 | 3/14/2020 | 10/30/2020 | North America / USA / Pennsylvania   |
| EPI_ISL_604838 | 3/14/2020 | 10/30/2020 | North America / USA / Pennsylvania   |
| EPI_ISL_604839 | 3/14/2020 | 10/30/2020 | North America / USA / Pennsylvania   |
| EPI_ISL_604840 | 3/15/2020 | 10/30/2020 | North America / USA / Pennsylvania   |
| EPI_ISL_604841 | 3/14/2020 | 10/30/2020 | North America / USA / South Carolina |
| EPI_ISL_604842 | 3/14/2020 | 10/30/2020 | North America / USA / Tennessee      |
| EPI_ISL_604843 | 3/14/2020 | 10/30/2020 | North America / USA / Texas          |
| EPI_ISL_604844 | 3/13/2020 | 10/30/2020 | North America / USA / Utah           |
| EPI_ISL_604845 | 3/13/2020 | 10/30/2020 | North America / USA / Utah           |
| EPI_ISL_604846 | 3/13/2020 | 10/30/2020 | North America / USA / Utah           |
| EPI_ISL_604847 | 3/14/2020 | 10/30/2020 | North America / USA / Utah           |
| EPI_ISL_604848 | 3/13/2020 | 10/30/2020 | North America / USA / Utah           |
| EPI_ISL_604849 | 3/13/2020 | 10/30/2020 | North America / USA / Utah           |
| EPI_ISL_604850 | 3/13/2020 | 10/30/2020 | North America / USA / Utah           |
| EPI_ISL_604851 | 3/13/2020 | 10/30/2020 | North America / USA / Utah           |
| EPI_ISL_604852 | 3/12/2020 | 10/30/2020 | North America / USA / Utah           |
| EPI_ISL_604853 | 3/12/2020 | 10/30/2020 | North America / USA / Utah           |
| EPI_ISL_604854 | 3/12/2020 | 10/30/2020 | North America / USA / Utah           |
| EPI_ISL_604855 | 3/13/2020 | 10/30/2020 | North America / USA / Utah           |
| EPI_ISL_604856 | 3/12/2020 | 10/30/2020 | North America / USA / Utah           |
| EPI_ISL_604857 | 3/14/2020 | 10/30/2020 | North America / USA / Utah           |
| EPI_ISL_604858 | 3/12/2020 | 10/30/2020 | North America / USA / Utah           |
| EPI_ISL_604859 | 3/13/2020 | 10/30/2020 | North America / USA / Utah           |
| EPI_ISL_604860 | 3/13/2020 | 10/30/2020 | North America / USA / Utah           |
| EPI_ISL_604861 | 3/13/2020 | 10/30/2020 | North America / USA / Utah           |
| EPI_ISL_604862 | 3/13/2020 | 10/30/2020 | North America / USA / Utah           |
| EPI_ISL_604863 | 3/13/2020 | 10/30/2020 | North America / USA / Utah           |
| EPI_ISL_604864 | 3/12/2020 | 10/30/2020 | North America / USA / Utah           |
| EPI_ISL_604865 | 3/13/2020 | 10/30/2020 | North America / USA / Utah           |



|                |           |            |                                   |
|----------------|-----------|------------|-----------------------------------|
| EPI_ISL_604913 | 3/16/2020 | 10/30/2020 | North America / USA / California  |
| EPI_ISL_604914 | 3/16/2020 | 10/30/2020 | North America / USA / California  |
| EPI_ISL_604915 | 3/16/2020 | 10/30/2020 | North America / USA / California  |
| EPI_ISL_604916 | 3/16/2020 | 10/30/2020 | North America / USA / California  |
| EPI_ISL_604917 | 3/15/2020 | 10/30/2020 | North America / USA / California  |
| EPI_ISL_604918 | 3/16/2020 | 10/30/2020 | North America / USA / California  |
| EPI_ISL_604919 | 3/12/2020 | 10/30/2020 | North America / USA / Connecticut |
| EPI_ISL_604920 | 3/13/2020 | 10/30/2020 | North America / USA / Connecticut |
| EPI_ISL_604921 | 3/15/2020 | 10/30/2020 | North America / USA / Florida     |
| EPI_ISL_604922 | 3/15/2020 | 10/30/2020 | North America / USA / Florida     |
| EPI_ISL_604923 | 3/15/2020 | 10/30/2020 | North America / USA / Florida     |
| EPI_ISL_604924 | 3/14/2020 | 10/30/2020 | North America / USA / Florida     |
| EPI_ISL_604925 | 3/15/2020 | 10/30/2020 | North America / USA / Florida     |
| EPI_ISL_604926 | 3/15/2020 | 10/30/2020 | North America / USA / Florida     |
| EPI_ISL_604927 | 3/15/2020 | 10/30/2020 | North America / USA / Florida     |
| EPI_ISL_604928 | 3/15/2020 | 10/30/2020 | North America / USA / Florida     |
| EPI_ISL_604929 | 3/15/2020 | 10/30/2020 | North America / USA / Florida     |
| EPI_ISL_604930 | 3/15/2020 | 10/30/2020 | North America / USA / Florida     |
| EPI_ISL_604931 | 3/14/2020 | 10/30/2020 | North America / USA / Georgia     |
| EPI_ISL_604932 | 3/14/2020 | 10/30/2020 | North America / USA / Illinois    |
| EPI_ISL_604933 | 3/14/2020 | 10/30/2020 | North America / USA / Illinois    |
| EPI_ISL_604934 | 3/15/2020 | 10/30/2020 | North America / USA / Indiana     |
| EPI_ISL_604935 | 3/15/2020 | 10/30/2020 | North America / USA / Indiana     |
| EPI_ISL_604936 | 3/16/2020 | 10/30/2020 | North America / USA / Louisiana   |
| EPI_ISL_604937 | 3/13/2020 | 10/30/2020 | North America / USA / Minnesota   |
| EPI_ISL_604938 | 3/15/2020 | 10/30/2020 | North America / USA / Minnesota   |
| EPI_ISL_604939 | 3/15/2020 | 10/30/2020 | North America / USA / Missouri    |
| EPI_ISL_604940 | 3/15/2020 | 10/30/2020 | North America / USA / Missouri    |
| EPI_ISL_604941 | 3/15/2020 | 10/30/2020 | North America / USA / Missouri    |
| EPI_ISL_604942 | 3/15/2020 | 10/30/2020 | North America / USA / Missouri    |
| EPI_ISL_604943 | 3/15/2020 | 10/30/2020 | North America / USA / Missouri    |
| EPI_ISL_604944 | 3/14/2020 | 10/30/2020 | North America / USA / Missouri    |
| EPI_ISL_604945 | 3/15/2020 | 10/30/2020 | North America / USA / Missouri    |
| EPI_ISL_604946 | 3/14/2020 | 10/30/2020 | North America / USA / Missouri    |
| EPI_ISL_604947 | 3/15/2020 | 10/30/2020 | North America / USA / Missouri    |
| EPI_ISL_604948 | 3/15/2020 | 10/30/2020 | North America / USA / Missouri    |
| EPI_ISL_604949 | 3/14/2020 | 10/30/2020 | North America / USA / Missouri    |
| EPI_ISL_604950 | 3/15/2020 | 10/30/2020 | North America / USA / Nevada      |
| EPI_ISL_604951 | 3/15/2020 | 10/30/2020 | North America / USA / Nevada      |
| EPI_ISL_604952 | 3/16/2020 | 10/30/2020 | North America / USA / Nevada      |
| EPI_ISL_604953 | 3/15/2020 | 10/30/2020 | North America / USA / Nevada      |
| EPI_ISL_604954 | 3/15/2020 | 10/30/2020 | North America / USA / Nevada      |
| EPI_ISL_604955 | 3/16/2020 | 10/30/2020 | North America / USA / New York    |
| EPI_ISL_604956 | 3/15/2020 | 10/30/2020 | North America / USA / New York    |
| EPI_ISL_604957 | 3/15/2020 | 10/30/2020 | North America / USA / New York    |
| EPI_ISL_604958 | 3/15/2020 | 10/30/2020 | North America / USA / New York    |
| EPI_ISL_604959 | 3/15/2020 | 10/30/2020 | North America / USA / Ohio        |





|                |           |            |                                 |
|----------------|-----------|------------|---------------------------------|
| EPI_ISL_605054 | 3/15/2020 | 10/30/2020 | North America / USA / New York  |
| EPI_ISL_605055 | 3/15/2020 | 10/30/2020 | North America / USA / New York  |
| EPI_ISL_605056 | 3/16/2020 | 10/30/2020 | North America / USA / New York  |
| EPI_ISL_605057 | 3/17/2020 | 10/30/2020 | North America / USA / Tennessee |
| EPI_ISL_605058 | 3/31/2020 | 10/30/2020 | Europe / Ireland / Dublin       |
| EPI_ISL_605059 | 3/17/2020 | 10/30/2020 | Europe / Ireland / Tipperary    |
| EPI_ISL_605060 | 3/20/2020 | 10/30/2020 | Europe / Ireland / Dublin       |
| EPI_ISL_605061 | 3/31/2020 | 10/30/2020 | Europe / Ireland / Dublin       |
| EPI_ISL_605062 | 3/31/2020 | 10/30/2020 | Europe / Ireland / Dublin       |
| EPI_ISL_605063 | 3/31/2020 | 10/30/2020 | Europe / Ireland / Dublin       |
| EPI_ISL_605064 | 3/18/2020 | 10/30/2020 | Europe / Ireland / Dublin       |
| EPI_ISL_605065 | 3/31/2020 | 10/30/2020 | Europe / Ireland / Dublin       |
| EPI_ISL_605066 | 3/31/2020 | 10/30/2020 | Europe / Ireland / Dublin       |
| EPI_ISL_605067 | 3/29/2020 | 10/30/2020 | Europe / Ireland / Dublin       |
| EPI_ISL_605068 | 3/18/2020 | 10/30/2020 | Europe / Ireland / Mayo         |
| EPI_ISL_605069 | 3/20/2020 | 10/30/2020 | Europe / Ireland / Dublin       |
| EPI_ISL_605070 | 3/30/2020 | 10/30/2020 | Europe / Ireland / Dublin       |
| EPI_ISL_605071 | 3/26/2020 | 10/30/2020 | Europe / Ireland / Dublin       |
| EPI_ISL_605072 | 3/31/2020 | 10/30/2020 | Europe / Ireland / Dublin       |
| EPI_ISL_605073 | 3/18/2020 | 10/30/2020 | Europe / Ireland / Mayo         |
| EPI_ISL_605074 | 3/20/2020 | 10/30/2020 | Europe / Ireland / Wicklow      |
| EPI_ISL_605077 | 3/20/2020 | 10/30/2020 | Europe / Ireland / Dublin       |
| EPI_ISL_605080 | 3/28/2020 | 10/30/2020 | Europe / Ireland / Dublin       |
| EPI_ISL_605148 | 5/27/2020 | 10/30/2020 | North America / USA / Utah      |
| EPI_ISL_605150 | 5/27/2020 | 10/30/2020 | North America / USA / Utah      |
| EPI_ISL_605153 | 6/19/2020 | 10/30/2020 | North America / USA / Utah      |
| EPI_ISL_605157 | 7/18/2020 | 10/30/2020 | North America / USA / Utah      |
| EPI_ISL_605158 | 7/18/2020 | 10/30/2020 | North America / USA / Utah      |
| EPI_ISL_605159 | 7/18/2020 | 10/30/2020 | North America / USA / Utah      |
| EPI_ISL_605160 | 7/18/2020 | 10/30/2020 | North America / USA / Utah      |
| EPI_ISL_605162 | 7/19/2020 | 10/30/2020 | North America / USA / Utah      |
| EPI_ISL_605164 | 7/19/2020 | 10/30/2020 | North America / USA / Utah      |
| EPI_ISL_605165 | 7/11/2020 | 10/30/2020 | North America / USA / Utah      |
| EPI_ISL_605166 | 7/18/2020 | 10/30/2020 | North America / USA / Utah      |
| EPI_ISL_605170 | 7/14/2020 | 10/30/2020 | North America / USA / Utah      |
| EPI_ISL_605172 | 7/19/2020 | 10/30/2020 | North America / USA / Utah      |
| EPI_ISL_605173 | 7/19/2020 | 10/30/2020 | North America / USA / Utah      |
| EPI_ISL_605177 | 7/18/2020 | 10/30/2020 | North America / USA / Utah      |
| EPI_ISL_605181 | 7/14/2020 | 10/30/2020 | North America / USA / Utah      |
| EPI_ISL_605182 | 7/15/2020 | 10/30/2020 | North America / USA / Utah      |
| EPI_ISL_605183 | 7/19/2020 | 10/30/2020 | North America / USA / Utah      |
| EPI_ISL_605187 | 7/18/2020 | 10/30/2020 | North America / USA / Utah      |
| EPI_ISL_605192 | 7/19/2020 | 10/30/2020 | North America / USA / Utah      |
| EPI_ISL_605193 | 7/19/2020 | 10/30/2020 | North America / USA / Utah      |
| EPI_ISL_605194 | 7/19/2020 | 10/30/2020 | North America / USA / Utah      |
| EPI_ISL_605198 | 7/18/2020 | 10/30/2020 | North America / USA / Utah      |
| EPI_ISL_605200 | 7/18/2020 | 10/30/2020 | North America / USA / Utah      |

























|                |            |            |                                                            |
|----------------|------------|------------|------------------------------------------------------------|
| EPI_ISL_605762 | 9/23/2020  | 10/30/2020 | North America / USA / Wisconsin / Milwaukee County         |
| EPI_ISL_605763 | 9/25/2020  | 10/30/2020 | North America / USA / Wisconsin / Dane County              |
| EPI_ISL_605764 | 9/17/2020  | 10/30/2020 | North America / USA / Wisconsin / Dane County              |
| EPI_ISL_605765 | 9/24/2020  | 10/30/2020 | North America / USA / Wisconsin / Dane County              |
| EPI_ISL_605766 | 9/22/2020  | 10/30/2020 | North America / USA / Wisconsin / Dane County              |
| EPI_ISL_605768 | 6/19/2020  | 10/30/2020 | North America / USA / Wisconsin / Dane County              |
| EPI_ISL_605769 | 9/11/2020  | 10/30/2020 | North America / USA / Wisconsin / Dane County              |
| EPI_ISL_605770 | 9/18/2020  | 10/30/2020 | North America / USA / Wisconsin / Winnebago County         |
| EPI_ISL_605771 | 9/17/2020  | 10/30/2020 | North America / USA / Wisconsin / Dane County              |
| EPI_ISL_605772 | 9/16/2020  | 10/30/2020 | North America / USA / Illinois / Winnebago County          |
| EPI_ISL_605773 | 9/17/2020  | 10/30/2020 | North America / USA / Wisconsin / Dane County              |
| EPI_ISL_605774 | 9/17/2020  | 10/30/2020 | North America / USA / Wisconsin / Dane County              |
| EPI_ISL_605775 | 9/17/2020  | 10/30/2020 | North America / USA / Wisconsin / Dane County              |
| EPI_ISL_605777 | 9/17/2020  | 10/30/2020 | North America / USA / Wisconsin / Dodge County             |
| EPI_ISL_605778 | 9/17/2020  | 10/30/2020 | North America / USA / Wisconsin / Columbia County          |
| EPI_ISL_605779 | 9/17/2020  | 10/30/2020 | North America / USA / Wisconsin / Dane County              |
| EPI_ISL_605783 | 8/8/2020   | 10/31/2020 | Asia / Bangladesh / Khulna / Jashore / Chowgacha / Mohespu |
| EPI_ISL_605785 | 9/18/2020  | 10/31/2020 | Africa / South Africa / KwaZulu-Natal                      |
| EPI_ISL_605786 | 9/26/2020  | 10/31/2020 | Africa / South Africa / KwaZulu-Natal                      |
| EPI_ISL_605787 | 10/7/2020  | 10/31/2020 | Africa / South Africa / KwaZulu-Natal                      |
| EPI_ISL_605788 | 10/7/2020  | 10/31/2020 | Africa / South Africa / KwaZulu-Natal                      |
| EPI_ISL_605790 | 10/1/2020  | 10/31/2020 | Africa / South Africa / KwaZulu-Natal                      |
| EPI_ISL_605791 | 10/14/2020 | 10/31/2020 | North America / USA / District of Columbia                 |
| EPI_ISL_605792 | 2020       | 11/1/2020  | Europe / Russia / Novosibirsk                              |
| EPI_ISL_605793 | 2020-04    | 11/1/2020  | Europe / Russia / Novosibirsk                              |
| EPI_ISL_605794 | 2020-04    | 11/1/2020  | Europe / Russia / Novosibirsk                              |
| EPI_ISL_605795 | 2020-04    | 11/1/2020  | Europe / Russia / Novosibirsk                              |
| EPI_ISL_605796 | 2020-04    | 11/1/2020  | Europe / Russia / Novosibirsk                              |
| EPI_ISL_605799 | 5/1/2020   | 11/2/2020  | Asia / India / Delhi / New Delhi                           |
| EPI_ISL_605800 | 4/9/2020   | 11/2/2020  | Asia / India / Delhi / New Delhi                           |
| EPI_ISL_605801 | 5/1/2020   | 11/2/2020  | Asia / India / Delhi / New Delhi                           |
| EPI_ISL_605802 | 5/1/2020   | 11/2/2020  | Asia / India / Delhi / New Delhi                           |
| EPI_ISL_605803 | 3/31/2020  | 11/2/2020  | Asia / India / Delhi / New Delhi                           |
| EPI_ISL_605804 | 5/1/2020   | 11/2/2020  | Asia / India / Delhi / New Delhi                           |
| EPI_ISL_605805 | 5/1/2020   | 11/2/2020  | Asia / India / Delhi / New Delhi                           |
| EPI_ISL_605806 | 5/1/2020   | 11/2/2020  | Asia / India / Delhi / New Delhi                           |
| EPI_ISL_605807 | 5/1/2020   | 11/2/2020  | Asia / India / Delhi / New Delhi                           |
| EPI_ISL_605808 | 5/1/2020   | 11/2/2020  | Asia / India / Delhi / New Delhi                           |
| EPI_ISL_605809 | 5/1/2020   | 11/2/2020  | Asia / India / Delhi / New Delhi                           |
| EPI_ISL_605810 | 4/6/2020   | 11/2/2020  | Asia / India / Delhi / New Delhi                           |
| EPI_ISL_605811 | 3/31/2020  | 11/2/2020  | Asia / India / Delhi / New Delhi                           |
| EPI_ISL_605812 | 3/31/2020  | 11/2/2020  | Asia / India / Delhi / New Delhi                           |
| EPI_ISL_605813 | 4/12/2020  | 11/2/2020  | Asia / India / Delhi / New Delhi                           |
| EPI_ISL_605814 | 4/6/2020   | 11/2/2020  | Asia / India / Delhi / New Delhi                           |
| EPI_ISL_605815 | 4/5/2020   | 11/2/2020  | Asia / India / Delhi / New Delhi                           |
| EPI_ISL_605816 | 3/31/2020  | 11/2/2020  | Asia / India / Delhi / New Delhi                           |
| EPI_ISL_605817 | 10/24/2020 | 11/2/2020  | Asia / Singapore                                           |

|                |            |                                                   |
|----------------|------------|---------------------------------------------------|
| EPI_ISL_605818 | 10/19/2020 | 11/2/2020 Asia / Singapore                        |
| EPI_ISL_605819 | 10/25/2020 | 11/2/2020 Asia / Singapore                        |
| EPI_ISL_605820 | 10/19/2020 | 11/2/2020 Asia / Singapore                        |
| EPI_ISL_605821 | 10/19/2020 | 11/2/2020 Asia / Singapore                        |
| EPI_ISL_605822 | 10/19/2020 | 11/2/2020 Asia / Singapore                        |
| EPI_ISL_605823 | 10/21/2020 | 11/2/2020 Asia / Singapore                        |
| EPI_ISL_605824 | 10/20/2020 | 11/2/2020 Asia / Singapore                        |
| EPI_ISL_605825 | 10/21/2020 | 11/2/2020 Oceania / Australia / Western Australia |
| EPI_ISL_605826 | 10/18/2020 | 11/2/2020 Oceania / Australia / Western Australia |
| EPI_ISL_605827 | 4/6/2020   | 11/2/2020 Oceania / Australia / Western Australia |
| EPI_ISL_605828 | 10/18/2020 | 11/2/2020 Oceania / Australia / Western Australia |
| EPI_ISL_605829 | 10/18/2020 | 11/2/2020 Oceania / Australia / Western Australia |
| EPI_ISL_605830 | 10/18/2020 | 11/2/2020 Oceania / Australia / Western Australia |
| EPI_ISL_605831 | 10/15/2020 | 11/2/2020 Oceania / Australia / Western Australia |
| EPI_ISL_605832 | 10/18/2020 | 11/2/2020 Oceania / Australia / Western Australia |
| EPI_ISL_605833 | 5/27/2020  | 11/2/2020 Oceania / Australia / Western Australia |
| EPI_ISL_605834 | 10/18/2020 | 11/2/2020 Oceania / Australia / Western Australia |
| EPI_ISL_605835 | 10/18/2020 | 11/2/2020 Oceania / Australia / Western Australia |
| EPI_ISL_605836 | 10/20/2020 | 11/2/2020 Oceania / Australia / Western Australia |
| EPI_ISL_605932 | 10/14/2020 | 11/2/2020 Europe / United Kingdom / England       |
| EPI_ISL_605933 | 10/16/2020 | 11/2/2020 Europe / United Kingdom / England       |
| EPI_ISL_605934 | 10/17/2020 | 11/2/2020 Europe / United Kingdom / England       |
| EPI_ISL_605936 | 10/17/2020 | 11/2/2020 Europe / United Kingdom / England       |
| EPI_ISL_605937 | 10/16/2020 | 11/2/2020 Europe / United Kingdom / England       |
| EPI_ISL_605939 | 10/16/2020 | 11/2/2020 Europe / United Kingdom / England       |
| EPI_ISL_605940 | 10/17/2020 | 11/2/2020 Europe / United Kingdom / England       |
| EPI_ISL_605941 | 10/17/2020 | 11/2/2020 Europe / United Kingdom / England       |
| EPI_ISL_605942 | 10/17/2020 | 11/2/2020 Europe / United Kingdom / England       |
| EPI_ISL_605943 | 10/16/2020 | 11/2/2020 Europe / United Kingdom / England       |
| EPI_ISL_605945 | 10/17/2020 | 11/2/2020 Europe / United Kingdom / England       |
| EPI_ISL_605947 | 10/17/2020 | 11/2/2020 Europe / United Kingdom / England       |
| EPI_ISL_605948 | 10/17/2020 | 11/2/2020 Europe / United Kingdom / England       |
| EPI_ISL_605949 | 10/17/2020 | 11/2/2020 Europe / United Kingdom / England       |
| EPI_ISL_605950 | 10/17/2020 | 11/2/2020 Europe / United Kingdom / England       |
| EPI_ISL_605951 | 10/17/2020 | 11/2/2020 Europe / United Kingdom / England       |
| EPI_ISL_605952 | 10/17/2020 | 11/2/2020 Europe / United Kingdom / England       |
| EPI_ISL_605953 | 10/17/2020 | 11/2/2020 Europe / United Kingdom / England       |
| EPI_ISL_605954 | 10/17/2020 | 11/2/2020 Europe / United Kingdom / England       |
| EPI_ISL_605955 | 10/17/2020 | 11/2/2020 Europe / United Kingdom / England       |
| EPI_ISL_605956 | 10/17/2020 | 11/2/2020 Europe / United Kingdom / England       |
| EPI_ISL_605959 | 10/17/2020 | 11/2/2020 Europe / United Kingdom / England       |
| EPI_ISL_605960 | 10/17/2020 | 11/2/2020 Europe / United Kingdom / England       |
| EPI_ISL_605961 | 10/17/2020 | 11/2/2020 Europe / United Kingdom / England       |
| EPI_ISL_605962 | 10/17/2020 | 11/2/2020 Europe / United Kingdom / England       |
| EPI_ISL_605965 | 10/17/2020 | 11/2/2020 Europe / United Kingdom / England       |
| EPI_ISL_605966 | 10/17/2020 | 11/2/2020 Europe / United Kingdom / England       |
| EPI_ISL_605967 | 10/16/2020 | 11/2/2020 Europe / United Kingdom / England       |



































































































































































|                |            |                                             |
|----------------|------------|---------------------------------------------|
| EPI_ISL_609886 | 10/12/2020 | 11/2/2020 Europe / United Kingdom / England |
| EPI_ISL_609887 | 10/12/2020 | 11/2/2020 Europe / United Kingdom / England |
| EPI_ISL_609888 | 10/12/2020 | 11/2/2020 Europe / United Kingdom / England |
| EPI_ISL_609889 | 10/12/2020 | 11/2/2020 Europe / United Kingdom / England |
| EPI_ISL_609890 | 10/13/2020 | 11/2/2020 Europe / United Kingdom / England |
| EPI_ISL_609891 | 10/13/2020 | 11/2/2020 Europe / United Kingdom / England |
| EPI_ISL_609892 | 10/14/2020 | 11/2/2020 Europe / United Kingdom / England |
| EPI_ISL_609894 | 10/14/2020 | 11/2/2020 Europe / United Kingdom / England |
| EPI_ISL_609895 | 10/14/2020 | 11/2/2020 Europe / United Kingdom / England |
| EPI_ISL_609896 | 10/14/2020 | 11/2/2020 Europe / United Kingdom / England |
| EPI_ISL_609897 | 10/12/2020 | 11/2/2020 Europe / United Kingdom / England |
| EPI_ISL_609898 | 10/14/2020 | 11/2/2020 Europe / United Kingdom / England |
| EPI_ISL_609899 | 10/14/2020 | 11/2/2020 Europe / United Kingdom / England |
| EPI_ISL_609901 | 10/15/2020 | 11/2/2020 Europe / United Kingdom / England |
| EPI_ISL_609902 | 10/17/2020 | 11/2/2020 Europe / United Kingdom / England |
| EPI_ISL_609903 | 10/16/2020 | 11/2/2020 Europe / United Kingdom / England |
| EPI_ISL_609904 | 10/19/2020 | 11/2/2020 Europe / United Kingdom / England |
| EPI_ISL_609905 | 10/18/2020 | 11/2/2020 Europe / United Kingdom / England |
| EPI_ISL_609906 | 10/18/2020 | 11/2/2020 Europe / United Kingdom / England |
| EPI_ISL_609907 | 10/17/2020 | 11/2/2020 Europe / United Kingdom / England |
| EPI_ISL_609908 | 10/16/2020 | 11/2/2020 Europe / United Kingdom / England |
| EPI_ISL_609971 | 9/3/2020   | 11/2/2020 North America / USA / Virginia    |
| EPI_ISL_609972 | 9/3/2020   | 11/2/2020 North America / USA / Virginia    |
| EPI_ISL_609973 | 9/3/2020   | 11/2/2020 North America / USA / Virginia    |
| EPI_ISL_609974 | 9/8/2020   | 11/2/2020 North America / USA / Virginia    |
| EPI_ISL_609975 | 9/8/2020   | 11/2/2020 North America / USA / Virginia    |
| EPI_ISL_609976 | 9/8/2020   | 11/2/2020 North America / USA / Virginia    |
| EPI_ISL_609977 | 9/8/2020   | 11/2/2020 North America / USA / Virginia    |
| EPI_ISL_609978 | 9/5/2020   | 11/2/2020 North America / USA / Virginia    |
| EPI_ISL_609979 | 9/4/2020   | 11/2/2020 North America / USA / Virginia    |
| EPI_ISL_609980 | 9/4/2020   | 11/2/2020 North America / USA / Virginia    |
| EPI_ISL_609981 | 9/5/2020   | 11/2/2020 North America / USA / Virginia    |
| EPI_ISL_609982 | 9/4/2020   | 11/2/2020 North America / USA / Virginia    |
| EPI_ISL_609983 | 9/4/2020   | 11/2/2020 North America / USA / Virginia    |
| EPI_ISL_609984 | 9/22/2020  | 11/2/2020 North America / USA / Virginia    |
| EPI_ISL_609985 | 9/22/2020  | 11/2/2020 North America / USA / Virginia    |
| EPI_ISL_609986 | 9/23/2020  | 11/2/2020 North America / USA / Virginia    |
| EPI_ISL_609989 | 8/17/2020  | 11/2/2020 Europe / Italy / Lazio            |
| EPI_ISL_609990 | 8/18/2020  | 11/2/2020 Europe / Italy / Lazio            |
| EPI_ISL_609991 | 8/20/2020  | 11/2/2020 Europe / Italy / Lazio            |
| EPI_ISL_609992 | 8/20/2020  | 11/2/2020 Europe / Italy / Lazio            |
| EPI_ISL_609993 | 8/23/2020  | 11/2/2020 Europe / Italy / Lazio            |
| EPI_ISL_609994 | 10/16/2020 | 11/2/2020 Europe / Italy / Lazio            |
| EPI_ISL_609995 | 10/17/2020 | 11/2/2020 Europe / Italy / Lazio            |
| EPI_ISL_609996 | 10/17/2020 | 11/2/2020 Europe / Italy / Lazio            |
| EPI_ISL_609997 | 10/16/2020 | 11/2/2020 Europe / Italy / Lazio            |
| EPI_ISL_609998 | 10/19/2020 | 11/2/2020 Europe / Italy / Lazio            |

|                |            |                                                       |
|----------------|------------|-------------------------------------------------------|
| EPI_ISL_609999 | 10/19/2020 | 11/2/2020 Europe / Italy / Lazio                      |
| EPI_ISL_610045 | 7/2/2020   | 11/2/2020 North America / USA / Texas / Travis County |
| EPI_ISL_610048 | 10/12/2020 | 11/2/2020 North America / USA / Michigan              |
| EPI_ISL_610049 | 10/15/2020 | 11/2/2020 North America / USA / Michigan              |
| EPI_ISL_610050 | 10/12/2020 | 11/2/2020 North America / USA / Michigan              |
| EPI_ISL_610051 | 10/16/2020 | 11/2/2020 North America / USA / Michigan              |
| EPI_ISL_610052 | 10/15/2020 | 11/2/2020 North America / USA / Michigan              |
| EPI_ISL_610053 | 10/12/2020 | 11/2/2020 North America / USA / Michigan              |
| EPI_ISL_610054 | 10/8/2020  | 11/2/2020 North America / USA / Michigan              |
| EPI_ISL_610055 | 10/7/2020  | 11/2/2020 North America / USA / Michigan              |
| EPI_ISL_610057 | 10/10/2020 | 11/2/2020 North America / USA / Michigan              |
| EPI_ISL_610058 | 10/12/2020 | 11/2/2020 North America / USA / Michigan              |
| EPI_ISL_610059 | 10/7/2020  | 11/2/2020 North America / USA / Michigan              |
| EPI_ISL_610060 | 10/13/2020 | 11/2/2020 North America / USA / Michigan              |
| EPI_ISL_610061 | 10/8/2020  | 11/2/2020 North America / USA / Michigan              |
| EPI_ISL_610062 | 10/11/2020 | 11/2/2020 North America / USA / Michigan              |
| EPI_ISL_610063 | 10/12/2020 | 11/2/2020 North America / USA / Michigan              |
| EPI_ISL_610064 | 10/10/2020 | 11/2/2020 North America / USA / Michigan              |
| EPI_ISL_610065 | 10/12/2020 | 11/2/2020 North America / USA / Michigan              |
| EPI_ISL_610066 | 10/12/2020 | 11/2/2020 North America / USA / Michigan              |
| EPI_ISL_610067 | 10/7/2020  | 11/2/2020 North America / USA / Michigan              |
| EPI_ISL_610068 | 10/12/2020 | 11/2/2020 North America / USA / Michigan              |
| EPI_ISL_610069 | 10/11/2020 | 11/2/2020 North America / USA / Michigan              |
| EPI_ISL_610070 | 10/8/2020  | 11/2/2020 North America / USA / Michigan              |
| EPI_ISL_610071 | 10/10/2020 | 11/2/2020 North America / USA / Michigan              |
| EPI_ISL_610072 | 10/12/2020 | 11/2/2020 North America / USA / Michigan              |
| EPI_ISL_610073 | 10/12/2020 | 11/2/2020 North America / USA / Michigan              |
| EPI_ISL_610074 | 10/13/2020 | 11/2/2020 North America / USA / Michigan              |
| EPI_ISL_610075 | 10/12/2020 | 11/2/2020 North America / USA / Michigan              |
| EPI_ISL_610076 | 10/12/2020 | 11/2/2020 North America / USA / Michigan              |
| EPI_ISL_610078 | 10/12/2020 | 11/2/2020 North America / USA / Michigan              |
| EPI_ISL_610079 | 10/13/2020 | 11/2/2020 North America / USA / Michigan              |
| EPI_ISL_610083 | 10/13/2020 | 11/2/2020 North America / USA / Michigan              |
| EPI_ISL_610084 | 10/12/2020 | 11/2/2020 North America / USA / Michigan              |
| EPI_ISL_610085 | 10/12/2020 | 11/2/2020 North America / USA / Michigan              |
| EPI_ISL_610086 | 10/13/2020 | 11/2/2020 North America / USA / Michigan              |
| EPI_ISL_610087 | 10/12/2020 | 11/2/2020 North America / USA / Michigan              |
| EPI_ISL_610088 | 10/12/2020 | 11/2/2020 North America / USA / Michigan              |
| EPI_ISL_610089 | 10/13/2020 | 11/2/2020 North America / USA / Michigan              |
| EPI_ISL_610090 | 10/14/2020 | 11/2/2020 North America / USA / Michigan              |
| EPI_ISL_610092 | 10/12/2020 | 11/2/2020 North America / USA / Michigan              |
| EPI_ISL_610093 | 10/13/2020 | 11/2/2020 North America / USA / Michigan              |
| EPI_ISL_610094 | 10/13/2020 | 11/2/2020 North America / USA / Michigan              |
| EPI_ISL_610095 | 10/13/2020 | 11/2/2020 North America / USA / Michigan              |
| EPI_ISL_610097 | 10/13/2020 | 11/2/2020 North America / USA / Michigan              |
| EPI_ISL_610101 | 10/14/2020 | 11/2/2020 North America / USA / Michigan              |
| EPI_ISL_610103 | 10/14/2020 | 11/2/2020 North America / USA / Michigan              |

|                |            |                                                      |
|----------------|------------|------------------------------------------------------|
| EPI_ISL_610104 | 10/13/2020 | 11/2/2020 North America / USA / Michigan             |
| EPI_ISL_610105 | 10/15/2020 | 11/2/2020 North America / USA / Michigan             |
| EPI_ISL_610106 | 10/14/2020 | 11/2/2020 North America / USA / Michigan             |
| EPI_ISL_610107 | 10/14/2020 | 11/2/2020 North America / USA / Michigan             |
| EPI_ISL_610109 | 10/15/2020 | 11/2/2020 North America / USA / Michigan             |
| EPI_ISL_610110 | 10/14/2020 | 11/2/2020 North America / USA / Michigan             |
| EPI_ISL_610111 | 10/14/2020 | 11/2/2020 North America / USA / Michigan             |
| EPI_ISL_610112 | 10/14/2020 | 11/2/2020 North America / USA / Michigan             |
| EPI_ISL_610116 | 10/15/2020 | 11/2/2020 North America / USA / Michigan             |
| EPI_ISL_610118 | 8/7/2020   | 11/2/2020 North America / USA / Virginia             |
| EPI_ISL_610119 | 8/8/2020   | 11/2/2020 North America / USA / Virginia             |
| EPI_ISL_610120 | 8/8/2020   | 11/2/2020 North America / USA / Virginia             |
| EPI_ISL_610121 | 8/8/2020   | 11/2/2020 North America / USA / Virginia             |
| EPI_ISL_610122 | 8/7/2020   | 11/2/2020 North America / USA / Virginia             |
| EPI_ISL_610123 | 8/6/2020   | 11/2/2020 North America / USA / Virginia             |
| EPI_ISL_610124 | 8/5/2020   | 11/2/2020 North America / USA / Virginia             |
| EPI_ISL_610125 | 8/4/2020   | 11/2/2020 North America / USA / Virginia             |
| EPI_ISL_610126 | 7/31/2020  | 11/2/2020 North America / USA / Virginia             |
| EPI_ISL_610127 | 7/31/2020  | 11/2/2020 North America / USA / Virginia             |
| EPI_ISL_610128 | 8/13/2020  | 11/2/2020 North America / USA / Virginia             |
| EPI_ISL_610129 | 8/14/2020  | 11/2/2020 North America / USA / Virginia             |
| EPI_ISL_610130 | 8/14/2020  | 11/2/2020 North America / USA / Virginia             |
| EPI_ISL_610131 | 8/14/2020  | 11/2/2020 North America / USA / Virginia             |
| EPI_ISL_610132 | 8/14/2020  | 11/2/2020 North America / USA / Virginia             |
| EPI_ISL_610133 | 8/14/2020  | 11/2/2020 North America / USA / Virginia             |
| EPI_ISL_610134 | 8/14/2020  | 11/2/2020 North America / USA / Virginia             |
| EPI_ISL_610135 | 8/14/2020  | 11/2/2020 North America / USA / Virginia             |
| EPI_ISL_610136 | 8/14/2020  | 11/2/2020 North America / USA / Virginia             |
| EPI_ISL_610137 | 8/14/2020  | 11/2/2020 North America / USA / Virginia             |
| EPI_ISL_610138 | 8/13/2020  | 11/2/2020 North America / USA / Virginia             |
| EPI_ISL_610139 | 8/14/2020  | 11/2/2020 North America / USA / Virginia             |
| EPI_ISL_610140 | 8/14/2020  | 11/2/2020 North America / USA / Virginia             |
| EPI_ISL_610141 | 8/14/2020  | 11/2/2020 North America / USA / Virginia             |
| EPI_ISL_610142 | 8/14/2020  | 11/2/2020 North America / USA / Virginia             |
| EPI_ISL_610143 | 8/14/2020  | 11/2/2020 North America / USA / Virginia             |
| EPI_ISL_610144 | 8/14/2020  | 11/2/2020 North America / USA / Virginia             |
| EPI_ISL_610145 | 8/14/2020  | 11/2/2020 North America / USA / Virginia             |
| EPI_ISL_610146 | 8/14/2020  | 11/2/2020 North America / USA / Virginia             |
| EPI_ISL_610147 | 8/14/2020  | 11/2/2020 North America / USA / Virginia             |
| EPI_ISL_610148 | 8/14/2020  | 11/2/2020 North America / USA / Virginia             |
| EPI_ISL_610149 | 8/14/2020  | 11/2/2020 North America / USA / Virginia             |
| EPI_ISL_610150 | 8/14/2020  | 11/2/2020 North America / USA / Virginia             |
| EPI_ISL_610151 | 8/14/2020  | 11/2/2020 North America / USA / Virginia             |
| EPI_ISL_610152 | 10/22/2020 | 11/3/2020 Asia / Singapore                           |
| EPI_ISL_610153 | 9/30/2020  | 11/3/2020 Asia / Singapore                           |
| EPI_ISL_610154 | 10/12/2020 | 11/3/2020 Asia / Singapore                           |
| EPI_ISL_610157 | 8/14/2020  | 11/3/2020 North America / USA / Missouri / St. Louis |

|                |           |                                                      |
|----------------|-----------|------------------------------------------------------|
| EPI_ISL_610159 | 8/16/2020 | 11/3/2020 North America / USA / Missouri / St. Louis |
| EPI_ISL_610160 | 8/16/2020 | 11/3/2020 North America / USA / Missouri / St. Louis |
| EPI_ISL_610161 | 9/1/2020  | 11/3/2020 Asia / Indonesia / Central Java            |
| EPI_ISL_610162 | 8/31/2020 | 11/3/2020 Asia / Indonesia / Central Java            |
| EPI_ISL_610227 | 7/14/2020 | 11/3/2020 Europe / Russia / Moscow                   |
| EPI_ISL_610228 | 7/15/2020 | 11/3/2020 Europe / Russia / Moscow                   |
| EPI_ISL_610229 | 7/15/2020 | 11/3/2020 Europe / Russia / Moscow                   |
| EPI_ISL_610230 | 7/16/2020 | 11/3/2020 Europe / Russia / Moscow                   |
| EPI_ISL_610231 | 7/16/2020 | 11/3/2020 Europe / Russia / Moscow                   |
| EPI_ISL_610232 | 7/16/2020 | 11/3/2020 Europe / Russia / Moscow                   |
| EPI_ISL_610233 | 7/16/2020 | 11/3/2020 Europe / Russia / Moscow                   |
| EPI_ISL_610234 | 7/16/2020 | 11/3/2020 Europe / Russia / Moscow                   |
| EPI_ISL_610235 | 7/16/2020 | 11/3/2020 Europe / Russia / Moscow                   |
| EPI_ISL_610236 | 7/16/2020 | 11/3/2020 Europe / Russia / Moscow                   |
| EPI_ISL_610237 | 3/31/2020 | 11/3/2020 Europe / Russia / Moscow                   |
| EPI_ISL_610238 | 3/31/2020 | 11/3/2020 Europe / Russia / Moscow                   |
| EPI_ISL_610239 | 8/24/2020 | 11/3/2020 Europe / Russia / Moscow                   |
| EPI_ISL_610240 | 8/24/2020 | 11/3/2020 Europe / Russia / Moscow                   |
| EPI_ISL_610241 | 8/24/2020 | 11/3/2020 Europe / Russia / Moscow                   |
| EPI_ISL_610242 | 8/24/2020 | 11/3/2020 Europe / Russia / Moscow                   |
| EPI_ISL_610243 | 8/24/2020 | 11/3/2020 Europe / Russia / Moscow                   |
| EPI_ISL_610244 | 8/25/2020 | 11/3/2020 Europe / Russia / Moscow                   |
| EPI_ISL_610249 | 2020-03   | 11/3/2020 Europe / Germany / Bavaria / Erlangen      |
| EPI_ISL_610258 | 5/5/2020  | 11/3/2020 North America / USA / New Mexico           |
| EPI_ISL_610259 | 5/5/2020  | 11/3/2020 North America / USA / New Mexico           |
| EPI_ISL_610260 | 5/5/2020  | 11/3/2020 North America / USA / New Mexico           |
| EPI_ISL_610261 | 5/6/2020  | 11/3/2020 North America / USA / New Mexico           |
| EPI_ISL_610262 | 5/5/2020  | 11/3/2020 North America / USA / New Mexico           |
| EPI_ISL_610263 | 5/4/2020  | 11/3/2020 North America / USA / New Mexico           |
| EPI_ISL_610264 | 5/4/2020  | 11/3/2020 North America / USA / New Mexico           |
| EPI_ISL_610265 | 5/13/2020 | 11/3/2020 North America / USA / New Mexico           |
| EPI_ISL_610266 | 5/12/2020 | 11/3/2020 North America / USA / New Mexico           |
| EPI_ISL_610267 | 5/12/2020 | 11/3/2020 North America / USA / New Mexico           |
| EPI_ISL_610268 | 5/4/2020  | 11/3/2020 North America / USA / New Mexico           |
| EPI_ISL_610269 | 5/5/2020  | 11/3/2020 North America / USA / New Mexico           |
| EPI_ISL_610270 | 5/4/2020  | 11/3/2020 North America / USA / New Mexico           |
| EPI_ISL_610271 | 5/5/2020  | 11/3/2020 North America / USA / New Mexico           |
| EPI_ISL_610272 | 5/4/2020  | 11/3/2020 North America / USA / New Mexico           |
| EPI_ISL_610273 | 5/5/2020  | 11/3/2020 North America / USA / New Mexico           |
| EPI_ISL_610274 | 5/4/2020  | 11/3/2020 North America / USA / New Mexico           |
| EPI_ISL_610275 | 5/4/2020  | 11/3/2020 North America / USA / New Mexico           |
| EPI_ISL_610276 | 5/4/2020  | 11/3/2020 North America / USA / New Mexico           |
| EPI_ISL_610277 | 5/4/2020  | 11/3/2020 North America / USA / New Mexico           |
| EPI_ISL_610278 | 5/4/2020  | 11/3/2020 North America / USA / New Mexico           |
| EPI_ISL_610279 | 5/4/2020  | 11/3/2020 North America / USA / New Mexico           |
| EPI_ISL_610280 | 5/4/2020  | 11/3/2020 North America / USA / New Mexico           |
| EPI_ISL_610281 | 5/4/2020  | 11/3/2020 North America / USA / New Mexico           |



















































|                |            |                                              |
|----------------|------------|----------------------------------------------|
| EPI_ISL_611967 | 10/12/2020 | 11/3/2020 Europe / United Kingdom / England  |
| EPI_ISL_611968 | 10/2/2020  | 11/3/2020 Europe / United Kingdom / England  |
| EPI_ISL_611969 | 10/1/2020  | 11/3/2020 Europe / United Kingdom / England  |
| EPI_ISL_611970 | 10/1/2020  | 11/3/2020 Europe / United Kingdom / England  |
| EPI_ISL_611971 | 10/7/2020  | 11/3/2020 Europe / United Kingdom / England  |
| EPI_ISL_611972 | 10/15/2020 | 11/3/2020 Europe / United Kingdom / Wales    |
| EPI_ISL_611973 | 10/19/2020 | 11/3/2020 Europe / United Kingdom / Wales    |
| EPI_ISL_612117 | 10/3/2020  | 11/3/2020 Europe / United Kingdom / England  |
| EPI_ISL_612118 | 10/5/2020  | 11/3/2020 Europe / United Kingdom / England  |
| EPI_ISL_612119 | 10/17/2020 | 11/3/2020 Europe / United Kingdom / Wales    |
| EPI_ISL_612120 | 10/21/2020 | 11/3/2020 Europe / United Kingdom / Wales    |
| EPI_ISL_612121 | 10/1/2020  | 11/3/2020 Europe / United Kingdom / England  |
| EPI_ISL_612123 | 10/13/2020 | 11/3/2020 Europe / United Kingdom / England  |
| EPI_ISL_612124 | 9/21/2020  | 11/3/2020 Europe / United Kingdom / Scotland |
| EPI_ISL_612125 | 9/20/2020  | 11/3/2020 Europe / United Kingdom / Scotland |
| EPI_ISL_612126 | 10/6/2020  | 11/3/2020 Europe / United Kingdom / Scotland |
| EPI_ISL_612127 | 10/15/2020 | 11/3/2020 Europe / United Kingdom / Scotland |
| EPI_ISL_612128 | 10/16/2020 | 11/3/2020 Europe / United Kingdom / Scotland |
| EPI_ISL_612129 | 10/17/2020 | 11/3/2020 Europe / United Kingdom / Scotland |
| EPI_ISL_612130 | 10/3/2020  | 11/3/2020 Europe / United Kingdom / England  |
| EPI_ISL_612131 | 8/28/2020  | 11/3/2020 Europe / United Kingdom / England  |
| EPI_ISL_612132 | 10/1/2020  | 11/3/2020 Europe / United Kingdom / England  |
| EPI_ISL_612133 | 10/1/2020  | 11/3/2020 Europe / United Kingdom / England  |
| EPI_ISL_612134 | 10/3/2020  | 11/3/2020 Europe / United Kingdom / England  |
| EPI_ISL_612135 | 10/10/2020 | 11/3/2020 Europe / United Kingdom / Wales    |
| EPI_ISL_612136 | 10/14/2020 | 11/3/2020 Europe / United Kingdom / Wales    |
| EPI_ISL_612137 | 10/11/2020 | 11/3/2020 Europe / United Kingdom / Wales    |
| EPI_ISL_612138 | 10/7/2020  | 11/3/2020 Europe / United Kingdom / Wales    |
| EPI_ISL_612139 | 10/7/2020  | 11/3/2020 Europe / United Kingdom / Wales    |
| EPI_ISL_612140 | 10/13/2020 | 11/3/2020 Europe / United Kingdom / Wales    |
| EPI_ISL_612141 | 10/9/2020  | 11/3/2020 Europe / United Kingdom / Wales    |
| EPI_ISL_612142 | 10/7/2020  | 11/3/2020 Europe / United Kingdom / Wales    |
| EPI_ISL_612143 | 10/14/2020 | 11/3/2020 Europe / United Kingdom / Wales    |
| EPI_ISL_612144 | 10/7/2020  | 11/3/2020 Europe / United Kingdom / Wales    |
| EPI_ISL_612145 | 10/6/2020  | 11/3/2020 Europe / United Kingdom / Wales    |
| EPI_ISL_612146 | 10/21/2020 | 11/3/2020 Europe / United Kingdom / Wales    |
| EPI_ISL_612147 | 10/21/2020 | 11/3/2020 Europe / United Kingdom / Wales    |
| EPI_ISL_612148 | 10/17/2020 | 11/3/2020 Europe / United Kingdom / Wales    |
| EPI_ISL_612149 | 10/22/2020 | 11/3/2020 Europe / United Kingdom / Wales    |
| EPI_ISL_612150 | 10/17/2020 | 11/3/2020 Europe / United Kingdom / Wales    |
| EPI_ISL_612151 | 10/16/2020 | 11/3/2020 Europe / United Kingdom / Wales    |
| EPI_ISL_612152 | 10/20/2020 | 11/3/2020 Europe / United Kingdom / Wales    |
| EPI_ISL_612153 | 10/19/2020 | 11/3/2020 Europe / United Kingdom / Wales    |
| EPI_ISL_612154 | 10/19/2020 | 11/3/2020 Europe / United Kingdom / Wales    |
| EPI_ISL_612155 | 10/21/2020 | 11/3/2020 Europe / United Kingdom / Wales    |
| EPI_ISL_612156 | 10/20/2020 | 11/3/2020 Europe / United Kingdom / Wales    |
| EPI_ISL_612157 | 10/20/2020 | 11/3/2020 Europe / United Kingdom / Wales    |





























































|                |            |                                                        |
|----------------|------------|--------------------------------------------------------|
| EPI_ISL_613407 | 10/11/2020 | 11/3/2020 Europe / United Kingdom / England            |
| EPI_ISL_613408 | 10/10/2020 | 11/3/2020 Europe / United Kingdom / England            |
| EPI_ISL_613409 | 10/11/2020 | 11/3/2020 Europe / United Kingdom / England            |
| EPI_ISL_613419 | 3/18/2020  | 11/3/2020 North America / Guadeloupe / Sainte-Anne     |
| EPI_ISL_613420 | 3/14/2020  | 11/3/2020 North America / Guadeloupe / Les Abymes      |
| EPI_ISL_613421 | 3/14/2020  | 11/3/2020 North America / Guadeloupe / Basse-Terre     |
| EPI_ISL_613422 | 3/15/2020  | 11/3/2020 North America / Guadeloupe / MÃ©tropole      |
| EPI_ISL_613423 | 3/15/2020  | 11/3/2020 North America / Guadeloupe / Saint-Francois  |
| EPI_ISL_613424 | 3/13/2020  | 11/3/2020 North America / Guadeloupe / Sainte-Anne     |
| EPI_ISL_613425 | 3/15/2020  | 11/3/2020 North America / Guadeloupe / Morne Ã  l'Eau  |
| EPI_ISL_613426 | 3/17/2020  | 11/3/2020 North America / Guadeloupe / Baie-Mahault    |
| EPI_ISL_613427 | 3/17/2020  | 11/3/2020 North America / Guadeloupe / Baie-Mahault    |
| EPI_ISL_613428 | 3/17/2020  | 11/3/2020 North America / Guadeloupe / Baie-Mahault    |
| EPI_ISL_613429 | 3/13/2020  | 11/3/2020 North America / Saint Barthelemy             |
| EPI_ISL_613430 | 3/16/2020  | 11/3/2020 North America / Guadeloupe / Lamentin        |
| EPI_ISL_613431 | 3/16/2020  | 11/3/2020 North America / Guadeloupe / Sainte-Rose     |
| EPI_ISL_613432 | 3/20/2020  | 11/3/2020 North America / Guadeloupe / Le Gosier       |
| EPI_ISL_613433 | 3/23/2020  | 11/3/2020 North America / Guadeloupe                   |
| EPI_ISL_613434 | 3/23/2020  | 11/3/2020 North America / Guadeloupe / Le Gosier       |
| EPI_ISL_613435 | 3/22/2020  | 11/3/2020 North America / Guadeloupe / Sainte-Anne     |
| EPI_ISL_613436 | 3/22/2020  | 11/3/2020 North America / Guadeloupe / Trois-Rivieres  |
| EPI_ISL_613437 | 3/22/2020  | 11/3/2020 North America / Guadeloupe / MÃ©tropole      |
| EPI_ISL_613438 | 3/22/2020  | 11/3/2020 North America / Guadeloupe / Le Moule        |
| EPI_ISL_613439 | 3/24/2020  | 11/3/2020 North America / Guadeloupe / Trois-Rivieres  |
| EPI_ISL_613440 | 3/25/2020  | 11/3/2020 North America / Guadeloupe / Trois-Rivieres  |
| EPI_ISL_613441 | 3/26/2020  | 11/3/2020 North America / Guadeloupe / Vieux Habitants |
| EPI_ISL_613442 | 3/26/2020  | 11/3/2020 North America / Guadeloupe / Saint-Francois  |
| EPI_ISL_613443 | 3/28/2020  | 11/3/2020 North America / Guadeloupe / Les Abymes      |
| EPI_ISL_613444 | 3/30/2020  | 11/3/2020 North America / Guadeloupe / Baie-Mahault    |
| EPI_ISL_613445 | 3/31/2020  | 11/3/2020 North America / Guadeloupe / MÃ©tropole      |
| EPI_ISL_613446 | 2/28/2020  | 11/3/2020 North America / Saint Barthelemy             |
| EPI_ISL_613447 | 3/25/2020  | 11/3/2020 North America / Saint Martin                 |
| EPI_ISL_613448 | 3/28/2020  | 11/3/2020 North America / Saint Martin                 |
| EPI_ISL_613449 | 3/28/2020  | 11/3/2020 North America / Saint Martin                 |
| EPI_ISL_613450 | 3/26/2020  | 11/3/2020 North America / Saint Martin                 |
| EPI_ISL_613451 | 3/29/2020  | 11/3/2020 North America / Saint Martin                 |
| EPI_ISL_613452 | 3/28/2020  | 11/3/2020 North America / Saint Martin                 |
| EPI_ISL_613453 | 4/2/2020   | 11/3/2020 North America / Saint Martin                 |
| EPI_ISL_613454 | 4/2/2020   | 11/3/2020 North America / Saint Martin                 |
| EPI_ISL_613455 | 4/4/2020   | 11/3/2020 North America / Saint Martin                 |
| EPI_ISL_613456 | 4/7/2020   | 11/3/2020 North America / Saint Martin                 |
| EPI_ISL_613459 | 5/18/2020  | 11/3/2020 Europe / Turkey                              |
| EPI_ISL_613460 | 6/21/2020  | 11/3/2020 Europe / Turkey                              |
| EPI_ISL_613461 | 3/26/2020  | 11/3/2020 Europe / Turkey                              |
| EPI_ISL_613462 | 3/29/2020  | 11/3/2020 Europe / Turkey                              |
| EPI_ISL_613463 | 7/30/2020  | 11/3/2020 North America / USA / Minnesota              |
| EPI_ISL_613464 | 8/18/2020  | 11/3/2020 North America / USA / Minnesota              |



|                |            |                                                 |
|----------------|------------|-------------------------------------------------|
| EPI_ISL_613512 | 10/18/2020 | 11/3/2020 North America / USA / Minnesota       |
| EPI_ISL_613513 | 10/18/2020 | 11/3/2020 North America / USA / Minnesota       |
| EPI_ISL_613514 | 10/18/2020 | 11/3/2020 North America / USA / Minnesota       |
| EPI_ISL_613515 | 10/18/2020 | 11/3/2020 North America / USA / Minnesota       |
| EPI_ISL_613516 | 10/18/2020 | 11/3/2020 North America / USA / Minnesota       |
| EPI_ISL_613517 | 10/18/2020 | 11/3/2020 North America / USA / Minnesota       |
| EPI_ISL_613518 | 10/18/2020 | 11/3/2020 North America / USA / Minnesota       |
| EPI_ISL_613519 | 10/18/2020 | 11/3/2020 North America / USA / Minnesota       |
| EPI_ISL_613520 | 10/18/2020 | 11/3/2020 North America / USA / Minnesota       |
| EPI_ISL_613521 | 10/18/2020 | 11/3/2020 North America / USA / Minnesota       |
| EPI_ISL_613522 | 10/18/2020 | 11/3/2020 North America / USA / Minnesota       |
| EPI_ISL_613523 | 10/19/2020 | 11/3/2020 North America / USA / Minnesota       |
| EPI_ISL_613524 | 10/18/2020 | 11/3/2020 North America / USA / Minnesota       |
| EPI_ISL_613525 | 10/18/2020 | 11/3/2020 North America / USA / Minnesota       |
| EPI_ISL_613527 | 10/16/2020 | 11/3/2020 North America / USA / Minnesota       |
| EPI_ISL_613528 | 10/22/2020 | 11/3/2020 North America / USA / Minnesota       |
| EPI_ISL_613529 | 10/23/2020 | 11/3/2020 North America / USA / Minnesota       |
| EPI_ISL_613530 | 10/23/2020 | 11/3/2020 North America / USA / Minnesota       |
| EPI_ISL_613531 | 10/23/2020 | 11/3/2020 North America / USA / Minnesota       |
| EPI_ISL_613532 | 10/24/2020 | 11/3/2020 North America / USA / Minnesota       |
| EPI_ISL_613533 | 10/23/2020 | 11/3/2020 North America / USA / Minnesota       |
| EPI_ISL_613534 | 10/23/2020 | 11/3/2020 North America / USA / Minnesota       |
| EPI_ISL_613535 | 10/23/2020 | 11/3/2020 North America / USA / Minnesota       |
| EPI_ISL_613536 | 10/23/2020 | 11/3/2020 North America / USA / Minnesota       |
| EPI_ISL_613537 | 10/23/2020 | 11/3/2020 North America / USA / Minnesota       |
| EPI_ISL_613538 | 10/23/2020 | 11/3/2020 North America / USA / Minnesota       |
| EPI_ISL_613539 | 10/23/2020 | 11/3/2020 North America / USA / Minnesota       |
| EPI_ISL_613540 | 10/23/2020 | 11/3/2020 North America / USA / Minnesota       |
| EPI_ISL_613457 | 8/11/2020  | 11/4/2020 Asia / Hong Kong                      |
| EPI_ISL_613541 | 3/2/2020   | 11/4/2020 Europe / Denmark / Sjælland           |
| EPI_ISL_613542 | 3/9/2020   | 11/4/2020 Europe / Denmark / Syddanmark         |
| EPI_ISL_613543 | 3/9/2020   | 11/4/2020 Europe / Denmark / Syddanmark         |
| EPI_ISL_613545 | 8/15/2020  | 11/4/2020 Europe / France / Bretagne / Rennes   |
| EPI_ISL_613546 | 8/15/2020  | 11/4/2020 Europe / France / Bretagne / Rennes   |
| EPI_ISL_613547 | 8/25/2020  | 11/4/2020 Europe / France / Bretagne / Rennes   |
| EPI_ISL_613548 | 8/29/2020  | 11/4/2020 Europe / France / Bretagne / Fougères |
| EPI_ISL_613549 | 9/1/2020   | 11/4/2020 Europe / France / Bretagne / Fougères |
| EPI_ISL_613550 | 8/31/2020  | 11/4/2020 Europe / France / Bretagne / Rennes   |
| EPI_ISL_613551 | 9/2/2020   | 11/4/2020 Europe / France / Bretagne / Fougères |
| EPI_ISL_613552 | 9/2/2020   | 11/4/2020 Europe / France / Bretagne / Rennes   |
| EPI_ISL_613553 | 9/3/2020   | 11/4/2020 Europe / France / Bretagne / Rennes   |
| EPI_ISL_613554 | 9/4/2020   | 11/4/2020 Europe / France / Bretagne / Rennes   |
| EPI_ISL_613555 | 9/4/2020   | 11/4/2020 Europe / France / Bretagne / Rennes   |
| EPI_ISL_613556 | 9/5/2020   | 11/4/2020 Europe / France / Bretagne / Rennes   |
| EPI_ISL_613557 | 9/6/2020   | 11/4/2020 Europe / France / Bretagne / Rennes   |
| EPI_ISL_613558 | 9/6/2020   | 11/4/2020 Europe / France / Bretagne / Betton   |
| EPI_ISL_613559 | 9/6/2020   | 11/4/2020 Europe / France / Bretagne / Rennes   |

|                |            |                                                               |
|----------------|------------|---------------------------------------------------------------|
| EPI_ISL_613560 | 4/4/2020   | 11/4/2020 Europe / Italy / Sardinia / Nuoro                   |
| EPI_ISL_613563 | 4/1/2020   | 11/4/2020 South America / Brazil / Sao Paulo / Ribeirao Preto |
| EPI_ISL_613564 | 4/5/2020   | 11/4/2020 South America / Brazil / Sao Paulo / Ribeirao Preto |
| EPI_ISL_613570 | 10/27/2020 | 11/4/2020 Europe / Gibraltar                                  |
| EPI_ISL_613571 | 10/14/2020 | 11/4/2020 Europe / United Kingdom / England                   |
| EPI_ISL_613572 | 10/14/2020 | 11/4/2020 Europe / United Kingdom / England                   |
| EPI_ISL_613573 | 10/14/2020 | 11/4/2020 Europe / United Kingdom / England                   |
| EPI_ISL_613574 | 10/14/2020 | 11/4/2020 Europe / United Kingdom / England                   |
| EPI_ISL_613575 | 10/14/2020 | 11/4/2020 Europe / United Kingdom / England                   |
| EPI_ISL_613576 | 10/13/2020 | 11/4/2020 Europe / United Kingdom / England                   |
| EPI_ISL_613577 | 10/15/2020 | 11/4/2020 Europe / United Kingdom / England                   |
| EPI_ISL_613578 | 10/15/2020 | 11/4/2020 Europe / United Kingdom / England                   |
| EPI_ISL_613579 | 10/15/2020 | 11/4/2020 Europe / United Kingdom / England                   |
| EPI_ISL_613580 | 10/15/2020 | 11/4/2020 Europe / United Kingdom / England                   |
| EPI_ISL_613581 | 10/15/2020 | 11/4/2020 Europe / United Kingdom / England                   |
| EPI_ISL_613582 | 10/15/2020 | 11/4/2020 Europe / United Kingdom / England                   |
| EPI_ISL_613583 | 10/15/2020 | 11/4/2020 Europe / United Kingdom / England                   |
| EPI_ISL_613584 | 10/15/2020 | 11/4/2020 Europe / United Kingdom / England                   |
| EPI_ISL_613585 | 10/15/2020 | 11/4/2020 Europe / United Kingdom / England                   |
| EPI_ISL_613586 | 10/15/2020 | 11/4/2020 Europe / United Kingdom / England                   |
| EPI_ISL_613587 | 10/9/2020  | 11/4/2020 Europe / United Kingdom / England                   |
| EPI_ISL_613588 | 10/9/2020  | 11/4/2020 Europe / United Kingdom / England                   |
| EPI_ISL_613589 | 10/9/2020  | 11/4/2020 Europe / United Kingdom / England                   |
| EPI_ISL_613590 | 10/13/2020 | 11/4/2020 Europe / United Kingdom / England                   |
| EPI_ISL_613591 | 10/15/2020 | 11/4/2020 Europe / United Kingdom / England                   |
| EPI_ISL_613592 | 10/15/2020 | 11/4/2020 Europe / United Kingdom / England                   |
| EPI_ISL_613593 | 10/15/2020 | 11/4/2020 Europe / United Kingdom / England                   |
| EPI_ISL_613594 | 10/15/2020 | 11/4/2020 Europe / United Kingdom / England                   |
| EPI_ISL_613595 | 10/15/2020 | 11/4/2020 Europe / United Kingdom / England                   |
| EPI_ISL_613596 | 10/15/2020 | 11/4/2020 Europe / United Kingdom / England                   |
| EPI_ISL_613597 | 10/15/2020 | 11/4/2020 Europe / United Kingdom / England                   |
| EPI_ISL_613598 | 10/15/2020 | 11/4/2020 Europe / United Kingdom / England                   |
| EPI_ISL_613599 | 10/14/2020 | 11/4/2020 Europe / United Kingdom / England                   |
| EPI_ISL_613600 | 10/16/2020 | 11/4/2020 Europe / United Kingdom / England                   |
| EPI_ISL_613601 | 10/16/2020 | 11/4/2020 Europe / United Kingdom / England                   |
| EPI_ISL_613602 | 10/16/2020 | 11/4/2020 Europe / United Kingdom / England                   |
| EPI_ISL_613603 | 10/16/2020 | 11/4/2020 Europe / United Kingdom / England                   |
| EPI_ISL_613604 | 10/16/2020 | 11/4/2020 Europe / United Kingdom / England                   |
| EPI_ISL_613605 | 10/16/2020 | 11/4/2020 Europe / United Kingdom / England                   |
| EPI_ISL_613606 | 10/16/2020 | 11/4/2020 Europe / United Kingdom / England                   |
| EPI_ISL_613607 | 10/16/2020 | 11/4/2020 Europe / United Kingdom / England                   |
| EPI_ISL_613608 | 10/16/2020 | 11/4/2020 Europe / United Kingdom / England                   |
| EPI_ISL_613609 | 10/16/2020 | 11/4/2020 Europe / United Kingdom / England                   |
| EPI_ISL_613610 | 10/16/2020 | 11/4/2020 Europe / United Kingdom / England                   |
| EPI_ISL_613611 | 10/16/2020 | 11/4/2020 Europe / United Kingdom / England                   |
| EPI_ISL_613612 | 10/14/2020 | 11/4/2020 Europe / United Kingdom / England                   |
| EPI_ISL_613613 | 10/14/2020 | 11/4/2020 Europe / United Kingdom / England                   |



|                |            |                                                               |
|----------------|------------|---------------------------------------------------------------|
| EPI_ISL_613661 | 10/27/2020 | 11/4/2020 Europe / Gibraltar                                  |
| EPI_ISL_613662 | 10/27/2020 | 11/4/2020 Europe / Gibraltar                                  |
| EPI_ISL_613663 | 10/27/2020 | 11/4/2020 Europe / Gibraltar                                  |
| EPI_ISL_613664 | 10/27/2020 | 11/4/2020 Europe / Gibraltar                                  |
| EPI_ISL_613665 | 10/27/2020 | 11/4/2020 Europe / Gibraltar                                  |
| EPI_ISL_613666 | 10/27/2020 | 11/4/2020 Europe / Gibraltar                                  |
| EPI_ISL_613667 | 10/27/2020 | 11/4/2020 Europe / Gibraltar                                  |
| EPI_ISL_613668 | 10/27/2020 | 11/4/2020 Europe / Gibraltar                                  |
| EPI_ISL_613669 | 10/27/2020 | 11/4/2020 Europe / Gibraltar                                  |
| EPI_ISL_613670 | 10/27/2020 | 11/4/2020 Europe / Gibraltar                                  |
| EPI_ISL_613671 | 10/27/2020 | 11/4/2020 Europe / Gibraltar                                  |
| EPI_ISL_613672 | 10/27/2020 | 11/4/2020 Europe / Gibraltar                                  |
| EPI_ISL_613673 | 10/27/2020 | 11/4/2020 Europe / Gibraltar                                  |
| EPI_ISL_613674 | 10/27/2020 | 11/4/2020 Europe / Gibraltar                                  |
| EPI_ISL_613675 | 10/27/2020 | 11/4/2020 Europe / Gibraltar                                  |
| EPI_ISL_613676 | 10/27/2020 | 11/4/2020 Europe / Gibraltar                                  |
| EPI_ISL_613677 | 10/27/2020 | 11/4/2020 Europe / Gibraltar                                  |
| EPI_ISL_613678 | 10/27/2020 | 11/4/2020 Europe / Gibraltar                                  |
| EPI_ISL_613679 | 10/27/2020 | 11/4/2020 Europe / Gibraltar                                  |
| EPI_ISL_613680 | 10/27/2020 | 11/4/2020 Europe / Gibraltar                                  |
| EPI_ISL_613681 | 10/27/2020 | 11/4/2020 Europe / Gibraltar                                  |
| EPI_ISL_613682 | 10/27/2020 | 11/4/2020 Europe / Gibraltar                                  |
| EPI_ISL_613683 | 10/27/2020 | 11/4/2020 Europe / Gibraltar                                  |
| EPI_ISL_613684 | 10/27/2020 | 11/4/2020 Europe / Gibraltar                                  |
| EPI_ISL_613685 | 10/27/2020 | 11/4/2020 Europe / Gibraltar                                  |
| EPI_ISL_613686 | 10/27/2020 | 11/4/2020 Europe / Gibraltar                                  |
| EPI_ISL_613687 | 10/27/2020 | 11/4/2020 Europe / Gibraltar                                  |
| EPI_ISL_613688 | 10/27/2020 | 11/4/2020 Europe / Gibraltar                                  |
| EPI_ISL_613689 | 10/27/2020 | 11/4/2020 Europe / Gibraltar                                  |
| EPI_ISL_613690 | 10/27/2020 | 11/4/2020 Europe / Gibraltar                                  |
| EPI_ISL_613691 | 10/27/2020 | 11/4/2020 Europe / Gibraltar                                  |
| EPI_ISL_613692 | 10/27/2020 | 11/4/2020 Europe / Gibraltar                                  |
| EPI_ISL_613693 | 10/27/2020 | 11/4/2020 Europe / Gibraltar                                  |
| EPI_ISL_613694 | 10/27/2020 | 11/4/2020 Europe / Gibraltar                                  |
| EPI_ISL_613695 | 10/27/2020 | 11/4/2020 Europe / Gibraltar                                  |
| EPI_ISL_613696 | 10/27/2020 | 11/4/2020 Europe / Gibraltar                                  |
| EPI_ISL_613697 | 10/27/2020 | 11/4/2020 Europe / Gibraltar                                  |
| EPI_ISL_613698 | 10/27/2020 | 11/4/2020 Europe / Gibraltar                                  |
| EPI_ISL_613699 | 10/27/2020 | 11/4/2020 Europe / Gibraltar                                  |
| EPI_ISL_613700 | 10/27/2020 | 11/4/2020 Europe / Gibraltar                                  |
| EPI_ISL_613701 | 10/27/2020 | 11/4/2020 Europe / Gibraltar                                  |
| EPI_ISL_613702 | 10/27/2020 | 11/4/2020 Europe / Gibraltar                                  |
| EPI_ISL_613703 | 10/27/2020 | 11/4/2020 Europe / Gibraltar                                  |
| EPI_ISL_613704 | 10/27/2020 | 11/4/2020 Europe / Gibraltar                                  |
| EPI_ISL_613705 | 10/27/2020 | 11/4/2020 Europe / Gibraltar                                  |
| EPI_ISL_613706 | 4/15/2020  | 11/4/2020 Europe / Italy / Sardinia                           |
| EPI_ISL_613707 | 3/24/2020  | 11/4/2020 South America / Brazil / Sao Paulo / Ribeirao Preto |







|                |            |                                                               |
|----------------|------------|---------------------------------------------------------------|
| EPI_ISL_613924 | 4/10/2020  | 11/4/2020 North America / USA / Florida                       |
| EPI_ISL_613925 | 4/9/2020   | 11/4/2020 North America / USA / Florida                       |
| EPI_ISL_613926 | 4/9/2020   | 11/4/2020 North America / USA / Florida                       |
| EPI_ISL_613927 | 4/9/2020   | 11/4/2020 North America / USA / Florida                       |
| EPI_ISL_613928 | 4/9/2020   | 11/4/2020 North America / USA / Florida                       |
| EPI_ISL_613929 | 4/9/2020   | 11/4/2020 North America / USA / Florida                       |
| EPI_ISL_613930 | 4/9/2020   | 11/4/2020 North America / USA / Florida                       |
| EPI_ISL_613931 | 4/9/2020   | 11/4/2020 North America / USA / Florida                       |
| EPI_ISL_613932 | 4/6/2020   | 11/4/2020 North America / USA / Florida                       |
| EPI_ISL_613933 | 4/9/2020   | 11/4/2020 North America / USA / Florida                       |
| EPI_ISL_613934 | 4/6/2020   | 11/4/2020 North America / USA / Florida                       |
| EPI_ISL_613935 | 4/9/2020   | 11/4/2020 North America / USA / Florida                       |
| EPI_ISL_613936 | 4/10/2020  | 11/4/2020 North America / USA / Florida                       |
| EPI_ISL_613937 | 4/10/2020  | 11/4/2020 North America / USA / Florida                       |
| EPI_ISL_613938 | 4/10/2020  | 11/4/2020 North America / USA / Florida                       |
| EPI_ISL_613939 | 4/10/2020  | 11/4/2020 North America / USA / Florida                       |
| EPI_ISL_613940 | 4/10/2020  | 11/4/2020 North America / USA / Florida                       |
| EPI_ISL_613941 | 4/10/2020  | 11/4/2020 North America / USA / Florida                       |
| EPI_ISL_613942 | 4/10/2020  | 11/4/2020 North America / USA / Florida                       |
| EPI_ISL_613943 | 4/9/2020   | 11/4/2020 North America / USA / Florida                       |
| EPI_ISL_613944 | 4/9/2020   | 11/4/2020 North America / USA / Florida                       |
| EPI_ISL_613945 | 4/9/2020   | 11/4/2020 North America / USA / Florida                       |
| EPI_ISL_613946 | 4/9/2020   | 11/4/2020 North America / USA / Florida                       |
| EPI_ISL_613947 | 4/9/2020   | 11/4/2020 North America / USA / Florida                       |
| EPI_ISL_613948 | 4/9/2020   | 11/4/2020 North America / USA / Florida                       |
| EPI_ISL_613949 | 7/14/2020  | 11/4/2020 North America / USA / Florida                       |
| EPI_ISL_613950 | 7/29/2020  | 11/4/2020 North America / USA / Florida                       |
| EPI_ISL_613951 | 4/1/2020   | 11/4/2020 South America / Brazil / Sao Paulo / Ribeirao Preto |
| EPI_ISL_613953 | 4/10/2020  | 11/4/2020 Europe / Italy / Sardinia                           |
| EPI_ISL_613955 | 4/9/2020   | 11/4/2020 Europe / Italy / Sardinia                           |
| EPI_ISL_613958 | 10/27/2020 | 11/4/2020 Europe / Gibraltar                                  |
| EPI_ISL_614012 | 8/14/2020  | 11/4/2020 North America / USA / Virginia                      |
| EPI_ISL_614013 | 8/14/2020  | 11/4/2020 North America / USA / Virginia                      |
| EPI_ISL_614014 | 8/14/2020  | 11/4/2020 North America / USA / Virginia                      |
| EPI_ISL_614015 | 8/19/2020  | 11/4/2020 North America / USA / Virginia                      |
| EPI_ISL_614016 | 8/20/2020  | 11/4/2020 North America / USA / Virginia                      |
| EPI_ISL_614017 | 8/18/2020  | 11/4/2020 North America / USA / Virginia                      |
| EPI_ISL_614018 | 8/20/2020  | 11/4/2020 North America / USA / Virginia                      |
| EPI_ISL_614019 | 8/18/2020  | 11/4/2020 North America / USA / Virginia                      |
| EPI_ISL_614020 | 8/20/2020  | 11/4/2020 North America / USA / Virginia                      |
| EPI_ISL_614021 | 8/20/2020  | 11/4/2020 North America / USA / Virginia                      |
| EPI_ISL_614022 | 8/20/2020  | 11/4/2020 North America / USA / Virginia                      |
| EPI_ISL_614023 | 8/17/2020  | 11/4/2020 North America / USA / Virginia                      |
| EPI_ISL_614024 | 8/20/2020  | 11/4/2020 North America / USA / Virginia                      |
| EPI_ISL_614025 | 8/19/2020  | 11/4/2020 North America / USA / Virginia                      |
| EPI_ISL_614026 | 8/20/2020  | 11/4/2020 North America / USA / Virginia                      |
| EPI_ISL_614027 | 8/20/2020  | 11/4/2020 North America / USA / Virginia                      |







|                |            |                                          |
|----------------|------------|------------------------------------------|
| EPI_ISL_614211 | 10/13/2020 | 11/4/2020 North America / USA / Michigan |
| EPI_ISL_614212 | 10/14/2020 | 11/4/2020 North America / USA / Michigan |
| EPI_ISL_614213 | 10/10/2020 | 11/4/2020 North America / USA / Michigan |
| EPI_ISL_614214 | 10/16/2020 | 11/4/2020 North America / USA / Michigan |
| EPI_ISL_614215 | 10/19/2020 | 11/4/2020 North America / USA / Michigan |
| EPI_ISL_614216 | 10/12/2020 | 11/4/2020 North America / USA / Michigan |
| EPI_ISL_614217 | 10/18/2020 | 11/4/2020 North America / USA / Michigan |
| EPI_ISL_614218 | 10/6/2020  | 11/4/2020 North America / USA / Michigan |
| EPI_ISL_614219 | 10/9/2020  | 11/4/2020 North America / USA / Michigan |
| EPI_ISL_614220 | 10/16/2020 | 11/4/2020 North America / USA / Michigan |
| EPI_ISL_614221 | 10/20/2020 | 11/4/2020 North America / USA / Michigan |
| EPI_ISL_614222 | 10/20/2020 | 11/4/2020 North America / USA / Michigan |
| EPI_ISL_614223 | 10/12/2020 | 11/4/2020 North America / USA / Michigan |
| EPI_ISL_614224 | 10/16/2020 | 11/4/2020 North America / USA / Michigan |
| EPI_ISL_614225 | 10/12/2020 | 11/4/2020 North America / USA / Michigan |
| EPI_ISL_614226 | 10/20/2020 | 11/4/2020 North America / USA / Michigan |
| EPI_ISL_614227 | 10/8/2020  | 11/4/2020 North America / USA / Michigan |
| EPI_ISL_614228 | 10/12/2020 | 11/4/2020 North America / USA / Michigan |
| EPI_ISL_614229 | 10/12/2020 | 11/4/2020 North America / USA / Michigan |
| EPI_ISL_614230 | 10/19/2020 | 11/4/2020 North America / USA / Michigan |
| EPI_ISL_614231 | 10/13/2020 | 11/4/2020 North America / USA / Michigan |
| EPI_ISL_614232 | 10/12/2020 | 11/4/2020 North America / USA / Michigan |
| EPI_ISL_614233 | 10/18/2020 | 11/4/2020 North America / USA / Michigan |
| EPI_ISL_614234 | 10/6/2020  | 11/4/2020 North America / USA / Michigan |
| EPI_ISL_614235 | 10/13/2020 | 11/4/2020 North America / USA / Michigan |
| EPI_ISL_614236 | 10/15/2020 | 11/4/2020 North America / USA / Michigan |
| EPI_ISL_614237 | 10/20/2020 | 11/4/2020 North America / USA / Michigan |
| EPI_ISL_614238 | 10/18/2020 | 11/4/2020 North America / USA / Michigan |
| EPI_ISL_614239 | 10/19/2020 | 11/4/2020 North America / USA / Michigan |
| EPI_ISL_614240 | 10/20/2020 | 11/4/2020 North America / USA / Michigan |
| EPI_ISL_614241 | 10/16/2020 | 11/4/2020 North America / USA / Michigan |
| EPI_ISL_614242 | 10/17/2020 | 11/4/2020 North America / USA / Michigan |
| EPI_ISL_614243 | 10/18/2020 | 11/4/2020 North America / USA / Michigan |
| EPI_ISL_614244 | 10/20/2020 | 11/4/2020 North America / USA / Michigan |
| EPI_ISL_614245 | 10/20/2020 | 11/4/2020 North America / USA / Michigan |
| EPI_ISL_614246 | 10/20/2020 | 11/4/2020 North America / USA / Michigan |
| EPI_ISL_614249 | 6/5/2020   | 11/4/2020 North America / USA / Wyoming  |
| EPI_ISL_614250 | 6/5/2020   | 11/4/2020 North America / USA / Wyoming  |
| EPI_ISL_614251 | 6/5/2020   | 11/4/2020 North America / USA / Wyoming  |
| EPI_ISL_614252 | 6/6/2020   | 11/4/2020 North America / USA / Wyoming  |
| EPI_ISL_614253 | 6/8/2020   | 11/4/2020 North America / USA / Wyoming  |
| EPI_ISL_614254 | 6/11/2020  | 11/4/2020 North America / USA / Wyoming  |
| EPI_ISL_614255 | 6/16/2020  | 11/4/2020 North America / USA / Wyoming  |
| EPI_ISL_614256 | 6/15/2020  | 11/4/2020 North America / USA / Wyoming  |
| EPI_ISL_614257 | 6/19/2020  | 11/4/2020 North America / USA / Wyoming  |
| EPI_ISL_614258 | 6/22/2020  | 11/4/2020 North America / USA / Wyoming  |
| EPI_ISL_614259 | 7/1/2020   | 11/4/2020 North America / USA / Wyoming  |

|                |            |                                                                        |
|----------------|------------|------------------------------------------------------------------------|
| EPI_ISL_614260 | 7/1/2020   | 11/4/2020 North America / USA / Wyoming                                |
| EPI_ISL_614261 | 7/3/2020   | 11/4/2020 North America / USA / Wyoming                                |
| EPI_ISL_614262 | 7/6/2020   | 11/4/2020 North America / USA / Wyoming                                |
| EPI_ISL_614263 | 7/6/2020   | 11/4/2020 North America / USA / Wyoming                                |
| EPI_ISL_614264 | 7/6/2020   | 11/4/2020 North America / USA / Wyoming                                |
| EPI_ISL_614265 | 8/9/2020   | 11/4/2020 Europe / France / Bretagne / Chateaulin                      |
| EPI_ISL_614266 | 8/11/2020  | 11/4/2020 Europe / France / Bretagne / Chateaulin                      |
| EPI_ISL_614267 | 8/11/2020  | 11/4/2020 Europe / France / Bretagne / Chateaulin                      |
| EPI_ISL_614268 | 8/13/2020  | 11/4/2020 Europe / France / Bretagne / Chateaulin                      |
| EPI_ISL_614269 | 8/13/2020  | 11/4/2020 Europe / France / Bretagne / Chateaulin                      |
| EPI_ISL_614270 | 8/13/2020  | 11/4/2020 Europe / France / Bretagne / Chateaulin                      |
| EPI_ISL_614271 | 8/13/2020  | 11/4/2020 Europe / France / Bretagne / Chateaulin                      |
| EPI_ISL_614272 | 8/13/2020  | 11/4/2020 Europe / France / Bretagne / Chateaulin                      |
| EPI_ISL_614273 | 8/13/2020  | 11/4/2020 Europe / France / Bretagne / Chateaulin                      |
| EPI_ISL_614274 | 8/13/2020  | 11/4/2020 Europe / France / Bretagne / Chateaulin                      |
| EPI_ISL_614275 | 8/13/2020  | 11/4/2020 Europe / France / Bretagne / Chateaulin                      |
| EPI_ISL_614276 | 8/13/2020  | 11/4/2020 Europe / France / Bretagne / Chateaulin                      |
| EPI_ISL_614277 | 8/13/2020  | 11/4/2020 Europe / France / Bretagne / Chateaulin                      |
| EPI_ISL_614278 | 8/13/2020  | 11/4/2020 Europe / France / Bretagne / Chateaulin                      |
| EPI_ISL_614279 | 8/13/2020  | 11/4/2020 Europe / France / Bretagne / Chateaulin                      |
| EPI_ISL_614280 | 8/13/2020  | 11/4/2020 Europe / France / Bretagne / Chateaulin                      |
| EPI_ISL_614281 | 4/18/2020  | 11/4/2020 Europe / France / Bretagne / Rennes                          |
| EPI_ISL_614282 | 10/5/2020  | 11/4/2020 Europe / France / Grand Est / Bischheim                      |
| EPI_ISL_614283 | 10/6/2020  | 11/4/2020 Europe / France / Bourgogne-Franche-Comte / Montcenis        |
| EPI_ISL_614284 | 10/12/2020 | 11/4/2020 Europe / France / Hauts-de-France / Compiègne                |
| EPI_ISL_614285 | 10/12/2020 | 11/4/2020 Europe / France / Île-de-France / Verrières-le-Buisson       |
| EPI_ISL_614286 | 10/14/2020 | 11/4/2020 Europe / France / Centre-Val de Loire / Craon                |
| EPI_ISL_614287 | 10/19/2020 | 11/4/2020 Europe / France / Île-de-France / Pecq                       |
| EPI_ISL_614288 | 10/19/2020 | 11/4/2020 Europe / France / Centre-Val de Loire / Blois                |
| EPI_ISL_614289 | 10/19/2020 | 11/4/2020 Europe / France / Centre-Val de Loire / Rouziers-de-Touraine |
| EPI_ISL_614290 | 10/16/2020 | 11/4/2020 Europe / France / Centre-Val de Loire / Blois                |
| EPI_ISL_614291 | 10/19/2020 | 11/4/2020 Europe / France / Île-de-France / Moussy-le-Neuf             |
| EPI_ISL_614292 | 10/22/2020 | 11/4/2020 Europe / France / Grand Est / Thann                          |
| EPI_ISL_614293 | 10/22/2020 | 11/4/2020 Europe / France / Île-de-France / Compans                    |
| EPI_ISL_614294 | 3/6/2020   | 11/5/2020 North America / USA / New York / New York City               |
| EPI_ISL_614298 | 9/21/2020  | 11/5/2020 Europe / Faroe Islands                                       |
| EPI_ISL_614304 | 9/30/2020  | 11/5/2020 Europe / Faroe Islands                                       |
| EPI_ISL_614307 | 7/24/2020  | 11/5/2020 Europe / Faroe Islands                                       |
| EPI_ISL_614308 | 8/4/2020   | 11/5/2020 Europe / Faroe Islands                                       |
| EPI_ISL_614310 | 8/4/2020   | 11/5/2020 Europe / Faroe Islands                                       |
| EPI_ISL_614311 | 8/5/2020   | 11/5/2020 Europe / Faroe Islands                                       |
| EPI_ISL_614312 | 8/5/2020   | 11/5/2020 Europe / Faroe Islands                                       |
| EPI_ISL_614347 | 9/22/2020  | 11/5/2020 Africa / Cote d'Ivoire / Bouake                              |
| EPI_ISL_614348 | 5/30/2020  | 11/5/2020 Africa / Cote d'Ivoire / Bouake                              |
| EPI_ISL_614349 | 5/29/2020  | 11/5/2020 Africa / Cote d'Ivoire / Bouake                              |
| EPI_ISL_614351 | 6/4/2020   | 11/5/2020 Africa / Cote d'Ivoire / Bouake                              |
| EPI_ISL_614352 | 6/4/2020   | 11/5/2020 Africa / Cote d'Ivoire / Bouake                              |

|                |           |                                                 |
|----------------|-----------|-------------------------------------------------|
| EPI_ISL_614353 | 6/8/2020  | 11/5/2020 Africa / Cote d'Ivoire / Bouake       |
| EPI_ISL_614354 | 6/10/2020 | 11/5/2020 Africa / Cote d'Ivoire / Bouake       |
| EPI_ISL_614355 | 6/10/2020 | 11/5/2020 Africa / Cote d'Ivoire / Bouake       |
| EPI_ISL_614356 | 6/12/2020 | 11/5/2020 Africa / Cote d'Ivoire / Bouake       |
| EPI_ISL_614357 | 6/13/2020 | 11/5/2020 Africa / Cote d'Ivoire / Bouake       |
| EPI_ISL_614358 | 6/13/2020 | 11/5/2020 Africa / Cote d'Ivoire / Bouake       |
| EPI_ISL_614359 | 6/12/2020 | 11/5/2020 Africa / Cote d'Ivoire / Bouake       |
| EPI_ISL_614360 | 6/16/2020 | 11/5/2020 Africa / Cote d'Ivoire / Bouake       |
| EPI_ISL_614361 | 6/16/2020 | 11/5/2020 Africa / Cote d'Ivoire / Bouake       |
| EPI_ISL_614362 | 6/16/2020 | 11/5/2020 Africa / Cote d'Ivoire / Bouake       |
| EPI_ISL_614363 | 6/15/2020 | 11/5/2020 Africa / Cote d'Ivoire / Bouake       |
| EPI_ISL_614364 | 6/19/2020 | 11/5/2020 Africa / Cote d'Ivoire / Bouake       |
| EPI_ISL_614365 | 6/20/2020 | 11/5/2020 Africa / Cote d'Ivoire / Bouake       |
| EPI_ISL_614366 | 6/20/2020 | 11/5/2020 Africa / Cote d'Ivoire / Bouake       |
| EPI_ISL_614367 | 6/19/2020 | 11/5/2020 Africa / Cote d'Ivoire / Bouake       |
| EPI_ISL_614368 | 6/19/2020 | 11/5/2020 Africa / Cote d'Ivoire / Bouake       |
| EPI_ISL_614371 | 6/24/2020 | 11/5/2020 Africa / Cote d'Ivoire / Bouake       |
| EPI_ISL_614372 | 6/24/2020 | 11/5/2020 Africa / Cote d'Ivoire / Bouake       |
| EPI_ISL_614375 | 7/2/2020  | 11/5/2020 Africa / Cote d'Ivoire / Bouake       |
| EPI_ISL_614376 | 7/2/2020  | 11/5/2020 Africa / Cote d'Ivoire / Yamoussoukro |
| EPI_ISL_614377 | 7/15/2020 | 11/5/2020 Africa / Cote d'Ivoire / Bouafle      |
| EPI_ISL_614379 | 7/17/2020 | 11/5/2020 Africa / Cote d'Ivoire / Yamoussoukro |
| EPI_ISL_614380 | 7/17/2020 | 11/5/2020 Africa / Cote d'Ivoire / Yamoussoukro |
| EPI_ISL_614381 | 7/23/2020 | 11/5/2020 Africa / Cote d'Ivoire / Bouake       |
| EPI_ISL_614384 | 7/27/2020 | 11/5/2020 Africa / Cote d'Ivoire / Katiola      |
| EPI_ISL_614386 | 8/12/2020 | 11/5/2020 Africa / Cote d'Ivoire / Bouake       |
| EPI_ISL_614387 | 8/17/2020 | 11/5/2020 Africa / Cote d'Ivoire / Bouake       |
| EPI_ISL_614388 | 8/19/2020 | 11/5/2020 Africa / Cote d'Ivoire / Bouake       |
| EPI_ISL_614391 | 8/23/2020 | 11/5/2020 Africa / Cote d'Ivoire / Beoumi       |
| EPI_ISL_614393 | 9/4/2020  | 11/5/2020 Africa / Cote d'Ivoire / Bouake       |
| EPI_ISL_614396 | 4/23/2020 | 11/5/2020 Europe / Italy / Sardinia             |
| EPI_ISL_614397 | 4/28/2020 | 11/5/2020 Europe / Italy / Sardinia             |
| EPI_ISL_614398 | 4/3/2020  | 11/5/2020 Europe / Italy / Sardinia             |
| EPI_ISL_614419 | 4/20/2020 | 11/5/2020 Europe / Denmark / Hovedstaden        |
| EPI_ISL_614427 | 5/18/2020 | 11/5/2020 Europe / Denmark / Hovedstaden        |
| EPI_ISL_614428 | 3/9/2020  | 11/5/2020 Europe / Denmark / Syddanmark         |
| EPI_ISL_614429 | 3/9/2020  | 11/5/2020 Europe / Denmark / Syddanmark         |
| EPI_ISL_614430 | 3/9/2020  | 11/5/2020 Europe / Denmark / Syddanmark         |
| EPI_ISL_614431 | 3/9/2020  | 11/5/2020 Europe / Denmark / Syddanmark         |
| EPI_ISL_614432 | 5/4/2020  | 11/5/2020 Europe / Denmark / Nordjylland        |
| EPI_ISL_614433 | 4/20/2020 | 11/5/2020 Europe / Denmark / Hovedstaden        |
| EPI_ISL_614434 | 4/20/2020 | 11/5/2020 Europe / Denmark / Syddanmark         |
| EPI_ISL_614435 | 3/30/2020 | 11/5/2020 Europe / Denmark / Sjaelland          |
| EPI_ISL_614436 | 3/9/2020  | 11/5/2020 Europe / Denmark / Nordjylland        |
| EPI_ISL_614437 | 3/9/2020  | 11/5/2020 Europe / Denmark / Sjaelland          |
| EPI_ISL_614438 | 3/9/2020  | 11/5/2020 Europe / Denmark / Sjaelland          |
| EPI_ISL_614439 | 3/16/2020 | 11/5/2020 Europe / Denmark / Hovedstaden        |



|                |           |                                          |
|----------------|-----------|------------------------------------------|
| EPI_ISL_614440 | 3/9/2020  | 11/5/2020 Europe / Denmark / Hovedstaden |
| EPI_ISL_614441 | 5/18/2020 | 11/5/2020 Europe / Denmark / Hovedstaden |
| EPI_ISL_614442 | 5/18/2020 | 11/5/2020 Europe / Denmark / Hovedstaden |
| EPI_ISL_614443 | 3/30/2020 | 11/5/2020 Europe / Denmark / Nordjylland |
| EPI_ISL_614444 | 3/30/2020 | 11/5/2020 Europe / Denmark / Nordjylland |
| EPI_ISL_614445 | 5/25/2020 | 11/5/2020 Europe / Denmark / Hovedstaden |
| EPI_ISL_614446 | 3/9/2020  | 11/5/2020 Europe / Denmark / Syddanmark  |
| EPI_ISL_614447 | 4/20/2020 | 11/5/2020 Europe / Denmark / Hovedstaden |
| EPI_ISL_614448 | 4/27/2020 | 11/5/2020 Europe / Denmark / Syddanmark  |
| EPI_ISL_614449 | 5/11/2020 | 11/5/2020 Europe / Denmark / Hovedstaden |
| EPI_ISL_614450 | 4/13/2020 | 11/5/2020 Europe / Denmark / Hovedstaden |
| EPI_ISL_614451 | 5/25/2020 | 11/5/2020 Europe / Denmark / Hovedstaden |
| EPI_ISL_614452 | 5/11/2020 | 11/5/2020 Europe / Denmark / Hovedstaden |
| EPI_ISL_614453 | 5/18/2020 | 11/5/2020 Europe / Denmark / Hovedstaden |
| EPI_ISL_614454 | 5/18/2020 | 11/5/2020 Europe / Denmark / Hovedstaden |
| EPI_ISL_614455 | 5/18/2020 | 11/5/2020 Europe / Denmark / Hovedstaden |
| EPI_ISL_614456 | 5/18/2020 | 11/5/2020 Europe / Denmark / Hovedstaden |
| EPI_ISL_614457 | 5/18/2020 | 11/5/2020 Europe / Denmark / Hovedstaden |
| EPI_ISL_614458 | 5/18/2020 | 11/5/2020 Europe / Denmark / Hovedstaden |
| EPI_ISL_614459 | 5/18/2020 | 11/5/2020 Europe / Denmark / Hovedstaden |
| EPI_ISL_614460 | 5/11/2020 | 11/5/2020 Europe / Denmark / Hovedstaden |
| EPI_ISL_614461 | 5/18/2020 | 11/5/2020 Europe / Denmark / Hovedstaden |
| EPI_ISL_614462 | 5/18/2020 | 11/5/2020 Europe / Denmark / Hovedstaden |
| EPI_ISL_614463 | 5/18/2020 | 11/5/2020 Europe / Denmark / Hovedstaden |
| EPI_ISL_614464 | 5/18/2020 | 11/5/2020 Europe / Denmark               |
| EPI_ISL_614465 | 5/11/2020 | 11/5/2020 Europe / Denmark / Hovedstaden |
| EPI_ISL_614466 | 5/11/2020 | 11/5/2020 Europe / Denmark / Hovedstaden |
| EPI_ISL_614467 | 5/11/2020 | 11/5/2020 Europe / Denmark / Hovedstaden |
| EPI_ISL_614468 | 5/11/2020 | 11/5/2020 Europe / Denmark / Hovedstaden |
| EPI_ISL_614469 | 5/18/2020 | 11/5/2020 Europe / Denmark / Hovedstaden |
| EPI_ISL_614470 | 5/4/2020  | 11/5/2020 Europe / Denmark / Hovedstaden |
| EPI_ISL_614471 | 5/4/2020  | 11/5/2020 Europe / Denmark / Hovedstaden |
| EPI_ISL_614472 | 5/18/2020 | 11/5/2020 Europe / Denmark / Hovedstaden |
| EPI_ISL_614473 | 3/16/2020 | 11/5/2020 Europe / Denmark / Hovedstaden |
| EPI_ISL_614474 | 3/23/2020 | 11/5/2020 Europe / Denmark / Hovedstaden |
| EPI_ISL_614475 | 3/30/2020 | 11/5/2020 Europe / Denmark / Hovedstaden |
| EPI_ISL_614476 | 3/30/2020 | 11/5/2020 Europe / Denmark / Hovedstaden |
| EPI_ISL_614477 | 3/30/2020 | 11/5/2020 Europe / Denmark / Hovedstaden |
| EPI_ISL_614478 | 3/30/2020 | 11/5/2020 Europe / Denmark / Hovedstaden |
| EPI_ISL_614479 | 3/30/2020 | 11/5/2020 Europe / Denmark / Hovedstaden |
| EPI_ISL_614480 | 4/6/2020  | 11/5/2020 Europe / Denmark / Hovedstaden |
| EPI_ISL_614481 | 4/6/2020  | 11/5/2020 Europe / Denmark / Hovedstaden |
| EPI_ISL_614482 | 4/6/2020  | 11/5/2020 Europe / Denmark / Hovedstaden |
| EPI_ISL_614483 | 4/6/2020  | 11/5/2020 Europe / Denmark               |
| EPI_ISL_614484 | 4/20/2020 | 11/5/2020 Europe / Denmark / Hovedstaden |
| EPI_ISL_614485 | 4/20/2020 | 11/5/2020 Europe / Denmark / Hovedstaden |
| EPI_ISL_614486 | 6/1/2020  | 11/5/2020 Europe / Denmark / Sjælland    |



|                |           |                                          |
|----------------|-----------|------------------------------------------|
| EPI_ISL_614534 | 3/30/2020 | 11/5/2020 Europe / Denmark / Sjaelland   |
| EPI_ISL_614535 | 3/30/2020 | 11/5/2020 Europe / Denmark / Sjaelland   |
| EPI_ISL_614536 | 3/30/2020 | 11/5/2020 Europe / Denmark / Hovedstaden |
| EPI_ISL_614537 | 3/30/2020 | 11/5/2020 Europe / Denmark / Hovedstaden |
| EPI_ISL_614538 | 3/30/2020 | 11/5/2020 Europe / Denmark / Nordjylland |
| EPI_ISL_614539 | 3/30/2020 | 11/5/2020 Europe / Denmark / Nordjylland |
| EPI_ISL_614540 | 3/9/2020  | 11/5/2020 Europe / Denmark / Midtjylland |
| EPI_ISL_614541 | 3/9/2020  | 11/5/2020 Europe / Denmark / Syddanmark  |
| EPI_ISL_614542 | 3/9/2020  | 11/5/2020 Europe / Denmark / Syddanmark  |
| EPI_ISL_614543 | 4/6/2020  | 11/5/2020 Europe / Denmark / Sjaelland   |
| EPI_ISL_614544 | 3/9/2020  | 11/5/2020 Europe / Denmark / Sjaelland   |
| EPI_ISL_614545 | 3/9/2020  | 11/5/2020 Europe / Denmark / Midtjylland |
| EPI_ISL_614546 | 3/9/2020  | 11/5/2020 Europe / Denmark / Nordjylland |
| EPI_ISL_614547 | 3/9/2020  | 11/5/2020 Europe / Denmark / Sjaelland   |
| EPI_ISL_614548 | 3/9/2020  | 11/5/2020 Europe / Denmark / Syddanmark  |
| EPI_ISL_614549 | 3/9/2020  | 11/5/2020 Europe / Denmark / Nordjylland |
| EPI_ISL_614550 | 3/9/2020  | 11/5/2020 Europe / Denmark / Hovedstaden |
| EPI_ISL_614551 | 3/9/2020  | 11/5/2020 Europe / Denmark / Hovedstaden |
| EPI_ISL_614552 | 3/9/2020  | 11/5/2020 Europe / Denmark / Nordjylland |
| EPI_ISL_614553 | 3/9/2020  | 11/5/2020 Europe / Denmark / Nordjylland |
| EPI_ISL_614554 | 3/9/2020  | 11/5/2020 Europe / Denmark / Nordjylland |
| EPI_ISL_614555 | 3/9/2020  | 11/5/2020 Europe / Denmark / Nordjylland |
| EPI_ISL_614556 | 3/9/2020  | 11/5/2020 Europe / Denmark / Nordjylland |
| EPI_ISL_614557 | 3/9/2020  | 11/5/2020 Europe / Denmark / Sjaelland   |
| EPI_ISL_614558 | 3/9/2020  | 11/5/2020 Europe / Denmark / Nordjylland |
| EPI_ISL_614559 | 3/9/2020  | 11/5/2020 Europe / Denmark / Nordjylland |
| EPI_ISL_614560 | 3/9/2020  | 11/5/2020 Europe / Denmark / Nordjylland |
| EPI_ISL_614561 | 3/9/2020  | 11/5/2020 Europe / Denmark / Nordjylland |
| EPI_ISL_614562 | 3/9/2020  | 11/5/2020 Europe / Denmark / Nordjylland |
| EPI_ISL_614563 | 3/9/2020  | 11/5/2020 Europe / Denmark / Nordjylland |
| EPI_ISL_614564 | 3/9/2020  | 11/5/2020 Europe / Denmark / Sjaelland   |
| EPI_ISL_614565 | 3/9/2020  | 11/5/2020 Europe / Denmark / Hovedstaden |
| EPI_ISL_614566 | 3/9/2020  | 11/5/2020 Europe / Denmark / Midtjylland |
| EPI_ISL_614567 | 3/9/2020  | 11/5/2020 Europe / Denmark / Sjaelland   |
| EPI_ISL_614568 | 3/9/2020  | 11/5/2020 Europe / Denmark / Sjaelland   |
| EPI_ISL_614569 | 3/9/2020  | 11/5/2020 Europe / Denmark / Sjaelland   |
| EPI_ISL_614570 | 3/9/2020  | 11/5/2020 Europe / Denmark / Sjaelland   |
| EPI_ISL_614571 | 3/9/2020  | 11/5/2020 Europe / Denmark / Sjaelland   |
| EPI_ISL_614572 | 3/9/2020  | 11/5/2020 Europe / Denmark / Sjaelland   |
| EPI_ISL_614573 | 3/9/2020  | 11/5/2020 Europe / Denmark / Sjaelland   |
| EPI_ISL_614574 | 3/9/2020  | 11/5/2020 Europe / Denmark / Sjaelland   |
| EPI_ISL_614575 | 3/9/2020  | 11/5/2020 Europe / Denmark / Sjaelland   |
| EPI_ISL_614576 | 3/9/2020  | 11/5/2020 Europe / Denmark / Nordjylland |
| EPI_ISL_614577 | 3/9/2020  | 11/5/2020 Europe / Denmark / Nordjylland |
| EPI_ISL_614578 | 3/9/2020  | 11/5/2020 Europe / Denmark / Nordjylland |
| EPI_ISL_614579 | 3/9/2020  | 11/5/2020 Europe / Denmark / Nordjylland |
| EPI_ISL_614580 | 3/9/2020  | 11/5/2020 Europe / Denmark / Sjaelland   |









|                |           |                                          |
|----------------|-----------|------------------------------------------|
| EPI_ISL_614770 | 3/9/2020  | 11/5/2020 Europe / Denmark / Syddanmark  |
| EPI_ISL_614771 | 5/4/2020  | 11/5/2020 Europe / Denmark / Hovedstaden |
| EPI_ISL_614772 | 3/9/2020  | 11/5/2020 Europe / Denmark / Syddanmark  |
| EPI_ISL_614773 | 5/4/2020  | 11/5/2020 Europe / Denmark / Hovedstaden |
| EPI_ISL_614774 | 3/9/2020  | 11/5/2020 Europe / Denmark / Syddanmark  |
| EPI_ISL_614775 | 3/9/2020  | 11/5/2020 Europe / Denmark / Syddanmark  |
| EPI_ISL_614776 | 4/27/2020 | 11/5/2020 Europe / Denmark / Syddanmark  |
| EPI_ISL_614777 | 4/20/2020 | 11/5/2020 Europe / Denmark / Syddanmark  |
| EPI_ISL_614778 | 4/27/2020 | 11/5/2020 Europe / Denmark / Syddanmark  |
| EPI_ISL_614779 | 3/9/2020  | 11/5/2020 Europe / Denmark / Syddanmark  |
| EPI_ISL_614780 | 3/9/2020  | 11/5/2020 Europe / Denmark / Syddanmark  |
| EPI_ISL_614781 | 3/9/2020  | 11/5/2020 Europe / Denmark / Syddanmark  |
| EPI_ISL_614782 | 3/9/2020  | 11/5/2020 Europe / Denmark / Syddanmark  |
| EPI_ISL_614783 | 3/9/2020  | 11/5/2020 Europe / Denmark / Hovedstaden |
| EPI_ISL_614784 | 3/9/2020  | 11/5/2020 Europe / Denmark / Hovedstaden |
| EPI_ISL_614785 | 5/11/2020 | 11/5/2020 Europe / Denmark / Nordjylland |
| EPI_ISL_614786 | 5/4/2020  | 11/5/2020 Europe / Denmark / Hovedstaden |
| EPI_ISL_614787 | 5/4/2020  | 11/5/2020 Europe / Denmark / Hovedstaden |
| EPI_ISL_614788 | 5/4/2020  | 11/5/2020 Europe / Denmark / Hovedstaden |
| EPI_ISL_614789 | 5/4/2020  | 11/5/2020 Europe / Denmark / Hovedstaden |
| EPI_ISL_614790 | 3/9/2020  | 11/5/2020 Europe / Denmark / Syddanmark  |
| EPI_ISL_614791 | 5/4/2020  | 11/5/2020 Europe / Denmark / Hovedstaden |
| EPI_ISL_614792 | 5/4/2020  | 11/5/2020 Europe / Denmark / Hovedstaden |
| EPI_ISL_614793 | 5/4/2020  | 11/5/2020 Europe / Denmark / Hovedstaden |
| EPI_ISL_614794 | 5/4/2020  | 11/5/2020 Europe / Denmark / Hovedstaden |
| EPI_ISL_614795 | 5/4/2020  | 11/5/2020 Europe / Denmark / Hovedstaden |
| EPI_ISL_614796 | 5/11/2020 | 11/5/2020 Europe / Denmark / Hovedstaden |
| EPI_ISL_614797 | 5/11/2020 | 11/5/2020 Europe / Denmark / Hovedstaden |
| EPI_ISL_614798 | 5/11/2020 | 11/5/2020 Europe / Denmark / Nordjylland |
| EPI_ISL_614799 | 5/11/2020 | 11/5/2020 Europe / Denmark / Syddanmark  |
| EPI_ISL_614800 | 5/11/2020 | 11/5/2020 Europe / Denmark / Hovedstaden |
| EPI_ISL_614801 | 5/11/2020 | 11/5/2020 Europe / Denmark / Syddanmark  |
| EPI_ISL_614802 | 5/11/2020 | 11/5/2020 Europe / Denmark / Syddanmark  |
| EPI_ISL_614803 | 5/11/2020 | 11/5/2020 Europe / Denmark / Hovedstaden |
| EPI_ISL_614804 | 5/11/2020 | 11/5/2020 Europe / Denmark / Hovedstaden |
| EPI_ISL_614805 | 5/11/2020 | 11/5/2020 Europe / Denmark / Hovedstaden |
| EPI_ISL_614806 | 5/11/2020 | 11/5/2020 Europe / Denmark / Hovedstaden |
| EPI_ISL_614807 | 5/11/2020 | 11/5/2020 Europe / Denmark / Hovedstaden |
| EPI_ISL_614808 | 5/11/2020 | 11/5/2020 Europe / Denmark / Hovedstaden |
| EPI_ISL_614809 | 5/11/2020 | 11/5/2020 Europe / Denmark / Hovedstaden |
| EPI_ISL_614810 | 5/11/2020 | 11/5/2020 Europe / Denmark               |
| EPI_ISL_614811 | 5/18/2020 | 11/5/2020 Europe / Denmark / Hovedstaden |
| EPI_ISL_614812 | 5/11/2020 | 11/5/2020 Europe / Denmark / Syddanmark  |
| EPI_ISL_614813 | 5/11/2020 | 11/5/2020 Europe / Denmark / Syddanmark  |
| EPI_ISL_614814 | 5/4/2020  | 11/5/2020 Europe / Denmark / Syddanmark  |
| EPI_ISL_614815 | 5/4/2020  | 11/5/2020 Europe / Denmark / Syddanmark  |
| EPI_ISL_614816 | 5/11/2020 | 11/5/2020 Europe / Denmark / Syddanmark  |





|                |            |                                                   |
|----------------|------------|---------------------------------------------------|
| EPI_ISL_614864 | 5/18/2020  | 11/5/2020 Europe / Denmark / Hovedstaden          |
| EPI_ISL_614865 | 5/25/2020  | 11/5/2020 Europe / Denmark / Syddanmark           |
| EPI_ISL_614866 | 5/25/2020  | 11/5/2020 Europe / Denmark / Hovedstaden          |
| EPI_ISL_614867 | 5/25/2020  | 11/5/2020 Europe / Denmark / Hovedstaden          |
| EPI_ISL_614868 | 5/25/2020  | 11/5/2020 Europe / Denmark / Hovedstaden          |
| EPI_ISL_614869 | 5/25/2020  | 11/5/2020 Europe / Denmark / Hovedstaden          |
| EPI_ISL_614870 | 5/25/2020  | 11/5/2020 Europe / Denmark / Hovedstaden          |
| EPI_ISL_614871 | 5/25/2020  | 11/5/2020 Europe / Denmark / Hovedstaden          |
| EPI_ISL_614872 | 5/25/2020  | 11/5/2020 Europe / Denmark / Hovedstaden          |
| EPI_ISL_614873 | 5/25/2020  | 11/5/2020 Europe / Denmark / Hovedstaden          |
| EPI_ISL_614874 | 5/25/2020  | 11/5/2020 Europe / Denmark / Hovedstaden          |
| EPI_ISL_614875 | 5/25/2020  | 11/5/2020 Europe / Denmark / Hovedstaden          |
| EPI_ISL_614876 | 3/23/2020  | 11/5/2020 Europe / Denmark / Syddanmark           |
| EPI_ISL_614877 | 3/30/2020  | 11/5/2020 Europe / Denmark / Hovedstaden          |
| EPI_ISL_614878 | 3/23/2020  | 11/5/2020 Europe / Denmark / Sjælland             |
| EPI_ISL_614879 | 3/23/2020  | 11/5/2020 Europe / Denmark / Sjælland             |
| EPI_ISL_614880 | 3/23/2020  | 11/5/2020 Europe / Denmark / Sjælland             |
| EPI_ISL_614881 | 3/30/2020  | 11/5/2020 Europe / Denmark / Nordjylland          |
| EPI_ISL_614882 | 3/30/2020  | 11/5/2020 Europe / Denmark / Nordjylland          |
| EPI_ISL_614883 | 3/30/2020  | 11/5/2020 Europe / Denmark / Nordjylland          |
| EPI_ISL_614884 | 3/30/2020  | 11/5/2020 Europe / Denmark / Syddanmark           |
| EPI_ISL_614885 | 3/30/2020  | 11/5/2020 Europe / Denmark / Syddanmark           |
| EPI_ISL_614886 | 3/30/2020  | 11/5/2020 Europe / Denmark / Syddanmark           |
| EPI_ISL_614887 | 3/30/2020  | 11/5/2020 Europe / Denmark / Syddanmark           |
| EPI_ISL_614888 | 3/30/2020  | 11/5/2020 Europe / Denmark / Syddanmark           |
| EPI_ISL_614889 | 4/28/2020  | 11/5/2020 Europe / Italy / Sardinia               |
| EPI_ISL_614893 | 10/20/2020 | 11/5/2020 Europe / Switzerland / Aargau           |
| EPI_ISL_614894 | 10/20/2020 | 11/5/2020 Europe / Switzerland / Aargau           |
| EPI_ISL_614895 | 10/16/2020 | 11/5/2020 Europe / Switzerland / Basel-Landschaft |
| EPI_ISL_614896 | 10/16/2020 | 11/5/2020 Europe / Switzerland / Basel-Landschaft |
| EPI_ISL_614897 | 10/16/2020 | 11/5/2020 Europe / Switzerland / Basel-Landschaft |
| EPI_ISL_614898 | 10/16/2020 | 11/5/2020 Europe / Switzerland / Basel-Landschaft |
| EPI_ISL_614899 | 10/18/2020 | 11/5/2020 Europe / Switzerland / Basel-Stadt      |
| EPI_ISL_614900 | 10/18/2020 | 11/5/2020 Europe / Switzerland / Basel-Stadt      |
| EPI_ISL_614901 | 10/18/2020 | 11/5/2020 Europe / Switzerland / Basel-Stadt      |
| EPI_ISL_614902 | 10/18/2020 | 11/5/2020 Europe / Switzerland / Basel-Stadt      |
| EPI_ISL_614903 | 10/18/2020 | 11/5/2020 Europe / Switzerland / Basel-Stadt      |
| EPI_ISL_614904 | 10/18/2020 | 11/5/2020 Europe / Switzerland / Basel-Stadt      |
| EPI_ISL_614905 | 10/18/2020 | 11/5/2020 Europe / Switzerland / Basel-Stadt      |
| EPI_ISL_614906 | 10/18/2020 | 11/5/2020 Europe / Switzerland / Basel-Stadt      |
| EPI_ISL_614907 | 10/17/2020 | 11/5/2020 Europe / Switzerland / Bern             |
| EPI_ISL_614908 | 10/18/2020 | 11/5/2020 Europe / Switzerland / Bern             |
| EPI_ISL_614909 | 10/18/2020 | 11/5/2020 Europe / Switzerland / Bern             |
| EPI_ISL_614910 | 10/18/2020 | 11/5/2020 Europe / Switzerland / Bern             |
| EPI_ISL_614911 | 10/18/2020 | 11/5/2020 Europe / Switzerland / Bern             |
| EPI_ISL_614912 | 10/19/2020 | 11/5/2020 Europe / Switzerland / Bern             |
| EPI_ISL_614913 | 10/19/2020 | 11/5/2020 Europe / Switzerland / Bern             |







|                |           |                                                                       |
|----------------|-----------|-----------------------------------------------------------------------|
| EPI_ISL_615081 | 5/24/2020 | 11/5/2020 Europe / Sweden / Skane                                     |
| EPI_ISL_615082 | 5/24/2020 | 11/5/2020 Europe / Sweden / Skane                                     |
| EPI_ISL_615083 | 5/24/2020 | 11/5/2020 Europe / Sweden / Skane                                     |
| EPI_ISL_615084 | 5/22/2020 | 11/5/2020 Europe / Sweden / Skane                                     |
| EPI_ISL_615085 | 5/22/2020 | 11/5/2020 Europe / Sweden / Skane                                     |
| EPI_ISL_615086 | 5/6/2020  | 11/5/2020 Europe / Sweden / Stockholm                                 |
| EPI_ISL_615087 | 5/24/2020 | 11/5/2020 Europe / Sweden / Stockholm                                 |
| EPI_ISL_615088 | 5/24/2020 | 11/5/2020 Europe / Sweden / Stockholm                                 |
| EPI_ISL_615089 | 5/24/2020 | 11/5/2020 Europe / Sweden / Stockholm                                 |
| EPI_ISL_615090 | 5/25/2020 | 11/5/2020 Europe / Sweden / Vastra Gotaland                           |
| EPI_ISL_615091 | 5/22/2020 | 11/5/2020 Europe / Sweden / Vastra Gotaland                           |
| EPI_ISL_615092 | 5/22/2020 | 11/5/2020 Europe / Sweden / Vasterbotten                              |
| EPI_ISL_615093 | 5/22/2020 | 11/5/2020 Europe / Sweden / Vasterbotten                              |
| EPI_ISL_615094 | 5/15/2020 | 11/5/2020 Europe / Sweden / Vasterbotten                              |
| EPI_ISL_615095 | 5/14/2020 | 11/5/2020 Europe / Sweden / Vasterbotten                              |
| EPI_ISL_615096 | 5/7/2020  | 11/5/2020 Europe / Sweden / Vasterbotten                              |
| EPI_ISL_615097 | 5/5/2020  | 11/5/2020 Europe / Sweden / Jonkoping                                 |
| EPI_ISL_615098 | 5/12/2020 | 11/5/2020 Europe / Sweden / Jonkoping                                 |
| EPI_ISL_615099 | 5/22/2020 | 11/5/2020 Europe / Sweden / Jonkoping                                 |
| EPI_ISL_615100 | 5/28/2020 | 11/5/2020 Europe / Sweden / Jonkoping                                 |
| EPI_ISL_615101 | 8/24/2020 | 11/5/2020 Europe / Sweden / Gavleborg                                 |
| EPI_ISL_615102 | 8/24/2020 | 11/5/2020 Europe / Sweden / Gavleborg                                 |
| EPI_ISL_615103 | 6/28/2020 | 11/5/2020 Europe / Sweden / Gavleborg                                 |
| EPI_ISL_615104 | 9/9/2020  | 11/5/2020 Europe / Sweden / Halland                                   |
| EPI_ISL_615105 | 9/14/2020 | 11/5/2020 Europe / Sweden / Halland                                   |
| EPI_ISL_615106 | 9/13/2020 | 11/5/2020 Europe / Sweden / Halland                                   |
| EPI_ISL_615107 | 9/12/2020 | 11/5/2020 Europe / Sweden / Halland                                   |
| EPI_ISL_615108 | 8/25/2020 | 11/5/2020 Europe / Sweden / Vastmanland                               |
| EPI_ISL_615109 | 8/21/2020 | 11/5/2020 Europe / Sweden / Vastra Gotaland                           |
| EPI_ISL_615110 | 8/25/2020 | 11/5/2020 Europe / Sweden / Ostergotland                              |
| EPI_ISL_615111 | 8/25/2020 | 11/5/2020 Europe / Sweden / Orebro                                    |
| EPI_ISL_615112 | 8/27/2020 | 11/5/2020 Europe / Sweden / Orebro                                    |
| EPI_ISL_615113 | 8/27/2020 | 11/5/2020 Europe / Sweden / Orebro                                    |
| EPI_ISL_615114 | 8/29/2020 | 11/5/2020 Europe / Sweden / Varmland                                  |
| EPI_ISL_615115 | 9/4/2020  | 11/5/2020 Europe / Sweden / Vastra Gotaland                           |
| EPI_ISL_615116 | 9/7/2020  | 11/5/2020 Europe / Sweden / Vastra Gotaland                           |
| EPI_ISL_615117 | 9/27/2020 | 11/5/2020 Europe / Sweden / Ostergotland                              |
| EPI_ISL_615118 | 9/27/2020 | 11/5/2020 Europe / Sweden / Ostergotland                              |
| EPI_ISL_615119 | 9/27/2020 | 11/5/2020 Europe / Sweden / Ostergotland                              |
| EPI_ISL_615120 | 9/27/2020 | 11/5/2020 Europe / Sweden / Orebro                                    |
| EPI_ISL_615121 | 5/26/2020 | 11/5/2020 South America / Argentina / Ciudad Autonoma de Buenos Aires |
| EPI_ISL_615139 | 6/12/2020 | 11/5/2020 North America / USA / Texas / El Paso County                |
| EPI_ISL_615158 | 6/21/2020 | 11/5/2020 North America / USA / Texas / Hidalgo County                |
| EPI_ISL_615166 | 9/14/2020 | 11/5/2020 Europe / Denmark / Nordjylland                              |
| EPI_ISL_615167 | 9/14/2020 | 11/5/2020 Europe / Denmark / Nordjylland                              |
| EPI_ISL_615168 | 9/14/2020 | 11/5/2020 Europe / Denmark / Nordjylland                              |
| EPI_ISL_615169 | 9/14/2020 | 11/5/2020 Europe / Denmark / Sjaelland                                |













|                |           |                                          |
|----------------|-----------|------------------------------------------|
| EPI_ISL_615423 | 8/31/2020 | 11/5/2020 Europe / Denmark / Midtjylland |
| EPI_ISL_615424 | 8/31/2020 | 11/5/2020 Europe / Denmark / Hovedstaden |
| EPI_ISL_615425 | 8/31/2020 | 11/5/2020 Europe / Denmark / Hovedstaden |
| EPI_ISL_615426 | 8/31/2020 | 11/5/2020 Europe / Denmark / Hovedstaden |
| EPI_ISL_615427 | 8/31/2020 | 11/5/2020 Europe / Denmark / Hovedstaden |
| EPI_ISL_615428 | 8/31/2020 | 11/5/2020 Europe / Denmark / Hovedstaden |
| EPI_ISL_615429 | 8/31/2020 | 11/5/2020 Europe / Denmark / Hovedstaden |
| EPI_ISL_615430 | 8/31/2020 | 11/5/2020 Europe / Denmark / Hovedstaden |
| EPI_ISL_615431 | 8/31/2020 | 11/5/2020 Europe / Denmark / Sjælland    |
| EPI_ISL_615432 | 8/31/2020 | 11/5/2020 Europe / Denmark / Sjælland    |
| EPI_ISL_615433 | 8/31/2020 | 11/5/2020 Europe / Denmark / Syddanmark  |
| EPI_ISL_615434 | 8/31/2020 | 11/5/2020 Europe / Denmark / Hovedstaden |
| EPI_ISL_615435 | 8/31/2020 | 11/5/2020 Europe / Denmark / Midtjylland |
| EPI_ISL_615437 | 8/31/2020 | 11/5/2020 Europe / Denmark / Sjælland    |
| EPI_ISL_615439 | 8/31/2020 | 11/5/2020 Europe / Denmark / Sjælland    |
| EPI_ISL_615440 | 8/31/2020 | 11/5/2020 Europe / Denmark / Hovedstaden |
| EPI_ISL_615441 | 8/31/2020 | 11/5/2020 Europe / Denmark / Hovedstaden |
| EPI_ISL_615442 | 8/31/2020 | 11/5/2020 Europe / Denmark / Hovedstaden |
| EPI_ISL_615443 | 8/31/2020 | 11/5/2020 Europe / Denmark / Hovedstaden |
| EPI_ISL_615444 | 8/31/2020 | 11/5/2020 Europe / Denmark / Hovedstaden |
| EPI_ISL_615445 | 8/31/2020 | 11/5/2020 Europe / Denmark / Hovedstaden |
| EPI_ISL_615446 | 8/31/2020 | 11/5/2020 Europe / Denmark / Hovedstaden |
| EPI_ISL_615447 | 8/31/2020 | 11/5/2020 Europe / Denmark / Hovedstaden |
| EPI_ISL_615448 | 8/31/2020 | 11/5/2020 Europe / Denmark / Midtjylland |
| EPI_ISL_615450 | 8/31/2020 | 11/5/2020 Europe / Denmark / Syddanmark  |
| EPI_ISL_615451 | 8/31/2020 | 11/5/2020 Europe / Denmark / Hovedstaden |
| EPI_ISL_615452 | 8/31/2020 | 11/5/2020 Europe / Denmark / Nordjylland |
| EPI_ISL_615453 | 9/7/2020  | 11/5/2020 Europe / Denmark / Sjælland    |
| EPI_ISL_615454 | 9/7/2020  | 11/5/2020 Europe / Denmark / Midtjylland |
| EPI_ISL_615455 | 9/7/2020  | 11/5/2020 Europe / Denmark / Hovedstaden |
| EPI_ISL_615457 | 9/7/2020  | 11/5/2020 Europe / Denmark / Hovedstaden |
| EPI_ISL_615458 | 9/7/2020  | 11/5/2020 Europe / Denmark / Hovedstaden |
| EPI_ISL_615459 | 9/7/2020  | 11/5/2020 Europe / Denmark / Sjælland    |
| EPI_ISL_615460 | 9/7/2020  | 11/5/2020 Europe / Denmark / Midtjylland |
| EPI_ISL_615461 | 9/7/2020  | 11/5/2020 Europe / Denmark / Hovedstaden |
| EPI_ISL_615463 | 9/7/2020  | 11/5/2020 Europe / Denmark / Hovedstaden |
| EPI_ISL_615464 | 9/7/2020  | 11/5/2020 Europe / Denmark / Hovedstaden |
| EPI_ISL_615465 | 9/7/2020  | 11/5/2020 Europe / Denmark / Hovedstaden |
| EPI_ISL_615466 | 9/7/2020  | 11/5/2020 Europe / Denmark / Hovedstaden |
| EPI_ISL_615467 | 3/16/2020 | 11/5/2020 Europe / Denmark / Sjælland    |
| EPI_ISL_615468 | 9/7/2020  | 11/5/2020 Europe / Denmark / Hovedstaden |
| EPI_ISL_615469 | 9/7/2020  | 11/5/2020 Europe / Denmark / Midtjylland |
| EPI_ISL_615470 | 9/7/2020  | 11/5/2020 Europe / Denmark / Hovedstaden |
| EPI_ISL_615471 | 9/7/2020  | 11/5/2020 Europe / Denmark / Hovedstaden |
| EPI_ISL_615472 | 9/7/2020  | 11/5/2020 Europe / Denmark / Midtjylland |
| EPI_ISL_615473 | 8/31/2020 | 11/5/2020 Europe / Denmark / Syddanmark  |
| EPI_ISL_615474 | 8/31/2020 | 11/5/2020 Europe / Denmark / Midtjylland |

|                |           |                                          |
|----------------|-----------|------------------------------------------|
| EPI_ISL_615475 | 8/31/2020 | 11/5/2020 Europe / Denmark / Midtjylland |
| EPI_ISL_615477 | 8/31/2020 | 11/5/2020 Europe / Denmark / Syddanmark  |
| EPI_ISL_615478 | 8/31/2020 | 11/5/2020 Europe / Denmark / Hovedstaden |
| EPI_ISL_615479 | 8/31/2020 | 11/5/2020 Europe / Denmark / Midtjylland |
| EPI_ISL_615480 | 8/31/2020 | 11/5/2020 Europe / Denmark / Syddanmark  |
| EPI_ISL_615481 | 8/31/2020 | 11/5/2020 Europe / Denmark / Syddanmark  |
| EPI_ISL_615482 | 8/31/2020 | 11/5/2020 Europe / Denmark / Hovedstaden |
| EPI_ISL_615483 | 8/31/2020 | 11/5/2020 Europe / Denmark / Syddanmark  |
| EPI_ISL_615484 | 8/31/2020 | 11/5/2020 Europe / Denmark / Midtjylland |
| EPI_ISL_615485 | 8/31/2020 | 11/5/2020 Europe / Denmark / Hovedstaden |
| EPI_ISL_615486 | 8/31/2020 | 11/5/2020 Europe / Denmark / Nordjylland |
| EPI_ISL_615487 | 8/31/2020 | 11/5/2020 Europe / Denmark / Hovedstaden |
| EPI_ISL_615488 | 8/31/2020 | 11/5/2020 Europe / Denmark / Midtjylland |
| EPI_ISL_615489 | 8/31/2020 | 11/5/2020 Europe / Denmark / Midtjylland |
| EPI_ISL_615490 | 8/31/2020 | 11/5/2020 Europe / Denmark / Syddanmark  |
| EPI_ISL_615491 | 8/31/2020 | 11/5/2020 Europe / Denmark / Hovedstaden |
| EPI_ISL_615492 | 8/31/2020 | 11/5/2020 Europe / Denmark / Syddanmark  |
| EPI_ISL_615493 | 8/31/2020 | 11/5/2020 Europe / Denmark / Midtjylland |
| EPI_ISL_615494 | 8/31/2020 | 11/5/2020 Europe / Denmark / Hovedstaden |
| EPI_ISL_615495 | 8/31/2020 | 11/5/2020 Europe / Denmark / Hovedstaden |
| EPI_ISL_615496 | 8/31/2020 | 11/5/2020 Europe / Denmark / Hovedstaden |
| EPI_ISL_615497 | 8/31/2020 | 11/5/2020 Europe / Denmark / Hovedstaden |
| EPI_ISL_615498 | 8/31/2020 | 11/5/2020 Europe / Denmark / Hovedstaden |
| EPI_ISL_615499 | 8/31/2020 | 11/5/2020 Europe / Denmark / Sjælland    |
| EPI_ISL_615501 | 8/31/2020 | 11/5/2020 Europe / Denmark / Hovedstaden |
| EPI_ISL_615502 | 8/31/2020 | 11/5/2020 Europe / Denmark / Hovedstaden |
| EPI_ISL_615503 | 8/31/2020 | 11/5/2020 Europe / Denmark / Hovedstaden |
| EPI_ISL_615504 | 8/31/2020 | 11/5/2020 Europe / Denmark / Hovedstaden |
| EPI_ISL_615505 | 8/31/2020 | 11/5/2020 Europe / Denmark / Hovedstaden |
| EPI_ISL_615506 | 8/31/2020 | 11/5/2020 Europe / Denmark / Midtjylland |
| EPI_ISL_615507 | 8/31/2020 | 11/5/2020 Europe / Denmark / Hovedstaden |
| EPI_ISL_615508 | 8/31/2020 | 11/5/2020 Europe / Denmark / Hovedstaden |
| EPI_ISL_615509 | 8/31/2020 | 11/5/2020 Europe / Denmark / Hovedstaden |
| EPI_ISL_615510 | 8/31/2020 | 11/5/2020 Europe / Denmark / Hovedstaden |
| EPI_ISL_615511 | 8/31/2020 | 11/5/2020 Europe / Denmark / Hovedstaden |
| EPI_ISL_615512 | 8/31/2020 | 11/5/2020 Europe / Denmark / Hovedstaden |
| EPI_ISL_615513 | 8/31/2020 | 11/5/2020 Europe / Denmark / Sjælland    |
| EPI_ISL_615514 | 8/31/2020 | 11/5/2020 Europe / Denmark / Hovedstaden |
| EPI_ISL_615515 | 8/31/2020 | 11/5/2020 Europe / Denmark / Hovedstaden |
| EPI_ISL_615516 | 9/7/2020  | 11/5/2020 Europe / Denmark / Hovedstaden |
| EPI_ISL_615517 | 9/7/2020  | 11/5/2020 Europe / Denmark / Hovedstaden |
| EPI_ISL_615518 | 9/7/2020  | 11/5/2020 Europe / Denmark / Hovedstaden |
| EPI_ISL_615519 | 9/7/2020  | 11/5/2020 Europe / Denmark / Nordjylland |
| EPI_ISL_615520 | 9/7/2020  | 11/5/2020 Europe / Denmark / Nordjylland |
| EPI_ISL_615521 | 9/7/2020  | 11/5/2020 Europe / Denmark / Nordjylland |
| EPI_ISL_615522 | 9/7/2020  | 11/5/2020 Europe / Denmark / Syddanmark  |
| EPI_ISL_615523 | 8/31/2020 | 11/5/2020 Europe / Denmark / Syddanmark  |









|                |           |                                          |
|----------------|-----------|------------------------------------------|
| EPI_ISL_615682 | 9/7/2020  | 11/5/2020 Europe / Denmark / Syddanmark  |
| EPI_ISL_615683 | 9/7/2020  | 11/5/2020 Europe / Denmark / Syddanmark  |
| EPI_ISL_615685 | 9/14/2020 | 11/5/2020 Europe / Denmark / Syddanmark  |
| EPI_ISL_615686 | 9/14/2020 | 11/5/2020 Europe / Denmark / Syddanmark  |
| EPI_ISL_615687 | 9/7/2020  | 11/5/2020 Europe / Denmark / Syddanmark  |
| EPI_ISL_615689 | 9/7/2020  | 11/5/2020 Europe / Denmark / Syddanmark  |
| EPI_ISL_615690 | 9/7/2020  | 11/5/2020 Europe / Denmark / Syddanmark  |
| EPI_ISL_615691 | 9/7/2020  | 11/5/2020 Europe / Denmark / Syddanmark  |
| EPI_ISL_615692 | 9/7/2020  | 11/5/2020 Europe / Denmark / Syddanmark  |
| EPI_ISL_615693 | 9/7/2020  | 11/5/2020 Europe / Denmark / Syddanmark  |
| EPI_ISL_615694 | 9/7/2020  | 11/5/2020 Europe / Denmark / Sjælland    |
| EPI_ISL_615695 | 9/7/2020  | 11/5/2020 Europe / Denmark / Midtjylland |
| EPI_ISL_615699 | 9/7/2020  | 11/5/2020 Europe / Denmark / Hovedstaden |
| EPI_ISL_615700 | 9/7/2020  | 11/5/2020 Europe / Denmark / Hovedstaden |
| EPI_ISL_615701 | 9/7/2020  | 11/5/2020 Europe / Denmark / Midtjylland |
| EPI_ISL_615703 | 9/7/2020  | 11/5/2020 Europe / Denmark / Hovedstaden |
| EPI_ISL_615704 | 9/7/2020  | 11/5/2020 Europe / Denmark / Midtjylland |
| EPI_ISL_615705 | 9/7/2020  | 11/5/2020 Europe / Denmark / Sjælland    |
| EPI_ISL_615706 | 9/7/2020  | 11/5/2020 Europe / Denmark / Hovedstaden |
| EPI_ISL_615707 | 9/7/2020  | 11/5/2020 Europe / Denmark / Hovedstaden |
| EPI_ISL_615708 | 9/7/2020  | 11/5/2020 Europe / Denmark / Nordjylland |
| EPI_ISL_615710 | 9/7/2020  | 11/5/2020 Europe / Denmark / Nordjylland |
| EPI_ISL_615711 | 9/7/2020  | 11/5/2020 Europe / Denmark / Sjælland    |
| EPI_ISL_615712 | 9/7/2020  | 11/5/2020 Europe / Denmark / Sjælland    |
| EPI_ISL_615714 | 9/7/2020  | 11/5/2020 Europe / Denmark / Nordjylland |
| EPI_ISL_615715 | 9/7/2020  | 11/5/2020 Europe / Denmark / Hovedstaden |
| EPI_ISL_615716 | 9/7/2020  | 11/5/2020 Europe / Denmark / Hovedstaden |
| EPI_ISL_615717 | 9/7/2020  | 11/5/2020 Europe / Denmark / Sjælland    |
| EPI_ISL_615718 | 9/7/2020  | 11/5/2020 Europe / Denmark / Midtjylland |
| EPI_ISL_615719 | 9/7/2020  | 11/5/2020 Europe / Denmark / Syddanmark  |
| EPI_ISL_615720 | 9/7/2020  | 11/5/2020 Europe / Denmark / Hovedstaden |
| EPI_ISL_615721 | 9/7/2020  | 11/5/2020 Europe / Denmark / Hovedstaden |
| EPI_ISL_615722 | 9/7/2020  | 11/5/2020 Europe / Denmark / Hovedstaden |
| EPI_ISL_615723 | 9/7/2020  | 11/5/2020 Europe / Denmark / Sjælland    |
| EPI_ISL_615724 | 9/7/2020  | 11/5/2020 Europe / Denmark / Sjælland    |
| EPI_ISL_615725 | 9/7/2020  | 11/5/2020 Europe / Denmark / Hovedstaden |
| EPI_ISL_615727 | 9/7/2020  | 11/5/2020 Europe / Denmark / Hovedstaden |
| EPI_ISL_615728 | 9/7/2020  | 11/5/2020 Europe / Denmark / Hovedstaden |
| EPI_ISL_615730 | 9/7/2020  | 11/5/2020 Europe / Denmark / Syddanmark  |
| EPI_ISL_615731 | 9/7/2020  | 11/5/2020 Europe / Denmark / Hovedstaden |
| EPI_ISL_615732 | 9/7/2020  | 11/5/2020 Europe / Denmark / Hovedstaden |
| EPI_ISL_615733 | 9/7/2020  | 11/5/2020 Europe / Denmark / Hovedstaden |
| EPI_ISL_615734 | 9/7/2020  | 11/5/2020 Europe / Denmark / Hovedstaden |
| EPI_ISL_615735 | 9/7/2020  | 11/5/2020 Europe / Denmark / Hovedstaden |
| EPI_ISL_615736 | 9/7/2020  | 11/5/2020 Europe / Denmark / Sjælland    |
| EPI_ISL_615737 | 9/7/2020  | 11/5/2020 Europe / Denmark / Hovedstaden |
| EPI_ISL_615739 | 9/7/2020  | 11/5/2020 Europe / Denmark / Hovedstaden |

|                |           |                                          |
|----------------|-----------|------------------------------------------|
| EPI_ISL_615740 | 9/7/2020  | 11/5/2020 Europe / Denmark / Hovedstaden |
| EPI_ISL_615742 | 9/7/2020  | 11/5/2020 Europe / Denmark / Syddanmark  |
| EPI_ISL_615743 | 9/7/2020  | 11/5/2020 Europe / Denmark / Nordjylland |
| EPI_ISL_615744 | 9/7/2020  | 11/5/2020 Europe / Denmark / Hovedstaden |
| EPI_ISL_615745 | 9/7/2020  | 11/5/2020 Europe / Denmark / Hovedstaden |
| EPI_ISL_615746 | 9/7/2020  | 11/5/2020 Europe / Denmark / Sjaelland   |
| EPI_ISL_615747 | 9/7/2020  | 11/5/2020 Europe / Denmark / Hovedstaden |
| EPI_ISL_615748 | 9/7/2020  | 11/5/2020 Europe / Denmark / Hovedstaden |
| EPI_ISL_615749 | 9/7/2020  | 11/5/2020 Europe / Denmark / Nordjylland |
| EPI_ISL_615750 | 9/7/2020  | 11/5/2020 Europe / Denmark / Hovedstaden |
| EPI_ISL_615751 | 9/7/2020  | 11/5/2020 Europe / Denmark / Nordjylland |
| EPI_ISL_615752 | 9/7/2020  | 11/5/2020 Europe / Denmark / Nordjylland |
| EPI_ISL_615754 | 9/14/2020 | 11/5/2020 Europe / Denmark / Nordjylland |
| EPI_ISL_615755 | 9/14/2020 | 11/5/2020 Europe / Denmark / Nordjylland |
| EPI_ISL_615756 | 9/14/2020 | 11/5/2020 Europe / Denmark / Hovedstaden |
| EPI_ISL_615757 | 9/14/2020 | 11/5/2020 Europe / Denmark / Hovedstaden |
| EPI_ISL_615758 | 9/14/2020 | 11/5/2020 Europe / Denmark / Hovedstaden |
| EPI_ISL_615759 | 9/14/2020 | 11/5/2020 Europe / Denmark / Hovedstaden |
| EPI_ISL_615760 | 9/14/2020 | 11/5/2020 Europe / Denmark / Nordjylland |
| EPI_ISL_615761 | 9/14/2020 | 11/5/2020 Europe / Denmark / Syddanmark  |
| EPI_ISL_615762 | 9/14/2020 | 11/5/2020 Europe / Denmark / Midtjylland |
| EPI_ISL_615763 | 9/14/2020 | 11/5/2020 Europe / Denmark / Syddanmark  |
| EPI_ISL_615764 | 9/14/2020 | 11/5/2020 Europe / Denmark / Hovedstaden |
| EPI_ISL_615765 | 9/14/2020 | 11/5/2020 Europe / Denmark / Nordjylland |
| EPI_ISL_615766 | 9/14/2020 | 11/5/2020 Europe / Denmark / Midtjylland |
| EPI_ISL_615767 | 9/14/2020 | 11/5/2020 Europe / Denmark / Syddanmark  |
| EPI_ISL_615768 | 9/14/2020 | 11/5/2020 Europe / Denmark / Midtjylland |
| EPI_ISL_615769 | 9/14/2020 | 11/5/2020 Europe / Denmark / Nordjylland |
| EPI_ISL_615770 | 9/14/2020 | 11/5/2020 Europe / Denmark / Syddanmark  |
| EPI_ISL_615771 | 9/14/2020 | 11/5/2020 Europe / Denmark / Nordjylland |
| EPI_ISL_615772 | 9/14/2020 | 11/5/2020 Europe / Denmark / Midtjylland |
| EPI_ISL_615773 | 9/14/2020 | 11/5/2020 Europe / Denmark / Midtjylland |
| EPI_ISL_615774 | 9/14/2020 | 11/5/2020 Europe / Denmark / Midtjylland |
| EPI_ISL_615776 | 9/14/2020 | 11/5/2020 Europe / Denmark / Hovedstaden |
| EPI_ISL_615777 | 9/14/2020 | 11/5/2020 Europe / Denmark / Nordjylland |
| EPI_ISL_615779 | 9/14/2020 | 11/5/2020 Europe / Denmark / Sjaelland   |
| EPI_ISL_615780 | 9/14/2020 | 11/5/2020 Europe / Denmark / Hovedstaden |
| EPI_ISL_615781 | 9/14/2020 | 11/5/2020 Europe / Denmark / Hovedstaden |
| EPI_ISL_615782 | 9/14/2020 | 11/5/2020 Europe / Denmark / Hovedstaden |
| EPI_ISL_615783 | 9/14/2020 | 11/5/2020 Europe / Denmark / Hovedstaden |
| EPI_ISL_615784 | 9/14/2020 | 11/5/2020 Europe / Denmark / Hovedstaden |
| EPI_ISL_615785 | 9/14/2020 | 11/5/2020 Europe / Denmark / Nordjylland |
| EPI_ISL_615786 | 9/14/2020 | 11/5/2020 Europe / Denmark / Syddanmark  |
| EPI_ISL_615787 | 9/14/2020 | 11/5/2020 Europe / Denmark / Syddanmark  |
| EPI_ISL_615788 | 9/14/2020 | 11/5/2020 Europe / Denmark / Syddanmark  |
| EPI_ISL_615789 | 9/14/2020 | 11/5/2020 Europe / Denmark / Hovedstaden |
| EPI_ISL_615790 | 9/14/2020 | 11/5/2020 Europe / Denmark / Syddanmark  |







|                |           |                                          |
|----------------|-----------|------------------------------------------|
| EPI_ISL_615945 | 8/31/2020 | 11/5/2020 Europe / Denmark / Sjaelland   |
| EPI_ISL_615946 | 8/31/2020 | 11/5/2020 Europe / Denmark / Hovedstaden |
| EPI_ISL_615947 | 8/31/2020 | 11/5/2020 Europe / Denmark / Sjaelland   |
| EPI_ISL_615948 | 8/31/2020 | 11/5/2020 Europe / Denmark / Sjaelland   |
| EPI_ISL_615949 | 8/31/2020 | 11/5/2020 Europe / Denmark / Hovedstaden |
| EPI_ISL_615950 | 8/31/2020 | 11/5/2020 Europe / Denmark / Hovedstaden |
| EPI_ISL_615951 | 8/31/2020 | 11/5/2020 Europe / Denmark / Syddanmark  |
| EPI_ISL_615952 | 8/31/2020 | 11/5/2020 Europe / Denmark / Hovedstaden |
| EPI_ISL_615953 | 8/31/2020 | 11/5/2020 Europe / Denmark / Hovedstaden |
| EPI_ISL_615954 | 8/31/2020 | 11/5/2020 Europe / Denmark / Hovedstaden |
| EPI_ISL_615955 | 8/31/2020 | 11/5/2020 Europe / Denmark / Hovedstaden |
| EPI_ISL_615956 | 8/31/2020 | 11/5/2020 Europe / Denmark / Sjaelland   |
| EPI_ISL_615957 | 8/31/2020 | 11/5/2020 Europe / Denmark / Hovedstaden |
| EPI_ISL_615959 | 8/31/2020 | 11/5/2020 Europe / Denmark / Hovedstaden |
| EPI_ISL_615960 | 8/31/2020 | 11/5/2020 Europe / Denmark               |
| EPI_ISL_615961 | 8/31/2020 | 11/5/2020 Europe / Denmark / Hovedstaden |
| EPI_ISL_615962 | 8/31/2020 | 11/5/2020 Europe / Denmark / Hovedstaden |
| EPI_ISL_615965 | 8/31/2020 | 11/5/2020 Europe / Denmark / Hovedstaden |
| EPI_ISL_615966 | 8/31/2020 | 11/5/2020 Europe / Denmark / Hovedstaden |
| EPI_ISL_615967 | 8/31/2020 | 11/5/2020 Europe / Denmark / Sjaelland   |
| EPI_ISL_615968 | 8/31/2020 | 11/5/2020 Europe / Denmark / Hovedstaden |
| EPI_ISL_615969 | 8/31/2020 | 11/5/2020 Europe / Denmark / Hovedstaden |
| EPI_ISL_615970 | 8/31/2020 | 11/5/2020 Europe / Denmark / Hovedstaden |
| EPI_ISL_615971 | 8/31/2020 | 11/5/2020 Europe / Denmark / Hovedstaden |
| EPI_ISL_615972 | 8/31/2020 | 11/5/2020 Europe / Denmark / Nordjylland |
| EPI_ISL_615973 | 8/31/2020 | 11/5/2020 Europe / Denmark / Midtjylland |
| EPI_ISL_615974 | 8/31/2020 | 11/5/2020 Europe / Denmark / Syddanmark  |
| EPI_ISL_615975 | 8/31/2020 | 11/5/2020 Europe / Denmark / Midtjylland |
| EPI_ISL_615976 | 8/31/2020 | 11/5/2020 Europe / Denmark / Hovedstaden |
| EPI_ISL_615977 | 8/31/2020 | 11/5/2020 Europe / Denmark / Nordjylland |
| EPI_ISL_615978 | 8/31/2020 | 11/5/2020 Europe / Denmark / Hovedstaden |
| EPI_ISL_615979 | 8/31/2020 | 11/5/2020 Europe / Denmark / Hovedstaden |
| EPI_ISL_615981 | 8/31/2020 | 11/5/2020 Europe / Denmark / Hovedstaden |
| EPI_ISL_615982 | 8/31/2020 | 11/5/2020 Europe / Denmark / Syddanmark  |
| EPI_ISL_615983 | 8/31/2020 | 11/5/2020 Europe / Denmark / Midtjylland |
| EPI_ISL_615984 | 8/31/2020 | 11/5/2020 Europe / Denmark / Hovedstaden |
| EPI_ISL_615985 | 8/31/2020 | 11/5/2020 Europe / Denmark / Hovedstaden |
| EPI_ISL_615986 | 8/31/2020 | 11/5/2020 Europe / Denmark / Hovedstaden |
| EPI_ISL_615987 | 8/31/2020 | 11/5/2020 Europe / Denmark / Hovedstaden |
| EPI_ISL_615989 | 8/31/2020 | 11/5/2020 Europe / Denmark / Hovedstaden |
| EPI_ISL_615991 | 8/31/2020 | 11/5/2020 Europe / Denmark / Sjaelland   |
| EPI_ISL_615992 | 8/31/2020 | 11/5/2020 Europe / Denmark / Hovedstaden |
| EPI_ISL_615993 | 8/24/2020 | 11/5/2020 Europe / Denmark / Hovedstaden |
| EPI_ISL_615994 | 8/31/2020 | 11/5/2020 Europe / Denmark / Hovedstaden |
| EPI_ISL_615995 | 8/31/2020 | 11/5/2020 Europe / Denmark / Hovedstaden |
| EPI_ISL_615996 | 8/24/2020 | 11/5/2020 Europe / Denmark / Nordjylland |
| EPI_ISL_615997 | 8/24/2020 | 11/5/2020 Europe / Denmark / Syddanmark  |



















|                |           |                                          |
|----------------|-----------|------------------------------------------|
| EPI_ISL_616396 | 8/31/2020 | 11/5/2020 Europe / Denmark / Syddanmark  |
| EPI_ISL_616397 | 8/31/2020 | 11/5/2020 Europe / Denmark / Syddanmark  |
| EPI_ISL_616398 | 8/31/2020 | 11/5/2020 Europe / Denmark / Syddanmark  |
| EPI_ISL_616399 | 8/31/2020 | 11/5/2020 Europe / Denmark / Syddanmark  |
| EPI_ISL_616400 | 8/31/2020 | 11/5/2020 Europe / Denmark / Syddanmark  |
| EPI_ISL_616401 | 8/31/2020 | 11/5/2020 Europe / Denmark / Hovedstaden |
| EPI_ISL_616402 | 8/31/2020 | 11/5/2020 Europe / Denmark / Nordjylland |
| EPI_ISL_616403 | 8/31/2020 | 11/5/2020 Europe / Denmark / Hovedstaden |
| EPI_ISL_616404 | 8/31/2020 | 11/5/2020 Europe / Denmark / Hovedstaden |
| EPI_ISL_616405 | 8/31/2020 | 11/5/2020 Europe / Denmark / Hovedstaden |
| EPI_ISL_616406 | 8/17/2020 | 11/5/2020 Europe / Denmark / Midtjylland |
| EPI_ISL_616407 | 8/17/2020 | 11/5/2020 Europe / Denmark / Syddanmark  |
| EPI_ISL_616409 | 8/17/2020 | 11/5/2020 Europe / Denmark / Syddanmark  |
| EPI_ISL_616410 | 8/17/2020 | 11/5/2020 Europe / Denmark / Syddanmark  |
| EPI_ISL_616411 | 8/17/2020 | 11/5/2020 Europe / Denmark               |
| EPI_ISL_616412 | 8/17/2020 | 11/5/2020 Europe / Denmark / Nordjylland |
| EPI_ISL_616413 | 8/17/2020 | 11/5/2020 Europe / Denmark / Syddanmark  |
| EPI_ISL_616414 | 8/17/2020 | 11/5/2020 Europe / Denmark / Syddanmark  |
| EPI_ISL_616415 | 8/17/2020 | 11/5/2020 Europe / Denmark / Hovedstaden |
| EPI_ISL_616416 | 3/30/2020 | 11/5/2020 Europe / Denmark / Syddanmark  |
| EPI_ISL_616417 | 8/17/2020 | 11/5/2020 Europe / Denmark / Sjaelland   |
| EPI_ISL_616418 | 8/17/2020 | 11/5/2020 Europe / Denmark / Hovedstaden |
| EPI_ISL_616419 | 8/17/2020 | 11/5/2020 Europe / Denmark / Hovedstaden |
| EPI_ISL_616420 | 8/17/2020 | 11/5/2020 Europe / Denmark / Hovedstaden |
| EPI_ISL_616421 | 8/17/2020 | 11/5/2020 Europe / Denmark / Hovedstaden |
| EPI_ISL_616422 | 8/17/2020 | 11/5/2020 Europe / Denmark / Sjaelland   |
| EPI_ISL_616423 | 8/17/2020 | 11/5/2020 Europe / Denmark / Hovedstaden |
| EPI_ISL_616424 | 8/17/2020 | 11/5/2020 Europe / Denmark / Midtjylland |
| EPI_ISL_616425 | 8/17/2020 | 11/5/2020 Europe / Denmark / Syddanmark  |
| EPI_ISL_616426 | 8/17/2020 | 11/5/2020 Europe / Denmark / Midtjylland |
| EPI_ISL_616428 | 8/17/2020 | 11/5/2020 Europe / Denmark / Hovedstaden |
| EPI_ISL_616429 | 8/17/2020 | 11/5/2020 Europe / Denmark / Sjaelland   |
| EPI_ISL_616430 | 8/17/2020 | 11/5/2020 Europe / Denmark / Hovedstaden |
| EPI_ISL_616432 | 8/17/2020 | 11/5/2020 Europe / Denmark / Hovedstaden |
| EPI_ISL_616434 | 8/17/2020 | 11/5/2020 Europe / Denmark / Midtjylland |
| EPI_ISL_616435 | 8/17/2020 | 11/5/2020 Europe / Denmark / Midtjylland |
| EPI_ISL_616436 | 8/17/2020 | 11/5/2020 Europe / Denmark / Midtjylland |
| EPI_ISL_616437 | 8/17/2020 | 11/5/2020 Europe / Denmark / Midtjylland |
| EPI_ISL_616438 | 8/17/2020 | 11/5/2020 Europe / Denmark / Midtjylland |
| EPI_ISL_616439 | 8/17/2020 | 11/5/2020 Europe / Denmark / Syddanmark  |
| EPI_ISL_616440 | 8/17/2020 | 11/5/2020 Europe / Denmark / Sjaelland   |
| EPI_ISL_616441 | 8/17/2020 | 11/5/2020 Europe / Denmark / Hovedstaden |
| EPI_ISL_616443 | 8/17/2020 | 11/5/2020 Europe / Denmark / Hovedstaden |
| EPI_ISL_616444 | 8/17/2020 | 11/5/2020 Europe / Denmark / Hovedstaden |
| EPI_ISL_616445 | 8/17/2020 | 11/5/2020 Europe / Denmark / Midtjylland |
| EPI_ISL_616446 | 8/17/2020 | 11/5/2020 Europe / Denmark / Midtjylland |
| EPI_ISL_616447 | 8/17/2020 | 11/5/2020 Europe / Denmark / Midtjylland |





|                |           |                                          |
|----------------|-----------|------------------------------------------|
| EPI_ISL_616500 | 8/17/2020 | 11/5/2020 Europe / Denmark / Sjaelland   |
| EPI_ISL_616502 | 8/17/2020 | 11/5/2020 Europe / Denmark / Midtjylland |
| EPI_ISL_616503 | 8/17/2020 | 11/5/2020 Europe / Denmark / Sjaelland   |
| EPI_ISL_616504 | 8/17/2020 | 11/5/2020 Europe / Denmark / Hovedstaden |
| EPI_ISL_616505 | 8/17/2020 | 11/5/2020 Europe / Denmark / Syddanmark  |
| EPI_ISL_616506 | 8/17/2020 | 11/5/2020 Europe / Denmark / Hovedstaden |
| EPI_ISL_616507 | 8/17/2020 | 11/5/2020 Europe / Denmark / Midtjylland |
| EPI_ISL_616508 | 8/17/2020 | 11/5/2020 Europe / Denmark / Midtjylland |
| EPI_ISL_616509 | 8/17/2020 | 11/5/2020 Europe / Denmark / Midtjylland |
| EPI_ISL_616510 | 8/17/2020 | 11/5/2020 Europe / Denmark / Midtjylland |
| EPI_ISL_616511 | 8/17/2020 | 11/5/2020 Europe / Denmark / Sjaelland   |
| EPI_ISL_616512 | 8/17/2020 | 11/5/2020 Europe / Denmark / Nordjylland |
| EPI_ISL_616513 | 8/17/2020 | 11/5/2020 Europe / Denmark / Midtjylland |
| EPI_ISL_616514 | 8/17/2020 | 11/5/2020 Europe / Denmark / Midtjylland |
| EPI_ISL_616515 | 8/17/2020 | 11/5/2020 Europe / Denmark / Midtjylland |
| EPI_ISL_616516 | 8/17/2020 | 11/5/2020 Europe / Denmark / Syddanmark  |
| EPI_ISL_616517 | 8/17/2020 | 11/5/2020 Europe / Denmark / Midtjylland |
| EPI_ISL_616518 | 8/17/2020 | 11/5/2020 Europe / Denmark / Syddanmark  |
| EPI_ISL_616519 | 8/17/2020 | 11/5/2020 Europe / Denmark / Hovedstaden |
| EPI_ISL_616520 | 8/17/2020 | 11/5/2020 Europe / Denmark / Hovedstaden |
| EPI_ISL_616521 | 8/17/2020 | 11/5/2020 Europe / Denmark / Nordjylland |
| EPI_ISL_616522 | 8/17/2020 | 11/5/2020 Europe / Denmark / Midtjylland |
| EPI_ISL_616523 | 8/17/2020 | 11/5/2020 Europe / Denmark / Hovedstaden |
| EPI_ISL_616524 | 8/17/2020 | 11/5/2020 Europe / Denmark / Hovedstaden |
| EPI_ISL_616525 | 8/17/2020 | 11/5/2020 Europe / Denmark / Hovedstaden |
| EPI_ISL_616526 | 8/17/2020 | 11/5/2020 Europe / Denmark / Hovedstaden |
| EPI_ISL_616527 | 8/17/2020 | 11/5/2020 Europe / Denmark / Hovedstaden |
| EPI_ISL_616528 | 8/17/2020 | 11/5/2020 Europe / Denmark / Hovedstaden |
| EPI_ISL_616529 | 8/17/2020 | 11/5/2020 Europe / Denmark / Hovedstaden |
| EPI_ISL_616530 | 8/17/2020 | 11/5/2020 Europe / Denmark / Hovedstaden |
| EPI_ISL_616531 | 8/17/2020 | 11/5/2020 Europe / Denmark / Hovedstaden |
| EPI_ISL_616532 | 8/17/2020 | 11/5/2020 Europe / Denmark / Hovedstaden |
| EPI_ISL_616534 | 8/17/2020 | 11/5/2020 Europe / Denmark / Nordjylland |
| EPI_ISL_616535 | 8/17/2020 | 11/5/2020 Europe / Denmark / Nordjylland |
| EPI_ISL_616536 | 8/24/2020 | 11/5/2020 Europe / Denmark / Nordjylland |
| EPI_ISL_616537 | 8/24/2020 | 11/5/2020 Europe / Denmark               |
| EPI_ISL_616538 | 8/17/2020 | 11/5/2020 Europe / Denmark / Hovedstaden |
| EPI_ISL_616540 | 8/24/2020 | 11/5/2020 Europe / Denmark / Syddanmark  |
| EPI_ISL_616541 | 8/17/2020 | 11/5/2020 Europe / Denmark / Syddanmark  |
| EPI_ISL_616542 | 8/17/2020 | 11/5/2020 Europe / Denmark / Syddanmark  |
| EPI_ISL_616543 | 8/17/2020 | 11/5/2020 Europe / Denmark / Syddanmark  |
| EPI_ISL_616545 | 8/17/2020 | 11/5/2020 Europe / Denmark / Midtjylland |
| EPI_ISL_616546 | 8/17/2020 | 11/5/2020 Europe / Denmark / Syddanmark  |
| EPI_ISL_616547 | 8/17/2020 | 11/5/2020 Europe / Denmark / Syddanmark  |
| EPI_ISL_616548 | 8/24/2020 | 11/5/2020 Europe / Denmark / Syddanmark  |
| EPI_ISL_616549 | 8/17/2020 | 11/5/2020 Europe / Denmark / Syddanmark  |
| EPI_ISL_616550 | 8/17/2020 | 11/5/2020 Europe / Denmark / Syddanmark  |

|                |           |                                          |
|----------------|-----------|------------------------------------------|
| EPI_ISL_616551 | 8/17/2020 | 11/5/2020 Europe / Denmark / Sjaelland   |
| EPI_ISL_616552 | 8/17/2020 | 11/5/2020 Europe / Denmark / Syddanmark  |
| EPI_ISL_616553 | 8/17/2020 | 11/5/2020 Europe / Denmark / Syddanmark  |
| EPI_ISL_616554 | 8/17/2020 | 11/5/2020 Europe / Denmark               |
| EPI_ISL_616555 | 8/17/2020 | 11/5/2020 Europe / Denmark / Syddanmark  |
| EPI_ISL_616556 | 8/24/2020 | 11/5/2020 Europe / Denmark / Syddanmark  |
| EPI_ISL_616557 | 8/17/2020 | 11/5/2020 Europe / Denmark / Syddanmark  |
| EPI_ISL_616558 | 8/17/2020 | 11/5/2020 Europe / Denmark / Syddanmark  |
| EPI_ISL_616559 | 8/17/2020 | 11/5/2020 Europe / Denmark / Sjaelland   |
| EPI_ISL_616560 | 8/17/2020 | 11/5/2020 Europe / Denmark / Hovedstaden |
| EPI_ISL_616561 | 8/17/2020 | 11/5/2020 Europe / Denmark / Hovedstaden |
| EPI_ISL_616562 | 8/24/2020 | 11/5/2020 Europe / Denmark / Nordjylland |
| EPI_ISL_616563 | 8/24/2020 | 11/5/2020 Europe / Denmark / Nordjylland |
| EPI_ISL_616564 | 8/24/2020 | 11/5/2020 Europe / Denmark / Nordjylland |
| EPI_ISL_616565 | 8/24/2020 | 11/5/2020 Europe / Denmark / Nordjylland |
| EPI_ISL_616566 | 8/24/2020 | 11/5/2020 Europe / Denmark / Syddanmark  |
| EPI_ISL_616567 | 8/24/2020 | 11/5/2020 Europe / Denmark / Syddanmark  |
| EPI_ISL_616568 | 8/24/2020 | 11/5/2020 Europe / Denmark / Syddanmark  |
| EPI_ISL_616569 | 3/30/2020 | 11/5/2020 Europe / Denmark / Hovedstaden |
| EPI_ISL_616570 | 8/24/2020 | 11/5/2020 Europe / Denmark / Syddanmark  |
| EPI_ISL_616571 | 8/24/2020 | 11/5/2020 Europe / Denmark / Syddanmark  |
| EPI_ISL_616572 | 8/24/2020 | 11/5/2020 Europe / Denmark / Syddanmark  |
| EPI_ISL_616573 | 8/24/2020 | 11/5/2020 Europe / Denmark / Syddanmark  |
| EPI_ISL_616574 | 8/17/2020 | 11/5/2020 Europe / Denmark / Syddanmark  |
| EPI_ISL_616575 | 8/24/2020 | 11/5/2020 Europe / Denmark / Syddanmark  |
| EPI_ISL_616576 | 8/24/2020 | 11/5/2020 Europe / Denmark / Syddanmark  |
| EPI_ISL_616577 | 8/24/2020 | 11/5/2020 Europe / Denmark / Syddanmark  |
| EPI_ISL_616578 | 8/24/2020 | 11/5/2020 Europe / Denmark / Syddanmark  |
| EPI_ISL_616579 | 8/24/2020 | 11/5/2020 Europe / Denmark / Syddanmark  |
| EPI_ISL_616580 | 8/24/2020 | 11/5/2020 Europe / Denmark / Hovedstaden |
| EPI_ISL_616581 | 8/24/2020 | 11/5/2020 Europe / Denmark / Hovedstaden |
| EPI_ISL_616582 | 8/24/2020 | 11/5/2020 Europe / Denmark / Hovedstaden |
| EPI_ISL_616585 | 8/24/2020 | 11/5/2020 Europe / Denmark / Hovedstaden |
| EPI_ISL_616586 | 8/24/2020 | 11/5/2020 Europe / Denmark / Hovedstaden |
| EPI_ISL_616587 | 8/24/2020 | 11/5/2020 Europe / Denmark / Sjaelland   |
| EPI_ISL_616588 | 8/24/2020 | 11/5/2020 Europe / Denmark / Syddanmark  |
| EPI_ISL_616589 | 8/24/2020 | 11/5/2020 Europe / Denmark / Hovedstaden |
| EPI_ISL_616590 | 8/24/2020 | 11/5/2020 Europe / Denmark / Midtjylland |
| EPI_ISL_616591 | 8/24/2020 | 11/5/2020 Europe / Denmark / Hovedstaden |
| EPI_ISL_616592 | 8/24/2020 | 11/5/2020 Europe / Denmark / Hovedstaden |
| EPI_ISL_616593 | 8/24/2020 | 11/5/2020 Europe / Denmark / Hovedstaden |
| EPI_ISL_616594 | 8/24/2020 | 11/5/2020 Europe / Denmark / Hovedstaden |
| EPI_ISL_616595 | 8/24/2020 | 11/5/2020 Europe / Denmark / Midtjylland |
| EPI_ISL_616596 | 8/24/2020 | 11/5/2020 Europe / Denmark / Hovedstaden |
| EPI_ISL_616597 | 8/24/2020 | 11/5/2020 Europe / Denmark / Hovedstaden |
| EPI_ISL_616598 | 8/24/2020 | 11/5/2020 Europe / Denmark / Midtjylland |
| EPI_ISL_616599 | 8/24/2020 | 11/5/2020 Europe / Denmark / Hovedstaden |



|                |           |                                          |
|----------------|-----------|------------------------------------------|
| EPI_ISL_616651 | 8/17/2020 | 11/5/2020 Europe / Denmark / Hovedstaden |
| EPI_ISL_616652 | 8/24/2020 | 11/5/2020 Europe / Denmark / Hovedstaden |
| EPI_ISL_616653 | 8/24/2020 | 11/5/2020 Europe / Denmark / Hovedstaden |
| EPI_ISL_616654 | 8/24/2020 | 11/5/2020 Europe / Denmark / Hovedstaden |
| EPI_ISL_616655 | 8/24/2020 | 11/5/2020 Europe / Denmark / Midtjylland |
| EPI_ISL_616656 | 8/24/2020 | 11/5/2020 Europe / Denmark / Sjælland    |
| EPI_ISL_616657 | 8/24/2020 | 11/5/2020 Europe / Denmark / Midtjylland |
| EPI_ISL_616658 | 8/24/2020 | 11/5/2020 Europe / Denmark / Hovedstaden |
| EPI_ISL_616659 | 8/24/2020 | 11/5/2020 Europe / Denmark / Midtjylland |
| EPI_ISL_616660 | 8/24/2020 | 11/5/2020 Europe / Denmark / Midtjylland |
| EPI_ISL_616661 | 8/24/2020 | 11/5/2020 Europe / Denmark / Syddanmark  |
| EPI_ISL_616662 | 8/24/2020 | 11/5/2020 Europe / Denmark / Midtjylland |
| EPI_ISL_616663 | 8/24/2020 | 11/5/2020 Europe / Denmark / Midtjylland |
| EPI_ISL_616664 | 8/24/2020 | 11/5/2020 Europe / Denmark / Hovedstaden |
| EPI_ISL_616665 | 8/24/2020 | 11/5/2020 Europe / Denmark / Hovedstaden |
| EPI_ISL_616666 | 8/24/2020 | 11/5/2020 Europe / Denmark / Hovedstaden |
| EPI_ISL_616667 | 8/24/2020 | 11/5/2020 Europe / Denmark / Hovedstaden |
| EPI_ISL_616668 | 8/24/2020 | 11/5/2020 Europe / Denmark / Nordjylland |
| EPI_ISL_616669 | 8/24/2020 | 11/5/2020 Europe / Denmark / Midtjylland |
| EPI_ISL_616670 | 8/24/2020 | 11/5/2020 Europe / Denmark / Sjælland    |
| EPI_ISL_616671 | 8/24/2020 | 11/5/2020 Europe / Denmark / Hovedstaden |
| EPI_ISL_616672 | 8/24/2020 | 11/5/2020 Europe / Denmark / Midtjylland |
| EPI_ISL_616673 | 8/24/2020 | 11/5/2020 Europe / Denmark / Hovedstaden |
| EPI_ISL_616674 | 8/24/2020 | 11/5/2020 Europe / Denmark / Midtjylland |
| EPI_ISL_616675 | 8/24/2020 | 11/5/2020 Europe / Denmark / Sjælland    |
| EPI_ISL_616676 | 8/24/2020 | 11/5/2020 Europe / Denmark / Hovedstaden |
| EPI_ISL_616677 | 8/17/2020 | 11/5/2020 Europe / Denmark / Hovedstaden |
| EPI_ISL_616678 | 8/17/2020 | 11/5/2020 Europe / Denmark / Midtjylland |
| EPI_ISL_616679 | 8/17/2020 | 11/5/2020 Europe / Denmark / Midtjylland |
| EPI_ISL_616680 | 8/17/2020 | 11/5/2020 Europe / Denmark / Sjælland    |
| EPI_ISL_616681 | 8/17/2020 | 11/5/2020 Europe / Denmark / Sjælland    |
| EPI_ISL_616682 | 8/17/2020 | 11/5/2020 Europe / Denmark / Hovedstaden |
| EPI_ISL_616683 | 8/17/2020 | 11/5/2020 Europe / Denmark / Midtjylland |
| EPI_ISL_616684 | 8/17/2020 | 11/5/2020 Europe / Denmark / Midtjylland |
| EPI_ISL_616685 | 8/17/2020 | 11/5/2020 Europe / Denmark / Midtjylland |
| EPI_ISL_616686 | 8/17/2020 | 11/5/2020 Europe / Denmark / Syddanmark  |
| EPI_ISL_616687 | 8/17/2020 | 11/5/2020 Europe / Denmark / Midtjylland |
| EPI_ISL_616689 | 8/17/2020 | 11/5/2020 Europe / Denmark / Midtjylland |
| EPI_ISL_616690 | 8/17/2020 | 11/5/2020 Europe / Denmark / Midtjylland |
| EPI_ISL_616691 | 8/17/2020 | 11/5/2020 Europe / Denmark / Hovedstaden |
| EPI_ISL_616692 | 8/17/2020 | 11/5/2020 Europe / Denmark / Midtjylland |
| EPI_ISL_616694 | 8/24/2020 | 11/5/2020 Europe / Denmark / Nordjylland |
| EPI_ISL_616696 | 8/24/2020 | 11/5/2020 Europe / Denmark / Midtjylland |
| EPI_ISL_616698 | 8/24/2020 | 11/5/2020 Europe / Denmark / Sjælland    |
| EPI_ISL_616699 | 8/24/2020 | 11/5/2020 Europe / Denmark / Hovedstaden |
| EPI_ISL_616700 | 8/24/2020 | 11/5/2020 Europe / Denmark / Hovedstaden |
| EPI_ISL_616701 | 8/24/2020 | 11/5/2020 Europe / Denmark / Hovedstaden |

|                |           |                                          |
|----------------|-----------|------------------------------------------|
| EPI_ISL_616702 | 8/24/2020 | 11/5/2020 Europe / Denmark / Nordjylland |
| EPI_ISL_616703 | 8/24/2020 | 11/5/2020 Europe / Denmark / Hovedstaden |
| EPI_ISL_616704 | 8/24/2020 | 11/5/2020 Europe / Denmark / Hovedstaden |
| EPI_ISL_616705 | 8/24/2020 | 11/5/2020 Europe / Denmark / Midtjylland |
| EPI_ISL_616706 | 8/24/2020 | 11/5/2020 Europe / Denmark / Midtjylland |
| EPI_ISL_616707 | 8/24/2020 | 11/5/2020 Europe / Denmark / Midtjylland |
| EPI_ISL_616708 | 8/24/2020 | 11/5/2020 Europe / Denmark / Hovedstaden |
| EPI_ISL_616709 | 8/24/2020 | 11/5/2020 Europe / Denmark / Midtjylland |
| EPI_ISL_616710 | 8/24/2020 | 11/5/2020 Europe / Denmark / Hovedstaden |
| EPI_ISL_616711 | 8/24/2020 | 11/5/2020 Europe / Denmark / Hovedstaden |
| EPI_ISL_616712 | 8/24/2020 | 11/5/2020 Europe / Denmark / Syddanmark  |
| EPI_ISL_616713 | 8/24/2020 | 11/5/2020 Europe / Denmark / Hovedstaden |
| EPI_ISL_616714 | 8/24/2020 | 11/5/2020 Europe / Denmark / Nordjylland |
| EPI_ISL_616715 | 8/24/2020 | 11/5/2020 Europe / Denmark / Hovedstaden |
| EPI_ISL_616716 | 8/24/2020 | 11/5/2020 Europe / Denmark / Hovedstaden |
| EPI_ISL_616717 | 8/24/2020 | 11/5/2020 Europe / Denmark / Hovedstaden |
| EPI_ISL_616718 | 8/24/2020 | 11/5/2020 Europe / Denmark               |
| EPI_ISL_616719 | 8/24/2020 | 11/5/2020 Europe / Denmark / Hovedstaden |
| EPI_ISL_616720 | 8/24/2020 | 11/5/2020 Europe / Denmark / Hovedstaden |
| EPI_ISL_616721 | 8/24/2020 | 11/5/2020 Europe / Denmark / Nordjylland |
| EPI_ISL_616722 | 8/24/2020 | 11/5/2020 Europe / Denmark / Hovedstaden |
| EPI_ISL_616723 | 8/24/2020 | 11/5/2020 Europe / Denmark / Midtjylland |
| EPI_ISL_616725 | 8/24/2020 | 11/5/2020 Europe / Denmark / Hovedstaden |
| EPI_ISL_616726 | 8/24/2020 | 11/5/2020 Europe / Denmark / Hovedstaden |
| EPI_ISL_616728 | 8/24/2020 | 11/5/2020 Europe / Denmark / Syddanmark  |
| EPI_ISL_616729 | 8/24/2020 | 11/5/2020 Europe / Denmark / Syddanmark  |
| EPI_ISL_616731 | 8/24/2020 | 11/5/2020 Europe / Denmark / Hovedstaden |
| EPI_ISL_616732 | 8/24/2020 | 11/5/2020 Europe / Denmark / Sjælland    |
| EPI_ISL_616733 | 8/24/2020 | 11/5/2020 Europe / Denmark / Hovedstaden |
| EPI_ISL_616734 | 8/24/2020 | 11/5/2020 Europe / Denmark / Midtjylland |
| EPI_ISL_616735 | 8/24/2020 | 11/5/2020 Europe / Denmark               |
| EPI_ISL_616736 | 8/24/2020 | 11/5/2020 Europe / Denmark / Midtjylland |
| EPI_ISL_616737 | 8/24/2020 | 11/5/2020 Europe / Denmark / Hovedstaden |
| EPI_ISL_616738 | 8/24/2020 | 11/5/2020 Europe / Denmark / Hovedstaden |
| EPI_ISL_616739 | 8/24/2020 | 11/5/2020 Europe / Denmark / Hovedstaden |
| EPI_ISL_616740 | 8/24/2020 | 11/5/2020 Europe / Denmark / Midtjylland |
| EPI_ISL_616741 | 8/24/2020 | 11/5/2020 Europe / Denmark / Midtjylland |
| EPI_ISL_616742 | 8/24/2020 | 11/5/2020 Europe / Denmark / Midtjylland |
| EPI_ISL_616743 | 8/24/2020 | 11/5/2020 Europe / Denmark / Hovedstaden |
| EPI_ISL_616744 | 8/24/2020 | 11/5/2020 Europe / Denmark / Hovedstaden |
| EPI_ISL_616746 | 8/24/2020 | 11/5/2020 Europe / Denmark / Hovedstaden |
| EPI_ISL_616747 | 8/24/2020 | 11/5/2020 Europe / Denmark / Hovedstaden |
| EPI_ISL_616750 | 8/24/2020 | 11/5/2020 Europe / Denmark / Syddanmark  |
| EPI_ISL_616753 | 8/24/2020 | 11/5/2020 Europe / Denmark / Sjælland    |
| EPI_ISL_616754 | 8/24/2020 | 11/5/2020 Europe / Denmark / Midtjylland |
| EPI_ISL_616755 | 8/24/2020 | 11/5/2020 Europe / Denmark / Midtjylland |
| EPI_ISL_616756 | 8/24/2020 | 11/5/2020 Europe / Denmark / Nordjylland |

|                |           |                                          |
|----------------|-----------|------------------------------------------|
| EPI_ISL_616758 | 8/24/2020 | 11/5/2020 Europe / Denmark / Midtjylland |
| EPI_ISL_616759 | 8/24/2020 | 11/5/2020 Europe / Denmark / Midtjylland |
| EPI_ISL_616763 | 8/24/2020 | 11/5/2020 Europe / Denmark / Midtjylland |
| EPI_ISL_616764 | 8/24/2020 | 11/5/2020 Europe / Denmark               |
| EPI_ISL_616765 | 8/24/2020 | 11/5/2020 Europe / Denmark / Nordjylland |
| EPI_ISL_616766 | 8/24/2020 | 11/5/2020 Europe / Denmark / Hovedstaden |
| EPI_ISL_616767 | 8/24/2020 | 11/5/2020 Europe / Denmark               |
| EPI_ISL_616768 | 8/24/2020 | 11/5/2020 Europe / Denmark / Syddanmark  |
| EPI_ISL_616769 | 8/24/2020 | 11/5/2020 Europe / Denmark / Syddanmark  |
| EPI_ISL_616770 | 8/24/2020 | 11/5/2020 Europe / Denmark / Syddanmark  |
| EPI_ISL_616772 | 8/24/2020 | 11/5/2020 Europe / Denmark / Syddanmark  |
| EPI_ISL_616773 | 8/24/2020 | 11/5/2020 Europe / Denmark / Syddanmark  |
| EPI_ISL_616774 | 8/24/2020 | 11/5/2020 Europe / Denmark / Syddanmark  |
| EPI_ISL_616777 | 8/24/2020 | 11/5/2020 Europe / Denmark / Midtjylland |
| EPI_ISL_616779 | 8/24/2020 | 11/5/2020 Europe / Denmark / Midtjylland |
| EPI_ISL_616781 | 8/24/2020 | 11/5/2020 Europe / Denmark / Sjælland    |
| EPI_ISL_616783 | 8/24/2020 | 11/5/2020 Europe / Denmark / Syddanmark  |
| EPI_ISL_616784 | 8/24/2020 | 11/5/2020 Europe / Denmark / Midtjylland |
| EPI_ISL_616785 | 8/24/2020 | 11/5/2020 Europe / Denmark / Syddanmark  |
| EPI_ISL_616786 | 8/24/2020 | 11/5/2020 Europe / Denmark / Hovedstaden |
| EPI_ISL_616787 | 8/24/2020 | 11/5/2020 Europe / Denmark / Hovedstaden |
| EPI_ISL_616789 | 8/24/2020 | 11/5/2020 Europe / Denmark / Hovedstaden |
| EPI_ISL_616790 | 8/24/2020 | 11/5/2020 Europe / Denmark / Hovedstaden |
| EPI_ISL_616791 | 8/24/2020 | 11/5/2020 Europe / Denmark / Hovedstaden |
| EPI_ISL_616792 | 8/24/2020 | 11/5/2020 Europe / Denmark / Hovedstaden |
| EPI_ISL_616793 | 8/24/2020 | 11/5/2020 Europe / Denmark / Hovedstaden |
| EPI_ISL_616794 | 8/24/2020 | 11/5/2020 Europe / Denmark / Hovedstaden |
| EPI_ISL_616795 | 8/24/2020 | 11/5/2020 Europe / Denmark / Hovedstaden |
| EPI_ISL_616796 | 8/24/2020 | 11/5/2020 Europe / Denmark / Hovedstaden |
| EPI_ISL_616797 | 8/24/2020 | 11/5/2020 Europe / Denmark / Hovedstaden |
| EPI_ISL_616798 | 8/24/2020 | 11/5/2020 Europe / Denmark / Hovedstaden |
| EPI_ISL_616799 | 8/24/2020 | 11/5/2020 Europe / Denmark / Hovedstaden |
| EPI_ISL_616801 | 8/24/2020 | 11/5/2020 Europe / Denmark / Hovedstaden |
| EPI_ISL_616802 | 8/24/2020 | 11/5/2020 Europe / Denmark / Nordjylland |
| EPI_ISL_616803 | 8/24/2020 | 11/5/2020 Europe / Denmark / Hovedstaden |
| EPI_ISL_616805 | 8/24/2020 | 11/5/2020 Europe / Denmark / Syddanmark  |
| EPI_ISL_616806 | 8/24/2020 | 11/5/2020 Europe / Denmark / Hovedstaden |
| EPI_ISL_616807 | 8/24/2020 | 11/5/2020 Europe / Denmark               |
| EPI_ISL_616809 | 8/24/2020 | 11/5/2020 Europe / Denmark / Midtjylland |
| EPI_ISL_616810 | 8/24/2020 | 11/5/2020 Europe / Denmark / Hovedstaden |
| EPI_ISL_616811 | 8/24/2020 | 11/5/2020 Europe / Denmark / Hovedstaden |
| EPI_ISL_616812 | 8/24/2020 | 11/5/2020 Europe / Denmark / Syddanmark  |
| EPI_ISL_616813 | 8/24/2020 | 11/5/2020 Europe / Denmark / Midtjylland |
| EPI_ISL_616814 | 8/24/2020 | 11/5/2020 Europe / Denmark / Midtjylland |
| EPI_ISL_616816 | 8/24/2020 | 11/5/2020 Europe / Denmark / Midtjylland |
| EPI_ISL_616817 | 8/24/2020 | 11/5/2020 Europe / Denmark / Hovedstaden |
| EPI_ISL_616818 | 8/24/2020 | 11/5/2020 Europe / Denmark / Hovedstaden |



|                |            |                                          |
|----------------|------------|------------------------------------------|
| EPI_ISL_616871 | 8/24/2020  | 11/5/2020 Europe / Denmark / Midtjylland |
| EPI_ISL_616872 | 8/24/2020  | 11/5/2020 Europe / Denmark / Midtjylland |
| EPI_ISL_616873 | 8/31/2020  | 11/5/2020 Europe / Denmark / Midtjylland |
| EPI_ISL_616875 | 8/31/2020  | 11/5/2020 Europe / Denmark / Hovedstaden |
| EPI_ISL_616876 | 8/24/2020  | 11/5/2020 Europe / Denmark / Nordjylland |
| EPI_ISL_616877 | 8/24/2020  | 11/5/2020 Europe / Denmark / Midtjylland |
| EPI_ISL_616878 | 8/31/2020  | 11/5/2020 Europe / Denmark               |
| EPI_ISL_616879 | 8/31/2020  | 11/5/2020 Europe / Denmark / Nordjylland |
| EPI_ISL_616880 | 8/31/2020  | 11/5/2020 Europe / Denmark / Syddanmark  |
| EPI_ISL_616881 | 8/31/2020  | 11/5/2020 Europe / Denmark / Syddanmark  |
| EPI_ISL_616882 | 8/31/2020  | 11/5/2020 Europe / Denmark / Syddanmark  |
| EPI_ISL_616883 | 8/31/2020  | 11/5/2020 Europe / Denmark / Syddanmark  |
| EPI_ISL_616884 | 8/31/2020  | 11/5/2020 Europe / Denmark / Syddanmark  |
| EPI_ISL_616885 | 8/31/2020  | 11/5/2020 Europe / Denmark / Nordjylland |
| EPI_ISL_616886 | 8/31/2020  | 11/5/2020 Europe / Denmark / Nordjylland |
| EPI_ISL_616887 | 8/31/2020  | 11/5/2020 Europe / Denmark / Nordjylland |
| EPI_ISL_616888 | 8/24/2020  | 11/5/2020 Europe / Denmark / Syddanmark  |
| EPI_ISL_616889 | 8/24/2020  | 11/5/2020 Europe / Denmark / Syddanmark  |
| EPI_ISL_616890 | 8/24/2020  | 11/5/2020 Europe / Denmark / Syddanmark  |
| EPI_ISL_616891 | 8/31/2020  | 11/5/2020 Europe / Denmark / Syddanmark  |
| EPI_ISL_616892 | 8/31/2020  | 11/5/2020 Europe / Denmark / Syddanmark  |
| EPI_ISL_616893 | 8/31/2020  | 11/5/2020 Europe / Denmark / Hovedstaden |
| EPI_ISL_616894 | 8/31/2020  | 11/5/2020 Europe / Denmark / Hovedstaden |
| EPI_ISL_616895 | 8/31/2020  | 11/5/2020 Europe / Denmark / Hovedstaden |
| EPI_ISL_616896 | 8/31/2020  | 11/5/2020 Europe / Denmark / Hovedstaden |
| EPI_ISL_616897 | 8/31/2020  | 11/5/2020 Europe / Denmark / Hovedstaden |
| EPI_ISL_616898 | 8/31/2020  | 11/5/2020 Europe / Denmark / Hovedstaden |
| EPI_ISL_616899 | 8/31/2020  | 11/5/2020 Europe / Denmark / Hovedstaden |
| EPI_ISL_616900 | 8/31/2020  | 11/5/2020 Europe / Denmark               |
| EPI_ISL_616901 | 8/24/2020  | 11/5/2020 Europe / Denmark / Hovedstaden |
| EPI_ISL_616902 | 8/24/2020  | 11/5/2020 Europe / Denmark / Sjælland    |
| EPI_ISL_616903 | 8/31/2020  | 11/5/2020 Europe / Denmark / Hovedstaden |
| EPI_ISL_616905 | 8/31/2020  | 11/5/2020 Europe / Denmark / Sjælland    |
| EPI_ISL_616951 | 10/26/2020 | 11/5/2020 Europe / Denmark / Nordjylland |
| EPI_ISL_616952 | 10/26/2020 | 11/5/2020 Europe / Denmark / Midtjylland |
| EPI_ISL_616953 | 10/26/2020 | 11/5/2020 Europe / Denmark / Hovedstaden |
| EPI_ISL_616954 | 10/26/2020 | 11/5/2020 Europe / Denmark / Hovedstaden |
| EPI_ISL_616955 | 10/26/2020 | 11/5/2020 Europe / Denmark / Syddanmark  |
| EPI_ISL_616956 | 10/26/2020 | 11/5/2020 Europe / Denmark / Syddanmark  |
| EPI_ISL_616976 | 10/26/2020 | 11/5/2020 Europe / Denmark / Syddanmark  |
| EPI_ISL_616977 | 10/26/2020 | 11/5/2020 Europe / Denmark / Sjælland    |
| EPI_ISL_616978 | 10/26/2020 | 11/5/2020 Europe / Denmark / Hovedstaden |
| EPI_ISL_616979 | 10/26/2020 | 11/5/2020 Europe / Denmark / Hovedstaden |
| EPI_ISL_616980 | 10/26/2020 | 11/5/2020 Europe / Denmark / Sjælland    |
| EPI_ISL_616981 | 10/26/2020 | 11/5/2020 Europe / Denmark / Hovedstaden |
| EPI_ISL_616982 | 10/26/2020 | 11/5/2020 Europe / Denmark / Midtjylland |
| EPI_ISL_616983 | 10/26/2020 | 11/5/2020 Europe / Denmark / Midtjylland |



|                |            |                                          |
|----------------|------------|------------------------------------------|
| EPI_ISL_616984 | 10/26/2020 | 11/5/2020 Europe / Denmark / Midtjylland |
| EPI_ISL_616985 | 10/26/2020 | 11/5/2020 Europe / Denmark / Hovedstaden |
| EPI_ISL_616986 | 10/26/2020 | 11/5/2020 Europe / Denmark / Syddanmark  |
| EPI_ISL_616987 | 10/26/2020 | 11/5/2020 Europe / Denmark / Hovedstaden |
| EPI_ISL_616988 | 10/26/2020 | 11/5/2020 Europe / Denmark / Hovedstaden |
| EPI_ISL_616989 | 10/26/2020 | 11/5/2020 Europe / Denmark / Hovedstaden |
| EPI_ISL_616990 | 10/26/2020 | 11/5/2020 Europe / Denmark / Hovedstaden |
| EPI_ISL_616991 | 10/26/2020 | 11/5/2020 Europe / Denmark / Hovedstaden |
| EPI_ISL_616992 | 10/26/2020 | 11/5/2020 Europe / Denmark / Hovedstaden |
| EPI_ISL_616993 | 10/26/2020 | 11/5/2020 Europe / Denmark / Hovedstaden |
| EPI_ISL_616994 | 10/26/2020 | 11/5/2020 Europe / Denmark / Hovedstaden |
| EPI_ISL_616995 | 10/26/2020 | 11/5/2020 Europe / Denmark / Hovedstaden |
| EPI_ISL_616996 | 10/26/2020 | 11/5/2020 Europe / Denmark / Midtjylland |
| EPI_ISL_616997 | 10/26/2020 | 11/5/2020 Europe / Denmark / Hovedstaden |
| EPI_ISL_616998 | 10/26/2020 | 11/5/2020 Europe / Denmark / Sjælland    |
| EPI_ISL_616999 | 10/26/2020 | 11/5/2020 Europe / Denmark / Hovedstaden |
| EPI_ISL_617000 | 10/26/2020 | 11/5/2020 Europe / Denmark / Syddanmark  |
| EPI_ISL_617001 | 10/26/2020 | 11/5/2020 Europe / Denmark / Nordjylland |
| EPI_ISL_617002 | 10/26/2020 | 11/5/2020 Europe / Denmark / Hovedstaden |
| EPI_ISL_617003 | 10/26/2020 | 11/5/2020 Europe / Denmark / Hovedstaden |
| EPI_ISL_617004 | 10/26/2020 | 11/5/2020 Europe / Denmark / Hovedstaden |
| EPI_ISL_617005 | 10/26/2020 | 11/5/2020 Europe / Denmark / Hovedstaden |
| EPI_ISL_617006 | 10/26/2020 | 11/5/2020 Europe / Denmark / Hovedstaden |
| EPI_ISL_617007 | 10/26/2020 | 11/5/2020 Europe / Denmark / Syddanmark  |
| EPI_ISL_617008 | 10/26/2020 | 11/5/2020 Europe / Denmark / Midtjylland |
| EPI_ISL_617009 | 10/26/2020 | 11/5/2020 Europe / Denmark / Hovedstaden |
| EPI_ISL_617010 | 10/26/2020 | 11/5/2020 Europe / Denmark / Hovedstaden |
| EPI_ISL_617011 | 10/26/2020 | 11/5/2020 Europe / Denmark / Hovedstaden |
| EPI_ISL_617012 | 10/26/2020 | 11/5/2020 Europe / Denmark / Hovedstaden |
| EPI_ISL_617013 | 10/26/2020 | 11/5/2020 Europe / Denmark / Syddanmark  |
| EPI_ISL_617014 | 10/26/2020 | 11/5/2020 Europe / Denmark / Sjælland    |
| EPI_ISL_617015 | 10/26/2020 | 11/5/2020 Europe / Denmark / Midtjylland |
| EPI_ISL_617016 | 10/26/2020 | 11/5/2020 Europe / Denmark / Hovedstaden |
| EPI_ISL_617017 | 10/26/2020 | 11/5/2020 Europe / Denmark / Hovedstaden |
| EPI_ISL_617018 | 10/26/2020 | 11/5/2020 Europe / Denmark / Hovedstaden |
| EPI_ISL_617019 | 10/26/2020 | 11/5/2020 Europe / Denmark / Hovedstaden |
| EPI_ISL_617020 | 10/26/2020 | 11/5/2020 Europe / Denmark / Syddanmark  |
| EPI_ISL_617021 | 10/26/2020 | 11/5/2020 Europe / Denmark / Hovedstaden |
| EPI_ISL_617022 | 10/26/2020 | 11/5/2020 Europe / Denmark / Sjælland    |
| EPI_ISL_617023 | 10/26/2020 | 11/5/2020 Europe / Denmark / Hovedstaden |
| EPI_ISL_617024 | 10/26/2020 | 11/5/2020 Europe / Denmark / Hovedstaden |
| EPI_ISL_617025 | 10/26/2020 | 11/5/2020 Europe / Denmark / Hovedstaden |
| EPI_ISL_617026 | 10/19/2020 | 11/5/2020 Europe / Denmark / Syddanmark  |
| EPI_ISL_617027 | 10/26/2020 | 11/5/2020 Europe / Denmark / Midtjylland |
| EPI_ISL_617028 | 10/26/2020 | 11/5/2020 Europe / Denmark / Hovedstaden |
| EPI_ISL_617029 | 10/26/2020 | 11/5/2020 Europe / Denmark / Hovedstaden |
| EPI_ISL_617030 | 10/26/2020 | 11/5/2020 Europe / Denmark / Hovedstaden |





|                |            |                                          |
|----------------|------------|------------------------------------------|
| EPI_ISL_617143 | 10/26/2020 | 11/5/2020 Europe / Denmark / Midtjylland |
| EPI_ISL_617144 | 10/26/2020 | 11/5/2020 Europe / Denmark / Nordjylland |
| EPI_ISL_617145 | 10/26/2020 | 11/5/2020 Europe / Denmark / Midtjylland |
| EPI_ISL_617146 | 10/26/2020 | 11/5/2020 Europe / Denmark / Nordjylland |
| EPI_ISL_617147 | 10/26/2020 | 11/5/2020 Europe / Denmark / Hovedstaden |
| EPI_ISL_617148 | 10/26/2020 | 11/5/2020 Europe / Denmark / Midtjylland |
| EPI_ISL_617149 | 10/26/2020 | 11/5/2020 Europe / Denmark / Midtjylland |
| EPI_ISL_617150 | 10/26/2020 | 11/5/2020 Europe / Denmark / Midtjylland |
| EPI_ISL_617151 | 10/26/2020 | 11/5/2020 Europe / Denmark / Hovedstaden |
| EPI_ISL_617152 | 10/26/2020 | 11/5/2020 Europe / Denmark / Syddanmark  |
| EPI_ISL_617153 | 10/26/2020 | 11/5/2020 Europe / Denmark / Hovedstaden |
| EPI_ISL_617154 | 10/26/2020 | 11/5/2020 Europe / Denmark / Hovedstaden |
| EPI_ISL_617155 | 10/26/2020 | 11/5/2020 Europe / Denmark / Sjælland    |
| EPI_ISL_617156 | 10/26/2020 | 11/5/2020 Europe / Denmark / Hovedstaden |
| EPI_ISL_617157 | 10/26/2020 | 11/5/2020 Europe / Denmark / Sjælland    |
| EPI_ISL_617158 | 10/26/2020 | 11/5/2020 Europe / Denmark / Hovedstaden |
| EPI_ISL_617159 | 10/26/2020 | 11/5/2020 Europe / Denmark / Syddanmark  |
| EPI_ISL_617160 | 10/26/2020 | 11/5/2020 Europe / Denmark / Nordjylland |
| EPI_ISL_617161 | 10/26/2020 | 11/5/2020 Europe / Denmark / Syddanmark  |
| EPI_ISL_617162 | 10/26/2020 | 11/5/2020 Europe / Denmark / Hovedstaden |
| EPI_ISL_617163 | 10/26/2020 | 11/5/2020 Europe / Denmark               |
| EPI_ISL_617164 | 10/26/2020 | 11/5/2020 Europe / Denmark / Hovedstaden |
| EPI_ISL_617165 | 10/26/2020 | 11/5/2020 Europe / Denmark / Midtjylland |
| EPI_ISL_617166 | 10/26/2020 | 11/5/2020 Europe / Denmark / Hovedstaden |
| EPI_ISL_617167 | 10/26/2020 | 11/5/2020 Europe / Denmark / Hovedstaden |
| EPI_ISL_617168 | 10/26/2020 | 11/5/2020 Europe / Denmark / Hovedstaden |
| EPI_ISL_617169 | 10/26/2020 | 11/5/2020 Europe / Denmark / Midtjylland |
| EPI_ISL_617170 | 10/26/2020 | 11/5/2020 Europe / Denmark / Hovedstaden |
| EPI_ISL_617171 | 10/26/2020 | 11/5/2020 Europe / Denmark / Syddanmark  |
| EPI_ISL_617172 | 10/26/2020 | 11/5/2020 Europe / Denmark / Nordjylland |
| EPI_ISL_617173 | 10/26/2020 | 11/5/2020 Europe / Denmark / Sjælland    |
| EPI_ISL_617174 | 10/26/2020 | 11/5/2020 Europe / Denmark / Hovedstaden |
| EPI_ISL_617175 | 10/26/2020 | 11/5/2020 Europe / Denmark / Nordjylland |
| EPI_ISL_617176 | 10/26/2020 | 11/5/2020 Europe / Denmark / Sjælland    |
| EPI_ISL_617177 | 10/26/2020 | 11/5/2020 Europe / Denmark / Hovedstaden |
| EPI_ISL_617178 | 10/26/2020 | 11/5/2020 Europe / Denmark / Syddanmark  |
| EPI_ISL_617179 | 10/26/2020 | 11/5/2020 Europe / Denmark / Sjælland    |
| EPI_ISL_617180 | 10/26/2020 | 11/5/2020 Europe / Denmark / Hovedstaden |
| EPI_ISL_617181 | 10/26/2020 | 11/5/2020 Europe / Denmark / Nordjylland |
| EPI_ISL_617182 | 10/26/2020 | 11/5/2020 Europe / Denmark / Hovedstaden |
| EPI_ISL_617183 | 10/26/2020 | 11/5/2020 Europe / Denmark / Sjælland    |
| EPI_ISL_617184 | 10/26/2020 | 11/5/2020 Europe / Denmark / Hovedstaden |
| EPI_ISL_617185 | 10/26/2020 | 11/5/2020 Europe / Denmark / Hovedstaden |
| EPI_ISL_617186 | 10/26/2020 | 11/5/2020 Europe / Denmark / Nordjylland |
| EPI_ISL_617187 | 10/26/2020 | 11/5/2020 Europe / Denmark / Hovedstaden |
| EPI_ISL_617188 | 10/26/2020 | 11/5/2020 Europe / Denmark / Midtjylland |
| EPI_ISL_617189 | 10/26/2020 | 11/5/2020 Europe / Denmark / Sjælland    |



|                |            |                                          |
|----------------|------------|------------------------------------------|
| EPI_ISL_617237 | 10/26/2020 | 11/5/2020 Europe / Denmark / Nordjylland |
| EPI_ISL_617238 | 10/26/2020 | 11/5/2020 Europe / Denmark / Nordjylland |
| EPI_ISL_617239 | 10/26/2020 | 11/5/2020 Europe / Denmark / Nordjylland |
| EPI_ISL_617240 | 10/26/2020 | 11/5/2020 Europe / Denmark / Hovedstaden |
| EPI_ISL_617241 | 10/26/2020 | 11/5/2020 Europe / Denmark / Hovedstaden |
| EPI_ISL_617242 | 10/26/2020 | 11/5/2020 Europe / Denmark / Syddanmark  |
| EPI_ISL_617243 | 10/26/2020 | 11/5/2020 Europe / Denmark / Midtjylland |
| EPI_ISL_617244 | 10/26/2020 | 11/5/2020 Europe / Denmark / Sjælland    |
| EPI_ISL_617245 | 10/26/2020 | 11/5/2020 Europe / Denmark / Hovedstaden |
| EPI_ISL_617246 | 10/26/2020 | 11/5/2020 Europe / Denmark / Hovedstaden |
| EPI_ISL_617247 | 10/26/2020 | 11/5/2020 Europe / Denmark / Sjælland    |
| EPI_ISL_617248 | 10/26/2020 | 11/5/2020 Europe / Denmark / Hovedstaden |
| EPI_ISL_617249 | 10/26/2020 | 11/5/2020 Europe / Denmark / Hovedstaden |
| EPI_ISL_617250 | 10/26/2020 | 11/5/2020 Europe / Denmark / Hovedstaden |
| EPI_ISL_617251 | 10/19/2020 | 11/5/2020 Europe / Denmark / Syddanmark  |
| EPI_ISL_617252 | 10/26/2020 | 11/5/2020 Europe / Denmark / Sjælland    |
| EPI_ISL_617253 | 10/26/2020 | 11/5/2020 Europe / Denmark / Hovedstaden |
| EPI_ISL_617254 | 10/26/2020 | 11/5/2020 Europe / Denmark / Nordjylland |
| EPI_ISL_617255 | 10/26/2020 | 11/5/2020 Europe / Denmark / Hovedstaden |
| EPI_ISL_617256 | 10/26/2020 | 11/5/2020 Europe / Denmark / Nordjylland |
| EPI_ISL_617257 | 10/19/2020 | 11/5/2020 Europe / Denmark / Syddanmark  |
| EPI_ISL_617258 | 10/26/2020 | 11/5/2020 Europe / Denmark / Sjælland    |
| EPI_ISL_617259 | 10/26/2020 | 11/5/2020 Europe / Denmark / Hovedstaden |
| EPI_ISL_617260 | 10/26/2020 | 11/5/2020 Europe / Denmark / Nordjylland |
| EPI_ISL_617261 | 10/26/2020 | 11/5/2020 Europe / Denmark / Midtjylland |
| EPI_ISL_617262 | 10/26/2020 | 11/5/2020 Europe / Denmark / Nordjylland |
| EPI_ISL_617263 | 10/26/2020 | 11/5/2020 Europe / Denmark / Nordjylland |
| EPI_ISL_617264 | 10/26/2020 | 11/5/2020 Europe / Denmark / Hovedstaden |
| EPI_ISL_617265 | 10/26/2020 | 11/5/2020 Europe / Denmark / Nordjylland |
| EPI_ISL_617266 | 10/26/2020 | 11/5/2020 Europe / Denmark / Hovedstaden |
| EPI_ISL_617267 | 10/26/2020 | 11/5/2020 Europe / Denmark / Nordjylland |
| EPI_ISL_617268 | 10/26/2020 | 11/5/2020 Europe / Denmark / Syddanmark  |
| EPI_ISL_617269 | 10/26/2020 | 11/5/2020 Europe / Denmark / Hovedstaden |
| EPI_ISL_617270 | 10/26/2020 | 11/5/2020 Europe / Denmark / Midtjylland |
| EPI_ISL_617271 | 10/26/2020 | 11/5/2020 Europe / Denmark / Hovedstaden |
| EPI_ISL_617272 | 10/26/2020 | 11/5/2020 Europe / Denmark / Hovedstaden |
| EPI_ISL_617273 | 10/26/2020 | 11/5/2020 Europe / Denmark / Nordjylland |
| EPI_ISL_617274 | 10/26/2020 | 11/5/2020 Europe / Denmark / Nordjylland |
| EPI_ISL_617275 | 10/26/2020 | 11/5/2020 Europe / Denmark / Hovedstaden |
| EPI_ISL_617276 | 10/26/2020 | 11/5/2020 Europe / Denmark / Syddanmark  |
| EPI_ISL_617277 | 10/26/2020 | 11/5/2020 Europe / Denmark / Hovedstaden |
| EPI_ISL_617278 | 10/26/2020 | 11/5/2020 Europe / Denmark / Nordjylland |
| EPI_ISL_617279 | 10/26/2020 | 11/5/2020 Europe / Denmark / Hovedstaden |
| EPI_ISL_617280 | 10/26/2020 | 11/5/2020 Europe / Denmark / Syddanmark  |
| EPI_ISL_617281 | 10/26/2020 | 11/5/2020 Europe / Denmark / Nordjylland |
| EPI_ISL_617282 | 10/26/2020 | 11/5/2020 Europe / Denmark / Nordjylland |
| EPI_ISL_617283 | 10/26/2020 | 11/5/2020 Europe / Denmark / Hovedstaden |

|                |            |                                          |
|----------------|------------|------------------------------------------|
| EPI_ISL_617284 | 3/9/2020   | 11/5/2020 Europe / Denmark / Syddanmark  |
| EPI_ISL_617285 | 10/26/2020 | 11/5/2020 Europe / Denmark / Hovedstaden |
| EPI_ISL_617286 | 10/26/2020 | 11/5/2020 Europe / Denmark / Hovedstaden |
| EPI_ISL_617287 | 10/26/2020 | 11/5/2020 Europe / Denmark / Hovedstaden |
| EPI_ISL_617288 | 10/26/2020 | 11/5/2020 Europe / Denmark               |
| EPI_ISL_617289 | 10/26/2020 | 11/5/2020 Europe / Denmark / Midtjylland |
| EPI_ISL_617290 | 10/26/2020 | 11/5/2020 Europe / Denmark / Midtjylland |
| EPI_ISL_617291 | 10/26/2020 | 11/5/2020 Europe / Denmark / Hovedstaden |
| EPI_ISL_617292 | 10/26/2020 | 11/5/2020 Europe / Denmark / Midtjylland |
| EPI_ISL_617293 | 10/26/2020 | 11/5/2020 Europe / Denmark / Hovedstaden |
| EPI_ISL_617294 | 10/26/2020 | 11/5/2020 Europe / Denmark / Midtjylland |
| EPI_ISL_617295 | 10/26/2020 | 11/5/2020 Europe / Denmark / Midtjylland |
| EPI_ISL_617296 | 10/26/2020 | 11/5/2020 Europe / Denmark / Hovedstaden |
| EPI_ISL_617297 | 10/26/2020 | 11/5/2020 Europe / Denmark / Syddanmark  |
| EPI_ISL_617298 | 10/26/2020 | 11/5/2020 Europe / Denmark / Nordjylland |
| EPI_ISL_617299 | 10/26/2020 | 11/5/2020 Europe / Denmark / Midtjylland |
| EPI_ISL_617300 | 10/26/2020 | 11/5/2020 Europe / Denmark / Hovedstaden |
| EPI_ISL_617301 | 10/26/2020 | 11/5/2020 Europe / Denmark / Midtjylland |
| EPI_ISL_617302 | 10/26/2020 | 11/5/2020 Europe / Denmark / Syddanmark  |
| EPI_ISL_617303 | 10/26/2020 | 11/5/2020 Europe / Denmark / Nordjylland |
| EPI_ISL_617304 | 10/26/2020 | 11/5/2020 Europe / Denmark / Sjaelland   |
| EPI_ISL_617305 | 10/26/2020 | 11/5/2020 Europe / Denmark / Syddanmark  |
| EPI_ISL_617306 | 10/26/2020 | 11/5/2020 Europe / Denmark               |
| EPI_ISL_617307 | 10/26/2020 | 11/5/2020 Europe / Denmark / Hovedstaden |
| EPI_ISL_617308 | 10/26/2020 | 11/5/2020 Europe / Denmark / Syddanmark  |
| EPI_ISL_617309 | 10/26/2020 | 11/5/2020 Europe / Denmark / Hovedstaden |
| EPI_ISL_617310 | 10/26/2020 | 11/5/2020 Europe / Denmark / Syddanmark  |
| EPI_ISL_617311 | 10/26/2020 | 11/5/2020 Europe / Denmark / Sjaelland   |
| EPI_ISL_617312 | 10/26/2020 | 11/5/2020 Europe / Denmark / Hovedstaden |
| EPI_ISL_617313 | 10/26/2020 | 11/5/2020 Europe / Denmark / Midtjylland |
| EPI_ISL_617314 | 10/26/2020 | 11/5/2020 Europe / Denmark / Nordjylland |
| EPI_ISL_617315 | 10/26/2020 | 11/5/2020 Europe / Denmark / Hovedstaden |
| EPI_ISL_617316 | 10/26/2020 | 11/5/2020 Europe / Denmark / Hovedstaden |
| EPI_ISL_617317 | 10/26/2020 | 11/5/2020 Europe / Denmark / Nordjylland |
| EPI_ISL_617318 | 10/26/2020 | 11/5/2020 Europe / Denmark / Nordjylland |
| EPI_ISL_617319 | 10/26/2020 | 11/5/2020 Europe / Denmark / Hovedstaden |
| EPI_ISL_617320 | 10/26/2020 | 11/5/2020 Europe / Denmark / Hovedstaden |
| EPI_ISL_617321 | 10/26/2020 | 11/5/2020 Europe / Denmark / Syddanmark  |
| EPI_ISL_617322 | 10/26/2020 | 11/5/2020 Europe / Denmark / Sjaelland   |
| EPI_ISL_617323 | 10/26/2020 | 11/5/2020 Europe / Denmark / Syddanmark  |
| EPI_ISL_617324 | 10/26/2020 | 11/5/2020 Europe / Denmark / Nordjylland |
| EPI_ISL_617325 | 10/26/2020 | 11/5/2020 Europe / Denmark / Midtjylland |
| EPI_ISL_617326 | 10/26/2020 | 11/5/2020 Europe / Denmark / Hovedstaden |
| EPI_ISL_617327 | 10/26/2020 | 11/5/2020 Europe / Denmark / Midtjylland |
| EPI_ISL_617328 | 10/26/2020 | 11/5/2020 Europe / Denmark / Sjaelland   |
| EPI_ISL_617329 | 10/26/2020 | 11/5/2020 Europe / Denmark / Hovedstaden |
| EPI_ISL_617330 | 10/26/2020 | 11/5/2020 Europe / Denmark / Nordjylland |

|                |            |                                          |
|----------------|------------|------------------------------------------|
| EPI_ISL_617331 | 10/26/2020 | 11/5/2020 Europe / Denmark / Midtjylland |
| EPI_ISL_617332 | 10/26/2020 | 11/5/2020 Europe / Denmark / Hovedstaden |
| EPI_ISL_617333 | 10/26/2020 | 11/5/2020 Europe / Denmark / Syddanmark  |
| EPI_ISL_617334 | 10/26/2020 | 11/5/2020 Europe / Denmark / Hovedstaden |
| EPI_ISL_617335 | 10/26/2020 | 11/5/2020 Europe / Denmark / Midtjylland |
| EPI_ISL_617336 | 10/26/2020 | 11/5/2020 Europe / Denmark / Syddanmark  |
| EPI_ISL_617337 | 10/26/2020 | 11/5/2020 Europe / Denmark / Syddanmark  |
| EPI_ISL_617338 | 10/26/2020 | 11/5/2020 Europe / Denmark / Hovedstaden |
| EPI_ISL_617339 | 10/26/2020 | 11/5/2020 Europe / Denmark / Nordjylland |
| EPI_ISL_617340 | 10/26/2020 | 11/5/2020 Europe / Denmark / Hovedstaden |
| EPI_ISL_617341 | 10/26/2020 | 11/5/2020 Europe / Denmark / Sjælland    |
| EPI_ISL_617342 | 10/26/2020 | 11/5/2020 Europe / Denmark / Hovedstaden |
| EPI_ISL_617343 | 10/26/2020 | 11/5/2020 Europe / Denmark / Hovedstaden |
| EPI_ISL_617344 | 10/26/2020 | 11/5/2020 Europe / Denmark / Midtjylland |
| EPI_ISL_617345 | 10/26/2020 | 11/5/2020 Europe / Denmark / Sjælland    |
| EPI_ISL_617346 | 10/26/2020 | 11/5/2020 Europe / Denmark / Hovedstaden |
| EPI_ISL_617347 | 10/26/2020 | 11/5/2020 Europe / Denmark / Nordjylland |
| EPI_ISL_617348 | 10/26/2020 | 11/5/2020 Europe / Denmark / Midtjylland |
| EPI_ISL_617349 | 10/26/2020 | 11/5/2020 Europe / Denmark / Midtjylland |
| EPI_ISL_617350 | 10/26/2020 | 11/5/2020 Europe / Denmark / Hovedstaden |
| EPI_ISL_617351 | 10/26/2020 | 11/5/2020 Europe / Denmark / Midtjylland |
| EPI_ISL_617352 | 10/26/2020 | 11/5/2020 Europe / Denmark / Sjælland    |
| EPI_ISL_617353 | 10/26/2020 | 11/5/2020 Europe / Denmark / Midtjylland |
| EPI_ISL_617354 | 10/26/2020 | 11/5/2020 Europe / Denmark / Syddanmark  |
| EPI_ISL_617355 | 10/26/2020 | 11/5/2020 Europe / Denmark / Sjælland    |
| EPI_ISL_617356 | 10/26/2020 | 11/5/2020 Europe / Denmark / Syddanmark  |
| EPI_ISL_617357 | 10/26/2020 | 11/5/2020 Europe / Denmark / Syddanmark  |
| EPI_ISL_617358 | 10/26/2020 | 11/5/2020 Europe / Denmark / Sjælland    |
| EPI_ISL_617359 | 10/26/2020 | 11/5/2020 Europe / Denmark / Hovedstaden |
| EPI_ISL_617360 | 10/26/2020 | 11/5/2020 Europe / Denmark / Midtjylland |
| EPI_ISL_617361 | 10/26/2020 | 11/5/2020 Europe / Denmark / Midtjylland |
| EPI_ISL_617362 | 10/26/2020 | 11/5/2020 Europe / Denmark / Hovedstaden |
| EPI_ISL_617363 | 10/26/2020 | 11/5/2020 Europe / Denmark / Syddanmark  |
| EPI_ISL_617364 | 10/26/2020 | 11/5/2020 Europe / Denmark / Syddanmark  |
| EPI_ISL_617365 | 10/26/2020 | 11/5/2020 Europe / Denmark / Nordjylland |
| EPI_ISL_617366 | 10/26/2020 | 11/5/2020 Europe / Denmark / Sjælland    |
| EPI_ISL_617367 | 10/26/2020 | 11/5/2020 Europe / Denmark / Midtjylland |
| EPI_ISL_617368 | 10/26/2020 | 11/5/2020 Europe / Denmark / Hovedstaden |
| EPI_ISL_617369 | 10/26/2020 | 11/5/2020 Europe / Denmark / Hovedstaden |
| EPI_ISL_617370 | 10/26/2020 | 11/5/2020 Europe / Denmark / Sjælland    |
| EPI_ISL_617371 | 10/26/2020 | 11/5/2020 Europe / Denmark / Sjælland    |
| EPI_ISL_617372 | 10/26/2020 | 11/5/2020 Europe / Denmark / Hovedstaden |
| EPI_ISL_617373 | 10/26/2020 | 11/5/2020 Europe / Denmark / Hovedstaden |
| EPI_ISL_617374 | 10/26/2020 | 11/5/2020 Europe / Denmark / Hovedstaden |
| EPI_ISL_617375 | 10/26/2020 | 11/5/2020 Europe / Denmark / Midtjylland |
| EPI_ISL_617376 | 10/26/2020 | 11/5/2020 Europe / Denmark / Sjælland    |
| EPI_ISL_617377 | 10/26/2020 | 11/5/2020 Europe / Denmark / Sjælland    |



|                |            |           |                                |
|----------------|------------|-----------|--------------------------------|
| EPI_ISL_617378 | 10/26/2020 | 11/5/2020 | Europe / Denmark / Hovedstaden |
| EPI_ISL_617379 | 10/26/2020 | 11/5/2020 | Europe / Denmark / Hovedstaden |
| EPI_ISL_617380 | 10/26/2020 | 11/5/2020 | Europe / Denmark / Hovedstaden |
| EPI_ISL_617381 | 10/26/2020 | 11/5/2020 | Europe / Denmark / Hovedstaden |
| EPI_ISL_617382 | 4/27/2020  | 11/5/2020 | Europe / Denmark / Sjælland    |
| EPI_ISL_617383 | 3/9/2020   | 11/5/2020 | Europe / Denmark / Syddanmark  |
| EPI_ISL_617384 | 5/4/2020   | 11/5/2020 | Europe / Denmark / Hovedstaden |
| EPI_ISL_617385 | 10/26/2020 | 11/5/2020 | Europe / Denmark / Hovedstaden |
| EPI_ISL_617386 | 10/26/2020 | 11/5/2020 | Europe / Denmark / Syddanmark  |
| EPI_ISL_617387 | 10/26/2020 | 11/5/2020 | Europe / Denmark / Syddanmark  |
| EPI_ISL_617388 | 10/26/2020 | 11/5/2020 | Europe / Denmark / Syddanmark  |
| EPI_ISL_617389 | 10/26/2020 | 11/5/2020 | Europe / Denmark / Midtjylland |
| EPI_ISL_617390 | 10/26/2020 | 11/5/2020 | Europe / Denmark / Midtjylland |
| EPI_ISL_617391 | 10/26/2020 | 11/5/2020 | Europe / Denmark / Midtjylland |
| EPI_ISL_617392 | 10/26/2020 | 11/5/2020 | Europe / Denmark               |
| EPI_ISL_617393 | 10/26/2020 | 11/5/2020 | Europe / Denmark / Syddanmark  |
| EPI_ISL_617394 | 10/26/2020 | 11/5/2020 | Europe / Denmark / Syddanmark  |
| EPI_ISL_617395 | 10/26/2020 | 11/5/2020 | Europe / Denmark / Syddanmark  |
| EPI_ISL_617396 | 10/26/2020 | 11/5/2020 | Europe / Denmark / Nordjylland |
| EPI_ISL_617397 | 10/26/2020 | 11/5/2020 | Europe / Denmark / Syddanmark  |
| EPI_ISL_617398 | 10/26/2020 | 11/5/2020 | Europe / Denmark / Hovedstaden |
| EPI_ISL_617399 | 10/26/2020 | 11/5/2020 | Europe / Denmark / Syddanmark  |
| EPI_ISL_617400 | 10/26/2020 | 11/5/2020 | Europe / Denmark / Nordjylland |
| EPI_ISL_617401 | 10/26/2020 | 11/5/2020 | Europe / Denmark / Syddanmark  |
| EPI_ISL_617402 | 10/26/2020 | 11/5/2020 | Europe / Denmark / Nordjylland |
| EPI_ISL_617403 | 10/26/2020 | 11/5/2020 | Europe / Denmark / Nordjylland |
| EPI_ISL_617404 | 10/26/2020 | 11/5/2020 | Europe / Denmark / Hovedstaden |
| EPI_ISL_617405 | 10/26/2020 | 11/5/2020 | Europe / Denmark / Syddanmark  |
| EPI_ISL_617406 | 8/10/2020  | 11/5/2020 | Europe / Denmark / Nordjylland |
| EPI_ISL_617407 | 8/10/2020  | 11/5/2020 | Europe / Denmark / Syddanmark  |
| EPI_ISL_617408 | 8/10/2020  | 11/5/2020 | Europe / Denmark / Syddanmark  |
| EPI_ISL_617409 | 8/10/2020  | 11/5/2020 | Europe / Denmark / Syddanmark  |
| EPI_ISL_617410 | 8/10/2020  | 11/5/2020 | Europe / Denmark / Syddanmark  |
| EPI_ISL_617411 | 8/10/2020  | 11/5/2020 | Europe / Denmark / Syddanmark  |
| EPI_ISL_617412 | 8/3/2020   | 11/5/2020 | Europe / Denmark / Syddanmark  |
| EPI_ISL_617413 | 8/3/2020   | 11/5/2020 | Europe / Denmark / Syddanmark  |
| EPI_ISL_617414 | 8/3/2020   | 11/5/2020 | Europe / Denmark / Syddanmark  |
| EPI_ISL_617416 | 8/3/2020   | 11/5/2020 | Europe / Denmark / Syddanmark  |
| EPI_ISL_617417 | 8/3/2020   | 11/5/2020 | Europe / Denmark / Syddanmark  |
| EPI_ISL_617419 | 8/3/2020   | 11/5/2020 | Europe / Denmark / Syddanmark  |
| EPI_ISL_617420 | 8/3/2020   | 11/5/2020 | Europe / Denmark / Syddanmark  |
| EPI_ISL_617422 | 8/3/2020   | 11/5/2020 | Europe / Denmark / Syddanmark  |
| EPI_ISL_617424 | 8/3/2020   | 11/5/2020 | Europe / Denmark / Sjælland    |
| EPI_ISL_617425 | 8/3/2020   | 11/5/2020 | Europe / Denmark / Sjælland    |
| EPI_ISL_617426 | 8/3/2020   | 11/5/2020 | Europe / Denmark / Sjælland    |
| EPI_ISL_617427 | 6/22/2020  | 11/5/2020 | Europe / Denmark / Sjælland    |
| EPI_ISL_617428 | 6/1/2020   | 11/5/2020 | Europe / Denmark / Sjælland    |





















|                |            |                                          |
|----------------|------------|------------------------------------------|
| EPI_ISL_617887 | 8/17/2020  | 11/5/2020 Europe / Denmark / Hovedstaden |
| EPI_ISL_617888 | 8/17/2020  | 11/5/2020 Europe / Denmark / Hovedstaden |
| EPI_ISL_617889 | 8/17/2020  | 11/5/2020 Europe / Denmark / Hovedstaden |
| EPI_ISL_617890 | 8/17/2020  | 11/5/2020 Europe / Denmark / Midtjylland |
| EPI_ISL_617891 | 8/17/2020  | 11/5/2020 Europe / Denmark / Hovedstaden |
| EPI_ISL_617892 | 8/17/2020  | 11/5/2020 Europe / Denmark / Hovedstaden |
| EPI_ISL_617893 | 8/17/2020  | 11/5/2020 Europe / Denmark / Midtjylland |
| EPI_ISL_617894 | 8/17/2020  | 11/5/2020 Europe / Denmark / Midtjylland |
| EPI_ISL_617895 | 8/17/2020  | 11/5/2020 Europe / Denmark / Midtjylland |
| EPI_ISL_617896 | 8/17/2020  | 11/5/2020 Europe / Denmark / Hovedstaden |
| EPI_ISL_617897 | 8/17/2020  | 11/5/2020 Europe / Denmark / Midtjylland |
| EPI_ISL_617898 | 8/17/2020  | 11/5/2020 Europe / Denmark / Midtjylland |
| EPI_ISL_617899 | 8/17/2020  | 11/5/2020 Europe / Denmark / Hovedstaden |
| EPI_ISL_617900 | 8/17/2020  | 11/5/2020 Europe / Denmark / Hovedstaden |
| EPI_ISL_617901 | 8/17/2020  | 11/5/2020 Europe / Denmark / Sjælland    |
| EPI_ISL_617902 | 8/17/2020  | 11/5/2020 Europe / Denmark / Sjælland    |
| EPI_ISL_617903 | 8/17/2020  | 11/5/2020 Europe / Denmark / Midtjylland |
| EPI_ISL_617904 | 8/17/2020  | 11/5/2020 Europe / Denmark / Midtjylland |
| EPI_ISL_617905 | 8/17/2020  | 11/5/2020 Europe / Denmark / Syddanmark  |
| EPI_ISL_617906 | 10/26/2020 | 11/5/2020 Europe / Denmark / Hovedstaden |
| EPI_ISL_617907 | 10/26/2020 | 11/5/2020 Europe / Denmark / Midtjylland |
| EPI_ISL_617908 | 10/26/2020 | 11/5/2020 Europe / Denmark / Hovedstaden |
| EPI_ISL_617909 | 10/26/2020 | 11/5/2020 Europe / Denmark / Syddanmark  |
| EPI_ISL_617910 | 10/26/2020 | 11/5/2020 Europe / Denmark / Syddanmark  |
| EPI_ISL_617911 | 10/26/2020 | 11/5/2020 Europe / Denmark / Hovedstaden |
| EPI_ISL_617912 | 10/26/2020 | 11/5/2020 Europe / Denmark / Nordjylland |
| EPI_ISL_617913 | 10/26/2020 | 11/5/2020 Europe / Denmark / Syddanmark  |
| EPI_ISL_617914 | 10/26/2020 | 11/5/2020 Europe / Denmark / Syddanmark  |
| EPI_ISL_617915 | 10/26/2020 | 11/5/2020 Europe / Denmark / Hovedstaden |
| EPI_ISL_617916 | 10/26/2020 | 11/5/2020 Europe / Denmark / Nordjylland |
| EPI_ISL_617917 | 10/26/2020 | 11/5/2020 Europe / Denmark / Syddanmark  |
| EPI_ISL_617920 | 10/26/2020 | 11/5/2020 Europe / Denmark / Nordjylland |
| EPI_ISL_617921 | 10/26/2020 | 11/5/2020 Europe / Denmark / Syddanmark  |
| EPI_ISL_617922 | 10/26/2020 | 11/5/2020 Europe / Denmark / Hovedstaden |
| EPI_ISL_617923 | 10/26/2020 | 11/5/2020 Europe / Denmark / Nordjylland |
| EPI_ISL_617924 | 10/26/2020 | 11/5/2020 Europe / Denmark / Nordjylland |
| EPI_ISL_617926 | 10/26/2020 | 11/5/2020 Europe / Denmark / Syddanmark  |
| EPI_ISL_617927 | 10/26/2020 | 11/5/2020 Europe / Denmark / Hovedstaden |
| EPI_ISL_617928 | 10/26/2020 | 11/5/2020 Europe / Denmark / Nordjylland |
| EPI_ISL_617929 | 10/26/2020 | 11/5/2020 Europe / Denmark / Syddanmark  |
| EPI_ISL_617930 | 10/26/2020 | 11/5/2020 Europe / Denmark / Syddanmark  |
| EPI_ISL_617931 | 10/26/2020 | 11/5/2020 Europe / Denmark / Hovedstaden |
| EPI_ISL_617933 | 10/26/2020 | 11/5/2020 Europe / Denmark / Nordjylland |
| EPI_ISL_617935 | 10/26/2020 | 11/5/2020 Europe / Denmark / Syddanmark  |
| EPI_ISL_617936 | 10/26/2020 | 11/5/2020 Europe / Denmark / Hovedstaden |
| EPI_ISL_617937 | 10/26/2020 | 11/5/2020 Europe / Denmark / Syddanmark  |
| EPI_ISL_617938 | 10/26/2020 | 11/5/2020 Europe / Denmark / Nordjylland |

|                |           |                                          |
|----------------|-----------|------------------------------------------|
| EPI_ISL_617939 | 5/11/2020 | 11/5/2020 Europe / Denmark / Hovedstaden |
| EPI_ISL_617944 | 5/11/2020 | 11/5/2020 Europe / Denmark / Nordjylland |
| EPI_ISL_617945 | 5/11/2020 | 11/5/2020 Europe / Denmark / Syddanmark  |
| EPI_ISL_617946 | 5/11/2020 | 11/5/2020 Europe / Denmark / Syddanmark  |
| EPI_ISL_617947 | 5/11/2020 | 11/5/2020 Europe / Denmark / Hovedstaden |
| EPI_ISL_617948 | 5/11/2020 | 11/5/2020 Europe / Denmark               |
| EPI_ISL_617949 | 5/11/2020 | 11/5/2020 Europe / Denmark / Hovedstaden |
| EPI_ISL_617950 | 5/11/2020 | 11/5/2020 Europe / Denmark / Hovedstaden |
| EPI_ISL_617951 | 5/11/2020 | 11/5/2020 Europe / Denmark / Hovedstaden |
| EPI_ISL_617952 | 5/11/2020 | 11/5/2020 Europe / Denmark / Hovedstaden |
| EPI_ISL_617954 | 5/18/2020 | 11/5/2020 Europe / Denmark / Hovedstaden |
| EPI_ISL_617955 | 5/25/2020 | 11/5/2020 Europe / Denmark / Hovedstaden |
| EPI_ISL_617956 | 5/25/2020 | 11/5/2020 Europe / Denmark / Hovedstaden |
| EPI_ISL_617957 | 5/18/2020 | 11/5/2020 Europe / Denmark / Hovedstaden |
| EPI_ISL_617958 | 5/25/2020 | 11/5/2020 Europe / Denmark / Hovedstaden |
| EPI_ISL_617962 | 5/25/2020 | 11/5/2020 Europe / Denmark / Hovedstaden |
| EPI_ISL_617963 | 5/25/2020 | 11/5/2020 Europe / Denmark / Hovedstaden |
| EPI_ISL_617964 | 5/25/2020 | 11/5/2020 Europe / Denmark / Hovedstaden |
| EPI_ISL_617966 | 6/1/2020  | 11/5/2020 Europe / Denmark / Hovedstaden |
| EPI_ISL_617967 | 6/1/2020  | 11/5/2020 Europe / Denmark / Hovedstaden |
| EPI_ISL_617968 | 6/1/2020  | 11/5/2020 Europe / Denmark / Hovedstaden |
| EPI_ISL_617970 | 5/25/2020 | 11/5/2020 Europe / Denmark / Hovedstaden |
| EPI_ISL_617971 | 5/25/2020 | 11/5/2020 Europe / Denmark / Hovedstaden |
| EPI_ISL_617972 | 6/1/2020  | 11/5/2020 Europe / Denmark               |
| EPI_ISL_617973 | 6/1/2020  | 11/5/2020 Europe / Denmark / Hovedstaden |
| EPI_ISL_617974 | 5/25/2020 | 11/5/2020 Europe / Denmark / Hovedstaden |
| EPI_ISL_617976 | 5/25/2020 | 11/5/2020 Europe / Denmark / Hovedstaden |
| EPI_ISL_617977 | 5/25/2020 | 11/5/2020 Europe / Denmark / Hovedstaden |
| EPI_ISL_617979 | 5/25/2020 | 11/5/2020 Europe / Denmark / Hovedstaden |
| EPI_ISL_617981 | 5/25/2020 | 11/5/2020 Europe / Denmark / Hovedstaden |
| EPI_ISL_617982 | 6/1/2020  | 11/5/2020 Europe / Denmark / Hovedstaden |
| EPI_ISL_617983 | 6/1/2020  | 11/5/2020 Europe / Denmark / Hovedstaden |
| EPI_ISL_617984 | 6/1/2020  | 11/5/2020 Europe / Denmark / Hovedstaden |
| EPI_ISL_617985 | 6/1/2020  | 11/5/2020 Europe / Denmark / Hovedstaden |
| EPI_ISL_617986 | 6/1/2020  | 11/5/2020 Europe / Denmark / Hovedstaden |
| EPI_ISL_617987 | 6/1/2020  | 11/5/2020 Europe / Denmark / Hovedstaden |
| EPI_ISL_617989 | 6/1/2020  | 11/5/2020 Europe / Denmark / Hovedstaden |
| EPI_ISL_617990 | 6/1/2020  | 11/5/2020 Europe / Denmark / Syddanmark  |
| EPI_ISL_617991 | 6/1/2020  | 11/5/2020 Europe / Denmark / Syddanmark  |
| EPI_ISL_617992 | 6/1/2020  | 11/5/2020 Europe / Denmark / Hovedstaden |
| EPI_ISL_617993 | 3/23/2020 | 11/5/2020 Europe / Denmark / Sjælland    |
| EPI_ISL_617994 | 6/8/2020  | 11/5/2020 Europe / Denmark / Hovedstaden |
| EPI_ISL_617995 | 6/8/2020  | 11/5/2020 Europe / Denmark / Hovedstaden |
| EPI_ISL_617996 | 6/8/2020  | 11/5/2020 Europe / Denmark / Hovedstaden |
| EPI_ISL_617997 | 6/1/2020  | 11/5/2020 Europe / Denmark / Hovedstaden |
| EPI_ISL_617998 | 6/1/2020  | 11/5/2020 Europe / Denmark / Hovedstaden |
| EPI_ISL_617999 | 6/1/2020  | 11/5/2020 Europe / Denmark / Hovedstaden |





|                |           |                                          |
|----------------|-----------|------------------------------------------|
| EPI_ISL_618108 | 6/15/2020 | 11/5/2020 Europe / Denmark / Hovedstaden |
| EPI_ISL_618109 | 6/15/2020 | 11/5/2020 Europe / Denmark / Hovedstaden |
| EPI_ISL_618110 | 6/15/2020 | 11/5/2020 Europe / Denmark / Hovedstaden |
| EPI_ISL_618111 | 6/15/2020 | 11/5/2020 Europe / Denmark / Hovedstaden |
| EPI_ISL_618112 | 6/15/2020 | 11/5/2020 Europe / Denmark / Hovedstaden |
| EPI_ISL_618113 | 6/15/2020 | 11/5/2020 Europe / Denmark / Hovedstaden |
| EPI_ISL_618114 | 6/15/2020 | 11/5/2020 Europe / Denmark / Hovedstaden |
| EPI_ISL_618115 | 6/15/2020 | 11/5/2020 Europe / Denmark / Hovedstaden |
| EPI_ISL_618116 | 6/15/2020 | 11/5/2020 Europe / Denmark / Nordjylland |
| EPI_ISL_618117 | 6/15/2020 | 11/5/2020 Europe / Denmark / Nordjylland |
| EPI_ISL_618118 | 6/15/2020 | 11/5/2020 Europe / Denmark / Nordjylland |
| EPI_ISL_618120 | 6/1/2020  | 11/5/2020 Europe / Denmark / Sjaelland   |
| EPI_ISL_618121 | 6/8/2020  | 11/5/2020 Europe / Denmark / Sjaelland   |
| EPI_ISL_618122 | 6/8/2020  | 11/5/2020 Europe / Denmark / Sjaelland   |
| EPI_ISL_618124 | 6/8/2020  | 11/5/2020 Europe / Denmark / Sjaelland   |
| EPI_ISL_618125 | 6/8/2020  | 11/5/2020 Europe / Denmark / Sjaelland   |
| EPI_ISL_618128 | 6/8/2020  | 11/5/2020 Europe / Denmark / Sjaelland   |
| EPI_ISL_618129 | 6/8/2020  | 11/5/2020 Europe / Denmark / Sjaelland   |
| EPI_ISL_618130 | 6/8/2020  | 11/5/2020 Europe / Denmark / Sjaelland   |
| EPI_ISL_618132 | 6/8/2020  | 11/5/2020 Europe / Denmark / Sjaelland   |
| EPI_ISL_618133 | 6/8/2020  | 11/5/2020 Europe / Denmark / Sjaelland   |
| EPI_ISL_618134 | 5/25/2020 | 11/5/2020 Europe / Denmark / Sjaelland   |
| EPI_ISL_618135 | 6/8/2020  | 11/5/2020 Europe / Denmark / Sjaelland   |
| EPI_ISL_618136 | 6/8/2020  | 11/5/2020 Europe / Denmark / Sjaelland   |
| EPI_ISL_618137 | 6/15/2020 | 11/5/2020 Europe / Denmark / Hovedstaden |
| EPI_ISL_618139 | 6/15/2020 | 11/5/2020 Europe / Denmark / Hovedstaden |
| EPI_ISL_618144 | 6/15/2020 | 11/5/2020 Europe / Denmark / Sjaelland   |
| EPI_ISL_618145 | 6/15/2020 | 11/5/2020 Europe / Denmark / Sjaelland   |
| EPI_ISL_618146 | 6/15/2020 | 11/5/2020 Europe / Denmark / Sjaelland   |
| EPI_ISL_618147 | 6/22/2020 | 11/5/2020 Europe / Denmark / Hovedstaden |
| EPI_ISL_618148 | 6/15/2020 | 11/5/2020 Europe / Denmark / Hovedstaden |
| EPI_ISL_618149 | 6/15/2020 | 11/5/2020 Europe / Denmark / Hovedstaden |
| EPI_ISL_618150 | 6/22/2020 | 11/5/2020 Europe / Denmark / Nordjylland |
| EPI_ISL_618154 | 3/23/2020 | 11/5/2020 Europe / Denmark / Sjaelland   |
| EPI_ISL_618155 | 6/22/2020 | 11/5/2020 Europe / Denmark / Hovedstaden |
| EPI_ISL_618156 | 6/29/2020 | 11/5/2020 Europe / Denmark / Hovedstaden |
| EPI_ISL_618157 | 3/9/2020  | 11/5/2020 Europe / Denmark / Sjaelland   |
| EPI_ISL_618158 | 6/29/2020 | 11/5/2020 Europe / Denmark / Nordjylland |
| EPI_ISL_618159 | 6/29/2020 | 11/5/2020 Europe / Denmark / Nordjylland |
| EPI_ISL_618160 | 6/22/2020 | 11/5/2020 Europe / Denmark / Nordjylland |
| EPI_ISL_618161 | 6/22/2020 | 11/5/2020 Europe / Denmark / Nordjylland |
| EPI_ISL_618162 | 6/22/2020 | 11/5/2020 Europe / Denmark / Nordjylland |
| EPI_ISL_618163 | 6/22/2020 | 11/5/2020 Europe / Denmark / Nordjylland |
| EPI_ISL_618164 | 6/22/2020 | 11/5/2020 Europe / Denmark / Nordjylland |
| EPI_ISL_618165 | 6/29/2020 | 11/5/2020 Europe / Denmark / Syddanmark  |
| EPI_ISL_618166 | 6/22/2020 | 11/5/2020 Europe / Denmark / Midtjylland |
| EPI_ISL_618167 | 6/22/2020 | 11/5/2020 Europe / Denmark / Syddanmark  |

|                |           |                                          |
|----------------|-----------|------------------------------------------|
| EPI_ISL_618169 | 6/29/2020 | 11/5/2020 Europe / Denmark / Nordjylland |
| EPI_ISL_618170 | 6/29/2020 | 11/5/2020 Europe / Denmark / Nordjylland |
| EPI_ISL_618171 | 6/29/2020 | 11/5/2020 Europe / Denmark / Nordjylland |
| EPI_ISL_618173 | 6/29/2020 | 11/5/2020 Europe / Denmark / Hovedstaden |
| EPI_ISL_618174 | 6/22/2020 | 11/5/2020 Europe / Denmark / Sjaelland   |
| EPI_ISL_618175 | 7/6/2020  | 11/5/2020 Europe / Denmark / Hovedstaden |
| EPI_ISL_618176 | 6/29/2020 | 11/5/2020 Europe / Denmark               |
| EPI_ISL_618177 | 6/29/2020 | 11/5/2020 Europe / Denmark               |
| EPI_ISL_618178 | 7/13/2020 | 11/5/2020 Europe / Denmark / Hovedstaden |
| EPI_ISL_618179 | 7/13/2020 | 11/5/2020 Europe / Denmark / Hovedstaden |
| EPI_ISL_618180 | 7/13/2020 | 11/5/2020 Europe / Denmark / Hovedstaden |
| EPI_ISL_618181 | 7/13/2020 | 11/5/2020 Europe / Denmark / Sjaelland   |
| EPI_ISL_618182 | 7/13/2020 | 11/5/2020 Europe / Denmark / Hovedstaden |
| EPI_ISL_618183 | 7/13/2020 | 11/5/2020 Europe / Denmark / Nordjylland |
| EPI_ISL_618184 | 7/13/2020 | 11/5/2020 Europe / Denmark / Syddanmark  |
| EPI_ISL_618185 | 7/6/2020  | 11/5/2020 Europe / Denmark / Syddanmark  |
| EPI_ISL_618186 | 7/6/2020  | 11/5/2020 Europe / Denmark / Midtjylland |
| EPI_ISL_618187 | 7/6/2020  | 11/5/2020 Europe / Denmark / Nordjylland |
| EPI_ISL_618188 | 7/6/2020  | 11/5/2020 Europe / Denmark / Nordjylland |
| EPI_ISL_618189 | 7/6/2020  | 11/5/2020 Europe / Denmark / Nordjylland |
| EPI_ISL_618190 | 7/6/2020  | 11/5/2020 Europe / Denmark / Nordjylland |
| EPI_ISL_618191 | 7/13/2020 | 11/5/2020 Europe / Denmark / Syddanmark  |
| EPI_ISL_618192 | 7/13/2020 | 11/5/2020 Europe / Denmark / Syddanmark  |
| EPI_ISL_618193 | 7/20/2020 | 11/5/2020 Europe / Denmark / Nordjylland |
| EPI_ISL_618194 | 7/13/2020 | 11/5/2020 Europe / Denmark / Sjaelland   |
| EPI_ISL_618195 | 7/13/2020 | 11/5/2020 Europe / Denmark / Sjaelland   |
| EPI_ISL_618196 | 7/6/2020  | 11/5/2020 Europe / Denmark / Sjaelland   |
| EPI_ISL_618197 | 7/6/2020  | 11/5/2020 Europe / Denmark / Hovedstaden |
| EPI_ISL_618198 | 7/6/2020  | 11/5/2020 Europe / Denmark / Hovedstaden |
| EPI_ISL_618199 | 7/13/2020 | 11/5/2020 Europe / Denmark / Sjaelland   |
| EPI_ISL_618200 | 7/13/2020 | 11/5/2020 Europe / Denmark / Syddanmark  |
| EPI_ISL_618201 | 7/13/2020 | 11/5/2020 Europe / Denmark / Syddanmark  |
| EPI_ISL_618202 | 7/13/2020 | 11/5/2020 Europe / Denmark / Hovedstaden |
| EPI_ISL_618203 | 7/13/2020 | 11/5/2020 Europe / Denmark / Hovedstaden |
| EPI_ISL_618204 | 7/13/2020 | 11/5/2020 Europe / Denmark / Hovedstaden |
| EPI_ISL_618205 | 7/13/2020 | 11/5/2020 Europe / Denmark / Hovedstaden |
| EPI_ISL_618206 | 7/13/2020 | 11/5/2020 Europe / Denmark / Sjaelland   |
| EPI_ISL_618207 | 7/13/2020 | 11/5/2020 Europe / Denmark / Hovedstaden |
| EPI_ISL_618208 | 7/13/2020 | 11/5/2020 Europe / Denmark / Hovedstaden |
| EPI_ISL_618209 | 7/13/2020 | 11/5/2020 Europe / Denmark / Hovedstaden |
| EPI_ISL_618210 | 7/13/2020 | 11/5/2020 Europe / Denmark / Hovedstaden |
| EPI_ISL_618211 | 7/13/2020 | 11/5/2020 Europe / Denmark / Hovedstaden |
| EPI_ISL_618212 | 7/13/2020 | 11/5/2020 Europe / Denmark / Hovedstaden |
| EPI_ISL_618213 | 7/20/2020 | 11/5/2020 Europe / Denmark / Hovedstaden |
| EPI_ISL_618214 | 7/20/2020 | 11/5/2020 Europe / Denmark / Hovedstaden |
| EPI_ISL_618215 | 7/20/2020 | 11/5/2020 Europe / Denmark / Hovedstaden |
| EPI_ISL_618217 | 7/20/2020 | 11/5/2020 Europe / Denmark / Hovedstaden |



|                |           |                                          |
|----------------|-----------|------------------------------------------|
| EPI_ISL_618218 | 7/20/2020 | 11/5/2020 Europe / Denmark / Hovedstaden |
| EPI_ISL_618219 | 7/20/2020 | 11/5/2020 Europe / Denmark / Hovedstaden |
| EPI_ISL_618220 | 7/20/2020 | 11/5/2020 Europe / Denmark / Hovedstaden |
| EPI_ISL_618221 | 7/20/2020 | 11/5/2020 Europe / Denmark               |
| EPI_ISL_618222 | 7/20/2020 | 11/5/2020 Europe / Denmark / Hovedstaden |
| EPI_ISL_618224 | 7/20/2020 | 11/5/2020 Europe / Denmark / Hovedstaden |
| EPI_ISL_618225 | 7/20/2020 | 11/5/2020 Europe / Denmark / Hovedstaden |
| EPI_ISL_618226 | 7/20/2020 | 11/5/2020 Europe / Denmark / Syddanmark  |
| EPI_ISL_618227 | 7/20/2020 | 11/5/2020 Europe / Denmark / Hovedstaden |
| EPI_ISL_618228 | 7/20/2020 | 11/5/2020 Europe / Denmark               |
| EPI_ISL_618229 | 7/20/2020 | 11/5/2020 Europe / Denmark / Hovedstaden |
| EPI_ISL_618230 | 7/6/2020  | 11/5/2020 Europe / Denmark / Syddanmark  |
| EPI_ISL_618231 | 7/27/2020 | 11/5/2020 Europe / Denmark / Hovedstaden |
| EPI_ISL_618232 | 7/20/2020 | 11/5/2020 Europe / Denmark / Hovedstaden |
| EPI_ISL_618233 | 7/27/2020 | 11/5/2020 Europe / Denmark / Nordjylland |
| EPI_ISL_618234 | 7/27/2020 | 11/5/2020 Europe / Denmark / Syddanmark  |
| EPI_ISL_618235 | 7/27/2020 | 11/5/2020 Europe / Denmark / Syddanmark  |
| EPI_ISL_618236 | 7/27/2020 | 11/5/2020 Europe / Denmark / Syddanmark  |
| EPI_ISL_618237 | 7/27/2020 | 11/5/2020 Europe / Denmark / Syddanmark  |
| EPI_ISL_618238 | 7/27/2020 | 11/5/2020 Europe / Denmark / Hovedstaden |
| EPI_ISL_618239 | 7/27/2020 | 11/5/2020 Europe / Denmark / Hovedstaden |
| EPI_ISL_618240 | 7/13/2020 | 11/5/2020 Europe / Denmark / Syddanmark  |
| EPI_ISL_618241 | 7/13/2020 | 11/5/2020 Europe / Denmark / Syddanmark  |
| EPI_ISL_618242 | 7/27/2020 | 11/5/2020 Europe / Denmark               |
| EPI_ISL_618243 | 7/27/2020 | 11/5/2020 Europe / Denmark / Syddanmark  |
| EPI_ISL_618244 | 7/27/2020 | 11/5/2020 Europe / Denmark / Syddanmark  |
| EPI_ISL_618246 | 7/20/2020 | 11/5/2020 Europe / Denmark / Sjælland    |
| EPI_ISL_618247 | 7/27/2020 | 11/5/2020 Europe / Denmark / Sjælland    |
| EPI_ISL_618248 | 7/27/2020 | 11/5/2020 Europe / Denmark / Sjælland    |
| EPI_ISL_618249 | 7/27/2020 | 11/5/2020 Europe / Denmark / Sjælland    |
| EPI_ISL_618250 | 7/20/2020 | 11/5/2020 Europe / Denmark / Sjælland    |
| EPI_ISL_618251 | 7/20/2020 | 11/5/2020 Europe / Denmark / Sjælland    |
| EPI_ISL_618252 | 7/27/2020 | 11/5/2020 Europe / Denmark / Hovedstaden |
| EPI_ISL_618253 | 7/27/2020 | 11/5/2020 Europe / Denmark / Midtjylland |
| EPI_ISL_618254 | 7/27/2020 | 11/5/2020 Europe / Denmark / Hovedstaden |
| EPI_ISL_618255 | 7/27/2020 | 11/5/2020 Europe / Denmark / Syddanmark  |
| EPI_ISL_618256 | 7/27/2020 | 11/5/2020 Europe / Denmark / Syddanmark  |
| EPI_ISL_618257 | 7/27/2020 | 11/5/2020 Europe / Denmark / Syddanmark  |
| EPI_ISL_618258 | 7/13/2020 | 11/5/2020 Europe / Denmark / Hovedstaden |
| EPI_ISL_618259 | 7/13/2020 | 11/5/2020 Europe / Denmark / Hovedstaden |
| EPI_ISL_618260 | 7/20/2020 | 11/5/2020 Europe / Denmark / Sjælland    |
| EPI_ISL_618261 | 7/20/2020 | 11/5/2020 Europe / Denmark / Sjælland    |
| EPI_ISL_618262 | 7/20/2020 | 11/5/2020 Europe / Denmark / Sjælland    |
| EPI_ISL_618263 | 7/27/2020 | 11/5/2020 Europe / Denmark / Syddanmark  |
| EPI_ISL_618264 | 7/27/2020 | 11/5/2020 Europe / Denmark / Syddanmark  |
| EPI_ISL_618266 | 7/27/2020 | 11/5/2020 Europe / Denmark / Syddanmark  |
| EPI_ISL_618267 | 7/27/2020 | 11/5/2020 Europe / Denmark / Syddanmark  |

|                |           |                                          |
|----------------|-----------|------------------------------------------|
| EPI_ISL_618268 | 7/27/2020 | 11/5/2020 Europe / Denmark / Syddanmark  |
| EPI_ISL_618270 | 7/20/2020 | 11/5/2020 Europe / Denmark / Hovedstaden |
| EPI_ISL_618271 | 7/20/2020 | 11/5/2020 Europe / Denmark / Hovedstaden |
| EPI_ISL_618272 | 6/29/2020 | 11/5/2020 Europe / Denmark / Hovedstaden |
| EPI_ISL_618273 | 7/6/2020  | 11/5/2020 Europe / Denmark / Hovedstaden |
| EPI_ISL_618275 | 7/20/2020 | 11/5/2020 Europe / Denmark / Hovedstaden |
| EPI_ISL_618277 | 7/20/2020 | 11/5/2020 Europe / Denmark / Hovedstaden |
| EPI_ISL_618278 | 7/6/2020  | 11/5/2020 Europe / Denmark / Sjaelland   |
| EPI_ISL_618279 | 7/20/2020 | 11/5/2020 Europe / Denmark / Sjaelland   |
| EPI_ISL_618280 | 7/6/2020  | 11/5/2020 Europe / Denmark / Sjaelland   |
| EPI_ISL_618281 | 7/6/2020  | 11/5/2020 Europe / Denmark / Sjaelland   |
| EPI_ISL_618282 | 7/20/2020 | 11/5/2020 Europe / Denmark / Sjaelland   |
| EPI_ISL_618283 | 7/20/2020 | 11/5/2020 Europe / Denmark / Hovedstaden |
| EPI_ISL_618284 | 7/20/2020 | 11/5/2020 Europe / Denmark / Sjaelland   |
| EPI_ISL_618285 | 7/20/2020 | 11/5/2020 Europe / Denmark / Hovedstaden |
| EPI_ISL_618286 | 7/20/2020 | 11/5/2020 Europe / Denmark / Hovedstaden |
| EPI_ISL_618287 | 7/13/2020 | 11/5/2020 Europe / Denmark / Hovedstaden |
| EPI_ISL_618288 | 7/20/2020 | 11/5/2020 Europe / Denmark / Hovedstaden |
| EPI_ISL_618289 | 7/6/2020  | 11/5/2020 Europe / Denmark / Hovedstaden |
| EPI_ISL_618290 | 7/20/2020 | 11/5/2020 Europe / Denmark / Sjaelland   |
| EPI_ISL_618291 | 7/20/2020 | 11/5/2020 Europe / Denmark / Hovedstaden |
| EPI_ISL_618292 | 7/13/2020 | 11/5/2020 Europe / Denmark / Hovedstaden |
| EPI_ISL_618294 | 6/29/2020 | 11/5/2020 Europe / Denmark / Syddanmark  |
| EPI_ISL_618295 | 7/20/2020 | 11/5/2020 Europe / Denmark / Nordjylland |
| EPI_ISL_618298 | 7/20/2020 | 11/5/2020 Europe / Denmark / Sjaelland   |
| EPI_ISL_618299 | 7/20/2020 | 11/5/2020 Europe / Denmark / Sjaelland   |
| EPI_ISL_618300 | 7/20/2020 | 11/5/2020 Europe / Denmark / Sjaelland   |
| EPI_ISL_618301 | 7/13/2020 | 11/5/2020 Europe / Denmark / Hovedstaden |
| EPI_ISL_618302 | 7/13/2020 | 11/5/2020 Europe / Denmark / Nordjylland |
| EPI_ISL_618303 | 7/13/2020 | 11/5/2020 Europe / Denmark / Nordjylland |
| EPI_ISL_618304 | 7/20/2020 | 11/5/2020 Europe / Denmark / Syddanmark  |
| EPI_ISL_618305 | 7/13/2020 | 11/5/2020 Europe / Denmark / Hovedstaden |
| EPI_ISL_618306 | 7/13/2020 | 11/5/2020 Europe / Denmark / Hovedstaden |
| EPI_ISL_618307 | 7/13/2020 | 11/5/2020 Europe / Denmark / Sjaelland   |
| EPI_ISL_618308 | 7/13/2020 | 11/5/2020 Europe / Denmark / Hovedstaden |
| EPI_ISL_618309 | 7/20/2020 | 11/5/2020 Europe / Denmark / Hovedstaden |
| EPI_ISL_618310 | 7/13/2020 | 11/5/2020 Europe / Denmark / Hovedstaden |
| EPI_ISL_618311 | 7/13/2020 | 11/5/2020 Europe / Denmark / Hovedstaden |
| EPI_ISL_618312 | 7/13/2020 | 11/5/2020 Europe / Denmark / Hovedstaden |
| EPI_ISL_618313 | 3/23/2020 | 11/5/2020 Europe / Denmark / Nordjylland |
| EPI_ISL_618314 | 6/29/2020 | 11/5/2020 Europe / Denmark / Hovedstaden |
| EPI_ISL_618315 | 7/13/2020 | 11/5/2020 Europe / Denmark / Hovedstaden |
| EPI_ISL_618316 | 7/20/2020 | 11/5/2020 Europe / Denmark / Midtjylland |
| EPI_ISL_618317 | 7/20/2020 | 11/5/2020 Europe / Denmark / Sjaelland   |
| EPI_ISL_618318 | 7/20/2020 | 11/5/2020 Europe / Denmark / Hovedstaden |
| EPI_ISL_618319 | 7/20/2020 | 11/5/2020 Europe / Denmark / Midtjylland |
| EPI_ISL_618320 | 7/20/2020 | 11/5/2020 Europe / Denmark / Hovedstaden |

|                |           |                                          |
|----------------|-----------|------------------------------------------|
| EPI_ISL_618321 | 7/20/2020 | 11/5/2020 Europe / Denmark / Hovedstaden |
| EPI_ISL_618322 | 7/13/2020 | 11/5/2020 Europe / Denmark / Hovedstaden |
| EPI_ISL_618323 | 7/20/2020 | 11/5/2020 Europe / Denmark / Hovedstaden |
| EPI_ISL_618324 | 7/20/2020 | 11/5/2020 Europe / Denmark / Hovedstaden |
| EPI_ISL_618325 | 7/20/2020 | 11/5/2020 Europe / Denmark / Hovedstaden |
| EPI_ISL_618326 | 7/20/2020 | 11/5/2020 Europe / Denmark / Hovedstaden |
| EPI_ISL_618327 | 7/20/2020 | 11/5/2020 Europe / Denmark / Hovedstaden |
| EPI_ISL_618328 | 7/20/2020 | 11/5/2020 Europe / Denmark / Hovedstaden |
| EPI_ISL_618329 | 7/20/2020 | 11/5/2020 Europe / Denmark / Hovedstaden |
| EPI_ISL_618331 | 7/20/2020 | 11/5/2020 Europe / Denmark / Hovedstaden |
| EPI_ISL_618333 | 7/13/2020 | 11/5/2020 Europe / Denmark / Midtjylland |
| EPI_ISL_618334 | 7/13/2020 | 11/5/2020 Europe / Denmark / Midtjylland |
| EPI_ISL_618335 | 6/8/2020  | 11/5/2020 Europe / Denmark / Midtjylland |
| EPI_ISL_618336 | 7/20/2020 | 11/5/2020 Europe / Denmark / Midtjylland |
| EPI_ISL_618337 | 7/27/2020 | 11/5/2020 Europe / Denmark / Nordjylland |
| EPI_ISL_618338 | 7/27/2020 | 11/5/2020 Europe / Denmark / Nordjylland |
| EPI_ISL_618339 | 8/3/2020  | 11/5/2020 Europe / Denmark / Hovedstaden |
| EPI_ISL_618340 | 8/3/2020  | 11/5/2020 Europe / Denmark / Hovedstaden |
| EPI_ISL_618341 | 7/27/2020 | 11/5/2020 Europe / Denmark / Syddanmark  |
| EPI_ISL_618342 | 3/23/2020 | 11/5/2020 Europe / Denmark / Sjaelland   |
| EPI_ISL_618343 | 8/3/2020  | 11/5/2020 Europe / Denmark / Syddanmark  |
| EPI_ISL_618344 | 8/3/2020  | 11/5/2020 Europe / Denmark / Syddanmark  |
| EPI_ISL_618345 | 7/13/2020 | 11/5/2020 Europe / Denmark / Hovedstaden |
| EPI_ISL_618346 | 8/3/2020  | 11/5/2020 Europe / Denmark / Hovedstaden |
| EPI_ISL_618347 | 8/3/2020  | 11/5/2020 Europe / Denmark / Hovedstaden |
| EPI_ISL_618348 | 7/27/2020 | 11/5/2020 Europe / Denmark / Midtjylland |
| EPI_ISL_618350 | 7/27/2020 | 11/5/2020 Europe / Denmark / Midtjylland |
| EPI_ISL_618351 | 7/27/2020 | 11/5/2020 Europe / Denmark / Midtjylland |
| EPI_ISL_618352 | 7/27/2020 | 11/5/2020 Europe / Denmark / Midtjylland |
| EPI_ISL_618353 | 7/27/2020 | 11/5/2020 Europe / Denmark / Midtjylland |
| EPI_ISL_618354 | 7/27/2020 | 11/5/2020 Europe / Denmark / Sjaelland   |
| EPI_ISL_618355 | 7/27/2020 | 11/5/2020 Europe / Denmark / Sjaelland   |
| EPI_ISL_618356 | 7/27/2020 | 11/5/2020 Europe / Denmark / Sjaelland   |
| EPI_ISL_618357 | 7/13/2020 | 11/5/2020 Europe / Denmark / Hovedstaden |
| EPI_ISL_618358 | 7/6/2020  | 11/5/2020 Europe / Denmark / Hovedstaden |
| EPI_ISL_618359 | 7/20/2020 | 11/5/2020 Europe / Denmark / Hovedstaden |
| EPI_ISL_618360 | 7/20/2020 | 11/5/2020 Europe / Denmark / Hovedstaden |
| EPI_ISL_618361 | 7/20/2020 | 11/5/2020 Europe / Denmark / Hovedstaden |
| EPI_ISL_618363 | 8/3/2020  | 11/5/2020 Europe / Denmark / Nordjylland |
| EPI_ISL_618364 | 8/3/2020  | 11/5/2020 Europe / Denmark / Hovedstaden |
| EPI_ISL_618365 | 8/10/2020 | 11/5/2020 Europe / Denmark / Hovedstaden |
| EPI_ISL_618366 | 8/10/2020 | 11/5/2020 Europe / Denmark / Hovedstaden |
| EPI_ISL_618367 | 7/27/2020 | 11/5/2020 Europe / Denmark / Midtjylland |
| EPI_ISL_618368 | 7/27/2020 | 11/5/2020 Europe / Denmark / Midtjylland |
| EPI_ISL_618369 | 7/27/2020 | 11/5/2020 Europe / Denmark / Midtjylland |
| EPI_ISL_618370 | 7/27/2020 | 11/5/2020 Europe / Denmark / Midtjylland |
| EPI_ISL_618371 | 7/27/2020 | 11/5/2020 Europe / Denmark / Midtjylland |

|                |            |                                          |
|----------------|------------|------------------------------------------|
| EPI_ISL_618372 | 7/20/2020  | 11/5/2020 Europe / Denmark / Hovedstaden |
| EPI_ISL_618374 | 7/20/2020  | 11/5/2020 Europe / Denmark / Sjaelland   |
| EPI_ISL_618375 | 6/29/2020  | 11/5/2020 Europe / Denmark / Hovedstaden |
| EPI_ISL_618376 | 7/27/2020  | 11/5/2020 Europe / Denmark / Syddanmark  |
| EPI_ISL_618377 | 7/27/2020  | 11/5/2020 Europe / Denmark / Midtjylland |
| EPI_ISL_618378 | 7/27/2020  | 11/5/2020 Europe / Denmark / Midtjylland |
| EPI_ISL_618379 | 7/27/2020  | 11/5/2020 Europe / Denmark / Sjaelland   |
| EPI_ISL_618380 | 7/20/2020  | 11/5/2020 Europe / Denmark / Hovedstaden |
| EPI_ISL_618381 | 7/27/2020  | 11/5/2020 Europe / Denmark / Midtjylland |
| EPI_ISL_618382 | 7/27/2020  | 11/5/2020 Europe / Denmark / Midtjylland |
| EPI_ISL_618383 | 7/27/2020  | 11/5/2020 Europe / Denmark / Midtjylland |
| EPI_ISL_618384 | 7/27/2020  | 11/5/2020 Europe / Denmark / Midtjylland |
| EPI_ISL_618385 | 7/27/2020  | 11/5/2020 Europe / Denmark / Midtjylland |
| EPI_ISL_618386 | 7/27/2020  | 11/5/2020 Europe / Denmark / Midtjylland |
| EPI_ISL_618387 | 7/27/2020  | 11/5/2020 Europe / Denmark / Syddanmark  |
| EPI_ISL_618389 | 7/27/2020  | 11/5/2020 Europe / Denmark / Sjaelland   |
| EPI_ISL_618390 | 7/27/2020  | 11/5/2020 Europe / Denmark / Sjaelland   |
| EPI_ISL_618391 | 7/27/2020  | 11/5/2020 Europe / Denmark / Midtjylland |
| EPI_ISL_618392 | 7/27/2020  | 11/5/2020 Europe / Denmark / Sjaelland   |
| EPI_ISL_618393 | 7/27/2020  | 11/5/2020 Europe / Denmark / Sjaelland   |
| EPI_ISL_618394 | 7/27/2020  | 11/5/2020 Europe / Denmark / Sjaelland   |
| EPI_ISL_618395 | 7/27/2020  | 11/5/2020 Europe / Denmark / Sjaelland   |
| EPI_ISL_618396 | 7/27/2020  | 11/5/2020 Europe / Denmark / Sjaelland   |
| EPI_ISL_618397 | 7/27/2020  | 11/5/2020 Europe / Denmark / Sjaelland   |
| EPI_ISL_618398 | 7/27/2020  | 11/5/2020 Europe / Denmark / Midtjylland |
| EPI_ISL_618399 | 7/27/2020  | 11/5/2020 Europe / Denmark / Midtjylland |
| EPI_ISL_618400 | 7/27/2020  | 11/5/2020 Europe / Denmark / Midtjylland |
| EPI_ISL_618402 | 7/20/2020  | 11/5/2020 Europe / Denmark / Midtjylland |
| EPI_ISL_618403 | 7/20/2020  | 11/5/2020 Europe / Denmark / Sjaelland   |
| EPI_ISL_618404 | 7/20/2020  | 11/5/2020 Europe / Denmark / Sjaelland   |
| EPI_ISL_618405 | 7/27/2020  | 11/5/2020 Europe / Denmark / Sjaelland   |
| EPI_ISL_618406 | 10/12/2020 | 11/5/2020 Europe / Denmark / Sjaelland   |
| EPI_ISL_618407 | 10/12/2020 | 11/5/2020 Europe / Denmark / Sjaelland   |
| EPI_ISL_618408 | 10/12/2020 | 11/5/2020 Europe / Denmark / Hovedstaden |
| EPI_ISL_618410 | 10/12/2020 | 11/5/2020 Europe / Denmark / Hovedstaden |
| EPI_ISL_618411 | 10/12/2020 | 11/5/2020 Europe / Denmark / Hovedstaden |
| EPI_ISL_618412 | 10/12/2020 | 11/5/2020 Europe / Denmark / Hovedstaden |
| EPI_ISL_618414 | 10/12/2020 | 11/5/2020 Europe / Denmark / Hovedstaden |
| EPI_ISL_618415 | 10/12/2020 | 11/5/2020 Europe / Denmark / Hovedstaden |
| EPI_ISL_618416 | 10/12/2020 | 11/5/2020 Europe / Denmark / Hovedstaden |
| EPI_ISL_618417 | 10/12/2020 | 11/5/2020 Europe / Denmark / Syddanmark  |
| EPI_ISL_618418 | 10/12/2020 | 11/5/2020 Europe / Denmark / Hovedstaden |
| EPI_ISL_618419 | 10/12/2020 | 11/5/2020 Europe / Denmark / Midtjylland |
| EPI_ISL_618421 | 10/12/2020 | 11/5/2020 Europe / Denmark / Syddanmark  |
| EPI_ISL_618422 | 10/12/2020 | 11/5/2020 Europe / Denmark / Hovedstaden |
| EPI_ISL_618424 | 10/12/2020 | 11/5/2020 Europe / Denmark / Hovedstaden |
| EPI_ISL_618425 | 10/12/2020 | 11/5/2020 Europe / Denmark / Midtjylland |

|                |            |                                          |
|----------------|------------|------------------------------------------|
| EPI_ISL_618427 | 10/12/2020 | 11/5/2020 Europe / Denmark / Hovedstaden |
| EPI_ISL_618428 | 10/12/2020 | 11/5/2020 Europe / Denmark / Midtjylland |
| EPI_ISL_618429 | 10/12/2020 | 11/5/2020 Europe / Denmark               |
| EPI_ISL_618430 | 10/12/2020 | 11/5/2020 Europe / Denmark / Hovedstaden |
| EPI_ISL_618431 | 10/12/2020 | 11/5/2020 Europe / Denmark / Hovedstaden |
| EPI_ISL_618433 | 10/12/2020 | 11/5/2020 Europe / Denmark / Syddanmark  |
| EPI_ISL_618434 | 10/12/2020 | 11/5/2020 Europe / Denmark / Hovedstaden |
| EPI_ISL_618435 | 10/12/2020 | 11/5/2020 Europe / Denmark / Midtjylland |
| EPI_ISL_618436 | 10/12/2020 | 11/5/2020 Europe / Denmark               |
| EPI_ISL_618437 | 10/12/2020 | 11/5/2020 Europe / Denmark / Nordjylland |
| EPI_ISL_618438 | 10/12/2020 | 11/5/2020 Europe / Denmark / Hovedstaden |
| EPI_ISL_618439 | 10/12/2020 | 11/5/2020 Europe / Denmark / Midtjylland |
| EPI_ISL_618440 | 10/12/2020 | 11/5/2020 Europe / Denmark / Sjælland    |
| EPI_ISL_618442 | 10/12/2020 | 11/5/2020 Europe / Denmark / Hovedstaden |
| EPI_ISL_618443 | 10/12/2020 | 11/5/2020 Europe / Denmark / Hovedstaden |
| EPI_ISL_618444 | 10/12/2020 | 11/5/2020 Europe / Denmark / Syddanmark  |
| EPI_ISL_618446 | 10/12/2020 | 11/5/2020 Europe / Denmark / Hovedstaden |
| EPI_ISL_618447 | 10/12/2020 | 11/5/2020 Europe / Denmark / Midtjylland |
| EPI_ISL_618448 | 10/12/2020 | 11/5/2020 Europe / Denmark / Midtjylland |
| EPI_ISL_618449 | 10/12/2020 | 11/5/2020 Europe / Denmark / Hovedstaden |
| EPI_ISL_618450 | 10/12/2020 | 11/5/2020 Europe / Denmark / Hovedstaden |
| EPI_ISL_618451 | 10/12/2020 | 11/5/2020 Europe / Denmark / Hovedstaden |
| EPI_ISL_618452 | 10/12/2020 | 11/5/2020 Europe / Denmark / Midtjylland |
| EPI_ISL_618453 | 10/12/2020 | 11/5/2020 Europe / Denmark / Hovedstaden |
| EPI_ISL_618454 | 10/12/2020 | 11/5/2020 Europe / Denmark / Nordjylland |
| EPI_ISL_618455 | 10/12/2020 | 11/5/2020 Europe / Denmark / Sjælland    |
| EPI_ISL_618456 | 10/12/2020 | 11/5/2020 Europe / Denmark / Hovedstaden |
| EPI_ISL_618457 | 10/12/2020 | 11/5/2020 Europe / Denmark / Sjælland    |
| EPI_ISL_618458 | 10/12/2020 | 11/5/2020 Europe / Denmark / Hovedstaden |
| EPI_ISL_618459 | 10/12/2020 | 11/5/2020 Europe / Denmark / Hovedstaden |
| EPI_ISL_618460 | 10/12/2020 | 11/5/2020 Europe / Denmark / Hovedstaden |
| EPI_ISL_618461 | 10/12/2020 | 11/5/2020 Europe / Denmark / Hovedstaden |
| EPI_ISL_618462 | 10/12/2020 | 11/5/2020 Europe / Denmark / Hovedstaden |
| EPI_ISL_618463 | 10/12/2020 | 11/5/2020 Europe / Denmark / Hovedstaden |
| EPI_ISL_618465 | 10/12/2020 | 11/5/2020 Europe / Denmark / Midtjylland |
| EPI_ISL_618467 | 10/12/2020 | 11/5/2020 Europe / Denmark / Hovedstaden |
| EPI_ISL_618468 | 10/12/2020 | 11/5/2020 Europe / Denmark / Hovedstaden |
| EPI_ISL_618470 | 10/12/2020 | 11/5/2020 Europe / Denmark / Hovedstaden |
| EPI_ISL_618471 | 10/12/2020 | 11/5/2020 Europe / Denmark / Hovedstaden |
| EPI_ISL_618472 | 10/12/2020 | 11/5/2020 Europe / Denmark / Nordjylland |
| EPI_ISL_618475 | 10/12/2020 | 11/5/2020 Europe / Denmark / Syddanmark  |
| EPI_ISL_618476 | 10/12/2020 | 11/5/2020 Europe / Denmark / Hovedstaden |
| EPI_ISL_618477 | 10/12/2020 | 11/5/2020 Europe / Denmark / Hovedstaden |
| EPI_ISL_618478 | 10/12/2020 | 11/5/2020 Europe / Denmark / Hovedstaden |
| EPI_ISL_618479 | 3/9/2020   | 11/5/2020 Europe / Denmark / Midtjylland |
| EPI_ISL_618480 | 10/12/2020 | 11/5/2020 Europe / Denmark / Nordjylland |
| EPI_ISL_618481 | 10/12/2020 | 11/5/2020 Europe / Denmark / Nordjylland |

|                |            |                                          |
|----------------|------------|------------------------------------------|
| EPI_ISL_618482 | 10/12/2020 | 11/5/2020 Europe / Denmark / Midtjylland |
| EPI_ISL_618485 | 10/12/2020 | 11/5/2020 Europe / Denmark / Midtjylland |
| EPI_ISL_618487 | 10/12/2020 | 11/5/2020 Europe / Denmark / Hovedstaden |
| EPI_ISL_618489 | 10/12/2020 | 11/5/2020 Europe / Denmark / Syddanmark  |
| EPI_ISL_618490 | 10/12/2020 | 11/5/2020 Europe / Denmark / Midtjylland |
| EPI_ISL_618491 | 10/12/2020 | 11/5/2020 Europe / Denmark / Hovedstaden |
| EPI_ISL_618492 | 10/12/2020 | 11/5/2020 Europe / Denmark / Hovedstaden |
| EPI_ISL_618493 | 10/12/2020 | 11/5/2020 Europe / Denmark / Hovedstaden |
| EPI_ISL_618495 | 10/12/2020 | 11/5/2020 Europe / Denmark / Hovedstaden |
| EPI_ISL_618496 | 4/13/2020  | 11/5/2020 Europe / Denmark / Syddanmark  |
| EPI_ISL_618497 | 10/12/2020 | 11/5/2020 Europe / Denmark / Syddanmark  |
| EPI_ISL_618498 | 10/12/2020 | 11/5/2020 Europe / Denmark / Nordjylland |
| EPI_ISL_618499 | 10/19/2020 | 11/5/2020 Europe / Denmark / Hovedstaden |
| EPI_ISL_618500 | 10/19/2020 | 11/5/2020 Europe / Denmark / Hovedstaden |
| EPI_ISL_618501 | 10/19/2020 | 11/5/2020 Europe / Denmark / Hovedstaden |
| EPI_ISL_618502 | 10/19/2020 | 11/5/2020 Europe / Denmark / Midtjylland |
| EPI_ISL_618503 | 10/19/2020 | 11/5/2020 Europe / Denmark / Midtjylland |
| EPI_ISL_618505 | 10/19/2020 | 11/5/2020 Europe / Denmark / Hovedstaden |
| EPI_ISL_618507 | 10/19/2020 | 11/5/2020 Europe / Denmark / Midtjylland |
| EPI_ISL_618508 | 10/19/2020 | 11/5/2020 Europe / Denmark / Hovedstaden |
| EPI_ISL_618510 | 10/19/2020 | 11/5/2020 Europe / Denmark / Sjælland    |
| EPI_ISL_618511 | 4/13/2020  | 11/5/2020 Europe / Denmark / Syddanmark  |
| EPI_ISL_618513 | 10/19/2020 | 11/5/2020 Europe / Denmark / Sjælland    |
| EPI_ISL_618514 | 10/19/2020 | 11/5/2020 Europe / Denmark / Hovedstaden |
| EPI_ISL_618515 | 10/19/2020 | 11/5/2020 Europe / Denmark / Nordjylland |
| EPI_ISL_618516 | 10/19/2020 | 11/5/2020 Europe / Denmark / Hovedstaden |
| EPI_ISL_618517 | 4/13/2020  | 11/5/2020 Europe / Denmark / Syddanmark  |
| EPI_ISL_618518 | 10/19/2020 | 11/5/2020 Europe / Denmark / Hovedstaden |
| EPI_ISL_618519 | 10/19/2020 | 11/5/2020 Europe / Denmark / Nordjylland |
| EPI_ISL_618520 | 10/19/2020 | 11/5/2020 Europe / Denmark / Midtjylland |
| EPI_ISL_618522 | 10/19/2020 | 11/5/2020 Europe / Denmark / Hovedstaden |
| EPI_ISL_618524 | 10/19/2020 | 11/5/2020 Europe / Denmark / Hovedstaden |
| EPI_ISL_618525 | 4/13/2020  | 11/5/2020 Europe / Denmark / Syddanmark  |
| EPI_ISL_618526 | 10/19/2020 | 11/5/2020 Europe / Denmark / Midtjylland |
| EPI_ISL_618527 | 10/19/2020 | 11/5/2020 Europe / Denmark / Hovedstaden |
| EPI_ISL_618528 | 10/19/2020 | 11/5/2020 Europe / Denmark / Midtjylland |
| EPI_ISL_618530 | 10/19/2020 | 11/5/2020 Europe / Denmark / Nordjylland |
| EPI_ISL_618531 | 10/19/2020 | 11/5/2020 Europe / Denmark / Hovedstaden |
| EPI_ISL_618532 | 10/19/2020 | 11/5/2020 Europe / Denmark / Hovedstaden |
| EPI_ISL_618534 | 10/19/2020 | 11/5/2020 Europe / Denmark / Hovedstaden |
| EPI_ISL_618535 | 10/19/2020 | 11/5/2020 Europe / Denmark / Nordjylland |
| EPI_ISL_618536 | 10/19/2020 | 11/5/2020 Europe / Denmark / Midtjylland |
| EPI_ISL_618537 | 10/19/2020 | 11/5/2020 Europe / Denmark / Hovedstaden |
| EPI_ISL_618538 | 10/19/2020 | 11/5/2020 Europe / Denmark / Hovedstaden |
| EPI_ISL_618539 | 10/19/2020 | 11/5/2020 Europe / Denmark / Nordjylland |
| EPI_ISL_618540 | 10/19/2020 | 11/5/2020 Europe / Denmark / Midtjylland |
| EPI_ISL_618543 | 10/19/2020 | 11/5/2020 Europe / Denmark / Hovedstaden |



|                |            |                                          |
|----------------|------------|------------------------------------------|
| EPI_ISL_618596 | 10/19/2020 | 11/5/2020 Europe / Denmark / Syddanmark  |
| EPI_ISL_618597 | 10/19/2020 | 11/5/2020 Europe / Denmark / Hovedstaden |
| EPI_ISL_618598 | 10/19/2020 | 11/5/2020 Europe / Denmark / Midtjylland |
| EPI_ISL_618600 | 10/19/2020 | 11/5/2020 Europe / Denmark / Hovedstaden |
| EPI_ISL_618601 | 10/19/2020 | 11/5/2020 Europe / Denmark / Hovedstaden |
| EPI_ISL_618602 | 10/19/2020 | 11/5/2020 Europe / Denmark / Hovedstaden |
| EPI_ISL_618603 | 10/19/2020 | 11/5/2020 Europe / Denmark / Hovedstaden |
| EPI_ISL_618604 | 10/19/2020 | 11/5/2020 Europe / Denmark / Midtjylland |
| EPI_ISL_618605 | 10/19/2020 | 11/5/2020 Europe / Denmark / Hovedstaden |
| EPI_ISL_618606 | 10/19/2020 | 11/5/2020 Europe / Denmark / Sjaelland   |
| EPI_ISL_618607 | 10/19/2020 | 11/5/2020 Europe / Denmark / Hovedstaden |
| EPI_ISL_618608 | 10/19/2020 | 11/5/2020 Europe / Denmark / Hovedstaden |
| EPI_ISL_618609 | 4/13/2020  | 11/5/2020 Europe / Denmark / Nordjylland |
| EPI_ISL_618610 | 10/19/2020 | 11/5/2020 Europe / Denmark / Syddanmark  |
| EPI_ISL_618611 | 10/19/2020 | 11/5/2020 Europe / Denmark / Nordjylland |
| EPI_ISL_618612 | 10/19/2020 | 11/5/2020 Europe / Denmark / Hovedstaden |
| EPI_ISL_618613 | 10/19/2020 | 11/5/2020 Europe / Denmark / Hovedstaden |
| EPI_ISL_618614 | 10/19/2020 | 11/5/2020 Europe / Denmark / Midtjylland |
| EPI_ISL_618615 | 10/19/2020 | 11/5/2020 Europe / Denmark / Hovedstaden |
| EPI_ISL_618616 | 10/19/2020 | 11/5/2020 Europe / Denmark / Sjaelland   |
| EPI_ISL_618617 | 10/19/2020 | 11/5/2020 Europe / Denmark / Hovedstaden |
| EPI_ISL_618618 | 10/19/2020 | 11/5/2020 Europe / Denmark / Hovedstaden |
| EPI_ISL_618619 | 10/19/2020 | 11/5/2020 Europe / Denmark / Syddanmark  |
| EPI_ISL_618620 | 10/19/2020 | 11/5/2020 Europe / Denmark / Midtjylland |
| EPI_ISL_618622 | 10/19/2020 | 11/5/2020 Europe / Denmark / Hovedstaden |
| EPI_ISL_618623 | 10/19/2020 | 11/5/2020 Europe / Denmark / Midtjylland |
| EPI_ISL_618625 | 10/19/2020 | 11/5/2020 Europe / Denmark / Sjaelland   |
| EPI_ISL_618626 | 4/13/2020  | 11/5/2020 Europe / Denmark / Nordjylland |
| EPI_ISL_618627 | 4/13/2020  | 11/5/2020 Europe / Denmark / Nordjylland |
| EPI_ISL_618628 | 4/13/2020  | 11/5/2020 Europe / Denmark / Nordjylland |
| EPI_ISL_618629 | 4/13/2020  | 11/5/2020 Europe / Denmark / Nordjylland |
| EPI_ISL_618630 | 4/13/2020  | 11/5/2020 Europe / Denmark / Hovedstaden |
| EPI_ISL_618631 | 4/13/2020  | 11/5/2020 Europe / Denmark / Hovedstaden |
| EPI_ISL_618633 | 4/13/2020  | 11/5/2020 Europe / Denmark / Hovedstaden |
| EPI_ISL_618634 | 4/13/2020  | 11/5/2020 Europe / Denmark / Hovedstaden |
| EPI_ISL_618635 | 4/13/2020  | 11/5/2020 Europe / Denmark / Hovedstaden |
| EPI_ISL_618637 | 4/13/2020  | 11/5/2020 Europe / Denmark / Syddanmark  |
| EPI_ISL_618638 | 4/13/2020  | 11/5/2020 Europe / Denmark / Syddanmark  |
| EPI_ISL_618639 | 4/13/2020  | 11/5/2020 Europe / Denmark / Nordjylland |
| EPI_ISL_618640 | 4/13/2020  | 11/5/2020 Europe / Denmark / Nordjylland |
| EPI_ISL_618641 | 4/13/2020  | 11/5/2020 Europe / Denmark / Nordjylland |
| EPI_ISL_618642 | 4/13/2020  | 11/5/2020 Europe / Denmark / Nordjylland |
| EPI_ISL_618643 | 4/6/2020   | 11/5/2020 Europe / Denmark / Syddanmark  |
| EPI_ISL_618644 | 4/6/2020   | 11/5/2020 Europe / Denmark / Syddanmark  |
| EPI_ISL_618645 | 4/6/2020   | 11/5/2020 Europe / Denmark / Syddanmark  |
| EPI_ISL_618647 | 4/13/2020  | 11/5/2020 Europe / Denmark / Syddanmark  |
| EPI_ISL_618648 | 4/13/2020  | 11/5/2020 Europe / Denmark / Syddanmark  |



|                |            |                                          |
|----------------|------------|------------------------------------------|
| EPI_ISL_618649 | 4/13/2020  | 11/5/2020 Europe / Denmark / Syddanmark  |
| EPI_ISL_618650 | 4/13/2020  | 11/5/2020 Europe / Denmark / Syddanmark  |
| EPI_ISL_618651 | 4/13/2020  | 11/5/2020 Europe / Denmark / Syddanmark  |
| EPI_ISL_618652 | 4/13/2020  | 11/5/2020 Europe / Denmark / Syddanmark  |
| EPI_ISL_618653 | 4/13/2020  | 11/5/2020 Europe / Denmark / Syddanmark  |
| EPI_ISL_618654 | 4/13/2020  | 11/5/2020 Europe / Denmark / Syddanmark  |
| EPI_ISL_618655 | 4/13/2020  | 11/5/2020 Europe / Denmark / Syddanmark  |
| EPI_ISL_618656 | 4/13/2020  | 11/5/2020 Europe / Denmark / Syddanmark  |
| EPI_ISL_618657 | 4/13/2020  | 11/5/2020 Europe / Denmark / Syddanmark  |
| EPI_ISL_618659 | 4/13/2020  | 11/5/2020 Europe / Denmark / Syddanmark  |
| EPI_ISL_618661 | 4/13/2020  | 11/5/2020 Europe / Denmark / Syddanmark  |
| EPI_ISL_618662 | 4/20/2020  | 11/5/2020 Europe / Denmark / Hovedstaden |
| EPI_ISL_618663 | 10/19/2020 | 11/5/2020 Europe / Denmark / Sjælland    |
| EPI_ISL_618664 | 10/19/2020 | 11/5/2020 Europe / Denmark / Hovedstaden |
| EPI_ISL_618665 | 10/19/2020 | 11/5/2020 Europe / Denmark / Midtjylland |
| EPI_ISL_618666 | 10/19/2020 | 11/5/2020 Europe / Denmark / Syddanmark  |
| EPI_ISL_618668 | 10/19/2020 | 11/5/2020 Europe / Denmark / Syddanmark  |
| EPI_ISL_618669 | 10/19/2020 | 11/5/2020 Europe / Denmark / Hovedstaden |
| EPI_ISL_618671 | 10/19/2020 | 11/5/2020 Europe / Denmark / Nordjylland |
| EPI_ISL_618672 | 10/19/2020 | 11/5/2020 Europe / Denmark / Nordjylland |
| EPI_ISL_618673 | 10/19/2020 | 11/5/2020 Europe / Denmark / Syddanmark  |
| EPI_ISL_618675 | 10/19/2020 | 11/5/2020 Europe / Denmark / Hovedstaden |
| EPI_ISL_618676 | 10/19/2020 | 11/5/2020 Europe / Denmark / Midtjylland |
| EPI_ISL_618677 | 10/19/2020 | 11/5/2020 Europe / Denmark / Syddanmark  |
| EPI_ISL_618678 | 10/19/2020 | 11/5/2020 Europe / Denmark / Syddanmark  |
| EPI_ISL_618679 | 10/19/2020 | 11/5/2020 Europe / Denmark / Hovedstaden |
| EPI_ISL_618680 | 10/19/2020 | 11/5/2020 Europe / Denmark / Midtjylland |
| EPI_ISL_618681 | 10/19/2020 | 11/5/2020 Europe / Denmark / Nordjylland |
| EPI_ISL_618682 | 10/19/2020 | 11/5/2020 Europe / Denmark / Syddanmark  |
| EPI_ISL_618683 | 10/19/2020 | 11/5/2020 Europe / Denmark / Sjælland    |
| EPI_ISL_618684 | 10/19/2020 | 11/5/2020 Europe / Denmark / Hovedstaden |
| EPI_ISL_618685 | 10/19/2020 | 11/5/2020 Europe / Denmark / Midtjylland |
| EPI_ISL_618686 | 10/19/2020 | 11/5/2020 Europe / Denmark / Hovedstaden |
| EPI_ISL_618688 | 10/19/2020 | 11/5/2020 Europe / Denmark / Nordjylland |
| EPI_ISL_618689 | 10/19/2020 | 11/5/2020 Europe / Denmark / Midtjylland |
| EPI_ISL_618690 | 10/19/2020 | 11/5/2020 Europe / Denmark / Sjælland    |
| EPI_ISL_618691 | 10/19/2020 | 11/5/2020 Europe / Denmark / Hovedstaden |
| EPI_ISL_618692 | 10/19/2020 | 11/5/2020 Europe / Denmark / Midtjylland |
| EPI_ISL_618693 | 10/19/2020 | 11/5/2020 Europe / Denmark / Midtjylland |
| EPI_ISL_618694 | 10/19/2020 | 11/5/2020 Europe / Denmark / Hovedstaden |
| EPI_ISL_618696 | 10/19/2020 | 11/5/2020 Europe / Denmark / Nordjylland |
| EPI_ISL_618698 | 10/19/2020 | 11/5/2020 Europe / Denmark / Hovedstaden |
| EPI_ISL_618701 | 10/19/2020 | 11/5/2020 Europe / Denmark / Sjælland    |
| EPI_ISL_618703 | 10/19/2020 | 11/5/2020 Europe / Denmark / Hovedstaden |
| EPI_ISL_618704 | 10/19/2020 | 11/5/2020 Europe / Denmark / Hovedstaden |
| EPI_ISL_618705 | 10/19/2020 | 11/5/2020 Europe / Denmark / Sjælland    |
| EPI_ISL_618706 | 10/19/2020 | 11/5/2020 Europe / Denmark / Nordjylland |



|                |            |           |                                |
|----------------|------------|-----------|--------------------------------|
| EPI_ISL_618762 | 10/19/2020 | 11/5/2020 | Europe / Denmark / Hovedstaden |
| EPI_ISL_618763 | 10/19/2020 | 11/5/2020 | Europe / Denmark / Nordjylland |
| EPI_ISL_618770 | 10/19/2020 | 11/5/2020 | Europe / Denmark / Nordjylland |
| EPI_ISL_618772 | 10/19/2020 | 11/5/2020 | Europe / Denmark / Hovedstaden |
| EPI_ISL_618773 | 10/19/2020 | 11/5/2020 | Europe / Denmark / Nordjylland |
| EPI_ISL_618774 | 10/19/2020 | 11/5/2020 | Europe / Denmark / Midtjylland |
| EPI_ISL_618775 | 10/19/2020 | 11/5/2020 | Europe / Denmark / Sjælland    |
| EPI_ISL_618776 | 10/19/2020 | 11/5/2020 | Europe / Denmark / Hovedstaden |
| EPI_ISL_618777 | 10/19/2020 | 11/5/2020 | Europe / Denmark / Hovedstaden |
| EPI_ISL_618778 | 10/19/2020 | 11/5/2020 | Europe / Denmark / Syddanmark  |
| EPI_ISL_618779 | 10/19/2020 | 11/5/2020 | Europe / Denmark / Hovedstaden |
| EPI_ISL_618780 | 10/19/2020 | 11/5/2020 | Europe / Denmark / Hovedstaden |
| EPI_ISL_618781 | 10/19/2020 | 11/5/2020 | Europe / Denmark / Hovedstaden |
| EPI_ISL_618783 | 10/19/2020 | 11/5/2020 | Europe / Denmark / Hovedstaden |
| EPI_ISL_618784 | 10/19/2020 | 11/5/2020 | Europe / Denmark / Midtjylland |
| EPI_ISL_618786 | 10/19/2020 | 11/5/2020 | Europe / Denmark / Hovedstaden |
| EPI_ISL_618787 | 10/19/2020 | 11/5/2020 | Europe / Denmark / Hovedstaden |
| EPI_ISL_618788 | 10/19/2020 | 11/5/2020 | Europe / Denmark / Midtjylland |
| EPI_ISL_618791 | 10/19/2020 | 11/5/2020 | Europe / Denmark / Midtjylland |
| EPI_ISL_618792 | 10/19/2020 | 11/5/2020 | Europe / Denmark / Syddanmark  |
| EPI_ISL_618793 | 10/19/2020 | 11/5/2020 | Europe / Denmark / Nordjylland |
| EPI_ISL_618794 | 10/19/2020 | 11/5/2020 | Europe / Denmark / Hovedstaden |
| EPI_ISL_618795 | 10/19/2020 | 11/5/2020 | Europe / Denmark / Hovedstaden |
| EPI_ISL_618796 | 10/19/2020 | 11/5/2020 | Europe / Denmark / Hovedstaden |
| EPI_ISL_618798 | 10/19/2020 | 11/5/2020 | Europe / Denmark / Hovedstaden |
| EPI_ISL_618801 | 4/20/2020  | 11/5/2020 | Europe / Denmark / Hovedstaden |
| EPI_ISL_618802 | 4/27/2020  | 11/5/2020 | Europe / Denmark / Nordjylland |
| EPI_ISL_618803 | 4/27/2020  | 11/5/2020 | Europe / Denmark / Nordjylland |
| EPI_ISL_618804 | 4/20/2020  | 11/5/2020 | Europe / Denmark / Nordjylland |
| EPI_ISL_618805 | 4/6/2020   | 11/5/2020 | Europe / Denmark / Sjælland    |
| EPI_ISL_618806 | 3/23/2020  | 11/5/2020 | Europe / Denmark / Syddanmark  |
| EPI_ISL_618807 | 4/27/2020  | 11/5/2020 | Europe / Denmark / Hovedstaden |
| EPI_ISL_618808 | 3/9/2020   | 11/5/2020 | Europe / Denmark / Midtjylland |
| EPI_ISL_618809 | 10/26/2020 | 11/5/2020 | Europe / Denmark / Hovedstaden |
| EPI_ISL_618811 | 10/26/2020 | 11/5/2020 | Europe / Denmark / Syddanmark  |
| EPI_ISL_618812 | 10/26/2020 | 11/5/2020 | Europe / Denmark / Hovedstaden |
| EPI_ISL_618813 | 10/19/2020 | 11/5/2020 | Europe / Denmark / Syddanmark  |
| EPI_ISL_618814 | 10/26/2020 | 11/5/2020 | Europe / Denmark / Hovedstaden |
| EPI_ISL_618815 | 10/26/2020 | 11/5/2020 | Europe / Denmark / Hovedstaden |
| EPI_ISL_618817 | 10/26/2020 | 11/5/2020 | Europe / Denmark / Hovedstaden |
| EPI_ISL_618818 | 10/26/2020 | 11/5/2020 | Europe / Denmark / Sjælland    |
| EPI_ISL_618819 | 10/26/2020 | 11/5/2020 | Europe / Denmark / Hovedstaden |
| EPI_ISL_618820 | 10/26/2020 | 11/5/2020 | Europe / Denmark / Hovedstaden |
| EPI_ISL_618821 | 10/26/2020 | 11/5/2020 | Europe / Denmark / Syddanmark  |
| EPI_ISL_618822 | 10/19/2020 | 11/5/2020 | Europe / Denmark / Syddanmark  |
| EPI_ISL_618823 | 10/26/2020 | 11/5/2020 | Europe / Denmark / Hovedstaden |
| EPI_ISL_618824 | 10/26/2020 | 11/5/2020 | Europe / Denmark / Hovedstaden |

|                |            |                                          |
|----------------|------------|------------------------------------------|
| EPI_ISL_618825 | 10/26/2020 | 11/5/2020 Europe / Denmark / Nordjylland |
| EPI_ISL_618827 | 10/26/2020 | 11/5/2020 Europe / Denmark / Hovedstaden |
| EPI_ISL_618828 | 10/26/2020 | 11/5/2020 Europe / Denmark / Hovedstaden |
| EPI_ISL_618829 | 10/26/2020 | 11/5/2020 Europe / Denmark / Hovedstaden |
| EPI_ISL_618830 | 10/19/2020 | 11/5/2020 Europe / Denmark / Syddanmark  |
| EPI_ISL_618831 | 10/26/2020 | 11/5/2020 Europe / Denmark / Hovedstaden |
| EPI_ISL_618832 | 10/26/2020 | 11/5/2020 Europe / Denmark / Hovedstaden |
| EPI_ISL_618833 | 10/19/2020 | 11/5/2020 Europe / Denmark / Syddanmark  |
| EPI_ISL_618834 | 10/26/2020 | 11/5/2020 Europe / Denmark / Hovedstaden |
| EPI_ISL_618835 | 10/26/2020 | 11/5/2020 Europe / Denmark / Hovedstaden |
| EPI_ISL_618836 | 10/26/2020 | 11/5/2020 Europe / Denmark / Hovedstaden |
| EPI_ISL_618837 | 10/19/2020 | 11/5/2020 Europe / Denmark / Midtjylland |
| EPI_ISL_618838 | 10/26/2020 | 11/5/2020 Europe / Denmark / Hovedstaden |
| EPI_ISL_618839 | 10/26/2020 | 11/5/2020 Europe / Denmark / Hovedstaden |
| EPI_ISL_618840 | 10/26/2020 | 11/5/2020 Europe / Denmark / Midtjylland |
| EPI_ISL_618842 | 10/26/2020 | 11/5/2020 Europe / Denmark / Nordjylland |
| EPI_ISL_618843 | 10/26/2020 | 11/5/2020 Europe / Denmark / Hovedstaden |
| EPI_ISL_618844 | 10/19/2020 | 11/5/2020 Europe / Denmark / Midtjylland |
| EPI_ISL_618845 | 10/26/2020 | 11/5/2020 Europe / Denmark / Hovedstaden |
| EPI_ISL_618846 | 10/19/2020 | 11/5/2020 Europe / Denmark / Midtjylland |
| EPI_ISL_618847 | 10/19/2020 | 11/5/2020 Europe / Denmark / Syddanmark  |
| EPI_ISL_618849 | 10/26/2020 | 11/5/2020 Europe / Denmark / Midtjylland |
| EPI_ISL_618850 | 10/26/2020 | 11/5/2020 Europe / Denmark / Hovedstaden |
| EPI_ISL_618851 | 10/26/2020 | 11/5/2020 Europe / Denmark / Hovedstaden |
| EPI_ISL_618852 | 10/19/2020 | 11/5/2020 Europe / Denmark / Midtjylland |
| EPI_ISL_618853 | 10/26/2020 | 11/5/2020 Europe / Denmark / Hovedstaden |
| EPI_ISL_618854 | 10/26/2020 | 11/5/2020 Europe / Denmark / Hovedstaden |
| EPI_ISL_618855 | 10/19/2020 | 11/5/2020 Europe / Denmark / Syddanmark  |
| EPI_ISL_618856 | 10/26/2020 | 11/5/2020 Europe / Denmark / Sjaelland   |
| EPI_ISL_618857 | 10/19/2020 | 11/5/2020 Europe / Denmark / Sjaelland   |
| EPI_ISL_618858 | 10/26/2020 | 11/5/2020 Europe / Denmark / Hovedstaden |
| EPI_ISL_618859 | 10/26/2020 | 11/5/2020 Europe / Denmark / Nordjylland |
| EPI_ISL_618860 | 10/26/2020 | 11/5/2020 Europe / Denmark / Nordjylland |
| EPI_ISL_618861 | 10/26/2020 | 11/5/2020 Europe / Denmark / Hovedstaden |
| EPI_ISL_618862 | 10/26/2020 | 11/5/2020 Europe / Denmark / Sjaelland   |
| EPI_ISL_618863 | 10/26/2020 | 11/5/2020 Europe / Denmark / Midtjylland |
| EPI_ISL_618864 | 10/26/2020 | 11/5/2020 Europe / Denmark / Sjaelland   |
| EPI_ISL_618865 | 10/26/2020 | 11/5/2020 Europe / Denmark / Hovedstaden |
| EPI_ISL_618866 | 10/26/2020 | 11/5/2020 Europe / Denmark / Sjaelland   |
| EPI_ISL_618867 | 10/26/2020 | 11/5/2020 Europe / Denmark / Hovedstaden |
| EPI_ISL_618868 | 10/26/2020 | 11/5/2020 Europe / Denmark / Nordjylland |
| EPI_ISL_618869 | 10/26/2020 | 11/5/2020 Europe / Denmark / Hovedstaden |
| EPI_ISL_618870 | 10/26/2020 | 11/5/2020 Europe / Denmark / Hovedstaden |
| EPI_ISL_618871 | 10/26/2020 | 11/5/2020 Europe / Denmark / Hovedstaden |
| EPI_ISL_618872 | 10/19/2020 | 11/5/2020 Europe / Denmark / Syddanmark  |
| EPI_ISL_618873 | 10/26/2020 | 11/5/2020 Europe / Denmark / Hovedstaden |
| EPI_ISL_618874 | 10/26/2020 | 11/5/2020 Europe / Denmark / Hovedstaden |

|                |            |                                          |
|----------------|------------|------------------------------------------|
| EPI_ISL_618875 | 10/26/2020 | 11/5/2020 Europe / Denmark / Hovedstaden |
| EPI_ISL_618876 | 10/26/2020 | 11/5/2020 Europe / Denmark / Midtjylland |
| EPI_ISL_618877 | 10/26/2020 | 11/5/2020 Europe / Denmark / Hovedstaden |
| EPI_ISL_618878 | 10/26/2020 | 11/5/2020 Europe / Denmark / Hovedstaden |
| EPI_ISL_618879 | 10/26/2020 | 11/5/2020 Europe / Denmark / Hovedstaden |
| EPI_ISL_618880 | 10/26/2020 | 11/5/2020 Europe / Denmark / Hovedstaden |
| EPI_ISL_618881 | 10/26/2020 | 11/5/2020 Europe / Denmark / Midtjylland |
| EPI_ISL_618882 | 10/26/2020 | 11/5/2020 Europe / Denmark / Syddanmark  |
| EPI_ISL_618884 | 10/26/2020 | 11/5/2020 Europe / Denmark / Sjaelland   |
| EPI_ISL_618885 | 10/26/2020 | 11/5/2020 Europe / Denmark / Hovedstaden |
| EPI_ISL_618886 | 10/26/2020 | 11/5/2020 Europe / Denmark / Hovedstaden |
| EPI_ISL_618887 | 10/26/2020 | 11/5/2020 Europe / Denmark / Midtjylland |
| EPI_ISL_618888 | 10/26/2020 | 11/5/2020 Europe / Denmark / Nordjylland |
| EPI_ISL_618889 | 10/26/2020 | 11/5/2020 Europe / Denmark / Midtjylland |
| EPI_ISL_618890 | 10/26/2020 | 11/5/2020 Europe / Denmark / Syddanmark  |
| EPI_ISL_618891 | 10/26/2020 | 11/5/2020 Europe / Denmark / Midtjylland |
| EPI_ISL_618892 | 10/26/2020 | 11/5/2020 Europe / Denmark / Hovedstaden |
| EPI_ISL_618893 | 10/26/2020 | 11/5/2020 Europe / Denmark / Hovedstaden |
| EPI_ISL_618894 | 10/26/2020 | 11/5/2020 Europe / Denmark / Hovedstaden |
| EPI_ISL_618895 | 10/26/2020 | 11/5/2020 Europe / Denmark / Hovedstaden |
| EPI_ISL_618896 | 10/26/2020 | 11/5/2020 Europe / Denmark / Hovedstaden |
| EPI_ISL_618897 | 10/26/2020 | 11/5/2020 Europe / Denmark / Hovedstaden |
| EPI_ISL_618898 | 10/26/2020 | 11/5/2020 Europe / Denmark / Hovedstaden |
| EPI_ISL_618899 | 10/26/2020 | 11/5/2020 Europe / Denmark / Syddanmark  |
| EPI_ISL_618900 | 10/26/2020 | 11/5/2020 Europe / Denmark / Hovedstaden |
| EPI_ISL_618901 | 10/26/2020 | 11/5/2020 Europe / Denmark / Hovedstaden |
| EPI_ISL_618902 | 10/26/2020 | 11/5/2020 Europe / Denmark / Syddanmark  |
| EPI_ISL_618903 | 10/26/2020 | 11/5/2020 Europe / Denmark / Hovedstaden |
| EPI_ISL_618904 | 10/26/2020 | 11/5/2020 Europe / Denmark               |
| EPI_ISL_618957 | 10/12/2020 | 11/5/2020 Europe / Denmark / Nordjylland |
| EPI_ISL_618958 | 10/12/2020 | 11/5/2020 Europe / Denmark / Syddanmark  |
| EPI_ISL_618959 | 10/12/2020 | 11/5/2020 Europe / Denmark / Sjaelland   |
| EPI_ISL_618960 | 10/12/2020 | 11/5/2020 Europe / Denmark / Hovedstaden |
| EPI_ISL_618961 | 10/12/2020 | 11/5/2020 Europe / Denmark / Hovedstaden |
| EPI_ISL_618974 | 10/12/2020 | 11/5/2020 Europe / Denmark / Midtjylland |
| EPI_ISL_618975 | 10/12/2020 | 11/5/2020 Europe / Denmark / Hovedstaden |
| EPI_ISL_618976 | 10/12/2020 | 11/5/2020 Europe / Denmark / Midtjylland |
| EPI_ISL_618977 | 10/12/2020 | 11/5/2020 Europe / Denmark / Midtjylland |
| EPI_ISL_618978 | 4/6/2020   | 11/5/2020 Europe / Denmark / Hovedstaden |
| EPI_ISL_618979 | 4/6/2020   | 11/5/2020 Europe / Denmark / Hovedstaden |
| EPI_ISL_618980 | 4/6/2020   | 11/5/2020 Europe / Denmark / Hovedstaden |
| EPI_ISL_618981 | 10/12/2020 | 11/5/2020 Europe / Denmark / Midtjylland |
| EPI_ISL_618982 | 10/12/2020 | 11/5/2020 Europe / Denmark / Hovedstaden |
| EPI_ISL_618983 | 10/12/2020 | 11/5/2020 Europe / Denmark / Syddanmark  |
| EPI_ISL_618984 | 10/12/2020 | 11/5/2020 Europe / Denmark / Hovedstaden |
| EPI_ISL_618985 | 10/12/2020 | 11/5/2020 Europe / Denmark / Hovedstaden |
| EPI_ISL_618986 | 10/12/2020 | 11/5/2020 Europe / Denmark / Midtjylland |

|                |            |                                          |
|----------------|------------|------------------------------------------|
| EPI_ISL_618987 | 10/12/2020 | 11/5/2020 Europe / Denmark / Hovedstaden |
| EPI_ISL_618988 | 10/12/2020 | 11/5/2020 Europe / Denmark / Hovedstaden |
| EPI_ISL_618989 | 10/12/2020 | 11/5/2020 Europe / Denmark / Hovedstaden |
| EPI_ISL_618990 | 10/12/2020 | 11/5/2020 Europe / Denmark / Syddanmark  |
| EPI_ISL_618991 | 10/12/2020 | 11/5/2020 Europe / Denmark / Nordjylland |
| EPI_ISL_618992 | 10/12/2020 | 11/5/2020 Europe / Denmark / Hovedstaden |
| EPI_ISL_618993 | 10/12/2020 | 11/5/2020 Europe / Denmark / Nordjylland |
| EPI_ISL_618994 | 10/12/2020 | 11/5/2020 Europe / Denmark / Hovedstaden |
| EPI_ISL_618995 | 10/12/2020 | 11/5/2020 Europe / Denmark / Hovedstaden |
| EPI_ISL_618996 | 10/12/2020 | 11/5/2020 Europe / Denmark / Hovedstaden |
| EPI_ISL_618997 | 10/12/2020 | 11/5/2020 Europe / Denmark               |
| EPI_ISL_618998 | 10/12/2020 | 11/5/2020 Europe / Denmark / Nordjylland |
| EPI_ISL_618999 | 10/12/2020 | 11/5/2020 Europe / Denmark / Hovedstaden |
| EPI_ISL_619000 | 10/12/2020 | 11/5/2020 Europe / Denmark / Hovedstaden |
| EPI_ISL_619001 | 10/12/2020 | 11/5/2020 Europe / Denmark / Hovedstaden |
| EPI_ISL_619002 | 10/12/2020 | 11/5/2020 Europe / Denmark / Hovedstaden |
| EPI_ISL_619003 | 10/12/2020 | 11/5/2020 Europe / Denmark / Hovedstaden |
| EPI_ISL_619004 | 10/12/2020 | 11/5/2020 Europe / Denmark / Hovedstaden |
| EPI_ISL_619005 | 10/12/2020 | 11/5/2020 Europe / Denmark / Nordjylland |
| EPI_ISL_619006 | 10/12/2020 | 11/5/2020 Europe / Denmark / Nordjylland |
| EPI_ISL_619007 | 10/12/2020 | 11/5/2020 Europe / Denmark / Hovedstaden |
| EPI_ISL_619008 | 10/12/2020 | 11/5/2020 Europe / Denmark / Midtjylland |
| EPI_ISL_619009 | 10/12/2020 | 11/5/2020 Europe / Denmark / Midtjylland |
| EPI_ISL_619010 | 10/12/2020 | 11/5/2020 Europe / Denmark / Hovedstaden |
| EPI_ISL_619011 | 10/12/2020 | 11/5/2020 Europe / Denmark / Midtjylland |
| EPI_ISL_619012 | 10/12/2020 | 11/5/2020 Europe / Denmark / Midtjylland |
| EPI_ISL_619013 | 10/12/2020 | 11/5/2020 Europe / Denmark               |
| EPI_ISL_619014 | 10/12/2020 | 11/5/2020 Europe / Denmark / Hovedstaden |
| EPI_ISL_619015 | 10/12/2020 | 11/5/2020 Europe / Denmark / Sjælland    |
| EPI_ISL_619016 | 10/12/2020 | 11/5/2020 Europe / Denmark / Sjælland    |
| EPI_ISL_619017 | 4/13/2020  | 11/5/2020 Europe / Denmark / Hovedstaden |
| EPI_ISL_619018 | 4/13/2020  | 11/5/2020 Europe / Denmark / Hovedstaden |
| EPI_ISL_619019 | 10/12/2020 | 11/5/2020 Europe / Denmark / Midtjylland |
| EPI_ISL_619020 | 10/12/2020 | 11/5/2020 Europe / Denmark / Hovedstaden |
| EPI_ISL_619021 | 10/12/2020 | 11/5/2020 Europe / Denmark / Midtjylland |
| EPI_ISL_619022 | 10/12/2020 | 11/5/2020 Europe / Denmark / Hovedstaden |
| EPI_ISL_619023 | 10/12/2020 | 11/5/2020 Europe / Denmark / Nordjylland |
| EPI_ISL_619024 | 10/12/2020 | 11/5/2020 Europe / Denmark / Hovedstaden |
| EPI_ISL_619025 | 10/12/2020 | 11/5/2020 Europe / Denmark / Hovedstaden |
| EPI_ISL_619026 | 10/12/2020 | 11/5/2020 Europe / Denmark / Hovedstaden |
| EPI_ISL_619027 | 10/12/2020 | 11/5/2020 Europe / Denmark / Hovedstaden |
| EPI_ISL_619028 | 10/12/2020 | 11/5/2020 Europe / Denmark / Hovedstaden |
| EPI_ISL_619029 | 10/12/2020 | 11/5/2020 Europe / Denmark / Hovedstaden |
| EPI_ISL_619030 | 10/12/2020 | 11/5/2020 Europe / Denmark / Syddanmark  |
| EPI_ISL_619031 | 10/12/2020 | 11/5/2020 Europe / Denmark / Hovedstaden |
| EPI_ISL_619032 | 10/12/2020 | 11/5/2020 Europe / Denmark / Midtjylland |
| EPI_ISL_619033 | 10/12/2020 | 11/5/2020 Europe / Denmark / Hovedstaden |



|                |            |                                          |
|----------------|------------|------------------------------------------|
| EPI_ISL_619084 | 10/12/2020 | 11/5/2020 Europe / Denmark / Hovedstaden |
| EPI_ISL_619085 | 10/12/2020 | 11/5/2020 Europe / Denmark / Nordjylland |
| EPI_ISL_619086 | 10/12/2020 | 11/5/2020 Europe / Denmark / Syddanmark  |
| EPI_ISL_619087 | 10/12/2020 | 11/5/2020 Europe / Denmark / Hovedstaden |
| EPI_ISL_619088 | 10/12/2020 | 11/5/2020 Europe / Denmark / Midtjylland |
| EPI_ISL_619089 | 10/12/2020 | 11/5/2020 Europe / Denmark / Hovedstaden |
| EPI_ISL_619090 | 10/12/2020 | 11/5/2020 Europe / Denmark / Syddanmark  |
| EPI_ISL_619091 | 10/12/2020 | 11/5/2020 Europe / Denmark / Midtjylland |
| EPI_ISL_619112 | 10/12/2020 | 11/5/2020 Europe / Denmark / Hovedstaden |
| EPI_ISL_619113 | 10/12/2020 | 11/5/2020 Europe / Denmark / Hovedstaden |
| EPI_ISL_619114 | 10/12/2020 | 11/5/2020 Europe / Denmark / Hovedstaden |
| EPI_ISL_619115 | 10/12/2020 | 11/5/2020 Europe / Denmark / Hovedstaden |
| EPI_ISL_619116 | 10/12/2020 | 11/5/2020 Europe / Denmark / Hovedstaden |
| EPI_ISL_619117 | 10/12/2020 | 11/5/2020 Europe / Denmark / Midtjylland |
| EPI_ISL_619118 | 10/12/2020 | 11/5/2020 Europe / Denmark / Midtjylland |
| EPI_ISL_619119 | 10/12/2020 | 11/5/2020 Europe / Denmark / Midtjylland |
| EPI_ISL_619120 | 10/12/2020 | 11/5/2020 Europe / Denmark / Midtjylland |
| EPI_ISL_619121 | 10/12/2020 | 11/5/2020 Europe / Denmark / Midtjylland |
| EPI_ISL_619122 | 10/12/2020 | 11/5/2020 Europe / Denmark / Midtjylland |
| EPI_ISL_619123 | 10/12/2020 | 11/5/2020 Europe / Denmark / Sjaelland   |
| EPI_ISL_619124 | 10/12/2020 | 11/5/2020 Europe / Denmark / Midtjylland |
| EPI_ISL_619125 | 10/12/2020 | 11/5/2020 Europe / Denmark / Syddanmark  |
| EPI_ISL_619126 | 10/12/2020 | 11/5/2020 Europe / Denmark / Syddanmark  |
| EPI_ISL_619127 | 10/12/2020 | 11/5/2020 Europe / Denmark / Hovedstaden |
| EPI_ISL_619128 | 10/12/2020 | 11/5/2020 Europe / Denmark / Hovedstaden |
| EPI_ISL_619129 | 10/12/2020 | 11/5/2020 Europe / Denmark / Hovedstaden |
| EPI_ISL_619130 | 10/12/2020 | 11/5/2020 Europe / Denmark / Midtjylland |
| EPI_ISL_619131 | 10/12/2020 | 11/5/2020 Europe / Denmark / Hovedstaden |
| EPI_ISL_619132 | 10/12/2020 | 11/5/2020 Europe / Denmark / Midtjylland |
| EPI_ISL_619133 | 4/6/2020   | 11/5/2020 Europe / Denmark / Hovedstaden |
| EPI_ISL_619134 | 10/12/2020 | 11/5/2020 Europe / Denmark / Midtjylland |
| EPI_ISL_619135 | 10/12/2020 | 11/5/2020 Europe / Denmark / Midtjylland |
| EPI_ISL_619136 | 10/12/2020 | 11/5/2020 Europe / Denmark / Nordjylland |
| EPI_ISL_619137 | 10/12/2020 | 11/5/2020 Europe / Denmark / Hovedstaden |
| EPI_ISL_619138 | 10/12/2020 | 11/5/2020 Europe / Denmark / Syddanmark  |
| EPI_ISL_619139 | 10/12/2020 | 11/5/2020 Europe / Denmark / Sjaelland   |
| EPI_ISL_619140 | 10/12/2020 | 11/5/2020 Europe / Denmark / Hovedstaden |
| EPI_ISL_619141 | 4/6/2020   | 11/5/2020 Europe / Denmark / Hovedstaden |
| EPI_ISL_619142 | 10/12/2020 | 11/5/2020 Europe / Denmark / Hovedstaden |
| EPI_ISL_619143 | 10/12/2020 | 11/5/2020 Europe / Denmark / Hovedstaden |
| EPI_ISL_619144 | 10/12/2020 | 11/5/2020 Europe / Denmark / Midtjylland |
| EPI_ISL_619145 | 4/6/2020   | 11/5/2020 Europe / Denmark / Hovedstaden |
| EPI_ISL_619146 | 10/12/2020 | 11/5/2020 Europe / Denmark / Hovedstaden |
| EPI_ISL_619147 | 10/12/2020 | 11/5/2020 Europe / Denmark / Syddanmark  |
| EPI_ISL_619148 | 10/12/2020 | 11/5/2020 Europe / Denmark / Hovedstaden |
| EPI_ISL_619149 | 10/12/2020 | 11/5/2020 Europe / Denmark / Hovedstaden |
| EPI_ISL_619150 | 10/12/2020 | 11/5/2020 Europe / Denmark / Nordjylland |





|                |            |                                          |
|----------------|------------|------------------------------------------|
| EPI_ISL_619198 | 10/12/2020 | 11/5/2020 Europe / Denmark / Hovedstaden |
| EPI_ISL_619199 | 10/12/2020 | 11/5/2020 Europe / Denmark / Hovedstaden |
| EPI_ISL_619200 | 10/12/2020 | 11/5/2020 Europe / Denmark / Hovedstaden |
| EPI_ISL_619201 | 10/12/2020 | 11/5/2020 Europe / Denmark / Hovedstaden |
| EPI_ISL_619202 | 10/12/2020 | 11/5/2020 Europe / Denmark / Hovedstaden |
| EPI_ISL_619203 | 10/12/2020 | 11/5/2020 Europe / Denmark / Hovedstaden |
| EPI_ISL_619204 | 10/12/2020 | 11/5/2020 Europe / Denmark / Hovedstaden |
| EPI_ISL_619205 | 10/12/2020 | 11/5/2020 Europe / Denmark / Sjælland    |
| EPI_ISL_619206 | 10/12/2020 | 11/5/2020 Europe / Denmark / Hovedstaden |
| EPI_ISL_619207 | 10/12/2020 | 11/5/2020 Europe / Denmark / Hovedstaden |
| EPI_ISL_619208 | 10/12/2020 | 11/5/2020 Europe / Denmark / Syddanmark  |
| EPI_ISL_619209 | 10/12/2020 | 11/5/2020 Europe / Denmark / Hovedstaden |
| EPI_ISL_619210 | 10/12/2020 | 11/5/2020 Europe / Denmark / Hovedstaden |
| EPI_ISL_619211 | 4/6/2020   | 11/5/2020 Europe / Denmark / Hovedstaden |
| EPI_ISL_619212 | 10/12/2020 | 11/5/2020 Europe / Denmark / Hovedstaden |
| EPI_ISL_619213 | 10/12/2020 | 11/5/2020 Europe / Denmark / Midtjylland |
| EPI_ISL_619214 | 10/12/2020 | 11/5/2020 Europe / Denmark / Midtjylland |
| EPI_ISL_619215 | 10/12/2020 | 11/5/2020 Europe / Denmark / Nordjylland |
| EPI_ISL_619216 | 10/12/2020 | 11/5/2020 Europe / Denmark / Hovedstaden |
| EPI_ISL_619217 | 10/12/2020 | 11/5/2020 Europe / Denmark / Hovedstaden |
| EPI_ISL_619218 | 10/12/2020 | 11/5/2020 Europe / Denmark / Hovedstaden |
| EPI_ISL_619219 | 10/12/2020 | 11/5/2020 Europe / Denmark / Hovedstaden |
| EPI_ISL_619220 | 10/12/2020 | 11/5/2020 Europe / Denmark / Midtjylland |
| EPI_ISL_619221 | 10/12/2020 | 11/5/2020 Europe / Denmark / Hovedstaden |
| EPI_ISL_619222 | 10/12/2020 | 11/5/2020 Europe / Denmark / Midtjylland |
| EPI_ISL_619223 | 10/12/2020 | 11/5/2020 Europe / Denmark / Sjælland    |
| EPI_ISL_619224 | 10/12/2020 | 11/5/2020 Europe / Denmark / Hovedstaden |
| EPI_ISL_619225 | 10/12/2020 | 11/5/2020 Europe / Denmark / Hovedstaden |
| EPI_ISL_619226 | 4/6/2020   | 11/5/2020 Europe / Denmark / Hovedstaden |
| EPI_ISL_619227 | 10/12/2020 | 11/5/2020 Europe / Denmark / Midtjylland |
| EPI_ISL_619228 | 10/12/2020 | 11/5/2020 Europe / Denmark / Midtjylland |
| EPI_ISL_619229 | 10/12/2020 | 11/5/2020 Europe / Denmark / Sjælland    |
| EPI_ISL_619230 | 10/12/2020 | 11/5/2020 Europe / Denmark / Midtjylland |
| EPI_ISL_619231 | 10/12/2020 | 11/5/2020 Europe / Denmark / Midtjylland |
| EPI_ISL_619232 | 10/12/2020 | 11/5/2020 Europe / Denmark / Midtjylland |
| EPI_ISL_619233 | 4/6/2020   | 11/5/2020 Europe / Denmark / Hovedstaden |
| EPI_ISL_619234 | 10/12/2020 | 11/5/2020 Europe / Denmark / Midtjylland |
| EPI_ISL_619235 | 10/12/2020 | 11/5/2020 Europe / Denmark               |
| EPI_ISL_619236 | 10/12/2020 | 11/5/2020 Europe / Denmark               |
| EPI_ISL_619237 | 10/12/2020 | 11/5/2020 Europe / Denmark / Syddanmark  |
| EPI_ISL_619238 | 10/12/2020 | 11/5/2020 Europe / Denmark / Midtjylland |
| EPI_ISL_619239 | 10/12/2020 | 11/5/2020 Europe / Denmark / Midtjylland |
| EPI_ISL_619240 | 10/12/2020 | 11/5/2020 Europe / Denmark / Midtjylland |
| EPI_ISL_619241 | 10/12/2020 | 11/5/2020 Europe / Denmark / Midtjylland |
| EPI_ISL_619242 | 10/12/2020 | 11/5/2020 Europe / Denmark / Nordjylland |
| EPI_ISL_619243 | 10/12/2020 | 11/5/2020 Europe / Denmark / Syddanmark  |
| EPI_ISL_619244 | 10/12/2020 | 11/5/2020 Europe / Denmark / Hovedstaden |

|                |            |                                          |
|----------------|------------|------------------------------------------|
| EPI_ISL_619245 | 10/12/2020 | 11/5/2020 Europe / Denmark / Hovedstaden |
| EPI_ISL_619246 | 10/12/2020 | 11/5/2020 Europe / Denmark / Midtjylland |
| EPI_ISL_619247 | 10/12/2020 | 11/5/2020 Europe / Denmark / Hovedstaden |
| EPI_ISL_619248 | 10/12/2020 | 11/5/2020 Europe / Denmark               |
| EPI_ISL_619249 | 10/12/2020 | 11/5/2020 Europe / Denmark / Midtjylland |
| EPI_ISL_619250 | 10/12/2020 | 11/5/2020 Europe / Denmark / Midtjylland |
| EPI_ISL_619251 | 10/12/2020 | 11/5/2020 Europe / Denmark / Hovedstaden |
| EPI_ISL_619252 | 10/12/2020 | 11/5/2020 Europe / Denmark / Hovedstaden |
| EPI_ISL_619253 | 10/12/2020 | 11/5/2020 Europe / Denmark / Midtjylland |
| EPI_ISL_619254 | 10/12/2020 | 11/5/2020 Europe / Denmark / Midtjylland |
| EPI_ISL_619255 | 10/12/2020 | 11/5/2020 Europe / Denmark / Hovedstaden |
| EPI_ISL_619256 | 4/6/2020   | 11/5/2020 Europe / Denmark / Sjælland    |
| EPI_ISL_619257 | 10/12/2020 | 11/5/2020 Europe / Denmark / Nordjylland |
| EPI_ISL_619258 | 10/12/2020 | 11/5/2020 Europe / Denmark / Nordjylland |
| EPI_ISL_619259 | 10/12/2020 | 11/5/2020 Europe / Denmark / Midtjylland |
| EPI_ISL_619260 | 4/6/2020   | 11/5/2020 Europe / Denmark / Hovedstaden |
| EPI_ISL_619261 | 4/6/2020   | 11/5/2020 Europe / Denmark / Hovedstaden |
| EPI_ISL_619262 | 4/6/2020   | 11/5/2020 Europe / Denmark / Hovedstaden |
| EPI_ISL_619263 | 4/6/2020   | 11/5/2020 Europe / Denmark / Hovedstaden |
| EPI_ISL_619264 | 4/6/2020   | 11/5/2020 Europe / Denmark / Hovedstaden |
| EPI_ISL_619265 | 4/6/2020   | 11/5/2020 Europe / Denmark / Hovedstaden |
| EPI_ISL_619266 | 4/6/2020   | 11/5/2020 Europe / Denmark / Hovedstaden |
| EPI_ISL_619267 | 4/6/2020   | 11/5/2020 Europe / Denmark / Hovedstaden |
| EPI_ISL_619268 | 4/6/2020   | 11/5/2020 Europe / Denmark / Hovedstaden |
| EPI_ISL_619269 | 4/6/2020   | 11/5/2020 Europe / Denmark / Hovedstaden |
| EPI_ISL_619270 | 4/6/2020   | 11/5/2020 Europe / Denmark / Hovedstaden |
| EPI_ISL_619271 | 4/6/2020   | 11/5/2020 Europe / Denmark / Hovedstaden |
| EPI_ISL_619272 | 4/13/2020  | 11/5/2020 Europe / Denmark / Hovedstaden |
| EPI_ISL_619273 | 4/13/2020  | 11/5/2020 Europe / Denmark / Hovedstaden |
| EPI_ISL_619274 | 10/12/2020 | 11/5/2020 Europe / Denmark / Hovedstaden |
| EPI_ISL_619275 | 10/12/2020 | 11/5/2020 Europe / Denmark / Sjælland    |
| EPI_ISL_619276 | 10/12/2020 | 11/5/2020 Europe / Denmark / Midtjylland |
| EPI_ISL_619277 | 10/12/2020 | 11/5/2020 Europe / Denmark / Syddanmark  |
| EPI_ISL_619278 | 10/12/2020 | 11/5/2020 Europe / Denmark / Hovedstaden |
| EPI_ISL_619279 | 10/12/2020 | 11/5/2020 Europe / Denmark / Hovedstaden |
| EPI_ISL_619280 | 10/12/2020 | 11/5/2020 Europe / Denmark / Nordjylland |
| EPI_ISL_619281 | 10/12/2020 | 11/5/2020 Europe / Denmark / Hovedstaden |
| EPI_ISL_619282 | 10/12/2020 | 11/5/2020 Europe / Denmark / Sjælland    |
| EPI_ISL_619283 | 10/12/2020 | 11/5/2020 Europe / Denmark / Midtjylland |
| EPI_ISL_619284 | 10/12/2020 | 11/5/2020 Europe / Denmark / Syddanmark  |
| EPI_ISL_619285 | 10/12/2020 | 11/5/2020 Europe / Denmark / Hovedstaden |
| EPI_ISL_619286 | 10/12/2020 | 11/5/2020 Europe / Denmark / Nordjylland |
| EPI_ISL_619287 | 10/12/2020 | 11/5/2020 Europe / Denmark / Hovedstaden |
| EPI_ISL_619288 | 10/12/2020 | 11/5/2020 Europe / Denmark               |
| EPI_ISL_619289 | 10/12/2020 | 11/5/2020 Europe / Denmark / Midtjylland |
| EPI_ISL_619290 | 10/12/2020 | 11/5/2020 Europe / Denmark / Hovedstaden |
| EPI_ISL_619291 | 10/12/2020 | 11/5/2020 Europe / Denmark / Hovedstaden |

|                |            |                                          |
|----------------|------------|------------------------------------------|
| EPI_ISL_619292 | 4/6/2020   | 11/5/2020 Europe / Denmark / Hovedstaden |
| EPI_ISL_619293 | 10/12/2020 | 11/5/2020 Europe / Denmark / Hovedstaden |
| EPI_ISL_619294 | 10/12/2020 | 11/5/2020 Europe / Denmark / Hovedstaden |
| EPI_ISL_619295 | 10/12/2020 | 11/5/2020 Europe / Denmark / Hovedstaden |
| EPI_ISL_619296 | 10/12/2020 | 11/5/2020 Europe / Denmark / Syddanmark  |
| EPI_ISL_619297 | 10/12/2020 | 11/5/2020 Europe / Denmark / Hovedstaden |
| EPI_ISL_619298 | 10/12/2020 | 11/5/2020 Europe / Denmark / Midtjylland |
| EPI_ISL_619299 | 10/12/2020 | 11/5/2020 Europe / Denmark / Nordjylland |
| EPI_ISL_619300 | 10/12/2020 | 11/5/2020 Europe / Denmark / Hovedstaden |
| EPI_ISL_619301 | 10/12/2020 | 11/5/2020 Europe / Denmark / Hovedstaden |
| EPI_ISL_619302 | 10/12/2020 | 11/5/2020 Europe / Denmark / Hovedstaden |
| EPI_ISL_619303 | 10/12/2020 | 11/5/2020 Europe / Denmark / Hovedstaden |
| EPI_ISL_619304 | 10/12/2020 | 11/5/2020 Europe / Denmark / Syddanmark  |
| EPI_ISL_619305 | 10/12/2020 | 11/5/2020 Europe / Denmark / Syddanmark  |
| EPI_ISL_619306 | 10/12/2020 | 11/5/2020 Europe / Denmark / Hovedstaden |
| EPI_ISL_619307 | 10/12/2020 | 11/5/2020 Europe / Denmark / Sjaelland   |
| EPI_ISL_619308 | 10/12/2020 | 11/5/2020 Europe / Denmark / Hovedstaden |
| EPI_ISL_619309 | 10/12/2020 | 11/5/2020 Europe / Denmark / Hovedstaden |
| EPI_ISL_619310 | 10/12/2020 | 11/5/2020 Europe / Denmark / Hovedstaden |
| EPI_ISL_619311 | 10/12/2020 | 11/5/2020 Europe / Denmark / Syddanmark  |
| EPI_ISL_619312 | 10/12/2020 | 11/5/2020 Europe / Denmark / Syddanmark  |
| EPI_ISL_619313 | 10/12/2020 | 11/5/2020 Europe / Denmark / Hovedstaden |
| EPI_ISL_619314 | 10/12/2020 | 11/5/2020 Europe / Denmark / Hovedstaden |
| EPI_ISL_619315 | 10/12/2020 | 11/5/2020 Europe / Denmark / Hovedstaden |
| EPI_ISL_619316 | 10/12/2020 | 11/5/2020 Europe / Denmark / Syddanmark  |
| EPI_ISL_619317 | 10/12/2020 | 11/5/2020 Europe / Denmark / Sjaelland   |
| EPI_ISL_619318 | 4/6/2020   | 11/5/2020 Europe / Denmark / Hovedstaden |
| EPI_ISL_619319 | 10/12/2020 | 11/5/2020 Europe / Denmark / Hovedstaden |
| EPI_ISL_619320 | 10/12/2020 | 11/5/2020 Europe / Denmark / Hovedstaden |
| EPI_ISL_619321 | 4/13/2020  | 11/5/2020 Europe / Denmark / Nordjylland |
| EPI_ISL_619322 | 10/12/2020 | 11/5/2020 Europe / Denmark / Midtjylland |
| EPI_ISL_619323 | 10/12/2020 | 11/5/2020 Europe / Denmark / Syddanmark  |
| EPI_ISL_619324 | 10/12/2020 | 11/5/2020 Europe / Denmark / Syddanmark  |
| EPI_ISL_619325 | 10/12/2020 | 11/5/2020 Europe / Denmark / Midtjylland |
| EPI_ISL_619326 | 10/12/2020 | 11/5/2020 Europe / Denmark / Sjaelland   |
| EPI_ISL_619327 | 10/12/2020 | 11/5/2020 Europe / Denmark / Midtjylland |
| EPI_ISL_619328 | 4/13/2020  | 11/5/2020 Europe / Denmark / Nordjylland |
| EPI_ISL_619329 | 10/12/2020 | 11/5/2020 Europe / Denmark / Midtjylland |
| EPI_ISL_619330 | 10/12/2020 | 11/5/2020 Europe / Denmark / Sjaelland   |
| EPI_ISL_619331 | 10/12/2020 | 11/5/2020 Europe / Denmark / Hovedstaden |
| EPI_ISL_619332 | 4/13/2020  | 11/5/2020 Europe / Denmark / Nordjylland |
| EPI_ISL_619333 | 10/12/2020 | 11/5/2020 Europe / Denmark / Midtjylland |
| EPI_ISL_619334 | 10/12/2020 | 11/5/2020 Europe / Denmark / Midtjylland |
| EPI_ISL_619335 | 10/12/2020 | 11/5/2020 Europe / Denmark / Sjaelland   |
| EPI_ISL_619336 | 10/12/2020 | 11/5/2020 Europe / Denmark / Midtjylland |
| EPI_ISL_619337 | 4/13/2020  | 11/5/2020 Europe / Denmark / Midtjylland |
| EPI_ISL_619338 | 10/12/2020 | 11/5/2020 Europe / Denmark / Midtjylland |



|                |            |                                          |
|----------------|------------|------------------------------------------|
| EPI_ISL_619386 | 10/12/2020 | 11/5/2020 Europe / Denmark / Hovedstaden |
| EPI_ISL_619387 | 10/12/2020 | 11/5/2020 Europe / Denmark / Hovedstaden |
| EPI_ISL_619388 | 10/12/2020 | 11/5/2020 Europe / Denmark / Hovedstaden |
| EPI_ISL_619389 | 4/13/2020  | 11/5/2020 Europe / Denmark / Nordjylland |
| EPI_ISL_619390 | 10/12/2020 | 11/5/2020 Europe / Denmark / Midtjylland |
| EPI_ISL_619391 | 10/12/2020 | 11/5/2020 Europe / Denmark / Hovedstaden |
| EPI_ISL_619392 | 10/12/2020 | 11/5/2020 Europe / Denmark / Hovedstaden |
| EPI_ISL_619393 | 10/12/2020 | 11/5/2020 Europe / Denmark / Hovedstaden |
| EPI_ISL_619394 | 10/12/2020 | 11/5/2020 Europe / Denmark / Hovedstaden |
| EPI_ISL_619395 | 10/12/2020 | 11/5/2020 Europe / Denmark / Midtjylland |
| EPI_ISL_619396 | 10/12/2020 | 11/5/2020 Europe / Denmark / Hovedstaden |
| EPI_ISL_619397 | 10/12/2020 | 11/5/2020 Europe / Denmark / Hovedstaden |
| EPI_ISL_619398 | 4/13/2020  | 11/5/2020 Europe / Denmark / Nordjylland |
| EPI_ISL_619399 | 10/12/2020 | 11/5/2020 Europe / Denmark / Hovedstaden |
| EPI_ISL_619400 | 10/12/2020 | 11/5/2020 Europe / Denmark / Hovedstaden |
| EPI_ISL_619401 | 10/12/2020 | 11/5/2020 Europe / Denmark / Sjælland    |
| EPI_ISL_619402 | 10/12/2020 | 11/5/2020 Europe / Denmark / Hovedstaden |
| EPI_ISL_619403 | 10/12/2020 | 11/5/2020 Europe / Denmark / Midtjylland |
| EPI_ISL_619404 | 10/12/2020 | 11/5/2020 Europe / Denmark / Hovedstaden |
| EPI_ISL_619405 | 4/13/2020  | 11/5/2020 Europe / Denmark / Nordjylland |
| EPI_ISL_619406 | 10/5/2020  | 11/5/2020 Europe / Denmark / Midtjylland |
| EPI_ISL_619407 | 10/5/2020  | 11/5/2020 Europe / Denmark / Syddanmark  |
| EPI_ISL_619408 | 10/5/2020  | 11/5/2020 Europe / Denmark / Midtjylland |
| EPI_ISL_619409 | 10/5/2020  | 11/5/2020 Europe / Denmark / Midtjylland |
| EPI_ISL_619410 | 10/5/2020  | 11/5/2020 Europe / Denmark / Midtjylland |
| EPI_ISL_619411 | 10/5/2020  | 11/5/2020 Europe / Denmark / Midtjylland |
| EPI_ISL_619412 | 10/5/2020  | 11/5/2020 Europe / Denmark / Hovedstaden |
| EPI_ISL_619413 | 10/5/2020  | 11/5/2020 Europe / Denmark / Midtjylland |
| EPI_ISL_619414 | 10/5/2020  | 11/5/2020 Europe / Denmark / Hovedstaden |
| EPI_ISL_619416 | 10/5/2020  | 11/5/2020 Europe / Denmark / Midtjylland |
| EPI_ISL_619420 | 10/5/2020  | 11/5/2020 Europe / Denmark / Midtjylland |
| EPI_ISL_619422 | 10/5/2020  | 11/5/2020 Europe / Denmark / Midtjylland |
| EPI_ISL_619423 | 10/5/2020  | 11/5/2020 Europe / Denmark / Midtjylland |
| EPI_ISL_619425 | 10/5/2020  | 11/5/2020 Europe / Denmark / Midtjylland |
| EPI_ISL_619426 | 10/5/2020  | 11/5/2020 Europe / Denmark / Syddanmark  |
| EPI_ISL_619427 | 10/5/2020  | 11/5/2020 Europe / Denmark / Hovedstaden |
| EPI_ISL_619428 | 10/5/2020  | 11/5/2020 Europe / Denmark / Hovedstaden |
| EPI_ISL_619429 | 10/5/2020  | 11/5/2020 Europe / Denmark / Hovedstaden |
| EPI_ISL_619430 | 10/5/2020  | 11/5/2020 Europe / Denmark / Hovedstaden |
| EPI_ISL_619431 | 10/5/2020  | 11/5/2020 Europe / Denmark / Hovedstaden |
| EPI_ISL_619432 | 10/5/2020  | 11/5/2020 Europe / Denmark / Hovedstaden |
| EPI_ISL_619433 | 10/5/2020  | 11/5/2020 Europe / Denmark / Syddanmark  |
| EPI_ISL_619434 | 10/5/2020  | 11/5/2020 Europe / Denmark / Hovedstaden |
| EPI_ISL_619435 | 10/5/2020  | 11/5/2020 Europe / Denmark / Hovedstaden |
| EPI_ISL_619436 | 10/5/2020  | 11/5/2020 Europe / Denmark / Hovedstaden |
| EPI_ISL_619437 | 10/5/2020  | 11/5/2020 Europe / Denmark / Hovedstaden |
| EPI_ISL_619438 | 10/5/2020  | 11/5/2020 Europe / Denmark / Syddanmark  |



|                |            |                                          |
|----------------|------------|------------------------------------------|
| EPI_ISL_619508 | 10/12/2020 | 11/5/2020 Europe / Denmark / Midtjylland |
| EPI_ISL_619509 | 10/12/2020 | 11/5/2020 Europe / Denmark / Midtjylland |
| EPI_ISL_619510 | 10/12/2020 | 11/5/2020 Europe / Denmark / Midtjylland |
| EPI_ISL_619513 | 10/12/2020 | 11/5/2020 Europe / Denmark / Nordjylland |
| EPI_ISL_619515 | 10/12/2020 | 11/5/2020 Europe / Denmark / Midtjylland |
| EPI_ISL_619517 | 10/12/2020 | 11/5/2020 Europe / Denmark / Hovedstaden |
| EPI_ISL_619519 | 10/12/2020 | 11/5/2020 Europe / Denmark / Hovedstaden |
| EPI_ISL_619520 | 10/12/2020 | 11/5/2020 Europe / Denmark / Hovedstaden |
| EPI_ISL_619521 | 10/12/2020 | 11/5/2020 Europe / Denmark / Hovedstaden |
| EPI_ISL_619522 | 10/12/2020 | 11/5/2020 Europe / Denmark / Hovedstaden |
| EPI_ISL_619523 | 10/12/2020 | 11/5/2020 Europe / Denmark / Sjælland    |
| EPI_ISL_619524 | 10/12/2020 | 11/5/2020 Europe / Denmark / Sjælland    |
| EPI_ISL_619526 | 10/12/2020 | 11/5/2020 Europe / Denmark               |
| EPI_ISL_619528 | 10/12/2020 | 11/5/2020 Europe / Denmark / Sjælland    |
| EPI_ISL_619529 | 10/12/2020 | 11/5/2020 Europe / Denmark / Sjælland    |
| EPI_ISL_619530 | 10/12/2020 | 11/5/2020 Europe / Denmark               |
| EPI_ISL_619531 | 10/12/2020 | 11/5/2020 Europe / Denmark / Hovedstaden |
| EPI_ISL_619533 | 10/12/2020 | 11/5/2020 Europe / Denmark / Hovedstaden |
| EPI_ISL_619534 | 3/16/2020  | 11/5/2020 Europe / Denmark / Sjælland    |
| EPI_ISL_619536 | 10/12/2020 | 11/5/2020 Europe / Denmark / Hovedstaden |
| EPI_ISL_619537 | 10/12/2020 | 11/5/2020 Europe / Denmark / Midtjylland |
| EPI_ISL_619538 | 10/12/2020 | 11/5/2020 Europe / Denmark / Syddanmark  |
| EPI_ISL_619539 | 10/12/2020 | 11/5/2020 Europe / Denmark / Syddanmark  |
| EPI_ISL_619540 | 10/12/2020 | 11/5/2020 Europe / Denmark / Midtjylland |
| EPI_ISL_619541 | 10/12/2020 | 11/5/2020 Europe / Denmark / Sjælland    |
| EPI_ISL_619542 | 10/12/2020 | 11/5/2020 Europe / Denmark / Midtjylland |
| EPI_ISL_619543 | 10/12/2020 | 11/5/2020 Europe / Denmark / Syddanmark  |
| EPI_ISL_619544 | 10/12/2020 | 11/5/2020 Europe / Denmark / Syddanmark  |
| EPI_ISL_619545 | 10/12/2020 | 11/5/2020 Europe / Denmark / Syddanmark  |
| EPI_ISL_619546 | 10/12/2020 | 11/5/2020 Europe / Denmark / Syddanmark  |
| EPI_ISL_619547 | 10/12/2020 | 11/5/2020 Europe / Denmark / Syddanmark  |
| EPI_ISL_619548 | 10/12/2020 | 11/5/2020 Europe / Denmark / Midtjylland |
| EPI_ISL_619549 | 10/12/2020 | 11/5/2020 Europe / Denmark / Syddanmark  |
| EPI_ISL_619550 | 10/12/2020 | 11/5/2020 Europe / Denmark / Nordjylland |
| EPI_ISL_619551 | 10/12/2020 | 11/5/2020 Europe / Denmark / Midtjylland |
| EPI_ISL_619552 | 10/12/2020 | 11/5/2020 Europe / Denmark / Midtjylland |
| EPI_ISL_619553 | 10/12/2020 | 11/5/2020 Europe / Denmark / Midtjylland |
| EPI_ISL_619554 | 10/12/2020 | 11/5/2020 Europe / Denmark / Midtjylland |
| EPI_ISL_619555 | 10/12/2020 | 11/5/2020 Europe / Denmark / Midtjylland |
| EPI_ISL_619556 | 3/16/2020  | 11/5/2020 Europe / Denmark / Sjælland    |
| EPI_ISL_619558 | 10/12/2020 | 11/5/2020 Europe / Denmark / Midtjylland |
| EPI_ISL_619559 | 10/12/2020 | 11/5/2020 Europe / Denmark / Hovedstaden |
| EPI_ISL_619560 | 10/12/2020 | 11/5/2020 Europe / Denmark / Midtjylland |
| EPI_ISL_619561 | 10/12/2020 | 11/5/2020 Europe / Denmark / Midtjylland |
| EPI_ISL_619562 | 10/12/2020 | 11/5/2020 Europe / Denmark / Midtjylland |
| EPI_ISL_619563 | 10/12/2020 | 11/5/2020 Europe / Denmark / Midtjylland |
| EPI_ISL_619564 | 10/12/2020 | 11/5/2020 Europe / Denmark / Hovedstaden |

















|                |           |                                          |
|----------------|-----------|------------------------------------------|
| EPI_ISL_619973 | 9/28/2020 | 11/5/2020 Europe / Denmark / Sjaelland   |
| EPI_ISL_619975 | 9/28/2020 | 11/5/2020 Europe / Denmark / Hovedstaden |
| EPI_ISL_619976 | 9/28/2020 | 11/5/2020 Europe / Denmark / Hovedstaden |
| EPI_ISL_619978 | 3/9/2020  | 11/5/2020 Europe / Denmark / Midtjylland |
| EPI_ISL_619979 | 3/9/2020  | 11/5/2020 Europe / Denmark / Midtjylland |
| EPI_ISL_619980 | 3/9/2020  | 11/5/2020 Europe / Denmark / Nordjylland |
| EPI_ISL_619981 | 3/9/2020  | 11/5/2020 Europe / Denmark / Nordjylland |
| EPI_ISL_619982 | 3/9/2020  | 11/5/2020 Europe / Denmark / Nordjylland |
| EPI_ISL_619983 | 3/9/2020  | 11/5/2020 Europe / Denmark / Nordjylland |
| EPI_ISL_619985 | 10/5/2020 | 11/5/2020 Europe / Denmark / Sjaelland   |
| EPI_ISL_619986 | 10/5/2020 | 11/5/2020 Europe / Denmark / Midtjylland |
| EPI_ISL_619989 | 10/5/2020 | 11/5/2020 Europe / Denmark / Sjaelland   |
| EPI_ISL_619991 | 10/5/2020 | 11/5/2020 Europe / Denmark / Syddanmark  |
| EPI_ISL_619992 | 10/5/2020 | 11/5/2020 Europe / Denmark / Sjaelland   |
| EPI_ISL_619993 | 10/5/2020 | 11/5/2020 Europe / Denmark / Midtjylland |
| EPI_ISL_619994 | 10/5/2020 | 11/5/2020 Europe / Denmark / Midtjylland |
| EPI_ISL_619995 | 10/5/2020 | 11/5/2020 Europe / Denmark / Midtjylland |
| EPI_ISL_619996 | 10/5/2020 | 11/5/2020 Europe / Denmark / Midtjylland |
| EPI_ISL_619997 | 10/5/2020 | 11/5/2020 Europe / Denmark               |
| EPI_ISL_619999 | 10/5/2020 | 11/5/2020 Europe / Denmark / Syddanmark  |
| EPI_ISL_620000 | 10/5/2020 | 11/5/2020 Europe / Denmark / Midtjylland |
| EPI_ISL_620001 | 10/5/2020 | 11/5/2020 Europe / Denmark / Syddanmark  |
| EPI_ISL_620003 | 10/5/2020 | 11/5/2020 Europe / Denmark / Midtjylland |
| EPI_ISL_620004 | 10/5/2020 | 11/5/2020 Europe / Denmark / Midtjylland |
| EPI_ISL_620006 | 10/5/2020 | 11/5/2020 Europe / Denmark / Syddanmark  |
| EPI_ISL_620010 | 10/5/2020 | 11/5/2020 Europe / Denmark / Hovedstaden |
| EPI_ISL_620011 | 10/5/2020 | 11/5/2020 Europe / Denmark / Hovedstaden |
| EPI_ISL_620012 | 10/5/2020 | 11/5/2020 Europe / Denmark / Hovedstaden |
| EPI_ISL_620013 | 10/5/2020 | 11/5/2020 Europe / Denmark / Sjaelland   |
| EPI_ISL_620014 | 10/5/2020 | 11/5/2020 Europe / Denmark / Hovedstaden |
| EPI_ISL_620015 | 10/5/2020 | 11/5/2020 Europe / Denmark / Hovedstaden |
| EPI_ISL_620016 | 10/5/2020 | 11/5/2020 Europe / Denmark / Hovedstaden |
| EPI_ISL_620017 | 10/5/2020 | 11/5/2020 Europe / Denmark / Hovedstaden |
| EPI_ISL_620018 | 10/5/2020 | 11/5/2020 Europe / Denmark / Hovedstaden |
| EPI_ISL_620019 | 10/5/2020 | 11/5/2020 Europe / Denmark / Hovedstaden |
| EPI_ISL_620020 | 10/5/2020 | 11/5/2020 Europe / Denmark / Syddanmark  |
| EPI_ISL_620021 | 10/5/2020 | 11/5/2020 Europe / Denmark / Hovedstaden |
| EPI_ISL_620022 | 10/5/2020 | 11/5/2020 Europe / Denmark / Midtjylland |
| EPI_ISL_620023 | 10/5/2020 | 11/5/2020 Europe / Denmark / Midtjylland |
| EPI_ISL_620024 | 10/5/2020 | 11/5/2020 Europe / Denmark / Midtjylland |
| EPI_ISL_620025 | 10/5/2020 | 11/5/2020 Europe / Denmark / Midtjylland |
| EPI_ISL_620026 | 10/5/2020 | 11/5/2020 Europe / Denmark / Midtjylland |
| EPI_ISL_620027 | 10/5/2020 | 11/5/2020 Europe / Denmark / Hovedstaden |
| EPI_ISL_620028 | 10/5/2020 | 11/5/2020 Europe / Denmark / Hovedstaden |
| EPI_ISL_620029 | 10/5/2020 | 11/5/2020 Europe / Denmark / Hovedstaden |
| EPI_ISL_620030 | 10/5/2020 | 11/5/2020 Europe / Denmark / Hovedstaden |
| EPI_ISL_620032 | 10/5/2020 | 11/5/2020 Europe / Denmark / Hovedstaden |





|                |           |                                          |
|----------------|-----------|------------------------------------------|
| EPI_ISL_620087 | 10/5/2020 | 11/5/2020 Europe / Denmark / Hovedstaden |
| EPI_ISL_620088 | 10/5/2020 | 11/5/2020 Europe / Denmark / Hovedstaden |
| EPI_ISL_620089 | 10/5/2020 | 11/5/2020 Europe / Denmark / Syddanmark  |
| EPI_ISL_620090 | 10/5/2020 | 11/5/2020 Europe / Denmark / Syddanmark  |
| EPI_ISL_620091 | 10/5/2020 | 11/5/2020 Europe / Denmark / Hovedstaden |
| EPI_ISL_620093 | 10/5/2020 | 11/5/2020 Europe / Denmark / Sjaelland   |
| EPI_ISL_620094 | 10/5/2020 | 11/5/2020 Europe / Denmark / Sjaelland   |
| EPI_ISL_620097 | 10/5/2020 | 11/5/2020 Europe / Denmark / Midtjylland |
| EPI_ISL_620098 | 10/5/2020 | 11/5/2020 Europe / Denmark / Hovedstaden |
| EPI_ISL_620100 | 10/5/2020 | 11/5/2020 Europe / Denmark / Hovedstaden |
| EPI_ISL_620101 | 10/5/2020 | 11/5/2020 Europe / Denmark / Hovedstaden |
| EPI_ISL_620102 | 10/5/2020 | 11/5/2020 Europe / Denmark / Hovedstaden |
| EPI_ISL_620103 | 10/5/2020 | 11/5/2020 Europe / Denmark / Hovedstaden |
| EPI_ISL_620104 | 10/5/2020 | 11/5/2020 Europe / Denmark / Hovedstaden |
| EPI_ISL_620105 | 10/5/2020 | 11/5/2020 Europe / Denmark / Midtjylland |
| EPI_ISL_620107 | 10/5/2020 | 11/5/2020 Europe / Denmark / Syddanmark  |
| EPI_ISL_620109 | 10/5/2020 | 11/5/2020 Europe / Denmark / Midtjylland |
| EPI_ISL_620110 | 10/5/2020 | 11/5/2020 Europe / Denmark / Midtjylland |
| EPI_ISL_620111 | 10/5/2020 | 11/5/2020 Europe / Denmark / Midtjylland |
| EPI_ISL_620112 | 10/5/2020 | 11/5/2020 Europe / Denmark / Midtjylland |
| EPI_ISL_620113 | 10/5/2020 | 11/5/2020 Europe / Denmark / Midtjylland |
| EPI_ISL_620114 | 10/5/2020 | 11/5/2020 Europe / Denmark / Midtjylland |
| EPI_ISL_620115 | 10/5/2020 | 11/5/2020 Europe / Denmark / Midtjylland |
| EPI_ISL_620120 | 10/5/2020 | 11/5/2020 Europe / Denmark / Nordjylland |
| EPI_ISL_620121 | 10/5/2020 | 11/5/2020 Europe / Denmark / Nordjylland |
| EPI_ISL_620123 | 10/5/2020 | 11/5/2020 Europe / Denmark / Midtjylland |
| EPI_ISL_620124 | 10/5/2020 | 11/5/2020 Europe / Denmark / Syddanmark  |
| EPI_ISL_620125 | 10/5/2020 | 11/5/2020 Europe / Denmark / Syddanmark  |
| EPI_ISL_620126 | 10/5/2020 | 11/5/2020 Europe / Denmark / Syddanmark  |
| EPI_ISL_620127 | 3/9/2020  | 11/5/2020 Europe / Denmark / Sjaelland   |
| EPI_ISL_620128 | 3/9/2020  | 11/5/2020 Europe / Denmark / Sjaelland   |
| EPI_ISL_620130 | 3/9/2020  | 11/5/2020 Europe / Denmark / Sjaelland   |
| EPI_ISL_620132 | 3/9/2020  | 11/5/2020 Europe / Denmark / Midtjylland |
| EPI_ISL_620133 | 3/9/2020  | 11/5/2020 Europe / Denmark / Midtjylland |
| EPI_ISL_620134 | 3/9/2020  | 11/5/2020 Europe / Denmark / Midtjylland |
| EPI_ISL_620135 | 3/9/2020  | 11/5/2020 Europe / Denmark / Midtjylland |
| EPI_ISL_620136 | 3/9/2020  | 11/5/2020 Europe / Denmark / Midtjylland |
| EPI_ISL_620139 | 3/9/2020  | 11/5/2020 Europe / Denmark / Midtjylland |
| EPI_ISL_620140 | 3/9/2020  | 11/5/2020 Europe / Denmark / Midtjylland |
| EPI_ISL_620141 | 3/9/2020  | 11/5/2020 Europe / Denmark / Syddanmark  |
| EPI_ISL_620142 | 3/9/2020  | 11/5/2020 Europe / Denmark / Syddanmark  |
| EPI_ISL_620145 | 3/16/2020 | 11/5/2020 Europe / Denmark / Hovedstaden |
| EPI_ISL_620146 | 3/16/2020 | 11/5/2020 Europe / Denmark / Hovedstaden |
| EPI_ISL_620148 | 10/5/2020 | 11/5/2020 Europe / Denmark / Hovedstaden |
| EPI_ISL_620149 | 10/5/2020 | 11/5/2020 Europe / Denmark / Hovedstaden |
| EPI_ISL_620150 | 10/5/2020 | 11/5/2020 Europe / Denmark / Hovedstaden |
| EPI_ISL_620151 | 10/5/2020 | 11/5/2020 Europe / Denmark / Hovedstaden |









|                |            |                                          |
|----------------|------------|------------------------------------------|
| EPI_ISL_620365 | 10/12/2020 | 11/5/2020 Europe / Denmark / Hovedstaden |
| EPI_ISL_620366 | 10/12/2020 | 11/5/2020 Europe / Denmark / Midtjylland |
| EPI_ISL_620367 | 10/12/2020 | 11/5/2020 Europe / Denmark / Nordjylland |
| EPI_ISL_620368 | 10/12/2020 | 11/5/2020 Europe / Denmark / Midtjylland |
| EPI_ISL_620369 | 10/12/2020 | 11/5/2020 Europe / Denmark / Syddanmark  |
| EPI_ISL_620370 | 10/12/2020 | 11/5/2020 Europe / Denmark / Syddanmark  |
| EPI_ISL_620371 | 10/12/2020 | 11/5/2020 Europe / Denmark               |
| EPI_ISL_620372 | 10/12/2020 | 11/5/2020 Europe / Denmark / Syddanmark  |
| EPI_ISL_620374 | 10/12/2020 | 11/5/2020 Europe / Denmark / Syddanmark  |
| EPI_ISL_620376 | 10/12/2020 | 11/5/2020 Europe / Denmark / Midtjylland |
| EPI_ISL_620377 | 10/12/2020 | 11/5/2020 Europe / Denmark / Midtjylland |
| EPI_ISL_620378 | 10/12/2020 | 11/5/2020 Europe / Denmark / Syddanmark  |
| EPI_ISL_620379 | 10/12/2020 | 11/5/2020 Europe / Denmark / Syddanmark  |
| EPI_ISL_620380 | 10/5/2020  | 11/5/2020 Europe / Denmark / Syddanmark  |
| EPI_ISL_620381 | 10/5/2020  | 11/5/2020 Europe / Denmark / Syddanmark  |
| EPI_ISL_620383 | 10/5/2020  | 11/5/2020 Europe / Denmark / Hovedstaden |
| EPI_ISL_620384 | 10/5/2020  | 11/5/2020 Europe / Denmark / Syddanmark  |
| EPI_ISL_620385 | 10/5/2020  | 11/5/2020 Europe / Denmark / Midtjylland |
| EPI_ISL_620386 | 10/5/2020  | 11/5/2020 Europe / Denmark / Nordjylland |
| EPI_ISL_620389 | 10/5/2020  | 11/5/2020 Europe / Denmark / Syddanmark  |
| EPI_ISL_620391 | 10/5/2020  | 11/5/2020 Europe / Denmark / Midtjylland |
| EPI_ISL_620392 | 10/5/2020  | 11/5/2020 Europe / Denmark / Midtjylland |
| EPI_ISL_620393 | 10/5/2020  | 11/5/2020 Europe / Denmark / Hovedstaden |
| EPI_ISL_620396 | 10/5/2020  | 11/5/2020 Europe / Denmark / Syddanmark  |
| EPI_ISL_620397 | 10/5/2020  | 11/5/2020 Europe / Denmark / Midtjylland |
| EPI_ISL_620398 | 10/5/2020  | 11/5/2020 Europe / Denmark / Syddanmark  |
| EPI_ISL_620399 | 10/5/2020  | 11/5/2020 Europe / Denmark / Syddanmark  |
| EPI_ISL_620400 | 10/5/2020  | 11/5/2020 Europe / Denmark / Syddanmark  |
| EPI_ISL_620401 | 10/5/2020  | 11/5/2020 Europe / Denmark / Midtjylland |
| EPI_ISL_620403 | 10/5/2020  | 11/5/2020 Europe / Denmark / Midtjylland |
| EPI_ISL_620404 | 10/5/2020  | 11/5/2020 Europe / Denmark / Syddanmark  |
| EPI_ISL_634976 | 2020-07    | 11/5/2020 Asia / Philippines             |
| EPI_ISL_620762 | 9/21/2020  | 11/6/2020 Europe / Denmark / Midtjylland |
| EPI_ISL_620763 | 9/21/2020  | 11/6/2020 Europe / Denmark / Syddanmark  |
| EPI_ISL_620764 | 9/21/2020  | 11/6/2020 Europe / Denmark / Midtjylland |
| EPI_ISL_620765 | 9/21/2020  | 11/6/2020 Europe / Denmark / Syddanmark  |
| EPI_ISL_620766 | 9/21/2020  | 11/6/2020 Europe / Denmark / Syddanmark  |
| EPI_ISL_620767 | 9/21/2020  | 11/6/2020 Europe / Denmark / Syddanmark  |
| EPI_ISL_620768 | 9/21/2020  | 11/6/2020 Europe / Denmark / Syddanmark  |
| EPI_ISL_620769 | 9/21/2020  | 11/6/2020 Europe / Denmark / Syddanmark  |
| EPI_ISL_620770 | 9/21/2020  | 11/6/2020 Europe / Denmark / Syddanmark  |
| EPI_ISL_620771 | 9/21/2020  | 11/6/2020 Europe / Denmark / Syddanmark  |
| EPI_ISL_620772 | 9/21/2020  | 11/6/2020 Europe / Denmark / Syddanmark  |
| EPI_ISL_620773 | 9/21/2020  | 11/6/2020 Europe / Denmark / Syddanmark  |
| EPI_ISL_620774 | 9/21/2020  | 11/6/2020 Europe / Denmark / Syddanmark  |
| EPI_ISL_620775 | 9/21/2020  | 11/6/2020 Europe / Denmark / Syddanmark  |
| EPI_ISL_620776 | 9/21/2020  | 11/6/2020 Europe / Denmark / Syddanmark  |



















|                |           |                                          |
|----------------|-----------|------------------------------------------|
| EPI_ISL_621184 | 9/14/2020 | 11/6/2020 Europe / Denmark               |
| EPI_ISL_621185 | 9/14/2020 | 11/6/2020 Europe / Denmark / Midtjylland |
| EPI_ISL_621186 | 9/7/2020  | 11/6/2020 Europe / Denmark / Midtjylland |
| EPI_ISL_621187 | 9/7/2020  | 11/6/2020 Europe / Denmark / Midtjylland |
| EPI_ISL_621191 | 8/24/2020 | 11/6/2020 Europe / Denmark / Midtjylland |
| EPI_ISL_621192 | 8/24/2020 | 11/6/2020 Europe / Denmark / Midtjylland |
| EPI_ISL_621194 | 8/17/2020 | 11/6/2020 Europe / Denmark / Midtjylland |
| EPI_ISL_621195 | 9/21/2020 | 11/6/2020 Europe / Denmark / Hovedstaden |
| EPI_ISL_621196 | 9/21/2020 | 11/6/2020 Europe / Denmark / Hovedstaden |
| EPI_ISL_621197 | 9/21/2020 | 11/6/2020 Europe / Denmark / Sjælland    |
| EPI_ISL_621198 | 9/21/2020 | 11/6/2020 Europe / Denmark / Nordjylland |
| EPI_ISL_621199 | 9/21/2020 | 11/6/2020 Europe / Denmark / Syddanmark  |
| EPI_ISL_621200 | 9/21/2020 | 11/6/2020 Europe / Denmark / Midtjylland |
| EPI_ISL_621202 | 9/21/2020 | 11/6/2020 Europe / Denmark / Syddanmark  |
| EPI_ISL_621203 | 9/21/2020 | 11/6/2020 Europe / Denmark / Nordjylland |
| EPI_ISL_621204 | 9/21/2020 | 11/6/2020 Europe / Denmark / Nordjylland |
| EPI_ISL_621205 | 9/21/2020 | 11/6/2020 Europe / Denmark / Nordjylland |
| EPI_ISL_621206 | 9/21/2020 | 11/6/2020 Europe / Denmark / Syddanmark  |
| EPI_ISL_621207 | 9/21/2020 | 11/6/2020 Europe / Denmark / Syddanmark  |
| EPI_ISL_621208 | 9/21/2020 | 11/6/2020 Europe / Denmark / Syddanmark  |
| EPI_ISL_621209 | 9/21/2020 | 11/6/2020 Europe / Denmark / Sjælland    |
| EPI_ISL_621210 | 9/21/2020 | 11/6/2020 Europe / Denmark / Sjælland    |
| EPI_ISL_621211 | 9/28/2020 | 11/6/2020 Europe / Denmark / Sjælland    |
| EPI_ISL_621212 | 9/28/2020 | 11/6/2020 Europe / Denmark / Hovedstaden |
| EPI_ISL_621213 | 9/28/2020 | 11/6/2020 Europe / Denmark / Hovedstaden |
| EPI_ISL_621214 | 9/28/2020 | 11/6/2020 Europe / Denmark / Hovedstaden |
| EPI_ISL_621215 | 9/28/2020 | 11/6/2020 Europe / Denmark / Hovedstaden |
| EPI_ISL_621216 | 9/28/2020 | 11/6/2020 Europe / Denmark / Sjælland    |
| EPI_ISL_621217 | 9/28/2020 | 11/6/2020 Europe / Denmark / Hovedstaden |
| EPI_ISL_621218 | 9/28/2020 | 11/6/2020 Europe / Denmark / Hovedstaden |
| EPI_ISL_621219 | 9/28/2020 | 11/6/2020 Europe / Denmark / Hovedstaden |
| EPI_ISL_621220 | 9/28/2020 | 11/6/2020 Europe / Denmark / Hovedstaden |
| EPI_ISL_621221 | 9/21/2020 | 11/6/2020 Europe / Denmark / Hovedstaden |
| EPI_ISL_621222 | 9/21/2020 | 11/6/2020 Europe / Denmark / Sjælland    |
| EPI_ISL_621223 | 9/21/2020 | 11/6/2020 Europe / Denmark / Sjælland    |
| EPI_ISL_621224 | 9/21/2020 | 11/6/2020 Europe / Denmark / Sjælland    |
| EPI_ISL_621225 | 9/21/2020 | 11/6/2020 Europe / Denmark / Sjælland    |
| EPI_ISL_621226 | 9/21/2020 | 11/6/2020 Europe / Denmark / Hovedstaden |
| EPI_ISL_621227 | 9/21/2020 | 11/6/2020 Europe / Denmark / Hovedstaden |
| EPI_ISL_621228 | 9/21/2020 | 11/6/2020 Europe / Denmark / Hovedstaden |
| EPI_ISL_621229 | 9/21/2020 | 11/6/2020 Europe / Denmark / Hovedstaden |
| EPI_ISL_621230 | 9/21/2020 | 11/6/2020 Europe / Denmark / Hovedstaden |
| EPI_ISL_621231 | 9/21/2020 | 11/6/2020 Europe / Denmark / Hovedstaden |
| EPI_ISL_621232 | 9/21/2020 | 11/6/2020 Europe / Denmark / Hovedstaden |
| EPI_ISL_621233 | 9/28/2020 | 11/6/2020 Europe / Denmark / Midtjylland |
| EPI_ISL_621234 | 9/28/2020 | 11/6/2020 Europe / Denmark / Midtjylland |
| EPI_ISL_621235 | 9/28/2020 | 11/6/2020 Europe / Denmark / Midtjylland |







|                |           |                                          |
|----------------|-----------|------------------------------------------|
| EPI_ISL_621334 | 9/21/2020 | 11/6/2020 Europe / Denmark / Syddanmark  |
| EPI_ISL_621335 | 9/21/2020 | 11/6/2020 Europe / Denmark / Syddanmark  |
| EPI_ISL_621336 | 9/21/2020 | 11/6/2020 Europe / Denmark / Hovedstaden |
| EPI_ISL_621337 | 9/21/2020 | 11/6/2020 Europe / Denmark / Sjælland    |
| EPI_ISL_621338 | 3/9/2020  | 11/6/2020 Europe / Denmark / Midtjylland |
| EPI_ISL_621339 | 9/21/2020 | 11/6/2020 Europe / Denmark / Syddanmark  |
| EPI_ISL_621340 | 9/21/2020 | 11/6/2020 Europe / Denmark / Syddanmark  |
| EPI_ISL_621341 | 9/21/2020 | 11/6/2020 Europe / Denmark / Syddanmark  |
| EPI_ISL_621342 | 9/21/2020 | 11/6/2020 Europe / Denmark / Hovedstaden |
| EPI_ISL_621343 | 9/21/2020 | 11/6/2020 Europe / Denmark / Hovedstaden |
| EPI_ISL_621344 | 9/21/2020 | 11/6/2020 Europe / Denmark / Hovedstaden |
| EPI_ISL_621345 | 9/21/2020 | 11/6/2020 Europe / Denmark / Sjælland    |
| EPI_ISL_621346 | 9/21/2020 | 11/6/2020 Europe / Denmark / Hovedstaden |
| EPI_ISL_621347 | 9/21/2020 | 11/6/2020 Europe / Denmark / Hovedstaden |
| EPI_ISL_621348 | 9/21/2020 | 11/6/2020 Europe / Denmark / Hovedstaden |
| EPI_ISL_621350 | 9/21/2020 | 11/6/2020 Europe / Denmark / Midtjylland |
| EPI_ISL_621351 | 9/21/2020 | 11/6/2020 Europe / Denmark / Sjælland    |
| EPI_ISL_621352 | 9/21/2020 | 11/6/2020 Europe / Denmark / Hovedstaden |
| EPI_ISL_621353 | 9/21/2020 | 11/6/2020 Europe / Denmark / Hovedstaden |
| EPI_ISL_621354 | 9/21/2020 | 11/6/2020 Europe / Denmark / Syddanmark  |
| EPI_ISL_621355 | 9/21/2020 | 11/6/2020 Europe / Denmark / Midtjylland |
| EPI_ISL_621356 | 9/21/2020 | 11/6/2020 Europe / Denmark / Nordjylland |
| EPI_ISL_621357 | 9/21/2020 | 11/6/2020 Europe / Denmark / Hovedstaden |
| EPI_ISL_621358 | 9/21/2020 | 11/6/2020 Europe / Denmark / Hovedstaden |
| EPI_ISL_621359 | 9/21/2020 | 11/6/2020 Europe / Denmark / Sjælland    |
| EPI_ISL_621360 | 9/21/2020 | 11/6/2020 Europe / Denmark / Sjælland    |
| EPI_ISL_621361 | 9/21/2020 | 11/6/2020 Europe / Denmark / Hovedstaden |
| EPI_ISL_621362 | 9/21/2020 | 11/6/2020 Europe / Denmark / Midtjylland |
| EPI_ISL_621363 | 9/21/2020 | 11/6/2020 Europe / Denmark / Hovedstaden |
| EPI_ISL_621364 | 9/21/2020 | 11/6/2020 Europe / Denmark / Hovedstaden |
| EPI_ISL_621365 | 9/21/2020 | 11/6/2020 Europe / Denmark / Hovedstaden |
| EPI_ISL_621366 | 9/21/2020 | 11/6/2020 Europe / Denmark / Hovedstaden |
| EPI_ISL_621367 | 9/21/2020 | 11/6/2020 Europe / Denmark / Hovedstaden |
| EPI_ISL_621368 | 9/21/2020 | 11/6/2020 Europe / Denmark / Hovedstaden |
| EPI_ISL_621369 | 9/21/2020 | 11/6/2020 Europe / Denmark / Hovedstaden |
| EPI_ISL_621370 | 9/21/2020 | 11/6/2020 Europe / Denmark / Hovedstaden |
| EPI_ISL_621371 | 9/21/2020 | 11/6/2020 Europe / Denmark / Nordjylland |
| EPI_ISL_621372 | 9/21/2020 | 11/6/2020 Europe / Denmark / Nordjylland |
| EPI_ISL_621373 | 9/21/2020 | 11/6/2020 Europe / Denmark / Nordjylland |
| EPI_ISL_621374 | 9/21/2020 | 11/6/2020 Europe / Denmark / Nordjylland |
| EPI_ISL_621375 | 9/21/2020 | 11/6/2020 Europe / Denmark / Nordjylland |
| EPI_ISL_621376 | 9/21/2020 | 11/6/2020 Europe / Denmark / Nordjylland |
| EPI_ISL_621377 | 9/21/2020 | 11/6/2020 Europe / Denmark / Syddanmark  |
| EPI_ISL_621378 | 9/21/2020 | 11/6/2020 Europe / Denmark / Syddanmark  |
| EPI_ISL_621379 | 9/21/2020 | 11/6/2020 Europe / Denmark / Midtjylland |
| EPI_ISL_621380 | 9/21/2020 | 11/6/2020 Europe / Denmark / Hovedstaden |
| EPI_ISL_621381 | 9/21/2020 | 11/6/2020 Europe / Denmark / Hovedstaden |







|                |           |                                          |
|----------------|-----------|------------------------------------------|
| EPI_ISL_621529 | 9/21/2020 | 11/6/2020 Europe / Denmark / Hovedstaden |
| EPI_ISL_621530 | 9/21/2020 | 11/6/2020 Europe / Denmark / Hovedstaden |
| EPI_ISL_621531 | 9/21/2020 | 11/6/2020 Europe / Denmark / Midtjylland |
| EPI_ISL_621532 | 9/21/2020 | 11/6/2020 Europe / Denmark / Hovedstaden |
| EPI_ISL_621535 | 3/9/2020  | 11/6/2020 Europe / Denmark / Midtjylland |
| EPI_ISL_621536 | 9/14/2020 | 11/6/2020 Europe / Denmark / Syddanmark  |
| EPI_ISL_621537 | 9/14/2020 | 11/6/2020 Europe / Denmark / Sjaelland   |
| EPI_ISL_621538 | 9/21/2020 | 11/6/2020 Europe / Denmark / Midtjylland |
| EPI_ISL_621539 | 9/21/2020 | 11/6/2020 Europe / Denmark / Hovedstaden |
| EPI_ISL_621540 | 9/21/2020 | 11/6/2020 Europe / Denmark / Midtjylland |
| EPI_ISL_621541 | 9/14/2020 | 11/6/2020 Europe / Denmark / Hovedstaden |
| EPI_ISL_621542 | 9/21/2020 | 11/6/2020 Europe / Denmark / Hovedstaden |
| EPI_ISL_621543 | 9/21/2020 | 11/6/2020 Europe / Denmark / Hovedstaden |
| EPI_ISL_621545 | 9/21/2020 | 11/6/2020 Europe / Denmark / Nordjylland |
| EPI_ISL_621546 | 9/21/2020 | 11/6/2020 Europe / Denmark / Hovedstaden |
| EPI_ISL_621547 | 9/21/2020 | 11/6/2020 Europe / Denmark / Sjaelland   |
| EPI_ISL_621548 | 9/14/2020 | 11/6/2020 Europe / Denmark / Nordjylland |
| EPI_ISL_621549 | 9/21/2020 | 11/6/2020 Europe / Denmark / Hovedstaden |
| EPI_ISL_621550 | 9/21/2020 | 11/6/2020 Europe / Denmark / Hovedstaden |
| EPI_ISL_621551 | 9/21/2020 | 11/6/2020 Europe / Denmark / Hovedstaden |
| EPI_ISL_621552 | 9/21/2020 | 11/6/2020 Europe / Denmark / Hovedstaden |
| EPI_ISL_621553 | 9/21/2020 | 11/6/2020 Europe / Denmark / Sjaelland   |
| EPI_ISL_621554 | 9/21/2020 | 11/6/2020 Europe / Denmark / Hovedstaden |
| EPI_ISL_621555 | 9/21/2020 | 11/6/2020 Europe / Denmark / Nordjylland |
| EPI_ISL_621556 | 9/21/2020 | 11/6/2020 Europe / Denmark / Hovedstaden |
| EPI_ISL_621557 | 9/21/2020 | 11/6/2020 Europe / Denmark / Sjaelland   |
| EPI_ISL_621558 | 9/21/2020 | 11/6/2020 Europe / Denmark / Hovedstaden |
| EPI_ISL_621559 | 9/21/2020 | 11/6/2020 Europe / Denmark / Hovedstaden |
| EPI_ISL_621560 | 9/21/2020 | 11/6/2020 Europe / Denmark / Hovedstaden |
| EPI_ISL_621562 | 9/21/2020 | 11/6/2020 Europe / Denmark / Hovedstaden |
| EPI_ISL_621563 | 9/21/2020 | 11/6/2020 Europe / Denmark / Hovedstaden |
| EPI_ISL_621564 | 9/21/2020 | 11/6/2020 Europe / Denmark / Sjaelland   |
| EPI_ISL_621565 | 9/21/2020 | 11/6/2020 Europe / Denmark / Hovedstaden |
| EPI_ISL_621566 | 9/21/2020 | 11/6/2020 Europe / Denmark / Hovedstaden |
| EPI_ISL_621567 | 9/21/2020 | 11/6/2020 Europe / Denmark / Hovedstaden |
| EPI_ISL_621568 | 9/14/2020 | 11/6/2020 Europe / Denmark / Hovedstaden |
| EPI_ISL_621569 | 9/14/2020 | 11/6/2020 Europe / Denmark / Hovedstaden |
| EPI_ISL_621570 | 9/14/2020 | 11/6/2020 Europe / Denmark / Syddanmark  |
| EPI_ISL_621571 | 9/21/2020 | 11/6/2020 Europe / Denmark / Midtjylland |
| EPI_ISL_621572 | 9/21/2020 | 11/6/2020 Europe / Denmark / Midtjylland |
| EPI_ISL_621573 | 9/21/2020 | 11/6/2020 Europe / Denmark / Midtjylland |
| EPI_ISL_621574 | 9/21/2020 | 11/6/2020 Europe / Denmark / Hovedstaden |
| EPI_ISL_621575 | 9/21/2020 | 11/6/2020 Europe / Denmark / Hovedstaden |
| EPI_ISL_621576 | 9/21/2020 | 11/6/2020 Europe / Denmark / Hovedstaden |
| EPI_ISL_621577 | 9/21/2020 | 11/6/2020 Europe / Denmark / Midtjylland |
| EPI_ISL_621579 | 9/21/2020 | 11/6/2020 Europe / Denmark / Sjaelland   |
| EPI_ISL_621580 | 9/21/2020 | 11/6/2020 Europe / Denmark / Hovedstaden |























|                |           |                                          |
|----------------|-----------|------------------------------------------|
| EPI_ISL_622055 | 9/14/2020 | 11/6/2020 Europe / Denmark / Midtjylland |
| EPI_ISL_622056 | 9/14/2020 | 11/6/2020 Europe / Denmark / Midtjylland |
| EPI_ISL_622057 | 9/14/2020 | 11/6/2020 Europe / Denmark / Nordjylland |
| EPI_ISL_622058 | 9/14/2020 | 11/6/2020 Europe / Denmark / Nordjylland |
| EPI_ISL_622059 | 9/14/2020 | 11/6/2020 Europe / Denmark / Midtjylland |
| EPI_ISL_622060 | 9/14/2020 | 11/6/2020 Europe / Denmark / Midtjylland |
| EPI_ISL_622061 | 9/14/2020 | 11/6/2020 Europe / Denmark / Nordjylland |
| EPI_ISL_622062 | 9/14/2020 | 11/6/2020 Europe / Denmark / Sjaelland   |
| EPI_ISL_622063 | 9/14/2020 | 11/6/2020 Europe / Denmark / Hovedstaden |
| EPI_ISL_622064 | 9/14/2020 | 11/6/2020 Europe / Denmark / Hovedstaden |
| EPI_ISL_622066 | 9/14/2020 | 11/6/2020 Europe / Denmark / Midtjylland |
| EPI_ISL_622067 | 9/14/2020 | 11/6/2020 Europe / Denmark / Midtjylland |
| EPI_ISL_622068 | 9/14/2020 | 11/6/2020 Europe / Denmark / Midtjylland |
| EPI_ISL_622070 | 9/14/2020 | 11/6/2020 Europe / Denmark / Syddanmark  |
| EPI_ISL_622071 | 9/14/2020 | 11/6/2020 Europe / Denmark / Hovedstaden |
| EPI_ISL_622072 | 9/14/2020 | 11/6/2020 Europe / Denmark / Hovedstaden |
| EPI_ISL_622073 | 9/14/2020 | 11/6/2020 Europe / Denmark / Hovedstaden |
| EPI_ISL_622074 | 9/14/2020 | 11/6/2020 Europe / Denmark / Hovedstaden |
| EPI_ISL_622075 | 9/14/2020 | 11/6/2020 Europe / Denmark / Hovedstaden |
| EPI_ISL_622077 | 9/14/2020 | 11/6/2020 Europe / Denmark / Hovedstaden |
| EPI_ISL_622078 | 9/21/2020 | 11/6/2020 Europe / Denmark / Hovedstaden |
| EPI_ISL_622079 | 9/21/2020 | 11/6/2020 Europe / Denmark / Sjaelland   |
| EPI_ISL_622080 | 9/21/2020 | 11/6/2020 Europe / Denmark / Hovedstaden |
| EPI_ISL_622081 | 9/21/2020 | 11/6/2020 Europe / Denmark / Hovedstaden |
| EPI_ISL_622082 | 9/21/2020 | 11/6/2020 Europe / Denmark / Hovedstaden |
| EPI_ISL_622083 | 9/21/2020 | 11/6/2020 Europe / Denmark / Midtjylland |
| EPI_ISL_622084 | 9/21/2020 | 11/6/2020 Europe / Denmark / Hovedstaden |
| EPI_ISL_622085 | 9/21/2020 | 11/6/2020 Europe / Denmark / Syddanmark  |
| EPI_ISL_622086 | 9/21/2020 | 11/6/2020 Europe / Denmark / Syddanmark  |
| EPI_ISL_622087 | 9/21/2020 | 11/6/2020 Europe / Denmark / Syddanmark  |
| EPI_ISL_622088 | 9/21/2020 | 11/6/2020 Europe / Denmark / Syddanmark  |
| EPI_ISL_622089 | 9/21/2020 | 11/6/2020 Europe / Denmark / Hovedstaden |
| EPI_ISL_622090 | 9/14/2020 | 11/6/2020 Europe / Denmark / Hovedstaden |
| EPI_ISL_622091 | 9/14/2020 | 11/6/2020 Europe / Denmark / Sjaelland   |
| EPI_ISL_622092 | 9/14/2020 | 11/6/2020 Europe / Denmark / Hovedstaden |
| EPI_ISL_622093 | 9/14/2020 | 11/6/2020 Europe / Denmark / Sjaelland   |
| EPI_ISL_622094 | 9/14/2020 | 11/6/2020 Europe / Denmark / Sjaelland   |
| EPI_ISL_622095 | 9/14/2020 | 11/6/2020 Europe / Denmark / Hovedstaden |
| EPI_ISL_622096 | 9/14/2020 | 11/6/2020 Europe / Denmark / Hovedstaden |
| EPI_ISL_622097 | 9/14/2020 | 11/6/2020 Europe / Denmark / Hovedstaden |
| EPI_ISL_622098 | 9/14/2020 | 11/6/2020 Europe / Denmark / Hovedstaden |
| EPI_ISL_622099 | 9/14/2020 | 11/6/2020 Europe / Denmark / Hovedstaden |
| EPI_ISL_622100 | 9/14/2020 | 11/6/2020 Europe / Denmark / Sjaelland   |
| EPI_ISL_622101 | 9/14/2020 | 11/6/2020 Europe / Denmark / Hovedstaden |
| EPI_ISL_622103 | 9/14/2020 | 11/6/2020 Europe / Denmark / Sjaelland   |
| EPI_ISL_622104 | 9/14/2020 | 11/6/2020 Europe / Denmark / Sjaelland   |
| EPI_ISL_622105 | 9/14/2020 | 11/6/2020 Europe / Denmark               |

|                |           |                                          |
|----------------|-----------|------------------------------------------|
| EPI_ISL_622106 | 9/14/2020 | 11/6/2020 Europe / Denmark / Hovedstaden |
| EPI_ISL_622107 | 9/14/2020 | 11/6/2020 Europe / Denmark / Nordjylland |
| EPI_ISL_622108 | 9/14/2020 | 11/6/2020 Europe / Denmark / Sjælland    |
| EPI_ISL_622109 | 9/14/2020 | 11/6/2020 Europe / Denmark / Hovedstaden |
| EPI_ISL_622110 | 9/14/2020 | 11/6/2020 Europe / Denmark / Hovedstaden |
| EPI_ISL_622111 | 9/14/2020 | 11/6/2020 Europe / Denmark / Hovedstaden |
| EPI_ISL_622112 | 9/14/2020 | 11/6/2020 Europe / Denmark / Hovedstaden |
| EPI_ISL_622113 | 9/14/2020 | 11/6/2020 Europe / Denmark               |
| EPI_ISL_622114 | 9/14/2020 | 11/6/2020 Europe / Denmark / Hovedstaden |
| EPI_ISL_622115 | 9/14/2020 | 11/6/2020 Europe / Denmark / Hovedstaden |
| EPI_ISL_622116 | 9/14/2020 | 11/6/2020 Europe / Denmark / Midtjylland |
| EPI_ISL_622117 | 9/14/2020 | 11/6/2020 Europe / Denmark / Nordjylland |
| EPI_ISL_622118 | 9/14/2020 | 11/6/2020 Europe / Denmark / Nordjylland |
| EPI_ISL_622119 | 9/14/2020 | 11/6/2020 Europe / Denmark / Hovedstaden |
| EPI_ISL_622120 | 9/14/2020 | 11/6/2020 Europe / Denmark / Hovedstaden |
| EPI_ISL_622121 | 9/14/2020 | 11/6/2020 Europe / Denmark / Hovedstaden |
| EPI_ISL_622122 | 9/14/2020 | 11/6/2020 Europe / Denmark / Syddanmark  |
| EPI_ISL_622123 | 9/14/2020 | 11/6/2020 Europe / Denmark / Hovedstaden |
| EPI_ISL_622124 | 9/14/2020 | 11/6/2020 Europe / Denmark / Hovedstaden |
| EPI_ISL_622125 | 9/14/2020 | 11/6/2020 Europe / Denmark / Sjælland    |
| EPI_ISL_622126 | 9/14/2020 | 11/6/2020 Europe / Denmark / Hovedstaden |
| EPI_ISL_622127 | 9/14/2020 | 11/6/2020 Europe / Denmark / Hovedstaden |
| EPI_ISL_622129 | 9/14/2020 | 11/6/2020 Europe / Denmark / Midtjylland |
| EPI_ISL_622130 | 9/14/2020 | 11/6/2020 Europe / Denmark / Midtjylland |
| EPI_ISL_622132 | 9/14/2020 | 11/6/2020 Europe / Denmark / Hovedstaden |
| EPI_ISL_622133 | 9/14/2020 | 11/6/2020 Europe / Denmark / Hovedstaden |
| EPI_ISL_622134 | 9/14/2020 | 11/6/2020 Europe / Denmark / Midtjylland |
| EPI_ISL_622135 | 9/14/2020 | 11/6/2020 Europe / Denmark / Midtjylland |
| EPI_ISL_622136 | 9/14/2020 | 11/6/2020 Europe / Denmark / Hovedstaden |
| EPI_ISL_622137 | 9/14/2020 | 11/6/2020 Europe / Denmark / Hovedstaden |
| EPI_ISL_622138 | 9/14/2020 | 11/6/2020 Europe / Denmark / Hovedstaden |
| EPI_ISL_622139 | 9/14/2020 | 11/6/2020 Europe / Denmark / Hovedstaden |
| EPI_ISL_622140 | 9/14/2020 | 11/6/2020 Europe / Denmark / Sjælland    |
| EPI_ISL_622141 | 9/14/2020 | 11/6/2020 Europe / Denmark / Midtjylland |
| EPI_ISL_622142 | 9/14/2020 | 11/6/2020 Europe / Denmark / Hovedstaden |
| EPI_ISL_622143 | 9/14/2020 | 11/6/2020 Europe / Denmark / Hovedstaden |
| EPI_ISL_622144 | 9/14/2020 | 11/6/2020 Europe / Denmark / Hovedstaden |
| EPI_ISL_622145 | 9/14/2020 | 11/6/2020 Europe / Denmark / Hovedstaden |
| EPI_ISL_622146 | 9/14/2020 | 11/6/2020 Europe / Denmark / Hovedstaden |
| EPI_ISL_622147 | 9/14/2020 | 11/6/2020 Europe / Denmark / Hovedstaden |
| EPI_ISL_622148 | 9/14/2020 | 11/6/2020 Europe / Denmark / Sjælland    |
| EPI_ISL_622149 | 9/14/2020 | 11/6/2020 Europe / Denmark / Hovedstaden |
| EPI_ISL_622150 | 9/21/2020 | 11/6/2020 Europe / Denmark / Nordjylland |
| EPI_ISL_622151 | 9/21/2020 | 11/6/2020 Europe / Denmark / Nordjylland |
| EPI_ISL_622152 | 9/21/2020 | 11/6/2020 Europe / Denmark / Nordjylland |
| EPI_ISL_622153 | 9/21/2020 | 11/6/2020 Europe / Denmark / Syddanmark  |
| EPI_ISL_622154 | 9/21/2020 | 11/6/2020 Europe / Denmark / Syddanmark  |











|                |           |           |                                |
|----------------|-----------|-----------|--------------------------------|
| EPI_ISL_622419 | 6/1/2020  | 11/6/2020 | Europe / Denmark / Hovedstaden |
| EPI_ISL_622420 | 5/11/2020 | 11/6/2020 | Europe / Denmark / Hovedstaden |
| EPI_ISL_622421 | 5/4/2020  | 11/6/2020 | Europe / Denmark / Hovedstaden |
| EPI_ISL_622422 | 3/9/2020  | 11/6/2020 | Europe / Denmark / Hovedstaden |
| EPI_ISL_622423 | 5/11/2020 | 11/6/2020 | Europe / Denmark / Hovedstaden |
| EPI_ISL_622424 | 5/11/2020 | 11/6/2020 | Europe / Denmark / Hovedstaden |
| EPI_ISL_622425 | 5/11/2020 | 11/6/2020 | Europe / Denmark / Sjælland    |
| EPI_ISL_622426 | 5/11/2020 | 11/6/2020 | Europe / Denmark / Hovedstaden |
| EPI_ISL_622427 | 4/27/2020 | 11/6/2020 | Europe / Denmark / Hovedstaden |
| EPI_ISL_622428 | 4/27/2020 | 11/6/2020 | Europe / Denmark / Hovedstaden |
| EPI_ISL_622429 | 3/9/2020  | 11/6/2020 | Europe / Denmark / Hovedstaden |
| EPI_ISL_622430 | 5/11/2020 | 11/6/2020 | Europe / Denmark / Hovedstaden |
| EPI_ISL_622431 | 4/27/2020 | 11/6/2020 | Europe / Denmark / Hovedstaden |
| EPI_ISL_622432 | 4/20/2020 | 11/6/2020 | Europe / Denmark / Hovedstaden |
| EPI_ISL_622433 | 5/11/2020 | 11/6/2020 | Europe / Denmark / Hovedstaden |
| EPI_ISL_622434 | 5/11/2020 | 11/6/2020 | Europe / Denmark               |
| EPI_ISL_622435 | 4/27/2020 | 11/6/2020 | Europe / Denmark / Hovedstaden |
| EPI_ISL_622436 | 5/11/2020 | 11/6/2020 | Europe / Denmark / Hovedstaden |
| EPI_ISL_622437 | 3/30/2020 | 11/6/2020 | Europe / Denmark / Hovedstaden |
| EPI_ISL_622438 | 3/30/2020 | 11/6/2020 | Europe / Denmark / Hovedstaden |
| EPI_ISL_622439 | 3/30/2020 | 11/6/2020 | Europe / Denmark / Hovedstaden |
| EPI_ISL_622440 | 3/30/2020 | 11/6/2020 | Europe / Denmark / Hovedstaden |
| EPI_ISL_622441 | 3/23/2020 | 11/6/2020 | Europe / Denmark / Hovedstaden |
| EPI_ISL_622442 | 3/23/2020 | 11/6/2020 | Europe / Denmark / Sjælland    |
| EPI_ISL_622444 | 3/23/2020 | 11/6/2020 | Europe / Denmark / Hovedstaden |
| EPI_ISL_622445 | 3/23/2020 | 11/6/2020 | Europe / Denmark / Hovedstaden |
| EPI_ISL_622446 | 3/23/2020 | 11/6/2020 | Europe / Denmark / Hovedstaden |
| EPI_ISL_622447 | 3/23/2020 | 11/6/2020 | Europe / Denmark / Hovedstaden |
| EPI_ISL_622448 | 3/23/2020 | 11/6/2020 | Europe / Denmark / Hovedstaden |
| EPI_ISL_622450 | 3/23/2020 | 11/6/2020 | Europe / Denmark / Hovedstaden |
| EPI_ISL_622451 | 3/23/2020 | 11/6/2020 | Europe / Denmark / Hovedstaden |
| EPI_ISL_622452 | 3/23/2020 | 11/6/2020 | Europe / Denmark / Hovedstaden |
| EPI_ISL_622453 | 3/23/2020 | 11/6/2020 | Europe / Denmark / Hovedstaden |
| EPI_ISL_622454 | 4/6/2020  | 11/6/2020 | Europe / Denmark / Hovedstaden |
| EPI_ISL_622455 | 4/6/2020  | 11/6/2020 | Europe / Denmark / Hovedstaden |
| EPI_ISL_622456 | 4/6/2020  | 11/6/2020 | Europe / Denmark / Hovedstaden |
| EPI_ISL_622457 | 4/6/2020  | 11/6/2020 | Europe / Denmark / Hovedstaden |
| EPI_ISL_622458 | 4/6/2020  | 11/6/2020 | Europe / Denmark / Hovedstaden |
| EPI_ISL_622459 | 3/23/2020 | 11/6/2020 | Europe / Denmark / Hovedstaden |
| EPI_ISL_622460 | 3/23/2020 | 11/6/2020 | Europe / Denmark / Hovedstaden |
| EPI_ISL_622461 | 3/30/2020 | 11/6/2020 | Europe / Denmark / Hovedstaden |
| EPI_ISL_622462 | 3/23/2020 | 11/6/2020 | Europe / Denmark / Hovedstaden |
| EPI_ISL_622463 | 4/27/2020 | 11/6/2020 | Europe / Denmark / Midtjylland |
| EPI_ISL_622464 | 4/27/2020 | 11/6/2020 | Europe / Denmark / Hovedstaden |
| EPI_ISL_622465 | 4/27/2020 | 11/6/2020 | Europe / Denmark / Hovedstaden |
| EPI_ISL_622467 | 4/27/2020 | 11/6/2020 | Europe / Denmark / Sjælland    |
| EPI_ISL_622468 | 4/27/2020 | 11/6/2020 | Europe / Denmark / Hovedstaden |













|                |            |                                                     |
|----------------|------------|-----------------------------------------------------|
| EPI_ISL_622725 | 8/31/2020  | 11/6/2020 Europe / Denmark / Hovedstaden            |
| EPI_ISL_622726 | 9/7/2020   | 11/6/2020 Europe / Denmark / Hovedstaden            |
| EPI_ISL_622727 | 6/15/2020  | 11/6/2020 Europe / Denmark / Hovedstaden            |
| EPI_ISL_622728 | 6/15/2020  | 11/6/2020 Europe / Denmark / Hovedstaden            |
| EPI_ISL_622729 | 8/10/2020  | 11/6/2020 Europe / Denmark / Hovedstaden            |
| EPI_ISL_622730 | 8/3/2020   | 11/6/2020 Europe / Denmark / Hovedstaden            |
| EPI_ISL_622731 | 8/3/2020   | 11/6/2020 Europe / Denmark / Hovedstaden            |
| EPI_ISL_622732 | 8/24/2020  | 11/6/2020 Europe / Denmark                          |
| EPI_ISL_622733 | 8/24/2020  | 11/6/2020 Europe / Denmark / Hovedstaden            |
| EPI_ISL_622734 | 9/7/2020   | 11/6/2020 Europe / Denmark / Hovedstaden            |
| EPI_ISL_622735 | 8/31/2020  | 11/6/2020 Europe / Denmark / Hovedstaden            |
| EPI_ISL_622736 | 9/7/2020   | 11/6/2020 Europe / Denmark / Hovedstaden            |
| EPI_ISL_622737 | 8/24/2020  | 11/6/2020 Europe / Denmark / Hovedstaden            |
| EPI_ISL_622738 | 8/31/2020  | 11/6/2020 Europe / Denmark / Hovedstaden            |
| EPI_ISL_622739 | 9/7/2020   | 11/6/2020 Europe / Denmark / Hovedstaden            |
| EPI_ISL_622741 | 9/7/2020   | 11/6/2020 Europe / Denmark / Hovedstaden            |
| EPI_ISL_622742 | 9/7/2020   | 11/6/2020 Europe / Denmark / Hovedstaden            |
| EPI_ISL_622743 | 9/7/2020   | 11/6/2020 Europe / Denmark / Hovedstaden            |
| EPI_ISL_622744 | 9/7/2020   | 11/6/2020 Europe / Denmark / Hovedstaden            |
| EPI_ISL_622745 | 9/7/2020   | 11/6/2020 Europe / Denmark / Hovedstaden            |
| EPI_ISL_622746 | 9/7/2020   | 11/6/2020 Europe / Denmark / Hovedstaden            |
| EPI_ISL_622747 | 9/7/2020   | 11/6/2020 Europe / Denmark / Hovedstaden            |
| EPI_ISL_622748 | 9/14/2020  | 11/6/2020 Europe / Denmark / Hovedstaden            |
| EPI_ISL_622749 | 9/14/2020  | 11/6/2020 Europe / Denmark / Hovedstaden            |
| EPI_ISL_622750 | 9/14/2020  | 11/6/2020 Europe / Denmark / Hovedstaden            |
| EPI_ISL_622751 | 9/14/2020  | 11/6/2020 Europe / Denmark / Hovedstaden            |
| EPI_ISL_622752 | 9/14/2020  | 11/6/2020 Europe / Denmark / Hovedstaden            |
| EPI_ISL_622753 | 9/14/2020  | 11/6/2020 Europe / Denmark / Hovedstaden            |
| EPI_ISL_622754 | 9/14/2020  | 11/6/2020 Europe / Denmark / Hovedstaden            |
| EPI_ISL_622755 | 9/14/2020  | 11/6/2020 Europe / Denmark / Hovedstaden            |
| EPI_ISL_622756 | 9/14/2020  | 11/6/2020 Europe / Denmark / Hovedstaden            |
| EPI_ISL_622757 | 9/14/2020  | 11/6/2020 Europe / Denmark / Hovedstaden            |
| EPI_ISL_622758 | 9/14/2020  | 11/6/2020 Europe / Denmark / Hovedstaden            |
| EPI_ISL_622759 | 9/14/2020  | 11/6/2020 Europe / Denmark / Hovedstaden            |
| EPI_ISL_622760 | 9/14/2020  | 11/6/2020 Europe / Denmark / Hovedstaden            |
| EPI_ISL_622762 | 10/26/2020 | 11/6/2020 Oceania / Australia / South Australia     |
| EPI_ISL_622763 | 10/27/2020 | 11/6/2020 Oceania / Australia / South Australia     |
| EPI_ISL_622764 | 10/29/2020 | 11/6/2020 Oceania / Australia / South Australia     |
| EPI_ISL_622765 | 10/29/2020 | 11/6/2020 Oceania / Australia / South Australia     |
| EPI_ISL_622766 | 10/29/2020 | 11/6/2020 Oceania / Australia / South Australia     |
| EPI_ISL_622787 | 10/29/2020 | 11/6/2020 Oceania / New Zealand / Counties Manukau  |
| EPI_ISL_622792 | 11/1/2020  | 11/6/2020 Oceania / New Zealand / Counties Manukau  |
| EPI_ISL_622793 | 10/16/2020 | 11/6/2020 Oceania / New Zealand / Combined Auckland |
| EPI_ISL_622794 | 3/27/2020  | 11/6/2020 Oceania / New Zealand / Hawkes Bay        |
| EPI_ISL_622795 | 3/26/2020  | 11/6/2020 Oceania / New Zealand / South Canterbury  |
| EPI_ISL_622796 | 3/27/2020  | 11/6/2020 Oceania / New Zealand / Taranaki          |
| EPI_ISL_622797 | 3/29/2020  | 11/6/2020 Oceania / New Zealand / Hawkes Bay        |

|                |            |                                                    |
|----------------|------------|----------------------------------------------------|
| EPI_ISL_622798 | 3/30/2020  | 11/6/2020 Oceania / New Zealand / Hawkes Bay       |
| EPI_ISL_622799 | 3/30/2020  | 11/6/2020 Oceania / New Zealand / Whanganui        |
| EPI_ISL_622800 | 4/1/2020   | 11/6/2020 Oceania / New Zealand / Hawkes Bay       |
| EPI_ISL_622801 | 4/1/2020   | 11/6/2020 Oceania / New Zealand / Hawkes Bay       |
| EPI_ISL_622802 | 10/5/2020  | 11/6/2020 Oceania / New Zealand / Counties Manukau |
| EPI_ISL_622803 | 10/4/2020  | 11/6/2020 Oceania / New Zealand / Auckland         |
| EPI_ISL_622804 | 2020       | 11/6/2020 Oceania / New Zealand / Bay of Plenty    |
| EPI_ISL_622805 | 9/13/2020  | 11/6/2020 Oceania / New Zealand / Bay of Plenty    |
| EPI_ISL_622806 | 9/13/2020  | 11/6/2020 Oceania / New Zealand / Bay of Plenty    |
| EPI_ISL_622807 | 10/6/2020  | 11/6/2020 Oceania / New Zealand / Auckland         |
| EPI_ISL_622808 | 10/13/2020 | 11/6/2020 Oceania / New Zealand / South Canterbury |
| EPI_ISL_622809 | 10/19/2020 | 11/6/2020 Oceania / New Zealand / Canterbury       |
| EPI_ISL_622810 | 10/22/2020 | 11/6/2020 Oceania / New Zealand / South Canterbury |
| EPI_ISL_622811 | 10/22/2020 | 11/6/2020 Oceania / New Zealand / Canterbury       |
| EPI_ISL_622812 | 10/22/2020 | 11/6/2020 Oceania / New Zealand / Canterbury       |
| EPI_ISL_622813 | 10/22/2020 | 11/6/2020 Oceania / New Zealand / Canterbury       |
| EPI_ISL_622814 | 10/22/2020 | 11/6/2020 Oceania / New Zealand / Auckland         |
| EPI_ISL_622815 | 10/22/2020 | 11/6/2020 Oceania / New Zealand / Auckland         |
| EPI_ISL_622816 | 10/22/2020 | 11/6/2020 Oceania / New Zealand / Auckland         |
| EPI_ISL_622817 | 10/26/2020 | 11/6/2020 Oceania / New Zealand / Waitemata        |
| EPI_ISL_622818 | 10/21/2020 | 11/6/2020 Oceania / New Zealand / Auckland         |
| EPI_ISL_622819 | 10/22/2020 | 11/6/2020 Oceania / New Zealand / Auckland         |
| EPI_ISL_622820 | 10/25/2020 | 11/6/2020 Oceania / New Zealand / Auckland         |
| EPI_ISL_622821 | 10/26/2020 | 11/6/2020 Oceania / New Zealand / Auckland         |
| EPI_ISL_622822 | 10/26/2020 | 11/6/2020 Oceania / New Zealand / Auckland         |
| EPI_ISL_622823 | 10/27/2020 | 11/6/2020 Oceania / New Zealand / Auckland         |
| EPI_ISL_622824 | 11/1/2020  | 11/6/2020 Oceania / New Zealand / Canterbury       |
| EPI_ISL_622825 | 10/25/2020 | 11/6/2020 Oceania / New Zealand / Canterbury       |
| EPI_ISL_622826 | 10/25/2020 | 11/6/2020 Oceania / New Zealand / Canterbury       |
| EPI_ISL_622827 | 10/25/2020 | 11/6/2020 Oceania / New Zealand / South Canterbury |
| EPI_ISL_622828 | 10/31/2020 | 11/6/2020 Oceania / New Zealand / Canterbury       |
| EPI_ISL_622829 | 10/31/2020 | 11/6/2020 Oceania / New Zealand / Canterbury       |
| EPI_ISL_622830 | 10/28/2020 | 11/6/2020 Oceania / New Zealand / Canterbury       |
| EPI_ISL_622831 | 10/30/2020 | 11/6/2020 Oceania / New Zealand / Counties Manukau |
| EPI_ISL_622832 | 10/29/2020 | 11/6/2020 Oceania / New Zealand / Counties Manukau |
| EPI_ISL_622833 | 9/28/2020  | 11/6/2020 Europe / United Kingdom / England        |
| EPI_ISL_622835 | 9/29/2020  | 11/6/2020 Europe / United Kingdom / England        |
| EPI_ISL_622836 | 9/28/2020  | 11/6/2020 Europe / United Kingdom / England        |
| EPI_ISL_622837 | 9/29/2020  | 11/6/2020 Europe / United Kingdom / England        |
| EPI_ISL_622838 | 9/28/2020  | 11/6/2020 Europe / United Kingdom / England        |
| EPI_ISL_622839 | 9/28/2020  | 11/6/2020 Europe / United Kingdom / England        |
| EPI_ISL_622840 | 9/28/2020  | 11/6/2020 Europe / United Kingdom / England        |
| EPI_ISL_622841 | 9/29/2020  | 11/6/2020 Europe / United Kingdom / England        |
| EPI_ISL_622842 | 9/28/2020  | 11/6/2020 Europe / United Kingdom / England        |
| EPI_ISL_622843 | 10/9/2020  | 11/6/2020 Europe / United Kingdom / England        |
| EPI_ISL_622844 | 10/13/2020 | 11/6/2020 Europe / United Kingdom / England        |
| EPI_ISL_622845 | 10/13/2020 | 11/6/2020 Europe / United Kingdom / England        |

|                |            |           |                                       |
|----------------|------------|-----------|---------------------------------------|
| EPI_ISL_622846 | 10/9/2020  | 11/6/2020 | Europe / United Kingdom / England     |
| EPI_ISL_622847 | 10/13/2020 | 11/6/2020 | Europe / United Kingdom / England     |
| EPI_ISL_622848 | 10/12/2020 | 11/6/2020 | Europe / United Kingdom / England     |
| EPI_ISL_622849 | 10/14/2020 | 11/6/2020 | Europe / United Kingdom / England     |
| EPI_ISL_622850 | 10/14/2020 | 11/6/2020 | Europe / United Kingdom / England     |
| EPI_ISL_622851 | 10/12/2020 | 11/6/2020 | Europe / United Kingdom / England     |
| EPI_ISL_622852 | 10/14/2020 | 11/6/2020 | Europe / United Kingdom / England     |
| EPI_ISL_622853 | 10/14/2020 | 11/6/2020 | Europe / United Kingdom / England     |
| EPI_ISL_622854 | 10/14/2020 | 11/6/2020 | Europe / United Kingdom / England     |
| EPI_ISL_622855 | 10/13/2020 | 11/6/2020 | Europe / United Kingdom / England     |
| EPI_ISL_622856 | 10/14/2020 | 11/6/2020 | Europe / United Kingdom / England     |
| EPI_ISL_622857 | 10/16/2020 | 11/6/2020 | Europe / United Kingdom / England     |
| EPI_ISL_622858 | 10/15/2020 | 11/6/2020 | Europe / United Kingdom / England     |
| EPI_ISL_622859 | 10/14/2020 | 11/6/2020 | Europe / United Kingdom / England     |
| EPI_ISL_622860 | 10/16/2020 | 11/6/2020 | Europe / United Kingdom / England     |
| EPI_ISL_622861 | 10/16/2020 | 11/6/2020 | Europe / United Kingdom / England     |
| EPI_ISL_622862 | 10/17/2020 | 11/6/2020 | Europe / United Kingdom / England     |
| EPI_ISL_622863 | 10/16/2020 | 11/6/2020 | Europe / United Kingdom / England     |
| EPI_ISL_622864 | 10/16/2020 | 11/6/2020 | Europe / United Kingdom / England     |
| EPI_ISL_622865 | 10/16/2020 | 11/6/2020 | Europe / United Kingdom / England     |
| EPI_ISL_622866 | 10/16/2020 | 11/6/2020 | Europe / United Kingdom / England     |
| EPI_ISL_622867 | 10/16/2020 | 11/6/2020 | Europe / United Kingdom / England     |
| EPI_ISL_622868 | 10/16/2020 | 11/6/2020 | Europe / United Kingdom / England     |
| EPI_ISL_622869 | 10/16/2020 | 11/6/2020 | Europe / United Kingdom / England     |
| EPI_ISL_622870 | 10/15/2020 | 11/6/2020 | Europe / United Kingdom / England     |
| EPI_ISL_622871 | 10/17/2020 | 11/6/2020 | Europe / United Kingdom / England     |
| EPI_ISL_622872 | 10/9/2020  | 11/6/2020 | Europe / United Kingdom / England     |
| EPI_ISL_622873 | 10/16/2020 | 11/6/2020 | Europe / United Kingdom / England     |
| EPI_ISL_622874 | 10/16/2020 | 11/6/2020 | Europe / United Kingdom / England     |
| EPI_ISL_622875 | 10/16/2020 | 11/6/2020 | Europe / United Kingdom / England     |
| EPI_ISL_622877 | 10/16/2020 | 11/6/2020 | Europe / United Kingdom / England     |
| EPI_ISL_622878 | 10/26/2020 | 11/6/2020 | Europe / United Kingdom / England     |
| EPI_ISL_622881 | 10/20/2020 | 11/6/2020 | Europe / United Kingdom / England     |
| EPI_ISL_622882 | 10/19/2020 | 11/6/2020 | Europe / United Kingdom / England     |
| EPI_ISL_622883 | 10/20/2020 | 11/6/2020 | Europe / United Kingdom / England     |
| EPI_ISL_622884 | 10/18/2020 | 11/6/2020 | Europe / United Kingdom / England     |
| EPI_ISL_622885 | 10/18/2020 | 11/6/2020 | Europe / United Kingdom / England     |
| EPI_ISL_622886 | 10/20/2020 | 11/6/2020 | Europe / United Kingdom / England     |
| EPI_ISL_622887 | 10/19/2020 | 11/6/2020 | Europe / United Kingdom / England     |
| EPI_ISL_622888 | 10/18/2020 | 11/6/2020 | Europe / United Kingdom / England     |
| EPI_ISL_622889 | 10/19/2020 | 11/6/2020 | Europe / United Kingdom / England     |
| EPI_ISL_622890 | 10/17/2020 | 11/6/2020 | Europe / United Kingdom / England     |
| EPI_ISL_622892 | 2020-10    | 11/6/2020 | Europe / United Kingdom / England     |
| EPI_ISL_622922 | 7/9/2020   | 11/6/2020 | Africa / South Africa / KwaZulu-Natal |
| EPI_ISL_622934 | 6/23/2020  | 11/6/2020 | Africa / South Africa / Western Cape  |
| EPI_ISL_622935 | 6/26/2020  | 11/6/2020 | Africa / South Africa / Western Cape  |
| EPI_ISL_622936 | 6/30/2020  | 11/6/2020 | Africa / South Africa / Gauteng       |



|                |            |                                                         |
|----------------|------------|---------------------------------------------------------|
| EPI_ISL_622937 | 6/29/2020  | 11/6/2020 Africa / South Africa / KwaZulu-Natal         |
| EPI_ISL_622938 | 6/29/2020  | 11/6/2020 Africa / South Africa / KwaZulu-Natal         |
| EPI_ISL_622939 | 7/2/2020   | 11/6/2020 Africa / South Africa / Western Cape          |
| EPI_ISL_622940 | 7/7/2020   | 11/6/2020 Africa / South Africa / KwaZulu-Natal         |
| EPI_ISL_622941 | 7/7/2020   | 11/6/2020 Africa / South Africa / KwaZulu-Natal         |
| EPI_ISL_623073 | 7/27/2020  | 11/6/2020 Africa / South Africa / Gauteng               |
| EPI_ISL_623076 | 6/3/2020   | 11/6/2020 Europe / Sweden / Uppsala                     |
| EPI_ISL_623077 | 6/21/2020  | 11/6/2020 Europe / Sweden / Uppsala                     |
| EPI_ISL_623078 | 6/24/2020  | 11/6/2020 Europe / Sweden / Uppsala                     |
| EPI_ISL_623079 | 6/22/2020  | 11/6/2020 Europe / Sweden / Uppsala                     |
| EPI_ISL_623080 | 6/26/2020  | 11/6/2020 Europe / Sweden / Skane                       |
| EPI_ISL_623081 | 6/26/2020  | 11/6/2020 Europe / Sweden / Skane                       |
| EPI_ISL_623082 | 6/26/2020  | 11/6/2020 Europe / Sweden / Skane                       |
| EPI_ISL_623083 | 6/2/2020   | 11/6/2020 Europe / Sweden / Skane                       |
| EPI_ISL_623084 | 6/2/2020   | 11/6/2020 Europe / Sweden / Skane                       |
| EPI_ISL_623085 | 6/4/2020   | 11/6/2020 Europe / Sweden / Skane                       |
| EPI_ISL_623086 | 6/10/2020  | 11/6/2020 Europe / Sweden / Halland                     |
| EPI_ISL_623087 | 6/15/2020  | 11/6/2020 Europe / Sweden / Vastra Gotaland             |
| EPI_ISL_623088 | 6/4/2020   | 11/6/2020 Europe / Sweden / Vastra Gotaland             |
| EPI_ISL_623089 | 6/15/2020  | 11/6/2020 Europe / Sweden / Ostergotland                |
| EPI_ISL_623090 | 6/21/2020  | 11/6/2020 Europe / Sweden / Vasternorrland              |
| EPI_ISL_623091 | 6/16/2020  | 11/6/2020 Europe / Sweden / Kalmar                      |
| EPI_ISL_623092 | 6/3/2020   | 11/6/2020 Europe / Sweden / Jonkoping                   |
| EPI_ISL_623093 | 6/3/2020   | 11/6/2020 Europe / Sweden / Jonkoping                   |
| EPI_ISL_623094 | 6/24/2020  | 11/6/2020 Europe / Sweden / Jonkoping                   |
| EPI_ISL_623095 | 6/29/2020  | 11/6/2020 Europe / Sweden / Gavleborg                   |
| EPI_ISL_623096 | 10/22/2020 | 11/6/2020 Europe / France / Bretagne / Saint-Brieuc     |
| EPI_ISL_623097 | 10/20/2020 | 11/6/2020 Europe / France / Grand Est / Tucquegnieux    |
| EPI_ISL_623099 | 9/23/2020  | 11/6/2020 Europe / France / Auvergne-Rhone-Alpes / Lyon |
| EPI_ISL_623100 | 9/8/2020   | 11/6/2020 Europe / France / Auvergne-Rhone-Alpes / Lyon |
| EPI_ISL_623101 | 9/8/2020   | 11/6/2020 Europe / France / Auvergne-Rhone-Alpes / Lyon |
| EPI_ISL_623102 | 9/9/2020   | 11/6/2020 Europe / France / Auvergne-Rhone-Alpes / Lyon |
| EPI_ISL_623108 | 4/16/2020  | 11/6/2020 South America / Brazil / Rio de Janeiro       |
| EPI_ISL_623110 | 4/24/2020  | 11/6/2020 South America / Brazil / Rio de Janeiro       |
| EPI_ISL_623112 | 4/20/2020  | 11/6/2020 South America / Brazil / Rio de Janeiro       |
| EPI_ISL_623114 | 4/24/2020  | 11/6/2020 South America / Brazil / Rio de Janeiro       |
| EPI_ISL_623116 | 4/7/2020   | 11/6/2020 South America / Brazil / Rio de Janeiro       |
| EPI_ISL_623118 | 4/24/2020  | 11/6/2020 South America / Brazil / Rio de Janeiro       |
| EPI_ISL_623119 | 5/4/2020   | 11/6/2020 South America / Brazil / Rio de Janeiro       |
| EPI_ISL_623120 | 4/22/2020  | 11/6/2020 South America / Brazil / Rio de Janeiro       |
| EPI_ISL_623124 | 4/22/2020  | 11/6/2020 South America / Brazil / Rio de Janeiro       |
| EPI_ISL_623126 | 4/1/2020   | 11/6/2020 South America / Brazil / Rio de Janeiro       |
| EPI_ISL_623129 | 4/29/2020  | 11/6/2020 South America / Brazil / Rio de Janeiro       |
| EPI_ISL_623130 | 4/22/2020  | 11/6/2020 South America / Brazil / Rio de Janeiro       |
| EPI_ISL_623132 | 4/9/2020   | 11/6/2020 South America / Brazil / Rio de Janeiro       |
| EPI_ISL_623134 | 4/28/2020  | 11/6/2020 South America / Brazil / Rio de Janeiro       |
| EPI_ISL_623136 | 4/28/2020  | 11/6/2020 South America / Brazil / Rio de Janeiro       |

|                |           |                                                   |
|----------------|-----------|---------------------------------------------------|
| EPI_ISL_623138 | 3/30/2020 | 11/6/2020 South America / Brazil / Rio de Janeiro |
| EPI_ISL_623140 | 4/17/2020 | 11/6/2020 South America / Brazil / Rio de Janeiro |
| EPI_ISL_623142 | 4/22/2020 | 11/6/2020 South America / Brazil / Rio de Janeiro |
| EPI_ISL_623143 | 5/11/2020 | 11/6/2020 South America / Brazil / Rio de Janeiro |
| EPI_ISL_623144 | 5/4/2020  | 11/6/2020 South America / Brazil / Rio de Janeiro |
| EPI_ISL_623145 | 5/18/2020 | 11/6/2020 South America / Brazil / Rio de Janeiro |
| EPI_ISL_623146 | 4/29/2020 | 11/6/2020 South America / Brazil / Rio de Janeiro |
| EPI_ISL_623147 | 5/18/2020 | 11/6/2020 South America / Brazil / Rio de Janeiro |
| EPI_ISL_623148 | 4/27/2020 | 11/6/2020 South America / Brazil / Rio de Janeiro |
| EPI_ISL_623149 | 5/8/2020  | 11/6/2020 South America / Brazil / Rio de Janeiro |
| EPI_ISL_623152 | 4/16/2020 | 11/6/2020 South America / Brazil / Rio de Janeiro |
| EPI_ISL_623154 | 4/27/2020 | 11/6/2020 South America / Brazil / Rio de Janeiro |
| EPI_ISL_623157 | 4/30/2020 | 11/6/2020 South America / Brazil / Rio de Janeiro |
| EPI_ISL_623158 | 5/7/2020  | 11/6/2020 South America / Brazil / Rio de Janeiro |
| EPI_ISL_623160 | 4/22/2020 | 11/6/2020 South America / Brazil / Rio de Janeiro |
| EPI_ISL_623161 | 5/4/2020  | 11/6/2020 South America / Brazil / Rio de Janeiro |
| EPI_ISL_623162 | 4/29/2020 | 11/6/2020 South America / Brazil / Rio de Janeiro |
| EPI_ISL_623164 | 4/29/2020 | 11/6/2020 South America / Brazil / Rio de Janeiro |
| EPI_ISL_623165 | 5/5/2020  | 11/6/2020 South America / Brazil / Rio de Janeiro |
| EPI_ISL_623166 | 4/20/2020 | 11/6/2020 South America / Brazil / Rio de Janeiro |
| EPI_ISL_623168 | 4/8/2020  | 11/6/2020 South America / Brazil / Rio de Janeiro |
| EPI_ISL_623171 | 4/5/2020  | 11/6/2020 North America / USA / Utah              |
| EPI_ISL_623172 | 4/3/2020  | 11/6/2020 North America / USA / Utah              |
| EPI_ISL_623174 | 4/4/2020  | 11/6/2020 North America / USA / Utah              |
| EPI_ISL_623175 | 4/4/2020  | 11/6/2020 North America / USA / Utah              |
| EPI_ISL_623176 | 4/4/2020  | 11/6/2020 North America / USA / Utah              |
| EPI_ISL_623177 | 4/4/2020  | 11/6/2020 North America / USA / Utah              |
| EPI_ISL_623178 | 4/4/2020  | 11/6/2020 North America / USA / Utah              |
| EPI_ISL_623179 | 10/1/2020 | 11/6/2020 North America / USA / Utah              |
| EPI_ISL_623180 | 4/2/2020  | 11/6/2020 North America / USA / Utah              |
| EPI_ISL_623182 | 4/1/2020  | 11/6/2020 North America / USA / Utah              |
| EPI_ISL_623183 | 4/3/2020  | 11/6/2020 North America / USA / Utah              |
| EPI_ISL_623185 | 4/3/2020  | 11/6/2020 North America / USA / Utah              |
| EPI_ISL_623186 | 4/9/2020  | 11/6/2020 North America / USA / Utah              |
| EPI_ISL_623188 | 4/9/2020  | 11/6/2020 North America / USA / Utah              |
| EPI_ISL_623189 | 4/9/2020  | 11/6/2020 North America / USA / Utah              |
| EPI_ISL_623190 | 4/9/2020  | 11/6/2020 North America / USA / Utah              |
| EPI_ISL_623191 | 4/8/2020  | 11/6/2020 North America / USA / Utah              |
| EPI_ISL_623192 | 4/9/2020  | 11/6/2020 North America / USA / Utah              |
| EPI_ISL_623193 | 4/9/2020  | 11/6/2020 North America / USA / Utah              |
| EPI_ISL_623195 | 4/9/2020  | 11/6/2020 North America / USA / Utah              |
| EPI_ISL_623196 | 4/9/2020  | 11/6/2020 North America / USA / Utah              |
| EPI_ISL_623197 | 4/6/2020  | 11/6/2020 North America / USA / Utah              |
| EPI_ISL_623199 | 4/9/2020  | 11/6/2020 North America / USA / Utah              |
| EPI_ISL_623200 | 4/9/2020  | 11/6/2020 North America / USA / Utah              |
| EPI_ISL_623202 | 4/6/2020  | 11/6/2020 North America / USA / Utah              |
| EPI_ISL_623203 | 4/9/2020  | 11/6/2020 North America / USA / Utah              |



























































































|                |            |                                                                 |
|----------------|------------|-----------------------------------------------------------------|
| EPI_ISL_625417 | 10/9/2020  | 11/6/2020 Europe / United Kingdom / Wales                       |
| EPI_ISL_625418 | 10/8/2020  | 11/6/2020 Europe / United Kingdom / Scotland                    |
| EPI_ISL_625419 | 10/9/2020  | 11/6/2020 Europe / United Kingdom / Scotland                    |
| EPI_ISL_625420 | 10/9/2020  | 11/6/2020 Europe / United Kingdom / Scotland                    |
| EPI_ISL_625421 | 10/8/2020  | 11/6/2020 Europe / United Kingdom / Scotland                    |
| EPI_ISL_625422 | 10/9/2020  | 11/6/2020 Europe / United Kingdom / Wales                       |
| EPI_ISL_625423 | 10/8/2020  | 11/6/2020 Europe / United Kingdom / Scotland                    |
| EPI_ISL_625424 | 10/8/2020  | 11/6/2020 Europe / United Kingdom / Scotland                    |
| EPI_ISL_625425 | 10/9/2020  | 11/6/2020 Europe / United Kingdom / Wales                       |
| EPI_ISL_625426 | 10/8/2020  | 11/6/2020 Europe / United Kingdom / Scotland                    |
| EPI_ISL_625427 | 10/9/2020  | 11/6/2020 Europe / United Kingdom / Wales                       |
| EPI_ISL_625429 | 10/9/2020  | 11/6/2020 Europe / United Kingdom / Wales                       |
| EPI_ISL_625430 | 10/9/2020  | 11/6/2020 Europe / United Kingdom / Scotland                    |
| EPI_ISL_625431 | 10/10/2020 | 11/6/2020 Europe / United Kingdom / Wales                       |
| EPI_ISL_625432 | 10/9/2020  | 11/6/2020 Europe / United Kingdom / Wales                       |
| EPI_ISL_625433 | 10/9/2020  | 11/6/2020 Europe / United Kingdom / Wales                       |
| EPI_ISL_625434 | 10/10/2020 | 11/6/2020 Europe / United Kingdom / Wales                       |
| EPI_ISL_625435 | 10/9/2020  | 11/6/2020 Europe / United Kingdom / Wales                       |
| EPI_ISL_625436 | 10/9/2020  | 11/6/2020 Europe / United Kingdom / Wales                       |
| EPI_ISL_625437 | 10/6/2020  | 11/6/2020 Europe / United Kingdom / Scotland                    |
| EPI_ISL_625438 | 10/6/2020  | 11/6/2020 Europe / United Kingdom / Wales                       |
| EPI_ISL_625439 | 10/5/2020  | 11/6/2020 Europe / United Kingdom / Wales                       |
| EPI_ISL_625440 | 10/6/2020  | 11/6/2020 Europe / United Kingdom / Wales                       |
| EPI_ISL_625441 | 10/7/2020  | 11/6/2020 Europe / United Kingdom / Wales                       |
| EPI_ISL_625442 | 10/7/2020  | 11/6/2020 Europe / United Kingdom / Wales                       |
| EPI_ISL_625443 | 10/7/2020  | 11/6/2020 Europe / United Kingdom / Wales                       |
| EPI_ISL_625444 | 10/5/2020  | 11/6/2020 Europe / United Kingdom / Wales                       |
| EPI_ISL_625446 | 10/5/2020  | 11/6/2020 Europe / United Kingdom / Scotland                    |
| EPI_ISL_625447 | 10/5/2020  | 11/6/2020 Europe / United Kingdom / Scotland                    |
| EPI_ISL_625448 | 10/5/2020  | 11/6/2020 Europe / United Kingdom / Scotland                    |
| EPI_ISL_625449 | 10/4/2020  | 11/6/2020 Europe / United Kingdom / Wales                       |
| EPI_ISL_625450 | 10/5/2020  | 11/6/2020 Europe / United Kingdom / Scotland                    |
| EPI_ISL_625451 | 10/6/2020  | 11/6/2020 Europe / United Kingdom / Scotland                    |
| EPI_ISL_625452 | 10/6/2020  | 11/6/2020 Europe / United Kingdom / Scotland                    |
| EPI_ISL_625453 | 10/5/2020  | 11/6/2020 Europe / United Kingdom / Wales                       |
| EPI_ISL_625456 | 5/4/2020   | 11/7/2020 Africa / Madagascar / Toamasina                       |
| EPI_ISL_625460 | 5/23/2020  | 11/7/2020 Asia / Bangladesh                                     |
| EPI_ISL_625461 | 5/24/2020  | 11/7/2020 Asia / Bangladesh                                     |
| EPI_ISL_625465 | 6/14/2020  | 11/7/2020 Asia / Bangladesh                                     |
| EPI_ISL_625467 | 6/17/2020  | 11/7/2020 Asia / Bangladesh                                     |
| EPI_ISL_625471 | 6/19/2020  | 11/7/2020 Asia / Bangladesh                                     |
| EPI_ISL_625473 | 7/31/2020  | 11/7/2020 Asia / Bangladesh                                     |
| EPI_ISL_625474 | 7/17/2020  | 11/7/2020 Asia / Bangladesh                                     |
| EPI_ISL_625475 | 7/24/2020  | 11/7/2020 Asia / Bangladesh                                     |
| EPI_ISL_625476 | 7/18/2020  | 11/7/2020 Asia / Bangladesh                                     |
| EPI_ISL_625477 | 7/18/2020  | 11/7/2020 Asia / Bangladesh                                     |
| EPI_ISL_625478 | 9/23/2020  | 11/7/2020 North America / USA / California / Santa Clara County |







|                |            |                                                                   |
|----------------|------------|-------------------------------------------------------------------|
| EPI_ISL_625647 | 9/26/2020  | 11/7/2020 North America / USA / California / Orange County        |
| EPI_ISL_625649 | 9/28/2020  | 11/7/2020 North America / USA / California / Orange County        |
| EPI_ISL_625650 | 9/28/2020  | 11/7/2020 North America / USA / California / Orange County        |
| EPI_ISL_625651 | 9/28/2020  | 11/7/2020 North America / USA / California / Orange County        |
| EPI_ISL_625652 | 9/29/2020  | 11/7/2020 North America / USA / California / Orange County        |
| EPI_ISL_625654 | 10/1/2020  | 11/7/2020 North America / USA / California / Orange County        |
| EPI_ISL_625655 | 10/1/2020  | 11/7/2020 North America / USA / California / Orange County        |
| EPI_ISL_625656 | 10/1/2020  | 11/7/2020 North America / USA / California / Orange County        |
| EPI_ISL_625657 | 10/1/2020  | 11/7/2020 North America / USA / California / Orange County        |
| EPI_ISL_625660 | 9/15/2020  | 11/7/2020 North America / USA / California / San Joaquin County   |
| EPI_ISL_625662 | 10/7/2020  | 11/7/2020 North America / USA / California / Marin County         |
| EPI_ISL_625663 | 10/7/2020  | 11/7/2020 North America / USA / California / Marin County         |
| EPI_ISL_625664 | 10/7/2020  | 11/7/2020 North America / USA / California / Marin County         |
| EPI_ISL_625665 | 10/3/2020  | 11/7/2020 North America / USA / California / Marin County         |
| EPI_ISL_625666 | 10/2/2020  | 11/7/2020 North America / USA / California / Marin County         |
| EPI_ISL_625667 | 9/22/2020  | 11/7/2020 North America / USA / California / Marin County         |
| EPI_ISL_625668 | 9/25/2020  | 11/7/2020 North America / USA / California / Marin County         |
| EPI_ISL_625669 | 9/11/2020  | 11/7/2020 North America / USA / California / Marin County         |
| EPI_ISL_625670 | 9/21/2020  | 11/7/2020 North America / USA / California / San Francisco County |
| EPI_ISL_625673 | 9/17/2020  | 11/8/2020 South America / Chile / Magallanes / Puerto Natales     |
| EPI_ISL_625674 | 9/27/2020  | 11/8/2020 South America / Chile / Magallanes / Puerto Natales     |
| EPI_ISL_625675 | 9/3/2020   | 11/8/2020 South America / Chile / Magallanes / Porvenir           |
| EPI_ISL_625676 | 9/8/2020   | 11/8/2020 South America / Chile / Magallanes / Punta Arenas       |
| EPI_ISL_625677 | 9/19/2020  | 11/8/2020 South America / Chile / Magallanes / Punta Arenas       |
| EPI_ISL_625678 | 10/9/2020  | 11/8/2020 South America / Chile / Magallanes / Puerto Williams    |
| EPI_ISL_625679 | 10/9/2020  | 11/8/2020 South America / Chile / Magallanes / Puerto Williams    |
| EPI_ISL_625680 | 8/25/2020  | 11/8/2020 South America / Chile / Magallanes / Punta Arenas       |
| EPI_ISL_625681 | 8/10/2020  | 11/8/2020 South America / Chile / Magallanes / Porvenir           |
| EPI_ISL_625682 | 8/10/2020  | 11/8/2020 South America / Chile / Magallanes / Porvenir           |
| EPI_ISL_625684 | 10/26/2020 | 11/8/2020 Europe / Denmark / Midtjylland                          |
| EPI_ISL_625697 | 10/26/2020 | 11/8/2020 Europe / Denmark / Nordjylland                          |
| EPI_ISL_625703 | 10/26/2020 | 11/8/2020 Europe / Denmark / Syddanmark                           |
| EPI_ISL_625708 | 10/26/2020 | 11/8/2020 Europe / Denmark / Nordjylland                          |
| EPI_ISL_625716 | 10/26/2020 | 11/8/2020 Europe / Denmark / Hovedstaden                          |
| EPI_ISL_625718 | 10/26/2020 | 11/8/2020 Europe / Denmark / Nordjylland                          |
| EPI_ISL_625732 | 10/26/2020 | 11/8/2020 Europe / Denmark / Syddanmark                           |
| EPI_ISL_625733 | 10/26/2020 | 11/8/2020 Europe / Denmark / Syddanmark                           |
| EPI_ISL_625734 | 10/26/2020 | 11/8/2020 Europe / Denmark / Nordjylland                          |
| EPI_ISL_625735 | 10/26/2020 | 11/8/2020 Europe / Denmark / Nordjylland                          |
| EPI_ISL_625736 | 10/26/2020 | 11/8/2020 Europe / Denmark / Nordjylland                          |
| EPI_ISL_625737 | 10/26/2020 | 11/8/2020 Europe / Denmark / Hovedstaden                          |
| EPI_ISL_625738 | 10/26/2020 | 11/8/2020 Europe / Denmark / Nordjylland                          |
| EPI_ISL_625739 | 10/26/2020 | 11/8/2020 Europe / Denmark / Hovedstaden                          |
| EPI_ISL_625740 | 10/26/2020 | 11/8/2020 Europe / Denmark / Syddanmark                           |
| EPI_ISL_625741 | 10/26/2020 | 11/8/2020 Europe / Denmark / Hovedstaden                          |
| EPI_ISL_625746 | 10/26/2020 | 11/8/2020 Europe / Denmark / Midtjylland                          |
| EPI_ISL_625752 | 10/26/2020 | 11/8/2020 Europe / Denmark / Syddanmark                           |











|                |            |                                          |
|----------------|------------|------------------------------------------|
| EPI_ISL_625974 | 10/26/2020 | 11/8/2020 Europe / Denmark / Midtjylland |
| EPI_ISL_625976 | 10/26/2020 | 11/8/2020 Europe / Denmark / Midtjylland |
| EPI_ISL_625977 | 10/26/2020 | 11/8/2020 Europe / Denmark / Sjælland    |
| EPI_ISL_625978 | 10/26/2020 | 11/8/2020 Europe / Denmark / Midtjylland |
| EPI_ISL_625980 | 10/26/2020 | 11/8/2020 Europe / Denmark / Nordjylland |
| EPI_ISL_625981 | 10/26/2020 | 11/8/2020 Europe / Denmark               |
| EPI_ISL_625982 | 10/26/2020 | 11/8/2020 Europe / Denmark / Syddanmark  |
| EPI_ISL_625985 | 10/26/2020 | 11/8/2020 Europe / Denmark / Hovedstaden |
| EPI_ISL_625986 | 10/26/2020 | 11/8/2020 Europe / Denmark / Sjælland    |
| EPI_ISL_625987 | 10/26/2020 | 11/8/2020 Europe / Denmark / Syddanmark  |
| EPI_ISL_625988 | 10/26/2020 | 11/8/2020 Europe / Denmark / Hovedstaden |
| EPI_ISL_625990 | 10/26/2020 | 11/8/2020 Europe / Denmark / Sjælland    |
| EPI_ISL_625991 | 10/26/2020 | 11/8/2020 Europe / Denmark / Hovedstaden |
| EPI_ISL_625992 | 10/26/2020 | 11/8/2020 Europe / Denmark / Sjælland    |
| EPI_ISL_625993 | 10/26/2020 | 11/8/2020 Europe / Denmark / Hovedstaden |
| EPI_ISL_625994 | 10/26/2020 | 11/8/2020 Europe / Denmark / Midtjylland |
| EPI_ISL_625995 | 10/26/2020 | 11/8/2020 Europe / Denmark / Sjælland    |
| EPI_ISL_625996 | 10/26/2020 | 11/8/2020 Europe / Denmark / Sjælland    |
| EPI_ISL_625997 | 10/26/2020 | 11/8/2020 Europe / Denmark / Syddanmark  |
| EPI_ISL_625999 | 10/26/2020 | 11/8/2020 Europe / Denmark / Nordjylland |
| EPI_ISL_626000 | 10/26/2020 | 11/8/2020 Europe / Denmark / Sjælland    |
| EPI_ISL_626001 | 10/26/2020 | 11/8/2020 Europe / Denmark / Nordjylland |
| EPI_ISL_626002 | 10/26/2020 | 11/8/2020 Europe / Denmark / Sjælland    |
| EPI_ISL_626003 | 10/26/2020 | 11/8/2020 Europe / Denmark / Nordjylland |
| EPI_ISL_626004 | 10/26/2020 | 11/8/2020 Europe / Denmark / Syddanmark  |
| EPI_ISL_626005 | 10/26/2020 | 11/8/2020 Europe / Denmark / Nordjylland |
| EPI_ISL_626006 | 10/26/2020 | 11/8/2020 Europe / Denmark / Sjælland    |
| EPI_ISL_626007 | 10/26/2020 | 11/8/2020 Europe / Denmark / Midtjylland |
| EPI_ISL_626008 | 10/26/2020 | 11/8/2020 Europe / Denmark / Hovedstaden |
| EPI_ISL_626009 | 10/26/2020 | 11/8/2020 Europe / Denmark / Syddanmark  |
| EPI_ISL_626011 | 10/26/2020 | 11/8/2020 Europe / Denmark / Hovedstaden |
| EPI_ISL_626012 | 10/26/2020 | 11/8/2020 Europe / Denmark / Hovedstaden |
| EPI_ISL_626013 | 10/26/2020 | 11/8/2020 Europe / Denmark / Hovedstaden |
| EPI_ISL_626014 | 10/26/2020 | 11/8/2020 Europe / Denmark / Hovedstaden |
| EPI_ISL_626015 | 10/26/2020 | 11/8/2020 Europe / Denmark / Syddanmark  |
| EPI_ISL_626016 | 10/26/2020 | 11/8/2020 Europe / Denmark / Hovedstaden |
| EPI_ISL_626017 | 10/26/2020 | 11/8/2020 Europe / Denmark / Hovedstaden |
| EPI_ISL_626018 | 10/26/2020 | 11/8/2020 Europe / Denmark / Hovedstaden |
| EPI_ISL_626019 | 10/26/2020 | 11/8/2020 Europe / Denmark / Hovedstaden |
| EPI_ISL_626020 | 10/26/2020 | 11/8/2020 Europe / Denmark / Sjælland    |
| EPI_ISL_626021 | 10/26/2020 | 11/8/2020 Europe / Denmark / Syddanmark  |
| EPI_ISL_626022 | 10/26/2020 | 11/8/2020 Europe / Denmark / Hovedstaden |
| EPI_ISL_626023 | 10/26/2020 | 11/8/2020 Europe / Denmark / Hovedstaden |
| EPI_ISL_626024 | 10/26/2020 | 11/8/2020 Europe / Denmark / Hovedstaden |
| EPI_ISL_626025 | 10/26/2020 | 11/8/2020 Europe / Denmark / Nordjylland |
| EPI_ISL_626026 | 10/26/2020 | 11/8/2020 Europe / Denmark / Hovedstaden |
| EPI_ISL_626027 | 10/26/2020 | 11/8/2020 Europe / Denmark / Nordjylland |



|                |            |                                          |
|----------------|------------|------------------------------------------|
| EPI_ISL_626075 | 10/26/2020 | 11/8/2020 Europe / Denmark / Hovedstaden |
| EPI_ISL_626076 | 10/26/2020 | 11/8/2020 Europe / Denmark / Hovedstaden |
| EPI_ISL_626077 | 10/26/2020 | 11/8/2020 Europe / Denmark / Syddanmark  |
| EPI_ISL_626078 | 10/26/2020 | 11/8/2020 Europe / Denmark / Hovedstaden |
| EPI_ISL_626079 | 10/26/2020 | 11/8/2020 Europe / Denmark / Midtjylland |
| EPI_ISL_626080 | 10/26/2020 | 11/8/2020 Europe / Denmark / Syddanmark  |
| EPI_ISL_626081 | 10/26/2020 | 11/8/2020 Europe / Denmark / Midtjylland |
| EPI_ISL_626082 | 10/26/2020 | 11/8/2020 Europe / Denmark / Hovedstaden |
| EPI_ISL_626083 | 10/26/2020 | 11/8/2020 Europe / Denmark / Hovedstaden |
| EPI_ISL_626084 | 10/26/2020 | 11/8/2020 Europe / Denmark / Syddanmark  |
| EPI_ISL_626085 | 10/26/2020 | 11/8/2020 Europe / Denmark / Hovedstaden |
| EPI_ISL_626086 | 10/26/2020 | 11/8/2020 Europe / Denmark / Midtjylland |
| EPI_ISL_626087 | 10/26/2020 | 11/8/2020 Europe / Denmark / Midtjylland |
| EPI_ISL_626088 | 10/26/2020 | 11/8/2020 Europe / Denmark / Hovedstaden |
| EPI_ISL_626089 | 10/26/2020 | 11/8/2020 Europe / Denmark / Hovedstaden |
| EPI_ISL_626090 | 10/26/2020 | 11/8/2020 Europe / Denmark / Syddanmark  |
| EPI_ISL_626091 | 10/26/2020 | 11/8/2020 Europe / Denmark / Syddanmark  |
| EPI_ISL_626092 | 10/26/2020 | 11/8/2020 Europe / Denmark / Hovedstaden |
| EPI_ISL_626093 | 10/26/2020 | 11/8/2020 Europe / Denmark / Hovedstaden |
| EPI_ISL_626094 | 10/26/2020 | 11/8/2020 Europe / Denmark / Nordjylland |
| EPI_ISL_626095 | 10/26/2020 | 11/8/2020 Europe / Denmark / Syddanmark  |
| EPI_ISL_626096 | 10/26/2020 | 11/8/2020 Europe / Denmark / Syddanmark  |
| EPI_ISL_626097 | 10/26/2020 | 11/8/2020 Europe / Denmark / Hovedstaden |
| EPI_ISL_626098 | 10/26/2020 | 11/8/2020 Europe / Denmark / Sjaelland   |
| EPI_ISL_626099 | 10/26/2020 | 11/8/2020 Europe / Denmark / Hovedstaden |
| EPI_ISL_626100 | 10/26/2020 | 11/8/2020 Europe / Denmark / Sjaelland   |
| EPI_ISL_626101 | 10/26/2020 | 11/8/2020 Europe / Denmark / Hovedstaden |
| EPI_ISL_626102 | 10/26/2020 | 11/8/2020 Europe / Denmark / Midtjylland |
| EPI_ISL_626103 | 10/26/2020 | 11/8/2020 Europe / Denmark / Hovedstaden |
| EPI_ISL_626104 | 10/26/2020 | 11/8/2020 Europe / Denmark / Hovedstaden |
| EPI_ISL_626105 | 10/26/2020 | 11/8/2020 Europe / Denmark / Midtjylland |
| EPI_ISL_626106 | 10/26/2020 | 11/8/2020 Europe / Denmark / Hovedstaden |
| EPI_ISL_626107 | 10/26/2020 | 11/8/2020 Europe / Denmark / Nordjylland |
| EPI_ISL_626108 | 10/26/2020 | 11/8/2020 Europe / Denmark / Sjaelland   |
| EPI_ISL_626109 | 10/26/2020 | 11/8/2020 Europe / Denmark / Hovedstaden |
| EPI_ISL_626110 | 10/26/2020 | 11/8/2020 Europe / Denmark / Hovedstaden |
| EPI_ISL_626111 | 10/26/2020 | 11/8/2020 Europe / Denmark / Syddanmark  |
| EPI_ISL_626112 | 10/26/2020 | 11/8/2020 Europe / Denmark / Nordjylland |
| EPI_ISL_626113 | 10/26/2020 | 11/8/2020 Europe / Denmark / Nordjylland |
| EPI_ISL_626114 | 10/26/2020 | 11/8/2020 Europe / Denmark / Sjaelland   |
| EPI_ISL_626115 | 10/26/2020 | 11/8/2020 Europe / Denmark / Nordjylland |
| EPI_ISL_626116 | 10/26/2020 | 11/8/2020 Europe / Denmark / Hovedstaden |
| EPI_ISL_626117 | 10/26/2020 | 11/8/2020 Europe / Denmark / Hovedstaden |
| EPI_ISL_626118 | 10/26/2020 | 11/8/2020 Europe / Denmark / Syddanmark  |
| EPI_ISL_626119 | 10/26/2020 | 11/8/2020 Europe / Denmark / Midtjylland |
| EPI_ISL_626120 | 10/26/2020 | 11/8/2020 Europe / Denmark / Sjaelland   |
| EPI_ISL_626121 | 10/26/2020 | 11/8/2020 Europe / Denmark / Hovedstaden |

|                |            |                                          |
|----------------|------------|------------------------------------------|
| EPI_ISL_626122 | 10/26/2020 | 11/8/2020 Europe / Denmark / Midtjylland |
| EPI_ISL_626123 | 10/26/2020 | 11/8/2020 Europe / Denmark / Hovedstaden |
| EPI_ISL_626124 | 11/2/2020  | 11/8/2020 Europe / Denmark / Hovedstaden |
| EPI_ISL_626125 | 10/26/2020 | 11/8/2020 Europe / Denmark / Nordjylland |
| EPI_ISL_626126 | 10/26/2020 | 11/8/2020 Europe / Denmark / Nordjylland |
| EPI_ISL_626127 | 11/2/2020  | 11/8/2020 Europe / Denmark / Sjaelland   |
| EPI_ISL_626128 | 10/26/2020 | 11/8/2020 Europe / Denmark / Hovedstaden |
| EPI_ISL_626129 | 11/2/2020  | 11/8/2020 Europe / Denmark / Hovedstaden |
| EPI_ISL_626130 | 10/26/2020 | 11/8/2020 Europe / Denmark / Hovedstaden |
| EPI_ISL_626131 | 10/26/2020 | 11/8/2020 Europe / Denmark / Syddanmark  |
| EPI_ISL_626132 | 11/2/2020  | 11/8/2020 Europe / Denmark / Hovedstaden |
| EPI_ISL_626133 | 11/2/2020  | 11/8/2020 Europe / Denmark / Sjaelland   |
| EPI_ISL_626134 | 11/2/2020  | 11/8/2020 Europe / Denmark / Hovedstaden |
| EPI_ISL_626135 | 10/26/2020 | 11/8/2020 Europe / Denmark / Sjaelland   |
| EPI_ISL_626136 | 10/26/2020 | 11/8/2020 Europe / Denmark / Hovedstaden |
| EPI_ISL_626137 | 11/2/2020  | 11/8/2020 Europe / Denmark / Hovedstaden |
| EPI_ISL_626138 | 11/2/2020  | 11/8/2020 Europe / Denmark / Hovedstaden |
| EPI_ISL_626139 | 11/2/2020  | 11/8/2020 Europe / Denmark / Sjaelland   |
| EPI_ISL_626140 | 10/26/2020 | 11/8/2020 Europe / Denmark / Nordjylland |
| EPI_ISL_626141 | 10/26/2020 | 11/8/2020 Europe / Denmark / Hovedstaden |
| EPI_ISL_626142 | 10/26/2020 | 11/8/2020 Europe / Denmark / Midtjylland |
| EPI_ISL_626143 | 10/26/2020 | 11/8/2020 Europe / Denmark / Midtjylland |
| EPI_ISL_626144 | 11/2/2020  | 11/8/2020 Europe / Denmark               |
| EPI_ISL_626145 | 10/26/2020 | 11/8/2020 Europe / Denmark / Nordjylland |
| EPI_ISL_626146 | 11/2/2020  | 11/8/2020 Europe / Denmark / Midtjylland |
| EPI_ISL_626147 | 10/26/2020 | 11/8/2020 Europe / Denmark / Nordjylland |
| EPI_ISL_626148 | 11/2/2020  | 11/8/2020 Europe / Denmark / Hovedstaden |
| EPI_ISL_626149 | 11/2/2020  | 11/8/2020 Europe / Denmark / Syddanmark  |
| EPI_ISL_626150 | 10/26/2020 | 11/8/2020 Europe / Denmark / Hovedstaden |
| EPI_ISL_626151 | 10/26/2020 | 11/8/2020 Europe / Denmark / Midtjylland |
| EPI_ISL_626152 | 10/26/2020 | 11/8/2020 Europe / Denmark / Syddanmark  |
| EPI_ISL_626153 | 10/26/2020 | 11/8/2020 Europe / Denmark / Hovedstaden |
| EPI_ISL_626154 | 10/26/2020 | 11/8/2020 Europe / Denmark / Hovedstaden |
| EPI_ISL_626155 | 10/26/2020 | 11/8/2020 Europe / Denmark / Hovedstaden |
| EPI_ISL_626156 | 10/26/2020 | 11/8/2020 Europe / Denmark / Midtjylland |
| EPI_ISL_626157 | 11/2/2020  | 11/8/2020 Europe / Denmark / Midtjylland |
| EPI_ISL_626158 | 10/26/2020 | 11/8/2020 Europe / Denmark / Hovedstaden |
| EPI_ISL_626159 | 10/26/2020 | 11/8/2020 Europe / Denmark / Hovedstaden |
| EPI_ISL_626160 | 10/26/2020 | 11/8/2020 Europe / Denmark / Hovedstaden |
| EPI_ISL_626161 | 10/26/2020 | 11/8/2020 Europe / Denmark / Syddanmark  |
| EPI_ISL_626162 | 11/2/2020  | 11/8/2020 Europe / Denmark / Midtjylland |
| EPI_ISL_626163 | 10/26/2020 | 11/8/2020 Europe / Denmark / Syddanmark  |
| EPI_ISL_626164 | 11/2/2020  | 11/8/2020 Europe / Denmark / Hovedstaden |
| EPI_ISL_626165 | 10/26/2020 | 11/8/2020 Europe / Denmark / Hovedstaden |
| EPI_ISL_626166 | 10/26/2020 | 11/8/2020 Europe / Denmark / Hovedstaden |
| EPI_ISL_626167 | 10/26/2020 | 11/8/2020 Europe / Denmark / Hovedstaden |
| EPI_ISL_626168 | 10/26/2020 | 11/8/2020 Europe / Denmark / Syddanmark  |

|                |            |                                                             |
|----------------|------------|-------------------------------------------------------------|
| EPI_ISL_626169 | 10/26/2020 | 11/8/2020 Europe / Denmark / Hovedstaden                    |
| EPI_ISL_626170 | 10/26/2020 | 11/8/2020 Europe / Denmark / Syddanmark                     |
| EPI_ISL_626171 | 10/26/2020 | 11/8/2020 Europe / Denmark / Sjælland                       |
| EPI_ISL_626172 | 10/26/2020 | 11/8/2020 Europe / Denmark / Hovedstaden                    |
| EPI_ISL_626173 | 10/26/2020 | 11/8/2020 Europe / Denmark / Hovedstaden                    |
| EPI_ISL_626174 | 10/26/2020 | 11/8/2020 Europe / Denmark / Hovedstaden                    |
| EPI_ISL_626175 | 10/26/2020 | 11/8/2020 Europe / Denmark / Hovedstaden                    |
| EPI_ISL_626176 | 10/26/2020 | 11/8/2020 Europe / Denmark / Midtjylland                    |
| EPI_ISL_626177 | 10/26/2020 | 11/8/2020 Europe / Denmark / Hovedstaden                    |
| EPI_ISL_626178 | 10/26/2020 | 11/8/2020 Europe / Denmark / Hovedstaden                    |
| EPI_ISL_626179 | 10/26/2020 | 11/8/2020 Europe / Denmark / Nordjylland                    |
| EPI_ISL_626180 | 10/26/2020 | 11/8/2020 Europe / Denmark / Hovedstaden                    |
| EPI_ISL_626181 | 10/26/2020 | 11/8/2020 Europe / Denmark / Hovedstaden                    |
| EPI_ISL_626182 | 10/26/2020 | 11/8/2020 Europe / Denmark / Syddanmark                     |
| EPI_ISL_626183 | 10/26/2020 | 11/8/2020 Europe / Denmark / Syddanmark                     |
| EPI_ISL_626184 | 10/26/2020 | 11/8/2020 Europe / Denmark / Hovedstaden                    |
| EPI_ISL_626185 | 10/26/2020 | 11/8/2020 Europe / Denmark / Midtjylland                    |
| EPI_ISL_626186 | 10/26/2020 | 11/8/2020 Europe / Denmark / Sjælland                       |
| EPI_ISL_626187 | 10/26/2020 | 11/8/2020 Europe / Denmark / Midtjylland                    |
| EPI_ISL_626188 | 10/26/2020 | 11/8/2020 Europe / Denmark / Hovedstaden                    |
| EPI_ISL_626189 | 10/26/2020 | 11/8/2020 Europe / Denmark / Hovedstaden                    |
| EPI_ISL_626190 | 10/26/2020 | 11/8/2020 Europe / Denmark / Syddanmark                     |
| EPI_ISL_626191 | 10/26/2020 | 11/8/2020 Europe / Denmark / Hovedstaden                    |
| EPI_ISL_626192 | 10/26/2020 | 11/8/2020 Europe / Denmark / Midtjylland                    |
| EPI_ISL_626193 | 10/26/2020 | 11/8/2020 Europe / Denmark / Sjælland                       |
| EPI_ISL_626194 | 10/26/2020 | 11/8/2020 Europe / Denmark / Hovedstaden                    |
| EPI_ISL_626195 | 10/26/2020 | 11/8/2020 Europe / Denmark / Midtjylland                    |
| EPI_ISL_626196 | 10/26/2020 | 11/8/2020 Europe / Denmark / Hovedstaden                    |
| EPI_ISL_626197 | 10/26/2020 | 11/8/2020 Europe / Denmark / Hovedstaden                    |
| EPI_ISL_626198 | 10/26/2020 | 11/8/2020 Europe / Denmark / Hovedstaden                    |
| EPI_ISL_626199 | 10/26/2020 | 11/8/2020 Europe / Denmark / Sjælland                       |
| EPI_ISL_626200 | 10/26/2020 | 11/8/2020 Europe / Denmark / Hovedstaden                    |
| EPI_ISL_626201 | 10/26/2020 | 11/8/2020 Europe / Denmark / Hovedstaden                    |
| EPI_ISL_626202 | 10/26/2020 | 11/8/2020 Europe / Denmark / Hovedstaden                    |
| EPI_ISL_626203 | 10/26/2020 | 11/8/2020 Europe / Denmark / Nordjylland                    |
| EPI_ISL_626204 | 10/26/2020 | 11/8/2020 Europe / Denmark / Midtjylland                    |
| EPI_ISL_626205 | 10/26/2020 | 11/8/2020 Europe / Denmark / Nordjylland                    |
| EPI_ISL_626206 | 10/26/2020 | 11/8/2020 Europe / Denmark / Hovedstaden                    |
| EPI_ISL_626207 | 10/26/2020 | 11/8/2020 Europe / Denmark / Hovedstaden                    |
| EPI_ISL_626208 | 10/26/2020 | 11/8/2020 Europe / Denmark / Hovedstaden                    |
| EPI_ISL_626209 | 10/26/2020 | 11/8/2020 Europe / Denmark / Hovedstaden                    |
| EPI_ISL_626210 | 10/26/2020 | 11/8/2020 Europe / Denmark / Hovedstaden                    |
| EPI_ISL_626211 | 4/14/2020  | 11/8/2020 Europe / Germany / North Rhine-Westphalia / Essen |
| EPI_ISL_626212 | 4/14/2020  | 11/8/2020 Europe / Germany / North Rhine-Westphalia / Essen |
| EPI_ISL_626214 | 4/17/2020  | 11/8/2020 Europe / Germany / North Rhine-Westphalia / Essen |
| EPI_ISL_626216 | 4/22/2020  | 11/8/2020 Europe / Germany / North Rhine-Westphalia / Essen |
| EPI_ISL_626217 | 4/23/2020  | 11/8/2020 Europe / Germany / North Rhine-Westphalia / Essen |







|                |            |                                                    |
|----------------|------------|----------------------------------------------------|
| EPI_ISL_626325 | 10/23/2020 | 11/8/2020 Europe / Belgium / Liège                 |
| EPI_ISL_626326 | 10/23/2020 | 11/8/2020 Europe / Belgium / Liège                 |
| EPI_ISL_626327 | 10/23/2020 | 11/8/2020 Europe / Belgium / Liège                 |
| EPI_ISL_626328 | 10/23/2020 | 11/8/2020 Europe / Belgium / Liège                 |
| EPI_ISL_626329 | 10/23/2020 | 11/8/2020 Europe / Belgium / Liège                 |
| EPI_ISL_626330 | 10/23/2020 | 11/8/2020 Europe / Belgium / Liège                 |
| EPI_ISL_626331 | 10/23/2020 | 11/8/2020 Europe / Belgium / Liège                 |
| EPI_ISL_626332 | 10/23/2020 | 11/8/2020 Europe / Belgium / Liège                 |
| EPI_ISL_626333 | 10/23/2020 | 11/8/2020 Europe / Belgium / Liège                 |
| EPI_ISL_626334 | 10/23/2020 | 11/8/2020 Europe / Belgium / Liège                 |
| EPI_ISL_626335 | 10/23/2020 | 11/8/2020 Europe / Belgium / Liège                 |
| EPI_ISL_626336 | 10/23/2020 | 11/8/2020 Europe / Belgium / Liège                 |
| EPI_ISL_626337 | 10/23/2020 | 11/8/2020 Europe / Belgium / Liège                 |
| EPI_ISL_626338 | 10/23/2020 | 11/8/2020 Europe / Belgium / Liège                 |
| EPI_ISL_626339 | 10/23/2020 | 11/8/2020 Europe / Belgium / Liège                 |
| EPI_ISL_632284 | 7/25/2020  | 11/8/2020 Asia / Bahrain                           |
| EPI_ISL_632285 | 5/31/2020  | 11/8/2020 Asia / Bahrain                           |
| EPI_ISL_626352 | 10/31/2020 | 11/9/2020 Oceania / New Zealand / Auckland         |
| EPI_ISL_626353 | 10/30/2020 | 11/9/2020 Oceania / New Zealand / Auckland         |
| EPI_ISL_626354 | 10/30/2020 | 11/9/2020 Oceania / New Zealand / Auckland         |
| EPI_ISL_626355 | 10/29/2020 | 11/9/2020 Oceania / New Zealand / Auckland         |
| EPI_ISL_626356 | 11/3/2020  | 11/9/2020 Oceania / New Zealand / Auckland         |
| EPI_ISL_626359 | 3/15/2020  | 11/9/2020 North America / USA / Illinois / Chicago |
| EPI_ISL_626360 | 3/15/2020  | 11/9/2020 North America / USA / Illinois / Chicago |
| EPI_ISL_626364 | 3/21/2020  | 11/9/2020 North America / USA / Illinois / Chicago |
| EPI_ISL_626365 | 3/21/2020  | 11/9/2020 North America / USA / Illinois / Chicago |
| EPI_ISL_626366 | 3/23/2020  | 11/9/2020 North America / USA / Illinois / Chicago |
| EPI_ISL_626368 | 3/23/2020  | 11/9/2020 North America / USA / Illinois / Chicago |
| EPI_ISL_626370 | 3/23/2020  | 11/9/2020 North America / USA / Illinois / Chicago |
| EPI_ISL_626371 | 3/23/2020  | 11/9/2020 North America / USA / Illinois / Chicago |
| EPI_ISL_626372 | 3/23/2020  | 11/9/2020 North America / USA / Illinois / Chicago |
| EPI_ISL_626373 | 3/23/2020  | 11/9/2020 North America / USA / Illinois / Chicago |
| EPI_ISL_626374 | 3/24/2020  | 11/9/2020 North America / USA / Illinois / Chicago |
| EPI_ISL_626375 | 3/24/2020  | 11/9/2020 North America / USA / Illinois / Chicago |
| EPI_ISL_626376 | 3/25/2020  | 11/9/2020 North America / USA / Illinois / Chicago |
| EPI_ISL_626377 | 3/25/2020  | 11/9/2020 North America / USA / Illinois / Chicago |
| EPI_ISL_626378 | 3/26/2020  | 11/9/2020 North America / USA / Illinois / Chicago |
| EPI_ISL_626379 | 3/26/2020  | 11/9/2020 North America / USA / Illinois / Chicago |
| EPI_ISL_626381 | 3/27/2020  | 11/9/2020 North America / USA / Illinois / Chicago |
| EPI_ISL_626382 | 3/28/2020  | 11/9/2020 North America / USA / Illinois / Chicago |
| EPI_ISL_626383 | 3/28/2020  | 11/9/2020 North America / USA / Illinois / Chicago |
| EPI_ISL_626384 | 3/28/2020  | 11/9/2020 North America / USA / Illinois / Chicago |
| EPI_ISL_626385 | 4/15/2020  | 11/9/2020 North America / USA / Illinois / Chicago |
| EPI_ISL_626386 | 4/15/2020  | 11/9/2020 North America / USA / Illinois / Chicago |
| EPI_ISL_626387 | 4/15/2020  | 11/9/2020 North America / USA / Illinois / Chicago |
| EPI_ISL_626388 | 4/15/2020  | 11/9/2020 North America / USA / Illinois / Chicago |
| EPI_ISL_626389 | 4/14/2020  | 11/9/2020 North America / USA / Illinois / Chicago |



|                |           |                                                                       |
|----------------|-----------|-----------------------------------------------------------------------|
| EPI_ISL_626470 | 5/10/2020 | 11/9/2020 North America / USA / Illinois / Chicago                    |
| EPI_ISL_626472 | 5/12/2020 | 11/9/2020 North America / USA / Illinois / Chicago                    |
| EPI_ISL_626473 | 5/13/2020 | 11/9/2020 North America / USA / Illinois / Chicago                    |
| EPI_ISL_626476 | 5/16/2020 | 11/9/2020 North America / USA / Illinois / Chicago                    |
| EPI_ISL_626478 | 5/18/2020 | 11/9/2020 North America / USA / Illinois / Chicago                    |
| EPI_ISL_626480 | 5/20/2020 | 11/9/2020 North America / USA / Illinois / Chicago                    |
| EPI_ISL_626485 | 5/26/2020 | 11/9/2020 North America / USA / Illinois / Chicago                    |
| EPI_ISL_626486 | 5/27/2020 | 11/9/2020 North America / USA / Illinois / Chicago                    |
| EPI_ISL_626487 | 5/28/2020 | 11/9/2020 North America / USA / Illinois / Chicago                    |
| EPI_ISL_626488 | 5/29/2020 | 11/9/2020 North America / USA / Illinois / Chicago                    |
| EPI_ISL_626489 | 5/30/2020 | 11/9/2020 North America / USA / Illinois / Chicago                    |
| EPI_ISL_626492 | 6/4/2020  | 11/9/2020 North America / USA / Illinois / Chicago                    |
| EPI_ISL_626493 | 6/5/2020  | 11/9/2020 North America / USA / Illinois / Chicago                    |
| EPI_ISL_626494 | 6/6/2020  | 11/9/2020 North America / USA / Illinois / Chicago                    |
| EPI_ISL_626495 | 6/7/2020  | 11/9/2020 North America / USA / Illinois / Chicago                    |
| EPI_ISL_626497 | 6/9/2020  | 11/9/2020 North America / USA / Illinois / Chicago                    |
| EPI_ISL_626498 | 6/10/2020 | 11/9/2020 North America / USA / Illinois / Chicago                    |
| EPI_ISL_626502 | 6/14/2020 | 11/9/2020 North America / USA / Illinois / Chicago                    |
| EPI_ISL_626503 | 6/15/2020 | 11/9/2020 North America / USA / Illinois / Chicago                    |
| EPI_ISL_626505 | 6/18/2020 | 11/9/2020 North America / USA / Illinois / Chicago                    |
| EPI_ISL_626506 | 6/19/2020 | 11/9/2020 North America / USA / Illinois / Chicago                    |
| EPI_ISL_626507 | 6/21/2020 | 11/9/2020 North America / USA / Illinois / Chicago                    |
| EPI_ISL_626508 | 6/22/2020 | 11/9/2020 North America / USA / Illinois / Chicago                    |
| EPI_ISL_626509 | 6/23/2020 | 11/9/2020 North America / USA / Illinois / Chicago                    |
| EPI_ISL_626511 | 6/25/2020 | 11/9/2020 North America / USA / Illinois / Chicago                    |
| EPI_ISL_626514 | 4/1/2020  | 11/9/2020 North America / USA / Illinois / Chicago                    |
| EPI_ISL_626515 | 4/1/2020  | 11/9/2020 North America / USA / Illinois / Chicago                    |
| EPI_ISL_626521 | 7/3/2020  | 11/9/2020 North America / USA / Illinois / Chicago                    |
| EPI_ISL_626522 | 7/4/2020  | 11/9/2020 North America / USA / Illinois / Chicago                    |
| EPI_ISL_626524 | 7/6/2020  | 11/9/2020 North America / USA / Illinois / Chicago                    |
| EPI_ISL_626525 | 7/7/2020  | 11/9/2020 North America / USA / Illinois / Chicago                    |
| EPI_ISL_626526 | 7/8/2020  | 11/9/2020 North America / USA / Illinois / Chicago                    |
| EPI_ISL_626527 | 7/10/2020 | 11/9/2020 North America / USA / Illinois / Chicago                    |
| EPI_ISL_626529 | 7/12/2020 | 11/9/2020 North America / USA / Illinois / Chicago                    |
| EPI_ISL_626532 | 7/14/2020 | 11/9/2020 North America / USA / Illinois / Chicago                    |
| EPI_ISL_626536 | 7/20/2020 | 11/9/2020 North America / USA / Illinois / Chicago                    |
| EPI_ISL_626538 | 7/21/2020 | 11/9/2020 North America / USA / Illinois / Chicago                    |
| EPI_ISL_626539 | 7/22/2020 | 11/9/2020 North America / USA / Illinois / Chicago                    |
| EPI_ISL_626540 | 7/23/2020 | 11/9/2020 North America / USA / Illinois / Chicago                    |
| EPI_ISL_626542 | 7/24/2020 | 11/9/2020 North America / USA / Illinois / Chicago                    |
| EPI_ISL_626549 | 7/29/2020 | 11/9/2020 South America / Chile / Atacama / Copiapo                   |
| EPI_ISL_626550 | 7/20/2020 | 11/9/2020 South America / Chile / Atacama / Copiapo                   |
| EPI_ISL_626551 | 7/25/2020 | 11/9/2020 South America / Chile / Atacama / Domeyko                   |
| EPI_ISL_626552 | 7/22/2020 | 11/9/2020 South America / Chile / Atacama / Copiapo / Tierra Amarilla |
| EPI_ISL_626553 | 7/25/2020 | 11/9/2020 South America / Chile / Atacama / Huasco / Freirina         |
| EPI_ISL_626554 | 7/26/2020 | 11/9/2020 South America / Chile / Atacama / Copiapo / Chanaral        |
| EPI_ISL_626555 | 7/25/2020 | 11/9/2020 South America / Chile / Atacama / Copiapo / Paipote         |

|                |           |                                                                       |
|----------------|-----------|-----------------------------------------------------------------------|
| EPI_ISL_626556 | 8/7/2020  | 11/9/2020 South America / Chile / Atacama / Copiapo / Caldera         |
| EPI_ISL_626557 | 8/7/2020  | 11/9/2020 South America / Chile / Atacama / Copiapo / Caldera         |
| EPI_ISL_626558 | 8/10/2020 | 11/9/2020 South America / Chile / Atacama / Copiapo                   |
| EPI_ISL_626559 | 8/7/2020  | 11/9/2020 South America / Chile / Atacama / Copiapo / Caldera         |
| EPI_ISL_626560 | 8/7/2020  | 11/9/2020 South America / Chile / Atacama / Chañaral / El Salvador    |
| EPI_ISL_626561 | 8/7/2020  | 11/9/2020 South America / Chile / Atacama / Huasco / Freirina         |
| EPI_ISL_626562 | 8/7/2020  | 11/9/2020 South America / Chile / Atacama / Huasco / Freirina         |
| EPI_ISL_626563 | 8/7/2020  | 11/9/2020 South America / Chile / Atacama / Huasco / Freirina         |
| EPI_ISL_626564 | 7/30/2020 | 11/9/2020 South America / Chile / Atacama / Copiapo                   |
| EPI_ISL_626565 | 7/26/2020 | 11/9/2020 South America / Chile / Atacama / Copiapo                   |
| EPI_ISL_626570 | 4/2/2020  | 11/9/2020 Europe / Czech Republic / South Bohemian Region / Jindrichu |
| EPI_ISL_626571 | 9/19/2020 | 11/9/2020 Europe / Czech Republic / Central Bohemian Region / Kolin   |
| EPI_ISL_626572 | 9/20/2020 | 11/9/2020 Europe / Czech Republic / Prague                            |
| EPI_ISL_626573 | 9/20/2020 | 11/9/2020 Europe / Czech Republic / Prague                            |
| EPI_ISL_626574 | 9/10/2020 | 11/9/2020 Europe / Czech Republic / South Bohemian Region / Āeskŷ     |
| EPI_ISL_626575 | 9/9/2020  | 11/9/2020 Europe / Czech Republic / Central Bohemian Region / Kolin   |
| EPI_ISL_626576 | 9/11/2020 | 11/9/2020 Europe / Czech Republic / Central Bohemian Region / Pŀ™ŀ-b  |
| EPI_ISL_626577 | 9/14/2020 | 11/9/2020 Europe / Czech Republic / Prague                            |
| EPI_ISL_626578 | 9/14/2020 | 11/9/2020 Europe / Czech Republic / Prague                            |
| EPI_ISL_626579 | 9/15/2020 | 11/9/2020 Europe / Czech Republic / Prague                            |
| EPI_ISL_626580 | 9/15/2020 | 11/9/2020 Europe / Czech Republic / Prague                            |
| EPI_ISL_626581 | 9/15/2020 | 11/9/2020 Europe / Czech Republic / Prague                            |
| EPI_ISL_626582 | 9/15/2020 | 11/9/2020 Europe / Czech Republic / Prague                            |
| EPI_ISL_626583 | 9/15/2020 | 11/9/2020 Europe / Czech Republic / Prague                            |
| EPI_ISL_626584 | 9/16/2020 | 11/9/2020 Europe / Czech Republic / Prague                            |
| EPI_ISL_626585 | 9/18/2020 | 11/9/2020 Europe / Czech Republic / Prague                            |
| EPI_ISL_626586 | 9/25/2020 | 11/9/2020 Europe / Czech Republic / Prague                            |
| EPI_ISL_626587 | 9/28/2020 | 11/9/2020 Europe / Czech Republic / Prague                            |
| EPI_ISL_626588 | 9/29/2020 | 11/9/2020 Europe / Czech Republic / Prague                            |
| EPI_ISL_626589 | 9/29/2020 | 11/9/2020 Europe / Czech Republic / Prague                            |
| EPI_ISL_626590 | 10/1/2020 | 11/9/2020 Europe / Czech Republic / Prague                            |
| EPI_ISL_626591 | 9/29/2020 | 11/9/2020 Europe / Czech Republic / South Bohemian Region / Prachatic |
| EPI_ISL_626592 | 10/6/2020 | 11/9/2020 Europe / Czech Republic / Prague                            |
| EPI_ISL_626593 | 4/4/2020  | 11/9/2020 Europe / Czech Republic / Moravian-Silesian Region / Frŷdel |
| EPI_ISL_626594 | 10/7/2020 | 11/9/2020 Europe / Czech Republic / Prague                            |
| EPI_ISL_626595 | 10/7/2020 | 11/9/2020 Europe / Czech Republic / Prague                            |
| EPI_ISL_626596 | 10/7/2020 | 11/9/2020 Europe / Czech Republic / Prague                            |
| EPI_ISL_626597 | 10/6/2020 | 11/9/2020 Europe / Czech Republic / South Bohemian Region / Netolice  |
| EPI_ISL_626598 | 10/6/2020 | 11/9/2020 Europe / Czech Republic / South Bohemian Region / ŀumavsk   |
| EPI_ISL_626599 | 9/30/2020 | 11/9/2020 Europe / Czech Republic / South Bohemian Region / Dobra Vo  |
| EPI_ISL_626600 | 9/30/2020 | 11/9/2020 Europe / Czech Republic / South Bohemian Region / Dobra Vo  |
| EPI_ISL_626601 | 9/30/2020 | 11/9/2020 Europe / Czech Republic / South Bohemian Region / Dobra Vo  |
| EPI_ISL_626602 | 10/6/2020 | 11/9/2020 Europe / Czech Republic / South Bohemian Region / Dubnŀ     |
| EPI_ISL_626603 | 10/7/2020 | 11/9/2020 Europe / Czech Republic / Prague                            |
| EPI_ISL_626604 | 10/8/2020 | 11/9/2020 Europe / Czech Republic / Central Bohemian Region / Chrŷjŷ  |
| EPI_ISL_626605 | 10/7/2020 | 11/9/2020 Europe / Czech Republic / Plzen Region / Dobrany            |
| EPI_ISL_626606 | 10/7/2020 | 11/9/2020 Europe / Czech Republic / Central Bohemian Region / Podŷbr  |

|                |            |                                                                       |
|----------------|------------|-----------------------------------------------------------------------|
| EPI_ISL_626607 | 10/12/2020 | 11/9/2020 Europe / Czech Republic / Prague                            |
| EPI_ISL_626608 | 10/12/2020 | 11/9/2020 Europe / Czech Republic / Central Bohemian Region / Zdiby   |
| EPI_ISL_626609 | 10/12/2020 | 11/9/2020 Europe / Czech Republic / Prague                            |
| EPI_ISL_626610 | 10/12/2020 | 11/9/2020 Europe / Czech Republic / Prague                            |
| EPI_ISL_626611 | 10/6/2020  | 11/9/2020 Europe / Czech Republic / Prague                            |
| EPI_ISL_626612 | 10/11/2020 | 11/9/2020 Europe / Czech Republic / Central Bohemian Region / Neratov |
| EPI_ISL_626613 | 10/11/2020 | 11/9/2020 Europe / Czech Republic / Prague / MiÅškovice               |
| EPI_ISL_626614 | 10/11/2020 | 11/9/2020 Europe / Czech Republic / ÅšstÅ- nad Labem Region / Teplice |
| EPI_ISL_626615 | 10/11/2020 | 11/9/2020 Europe / Czech Republic / Central Bohemian Region / BÅšjÅš  |
| EPI_ISL_626616 | 10/6/2020  | 11/9/2020 Europe / Czech Republic / Central Bohemian Region / Neratov |
| EPI_ISL_626617 | 10/6/2020  | 11/9/2020 Europe / Czech Republic / Prague                            |
| EPI_ISL_626618 | 10/6/2020  | 11/9/2020 Europe / Czech Republic / Prague                            |
| EPI_ISL_626619 | 10/12/2020 | 11/9/2020 Europe / Czech Republic / Central Bohemian Region / BenÅštk |
| EPI_ISL_626620 | 10/12/2020 | 11/9/2020 Europe / Czech Republic                                     |
| EPI_ISL_626621 | 10/12/2020 | 11/9/2020 Europe / Czech Republic                                     |
| EPI_ISL_626622 | 10/12/2020 | 11/9/2020 Europe / Czech Republic / Plzen                             |
| EPI_ISL_626623 | 10/14/2020 | 11/9/2020 Europe / Czech Republic / Prague                            |
| EPI_ISL_626624 | 10/20/2020 | 11/9/2020 Europe / Czech Republic / Prague                            |
| EPI_ISL_626625 | 10/16/2020 | 11/9/2020 Europe / Czech Republic / Prague                            |
| EPI_ISL_626628 | 10/26/2020 | 11/9/2020 Asia / Singapore                                            |
| EPI_ISL_626629 | 10/26/2020 | 11/9/2020 Asia / Singapore                                            |
| EPI_ISL_626630 | 10/24/2020 | 11/9/2020 Asia / Singapore                                            |
| EPI_ISL_626631 | 10/19/2020 | 11/9/2020 Asia / Singapore                                            |
| EPI_ISL_626632 | 10/25/2020 | 11/9/2020 Asia / Singapore                                            |
| EPI_ISL_626633 | 10/26/2020 | 11/9/2020 Asia / Singapore                                            |
| EPI_ISL_626634 | 10/22/2020 | 11/9/2020 Asia / Singapore                                            |
| EPI_ISL_626635 | 10/23/2020 | 11/9/2020 Asia / Singapore                                            |
| EPI_ISL_626639 | 10/29/2020 | 11/9/2020 Asia / Singapore                                            |
| EPI_ISL_626640 | 10/29/2020 | 11/9/2020 Asia / Singapore                                            |
| EPI_ISL_626641 | 10/31/2020 | 11/9/2020 Asia / Singapore                                            |
| EPI_ISL_626642 | 10/30/2020 | 11/9/2020 Asia / Singapore                                            |
| EPI_ISL_626643 | 10/31/2020 | 11/9/2020 Asia / Singapore                                            |
| EPI_ISL_627070 | 10/9/2020  | 11/9/2020 Europe / United Kingdom / Northern Ireland                  |
| EPI_ISL_627071 | 10/26/2020 | 11/9/2020 Europe / United Kingdom / England                           |
| EPI_ISL_627072 | 10/20/2020 | 11/9/2020 Europe / United Kingdom / England                           |
| EPI_ISL_627073 | 10/26/2020 | 11/9/2020 Europe / United Kingdom / England                           |
| EPI_ISL_627074 | 10/21/2020 | 11/9/2020 Europe / United Kingdom / England                           |
| EPI_ISL_627075 | 10/20/2020 | 11/9/2020 Europe / United Kingdom / England                           |
| EPI_ISL_627076 | 10/20/2020 | 11/9/2020 Europe / United Kingdom / England                           |
| EPI_ISL_627077 | 10/19/2020 | 11/9/2020 Europe / United Kingdom / England                           |
| EPI_ISL_627078 | 10/18/2020 | 11/9/2020 Europe / United Kingdom / Wales                             |
| EPI_ISL_627079 | 10/5/2020  | 11/9/2020 Europe / United Kingdom / England                           |
| EPI_ISL_627080 | 10/12/2020 | 11/9/2020 Europe / United Kingdom / England                           |
| EPI_ISL_627081 | 10/23/2020 | 11/9/2020 Europe / United Kingdom / England                           |
| EPI_ISL_627082 | 10/17/2020 | 11/9/2020 Europe / United Kingdom / England                           |
| EPI_ISL_627083 | 10/25/2020 | 11/9/2020 Europe / United Kingdom / England                           |
| EPI_ISL_627084 | 10/24/2020 | 11/9/2020 Europe / United Kingdom / England                           |

|                |            |                                              |
|----------------|------------|----------------------------------------------|
| EPI_ISL_627085 | 10/5/2020  | 11/9/2020 Europe / United Kingdom / England  |
| EPI_ISL_627086 | 10/24/2020 | 11/9/2020 Europe / United Kingdom / Wales    |
| EPI_ISL_627087 | 10/26/2020 | 11/9/2020 Europe / United Kingdom / Wales    |
| EPI_ISL_627088 | 10/17/2020 | 11/9/2020 Europe / United Kingdom / Wales    |
| EPI_ISL_627089 | 10/17/2020 | 11/9/2020 Europe / United Kingdom / Wales    |
| EPI_ISL_627090 | 10/17/2020 | 11/9/2020 Europe / United Kingdom / Wales    |
| EPI_ISL_627091 | 10/19/2020 | 11/9/2020 Europe / United Kingdom / Wales    |
| EPI_ISL_627092 | 10/17/2020 | 11/9/2020 Europe / United Kingdom / Wales    |
| EPI_ISL_627093 | 10/17/2020 | 11/9/2020 Europe / United Kingdom / Wales    |
| EPI_ISL_627094 | 10/17/2020 | 11/9/2020 Europe / United Kingdom / Wales    |
| EPI_ISL_627095 | 10/19/2020 | 11/9/2020 Europe / United Kingdom / Wales    |
| EPI_ISL_627096 | 10/22/2020 | 11/9/2020 Europe / United Kingdom / Wales    |
| EPI_ISL_627097 | 10/5/2020  | 11/9/2020 Europe / United Kingdom / Wales    |
| EPI_ISL_627203 | 10/1/2020  | 11/9/2020 Europe / United Kingdom / England  |
| EPI_ISL_627204 | 10/24/2020 | 11/9/2020 Europe / United Kingdom / Wales    |
| EPI_ISL_627205 | 10/26/2020 | 11/9/2020 Europe / United Kingdom / Wales    |
| EPI_ISL_627206 | 10/22/2020 | 11/9/2020 Europe / United Kingdom / Wales    |
| EPI_ISL_627207 | 10/26/2020 | 11/9/2020 Europe / United Kingdom / Wales    |
| EPI_ISL_627208 | 9/21/2020  | 11/9/2020 Europe / United Kingdom / Wales    |
| EPI_ISL_627209 | 10/21/2020 | 11/9/2020 Europe / United Kingdom / Scotland |
| EPI_ISL_627210 | 10/19/2020 | 11/9/2020 Europe / United Kingdom / England  |
| EPI_ISL_627211 | 8/18/2020  | 11/9/2020 Europe / United Kingdom / England  |
| EPI_ISL_627212 | 10/1/2020  | 11/9/2020 Europe / United Kingdom / England  |
| EPI_ISL_627213 | 10/19/2020 | 11/9/2020 Europe / United Kingdom / England  |
| EPI_ISL_627214 | 10/24/2020 | 11/9/2020 Europe / United Kingdom / England  |
| EPI_ISL_627215 | 10/30/2020 | 11/9/2020 Europe / United Kingdom / England  |
| EPI_ISL_627216 | 11/2/2020  | 11/9/2020 Europe / United Kingdom / England  |
| EPI_ISL_627217 | 10/25/2020 | 11/9/2020 Europe / United Kingdom / Wales    |
| EPI_ISL_627218 | 10/21/2020 | 11/9/2020 Europe / United Kingdom / Wales    |
| EPI_ISL_627219 | 10/4/2020  | 11/9/2020 Europe / United Kingdom / Wales    |
| EPI_ISL_627220 | 9/25/2020  | 11/9/2020 Europe / United Kingdom / Wales    |
| EPI_ISL_627221 | 10/20/2020 | 11/9/2020 Europe / United Kingdom / Wales    |
| EPI_ISL_627222 | 10/19/2020 | 11/9/2020 Europe / United Kingdom / Wales    |
| EPI_ISL_627223 | 10/21/2020 | 11/9/2020 Europe / United Kingdom / Wales    |
| EPI_ISL_627224 | 10/25/2020 | 11/9/2020 Europe / United Kingdom / Wales    |
| EPI_ISL_627225 | 10/20/2020 | 11/9/2020 Europe / United Kingdom / Wales    |
| EPI_ISL_627226 | 10/21/2020 | 11/9/2020 Europe / United Kingdom / Wales    |
| EPI_ISL_627227 | 10/24/2020 | 11/9/2020 Europe / United Kingdom / Wales    |
| EPI_ISL_627228 | 10/24/2020 | 11/9/2020 Europe / United Kingdom / Wales    |
| EPI_ISL_627229 | 10/22/2020 | 11/9/2020 Europe / United Kingdom / Wales    |
| EPI_ISL_627230 | 10/24/2020 | 11/9/2020 Europe / United Kingdom / Wales    |
| EPI_ISL_627231 | 10/24/2020 | 11/9/2020 Europe / United Kingdom / Wales    |
| EPI_ISL_627232 | 10/23/2020 | 11/9/2020 Europe / United Kingdom / Wales    |
| EPI_ISL_627233 | 10/24/2020 | 11/9/2020 Europe / United Kingdom / Wales    |
| EPI_ISL_627234 | 10/23/2020 | 11/9/2020 Europe / United Kingdom / Wales    |
| EPI_ISL_627235 | 10/25/2020 | 11/9/2020 Europe / United Kingdom / Wales    |
| EPI_ISL_627236 | 10/22/2020 | 11/9/2020 Europe / United Kingdom / Wales    |



|                |            |                                              |
|----------------|------------|----------------------------------------------|
| EPI_ISL_627237 | 10/26/2020 | 11/9/2020 Europe / United Kingdom / Wales    |
| EPI_ISL_627238 | 10/21/2020 | 11/9/2020 Europe / United Kingdom / Wales    |
| EPI_ISL_627239 | 10/21/2020 | 11/9/2020 Europe / United Kingdom / Wales    |
| EPI_ISL_627240 | 10/25/2020 | 11/9/2020 Europe / United Kingdom / Wales    |
| EPI_ISL_627241 | 10/21/2020 | 11/9/2020 Europe / United Kingdom / Wales    |
| EPI_ISL_627242 | 10/26/2020 | 11/9/2020 Europe / United Kingdom / Wales    |
| EPI_ISL_627243 | 10/23/2020 | 11/9/2020 Europe / United Kingdom / Wales    |
| EPI_ISL_627244 | 10/26/2020 | 11/9/2020 Europe / United Kingdom / Wales    |
| EPI_ISL_627245 | 10/25/2020 | 11/9/2020 Europe / United Kingdom / Wales    |
| EPI_ISL_627246 | 10/25/2020 | 11/9/2020 Europe / United Kingdom / Wales    |
| EPI_ISL_627247 | 10/23/2020 | 11/9/2020 Europe / United Kingdom / Wales    |
| EPI_ISL_627248 | 10/26/2020 | 11/9/2020 Europe / United Kingdom / Wales    |
| EPI_ISL_627249 | 10/26/2020 | 11/9/2020 Europe / United Kingdom / Wales    |
| EPI_ISL_627250 | 10/7/2020  | 11/9/2020 Europe / United Kingdom / Scotland |
| EPI_ISL_627251 | 10/6/2020  | 11/9/2020 Europe / United Kingdom / England  |
| EPI_ISL_627252 | 10/5/2020  | 11/9/2020 Europe / United Kingdom / Scotland |
| EPI_ISL_627253 | 10/5/2020  | 11/9/2020 Europe / United Kingdom / Wales    |
| EPI_ISL_627254 | 10/7/2020  | 11/9/2020 Europe / United Kingdom / Scotland |
| EPI_ISL_627255 | 10/8/2020  | 11/9/2020 Europe / United Kingdom / England  |
| EPI_ISL_627256 | 10/5/2020  | 11/9/2020 Europe / United Kingdom / England  |
| EPI_ISL_627257 | 10/8/2020  | 11/9/2020 Europe / United Kingdom / Scotland |
| EPI_ISL_627258 | 10/5/2020  | 11/9/2020 Europe / United Kingdom / England  |
| EPI_ISL_627259 | 10/7/2020  | 11/9/2020 Europe / United Kingdom / Scotland |
| EPI_ISL_627260 | 10/13/2020 | 11/9/2020 Europe / United Kingdom / England  |
| EPI_ISL_627261 | 10/12/2020 | 11/9/2020 Europe / United Kingdom / England  |
| EPI_ISL_627262 | 10/10/2020 | 11/9/2020 Europe / United Kingdom / England  |
| EPI_ISL_627292 | 10/12/2020 | 11/9/2020 Europe / United Kingdom / England  |
| EPI_ISL_627295 | 10/22/2020 | 11/9/2020 Europe / United Kingdom / Wales    |
| EPI_ISL_627296 | 10/22/2020 | 11/9/2020 Europe / United Kingdom / Wales    |
| EPI_ISL_627297 | 10/8/2020  | 11/9/2020 Europe / United Kingdom / England  |
| EPI_ISL_627298 | 10/7/2020  | 11/9/2020 Europe / United Kingdom / Scotland |
| EPI_ISL_627300 | 10/16/2020 | 11/9/2020 Europe / United Kingdom / England  |
| EPI_ISL_627301 | 10/22/2020 | 11/9/2020 Europe / United Kingdom / Wales    |
| EPI_ISL_627304 | 11/2/2020  | 11/9/2020 Europe / United Kingdom / England  |
| EPI_ISL_627305 | 10/5/2020  | 11/9/2020 Europe / United Kingdom / England  |
| EPI_ISL_627306 | 10/8/2020  | 11/9/2020 Europe / United Kingdom / Wales    |
| EPI_ISL_627307 | 10/6/2020  | 11/9/2020 Europe / United Kingdom / Wales    |
| EPI_ISL_627308 | 10/6/2020  | 11/9/2020 Europe / United Kingdom / Wales    |
| EPI_ISL_627309 | 10/28/2020 | 11/9/2020 Europe / United Kingdom / England  |
| EPI_ISL_627310 | 11/1/2020  | 11/9/2020 Europe / United Kingdom / England  |
| EPI_ISL_627314 | 10/10/2020 | 11/9/2020 Europe / United Kingdom / England  |
| EPI_ISL_627315 | 10/11/2020 | 11/9/2020 Europe / United Kingdom / England  |
| EPI_ISL_627316 | 10/11/2020 | 11/9/2020 Europe / United Kingdom / England  |
| EPI_ISL_627317 | 10/11/2020 | 11/9/2020 Europe / United Kingdom / England  |
| EPI_ISL_627318 | 10/11/2020 | 11/9/2020 Europe / United Kingdom / England  |
| EPI_ISL_627319 | 10/11/2020 | 11/9/2020 Europe / United Kingdom / England  |
| EPI_ISL_627320 | 10/11/2020 | 11/9/2020 Europe / United Kingdom / England  |























|                |            |                                           |
|----------------|------------|-------------------------------------------|
| EPI_ISL_627791 | 10/23/2020 | 11/9/2020 Europe / United Kingdom / Wales |
| EPI_ISL_627792 | 10/13/2020 | 11/9/2020 Europe / United Kingdom / Wales |
| EPI_ISL_627793 | 10/11/2020 | 11/9/2020 Europe / United Kingdom / Wales |
| EPI_ISL_627794 | 10/16/2020 | 11/9/2020 Europe / United Kingdom / Wales |
| EPI_ISL_627795 | 10/21/2020 | 11/9/2020 Europe / United Kingdom / Wales |
| EPI_ISL_627796 | 10/21/2020 | 11/9/2020 Europe / United Kingdom / Wales |
| EPI_ISL_627797 | 10/20/2020 | 11/9/2020 Europe / United Kingdom / Wales |
| EPI_ISL_627798 | 10/22/2020 | 11/9/2020 Europe / United Kingdom / Wales |
| EPI_ISL_627799 | 10/5/2020  | 11/9/2020 Europe / United Kingdom / Wales |
| EPI_ISL_627800 | 10/20/2020 | 11/9/2020 Europe / United Kingdom / Wales |
| EPI_ISL_627801 | 10/20/2020 | 11/9/2020 Europe / United Kingdom / Wales |
| EPI_ISL_627802 | 10/12/2020 | 11/9/2020 Europe / United Kingdom / Wales |
| EPI_ISL_627803 | 10/12/2020 | 11/9/2020 Europe / United Kingdom / Wales |
| EPI_ISL_627804 | 10/20/2020 | 11/9/2020 Europe / United Kingdom / Wales |
| EPI_ISL_627805 | 9/22/2020  | 11/9/2020 Europe / United Kingdom / Wales |
| EPI_ISL_627806 | 10/3/2020  | 11/9/2020 Europe / United Kingdom / Wales |
| EPI_ISL_627807 | 10/11/2020 | 11/9/2020 Europe / United Kingdom / Wales |
| EPI_ISL_627808 | 10/22/2020 | 11/9/2020 Europe / United Kingdom / Wales |
| EPI_ISL_627809 | 10/17/2020 | 11/9/2020 Europe / United Kingdom / Wales |
| EPI_ISL_627810 | 10/13/2020 | 11/9/2020 Europe / United Kingdom / Wales |
| EPI_ISL_627811 | 9/6/2020   | 11/9/2020 Europe / United Kingdom / Wales |
| EPI_ISL_627812 | 10/21/2020 | 11/9/2020 Europe / United Kingdom / Wales |
| EPI_ISL_627813 | 10/23/2020 | 11/9/2020 Europe / United Kingdom / Wales |
| EPI_ISL_627814 | 10/22/2020 | 11/9/2020 Europe / United Kingdom / Wales |
| EPI_ISL_627815 | 10/20/2020 | 11/9/2020 Europe / United Kingdom / Wales |
| EPI_ISL_627816 | 10/20/2020 | 11/9/2020 Europe / United Kingdom / Wales |
| EPI_ISL_627817 | 10/13/2020 | 11/9/2020 Europe / United Kingdom / Wales |
| EPI_ISL_627818 | 10/11/2020 | 11/9/2020 Europe / United Kingdom / Wales |
| EPI_ISL_627819 | 10/21/2020 | 11/9/2020 Europe / United Kingdom / Wales |
| EPI_ISL_627820 | 10/13/2020 | 11/9/2020 Europe / United Kingdom / Wales |
| EPI_ISL_627821 | 10/18/2020 | 11/9/2020 Europe / United Kingdom / Wales |
| EPI_ISL_627822 | 10/14/2020 | 11/9/2020 Europe / United Kingdom / Wales |
| EPI_ISL_627823 | 10/23/2020 | 11/9/2020 Europe / United Kingdom / Wales |
| EPI_ISL_627824 | 9/22/2020  | 11/9/2020 Europe / United Kingdom / Wales |
| EPI_ISL_627825 | 10/12/2020 | 11/9/2020 Europe / United Kingdom / Wales |
| EPI_ISL_627826 | 10/13/2020 | 11/9/2020 Europe / United Kingdom / Wales |
| EPI_ISL_627827 | 10/21/2020 | 11/9/2020 Europe / United Kingdom / Wales |
| EPI_ISL_627828 | 10/8/2020  | 11/9/2020 Europe / United Kingdom / Wales |
| EPI_ISL_627829 | 10/11/2020 | 11/9/2020 Europe / United Kingdom / Wales |
| EPI_ISL_627830 | 10/22/2020 | 11/9/2020 Europe / United Kingdom / Wales |
| EPI_ISL_627831 | 10/19/2020 | 11/9/2020 Europe / United Kingdom / Wales |
| EPI_ISL_627832 | 10/5/2020  | 11/9/2020 Europe / United Kingdom / Wales |
| EPI_ISL_627833 | 10/12/2020 | 11/9/2020 Europe / United Kingdom / Wales |
| EPI_ISL_627834 | 10/11/2020 | 11/9/2020 Europe / United Kingdom / Wales |
| EPI_ISL_627835 | 10/20/2020 | 11/9/2020 Europe / United Kingdom / Wales |
| EPI_ISL_627836 | 10/15/2020 | 11/9/2020 Europe / United Kingdom / Wales |
| EPI_ISL_627837 | 10/22/2020 | 11/9/2020 Europe / United Kingdom / Wales |











































|                |            |                                          |
|----------------|------------|------------------------------------------|
| EPI_ISL_628840 | 10/15/2020 | 11/9/2020 North America / USA / Michigan |
| EPI_ISL_628841 | 10/16/2020 | 11/9/2020 North America / USA / Michigan |
| EPI_ISL_628842 | 10/17/2020 | 11/9/2020 North America / USA / Michigan |
| EPI_ISL_628843 | 10/15/2020 | 11/9/2020 North America / USA / Michigan |
| EPI_ISL_628844 | 10/17/2020 | 11/9/2020 North America / USA / Michigan |
| EPI_ISL_628845 | 10/15/2020 | 11/9/2020 North America / USA / Michigan |
| EPI_ISL_628846 | 10/15/2020 | 11/9/2020 North America / USA / Michigan |
| EPI_ISL_628847 | 10/15/2020 | 11/9/2020 North America / USA / Michigan |
| EPI_ISL_628848 | 10/15/2020 | 11/9/2020 North America / USA / Michigan |
| EPI_ISL_628849 | 10/16/2020 | 11/9/2020 North America / USA / Michigan |
| EPI_ISL_628851 | 10/15/2020 | 11/9/2020 North America / USA / Michigan |
| EPI_ISL_628853 | 10/15/2020 | 11/9/2020 North America / USA / Michigan |
| EPI_ISL_628856 | 10/17/2020 | 11/9/2020 North America / USA / Michigan |
| EPI_ISL_628857 | 10/17/2020 | 11/9/2020 North America / USA / Michigan |
| EPI_ISL_628859 | 10/17/2020 | 11/9/2020 North America / USA / Michigan |
| EPI_ISL_628860 | 10/18/2020 | 11/9/2020 North America / USA / Michigan |
| EPI_ISL_628861 | 10/16/2020 | 11/9/2020 North America / USA / Michigan |
| EPI_ISL_628862 | 10/18/2020 | 11/9/2020 North America / USA / Michigan |
| EPI_ISL_628863 | 10/16/2020 | 11/9/2020 North America / USA / Michigan |
| EPI_ISL_628867 | 10/19/2020 | 11/9/2020 North America / USA / Michigan |
| EPI_ISL_628869 | 10/19/2020 | 11/9/2020 North America / USA / Michigan |
| EPI_ISL_628870 | 10/19/2020 | 11/9/2020 North America / USA / Michigan |
| EPI_ISL_628873 | 10/19/2020 | 11/9/2020 North America / USA / Michigan |
| EPI_ISL_628874 | 10/19/2020 | 11/9/2020 North America / USA / Michigan |
| EPI_ISL_628875 | 10/19/2020 | 11/9/2020 North America / USA / Michigan |
| EPI_ISL_628876 | 10/19/2020 | 11/9/2020 North America / USA / Michigan |
| EPI_ISL_628878 | 10/19/2020 | 11/9/2020 North America / USA / Michigan |
| EPI_ISL_628879 | 10/19/2020 | 11/9/2020 North America / USA / Michigan |
| EPI_ISL_628880 | 10/19/2020 | 11/9/2020 North America / USA / Michigan |
| EPI_ISL_628881 | 10/19/2020 | 11/9/2020 North America / USA / Michigan |
| EPI_ISL_628882 | 10/19/2020 | 11/9/2020 North America / USA / Michigan |
| EPI_ISL_628884 | 10/19/2020 | 11/9/2020 North America / USA / Michigan |
| EPI_ISL_632261 | 7/5/2020   | 11/9/2020 Asia / Bahrain                 |
| EPI_ISL_632262 | 8/17/2020  | 11/9/2020 Asia / Bahrain                 |
| EPI_ISL_632263 | 8/25/2020  | 11/9/2020 Asia / Bahrain                 |
| EPI_ISL_632264 | 10/4/2020  | 11/9/2020 Asia / Bahrain                 |
| EPI_ISL_632265 | 6/19/2020  | 11/9/2020 Asia / Bahrain                 |
| EPI_ISL_632266 | 6/21/2020  | 11/9/2020 Asia / Bahrain                 |
| EPI_ISL_632267 | 7/26/2020  | 11/9/2020 Asia / Bahrain                 |
| EPI_ISL_632268 | 10/14/2020 | 11/9/2020 Asia / Bahrain                 |
| EPI_ISL_632269 | 10/13/2020 | 11/9/2020 Asia / Bahrain                 |
| EPI_ISL_632270 | 10/14/2020 | 11/9/2020 Asia / Bahrain                 |
| EPI_ISL_632271 | 10/14/2020 | 11/9/2020 Asia / Bahrain                 |
| EPI_ISL_632272 | 10/14/2020 | 11/9/2020 Asia / Bahrain                 |
| EPI_ISL_632273 | 10/14/2020 | 11/9/2020 Asia / Bahrain                 |
| EPI_ISL_632274 | 10/14/2020 | 11/9/2020 Asia / Bahrain                 |
| EPI_ISL_632275 | 10/14/2020 | 11/9/2020 Asia / Bahrain                 |



|                |            |                                         |
|----------------|------------|-----------------------------------------|
| EPI_ISL_632276 | 10/14/2020 | 11/9/2020 Asia / Bahrain                |
| EPI_ISL_632277 | 10/14/2020 | 11/9/2020 Asia / Bahrain                |
| EPI_ISL_632278 | 10/14/2020 | 11/9/2020 Asia / Bahrain                |
| EPI_ISL_632279 | 10/14/2020 | 11/9/2020 Asia / Bahrain                |
| EPI_ISL_632280 | 10/14/2020 | 11/9/2020 Asia / Bahrain                |
| EPI_ISL_632281 | 10/14/2020 | 11/9/2020 Asia / Bahrain                |
| EPI_ISL_632282 | 10/14/2020 | 11/9/2020 Asia / Bahrain                |
| EPI_ISL_632287 | 7/22/2020  | 11/9/2020 North America / USA / Florida |
| EPI_ISL_628932 | 10/8/2020  | 11/10/2020 North America / USA / Utah   |
| EPI_ISL_628933 | 9/23/2020  | 11/10/2020 North America / USA / Utah   |
| EPI_ISL_628934 | 9/23/2020  | 11/10/2020 North America / USA / Utah   |
| EPI_ISL_628935 | 9/23/2020  | 11/10/2020 North America / USA / Utah   |
| EPI_ISL_628936 | 10/5/2020  | 11/10/2020 North America / USA / Utah   |
| EPI_ISL_628937 | 10/5/2020  | 11/10/2020 North America / USA / Utah   |
| EPI_ISL_628938 | 10/5/2020  | 11/10/2020 North America / USA / Utah   |
| EPI_ISL_628939 | 9/28/2020  | 11/10/2020 North America / USA / Utah   |
| EPI_ISL_628940 | 9/28/2020  | 11/10/2020 North America / USA / Utah   |
| EPI_ISL_628941 | 9/28/2020  | 11/10/2020 North America / USA / Utah   |
| EPI_ISL_628943 | 10/8/2020  | 11/10/2020 North America / USA / Utah   |
| EPI_ISL_628945 | 10/7/2020  | 11/10/2020 North America / USA / Utah   |
| EPI_ISL_628946 | 10/1/2020  | 11/10/2020 North America / USA / Utah   |
| EPI_ISL_628951 | 10/10/2020 | 11/10/2020 North America / USA / Utah   |
| EPI_ISL_628953 | 10/12/2020 | 11/10/2020 North America / USA / Utah   |
| EPI_ISL_628954 | 10/7/2020  | 11/10/2020 North America / USA / Utah   |
| EPI_ISL_628955 | 10/10/2020 | 11/10/2020 North America / USA / Utah   |
| EPI_ISL_628958 | 10/10/2020 | 11/10/2020 North America / USA / Utah   |
| EPI_ISL_628959 | 10/11/2020 | 11/10/2020 North America / USA / Utah   |
| EPI_ISL_628960 | 9/30/2020  | 11/10/2020 North America / USA / Utah   |
| EPI_ISL_628961 | 10/7/2020  | 11/10/2020 North America / USA / Utah   |
| EPI_ISL_628964 | 5/12/2020  | 11/10/2020 North America / USA / Utah   |
| EPI_ISL_628967 | 5/13/2020  | 11/10/2020 North America / USA / Utah   |
| EPI_ISL_628968 | 5/13/2020  | 11/10/2020 North America / USA / Utah   |
| EPI_ISL_628969 | 5/12/2020  | 11/10/2020 North America / USA / Utah   |
| EPI_ISL_628971 | 5/13/2020  | 11/10/2020 North America / USA / Utah   |
| EPI_ISL_628972 | 5/12/2020  | 11/10/2020 North America / USA / Utah   |
| EPI_ISL_628975 | 5/13/2020  | 11/10/2020 North America / USA / Utah   |
| EPI_ISL_628976 | 5/13/2020  | 11/10/2020 North America / USA / Utah   |
| EPI_ISL_628977 | 5/12/2020  | 11/10/2020 North America / USA / Utah   |
| EPI_ISL_628978 | 5/13/2020  | 11/10/2020 North America / USA / Utah   |
| EPI_ISL_628979 | 5/13/2020  | 11/10/2020 North America / USA / Utah   |
| EPI_ISL_628981 | 5/12/2020  | 11/10/2020 North America / USA / Utah   |
| EPI_ISL_628983 | 5/12/2020  | 11/10/2020 North America / USA / Utah   |
| EPI_ISL_628984 | 5/12/2020  | 11/10/2020 North America / USA / Utah   |
| EPI_ISL_628985 | 5/12/2020  | 11/10/2020 North America / USA / Utah   |
| EPI_ISL_628986 | 5/12/2020  | 11/10/2020 North America / USA / Utah   |
| EPI_ISL_628987 | 5/13/2020  | 11/10/2020 North America / USA / Utah   |
| EPI_ISL_628989 | 5/13/2020  | 11/10/2020 North America / USA / Utah   |

|                |            |            |                                                              |
|----------------|------------|------------|--------------------------------------------------------------|
| EPI_ISL_628990 | 5/13/2020  | 11/10/2020 | North America / USA / Utah                                   |
| EPI_ISL_628991 | 5/13/2020  | 11/10/2020 | North America / USA / Utah                                   |
| EPI_ISL_628992 | 5/12/2020  | 11/10/2020 | North America / USA / Utah                                   |
| EPI_ISL_628993 | 5/12/2020  | 11/10/2020 | North America / USA / Utah                                   |
| EPI_ISL_628994 | 5/12/2020  | 11/10/2020 | North America / USA / Utah                                   |
| EPI_ISL_628996 | 5/12/2020  | 11/10/2020 | North America / USA / Utah                                   |
| EPI_ISL_628997 | 5/12/2020  | 11/10/2020 | North America / USA / Utah                                   |
| EPI_ISL_628998 | 5/12/2020  | 11/10/2020 | North America / USA / Utah                                   |
| EPI_ISL_628999 | 5/12/2020  | 11/10/2020 | North America / USA / Utah                                   |
| EPI_ISL_629001 | 9/17/2020  | 11/10/2020 | Oceania / Australia / New South Wales / Sydney               |
| EPI_ISL_629002 | 10/14/2020 | 11/10/2020 | Oceania / Australia / New South Wales / Sydney               |
| EPI_ISL_629003 | 10/6/2020  | 11/10/2020 | Oceania / Australia / New South Wales / Sydney               |
| EPI_ISL_629004 | 10/7/2020  | 11/10/2020 | Oceania / Australia / New South Wales / Sydney               |
| EPI_ISL_629005 | 10/10/2020 | 11/10/2020 | Oceania / Australia / New South Wales / Sydney               |
| EPI_ISL_629006 | 10/10/2020 | 11/10/2020 | Oceania / Australia / New South Wales / Sydney               |
| EPI_ISL_629007 | 10/25/2020 | 11/10/2020 | Oceania / Australia / New South Wales / Sydney               |
| EPI_ISL_629008 | 10/27/2020 | 11/10/2020 | Oceania / Australia / New South Wales / Sydney               |
| EPI_ISL_629009 | 10/30/2020 | 11/10/2020 | Oceania / Australia / New South Wales / Sydney               |
| EPI_ISL_629010 | 10/15/2020 | 11/10/2020 | Oceania / Australia / New South Wales / Sydney               |
| EPI_ISL_629011 | 4/28/2020  | 11/10/2020 | South America / Chile / Atacama / Copiapo                    |
| EPI_ISL_629012 | 4/28/2020  | 11/10/2020 | South America / Chile / Region Metropolitana de Santiago / S |
| EPI_ISL_629013 | 5/20/2020  | 11/10/2020 | South America / Chile / Region Metropolitana de Santiago / S |
| EPI_ISL_629014 | 4/28/2020  | 11/10/2020 | South America / Chile / Region Metropolitana de Santiago / S |
| EPI_ISL_629015 | 4/28/2020  | 11/10/2020 | South America / Chile / Region Metropolitana de Santiago / S |
| EPI_ISL_629016 | 4/28/2020  | 11/10/2020 | South America / Chile / Region Metropolitana de Santiago / S |
| EPI_ISL_629017 | 4/24/2020  | 11/10/2020 | South America / Chile / Region Metropolitana de Santiago / S |
| EPI_ISL_629018 | 5/1/2020   | 11/10/2020 | South America / Chile / Region Metropolitana de Santiago / S |
| EPI_ISL_629019 | 5/1/2020   | 11/10/2020 | South America / Chile / Region Metropolitana de Santiago / S |
| EPI_ISL_629020 | 5/1/2020   | 11/10/2020 | South America / Chile / Region Metropolitana de Santiago / S |
| EPI_ISL_629021 | 5/1/2020   | 11/10/2020 | South America / Chile / Region Metropolitana de Santiago / S |
| EPI_ISL_629022 | 5/2/2020   | 11/10/2020 | South America / Chile / Region Metropolitana de Santiago / S |
| EPI_ISL_629023 | 3/13/2020  | 11/10/2020 | South America / Chile / Region Metropolitana de Santiago / S |
| EPI_ISL_629024 | 3/16/2020  | 11/10/2020 | South America / Chile / Region Metropolitana de Santiago / S |
| EPI_ISL_629025 | 3/21/2020  | 11/10/2020 | South America / Chile / Region Metropolitana de Santiago / S |
| EPI_ISL_629026 | 3/19/2020  | 11/10/2020 | South America / Chile / Region Metropolitana de Santiago / S |
| EPI_ISL_629027 | 3/20/2020  | 11/10/2020 | South America / Chile / Region Metropolitana de Santiago / S |
| EPI_ISL_629028 | 3/19/2020  | 11/10/2020 | South America / Chile / Region Metropolitana de Santiago / S |
| EPI_ISL_629029 | 9/24/2020  | 11/10/2020 | Oceania / Australia / New South Wales / Sydney               |
| EPI_ISL_629030 | 9/28/2020  | 11/10/2020 | Oceania / Australia / New South Wales / Sydney               |
| EPI_ISL_629031 | 5/3/2020   | 11/10/2020 | Europe / Russia / Omsk / Omsk                                |
| EPI_ISL_629032 | 5/3/2020   | 11/10/2020 | Europe / Russia / Omsk / Omsk                                |
| EPI_ISL_629033 | 5/3/2020   | 11/10/2020 | Europe / Russia / Omsk / Omsk                                |
| EPI_ISL_629034 | 5/3/2020   | 11/10/2020 | Europe / Russia / Omsk / Omsk                                |
| EPI_ISL_629036 | 10/5/2020  | 11/10/2020 | North America / USA / Maryland                               |
| EPI_ISL_629037 | 10/6/2020  | 11/10/2020 | North America / USA / Maryland                               |
| EPI_ISL_629038 | 10/6/2020  | 11/10/2020 | North America / USA / Maryland                               |
| EPI_ISL_629039 | 10/6/2020  | 11/10/2020 | North America / USA / Maryland                               |

































































































|                |           |            |                                                        |
|----------------|-----------|------------|--------------------------------------------------------|
| EPI_ISL_631387 | 9/16/2020 | 11/10/2020 | Europe / Germany / North Rhine-Westphalia / Düsseldorf |
| EPI_ISL_631388 | 9/30/2020 | 11/10/2020 | Europe / Germany / North Rhine-Westphalia / Cologne    |
| EPI_ISL_631389 | 6/8/2020  | 11/10/2020 | North America / USA / Wisconsin / Kenosha County       |
| EPI_ISL_631390 | 4/1/2020  | 11/10/2020 | North America / USA / Wisconsin / Columbia County      |
| EPI_ISL_631391 | 4/3/2020  | 11/10/2020 | North America / USA / Wisconsin / Columbia County      |
| EPI_ISL_631392 | 4/3/2020  | 11/10/2020 | North America / USA / Wisconsin / Winnebago County     |
| EPI_ISL_631393 | 4/13/2020 | 11/10/2020 | North America / USA / Wisconsin / Winnebago County     |
| EPI_ISL_631394 | 4/15/2020 | 11/10/2020 | North America / USA / Wisconsin / Milwaukee County     |
| EPI_ISL_631395 | 4/17/2020 | 11/10/2020 | North America / USA / Wisconsin / Milwaukee County     |
| EPI_ISL_631396 | 4/22/2020 | 11/10/2020 | North America / USA / Wisconsin / Milwaukee County     |
| EPI_ISL_631397 | 6/26/2020 | 11/10/2020 | North America / USA / Wisconsin / Waushara County      |
| EPI_ISL_631398 | 7/13/2020 | 11/10/2020 | North America / USA / Wisconsin / Milwaukee County     |
| EPI_ISL_631399 | 7/23/2020 | 11/10/2020 | North America / USA / Wisconsin / Racine County        |
| EPI_ISL_631400 | 8/18/2020 | 11/10/2020 | North America / USA / Wisconsin / Milwaukee County     |
| EPI_ISL_631401 | 8/19/2020 | 11/10/2020 | North America / USA / Wisconsin / Sheboygan County     |
| EPI_ISL_631402 | 6/8/2020  | 11/10/2020 | North America / USA / Wisconsin / Kenosha County       |
| EPI_ISL_631404 | 6/10/2020 | 11/10/2020 | North America / USA / Wisconsin / Brown County         |
| EPI_ISL_631405 | 6/10/2020 | 11/10/2020 | North America / USA / Wisconsin / Rock County          |
| EPI_ISL_631406 | 6/11/2020 | 11/10/2020 | North America / USA / Wisconsin / Racine County        |
| EPI_ISL_631407 | 6/10/2020 | 11/10/2020 | North America / USA / Wisconsin / Jefferson County     |
| EPI_ISL_631408 | 6/12/2020 | 11/10/2020 | North America / USA / Wisconsin / Jefferson County     |
| EPI_ISL_631409 | 6/13/2020 | 11/10/2020 | North America / USA / Wisconsin / Racine County        |
| EPI_ISL_631410 | 6/15/2020 | 11/10/2020 | North America / USA / Wisconsin / Columbia County      |
| EPI_ISL_631412 | 6/15/2020 | 11/10/2020 | North America / USA / Wisconsin / Chippewa County      |
| EPI_ISL_631413 | 6/15/2020 | 11/10/2020 | North America / USA / Wisconsin / Chippewa County      |
| EPI_ISL_631414 | 6/12/2020 | 11/10/2020 | North America / USA / Wisconsin / Columbia County      |
| EPI_ISL_631415 | 6/16/2020 | 11/10/2020 | North America / USA / Wisconsin / Barron County        |
| EPI_ISL_631416 | 6/16/2020 | 11/10/2020 | North America / USA / Wisconsin / Barron County        |
| EPI_ISL_631417 | 6/16/2020 | 11/10/2020 | North America / USA / Wisconsin / Milwaukee County     |
| EPI_ISL_631418 | 6/18/2020 | 11/10/2020 | North America / USA / Wisconsin / Lafayette County     |
| EPI_ISL_631419 | 6/17/2020 | 11/10/2020 | North America / USA / Wisconsin / Racine County        |
| EPI_ISL_631420 | 6/18/2020 | 11/10/2020 | North America / USA / Wisconsin / Jefferson County     |
| EPI_ISL_631421 | 6/18/2020 | 11/10/2020 | North America / USA / Wisconsin / Brown County         |
| EPI_ISL_631422 | 6/19/2020 | 11/10/2020 | North America / USA / Wisconsin / Eau Claire County    |
| EPI_ISL_631423 | 6/19/2020 | 11/10/2020 | North America / USA / Wisconsin / Lafayette County     |
| EPI_ISL_631424 | 6/19/2020 | 11/10/2020 | North America / USA / Wisconsin / Lafayette County     |
| EPI_ISL_631425 | 6/19/2020 | 11/10/2020 | North America / USA / Wisconsin / Lafayette County     |
| EPI_ISL_631426 | 8/17/2020 | 11/10/2020 | North America / USA / Wisconsin / Brown County         |
| EPI_ISL_631427 | 8/28/2020 | 11/10/2020 | North America / USA / Wisconsin / Brown County         |
| EPI_ISL_631428 | 6/22/2020 | 11/10/2020 | North America / USA / Wisconsin / Brown County         |
| EPI_ISL_631429 | 6/22/2020 | 11/10/2020 | North America / USA / Wisconsin / Grant County         |
| EPI_ISL_631430 | 6/22/2020 | 11/10/2020 | North America / USA / Wisconsin / Milwaukee County     |
| EPI_ISL_631431 | 6/23/2020 | 11/10/2020 | North America / USA / Wisconsin / Kenosha County       |
| EPI_ISL_631432 | 6/23/2020 | 11/10/2020 | North America / USA / Wisconsin / Winnebago County     |
| EPI_ISL_631433 | 6/23/2020 | 11/10/2020 | North America / USA / Wisconsin / Racine County        |
| EPI_ISL_631434 | 6/23/2020 | 11/10/2020 | North America / USA / Wisconsin / Jefferson County     |
| EPI_ISL_631435 | 8/19/2020 | 11/10/2020 | North America / USA / Wisconsin / Sheboygan County     |

|                |           |            |                                                     |
|----------------|-----------|------------|-----------------------------------------------------|
| EPI_ISL_631436 | 8/19/2020 | 11/10/2020 | North America / USA / Wisconsin / Sheboygan County  |
| EPI_ISL_631437 | 8/19/2020 | 11/10/2020 | North America / USA / Wisconsin / Sheboygan County  |
| EPI_ISL_631438 | 8/24/2020 | 11/10/2020 | North America / USA / Wisconsin / Sheboygan County  |
| EPI_ISL_631439 | 8/24/2020 | 11/10/2020 | North America / USA / Wisconsin / Sheboygan County  |
| EPI_ISL_631440 | 8/24/2020 | 11/10/2020 | North America / USA / Wisconsin / Sheboygan County  |
| EPI_ISL_631441 | 9/10/2020 | 11/10/2020 | North America / USA / Wisconsin / Sheboygan County  |
| EPI_ISL_631442 | 9/10/2020 | 11/10/2020 | North America / USA / Wisconsin / Sheboygan County  |
| EPI_ISL_631443 | 9/11/2020 | 11/10/2020 | North America / USA / Wisconsin / Sheboygan County  |
| EPI_ISL_631444 | 9/14/2020 | 11/10/2020 | North America / USA / Wisconsin / Sheboygan County  |
| EPI_ISL_631445 | 9/14/2020 | 11/10/2020 | North America / USA / Wisconsin / Sheboygan County  |
| EPI_ISL_631446 | 9/14/2020 | 11/10/2020 | North America / USA / Wisconsin / Sheboygan County  |
| EPI_ISL_631447 | 9/14/2020 | 11/10/2020 | North America / USA / Wisconsin / Sheboygan County  |
| EPI_ISL_631448 | 9/14/2020 | 11/10/2020 | North America / USA / Wisconsin / Sheboygan County  |
| EPI_ISL_631449 | 9/14/2020 | 11/10/2020 | North America / USA / Wisconsin / Sheboygan County  |
| EPI_ISL_631450 | 9/14/2020 | 11/10/2020 | North America / USA / Wisconsin / Sheboygan County  |
| EPI_ISL_631451 | 9/14/2020 | 11/10/2020 | North America / USA / Wisconsin / Sheboygan County  |
| EPI_ISL_631452 | 9/17/2020 | 11/10/2020 | North America / USA / Wisconsin / Sheboygan County  |
| EPI_ISL_631453 | 9/17/2020 | 11/10/2020 | North America / USA / Wisconsin / Sheboygan County  |
| EPI_ISL_631454 | 9/17/2020 | 11/10/2020 | North America / USA / Wisconsin / Sheboygan County  |
| EPI_ISL_631455 | 9/18/2020 | 11/10/2020 | North America / USA / Wisconsin / Sheboygan County  |
| EPI_ISL_631456 | 9/18/2020 | 11/10/2020 | North America / USA / Wisconsin / Sheboygan County  |
| EPI_ISL_631457 | 9/22/2020 | 11/10/2020 | North America / USA / Wisconsin / Sheboygan County  |
| EPI_ISL_631458 | 6/24/2020 | 11/10/2020 | North America / USA / Wisconsin / Jefferson County  |
| EPI_ISL_631459 | 6/25/2020 | 11/10/2020 | North America / USA / Wisconsin / Pepin County      |
| EPI_ISL_631460 | 6/25/2020 | 11/10/2020 | North America / USA / Wisconsin / Rock County       |
| EPI_ISL_631461 | 6/25/2020 | 11/10/2020 | North America / USA / Wisconsin / Milwaukee County  |
| EPI_ISL_631462 | 6/26/2020 | 11/10/2020 | North America / USA / Wisconsin / Chippewa County   |
| EPI_ISL_631463 | 6/26/2020 | 11/10/2020 | North America / USA / Wisconsin / Green County      |
| EPI_ISL_631464 | 6/26/2020 | 11/10/2020 | North America / USA / Wisconsin / Chippewa County   |
| EPI_ISL_631465 | 6/27/2020 | 11/10/2020 | North America / USA / Wisconsin / Chippewa County   |
| EPI_ISL_631466 | 6/29/2020 | 11/10/2020 | North America / USA / Wisconsin / Columbia County   |
| EPI_ISL_631467 | 6/27/2020 | 11/10/2020 | North America / USA / Wisconsin / Milwaukee County  |
| EPI_ISL_631468 | 6/29/2020 | 11/10/2020 | North America / USA / Wisconsin / Winnebago County  |
| EPI_ISL_631469 | 6/29/2020 | 11/10/2020 | North America / USA / Wisconsin / Rock County       |
| EPI_ISL_631470 | 6/29/2020 | 11/10/2020 | North America / USA / Wisconsin / Eau Claire County |
| EPI_ISL_631471 | 6/26/2020 | 11/10/2020 | North America / USA / Wisconsin / Green County      |
| EPI_ISL_631472 | 6/28/2020 | 11/10/2020 | North America / USA / Wisconsin / Chippewa County   |
| EPI_ISL_631473 | 6/29/2020 | 11/10/2020 | North America / USA / Wisconsin / Pepin County      |
| EPI_ISL_631474 | 6/29/2020 | 11/10/2020 | North America / USA / Wisconsin / Milwaukee County  |
| EPI_ISL_631475 | 6/29/2020 | 11/10/2020 | North America / USA / Wisconsin / Brown County      |
| EPI_ISL_631476 | 6/29/2020 | 11/10/2020 | North America / USA / Wisconsin / Eau Claire County |
| EPI_ISL_631477 | 10/3/2020 | 11/10/2020 | North America / USA / Wisconsin / Taylor County     |
| EPI_ISL_631478 | 10/3/2020 | 11/10/2020 | North America / USA / Wisconsin / Taylor County     |
| EPI_ISL_631479 | 10/3/2020 | 11/10/2020 | North America / USA / Wisconsin / Taylor County     |
| EPI_ISL_631480 | 7/1/2020  | 11/10/2020 | North America / USA / Wisconsin / Dane County       |
| EPI_ISL_631481 | 7/1/2020  | 11/10/2020 | North America / USA / Wisconsin / Dane County       |
| EPI_ISL_631482 | 7/2/2020  | 11/10/2020 | North America / USA / Wisconsin / Dane County       |

































|                |            |            |                                                       |
|----------------|------------|------------|-------------------------------------------------------|
| EPI_ISL_632299 | 2020       | 11/11/2020 | North America / USA / Massachusetts                   |
| EPI_ISL_632300 | 2020       | 11/11/2020 | North America / USA / Massachusetts                   |
| EPI_ISL_632301 | 2020       | 11/11/2020 | North America / USA / Massachusetts                   |
| EPI_ISL_632302 | 2020       | 11/11/2020 | North America / USA / Massachusetts                   |
| EPI_ISL_632303 | 2020       | 11/11/2020 | North America / USA / Massachusetts                   |
| EPI_ISL_632304 | 2020       | 11/11/2020 | North America / USA / Massachusetts                   |
| EPI_ISL_632305 | 2020       | 11/11/2020 | North America / USA / Massachusetts                   |
| EPI_ISL_632306 | 2020       | 11/11/2020 | North America / USA / Massachusetts                   |
| EPI_ISL_632307 | 2020       | 11/11/2020 | North America / USA / Massachusetts                   |
| EPI_ISL_632308 | 2020       | 11/11/2020 | North America / USA / Massachusetts                   |
| EPI_ISL_632309 | 2020       | 11/11/2020 | North America / USA / Massachusetts                   |
| EPI_ISL_632310 | 10/31/2020 | 11/11/2020 | Africa / Tunisia / Ben Arous                          |
| EPI_ISL_632311 | 3/12/2020  | 11/11/2020 | Europe / Germany / North Rhine-Westphalia / Bielefeld |
| EPI_ISL_632312 | 8/29/2020  | 11/11/2020 | Europe / Sweden / Västmanland                         |
| EPI_ISL_632313 | 5/1/2020   | 11/11/2020 | Europe / Sweden                                       |
| EPI_ISL_632389 | 9/29/2020  | 11/11/2020 | Europe / Netherlands / Zuid-Holland                   |
| EPI_ISL_632390 | 9/25/2020  | 11/11/2020 | Europe / Netherlands                                  |
| EPI_ISL_632391 | 9/14/2020  | 11/11/2020 | Europe / Netherlands / Utrecht                        |
| EPI_ISL_632431 | 2020       | 11/11/2020 | Europe / Netherlands / Limburg                        |
| EPI_ISL_632432 | 2020       | 11/11/2020 | Europe / Netherlands / Limburg                        |
| EPI_ISL_632433 | 2020       | 11/11/2020 | Europe / Netherlands / Limburg                        |
| EPI_ISL_632440 | 10/9/2020  | 11/11/2020 | Europe / Netherlands / Gelderland                     |
| EPI_ISL_632441 | 10/14/2020 | 11/11/2020 | Europe / Netherlands / Zuid-Holland                   |
| EPI_ISL_632442 | 10/14/2020 | 11/11/2020 | Europe / Netherlands / Zuid-Holland                   |
| EPI_ISL_632443 | 10/15/2020 | 11/11/2020 | Europe / Netherlands / Zuid-Holland                   |
| EPI_ISL_632444 | 10/15/2020 | 11/11/2020 | Europe / Netherlands / Zuid-Holland                   |
| EPI_ISL_632445 | 10/8/2020  | 11/11/2020 | Europe / Netherlands / Flevoland                      |
| EPI_ISL_632448 | 10/14/2020 | 11/11/2020 | Europe / Netherlands / Zuid-Holland                   |
| EPI_ISL_632460 | 9/14/2020  | 11/11/2020 | Europe / Netherlands / Utrecht                        |
| EPI_ISL_632461 | 9/28/2020  | 11/11/2020 | Europe / Netherlands / Utrecht                        |
| EPI_ISL_632479 | 2020       | 11/11/2020 | Europe / Netherlands / Limburg                        |
| EPI_ISL_632480 | 10/5/2020  | 11/11/2020 | Europe / Netherlands / Gelderland                     |
| EPI_ISL_632481 | 10/6/2020  | 11/11/2020 | Europe / Netherlands / Gelderland                     |
| EPI_ISL_632482 | 10/21/2020 | 11/11/2020 | Europe / Netherlands / Gelderland                     |
| EPI_ISL_632493 | 9/27/2020  | 11/11/2020 | Europe / Netherlands / Zuid-Holland                   |
| EPI_ISL_632494 | 9/28/2020  | 11/11/2020 | Europe / Netherlands / Zuid-Holland                   |
| EPI_ISL_632495 | 9/14/2020  | 11/11/2020 | Europe / Netherlands / Zuid-Holland                   |
| EPI_ISL_632496 | 9/10/2020  | 11/11/2020 | Europe / Netherlands / Utrecht                        |
| EPI_ISL_632497 | 9/10/2020  | 11/11/2020 | Europe / Netherlands / Utrecht                        |
| EPI_ISL_632498 | 9/12/2020  | 11/11/2020 | Europe / Netherlands / Utrecht                        |
| EPI_ISL_632499 | 9/12/2020  | 11/11/2020 | Europe / Netherlands / Utrecht                        |
| EPI_ISL_632500 | 9/13/2020  | 11/11/2020 | Europe / Netherlands / Utrecht                        |
| EPI_ISL_632501 | 9/13/2020  | 11/11/2020 | Europe / Netherlands / Utrecht                        |
| EPI_ISL_632502 | 9/27/2020  | 11/11/2020 | Europe / Netherlands / Utrecht                        |
| EPI_ISL_632503 | 9/14/2020  | 11/11/2020 | Europe / Netherlands / Zuid-Holland                   |
| EPI_ISL_632504 | 9/17/2020  | 11/11/2020 | Europe / Netherlands / Zuid-Holland                   |
| EPI_ISL_632505 | 9/24/2020  | 11/11/2020 | Europe / Netherlands / Zuid-Holland                   |

|                |           |            |                                      |
|----------------|-----------|------------|--------------------------------------|
| EPI_ISL_632506 | 9/25/2020 | 11/11/2020 | Europe / Netherlands / Zuid-Holland  |
| EPI_ISL_632507 | 10/5/2020 | 11/11/2020 | Europe / Netherlands / Zuid-Holland  |
| EPI_ISL_632508 | 10/5/2020 | 11/11/2020 | Europe / Netherlands / Zuid-Holland  |
| EPI_ISL_632509 | 9/24/2020 | 11/11/2020 | Europe / Netherlands / Zuid-Holland  |
| EPI_ISL_632510 | 9/29/2020 | 11/11/2020 | Europe / Netherlands / Noord-Brabant |
| EPI_ISL_632511 | 9/29/2020 | 11/11/2020 | Europe / Netherlands / Noord-Brabant |
| EPI_ISL_632512 | 10/2/2020 | 11/11/2020 | Europe / Netherlands / Zuid-Holland  |
| EPI_ISL_632513 | 9/30/2020 | 11/11/2020 | Europe / Netherlands / Zuid-Holland  |
| EPI_ISL_632514 | 10/2/2020 | 11/11/2020 | Europe / Netherlands / Zuid-Holland  |
| EPI_ISL_632515 | 10/2/2020 | 11/11/2020 | Europe / Netherlands / Zuid-Holland  |
| EPI_ISL_632516 | 10/2/2020 | 11/11/2020 | Europe / Netherlands / Zuid-Holland  |
| EPI_ISL_632517 | 10/2/2020 | 11/11/2020 | Europe / Netherlands / Zuid-Holland  |
| EPI_ISL_632518 | 10/2/2020 | 11/11/2020 | Europe / Netherlands / Zuid-Holland  |
| EPI_ISL_632519 | 10/2/2020 | 11/11/2020 | Europe / Netherlands / Zuid-Holland  |
| EPI_ISL_632520 | 9/9/2020  | 11/11/2020 | Europe / Netherlands / Noord-Holland |
| EPI_ISL_632521 | 9/1/2020  | 11/11/2020 | Europe / Netherlands / Noord-Holland |
| EPI_ISL_632522 | 9/2/2020  | 11/11/2020 | Europe / Netherlands / Noord-Holland |
| EPI_ISL_632523 | 9/9/2020  | 11/11/2020 | Europe / Netherlands / Noord-Holland |
| EPI_ISL_632524 | 9/1/2020  | 11/11/2020 | Europe / Netherlands / Noord-Holland |
| EPI_ISL_632525 | 9/2/2020  | 11/11/2020 | Europe / Netherlands / Noord-Holland |
| EPI_ISL_632526 | 9/2/2020  | 11/11/2020 | Europe / Netherlands / Noord-Holland |
| EPI_ISL_632527 | 9/2/2020  | 11/11/2020 | Europe / Netherlands / Noord-Holland |
| EPI_ISL_632528 | 9/9/2020  | 11/11/2020 | Europe / Netherlands / Noord-Holland |
| EPI_ISL_632529 | 9/2/2020  | 11/11/2020 | Europe / Netherlands / Noord-Holland |
| EPI_ISL_632530 | 9/26/2020 | 11/11/2020 | Europe / Netherlands / Zuid-Holland  |
| EPI_ISL_632531 | 9/28/2020 | 11/11/2020 | Europe / Netherlands / Utrecht       |
| EPI_ISL_632532 | 9/2/2020  | 11/11/2020 | Europe / Netherlands / Noord-Holland |
| EPI_ISL_632533 | 9/2/2020  | 11/11/2020 | Europe / Netherlands / Noord-Holland |
| EPI_ISL_632534 | 9/9/2020  | 11/11/2020 | Europe / Netherlands / Noord-Holland |
| EPI_ISL_632535 | 10/1/2020 | 11/11/2020 | Europe / Netherlands / Noord-Brabant |
| EPI_ISL_632536 | 10/2/2020 | 11/11/2020 | Europe / Netherlands / Noord-Brabant |
| EPI_ISL_632537 | 10/2/2020 | 11/11/2020 | Europe / Netherlands / Noord-Brabant |
| EPI_ISL_632538 | 10/3/2020 | 11/11/2020 | Europe / Netherlands / Noord-Brabant |
| EPI_ISL_632539 | 10/2/2020 | 11/11/2020 | Europe / Netherlands / Zuid-Holland  |
| EPI_ISL_632540 | 10/6/2020 | 11/11/2020 | Europe / Netherlands / Zuid-Holland  |
| EPI_ISL_632541 | 10/2/2020 | 11/11/2020 | Europe / Netherlands / Zuid-Holland  |
| EPI_ISL_632542 | 10/6/2020 | 11/11/2020 | Europe / Netherlands / Zuid-Holland  |
| EPI_ISL_632543 | 8/7/2020  | 11/11/2020 | Europe / Netherlands / Zuid-Holland  |
| EPI_ISL_632544 | 9/25/2020 | 11/11/2020 | Europe / Netherlands / Zuid-Holland  |
| EPI_ISL_632545 | 9/28/2020 | 11/11/2020 | Europe / Netherlands / Zuid-Holland  |
| EPI_ISL_632546 | 9/27/2020 | 11/11/2020 | Europe / Netherlands / Zuid-Holland  |
| EPI_ISL_632547 | 9/14/2020 | 11/11/2020 | Europe / Netherlands / Zuid-Holland  |
| EPI_ISL_632548 | 9/17/2020 | 11/11/2020 | Europe / Netherlands / Zuid-Holland  |
| EPI_ISL_632549 | 9/21/2020 | 11/11/2020 | Europe / Netherlands / Zuid-Holland  |
| EPI_ISL_632550 | 9/23/2020 | 11/11/2020 | Europe / Netherlands / Zuid-Holland  |
| EPI_ISL_632551 | 9/25/2020 | 11/11/2020 | Europe / Netherlands / Zuid-Holland  |
| EPI_ISL_632552 | 9/25/2020 | 11/11/2020 | Europe / Netherlands / Zuid-Holland  |





|                |            |            |                                      |
|----------------|------------|------------|--------------------------------------|
| EPI_ISL_632600 | 10/2/2020  | 11/11/2020 | Europe / Netherlands / Zuid-Holland  |
| EPI_ISL_632601 | 10/5/2020  | 11/11/2020 | Europe / Netherlands / Zuid-Holland  |
| EPI_ISL_632602 | 10/6/2020  | 11/11/2020 | Europe / Netherlands / Zuid-Holland  |
| EPI_ISL_632603 | 10/8/2020  | 11/11/2020 | Europe / Netherlands / Zuid-Holland  |
| EPI_ISL_632604 | 10/10/2020 | 11/11/2020 | Europe / Netherlands / Zuid-Holland  |
| EPI_ISL_632605 | 10/10/2020 | 11/11/2020 | Europe / Netherlands / Zuid-Holland  |
| EPI_ISL_632606 | 10/12/2020 | 11/11/2020 | Europe / Netherlands / Zuid-Holland  |
| EPI_ISL_632607 | 10/4/2020  | 11/11/2020 | Europe / Netherlands / Zuid-Holland  |
| EPI_ISL_632608 | 10/7/2020  | 11/11/2020 | Europe / Netherlands / Noord-Brabant |
| EPI_ISL_632609 | 10/4/2020  | 11/11/2020 | Europe / Netherlands / Noord-Brabant |
| EPI_ISL_632610 | 10/12/2020 | 11/11/2020 | Europe / Netherlands / Zuid-Holland  |
| EPI_ISL_632611 | 10/8/2020  | 11/11/2020 | Europe / Netherlands / Zuid-Holland  |
| EPI_ISL_632612 | 9/26/2020  | 11/11/2020 | Europe / Netherlands / Zuid-Holland  |
| EPI_ISL_632613 | 9/27/2020  | 11/11/2020 | Europe / Netherlands / Zuid-Holland  |
| EPI_ISL_632614 | 9/30/2020  | 11/11/2020 | Europe / Netherlands / Zuid-Holland  |
| EPI_ISL_632615 | 9/26/2020  | 11/11/2020 | Europe / Netherlands / Zuid-Holland  |
| EPI_ISL_632616 | 9/30/2020  | 11/11/2020 | Europe / Netherlands / Zuid-Holland  |
| EPI_ISL_632617 | 10/1/2020  | 11/11/2020 | Europe / Netherlands / Zuid-Holland  |
| EPI_ISL_632618 | 9/30/2020  | 11/11/2020 | Europe / Netherlands / Zuid-Holland  |
| EPI_ISL_632619 | 9/27/2020  | 11/11/2020 | Europe / Netherlands / Zuid-Holland  |
| EPI_ISL_632620 | 9/29/2020  | 11/11/2020 | Europe / Netherlands / Zuid-Holland  |
| EPI_ISL_632621 | 9/27/2020  | 11/11/2020 | Europe / Netherlands / Zuid-Holland  |
| EPI_ISL_632623 | 10/7/2020  | 11/11/2020 | Europe / Netherlands / Utrecht       |
| EPI_ISL_632624 | 10/7/2020  | 11/11/2020 | Europe / Netherlands / Gelderland    |
| EPI_ISL_632625 | 10/7/2020  | 11/11/2020 | Europe / Netherlands / Utrecht       |
| EPI_ISL_632626 | 10/7/2020  | 11/11/2020 | Europe / Netherlands / Utrecht       |
| EPI_ISL_632627 | 10/8/2020  | 11/11/2020 | Europe / Netherlands / Gelderland    |
| EPI_ISL_632628 | 10/8/2020  | 11/11/2020 | Europe / Netherlands / Utrecht       |
| EPI_ISL_632629 | 10/8/2020  | 11/11/2020 | Europe / Netherlands / Utrecht       |
| EPI_ISL_632630 | 10/9/2020  | 11/11/2020 | Europe / Netherlands / Utrecht       |
| EPI_ISL_632631 | 10/9/2020  | 11/11/2020 | Europe / Netherlands / Gelderland    |
| EPI_ISL_632632 | 10/9/2020  | 11/11/2020 | Europe / Netherlands / Flevoland     |
| EPI_ISL_632633 | 10/9/2020  | 11/11/2020 | Europe / Netherlands / Gelderland    |
| EPI_ISL_632634 | 10/9/2020  | 11/11/2020 | Europe / Netherlands / Utrecht       |
| EPI_ISL_632635 | 10/11/2020 | 11/11/2020 | Europe / Netherlands / Utrecht       |
| EPI_ISL_632636 | 10/12/2020 | 11/11/2020 | Europe / Netherlands / Gelderland    |
| EPI_ISL_632637 | 10/12/2020 | 11/11/2020 | Europe / Netherlands / Utrecht       |
| EPI_ISL_632638 | 10/12/2020 | 11/11/2020 | Europe / Netherlands / Utrecht       |
| EPI_ISL_632639 | 10/11/2020 | 11/11/2020 | Europe / Netherlands / Gelderland    |
| EPI_ISL_632640 | 10/11/2020 | 11/11/2020 | Europe / Netherlands / Utrecht       |
| EPI_ISL_632641 | 10/5/2020  | 11/11/2020 | Europe / Netherlands / Utrecht       |
| EPI_ISL_632642 | 10/5/2020  | 11/11/2020 | Europe / Netherlands / Gelderland    |
| EPI_ISL_632643 | 10/4/2020  | 11/11/2020 | Europe / Netherlands / Gelderland    |
| EPI_ISL_632644 | 10/4/2020  | 11/11/2020 | Europe / Netherlands / Utrecht       |
| EPI_ISL_632645 | 10/5/2020  | 11/11/2020 | Europe / Netherlands / Utrecht       |
| EPI_ISL_632646 | 10/5/2020  | 11/11/2020 | Europe / Netherlands / Gelderland    |
| EPI_ISL_632647 | 10/6/2020  | 11/11/2020 | Europe / Netherlands / Gelderland    |



|                |            |            |                                     |
|----------------|------------|------------|-------------------------------------|
| EPI_ISL_632695 | 10/16/2020 | 11/11/2020 | Europe / Netherlands / Zuid-Holland |
| EPI_ISL_632696 | 10/3/2020  | 11/11/2020 | Europe / Netherlands / Zuid-Holland |
| EPI_ISL_632697 | 9/27/2020  | 11/11/2020 | Europe / Netherlands / Zuid-Holland |
| EPI_ISL_632698 | 10/9/2020  | 11/11/2020 | Europe / Netherlands / Zuid-Holland |
| EPI_ISL_632699 | 10/6/2020  | 11/11/2020 | Europe / Netherlands / Zuid-Holland |
| EPI_ISL_632700 | 10/6/2020  | 11/11/2020 | Europe / Netherlands / Zuid-Holland |
| EPI_ISL_632701 | 10/17/2020 | 11/11/2020 | Europe / Netherlands / Zuid-Holland |
| EPI_ISL_632702 | 10/8/2020  | 11/11/2020 | Europe / Netherlands / Zuid-Holland |
| EPI_ISL_632703 | 10/8/2020  | 11/11/2020 | Europe / Netherlands / Zuid-Holland |
| EPI_ISL_632704 | 9/21/2020  | 11/11/2020 | Europe / Netherlands / Zuid-Holland |
| EPI_ISL_632705 | 10/14/2020 | 11/11/2020 | Europe / Netherlands / Zuid-Holland |
| EPI_ISL_632706 | 10/16/2020 | 11/11/2020 | Europe / Netherlands / Zuid-Holland |
| EPI_ISL_632707 | 10/8/2020  | 11/11/2020 | Europe / Netherlands / Zuid-Holland |
| EPI_ISL_632708 | 10/8/2020  | 11/11/2020 | Europe / Netherlands / Zuid-Holland |
| EPI_ISL_632709 | 10/12/2020 | 11/11/2020 | Europe / Netherlands / Zuid-Holland |
| EPI_ISL_632710 | 10/20/2020 | 11/11/2020 | Europe / Netherlands / Zuid-Holland |
| EPI_ISL_632711 | 10/14/2020 | 11/11/2020 | Europe / Netherlands / Gelderland   |
| EPI_ISL_632712 | 10/17/2020 | 11/11/2020 | Europe / Netherlands / Gelderland   |
| EPI_ISL_632713 | 10/18/2020 | 11/11/2020 | Europe / Netherlands / Gelderland   |
| EPI_ISL_632714 | 10/12/2020 | 11/11/2020 | Europe / Netherlands / Zuid-Holland |
| EPI_ISL_632715 | 10/19/2020 | 11/11/2020 | Europe / Netherlands / Limburg      |
| EPI_ISL_632716 | 9/27/2020  | 11/11/2020 | Europe / Netherlands / Zuid-Holland |
| EPI_ISL_632717 | 9/27/2020  | 11/11/2020 | Europe / Netherlands / Zuid-Holland |
| EPI_ISL_632718 | 9/25/2020  | 11/11/2020 | Europe / Netherlands / Zuid-Holland |
| EPI_ISL_632719 | 10/3/2020  | 11/11/2020 | Europe / Netherlands / Zuid-Holland |
| EPI_ISL_632720 | 10/14/2020 | 11/11/2020 | Europe / Netherlands / Utrecht      |
| EPI_ISL_632721 | 10/21/2020 | 11/11/2020 | Europe / Netherlands / Utrecht      |
| EPI_ISL_632722 | 10/21/2020 | 11/11/2020 | Europe / Netherlands / Gelderland   |
| EPI_ISL_632723 | 10/22/2020 | 11/11/2020 | Europe / Netherlands / Utrecht      |
| EPI_ISL_632724 | 10/23/2020 | 11/11/2020 | Europe / Netherlands / Utrecht      |
| EPI_ISL_632725 | 10/27/2020 | 11/11/2020 | Europe / Netherlands / Flevoland    |
| EPI_ISL_632726 | 10/14/2020 | 11/11/2020 | Europe / Netherlands / Utrecht      |
| EPI_ISL_632727 | 10/14/2020 | 11/11/2020 | Europe / Netherlands / Utrecht      |
| EPI_ISL_632728 | 10/16/2020 | 11/11/2020 | Europe / Netherlands / Flevoland    |
| EPI_ISL_632729 | 10/16/2020 | 11/11/2020 | Europe / Netherlands / Flevoland    |
| EPI_ISL_632730 | 10/15/2020 | 11/11/2020 | Europe / Netherlands / Utrecht      |
| EPI_ISL_632731 | 10/18/2020 | 11/11/2020 | Europe / Netherlands / Utrecht      |
| EPI_ISL_632732 | 10/19/2020 | 11/11/2020 | Europe / Netherlands / Utrecht      |
| EPI_ISL_632733 | 9/29/2020  | 11/11/2020 | Europe / Netherlands / Utrecht      |
| EPI_ISL_632734 | 10/2/2020  | 11/11/2020 | Europe / Netherlands / Zuid-Holland |
| EPI_ISL_632735 | 10/9/2020  | 11/11/2020 | Europe / Netherlands / Zuid-Holland |
| EPI_ISL_632736 | 10/13/2020 | 11/11/2020 | Europe / Netherlands / Zuid-Holland |
| EPI_ISL_632737 | 10/16/2020 | 11/11/2020 | Europe / Netherlands / Zuid-Holland |
| EPI_ISL_632738 | 10/26/2020 | 11/11/2020 | Europe / Netherlands / Zuid-Holland |
| EPI_ISL_632739 | 10/17/2020 | 11/11/2020 | Europe / Netherlands / Gelderland   |
| EPI_ISL_632740 | 10/16/2020 | 11/11/2020 | Europe / Netherlands / Flevoland    |
| EPI_ISL_632741 | 10/18/2020 | 11/11/2020 | Europe / Netherlands / Overijssel   |

|                |            |            |                                      |
|----------------|------------|------------|--------------------------------------|
| EPI_ISL_632742 | 10/20/2020 | 11/11/2020 | Europe / Netherlands / Gelderland    |
| EPI_ISL_632743 | 10/20/2020 | 11/11/2020 | Europe / Netherlands / Gelderland    |
| EPI_ISL_632744 | 10/19/2020 | 11/11/2020 | Europe / Netherlands / Flevoland     |
| EPI_ISL_632745 | 10/19/2020 | 11/11/2020 | Europe / Netherlands / Gelderland    |
| EPI_ISL_632746 | 10/19/2020 | 11/11/2020 | Europe / Netherlands / Zuid-Holland  |
| EPI_ISL_632747 | 10/17/2020 | 11/11/2020 | Europe / Netherlands / Zuid-Holland  |
| EPI_ISL_632748 | 10/23/2020 | 11/11/2020 | Europe / Netherlands / Zuid-Holland  |
| EPI_ISL_632749 | 10/24/2020 | 11/11/2020 | Europe / Netherlands / Zuid-Holland  |
| EPI_ISL_632750 | 10/15/2020 | 11/11/2020 | Europe / Netherlands / Zuid-Holland  |
| EPI_ISL_632751 | 10/16/2020 | 11/11/2020 | Europe / Netherlands / Zuid-Holland  |
| EPI_ISL_632752 | 10/14/2020 | 11/11/2020 | Europe / Netherlands / Zuid-Holland  |
| EPI_ISL_632753 | 10/14/2020 | 11/11/2020 | Europe / Netherlands / Zuid-Holland  |
| EPI_ISL_632754 | 9/25/2020  | 11/11/2020 | Europe / Netherlands / Zuid-Holland  |
| EPI_ISL_632755 | 10/5/2020  | 11/11/2020 | Europe / Netherlands / Zuid-Holland  |
| EPI_ISL_632756 | 10/28/2020 | 11/11/2020 | Europe / Netherlands / Zuid-Holland  |
| EPI_ISL_632757 | 10/28/2020 | 11/11/2020 | Europe / Netherlands / Zuid-Holland  |
| EPI_ISL_632758 | 10/28/2020 | 11/11/2020 | Europe / Netherlands / Zuid-Holland  |
| EPI_ISL_632759 | 10/16/2020 | 11/11/2020 | Europe / Netherlands / Zuid-Holland  |
| EPI_ISL_632760 | 10/15/2020 | 11/11/2020 | Europe / Netherlands / Zuid-Holland  |
| EPI_ISL_632761 | 10/21/2020 | 11/11/2020 | Europe / Netherlands / Limburg       |
| EPI_ISL_632762 | 9/11/2020  | 11/11/2020 | Europe / Netherlands / Zuid-Holland  |
| EPI_ISL_632763 | 9/16/2020  | 11/11/2020 | Europe / Netherlands / Zuid-Holland  |
| EPI_ISL_632764 | 10/27/2020 | 11/11/2020 | Europe / Netherlands / Gelderland    |
| EPI_ISL_632765 | 10/29/2020 | 11/11/2020 | Europe / Netherlands / Zuid-Holland  |
| EPI_ISL_632766 | 10/30/2020 | 11/11/2020 | Europe / Netherlands / Zuid-Holland  |
| EPI_ISL_632767 | 10/30/2020 | 11/11/2020 | Europe / Netherlands / Zuid-Holland  |
| EPI_ISL_632768 | 10/29/2020 | 11/11/2020 | Europe / Netherlands / Zuid-Holland  |
| EPI_ISL_632769 | 10/30/2020 | 11/11/2020 | Europe / Netherlands / Zuid-Holland  |
| EPI_ISL_632770 | 10/29/2020 | 11/11/2020 | Europe / Netherlands / Zuid-Holland  |
| EPI_ISL_632771 | 6/30/2020  | 11/11/2020 | Europe / Netherlands / Noord-Brabant |
| EPI_ISL_632772 | 7/3/2020   | 11/11/2020 | Europe / Netherlands / Noord-Brabant |
| EPI_ISL_632773 | 7/4/2020   | 11/11/2020 | Europe / Netherlands / Noord-Brabant |
| EPI_ISL_632774 | 7/6/2020   | 11/11/2020 | Europe / Netherlands / Noord-Brabant |
| EPI_ISL_632775 | 7/8/2020   | 11/11/2020 | Europe / Netherlands / Noord-Brabant |
| EPI_ISL_632776 | 10/13/2020 | 11/11/2020 | Europe / Netherlands                 |
| EPI_ISL_632777 | 10/12/2020 | 11/11/2020 | Europe / Netherlands                 |
| EPI_ISL_632778 | 10/16/2020 | 11/11/2020 | Europe / Netherlands / Flevoland     |
| EPI_ISL_632779 | 10/15/2020 | 11/11/2020 | Europe / Netherlands / Utrecht       |
| EPI_ISL_632780 | 10/15/2020 | 11/11/2020 | Europe / Netherlands / Utrecht       |
| EPI_ISL_632781 | 10/15/2020 | 11/11/2020 | Europe / Netherlands / Flevoland     |
| EPI_ISL_632782 | 10/16/2020 | 11/11/2020 | Europe / Netherlands / Utrecht       |
| EPI_ISL_632783 | 10/18/2020 | 11/11/2020 | Europe / Netherlands / Utrecht       |
| EPI_ISL_632784 | 10/17/2020 | 11/11/2020 | Europe / Netherlands / Utrecht       |
| EPI_ISL_632785 | 9/29/2020  | 11/11/2020 | Europe / Netherlands / Zuid-Holland  |
| EPI_ISL_632786 | 10/4/2020  | 11/11/2020 | Europe / Netherlands / Zuid-Holland  |
| EPI_ISL_632787 | 10/16/2020 | 11/11/2020 | Europe / Netherlands / Zuid-Holland  |
| EPI_ISL_632788 | 10/21/2020 | 11/11/2020 | Europe / Netherlands / Zuid-Holland  |

|                |            |            |                                     |
|----------------|------------|------------|-------------------------------------|
| EPI_ISL_632789 | 10/23/2020 | 11/11/2020 | Europe / Netherlands / Zuid-Holland |
| EPI_ISL_632790 | 10/26/2020 | 11/11/2020 | Europe / Netherlands / Zuid-Holland |
| EPI_ISL_632791 | 10/26/2020 | 11/11/2020 | Europe / Netherlands / Zuid-Holland |
| EPI_ISL_632792 | 10/27/2020 | 11/11/2020 | Europe / Netherlands / Zuid-Holland |
| EPI_ISL_632793 | 10/30/2020 | 11/11/2020 | Europe / Netherlands / Zuid-Holland |
| EPI_ISL_632794 | 10/30/2020 | 11/11/2020 | Europe / Netherlands / Zuid-Holland |
| EPI_ISL_632795 | 10/27/2020 | 11/11/2020 | Europe / Netherlands / Zuid-Holland |
| EPI_ISL_632796 | 10/9/2020  | 11/11/2020 | Europe / United Kingdom / England   |
| EPI_ISL_632797 | 10/29/2020 | 11/11/2020 | Europe / Gibraltar                  |
| EPI_ISL_632798 | 10/29/2020 | 11/11/2020 | Europe / Gibraltar                  |
| EPI_ISL_632799 | 10/29/2020 | 11/11/2020 | Europe / Gibraltar                  |
| EPI_ISL_632800 | 10/29/2020 | 11/11/2020 | Europe / Gibraltar                  |
| EPI_ISL_632801 | 10/29/2020 | 11/11/2020 | Europe / Gibraltar                  |
| EPI_ISL_632802 | 10/29/2020 | 11/11/2020 | Europe / Gibraltar                  |
| EPI_ISL_632803 | 10/29/2020 | 11/11/2020 | Europe / Gibraltar                  |
| EPI_ISL_632804 | 10/29/2020 | 11/11/2020 | Europe / Gibraltar                  |
| EPI_ISL_632805 | 10/29/2020 | 11/11/2020 | Europe / Gibraltar                  |
| EPI_ISL_632806 | 10/29/2020 | 11/11/2020 | Europe / Gibraltar                  |
| EPI_ISL_632807 | 10/29/2020 | 11/11/2020 | Europe / Gibraltar                  |
| EPI_ISL_632808 | 10/29/2020 | 11/11/2020 | Europe / Gibraltar                  |
| EPI_ISL_632809 | 10/29/2020 | 11/11/2020 | Europe / Gibraltar                  |
| EPI_ISL_632810 | 10/29/2020 | 11/11/2020 | Europe / Gibraltar                  |
| EPI_ISL_632811 | 10/29/2020 | 11/11/2020 | Europe / Gibraltar                  |
| EPI_ISL_632812 | 10/29/2020 | 11/11/2020 | Europe / Gibraltar                  |
| EPI_ISL_632813 | 10/29/2020 | 11/11/2020 | Europe / Gibraltar                  |
| EPI_ISL_632815 | 10/29/2020 | 11/11/2020 | Europe / Gibraltar                  |
| EPI_ISL_632816 | 10/29/2020 | 11/11/2020 | Europe / Gibraltar                  |
| EPI_ISL_632817 | 10/29/2020 | 11/11/2020 | Europe / Gibraltar                  |
| EPI_ISL_632818 | 10/29/2020 | 11/11/2020 | Europe / Gibraltar                  |
| EPI_ISL_632819 | 10/29/2020 | 11/11/2020 | Europe / Gibraltar                  |
| EPI_ISL_632820 | 10/29/2020 | 11/11/2020 | Europe / Gibraltar                  |
| EPI_ISL_632821 | 10/29/2020 | 11/11/2020 | Europe / Gibraltar                  |
| EPI_ISL_632822 | 10/29/2020 | 11/11/2020 | Europe / Gibraltar                  |
| EPI_ISL_632823 | 9/1/2020   | 11/11/2020 | North America / USA / New Mexico    |
| EPI_ISL_632824 | 9/2/2020   | 11/11/2020 | North America / USA / New Mexico    |
| EPI_ISL_632825 | 9/2/2020   | 11/11/2020 | North America / USA / New Mexico    |
| EPI_ISL_632826 | 9/2/2020   | 11/11/2020 | North America / USA / New Mexico    |
| EPI_ISL_632827 | 9/2/2020   | 11/11/2020 | North America / USA / New Mexico    |
| EPI_ISL_632828 | 9/2/2020   | 11/11/2020 | North America / USA / New Mexico    |
| EPI_ISL_632831 | 9/2/2020   | 11/11/2020 | North America / USA / New Mexico    |
| EPI_ISL_632832 | 9/2/2020   | 11/11/2020 | North America / USA / New Mexico    |
| EPI_ISL_632834 | 9/2/2020   | 11/11/2020 | North America / USA / New Mexico    |
| EPI_ISL_632836 | 9/2/2020   | 11/11/2020 | North America / USA / New Mexico    |
| EPI_ISL_632837 | 9/2/2020   | 11/11/2020 | North America / USA / New Mexico    |
| EPI_ISL_632839 | 9/2/2020   | 11/11/2020 | North America / USA / New Mexico    |
| EPI_ISL_632841 | 9/2/2020   | 11/11/2020 | North America / USA / New Mexico    |
| EPI_ISL_632843 | 9/2/2020   | 11/11/2020 | North America / USA / New Mexico    |

|                |            |                                                               |
|----------------|------------|---------------------------------------------------------------|
| EPI_ISL_632844 | 9/2/2020   | 11/11/2020 North America / USA / New Mexico                   |
| EPI_ISL_632845 | 9/2/2020   | 11/11/2020 North America / USA / New Mexico                   |
| EPI_ISL_632847 | 3/15/2020  | 11/11/2020 North America / USA / Idaho                        |
| EPI_ISL_632848 | 3/16/2020  | 11/11/2020 North America / USA / Idaho                        |
| EPI_ISL_632849 | 3/19/2020  | 11/11/2020 North America / USA / Idaho                        |
| EPI_ISL_632850 | 3/15/2020  | 11/11/2020 North America / USA / Idaho                        |
| EPI_ISL_632851 | 3/28/2020  | 11/11/2020 North America / USA / Idaho                        |
| EPI_ISL_632852 | 3/15/2020  | 11/11/2020 North America / USA / Idaho                        |
| EPI_ISL_632853 | 3/18/2020  | 11/11/2020 North America / USA / Idaho                        |
| EPI_ISL_632856 | 3/20/2020  | 11/11/2020 North America / USA / Idaho                        |
| EPI_ISL_632857 | 3/12/2020  | 11/11/2020 North America / USA / Idaho                        |
| EPI_ISL_632858 | 3/13/2020  | 11/11/2020 North America / USA / Idaho                        |
| EPI_ISL_632859 | 3/12/2020  | 11/11/2020 North America / USA / Idaho                        |
| EPI_ISL_632861 | 3/28/2020  | 11/11/2020 North America / USA / Idaho                        |
| EPI_ISL_632863 | 3/20/2020  | 11/11/2020 North America / USA / Idaho                        |
| EPI_ISL_632864 | 3/18/2020  | 11/11/2020 North America / USA / Idaho                        |
| EPI_ISL_632865 | 3/18/2020  | 11/11/2020 North America / USA / Idaho                        |
| EPI_ISL_632868 | 3/13/2020  | 11/11/2020 North America / USA / Idaho                        |
| EPI_ISL_632870 | 3/13/2020  | 11/11/2020 North America / USA / Idaho                        |
| EPI_ISL_632871 | 3/15/2020  | 11/11/2020 North America / USA / Idaho                        |
| EPI_ISL_632872 | 3/27/2020  | 11/11/2020 North America / USA / Idaho                        |
| EPI_ISL_632873 | 3/17/2020  | 11/11/2020 North America / USA / Idaho                        |
| EPI_ISL_632876 | 3/17/2020  | 11/11/2020 North America / USA / Idaho                        |
| EPI_ISL_632878 | 3/20/2020  | 11/11/2020 North America / USA / Idaho                        |
| EPI_ISL_632879 | 3/22/2020  | 11/11/2020 North America / USA / Idaho                        |
| EPI_ISL_632880 | 3/20/2020  | 11/11/2020 North America / USA / Idaho                        |
| EPI_ISL_632881 | 3/17/2020  | 11/11/2020 North America / USA / Idaho                        |
| EPI_ISL_632882 | 3/18/2020  | 11/11/2020 North America / USA / Idaho                        |
| EPI_ISL_632883 | 3/20/2020  | 11/11/2020 North America / USA / Idaho                        |
| EPI_ISL_632885 | 3/19/2020  | 11/11/2020 North America / USA / Idaho                        |
| EPI_ISL_632886 | 3/20/2020  | 11/11/2020 North America / USA / Idaho                        |
| EPI_ISL_632899 | 10/14/2020 | 11/11/2020 Asia / Bahrain                                     |
| EPI_ISL_632900 | 10/14/2020 | 11/11/2020 Asia / Bahrain                                     |
| EPI_ISL_632901 | 10/14/2020 | 11/11/2020 Asia / Bahrain                                     |
| EPI_ISL_632902 | 10/14/2020 | 11/11/2020 Asia / Bahrain                                     |
| EPI_ISL_632903 | 10/14/2020 | 11/11/2020 Asia / Bahrain                                     |
| EPI_ISL_632904 | 10/2/2020  | 11/11/2020 Asia / Bahrain                                     |
| EPI_ISL_632905 | 10/14/2020 | 11/11/2020 Asia / Bahrain                                     |
| EPI_ISL_632906 | 10/14/2020 | 11/11/2020 Asia / Bahrain                                     |
| EPI_ISL_632907 | 10/14/2020 | 11/11/2020 Asia / Bahrain                                     |
| EPI_ISL_632908 | 4/1/2020   | 11/11/2020 Asia / Pakistan                                    |
| EPI_ISL_632891 | 9/17/2020  | 11/12/2020 North America / USA / Wisconsin / Dodge County     |
| EPI_ISL_632892 | 9/17/2020  | 11/12/2020 North America / USA / Wisconsin / Dane County      |
| EPI_ISL_632893 | 9/17/2020  | 11/12/2020 North America / USA / Wisconsin / Iowa County      |
| EPI_ISL_632895 | 9/16/2020  | 11/12/2020 North America / USA / Wisconsin / Dane County      |
| EPI_ISL_632896 | 9/11/2020  | 11/12/2020 North America / USA / Wisconsin / Milwaukee County |
| EPI_ISL_632897 | 9/14/2020  | 11/12/2020 North America / USA / Wisconsin / Milwaukee County |

|                |           |            |                                                    |
|----------------|-----------|------------|----------------------------------------------------|
| EPI_ISL_632898 | 9/16/2020 | 11/12/2020 | North America / USA / Wisconsin / Milwaukee County |
| EPI_ISL_632909 | 4/28/2020 | 11/12/2020 | North America / Canada / Manitoba                  |
| EPI_ISL_632910 | 3/25/2020 | 11/12/2020 | North America / Canada / Manitoba                  |
| EPI_ISL_632911 | 3/22/2020 | 11/12/2020 | North America / Canada / Manitoba                  |
| EPI_ISL_632912 | 3/28/2020 | 11/12/2020 | North America / Canada / Manitoba                  |
| EPI_ISL_632913 | 4/3/2020  | 11/12/2020 | North America / Canada / Manitoba                  |
| EPI_ISL_632914 | 3/27/2020 | 11/12/2020 | North America / Canada / Manitoba                  |
| EPI_ISL_632915 | 3/23/2020 | 11/12/2020 | North America / Canada / Manitoba                  |
| EPI_ISL_632916 | 3/23/2020 | 11/12/2020 | North America / Canada / Manitoba                  |
| EPI_ISL_632917 | 4/3/2020  | 11/12/2020 | North America / Canada / Manitoba                  |
| EPI_ISL_632918 | 3/21/2020 | 11/12/2020 | North America / Canada / Manitoba                  |
| EPI_ISL_632919 | 3/20/2020 | 11/12/2020 | North America / Canada / Manitoba                  |
| EPI_ISL_632920 | 3/23/2020 | 11/12/2020 | North America / Canada / Manitoba                  |
| EPI_ISL_632921 | 3/23/2020 | 11/12/2020 | North America / Canada / Manitoba                  |
| EPI_ISL_632922 | 3/21/2020 | 11/12/2020 | North America / Canada / Manitoba                  |
| EPI_ISL_632923 | 3/25/2020 | 11/12/2020 | North America / Canada / Manitoba                  |
| EPI_ISL_632924 | 3/23/2020 | 11/12/2020 | North America / Canada / Manitoba                  |
| EPI_ISL_632925 | 3/23/2020 | 11/12/2020 | North America / Canada / Manitoba                  |
| EPI_ISL_632926 | 3/16/2020 | 11/12/2020 | North America / Canada / Manitoba                  |
| EPI_ISL_632927 | 3/16/2020 | 11/12/2020 | North America / Canada / Manitoba                  |
| EPI_ISL_632928 | 3/16/2020 | 11/12/2020 | North America / Canada / Manitoba                  |
| EPI_ISL_632929 | 3/20/2020 | 11/12/2020 | North America / Canada / Manitoba                  |
| EPI_ISL_632930 | 3/13/2020 | 11/12/2020 | North America / Canada / Manitoba                  |
| EPI_ISL_632931 | 3/12/2020 | 11/12/2020 | North America / Canada / Manitoba                  |
| EPI_ISL_632932 | 3/11/2020 | 11/12/2020 | North America / Canada / Manitoba                  |
| EPI_ISL_632933 | 3/13/2020 | 11/12/2020 | North America / Canada / Manitoba                  |
| EPI_ISL_632934 | 9/13/2020 | 11/12/2020 | Asia / China / Yunnan                              |
| EPI_ISL_632936 | 8/22/2020 | 11/12/2020 | Asia / Indonesia / Special Region of Yogyakarta    |
| EPI_ISL_632937 | 9/9/2020  | 11/12/2020 | Asia / Indonesia / Special Region of Yogyakarta    |
| EPI_ISL_632939 | 3/25/2020 | 11/12/2020 | North America / USA / New York / New York City     |
| EPI_ISL_632940 | 3/25/2020 | 11/12/2020 | North America / USA / New York / New York City     |
| EPI_ISL_632941 | 3/25/2020 | 11/12/2020 | North America / USA / New York / New York City     |
| EPI_ISL_632942 | 3/25/2020 | 11/12/2020 | North America / USA / New York / New York City     |
| EPI_ISL_632944 | 3/26/2020 | 11/12/2020 | North America / USA / New York / New York City     |
| EPI_ISL_632945 | 3/25/2020 | 11/12/2020 | North America / USA / New York / New York City     |
| EPI_ISL_632946 | 3/25/2020 | 11/12/2020 | North America / USA / New York / New York City     |
| EPI_ISL_632947 | 3/26/2020 | 11/12/2020 | North America / USA / New York / New York City     |
| EPI_ISL_632948 | 3/26/2020 | 11/12/2020 | North America / USA / New York / New York City     |
| EPI_ISL_632949 | 3/26/2020 | 11/12/2020 | North America / USA / New York / New York City     |
| EPI_ISL_632950 | 3/26/2020 | 11/12/2020 | North America / USA / New York / New York City     |
| EPI_ISL_632951 | 3/26/2020 | 11/12/2020 | North America / USA / New York / New York City     |
| EPI_ISL_632952 | 3/27/2020 | 11/12/2020 | North America / USA / New York / New York City     |
| EPI_ISL_632953 | 3/27/2020 | 11/12/2020 | North America / USA / New York / New York City     |
| EPI_ISL_632954 | 3/27/2020 | 11/12/2020 | North America / USA / New York / New York City     |
| EPI_ISL_632955 | 3/27/2020 | 11/12/2020 | North America / USA / New York / New York City     |
| EPI_ISL_632956 | 3/27/2020 | 11/12/2020 | North America / USA / New York / New York City     |
| EPI_ISL_632957 | 3/27/2020 | 11/12/2020 | North America / USA / New York / New York City     |



















































































|                |            |            |                              |
|----------------|------------|------------|------------------------------|
| EPI_ISL_634877 | 7/26/2020  | 11/12/2020 | Europe / Belgium / Ghent     |
| EPI_ISL_634878 | 6/3/2020   | 11/12/2020 | Europe / Belgium / Ghent     |
| EPI_ISL_634879 | 7/29/2020  | 11/12/2020 | Europe / Belgium / Ghent     |
| EPI_ISL_634880 | 9/8/2020   | 11/12/2020 | Europe / Belgium / Ghent     |
| EPI_ISL_634881 | 10/19/2020 | 11/12/2020 | Europe / Belgium / Ghent     |
| EPI_ISL_634882 | 10/12/2020 | 11/12/2020 | Europe / Belgium / Ghent     |
| EPI_ISL_634883 | 10/19/2020 | 11/12/2020 | Europe / Belgium / Ghent     |
| EPI_ISL_634884 | 10/1/2020  | 11/12/2020 | Europe / Belgium / Ghent     |
| EPI_ISL_634885 | 10/6/2020  | 11/12/2020 | Europe / Belgium / Ghent     |
| EPI_ISL_634886 | 10/4/2020  | 11/12/2020 | Europe / Belgium / Ghent     |
| EPI_ISL_634887 | 10/2/2020  | 11/12/2020 | Europe / Belgium / Ghent     |
| EPI_ISL_634888 | 10/2/2020  | 11/12/2020 | Europe / Belgium / Ghent     |
| EPI_ISL_634889 | 10/4/2020  | 11/12/2020 | Europe / Belgium / Ghent     |
| EPI_ISL_634890 | 10/18/2020 | 11/12/2020 | Europe / Belgium / Ghent     |
| EPI_ISL_634891 | 10/18/2020 | 11/12/2020 | Europe / Belgium / Ghent     |
| EPI_ISL_634892 | 10/12/2020 | 11/12/2020 | Europe / Belgium / Ghent     |
| EPI_ISL_634893 | 10/16/2020 | 11/12/2020 | Europe / Belgium / Ghent     |
| EPI_ISL_634894 | 10/18/2020 | 11/12/2020 | Europe / Belgium / Ghent     |
| EPI_ISL_634895 | 10/19/2020 | 11/12/2020 | Europe / Belgium / Ghent     |
| EPI_ISL_634896 | 4/21/2020  | 11/12/2020 | North America / USA / Utah   |
| EPI_ISL_634898 | 4/23/2020  | 11/12/2020 | North America / USA / Utah   |
| EPI_ISL_634900 | 4/22/2020  | 11/12/2020 | North America / USA / Utah   |
| EPI_ISL_634901 | 4/23/2020  | 11/12/2020 | North America / USA / Utah   |
| EPI_ISL_634902 | 4/22/2020  | 11/12/2020 | North America / USA / Utah   |
| EPI_ISL_634903 | 5/1/2020   | 11/12/2020 | North America / USA / Utah   |
| EPI_ISL_634904 | 5/1/2020   | 11/12/2020 | North America / USA / Utah   |
| EPI_ISL_634905 | 5/1/2020   | 11/12/2020 | North America / USA / Utah   |
| EPI_ISL_634906 | 5/1/2020   | 11/12/2020 | North America / USA / Utah   |
| EPI_ISL_634907 | 5/1/2020   | 11/12/2020 | North America / USA / Utah   |
| EPI_ISL_634908 | 5/2/2020   | 11/12/2020 | North America / USA / Utah   |
| EPI_ISL_634909 | 5/1/2020   | 11/12/2020 | North America / USA / Utah   |
| EPI_ISL_634913 | 4/30/2020  | 11/12/2020 | North America / USA / Utah   |
| EPI_ISL_634914 | 4/30/2020  | 11/12/2020 | North America / USA / Utah   |
| EPI_ISL_634915 | 4/29/2020  | 11/12/2020 | North America / USA / Utah   |
| EPI_ISL_634916 | 4/30/2020  | 11/12/2020 | North America / USA / Utah   |
| EPI_ISL_634919 | 4/30/2020  | 11/12/2020 | North America / USA / Utah   |
| EPI_ISL_634921 | 4/30/2020  | 11/12/2020 | North America / USA / Utah   |
| EPI_ISL_634922 | 4/29/2020  | 11/12/2020 | North America / USA / Utah   |
| EPI_ISL_634924 | 10/7/2020  | 11/12/2020 | North America / USA / Utah   |
| EPI_ISL_634925 | 10/6/2020  | 11/12/2020 | North America / USA / Utah   |
| EPI_ISL_634926 | 10/6/2020  | 11/12/2020 | North America / USA / Utah   |
| EPI_ISL_634927 | 10/5/2020  | 11/12/2020 | North America / USA / Utah   |
| EPI_ISL_634928 | 10/6/2020  | 11/12/2020 | North America / USA / Utah   |
| EPI_ISL_634929 | 10/6/2020  | 11/12/2020 | North America / USA / Utah   |
| EPI_ISL_634931 | 10/6/2020  | 11/12/2020 | North America / USA / Utah   |
| EPI_ISL_634932 | 10/5/2020  | 11/12/2020 | North America / USA / Utah   |
| EPI_ISL_634977 | 10/31/2020 | 11/13/2020 | Africa / Tunisia / Ben Arous |

|                |            |            |                                                       |
|----------------|------------|------------|-------------------------------------------------------|
| EPI_ISL_634978 | 9/25/2020  | 11/13/2020 | Africa / South Africa / KwaZulu-Natal / Umkhanyakude  |
| EPI_ISL_634979 | 9/25/2020  | 11/13/2020 | Africa / South Africa / KwaZulu-Natal / ilembe        |
| EPI_ISL_634981 | 9/28/2020  | 11/13/2020 | Africa / South Africa / KwaZulu-Natal / Zululand      |
| EPI_ISL_634983 | 9/28/2020  | 11/13/2020 | Africa / South Africa / KwaZulu-Natal / Umgungundlovu |
| EPI_ISL_634984 | 9/28/2020  | 11/13/2020 | Africa / South Africa / KwaZulu-Natal / ilembe        |
| EPI_ISL_634985 | 9/25/2020  | 11/13/2020 | Africa / South Africa / KwaZulu-Natal / Zululand      |
| EPI_ISL_634986 | 9/26/2020  | 11/13/2020 | Africa / South Africa / KwaZulu-Natal / Zululand      |
| EPI_ISL_634987 | 9/24/2020  | 11/13/2020 | Africa / South Africa / KwaZulu-Natal / Zululand      |
| EPI_ISL_634989 | 9/28/2020  | 11/13/2020 | Africa / South Africa / KwaZulu-Natal / Umkhanyakude  |
| EPI_ISL_634990 | 9/29/2020  | 11/13/2020 | Africa / South Africa / KwaZulu-Natal / eThekwini     |
| EPI_ISL_634993 | 10/12/2020 | 11/13/2020 | Africa / South Africa / KwaZulu-Natal / Ilembe        |
| EPI_ISL_634994 | 10/11/2020 | 11/13/2020 | Africa / South Africa / KwaZulu-Natal / Ugu           |
| EPI_ISL_634995 | 10/9/2020  | 11/13/2020 | Africa / South Africa / KwaZulu-Natal / Umkhanyakude  |
| EPI_ISL_634996 | 10/12/2020 | 11/13/2020 | Africa / South Africa / KwaZulu-Natal / Ilembe        |
| EPI_ISL_634997 | 10/12/2020 | 11/13/2020 | Africa / South Africa / KwaZulu-Natal / Ilembe        |
| EPI_ISL_634998 | 10/10/2020 | 11/13/2020 | Africa / South Africa / KwaZulu-Natal / Zululand      |
| EPI_ISL_634999 | 10/12/2020 | 11/13/2020 | Africa / South Africa / KwaZulu-Natal / ugu           |
| EPI_ISL_635000 | 10/12/2020 | 11/13/2020 | Africa / South Africa / KwaZulu-Natal / Umkhanyakude  |
| EPI_ISL_635001 | 10/14/2020 | 11/13/2020 | Africa / South Africa / KwaZulu-Natal / Umkhanyakude  |
| EPI_ISL_635002 | 10/12/2020 | 11/13/2020 | Africa / South Africa / KwaZulu-Natal / Ilembe        |
| EPI_ISL_635003 | 10/13/2020 | 11/13/2020 | Africa / South Africa / KwaZulu-Natal / Zululand      |
| EPI_ISL_635004 | 10/13/2020 | 11/13/2020 | Africa / South Africa / KwaZulu-Natal / Harry Gwala   |
| EPI_ISL_635005 | 10/9/2020  | 11/13/2020 | Africa / South Africa / KwaZulu-Natal / Umkhanyakude  |
| EPI_ISL_635006 | 10/9/2020  | 11/13/2020 | Africa / South Africa / KwaZulu-Natal / Umkhanyakude  |
| EPI_ISL_635007 | 10/8/2020  | 11/13/2020 | Africa / South Africa / KwaZulu-Natal / Zululand      |
| EPI_ISL_635008 | 10/9/2020  | 11/13/2020 | Africa / South Africa / KwaZulu-Natal / Ilembe        |
| EPI_ISL_635009 | 10/14/2020 | 11/13/2020 | Africa / South Africa / KwaZulu-Natal / Ilembe        |
| EPI_ISL_635010 | 10/9/2020  | 11/13/2020 | Africa / South Africa / KwaZulu-Natal / Ilembe        |
| EPI_ISL_635011 | 10/12/2020 | 11/13/2020 | Africa / South Africa / KwaZulu-Natal / Ugu           |
| EPI_ISL_635012 | 10/12/2020 | 11/13/2020 | Africa / South Africa / KwaZulu-Natal / Ugu           |
| EPI_ISL_635013 | 10/12/2020 | 11/13/2020 | Africa / South Africa / KwaZulu-Natal / Ugu           |
| EPI_ISL_635014 | 10/12/2020 | 11/13/2020 | Africa / South Africa / KwaZulu-Natal / Ugu           |
| EPI_ISL_635015 | 10/14/2020 | 11/13/2020 | Africa / South Africa / KwaZulu-Natal / Zululand      |
| EPI_ISL_635016 | 10/14/2020 | 11/13/2020 | Africa / South Africa / KwaZulu-Natal / Ilembe        |
| EPI_ISL_635017 | 10/14/2020 | 11/13/2020 | Africa / South Africa / KwaZulu-Natal / Umkhanyakude  |
| EPI_ISL_635018 | 10/15/2020 | 11/13/2020 | Africa / South Africa / KwaZulu-Natal / eThekwini     |
| EPI_ISL_635019 | 10/15/2020 | 11/13/2020 | Africa / South Africa / KwaZulu-Natal / Umgungundlovu |
| EPI_ISL_635021 | 10/16/2020 | 11/13/2020 | Africa / South Africa / KwaZulu-Natal / Ugu           |
| EPI_ISL_635022 | 10/15/2020 | 11/13/2020 | Africa / South Africa / KwaZulu-Natal / Zululand      |
| EPI_ISL_635024 | 10/15/2020 | 11/13/2020 | Africa / South Africa / KwaZulu-Natal / Ugu           |
| EPI_ISL_635025 | 10/16/2020 | 11/13/2020 | Africa / South Africa / KwaZulu-Natal / Ilembe        |
| EPI_ISL_635026 | 10/20/2020 | 11/13/2020 | Africa / South Africa / KwaZulu-Natal / eThekwini     |
| EPI_ISL_635027 | 10/19/2020 | 11/13/2020 | Africa / South Africa / KwaZulu-Natal / eThekwini     |
| EPI_ISL_635028 | 10/20/2020 | 11/13/2020 | Africa / South Africa / KwaZulu-Natal / Ugu           |
| EPI_ISL_635029 | 10/19/2020 | 11/13/2020 | Africa / South Africa / KwaZulu-Natal / ilembe        |
| EPI_ISL_635030 | 10/19/2020 | 11/13/2020 | Africa / South Africa / KwaZulu-Natal / Zululand      |
| EPI_ISL_635031 | 10/19/2020 | 11/13/2020 | Africa / South Africa / KwaZulu-Natal / Umkhanyakude  |

|                |            |            |                                                       |
|----------------|------------|------------|-------------------------------------------------------|
| EPI_ISL_635032 | 10/18/2020 | 11/13/2020 | Africa / South Africa / KwaZulu-Natal / Ugu           |
| EPI_ISL_635033 | 10/20/2020 | 11/13/2020 | Africa / South Africa / KwaZulu-Natal / uMgungundlovu |
| EPI_ISL_635034 | 10/19/2020 | 11/13/2020 | Africa / South Africa / KwaZulu-Natal / Ugu           |
| EPI_ISL_635035 | 10/20/2020 | 11/13/2020 | Africa / South Africa / KwaZulu-Natal / uMgungundlovu |
| EPI_ISL_635036 | 10/18/2020 | 11/13/2020 | Africa / South Africa / KwaZulu-Natal / Ugu           |
| EPI_ISL_635037 | 10/18/2020 | 11/13/2020 | Africa / South Africa / KwaZulu-Natal / Ugu           |
| EPI_ISL_635038 | 10/18/2020 | 11/13/2020 | Africa / South Africa / KwaZulu-Natal / Ugu           |
| EPI_ISL_635039 | 10/20/2020 | 11/13/2020 | Africa / South Africa / KwaZulu-Natal / Harry Gwala   |
| EPI_ISL_635040 | 10/18/2020 | 11/13/2020 | Africa / South Africa / KwaZulu-Natal / Ugu           |
| EPI_ISL_635041 | 10/19/2020 | 11/13/2020 | Africa / South Africa / KwaZulu-Natal / Umkhanyakude  |
| EPI_ISL_635043 | 10/20/2020 | 11/13/2020 | Africa / South Africa / KwaZulu-Natal / Uthungulu     |
| EPI_ISL_635045 | 10/20/2020 | 11/13/2020 | Africa / South Africa / KwaZulu-Natal / Ugu           |
| EPI_ISL_635046 | 10/20/2020 | 11/13/2020 | Africa / South Africa / KwaZulu-Natal / Ugu           |
| EPI_ISL_635047 | 10/20/2020 | 11/13/2020 | Africa / South Africa / KwaZulu-Natal / Ugu           |
| EPI_ISL_635048 | 10/20/2020 | 11/13/2020 | Africa / South Africa / KwaZulu-Natal / Uthungulu     |
| EPI_ISL_635049 | 10/20/2020 | 11/13/2020 | Africa / South Africa / KwaZulu-Natal / Uthungulu     |
| EPI_ISL_635050 | 10/20/2020 | 11/13/2020 | Africa / South Africa / KwaZulu-Natal / Umkhanyakude  |
| EPI_ISL_635051 | 10/20/2020 | 11/13/2020 | Africa / South Africa / KwaZulu-Natal / Umkhanyakude  |
| EPI_ISL_635052 | 10/18/2020 | 11/13/2020 | Africa / South Africa / KwaZulu-Natal / Umkhanyakude  |
| EPI_ISL_635053 | 10/17/2020 | 11/13/2020 | Africa / South Africa / KwaZulu-Natal / Zululand      |
| EPI_ISL_635054 | 10/19/2020 | 11/13/2020 | Africa / South Africa / KwaZulu-Natal / Harry Gwala   |
| EPI_ISL_635055 | 10/19/2020 | 11/13/2020 | Africa / South Africa / KwaZulu-Natal / Ugu           |
| EPI_ISL_635056 | 10/19/2020 | 11/13/2020 | Africa / South Africa / KwaZulu-Natal / Harry Gwala   |
| EPI_ISL_635057 | 10/19/2020 | 11/13/2020 | Africa / South Africa / KwaZulu-Natal / uMgungundlovu |
| EPI_ISL_635058 | 10/19/2020 | 11/13/2020 | Africa / South Africa / KwaZulu-Natal / uMgungundlovu |
| EPI_ISL_635061 | 11/2/2020  | 11/13/2020 | Africa / Tunisia / Nabeul                             |
| EPI_ISL_635062 | 11/2/2020  | 11/13/2020 | Africa / Tunisia / Tunis                              |
| EPI_ISL_635063 | 10/2/2020  | 11/13/2020 | Europe / Norway / Vestland                            |
| EPI_ISL_635064 | 9/30/2020  | 11/13/2020 | Europe / Norway / Vestland                            |
| EPI_ISL_635065 | 9/30/2020  | 11/13/2020 | Europe / Norway / Vestland                            |
| EPI_ISL_635066 | 10/22/2020 | 11/13/2020 | Europe / Norway / Oslo                                |
| EPI_ISL_635067 | 10/22/2020 | 11/13/2020 | Europe / Norway / Oslo                                |
| EPI_ISL_635068 | 10/14/2020 | 11/13/2020 | Europe / Norway / Troms og Finnmark                   |
| EPI_ISL_635069 | 10/15/2020 | 11/13/2020 | Europe / Norway / Troms og Finnmark                   |
| EPI_ISL_635070 | 10/15/2020 | 11/13/2020 | Europe / Norway / Troms og Finnmark                   |
| EPI_ISL_635071 | 10/12/2020 | 11/13/2020 | Europe / Norway / Troms og Finnmark                   |
| EPI_ISL_635072 | 10/12/2020 | 11/13/2020 | Europe / Norway / Troms og Finnmark                   |
| EPI_ISL_635073 | 10/20/2020 | 11/13/2020 | Europe / Norway / Troms og Finnmark                   |
| EPI_ISL_635074 | 10/26/2020 | 11/13/2020 | Europe / Norway / Oslo                                |
| EPI_ISL_635075 | 10/26/2020 | 11/13/2020 | Europe / Norway / Oslo                                |
| EPI_ISL_635076 | 10/26/2020 | 11/13/2020 | Europe / Norway / Oslo                                |
| EPI_ISL_635077 | 10/27/2020 | 11/13/2020 | Europe / Norway / Oslo                                |
| EPI_ISL_635078 | 10/27/2020 | 11/13/2020 | Europe / Norway / Oslo                                |
| EPI_ISL_635079 | 10/26/2020 | 11/13/2020 | Europe / Norway / Viken                               |
| EPI_ISL_635081 | 10/26/2020 | 11/13/2020 | Europe / Norway / Vestlandet                          |
| EPI_ISL_635085 | 10/22/2020 | 11/13/2020 | Europe / Norway / Oslo                                |
| EPI_ISL_635086 | 10/29/2020 | 11/13/2020 | Europe / Norway / Oslo                                |

|                |            |            |                                        |
|----------------|------------|------------|----------------------------------------|
| EPI_ISL_635087 | 10/29/2020 | 11/13/2020 | Europe / Norway / Oslo                 |
| EPI_ISL_635088 | 10/8/2020  | 11/13/2020 | Europe / Norway / Viken                |
| EPI_ISL_635089 | 10/5/2020  | 11/13/2020 | Europe / Norway / Vestland             |
| EPI_ISL_635090 | 10/19/2020 | 11/13/2020 | Europe / Norway / Vestland             |
| EPI_ISL_635091 | 10/5/2020  | 11/13/2020 | Europe / Norway / Vestland             |
| EPI_ISL_635092 | 9/30/2020  | 11/13/2020 | Europe / Norway / Viken                |
| EPI_ISL_635093 | 9/21/2020  | 11/13/2020 | Europe / Norway / Oslo                 |
| EPI_ISL_635094 | 10/1/2020  | 11/13/2020 | Europe / Norway / Oslo                 |
| EPI_ISL_635095 | 10/4/2020  | 11/13/2020 | Europe / Norway / Oslo                 |
| EPI_ISL_635096 | 10/2/2020  | 11/13/2020 | Europe / Norway / Tr ndelag            |
| EPI_ISL_635097 | 10/3/2020  | 11/13/2020 | Europe / Norway / Agder                |
| EPI_ISL_635098 | 9/30/2020  | 11/13/2020 | Europe / Norway / Vestland             |
| EPI_ISL_635099 | 9/24/2020  | 11/13/2020 | Europe / Norway / Viken                |
| EPI_ISL_635100 | 10/18/2020 | 11/13/2020 | Europe / Norway / Tr ndelag            |
| EPI_ISL_635101 | 10/18/2020 | 11/13/2020 | Europe / Norway / Viken                |
| EPI_ISL_635102 | 10/19/2020 | 11/13/2020 | Europe / Norway / Viken                |
| EPI_ISL_635103 | 10/18/2020 | 11/13/2020 | Europe / Norway / Vestfold og Telemark |
| EPI_ISL_635104 | 9/3/2020   | 11/13/2020 | Europe / Norway / Viken                |
| EPI_ISL_635105 | 8/18/2020  | 11/13/2020 | Europe / Norway / Vestfold og Telemark |
| EPI_ISL_635106 | 8/18/2020  | 11/13/2020 | Europe / Norway / Vestfold og Telemark |
| EPI_ISL_635107 | 8/28/2020  | 11/13/2020 | Europe / Norway / Viken                |
| EPI_ISL_635108 | 9/9/2020   | 11/13/2020 | Europe / Norway / Viken                |
| EPI_ISL_635109 | 9/9/2020   | 11/13/2020 | Europe / Norway / Viken                |
| EPI_ISL_635110 | 9/25/2020  | 11/13/2020 | Europe / Norway / Tr ndelag            |
| EPI_ISL_635111 | 9/25/2020  | 11/13/2020 | Europe / Norway / Tr ndelag            |
| EPI_ISL_635112 | 9/21/2020  | 11/13/2020 | Europe / Norway / Vestfold og Telemark |
| EPI_ISL_635113 | 8/6/2020   | 11/13/2020 | Europe / Norway / Troms og Finnmark    |
| EPI_ISL_635114 | 8/6/2020   | 11/13/2020 | Europe / Norway / Troms og Finnmark    |
| EPI_ISL_635115 | 7/31/2020  | 11/13/2020 | Europe / Norway / Troms og Finnmark    |
| EPI_ISL_635116 | 5/22/2020  | 11/13/2020 | Europe / Norway / Viken                |
| EPI_ISL_635117 | 7/31/2020  | 11/13/2020 | Europe / Norway / Troms og Finnmark    |
| EPI_ISL_635118 | 7/31/2020  | 11/13/2020 | Europe / Norway / Troms og Finnmark    |
| EPI_ISL_635119 | 9/18/2020  | 11/13/2020 | Europe / Norway / Viken                |
| EPI_ISL_635120 | 9/29/2020  | 11/13/2020 | Europe / Norway / Rogaland             |
| EPI_ISL_635121 | 9/28/2020  | 11/13/2020 | Europe / Norway / Agder                |
| EPI_ISL_635122 | 9/29/2020  | 11/13/2020 | Europe / Norway / Agder                |
| EPI_ISL_635123 | 9/28/2020  | 11/13/2020 | Europe / Norway / Agder                |
| EPI_ISL_635124 | 10/2/2020  | 11/13/2020 | Europe / Norway / Innlandet            |
| EPI_ISL_635125 | 10/2/2020  | 11/13/2020 | Europe / Norway / Innlandet            |
| EPI_ISL_635126 | 9/30/2020  | 11/13/2020 | Europe / Norway / Tr ndelag            |
| EPI_ISL_635127 | 9/29/2020  | 11/13/2020 | Europe / Norway / Vestland             |
| EPI_ISL_635128 | 10/5/2020  | 11/13/2020 | Europe / Norway / Vestland             |
| EPI_ISL_635129 | 10/2/2020  | 11/13/2020 | Europe / Norway / Oslo                 |
| EPI_ISL_635130 | 9/24/2020  | 11/13/2020 | Europe / Norway / Innlandet            |
| EPI_ISL_635131 | 9/24/2020  | 11/13/2020 | Europe / Norway / Innlandet            |
| EPI_ISL_635132 | 9/25/2020  | 11/13/2020 | Europe / Norway / Vestfold og Telemark |
| EPI_ISL_635133 | 9/21/2020  | 11/13/2020 | Europe / Norway / Vestlandet           |

|                |            |            |                                        |
|----------------|------------|------------|----------------------------------------|
| EPI_ISL_635134 | 10/2/2020  | 11/13/2020 | Europe / Norway / Viken                |
| EPI_ISL_635135 | 9/30/2020  | 11/13/2020 | Europe / Norway / TrÅ,ndelag           |
| EPI_ISL_635136 | 9/30/2020  | 11/13/2020 | Europe / Norway / TrÅ,ndelag           |
| EPI_ISL_635137 | 10/1/2020  | 11/13/2020 | Europe / Norway / Troms og Finnmark    |
| EPI_ISL_635138 | 10/2/2020  | 11/13/2020 | Europe / Norway / Rogaland             |
| EPI_ISL_635139 | 10/7/2020  | 11/13/2020 | Europe / Norway / Vestfold og Telemark |
| EPI_ISL_635140 | 10/10/2020 | 11/13/2020 | Europe / Norway / Vestfold og Telemark |
| EPI_ISL_635141 | 10/12/2020 | 11/13/2020 | Europe / Norway / Troms og Finnmark    |
| EPI_ISL_635142 | 10/12/2020 | 11/13/2020 | Europe / Norway / Nordland             |
| EPI_ISL_635143 | 10/10/2020 | 11/13/2020 | Europe / Norway / Agder                |
| EPI_ISL_635144 | 10/6/2020  | 11/13/2020 | Europe / Norway / Rogaland             |
| EPI_ISL_635145 | 10/12/2020 | 11/13/2020 | Europe / Norway / Oslo                 |
| EPI_ISL_635146 | 8/10/2020  | 11/13/2020 | Europe / Norway / Rogaland             |
| EPI_ISL_635147 | 7/31/2020  | 11/13/2020 | Europe / Norway / Troms og Finnmark    |
| EPI_ISL_635148 | 8/1/2020   | 11/13/2020 | Europe / Norway / Troms og Finnmark    |
| EPI_ISL_635149 | 8/31/2020  | 11/13/2020 | Europe / Norway / Viken                |
| EPI_ISL_635150 | 9/2/2020   | 11/13/2020 | Europe / Norway / Viken                |
| EPI_ISL_635151 | 9/4/2020   | 11/13/2020 | Europe / Norway / Viken                |
| EPI_ISL_635152 | 9/8/2020   | 11/13/2020 | Europe / Norway / Viken                |
| EPI_ISL_635153 | 10/7/2020  | 11/13/2020 | Europe / Norway / Vestfold og Telemark |
| EPI_ISL_635154 | 10/5/2020  | 11/13/2020 | Europe / Norway / Vestfold og Telemark |
| EPI_ISL_635155 | 9/30/2020  | 11/13/2020 | Europe / Norway / Oslo                 |
| EPI_ISL_635156 | 7/31/2020  | 11/13/2020 | Europe / Norway / Troms og Finnmark    |
| EPI_ISL_635157 | 7/31/2020  | 11/13/2020 | Europe / Norway / Troms og Finnmark    |
| EPI_ISL_635158 | 9/28/2020  | 11/13/2020 | Europe / Norway / Vestfold og Telemark |
| EPI_ISL_635159 | 10/4/2020  | 11/13/2020 | Europe / Norway / Viken                |
| EPI_ISL_635160 | 10/12/2020 | 11/13/2020 | Europe / Norway / Troms og Finnmark    |
| EPI_ISL_635161 | 10/18/2020 | 11/13/2020 | Europe / Norway / Agder                |
| EPI_ISL_635162 | 10/12/2020 | 11/13/2020 | Europe / Norway / Vestfold og Telemark |
| EPI_ISL_635163 | 10/12/2020 | 11/13/2020 | Europe / Norway / Troms og Finnmark    |
| EPI_ISL_635164 | 10/18/2020 | 11/13/2020 | Europe / Norway / Viken                |
| EPI_ISL_635165 | 10/18/2020 | 11/13/2020 | Europe / Norway / TrÅ,ndelag           |
| EPI_ISL_635166 | 10/9/2020  | 11/13/2020 | Europe / Norway / Rogaland             |
| EPI_ISL_635167 | 10/12/2020 | 11/13/2020 | Europe / Norway / Vestland             |
| EPI_ISL_635168 | 10/15/2020 | 11/13/2020 | Europe / Norway / Vestfold og Telemark |
| EPI_ISL_635169 | 10/18/2020 | 11/13/2020 | Europe / Norway / Viken                |
| EPI_ISL_635170 | 10/7/2020  | 11/13/2020 | Europe / Norway / Vestland             |
| EPI_ISL_635171 | 10/7/2020  | 11/13/2020 | Europe / Norway / Vestfold og Telemark |
| EPI_ISL_635172 | 10/4/2020  | 11/13/2020 | Europe / Norway / Oslo                 |
| EPI_ISL_635173 | 10/6/2020  | 11/13/2020 | Europe / Norway / Viken                |
| EPI_ISL_635174 | 10/18/2020 | 11/13/2020 | Europe / Norway / Nordland             |
| EPI_ISL_635175 | 10/18/2020 | 11/13/2020 | Europe / Norway / Vestland             |
| EPI_ISL_635176 | 10/6/2020  | 11/13/2020 | Europe / Norway / Vestland             |
| EPI_ISL_635177 | 10/2/2020  | 11/13/2020 | Europe / Norway / Vestland             |
| EPI_ISL_635178 | 10/22/2020 | 11/13/2020 | Europe / Norway / Oslo                 |
| EPI_ISL_635179 | 10/14/2020 | 11/13/2020 | Europe / Norway / Troms og Finnmark    |
| EPI_ISL_635180 | 10/16/2020 | 11/13/2020 | Europe / Norway / Troms og Finnmark    |



|                |            |            |                                        |
|----------------|------------|------------|----------------------------------------|
| EPI_ISL_635181 | 10/19/2020 | 11/13/2020 | Europe / Norway / Troms og Finnmark    |
| EPI_ISL_635182 | 10/12/2020 | 11/13/2020 | Europe / Norway / Nordland             |
| EPI_ISL_635183 | 10/6/2020  | 11/13/2020 | Europe / Norway / Innlandet            |
| EPI_ISL_635184 | 9/23/2020  | 11/13/2020 | Europe / Norway / Rogaland             |
| EPI_ISL_635185 | 9/20/2020  | 11/13/2020 | Europe / Norway / Viken                |
| EPI_ISL_635186 | 7/31/2020  | 11/13/2020 | Europe / Norway / Troms og Finnmark    |
| EPI_ISL_635187 | 9/22/2020  | 11/13/2020 | Europe / Norway / Oslo                 |
| EPI_ISL_635188 | 9/25/2020  | 11/13/2020 | Europe / Norway / Oslo                 |
| EPI_ISL_635189 | 10/11/2020 | 11/13/2020 | Europe / Norway / Agder                |
| EPI_ISL_635190 | 10/6/2020  | 11/13/2020 | Europe / Norway / Troms og Finnmark    |
| EPI_ISL_635191 | 10/12/2020 | 11/13/2020 | Europe / Norway / Vestfold og Telemark |
| EPI_ISL_635192 | 10/17/2020 | 11/13/2020 | Europe / Norway / Viken                |
| EPI_ISL_635193 | 10/17/2020 | 11/13/2020 | Europe / Norway / Viken                |
| EPI_ISL_635194 | 10/19/2020 | 11/13/2020 | Europe / Norway / Innlandet            |
| EPI_ISL_635195 | 10/15/2020 | 11/13/2020 | Europe / Norway / Vestfold og Telemark |
| EPI_ISL_635196 | 10/12/2020 | 11/13/2020 | Europe / Norway / Rogaland             |
| EPI_ISL_635197 | 10/6/2020  | 11/13/2020 | Europe / Norway / Oslo                 |
| EPI_ISL_635198 | 10/19/2020 | 11/13/2020 | Europe / Norway / Troms og Finnmark    |
| EPI_ISL_635200 | 3/5/2020   | 11/13/2020 | Europe / Slovenia                      |
| EPI_ISL_635201 | 3/7/2020   | 11/13/2020 | Europe / Slovenia                      |
| EPI_ISL_635203 | 3/30/2020  | 11/13/2020 | Europe / Slovenia                      |
| EPI_ISL_635204 | 3/9/2020   | 11/13/2020 | Europe / Slovenia                      |
| EPI_ISL_635206 | 3/4/2020   | 11/13/2020 | Europe / Slovenia                      |
| EPI_ISL_635207 | 3/5/2020   | 11/13/2020 | Europe / Slovenia                      |
| EPI_ISL_635208 | 3/7/2020   | 11/13/2020 | Europe / Slovenia                      |
| EPI_ISL_635209 | 3/8/2020   | 11/13/2020 | Europe / Slovenia                      |
| EPI_ISL_635210 | 3/8/2020   | 11/13/2020 | Europe / Slovenia                      |
| EPI_ISL_635211 | 3/8/2020   | 11/13/2020 | Europe / Slovenia                      |
| EPI_ISL_635212 | 3/8/2020   | 11/13/2020 | Europe / Slovenia                      |
| EPI_ISL_635213 | 3/9/2020   | 11/13/2020 | Europe / Slovenia                      |
| EPI_ISL_635214 | 3/9/2020   | 11/13/2020 | Europe / Slovenia                      |
| EPI_ISL_635215 | 3/9/2020   | 11/13/2020 | Europe / Slovenia                      |
| EPI_ISL_635216 | 3/9/2020   | 11/13/2020 | Europe / Slovenia                      |
| EPI_ISL_635217 | 3/9/2020   | 11/13/2020 | Europe / Slovenia                      |
| EPI_ISL_635218 | 3/9/2020   | 11/13/2020 | Europe / Slovenia                      |
| EPI_ISL_635219 | 3/10/2020  | 11/13/2020 | Europe / Slovenia                      |
| EPI_ISL_635220 | 3/18/2020  | 11/13/2020 | Europe / Slovenia                      |
| EPI_ISL_635221 | 3/11/2020  | 11/13/2020 | Europe / Slovenia                      |
| EPI_ISL_635222 | 3/11/2020  | 11/13/2020 | Europe / Slovenia                      |
| EPI_ISL_635223 | 3/11/2020  | 11/13/2020 | Europe / Slovenia                      |
| EPI_ISL_635224 | 3/11/2020  | 11/13/2020 | Europe / Slovenia                      |
| EPI_ISL_635225 | 3/11/2020  | 11/13/2020 | Europe / Slovenia                      |
| EPI_ISL_635226 | 3/11/2020  | 11/13/2020 | Europe / Slovenia                      |
| EPI_ISL_635227 | 3/11/2020  | 11/13/2020 | Europe / Slovenia                      |
| EPI_ISL_635228 | 3/12/2020  | 11/13/2020 | Europe / Slovenia                      |
| EPI_ISL_635229 | 3/12/2020  | 11/13/2020 | Europe / Slovenia                      |
| EPI_ISL_635230 | 3/12/2020  | 11/13/2020 | Europe / Slovenia                      |



|                |           |            |                                              |
|----------------|-----------|------------|----------------------------------------------|
| EPI_ISL_635282 | 3/27/2020 | 11/13/2020 | Europe / Slovenia                            |
| EPI_ISL_635283 | 4/1/2020  | 11/13/2020 | Europe / Slovenia                            |
| EPI_ISL_635284 | 4/1/2020  | 11/13/2020 | Europe / Slovenia                            |
| EPI_ISL_635285 | 4/2/2020  | 11/13/2020 | Europe / Slovenia                            |
| EPI_ISL_635286 | 4/3/2020  | 11/13/2020 | Europe / Slovenia                            |
| EPI_ISL_635287 | 3/27/2020 | 11/13/2020 | Europe / Slovenia                            |
| EPI_ISL_635288 | 3/23/2020 | 11/13/2020 | Europe / Slovenia                            |
| EPI_ISL_635289 | 4/3/2020  | 11/13/2020 | Europe / Slovenia                            |
| EPI_ISL_635290 | 3/27/2020 | 11/13/2020 | Europe / Slovenia                            |
| EPI_ISL_635291 | 3/27/2020 | 11/13/2020 | Europe / Slovenia                            |
| EPI_ISL_635292 | 4/6/2020  | 11/13/2020 | Europe / Slovenia                            |
| EPI_ISL_635293 | 3/27/2020 | 11/13/2020 | Europe / Slovenia                            |
| EPI_ISL_635294 | 4/7/2020  | 11/13/2020 | Europe / Slovenia                            |
| EPI_ISL_635295 | 4/7/2020  | 11/13/2020 | Europe / Slovenia                            |
| EPI_ISL_635296 | 4/8/2020  | 11/13/2020 | Europe / Slovenia                            |
| EPI_ISL_635297 | 4/9/2020  | 11/13/2020 | Europe / Slovenia                            |
| EPI_ISL_635299 | 4/14/2020 | 11/13/2020 | Europe / Slovenia                            |
| EPI_ISL_635300 | 5/14/2020 | 11/13/2020 | North America / USA / California / San Diego |
| EPI_ISL_635301 | 5/8/2020  | 11/13/2020 | North America / USA / California / San Diego |
| EPI_ISL_635302 | 5/12/2020 | 11/13/2020 | North America / USA / California / San Diego |
| EPI_ISL_635303 | 5/14/2020 | 11/13/2020 | North America / USA / California / San Diego |
| EPI_ISL_635304 | 5/14/2020 | 11/13/2020 | North America / USA / California / San Diego |
| EPI_ISL_635305 | 5/14/2020 | 11/13/2020 | North America / USA / California / San Diego |
| EPI_ISL_635306 | 5/9/2020  | 11/13/2020 | North America / USA / California / San Diego |
| EPI_ISL_635308 | 5/9/2020  | 11/13/2020 | North America / USA / California / San Diego |
| EPI_ISL_635309 | 5/7/2020  | 11/13/2020 | North America / USA / California / Imperial  |
| EPI_ISL_635310 | 5/9/2020  | 11/13/2020 | North America / USA / California / San Diego |
| EPI_ISL_635311 | 5/7/2020  | 11/13/2020 | North America / USA / California / San Diego |
| EPI_ISL_635312 | 5/7/2020  | 11/13/2020 | North America / USA / California / Imperial  |
| EPI_ISL_635313 | 5/9/2020  | 11/13/2020 | North America / USA / California / San Diego |
| EPI_ISL_635314 | 5/8/2020  | 11/13/2020 | North America / USA / California / San Diego |
| EPI_ISL_635315 | 5/9/2020  | 11/13/2020 | North America / USA / California / San Diego |
| EPI_ISL_635316 | 5/15/2020 | 11/13/2020 | North America / USA / California / San Diego |
| EPI_ISL_635317 | 5/11/2020 | 11/13/2020 | North America / USA / California / San Diego |
| EPI_ISL_635318 | 5/11/2020 | 11/13/2020 | North America / USA / California / San Diego |
| EPI_ISL_635319 | 5/8/2020  | 11/13/2020 | North America / USA / California / San Diego |
| EPI_ISL_635320 | 5/7/2020  | 11/13/2020 | North America / USA / California / San Diego |
| EPI_ISL_635321 | 5/7/2020  | 11/13/2020 | North America / USA / California / San Diego |
| EPI_ISL_635322 | 4/22/2020 | 11/13/2020 | North America / USA / California / San Diego |
| EPI_ISL_635323 | 5/11/2020 | 11/13/2020 | North America / USA / California / San Diego |
| EPI_ISL_635324 | 5/11/2020 | 11/13/2020 | North America / USA / California / San Diego |
| EPI_ISL_635325 | 4/22/2020 | 11/13/2020 | North America / USA / California / San Diego |
| EPI_ISL_635326 | 4/22/2020 | 11/13/2020 | North America / USA / California / San Diego |
| EPI_ISL_635327 | 4/22/2020 | 11/13/2020 | North America / USA / California / San Diego |
| EPI_ISL_635328 | 5/8/2020  | 11/13/2020 | North America / USA / California / San Diego |
| EPI_ISL_635329 | 4/22/2020 | 11/13/2020 | North America / USA / California / San Diego |
| EPI_ISL_635330 | 4/22/2020 | 11/13/2020 | North America / USA / California / San Diego |



































|                |           |            |                                                         |
|----------------|-----------|------------|---------------------------------------------------------|
| EPI_ISL_636105 | 6/24/2020 | 11/13/2020 | North America / USA / California / San Diego            |
| EPI_ISL_636106 | 6/24/2020 | 11/13/2020 | North America / USA / California / San Diego            |
| EPI_ISL_636107 | 6/25/2020 | 11/13/2020 | North America / USA / California / Santa Barbara        |
| EPI_ISL_636108 | 6/25/2020 | 11/13/2020 | North America / USA / California / San Diego            |
| EPI_ISL_636109 | 6/24/2020 | 11/13/2020 | North America / USA / California / San Diego            |
| EPI_ISL_636110 | 6/24/2020 | 11/13/2020 | North America / USA / California / San Diego            |
| EPI_ISL_636111 | 6/24/2020 | 11/13/2020 | North America / USA / California / San Diego            |
| EPI_ISL_636112 | 6/24/2020 | 11/13/2020 | North America / USA / California / San Diego            |
| EPI_ISL_636113 | 6/3/2020  | 11/13/2020 | North America / Mexico / Baja California / Tijuana      |
| EPI_ISL_636114 | 6/4/2020  | 11/13/2020 | North America / Mexico / Baja California / Tijuana      |
| EPI_ISL_636115 | 5/29/2020 | 11/13/2020 | North America / Mexico / Baja California / Tijuana      |
| EPI_ISL_636116 | 6/12/2020 | 11/13/2020 | North America / Mexico / Sonora / San Luis Rio Colorado |
| EPI_ISL_636117 | 6/12/2020 | 11/13/2020 | North America / Mexico / Baja California / Mexicali     |
| EPI_ISL_636118 | 5/27/2020 | 11/13/2020 | North America / Mexico / Baja California / Tijuana      |
| EPI_ISL_636119 | 5/28/2020 | 11/13/2020 | North America / Mexico / Baja California / Tijuana      |
| EPI_ISL_636121 | 9/25/2020 | 11/13/2020 | North America / USA / California / San Diego            |
| EPI_ISL_636122 | 9/28/2020 | 11/13/2020 | North America / USA / California / San Diego            |
| EPI_ISL_636123 | 9/28/2020 | 11/13/2020 | North America / USA / California / San Diego            |
| EPI_ISL_636124 | 9/24/2020 | 11/13/2020 | North America / USA / California / San Diego            |
| EPI_ISL_636125 | 9/17/2020 | 11/13/2020 | North America / USA / California / San Diego            |
| EPI_ISL_636126 | 9/29/2020 | 11/13/2020 | North America / USA / California / San Diego            |
| EPI_ISL_636127 | 9/28/2020 | 11/13/2020 | North America / USA / California / San Diego            |
| EPI_ISL_636128 | 9/21/2020 | 11/13/2020 | North America / USA / California / San Diego            |
| EPI_ISL_636129 | 9/20/2020 | 11/13/2020 | North America / USA / California / San Diego            |
| EPI_ISL_636130 | 9/25/2020 | 11/13/2020 | North America / USA / California / San Diego            |
| EPI_ISL_636131 | 6/7/2020  | 11/13/2020 | North America / USA / California / San Diego            |
| EPI_ISL_636132 | 6/4/2020  | 11/13/2020 | North America / USA / California / San Diego            |
| EPI_ISL_636133 | 5/27/2020 | 11/13/2020 | North America / USA / California / San Diego            |
| EPI_ISL_636134 | 9/29/2020 | 11/13/2020 | North America / USA / California / San Diego            |
| EPI_ISL_636135 | 9/24/2020 | 11/13/2020 | North America / USA / California / San Diego            |
| EPI_ISL_636136 | 9/23/2020 | 11/13/2020 | North America / USA / California / San Diego            |
| EPI_ISL_636137 | 6/11/2020 | 11/13/2020 | North America / USA / California / San Diego            |
| EPI_ISL_636138 | 6/3/2020  | 11/13/2020 | North America / USA / California / San Diego            |
| EPI_ISL_636139 | 5/27/2020 | 11/13/2020 | North America / USA / California / San Diego            |
| EPI_ISL_636140 | 9/29/2020 | 11/13/2020 | North America / USA / California / San Diego            |
| EPI_ISL_636141 | 9/28/2020 | 11/13/2020 | North America / USA / California / San Diego            |
| EPI_ISL_636143 | 5/28/2020 | 11/13/2020 | North America / USA / California / San Diego            |
| EPI_ISL_636144 | 9/28/2020 | 11/13/2020 | North America / USA / California / San Diego            |
| EPI_ISL_636145 | 9/23/2020 | 11/13/2020 | North America / USA / California / San Diego            |
| EPI_ISL_636146 | 9/25/2020 | 11/13/2020 | North America / USA / California / San Diego            |
| EPI_ISL_636147 | 9/28/2020 | 11/13/2020 | North America / USA / California / San Diego            |
| EPI_ISL_636148 | 9/23/2020 | 11/13/2020 | North America / USA / California / San Diego            |
| EPI_ISL_636149 | 6/5/2020  | 11/13/2020 | North America / USA / California / San Diego            |
| EPI_ISL_636150 | 9/28/2020 | 11/13/2020 | North America / USA / California / San Diego            |
| EPI_ISL_636151 | 9/23/2020 | 11/13/2020 | North America / USA / California / San Diego            |
| EPI_ISL_636152 | 6/5/2020  | 11/13/2020 | North America / USA / California / San Diego            |
| EPI_ISL_636153 | 9/28/2020 | 11/13/2020 | North America / USA / California / San Diego            |















|                |            |                                                                      |
|----------------|------------|----------------------------------------------------------------------|
| EPI_ISL_636447 | 10/3/2020  | 11/13/2020 Asia / Jordan / Amman                                     |
| EPI_ISL_636448 | 10/3/2020  | 11/13/2020 Asia / Jordan / Amman                                     |
| EPI_ISL_636449 | 10/3/2020  | 11/13/2020 Asia / Jordan / Amman                                     |
| EPI_ISL_636450 | 10/3/2020  | 11/13/2020 Asia / Jordan / Amman                                     |
| EPI_ISL_636451 | 10/3/2020  | 11/13/2020 Asia / Jordan / Amman                                     |
| EPI_ISL_636452 | 10/3/2020  | 11/13/2020 Asia / Jordan / Amman                                     |
| EPI_ISL_636453 | 10/3/2020  | 11/13/2020 Asia / Jordan / Amman                                     |
| EPI_ISL_636454 | 10/3/2020  | 11/13/2020 Asia / Jordan / Amman                                     |
| EPI_ISL_636455 | 10/3/2020  | 11/13/2020 Asia / Jordan / Amman                                     |
| EPI_ISL_636456 | 10/3/2020  | 11/13/2020 Asia / Jordan / Amman                                     |
| EPI_ISL_636457 | 10/3/2020  | 11/13/2020 Asia / Jordan / Amman                                     |
| EPI_ISL_636458 | 10/3/2020  | 11/13/2020 Asia / Jordan / Amman                                     |
| EPI_ISL_636462 | 4/15/2020  | 11/13/2020 Europe / Italy / Veneto / Padova                          |
| EPI_ISL_636463 | 4/18/2020  | 11/13/2020 Europe / Italy / Veneto / Padova                          |
| EPI_ISL_636464 | 3/21/2020  | 11/13/2020 Europe / Italy / Veneto / Padova                          |
| EPI_ISL_636467 | 3/24/2020  | 11/13/2020 Europe / Italy / Veneto / Padova                          |
| EPI_ISL_636468 | 3/24/2020  | 11/13/2020 Europe / Italy / Veneto / Padova                          |
| EPI_ISL_636469 | 3/24/2020  | 11/13/2020 Europe / Italy / Veneto / Padova                          |
| EPI_ISL_636470 | 3/24/2020  | 11/13/2020 Europe / Italy / Veneto / Padova                          |
| EPI_ISL_636471 | 3/24/2020  | 11/13/2020 Europe / Italy / Veneto / Padova                          |
| EPI_ISL_636472 | 3/22/2020  | 11/13/2020 Europe / Italy / Veneto / Padova                          |
| EPI_ISL_636473 | 4/6/2020   | 11/13/2020 Europe / Italy / Veneto / Padova                          |
| EPI_ISL_636474 | 3/22/2020  | 11/13/2020 Europe / Italy / Veneto / Padova                          |
| EPI_ISL_636475 | 3/22/2020  | 11/13/2020 Europe / Italy / Veneto / Padova                          |
| EPI_ISL_636476 | 5/1/2020   | 11/13/2020 Europe / France / Auvergne-Rhone-Alpes / Lyon             |
| EPI_ISL_636477 | 5/1/2020   | 11/13/2020 Europe / France / Auvergne-Rhone-Alpes / Lyon             |
| EPI_ISL_636478 | 5/3/2020   | 11/13/2020 Europe / France / Auvergne-Rhone-Alpes / Bourgoin-Jallieu |
| EPI_ISL_636479 | 5/4/2020   | 11/13/2020 Europe / France / Auvergne-Rhone-Alpes / Lyon             |
| EPI_ISL_636480 | 5/6/2020   | 11/13/2020 Europe / France / Auvergne-Rhone-Alpes / Bourgoin-Jallieu |
| EPI_ISL_636481 | 5/6/2020   | 11/13/2020 Europe / France / Auvergne-Rhone-Alpes / Bourg-en-Bresse  |
| EPI_ISL_636482 | 5/11/2020  | 11/13/2020 Europe / France / Auvergne-Rhone-Alpes / Bourgoin-Jallieu |
| EPI_ISL_636483 | 5/11/2020  | 11/13/2020 Europe / France / Auvergne-Rhone-Alpes / Bourgoin-Jallieu |
| EPI_ISL_636484 | 5/11/2020  | 11/13/2020 Europe / France / Auvergne-Rhone-Alpes / Lyon             |
| EPI_ISL_636485 | 5/12/2020  | 11/13/2020 Europe / France / Auvergne-Rhone-Alpes / Lyon             |
| EPI_ISL_636486 | 5/13/2020  | 11/13/2020 Europe / France / Auvergne-Rhone-Alpes / Bourgoin-Jallieu |
| EPI_ISL_636487 | 5/3/2020   | 11/13/2020 Europe / France / Auvergne-Rhone-Alpes / Lyon             |
| EPI_ISL_636488 | 5/27/2020  | 11/13/2020 Europe / Italy / Veneto / Verona                          |
| EPI_ISL_636491 | 10/14/2020 | 11/13/2020 Europe / Netherlands / Noord-Holland                      |
| EPI_ISL_636492 | 3/10/2020  | 11/13/2020 South America / Curacao                                   |
| EPI_ISL_636493 | 3/10/2020  | 11/13/2020 South America / Curacao                                   |
| EPI_ISL_636494 | 3/10/2020  | 11/13/2020 Europe / Netherlands / Gelderland                         |
| EPI_ISL_636495 | 3/5/2020   | 11/13/2020 Europe / Netherlands / Gelderland                         |
| EPI_ISL_636496 | 3/20/2020  | 11/13/2020 Europe / Netherlands / Gelderland                         |
| EPI_ISL_636497 | 3/20/2020  | 11/13/2020 Europe / Netherlands / Gelderland                         |
| EPI_ISL_636498 | 3/21/2020  | 11/13/2020 Europe / Netherlands / Gelderland                         |
| EPI_ISL_636499 | 3/22/2020  | 11/13/2020 Europe / Netherlands / Gelderland                         |
| EPI_ISL_636500 | 3/23/2020  | 11/13/2020 Europe / Netherlands / Gelderland                         |

|                |            |            |                                      |
|----------------|------------|------------|--------------------------------------|
| EPI_ISL_636501 | 3/23/2020  | 11/13/2020 | Europe / Netherlands / Gelderland    |
| EPI_ISL_636502 | 3/23/2020  | 11/13/2020 | Europe / Netherlands / Gelderland    |
| EPI_ISL_636503 | 4/8/2020   | 11/13/2020 | Europe / Netherlands / Limburg       |
| EPI_ISL_636504 | 2/27/2020  | 11/13/2020 | Europe / Netherlands / Noord-Brabant |
| EPI_ISL_636505 | 2020       | 11/13/2020 | Europe / Netherlands / Noord-Brabant |
| EPI_ISL_636506 | 3/4/2020   | 11/13/2020 | Europe / Netherlands / Noord-Brabant |
| EPI_ISL_636507 | 3/10/2020  | 11/13/2020 | Europe / Netherlands / Noord-Brabant |
| EPI_ISL_636508 | 2020       | 11/13/2020 | Europe / Netherlands / Noord-Brabant |
| EPI_ISL_636509 | 2020       | 11/13/2020 | Europe / Netherlands / Noord-Brabant |
| EPI_ISL_636510 | 2020       | 11/13/2020 | Europe / Netherlands / Noord-Holland |
| EPI_ISL_636511 | 3/3/2020   | 11/13/2020 | Europe / Netherlands / Utrecht       |
| EPI_ISL_636512 | 2020       | 11/13/2020 | Europe / Netherlands / Zuid-Holland  |
| EPI_ISL_636513 | 3/20/2020  | 11/13/2020 | South America / Aruba                |
| EPI_ISL_636514 | 8/4/2020   | 11/13/2020 | South America / Aruba                |
| EPI_ISL_636515 | 8/5/2020   | 11/13/2020 | South America / Aruba                |
| EPI_ISL_636516 | 8/6/2020   | 11/13/2020 | South America / Aruba                |
| EPI_ISL_636517 | 8/7/2020   | 11/13/2020 | South America / Aruba                |
| EPI_ISL_636518 | 8/25/2020  | 11/13/2020 | South America / Aruba                |
| EPI_ISL_636519 | 8/11/2020  | 11/13/2020 | South America / Curacao              |
| EPI_ISL_636520 | 8/11/2020  | 11/13/2020 | South America / Curacao              |
| EPI_ISL_636521 | 8/11/2020  | 11/13/2020 | South America / Curacao              |
| EPI_ISL_636522 | 2020       | 11/13/2020 | Europe / Netherlands / Flevoland     |
| EPI_ISL_636523 | 2020       | 11/13/2020 | Europe / Netherlands / Flevoland     |
| EPI_ISL_636524 | 2020       | 11/13/2020 | Europe / Netherlands / Flevoland     |
| EPI_ISL_636525 | 4/30/2020  | 11/13/2020 | Europe / Netherlands / Flevoland     |
| EPI_ISL_636526 | 4/23/2020  | 11/13/2020 | Europe / Netherlands / Gelderland    |
| EPI_ISL_636527 | 2020       | 11/13/2020 | Europe / Netherlands / Gelderland    |
| EPI_ISL_636528 | 3/12/2020  | 11/13/2020 | Europe / Netherlands / Gelderland    |
| EPI_ISL_636529 | 3/14/2020  | 11/13/2020 | Europe / Netherlands / Gelderland    |
| EPI_ISL_636530 | 3/14/2020  | 11/13/2020 | Europe / Netherlands / Gelderland    |
| EPI_ISL_636531 | 3/18/2020  | 11/13/2020 | Europe / Netherlands / Gelderland    |
| EPI_ISL_636532 | 3/20/2020  | 11/13/2020 | Europe / Netherlands / Gelderland    |
| EPI_ISL_636533 | 9/23/2020  | 11/13/2020 | Europe / Netherlands / Gelderland    |
| EPI_ISL_636534 | 10/1/2020  | 11/13/2020 | Europe / Netherlands / Gelderland    |
| EPI_ISL_636535 | 10/1/2020  | 11/13/2020 | Europe / Netherlands / Gelderland    |
| EPI_ISL_636536 | 10/9/2020  | 11/13/2020 | Europe / Netherlands / Gelderland    |
| EPI_ISL_636537 | 10/20/2020 | 11/13/2020 | Europe / Netherlands / Gelderland    |
| EPI_ISL_636538 | 10/8/2020  | 11/13/2020 | Europe / Netherlands / Gelderland    |
| EPI_ISL_636539 | 3/13/2020  | 11/13/2020 | Europe / Netherlands / Limburg       |
| EPI_ISL_636540 | 3/23/2020  | 11/13/2020 | Europe / Netherlands / Limburg       |
| EPI_ISL_636541 | 3/23/2020  | 11/13/2020 | Europe / Netherlands / Limburg       |
| EPI_ISL_636542 | 3/31/2020  | 11/13/2020 | Europe / Netherlands / Limburg       |
| EPI_ISL_636543 | 4/30/2020  | 11/13/2020 | Europe / Netherlands / Limburg       |
| EPI_ISL_636544 | 4/15/2020  | 11/13/2020 | Europe / Netherlands / Limburg       |
| EPI_ISL_636545 | 2020       | 11/13/2020 | Europe / Netherlands / Limburg       |
| EPI_ISL_636546 | 3/11/2020  | 11/13/2020 | Europe / Netherlands / Noord-Brabant |
| EPI_ISL_636547 | 4/14/2020  | 11/13/2020 | Europe / Netherlands / Noord-Brabant |

|                |            |            |                                      |
|----------------|------------|------------|--------------------------------------|
| EPI_ISL_636548 | 9/9/2020   | 11/13/2020 | Europe / Netherlands / Noord-Brabant |
| EPI_ISL_636549 | 9/21/2020  | 11/13/2020 | Europe / Netherlands / Noord-Brabant |
| EPI_ISL_636550 | 10/16/2020 | 11/13/2020 | Europe / Netherlands / Noord-Brabant |
| EPI_ISL_636551 | 10/21/2020 | 11/13/2020 | Europe / Netherlands / Noord-Brabant |
| EPI_ISL_636552 | 3/4/2020   | 11/13/2020 | Europe / Netherlands / Noord-Brabant |
| EPI_ISL_636553 | 3/11/2020  | 11/13/2020 | Europe / Netherlands / Noord-Brabant |
| EPI_ISL_636554 | 4/14/2020  | 11/13/2020 | Europe / Netherlands / Noord-Brabant |
| EPI_ISL_636555 | 4/21/2020  | 11/13/2020 | Europe / Netherlands / Noord-Brabant |
| EPI_ISL_636556 | 6/13/2020  | 11/13/2020 | Europe / Netherlands / Noord-Brabant |
| EPI_ISL_636557 | 6/23/2020  | 11/13/2020 | Europe / Netherlands / Noord-Brabant |
| EPI_ISL_636558 | 6/15/2020  | 11/13/2020 | Europe / Netherlands / Noord-Brabant |
| EPI_ISL_636559 | 10/19/2020 | 11/13/2020 | Europe / Netherlands / Noord-Brabant |
| EPI_ISL_636560 | 10/19/2020 | 11/13/2020 | Europe / Netherlands / Noord-Brabant |
| EPI_ISL_636561 | 4/20/2020  | 11/13/2020 | Europe / Netherlands / Noord-Holland |
| EPI_ISL_636562 | 2020       | 11/13/2020 | Europe / Netherlands / Noord-Holland |
| EPI_ISL_636563 | 2020       | 11/13/2020 | Europe / Netherlands / Noord-Holland |
| EPI_ISL_636564 | 4/6/2020   | 11/13/2020 | Europe / Netherlands / Noord-Holland |
| EPI_ISL_636565 | 4/1/2020   | 11/13/2020 | Europe / Netherlands / Noord-Holland |
| EPI_ISL_636566 | 6/16/2020  | 11/13/2020 | Europe / Netherlands / Noord-Holland |
| EPI_ISL_636567 | 7/30/2020  | 11/13/2020 | Europe / Netherlands / Noord-Holland |
| EPI_ISL_636568 | 10/14/2020 | 11/13/2020 | Europe / Netherlands / Noord-Holland |
| EPI_ISL_636569 | 10/14/2020 | 11/13/2020 | Europe / Netherlands / Noord-Holland |
| EPI_ISL_636570 | 10/14/2020 | 11/13/2020 | Europe / Netherlands / Noord-Holland |
| EPI_ISL_636571 | 10/14/2020 | 11/13/2020 | Europe / Netherlands / Noord-Holland |
| EPI_ISL_636572 | 3/5/2020   | 11/13/2020 | Europe / Netherlands / Overijssel    |
| EPI_ISL_636573 | 5/8/2020   | 11/13/2020 | Europe / Netherlands / Utrecht       |
| EPI_ISL_636574 | 5/19/2020  | 11/13/2020 | Europe / Netherlands / Utrecht       |
| EPI_ISL_636575 | 5/22/2020  | 11/13/2020 | Europe / Netherlands / Utrecht       |
| EPI_ISL_636576 | 8/12/2020  | 11/13/2020 | Europe / Netherlands / Utrecht       |
| EPI_ISL_636577 | 8/12/2020  | 11/13/2020 | Europe / Netherlands / Utrecht       |
| EPI_ISL_636578 | 9/7/2020   | 11/13/2020 | Europe / Netherlands / Utrecht       |
| EPI_ISL_636579 | 9/29/2020  | 11/13/2020 | Europe / Netherlands / Utrecht       |
| EPI_ISL_636580 | 10/5/2020  | 11/13/2020 | Europe / Netherlands / Utrecht       |
| EPI_ISL_636581 | 10/8/2020  | 11/13/2020 | Europe / Netherlands / Utrecht       |
| EPI_ISL_636582 | 10/8/2020  | 11/13/2020 | Europe / Netherlands / Utrecht       |
| EPI_ISL_636583 | 10/22/2020 | 11/13/2020 | Europe / Netherlands / Utrecht       |
| EPI_ISL_636584 | 10/12/2020 | 11/13/2020 | Europe / Netherlands / Zeeland       |
| EPI_ISL_636585 | 10/14/2020 | 11/13/2020 | Europe / Netherlands / Zeeland       |
| EPI_ISL_636586 | 2020       | 11/13/2020 | Europe / Netherlands / Zeeland       |
| EPI_ISL_636587 | 7/30/2020  | 11/13/2020 | Europe / Netherlands / Zeeland       |
| EPI_ISL_636588 | 7/30/2020  | 11/13/2020 | Europe / Netherlands / Zeeland       |
| EPI_ISL_636589 | 9/11/2020  | 11/13/2020 | Europe / Netherlands / Zeeland       |
| EPI_ISL_636590 | 9/7/2020   | 11/13/2020 | Europe / Netherlands / Zeeland       |
| EPI_ISL_636591 | 10/19/2020 | 11/13/2020 | Europe / Netherlands / Zuid-Holland  |
| EPI_ISL_636592 | 2020       | 11/13/2020 | Europe / Netherlands / Zuid-Holland  |
| EPI_ISL_636593 | 3/14/2020  | 11/13/2020 | Europe / Netherlands / Zuid-Holland  |
| EPI_ISL_636594 | 2020       | 11/13/2020 | Europe / Netherlands / Zuid-Holland  |

|                |            |            |                                         |
|----------------|------------|------------|-----------------------------------------|
| EPI_ISL_636595 | 2020       | 11/13/2020 | Europe / Netherlands / Zuid-Holland     |
| EPI_ISL_636596 | 2020       | 11/13/2020 | Europe / Netherlands / Zuid-Holland     |
| EPI_ISL_636597 | 2020       | 11/13/2020 | Europe / Netherlands / Zuid-Holland     |
| EPI_ISL_636598 | 4/30/2020  | 11/13/2020 | Europe / Netherlands / Zuid-Holland     |
| EPI_ISL_636599 | 2020       | 11/13/2020 | Europe / Netherlands / Zuid-Holland     |
| EPI_ISL_636600 | 9/8/2020   | 11/13/2020 | North America / Sint Eustatius          |
| EPI_ISL_636601 | 9/8/2020   | 11/13/2020 | North America / Sint Eustatius          |
| EPI_ISL_636602 | 9/8/2020   | 11/13/2020 | North America / Sint Eustatius          |
| EPI_ISL_636603 | 9/7/2020   | 11/13/2020 | North America / Sint Eustatius          |
| EPI_ISL_636604 | 7/21/2020  | 11/13/2020 | Europe / Lithuania / Taurages apskritis |
| EPI_ISL_636605 | 10/26/2020 | 11/13/2020 | Europe / Belgium / Liège                |
| EPI_ISL_636606 | 10/27/2020 | 11/13/2020 | Europe / Belgium / Liège                |
| EPI_ISL_636607 | 10/25/2020 | 11/13/2020 | Europe / Belgium / Liège                |
| EPI_ISL_636608 | 10/26/2020 | 11/13/2020 | Europe / Belgium / Liège                |
| EPI_ISL_636609 | 10/26/2020 | 11/13/2020 | Europe / Belgium / Liège                |
| EPI_ISL_636610 | 10/25/2020 | 11/13/2020 | Europe / Belgium / Liège                |
| EPI_ISL_636611 | 10/26/2020 | 11/13/2020 | Europe / Belgium / Liège                |
| EPI_ISL_636612 | 10/26/2020 | 11/13/2020 | Europe / Belgium / Liège                |
| EPI_ISL_636613 | 10/26/2020 | 11/13/2020 | Europe / Belgium / Liège                |
| EPI_ISL_636614 | 10/26/2020 | 11/13/2020 | Europe / Belgium / Liège                |
| EPI_ISL_636615 | 10/25/2020 | 11/13/2020 | Europe / Belgium / Liège                |
| EPI_ISL_636616 | 10/26/2020 | 11/13/2020 | Europe / Belgium / Liège                |
| EPI_ISL_636617 | 10/25/2020 | 11/13/2020 | Europe / Belgium / Liège                |
| EPI_ISL_636618 | 10/27/2020 | 11/13/2020 | Europe / Belgium / Liège                |
| EPI_ISL_636619 | 10/26/2020 | 11/13/2020 | Europe / Belgium / Liège                |
| EPI_ISL_636620 | 10/26/2020 | 11/13/2020 | Europe / Belgium / Liège                |
| EPI_ISL_636621 | 10/26/2020 | 11/13/2020 | Europe / Belgium / Liège                |
| EPI_ISL_636622 | 10/26/2020 | 11/13/2020 | Europe / Belgium / Liège                |
| EPI_ISL_636623 | 10/26/2020 | 11/13/2020 | Europe / Belgium / Liège                |
| EPI_ISL_636624 | 10/26/2020 | 11/13/2020 | Europe / Belgium / Liège                |
| EPI_ISL_636625 | 10/26/2020 | 11/13/2020 | Europe / Belgium / Liège                |
| EPI_ISL_636626 | 10/26/2020 | 11/13/2020 | Europe / Belgium / Liège                |
| EPI_ISL_636627 | 10/24/2020 | 11/13/2020 | Europe / Belgium / Liège                |
| EPI_ISL_636628 | 10/26/2020 | 11/13/2020 | Europe / Belgium / Liège                |
| EPI_ISL_636629 | 10/26/2020 | 11/13/2020 | Europe / Belgium / Liège                |
| EPI_ISL_636630 | 10/26/2020 | 11/13/2020 | Europe / Belgium / Liège                |
| EPI_ISL_636631 | 10/26/2020 | 11/13/2020 | Europe / Belgium / Liège                |
| EPI_ISL_636632 | 10/26/2020 | 11/13/2020 | Europe / Belgium / Liège                |
| EPI_ISL_636633 | 10/26/2020 | 11/13/2020 | Europe / Belgium / Liège                |
| EPI_ISL_636634 | 10/26/2020 | 11/13/2020 | Europe / Belgium / Liège                |
| EPI_ISL_636635 | 10/26/2020 | 11/13/2020 | Europe / Belgium / Liège                |
| EPI_ISL_636636 | 10/26/2020 | 11/13/2020 | Europe / Belgium / Liège                |
| EPI_ISL_636637 | 10/26/2020 | 11/13/2020 | Europe / Belgium / Liège                |
| EPI_ISL_636638 | 10/26/2020 | 11/13/2020 | Europe / Belgium / Liège                |
| EPI_ISL_636639 | 10/26/2020 | 11/13/2020 | Europe / Belgium / Liège                |
| EPI_ISL_636640 | 10/26/2020 | 11/13/2020 | Europe / Belgium / Liège                |
| EPI_ISL_636641 | 10/26/2020 | 11/13/2020 | Europe / Belgium / Liège                |



|                |            |            |                                         |
|----------------|------------|------------|-----------------------------------------|
| EPI_ISL_636691 | 10/8/2020  | 11/13/2020 | Europe / United Kingdom / England       |
| EPI_ISL_636692 | 10/8/2020  | 11/13/2020 | Europe / United Kingdom / England       |
| EPI_ISL_636693 | 10/8/2020  | 11/13/2020 | Europe / United Kingdom / England       |
| EPI_ISL_636694 | 10/8/2020  | 11/13/2020 | Europe / United Kingdom / England       |
| EPI_ISL_636695 | 10/8/2020  | 11/13/2020 | Europe / United Kingdom / England       |
| EPI_ISL_636696 | 10/8/2020  | 11/13/2020 | Europe / United Kingdom / England       |
| EPI_ISL_636697 | 10/8/2020  | 11/13/2020 | Europe / United Kingdom / England       |
| EPI_ISL_636699 | 10/9/2020  | 11/13/2020 | Europe / United Kingdom / England       |
| EPI_ISL_636700 | 10/9/2020  | 11/13/2020 | Europe / United Kingdom / England       |
| EPI_ISL_636701 | 10/9/2020  | 11/13/2020 | Europe / United Kingdom / England       |
| EPI_ISL_636702 | 10/6/2020  | 11/13/2020 | Europe / United Kingdom / England       |
| EPI_ISL_636703 | 10/9/2020  | 11/13/2020 | Europe / United Kingdom / England       |
| EPI_ISL_636705 | 10/15/2020 | 11/13/2020 | Europe / United Kingdom / England       |
| EPI_ISL_636706 | 10/15/2020 | 11/13/2020 | Europe / United Kingdom / England       |
| EPI_ISL_636707 | 10/15/2020 | 11/13/2020 | Europe / United Kingdom / England       |
| EPI_ISL_636708 | 10/15/2020 | 11/13/2020 | Europe / United Kingdom / England       |
| EPI_ISL_636709 | 10/15/2020 | 11/13/2020 | Europe / United Kingdom / England       |
| EPI_ISL_636710 | 10/15/2020 | 11/13/2020 | Europe / United Kingdom / England       |
| EPI_ISL_636711 | 10/15/2020 | 11/13/2020 | Europe / United Kingdom / England       |
| EPI_ISL_636712 | 10/15/2020 | 11/13/2020 | Europe / United Kingdom / England       |
| EPI_ISL_636714 | 10/15/2020 | 11/13/2020 | Europe / United Kingdom / England       |
| EPI_ISL_636715 | 10/15/2020 | 11/13/2020 | Europe / United Kingdom / England       |
| EPI_ISL_636716 | 10/20/2020 | 11/13/2020 | Europe / United Kingdom / England       |
| EPI_ISL_636718 | 2020       | 11/13/2020 | Europe / United Kingdom / England       |
| EPI_ISL_636719 | 10/21/2020 | 11/13/2020 | Europe / United Kingdom / England       |
| EPI_ISL_636720 | 10/21/2020 | 11/13/2020 | Europe / United Kingdom / England       |
| EPI_ISL_636721 | 10/21/2020 | 11/13/2020 | Europe / United Kingdom / England       |
| EPI_ISL_636722 | 10/21/2020 | 11/13/2020 | Europe / United Kingdom / England       |
| EPI_ISL_636723 | 10/21/2020 | 11/13/2020 | Europe / United Kingdom / England       |
| EPI_ISL_636724 | 2020       | 11/13/2020 | Europe / United Kingdom / England       |
| EPI_ISL_636728 | 2020       | 11/13/2020 | Europe / United Kingdom / England       |
| EPI_ISL_636729 | 10/23/2020 | 11/13/2020 | Europe / United Kingdom / England       |
| EPI_ISL_636730 | 10/23/2020 | 11/13/2020 | Europe / United Kingdom / England       |
| EPI_ISL_636731 | 2020       | 11/13/2020 | Europe / United Kingdom / England       |
| EPI_ISL_636732 | 10/29/2020 | 11/13/2020 | Europe / United Kingdom / England       |
| EPI_ISL_636733 | 10/29/2020 | 11/13/2020 | Europe / United Kingdom / England       |
| EPI_ISL_636734 | 11/9/2020  | 11/13/2020 | Europe / United Kingdom / England       |
| EPI_ISL_636737 | 5/29/2020  | 11/13/2020 | South America / Brazil / Rio de Janeiro |
| EPI_ISL_636740 | 8/2/2020   | 11/13/2020 | Asia / India / Delhi                    |
| EPI_ISL_636742 | 8/9/2020   | 11/13/2020 | Asia / India / Uttarakhand              |
| EPI_ISL_636743 | 8/9/2020   | 11/13/2020 | Asia / India / Uttarakhand              |
| EPI_ISL_636746 | 8/9/2020   | 11/13/2020 | Asia / India / Uttarakhand              |
| EPI_ISL_636747 | 8/9/2020   | 11/13/2020 | Asia / India / Uttarakhand              |
| EPI_ISL_636748 | 7/26/2020  | 11/13/2020 | Asia / India / Uttarakhand              |
| EPI_ISL_636750 | 8/9/2020   | 11/13/2020 | Asia / India / Uttarakhand              |
| EPI_ISL_636752 | 8/2/2020   | 11/13/2020 | Asia / India / Delhi                    |
| EPI_ISL_636753 | 8/9/2020   | 11/13/2020 | Asia / India / Uttarakhand              |

|                |           |                                                    |
|----------------|-----------|----------------------------------------------------|
| EPI_ISL_636754 | 8/14/2020 | 11/13/2020 Asia / India / Delhi                    |
| EPI_ISL_636755 | 8/14/2020 | 11/13/2020 Asia / India / Delhi                    |
| EPI_ISL_636756 | 8/9/2020  | 11/13/2020 Asia / India / Uttarakhand              |
| EPI_ISL_636757 | 8/14/2020 | 11/13/2020 Asia / India / Delhi                    |
| EPI_ISL_636759 | 7/26/2020 | 11/13/2020 Asia / India / Uttarakhand              |
| EPI_ISL_636760 | 8/14/2020 | 11/13/2020 Asia / India / Delhi                    |
| EPI_ISL_636761 | 8/14/2020 | 11/13/2020 Asia / India / Delhi                    |
| EPI_ISL_636762 | 8/14/2020 | 11/13/2020 Asia / India / Delhi                    |
| EPI_ISL_636766 | 8/6/2020  | 11/13/2020 Asia / India / Delhi                    |
| EPI_ISL_636770 | 7/27/2020 | 11/13/2020 Asia / India / Delhi                    |
| EPI_ISL_636774 | 8/6/2020  | 11/13/2020 Asia / India / Delhi                    |
| EPI_ISL_636776 | 8/8/2020  | 11/13/2020 Asia / India / Delhi                    |
| EPI_ISL_636777 | 8/16/2020 | 11/13/2020 Asia / India / Delhi                    |
| EPI_ISL_636780 | 8/6/2020  | 11/13/2020 Asia / India / Delhi                    |
| EPI_ISL_636781 | 7/26/2020 | 11/13/2020 Asia / India / Uttarakhand              |
| EPI_ISL_636787 | 8/6/2020  | 11/13/2020 Asia / India / Delhi                    |
| EPI_ISL_636788 | 8/6/2020  | 11/13/2020 Asia / India / Delhi                    |
| EPI_ISL_636795 | 8/5/2020  | 11/13/2020 Asia / India / Delhi                    |
| EPI_ISL_636801 | 8/3/2020  | 11/13/2020 Asia / India / Uttarakhand              |
| EPI_ISL_636802 | 8/5/2020  | 11/13/2020 Asia / India / Delhi                    |
| EPI_ISL_636804 | 8/7/2020  | 11/13/2020 Asia / India / Uttarakhand              |
| EPI_ISL_636805 | 8/2/2020  | 11/13/2020 Asia / India / Uttarakhand              |
| EPI_ISL_636809 | 8/4/2020  | 11/13/2020 Asia / India / Delhi                    |
| EPI_ISL_636811 | 8/7/2020  | 11/13/2020 Asia / India / Uttarakhand              |
| EPI_ISL_636813 | 8/2/2020  | 11/13/2020 Asia / India / Uttarakhand              |
| EPI_ISL_636815 | 8/4/2020  | 11/13/2020 Asia / India / Delhi                    |
| EPI_ISL_636816 | 8/5/2020  | 11/13/2020 Asia / India / Delhi                    |
| EPI_ISL_636817 | 8/11/2020 | 11/13/2020 Asia / India / Delhi                    |
| EPI_ISL_636818 | 8/11/2020 | 11/13/2020 Asia / India / Delhi                    |
| EPI_ISL_636819 | 8/11/2020 | 11/13/2020 Asia / India / Delhi                    |
| EPI_ISL_636820 | 8/11/2020 | 11/13/2020 Asia / India / Delhi                    |
| EPI_ISL_636821 | 8/11/2020 | 11/13/2020 Asia / India / Delhi                    |
| EPI_ISL_636822 | 8/7/2020  | 11/13/2020 Asia / India / Uttarakhand              |
| EPI_ISL_636823 | 8/7/2020  | 11/13/2020 Asia / India / Uttarakhand              |
| EPI_ISL_636824 | 8/7/2020  | 11/13/2020 Asia / India / Uttarakhand              |
| EPI_ISL_636826 | 2020-08   | 11/13/2020 Asia / India / Delhi                    |
| EPI_ISL_636828 | 8/7/2020  | 11/13/2020 Asia / India / Uttarakhand              |
| EPI_ISL_636829 | 8/5/2020  | 11/13/2020 Asia / India / Uttarakhand              |
| EPI_ISL_636830 | 8/2/2020  | 11/13/2020 Asia / India / Uttarakhand              |
| EPI_ISL_636831 | 8/2/2020  | 11/13/2020 Asia / India / Uttarakhand              |
| EPI_ISL_636834 | 3/24/2020 | 11/13/2020 South America / Brazil / Rio de Janeiro |
| EPI_ISL_636835 | 5/29/2020 | 11/13/2020 South America / Brazil / Rio de Janeiro |
| EPI_ISL_636837 | 5/29/2020 | 11/13/2020 South America / Brazil / Rio de Janeiro |
| EPI_ISL_636839 | 7/21/2020 | 11/13/2020 Europe / Lithuania / Taurages apskritis |
| EPI_ISL_636840 | 7/21/2020 | 11/13/2020 Europe / Lithuania / Taurages apskritis |
| EPI_ISL_636841 | 7/27/2020 | 11/13/2020 Europe / Lithuania / Taurages apskritis |
| EPI_ISL_636842 | 7/28/2020 | 11/13/2020 Europe / Lithuania / Kauno apskritis    |





|                |           |                                                 |
|----------------|-----------|-------------------------------------------------|
| EPI_ISL_636891 | 9/9/2020  | 11/13/2020 Europe / Lithuania / Kauno apskritis |
| EPI_ISL_636892 | 9/12/2020 | 11/13/2020 Europe / Lithuania / Kauno apskritis |
| EPI_ISL_636893 | 9/12/2020 | 11/13/2020 Europe / Lithuania / Kauno apskritis |
| EPI_ISL_636894 | 9/12/2020 | 11/13/2020 Europe / Lithuania / Kauno apskritis |
| EPI_ISL_636895 | 9/12/2020 | 11/13/2020 Europe / Lithuania / Kauno apskritis |
| EPI_ISL_636896 | 9/12/2020 | 11/13/2020 Europe / Lithuania / Kauno apskritis |
| EPI_ISL_636897 | 9/12/2020 | 11/13/2020 Europe / Lithuania / Kauno apskritis |
| EPI_ISL_636898 | 9/12/2020 | 11/13/2020 Europe / Lithuania / Kauno apskritis |
| EPI_ISL_636899 | 9/12/2020 | 11/13/2020 Europe / Lithuania / Kauno apskritis |
| EPI_ISL_636900 | 9/12/2020 | 11/13/2020 Europe / Lithuania / Kauno apskritis |
| EPI_ISL_636901 | 9/12/2020 | 11/13/2020 Europe / Lithuania / Kauno apskritis |
| EPI_ISL_636902 | 9/12/2020 | 11/13/2020 Europe / Lithuania / Kauno apskritis |
| EPI_ISL_636903 | 9/12/2020 | 11/13/2020 Europe / Lithuania / Kauno apskritis |
| EPI_ISL_636904 | 9/12/2020 | 11/13/2020 Europe / Lithuania / Kauno apskritis |
| EPI_ISL_636905 | 9/12/2020 | 11/13/2020 Europe / Lithuania / Kauno apskritis |
| EPI_ISL_636906 | 9/12/2020 | 11/13/2020 Europe / Lithuania / Kauno apskritis |
| EPI_ISL_649126 | 2020-07   | 11/13/2020 Asia / Japan                         |
| EPI_ISL_649127 | 2020-07   | 11/13/2020 Asia / Japan                         |
| EPI_ISL_649128 | 2020-07   | 11/13/2020 Asia / Japan                         |
| EPI_ISL_649129 | 2020-07   | 11/13/2020 Asia / Japan                         |
| EPI_ISL_649130 | 2020-07   | 11/13/2020 Asia / Japan                         |
| EPI_ISL_649131 | 2020-07   | 11/13/2020 Asia / Japan                         |
| EPI_ISL_649132 | 2020-07   | 11/13/2020 Asia / Japan                         |
| EPI_ISL_649133 | 2020-07   | 11/13/2020 Asia / Japan                         |
| EPI_ISL_649134 | 2020-07   | 11/13/2020 Asia / Japan                         |
| EPI_ISL_649135 | 2020-07   | 11/13/2020 Asia / Japan                         |
| EPI_ISL_649136 | 2020-08   | 11/13/2020 Asia / Japan                         |
| EPI_ISL_649137 | 2020-08   | 11/13/2020 Asia / Japan                         |
| EPI_ISL_649138 | 2020-08   | 11/13/2020 Asia / Japan                         |
| EPI_ISL_649139 | 2020-08   | 11/13/2020 Asia / Japan                         |
| EPI_ISL_649140 | 2020-08   | 11/13/2020 Asia / Japan                         |
| EPI_ISL_649141 | 2020-08   | 11/13/2020 Asia / Japan                         |
| EPI_ISL_649142 | 2020-08   | 11/13/2020 Asia / Japan                         |
| EPI_ISL_649143 | 2020-08   | 11/13/2020 Asia / Japan                         |
| EPI_ISL_649144 | 2020-08   | 11/13/2020 Asia / Japan                         |
| EPI_ISL_636907 | 2020-07   | 11/14/2020 North America / Canada / Ontario     |
| EPI_ISL_636908 | 2020-07   | 11/14/2020 North America / Canada / Ontario     |
| EPI_ISL_636909 | 2020-07   | 11/14/2020 North America / Canada / Ontario     |
| EPI_ISL_636910 | 2020-07   | 11/14/2020 North America / Canada / Ontario     |
| EPI_ISL_636911 | 2020-07   | 11/14/2020 North America / Canada / Ontario     |
| EPI_ISL_636912 | 2020-07   | 11/14/2020 North America / Canada / Ontario     |
| EPI_ISL_636913 | 2020-07   | 11/14/2020 North America / Canada / Ontario     |
| EPI_ISL_636914 | 2020-07   | 11/14/2020 North America / Canada / Ontario     |
| EPI_ISL_636915 | 2020-07   | 11/14/2020 North America / Canada / Ontario     |
| EPI_ISL_636916 | 2020-07   | 11/14/2020 North America / Canada / Ontario     |
| EPI_ISL_636917 | 2020-07   | 11/14/2020 North America / Canada / Ontario     |
| EPI_ISL_636918 | 2020-07   | 11/14/2020 North America / Canada / Ontario     |

|                |           |            |                                  |
|----------------|-----------|------------|----------------------------------|
| EPI_ISL_636919 | 2020-07   | 11/14/2020 | North America / Canada / Ontario |
| EPI_ISL_636920 | 2020-07   | 11/14/2020 | North America / Canada / Ontario |
| EPI_ISL_636921 | 2020-07   | 11/14/2020 | North America / Canada / Ontario |
| EPI_ISL_636922 | 2020-07   | 11/14/2020 | North America / Canada / Ontario |
| EPI_ISL_636923 | 2020-07   | 11/14/2020 | North America / Canada / Ontario |
| EPI_ISL_636924 | 2020-07   | 11/14/2020 | North America / Canada / Ontario |
| EPI_ISL_636925 | 2020-07   | 11/14/2020 | North America / Canada / Ontario |
| EPI_ISL_636927 | 2020-07   | 11/14/2020 | North America / Canada / Ontario |
| EPI_ISL_636928 | 2020-07   | 11/14/2020 | North America / Canada / Ontario |
| EPI_ISL_636929 | 2020-07   | 11/14/2020 | North America / Canada / Ontario |
| EPI_ISL_636930 | 2020-07   | 11/14/2020 | North America / Canada / Ontario |
| EPI_ISL_636931 | 2020-07   | 11/14/2020 | North America / Canada / Ontario |
| EPI_ISL_636932 | 2020-07   | 11/14/2020 | North America / Canada / Ontario |
| EPI_ISL_636933 | 2020-07   | 11/14/2020 | North America / Canada / Ontario |
| EPI_ISL_636934 | 2020-07   | 11/14/2020 | North America / Canada / Ontario |
| EPI_ISL_636935 | 2020-07   | 11/14/2020 | North America / Canada / Ontario |
| EPI_ISL_636936 | 2020-07   | 11/14/2020 | North America / Canada / Ontario |
| EPI_ISL_636937 | 2020-07   | 11/14/2020 | North America / Canada / Ontario |
| EPI_ISL_636938 | 2020-07   | 11/14/2020 | North America / Canada / Ontario |
| EPI_ISL_636939 | 2020-07   | 11/14/2020 | North America / Canada / Ontario |
| EPI_ISL_636940 | 2020-07   | 11/14/2020 | North America / Canada / Ontario |
| EPI_ISL_636941 | 2020-07   | 11/14/2020 | North America / Canada / Ontario |
| EPI_ISL_636942 | 2020-07   | 11/14/2020 | North America / Canada / Ontario |
| EPI_ISL_636943 | 2020-07   | 11/14/2020 | North America / Canada / Ontario |
| EPI_ISL_636944 | 2020-07   | 11/14/2020 | North America / Canada / Ontario |
| EPI_ISL_636945 | 2020-07   | 11/14/2020 | North America / Canada / Ontario |
| EPI_ISL_636946 | 2020-04   | 11/14/2020 | North America / Canada / Ontario |
| EPI_ISL_636947 | 2020-04   | 11/14/2020 | North America / Canada / Ontario |
| EPI_ISL_636949 | 2020-06   | 11/14/2020 | North America / Canada / Ontario |
| EPI_ISL_636950 | 2020-06   | 11/14/2020 | North America / Canada / Ontario |
| EPI_ISL_636951 | 2020-06   | 11/14/2020 | North America / Canada / Ontario |
| EPI_ISL_636952 | 2020-06   | 11/14/2020 | North America / Canada / Ontario |
| EPI_ISL_636953 | 2020-06   | 11/14/2020 | North America / Canada / Ontario |
| EPI_ISL_636954 | 2020-06   | 11/14/2020 | North America / Canada / Ontario |
| EPI_ISL_636955 | 2020-06   | 11/14/2020 | North America / Canada / Ontario |
| EPI_ISL_636956 | 2020-06   | 11/14/2020 | North America / Canada / Ontario |
| EPI_ISL_636957 | 2020-06   | 11/14/2020 | North America / Canada / Ontario |
| EPI_ISL_636958 | 2020-07   | 11/14/2020 | North America / Canada / Ontario |
| EPI_ISL_636959 | 2020-05   | 11/14/2020 | North America / Canada / Ontario |
| EPI_ISL_636964 | 5/12/2020 | 11/14/2020 | Asia / Saudi Arabia / Madinah    |
| EPI_ISL_636965 | 6/17/2020 | 11/14/2020 | Asia / Saudi Arabia / Jeddah     |
| EPI_ISL_636966 | 6/23/2020 | 11/14/2020 | Asia / Saudi Arabia / Jeddah     |
| EPI_ISL_636967 | 6/13/2020 | 11/14/2020 | Asia / Saudi Arabia / Madinah    |
| EPI_ISL_636969 | 2020-04   | 11/14/2020 | Europe / Turkey / Ankara         |
| EPI_ISL_636970 | 2020-04   | 11/14/2020 | Europe / Turkey / Ankara         |
| EPI_ISL_636971 | 2020-03   | 11/14/2020 | Europe / Turkey / Ankara         |
| EPI_ISL_636972 | 5/24/2020 | 11/15/2020 | Asia / Saudi Arabia / Jeddah     |

|                |            |                                                                 |
|----------------|------------|-----------------------------------------------------------------|
| EPI_ISL_636973 | 8/26/2020  | 11/15/2020 Asia / Bahrain                                       |
| EPI_ISL_636977 | 7/11/2020  | 11/15/2020 Africa / Mozambique / Cabo Delgado / Pemba           |
| EPI_ISL_636980 | 7/14/2020  | 11/15/2020 Africa / Mozambique / Gaza / Xai Xai                 |
| EPI_ISL_636982 | 5/21/2020  | 11/15/2020 Africa / Democratic Republic of the Congo / Kisantu  |
| EPI_ISL_636983 | 5/6/2020   | 11/15/2020 Africa / Democratic Republic of the Congo / Kinshasa |
| EPI_ISL_636984 | 5/12/2020  | 11/15/2020 Africa / Democratic Republic of the Congo / Kinshasa |
| EPI_ISL_636985 | 5/14/2020  | 11/15/2020 Africa / Democratic Republic of the Congo / Kinshasa |
| EPI_ISL_636986 | 5/20/2020  | 11/15/2020 Africa / Democratic Republic of the Congo / Kinshasa |
| EPI_ISL_636988 | 5/19/2020  | 11/15/2020 Africa / Democratic Republic of the Congo / Kinshasa |
| EPI_ISL_639739 | 7/20/2020  | 11/15/2020 Europe / Romania                                     |
| EPI_ISL_636989 | 3/13/2020  | 11/16/2020 Asia / Japan / Aichi / Nagoya                        |
| EPI_ISL_636990 | 3/31/2020  | 11/16/2020 Asia / Japan / Aichi / Nagoya                        |
| EPI_ISL_636991 | 4/6/2020   | 11/16/2020 Asia / Japan / Aichi / Nagoya                        |
| EPI_ISL_636992 | 4/7/2020   | 11/16/2020 Asia / Japan / Aichi / Nagoya                        |
| EPI_ISL_636993 | 4/10/2020  | 11/16/2020 Asia / Japan / Aichi / Nagoya                        |
| EPI_ISL_636994 | 4/13/2020  | 11/16/2020 Asia / Japan / Aichi / Nagoya                        |
| EPI_ISL_636995 | 7/21/2020  | 11/16/2020 Asia / Japan / Aichi / Nagoya                        |
| EPI_ISL_636996 | 7/22/2020  | 11/16/2020 Asia / Japan / Aichi / Nagoya                        |
| EPI_ISL_636997 | 7/23/2020  | 11/16/2020 Asia / Japan / Aichi / Nagoya                        |
| EPI_ISL_636998 | 7/27/2020  | 11/16/2020 Asia / Japan / Aichi / Nagoya                        |
| EPI_ISL_636999 | 7/27/2020  | 11/16/2020 Asia / Japan / Aichi / Nagoya                        |
| EPI_ISL_637000 | 7/27/2020  | 11/16/2020 Asia / Japan / Aichi / Nagoya                        |
| EPI_ISL_637001 | 7/28/2020  | 11/16/2020 Asia / Japan / Aichi / Nagoya                        |
| EPI_ISL_637002 | 7/28/2020  | 11/16/2020 Asia / Japan / Aichi / Nagoya                        |
| EPI_ISL_637003 | 7/31/2020  | 11/16/2020 Asia / Japan / Aichi / Nagoya                        |
| EPI_ISL_637004 | 7/31/2020  | 11/16/2020 Asia / Japan / Aichi / Nagoya                        |
| EPI_ISL_637005 | 8/3/2020   | 11/16/2020 Asia / Japan / Aichi / Nagoya                        |
| EPI_ISL_637006 | 8/4/2020   | 11/16/2020 Asia / Japan / Aichi / Nagoya                        |
| EPI_ISL_637007 | 8/5/2020   | 11/16/2020 Asia / Japan / Aichi / Nagoya                        |
| EPI_ISL_637008 | 8/8/2020   | 11/16/2020 Asia / Japan / Aichi / Nagoya                        |
| EPI_ISL_637009 | 8/10/2020  | 11/16/2020 Asia / Japan / Aichi / Nagoya                        |
| EPI_ISL_637010 | 8/11/2020  | 11/16/2020 Asia / Japan / Aichi / Nagoya                        |
| EPI_ISL_637011 | 8/14/2020  | 11/16/2020 Asia / Japan / Aichi / Nagoya                        |
| EPI_ISL_637012 | 8/20/2020  | 11/16/2020 Asia / Japan / Aichi / Nagoya                        |
| EPI_ISL_637013 | 8/22/2020  | 11/16/2020 Asia / Japan / Aichi / Nagoya                        |
| EPI_ISL_637014 | 8/25/2020  | 11/16/2020 Asia / Japan / Aichi / Nagoya                        |
| EPI_ISL_637015 | 9/17/2020  | 11/16/2020 Asia / Japan / Aichi / Nagoya                        |
| EPI_ISL_637016 | 9/22/2020  | 11/16/2020 Asia / Japan / Aichi / Nagoya                        |
| EPI_ISL_637017 | 9/25/2020  | 11/16/2020 Asia / Japan / Aichi / Nagoya                        |
| EPI_ISL_637018 | 10/5/2020  | 11/16/2020 Asia / Japan / Aichi / Nagoya                        |
| EPI_ISL_637019 | 10/12/2020 | 11/16/2020 Asia / Japan / Aichi / Nagoya                        |
| EPI_ISL_637020 | 10/23/2020 | 11/16/2020 Asia / Japan / Aichi / Nagoya                        |
| EPI_ISL_637021 | 10/28/2020 | 11/16/2020 Asia / Japan / Aichi / Nagoya                        |
| EPI_ISL_637075 | 5/1/2020   | 11/16/2020 Asia / Japan / Aichi / Nagoya                        |
| EPI_ISL_637084 | 11/5/2020  | 11/16/2020 Oceania / New Zealand / Combined Auckland            |
| EPI_ISL_637085 | 11/8/2020  | 11/16/2020 Oceania / New Zealand / Combined Wellington          |
| EPI_ISL_637086 | 11/3/2020  | 11/16/2020 Oceania / New Zealand / Auckland                     |

|                |            |                                                      |
|----------------|------------|------------------------------------------------------|
| EPI_ISL_637087 | 11/8/2020  | 11/16/2020 Oceania / New Zealand / Auckland          |
| EPI_ISL_637088 | 10/16/2020 | 11/16/2020 Oceania / New Zealand / Bay of Plenty     |
| EPI_ISL_637093 | 11/6/2020  | 11/16/2020 Oceania / New Zealand / Auckland          |
| EPI_ISL_637094 | 11/6/2020  | 11/16/2020 Oceania / New Zealand / Auckland          |
| EPI_ISL_637096 | 11/10/2020 | 11/16/2020 Oceania / New Zealand / Combined Auckland |
| EPI_ISL_637099 | 3/10/2020  | 11/16/2020 Asia / Iran                               |
| EPI_ISL_637100 | 3/10/2020  | 11/16/2020 Asia / Iran                               |
| EPI_ISL_637101 | 3/10/2020  | 11/16/2020 Asia / Iran                               |
| EPI_ISL_637103 | 3/10/2020  | 11/16/2020 Asia / Iran                               |
| EPI_ISL_637104 | 3/10/2020  | 11/16/2020 Asia / Iran                               |
| EPI_ISL_637108 | 3/29/2020  | 11/16/2020 Europe / Italy / Sardinia                 |
| EPI_ISL_637109 | 4/23/2020  | 11/16/2020 Europe / Italy / Sardinia                 |
| EPI_ISL_637114 | 10/10/2020 | 11/16/2020 Europe / United Kingdom / England         |
| EPI_ISL_637115 | 10/12/2020 | 11/16/2020 Europe / United Kingdom / England         |
| EPI_ISL_637116 | 10/12/2020 | 11/16/2020 Europe / United Kingdom / England         |
| EPI_ISL_637117 | 10/9/2020  | 11/16/2020 Europe / United Kingdom / England         |
| EPI_ISL_637118 | 10/21/2020 | 11/16/2020 Europe / United Kingdom / England         |
| EPI_ISL_637119 | 10/21/2020 | 11/16/2020 Europe / United Kingdom / England         |
| EPI_ISL_637120 | 10/22/2020 | 11/16/2020 Europe / United Kingdom / England         |
| EPI_ISL_637121 | 10/22/2020 | 11/16/2020 Europe / United Kingdom / England         |
| EPI_ISL_637123 | 10/23/2020 | 11/16/2020 Europe / United Kingdom / England         |
| EPI_ISL_637124 | 10/22/2020 | 11/16/2020 Europe / United Kingdom / England         |
| EPI_ISL_637125 | 10/22/2020 | 11/16/2020 Europe / United Kingdom / England         |
| EPI_ISL_637126 | 10/22/2020 | 11/16/2020 Europe / United Kingdom / England         |
| EPI_ISL_637127 | 10/23/2020 | 11/16/2020 Europe / United Kingdom / England         |
| EPI_ISL_637128 | 10/23/2020 | 11/16/2020 Europe / United Kingdom / England         |
| EPI_ISL_637129 | 10/23/2020 | 11/16/2020 Europe / United Kingdom / England         |
| EPI_ISL_637130 | 10/23/2020 | 11/16/2020 Europe / United Kingdom / England         |
| EPI_ISL_637148 | 10/23/2020 | 11/16/2020 Europe / United Kingdom / England         |
| EPI_ISL_637149 | 10/24/2020 | 11/16/2020 Europe / United Kingdom / England         |
| EPI_ISL_637150 | 10/26/2020 | 11/16/2020 Europe / United Kingdom / England         |
| EPI_ISL_637151 | 10/27/2020 | 11/16/2020 Europe / United Kingdom / England         |
| EPI_ISL_637152 | 10/27/2020 | 11/16/2020 Europe / United Kingdom / England         |
| EPI_ISL_637153 | 5/1/2020   | 11/16/2020 Europe / United Kingdom / England         |
| EPI_ISL_637154 | 10/25/2020 | 11/16/2020 Europe / United Kingdom / England         |
| EPI_ISL_637156 | 10/15/2020 | 11/16/2020 Europe / United Kingdom / England         |
| EPI_ISL_637158 | 10/29/2020 | 11/16/2020 Europe / United Kingdom / England         |
| EPI_ISL_637159 | 10/28/2020 | 11/16/2020 Europe / United Kingdom / England         |
| EPI_ISL_637160 | 10/28/2020 | 11/16/2020 Europe / United Kingdom / England         |
| EPI_ISL_637161 | 10/29/2020 | 11/16/2020 Europe / United Kingdom / England         |
| EPI_ISL_637162 | 10/28/2020 | 11/16/2020 Europe / United Kingdom / England         |
| EPI_ISL_637163 | 10/28/2020 | 11/16/2020 Europe / United Kingdom / England         |
| EPI_ISL_637164 | 10/28/2020 | 11/16/2020 Europe / United Kingdom / England         |
| EPI_ISL_637165 | 10/28/2020 | 11/16/2020 Europe / United Kingdom / England         |
| EPI_ISL_637166 | 10/29/2020 | 11/16/2020 Europe / United Kingdom / England         |
| EPI_ISL_637167 | 10/22/2020 | 11/16/2020 Europe / United Kingdom / England         |
| EPI_ISL_637169 | 10/30/2020 | 11/16/2020 Europe / United Kingdom / England         |

|                |            |            |                                   |
|----------------|------------|------------|-----------------------------------|
| EPI_ISL_637171 | 10/29/2020 | 11/16/2020 | Europe / United Kingdom / England |
| EPI_ISL_637173 | 10/29/2020 | 11/16/2020 | Europe / United Kingdom / England |
| EPI_ISL_637174 | 10/30/2020 | 11/16/2020 | Europe / United Kingdom / England |
| EPI_ISL_637176 | 10/30/2020 | 11/16/2020 | Europe / United Kingdom / England |
| EPI_ISL_637177 | 10/30/2020 | 11/16/2020 | Europe / United Kingdom / England |
| EPI_ISL_637178 | 10/29/2020 | 11/16/2020 | Europe / United Kingdom / England |
| EPI_ISL_637180 | 11/2/2020  | 11/16/2020 | Europe / United Kingdom / England |
| EPI_ISL_637181 | 11/2/2020  | 11/16/2020 | Europe / United Kingdom / England |
| EPI_ISL_637182 | 11/2/2020  | 11/16/2020 | Europe / United Kingdom / England |
| EPI_ISL_637183 | 11/2/2020  | 11/16/2020 | Europe / United Kingdom / England |
| EPI_ISL_637184 | 11/3/2020  | 11/16/2020 | Europe / United Kingdom / England |
| EPI_ISL_637185 | 2020       | 11/16/2020 | Europe / United Kingdom / England |
| EPI_ISL_637187 | 2020       | 11/16/2020 | Europe / United Kingdom / England |
| EPI_ISL_637188 | 2020       | 11/16/2020 | Europe / United Kingdom / England |
| EPI_ISL_637189 | 2020       | 11/16/2020 | Europe / United Kingdom / England |
| EPI_ISL_637190 | 2020       | 11/16/2020 | Europe / Gibraltar                |
| EPI_ISL_637191 | 2020       | 11/16/2020 | Europe / Gibraltar                |
| EPI_ISL_637192 | 2020       | 11/16/2020 | Europe / Gibraltar                |
| EPI_ISL_637193 | 2020       | 11/16/2020 | Europe / Gibraltar                |
| EPI_ISL_637194 | 2020       | 11/16/2020 | Europe / Gibraltar                |
| EPI_ISL_637195 | 2020       | 11/16/2020 | Europe / Gibraltar                |
| EPI_ISL_637196 | 2020       | 11/16/2020 | Europe / Gibraltar                |
| EPI_ISL_637198 | 2020       | 11/16/2020 | Europe / Gibraltar                |
| EPI_ISL_637202 | 2020       | 11/16/2020 | Europe / Gibraltar                |
| EPI_ISL_637203 | 2020       | 11/16/2020 | Europe / Gibraltar                |
| EPI_ISL_637206 | 2020       | 11/16/2020 | Europe / Gibraltar                |
| EPI_ISL_637210 | 2020       | 11/16/2020 | Europe / Gibraltar                |
| EPI_ISL_637211 | 2020       | 11/16/2020 | Europe / Gibraltar                |
| EPI_ISL_637212 | 2020       | 11/16/2020 | Europe / Gibraltar                |
| EPI_ISL_637217 | 2020       | 11/16/2020 | Europe / Gibraltar                |
| EPI_ISL_637218 | 2020       | 11/16/2020 | Europe / Gibraltar                |
| EPI_ISL_637219 | 2020       | 11/16/2020 | Europe / Gibraltar                |
| EPI_ISL_637222 | 2020       | 11/16/2020 | Europe / Gibraltar                |
| EPI_ISL_637224 | 2020       | 11/16/2020 | Europe / Gibraltar                |
| EPI_ISL_637225 | 2020       | 11/16/2020 | Europe / Gibraltar                |
| EPI_ISL_637226 | 2020       | 11/16/2020 | Europe / Gibraltar                |
| EPI_ISL_637227 | 2020       | 11/16/2020 | Europe / Gibraltar                |
| EPI_ISL_637231 | 2020       | 11/16/2020 | Europe / Gibraltar                |
| EPI_ISL_637855 | 10/12/2020 | 11/16/2020 | Europe / United Kingdom / England |
| EPI_ISL_637856 | 9/25/2020  | 11/16/2020 | Europe / United Kingdom / England |
| EPI_ISL_637857 | 10/28/2020 | 11/16/2020 | Europe / United Kingdom / England |
| EPI_ISL_637858 | 10/16/2020 | 11/16/2020 | Europe / United Kingdom / England |
| EPI_ISL_637859 | 10/14/2020 | 11/16/2020 | Europe / United Kingdom / England |
| EPI_ISL_637860 | 9/21/2020  | 11/16/2020 | Europe / United Kingdom / England |
| EPI_ISL_637861 | 10/13/2020 | 11/16/2020 | Europe / United Kingdom / England |
| EPI_ISL_637862 | 10/24/2020 | 11/16/2020 | Europe / United Kingdom / England |
| EPI_ISL_637863 | 10/24/2020 | 11/16/2020 | Europe / United Kingdom / England |

|                |            |            |                                   |
|----------------|------------|------------|-----------------------------------|
| EPI_ISL_637864 | 10/27/2020 | 11/16/2020 | Europe / United Kingdom / England |
| EPI_ISL_637865 | 10/30/2020 | 11/16/2020 | Europe / United Kingdom / England |
| EPI_ISL_637866 | 10/30/2020 | 11/16/2020 | Europe / United Kingdom / England |
| EPI_ISL_637867 | 10/12/2020 | 11/16/2020 | Europe / United Kingdom / England |
| EPI_ISL_637868 | 10/31/2020 | 11/16/2020 | Europe / United Kingdom / Wales   |
| EPI_ISL_637869 | 11/1/2020  | 11/16/2020 | Europe / United Kingdom / Wales   |
| EPI_ISL_637870 | 10/27/2020 | 11/16/2020 | Europe / United Kingdom / Wales   |
| EPI_ISL_638037 | 10/14/2020 | 11/16/2020 | Europe / United Kingdom / England |
| EPI_ISL_638038 | 10/17/2020 | 11/16/2020 | Europe / United Kingdom / England |
| EPI_ISL_638039 | 10/14/2020 | 11/16/2020 | Europe / United Kingdom / England |
| EPI_ISL_638040 | 10/24/2020 | 11/16/2020 | Europe / United Kingdom / England |
| EPI_ISL_638041 | 10/4/2020  | 11/16/2020 | Europe / United Kingdom / England |
| EPI_ISL_638042 | 10/26/2020 | 11/16/2020 | Europe / United Kingdom / Wales   |
| EPI_ISL_638043 | 10/26/2020 | 11/16/2020 | Europe / United Kingdom / Wales   |
| EPI_ISL_638044 | 10/31/2020 | 11/16/2020 | Europe / United Kingdom / Wales   |
| EPI_ISL_638045 | 10/26/2020 | 11/16/2020 | Europe / United Kingdom / Wales   |
| EPI_ISL_638046 | 10/30/2020 | 11/16/2020 | Europe / United Kingdom / Wales   |
| EPI_ISL_638047 | 11/1/2020  | 11/16/2020 | Europe / United Kingdom / Wales   |
| EPI_ISL_638048 | 10/26/2020 | 11/16/2020 | Europe / United Kingdom / Wales   |
| EPI_ISL_638049 | 10/26/2020 | 11/16/2020 | Europe / United Kingdom / Wales   |
| EPI_ISL_638050 | 9/24/2020  | 11/16/2020 | Europe / United Kingdom / England |
| EPI_ISL_638051 | 10/14/2020 | 11/16/2020 | Europe / United Kingdom / Wales   |
| EPI_ISL_638052 | 10/29/2020 | 11/16/2020 | Europe / United Kingdom / Wales   |
| EPI_ISL_638053 | 10/27/2020 | 11/16/2020 | Europe / United Kingdom / Wales   |
| EPI_ISL_638054 | 10/27/2020 | 11/16/2020 | Europe / United Kingdom / Wales   |
| EPI_ISL_638055 | 10/29/2020 | 11/16/2020 | Europe / United Kingdom / Wales   |
| EPI_ISL_638056 | 10/29/2020 | 11/16/2020 | Europe / United Kingdom / Wales   |
| EPI_ISL_638057 | 10/29/2020 | 11/16/2020 | Europe / United Kingdom / Wales   |
| EPI_ISL_638058 | 11/2/2020  | 11/16/2020 | Europe / United Kingdom / Wales   |
| EPI_ISL_638059 | 11/2/2020  | 11/16/2020 | Europe / United Kingdom / Wales   |
| EPI_ISL_638060 | 11/1/2020  | 11/16/2020 | Europe / United Kingdom / Wales   |
| EPI_ISL_638061 | 11/2/2020  | 11/16/2020 | Europe / United Kingdom / Wales   |
| EPI_ISL_638062 | 11/2/2020  | 11/16/2020 | Europe / United Kingdom / Wales   |
| EPI_ISL_638063 | 11/2/2020  | 11/16/2020 | Europe / United Kingdom / Wales   |
| EPI_ISL_638064 | 11/2/2020  | 11/16/2020 | Europe / United Kingdom / Wales   |
| EPI_ISL_638065 | 9/24/2020  | 11/16/2020 | Europe / United Kingdom / England |
| EPI_ISL_638066 | 10/23/2020 | 11/16/2020 | Europe / United Kingdom / England |
| EPI_ISL_638067 | 10/16/2020 | 11/16/2020 | Europe / United Kingdom / England |
| EPI_ISL_638068 | 10/13/2020 | 11/16/2020 | Europe / United Kingdom / England |
| EPI_ISL_638069 | 9/21/2020  | 11/16/2020 | Europe / United Kingdom / England |
| EPI_ISL_638070 | 9/21/2020  | 11/16/2020 | Europe / United Kingdom / England |
| EPI_ISL_638071 | 9/21/2020  | 11/16/2020 | Europe / United Kingdom / England |
| EPI_ISL_638072 | 10/11/2020 | 11/16/2020 | Europe / United Kingdom / England |
| EPI_ISL_638073 | 10/15/2020 | 11/16/2020 | Europe / United Kingdom / England |
| EPI_ISL_638074 | 10/15/2020 | 11/16/2020 | Europe / United Kingdom / England |
| EPI_ISL_638075 | 10/13/2020 | 11/16/2020 | Europe / United Kingdom / England |
| EPI_ISL_638076 | 10/15/2020 | 11/16/2020 | Europe / United Kingdom / England |









































































|                |            |            |                                 |
|----------------|------------|------------|---------------------------------|
| EPI_ISL_639616 | 11/2/2020  | 11/16/2020 | Europe / United Kingdom / Wales |
| EPI_ISL_639617 | 11/2/2020  | 11/16/2020 | Europe / United Kingdom / Wales |
| EPI_ISL_639618 | 11/3/2020  | 11/16/2020 | Europe / United Kingdom / Wales |
| EPI_ISL_639619 | 10/27/2020 | 11/16/2020 | Europe / United Kingdom / Wales |
| EPI_ISL_639620 | 11/1/2020  | 11/16/2020 | Europe / United Kingdom / Wales |
| EPI_ISL_639621 | 10/31/2020 | 11/16/2020 | Europe / United Kingdom / Wales |
| EPI_ISL_639622 | 10/26/2020 | 11/16/2020 | Europe / United Kingdom / Wales |
| EPI_ISL_639623 | 11/1/2020  | 11/16/2020 | Europe / United Kingdom / Wales |
| EPI_ISL_639624 | 9/1/2020   | 11/16/2020 | Europe / United Kingdom / Wales |
| EPI_ISL_639625 | 9/2/2020   | 11/16/2020 | Europe / United Kingdom / Wales |
| EPI_ISL_639626 | 10/3/2020  | 11/16/2020 | Europe / United Kingdom / Wales |
| EPI_ISL_639627 | 10/11/2020 | 11/16/2020 | Europe / United Kingdom / Wales |
| EPI_ISL_639628 | 10/16/2020 | 11/16/2020 | Europe / United Kingdom / Wales |
| EPI_ISL_639629 | 10/16/2020 | 11/16/2020 | Europe / United Kingdom / Wales |
| EPI_ISL_639630 | 10/16/2020 | 11/16/2020 | Europe / United Kingdom / Wales |
| EPI_ISL_639631 | 8/27/2020  | 11/16/2020 | Europe / Latvia                 |
| EPI_ISL_639632 | 8/28/2020  | 11/16/2020 | Europe / Latvia                 |
| EPI_ISL_639633 | 8/28/2020  | 11/16/2020 | Europe / Latvia                 |
| EPI_ISL_639634 | 9/4/2020   | 11/16/2020 | Europe / Latvia                 |
| EPI_ISL_639635 | 9/2/2020   | 11/16/2020 | Europe / Latvia                 |
| EPI_ISL_639636 | 9/4/2020   | 11/16/2020 | Europe / Latvia                 |
| EPI_ISL_639637 | 9/8/2020   | 11/16/2020 | Europe / Latvia                 |
| EPI_ISL_639638 | 8/31/2020  | 11/16/2020 | Europe / Latvia                 |
| EPI_ISL_639639 | 8/24/2020  | 11/16/2020 | Europe / Latvia                 |
| EPI_ISL_639640 | 9/9/2020   | 11/16/2020 | Europe / Latvia                 |
| EPI_ISL_639641 | 9/9/2020   | 11/16/2020 | Europe / Latvia                 |
| EPI_ISL_639642 | 9/8/2020   | 11/16/2020 | Europe / Latvia                 |
| EPI_ISL_639643 | 9/21/2020  | 11/16/2020 | Europe / Latvia                 |
| EPI_ISL_639644 | 9/23/2020  | 11/16/2020 | Europe / Latvia                 |
| EPI_ISL_639645 | 9/11/2020  | 11/16/2020 | Europe / Latvia                 |
| EPI_ISL_639646 | 9/23/2020  | 11/16/2020 | Europe / Latvia                 |
| EPI_ISL_639647 | 9/11/2020  | 11/16/2020 | Europe / Latvia                 |
| EPI_ISL_639648 | 9/22/2020  | 11/16/2020 | Europe / Latvia                 |
| EPI_ISL_639649 | 8/29/2020  | 11/16/2020 | Europe / Latvia                 |
| EPI_ISL_639650 | 9/9/2020   | 11/16/2020 | Europe / Latvia                 |
| EPI_ISL_639651 | 9/12/2020  | 11/16/2020 | Europe / Latvia                 |
| EPI_ISL_639652 | 9/22/2020  | 11/16/2020 | Europe / Latvia                 |
| EPI_ISL_639653 | 9/21/2020  | 11/16/2020 | Europe / Latvia                 |
| EPI_ISL_639654 | 9/20/2020  | 11/16/2020 | Europe / Latvia                 |
| EPI_ISL_639655 | 9/21/2020  | 11/16/2020 | Europe / Latvia                 |
| EPI_ISL_639656 | 9/23/2020  | 11/16/2020 | Europe / Latvia                 |
| EPI_ISL_639657 | 8/30/2020  | 11/16/2020 | Europe / Latvia                 |
| EPI_ISL_639658 | 8/28/2020  | 11/16/2020 | Europe / Latvia                 |
| EPI_ISL_639659 | 8/26/2020  | 11/16/2020 | Europe / Latvia                 |
| EPI_ISL_639660 | 8/31/2020  | 11/16/2020 | Europe / Latvia                 |
| EPI_ISL_639661 | 9/9/2020   | 11/16/2020 | Europe / Latvia                 |
| EPI_ISL_639662 | 9/18/2020  | 11/16/2020 | Europe / Latvia                 |



|                |            |                                                           |
|----------------|------------|-----------------------------------------------------------|
| EPI_ISL_639663 | 9/21/2020  | 11/16/2020 Europe / Latvia                                |
| EPI_ISL_639664 | 9/11/2020  | 11/16/2020 Europe / Latvia                                |
| EPI_ISL_639665 | 9/10/2020  | 11/16/2020 Europe / Latvia                                |
| EPI_ISL_639666 | 9/23/2020  | 11/16/2020 Europe / Latvia                                |
| EPI_ISL_639667 | 9/23/2020  | 11/16/2020 Europe / Latvia                                |
| EPI_ISL_639668 | 9/28/2020  | 11/16/2020 Europe / Latvia                                |
| EPI_ISL_639669 | 10/5/2020  | 11/16/2020 Europe / Latvia                                |
| EPI_ISL_639670 | 9/29/2020  | 11/16/2020 Europe / Latvia                                |
| EPI_ISL_639671 | 10/2/2020  | 11/16/2020 Europe / Latvia                                |
| EPI_ISL_639672 | 10/7/2020  | 11/16/2020 Europe / Latvia                                |
| EPI_ISL_639673 | 9/29/2020  | 11/16/2020 Europe / Latvia                                |
| EPI_ISL_639674 | 10/13/2020 | 11/16/2020 Europe / Latvia                                |
| EPI_ISL_639675 | 9/30/2020  | 11/16/2020 Europe / Latvia                                |
| EPI_ISL_639676 | 9/29/2020  | 11/16/2020 Europe / Latvia                                |
| EPI_ISL_639677 | 9/26/2020  | 11/16/2020 Europe / Latvia                                |
| EPI_ISL_639678 | 9/26/2020  | 11/16/2020 Europe / Latvia                                |
| EPI_ISL_639679 | 9/27/2020  | 11/16/2020 Europe / Latvia                                |
| EPI_ISL_639680 | 9/26/2020  | 11/16/2020 Europe / Latvia                                |
| EPI_ISL_639681 | 10/7/2020  | 11/16/2020 Europe / Latvia                                |
| EPI_ISL_639682 | 10/1/2020  | 11/16/2020 Europe / Latvia                                |
| EPI_ISL_639683 | 9/24/2020  | 11/16/2020 Europe / Latvia                                |
| EPI_ISL_639684 | 10/3/2020  | 11/16/2020 Europe / Latvia                                |
| EPI_ISL_639685 | 10/12/2020 | 11/16/2020 Europe / Latvia                                |
| EPI_ISL_639686 | 10/13/2020 | 11/16/2020 Europe / Latvia                                |
| EPI_ISL_639687 | 10/7/2020  | 11/16/2020 Europe / Latvia                                |
| EPI_ISL_639688 | 10/4/2020  | 11/16/2020 Europe / Latvia                                |
| EPI_ISL_639689 | 10/5/2020  | 11/16/2020 Europe / Latvia                                |
| EPI_ISL_639690 | 10/8/2020  | 11/16/2020 Europe / Latvia                                |
| EPI_ISL_639691 | 10/13/2020 | 11/16/2020 Europe / Latvia                                |
| EPI_ISL_639692 | 10/6/2020  | 11/16/2020 Europe / Latvia                                |
| EPI_ISL_639693 | 10/7/2020  | 11/16/2020 Europe / Latvia                                |
| EPI_ISL_639694 | 10/12/2020 | 11/16/2020 Europe / Latvia                                |
| EPI_ISL_639729 | 8/2/2020   | 11/16/2020 Oceania / Australia / New South Wales / Sydney |
| EPI_ISL_639730 | 8/3/2020   | 11/16/2020 Oceania / Australia / New South Wales / Sydney |
| EPI_ISL_639731 | 10/7/2020  | 11/16/2020 Oceania / Australia / New South Wales / Sydney |
| EPI_ISL_639732 | 10/18/2020 | 11/16/2020 Oceania / Australia / New South Wales / Sydney |
| EPI_ISL_639733 | 11/2/2020  | 11/16/2020 Oceania / Australia / New South Wales / Sydney |
| EPI_ISL_639734 | 11/2/2020  | 11/16/2020 Oceania / Australia / New South Wales / Sydney |
| EPI_ISL_639735 | 11/2/2020  | 11/16/2020 Oceania / Australia / New South Wales / Sydney |
| EPI_ISL_639736 | 10/21/2020 | 11/16/2020 Oceania / Australia / New South Wales / Sydney |
| EPI_ISL_639737 | 10/20/2020 | 11/16/2020 Oceania / Australia / New South Wales / Sydney |
| EPI_ISL_639738 | 10/26/2020 | 11/16/2020 Oceania / Australia / New South Wales / Sydney |
| EPI_ISL_639740 | 3/29/2020  | 11/16/2020 Europe / United Kingdom / England / London     |
| EPI_ISL_641311 | 3/25/2020  | 11/16/2020 North America / USA / New York                 |
| EPI_ISL_641318 | 10/2/2020  | 11/16/2020 North America / USA / Florida / Alachua County |
| EPI_ISL_641319 | 4/1/2020   | 11/16/2020 North America / USA / Florida / Alachua County |
| EPI_ISL_639741 | 3/22/2020  | 11/17/2020 Oceania / Australia / Queensland               |



|                |            |                                              |
|----------------|------------|----------------------------------------------|
| EPI_ISL_639789 | 3/29/2020  | 11/17/2020 Oceania / Australia / Queensland  |
| EPI_ISL_639790 | 3/28/2020  | 11/17/2020 Oceania / Australia / Queensland  |
| EPI_ISL_639791 | 3/28/2020  | 11/17/2020 Oceania / Australia / Queensland  |
| EPI_ISL_639792 | 3/28/2020  | 11/17/2020 Oceania / Australia / Queensland  |
| EPI_ISL_639793 | 3/29/2020  | 11/17/2020 Oceania / Australia / Queensland  |
| EPI_ISL_639794 | 3/16/2020  | 11/17/2020 Oceania / Australia / Queensland  |
| EPI_ISL_639795 | 3/18/2020  | 11/17/2020 Oceania / Australia / Queensland  |
| EPI_ISL_639796 | 3/18/2020  | 11/17/2020 Oceania / Australia / Queensland  |
| EPI_ISL_639797 | 3/20/2020  | 11/17/2020 Oceania / Australia / Queensland  |
| EPI_ISL_639798 | 3/20/2020  | 11/17/2020 Oceania / Australia / Queensland  |
| EPI_ISL_639799 | 3/20/2020  | 11/17/2020 Oceania / Australia / Queensland  |
| EPI_ISL_639800 | 3/22/2020  | 11/17/2020 Oceania / Australia / Queensland  |
| EPI_ISL_639801 | 3/22/2020  | 11/17/2020 Oceania / Australia / Queensland  |
| EPI_ISL_639802 | 3/22/2020  | 11/17/2020 Oceania / Australia / Queensland  |
| EPI_ISL_639803 | 3/22/2020  | 11/17/2020 Oceania / Australia / Queensland  |
| EPI_ISL_639804 | 3/22/2020  | 11/17/2020 Oceania / Australia / Queensland  |
| EPI_ISL_639805 | 3/23/2020  | 11/17/2020 Oceania / Australia / Queensland  |
| EPI_ISL_639806 | 3/22/2020  | 11/17/2020 Oceania / Australia / Queensland  |
| EPI_ISL_639807 | 3/22/2020  | 11/17/2020 Oceania / Australia / Queensland  |
| EPI_ISL_639808 | 3/22/2020  | 11/17/2020 Oceania / Australia / Queensland  |
| EPI_ISL_639809 | 3/22/2020  | 11/17/2020 Oceania / Australia / Queensland  |
| EPI_ISL_639810 | 3/23/2020  | 11/17/2020 Oceania / Australia / Queensland  |
| EPI_ISL_639811 | 3/22/2020  | 11/17/2020 Oceania / Australia / Queensland  |
| EPI_ISL_639812 | 3/22/2020  | 11/17/2020 Oceania / Australia / Queensland  |
| EPI_ISL_639813 | 3/22/2020  | 11/17/2020 Oceania / Australia / Queensland  |
| EPI_ISL_639814 | 3/29/2020  | 11/17/2020 Oceania / Australia / Queensland  |
| EPI_ISL_639815 | 3/29/2020  | 11/17/2020 Oceania / Australia / Queensland  |
| EPI_ISL_639816 | 3/31/2020  | 11/17/2020 Oceania / Australia / Queensland  |
| EPI_ISL_639817 | 3/31/2020  | 11/17/2020 Oceania / Australia / Queensland  |
| EPI_ISL_639818 | 10/19/2020 | 11/17/2020 Oceania / Australia / Queensland  |
| EPI_ISL_639819 | 10/29/2020 | 11/17/2020 Oceania / Australia / Queensland  |
| EPI_ISL_639820 | 3/26/2020  | 11/17/2020 Oceania / Australia / Queensland  |
| EPI_ISL_639821 | 10/25/2020 | 11/17/2020 Europe / United Kingdom / England |
| EPI_ISL_639822 | 10/30/2020 | 11/17/2020 Europe / United Kingdom / England |
| EPI_ISL_639825 | 9/14/2020  | 11/17/2020 Europe / Ireland / Louth          |
| EPI_ISL_639826 | 9/2/2020   | 11/17/2020 Europe / Ireland / Sligo          |
| EPI_ISL_639827 | 9/9/2020   | 11/17/2020 Europe / Ireland / Louth          |
| EPI_ISL_639828 | 9/14/2020  | 11/17/2020 Europe / Ireland / Louth          |
| EPI_ISL_639829 | 9/14/2020  | 11/17/2020 Europe / Ireland / Louth          |
| EPI_ISL_639830 | 9/14/2020  | 11/17/2020 Europe / Ireland / Louth          |
| EPI_ISL_639831 | 9/14/2020  | 11/17/2020 Europe / Ireland / Monaghan       |
| EPI_ISL_639833 | 9/4/2020   | 11/17/2020 Europe / Ireland / Sligo          |
| EPI_ISL_639834 | 9/14/2020  | 11/17/2020 Europe / Ireland / Sligo          |
| EPI_ISL_639835 | 9/14/2020  | 11/17/2020 Europe / Ireland / Monaghan       |
| EPI_ISL_639836 | 9/4/2020   | 11/17/2020 Europe / Ireland / Sligo          |
| EPI_ISL_639837 | 9/14/2020  | 11/17/2020 Europe / Ireland / Louth          |
| EPI_ISL_639838 | 9/4/2020   | 11/17/2020 Europe / Ireland / Sligo          |

|                |            |            |                             |
|----------------|------------|------------|-----------------------------|
| EPI_ISL_639839 | 9/9/2020   | 11/17/2020 | Europe / Ireland / Louth    |
| EPI_ISL_639840 | 10/18/2020 | 11/17/2020 | Europe / Ireland / Meath    |
| EPI_ISL_639841 | 9/14/2020  | 11/17/2020 | Europe / Ireland / Louth    |
| EPI_ISL_639842 | 10/18/2020 | 11/17/2020 | Europe / Ireland / Meath    |
| EPI_ISL_639843 | 9/13/2020  | 11/17/2020 | Europe / Ireland / Sligo    |
| EPI_ISL_639844 | 9/2/2020   | 11/17/2020 | Europe / Ireland / Sligo    |
| EPI_ISL_639845 | 9/13/2020  | 11/17/2020 | Europe / Ireland / Sligo    |
| EPI_ISL_639846 | 9/13/2020  | 11/17/2020 | Europe / Ireland / Sligo    |
| EPI_ISL_639847 | 9/14/2020  | 11/17/2020 | Europe / Ireland / Louth    |
| EPI_ISL_639848 | 9/9/2020   | 11/17/2020 | Europe / Ireland / Louth    |
| EPI_ISL_639849 | 9/14/2020  | 11/17/2020 | Europe / Ireland / Cavan    |
| EPI_ISL_639850 | 9/9/2020   | 11/17/2020 | Europe / Ireland / Louth    |
| EPI_ISL_639851 | 9/15/2020  | 11/17/2020 | Europe / Ireland / Sligo    |
| EPI_ISL_639852 | 9/14/2020  | 11/17/2020 | Europe / Ireland / Louth    |
| EPI_ISL_639854 | 9/14/2020  | 11/17/2020 | Europe / Ireland / Louth    |
| EPI_ISL_639855 | 9/9/2020   | 11/17/2020 | Europe / Ireland / Louth    |
| EPI_ISL_639856 | 9/9/2020   | 11/17/2020 | Europe / Ireland / Louth    |
| EPI_ISL_639859 | 9/9/2020   | 11/17/2020 | Europe / Ireland / Louth    |
| EPI_ISL_639860 | 9/14/2020  | 11/17/2020 | Europe / Ireland / Louth    |
| EPI_ISL_639861 | 9/9/2020   | 11/17/2020 | Europe / Ireland / Louth    |
| EPI_ISL_639862 | 9/9/2020   | 11/17/2020 | Europe / Ireland / Louth    |
| EPI_ISL_639863 | 9/15/2020  | 11/17/2020 | Europe / Ireland / Sligo    |
| EPI_ISL_639864 | 9/14/2020  | 11/17/2020 | Europe / Ireland / Louth    |
| EPI_ISL_639865 | 10/22/2020 | 11/17/2020 | Europe / Ireland / Dublin   |
| EPI_ISL_639866 | 10/5/2020  | 11/17/2020 | Europe / Ireland / Monaghan |
| EPI_ISL_639867 | 10/5/2020  | 11/17/2020 | Europe / Ireland / Monaghan |
| EPI_ISL_639868 | 10/5/2020  | 11/17/2020 | Europe / Ireland / Monaghan |
| EPI_ISL_639869 | 10/5/2020  | 11/17/2020 | Europe / Ireland / Cavan    |
| EPI_ISL_639870 | 10/5/2020  | 11/17/2020 | Europe / Ireland / Cavan    |
| EPI_ISL_639871 | 10/5/2020  | 11/17/2020 | Europe / Ireland / Cavan    |
| EPI_ISL_639872 | 10/5/2020  | 11/17/2020 | Europe / Ireland / Cavan    |
| EPI_ISL_639873 | 10/5/2020  | 11/17/2020 | Europe / Ireland / Cavan    |
| EPI_ISL_639874 | 10/5/2020  | 11/17/2020 | Europe / Ireland / Cavan    |
| EPI_ISL_639875 | 10/5/2020  | 11/17/2020 | Europe / Ireland / Meath    |
| EPI_ISL_639876 | 10/5/2020  | 11/17/2020 | Europe / Ireland / Meath    |
| EPI_ISL_639877 | 10/5/2020  | 11/17/2020 | Europe / Ireland / Monaghan |
| EPI_ISL_639878 | 10/5/2020  | 11/17/2020 | Europe / Ireland / Louth    |
| EPI_ISL_639879 | 10/5/2020  | 11/17/2020 | Europe / Ireland / Louth    |
| EPI_ISL_639880 | 10/5/2020  | 11/17/2020 | Europe / Ireland / Louth    |
| EPI_ISL_639881 | 10/5/2020  | 11/17/2020 | Europe / Ireland / Louth    |
| EPI_ISL_639882 | 10/5/2020  | 11/17/2020 | Europe / Ireland / Cavan    |
| EPI_ISL_639883 | 10/5/2020  | 11/17/2020 | Europe / Ireland / Meath    |
| EPI_ISL_639884 | 10/5/2020  | 11/17/2020 | Europe / Ireland / Cavan    |
| EPI_ISL_639885 | 10/13/2020 | 11/17/2020 | Europe / Ireland / Wicklow  |
| EPI_ISL_639886 | 10/5/2020  | 11/17/2020 | Europe / Ireland / Cavan    |
| EPI_ISL_639887 | 10/5/2020  | 11/17/2020 | Europe / Ireland / Cavan    |
| EPI_ISL_639888 | 10/5/2020  | 11/17/2020 | Europe / Ireland / Cavan    |

|                |           |            |                               |
|----------------|-----------|------------|-------------------------------|
| EPI_ISL_639889 | 10/5/2020 | 11/17/2020 | Europe / Ireland / Cavan      |
| EPI_ISL_639890 | 10/5/2020 | 11/17/2020 | Europe / Ireland / Cavan      |
| EPI_ISL_639891 | 10/5/2020 | 11/17/2020 | Europe / Ireland / Cavan      |
| EPI_ISL_639892 | 9/30/2020 | 11/17/2020 | Europe / Ireland / Monaghan   |
| EPI_ISL_639893 | 9/30/2020 | 11/17/2020 | Europe / Ireland / Louth      |
| EPI_ISL_639894 | 9/30/2020 | 11/17/2020 | Europe / Ireland / Louth      |
| EPI_ISL_639895 | 10/1/2020 | 11/17/2020 | Europe / Ireland / Louth      |
| EPI_ISL_639896 | 10/1/2020 | 11/17/2020 | Europe / Ireland / Louth      |
| EPI_ISL_639897 | 10/1/2020 | 11/17/2020 | Europe / Ireland / Louth      |
| EPI_ISL_639898 | 9/29/2020 | 11/17/2020 | Europe / Ireland / Monaghan   |
| EPI_ISL_639899 | 9/29/2020 | 11/17/2020 | Europe / Ireland / Monaghan   |
| EPI_ISL_639900 | 9/29/2020 | 11/17/2020 | Europe / Ireland / Monaghan   |
| EPI_ISL_639901 | 9/29/2020 | 11/17/2020 | Europe / Ireland / Monaghan   |
| EPI_ISL_639902 | 9/30/2020 | 11/17/2020 | Europe / Ireland / Monaghan   |
| EPI_ISL_639903 | 9/30/2020 | 11/17/2020 | Europe / Ireland / Monaghan   |
| EPI_ISL_639904 | 10/5/2020 | 11/17/2020 | Europe / Ireland / Cavan      |
| EPI_ISL_639905 | 9/30/2020 | 11/17/2020 | Europe / Ireland / Cavan      |
| EPI_ISL_639906 | 9/30/2020 | 11/17/2020 | Europe / Ireland / Monaghan   |
| EPI_ISL_639907 | 9/30/2020 | 11/17/2020 | Europe / Ireland / Cavan      |
| EPI_ISL_639908 | 10/1/2020 | 11/17/2020 | Europe / Ireland / Monaghan   |
| EPI_ISL_639912 | 6/26/2020 | 11/17/2020 | Europe / Russia / Omsk / Omsk |
| EPI_ISL_639913 | 6/30/2020 | 11/17/2020 | Europe / Russia / Omsk / Omsk |
| EPI_ISL_639914 | 7/6/2020  | 11/17/2020 | Europe / Russia / Omsk / Omsk |
| EPI_ISL_639915 | 6/26/2020 | 11/17/2020 | Europe / Russia / Omsk / Omsk |
| EPI_ISL_639916 | 7/2/2020  | 11/17/2020 | Europe / Russia / Omsk / Omsk |
| EPI_ISL_639917 | 7/2/2020  | 11/17/2020 | Europe / Russia / Omsk / Omsk |
| EPI_ISL_639918 | 7/2/2020  | 11/17/2020 | Europe / Russia / Omsk / Omsk |
| EPI_ISL_639920 | 7/2/2020  | 11/17/2020 | Europe / Russia / Omsk / Omsk |
| EPI_ISL_639921 | 6/30/2020 | 11/17/2020 | Europe / Russia / Omsk / Omsk |
| EPI_ISL_639922 | 6/23/2020 | 11/17/2020 | Europe / Russia / Omsk / Omsk |
| EPI_ISL_639923 | 5/28/2020 | 11/17/2020 | Europe / Russia / Omsk / Omsk |
| EPI_ISL_639924 | 6/1/2020  | 11/17/2020 | Europe / Russia / Omsk / Omsk |
| EPI_ISL_639925 | 6/2/2020  | 11/17/2020 | Europe / Russia / Omsk / Omsk |
| EPI_ISL_639926 | 6/2/2020  | 11/17/2020 | Europe / Russia / Omsk / Omsk |
| EPI_ISL_639927 | 5/21/2020 | 11/17/2020 | Europe / Russia / Omsk / Omsk |
| EPI_ISL_639928 | 5/5/2020  | 11/17/2020 | Europe / Russia / Omsk / Omsk |
| EPI_ISL_639929 | 5/5/2020  | 11/17/2020 | Europe / Russia / Omsk / Omsk |
| EPI_ISL_639930 | 6/5/2020  | 11/17/2020 | Europe / Russia / Omsk / Omsk |
| EPI_ISL_639931 | 5/25/2020 | 11/17/2020 | Europe / Russia / Omsk / Omsk |
| EPI_ISL_639932 | 6/7/2020  | 11/17/2020 | Europe / Russia / Omsk / Omsk |
| EPI_ISL_639933 | 5/10/2020 | 11/17/2020 | Europe / Russia / Omsk / Omsk |
| EPI_ISL_639934 | 6/5/2020  | 11/17/2020 | Europe / Russia / Omsk / Omsk |
| EPI_ISL_639935 | 5/12/2020 | 11/17/2020 | Europe / Russia / Omsk / Omsk |
| EPI_ISL_639936 | 5/14/2020 | 11/17/2020 | Europe / Russia / Omsk / Omsk |
| EPI_ISL_639937 | 5/14/2020 | 11/17/2020 | Europe / Russia / Omsk / Omsk |
| EPI_ISL_639938 | 5/25/2020 | 11/17/2020 | Europe / Russia / Omsk / Omsk |
| EPI_ISL_639939 | 5/17/2020 | 11/17/2020 | Europe / Russia / Omsk / Omsk |

|                |            |            |                                                               |
|----------------|------------|------------|---------------------------------------------------------------|
| EPI_ISL_639940 | 5/17/2020  | 11/17/2020 | Europe / Russia / Omsk / Omsk                                 |
| EPI_ISL_639941 | 6/26/2020  | 11/17/2020 | Europe / Russia / Omsk / Omsk                                 |
| EPI_ISL_639942 | 6/26/2020  | 11/17/2020 | Europe / Russia / Omsk / Omsk                                 |
| EPI_ISL_639945 | 6/26/2020  | 11/17/2020 | Europe / Russia / Omsk / Omsk                                 |
| EPI_ISL_639946 | 5/21/2020  | 11/17/2020 | Europe / Russia / Omsk / Omsk                                 |
| EPI_ISL_639947 | 6/17/2020  | 11/17/2020 | Europe / Russia / Omsk / Omsk                                 |
| EPI_ISL_639949 | 9/10/2020  | 11/17/2020 | Europe / Russia / Perm / Perm                                 |
| EPI_ISL_639951 | 9/22/2020  | 11/17/2020 | Europe / Russia / Moscow / Lapino                             |
| EPI_ISL_639952 | 9/19/2020  | 11/17/2020 | Europe / Russia / Moscow / Korolyov                           |
| EPI_ISL_639953 | 9/27/2020  | 11/17/2020 | Europe / Russia / Moscow / Sergiyev Posad                     |
| EPI_ISL_639954 | 9/26/2020  | 11/17/2020 | Europe / Russia / Moscow / Lapino                             |
| EPI_ISL_639955 | 9/27/2020  | 11/17/2020 | Europe / Russia / Moscow / Lyubertsy                          |
| EPI_ISL_639956 | 9/27/2020  | 11/17/2020 | Europe / Russia / Moscow / Lapino                             |
| EPI_ISL_639957 | 9/27/2020  | 11/17/2020 | Europe / Russia / Moscow / Sergiyev Posad                     |
| EPI_ISL_639958 | 9/25/2020  | 11/17/2020 | Europe / Russia / Novosibirsk / Berdsk                        |
| EPI_ISL_639959 | 9/25/2020  | 11/17/2020 | Europe / Russia / Novosibirsk / Berdsk                        |
| EPI_ISL_639961 | 9/21/2020  | 11/17/2020 | Europe / Russia / Orenburg / Orenburg                         |
| EPI_ISL_639963 | 9/24/2020  | 11/17/2020 | Europe / Russia / Perm / Perm                                 |
| EPI_ISL_639964 | 9/22/2020  | 11/17/2020 | Europe / Russia / Perm / Perm                                 |
| EPI_ISL_639966 | 9/24/2020  | 11/17/2020 | Europe / Russia / Rostov / Kamensk-Shakhtinsky                |
| EPI_ISL_639967 | 9/24/2020  | 11/17/2020 | Europe / Russia / Ryazan / Ryazan                             |
| EPI_ISL_639968 | 9/26/2020  | 11/17/2020 | Europe / Russia / Ryazan / Ryazan                             |
| EPI_ISL_639969 | 9/18/2020  | 11/17/2020 | Europe / Russia / Sverdlovsk / Asbest                         |
| EPI_ISL_639970 | 9/24/2020  | 11/17/2020 | Europe / Russia / Sverdlovsk / Ekaterinburg                   |
| EPI_ISL_639971 | 9/24/2020  | 11/17/2020 | Europe / Russia / Sverdlovsk / Revda                          |
| EPI_ISL_639972 | 9/26/2020  | 11/17/2020 | Europe / Russia / Sverdlovsk / Svobodnyi                      |
| EPI_ISL_639973 | 9/24/2020  | 11/17/2020 | Europe / Russia / Sverdlovsk / Ekaterinburg                   |
| EPI_ISL_639974 | 10/6/2020  | 11/17/2020 | Europe / France / Auvergne-Rhone-Alpes / Craponne             |
| EPI_ISL_639975 | 10/5/2020  | 11/17/2020 | Europe / France / Provence-Alpes-Cote d'Azur / Embrun         |
| EPI_ISL_639976 | 9/21/2020  | 11/17/2020 | Europe / France / Auvergne-Rhone-Alpes / Lyon                 |
| EPI_ISL_639977 | 10/14/2020 | 11/17/2020 | Europe / France / Provence-Alpes-Cote d'Azur / Draguigna      |
| EPI_ISL_639978 | 9/17/2020  | 11/17/2020 | Europe / France / Auvergne-Rhone-Alpes / Lyon                 |
| EPI_ISL_639979 | 9/19/2020  | 11/17/2020 | Europe / France / Auvergne-Rhone-Alpes / Lyon                 |
| EPI_ISL_639980 | 9/22/2020  | 11/17/2020 | Europe / France / Auvergne-Rhone-Alpes / Lyon                 |
| EPI_ISL_639981 | 10/13/2020 | 11/17/2020 | Europe / France / Auvergne-Rhone-Alpes / Saint-Verand         |
| EPI_ISL_639983 | 11/2/2020  | 11/17/2020 | Europe / France / Auvergne-Rhone-Alpes / Andrezieux-Bouth     |
| EPI_ISL_639984 | 9/20/2020  | 11/17/2020 | Europe / France / Auvergne-Rhone-Alpes / Bourg-en-Bresse      |
| EPI_ISL_639985 | 9/21/2020  | 11/17/2020 | Europe / France / Auvergne-Rhone-Alpes / Lyon                 |
| EPI_ISL_639986 | 10/30/2020 | 11/17/2020 | Europe / France / Auvergne-Rhone-Alpes / Lyon                 |
| EPI_ISL_639987 | 10/5/2020  | 11/17/2020 | Europe / France / Auvergne-Rhone-Alpes / Andrezieux-Bouth     |
| EPI_ISL_639988 | 10/30/2020 | 11/17/2020 | Europe / France / Auvergne-Rhone-Alpes / Mazet-Saint-Voy      |
| EPI_ISL_639989 | 10/29/2020 | 11/17/2020 | Europe / France / Auvergne-Rhone-Alpes / Lyon                 |
| EPI_ISL_639990 | 10/29/2020 | 11/17/2020 | Europe / France / Auvergne-Rhone-Alpes / Saint-Genis-les-Olli |
| EPI_ISL_639991 | 9/30/2020  | 11/17/2020 | Europe / France / Auvergne-Rhone-Alpes / Saint-Jean-de-Bou    |
| EPI_ISL_639992 | 9/23/2020  | 11/17/2020 | Europe / France / Auvergne-Rhone-Alpes / Lyon                 |
| EPI_ISL_639993 | 9/26/2020  | 11/17/2020 | Europe / France / Auvergne-Rhone-Alpes / Lyon                 |
| EPI_ISL_639994 | 9/5/2020   | 11/17/2020 | Europe / France / Auvergne-Rhone-Alpes / Lyon                 |

|                |            |            |                                                              |
|----------------|------------|------------|--------------------------------------------------------------|
| EPI_ISL_639995 | 9/25/2020  | 11/17/2020 | Europe / France / Auvergne-Rhone-Alpes / Lyon                |
| EPI_ISL_639996 | 10/26/2020 | 11/17/2020 | Europe / France / Provence-Alpes-Cote d'Azur / Marignane     |
| EPI_ISL_639997 | 10/19/2020 | 11/17/2020 | Europe / France / Provence-Alpes-Cote d'Azur / Draguignan    |
| EPI_ISL_639998 | 9/23/2020  | 11/17/2020 | Europe / France / Auvergne-Rhone-Alpes / Lyon                |
| EPI_ISL_639999 | 9/5/2020   | 11/17/2020 | Europe / France / Auvergne-Rhone-Alpes / Lyon                |
| EPI_ISL_640000 | 10/24/2020 | 11/17/2020 | Europe / France / Auvergne-Rhone-Alpes / Lyon                |
| EPI_ISL_640001 | 10/29/2020 | 11/17/2020 | Europe / France / Auvergne-Rhone-Alpes / Lyon                |
| EPI_ISL_640002 | 10/19/2020 | 11/17/2020 | Europe / France / Occitanie / Montpellier                    |
| EPI_ISL_640003 | 10/24/2020 | 11/17/2020 | Europe / France / Auvergne-Rhone-Alpes / Lyon                |
| EPI_ISL_640004 | 10/25/2020 | 11/17/2020 | Europe / France / Auvergne-Rhone-Alpes / Lyon                |
| EPI_ISL_640005 | 10/26/2020 | 11/17/2020 | Europe / France / Auvergne-Rhone-Alpes / Andrezieux-Bouthery |
| EPI_ISL_640006 | 10/15/2020 | 11/17/2020 | Europe / France / Occitanie / Saint-Gely-du-Fesc             |
| EPI_ISL_640007 | 10/29/2020 | 11/17/2020 | Europe / France / Auvergne-Rhone-Alpes / Lyon                |
| EPI_ISL_640008 | 10/30/2020 | 11/17/2020 | Europe / France / Auvergne-Rhone-Alpes / Lyon                |
| EPI_ISL_640009 | 10/24/2020 | 11/17/2020 | Europe / France / Auvergne-Rhone-Alpes / Lyon                |
| EPI_ISL_640010 | 10/29/2020 | 11/17/2020 | Europe / France / Auvergne-Rhone-Alpes / Lyon                |
| EPI_ISL_640011 | 10/29/2020 | 11/17/2020 | Europe / France / Auvergne-Rhone-Alpes / Lyon                |
| EPI_ISL_640012 | 10/23/2020 | 11/17/2020 | Europe / France / Auvergne-Rhone-Alpes / Lyon                |
| EPI_ISL_640013 | 10/25/2020 | 11/17/2020 | Europe / France / Auvergne-Rhone-Alpes / Lyon                |
| EPI_ISL_640014 | 10/23/2020 | 11/17/2020 | Europe / France / Auvergne-Rhone-Alpes / Lyon                |
| EPI_ISL_640015 | 8/11/2020  | 11/17/2020 | Africa / South Africa / Western Cape / George                |
| EPI_ISL_640016 | 8/10/2020  | 11/17/2020 | Africa / South Africa / Western Cape / George                |
| EPI_ISL_640017 | 8/11/2020  | 11/17/2020 | Africa / South Africa / Western Cape / Oudtshoorn            |
| EPI_ISL_640018 | 8/11/2020  | 11/17/2020 | Africa / South Africa / Western Cape / Northern              |
| EPI_ISL_640019 | 8/13/2020  | 11/17/2020 | Africa / South Africa / Western Cape / George                |
| EPI_ISL_640020 | 8/13/2020  | 11/17/2020 | Africa / South Africa / Western Cape / Mitchells Plain       |
| EPI_ISL_640022 | 8/11/2020  | 11/17/2020 | Africa / South Africa / Western Cape / Knysna                |
| EPI_ISL_640023 | 8/11/2020  | 11/17/2020 | Africa / South Africa / Western Cape / Oudtshoorn            |
| EPI_ISL_640024 | 8/13/2020  | 11/17/2020 | Africa / South Africa / Western Cape / Oudtshoorn            |
| EPI_ISL_640025 | 8/14/2020  | 11/17/2020 | Africa / South Africa / Western Cape / Mitchells Plain       |
| EPI_ISL_640028 | 8/18/2020  | 11/17/2020 | Africa / South Africa / Western Cape / Mitchells Plain       |
| EPI_ISL_640029 | 8/18/2020  | 11/17/2020 | Africa / South Africa / Western Cape / Mossel Bay            |
| EPI_ISL_640031 | 8/19/2020  | 11/17/2020 | Africa / South Africa / Western Cape / Beaufort West         |
| EPI_ISL_640032 | 8/18/2020  | 11/17/2020 | Africa / South Africa / Western Cape / Southern              |
| EPI_ISL_640033 | 8/19/2020  | 11/17/2020 | Africa / South Africa / Western Cape / Southern              |
| EPI_ISL_640035 | 8/20/2020  | 11/17/2020 | Africa / South Africa / Western Cape / Hessequa              |
| EPI_ISL_640040 | 3/22/2020  | 11/17/2020 | Africa / South Africa / Western Cape / Western               |
| EPI_ISL_640043 | 3/30/2020  | 11/17/2020 | Africa / South Africa / Western Cape / Western               |
| EPI_ISL_640044 | 4/1/2020   | 11/17/2020 | Africa / South Africa / Western Cape / Western               |
| EPI_ISL_640045 | 4/1/2020   | 11/17/2020 | Africa / South Africa / Western Cape / Western               |
| EPI_ISL_640046 | 8/29/2020  | 11/17/2020 | Africa / South Africa / Western Cape / Western               |
| EPI_ISL_640047 | 8/26/2020  | 11/17/2020 | Africa / South Africa / Western Cape / Beaufort West         |
| EPI_ISL_640048 | 8/25/2020  | 11/17/2020 | Africa / South Africa / Western Cape / Mossel Bay            |
| EPI_ISL_640049 | 8/25/2020  | 11/17/2020 | Africa / South Africa / Western Cape / George                |
| EPI_ISL_640065 | 6/29/2020  | 11/17/2020 | Africa / South Africa / Western Cape / Mitchells Plain       |
| EPI_ISL_640067 | 7/8/2020   | 11/17/2020 | Africa / South Africa / Western Cape / Western               |
| EPI_ISL_640072 | 8/11/2020  | 11/17/2020 | Africa / South Africa / Western Cape / Klipfontein           |

|                |            |            |                                                     |
|----------------|------------|------------|-----------------------------------------------------|
| EPI_ISL_640074 | 7/22/2020  | 11/17/2020 | Africa / South Africa / Western Cape / Western      |
| EPI_ISL_640075 | 7/23/2020  | 11/17/2020 | Africa / South Africa / Western Cape / Northern     |
| EPI_ISL_640076 | 7/29/2020  | 11/17/2020 | Africa / South Africa / Western Cape / Knysna       |
| EPI_ISL_640077 | 8/29/2020  | 11/17/2020 | Africa / South Africa / Western Cape / Oudtshoorn   |
| EPI_ISL_640078 | 9/22/2020  | 11/17/2020 | Africa / South Africa / Western Cape / Southern     |
| EPI_ISL_640079 | 6/6/2020   | 11/17/2020 | Africa / South Africa / Western Cape / Stellenbosch |
| EPI_ISL_640082 | 4/26/2020  | 11/17/2020 | Africa / South Africa / Western Cape / Klipfontein  |
| EPI_ISL_640084 | 9/25/2020  | 11/17/2020 | Africa / South Africa / Western Cape / Western      |
| EPI_ISL_640093 | 10/10/2020 | 11/17/2020 | Africa / South Africa / Western Cape / Western      |
| EPI_ISL_640104 | 4/29/2020  | 11/17/2020 | Africa / South Africa / Western Cape / Klipfontein  |
| EPI_ISL_640107 | 9/1/2020   | 11/17/2020 | Africa / South Africa / Western Cape / Southern     |
| EPI_ISL_640108 | 9/2/2020   | 11/17/2020 | Africa / South Africa / Western Cape / Southern     |
| EPI_ISL_640111 | 9/4/2020   | 11/17/2020 | Africa / South Africa / Western Cape / Western      |
| EPI_ISL_640112 | 9/4/2020   | 11/17/2020 | Africa / South Africa / Western Cape / Western      |
| EPI_ISL_640113 | 9/4/2020   | 11/17/2020 | Africa / South Africa / Western Cape / Southern     |
| EPI_ISL_640115 | 9/9/2020   | 11/17/2020 | Africa / South Africa / Western Cape / Southern     |
| EPI_ISL_640116 | 9/10/2020  | 11/17/2020 | Africa / South Africa / Western Cape / Southern     |
| EPI_ISL_640118 | 9/8/2020   | 11/17/2020 | Africa / South Africa / Western Cape / George       |
| EPI_ISL_640121 | 9/16/2020  | 11/17/2020 | Africa / South Africa / Western Cape / Southern     |
| EPI_ISL_640122 | 9/18/2020  | 11/17/2020 | Africa / South Africa / Western Cape / Western      |
| EPI_ISL_640123 | 9/18/2020  | 11/17/2020 | Africa / South Africa / Western Cape / Southern     |
| EPI_ISL_640124 | 9/18/2020  | 11/17/2020 | Africa / South Africa / Western Cape / Southern     |
| EPI_ISL_640125 | 9/18/2020  | 11/17/2020 | Africa / South Africa / Western Cape / Southern     |
| EPI_ISL_640127 | 9/22/2020  | 11/17/2020 | Africa / South Africa / Western Cape / Southern     |
| EPI_ISL_640128 | 9/23/2020  | 11/17/2020 | Africa / South Africa / Western Cape / Western      |
| EPI_ISL_640129 | 9/23/2020  | 11/17/2020 | Africa / South Africa / Western Cape / Western      |
| EPI_ISL_640130 | 9/23/2020  | 11/17/2020 | Africa / South Africa / Western Cape / Western      |
| EPI_ISL_640131 | 9/28/2020  | 11/17/2020 | Africa / South Africa / Western Cape / Western      |
| EPI_ISL_640132 | 9/28/2020  | 11/17/2020 | Africa / South Africa / Western Cape / Western      |
| EPI_ISL_640133 | 10/1/2020  | 11/17/2020 | Africa / South Africa / Western Cape / Western      |
| EPI_ISL_640134 | 10/1/2020  | 11/17/2020 | Africa / South Africa / Western Cape / Western      |
| EPI_ISL_640135 | 10/1/2020  | 11/17/2020 | Africa / South Africa / Western Cape / Western      |
| EPI_ISL_640136 | 9/28/2020  | 11/17/2020 | Africa / South Africa / Western Cape / Southern     |
| EPI_ISL_640139 | 10/9/2020  | 11/17/2020 | Africa / South Africa / Western Cape / Western      |
| EPI_ISL_640141 | 10/11/2020 | 11/17/2020 | Africa / South Africa / Western Cape / Southern     |
| EPI_ISL_640143 | 10/20/2020 | 11/17/2020 | North America / USA / Michigan                      |
| EPI_ISL_640144 | 10/20/2020 | 11/17/2020 | North America / USA / Michigan                      |
| EPI_ISL_640145 | 10/20/2020 | 11/17/2020 | North America / USA / Michigan                      |
| EPI_ISL_640146 | 10/20/2020 | 11/17/2020 | North America / USA / Michigan                      |
| EPI_ISL_640147 | 10/20/2020 | 11/17/2020 | North America / USA / Michigan                      |
| EPI_ISL_640148 | 10/20/2020 | 11/17/2020 | North America / USA / Michigan                      |
| EPI_ISL_640149 | 10/20/2020 | 11/17/2020 | North America / USA / Michigan                      |
| EPI_ISL_640150 | 10/20/2020 | 11/17/2020 | North America / USA / Michigan                      |
| EPI_ISL_640151 | 10/20/2020 | 11/17/2020 | North America / USA / Michigan                      |
| EPI_ISL_640152 | 10/20/2020 | 11/17/2020 | North America / USA / Michigan                      |
| EPI_ISL_640153 | 10/20/2020 | 11/17/2020 | North America / USA / Michigan                      |
| EPI_ISL_640154 | 10/20/2020 | 11/17/2020 | North America / USA / Michigan                      |





|                |            |            |                                                          |
|----------------|------------|------------|----------------------------------------------------------|
| EPI_ISL_640215 | 10/23/2020 | 11/17/2020 | North America / USA / Michigan                           |
| EPI_ISL_640216 | 10/24/2020 | 11/17/2020 | North America / USA / Michigan                           |
| EPI_ISL_640218 | 10/23/2020 | 11/17/2020 | North America / USA / Michigan                           |
| EPI_ISL_640219 | 4/29/2020  | 11/17/2020 | Europe / Germany / Baden-Wurttemberg / Villingen-Schwenn |
| EPI_ISL_640220 | 4/9/2020   | 11/17/2020 | Europe / Germany / Baden-Wurttemberg / Villingen-Schwenn |
| EPI_ISL_640221 | 4/28/2020  | 11/17/2020 | Europe / Germany / Baden-Wurttemberg / Tuttlingen        |
| EPI_ISL_640222 | 4/14/2020  | 11/17/2020 | Europe / Germany / Baden-Wurttemberg / Tuttlingen        |
| EPI_ISL_640223 | 4/15/2020  | 11/17/2020 | Europe / Germany / Baden-Wurttemberg / Tuttlingen        |
| EPI_ISL_640224 | 4/7/2020   | 11/17/2020 | Europe / Germany / Baden-Wurttemberg / Villingen-Schwenn |
| EPI_ISL_640225 | 4/8/2020   | 11/17/2020 | Europe / Germany / Baden-Wurttemberg / Villingen-Schwenn |
| EPI_ISL_640226 | 4/14/2020  | 11/17/2020 | Europe / Germany / Baden-Wurttemberg / Villingen-Schwenn |
| EPI_ISL_640227 | 4/8/2020   | 11/17/2020 | Europe / Germany / Baden-Wurttemberg / Villingen-Schwenn |
| EPI_ISL_640228 | 4/16/2020  | 11/17/2020 | Europe / Germany / Baden-Wurttemberg / Konstanz          |
| EPI_ISL_640229 | 4/15/2020  | 11/17/2020 | Europe / Germany / Baden-Wurttemberg / Konstanz          |
| EPI_ISL_640231 | 5/5/2020   | 11/17/2020 | Europe / Germany / Baden-Wurttemberg / Villingen-Schwenn |
| EPI_ISL_640232 | 4/14/2020  | 11/17/2020 | Europe / Germany / Baden-Wurttemberg / Tuttlingen        |
| EPI_ISL_640233 | 4/30/2020  | 11/17/2020 | Europe / Germany / Baden-Wurttemberg / Villingen-Schwenn |
| EPI_ISL_640235 | 4/14/2020  | 11/17/2020 | Europe / Germany / Baden-Wurttemberg / Tuttlingen        |
| EPI_ISL_640236 | 4/7/2020   | 11/17/2020 | Europe / Germany / Baden-Wurttemberg / Konstanz          |
| EPI_ISL_640238 | 4/13/2020  | 11/17/2020 | Europe / Germany / Baden-Wurttemberg / Sigmaringen       |
| EPI_ISL_640239 | 4/15/2020  | 11/17/2020 | Europe / Germany / Baden-Wurttemberg / Villingen-Schwenn |
| EPI_ISL_640240 | 4/15/2020  | 11/17/2020 | Europe / Germany / Baden-Wurttemberg / Tuttlingen        |
| EPI_ISL_640241 | 4/16/2020  | 11/17/2020 | Europe / Germany / Baden-Wurttemberg / Villingen-Schwenn |
| EPI_ISL_640242 | 4/7/2020   | 11/17/2020 | Europe / Germany / Baden-Wurttemberg / Tuttlingen        |
| EPI_ISL_640243 | 4/7/2020   | 11/17/2020 | Europe / Germany / Baden-Wurttemberg / Tuttlingen        |
| EPI_ISL_640244 | 4/21/2020  | 11/17/2020 | Europe / Germany / Baden-Wurttemberg / Rottweil          |
| EPI_ISL_640245 | 4/23/2020  | 11/17/2020 | Europe / Germany / Baden-Wurttemberg / Sigmaringen       |
| EPI_ISL_640246 | 4/21/2020  | 11/17/2020 | Europe / Germany / Baden-Wurttemberg / Tuttlingen        |
| EPI_ISL_640247 | 4/14/2020  | 11/17/2020 | Europe / Germany / Baden-Wurttemberg / Sigmaringen       |
| EPI_ISL_640248 | 4/16/2020  | 11/17/2020 | Europe / Germany / Baden-Wurttemberg / Villingen-Schwenn |
| EPI_ISL_640251 | 4/8/2020   | 11/17/2020 | Europe / Germany / Baden-Wurttemberg / Tuttlingen        |
| EPI_ISL_640252 | 4/28/2020  | 11/17/2020 | Europe / Germany / Baden-Wurttemberg / Villingen-Schwenn |
| EPI_ISL_640253 | 4/16/2020  | 11/17/2020 | Europe / Germany / Baden-Wurttemberg / Konstanz          |
| EPI_ISL_640254 | 4/8/2020   | 11/17/2020 | Europe / Germany / Baden-Wurttemberg / Konstanz          |
| EPI_ISL_640255 | 4/22/2020  | 11/17/2020 | Europe / Germany / Baden-Wurttemberg / Konstanz          |
| EPI_ISL_640256 | 4/16/2020  | 11/17/2020 | Europe / Germany / Baden-Wurttemberg / Sigmaringen       |
| EPI_ISL_640257 | 4/21/2020  | 11/17/2020 | Europe / Germany / Baden-Wurttemberg / Tuttlingen        |
| EPI_ISL_640258 | 4/8/2020   | 11/17/2020 | Europe / Germany / Baden-Wurttemberg / Tuttlingen        |
| EPI_ISL_640259 | 4/14/2020  | 11/17/2020 | Europe / Germany / Baden-Wurttemberg / Villingen-Schwenn |
| EPI_ISL_640260 | 4/9/2020   | 11/17/2020 | Europe / Germany / Baden-Wurttemberg / Tuttlingen        |
| EPI_ISL_640261 | 4/27/2020  | 11/17/2020 | Europe / Germany / Baden-Wurttemberg / Tuttlingen        |
| EPI_ISL_640262 | 4/8/2020   | 11/17/2020 | Europe / Germany / Baden-Wurttemberg / Tuttlingen        |
| EPI_ISL_640263 | 4/9/2020   | 11/17/2020 | Europe / Germany / Baden-Wurttemberg / Villingen-Schwenn |
| EPI_ISL_640264 | 4/13/2020  | 11/17/2020 | Europe / Germany / Baden-Wurttemberg / Sigmaringen       |
| EPI_ISL_640268 | 4/15/2020  | 11/17/2020 | Europe / Germany / Baden-Wurttemberg / Konstanz          |
| EPI_ISL_640271 | 4/7/2020   | 11/17/2020 | Europe / Germany / Baden-Wurttemberg / Tuttlingen        |
| EPI_ISL_640272 | 4/7/2020   | 11/17/2020 | Europe / Germany / Baden-Wurttemberg / Villingen-Schwenn |

|                |           |            |                                |
|----------------|-----------|------------|--------------------------------|
| EPI_ISL_640279 | 6/19/2020 | 11/17/2020 | North America / USA / Utah     |
| EPI_ISL_640288 | 6/20/2020 | 11/17/2020 | North America / USA / Utah     |
| EPI_ISL_640290 | 6/21/2020 | 11/17/2020 | North America / USA / Utah     |
| EPI_ISL_640300 | 6/21/2020 | 11/17/2020 | North America / USA / Utah     |
| EPI_ISL_640303 | 7/29/2020 | 11/18/2020 | Oceania / Australia / Victoria |
| EPI_ISL_640304 | 8/10/2020 | 11/18/2020 | Oceania / Australia / Victoria |
| EPI_ISL_640305 | 9/4/2020  | 11/18/2020 | Oceania / Australia / Victoria |
| EPI_ISL_640308 | 8/2/2020  | 11/18/2020 | Oceania / Australia / Victoria |
| EPI_ISL_640310 | 8/5/2020  | 11/18/2020 | Oceania / Australia / Victoria |
| EPI_ISL_640312 | 7/30/2020 | 11/18/2020 | Oceania / Australia / Victoria |
| EPI_ISL_640313 | 8/11/2020 | 11/18/2020 | Oceania / Australia / Victoria |
| EPI_ISL_640314 | 8/2/2020  | 11/18/2020 | Oceania / Australia / Victoria |
| EPI_ISL_640315 | 7/29/2020 | 11/18/2020 | Oceania / Australia / Victoria |
| EPI_ISL_640316 | 7/28/2020 | 11/18/2020 | Oceania / Australia / Victoria |
| EPI_ISL_640317 | 9/4/2020  | 11/18/2020 | Oceania / Australia / Victoria |
| EPI_ISL_640318 | 8/11/2020 | 11/18/2020 | Oceania / Australia / Victoria |
| EPI_ISL_640320 | 8/5/2020  | 11/18/2020 | Oceania / Australia / Victoria |
| EPI_ISL_640321 | 8/8/2020  | 11/18/2020 | Oceania / Australia / Victoria |
| EPI_ISL_640322 | 7/24/2020 | 11/18/2020 | Oceania / Australia / Victoria |
| EPI_ISL_640324 | 8/2/2020  | 11/18/2020 | Oceania / Australia / Victoria |
| EPI_ISL_640325 | 8/6/2020  | 11/18/2020 | Oceania / Australia / Victoria |
| EPI_ISL_640327 | 7/29/2020 | 11/18/2020 | Oceania / Australia / Victoria |
| EPI_ISL_640328 | 7/26/2020 | 11/18/2020 | Oceania / Australia / Victoria |
| EPI_ISL_640329 | 7/30/2020 | 11/18/2020 | Oceania / Australia / Victoria |
| EPI_ISL_640331 | 7/28/2020 | 11/18/2020 | Oceania / Australia / Victoria |
| EPI_ISL_640333 | 7/29/2020 | 11/18/2020 | Oceania / Australia / Victoria |
| EPI_ISL_640334 | 9/8/2020  | 11/18/2020 | Oceania / Australia / Victoria |
| EPI_ISL_640335 | 7/29/2020 | 11/18/2020 | Oceania / Australia / Victoria |
| EPI_ISL_640336 | 7/29/2020 | 11/18/2020 | Oceania / Australia / Victoria |
| EPI_ISL_640338 | 8/15/2020 | 11/18/2020 | Oceania / Australia / Victoria |
| EPI_ISL_640339 | 7/25/2020 | 11/18/2020 | Oceania / Australia / Victoria |
| EPI_ISL_640340 | 8/9/2020  | 11/18/2020 | Oceania / Australia / Victoria |
| EPI_ISL_640341 | 8/8/2020  | 11/18/2020 | Oceania / Australia / Victoria |
| EPI_ISL_640344 | 7/18/2020 | 11/18/2020 | Oceania / Australia / Victoria |
| EPI_ISL_640345 | 8/4/2020  | 11/18/2020 | Oceania / Australia / Victoria |
| EPI_ISL_640347 | 7/18/2020 | 11/18/2020 | Oceania / Australia / Victoria |
| EPI_ISL_640348 | 8/3/2020  | 11/18/2020 | Oceania / Australia / Victoria |
| EPI_ISL_640351 | 7/29/2020 | 11/18/2020 | Oceania / Australia / Victoria |
| EPI_ISL_640352 | 8/9/2020  | 11/18/2020 | Oceania / Australia / Victoria |
| EPI_ISL_640353 | 7/23/2020 | 11/18/2020 | Oceania / Australia / Victoria |
| EPI_ISL_640354 | 7/29/2020 | 11/18/2020 | Oceania / Australia / Victoria |
| EPI_ISL_640355 | 8/3/2020  | 11/18/2020 | Oceania / Australia / Victoria |
| EPI_ISL_640358 | 7/28/2020 | 11/18/2020 | Oceania / Australia / Victoria |
| EPI_ISL_640359 | 8/5/2020  | 11/18/2020 | Oceania / Australia / Victoria |
| EPI_ISL_640360 | 7/29/2020 | 11/18/2020 | Oceania / Australia / Victoria |
| EPI_ISL_640361 | 8/20/2020 | 11/18/2020 | Oceania / Australia / Victoria |
| EPI_ISL_640362 | 8/9/2020  | 11/18/2020 | Oceania / Australia / Victoria |

|                |           |                                           |
|----------------|-----------|-------------------------------------------|
| EPI_ISL_640363 | 8/1/2020  | 11/18/2020 Oceania / Australia / Victoria |
| EPI_ISL_640364 | 8/5/2020  | 11/18/2020 Oceania / Australia / Victoria |
| EPI_ISL_640367 | 7/24/2020 | 11/18/2020 Oceania / Australia / Victoria |
| EPI_ISL_640368 | 8/9/2020  | 11/18/2020 Oceania / Australia / Victoria |
| EPI_ISL_640369 | 7/29/2020 | 11/18/2020 Oceania / Australia / Victoria |
| EPI_ISL_640371 | 8/4/2020  | 11/18/2020 Oceania / Australia / Victoria |
| EPI_ISL_640372 | 8/3/2020  | 11/18/2020 Oceania / Australia / Victoria |
| EPI_ISL_640373 | 8/4/2020  | 11/18/2020 Oceania / Australia / Victoria |
| EPI_ISL_640376 | 8/4/2020  | 11/18/2020 Oceania / Australia / Victoria |
| EPI_ISL_640377 | 7/30/2020 | 11/18/2020 Oceania / Australia / Victoria |
| EPI_ISL_640378 | 8/8/2020  | 11/18/2020 Oceania / Australia / Victoria |
| EPI_ISL_640379 | 8/12/2020 | 11/18/2020 Oceania / Australia / Victoria |
| EPI_ISL_640380 | 7/23/2020 | 11/18/2020 Oceania / Australia / Victoria |
| EPI_ISL_640382 | 7/31/2020 | 11/18/2020 Oceania / Australia / Victoria |
| EPI_ISL_640383 | 7/18/2020 | 11/18/2020 Oceania / Australia / Victoria |
| EPI_ISL_640384 | 7/23/2020 | 11/18/2020 Oceania / Australia / Victoria |
| EPI_ISL_640385 | 8/11/2020 | 11/18/2020 Oceania / Australia / Victoria |
| EPI_ISL_640388 | 8/9/2020  | 11/18/2020 Oceania / Australia / Victoria |
| EPI_ISL_640390 | 8/5/2020  | 11/18/2020 Oceania / Australia / Victoria |
| EPI_ISL_640391 | 8/12/2020 | 11/18/2020 Oceania / Australia / Victoria |
| EPI_ISL_640392 | 7/31/2020 | 11/18/2020 Oceania / Australia / Victoria |
| EPI_ISL_640394 | 8/1/2020  | 11/18/2020 Oceania / Australia / Victoria |
| EPI_ISL_640396 | 7/29/2020 | 11/18/2020 Oceania / Australia / Victoria |
| EPI_ISL_640397 | 7/29/2020 | 11/18/2020 Oceania / Australia / Victoria |
| EPI_ISL_640398 | 8/11/2020 | 11/18/2020 Oceania / Australia / Victoria |
| EPI_ISL_640400 | 8/8/2020  | 11/18/2020 Oceania / Australia / Victoria |
| EPI_ISL_640401 | 8/8/2020  | 11/18/2020 Oceania / Australia / Victoria |
| EPI_ISL_640402 | 7/23/2020 | 11/18/2020 Oceania / Australia / Victoria |
| EPI_ISL_640403 | 7/27/2020 | 11/18/2020 Oceania / Australia / Victoria |
| EPI_ISL_640404 | 8/9/2020  | 11/18/2020 Oceania / Australia / Victoria |
| EPI_ISL_640405 | 8/3/2020  | 11/18/2020 Oceania / Australia / Victoria |
| EPI_ISL_640406 | 8/6/2020  | 11/18/2020 Oceania / Australia / Victoria |
| EPI_ISL_640407 | 8/5/2020  | 11/18/2020 Oceania / Australia / Victoria |
| EPI_ISL_640408 | 7/30/2020 | 11/18/2020 Oceania / Australia / Victoria |
| EPI_ISL_640410 | 8/13/2020 | 11/18/2020 Oceania / Australia / Victoria |
| EPI_ISL_640411 | 7/24/2020 | 11/18/2020 Oceania / Australia / Victoria |
| EPI_ISL_640412 | 8/10/2020 | 11/18/2020 Oceania / Australia / Victoria |
| EPI_ISL_640413 | 8/4/2020  | 11/18/2020 Oceania / Australia / Victoria |
| EPI_ISL_640415 | 8/5/2020  | 11/18/2020 Oceania / Australia / Victoria |
| EPI_ISL_640416 | 7/29/2020 | 11/18/2020 Oceania / Australia / Victoria |
| EPI_ISL_640417 | 7/31/2020 | 11/18/2020 Oceania / Australia / Victoria |
| EPI_ISL_640419 | 7/30/2020 | 11/18/2020 Oceania / Australia / Victoria |
| EPI_ISL_640420 | 8/3/2020  | 11/18/2020 Oceania / Australia / Victoria |
| EPI_ISL_640421 | 7/29/2020 | 11/18/2020 Oceania / Australia / Victoria |
| EPI_ISL_640422 | 8/3/2020  | 11/18/2020 Oceania / Australia / Victoria |
| EPI_ISL_640423 | 7/28/2020 | 11/18/2020 Oceania / Australia / Victoria |
| EPI_ISL_640424 | 8/4/2020  | 11/18/2020 Oceania / Australia / Victoria |

|                |           |                                           |
|----------------|-----------|-------------------------------------------|
| EPI_ISL_640425 | 8/5/2020  | 11/18/2020 Oceania / Australia / Victoria |
| EPI_ISL_640427 | 8/6/2020  | 11/18/2020 Oceania / Australia / Victoria |
| EPI_ISL_640428 | 8/9/2020  | 11/18/2020 Oceania / Australia / Victoria |
| EPI_ISL_640432 | 8/9/2020  | 11/18/2020 Oceania / Australia / Victoria |
| EPI_ISL_640433 | 8/1/2020  | 11/18/2020 Oceania / Australia / Victoria |
| EPI_ISL_640434 | 8/2/2020  | 11/18/2020 Oceania / Australia / Victoria |
| EPI_ISL_640435 | 7/23/2020 | 11/18/2020 Oceania / Australia / Victoria |
| EPI_ISL_640436 | 8/6/2020  | 11/18/2020 Oceania / Australia / Victoria |
| EPI_ISL_640437 | 7/24/2020 | 11/18/2020 Oceania / Australia / Victoria |
| EPI_ISL_640439 | 7/24/2020 | 11/18/2020 Oceania / Australia / Victoria |
| EPI_ISL_640440 | 8/4/2020  | 11/18/2020 Oceania / Australia / Victoria |
| EPI_ISL_640441 | 7/30/2020 | 11/18/2020 Oceania / Australia / Victoria |
| EPI_ISL_640442 | 8/2/2020  | 11/18/2020 Oceania / Australia / Victoria |
| EPI_ISL_640444 | 7/25/2020 | 11/18/2020 Oceania / Australia / Victoria |
| EPI_ISL_640445 | 8/10/2020 | 11/18/2020 Oceania / Australia / Victoria |
| EPI_ISL_640446 | 7/29/2020 | 11/18/2020 Oceania / Australia / Victoria |
| EPI_ISL_640448 | 8/8/2020  | 11/18/2020 Oceania / Australia / Victoria |
| EPI_ISL_640449 | 7/25/2020 | 11/18/2020 Oceania / Australia / Victoria |
| EPI_ISL_640450 | 7/29/2020 | 11/18/2020 Oceania / Australia / Victoria |
| EPI_ISL_640451 | 7/23/2020 | 11/18/2020 Oceania / Australia / Victoria |
| EPI_ISL_640452 | 7/29/2020 | 11/18/2020 Oceania / Australia / Victoria |
| EPI_ISL_640454 | 7/30/2020 | 11/18/2020 Oceania / Australia / Victoria |
| EPI_ISL_640455 | 8/2/2020  | 11/18/2020 Oceania / Australia / Victoria |
| EPI_ISL_640456 | 8/3/2020  | 11/18/2020 Oceania / Australia / Victoria |
| EPI_ISL_640457 | 8/3/2020  | 11/18/2020 Oceania / Australia / Victoria |
| EPI_ISL_640459 | 8/9/2020  | 11/18/2020 Oceania / Australia / Victoria |
| EPI_ISL_640460 | 7/29/2020 | 11/18/2020 Oceania / Australia / Victoria |
| EPI_ISL_640461 | 8/4/2020  | 11/18/2020 Oceania / Australia / Victoria |
| EPI_ISL_640462 | 7/25/2020 | 11/18/2020 Oceania / Australia / Victoria |
| EPI_ISL_640463 | 8/4/2020  | 11/18/2020 Oceania / Australia / Victoria |
| EPI_ISL_640464 | 8/2/2020  | 11/18/2020 Oceania / Australia / Victoria |
| EPI_ISL_640465 | 7/28/2020 | 11/18/2020 Oceania / Australia / Victoria |
| EPI_ISL_640466 | 8/3/2020  | 11/18/2020 Oceania / Australia / Victoria |
| EPI_ISL_640467 | 8/2/2020  | 11/18/2020 Oceania / Australia / Victoria |
| EPI_ISL_640468 | 8/10/2020 | 11/18/2020 Oceania / Australia / Victoria |
| EPI_ISL_640469 | 7/30/2020 | 11/18/2020 Oceania / Australia / Victoria |
| EPI_ISL_640470 | 8/2/2020  | 11/18/2020 Oceania / Australia / Victoria |
| EPI_ISL_640472 | 8/5/2020  | 11/18/2020 Oceania / Australia / Victoria |
| EPI_ISL_640473 | 8/12/2020 | 11/18/2020 Oceania / Australia / Victoria |
| EPI_ISL_640475 | 8/9/2020  | 11/18/2020 Oceania / Australia / Victoria |
| EPI_ISL_640478 | 8/6/2020  | 11/18/2020 Oceania / Australia / Victoria |
| EPI_ISL_640480 | 7/17/2020 | 11/18/2020 Oceania / Australia / Victoria |
| EPI_ISL_640482 | 8/10/2020 | 11/18/2020 Oceania / Australia / Victoria |
| EPI_ISL_640485 | 7/30/2020 | 11/18/2020 Oceania / Australia / Victoria |
| EPI_ISL_640486 | 8/11/2020 | 11/18/2020 Oceania / Australia / Victoria |
| EPI_ISL_640487 | 8/6/2020  | 11/18/2020 Oceania / Australia / Victoria |
| EPI_ISL_640490 | 7/28/2020 | 11/18/2020 Oceania / Australia / Victoria |

|                |           |            |                                |
|----------------|-----------|------------|--------------------------------|
| EPI_ISL_640492 | 7/25/2020 | 11/18/2020 | Oceania / Australia / Victoria |
| EPI_ISL_640494 | 7/29/2020 | 11/18/2020 | Oceania / Australia / Victoria |
| EPI_ISL_640495 | 7/31/2020 | 11/18/2020 | Oceania / Australia / Victoria |
| EPI_ISL_640496 | 7/23/2020 | 11/18/2020 | Oceania / Australia / Victoria |
| EPI_ISL_640497 | 8/6/2020  | 11/18/2020 | Oceania / Australia / Victoria |
| EPI_ISL_640498 | 8/9/2020  | 11/18/2020 | Oceania / Australia / Victoria |
| EPI_ISL_640499 | 7/31/2020 | 11/18/2020 | Oceania / Australia / Victoria |
| EPI_ISL_640500 | 7/26/2020 | 11/18/2020 | Oceania / Australia / Victoria |
| EPI_ISL_640501 | 7/30/2020 | 11/18/2020 | Oceania / Australia / Victoria |
| EPI_ISL_640502 | 7/18/2020 | 11/18/2020 | Oceania / Australia / Victoria |
| EPI_ISL_640503 | 7/24/2020 | 11/18/2020 | Oceania / Australia / Victoria |
| EPI_ISL_640504 | 8/3/2020  | 11/18/2020 | Oceania / Australia / Victoria |
| EPI_ISL_640505 | 7/29/2020 | 11/18/2020 | Oceania / Australia / Victoria |
| EPI_ISL_640506 | 8/9/2020  | 11/18/2020 | Oceania / Australia / Victoria |
| EPI_ISL_640507 | 7/14/2020 | 11/18/2020 | Oceania / Australia / Victoria |
| EPI_ISL_640508 | 7/31/2020 | 11/18/2020 | Oceania / Australia / Victoria |
| EPI_ISL_640510 | 8/10/2020 | 11/18/2020 | Oceania / Australia / Victoria |
| EPI_ISL_640511 | 8/2/2020  | 11/18/2020 | Oceania / Australia / Victoria |
| EPI_ISL_640513 | 8/10/2020 | 11/18/2020 | Oceania / Australia / Victoria |
| EPI_ISL_640514 | 7/27/2020 | 11/18/2020 | Oceania / Australia / Victoria |
| EPI_ISL_640516 | 8/6/2020  | 11/18/2020 | Oceania / Australia / Victoria |
| EPI_ISL_640517 | 8/5/2020  | 11/18/2020 | Oceania / Australia / Victoria |
| EPI_ISL_640518 | 8/6/2020  | 11/18/2020 | Oceania / Australia / Victoria |
| EPI_ISL_640519 | 10/3/2020 | 11/18/2020 | Oceania / Australia / Victoria |
| EPI_ISL_640520 | 8/9/2020  | 11/18/2020 | Oceania / Australia / Victoria |
| EPI_ISL_640521 | 8/3/2020  | 11/18/2020 | Oceania / Australia / Victoria |
| EPI_ISL_640523 | 9/8/2020  | 11/18/2020 | Oceania / Australia / Victoria |
| EPI_ISL_640524 | 7/24/2020 | 11/18/2020 | Oceania / Australia / Victoria |
| EPI_ISL_640528 | 8/3/2020  | 11/18/2020 | Oceania / Australia / Victoria |
| EPI_ISL_640529 | 7/22/2020 | 11/18/2020 | Oceania / Australia / Victoria |
| EPI_ISL_640530 | 7/31/2020 | 11/18/2020 | Oceania / Australia / Victoria |
| EPI_ISL_640531 | 8/3/2020  | 11/18/2020 | Oceania / Australia / Victoria |
| EPI_ISL_640533 | 8/10/2020 | 11/18/2020 | Oceania / Australia / Victoria |
| EPI_ISL_640535 | 8/1/2020  | 11/18/2020 | Oceania / Australia / Victoria |
| EPI_ISL_640536 | 7/31/2020 | 11/18/2020 | Oceania / Australia / Victoria |
| EPI_ISL_640541 | 8/3/2020  | 11/18/2020 | Oceania / Australia / Victoria |
| EPI_ISL_640544 | 7/26/2020 | 11/18/2020 | Oceania / Australia / Victoria |
| EPI_ISL_640545 | 8/1/2020  | 11/18/2020 | Oceania / Australia / Victoria |
| EPI_ISL_640546 | 7/30/2020 | 11/18/2020 | Oceania / Australia / Victoria |
| EPI_ISL_640547 | 7/30/2020 | 11/18/2020 | Oceania / Australia / Victoria |
| EPI_ISL_640548 | 8/3/2020  | 11/18/2020 | Oceania / Australia / Victoria |
| EPI_ISL_640549 | 7/25/2020 | 11/18/2020 | Oceania / Australia / Victoria |
| EPI_ISL_640550 | 7/24/2020 | 11/18/2020 | Oceania / Australia / Victoria |
| EPI_ISL_640552 | 8/3/2020  | 11/18/2020 | Oceania / Australia / Victoria |
| EPI_ISL_640553 | 7/31/2020 | 11/18/2020 | Oceania / Australia / Victoria |
| EPI_ISL_640554 | 7/29/2020 | 11/18/2020 | Oceania / Australia / Victoria |
| EPI_ISL_640555 | 7/29/2020 | 11/18/2020 | Oceania / Australia / Victoria |

|                |           |                                           |
|----------------|-----------|-------------------------------------------|
| EPI_ISL_640557 | 7/27/2020 | 11/18/2020 Oceania / Australia / Victoria |
| EPI_ISL_640558 | 7/31/2020 | 11/18/2020 Oceania / Australia / Victoria |
| EPI_ISL_640559 | 8/6/2020  | 11/18/2020 Oceania / Australia / Victoria |
| EPI_ISL_640560 | 7/29/2020 | 11/18/2020 Oceania / Australia / Victoria |
| EPI_ISL_640561 | 9/7/2020  | 11/18/2020 Oceania / Australia / Victoria |
| EPI_ISL_640565 | 8/3/2020  | 11/18/2020 Oceania / Australia / Victoria |
| EPI_ISL_640566 | 8/2/2020  | 11/18/2020 Oceania / Australia / Victoria |
| EPI_ISL_640567 | 7/31/2020 | 11/18/2020 Oceania / Australia / Victoria |
| EPI_ISL_640569 | 7/28/2020 | 11/18/2020 Oceania / Australia / Victoria |
| EPI_ISL_640570 | 7/30/2020 | 11/18/2020 Oceania / Australia / Victoria |
| EPI_ISL_640571 | 8/6/2020  | 11/18/2020 Oceania / Australia / Victoria |
| EPI_ISL_640572 | 8/5/2020  | 11/18/2020 Oceania / Australia / Victoria |
| EPI_ISL_640573 | 8/3/2020  | 11/18/2020 Oceania / Australia / Victoria |
| EPI_ISL_640574 | 7/25/2020 | 11/18/2020 Oceania / Australia / Victoria |
| EPI_ISL_640575 | 7/31/2020 | 11/18/2020 Oceania / Australia / Victoria |
| EPI_ISL_640576 | 8/3/2020  | 11/18/2020 Oceania / Australia / Victoria |
| EPI_ISL_640577 | 7/30/2020 | 11/18/2020 Oceania / Australia / Victoria |
| EPI_ISL_640578 | 8/6/2020  | 11/18/2020 Oceania / Australia / Victoria |
| EPI_ISL_640579 | 8/11/2020 | 11/18/2020 Oceania / Australia / Victoria |
| EPI_ISL_640580 | 8/4/2020  | 11/18/2020 Oceania / Australia / Victoria |
| EPI_ISL_640581 | 7/28/2020 | 11/18/2020 Oceania / Australia / Victoria |
| EPI_ISL_640582 | 7/31/2020 | 11/18/2020 Oceania / Australia / Victoria |
| EPI_ISL_640583 | 9/11/2020 | 11/18/2020 Oceania / Australia / Victoria |
| EPI_ISL_640584 | 8/1/2020  | 11/18/2020 Oceania / Australia / Victoria |
| EPI_ISL_640586 | 8/10/2020 | 11/18/2020 Oceania / Australia / Victoria |
| EPI_ISL_640587 | 8/1/2020  | 11/18/2020 Oceania / Australia / Victoria |
| EPI_ISL_640588 | 10/3/2020 | 11/18/2020 Oceania / Australia / Victoria |
| EPI_ISL_640589 | 8/3/2020  | 11/18/2020 Oceania / Australia / Victoria |
| EPI_ISL_640591 | 8/5/2020  | 11/18/2020 Oceania / Australia / Victoria |
| EPI_ISL_640592 | 7/24/2020 | 11/18/2020 Oceania / Australia / Victoria |
| EPI_ISL_640593 | 8/4/2020  | 11/18/2020 Oceania / Australia / Victoria |
| EPI_ISL_640594 | 7/29/2020 | 11/18/2020 Oceania / Australia / Victoria |
| EPI_ISL_640595 | 8/12/2020 | 11/18/2020 Oceania / Australia / Victoria |
| EPI_ISL_640596 | 7/29/2020 | 11/18/2020 Oceania / Australia / Victoria |
| EPI_ISL_640597 | 7/31/2020 | 11/18/2020 Oceania / Australia / Victoria |
| EPI_ISL_640598 | 7/28/2020 | 11/18/2020 Oceania / Australia / Victoria |
| EPI_ISL_640600 | 10/7/2020 | 11/18/2020 Oceania / Australia / Victoria |
| EPI_ISL_640603 | 7/23/2020 | 11/18/2020 Oceania / Australia / Victoria |
| EPI_ISL_640604 | 8/9/2020  | 11/18/2020 Oceania / Australia / Victoria |
| EPI_ISL_640610 | 9/6/2020  | 11/18/2020 Oceania / Australia / Victoria |
| EPI_ISL_640611 | 7/29/2020 | 11/18/2020 Oceania / Australia / Victoria |
| EPI_ISL_640612 | 8/10/2020 | 11/18/2020 Oceania / Australia / Victoria |
| EPI_ISL_640614 | 8/11/2020 | 11/18/2020 Oceania / Australia / Victoria |
| EPI_ISL_640615 | 7/30/2020 | 11/18/2020 Oceania / Australia / Victoria |
| EPI_ISL_640616 | 8/5/2020  | 11/18/2020 Oceania / Australia / Victoria |
| EPI_ISL_640617 | 8/16/2020 | 11/18/2020 Oceania / Australia / Victoria |
| EPI_ISL_640618 | 7/29/2020 | 11/18/2020 Oceania / Australia / Victoria |

|                |           |                                           |
|----------------|-----------|-------------------------------------------|
| EPI_ISL_640619 | 8/6/2020  | 11/18/2020 Oceania / Australia / Victoria |
| EPI_ISL_640620 | 7/30/2020 | 11/18/2020 Oceania / Australia / Victoria |
| EPI_ISL_640621 | 8/4/2020  | 11/18/2020 Oceania / Australia / Victoria |
| EPI_ISL_640622 | 7/29/2020 | 11/18/2020 Oceania / Australia / Victoria |
| EPI_ISL_640623 | 7/18/2020 | 11/18/2020 Oceania / Australia / Victoria |
| EPI_ISL_640624 | 7/20/2020 | 11/18/2020 Oceania / Australia / Victoria |
| EPI_ISL_640628 | 8/9/2020  | 11/18/2020 Oceania / Australia / Victoria |
| EPI_ISL_640629 | 7/29/2020 | 11/18/2020 Oceania / Australia / Victoria |
| EPI_ISL_640631 | 8/10/2020 | 11/18/2020 Oceania / Australia / Victoria |
| EPI_ISL_640632 | 8/3/2020  | 11/18/2020 Oceania / Australia / Victoria |
| EPI_ISL_640633 | 8/1/2020  | 11/18/2020 Oceania / Australia / Victoria |
| EPI_ISL_640635 | 7/25/2020 | 11/18/2020 Oceania / Australia / Victoria |
| EPI_ISL_640636 | 8/9/2020  | 11/18/2020 Oceania / Australia / Victoria |
| EPI_ISL_640637 | 8/5/2020  | 11/18/2020 Oceania / Australia / Victoria |
| EPI_ISL_640638 | 8/4/2020  | 11/18/2020 Oceania / Australia / Victoria |
| EPI_ISL_640642 | 8/6/2020  | 11/18/2020 Oceania / Australia / Victoria |
| EPI_ISL_640643 | 8/2/2020  | 11/18/2020 Oceania / Australia / Victoria |
| EPI_ISL_640646 | 7/29/2020 | 11/18/2020 Oceania / Australia / Victoria |
| EPI_ISL_640647 | 7/31/2020 | 11/18/2020 Oceania / Australia / Victoria |
| EPI_ISL_640648 | 8/4/2020  | 11/18/2020 Oceania / Australia / Victoria |
| EPI_ISL_640649 | 8/2/2020  | 11/18/2020 Oceania / Australia / Victoria |
| EPI_ISL_640651 | 7/25/2020 | 11/18/2020 Oceania / Australia / Victoria |
| EPI_ISL_640652 | 8/2/2020  | 11/18/2020 Oceania / Australia / Victoria |
| EPI_ISL_640653 | 8/2/2020  | 11/18/2020 Oceania / Australia / Victoria |
| EPI_ISL_640655 | 7/30/2020 | 11/18/2020 Oceania / Australia / Victoria |
| EPI_ISL_640656 | 7/30/2020 | 11/18/2020 Oceania / Australia / Victoria |
| EPI_ISL_640657 | 8/3/2020  | 11/18/2020 Oceania / Australia / Victoria |
| EPI_ISL_640659 | 7/31/2020 | 11/18/2020 Oceania / Australia / Victoria |
| EPI_ISL_640660 | 8/5/2020  | 11/18/2020 Oceania / Australia / Victoria |
| EPI_ISL_640661 | 7/31/2020 | 11/18/2020 Oceania / Australia / Victoria |
| EPI_ISL_640662 | 8/8/2020  | 11/18/2020 Oceania / Australia / Victoria |
| EPI_ISL_640663 | 7/24/2020 | 11/18/2020 Oceania / Australia / Victoria |
| EPI_ISL_640665 | 9/7/2020  | 11/18/2020 Oceania / Australia / Victoria |
| EPI_ISL_640666 | 7/26/2020 | 11/18/2020 Oceania / Australia / Victoria |
| EPI_ISL_640667 | 8/14/2020 | 11/18/2020 Oceania / Australia / Victoria |
| EPI_ISL_640668 | 7/30/2020 | 11/18/2020 Oceania / Australia / Victoria |
| EPI_ISL_640670 | 8/5/2020  | 11/18/2020 Oceania / Australia / Victoria |
| EPI_ISL_640671 | 8/7/2020  | 11/18/2020 Oceania / Australia / Victoria |
| EPI_ISL_640672 | 8/2/2020  | 11/18/2020 Oceania / Australia / Victoria |
| EPI_ISL_640673 | 8/9/2020  | 11/18/2020 Oceania / Australia / Victoria |
| EPI_ISL_640675 | 8/6/2020  | 11/18/2020 Oceania / Australia / Victoria |
| EPI_ISL_640677 | 7/29/2020 | 11/18/2020 Oceania / Australia / Victoria |
| EPI_ISL_640678 | 7/29/2020 | 11/18/2020 Oceania / Australia / Victoria |
| EPI_ISL_640679 | 7/26/2020 | 11/18/2020 Oceania / Australia / Victoria |
| EPI_ISL_640684 | 8/2/2020  | 11/18/2020 Oceania / Australia / Victoria |
| EPI_ISL_640685 | 7/29/2020 | 11/18/2020 Oceania / Australia / Victoria |
| EPI_ISL_640686 | 8/3/2020  | 11/18/2020 Oceania / Australia / Victoria |



|                |            |                                           |
|----------------|------------|-------------------------------------------|
| EPI_ISL_640687 | 7/31/2020  | 11/18/2020 Oceania / Australia / Victoria |
| EPI_ISL_640688 | 7/29/2020  | 11/18/2020 Oceania / Australia / Victoria |
| EPI_ISL_640689 | 10/12/2020 | 11/18/2020 Oceania / Australia / Victoria |
| EPI_ISL_640690 | 8/10/2020  | 11/18/2020 Oceania / Australia / Victoria |
| EPI_ISL_640691 | 7/29/2020  | 11/18/2020 Oceania / Australia / Victoria |
| EPI_ISL_640692 | 8/7/2020   | 11/18/2020 Oceania / Australia / Victoria |
| EPI_ISL_640693 | 8/5/2020   | 11/18/2020 Oceania / Australia / Victoria |
| EPI_ISL_640694 | 8/2/2020   | 11/18/2020 Oceania / Australia / Victoria |
| EPI_ISL_640695 | 7/30/2020  | 11/18/2020 Oceania / Australia / Victoria |
| EPI_ISL_640697 | 7/30/2020  | 11/18/2020 Oceania / Australia / Victoria |
| EPI_ISL_640698 | 7/29/2020  | 11/18/2020 Oceania / Australia / Victoria |
| EPI_ISL_640699 | 8/2/2020   | 11/18/2020 Oceania / Australia / Victoria |
| EPI_ISL_640703 | 8/5/2020   | 11/18/2020 Oceania / Australia / Victoria |
| EPI_ISL_640704 | 8/8/2020   | 11/18/2020 Oceania / Australia / Victoria |
| EPI_ISL_640706 | 8/2/2020   | 11/18/2020 Oceania / Australia / Victoria |
| EPI_ISL_640707 | 7/23/2020  | 11/18/2020 Oceania / Australia / Victoria |
| EPI_ISL_640708 | 7/24/2020  | 11/18/2020 Oceania / Australia / Victoria |
| EPI_ISL_640709 | 8/2/2020   | 11/18/2020 Oceania / Australia / Victoria |
| EPI_ISL_640710 | 7/28/2020  | 11/18/2020 Oceania / Australia / Victoria |
| EPI_ISL_640711 | 9/6/2020   | 11/18/2020 Oceania / Australia / Victoria |
| EPI_ISL_640713 | 7/27/2020  | 11/18/2020 Oceania / Australia / Victoria |
| EPI_ISL_640714 | 8/9/2020   | 11/18/2020 Oceania / Australia / Victoria |
| EPI_ISL_640715 | 8/6/2020   | 11/18/2020 Oceania / Australia / Victoria |
| EPI_ISL_640717 | 7/29/2020  | 11/18/2020 Oceania / Australia / Victoria |
| EPI_ISL_640718 | 8/2/2020   | 11/18/2020 Oceania / Australia / Victoria |
| EPI_ISL_640719 | 8/1/2020   | 11/18/2020 Oceania / Australia / Victoria |
| EPI_ISL_640721 | 8/4/2020   | 11/18/2020 Oceania / Australia / Victoria |
| EPI_ISL_640723 | 7/29/2020  | 11/18/2020 Oceania / Australia / Victoria |
| EPI_ISL_640724 | 8/1/2020   | 11/18/2020 Oceania / Australia / Victoria |
| EPI_ISL_640725 | 7/18/2020  | 11/18/2020 Oceania / Australia / Victoria |
| EPI_ISL_640726 | 8/11/2020  | 11/18/2020 Oceania / Australia / Victoria |
| EPI_ISL_640727 | 8/5/2020   | 11/18/2020 Oceania / Australia / Victoria |
| EPI_ISL_640728 | 7/31/2020  | 11/18/2020 Oceania / Australia / Victoria |
| EPI_ISL_640729 | 8/6/2020   | 11/18/2020 Oceania / Australia / Victoria |
| EPI_ISL_640730 | 7/29/2020  | 11/18/2020 Oceania / Australia / Victoria |
| EPI_ISL_640731 | 7/29/2020  | 11/18/2020 Oceania / Australia / Victoria |
| EPI_ISL_640733 | 7/29/2020  | 11/18/2020 Oceania / Australia / Victoria |
| EPI_ISL_640734 | 8/3/2020   | 11/18/2020 Oceania / Australia / Victoria |
| EPI_ISL_640735 | 8/6/2020   | 11/18/2020 Oceania / Australia / Victoria |
| EPI_ISL_640736 | 8/9/2020   | 11/18/2020 Oceania / Australia / Victoria |
| EPI_ISL_640737 | 8/2/2020   | 11/18/2020 Oceania / Australia / Victoria |
| EPI_ISL_640743 | 7/24/2020  | 11/18/2020 Oceania / Australia / Victoria |
| EPI_ISL_640745 | 8/6/2020   | 11/18/2020 Oceania / Australia / Victoria |
| EPI_ISL_640746 | 7/29/2020  | 11/18/2020 Oceania / Australia / Victoria |
| EPI_ISL_640747 | 8/5/2020   | 11/18/2020 Oceania / Australia / Victoria |
| EPI_ISL_640749 | 8/1/2020   | 11/18/2020 Oceania / Australia / Victoria |
| EPI_ISL_640750 | 8/13/2020  | 11/18/2020 Oceania / Australia / Victoria |

|                |           |                                           |
|----------------|-----------|-------------------------------------------|
| EPI_ISL_640753 | 8/6/2020  | 11/18/2020 Oceania / Australia / Victoria |
| EPI_ISL_640754 | 10/5/2020 | 11/18/2020 Oceania / Australia / Victoria |
| EPI_ISL_640756 | 8/4/2020  | 11/18/2020 Oceania / Australia / Victoria |
| EPI_ISL_640757 | 8/10/2020 | 11/18/2020 Oceania / Australia / Victoria |
| EPI_ISL_640758 | 8/8/2020  | 11/18/2020 Oceania / Australia / Victoria |
| EPI_ISL_640759 | 7/31/2020 | 11/18/2020 Oceania / Australia / Victoria |
| EPI_ISL_640760 | 8/6/2020  | 11/18/2020 Oceania / Australia / Victoria |
| EPI_ISL_640761 | 8/2/2020  | 11/18/2020 Oceania / Australia / Victoria |
| EPI_ISL_640762 | 7/29/2020 | 11/18/2020 Oceania / Australia / Victoria |
| EPI_ISL_640765 | 7/29/2020 | 11/18/2020 Oceania / Australia / Victoria |
| EPI_ISL_640766 | 7/25/2020 | 11/18/2020 Oceania / Australia / Victoria |
| EPI_ISL_640767 | 7/29/2020 | 11/18/2020 Oceania / Australia / Victoria |
| EPI_ISL_640770 | 8/3/2020  | 11/18/2020 Oceania / Australia / Victoria |
| EPI_ISL_640773 | 8/1/2020  | 11/18/2020 Oceania / Australia / Victoria |
| EPI_ISL_640776 | 7/29/2020 | 11/18/2020 Oceania / Australia / Victoria |
| EPI_ISL_640777 | 8/4/2020  | 11/18/2020 Oceania / Australia / Victoria |
| EPI_ISL_640778 | 7/31/2020 | 11/18/2020 Oceania / Australia / Victoria |
| EPI_ISL_640780 | 8/5/2020  | 11/18/2020 Oceania / Australia / Victoria |
| EPI_ISL_640781 | 7/27/2020 | 11/18/2020 Oceania / Australia / Victoria |
| EPI_ISL_640782 | 7/31/2020 | 11/18/2020 Oceania / Australia / Victoria |
| EPI_ISL_640784 | 10/6/2020 | 11/18/2020 Oceania / Australia / Victoria |
| EPI_ISL_640785 | 7/29/2020 | 11/18/2020 Oceania / Australia / Victoria |
| EPI_ISL_640786 | 8/3/2020  | 11/18/2020 Oceania / Australia / Victoria |
| EPI_ISL_640788 | 8/10/2020 | 11/18/2020 Oceania / Australia / Victoria |
| EPI_ISL_640789 | 8/3/2020  | 11/18/2020 Oceania / Australia / Victoria |
| EPI_ISL_640790 | 8/1/2020  | 11/18/2020 Oceania / Australia / Victoria |
| EPI_ISL_640792 | 8/2/2020  | 11/18/2020 Oceania / Australia / Victoria |
| EPI_ISL_640793 | 7/23/2020 | 11/18/2020 Oceania / Australia / Victoria |
| EPI_ISL_640794 | 8/8/2020  | 11/18/2020 Oceania / Australia / Victoria |
| EPI_ISL_640796 | 7/30/2020 | 11/18/2020 Oceania / Australia / Victoria |
| EPI_ISL_640798 | 7/25/2020 | 11/18/2020 Oceania / Australia / Victoria |
| EPI_ISL_640799 | 8/10/2020 | 11/18/2020 Oceania / Australia / Victoria |
| EPI_ISL_640800 | 8/3/2020  | 11/18/2020 Oceania / Australia / Victoria |
| EPI_ISL_640801 | 7/27/2020 | 11/18/2020 Oceania / Australia / Victoria |
| EPI_ISL_640802 | 7/29/2020 | 11/18/2020 Oceania / Australia / Victoria |
| EPI_ISL_640805 | 7/31/2020 | 11/18/2020 Oceania / Australia / Victoria |
| EPI_ISL_640806 | 8/6/2020  | 11/18/2020 Oceania / Australia / Victoria |
| EPI_ISL_640807 | 8/3/2020  | 11/18/2020 Oceania / Australia / Victoria |
| EPI_ISL_640808 | 7/24/2020 | 11/18/2020 Oceania / Australia / Victoria |
| EPI_ISL_640809 | 8/6/2020  | 11/18/2020 Oceania / Australia / Victoria |
| EPI_ISL_640810 | 8/10/2020 | 11/18/2020 Oceania / Australia / Victoria |
| EPI_ISL_640811 | 7/22/2020 | 11/18/2020 Oceania / Australia / Victoria |
| EPI_ISL_640812 | 8/1/2020  | 11/18/2020 Oceania / Australia / Victoria |
| EPI_ISL_640813 | 8/7/2020  | 11/18/2020 Oceania / Australia / Victoria |
| EPI_ISL_640816 | 7/29/2020 | 11/18/2020 Oceania / Australia / Victoria |
| EPI_ISL_640817 | 8/10/2020 | 11/18/2020 Oceania / Australia / Victoria |
| EPI_ISL_640819 | 8/6/2020  | 11/18/2020 Oceania / Australia / Victoria |

|                |            |                                           |
|----------------|------------|-------------------------------------------|
| EPI_ISL_640820 | 7/29/2020  | 11/18/2020 Oceania / Australia / Victoria |
| EPI_ISL_640821 | 7/30/2020  | 11/18/2020 Oceania / Australia / Victoria |
| EPI_ISL_640822 | 8/9/2020   | 11/18/2020 Oceania / Australia / Victoria |
| EPI_ISL_640823 | 7/31/2020  | 11/18/2020 Oceania / Australia / Victoria |
| EPI_ISL_640824 | 8/5/2020   | 11/18/2020 Oceania / Australia / Victoria |
| EPI_ISL_640825 | 8/2/2020   | 11/18/2020 Oceania / Australia / Victoria |
| EPI_ISL_640826 | 7/29/2020  | 11/18/2020 Oceania / Australia / Victoria |
| EPI_ISL_640829 | 7/23/2020  | 11/18/2020 Oceania / Australia / Victoria |
| EPI_ISL_640830 | 7/25/2020  | 11/18/2020 Oceania / Australia / Victoria |
| EPI_ISL_640831 | 8/9/2020   | 11/18/2020 Oceania / Australia / Victoria |
| EPI_ISL_640832 | 8/4/2020   | 11/18/2020 Oceania / Australia / Victoria |
| EPI_ISL_640833 | 8/1/2020   | 11/18/2020 Oceania / Australia / Victoria |
| EPI_ISL_640834 | 7/25/2020  | 11/18/2020 Oceania / Australia / Victoria |
| EPI_ISL_640835 | 7/18/2020  | 11/18/2020 Oceania / Australia / Victoria |
| EPI_ISL_640837 | 7/29/2020  | 11/18/2020 Oceania / Australia / Victoria |
| EPI_ISL_640838 | 8/13/2020  | 11/18/2020 Oceania / Australia / Victoria |
| EPI_ISL_640839 | 8/2/2020   | 11/18/2020 Oceania / Australia / Victoria |
| EPI_ISL_640840 | 8/1/2020   | 11/18/2020 Oceania / Australia / Victoria |
| EPI_ISL_640841 | 8/4/2020   | 11/18/2020 Oceania / Australia / Victoria |
| EPI_ISL_640842 | 8/5/2020   | 11/18/2020 Oceania / Australia / Victoria |
| EPI_ISL_640843 | 8/14/2020  | 11/18/2020 Oceania / Australia / Victoria |
| EPI_ISL_640844 | 7/29/2020  | 11/18/2020 Oceania / Australia / Victoria |
| EPI_ISL_640845 | 7/31/2020  | 11/18/2020 Oceania / Australia / Victoria |
| EPI_ISL_640846 | 8/6/2020   | 11/18/2020 Oceania / Australia / Victoria |
| EPI_ISL_640847 | 8/14/2020  | 11/18/2020 Oceania / Australia / Victoria |
| EPI_ISL_640849 | 8/2/2020   | 11/18/2020 Oceania / Australia / Victoria |
| EPI_ISL_640850 | 7/31/2020  | 11/18/2020 Oceania / Australia / Victoria |
| EPI_ISL_640851 | 8/10/2020  | 11/18/2020 Oceania / Australia / Victoria |
| EPI_ISL_640852 | 8/6/2020   | 11/18/2020 Oceania / Australia / Victoria |
| EPI_ISL_640853 | 8/8/2020   | 11/18/2020 Oceania / Australia / Victoria |
| EPI_ISL_640854 | 8/5/2020   | 11/18/2020 Oceania / Australia / Victoria |
| EPI_ISL_640856 | 7/26/2020  | 11/18/2020 Oceania / Australia / Victoria |
| EPI_ISL_640859 | 7/29/2020  | 11/18/2020 Oceania / Australia / Victoria |
| EPI_ISL_640862 | 7/29/2020  | 11/18/2020 Oceania / Australia / Victoria |
| EPI_ISL_640864 | 7/30/2020  | 11/18/2020 Oceania / Australia / Victoria |
| EPI_ISL_640866 | 8/2/2020   | 11/18/2020 Oceania / Australia / Victoria |
| EPI_ISL_640867 | 7/17/2020  | 11/18/2020 Oceania / Australia / Victoria |
| EPI_ISL_640868 | 8/4/2020   | 11/18/2020 Oceania / Australia / Victoria |
| EPI_ISL_640869 | 7/18/2020  | 11/18/2020 Oceania / Australia / Victoria |
| EPI_ISL_640872 | 10/17/2020 | 11/18/2020 Oceania / Australia / Victoria |
| EPI_ISL_640874 | 7/30/2020  | 11/18/2020 Oceania / Australia / Victoria |
| EPI_ISL_640875 | 7/28/2020  | 11/18/2020 Oceania / Australia / Victoria |
| EPI_ISL_640876 | 8/5/2020   | 11/18/2020 Oceania / Australia / Victoria |
| EPI_ISL_640877 | 7/28/2020  | 11/18/2020 Oceania / Australia / Victoria |
| EPI_ISL_640878 | 7/29/2020  | 11/18/2020 Oceania / Australia / Victoria |
| EPI_ISL_640879 | 8/6/2020   | 11/18/2020 Oceania / Australia / Victoria |
| EPI_ISL_640880 | 7/31/2020  | 11/18/2020 Oceania / Australia / Victoria |

|                |           |                                           |
|----------------|-----------|-------------------------------------------|
| EPI_ISL_640881 | 8/6/2020  | 11/18/2020 Oceania / Australia / Victoria |
| EPI_ISL_640882 | 8/4/2020  | 11/18/2020 Oceania / Australia / Victoria |
| EPI_ISL_640883 | 8/9/2020  | 11/18/2020 Oceania / Australia / Victoria |
| EPI_ISL_640884 | 7/23/2020 | 11/18/2020 Oceania / Australia / Victoria |
| EPI_ISL_640885 | 8/5/2020  | 11/18/2020 Oceania / Australia / Victoria |
| EPI_ISL_640886 | 7/28/2020 | 11/18/2020 Oceania / Australia / Victoria |
| EPI_ISL_640887 | 8/1/2020  | 11/18/2020 Oceania / Australia / Victoria |
| EPI_ISL_640888 | 7/29/2020 | 11/18/2020 Oceania / Australia / Victoria |
| EPI_ISL_640889 | 8/5/2020  | 11/18/2020 Oceania / Australia / Victoria |
| EPI_ISL_640890 | 7/21/2020 | 11/18/2020 Oceania / Australia / Victoria |
| EPI_ISL_640891 | 8/9/2020  | 11/18/2020 Oceania / Australia / Victoria |
| EPI_ISL_640892 | 8/11/2020 | 11/18/2020 Oceania / Australia / Victoria |
| EPI_ISL_640893 | 7/29/2020 | 11/18/2020 Oceania / Australia / Victoria |
| EPI_ISL_640894 | 7/11/2020 | 11/18/2020 Oceania / Australia / Victoria |
| EPI_ISL_640895 | 8/5/2020  | 11/18/2020 Oceania / Australia / Victoria |
| EPI_ISL_640896 | 8/10/2020 | 11/18/2020 Oceania / Australia / Victoria |
| EPI_ISL_640897 | 7/29/2020 | 11/18/2020 Oceania / Australia / Victoria |
| EPI_ISL_640899 | 8/3/2020  | 11/18/2020 Oceania / Australia / Victoria |
| EPI_ISL_640901 | 7/29/2020 | 11/18/2020 Oceania / Australia / Victoria |
| EPI_ISL_640903 | 8/3/2020  | 11/18/2020 Oceania / Australia / Victoria |
| EPI_ISL_640904 | 7/30/2020 | 11/18/2020 Oceania / Australia / Victoria |
| EPI_ISL_640905 | 7/29/2020 | 11/18/2020 Oceania / Australia / Victoria |
| EPI_ISL_640906 | 8/3/2020  | 11/18/2020 Oceania / Australia / Victoria |
| EPI_ISL_640907 | 8/4/2020  | 11/18/2020 Oceania / Australia / Victoria |
| EPI_ISL_640908 | 7/21/2020 | 11/18/2020 Oceania / Australia / Victoria |
| EPI_ISL_640909 | 8/16/2020 | 11/18/2020 Oceania / Australia / Victoria |
| EPI_ISL_640911 | 7/31/2020 | 11/18/2020 Oceania / Australia / Victoria |
| EPI_ISL_640913 | 7/30/2020 | 11/18/2020 Oceania / Australia / Victoria |
| EPI_ISL_640914 | 8/9/2020  | 11/18/2020 Oceania / Australia / Victoria |
| EPI_ISL_640915 | 8/3/2020  | 11/18/2020 Oceania / Australia / Victoria |
| EPI_ISL_640916 | 7/25/2020 | 11/18/2020 Oceania / Australia / Victoria |
| EPI_ISL_640917 | 7/29/2020 | 11/18/2020 Oceania / Australia / Victoria |
| EPI_ISL_640918 | 7/29/2020 | 11/18/2020 Oceania / Australia / Victoria |
| EPI_ISL_640919 | 7/28/2020 | 11/18/2020 Oceania / Australia / Victoria |
| EPI_ISL_640921 | 8/4/2020  | 11/18/2020 Oceania / Australia / Victoria |
| EPI_ISL_640922 | 7/27/2020 | 11/18/2020 Oceania / Australia / Victoria |
| EPI_ISL_640923 | 8/11/2020 | 11/18/2020 Oceania / Australia / Victoria |
| EPI_ISL_640924 | 8/11/2020 | 11/18/2020 Oceania / Australia / Victoria |
| EPI_ISL_640925 | 8/13/2020 | 11/18/2020 Oceania / Australia / Victoria |
| EPI_ISL_640926 | 8/4/2020  | 11/18/2020 Oceania / Australia / Victoria |
| EPI_ISL_640928 | 8/3/2020  | 11/18/2020 Oceania / Australia / Victoria |
| EPI_ISL_640931 | 8/1/2020  | 11/18/2020 Oceania / Australia / Victoria |
| EPI_ISL_640932 | 8/3/2020  | 11/18/2020 Oceania / Australia / Victoria |
| EPI_ISL_640934 | 7/29/2020 | 11/18/2020 Oceania / Australia / Victoria |
| EPI_ISL_640935 | 8/2/2020  | 11/18/2020 Oceania / Australia / Victoria |
| EPI_ISL_640936 | 8/8/2020  | 11/18/2020 Oceania / Australia / Victoria |
| EPI_ISL_640938 | 8/6/2020  | 11/18/2020 Oceania / Australia / Victoria |

|                |           |                                           |
|----------------|-----------|-------------------------------------------|
| EPI_ISL_640939 | 8/11/2020 | 11/18/2020 Oceania / Australia / Victoria |
| EPI_ISL_640940 | 8/5/2020  | 11/18/2020 Oceania / Australia / Victoria |
| EPI_ISL_640941 | 8/3/2020  | 11/18/2020 Oceania / Australia / Victoria |
| EPI_ISL_640943 | 7/27/2020 | 11/18/2020 Oceania / Australia / Victoria |
| EPI_ISL_640944 | 8/7/2020  | 11/18/2020 Oceania / Australia / Victoria |
| EPI_ISL_640945 | 8/2/2020  | 11/18/2020 Oceania / Australia / Victoria |
| EPI_ISL_640947 | 7/31/2020 | 11/18/2020 Oceania / Australia / Victoria |
| EPI_ISL_640948 | 7/29/2020 | 11/18/2020 Oceania / Australia / Victoria |
| EPI_ISL_640949 | 7/27/2020 | 11/18/2020 Oceania / Australia / Victoria |
| EPI_ISL_640950 | 8/6/2020  | 11/18/2020 Oceania / Australia / Victoria |
| EPI_ISL_640951 | 7/31/2020 | 11/18/2020 Oceania / Australia / Victoria |
| EPI_ISL_640952 | 8/6/2020  | 11/18/2020 Oceania / Australia / Victoria |
| EPI_ISL_640953 | 7/29/2020 | 11/18/2020 Oceania / Australia / Victoria |
| EPI_ISL_640954 | 8/5/2020  | 11/18/2020 Oceania / Australia / Victoria |
| EPI_ISL_640955 | 8/1/2020  | 11/18/2020 Oceania / Australia / Victoria |
| EPI_ISL_640956 | 7/28/2020 | 11/18/2020 Oceania / Australia / Victoria |
| EPI_ISL_640957 | 7/25/2020 | 11/18/2020 Oceania / Australia / Victoria |
| EPI_ISL_640959 | 7/29/2020 | 11/18/2020 Oceania / Australia / Victoria |
| EPI_ISL_640960 | 7/29/2020 | 11/18/2020 Oceania / Australia / Victoria |
| EPI_ISL_640961 | 8/19/2020 | 11/18/2020 Oceania / Australia / Victoria |
| EPI_ISL_640962 | 8/5/2020  | 11/18/2020 Oceania / Australia / Victoria |
| EPI_ISL_640963 | 9/8/2020  | 11/18/2020 Oceania / Australia / Victoria |
| EPI_ISL_640964 | 8/2/2020  | 11/18/2020 Oceania / Australia / Victoria |
| EPI_ISL_640966 | 8/9/2020  | 11/18/2020 Oceania / Australia / Victoria |
| EPI_ISL_640968 | 8/5/2020  | 11/18/2020 Oceania / Australia / Victoria |
| EPI_ISL_640969 | 9/13/2020 | 11/18/2020 Oceania / Australia / Victoria |
| EPI_ISL_640970 | 8/19/2020 | 11/18/2020 Oceania / Australia / Victoria |
| EPI_ISL_640971 | 8/9/2020  | 11/18/2020 Oceania / Australia / Victoria |
| EPI_ISL_640972 | 8/3/2020  | 11/18/2020 Oceania / Australia / Victoria |
| EPI_ISL_640973 | 8/4/2020  | 11/18/2020 Oceania / Australia / Victoria |
| EPI_ISL_640975 | 8/20/2020 | 11/18/2020 Oceania / Australia / Victoria |
| EPI_ISL_640976 | 7/27/2020 | 11/18/2020 Oceania / Australia / Victoria |
| EPI_ISL_640977 | 8/6/2020  | 11/18/2020 Oceania / Australia / Victoria |
| EPI_ISL_640979 | 8/3/2020  | 11/18/2020 Oceania / Australia / Victoria |
| EPI_ISL_640980 | 8/4/2020  | 11/18/2020 Oceania / Australia / Victoria |
| EPI_ISL_640983 | 8/10/2020 | 11/18/2020 Oceania / Australia / Victoria |
| EPI_ISL_640984 | 8/1/2020  | 11/18/2020 Oceania / Australia / Victoria |
| EPI_ISL_640987 | 8/1/2020  | 11/18/2020 Oceania / Australia / Victoria |
| EPI_ISL_640988 | 7/31/2020 | 11/18/2020 Oceania / Australia / Victoria |
| EPI_ISL_640989 | 8/8/2020  | 11/18/2020 Oceania / Australia / Victoria |
| EPI_ISL_640991 | 7/17/2020 | 11/18/2020 Oceania / Australia / Victoria |
| EPI_ISL_640992 | 10/9/2020 | 11/18/2020 Oceania / Australia / Victoria |
| EPI_ISL_640993 | 8/5/2020  | 11/18/2020 Oceania / Australia / Victoria |
| EPI_ISL_640994 | 8/12/2020 | 11/18/2020 Oceania / Australia / Victoria |
| EPI_ISL_640995 | 8/5/2020  | 11/18/2020 Oceania / Australia / Victoria |
| EPI_ISL_640996 | 8/2/2020  | 11/18/2020 Oceania / Australia / Victoria |
| EPI_ISL_640997 | 8/4/2020  | 11/18/2020 Oceania / Australia / Victoria |

|                |            |                                           |
|----------------|------------|-------------------------------------------|
| EPI_ISL_640999 | 8/11/2020  | 11/18/2020 Oceania / Australia / Victoria |
| EPI_ISL_641000 | 7/18/2020  | 11/18/2020 Oceania / Australia / Victoria |
| EPI_ISL_641001 | 8/2/2020   | 11/18/2020 Oceania / Australia / Victoria |
| EPI_ISL_641003 | 7/18/2020  | 11/18/2020 Oceania / Australia / Victoria |
| EPI_ISL_641004 | 7/25/2020  | 11/18/2020 Oceania / Australia / Victoria |
| EPI_ISL_641005 | 7/31/2020  | 11/18/2020 Oceania / Australia / Victoria |
| EPI_ISL_641008 | 8/5/2020   | 11/18/2020 Oceania / Australia / Victoria |
| EPI_ISL_641009 | 8/2/2020   | 11/18/2020 Oceania / Australia / Victoria |
| EPI_ISL_641010 | 8/1/2020   | 11/18/2020 Oceania / Australia / Victoria |
| EPI_ISL_641011 | 7/25/2020  | 11/18/2020 Oceania / Australia / Victoria |
| EPI_ISL_641012 | 10/14/2020 | 11/18/2020 Oceania / Australia / Victoria |
| EPI_ISL_641013 | 8/6/2020   | 11/18/2020 Oceania / Australia / Victoria |
| EPI_ISL_641014 | 8/4/2020   | 11/18/2020 Oceania / Australia / Victoria |
| EPI_ISL_641017 | 10/13/2020 | 11/18/2020 Oceania / Australia / Victoria |
| EPI_ISL_641018 | 7/25/2020  | 11/18/2020 Oceania / Australia / Victoria |
| EPI_ISL_641020 | 7/26/2020  | 11/18/2020 Oceania / Australia / Victoria |
| EPI_ISL_641021 | 8/5/2020   | 11/18/2020 Oceania / Australia / Victoria |
| EPI_ISL_641022 | 7/28/2020  | 11/18/2020 Oceania / Australia / Victoria |
| EPI_ISL_641024 | 8/3/2020   | 11/18/2020 Oceania / Australia / Victoria |
| EPI_ISL_641025 | 8/10/2020  | 11/18/2020 Oceania / Australia / Victoria |
| EPI_ISL_641026 | 8/7/2020   | 11/18/2020 Oceania / Australia / Victoria |
| EPI_ISL_641027 | 7/29/2020  | 11/18/2020 Oceania / Australia / Victoria |
| EPI_ISL_641028 | 8/5/2020   | 11/18/2020 Oceania / Australia / Victoria |
| EPI_ISL_641029 | 8/14/2020  | 11/18/2020 Oceania / Australia / Victoria |
| EPI_ISL_641030 | 7/31/2020  | 11/18/2020 Oceania / Australia / Victoria |
| EPI_ISL_641032 | 7/29/2020  | 11/18/2020 Oceania / Australia / Victoria |
| EPI_ISL_641034 | 8/11/2020  | 11/18/2020 Oceania / Australia / Victoria |
| EPI_ISL_641035 | 7/24/2020  | 11/18/2020 Oceania / Australia / Victoria |
| EPI_ISL_641036 | 8/20/2020  | 11/18/2020 Oceania / Australia / Victoria |
| EPI_ISL_641038 | 7/30/2020  | 11/18/2020 Oceania / Australia / Victoria |
| EPI_ISL_641040 | 7/29/2020  | 11/18/2020 Oceania / Australia / Victoria |
| EPI_ISL_641041 | 10/9/2020  | 11/18/2020 Oceania / Australia / Victoria |
| EPI_ISL_641042 | 8/1/2020   | 11/18/2020 Oceania / Australia / Victoria |
| EPI_ISL_641043 | 7/30/2020  | 11/18/2020 Oceania / Australia / Victoria |
| EPI_ISL_641045 | 8/9/2020   | 11/18/2020 Oceania / Australia / Victoria |
| EPI_ISL_641046 | 7/24/2020  | 11/18/2020 Oceania / Australia / Victoria |
| EPI_ISL_641048 | 9/8/2020   | 11/18/2020 Oceania / Australia / Victoria |
| EPI_ISL_641050 | 10/8/2020  | 11/18/2020 Oceania / Australia / Victoria |
| EPI_ISL_641051 | 8/4/2020   | 11/18/2020 Oceania / Australia / Victoria |
| EPI_ISL_641053 | 9/6/2020   | 11/18/2020 Oceania / Australia / Victoria |
| EPI_ISL_641054 | 9/9/2020   | 11/18/2020 Oceania / Australia / Victoria |
| EPI_ISL_641056 | 8/3/2020   | 11/18/2020 Oceania / Australia / Victoria |
| EPI_ISL_641058 | 8/5/2020   | 11/18/2020 Oceania / Australia / Victoria |
| EPI_ISL_641060 | 7/18/2020  | 11/18/2020 Oceania / Australia / Victoria |
| EPI_ISL_641061 | 8/20/2020  | 11/18/2020 Oceania / Australia / Victoria |
| EPI_ISL_641063 | 7/25/2020  | 11/18/2020 Oceania / Australia / Victoria |
| EPI_ISL_641064 | 7/29/2020  | 11/18/2020 Oceania / Australia / Victoria |

|                |           |                                           |
|----------------|-----------|-------------------------------------------|
| EPI_ISL_641065 | 8/14/2020 | 11/18/2020 Oceania / Australia / Victoria |
| EPI_ISL_641066 | 7/23/2020 | 11/18/2020 Oceania / Australia / Victoria |
| EPI_ISL_641071 | 7/29/2020 | 11/18/2020 Oceania / Australia / Victoria |
| EPI_ISL_641073 | 8/6/2020  | 11/18/2020 Oceania / Australia / Victoria |
| EPI_ISL_641074 | 8/4/2020  | 11/18/2020 Oceania / Australia / Victoria |
| EPI_ISL_641077 | 2020      | 11/18/2020 Oceania / Australia / Victoria |
| EPI_ISL_641078 | 8/5/2020  | 11/18/2020 Oceania / Australia / Victoria |
| EPI_ISL_641081 | 7/30/2020 | 11/18/2020 Oceania / Australia / Victoria |
| EPI_ISL_641082 | 7/29/2020 | 11/18/2020 Oceania / Australia / Victoria |
| EPI_ISL_641083 | 8/1/2020  | 11/18/2020 Oceania / Australia / Victoria |
| EPI_ISL_641084 | 7/29/2020 | 11/18/2020 Oceania / Australia / Victoria |
| EPI_ISL_641085 | 7/28/2020 | 11/18/2020 Oceania / Australia / Victoria |
| EPI_ISL_641089 | 8/1/2020  | 11/18/2020 Oceania / Australia / Victoria |
| EPI_ISL_641093 | 7/30/2020 | 11/18/2020 Oceania / Australia / Victoria |
| EPI_ISL_641094 | 7/31/2020 | 11/18/2020 Oceania / Australia / Victoria |
| EPI_ISL_641095 | 7/28/2020 | 11/18/2020 Oceania / Australia / Victoria |
| EPI_ISL_641096 | 8/9/2020  | 11/18/2020 Oceania / Australia / Victoria |
| EPI_ISL_641099 | 8/11/2020 | 11/18/2020 Oceania / Australia / Victoria |
| EPI_ISL_641100 | 7/31/2020 | 11/18/2020 Oceania / Australia / Victoria |
| EPI_ISL_641101 | 7/23/2020 | 11/18/2020 Oceania / Australia / Victoria |
| EPI_ISL_641103 | 8/10/2020 | 11/18/2020 Oceania / Australia / Victoria |
| EPI_ISL_641104 | 10/9/2020 | 11/18/2020 Oceania / Australia / Victoria |
| EPI_ISL_641105 | 8/17/2020 | 11/18/2020 Oceania / Australia / Victoria |
| EPI_ISL_641107 | 7/18/2020 | 11/18/2020 Oceania / Australia / Victoria |
| EPI_ISL_641108 | 8/13/2020 | 11/18/2020 Oceania / Australia / Victoria |
| EPI_ISL_641109 | 8/10/2020 | 11/18/2020 Oceania / Australia / Victoria |
| EPI_ISL_641111 | 8/1/2020  | 11/18/2020 Oceania / Australia / Victoria |
| EPI_ISL_641112 | 7/18/2020 | 11/18/2020 Oceania / Australia / Victoria |
| EPI_ISL_641113 | 7/31/2020 | 11/18/2020 Oceania / Australia / Victoria |
| EPI_ISL_641114 | 7/29/2020 | 11/18/2020 Oceania / Australia / Victoria |
| EPI_ISL_641115 | 8/2/2020  | 11/18/2020 Oceania / Australia / Victoria |
| EPI_ISL_641117 | 7/30/2020 | 11/18/2020 Oceania / Australia / Victoria |
| EPI_ISL_641118 | 8/1/2020  | 11/18/2020 Oceania / Australia / Victoria |
| EPI_ISL_641120 | 7/28/2020 | 11/18/2020 Oceania / Australia / Victoria |
| EPI_ISL_641121 | 9/9/2020  | 11/18/2020 Oceania / Australia / Victoria |
| EPI_ISL_641122 | 8/9/2020  | 11/18/2020 Oceania / Australia / Victoria |
| EPI_ISL_641123 | 8/9/2020  | 11/18/2020 Oceania / Australia / Victoria |
| EPI_ISL_641124 | 8/8/2020  | 11/18/2020 Oceania / Australia / Victoria |
| EPI_ISL_641125 | 7/27/2020 | 11/18/2020 Oceania / Australia / Victoria |
| EPI_ISL_641128 | 8/1/2020  | 11/18/2020 Oceania / Australia / Victoria |
| EPI_ISL_641129 | 7/30/2020 | 11/18/2020 Oceania / Australia / Victoria |
| EPI_ISL_641130 | 7/30/2020 | 11/18/2020 Oceania / Australia / Victoria |
| EPI_ISL_641131 | 8/1/2020  | 11/18/2020 Oceania / Australia / Victoria |
| EPI_ISL_641132 | 7/30/2020 | 11/18/2020 Oceania / Australia / Victoria |
| EPI_ISL_641133 | 8/9/2020  | 11/18/2020 Oceania / Australia / Victoria |
| EPI_ISL_641134 | 8/4/2020  | 11/18/2020 Oceania / Australia / Victoria |
| EPI_ISL_641135 | 7/23/2020 | 11/18/2020 Oceania / Australia / Victoria |

|                |           |                                           |
|----------------|-----------|-------------------------------------------|
| EPI_ISL_641136 | 7/31/2020 | 11/18/2020 Oceania / Australia / Victoria |
| EPI_ISL_641137 | 8/3/2020  | 11/18/2020 Oceania / Australia / Victoria |
| EPI_ISL_641138 | 8/5/2020  | 11/18/2020 Oceania / Australia / Victoria |
| EPI_ISL_641140 | 7/31/2020 | 11/18/2020 Oceania / Australia / Victoria |
| EPI_ISL_641141 | 8/1/2020  | 11/18/2020 Oceania / Australia / Victoria |
| EPI_ISL_641142 | 8/5/2020  | 11/18/2020 Oceania / Australia / Victoria |
| EPI_ISL_641146 | 7/29/2020 | 11/18/2020 Oceania / Australia / Victoria |
| EPI_ISL_641147 | 8/10/2020 | 11/18/2020 Oceania / Australia / Victoria |
| EPI_ISL_641148 | 8/6/2020  | 11/18/2020 Oceania / Australia / Victoria |
| EPI_ISL_641149 | 8/4/2020  | 11/18/2020 Oceania / Australia / Victoria |
| EPI_ISL_641150 | 8/5/2020  | 11/18/2020 Oceania / Australia / Victoria |
| EPI_ISL_641151 | 7/30/2020 | 11/18/2020 Oceania / Australia / Victoria |
| EPI_ISL_641152 | 7/29/2020 | 11/18/2020 Oceania / Australia / Victoria |
| EPI_ISL_641153 | 8/10/2020 | 11/18/2020 Oceania / Australia / Victoria |
| EPI_ISL_641154 | 7/23/2020 | 11/18/2020 Oceania / Australia / Victoria |
| EPI_ISL_641155 | 8/3/2020  | 11/18/2020 Oceania / Australia / Victoria |
| EPI_ISL_641156 | 2020      | 11/18/2020 Oceania / Australia / Victoria |
| EPI_ISL_641157 | 8/9/2020  | 11/18/2020 Oceania / Australia / Victoria |
| EPI_ISL_641158 | 8/8/2020  | 11/18/2020 Oceania / Australia / Victoria |
| EPI_ISL_641159 | 7/31/2020 | 11/18/2020 Oceania / Australia / Victoria |
| EPI_ISL_641160 | 7/25/2020 | 11/18/2020 Oceania / Australia / Victoria |
| EPI_ISL_641161 | 8/16/2020 | 11/18/2020 Oceania / Australia / Victoria |
| EPI_ISL_641162 | 8/9/2020  | 11/18/2020 Oceania / Australia / Victoria |
| EPI_ISL_641164 | 8/10/2020 | 11/18/2020 Oceania / Australia / Victoria |
| EPI_ISL_641167 | 8/6/2020  | 11/18/2020 Oceania / Australia / Victoria |
| EPI_ISL_641168 | 7/29/2020 | 11/18/2020 Oceania / Australia / Victoria |
| EPI_ISL_641170 | 8/10/2020 | 11/18/2020 Oceania / Australia / Victoria |
| EPI_ISL_641171 | 8/3/2020  | 11/18/2020 Oceania / Australia / Victoria |
| EPI_ISL_641172 | 8/9/2020  | 11/18/2020 Oceania / Australia / Victoria |
| EPI_ISL_641173 | 7/26/2020 | 11/18/2020 Oceania / Australia / Victoria |
| EPI_ISL_641174 | 8/3/2020  | 11/18/2020 Oceania / Australia / Victoria |
| EPI_ISL_641175 | 7/31/2020 | 11/18/2020 Oceania / Australia / Victoria |
| EPI_ISL_641176 | 8/1/2020  | 11/18/2020 Oceania / Australia / Victoria |
| EPI_ISL_641177 | 10/8/2020 | 11/18/2020 Oceania / Australia / Victoria |
| EPI_ISL_641178 | 8/9/2020  | 11/18/2020 Oceania / Australia / Victoria |
| EPI_ISL_641179 | 8/4/2020  | 11/18/2020 Oceania / Australia / Victoria |
| EPI_ISL_641181 | 7/18/2020 | 11/18/2020 Oceania / Australia / Victoria |
| EPI_ISL_641183 | 7/30/2020 | 11/18/2020 Oceania / Australia / Victoria |
| EPI_ISL_641185 | 8/4/2020  | 11/18/2020 Oceania / Australia / Victoria |
| EPI_ISL_641186 | 8/6/2020  | 11/18/2020 Oceania / Australia / Victoria |
| EPI_ISL_641187 | 8/4/2020  | 11/18/2020 Oceania / Australia / Victoria |
| EPI_ISL_641189 | 8/4/2020  | 11/18/2020 Oceania / Australia / Victoria |
| EPI_ISL_641190 | 7/31/2020 | 11/18/2020 Oceania / Australia / Victoria |
| EPI_ISL_641192 | 7/30/2020 | 11/18/2020 Oceania / Australia / Victoria |
| EPI_ISL_641193 | 9/6/2020  | 11/18/2020 Oceania / Australia / Victoria |
| EPI_ISL_641194 | 8/9/2020  | 11/18/2020 Oceania / Australia / Victoria |
| EPI_ISL_641195 | 8/1/2020  | 11/18/2020 Oceania / Australia / Victoria |



|                |            |                                           |
|----------------|------------|-------------------------------------------|
| EPI_ISL_641196 | 8/14/2020  | 11/18/2020 Oceania / Australia / Victoria |
| EPI_ISL_641197 | 9/12/2020  | 11/18/2020 Oceania / Australia / Victoria |
| EPI_ISL_641198 | 8/1/2020   | 11/18/2020 Oceania / Australia / Victoria |
| EPI_ISL_641199 | 7/25/2020  | 11/18/2020 Oceania / Australia / Victoria |
| EPI_ISL_641200 | 9/9/2020   | 11/18/2020 Oceania / Australia / Victoria |
| EPI_ISL_641201 | 7/27/2020  | 11/18/2020 Oceania / Australia / Victoria |
| EPI_ISL_641208 | 8/11/2020  | 11/18/2020 Oceania / Australia / Victoria |
| EPI_ISL_641209 | 8/10/2020  | 11/18/2020 Oceania / Australia / Victoria |
| EPI_ISL_641211 | 7/31/2020  | 11/18/2020 Oceania / Australia / Victoria |
| EPI_ISL_641212 | 8/6/2020   | 11/18/2020 Oceania / Australia / Victoria |
| EPI_ISL_641214 | 10/13/2020 | 11/18/2020 Oceania / Australia / Victoria |
| EPI_ISL_641216 | 7/18/2020  | 11/18/2020 Oceania / Australia / Victoria |
| EPI_ISL_641217 | 8/3/2020   | 11/18/2020 Oceania / Australia / Victoria |
| EPI_ISL_641219 | 7/26/2020  | 11/18/2020 Oceania / Australia / Victoria |
| EPI_ISL_641221 | 8/6/2020   | 11/18/2020 Oceania / Australia / Victoria |
| EPI_ISL_641222 | 8/3/2020   | 11/18/2020 Oceania / Australia / Victoria |
| EPI_ISL_641223 | 8/8/2020   | 11/18/2020 Oceania / Australia / Victoria |
| EPI_ISL_641224 | 7/23/2020  | 11/18/2020 Oceania / Australia / Victoria |
| EPI_ISL_641225 | 8/1/2020   | 11/18/2020 Oceania / Australia / Victoria |
| EPI_ISL_641226 | 8/1/2020   | 11/18/2020 Oceania / Australia / Victoria |
| EPI_ISL_641228 | 7/24/2020  | 11/18/2020 Oceania / Australia / Victoria |
| EPI_ISL_641229 | 7/27/2020  | 11/18/2020 Oceania / Australia / Victoria |
| EPI_ISL_641230 | 8/5/2020   | 11/18/2020 Oceania / Australia / Victoria |
| EPI_ISL_641233 | 8/12/2020  | 11/18/2020 Oceania / Australia / Victoria |
| EPI_ISL_641234 | 8/5/2020   | 11/18/2020 Oceania / Australia / Victoria |
| EPI_ISL_641235 | 7/29/2020  | 11/18/2020 Oceania / Australia / Victoria |
| EPI_ISL_641238 | 7/29/2020  | 11/18/2020 Oceania / Australia / Victoria |
| EPI_ISL_641239 | 7/29/2020  | 11/18/2020 Oceania / Australia / Victoria |
| EPI_ISL_641240 | 8/2/2020   | 11/18/2020 Oceania / Australia / Victoria |
| EPI_ISL_641241 | 8/8/2020   | 11/18/2020 Oceania / Australia / Victoria |
| EPI_ISL_641242 | 7/23/2020  | 11/18/2020 Oceania / Australia / Victoria |
| EPI_ISL_641243 | 8/3/2020   | 11/18/2020 Oceania / Australia / Victoria |
| EPI_ISL_641244 | 8/5/2020   | 11/18/2020 Oceania / Australia / Victoria |
| EPI_ISL_641245 | 8/2/2020   | 11/18/2020 Oceania / Australia / Victoria |
| EPI_ISL_641248 | 7/23/2020  | 11/18/2020 Oceania / Australia / Victoria |
| EPI_ISL_641249 | 7/23/2020  | 11/18/2020 Oceania / Australia / Victoria |
| EPI_ISL_641250 | 7/30/2020  | 11/18/2020 Oceania / Australia / Victoria |
| EPI_ISL_641252 | 7/31/2020  | 11/18/2020 Oceania / Australia / Victoria |
| EPI_ISL_641253 | 8/5/2020   | 11/18/2020 Oceania / Australia / Victoria |
| EPI_ISL_641254 | 8/3/2020   | 11/18/2020 Oceania / Australia / Victoria |
| EPI_ISL_641255 | 8/2/2020   | 11/18/2020 Oceania / Australia / Victoria |
| EPI_ISL_641256 | 8/8/2020   | 11/18/2020 Oceania / Australia / Victoria |
| EPI_ISL_641257 | 8/4/2020   | 11/18/2020 Oceania / Australia / Victoria |
| EPI_ISL_641259 | 7/23/2020  | 11/18/2020 Oceania / Australia / Victoria |
| EPI_ISL_641261 | 8/5/2020   | 11/18/2020 Oceania / Australia / Victoria |
| EPI_ISL_641262 | 7/30/2020  | 11/18/2020 Oceania / Australia / Victoria |
| EPI_ISL_641263 | 7/31/2020  | 11/18/2020 Oceania / Australia / Victoria |

|                |           |                                                                |
|----------------|-----------|----------------------------------------------------------------|
| EPI_ISL_641264 | 8/16/2020 | 11/18/2020 Oceania / Australia / Victoria                      |
| EPI_ISL_641266 | 8/21/2020 | 11/18/2020 Oceania / Australia / Victoria                      |
| EPI_ISL_641267 | 7/27/2020 | 11/18/2020 Oceania / Australia / Victoria                      |
| EPI_ISL_641268 | 8/10/2020 | 11/18/2020 Oceania / Australia / Victoria                      |
| EPI_ISL_641270 | 8/2/2020  | 11/18/2020 Oceania / Australia / Victoria                      |
| EPI_ISL_641271 | 7/26/2020 | 11/18/2020 Oceania / Australia / Victoria                      |
| EPI_ISL_641272 | 7/29/2020 | 11/18/2020 Oceania / Australia / Victoria                      |
| EPI_ISL_641274 | 7/28/2020 | 11/18/2020 Oceania / Australia / Victoria                      |
| EPI_ISL_641275 | 8/10/2020 | 11/18/2020 Oceania / Australia / Victoria                      |
| EPI_ISL_641276 | 8/10/2020 | 11/18/2020 Oceania / Australia / Victoria                      |
| EPI_ISL_641278 | 8/5/2020  | 11/18/2020 Oceania / Australia / Victoria                      |
| EPI_ISL_641281 | 7/26/2020 | 11/18/2020 Oceania / Australia / Victoria                      |
| EPI_ISL_641282 | 7/29/2020 | 11/18/2020 Oceania / Australia / Victoria                      |
| EPI_ISL_641283 | 7/30/2020 | 11/18/2020 Oceania / Australia / Victoria                      |
| EPI_ISL_641284 | 7/31/2020 | 11/18/2020 Oceania / Australia / Victoria                      |
| EPI_ISL_641285 | 8/2/2020  | 11/18/2020 Oceania / Australia / Victoria                      |
| EPI_ISL_641286 | 7/28/2020 | 11/18/2020 Oceania / Australia / Victoria                      |
| EPI_ISL_641287 | 8/1/2020  | 11/18/2020 Oceania / Australia / Victoria                      |
| EPI_ISL_641289 | 8/9/2020  | 11/18/2020 Oceania / Australia / Victoria                      |
| EPI_ISL_641290 | 7/30/2020 | 11/18/2020 Oceania / Australia / Victoria                      |
| EPI_ISL_641291 | 7/29/2020 | 11/18/2020 Oceania / Australia / Victoria                      |
| EPI_ISL_641293 | 7/27/2020 | 11/18/2020 Oceania / Australia / Victoria                      |
| EPI_ISL_641294 | 7/18/2020 | 11/18/2020 Oceania / Australia / Victoria                      |
| EPI_ISL_641295 | 7/28/2020 | 11/18/2020 Oceania / Australia / Victoria                      |
| EPI_ISL_641296 | 7/29/2020 | 11/18/2020 Oceania / Australia / Victoria                      |
| EPI_ISL_641297 | 8/2/2020  | 11/18/2020 Oceania / Australia / Victoria                      |
| EPI_ISL_641298 | 7/31/2020 | 11/18/2020 Oceania / Australia / Victoria                      |
| EPI_ISL_641299 | 7/25/2020 | 11/18/2020 Oceania / Australia / Victoria                      |
| EPI_ISL_641300 | 8/1/2020  | 11/18/2020 Oceania / Australia / Victoria                      |
| EPI_ISL_641301 | 8/1/2020  | 11/18/2020 Oceania / Australia / Victoria                      |
| EPI_ISL_641302 | 8/17/2020 | 11/18/2020 Oceania / Australia / Victoria                      |
| EPI_ISL_641303 | 8/5/2020  | 11/18/2020 Oceania / Australia / Victoria                      |
| EPI_ISL_641307 | 8/1/2020  | 11/18/2020 Oceania / Australia / Victoria                      |
| EPI_ISL_641308 | 8/8/2020  | 11/18/2020 Oceania / Australia / Victoria                      |
| EPI_ISL_641309 | 3/31/2020 | 11/18/2020 Oceania / Australia / Queensland                    |
| EPI_ISL_641310 | 4/1/2020  | 11/18/2020 Oceania / Australia / Queensland                    |
| EPI_ISL_641520 | 3/28/2020 | 11/18/2020 Europe / France / Provence-Alpes-Cote d'Azur / Nice |
| EPI_ISL_641521 | 3/29/2020 | 11/18/2020 Europe / France / Provence-Alpes-Cote d'Azur / Nice |
| EPI_ISL_641522 | 3/28/2020 | 11/18/2020 Europe / France / Provence-Alpes-Cote d'Azur / Nice |
| EPI_ISL_641523 | 3/29/2020 | 11/18/2020 Europe / France / Provence-Alpes-Cote d'Azur / Nice |
| EPI_ISL_641524 | 3/28/2020 | 11/18/2020 Europe / France / Provence-Alpes-Cote d'Azur / Nice |
| EPI_ISL_641525 | 3/28/2020 | 11/18/2020 Europe / France / Provence-Alpes-Cote d'Azur / Nice |
| EPI_ISL_641526 | 3/29/2020 | 11/18/2020 Europe / France / Provence-Alpes-Cote d'Azur / Nice |
| EPI_ISL_641527 | 3/29/2020 | 11/18/2020 Europe / France / Provence-Alpes-Cote d'Azur / Nice |
| EPI_ISL_641528 | 4/2/2020  | 11/18/2020 Europe / France / Provence-Alpes-Cote d'Azur / Nice |
| EPI_ISL_641529 | 4/4/2020  | 11/18/2020 Europe / France / Provence-Alpes-Cote d'Azur / Nice |
| EPI_ISL_641530 | 4/10/2020 | 11/18/2020 Europe / France / Provence-Alpes-Cote d'Azur / Nice |

|                |           |            |                                                           |
|----------------|-----------|------------|-----------------------------------------------------------|
| EPI_ISL_641531 | 4/24/2020 | 11/18/2020 | Europe / France / Provence-Alpes-Cote d'Azur / Nice       |
| EPI_ISL_641532 | 4/24/2020 | 11/18/2020 | Europe / France / Provence-Alpes-Cote d'Azur / Nice       |
| EPI_ISL_641533 | 4/29/2020 | 11/18/2020 | Europe / France / Provence-Alpes-Cote d'Azur / Nice       |
| EPI_ISL_641534 | 5/7/2020  | 11/18/2020 | Europe / France / Provence-Alpes-Cote d'Azur / Nice       |
| EPI_ISL_641535 | 4/7/2020  | 11/18/2020 | Europe / France / Auvergne-Rhone-Alpes / Saint-Etienne    |
| EPI_ISL_641536 | 4/9/2020  | 11/18/2020 | Europe / France / Auvergne-Rhone-Alpes / Saint-Etienne    |
| EPI_ISL_641537 | 4/14/2020 | 11/18/2020 | Europe / France / Auvergne-Rhone-Alpes / Saint-Etienne    |
| EPI_ISL_641538 | 3/20/2020 | 11/18/2020 | Europe / France / Auvergne-Rhone-Alpes / Saint-Etienne    |
| EPI_ISL_641539 | 3/23/2020 | 11/18/2020 | Europe / France / Auvergne-Rhone-Alpes / Saint-Etienne    |
| EPI_ISL_641540 | 3/24/2020 | 11/18/2020 | Europe / France / Auvergne-Rhone-Alpes / Saint-Etienne    |
| EPI_ISL_641541 | 4/13/2020 | 11/18/2020 | Europe / France / Auvergne-Rhone-Alpes / Saint-Etienne    |
| EPI_ISL_641542 | 3/12/2020 | 11/18/2020 | Europe / France / Auvergne-Rhone-Alpes / Saint-Etienne    |
| EPI_ISL_641543 | 3/17/2020 | 11/18/2020 | Europe / France / Auvergne-Rhone-Alpes / Saint-Etienne    |
| EPI_ISL_641544 | 4/11/2020 | 11/18/2020 | Europe / France / Auvergne-Rhone-Alpes / Saint-Etienne    |
| EPI_ISL_641545 | 3/6/2020  | 11/18/2020 | Europe / France / Auvergne-Rhone-Alpes / Saint-Etienne    |
| EPI_ISL_641546 | 4/7/2020  | 11/18/2020 | Europe / France / Auvergne-Rhone-Alpes / Clermond-Ferrand |
| EPI_ISL_641547 | 4/14/2020 | 11/18/2020 | Europe / France / Auvergne-Rhone-Alpes / Clermond-Ferrand |
| EPI_ISL_641548 | 4/20/2020 | 11/18/2020 | Europe / France / Auvergne-Rhone-Alpes / Clermond-Ferrand |
| EPI_ISL_641549 | 4/20/2020 | 11/18/2020 | Europe / France / Auvergne-Rhone-Alpes / Clermond-Ferrand |
| EPI_ISL_641550 | 5/22/2020 | 11/18/2020 | Europe / France / Auvergne-Rhone-Alpes / Clermond-Ferrand |
| EPI_ISL_641551 | 3/14/2020 | 11/18/2020 | Europe / France / Occitanie / Toulouse                    |
| EPI_ISL_641552 | 3/14/2020 | 11/18/2020 | Europe / France / Occitanie / Toulouse                    |
| EPI_ISL_641553 | 3/14/2020 | 11/18/2020 | Europe / France / Occitanie / Toulouse                    |
| EPI_ISL_641554 | 4/13/2020 | 11/18/2020 | Europe / France / Occitanie / Toulouse                    |
| EPI_ISL_641555 | 5/24/2020 | 11/18/2020 | Europe / France / Occitanie / Toulouse                    |
| EPI_ISL_641556 | 3/3/2020  | 11/18/2020 | Europe / France / Occitanie / Montpellier                 |
| EPI_ISL_641557 | 9/14/2020 | 11/18/2020 | Europe / Belgium / Liège                                  |
| EPI_ISL_641558 | 9/14/2020 | 11/18/2020 | Europe / Belgium / Liège                                  |
| EPI_ISL_641559 | 9/14/2020 | 11/18/2020 | Europe / Belgium / Liège                                  |
| EPI_ISL_641560 | 9/14/2020 | 11/18/2020 | Europe / Belgium / Liège                                  |
| EPI_ISL_641561 | 9/14/2020 | 11/18/2020 | Europe / Belgium / Liège                                  |
| EPI_ISL_641562 | 9/14/2020 | 11/18/2020 | Europe / Belgium / Liège                                  |
| EPI_ISL_641563 | 9/14/2020 | 11/18/2020 | Europe / Belgium / Liège                                  |
| EPI_ISL_641564 | 9/15/2020 | 11/18/2020 | Europe / Belgium / Liège                                  |
| EPI_ISL_641565 | 9/15/2020 | 11/18/2020 | Europe / Belgium / Liège                                  |
| EPI_ISL_641566 | 9/15/2020 | 11/18/2020 | Europe / Belgium / Liège                                  |
| EPI_ISL_641567 | 9/15/2020 | 11/18/2020 | Europe / Belgium / Liège                                  |
| EPI_ISL_641568 | 9/15/2020 | 11/18/2020 | Europe / Belgium / Liège                                  |
| EPI_ISL_641569 | 9/15/2020 | 11/18/2020 | Europe / Belgium / Liège                                  |
| EPI_ISL_641570 | 9/15/2020 | 11/18/2020 | Europe / Belgium / Liège                                  |
| EPI_ISL_641571 | 9/15/2020 | 11/18/2020 | Europe / Belgium / Liège                                  |
| EPI_ISL_641572 | 9/15/2020 | 11/18/2020 | Europe / Belgium / Liège                                  |
| EPI_ISL_641573 | 9/18/2020 | 11/18/2020 | Europe / Belgium / Liège                                  |
| EPI_ISL_641574 | 9/18/2020 | 11/18/2020 | Europe / Belgium / Liège                                  |
| EPI_ISL_641575 | 9/18/2020 | 11/18/2020 | Europe / Belgium / Liège                                  |
| EPI_ISL_641576 | 9/18/2020 | 11/18/2020 | Europe / Belgium / Liège                                  |
| EPI_ISL_641577 | 9/18/2020 | 11/18/2020 | Europe / Belgium / Liège                                  |













































































































|                |            |            |                                       |
|----------------|------------|------------|---------------------------------------|
| EPI_ISL_644084 | 10/21/2020 | 11/18/2020 | Europe / United Kingdom / England     |
| EPI_ISL_644085 | 10/21/2020 | 11/18/2020 | Europe / United Kingdom / England     |
| EPI_ISL_644087 | 10/19/2020 | 11/18/2020 | Europe / United Kingdom / England     |
| EPI_ISL_644088 | 10/21/2020 | 11/18/2020 | Europe / United Kingdom / England     |
| EPI_ISL_644089 | 10/21/2020 | 11/18/2020 | Europe / United Kingdom / England     |
| EPI_ISL_644090 | 10/21/2020 | 11/18/2020 | Europe / United Kingdom / England     |
| EPI_ISL_644091 | 10/21/2020 | 11/18/2020 | Europe / United Kingdom / England     |
| EPI_ISL_644094 | 10/22/2020 | 11/18/2020 | Europe / United Kingdom / Scotland    |
| EPI_ISL_644095 | 10/22/2020 | 11/18/2020 | Europe / United Kingdom / England     |
| EPI_ISL_644096 | 10/21/2020 | 11/18/2020 | Europe / United Kingdom / England     |
| EPI_ISL_644097 | 10/21/2020 | 11/18/2020 | Europe / United Kingdom / England     |
| EPI_ISL_644101 | 10/22/2020 | 11/18/2020 | Europe / United Kingdom / Scotland    |
| EPI_ISL_644103 | 10/22/2020 | 11/18/2020 | Europe / United Kingdom / England     |
| EPI_ISL_644104 | 10/22/2020 | 11/18/2020 | Europe / United Kingdom / England     |
| EPI_ISL_644105 | 10/21/2020 | 11/18/2020 | Europe / United Kingdom / England     |
| EPI_ISL_644106 | 10/21/2020 | 11/18/2020 | Europe / United Kingdom / England     |
| EPI_ISL_644107 | 10/21/2020 | 11/18/2020 | Europe / United Kingdom / England     |
| EPI_ISL_644108 | 10/22/2020 | 11/18/2020 | Europe / United Kingdom / England     |
| EPI_ISL_644109 | 10/21/2020 | 11/18/2020 | Europe / United Kingdom / England     |
| EPI_ISL_644110 | 10/21/2020 | 11/18/2020 | Europe / United Kingdom / England     |
| EPI_ISL_644111 | 10/22/2020 | 11/18/2020 | Europe / United Kingdom / England     |
| EPI_ISL_644112 | 10/22/2020 | 11/18/2020 | Europe / United Kingdom / Scotland    |
| EPI_ISL_644113 | 10/21/2020 | 11/18/2020 | Europe / United Kingdom / England     |
| EPI_ISL_644117 | 10/23/2020 | 11/18/2020 | Europe / United Kingdom / England     |
| EPI_ISL_644118 | 10/10/2020 | 11/18/2020 | Europe / United Kingdom / England     |
| EPI_ISL_644120 | 10/22/2020 | 11/18/2020 | Europe / United Kingdom / England     |
| EPI_ISL_644162 | 11/13/2020 | 11/18/2020 | Europe / United Kingdom / England     |
| EPI_ISL_644168 | 3/30/2020  | 11/18/2020 | North America / USA / Texas / Cameron |
| EPI_ISL_644176 | 3/24/2020  | 11/18/2020 | North America / USA / Texas / Cameron |
| EPI_ISL_644247 | 4/24/2020  | 11/18/2020 | Europe / Ireland / Dublin             |
| EPI_ISL_644248 | 4/18/2020  | 11/18/2020 | Europe / Ireland / Dublin             |
| EPI_ISL_644249 | 4/20/2020  | 11/18/2020 | Europe / Ireland / Dublin             |
| EPI_ISL_644250 | 4/30/2020  | 11/18/2020 | Europe / Ireland / Dublin             |
| EPI_ISL_644251 | 5/1/2020   | 11/18/2020 | Europe / Ireland / Dublin             |
| EPI_ISL_644252 | 6/9/2020   | 11/18/2020 | Europe / Ireland / Dublin             |
| EPI_ISL_644253 | 5/1/2020   | 11/18/2020 | Europe / Ireland / Dublin             |
| EPI_ISL_644254 | 4/29/2020  | 11/18/2020 | Europe / Ireland / Dublin             |
| EPI_ISL_644255 | 5/8/2020   | 11/18/2020 | Europe / Ireland / Wicklow            |
| EPI_ISL_644256 | 5/22/2020  | 11/18/2020 | Europe / Ireland / Meath              |
| EPI_ISL_644257 | 4/12/2020  | 11/18/2020 | Europe / Ireland / Dublin             |
| EPI_ISL_644258 | 5/20/2020  | 11/18/2020 | Europe / Ireland / Dublin             |
| EPI_ISL_644259 | 4/10/2020  | 11/18/2020 | Europe / Ireland / Wicklow            |
| EPI_ISL_644260 | 4/9/2020   | 11/18/2020 | Europe / Ireland / Dublin             |
| EPI_ISL_644261 | 4/16/2020  | 11/18/2020 | Europe / Ireland / Dublin             |
| EPI_ISL_644262 | 4/15/2020  | 11/18/2020 | Europe / Ireland / Dublin             |
| EPI_ISL_644263 | 4/10/2020  | 11/18/2020 | Europe / Ireland / Dublin             |
| EPI_ISL_644264 | 4/24/2020  | 11/18/2020 | Europe / Ireland / Wicklow            |

|                |           |            |                             |
|----------------|-----------|------------|-----------------------------|
| EPI_ISL_644265 | 4/24/2020 | 11/18/2020 | Europe / Ireland / Dublin   |
| EPI_ISL_644266 | 4/24/2020 | 11/18/2020 | Europe / Ireland / Dublin   |
| EPI_ISL_644267 | 4/24/2020 | 11/18/2020 | Europe / Ireland / Dublin   |
| EPI_ISL_644268 | 4/24/2020 | 11/18/2020 | Europe / Ireland / Dublin   |
| EPI_ISL_644269 | 4/26/2020 | 11/18/2020 | Europe / Ireland / Clare    |
| EPI_ISL_644270 | 4/26/2020 | 11/18/2020 | Europe / Ireland / Wicklow  |
| EPI_ISL_644271 | 4/26/2020 | 11/18/2020 | Europe / Ireland / Dublin   |
| EPI_ISL_644272 | 4/26/2020 | 11/18/2020 | Europe / Ireland / Clare    |
| EPI_ISL_644273 | 3/27/2020 | 11/18/2020 | Europe / Ireland / Dublin   |
| EPI_ISL_644274 | 4/7/2020  | 11/18/2020 | Europe / Ireland / Dublin   |
| EPI_ISL_644275 | 4/21/2020 | 11/18/2020 | Europe / Ireland / Longford |
| EPI_ISL_644276 | 4/10/2020 | 11/18/2020 | Europe / Ireland / Dublin   |
| EPI_ISL_644277 | 4/28/2020 | 11/18/2020 | Europe / Ireland / Wicklow  |
| EPI_ISL_644278 | 4/3/2020  | 11/18/2020 | Europe / Ireland / Dublin   |
| EPI_ISL_644279 | 4/13/2020 | 11/18/2020 | Europe / Ireland / Dublin   |
| EPI_ISL_644280 | 4/28/2020 | 11/18/2020 | Europe / Ireland / Wicklow  |
| EPI_ISL_644281 | 4/22/2020 | 11/18/2020 | Europe / Ireland / Dublin   |
| EPI_ISL_644282 | 4/3/2020  | 11/18/2020 | Europe / Ireland / Wicklow  |
| EPI_ISL_644283 | 4/5/2020  | 11/18/2020 | Europe / Ireland / Wicklow  |
| EPI_ISL_644284 | 5/1/2020  | 11/18/2020 | Europe / Ireland / Dublin   |
| EPI_ISL_644285 | 4/4/2020  | 11/18/2020 | Europe / Ireland / Dublin   |
| EPI_ISL_644286 | 4/15/2020 | 11/18/2020 | Europe / Ireland / Dublin   |
| EPI_ISL_644287 | 4/7/2020  | 11/18/2020 | Europe / Ireland / Dublin   |
| EPI_ISL_644288 | 4/17/2020 | 11/18/2020 | Europe / Ireland / Dublin   |
| EPI_ISL_644289 | 4/19/2020 | 11/18/2020 | Europe / Ireland / Dublin   |
| EPI_ISL_644290 | 4/15/2020 | 11/18/2020 | Europe / Ireland / Dublin   |
| EPI_ISL_644291 | 4/14/2020 | 11/18/2020 | Europe / Ireland / Wicklow  |
| EPI_ISL_644292 | 4/9/2020  | 11/18/2020 | Europe / Ireland / Dublin   |
| EPI_ISL_644293 | 4/16/2020 | 11/18/2020 | Europe / Ireland / Dublin   |
| EPI_ISL_644294 | 4/25/2020 | 11/18/2020 | Europe / Ireland / Dublin   |
| EPI_ISL_644295 | 4/24/2020 | 11/18/2020 | Europe / Ireland / Wicklow  |
| EPI_ISL_644296 | 4/14/2020 | 11/18/2020 | Europe / Ireland / Dublin   |
| EPI_ISL_644297 | 4/27/2020 | 11/18/2020 | Europe / Ireland / Dublin   |
| EPI_ISL_644298 | 4/26/2020 | 11/18/2020 | Europe / Ireland / Wicklow  |
| EPI_ISL_644299 | 4/30/2020 | 11/18/2020 | Europe / Ireland / Wicklow  |
| EPI_ISL_644300 | 4/9/2020  | 11/18/2020 | Europe / Ireland / Wicklow  |
| EPI_ISL_644301 | 5/2/2020  | 11/18/2020 | Europe / Ireland / Wicklow  |
| EPI_ISL_644302 | 5/4/2020  | 11/18/2020 | Europe / Ireland / Wicklow  |
| EPI_ISL_644303 | 4/8/2020  | 11/18/2020 | Europe / Ireland / Wicklow  |
| EPI_ISL_644304 | 4/21/2020 | 11/18/2020 | Europe / Ireland / Dublin   |
| EPI_ISL_644305 | 4/13/2020 | 11/18/2020 | Europe / Ireland / Dublin   |
| EPI_ISL_644306 | 4/12/2020 | 11/18/2020 | Europe / Ireland / Wicklow  |
| EPI_ISL_644307 | 5/6/2020  | 11/18/2020 | Europe / Ireland / Dublin   |
| EPI_ISL_644308 | 5/12/2020 | 11/18/2020 | Europe / Ireland / Dublin   |
| EPI_ISL_644309 | 4/8/2020  | 11/18/2020 | Europe / Ireland / Wicklow  |
| EPI_ISL_644310 | 3/27/2020 | 11/18/2020 | Europe / Ireland / Dublin   |
| EPI_ISL_644311 | 5/20/2020 | 11/18/2020 | Europe / Ireland / Wicklow  |

|                |            |            |                                                          |
|----------------|------------|------------|----------------------------------------------------------|
| EPI_ISL_644312 | 5/22/2020  | 11/18/2020 | Europe / Ireland / Wicklow                               |
| EPI_ISL_644313 | 4/14/2020  | 11/18/2020 | Europe / Ireland / Wicklow                               |
| EPI_ISL_644314 | 4/17/2020  | 11/18/2020 | Europe / Ireland / Dublin                                |
| EPI_ISL_644315 | 4/28/2020  | 11/18/2020 | Europe / Ireland / Clare                                 |
| EPI_ISL_644316 | 4/7/2020   | 11/18/2020 | Europe / Ireland / Dublin                                |
| EPI_ISL_644317 | 4/30/2020  | 11/18/2020 | Europe / Ireland / Clare                                 |
| EPI_ISL_644318 | 4/13/2020  | 11/18/2020 | Europe / Ireland / Dublin                                |
| EPI_ISL_644319 | 3/30/2020  | 11/18/2020 | Europe / Ireland / Dublin                                |
| EPI_ISL_644320 | 4/2/2020   | 11/18/2020 | Europe / Ireland / Wicklow                               |
| EPI_ISL_644321 | 3/26/2020  | 11/18/2020 | Europe / Ireland / Dublin                                |
| EPI_ISL_644322 | 4/17/2020  | 11/18/2020 | Europe / Ireland / Dublin                                |
| EPI_ISL_644323 | 5/5/2020   | 11/18/2020 | Europe / Ireland / Dublin                                |
| EPI_ISL_644324 | 4/19/2020  | 11/18/2020 | Europe / Ireland / Dublin                                |
| EPI_ISL_644325 | 4/21/2020  | 11/18/2020 | Europe / Ireland / Dublin                                |
| EPI_ISL_644326 | 4/3/2020   | 11/18/2020 | Europe / Ireland / Dublin                                |
| EPI_ISL_644327 | 4/16/2020  | 11/18/2020 | Europe / Ireland / Wicklow                               |
| EPI_ISL_644328 | 4/16/2020  | 11/18/2020 | Europe / Ireland / Dublin                                |
| EPI_ISL_644329 | 4/29/2020  | 11/18/2020 | Europe / Ireland / Dublin                                |
| EPI_ISL_644330 | 5/6/2020   | 11/18/2020 | Europe / Ireland / Wicklow                               |
| EPI_ISL_644331 | 4/15/2020  | 11/18/2020 | Europe / Ireland / Dublin                                |
| EPI_ISL_644332 | 4/11/2020  | 11/18/2020 | Europe / Ireland / Dublin                                |
| EPI_ISL_644333 | 4/14/2020  | 11/18/2020 | Europe / Ireland / Dublin                                |
| EPI_ISL_644334 | 4/18/2020  | 11/18/2020 | Europe / Ireland / Wicklow                               |
| EPI_ISL_644335 | 4/9/2020   | 11/18/2020 | Europe / Ireland / Dublin                                |
| EPI_ISL_644336 | 5/1/2020   | 11/18/2020 | Europe / Ireland / Dublin                                |
| EPI_ISL_644337 | 5/10/2020  | 11/18/2020 | Europe / Ireland / Wicklow                               |
| EPI_ISL_644338 | 5/2/2020   | 11/18/2020 | Europe / Ireland / Clare                                 |
| EPI_ISL_644339 | 4/9/2020   | 11/18/2020 | Europe / Ireland / Dublin                                |
| EPI_ISL_644340 | 4/2/2020   | 11/18/2020 | Europe / Ireland / Dublin                                |
| EPI_ISL_644341 | 5/3/2020   | 11/18/2020 | Europe / Ireland / Dublin                                |
| EPI_ISL_644342 | 3/29/2020  | 11/18/2020 | Europe / Ireland / Dublin                                |
| EPI_ISL_644343 | 3/24/2020  | 11/18/2020 | Europe / Ireland / Wicklow                               |
| EPI_ISL_644344 | 5/3/2020   | 11/18/2020 | Europe / Ireland / Dublin                                |
| EPI_ISL_644345 | 5/12/2020  | 11/18/2020 | Europe / Ireland / Wicklow                               |
| EPI_ISL_644364 | 10/26/2020 | 11/18/2020 | North America / USA / Michigan                           |
| EPI_ISL_644365 | 10/27/2020 | 11/18/2020 | North America / USA / Michigan                           |
| EPI_ISL_644366 | 10/27/2020 | 11/18/2020 | North America / USA / Michigan                           |
| EPI_ISL_644367 | 10/26/2020 | 11/18/2020 | North America / USA / Michigan                           |
| EPI_ISL_644368 | 10/22/2020 | 11/18/2020 | North America / USA / Michigan                           |
| EPI_ISL_644369 | 10/23/2020 | 11/18/2020 | North America / USA / Michigan                           |
| EPI_ISL_644370 | 10/27/2020 | 11/18/2020 | North America / USA / Michigan                           |
| EPI_ISL_644371 | 10/26/2020 | 11/18/2020 | North America / USA / Michigan                           |
| EPI_ISL_644372 | 10/21/2020 | 11/18/2020 | North America / USA / Michigan                           |
| EPI_ISL_644373 | 10/23/2020 | 11/18/2020 | North America / USA / Michigan                           |
| EPI_ISL_644374 | 10/27/2020 | 11/18/2020 | North America / USA / Michigan                           |
| EPI_ISL_644392 | 9/19/2020  | 11/18/2020 | Europe / France / Provence-Alpes-Cote d'Azur / Marseille |
| EPI_ISL_644393 | 9/15/2020  | 11/18/2020 | Europe / France / Provence-Alpes-Cote d'Azur / Marseille |











|                |            |                                             |
|----------------|------------|---------------------------------------------|
| EPI_ISL_644583 | 4/5/2020   | 11/18/2020 Europe / Serbia / Uzice          |
| EPI_ISL_644587 | 9/3/2020   | 11/18/2020 North America / USA / New Mexico |
| EPI_ISL_644588 | 9/3/2020   | 11/18/2020 North America / USA / New Mexico |
| EPI_ISL_644589 | 9/4/2020   | 11/18/2020 North America / USA / New Mexico |
| EPI_ISL_644590 | 9/4/2020   | 11/18/2020 North America / USA / New Mexico |
| EPI_ISL_644591 | 9/4/2020   | 11/18/2020 North America / USA / New Mexico |
| EPI_ISL_644592 | 9/4/2020   | 11/18/2020 North America / USA / New Mexico |
| EPI_ISL_644593 | 9/4/2020   | 11/18/2020 North America / USA / New Mexico |
| EPI_ISL_644594 | 9/4/2020   | 11/18/2020 North America / USA / New Mexico |
| EPI_ISL_644595 | 9/4/2020   | 11/18/2020 North America / USA / New Mexico |
| EPI_ISL_644596 | 9/4/2020   | 11/18/2020 North America / USA / New Mexico |
| EPI_ISL_644597 | 9/4/2020   | 11/18/2020 North America / USA / New Mexico |
| EPI_ISL_644598 | 9/4/2020   | 11/18/2020 North America / USA / New Mexico |
| EPI_ISL_644599 | 9/4/2020   | 11/18/2020 North America / USA / New Mexico |
| EPI_ISL_644600 | 9/4/2020   | 11/18/2020 North America / USA / New Mexico |
| EPI_ISL_644601 | 9/4/2020   | 11/18/2020 North America / USA / New Mexico |
| EPI_ISL_644602 | 9/5/2020   | 11/18/2020 North America / USA / New Mexico |
| EPI_ISL_644603 | 9/5/2020   | 11/18/2020 North America / USA / New Mexico |
| EPI_ISL_644604 | 9/4/2020   | 11/18/2020 North America / USA / New Mexico |
| EPI_ISL_644605 | 9/5/2020   | 11/18/2020 North America / USA / New Mexico |
| EPI_ISL_644606 | 9/5/2020   | 11/18/2020 North America / USA / New Mexico |
| EPI_ISL_644607 | 9/4/2020   | 11/18/2020 North America / USA / New Mexico |
| EPI_ISL_644608 | 9/5/2020   | 11/18/2020 North America / USA / New Mexico |
| EPI_ISL_644609 | 9/5/2020   | 11/18/2020 North America / USA / New Mexico |
| EPI_ISL_644611 | 10/31/2020 | 11/18/2020 Europe / Belgium / Liège         |
| EPI_ISL_644612 | 10/31/2020 | 11/18/2020 Europe / Belgium / Liège         |
| EPI_ISL_644613 | 10/31/2020 | 11/18/2020 Europe / Belgium / Liège         |
| EPI_ISL_644614 | 11/2/2020  | 11/18/2020 Europe / Belgium / Liège         |
| EPI_ISL_644615 | 11/2/2020  | 11/18/2020 Europe / Belgium / Liège         |
| EPI_ISL_644616 | 10/31/2020 | 11/18/2020 Europe / Belgium / Liège         |
| EPI_ISL_644617 | 10/31/2020 | 11/18/2020 Europe / Belgium / Liège         |
| EPI_ISL_644619 | 10/31/2020 | 11/18/2020 Europe / Belgium / Liège         |
| EPI_ISL_644620 | 10/31/2020 | 11/18/2020 Europe / Belgium / Liège         |
| EPI_ISL_644621 | 10/31/2020 | 11/18/2020 Europe / Belgium / Liège         |
| EPI_ISL_644622 | 10/31/2020 | 11/18/2020 Europe / Belgium / Liège         |
| EPI_ISL_644623 | 10/31/2020 | 11/18/2020 Europe / Belgium / Liège         |
| EPI_ISL_644624 | 10/31/2020 | 11/18/2020 Europe / Belgium / Liège         |
| EPI_ISL_644625 | 10/31/2020 | 11/18/2020 Europe / Belgium / Liège         |
| EPI_ISL_644626 | 10/30/2020 | 11/18/2020 Europe / Belgium / Liège         |
| EPI_ISL_645000 | 4/23/2020  | 11/18/2020 Europe / Poland                  |
| EPI_ISL_645001 | 4/22/2020  | 11/18/2020 Europe / Poland                  |
| EPI_ISL_645002 | 4/22/2020  | 11/18/2020 Europe / Poland                  |
| EPI_ISL_645003 | 4/22/2020  | 11/18/2020 Europe / Poland                  |
| EPI_ISL_645004 | 4/7/2020   | 11/18/2020 Europe / Poland                  |
| EPI_ISL_645005 | 4/7/2020   | 11/18/2020 Europe / Poland                  |
| EPI_ISL_645006 | 4/7/2020   | 11/18/2020 Europe / Poland                  |
| EPI_ISL_645007 | 4/7/2020   | 11/18/2020 Europe / Poland                  |

|                |           |            |                 |
|----------------|-----------|------------|-----------------|
| EPI_ISL_645008 | 4/7/2020  | 11/18/2020 | Europe / Poland |
| EPI_ISL_645009 | 4/7/2020  | 11/18/2020 | Europe / Poland |
| EPI_ISL_645010 | 4/22/2020 | 11/18/2020 | Europe / Poland |
| EPI_ISL_645011 | 4/7/2020  | 11/18/2020 | Europe / Poland |
| EPI_ISL_645012 | 4/7/2020  | 11/18/2020 | Europe / Poland |
| EPI_ISL_645013 | 3/28/2020 | 11/18/2020 | Europe / Poland |
| EPI_ISL_645014 | 3/28/2020 | 11/18/2020 | Europe / Poland |
| EPI_ISL_645015 | 3/28/2020 | 11/18/2020 | Europe / Poland |
| EPI_ISL_645016 | 3/28/2020 | 11/18/2020 | Europe / Poland |
| EPI_ISL_645017 | 3/28/2020 | 11/18/2020 | Europe / Poland |
| EPI_ISL_645018 | 3/28/2020 | 11/18/2020 | Europe / Poland |
| EPI_ISL_645019 | 3/30/2020 | 11/18/2020 | Europe / Poland |
| EPI_ISL_645020 | 3/29/2020 | 11/18/2020 | Europe / Poland |
| EPI_ISL_645021 | 3/29/2020 | 11/18/2020 | Europe / Poland |
| EPI_ISL_645022 | 3/28/2020 | 11/18/2020 | Europe / Poland |
| EPI_ISL_645023 | 3/28/2020 | 11/18/2020 | Europe / Poland |
| EPI_ISL_645024 | 3/28/2020 | 11/18/2020 | Europe / Poland |
| EPI_ISL_645025 | 5/12/2020 | 11/18/2020 | Europe / Poland |
| EPI_ISL_645026 | 5/12/2020 | 11/18/2020 | Europe / Poland |
| EPI_ISL_645027 | 5/12/2020 | 11/18/2020 | Europe / Poland |
| EPI_ISL_645028 | 5/12/2020 | 11/18/2020 | Europe / Poland |
| EPI_ISL_645029 | 4/15/2020 | 11/18/2020 | Europe / Poland |
| EPI_ISL_645030 | 4/19/2020 | 11/18/2020 | Europe / Poland |
| EPI_ISL_645031 | 4/22/2020 | 11/18/2020 | Europe / Poland |
| EPI_ISL_645032 | 5/5/2020  | 11/18/2020 | Europe / Poland |
| EPI_ISL_645033 | 5/6/2020  | 11/18/2020 | Europe / Poland |
| EPI_ISL_645034 | 5/12/2020 | 11/18/2020 | Europe / Poland |
| EPI_ISL_645035 | 4/21/2020 | 11/18/2020 | Europe / Poland |
| EPI_ISL_645036 | 4/7/2020  | 11/18/2020 | Europe / Poland |
| EPI_ISL_645037 | 4/7/2020  | 11/18/2020 | Europe / Poland |
| EPI_ISL_645038 | 4/21/2020 | 11/18/2020 | Europe / Poland |
| EPI_ISL_645039 | 4/28/2020 | 11/18/2020 | Europe / Poland |
| EPI_ISL_645040 | 4/28/2020 | 11/18/2020 | Europe / Poland |
| EPI_ISL_645041 | 4/28/2020 | 11/18/2020 | Europe / Poland |
| EPI_ISL_645042 | 4/7/2020  | 11/18/2020 | Europe / Poland |
| EPI_ISL_645043 | 5/12/2020 | 11/18/2020 | Europe / Poland |
| EPI_ISL_645044 | 4/21/2020 | 11/18/2020 | Europe / Poland |
| EPI_ISL_645045 | 4/21/2020 | 11/18/2020 | Europe / Poland |
| EPI_ISL_645046 | 4/21/2020 | 11/18/2020 | Europe / Poland |
| EPI_ISL_645047 | 5/10/2020 | 11/18/2020 | Europe / Poland |
| EPI_ISL_645048 | 5/10/2020 | 11/18/2020 | Europe / Poland |
| EPI_ISL_645049 | 5/10/2020 | 11/18/2020 | Europe / Poland |
| EPI_ISL_645050 | 5/10/2020 | 11/18/2020 | Europe / Poland |
| EPI_ISL_645051 | 5/10/2020 | 11/18/2020 | Europe / Poland |
| EPI_ISL_645052 | 5/10/2020 | 11/18/2020 | Europe / Poland |
| EPI_ISL_645053 | 5/10/2020 | 11/18/2020 | Europe / Poland |
| EPI_ISL_645054 | 5/10/2020 | 11/18/2020 | Europe / Poland |



|                |           |            |                                                          |
|----------------|-----------|------------|----------------------------------------------------------|
| EPI_ISL_645102 | 4/21/2020 | 11/18/2020 | Europe / Poland                                          |
| EPI_ISL_645103 | 4/21/2020 | 11/18/2020 | Europe / Poland                                          |
| EPI_ISL_645104 | 4/22/2020 | 11/18/2020 | Europe / Poland                                          |
| EPI_ISL_645105 | 5/5/2020  | 11/18/2020 | Europe / Poland                                          |
| EPI_ISL_645106 | 5/12/2020 | 11/18/2020 | Europe / Poland                                          |
| EPI_ISL_645107 | 5/12/2020 | 11/18/2020 | Europe / Poland                                          |
| EPI_ISL_645108 | 4/21/2020 | 11/18/2020 | Europe / Poland                                          |
| EPI_ISL_645109 | 6/6/2020  | 11/18/2020 | Europe / Poland                                          |
| EPI_ISL_644672 | 9/1/2020  | 11/19/2020 | Asia / Malaysia                                          |
| EPI_ISL_644673 | 3/30/2020 | 11/19/2020 | Europe / France / Nouvelle-Aquitaine / Limoges           |
| EPI_ISL_644674 | 3/30/2020 | 11/19/2020 | Europe / France / Nouvelle-Aquitaine / Limoges           |
| EPI_ISL_644675 | 3/31/2020 | 11/19/2020 | Europe / France / Nouvelle-Aquitaine / Limoges           |
| EPI_ISL_644676 | 4/5/2020  | 11/19/2020 | Europe / France / Nouvelle-Aquitaine / Limoges           |
| EPI_ISL_644677 | 4/6/2020  | 11/19/2020 | Europe / France / Nouvelle-Aquitaine / Limoges           |
| EPI_ISL_644678 | 4/10/2020 | 11/19/2020 | Europe / France / Nouvelle-Aquitaine / Limoges           |
| EPI_ISL_644679 | 4/11/2020 | 11/19/2020 | Europe / France / Nouvelle-Aquitaine / Limoges           |
| EPI_ISL_644680 | 4/28/2020 | 11/19/2020 | Europe / France / Nouvelle-Aquitaine / Limoges           |
| EPI_ISL_644681 | 2/26/2020 | 11/19/2020 | Europe / France / Occitanie / Montpellier                |
| EPI_ISL_644682 | 3/5/2020  | 11/19/2020 | Europe / France / Occitanie / Montpellier                |
| EPI_ISL_644683 | 3/6/2020  | 11/19/2020 | Europe / France / Occitanie / Montpellier                |
| EPI_ISL_644684 | 3/6/2020  | 11/19/2020 | Europe / France / Occitanie / Montpellier                |
| EPI_ISL_644685 | 3/10/2020 | 11/19/2020 | Europe / France / Occitanie / Montpellier                |
| EPI_ISL_644686 | 3/11/2020 | 11/19/2020 | Europe / France / Occitanie / Montpellier                |
| EPI_ISL_644687 | 3/17/2020 | 11/19/2020 | Europe / France / Occitanie / Montpellier                |
| EPI_ISL_644688 | 3/24/2020 | 11/19/2020 | Europe / France / Occitanie / Montpellier                |
| EPI_ISL_644689 | 3/24/2020 | 11/19/2020 | Europe / France / Occitanie / Montpellier                |
| EPI_ISL_644690 | 3/24/2020 | 11/19/2020 | Europe / France / Occitanie / Montpellier                |
| EPI_ISL_644691 | 3/25/2020 | 11/19/2020 | Europe / France / Occitanie / Montpellier                |
| EPI_ISL_644692 | 3/26/2020 | 11/19/2020 | Europe / France / Occitanie / Montpellier                |
| EPI_ISL_644693 | 3/26/2020 | 11/19/2020 | Europe / France / Occitanie / Montpellier                |
| EPI_ISL_644694 | 4/21/2020 | 11/19/2020 | Europe / France / Occitanie / Montpellier                |
| EPI_ISL_644695 | 4/21/2020 | 11/19/2020 | Europe / France / Occitanie / Montpellier                |
| EPI_ISL_644696 | 4/29/2020 | 11/19/2020 | Europe / France / Occitanie / Montpellier                |
| EPI_ISL_644697 | 3/10/2020 | 11/19/2020 | Europe / France / Occitanie / Nimes                      |
| EPI_ISL_644698 | 3/11/2020 | 11/19/2020 | Europe / France / Occitanie / Nimes                      |
| EPI_ISL_644699 | 3/11/2020 | 11/19/2020 | Europe / France / Occitanie / Nimes                      |
| EPI_ISL_644700 | 3/12/2020 | 11/19/2020 | Europe / France / Occitanie / Nimes                      |
| EPI_ISL_644701 | 3/13/2020 | 11/19/2020 | Europe / France / Occitanie / Nimes                      |
| EPI_ISL_644702 | 3/15/2020 | 11/19/2020 | Europe / France / Occitanie / Nimes                      |
| EPI_ISL_644703 | 4/23/2020 | 11/19/2020 | Europe / France / Provence-Alpes-Cote d'Azur / Marseille |
| EPI_ISL_644704 | 4/23/2020 | 11/19/2020 | Europe / France / Provence-Alpes-Cote d'Azur / Marseille |
| EPI_ISL_644705 | 4/24/2020 | 11/19/2020 | Europe / France / Provence-Alpes-Cote d'Azur / Marseille |
| EPI_ISL_644706 | 4/22/2020 | 11/19/2020 | Europe / France / Provence-Alpes-Cote d'Azur / Marseille |
| EPI_ISL_644707 | 4/29/2020 | 11/19/2020 | Europe / France / Provence-Alpes-Cote d'Azur / Marseille |
| EPI_ISL_644708 | 4/22/2020 | 11/19/2020 | Europe / France / Provence-Alpes-Cote d'Azur / Marseille |
| EPI_ISL_644709 | 4/22/2020 | 11/19/2020 | Europe / France / Provence-Alpes-Cote d'Azur / Marseille |
| EPI_ISL_644710 | 3/18/2020 | 11/19/2020 | Europe / France / Provence-Alpes-Cote d'Azur / Marseille |

|                |           |            |                                                          |
|----------------|-----------|------------|----------------------------------------------------------|
| EPI_ISL_644711 | 3/10/2020 | 11/19/2020 | Europe / France / Provence-Alpes-Cote d'Azur / Marseille |
| EPI_ISL_644712 | 3/18/2020 | 11/19/2020 | Europe / France / Provence-Alpes-Cote d'Azur / Marseille |
| EPI_ISL_644713 | 4/2/2020  | 11/19/2020 | Europe / France / Provence-Alpes-Cote d'Azur / Marseille |
| EPI_ISL_644714 | 4/2/2020  | 11/19/2020 | Europe / France / Provence-Alpes-Cote d'Azur / Marseille |
| EPI_ISL_644715 | 9/20/2020 | 11/19/2020 | Asia / India / Telangana / Hyderabad                     |
| EPI_ISL_644716 | 9/20/2020 | 11/19/2020 | Asia / India / Telangana / Hyderabad                     |
| EPI_ISL_644717 | 9/20/2020 | 11/19/2020 | Asia / India / Telangana / Hyderabad                     |
| EPI_ISL_644718 | 9/20/2020 | 11/19/2020 | Asia / India / Telangana / Hyderabad                     |
| EPI_ISL_644719 | 9/20/2020 | 11/19/2020 | Asia / India / Telangana / Hyderabad                     |
| EPI_ISL_644720 | 9/20/2020 | 11/19/2020 | Asia / India / Telangana / Hyderabad                     |
| EPI_ISL_644721 | 9/20/2020 | 11/19/2020 | Asia / India / Telangana / Hyderabad                     |
| EPI_ISL_644722 | 9/20/2020 | 11/19/2020 | Asia / India / Telangana / Hyderabad                     |
| EPI_ISL_644723 | 9/20/2020 | 11/19/2020 | Asia / India / Telangana / Hyderabad                     |
| EPI_ISL_644724 | 9/20/2020 | 11/19/2020 | Asia / India / Telangana / Hyderabad                     |
| EPI_ISL_644725 | 4/13/2020 | 11/19/2020 | Asia / India / Telangana / Hyderabad                     |
| EPI_ISL_644726 | 4/13/2020 | 11/19/2020 | Asia / India / Telangana / Hyderabad                     |
| EPI_ISL_644727 | 4/15/2020 | 11/19/2020 | Asia / India / Telangana / Hyderabad                     |
| EPI_ISL_644728 | 4/15/2020 | 11/19/2020 | Asia / India / Telangana / Hyderabad                     |
| EPI_ISL_644729 | 4/15/2020 | 11/19/2020 | Asia / India / Telangana / Hyderabad                     |
| EPI_ISL_644730 | 5/26/2020 | 11/19/2020 | Asia / India / Telangana / Hyderabad                     |
| EPI_ISL_644731 | 4/19/2020 | 11/19/2020 | Asia / India / Telangana / Hyderabad                     |
| EPI_ISL_644732 | 5/24/2020 | 11/19/2020 | Asia / India / Telangana / Hyderabad                     |
| EPI_ISL_644733 | 5/23/2020 | 11/19/2020 | Asia / India / Telangana / Hyderabad                     |
| EPI_ISL_644734 | 5/26/2020 | 11/19/2020 | Asia / India / Telangana / Hyderabad                     |
| EPI_ISL_644786 | 4/1/2020  | 11/19/2020 | Africa / Zimbabwe                                        |
| EPI_ISL_644787 | 4/1/2020  | 11/19/2020 | Africa / Zimbabwe                                        |
| EPI_ISL_644788 | 4/1/2020  | 11/19/2020 | Africa / Zimbabwe                                        |
| EPI_ISL_644789 | 4/1/2020  | 11/19/2020 | Africa / Zimbabwe                                        |
| EPI_ISL_644790 | 2020      | 11/19/2020 | Africa / Zimbabwe                                        |
| EPI_ISL_644791 | 5/1/2020  | 11/19/2020 | Africa / Zimbabwe                                        |
| EPI_ISL_644792 | 5/1/2020  | 11/19/2020 | Africa / Zimbabwe                                        |
| EPI_ISL_644793 | 5/1/2020  | 11/19/2020 | Africa / Zimbabwe                                        |
| EPI_ISL_644794 | 5/1/2020  | 11/19/2020 | Africa / Zimbabwe                                        |
| EPI_ISL_644795 | 5/1/2020  | 11/19/2020 | Africa / Zimbabwe                                        |
| EPI_ISL_644796 | 5/1/2020  | 11/19/2020 | Africa / Zimbabwe                                        |
| EPI_ISL_644797 | 5/1/2020  | 11/19/2020 | Africa / Zimbabwe                                        |
| EPI_ISL_644798 | 5/1/2020  | 11/19/2020 | Africa / Zimbabwe                                        |
| EPI_ISL_644799 | 2020      | 11/19/2020 | Africa / Zimbabwe                                        |
| EPI_ISL_644800 | 5/1/2020  | 11/19/2020 | Africa / Zimbabwe                                        |
| EPI_ISL_644801 | 5/1/2020  | 11/19/2020 | Africa / Zimbabwe                                        |
| EPI_ISL_644802 | 5/1/2020  | 11/19/2020 | Africa / Zimbabwe                                        |
| EPI_ISL_644803 | 5/1/2020  | 11/19/2020 | Africa / Zimbabwe                                        |
| EPI_ISL_644804 | 5/1/2020  | 11/19/2020 | Africa / Zimbabwe                                        |
| EPI_ISL_644805 | 5/1/2020  | 11/19/2020 | Africa / Zimbabwe                                        |
| EPI_ISL_644806 | 5/1/2020  | 11/19/2020 | Africa / Zimbabwe                                        |
| EPI_ISL_644807 | 5/1/2020  | 11/19/2020 | Africa / Zimbabwe                                        |
| EPI_ISL_644808 | 5/1/2020  | 11/19/2020 | Africa / Zimbabwe                                        |







|                |            |            |                                                       |
|----------------|------------|------------|-------------------------------------------------------|
| EPI_ISL_644913 | 9/23/2020  | 11/19/2020 | North America / USA / Virginia                        |
| EPI_ISL_644914 | 9/22/2020  | 11/19/2020 | North America / USA / Virginia                        |
| EPI_ISL_644915 | 9/23/2020  | 11/19/2020 | North America / USA / Virginia                        |
| EPI_ISL_644916 | 9/23/2020  | 11/19/2020 | North America / USA / Virginia                        |
| EPI_ISL_644917 | 9/24/2020  | 11/19/2020 | North America / USA / Virginia                        |
| EPI_ISL_644919 | 9/23/2020  | 11/19/2020 | North America / USA / Virginia                        |
| EPI_ISL_644920 | 9/23/2020  | 11/19/2020 | North America / USA / Virginia                        |
| EPI_ISL_644921 | 9/30/2020  | 11/19/2020 | North America / USA / Virginia                        |
| EPI_ISL_644922 | 9/29/2020  | 11/19/2020 | North America / USA / Virginia                        |
| EPI_ISL_644923 | 9/30/2020  | 11/19/2020 | North America / USA / Virginia                        |
| EPI_ISL_644924 | 9/28/2020  | 11/19/2020 | North America / USA / Virginia                        |
| EPI_ISL_644925 | 9/29/2020  | 11/19/2020 | North America / USA / Virginia                        |
| EPI_ISL_644926 | 9/29/2020  | 11/19/2020 | North America / USA / Virginia                        |
| EPI_ISL_644927 | 9/30/2020  | 11/19/2020 | North America / USA / Virginia                        |
| EPI_ISL_644928 | 9/30/2020  | 11/19/2020 | North America / USA / Virginia                        |
| EPI_ISL_644930 | 9/29/2020  | 11/19/2020 | North America / USA / Virginia                        |
| EPI_ISL_644931 | 9/29/2020  | 11/19/2020 | North America / USA / Virginia                        |
| EPI_ISL_644932 | 10/7/2020  | 11/19/2020 | North America / USA / Virginia                        |
| EPI_ISL_644933 | 10/29/2020 | 11/19/2020 | North America / USA / Minnesota                       |
| EPI_ISL_644934 | 10/16/2020 | 11/19/2020 | North America / USA / Minnesota                       |
| EPI_ISL_644935 | 10/14/2020 | 11/19/2020 | North America / USA / Minnesota                       |
| EPI_ISL_644936 | 10/1/2020  | 11/19/2020 | North America / USA / Minnesota                       |
| EPI_ISL_644937 | 9/18/2020  | 11/19/2020 | North America / USA / Minnesota                       |
| EPI_ISL_644938 | 9/30/2020  | 11/19/2020 | North America / USA / Minnesota                       |
| EPI_ISL_644939 | 9/29/2020  | 11/19/2020 | North America / USA / Minnesota                       |
| EPI_ISL_644940 | 9/21/2020  | 11/19/2020 | North America / USA / Minnesota                       |
| EPI_ISL_644941 | 10/29/2020 | 11/19/2020 | North America / USA / Minnesota                       |
| EPI_ISL_644942 | 10/23/2020 | 11/19/2020 | North America / USA / Minnesota                       |
| EPI_ISL_644943 | 10/5/2020  | 11/19/2020 | North America / USA / Minnesota                       |
| EPI_ISL_644944 | 8/13/2020  | 11/19/2020 | North America / USA / Minnesota                       |
| EPI_ISL_649149 | 8/11/2020  | 11/19/2020 | Oceania / Australia / Victoria                        |
| EPI_ISL_649150 | 7/29/2020  | 11/19/2020 | Oceania / Australia / Victoria                        |
| EPI_ISL_649151 | 8/4/2020   | 11/19/2020 | Oceania / Australia / Victoria                        |
| EPI_ISL_649152 | 7/14/2020  | 11/19/2020 | North America / USA / California / Santa Clara County |
| EPI_ISL_644945 | 5/30/2020  | 11/20/2020 | Asia / Japan / Kanto                                  |
| EPI_ISL_644946 | 6/10/2020  | 11/20/2020 | Asia / Japan / Kanto                                  |
| EPI_ISL_644947 | 6/11/2020  | 11/20/2020 | Asia / Japan / Kanto                                  |
| EPI_ISL_644948 | 6/13/2020  | 11/20/2020 | Asia / Japan / Kanto                                  |
| EPI_ISL_644949 | 6/13/2020  | 11/20/2020 | Asia / Japan / Kanto                                  |
| EPI_ISL_644950 | 6/20/2020  | 11/20/2020 | Asia / Japan / Kanto                                  |
| EPI_ISL_644951 | 6/22/2020  | 11/20/2020 | Asia / Japan / Kanto                                  |
| EPI_ISL_644952 | 6/29/2020  | 11/20/2020 | Asia / Japan / Kanto                                  |
| EPI_ISL_644953 | 6/30/2020  | 11/20/2020 | Asia / Japan / Kanto                                  |
| EPI_ISL_644954 | 6/30/2020  | 11/20/2020 | Asia / Japan / Kanto                                  |
| EPI_ISL_644955 | 7/1/2020   | 11/20/2020 | Asia / Japan / Kanto                                  |
| EPI_ISL_644956 | 7/6/2020   | 11/20/2020 | Asia / Japan / Kanto                                  |
| EPI_ISL_644957 | 7/6/2020   | 11/20/2020 | Asia / Japan / Kanto                                  |

|                |            |                                 |
|----------------|------------|---------------------------------|
| EPI_ISL_644958 | 7/6/2020   | 11/20/2020 Asia / Japan / Kanto |
| EPI_ISL_644959 | 7/7/2020   | 11/20/2020 Asia / Japan / Kanto |
| EPI_ISL_644960 | 7/8/2020   | 11/20/2020 Asia / Japan / Kanto |
| EPI_ISL_644961 | 7/11/2020  | 11/20/2020 Asia / Japan / Kanto |
| EPI_ISL_644962 | 7/13/2020  | 11/20/2020 Asia / Japan / Kanto |
| EPI_ISL_644963 | 7/15/2020  | 11/20/2020 Asia / Japan / Kanto |
| EPI_ISL_644964 | 7/16/2020  | 11/20/2020 Asia / Japan / Kanto |
| EPI_ISL_644965 | 7/20/2020  | 11/20/2020 Asia / Japan / Kanto |
| EPI_ISL_644966 | 7/20/2020  | 11/20/2020 Asia / Japan / Kanto |
| EPI_ISL_644967 | 7/21/2020  | 11/20/2020 Asia / Japan / Kanto |
| EPI_ISL_644968 | 7/21/2020  | 11/20/2020 Asia / Japan / Kanto |
| EPI_ISL_644969 | 7/22/2020  | 11/20/2020 Asia / Japan / Kanto |
| EPI_ISL_644970 | 7/24/2020  | 11/20/2020 Asia / Japan / Kanto |
| EPI_ISL_644971 | 7/24/2020  | 11/20/2020 Asia / Japan / Kanto |
| EPI_ISL_644972 | 7/25/2020  | 11/20/2020 Asia / Japan / Kanto |
| EPI_ISL_644973 | 7/27/2020  | 11/20/2020 Asia / Japan / Kanto |
| EPI_ISL_644974 | 7/27/2020  | 11/20/2020 Asia / Japan / Kanto |
| EPI_ISL_644975 | 7/27/2020  | 11/20/2020 Asia / Japan / Kanto |
| EPI_ISL_644976 | 7/27/2020  | 11/20/2020 Asia / Japan / Kanto |
| EPI_ISL_644977 | 7/28/2020  | 11/20/2020 Asia / Japan / Kanto |
| EPI_ISL_644978 | 7/29/2020  | 11/20/2020 Asia / Japan / Kanto |
| EPI_ISL_644979 | 7/30/2020  | 11/20/2020 Asia / Japan / Kanto |
| EPI_ISL_644980 | 7/31/2020  | 11/20/2020 Asia / Japan / Kanto |
| EPI_ISL_644981 | 8/1/2020   | 11/20/2020 Asia / Japan / Kanto |
| EPI_ISL_644982 | 8/1/2020   | 11/20/2020 Asia / Japan / Kanto |
| EPI_ISL_644983 | 8/3/2020   | 11/20/2020 Asia / Japan / Kanto |
| EPI_ISL_644984 | 8/3/2020   | 11/20/2020 Asia / Japan / Kanto |
| EPI_ISL_644985 | 8/3/2020   | 11/20/2020 Asia / Japan / Kanto |
| EPI_ISL_644986 | 8/3/2020   | 11/20/2020 Asia / Japan / Kanto |
| EPI_ISL_644987 | 8/4/2020   | 11/20/2020 Asia / Japan / Kanto |
| EPI_ISL_644988 | 8/4/2020   | 11/20/2020 Asia / Japan / Kanto |
| EPI_ISL_644989 | 8/4/2020   | 11/20/2020 Asia / Japan / Kanto |
| EPI_ISL_644990 | 8/5/2020   | 11/20/2020 Asia / Japan / Kanto |
| EPI_ISL_644991 | 8/9/2020   | 11/20/2020 Asia / Japan / Kanto |
| EPI_ISL_644992 | 8/11/2020  | 11/20/2020 Asia / Japan / Kanto |
| EPI_ISL_644993 | 8/16/2020  | 11/20/2020 Asia / Japan / Kanto |
| EPI_ISL_644994 | 8/16/2020  | 11/20/2020 Asia / Japan / Kanto |
| EPI_ISL_644995 | 8/17/2020  | 11/20/2020 Asia / Japan / Kanto |
| EPI_ISL_644996 | 8/19/2020  | 11/20/2020 Asia / Japan / Kanto |
| EPI_ISL_644997 | 8/20/2020  | 11/20/2020 Asia / Japan / Kanto |
| EPI_ISL_644998 | 8/25/2020  | 11/20/2020 Asia / Japan / Kanto |
| EPI_ISL_644999 | 8/27/2020  | 11/20/2020 Asia / Japan / Kanto |
| EPI_ISL_645115 | 10/29/2020 | 11/20/2020 Asia / Singapore     |
| EPI_ISL_645116 | 9/16/2020  | 11/20/2020 Asia / Singapore     |
| EPI_ISL_645117 | 11/4/2020  | 11/20/2020 Asia / Singapore     |
| EPI_ISL_645118 | 11/3/2020  | 11/20/2020 Asia / Singapore     |
| EPI_ISL_645120 | 11/9/2020  | 11/20/2020 Asia / Singapore     |

|                |            |                                                                      |
|----------------|------------|----------------------------------------------------------------------|
| EPI_ISL_645121 | 11/7/2020  | 11/20/2020 Asia / Singapore                                          |
| EPI_ISL_645122 | 11/11/2020 | 11/20/2020 Asia / Singapore                                          |
| EPI_ISL_645123 | 11/9/2020  | 11/20/2020 Asia / Singapore                                          |
| EPI_ISL_645124 | 11/7/2020  | 11/20/2020 Asia / Singapore                                          |
| EPI_ISL_645125 | 11/10/2020 | 11/20/2020 Asia / Singapore                                          |
| EPI_ISL_645126 | 11/9/2020  | 11/20/2020 Asia / Singapore                                          |
| EPI_ISL_645127 | 11/9/2020  | 11/20/2020 Asia / Singapore                                          |
| EPI_ISL_645128 | 11/7/2020  | 11/20/2020 Asia / Singapore                                          |
| EPI_ISL_645129 | 11/8/2020  | 11/20/2020 Asia / Singapore                                          |
| EPI_ISL_645130 | 11/9/2020  | 11/20/2020 Asia / Singapore                                          |
| EPI_ISL_645131 | 11/7/2020  | 11/20/2020 Asia / Singapore                                          |
| EPI_ISL_645132 | 11/6/2020  | 11/20/2020 Asia / Singapore                                          |
| EPI_ISL_645134 | 11/16/2020 | 11/20/2020 Europe / United Kingdom / England                         |
| EPI_ISL_645135 | 11/15/2020 | 11/20/2020 Europe / United Kingdom / England                         |
| EPI_ISL_645136 | 11/15/2020 | 11/20/2020 Europe / United Kingdom / England                         |
| EPI_ISL_645169 | 3/5/2020   | 11/20/2020 Europe / France / Nouvelle-Aquitaine / Bordeaux           |
| EPI_ISL_645170 | 3/28/2020  | 11/20/2020 Europe / France / Nouvelle-Aquitaine / Bordeaux           |
| EPI_ISL_645171 | 3/28/2020  | 11/20/2020 Europe / France / Nouvelle-Aquitaine / Bordeaux           |
| EPI_ISL_645172 | 5/1/2020   | 11/20/2020 Europe / France / Nouvelle-Aquitaine / Bordeaux           |
| EPI_ISL_645173 | 3/27/2020  | 11/20/2020 Europe / France / Provence-Alpes-Cote d'Azur / Nice       |
| EPI_ISL_645174 | 3/16/2020  | 11/20/2020 Europe / France / Nouvelle-Aquitaine / Limoges            |
| EPI_ISL_645175 | 3/11/2020  | 11/20/2020 Europe / France / Nouvelle-Aquitaine / Limoges            |
| EPI_ISL_645176 | 3/9/2020   | 11/20/2020 Europe / France / Nouvelle-Aquitaine / Limoges            |
| EPI_ISL_645177 | 3/3/2020   | 11/20/2020 Europe / France / Nouvelle-Aquitaine / Limoges            |
| EPI_ISL_645178 | 3/9/2020   | 11/20/2020 Europe / France / Nouvelle-Aquitaine / Limoges            |
| EPI_ISL_645179 | 3/25/2020  | 11/20/2020 Europe / France / Nouvelle-Aquitaine / Limoges            |
| EPI_ISL_645180 | 3/25/2020  | 11/20/2020 Europe / France / Nouvelle-Aquitaine / Limoges            |
| EPI_ISL_645181 | 3/25/2020  | 11/20/2020 Europe / France / Nouvelle-Aquitaine / Limoges            |
| EPI_ISL_645182 | 3/31/2020  | 11/20/2020 Europe / France / Nouvelle-Aquitaine / Limoges            |
| EPI_ISL_645183 | 3/30/2020  | 11/20/2020 Europe / France / Nouvelle-Aquitaine / Limoges            |
| EPI_ISL_645184 | 3/8/2020   | 11/20/2020 Europe / France / Auvergne-Rhone-Alpes / Saint-Etienne    |
| EPI_ISL_645185 | 5/1/2020   | 11/20/2020 Europe / France / Auvergne-Rhone-Alpes / Saint-Etienne    |
| EPI_ISL_645186 | 5/13/2020  | 11/20/2020 Europe / France / Auvergne-Rhone-Alpes / Saint-Etienne    |
| EPI_ISL_645187 | 5/6/2020   | 11/20/2020 Europe / France / Auvergne-Rhone-Alpes / Saint-Etienne    |
| EPI_ISL_645188 | 3/11/2020  | 11/20/2020 Europe / France / Auvergne-Rhone-Alpes / Clermond-Ferrand |
| EPI_ISL_645189 | 3/13/2020  | 11/20/2020 Europe / France / Auvergne-Rhone-Alpes / Clermond-Ferrand |
| EPI_ISL_645190 | 3/15/2020  | 11/20/2020 Europe / France / Auvergne-Rhone-Alpes / Clermond-Ferrand |
| EPI_ISL_645191 | 3/17/2020  | 11/20/2020 Europe / France / Auvergne-Rhone-Alpes / Clermond-Ferrand |
| EPI_ISL_645192 | 3/20/2020  | 11/20/2020 Europe / France / Auvergne-Rhone-Alpes / Clermond-Ferrand |
| EPI_ISL_645193 | 3/26/2020  | 11/20/2020 Europe / France / Auvergne-Rhone-Alpes / Clermond-Ferrand |
| EPI_ISL_645194 | 3/30/2020  | 11/20/2020 Europe / France / Auvergne-Rhone-Alpes / Clermond-Ferrand |
| EPI_ISL_645195 | 4/4/2020   | 11/20/2020 Europe / France / Auvergne-Rhone-Alpes / Clermond-Ferrand |
| EPI_ISL_645196 | 4/5/2020   | 11/20/2020 Europe / France / Auvergne-Rhone-Alpes / Clermond-Ferrand |
| EPI_ISL_645197 | 3/16/2020  | 11/20/2020 Europe / France / Occitanie / Nimes                       |
| EPI_ISL_645198 | 3/16/2020  | 11/20/2020 Europe / France / Occitanie / Nimes                       |
| EPI_ISL_645199 | 3/29/2020  | 11/20/2020 Europe / France / Occitanie / Nimes                       |
| EPI_ISL_645200 | 3/30/2020  | 11/20/2020 Europe / France / Occitanie / Nimes                       |

|                |            |            |                                                          |
|----------------|------------|------------|----------------------------------------------------------|
| EPI_ISL_645201 | 4/2/2020   | 11/20/2020 | Europe / France / Occitanie / Nimes                      |
| EPI_ISL_645202 | 4/2/2020   | 11/20/2020 | Europe / France / Occitanie / Nimes                      |
| EPI_ISL_645203 | 4/3/2020   | 11/20/2020 | Europe / France / Occitanie / Nimes                      |
| EPI_ISL_645204 | 4/3/2020   | 11/20/2020 | Europe / France / Occitanie / Nimes                      |
| EPI_ISL_645205 | 4/3/2020   | 11/20/2020 | Europe / France / Occitanie / Nimes                      |
| EPI_ISL_645206 | 4/3/2020   | 11/20/2020 | Europe / France / Occitanie / Nimes                      |
| EPI_ISL_645207 | 4/20/2020  | 11/20/2020 | Europe / France / Occitanie / Nimes                      |
| EPI_ISL_645208 | 4/21/2020  | 11/20/2020 | Europe / France / Occitanie / Nimes                      |
| EPI_ISL_645209 | 5/29/2020  | 11/20/2020 | Europe / France / Occitanie / Nimes                      |
| EPI_ISL_645212 | 5/8/2020   | 11/20/2020 | Europe / France / Provence-Alpes-Cote d'Azur / Marseille |
| EPI_ISL_645213 | 5/20/2020  | 11/20/2020 | Europe / France / Provence-Alpes-Cote d'Azur / Marseille |
| EPI_ISL_645214 | 5/20/2020  | 11/20/2020 | Europe / France / Provence-Alpes-Cote d'Azur / Marseille |
| EPI_ISL_645215 | 6/5/2020   | 11/20/2020 | Europe / France / Occitanie / Nimes                      |
| EPI_ISL_645216 | 3/4/2020   | 11/20/2020 | Europe / France / Nouvelle-Aquitaine / Poitiers          |
| EPI_ISL_645217 | 3/12/2020  | 11/20/2020 | Europe / France / Pays de la Loire / Nantes              |
| EPI_ISL_645218 | 4/15/2020  | 11/20/2020 | Europe / France / Pays de la Loire / Nantes              |
| EPI_ISL_645219 | 11/5/2020  | 11/20/2020 | Europe / United Kingdom / England                        |
| EPI_ISL_645220 | 11/5/2020  | 11/20/2020 | Europe / United Kingdom / England                        |
| EPI_ISL_645221 | 11/1/2020  | 11/20/2020 | Europe / United Kingdom / England                        |
| EPI_ISL_645222 | 11/5/2020  | 11/20/2020 | Europe / United Kingdom / England                        |
| EPI_ISL_645223 | 11/5/2020  | 11/20/2020 | Europe / United Kingdom / England                        |
| EPI_ISL_645224 | 11/5/2020  | 11/20/2020 | Europe / United Kingdom / England                        |
| EPI_ISL_645225 | 11/5/2020  | 11/20/2020 | Europe / United Kingdom / England                        |
| EPI_ISL_645226 | 11/1/2020  | 11/20/2020 | Europe / United Kingdom / England                        |
| EPI_ISL_645228 | 11/5/2020  | 11/20/2020 | Europe / United Kingdom / England                        |
| EPI_ISL_645229 | 11/5/2020  | 11/20/2020 | Europe / United Kingdom / England                        |
| EPI_ISL_645230 | 11/5/2020  | 11/20/2020 | Europe / United Kingdom / England                        |
| EPI_ISL_645231 | 11/5/2020  | 11/20/2020 | Europe / United Kingdom / England                        |
| EPI_ISL_645232 | 11/5/2020  | 11/20/2020 | Europe / United Kingdom / England                        |
| EPI_ISL_645233 | 11/5/2020  | 11/20/2020 | Europe / United Kingdom / England                        |
| EPI_ISL_645234 | 11/5/2020  | 11/20/2020 | Europe / United Kingdom / England                        |
| EPI_ISL_645235 | 11/5/2020  | 11/20/2020 | Europe / United Kingdom / England                        |
| EPI_ISL_645236 | 11/5/2020  | 11/20/2020 | Europe / United Kingdom / England                        |
| EPI_ISL_645237 | 11/5/2020  | 11/20/2020 | Europe / United Kingdom / England                        |
| EPI_ISL_645238 | 11/5/2020  | 11/20/2020 | Europe / United Kingdom / England                        |
| EPI_ISL_645239 | 11/5/2020  | 11/20/2020 | Europe / United Kingdom / England                        |
| EPI_ISL_645240 | 9/28/2020  | 11/20/2020 | Europe / United Kingdom / England                        |
| EPI_ISL_645241 | 10/30/2020 | 11/20/2020 | Europe / United Kingdom / England                        |
| EPI_ISL_645242 | 11/5/2020  | 11/20/2020 | Europe / United Kingdom / England                        |
| EPI_ISL_645244 | 11/1/2020  | 11/20/2020 | Europe / United Kingdom / England                        |
| EPI_ISL_645245 | 11/5/2020  | 11/20/2020 | Europe / United Kingdom / England                        |
| EPI_ISL_645246 | 11/5/2020  | 11/20/2020 | Europe / United Kingdom / England                        |
| EPI_ISL_645247 | 11/5/2020  | 11/20/2020 | Europe / United Kingdom / England                        |
| EPI_ISL_645249 | 11/5/2020  | 11/20/2020 | Europe / United Kingdom / England                        |
| EPI_ISL_645250 | 11/5/2020  | 11/20/2020 | Europe / United Kingdom / England                        |
| EPI_ISL_645251 | 11/5/2020  | 11/20/2020 | Europe / United Kingdom / England                        |
| EPI_ISL_645252 | 11/5/2020  | 11/20/2020 | Europe / United Kingdom / England                        |



























































































































|                |           |                                              |
|----------------|-----------|----------------------------------------------|
| EPI_ISL_648035 | 4/6/2020  | 11/20/2020 North America / USA / Wisconsin   |
| EPI_ISL_648036 | 4/7/2020  | 11/20/2020 North America / USA / Wisconsin   |
| EPI_ISL_648037 | 8/22/2020 | 11/20/2020 North America / USA / Mississippi |
| EPI_ISL_648038 | 8/22/2020 | 11/20/2020 North America / USA / Mississippi |
| EPI_ISL_648039 | 8/22/2020 | 11/20/2020 North America / USA / Mississippi |
| EPI_ISL_648040 | 9/3/2020  | 11/20/2020 North America / USA / Mississippi |
| EPI_ISL_648041 | 4/1/2020  | 11/20/2020 North America / USA / Mississippi |
| EPI_ISL_648042 | 3/23/2020 | 11/20/2020 North America / USA / Mississippi |
| EPI_ISL_648043 | 2/7/2020  | 11/20/2020 Asia / Singapore                  |
| EPI_ISL_648044 | 3/12/2020 | 11/20/2020 Asia / Singapore                  |
| EPI_ISL_648045 | 3/25/2020 | 11/20/2020 Asia / Singapore                  |
| EPI_ISL_648046 | 4/15/2020 | 11/20/2020 Asia / Singapore                  |
| EPI_ISL_648047 | 4/15/2020 | 11/20/2020 Asia / Singapore                  |
| EPI_ISL_648048 | 4/15/2020 | 11/20/2020 Asia / Singapore                  |
| EPI_ISL_648049 | 4/15/2020 | 11/20/2020 Asia / Singapore                  |
| EPI_ISL_648050 | 4/15/2020 | 11/20/2020 Asia / Singapore                  |
| EPI_ISL_648051 | 4/15/2020 | 11/20/2020 Asia / Singapore                  |
| EPI_ISL_648052 | 4/15/2020 | 11/20/2020 Asia / Singapore                  |
| EPI_ISL_648053 | 4/16/2020 | 11/20/2020 Asia / Singapore                  |
| EPI_ISL_648054 | 4/16/2020 | 11/20/2020 Asia / Singapore                  |
| EPI_ISL_648055 | 4/17/2020 | 11/20/2020 Asia / Singapore                  |
| EPI_ISL_648056 | 4/17/2020 | 11/20/2020 Asia / Singapore                  |
| EPI_ISL_648057 | 4/17/2020 | 11/20/2020 Asia / Singapore                  |
| EPI_ISL_648058 | 4/17/2020 | 11/20/2020 Asia / Singapore                  |
| EPI_ISL_648059 | 4/17/2020 | 11/20/2020 Asia / Singapore                  |
| EPI_ISL_648060 | 4/17/2020 | 11/20/2020 Asia / Singapore                  |
| EPI_ISL_648061 | 4/17/2020 | 11/20/2020 Asia / Singapore                  |
| EPI_ISL_648062 | 3/10/2020 | 11/20/2020 Asia / Singapore                  |
| EPI_ISL_648063 | 3/12/2020 | 11/20/2020 Asia / Singapore                  |
| EPI_ISL_648064 | 3/19/2020 | 11/20/2020 Asia / Singapore                  |
| EPI_ISL_648065 | 3/19/2020 | 11/20/2020 Asia / Singapore                  |
| EPI_ISL_648066 | 3/19/2020 | 11/20/2020 Asia / Singapore                  |
| EPI_ISL_648067 | 3/19/2020 | 11/20/2020 Asia / Singapore                  |
| EPI_ISL_648068 | 3/20/2020 | 11/20/2020 Asia / Singapore                  |
| EPI_ISL_648069 | 3/21/2020 | 11/20/2020 Asia / Singapore                  |
| EPI_ISL_648070 | 3/23/2020 | 11/20/2020 Asia / Singapore                  |
| EPI_ISL_648071 | 2/8/2020  | 11/20/2020 Asia / Singapore                  |
| EPI_ISL_648072 | 3/5/2020  | 11/20/2020 Asia / Singapore                  |
| EPI_ISL_648073 | 3/13/2020 | 11/20/2020 Asia / Singapore                  |
| EPI_ISL_648074 | 3/14/2020 | 11/20/2020 Asia / Singapore                  |
| EPI_ISL_648075 | 3/16/2020 | 11/20/2020 Asia / Singapore                  |
| EPI_ISL_648076 | 3/17/2020 | 11/20/2020 Asia / Singapore                  |
| EPI_ISL_648077 | 3/17/2020 | 11/20/2020 Asia / Singapore                  |
| EPI_ISL_648078 | 3/17/2020 | 11/20/2020 Asia / Singapore                  |
| EPI_ISL_648079 | 3/18/2020 | 11/20/2020 Asia / Singapore                  |
| EPI_ISL_648080 | 3/18/2020 | 11/20/2020 Asia / Singapore                  |
| EPI_ISL_648081 | 3/24/2020 | 11/20/2020 Asia / Singapore                  |

|                |            |                                        |
|----------------|------------|----------------------------------------|
| EPI_ISL_648082 | 3/25/2020  | 11/20/2020 Asia / Singapore            |
| EPI_ISL_648083 | 3/25/2020  | 11/20/2020 Asia / Singapore            |
| EPI_ISL_648084 | 3/27/2020  | 11/20/2020 Asia / Singapore            |
| EPI_ISL_648085 | 3/29/2020  | 11/20/2020 Asia / Singapore            |
| EPI_ISL_648086 | 4/2/2020   | 11/20/2020 Asia / Singapore            |
| EPI_ISL_648087 | 4/3/2020   | 11/20/2020 Asia / Singapore            |
| EPI_ISL_648088 | 4/3/2020   | 11/20/2020 Asia / Singapore            |
| EPI_ISL_648089 | 4/3/2020   | 11/20/2020 Asia / Singapore            |
| EPI_ISL_648090 | 4/4/2020   | 11/20/2020 Asia / Singapore            |
| EPI_ISL_648091 | 4/4/2020   | 11/20/2020 Asia / Singapore            |
| EPI_ISL_648092 | 4/6/2020   | 11/20/2020 Asia / Singapore            |
| EPI_ISL_648093 | 4/7/2020   | 11/20/2020 Asia / Singapore            |
| EPI_ISL_648094 | 4/7/2020   | 11/20/2020 Asia / Singapore            |
| EPI_ISL_648095 | 4/8/2020   | 11/20/2020 Asia / Singapore            |
| EPI_ISL_648096 | 4/9/2020   | 11/20/2020 Asia / Singapore            |
| EPI_ISL_648097 | 4/9/2020   | 11/20/2020 Asia / Singapore            |
| EPI_ISL_648098 | 4/9/2020   | 11/20/2020 Asia / Singapore            |
| EPI_ISL_648099 | 4/11/2020  | 11/20/2020 Asia / Singapore            |
| EPI_ISL_648100 | 4/11/2020  | 11/20/2020 Asia / Singapore            |
| EPI_ISL_648101 | 4/11/2020  | 11/20/2020 Asia / Singapore            |
| EPI_ISL_648102 | 4/11/2020  | 11/20/2020 Asia / Singapore            |
| EPI_ISL_648103 | 4/11/2020  | 11/20/2020 Asia / Singapore            |
| EPI_ISL_648104 | 4/11/2020  | 11/20/2020 Asia / Singapore            |
| EPI_ISL_648105 | 4/12/2020  | 11/20/2020 Asia / Singapore            |
| EPI_ISL_648106 | 4/11/2020  | 11/20/2020 Asia / Singapore            |
| EPI_ISL_648107 | 4/12/2020  | 11/20/2020 Asia / Singapore            |
| EPI_ISL_648108 | 4/12/2020  | 11/20/2020 Asia / Singapore            |
| EPI_ISL_648109 | 4/12/2020  | 11/20/2020 Asia / Singapore            |
| EPI_ISL_648110 | 4/12/2020  | 11/20/2020 Asia / Singapore            |
| EPI_ISL_648111 | 4/12/2020  | 11/20/2020 Asia / Singapore            |
| EPI_ISL_648112 | 4/13/2020  | 11/20/2020 Asia / Singapore            |
| EPI_ISL_648113 | 4/13/2020  | 11/20/2020 Asia / Singapore            |
| EPI_ISL_648114 | 4/13/2020  | 11/20/2020 Asia / Singapore            |
| EPI_ISL_648115 | 4/13/2020  | 11/20/2020 Asia / Singapore            |
| EPI_ISL_648116 | 4/14/2020  | 11/20/2020 Asia / Singapore            |
| EPI_ISL_648117 | 4/14/2020  | 11/20/2020 Asia / Singapore            |
| EPI_ISL_648118 | 4/14/2020  | 11/20/2020 Asia / Singapore            |
| EPI_ISL_648119 | 4/14/2020  | 11/20/2020 Asia / Singapore            |
| EPI_ISL_648120 | 4/14/2020  | 11/20/2020 Asia / Singapore            |
| EPI_ISL_648121 | 4/14/2020  | 11/20/2020 Asia / Singapore            |
| EPI_ISL_648129 | 10/29/2020 | 11/20/2020 Europe / Sweden             |
| EPI_ISL_648130 | 10/8/2020  | 11/20/2020 Europe / Sweden             |
| EPI_ISL_648131 | 3/20/2020  | 11/20/2020 Europe / Sweden             |
| EPI_ISL_648132 | 8/13/2020  | 11/20/2020 Europe / Sweden / Kronoberg |
| EPI_ISL_648133 | 7/7/2020   | 11/20/2020 Europe / Sweden / Varmland  |
| EPI_ISL_648134 | 7/11/2020  | 11/20/2020 Europe / Sweden             |
| EPI_ISL_648135 | 10/6/2020  | 11/20/2020 Europe / Sweden             |

|                |            |                                              |
|----------------|------------|----------------------------------------------|
| EPI_ISL_648136 | 9/8/2020   | 11/20/2020 Europe / Sweden                   |
| EPI_ISL_648137 | 10/8/2020  | 11/20/2020 Europe / Sweden                   |
| EPI_ISL_648138 | 7/13/2020  | 11/20/2020 Europe / Sweden                   |
| EPI_ISL_648139 | 7/15/2020  | 11/20/2020 Europe / Sweden                   |
| EPI_ISL_648140 | 9/1/2020   | 11/20/2020 Europe / Sweden                   |
| EPI_ISL_648141 | 9/25/2020  | 11/20/2020 Europe / Sweden                   |
| EPI_ISL_648142 | 8/29/2020  | 11/20/2020 Europe / Sweden / Gavleborg       |
| EPI_ISL_648143 | 7/26/2020  | 11/20/2020 Europe / Sweden                   |
| EPI_ISL_648144 | 6/29/2020  | 11/20/2020 Europe / Sweden / Gavleborg       |
| EPI_ISL_648145 | 7/10/2020  | 11/20/2020 Europe / Sweden                   |
| EPI_ISL_648146 | 10/1/2020  | 11/20/2020 Europe / Sweden                   |
| EPI_ISL_648147 | 10/2/2020  | 11/20/2020 Europe / Sweden                   |
| EPI_ISL_648148 | 9/9/2020   | 11/20/2020 Europe / Sweden / Halland         |
| EPI_ISL_648149 | 10/5/2020  | 11/20/2020 Europe / Sweden                   |
| EPI_ISL_648150 | 10/5/2020  | 11/20/2020 Europe / Sweden                   |
| EPI_ISL_648151 | 10/30/2020 | 11/20/2020 Europe / Sweden                   |
| EPI_ISL_648152 | 10/17/2020 | 11/20/2020 Europe / Sweden                   |
| EPI_ISL_648153 | 10/21/2020 | 11/20/2020 Europe / Sweden                   |
| EPI_ISL_648154 | 10/15/2020 | 11/20/2020 Europe / Sweden                   |
| EPI_ISL_648155 | 10/15/2020 | 11/20/2020 Europe / Sweden                   |
| EPI_ISL_648156 | 10/6/2020  | 11/20/2020 Europe / Sweden                   |
| EPI_ISL_648157 | 10/30/2020 | 11/20/2020 Europe / Sweden                   |
| EPI_ISL_648158 | 10/30/2020 | 11/20/2020 Europe / Sweden                   |
| EPI_ISL_648159 | 10/29/2020 | 11/20/2020 Europe / Sweden                   |
| EPI_ISL_648160 | 10/28/2020 | 11/20/2020 Europe / Sweden                   |
| EPI_ISL_648161 | 10/26/2020 | 11/20/2020 Europe / Sweden                   |
| EPI_ISL_648162 | 10/1/2020  | 11/20/2020 Europe / Sweden                   |
| EPI_ISL_648163 | 8/17/2020  | 11/20/2020 Europe / Sweden / Gavleborg       |
| EPI_ISL_648164 | 9/28/2020  | 11/20/2020 Europe / Sweden / Kalmar          |
| EPI_ISL_648165 | 8/6/2020   | 11/20/2020 Europe / Sweden / Jonkoping       |
| EPI_ISL_648166 | 10/27/2020 | 11/20/2020 Europe / Sweden                   |
| EPI_ISL_648167 | 10/20/2020 | 11/20/2020 Europe / Sweden                   |
| EPI_ISL_648168 | 10/13/2020 | 11/20/2020 Europe / Sweden                   |
| EPI_ISL_648169 | 8/4/2020   | 11/20/2020 Europe / Sweden / Vastra Gotaland |
| EPI_ISL_648170 | 9/14/2020  | 11/20/2020 Europe / Sweden                   |
| EPI_ISL_648171 | 9/4/2020   | 11/20/2020 Europe / Sweden                   |
| EPI_ISL_648172 | 9/23/2020  | 11/20/2020 Europe / Sweden                   |
| EPI_ISL_648173 | 7/1/2020   | 11/20/2020 Europe / Sweden / Vastra Gotaland |
| EPI_ISL_648174 | 9/28/2020  | 11/20/2020 Europe / Sweden                   |
| EPI_ISL_648175 | 9/28/2020  | 11/20/2020 Europe / Sweden                   |
| EPI_ISL_648176 | 10/19/2020 | 11/20/2020 Europe / Sweden                   |
| EPI_ISL_648177 | 10/19/2020 | 11/20/2020 Europe / Sweden                   |
| EPI_ISL_648178 | 10/19/2020 | 11/20/2020 Europe / Sweden                   |
| EPI_ISL_648179 | 10/19/2020 | 11/20/2020 Europe / Sweden                   |
| EPI_ISL_648180 | 6/26/2020  | 11/20/2020 Europe / Sweden / Skane           |
| EPI_ISL_648181 | 8/13/2020  | 11/20/2020 Europe / Sweden / Skane           |
| EPI_ISL_648182 | 8/9/2020   | 11/20/2020 Europe / Sweden / Skane           |

|                |            |                                                                             |
|----------------|------------|-----------------------------------------------------------------------------|
| EPI_ISL_648183 | 8/4/2020   | 11/20/2020 Europe / Sweden / Skane                                          |
| EPI_ISL_648184 | 5/23/2020  | 11/20/2020 Europe / Sweden / Skane                                          |
| EPI_ISL_648185 | 10/5/2020  | 11/20/2020 Europe / Sweden                                                  |
| EPI_ISL_648186 | 10/6/2020  | 11/20/2020 Europe / Sweden                                                  |
| EPI_ISL_648187 | 10/12/2020 | 11/20/2020 Europe / Sweden                                                  |
| EPI_ISL_648188 | 10/6/2020  | 11/20/2020 Europe / Sweden                                                  |
| EPI_ISL_648189 | 10/9/2020  | 11/20/2020 Europe / Sweden                                                  |
| EPI_ISL_648190 | 10/7/2020  | 11/20/2020 Europe / Sweden                                                  |
| EPI_ISL_648191 | 10/7/2020  | 11/20/2020 Europe / Sweden                                                  |
| EPI_ISL_648192 | 10/21/2020 | 11/20/2020 Europe / Sweden                                                  |
| EPI_ISL_648193 | 8/17/2020  | 11/20/2020 Europe / Sweden / Vastra Gotaland                                |
| EPI_ISL_648194 | 10/6/2020  | 11/20/2020 Europe / Sweden                                                  |
| EPI_ISL_648195 | 9/24/2020  | 11/20/2020 Europe / Sweden                                                  |
| EPI_ISL_648196 | 9/24/2020  | 11/20/2020 Europe / Sweden                                                  |
| EPI_ISL_648197 | 9/28/2020  | 11/20/2020 Europe / Sweden                                                  |
| EPI_ISL_648198 | 9/7/2020   | 11/20/2020 Europe / Sweden / Vastra Gotaland                                |
| EPI_ISL_648199 | 9/4/2020   | 11/20/2020 Europe / Sweden / Vastra Gotaland                                |
| EPI_ISL_648200 | 10/26/2020 | 11/20/2020 Europe / Sweden                                                  |
| EPI_ISL_648201 | 10/27/2020 | 11/20/2020 Europe / Sweden                                                  |
| EPI_ISL_648202 | 10/27/2020 | 11/20/2020 Europe / Sweden                                                  |
| EPI_ISL_648203 | 10/26/2020 | 11/20/2020 Europe / Sweden                                                  |
| EPI_ISL_648204 | 8/26/2020  | 11/20/2020 Europe / Sweden / Orebro                                         |
| EPI_ISL_648205 | 9/28/2020  | 11/20/2020 Europe / Sweden / Orebro                                         |
| EPI_ISL_648206 | 9/28/2020  | 11/20/2020 Europe / Sweden / Orebro                                         |
| EPI_ISL_648207 | 10/26/2020 | 11/20/2020 Europe / Sweden                                                  |
| EPI_ISL_648208 | 10/26/2020 | 11/20/2020 Europe / Sweden                                                  |
| EPI_ISL_648209 | 7/22/2020  | 11/20/2020 South America / Argentina / Buenos Aires / Cañuelas              |
| EPI_ISL_648210 | 7/22/2020  | 11/20/2020 South America / Argentina / Buenos Aires / Cañuelas              |
| EPI_ISL_648211 | 7/22/2020  | 11/20/2020 South America / Argentina / Buenos Aires / La Matanza            |
| EPI_ISL_648213 | 7/22/2020  | 11/20/2020 South America / Argentina / Buenos Aires / Gregorio de Laferrere |
| EPI_ISL_648214 | 7/22/2020  | 11/20/2020 South America / Argentina / Buenos Aires / Gregorio de Laferrere |
| EPI_ISL_648216 | 7/22/2020  | 11/20/2020 South America / Argentina / Buenos Aires / La Matanza            |
| EPI_ISL_648217 | 7/20/2020  | 11/20/2020 South America / Argentina / Santa Fe / Totoras                   |
| EPI_ISL_648218 | 7/22/2020  | 11/20/2020 South America / Argentina / Buenos Aires / Máximo Paz            |
| EPI_ISL_648265 | 4/22/2020  | 11/20/2020 North America / USA / Massachusetts                              |
| EPI_ISL_648267 | 5/11/2020  | 11/20/2020 North America / USA / Massachusetts                              |
| EPI_ISL_648270 | 5/5/2020   | 11/20/2020 North America / USA / Massachusetts                              |
| EPI_ISL_648271 | 10/14/2020 | 11/20/2020 North America / USA / Maryland                                   |
| EPI_ISL_648272 | 10/13/2020 | 11/20/2020 North America / USA / Maryland                                   |
| EPI_ISL_648273 | 10/14/2020 | 11/20/2020 North America / USA / Maryland                                   |
| EPI_ISL_648274 | 10/14/2020 | 11/20/2020 North America / USA / Maryland                                   |
| EPI_ISL_648275 | 10/14/2020 | 11/20/2020 North America / USA / Maryland                                   |
| EPI_ISL_648276 | 10/14/2020 | 11/20/2020 North America / USA / Maryland                                   |
| EPI_ISL_648277 | 10/14/2020 | 11/20/2020 North America / USA / Maryland                                   |
| EPI_ISL_648278 | 10/14/2020 | 11/20/2020 North America / USA / Maryland                                   |
| EPI_ISL_648279 | 10/14/2020 | 11/20/2020 North America / USA / Maryland                                   |
| EPI_ISL_648280 | 10/14/2020 | 11/20/2020 North America / USA / Maryland                                   |

|                |            |            |                                                   |
|----------------|------------|------------|---------------------------------------------------|
| EPI_ISL_648281 | 10/16/2020 | 11/20/2020 | North America / USA / Maryland                    |
| EPI_ISL_648283 | 10/16/2020 | 11/20/2020 | North America / USA / Maryland                    |
| EPI_ISL_648284 | 10/17/2020 | 11/20/2020 | North America / USA / Maryland                    |
| EPI_ISL_648285 | 10/17/2020 | 11/20/2020 | North America / USA / Maryland                    |
| EPI_ISL_648287 | 10/20/2020 | 11/20/2020 | North America / USA / Maryland                    |
| EPI_ISL_648288 | 10/20/2020 | 11/20/2020 | North America / USA / Maryland                    |
| EPI_ISL_648289 | 10/20/2020 | 11/20/2020 | North America / USA / Maryland                    |
| EPI_ISL_648290 | 10/20/2020 | 11/20/2020 | North America / USA / Maryland                    |
| EPI_ISL_648291 | 10/20/2020 | 11/20/2020 | North America / USA / Maryland                    |
| EPI_ISL_648292 | 10/20/2020 | 11/20/2020 | North America / USA / Maryland                    |
| EPI_ISL_648293 | 10/20/2020 | 11/20/2020 | North America / USA / Maryland                    |
| EPI_ISL_648294 | 10/21/2020 | 11/20/2020 | North America / USA / Maryland                    |
| EPI_ISL_648295 | 10/21/2020 | 11/20/2020 | North America / USA / Maryland                    |
| EPI_ISL_648296 | 10/21/2020 | 11/20/2020 | North America / USA / Maryland                    |
| EPI_ISL_648297 | 10/22/2020 | 11/20/2020 | North America / USA / Maryland                    |
| EPI_ISL_648298 | 10/22/2020 | 11/20/2020 | North America / USA / Maryland                    |
| EPI_ISL_648299 | 10/22/2020 | 11/20/2020 | North America / USA / Maryland                    |
| EPI_ISL_648300 | 10/22/2020 | 11/20/2020 | North America / USA / Maryland                    |
| EPI_ISL_648301 | 10/26/2020 | 11/20/2020 | North America / USA / Maryland                    |
| EPI_ISL_648302 | 10/26/2020 | 11/20/2020 | North America / USA / Maryland                    |
| EPI_ISL_648305 | 5/24/2020  | 11/20/2020 | Africa / Equatorial Guinea / Bioko Norte / Malabo |
| EPI_ISL_648307 | 5/27/2020  | 11/20/2020 | Africa / Equatorial Guinea / Bioko Norte / Malabo |
| EPI_ISL_648308 | 5/27/2020  | 11/20/2020 | Africa / Equatorial Guinea / Bioko Norte / Malabo |
| EPI_ISL_648310 | 5/29/2020  | 11/20/2020 | Africa / Equatorial Guinea / Bioko Norte / Malabo |
| EPI_ISL_648312 | 5/30/2020  | 11/20/2020 | Africa / Equatorial Guinea / Bioko Norte / Malabo |
| EPI_ISL_648313 | 5/30/2020  | 11/20/2020 | Africa / Equatorial Guinea / Bioko Norte / Malabo |
| EPI_ISL_648315 | 4/21/2020  | 11/20/2020 | Africa / Equatorial Guinea / Bioko Norte / Malabo |
| EPI_ISL_648319 | 4/22/2020  | 11/20/2020 | Africa / Equatorial Guinea / Bioko Norte / Malabo |
| EPI_ISL_648320 | 6/29/2020  | 11/20/2020 | Africa / Equatorial Guinea / Bioko Norte / Baney  |
| EPI_ISL_648321 | 4/23/2020  | 11/20/2020 | Africa / Equatorial Guinea / Bioko Norte / Malabo |
| EPI_ISL_648322 | 7/1/2020   | 11/20/2020 | Africa / Equatorial Guinea / Bioko Norte / Malabo |
| EPI_ISL_648324 | 7/7/2020   | 11/20/2020 | Africa / Equatorial Guinea / Litoral / Mbini      |
| EPI_ISL_648325 | 4/24/2020  | 11/20/2020 | Africa / Equatorial Guinea / Litoral / Bata       |
| EPI_ISL_648326 | 4/24/2020  | 11/20/2020 | Africa / Equatorial Guinea / Litoral / Bata       |
| EPI_ISL_648327 | 7/14/2020  | 11/20/2020 | Africa / Equatorial Guinea / Bioko Norte / Baney  |
| EPI_ISL_648328 | 7/15/2020  | 11/20/2020 | Africa / Equatorial Guinea / Bioko Norte / Malabo |
| EPI_ISL_648329 | 7/15/2020  | 11/20/2020 | Africa / Equatorial Guinea / Bioko Norte / Malabo |
| EPI_ISL_648330 | 7/16/2020  | 11/20/2020 | Africa / Equatorial Guinea / Bioko Norte / Malabo |
| EPI_ISL_648334 | 4/27/2020  | 11/20/2020 | Africa / Equatorial Guinea / Litoral / Bata       |
| EPI_ISL_648336 | 4/28/2020  | 11/20/2020 | Africa / Equatorial Guinea / Litoral / Bata       |
| EPI_ISL_648338 | 8/12/2020  | 11/20/2020 | Africa / Equatorial Guinea / Bioko Norte / Malabo |
| EPI_ISL_648339 | 8/14/2020  | 11/20/2020 | Africa / Equatorial Guinea / Bioko Norte / Malabo |
| EPI_ISL_648340 | 4/30/2020  | 11/20/2020 | Africa / Equatorial Guinea / Bioko Norte / Malabo |
| EPI_ISL_648341 | 4/30/2020  | 11/20/2020 | Africa / Equatorial Guinea / Bioko Norte / Malabo |
| EPI_ISL_648343 | 5/3/2020   | 11/20/2020 | Africa / Equatorial Guinea / Bioko Norte / Malabo |
| EPI_ISL_648344 | 5/5/2020   | 11/20/2020 | Africa / Equatorial Guinea / Bioko Norte / Baney  |
| EPI_ISL_648345 | 5/8/2020   | 11/20/2020 | Africa / Equatorial Guinea / Bioko Norte / Malabo |









|                |           |            |                                                         |
|----------------|-----------|------------|---------------------------------------------------------|
| EPI_ISL_648541 | 10/6/2020 | 11/21/2020 | North America / USA / California / Tulare County        |
| EPI_ISL_648542 | 7/6/2020  | 11/21/2020 | North America / USA / California / Santa Clara County   |
| EPI_ISL_648543 | 7/28/2020 | 11/21/2020 | North America / USA / California / San Francisco County |
| EPI_ISL_648544 | 7/28/2020 | 11/21/2020 | North America / USA / California / San Francisco County |
| EPI_ISL_648545 | 9/12/2020 | 11/21/2020 | North America / USA / California / Madera County        |
| EPI_ISL_648546 | 9/12/2020 | 11/21/2020 | North America / USA / California / Madera County        |
| EPI_ISL_648547 | 9/12/2020 | 11/21/2020 | North America / USA / California / Madera County        |
| EPI_ISL_648548 | 9/10/2020 | 11/21/2020 | North America / USA / California / Madera County        |
| EPI_ISL_648549 | 9/10/2020 | 11/21/2020 | North America / USA / California / Madera County        |
| EPI_ISL_648550 | 9/3/2020  | 11/21/2020 | North America / USA / California / Madera County        |
| EPI_ISL_648551 | 9/3/2020  | 11/21/2020 | North America / USA / California / Madera County        |
| EPI_ISL_648552 | 9/3/2020  | 11/21/2020 | North America / USA / California / Madera County        |
| EPI_ISL_648553 | 9/3/2020  | 11/21/2020 | North America / USA / California / Madera County        |
| EPI_ISL_648554 | 9/3/2020  | 11/21/2020 | North America / USA / California / Madera County        |
| EPI_ISL_648556 | 4/1/2020  | 11/21/2020 | North America / USA / Utah                              |
| EPI_ISL_648558 | 4/9/2020  | 11/21/2020 | North America / USA / Utah                              |
| EPI_ISL_648561 | 4/10/2020 | 11/21/2020 | North America / USA / Utah                              |
| EPI_ISL_648568 | 4/6/2020  | 11/21/2020 | North America / USA / Utah                              |
| EPI_ISL_648569 | 4/7/2020  | 11/21/2020 | North America / USA / Utah                              |
| EPI_ISL_648571 | 4/6/2020  | 11/21/2020 | North America / USA / Utah                              |
| EPI_ISL_648572 | 4/6/2020  | 11/21/2020 | North America / USA / Utah                              |
| EPI_ISL_648573 | 4/6/2020  | 11/21/2020 | North America / USA / Utah                              |
| EPI_ISL_648574 | 4/6/2020  | 11/21/2020 | North America / USA / Utah                              |
| EPI_ISL_648575 | 4/7/2020  | 11/21/2020 | North America / USA / Utah                              |
| EPI_ISL_648576 | 4/6/2020  | 11/21/2020 | North America / USA / Utah                              |
| EPI_ISL_648578 | 4/20/2020 | 11/21/2020 | North America / USA / Utah                              |
| EPI_ISL_648579 | 4/20/2020 | 11/21/2020 | North America / USA / Utah                              |
| EPI_ISL_648580 | 5/13/2020 | 11/21/2020 | North America / USA / Utah                              |
| EPI_ISL_648582 | 5/13/2020 | 11/21/2020 | North America / USA / Utah                              |
| EPI_ISL_648585 | 5/13/2020 | 11/21/2020 | North America / USA / Utah                              |
| EPI_ISL_648586 | 5/12/2020 | 11/21/2020 | North America / USA / Utah                              |
| EPI_ISL_648588 | 5/13/2020 | 11/21/2020 | North America / USA / Utah                              |
| EPI_ISL_648590 | 5/13/2020 | 11/21/2020 | North America / USA / Utah                              |
| EPI_ISL_648591 | 5/13/2020 | 11/21/2020 | North America / USA / Utah                              |
| EPI_ISL_648592 | 5/13/2020 | 11/21/2020 | North America / USA / Utah                              |
| EPI_ISL_648595 | 3/16/2020 | 11/21/2020 | North America / Mexico / Nuevo Leon                     |
| EPI_ISL_648602 | 5/23/2020 | 11/21/2020 | North America / Mexico / Nuevo Leon                     |
| EPI_ISL_648603 | 5/23/2020 | 11/21/2020 | North America / Mexico / Nuevo Leon                     |
| EPI_ISL_648607 | 6/17/2020 | 11/21/2020 | North America / Mexico / Nuevo Leon                     |
| EPI_ISL_648610 | 4/18/2020 | 11/21/2020 | Asia / Singapore                                        |
| EPI_ISL_648611 | 4/18/2020 | 11/21/2020 | Asia / Singapore                                        |
| EPI_ISL_648612 | 4/18/2020 | 11/21/2020 | Asia / Singapore                                        |
| EPI_ISL_648613 | 4/19/2020 | 11/21/2020 | Asia / Singapore                                        |
| EPI_ISL_648614 | 4/20/2020 | 11/21/2020 | Asia / Singapore                                        |
| EPI_ISL_648615 | 4/20/2020 | 11/21/2020 | Asia / Singapore                                        |
| EPI_ISL_648616 | 4/21/2020 | 11/21/2020 | Asia / Singapore                                        |
| EPI_ISL_648617 | 4/21/2020 | 11/21/2020 | Asia / Singapore                                        |



|                |           |                                                                             |
|----------------|-----------|-----------------------------------------------------------------------------|
| EPI_ISL_648665 | 5/1/2020  | 11/21/2020 Asia / Singapore                                                 |
| EPI_ISL_648666 | 5/1/2020  | 11/21/2020 Asia / Singapore                                                 |
| EPI_ISL_648667 | 5/1/2020  | 11/21/2020 Asia / Singapore                                                 |
| EPI_ISL_648668 | 5/2/2020  | 11/21/2020 Asia / Singapore                                                 |
| EPI_ISL_648669 | 5/2/2020  | 11/21/2020 Asia / Singapore                                                 |
| EPI_ISL_648670 | 5/2/2020  | 11/21/2020 Asia / Singapore                                                 |
| EPI_ISL_648671 | 5/2/2020  | 11/21/2020 Asia / Singapore                                                 |
| EPI_ISL_648672 | 5/2/2020  | 11/21/2020 Asia / Singapore                                                 |
| EPI_ISL_648673 | 5/3/2020  | 11/21/2020 Asia / Singapore                                                 |
| EPI_ISL_648674 | 5/3/2020  | 11/21/2020 Asia / Singapore                                                 |
| EPI_ISL_648675 | 5/3/2020  | 11/21/2020 Asia / Singapore                                                 |
| EPI_ISL_648676 | 5/3/2020  | 11/21/2020 Asia / Singapore                                                 |
| EPI_ISL_648677 | 7/22/2020 | 11/21/2020 South America / Argentina / Buenos Aires / Gregorio de Laferrere |
| EPI_ISL_648678 | 7/6/2020  | 11/21/2020 Asia / Singapore                                                 |
| EPI_ISL_648679 | 7/8/2020  | 11/21/2020 Asia / Singapore                                                 |
| EPI_ISL_648680 | 7/13/2020 | 11/21/2020 Asia / Singapore                                                 |
| EPI_ISL_648681 | 7/20/2020 | 11/21/2020 Asia / Singapore                                                 |
| EPI_ISL_648682 | 6/2/2020  | 11/21/2020 Asia / Singapore                                                 |
| EPI_ISL_648683 | 6/3/2020  | 11/21/2020 Asia / Singapore                                                 |
| EPI_ISL_648684 | 6/3/2020  | 11/21/2020 Asia / Singapore                                                 |
| EPI_ISL_648685 | 6/3/2020  | 11/21/2020 Asia / Singapore                                                 |
| EPI_ISL_648686 | 6/4/2020  | 11/21/2020 Asia / Singapore                                                 |
| EPI_ISL_648687 | 6/4/2020  | 11/21/2020 Asia / Singapore                                                 |
| EPI_ISL_648688 | 6/5/2020  | 11/21/2020 Asia / Singapore                                                 |
| EPI_ISL_648689 | 6/5/2020  | 11/21/2020 Asia / Singapore                                                 |
| EPI_ISL_648690 | 6/7/2020  | 11/21/2020 Asia / Singapore                                                 |
| EPI_ISL_648691 | 6/7/2020  | 11/21/2020 Asia / Singapore                                                 |
| EPI_ISL_648692 | 6/9/2020  | 11/21/2020 Asia / Singapore                                                 |
| EPI_ISL_648693 | 6/9/2020  | 11/21/2020 Asia / Singapore                                                 |
| EPI_ISL_648694 | 6/9/2020  | 11/21/2020 Asia / Singapore                                                 |
| EPI_ISL_648695 | 6/10/2020 | 11/21/2020 Asia / Singapore                                                 |
| EPI_ISL_648696 | 6/10/2020 | 11/21/2020 Asia / Singapore                                                 |
| EPI_ISL_648697 | 6/11/2020 | 11/21/2020 Asia / Singapore                                                 |
| EPI_ISL_648698 | 6/12/2020 | 11/21/2020 Asia / Singapore                                                 |
| EPI_ISL_648699 | 6/13/2020 | 11/21/2020 Asia / Singapore                                                 |
| EPI_ISL_648700 | 6/13/2020 | 11/21/2020 Asia / Singapore                                                 |
| EPI_ISL_648701 | 6/13/2020 | 11/21/2020 Asia / Singapore                                                 |
| EPI_ISL_648702 | 6/14/2020 | 11/21/2020 Asia / Singapore                                                 |
| EPI_ISL_648703 | 6/15/2020 | 11/21/2020 Asia / Singapore                                                 |
| EPI_ISL_648704 | 6/16/2020 | 11/21/2020 Asia / Singapore                                                 |
| EPI_ISL_648705 | 6/18/2020 | 11/21/2020 Asia / Singapore                                                 |
| EPI_ISL_648706 | 6/18/2020 | 11/21/2020 Asia / Singapore                                                 |
| EPI_ISL_648707 | 6/18/2020 | 11/21/2020 Asia / Singapore                                                 |
| EPI_ISL_648708 | 6/19/2020 | 11/21/2020 Asia / Singapore                                                 |
| EPI_ISL_648709 | 6/19/2020 | 11/21/2020 Asia / Singapore                                                 |
| EPI_ISL_648710 | 6/21/2020 | 11/21/2020 Asia / Singapore                                                 |
| EPI_ISL_648711 | 6/21/2020 | 11/21/2020 Asia / Singapore                                                 |

|                |           |                             |
|----------------|-----------|-----------------------------|
| EPI_ISL_648712 | 6/22/2020 | 11/21/2020 Asia / Singapore |
| EPI_ISL_648713 | 6/22/2020 | 11/21/2020 Asia / Singapore |
| EPI_ISL_648714 | 6/24/2020 | 11/21/2020 Asia / Singapore |
| EPI_ISL_648715 | 6/25/2020 | 11/21/2020 Asia / Singapore |
| EPI_ISL_648716 | 6/25/2020 | 11/21/2020 Asia / Singapore |
| EPI_ISL_648717 | 6/25/2020 | 11/21/2020 Asia / Singapore |
| EPI_ISL_648718 | 6/25/2020 | 11/21/2020 Asia / Singapore |
| EPI_ISL_648719 | 6/27/2020 | 11/21/2020 Asia / Singapore |
| EPI_ISL_648720 | 6/28/2020 | 11/21/2020 Asia / Singapore |
| EPI_ISL_648721 | 6/29/2020 | 11/21/2020 Asia / Singapore |
| EPI_ISL_648722 | 6/30/2020 | 11/21/2020 Asia / Singapore |
| EPI_ISL_648723 | 7/1/2020  | 11/21/2020 Asia / Singapore |
| EPI_ISL_648724 | 7/1/2020  | 11/21/2020 Asia / Singapore |
| EPI_ISL_648725 | 7/1/2020  | 11/21/2020 Asia / Singapore |
| EPI_ISL_648726 | 7/1/2020  | 11/21/2020 Asia / Singapore |
| EPI_ISL_648727 | 7/2/2020  | 11/21/2020 Asia / Singapore |
| EPI_ISL_648728 | 7/4/2020  | 11/21/2020 Asia / Singapore |
| EPI_ISL_648729 | 7/5/2020  | 11/21/2020 Asia / Singapore |
| EPI_ISL_648730 | 7/6/2020  | 11/21/2020 Asia / Singapore |
| EPI_ISL_648731 | 7/6/2020  | 11/21/2020 Asia / Singapore |
| EPI_ISL_648732 | 7/9/2020  | 11/21/2020 Asia / Singapore |
| EPI_ISL_648733 | 7/10/2020 | 11/21/2020 Asia / Singapore |
| EPI_ISL_648734 | 7/10/2020 | 11/21/2020 Asia / Singapore |
| EPI_ISL_648735 | 7/15/2020 | 11/21/2020 Asia / Singapore |
| EPI_ISL_648736 | 7/18/2020 | 11/21/2020 Asia / Singapore |
| EPI_ISL_648737 | 7/18/2020 | 11/21/2020 Asia / Singapore |
| EPI_ISL_648738 | 7/18/2020 | 11/21/2020 Asia / Singapore |
| EPI_ISL_648739 | 7/21/2020 | 11/21/2020 Asia / Singapore |
| EPI_ISL_648740 | 7/21/2020 | 11/21/2020 Asia / Singapore |
| EPI_ISL_648741 | 7/26/2020 | 11/21/2020 Asia / Singapore |
| EPI_ISL_648742 | 4/25/2020 | 11/21/2020 Asia / Singapore |
| EPI_ISL_648743 | 5/4/2020  | 11/21/2020 Asia / Singapore |
| EPI_ISL_648744 | 5/4/2020  | 11/21/2020 Asia / Singapore |
| EPI_ISL_648745 | 5/4/2020  | 11/21/2020 Asia / Singapore |
| EPI_ISL_648746 | 5/4/2020  | 11/21/2020 Asia / Singapore |
| EPI_ISL_648747 | 5/4/2020  | 11/21/2020 Asia / Singapore |
| EPI_ISL_648748 | 5/5/2020  | 11/21/2020 Asia / Singapore |
| EPI_ISL_648749 | 5/5/2020  | 11/21/2020 Asia / Singapore |
| EPI_ISL_648750 | 5/5/2020  | 11/21/2020 Asia / Singapore |
| EPI_ISL_648751 | 5/5/2020  | 11/21/2020 Asia / Singapore |
| EPI_ISL_648752 | 5/5/2020  | 11/21/2020 Asia / Singapore |
| EPI_ISL_648753 | 5/5/2020  | 11/21/2020 Asia / Singapore |
| EPI_ISL_648754 | 5/5/2020  | 11/21/2020 Asia / Singapore |
| EPI_ISL_648755 | 5/5/2020  | 11/21/2020 Asia / Singapore |
| EPI_ISL_648756 | 5/5/2020  | 11/21/2020 Asia / Singapore |
| EPI_ISL_648757 | 5/5/2020  | 11/21/2020 Asia / Singapore |
| EPI_ISL_648758 | 5/5/2020  | 11/21/2020 Asia / Singapore |





|                |           |                                                           |
|----------------|-----------|-----------------------------------------------------------|
| EPI_ISL_648806 | 5/21/2020 | 11/21/2020 Asia / Singapore                               |
| EPI_ISL_648807 | 5/21/2020 | 11/21/2020 Asia / Singapore                               |
| EPI_ISL_648808 | 5/21/2020 | 11/21/2020 Asia / Singapore                               |
| EPI_ISL_648809 | 5/21/2020 | 11/21/2020 Asia / Singapore                               |
| EPI_ISL_648810 | 5/22/2020 | 11/21/2020 Asia / Singapore                               |
| EPI_ISL_648811 | 5/22/2020 | 11/21/2020 Asia / Singapore                               |
| EPI_ISL_648812 | 5/24/2020 | 11/21/2020 Asia / Singapore                               |
| EPI_ISL_648813 | 5/24/2020 | 11/21/2020 Asia / Singapore                               |
| EPI_ISL_648814 | 5/27/2020 | 11/21/2020 Asia / Singapore                               |
| EPI_ISL_648815 | 5/27/2020 | 11/21/2020 Asia / Singapore                               |
| EPI_ISL_648816 | 5/30/2020 | 11/21/2020 Asia / Singapore                               |
| EPI_ISL_648817 | 5/31/2020 | 11/21/2020 Asia / Singapore                               |
| EPI_ISL_648818 | 6/1/2020  | 11/21/2020 Asia / Singapore                               |
| EPI_ISL_648819 | 6/1/2020  | 11/21/2020 Asia / Singapore                               |
| EPI_ISL_648820 | 6/1/2020  | 11/21/2020 Asia / Singapore                               |
| EPI_ISL_648822 | 8/30/2020 | 11/21/2020 North America / USA / Montana / Ravalli County |
| EPI_ISL_649153 | 11/7/2020 | 11/21/2020 Asia / Palestine / West Bank / Jericho         |
| EPI_ISL_648823 | 7/1/2020  | 11/22/2020 North America / USA / California / San Diego   |
| EPI_ISL_648824 | 7/2/2020  | 11/22/2020 North America / USA / California / San Diego   |
| EPI_ISL_648825 | 7/2/2020  | 11/22/2020 North America / USA / California / San Diego   |
| EPI_ISL_648826 | 7/2/2020  | 11/22/2020 North America / USA / California / San Diego   |
| EPI_ISL_648827 | 7/2/2020  | 11/22/2020 North America / USA / California / San Diego   |
| EPI_ISL_648828 | 7/1/2020  | 11/22/2020 North America / USA / California / San Diego   |
| EPI_ISL_648830 | 6/9/2020  | 11/22/2020 North America / USA / California / San Diego   |
| EPI_ISL_648832 | 7/2/2020  | 11/22/2020 North America / USA / California / San Diego   |
| EPI_ISL_648833 | 7/2/2020  | 11/22/2020 North America / USA / California / San Diego   |
| EPI_ISL_648834 | 6/10/2020 | 11/22/2020 North America / USA / California / San Diego   |
| EPI_ISL_648835 | 7/6/2020  | 11/22/2020 North America / USA / California / San Diego   |
| EPI_ISL_648836 | 7/6/2020  | 11/22/2020 North America / USA / California / San Diego   |
| EPI_ISL_648837 | 7/2/2020  | 11/22/2020 North America / USA / California / San Diego   |
| EPI_ISL_648838 | 7/2/2020  | 11/22/2020 North America / USA / California / San Diego   |
| EPI_ISL_648839 | 7/2/2020  | 11/22/2020 North America / USA / California / San Diego   |
| EPI_ISL_648840 | 7/6/2020  | 11/22/2020 North America / USA / California / San Diego   |
| EPI_ISL_648841 | 7/6/2020  | 11/22/2020 North America / USA / California / San Diego   |
| EPI_ISL_648843 | 7/2/2020  | 11/22/2020 North America / USA / California / San Diego   |
| EPI_ISL_648844 | 7/2/2020  | 11/22/2020 North America / USA / California / San Diego   |
| EPI_ISL_648845 | 6/27/2020 | 11/22/2020 North America / USA / California / San Diego   |
| EPI_ISL_648846 | 6/25/2020 | 11/22/2020 North America / USA / California / San Diego   |
| EPI_ISL_648847 | 6/27/2020 | 11/22/2020 North America / USA / California / San Diego   |
| EPI_ISL_648848 | 6/26/2020 | 11/22/2020 North America / USA / California / San Diego   |
| EPI_ISL_648849 | 6/24/2020 | 11/22/2020 North America / USA / California / San Diego   |
| EPI_ISL_648850 | 6/27/2020 | 11/22/2020 North America / USA / California / San Diego   |
| EPI_ISL_648851 | 6/24/2020 | 11/22/2020 North America / USA / California / San Diego   |
| EPI_ISL_648852 | 6/24/2020 | 11/22/2020 North America / USA / California / San Diego   |
| EPI_ISL_648853 | 6/24/2020 | 11/22/2020 North America / USA / California / San Diego   |
| EPI_ISL_648854 | 6/25/2020 | 11/22/2020 North America / USA / California / San Diego   |
| EPI_ISL_648855 | 6/26/2020 | 11/22/2020 North America / USA / California / San Diego   |







|                |            |            |                                              |
|----------------|------------|------------|----------------------------------------------|
| EPI_ISL_649014 | 10/19/2020 | 11/22/2020 | North America / USA / California / San Diego |
| EPI_ISL_649016 | 6/22/2020  | 11/22/2020 | North America / USA / California / San Diego |
| EPI_ISL_649017 | 6/22/2020  | 11/22/2020 | North America / USA / California / San Diego |
| EPI_ISL_649018 | 10/30/2020 | 11/22/2020 | North America / USA / California / San Diego |
| EPI_ISL_649020 | 10/26/2020 | 11/22/2020 | North America / USA / California / San Diego |
| EPI_ISL_649022 | 10/26/2020 | 11/22/2020 | North America / USA / California / San Diego |
| EPI_ISL_649023 | 6/22/2020  | 11/22/2020 | North America / USA / California / San Diego |
| EPI_ISL_649025 | 10/26/2020 | 11/22/2020 | North America / USA / California / San Diego |
| EPI_ISL_649027 | 10/22/2020 | 11/22/2020 | North America / USA / California / San Diego |
| EPI_ISL_649028 | 9/25/2020  | 11/22/2020 | North America / USA / California / San Diego |
| EPI_ISL_649029 | 10/12/2020 | 11/22/2020 | North America / USA / California / San Diego |
| EPI_ISL_649030 | 10/20/2020 | 11/22/2020 | North America / USA / California / San Diego |
| EPI_ISL_649032 | 9/28/2020  | 11/22/2020 | North America / USA / California / San Diego |
| EPI_ISL_649033 | 7/8/2020   | 11/22/2020 | North America / USA / California / San Diego |
| EPI_ISL_649034 | 9/28/2020  | 11/22/2020 | North America / USA / California / San Diego |
| EPI_ISL_649036 | 7/8/2020   | 11/22/2020 | North America / USA / California / San Diego |
| EPI_ISL_649037 | 7/8/2020   | 11/22/2020 | North America / USA / California / San Diego |
| EPI_ISL_649038 | 10/21/2020 | 11/22/2020 | North America / USA / California / San Diego |
| EPI_ISL_649040 | 8/13/2020  | 11/22/2020 | North America / USA / California / San Diego |
| EPI_ISL_649042 | 10/20/2020 | 11/22/2020 | North America / USA / California / San Diego |
| EPI_ISL_649043 | 7/8/2020   | 11/22/2020 | North America / USA / California / San Diego |
| EPI_ISL_649044 | 10/21/2020 | 11/22/2020 | North America / USA / California / San Diego |
| EPI_ISL_649045 | 9/25/2020  | 11/22/2020 | North America / USA / California / San Diego |
| EPI_ISL_649046 | 10/20/2020 | 11/22/2020 | North America / USA / California / San Diego |
| EPI_ISL_649047 | 7/8/2020   | 11/22/2020 | North America / USA / California / San Diego |
| EPI_ISL_649048 | 9/16/2020  | 11/22/2020 | North America / USA / California / San Diego |
| EPI_ISL_649049 | 10/20/2020 | 11/22/2020 | North America / USA / California / San Diego |
| EPI_ISL_649050 | 10/19/2020 | 11/22/2020 | North America / USA / California / San Diego |
| EPI_ISL_649051 | 9/24/2020  | 11/22/2020 | North America / USA / California / San Diego |
| EPI_ISL_649052 | 7/8/2020   | 11/22/2020 | North America / USA / California / San Diego |
| EPI_ISL_649053 | 10/20/2020 | 11/22/2020 | North America / USA / California / San Diego |
| EPI_ISL_649054 | 9/25/2020  | 11/22/2020 | North America / USA / California / San Diego |
| EPI_ISL_649055 | 7/8/2020   | 11/22/2020 | North America / USA / California / San Diego |
| EPI_ISL_649056 | 10/6/2020  | 11/22/2020 | North America / USA / California / San Diego |
| EPI_ISL_649057 | 11/5/2020  | 11/22/2020 | North America / USA / Michigan               |
| EPI_ISL_649058 | 11/1/2020  | 11/22/2020 | North America / USA / Michigan               |
| EPI_ISL_649059 | 11/4/2020  | 11/22/2020 | North America / USA / Michigan               |
| EPI_ISL_649064 | 3/2/2020   | 11/22/2020 | Asia / Israel / Ashdod                       |
| EPI_ISL_649065 | 3/10/2020  | 11/22/2020 | Asia / Israel / Ashdod                       |
| EPI_ISL_649066 | 3/8/2020   | 11/22/2020 | Asia / Israel / Bat-Yam                      |
| EPI_ISL_649067 | 3/5/2020   | 11/22/2020 | Asia / Israel / Beerot-Itzhak                |
| EPI_ISL_649068 | 3/10/2020  | 11/22/2020 | Asia / Israel / Beer-Sheva                   |
| EPI_ISL_649069 | 3/6/2020   | 11/22/2020 | Asia / Israel / Ceasaria                     |
| EPI_ISL_649070 | 3/10/2020  | 11/22/2020 | Asia / Israel / Chaspin                      |
| EPI_ISL_649071 | 3/11/2020  | 11/22/2020 | Asia / Israel / Elkana                       |
| EPI_ISL_649072 | 3/11/2020  | 11/22/2020 | Asia / Israel / Elkana                       |
| EPI_ISL_649073 | 3/8/2020   | 11/22/2020 | Asia / Israel / Haifa                        |

|                |            |            |                                                   |
|----------------|------------|------------|---------------------------------------------------|
| EPI_ISL_649074 | 3/8/2020   | 11/22/2020 | Asia / Israel / Haifa                             |
| EPI_ISL_649075 | 3/9/2020   | 11/22/2020 | Asia / Israel / Haifa                             |
| EPI_ISL_649076 | 3/8/2020   | 11/22/2020 | Asia / Israel / Jerusalem                         |
| EPI_ISL_649077 | 3/10/2020  | 11/22/2020 | Asia / Israel / Jerusalem                         |
| EPI_ISL_649078 | 3/11/2020  | 11/22/2020 | Asia / Israel / Lod                               |
| EPI_ISL_649079 | 3/9/2020   | 11/22/2020 | Asia / Israel / Maale-Edumim                      |
| EPI_ISL_649080 | 3/8/2020   | 11/22/2020 | Asia / Israel / Modiin                            |
| EPI_ISL_649081 | 3/12/2020  | 11/22/2020 | Asia / Israel / Modiin                            |
| EPI_ISL_649082 | 3/10/2020  | 11/22/2020 | Asia / Israel / Nir-Tzvi                          |
| EPI_ISL_649083 | 3/8/2020   | 11/22/2020 | Asia / Israel / Orot                              |
| EPI_ISL_649084 | 3/12/2020  | 11/22/2020 | Asia / Israel / Or-Yehuda                         |
| EPI_ISL_649085 | 3/12/2020  | 11/22/2020 | Asia / Israel / Or-Yehuda                         |
| EPI_ISL_649086 | 3/7/2020   | 11/22/2020 | Asia / Israel / Petah-Tikva                       |
| EPI_ISL_649087 | 3/10/2020  | 11/22/2020 | Asia / Israel / Petah-Tikva                       |
| EPI_ISL_649088 | 3/8/2020   | 11/22/2020 | Asia / Israel / Raanana                           |
| EPI_ISL_649089 | 3/10/2020  | 11/22/2020 | Asia / Israel / Raanana                           |
| EPI_ISL_649090 | 3/2/2020   | 11/22/2020 | Asia / Israel / Ramat Gan                         |
| EPI_ISL_649091 | 3/8/2020   | 11/22/2020 | Asia / Israel / Ramat Gan                         |
| EPI_ISL_649092 | 3/6/2020   | 11/22/2020 | Asia / Israel / Ramat-Hasharon                    |
| EPI_ISL_649093 | 3/7/2020   | 11/22/2020 | Asia / Israel / Ramat-Hasharon                    |
| EPI_ISL_649094 | 2/27/2020  | 11/22/2020 | Asia / Israel / Rishon-Letsion                    |
| EPI_ISL_649095 | 3/6/2020   | 11/22/2020 | Asia / Israel / Rishon-Letsion                    |
| EPI_ISL_649096 | 3/7/2020   | 11/22/2020 | Asia / Israel / Rishon-Letsion                    |
| EPI_ISL_649097 | 3/11/2020  | 11/22/2020 | Asia / Israel / Rishpon                           |
| EPI_ISL_649098 | 3/4/2020   | 11/22/2020 | Asia / Israel / Sdema                             |
| EPI_ISL_649099 | 3/4/2020   | 11/22/2020 | Asia / Israel / Sdema                             |
| EPI_ISL_649100 | 3/7/2020   | 11/22/2020 | Asia / Israel / Shoham                            |
| EPI_ISL_649101 | 3/8/2020   | 11/22/2020 | Asia / Israel / Tel-Aviv                          |
| EPI_ISL_649102 | 3/10/2020  | 11/22/2020 | Asia / Israel / Tel-Aviv                          |
| EPI_ISL_649103 | 3/12/2020  | 11/22/2020 | Asia / Israel / Tzfat                             |
| EPI_ISL_649104 | 3/10/2020  | 11/22/2020 | Asia / Israel                                     |
| EPI_ISL_649105 | 3/11/2020  | 11/22/2020 | Asia / Israel                                     |
| EPI_ISL_649106 | 3/11/2020  | 11/22/2020 | Asia / Israel                                     |
| EPI_ISL_649107 | 3/11/2020  | 11/22/2020 | Asia / Israel / Yuvalim                           |
| EPI_ISL_649108 | 11/17/2020 | 11/22/2020 | Europe / United Kingdom / England                 |
| EPI_ISL_649112 | 2020       | 11/22/2020 | Europe / United Kingdom / England                 |
| EPI_ISL_649121 | 11/12/2020 | 11/23/2020 | Oceania / New Zealand / Counties Manukau          |
| EPI_ISL_649122 | 11/9/2020  | 11/23/2020 | Oceania / New Zealand / Counties Manukau          |
| EPI_ISL_649123 | 11/11/2020 | 11/23/2020 | Oceania / New Zealand / Combined Wellington       |
| EPI_ISL_649124 | 11/13/2020 | 11/23/2020 | Oceania / New Zealand / Waikato                   |
| EPI_ISL_649125 | 11/18/2020 | 11/23/2020 | Oceania / New Zealand / Combined Wellington       |
| EPI_ISL_649154 | 6/30/2020  | 11/23/2020 | Europe / Belgium / Brussels                       |
| EPI_ISL_649156 | 5/30/2020  | 11/23/2020 | Africa / Equatorial Guinea / Bioko Norte / Malabo |
| EPI_ISL_649158 | 6/9/2020   | 11/23/2020 | Africa / Equatorial Guinea / Bioko Norte / Malabo |
| EPI_ISL_649164 | 6/28/2020  | 11/23/2020 | Africa / Equatorial Guinea / Bioko Norte / Baney  |
| EPI_ISL_649166 | 7/9/2020   | 11/23/2020 | Africa / Equatorial Guinea / Bioko Norte / Malabo |
| EPI_ISL_649170 | 7/28/2020  | 11/23/2020 | Africa / Equatorial Guinea / Bioko Sur / Riaba    |

|                |            |                                                                     |
|----------------|------------|---------------------------------------------------------------------|
| EPI_ISL_649171 | 7/29/2020  | 11/23/2020 Africa / Equatorial Guinea / Bioko Sur / Riaba           |
| EPI_ISL_649172 | 8/2/2020   | 11/23/2020 Africa / Equatorial Guinea / Bioko Norte / Baney         |
| EPI_ISL_649173 | 3/11/2020  | 11/23/2020 Europe / France / Pays de la Loire / Nantes              |
| EPI_ISL_649174 | 3/19/2020  | 11/23/2020 Europe / France / Pays de la Loire / Nantes              |
| EPI_ISL_649175 | 3/23/2020  | 11/23/2020 Europe / France / Pays de la Loire / Nantes              |
| EPI_ISL_649176 | 3/31/2020  | 11/23/2020 Europe / France / Pays de la Loire / Nantes              |
| EPI_ISL_649177 | 3/31/2020  | 11/23/2020 Europe / France / Pays de la Loire / Nantes              |
| EPI_ISL_649178 | 4/1/2020   | 11/23/2020 Europe / France / Pays de la Loire / Nantes              |
| EPI_ISL_649179 | 4/1/2020   | 11/23/2020 Europe / France / Pays de la Loire / Nantes              |
| EPI_ISL_649180 | 4/2/2020   | 11/23/2020 Europe / France / Pays de la Loire / Nantes              |
| EPI_ISL_649181 | 4/3/2020   | 11/23/2020 Europe / France / Pays de la Loire / Nantes              |
| EPI_ISL_649182 | 4/4/2020   | 11/23/2020 Europe / France / Pays de la Loire / Nantes              |
| EPI_ISL_649183 | 4/11/2020  | 11/23/2020 Europe / France / Pays de la Loire / Nantes              |
| EPI_ISL_649184 | 4/14/2020  | 11/23/2020 Europe / France / Pays de la Loire / Nantes              |
| EPI_ISL_649185 | 4/17/2020  | 11/23/2020 Europe / France / Pays de la Loire / Nantes              |
| EPI_ISL_649186 | 4/23/2020  | 11/23/2020 Europe / France / Pays de la Loire / Nantes              |
| EPI_ISL_649187 | 4/25/2020  | 11/23/2020 Europe / France / Pays de la Loire / Nantes              |
| EPI_ISL_649188 | 5/14/2020  | 11/23/2020 Europe / France / Provence-Alpes-Cote d'Azur / Marseille |
| EPI_ISL_649189 | 4/10/2020  | 11/23/2020 Europe / Italy / Apulia                                  |
| EPI_ISL_649190 | 8/17/2020  | 11/23/2020 Europe / Italy / Apulia                                  |
| EPI_ISL_649191 | 8/20/2020  | 11/23/2020 Europe / Italy / Apulia                                  |
| EPI_ISL_649192 | 10/20/2020 | 11/23/2020 Europe / United Kingdom / England                        |
| EPI_ISL_649193 | 11/7/2020  | 11/23/2020 Europe / United Kingdom / England                        |
| EPI_ISL_649194 | 11/7/2020  | 11/23/2020 Europe / United Kingdom / England                        |
| EPI_ISL_649195 | 11/7/2020  | 11/23/2020 Europe / United Kingdom / England                        |
| EPI_ISL_649196 | 11/7/2020  | 11/23/2020 Europe / United Kingdom / England                        |
| EPI_ISL_649197 | 11/7/2020  | 11/23/2020 Europe / United Kingdom / England                        |
| EPI_ISL_649198 | 11/7/2020  | 11/23/2020 Europe / United Kingdom / England                        |
| EPI_ISL_649199 | 11/7/2020  | 11/23/2020 Europe / United Kingdom / England                        |
| EPI_ISL_649200 | 11/7/2020  | 11/23/2020 Europe / United Kingdom / England                        |
| EPI_ISL_649201 | 11/7/2020  | 11/23/2020 Europe / United Kingdom / England                        |
| EPI_ISL_649202 | 11/7/2020  | 11/23/2020 Europe / United Kingdom / England                        |
| EPI_ISL_649203 | 11/7/2020  | 11/23/2020 Europe / United Kingdom / England                        |
| EPI_ISL_649204 | 11/7/2020  | 11/23/2020 Europe / United Kingdom / England                        |
| EPI_ISL_649205 | 10/20/2020 | 11/23/2020 Europe / United Kingdom / England                        |
| EPI_ISL_649206 | 11/7/2020  | 11/23/2020 Europe / United Kingdom / England                        |
| EPI_ISL_649207 | 11/7/2020  | 11/23/2020 Europe / United Kingdom / England                        |
| EPI_ISL_649208 | 11/7/2020  | 11/23/2020 Europe / United Kingdom / England                        |
| EPI_ISL_649209 | 11/7/2020  | 11/23/2020 Europe / United Kingdom / England                        |
| EPI_ISL_649210 | 11/7/2020  | 11/23/2020 Europe / United Kingdom / England                        |
| EPI_ISL_649211 | 11/7/2020  | 11/23/2020 Europe / United Kingdom / England                        |
| EPI_ISL_649212 | 11/7/2020  | 11/23/2020 Europe / United Kingdom / England                        |
| EPI_ISL_649213 | 11/7/2020  | 11/23/2020 Europe / United Kingdom / England                        |
| EPI_ISL_649214 | 11/7/2020  | 11/23/2020 Europe / United Kingdom / England                        |
| EPI_ISL_649215 | 11/7/2020  | 11/23/2020 Europe / United Kingdom / England                        |
| EPI_ISL_649216 | 11/7/2020  | 11/23/2020 Europe / United Kingdom / England                        |
| EPI_ISL_649217 | 11/7/2020  | 11/23/2020 Europe / United Kingdom / England                        |





























|                |            |            |                                                        |
|----------------|------------|------------|--------------------------------------------------------|
| EPI_ISL_649863 | 10/23/2020 | 11/23/2020 | Europe / United Kingdom / England                      |
| EPI_ISL_649864 | 10/22/2020 | 11/23/2020 | Europe / United Kingdom / England                      |
| EPI_ISL_649865 | 10/21/2020 | 11/23/2020 | Europe / United Kingdom / England                      |
| EPI_ISL_649866 | 10/22/2020 | 11/23/2020 | Europe / United Kingdom / England                      |
| EPI_ISL_649867 | 10/23/2020 | 11/23/2020 | Europe / United Kingdom / England                      |
| EPI_ISL_649869 | 10/23/2020 | 11/23/2020 | Europe / United Kingdom / England                      |
| EPI_ISL_649871 | 10/23/2020 | 11/23/2020 | Europe / United Kingdom / England                      |
| EPI_ISL_649872 | 10/23/2020 | 11/23/2020 | Europe / United Kingdom / England                      |
| EPI_ISL_649873 | 10/22/2020 | 11/23/2020 | Europe / United Kingdom / England                      |
| EPI_ISL_649874 | 10/22/2020 | 11/23/2020 | Europe / United Kingdom / England                      |
| EPI_ISL_649875 | 10/23/2020 | 11/23/2020 | Europe / United Kingdom / England                      |
| EPI_ISL_649876 | 10/23/2020 | 11/23/2020 | Europe / United Kingdom / England                      |
| EPI_ISL_649877 | 10/24/2020 | 11/23/2020 | Europe / United Kingdom / England                      |
| EPI_ISL_649878 | 10/23/2020 | 11/23/2020 | Europe / United Kingdom / England                      |
| EPI_ISL_649879 | 10/22/2020 | 11/23/2020 | Europe / United Kingdom / England                      |
| EPI_ISL_649880 | 10/23/2020 | 11/23/2020 | Europe / United Kingdom / England                      |
| EPI_ISL_649881 | 10/24/2020 | 11/23/2020 | Europe / United Kingdom / England                      |
| EPI_ISL_649883 | 10/24/2020 | 11/23/2020 | Europe / United Kingdom / England                      |
| EPI_ISL_649884 | 10/23/2020 | 11/23/2020 | Europe / United Kingdom / England                      |
| EPI_ISL_649885 | 10/24/2020 | 11/23/2020 | Europe / United Kingdom / England                      |
| EPI_ISL_649886 | 10/24/2020 | 11/23/2020 | Europe / United Kingdom / England                      |
| EPI_ISL_649887 | 10/24/2020 | 11/23/2020 | Europe / United Kingdom / England                      |
| EPI_ISL_649888 | 10/25/2020 | 11/23/2020 | Europe / United Kingdom / England                      |
| EPI_ISL_649889 | 11/12/2020 | 11/23/2020 | Europe / United Kingdom / England                      |
| EPI_ISL_649890 | 10/31/2020 | 11/23/2020 | Europe / United Kingdom / England                      |
| EPI_ISL_649891 | 11/15/2020 | 11/23/2020 | Europe / United Kingdom / England                      |
| EPI_ISL_649927 | 2020       | 11/23/2020 | Europe / United Kingdom / England                      |
| EPI_ISL_649936 | 11/17/2020 | 11/23/2020 | Europe / United Kingdom / England                      |
| EPI_ISL_649937 | 11/17/2020 | 11/23/2020 | Europe / United Kingdom / England                      |
| EPI_ISL_649938 | 8/28/2020  | 11/23/2020 | Europe / Italy / Apulia / Bari                         |
| EPI_ISL_649939 | 8/28/2020  | 11/23/2020 | Europe / Italy / Apulia / Bari                         |
| EPI_ISL_649940 | 8/28/2020  | 11/23/2020 | Europe / Italy / Apulia / Foggia                       |
| EPI_ISL_649942 | 3/21/2020  | 11/23/2020 | Europe / France / Auvergne-Rhone-Alpes / Saint-Etienne |
| EPI_ISL_649943 | 3/23/2020  | 11/23/2020 | Europe / France / Auvergne-Rhone-Alpes / Saint-Etienne |
| EPI_ISL_649944 | 3/24/2020  | 11/23/2020 | Europe / France / Auvergne-Rhone-Alpes / Saint-Etienne |
| EPI_ISL_649945 | 3/24/2020  | 11/23/2020 | Europe / France / Auvergne-Rhone-Alpes / Saint-Etienne |
| EPI_ISL_649946 | 3/24/2020  | 11/23/2020 | Europe / France / Auvergne-Rhone-Alpes / Saint-Etienne |
| EPI_ISL_649947 | 4/9/2020   | 11/23/2020 | Europe / France / Auvergne-Rhone-Alpes / Saint-Etienne |
| EPI_ISL_649948 | 4/11/2020  | 11/23/2020 | Europe / France / Auvergne-Rhone-Alpes / Saint-Etienne |
| EPI_ISL_649949 | 4/17/2020  | 11/23/2020 | Europe / France / Auvergne-Rhone-Alpes / Saint-Etienne |
| EPI_ISL_649950 | 4/18/2020  | 11/23/2020 | Europe / France / Auvergne-Rhone-Alpes / Saint-Etienne |
| EPI_ISL_649951 | 4/20/2020  | 11/23/2020 | Europe / France / Auvergne-Rhone-Alpes / Saint-Etienne |
| EPI_ISL_649952 | 4/20/2020  | 11/23/2020 | Europe / France / Auvergne-Rhone-Alpes / Saint-Etienne |
| EPI_ISL_649953 | 3/21/2020  | 11/23/2020 | Europe / France / Auvergne-Rhone-Alpes / Saint-Etienne |
| EPI_ISL_649954 | 3/4/2020   | 11/23/2020 | Europe / France / Nouvelle-Aquitaine / Bordeaux        |
| EPI_ISL_649955 | 3/4/2020   | 11/23/2020 | Europe / France / Nouvelle-Aquitaine / Bordeaux        |
| EPI_ISL_649956 | 3/5/2020   | 11/23/2020 | Europe / France / Nouvelle-Aquitaine / Bordeaux        |





|                |            |            |                                            |
|----------------|------------|------------|--------------------------------------------|
| EPI_ISL_650077 | 10/27/2020 | 11/23/2020 | North America / USA / Michigan             |
| EPI_ISL_650078 | 10/27/2020 | 11/23/2020 | North America / USA / Michigan             |
| EPI_ISL_650079 | 10/28/2020 | 11/23/2020 | North America / USA / Michigan             |
| EPI_ISL_650083 | 10/28/2020 | 11/23/2020 | North America / USA / Michigan             |
| EPI_ISL_650085 | 10/29/2020 | 11/23/2020 | North America / USA / Michigan             |
| EPI_ISL_650087 | 10/29/2020 | 11/23/2020 | North America / USA / Michigan             |
| EPI_ISL_650088 | 10/29/2020 | 11/23/2020 | North America / USA / Michigan             |
| EPI_ISL_650089 | 10/28/2020 | 11/23/2020 | North America / USA / Michigan             |
| EPI_ISL_650090 | 10/29/2020 | 11/23/2020 | North America / USA / Michigan             |
| EPI_ISL_650091 | 10/28/2020 | 11/23/2020 | North America / USA / Michigan             |
| EPI_ISL_650092 | 10/28/2020 | 11/23/2020 | North America / USA / Michigan             |
| EPI_ISL_650093 | 10/28/2020 | 11/23/2020 | North America / USA / Michigan             |
| EPI_ISL_650094 | 10/29/2020 | 11/23/2020 | North America / USA / Michigan             |
| EPI_ISL_650095 | 10/29/2020 | 11/23/2020 | North America / USA / Michigan             |
| EPI_ISL_650096 | 10/28/2020 | 11/23/2020 | North America / USA / Michigan             |
| EPI_ISL_650097 | 10/28/2020 | 11/23/2020 | North America / USA / Michigan             |
| EPI_ISL_650098 | 10/28/2020 | 11/23/2020 | North America / USA / Michigan             |
| EPI_ISL_650099 | 10/29/2020 | 11/23/2020 | North America / USA / Michigan             |
| EPI_ISL_650100 | 10/28/2020 | 11/23/2020 | North America / USA / Michigan             |
| EPI_ISL_650101 | 10/28/2020 | 11/23/2020 | North America / USA / Michigan             |
| EPI_ISL_650102 | 10/28/2020 | 11/23/2020 | North America / USA / Michigan             |
| EPI_ISL_650104 | 10/29/2020 | 11/23/2020 | North America / USA / Michigan             |
| EPI_ISL_650106 | 10/29/2020 | 11/23/2020 | North America / USA / Michigan             |
| EPI_ISL_651078 | 11/3/2020  | 11/23/2020 | Europe / United Kingdom / England          |
| EPI_ISL_651079 | 10/26/2020 | 11/23/2020 | Europe / United Kingdom / England          |
| EPI_ISL_651080 | 10/24/2020 | 11/23/2020 | Europe / United Kingdom / England          |
| EPI_ISL_651081 | 10/24/2020 | 11/23/2020 | Europe / United Kingdom / England          |
| EPI_ISL_651082 | 10/24/2020 | 11/23/2020 | Europe / United Kingdom / England          |
| EPI_ISL_651083 | 11/1/2020  | 11/23/2020 | Europe / United Kingdom / England          |
| EPI_ISL_651084 | 11/2/2020  | 11/23/2020 | Europe / United Kingdom / England          |
| EPI_ISL_651085 | 11/1/2020  | 11/23/2020 | Europe / United Kingdom / England          |
| EPI_ISL_651086 | 10/21/2020 | 11/23/2020 | Europe / United Kingdom / England          |
| EPI_ISL_651087 | 10/21/2020 | 11/23/2020 | Europe / United Kingdom / England          |
| EPI_ISL_651088 | 10/20/2020 | 11/23/2020 | Europe / United Kingdom / England          |
| EPI_ISL_651089 | 10/23/2020 | 11/23/2020 | Europe / United Kingdom / England          |
| EPI_ISL_651090 | 11/10/2020 | 11/23/2020 | Europe / United Kingdom / England          |
| EPI_ISL_651091 | 11/10/2020 | 11/23/2020 | Europe / United Kingdom / England          |
| EPI_ISL_651092 | 11/6/2020  | 11/23/2020 | Europe / United Kingdom / England          |
| EPI_ISL_651093 | 11/4/2020  | 11/23/2020 | Europe / United Kingdom / England          |
| EPI_ISL_651094 | 11/7/2020  | 11/23/2020 | Europe / United Kingdom / England          |
| EPI_ISL_651095 | 10/20/2020 | 11/23/2020 | Europe / United Kingdom / England          |
| EPI_ISL_651096 | 10/24/2020 | 11/23/2020 | Europe / United Kingdom / England          |
| EPI_ISL_651097 | 10/20/2020 | 11/23/2020 | Europe / United Kingdom / Northern Ireland |
| EPI_ISL_651098 | 11/11/2020 | 11/23/2020 | Europe / United Kingdom / England          |
| EPI_ISL_651099 | 10/4/2020  | 11/23/2020 | Europe / United Kingdom / England          |
| EPI_ISL_651100 | 11/4/2020  | 11/23/2020 | Europe / United Kingdom / England          |
| EPI_ISL_651101 | 11/4/2020  | 11/23/2020 | Europe / United Kingdom / England          |

|                |            |            |                                    |
|----------------|------------|------------|------------------------------------|
| EPI_ISL_651102 | 11/7/2020  | 11/23/2020 | Europe / United Kingdom / England  |
| EPI_ISL_651103 | 10/21/2020 | 11/23/2020 | Europe / United Kingdom / England  |
| EPI_ISL_651104 | 10/21/2020 | 11/23/2020 | Europe / United Kingdom / England  |
| EPI_ISL_651105 | 10/21/2020 | 11/23/2020 | Europe / United Kingdom / England  |
| EPI_ISL_651106 | 10/21/2020 | 11/23/2020 | Europe / United Kingdom / England  |
| EPI_ISL_651107 | 11/16/2020 | 11/23/2020 | Europe / United Kingdom / England  |
| EPI_ISL_651108 | 10/28/2020 | 11/23/2020 | Europe / United Kingdom / Wales    |
| EPI_ISL_651109 | 11/2/2020  | 11/23/2020 | Europe / United Kingdom / England  |
| EPI_ISL_651413 | 10/27/2020 | 11/23/2020 | Europe / United Kingdom / England  |
| EPI_ISL_651414 | 11/2/2020  | 11/23/2020 | Europe / United Kingdom / England  |
| EPI_ISL_651415 | 10/24/2020 | 11/23/2020 | Europe / United Kingdom / Wales    |
| EPI_ISL_651416 | 11/3/2020  | 11/23/2020 | Europe / United Kingdom / Wales    |
| EPI_ISL_651417 | 10/21/2020 | 11/23/2020 | Europe / United Kingdom / England  |
| EPI_ISL_651418 | 10/30/2020 | 11/23/2020 | Europe / United Kingdom / England  |
| EPI_ISL_651419 | 10/30/2020 | 11/23/2020 | Europe / United Kingdom / England  |
| EPI_ISL_651420 | 10/26/2020 | 11/23/2020 | Europe / United Kingdom / Wales    |
| EPI_ISL_651421 | 10/21/2020 | 11/23/2020 | Europe / United Kingdom / England  |
| EPI_ISL_651422 | 11/11/2020 | 11/23/2020 | Europe / United Kingdom / England  |
| EPI_ISL_651423 | 10/30/2020 | 11/23/2020 | Europe / United Kingdom / England  |
| EPI_ISL_651424 | 9/22/2020  | 11/23/2020 | Europe / United Kingdom / Scotland |
| EPI_ISL_651425 | 10/26/2020 | 11/23/2020 | Europe / United Kingdom / Scotland |
| EPI_ISL_651426 | 10/27/2020 | 11/23/2020 | Europe / United Kingdom / Scotland |
| EPI_ISL_651427 | 10/31/2020 | 11/23/2020 | Europe / United Kingdom / Scotland |
| EPI_ISL_651428 | 11/4/2020  | 11/23/2020 | Europe / United Kingdom / Scotland |
| EPI_ISL_651429 | 10/23/2020 | 11/23/2020 | Europe / United Kingdom / England  |
| EPI_ISL_651430 | 11/6/2020  | 11/23/2020 | Europe / United Kingdom / England  |
| EPI_ISL_651431 | 10/22/2020 | 11/23/2020 | Europe / United Kingdom / England  |
| EPI_ISL_651432 | 10/22/2020 | 11/23/2020 | Europe / United Kingdom / England  |
| EPI_ISL_651433 | 10/22/2020 | 11/23/2020 | Europe / United Kingdom / England  |
| EPI_ISL_651434 | 10/23/2020 | 11/23/2020 | Europe / United Kingdom / England  |
| EPI_ISL_651435 | 10/24/2020 | 11/23/2020 | Europe / United Kingdom / England  |
| EPI_ISL_651436 | 10/24/2020 | 11/23/2020 | Europe / United Kingdom / Wales    |
| EPI_ISL_651437 | 10/24/2020 | 11/23/2020 | Europe / United Kingdom / Wales    |
| EPI_ISL_651438 | 10/29/2020 | 11/23/2020 | Europe / United Kingdom / England  |
| EPI_ISL_651439 | 11/2/2020  | 11/23/2020 | Europe / United Kingdom / England  |
| EPI_ISL_651440 | 10/29/2020 | 11/23/2020 | Europe / United Kingdom / Wales    |
| EPI_ISL_651441 | 10/26/2020 | 11/23/2020 | Europe / United Kingdom / Wales    |
| EPI_ISL_651442 | 10/28/2020 | 11/23/2020 | Europe / United Kingdom / Wales    |
| EPI_ISL_651443 | 10/26/2020 | 11/23/2020 | Europe / United Kingdom / Wales    |
| EPI_ISL_651444 | 10/26/2020 | 11/23/2020 | Europe / United Kingdom / Wales    |
| EPI_ISL_651445 | 10/26/2020 | 11/23/2020 | Europe / United Kingdom / Wales    |
| EPI_ISL_651446 | 10/26/2020 | 11/23/2020 | Europe / United Kingdom / Wales    |
| EPI_ISL_651447 | 10/26/2020 | 11/23/2020 | Europe / United Kingdom / Wales    |
| EPI_ISL_651448 | 10/25/2020 | 11/23/2020 | Europe / United Kingdom / Wales    |
| EPI_ISL_651449 | 10/26/2020 | 11/23/2020 | Europe / United Kingdom / Wales    |
| EPI_ISL_651450 | 11/3/2020  | 11/23/2020 | Europe / United Kingdom / Wales    |
| EPI_ISL_651451 | 10/27/2020 | 11/23/2020 | Europe / United Kingdom / Wales    |















































































|                |            |            |                                   |
|----------------|------------|------------|-----------------------------------|
| EPI_ISL_653087 | 10/5/2020  | 11/23/2020 | Europe / United Kingdom / England |
| EPI_ISL_653088 | 10/29/2020 | 11/23/2020 | Europe / United Kingdom / England |
| EPI_ISL_653089 | 11/10/2020 | 11/23/2020 | Europe / United Kingdom / England |
| EPI_ISL_653090 | 10/29/2020 | 11/23/2020 | Europe / United Kingdom / England |
| EPI_ISL_653091 | 10/31/2020 | 11/23/2020 | Europe / United Kingdom / England |
| EPI_ISL_653092 | 10/17/2020 | 11/23/2020 | Europe / United Kingdom / England |
| EPI_ISL_653093 | 10/5/2020  | 11/23/2020 | Europe / United Kingdom / England |
| EPI_ISL_653094 | 10/29/2020 | 11/23/2020 | Europe / United Kingdom / England |
| EPI_ISL_653095 | 10/27/2020 | 11/23/2020 | Europe / United Kingdom / England |
| EPI_ISL_653096 | 10/29/2020 | 11/23/2020 | Europe / United Kingdom / England |
| EPI_ISL_653097 | 10/5/2020  | 11/23/2020 | Europe / United Kingdom / England |
| EPI_ISL_653098 | 4/9/2020   | 11/23/2020 | North America / USA / Florida     |
| EPI_ISL_653100 | 4/10/2020  | 11/23/2020 | North America / USA / Florida     |
| EPI_ISL_653101 | 4/10/2020  | 11/23/2020 | North America / USA / Florida     |
| EPI_ISL_653102 | 4/10/2020  | 11/23/2020 | North America / USA / Florida     |
| EPI_ISL_653103 | 4/11/2020  | 11/23/2020 | North America / USA / Florida     |
| EPI_ISL_653104 | 4/11/2020  | 11/23/2020 | North America / USA / Florida     |
| EPI_ISL_653105 | 4/11/2020  | 11/23/2020 | North America / USA / Florida     |
| EPI_ISL_653106 | 4/11/2020  | 11/23/2020 | North America / USA / Florida     |
| EPI_ISL_653107 | 4/11/2020  | 11/23/2020 | North America / USA / Florida     |
| EPI_ISL_653108 | 4/11/2020  | 11/23/2020 | North America / USA / Florida     |
| EPI_ISL_653109 | 4/11/2020  | 11/23/2020 | North America / USA / Florida     |
| EPI_ISL_653110 | 4/13/2020  | 11/23/2020 | North America / USA / Florida     |
| EPI_ISL_653111 | 4/13/2020  | 11/23/2020 | North America / USA / Florida     |
| EPI_ISL_653112 | 4/13/2020  | 11/23/2020 | North America / USA / Florida     |
| EPI_ISL_653113 | 4/12/2020  | 11/23/2020 | North America / USA / Florida     |
| EPI_ISL_653114 | 4/13/2020  | 11/23/2020 | North America / USA / Florida     |
| EPI_ISL_653115 | 4/13/2020  | 11/23/2020 | North America / USA / Florida     |
| EPI_ISL_653117 | 4/10/2020  | 11/23/2020 | North America / USA / Florida     |
| EPI_ISL_653118 | 4/14/2020  | 11/23/2020 | North America / USA / Florida     |
| EPI_ISL_653119 | 4/13/2020  | 11/23/2020 | North America / USA / Florida     |
| EPI_ISL_653120 | 4/14/2020  | 11/23/2020 | North America / USA / Florida     |
| EPI_ISL_653122 | 4/15/2020  | 11/23/2020 | North America / USA / Florida     |
| EPI_ISL_653123 | 4/16/2020  | 11/23/2020 | North America / USA / Florida     |
| EPI_ISL_653124 | 4/16/2020  | 11/23/2020 | North America / USA / Florida     |
| EPI_ISL_653126 | 4/16/2020  | 11/23/2020 | North America / USA / Florida     |
| EPI_ISL_653127 | 4/16/2020  | 11/23/2020 | North America / USA / Florida     |
| EPI_ISL_653128 | 4/13/2020  | 11/23/2020 | North America / USA / Florida     |
| EPI_ISL_653130 | 4/17/2020  | 11/23/2020 | North America / USA / Florida     |
| EPI_ISL_653132 | 4/17/2020  | 11/23/2020 | North America / USA / Florida     |
| EPI_ISL_653133 | 4/17/2020  | 11/23/2020 | North America / USA / Florida     |
| EPI_ISL_653137 | 4/17/2020  | 11/23/2020 | North America / USA / Florida     |
| EPI_ISL_653139 | 4/18/2020  | 11/23/2020 | North America / USA / Florida     |
| EPI_ISL_653140 | 4/19/2020  | 11/23/2020 | North America / USA / Florida     |
| EPI_ISL_653141 | 4/18/2020  | 11/23/2020 | North America / USA / Florida     |
| EPI_ISL_653145 | 4/16/2020  | 11/23/2020 | North America / USA / Florida     |
| EPI_ISL_653146 | 4/16/2020  | 11/23/2020 | North America / USA / Florida     |























|                |            |            |                                                           |
|----------------|------------|------------|-----------------------------------------------------------|
| EPI_ISL_653741 | 8/28/2020  | 11/23/2020 | North America / USA / Louisiana / Caddo Parish            |
| EPI_ISL_653742 | 8/28/2020  | 11/23/2020 | North America / USA / Louisiana / Caddo Parish            |
| EPI_ISL_653743 | 8/28/2020  | 11/23/2020 | North America / USA / Louisiana / Caddo Parish            |
| EPI_ISL_653744 | 8/28/2020  | 11/23/2020 | North America / USA / Louisiana / Caddo Parish            |
| EPI_ISL_653746 | 8/7/2020   | 11/23/2020 | South America / Colombia / Bogota                         |
| EPI_ISL_653747 | 8/7/2020   | 11/23/2020 | South America / Colombia / Bogota                         |
| EPI_ISL_653750 | 3/24/2020  | 11/23/2020 | South America / Colombia / Bogota                         |
| EPI_ISL_653751 | 3/20/2020  | 11/23/2020 | South America / Colombia / Valle del Cauca / Cali         |
| EPI_ISL_653752 | 3/14/2020  | 11/23/2020 | South America / Colombia / Norte de Santander             |
| EPI_ISL_653754 | 9/2/2020   | 11/23/2020 | South America / Colombia / Bogota                         |
| EPI_ISL_653755 | 6/30/2020  | 11/23/2020 | South America / Colombia / Bogota                         |
| EPI_ISL_653756 | 7/7/2020   | 11/23/2020 | South America / Colombia / Antioquia / Medellin           |
| EPI_ISL_653757 | 6/26/2020  | 11/23/2020 | South America / Colombia / Atlantico / Barranquilla       |
| EPI_ISL_653763 | 8/28/2020  | 11/23/2020 | Europe / Italy / Apulia / Bari                            |
| EPI_ISL_653764 | 8/28/2020  | 11/23/2020 | Europe / Italy / Apulia / Bari                            |
| EPI_ISL_653765 | 11/2/2020  | 11/23/2020 | Europe / Italy / Apulia / Bari / Acquaviva delle Fonti    |
| EPI_ISL_653766 | 11/2/2020  | 11/23/2020 | Europe / Italy / Apulia / Brindisi                        |
| EPI_ISL_653767 | 11/2/2020  | 11/23/2020 | Europe / Italy / Apulia / Bari / Castellana Grotte        |
| EPI_ISL_653768 | 11/2/2020  | 11/23/2020 | Europe / Italy / Apulia / Brindisi / Ostuni               |
| EPI_ISL_653769 | 11/2/2020  | 11/23/2020 | Europe / Italy / Apulia / Brindisi / Francavilla Fontana  |
| EPI_ISL_653770 | 11/2/2020  | 11/23/2020 | Europe / Italy / Apulia / Brindisi                        |
| EPI_ISL_653771 | 11/2/2020  | 11/23/2020 | Europe / Italy / Apulia / Brindisi                        |
| EPI_ISL_653772 | 11/2/2020  | 11/23/2020 | Europe / Italy / Apulia / Brindisi                        |
| EPI_ISL_653773 | 11/2/2020  | 11/23/2020 | Europe / Italy / Apulia / Brindisi / Francavilla Fontana  |
| EPI_ISL_653774 | 11/2/2020  | 11/23/2020 | Europe / Italy / Apulia / Brindisi / Francavilla Fontana  |
| EPI_ISL_653775 | 11/2/2020  | 11/23/2020 | Europe / Italy / Apulia / Brindisi                        |
| EPI_ISL_653776 | 11/2/2020  | 11/23/2020 | Europe / Italy / Apulia / Brindisi                        |
| EPI_ISL_653777 | 11/2/2020  | 11/23/2020 | Europe / Italy / Apulia / Brindisi / San Pietro Vernotico |
| EPI_ISL_653778 | 11/2/2020  | 11/23/2020 | Europe / Italy / Apulia / Brindisi / San Pietro Vernotico |
| EPI_ISL_653779 | 11/2/2020  | 11/23/2020 | Europe / Italy / Apulia / Brindisi / Erchia               |
| EPI_ISL_653780 | 11/2/2020  | 11/23/2020 | Europe / Italy / Apulia / Brindisi                        |
| EPI_ISL_653781 | 11/2/2020  | 11/23/2020 | Europe / Italy / Apulia / Brindisi / Ostuni               |
| EPI_ISL_653782 | 10/30/2020 | 11/23/2020 | Europe / Italy / Apulia / Brindisi / Fasano               |
| EPI_ISL_653783 | 11/2/2020  | 11/23/2020 | Europe / Italy / Apulia / Brindisi                        |
| EPI_ISL_653784 | 9/22/2020  | 11/23/2020 | Europe / Italy / Apulia / Bari                            |
| EPI_ISL_653785 | 9/29/2020  | 11/23/2020 | Europe / Italy / Apulia / Foggia                          |
| EPI_ISL_653786 | 9/30/2020  | 11/23/2020 | Europe / Italy / Apulia / Bari / Gravina di Puglia        |
| EPI_ISL_653787 | 11/3/2020  | 11/23/2020 | Europe / Italy / Apulia / Taranto / Martina Franca        |
| EPI_ISL_653788 | 11/3/2020  | 11/23/2020 | Europe / Italy / Apulia / Bari / Monopoli                 |
| EPI_ISL_653789 | 11/3/2020  | 11/23/2020 | Europe / Italy / Apulia / Martina Franca                  |
| EPI_ISL_653790 | 11/3/2020  | 11/23/2020 | Europe / Italy / Apulia / Martina Franca                  |
| EPI_ISL_653791 | 11/3/2020  | 11/23/2020 | Europe / Italy / Apulia / Bari / Altamura                 |
| EPI_ISL_653792 | 11/3/2020  | 11/23/2020 | Europe / Italy / Basilicata / Matera / Ferrandina         |
| EPI_ISL_653793 | 11/3/2020  | 11/23/2020 | Europe / Italy / Apulia / Bari                            |
| EPI_ISL_653794 | 11/3/2020  | 11/23/2020 | Europe / Italy / Apulia / Bari / Turi                     |
| EPI_ISL_653795 | 11/3/2020  | 11/23/2020 | Europe / Italy / Apulia / Bari / Monopoli                 |
| EPI_ISL_653796 | 11/3/2020  | 11/23/2020 | Europe / Italy / Apulia / Bari / Acquaviva delle Fonti    |

|                |            |            |                                                        |
|----------------|------------|------------|--------------------------------------------------------|
| EPI_ISL_653797 | 11/3/2020  | 11/23/2020 | Europe / Italy / Apulia / Bari / Acquaviva delle Fonti |
| EPI_ISL_653798 | 11/3/2020  | 11/23/2020 | Europe / Italy / Apulia / Bari / Acquaviva delle Fonti |
| EPI_ISL_653799 | 11/3/2020  | 11/23/2020 | Europe / Italy / Apulia / Bari / Locorotondo           |
| EPI_ISL_653800 | 11/3/2020  | 11/23/2020 | Europe / Italy / Apulia / Bari / Alberobello           |
| EPI_ISL_653801 | 11/2/2020  | 11/23/2020 | Europe / Italy / Apulia / Brindisi / Latiano           |
| EPI_ISL_653802 | 10/24/2020 | 11/23/2020 | Europe / Italy / Apulia / Bari / Monopoli              |
| EPI_ISL_653803 | 10/24/2020 | 11/23/2020 | Europe / Italy / Apulia / Bari / Monopoli              |
| EPI_ISL_653804 | 11/3/2020  | 11/23/2020 | Europe / Italy / Apulia / Bari / Sammichele di Bari    |
| EPI_ISL_653805 | 11/3/2020  | 11/23/2020 | Europe / Italy / Apulia / Bari / Monopoli              |
| EPI_ISL_653806 | 11/3/2020  | 11/23/2020 | Europe / Italy / Apulia / Bari / Putignano             |
| EPI_ISL_653807 | 11/2/2020  | 11/23/2020 | Europe / Italy / Apulia / Brindisi / Ceglie Messapica  |
| EPI_ISL_653808 | 11/2/2020  | 11/23/2020 | Europe / Italy / Apulia / Brindisi / Carovigno         |
| EPI_ISL_653809 | 11/2/2020  | 11/23/2020 | Europe / Italy / Apulia / Brindisi                     |
| EPI_ISL_653810 | 10/31/2020 | 11/23/2020 | Europe / Italy / Apulia / Brindisi                     |
| EPI_ISL_653811 | 11/2/2020  | 11/23/2020 | Europe / Italy / Apulia / Brindisi                     |
| EPI_ISL_653812 | 11/2/2020  | 11/23/2020 | Europe / Italy / Apulia / Brindisi / Fasano            |
| EPI_ISL_653813 | 4/11/2020  | 11/23/2020 | Europe / Italy / Apulia / Brindisi                     |
| EPI_ISL_653814 | 4/11/2020  | 11/23/2020 | Europe / Italy / Apulia / Brindisi                     |
| EPI_ISL_653815 | 4/11/2020  | 11/23/2020 | Europe / Italy / Apulia / Brindisi                     |
| EPI_ISL_653816 | 4/11/2020  | 11/23/2020 | Europe / Italy / Apulia / Brindisi                     |
| EPI_ISL_653817 | 4/11/2020  | 11/23/2020 | Europe / Italy / Apulia / Brindisi                     |
| EPI_ISL_653818 | 4/11/2020  | 11/23/2020 | Europe / Italy / Apulia / Brindisi                     |
| EPI_ISL_653819 | 11/4/2020  | 11/23/2020 | Europe / Italy / Apulia / Bari                         |
| EPI_ISL_653820 | 11/6/2020  | 11/23/2020 | Europe / Italy / Apulia / Bari / Putignano             |
| EPI_ISL_653821 | 10/27/2020 | 11/23/2020 | Europe / Italy / Apulia / Bari                         |
| EPI_ISL_653822 | 11/4/2020  | 11/23/2020 | Europe / Italy / Apulia / Bari                         |
| EPI_ISL_653823 | 8/17/2020  | 11/23/2020 | Europe / Italy / Apulia / Foggia / Manfredonia         |
| EPI_ISL_653826 | 5/5/2020   | 11/24/2020 | Asia / India / West Bengal / Kolkata                   |
| EPI_ISL_653827 | 5/19/2020  | 11/24/2020 | Asia / India / West Bengal / Kolkata                   |
| EPI_ISL_653828 | 5/17/2020  | 11/24/2020 | Asia / India / West Bengal / Kolkata                   |
| EPI_ISL_653829 | 5/19/2020  | 11/24/2020 | Asia / India / West Bengal / Kolkata                   |
| EPI_ISL_653830 | 5/24/2020  | 11/24/2020 | Asia / India / West Bengal / Kolkata                   |
| EPI_ISL_653831 | 5/24/2020  | 11/24/2020 | Asia / India / West Bengal / Kolkata                   |
| EPI_ISL_653832 | 5/24/2020  | 11/24/2020 | Asia / India / West Bengal / Kolkata                   |
| EPI_ISL_653833 | 6/18/2020  | 11/24/2020 | Asia / India / Delhi                                   |
| EPI_ISL_653834 | 6/18/2020  | 11/24/2020 | Asia / India / Delhi                                   |
| EPI_ISL_653835 | 6/18/2020  | 11/24/2020 | Asia / India / Delhi                                   |
| EPI_ISL_653836 | 6/18/2020  | 11/24/2020 | Asia / India / Delhi                                   |
| EPI_ISL_653837 | 6/18/2020  | 11/24/2020 | Asia / India / Delhi                                   |
| EPI_ISL_653838 | 6/18/2020  | 11/24/2020 | Asia / India / Delhi                                   |
| EPI_ISL_653839 | 6/18/2020  | 11/24/2020 | Asia / India / Delhi                                   |
| EPI_ISL_653840 | 6/18/2020  | 11/24/2020 | Asia / India / Delhi                                   |
| EPI_ISL_653841 | 6/18/2020  | 11/24/2020 | Asia / India / Delhi                                   |
| EPI_ISL_653842 | 6/18/2020  | 11/24/2020 | Asia / India / Delhi                                   |
| EPI_ISL_653843 | 6/19/2020  | 11/24/2020 | Asia / India / Delhi                                   |
| EPI_ISL_653844 | 6/19/2020  | 11/24/2020 | Asia / India / Delhi                                   |
| EPI_ISL_653845 | 6/19/2020  | 11/24/2020 | Asia / India / Delhi                                   |

|                |           |                                               |
|----------------|-----------|-----------------------------------------------|
| EPI_ISL_653846 | 6/19/2020 | 11/24/2020 Asia / India / Delhi               |
| EPI_ISL_653847 | 6/19/2020 | 11/24/2020 Asia / India / Delhi               |
| EPI_ISL_653848 | 6/19/2020 | 11/24/2020 Asia / India / Delhi               |
| EPI_ISL_653849 | 6/20/2020 | 11/24/2020 Asia / India / Delhi               |
| EPI_ISL_653850 | 6/20/2020 | 11/24/2020 Asia / India / Delhi               |
| EPI_ISL_653851 | 6/20/2020 | 11/24/2020 Asia / India / Delhi               |
| EPI_ISL_653852 | 6/21/2020 | 11/24/2020 Asia / India / Delhi               |
| EPI_ISL_653853 | 6/21/2020 | 11/24/2020 Asia / India / Delhi               |
| EPI_ISL_653854 | 6/23/2020 | 11/24/2020 Asia / India / Delhi               |
| EPI_ISL_653855 | 6/26/2020 | 11/24/2020 Asia / India / Delhi               |
| EPI_ISL_653856 | 6/26/2020 | 11/24/2020 Asia / India / Delhi               |
| EPI_ISL_653857 | 6/28/2020 | 11/24/2020 Asia / India / Delhi               |
| EPI_ISL_653858 | 6/28/2020 | 11/24/2020 Asia / India / Delhi               |
| EPI_ISL_653859 | 6/14/2020 | 11/24/2020 Asia / India / Haryana / Palwal    |
| EPI_ISL_653860 | 6/17/2020 | 11/24/2020 Asia / India / Haryana / Faridabad |
| EPI_ISL_653861 | 6/17/2020 | 11/24/2020 Asia / India / Haryana / Faridabad |
| EPI_ISL_653863 | 6/22/2020 | 11/24/2020 Asia / India / Haryana / Faridabad |
| EPI_ISL_653864 | 6/22/2020 | 11/24/2020 Asia / India / Haryana / Faridabad |
| EPI_ISL_653865 | 6/22/2020 | 11/24/2020 Asia / India / Haryana / Palwal    |
| EPI_ISL_653866 | 6/22/2020 | 11/24/2020 Asia / India / Haryana / Palwal    |
| EPI_ISL_653869 | 5/1/2020  | 11/24/2020 Asia / India / Haryana / Palwal    |
| EPI_ISL_653871 | 5/19/2020 | 11/24/2020 Asia / India / Haryana / Gurugram  |
| EPI_ISL_653872 | 5/19/2020 | 11/24/2020 Asia / India / Haryana / Gurugram  |
| EPI_ISL_653873 | 5/19/2020 | 11/24/2020 Asia / India / Haryana / Gurugram  |
| EPI_ISL_653874 | 5/19/2020 | 11/24/2020 Asia / India / Haryana / Gurugram  |
| EPI_ISL_653875 | 5/20/2020 | 11/24/2020 Asia / India / Haryana / Gurugram  |
| EPI_ISL_653876 | 5/20/2020 | 11/24/2020 Asia / India / Haryana / Gurugram  |
| EPI_ISL_653877 | 5/20/2020 | 11/24/2020 Asia / India / Haryana / Gurugram  |
| EPI_ISL_653878 | 5/20/2020 | 11/24/2020 Asia / India / Haryana / Gurugram  |
| EPI_ISL_653879 | 5/20/2020 | 11/24/2020 Asia / India / Delhi / West Delhi  |
| EPI_ISL_653880 | 5/21/2020 | 11/24/2020 Asia / India / Haryana / Gurugram  |
| EPI_ISL_653881 | 5/21/2020 | 11/24/2020 Asia / India / Haryana / Gurugram  |
| EPI_ISL_653882 | 5/21/2020 | 11/24/2020 Asia / India / Haryana / Gurugram  |
| EPI_ISL_653883 | 5/21/2020 | 11/24/2020 Asia / India / Haryana / Gurugram  |
| EPI_ISL_653885 | 5/21/2020 | 11/24/2020 Asia / India / Haryana / Gurugram  |
| EPI_ISL_653886 | 5/19/2020 | 11/24/2020 Asia / India / Haryana / Gurugram  |
| EPI_ISL_653887 | 6/19/2020 | 11/24/2020 Asia / India / Haryana / Faridabad |
| EPI_ISL_653888 | 6/19/2020 | 11/24/2020 Asia / India / Haryana / Faridabad |
| EPI_ISL_653889 | 5/21/2020 | 11/24/2020 Asia / India / Haryana / Palwal    |
| EPI_ISL_653890 | 5/21/2020 | 11/24/2020 Asia / India / Haryana / Faridabad |
| EPI_ISL_653891 | 5/25/2020 | 11/24/2020 Asia / India / Haryana / Gurugram  |
| EPI_ISL_653893 | 5/25/2020 | 11/24/2020 Asia / India / Haryana / Gurugram  |
| EPI_ISL_653894 | 5/25/2020 | 11/24/2020 Asia / India / Haryana / Gurugram  |
| EPI_ISL_653895 | 5/25/2020 | 11/24/2020 Asia / India / Haryana / Gurugram  |
| EPI_ISL_653896 | 5/25/2020 | 11/24/2020 Asia / India / Haryana / Gurugram  |
| EPI_ISL_653897 | 5/25/2020 | 11/24/2020 Asia / India / Haryana / Gurugram  |
| EPI_ISL_653898 | 5/25/2020 | 11/24/2020 Asia / India / Haryana / Gurugram  |



|                |            |                                               |
|----------------|------------|-----------------------------------------------|
| EPI_ISL_653899 | 5/25/2020  | 11/24/2020 Asia / India / Haryana / Gurugram  |
| EPI_ISL_653900 | 5/25/2020  | 11/24/2020 Asia / India / Haryana / Gurugram  |
| EPI_ISL_653901 | 5/25/2020  | 11/24/2020 Asia / India / Haryana / Gurugram  |
| EPI_ISL_653902 | 5/25/2020  | 11/24/2020 Asia / India / Haryana / Gurugram  |
| EPI_ISL_653904 | 5/26/2020  | 11/24/2020 Asia / India / Haryana / Palwal    |
| EPI_ISL_653905 | 5/26/2020  | 11/24/2020 Asia / India / Haryana / Palwal    |
| EPI_ISL_653906 | 5/26/2020  | 11/24/2020 Asia / India / Haryana / Gurugram  |
| EPI_ISL_653908 | 5/26/2020  | 11/24/2020 Asia / India / Haryana / Gurugram  |
| EPI_ISL_653909 | 6/19/2020  | 11/24/2020 Asia / India / Haryana / Faridabad |
| EPI_ISL_653910 | 6/19/2020  | 11/24/2020 Asia / India / Haryana / Faridabad |
| EPI_ISL_653911 | 6/19/2020  | 11/24/2020 Asia / India / Haryana / Faridabad |
| EPI_ISL_653912 | 6/19/2020  | 11/24/2020 Asia / India / Haryana / Faridabad |
| EPI_ISL_653913 | 6/19/2020  | 11/24/2020 Asia / India / Haryana / Faridabad |
| EPI_ISL_653914 | 6/19/2020  | 11/24/2020 Asia / India / Haryana / Faridabad |
| EPI_ISL_653916 | 9/15/2020  | 11/24/2020 Europe / Austria / Styria          |
| EPI_ISL_653922 | 8/24/2020  | 11/24/2020 Europe / Russia / Moscow           |
| EPI_ISL_653923 | 8/24/2020  | 11/24/2020 Europe / Russia / Moscow           |
| EPI_ISL_653924 | 8/24/2020  | 11/24/2020 Europe / Russia / Moscow           |
| EPI_ISL_653925 | 8/24/2020  | 11/24/2020 Europe / Russia / Moscow           |
| EPI_ISL_653926 | 8/23/2020  | 11/24/2020 Europe / Russia / Moscow           |
| EPI_ISL_653927 | 8/23/2020  | 11/24/2020 Europe / Russia / Moscow           |
| EPI_ISL_653928 | 8/24/2020  | 11/24/2020 Europe / Russia / Moscow           |
| EPI_ISL_653929 | 8/24/2020  | 11/24/2020 Europe / Russia / Moscow           |
| EPI_ISL_653930 | 8/24/2020  | 11/24/2020 Europe / Russia / Moscow           |
| EPI_ISL_653931 | 8/24/2020  | 11/24/2020 Europe / Russia / Moscow           |
| EPI_ISL_653932 | 8/24/2020  | 11/24/2020 Europe / Russia / Moscow           |
| EPI_ISL_653951 | 10/28/2020 | 11/24/2020 Europe / United Kingdom / England  |
| EPI_ISL_653952 | 10/29/2020 | 11/24/2020 Europe / United Kingdom / England  |
| EPI_ISL_653953 | 10/30/2020 | 11/24/2020 Europe / United Kingdom / England  |
| EPI_ISL_653954 | 10/31/2020 | 11/24/2020 Europe / United Kingdom / England  |
| EPI_ISL_653958 | 10/25/2020 | 11/24/2020 Europe / United Kingdom / England  |
| EPI_ISL_653959 | 10/25/2020 | 11/24/2020 Europe / United Kingdom / England  |
| EPI_ISL_653960 | 10/23/2020 | 11/24/2020 Europe / United Kingdom / England  |
| EPI_ISL_653961 | 10/26/2020 | 11/24/2020 Europe / United Kingdom / England  |
| EPI_ISL_653962 | 10/27/2020 | 11/24/2020 Europe / United Kingdom / England  |
| EPI_ISL_653963 | 10/25/2020 | 11/24/2020 Europe / United Kingdom / England  |
| EPI_ISL_653964 | 10/23/2020 | 11/24/2020 Europe / United Kingdom / England  |
| EPI_ISL_653965 | 10/27/2020 | 11/24/2020 Europe / United Kingdom / England  |
| EPI_ISL_653966 | 10/27/2020 | 11/24/2020 Europe / United Kingdom / England  |
| EPI_ISL_653967 | 10/27/2020 | 11/24/2020 Europe / United Kingdom / England  |
| EPI_ISL_653968 | 10/27/2020 | 11/24/2020 Europe / United Kingdom / England  |
| EPI_ISL_653969 | 10/27/2020 | 11/24/2020 Europe / United Kingdom / England  |
| EPI_ISL_653970 | 10/28/2020 | 11/24/2020 Europe / United Kingdom / England  |
| EPI_ISL_653971 | 10/28/2020 | 11/24/2020 Europe / United Kingdom / England  |
| EPI_ISL_653972 | 10/28/2020 | 11/24/2020 Europe / United Kingdom / England  |
| EPI_ISL_653973 | 10/27/2020 | 11/24/2020 Europe / United Kingdom / England  |
| EPI_ISL_653974 | 10/28/2020 | 11/24/2020 Europe / United Kingdom / England  |



















|                |            |            |                                                 |
|----------------|------------|------------|-------------------------------------------------|
| EPI_ISL_654502 | 10/27/2020 | 11/24/2020 | Europe / Sweden                                 |
| EPI_ISL_654503 | 10/27/2020 | 11/24/2020 | Europe / Sweden                                 |
| EPI_ISL_654504 | 10/4/2020  | 11/24/2020 | Europe / Sweden                                 |
| EPI_ISL_654505 | 10/4/2020  | 11/24/2020 | Europe / Sweden                                 |
| EPI_ISL_654506 | 8/9/2020   | 11/24/2020 | Europe / Sweden / Jonkoping                     |
| EPI_ISL_654507 | 6/14/2020  | 11/24/2020 | Europe / Sweden / Jonkoping                     |
| EPI_ISL_654508 | 10/5/2020  | 11/24/2020 | Europe / Sweden                                 |
| EPI_ISL_654516 | 10/7/2020  | 11/24/2020 | Europe / Spain / Catalunya / Badalona           |
| EPI_ISL_654517 | 10/7/2020  | 11/24/2020 | Europe / Spain / Catalunya / Badalona           |
| EPI_ISL_654518 | 10/2/2020  | 11/24/2020 | Europe / Spain / Catalunya / Badalona           |
| EPI_ISL_654519 | 8/30/2020  | 11/24/2020 | Europe / Spain / Catalunya / Badalona           |
| EPI_ISL_654520 | 9/22/2020  | 11/24/2020 | Europe / Spain / Catalunya / Badalona           |
| EPI_ISL_654521 | 9/30/2020  | 11/24/2020 | Europe / Spain / Catalunya / Badalona           |
| EPI_ISL_654522 | 10/6/2020  | 11/24/2020 | Europe / Spain / Catalunya / Badalona           |
| EPI_ISL_654523 | 9/19/2020  | 11/24/2020 | Europe / Spain / Catalunya / Badalona           |
| EPI_ISL_654524 | 9/14/2020  | 11/24/2020 | Europe / Spain / Catalunya / Badalona           |
| EPI_ISL_654525 | 10/7/2020  | 11/24/2020 | Europe / Spain / Catalunya / Badalona           |
| EPI_ISL_654526 | 10/2/2020  | 11/24/2020 | Europe / Spain / Catalunya / Badalona           |
| EPI_ISL_654527 | 10/6/2020  | 11/24/2020 | Europe / Spain / Catalunya / Badalona           |
| EPI_ISL_654528 | 10/5/2020  | 11/24/2020 | Europe / Spain / Catalunya / Badalona           |
| EPI_ISL_654529 | 10/7/2020  | 11/24/2020 | Europe / Spain / Catalunya / Badalona           |
| EPI_ISL_654530 | 10/7/2020  | 11/24/2020 | Europe / Spain / Catalunya / Badalona           |
| EPI_ISL_654531 | 10/7/2020  | 11/24/2020 | Europe / Spain / Catalunya / Badalona           |
| EPI_ISL_654532 | 10/8/2020  | 11/24/2020 | Europe / Spain / Catalunya / Badalona           |
| EPI_ISL_654533 | 10/7/2020  | 11/24/2020 | Europe / Spain / Catalunya / Badalona           |
| EPI_ISL_654534 | 10/6/2020  | 11/24/2020 | Europe / Spain / Catalunya / Badalona           |
| EPI_ISL_654535 | 4/10/2020  | 11/24/2020 | Europe / Spain / Catalunya / Badalona           |
| EPI_ISL_654536 | 10/10/2020 | 11/24/2020 | Europe / Spain / Catalunya / Badalona           |
| EPI_ISL_654537 | 10/6/2020  | 11/24/2020 | Europe / Spain / Catalunya / Badalona           |
| EPI_ISL_654538 | 9/21/2020  | 11/24/2020 | Europe / Spain / Catalunya / Badalona           |
| EPI_ISL_654547 | 10/24/2020 | 11/24/2020 | Europe / Spain / Basque Country / San Sebastian |
| EPI_ISL_654553 | 10/1/2020  | 11/24/2020 | Europe / Spain / Basque Country / San Sebastian |
| EPI_ISL_654554 | 10/1/2020  | 11/24/2020 | Europe / Spain / Basque Country / San Sebastian |
| EPI_ISL_654555 | 10/2/2020  | 11/24/2020 | Europe / Spain / Basque Country / San Sebastian |
| EPI_ISL_654556 | 10/2/2020  | 11/24/2020 | Europe / Spain / Basque Country / San Sebastian |
| EPI_ISL_654557 | 10/2/2020  | 11/24/2020 | Europe / Spain / Basque Country / San Sebastian |
| EPI_ISL_654558 | 10/26/2020 | 11/24/2020 | Europe / Spain / Basque Country / San Sebastian |
| EPI_ISL_654559 | 10/3/2020  | 11/24/2020 | Europe / Spain / Basque Country / San Sebastian |
| EPI_ISL_654560 | 10/3/2020  | 11/24/2020 | Europe / Spain / Basque Country / San Sebastian |
| EPI_ISL_654561 | 10/3/2020  | 11/24/2020 | Europe / Spain / Basque Country / San Sebastian |
| EPI_ISL_654562 | 10/5/2020  | 11/24/2020 | Europe / Spain / Basque Country / San Sebastian |
| EPI_ISL_654563 | 10/5/2020  | 11/24/2020 | Europe / Spain / Basque Country / San Sebastian |
| EPI_ISL_654564 | 10/6/2020  | 11/24/2020 | Europe / Spain / Basque Country / San Sebastian |
| EPI_ISL_654565 | 10/7/2020  | 11/24/2020 | Europe / Spain / Basque Country / San Sebastian |
| EPI_ISL_654566 | 10/8/2020  | 11/24/2020 | Europe / Spain / Basque Country / San Sebastian |
| EPI_ISL_654567 | 10/9/2020  | 11/24/2020 | Europe / Spain / Basque Country / San Sebastian |
| EPI_ISL_654568 | 10/9/2020  | 11/24/2020 | Europe / Spain / Basque Country / San Sebastian |







|                |            |                                                     |
|----------------|------------|-----------------------------------------------------|
| EPI_ISL_654769 | 5/1/2020   | 11/24/2020 North America / USA / Texas / Williamson |
| EPI_ISL_654770 | 5/11/2020  | 11/24/2020 North America / USA / Texas / Gonzales   |
| EPI_ISL_654771 | 5/13/2020  | 11/24/2020 North America / USA / Texas / Smith      |
| EPI_ISL_654772 | 5/13/2020  | 11/24/2020 North America / USA / Texas / Gregg      |
| EPI_ISL_654773 | 5/16/2020  | 11/24/2020 North America / USA / Texas / Comanche   |
| EPI_ISL_654795 | 11/14/2020 | 11/25/2020 Oceania / Australia / South Australia    |
| EPI_ISL_654799 | 11/16/2020 | 11/25/2020 Oceania / Australia / South Australia    |
| EPI_ISL_654800 | 11/16/2020 | 11/25/2020 Oceania / Australia / South Australia    |
| EPI_ISL_654801 | 11/16/2020 | 11/25/2020 Oceania / Australia / South Australia    |
| EPI_ISL_654802 | 11/16/2020 | 11/25/2020 Oceania / Australia / South Australia    |
| EPI_ISL_654803 | 11/16/2020 | 11/25/2020 Oceania / Australia / South Australia    |
| EPI_ISL_654804 | 11/16/2020 | 11/25/2020 Oceania / Australia / South Australia    |
| EPI_ISL_654805 | 11/16/2020 | 11/25/2020 Oceania / Australia / South Australia    |
| EPI_ISL_654806 | 11/16/2020 | 11/25/2020 Oceania / Australia / South Australia    |
| EPI_ISL_654807 | 11/16/2020 | 11/25/2020 Oceania / Australia / South Australia    |
| EPI_ISL_654808 | 11/16/2020 | 11/25/2020 Oceania / Australia / South Australia    |
| EPI_ISL_654809 | 11/16/2020 | 11/25/2020 Oceania / Australia / South Australia    |
| EPI_ISL_654810 | 11/15/2020 | 11/25/2020 Asia / Singapore                         |
| EPI_ISL_654811 | 11/11/2020 | 11/25/2020 Asia / Singapore                         |
| EPI_ISL_654812 | 11/12/2020 | 11/25/2020 Asia / Singapore                         |
| EPI_ISL_654813 | 11/11/2020 | 11/25/2020 Asia / Singapore                         |
| EPI_ISL_654814 | 11/11/2020 | 11/25/2020 Asia / Singapore                         |
| EPI_ISL_654815 | 11/11/2020 | 11/25/2020 Asia / Singapore                         |
| EPI_ISL_654816 | 11/13/2020 | 11/25/2020 Asia / Singapore                         |
| EPI_ISL_654817 | 11/11/2020 | 11/25/2020 Asia / Singapore                         |
| EPI_ISL_654818 | 8/6/2020   | 11/25/2020 Europe / Ukraine / Chernivtsi            |
| EPI_ISL_654819 | 8/6/2020   | 11/25/2020 Europe / Ukraine / Chernivtsi            |
| EPI_ISL_654820 | 8/4/2020   | 11/25/2020 Europe / Ukraine / Lutsk                 |
| EPI_ISL_654866 | 1/31/2020  | 11/25/2020 Asia / Vietnam / Ho Chi Minh City        |
| EPI_ISL_654867 | 3/16/2020  | 11/25/2020 Asia / Vietnam / Ho Chi Minh City        |
| EPI_ISL_654868 | 3/15/2020  | 11/25/2020 Asia / Vietnam / Ho Chi Minh City        |
| EPI_ISL_654869 | 3/18/2020  | 11/25/2020 Asia / Vietnam / Ho Chi Minh City        |
| EPI_ISL_654870 | 3/17/2020  | 11/25/2020 Asia / Vietnam / Ho Chi Minh City        |
| EPI_ISL_654872 | 3/20/2020  | 11/25/2020 Asia / Vietnam / Ho Chi Minh City        |
| EPI_ISL_654873 | 3/22/2020  | 11/25/2020 Asia / Vietnam / Ho Chi Minh City        |
| EPI_ISL_654874 | 3/24/2020  | 11/25/2020 Asia / Vietnam / Ho Chi Minh City        |
| EPI_ISL_654875 | 3/24/2020  | 11/25/2020 Asia / Vietnam / Ho Chi Minh City        |
| EPI_ISL_654876 | 3/22/2020  | 11/25/2020 Asia / Vietnam / Ho Chi Minh City        |
| EPI_ISL_654877 | 3/14/2020  | 11/25/2020 Asia / Vietnam / Ho Chi Minh City        |
| EPI_ISL_654878 | 3/18/2020  | 11/25/2020 Asia / Vietnam / Ho Chi Minh City        |
| EPI_ISL_654879 | 3/25/2020  | 11/25/2020 Asia / Vietnam / Ho Chi Minh City        |
| EPI_ISL_654881 | 4/1/2020   | 11/25/2020 Asia / Vietnam / Ho Chi Minh City        |
| EPI_ISL_654882 | 3/20/2020  | 11/25/2020 Asia / Vietnam / Ho Chi Minh City        |
| EPI_ISL_654883 | 4/23/2020  | 11/25/2020 Asia / Vietnam / Ho Chi Minh City        |
| EPI_ISL_654884 | 3/22/2020  | 11/25/2020 Asia / Vietnam / Ho Chi Minh City        |
| EPI_ISL_654885 | 3/16/2020  | 11/25/2020 Asia / Vietnam / Ho Chi Minh City        |
| EPI_ISL_654886 | 3/23/2020  | 11/25/2020 Asia / Vietnam / Ho Chi Minh City        |

|                |            |            |                                       |
|----------------|------------|------------|---------------------------------------|
| EPI_ISL_654887 | 3/28/2020  | 11/25/2020 | Asia / Vietnam / Ho Chi Minh City     |
| EPI_ISL_654888 | 3/18/2020  | 11/25/2020 | Asia / Vietnam / Ho Chi Minh City     |
| EPI_ISL_654889 | 3/24/2020  | 11/25/2020 | Asia / Vietnam / Ho Chi Minh City     |
| EPI_ISL_654890 | 3/8/2020   | 11/25/2020 | Asia / Vietnam / Ho Chi Minh City     |
| EPI_ISL_654891 | 3/11/2020  | 11/25/2020 | Asia / Vietnam / Ho Chi Minh City     |
| EPI_ISL_654892 | 8/4/2020   | 11/25/2020 | Europe / Sweden / Skane               |
| EPI_ISL_654893 | 9/17/2020  | 11/25/2020 | Europe / Sweden / Skane               |
| EPI_ISL_654894 | 9/17/2020  | 11/25/2020 | Europe / Sweden / Skane               |
| EPI_ISL_654895 | 9/17/2020  | 11/25/2020 | Europe / Sweden / Skane               |
| EPI_ISL_654896 | 9/17/2020  | 11/25/2020 | Europe / Sweden / Skane               |
| EPI_ISL_654897 | 9/17/2020  | 11/25/2020 | Europe / Sweden / Skane               |
| EPI_ISL_654898 | 9/17/2020  | 11/25/2020 | Europe / Sweden / Skane               |
| EPI_ISL_654899 | 7/7/2020   | 11/25/2020 | Europe / Sweden / Jonkoping           |
| EPI_ISL_654911 | 4/2/2020   | 11/25/2020 | North America / USA / Texas / Bexar   |
| EPI_ISL_654913 | 4/1/2020   | 11/25/2020 | North America / USA / Texas / Calhoun |
| EPI_ISL_654926 | 4/7/2020   | 11/25/2020 | North America / USA / Texas / Bexar   |
| EPI_ISL_654937 | 4/21/2020  | 11/25/2020 | North America / USA / Texas / Bandera |
| EPI_ISL_654942 | 8/4/2020   | 11/25/2020 | Europe / Sweden / Skane               |
| EPI_ISL_654943 | 7/14/2020  | 11/25/2020 | Europe / Sweden / Orebro              |
| EPI_ISL_654944 | 7/14/2020  | 11/25/2020 | Europe / Sweden / Jonkoping           |
| EPI_ISL_654945 | 8/20/2020  | 11/25/2020 | Europe / Sweden / Kronoberg           |
| EPI_ISL_654946 | 8/5/2020   | 11/25/2020 | Europe / Sweden / Kronoberg           |
| EPI_ISL_654947 | 8/6/2020   | 11/25/2020 | Europe / Sweden / Kronoberg           |
| EPI_ISL_654948 | 8/3/2020   | 11/25/2020 | Europe / Sweden / Kronoberg           |
| EPI_ISL_654949 | 8/6/2020   | 11/25/2020 | Europe / Sweden / Kronoberg           |
| EPI_ISL_654950 | 8/4/2020   | 11/25/2020 | Europe / Sweden / Kronoberg           |
| EPI_ISL_654951 | 8/17/2020  | 11/25/2020 | Europe / Sweden / Kronoberg           |
| EPI_ISL_654952 | 8/25/2020  | 11/25/2020 | Europe / Sweden / Ostergotland        |
| EPI_ISL_654953 | 3/20/2020  | 11/25/2020 | Europe / Sweden / Uppsala             |
| EPI_ISL_654954 | 8/29/2020  | 11/25/2020 | Europe / Sweden / Vastmanland         |
| EPI_ISL_654955 | 7/14/2020  | 11/25/2020 | Europe / Sweden / Vastra Gotaland     |
| EPI_ISL_654956 | 9/7/2020   | 11/25/2020 | Europe / Sweden / Vastra Gotaland     |
| EPI_ISL_654957 | 9/20/2020  | 11/25/2020 | Europe / Sweden / Vasternorrland      |
| EPI_ISL_654959 | 11/11/2020 | 11/25/2020 | Europe / United Kingdom / England     |
| EPI_ISL_654960 | 11/11/2020 | 11/25/2020 | Europe / United Kingdom / England     |
| EPI_ISL_654961 | 11/11/2020 | 11/25/2020 | Europe / United Kingdom / England     |
| EPI_ISL_654962 | 11/11/2020 | 11/25/2020 | Europe / United Kingdom / England     |
| EPI_ISL_654963 | 11/11/2020 | 11/25/2020 | Europe / United Kingdom / England     |
| EPI_ISL_654964 | 11/11/2020 | 11/25/2020 | Europe / United Kingdom / England     |
| EPI_ISL_654965 | 11/11/2020 | 11/25/2020 | Europe / United Kingdom / England     |
| EPI_ISL_654966 | 11/11/2020 | 11/25/2020 | Europe / United Kingdom / England     |
| EPI_ISL_654967 | 11/10/2020 | 11/25/2020 | Europe / United Kingdom / England     |
| EPI_ISL_654968 | 11/11/2020 | 11/25/2020 | Europe / United Kingdom / England     |
| EPI_ISL_654969 | 11/10/2020 | 11/25/2020 | Europe / United Kingdom / England     |
| EPI_ISL_654970 | 11/11/2020 | 11/25/2020 | Europe / United Kingdom / England     |
| EPI_ISL_654971 | 11/11/2020 | 11/25/2020 | Europe / United Kingdom / England     |
| EPI_ISL_654972 | 11/11/2020 | 11/25/2020 | Europe / United Kingdom / England     |









































































































































































|                |            |            |                                         |
|----------------|------------|------------|-----------------------------------------|
| EPI_ISL_658874 | 11/1/2020  | 11/25/2020 | Europe / United Kingdom / England       |
| EPI_ISL_658875 | 11/2/2020  | 11/25/2020 | North America / Mexico / Aguascalientes |
| EPI_ISL_658876 | 11/1/2020  | 11/25/2020 | Europe / United Kingdom / England       |
| EPI_ISL_658877 | 11/5/2020  | 11/25/2020 | Europe / United Kingdom / England       |
| EPI_ISL_658878 | 11/2/2020  | 11/25/2020 | North America / Mexico / Queretaro      |
| EPI_ISL_658879 | 11/2/2020  | 11/25/2020 | Europe / United Kingdom / England       |
| EPI_ISL_658880 | 11/2/2020  | 11/25/2020 | North America / Mexico / Aguascalientes |
| EPI_ISL_658881 | 11/5/2020  | 11/25/2020 | Europe / United Kingdom / England       |
| EPI_ISL_658882 | 11/1/2020  | 11/25/2020 | Europe / United Kingdom / England       |
| EPI_ISL_658883 | 11/2/2020  | 11/25/2020 | North America / Mexico / Aguascalientes |
| EPI_ISL_658884 | 11/1/2020  | 11/25/2020 | Europe / United Kingdom / England       |
| EPI_ISL_658885 | 11/5/2020  | 11/25/2020 | Europe / United Kingdom / England       |
| EPI_ISL_658886 | 11/3/2020  | 11/25/2020 | North America / Mexico / Queretaro      |
| EPI_ISL_658887 | 11/1/2020  | 11/25/2020 | Europe / United Kingdom / England       |
| EPI_ISL_658888 | 11/3/2020  | 11/25/2020 | North America / Mexico / Queretaro      |
| EPI_ISL_658889 | 11/1/2020  | 11/25/2020 | Europe / United Kingdom / England       |
| EPI_ISL_658891 | 11/1/2020  | 11/25/2020 | North America / Mexico / Aguascalientes |
| EPI_ISL_658892 | 11/1/2020  | 11/25/2020 | Europe / United Kingdom / England       |
| EPI_ISL_658893 | 11/3/2020  | 11/25/2020 | North America / Mexico / Queretaro      |
| EPI_ISL_658894 | 11/1/2020  | 11/25/2020 | Europe / United Kingdom / England       |
| EPI_ISL_658895 | 11/1/2020  | 11/25/2020 | Europe / United Kingdom / England       |
| EPI_ISL_658896 | 6/8/2020   | 11/25/2020 | North America / Mexico / Guerrero       |
| EPI_ISL_658897 | 11/1/2020  | 11/25/2020 | Europe / United Kingdom / England       |
| EPI_ISL_658898 | 11/1/2020  | 11/25/2020 | Europe / United Kingdom / England       |
| EPI_ISL_658900 | 11/5/2020  | 11/25/2020 | Europe / United Kingdom / England       |
| EPI_ISL_658901 | 9/7/2020   | 11/25/2020 | North America / Mexico / Guerrero       |
| EPI_ISL_658902 | 11/1/2020  | 11/25/2020 | Europe / United Kingdom / England       |
| EPI_ISL_658904 | 4/10/2020  | 11/25/2020 | North America / Mexico / Quintana Roo   |
| EPI_ISL_658905 | 11/5/2020  | 11/25/2020 | Europe / United Kingdom / England       |
| EPI_ISL_658907 | 11/1/2020  | 11/25/2020 | Europe / United Kingdom / England       |
| EPI_ISL_658908 | 11/2/2020  | 11/25/2020 | Europe / United Kingdom / England       |
| EPI_ISL_658909 | 11/5/2020  | 11/25/2020 | Europe / United Kingdom / England       |
| EPI_ISL_658910 | 10/31/2020 | 11/25/2020 | Europe / United Kingdom / England       |
| EPI_ISL_658911 | 11/1/2020  | 11/25/2020 | Europe / United Kingdom / England       |
| EPI_ISL_658912 | 11/5/2020  | 11/25/2020 | Europe / United Kingdom / England       |
| EPI_ISL_658913 | 11/5/2020  | 11/25/2020 | Europe / United Kingdom / England       |
| EPI_ISL_658914 | 11/5/2020  | 11/25/2020 | Europe / United Kingdom / England       |
| EPI_ISL_658915 | 11/1/2020  | 11/25/2020 | Europe / United Kingdom / England       |
| EPI_ISL_658916 | 11/5/2020  | 11/25/2020 | Europe / United Kingdom / England       |
| EPI_ISL_658918 | 11/1/2020  | 11/25/2020 | Europe / United Kingdom / England       |
| EPI_ISL_658920 | 11/1/2020  | 11/25/2020 | Europe / United Kingdom / England       |
| EPI_ISL_658921 | 11/5/2020  | 11/25/2020 | Europe / United Kingdom / England       |
| EPI_ISL_658922 | 11/2/2020  | 11/25/2020 | Europe / United Kingdom / England       |
| EPI_ISL_658923 | 11/5/2020  | 11/25/2020 | Europe / United Kingdom / England       |
| EPI_ISL_658924 | 11/1/2020  | 11/25/2020 | Europe / United Kingdom / England       |
| EPI_ISL_658925 | 11/5/2020  | 11/25/2020 | Europe / United Kingdom / England       |
| EPI_ISL_658926 | 11/1/2020  | 11/25/2020 | Europe / United Kingdom / England       |















































|                |            |            |                                          |
|----------------|------------|------------|------------------------------------------|
| EPI_ISL_660053 | 11/4/2020  | 11/25/2020 | Europe / United Kingdom / England        |
| EPI_ISL_660054 | 11/4/2020  | 11/25/2020 | Europe / United Kingdom / England        |
| EPI_ISL_660055 | 11/3/2020  | 11/25/2020 | Europe / United Kingdom / England        |
| EPI_ISL_660056 | 11/3/2020  | 11/25/2020 | Europe / United Kingdom / Scotland       |
| EPI_ISL_660057 | 11/3/2020  | 11/25/2020 | Europe / United Kingdom / England        |
| EPI_ISL_660058 | 11/2/2020  | 11/25/2020 | Europe / United Kingdom / England        |
| EPI_ISL_660059 | 11/3/2020  | 11/25/2020 | Europe / United Kingdom / England        |
| EPI_ISL_660060 | 11/4/2020  | 11/25/2020 | Europe / United Kingdom / England        |
| EPI_ISL_660061 | 11/4/2020  | 11/25/2020 | Europe / United Kingdom / England        |
| EPI_ISL_660062 | 11/4/2020  | 11/25/2020 | Europe / United Kingdom / England        |
| EPI_ISL_660064 | 11/4/2020  | 11/25/2020 | Europe / United Kingdom / England        |
| EPI_ISL_660065 | 11/3/2020  | 11/25/2020 | Europe / United Kingdom / England        |
| EPI_ISL_660067 | 11/4/2020  | 11/25/2020 | Europe / United Kingdom / England        |
| EPI_ISL_660068 | 11/1/2020  | 11/25/2020 | North America / Mexico / San Luis Potosi |
| EPI_ISL_660069 | 7/20/2020  | 11/25/2020 | South America / Ecuador / Quito          |
| EPI_ISL_660070 | 10/26/2020 | 11/25/2020 | South America / Ecuador / Quito          |
| EPI_ISL_660071 | 10/25/2020 | 11/25/2020 | North America / USA / Maryland           |
| EPI_ISL_660072 | 10/26/2020 | 11/25/2020 | North America / USA / Maryland           |
| EPI_ISL_660073 | 10/26/2020 | 11/25/2020 | North America / USA / Maryland           |
| EPI_ISL_660074 | 10/26/2020 | 11/25/2020 | North America / USA / Maryland           |
| EPI_ISL_660075 | 10/26/2020 | 11/25/2020 | North America / USA / Maryland           |
| EPI_ISL_660076 | 10/26/2020 | 11/25/2020 | North America / USA / Maryland           |
| EPI_ISL_660077 | 10/25/2020 | 11/25/2020 | North America / USA / Maryland           |
| EPI_ISL_660078 | 10/27/2020 | 11/25/2020 | North America / USA / Maryland           |
| EPI_ISL_660079 | 10/27/2020 | 11/25/2020 | North America / USA / Maryland           |
| EPI_ISL_660080 | 10/27/2020 | 11/25/2020 | North America / USA / Maryland           |
| EPI_ISL_660081 | 10/26/2020 | 11/25/2020 | North America / USA / Maryland           |
| EPI_ISL_660082 | 10/27/2020 | 11/25/2020 | North America / USA / Maryland           |
| EPI_ISL_660083 | 10/27/2020 | 11/25/2020 | North America / USA / Maryland           |
| EPI_ISL_660084 | 10/27/2020 | 11/25/2020 | North America / USA / Maryland           |
| EPI_ISL_660085 | 10/27/2020 | 11/25/2020 | North America / USA / Maryland           |
| EPI_ISL_660086 | 11/2/2020  | 11/25/2020 | North America / USA / Maryland           |
| EPI_ISL_660087 | 11/2/2020  | 11/25/2020 | North America / USA / Maryland           |
| EPI_ISL_660088 | 11/2/2020  | 11/25/2020 | North America / USA / Maryland           |
| EPI_ISL_660089 | 11/2/2020  | 11/25/2020 | North America / USA / Maryland           |
| EPI_ISL_660090 | 11/2/2020  | 11/25/2020 | North America / USA / Maryland           |
| EPI_ISL_660091 | 11/2/2020  | 11/25/2020 | North America / USA / Maryland           |
| EPI_ISL_660092 | 11/2/2020  | 11/25/2020 | North America / USA / Maryland           |
| EPI_ISL_660093 | 11/2/2020  | 11/25/2020 | North America / USA / Maryland           |
| EPI_ISL_660094 | 11/1/2020  | 11/25/2020 | North America / USA / Maryland           |
| EPI_ISL_660095 | 11/4/2020  | 11/25/2020 | North America / USA / Maryland           |
| EPI_ISL_660096 | 11/4/2020  | 11/25/2020 | North America / USA / Maryland           |
| EPI_ISL_660097 | 11/3/2020  | 11/25/2020 | North America / USA / Maryland           |
| EPI_ISL_660098 | 11/4/2020  | 11/25/2020 | North America / USA / Maryland           |
| EPI_ISL_660099 | 10/27/2020 | 11/25/2020 | North America / USA / Maryland           |
| EPI_ISL_660100 | 10/26/2020 | 11/25/2020 | North America / USA / Maryland           |
| EPI_ISL_660101 | 10/26/2020 | 11/25/2020 | North America / USA / Maryland           |



|                |            |            |                                                      |
|----------------|------------|------------|------------------------------------------------------|
| EPI_ISL_660102 | 10/26/2020 | 11/25/2020 | North America / USA / Maryland                       |
| EPI_ISL_660103 | 11/4/2020  | 11/25/2020 | North America / USA / Maryland                       |
| EPI_ISL_660104 | 10/26/2020 | 11/25/2020 | North America / USA / Maryland                       |
| EPI_ISL_660105 | 10/26/2020 | 11/25/2020 | North America / USA / Maryland                       |
| EPI_ISL_660109 | 6/4/2020   | 11/26/2020 | Asia / South Korea / Seoul                           |
| EPI_ISL_660110 | 6/7/2020   | 11/26/2020 | Asia / South Korea / Seoul                           |
| EPI_ISL_660121 | 10/7/2020  | 11/26/2020 | Africa / South Africa / Western Cape / Cape Town     |
| EPI_ISL_660122 | 10/8/2020  | 11/26/2020 | Africa / South Africa / Western Cape / Cape Town     |
| EPI_ISL_660124 | 10/7/2020  | 11/26/2020 | Africa / South Africa / Western Cape / Cape Town     |
| EPI_ISL_660127 | 10/9/2020  | 11/26/2020 | Africa / South Africa / Western Cape / Cape Town     |
| EPI_ISL_660139 | 10/9/2020  | 11/26/2020 | Africa / South Africa / Western Cape / Cape Town     |
| EPI_ISL_660141 | 10/10/2020 | 11/26/2020 | Africa / South Africa / Western Cape / Cape Town     |
| EPI_ISL_660143 | 10/9/2020  | 11/26/2020 | Africa / South Africa / Western Cape / Cape Town     |
| EPI_ISL_660144 | 10/9/2020  | 11/26/2020 | Africa / South Africa / Western Cape / Cape Town     |
| EPI_ISL_660145 | 10/9/2020  | 11/26/2020 | Africa / South Africa / Western Cape / Cape Town     |
| EPI_ISL_660146 | 10/9/2020  | 11/26/2020 | Africa / South Africa / Western Cape / Cape Town     |
| EPI_ISL_660148 | 10/9/2020  | 11/26/2020 | Africa / South Africa / Western Cape / Cape Town     |
| EPI_ISL_660150 | 10/9/2020  | 11/26/2020 | Africa / South Africa / Western Cape / Cape Town     |
| EPI_ISL_660152 | 10/9/2020  | 11/26/2020 | Africa / South Africa / Western Cape / Cape Town     |
| EPI_ISL_660154 | 10/12/2020 | 11/26/2020 | Africa / South Africa / Western Cape / Cape Town     |
| EPI_ISL_660157 | 10/16/2020 | 11/26/2020 | Africa / South Africa / Western Cape / Cape Town     |
| EPI_ISL_660158 | 10/10/2020 | 11/26/2020 | Africa / South Africa / Western Cape / Cape Town     |
| EPI_ISL_660159 | 11/5/2020  | 11/26/2020 | Africa / South Africa / KwaZulu-Natal / eThekwini    |
| EPI_ISL_660160 | 11/5/2020  | 11/26/2020 | Africa / South Africa / KwaZulu-Natal / eThekwini    |
| EPI_ISL_660161 | 11/5/2020  | 11/26/2020 | Africa / South Africa / KwaZulu-Natal / eThekwini    |
| EPI_ISL_660162 | 11/5/2020  | 11/26/2020 | Africa / South Africa / KwaZulu-Natal / eThekwini    |
| EPI_ISL_660163 | 11/5/2020  | 11/26/2020 | Africa / South Africa / KwaZulu-Natal / eThekwini    |
| EPI_ISL_660164 | 11/5/2020  | 11/26/2020 | Africa / South Africa / KwaZulu-Natal / eThekwini    |
| EPI_ISL_660165 | 6/25/2020  | 11/26/2020 | Africa / South Africa / KwaZulu-Natal / eThekwini    |
| EPI_ISL_660166 | 7/2/2020   | 11/26/2020 | Africa / South Africa / KwaZulu-Natal / eThekwini    |
| EPI_ISL_660168 | 7/29/2020  | 11/26/2020 | Africa / South Africa / KwaZulu-Natal / eThekwini    |
| EPI_ISL_660169 | 7/8/2020   | 11/26/2020 | Africa / South Africa / KwaZulu-Natal / eThekwini    |
| EPI_ISL_660171 | 7/29/2020  | 11/26/2020 | Africa / South Africa / KwaZulu-Natal / eThekwini    |
| EPI_ISL_660172 | 7/17/2020  | 11/26/2020 | Africa / South Africa / KwaZulu-Natal / eThekwini    |
| EPI_ISL_660173 | 7/24/2020  | 11/26/2020 | Africa / South Africa / KwaZulu-Natal / eThekwini    |
| EPI_ISL_660174 | 7/24/2020  | 11/26/2020 | Africa / South Africa / KwaZulu-Natal / eThekwini    |
| EPI_ISL_660175 | 7/27/2020  | 11/26/2020 | Africa / South Africa / KwaZulu-Natal / eThekwini    |
| EPI_ISL_660176 | 7/28/2020  | 11/26/2020 | Africa / South Africa / KwaZulu-Natal / eThekwini    |
| EPI_ISL_660181 | 8/18/2020  | 11/26/2020 | Africa / South Africa / KwaZulu-Natal / eThekwini    |
| EPI_ISL_660185 | 10/5/2020  | 11/26/2020 | Africa / South Africa / KwaZulu-Natal / eThekwini    |
| EPI_ISL_660189 | 10/26/2020 | 11/26/2020 | Africa / South Africa / KwaZulu-Natal / uMkhanyakude |
| EPI_ISL_660190 | 10/23/2020 | 11/26/2020 | Africa / South Africa / KwaZulu-Natal / Harry Gwala  |
| EPI_ISL_660191 | 10/25/2020 | 11/26/2020 | Africa / South Africa / KwaZulu-Natal / Ugu          |
| EPI_ISL_660192 | 10/27/2020 | 11/26/2020 | Africa / South Africa / KwaZulu-Natal / Harry Gwala  |
| EPI_ISL_660193 | 10/26/2020 | 11/26/2020 | Africa / South Africa / KwaZulu-Natal / Ugu          |
| EPI_ISL_660194 | 10/26/2020 | 11/26/2020 | Africa / South Africa / KwaZulu-Natal / Ugu          |
| EPI_ISL_660195 | 10/26/2020 | 11/26/2020 | Africa / South Africa / KwaZulu-Natal / Ugu          |





|                |            |            |                                                              |
|----------------|------------|------------|--------------------------------------------------------------|
| EPI_ISL_660294 | 8/7/2020   | 11/26/2020 | Europe / Spain / Catalunya / Badalona                        |
| EPI_ISL_660295 | 8/7/2020   | 11/26/2020 | Europe / Spain / Catalunya / Badalona                        |
| EPI_ISL_660296 | 8/8/2020   | 11/26/2020 | Europe / Spain / Catalunya / Badalona                        |
| EPI_ISL_660297 | 8/9/2020   | 11/26/2020 | Europe / Spain / Catalunya / Badalona                        |
| EPI_ISL_660298 | 8/8/2020   | 11/26/2020 | Europe / Spain / Catalunya / Badalona                        |
| EPI_ISL_660299 | 8/8/2020   | 11/26/2020 | Europe / Spain / Catalunya / Badalona                        |
| EPI_ISL_660300 | 8/8/2020   | 11/26/2020 | Europe / Spain / Catalunya / Badalona                        |
| EPI_ISL_660301 | 8/8/2020   | 11/26/2020 | Europe / Spain / Catalunya / Badalona                        |
| EPI_ISL_660302 | 8/8/2020   | 11/26/2020 | Europe / Spain / Catalunya / Badalona                        |
| EPI_ISL_660303 | 8/8/2020   | 11/26/2020 | Europe / Spain / Catalunya / Badalona                        |
| EPI_ISL_660304 | 9/4/2020   | 11/26/2020 | Europe / Spain / Catalunya / Badalona                        |
| EPI_ISL_660305 | 8/9/2020   | 11/26/2020 | Europe / Spain / Catalunya / Badalona                        |
| EPI_ISL_660306 | 8/8/2020   | 11/26/2020 | Europe / Spain / Catalunya / Badalona                        |
| EPI_ISL_660307 | 8/8/2020   | 11/26/2020 | Europe / Spain / Catalunya / Badalona                        |
| EPI_ISL_660308 | 8/10/2020  | 11/26/2020 | Europe / Spain / Catalunya / Badalona                        |
| EPI_ISL_660309 | 8/10/2020  | 11/26/2020 | Europe / Spain / Catalunya / Badalona                        |
| EPI_ISL_660310 | 8/10/2020  | 11/26/2020 | Europe / Spain / Catalunya / Badalona                        |
| EPI_ISL_660311 | 8/10/2020  | 11/26/2020 | Europe / Spain / Catalunya / Badalona                        |
| EPI_ISL_660312 | 8/10/2020  | 11/26/2020 | Europe / Spain / Catalunya / Badalona                        |
| EPI_ISL_660313 | 8/11/2020  | 11/26/2020 | Europe / Spain / Catalunya / Badalona                        |
| EPI_ISL_660314 | 9/15/2020  | 11/26/2020 | Europe / Spain / Catalunya / Badalona                        |
| EPI_ISL_660315 | 8/11/2020  | 11/26/2020 | Europe / Spain / Catalunya / Badalona                        |
| EPI_ISL_660316 | 8/11/2020  | 11/26/2020 | Europe / Spain / Catalunya / Badalona                        |
| EPI_ISL_660318 | 8/11/2020  | 11/26/2020 | Europe / Spain / Catalunya / Badalona                        |
| EPI_ISL_660319 | 8/12/2020  | 11/26/2020 | Europe / Spain / Catalunya / Badalona                        |
| EPI_ISL_660320 | 8/12/2020  | 11/26/2020 | Europe / Spain / Catalunya / Badalona                        |
| EPI_ISL_660321 | 8/13/2020  | 11/26/2020 | Europe / Spain / Catalunya / Badalona                        |
| EPI_ISL_660322 | 9/4/2020   | 11/26/2020 | Europe / Spain / Catalunya / Badalona                        |
| EPI_ISL_660323 | 10/27/2020 | 11/26/2020 | Europe / France / Centre-Val de Loire / Angers               |
| EPI_ISL_660324 | 11/2/2020  | 11/26/2020 | Europe / France / Centre-Val de Loire / Rouziers-de-Touraine |
| EPI_ISL_660325 | 11/2/2020  | 11/26/2020 | Europe / France / Île-de-France / Villeneuve st Georges      |
| EPI_ISL_660326 | 3/23/2020  | 11/26/2020 | Europe / France / Auvergne-Rhone-Alpes / Saint-Etienne       |
| EPI_ISL_660327 | 3/23/2020  | 11/26/2020 | Europe / France / Auvergne-Rhone-Alpes / Saint-Etienne       |
| EPI_ISL_660328 | 3/23/2020  | 11/26/2020 | Europe / France / Auvergne-Rhone-Alpes / Saint-Etienne       |
| EPI_ISL_660329 | 3/24/2020  | 11/26/2020 | Europe / France / Auvergne-Rhone-Alpes / Saint-Etienne       |
| EPI_ISL_660330 | 3/24/2020  | 11/26/2020 | Europe / France / Auvergne-Rhone-Alpes / Saint-Etienne       |
| EPI_ISL_660331 | 3/25/2020  | 11/26/2020 | Europe / France / Auvergne-Rhone-Alpes / Saint-Etienne       |
| EPI_ISL_660332 | 3/26/2020  | 11/26/2020 | Europe / France / Auvergne-Rhone-Alpes / Saint-Etienne       |
| EPI_ISL_660333 | 4/7/2020   | 11/26/2020 | Europe / France / Auvergne-Rhone-Alpes / Saint-Etienne       |
| EPI_ISL_660334 | 3/2/2020   | 11/26/2020 | Europe / France / Auvergne-Rhone-Alpes / Saint-Etienne       |
| EPI_ISL_660335 | 3/11/2020  | 11/26/2020 | Europe / France / Auvergne-Rhone-Alpes / Saint-Etienne       |
| EPI_ISL_660336 | 3/12/2020  | 11/26/2020 | Europe / France / Auvergne-Rhone-Alpes / Saint-Etienne       |
| EPI_ISL_660337 | 3/14/2020  | 11/26/2020 | Europe / France / Auvergne-Rhone-Alpes / Saint-Etienne       |
| EPI_ISL_660338 | 3/15/2020  | 11/26/2020 | Europe / France / Auvergne-Rhone-Alpes / Saint-Etienne       |
| EPI_ISL_660339 | 3/15/2020  | 11/26/2020 | Europe / France / Auvergne-Rhone-Alpes / Saint-Etienne       |
| EPI_ISL_660340 | 3/15/2020  | 11/26/2020 | Europe / France / Auvergne-Rhone-Alpes / Saint-Etienne       |
| EPI_ISL_660341 | 3/18/2020  | 11/26/2020 | Europe / France / Auvergne-Rhone-Alpes / Saint-Etienne       |

|                |           |            |                                                           |
|----------------|-----------|------------|-----------------------------------------------------------|
| EPI_ISL_660342 | 4/11/2020 | 11/26/2020 | Europe / France / Auvergne-Rhone-Alpes / Saint-Etienne    |
| EPI_ISL_660343 | 4/15/2020 | 11/26/2020 | Europe / France / Auvergne-Rhone-Alpes / Saint-Etienne    |
| EPI_ISL_660344 | 3/8/2020  | 11/26/2020 | Europe / France / Auvergne-Rhone-Alpes / Saint-Etienne    |
| EPI_ISL_660345 | 3/7/2020  | 11/26/2020 | Europe / France / Auvergne-Rhone-Alpes / Saint-Etienne    |
| EPI_ISL_660346 | 3/7/2020  | 11/26/2020 | Europe / France / Auvergne-Rhone-Alpes / Saint-Etienne    |
| EPI_ISL_660347 | 3/7/2020  | 11/26/2020 | Europe / France / Auvergne-Rhone-Alpes / Saint-Etienne    |
| EPI_ISL_660348 | 3/7/2020  | 11/26/2020 | Europe / France / Auvergne-Rhone-Alpes / Saint-Etienne    |
| EPI_ISL_660349 | 3/8/2020  | 11/26/2020 | Europe / France / Auvergne-Rhone-Alpes / Saint-Etienne    |
| EPI_ISL_660350 | 4/29/2020 | 11/26/2020 | Europe / France / Auvergne-Rhone-Alpes / Saint-Etienne    |
| EPI_ISL_660351 | 5/14/2020 | 11/26/2020 | Europe / France / Auvergne-Rhone-Alpes / Saint-Etienne    |
| EPI_ISL_660352 | 5/14/2020 | 11/26/2020 | Europe / France / Auvergne-Rhone-Alpes / Saint-Etienne    |
| EPI_ISL_660353 | 3/11/2020 | 11/26/2020 | Europe / France / Auvergne-Rhone-Alpes / Clermond-Ferrand |
| EPI_ISL_660354 | 3/14/2020 | 11/26/2020 | Europe / France / Auvergne-Rhone-Alpes / Clermond-Ferrand |
| EPI_ISL_660355 | 3/14/2020 | 11/26/2020 | Europe / France / Auvergne-Rhone-Alpes / Clermond-Ferrand |
| EPI_ISL_660356 | 3/16/2020 | 11/26/2020 | Europe / France / Auvergne-Rhone-Alpes / Clermond-Ferrand |
| EPI_ISL_660357 | 3/17/2020 | 11/26/2020 | Europe / France / Auvergne-Rhone-Alpes / Clermond-Ferrand |
| EPI_ISL_660358 | 3/17/2020 | 11/26/2020 | Europe / France / Auvergne-Rhone-Alpes / Clermond-Ferrand |
| EPI_ISL_660359 | 3/22/2020 | 11/26/2020 | Europe / France / Auvergne-Rhone-Alpes / Clermond-Ferrand |
| EPI_ISL_660360 | 3/28/2020 | 11/26/2020 | Europe / France / Auvergne-Rhone-Alpes / Clermond-Ferrand |
| EPI_ISL_660361 | 4/5/2020  | 11/26/2020 | Europe / France / Auvergne-Rhone-Alpes / Clermond-Ferrand |
| EPI_ISL_660362 | 4/9/2020  | 11/26/2020 | Europe / France / Auvergne-Rhone-Alpes / Clermond-Ferrand |
| EPI_ISL_660363 | 4/14/2020 | 11/26/2020 | Europe / France / Auvergne-Rhone-Alpes / Clermond-Ferrand |
| EPI_ISL_660364 | 4/15/2020 | 11/26/2020 | Europe / France / Auvergne-Rhone-Alpes / Clermond-Ferrand |
| EPI_ISL_660365 | 4/21/2020 | 11/26/2020 | Europe / France / Auvergne-Rhone-Alpes / Clermond-Ferrand |
| EPI_ISL_660366 | 4/22/2020 | 11/26/2020 | Europe / France / Auvergne-Rhone-Alpes / Clermond-Ferrand |
| EPI_ISL_660367 | 4/26/2020 | 11/26/2020 | Europe / France / Auvergne-Rhone-Alpes / Clermond-Ferrand |
| EPI_ISL_660368 | 5/2/2020  | 11/26/2020 | Europe / France / Auvergne-Rhone-Alpes / Clermond-Ferrand |
| EPI_ISL_660369 | 5/7/2020  | 11/26/2020 | Europe / France / Auvergne-Rhone-Alpes / Clermond-Ferrand |
| EPI_ISL_660370 | 5/11/2020 | 11/26/2020 | Europe / France / Auvergne-Rhone-Alpes / Clermond-Ferrand |
| EPI_ISL_660371 | 5/25/2020 | 11/26/2020 | Europe / France / Auvergne-Rhone-Alpes / Clermond-Ferrand |
| EPI_ISL_660372 | 4/28/2020 | 11/26/2020 | Europe / France / Nouvelle-Aquitaine / Bordeaux           |
| EPI_ISL_660373 | 3/14/2020 | 11/26/2020 | Europe / France / Occitanie / Toulouse                    |
| EPI_ISL_660374 | 4/11/2020 | 11/26/2020 | Europe / France / Occitanie / Toulouse                    |
| EPI_ISL_660375 | 4/11/2020 | 11/26/2020 | Europe / France / Occitanie / Toulouse                    |
| EPI_ISL_660376 | 4/12/2020 | 11/26/2020 | Europe / France / Occitanie / Toulouse                    |
| EPI_ISL_660377 | 4/12/2020 | 11/26/2020 | Europe / France / Occitanie / Toulouse                    |
| EPI_ISL_660378 | 4/1/2020  | 11/26/2020 | Europe / Sweden / Orebro                                  |
| EPI_ISL_660379 | 8/25/2020 | 11/26/2020 | Europe / Sweden / Orebro                                  |
| EPI_ISL_660380 | 4/2/2020  | 11/26/2020 | Europe / Sweden / Orebro                                  |
| EPI_ISL_660381 | 4/2/2020  | 11/26/2020 | Europe / Sweden / Orebro                                  |
| EPI_ISL_660382 | 4/4/2020  | 11/26/2020 | Europe / Sweden / Orebro                                  |
| EPI_ISL_660383 | 4/1/2020  | 11/26/2020 | Europe / Sweden / Orebro                                  |
| EPI_ISL_660384 | 3/12/2020 | 11/26/2020 | Europe / Sweden / Ostergotland                            |
| EPI_ISL_660385 | 3/18/2020 | 11/26/2020 | Europe / Sweden / Ostergotland                            |
| EPI_ISL_660386 | 3/20/2020 | 11/26/2020 | Europe / Sweden / Ostergotland                            |
| EPI_ISL_660387 | 3/20/2020 | 11/26/2020 | Europe / Sweden / Ostergotland                            |
| EPI_ISL_660388 | 3/23/2020 | 11/26/2020 | Europe / Sweden / Ostergotland                            |

|                |           |            |                                                        |
|----------------|-----------|------------|--------------------------------------------------------|
| EPI_ISL_660389 | 3/25/2020 | 11/26/2020 | Europe / Sweden / Ostergotland                         |
| EPI_ISL_660390 | 3/27/2020 | 11/26/2020 | Europe / Sweden / Ostergotland                         |
| EPI_ISL_660391 | 3/26/2020 | 11/26/2020 | Europe / Sweden / Ostergotland                         |
| EPI_ISL_660392 | 3/27/2020 | 11/26/2020 | Europe / Sweden / Ostergotland                         |
| EPI_ISL_660393 | 3/28/2020 | 11/26/2020 | Europe / Sweden / Ostergotland                         |
| EPI_ISL_660394 | 3/29/2020 | 11/26/2020 | Europe / Sweden / Ostergotland                         |
| EPI_ISL_660395 | 3/31/2020 | 11/26/2020 | Europe / Sweden / Ostergotland                         |
| EPI_ISL_660396 | 3/31/2020 | 11/26/2020 | Europe / Sweden / Ostergotland                         |
| EPI_ISL_660397 | 4/1/2020  | 11/26/2020 | Europe / Sweden / Ostergotland                         |
| EPI_ISL_660398 | 4/1/2020  | 11/26/2020 | Europe / Sweden / Ostergotland                         |
| EPI_ISL_660399 | 4/1/2020  | 11/26/2020 | Europe / Sweden / Ostergotland                         |
| EPI_ISL_660400 | 4/2/2020  | 11/26/2020 | Europe / Sweden / Ostergotland                         |
| EPI_ISL_660401 | 4/2/2020  | 11/26/2020 | Europe / Sweden / Ostergotland                         |
| EPI_ISL_660402 | 4/3/2020  | 11/26/2020 | Europe / Sweden / Ostergotland                         |
| EPI_ISL_660403 | 4/4/2020  | 11/26/2020 | Europe / Sweden / Ostergotland                         |
| EPI_ISL_660404 | 4/5/2020  | 11/26/2020 | Europe / Sweden / Ostergotland                         |
| EPI_ISL_660405 | 4/6/2020  | 11/26/2020 | Europe / Sweden / Ostergotland                         |
| EPI_ISL_660406 | 4/6/2020  | 11/26/2020 | Europe / Sweden / Ostergotland                         |
| EPI_ISL_660407 | 4/7/2020  | 11/26/2020 | Europe / Sweden / Ostergotland                         |
| EPI_ISL_660408 | 4/7/2020  | 11/26/2020 | Europe / Sweden / Ostergotland                         |
| EPI_ISL_660409 | 4/7/2020  | 11/26/2020 | Europe / Sweden / Ostergotland                         |
| EPI_ISL_660410 | 4/7/2020  | 11/26/2020 | Europe / Sweden / Ostergotland                         |
| EPI_ISL_660411 | 4/8/2020  | 11/26/2020 | Europe / Sweden / Ostergotland                         |
| EPI_ISL_660412 | 4/10/2020 | 11/26/2020 | Europe / Sweden / Ostergotland                         |
| EPI_ISL_660413 | 4/10/2020 | 11/26/2020 | Europe / Sweden / Ostergotland                         |
| EPI_ISL_660414 | 4/10/2020 | 11/26/2020 | Europe / Sweden / Ostergotland                         |
| EPI_ISL_660415 | 6/22/2020 | 11/26/2020 | Europe / Sweden / Norrbotten                           |
| EPI_ISL_660416 | 5/25/2020 | 11/26/2020 | Europe / Sweden / Orebro                               |
| EPI_ISL_660417 | 5/25/2020 | 11/26/2020 | Europe / Sweden / Orebro                               |
| EPI_ISL_660418 | 5/22/2020 | 11/26/2020 | Europe / Sweden / Orebro                               |
| EPI_ISL_660419 | 5/22/2020 | 11/26/2020 | Europe / Sweden / Orebro                               |
| EPI_ISL_660420 | 6/2/2020  | 11/26/2020 | Europe / Sweden / Orebro                               |
| EPI_ISL_660421 | 6/2/2020  | 11/26/2020 | Europe / Sweden / Orebro                               |
| EPI_ISL_660422 | 9/23/2020 | 11/26/2020 | Europe / Sweden / Orebro                               |
| EPI_ISL_660423 | 9/23/2020 | 11/26/2020 | Europe / Sweden / Orebro                               |
| EPI_ISL_660424 | 9/23/2020 | 11/26/2020 | Europe / Sweden / Orebro                               |
| EPI_ISL_660425 | 9/23/2020 | 11/26/2020 | Europe / Sweden / Orebro                               |
| EPI_ISL_660426 | 8/31/2020 | 11/26/2020 | Europe / Sweden / Orebro                               |
| EPI_ISL_660427 | 9/10/2020 | 11/26/2020 | Europe / Sweden / Vastmanland                          |
| EPI_ISL_660428 | 9/10/2020 | 11/26/2020 | Europe / Sweden / Vastmanland                          |
| EPI_ISL_660429 | 9/4/2020  | 11/26/2020 | Europe / Sweden / Vastmanland                          |
| EPI_ISL_660430 | 9/7/2020  | 11/26/2020 | Europe / Sweden / Vastmanland                          |
| EPI_ISL_660431 | 9/12/2020 | 11/26/2020 | Europe / Sweden / Vastmanland                          |
| EPI_ISL_660432 | 4/23/2020 | 11/26/2020 | Europe / France / Auvergne-Rhone-Alpes / Saint-Etienne |
| EPI_ISL_660435 | 7/16/2020 | 11/26/2020 | Europe / Russia / Moscow                               |
| EPI_ISL_660436 | 7/16/2020 | 11/26/2020 | Europe / Russia / Moscow                               |
| EPI_ISL_660437 | 8/24/2020 | 11/26/2020 | Europe / Russia / Moscow                               |

|                |            |                                                   |
|----------------|------------|---------------------------------------------------|
| EPI_ISL_660438 | 8/24/2020  | 11/26/2020 Europe / Russia / Moscow               |
| EPI_ISL_660446 | 7/21/2020  | 11/26/2020 Africa / Burkina Faso / Gaoua          |
| EPI_ISL_660447 | 8/7/2020   | 11/26/2020 Africa / Burkina Faso / Bobo Dioulasso |
| EPI_ISL_660448 | 8/14/2020  | 11/26/2020 Africa / Burkina Faso / Bobo Dioulasso |
| EPI_ISL_660449 | 8/14/2020  | 11/26/2020 Africa / Burkina Faso / Bobo Dioulasso |
| EPI_ISL_660450 | 5/8/2020   | 11/26/2020 Africa / Burkina Faso / Bobo Dioulasso |
| EPI_ISL_660451 | 5/10/2020  | 11/26/2020 Africa / Burkina Faso / Bobo Dioulasso |
| EPI_ISL_660452 | 11/4/2020  | 11/26/2020 Africa / Burkina Faso / Bobo Dioulasso |
| EPI_ISL_660453 | 8/14/2020  | 11/26/2020 Africa / Burkina Faso / Bobo Dioulasso |
| EPI_ISL_660454 | 8/10/2020  | 11/26/2020 Africa / Burkina Faso / Bobo Dioulasso |
| EPI_ISL_660455 | 8/12/2020  | 11/26/2020 Africa / Burkina Faso / Bobo Dioulasso |
| EPI_ISL_660456 | 9/12/2020  | 11/26/2020 Africa / Burkina Faso / Bobo Dioulasso |
| EPI_ISL_660457 | 9/6/2020   | 11/26/2020 Africa / Burkina Faso / Bobo Dioulasso |
| EPI_ISL_660458 | 9/11/2020  | 11/26/2020 Africa / Burkina Faso / Bobo Dioulasso |
| EPI_ISL_660459 | 9/14/2020  | 11/26/2020 Africa / Burkina Faso / Bobo Dioulasso |
| EPI_ISL_660460 | 9/16/2020  | 11/26/2020 Africa / Burkina Faso / Bobo Dioulasso |
| EPI_ISL_660461 | 9/16/2020  | 11/26/2020 Africa / Burkina Faso / Bobo Dioulasso |
| EPI_ISL_660462 | 9/17/2020  | 11/26/2020 Africa / Burkina Faso / Bobo Dioulasso |
| EPI_ISL_660463 | 9/17/2020  | 11/26/2020 Africa / Burkina Faso / HoundÃ©        |
| EPI_ISL_660464 | 9/21/2020  | 11/26/2020 Africa / Burkina Faso / Bobo Dioulasso |
| EPI_ISL_660465 | 9/24/2020  | 11/26/2020 Africa / Burkina Faso / Bobo Dioulasso |
| EPI_ISL_660466 | 9/25/2020  | 11/26/2020 Africa / Burkina Faso / Bobo Dioulasso |
| EPI_ISL_660467 | 9/28/2020  | 11/26/2020 Africa / Burkina Faso / Bobo Dioulasso |
| EPI_ISL_660468 | 10/9/2020  | 11/26/2020 Africa / Burkina Faso / Bobo Dioulasso |
| EPI_ISL_660469 | 8/14/2020  | 11/26/2020 Africa / Burkina Faso / Bobo Dioulasso |
| EPI_ISL_660470 | 10/24/2020 | 11/26/2020 Africa / Burkina Faso / Banfora        |
| EPI_ISL_660471 | 10/27/2020 | 11/26/2020 Africa / Burkina Faso / Bobo Dioulasso |
| EPI_ISL_660472 | 10/27/2020 | 11/26/2020 Africa / Burkina Faso / Bobo Dioulasso |
| EPI_ISL_660473 | 11/3/2020  | 11/26/2020 Africa / Burkina Faso / Bobo Dioulasso |
| EPI_ISL_660474 | 6/21/2020  | 11/26/2020 Africa / Burkina Faso / BatiÃ©         |
| EPI_ISL_660475 | 6/21/2020  | 11/26/2020 Africa / Burkina Faso / Batie          |
| EPI_ISL_660476 | 6/21/2020  | 11/26/2020 Africa / Burkina Faso / BatiÃ©         |
| EPI_ISL_660477 | 6/21/2020  | 11/26/2020 Africa / Burkina Faso / BatiÃ©         |
| EPI_ISL_660478 | 7/23/2020  | 11/26/2020 Africa / Burkina Faso / Bobo Dioulasso |
| EPI_ISL_660479 | 7/25/2020  | 11/26/2020 Africa / Burkina Faso / Bobo Dioulasso |
| EPI_ISL_660480 | 9/9/2020   | 11/26/2020 Africa / Burkina Faso / Bobo Dioulasso |
| EPI_ISL_660481 | 9/11/2020  | 11/26/2020 Africa / Burkina Faso / Nâ€™Dorola     |
| EPI_ISL_660482 | 9/11/2020  | 11/26/2020 Africa / Burkina Faso / Bobo Dioulasso |
| EPI_ISL_660483 | 9/11/2020  | 11/26/2020 Africa / Burkina Faso / Nâ€™Dorola     |
| EPI_ISL_660484 | 9/11/2020  | 11/26/2020 Africa / Burkina Faso / Nâ€™Dorola     |
| EPI_ISL_660485 | 9/11/2020  | 11/26/2020 Africa / Burkina Faso / Nâ€™Dorola     |
| EPI_ISL_660486 | 9/11/2020  | 11/26/2020 Africa / Burkina Faso / Nâ€™Dorola     |
| EPI_ISL_660487 | 9/11/2020  | 11/26/2020 Africa / Burkina Faso / Bobo Dioulasso |
| EPI_ISL_660488 | 10/9/2020  | 11/26/2020 Africa / Burkina Faso / Bobo Dioulasso |
| EPI_ISL_660489 | 10/19/2020 | 11/26/2020 Africa / Burkina Faso / Bobo Dioulasso |
| EPI_ISL_660490 | 8/12/2020  | 11/26/2020 Africa / Burkina Faso / HoundÃ©        |
| EPI_ISL_660491 | 9/9/2020   | 11/26/2020 Africa / Burkina Faso / Bobo Dioulasso |

|                |            |                                                                         |
|----------------|------------|-------------------------------------------------------------------------|
| EPI_ISL_660492 | 8/13/2020  | 11/26/2020 Africa / Burkina Faso / HoundÃ©                              |
| EPI_ISL_660493 | 8/13/2020  | 11/26/2020 Africa / Burkina Faso / HoundÃ©                              |
| EPI_ISL_660494 | 9/16/2020  | 11/26/2020 Africa / Burkina Faso / Bobo Dioulasso                       |
| EPI_ISL_660495 | 10/22/2020 | 11/26/2020 Africa / Burkina Faso / Bobo Dioulasso                       |
| EPI_ISL_660529 | 10/1/2020  | 11/26/2020 South America / Ecuador / Tungurahua / Ambato                |
| EPI_ISL_660530 | 10/1/2020  | 11/26/2020 South America / Ecuador / Tungurahua / Ambato                |
| EPI_ISL_660531 | 10/1/2020  | 11/26/2020 South America / Ecuador / Tungurahua / Ambato                |
| EPI_ISL_660532 | 10/2/2020  | 11/26/2020 South America / Ecuador / Pastaza / Puyo                     |
| EPI_ISL_660533 | 10/5/2020  | 11/26/2020 South America / Ecuador / Cotopaxi / Latacunga               |
| EPI_ISL_660534 | 10/5/2020  | 11/26/2020 South America / Ecuador / Cotopaxi / Latacunga               |
| EPI_ISL_660535 | 10/10/2020 | 11/26/2020 South America / Ecuador / El Oro / Machala                   |
| EPI_ISL_660536 | 10/10/2020 | 11/26/2020 South America / Ecuador / El Oro / Machala                   |
| EPI_ISL_660537 | 10/10/2020 | 11/26/2020 South America / Ecuador / El Oro / Machala                   |
| EPI_ISL_660538 | 10/10/2020 | 11/26/2020 South America / Ecuador / El Oro / Machala                   |
| EPI_ISL_660539 | 10/2/2020  | 11/26/2020 South America / Ecuador / Pastaza / Puyo                     |
| EPI_ISL_660541 | 1/31/2020  | 11/27/2020 Asia / Vietnam / Vinh Phuc                                   |
| EPI_ISL_660542 | 3/21/2020  | 11/27/2020 Asia / Vietnam                                               |
| EPI_ISL_660543 | 7/31/2020  | 11/27/2020 Asia / Taiwan / Taoyuan                                      |
| EPI_ISL_660544 | 9/6/2020   | 11/27/2020 Asia / Taiwan / Taoyuan                                      |
| EPI_ISL_660545 | 10/4/2020  | 11/27/2020 Asia / Taiwan / Taoyuan                                      |
| EPI_ISL_660547 | 10/21/2020 | 11/27/2020 Europe / United Kingdom / England                            |
| EPI_ISL_660548 | 10/22/2020 | 11/27/2020 Europe / United Kingdom / England                            |
| EPI_ISL_660549 | 10/23/2020 | 11/27/2020 Europe / United Kingdom / England                            |
| EPI_ISL_660553 | 10/21/2020 | 11/27/2020 Europe / Czech Republic / Prague                             |
| EPI_ISL_660554 | 9/24/2020  | 11/27/2020 Europe / Czech Republic / South Moravian Region / Brno       |
| EPI_ISL_660555 | 10/22/2020 | 11/27/2020 Europe / Czech Republic                                      |
| EPI_ISL_660556 | 10/22/2020 | 11/27/2020 Europe / Czech Republic / Central Bohemian Region / Kutna H  |
| EPI_ISL_660557 | 10/22/2020 | 11/27/2020 Europe / Czech Republic / Prague                             |
| EPI_ISL_660558 | 9/29/2020  | 11/27/2020 Europe / Czech Republic / South Moravian Region / Brno       |
| EPI_ISL_660559 | 10/15/2020 | 11/27/2020 Europe / Czech Republic / Prague                             |
| EPI_ISL_660560 | 10/15/2020 | 11/27/2020 Europe / Czech Republic / Prague                             |
| EPI_ISL_660561 | 10/16/2020 | 11/27/2020 Europe / Czech Republic / Prague                             |
| EPI_ISL_660562 | 10/16/2020 | 11/27/2020 Europe / Czech Republic / Prague                             |
| EPI_ISL_660563 | 10/23/2020 | 11/27/2020 Europe / Czech Republic / Prague                             |
| EPI_ISL_660564 | 10/14/2020 | 11/27/2020 Europe / Czech Republic / Prague                             |
| EPI_ISL_660565 | 10/23/2020 | 11/27/2020 Europe / Czech Republic / South Bohemian Region / ÅEeskÅ©    |
| EPI_ISL_660566 | 10/20/2020 | 11/27/2020 Europe / Czech Republic / Central Bohemian Region / ÅšnÅ©tic |
| EPI_ISL_660567 | 10/19/2020 | 11/27/2020 Europe / Czech Republic / Prague                             |
| EPI_ISL_660568 | 10/23/2020 | 11/27/2020 Europe / Czech Republic / South Bohemian Region / ÅEeskÅ©    |
| EPI_ISL_660569 | 10/19/2020 | 11/27/2020 Europe / Czech Republic / Central Bohemian Region / Tehovec  |
| EPI_ISL_660570 | 10/19/2020 | 11/27/2020 Europe / Czech Republic / Prague                             |
| EPI_ISL_660571 | 10/20/2020 | 11/27/2020 Europe / Czech Republic / Prague                             |
| EPI_ISL_660572 | 10/21/2020 | 11/27/2020 Europe / Czech Republic / Prague                             |
| EPI_ISL_660573 | 10/21/2020 | 11/27/2020 Europe / Czech Republic / Prague                             |
| EPI_ISL_660574 | 10/23/2020 | 11/27/2020 Europe / Czech Republic / Central Bohemian Region / ÅEerÅ©   |
| EPI_ISL_660575 | 10/23/2020 | 11/27/2020 Europe / Czech Republic / Central Bohemian Region / Herink   |
| EPI_ISL_660576 | 10/23/2020 | 11/27/2020 Europe / Czech Republic / Central Bohemian Region / KrÅ©lÅ©v |



|                |            |            |                                                              |
|----------------|------------|------------|--------------------------------------------------------------|
| EPI_ISL_660577 | 10/20/2020 | 11/27/2020 | Europe / Czech Republic / Central Bohemian Region / Krhanice |
| EPI_ISL_660578 | 10/22/2020 | 11/27/2020 | Europe / Czech Republic / Central Bohemian Region / Pátek-b  |
| EPI_ISL_660579 | 10/16/2020 | 11/27/2020 | Europe / Czech Republic / Central Bohemian Region / Tehovec  |
| EPI_ISL_660580 | 10/21/2020 | 11/27/2020 | Europe / Czech Republic / Central Bohemian Region / Tehovec  |
| EPI_ISL_660581 | 10/18/2020 | 11/27/2020 | Europe / Czech Republic / Central Bohemian Region / Tuklaty  |
| EPI_ISL_660582 | 10/15/2020 | 11/27/2020 | Europe / Czech Republic / Central Bohemian Region / Zeleneč  |
| EPI_ISL_660583 | 10/21/2020 | 11/27/2020 | Europe / Czech Republic / Hradec Kralove Region / Sbělč      |
| EPI_ISL_660584 | 10/19/2020 | 11/27/2020 | Europe / Czech Republic / Prague                             |
| EPI_ISL_660585 | 10/20/2020 | 11/27/2020 | Europe / Czech Republic / Prague                             |
| EPI_ISL_660586 | 10/21/2020 | 11/27/2020 | Europe / Czech Republic / Prague                             |
| EPI_ISL_660587 | 10/21/2020 | 11/27/2020 | Europe / Czech Republic / Prague                             |
| EPI_ISL_660588 | 10/21/2020 | 11/27/2020 | Europe / Czech Republic / Prague                             |
| EPI_ISL_660589 | 10/14/2020 | 11/27/2020 | Europe / Czech Republic / Prague                             |
| EPI_ISL_660590 | 10/14/2020 | 11/27/2020 | Europe / Czech Republic / Prague                             |
| EPI_ISL_660591 | 10/22/2020 | 11/27/2020 | Europe / Czech Republic / Prague                             |
| EPI_ISL_660592 | 10/22/2020 | 11/27/2020 | Europe / Czech Republic / Prague                             |
| EPI_ISL_660593 | 10/23/2020 | 11/27/2020 | Europe / Czech Republic / Prague                             |
| EPI_ISL_660594 | 10/23/2020 | 11/27/2020 | Europe / Czech Republic / Prague                             |
| EPI_ISL_660595 | 10/22/2020 | 11/27/2020 | Europe / Czech Republic / Prague                             |
| EPI_ISL_660596 | 9/22/2020  | 11/27/2020 | Europe / Czech Republic / South Moravian Region / Brno       |
| EPI_ISL_660597 | 9/22/2020  | 11/27/2020 | Europe / Czech Republic / South Moravian Region / Brno       |
| EPI_ISL_660598 | 10/18/2020 | 11/27/2020 | Europe / Czech Republic                                      |
| EPI_ISL_660599 | 10/14/2020 | 11/27/2020 | Europe / Czech Republic / Šstá- nad Labem Region / Chomutov  |
| EPI_ISL_660601 | 10/25/2020 | 11/27/2020 | Europe / United Kingdom / England                            |
| EPI_ISL_660604 | 10/28/2020 | 11/27/2020 | Europe / United Kingdom / England                            |
| EPI_ISL_660605 | 11/12/2020 | 11/27/2020 | Africa / South Africa / Eastern Cape / Nelson Mandela Bay    |
| EPI_ISL_660606 | 11/12/2020 | 11/27/2020 | Africa / South Africa / Eastern Cape / Nelson Mandela Bay    |
| EPI_ISL_660609 | 11/12/2020 | 11/27/2020 | Africa / South Africa / Eastern Cape / Nelson Mandela Bay    |
| EPI_ISL_660610 | 11/11/2020 | 11/27/2020 | Africa / South Africa / Eastern Cape / Nelson Mandela Bay    |
| EPI_ISL_660611 | 11/12/2020 | 11/27/2020 | Africa / South Africa / Eastern Cape / Sarah Baartman        |
| EPI_ISL_660613 | 11/12/2020 | 11/27/2020 | Africa / South Africa / Eastern Cape / Nelson Mandela Bay    |
| EPI_ISL_660614 | 11/13/2020 | 11/27/2020 | Africa / South Africa / Eastern Cape / Sarah Baartman        |
| EPI_ISL_660615 | 11/12/2020 | 11/27/2020 | Africa / South Africa / Eastern Cape / Sarah Baartman        |
| EPI_ISL_660618 | 11/6/2020  | 11/27/2020 | Africa / South Africa / KwaZulu-Natal / Ugu                  |
| EPI_ISL_660619 | 11/6/2020  | 11/27/2020 | Africa / South Africa / KwaZulu-Natal / uMkhanyakude         |
| EPI_ISL_660620 | 11/5/2020  | 11/27/2020 | Africa / South Africa / KwaZulu-Natal / uMkhanyakude         |
| EPI_ISL_660621 | 11/7/2020  | 11/27/2020 | Africa / South Africa / KwaZulu-Natal / eThekwini            |
| EPI_ISL_660622 | 11/7/2020  | 11/27/2020 | Africa / South Africa / KwaZulu-Natal / uMkhanyakude         |
| EPI_ISL_660623 | 11/7/2020  | 11/27/2020 | Africa / South Africa / KwaZulu-Natal / uMkhanyakude         |
| EPI_ISL_660624 | 11/7/2020  | 11/27/2020 | Africa / South Africa / KwaZulu-Natal / King Cetshwayo       |
| EPI_ISL_660625 | 11/5/2020  | 11/27/2020 | Africa / South Africa / KwaZulu-Natal / uMkhanyakude         |
| EPI_ISL_660626 | 11/7/2020  | 11/27/2020 | Africa / South Africa / KwaZulu-Natal / Ugu                  |
| EPI_ISL_660627 | 11/7/2020  | 11/27/2020 | Africa / South Africa / KwaZulu-Natal / eThekwini            |
| EPI_ISL_660628 | 11/5/2020  | 11/27/2020 | Africa / South Africa / KwaZulu-Natal / eThekwini            |
| EPI_ISL_660629 | 11/6/2020  | 11/27/2020 | Africa / South Africa / KwaZulu-Natal / uMkhanyakude         |
| EPI_ISL_660630 | 11/5/2020  | 11/27/2020 | Africa / South Africa / KwaZulu-Natal / Ugu                  |
| EPI_ISL_660631 | 11/6/2020  | 11/27/2020 | Africa / South Africa / KwaZulu-Natal / Harry Gwala          |

|                |           |                                                                   |
|----------------|-----------|-------------------------------------------------------------------|
| EPI_ISL_660632 | 11/8/2020 | 11/27/2020 Africa / South Africa / KwaZulu-Natal / Ugu            |
| EPI_ISL_660633 | 11/8/2020 | 11/27/2020 Africa / South Africa / KwaZulu-Natal / uMkhanyakude   |
| EPI_ISL_660634 | 11/8/2020 | 11/27/2020 Africa / South Africa / KwaZulu-Natal / Ugu            |
| EPI_ISL_660635 | 11/4/2020 | 11/27/2020 Africa / South Africa / KwaZulu-Natal / eThekwini      |
| EPI_ISL_660636 | 11/4/2020 | 11/27/2020 Africa / South Africa / KwaZulu-Natal / Ugu            |
| EPI_ISL_660637 | 11/3/2020 | 11/27/2020 Africa / South Africa / KwaZulu-Natal / eThekwini      |
| EPI_ISL_660638 | 11/4/2020 | 11/27/2020 Africa / South Africa / KwaZulu-Natal / uMkhanyakude   |
| EPI_ISL_660639 | 11/3/2020 | 11/27/2020 Africa / South Africa / KwaZulu-Natal / Zululand       |
| EPI_ISL_660640 | 11/4/2020 | 11/27/2020 Africa / South Africa / KwaZulu-Natal / uMkhanyakude   |
| EPI_ISL_660641 | 11/4/2020 | 11/27/2020 Africa / South Africa / KwaZulu-Natal / uMkhanyakude   |
| EPI_ISL_660642 | 11/2/2020 | 11/27/2020 Africa / South Africa / KwaZulu-Natal / Ugu            |
| EPI_ISL_660643 | 11/1/2020 | 11/27/2020 Africa / South Africa / KwaZulu-Natal / Ugu            |
| EPI_ISL_660644 | 11/2/2020 | 11/27/2020 Africa / South Africa / KwaZulu-Natal / King Cetshwayo |
| EPI_ISL_660645 | 11/2/2020 | 11/27/2020 Africa / South Africa / KwaZulu-Natal / Zululand       |
| EPI_ISL_660646 | 11/4/2020 | 11/27/2020 Africa / South Africa / KwaZulu-Natal / Ugu            |
| EPI_ISL_660649 | 11/4/2020 | 11/27/2020 Africa / South Africa / KwaZulu-Natal / uMgungundlovu  |
| EPI_ISL_660650 | 11/2/2020 | 11/27/2020 Africa / South Africa / KwaZulu-Natal / Ugu            |
| EPI_ISL_660651 | 11/2/2020 | 11/27/2020 Africa / South Africa / KwaZulu-Natal / Zululand       |
| EPI_ISL_660652 | 11/1/2020 | 11/27/2020 Africa / South Africa / KwaZulu-Natal / Zululand       |
| EPI_ISL_660654 | 11/2/2020 | 11/27/2020 Africa / South Africa / KwaZulu-Natal / Zululand       |
| EPI_ISL_660655 | 11/3/2020 | 11/27/2020 Africa / South Africa / KwaZulu-Natal / Ugu            |
| EPI_ISL_660657 | 11/1/2020 | 11/27/2020 Africa / South Africa / KwaZulu-Natal / Ugu            |
| EPI_ISL_660659 | 11/2/2020 | 11/27/2020 Africa / South Africa / KwaZulu-Natal / King Cetshwayo |
| EPI_ISL_660661 | 11/3/2020 | 11/27/2020 Africa / South Africa / KwaZulu-Natal / Zululand       |
| EPI_ISL_660662 | 11/4/2020 | 11/27/2020 Africa / South Africa / KwaZulu-Natal / Amajuba        |
| EPI_ISL_660663 | 11/3/2020 | 11/27/2020 Africa / South Africa / KwaZulu-Natal / Ugu            |
| EPI_ISL_660665 | 4/13/2020 | 11/27/2020 Europe / France / Occitanie / Toulouse                 |
| EPI_ISL_660666 | 4/13/2020 | 11/27/2020 Europe / France / Occitanie / Toulouse                 |
| EPI_ISL_660667 | 4/14/2020 | 11/27/2020 Europe / France / Occitanie / Toulouse                 |
| EPI_ISL_660668 | 4/14/2020 | 11/27/2020 Europe / France / Occitanie / Toulouse                 |
| EPI_ISL_660670 | 5/25/2020 | 11/27/2020 Europe / France / Occitanie / Toulouse                 |
| EPI_ISL_660671 | 5/25/2020 | 11/27/2020 Europe / France / Occitanie / Toulouse                 |
| EPI_ISL_660672 | 3/3/2020  | 11/27/2020 Europe / France / Occitanie / Montpellier              |
| EPI_ISL_660673 | 3/7/2020  | 11/27/2020 Europe / France / Occitanie / Montpellier              |
| EPI_ISL_660674 | 3/9/2020  | 11/27/2020 Europe / France / Occitanie / Montpellier              |
| EPI_ISL_660675 | 3/16/2020 | 11/27/2020 Europe / France / Occitanie / Montpellier              |
| EPI_ISL_660676 | 3/17/2020 | 11/27/2020 Europe / France / Occitanie / Montpellier              |
| EPI_ISL_660677 | 3/17/2020 | 11/27/2020 Europe / France / Occitanie / Montpellier              |
| EPI_ISL_660678 | 3/17/2020 | 11/27/2020 Europe / France / Occitanie / Montpellier              |
| EPI_ISL_660679 | 3/17/2020 | 11/27/2020 Europe / France / Occitanie / Montpellier              |
| EPI_ISL_660680 | 3/17/2020 | 11/27/2020 Europe / France / Occitanie / Montpellier              |
| EPI_ISL_660681 | 3/24/2020 | 11/27/2020 Europe / France / Occitanie / Montpellier              |
| EPI_ISL_660682 | 3/24/2020 | 11/27/2020 Europe / France / Occitanie / Montpellier              |
| EPI_ISL_660683 | 3/24/2020 | 11/27/2020 Europe / France / Occitanie / Montpellier              |
| EPI_ISL_660684 | 3/24/2020 | 11/27/2020 Europe / France / Occitanie / Montpellier              |
| EPI_ISL_660685 | 3/24/2020 | 11/27/2020 Europe / France / Occitanie / Montpellier              |
| EPI_ISL_660686 | 3/24/2020 | 11/27/2020 Europe / France / Occitanie / Montpellier              |

|                |           |            |                                                          |
|----------------|-----------|------------|----------------------------------------------------------|
| EPI_ISL_660687 | 3/25/2020 | 11/27/2020 | Europe / France / Occitanie / Montpellier                |
| EPI_ISL_660688 | 3/26/2020 | 11/27/2020 | Europe / France / Occitanie / Montpellier                |
| EPI_ISL_660689 | 3/26/2020 | 11/27/2020 | Europe / France / Occitanie / Montpellier                |
| EPI_ISL_660690 | 3/26/2020 | 11/27/2020 | Europe / France / Occitanie / Montpellier                |
| EPI_ISL_660691 | 3/30/2020 | 11/27/2020 | Europe / France / Occitanie / Montpellier                |
| EPI_ISL_660692 | 3/30/2020 | 11/27/2020 | Europe / France / Occitanie / Montpellier                |
| EPI_ISL_660693 | 4/2/2020  | 11/27/2020 | Europe / France / Occitanie / Montpellier                |
| EPI_ISL_660694 | 4/3/2020  | 11/27/2020 | Europe / France / Occitanie / Montpellier                |
| EPI_ISL_660695 | 4/6/2020  | 11/27/2020 | Europe / France / Occitanie / Montpellier                |
| EPI_ISL_660696 | 4/21/2020 | 11/27/2020 | Europe / France / Occitanie / Montpellier                |
| EPI_ISL_660697 | 4/22/2020 | 11/27/2020 | Europe / France / Occitanie / Montpellier                |
| EPI_ISL_660700 | 4/23/2020 | 11/27/2020 | Europe / France / Occitanie / Montpellier                |
| EPI_ISL_660701 | 4/24/2020 | 11/27/2020 | Europe / France / Occitanie / Montpellier                |
| EPI_ISL_660702 | 4/24/2020 | 11/27/2020 | Europe / France / Occitanie / Montpellier                |
| EPI_ISL_660703 | 4/27/2020 | 11/27/2020 | Europe / France / Occitanie / Montpellier                |
| EPI_ISL_660704 | 4/27/2020 | 11/27/2020 | Europe / France / Occitanie / Montpellier                |
| EPI_ISL_660705 | 4/29/2020 | 11/27/2020 | Europe / France / Occitanie / Montpellier                |
| EPI_ISL_660706 | 4/30/2020 | 11/27/2020 | Europe / France / Occitanie / Montpellier                |
| EPI_ISL_660707 | 5/4/2020  | 11/27/2020 | Europe / France / Occitanie / Montpellier                |
| EPI_ISL_660708 | 5/11/2020 | 11/27/2020 | Europe / France / Occitanie / Montpellier                |
| EPI_ISL_660709 | 5/11/2020 | 11/27/2020 | Europe / France / Occitanie / Montpellier                |
| EPI_ISL_660710 | 3/2/2020  | 11/27/2020 | Europe / France / Occitanie / Nimes                      |
| EPI_ISL_660711 | 3/3/2020  | 11/27/2020 | Europe / France / Occitanie / Nimes                      |
| EPI_ISL_660712 | 3/10/2020 | 11/27/2020 | Europe / France / Occitanie / Nimes                      |
| EPI_ISL_660713 | 3/17/2020 | 11/27/2020 | Europe / France / Occitanie / Nimes                      |
| EPI_ISL_660714 | 3/24/2020 | 11/27/2020 | Europe / France / Occitanie / Nimes                      |
| EPI_ISL_660715 | 3/28/2020 | 11/27/2020 | Europe / France / Occitanie / Nimes                      |
| EPI_ISL_660716 | 3/28/2020 | 11/27/2020 | Europe / France / Occitanie / Nimes                      |
| EPI_ISL_660717 | 3/30/2020 | 11/27/2020 | Europe / France / Occitanie / Nimes                      |
| EPI_ISL_660718 | 3/30/2020 | 11/27/2020 | Europe / France / Occitanie / Nimes                      |
| EPI_ISL_660719 | 4/2/2020  | 11/27/2020 | Europe / France / Occitanie / Nimes                      |
| EPI_ISL_660720 | 4/3/2020  | 11/27/2020 | Europe / France / Occitanie / Nimes                      |
| EPI_ISL_660721 | 4/3/2020  | 11/27/2020 | Europe / France / Occitanie / Nimes                      |
| EPI_ISL_660722 | 4/3/2020  | 11/27/2020 | Europe / France / Occitanie / Nimes                      |
| EPI_ISL_660723 | 4/3/2020  | 11/27/2020 | Europe / France / Occitanie / Nimes                      |
| EPI_ISL_660724 | 4/4/2020  | 11/27/2020 | Europe / France / Occitanie / Nimes                      |
| EPI_ISL_660725 | 4/4/2020  | 11/27/2020 | Europe / France / Occitanie / Nimes                      |
| EPI_ISL_660726 | 4/20/2020 | 11/27/2020 | Europe / France / Occitanie / Nimes                      |
| EPI_ISL_660727 | 4/20/2020 | 11/27/2020 | Europe / France / Occitanie / Nimes                      |
| EPI_ISL_660728 | 4/20/2020 | 11/27/2020 | Europe / France / Occitanie / Nimes                      |
| EPI_ISL_660729 | 4/22/2020 | 11/27/2020 | Europe / France / Occitanie / Nimes                      |
| EPI_ISL_660730 | 4/22/2020 | 11/27/2020 | Europe / France / Occitanie / Nimes                      |
| EPI_ISL_660731 | 5/19/2020 | 11/27/2020 | Europe / France / Occitanie / Nimes                      |
| EPI_ISL_660732 | 4/30/2020 | 11/27/2020 | Europe / France / Provence-Alpes-Cote d'Azur / Marseille |
| EPI_ISL_660733 | 3/5/2020  | 11/27/2020 | Europe / France / Provence-Alpes-Cote d'Azur / Marseille |
| EPI_ISL_660734 | 3/15/2020 | 11/27/2020 | Europe / France / Provence-Alpes-Cote d'Azur / Marseille |
| EPI_ISL_660735 | 4/22/2020 | 11/27/2020 | Europe / France / Provence-Alpes-Cote d'Azur / Marseille |

|                |            |            |                                                          |
|----------------|------------|------------|----------------------------------------------------------|
| EPI_ISL_660736 | 3/17/2020  | 11/27/2020 | Europe / France / Provence-Alpes-Cote d'Azur / Marseille |
| EPI_ISL_660737 | 4/1/2020   | 11/27/2020 | Europe / France / Provence-Alpes-Cote d'Azur / Marseille |
| EPI_ISL_660738 | 5/6/2020   | 11/27/2020 | Europe / France / Provence-Alpes-Cote d'Azur / Marseille |
| EPI_ISL_660739 | 5/8/2020   | 11/27/2020 | Europe / France / Provence-Alpes-Cote d'Azur / Marseille |
| EPI_ISL_660740 | 5/8/2020   | 11/27/2020 | Europe / France / Provence-Alpes-Cote d'Azur / Marseille |
| EPI_ISL_660741 | 5/14/2020  | 11/27/2020 | Europe / France / Provence-Alpes-Cote d'Azur / Marseille |
| EPI_ISL_660743 | 10/18/2020 | 11/27/2020 | Europe / United Kingdom / England                        |
| EPI_ISL_660744 | 10/18/2020 | 11/27/2020 | Europe / United Kingdom / England                        |
| EPI_ISL_660745 | 10/18/2020 | 11/27/2020 | Europe / United Kingdom / England                        |
| EPI_ISL_660747 | 10/23/2020 | 11/27/2020 | Europe / United Kingdom / England                        |
| EPI_ISL_660750 | 10/23/2020 | 11/27/2020 | Europe / United Kingdom / England                        |
| EPI_ISL_660752 | 10/27/2020 | 11/27/2020 | Europe / United Kingdom / England                        |
| EPI_ISL_660753 | 10/29/2020 | 11/27/2020 | Europe / United Kingdom / England                        |
| EPI_ISL_660758 | 10/30/2020 | 11/27/2020 | Europe / United Kingdom / England                        |
| EPI_ISL_660759 | 10/31/2020 | 11/27/2020 | Europe / United Kingdom / England                        |
| EPI_ISL_660760 | 10/30/2020 | 11/27/2020 | Europe / United Kingdom / England                        |
| EPI_ISL_660761 | 10/29/2020 | 11/27/2020 | Europe / United Kingdom / England                        |
| EPI_ISL_660762 | 10/29/2020 | 11/27/2020 | Europe / United Kingdom / England                        |
| EPI_ISL_660763 | 10/30/2020 | 11/27/2020 | Europe / United Kingdom / England                        |
| EPI_ISL_660764 | 10/30/2020 | 11/27/2020 | Europe / United Kingdom / England                        |
| EPI_ISL_660765 | 10/30/2020 | 11/27/2020 | Europe / United Kingdom / England                        |
| EPI_ISL_660767 | 10/31/2020 | 11/27/2020 | Europe / United Kingdom / England                        |
| EPI_ISL_660770 | 10/31/2020 | 11/27/2020 | Europe / United Kingdom / England                        |
| EPI_ISL_660771 | 10/31/2020 | 11/27/2020 | Europe / United Kingdom / England                        |
| EPI_ISL_660772 | 11/1/2020  | 11/27/2020 | Europe / United Kingdom / England                        |
| EPI_ISL_660774 | 11/1/2020  | 11/27/2020 | Europe / United Kingdom / England                        |
| EPI_ISL_660775 | 11/1/2020  | 11/27/2020 | Europe / United Kingdom / England                        |
| EPI_ISL_660776 | 11/1/2020  | 11/27/2020 | Europe / United Kingdom / England                        |
| EPI_ISL_660777 | 11/1/2020  | 11/27/2020 | Europe / United Kingdom / England                        |
| EPI_ISL_660778 | 11/1/2020  | 11/27/2020 | Europe / United Kingdom / England                        |
| EPI_ISL_660779 | 11/1/2020  | 11/27/2020 | Europe / United Kingdom / England                        |
| EPI_ISL_660782 | 11/2/2020  | 11/27/2020 | Europe / United Kingdom / England                        |
| EPI_ISL_660783 | 10/30/2020 | 11/27/2020 | Europe / United Kingdom / England                        |
| EPI_ISL_660784 | 11/2/2020  | 11/27/2020 | Europe / United Kingdom / England                        |
| EPI_ISL_660786 | 11/2/2020  | 11/27/2020 | Europe / United Kingdom / England                        |
| EPI_ISL_660787 | 11/2/2020  | 11/27/2020 | Europe / United Kingdom / England                        |
| EPI_ISL_660788 | 11/2/2020  | 11/27/2020 | Europe / United Kingdom / England                        |
| EPI_ISL_660789 | 11/2/2020  | 11/27/2020 | Europe / United Kingdom / England                        |
| EPI_ISL_660790 | 11/2/2020  | 11/27/2020 | Europe / United Kingdom / England                        |
| EPI_ISL_660791 | 11/2/2020  | 11/27/2020 | Europe / United Kingdom / England                        |
| EPI_ISL_660792 | 11/3/2020  | 11/27/2020 | Europe / United Kingdom / England                        |
| EPI_ISL_660793 | 11/3/2020  | 11/27/2020 | Europe / United Kingdom / England                        |
| EPI_ISL_660795 | 9/15/2020  | 11/27/2020 | North America / USA / Wisconsin / La Crosse County       |
| EPI_ISL_660796 | 9/15/2020  | 11/27/2020 | North America / USA / Wisconsin / Trempealeau County     |
| EPI_ISL_660797 | 9/15/2020  | 11/27/2020 | North America / USA / Wisconsin / La Crosse County       |
| EPI_ISL_660798 | 9/15/2020  | 11/27/2020 | North America / USA / Wisconsin / Waushara County        |
| EPI_ISL_660799 | 9/15/2020  | 11/27/2020 | North America / USA / Wisconsin / La Crosse County       |

|                |           |            |                                                      |
|----------------|-----------|------------|------------------------------------------------------|
| EPI_ISL_660800 | 9/15/2020 | 11/27/2020 | North America / USA / Wisconsin / La Crosse County   |
| EPI_ISL_660801 | 9/16/2020 | 11/27/2020 | North America / USA / Wisconsin / La Crosse County   |
| EPI_ISL_660802 | 9/16/2020 | 11/27/2020 | North America / USA / Wisconsin / La Crosse County   |
| EPI_ISL_660803 | 9/16/2020 | 11/27/2020 | North America / USA / Wisconsin / La Crosse County   |
| EPI_ISL_660804 | 9/16/2020 | 11/27/2020 | North America / USA / Wisconsin / La Crosse County   |
| EPI_ISL_660805 | 9/16/2020 | 11/27/2020 | North America / USA / Wisconsin / Monroe County      |
| EPI_ISL_660806 | 9/16/2020 | 11/27/2020 | North America / USA / Wisconsin / La Crosse County   |
| EPI_ISL_660807 | 9/16/2020 | 11/27/2020 | North America / USA / Wisconsin / La Crosse County   |
| EPI_ISL_660808 | 9/16/2020 | 11/27/2020 | North America / USA / Wisconsin / La Crosse County   |
| EPI_ISL_660809 | 9/16/2020 | 11/27/2020 | North America / USA / Wisconsin / La Crosse County   |
| EPI_ISL_660810 | 9/15/2020 | 11/27/2020 | North America / USA / Wisconsin / Vernon County      |
| EPI_ISL_660811 | 9/16/2020 | 11/27/2020 | North America / USA / Wisconsin / La Crosse County   |
| EPI_ISL_660812 | 9/17/2020 | 11/27/2020 | North America / USA / Wisconsin / Vernon County      |
| EPI_ISL_660813 | 9/17/2020 | 11/27/2020 | North America / USA / Wisconsin / Vernon County      |
| EPI_ISL_660814 | 9/17/2020 | 11/27/2020 | North America / USA / Wisconsin / Monroe County      |
| EPI_ISL_660815 | 9/17/2020 | 11/27/2020 | North America / USA / Wisconsin / Trempealeau County |
| EPI_ISL_660816 | 9/17/2020 | 11/27/2020 | North America / USA / Wisconsin / La Crosse County   |
| EPI_ISL_660817 | 9/17/2020 | 11/27/2020 | North America / USA / Wisconsin / La Crosse County   |
| EPI_ISL_660818 | 9/17/2020 | 11/27/2020 | North America / USA / Wisconsin / La Crosse County   |
| EPI_ISL_660819 | 9/17/2020 | 11/27/2020 | North America / USA / Wisconsin / La Crosse County   |
| EPI_ISL_660820 | 9/18/2020 | 11/27/2020 | North America / USA / Wisconsin / La Crosse County   |
| EPI_ISL_660821 | 9/18/2020 | 11/27/2020 | North America / USA / Wisconsin / Monroe County      |
| EPI_ISL_660822 | 9/18/2020 | 11/27/2020 | North America / USA / Wisconsin / Trempealeau County |
| EPI_ISL_660823 | 9/18/2020 | 11/27/2020 | North America / USA / Wisconsin / Vernon County      |
| EPI_ISL_660824 | 9/18/2020 | 11/27/2020 | North America / USA / Wisconsin / La Crosse County   |
| EPI_ISL_660825 | 9/18/2020 | 11/27/2020 | North America / USA / Minnesota / Houston County     |
| EPI_ISL_660826 | 9/18/2020 | 11/27/2020 | North America / USA / Wisconsin / Vernon County      |
| EPI_ISL_660827 | 9/18/2020 | 11/27/2020 | North America / USA / Wisconsin / La Crosse County   |
| EPI_ISL_660828 | 9/18/2020 | 11/27/2020 | North America / USA / Wisconsin / Vernon County      |
| EPI_ISL_660829 | 9/19/2020 | 11/27/2020 | North America / USA / Iowa / La Crosse County        |
| EPI_ISL_660830 | 9/19/2020 | 11/27/2020 | North America / USA / Wisconsin / La Crosse County   |
| EPI_ISL_660831 | 9/20/2020 | 11/27/2020 | North America / USA / Iowa / Winneshiek County       |
| EPI_ISL_660832 | 9/20/2020 | 11/27/2020 | North America / USA / Minnesota / Fillmore County    |
| EPI_ISL_660833 | 9/20/2020 | 11/27/2020 | North America / USA / Wisconsin / La Crosse County   |
| EPI_ISL_660834 | 9/20/2020 | 11/27/2020 | North America / USA / Wisconsin / Monroe County      |
| EPI_ISL_660835 | 9/21/2020 | 11/27/2020 | North America / USA / Wisconsin / Trempealeau County |
| EPI_ISL_660836 | 9/21/2020 | 11/27/2020 | North America / USA / Wisconsin / La Crosse County   |
| EPI_ISL_660837 | 9/21/2020 | 11/27/2020 | North America / USA / Wisconsin / La Crosse County   |
| EPI_ISL_660838 | 9/21/2020 | 11/27/2020 | North America / USA / Wisconsin / Grant County       |
| EPI_ISL_660839 | 9/21/2020 | 11/27/2020 | North America / USA / Wisconsin / Vernon County      |
| EPI_ISL_660840 | 9/22/2020 | 11/27/2020 | North America / USA / Wisconsin / La Crosse County   |
| EPI_ISL_660841 | 9/22/2020 | 11/27/2020 | North America / USA / Minnesota / Houston County     |
| EPI_ISL_660842 | 9/22/2020 | 11/27/2020 | North America / USA / Minnesota / Winona County      |
| EPI_ISL_660843 | 9/22/2020 | 11/27/2020 | North America / USA / Wisconsin / La Crosse County   |
| EPI_ISL_660844 | 9/23/2020 | 11/27/2020 | North America / USA / Minnesota / Houston County     |
| EPI_ISL_660845 | 9/23/2020 | 11/27/2020 | North America / USA / Wisconsin / Monroe County      |
| EPI_ISL_660846 | 9/23/2020 | 11/27/2020 | North America / USA / Wisconsin / Vernon County      |

|                |           |            |                                                      |
|----------------|-----------|------------|------------------------------------------------------|
| EPI_ISL_660847 | 9/23/2020 | 11/27/2020 | North America / USA / Wisconsin / Vernon County      |
| EPI_ISL_660848 | 9/23/2020 | 11/27/2020 | North America / USA / Minnesota / Houston County     |
| EPI_ISL_660849 | 9/23/2020 | 11/27/2020 | North America / USA / Wisconsin / La Crosse County   |
| EPI_ISL_660850 | 9/23/2020 | 11/27/2020 | North America / USA / Wisconsin / La Crosse County   |
| EPI_ISL_660851 | 9/23/2020 | 11/27/2020 | North America / USA / Wisconsin / La Crosse County   |
| EPI_ISL_660852 | 9/23/2020 | 11/27/2020 | North America / USA / Wisconsin / La Crosse County   |
| EPI_ISL_660853 | 9/24/2020 | 11/27/2020 | North America / USA / Wisconsin / La Crosse County   |
| EPI_ISL_660854 | 9/25/2020 | 11/27/2020 | North America / USA / Wisconsin / La Crosse County   |
| EPI_ISL_660855 | 9/25/2020 | 11/27/2020 | North America / USA / Wisconsin / La Crosse County   |
| EPI_ISL_660856 | 9/25/2020 | 11/27/2020 | North America / USA / Minnesota / Houston County     |
| EPI_ISL_660857 | 9/25/2020 | 11/27/2020 | North America / USA / Wisconsin / La Crosse County   |
| EPI_ISL_660858 | 9/26/2020 | 11/27/2020 | North America / USA / Wisconsin / La Crosse County   |
| EPI_ISL_660859 | 9/27/2020 | 11/27/2020 | North America / USA / Wisconsin / La Crosse County   |
| EPI_ISL_660860 | 9/28/2020 | 11/27/2020 | North America / USA / Minnesota / Fillmore County    |
| EPI_ISL_660861 | 9/28/2020 | 11/27/2020 | North America / USA / Wisconsin / La Crosse County   |
| EPI_ISL_660862 | 9/28/2020 | 11/27/2020 | North America / USA / Wisconsin / Monroe County      |
| EPI_ISL_660863 | 9/28/2020 | 11/27/2020 | North America / USA / Wisconsin / Richland County    |
| EPI_ISL_660864 | 9/28/2020 | 11/27/2020 | North America / USA / Wisconsin / La Crosse County   |
| EPI_ISL_660865 | 9/28/2020 | 11/27/2020 | North America / USA / Wisconsin / Trempealeau County |
| EPI_ISL_660866 | 9/29/2020 | 11/27/2020 | North America / USA / Wisconsin / La Crosse County   |
| EPI_ISL_660867 | 9/29/2020 | 11/27/2020 | North America / USA / Wisconsin / La Crosse County   |
| EPI_ISL_660868 | 9/30/2020 | 11/27/2020 | North America / USA / Wisconsin / Buffalo County     |
| EPI_ISL_660869 | 9/30/2020 | 11/27/2020 | North America / USA / Wisconsin / La Crosse County   |
| EPI_ISL_660870 | 10/1/2020 | 11/27/2020 | North America / USA / Wisconsin / La Crosse County   |
| EPI_ISL_660871 | 10/1/2020 | 11/27/2020 | North America / USA / Wisconsin / Monroe County      |
| EPI_ISL_660872 | 10/1/2020 | 11/27/2020 | North America / USA / Wisconsin / Trempealeau County |
| EPI_ISL_660873 | 10/1/2020 | 11/27/2020 | North America / USA / Wisconsin / La Crosse County   |
| EPI_ISL_660874 | 10/1/2020 | 11/27/2020 | North America / USA / Wisconsin / La Crosse County   |
| EPI_ISL_660875 | 10/2/2020 | 11/27/2020 | North America / USA / Wisconsin / Crawford County    |
| EPI_ISL_660876 | 10/2/2020 | 11/27/2020 | North America / USA / Iowa / Winneshiek County       |
| EPI_ISL_660877 | 10/2/2020 | 11/27/2020 | North America / USA / Wisconsin / La Crosse County   |
| EPI_ISL_660878 | 10/2/2020 | 11/27/2020 | North America / USA / Wisconsin / La Crosse County   |
| EPI_ISL_660879 | 10/2/2020 | 11/27/2020 | North America / USA / Iowa / Allamakee County        |
| EPI_ISL_660880 | 10/2/2020 | 11/27/2020 | North America / USA / Wisconsin / La Crosse County   |
| EPI_ISL_660881 | 10/3/2020 | 11/27/2020 | North America / USA / Wisconsin / Vernon County      |
| EPI_ISL_660882 | 10/3/2020 | 11/27/2020 | North America / USA / Wisconsin / La Crosse County   |
| EPI_ISL_660883 | 10/4/2020 | 11/27/2020 | North America / USA / Wisconsin / La Crosse County   |
| EPI_ISL_660884 | 10/4/2020 | 11/27/2020 | North America / USA / Wisconsin / La Crosse County   |
| EPI_ISL_660885 | 10/4/2020 | 11/27/2020 | North America / USA / Wisconsin / Vernon County      |
| EPI_ISL_660886 | 10/4/2020 | 11/27/2020 | North America / USA / Wisconsin / La Crosse County   |
| EPI_ISL_660887 | 10/4/2020 | 11/27/2020 | North America / USA / Wisconsin / La Crosse County   |
| EPI_ISL_660888 | 10/4/2020 | 11/27/2020 | North America / USA / Wisconsin / La Crosse County   |
| EPI_ISL_660889 | 10/5/2020 | 11/27/2020 | North America / USA / Wisconsin / La Crosse County   |
| EPI_ISL_660890 | 10/5/2020 | 11/27/2020 | North America / USA / Wisconsin / Vernon County      |
| EPI_ISL_660891 | 10/5/2020 | 11/27/2020 | North America / USA / Wisconsin / Trempealeau County |
| EPI_ISL_660892 | 10/5/2020 | 11/27/2020 | North America / USA / Wisconsin / La Crosse County   |
| EPI_ISL_660893 | 10/5/2020 | 11/27/2020 | North America / USA / Wisconsin / La Crosse County   |

|                |            |            |                                                      |
|----------------|------------|------------|------------------------------------------------------|
| EPI_ISL_660894 | 10/5/2020  | 11/27/2020 | North America / USA / Wisconsin / La Crosse County   |
| EPI_ISL_660895 | 10/5/2020  | 11/27/2020 | North America / USA / Wisconsin / La Crosse County   |
| EPI_ISL_660896 | 10/5/2020  | 11/27/2020 | North America / USA / Wisconsin / Richland County    |
| EPI_ISL_660897 | 10/5/2020  | 11/27/2020 | North America / USA / Wisconsin / La Crosse County   |
| EPI_ISL_660898 | 10/5/2020  | 11/27/2020 | North America / USA / Wisconsin / La Crosse County   |
| EPI_ISL_660899 | 10/5/2020  | 11/27/2020 | North America / USA / Wisconsin / La Crosse County   |
| EPI_ISL_660900 | 10/5/2020  | 11/27/2020 | North America / USA / Wisconsin / La Crosse County   |
| EPI_ISL_660901 | 10/6/2020  | 11/27/2020 | North America / USA / Wisconsin / Marquette County   |
| EPI_ISL_660902 | 10/7/2020  | 11/27/2020 | North America / USA / Iowa / Fayette County          |
| EPI_ISL_660903 | 10/7/2020  | 11/27/2020 | North America / USA / Wisconsin / La Crosse County   |
| EPI_ISL_660904 | 10/7/2020  | 11/27/2020 | North America / USA / Wisconsin / Crawford County    |
| EPI_ISL_660905 | 10/7/2020  | 11/27/2020 | North America / USA / Wisconsin / La Crosse County   |
| EPI_ISL_660906 | 10/7/2020  | 11/27/2020 | North America / USA / Wisconsin / La Crosse County   |
| EPI_ISL_660907 | 10/7/2020  | 11/27/2020 | North America / USA / Wisconsin / Vernon County      |
| EPI_ISL_660908 | 10/8/2020  | 11/27/2020 | North America / USA / Wisconsin / La Crosse County   |
| EPI_ISL_660909 | 10/8/2020  | 11/27/2020 | North America / USA / Wisconsin / Vernon County      |
| EPI_ISL_660910 | 10/8/2020  | 11/27/2020 | North America / USA / Wisconsin / La Crosse County   |
| EPI_ISL_660911 | 10/8/2020  | 11/27/2020 | North America / USA / Wisconsin / La Crosse County   |
| EPI_ISL_660912 | 10/8/2020  | 11/27/2020 | North America / USA / Wisconsin / Juneau County      |
| EPI_ISL_660913 | 10/8/2020  | 11/27/2020 | North America / USA / Wisconsin / Vernon County      |
| EPI_ISL_660914 | 10/9/2020  | 11/27/2020 | North America / USA / Wisconsin / Buffalo County     |
| EPI_ISL_660915 | 10/9/2020  | 11/27/2020 | North America / USA / Wisconsin / Vernon County      |
| EPI_ISL_660916 | 10/10/2020 | 11/27/2020 | North America / USA / Wisconsin / Trempealeau County |
| EPI_ISL_660917 | 10/11/2020 | 11/27/2020 | North America / USA / Iowa / Allamakee County        |
| EPI_ISL_660918 | 10/11/2020 | 11/27/2020 | North America / USA / Wisconsin / Vernon County      |
| EPI_ISL_660919 | 10/11/2020 | 11/27/2020 | North America / USA / Wisconsin / Vernon County      |
| EPI_ISL_660920 | 10/11/2020 | 11/27/2020 | North America / USA / Wisconsin / La Crosse County   |
| EPI_ISL_660921 | 10/11/2020 | 11/27/2020 | North America / USA / Wisconsin / La Crosse County   |
| EPI_ISL_660922 | 10/12/2020 | 11/27/2020 | North America / USA / Wisconsin / Trempealeau County |
| EPI_ISL_660923 | 10/12/2020 | 11/27/2020 | North America / USA / Wisconsin / Vernon County      |
| EPI_ISL_660924 | 10/12/2020 | 11/27/2020 | North America / USA / Wisconsin / La Crosse County   |
| EPI_ISL_660925 | 10/12/2020 | 11/27/2020 | North America / USA / Wisconsin / La Crosse County   |
| EPI_ISL_660926 | 10/12/2020 | 11/27/2020 | North America / USA / Wisconsin / La Crosse County   |
| EPI_ISL_660927 | 10/12/2020 | 11/27/2020 | North America / USA / Wisconsin / La Crosse County   |
| EPI_ISL_660928 | 10/12/2020 | 11/27/2020 | North America / USA / Wisconsin / La Crosse County   |
| EPI_ISL_660929 | 10/12/2020 | 11/27/2020 | North America / USA / Wisconsin / La Crosse County   |
| EPI_ISL_660930 | 10/12/2020 | 11/27/2020 | North America / USA / Wisconsin / La Crosse County   |
| EPI_ISL_660931 | 10/12/2020 | 11/27/2020 | North America / USA / Wisconsin / Monroe County      |
| EPI_ISL_660932 | 10/13/2020 | 11/27/2020 | North America / USA / Wisconsin / Vernon County      |
| EPI_ISL_660933 | 10/13/2020 | 11/27/2020 | North America / USA / Wisconsin / La Crosse County   |
| EPI_ISL_660934 | 10/13/2020 | 11/27/2020 | North America / USA / Wisconsin / La Crosse County   |
| EPI_ISL_660935 | 10/14/2020 | 11/27/2020 | North America / USA / Wisconsin / Monroe County      |
| EPI_ISL_660936 | 10/14/2020 | 11/27/2020 | North America / USA / Wisconsin / La Crosse County   |
| EPI_ISL_660937 | 10/14/2020 | 11/27/2020 | North America / USA / Wisconsin / Vernon County      |
| EPI_ISL_660938 | 10/14/2020 | 11/27/2020 | North America / USA / Wisconsin / Monroe County      |
| EPI_ISL_660939 | 10/15/2020 | 11/27/2020 | North America / USA / Iowa / Clayton County          |
| EPI_ISL_660940 | 10/15/2020 | 11/27/2020 | North America / USA / Wisconsin / Juneau County      |





|                |            |            |                                                      |
|----------------|------------|------------|------------------------------------------------------|
| EPI_ISL_660988 | 10/26/2020 | 11/27/2020 | North America / USA / Minnesota / Winona County      |
| EPI_ISL_660989 | 10/26/2020 | 11/27/2020 | North America / USA / Wisconsin / La Crosse County   |
| EPI_ISL_660990 | 10/26/2020 | 11/27/2020 | North America / USA / Minnesota / Houston County     |
| EPI_ISL_660991 | 10/26/2020 | 11/27/2020 | North America / USA / Wisconsin / Monroe County      |
| EPI_ISL_660992 | 10/26/2020 | 11/27/2020 | North America / USA / Wisconsin / La Crosse County   |
| EPI_ISL_660993 | 10/26/2020 | 11/27/2020 | North America / USA / Wisconsin / La Crosse County   |
| EPI_ISL_660994 | 10/26/2020 | 11/27/2020 | North America / USA / Wisconsin / Vernon County      |
| EPI_ISL_660995 | 10/26/2020 | 11/27/2020 | North America / USA / Wisconsin / Trempealeau County |
| EPI_ISL_660996 | 10/27/2020 | 11/27/2020 | North America / USA / Wisconsin / Crawford County    |
| EPI_ISL_660997 | 10/27/2020 | 11/27/2020 | North America / USA / Wisconsin / Crawford County    |
| EPI_ISL_660998 | 10/27/2020 | 11/27/2020 | North America / USA / Wisconsin / Crawford County    |
| EPI_ISL_660999 | 10/27/2020 | 11/27/2020 | North America / USA / Wisconsin / Grant County       |
| EPI_ISL_661000 | 10/27/2020 | 11/27/2020 | North America / USA / Wisconsin / Crawford County    |
| EPI_ISL_661001 | 10/27/2020 | 11/27/2020 | North America / USA / Wisconsin / Grant County       |
| EPI_ISL_661002 | 10/27/2020 | 11/27/2020 | North America / USA / Wisconsin / La Crosse County   |
| EPI_ISL_661003 | 10/27/2020 | 11/27/2020 | North America / USA / Wisconsin / Trempealeau County |
| EPI_ISL_661004 | 10/27/2020 | 11/27/2020 | North America / USA / Wisconsin / Vernon County      |
| EPI_ISL_661005 | 10/27/2020 | 11/27/2020 | North America / USA / Wisconsin / La Crosse County   |
| EPI_ISL_661006 | 10/27/2020 | 11/27/2020 | North America / USA / Minnesota / Houston County     |
| EPI_ISL_661007 | 10/27/2020 | 11/27/2020 | North America / USA / Wisconsin / La Crosse County   |
| EPI_ISL_661008 | 10/27/2020 | 11/27/2020 | North America / USA / Wisconsin / La Crosse County   |
| EPI_ISL_661009 | 10/27/2020 | 11/27/2020 | North America / USA / Wisconsin / La Crosse County   |
| EPI_ISL_661010 | 10/27/2020 | 11/27/2020 | North America / USA / Wisconsin / La Crosse County   |
| EPI_ISL_661011 | 10/27/2020 | 11/27/2020 | North America / USA / Wisconsin / Vernon County      |
| EPI_ISL_661012 | 10/27/2020 | 11/27/2020 | North America / USA / Wisconsin / La Crosse County   |
| EPI_ISL_661013 | 10/27/2020 | 11/27/2020 | North America / USA / Minnesota / Winona County      |
| EPI_ISL_661014 | 10/28/2020 | 11/27/2020 | North America / USA / Wisconsin / La Crosse County   |
| EPI_ISL_661015 | 10/28/2020 | 11/27/2020 | North America / USA / Wisconsin / La Crosse County   |
| EPI_ISL_661016 | 10/28/2020 | 11/27/2020 | North America / USA / Wisconsin / La Crosse County   |
| EPI_ISL_661017 | 10/28/2020 | 11/27/2020 | North America / USA / Wisconsin / La Crosse County   |
| EPI_ISL_661018 | 10/28/2020 | 11/27/2020 | North America / USA / Iowa / Allamakee County        |
| EPI_ISL_661019 | 10/28/2020 | 11/27/2020 | North America / USA / Wisconsin / Vernon County      |
| EPI_ISL_661020 | 10/28/2020 | 11/27/2020 | North America / USA / Wisconsin / Vernon County      |
| EPI_ISL_661021 | 10/28/2020 | 11/27/2020 | North America / USA / Iowa / Allamakee County        |
| EPI_ISL_661022 | 10/29/2020 | 11/27/2020 | North America / USA / Wisconsin / Wood County        |
| EPI_ISL_661023 | 10/29/2020 | 11/27/2020 | North America / USA / Wisconsin / La Crosse County   |
| EPI_ISL_661024 | 10/29/2020 | 11/27/2020 | North America / USA / Wisconsin / Crawford County    |
| EPI_ISL_661025 | 10/29/2020 | 11/27/2020 | North America / USA / Wisconsin / La Crosse County   |
| EPI_ISL_661026 | 10/29/2020 | 11/27/2020 | North America / USA / Wisconsin / Vernon County      |
| EPI_ISL_661027 | 10/30/2020 | 11/27/2020 | North America / USA / Wisconsin / Trempealeau County |
| EPI_ISL_661028 | 10/30/2020 | 11/27/2020 | North America / USA / Wisconsin / La Crosse County   |
| EPI_ISL_661029 | 10/30/2020 | 11/27/2020 | North America / USA / Wisconsin / La Crosse County   |
| EPI_ISL_661030 | 10/30/2020 | 11/27/2020 | North America / USA / Wisconsin / Monroe County      |
| EPI_ISL_661031 | 10/30/2020 | 11/27/2020 | North America / USA / Wisconsin / La Crosse County   |
| EPI_ISL_661032 | 10/30/2020 | 11/27/2020 | North America / USA / Wisconsin / La Crosse County   |
| EPI_ISL_661033 | 10/30/2020 | 11/27/2020 | North America / USA / Wisconsin / La Crosse County   |
| EPI_ISL_661034 | 10/31/2020 | 11/27/2020 | North America / USA / Wisconsin / La Crosse County   |



|                |           |            |                                                      |
|----------------|-----------|------------|------------------------------------------------------|
| EPI_ISL_661083 | 11/4/2020 | 11/27/2020 | North America / USA / Wisconsin / La Crosse County   |
| EPI_ISL_661084 | 11/4/2020 | 11/27/2020 | North America / USA / Wisconsin / La Crosse County   |
| EPI_ISL_661085 | 11/4/2020 | 11/27/2020 | North America / USA / Minnesota / Houston County     |
| EPI_ISL_661086 | 11/4/2020 | 11/27/2020 | North America / USA / Wisconsin / La Crosse County   |
| EPI_ISL_661087 | 11/4/2020 | 11/27/2020 | North America / USA / Minnesota / Houston County     |
| EPI_ISL_661088 | 11/4/2020 | 11/27/2020 | North America / USA / Wisconsin / Jackson County     |
| EPI_ISL_661089 | 11/4/2020 | 11/27/2020 | North America / USA / Iowa / Allamakee County        |
| EPI_ISL_661090 | 11/4/2020 | 11/27/2020 | North America / USA / Wisconsin / La Crosse County   |
| EPI_ISL_661091 | 11/4/2020 | 11/27/2020 | North America / USA / Wisconsin / La Crosse County   |
| EPI_ISL_661092 | 11/4/2020 | 11/27/2020 | North America / USA / Minnesota / Houston County     |
| EPI_ISL_661093 | 11/4/2020 | 11/27/2020 | North America / USA / Minnesota / Winona County      |
| EPI_ISL_661094 | 11/4/2020 | 11/27/2020 | North America / USA / Wisconsin / La Crosse County   |
| EPI_ISL_661095 | 11/4/2020 | 11/27/2020 | North America / USA / Wisconsin / La Crosse County   |
| EPI_ISL_661096 | 11/5/2020 | 11/27/2020 | North America / USA / Minnesota / Houston County     |
| EPI_ISL_661097 | 11/5/2020 | 11/27/2020 | North America / USA / Wisconsin / La Crosse County   |
| EPI_ISL_661098 | 11/5/2020 | 11/27/2020 | North America / USA / Wisconsin / La Crosse County   |
| EPI_ISL_661099 | 11/5/2020 | 11/27/2020 | North America / USA / Wisconsin / La Crosse County   |
| EPI_ISL_661100 | 11/5/2020 | 11/27/2020 | North America / USA / Wisconsin / Trempealeau County |
| EPI_ISL_661101 | 11/5/2020 | 11/27/2020 | North America / USA / Wisconsin / Monroe County      |
| EPI_ISL_661102 | 11/5/2020 | 11/27/2020 | North America / USA / Wisconsin / La Crosse County   |
| EPI_ISL_661103 | 11/5/2020 | 11/27/2020 | North America / USA / Wisconsin / Vernon County      |
| EPI_ISL_661104 | 11/5/2020 | 11/27/2020 | North America / USA / Wisconsin / Monroe County      |
| EPI_ISL_661105 | 11/5/2020 | 11/27/2020 | North America / USA / Wisconsin / Trempealeau County |
| EPI_ISL_661106 | 11/5/2020 | 11/27/2020 | North America / USA / Wisconsin / La Crosse County   |
| EPI_ISL_661107 | 11/5/2020 | 11/27/2020 | North America / USA / Iowa / Allamakee County        |
| EPI_ISL_661108 | 11/5/2020 | 11/27/2020 | North America / USA / Wisconsin / La Crosse County   |
| EPI_ISL_661109 | 11/5/2020 | 11/27/2020 | North America / USA / Wisconsin / La Crosse County   |
| EPI_ISL_661110 | 11/5/2020 | 11/27/2020 | North America / USA / Wisconsin / La Crosse County   |
| EPI_ISL_661111 | 11/5/2020 | 11/27/2020 | North America / USA / Wisconsin / La Crosse County   |
| EPI_ISL_661112 | 11/6/2020 | 11/27/2020 | North America / USA / Wisconsin / Grant County       |
| EPI_ISL_661113 | 11/6/2020 | 11/27/2020 | North America / USA / Wisconsin / La Crosse County   |
| EPI_ISL_661114 | 11/6/2020 | 11/27/2020 | North America / USA / Wisconsin / La Crosse County   |
| EPI_ISL_661115 | 11/6/2020 | 11/27/2020 | North America / USA / Wisconsin / Monroe County      |
| EPI_ISL_661116 | 11/6/2020 | 11/27/2020 | North America / USA / Wisconsin / La Crosse County   |
| EPI_ISL_661117 | 11/6/2020 | 11/27/2020 | North America / USA / Wisconsin / La Crosse County   |
| EPI_ISL_661118 | 11/6/2020 | 11/27/2020 | North America / USA / Wisconsin / La Crosse County   |
| EPI_ISL_661119 | 11/6/2020 | 11/27/2020 | North America / USA / Wisconsin / Vernon County      |
| EPI_ISL_661120 | 11/6/2020 | 11/27/2020 | North America / USA / Wisconsin / Trempealeau County |
| EPI_ISL_661121 | 11/6/2020 | 11/27/2020 | North America / USA / Wisconsin / Crawford County    |
| EPI_ISL_661122 | 11/6/2020 | 11/27/2020 | North America / USA / Wisconsin / La Crosse County   |
| EPI_ISL_661123 | 11/7/2020 | 11/27/2020 | North America / USA / Iowa / Winneshiek County       |
| EPI_ISL_661124 | 11/7/2020 | 11/27/2020 | North America / USA / Wisconsin / La Crosse County   |
| EPI_ISL_661125 | 11/7/2020 | 11/27/2020 | North America / USA / Wisconsin / La Crosse County   |
| EPI_ISL_661126 | 11/7/2020 | 11/27/2020 | North America / USA / Wisconsin / La Crosse County   |
| EPI_ISL_661127 | 11/7/2020 | 11/27/2020 | North America / USA / Wisconsin / Trempealeau County |
| EPI_ISL_661128 | 11/7/2020 | 11/27/2020 | North America / USA / Iowa / Allamakee County        |
| EPI_ISL_661129 | 11/8/2020 | 11/27/2020 | North America / USA / Wisconsin / La Crosse County   |

|                |            |            |                                                      |
|----------------|------------|------------|------------------------------------------------------|
| EPI_ISL_661130 | 11/8/2020  | 11/27/2020 | North America / USA / Wisconsin / La Crosse County   |
| EPI_ISL_661131 | 11/8/2020  | 11/27/2020 | North America / USA / Wisconsin / La Crosse County   |
| EPI_ISL_661132 | 11/8/2020  | 11/27/2020 | North America / USA / Wisconsin / La Crosse County   |
| EPI_ISL_661133 | 11/8/2020  | 11/27/2020 | North America / USA / Wisconsin / La Crosse County   |
| EPI_ISL_661134 | 11/8/2020  | 11/27/2020 | North America / USA / Wisconsin / La Crosse County   |
| EPI_ISL_661135 | 11/8/2020  | 11/27/2020 | North America / USA / Wisconsin / La Crosse County   |
| EPI_ISL_661136 | 11/8/2020  | 11/27/2020 | North America / USA / Wisconsin / La Crosse County   |
| EPI_ISL_661137 | 11/8/2020  | 11/27/2020 | North America / USA / Wisconsin / La Crosse County   |
| EPI_ISL_661138 | 11/8/2020  | 11/27/2020 | North America / USA / Wisconsin / Grant County       |
| EPI_ISL_661139 | 11/9/2020  | 11/27/2020 | North America / USA / Wisconsin / La Crosse County   |
| EPI_ISL_661140 | 11/9/2020  | 11/27/2020 | North America / USA / Wisconsin / La Crosse County   |
| EPI_ISL_661141 | 11/9/2020  | 11/27/2020 | North America / USA / Wisconsin / La Crosse County   |
| EPI_ISL_661142 | 11/9/2020  | 11/27/2020 | North America / USA / Iowa / Winneshiek County       |
| EPI_ISL_661143 | 11/9/2020  | 11/27/2020 | North America / USA / Wisconsin / La Crosse County   |
| EPI_ISL_661144 | 11/9/2020  | 11/27/2020 | North America / USA / Wisconsin / La Crosse County   |
| EPI_ISL_661145 | 11/9/2020  | 11/27/2020 | North America / USA / Wisconsin / La Crosse County   |
| EPI_ISL_661146 | 11/9/2020  | 11/27/2020 | North America / USA / Wisconsin / Wood County        |
| EPI_ISL_661147 | 11/9/2020  | 11/27/2020 | North America / USA / Wisconsin / La Crosse County   |
| EPI_ISL_661148 | 11/9/2020  | 11/27/2020 | North America / USA / Wisconsin / Juneau County      |
| EPI_ISL_661149 | 11/9/2020  | 11/27/2020 | North America / USA / Wisconsin / Portage County     |
| EPI_ISL_661150 | 11/9/2020  | 11/27/2020 | North America / USA / Wisconsin / La Crosse County   |
| EPI_ISL_661151 | 11/9/2020  | 11/27/2020 | North America / USA / Wisconsin / La Crosse County   |
| EPI_ISL_661152 | 11/9/2020  | 11/27/2020 | North America / USA / Wisconsin / La Crosse County   |
| EPI_ISL_661153 | 11/9/2020  | 11/27/2020 | North America / USA / Wisconsin / La Crosse County   |
| EPI_ISL_661154 | 11/9/2020  | 11/27/2020 | North America / USA / Wisconsin / La Crosse County   |
| EPI_ISL_661155 | 11/9/2020  | 11/27/2020 | North America / USA / Wisconsin / Vernon County      |
| EPI_ISL_661156 | 11/9/2020  | 11/27/2020 | North America / USA / Iowa / Allamakee County        |
| EPI_ISL_661157 | 11/9/2020  | 11/27/2020 | North America / USA / Wisconsin / Juneau County      |
| EPI_ISL_661158 | 11/9/2020  | 11/27/2020 | North America / USA / Wisconsin / La Crosse County   |
| EPI_ISL_661159 | 11/9/2020  | 11/27/2020 | North America / USA / Wisconsin / Monroe County      |
| EPI_ISL_661160 | 11/9/2020  | 11/27/2020 | North America / USA / Minnesota / Winona County      |
| EPI_ISL_661161 | 11/9/2020  | 11/27/2020 | North America / USA / Wisconsin / Jackson County     |
| EPI_ISL_661162 | 11/9/2020  | 11/27/2020 | North America / USA / Wisconsin / Vernon County      |
| EPI_ISL_661163 | 11/9/2020  | 11/27/2020 | North America / USA / Wisconsin / Vernon County      |
| EPI_ISL_661164 | 11/9/2020  | 11/27/2020 | North America / USA / Iowa / Winneshiek County       |
| EPI_ISL_661165 | 11/10/2020 | 11/27/2020 | North America / USA / Wisconsin / La Crosse County   |
| EPI_ISL_661166 | 11/10/2020 | 11/27/2020 | North America / USA / Wisconsin / La Crosse County   |
| EPI_ISL_661167 | 11/10/2020 | 11/27/2020 | North America / USA / Minnesota / Dakota County      |
| EPI_ISL_661168 | 11/10/2020 | 11/27/2020 | North America / USA / Wisconsin / Trempealeau County |
| EPI_ISL_661169 | 11/10/2020 | 11/27/2020 | North America / USA / Iowa / Allamakee County        |
| EPI_ISL_661170 | 11/11/2020 | 11/27/2020 | North America / USA / Iowa / Clayton County          |
| EPI_ISL_661171 | 11/11/2020 | 11/27/2020 | North America / USA / Wisconsin / Crawford County    |
| EPI_ISL_661172 | 11/11/2020 | 11/27/2020 | North America / USA / Wisconsin / Monroe County      |
| EPI_ISL_661173 | 11/16/2020 | 11/27/2020 | North America / USA / Wisconsin / La Crosse County   |
| EPI_ISL_936380 | 7/14/2020  | 11/27/2020 | South America / Uruguay                              |
| EPI_ISL_936381 | 7/14/2020  | 11/27/2020 | South America / Uruguay                              |
| EPI_ISL_936382 | 7/14/2020  | 11/27/2020 | South America / Uruguay                              |

|                |            |            |                                        |
|----------------|------------|------------|----------------------------------------|
| EPI_ISL_936383 | 7/14/2020  | 11/27/2020 | South America / Uruguay                |
| EPI_ISL_936384 | 7/14/2020  | 11/27/2020 | South America / Uruguay                |
| EPI_ISL_936385 | 7/14/2020  | 11/27/2020 | South America / Uruguay                |
| EPI_ISL_936386 | 7/14/2020  | 11/27/2020 | South America / Uruguay                |
| EPI_ISL_661175 | 11/21/2020 | 11/28/2020 | Europe / United Kingdom / England      |
| EPI_ISL_661179 | 6/16/2020  | 11/28/2020 | Europe / Serbia / Subotica             |
| EPI_ISL_661180 | 6/15/2020  | 11/28/2020 | Europe / Serbia / Novi Sad             |
| EPI_ISL_661181 | 6/25/2020  | 11/28/2020 | Europe / Serbia / Novi Sad             |
| EPI_ISL_661182 | 7/3/2020   | 11/28/2020 | Europe / Serbia / Backa Palanka        |
| EPI_ISL_661183 | 6/15/2020  | 11/28/2020 | Europe / Serbia / Novi Sad             |
| EPI_ISL_661184 | 6/24/2020  | 11/28/2020 | Europe / Serbia / Pancevo              |
| EPI_ISL_661185 | 6/16/2020  | 11/28/2020 | Europe / Serbia / Novi Sad             |
| EPI_ISL_661186 | 7/9/2020   | 11/28/2020 | Europe / Serbia / Vrsac                |
| EPI_ISL_661187 | 7/5/2020   | 11/28/2020 | Europe / Serbia / Novi Sad             |
| EPI_ISL_661188 | 6/25/2020  | 11/28/2020 | Europe / Serbia / Pancevo              |
| EPI_ISL_661189 | 3/12/2020  | 11/28/2020 | Europe / Serbia / Kikinda              |
| EPI_ISL_661190 | 7/22/2020  | 11/28/2020 | Europe / Serbia / Novi Sad             |
| EPI_ISL_661191 | 6/24/2020  | 11/28/2020 | Europe / Serbia / Novi Sad             |
| EPI_ISL_661192 | 6/25/2020  | 11/28/2020 | Europe / Serbia / Novi Sad             |
| EPI_ISL_661193 | 7/9/2020   | 11/28/2020 | Europe / Serbia / Ruma                 |
| EPI_ISL_661194 | 7/22/2020  | 11/28/2020 | Europe / Serbia / Novi Sad             |
| EPI_ISL_661195 | 6/25/2020  | 11/28/2020 | Europe / Serbia / Vrbas                |
| EPI_ISL_661196 | 6/25/2020  | 11/28/2020 | Europe / Serbia / Novi Sad             |
| EPI_ISL_661197 | 7/10/2020  | 11/28/2020 | Europe / Serbia / Vrsac                |
| EPI_ISL_661198 | 7/29/2020  | 11/28/2020 | Europe / Serbia / Srbobran             |
| EPI_ISL_661199 | 7/5/2020   | 11/28/2020 | Europe / Serbia / Vrbas                |
| EPI_ISL_661200 | 4/1/2020   | 11/28/2020 | Europe / Serbia / Pancevo              |
| EPI_ISL_661271 | 3/10/2020  | 11/28/2020 | Asia / China / Sichuan / Chengdu       |
| EPI_ISL_661272 | 11/7/2020  | 11/28/2020 | Asia / Palestine / West Bank / Jericho |
| EPI_ISL_661218 | 11/16/2020 | 11/29/2020 | Europe / Belgium / Liège               |
| EPI_ISL_661219 | 11/16/2020 | 11/29/2020 | Europe / Belgium / Liège               |
| EPI_ISL_661220 | 11/16/2020 | 11/29/2020 | Europe / Belgium / Liège               |
| EPI_ISL_661221 | 11/16/2020 | 11/29/2020 | Europe / Belgium / Liège               |
| EPI_ISL_661222 | 11/16/2020 | 11/29/2020 | Europe / Belgium / Liège               |
| EPI_ISL_661223 | 11/16/2020 | 11/29/2020 | Europe / Belgium / Liège               |
| EPI_ISL_661224 | 11/16/2020 | 11/29/2020 | Europe / Belgium / Liège               |
| EPI_ISL_661225 | 11/16/2020 | 11/29/2020 | Europe / Belgium / Liège               |
| EPI_ISL_661226 | 11/16/2020 | 11/29/2020 | Europe / Belgium / Liège               |
| EPI_ISL_661227 | 11/16/2020 | 11/29/2020 | Europe / Belgium / Liège               |
| EPI_ISL_661228 | 11/16/2020 | 11/29/2020 | Europe / Belgium / Liège               |
| EPI_ISL_661229 | 11/17/2020 | 11/29/2020 | Europe / Belgium / Liège               |
| EPI_ISL_661230 | 11/17/2020 | 11/29/2020 | Europe / Belgium / Liège               |
| EPI_ISL_661231 | 11/17/2020 | 11/29/2020 | Europe / Belgium / Liège               |
| EPI_ISL_661232 | 11/17/2020 | 11/29/2020 | Europe / Belgium / Liège               |
| EPI_ISL_661233 | 11/17/2020 | 11/29/2020 | Europe / Belgium / Liège               |
| EPI_ISL_661234 | 11/17/2020 | 11/29/2020 | Europe / Belgium / Liège               |
| EPI_ISL_661235 | 11/17/2020 | 11/29/2020 | Europe / Belgium / Liège               |

|                |            |            |                                          |
|----------------|------------|------------|------------------------------------------|
| EPI_ISL_661236 | 11/17/2020 | 11/29/2020 | Europe / Belgium / Liège                 |
| EPI_ISL_661237 | 11/17/2020 | 11/29/2020 | Europe / Belgium / Liège                 |
| EPI_ISL_661238 | 11/17/2020 | 11/29/2020 | Europe / Belgium / Liège                 |
| EPI_ISL_661239 | 11/17/2020 | 11/29/2020 | Europe / Belgium / Liège                 |
| EPI_ISL_661240 | 11/17/2020 | 11/29/2020 | Europe / Belgium / Liège                 |
| EPI_ISL_661241 | 11/17/2020 | 11/29/2020 | Europe / Belgium / Liège                 |
| EPI_ISL_661242 | 11/18/2020 | 11/29/2020 | Europe / Belgium / Liège                 |
| EPI_ISL_661243 | 11/16/2020 | 11/29/2020 | Europe / Belgium / Liège                 |
| EPI_ISL_661244 | 11/16/2020 | 11/29/2020 | Europe / Belgium / Liège                 |
| EPI_ISL_661245 | 11/16/2020 | 11/29/2020 | Europe / Belgium / Liège                 |
| EPI_ISL_661246 | 11/13/2020 | 11/29/2020 | Europe / Belgium / Liège                 |
| EPI_ISL_661247 | 11/13/2020 | 11/29/2020 | Europe / Belgium / Liège                 |
| EPI_ISL_661248 | 11/13/2020 | 11/29/2020 | Europe / Belgium / Liège                 |
| EPI_ISL_661249 | 11/13/2020 | 11/29/2020 | Europe / Belgium / Liège                 |
| EPI_ISL_661250 | 11/13/2020 | 11/29/2020 | Europe / Belgium / Liège                 |
| EPI_ISL_661251 | 11/13/2020 | 11/29/2020 | Europe / Belgium / Liège                 |
| EPI_ISL_661254 | 3/17/2020  | 11/30/2020 | North America / USA / New York           |
| EPI_ISL_661258 | 11/17/2020 | 11/30/2020 | Oceania / New Zealand / Auckland         |
| EPI_ISL_661259 | 11/17/2020 | 11/30/2020 | Oceania / New Zealand / Auckland         |
| EPI_ISL_661262 | 11/19/2020 | 11/30/2020 | Oceania / New Zealand / Auckland         |
| EPI_ISL_661264 | 11/20/2020 | 11/30/2020 | Oceania / New Zealand / Auckland         |
| EPI_ISL_661265 | 11/25/2020 | 11/30/2020 | Oceania / New Zealand / Counties Manukau |
| EPI_ISL_661273 | 7/16/2020  | 11/30/2020 | Europe / Sweden / Stockholm              |
| EPI_ISL_661274 | 11/4/2020  | 11/30/2020 | Europe / Sweden / Skane                  |
| EPI_ISL_661275 | 11/4/2020  | 11/30/2020 | Europe / Sweden / Skane                  |
| EPI_ISL_661276 | 11/10/2020 | 11/30/2020 | Europe / Sweden / Skane                  |
| EPI_ISL_661277 | 11/10/2020 | 11/30/2020 | Europe / Sweden / Skane                  |
| EPI_ISL_661278 | 9/17/2020  | 11/30/2020 | Europe / Sweden / Skane                  |
| EPI_ISL_661279 | 4/6/2020   | 11/30/2020 | Europe / Sweden / Ostergotland           |
| EPI_ISL_661280 | 10/6/2020  | 11/30/2020 | Europe / Sweden / Skane                  |
| EPI_ISL_661281 | 5/26/2020  | 11/30/2020 | Europe / Sweden / Jonkoping              |
| EPI_ISL_661282 | 8/24/2020  | 11/30/2020 | Europe / Sweden / Orebro                 |
| EPI_ISL_661283 | 6/25/2020  | 11/30/2020 | Europe / Sweden / Gavleborg              |
| EPI_ISL_661284 | 9/27/2020  | 11/30/2020 | Europe / Sweden / Ostergotland           |
| EPI_ISL_661285 | 9/27/2020  | 11/30/2020 | Europe / Sweden / Ostergotland           |
| EPI_ISL_661286 | 9/12/2020  | 11/30/2020 | Europe / Sweden / Gavleborg              |
| EPI_ISL_661287 | 9/21/2020  | 11/30/2020 | Europe / Sweden / Gavleborg              |
| EPI_ISL_661288 | 10/21/2020 | 11/30/2020 | Europe / Sweden / Vastmanland            |
| EPI_ISL_661289 | 10/27/2020 | 11/30/2020 | Europe / Sweden / Ostergotland           |
| EPI_ISL_661290 | 10/21/2020 | 11/30/2020 | Europe / Sweden / Stockholm              |
| EPI_ISL_661291 | 10/26/2020 | 11/30/2020 | Europe / Sweden / Vasternorrland         |
| EPI_ISL_661292 | 10/30/2020 | 11/30/2020 | Europe / Sweden / Vasternorrland         |
| EPI_ISL_661293 | 10/30/2020 | 11/30/2020 | Europe / Sweden / Halland                |
| EPI_ISL_661294 | 11/2/2020  | 11/30/2020 | Europe / Sweden / Sormland               |
| EPI_ISL_661295 | 10/26/2020 | 11/30/2020 | Europe / Sweden / Sormland               |
| EPI_ISL_661296 | 10/26/2020 | 11/30/2020 | Europe / Sweden / Sormland               |
| EPI_ISL_661297 | 10/30/2020 | 11/30/2020 | Europe / Sweden / Sormland               |

|                |            |            |                                   |
|----------------|------------|------------|-----------------------------------|
| EPI_ISL_661298 | 10/26/2020 | 11/30/2020 | Europe / Sweden / Sormland        |
| EPI_ISL_661299 | 10/19/2020 | 11/30/2020 | Europe / Sweden / Gavleborg       |
| EPI_ISL_661300 | 11/2/2020  | 11/30/2020 | Europe / Sweden / Varmland        |
| EPI_ISL_661301 | 11/4/2020  | 11/30/2020 | Europe / Sweden / Vastra Gotaland |
| EPI_ISL_661302 | 11/11/2020 | 11/30/2020 | Europe / Sweden / Vastmanland     |
| EPI_ISL_661303 | 11/13/2020 | 11/30/2020 | Europe / Sweden / Vastmanland     |
| EPI_ISL_661304 | 10/27/2020 | 11/30/2020 | Asia / India / West Bengal        |
| EPI_ISL_661305 | 10/26/2020 | 11/30/2020 | Asia / India / West Bengal        |
| EPI_ISL_661306 | 10/27/2020 | 11/30/2020 | Asia / India / West Bengal        |
| EPI_ISL_661307 | 10/27/2020 | 11/30/2020 | Asia / India / West Bengal        |
| EPI_ISL_661308 | 10/27/2020 | 11/30/2020 | Asia / India / West Bengal        |
| EPI_ISL_661309 | 10/27/2020 | 11/30/2020 | Asia / India / West Bengal        |
| EPI_ISL_661310 | 10/26/2020 | 11/30/2020 | Asia / India / West Bengal        |
| EPI_ISL_661311 | 10/27/2020 | 11/30/2020 | Asia / India / West Bengal        |
| EPI_ISL_661314 | 11/11/2020 | 11/30/2020 | Europe / United Kingdom / England |
| EPI_ISL_661315 | 11/11/2020 | 11/30/2020 | Europe / United Kingdom / England |
| EPI_ISL_661316 | 11/11/2020 | 11/30/2020 | Europe / United Kingdom / England |
| EPI_ISL_661319 | 11/11/2020 | 11/30/2020 | Europe / United Kingdom / England |
| EPI_ISL_661320 | 11/11/2020 | 11/30/2020 | Europe / United Kingdom / England |
| EPI_ISL_661322 | 11/11/2020 | 11/30/2020 | Europe / United Kingdom / England |
| EPI_ISL_661323 | 11/11/2020 | 11/30/2020 | Europe / United Kingdom / England |
| EPI_ISL_661324 | 11/11/2020 | 11/30/2020 | Europe / United Kingdom / England |
| EPI_ISL_661325 | 11/11/2020 | 11/30/2020 | Europe / United Kingdom / England |
| EPI_ISL_661326 | 11/11/2020 | 11/30/2020 | Europe / United Kingdom / England |
| EPI_ISL_661327 | 11/11/2020 | 11/30/2020 | Europe / United Kingdom / England |
| EPI_ISL_661328 | 11/11/2020 | 11/30/2020 | Europe / United Kingdom / England |
| EPI_ISL_661329 | 11/11/2020 | 11/30/2020 | Europe / United Kingdom / England |
| EPI_ISL_661330 | 11/11/2020 | 11/30/2020 | Europe / United Kingdom / England |
| EPI_ISL_661331 | 11/11/2020 | 11/30/2020 | Europe / United Kingdom / England |
| EPI_ISL_661332 | 11/11/2020 | 11/30/2020 | Europe / United Kingdom / England |
| EPI_ISL_661333 | 11/11/2020 | 11/30/2020 | Europe / United Kingdom / England |
| EPI_ISL_661335 | 11/11/2020 | 11/30/2020 | Europe / United Kingdom / England |
| EPI_ISL_661337 | 11/11/2020 | 11/30/2020 | Europe / United Kingdom / England |
| EPI_ISL_661338 | 11/10/2020 | 11/30/2020 | Europe / United Kingdom / England |
| EPI_ISL_661339 | 11/11/2020 | 11/30/2020 | Europe / United Kingdom / England |
| EPI_ISL_661340 | 11/11/2020 | 11/30/2020 | Europe / United Kingdom / England |
| EPI_ISL_661341 | 11/11/2020 | 11/30/2020 | Europe / United Kingdom / England |
| EPI_ISL_661342 | 11/11/2020 | 11/30/2020 | Europe / United Kingdom / England |
| EPI_ISL_661343 | 11/11/2020 | 11/30/2020 | Europe / United Kingdom / England |
| EPI_ISL_661344 | 11/11/2020 | 11/30/2020 | Europe / United Kingdom / England |
| EPI_ISL_661346 | 11/11/2020 | 11/30/2020 | Europe / United Kingdom / England |
| EPI_ISL_661347 | 11/11/2020 | 11/30/2020 | Europe / United Kingdom / England |
| EPI_ISL_661348 | 11/9/2020  | 11/30/2020 | Europe / United Kingdom / England |
| EPI_ISL_661349 | 11/11/2020 | 11/30/2020 | Europe / United Kingdom / England |
| EPI_ISL_661351 | 11/11/2020 | 11/30/2020 | Europe / United Kingdom / England |
| EPI_ISL_661352 | 11/11/2020 | 11/30/2020 | Europe / United Kingdom / England |
| EPI_ISL_661354 | 11/11/2020 | 11/30/2020 | Europe / United Kingdom / England |















































































|                |           |            |                                             |
|----------------|-----------|------------|---------------------------------------------|
| EPI_ISL_663272 | 4/2/2020  | 11/30/2020 | Europe / France / Pays de la Loire / Nantes |
| EPI_ISL_663273 | 4/3/2020  | 11/30/2020 | Europe / France / Pays de la Loire / Nantes |
| EPI_ISL_663274 | 4/3/2020  | 11/30/2020 | Europe / France / Pays de la Loire / Nantes |
| EPI_ISL_663275 | 4/4/2020  | 11/30/2020 | Europe / France / Pays de la Loire / Nantes |
| EPI_ISL_663278 | 4/4/2020  | 11/30/2020 | Europe / France / Pays de la Loire / Nantes |
| EPI_ISL_663279 | 4/4/2020  | 11/30/2020 | Europe / France / Pays de la Loire / Nantes |
| EPI_ISL_663280 | 4/5/2020  | 11/30/2020 | Europe / France / Pays de la Loire / Nantes |
| EPI_ISL_663281 | 4/5/2020  | 11/30/2020 | Europe / France / Pays de la Loire / Nantes |
| EPI_ISL_663282 | 4/10/2020 | 11/30/2020 | Europe / France / Pays de la Loire / Nantes |
| EPI_ISL_663283 | 4/12/2020 | 11/30/2020 | Europe / France / Pays de la Loire / Nantes |
| EPI_ISL_663284 | 4/13/2020 | 11/30/2020 | Europe / France / Pays de la Loire / Nantes |
| EPI_ISL_663437 | 8/15/2020 | 11/30/2020 | Oceania / Australia / Victoria              |
| EPI_ISL_663438 | 8/15/2020 | 11/30/2020 | Oceania / Australia / Victoria              |
| EPI_ISL_663439 | 7/20/2020 | 11/30/2020 | Oceania / Australia / Victoria              |
| EPI_ISL_663440 | 7/21/2020 | 11/30/2020 | Oceania / Australia / Victoria              |
| EPI_ISL_663529 | 8/6/2020  | 11/30/2020 | Oceania / Australia / Victoria              |
| EPI_ISL_663530 | 8/7/2020  | 11/30/2020 | Oceania / Australia / Victoria              |
| EPI_ISL_663531 | 8/6/2020  | 11/30/2020 | Oceania / Australia / Victoria              |
| EPI_ISL_663532 | 8/6/2020  | 11/30/2020 | Oceania / Australia / Victoria              |
| EPI_ISL_663533 | 8/6/2020  | 11/30/2020 | Oceania / Australia / Victoria              |
| EPI_ISL_663534 | 8/6/2020  | 11/30/2020 | Oceania / Australia / Victoria              |
| EPI_ISL_663535 | 8/8/2020  | 11/30/2020 | Oceania / Australia / Victoria              |
| EPI_ISL_663536 | 8/5/2020  | 11/30/2020 | Oceania / Australia / Victoria              |
| EPI_ISL_663537 | 8/17/2020 | 11/30/2020 | Oceania / Australia / Victoria              |
| EPI_ISL_663538 | 8/17/2020 | 11/30/2020 | Oceania / Australia / Victoria              |
| EPI_ISL_663539 | 8/19/2020 | 11/30/2020 | Oceania / Australia / Victoria              |
| EPI_ISL_663540 | 8/18/2020 | 11/30/2020 | Oceania / Australia / Victoria              |
| EPI_ISL_663541 | 8/13/2020 | 11/30/2020 | Oceania / Australia / Victoria              |
| EPI_ISL_663542 | 8/19/2020 | 11/30/2020 | Oceania / Australia / Victoria              |
| EPI_ISL_663543 | 8/22/2020 | 11/30/2020 | Oceania / Australia / Victoria              |
| EPI_ISL_663544 | 8/14/2020 | 11/30/2020 | Oceania / Australia / Victoria              |
| EPI_ISL_663545 | 7/16/2020 | 11/30/2020 | Oceania / Australia / Victoria              |
| EPI_ISL_663546 | 8/6/2020  | 11/30/2020 | Oceania / Australia / Victoria              |
| EPI_ISL_663547 | 7/31/2020 | 11/30/2020 | Oceania / Australia / Victoria              |
| EPI_ISL_663548 | 8/1/2020  | 11/30/2020 | Oceania / Australia / Victoria              |
| EPI_ISL_663549 | 8/5/2020  | 11/30/2020 | Oceania / Australia / Victoria              |
| EPI_ISL_663550 | 8/6/2020  | 11/30/2020 | Oceania / Australia / Victoria              |
| EPI_ISL_663551 | 8/7/2020  | 11/30/2020 | Oceania / Australia / Victoria              |
| EPI_ISL_663552 | 8/7/2020  | 11/30/2020 | Oceania / Australia / Victoria              |
| EPI_ISL_663553 | 8/7/2020  | 11/30/2020 | Oceania / Australia / Victoria              |
| EPI_ISL_663554 | 8/7/2020  | 11/30/2020 | Oceania / Australia / Victoria              |
| EPI_ISL_663555 | 8/7/2020  | 11/30/2020 | Oceania / Australia / Victoria              |
| EPI_ISL_663556 | 8/8/2020  | 11/30/2020 | Oceania / Australia / Victoria              |
| EPI_ISL_663557 | 8/8/2020  | 11/30/2020 | Oceania / Australia / Victoria              |
| EPI_ISL_663558 | 8/8/2020  | 11/30/2020 | Oceania / Australia / Victoria              |
| EPI_ISL_663559 | 8/8/2020  | 11/30/2020 | Oceania / Australia / Victoria              |
| EPI_ISL_663560 | 8/8/2020  | 11/30/2020 | Oceania / Australia / Victoria              |





















|                |            |                                              |
|----------------|------------|----------------------------------------------|
| EPI_ISL_663986 | 8/13/2020  | 11/30/2020 Oceania / Australia / Victoria    |
| EPI_ISL_663987 | 8/21/2020  | 11/30/2020 Oceania / Australia / Victoria    |
| EPI_ISL_663988 | 8/13/2020  | 11/30/2020 Oceania / Australia / Victoria    |
| EPI_ISL_663989 | 8/20/2020  | 11/30/2020 Oceania / Australia / Victoria    |
| EPI_ISL_663990 | 8/13/2020  | 11/30/2020 Oceania / Australia / Victoria    |
| EPI_ISL_663991 | 8/13/2020  | 11/30/2020 Oceania / Australia / Victoria    |
| EPI_ISL_663992 | 8/13/2020  | 11/30/2020 Oceania / Australia / Victoria    |
| EPI_ISL_663993 | 8/20/2020  | 11/30/2020 Oceania / Australia / Victoria    |
| EPI_ISL_663994 | 8/13/2020  | 11/30/2020 Oceania / Australia / Victoria    |
| EPI_ISL_663995 | 8/13/2020  | 11/30/2020 Oceania / Australia / Victoria    |
| EPI_ISL_663996 | 8/12/2020  | 11/30/2020 Oceania / Australia / Victoria    |
| EPI_ISL_663997 | 8/24/2020  | 11/30/2020 Oceania / Australia / Victoria    |
| EPI_ISL_663998 | 8/25/2020  | 11/30/2020 Oceania / Australia / Victoria    |
| EPI_ISL_663999 | 8/24/2020  | 11/30/2020 Oceania / Australia / Victoria    |
| EPI_ISL_664000 | 8/24/2020  | 11/30/2020 Oceania / Australia / Victoria    |
| EPI_ISL_664001 | 8/23/2020  | 11/30/2020 Oceania / Australia / Victoria    |
| EPI_ISL_664002 | 8/25/2020  | 11/30/2020 Oceania / Australia / Victoria    |
| EPI_ISL_664003 | 8/23/2020  | 11/30/2020 Oceania / Australia / Victoria    |
| EPI_ISL_664004 | 8/22/2020  | 11/30/2020 Oceania / Australia / Victoria    |
| EPI_ISL_664005 | 8/21/2020  | 11/30/2020 Oceania / Australia / Victoria    |
| EPI_ISL_664006 | 8/21/2020  | 11/30/2020 Oceania / Australia / Victoria    |
| EPI_ISL_664007 | 8/24/2020  | 11/30/2020 Oceania / Australia / Victoria    |
| EPI_ISL_664008 | 8/6/2020   | 11/30/2020 Oceania / Australia / Victoria    |
| EPI_ISL_664009 | 8/6/2020   | 11/30/2020 Oceania / Australia / Victoria    |
| EPI_ISL_664010 | 8/5/2020   | 11/30/2020 Oceania / Australia / Victoria    |
| EPI_ISL_664011 | 8/5/2020   | 11/30/2020 Oceania / Australia / Victoria    |
| EPI_ISL_664012 | 8/6/2020   | 11/30/2020 Oceania / Australia / Victoria    |
| EPI_ISL_664013 | 8/6/2020   | 11/30/2020 Oceania / Australia / Victoria    |
| EPI_ISL_664014 | 8/6/2020   | 11/30/2020 Oceania / Australia / Victoria    |
| EPI_ISL_664015 | 8/21/2020  | 11/30/2020 Oceania / Australia / Victoria    |
| EPI_ISL_664016 | 8/21/2020  | 11/30/2020 Oceania / Australia / Victoria    |
| EPI_ISL_664017 | 8/21/2020  | 11/30/2020 Oceania / Australia / Victoria    |
| EPI_ISL_664018 | 8/21/2020  | 11/30/2020 Oceania / Australia / Victoria    |
| EPI_ISL_664019 | 8/21/2020  | 11/30/2020 Oceania / Australia / Victoria    |
| EPI_ISL_664043 | 11/6/2020  | 11/30/2020 Europe / United Kingdom / England |
| EPI_ISL_664055 | 11/10/2020 | 11/30/2020 Europe / United Kingdom / England |
| EPI_ISL_664070 | 11/10/2020 | 11/30/2020 Europe / United Kingdom / England |
| EPI_ISL_664080 | 11/10/2020 | 11/30/2020 Europe / United Kingdom / England |
| EPI_ISL_664084 | 11/10/2020 | 11/30/2020 Europe / United Kingdom / England |
| EPI_ISL_664106 | 4/14/2020  | 11/30/2020 Europe / Norway / Viken           |
| EPI_ISL_664598 | 11/11/2020 | 11/30/2020 Europe / United Kingdom / England |
| EPI_ISL_664599 | 11/4/2020  | 11/30/2020 Europe / United Kingdom / England |
| EPI_ISL_664600 | 11/3/2020  | 11/30/2020 Europe / United Kingdom / England |
| EPI_ISL_664601 | 11/16/2020 | 11/30/2020 Europe / United Kingdom / England |
| EPI_ISL_664602 | 11/2/2020  | 11/30/2020 Europe / United Kingdom / England |
| EPI_ISL_664603 | 10/27/2020 | 11/30/2020 Europe / United Kingdom / England |
| EPI_ISL_664604 | 11/2/2020  | 11/30/2020 Europe / United Kingdom / England |























|                |            |            |                                    |
|----------------|------------|------------|------------------------------------|
| EPI_ISL_665220 | 10/23/2020 | 11/30/2020 | Europe / United Kingdom / England  |
| EPI_ISL_665221 | 10/24/2020 | 11/30/2020 | Europe / United Kingdom / England  |
| EPI_ISL_665222 | 10/24/2020 | 11/30/2020 | Europe / United Kingdom / England  |
| EPI_ISL_665223 | 10/1/2020  | 11/30/2020 | Europe / United Kingdom / England  |
| EPI_ISL_665224 | 10/20/2020 | 11/30/2020 | Europe / United Kingdom / England  |
| EPI_ISL_665225 | 10/21/2020 | 11/30/2020 | Europe / United Kingdom / England  |
| EPI_ISL_665226 | 10/21/2020 | 11/30/2020 | Europe / United Kingdom / England  |
| EPI_ISL_665227 | 10/21/2020 | 11/30/2020 | Europe / United Kingdom / England  |
| EPI_ISL_665228 | 10/25/2020 | 11/30/2020 | Europe / United Kingdom / England  |
| EPI_ISL_665229 | 10/26/2020 | 11/30/2020 | Europe / United Kingdom / England  |
| EPI_ISL_665230 | 10/26/2020 | 11/30/2020 | Europe / United Kingdom / England  |
| EPI_ISL_665231 | 10/26/2020 | 11/30/2020 | Europe / United Kingdom / England  |
| EPI_ISL_665232 | 10/26/2020 | 11/30/2020 | Europe / United Kingdom / England  |
| EPI_ISL_665233 | 10/26/2020 | 11/30/2020 | Europe / United Kingdom / England  |
| EPI_ISL_665234 | 10/26/2020 | 11/30/2020 | Europe / United Kingdom / England  |
| EPI_ISL_665235 | 10/26/2020 | 11/30/2020 | Europe / United Kingdom / England  |
| EPI_ISL_665236 | 10/27/2020 | 11/30/2020 | Europe / United Kingdom / England  |
| EPI_ISL_665237 | 10/28/2020 | 11/30/2020 | Europe / United Kingdom / England  |
| EPI_ISL_665238 | 10/28/2020 | 11/30/2020 | Europe / United Kingdom / England  |
| EPI_ISL_665239 | 10/30/2020 | 11/30/2020 | Europe / United Kingdom / England  |
| EPI_ISL_665240 | 9/10/2020  | 11/30/2020 | Europe / United Kingdom / England  |
| EPI_ISL_665241 | 10/5/2020  | 11/30/2020 | Europe / United Kingdom / England  |
| EPI_ISL_665242 | 10/12/2020 | 11/30/2020 | Europe / United Kingdom / England  |
| EPI_ISL_665244 | 11/2/2020  | 11/30/2020 | Europe / United Kingdom / England  |
| EPI_ISL_665245 | 11/2/2020  | 11/30/2020 | Europe / United Kingdom / England  |
| EPI_ISL_665246 | 11/2/2020  | 11/30/2020 | Europe / United Kingdom / England  |
| EPI_ISL_665247 | 11/2/2020  | 11/30/2020 | Europe / United Kingdom / England  |
| EPI_ISL_665248 | 11/2/2020  | 11/30/2020 | Europe / United Kingdom / England  |
| EPI_ISL_665249 | 11/3/2020  | 11/30/2020 | Europe / United Kingdom / England  |
| EPI_ISL_665250 | 11/3/2020  | 11/30/2020 | Europe / United Kingdom / England  |
| EPI_ISL_665251 | 11/4/2020  | 11/30/2020 | Europe / United Kingdom / England  |
| EPI_ISL_665252 | 11/4/2020  | 11/30/2020 | Europe / United Kingdom / England  |
| EPI_ISL_665253 | 11/4/2020  | 11/30/2020 | Europe / United Kingdom / England  |
| EPI_ISL_665254 | 4/19/2020  | 11/30/2020 | Europe / Norway / Viken            |
| EPI_ISL_665255 | 4/27/2020  | 11/30/2020 | Europe / Norway / Viken            |
| EPI_ISL_665632 | 11/12/2020 | 11/30/2020 | Europe / United Kingdom / England  |
| EPI_ISL_665633 | 11/13/2020 | 11/30/2020 | Europe / United Kingdom / Scotland |
| EPI_ISL_665634 | 11/9/2020  | 11/30/2020 | Europe / United Kingdom / England  |
| EPI_ISL_665635 | 11/10/2020 | 11/30/2020 | Europe / United Kingdom / England  |
| EPI_ISL_665636 | 11/16/2020 | 11/30/2020 | Europe / United Kingdom / England  |
| EPI_ISL_665637 | 11/14/2020 | 11/30/2020 | Europe / United Kingdom / England  |
| EPI_ISL_665638 | 11/17/2020 | 11/30/2020 | Europe / United Kingdom / England  |
| EPI_ISL_665639 | 11/21/2020 | 11/30/2020 | Europe / United Kingdom / England  |
| EPI_ISL_665640 | 11/10/2020 | 11/30/2020 | Europe / United Kingdom / Scotland |
| EPI_ISL_665641 | 11/17/2020 | 11/30/2020 | Europe / United Kingdom / Scotland |
| EPI_ISL_665642 | 11/5/2020  | 11/30/2020 | Europe / United Kingdom / Wales    |
| EPI_ISL_665643 | 11/16/2020 | 11/30/2020 | Europe / United Kingdom / England  |

|                |            |            |                                    |
|----------------|------------|------------|------------------------------------|
| EPI_ISL_665644 | 11/9/2020  | 11/30/2020 | Europe / United Kingdom / England  |
| EPI_ISL_665645 | 11/14/2020 | 11/30/2020 | Europe / United Kingdom / England  |
| EPI_ISL_665646 | 11/8/2020  | 11/30/2020 | Europe / United Kingdom / Scotland |
| EPI_ISL_665647 | 11/7/2020  | 11/30/2020 | Europe / United Kingdom / Wales    |
| EPI_ISL_665648 | 11/14/2020 | 11/30/2020 | Europe / United Kingdom / England  |
| EPI_ISL_665649 | 11/12/2020 | 11/30/2020 | Europe / United Kingdom / England  |
| EPI_ISL_665650 | 11/10/2020 | 11/30/2020 | Europe / United Kingdom / England  |
| EPI_ISL_665651 | 10/29/2020 | 11/30/2020 | Europe / United Kingdom / England  |
| EPI_ISL_665652 | 10/3/2020  | 11/30/2020 | Europe / United Kingdom / England  |
| EPI_ISL_665653 | 10/28/2020 | 11/30/2020 | Europe / United Kingdom / Wales    |
| EPI_ISL_665654 | 11/5/2020  | 11/30/2020 | Europe / United Kingdom / Wales    |
| EPI_ISL_665655 | 11/4/2020  | 11/30/2020 | Europe / United Kingdom / Wales    |
| EPI_ISL_665750 | 11/4/2020  | 11/30/2020 | Europe / United Kingdom / Wales    |
| EPI_ISL_665751 | 11/4/2020  | 11/30/2020 | Europe / United Kingdom / Wales    |
| EPI_ISL_665752 | 11/4/2020  | 11/30/2020 | Europe / United Kingdom / Wales    |
| EPI_ISL_665753 | 11/4/2020  | 11/30/2020 | Europe / United Kingdom / Wales    |
| EPI_ISL_665754 | 11/4/2020  | 11/30/2020 | Europe / United Kingdom / Wales    |
| EPI_ISL_665755 | 11/4/2020  | 11/30/2020 | Europe / United Kingdom / Wales    |
| EPI_ISL_665756 | 11/3/2020  | 11/30/2020 | Europe / United Kingdom / Wales    |
| EPI_ISL_665757 | 11/14/2020 | 11/30/2020 | Europe / United Kingdom / England  |
| EPI_ISL_665758 | 11/14/2020 | 11/30/2020 | Europe / United Kingdom / England  |
| EPI_ISL_665759 | 11/9/2020  | 11/30/2020 | Europe / United Kingdom / England  |
| EPI_ISL_665760 | 10/8/2020  | 11/30/2020 | Europe / United Kingdom / England  |
| EPI_ISL_665761 | 10/20/2020 | 11/30/2020 | Europe / United Kingdom / England  |
| EPI_ISL_665762 | 11/5/2020  | 11/30/2020 | Europe / United Kingdom / Scotland |
| EPI_ISL_665763 | 11/5/2020  | 11/30/2020 | Europe / United Kingdom / Wales    |
| EPI_ISL_665764 | 11/2/2020  | 11/30/2020 | Europe / United Kingdom / Wales    |
| EPI_ISL_665765 | 11/6/2020  | 11/30/2020 | Europe / United Kingdom / Wales    |
| EPI_ISL_665766 | 11/6/2020  | 11/30/2020 | Europe / United Kingdom / Wales    |
| EPI_ISL_665767 | 11/6/2020  | 11/30/2020 | Europe / United Kingdom / Wales    |
| EPI_ISL_665768 | 11/1/2020  | 11/30/2020 | Europe / United Kingdom / Wales    |
| EPI_ISL_665769 | 11/6/2020  | 11/30/2020 | Europe / United Kingdom / Wales    |
| EPI_ISL_665770 | 11/6/2020  | 11/30/2020 | Europe / United Kingdom / Wales    |
| EPI_ISL_665771 | 11/2/2020  | 11/30/2020 | Europe / United Kingdom / Wales    |
| EPI_ISL_665772 | 11/6/2020  | 11/30/2020 | Europe / United Kingdom / Wales    |
| EPI_ISL_665773 | 11/6/2020  | 11/30/2020 | Europe / United Kingdom / Wales    |
| EPI_ISL_665774 | 11/8/2020  | 11/30/2020 | Europe / United Kingdom / Wales    |
| EPI_ISL_665775 | 11/6/2020  | 11/30/2020 | Europe / United Kingdom / Wales    |
| EPI_ISL_665776 | 11/5/2020  | 11/30/2020 | Europe / United Kingdom / Wales    |
| EPI_ISL_665777 | 11/9/2020  | 11/30/2020 | Europe / United Kingdom / Wales    |
| EPI_ISL_665778 | 11/9/2020  | 11/30/2020 | Europe / United Kingdom / Wales    |
| EPI_ISL_665779 | 11/9/2020  | 11/30/2020 | Europe / United Kingdom / Wales    |
| EPI_ISL_665780 | 11/6/2020  | 11/30/2020 | Europe / United Kingdom / Wales    |
| EPI_ISL_665781 | 11/8/2020  | 11/30/2020 | Europe / United Kingdom / Wales    |
| EPI_ISL_665785 | 11/5/2020  | 11/30/2020 | Europe / United Kingdom / England  |
| EPI_ISL_665786 | 11/14/2020 | 11/30/2020 | Europe / United Kingdom / England  |
| EPI_ISL_665787 | 10/6/2020  | 11/30/2020 | Europe / United Kingdom / England  |









































|                |            |            |                                                             |
|----------------|------------|------------|-------------------------------------------------------------|
| EPI_ISL_666590 | 11/10/2020 | 11/30/2020 | Europe / United Kingdom / Wales                             |
| EPI_ISL_666591 | 10/12/2020 | 11/30/2020 | Europe / United Kingdom / Wales                             |
| EPI_ISL_666592 | 10/29/2020 | 11/30/2020 | Europe / United Kingdom / Wales                             |
| EPI_ISL_666593 | 4/14/2020  | 11/30/2020 | Europe / Norway / Viken                                     |
| EPI_ISL_666594 | 4/13/2020  | 11/30/2020 | Europe / Norway / Viken                                     |
| EPI_ISL_666595 | 6/10/2020  | 11/30/2020 | Europe / Norway / Viken                                     |
| EPI_ISL_666598 | 6/22/2020  | 11/30/2020 | Europe / Norway / Viken                                     |
| EPI_ISL_666602 | 3/24/2020  | 11/30/2020 | Europe / Norway / Viken                                     |
| EPI_ISL_666604 | 4/6/2020   | 11/30/2020 | Europe / Norway / Viken                                     |
| EPI_ISL_666606 | 4/6/2020   | 11/30/2020 | Europe / Norway / Viken                                     |
| EPI_ISL_666609 | 7/16/2020  | 11/30/2020 | North America / USA / Louisiana / Caddo Parish              |
| EPI_ISL_666610 | 4/24/2020  | 11/30/2020 | Europe / Norway / Viken                                     |
| EPI_ISL_666612 | 4/23/2020  | 11/30/2020 | Europe / Norway / Viken                                     |
| EPI_ISL_666613 | 8/25/2020  | 11/30/2020 | North America / USA / Louisiana / Caddo Parish              |
| EPI_ISL_666617 | 9/24/2020  | 11/30/2020 | North America / USA / Florida / Alachua County              |
| EPI_ISL_666618 | 10/15/2020 | 11/30/2020 | North America / USA / Florida / Alachua County              |
| EPI_ISL_666619 | 10/15/2020 | 11/30/2020 | North America / USA / Florida / Alachua County              |
| EPI_ISL_666620 | 10/15/2020 | 11/30/2020 | North America / USA / Florida / Alachua County              |
| EPI_ISL_666621 | 10/15/2020 | 11/30/2020 | North America / USA / Florida / Alachua County              |
| EPI_ISL_666622 | 10/6/2020  | 11/30/2020 | North America / USA / Florida / Alachua County              |
| EPI_ISL_667759 | 9/4/2020   | 11/30/2020 | North America / Canada                                      |
| EPI_ISL_667762 | 9/4/2020   | 11/30/2020 | North America / Canada                                      |
| EPI_ISL_667771 | 9/4/2020   | 11/30/2020 | North America / Canada                                      |
| EPI_ISL_666623 | 10/12/2020 | 12/1/2020  | Europe / Germany / North Rhine-Westphalia / Düsseldorf      |
| EPI_ISL_666624 | 10/12/2020 | 12/1/2020  | Europe / Germany / North Rhine-Westphalia / Düsseldorf      |
| EPI_ISL_666625 | 10/12/2020 | 12/1/2020  | Europe / Germany / North Rhine-Westphalia / Düsseldorf      |
| EPI_ISL_666626 | 10/12/2020 | 12/1/2020  | Europe / Germany / North Rhine-Westphalia / Düsseldorf      |
| EPI_ISL_666627 | 10/12/2020 | 12/1/2020  | Europe / Germany / North Rhine-Westphalia / Düsseldorf      |
| EPI_ISL_666628 | 10/13/2020 | 12/1/2020  | Europe / Germany / North Rhine-Westphalia / Düsseldorf      |
| EPI_ISL_666629 | 10/13/2020 | 12/1/2020  | Europe / Germany / North Rhine-Westphalia / Düsseldorf      |
| EPI_ISL_666637 | 9/10/2020  | 12/1/2020  | Europe / Germany / North Rhine-Westphalia / Düsseldorf      |
| EPI_ISL_666640 | 9/10/2020  | 12/1/2020  | Europe / Germany / North Rhine-Westphalia / Düsseldorf      |
| EPI_ISL_666642 | 9/10/2020  | 12/1/2020  | Europe / Germany / North Rhine-Westphalia / Düsseldorf      |
| EPI_ISL_666648 | 9/11/2020  | 12/1/2020  | Europe / Germany / North Rhine-Westphalia / Düsseldorf      |
| EPI_ISL_666654 | 3/16/2020  | 12/1/2020  | Europe / France / Auvergne-Rhone-Alpes / Saint-Julien-en-Ge |
| EPI_ISL_666656 | 3/22/2020  | 12/1/2020  | Europe / France / Auvergne-Rhone-Alpes / Saint-Julien-en-Ge |
| EPI_ISL_666657 | 3/23/2020  | 12/1/2020  | Europe / France / Auvergne-Rhone-Alpes / Saint-Julien-en-Ge |
| EPI_ISL_666659 | 3/24/2020  | 12/1/2020  | Europe / France / Auvergne-Rhone-Alpes / Saint-Julien-en-Ge |
| EPI_ISL_666660 | 3/29/2020  | 12/1/2020  | Europe / France / Auvergne-Rhone-Alpes / Saint-Julien-en-Ge |
| EPI_ISL_666661 | 3/29/2020  | 12/1/2020  | Europe / France / Auvergne-Rhone-Alpes / Saint-Julien-en-Ge |
| EPI_ISL_666662 | 3/31/2020  | 12/1/2020  | Europe / France / Auvergne-Rhone-Alpes / Saint-Julien-en-Ge |
| EPI_ISL_666664 | 3/31/2020  | 12/1/2020  | Europe / France / Auvergne-Rhone-Alpes / Saint-Julien-en-Ge |
| EPI_ISL_666665 | 4/1/2020   | 12/1/2020  | Europe / France / Auvergne-Rhone-Alpes / Saint-Julien-en-Ge |
| EPI_ISL_666668 | 4/3/2020   | 12/1/2020  | Europe / France / Auvergne-Rhone-Alpes / Saint-Julien-en-Ge |
| EPI_ISL_666669 | 4/8/2020   | 12/1/2020  | Europe / France / Auvergne-Rhone-Alpes / Saint-Julien-en-Ge |
| EPI_ISL_666670 | 4/9/2020   | 12/1/2020  | Europe / France / Auvergne-Rhone-Alpes / Saint-Julien-en-Ge |
| EPI_ISL_666671 | 4/9/2020   | 12/1/2020  | Europe / France / Auvergne-Rhone-Alpes / Saint-Julien-en-Ge |

|                |           |           |                                                              |
|----------------|-----------|-----------|--------------------------------------------------------------|
| EPI_ISL_666672 | 4/11/2020 | 12/1/2020 | Europe / France / Auvergne-Rhone-Alpes / Saint-Julien-en-Gei |
| EPI_ISL_666673 | 4/15/2020 | 12/1/2020 | Europe / France / Auvergne-Rhone-Alpes / Saint-Julien-en-Gei |
| EPI_ISL_666674 | 4/15/2020 | 12/1/2020 | Europe / France / Auvergne-Rhone-Alpes / Saint-Julien-en-Gei |
| EPI_ISL_666676 | 4/17/2020 | 12/1/2020 | Europe / France / Auvergne-Rhone-Alpes / Saint-Julien-en-Gei |
| EPI_ISL_666677 | 4/17/2020 | 12/1/2020 | Europe / France / Auvergne-Rhone-Alpes / Saint-Julien-en-Gei |
| EPI_ISL_666678 | 4/20/2020 | 12/1/2020 | Europe / France / Auvergne-Rhone-Alpes / Saint-Julien-en-Gei |
| EPI_ISL_666679 | 4/21/2020 | 12/1/2020 | Europe / France / Auvergne-Rhone-Alpes / Saint-Julien-en-Gei |
| EPI_ISL_666680 | 4/30/2020 | 12/1/2020 | Europe / France / Auvergne-Rhone-Alpes / Saint-Julien-en-Gei |
| EPI_ISL_666681 | 5/4/2020  | 12/1/2020 | Europe / France / Auvergne-Rhone-Alpes / Saint-Julien-en-Gei |
| EPI_ISL_666683 | 3/18/2020 | 12/1/2020 | Europe / France / Auvergne-Rhone-Alpes / Chambery            |
| EPI_ISL_666684 | 3/16/2020 | 12/1/2020 | Europe / France / Auvergne-Rhone-Alpes / Chambery            |
| EPI_ISL_666685 | 3/16/2020 | 12/1/2020 | Europe / France / Auvergne-Rhone-Alpes / Chambery            |
| EPI_ISL_666686 | 3/14/2020 | 12/1/2020 | Europe / France / Auvergne-Rhone-Alpes / Chambery            |
| EPI_ISL_666696 | 4/6/2020  | 12/1/2020 | Europe / Ireland / Donegal                                   |
| EPI_ISL_666697 | 4/6/2020  | 12/1/2020 | Europe / Ireland / Donegal                                   |
| EPI_ISL_666698 | 4/5/2020  | 12/1/2020 | Europe / Ireland / Donegal                                   |
| EPI_ISL_666699 | 4/5/2020  | 12/1/2020 | Europe / Ireland / Donegal                                   |
| EPI_ISL_666700 | 4/6/2020  | 12/1/2020 | Europe / Ireland / Donegal                                   |
| EPI_ISL_666701 | 4/5/2020  | 12/1/2020 | Europe / Ireland / Donegal                                   |
| EPI_ISL_666702 | 4/6/2020  | 12/1/2020 | Europe / Ireland / Donegal                                   |
| EPI_ISL_666703 | 4/3/2020  | 12/1/2020 | Europe / Ireland / Donegal                                   |
| EPI_ISL_666704 | 4/5/2020  | 12/1/2020 | Europe / Ireland / Donegal                                   |
| EPI_ISL_666705 | 4/2/2020  | 12/1/2020 | Europe / Ireland / Donegal                                   |
| EPI_ISL_666706 | 4/2/2020  | 12/1/2020 | Europe / Ireland / Donegal                                   |
| EPI_ISL_666707 | 4/2/2020  | 12/1/2020 | Europe / Ireland / Donegal                                   |
| EPI_ISL_666708 | 4/2/2020  | 12/1/2020 | Europe / Ireland / Donegal                                   |
| EPI_ISL_666709 | 4/5/2020  | 12/1/2020 | Europe / Ireland / Kildare                                   |
| EPI_ISL_666710 | 4/5/2020  | 12/1/2020 | Europe / Ireland / Mayo                                      |
| EPI_ISL_666711 | 4/21/2020 | 12/1/2020 | Europe / France / Nouvelle-Aquitaine / Limoges               |
| EPI_ISL_666712 | 5/14/2020 | 12/1/2020 | Europe / France / Nouvelle-Aquitaine / Limoges               |
| EPI_ISL_666713 | 5/9/2020  | 12/1/2020 | Europe / France / Nouvelle-Aquitaine / Limoges               |
| EPI_ISL_666714 | 5/11/2020 | 12/1/2020 | Europe / France / Nouvelle-Aquitaine / Limoges               |
| EPI_ISL_666715 | 5/7/2020  | 12/1/2020 | Europe / France / Nouvelle-Aquitaine / Limoges               |
| EPI_ISL_666716 | 5/5/2020  | 12/1/2020 | Europe / France / Nouvelle-Aquitaine / Limoges               |
| EPI_ISL_666717 | 5/5/2020  | 12/1/2020 | Europe / France / Nouvelle-Aquitaine / Limoges               |
| EPI_ISL_666718 | 5/4/2020  | 12/1/2020 | Europe / France / Nouvelle-Aquitaine / Limoges               |
| EPI_ISL_666719 | 4/28/2020 | 12/1/2020 | Europe / France / Nouvelle-Aquitaine / Limoges               |
| EPI_ISL_666720 | 4/27/2020 | 12/1/2020 | Europe / France / Nouvelle-Aquitaine / Limoges               |
| EPI_ISL_666721 | 4/20/2020 | 12/1/2020 | Europe / France / Pays de la Loire / Nantes                  |
| EPI_ISL_666722 | 4/21/2020 | 12/1/2020 | Europe / France / Pays de la Loire / Nantes                  |
| EPI_ISL_666723 | 4/24/2020 | 12/1/2020 | Europe / France / Pays de la Loire / Nantes                  |
| EPI_ISL_666724 | 4/27/2020 | 12/1/2020 | Europe / France / Pays de la Loire / Nantes                  |
| EPI_ISL_666731 | 2020      | 12/1/2020 | Europe / United Kingdom / England                            |
| EPI_ISL_666732 | 11/2/2020 | 12/1/2020 | Europe / United Kingdom / England                            |
| EPI_ISL_666733 | 11/2/2020 | 12/1/2020 | Europe / United Kingdom / England                            |
| EPI_ISL_666734 | 11/2/2020 | 12/1/2020 | Europe / United Kingdom / England                            |
| EPI_ISL_666735 | 11/2/2020 | 12/1/2020 | Europe / United Kingdom / England                            |



|                |            |           |                                |
|----------------|------------|-----------|--------------------------------|
| EPI_ISL_666787 | 11/5/2020  | 12/1/2020 | North America / USA / Maryland |
| EPI_ISL_666788 | 11/5/2020  | 12/1/2020 | North America / USA / Maryland |
| EPI_ISL_666789 | 11/5/2020  | 12/1/2020 | North America / USA / Maryland |
| EPI_ISL_666790 | 11/5/2020  | 12/1/2020 | North America / USA / Maryland |
| EPI_ISL_666791 | 11/5/2020  | 12/1/2020 | North America / USA / Maryland |
| EPI_ISL_666792 | 11/3/2020  | 12/1/2020 | North America / USA / Maryland |
| EPI_ISL_666793 | 11/5/2020  | 12/1/2020 | North America / USA / Maryland |
| EPI_ISL_666794 | 10/14/2020 | 12/1/2020 | North America / USA / Maryland |
| EPI_ISL_666795 | 10/14/2020 | 12/1/2020 | North America / USA / Maryland |
| EPI_ISL_666796 | 10/14/2020 | 12/1/2020 | North America / USA / Maryland |
| EPI_ISL_666797 | 10/14/2020 | 12/1/2020 | North America / USA / Maryland |
| EPI_ISL_666798 | 10/14/2020 | 12/1/2020 | North America / USA / Maryland |
| EPI_ISL_666799 | 11/10/2020 | 12/1/2020 | North America / USA / Maryland |
| EPI_ISL_666800 | 11/10/2020 | 12/1/2020 | North America / USA / Maryland |
| EPI_ISL_666801 | 11/10/2020 | 12/1/2020 | North America / USA / Maryland |
| EPI_ISL_666802 | 11/10/2020 | 12/1/2020 | North America / USA / Maryland |
| EPI_ISL_666803 | 11/10/2020 | 12/1/2020 | North America / USA / Maryland |
| EPI_ISL_666804 | 11/10/2020 | 12/1/2020 | North America / USA / Maryland |
| EPI_ISL_666805 | 11/10/2020 | 12/1/2020 | North America / USA / Maryland |
| EPI_ISL_666806 | 11/10/2020 | 12/1/2020 | North America / USA / Maryland |
| EPI_ISL_666807 | 11/10/2020 | 12/1/2020 | North America / USA / Maryland |
| EPI_ISL_666808 | 11/10/2020 | 12/1/2020 | North America / USA / Maryland |
| EPI_ISL_666809 | 11/10/2020 | 12/1/2020 | North America / USA / Maryland |
| EPI_ISL_666810 | 11/10/2020 | 12/1/2020 | North America / USA / Maryland |
| EPI_ISL_666811 | 11/10/2020 | 12/1/2020 | North America / USA / Maryland |
| EPI_ISL_666812 | 11/10/2020 | 12/1/2020 | North America / USA / Maryland |
| EPI_ISL_666813 | 11/11/2020 | 12/1/2020 | North America / USA / Maryland |
| EPI_ISL_666825 | 6/17/2020  | 12/1/2020 | North America / USA / Florida  |
| EPI_ISL_666833 | 5/11/2020  | 12/1/2020 | North America / USA / Florida  |
| EPI_ISL_666836 | 8/5/2020   | 12/1/2020 | North America / USA / Florida  |
| EPI_ISL_666837 | 8/6/2020   | 12/1/2020 | North America / USA / Florida  |
| EPI_ISL_666840 | 8/5/2020   | 12/1/2020 | North America / USA / Florida  |
| EPI_ISL_666842 | 8/13/2020  | 12/1/2020 | North America / USA / Florida  |
| EPI_ISL_666847 | 8/31/2020  | 12/1/2020 | North America / USA / Florida  |
| EPI_ISL_666849 | 9/4/2020   | 12/1/2020 | North America / USA / Florida  |
| EPI_ISL_666852 | 9/8/2020   | 12/1/2020 | North America / USA / Florida  |
| EPI_ISL_666854 | 8/10/2020  | 12/1/2020 | North America / USA / Florida  |
| EPI_ISL_666870 | 3/3/2020   | 12/1/2020 | Europe / France / Normandy     |
| EPI_ISL_666872 | 10/27/2020 | 12/1/2020 | Europe / Belgium / Liège       |
| EPI_ISL_666873 | 10/27/2020 | 12/1/2020 | Europe / Belgium / Liège       |
| EPI_ISL_666874 | 10/27/2020 | 12/1/2020 | Europe / Belgium / Liège       |
| EPI_ISL_666877 | 10/27/2020 | 12/1/2020 | Europe / Belgium / Liège       |
| EPI_ISL_666878 | 10/27/2020 | 12/1/2020 | Europe / Belgium / Liège       |
| EPI_ISL_666879 | 10/27/2020 | 12/1/2020 | Europe / Belgium / Liège       |
| EPI_ISL_666881 | 10/28/2020 | 12/1/2020 | Europe / Belgium / Liège       |
| EPI_ISL_666882 | 10/29/2020 | 12/1/2020 | Europe / Belgium / Liège       |
| EPI_ISL_666883 | 10/29/2020 | 12/1/2020 | Europe / Belgium / Liège       |

|                |            |                                                        |
|----------------|------------|--------------------------------------------------------|
| EPI_ISL_666884 | 10/29/2020 | 12/1/2020 Europe / Belgium / Liège                     |
| EPI_ISL_666885 | 10/29/2020 | 12/1/2020 Europe / Belgium / Liège                     |
| EPI_ISL_666886 | 11/6/2020  | 12/1/2020 Europe / Belgium / Liège                     |
| EPI_ISL_666887 | 11/10/2020 | 12/1/2020 Europe / Belgium / Liège                     |
| EPI_ISL_666930 | 11/7/2020  | 12/1/2020 North America / USA / Michigan               |
| EPI_ISL_666931 | 10/30/2020 | 12/1/2020 North America / USA / Michigan               |
| EPI_ISL_666932 | 11/2/2020  | 12/1/2020 North America / USA / Michigan               |
| EPI_ISL_666933 | 11/2/2020  | 12/1/2020 North America / USA / Michigan               |
| EPI_ISL_666934 | 11/7/2020  | 12/1/2020 North America / USA / Michigan               |
| EPI_ISL_666935 | 10/20/2020 | 12/1/2020 North America / USA / Michigan               |
| EPI_ISL_666936 | 11/3/2020  | 12/1/2020 North America / USA / Michigan               |
| EPI_ISL_666937 | 10/20/2020 | 12/1/2020 North America / USA / Michigan               |
| EPI_ISL_666938 | 10/27/2020 | 12/1/2020 North America / USA / Michigan               |
| EPI_ISL_666939 | 10/28/2020 | 12/1/2020 North America / USA / Michigan               |
| EPI_ISL_666940 | 10/30/2020 | 12/1/2020 North America / USA / Michigan               |
| EPI_ISL_666941 | 11/3/2020  | 12/1/2020 North America / USA / Michigan               |
| EPI_ISL_666942 | 11/4/2020  | 12/1/2020 North America / USA / Michigan               |
| EPI_ISL_666943 | 10/19/2020 | 12/1/2020 North America / USA / Michigan               |
| EPI_ISL_666944 | 11/1/2020  | 12/1/2020 North America / USA / Michigan               |
| EPI_ISL_666945 | 11/2/2020  | 12/1/2020 North America / USA / Michigan               |
| EPI_ISL_666946 | 11/7/2020  | 12/1/2020 North America / USA / Michigan               |
| EPI_ISL_666947 | 10/20/2020 | 12/1/2020 North America / USA / Michigan               |
| EPI_ISL_666948 | 11/1/2020  | 12/1/2020 North America / USA / Michigan               |
| EPI_ISL_666949 | 11/3/2020  | 12/1/2020 North America / USA / Michigan               |
| EPI_ISL_666950 | 10/28/2020 | 12/1/2020 North America / USA / Michigan               |
| EPI_ISL_666951 | 11/4/2020  | 12/1/2020 North America / USA / Michigan               |
| EPI_ISL_666952 | 11/4/2020  | 12/1/2020 North America / USA / Michigan               |
| EPI_ISL_666953 | 10/30/2020 | 12/1/2020 North America / USA / Michigan               |
| EPI_ISL_666954 | 11/2/2020  | 12/1/2020 North America / USA / Michigan               |
| EPI_ISL_666955 | 11/4/2020  | 12/1/2020 North America / USA / Michigan               |
| EPI_ISL_666956 | 10/29/2020 | 12/1/2020 North America / USA / Michigan               |
| EPI_ISL_666957 | 11/3/2020  | 12/1/2020 North America / USA / Michigan               |
| EPI_ISL_666958 | 10/30/2020 | 12/1/2020 North America / USA / Michigan               |
| EPI_ISL_666959 | 11/5/2020  | 12/1/2020 North America / USA / Michigan               |
| EPI_ISL_666960 | 10/26/2020 | 12/1/2020 North America / USA / Michigan               |
| EPI_ISL_666961 | 10/23/2020 | 12/1/2020 North America / USA / Michigan               |
| EPI_ISL_666962 | 11/4/2020  | 12/1/2020 North America / USA / Michigan               |
| EPI_ISL_666963 | 11/2/2020  | 12/1/2020 North America / USA / Michigan               |
| EPI_ISL_666964 | 3/18/2020  | 12/2/2020 North America / USA / New York               |
| EPI_ISL_666966 | 10/30/2020 | 12/2/2020 North America / USA / California / San Diego |
| EPI_ISL_666967 | 10/30/2020 | 12/2/2020 North America / USA / California / San Diego |
| EPI_ISL_666968 | 10/29/2020 | 12/2/2020 North America / USA / California / San Diego |
| EPI_ISL_666969 | 10/26/2020 | 12/2/2020 North America / USA / California / San Diego |
| EPI_ISL_666970 | 10/26/2020 | 12/2/2020 North America / USA / California / San Diego |
| EPI_ISL_666971 | 10/30/2020 | 12/2/2020 North America / USA / California / San Diego |
| EPI_ISL_666972 | 11/2/2020  | 12/2/2020 North America / USA / California / San Diego |
| EPI_ISL_666973 | 11/2/2020  | 12/2/2020 North America / USA / California / San Diego |



|                |            |           |                                                  |
|----------------|------------|-----------|--------------------------------------------------|
| EPI_ISL_667031 | 7/10/2020  | 12/2/2020 | North America / USA / California / San Diego     |
| EPI_ISL_667032 | 7/10/2020  | 12/2/2020 | North America / USA / West Virginia / Kanawha    |
| EPI_ISL_667033 | 7/16/2020  | 12/2/2020 | North America / USA / California / San Diego     |
| EPI_ISL_667034 | 7/9/2020   | 12/2/2020 | North America / USA / California / San Diego     |
| EPI_ISL_667036 | 7/9/2020   | 12/2/2020 | North America / USA / California / San Diego     |
| EPI_ISL_667037 | 7/8/2020   | 12/2/2020 | North America / USA / California / San Diego     |
| EPI_ISL_667038 | 7/9/2020   | 12/2/2020 | North America / USA / California / San Diego     |
| EPI_ISL_667039 | 6/19/2020  | 12/2/2020 | North America / USA / California / San Diego     |
| EPI_ISL_667040 | 6/19/2020  | 12/2/2020 | North America / USA / California / San Diego     |
| EPI_ISL_667041 | 7/8/2020   | 12/2/2020 | North America / USA / California / San Diego     |
| EPI_ISL_667042 | 11/3/2020  | 12/2/2020 | North America / USA / California / San Diego     |
| EPI_ISL_667043 | 11/2/2020  | 12/2/2020 | North America / USA / California / San Diego     |
| EPI_ISL_667044 | 10/22/2020 | 12/2/2020 | North America / USA / California / San Diego     |
| EPI_ISL_667045 | 10/21/2020 | 12/2/2020 | North America / USA / California / San Diego     |
| EPI_ISL_667046 | 10/22/2020 | 12/2/2020 | North America / USA / California / San Diego     |
| EPI_ISL_667047 | 10/22/2020 | 12/2/2020 | North America / USA / California / San Diego     |
| EPI_ISL_667048 | 10/20/2020 | 12/2/2020 | North America / USA / California / San Diego     |
| EPI_ISL_667049 | 10/22/2020 | 12/2/2020 | North America / USA / California / San Diego     |
| EPI_ISL_667050 | 10/22/2020 | 12/2/2020 | North America / USA / California / San Diego     |
| EPI_ISL_667051 | 10/23/2020 | 12/2/2020 | North America / USA / California / San Diego     |
| EPI_ISL_667052 | 10/21/2020 | 12/2/2020 | North America / USA / California / San Diego     |
| EPI_ISL_667054 | 11/10/2020 | 12/2/2020 | North America / USA / California / San Diego     |
| EPI_ISL_667055 | 11/11/2020 | 12/2/2020 | North America / USA / California / Los Angeles   |
| EPI_ISL_667056 | 9/4/2020   | 12/2/2020 | North America / USA / California / San Diego     |
| EPI_ISL_667057 | 11/6/2020  | 12/2/2020 | North America / USA / California / San Diego     |
| EPI_ISL_667058 | 11/5/2020  | 12/2/2020 | North America / USA / California / San Diego     |
| EPI_ISL_667059 | 11/6/2020  | 12/2/2020 | North America / USA / California / San Diego     |
| EPI_ISL_667060 | 11/2/2020  | 12/2/2020 | North America / USA / California / San Diego     |
| EPI_ISL_667061 | 11/2/2020  | 12/2/2020 | North America / USA / California / San Diego     |
| EPI_ISL_667062 | 10/28/2020 | 12/2/2020 | North America / USA / California / San Diego     |
| EPI_ISL_667063 | 10/22/2020 | 12/2/2020 | North America / USA / California / San Diego     |
| EPI_ISL_667064 | 11/11/2020 | 12/2/2020 | North America / USA / California / San Diego     |
| EPI_ISL_667065 | 11/11/2020 | 12/2/2020 | North America / USA / California / Los Angeles   |
| EPI_ISL_667066 | 11/11/2020 | 12/2/2020 | North America / USA / California / San Diego     |
| EPI_ISL_667067 | 11/6/2020  | 12/2/2020 | North America / USA / California / San Diego     |
| EPI_ISL_667068 | 11/5/2020  | 12/2/2020 | North America / USA / California / San Diego     |
| EPI_ISL_667069 | 11/6/2020  | 12/2/2020 | North America / USA / California / San Diego     |
| EPI_ISL_667070 | 11/10/2020 | 12/2/2020 | North America / USA / California / San Diego     |
| EPI_ISL_667072 | 11/10/2020 | 12/2/2020 | North America / USA / California / San Diego     |
| EPI_ISL_667073 | 11/10/2020 | 12/2/2020 | North America / USA / California / San Diego     |
| EPI_ISL_667074 | 11/4/2020  | 12/2/2020 | North America / USA / California / San Diego     |
| EPI_ISL_667075 | 11/4/2020  | 12/2/2020 | North America / USA / California / San Diego     |
| EPI_ISL_667076 | 11/2/2020  | 12/2/2020 | North America / USA / California / San Diego     |
| EPI_ISL_667077 | 11/5/2020  | 12/2/2020 | North America / USA / California / San Diego     |
| EPI_ISL_667079 | 4/23/2020  | 12/2/2020 | North America / USA / Oregon                     |
| EPI_ISL_667085 | 7/28/2020  | 12/2/2020 | North America / USA / Oregon / Washington County |
| EPI_ISL_667086 | 7/30/2020  | 12/2/2020 | North America / USA / Oregon / Multnomah County  |



|                |           |           |                                                     |
|----------------|-----------|-----------|-----------------------------------------------------|
| EPI_ISL_667087 | 7/31/2020 | 12/2/2020 | North America / USA / Oregon / Clackamas County     |
| EPI_ISL_667088 | 7/31/2020 | 12/2/2020 | North America / USA / California / Riverside County |
| EPI_ISL_667089 | 7/31/2020 | 12/2/2020 | North America / USA / Oregon / Washington County    |
| EPI_ISL_667090 | 7/31/2020 | 12/2/2020 | North America / USA / Oregon / Multnomah County     |
| EPI_ISL_667091 | 7/31/2020 | 12/2/2020 | North America / USA / Oregon / Clackamas County     |
| EPI_ISL_667092 | 7/31/2020 | 12/2/2020 | North America / USA / Oregon / Clackamas County     |
| EPI_ISL_667093 | 7/31/2020 | 12/2/2020 | North America / USA / Oregon / Washington County    |
| EPI_ISL_667094 | 7/31/2020 | 12/2/2020 | North America / USA / Oregon / Wasco County         |
| EPI_ISL_667095 | 7/31/2020 | 12/2/2020 | North America / USA / Oregon / Wasco County         |
| EPI_ISL_667096 | 7/31/2020 | 12/2/2020 | North America / USA / Oregon / Wasco County         |
| EPI_ISL_667098 | 8/1/2020  | 12/2/2020 | North America / USA / Washington / Clark County     |
| EPI_ISL_667099 | 8/1/2020  | 12/2/2020 | North America / USA / Oregon / Multnomah County     |
| EPI_ISL_667100 | 8/1/2020  | 12/2/2020 | North America / USA / Oregon / Multnomah County     |
| EPI_ISL_667101 | 8/1/2020  | 12/2/2020 | North America / USA / Oregon / Clackamas County     |
| EPI_ISL_667102 | 8/1/2020  | 12/2/2020 | North America / USA / Washington / Clark County     |
| EPI_ISL_667104 | 8/3/2020  | 12/2/2020 | North America / USA / Oregon / Multnomah County     |
| EPI_ISL_667105 | 8/3/2020  | 12/2/2020 | North America / USA / Washington / Clark County     |
| EPI_ISL_667106 | 8/3/2020  | 12/2/2020 | North America / USA / Oregon / Multnomah County     |
| EPI_ISL_667107 | 8/3/2020  | 12/2/2020 | North America / USA / Oregon / Washington County    |
| EPI_ISL_667108 | 8/3/2020  | 12/2/2020 | North America / USA / Oregon / Clackamas County     |
| EPI_ISL_667109 | 8/3/2020  | 12/2/2020 | North America / USA / Oregon / Washington County    |
| EPI_ISL_667110 | 8/3/2020  | 12/2/2020 | North America / USA / Oregon / Washington County    |
| EPI_ISL_667112 | 8/3/2020  | 12/2/2020 | North America / USA / Oregon / Wasco County         |
| EPI_ISL_667113 | 8/3/2020  | 12/2/2020 | North America / USA / Oregon / Wasco County         |
| EPI_ISL_667114 | 8/4/2020  | 12/2/2020 | North America / USA / Oregon / Marion County        |
| EPI_ISL_667116 | 8/4/2020  | 12/2/2020 | North America / USA / Oregon / Washington County    |
| EPI_ISL_667117 | 8/4/2020  | 12/2/2020 | North America / USA / Oregon / Clackamas County     |
| EPI_ISL_667119 | 8/4/2020  | 12/2/2020 | North America / USA / Oregon / Washington County    |
| EPI_ISL_667121 | 8/4/2020  | 12/2/2020 | North America / USA / Oregon / Clackamas County     |
| EPI_ISL_667122 | 8/5/2020  | 12/2/2020 | North America / USA / Oregon / Washington County    |
| EPI_ISL_667123 | 8/5/2020  | 12/2/2020 | North America / USA / Oregon / Washington County    |
| EPI_ISL_667124 | 8/5/2020  | 12/2/2020 | North America / USA / Oregon / Washington County    |
| EPI_ISL_667125 | 8/5/2020  | 12/2/2020 | North America / USA / Oregon / Multnomah County     |
| EPI_ISL_667126 | 8/5/2020  | 12/2/2020 | North America / USA / Oregon / Washington County    |
| EPI_ISL_667127 | 8/5/2020  | 12/2/2020 | North America / USA / Oregon / Multnomah County     |
| EPI_ISL_667128 | 8/5/2020  | 12/2/2020 | North America / USA / Oregon / Washington County    |
| EPI_ISL_667129 | 8/5/2020  | 12/2/2020 | North America / USA / Oregon / Washington County    |
| EPI_ISL_667130 | 8/5/2020  | 12/2/2020 | North America / USA / Oregon / Washington County    |
| EPI_ISL_667131 | 8/5/2020  | 12/2/2020 | North America / USA / Oregon / Multnomah County     |
| EPI_ISL_667132 | 8/5/2020  | 12/2/2020 | North America / USA / Oregon / Wasco County         |
| EPI_ISL_667133 | 8/5/2020  | 12/2/2020 | North America / USA / Oregon / Multnomah County     |
| EPI_ISL_667134 | 8/6/2020  | 12/2/2020 | North America / USA / Oregon / Washington County    |
| EPI_ISL_667135 | 8/6/2020  | 12/2/2020 | North America / USA / Oregon / Multnomah County     |
| EPI_ISL_667136 | 8/6/2020  | 12/2/2020 | North America / USA / Washington / Clark County     |
| EPI_ISL_667137 | 8/6/2020  | 12/2/2020 | North America / USA / Oregon / Clackamas County     |
| EPI_ISL_667138 | 8/6/2020  | 12/2/2020 | North America / USA / Oregon / Clackamas County     |
| EPI_ISL_667139 | 8/6/2020  | 12/2/2020 | North America / USA / Oregon / Washington County    |









|                |           |           |                                                       |
|----------------|-----------|-----------|-------------------------------------------------------|
| EPI_ISL_667373 | 9/3/2020  | 12/2/2020 | North America / USA / Oregon / Linn County            |
| EPI_ISL_667374 | 9/3/2020  | 12/2/2020 | North America / USA / Oregon / Multnomah County       |
| EPI_ISL_667375 | 9/3/2020  | 12/2/2020 | North America / USA / Oregon / Multnomah County       |
| EPI_ISL_667376 | 9/3/2020  | 12/2/2020 | North America / USA / Oregon / Multnomah County       |
| EPI_ISL_667378 | 9/3/2020  | 12/2/2020 | North America / USA / Oregon / Wasco County           |
| EPI_ISL_667380 | 9/3/2020  | 12/2/2020 | North America / USA / Washington / Clark County       |
| EPI_ISL_667383 | 9/4/2020  | 12/2/2020 | North America / USA / Washington / Clark County       |
| EPI_ISL_667384 | 9/4/2020  | 12/2/2020 | North America / USA / Washington / Clark County       |
| EPI_ISL_667390 | 9/4/2020  | 12/2/2020 | North America / USA / Oregon / Columbia County        |
| EPI_ISL_667393 | 9/4/2020  | 12/2/2020 | North America / USA / Oregon / Multnomah County       |
| EPI_ISL_667395 | 9/4/2020  | 12/2/2020 | North America / USA / Oregon / Multnomah County       |
| EPI_ISL_667396 | 9/4/2020  | 12/2/2020 | North America / USA / Washington / Clark County       |
| EPI_ISL_667397 | 9/4/2020  | 12/2/2020 | North America / USA / Washington / Clark County       |
| EPI_ISL_667400 | 9/4/2020  | 12/2/2020 | North America / USA / Oregon / Washington County      |
| EPI_ISL_667401 | 9/4/2020  | 12/2/2020 | North America / USA / Oregon / Washington County      |
| EPI_ISL_667402 | 9/4/2020  | 12/2/2020 | North America / USA / Oregon / Yamhill County         |
| EPI_ISL_667403 | 9/4/2020  | 12/2/2020 | North America / USA / Oregon / Yamhill County         |
| EPI_ISL_667405 | 9/4/2020  | 12/2/2020 | North America / USA / Oregon / Multnomah County       |
| EPI_ISL_667406 | 9/4/2020  | 12/2/2020 | North America / USA / Oregon / Multnomah County       |
| EPI_ISL_667407 | 9/4/2020  | 12/2/2020 | North America / USA / Oregon / Multnomah County       |
| EPI_ISL_667408 | 9/4/2020  | 12/2/2020 | North America / USA / Washington / Clark County       |
| EPI_ISL_667409 | 9/4/2020  | 12/2/2020 | North America / USA / Oregon / Wasco County           |
| EPI_ISL_667410 | 9/5/2020  | 12/2/2020 | North America / USA / Washington / Clark County       |
| EPI_ISL_667413 | 9/5/2020  | 12/2/2020 | North America / USA / Oregon / Washington County      |
| EPI_ISL_667414 | 9/5/2020  | 12/2/2020 | North America / USA / Oregon / Multnomah County       |
| EPI_ISL_667415 | 9/5/2020  | 12/2/2020 | North America / USA / Oregon / Washington County      |
| EPI_ISL_667417 | 9/5/2020  | 12/2/2020 | North America / USA / California / Santa Clara County |
| EPI_ISL_667419 | 9/5/2020  | 12/2/2020 | North America / USA / Oregon / Multnomah County       |
| EPI_ISL_667420 | 9/5/2020  | 12/2/2020 | North America / USA / Oregon / Yamhill County         |
| EPI_ISL_667422 | 9/5/2020  | 12/2/2020 | North America / USA / Oregon / Washington County      |
| EPI_ISL_667423 | 9/5/2020  | 12/2/2020 | North America / USA / Oregon / Washington County      |
| EPI_ISL_667424 | 9/5/2020  | 12/2/2020 | North America / USA / California / Santa Clara County |
| EPI_ISL_667426 | 9/7/2020  | 12/2/2020 | North America / USA / Oregon / Multnomah County       |
| EPI_ISL_667427 | 9/1/2020  | 12/2/2020 | North America / USA / Oregon / Multnomah County       |
| EPI_ISL_667429 | 8/24/2020 | 12/2/2020 | North America / USA / Oregon / Washington County      |
| EPI_ISL_667430 | 8/24/2020 | 12/2/2020 | North America / USA / Oregon / Multnomah County       |
| EPI_ISL_667431 | 8/17/2020 | 12/2/2020 | North America / USA / Oregon / Multnomah County       |
| EPI_ISL_667435 | 9/7/2020  | 12/2/2020 | North America / USA / Oregon / Multnomah County       |
| EPI_ISL_667436 | 9/7/2020  | 12/2/2020 | North America / USA / Oregon / Yamhill County         |
| EPI_ISL_667437 | 9/7/2020  | 12/2/2020 | North America / USA / Oregon / Washington County      |
| EPI_ISL_667438 | 9/7/2020  | 12/2/2020 | North America / USA / Oregon / Washington County      |
| EPI_ISL_667439 | 9/9/2020  | 12/2/2020 | North America / USA / Oregon / Multnomah County       |
| EPI_ISL_667440 | 9/9/2020  | 12/2/2020 | North America / USA / Oregon / Clackamas County       |
| EPI_ISL_667441 | 9/9/2020  | 12/2/2020 | North America / USA / Oregon / Multnomah County       |
| EPI_ISL_667442 | 9/9/2020  | 12/2/2020 | North America / USA / Oregon / Multnomah County       |
| EPI_ISL_667444 | 9/9/2020  | 12/2/2020 | North America / USA / Oregon / Multnomah County       |
| EPI_ISL_667445 | 9/9/2020  | 12/2/2020 | North America / USA / Oregon / Wasco County           |

|                |            |                                                            |
|----------------|------------|------------------------------------------------------------|
| EPI_ISL_667446 | 9/9/2020   | 12/2/2020 North America / USA / Oregon / Washington County |
| EPI_ISL_667447 | 9/9/2020   | 12/2/2020 North America / USA / Oregon / Yamhill County    |
| EPI_ISL_667448 | 9/9/2020   | 12/2/2020 North America / USA / Arizona / Maricopa County  |
| EPI_ISL_667449 | 9/10/2020  | 12/2/2020 North America / USA / Oregon / Multnomah County  |
| EPI_ISL_667450 | 9/10/2020  | 12/2/2020 North America / USA / Oregon / Multnomah County  |
| EPI_ISL_667451 | 9/10/2020  | 12/2/2020 North America / USA / Oregon / Multnomah County  |
| EPI_ISL_667452 | 9/11/2020  | 12/2/2020 North America / USA / Oregon / Multnomah County  |
| EPI_ISL_667454 | 9/30/2020  | 12/2/2020 North America / USA / Oregon / Washington County |
| EPI_ISL_667455 | 9/30/2020  | 12/2/2020 North America / USA / Oregon / Washington County |
| EPI_ISL_667456 | 9/30/2020  | 12/2/2020 North America / USA / Oregon / Washington County |
| EPI_ISL_667457 | 9/30/2020  | 12/2/2020 North America / USA / Oregon / Washington County |
| EPI_ISL_667458 | 9/30/2020  | 12/2/2020 North America / USA / Oregon / Washington County |
| EPI_ISL_667459 | 9/30/2020  | 12/2/2020 North America / USA / Oregon / Washington County |
| EPI_ISL_667460 | 9/30/2020  | 12/2/2020 North America / USA / Oregon / Washington County |
| EPI_ISL_667462 | 9/30/2020  | 12/2/2020 North America / USA / Oregon / Washington County |
| EPI_ISL_667463 | 9/30/2020  | 12/2/2020 North America / USA / Oregon / Multnomah County  |
| EPI_ISL_667465 | 9/30/2020  | 12/2/2020 North America / USA / Oregon / Yamhill County    |
| EPI_ISL_667466 | 9/30/2020  | 12/2/2020 North America / USA / Oregon / Wasco County      |
| EPI_ISL_667467 | 9/30/2020  | 12/2/2020 North America / USA / Oregon                     |
| EPI_ISL_667468 | 9/30/2020  | 12/2/2020 North America / USA / Oregon                     |
| EPI_ISL_667470 | 9/30/2020  | 12/2/2020 North America / USA / Oregon / Washington County |
| EPI_ISL_667471 | 9/30/2020  | 12/2/2020 North America / USA / Oregon / Washington County |
| EPI_ISL_667472 | 10/1/2020  | 12/2/2020 North America / USA / Oregon / Washington County |
| EPI_ISL_667473 | 10/1/2020  | 12/2/2020 North America / USA / Oregon / Multnomah County  |
| EPI_ISL_667474 | 10/1/2020  | 12/2/2020 North America / USA / Oregon                     |
| EPI_ISL_667475 | 10/1/2020  | 12/2/2020 North America / USA / Oregon / Washington County |
| EPI_ISL_667478 | 10/1/2020  | 12/2/2020 North America / USA / Oregon / Multnomah County  |
| EPI_ISL_667479 | 10/1/2020  | 12/2/2020 North America / USA / Oregon / Multnomah County  |
| EPI_ISL_667480 | 10/1/2020  | 12/2/2020 North America / USA / Oregon / Columbia County   |
| EPI_ISL_667481 | 10/1/2020  | 12/2/2020 North America / USA / Oregon / Klamath County    |
| EPI_ISL_667483 | 10/2/2020  | 12/2/2020 North America / USA / Oregon / Multnomah County  |
| EPI_ISL_667484 | 9/30/2020  | 12/2/2020 North America / USA / Oregon                     |
| EPI_ISL_667485 | 10/2/2020  | 12/2/2020 North America / USA / Washington / Clark County  |
| EPI_ISL_667487 | 10/2/2020  | 12/2/2020 North America / USA / Oregon / Multnomah County  |
| EPI_ISL_667488 | 10/2/2020  | 12/2/2020 North America / USA / Oregon / Washington County |
| EPI_ISL_667491 | 10/3/2020  | 12/2/2020 North America / USA / Oregon / Multnomah County  |
| EPI_ISL_667492 | 10/3/2020  | 12/2/2020 North America / USA / Oregon                     |
| EPI_ISL_667493 | 10/3/2020  | 12/2/2020 North America / USA / Oregon                     |
| EPI_ISL_667495 | 10/3/2020  | 12/2/2020 North America / USA / Oregon                     |
| EPI_ISL_667496 | 10/5/2020  | 12/2/2020 North America / USA / Oregon / Multnomah County  |
| EPI_ISL_667498 | 10/5/2020  | 12/2/2020 North America / USA / Oregon / Washington County |
| EPI_ISL_667500 | 10/5/2020  | 12/2/2020 North America / USA / Oregon / Washington County |
| EPI_ISL_667501 | 10/5/2020  | 12/2/2020 North America / USA / Oregon / Multnomah County  |
| EPI_ISL_667505 | 10/21/2020 | 12/2/2020 North America / USA / Oregon                     |
| EPI_ISL_667506 | 10/21/2020 | 12/2/2020 North America / USA / Oregon                     |
| EPI_ISL_667507 | 10/21/2020 | 12/2/2020 North America / USA / Oregon / Washington County |
| EPI_ISL_667508 | 10/16/2020 | 12/2/2020 North America / USA / Oregon                     |

|                |            |                                                            |
|----------------|------------|------------------------------------------------------------|
| EPI_ISL_667509 | 10/19/2020 | 12/2/2020 North America / USA / Oregon                     |
| EPI_ISL_667510 | 10/19/2020 | 12/2/2020 North America / USA / Oregon                     |
| EPI_ISL_667511 | 10/21/2020 | 12/2/2020 North America / USA / Oregon / Washington County |
| EPI_ISL_667512 | 10/26/2020 | 12/2/2020 North America / USA / Oregon                     |
| EPI_ISL_667513 | 10/28/2020 | 12/2/2020 North America / USA / Oregon                     |
| EPI_ISL_667514 | 10/29/2020 | 12/2/2020 North America / USA / Oregon                     |
| EPI_ISL_667515 | 10/29/2020 | 12/2/2020 North America / USA / Oregon                     |
| EPI_ISL_667516 | 10/30/2020 | 12/2/2020 North America / USA / Oregon                     |
| EPI_ISL_667518 | 11/2/2020  | 12/2/2020 North America / USA / Oregon                     |
| EPI_ISL_667519 | 11/6/2020  | 12/2/2020 North America / USA / Oregon                     |
| EPI_ISL_667520 | 11/6/2020  | 12/2/2020 North America / USA / Oregon                     |
| EPI_ISL_667521 | 11/6/2020  | 12/2/2020 North America / USA / Oregon                     |
| EPI_ISL_667522 | 11/6/2020  | 12/2/2020 North America / USA / Oregon                     |
| EPI_ISL_667523 | 10/28/2020 | 12/2/2020 North America / USA / Oregon / Multnomah County  |
| EPI_ISL_667524 | 10/28/2020 | 12/2/2020 North America / USA / Oregon                     |
| EPI_ISL_667525 | 10/29/2020 | 12/2/2020 North America / USA / Oregon                     |
| EPI_ISL_667526 | 10/30/2020 | 12/2/2020 North America / USA / Oregon                     |
| EPI_ISL_667527 | 10/30/2020 | 12/2/2020 North America / USA / Oregon                     |
| EPI_ISL_667528 | 10/30/2020 | 12/2/2020 North America / USA / Oregon                     |
| EPI_ISL_667529 | 11/2/2020  | 12/2/2020 North America / USA / Oregon                     |
| EPI_ISL_667530 | 11/2/2020  | 12/2/2020 North America / USA / Oregon                     |
| EPI_ISL_667531 | 11/2/2020  | 12/2/2020 North America / USA / Oregon                     |
| EPI_ISL_667532 | 11/2/2020  | 12/2/2020 North America / USA / Oregon                     |
| EPI_ISL_667533 | 11/2/2020  | 12/2/2020 North America / USA / Oregon                     |
| EPI_ISL_667534 | 11/3/2020  | 12/2/2020 North America / USA / Oregon                     |
| EPI_ISL_667535 | 11/3/2020  | 12/2/2020 North America / USA / Oregon                     |
| EPI_ISL_667536 | 10/31/2020 | 12/2/2020 North America / USA / Oregon                     |
| EPI_ISL_667537 | 11/5/2020  | 12/2/2020 North America / USA / Oregon                     |
| EPI_ISL_667538 | 11/9/2020  | 12/2/2020 North America / USA / Oregon                     |
| EPI_ISL_667539 | 11/3/2020  | 12/2/2020 North America / USA / Oregon                     |
| EPI_ISL_667540 | 11/3/2020  | 12/2/2020 North America / USA / Oregon                     |
| EPI_ISL_667541 | 11/4/2020  | 12/2/2020 North America / USA / Oregon                     |
| EPI_ISL_667542 | 11/4/2020  | 12/2/2020 North America / USA / Oregon                     |
| EPI_ISL_667543 | 11/5/2020  | 12/2/2020 North America / USA / Oregon                     |
| EPI_ISL_667544 | 11/9/2020  | 12/2/2020 North America / USA / Oregon                     |
| EPI_ISL_667545 | 11/9/2020  | 12/2/2020 North America / USA / Oregon                     |
| EPI_ISL_667546 | 11/10/2020 | 12/2/2020 North America / USA / Oregon                     |
| EPI_ISL_667547 | 11/10/2020 | 12/2/2020 North America / USA / Oregon                     |
| EPI_ISL_667548 | 10/28/2020 | 12/2/2020 North America / USA / Oregon                     |
| EPI_ISL_667551 | 8/1/2020   | 12/2/2020 North America / USA / Oregon / Multnomah County  |
| EPI_ISL_667552 | 8/3/2020   | 12/2/2020 North America / USA / Oregon / Multnomah County  |
| EPI_ISL_667553 | 8/5/2020   | 12/2/2020 North America / USA / Oregon / Multnomah County  |
| EPI_ISL_667559 | 8/9/2020   | 12/2/2020 Asia / Japan                                     |
| EPI_ISL_667560 | 9/9/2020   | 12/2/2020 Asia / Japan                                     |
| EPI_ISL_667561 | 7/8/2020   | 12/2/2020 Asia / Japan                                     |
| EPI_ISL_667562 | 7/11/2020  | 12/2/2020 Asia / Japan                                     |
| EPI_ISL_667563 | 7/19/2020  | 12/2/2020 Asia / Japan                                     |



|                |           |                        |
|----------------|-----------|------------------------|
| EPI_ISL_667564 | 7/22/2020 | 12/2/2020 Asia / Japan |
| EPI_ISL_667565 | 7/25/2020 | 12/2/2020 Asia / Japan |
| EPI_ISL_667566 | 9/26/2020 | 12/2/2020 Asia / Japan |
| EPI_ISL_667567 | 8/31/2020 | 12/2/2020 Asia / Japan |
| EPI_ISL_667568 | 9/11/2020 | 12/2/2020 Asia / Japan |
| EPI_ISL_667569 | 9/27/2020 | 12/2/2020 Asia / Japan |
| EPI_ISL_667570 | 9/27/2020 | 12/2/2020 Asia / Japan |
| EPI_ISL_667571 | 8/3/2020  | 12/2/2020 Asia / Japan |
| EPI_ISL_667572 | 8/6/2020  | 12/2/2020 Asia / Japan |
| EPI_ISL_667573 | 9/6/2020  | 12/2/2020 Asia / Japan |
| EPI_ISL_667574 | 9/18/2020 | 12/2/2020 Asia / Japan |
| EPI_ISL_667575 | 9/21/2020 | 12/2/2020 Asia / Japan |
| EPI_ISL_667576 | 7/31/2020 | 12/2/2020 Asia / Japan |
| EPI_ISL_667577 | 8/3/2020  | 12/2/2020 Asia / Japan |
| EPI_ISL_667578 | 8/4/2020  | 12/2/2020 Asia / Japan |
| EPI_ISL_667579 | 8/4/2020  | 12/2/2020 Asia / Japan |
| EPI_ISL_667580 | 8/7/2020  | 12/2/2020 Asia / Japan |
| EPI_ISL_667581 | 8/16/2020 | 12/2/2020 Asia / Japan |
| EPI_ISL_667582 | 8/22/2020 | 12/2/2020 Asia / Japan |
| EPI_ISL_667583 | 8/22/2020 | 12/2/2020 Asia / Japan |
| EPI_ISL_667584 | 8/24/2020 | 12/2/2020 Asia / Japan |
| EPI_ISL_667585 | 8/26/2020 | 12/2/2020 Asia / Japan |
| EPI_ISL_667586 | 8/28/2020 | 12/2/2020 Asia / Japan |
| EPI_ISL_667587 | 9/16/2020 | 12/2/2020 Asia / Japan |
| EPI_ISL_667588 | 9/16/2020 | 12/2/2020 Asia / Japan |
| EPI_ISL_667589 | 9/16/2020 | 12/2/2020 Asia / Japan |
| EPI_ISL_667590 | 9/17/2020 | 12/2/2020 Asia / Japan |
| EPI_ISL_667591 | 9/18/2020 | 12/2/2020 Asia / Japan |
| EPI_ISL_667592 | 9/19/2020 | 12/2/2020 Asia / Japan |
| EPI_ISL_667594 | 9/21/2020 | 12/2/2020 Asia / Japan |
| EPI_ISL_667595 | 9/24/2020 | 12/2/2020 Asia / Japan |
| EPI_ISL_667596 | 9/24/2020 | 12/2/2020 Asia / Japan |
| EPI_ISL_667597 | 9/25/2020 | 12/2/2020 Asia / Japan |
| EPI_ISL_667598 | 9/25/2020 | 12/2/2020 Asia / Japan |
| EPI_ISL_667599 | 9/26/2020 | 12/2/2020 Asia / Japan |
| EPI_ISL_667601 | 9/28/2020 | 12/2/2020 Asia / Japan |
| EPI_ISL_667602 | 9/30/2020 | 12/2/2020 Asia / Japan |
| EPI_ISL_667603 | 9/30/2020 | 12/2/2020 Asia / Japan |
| EPI_ISL_667604 | 9/30/2020 | 12/2/2020 Asia / Japan |
| EPI_ISL_667605 | 9/2/2020  | 12/2/2020 Asia / Japan |
| EPI_ISL_667606 | 9/15/2020 | 12/2/2020 Asia / Japan |
| EPI_ISL_667607 | 9/16/2020 | 12/2/2020 Asia / Japan |
| EPI_ISL_667608 | 9/20/2020 | 12/2/2020 Asia / Japan |
| EPI_ISL_667609 | 9/29/2020 | 12/2/2020 Asia / Japan |
| EPI_ISL_667610 | 9/30/2020 | 12/2/2020 Asia / Japan |
| EPI_ISL_667611 | 10/3/2020 | 12/2/2020 Asia / Japan |
| EPI_ISL_667612 | 10/7/2020 | 12/2/2020 Asia / Japan |

|                |            |                        |
|----------------|------------|------------------------|
| EPI_ISL_667613 | 10/12/2020 | 12/2/2020 Asia / Japan |
| EPI_ISL_667614 | 10/15/2020 | 12/2/2020 Asia / Japan |
| EPI_ISL_667615 | 10/17/2020 | 12/2/2020 Asia / Japan |
| EPI_ISL_667616 | 10/19/2020 | 12/2/2020 Asia / Japan |
| EPI_ISL_667617 | 10/23/2020 | 12/2/2020 Asia / Japan |
| EPI_ISL_667619 | 10/23/2020 | 12/2/2020 Asia / Japan |
| EPI_ISL_667620 | 10/24/2020 | 12/2/2020 Asia / Japan |
| EPI_ISL_667621 | 6/21/2020  | 12/2/2020 Asia / Japan |
| EPI_ISL_667622 | 6/24/2020  | 12/2/2020 Asia / Japan |
| EPI_ISL_667623 | 7/2/2020   | 12/2/2020 Asia / Japan |
| EPI_ISL_667624 | 7/10/2020  | 12/2/2020 Asia / Japan |
| EPI_ISL_667625 | 7/10/2020  | 12/2/2020 Asia / Japan |
| EPI_ISL_667626 | 7/11/2020  | 12/2/2020 Asia / Japan |
| EPI_ISL_667627 | 7/12/2020  | 12/2/2020 Asia / Japan |
| EPI_ISL_667628 | 7/12/2020  | 12/2/2020 Asia / Japan |
| EPI_ISL_667629 | 7/15/2020  | 12/2/2020 Asia / Japan |
| EPI_ISL_667630 | 7/16/2020  | 12/2/2020 Asia / Japan |
| EPI_ISL_667631 | 7/17/2020  | 12/2/2020 Asia / Japan |
| EPI_ISL_667632 | 7/19/2020  | 12/2/2020 Asia / Japan |
| EPI_ISL_667633 | 7/19/2020  | 12/2/2020 Asia / Japan |
| EPI_ISL_667634 | 7/25/2020  | 12/2/2020 Asia / Japan |
| EPI_ISL_667635 | 7/26/2020  | 12/2/2020 Asia / Japan |
| EPI_ISL_667636 | 7/28/2020  | 12/2/2020 Asia / Japan |
| EPI_ISL_667637 | 10/10/2020 | 12/2/2020 Asia / Japan |
| EPI_ISL_667638 | 10/10/2020 | 12/2/2020 Asia / Japan |
| EPI_ISL_667639 | 6/13/2020  | 12/2/2020 Asia / Japan |
| EPI_ISL_667640 | 6/21/2020  | 12/2/2020 Asia / Japan |
| EPI_ISL_667641 | 6/22/2020  | 12/2/2020 Asia / Japan |
| EPI_ISL_667642 | 6/22/2020  | 12/2/2020 Asia / Japan |
| EPI_ISL_667643 | 7/10/2020  | 12/2/2020 Asia / Japan |
| EPI_ISL_667644 | 7/10/2020  | 12/2/2020 Asia / Japan |
| EPI_ISL_667645 | 7/10/2020  | 12/2/2020 Asia / Japan |
| EPI_ISL_667646 | 7/10/2020  | 12/2/2020 Asia / Japan |
| EPI_ISL_667647 | 7/10/2020  | 12/2/2020 Asia / Japan |
| EPI_ISL_667648 | 7/10/2020  | 12/2/2020 Asia / Japan |
| EPI_ISL_667649 | 7/21/2020  | 12/2/2020 Asia / Japan |
| EPI_ISL_667650 | 7/28/2020  | 12/2/2020 Asia / Japan |
| EPI_ISL_667651 | 7/28/2020  | 12/2/2020 Asia / Japan |
| EPI_ISL_667652 | 7/29/2020  | 12/2/2020 Asia / Japan |
| EPI_ISL_667653 | 8/2/2020   | 12/2/2020 Asia / Japan |
| EPI_ISL_667654 | 8/4/2020   | 12/2/2020 Asia / Japan |
| EPI_ISL_667655 | 8/5/2020   | 12/2/2020 Asia / Japan |
| EPI_ISL_667656 | 8/5/2020   | 12/2/2020 Asia / Japan |
| EPI_ISL_667657 | 8/5/2020   | 12/2/2020 Asia / Japan |
| EPI_ISL_667658 | 8/7/2020   | 12/2/2020 Asia / Japan |
| EPI_ISL_667659 | 8/8/2020   | 12/2/2020 Asia / Japan |
| EPI_ISL_667660 | 8/9/2020   | 12/2/2020 Asia / Japan |

|                |            |                        |
|----------------|------------|------------------------|
| EPI_ISL_667661 | 8/16/2020  | 12/2/2020 Asia / Japan |
| EPI_ISL_667662 | 8/28/2020  | 12/2/2020 Asia / Japan |
| EPI_ISL_667663 | 9/1/2020   | 12/2/2020 Asia / Japan |
| EPI_ISL_667664 | 9/10/2020  | 12/2/2020 Asia / Japan |
| EPI_ISL_667665 | 9/17/2020  | 12/2/2020 Asia / Japan |
| EPI_ISL_667666 | 9/18/2020  | 12/2/2020 Asia / Japan |
| EPI_ISL_667667 | 10/2/2020  | 12/2/2020 Asia / Japan |
| EPI_ISL_667668 | 10/7/2020  | 12/2/2020 Asia / Japan |
| EPI_ISL_667669 | 10/17/2020 | 12/2/2020 Asia / Japan |
| EPI_ISL_667670 | 10/23/2020 | 12/2/2020 Asia / Japan |
| EPI_ISL_667671 | 10/24/2020 | 12/2/2020 Asia / Japan |
| EPI_ISL_667672 | 10/2/2020  | 12/2/2020 Asia / Japan |
| EPI_ISL_667673 | 10/3/2020  | 12/2/2020 Asia / Japan |
| EPI_ISL_667674 | 10/6/2020  | 12/2/2020 Asia / Japan |
| EPI_ISL_667675 | 10/9/2020  | 12/2/2020 Asia / Japan |
| EPI_ISL_667676 | 10/9/2020  | 12/2/2020 Asia / Japan |
| EPI_ISL_667677 | 10/12/2020 | 12/2/2020 Asia / Japan |
| EPI_ISL_667678 | 10/15/2020 | 12/2/2020 Asia / Japan |
| EPI_ISL_667679 | 10/16/2020 | 12/2/2020 Asia / Japan |
| EPI_ISL_667680 | 10/16/2020 | 12/2/2020 Asia / Japan |
| EPI_ISL_667681 | 10/19/2020 | 12/2/2020 Asia / Japan |
| EPI_ISL_667682 | 10/20/2020 | 12/2/2020 Asia / Japan |
| EPI_ISL_667683 | 10/20/2020 | 12/2/2020 Asia / Japan |
| EPI_ISL_667684 | 10/22/2020 | 12/2/2020 Asia / Japan |
| EPI_ISL_667685 | 10/23/2020 | 12/2/2020 Asia / Japan |
| EPI_ISL_667686 | 10/23/2020 | 12/2/2020 Asia / Japan |
| EPI_ISL_667687 | 10/23/2020 | 12/2/2020 Asia / Japan |
| EPI_ISL_667688 | 10/23/2020 | 12/2/2020 Asia / Japan |
| EPI_ISL_667689 | 10/23/2020 | 12/2/2020 Asia / Japan |
| EPI_ISL_667690 | 10/29/2020 | 12/2/2020 Asia / Japan |
| EPI_ISL_667691 | 10/30/2020 | 12/2/2020 Asia / Japan |
| EPI_ISL_667692 | 10/30/2020 | 12/2/2020 Asia / Japan |
| EPI_ISL_667693 | 10/31/2020 | 12/2/2020 Asia / Japan |
| EPI_ISL_667694 | 11/6/2020  | 12/2/2020 Asia / Japan |
| EPI_ISL_667695 | 11/6/2020  | 12/2/2020 Asia / Japan |
| EPI_ISL_667696 | 11/6/2020  | 12/2/2020 Asia / Japan |
| EPI_ISL_667697 | 11/6/2020  | 12/2/2020 Asia / Japan |
| EPI_ISL_667698 | 11/6/2020  | 12/2/2020 Asia / Japan |
| EPI_ISL_667699 | 11/6/2020  | 12/2/2020 Asia / Japan |
| EPI_ISL_667700 | 11/6/2020  | 12/2/2020 Asia / Japan |
| EPI_ISL_667701 | 11/6/2020  | 12/2/2020 Asia / Japan |
| EPI_ISL_667702 | 11/6/2020  | 12/2/2020 Asia / Japan |
| EPI_ISL_667703 | 11/6/2020  | 12/2/2020 Asia / Japan |
| EPI_ISL_667704 | 11/6/2020  | 12/2/2020 Asia / Japan |
| EPI_ISL_667705 | 11/3/2020  | 12/2/2020 Asia / Japan |
| EPI_ISL_667706 | 11/5/2020  | 12/2/2020 Asia / Japan |
| EPI_ISL_667707 | 11/6/2020  | 12/2/2020 Asia / Japan |

|                |            |                        |
|----------------|------------|------------------------|
| EPI_ISL_667708 | 11/1/2020  | 12/2/2020 Asia / Japan |
| EPI_ISL_667709 | 11/3/2020  | 12/2/2020 Asia / Japan |
| EPI_ISL_667710 | 11/5/2020  | 12/2/2020 Asia / Japan |
| EPI_ISL_667711 | 11/6/2020  | 12/2/2020 Asia / Japan |
| EPI_ISL_667712 | 11/1/2020  | 12/2/2020 Asia / Japan |
| EPI_ISL_667713 | 11/8/2020  | 12/2/2020 Asia / Japan |
| EPI_ISL_667714 | 11/7/2020  | 12/2/2020 Asia / Japan |
| EPI_ISL_667715 | 11/7/2020  | 12/2/2020 Asia / Japan |
| EPI_ISL_667716 | 11/7/2020  | 12/2/2020 Asia / Japan |
| EPI_ISL_667717 | 11/11/2020 | 12/2/2020 Asia / Japan |
| EPI_ISL_667718 | 11/11/2020 | 12/2/2020 Asia / Japan |
| EPI_ISL_667719 | 11/7/2020  | 12/2/2020 Asia / Japan |
| EPI_ISL_667720 | 11/7/2020  | 12/2/2020 Asia / Japan |
| EPI_ISL_667721 | 11/9/2020  | 12/2/2020 Asia / Japan |
| EPI_ISL_667722 | 11/10/2020 | 12/2/2020 Asia / Japan |
| EPI_ISL_667723 | 11/11/2020 | 12/2/2020 Asia / Japan |
| EPI_ISL_667724 | 11/12/2020 | 12/2/2020 Asia / Japan |
| EPI_ISL_667725 | 11/13/2020 | 12/2/2020 Asia / Japan |
| EPI_ISL_667726 | 11/4/2020  | 12/2/2020 Asia / Japan |
| EPI_ISL_667727 | 11/4/2020  | 12/2/2020 Asia / Japan |
| EPI_ISL_667728 | 11/7/2020  | 12/2/2020 Asia / Japan |
| EPI_ISL_667729 | 11/8/2020  | 12/2/2020 Asia / Japan |
| EPI_ISL_667730 | 11/8/2020  | 12/2/2020 Asia / Japan |
| EPI_ISL_667731 | 11/8/2020  | 12/2/2020 Asia / Japan |
| EPI_ISL_667732 | 11/10/2020 | 12/2/2020 Asia / Japan |
| EPI_ISL_667733 | 11/12/2020 | 12/2/2020 Asia / Japan |
| EPI_ISL_667734 | 11/13/2020 | 12/2/2020 Asia / Japan |
| EPI_ISL_667735 | 9/27/2020  | 12/2/2020 Asia / Japan |
| EPI_ISL_667736 | 9/29/2020  | 12/2/2020 Asia / Japan |
| EPI_ISL_667737 | 10/3/2020  | 12/2/2020 Asia / Japan |
| EPI_ISL_667738 | 10/31/2020 | 12/2/2020 Asia / Japan |
| EPI_ISL_667739 | 10/31/2020 | 12/2/2020 Asia / Japan |
| EPI_ISL_667740 | 11/3/2020  | 12/2/2020 Asia / Japan |
| EPI_ISL_667741 | 11/10/2020 | 12/2/2020 Asia / Japan |
| EPI_ISL_667742 | 11/11/2020 | 12/2/2020 Asia / Japan |
| EPI_ISL_667743 | 11/11/2020 | 12/2/2020 Asia / Japan |
| EPI_ISL_667744 | 11/11/2020 | 12/2/2020 Asia / Japan |
| EPI_ISL_667745 | 11/11/2020 | 12/2/2020 Asia / Japan |
| EPI_ISL_667746 | 11/11/2020 | 12/2/2020 Asia / Japan |
| EPI_ISL_667747 | 11/11/2020 | 12/2/2020 Asia / Japan |
| EPI_ISL_667748 | 11/11/2020 | 12/2/2020 Asia / Japan |
| EPI_ISL_667749 | 11/11/2020 | 12/2/2020 Asia / Japan |
| EPI_ISL_667750 | 11/11/2020 | 12/2/2020 Asia / Japan |
| EPI_ISL_667751 | 11/11/2020 | 12/2/2020 Asia / Japan |
| EPI_ISL_667752 | 11/11/2020 | 12/2/2020 Asia / Japan |
| EPI_ISL_667753 | 11/11/2020 | 12/2/2020 Asia / Japan |
| EPI_ISL_667754 | 11/11/2020 | 12/2/2020 Asia / Japan |

|                |            |                                                          |
|----------------|------------|----------------------------------------------------------|
| EPI_ISL_667755 | 8/28/2020  | 12/2/2020 Asia / Japan                                   |
| EPI_ISL_667756 | 8/30/2020  | 12/2/2020 Asia / Japan                                   |
| EPI_ISL_667757 | 9/13/2020  | 12/2/2020 Asia / Japan                                   |
| EPI_ISL_667777 | 8/31/2020  | 12/2/2020 Oceania / Australia / New South Wales / Sydney |
| EPI_ISL_667778 | 10/28/2020 | 12/2/2020 Oceania / Australia / New South Wales / Sydney |
| EPI_ISL_667779 | 10/16/2020 | 12/2/2020 Oceania / Australia / New South Wales / Sydney |
| EPI_ISL_667780 | 11/1/2020  | 12/2/2020 Oceania / Australia / New South Wales / Sydney |
| EPI_ISL_667781 | 11/2/2020  | 12/2/2020 Oceania / Australia / New South Wales / Sydney |
| EPI_ISL_667782 | 10/24/2020 | 12/2/2020 Oceania / Australia / New South Wales / Sydney |
| EPI_ISL_667783 | 10/26/2020 | 12/2/2020 Oceania / Australia / New South Wales / Sydney |
| EPI_ISL_667784 | 10/22/2020 | 12/2/2020 Oceania / Australia / New South Wales / Sydney |
| EPI_ISL_667785 | 10/22/2020 | 12/2/2020 Oceania / Australia / New South Wales / Sydney |
| EPI_ISL_667786 | 10/24/2020 | 12/2/2020 Oceania / Australia / New South Wales / Sydney |
| EPI_ISL_667787 | 10/21/2020 | 12/2/2020 Oceania / Australia / New South Wales / Sydney |
| EPI_ISL_667788 | 10/30/2020 | 12/2/2020 Oceania / Australia / New South Wales / Sydney |
| EPI_ISL_667789 | 10/28/2020 | 12/2/2020 Oceania / Australia / New South Wales / Sydney |
| EPI_ISL_667790 | 10/30/2020 | 12/2/2020 Oceania / Australia / New South Wales / Sydney |
| EPI_ISL_667791 | 10/25/2020 | 12/2/2020 Oceania / Australia / New South Wales / Sydney |
| EPI_ISL_667793 | 10/30/2020 | 12/2/2020 Oceania / Australia / New South Wales / Sydney |
| EPI_ISL_667794 | 10/30/2020 | 12/2/2020 Oceania / Australia / New South Wales / Sydney |
| EPI_ISL_667795 | 10/30/2020 | 12/2/2020 Oceania / Australia / New South Wales / Sydney |
| EPI_ISL_667796 | 10/11/2020 | 12/2/2020 Oceania / Australia / New South Wales / Sydney |
| EPI_ISL_667797 | 10/17/2020 | 12/2/2020 Oceania / Australia / New South Wales / Sydney |
| EPI_ISL_667798 | 11/6/2020  | 12/2/2020 Oceania / Australia / New South Wales / Sydney |
| EPI_ISL_667799 | 11/5/2020  | 12/2/2020 Oceania / Australia / New South Wales / Sydney |
| EPI_ISL_667800 | 11/7/2020  | 12/2/2020 Oceania / Australia / New South Wales / Sydney |
| EPI_ISL_667801 | 11/8/2020  | 12/2/2020 Oceania / Australia / New South Wales / Sydney |
| EPI_ISL_667802 | 11/6/2020  | 12/2/2020 Oceania / Australia / New South Wales / Sydney |
| EPI_ISL_667803 | 11/8/2020  | 12/2/2020 Oceania / Australia / New South Wales / Sydney |
| EPI_ISL_667804 | 11/9/2020  | 12/2/2020 Oceania / Australia / New South Wales / Sydney |
| EPI_ISL_667805 | 11/7/2020  | 12/2/2020 Oceania / Australia / New South Wales / Sydney |
| EPI_ISL_667806 | 11/3/2020  | 12/2/2020 Oceania / Australia / New South Wales / Sydney |
| EPI_ISL_667807 | 3/26/2020  | 12/2/2020 Asia / Taiwan / Taoyuan                        |
| EPI_ISL_667808 | 3/24/2020  | 12/2/2020 Asia / Taiwan / Taoyuan                        |
| EPI_ISL_667809 | 9/17/2020  | 12/2/2020 Asia / Taiwan / Taoyuan                        |
| EPI_ISL_667811 | 11/12/2020 | 12/2/2020 Europe / United Kingdom / England              |
| EPI_ISL_667812 | 11/12/2020 | 12/2/2020 Europe / United Kingdom / England              |
| EPI_ISL_667813 | 11/12/2020 | 12/2/2020 Europe / United Kingdom / England              |
| EPI_ISL_667814 | 11/14/2020 | 12/2/2020 Europe / United Kingdom / England              |
| EPI_ISL_667815 | 11/12/2020 | 12/2/2020 Europe / United Kingdom / England              |
| EPI_ISL_667816 | 11/14/2020 | 12/2/2020 Europe / United Kingdom / England              |
| EPI_ISL_667817 | 11/12/2020 | 12/2/2020 Europe / United Kingdom / England              |
| EPI_ISL_667818 | 11/12/2020 | 12/2/2020 Europe / United Kingdom / England              |
| EPI_ISL_667819 | 11/13/2020 | 12/2/2020 Europe / United Kingdom / England              |
| EPI_ISL_667820 | 11/12/2020 | 12/2/2020 Europe / United Kingdom / England              |
| EPI_ISL_667821 | 11/12/2020 | 12/2/2020 Europe / United Kingdom / England              |
| EPI_ISL_667823 | 11/12/2020 | 12/2/2020 Europe / United Kingdom / England              |





















|                |            |                                                  |
|----------------|------------|--------------------------------------------------|
| EPI_ISL_668388 | 11/12/2020 | 12/2/2020 Europe / United Kingdom / England      |
| EPI_ISL_668389 | 11/12/2020 | 12/2/2020 Europe / United Kingdom / England      |
| EPI_ISL_668391 | 10/19/2020 | 12/2/2020 Europe / Norway / Oslo                 |
| EPI_ISL_668393 | 9/30/2020  | 12/2/2020 Europe / Norway / Innlandet            |
| EPI_ISL_668394 | 10/21/2020 | 12/2/2020 Europe / Norway / Agder                |
| EPI_ISL_668395 | 10/21/2020 | 12/2/2020 Europe / Norway / Agder                |
| EPI_ISL_668396 | 10/22/2020 | 12/2/2020 Europe / Norway / Viken                |
| EPI_ISL_668397 | 10/22/2020 | 12/2/2020 Europe / Norway / Oslo                 |
| EPI_ISL_668398 | 10/13/2020 | 12/2/2020 Europe / Norway / Nordland             |
| EPI_ISL_668399 | 10/21/2020 | 12/2/2020 Europe / Norway / Nordland             |
| EPI_ISL_668400 | 10/22/2020 | 12/2/2020 Europe / Norway / Viken                |
| EPI_ISL_668401 | 10/19/2020 | 12/2/2020 Europe / Norway / Oslo                 |
| EPI_ISL_668402 | 10/15/2020 | 12/2/2020 Europe / Norway / Troms og Finnmark    |
| EPI_ISL_668404 | 10/23/2020 | 12/2/2020 Europe / Norway / Trøndelag            |
| EPI_ISL_668405 | 10/12/2020 | 12/2/2020 Europe / Norway / Vestland             |
| EPI_ISL_668406 | 10/6/2020  | 12/2/2020 Europe / Norway / Innlandet            |
| EPI_ISL_668407 | 10/22/2020 | 12/2/2020 Europe / Norway / Rogaland             |
| EPI_ISL_668408 | 10/22/2020 | 12/2/2020 Europe / Norway / Rogaland             |
| EPI_ISL_668409 | 10/23/2020 | 12/2/2020 Europe / Norway / Vestfold og Telemark |
| EPI_ISL_668410 | 10/26/2020 | 12/2/2020 Europe / Norway / Oslo                 |
| EPI_ISL_668411 | 10/26/2020 | 12/2/2020 Europe / Norway / Oslo                 |
| EPI_ISL_668412 | 10/20/2020 | 12/2/2020 Europe / Norway / Innlandet            |
| EPI_ISL_668413 | 10/23/2020 | 12/2/2020 Europe / Norway / Innlandet            |
| EPI_ISL_668414 | 10/21/2020 | 12/2/2020 Europe / Norway / Innlandet            |
| EPI_ISL_668415 | 10/23/2020 | 12/2/2020 Europe / Norway / Innlandet            |
| EPI_ISL_668416 | 10/20/2020 | 12/2/2020 Europe / Norway / Innlandet            |
| EPI_ISL_668417 | 10/21/2020 | 12/2/2020 Europe / Norway / Trøndelag            |
| EPI_ISL_668418 | 10/18/2020 | 12/2/2020 Europe / Norway / Trøndelag            |
| EPI_ISL_668419 | 10/23/2020 | 12/2/2020 Europe / Norway / Nordland             |
| EPI_ISL_668420 | 10/20/2020 | 12/2/2020 Europe / Norway / Trøndelag            |
| EPI_ISL_668421 | 10/21/2020 | 12/2/2020 Europe / Norway / Trøndelag            |
| EPI_ISL_668422 | 10/22/2020 | 12/2/2020 Europe / Norway / Nordland             |
| EPI_ISL_668423 | 10/23/2020 | 12/2/2020 Europe / Norway / Nordland             |
| EPI_ISL_668424 | 10/26/2020 | 12/2/2020 Europe / Norway / Troms og Finnmark    |
| EPI_ISL_668425 | 10/25/2020 | 12/2/2020 Europe / Norway / Oslo                 |
| EPI_ISL_668426 | 10/25/2020 | 12/2/2020 Europe / Norway / Troms og Finnmark    |
| EPI_ISL_668427 | 10/25/2020 | 12/2/2020 Europe / Norway / Agder                |
| EPI_ISL_668428 | 10/26/2020 | 12/2/2020 Europe / Norway / Agder                |
| EPI_ISL_668429 | 10/24/2020 | 12/2/2020 Europe / Norway / Nordland             |
| EPI_ISL_668430 | 10/25/2020 | 12/2/2020 Europe / Norway / Nordland             |
| EPI_ISL_668431 | 10/25/2020 | 12/2/2020 Europe / Norway / Nordland             |
| EPI_ISL_668432 | 10/24/2020 | 12/2/2020 Europe / Norway / Nordland             |
| EPI_ISL_668433 | 10/25/2020 | 12/2/2020 Europe / Norway / Viken                |
| EPI_ISL_668434 | 10/25/2020 | 12/2/2020 Europe / Norway / Nordland             |
| EPI_ISL_668435 | 10/28/2020 | 12/2/2020 Europe / Norway / Oslo                 |
| EPI_ISL_668436 | 10/29/2020 | 12/2/2020 Europe / Norway / Oslo                 |
| EPI_ISL_668437 | 10/29/2020 | 12/2/2020 Europe / Norway / Oslo                 |

|                |            |                                          |
|----------------|------------|------------------------------------------|
| EPI_ISL_668438 | 8/30/2020  | 12/2/2020 Europe / Norway / Viken        |
| EPI_ISL_668439 | 9/29/2020  | 12/2/2020 Europe / Norway / Viken        |
| EPI_ISL_668440 | 9/2/2020   | 12/2/2020 Europe / Norway / Viken        |
| EPI_ISL_668441 | 10/15/2020 | 12/2/2020 Europe / Norway / Trondelag    |
| EPI_ISL_668454 | 11/2/2020  | 12/2/2020 Asia / Sri Lanka / Colombo     |
| EPI_ISL_668598 | 11/9/2020  | 12/2/2020 Europe / Denmark / Hovedstaden |
| EPI_ISL_668599 | 11/9/2020  | 12/2/2020 Europe / Denmark / Hovedstaden |
| EPI_ISL_668600 | 11/9/2020  | 12/2/2020 Europe / Denmark / Hovedstaden |
| EPI_ISL_668601 | 11/16/2020 | 12/2/2020 Europe / Denmark / Nordjylland |
| EPI_ISL_668602 | 11/9/2020  | 12/2/2020 Europe / Denmark / Nordjylland |
| EPI_ISL_668603 | 11/9/2020  | 12/2/2020 Europe / Denmark / Nordjylland |
| EPI_ISL_668604 | 11/9/2020  | 12/2/2020 Europe / Denmark / Midtjylland |
| EPI_ISL_668605 | 11/9/2020  | 12/2/2020 Europe / Denmark / Syddanmark  |
| EPI_ISL_668606 | 11/16/2020 | 12/2/2020 Europe / Denmark / Syddanmark  |
| EPI_ISL_668607 | 11/9/2020  | 12/2/2020 Europe / Denmark / Syddanmark  |
| EPI_ISL_668608 | 11/9/2020  | 12/2/2020 Europe / Denmark / Syddanmark  |
| EPI_ISL_668609 | 11/16/2020 | 12/2/2020 Europe / Denmark / Midtjylland |
| EPI_ISL_668610 | 11/16/2020 | 12/2/2020 Europe / Denmark / Nordjylland |
| EPI_ISL_668611 | 11/9/2020  | 12/2/2020 Europe / Denmark / Nordjylland |
| EPI_ISL_668635 | 11/16/2020 | 12/2/2020 Europe / Denmark / Syddanmark  |
| EPI_ISL_668636 | 11/16/2020 | 12/2/2020 Europe / Denmark / Nordjylland |
| EPI_ISL_668637 | 11/9/2020  | 12/2/2020 Europe / Denmark / Syddanmark  |
| EPI_ISL_668638 | 11/9/2020  | 12/2/2020 Europe / Denmark / Syddanmark  |
| EPI_ISL_668639 | 11/9/2020  | 12/2/2020 Europe / Denmark / Syddanmark  |
| EPI_ISL_668640 | 11/9/2020  | 12/2/2020 Europe / Denmark / Hovedstaden |
| EPI_ISL_668641 | 11/9/2020  | 12/2/2020 Europe / Denmark / Syddanmark  |
| EPI_ISL_668644 | 11/9/2020  | 12/2/2020 Europe / Denmark / Nordjylland |
| EPI_ISL_668645 | 11/9/2020  | 12/2/2020 Europe / Denmark / Syddanmark  |
| EPI_ISL_668646 | 11/9/2020  | 12/2/2020 Europe / Denmark / Sjaelland   |
| EPI_ISL_668647 | 11/9/2020  | 12/2/2020 Europe / Denmark / Sjaelland   |
| EPI_ISL_668648 | 11/9/2020  | 12/2/2020 Europe / Denmark / Hovedstaden |
| EPI_ISL_668649 | 11/9/2020  | 12/2/2020 Europe / Denmark / Hovedstaden |
| EPI_ISL_668650 | 11/9/2020  | 12/2/2020 Europe / Denmark / Nordjylland |
| EPI_ISL_668651 | 11/9/2020  | 12/2/2020 Europe / Denmark / Hovedstaden |
| EPI_ISL_668652 | 11/16/2020 | 12/2/2020 Europe / Denmark / Hovedstaden |
| EPI_ISL_668653 | 11/16/2020 | 12/2/2020 Europe / Denmark / Hovedstaden |
| EPI_ISL_668654 | 11/9/2020  | 12/2/2020 Europe / Denmark / Hovedstaden |
| EPI_ISL_668655 | 11/9/2020  | 12/2/2020 Europe / Denmark / Nordjylland |
| EPI_ISL_668656 | 11/9/2020  | 12/2/2020 Europe / Denmark / Hovedstaden |
| EPI_ISL_668657 | 11/9/2020  | 12/2/2020 Europe / Denmark / Hovedstaden |
| EPI_ISL_668658 | 11/9/2020  | 12/2/2020 Europe / Denmark / Hovedstaden |
| EPI_ISL_668659 | 11/9/2020  | 12/2/2020 Europe / Denmark / Hovedstaden |
| EPI_ISL_668660 | 11/9/2020  | 12/2/2020 Europe / Denmark / Hovedstaden |
| EPI_ISL_668661 | 11/9/2020  | 12/2/2020 Europe / Denmark / Hovedstaden |
| EPI_ISL_668662 | 11/9/2020  | 12/2/2020 Europe / Denmark / Hovedstaden |
| EPI_ISL_668663 | 11/16/2020 | 12/2/2020 Europe / Denmark / Syddanmark  |
| EPI_ISL_668664 | 11/16/2020 | 12/2/2020 Europe / Denmark / Hovedstaden |



|                |            |                                          |
|----------------|------------|------------------------------------------|
| EPI_ISL_668665 | 11/16/2020 | 12/2/2020 Europe / Denmark / Nordjylland |
| EPI_ISL_668666 | 11/16/2020 | 12/2/2020 Europe / Denmark / Midtjylland |
| EPI_ISL_668667 | 11/16/2020 | 12/2/2020 Europe / Denmark / Nordjylland |
| EPI_ISL_668668 | 11/16/2020 | 12/2/2020 Europe / Denmark / Syddanmark  |
| EPI_ISL_668669 | 11/16/2020 | 12/2/2020 Europe / Denmark / Nordjylland |
| EPI_ISL_668670 | 11/16/2020 | 12/2/2020 Europe / Denmark / Nordjylland |
| EPI_ISL_668671 | 11/16/2020 | 12/2/2020 Europe / Denmark / Nordjylland |
| EPI_ISL_668672 | 11/16/2020 | 12/2/2020 Europe / Denmark / Midtjylland |
| EPI_ISL_668673 | 11/16/2020 | 12/2/2020 Europe / Denmark / Nordjylland |
| EPI_ISL_668674 | 11/16/2020 | 12/2/2020 Europe / Denmark / Hovedstaden |
| EPI_ISL_668675 | 11/9/2020  | 12/2/2020 Europe / Denmark / Nordjylland |
| EPI_ISL_668676 | 11/9/2020  | 12/2/2020 Europe / Denmark / Hovedstaden |
| EPI_ISL_668677 | 11/9/2020  | 12/2/2020 Europe / Denmark / Nordjylland |
| EPI_ISL_668678 | 11/9/2020  | 12/2/2020 Europe / Denmark / Syddanmark  |
| EPI_ISL_668679 | 11/9/2020  | 12/2/2020 Europe / Denmark / Nordjylland |
| EPI_ISL_668680 | 11/9/2020  | 12/2/2020 Europe / Denmark / Hovedstaden |
| EPI_ISL_668681 | 11/9/2020  | 12/2/2020 Europe / Denmark / Sjælland    |
| EPI_ISL_668682 | 11/9/2020  | 12/2/2020 Europe / Denmark / Hovedstaden |
| EPI_ISL_668683 | 11/9/2020  | 12/2/2020 Europe / Denmark / Syddanmark  |
| EPI_ISL_668684 | 11/9/2020  | 12/2/2020 Europe / Denmark / Hovedstaden |
| EPI_ISL_668685 | 11/9/2020  | 12/2/2020 Europe / Denmark / Hovedstaden |
| EPI_ISL_668686 | 11/9/2020  | 12/2/2020 Europe / Denmark / Nordjylland |
| EPI_ISL_668687 | 11/9/2020  | 12/2/2020 Europe / Denmark / Hovedstaden |
| EPI_ISL_668688 | 11/9/2020  | 12/2/2020 Europe / Denmark / Syddanmark  |
| EPI_ISL_668689 | 11/9/2020  | 12/2/2020 Europe / Denmark / Hovedstaden |
| EPI_ISL_668690 | 11/9/2020  | 12/2/2020 Europe / Denmark / Nordjylland |
| EPI_ISL_668691 | 11/9/2020  | 12/2/2020 Europe / Denmark / Midtjylland |
| EPI_ISL_668692 | 11/9/2020  | 12/2/2020 Europe / Denmark / Midtjylland |
| EPI_ISL_668693 | 11/9/2020  | 12/2/2020 Europe / Denmark / Hovedstaden |
| EPI_ISL_668694 | 11/9/2020  | 12/2/2020 Europe / Denmark / Nordjylland |
| EPI_ISL_668695 | 11/9/2020  | 12/2/2020 Europe / Denmark / Syddanmark  |
| EPI_ISL_668696 | 11/9/2020  | 12/2/2020 Europe / Denmark / Hovedstaden |
| EPI_ISL_668697 | 11/9/2020  | 12/2/2020 Europe / Denmark / Midtjylland |
| EPI_ISL_668698 | 11/9/2020  | 12/2/2020 Europe / Denmark / Hovedstaden |
| EPI_ISL_668699 | 11/9/2020  | 12/2/2020 Europe / Denmark / Syddanmark  |
| EPI_ISL_668700 | 11/9/2020  | 12/2/2020 Europe / Denmark / Nordjylland |
| EPI_ISL_668701 | 11/9/2020  | 12/2/2020 Europe / Denmark / Hovedstaden |
| EPI_ISL_668702 | 11/9/2020  | 12/2/2020 Europe / Denmark / Hovedstaden |
| EPI_ISL_668703 | 11/9/2020  | 12/2/2020 Europe / Denmark / Hovedstaden |
| EPI_ISL_668704 | 11/9/2020  | 12/2/2020 Europe / Denmark / Midtjylland |
| EPI_ISL_668705 | 11/9/2020  | 12/2/2020 Europe / Denmark / Syddanmark  |
| EPI_ISL_668706 | 11/9/2020  | 12/2/2020 Europe / Denmark / Hovedstaden |
| EPI_ISL_668707 | 11/9/2020  | 12/2/2020 Europe / Denmark / Hovedstaden |
| EPI_ISL_668708 | 11/9/2020  | 12/2/2020 Europe / Denmark / Hovedstaden |
| EPI_ISL_668709 | 11/9/2020  | 12/2/2020 Europe / Denmark / Hovedstaden |
| EPI_ISL_668710 | 11/9/2020  | 12/2/2020 Europe / Denmark / Hovedstaden |
| EPI_ISL_668711 | 11/9/2020  | 12/2/2020 Europe / Denmark / Nordjylland |

|                |            |           |                                |
|----------------|------------|-----------|--------------------------------|
| EPI_ISL_668712 | 11/9/2020  | 12/2/2020 | Europe / Denmark / Hovedstaden |
| EPI_ISL_668713 | 11/9/2020  | 12/2/2020 | Europe / Denmark / Hovedstaden |
| EPI_ISL_668715 | 11/9/2020  | 12/2/2020 | Europe / Denmark / Hovedstaden |
| EPI_ISL_668717 | 11/9/2020  | 12/2/2020 | Europe / Denmark / Sjælland    |
| EPI_ISL_668718 | 11/16/2020 | 12/2/2020 | Europe / Denmark / Nordjylland |
| EPI_ISL_668719 | 11/16/2020 | 12/2/2020 | Europe / Denmark / Nordjylland |
| EPI_ISL_668720 | 11/9/2020  | 12/2/2020 | Europe / Denmark / Nordjylland |
| EPI_ISL_668721 | 11/9/2020  | 12/2/2020 | Europe / Denmark / Hovedstaden |
| EPI_ISL_668722 | 11/9/2020  | 12/2/2020 | Europe / Denmark / Midtjylland |
| EPI_ISL_668723 | 11/9/2020  | 12/2/2020 | Europe / Denmark / Nordjylland |
| EPI_ISL_668724 | 11/9/2020  | 12/2/2020 | Europe / Denmark / Hovedstaden |
| EPI_ISL_668725 | 11/9/2020  | 12/2/2020 | Europe / Denmark / Hovedstaden |
| EPI_ISL_668726 | 11/9/2020  | 12/2/2020 | Europe / Denmark / Hovedstaden |
| EPI_ISL_668727 | 11/16/2020 | 12/2/2020 | Europe / Denmark / Nordjylland |
| EPI_ISL_668728 | 11/16/2020 | 12/2/2020 | Europe / Denmark / Nordjylland |
| EPI_ISL_668729 | 11/9/2020  | 12/2/2020 | Europe / Denmark / Nordjylland |
| EPI_ISL_668730 | 11/16/2020 | 12/2/2020 | Europe / Denmark / Nordjylland |
| EPI_ISL_668731 | 11/9/2020  | 12/2/2020 | Europe / Denmark / Sjælland    |
| EPI_ISL_668732 | 11/9/2020  | 12/2/2020 | Europe / Denmark / Sjælland    |
| EPI_ISL_668733 | 11/9/2020  | 12/2/2020 | Europe / Denmark / Midtjylland |
| EPI_ISL_668734 | 11/9/2020  | 12/2/2020 | Europe / Denmark / Nordjylland |
| EPI_ISL_668735 | 11/16/2020 | 12/2/2020 | Europe / Denmark / Syddanmark  |
| EPI_ISL_668736 | 11/9/2020  | 12/2/2020 | Europe / Denmark / Syddanmark  |
| EPI_ISL_668737 | 11/9/2020  | 12/2/2020 | Europe / Denmark / Midtjylland |
| EPI_ISL_668738 | 11/16/2020 | 12/2/2020 | Europe / Denmark / Nordjylland |
| EPI_ISL_668739 | 11/9/2020  | 12/2/2020 | Europe / Denmark / Midtjylland |
| EPI_ISL_668740 | 11/9/2020  | 12/2/2020 | Europe / Denmark / Midtjylland |
| EPI_ISL_668741 | 11/9/2020  | 12/2/2020 | Europe / Denmark / Midtjylland |
| EPI_ISL_668742 | 11/9/2020  | 12/2/2020 | Europe / Denmark / Nordjylland |
| EPI_ISL_668743 | 11/16/2020 | 12/2/2020 | Europe / Denmark / Nordjylland |
| EPI_ISL_668744 | 11/16/2020 | 12/2/2020 | Europe / Denmark / Nordjylland |
| EPI_ISL_668745 | 11/9/2020  | 12/2/2020 | Europe / Denmark / Nordjylland |
| EPI_ISL_668746 | 11/9/2020  | 12/2/2020 | Europe / Denmark / Nordjylland |
| EPI_ISL_668747 | 11/9/2020  | 12/2/2020 | Europe / Denmark / Nordjylland |
| EPI_ISL_668748 | 11/9/2020  | 12/2/2020 | Europe / Denmark / Nordjylland |
| EPI_ISL_668749 | 11/9/2020  | 12/2/2020 | Europe / Denmark / Midtjylland |
| EPI_ISL_668750 | 11/9/2020  | 12/2/2020 | Europe / Denmark / Midtjylland |
| EPI_ISL_668751 | 11/9/2020  | 12/2/2020 | Europe / Denmark / Midtjylland |
| EPI_ISL_668752 | 11/9/2020  | 12/2/2020 | Europe / Denmark / Nordjylland |
| EPI_ISL_668753 | 11/9/2020  | 12/2/2020 | Europe / Denmark / Nordjylland |
| EPI_ISL_668754 | 11/9/2020  | 12/2/2020 | Europe / Denmark / Midtjylland |
| EPI_ISL_668755 | 11/9/2020  | 12/2/2020 | Europe / Denmark / Nordjylland |
| EPI_ISL_668756 | 11/9/2020  | 12/2/2020 | Europe / Denmark / Nordjylland |
| EPI_ISL_668757 | 11/16/2020 | 12/2/2020 | Europe / Denmark / Midtjylland |
| EPI_ISL_668758 | 11/16/2020 | 12/2/2020 | Europe / Denmark / Nordjylland |
| EPI_ISL_668759 | 11/16/2020 | 12/2/2020 | Europe / Denmark / Nordjylland |
| EPI_ISL_668760 | 11/16/2020 | 12/2/2020 | Europe / Denmark / Nordjylland |



|                |            |                                          |
|----------------|------------|------------------------------------------|
| EPI_ISL_668808 | 11/9/2020  | 12/2/2020 Europe / Denmark / Nordjylland |
| EPI_ISL_668809 | 11/9/2020  | 12/2/2020 Europe / Denmark / Syddanmark  |
| EPI_ISL_668810 | 11/9/2020  | 12/2/2020 Europe / Denmark / Midtjylland |
| EPI_ISL_668811 | 11/9/2020  | 12/2/2020 Europe / Denmark / Midtjylland |
| EPI_ISL_668812 | 11/9/2020  | 12/2/2020 Europe / Denmark / Midtjylland |
| EPI_ISL_668813 | 11/9/2020  | 12/2/2020 Europe / Denmark / Syddanmark  |
| EPI_ISL_668814 | 11/9/2020  | 12/2/2020 Europe / Denmark / Midtjylland |
| EPI_ISL_668815 | 11/9/2020  | 12/2/2020 Europe / Denmark / Midtjylland |
| EPI_ISL_668816 | 11/9/2020  | 12/2/2020 Europe / Denmark / Syddanmark  |
| EPI_ISL_668817 | 11/9/2020  | 12/2/2020 Europe / Denmark / Midtjylland |
| EPI_ISL_668818 | 11/9/2020  | 12/2/2020 Europe / Denmark / Midtjylland |
| EPI_ISL_668819 | 11/9/2020  | 12/2/2020 Europe / Denmark / Midtjylland |
| EPI_ISL_668820 | 11/9/2020  | 12/2/2020 Europe / Denmark / Midtjylland |
| EPI_ISL_668821 | 11/9/2020  | 12/2/2020 Europe / Denmark / Syddanmark  |
| EPI_ISL_668822 | 11/9/2020  | 12/2/2020 Europe / Denmark / Midtjylland |
| EPI_ISL_668823 | 11/9/2020  | 12/2/2020 Europe / Denmark / Midtjylland |
| EPI_ISL_668824 | 11/9/2020  | 12/2/2020 Europe / Denmark / Nordjylland |
| EPI_ISL_668825 | 11/9/2020  | 12/2/2020 Europe / Denmark / Nordjylland |
| EPI_ISL_668826 | 11/9/2020  | 12/2/2020 Europe / Denmark / Syddanmark  |
| EPI_ISL_668827 | 11/9/2020  | 12/2/2020 Europe / Denmark / Midtjylland |
| EPI_ISL_668828 | 11/9/2020  | 12/2/2020 Europe / Denmark / Nordjylland |
| EPI_ISL_668829 | 11/16/2020 | 12/2/2020 Europe / Denmark / Syddanmark  |
| EPI_ISL_668830 | 11/16/2020 | 12/2/2020 Europe / Denmark / Midtjylland |
| EPI_ISL_668831 | 11/9/2020  | 12/2/2020 Europe / Denmark / Nordjylland |
| EPI_ISL_668832 | 11/9/2020  | 12/2/2020 Europe / Denmark / Nordjylland |
| EPI_ISL_668833 | 11/9/2020  | 12/2/2020 Europe / Denmark / Midtjylland |
| EPI_ISL_668834 | 11/9/2020  | 12/2/2020 Europe / Denmark / Midtjylland |
| EPI_ISL_668835 | 11/9/2020  | 12/2/2020 Europe / Denmark / Syddanmark  |
| EPI_ISL_668836 | 11/9/2020  | 12/2/2020 Europe / Denmark / Syddanmark  |
| EPI_ISL_668837 | 11/9/2020  | 12/2/2020 Europe / Denmark / Midtjylland |
| EPI_ISL_668853 | 11/16/2020 | 12/2/2020 Europe / Denmark / Nordjylland |
| EPI_ISL_668854 | 11/16/2020 | 12/2/2020 Europe / Denmark / Hovedstaden |
| EPI_ISL_668855 | 11/16/2020 | 12/2/2020 Europe / Denmark / Nordjylland |
| EPI_ISL_668856 | 11/16/2020 | 12/2/2020 Europe / Denmark               |
| EPI_ISL_668857 | 11/16/2020 | 12/2/2020 Europe / Denmark / Midtjylland |
| EPI_ISL_668858 | 11/16/2020 | 12/2/2020 Europe / Denmark / Nordjylland |
| EPI_ISL_668859 | 11/16/2020 | 12/2/2020 Europe / Denmark / Hovedstaden |
| EPI_ISL_668860 | 11/16/2020 | 12/2/2020 Europe / Denmark / Hovedstaden |
| EPI_ISL_668861 | 11/16/2020 | 12/2/2020 Europe / Denmark / Syddanmark  |
| EPI_ISL_668862 | 11/16/2020 | 12/2/2020 Europe / Denmark / Nordjylland |
| EPI_ISL_668863 | 11/16/2020 | 12/2/2020 Europe / Denmark / Nordjylland |
| EPI_ISL_668864 | 11/16/2020 | 12/2/2020 Europe / Denmark / Syddanmark  |
| EPI_ISL_668865 | 11/16/2020 | 12/2/2020 Europe / Denmark / Sjaelland   |
| EPI_ISL_668866 | 11/16/2020 | 12/2/2020 Europe / Denmark / Nordjylland |
| EPI_ISL_668867 | 11/16/2020 | 12/2/2020 Europe / Denmark / Midtjylland |
| EPI_ISL_668868 | 11/16/2020 | 12/2/2020 Europe / Denmark / Nordjylland |
| EPI_ISL_668869 | 11/16/2020 | 12/2/2020 Europe / Denmark / Nordjylland |



|                |            |                                          |
|----------------|------------|------------------------------------------|
| EPI_ISL_668917 | 11/16/2020 | 12/2/2020 Europe / Denmark / Nordjylland |
| EPI_ISL_668918 | 11/16/2020 | 12/2/2020 Europe / Denmark / Nordjylland |
| EPI_ISL_668919 | 11/16/2020 | 12/2/2020 Europe / Denmark / Nordjylland |
| EPI_ISL_668920 | 11/16/2020 | 12/2/2020 Europe / Denmark / Nordjylland |
| EPI_ISL_668921 | 11/16/2020 | 12/2/2020 Europe / Denmark / Midtjylland |
| EPI_ISL_668922 | 11/16/2020 | 12/2/2020 Europe / Denmark / Midtjylland |
| EPI_ISL_668923 | 11/16/2020 | 12/2/2020 Europe / Denmark / Syddanmark  |
| EPI_ISL_668924 | 11/16/2020 | 12/2/2020 Europe / Denmark / Hovedstaden |
| EPI_ISL_668925 | 11/16/2020 | 12/2/2020 Europe / Denmark / Syddanmark  |
| EPI_ISL_668926 | 11/16/2020 | 12/2/2020 Europe / Denmark / Midtjylland |
| EPI_ISL_668927 | 11/16/2020 | 12/2/2020 Europe / Denmark / Sjælland    |
| EPI_ISL_668928 | 11/16/2020 | 12/2/2020 Europe / Denmark / Hovedstaden |
| EPI_ISL_668929 | 11/16/2020 | 12/2/2020 Europe / Denmark / Midtjylland |
| EPI_ISL_668930 | 11/16/2020 | 12/2/2020 Europe / Denmark / Hovedstaden |
| EPI_ISL_668931 | 11/16/2020 | 12/2/2020 Europe / Denmark / Hovedstaden |
| EPI_ISL_668932 | 11/16/2020 | 12/2/2020 Europe / Denmark / Syddanmark  |
| EPI_ISL_668933 | 11/16/2020 | 12/2/2020 Europe / Denmark / Sjælland    |
| EPI_ISL_668934 | 11/16/2020 | 12/2/2020 Europe / Denmark / Midtjylland |
| EPI_ISL_668935 | 11/16/2020 | 12/2/2020 Europe / Denmark / Midtjylland |
| EPI_ISL_668936 | 11/16/2020 | 12/2/2020 Europe / Denmark / Hovedstaden |
| EPI_ISL_668937 | 11/16/2020 | 12/2/2020 Europe / Denmark / Sjælland    |
| EPI_ISL_668938 | 11/16/2020 | 12/2/2020 Europe / Denmark / Syddanmark  |
| EPI_ISL_668939 | 11/16/2020 | 12/2/2020 Europe / Denmark / Midtjylland |
| EPI_ISL_668940 | 11/16/2020 | 12/2/2020 Europe / Denmark / Sjælland    |
| EPI_ISL_668941 | 11/16/2020 | 12/2/2020 Europe / Denmark / Midtjylland |
| EPI_ISL_668942 | 11/16/2020 | 12/2/2020 Europe / Denmark / Syddanmark  |
| EPI_ISL_668943 | 11/16/2020 | 12/2/2020 Europe / Denmark / Midtjylland |
| EPI_ISL_668944 | 11/16/2020 | 12/2/2020 Europe / Denmark / Sjælland    |
| EPI_ISL_668945 | 11/16/2020 | 12/2/2020 Europe / Denmark / Midtjylland |
| EPI_ISL_668946 | 11/16/2020 | 12/2/2020 Europe / Denmark / Syddanmark  |
| EPI_ISL_668947 | 11/16/2020 | 12/2/2020 Europe / Denmark / Sjælland    |
| EPI_ISL_668948 | 11/16/2020 | 12/2/2020 Europe / Denmark / Midtjylland |
| EPI_ISL_668949 | 11/16/2020 | 12/2/2020 Europe / Denmark / Nordjylland |
| EPI_ISL_668950 | 11/16/2020 | 12/2/2020 Europe / Denmark / Midtjylland |
| EPI_ISL_668951 | 11/16/2020 | 12/2/2020 Europe / Denmark / Sjælland    |
| EPI_ISL_668952 | 11/16/2020 | 12/2/2020 Europe / Denmark / Sjælland    |
| EPI_ISL_668953 | 11/16/2020 | 12/2/2020 Europe / Denmark / Midtjylland |
| EPI_ISL_668954 | 11/16/2020 | 12/2/2020 Europe / Denmark / Midtjylland |
| EPI_ISL_668955 | 11/16/2020 | 12/2/2020 Europe / Denmark / Midtjylland |
| EPI_ISL_668956 | 11/16/2020 | 12/2/2020 Europe / Denmark / Nordjylland |
| EPI_ISL_668957 | 11/9/2020  | 12/2/2020 Europe / Denmark / Syddanmark  |
| EPI_ISL_668958 | 11/9/2020  | 12/2/2020 Europe / Denmark / Hovedstaden |
| EPI_ISL_668959 | 11/9/2020  | 12/2/2020 Europe / Denmark / Hovedstaden |
| EPI_ISL_668960 | 11/9/2020  | 12/2/2020 Europe / Denmark / Hovedstaden |
| EPI_ISL_668961 | 11/9/2020  | 12/2/2020 Europe / Denmark / Nordjylland |
| EPI_ISL_668962 | 11/9/2020  | 12/2/2020 Europe / Denmark / Midtjylland |
| EPI_ISL_668963 | 11/9/2020  | 12/2/2020 Europe / Denmark / Hovedstaden |

|                |           |                                          |
|----------------|-----------|------------------------------------------|
| EPI_ISL_668964 | 11/9/2020 | 12/2/2020 Europe / Denmark / Sjaelland   |
| EPI_ISL_668965 | 11/9/2020 | 12/2/2020 Europe / Denmark / Sjaelland   |
| EPI_ISL_668966 | 11/9/2020 | 12/2/2020 Europe / Denmark / Midtjylland |
| EPI_ISL_668967 | 11/9/2020 | 12/2/2020 Europe / Denmark / Syddanmark  |
| EPI_ISL_668968 | 11/9/2020 | 12/2/2020 Europe / Denmark / Nordjylland |
| EPI_ISL_668969 | 11/9/2020 | 12/2/2020 Europe / Denmark / Syddanmark  |
| EPI_ISL_668970 | 11/9/2020 | 12/2/2020 Europe / Denmark / Midtjylland |
| EPI_ISL_668971 | 11/9/2020 | 12/2/2020 Europe / Denmark / Nordjylland |
| EPI_ISL_668972 | 11/9/2020 | 12/2/2020 Europe / Denmark / Nordjylland |
| EPI_ISL_668973 | 11/9/2020 | 12/2/2020 Europe / Denmark / Sjaelland   |
| EPI_ISL_668974 | 11/9/2020 | 12/2/2020 Europe / Denmark / Hovedstaden |
| EPI_ISL_668975 | 11/9/2020 | 12/2/2020 Europe / Denmark / Sjaelland   |
| EPI_ISL_668976 | 11/9/2020 | 12/2/2020 Europe / Denmark / Hovedstaden |
| EPI_ISL_668977 | 11/9/2020 | 12/2/2020 Europe / Denmark / Midtjylland |
| EPI_ISL_668978 | 11/9/2020 | 12/2/2020 Europe / Denmark / Nordjylland |
| EPI_ISL_668979 | 11/9/2020 | 12/2/2020 Europe / Denmark / Nordjylland |
| EPI_ISL_668980 | 11/9/2020 | 12/2/2020 Europe / Denmark / Hovedstaden |
| EPI_ISL_668981 | 11/9/2020 | 12/2/2020 Europe / Denmark / Syddanmark  |
| EPI_ISL_668982 | 11/9/2020 | 12/2/2020 Europe / Denmark / Nordjylland |
| EPI_ISL_668983 | 11/9/2020 | 12/2/2020 Europe / Denmark / Sjaelland   |
| EPI_ISL_668984 | 11/9/2020 | 12/2/2020 Europe / Denmark / Hovedstaden |
| EPI_ISL_668985 | 11/9/2020 | 12/2/2020 Europe / Denmark / Hovedstaden |
| EPI_ISL_668986 | 11/9/2020 | 12/2/2020 Europe / Denmark / Hovedstaden |
| EPI_ISL_668987 | 11/9/2020 | 12/2/2020 Europe / Denmark / Hovedstaden |
| EPI_ISL_668988 | 11/9/2020 | 12/2/2020 Europe / Denmark / Sjaelland   |
| EPI_ISL_668989 | 11/9/2020 | 12/2/2020 Europe / Denmark / Sjaelland   |
| EPI_ISL_668990 | 11/9/2020 | 12/2/2020 Europe / Denmark / Nordjylland |
| EPI_ISL_668991 | 11/9/2020 | 12/2/2020 Europe / Denmark / Sjaelland   |
| EPI_ISL_668992 | 11/9/2020 | 12/2/2020 Europe / Denmark / Nordjylland |
| EPI_ISL_668993 | 11/9/2020 | 12/2/2020 Europe / Denmark / Midtjylland |
| EPI_ISL_668994 | 11/9/2020 | 12/2/2020 Europe / Denmark / Hovedstaden |
| EPI_ISL_668995 | 11/9/2020 | 12/2/2020 Europe / Denmark / Midtjylland |
| EPI_ISL_668996 | 11/9/2020 | 12/2/2020 Europe / Denmark / Hovedstaden |
| EPI_ISL_668997 | 11/9/2020 | 12/2/2020 Europe / Denmark / Hovedstaden |
| EPI_ISL_668998 | 11/9/2020 | 12/2/2020 Europe / Denmark / Hovedstaden |
| EPI_ISL_668999 | 11/9/2020 | 12/2/2020 Europe / Denmark / Nordjylland |
| EPI_ISL_669000 | 11/9/2020 | 12/2/2020 Europe / Denmark / Nordjylland |
| EPI_ISL_669001 | 11/9/2020 | 12/2/2020 Europe / Denmark / Midtjylland |
| EPI_ISL_669002 | 11/9/2020 | 12/2/2020 Europe / Denmark / Hovedstaden |
| EPI_ISL_669003 | 11/9/2020 | 12/2/2020 Europe / Denmark / Hovedstaden |
| EPI_ISL_669004 | 11/9/2020 | 12/2/2020 Europe / Denmark / Sjaelland   |
| EPI_ISL_669005 | 11/9/2020 | 12/2/2020 Europe / Denmark / Hovedstaden |
| EPI_ISL_669006 | 11/9/2020 | 12/2/2020 Europe / Denmark / Hovedstaden |
| EPI_ISL_669007 | 11/9/2020 | 12/2/2020 Europe / Denmark / Nordjylland |
| EPI_ISL_669008 | 11/9/2020 | 12/2/2020 Europe / Denmark / Sjaelland   |
| EPI_ISL_669009 | 11/9/2020 | 12/2/2020 Europe / Denmark / Hovedstaden |
| EPI_ISL_669010 | 11/9/2020 | 12/2/2020 Europe / Denmark / Hovedstaden |





|                |           |                                          |
|----------------|-----------|------------------------------------------|
| EPI_ISL_669058 | 11/9/2020 | 12/2/2020 Europe / Denmark / Midtjylland |
| EPI_ISL_669059 | 11/9/2020 | 12/2/2020 Europe / Denmark / Hovedstaden |
| EPI_ISL_669060 | 11/9/2020 | 12/2/2020 Europe / Denmark / Syddanmark  |
| EPI_ISL_669061 | 11/9/2020 | 12/2/2020 Europe / Denmark / Sjaelland   |
| EPI_ISL_669062 | 11/9/2020 | 12/2/2020 Europe / Denmark / Nordjylland |
| EPI_ISL_669063 | 11/9/2020 | 12/2/2020 Europe / Denmark / Hovedstaden |
| EPI_ISL_669064 | 11/9/2020 | 12/2/2020 Europe / Denmark               |
| EPI_ISL_669065 | 11/9/2020 | 12/2/2020 Europe / Denmark / Nordjylland |
| EPI_ISL_669066 | 11/9/2020 | 12/2/2020 Europe / Denmark / Midtjylland |
| EPI_ISL_669067 | 11/9/2020 | 12/2/2020 Europe / Denmark / Hovedstaden |
| EPI_ISL_669068 | 11/9/2020 | 12/2/2020 Europe / Denmark / Nordjylland |
| EPI_ISL_669069 | 11/9/2020 | 12/2/2020 Europe / Denmark / Hovedstaden |
| EPI_ISL_669070 | 11/9/2020 | 12/2/2020 Europe / Denmark / Hovedstaden |
| EPI_ISL_669071 | 11/9/2020 | 12/2/2020 Europe / Denmark / Hovedstaden |
| EPI_ISL_669072 | 11/9/2020 | 12/2/2020 Europe / Denmark / Hovedstaden |
| EPI_ISL_669073 | 11/9/2020 | 12/2/2020 Europe / Denmark / Syddanmark  |
| EPI_ISL_669075 | 11/9/2020 | 12/2/2020 Europe / Denmark / Hovedstaden |
| EPI_ISL_669076 | 11/9/2020 | 12/2/2020 Europe / Denmark / Midtjylland |
| EPI_ISL_669077 | 11/9/2020 | 12/2/2020 Europe / Denmark / Hovedstaden |
| EPI_ISL_669078 | 11/9/2020 | 12/2/2020 Europe / Denmark / Sjaelland   |
| EPI_ISL_669079 | 11/9/2020 | 12/2/2020 Europe / Denmark / Hovedstaden |
| EPI_ISL_669080 | 11/9/2020 | 12/2/2020 Europe / Denmark / Hovedstaden |
| EPI_ISL_669081 | 11/9/2020 | 12/2/2020 Europe / Denmark / Hovedstaden |
| EPI_ISL_669082 | 11/9/2020 | 12/2/2020 Europe / Denmark / Midtjylland |
| EPI_ISL_669083 | 11/9/2020 | 12/2/2020 Europe / Denmark / Hovedstaden |
| EPI_ISL_669084 | 11/9/2020 | 12/2/2020 Europe / Denmark / Sjaelland   |
| EPI_ISL_669085 | 11/9/2020 | 12/2/2020 Europe / Denmark / Hovedstaden |
| EPI_ISL_669086 | 11/9/2020 | 12/2/2020 Europe / Denmark / Sjaelland   |
| EPI_ISL_669087 | 11/9/2020 | 12/2/2020 Europe / Denmark / Syddanmark  |
| EPI_ISL_669088 | 11/9/2020 | 12/2/2020 Europe / Denmark / Hovedstaden |
| EPI_ISL_669089 | 11/9/2020 | 12/2/2020 Europe / Denmark / Syddanmark  |
| EPI_ISL_669090 | 11/9/2020 | 12/2/2020 Europe / Denmark / Nordjylland |
| EPI_ISL_669091 | 11/9/2020 | 12/2/2020 Europe / Denmark / Nordjylland |
| EPI_ISL_669092 | 11/9/2020 | 12/2/2020 Europe / Denmark / Hovedstaden |
| EPI_ISL_669093 | 11/9/2020 | 12/2/2020 Europe / Denmark / Hovedstaden |
| EPI_ISL_669094 | 11/9/2020 | 12/2/2020 Europe / Denmark / Syddanmark  |
| EPI_ISL_669095 | 11/9/2020 | 12/2/2020 Europe / Denmark / Sjaelland   |
| EPI_ISL_669096 | 11/9/2020 | 12/2/2020 Europe / Denmark / Hovedstaden |
| EPI_ISL_669097 | 11/9/2020 | 12/2/2020 Europe / Denmark / Nordjylland |
| EPI_ISL_669098 | 11/9/2020 | 12/2/2020 Europe / Denmark / Hovedstaden |
| EPI_ISL_669099 | 11/9/2020 | 12/2/2020 Europe / Denmark / Midtjylland |
| EPI_ISL_669100 | 11/9/2020 | 12/2/2020 Europe / Denmark / Hovedstaden |
| EPI_ISL_669101 | 11/9/2020 | 12/2/2020 Europe / Denmark / Midtjylland |
| EPI_ISL_669102 | 11/9/2020 | 12/2/2020 Europe / Denmark / Sjaelland   |
| EPI_ISL_669103 | 11/9/2020 | 12/2/2020 Europe / Denmark / Midtjylland |
| EPI_ISL_669104 | 11/9/2020 | 12/2/2020 Europe / Denmark / Midtjylland |
| EPI_ISL_669105 | 11/9/2020 | 12/2/2020 Europe / Denmark / Midtjylland |





|                |           |                                          |
|----------------|-----------|------------------------------------------|
| EPI_ISL_669200 | 11/9/2020 | 12/2/2020 Europe / Denmark / Syddanmark  |
| EPI_ISL_669201 | 11/9/2020 | 12/2/2020 Europe / Denmark               |
| EPI_ISL_669202 | 11/9/2020 | 12/2/2020 Europe / Denmark / Nordjylland |
| EPI_ISL_669203 | 11/9/2020 | 12/2/2020 Europe / Denmark / Midtjylland |
| EPI_ISL_669204 | 11/9/2020 | 12/2/2020 Europe / Denmark / Midtjylland |
| EPI_ISL_669205 | 11/9/2020 | 12/2/2020 Europe / Denmark / Sjaelland   |
| EPI_ISL_669206 | 11/9/2020 | 12/2/2020 Europe / Denmark / Midtjylland |
| EPI_ISL_669207 | 11/9/2020 | 12/2/2020 Europe / Denmark / Midtjylland |
| EPI_ISL_669208 | 11/9/2020 | 12/2/2020 Europe / Denmark / Hovedstaden |
| EPI_ISL_669209 | 11/9/2020 | 12/2/2020 Europe / Denmark / Hovedstaden |
| EPI_ISL_669210 | 11/9/2020 | 12/2/2020 Europe / Denmark               |
| EPI_ISL_669211 | 11/9/2020 | 12/2/2020 Europe / Denmark               |
| EPI_ISL_669212 | 11/9/2020 | 12/2/2020 Europe / Denmark / Syddanmark  |
| EPI_ISL_669213 | 11/9/2020 | 12/2/2020 Europe / Denmark / Sjaelland   |
| EPI_ISL_669214 | 11/9/2020 | 12/2/2020 Europe / Denmark / Nordjylland |
| EPI_ISL_669215 | 11/9/2020 | 12/2/2020 Europe / Denmark / Hovedstaden |
| EPI_ISL_669216 | 11/9/2020 | 12/2/2020 Europe / Denmark / Syddanmark  |
| EPI_ISL_669217 | 11/9/2020 | 12/2/2020 Europe / Denmark / Sjaelland   |
| EPI_ISL_669218 | 11/9/2020 | 12/2/2020 Europe / Denmark / Midtjylland |
| EPI_ISL_669219 | 11/9/2020 | 12/2/2020 Europe / Denmark / Hovedstaden |
| EPI_ISL_669220 | 11/9/2020 | 12/2/2020 Europe / Denmark / Hovedstaden |
| EPI_ISL_669221 | 11/9/2020 | 12/2/2020 Europe / Denmark / Midtjylland |
| EPI_ISL_669222 | 11/9/2020 | 12/2/2020 Europe / Denmark / Midtjylland |
| EPI_ISL_669223 | 11/9/2020 | 12/2/2020 Europe / Denmark / Hovedstaden |
| EPI_ISL_669224 | 11/9/2020 | 12/2/2020 Europe / Denmark / Syddanmark  |
| EPI_ISL_669225 | 11/9/2020 | 12/2/2020 Europe / Denmark / Sjaelland   |
| EPI_ISL_669226 | 11/9/2020 | 12/2/2020 Europe / Denmark / Sjaelland   |
| EPI_ISL_669227 | 11/9/2020 | 12/2/2020 Europe / Denmark / Nordjylland |
| EPI_ISL_669228 | 11/9/2020 | 12/2/2020 Europe / Denmark / Midtjylland |
| EPI_ISL_669229 | 11/9/2020 | 12/2/2020 Europe / Denmark / Midtjylland |
| EPI_ISL_669230 | 11/9/2020 | 12/2/2020 Europe / Denmark / Sjaelland   |
| EPI_ISL_669231 | 11/9/2020 | 12/2/2020 Europe / Denmark / Syddanmark  |
| EPI_ISL_669232 | 11/9/2020 | 12/2/2020 Europe / Denmark / Hovedstaden |
| EPI_ISL_669233 | 11/9/2020 | 12/2/2020 Europe / Denmark / Midtjylland |
| EPI_ISL_669234 | 11/9/2020 | 12/2/2020 Europe / Denmark / Hovedstaden |
| EPI_ISL_669235 | 11/9/2020 | 12/2/2020 Europe / Denmark / Syddanmark  |
| EPI_ISL_669236 | 11/9/2020 | 12/2/2020 Europe / Denmark               |
| EPI_ISL_669237 | 11/9/2020 | 12/2/2020 Europe / Denmark / Hovedstaden |
| EPI_ISL_669238 | 11/9/2020 | 12/2/2020 Europe / Denmark / Midtjylland |
| EPI_ISL_669239 | 11/9/2020 | 12/2/2020 Europe / Denmark / Sjaelland   |
| EPI_ISL_669240 | 11/9/2020 | 12/2/2020 Europe / Denmark / Hovedstaden |
| EPI_ISL_669241 | 11/9/2020 | 12/2/2020 Europe / Denmark / Hovedstaden |
| EPI_ISL_669242 | 11/9/2020 | 12/2/2020 Europe / Denmark / Sjaelland   |
| EPI_ISL_669243 | 11/9/2020 | 12/2/2020 Europe / Denmark / Hovedstaden |
| EPI_ISL_669244 | 11/9/2020 | 12/2/2020 Europe / Denmark / Midtjylland |
| EPI_ISL_669245 | 11/9/2020 | 12/2/2020 Europe / Denmark / Syddanmark  |
| EPI_ISL_669246 | 11/9/2020 | 12/2/2020 Europe / Denmark / Sjaelland   |

|                |           |                                          |
|----------------|-----------|------------------------------------------|
| EPI_ISL_669247 | 11/9/2020 | 12/2/2020 Europe / Denmark / Hovedstaden |
| EPI_ISL_669248 | 11/9/2020 | 12/2/2020 Europe / Denmark / Sjaelland   |
| EPI_ISL_669249 | 11/9/2020 | 12/2/2020 Europe / Denmark / Sjaelland   |
| EPI_ISL_669250 | 11/9/2020 | 12/2/2020 Europe / Denmark / Hovedstaden |
| EPI_ISL_669251 | 11/9/2020 | 12/2/2020 Europe / Denmark / Nordjylland |
| EPI_ISL_669252 | 11/9/2020 | 12/2/2020 Europe / Denmark / Nordjylland |
| EPI_ISL_669253 | 11/9/2020 | 12/2/2020 Europe / Denmark / Syddanmark  |
| EPI_ISL_669254 | 11/9/2020 | 12/2/2020 Europe / Denmark / Hovedstaden |
| EPI_ISL_669255 | 11/9/2020 | 12/2/2020 Europe / Denmark / Hovedstaden |
| EPI_ISL_669256 | 11/9/2020 | 12/2/2020 Europe / Denmark / Hovedstaden |
| EPI_ISL_669257 | 11/9/2020 | 12/2/2020 Europe / Denmark / Midtjylland |
| EPI_ISL_669258 | 11/9/2020 | 12/2/2020 Europe / Denmark / Nordjylland |
| EPI_ISL_669259 | 11/9/2020 | 12/2/2020 Europe / Denmark / Sjaelland   |
| EPI_ISL_669260 | 11/9/2020 | 12/2/2020 Europe / Denmark / Midtjylland |
| EPI_ISL_669261 | 11/9/2020 | 12/2/2020 Europe / Denmark / Hovedstaden |
| EPI_ISL_669262 | 11/9/2020 | 12/2/2020 Europe / Denmark               |
| EPI_ISL_669263 | 11/9/2020 | 12/2/2020 Europe / Denmark / Hovedstaden |
| EPI_ISL_669264 | 11/9/2020 | 12/2/2020 Europe / Denmark / Hovedstaden |
| EPI_ISL_669265 | 11/9/2020 | 12/2/2020 Europe / Denmark / Hovedstaden |
| EPI_ISL_669266 | 11/9/2020 | 12/2/2020 Europe / Denmark / Nordjylland |
| EPI_ISL_669267 | 11/9/2020 | 12/2/2020 Europe / Denmark / Syddanmark  |
| EPI_ISL_669268 | 11/9/2020 | 12/2/2020 Europe / Denmark / Hovedstaden |
| EPI_ISL_669269 | 11/9/2020 | 12/2/2020 Europe / Denmark / Sjaelland   |
| EPI_ISL_669270 | 11/9/2020 | 12/2/2020 Europe / Denmark / Hovedstaden |
| EPI_ISL_669271 | 11/9/2020 | 12/2/2020 Europe / Denmark / Sjaelland   |
| EPI_ISL_669272 | 11/9/2020 | 12/2/2020 Europe / Denmark / Nordjylland |
| EPI_ISL_669273 | 11/9/2020 | 12/2/2020 Europe / Denmark / Syddanmark  |
| EPI_ISL_669274 | 11/9/2020 | 12/2/2020 Europe / Denmark / Syddanmark  |
| EPI_ISL_669275 | 11/9/2020 | 12/2/2020 Europe / Denmark / Midtjylland |
| EPI_ISL_669276 | 11/9/2020 | 12/2/2020 Europe / Denmark / Hovedstaden |
| EPI_ISL_669277 | 11/9/2020 | 12/2/2020 Europe / Denmark / Hovedstaden |
| EPI_ISL_669278 | 11/9/2020 | 12/2/2020 Europe / Denmark / Nordjylland |
| EPI_ISL_669279 | 11/9/2020 | 12/2/2020 Europe / Denmark / Hovedstaden |
| EPI_ISL_669280 | 11/9/2020 | 12/2/2020 Europe / Denmark / Syddanmark  |
| EPI_ISL_669281 | 11/9/2020 | 12/2/2020 Europe / Denmark / Midtjylland |
| EPI_ISL_669282 | 11/9/2020 | 12/2/2020 Europe / Denmark / Hovedstaden |
| EPI_ISL_669283 | 11/9/2020 | 12/2/2020 Europe / Denmark / Sjaelland   |
| EPI_ISL_669284 | 11/9/2020 | 12/2/2020 Europe / Denmark / Syddanmark  |
| EPI_ISL_669285 | 11/9/2020 | 12/2/2020 Europe / Denmark / Sjaelland   |
| EPI_ISL_669286 | 11/9/2020 | 12/2/2020 Europe / Denmark / Hovedstaden |
| EPI_ISL_669287 | 11/9/2020 | 12/2/2020 Europe / Denmark / Midtjylland |
| EPI_ISL_669288 | 11/9/2020 | 12/2/2020 Europe / Denmark / Midtjylland |
| EPI_ISL_669289 | 11/9/2020 | 12/2/2020 Europe / Denmark / Midtjylland |
| EPI_ISL_669290 | 11/9/2020 | 12/2/2020 Europe / Denmark / Hovedstaden |
| EPI_ISL_669291 | 11/9/2020 | 12/2/2020 Europe / Denmark / Sjaelland   |
| EPI_ISL_669292 | 11/9/2020 | 12/2/2020 Europe / Denmark / Hovedstaden |
| EPI_ISL_669293 | 11/9/2020 | 12/2/2020 Europe / Denmark / Nordjylland |

|                |           |                                          |
|----------------|-----------|------------------------------------------|
| EPI_ISL_669294 | 11/9/2020 | 12/2/2020 Europe / Denmark / Midtjylland |
| EPI_ISL_669295 | 11/9/2020 | 12/2/2020 Europe / Denmark / Syddanmark  |
| EPI_ISL_669296 | 11/9/2020 | 12/2/2020 Europe / Denmark / Hovedstaden |
| EPI_ISL_669297 | 11/9/2020 | 12/2/2020 Europe / Denmark / Syddanmark  |
| EPI_ISL_669298 | 11/9/2020 | 12/2/2020 Europe / Denmark / Midtjylland |
| EPI_ISL_669299 | 11/9/2020 | 12/2/2020 Europe / Denmark / Hovedstaden |
| EPI_ISL_669300 | 11/9/2020 | 12/2/2020 Europe / Denmark / Syddanmark  |
| EPI_ISL_669301 | 11/9/2020 | 12/2/2020 Europe / Denmark / Hovedstaden |
| EPI_ISL_669302 | 11/9/2020 | 12/2/2020 Europe / Denmark / Hovedstaden |
| EPI_ISL_669303 | 11/9/2020 | 12/2/2020 Europe / Denmark / Syddanmark  |
| EPI_ISL_669304 | 11/9/2020 | 12/2/2020 Europe / Denmark / Midtjylland |
| EPI_ISL_669305 | 11/9/2020 | 12/2/2020 Europe / Denmark / Hovedstaden |
| EPI_ISL_669306 | 11/9/2020 | 12/2/2020 Europe / Denmark / Midtjylland |
| EPI_ISL_669307 | 11/9/2020 | 12/2/2020 Europe / Denmark / Syddanmark  |
| EPI_ISL_669308 | 11/9/2020 | 12/2/2020 Europe / Denmark / Sjaelland   |
| EPI_ISL_669309 | 11/9/2020 | 12/2/2020 Europe / Denmark / Midtjylland |
| EPI_ISL_669310 | 11/9/2020 | 12/2/2020 Europe / Denmark / Hovedstaden |
| EPI_ISL_669311 | 11/9/2020 | 12/2/2020 Europe / Denmark / Nordjylland |
| EPI_ISL_669312 | 11/9/2020 | 12/2/2020 Europe / Denmark / Hovedstaden |
| EPI_ISL_669313 | 11/9/2020 | 12/2/2020 Europe / Denmark / Nordjylland |
| EPI_ISL_669314 | 11/9/2020 | 12/2/2020 Europe / Denmark / Syddanmark  |
| EPI_ISL_669315 | 11/9/2020 | 12/2/2020 Europe / Denmark / Midtjylland |
| EPI_ISL_669316 | 11/9/2020 | 12/2/2020 Europe / Denmark / Hovedstaden |
| EPI_ISL_669317 | 11/9/2020 | 12/2/2020 Europe / Denmark / Sjaelland   |
| EPI_ISL_669318 | 11/9/2020 | 12/2/2020 Europe / Denmark / Midtjylland |
| EPI_ISL_669319 | 11/9/2020 | 12/2/2020 Europe / Denmark / Midtjylland |
| EPI_ISL_669320 | 11/9/2020 | 12/2/2020 Europe / Denmark / Syddanmark  |
| EPI_ISL_669321 | 11/9/2020 | 12/2/2020 Europe / Denmark / Syddanmark  |
| EPI_ISL_669322 | 11/9/2020 | 12/2/2020 Europe / Denmark / Hovedstaden |
| EPI_ISL_669323 | 11/9/2020 | 12/2/2020 Europe / Denmark / Hovedstaden |
| EPI_ISL_669324 | 11/9/2020 | 12/2/2020 Europe / Denmark / Syddanmark  |
| EPI_ISL_669325 | 11/9/2020 | 12/2/2020 Europe / Denmark / Midtjylland |
| EPI_ISL_669326 | 11/9/2020 | 12/2/2020 Europe / Denmark / Hovedstaden |
| EPI_ISL_669327 | 11/9/2020 | 12/2/2020 Europe / Denmark / Midtjylland |
| EPI_ISL_669328 | 11/9/2020 | 12/2/2020 Europe / Denmark / Sjaelland   |
| EPI_ISL_669329 | 11/9/2020 | 12/2/2020 Europe / Denmark / Hovedstaden |
| EPI_ISL_669330 | 11/9/2020 | 12/2/2020 Europe / Denmark / Sjaelland   |
| EPI_ISL_669331 | 11/9/2020 | 12/2/2020 Europe / Denmark / Midtjylland |
| EPI_ISL_669332 | 11/9/2020 | 12/2/2020 Europe / Denmark / Syddanmark  |
| EPI_ISL_669333 | 11/9/2020 | 12/2/2020 Europe / Denmark / Hovedstaden |
| EPI_ISL_669334 | 11/9/2020 | 12/2/2020 Europe / Denmark / Hovedstaden |
| EPI_ISL_669335 | 11/9/2020 | 12/2/2020 Europe / Denmark / Hovedstaden |
| EPI_ISL_669336 | 11/9/2020 | 12/2/2020 Europe / Denmark / Sjaelland   |
| EPI_ISL_669337 | 11/9/2020 | 12/2/2020 Europe / Denmark / Midtjylland |
| EPI_ISL_669338 | 11/9/2020 | 12/2/2020 Europe / Denmark / Syddanmark  |
| EPI_ISL_669339 | 11/9/2020 | 12/2/2020 Europe / Denmark / Nordjylland |
| EPI_ISL_669340 | 11/9/2020 | 12/2/2020 Europe / Denmark / Syddanmark  |







|                |           |           |                                |
|----------------|-----------|-----------|--------------------------------|
| EPI_ISL_669435 | 11/9/2020 | 12/2/2020 | Europe / Denmark / Midtjylland |
| EPI_ISL_669436 | 11/9/2020 | 12/2/2020 | Europe / Denmark / Hovedstaden |
| EPI_ISL_669437 | 11/9/2020 | 12/2/2020 | Europe / Denmark / Syddanmark  |
| EPI_ISL_669438 | 11/9/2020 | 12/2/2020 | Europe / Denmark / Nordjylland |
| EPI_ISL_669439 | 11/9/2020 | 12/2/2020 | Europe / Denmark / Sjælland    |
| EPI_ISL_669440 | 11/9/2020 | 12/2/2020 | Europe / Denmark / Nordjylland |
| EPI_ISL_669441 | 11/9/2020 | 12/2/2020 | Europe / Denmark / Hovedstaden |
| EPI_ISL_669442 | 11/9/2020 | 12/2/2020 | Europe / Denmark / Hovedstaden |
| EPI_ISL_669443 | 11/9/2020 | 12/2/2020 | Europe / Denmark / Syddanmark  |
| EPI_ISL_669444 | 11/9/2020 | 12/2/2020 | Europe / Denmark / Nordjylland |
| EPI_ISL_669445 | 11/9/2020 | 12/2/2020 | Europe / Denmark / Hovedstaden |
| EPI_ISL_669446 | 11/9/2020 | 12/2/2020 | Europe / Denmark / Hovedstaden |
| EPI_ISL_669447 | 11/9/2020 | 12/2/2020 | Europe / Denmark / Nordjylland |
| EPI_ISL_669448 | 11/9/2020 | 12/2/2020 | Europe / Denmark / Nordjylland |
| EPI_ISL_669449 | 11/9/2020 | 12/2/2020 | Europe / Denmark / Nordjylland |
| EPI_ISL_669450 | 11/9/2020 | 12/2/2020 | Europe / Denmark / Midtjylland |
| EPI_ISL_669451 | 11/9/2020 | 12/2/2020 | Europe / Denmark / Nordjylland |
| EPI_ISL_669452 | 11/9/2020 | 12/2/2020 | Europe / Denmark / Hovedstaden |
| EPI_ISL_669453 | 11/9/2020 | 12/2/2020 | Europe / Denmark / Hovedstaden |
| EPI_ISL_669454 | 11/9/2020 | 12/2/2020 | Europe / Denmark / Hovedstaden |
| EPI_ISL_669455 | 11/9/2020 | 12/2/2020 | Europe / Denmark / Hovedstaden |
| EPI_ISL_669456 | 11/9/2020 | 12/2/2020 | Europe / Denmark / Midtjylland |
| EPI_ISL_669457 | 11/9/2020 | 12/2/2020 | Europe / Denmark / Hovedstaden |
| EPI_ISL_669536 | 11/2/2020 | 12/2/2020 | Europe / Denmark / Syddanmark  |
| EPI_ISL_669537 | 11/9/2020 | 12/2/2020 | Europe / Denmark / Nordjylland |
| EPI_ISL_669538 | 11/2/2020 | 12/2/2020 | Europe / Denmark / Nordjylland |
| EPI_ISL_669539 | 11/2/2020 | 12/2/2020 | Europe / Denmark / Nordjylland |
| EPI_ISL_669540 | 11/2/2020 | 12/2/2020 | Europe / Denmark / Nordjylland |
| EPI_ISL_669541 | 11/2/2020 | 12/2/2020 | Europe / Denmark / Nordjylland |
| EPI_ISL_669542 | 11/2/2020 | 12/2/2020 | Europe / Denmark / Nordjylland |
| EPI_ISL_669543 | 11/2/2020 | 12/2/2020 | Europe / Denmark / Nordjylland |
| EPI_ISL_669544 | 11/2/2020 | 12/2/2020 | Europe / Denmark / Midtjylland |
| EPI_ISL_669545 | 11/2/2020 | 12/2/2020 | Europe / Denmark / Syddanmark  |
| EPI_ISL_669546 | 11/2/2020 | 12/2/2020 | Europe / Denmark / Sjælland    |
| EPI_ISL_669547 | 11/2/2020 | 12/2/2020 | Europe / Denmark / Midtjylland |
| EPI_ISL_669548 | 11/9/2020 | 12/2/2020 | Europe / Denmark / Midtjylland |
| EPI_ISL_669549 | 11/2/2020 | 12/2/2020 | Europe / Denmark / Hovedstaden |
| EPI_ISL_669550 | 11/2/2020 | 12/2/2020 | Europe / Denmark / Sjælland    |
| EPI_ISL_669551 | 11/2/2020 | 12/2/2020 | Europe / Denmark / Hovedstaden |
| EPI_ISL_669552 | 11/2/2020 | 12/2/2020 | Europe / Denmark / Syddanmark  |
| EPI_ISL_669553 | 11/2/2020 | 12/2/2020 | Europe / Denmark / Syddanmark  |
| EPI_ISL_669554 | 11/2/2020 | 12/2/2020 | Europe / Denmark / Sjælland    |
| EPI_ISL_669555 | 11/2/2020 | 12/2/2020 | Europe / Denmark / Hovedstaden |
| EPI_ISL_669556 | 11/2/2020 | 12/2/2020 | Europe / Denmark / Syddanmark  |
| EPI_ISL_669557 | 11/2/2020 | 12/2/2020 | Europe / Denmark / Hovedstaden |
| EPI_ISL_669596 | 11/2/2020 | 12/2/2020 | Europe / Denmark / Hovedstaden |
| EPI_ISL_669597 | 11/2/2020 | 12/2/2020 | Europe / Denmark / Hovedstaden |

|                |           |                                          |
|----------------|-----------|------------------------------------------|
| EPI_ISL_669598 | 11/2/2020 | 12/2/2020 Europe / Denmark / Midtjylland |
| EPI_ISL_669599 | 11/2/2020 | 12/2/2020 Europe / Denmark / Nordjylland |
| EPI_ISL_669600 | 11/2/2020 | 12/2/2020 Europe / Denmark / Syddanmark  |
| EPI_ISL_669605 | 11/2/2020 | 12/2/2020 Europe / Denmark / Hovedstaden |
| EPI_ISL_669606 | 11/2/2020 | 12/2/2020 Europe / Denmark / Sjaelland   |
| EPI_ISL_669607 | 11/2/2020 | 12/2/2020 Europe / Denmark / Sjaelland   |
| EPI_ISL_669608 | 11/2/2020 | 12/2/2020 Europe / Denmark / Hovedstaden |
| EPI_ISL_669609 | 11/2/2020 | 12/2/2020 Europe / Denmark / Sjaelland   |
| EPI_ISL_669610 | 11/2/2020 | 12/2/2020 Europe / Denmark / Syddanmark  |
| EPI_ISL_669611 | 11/2/2020 | 12/2/2020 Europe / Denmark / Hovedstaden |
| EPI_ISL_669612 | 11/9/2020 | 12/2/2020 Europe / Denmark / Nordjylland |
| EPI_ISL_669613 | 11/9/2020 | 12/2/2020 Europe / Denmark / Hovedstaden |
| EPI_ISL_669614 | 11/2/2020 | 12/2/2020 Europe / Denmark / Hovedstaden |
| EPI_ISL_669615 | 11/2/2020 | 12/2/2020 Europe / Denmark / Hovedstaden |
| EPI_ISL_669616 | 11/2/2020 | 12/2/2020 Europe / Denmark / Syddanmark  |
| EPI_ISL_669617 | 11/2/2020 | 12/2/2020 Europe / Denmark / Hovedstaden |
| EPI_ISL_669618 | 11/2/2020 | 12/2/2020 Europe / Denmark / Sjaelland   |
| EPI_ISL_669619 | 11/2/2020 | 12/2/2020 Europe / Denmark / Hovedstaden |
| EPI_ISL_669620 | 11/2/2020 | 12/2/2020 Europe / Denmark / Sjaelland   |
| EPI_ISL_669621 | 11/2/2020 | 12/2/2020 Europe / Denmark / Hovedstaden |
| EPI_ISL_669622 | 11/2/2020 | 12/2/2020 Europe / Denmark / Hovedstaden |
| EPI_ISL_669623 | 11/2/2020 | 12/2/2020 Europe / Denmark / Hovedstaden |
| EPI_ISL_669624 | 11/2/2020 | 12/2/2020 Europe / Denmark / Hovedstaden |
| EPI_ISL_669625 | 11/2/2020 | 12/2/2020 Europe / Denmark / Sjaelland   |
| EPI_ISL_669626 | 11/2/2020 | 12/2/2020 Europe / Denmark / Hovedstaden |
| EPI_ISL_669627 | 11/2/2020 | 12/2/2020 Europe / Denmark / Hovedstaden |
| EPI_ISL_669628 | 11/2/2020 | 12/2/2020 Europe / Denmark / Midtjylland |
| EPI_ISL_669629 | 11/2/2020 | 12/2/2020 Europe / Denmark / Sjaelland   |
| EPI_ISL_669630 | 11/2/2020 | 12/2/2020 Europe / Denmark / Midtjylland |
| EPI_ISL_669631 | 11/2/2020 | 12/2/2020 Europe / Denmark / Hovedstaden |
| EPI_ISL_669632 | 11/2/2020 | 12/2/2020 Europe / Denmark / Hovedstaden |
| EPI_ISL_669633 | 11/2/2020 | 12/2/2020 Europe / Denmark / Hovedstaden |
| EPI_ISL_669634 | 11/2/2020 | 12/2/2020 Europe / Denmark / Hovedstaden |
| EPI_ISL_669635 | 11/2/2020 | 12/2/2020 Europe / Denmark / Hovedstaden |
| EPI_ISL_669636 | 11/9/2020 | 12/2/2020 Europe / Denmark / Hovedstaden |
| EPI_ISL_669637 | 11/9/2020 | 12/2/2020 Europe / Denmark / Hovedstaden |
| EPI_ISL_669638 | 11/9/2020 | 12/2/2020 Europe / Denmark / Hovedstaden |
| EPI_ISL_669639 | 11/9/2020 | 12/2/2020 Europe / Denmark / Hovedstaden |
| EPI_ISL_669640 | 11/9/2020 | 12/2/2020 Europe / Denmark / Hovedstaden |
| EPI_ISL_669641 | 11/9/2020 | 12/2/2020 Europe / Denmark / Midtjylland |
| EPI_ISL_669642 | 11/9/2020 | 12/2/2020 Europe / Denmark / Hovedstaden |
| EPI_ISL_669643 | 11/9/2020 | 12/2/2020 Europe / Denmark / Hovedstaden |
| EPI_ISL_669644 | 11/2/2020 | 12/2/2020 Europe / Denmark / Hovedstaden |
| EPI_ISL_669645 | 11/2/2020 | 12/2/2020 Europe / Denmark / Nordjylland |
| EPI_ISL_669646 | 11/2/2020 | 12/2/2020 Europe / Denmark / Sjaelland   |
| EPI_ISL_669647 | 11/2/2020 | 12/2/2020 Europe / Denmark / Nordjylland |
| EPI_ISL_669648 | 11/2/2020 | 12/2/2020 Europe / Denmark / Nordjylland |





















|                |           |                                          |
|----------------|-----------|------------------------------------------|
| EPI_ISL_670091 | 11/2/2020 | 12/2/2020 Europe / Denmark / Nordjylland |
| EPI_ISL_670092 | 11/2/2020 | 12/2/2020 Europe / Denmark / Hovedstaden |
| EPI_ISL_670093 | 11/2/2020 | 12/2/2020 Europe / Denmark / Sjælland    |
| EPI_ISL_670094 | 11/2/2020 | 12/2/2020 Europe / Denmark / Nordjylland |
| EPI_ISL_670095 | 11/2/2020 | 12/2/2020 Europe / Denmark / Hovedstaden |
| EPI_ISL_670096 | 11/2/2020 | 12/2/2020 Europe / Denmark / Hovedstaden |
| EPI_ISL_670097 | 11/2/2020 | 12/2/2020 Europe / Denmark / Hovedstaden |
| EPI_ISL_670098 | 11/2/2020 | 12/2/2020 Europe / Denmark / Hovedstaden |
| EPI_ISL_670099 | 11/2/2020 | 12/2/2020 Europe / Denmark / Nordjylland |
| EPI_ISL_670100 | 11/2/2020 | 12/2/2020 Europe / Denmark / Hovedstaden |
| EPI_ISL_670101 | 11/2/2020 | 12/2/2020 Europe / Denmark / Nordjylland |
| EPI_ISL_670102 | 11/2/2020 | 12/2/2020 Europe / Denmark / Midtjylland |
| EPI_ISL_670103 | 11/2/2020 | 12/2/2020 Europe / Denmark / Sjælland    |
| EPI_ISL_670104 | 11/2/2020 | 12/2/2020 Europe / Denmark / Hovedstaden |
| EPI_ISL_670105 | 11/2/2020 | 12/2/2020 Europe / Denmark / Midtjylland |
| EPI_ISL_670106 | 11/2/2020 | 12/2/2020 Europe / Denmark / Hovedstaden |
| EPI_ISL_670107 | 11/2/2020 | 12/2/2020 Europe / Denmark / Syddanmark  |
| EPI_ISL_670108 | 11/2/2020 | 12/2/2020 Europe / Denmark / Midtjylland |
| EPI_ISL_670109 | 11/2/2020 | 12/2/2020 Europe / Denmark / Hovedstaden |
| EPI_ISL_670110 | 11/2/2020 | 12/2/2020 Europe / Denmark / Hovedstaden |
| EPI_ISL_670111 | 11/2/2020 | 12/2/2020 Europe / Denmark / Nordjylland |
| EPI_ISL_670112 | 11/2/2020 | 12/2/2020 Europe / Denmark / Sjælland    |
| EPI_ISL_670113 | 11/2/2020 | 12/2/2020 Europe / Denmark / Syddanmark  |
| EPI_ISL_670114 | 11/2/2020 | 12/2/2020 Europe / Denmark / Syddanmark  |
| EPI_ISL_670115 | 11/2/2020 | 12/2/2020 Europe / Denmark / Hovedstaden |
| EPI_ISL_670116 | 11/2/2020 | 12/2/2020 Europe / Denmark / Sjælland    |
| EPI_ISL_670117 | 11/2/2020 | 12/2/2020 Europe / Denmark / Nordjylland |
| EPI_ISL_670118 | 11/2/2020 | 12/2/2020 Europe / Denmark / Sjælland    |
| EPI_ISL_670119 | 11/2/2020 | 12/2/2020 Europe / Denmark / Hovedstaden |
| EPI_ISL_670120 | 11/2/2020 | 12/2/2020 Europe / Denmark / Sjælland    |
| EPI_ISL_670121 | 11/2/2020 | 12/2/2020 Europe / Denmark / Hovedstaden |
| EPI_ISL_670122 | 11/2/2020 | 12/2/2020 Europe / Denmark / Midtjylland |
| EPI_ISL_670123 | 11/2/2020 | 12/2/2020 Europe / Denmark / Nordjylland |
| EPI_ISL_670124 | 11/2/2020 | 12/2/2020 Europe / Denmark / Nordjylland |
| EPI_ISL_670125 | 11/2/2020 | 12/2/2020 Europe / Denmark / Midtjylland |
| EPI_ISL_670126 | 11/2/2020 | 12/2/2020 Europe / Denmark / Hovedstaden |
| EPI_ISL_670127 | 11/2/2020 | 12/2/2020 Europe / Denmark / Midtjylland |
| EPI_ISL_670128 | 11/2/2020 | 12/2/2020 Europe / Denmark / Sjælland    |
| EPI_ISL_670129 | 11/2/2020 | 12/2/2020 Europe / Denmark / Midtjylland |
| EPI_ISL_670130 | 11/2/2020 | 12/2/2020 Europe / Denmark / Hovedstaden |
| EPI_ISL_670131 | 11/2/2020 | 12/2/2020 Europe / Denmark / Sjælland    |
| EPI_ISL_670132 | 11/2/2020 | 12/2/2020 Europe / Denmark / Nordjylland |
| EPI_ISL_670133 | 11/2/2020 | 12/2/2020 Europe / Denmark / Hovedstaden |
| EPI_ISL_670134 | 11/2/2020 | 12/2/2020 Europe / Denmark / Hovedstaden |
| EPI_ISL_670135 | 11/2/2020 | 12/2/2020 Europe / Denmark / Syddanmark  |
| EPI_ISL_670136 | 11/2/2020 | 12/2/2020 Europe / Denmark / Hovedstaden |
| EPI_ISL_670137 | 11/2/2020 | 12/2/2020 Europe / Denmark / Sjælland    |



|                |           |                                          |
|----------------|-----------|------------------------------------------|
| EPI_ISL_670185 | 11/2/2020 | 12/2/2020 Europe / Denmark / Syddanmark  |
| EPI_ISL_670186 | 11/2/2020 | 12/2/2020 Europe / Denmark / Hovedstaden |
| EPI_ISL_670187 | 11/2/2020 | 12/2/2020 Europe / Denmark / Midtjylland |
| EPI_ISL_670188 | 11/2/2020 | 12/2/2020 Europe / Denmark / Hovedstaden |
| EPI_ISL_670189 | 11/2/2020 | 12/2/2020 Europe / Denmark / Hovedstaden |
| EPI_ISL_670190 | 11/2/2020 | 12/2/2020 Europe / Denmark / Sjaelland   |
| EPI_ISL_670191 | 11/2/2020 | 12/2/2020 Europe / Denmark / Syddanmark  |
| EPI_ISL_670192 | 11/2/2020 | 12/2/2020 Europe / Denmark / Hovedstaden |
| EPI_ISL_670193 | 11/2/2020 | 12/2/2020 Europe / Denmark / Hovedstaden |
| EPI_ISL_670194 | 11/2/2020 | 12/2/2020 Europe / Denmark / Syddanmark  |
| EPI_ISL_670195 | 11/2/2020 | 12/2/2020 Europe / Denmark / Midtjylland |
| EPI_ISL_670196 | 11/2/2020 | 12/2/2020 Europe / Denmark / Nordjylland |
| EPI_ISL_670197 | 11/2/2020 | 12/2/2020 Europe / Denmark / Hovedstaden |
| EPI_ISL_670198 | 11/2/2020 | 12/2/2020 Europe / Denmark / Hovedstaden |
| EPI_ISL_670199 | 11/2/2020 | 12/2/2020 Europe / Denmark / Midtjylland |
| EPI_ISL_670200 | 11/2/2020 | 12/2/2020 Europe / Denmark / Syddanmark  |
| EPI_ISL_670201 | 11/2/2020 | 12/2/2020 Europe / Denmark / Hovedstaden |
| EPI_ISL_670202 | 11/2/2020 | 12/2/2020 Europe / Denmark / Hovedstaden |
| EPI_ISL_670203 | 11/2/2020 | 12/2/2020 Europe / Denmark / Syddanmark  |
| EPI_ISL_670204 | 11/2/2020 | 12/2/2020 Europe / Denmark / Nordjylland |
| EPI_ISL_670205 | 11/2/2020 | 12/2/2020 Europe / Denmark / Hovedstaden |
| EPI_ISL_670206 | 11/2/2020 | 12/2/2020 Europe / Denmark / Midtjylland |
| EPI_ISL_670207 | 11/2/2020 | 12/2/2020 Europe / Denmark / Hovedstaden |
| EPI_ISL_670208 | 11/2/2020 | 12/2/2020 Europe / Denmark / Nordjylland |
| EPI_ISL_670209 | 11/2/2020 | 12/2/2020 Europe / Denmark / Syddanmark  |
| EPI_ISL_670210 | 11/2/2020 | 12/2/2020 Europe / Denmark / Nordjylland |
| EPI_ISL_670211 | 11/2/2020 | 12/2/2020 Europe / Denmark / Midtjylland |
| EPI_ISL_670212 | 11/2/2020 | 12/2/2020 Europe / Denmark / Hovedstaden |
| EPI_ISL_670213 | 11/2/2020 | 12/2/2020 Europe / Denmark / Nordjylland |
| EPI_ISL_670214 | 11/2/2020 | 12/2/2020 Europe / Denmark / Hovedstaden |
| EPI_ISL_670215 | 11/2/2020 | 12/2/2020 Europe / Denmark / Sjaelland   |
| EPI_ISL_670216 | 11/2/2020 | 12/2/2020 Europe / Denmark / Sjaelland   |
| EPI_ISL_670217 | 11/2/2020 | 12/2/2020 Europe / Denmark / Sjaelland   |
| EPI_ISL_670218 | 11/2/2020 | 12/2/2020 Europe / Denmark / Nordjylland |
| EPI_ISL_670219 | 11/2/2020 | 12/2/2020 Europe / Denmark / Syddanmark  |
| EPI_ISL_670220 | 11/2/2020 | 12/2/2020 Europe / Denmark / Hovedstaden |
| EPI_ISL_670221 | 11/2/2020 | 12/2/2020 Europe / Denmark / Syddanmark  |
| EPI_ISL_670222 | 11/2/2020 | 12/2/2020 Europe / Denmark / Hovedstaden |
| EPI_ISL_670223 | 11/2/2020 | 12/2/2020 Europe / Denmark / Hovedstaden |
| EPI_ISL_670224 | 11/2/2020 | 12/2/2020 Europe / Denmark / Syddanmark  |
| EPI_ISL_670225 | 11/2/2020 | 12/2/2020 Europe / Denmark / Hovedstaden |
| EPI_ISL_670226 | 11/2/2020 | 12/2/2020 Europe / Denmark / Nordjylland |
| EPI_ISL_670227 | 11/2/2020 | 12/2/2020 Europe / Denmark / Syddanmark  |
| EPI_ISL_670228 | 11/2/2020 | 12/2/2020 Europe / Denmark / Hovedstaden |
| EPI_ISL_670229 | 11/2/2020 | 12/2/2020 Europe / Denmark / Sjaelland   |
| EPI_ISL_670230 | 11/2/2020 | 12/2/2020 Europe / Denmark / Midtjylland |
| EPI_ISL_670231 | 11/2/2020 | 12/2/2020 Europe / Denmark / Hovedstaden |



|                |           |                                          |
|----------------|-----------|------------------------------------------|
| EPI_ISL_670279 | 11/2/2020 | 12/2/2020 Europe / Denmark / Hovedstaden |
| EPI_ISL_670280 | 11/2/2020 | 12/2/2020 Europe / Denmark / Nordjylland |
| EPI_ISL_670281 | 11/2/2020 | 12/2/2020 Europe / Denmark / Syddanmark  |
| EPI_ISL_670282 | 11/2/2020 | 12/2/2020 Europe / Denmark / Sjaelland   |
| EPI_ISL_670283 | 11/2/2020 | 12/2/2020 Europe / Denmark / Hovedstaden |
| EPI_ISL_670284 | 11/2/2020 | 12/2/2020 Europe / Denmark / Sjaelland   |
| EPI_ISL_670285 | 11/2/2020 | 12/2/2020 Europe / Denmark / Nordjylland |
| EPI_ISL_670286 | 11/2/2020 | 12/2/2020 Europe / Denmark / Hovedstaden |
| EPI_ISL_670287 | 11/2/2020 | 12/2/2020 Europe / Denmark / Hovedstaden |
| EPI_ISL_670288 | 11/2/2020 | 12/2/2020 Europe / Denmark / Hovedstaden |
| EPI_ISL_670289 | 11/2/2020 | 12/2/2020 Europe / Denmark / Hovedstaden |
| EPI_ISL_670290 | 11/2/2020 | 12/2/2020 Europe / Denmark / Hovedstaden |
| EPI_ISL_670291 | 11/2/2020 | 12/2/2020 Europe / Denmark / Sjaelland   |
| EPI_ISL_670292 | 11/2/2020 | 12/2/2020 Europe / Denmark / Hovedstaden |
| EPI_ISL_670293 | 11/2/2020 | 12/2/2020 Europe / Denmark / Midtjylland |
| EPI_ISL_670294 | 11/2/2020 | 12/2/2020 Europe / Denmark / Midtjylland |
| EPI_ISL_670295 | 11/2/2020 | 12/2/2020 Europe / Denmark / Sjaelland   |
| EPI_ISL_670296 | 11/2/2020 | 12/2/2020 Europe / Denmark / Sjaelland   |
| EPI_ISL_670297 | 11/2/2020 | 12/2/2020 Europe / Denmark / Hovedstaden |
| EPI_ISL_670298 | 11/2/2020 | 12/2/2020 Europe / Denmark / Hovedstaden |
| EPI_ISL_670299 | 11/2/2020 | 12/2/2020 Europe / Denmark / Syddanmark  |
| EPI_ISL_670300 | 11/2/2020 | 12/2/2020 Europe / Denmark / Hovedstaden |
| EPI_ISL_670301 | 11/2/2020 | 12/2/2020 Europe / Denmark / Nordjylland |
| EPI_ISL_670302 | 11/2/2020 | 12/2/2020 Europe / Denmark / Sjaelland   |
| EPI_ISL_670303 | 11/2/2020 | 12/2/2020 Europe / Denmark / Sjaelland   |
| EPI_ISL_670304 | 11/2/2020 | 12/2/2020 Europe / Denmark / Hovedstaden |
| EPI_ISL_670305 | 11/2/2020 | 12/2/2020 Europe / Denmark / Nordjylland |
| EPI_ISL_670306 | 11/2/2020 | 12/2/2020 Europe / Denmark / Hovedstaden |
| EPI_ISL_670307 | 11/2/2020 | 12/2/2020 Europe / Denmark / Hovedstaden |
| EPI_ISL_670308 | 11/2/2020 | 12/2/2020 Europe / Denmark / Sjaelland   |
| EPI_ISL_670309 | 11/2/2020 | 12/2/2020 Europe / Denmark / Sjaelland   |
| EPI_ISL_670310 | 11/2/2020 | 12/2/2020 Europe / Denmark / Midtjylland |
| EPI_ISL_670311 | 11/2/2020 | 12/2/2020 Europe / Denmark / Hovedstaden |
| EPI_ISL_670312 | 11/2/2020 | 12/2/2020 Europe / Denmark / Hovedstaden |
| EPI_ISL_670313 | 11/2/2020 | 12/2/2020 Europe / Denmark / Midtjylland |
| EPI_ISL_670314 | 11/2/2020 | 12/2/2020 Europe / Denmark / Midtjylland |
| EPI_ISL_670315 | 11/2/2020 | 12/2/2020 Europe / Denmark / Midtjylland |
| EPI_ISL_670316 | 11/2/2020 | 12/2/2020 Europe / Denmark / Syddanmark  |
| EPI_ISL_670317 | 11/2/2020 | 12/2/2020 Europe / Denmark / Midtjylland |
| EPI_ISL_670318 | 11/2/2020 | 12/2/2020 Europe / Denmark / Syddanmark  |
| EPI_ISL_670319 | 11/2/2020 | 12/2/2020 Europe / Denmark / Hovedstaden |
| EPI_ISL_670320 | 11/2/2020 | 12/2/2020 Europe / Denmark / Midtjylland |
| EPI_ISL_670321 | 11/2/2020 | 12/2/2020 Europe / Denmark / Syddanmark  |
| EPI_ISL_670322 | 11/2/2020 | 12/2/2020 Europe / Denmark / Sjaelland   |
| EPI_ISL_670323 | 11/2/2020 | 12/2/2020 Europe / Denmark / Nordjylland |
| EPI_ISL_670324 | 11/2/2020 | 12/2/2020 Europe / Denmark / Midtjylland |
| EPI_ISL_670325 | 11/2/2020 | 12/2/2020 Europe / Denmark / Hovedstaden |







|                |            |                                          |
|----------------|------------|------------------------------------------|
| EPI_ISL_670420 | 11/2/2020  | 12/2/2020 Europe / Denmark / Sjaelland   |
| EPI_ISL_670421 | 11/2/2020  | 12/2/2020 Europe / Denmark / Hovedstaden |
| EPI_ISL_670422 | 11/2/2020  | 12/2/2020 Europe / Denmark / Hovedstaden |
| EPI_ISL_670423 | 11/2/2020  | 12/2/2020 Europe / Denmark / Syddanmark  |
| EPI_ISL_670424 | 11/2/2020  | 12/2/2020 Europe / Denmark / Midtjylland |
| EPI_ISL_670425 | 11/2/2020  | 12/2/2020 Europe / Denmark / Hovedstaden |
| EPI_ISL_670426 | 11/2/2020  | 12/2/2020 Europe / Denmark / Syddanmark  |
| EPI_ISL_670427 | 11/2/2020  | 12/2/2020 Europe / Denmark / Syddanmark  |
| EPI_ISL_670428 | 11/2/2020  | 12/2/2020 Europe / Denmark / Syddanmark  |
| EPI_ISL_670429 | 11/2/2020  | 12/2/2020 Europe / Denmark / Sjaelland   |
| EPI_ISL_670430 | 11/2/2020  | 12/2/2020 Europe / Denmark / Midtjylland |
| EPI_ISL_670431 | 11/2/2020  | 12/2/2020 Europe / Denmark / Nordjylland |
| EPI_ISL_670432 | 11/2/2020  | 12/2/2020 Europe / Denmark / Sjaelland   |
| EPI_ISL_670433 | 11/2/2020  | 12/2/2020 Europe / Denmark / Midtjylland |
| EPI_ISL_670434 | 11/2/2020  | 12/2/2020 Europe / Denmark / Midtjylland |
| EPI_ISL_670435 | 11/2/2020  | 12/2/2020 Europe / Denmark / Syddanmark  |
| EPI_ISL_670436 | 11/2/2020  | 12/2/2020 Europe / Denmark / Nordjylland |
| EPI_ISL_670437 | 11/2/2020  | 12/2/2020 Europe / Denmark / Syddanmark  |
| EPI_ISL_670438 | 11/2/2020  | 12/2/2020 Europe / Denmark / Hovedstaden |
| EPI_ISL_670439 | 11/2/2020  | 12/2/2020 Europe / Denmark / Sjaelland   |
| EPI_ISL_670440 | 11/2/2020  | 12/2/2020 Europe / Denmark / Syddanmark  |
| EPI_ISL_670441 | 11/2/2020  | 12/2/2020 Europe / Denmark / Hovedstaden |
| EPI_ISL_670442 | 11/2/2020  | 12/2/2020 Europe / Denmark / Sjaelland   |
| EPI_ISL_670443 | 11/2/2020  | 12/2/2020 Europe / Denmark / Syddanmark  |
| EPI_ISL_670444 | 11/2/2020  | 12/2/2020 Europe / Denmark / Midtjylland |
| EPI_ISL_670445 | 11/2/2020  | 12/2/2020 Europe / Denmark / Hovedstaden |
| EPI_ISL_670446 | 11/2/2020  | 12/2/2020 Europe / Denmark / Hovedstaden |
| EPI_ISL_670447 | 11/2/2020  | 12/2/2020 Europe / Denmark / Hovedstaden |
| EPI_ISL_670448 | 11/2/2020  | 12/2/2020 Europe / Denmark / Hovedstaden |
| EPI_ISL_670449 | 11/2/2020  | 12/2/2020 Europe / Denmark / Midtjylland |
| EPI_ISL_670450 | 11/2/2020  | 12/2/2020 Europe / Denmark / Hovedstaden |
| EPI_ISL_670451 | 11/2/2020  | 12/2/2020 Europe / Denmark / Midtjylland |
| EPI_ISL_670452 | 11/2/2020  | 12/2/2020 Europe / Denmark / Hovedstaden |
| EPI_ISL_670453 | 11/2/2020  | 12/2/2020 Europe / Denmark / Hovedstaden |
| EPI_ISL_670454 | 11/2/2020  | 12/2/2020 Europe / Denmark / Nordjylland |
| EPI_ISL_670455 | 11/2/2020  | 12/2/2020 Europe / Denmark / Hovedstaden |
| EPI_ISL_670456 | 11/2/2020  | 12/2/2020 Europe / Denmark / Midtjylland |
| EPI_ISL_670457 | 11/2/2020  | 12/2/2020 Europe / Denmark / Syddanmark  |
| EPI_ISL_670523 | 11/2/2020  | 12/2/2020 Europe / Denmark / Syddanmark  |
| EPI_ISL_670524 | 10/26/2020 | 12/2/2020 Europe / Denmark / Nordjylland |
| EPI_ISL_670525 | 10/26/2020 | 12/2/2020 Europe / Denmark / Nordjylland |
| EPI_ISL_670526 | 10/26/2020 | 12/2/2020 Europe / Denmark / Nordjylland |
| EPI_ISL_670527 | 10/26/2020 | 12/2/2020 Europe / Denmark / Nordjylland |
| EPI_ISL_670528 | 10/26/2020 | 12/2/2020 Europe / Denmark / Midtjylland |
| EPI_ISL_670529 | 11/2/2020  | 12/2/2020 Europe / Denmark / Hovedstaden |
| EPI_ISL_670530 | 10/26/2020 | 12/2/2020 Europe / Denmark / Hovedstaden |
| EPI_ISL_670531 | 10/26/2020 | 12/2/2020 Europe / Denmark / Hovedstaden |



|                |            |                                          |
|----------------|------------|------------------------------------------|
| EPI_ISL_670599 | 11/2/2020  | 12/2/2020 Europe / Denmark / Hovedstaden |
| EPI_ISL_670600 | 11/2/2020  | 12/2/2020 Europe / Denmark / Midtjylland |
| EPI_ISL_670601 | 11/2/2020  | 12/2/2020 Europe / Denmark / Hovedstaden |
| EPI_ISL_670602 | 11/2/2020  | 12/2/2020 Europe / Denmark / Hovedstaden |
| EPI_ISL_670603 | 11/2/2020  | 12/2/2020 Europe / Denmark / Midtjylland |
| EPI_ISL_670604 | 11/2/2020  | 12/2/2020 Europe / Denmark / Hovedstaden |
| EPI_ISL_670605 | 11/2/2020  | 12/2/2020 Europe / Denmark / Hovedstaden |
| EPI_ISL_670606 | 11/2/2020  | 12/2/2020 Europe / Denmark / Hovedstaden |
| EPI_ISL_670607 | 11/2/2020  | 12/2/2020 Europe / Denmark / Nordjylland |
| EPI_ISL_670608 | 11/2/2020  | 12/2/2020 Europe / Denmark / Hovedstaden |
| EPI_ISL_670609 | 11/2/2020  | 12/2/2020 Europe / Denmark / Hovedstaden |
| EPI_ISL_670610 | 11/2/2020  | 12/2/2020 Europe / Denmark / Hovedstaden |
| EPI_ISL_670611 | 11/2/2020  | 12/2/2020 Europe / Denmark / Hovedstaden |
| EPI_ISL_670612 | 11/2/2020  | 12/2/2020 Europe / Denmark / Hovedstaden |
| EPI_ISL_670613 | 11/2/2020  | 12/2/2020 Europe / Denmark / Hovedstaden |
| EPI_ISL_670614 | 11/2/2020  | 12/2/2020 Europe / Denmark / Hovedstaden |
| EPI_ISL_670615 | 11/2/2020  | 12/2/2020 Europe / Denmark / Hovedstaden |
| EPI_ISL_670616 | 11/2/2020  | 12/2/2020 Europe / Denmark / Syddanmark  |
| EPI_ISL_670617 | 11/2/2020  | 12/2/2020 Europe / Denmark / Sjaelland   |
| EPI_ISL_670618 | 11/2/2020  | 12/2/2020 Europe / Denmark / Sjaelland   |
| EPI_ISL_670619 | 11/2/2020  | 12/2/2020 Europe / Denmark / Hovedstaden |
| EPI_ISL_670620 | 11/2/2020  | 12/2/2020 Europe / Denmark / Hovedstaden |
| EPI_ISL_670621 | 11/2/2020  | 12/2/2020 Europe / Denmark / Sjaelland   |
| EPI_ISL_670622 | 11/2/2020  | 12/2/2020 Europe / Denmark / Hovedstaden |
| EPI_ISL_670623 | 11/2/2020  | 12/2/2020 Europe / Denmark / Hovedstaden |
| EPI_ISL_670624 | 11/2/2020  | 12/2/2020 Europe / Denmark / Midtjylland |
| EPI_ISL_670625 | 11/2/2020  | 12/2/2020 Europe / Denmark / Hovedstaden |
| EPI_ISL_670626 | 10/26/2020 | 12/2/2020 Europe / Denmark / Hovedstaden |
| EPI_ISL_670627 | 10/26/2020 | 12/2/2020 Europe / Denmark / Hovedstaden |
| EPI_ISL_670628 | 10/26/2020 | 12/2/2020 Europe / Denmark / Midtjylland |
| EPI_ISL_670629 | 10/26/2020 | 12/2/2020 Europe / Denmark / Sjaelland   |
| EPI_ISL_670630 | 10/26/2020 | 12/2/2020 Europe / Denmark / Hovedstaden |
| EPI_ISL_670631 | 10/26/2020 | 12/2/2020 Europe / Denmark / Hovedstaden |
| EPI_ISL_670632 | 10/26/2020 | 12/2/2020 Europe / Denmark / Nordjylland |
| EPI_ISL_670633 | 10/26/2020 | 12/2/2020 Europe / Denmark / Syddanmark  |
| EPI_ISL_670634 | 10/26/2020 | 12/2/2020 Europe / Denmark / Sjaelland   |
| EPI_ISL_670635 | 10/26/2020 | 12/2/2020 Europe / Denmark / Sjaelland   |
| EPI_ISL_670636 | 10/26/2020 | 12/2/2020 Europe / Denmark / Sjaelland   |
| EPI_ISL_670637 | 10/26/2020 | 12/2/2020 Europe / Denmark / Midtjylland |
| EPI_ISL_670638 | 10/26/2020 | 12/2/2020 Europe / Denmark / Syddanmark  |
| EPI_ISL_670639 | 10/26/2020 | 12/2/2020 Europe / Denmark / Midtjylland |
| EPI_ISL_670640 | 10/26/2020 | 12/2/2020 Europe / Denmark / Hovedstaden |
| EPI_ISL_670641 | 10/26/2020 | 12/2/2020 Europe / Denmark / Nordjylland |
| EPI_ISL_670642 | 10/26/2020 | 12/2/2020 Europe / Denmark / Hovedstaden |
| EPI_ISL_670643 | 10/26/2020 | 12/2/2020 Europe / Denmark               |
| EPI_ISL_670644 | 10/19/2020 | 12/2/2020 Europe / Denmark / Midtjylland |
| EPI_ISL_670645 | 10/19/2020 | 12/2/2020 Europe / Denmark / Nordjylland |

|                |            |           |                                |
|----------------|------------|-----------|--------------------------------|
| EPI_ISL_670646 | 10/19/2020 | 12/2/2020 | Europe / Denmark / Hovedstaden |
| EPI_ISL_670647 | 10/12/2020 | 12/2/2020 | Europe / Denmark               |
| EPI_ISL_670648 | 10/12/2020 | 12/2/2020 | Europe / Denmark / Nordjylland |
| EPI_ISL_670649 | 10/12/2020 | 12/2/2020 | Europe / Denmark / Nordjylland |
| EPI_ISL_670650 | 10/5/2020  | 12/2/2020 | Europe / Denmark / Nordjylland |
| EPI_ISL_670651 | 9/14/2020  | 12/2/2020 | Europe / Denmark / Nordjylland |
| EPI_ISL_670652 | 9/14/2020  | 12/2/2020 | Europe / Denmark / Nordjylland |
| EPI_ISL_670653 | 9/14/2020  | 12/2/2020 | Europe / Denmark / Nordjylland |
| EPI_ISL_670654 | 9/14/2020  | 12/2/2020 | Europe / Denmark / Nordjylland |
| EPI_ISL_670655 | 9/14/2020  | 12/2/2020 | Europe / Denmark / Nordjylland |
| EPI_ISL_670656 | 9/14/2020  | 12/2/2020 | Europe / Denmark / Nordjylland |
| EPI_ISL_670657 | 9/14/2020  | 12/2/2020 | Europe / Denmark / Nordjylland |
| EPI_ISL_670658 | 9/14/2020  | 12/2/2020 | Europe / Denmark / Midtjylland |
| EPI_ISL_670659 | 9/7/2020   | 12/2/2020 | Europe / Denmark / Nordjylland |
| EPI_ISL_670660 | 9/7/2020   | 12/2/2020 | Europe / Denmark / Nordjylland |
| EPI_ISL_670661 | 9/7/2020   | 12/2/2020 | Europe / Denmark / Nordjylland |
| EPI_ISL_670662 | 9/7/2020   | 12/2/2020 | Europe / Denmark / Nordjylland |
| EPI_ISL_670663 | 9/7/2020   | 12/2/2020 | Europe / Denmark / Nordjylland |
| EPI_ISL_670664 | 9/7/2020   | 12/2/2020 | Europe / Denmark / Nordjylland |
| EPI_ISL_670665 | 9/7/2020   | 12/2/2020 | Europe / Denmark / Nordjylland |
| EPI_ISL_670667 | 11/2/2020  | 12/2/2020 | Europe / Denmark / Midtjylland |
| EPI_ISL_670668 | 11/2/2020  | 12/2/2020 | Europe / Denmark / Hovedstaden |
| EPI_ISL_670669 | 11/2/2020  | 12/2/2020 | Europe / Denmark / Nordjylland |
| EPI_ISL_670670 | 10/26/2020 | 12/2/2020 | Europe / Denmark / Syddanmark  |
| EPI_ISL_670671 | 10/26/2020 | 12/2/2020 | Europe / Denmark / Syddanmark  |
| EPI_ISL_670672 | 9/14/2020  | 12/2/2020 | Europe / Denmark / Nordjylland |
| EPI_ISL_670673 | 9/14/2020  | 12/2/2020 | Europe / Denmark / Nordjylland |
| EPI_ISL_670674 | 9/14/2020  | 12/2/2020 | Europe / Denmark / Nordjylland |
| EPI_ISL_670675 | 10/26/2020 | 12/2/2020 | Europe / Denmark / Nordjylland |
| EPI_ISL_670676 | 11/2/2020  | 12/2/2020 | Europe / Denmark / Syddanmark  |
| EPI_ISL_670677 | 11/2/2020  | 12/2/2020 | Europe / Denmark / Syddanmark  |
| EPI_ISL_670678 | 11/2/2020  | 12/2/2020 | Europe / Denmark / Hovedstaden |
| EPI_ISL_670679 | 11/2/2020  | 12/2/2020 | Europe / Denmark / Sjaelland   |
| EPI_ISL_670680 | 11/2/2020  | 12/2/2020 | Europe / Denmark / Hovedstaden |
| EPI_ISL_670681 | 10/26/2020 | 12/2/2020 | Europe / Denmark / Hovedstaden |
| EPI_ISL_670683 | 10/26/2020 | 12/2/2020 | Europe / Denmark / Midtjylland |
| EPI_ISL_670684 | 10/12/2020 | 12/2/2020 | Europe / Denmark / Nordjylland |
| EPI_ISL_670685 | 10/12/2020 | 12/2/2020 | Europe / Denmark / Nordjylland |
| EPI_ISL_670686 | 11/2/2020  | 12/2/2020 | Europe / Denmark / Nordjylland |
| EPI_ISL_670687 | 11/2/2020  | 12/2/2020 | Europe / Denmark / Nordjylland |
| EPI_ISL_670688 | 10/26/2020 | 12/2/2020 | Europe / Denmark / Nordjylland |
| EPI_ISL_670689 | 10/12/2020 | 12/2/2020 | Europe / Denmark / Nordjylland |
| EPI_ISL_670690 | 11/2/2020  | 12/2/2020 | Europe / Denmark / Hovedstaden |
| EPI_ISL_670691 | 11/2/2020  | 12/2/2020 | Europe / Denmark / Sjaelland   |
| EPI_ISL_670692 | 11/2/2020  | 12/2/2020 | Europe / Denmark / Midtjylland |
| EPI_ISL_670693 | 11/2/2020  | 12/2/2020 | Europe / Denmark / Hovedstaden |
| EPI_ISL_670694 | 10/26/2020 | 12/2/2020 | Europe / Denmark / Midtjylland |



|                |            |                                          |
|----------------|------------|------------------------------------------|
| EPI_ISL_670743 | 10/26/2020 | 12/2/2020 Europe / Denmark / Nordjylland |
| EPI_ISL_670744 | 10/26/2020 | 12/2/2020 Europe / Denmark / Nordjylland |
| EPI_ISL_670745 | 9/7/2020   | 12/2/2020 Europe / Denmark / Nordjylland |
| EPI_ISL_670746 | 11/2/2020  | 12/2/2020 Europe / Denmark               |
| EPI_ISL_670747 | 11/2/2020  | 12/2/2020 Europe / Denmark / Sjaelland   |
| EPI_ISL_670772 | 11/2/2020  | 12/2/2020 Europe / Denmark / Nordjylland |
| EPI_ISL_670773 | 11/2/2020  | 12/2/2020 Europe / Denmark / Nordjylland |
| EPI_ISL_670774 | 11/2/2020  | 12/2/2020 Europe / Denmark / Hovedstaden |
| EPI_ISL_670775 | 11/2/2020  | 12/2/2020 Europe / Denmark / Nordjylland |
| EPI_ISL_670776 | 11/2/2020  | 12/2/2020 Europe / Denmark / Hovedstaden |
| EPI_ISL_670777 | 11/2/2020  | 12/2/2020 Europe / Denmark / Hovedstaden |
| EPI_ISL_670778 | 11/2/2020  | 12/2/2020 Europe / Denmark / Hovedstaden |
| EPI_ISL_670779 | 11/2/2020  | 12/2/2020 Europe / Denmark / Hovedstaden |
| EPI_ISL_670780 | 11/2/2020  | 12/2/2020 Europe / Denmark / Midtjylland |
| EPI_ISL_670781 | 11/2/2020  | 12/2/2020 Europe / Denmark / Sjaelland   |
| EPI_ISL_670782 | 11/2/2020  | 12/2/2020 Europe / Denmark / Hovedstaden |
| EPI_ISL_670783 | 11/2/2020  | 12/2/2020 Europe / Denmark / Midtjylland |
| EPI_ISL_670784 | 11/2/2020  | 12/2/2020 Europe / Denmark / Hovedstaden |
| EPI_ISL_670785 | 11/2/2020  | 12/2/2020 Europe / Denmark / Hovedstaden |
| EPI_ISL_670786 | 11/2/2020  | 12/2/2020 Europe / Denmark / Syddanmark  |
| EPI_ISL_670787 | 11/2/2020  | 12/2/2020 Europe / Denmark / Hovedstaden |
| EPI_ISL_670788 | 11/2/2020  | 12/2/2020 Europe / Denmark / Nordjylland |
| EPI_ISL_670789 | 11/2/2020  | 12/2/2020 Europe / Denmark / Hovedstaden |
| EPI_ISL_670790 | 11/2/2020  | 12/2/2020 Europe / Denmark / Hovedstaden |
| EPI_ISL_670791 | 11/2/2020  | 12/2/2020 Europe / Denmark / Hovedstaden |
| EPI_ISL_670792 | 11/2/2020  | 12/2/2020 Europe / Denmark               |
| EPI_ISL_670793 | 11/2/2020  | 12/2/2020 Europe / Denmark / Sjaelland   |
| EPI_ISL_670794 | 11/2/2020  | 12/2/2020 Europe / Denmark / Hovedstaden |
| EPI_ISL_670795 | 11/2/2020  | 12/2/2020 Europe / Denmark / Hovedstaden |
| EPI_ISL_670796 | 11/2/2020  | 12/2/2020 Europe / Denmark / Hovedstaden |
| EPI_ISL_670797 | 11/2/2020  | 12/2/2020 Europe / Denmark / Hovedstaden |
| EPI_ISL_670798 | 11/2/2020  | 12/2/2020 Europe / Denmark / Sjaelland   |
| EPI_ISL_670799 | 11/2/2020  | 12/2/2020 Europe / Denmark / Nordjylland |
| EPI_ISL_670800 | 11/2/2020  | 12/2/2020 Europe / Denmark / Midtjylland |
| EPI_ISL_670801 | 11/2/2020  | 12/2/2020 Europe / Denmark / Syddanmark  |
| EPI_ISL_670802 | 11/2/2020  | 12/2/2020 Europe / Denmark / Syddanmark  |
| EPI_ISL_670803 | 11/2/2020  | 12/2/2020 Europe / Denmark / Midtjylland |
| EPI_ISL_670804 | 11/2/2020  | 12/2/2020 Europe / Denmark / Hovedstaden |
| EPI_ISL_670805 | 11/2/2020  | 12/2/2020 Europe / Denmark / Nordjylland |
| EPI_ISL_670806 | 11/2/2020  | 12/2/2020 Europe / Denmark / Midtjylland |
| EPI_ISL_670807 | 11/2/2020  | 12/2/2020 Europe / Denmark / Midtjylland |
| EPI_ISL_670808 | 11/2/2020  | 12/2/2020 Europe / Denmark / Nordjylland |
| EPI_ISL_670809 | 11/2/2020  | 12/2/2020 Europe / Denmark / Midtjylland |
| EPI_ISL_670810 | 11/2/2020  | 12/2/2020 Europe / Denmark / Hovedstaden |
| EPI_ISL_670811 | 11/2/2020  | 12/2/2020 Europe / Denmark / Nordjylland |
| EPI_ISL_670812 | 11/2/2020  | 12/2/2020 Europe / Denmark / Syddanmark  |
| EPI_ISL_670813 | 11/2/2020  | 12/2/2020 Europe / Denmark / Midtjylland |









|                |           |                                          |
|----------------|-----------|------------------------------------------|
| EPI_ISL_670955 | 11/2/2020 | 12/2/2020 Europe / Denmark / Hovedstaden |
| EPI_ISL_670956 | 11/2/2020 | 12/2/2020 Europe / Denmark / Hovedstaden |
| EPI_ISL_670957 | 11/2/2020 | 12/2/2020 Europe / Denmark / Sjaelland   |
| EPI_ISL_670958 | 11/2/2020 | 12/2/2020 Europe / Denmark / Hovedstaden |
| EPI_ISL_670959 | 11/2/2020 | 12/2/2020 Europe / Denmark / Nordjylland |
| EPI_ISL_670960 | 11/2/2020 | 12/2/2020 Europe / Denmark / Syddanmark  |
| EPI_ISL_670961 | 11/2/2020 | 12/2/2020 Europe / Denmark / Midtjylland |
| EPI_ISL_670962 | 11/2/2020 | 12/2/2020 Europe / Denmark / Sjaelland   |
| EPI_ISL_670963 | 11/2/2020 | 12/2/2020 Europe / Denmark / Syddanmark  |
| EPI_ISL_670964 | 11/2/2020 | 12/2/2020 Europe / Denmark / Hovedstaden |
| EPI_ISL_670965 | 11/2/2020 | 12/2/2020 Europe / Denmark / Hovedstaden |
| EPI_ISL_670966 | 11/2/2020 | 12/2/2020 Europe / Denmark / Hovedstaden |
| EPI_ISL_670967 | 11/2/2020 | 12/2/2020 Europe / Denmark / Sjaelland   |
| EPI_ISL_670968 | 11/2/2020 | 12/2/2020 Europe / Denmark / Hovedstaden |
| EPI_ISL_670969 | 11/2/2020 | 12/2/2020 Europe / Denmark / Sjaelland   |
| EPI_ISL_670970 | 11/2/2020 | 12/2/2020 Europe / Denmark / Midtjylland |
| EPI_ISL_670971 | 11/2/2020 | 12/2/2020 Europe / Denmark / Hovedstaden |
| EPI_ISL_670972 | 11/2/2020 | 12/2/2020 Europe / Denmark / Midtjylland |
| EPI_ISL_670973 | 11/2/2020 | 12/2/2020 Europe / Denmark / Hovedstaden |
| EPI_ISL_670974 | 11/2/2020 | 12/2/2020 Europe / Denmark / Midtjylland |
| EPI_ISL_670975 | 11/2/2020 | 12/2/2020 Europe / Denmark / Sjaelland   |
| EPI_ISL_670976 | 11/2/2020 | 12/2/2020 Europe / Denmark / Sjaelland   |
| EPI_ISL_670977 | 11/2/2020 | 12/2/2020 Europe / Denmark / Syddanmark  |
| EPI_ISL_670978 | 11/2/2020 | 12/2/2020 Europe / Denmark / Midtjylland |
| EPI_ISL_670979 | 11/2/2020 | 12/2/2020 Europe / Denmark / Sjaelland   |
| EPI_ISL_670980 | 11/2/2020 | 12/2/2020 Europe / Denmark / Hovedstaden |
| EPI_ISL_670981 | 11/2/2020 | 12/2/2020 Europe / Denmark / Hovedstaden |
| EPI_ISL_670982 | 11/2/2020 | 12/2/2020 Europe / Denmark / Hovedstaden |
| EPI_ISL_670983 | 11/2/2020 | 12/2/2020 Europe / Denmark / Hovedstaden |
| EPI_ISL_670984 | 11/2/2020 | 12/2/2020 Europe / Denmark / Midtjylland |
| EPI_ISL_670985 | 11/2/2020 | 12/2/2020 Europe / Denmark / Nordjylland |
| EPI_ISL_670986 | 11/2/2020 | 12/2/2020 Europe / Denmark / Syddanmark  |
| EPI_ISL_670987 | 11/2/2020 | 12/2/2020 Europe / Denmark / Hovedstaden |
| EPI_ISL_670988 | 11/2/2020 | 12/2/2020 Europe / Denmark / Nordjylland |
| EPI_ISL_670989 | 11/2/2020 | 12/2/2020 Europe / Denmark / Hovedstaden |
| EPI_ISL_670990 | 11/2/2020 | 12/2/2020 Europe / Denmark / Hovedstaden |
| EPI_ISL_670991 | 11/2/2020 | 12/2/2020 Europe / Denmark / Hovedstaden |
| EPI_ISL_670992 | 11/2/2020 | 12/2/2020 Europe / Denmark / Hovedstaden |
| EPI_ISL_670993 | 11/2/2020 | 12/2/2020 Europe / Denmark / Sjaelland   |
| EPI_ISL_670994 | 11/2/2020 | 12/2/2020 Europe / Denmark / Midtjylland |
| EPI_ISL_670995 | 11/2/2020 | 12/2/2020 Europe / Denmark / Nordjylland |
| EPI_ISL_670996 | 11/2/2020 | 12/2/2020 Europe / Denmark / Nordjylland |
| EPI_ISL_670997 | 11/2/2020 | 12/2/2020 Europe / Denmark / Sjaelland   |
| EPI_ISL_670998 | 11/2/2020 | 12/2/2020 Europe / Denmark / Hovedstaden |
| EPI_ISL_670999 | 11/2/2020 | 12/2/2020 Europe / Denmark / Midtjylland |
| EPI_ISL_671000 | 11/2/2020 | 12/2/2020 Europe / Denmark / Hovedstaden |
| EPI_ISL_671001 | 11/2/2020 | 12/2/2020 Europe / Denmark / Midtjylland |

|                |            |                                          |
|----------------|------------|------------------------------------------|
| EPI_ISL_671002 | 11/2/2020  | 12/2/2020 Europe / Denmark / Hovedstaden |
| EPI_ISL_671003 | 11/2/2020  | 12/2/2020 Europe / Denmark / Hovedstaden |
| EPI_ISL_671004 | 11/2/2020  | 12/2/2020 Europe / Denmark / Hovedstaden |
| EPI_ISL_671005 | 11/2/2020  | 12/2/2020 Europe / Denmark / Hovedstaden |
| EPI_ISL_671006 | 11/2/2020  | 12/2/2020 Europe / Denmark / Sjælland    |
| EPI_ISL_671007 | 11/2/2020  | 12/2/2020 Europe / Denmark / Hovedstaden |
| EPI_ISL_671008 | 11/2/2020  | 12/2/2020 Europe / Denmark / Hovedstaden |
| EPI_ISL_671009 | 11/2/2020  | 12/2/2020 Europe / Denmark / Hovedstaden |
| EPI_ISL_671010 | 11/2/2020  | 12/2/2020 Europe / Denmark / Syddanmark  |
| EPI_ISL_671011 | 11/2/2020  | 12/2/2020 Europe / Denmark / Midtjylland |
| EPI_ISL_671012 | 11/2/2020  | 12/2/2020 Europe / Denmark / Sjælland    |
| EPI_ISL_671013 | 11/2/2020  | 12/2/2020 Europe / Denmark / Hovedstaden |
| EPI_ISL_671014 | 11/2/2020  | 12/2/2020 Europe / Denmark / Hovedstaden |
| EPI_ISL_671015 | 11/2/2020  | 12/2/2020 Europe / Denmark / Midtjylland |
| EPI_ISL_671016 | 11/2/2020  | 12/2/2020 Europe / Denmark / Hovedstaden |
| EPI_ISL_671017 | 11/2/2020  | 12/2/2020 Europe / Denmark / Hovedstaden |
| EPI_ISL_671018 | 11/2/2020  | 12/2/2020 Europe / Denmark / Hovedstaden |
| EPI_ISL_671019 | 11/2/2020  | 12/2/2020 Europe / Denmark / Hovedstaden |
| EPI_ISL_671020 | 11/2/2020  | 12/2/2020 Europe / Denmark / Midtjylland |
| EPI_ISL_671021 | 11/2/2020  | 12/2/2020 Europe / Denmark / Hovedstaden |
| EPI_ISL_671022 | 11/2/2020  | 12/2/2020 Europe / Denmark / Hovedstaden |
| EPI_ISL_671023 | 11/2/2020  | 12/2/2020 Europe / Denmark / Syddanmark  |
| EPI_ISL_671024 | 11/2/2020  | 12/2/2020 Europe / Denmark / Midtjylland |
| EPI_ISL_671025 | 11/2/2020  | 12/2/2020 Europe / Denmark / Syddanmark  |
| EPI_ISL_671026 | 11/2/2020  | 12/2/2020 Europe / Denmark / Midtjylland |
| EPI_ISL_671027 | 11/2/2020  | 12/2/2020 Europe / Denmark / Midtjylland |
| EPI_ISL_671028 | 11/2/2020  | 12/2/2020 Europe / Denmark / Nordjylland |
| EPI_ISL_671029 | 11/2/2020  | 12/2/2020 Europe / Denmark / Nordjylland |
| EPI_ISL_671030 | 11/2/2020  | 12/2/2020 Europe / Denmark / Hovedstaden |
| EPI_ISL_671031 | 11/2/2020  | 12/2/2020 Europe / Denmark / Hovedstaden |
| EPI_ISL_671032 | 11/2/2020  | 12/2/2020 Europe / Denmark               |
| EPI_ISL_671033 | 11/2/2020  | 12/2/2020 Europe / Denmark / Hovedstaden |
| EPI_ISL_671034 | 11/2/2020  | 12/2/2020 Europe / Denmark / Midtjylland |
| EPI_ISL_671035 | 11/2/2020  | 12/2/2020 Europe / Denmark / Hovedstaden |
| EPI_ISL_671036 | 11/2/2020  | 12/2/2020 Europe / Denmark / Syddanmark  |
| EPI_ISL_671037 | 11/2/2020  | 12/2/2020 Europe / Denmark / Sjælland    |
| EPI_ISL_671038 | 11/2/2020  | 12/2/2020 Europe / Denmark / Hovedstaden |
| EPI_ISL_671039 | 11/2/2020  | 12/2/2020 Europe / Denmark / Sjælland    |
| EPI_ISL_671040 | 10/26/2020 | 12/2/2020 Europe / Denmark / Midtjylland |
| EPI_ISL_671041 | 10/26/2020 | 12/2/2020 Europe / Denmark / Midtjylland |
| EPI_ISL_671042 | 10/26/2020 | 12/2/2020 Europe / Denmark / Midtjylland |
| EPI_ISL_671043 | 10/26/2020 | 12/2/2020 Europe / Denmark / Hovedstaden |
| EPI_ISL_671044 | 10/26/2020 | 12/2/2020 Europe / Denmark / Sjælland    |
| EPI_ISL_671045 | 10/26/2020 | 12/2/2020 Europe / Denmark / Syddanmark  |
| EPI_ISL_671046 | 10/26/2020 | 12/2/2020 Europe / Denmark / Midtjylland |
| EPI_ISL_671047 | 10/26/2020 | 12/2/2020 Europe / Denmark / Midtjylland |
| EPI_ISL_671048 | 10/26/2020 | 12/2/2020 Europe / Denmark / Hovedstaden |



|                |            |                                          |
|----------------|------------|------------------------------------------|
| EPI_ISL_671096 | 10/26/2020 | 12/2/2020 Europe / Denmark / Syddanmark  |
| EPI_ISL_671097 | 10/26/2020 | 12/2/2020 Europe / Denmark / Hovedstaden |
| EPI_ISL_671098 | 10/26/2020 | 12/2/2020 Europe / Denmark / Hovedstaden |
| EPI_ISL_671099 | 10/26/2020 | 12/2/2020 Europe / Denmark / Midtjylland |
| EPI_ISL_671100 | 10/26/2020 | 12/2/2020 Europe / Denmark / Midtjylland |
| EPI_ISL_671101 | 10/26/2020 | 12/2/2020 Europe / Denmark / Hovedstaden |
| EPI_ISL_671102 | 10/26/2020 | 12/2/2020 Europe / Denmark / Hovedstaden |
| EPI_ISL_671103 | 10/26/2020 | 12/2/2020 Europe / Denmark / Hovedstaden |
| EPI_ISL_671104 | 10/26/2020 | 12/2/2020 Europe / Denmark / Hovedstaden |
| EPI_ISL_671105 | 10/26/2020 | 12/2/2020 Europe / Denmark / Sjaelland   |
| EPI_ISL_671106 | 10/26/2020 | 12/2/2020 Europe / Denmark / Sjaelland   |
| EPI_ISL_671107 | 10/26/2020 | 12/2/2020 Europe / Denmark / Syddanmark  |
| EPI_ISL_671108 | 10/26/2020 | 12/2/2020 Europe / Denmark / Hovedstaden |
| EPI_ISL_671109 | 10/26/2020 | 12/2/2020 Europe / Denmark / Syddanmark  |
| EPI_ISL_671110 | 10/26/2020 | 12/2/2020 Europe / Denmark / Midtjylland |
| EPI_ISL_671111 | 10/26/2020 | 12/2/2020 Europe / Denmark / Syddanmark  |
| EPI_ISL_671112 | 10/26/2020 | 12/2/2020 Europe / Denmark / Midtjylland |
| EPI_ISL_671113 | 10/26/2020 | 12/2/2020 Europe / Denmark / Nordjylland |
| EPI_ISL_671114 | 10/26/2020 | 12/2/2020 Europe / Denmark / Hovedstaden |
| EPI_ISL_671115 | 10/26/2020 | 12/2/2020 Europe / Denmark / Sjaelland   |
| EPI_ISL_671116 | 10/26/2020 | 12/2/2020 Europe / Denmark / Midtjylland |
| EPI_ISL_671117 | 10/26/2020 | 12/2/2020 Europe / Denmark / Nordjylland |
| EPI_ISL_671118 | 10/26/2020 | 12/2/2020 Europe / Denmark / Sjaelland   |
| EPI_ISL_671119 | 10/26/2020 | 12/2/2020 Europe / Denmark / Midtjylland |
| EPI_ISL_671120 | 10/26/2020 | 12/2/2020 Europe / Denmark / Syddanmark  |
| EPI_ISL_671121 | 10/26/2020 | 12/2/2020 Europe / Denmark / Sjaelland   |
| EPI_ISL_671122 | 10/26/2020 | 12/2/2020 Europe / Denmark / Sjaelland   |
| EPI_ISL_671123 | 10/26/2020 | 12/2/2020 Europe / Denmark / Syddanmark  |
| EPI_ISL_671124 | 10/26/2020 | 12/2/2020 Europe / Denmark / Syddanmark  |
| EPI_ISL_671125 | 10/26/2020 | 12/2/2020 Europe / Denmark / Nordjylland |
| EPI_ISL_671126 | 10/26/2020 | 12/2/2020 Europe / Denmark / Hovedstaden |
| EPI_ISL_671127 | 10/26/2020 | 12/2/2020 Europe / Denmark / Nordjylland |
| EPI_ISL_671128 | 10/26/2020 | 12/2/2020 Europe / Denmark / Midtjylland |
| EPI_ISL_671129 | 10/26/2020 | 12/2/2020 Europe / Denmark / Sjaelland   |
| EPI_ISL_671130 | 10/26/2020 | 12/2/2020 Europe / Denmark / Syddanmark  |
| EPI_ISL_671131 | 10/26/2020 | 12/2/2020 Europe / Denmark / Syddanmark  |
| EPI_ISL_671132 | 10/26/2020 | 12/2/2020 Europe / Denmark / Hovedstaden |
| EPI_ISL_671133 | 10/26/2020 | 12/2/2020 Europe / Denmark / Sjaelland   |
| EPI_ISL_671134 | 10/26/2020 | 12/2/2020 Europe / Denmark / Sjaelland   |
| EPI_ISL_671135 | 10/26/2020 | 12/2/2020 Europe / Denmark / Midtjylland |
| EPI_ISL_671136 | 10/26/2020 | 12/2/2020 Europe / Denmark / Syddanmark  |
| EPI_ISL_671137 | 10/26/2020 | 12/2/2020 Europe / Denmark / Midtjylland |
| EPI_ISL_671138 | 10/26/2020 | 12/2/2020 Europe / Denmark / Sjaelland   |
| EPI_ISL_671139 | 10/26/2020 | 12/2/2020 Europe / Denmark / Nordjylland |
| EPI_ISL_671140 | 10/26/2020 | 12/2/2020 Europe / Denmark / Hovedstaden |
| EPI_ISL_671141 | 10/26/2020 | 12/2/2020 Europe / Denmark / Hovedstaden |
| EPI_ISL_671142 | 10/26/2020 | 12/2/2020 Europe / Denmark / Midtjylland |

|                |            |                                          |
|----------------|------------|------------------------------------------|
| EPI_ISL_671143 | 10/26/2020 | 12/2/2020 Europe / Denmark / Hovedstaden |
| EPI_ISL_671144 | 10/26/2020 | 12/2/2020 Europe / Denmark / Hovedstaden |
| EPI_ISL_671145 | 10/26/2020 | 12/2/2020 Europe / Denmark / Syddanmark  |
| EPI_ISL_671146 | 10/26/2020 | 12/2/2020 Europe / Denmark / Nordjylland |
| EPI_ISL_671147 | 10/26/2020 | 12/2/2020 Europe / Denmark / Hovedstaden |
| EPI_ISL_671148 | 10/26/2020 | 12/2/2020 Europe / Denmark / Syddanmark  |
| EPI_ISL_671149 | 10/26/2020 | 12/2/2020 Europe / Denmark / Hovedstaden |
| EPI_ISL_671150 | 10/26/2020 | 12/2/2020 Europe / Denmark / Hovedstaden |
| EPI_ISL_671151 | 10/26/2020 | 12/2/2020 Europe / Denmark / Midtjylland |
| EPI_ISL_671152 | 10/26/2020 | 12/2/2020 Europe / Denmark / Hovedstaden |
| EPI_ISL_671153 | 10/26/2020 | 12/2/2020 Europe / Denmark / Midtjylland |
| EPI_ISL_671154 | 10/26/2020 | 12/2/2020 Europe / Denmark / Syddanmark  |
| EPI_ISL_671155 | 10/26/2020 | 12/2/2020 Europe / Denmark / Sjaelland   |
| EPI_ISL_671156 | 10/26/2020 | 12/2/2020 Europe / Denmark / Hovedstaden |
| EPI_ISL_671157 | 10/26/2020 | 12/2/2020 Europe / Denmark / Nordjylland |
| EPI_ISL_671158 | 10/26/2020 | 12/2/2020 Europe / Denmark / Syddanmark  |
| EPI_ISL_671159 | 10/26/2020 | 12/2/2020 Europe / Denmark / Nordjylland |
| EPI_ISL_671160 | 10/26/2020 | 12/2/2020 Europe / Denmark / Midtjylland |
| EPI_ISL_671161 | 10/26/2020 | 12/2/2020 Europe / Denmark / Nordjylland |
| EPI_ISL_671162 | 10/26/2020 | 12/2/2020 Europe / Denmark / Hovedstaden |
| EPI_ISL_671163 | 10/26/2020 | 12/2/2020 Europe / Denmark / Hovedstaden |
| EPI_ISL_671164 | 10/26/2020 | 12/2/2020 Europe / Denmark / Hovedstaden |
| EPI_ISL_671165 | 10/26/2020 | 12/2/2020 Europe / Denmark / Midtjylland |
| EPI_ISL_671166 | 10/26/2020 | 12/2/2020 Europe / Denmark / Hovedstaden |
| EPI_ISL_671167 | 10/26/2020 | 12/2/2020 Europe / Denmark / Syddanmark  |
| EPI_ISL_671168 | 10/26/2020 | 12/2/2020 Europe / Denmark / Midtjylland |
| EPI_ISL_671169 | 10/26/2020 | 12/2/2020 Europe / Denmark / Sjaelland   |
| EPI_ISL_671170 | 10/26/2020 | 12/2/2020 Europe / Denmark / Hovedstaden |
| EPI_ISL_671171 | 10/26/2020 | 12/2/2020 Europe / Denmark / Hovedstaden |
| EPI_ISL_671172 | 10/26/2020 | 12/2/2020 Europe / Denmark / Midtjylland |
| EPI_ISL_671173 | 10/26/2020 | 12/2/2020 Europe / Denmark / Hovedstaden |
| EPI_ISL_671174 | 10/26/2020 | 12/2/2020 Europe / Denmark / Nordjylland |
| EPI_ISL_671175 | 10/26/2020 | 12/2/2020 Europe / Denmark               |
| EPI_ISL_671176 | 10/26/2020 | 12/2/2020 Europe / Denmark / Hovedstaden |
| EPI_ISL_671177 | 10/26/2020 | 12/2/2020 Europe / Denmark / Sjaelland   |
| EPI_ISL_671178 | 10/26/2020 | 12/2/2020 Europe / Denmark / Syddanmark  |
| EPI_ISL_671179 | 10/26/2020 | 12/2/2020 Europe / Denmark / Syddanmark  |
| EPI_ISL_671180 | 10/26/2020 | 12/2/2020 Europe / Denmark / Hovedstaden |
| EPI_ISL_671181 | 10/26/2020 | 12/2/2020 Europe / Denmark / Hovedstaden |
| EPI_ISL_671182 | 10/26/2020 | 12/2/2020 Europe / Denmark / Syddanmark  |
| EPI_ISL_671183 | 10/26/2020 | 12/2/2020 Europe / Denmark / Hovedstaden |
| EPI_ISL_671184 | 10/26/2020 | 12/2/2020 Europe / Denmark / Syddanmark  |
| EPI_ISL_671185 | 10/26/2020 | 12/2/2020 Europe / Denmark / Sjaelland   |
| EPI_ISL_671186 | 10/26/2020 | 12/2/2020 Europe / Denmark / Sjaelland   |
| EPI_ISL_671187 | 10/26/2020 | 12/2/2020 Europe / Denmark / Nordjylland |
| EPI_ISL_671188 | 10/26/2020 | 12/2/2020 Europe / Denmark / Nordjylland |
| EPI_ISL_671189 | 10/26/2020 | 12/2/2020 Europe / Denmark / Nordjylland |



|                |            |           |                                |
|----------------|------------|-----------|--------------------------------|
| EPI_ISL_671190 | 10/26/2020 | 12/2/2020 | Europe / Denmark / Nordjylland |
| EPI_ISL_671191 | 10/26/2020 | 12/2/2020 | Europe / Denmark / Syddanmark  |
| EPI_ISL_671192 | 10/26/2020 | 12/2/2020 | Europe / Denmark / Nordjylland |
| EPI_ISL_671193 | 10/26/2020 | 12/2/2020 | Europe / Denmark / Nordjylland |
| EPI_ISL_671194 | 10/26/2020 | 12/2/2020 | Europe / Denmark / Hovedstaden |
| EPI_ISL_671195 | 10/26/2020 | 12/2/2020 | Europe / Denmark / Nordjylland |
| EPI_ISL_671196 | 10/26/2020 | 12/2/2020 | Europe / Denmark / Nordjylland |
| EPI_ISL_671197 | 10/26/2020 | 12/2/2020 | Europe / Denmark / Nordjylland |
| EPI_ISL_671198 | 10/26/2020 | 12/2/2020 | Europe / Denmark / Nordjylland |
| EPI_ISL_671199 | 10/26/2020 | 12/2/2020 | Europe / Denmark / Syddanmark  |
| EPI_ISL_671200 | 10/26/2020 | 12/2/2020 | Europe / Denmark / Sjælland    |
| EPI_ISL_671201 | 10/26/2020 | 12/2/2020 | Europe / Denmark / Syddanmark  |
| EPI_ISL_671202 | 10/26/2020 | 12/2/2020 | Europe / Denmark / Midtjylland |
| EPI_ISL_671203 | 10/26/2020 | 12/2/2020 | Europe / Denmark / Midtjylland |
| EPI_ISL_671204 | 10/26/2020 | 12/2/2020 | Europe / Denmark / Nordjylland |
| EPI_ISL_671205 | 10/26/2020 | 12/2/2020 | Europe / Denmark / Nordjylland |
| EPI_ISL_671206 | 10/26/2020 | 12/2/2020 | Europe / Denmark / Nordjylland |
| EPI_ISL_671207 | 10/26/2020 | 12/2/2020 | Europe / Denmark / Hovedstaden |
| EPI_ISL_671208 | 10/26/2020 | 12/2/2020 | Europe / Denmark / Hovedstaden |
| EPI_ISL_671209 | 10/26/2020 | 12/2/2020 | Europe / Denmark / Syddanmark  |
| EPI_ISL_671210 | 10/26/2020 | 12/2/2020 | Europe / Denmark / Nordjylland |
| EPI_ISL_671211 | 10/26/2020 | 12/2/2020 | Europe / Denmark / Hovedstaden |
| EPI_ISL_671212 | 10/26/2020 | 12/2/2020 | Europe / Denmark / Nordjylland |
| EPI_ISL_671213 | 10/26/2020 | 12/2/2020 | Europe / Denmark / Nordjylland |
| EPI_ISL_671214 | 10/26/2020 | 12/2/2020 | Europe / Denmark / Nordjylland |
| EPI_ISL_671215 | 10/26/2020 | 12/2/2020 | Europe / Denmark / Nordjylland |
| EPI_ISL_671216 | 10/26/2020 | 12/2/2020 | Europe / Denmark / Nordjylland |
| EPI_ISL_671217 | 10/26/2020 | 12/2/2020 | Europe / Denmark / Hovedstaden |
| EPI_ISL_671218 | 10/26/2020 | 12/2/2020 | Europe / Denmark / Nordjylland |
| EPI_ISL_671219 | 10/19/2020 | 12/2/2020 | Europe / Denmark / Sjælland    |
| EPI_ISL_671220 | 10/19/2020 | 12/2/2020 | Europe / Denmark / Syddanmark  |
| EPI_ISL_671221 | 10/19/2020 | 12/2/2020 | Europe / Denmark / Midtjylland |
| EPI_ISL_671222 | 10/19/2020 | 12/2/2020 | Europe / Denmark / Hovedstaden |
| EPI_ISL_671223 | 10/19/2020 | 12/2/2020 | Europe / Denmark / Midtjylland |
| EPI_ISL_671224 | 10/12/2020 | 12/2/2020 | Europe / Denmark / Nordjylland |
| EPI_ISL_671225 | 10/12/2020 | 12/2/2020 | Europe / Denmark / Nordjylland |
| EPI_ISL_671226 | 10/12/2020 | 12/2/2020 | Europe / Denmark / Nordjylland |
| EPI_ISL_671227 | 10/12/2020 | 12/2/2020 | Europe / Denmark / Nordjylland |
| EPI_ISL_671228 | 10/12/2020 | 12/2/2020 | Europe / Denmark / Nordjylland |
| EPI_ISL_671229 | 10/12/2020 | 12/2/2020 | Europe / Denmark / Nordjylland |
| EPI_ISL_671230 | 10/5/2020  | 12/2/2020 | Europe / Denmark / Midtjylland |
| EPI_ISL_671232 | 9/14/2020  | 12/2/2020 | Europe / Denmark / Nordjylland |
| EPI_ISL_671233 | 9/14/2020  | 12/2/2020 | Europe / Denmark / Nordjylland |
| EPI_ISL_671234 | 9/7/2020   | 12/2/2020 | Europe / Denmark / Nordjylland |
| EPI_ISL_671235 | 9/7/2020   | 12/2/2020 | Europe / Denmark / Midtjylland |
| EPI_ISL_671236 | 9/7/2020   | 12/2/2020 | Europe / Denmark / Nordjylland |
| EPI_ISL_671237 | 9/7/2020   | 12/2/2020 | Europe / Denmark / Nordjylland |

|                |           |                                          |
|----------------|-----------|------------------------------------------|
| EPI_ISL_671238 | 9/7/2020  | 12/2/2020 Europe / Denmark / Nordjylland |
| EPI_ISL_671239 | 8/31/2020 | 12/2/2020 Europe / Denmark / Nordjylland |
| EPI_ISL_671240 | 8/31/2020 | 12/2/2020 Europe / Denmark / Nordjylland |
| EPI_ISL_671241 | 8/24/2020 | 12/2/2020 Europe / Denmark / Midtjylland |
| EPI_ISL_671242 | 8/24/2020 | 12/2/2020 Europe / Denmark / Midtjylland |
| EPI_ISL_671243 | 8/10/2020 | 12/2/2020 Europe / Denmark / Midtjylland |
| EPI_ISL_671244 | 8/10/2020 | 12/2/2020 Europe / Denmark / Midtjylland |
| EPI_ISL_671245 | 7/27/2020 | 12/2/2020 Europe / Denmark / Syddanmark  |
| EPI_ISL_671246 | 6/22/2020 | 12/2/2020 Europe / Denmark / Nordjylland |
| EPI_ISL_671247 | 6/22/2020 | 12/2/2020 Europe / Denmark / Nordjylland |
| EPI_ISL_671248 | 6/22/2020 | 12/2/2020 Europe / Denmark / Nordjylland |
| EPI_ISL_671249 | 6/22/2020 | 12/2/2020 Europe / Denmark / Nordjylland |
| EPI_ISL_671250 | 6/22/2020 | 12/2/2020 Europe / Denmark / Nordjylland |
| EPI_ISL_671251 | 6/22/2020 | 12/2/2020 Europe / Denmark / Nordjylland |
| EPI_ISL_671252 | 6/22/2020 | 12/2/2020 Europe / Denmark / Nordjylland |
| EPI_ISL_671253 | 6/15/2020 | 12/2/2020 Europe / Denmark / Nordjylland |
| EPI_ISL_671254 | 6/15/2020 | 12/2/2020 Europe / Denmark / Nordjylland |
| EPI_ISL_671255 | 6/15/2020 | 12/2/2020 Europe / Denmark / Nordjylland |
| EPI_ISL_671256 | 6/15/2020 | 12/2/2020 Europe / Denmark / Nordjylland |
| EPI_ISL_671257 | 6/15/2020 | 12/2/2020 Europe / Denmark / Nordjylland |
| EPI_ISL_671258 | 6/15/2020 | 12/2/2020 Europe / Denmark / Nordjylland |
| EPI_ISL_671259 | 6/15/2020 | 12/2/2020 Europe / Denmark / Nordjylland |
| EPI_ISL_671260 | 6/15/2020 | 12/2/2020 Europe / Denmark / Nordjylland |
| EPI_ISL_671261 | 6/15/2020 | 12/2/2020 Europe / Denmark / Nordjylland |
| EPI_ISL_671262 | 6/8/2020  | 12/2/2020 Europe / Denmark / Nordjylland |
| EPI_ISL_671263 | 6/8/2020  | 12/2/2020 Europe / Denmark / Nordjylland |
| EPI_ISL_671264 | 6/8/2020  | 12/2/2020 Europe / Denmark / Nordjylland |
| EPI_ISL_671265 | 6/8/2020  | 12/2/2020 Europe / Denmark / Nordjylland |
| EPI_ISL_671266 | 6/8/2020  | 12/2/2020 Europe / Denmark / Nordjylland |
| EPI_ISL_671267 | 3/30/2020 | 12/2/2020 Europe / Denmark / Hovedstaden |
| EPI_ISL_671268 | 3/9/2020  | 12/2/2020 Europe / Denmark / Hovedstaden |
| EPI_ISL_671269 | 3/9/2020  | 12/2/2020 Europe / Denmark / Midtjylland |
| EPI_ISL_671270 | 2020      | 12/2/2020 Europe / Gibraltar             |
| EPI_ISL_671271 | 2020      | 12/2/2020 Europe / Gibraltar             |
| EPI_ISL_671273 | 2020      | 12/2/2020 Europe / Gibraltar             |
| EPI_ISL_671274 | 2020      | 12/2/2020 Europe / Gibraltar             |
| EPI_ISL_671275 | 2020      | 12/2/2020 Europe / Gibraltar             |
| EPI_ISL_671276 | 2020      | 12/2/2020 Europe / Gibraltar             |
| EPI_ISL_671277 | 2020      | 12/2/2020 Europe / Gibraltar             |
| EPI_ISL_671278 | 2020      | 12/2/2020 Europe / Gibraltar             |
| EPI_ISL_671280 | 2020      | 12/2/2020 Europe / Gibraltar             |
| EPI_ISL_671281 | 2020      | 12/2/2020 Europe / Gibraltar             |
| EPI_ISL_671282 | 2020      | 12/2/2020 Europe / Gibraltar             |
| EPI_ISL_671285 | 2020      | 12/2/2020 Europe / Gibraltar             |
| EPI_ISL_671286 | 2020      | 12/2/2020 Europe / Gibraltar             |
| EPI_ISL_671287 | 2020      | 12/2/2020 Europe / Gibraltar             |
| EPI_ISL_671289 | 2020      | 12/2/2020 Europe / Gibraltar             |

|                |           |           |                                   |
|----------------|-----------|-----------|-----------------------------------|
| EPI_ISL_671290 | 2020      | 12/2/2020 | Europe / Gibraltar                |
| EPI_ISL_671291 | 2020      | 12/2/2020 | Europe / Gibraltar                |
| EPI_ISL_671292 | 2020      | 12/2/2020 | Europe / Gibraltar                |
| EPI_ISL_671293 | 2020      | 12/2/2020 | Europe / Gibraltar                |
| EPI_ISL_671294 | 2020      | 12/2/2020 | Europe / Gibraltar                |
| EPI_ISL_671296 | 2020      | 12/2/2020 | Europe / Gibraltar                |
| EPI_ISL_671297 | 2020      | 12/2/2020 | Europe / Gibraltar                |
| EPI_ISL_671299 | 2020      | 12/2/2020 | Europe / Gibraltar                |
| EPI_ISL_671300 | 2020      | 12/2/2020 | Europe / Gibraltar                |
| EPI_ISL_671301 | 2020      | 12/2/2020 | Europe / Gibraltar                |
| EPI_ISL_671302 | 2020      | 12/2/2020 | Europe / Gibraltar                |
| EPI_ISL_671303 | 2020      | 12/2/2020 | Europe / Gibraltar                |
| EPI_ISL_671304 | 2020      | 12/2/2020 | Europe / Gibraltar                |
| EPI_ISL_671305 | 2020      | 12/2/2020 | Europe / Gibraltar                |
| EPI_ISL_671306 | 2020      | 12/2/2020 | Europe / Gibraltar                |
| EPI_ISL_671308 | 2020      | 12/2/2020 | Europe / Gibraltar                |
| EPI_ISL_671309 | 2020      | 12/2/2020 | Europe / Gibraltar                |
| EPI_ISL_671310 | 2020      | 12/2/2020 | Europe / Gibraltar                |
| EPI_ISL_671312 | 2020      | 12/2/2020 | Europe / Gibraltar                |
| EPI_ISL_671313 | 2020      | 12/2/2020 | Europe / Gibraltar                |
| EPI_ISL_671314 | 2020      | 12/2/2020 | Europe / Gibraltar                |
| EPI_ISL_671315 | 2020      | 12/2/2020 | Europe / Gibraltar                |
| EPI_ISL_671316 | 2020      | 12/2/2020 | Europe / Gibraltar                |
| EPI_ISL_671317 | 2020      | 12/2/2020 | Europe / Gibraltar                |
| EPI_ISL_671319 | 2020      | 12/2/2020 | Europe / Gibraltar                |
| EPI_ISL_671320 | 2020      | 12/2/2020 | Europe / Gibraltar                |
| EPI_ISL_671321 | 2020      | 12/2/2020 | Europe / Gibraltar                |
| EPI_ISL_671322 | 2020      | 12/2/2020 | Europe / Gibraltar                |
| EPI_ISL_671323 | 2020      | 12/2/2020 | Europe / Gibraltar                |
| EPI_ISL_671324 | 2020      | 12/2/2020 | Europe / Gibraltar                |
| EPI_ISL_671325 | 2020      | 12/2/2020 | Europe / Gibraltar                |
| EPI_ISL_671327 | 2020      | 12/2/2020 | Europe / Gibraltar                |
| EPI_ISL_671329 | 2020      | 12/2/2020 | Europe / Gibraltar                |
| EPI_ISL_671332 | 2020      | 12/2/2020 | Europe / Gibraltar                |
| EPI_ISL_671336 | 2020      | 12/2/2020 | Europe / United Kingdom / England |
| EPI_ISL_671337 | 5/1/2020  | 12/2/2020 | Europe / Ireland / Dublin         |
| EPI_ISL_671338 | 5/1/2020  | 12/2/2020 | Europe / Ireland / Dublin         |
| EPI_ISL_671339 | 5/1/2020  | 12/2/2020 | Europe / Ireland / Dublin         |
| EPI_ISL_671340 | 5/1/2020  | 12/2/2020 | Europe / Ireland / Dublin         |
| EPI_ISL_671341 | 4/25/2020 | 12/2/2020 | Europe / Ireland / Dublin         |
| EPI_ISL_671342 | 4/25/2020 | 12/2/2020 | Europe / Ireland / Wicklow        |
| EPI_ISL_671343 | 5/2/2020  | 12/2/2020 | Europe / Ireland / Dublin         |
| EPI_ISL_671344 | 5/3/2020  | 12/2/2020 | Europe / Ireland / Dublin         |
| EPI_ISL_671345 | 5/2/2020  | 12/2/2020 | Europe / Ireland / Dublin         |
| EPI_ISL_671346 | 5/1/2020  | 12/2/2020 | Europe / Ireland / Dublin         |
| EPI_ISL_671347 | 5/7/2020  | 12/2/2020 | Europe / Ireland / Tipperary      |
| EPI_ISL_671348 | 5/7/2020  | 12/2/2020 | Europe / Ireland / Tipperary      |

|                |           |                                        |
|----------------|-----------|----------------------------------------|
| EPI_ISL_671349 | 5/9/2020  | 12/2/2020 Europe / Ireland / Wicklow   |
| EPI_ISL_671350 | 5/12/2020 | 12/2/2020 Europe / Ireland / Limerick  |
| EPI_ISL_671351 | 5/13/2020 | 12/2/2020 Europe / Ireland / Limerick  |
| EPI_ISL_671352 | 5/13/2020 | 12/2/2020 Europe / Ireland / Clare     |
| EPI_ISL_671353 | 5/15/2020 | 12/2/2020 Europe / Ireland / Limerick  |
| EPI_ISL_671354 | 5/18/2020 | 12/2/2020 Europe / Ireland / Galway    |
| EPI_ISL_671355 | 4/28/2020 | 12/2/2020 Europe / Ireland / Dublin    |
| EPI_ISL_671356 | 4/23/2020 | 12/2/2020 Europe / Ireland / Dublin    |
| EPI_ISL_671357 | 4/22/2020 | 12/2/2020 Europe / Ireland / Offaly    |
| EPI_ISL_671358 | 4/22/2020 | 12/2/2020 Europe / Ireland / Dublin    |
| EPI_ISL_671359 | 4/15/2020 | 12/2/2020 Europe / Ireland / Dublin    |
| EPI_ISL_671360 | 4/16/2020 | 12/2/2020 Europe / Ireland / Dublin    |
| EPI_ISL_671361 | 4/18/2020 | 12/2/2020 Europe / Ireland / Monaghan  |
| EPI_ISL_671362 | 4/16/2020 | 12/2/2020 Europe / Ireland / Dublin    |
| EPI_ISL_671363 | 4/19/2020 | 12/2/2020 Europe / Ireland / Dublin    |
| EPI_ISL_671364 | 4/16/2020 | 12/2/2020 Europe / Ireland / Dublin    |
| EPI_ISL_671365 | 4/17/2020 | 12/2/2020 Europe / Ireland / Louth     |
| EPI_ISL_671366 | 4/15/2020 | 12/2/2020 Europe / Ireland / Mayo      |
| EPI_ISL_671367 | 4/18/2020 | 12/2/2020 Europe / Ireland / Monaghan  |
| EPI_ISL_671368 | 4/18/2020 | 12/2/2020 Europe / Ireland / Monaghan  |
| EPI_ISL_671369 | 4/14/2020 | 12/2/2020 Europe / Ireland / Mayo      |
| EPI_ISL_671370 | 4/15/2020 | 12/2/2020 Europe / Ireland / Dublin    |
| EPI_ISL_671371 | 4/17/2020 | 12/2/2020 Europe / Ireland / Westmeath |
| EPI_ISL_671372 | 4/17/2020 | 12/2/2020 Europe / Ireland / Wicklow   |
| EPI_ISL_671373 | 3/26/2020 | 12/2/2020 Europe / Ireland / Dublin    |
| EPI_ISL_671374 | 3/16/2020 | 12/2/2020 Europe / Ireland / Dublin    |
| EPI_ISL_671375 | 3/20/2020 | 12/2/2020 Europe / Ireland / Kerry     |
| EPI_ISL_671376 | 3/26/2020 | 12/2/2020 Europe / Ireland / Dublin    |
| EPI_ISL_671377 | 3/30/2020 | 12/2/2020 Europe / Ireland / Monaghan  |
| EPI_ISL_671378 | 3/30/2020 | 12/2/2020 Europe / Ireland / Monaghan  |
| EPI_ISL_671379 | 4/1/2020  | 12/2/2020 Europe / Ireland / Monaghan  |
| EPI_ISL_671380 | 4/1/2020  | 12/2/2020 Europe / Ireland / Monaghan  |
| EPI_ISL_671381 | 4/18/2020 | 12/2/2020 Europe / Ireland / Laois     |
| EPI_ISL_671382 | 4/17/2020 | 12/2/2020 Europe / Ireland / Dublin    |
| EPI_ISL_671383 | 4/15/2020 | 12/2/2020 Europe / Ireland / Dublin    |
| EPI_ISL_671384 | 4/17/2020 | 12/2/2020 Europe / Ireland / Dublin    |
| EPI_ISL_671385 | 4/16/2020 | 12/2/2020 Europe / Ireland / Laois     |
| EPI_ISL_671386 | 4/15/2020 | 12/2/2020 Europe / Ireland / Dublin    |
| EPI_ISL_671387 | 4/17/2020 | 12/2/2020 Europe / Ireland / Dublin    |
| EPI_ISL_671388 | 4/17/2020 | 12/2/2020 Europe / Ireland / Dublin    |
| EPI_ISL_671389 | 4/17/2020 | 12/2/2020 Europe / Ireland / Wicklow   |
| EPI_ISL_671390 | 4/17/2020 | 12/2/2020 Europe / Ireland / Dublin    |
| EPI_ISL_671391 | 4/18/2020 | 12/2/2020 Europe / Ireland / Monaghan  |
| EPI_ISL_671392 | 4/17/2020 | 12/2/2020 Europe / Ireland / Wicklow   |
| EPI_ISL_671393 | 4/17/2020 | 12/2/2020 Europe / Ireland / Wicklow   |
| EPI_ISL_671394 | 4/16/2020 | 12/2/2020 Europe / Ireland / Monaghan  |
| EPI_ISL_671395 | 4/15/2020 | 12/2/2020 Europe / Ireland / Dublin    |

|                |            |                                                            |
|----------------|------------|------------------------------------------------------------|
| EPI_ISL_671396 | 4/16/2020  | 12/2/2020 Europe / Ireland / Monaghan                      |
| EPI_ISL_671397 | 4/17/2020  | 12/2/2020 Europe / Ireland / Dublin                        |
| EPI_ISL_671398 | 4/17/2020  | 12/2/2020 Europe / Ireland / Dublin                        |
| EPI_ISL_671399 | 4/17/2020  | 12/2/2020 Europe / Ireland / Dublin                        |
| EPI_ISL_671400 | 4/18/2020  | 12/2/2020 Europe / Ireland / Laois                         |
| EPI_ISL_671402 | 4/17/2020  | 12/2/2020 Europe / Ireland / Dublin                        |
| EPI_ISL_671403 | 4/18/2020  | 12/2/2020 Europe / Ireland / Monaghan                      |
| EPI_ISL_671414 | 9/2/2020   | 12/2/2020 Europe / Hungary / Baranya county                |
| EPI_ISL_671415 | 10/20/2020 | 12/2/2020 Europe / Hungary / Baranya county                |
| EPI_ISL_671416 | 10/12/2020 | 12/2/2020 Europe / Hungary / Somogy county                 |
| EPI_ISL_671417 | 10/20/2020 | 12/2/2020 Europe / Hungary / Baranya county                |
| EPI_ISL_671418 | 10/24/2020 | 12/2/2020 Europe / Hungary / Baranya county                |
| EPI_ISL_671419 | 8/31/2020  | 12/2/2020 Europe / Hungary / Szabolcs-Szatmar-Bereg County |
| EPI_ISL_671420 | 8/31/2020  | 12/2/2020 Europe / Hungary / Hajdu-Bihar County            |
| EPI_ISL_671421 | 8/31/2020  | 12/2/2020 Europe / Hungary / Hajdu-Bihar County            |
| EPI_ISL_671423 | 8/31/2020  | 12/2/2020 Europe / Hungary / Hajdu-Bihar County            |
| EPI_ISL_671424 | 8/31/2020  | 12/2/2020 Europe / Hungary / Hajdu-Bihar County            |
| EPI_ISL_671425 | 8/31/2020  | 12/2/2020 Europe / Hungary / Hajdu-Bihar County            |
| EPI_ISL_671427 | 8/31/2020  | 12/2/2020 Europe / Hungary / Hajdu-Bihar County            |
| EPI_ISL_671428 | 9/1/2020   | 12/2/2020 Europe / Hungary / Szabolcs-Szatmar-Bereg County |
| EPI_ISL_671429 | 8/31/2020  | 12/2/2020 Europe / Hungary / Borsod-Abauj-Zemplen County   |
| EPI_ISL_671430 | 9/1/2020   | 12/2/2020 Europe / Hungary / Borsod-Abauj-Zemplen County   |
| EPI_ISL_671431 | 9/2/2020   | 12/2/2020 Europe / Hungary / Szabolcs-Szatmar-Bereg County |
| EPI_ISL_671432 | 9/2/2020   | 12/2/2020 Europe / Hungary / Szabolcs-Szatmar-Bereg County |
| EPI_ISL_671433 | 9/2/2020   | 12/2/2020 Europe / Hungary / Hajdu-Bihar County            |
| EPI_ISL_671434 | 9/2/2020   | 12/2/2020 Europe / Hungary / Hajdu-Bihar County            |
| EPI_ISL_671435 | 9/2/2020   | 12/2/2020 Europe / Hungary / Szabolcs-Szatmar-Bereg County |
| EPI_ISL_671436 | 9/2/2020   | 12/2/2020 Europe / Hungary / Hajdu-Bihar County            |
| EPI_ISL_671437 | 8/31/2020  | 12/2/2020 Europe / Hungary / Hajdu-Bihar County            |
| EPI_ISL_671438 | 9/2/2020   | 12/2/2020 Europe / Hungary / Gy r-Moson-Sopron county      |
| EPI_ISL_671440 | 9/2/2020   | 12/2/2020 Europe / Hungary / Hajdu-Bihar County            |
| EPI_ISL_671441 | 9/2/2020   | 12/2/2020 Europe / Hungary / Hajdu-Bihar County            |
| EPI_ISL_671443 | 9/2/2020   | 12/2/2020 Europe / Hungary / Borsod-Abauj-Zemplen County   |
| EPI_ISL_671444 | 9/2/2020   | 12/2/2020 Europe / Hungary / Borsod-Abauj-Zemplen County   |
| EPI_ISL_671445 | 9/2/2020   | 12/2/2020 Europe / Hungary / Borsod-Abauj-Zemplen County   |
| EPI_ISL_671447 | 9/2/2020   | 12/2/2020 Europe / Hungary / Borsod-Abauj-Zemplen County   |
| EPI_ISL_671448 | 9/2/2020   | 12/2/2020 Europe / Hungary / Borsod-Abauj-Zemplen County   |
| EPI_ISL_671449 | 9/2/2020   | 12/2/2020 Europe / Hungary / Hajdu-Bihar County            |
| EPI_ISL_671451 | 9/3/2020   | 12/2/2020 Europe / Hungary / Szabolcs-Szatmar-Bereg County |
| EPI_ISL_671452 | 9/3/2020   | 12/2/2020 Europe / Hungary / Szabolcs-Szatmar-Bereg County |
| EPI_ISL_671453 | 9/3/2020   | 12/2/2020 Europe / Hungary / Szabolcs-Szatmar-Bereg County |
| EPI_ISL_671454 | 9/3/2020   | 12/2/2020 Europe / Hungary / Hajdu-Bihar County            |
| EPI_ISL_671455 | 10/3/2020  | 12/2/2020 Europe / Hungary / Borsod-Abauj-Zemplen County   |
| EPI_ISL_671456 | 10/4/2020  | 12/2/2020 Europe / Hungary / Borsod-Abauj-Zemplen County   |
| EPI_ISL_671457 | 10/4/2020  | 12/2/2020 Europe / Hungary / Szabolcs-Szatmar-Bereg County |
| EPI_ISL_671458 | 10/4/2020  | 12/2/2020 Europe / Hungary / Borsod-Abauj-Zemplen County   |
| EPI_ISL_671459 | 10/4/2020  | 12/2/2020 Europe / Hungary / Borsod-Abauj-Zemplen County   |

|                |           |                                                            |
|----------------|-----------|------------------------------------------------------------|
| EPI_ISL_671460 | 10/4/2020 | 12/2/2020 Europe / Hungary / Borsod-Abauj-Zemplen County   |
| EPI_ISL_671461 | 10/4/2020 | 12/2/2020 Europe / Hungary / Borsod-Abauj-Zemplen County   |
| EPI_ISL_671462 | 10/3/2020 | 12/2/2020 Europe / Hungary / Veszprém county               |
| EPI_ISL_671463 | 10/3/2020 | 12/2/2020 Europe / Hungary / Veszprém county               |
| EPI_ISL_671464 | 10/3/2020 | 12/2/2020 Europe / Hungary / Veszprém county               |
| EPI_ISL_671465 | 10/3/2020 | 12/2/2020 Europe / Hungary / Borsod-Abauj-Zemplen County   |
| EPI_ISL_671466 | 10/4/2020 | 12/2/2020 Europe / Hungary / Borsod-Abauj-Zemplen County   |
| EPI_ISL_671467 | 10/4/2020 | 12/2/2020 Europe / Hungary / Borsod-Abauj-Zemplen County   |
| EPI_ISL_671468 | 10/4/2020 | 12/2/2020 Europe / Hungary / Borsod-Abauj-Zemplen County   |
| EPI_ISL_671469 | 10/4/2020 | 12/2/2020 Europe / Hungary / Borsod-Abauj-Zemplen County   |
| EPI_ISL_671470 | 10/4/2020 | 12/2/2020 Europe / Hungary / Borsod-Abauj-Zemplen County   |
| EPI_ISL_671471 | 10/4/2020 | 12/2/2020 Europe / Hungary / Borsod-Abauj-Zemplen County   |
| EPI_ISL_671472 | 10/4/2020 | 12/2/2020 Europe / Hungary / Borsod-Abauj-Zemplen County   |
| EPI_ISL_671473 | 10/4/2020 | 12/2/2020 Europe / Hungary / Pest county                   |
| EPI_ISL_671474 | 10/4/2020 | 12/2/2020 Europe / Hungary / Borsod-Abauj-Zemplen County   |
| EPI_ISL_671475 | 10/4/2020 | 12/2/2020 Europe / Hungary / Borsod-Abauj-Zemplen County   |
| EPI_ISL_671476 | 10/4/2020 | 12/2/2020 Europe / Hungary / Szabolcs-Szatmar-Bereg County |
| EPI_ISL_671477 | 10/4/2020 | 12/2/2020 Europe / Hungary / Szabolcs-Szatmar-Bereg County |
| EPI_ISL_671478 | 10/5/2020 | 12/2/2020 Europe / Hungary / Hajdu-Bihar County            |
| EPI_ISL_671479 | 10/5/2020 | 12/2/2020 Europe / Hungary / Hajdu-Bihar County            |
| EPI_ISL_671480 | 10/5/2020 | 12/2/2020 Europe / Hungary / Heves county                  |
| EPI_ISL_671481 | 10/5/2020 | 12/2/2020 Europe / Hungary / Hajdu-Bihar County            |
| EPI_ISL_671482 | 10/5/2020 | 12/2/2020 Europe / Hungary / Hajdu-Bihar County            |
| EPI_ISL_671483 | 10/6/2020 | 12/2/2020 Europe / Hungary / Szabolcs-Szatmar-Bereg County |
| EPI_ISL_671484 | 10/6/2020 | 12/2/2020 Europe / Hungary / Hajdu-Bihar County            |
| EPI_ISL_671485 | 10/8/2020 | 12/2/2020 Europe / Hungary / Hajdu-Bihar County            |
| EPI_ISL_671486 | 10/8/2020 | 12/2/2020 Europe / Hungary / Hajdu-Bihar County            |
| EPI_ISL_671487 | 10/8/2020 | 12/2/2020 Europe / Hungary / Hajdu-Bihar County            |
| EPI_ISL_671488 | 10/8/2020 | 12/2/2020 Europe / Hungary / Hajdu-Bihar County            |
| EPI_ISL_671489 | 10/8/2020 | 12/2/2020 Europe / Hungary / Hajdu-Bihar County            |
| EPI_ISL_671490 | 10/8/2020 | 12/2/2020 Europe / Hungary / Hajdu-Bihar County            |
| EPI_ISL_671491 | 10/8/2020 | 12/2/2020 Europe / Hungary / Hajdu-Bihar County            |
| EPI_ISL_671492 | 10/8/2020 | 12/2/2020 Europe / Hungary / Hajdu-Bihar County            |
| EPI_ISL_671493 | 10/8/2020 | 12/2/2020 Europe / Hungary / Borsod-Abauj-Zemplen County   |
| EPI_ISL_671494 | 10/8/2020 | 12/2/2020 Europe / Hungary / Borsod-Abauj-Zemplen County   |
| EPI_ISL_671495 | 10/8/2020 | 12/2/2020 Europe / Hungary / Borsod-Abauj-Zemplen County   |
| EPI_ISL_671496 | 2020-09   | 12/2/2020 North America / Canada / Ontario                 |
| EPI_ISL_671497 | 2020-09   | 12/2/2020 North America / Canada / Ontario                 |
| EPI_ISL_671498 | 2020-09   | 12/2/2020 North America / Canada / Ontario                 |
| EPI_ISL_671499 | 2020-09   | 12/2/2020 North America / Canada / Ontario                 |
| EPI_ISL_671500 | 2020-09   | 12/2/2020 North America / Canada / Ontario                 |
| EPI_ISL_671501 | 2020-09   | 12/2/2020 North America / Canada / Ontario                 |
| EPI_ISL_671502 | 2020-09   | 12/2/2020 North America / Canada / Ontario                 |
| EPI_ISL_671503 | 2020-09   | 12/2/2020 North America / Canada / Ontario                 |
| EPI_ISL_671504 | 2020-09   | 12/2/2020 North America / Canada / Ontario                 |
| EPI_ISL_671505 | 2020-09   | 12/2/2020 North America / Canada / Ontario                 |
| EPI_ISL_671506 | 2020-09   | 12/2/2020 North America / Canada / Ontario                 |







|                |            |           |                                                |
|----------------|------------|-----------|------------------------------------------------|
| EPI_ISL_671601 | 2020-09    | 12/2/2020 | North America / Canada / Ontario               |
| EPI_ISL_671602 | 2020-09    | 12/2/2020 | North America / Canada / Ontario               |
| EPI_ISL_671603 | 2020-09    | 12/2/2020 | North America / Canada / Ontario               |
| EPI_ISL_671604 | 2020-09    | 12/2/2020 | North America / Canada / Ontario               |
| EPI_ISL_671605 | 2020-09    | 12/2/2020 | North America / Canada / Ontario               |
| EPI_ISL_671606 | 2020-09    | 12/2/2020 | North America / Canada / Ontario               |
| EPI_ISL_671650 | 6/26/2020  | 12/2/2020 | North America / USA / Texas / Harris           |
| EPI_ISL_671652 | 10/1/2020  | 12/2/2020 | North America / Canada / Ontario               |
| EPI_ISL_671653 | 9/20/2020  | 12/2/2020 | North America / Canada / Ontario               |
| EPI_ISL_671654 | 10/4/2020  | 12/2/2020 | North America / Canada / Ontario               |
| EPI_ISL_671655 | 10/1/2020  | 12/2/2020 | North America / Canada / Ontario               |
| EPI_ISL_671656 | 10/2/2020  | 12/2/2020 | North America / Canada / Ontario               |
| EPI_ISL_671657 | 10/2/2020  | 12/2/2020 | North America / Canada / Ontario               |
| EPI_ISL_671658 | 10/4/2020  | 12/2/2020 | North America / Canada / Ontario               |
| EPI_ISL_671659 | 10/4/2020  | 12/2/2020 | North America / Canada / Ontario               |
| EPI_ISL_671660 | 10/1/2020  | 12/2/2020 | North America / Canada / Ontario               |
| EPI_ISL_671663 | 9/30/2020  | 12/2/2020 | North America / Canada / Ontario               |
| EPI_ISL_671665 | 10/3/2020  | 12/2/2020 | North America / Canada / Ontario               |
| EPI_ISL_671666 | 10/2/2020  | 12/2/2020 | North America / Canada / Ontario               |
| EPI_ISL_671667 | 10/4/2020  | 12/2/2020 | North America / Canada / Ontario               |
| EPI_ISL_671668 | 10/1/2020  | 12/2/2020 | North America / Canada / Ontario               |
| EPI_ISL_671669 | 10/2/2020  | 12/2/2020 | North America / Canada / Ontario               |
| EPI_ISL_671670 | 9/30/2020  | 12/2/2020 | North America / Canada / Ontario               |
| EPI_ISL_671671 | 10/1/2020  | 12/2/2020 | North America / Canada / Ontario               |
| EPI_ISL_671673 | 10/21/2020 | 12/2/2020 | Oceania / Australia / New South Wales / Sydney |
| EPI_ISL_671682 | 10/22/2020 | 12/3/2020 | North America / USA / New York / New York City |
| EPI_ISL_671683 | 10/22/2020 | 12/3/2020 | North America / USA / New York / New York City |
| EPI_ISL_671684 | 10/22/2020 | 12/3/2020 | North America / USA / New York / New York      |
| EPI_ISL_671685 | 10/22/2020 | 12/3/2020 | North America / USA / New York / New York      |
| EPI_ISL_671687 | 10/18/2020 | 12/3/2020 | North America / USA / New York / New York      |
| EPI_ISL_671690 | 10/19/2020 | 12/3/2020 | North America / USA / New York / New York City |
| EPI_ISL_671692 | 10/19/2020 | 12/3/2020 | North America / USA / New York / New York City |
| EPI_ISL_671693 | 10/19/2020 | 12/3/2020 | North America / USA / New York / New York City |
| EPI_ISL_671695 | 10/20/2020 | 12/3/2020 | North America / USA / New York / New York City |
| EPI_ISL_671698 | 10/20/2020 | 12/3/2020 | North America / USA / New York / New York City |
| EPI_ISL_671699 | 10/21/2020 | 12/3/2020 | North America / USA / New York / New York City |
| EPI_ISL_671700 | 10/21/2020 | 12/3/2020 | North America / USA / New York / New York City |
| EPI_ISL_671701 | 10/21/2020 | 12/3/2020 | North America / USA / New York / New York      |
| EPI_ISL_671703 | 10/22/2020 | 12/3/2020 | North America / USA / New York / New York City |
| EPI_ISL_671709 | 10/26/2020 | 12/3/2020 | North America / USA / New York / New York City |
| EPI_ISL_671710 | 10/26/2020 | 12/3/2020 | North America / USA / New York / New York City |
| EPI_ISL_671712 | 10/26/2020 | 12/3/2020 | North America / USA / New York / New York City |
| EPI_ISL_671713 | 10/26/2020 | 12/3/2020 | North America / USA / New York / New York City |
| EPI_ISL_671715 | 10/26/2020 | 12/3/2020 | North America / USA / New York / New York      |
| EPI_ISL_671716 | 10/26/2020 | 12/3/2020 | North America / USA / New York / New York      |
| EPI_ISL_671719 | 10/27/2020 | 12/3/2020 | North America / USA / New York / New York City |
| EPI_ISL_671720 | 10/27/2020 | 12/3/2020 | North America / USA / New York / New York City |

|                |            |           |                                                       |
|----------------|------------|-----------|-------------------------------------------------------|
| EPI_ISL_671721 | 10/23/2020 | 12/3/2020 | North America / USA / New York / New York City        |
| EPI_ISL_671722 | 10/23/2020 | 12/3/2020 | North America / USA / New York / New York City        |
| EPI_ISL_671723 | 10/23/2020 | 12/3/2020 | North America / USA / New York / New York City        |
| EPI_ISL_671724 | 10/23/2020 | 12/3/2020 | North America / USA / New York / New York City        |
| EPI_ISL_671725 | 10/23/2020 | 12/3/2020 | North America / USA / New York / New York City        |
| EPI_ISL_671726 | 10/23/2020 | 12/3/2020 | North America / USA / New York / New York City        |
| EPI_ISL_671727 | 10/23/2020 | 12/3/2020 | North America / USA / New York / New York City        |
| EPI_ISL_671728 | 10/25/2020 | 12/3/2020 | North America / USA / New York / New York City        |
| EPI_ISL_671729 | 10/25/2020 | 12/3/2020 | North America / USA / New York / New York City        |
| EPI_ISL_671730 | 10/26/2020 | 12/3/2020 | North America / USA / New York / New York City        |
| EPI_ISL_671732 | 10/26/2020 | 12/3/2020 | North America / USA / New York / New York             |
| EPI_ISL_671733 | 10/26/2020 | 12/3/2020 | North America / USA / New York / New York City        |
| EPI_ISL_671735 | 10/27/2020 | 12/3/2020 | North America / USA / New York / New York City        |
| EPI_ISL_671736 | 10/27/2020 | 12/3/2020 | North America / USA / New York / New York City        |
| EPI_ISL_671738 | 10/27/2020 | 12/3/2020 | North America / USA / New York / New York City        |
| EPI_ISL_671740 | 10/28/2020 | 12/3/2020 | North America / USA / New York / New York City        |
| EPI_ISL_671744 | 10/28/2020 | 12/3/2020 | North America / USA / New York / New York City        |
| EPI_ISL_671746 | 10/29/2020 | 12/3/2020 | North America / USA / New York / New York City        |
| EPI_ISL_671747 | 10/29/2020 | 12/3/2020 | North America / USA / New York / New York City        |
| EPI_ISL_671748 | 10/29/2020 | 12/3/2020 | North America / USA / New York / New York City        |
| EPI_ISL_671749 | 10/29/2020 | 12/3/2020 | North America / USA / New York / New York City        |
| EPI_ISL_671750 | 10/29/2020 | 12/3/2020 | North America / USA / New York / New York City        |
| EPI_ISL_671751 | 10/29/2020 | 12/3/2020 | North America / USA / New York / New York City        |
| EPI_ISL_671752 | 10/29/2020 | 12/3/2020 | North America / USA / New York / New York City        |
| EPI_ISL_671753 | 10/29/2020 | 12/3/2020 | North America / USA / New York / New York City        |
| EPI_ISL_671754 | 10/29/2020 | 12/3/2020 | North America / USA / New York / New York City        |
| EPI_ISL_671757 | 10/29/2020 | 12/3/2020 | North America / USA / New York / New York City        |
| EPI_ISL_671758 | 10/29/2020 | 12/3/2020 | North America / USA / New York / New York City        |
| EPI_ISL_671760 | 10/30/2020 | 12/3/2020 | North America / USA / New York / New York City        |
| EPI_ISL_671761 | 10/30/2020 | 12/3/2020 | North America / USA / New York / New York City        |
| EPI_ISL_671762 | 10/30/2020 | 12/3/2020 | North America / USA / New York / New York City        |
| EPI_ISL_671765 | 3/16/2020  | 12/3/2020 | North America / USA / California / Santa Clara County |
| EPI_ISL_671768 | 3/10/2020  | 12/3/2020 | North America / USA / California / Santa Clara County |
| EPI_ISL_671797 | 7/24/2020  | 12/3/2020 | Europe / Spain / Aragon / Zaragoza                    |
| EPI_ISL_671799 | 7/24/2020  | 12/3/2020 | Europe / Spain / Aragon / Zaragoza                    |
| EPI_ISL_671836 | 10/27/2020 | 12/3/2020 | Europe / Spain / Catalunya / Badalona                 |
| EPI_ISL_671838 | 10/28/2020 | 12/3/2020 | Europe / Spain / Catalunya / Badalona                 |
| EPI_ISL_671844 | 7/10/2020  | 12/3/2020 | Europe / Spain / Catalunya / Badalona                 |
| EPI_ISL_671851 | 7/20/2020  | 12/3/2020 | Europe / Spain / Catalunya / Badalona                 |
| EPI_ISL_671854 | 7/18/2020  | 12/3/2020 | Europe / Spain / Catalunya / Badalona                 |
| EPI_ISL_671861 | 7/29/2020  | 12/3/2020 | Europe / Spain / Catalunya / Badalona                 |
| EPI_ISL_671864 | 10/7/2020  | 12/3/2020 | Europe / Ireland / Clare                              |
| EPI_ISL_671865 | 10/14/2020 | 12/3/2020 | Europe / Ireland / Cavan                              |
| EPI_ISL_671866 | 11/1/2020  | 12/3/2020 | Europe / Ireland / Cork                               |
| EPI_ISL_671867 | 10/22/2020 | 12/3/2020 | Europe / Ireland / Cork                               |
| EPI_ISL_671868 | 10/6/2020  | 12/3/2020 | Europe / Ireland / Cork                               |
| EPI_ISL_671869 | 10/6/2020  | 12/3/2020 | Europe / Ireland / Cork                               |

|                |            |                                       |
|----------------|------------|---------------------------------------|
| EPI_ISL_671870 | 10/6/2020  | 12/3/2020 Europe / Ireland / Cork     |
| EPI_ISL_671871 | 10/6/2020  | 12/3/2020 Europe / Ireland / Cork     |
| EPI_ISL_671872 | 10/7/2020  | 12/3/2020 Europe / Ireland / Cork     |
| EPI_ISL_671873 | 10/7/2020  | 12/3/2020 Europe / Ireland / Cork     |
| EPI_ISL_671874 | 10/7/2020  | 12/3/2020 Europe / Ireland / Cork     |
| EPI_ISL_671875 | 10/7/2020  | 12/3/2020 Europe / Ireland / Cork     |
| EPI_ISL_671876 | 10/7/2020  | 12/3/2020 Europe / Ireland / Cork     |
| EPI_ISL_671877 | 10/7/2020  | 12/3/2020 Europe / Ireland / Cork     |
| EPI_ISL_671878 | 10/11/2020 | 12/3/2020 Europe / Ireland / Cork     |
| EPI_ISL_671879 | 10/11/2020 | 12/3/2020 Europe / Ireland / Cork     |
| EPI_ISL_671880 | 10/12/2020 | 12/3/2020 Europe / Ireland / Cork     |
| EPI_ISL_671881 | 10/13/2020 | 12/3/2020 Europe / Ireland / Cork     |
| EPI_ISL_671882 | 10/13/2020 | 12/3/2020 Europe / Ireland / Cork     |
| EPI_ISL_671883 | 11/17/2020 | 12/3/2020 Europe / Ireland / Dublin   |
| EPI_ISL_671884 | 10/7/2020  | 12/3/2020 Europe / Ireland / Dublin   |
| EPI_ISL_671885 | 10/7/2020  | 12/3/2020 Europe / Ireland / Dublin   |
| EPI_ISL_671888 | 10/12/2020 | 12/3/2020 Europe / Ireland / Dublin   |
| EPI_ISL_671889 | 10/12/2020 | 12/3/2020 Europe / Ireland / Dublin   |
| EPI_ISL_671890 | 10/13/2020 | 12/3/2020 Europe / Ireland / Dublin   |
| EPI_ISL_671891 | 10/13/2020 | 12/3/2020 Europe / Ireland / Dublin   |
| EPI_ISL_671892 | 10/12/2020 | 12/3/2020 Europe / Ireland / Dublin   |
| EPI_ISL_671893 | 10/13/2020 | 12/3/2020 Europe / Ireland / Dublin   |
| EPI_ISL_671894 | 10/13/2020 | 12/3/2020 Europe / Ireland / Dublin   |
| EPI_ISL_671899 | 10/13/2020 | 12/3/2020 Europe / Ireland / Dublin   |
| EPI_ISL_671900 | 10/14/2020 | 12/3/2020 Europe / Ireland / Dublin   |
| EPI_ISL_671901 | 10/14/2020 | 12/3/2020 Europe / Ireland / Dublin   |
| EPI_ISL_671902 | 10/12/2020 | 12/3/2020 Europe / Ireland / Galway   |
| EPI_ISL_671903 | 10/14/2020 | 12/3/2020 Europe / Ireland / Galway   |
| EPI_ISL_671904 | 10/16/2020 | 12/3/2020 Europe / Ireland / Galway   |
| EPI_ISL_671905 | 10/16/2020 | 12/3/2020 Europe / Ireland / Galway   |
| EPI_ISL_671906 | 10/16/2020 | 12/3/2020 Europe / Ireland / Galway   |
| EPI_ISL_671907 | 10/16/2020 | 12/3/2020 Europe / Ireland / Galway   |
| EPI_ISL_671908 | 10/7/2020  | 12/3/2020 Europe / Ireland / Kildare  |
| EPI_ISL_671909 | 10/7/2020  | 12/3/2020 Europe / Ireland / Kerry    |
| EPI_ISL_671910 | 10/14/2020 | 12/3/2020 Europe / Ireland / Kerry    |
| EPI_ISL_671911 | 10/6/2020  | 12/3/2020 Europe / Ireland / Louth    |
| EPI_ISL_671912 | 10/6/2020  | 12/3/2020 Europe / Ireland / Louth    |
| EPI_ISL_671913 | 10/6/2020  | 12/3/2020 Europe / Ireland / Louth    |
| EPI_ISL_671914 | 10/6/2020  | 12/3/2020 Europe / Ireland / Limerick |
| EPI_ISL_671915 | 10/6/2020  | 12/3/2020 Europe / Ireland / Limerick |
| EPI_ISL_671916 | 10/6/2020  | 12/3/2020 Europe / Ireland / Limerick |
| EPI_ISL_671917 | 10/7/2020  | 12/3/2020 Europe / Ireland / Limerick |
| EPI_ISL_671918 | 10/7/2020  | 12/3/2020 Europe / Ireland / Limerick |
| EPI_ISL_671919 | 10/7/2020  | 12/3/2020 Europe / Ireland / Limerick |
| EPI_ISL_671920 | 10/7/2020  | 12/3/2020 Europe / Ireland / Limerick |
| EPI_ISL_671921 | 10/12/2020 | 12/3/2020 Europe / Ireland / Laois    |
| EPI_ISL_671922 | 10/13/2020 | 12/3/2020 Europe / Ireland / Laois    |

|                |            |                                                      |
|----------------|------------|------------------------------------------------------|
| EPI_ISL_671923 | 10/13/2020 | 12/3/2020 Europe / Ireland / Laois                   |
| EPI_ISL_671924 | 10/12/2020 | 12/3/2020 Europe / Ireland / Mayo                    |
| EPI_ISL_671925 | 10/7/2020  | 12/3/2020 Europe / Ireland / Offaly                  |
| EPI_ISL_671926 | 10/12/2020 | 12/3/2020 Europe / Ireland / Offaly                  |
| EPI_ISL_671927 | 10/14/2020 | 12/3/2020 Europe / Ireland / Offaly                  |
| EPI_ISL_671928 | 10/6/2020  | 12/3/2020 Europe / Ireland / Roscommon               |
| EPI_ISL_671929 | 10/13/2020 | 12/3/2020 Europe / Ireland / Roscommon               |
| EPI_ISL_671930 | 10/6/2020  | 12/3/2020 Europe / Ireland / Sligo                   |
| EPI_ISL_671931 | 10/7/2020  | 12/3/2020 Europe / Ireland / Tipperary               |
| EPI_ISL_671934 | 10/7/2020  | 12/3/2020 Europe / Ireland / Westmeath               |
| EPI_ISL_671937 | 10/13/2020 | 12/3/2020 Europe / Ireland / Westmeath               |
| EPI_ISL_671938 | 10/7/2020  | 12/3/2020 Europe / Ireland / Wexford                 |
| EPI_ISL_671939 | 10/7/2020  | 12/3/2020 Europe / Ireland / Wexford                 |
| EPI_ISL_671941 | 9/3/2020   | 12/3/2020 Europe / France / Occitanie                |
| EPI_ISL_671942 | 9/8/2020   | 12/3/2020 Europe / France / Occitanie                |
| EPI_ISL_671943 | 7/9/2020   | 12/3/2020 Europe / France / Occitanie                |
| EPI_ISL_671944 | 10/6/2020  | 12/3/2020 Europe / France / Occitanie                |
| EPI_ISL_671945 | 10/5/2020  | 12/3/2020 Europe / France / Occitanie                |
| EPI_ISL_671946 | 10/22/2020 | 12/3/2020 Europe / France / Occitanie                |
| EPI_ISL_671947 | 10/22/2020 | 12/3/2020 Europe / France / Occitanie                |
| EPI_ISL_671948 | 10/22/2020 | 12/3/2020 Europe / France / Occitanie                |
| EPI_ISL_671949 | 10/22/2020 | 12/3/2020 Europe / France / Occitanie                |
| EPI_ISL_671950 | 10/22/2020 | 12/3/2020 Europe / France / Occitanie                |
| EPI_ISL_671951 | 10/22/2020 | 12/3/2020 Europe / France / Occitanie                |
| EPI_ISL_671952 | 10/22/2020 | 12/3/2020 Europe / France / Occitanie                |
| EPI_ISL_671953 | 10/22/2020 | 12/3/2020 Europe / France / Occitanie                |
| EPI_ISL_671954 | 10/22/2020 | 12/3/2020 Europe / France / Occitanie                |
| EPI_ISL_671955 | 10/23/2020 | 12/3/2020 Europe / France / Occitanie                |
| EPI_ISL_671956 | 10/23/2020 | 12/3/2020 Europe / France / Occitanie                |
| EPI_ISL_671957 | 10/22/2020 | 12/3/2020 Europe / France / Occitanie                |
| EPI_ISL_671958 | 10/23/2020 | 12/3/2020 Europe / France / Occitanie                |
| EPI_ISL_671959 | 10/22/2020 | 12/3/2020 Europe / France / Occitanie                |
| EPI_ISL_671960 | 10/22/2020 | 12/3/2020 Europe / France / Occitanie                |
| EPI_ISL_671961 | 10/22/2020 | 12/3/2020 Europe / France / Occitanie                |
| EPI_ISL_671962 | 10/22/2020 | 12/3/2020 Europe / France / Occitanie                |
| EPI_ISL_671963 | 10/22/2020 | 12/3/2020 Europe / France / Occitanie                |
| EPI_ISL_671964 | 9/12/2020  | 12/3/2020 Europe / France / Occitanie                |
| EPI_ISL_671965 | 10/2/2020  | 12/3/2020 Europe / France / Occitanie                |
| EPI_ISL_671966 | 10/13/2020 | 12/3/2020 Europe / France / Occitanie                |
| EPI_ISL_671967 | 10/14/2020 | 12/3/2020 Europe / France / Occitanie                |
| EPI_ISL_671968 | 8/21/2020  | 12/3/2020 Europe / France / Occitanie                |
| EPI_ISL_671969 | 10/22/2020 | 12/3/2020 Europe / France / Occitanie                |
| EPI_ISL_671970 | 10/23/2020 | 12/3/2020 Europe / France / Occitanie                |
| EPI_ISL_671971 | 10/7/2020  | 12/3/2020 Europe / France / Occitanie                |
| EPI_ISL_671972 | 8/24/2020  | 12/3/2020 Europe / France / Occitanie                |
| EPI_ISL_671974 | 9/16/2020  | 12/3/2020 North America / El Salvador / San Salvador |
| EPI_ISL_671975 | 8/3/2020   | 12/3/2020 Europe / France / Occitanie                |

|                |            |                                                                     |
|----------------|------------|---------------------------------------------------------------------|
| EPI_ISL_671976 | 3/24/2020  | 12/3/2020 Europe / France / Occitanie                               |
| EPI_ISL_671977 | 10/22/2020 | 12/3/2020 Europe / France / Occitanie                               |
| EPI_ISL_671978 | 2020-10    | 12/3/2020 North America / El Salvador / San Salvador                |
| EPI_ISL_671981 | 2020       | 12/3/2020 South America / Ecuador                                   |
| EPI_ISL_671983 | 2020       | 12/3/2020 South America / Ecuador                                   |
| EPI_ISL_671984 | 2020       | 12/3/2020 South America / Ecuador                                   |
| EPI_ISL_671985 | 2020       | 12/3/2020 South America / Ecuador                                   |
| EPI_ISL_671988 | 2020       | 12/3/2020 South America / Ecuador                                   |
| EPI_ISL_671990 | 2020       | 12/3/2020 South America / Ecuador                                   |
| EPI_ISL_671991 | 2020       | 12/3/2020 South America / Ecuador                                   |
| EPI_ISL_671994 | 2020       | 12/3/2020 South America / Ecuador                                   |
| EPI_ISL_671995 | 2020       | 12/3/2020 South America / Ecuador                                   |
| EPI_ISL_671998 | 2020       | 12/3/2020 South America / Ecuador                                   |
| EPI_ISL_671999 | 2020       | 12/3/2020 South America / Ecuador                                   |
| EPI_ISL_672000 | 2020       | 12/3/2020 South America / Ecuador                                   |
| EPI_ISL_672001 | 2020       | 12/3/2020 South America / Ecuador                                   |
| EPI_ISL_672002 | 2020       | 12/3/2020 South America / Ecuador                                   |
| EPI_ISL_672004 | 2020       | 12/3/2020 South America / Ecuador                                   |
| EPI_ISL_672005 | 2020       | 12/3/2020 South America / Ecuador                                   |
| EPI_ISL_672008 | 2020       | 12/3/2020 South America / Ecuador                                   |
| EPI_ISL_672009 | 2020       | 12/3/2020 South America / Ecuador                                   |
| EPI_ISL_672011 | 2020       | 12/3/2020 South America / Ecuador                                   |
| EPI_ISL_672012 | 2020-10    | 12/3/2020 North America / El Salvador / San Salvador                |
| EPI_ISL_672085 | 10/28/2020 | 12/3/2020 North America / USA / California / Santa Clara County     |
| EPI_ISL_672086 | 8/31/2020  | 12/3/2020 North America / USA / California / Alameda County         |
| EPI_ISL_672087 | 7/14/2020  | 12/3/2020 North America / USA / California / San Luis Obispo County |
| EPI_ISL_672088 | 10/21/2020 | 12/3/2020 North America / USA / California / Santa Clara County     |
| EPI_ISL_672089 | 9/30/2020  | 12/3/2020 North America / USA / California / Santa Clara County     |
| EPI_ISL_672098 | 10/28/2020 | 12/3/2020 North America / USA / California / Madera County          |
| EPI_ISL_672099 | 10/28/2020 | 12/3/2020 North America / USA / California / Madera County          |
| EPI_ISL_672100 | 10/23/2020 | 12/3/2020 North America / USA / California / Madera County          |
| EPI_ISL_672101 | 10/22/2020 | 12/3/2020 North America / USA / California / Madera County          |
| EPI_ISL_672102 | 10/22/2020 | 12/3/2020 North America / USA / California / Madera County          |
| EPI_ISL_672112 | 6/10/2020  | 12/3/2020 North America / USA / California / Santa Clara County     |
| EPI_ISL_672113 | 9/2/2020   | 12/3/2020 North America / USA / California / Alameda County         |
| EPI_ISL_672114 | 4/6/2020   | 12/3/2020 North America / USA / California / Santa Clara County     |
| EPI_ISL_672115 | 4/6/2020   | 12/3/2020 North America / USA / California / Santa Clara County     |
| EPI_ISL_672116 | 4/7/2020   | 12/3/2020 North America / USA / California / Santa Clara County     |
| EPI_ISL_672117 | 4/7/2020   | 12/3/2020 North America / USA / California / Santa Clara County     |
| EPI_ISL_672118 | 4/7/2020   | 12/3/2020 North America / USA / California / Santa Clara County     |
| EPI_ISL_672119 | 4/7/2020   | 12/3/2020 North America / USA / California / Santa Clara County     |
| EPI_ISL_672120 | 4/7/2020   | 12/3/2020 North America / USA / California / Santa Clara County     |
| EPI_ISL_672121 | 4/8/2020   | 12/3/2020 North America / USA / California / Santa Clara County     |
| EPI_ISL_672122 | 4/9/2020   | 12/3/2020 North America / USA / California / Santa Clara County     |
| EPI_ISL_672123 | 4/6/2020   | 12/3/2020 North America / USA / California / Santa Clara County     |
| EPI_ISL_672124 | 4/6/2020   | 12/3/2020 North America / USA / California / Santa Clara County     |
| EPI_ISL_672125 | 4/6/2020   | 12/3/2020 North America / USA / California / Santa Clara County     |





















|                |            |           |                                                |
|----------------|------------|-----------|------------------------------------------------|
| EPI_ISL_672570 | 2020-10    | 12/3/2020 | North America / El Salvador / San Salvador     |
| EPI_ISL_672572 | 2020-10    | 12/3/2020 | North America / El Salvador / San Salvador     |
| EPI_ISL_672573 | 2020-09    | 12/3/2020 | North America / El Salvador / San Salvador     |
| EPI_ISL_779254 | 3/6/2020   | 12/3/2020 | Europe / France                                |
| EPI_ISL_672619 | 5/25/2020  | 12/4/2020 | Oceania / Australia / Western Australia        |
| EPI_ISL_672621 | 5/25/2020  | 12/4/2020 | Oceania / Australia / Western Australia        |
| EPI_ISL_672623 | 5/25/2020  | 12/4/2020 | Oceania / Australia / Western Australia        |
| EPI_ISL_672625 | 5/27/2020  | 12/4/2020 | Oceania / Australia / Western Australia        |
| EPI_ISL_672626 | 5/27/2020  | 12/4/2020 | Oceania / Australia / Western Australia        |
| EPI_ISL_672630 | 7/11/2020  | 12/4/2020 | Oceania / Australia / Western Australia        |
| EPI_ISL_672631 | 3/23/2020  | 12/4/2020 | Oceania / Australia / Western Australia        |
| EPI_ISL_672633 | 3/20/2020  | 12/4/2020 | Oceania / Australia / Western Australia        |
| EPI_ISL_672634 | 3/23/2020  | 12/4/2020 | Oceania / Australia / Western Australia        |
| EPI_ISL_672635 | 3/25/2020  | 12/4/2020 | Oceania / Australia / Western Australia        |
| EPI_ISL_672637 | 9/15/2020  | 12/4/2020 | Oceania / Australia / Western Australia        |
| EPI_ISL_672642 | 9/23/2020  | 12/4/2020 | Oceania / Australia / Western Australia        |
| EPI_ISL_672644 | 9/25/2020  | 12/4/2020 | Oceania / Australia / Western Australia        |
| EPI_ISL_672647 | 9/25/2020  | 12/4/2020 | Oceania / Australia / Western Australia        |
| EPI_ISL_672648 | 9/25/2020  | 12/4/2020 | Oceania / Australia / Western Australia        |
| EPI_ISL_672650 | 9/26/2020  | 12/4/2020 | Oceania / Australia / Western Australia        |
| EPI_ISL_672652 | 9/26/2020  | 12/4/2020 | Oceania / Australia / Western Australia        |
| EPI_ISL_672653 | 9/29/2020  | 12/4/2020 | Oceania / Australia / Western Australia        |
| EPI_ISL_672655 | 11/16/2020 | 12/4/2020 | Oceania / Australia / New South Wales / Sydney |
| EPI_ISL_672656 | 11/19/2020 | 12/4/2020 | Oceania / Australia / New South Wales / Sydney |
| EPI_ISL_672657 | 11/19/2020 | 12/4/2020 | Oceania / Australia / New South Wales / Sydney |
| EPI_ISL_672658 | 11/19/2020 | 12/4/2020 | Oceania / Australia / New South Wales / Sydney |
| EPI_ISL_672659 | 11/17/2020 | 12/4/2020 | Oceania / Australia / New South Wales / Sydney |
| EPI_ISL_672660 | 11/14/2020 | 12/4/2020 | Oceania / Australia / New South Wales / Sydney |
| EPI_ISL_672661 | 11/13/2020 | 12/4/2020 | Oceania / Australia / New South Wales / Sydney |
| EPI_ISL_672662 | 11/13/2020 | 12/4/2020 | Oceania / Australia / New South Wales / Sydney |
| EPI_ISL_672705 | 4/8/2020   | 12/4/2020 | South America / Brazil / Sao Paulo             |
| EPI_ISL_672711 | 4/11/2020  | 12/4/2020 | South America / Brazil / Sao Paulo             |
| EPI_ISL_672719 | 4/14/2020  | 12/4/2020 | South America / Brazil / Sao Paulo             |
| EPI_ISL_672720 | 4/14/2020  | 12/4/2020 | South America / Brazil / Sao Paulo             |
| EPI_ISL_672748 | 4/15/2020  | 12/4/2020 | South America / Brazil / Sao Paulo             |
| EPI_ISL_672754 | 11/18/2020 | 12/4/2020 | Europe / United Kingdom / England              |
| EPI_ISL_672757 | 11/18/2020 | 12/4/2020 | Europe / United Kingdom / England              |
| EPI_ISL_672758 | 11/18/2020 | 12/4/2020 | Europe / United Kingdom / England              |
| EPI_ISL_672759 | 11/18/2020 | 12/4/2020 | Europe / United Kingdom / England              |
| EPI_ISL_672760 | 11/18/2020 | 12/4/2020 | Europe / United Kingdom / England              |
| EPI_ISL_672761 | 11/18/2020 | 12/4/2020 | Europe / United Kingdom / England              |
| EPI_ISL_672764 | 11/18/2020 | 12/4/2020 | Europe / United Kingdom / England              |
| EPI_ISL_672765 | 11/18/2020 | 12/4/2020 | Europe / United Kingdom / England              |
| EPI_ISL_672767 | 11/18/2020 | 12/4/2020 | Europe / United Kingdom / England              |
| EPI_ISL_672768 | 11/18/2020 | 12/4/2020 | Europe / United Kingdom / England              |
| EPI_ISL_672769 | 11/18/2020 | 12/4/2020 | Europe / United Kingdom / England              |
| EPI_ISL_672770 | 11/18/2020 | 12/4/2020 | Europe / United Kingdom / England              |



























































































































































|                |            |                                              |
|----------------|------------|----------------------------------------------|
| EPI_ISL_676449 | 10/30/2020 | 12/4/2020 Europe / United Kingdom / Scotland |
| EPI_ISL_676451 | 10/30/2020 | 12/4/2020 Europe / United Kingdom / Scotland |
| EPI_ISL_676452 | 10/30/2020 | 12/4/2020 Europe / United Kingdom / Scotland |
| EPI_ISL_676453 | 10/30/2020 | 12/4/2020 Europe / United Kingdom / Scotland |
| EPI_ISL_676455 | 10/30/2020 | 12/4/2020 Europe / United Kingdom / Scotland |
| EPI_ISL_676456 | 10/30/2020 | 12/4/2020 Europe / United Kingdom / Scotland |
| EPI_ISL_676457 | 10/30/2020 | 12/4/2020 Europe / United Kingdom / Scotland |
| EPI_ISL_676458 | 10/30/2020 | 12/4/2020 Europe / United Kingdom / Scotland |
| EPI_ISL_676459 | 10/30/2020 | 12/4/2020 Europe / United Kingdom / Scotland |
| EPI_ISL_676460 | 10/30/2020 | 12/4/2020 Europe / United Kingdom / Scotland |
| EPI_ISL_676461 | 10/30/2020 | 12/4/2020 Europe / United Kingdom / Scotland |
| EPI_ISL_676462 | 10/30/2020 | 12/4/2020 Europe / United Kingdom / Scotland |
| EPI_ISL_676464 | 10/30/2020 | 12/4/2020 Europe / United Kingdom / Scotland |
| EPI_ISL_676465 | 10/30/2020 | 12/4/2020 Europe / United Kingdom / Scotland |
| EPI_ISL_676466 | 10/30/2020 | 12/4/2020 Europe / United Kingdom / Scotland |
| EPI_ISL_676467 | 10/30/2020 | 12/4/2020 Europe / United Kingdom / Scotland |
| EPI_ISL_676468 | 10/30/2020 | 12/4/2020 Europe / United Kingdom / Scotland |
| EPI_ISL_676469 | 10/30/2020 | 12/4/2020 Europe / United Kingdom / Scotland |
| EPI_ISL_676470 | 10/30/2020 | 12/4/2020 Europe / United Kingdom / Scotland |
| EPI_ISL_676471 | 10/30/2020 | 12/4/2020 Europe / United Kingdom / Scotland |
| EPI_ISL_676472 | 10/30/2020 | 12/4/2020 Europe / United Kingdom / Scotland |
| EPI_ISL_676473 | 10/30/2020 | 12/4/2020 Europe / United Kingdom / Scotland |
| EPI_ISL_676474 | 10/30/2020 | 12/4/2020 Europe / United Kingdom / Scotland |
| EPI_ISL_676475 | 10/30/2020 | 12/4/2020 Europe / United Kingdom / Scotland |
| EPI_ISL_676476 | 10/30/2020 | 12/4/2020 Europe / United Kingdom / Scotland |
| EPI_ISL_676477 | 10/29/2020 | 12/4/2020 Europe / United Kingdom / Scotland |
| EPI_ISL_676478 | 10/30/2020 | 12/4/2020 Europe / United Kingdom / Scotland |
| EPI_ISL_676479 | 10/30/2020 | 12/4/2020 Europe / United Kingdom / Scotland |
| EPI_ISL_676480 | 10/30/2020 | 12/4/2020 Europe / United Kingdom / Scotland |
| EPI_ISL_676481 | 10/30/2020 | 12/4/2020 Europe / United Kingdom / Scotland |
| EPI_ISL_676482 | 10/30/2020 | 12/4/2020 Europe / United Kingdom / Scotland |
| EPI_ISL_676483 | 10/30/2020 | 12/4/2020 Europe / United Kingdom / Scotland |
| EPI_ISL_676485 | 10/30/2020 | 12/4/2020 Europe / United Kingdom / Scotland |
| EPI_ISL_676486 | 10/29/2020 | 12/4/2020 Europe / United Kingdom / Scotland |
| EPI_ISL_676487 | 10/30/2020 | 12/4/2020 Europe / United Kingdom / Scotland |
| EPI_ISL_676488 | 10/30/2020 | 12/4/2020 Europe / United Kingdom / Scotland |
| EPI_ISL_676489 | 11/4/2020  | 12/4/2020 Europe / Sweden / Skane            |
| EPI_ISL_676490 | 11/4/2020  | 12/4/2020 Europe / Sweden / Skane            |
| EPI_ISL_676491 | 11/22/2020 | 12/4/2020 Europe / Sweden / Kronoberg        |
| EPI_ISL_676492 | 8/24/2020  | 12/4/2020 Europe / Sweden / Vastmanland      |
| EPI_ISL_676493 | 9/28/2020  | 12/4/2020 Europe / Sweden / Orebro           |
| EPI_ISL_676494 | 10/5/2020  | 12/4/2020 Europe / Sweden / Halland          |
| EPI_ISL_676495 | 7/10/2020  | 12/4/2020 Europe / Sweden / Gavleborg        |
| EPI_ISL_676496 | 10/26/2020 | 12/4/2020 Europe / Sweden / Orebro           |
| EPI_ISL_676497 | 11/5/2020  | 12/4/2020 Europe / Sweden / Vastra Gotaland  |
| EPI_ISL_676498 | 11/5/2020  | 12/4/2020 Europe / Sweden / Vastra Gotaland  |
| EPI_ISL_676499 | 11/3/2020  | 12/4/2020 Europe / Sweden / Vastra Gotaland  |

|                |            |           |                                               |
|----------------|------------|-----------|-----------------------------------------------|
| EPI_ISL_676500 | 11/4/2020  | 12/4/2020 | Europe / Sweden / Vastra Gotaland             |
| EPI_ISL_676501 | 11/4/2020  | 12/4/2020 | Europe / Sweden / Vastra Gotaland             |
| EPI_ISL_676502 | 11/20/2020 | 12/4/2020 | Europe / Sweden / Halland                     |
| EPI_ISL_676503 | 11/22/2020 | 12/4/2020 | Europe / Sweden / Orebro                      |
| EPI_ISL_676504 | 11/22/2020 | 12/4/2020 | Europe / Sweden / Orebro                      |
| EPI_ISL_676505 | 11/10/2020 | 12/4/2020 | Europe / Sweden / Jonkoping                   |
| EPI_ISL_676506 | 9/28/2020  | 12/4/2020 | Europe / Sweden / Jonkoping                   |
| EPI_ISL_676507 | 10/9/2020  | 12/4/2020 | Europe / Sweden / Jonkoping                   |
| EPI_ISL_676508 | 10/23/2020 | 12/4/2020 | Europe / Sweden / Jonkoping                   |
| EPI_ISL_676511 | 11/19/2020 | 12/4/2020 | Europe / United Kingdom / England             |
| EPI_ISL_676512 | 9/6/2020   | 12/4/2020 | Europe / Sweden / Ostergotland                |
| EPI_ISL_676513 | 8/25/2020  | 12/4/2020 | Europe / Sweden / Orebro                      |
| EPI_ISL_676514 | 7/29/2020  | 12/4/2020 | Europe / Sweden / Gavleborg                   |
| EPI_ISL_676515 | 10/16/2020 | 12/4/2020 | Europe / Sweden / Stockholm                   |
| EPI_ISL_676516 | 10/27/2020 | 12/4/2020 | Europe / Sweden / Gavleborg                   |
| EPI_ISL_676517 | 10/28/2020 | 12/4/2020 | Europe / Sweden / Gavleborg                   |
| EPI_ISL_676518 | 11/4/2020  | 12/4/2020 | Europe / Sweden / Vastra Gotaland             |
| EPI_ISL_676519 | 8/25/2020  | 12/4/2020 | Europe / Sweden / Ostergotland                |
| EPI_ISL_676520 | 8/4/2020   | 12/4/2020 | Europe / Sweden / Skane                       |
| EPI_ISL_676521 | 4/30/2020  | 12/4/2020 | Europe / Sweden / Uppsala                     |
| EPI_ISL_676522 | 4/26/2020  | 12/4/2020 | Europe / Sweden / Uppsala                     |
| EPI_ISL_676523 | 4/21/2020  | 12/4/2020 | Europe / Sweden / Uppsala                     |
| EPI_ISL_676524 | 4/17/2020  | 12/4/2020 | Europe / Sweden / Uppsala                     |
| EPI_ISL_676525 | 4/30/2020  | 12/4/2020 | Europe / Sweden / Uppsala                     |
| EPI_ISL_676526 | 5/26/2020  | 12/4/2020 | Europe / Sweden / Uppsala                     |
| EPI_ISL_676527 | 7/10/2020  | 12/4/2020 | Europe / Sweden / Uppsala                     |
| EPI_ISL_676528 | 7/27/2020  | 12/4/2020 | Europe / Sweden / Uppsala                     |
| EPI_ISL_676529 | 7/13/2020  | 12/4/2020 | Europe / Sweden / Uppsala                     |
| EPI_ISL_676530 | 8/3/2020   | 12/4/2020 | Europe / Sweden / Uppsala                     |
| EPI_ISL_676531 | 9/17/2020  | 12/4/2020 | Europe / Sweden / Skane                       |
| EPI_ISL_676532 | 9/17/2020  | 12/4/2020 | Europe / Sweden / Skane                       |
| EPI_ISL_676533 | 4/10/2020  | 12/4/2020 | Europe / Sweden / unknown                     |
| EPI_ISL_676534 | 10/2/2020  | 12/4/2020 | Europe / Sweden / Kalmar                      |
| EPI_ISL_676535 | 10/29/2020 | 12/4/2020 | Europe / Sweden / Gavleborg                   |
| EPI_ISL_676536 | 10/26/2020 | 12/4/2020 | Europe / Sweden / Gavleborg                   |
| EPI_ISL_676537 | 10/26/2020 | 12/4/2020 | Europe / Sweden / Gavleborg                   |
| EPI_ISL_676538 | 10/27/2020 | 12/4/2020 | Europe / Sweden / Gavleborg                   |
| EPI_ISL_676539 | 11/3/2020  | 12/4/2020 | Europe / Sweden / Varmland                    |
| EPI_ISL_676540 | 11/3/2020  | 12/4/2020 | Europe / Sweden / Varmland                    |
| EPI_ISL_676542 | 4/8/2020   | 12/4/2020 | Europe / France / Auvergne-Rhone-Alpes / Lyon |
| EPI_ISL_676543 | 4/13/2020  | 12/4/2020 | Europe / France / Auvergne-Rhone-Alpes / Lyon |
| EPI_ISL_676544 | 4/13/2020  | 12/4/2020 | Europe / France / Auvergne-Rhone-Alpes / Lyon |
| EPI_ISL_676545 | 4/13/2020  | 12/4/2020 | Europe / France / Auvergne-Rhone-Alpes / Lyon |
| EPI_ISL_676546 | 4/13/2020  | 12/4/2020 | Europe / France / Auvergne-Rhone-Alpes / Lyon |
| EPI_ISL_676547 | 4/13/2020  | 12/4/2020 | Europe / France / Auvergne-Rhone-Alpes / Lyon |
| EPI_ISL_676548 | 4/14/2020  | 12/4/2020 | Europe / France / Auvergne-Rhone-Alpes / Lyon |
| EPI_ISL_676550 | 4/14/2020  | 12/4/2020 | Europe / France / Auvergne-Rhone-Alpes / Lyon |

|                |           |                                                         |
|----------------|-----------|---------------------------------------------------------|
| EPI_ISL_676551 | 4/14/2020 | 12/4/2020 Europe / France / Auvergne-Rhone-Alpes / Lyon |
| EPI_ISL_676552 | 4/14/2020 | 12/4/2020 Europe / France / Auvergne-Rhone-Alpes / Lyon |
| EPI_ISL_676553 | 4/15/2020 | 12/4/2020 Europe / France / Auvergne-Rhone-Alpes / Lyon |
| EPI_ISL_676554 | 4/15/2020 | 12/4/2020 Europe / France / Auvergne-Rhone-Alpes / Lyon |
| EPI_ISL_676555 | 4/15/2020 | 12/4/2020 Europe / France / Auvergne-Rhone-Alpes / Lyon |
| EPI_ISL_676556 | 4/15/2020 | 12/4/2020 Europe / France / Auvergne-Rhone-Alpes / Lyon |
| EPI_ISL_676557 | 4/15/2020 | 12/4/2020 Europe / France / Auvergne-Rhone-Alpes / Lyon |
| EPI_ISL_676558 | 4/16/2020 | 12/4/2020 Europe / France / Auvergne-Rhone-Alpes / Lyon |
| EPI_ISL_676559 | 4/16/2020 | 12/4/2020 Europe / France / Auvergne-Rhone-Alpes / Lyon |
| EPI_ISL_676560 | 4/16/2020 | 12/4/2020 Europe / France / Auvergne-Rhone-Alpes / Lyon |
| EPI_ISL_676561 | 4/16/2020 | 12/4/2020 Europe / France / Auvergne-Rhone-Alpes / Lyon |
| EPI_ISL_676562 | 4/17/2020 | 12/4/2020 Europe / France / Auvergne-Rhone-Alpes / Lyon |
| EPI_ISL_676563 | 4/17/2020 | 12/4/2020 Europe / France / Auvergne-Rhone-Alpes / Lyon |
| EPI_ISL_676564 | 4/17/2020 | 12/4/2020 Europe / France / Auvergne-Rhone-Alpes / Lyon |
| EPI_ISL_676565 | 4/18/2020 | 12/4/2020 Europe / France / Auvergne-Rhone-Alpes / Lyon |
| EPI_ISL_676566 | 4/18/2020 | 12/4/2020 Europe / France / Auvergne-Rhone-Alpes / Lyon |
| EPI_ISL_676567 | 4/17/2020 | 12/4/2020 Europe / France / Auvergne-Rhone-Alpes / Lyon |
| EPI_ISL_676568 | 4/18/2020 | 12/4/2020 Europe / France / Auvergne-Rhone-Alpes / Lyon |
| EPI_ISL_676569 | 4/19/2020 | 12/4/2020 Europe / France / Auvergne-Rhone-Alpes / Lyon |
| EPI_ISL_676570 | 4/19/2020 | 12/4/2020 Europe / France / Auvergne-Rhone-Alpes / Lyon |
| EPI_ISL_676571 | 4/19/2020 | 12/4/2020 Europe / France / Auvergne-Rhone-Alpes / Lyon |
| EPI_ISL_676572 | 4/19/2020 | 12/4/2020 Europe / France / Auvergne-Rhone-Alpes / Lyon |
| EPI_ISL_676573 | 4/18/2020 | 12/4/2020 Europe / France / Auvergne-Rhone-Alpes / Lyon |
| EPI_ISL_676574 | 4/5/2020  | 12/4/2020 Europe / Serbia / Subotica                    |
| EPI_ISL_676575 | 7/11/2020 | 12/4/2020 Europe / Serbia / Sremska Mitrovica           |
| EPI_ISL_676576 | 3/31/2020 | 12/4/2020 Europe / Serbia / Pancevo                     |
| EPI_ISL_676577 | 4/2/2020  | 12/4/2020 Europe / Serbia / Backa Topola                |
| EPI_ISL_676578 | 5/1/2020  | 12/4/2020 Europe / Serbia / Novi Sad                    |
| EPI_ISL_676579 | 7/8/2020  | 12/4/2020 Europe / Serbia / Sremska Mitrovica           |
| EPI_ISL_676580 | 4/6/2020  | 12/4/2020 Europe / Serbia / Novi Sad                    |
| EPI_ISL_676581 | 4/8/2020  | 12/4/2020 Europe / Serbia / Sremska Mitrovica           |
| EPI_ISL_676582 | 6/24/2020 | 12/4/2020 Europe / Serbia / Novi Sad                    |
| EPI_ISL_676583 | 6/24/2020 | 12/4/2020 Europe / Serbia / Novi Sad                    |
| EPI_ISL_676584 | 6/24/2020 | 12/4/2020 Europe / Serbia / Novi Sad                    |
| EPI_ISL_676585 | 5/5/2020  | 12/4/2020 Europe / Serbia / Subotica                    |
| EPI_ISL_676586 | 5/5/2020  | 12/4/2020 Europe / Serbia / Pancevo                     |
| EPI_ISL_676587 | 5/5/2020  | 12/4/2020 Europe / Serbia / Vrsac                       |
| EPI_ISL_676588 | 5/10/2020 | 12/4/2020 Europe / Serbia / Novi Sad                    |
| EPI_ISL_676589 | 5/16/2020 | 12/4/2020 Europe / Serbia / Subotica                    |
| EPI_ISL_676590 | 5/28/2020 | 12/4/2020 Europe / Serbia / Novi Sad                    |
| EPI_ISL_676591 | 5/28/2020 | 12/4/2020 Europe / Serbia / Novi Sad                    |
| EPI_ISL_676592 | 6/15/2020 | 12/4/2020 Europe / Serbia / Novi Sad                    |
| EPI_ISL_676593 | 4/13/2020 | 12/4/2020 Europe / Serbia / Zrenjanin                   |
| EPI_ISL_676594 | 4/14/2020 | 12/4/2020 Europe / Serbia / Pancevo                     |
| EPI_ISL_676595 | 4/15/2020 | 12/4/2020 Europe / Serbia / Vrsac                       |
| EPI_ISL_676596 | 4/16/2020 | 12/4/2020 Europe / Serbia / Srbobran                    |
| EPI_ISL_676597 | 4/20/2020 | 12/4/2020 Europe / Serbia / Titel                       |

|                |           |                                                               |
|----------------|-----------|---------------------------------------------------------------|
| EPI_ISL_676598 | 4/22/2020 | 12/4/2020 Europe / Serbia / Titel                             |
| EPI_ISL_676599 | 4/22/2020 | 12/4/2020 Europe / Serbia / Subotica                          |
| EPI_ISL_676600 | 4/27/2020 | 12/4/2020 Europe / Serbia / Pancevo                           |
| EPI_ISL_676601 | 6/15/2020 | 12/4/2020 Europe / Serbia / Novi Sad                          |
| EPI_ISL_676602 | 4/8/2020  | 12/4/2020 Europe / Serbia / Novi Sad                          |
| EPI_ISL_676603 | 4/8/2020  | 12/4/2020 Europe / Serbia / Novi Sad                          |
| EPI_ISL_676642 | 6/22/2020 | 12/4/2020 North America / USA / Texas / Hidalgo               |
| EPI_ISL_676643 | 6/22/2020 | 12/4/2020 North America / USA / Texas / Hidalgo               |
| EPI_ISL_676644 | 6/22/2020 | 12/4/2020 North America / USA / Texas / Hidalgo               |
| EPI_ISL_676645 | 6/22/2020 | 12/4/2020 North America / USA / Texas / Hidalgo               |
| EPI_ISL_676646 | 6/22/2020 | 12/4/2020 North America / USA / Texas / Hidalgo               |
| EPI_ISL_676648 | 3/14/2020 | 12/4/2020 North America / USA / New York                      |
| EPI_ISL_676649 | 4/13/2020 | 12/4/2020 North America / USA / New York                      |
| EPI_ISL_676650 | 4/9/2020  | 12/4/2020 North America / USA / New York                      |
| EPI_ISL_676719 | 4/27/2020 | 12/4/2020 North America / USA / New York / Warren County      |
| EPI_ISL_676720 | 5/13/2020 | 12/4/2020 North America / USA / New York / Warren County      |
| EPI_ISL_676721 | 5/13/2020 | 12/4/2020 North America / USA / New York / Orange County      |
| EPI_ISL_676722 | 5/7/2020  | 12/4/2020 North America / USA / New York / Cayuga County      |
| EPI_ISL_676723 | 4/7/2020  | 12/4/2020 North America / USA / New York / Madison County     |
| EPI_ISL_676724 | 5/7/2020  | 12/4/2020 North America / USA / New York / Onondaga County    |
| EPI_ISL_676725 | 5/9/2020  | 12/4/2020 North America / USA / New York / Onondaga County    |
| EPI_ISL_676726 | 7/22/2020 | 12/4/2020 North America / USA / New York / Oneida County      |
| EPI_ISL_676727 | 3/3/2020  | 12/4/2020 North America / USA / New York / Westchester County |
| EPI_ISL_676728 | 3/5/2020  | 12/4/2020 North America / USA / New York / Westchester County |
| EPI_ISL_676729 | 3/6/2020  | 12/4/2020 North America / USA / New York / Saratoga County    |
| EPI_ISL_676730 | 3/7/2020  | 12/4/2020 North America / USA / New York / Westchester County |
| EPI_ISL_676731 | 3/11/2020 | 12/4/2020 North America / USA / New York / Herkimer County    |
| EPI_ISL_676732 | 3/11/2020 | 12/4/2020 North America / USA / New York / Delaware County    |
| EPI_ISL_676733 | 4/10/2020 | 12/4/2020 North America / USA / New York / Westchester County |
| EPI_ISL_676734 | 3/13/2020 | 12/4/2020 North America / USA / New York / Montgomery County  |
| EPI_ISL_676735 | 3/8/2020  | 12/4/2020 North America / USA / New York / Queens             |
| EPI_ISL_676736 | 3/12/2020 | 12/4/2020 North America / USA / New York / Dutchess County    |
| EPI_ISL_676737 | 3/15/2020 | 12/4/2020 North America / USA / New York / Westchester County |
| EPI_ISL_676738 | 3/15/2020 | 12/4/2020 North America / USA / New York / Westchester County |
| EPI_ISL_676739 | 3/15/2020 | 12/4/2020 North America / USA / New York / Dutchess County    |
| EPI_ISL_676740 | 3/15/2020 | 12/4/2020 North America / USA / New York / Clinton County     |
| EPI_ISL_676741 | 3/14/2020 | 12/4/2020 North America / USA / New York / Tompkins County    |
| EPI_ISL_676742 | 3/15/2020 | 12/4/2020 North America / USA / New York / Westchester County |
| EPI_ISL_676743 | 3/16/2020 | 12/4/2020 North America / USA / New York / Montgomery County  |
| EPI_ISL_676744 | 3/15/2020 | 12/4/2020 North America / USA / New York / Tompkins County    |
| EPI_ISL_676745 | 3/16/2020 | 12/4/2020 North America / USA / New York / Clinton County     |
| EPI_ISL_676746 | 3/18/2020 | 12/4/2020 North America / USA / New York / Tompkins County    |
| EPI_ISL_676747 | 3/18/2020 | 12/4/2020 North America / USA / New York / Dutchess County    |
| EPI_ISL_676748 | 3/19/2020 | 12/4/2020 North America / USA / New York / Herkimer County    |
| EPI_ISL_676749 | 3/19/2020 | 12/4/2020 North America / USA / New York / Clinton County     |
| EPI_ISL_676750 | 3/19/2020 | 12/4/2020 North America / USA / New York / Erie County        |
| EPI_ISL_676751 | 3/19/2020 | 12/4/2020 North America / USA / New York / Saratoga County    |

|                |           |           |                                                     |
|----------------|-----------|-----------|-----------------------------------------------------|
| EPI_ISL_676752 | 3/19/2020 | 12/4/2020 | North America / USA / New York / Westchester County |
| EPI_ISL_676753 | 3/19/2020 | 12/4/2020 | North America / USA / New York / Westchester County |
| EPI_ISL_676754 | 3/19/2020 | 12/4/2020 | North America / USA / New York / Westchester County |
| EPI_ISL_676755 | 3/19/2020 | 12/4/2020 | North America / USA / New York / Westchester County |
| EPI_ISL_676756 | 3/20/2020 | 12/4/2020 | North America / USA / New York / Wyoming County     |
| EPI_ISL_676757 | 3/21/2020 | 12/4/2020 | North America / USA / New York / Otsego County      |
| EPI_ISL_676758 | 3/23/2020 | 12/4/2020 | North America / USA / New York / Otsego County      |
| EPI_ISL_676759 | 3/23/2020 | 12/4/2020 | North America / USA / New York / Schoharie County   |
| EPI_ISL_676760 | 3/24/2020 | 12/4/2020 | North America / USA / New York / Sullivan County    |
| EPI_ISL_676761 | 3/25/2020 | 12/4/2020 | North America / USA / New York / Herkimer County    |
| EPI_ISL_676762 | 3/25/2020 | 12/4/2020 | North America / USA / New York / Schoharie County   |
| EPI_ISL_676763 | 3/25/2020 | 12/4/2020 | North America / USA / New York / Otsego County      |
| EPI_ISL_676764 | 3/25/2020 | 12/4/2020 | North America / USA / New York / Delaware County    |
| EPI_ISL_676765 | 3/26/2020 | 12/4/2020 | North America / USA / New York / Herkimer County    |
| EPI_ISL_676766 | 3/25/2020 | 12/4/2020 | North America / USA / New York / Schoharie County   |
| EPI_ISL_676767 | 3/26/2020 | 12/4/2020 | North America / USA / New York / Oneida County      |
| EPI_ISL_676768 | 3/30/2020 | 12/4/2020 | North America / USA / New York / Oneida County      |
| EPI_ISL_676769 | 3/27/2020 | 12/4/2020 | North America / USA / New York / Lewis County       |
| EPI_ISL_676770 | 3/26/2020 | 12/4/2020 | North America / USA / New York / Broome County      |
| EPI_ISL_676771 | 3/26/2020 | 12/4/2020 | North America / USA / New York / Orange County      |
| EPI_ISL_676772 | 3/27/2020 | 12/4/2020 | North America / USA / New York / Chenango County    |
| EPI_ISL_676773 | 3/26/2020 | 12/4/2020 | North America / USA / New York / Sullivan County    |
| EPI_ISL_676774 | 3/27/2020 | 12/4/2020 | North America / USA / New York / Herkimer County    |
| EPI_ISL_676775 | 3/27/2020 | 12/4/2020 | North America / USA / New York / Otsego County      |
| EPI_ISL_676776 | 3/28/2020 | 12/4/2020 | North America / USA / New York / Schoharie County   |
| EPI_ISL_676777 | 3/28/2020 | 12/4/2020 | North America / USA / New York / Otsego County      |
| EPI_ISL_676778 | 3/27/2020 | 12/4/2020 | North America / USA / New York / Otsego County      |
| EPI_ISL_676779 | 3/27/2020 | 12/4/2020 | North America / USA / New York / Otsego County      |
| EPI_ISL_676780 | 3/28/2020 | 12/4/2020 | North America / USA / New York / Clinton County     |
| EPI_ISL_676781 | 3/29/2020 | 12/4/2020 | North America / USA / New York / Onondaga County    |
| EPI_ISL_676782 | 3/29/2020 | 12/4/2020 | North America / USA / New York / Tioga County       |
| EPI_ISL_676783 | 3/29/2020 | 12/4/2020 | North America / USA / New York / Madison County     |
| EPI_ISL_676784 | 3/29/2020 | 12/4/2020 | North America / USA / New York / Orange County      |
| EPI_ISL_676785 | 3/30/2020 | 12/4/2020 | North America / USA / New York / Clinton County     |
| EPI_ISL_676786 | 3/30/2020 | 12/4/2020 | North America / USA / New York / Montgomery County  |
| EPI_ISL_676787 | 3/30/2020 | 12/4/2020 | North America / USA / New York / Chenango County    |
| EPI_ISL_676788 | 3/30/2020 | 12/4/2020 | North America / USA / New York / Schoharie County   |
| EPI_ISL_676789 | 3/30/2020 | 12/4/2020 | North America / USA / New York / Schoharie County   |
| EPI_ISL_676790 | 4/4/2020  | 12/4/2020 | North America / USA / New York / Oneida County      |
| EPI_ISL_676791 | 3/30/2020 | 12/4/2020 | North America / USA / New York / Clinton County     |
| EPI_ISL_676792 | 3/31/2020 | 12/4/2020 | North America / USA / New York / Niagara County     |
| EPI_ISL_676793 | 3/30/2020 | 12/4/2020 | North America / USA / New York / Rockland County    |
| EPI_ISL_676794 | 3/31/2020 | 12/4/2020 | North America / USA / New York / Essex County       |
| EPI_ISL_676795 | 3/31/2020 | 12/4/2020 | North America / USA / New York / Seneca County      |
| EPI_ISL_676796 | 3/31/2020 | 12/4/2020 | North America / USA / New York / Niagara County     |
| EPI_ISL_676797 | 4/2/2020  | 12/4/2020 | North America / USA / New York / Clinton County     |
| EPI_ISL_676798 | 4/3/2020  | 12/4/2020 | North America / USA / New York / Rensselaer County  |



|                |           |           |                                                      |
|----------------|-----------|-----------|------------------------------------------------------|
| EPI_ISL_676799 | 4/3/2020  | 12/4/2020 | North America / USA / New York / Clinton County      |
| EPI_ISL_676800 | 4/3/2020  | 12/4/2020 | North America / USA / New York / Clinton County      |
| EPI_ISL_676801 | 4/4/2020  | 12/4/2020 | North America / USA / New York / Clinton County      |
| EPI_ISL_676802 | 4/5/2020  | 12/4/2020 | North America / USA / New York / Cortland County     |
| EPI_ISL_676803 | 4/5/2020  | 12/4/2020 | North America / USA / New York / Ulster County       |
| EPI_ISL_676804 | 4/5/2020  | 12/4/2020 | North America / USA / New York / Clinton County      |
| EPI_ISL_676805 | 4/6/2020  | 12/4/2020 | North America / USA / New York / Cattaraugus County  |
| EPI_ISL_676806 | 4/5/2020  | 12/4/2020 | North America / USA / New York / Warren County       |
| EPI_ISL_676807 | 4/6/2020  | 12/4/2020 | North America / USA / New York / Saratoga County     |
| EPI_ISL_676808 | 4/6/2020  | 12/4/2020 | North America / USA / New York / St. Lawrence County |
| EPI_ISL_676809 | 4/7/2020  | 12/4/2020 | North America / USA / New York / Cattaraugus County  |
| EPI_ISL_676810 | 4/7/2020  | 12/4/2020 | North America / USA / New York / Oneida County       |
| EPI_ISL_676811 | 4/7/2020  | 12/4/2020 | North America / USA / New York / Oneida County       |
| EPI_ISL_676812 | 4/7/2020  | 12/4/2020 | North America / USA / New York / Oneida County       |
| EPI_ISL_676813 | 4/7/2020  | 12/4/2020 | North America / USA / New York / Oneida County       |
| EPI_ISL_676814 | 4/9/2020  | 12/4/2020 | North America / USA / New York / Oneida County       |
| EPI_ISL_676815 | 4/7/2020  | 12/4/2020 | North America / USA / New York / Westchester County  |
| EPI_ISL_676816 | 4/7/2020  | 12/4/2020 | North America / USA / New York / Westchester County  |
| EPI_ISL_676817 | 4/8/2020  | 12/4/2020 | North America / USA / New York / Dutchess County     |
| EPI_ISL_676818 | 4/6/2020  | 12/4/2020 | North America / USA / New York / Tioga County        |
| EPI_ISL_676819 | 4/6/2020  | 12/4/2020 | North America / USA / New York / Tioga County        |
| EPI_ISL_676820 | 4/8/2020  | 12/4/2020 | North America / USA / New York / Fulton County       |
| EPI_ISL_676821 | 4/7/2020  | 12/4/2020 | North America / USA / New York / Tioga County        |
| EPI_ISL_676822 | 4/8/2020  | 12/4/2020 | North America / USA / New York / Cattaraugus County  |
| EPI_ISL_676823 | 4/8/2020  | 12/4/2020 | North America / USA / New York / Westchester County  |
| EPI_ISL_676824 | 4/8/2020  | 12/4/2020 | North America / USA / New York / Westchester County  |
| EPI_ISL_676825 | 4/8/2020  | 12/4/2020 | North America / USA / New York / Westchester County  |
| EPI_ISL_676826 | 4/8/2020  | 12/4/2020 | North America / USA / New York / Westchester County  |
| EPI_ISL_676827 | 4/8/2020  | 12/4/2020 | North America / USA / New York / Westchester County  |
| EPI_ISL_676828 | 4/8/2020  | 12/4/2020 | North America / USA / New York / Westchester County  |
| EPI_ISL_676829 | 4/8/2020  | 12/4/2020 | North America / USA / New York / Westchester County  |
| EPI_ISL_676830 | 4/8/2020  | 12/4/2020 | North America / USA / New York / Warren County       |
| EPI_ISL_676831 | 4/9/2020  | 12/4/2020 | North America / USA / New York / Tioga County        |
| EPI_ISL_676832 | 4/9/2020  | 12/4/2020 | North America / USA / New York / Tioga County        |
| EPI_ISL_676833 | 4/9/2020  | 12/4/2020 | North America / USA / New York / Tioga County        |
| EPI_ISL_676834 | 4/10/2020 | 12/4/2020 | North America / USA / New York / Cattaraugus County  |
| EPI_ISL_676835 | 4/10/2020 | 12/4/2020 | North America / USA / New York / Greene County       |
| EPI_ISL_676836 | 4/10/2020 | 12/4/2020 | North America / USA / New York / Westchester County  |
| EPI_ISL_676837 | 4/9/2020  | 12/4/2020 | North America / USA / New York / Westchester County  |
| EPI_ISL_676838 | 4/10/2020 | 12/4/2020 | North America / USA / New York / Orange County       |
| EPI_ISL_676839 | 4/10/2020 | 12/4/2020 | North America / USA / New York / Greene County       |
| EPI_ISL_676840 | 4/13/2020 | 12/4/2020 | North America / USA / New York / Westchester County  |
| EPI_ISL_676841 | 4/13/2020 | 12/4/2020 | North America / USA / New York / Broome County       |
| EPI_ISL_676842 | 4/13/2020 | 12/4/2020 | North America / USA / New York / Broome County       |
| EPI_ISL_676843 | 4/13/2020 | 12/4/2020 | North America / USA / New York / Orange County       |
| EPI_ISL_676844 | 4/12/2020 | 12/4/2020 | North America / USA / New York / Westchester County  |
| EPI_ISL_676845 | 4/13/2020 | 12/4/2020 | North America / USA / New York / Tioga County        |

|                |           |           |                                                     |
|----------------|-----------|-----------|-----------------------------------------------------|
| EPI_ISL_676846 | 4/14/2020 | 12/4/2020 | North America / USA / New York / Cattaraugus County |
| EPI_ISL_676847 | 4/14/2020 | 12/4/2020 | North America / USA / New York / Essex County       |
| EPI_ISL_676848 | 4/14/2020 | 12/4/2020 | North America / USA / New York / Westchester County |
| EPI_ISL_676849 | 4/14/2020 | 12/4/2020 | North America / USA / New York / Westchester County |
| EPI_ISL_676850 | 4/14/2020 | 12/4/2020 | North America / USA / New York / Westchester County |
| EPI_ISL_676851 | 4/14/2020 | 12/4/2020 | North America / USA / New York / Westchester County |
| EPI_ISL_676852 | 4/14/2020 | 12/4/2020 | North America / USA / New York / Westchester County |
| EPI_ISL_676853 | 4/14/2020 | 12/4/2020 | North America / USA / New York / Wayne County       |
| EPI_ISL_676854 | 4/14/2020 | 12/4/2020 | North America / USA / New York / Niagara County     |
| EPI_ISL_676855 | 4/14/2020 | 12/4/2020 | North America / USA / New York / Niagara County     |
| EPI_ISL_676856 | 4/14/2020 | 12/4/2020 | North America / USA / New York / Niagara County     |
| EPI_ISL_676857 | 4/15/2020 | 12/4/2020 | North America / USA / New York / Orange County      |
| EPI_ISL_676858 | 4/16/2020 | 12/4/2020 | North America / USA / New York / Essex County       |
| EPI_ISL_676859 | 4/16/2020 | 12/4/2020 | North America / USA / New York / Tioga County       |
| EPI_ISL_676860 | 4/16/2020 | 12/4/2020 | North America / USA / New York / Tioga County       |
| EPI_ISL_676861 | 4/16/2020 | 12/4/2020 | North America / USA / New York / Tioga County       |
| EPI_ISL_676862 | 4/16/2020 | 12/4/2020 | North America / USA / New York / Tioga County       |
| EPI_ISL_676863 | 4/17/2020 | 12/4/2020 | North America / USA / New York / Ulster County      |
| EPI_ISL_676864 | 4/17/2020 | 12/4/2020 | North America / USA / New York / Essex County       |
| EPI_ISL_676865 | 4/17/2020 | 12/4/2020 | North America / USA / New York / Westchester County |
| EPI_ISL_676866 | 4/20/2020 | 12/4/2020 | North America / USA / New York / Essex County       |
| EPI_ISL_676867 | 4/20/2020 | 12/4/2020 | North America / USA / New York / Orange County      |
| EPI_ISL_676868 | 4/21/2020 | 12/4/2020 | North America / USA / New York / Washington County  |
| EPI_ISL_676869 | 4/22/2020 | 12/4/2020 | North America / USA / New York / Rensselaer County  |
| EPI_ISL_676870 | 4/22/2020 | 12/4/2020 | North America / USA / New York / Cattaraugus County |
| EPI_ISL_676871 | 4/22/2020 | 12/4/2020 | North America / USA / New York / Orange County      |
| EPI_ISL_676872 | 4/22/2020 | 12/4/2020 | North America / USA / New York / Orange County      |
| EPI_ISL_676873 | 4/23/2020 | 12/4/2020 | North America / USA / New York / Fulton County      |
| EPI_ISL_676874 | 4/23/2020 | 12/4/2020 | North America / USA / New York / Fulton County      |
| EPI_ISL_676875 | 4/23/2020 | 12/4/2020 | North America / USA / New York / Fulton County      |
| EPI_ISL_676876 | 4/23/2020 | 12/4/2020 | North America / USA / New York / Fulton County      |
| EPI_ISL_676877 | 4/23/2020 | 12/4/2020 | North America / USA / New York / Fulton County      |
| EPI_ISL_676878 | 4/23/2020 | 12/4/2020 | North America / USA / New York / Fulton County      |
| EPI_ISL_676879 | 4/23/2020 | 12/4/2020 | North America / USA / New York / Fulton County      |
| EPI_ISL_676880 | 4/23/2020 | 12/4/2020 | North America / USA / New York / Fulton County      |
| EPI_ISL_676881 | 4/22/2020 | 12/4/2020 | North America / USA / New York / Putnam County      |
| EPI_ISL_676882 | 4/25/2020 | 12/4/2020 | North America / USA / New York / Essex County       |
| EPI_ISL_676883 | 4/23/2020 | 12/4/2020 | North America / USA / New York / Dutchess County    |
| EPI_ISL_676884 | 4/25/2020 | 12/4/2020 | North America / USA / New York / Orange County      |
| EPI_ISL_676885 | 4/27/2020 | 12/4/2020 | North America / USA / New York / Rensselaer County  |
| EPI_ISL_676886 | 4/25/2020 | 12/4/2020 | North America / USA / New York / Westchester County |
| EPI_ISL_676887 | 4/28/2020 | 12/4/2020 | North America / USA / New York / Schenectady County |
| EPI_ISL_676888 | 4/28/2020 | 12/4/2020 | North America / USA / New York / Albany County      |
| EPI_ISL_676889 | 4/29/2020 | 12/4/2020 | North America / USA / New York / Columbia County    |
| EPI_ISL_676890 | 4/29/2020 | 12/4/2020 | North America / USA / New York / Broome County      |
| EPI_ISL_676891 | 4/30/2020 | 12/4/2020 | North America / USA / New York / Cattaraugus County |
| EPI_ISL_676892 | 4/23/2020 | 12/4/2020 | North America / USA / New York / Rockland County    |

|                |           |           |                                                     |
|----------------|-----------|-----------|-----------------------------------------------------|
| EPI_ISL_676893 | 5/5/2020  | 12/4/2020 | North America / USA / New York / Cattaraugus County |
| EPI_ISL_676894 | 5/1/2020  | 12/4/2020 | North America / USA / New York / Erie County        |
| EPI_ISL_676895 | 5/1/2020  | 12/4/2020 | North America / USA / New York / Erie County        |
| EPI_ISL_676896 | 5/1/2020  | 12/4/2020 | North America / USA / New York / Erie County        |
| EPI_ISL_676897 | 5/1/2020  | 12/4/2020 | North America / USA / New York / Erie County        |
| EPI_ISL_676898 | 5/2/2020  | 12/4/2020 | North America / USA / New York / Madison County     |
| EPI_ISL_676899 | 5/2/2020  | 12/4/2020 | North America / USA / New York / Madison County     |
| EPI_ISL_676900 | 5/2/2020  | 12/4/2020 | North America / USA / New York / Madison County     |
| EPI_ISL_676901 | 5/2/2020  | 12/4/2020 | North America / USA / New York / Madison County     |
| EPI_ISL_676902 | 5/2/2020  | 12/4/2020 | North America / USA / New York / Madison County     |
| EPI_ISL_676903 | 5/3/2020  | 12/4/2020 | North America / USA / New York / Orange County      |
| EPI_ISL_676904 | 5/4/2020  | 12/4/2020 | North America / USA / New York / Oswego County      |
| EPI_ISL_676905 | 5/4/2020  | 12/4/2020 | North America / USA / New York / Madison County     |
| EPI_ISL_676906 | 5/4/2020  | 12/4/2020 | North America / USA / New York / Madison County     |
| EPI_ISL_676907 | 5/5/2020  | 12/4/2020 | North America / USA / New York / Putnam County      |
| EPI_ISL_676908 | 5/5/2020  | 12/4/2020 | North America / USA / New York / Putnam County      |
| EPI_ISL_676909 | 5/5/2020  | 12/4/2020 | North America / USA / New York / Cattaraugus County |
| EPI_ISL_676910 | 5/13/2020 | 12/4/2020 | North America / USA / New York / Cattaraugus County |
| EPI_ISL_676911 | 5/5/2020  | 12/4/2020 | North America / USA / New York / Oneida County      |
| EPI_ISL_676912 | 5/14/2020 | 12/4/2020 | North America / USA / New York / Oneida County      |
| EPI_ISL_676913 | 5/5/2020  | 12/4/2020 | North America / USA / New York / Hamilton County    |
| EPI_ISL_676914 | 5/6/2020  | 12/4/2020 | North America / USA / New York / Dutchess County    |
| EPI_ISL_676915 | 5/7/2020  | 12/4/2020 | North America / USA / New York / Tioga County       |
| EPI_ISL_676916 | 5/9/2020  | 12/4/2020 | North America / USA / New York / Niagara County     |
| EPI_ISL_676917 | 5/9/2020  | 12/4/2020 | North America / USA / New York / Niagara County     |
| EPI_ISL_676918 | 5/9/2020  | 12/4/2020 | North America / USA / New York / Niagara County     |
| EPI_ISL_676919 | 5/9/2020  | 12/4/2020 | North America / USA / New York / Niagara County     |
| EPI_ISL_676920 | 5/12/2020 | 12/4/2020 | North America / USA / New York / Orange County      |
| EPI_ISL_676921 | 5/12/2020 | 12/4/2020 | North America / USA / New York / Monroe County      |
| EPI_ISL_676922 | 5/12/2020 | 12/4/2020 | North America / USA / New York / Monroe County      |
| EPI_ISL_676923 | 3/20/2020 | 12/4/2020 | North America / USA / New York / Cattaraugus County |
| EPI_ISL_676924 | 5/13/2020 | 12/4/2020 | North America / USA / New York / Orleans County     |
| EPI_ISL_676925 | 5/13/2020 | 12/4/2020 | North America / USA / New York / Orleans County     |
| EPI_ISL_676926 | 5/13/2020 | 12/4/2020 | North America / USA / New York / Cayuga County      |
| EPI_ISL_676927 | 5/13/2020 | 12/4/2020 | North America / USA / New York / Monroe County      |
| EPI_ISL_676928 | 5/13/2020 | 12/4/2020 | North America / USA / New York / Orleans County     |
| EPI_ISL_676929 | 5/13/2020 | 12/4/2020 | North America / USA / New York / Monroe County      |
| EPI_ISL_676930 | 5/14/2020 | 12/4/2020 | North America / USA / New York / Erie County        |
| EPI_ISL_676931 | 5/13/2020 | 12/4/2020 | North America / USA / New York / Monroe County      |
| EPI_ISL_676932 | 5/13/2020 | 12/4/2020 | North America / USA / New York / Monroe County      |
| EPI_ISL_676933 | 5/14/2020 | 12/4/2020 | North America / USA / New York / Oneida County      |
| EPI_ISL_676934 | 5/14/2020 | 12/4/2020 | North America / USA / New York / Sullivan County    |
| EPI_ISL_676935 | 5/14/2020 | 12/4/2020 | North America / USA / New York / Chenango County    |
| EPI_ISL_676936 | 5/15/2020 | 12/4/2020 | North America / USA / New York / Washington County  |
| EPI_ISL_676937 | 5/15/2020 | 12/4/2020 | North America / USA / New York / Erie County        |
| EPI_ISL_676938 | 5/15/2020 | 12/4/2020 | North America / USA / New York / Fulton County      |
| EPI_ISL_676939 | 5/15/2020 | 12/4/2020 | North America / USA / New York / Fulton County      |

|                |           |           |                                                     |
|----------------|-----------|-----------|-----------------------------------------------------|
| EPI_ISL_676940 | 5/15/2020 | 12/4/2020 | North America / USA / New York / Columbia County    |
| EPI_ISL_676941 | 5/15/2020 | 12/4/2020 | North America / USA / New York / Rensselaer County  |
| EPI_ISL_676942 | 5/17/2020 | 12/4/2020 | North America / USA / New York / Dutchess County    |
| EPI_ISL_676943 | 5/18/2020 | 12/4/2020 | North America / USA / New York / Rensselaer County  |
| EPI_ISL_676944 | 5/18/2020 | 12/4/2020 | North America / USA / New York / Warren County      |
| EPI_ISL_676945 | 5/18/2020 | 12/4/2020 | North America / USA / New York / Albany County      |
| EPI_ISL_676946 | 5/19/2020 | 12/4/2020 | North America / USA / New York / Delaware County    |
| EPI_ISL_676947 | 5/19/2020 | 12/4/2020 | North America / USA / New York / Delaware County    |
| EPI_ISL_676948 | 5/19/2020 | 12/4/2020 | North America / USA / New York / Delaware County    |
| EPI_ISL_676949 | 5/20/2020 | 12/4/2020 | North America / USA / New York / Broome County      |
| EPI_ISL_676950 | 5/20/2020 | 12/4/2020 | North America / USA / New York / Warren County      |
| EPI_ISL_676951 | 5/21/2020 | 12/4/2020 | North America / USA / New York / Herkimer County    |
| EPI_ISL_676952 | 5/22/2020 | 12/4/2020 | North America / USA / New York / Delaware County    |
| EPI_ISL_676953 | 5/22/2020 | 12/4/2020 | North America / USA / New York / Delaware County    |
| EPI_ISL_676954 | 5/24/2020 | 12/4/2020 | North America / USA / New York / Chenango County    |
| EPI_ISL_676955 | 5/25/2020 | 12/4/2020 | North America / USA / New York / Columbia County    |
| EPI_ISL_676956 | 5/27/2020 | 12/4/2020 | North America / USA / New York / Ulster County      |
| EPI_ISL_676957 | 5/28/2020 | 12/4/2020 | North America / USA / New York / Monroe County      |
| EPI_ISL_676958 | 5/30/2020 | 12/4/2020 | North America / USA / New York / Erie County        |
| EPI_ISL_676959 | 6/1/2020  | 12/4/2020 | North America / USA / New York / Broome County      |
| EPI_ISL_676960 | 4/11/2020 | 12/4/2020 | North America / USA / New York / Nassau County      |
| EPI_ISL_676961 | 4/8/2020  | 12/4/2020 | North America / USA / New York / Nassau County      |
| EPI_ISL_676962 | 4/4/2020  | 12/4/2020 | North America / USA / New York / Nassau County      |
| EPI_ISL_676963 | 4/8/2020  | 12/4/2020 | North America / USA / New York / Nassau County      |
| EPI_ISL_676964 | 4/8/2020  | 12/4/2020 | North America / USA / New York / Nassau County      |
| EPI_ISL_676965 | 4/20/2020 | 12/4/2020 | North America / USA / New York / Nassau County      |
| EPI_ISL_676966 | 4/8/2020  | 12/4/2020 | North America / USA / New York / Nassau County      |
| EPI_ISL_676967 | 4/17/2020 | 12/4/2020 | North America / USA / New York / Nassau County      |
| EPI_ISL_676968 | 4/10/2020 | 12/4/2020 | North America / USA / New York / Nassau County      |
| EPI_ISL_676969 | 4/17/2020 | 12/4/2020 | North America / USA / New York / Nassau County      |
| EPI_ISL_676970 | 4/18/2020 | 12/4/2020 | North America / USA / New York / Nassau County      |
| EPI_ISL_676971 | 4/10/2020 | 12/4/2020 | North America / USA / New York / Nassau County      |
| EPI_ISL_676972 | 4/11/2020 | 12/4/2020 | North America / USA / New York / Nassau County      |
| EPI_ISL_676973 | 4/11/2020 | 12/4/2020 | North America / USA / New York / Nassau County      |
| EPI_ISL_676974 | 4/11/2020 | 12/4/2020 | North America / USA / New York / Nassau County      |
| EPI_ISL_676975 | 4/10/2020 | 12/4/2020 | North America / USA / New York / Nassau County      |
| EPI_ISL_676976 | 4/10/2020 | 12/4/2020 | North America / USA / New York / Nassau County      |
| EPI_ISL_676977 | 4/10/2020 | 12/4/2020 | North America / USA / New York / Nassau County      |
| EPI_ISL_676978 | 4/18/2020 | 12/4/2020 | North America / USA / New York / Nassau County      |
| EPI_ISL_676979 | 6/17/2020 | 12/4/2020 | North America / USA / New York / Schenectady County |
| EPI_ISL_676980 | 3/13/2020 | 12/4/2020 | North America / USA / New York / Westchester County |
| EPI_ISL_676981 | 3/21/2020 | 12/4/2020 | North America / USA / New York / Westchester County |
| EPI_ISL_676982 | 6/21/2020 | 12/4/2020 | North America / USA / New York / Oswego County      |
| EPI_ISL_676983 | 6/25/2020 | 12/4/2020 | North America / USA / New York / Herkimer County    |
| EPI_ISL_676984 | 6/24/2020 | 12/4/2020 | North America / USA / New York / Essex County       |
| EPI_ISL_676985 | 6/25/2020 | 12/4/2020 | North America / USA / New York / Herkimer County    |
| EPI_ISL_676986 | 6/25/2020 | 12/4/2020 | North America / USA / New York / Herkimer County    |





|                |           |           |                                                     |
|----------------|-----------|-----------|-----------------------------------------------------|
| EPI_ISL_677081 | 8/25/2020 | 12/4/2020 | North America / USA / New York / Essex County       |
| EPI_ISL_677082 | 8/25/2020 | 12/4/2020 | North America / USA / New York / Essex County       |
| EPI_ISL_677083 | 8/26/2020 | 12/4/2020 | North America / USA / New York / Essex County       |
| EPI_ISL_677084 | 8/26/2020 | 12/4/2020 | North America / USA / New York / Essex County       |
| EPI_ISL_677085 | 8/26/2020 | 12/4/2020 | North America / USA / New York / Essex County       |
| EPI_ISL_677086 | 8/26/2020 | 12/4/2020 | North America / USA / New York / Essex County       |
| EPI_ISL_677087 | 8/26/2020 | 12/4/2020 | North America / USA / New York / Essex County       |
| EPI_ISL_677088 | 8/26/2020 | 12/4/2020 | North America / USA / New York / Essex County       |
| EPI_ISL_677089 | 9/1/2020  | 12/4/2020 | North America / USA / New York / Schenectady County |
| EPI_ISL_677090 | 9/1/2020  | 12/4/2020 | North America / USA / New York / Ulster County      |
| EPI_ISL_677091 | 9/1/2020  | 12/4/2020 | North America / USA / New York / Essex County       |
| EPI_ISL_677092 | 9/2/2020  | 12/4/2020 | North America / USA / New York / Greene County      |
| EPI_ISL_677093 | 9/3/2020  | 12/4/2020 | North America / USA / New York / Orleans County     |
| EPI_ISL_677094 | 9/3/2020  | 12/4/2020 | North America / USA / New York / Chenango County    |
| EPI_ISL_677095 | 9/3/2020  | 12/4/2020 | North America / USA / New York / Ontario County     |
| EPI_ISL_677096 | 9/4/2020  | 12/4/2020 | North America / USA / New York / Rensselaer County  |
| EPI_ISL_677097 | 9/4/2020  | 12/4/2020 | North America / USA / New York / Oneida County      |
| EPI_ISL_677098 | 9/8/2020  | 12/4/2020 | North America / USA / New York / Schoharie County   |
| EPI_ISL_677099 | 9/11/2020 | 12/4/2020 | North America / USA / New York / Herkimer County    |
| EPI_ISL_677100 | 9/11/2020 | 12/4/2020 | North America / USA / New York / Nassau County      |
| EPI_ISL_677101 | 9/15/2020 | 12/4/2020 | North America / USA / New York / Hamilton County    |
| EPI_ISL_677102 | 9/17/2020 | 12/4/2020 | North America / USA / New York / Warren County      |
| EPI_ISL_677103 | 9/17/2020 | 12/4/2020 | North America / USA / New York / Chemung County     |
| EPI_ISL_677104 | 9/20/2020 | 12/4/2020 | North America / USA / New York / Otsego County      |
| EPI_ISL_677105 | 9/22/2020 | 12/4/2020 | North America / USA / New York / Niagara County     |
| EPI_ISL_677106 | 9/22/2020 | 12/4/2020 | North America / USA / New York / Niagara County     |
| EPI_ISL_677107 | 9/22/2020 | 12/4/2020 | North America / USA / New York / Albany County      |
| EPI_ISL_677108 | 9/22/2020 | 12/4/2020 | North America / USA / New York / Rockland County    |
| EPI_ISL_677109 | 9/22/2020 | 12/4/2020 | North America / USA / New York / Chemung County     |
| EPI_ISL_677110 | 9/22/2020 | 12/4/2020 | North America / USA / New York / Columbia County    |
| EPI_ISL_677111 | 8/22/2020 | 12/4/2020 | North America / USA / New York / Herkimer County    |
| EPI_ISL_677112 | 8/20/2020 | 12/4/2020 | North America / USA / New York / Oneida County      |
| EPI_ISL_677113 | 8/4/2020  | 12/4/2020 | North America / USA / New York / Herkimer County    |
| EPI_ISL_677114 | 8/1/2020  | 12/4/2020 | North America / USA / New York / Oneida County      |
| EPI_ISL_677115 | 7/28/2020 | 12/4/2020 | North America / USA / New York / Herkimer County    |
| EPI_ISL_677116 | 8/9/2020  | 12/4/2020 | North America / USA / New York / Oneida County      |
| EPI_ISL_677117 | 8/12/2020 | 12/4/2020 | North America / USA / New York / Oneida County      |
| EPI_ISL_677118 | 8/17/2020 | 12/4/2020 | North America / USA / New York / Oneida County      |
| EPI_ISL_677119 | 8/23/2020 | 12/4/2020 | North America / USA / New York / Oneida County      |
| EPI_ISL_677120 | 7/27/2020 | 12/4/2020 | North America / USA / New York / Oneida County      |
| EPI_ISL_677121 | 7/27/2020 | 12/4/2020 | North America / USA / New York / Oneida County      |
| EPI_ISL_677122 | 8/17/2020 | 12/4/2020 | North America / USA / New York / Oneida County      |
| EPI_ISL_677123 | 7/29/2020 | 12/4/2020 | North America / USA / New York / Oneida County      |
| EPI_ISL_677124 | 8/24/2020 | 12/4/2020 | North America / USA / New York / Oneida County      |
| EPI_ISL_677125 | 8/18/2020 | 12/4/2020 | North America / USA / New York / Herkimer County    |
| EPI_ISL_677126 | 8/20/2020 | 12/4/2020 | North America / USA / New York / Oneida County      |
| EPI_ISL_677127 | 8/3/2020  | 12/4/2020 | North America / USA / New York / Oneida County      |









|                |            |                                                              |
|----------------|------------|--------------------------------------------------------------|
| EPI_ISL_677315 | 9/14/2020  | 12/4/2020 North America / USA / Colorado                     |
| EPI_ISL_677316 | 9/14/2020  | 12/4/2020 North America / USA / Colorado                     |
| EPI_ISL_677317 | 9/16/2020  | 12/4/2020 North America / USA / Colorado                     |
| EPI_ISL_677318 | 10/19/2020 | 12/4/2020 North America / USA / Colorado                     |
| EPI_ISL_677319 | 11/1/2020  | 12/4/2020 North America / USA / Colorado                     |
| EPI_ISL_677320 | 10/21/2020 | 12/4/2020 North America / USA / Wisconsin / Dane County      |
| EPI_ISL_677321 | 10/26/2020 | 12/4/2020 North America / USA / Wisconsin / Dane County      |
| EPI_ISL_677322 | 10/26/2020 | 12/4/2020 North America / USA / Wisconsin / Dane County      |
| EPI_ISL_677323 | 10/26/2020 | 12/4/2020 North America / USA / Wisconsin / Dane County      |
| EPI_ISL_677324 | 10/27/2020 | 12/4/2020 North America / USA / Wisconsin / Dane County      |
| EPI_ISL_677325 | 10/27/2020 | 12/4/2020 North America / USA / Wisconsin / Dane County      |
| EPI_ISL_677326 | 10/28/2020 | 12/4/2020 North America / USA / Wisconsin / Dane County      |
| EPI_ISL_677327 | 10/28/2020 | 12/4/2020 North America / USA / Wisconsin / Dane County      |
| EPI_ISL_677328 | 10/28/2020 | 12/4/2020 North America / USA / Wisconsin / Dane County      |
| EPI_ISL_677329 | 10/29/2020 | 12/4/2020 North America / USA / Wisconsin / Dane County      |
| EPI_ISL_677330 | 10/30/2020 | 12/4/2020 North America / USA / Wisconsin / Dane County      |
| EPI_ISL_677331 | 10/30/2020 | 12/4/2020 North America / USA / Wisconsin / Dane County      |
| EPI_ISL_677332 | 10/30/2020 | 12/4/2020 North America / USA / Wisconsin / Dane County      |
| EPI_ISL_677333 | 10/30/2020 | 12/4/2020 North America / USA / Wisconsin / Dane County      |
| EPI_ISL_677334 | 10/30/2020 | 12/4/2020 North America / USA / Wisconsin / Dane County      |
| EPI_ISL_677335 | 10/5/2020  | 12/4/2020 North America / USA / Wisconsin / Dane County      |
| EPI_ISL_677336 | 10/5/2020  | 12/4/2020 North America / USA / Wisconsin / Dane County      |
| EPI_ISL_677338 | 10/5/2020  | 12/4/2020 North America / USA / Wisconsin / Dane County      |
| EPI_ISL_677339 | 9/24/2020  | 12/4/2020 North America / USA / Wisconsin / Dane County      |
| EPI_ISL_677340 | 10/5/2020  | 12/4/2020 North America / USA / Wisconsin / Dane County      |
| EPI_ISL_677341 | 10/2/2020  | 12/4/2020 North America / USA / Wisconsin / Dane County      |
| EPI_ISL_677342 | 10/2/2020  | 12/4/2020 North America / USA / Wisconsin / Dane County      |
| EPI_ISL_677343 | 9/17/2020  | 12/4/2020 North America / USA / Wisconsin / Dane County      |
| EPI_ISL_677344 | 9/27/2020  | 12/4/2020 North America / USA / Wisconsin / Walworth County  |
| EPI_ISL_677345 | 10/7/2020  | 12/4/2020 North America / USA / Wisconsin / Dane County      |
| EPI_ISL_677346 | 9/25/2020  | 12/4/2020 North America / USA / Illinois / Winnebago County  |
| EPI_ISL_677347 | 10/6/2020  | 12/4/2020 North America / USA / Wisconsin / Jefferson County |
| EPI_ISL_677348 | 10/6/2020  | 12/4/2020 North America / USA / Wisconsin / Dane County      |
| EPI_ISL_677349 | 10/5/2020  | 12/4/2020 North America / USA / Wisconsin / Dane County      |
| EPI_ISL_677350 | 9/14/2020  | 12/4/2020 North America / USA / Wisconsin / Dane County      |
| EPI_ISL_677351 | 10/4/2020  | 12/4/2020 North America / USA / Wisconsin / Columbia County  |
| EPI_ISL_677352 | 7/18/2020  | 12/4/2020 North America / USA / Wisconsin / Dane County      |
| EPI_ISL_677353 | 9/30/2020  | 12/4/2020 North America / USA / Illinois / Winnebago County  |
| EPI_ISL_677354 | 9/27/2020  | 12/4/2020 North America / USA / Illinois / Winnebago County  |
| EPI_ISL_677355 | 9/29/2020  | 12/4/2020 North America / USA / Wisconsin / Columbia County  |
| EPI_ISL_677356 | 9/21/2020  | 12/4/2020 North America / USA / Wisconsin / Dane County      |
| EPI_ISL_677357 | 9/28/2020  | 12/4/2020 North America / USA / Wisconsin / Dane County      |
| EPI_ISL_677358 | 9/30/2020  | 12/4/2020 North America / USA / Illinois / Winnebago County  |
| EPI_ISL_677359 | 9/29/2020  | 12/4/2020 North America / USA / Wisconsin / Dane County      |
| EPI_ISL_677360 | 9/21/2020  | 12/4/2020 North America / USA / Wisconsin / Dane County      |
| EPI_ISL_677361 | 9/22/2020  | 12/4/2020 North America / USA / Wisconsin / Dane County      |
| EPI_ISL_677362 | 9/25/2020  | 12/4/2020 North America / USA / Wisconsin / Dane County      |



|                |            |           |                                                    |
|----------------|------------|-----------|----------------------------------------------------|
| EPI_ISL_677415 | 9/10/2020  | 12/4/2020 | North America / USA / Wisconsin / Milwaukee County |
| EPI_ISL_677416 | 9/10/2020  | 12/4/2020 | North America / USA / Wisconsin / Milwaukee County |
| EPI_ISL_677417 | 9/10/2020  | 12/4/2020 | North America / USA / Wisconsin / Milwaukee County |
| EPI_ISL_677418 | 9/10/2020  | 12/4/2020 | North America / USA / Wisconsin / Milwaukee County |
| EPI_ISL_677419 | 9/10/2020  | 12/4/2020 | North America / USA / Wisconsin / Milwaukee County |
| EPI_ISL_677420 | 9/10/2020  | 12/4/2020 | North America / USA / Wisconsin / Milwaukee County |
| EPI_ISL_677421 | 9/10/2020  | 12/4/2020 | North America / USA / Wisconsin / Milwaukee County |
| EPI_ISL_677422 | 10/6/2020  | 12/4/2020 | North America / USA / Wisconsin / Dane County      |
| EPI_ISL_677423 | 10/8/2020  | 12/4/2020 | North America / USA / Wisconsin / Dane County      |
| EPI_ISL_677424 | 10/5/2020  | 12/4/2020 | North America / USA / Wisconsin / Dane County      |
| EPI_ISL_677425 | 10/3/2020  | 12/4/2020 | North America / USA / Illinois / Ogle County       |
| EPI_ISL_677426 | 9/18/2020  | 12/4/2020 | North America / USA / Wisconsin / Dane County      |
| EPI_ISL_677427 | 9/25/2020  | 12/4/2020 | North America / USA / Wisconsin / Columbia County  |
| EPI_ISL_677428 | 9/18/2020  | 12/4/2020 | North America / USA / Wisconsin / Dane County      |
| EPI_ISL_677429 | 10/1/2020  | 12/4/2020 | North America / USA / Wisconsin / Dane County      |
| EPI_ISL_677430 | 10/8/2020  | 12/4/2020 | North America / USA / Wisconsin / Dane County      |
| EPI_ISL_677431 | 9/24/2020  | 12/4/2020 | North America / USA / Illinois / Winnebago County  |
| EPI_ISL_677432 | 9/26/2020  | 12/4/2020 | North America / USA / Wisconsin / Columbia County  |
| EPI_ISL_677433 | 10/6/2020  | 12/4/2020 | North America / USA / Wisconsin / Winnebago County |
| EPI_ISL_677434 | 9/24/2020  | 12/4/2020 | North America / USA / Wisconsin / Dane County      |
| EPI_ISL_677435 | 9/21/2020  | 12/4/2020 | North America / USA / Wisconsin / Dane County      |
| EPI_ISL_677436 | 9/23/2020  | 12/4/2020 | North America / USA / Wisconsin / Winnebago County |
| EPI_ISL_677437 | 9/30/2020  | 12/4/2020 | North America / USA / Illinois / Boone County      |
| EPI_ISL_677438 | 10/1/2020  | 12/4/2020 | North America / USA / Wisconsin / Dane County      |
| EPI_ISL_677439 | 9/19/2020  | 12/4/2020 | North America / USA / Illinois / Winnebago County  |
| EPI_ISL_677440 | 9/24/2020  | 12/4/2020 | North America / USA / Wisconsin / Dane County      |
| EPI_ISL_677441 | 10/8/2020  | 12/4/2020 | North America / USA / Wisconsin / Columbia County  |
| EPI_ISL_677442 | 9/18/2020  | 12/4/2020 | North America / USA / Wisconsin / Jefferson County |
| EPI_ISL_677443 | 9/30/2020  | 12/4/2020 | North America / USA / Wisconsin / Dane County      |
| EPI_ISL_677444 | 9/29/2020  | 12/4/2020 | North America / USA / Wisconsin / Dane County      |
| EPI_ISL_677446 | 10/1/2020  | 12/4/2020 | North America / USA / Wisconsin / Jefferson County |
| EPI_ISL_677447 | 10/5/2020  | 12/4/2020 | North America / USA / Wisconsin / Dane County      |
| EPI_ISL_677448 | 9/20/2020  | 12/4/2020 | North America / USA / Wisconsin / Dane County      |
| EPI_ISL_677449 | 10/5/2020  | 12/4/2020 | North America / USA / Wisconsin / Dane County      |
| EPI_ISL_677450 | 9/17/2020  | 12/4/2020 | North America / USA / Illinois / Winnebago County  |
| EPI_ISL_677451 | 10/1/2020  | 12/4/2020 | North America / USA / Illinois / Winnebago County  |
| EPI_ISL_677453 | 9/25/2020  | 12/4/2020 | North America / USA / Wisconsin / Dane County      |
| EPI_ISL_677454 | 10/22/2020 | 12/4/2020 | North America / USA / Wisconsin / Dane County      |
| EPI_ISL_677455 | 10/2/2020  | 12/4/2020 | North America / USA / Wisconsin / Dane County      |
| EPI_ISL_677456 | 10/10/2020 | 12/4/2020 | North America / USA / Wisconsin / Dane County      |
| EPI_ISL_677457 | 10/9/2020  | 12/4/2020 | North America / USA / Wisconsin / Sauk County      |
| EPI_ISL_677458 | 10/8/2020  | 12/4/2020 | North America / USA / Illinois / Stephenson County |
| EPI_ISL_677459 | 10/2/2020  | 12/4/2020 | North America / USA / Wisconsin / Columbia County  |
| EPI_ISL_677460 | 10/15/2020 | 12/4/2020 | North America / USA / Wisconsin / Dane County      |
| EPI_ISL_677461 | 10/4/2020  | 12/4/2020 | North America / USA / Wisconsin / Dane County      |
| EPI_ISL_677462 | 9/18/2020  | 12/4/2020 | North America / USA / Wisconsin / Dane County      |
| EPI_ISL_677463 | 10/15/2020 | 12/4/2020 | North America / USA / Wisconsin / Dane County      |

|                |            |           |                                                    |
|----------------|------------|-----------|----------------------------------------------------|
| EPI_ISL_677464 | 9/23/2020  | 12/4/2020 | North America / USA / Wisconsin / Dane County      |
| EPI_ISL_677465 | 10/1/2020  | 12/4/2020 | North America / USA / Wisconsin / Dane County      |
| EPI_ISL_677466 | 9/23/2020  | 12/4/2020 | North America / USA / Wisconsin / Richland County  |
| EPI_ISL_677467 | 7/16/2020  | 12/4/2020 | North America / USA / Wisconsin / Dane County      |
| EPI_ISL_677468 | 10/9/2020  | 12/4/2020 | North America / USA / Illinois / Winnebago County  |
| EPI_ISL_677469 | 10/9/2020  | 12/4/2020 | North America / USA / Wisconsin / Dane County      |
| EPI_ISL_677470 | 10/9/2020  | 12/4/2020 | North America / USA / Wisconsin / Dane County      |
| EPI_ISL_677471 | 10/9/2020  | 12/4/2020 | North America / USA / Wisconsin / Sauk County      |
| EPI_ISL_677472 | 10/14/2020 | 12/4/2020 | North America / USA / Wisconsin / Dane County      |
| EPI_ISL_677473 | 10/8/2020  | 12/4/2020 | North America / USA / Wisconsin / Dane County      |
| EPI_ISL_677474 | 9/28/2020  | 12/4/2020 | North America / USA / Wisconsin / Columbia County  |
| EPI_ISL_677475 | 10/14/2020 | 12/4/2020 | North America / USA / Wisconsin / Dane County      |
| EPI_ISL_677476 | 10/18/2020 | 12/4/2020 | North America / USA / Illinois / Winnebago County  |
| EPI_ISL_677477 | 10/19/2020 | 12/4/2020 | North America / USA / Wisconsin / Dane County      |
| EPI_ISL_677478 | 10/19/2020 | 12/4/2020 | North America / USA / Wisconsin / Dane County      |
| EPI_ISL_677479 | 10/8/2020  | 12/4/2020 | North America / USA / Wisconsin / Dane County      |
| EPI_ISL_677480 | 10/18/2020 | 12/4/2020 | North America / USA / Wisconsin / Dane County      |
| EPI_ISL_677481 | 10/17/2020 | 12/4/2020 | North America / USA / Illinois / Winnebago County  |
| EPI_ISL_677482 | 10/17/2020 | 12/4/2020 | North America / USA / Wisconsin / Dodge County     |
| EPI_ISL_677483 | 10/18/2020 | 12/4/2020 | North America / USA / Wisconsin / Jefferson County |
| EPI_ISL_677484 | 10/19/2020 | 12/4/2020 | North America / USA / Illinois / Winnebago County  |
| EPI_ISL_677485 | 10/19/2020 | 12/4/2020 | North America / USA / Illinois / Winnebago County  |
| EPI_ISL_677486 | 10/17/2020 | 12/4/2020 | North America / USA / Wisconsin / Dane County      |
| EPI_ISL_677487 | 10/18/2020 | 12/4/2020 | North America / USA / Wisconsin / Jefferson County |
| EPI_ISL_677488 | 10/18/2020 | 12/4/2020 | North America / USA / Wisconsin / Dane County      |
| EPI_ISL_677489 | 10/18/2020 | 12/4/2020 | North America / USA / Wisconsin / Columbia County  |
| EPI_ISL_677490 | 9/21/2020  | 12/4/2020 | North America / USA / Illinois / Winnebago County  |
| EPI_ISL_677491 | 9/23/2020  | 12/4/2020 | North America / USA / Wisconsin / Jefferson County |
| EPI_ISL_677492 | 9/18/2020  | 12/4/2020 | North America / USA / Wisconsin / Sauk County      |
| EPI_ISL_677493 | 9/27/2020  | 12/4/2020 | North America / USA / Wisconsin / Dane County      |
| EPI_ISL_677494 | 9/27/2020  | 12/4/2020 | North America / USA / Wisconsin / Dane County      |
| EPI_ISL_677495 | 9/28/2020  | 12/4/2020 | North America / USA / Wisconsin / Iowa County      |
| EPI_ISL_677496 | 9/19/2020  | 12/4/2020 | North America / USA / Wisconsin / Columbia County  |
| EPI_ISL_677497 | 9/28/2020  | 12/4/2020 | North America / USA / Wisconsin / Dane County      |
| EPI_ISL_677498 | 11/2/2020  | 12/4/2020 | North America / USA / Wisconsin / Dane County      |
| EPI_ISL_677499 | 11/2/2020  | 12/4/2020 | North America / USA / Wisconsin / Dane County      |
| EPI_ISL_677500 | 11/2/2020  | 12/4/2020 | North America / USA / Wisconsin / Dane County      |
| EPI_ISL_677501 | 10/27/2020 | 12/4/2020 | North America / USA / Wisconsin / Dane County      |
| EPI_ISL_677502 | 10/27/2020 | 12/4/2020 | North America / USA / Wisconsin / Dane County      |
| EPI_ISL_677503 | 10/30/2020 | 12/4/2020 | North America / USA / Wisconsin / Dane County      |
| EPI_ISL_677504 | 10/30/2020 | 12/4/2020 | North America / USA / Wisconsin / Dane County      |
| EPI_ISL_677505 | 11/5/2020  | 12/4/2020 | North America / USA / Wisconsin / Dane County      |
| EPI_ISL_677506 | 11/5/2020  | 12/4/2020 | North America / USA / Wisconsin / Dane County      |
| EPI_ISL_677507 | 11/9/2020  | 12/4/2020 | North America / USA / Wisconsin / Dane County      |
| EPI_ISL_677508 | 11/9/2020  | 12/4/2020 | North America / USA / Wisconsin / Dane County      |
| EPI_ISL_677509 | 9/28/2020  | 12/4/2020 | North America / USA / Wisconsin / Dane County      |
| EPI_ISL_677510 | 9/29/2020  | 12/4/2020 | North America / USA / Wisconsin / Dane County      |

|                |            |           |                                                   |
|----------------|------------|-----------|---------------------------------------------------|
| EPI_ISL_677511 | 9/29/2020  | 12/4/2020 | North America / USA / Wisconsin / Dane County     |
| EPI_ISL_677512 | 9/28/2020  | 12/4/2020 | North America / USA / Wisconsin / Dane County     |
| EPI_ISL_677513 | 10/5/2020  | 12/4/2020 | North America / USA / Wisconsin / Dane County     |
| EPI_ISL_677514 | 9/29/2020  | 12/4/2020 | North America / USA / Wisconsin / Dane County     |
| EPI_ISL_677515 | 9/23/2020  | 12/4/2020 | North America / USA / Wisconsin / Dane County     |
| EPI_ISL_677516 | 9/30/2020  | 12/4/2020 | North America / USA / Wisconsin / Columbia County |
| EPI_ISL_677517 | 9/30/2020  | 12/4/2020 | North America / USA / Illinois / Winnebago County |
| EPI_ISL_677519 | 10/6/2020  | 12/4/2020 | North America / USA / Wisconsin / Dane County     |
| EPI_ISL_677521 | 10/3/2020  | 12/4/2020 | North America / USA / Nebraska / Lancaster County |
| EPI_ISL_677522 | 10/8/2020  | 12/4/2020 | North America / USA / Wisconsin / Dane County     |
| EPI_ISL_677523 | 10/8/2020  | 12/4/2020 | North America / USA / Wisconsin / Dodge County    |
| EPI_ISL_677524 | 10/2/2020  | 12/4/2020 | North America / USA / Illinois / Winnebago County |
| EPI_ISL_677525 | 9/30/2020  | 12/4/2020 | North America / USA / Wisconsin / Dodge County    |
| EPI_ISL_677526 | 10/7/2020  | 12/4/2020 | North America / USA / Wisconsin / Rock County     |
| EPI_ISL_677527 | 9/22/2020  | 12/4/2020 | North America / USA / Wisconsin / Dane County     |
| EPI_ISL_677528 | 9/22/2020  | 12/4/2020 | North America / USA / Illinois / Winnebago County |
| EPI_ISL_677529 | 9/26/2020  | 12/4/2020 | North America / USA / Wisconsin / Dane County     |
| EPI_ISL_677531 | 9/21/2020  | 12/4/2020 | North America / USA / Wisconsin / Dane County     |
| EPI_ISL_677532 | 9/24/2020  | 12/4/2020 | North America / USA / Wisconsin / Dane County     |
| EPI_ISL_677533 | 9/18/2020  | 12/4/2020 | North America / USA / Wisconsin / Dane County     |
| EPI_ISL_677534 | 10/1/2020  | 12/4/2020 | North America / USA / Wisconsin / Dane County     |
| EPI_ISL_677535 | 9/29/2020  | 12/4/2020 | North America / USA / Illinois / Winnebago County |
| EPI_ISL_677536 | 9/30/2020  | 12/4/2020 | North America / USA / Wisconsin / Dane County     |
| EPI_ISL_677539 | 10/13/2020 | 12/4/2020 | North America / USA / Wisconsin / Dane County     |
| EPI_ISL_677540 | 10/14/2020 | 12/4/2020 | North America / USA / Wisconsin / Dane County     |
| EPI_ISL_677544 | 10/15/2020 | 12/4/2020 | North America / USA / Wisconsin / Dane County     |
| EPI_ISL_677545 | 10/15/2020 | 12/4/2020 | North America / USA / Wisconsin / Dane County     |
| EPI_ISL_677546 | 10/15/2020 | 12/4/2020 | North America / USA / Wisconsin / Dane County     |
| EPI_ISL_677547 | 10/15/2020 | 12/4/2020 | North America / USA / Wisconsin / Green County    |
| EPI_ISL_677549 | 10/15/2020 | 12/4/2020 | North America / USA / Wisconsin / Columbia County |
| EPI_ISL_677551 | 10/15/2020 | 12/4/2020 | North America / USA / Wisconsin / Dane County     |
| EPI_ISL_677552 | 10/15/2020 | 12/4/2020 | North America / USA / Wisconsin / Dane County     |
| EPI_ISL_677555 | 10/12/2020 | 12/4/2020 | North America / USA / Wisconsin / Columbia County |
| EPI_ISL_677559 | 10/15/2020 | 12/4/2020 | North America / USA / Wisconsin / Green County    |
| EPI_ISL_677561 | 10/14/2020 | 12/4/2020 | North America / USA / Wisconsin / Dane County     |
| EPI_ISL_677565 | 10/15/2020 | 12/4/2020 | North America / USA / Wisconsin / Dane County     |
| EPI_ISL_677566 | 10/15/2020 | 12/4/2020 | North America / USA / Wisconsin / Dane County     |
| EPI_ISL_677571 | 10/15/2020 | 12/4/2020 | North America / USA / Wisconsin / Sauk County     |
| EPI_ISL_677576 | 10/15/2020 | 12/4/2020 | North America / USA / Wisconsin / Dane County     |
| EPI_ISL_677577 | 10/12/2020 | 12/4/2020 | North America / USA / Wisconsin / Dane County     |
| EPI_ISL_677587 | 10/21/2020 | 12/4/2020 | North America / USA / Wisconsin / Dane County     |
| EPI_ISL_677591 | 10/21/2020 | 12/4/2020 | North America / USA / Wisconsin / Dane County     |
| EPI_ISL_677592 | 10/20/2020 | 12/4/2020 | North America / USA / Wisconsin / Dane County     |
| EPI_ISL_677593 | 10/25/2020 | 12/4/2020 | North America / USA / Wisconsin / Dane County     |
| EPI_ISL_677594 | 10/26/2020 | 12/4/2020 | North America / USA / Wisconsin / Adams County    |
| EPI_ISL_677595 | 10/25/2020 | 12/4/2020 | North America / USA / Wisconsin / Dane County     |
| EPI_ISL_677596 | 10/25/2020 | 12/4/2020 | North America / USA / Wisconsin / Dane County     |

|                |            |           |                                                   |
|----------------|------------|-----------|---------------------------------------------------|
| EPI_ISL_677597 | 10/25/2020 | 12/4/2020 | North America / USA / Wisconsin / Dane County     |
| EPI_ISL_677598 | 10/25/2020 | 12/4/2020 | North America / USA / Wisconsin / Dane County     |
| EPI_ISL_677599 | 10/25/2020 | 12/4/2020 | North America / USA / Wisconsin / Dodge County    |
| EPI_ISL_677600 | 10/25/2020 | 12/4/2020 | North America / USA / Wisconsin / Dane County     |
| EPI_ISL_677601 | 10/25/2020 | 12/4/2020 | North America / USA / Wisconsin / Dane County     |
| EPI_ISL_677602 | 10/24/2020 | 12/4/2020 | North America / USA / Wisconsin / Dane County     |
| EPI_ISL_677603 | 10/24/2020 | 12/4/2020 | North America / USA / Wisconsin / Dane County     |
| EPI_ISL_677604 | 10/24/2020 | 12/4/2020 | North America / USA / Wisconsin / Dane County     |
| EPI_ISL_677605 | 10/24/2020 | 12/4/2020 | North America / USA / Wisconsin / Dane County     |
| EPI_ISL_677606 | 10/23/2020 | 12/4/2020 | North America / USA / Wisconsin / Dane County     |
| EPI_ISL_677607 | 10/22/2020 | 12/4/2020 | North America / USA / Wisconsin / Dane County     |
| EPI_ISL_677608 | 10/27/2020 | 12/4/2020 | North America / USA / Wisconsin / Dane County     |
| EPI_ISL_677609 | 10/27/2020 | 12/4/2020 | North America / USA / Wisconsin / Dane County     |
| EPI_ISL_677610 | 10/26/2020 | 12/4/2020 | North America / USA / Wisconsin / Dane County     |
| EPI_ISL_677612 | 10/26/2020 | 12/4/2020 | North America / USA / Wisconsin / Columbia County |
| EPI_ISL_677613 | 10/26/2020 | 12/4/2020 | North America / USA / Wisconsin / Dane County     |
| EPI_ISL_677614 | 10/25/2020 | 12/4/2020 | North America / USA / Wisconsin / Dane County     |
| EPI_ISL_677615 | 10/25/2020 | 12/4/2020 | North America / USA / Wisconsin / Dane County     |
| EPI_ISL_677616 | 10/27/2020 | 12/4/2020 | North America / USA / Wisconsin / Dane County     |
| EPI_ISL_677617 | 10/26/2020 | 12/4/2020 | North America / USA / Wisconsin / Dane County     |
| EPI_ISL_677618 | 10/26/2020 | 12/4/2020 | North America / USA / Wisconsin / Dane County     |
| EPI_ISL_677619 | 9/24/2020  | 12/4/2020 | North America / USA / Wisconsin / Dane County     |
| EPI_ISL_677620 | 9/26/2020  | 12/4/2020 | North America / USA / Wisconsin / Dane County     |
| EPI_ISL_677621 | 9/27/2020  | 12/4/2020 | North America / USA / Wisconsin / Dane County     |
| EPI_ISL_677622 | 9/26/2020  | 12/4/2020 | North America / USA / Wisconsin / Rock County     |
| EPI_ISL_677623 | 9/26/2020  | 12/4/2020 | North America / USA / Wisconsin / Dane County     |
| EPI_ISL_677624 | 9/21/2020  | 12/4/2020 | North America / USA / Wisconsin / Rock County     |
| EPI_ISL_677625 | 9/28/2020  | 12/4/2020 | North America / USA / Illinois / Winnebago County |
| EPI_ISL_677626 | 10/19/2020 | 12/4/2020 | North America / USA / Wisconsin / Dane County     |
| EPI_ISL_677627 | 10/15/2020 | 12/4/2020 | North America / USA / Wisconsin / Dane County     |
| EPI_ISL_677628 | 10/26/2020 | 12/4/2020 | North America / USA / Wisconsin / Dane County     |
| EPI_ISL_677629 | 10/10/2020 | 12/4/2020 | North America / USA / Wisconsin / Dane County     |
| EPI_ISL_677630 | 10/2/2020  | 12/4/2020 | North America / USA / Wisconsin / Dane County     |
| EPI_ISL_677631 | 10/6/2020  | 12/4/2020 | North America / USA / Wisconsin / Marathon County |
| EPI_ISL_677632 | 11/3/2020  | 12/4/2020 | North America / USA / Wisconsin / Chippewa County |
| EPI_ISL_677633 | 11/2/2020  | 12/4/2020 | North America / USA / Wisconsin / Dane County     |
| EPI_ISL_677634 | 9/16/2020  | 12/4/2020 | Africa / Madagascar / Antananarivo                |
| EPI_ISL_677635 | 3/26/2020  | 12/4/2020 | Africa / Madagascar / Toamasina                   |
| EPI_ISL_677636 | 3/26/2020  | 12/4/2020 | Africa / Madagascar / Toamasina                   |
| EPI_ISL_681320 | 9/24/2020  | 12/4/2020 | North America / USA / Wisconsin / Dane County     |
| EPI_ISL_681321 | 9/28/2020  | 12/4/2020 | North America / USA / Illinois / Winnebago County |
| EPI_ISL_677638 | 9/1/2020   | 12/5/2020 | North America / USA / Colorado                    |
| EPI_ISL_677639 | 9/1/2020   | 12/5/2020 | North America / USA / Colorado                    |
| EPI_ISL_677641 | 9/3/2020   | 12/5/2020 | North America / USA / Colorado                    |
| EPI_ISL_677642 | 9/3/2020   | 12/5/2020 | North America / USA / Colorado                    |
| EPI_ISL_677643 | 9/8/2020   | 12/5/2020 | North America / USA / Colorado                    |
| EPI_ISL_677644 | 9/8/2020   | 12/5/2020 | North America / USA / Colorado                    |



|                |            |                                                               |
|----------------|------------|---------------------------------------------------------------|
| EPI_ISL_677645 | 9/8/2020   | 12/5/2020 North America / USA / Colorado                      |
| EPI_ISL_677647 | 9/8/2020   | 12/5/2020 North America / USA / Colorado                      |
| EPI_ISL_677648 | 9/16/2020  | 12/5/2020 North America / USA / Colorado                      |
| EPI_ISL_677652 | 9/16/2020  | 12/5/2020 North America / USA / Colorado                      |
| EPI_ISL_677653 | 9/16/2020  | 12/5/2020 North America / USA / Colorado                      |
| EPI_ISL_677654 | 9/16/2020  | 12/5/2020 North America / USA / Colorado                      |
| EPI_ISL_677658 | 10/3/2020  | 12/5/2020 North America / USA / Wisconsin / Dane County       |
| EPI_ISL_677659 | 9/10/2020  | 12/5/2020 North America / USA / Wisconsin / Milwaukee County  |
| EPI_ISL_677662 | 10/12/2020 | 12/5/2020 North America / USA / Wisconsin / Dane County       |
| EPI_ISL_677665 | 4/13/2020  | 12/5/2020 North America / USA / New York / Tioga County       |
| EPI_ISL_677666 | 5/6/2020   | 12/5/2020 North America / USA / New York / Broome County      |
| EPI_ISL_677673 | 3/3/2020   | 12/5/2020 North America / USA / New York / Westchester County |
| EPI_ISL_677674 | 5/20/2020  | 12/5/2020 Europe / North Macedonia / Prilep                   |
| EPI_ISL_677675 | 6/1/2020   | 12/5/2020 Europe / North Macedonia / Veles                    |
| EPI_ISL_677676 | 6/3/2020   | 12/5/2020 Europe / North Macedonia / Shtip                    |
| EPI_ISL_677677 | 6/4/2020   | 12/5/2020 Europe / North Macedonia / Shtip                    |
| EPI_ISL_677678 | 4/17/2020  | 12/5/2020 North America / USA / New York / New York           |
| EPI_ISL_677679 | 4/25/2020  | 12/5/2020 North America / USA / New York / New York           |
| EPI_ISL_677680 | 4/13/2020  | 12/5/2020 North America / USA / New York / New York           |
| EPI_ISL_677681 | 4/11/2020  | 12/5/2020 North America / USA / New York / New York           |
| EPI_ISL_677682 | 4/17/2020  | 12/5/2020 North America / USA / New York / New York           |
| EPI_ISL_677683 | 4/20/2020  | 12/5/2020 North America / USA / New York / New York           |
| EPI_ISL_677684 | 4/30/2020  | 12/5/2020 North America / USA / New York / New York           |
| EPI_ISL_677685 | 5/6/2020   | 12/5/2020 North America / USA / New York / New York           |
| EPI_ISL_677686 | 5/7/2020   | 12/5/2020 North America / USA / New York / New York           |
| EPI_ISL_677687 | 5/11/2020  | 12/5/2020 North America / USA / New York / New York           |
| EPI_ISL_677688 | 5/11/2020  | 12/5/2020 North America / USA / New York / New York           |
| EPI_ISL_677689 | 4/15/2020  | 12/5/2020 North America / USA / New York / New York           |
| EPI_ISL_677699 | 9/16/2020  | 12/5/2020 North America / USA / New York / New York           |
| EPI_ISL_677700 | 6/4/2020   | 12/5/2020 Europe / North Macedonia / Skopje                   |
| EPI_ISL_677701 | 6/6/2020   | 12/5/2020 Europe / North Macedonia / Skopje                   |
| EPI_ISL_677702 | 6/10/2020  | 12/5/2020 Europe / North Macedonia / Skopje                   |
| EPI_ISL_677703 | 6/11/2020  | 12/5/2020 Europe / North Macedonia / Prilep                   |
| EPI_ISL_677704 | 6/11/2020  | 12/5/2020 Europe / North Macedonia / Ohrid                    |
| EPI_ISL_677705 | 6/11/2020  | 12/5/2020 Europe / North Macedonia / Kumanovo                 |
| EPI_ISL_677706 | 6/11/2020  | 12/5/2020 Europe / North Macedonia / Skopje                   |
| EPI_ISL_677707 | 6/15/2020  | 12/5/2020 Europe / North Macedonia / Kumanovo                 |
| EPI_ISL_677708 | 6/18/2020  | 12/5/2020 Europe / North Macedonia / Skopje                   |
| EPI_ISL_677709 | 6/22/2020  | 12/5/2020 Europe / North Macedonia / Ohrid                    |
| EPI_ISL_677710 | 6/22/2020  | 12/5/2020 Europe / North Macedonia / Veles                    |
| EPI_ISL_677711 | 6/25/2020  | 12/5/2020 Europe / North Macedonia / Ohrid                    |
| EPI_ISL_677712 | 6/25/2020  | 12/5/2020 Europe / North Macedonia / Prilep                   |
| EPI_ISL_677713 | 6/28/2020  | 12/5/2020 Europe / North Macedonia / Prilep                   |
| EPI_ISL_677714 | 6/28/2020  | 12/5/2020 Europe / North Macedonia / Prilep                   |
| EPI_ISL_677715 | 7/10/2020  | 12/5/2020 Europe / North Macedonia / Bitola                   |
| EPI_ISL_677716 | 7/10/2020  | 12/5/2020 Europe / North Macedonia / Shtip                    |
| EPI_ISL_677717 | 7/20/2020  | 12/5/2020 Europe / North Macedonia / Shtip                    |

|                |           |                                                 |
|----------------|-----------|-------------------------------------------------|
| EPI_ISL_677718 | 7/21/2020 | 12/5/2020 Europe / North Macedonia / Bitola     |
| EPI_ISL_677719 | 7/29/2020 | 12/5/2020 Europe / North Macedonia / Struga     |
| EPI_ISL_677720 | 7/29/2020 | 12/5/2020 Europe / North Macedonia / Shtip      |
| EPI_ISL_677721 | 7/30/2020 | 12/5/2020 Europe / North Macedonia / Shtip      |
| EPI_ISL_677722 | 8/4/2020  | 12/5/2020 Europe / North Macedonia / Ohrid      |
| EPI_ISL_677723 | 8/4/2020  | 12/5/2020 Europe / North Macedonia / Skopje     |
| EPI_ISL_677724 | 8/5/2020  | 12/5/2020 Europe / North Macedonia / Shtip      |
| EPI_ISL_677725 | 8/5/2020  | 12/5/2020 Europe / North Macedonia / Ohrid      |
| EPI_ISL_677726 | 8/5/2020  | 12/5/2020 Europe / North Macedonia / Ohrid      |
| EPI_ISL_677727 | 10/1/2020 | 12/6/2020 Europe / Hungary / Bácskás county     |
| EPI_ISL_677728 | 8/27/2020 | 12/6/2020 Europe / Hungary / Pest county        |
| EPI_ISL_677729 | 8/27/2020 | 12/6/2020 Europe / Hungary / Csongrád county    |
| EPI_ISL_677730 | 8/28/2020 | 12/6/2020 Europe / Hungary / Csongrád county    |
| EPI_ISL_677731 | 8/28/2020 | 12/6/2020 Europe / Hungary / Bács-Kiskun county |
| EPI_ISL_677732 | 8/28/2020 | 12/6/2020 Europe / Hungary / Bács-Kiskun county |
| EPI_ISL_677733 | 8/28/2020 | 12/6/2020 Europe / Hungary / Pest county        |
| EPI_ISL_677734 | 8/28/2020 | 12/6/2020 Europe / Hungary / Bács-Kiskun county |
| EPI_ISL_677735 | 8/31/2020 | 12/6/2020 Europe / Hungary / Csongrád county    |
| EPI_ISL_677736 | 8/31/2020 | 12/6/2020 Europe / Hungary / Csongrád county    |
| EPI_ISL_677737 | 8/31/2020 | 12/6/2020 Europe / Hungary / Csongrád county    |
| EPI_ISL_677738 | 8/31/2020 | 12/6/2020 Europe / Hungary / Bács-Kiskun county |
| EPI_ISL_677739 | 9/1/2020  | 12/6/2020 Europe / Hungary / Csongrád county    |
| EPI_ISL_677740 | 9/1/2020  | 12/6/2020 Europe / Hungary / Bács-Kiskun county |
| EPI_ISL_677741 | 9/1/2020  | 12/6/2020 Europe / Hungary / Csongrád county    |
| EPI_ISL_677742 | 9/1/2020  | 12/6/2020 Europe / Hungary / Csongrád county    |
| EPI_ISL_677743 | 9/1/2020  | 12/6/2020 Europe / Hungary / Bács-Kiskun county |
| EPI_ISL_677744 | 9/1/2020  | 12/6/2020 Europe / Hungary / Bács-Kiskun county |
| EPI_ISL_677745 | 9/1/2020  | 12/6/2020 Europe / Hungary / Pest county        |
| EPI_ISL_677746 | 9/2/2020  | 12/6/2020 Europe / Hungary / Csongrád county    |
| EPI_ISL_677748 | 9/2/2020  | 12/6/2020 Europe / Hungary / Csongrád county    |
| EPI_ISL_677749 | 9/2/2020  | 12/6/2020 Europe / Hungary / Csongrád county    |
| EPI_ISL_677750 | 9/2/2020  | 12/6/2020 Europe / Hungary / Csongrád county    |
| EPI_ISL_677751 | 9/2/2020  | 12/6/2020 Europe / Hungary / Csongrad County    |
| EPI_ISL_677752 | 9/2/2020  | 12/6/2020 Europe / Hungary / Csongrád county    |
| EPI_ISL_677753 | 9/2/2020  | 12/6/2020 Europe / Hungary / Csongrád county    |
| EPI_ISL_677754 | 9/2/2020  | 12/6/2020 Europe / Hungary / Csongrád county    |
| EPI_ISL_677755 | 9/2/2020  | 12/6/2020 Europe / Hungary / Csongrád county    |
| EPI_ISL_677756 | 9/2/2020  | 12/6/2020 Europe / Hungary / Csongrád county    |
| EPI_ISL_677757 | 9/2/2020  | 12/6/2020 Europe / Hungary / Csongrád county    |
| EPI_ISL_677758 | 9/2/2020  | 12/6/2020 Europe / Hungary / Csongrád county    |
| EPI_ISL_677759 | 9/2/2020  | 12/6/2020 Europe / Hungary / Csongrád county    |
| EPI_ISL_677760 | 9/2/2020  | 12/6/2020 Europe / Hungary / Bács-Kiskun county |
| EPI_ISL_677761 | 9/2/2020  | 12/6/2020 Europe / Hungary / Bács-Kiskun county |
| EPI_ISL_677762 | 9/2/2020  | 12/6/2020 Europe / Hungary / Csongrád county    |
| EPI_ISL_677763 | 9/2/2020  | 12/6/2020 Europe / Hungary / Csongrád county    |
| EPI_ISL_677764 | 9/3/2020  | 12/6/2020 Europe / Hungary / Csongrád county    |
| EPI_ISL_677765 | 9/3/2020  | 12/6/2020 Europe / Hungary / Csongrád county    |





|                |           |                                                             |
|----------------|-----------|-------------------------------------------------------------|
| EPI_ISL_677880 | 8/3/2020  | 12/6/2020 North America / USA / California / Alameda County |
| EPI_ISL_677883 | 7/27/2020 | 12/6/2020 North America / USA / California / Alameda County |
| EPI_ISL_677884 | 7/30/2020 | 12/6/2020 North America / USA / California / Alameda County |
| EPI_ISL_677885 | 7/30/2020 | 12/6/2020 North America / USA / California / Alameda County |
| EPI_ISL_677886 | 7/31/2020 | 12/6/2020 North America / USA / California / Alameda County |
| EPI_ISL_677887 | 7/31/2020 | 12/6/2020 North America / USA / California / Alameda County |
| EPI_ISL_677889 | 6/30/2020 | 12/6/2020 North America / USA / California / Alameda County |
| EPI_ISL_677890 | 7/13/2020 | 12/6/2020 North America / USA / California / Alameda County |
| EPI_ISL_677891 | 6/30/2020 | 12/6/2020 North America / USA / California / Alameda County |
| EPI_ISL_677892 | 6/30/2020 | 12/6/2020 North America / USA / California / Alameda County |
| EPI_ISL_677893 | 7/2/2020  | 12/6/2020 North America / USA / California / Alameda County |
| EPI_ISL_677894 | 6/30/2020 | 12/6/2020 North America / USA / California / Alameda County |
| EPI_ISL_677896 | 7/10/2020 | 12/6/2020 North America / USA / California / Alameda County |
| EPI_ISL_677897 | 7/17/2020 | 12/6/2020 North America / USA / California / Alameda County |
| EPI_ISL_677898 | 7/9/2020  | 12/6/2020 North America / USA / California / Alameda County |
| EPI_ISL_677899 | 7/9/2020  | 12/6/2020 North America / USA / California / Alameda County |
| EPI_ISL_677900 | 7/13/2020 | 12/6/2020 North America / USA / California / Alameda County |
| EPI_ISL_677901 | 7/2/2020  | 12/6/2020 North America / USA / California / Alameda County |
| EPI_ISL_677904 | 8/17/2020 | 12/6/2020 North America / USA / California / Alameda County |
| EPI_ISL_677905 | 6/29/2020 | 12/6/2020 North America / USA / California / Alameda County |
| EPI_ISL_677907 | 6/29/2020 | 12/6/2020 North America / USA / California / Alameda County |
| EPI_ISL_677922 | 6/30/2020 | 12/6/2020 Asia / Saudi Arabia / Jeddah                      |
| EPI_ISL_677923 | 6/30/2020 | 12/6/2020 Asia / Saudi Arabia / Jeddah                      |
| EPI_ISL_677924 | 6/30/2020 | 12/6/2020 Asia / Saudi Arabia / Jeddah                      |
| EPI_ISL_677925 | 6/30/2020 | 12/6/2020 Asia / Saudi Arabia / Jeddah                      |
| EPI_ISL_677926 | 6/30/2020 | 12/6/2020 Asia / Saudi Arabia / Jeddah                      |
| EPI_ISL_677927 | 6/30/2020 | 12/6/2020 Asia / Saudi Arabia / Jeddah                      |
| EPI_ISL_677928 | 6/30/2020 | 12/6/2020 Asia / Saudi Arabia / Jeddah                      |
| EPI_ISL_677929 | 6/30/2020 | 12/6/2020 Asia / Saudi Arabia / Jeddah                      |
| EPI_ISL_677930 | 6/30/2020 | 12/6/2020 Asia / Saudi Arabia / Jeddah                      |
| EPI_ISL_677931 | 6/30/2020 | 12/6/2020 Asia / Saudi Arabia / Jeddah                      |
| EPI_ISL_677932 | 6/30/2020 | 12/6/2020 Asia / Saudi Arabia / Jeddah                      |
| EPI_ISL_677933 | 6/30/2020 | 12/6/2020 Asia / Saudi Arabia / Jeddah                      |
| EPI_ISL_677934 | 6/30/2020 | 12/6/2020 Asia / Saudi Arabia / Jeddah                      |
| EPI_ISL_677935 | 6/30/2020 | 12/6/2020 Asia / Saudi Arabia / Jeddah                      |
| EPI_ISL_677936 | 6/30/2020 | 12/6/2020 Asia / Saudi Arabia / Jeddah                      |
| EPI_ISL_677937 | 4/15/2020 | 12/6/2020 Asia / Saudi Arabia / Jeddah                      |
| EPI_ISL_677938 | 4/23/2020 | 12/6/2020 Asia / Saudi Arabia / Jeddah                      |
| EPI_ISL_677939 | 4/22/2020 | 12/6/2020 Asia / Saudi Arabia / Jeddah                      |
| EPI_ISL_677940 | 3/25/2020 | 12/6/2020 Asia / Saudi Arabia / Jeddah                      |
| EPI_ISL_677941 | 4/28/2020 | 12/6/2020 Asia / Saudi Arabia / Jeddah                      |
| EPI_ISL_677942 | 4/28/2020 | 12/6/2020 Asia / Saudi Arabia / Jeddah                      |
| EPI_ISL_677943 | 4/5/2020  | 12/6/2020 Asia / Saudi Arabia / Jeddah                      |
| EPI_ISL_677944 | 4/1/2020  | 12/6/2020 Asia / Saudi Arabia / Jeddah                      |
| EPI_ISL_677968 | 4/1/2020  | 12/6/2020 Asia / Saudi Arabia / Madinah                     |
| EPI_ISL_677969 | 6/19/2020 | 12/6/2020 Asia / Saudi Arabia / Madinah                     |
| EPI_ISL_677972 | 6/13/2020 | 12/6/2020 Asia / Saudi Arabia / Madinah                     |











|                |            |                                               |
|----------------|------------|-----------------------------------------------|
| EPI_ISL_678225 | 7/18/2020  | 12/6/2020 Asia / Saudi Arabia / Riyadh        |
| EPI_ISL_678226 | 6/27/2020  | 12/6/2020 Asia / Saudi Arabia / Riyadh        |
| EPI_ISL_678230 | 4/6/2020   | 12/6/2020 Asia / Saudi Arabia / Makkah        |
| EPI_ISL_678231 | 4/6/2020   | 12/6/2020 Asia / Saudi Arabia / Makkah        |
| EPI_ISL_678233 | 4/6/2020   | 12/6/2020 Asia / Saudi Arabia / Makkah        |
| EPI_ISL_678237 | 6/19/2020  | 12/6/2020 Asia / Saudi Arabia / Madinah       |
| EPI_ISL_678239 | 7/29/2020  | 12/6/2020 Asia / Saudi Arabia / Riyadh        |
| EPI_ISL_678241 | 6/30/2020  | 12/6/2020 Asia / Saudi Arabia / Jeddah        |
| EPI_ISL_678246 | 4/26/2020  | 12/6/2020 Asia / Saudi Arabia / Makkah        |
| EPI_ISL_678247 | 8/11/2020  | 12/6/2020 Asia / Saudi Arabia / Riyadh        |
| EPI_ISL_678248 | 8/6/2020   | 12/6/2020 Europe / North Macedonia / Skopje   |
| EPI_ISL_678249 | 8/6/2020   | 12/6/2020 Europe / North Macedonia / Skopje   |
| EPI_ISL_678250 | 8/10/2020  | 12/6/2020 Europe / North Macedonia / Shtip    |
| EPI_ISL_678251 | 8/18/2020  | 12/6/2020 Europe / North Macedonia / Skopje   |
| EPI_ISL_678252 | 8/18/2020  | 12/6/2020 Europe / North Macedonia / Kumanovo |
| EPI_ISL_678253 | 9/7/2020   | 12/6/2020 Europe / North Macedonia / Skopje   |
| EPI_ISL_678254 | 9/7/2020   | 12/6/2020 Europe / North Macedonia / Strumica |
| EPI_ISL_678255 | 9/7/2020   | 12/6/2020 Europe / North Macedonia / Ohrid    |
| EPI_ISL_678256 | 9/7/2020   | 12/6/2020 Europe / North Macedonia / Ohrid    |
| EPI_ISL_678257 | 9/9/2020   | 12/6/2020 Europe / North Macedonia / Struga   |
| EPI_ISL_678258 | 9/9/2020   | 12/6/2020 Europe / North Macedonia / Prilep   |
| EPI_ISL_678259 | 9/9/2020   | 12/6/2020 Europe / North Macedonia / Shtip    |
| EPI_ISL_678260 | 9/11/2020  | 12/6/2020 Europe / North Macedonia / Struga   |
| EPI_ISL_678261 | 11/22/2020 | 12/6/2020 Asia / Bahrain                      |
| EPI_ISL_678262 | 11/21/2020 | 12/6/2020 Asia / Bahrain                      |
| EPI_ISL_678263 | 11/21/2020 | 12/6/2020 Asia / Bahrain                      |
| EPI_ISL_678264 | 11/22/2020 | 12/6/2020 Asia / Bahrain                      |
| EPI_ISL_678265 | 11/22/2020 | 12/6/2020 Asia / Bahrain                      |
| EPI_ISL_678266 | 11/21/2020 | 12/6/2020 Asia / Bahrain                      |
| EPI_ISL_678267 | 11/21/2020 | 12/6/2020 Asia / Bahrain                      |
| EPI_ISL_678268 | 11/22/2020 | 12/6/2020 Asia / Bahrain                      |
| EPI_ISL_678269 | 11/12/2020 | 12/6/2020 Asia / Bahrain                      |
| EPI_ISL_678270 | 11/12/2020 | 12/6/2020 Asia / Bahrain                      |
| EPI_ISL_678271 | 11/12/2020 | 12/6/2020 Asia / Bahrain                      |
| EPI_ISL_678272 | 11/12/2020 | 12/6/2020 Asia / Bahrain                      |
| EPI_ISL_678273 | 4/13/2020  | 12/6/2020 Europe / Russia / Saratov           |
| EPI_ISL_678274 | 7/30/2020  | 12/6/2020 Europe / Russia / Saratov           |
| EPI_ISL_678275 | 3/18/2020  | 12/6/2020 Europe / Russia / Moscow            |
| EPI_ISL_678276 | 4/11/2020  | 12/6/2020 Europe / Russia / Samara            |
| EPI_ISL_678277 | 5/3/2020   | 12/6/2020 Europe / Russia / Saratov           |
| EPI_ISL_678278 | 3/20/2020  | 12/6/2020 Europe / Russia / Moscow            |
| EPI_ISL_678280 | 4/29/2020  | 12/6/2020 Europe / Russia / Saratov           |
| EPI_ISL_678281 | 7/30/2020  | 12/6/2020 Europe / Russia / Saratov           |
| EPI_ISL_678282 | 7/31/2020  | 12/6/2020 Europe / Russia / Saratov           |
| EPI_ISL_678283 | 5/2/2020   | 12/6/2020 Europe / Russia / Saratov           |
| EPI_ISL_678284 | 7/28/2020  | 12/6/2020 Europe / Russia / Saratov           |
| EPI_ISL_678285 | 7/30/2020  | 12/6/2020 Europe / Russia / Saratov           |

|                |            |                                                          |
|----------------|------------|----------------------------------------------------------|
| EPI_ISL_678286 | 7/22/2020  | 12/6/2020 Europe / Russia / Saratov                      |
| EPI_ISL_678287 | 3/16/2020  | 12/6/2020 Europe / Russia / Moscow                       |
| EPI_ISL_678288 | 4/8/2020   | 12/6/2020 Europe / Russia / Penza                        |
| EPI_ISL_678290 | 10/2/2020  | 12/7/2020 Europe / Hungary / Bácsks county              |
| EPI_ISL_678291 | 10/2/2020  | 12/7/2020 Europe / Hungary / Csongrd county             |
| EPI_ISL_678293 | 3/20/2020  | 12/7/2020 Oceania / Australia / New South Wales / Sydney |
| EPI_ISL_678297 | 3/21/2020  | 12/7/2020 Oceania / Australia / New South Wales / Sydney |
| EPI_ISL_678299 | 3/22/2020  | 12/7/2020 Oceania / Australia / New South Wales / Sydney |
| EPI_ISL_678306 | 5/23/2020  | 12/7/2020 Oceania / Australia / New South Wales / Sydney |
| EPI_ISL_678307 | 3/23/2020  | 12/7/2020 Oceania / Australia / New South Wales / Sydney |
| EPI_ISL_678308 | 3/4/2020   | 12/7/2020 Oceania / Australia / New South Wales / Sydney |
| EPI_ISL_678309 | 3/4/2020   | 12/7/2020 Oceania / Australia / New South Wales / Sydney |
| EPI_ISL_678310 | 5/31/2020  | 12/7/2020 Oceania / Australia / New South Wales / Sydney |
| EPI_ISL_678314 | 4/4/2020   | 12/7/2020 Oceania / Australia / New South Wales / Sydney |
| EPI_ISL_678315 | 4/5/2020   | 12/7/2020 Oceania / Australia / New South Wales / Sydney |
| EPI_ISL_678316 | 4/9/2020   | 12/7/2020 Oceania / Australia / New South Wales / Sydney |
| EPI_ISL_678318 | 7/17/2020  | 12/7/2020 Oceania / Australia / New South Wales / Sydney |
| EPI_ISL_678320 | 6/12/2020  | 12/7/2020 Oceania / Australia / New South Wales / Sydney |
| EPI_ISL_678321 | 7/20/2020  | 12/7/2020 Oceania / Australia / New South Wales / Sydney |
| EPI_ISL_678322 | 4/5/2020   | 12/7/2020 Oceania / Australia / New South Wales / Sydney |
| EPI_ISL_678323 | 4/5/2020   | 12/7/2020 Oceania / Australia / New South Wales / Sydney |
| EPI_ISL_678325 | 7/21/2020  | 12/7/2020 Oceania / Australia / New South Wales / Sydney |
| EPI_ISL_678326 | 7/24/2020  | 12/7/2020 Oceania / Australia / New South Wales / Sydney |
| EPI_ISL_678327 | 7/22/2020  | 12/7/2020 Oceania / Australia / New South Wales / Sydney |
| EPI_ISL_678328 | 7/22/2020  | 12/7/2020 Oceania / Australia / New South Wales / Sydney |
| EPI_ISL_678330 | 7/16/2020  | 12/7/2020 Oceania / Australia / New South Wales / Sydney |
| EPI_ISL_678331 | 7/20/2020  | 12/7/2020 Oceania / Australia / New South Wales / Sydney |
| EPI_ISL_678332 | 7/18/2020  | 12/7/2020 Oceania / Australia / New South Wales / Sydney |
| EPI_ISL_678333 | 3/26/2020  | 12/7/2020 Oceania / Australia / New South Wales / Sydney |
| EPI_ISL_678336 | 8/10/2020  | 12/7/2020 Oceania / Australia / New South Wales / Sydney |
| EPI_ISL_678337 | 8/8/2020   | 12/7/2020 Oceania / Australia / New South Wales / Sydney |
| EPI_ISL_678340 | 8/21/2020  | 12/7/2020 Oceania / Australia / New South Wales / Sydney |
| EPI_ISL_678341 | 4/3/2020   | 12/7/2020 Oceania / Australia / New South Wales / Sydney |
| EPI_ISL_678342 | 7/3/2020   | 12/7/2020 Oceania / Australia / New South Wales / Sydney |
| EPI_ISL_678343 | 9/15/2020  | 12/7/2020 Oceania / Australia / New South Wales / Sydney |
| EPI_ISL_678345 | 9/8/2020   | 12/7/2020 Oceania / Australia / New South Wales / Sydney |
| EPI_ISL_678348 | 9/20/2020  | 12/7/2020 Oceania / Australia / New South Wales / Sydney |
| EPI_ISL_678351 | 9/28/2020  | 12/7/2020 Oceania / Australia / New South Wales / Sydney |
| EPI_ISL_678354 | 4/9/2020   | 12/7/2020 Oceania / Australia / New South Wales / Sydney |
| EPI_ISL_678358 | 9/17/2020  | 12/7/2020 Oceania / Australia / New South Wales / Sydney |
| EPI_ISL_678359 | 3/12/2020  | 12/7/2020 Oceania / Australia / New South Wales / Sydney |
| EPI_ISL_678360 | 3/13/2020  | 12/7/2020 Oceania / Australia / New South Wales / Sydney |
| EPI_ISL_678361 | 3/20/2020  | 12/7/2020 Oceania / Australia / New South Wales / Sydney |
| EPI_ISL_678363 | 10/6/2020  | 12/7/2020 Oceania / Australia / New South Wales / Sydney |
| EPI_ISL_678365 | 10/9/2020  | 12/7/2020 Oceania / Australia / New South Wales / Sydney |
| EPI_ISL_678366 | 10/11/2020 | 12/7/2020 Oceania / Australia / New South Wales / Sydney |
| EPI_ISL_678367 | 10/11/2020 | 12/7/2020 Oceania / Australia / New South Wales / Sydney |

|                |            |                                                          |
|----------------|------------|----------------------------------------------------------|
| EPI_ISL_678368 | 10/11/2020 | 12/7/2020 Oceania / Australia / New South Wales / Sydney |
| EPI_ISL_678370 | 10/3/2020  | 12/7/2020 Oceania / Australia / New South Wales / Sydney |
| EPI_ISL_678371 | 10/16/2020 | 12/7/2020 Oceania / Australia / New South Wales / Sydney |
| EPI_ISL_678372 | 10/16/2020 | 12/7/2020 Oceania / Australia / New South Wales / Sydney |
| EPI_ISL_678373 | 10/15/2020 | 12/7/2020 Oceania / Australia / New South Wales / Sydney |
| EPI_ISL_678374 | 10/13/2020 | 12/7/2020 Oceania / Australia / New South Wales / Sydney |
| EPI_ISL_678375 | 11/1/2020  | 12/7/2020 Oceania / Australia / New South Wales / Sydney |
| EPI_ISL_678376 | 11/2/2020  | 12/7/2020 Oceania / Australia / New South Wales / Sydney |
| EPI_ISL_678377 | 10/31/2020 | 12/7/2020 Oceania / Australia / New South Wales / Sydney |
| EPI_ISL_678378 | 10/24/2020 | 12/7/2020 Oceania / Australia / New South Wales / Sydney |
| EPI_ISL_678379 | 10/26/2020 | 12/7/2020 Oceania / Australia / New South Wales / Sydney |
| EPI_ISL_678380 | 10/21/2020 | 12/7/2020 Oceania / Australia / New South Wales / Sydney |
| EPI_ISL_678381 | 10/22/2020 | 12/7/2020 Oceania / Australia / New South Wales / Sydney |
| EPI_ISL_678383 | 11/16/2020 | 12/7/2020 Oceania / Australia / New South Wales / Sydney |
| EPI_ISL_678387 | 10/8/2020  | 12/7/2020 Europe / Hungary / Borsod-Abauj-Zemplen County |
| EPI_ISL_678388 | 10/8/2020  | 12/7/2020 Europe / Hungary / Borsod-Abauj-Zemplen County |
| EPI_ISL_678389 | 10/8/2020  | 12/7/2020 Europe / Hungary / Borsod-Abauj-Zemplen County |
| EPI_ISL_678390 | 10/8/2020  | 12/7/2020 Europe / Hungary / Borsod-Abauj-Zemplen County |
| EPI_ISL_678391 | 10/8/2020  | 12/7/2020 Europe / Hungary / Borsod-Abauj-Zemplen County |
| EPI_ISL_678392 | 10/8/2020  | 12/7/2020 Europe / Hungary / Borsod-Abauj-Zemplen County |
| EPI_ISL_678393 | 10/8/2020  | 12/7/2020 Europe / Hungary / Borsod-Abauj-Zemplen County |
| EPI_ISL_678394 | 10/8/2020  | 12/7/2020 Europe / Hungary / Borsod-Abauj-Zemplen County |
| EPI_ISL_678395 | 10/8/2020  | 12/7/2020 Europe / Hungary / Borsod-Abauj-Zemplen County |
| EPI_ISL_678396 | 10/8/2020  | 12/7/2020 Europe / Hungary / Borsod-Abauj-Zemplen County |
| EPI_ISL_678397 | 4/25/2020  | 12/7/2020 Europe / Romania / Suceava                     |
| EPI_ISL_678398 | 4/11/2020  | 12/7/2020 Europe / Romania / Suceava                     |
| EPI_ISL_678399 | 11/13/2020 | 12/7/2020 Europe / Belgium / Liège                       |
| EPI_ISL_678400 | 11/13/2020 | 12/7/2020 Europe / Belgium / Liège                       |
| EPI_ISL_678401 | 11/13/2020 | 12/7/2020 Europe / Belgium / Liège                       |
| EPI_ISL_678402 | 11/13/2020 | 12/7/2020 Europe / Belgium / Liège                       |
| EPI_ISL_678403 | 11/13/2020 | 12/7/2020 Europe / Belgium / Liège                       |
| EPI_ISL_678404 | 11/13/2020 | 12/7/2020 Europe / Belgium / Liège                       |
| EPI_ISL_678405 | 11/13/2020 | 12/7/2020 Europe / Belgium / Liège                       |
| EPI_ISL_678406 | 11/13/2020 | 12/7/2020 Europe / Belgium / Liège                       |
| EPI_ISL_678407 | 11/13/2020 | 12/7/2020 Europe / Belgium / Liège                       |
| EPI_ISL_678408 | 11/13/2020 | 12/7/2020 Europe / Belgium / Liège                       |
| EPI_ISL_678411 | 11/13/2020 | 12/7/2020 Europe / Belgium / Liège                       |
| EPI_ISL_678417 | 11/13/2020 | 12/7/2020 Europe / Belgium / Liège                       |
| EPI_ISL_678418 | 11/13/2020 | 12/7/2020 Europe / Belgium / Liège                       |
| EPI_ISL_678420 | 11/13/2020 | 12/7/2020 Europe / Belgium / Liège                       |
| EPI_ISL_678422 | 11/13/2020 | 12/7/2020 Europe / Belgium / Liège                       |
| EPI_ISL_678425 | 11/13/2020 | 12/7/2020 Europe / Belgium / Liège                       |
| EPI_ISL_678426 | 11/13/2020 | 12/7/2020 Europe / Belgium / Liège                       |
| EPI_ISL_678427 | 11/13/2020 | 12/7/2020 Europe / Belgium / Liège                       |
| EPI_ISL_678428 | 11/13/2020 | 12/7/2020 Europe / Belgium / Liège                       |
| EPI_ISL_678430 | 11/13/2020 | 12/7/2020 Europe / Belgium / Liège                       |
| EPI_ISL_678431 | 11/13/2020 | 12/7/2020 Europe / Belgium / Liège                       |



|                |            |           |                                                           |
|----------------|------------|-----------|-----------------------------------------------------------|
| EPI_ISL_678495 | 3/16/2020  | 12/7/2020 | Europe / France / Auvergne-Rhone-Alpes / Lyon             |
| EPI_ISL_678496 | 3/23/2020  | 12/7/2020 | Europe / France / Auvergne-Rhone-Alpes / Lyon             |
| EPI_ISL_678497 | 3/25/2020  | 12/7/2020 | Europe / France / Auvergne-Rhone-Alpes / Lyon             |
| EPI_ISL_678498 | 3/27/2020  | 12/7/2020 | Europe / France / Auvergne-Rhone-Alpes / Lyon             |
| EPI_ISL_678499 | 3/28/2020  | 12/7/2020 | Europe / France / Auvergne-Rhone-Alpes / Lyon             |
| EPI_ISL_678500 | 3/28/2020  | 12/7/2020 | Europe / France / Auvergne-Rhone-Alpes / Lyon             |
| EPI_ISL_678501 | 3/30/2020  | 12/7/2020 | Europe / France / Auvergne-Rhone-Alpes / Lyon             |
| EPI_ISL_678502 | 4/1/2020   | 12/7/2020 | Europe / France / Auvergne-Rhone-Alpes / Lyon             |
| EPI_ISL_678503 | 4/2/2020   | 12/7/2020 | Europe / France / Auvergne-Rhone-Alpes / Lyon             |
| EPI_ISL_678504 | 4/3/2020   | 12/7/2020 | Europe / France / Auvergne-Rhone-Alpes / Lyon             |
| EPI_ISL_678505 | 4/3/2020   | 12/7/2020 | Europe / France / Auvergne-Rhone-Alpes / Lyon             |
| EPI_ISL_678506 | 4/10/2020  | 12/7/2020 | Europe / France / Auvergne-Rhone-Alpes / Lyon             |
| EPI_ISL_678507 | 4/20/2020  | 12/7/2020 | Europe / France / Auvergne-Rhone-Alpes / Lyon             |
| EPI_ISL_678508 | 5/15/2020  | 12/7/2020 | Europe / France / Auvergne-Rhone-Alpes / Lyon             |
| EPI_ISL_678516 | 4/5/2020   | 12/7/2020 | North America / USA / Utah                                |
| EPI_ISL_678517 | 4/7/2020   | 12/7/2020 | North America / USA / Utah                                |
| EPI_ISL_678519 | 4/5/2020   | 12/7/2020 | North America / USA / Utah                                |
| EPI_ISL_678523 | 4/6/2020   | 12/7/2020 | North America / USA / Utah                                |
| EPI_ISL_678525 | 4/7/2020   | 12/7/2020 | North America / USA / Utah                                |
| EPI_ISL_678529 | 4/5/2020   | 12/7/2020 | North America / USA / Utah                                |
| EPI_ISL_678530 | 4/6/2020   | 12/7/2020 | North America / USA / Utah                                |
| EPI_ISL_678531 | 4/6/2020   | 12/7/2020 | North America / USA / Utah                                |
| EPI_ISL_678532 | 4/6/2020   | 12/7/2020 | North America / USA / Utah                                |
| EPI_ISL_678533 | 4/6/2020   | 12/7/2020 | North America / USA / Utah                                |
| EPI_ISL_678534 | 4/20/2020  | 12/7/2020 | Europe / France / Auvergne-Rhone-Alpes / Lyon             |
| EPI_ISL_678535 | 4/22/2020  | 12/7/2020 | Europe / France / Auvergne-Rhone-Alpes / Lyon             |
| EPI_ISL_678536 | 4/26/2020  | 12/7/2020 | Europe / France / Auvergne-Rhone-Alpes / Lyon             |
| EPI_ISL_678537 | 4/27/2020  | 12/7/2020 | Europe / France / Auvergne-Rhone-Alpes / Lyon             |
| EPI_ISL_678538 | 4/27/2020  | 12/7/2020 | Europe / France / Auvergne-Rhone-Alpes / Lyon             |
| EPI_ISL_678539 | 4/29/2020  | 12/7/2020 | Europe / France / Auvergne-Rhone-Alpes / Lyon             |
| EPI_ISL_678540 | 4/30/2020  | 12/7/2020 | Europe / France / Auvergne-Rhone-Alpes / Lyon             |
| EPI_ISL_678541 | 4/30/2020  | 12/7/2020 | Europe / France / Auvergne-Rhone-Alpes / Lyon             |
| EPI_ISL_678542 | 5/3/2020   | 12/7/2020 | Europe / France / Auvergne-Rhone-Alpes / Lyon             |
| EPI_ISL_678543 | 5/11/2020  | 12/7/2020 | Europe / France / Auvergne-Rhone-Alpes / Lyon             |
| EPI_ISL_678544 | 5/11/2020  | 12/7/2020 | Europe / France / Auvergne-Rhone-Alpes / Lyon             |
| EPI_ISL_678545 | 5/18/2020  | 12/7/2020 | Europe / France / Auvergne-Rhone-Alpes / Lyon             |
| EPI_ISL_678546 | 5/24/2020  | 12/7/2020 | Europe / France / Auvergne-Rhone-Alpes / Lyon             |
| EPI_ISL_678547 | 5/25/2020  | 12/7/2020 | Europe / France / Auvergne-Rhone-Alpes / Lyon             |
| EPI_ISL_678595 | 11/18/2020 | 12/7/2020 | Africa / South Africa / Eastern Cape / Nelson Mandela Bay |
| EPI_ISL_678596 | 11/19/2020 | 12/7/2020 | Africa / South Africa / Eastern Cape / Nelson Mandela Bay |
| EPI_ISL_678597 | 11/19/2020 | 12/7/2020 | Africa / South Africa / Eastern Cape / Nelson Mandela Bay |
| EPI_ISL_678598 | 11/3/2020  | 12/7/2020 | Africa / South Africa / KwaZulu-Natal / uMkhanyakude      |
| EPI_ISL_678599 | 10/29/2020 | 12/7/2020 | Africa / South Africa / KwaZulu-Natal / Ugu               |
| EPI_ISL_678600 | 10/30/2020 | 12/7/2020 | Africa / South Africa / KwaZulu-Natal / uMkhanyakude      |
| EPI_ISL_678601 | 10/30/2020 | 12/7/2020 | Africa / South Africa / KwaZulu-Natal / Harry Gwala       |
| EPI_ISL_678602 | 10/30/2020 | 12/7/2020 | Africa / South Africa / KwaZulu-Natal / Ugu               |
| EPI_ISL_678603 | 10/29/2020 | 12/7/2020 | Africa / South Africa / KwaZulu-Natal / Ugu               |

|                |            |                                                                     |
|----------------|------------|---------------------------------------------------------------------|
| EPI_ISL_678604 | 11/16/2020 | 12/7/2020 Africa / South Africa / KwaZulu-Natal / uThukela          |
| EPI_ISL_678605 | 10/29/2020 | 12/7/2020 Africa / South Africa / KwaZulu-Natal / Ugu               |
| EPI_ISL_678606 | 11/16/2020 | 12/7/2020 Africa / South Africa / KwaZulu-Natal / Ugu               |
| EPI_ISL_678607 | 11/15/2020 | 12/7/2020 Africa / South Africa / KwaZulu-Natal / uThukela          |
| EPI_ISL_678608 | 11/14/2020 | 12/7/2020 Africa / South Africa / KwaZulu-Natal / Ugu               |
| EPI_ISL_678609 | 11/15/2020 | 12/7/2020 Africa / South Africa / KwaZulu-Natal / Harry Gwala       |
| EPI_ISL_678610 | 11/15/2020 | 12/7/2020 Africa / South Africa / KwaZulu-Natal / uThukela          |
| EPI_ISL_678611 | 11/14/2020 | 12/7/2020 Africa / South Africa / KwaZulu-Natal / uMkhanyakude      |
| EPI_ISL_678612 | 11/17/2020 | 12/7/2020 Africa / South Africa / KwaZulu-Natal / Ugu               |
| EPI_ISL_678613 | 11/16/2020 | 12/7/2020 Africa / South Africa / KwaZulu-Natal / Ugu               |
| EPI_ISL_678614 | 11/15/2020 | 12/7/2020 Africa / South Africa / KwaZulu-Natal / uMkhanyakude      |
| EPI_ISL_678615 | 11/16/2020 | 12/7/2020 Africa / South Africa / KwaZulu-Natal / Ugu               |
| EPI_ISL_678616 | 11/16/2020 | 12/7/2020 Africa / South Africa / KwaZulu-Natal / Ugu               |
| EPI_ISL_678617 | 11/17/2020 | 12/7/2020 Africa / South Africa / KwaZulu-Natal / eThekwini         |
| EPI_ISL_678618 | 11/15/2020 | 12/7/2020 Africa / South Africa / KwaZulu-Natal / uMkhanyakude      |
| EPI_ISL_678619 | 11/14/2020 | 12/7/2020 Africa / South Africa / KwaZulu-Natal / uMkhanyakude      |
| EPI_ISL_678620 | 11/14/2020 | 12/7/2020 Africa / South Africa / KwaZulu-Natal / uMkhanyakude      |
| EPI_ISL_678621 | 11/13/2020 | 12/7/2020 Africa / South Africa / KwaZulu-Natal / Zululand          |
| EPI_ISL_678622 | 11/15/2020 | 12/7/2020 Africa / South Africa / KwaZulu-Natal / Harry Gwala       |
| EPI_ISL_678623 | 11/14/2020 | 12/7/2020 Africa / South Africa / KwaZulu-Natal / uMkhanyakude      |
| EPI_ISL_678624 | 11/15/2020 | 12/7/2020 Africa / South Africa / KwaZulu-Natal / eThekwini         |
| EPI_ISL_678625 | 11/11/2020 | 12/7/2020 Africa / South Africa / Eastern Cape / Sarah Baartman     |
| EPI_ISL_678626 | 11/12/2020 | 12/7/2020 Africa / South Africa / Eastern Cape / Chris Hani         |
| EPI_ISL_678627 | 11/10/2020 | 12/7/2020 Africa / South Africa / Eastern Cape / Sarah Baartman     |
| EPI_ISL_678628 | 11/12/2020 | 12/7/2020 Africa / South Africa / Eastern Cape / Nelson Mandela Bay |
| EPI_ISL_678629 | 11/13/2020 | 12/7/2020 Africa / South Africa / Eastern Cape / Nelson Mandela Bay |
| EPI_ISL_678630 | 11/11/2020 | 12/7/2020 Africa / South Africa / Eastern Cape / Nelson Mandela Bay |
| EPI_ISL_678631 | 11/12/2020 | 12/7/2020 Africa / South Africa / Eastern Cape / Nelson Mandela Bay |
| EPI_ISL_678632 | 11/11/2020 | 12/7/2020 Africa / South Africa / Eastern Cape / Nelson Mandela Bay |
| EPI_ISL_678633 | 11/11/2020 | 12/7/2020 Africa / South Africa / Eastern Cape / Nelson Mandela Bay |
| EPI_ISL_678634 | 11/11/2020 | 12/7/2020 Africa / South Africa / Eastern Cape / Nelson Mandela Bay |
| EPI_ISL_678635 | 11/13/2020 | 12/7/2020 Africa / South Africa / Eastern Cape / Sarah Baartman     |
| EPI_ISL_678636 | 11/11/2020 | 12/7/2020 Africa / South Africa / Eastern Cape / Sarah Baartman     |
| EPI_ISL_678637 | 11/13/2020 | 12/7/2020 Africa / South Africa / Eastern Cape / Nelson Mandela Bay |
| EPI_ISL_678638 | 11/13/2020 | 12/7/2020 Africa / South Africa / Eastern Cape / Chris Hani         |
| EPI_ISL_678639 | 11/12/2020 | 12/7/2020 Africa / South Africa / Eastern Cape / Chris Hani         |
| EPI_ISL_678640 | 11/12/2020 | 12/7/2020 Africa / South Africa / Eastern Cape / Sarah Baartman     |
| EPI_ISL_678641 | 11/12/2020 | 12/7/2020 Africa / South Africa / Eastern Cape / Sarah Baartman     |
| EPI_ISL_678642 | 11/11/2020 | 12/7/2020 Africa / South Africa / Eastern Cape / Sarah Baartman     |
| EPI_ISL_678643 | 11/22/2020 | 12/7/2020 Africa / South Africa / KwaZulu-Natal / eThekwini         |
| EPI_ISL_678644 | 11/3/2020  | 12/7/2020 Europe / United Kingdom / England                         |
| EPI_ISL_678645 | 11/2/2020  | 12/7/2020 Europe / United Kingdom / England                         |
| EPI_ISL_678646 | 11/2/2020  | 12/7/2020 Europe / United Kingdom / England                         |
| EPI_ISL_678647 | 11/3/2020  | 12/7/2020 Europe / United Kingdom / England                         |
| EPI_ISL_678648 | 11/2/2020  | 12/7/2020 Europe / United Kingdom / England                         |
| EPI_ISL_678649 | 11/2/2020  | 12/7/2020 Europe / United Kingdom / England                         |
| EPI_ISL_678651 | 11/3/2020  | 12/7/2020 Europe / United Kingdom / England                         |













































































|                |            |                                                         |
|----------------|------------|---------------------------------------------------------|
| EPI_ISL_681236 | 11/11/2020 | 12/7/2020 Europe / United Kingdom / Wales               |
| EPI_ISL_681237 | 11/11/2020 | 12/7/2020 Europe / United Kingdom / Wales               |
| EPI_ISL_681238 | 11/11/2020 | 12/7/2020 Europe / United Kingdom / Wales               |
| EPI_ISL_681239 | 11/11/2020 | 12/7/2020 Europe / United Kingdom / Wales               |
| EPI_ISL_681242 | 11/11/2020 | 12/7/2020 Europe / United Kingdom / Wales               |
| EPI_ISL_681243 | 11/11/2020 | 12/7/2020 Europe / United Kingdom / Wales               |
| EPI_ISL_681244 | 11/11/2020 | 12/7/2020 Europe / United Kingdom / Wales               |
| EPI_ISL_681245 | 11/11/2020 | 12/7/2020 Europe / United Kingdom / Wales               |
| EPI_ISL_681246 | 11/12/2020 | 12/7/2020 Europe / United Kingdom / Wales               |
| EPI_ISL_681247 | 11/11/2020 | 12/7/2020 Europe / United Kingdom / Wales               |
| EPI_ISL_681249 | 11/11/2020 | 12/7/2020 Europe / United Kingdom / Wales               |
| EPI_ISL_681250 | 11/11/2020 | 12/7/2020 Europe / United Kingdom / Wales               |
| EPI_ISL_681252 | 11/11/2020 | 12/7/2020 Europe / United Kingdom / Wales               |
| EPI_ISL_681253 | 11/11/2020 | 12/7/2020 Europe / United Kingdom / Wales               |
| EPI_ISL_681254 | 11/11/2020 | 12/7/2020 Europe / United Kingdom / Wales               |
| EPI_ISL_681255 | 11/11/2020 | 12/7/2020 Europe / United Kingdom / Wales               |
| EPI_ISL_681257 | 11/13/2020 | 12/7/2020 Europe / United Kingdom / Wales               |
| EPI_ISL_681258 | 11/13/2020 | 12/7/2020 Europe / United Kingdom / Wales               |
| EPI_ISL_681259 | 11/13/2020 | 12/7/2020 Europe / United Kingdom / Wales               |
| EPI_ISL_681261 | 3/4/2020   | 12/7/2020 Europe / France / Auvergne-Rhone-Alpes / Lyon |
| EPI_ISL_681262 | 3/4/2020   | 12/7/2020 Europe / France / Auvergne-Rhone-Alpes / Lyon |
| EPI_ISL_681263 | 3/5/2020   | 12/7/2020 Europe / France / Auvergne-Rhone-Alpes / Lyon |
| EPI_ISL_681264 | 10/26/2020 | 12/7/2020 Europe / Belgium / Liège                      |
| EPI_ISL_681265 | 10/26/2020 | 12/7/2020 Europe / Belgium / Liège                      |
| EPI_ISL_681266 | 10/26/2020 | 12/7/2020 Europe / Belgium / Liège                      |
| EPI_ISL_681298 | 10/13/2020 | 12/7/2020 Asia / Bahrain                                |
| EPI_ISL_681299 | 10/13/2020 | 12/7/2020 Asia / Bahrain                                |
| EPI_ISL_681300 | 10/13/2020 | 12/7/2020 Asia / Bahrain                                |
| EPI_ISL_681301 | 9/11/2020  | 12/7/2020 Asia / Bahrain                                |
| EPI_ISL_681302 | 11/10/2020 | 12/7/2020 Asia / Bahrain                                |
| EPI_ISL_681303 | 11/10/2020 | 12/7/2020 Asia / Bahrain                                |
| EPI_ISL_681304 | 10/14/2020 | 12/7/2020 Asia / Bahrain                                |
| EPI_ISL_681305 | 10/15/2020 | 12/7/2020 Asia / Bahrain                                |
| EPI_ISL_681306 | 10/11/2020 | 12/7/2020 Asia / Bahrain                                |
| EPI_ISL_681307 | 10/11/2020 | 12/7/2020 Asia / Bahrain                                |
| EPI_ISL_681308 | 11/1/2020  | 12/7/2020 Asia / Bahrain                                |
| EPI_ISL_681309 | 9/10/2020  | 12/7/2020 Asia / Bahrain                                |
| EPI_ISL_681310 | 10/26/2020 | 12/7/2020 Asia / Bahrain                                |
| EPI_ISL_681311 | 11/1/2020  | 12/7/2020 Asia / Bahrain                                |
| EPI_ISL_681312 | 10/11/2020 | 12/7/2020 Asia / Bahrain                                |
| EPI_ISL_681313 | 11/16/2020 | 12/7/2020 Asia / Bahrain                                |
| EPI_ISL_681314 | 11/16/2020 | 12/7/2020 Asia / Bahrain                                |
| EPI_ISL_681315 | 11/12/2020 | 12/7/2020 Asia / Bahrain                                |
| EPI_ISL_681316 | 11/12/2020 | 12/7/2020 Asia / Bahrain                                |
| EPI_ISL_681317 | 11/12/2020 | 12/7/2020 Asia / Bahrain                                |
| EPI_ISL_681318 | 11/11/2020 | 12/7/2020 Asia / Bahrain                                |
| EPI_ISL_681319 | 11/11/2020 | 12/7/2020 Asia / Bahrain                                |













|                |            |                                                                |
|----------------|------------|----------------------------------------------------------------|
| EPI_ISL_681653 | 11/18/2020 | 12/8/2020 Europe / United Kingdom / England                    |
| EPI_ISL_681654 | 11/18/2020 | 12/8/2020 Europe / United Kingdom / England                    |
| EPI_ISL_681655 | 11/17/2020 | 12/8/2020 Europe / United Kingdom / England                    |
| EPI_ISL_681656 | 10/29/2020 | 12/8/2020 Europe / United Kingdom / England                    |
| EPI_ISL_681657 | 10/31/2020 | 12/8/2020 Europe / United Kingdom / England                    |
| EPI_ISL_681659 | 11/15/2020 | 12/8/2020 Europe / United Kingdom / England                    |
| EPI_ISL_681660 | 11/12/2020 | 12/8/2020 Europe / United Kingdom / England                    |
| EPI_ISL_681661 | 11/14/2020 | 12/8/2020 Europe / United Kingdom / England                    |
| EPI_ISL_681662 | 11/14/2020 | 12/8/2020 Europe / United Kingdom / England                    |
| EPI_ISL_681665 | 11/15/2020 | 12/8/2020 Europe / United Kingdom / England                    |
| EPI_ISL_681666 | 11/13/2020 | 12/8/2020 Europe / United Kingdom / England                    |
| EPI_ISL_681667 | 11/13/2020 | 12/8/2020 Europe / United Kingdom / England                    |
| EPI_ISL_681668 | 11/14/2020 | 12/8/2020 Europe / United Kingdom / England                    |
| EPI_ISL_681670 | 11/13/2020 | 12/8/2020 Europe / United Kingdom / England                    |
| EPI_ISL_681671 | 11/12/2020 | 12/8/2020 Europe / United Kingdom / England                    |
| EPI_ISL_681672 | 11/12/2020 | 12/8/2020 Europe / United Kingdom / England                    |
| EPI_ISL_681673 | 3/30/2020  | 12/8/2020 South America / Chile / Magallanes / Punta Arenas    |
| EPI_ISL_681674 | 4/3/2020   | 12/8/2020 South America / Chile / Magallanes / Puerto Williams |
| EPI_ISL_681675 | 4/7/2020   | 12/8/2020 South America / Chile / Magallanes / Punta Arenas    |
| EPI_ISL_681681 | 4/30/2020  | 12/8/2020 South America / Chile / Magallanes / Puerto Williams |
| EPI_ISL_681682 | 4/30/2020  | 12/8/2020 South America / Chile / Magallanes / Punta Arenas    |
| EPI_ISL_681683 | 5/4/2020   | 12/8/2020 South America / Chile / Magallanes / Punta Arenas    |
| EPI_ISL_681684 | 5/28/2020  | 12/8/2020 South America / Chile / Magallanes / Punta Arenas    |
| EPI_ISL_681685 | 6/17/2020  | 12/8/2020 South America / Chile / Magallanes / Punta Arenas    |
| EPI_ISL_681686 | 6/18/2020  | 12/8/2020 South America / Chile / Magallanes / Punta Arenas    |
| EPI_ISL_681687 | 6/20/2020  | 12/8/2020 South America / Chile / Magallanes / Punta Arenas    |
| EPI_ISL_681688 | 6/20/2020  | 12/8/2020 South America / Chile / Magallanes / Punta Arenas    |
| EPI_ISL_681689 | 6/23/2020  | 12/8/2020 South America / Chile / Magallanes / Puerto Natales  |
| EPI_ISL_681690 | 6/23/2020  | 12/8/2020 South America / Chile / Magallanes / Puerto Natales  |
| EPI_ISL_681692 | 7/8/2020   | 12/8/2020 South America / Chile / Magallanes / Puerto Natales  |
| EPI_ISL_681693 | 7/10/2020  | 12/8/2020 South America / Chile / Magallanes / Punta Arenas    |
| EPI_ISL_681694 | 7/15/2020  | 12/8/2020 South America / Chile / Magallanes / Punta Arenas    |
| EPI_ISL_681695 | 7/25/2020  | 12/8/2020 South America / Chile / Magallanes / Punta Arenas    |
| EPI_ISL_681696 | 8/11/2020  | 12/8/2020 South America / Chile / Magallanes / Porvenir        |
| EPI_ISL_681697 | 8/12/2020  | 12/8/2020 South America / Chile / Magallanes / Punta Arenas    |
| EPI_ISL_681698 | 8/12/2020  | 12/8/2020 South America / Chile / Magallanes / Porvenir        |
| EPI_ISL_681700 | 8/15/2020  | 12/8/2020 South America / Chile / Magallanes / Punta Arenas    |
| EPI_ISL_681701 | 8/16/2020  | 12/8/2020 South America / Chile / Magallanes / Punta Arenas    |
| EPI_ISL_681702 | 3/23/2020  | 12/8/2020 South America / Ecuador / Quito                      |
| EPI_ISL_681703 | 4/30/2020  | 12/8/2020 South America / Ecuador / Quito                      |
| EPI_ISL_681708 | 4/7/2020   | 12/8/2020 Europe / Ireland / Clare                             |
| EPI_ISL_681711 | 4/7/2020   | 12/8/2020 Europe / Ireland / Clare                             |
| EPI_ISL_681714 | 4/27/2020  | 12/8/2020 Europe / Ireland / Clare                             |
| EPI_ISL_681716 | 5/1/2020   | 12/8/2020 Europe / Ireland / Clare                             |
| EPI_ISL_681721 | 3/31/2020  | 12/8/2020 Europe / Ireland / Limerick / Limerick City          |
| EPI_ISL_681731 | 3/31/2020  | 12/8/2020 Europe / Ireland / Limerick / Limerick City          |
| EPI_ISL_681734 | 4/8/2020   | 12/8/2020 Europe / Ireland / Limerick / Limerick City          |





|                |            |                                                 |
|----------------|------------|-------------------------------------------------|
| EPI_ISL_681805 | 10/27/2020 | 12/8/2020 North America / USA / Georgia         |
| EPI_ISL_681806 | 10/27/2020 | 12/8/2020 North America / USA / Georgia         |
| EPI_ISL_681807 | 10/27/2020 | 12/8/2020 North America / USA / Georgia         |
| EPI_ISL_681808 | 10/27/2020 | 12/8/2020 North America / USA / Georgia         |
| EPI_ISL_681809 | 10/27/2020 | 12/8/2020 North America / USA / Georgia         |
| EPI_ISL_681810 | 10/27/2020 | 12/8/2020 North America / USA / Georgia         |
| EPI_ISL_681811 | 10/27/2020 | 12/8/2020 North America / USA / Georgia         |
| EPI_ISL_681812 | 10/27/2020 | 12/8/2020 North America / USA / Georgia         |
| EPI_ISL_681813 | 10/27/2020 | 12/8/2020 North America / USA / Georgia         |
| EPI_ISL_681814 | 10/27/2020 | 12/8/2020 North America / USA / Georgia         |
| EPI_ISL_681815 | 10/27/2020 | 12/8/2020 North America / USA / Georgia         |
| EPI_ISL_681816 | 10/28/2020 | 12/8/2020 North America / USA / Georgia         |
| EPI_ISL_681817 | 10/28/2020 | 12/8/2020 North America / USA / Georgia         |
| EPI_ISL_681818 | 10/23/2020 | 12/8/2020 North America / USA / Georgia         |
| EPI_ISL_681819 | 10/22/2020 | 12/8/2020 North America / USA / Georgia         |
| EPI_ISL_681820 | 10/22/2020 | 12/8/2020 North America / USA / Georgia         |
| EPI_ISL_681821 | 10/23/2020 | 12/8/2020 North America / USA / Georgia         |
| EPI_ISL_681822 | 10/27/2020 | 12/8/2020 North America / USA / Georgia         |
| EPI_ISL_681823 | 10/27/2020 | 12/8/2020 North America / USA / Georgia         |
| EPI_ISL_681824 | 10/27/2020 | 12/8/2020 North America / USA / Georgia         |
| EPI_ISL_681825 | 10/27/2020 | 12/8/2020 North America / USA / Georgia         |
| EPI_ISL_681826 | 10/28/2020 | 12/8/2020 North America / USA / Georgia         |
| EPI_ISL_681827 | 10/28/2020 | 12/8/2020 North America / USA / Georgia         |
| EPI_ISL_681828 | 10/28/2020 | 12/8/2020 North America / USA / Georgia         |
| EPI_ISL_681829 | 6/9/2020   | 12/8/2020 Africa / Cote d'Ivoire / Bouake       |
| EPI_ISL_681832 | 6/29/2020  | 12/8/2020 Africa / Cote d'Ivoire / Bouake       |
| EPI_ISL_681833 | 6/29/2020  | 12/8/2020 Africa / Cote d'Ivoire / Bouake       |
| EPI_ISL_681834 | 6/18/2020  | 12/8/2020 Africa / Cote d'Ivoire / Seguela      |
| EPI_ISL_681835 | 6/30/2020  | 12/8/2020 Africa / Cote d'Ivoire / Bouake       |
| EPI_ISL_681836 | 7/3/2020   | 12/8/2020 Africa / Cote d'Ivoire / Bouake       |
| EPI_ISL_681840 | 8/5/2020   | 12/8/2020 Africa / Cote d'Ivoire / Bouake       |
| EPI_ISL_681841 | 8/10/2020  | 12/8/2020 Africa / Cote d'Ivoire / Bouake       |
| EPI_ISL_681876 | 6/16/2020  | 12/8/2020 North America / USA / Texas / Harris  |
| EPI_ISL_681877 | 6/22/2020  | 12/8/2020 North America / USA / Texas / Hidalgo |
| EPI_ISL_681878 | 6/22/2020  | 12/8/2020 North America / USA / Texas / Hidalgo |
| EPI_ISL_681879 | 6/22/2020  | 12/8/2020 North America / USA / Texas / Hidalgo |
| EPI_ISL_681880 | 6/22/2020  | 12/8/2020 North America / USA / Texas / Hidalgo |
| EPI_ISL_681881 | 6/23/2020  | 12/8/2020 North America / USA / Texas / Harris  |
| EPI_ISL_681882 | 6/24/2020  | 12/8/2020 North America / USA / Texas / Hidalgo |
| EPI_ISL_681883 | 6/24/2020  | 12/8/2020 North America / USA / Texas / Hidalgo |
| EPI_ISL_681893 | 4/6/2020   | 12/8/2020 Europe / Ireland / Longford           |
| EPI_ISL_681894 | 4/18/2020  | 12/8/2020 Europe / Ireland / Monaghan           |
| EPI_ISL_681895 | 4/18/2020  | 12/8/2020 Europe / Ireland / Monaghan           |
| EPI_ISL_681896 | 4/16/2020  | 12/8/2020 Europe / Ireland / Monaghan           |
| EPI_ISL_681897 | 4/16/2020  | 12/8/2020 Europe / Ireland / Monaghan           |
| EPI_ISL_681898 | 4/16/2020  | 12/8/2020 Europe / Ireland / Laois              |
| EPI_ISL_681899 | 4/17/2020  | 12/8/2020 Europe / Ireland / Dublin             |

|                |           |                                                                         |
|----------------|-----------|-------------------------------------------------------------------------|
| EPI_ISL_681900 | 4/19/2020 | 12/8/2020 Europe / Ireland / Dublin                                     |
| EPI_ISL_681901 | 4/17/2020 | 12/8/2020 Europe / Ireland / Wicklow                                    |
| EPI_ISL_681902 | 4/14/2020 | 12/8/2020 Europe / Ireland / Mayo                                       |
| EPI_ISL_681903 | 4/19/2020 | 12/8/2020 Europe / Ireland / Dublin                                     |
| EPI_ISL_681904 | 4/17/2020 | 12/8/2020 Europe / Ireland / Louth                                      |
| EPI_ISL_681905 | 4/17/2020 | 12/8/2020 Europe / Ireland / Dublin                                     |
| EPI_ISL_681906 | 4/6/2020  | 12/8/2020 Europe / Ireland / Cork                                       |
| EPI_ISL_681907 | 4/7/2020  | 12/8/2020 Europe / Ireland / Meath                                      |
| EPI_ISL_681908 | 3/30/2020 | 12/8/2020 Europe / Ireland / Cork                                       |
| EPI_ISL_681909 | 4/3/2020  | 12/8/2020 Europe / Ireland / Mayo                                       |
| EPI_ISL_681910 | 3/29/2020 | 12/8/2020 Europe / Ireland / Kilkenny                                   |
| EPI_ISL_681911 | 4/4/2020  | 12/8/2020 Europe / Ireland / Meath                                      |
| EPI_ISL_681912 | 3/28/2020 | 12/8/2020 Europe / Ireland / Meath                                      |
| EPI_ISL_681913 | 3/28/2020 | 12/8/2020 Europe / Ireland / Kilkenny                                   |
| EPI_ISL_681914 | 4/3/2020  | 12/8/2020 Europe / Ireland / Dublin                                     |
| EPI_ISL_681915 | 4/3/2020  | 12/8/2020 Europe / Ireland / Meath                                      |
| EPI_ISL_681916 | 4/4/2020  | 12/8/2020 Europe / Ireland / Meath                                      |
| EPI_ISL_681917 | 4/3/2020  | 12/8/2020 Europe / Ireland / Kerry                                      |
| EPI_ISL_681918 | 4/7/2020  | 12/8/2020 Europe / Ireland / Meath                                      |
| EPI_ISL_681919 | 3/28/2020 | 12/8/2020 Europe / Ireland / Dublin                                     |
| EPI_ISL_681920 | 3/31/2020 | 12/8/2020 Europe / Ireland / Laois                                      |
| EPI_ISL_681921 | 3/30/2020 | 12/8/2020 Europe / Ireland / Cork                                       |
| EPI_ISL_681922 | 3/26/2020 | 12/8/2020 Europe / Ireland / Dublin                                     |
| EPI_ISL_681923 | 3/30/2020 | 12/8/2020 Europe / Ireland / Cork                                       |
| EPI_ISL_681924 | 4/6/2020  | 12/8/2020 Europe / Ireland / Westmeath                                  |
| EPI_ISL_681925 | 3/25/2020 | 12/8/2020 Europe / Ireland / Dublin                                     |
| EPI_ISL_681926 | 4/6/2020  | 12/8/2020 Europe / Ireland / Meath                                      |
| EPI_ISL_681927 | 4/7/2020  | 12/8/2020 Europe / Ireland / Westmeath                                  |
| EPI_ISL_681928 | 3/28/2020 | 12/8/2020 Europe / Ireland / Kilkenny                                   |
| EPI_ISL_681929 | 3/24/2020 | 12/8/2020 North America / USA / Pennsylvania / Allegheny County / Pitts |
| EPI_ISL_681930 | 7/22/2020 | 12/8/2020 North America / USA / Pennsylvania / Allegheny County / Pitts |
| EPI_ISL_681931 | 7/24/2020 | 12/8/2020 North America / USA / Pennsylvania / Allegheny County / Pitts |
| EPI_ISL_681932 | 7/24/2020 | 12/8/2020 North America / USA / Pennsylvania / Allegheny County / Pitts |
| EPI_ISL_681933 | 7/25/2020 | 12/8/2020 North America / USA / Pennsylvania / Allegheny County / Pitts |
| EPI_ISL_681934 | 7/24/2020 | 12/8/2020 North America / USA / Pennsylvania / Allegheny County / Pitts |
| EPI_ISL_681935 | 7/24/2020 | 12/8/2020 North America / USA / Pennsylvania / Allegheny County / Pitts |
| EPI_ISL_681936 | 9/10/2020 | 12/8/2020 North America / USA / Pennsylvania / Allegheny County / Pitts |
| EPI_ISL_681937 | 10/6/2020 | 12/8/2020 North America / USA / Pennsylvania / Allegheny County / Pitts |
| EPI_ISL_681939 | 4/15/2020 | 12/8/2020 North America / USA / Pennsylvania / Allegheny County / Pitts |
| EPI_ISL_681940 | 3/23/2020 | 12/8/2020 North America / USA / Pennsylvania / Allegheny County / Pitts |
| EPI_ISL_681941 | 3/23/2020 | 12/8/2020 North America / USA / Pennsylvania / Allegheny County / Pitts |
| EPI_ISL_681942 | 2020-03   | 12/8/2020 North America / USA / Pennsylvania / Allegheny County / Pitts |
| EPI_ISL_681943 | 3/26/2020 | 12/8/2020 North America / USA / Pennsylvania / Allegheny County / Pitts |
| EPI_ISL_681944 | 3/26/2020 | 12/8/2020 North America / USA / Pennsylvania / Allegheny County / Pitts |
| EPI_ISL_681945 | 2020-03   | 12/8/2020 North America / USA / Pennsylvania / Allegheny County / Pitts |
| EPI_ISL_681946 | 3/24/2020 | 12/8/2020 North America / USA / Pennsylvania / Allegheny County / Pitts |
| EPI_ISL_681947 | 4/7/2020  | 12/8/2020 North America / USA / Pennsylvania / Allegheny County / Pitts |





|                |            |                                                                         |
|----------------|------------|-------------------------------------------------------------------------|
| EPI_ISL_682042 | 9/21/2020  | 12/8/2020 North America / USA / Pennsylvania / Allegheny County / Pitts |
| EPI_ISL_682043 | 9/21/2020  | 12/8/2020 North America / USA / Pennsylvania / Allegheny County / Pitts |
| EPI_ISL_682044 | 9/15/2020  | 12/8/2020 North America / USA / Pennsylvania / Allegheny County / Pitts |
| EPI_ISL_682045 | 9/15/2020  | 12/8/2020 North America / USA / Pennsylvania / Allegheny County / Pitts |
| EPI_ISL_682046 | 9/15/2020  | 12/8/2020 North America / USA / Pennsylvania / Allegheny County / Pitts |
| EPI_ISL_682047 | 9/15/2020  | 12/8/2020 North America / USA / Pennsylvania / Allegheny County / Pitts |
| EPI_ISL_682048 | 9/17/2020  | 12/8/2020 North America / USA / Pennsylvania / Allegheny County / Pitts |
| EPI_ISL_682049 | 9/15/2020  | 12/8/2020 North America / USA / Pennsylvania / Allegheny County / Pitts |
| EPI_ISL_682050 | 10/19/2020 | 12/8/2020 North America / USA / Pennsylvania / Allegheny County / Pitts |
| EPI_ISL_682051 | 10/12/2020 | 12/8/2020 North America / USA / Pennsylvania / Allegheny County / Pitts |
| EPI_ISL_682052 | 10/19/2020 | 12/8/2020 North America / USA / Pennsylvania / Allegheny County / Pitts |
| EPI_ISL_682053 | 10/18/2020 | 12/8/2020 North America / USA / Pennsylvania / Allegheny County / Pitts |
| EPI_ISL_682054 | 10/18/2020 | 12/8/2020 North America / USA / Pennsylvania / Allegheny County / Pitts |
| EPI_ISL_682055 | 9/14/2020  | 12/8/2020 North America / USA / Pennsylvania / Allegheny County / Pitts |
| EPI_ISL_682056 | 9/14/2020  | 12/8/2020 North America / USA / Pennsylvania / Allegheny County / Pitts |
| EPI_ISL_682057 | 3/31/2020  | 12/8/2020 Europe / Ireland / Meath                                      |
| EPI_ISL_682060 | 11/9/2020  | 12/8/2020 North America / USA / Maryland                                |
| EPI_ISL_682061 | 11/11/2020 | 12/8/2020 North America / USA / Maryland                                |
| EPI_ISL_682062 | 11/12/2020 | 12/8/2020 North America / USA / Maryland                                |
| EPI_ISL_682063 | 11/12/2020 | 12/8/2020 North America / USA / Maryland                                |
| EPI_ISL_682064 | 11/11/2020 | 12/8/2020 North America / USA / Maryland                                |
| EPI_ISL_682065 | 11/11/2020 | 12/8/2020 North America / USA / Maryland                                |
| EPI_ISL_682066 | 11/11/2020 | 12/8/2020 North America / USA / Maryland                                |
| EPI_ISL_682067 | 11/11/2020 | 12/8/2020 North America / USA / Maryland                                |
| EPI_ISL_682068 | 11/11/2020 | 12/8/2020 North America / USA / Maryland                                |
| EPI_ISL_682069 | 11/12/2020 | 12/8/2020 North America / USA / Maryland                                |
| EPI_ISL_682070 | 11/11/2020 | 12/8/2020 North America / USA / Maryland                                |
| EPI_ISL_682071 | 11/11/2020 | 12/8/2020 North America / USA / Maryland                                |
| EPI_ISL_682072 | 11/11/2020 | 12/8/2020 North America / USA / Maryland                                |
| EPI_ISL_682073 | 11/11/2020 | 12/8/2020 North America / USA / Maryland                                |
| EPI_ISL_682074 | 11/12/2020 | 12/8/2020 North America / USA / Maryland                                |
| EPI_ISL_682075 | 11/11/2020 | 12/8/2020 North America / USA / Maryland                                |
| EPI_ISL_682076 | 11/11/2020 | 12/8/2020 North America / USA / Maryland                                |
| EPI_ISL_682077 | 11/11/2020 | 12/8/2020 North America / USA / Maryland                                |
| EPI_ISL_682078 | 11/11/2020 | 12/8/2020 North America / USA / Maryland                                |
| EPI_ISL_682298 | 3/21/2020  | 12/8/2020 Asia / Cambodia / Phnom Penh                                  |
| EPI_ISL_682299 | 11/1/2020  | 12/8/2020 Asia / Bahrain                                                |
| EPI_ISL_682300 | 9/14/2020  | 12/8/2020 Asia / Bahrain                                                |
| EPI_ISL_682301 | 10/26/2020 | 12/8/2020 Asia / Bahrain                                                |
| EPI_ISL_682302 | 11/1/2020  | 12/8/2020 Asia / Bahrain                                                |
| EPI_ISL_682303 | 9/17/2020  | 12/8/2020 Asia / Bahrain                                                |
| EPI_ISL_682304 | 10/14/2020 | 12/8/2020 Asia / Bahrain                                                |
| EPI_ISL_682305 | 10/13/2020 | 12/8/2020 Asia / Bahrain                                                |
| EPI_ISL_682306 | 10/11/2020 | 12/8/2020 Asia / Bahrain                                                |
| EPI_ISL_682307 | 10/11/2020 | 12/8/2020 Asia / Bahrain                                                |
| EPI_ISL_682308 | 10/11/2020 | 12/8/2020 Asia / Bahrain                                                |
| EPI_ISL_682309 | 10/11/2020 | 12/8/2020 Asia / Bahrain                                                |

|                |            |                                          |
|----------------|------------|------------------------------------------|
| EPI_ISL_682310 | 10/13/2020 | 12/8/2020 Asia / Bahrain                 |
| EPI_ISL_682311 | 10/14/2020 | 12/8/2020 Asia / Bahrain                 |
| EPI_ISL_682312 | 10/13/2020 | 12/8/2020 Asia / Bahrain                 |
| EPI_ISL_682313 | 10/13/2020 | 12/8/2020 Asia / Bahrain                 |
| EPI_ISL_682314 | 10/11/2020 | 12/8/2020 Asia / Bahrain                 |
| EPI_ISL_682315 | 11/16/2020 | 12/8/2020 Asia / Bahrain                 |
| EPI_ISL_682316 | 11/16/2020 | 12/8/2020 Asia / Bahrain                 |
| EPI_ISL_682317 | 11/11/2020 | 12/8/2020 Asia / Bahrain                 |
| EPI_ISL_682318 | 11/12/2020 | 12/8/2020 Asia / Bahrain                 |
| EPI_ISL_682319 | 11/16/2020 | 12/8/2020 Asia / Bahrain                 |
| EPI_ISL_682320 | 11/16/2020 | 12/8/2020 Asia / Bahrain                 |
| EPI_ISL_682321 | 11/18/2020 | 12/8/2020 Asia / Bahrain                 |
| EPI_ISL_682322 | 11/21/2020 | 12/8/2020 Asia / Bahrain                 |
| EPI_ISL_682079 | 10/29/2020 | 12/9/2020 North America / USA / Michigan |
| EPI_ISL_682080 | 10/30/2020 | 12/9/2020 North America / USA / Michigan |
| EPI_ISL_682081 | 10/30/2020 | 12/9/2020 North America / USA / Michigan |
| EPI_ISL_682082 | 10/29/2020 | 12/9/2020 North America / USA / Michigan |
| EPI_ISL_682083 | 10/29/2020 | 12/9/2020 North America / USA / Michigan |
| EPI_ISL_682084 | 10/29/2020 | 12/9/2020 North America / USA / Michigan |
| EPI_ISL_682085 | 10/29/2020 | 12/9/2020 North America / USA / Michigan |
| EPI_ISL_682086 | 10/29/2020 | 12/9/2020 North America / USA / Michigan |
| EPI_ISL_682087 | 10/29/2020 | 12/9/2020 North America / USA / Michigan |
| EPI_ISL_682088 | 10/29/2020 | 12/9/2020 North America / USA / Michigan |
| EPI_ISL_682089 | 10/29/2020 | 12/9/2020 North America / USA / Michigan |
| EPI_ISL_682090 | 10/29/2020 | 12/9/2020 North America / USA / Michigan |
| EPI_ISL_682091 | 10/29/2020 | 12/9/2020 North America / USA / Michigan |
| EPI_ISL_682092 | 10/29/2020 | 12/9/2020 North America / USA / Michigan |
| EPI_ISL_682093 | 10/29/2020 | 12/9/2020 North America / USA / Michigan |
| EPI_ISL_682094 | 10/30/2020 | 12/9/2020 North America / USA / Michigan |
| EPI_ISL_682095 | 10/30/2020 | 12/9/2020 North America / USA / Michigan |
| EPI_ISL_682097 | 10/29/2020 | 12/9/2020 North America / USA / Michigan |
| EPI_ISL_682098 | 10/29/2020 | 12/9/2020 North America / USA / Michigan |
| EPI_ISL_682099 | 10/29/2020 | 12/9/2020 North America / USA / Michigan |
| EPI_ISL_682101 | 10/29/2020 | 12/9/2020 North America / USA / Michigan |
| EPI_ISL_682102 | 10/27/2020 | 12/9/2020 North America / USA / Michigan |
| EPI_ISL_682103 | 10/30/2020 | 12/9/2020 North America / USA / Michigan |
| EPI_ISL_682104 | 10/30/2020 | 12/9/2020 North America / USA / Michigan |
| EPI_ISL_682105 | 11/2/2020  | 12/9/2020 North America / USA / Michigan |
| EPI_ISL_682106 | 10/30/2020 | 12/9/2020 North America / USA / Michigan |
| EPI_ISL_682107 | 10/30/2020 | 12/9/2020 North America / USA / Michigan |
| EPI_ISL_682108 | 11/2/2020  | 12/9/2020 North America / USA / Michigan |
| EPI_ISL_682109 | 10/30/2020 | 12/9/2020 North America / USA / Michigan |
| EPI_ISL_682110 | 10/30/2020 | 12/9/2020 North America / USA / Michigan |
| EPI_ISL_682111 | 11/2/2020  | 12/9/2020 North America / USA / Michigan |
| EPI_ISL_682112 | 10/29/2020 | 12/9/2020 North America / USA / Michigan |
| EPI_ISL_682113 | 10/30/2020 | 12/9/2020 North America / USA / Michigan |
| EPI_ISL_682114 | 10/29/2020 | 12/9/2020 North America / USA / Michigan |







|                |           |                                                                        |
|----------------|-----------|------------------------------------------------------------------------|
| EPI_ISL_682225 | 11/3/2020 | 12/9/2020 North America / USA / Michigan                               |
| EPI_ISL_682226 | 11/3/2020 | 12/9/2020 North America / USA / Michigan                               |
| EPI_ISL_682227 | 11/3/2020 | 12/9/2020 North America / USA / Michigan                               |
| EPI_ISL_682228 | 11/3/2020 | 12/9/2020 North America / USA / Michigan                               |
| EPI_ISL_682229 | 11/3/2020 | 12/9/2020 North America / USA / Michigan                               |
| EPI_ISL_682230 | 11/3/2020 | 12/9/2020 North America / USA / Michigan                               |
| EPI_ISL_682232 | 11/3/2020 | 12/9/2020 North America / USA / Michigan                               |
| EPI_ISL_682234 | 11/3/2020 | 12/9/2020 North America / USA / Michigan                               |
| EPI_ISL_682235 | 6/30/2020 | 12/9/2020 North America / Costa Rica / Alajuela                        |
| EPI_ISL_682236 | 7/1/2020  | 12/9/2020 North America / Costa Rica / San Jose                        |
| EPI_ISL_682237 | 7/3/2020  | 12/9/2020 North America / Costa Rica / Puntarenas / Corredor           |
| EPI_ISL_682238 | 7/3/2020  | 12/9/2020 North America / Costa Rica / Guanacaste / La Cruz            |
| EPI_ISL_682239 | 7/3/2020  | 12/9/2020 North America / Costa Rica / Puntarenas / Corredor           |
| EPI_ISL_682241 | 7/12/2020 | 12/9/2020 North America / Costa Rica / Cartago / Carmen                |
| EPI_ISL_682242 | 7/13/2020 | 12/9/2020 North America / Costa Rica / Heredia                         |
| EPI_ISL_682243 | 7/15/2020 | 12/9/2020 North America / Costa Rica / Puntarenas / Piedras Blancas    |
| EPI_ISL_682244 | 7/15/2020 | 12/9/2020 North America / Costa Rica / Alajuela / San Roque            |
| EPI_ISL_682245 | 7/14/2020 | 12/9/2020 North America / Costa Rica / San Jose / San Felipe           |
| EPI_ISL_682246 | 7/17/2020 | 12/9/2020 North America / Costa Rica / Cartago / San Diego             |
| EPI_ISL_682247 | 7/16/2020 | 12/9/2020 North America / Costa Rica / Alajuela / Quesada              |
| EPI_ISL_682248 | 7/16/2020 | 12/9/2020 North America / Costa Rica / Alajuela / Quesada              |
| EPI_ISL_682249 | 7/20/2020 | 12/9/2020 North America / Costa Rica / Cartago / Tres Rios             |
| EPI_ISL_682250 | 7/21/2020 | 12/9/2020 North America / Costa Rica / San Jose / San Antonio          |
| EPI_ISL_682252 | 7/21/2020 | 12/9/2020 North America / Costa Rica / San Jose / San Antonio          |
| EPI_ISL_682253 | 7/19/2020 | 12/9/2020 North America / Costa Rica / San Jose                        |
| EPI_ISL_682254 | 7/19/2020 | 12/9/2020 North America / Costa Rica / San Jose / Zapote               |
| EPI_ISL_682255 | 7/21/2020 | 12/9/2020 North America / Costa Rica / Heredia / San Francisco         |
| EPI_ISL_682256 | 7/22/2020 | 12/9/2020 North America / Costa Rica / Puntarenas / Laurel             |
| EPI_ISL_682257 | 7/24/2020 | 12/9/2020 North America / Costa Rica / Cartago / Dulce Nombre          |
| EPI_ISL_682258 | 7/24/2020 | 12/9/2020 North America / Costa Rica / Alajuela                        |
| EPI_ISL_682259 | 7/27/2020 | 12/9/2020 North America / Costa Rica / Alajuela                        |
| EPI_ISL_682260 | 7/31/2020 | 12/9/2020 North America / Costa Rica / San Jose / San Rafael           |
| EPI_ISL_682261 | 7/31/2020 | 12/9/2020 North America / Costa Rica / Puntarenas / Corredor           |
| EPI_ISL_682262 | 8/2/2020  | 12/9/2020 North America / Costa Rica / San Jose                        |
| EPI_ISL_682263 | 8/8/2020  | 12/9/2020 North America / Costa Rica / San Jose / Pavas                |
| EPI_ISL_682264 | 8/8/2020  | 12/9/2020 North America / Costa Rica / San Jose / Pozos                |
| EPI_ISL_682265 | 8/7/2020  | 12/9/2020 North America / Costa Rica / Alajuela                        |
| EPI_ISL_682266 | 8/6/2020  | 12/9/2020 North America / Costa Rica / San Jose / Picagres             |
| EPI_ISL_682267 | 8/8/2020  | 12/9/2020 North America / Costa Rica / Limon                           |
| EPI_ISL_682268 | 8/8/2020  | 12/9/2020 North America / Costa Rica / San Jose / Santiago             |
| EPI_ISL_682269 | 8/11/2020 | 12/9/2020 North America / Costa Rica / San Jose / Los Guido            |
| EPI_ISL_682270 | 8/10/2020 | 12/9/2020 North America / Costa Rica / Cartago / La Suiza              |
| EPI_ISL_682271 | 8/10/2020 | 12/9/2020 North America / Costa Rica / Cartago / San Isidro            |
| EPI_ISL_682272 | 8/13/2020 | 12/9/2020 North America / Costa Rica / Cartago / Llanos de Santa Lucia |
| EPI_ISL_682273 | 8/11/2020 | 12/9/2020 North America / Costa Rica / Limon                           |
| EPI_ISL_682275 | 8/17/2020 | 12/9/2020 North America / Costa Rica / San Jose / Zapote               |
| EPI_ISL_682276 | 8/17/2020 | 12/9/2020 North America / Costa Rica / Heredia / San Pablo             |

|                |            |                                                                             |
|----------------|------------|-----------------------------------------------------------------------------|
| EPI_ISL_682277 | 8/17/2020  | 12/9/2020 North America / Costa Rica / San Jose / San Jer <sup>3</sup> nimo |
| EPI_ISL_682279 | 11/18/2020 | 12/9/2020 Oceania / New Zealand / Counties Manukau                          |
| EPI_ISL_682280 | 11/21/2020 | 12/9/2020 Oceania / New Zealand / Counties Manukau                          |
| EPI_ISL_682281 | 11/21/2020 | 12/9/2020 Oceania / New Zealand / Counties Manukau                          |
| EPI_ISL_682282 | 11/20/2020 | 12/9/2020 Oceania / New Zealand / Counties Manukau                          |
| EPI_ISL_682283 | 11/25/2020 | 12/9/2020 Oceania / New Zealand / Canterbury                                |
| EPI_ISL_682284 | 11/25/2020 | 12/9/2020 Oceania / New Zealand / Canterbury                                |
| EPI_ISL_682286 | 11/25/2020 | 12/9/2020 Oceania / New Zealand / Canterbury                                |
| EPI_ISL_682287 | 11/29/2020 | 12/9/2020 Oceania / New Zealand / Counties Manukau                          |
| EPI_ISL_682288 | 11/27/2020 | 12/9/2020 Oceania / New Zealand / Counties Manukau                          |
| EPI_ISL_682289 | 11/28/2020 | 12/9/2020 Oceania / New Zealand / Counties Manukau                          |
| EPI_ISL_682290 | 11/28/2020 | 12/9/2020 Oceania / New Zealand / Counties Manukau                          |
| EPI_ISL_682291 | 11/26/2020 | 12/9/2020 Oceania / New Zealand / Auckland                                  |
| EPI_ISL_682292 | 11/26/2020 | 12/9/2020 Oceania / New Zealand / Auckland                                  |
| EPI_ISL_682293 | 11/26/2020 | 12/9/2020 Oceania / New Zealand / Auckland                                  |
| EPI_ISL_682294 | 10/24/2020 | 12/9/2020 Oceania / New Zealand / Auckland                                  |
| EPI_ISL_682295 | 11/27/2020 | 12/9/2020 Oceania / New Zealand / Canterbury                                |
| EPI_ISL_682296 | 11/30/2020 | 12/9/2020 Oceania / New Zealand / Canterbury                                |
| EPI_ISL_682323 | 10/18/2020 | 12/9/2020 Africa / South Africa / Free State                                |
| EPI_ISL_682324 | 10/15/2020 | 12/9/2020 Africa / South Africa / Free State                                |
| EPI_ISL_682325 | 10/15/2020 | 12/9/2020 Africa / South Africa / Free State                                |
| EPI_ISL_682326 | 10/18/2020 | 12/9/2020 Africa / South Africa / Free State                                |
| EPI_ISL_682327 | 10/10/2020 | 12/9/2020 Africa / South Africa / Free State                                |
| EPI_ISL_682328 | 10/14/2020 | 12/9/2020 Africa / South Africa / Free State                                |
| EPI_ISL_682329 | 10/9/2020  | 12/9/2020 Africa / South Africa / Free State                                |
| EPI_ISL_682330 | 9/30/2020  | 12/9/2020 Africa / South Africa / Free State                                |
| EPI_ISL_682331 | 10/16/2020 | 12/9/2020 Africa / South Africa / Free State                                |
| EPI_ISL_682333 | 10/14/2020 | 12/9/2020 Africa / South Africa / Free State                                |
| EPI_ISL_682334 | 9/28/2020  | 12/9/2020 Africa / South Africa / Free State                                |
| EPI_ISL_682335 | 9/28/2020  | 12/9/2020 Africa / South Africa / Free State                                |
| EPI_ISL_682337 | 9/25/2020  | 12/9/2020 Africa / South Africa / Free State                                |
| EPI_ISL_682338 | 9/23/2020  | 12/9/2020 Africa / South Africa / Free State                                |
| EPI_ISL_682341 | 10/8/2020  | 12/9/2020 Africa / South Africa / Free State                                |
| EPI_ISL_682342 | 9/29/2020  | 12/9/2020 Africa / South Africa / Free State                                |
| EPI_ISL_682345 | 10/15/2020 | 12/9/2020 Africa / South Africa / Free State                                |
| EPI_ISL_682347 | 10/8/2020  | 12/9/2020 Africa / South Africa / Free State                                |
| EPI_ISL_682350 | 10/17/2020 | 12/9/2020 Africa / South Africa / Free State                                |
| EPI_ISL_682351 | 10/18/2020 | 12/9/2020 Africa / South Africa / Free State                                |
| EPI_ISL_682353 | 11/23/2020 | 12/9/2020 Europe / Denmark / Nordjylland                                    |
| EPI_ISL_682354 | 11/23/2020 | 12/9/2020 Europe / Denmark / Syddanmark                                     |
| EPI_ISL_682356 | 11/23/2020 | 12/9/2020 Europe / Denmark / Midtjylland                                    |
| EPI_ISL_682357 | 11/23/2020 | 12/9/2020 Europe / Denmark / Nordjylland                                    |
| EPI_ISL_682358 | 11/23/2020 | 12/9/2020 Europe / Denmark / Midtjylland                                    |
| EPI_ISL_682361 | 11/23/2020 | 12/9/2020 Europe / Denmark / Nordjylland                                    |
| EPI_ISL_682362 | 11/23/2020 | 12/9/2020 Europe / Denmark / Nordjylland                                    |
| EPI_ISL_682363 | 11/16/2020 | 12/9/2020 Europe / Denmark / Hovedstaden                                    |
| EPI_ISL_682364 | 11/16/2020 | 12/9/2020 Europe / Denmark / Hovedstaden                                    |

|                |            |                                          |
|----------------|------------|------------------------------------------|
| EPI_ISL_682365 | 11/16/2020 | 12/9/2020 Europe / Denmark / Hovedstaden |
| EPI_ISL_682366 | 11/16/2020 | 12/9/2020 Europe / Denmark / Hovedstaden |
| EPI_ISL_682367 | 11/16/2020 | 12/9/2020 Europe / Denmark / Syddanmark  |
| EPI_ISL_682369 | 11/16/2020 | 12/9/2020 Europe / Denmark / Hovedstaden |
| EPI_ISL_682370 | 11/16/2020 | 12/9/2020 Europe / Denmark / Hovedstaden |
| EPI_ISL_682371 | 11/16/2020 | 12/9/2020 Europe / Denmark / Hovedstaden |
| EPI_ISL_682372 | 11/16/2020 | 12/9/2020 Europe / Denmark / Hovedstaden |
| EPI_ISL_682374 | 11/16/2020 | 12/9/2020 Europe / Denmark / Hovedstaden |
| EPI_ISL_682375 | 11/16/2020 | 12/9/2020 Europe / Denmark               |
| EPI_ISL_682376 | 11/16/2020 | 12/9/2020 Europe / Denmark / Nordjylland |
| EPI_ISL_682378 | 11/16/2020 | 12/9/2020 Europe / Denmark / Syddanmark  |
| EPI_ISL_682379 | 11/16/2020 | 12/9/2020 Europe / Denmark / Midtjylland |
| EPI_ISL_682380 | 11/16/2020 | 12/9/2020 Europe / Denmark / Midtjylland |
| EPI_ISL_682381 | 11/16/2020 | 12/9/2020 Europe / Denmark / Nordjylland |
| EPI_ISL_682382 | 11/16/2020 | 12/9/2020 Europe / Denmark / Midtjylland |
| EPI_ISL_682383 | 11/16/2020 | 12/9/2020 Europe / Denmark / Hovedstaden |
| EPI_ISL_682384 | 11/16/2020 | 12/9/2020 Europe / Denmark / Sjælland    |
| EPI_ISL_682385 | 11/16/2020 | 12/9/2020 Europe / Denmark / Hovedstaden |
| EPI_ISL_682386 | 11/16/2020 | 12/9/2020 Europe / Denmark / Hovedstaden |
| EPI_ISL_682387 | 11/16/2020 | 12/9/2020 Europe / Denmark / Midtjylland |
| EPI_ISL_682389 | 11/16/2020 | 12/9/2020 Europe / Denmark / Hovedstaden |
| EPI_ISL_682391 | 11/16/2020 | 12/9/2020 Europe / Denmark / Syddanmark  |
| EPI_ISL_682394 | 11/16/2020 | 12/9/2020 Europe / Denmark / Midtjylland |
| EPI_ISL_682395 | 11/16/2020 | 12/9/2020 Europe / Denmark / Syddanmark  |
| EPI_ISL_682396 | 11/16/2020 | 12/9/2020 Europe / Denmark / Midtjylland |
| EPI_ISL_682397 | 11/16/2020 | 12/9/2020 Europe / Denmark / Nordjylland |
| EPI_ISL_682398 | 11/16/2020 | 12/9/2020 Europe / Denmark / Syddanmark  |
| EPI_ISL_682401 | 11/16/2020 | 12/9/2020 Europe / Denmark / Hovedstaden |
| EPI_ISL_682403 | 11/16/2020 | 12/9/2020 Europe / Denmark / Hovedstaden |
| EPI_ISL_682404 | 11/16/2020 | 12/9/2020 Europe / Denmark / Hovedstaden |
| EPI_ISL_682406 | 11/16/2020 | 12/9/2020 Europe / Denmark / Midtjylland |
| EPI_ISL_682409 | 11/16/2020 | 12/9/2020 Europe / Denmark / Nordjylland |
| EPI_ISL_682410 | 11/16/2020 | 12/9/2020 Europe / Denmark / Nordjylland |
| EPI_ISL_682411 | 11/16/2020 | 12/9/2020 Europe / Denmark / Nordjylland |
| EPI_ISL_682412 | 11/16/2020 | 12/9/2020 Europe / Denmark / Hovedstaden |
| EPI_ISL_682413 | 11/16/2020 | 12/9/2020 Europe / Denmark / Sjælland    |
| EPI_ISL_682416 | 11/16/2020 | 12/9/2020 Europe / Denmark / Hovedstaden |
| EPI_ISL_682417 | 11/16/2020 | 12/9/2020 Europe / Denmark               |
| EPI_ISL_682418 | 11/16/2020 | 12/9/2020 Europe / Denmark / Syddanmark  |
| EPI_ISL_682420 | 11/16/2020 | 12/9/2020 Europe / Denmark / Hovedstaden |
| EPI_ISL_682421 | 11/16/2020 | 12/9/2020 Europe / Denmark / Syddanmark  |
| EPI_ISL_682422 | 11/16/2020 | 12/9/2020 Europe / Denmark / Hovedstaden |
| EPI_ISL_682423 | 11/16/2020 | 12/9/2020 Europe / Denmark / Nordjylland |
| EPI_ISL_682424 | 11/16/2020 | 12/9/2020 Europe / Denmark / Hovedstaden |
| EPI_ISL_682425 | 11/16/2020 | 12/9/2020 Europe / Denmark / Nordjylland |
| EPI_ISL_682427 | 11/16/2020 | 12/9/2020 Europe / Denmark / Sjælland    |
| EPI_ISL_682428 | 11/16/2020 | 12/9/2020 Europe / Denmark / Syddanmark  |

|                |            |                                          |
|----------------|------------|------------------------------------------|
| EPI_ISL_682429 | 11/16/2020 | 12/9/2020 Europe / Denmark / Hovedstaden |
| EPI_ISL_682431 | 11/16/2020 | 12/9/2020 Europe / Denmark / Hovedstaden |
| EPI_ISL_682432 | 11/16/2020 | 12/9/2020 Europe / Denmark / Nordjylland |
| EPI_ISL_682433 | 11/16/2020 | 12/9/2020 Europe / Denmark / Hovedstaden |
| EPI_ISL_682434 | 11/16/2020 | 12/9/2020 Europe / Denmark / Sjælland    |
| EPI_ISL_682435 | 11/16/2020 | 12/9/2020 Europe / Denmark / Midtjylland |
| EPI_ISL_682436 | 11/16/2020 | 12/9/2020 Europe / Denmark / Nordjylland |
| EPI_ISL_682437 | 11/16/2020 | 12/9/2020 Europe / Denmark / Sjælland    |
| EPI_ISL_682438 | 11/16/2020 | 12/9/2020 Europe / Denmark / Midtjylland |
| EPI_ISL_682440 | 11/16/2020 | 12/9/2020 Europe / Denmark / Hovedstaden |
| EPI_ISL_682441 | 11/16/2020 | 12/9/2020 Europe / Denmark / Hovedstaden |
| EPI_ISL_682445 | 11/16/2020 | 12/9/2020 Europe / Denmark / Nordjylland |
| EPI_ISL_682446 | 11/16/2020 | 12/9/2020 Europe / Denmark / Hovedstaden |
| EPI_ISL_682447 | 11/16/2020 | 12/9/2020 Europe / Denmark / Hovedstaden |
| EPI_ISL_682448 | 11/16/2020 | 12/9/2020 Europe / Denmark / Midtjylland |
| EPI_ISL_682449 | 11/16/2020 | 12/9/2020 Europe / Denmark / Nordjylland |
| EPI_ISL_682450 | 11/16/2020 | 12/9/2020 Europe / Denmark / Syddanmark  |
| EPI_ISL_682451 | 11/16/2020 | 12/9/2020 Europe / Denmark / Hovedstaden |
| EPI_ISL_682452 | 11/16/2020 | 12/9/2020 Europe / Denmark / Hovedstaden |
| EPI_ISL_682455 | 11/16/2020 | 12/9/2020 Europe / Denmark / Sjælland    |
| EPI_ISL_682456 | 11/16/2020 | 12/9/2020 Europe / Denmark / Midtjylland |
| EPI_ISL_682457 | 11/16/2020 | 12/9/2020 Europe / Denmark / Hovedstaden |
| EPI_ISL_682458 | 11/16/2020 | 12/9/2020 Europe / Denmark / Nordjylland |
| EPI_ISL_682459 | 11/16/2020 | 12/9/2020 Europe / Denmark / Midtjylland |
| EPI_ISL_682460 | 11/16/2020 | 12/9/2020 Europe / Denmark / Midtjylland |
| EPI_ISL_682461 | 11/16/2020 | 12/9/2020 Europe / Denmark / Syddanmark  |
| EPI_ISL_682462 | 11/16/2020 | 12/9/2020 Europe / Denmark / Nordjylland |
| EPI_ISL_682463 | 11/16/2020 | 12/9/2020 Europe / Denmark / Hovedstaden |
| EPI_ISL_682464 | 11/16/2020 | 12/9/2020 Europe / Denmark / Midtjylland |
| EPI_ISL_682466 | 11/16/2020 | 12/9/2020 Europe / Denmark / Midtjylland |
| EPI_ISL_682468 | 11/16/2020 | 12/9/2020 Europe / Denmark / Midtjylland |
| EPI_ISL_682470 | 11/16/2020 | 12/9/2020 Europe / Denmark / Syddanmark  |
| EPI_ISL_682472 | 11/16/2020 | 12/9/2020 Europe / Denmark / Hovedstaden |
| EPI_ISL_682474 | 11/16/2020 | 12/9/2020 Europe / Denmark / Sjælland    |
| EPI_ISL_682475 | 11/16/2020 | 12/9/2020 Europe / Denmark / Hovedstaden |
| EPI_ISL_682476 | 11/16/2020 | 12/9/2020 Europe / Denmark / Hovedstaden |
| EPI_ISL_682477 | 11/16/2020 | 12/9/2020 Europe / Denmark / Sjælland    |
| EPI_ISL_682478 | 11/16/2020 | 12/9/2020 Europe / Denmark / Nordjylland |
| EPI_ISL_682479 | 11/16/2020 | 12/9/2020 Europe / Denmark / Nordjylland |
| EPI_ISL_682481 | 11/16/2020 | 12/9/2020 Europe / Denmark / Midtjylland |
| EPI_ISL_682482 | 11/16/2020 | 12/9/2020 Europe / Denmark / Midtjylland |
| EPI_ISL_682486 | 11/16/2020 | 12/9/2020 Europe / Denmark / Hovedstaden |
| EPI_ISL_682487 | 11/16/2020 | 12/9/2020 Europe / Denmark / Hovedstaden |
| EPI_ISL_682488 | 11/16/2020 | 12/9/2020 Europe / Denmark / Midtjylland |
| EPI_ISL_682489 | 11/16/2020 | 12/9/2020 Europe / Denmark / Hovedstaden |
| EPI_ISL_682491 | 11/16/2020 | 12/9/2020 Europe / Denmark / Hovedstaden |
| EPI_ISL_682492 | 11/16/2020 | 12/9/2020 Europe / Denmark / Syddanmark  |



|                |            |                                          |
|----------------|------------|------------------------------------------|
| EPI_ISL_682552 | 11/16/2020 | 12/9/2020 Europe / Denmark / Nordjylland |
| EPI_ISL_682553 | 11/16/2020 | 12/9/2020 Europe / Denmark / Hovedstaden |
| EPI_ISL_682554 | 11/16/2020 | 12/9/2020 Europe / Denmark / Hovedstaden |
| EPI_ISL_682555 | 11/16/2020 | 12/9/2020 Europe / Denmark / Hovedstaden |
| EPI_ISL_682556 | 11/16/2020 | 12/9/2020 Europe / Denmark / Sjælland    |
| EPI_ISL_682557 | 11/16/2020 | 12/9/2020 Europe / Denmark / Nordjylland |
| EPI_ISL_682560 | 11/16/2020 | 12/9/2020 Europe / Denmark / Midtjylland |
| EPI_ISL_682561 | 11/16/2020 | 12/9/2020 Europe / Denmark / Nordjylland |
| EPI_ISL_682562 | 11/16/2020 | 12/9/2020 Europe / Denmark / Hovedstaden |
| EPI_ISL_682564 | 11/16/2020 | 12/9/2020 Europe / Denmark / Midtjylland |
| EPI_ISL_682566 | 11/16/2020 | 12/9/2020 Europe / Denmark / Midtjylland |
| EPI_ISL_682567 | 11/16/2020 | 12/9/2020 Europe / Denmark / Nordjylland |
| EPI_ISL_682568 | 11/16/2020 | 12/9/2020 Europe / Denmark / Hovedstaden |
| EPI_ISL_682571 | 11/16/2020 | 12/9/2020 Europe / Denmark / Hovedstaden |
| EPI_ISL_682572 | 11/16/2020 | 12/9/2020 Europe / Denmark / Midtjylland |
| EPI_ISL_682574 | 11/16/2020 | 12/9/2020 Europe / Denmark / Midtjylland |
| EPI_ISL_682576 | 11/16/2020 | 12/9/2020 Europe / Denmark / Hovedstaden |
| EPI_ISL_682577 | 11/16/2020 | 12/9/2020 Europe / Denmark / Hovedstaden |
| EPI_ISL_682578 | 11/16/2020 | 12/9/2020 Europe / Denmark / Hovedstaden |
| EPI_ISL_682580 | 11/16/2020 | 12/9/2020 Europe / Denmark / Hovedstaden |
| EPI_ISL_682581 | 11/16/2020 | 12/9/2020 Europe / Denmark / Syddanmark  |
| EPI_ISL_682583 | 11/16/2020 | 12/9/2020 Europe / Denmark / Syddanmark  |
| EPI_ISL_682584 | 11/16/2020 | 12/9/2020 Europe / Denmark / Hovedstaden |
| EPI_ISL_682585 | 11/16/2020 | 12/9/2020 Europe / Denmark / Sjælland    |
| EPI_ISL_682586 | 11/16/2020 | 12/9/2020 Europe / Denmark / Syddanmark  |
| EPI_ISL_682587 | 11/16/2020 | 12/9/2020 Europe / Denmark / Hovedstaden |
| EPI_ISL_682589 | 11/16/2020 | 12/9/2020 Europe / Denmark / Hovedstaden |
| EPI_ISL_682591 | 11/16/2020 | 12/9/2020 Europe / Denmark / Sjælland    |
| EPI_ISL_682592 | 11/16/2020 | 12/9/2020 Europe / Denmark / Hovedstaden |
| EPI_ISL_682593 | 11/16/2020 | 12/9/2020 Europe / Denmark / Hovedstaden |
| EPI_ISL_682594 | 11/16/2020 | 12/9/2020 Europe / Denmark / Hovedstaden |
| EPI_ISL_682595 | 11/16/2020 | 12/9/2020 Europe / Denmark / Sjælland    |
| EPI_ISL_682596 | 11/16/2020 | 12/9/2020 Europe / Denmark / Hovedstaden |
| EPI_ISL_682597 | 11/16/2020 | 12/9/2020 Europe / Denmark / Hovedstaden |
| EPI_ISL_682598 | 11/16/2020 | 12/9/2020 Europe / Denmark / Hovedstaden |
| EPI_ISL_682599 | 11/16/2020 | 12/9/2020 Europe / Denmark / Midtjylland |
| EPI_ISL_682600 | 11/16/2020 | 12/9/2020 Europe / Denmark / Hovedstaden |
| EPI_ISL_682601 | 11/16/2020 | 12/9/2020 Europe / Denmark / Midtjylland |
| EPI_ISL_682604 | 11/16/2020 | 12/9/2020 Europe / Denmark / Midtjylland |
| EPI_ISL_682605 | 11/16/2020 | 12/9/2020 Europe / Denmark / Syddanmark  |
| EPI_ISL_682606 | 11/16/2020 | 12/9/2020 Europe / Denmark / Midtjylland |
| EPI_ISL_682607 | 11/16/2020 | 12/9/2020 Europe / Denmark / Syddanmark  |
| EPI_ISL_682608 | 11/16/2020 | 12/9/2020 Europe / Denmark / Sjælland    |
| EPI_ISL_682609 | 11/16/2020 | 12/9/2020 Europe / Denmark / Midtjylland |
| EPI_ISL_682610 | 11/16/2020 | 12/9/2020 Europe / Denmark / Midtjylland |
| EPI_ISL_682613 | 11/16/2020 | 12/9/2020 Europe / Denmark / Syddanmark  |
| EPI_ISL_682615 | 11/16/2020 | 12/9/2020 Europe / Denmark / Midtjylland |







|                |            |                                          |
|----------------|------------|------------------------------------------|
| EPI_ISL_682751 | 11/16/2020 | 12/9/2020 Europe / Denmark / Syddanmark  |
| EPI_ISL_682752 | 11/16/2020 | 12/9/2020 Europe / Denmark / Midtjylland |
| EPI_ISL_682753 | 11/16/2020 | 12/9/2020 Europe / Denmark / Syddanmark  |
| EPI_ISL_682754 | 11/16/2020 | 12/9/2020 Europe / Denmark / Midtjylland |
| EPI_ISL_682756 | 11/16/2020 | 12/9/2020 Europe / Denmark / Midtjylland |
| EPI_ISL_682757 | 11/16/2020 | 12/9/2020 Europe / Denmark / Syddanmark  |
| EPI_ISL_682758 | 11/16/2020 | 12/9/2020 Europe / Denmark / Syddanmark  |
| EPI_ISL_682759 | 11/16/2020 | 12/9/2020 Europe / Denmark / Syddanmark  |
| EPI_ISL_682761 | 11/16/2020 | 12/9/2020 Europe / Denmark / Syddanmark  |
| EPI_ISL_682763 | 11/16/2020 | 12/9/2020 Europe / Denmark / Hovedstaden |
| EPI_ISL_682764 | 11/16/2020 | 12/9/2020 Europe / Denmark / Syddanmark  |
| EPI_ISL_682766 | 11/16/2020 | 12/9/2020 Europe / Denmark / Midtjylland |
| EPI_ISL_682768 | 11/16/2020 | 12/9/2020 Europe / Denmark / Syddanmark  |
| EPI_ISL_682769 | 11/16/2020 | 12/9/2020 Europe / Denmark / Midtjylland |
| EPI_ISL_682772 | 11/16/2020 | 12/9/2020 Europe / Denmark / Syddanmark  |
| EPI_ISL_682773 | 11/16/2020 | 12/9/2020 Europe / Denmark / Nordjylland |
| EPI_ISL_682774 | 11/16/2020 | 12/9/2020 Europe / Denmark / Syddanmark  |
| EPI_ISL_682775 | 11/16/2020 | 12/9/2020 Europe / Denmark / Hovedstaden |
| EPI_ISL_682776 | 11/16/2020 | 12/9/2020 Europe / Denmark / Midtjylland |
| EPI_ISL_682781 | 11/16/2020 | 12/9/2020 Europe / Denmark / Midtjylland |
| EPI_ISL_682782 | 11/16/2020 | 12/9/2020 Europe / Denmark / Midtjylland |
| EPI_ISL_682784 | 11/16/2020 | 12/9/2020 Europe / Denmark / Syddanmark  |
| EPI_ISL_682785 | 11/16/2020 | 12/9/2020 Europe / Denmark / Hovedstaden |
| EPI_ISL_682786 | 11/16/2020 | 12/9/2020 Europe / Denmark / Hovedstaden |
| EPI_ISL_682787 | 11/16/2020 | 12/9/2020 Europe / Denmark / Hovedstaden |
| EPI_ISL_682788 | 11/16/2020 | 12/9/2020 Europe / Denmark / Syddanmark  |
| EPI_ISL_682789 | 11/16/2020 | 12/9/2020 Europe / Denmark / Syddanmark  |
| EPI_ISL_682792 | 11/16/2020 | 12/9/2020 Europe / Denmark / Hovedstaden |
| EPI_ISL_682793 | 11/16/2020 | 12/9/2020 Europe / Denmark / Nordjylland |
| EPI_ISL_682795 | 11/16/2020 | 12/9/2020 Europe / Denmark / Syddanmark  |
| EPI_ISL_682796 | 11/16/2020 | 12/9/2020 Europe / Denmark / Hovedstaden |
| EPI_ISL_682797 | 11/16/2020 | 12/9/2020 Europe / Denmark / Midtjylland |
| EPI_ISL_682798 | 11/16/2020 | 12/9/2020 Europe / Denmark / Hovedstaden |
| EPI_ISL_682800 | 11/16/2020 | 12/9/2020 Europe / Denmark / Syddanmark  |
| EPI_ISL_682801 | 11/16/2020 | 12/9/2020 Europe / Denmark / Syddanmark  |
| EPI_ISL_682802 | 11/16/2020 | 12/9/2020 Europe / Denmark / Syddanmark  |
| EPI_ISL_682803 | 11/16/2020 | 12/9/2020 Europe / Denmark / Syddanmark  |
| EPI_ISL_682804 | 11/16/2020 | 12/9/2020 Europe / Denmark / Syddanmark  |
| EPI_ISL_682805 | 11/16/2020 | 12/9/2020 Europe / Denmark / Syddanmark  |
| EPI_ISL_682806 | 11/16/2020 | 12/9/2020 Europe / Denmark / Hovedstaden |
| EPI_ISL_682808 | 11/16/2020 | 12/9/2020 Europe / Denmark / Midtjylland |
| EPI_ISL_682809 | 11/16/2020 | 12/9/2020 Europe / Denmark / Sjælland    |
| EPI_ISL_682810 | 11/16/2020 | 12/9/2020 Europe / Denmark / Syddanmark  |
| EPI_ISL_682811 | 11/16/2020 | 12/9/2020 Europe / Denmark / Hovedstaden |
| EPI_ISL_682812 | 11/16/2020 | 12/9/2020 Europe / Denmark / Sjælland    |
| EPI_ISL_682813 | 11/16/2020 | 12/9/2020 Europe / Denmark / Syddanmark  |
| EPI_ISL_682815 | 11/16/2020 | 12/9/2020 Europe / Denmark / Sjælland    |

|                |            |                                          |
|----------------|------------|------------------------------------------|
| EPI_ISL_682816 | 11/16/2020 | 12/9/2020 Europe / Denmark / Midtjylland |
| EPI_ISL_682817 | 11/16/2020 | 12/9/2020 Europe / Denmark / Midtjylland |
| EPI_ISL_682819 | 11/16/2020 | 12/9/2020 Europe / Denmark / Hovedstaden |
| EPI_ISL_682820 | 11/16/2020 | 12/9/2020 Europe / Denmark / Hovedstaden |
| EPI_ISL_682822 | 11/16/2020 | 12/9/2020 Europe / Denmark / Sjælland    |
| EPI_ISL_682823 | 11/16/2020 | 12/9/2020 Europe / Denmark / Midtjylland |
| EPI_ISL_682824 | 11/16/2020 | 12/9/2020 Europe / Denmark / Hovedstaden |
| EPI_ISL_682826 | 11/16/2020 | 12/9/2020 Europe / Denmark / Midtjylland |
| EPI_ISL_682827 | 11/16/2020 | 12/9/2020 Europe / Denmark / Nordjylland |
| EPI_ISL_682828 | 11/16/2020 | 12/9/2020 Europe / Denmark / Syddanmark  |
| EPI_ISL_682831 | 11/16/2020 | 12/9/2020 Europe / Denmark / Syddanmark  |
| EPI_ISL_682833 | 11/16/2020 | 12/9/2020 Europe / Denmark / Syddanmark  |
| EPI_ISL_682835 | 11/16/2020 | 12/9/2020 Europe / Denmark / Hovedstaden |
| EPI_ISL_682836 | 11/16/2020 | 12/9/2020 Europe / Denmark / Hovedstaden |
| EPI_ISL_682837 | 11/16/2020 | 12/9/2020 Europe / Denmark / Syddanmark  |
| EPI_ISL_682838 | 11/16/2020 | 12/9/2020 Europe / Denmark / Syddanmark  |
| EPI_ISL_682839 | 11/16/2020 | 12/9/2020 Europe / Denmark / Midtjylland |
| EPI_ISL_682840 | 11/16/2020 | 12/9/2020 Europe / Denmark / Hovedstaden |
| EPI_ISL_682841 | 11/16/2020 | 12/9/2020 Europe / Denmark / Midtjylland |
| EPI_ISL_682842 | 11/16/2020 | 12/9/2020 Europe / Denmark / Midtjylland |
| EPI_ISL_682844 | 11/16/2020 | 12/9/2020 Europe / Denmark / Syddanmark  |
| EPI_ISL_682845 | 11/16/2020 | 12/9/2020 Europe / Denmark / Syddanmark  |
| EPI_ISL_682846 | 11/16/2020 | 12/9/2020 Europe / Denmark / Hovedstaden |
| EPI_ISL_682848 | 11/16/2020 | 12/9/2020 Europe / Denmark / Nordjylland |
| EPI_ISL_682849 | 11/16/2020 | 12/9/2020 Europe / Denmark / Syddanmark  |
| EPI_ISL_682850 | 11/16/2020 | 12/9/2020 Europe / Denmark / Syddanmark  |
| EPI_ISL_682851 | 11/16/2020 | 12/9/2020 Europe / Denmark / Syddanmark  |
| EPI_ISL_682854 | 11/16/2020 | 12/9/2020 Europe / Denmark / Syddanmark  |
| EPI_ISL_682855 | 11/16/2020 | 12/9/2020 Europe / Denmark / Syddanmark  |
| EPI_ISL_682856 | 11/16/2020 | 12/9/2020 Europe / Denmark / Hovedstaden |
| EPI_ISL_682857 | 11/16/2020 | 12/9/2020 Europe / Denmark / Syddanmark  |
| EPI_ISL_682858 | 11/16/2020 | 12/9/2020 Europe / Denmark / Hovedstaden |
| EPI_ISL_682859 | 11/16/2020 | 12/9/2020 Europe / Denmark / Syddanmark  |
| EPI_ISL_682862 | 11/16/2020 | 12/9/2020 Europe / Denmark / Syddanmark  |
| EPI_ISL_682864 | 11/16/2020 | 12/9/2020 Europe / Denmark / Sjælland    |
| EPI_ISL_682866 | 11/16/2020 | 12/9/2020 Europe / Denmark / Syddanmark  |
| EPI_ISL_682867 | 11/16/2020 | 12/9/2020 Europe / Denmark / Syddanmark  |
| EPI_ISL_682868 | 11/16/2020 | 12/9/2020 Europe / Denmark / Hovedstaden |
| EPI_ISL_682869 | 11/16/2020 | 12/9/2020 Europe / Denmark / Sjælland    |
| EPI_ISL_682870 | 11/16/2020 | 12/9/2020 Europe / Denmark / Syddanmark  |
| EPI_ISL_682871 | 11/16/2020 | 12/9/2020 Europe / Denmark / Syddanmark  |
| EPI_ISL_682873 | 11/16/2020 | 12/9/2020 Europe / Denmark / Nordjylland |
| EPI_ISL_682874 | 11/16/2020 | 12/9/2020 Europe / Denmark / Nordjylland |
| EPI_ISL_682876 | 11/16/2020 | 12/9/2020 Europe / Denmark / Syddanmark  |
| EPI_ISL_682878 | 11/16/2020 | 12/9/2020 Europe / Denmark / Syddanmark  |
| EPI_ISL_682880 | 11/16/2020 | 12/9/2020 Europe / Denmark / Syddanmark  |
| EPI_ISL_682881 | 11/16/2020 | 12/9/2020 Europe / Denmark / Syddanmark  |

|                |            |                                          |
|----------------|------------|------------------------------------------|
| EPI_ISL_682883 | 11/16/2020 | 12/9/2020 Europe / Denmark / Syddanmark  |
| EPI_ISL_682885 | 11/16/2020 | 12/9/2020 Europe / Denmark / Syddanmark  |
| EPI_ISL_682886 | 11/16/2020 | 12/9/2020 Europe / Denmark / Midtjylland |
| EPI_ISL_682888 | 11/16/2020 | 12/9/2020 Europe / Denmark / Nordjylland |
| EPI_ISL_682892 | 11/16/2020 | 12/9/2020 Europe / Denmark / Nordjylland |
| EPI_ISL_682893 | 11/16/2020 | 12/9/2020 Europe / Denmark / Sjælland    |
| EPI_ISL_682894 | 11/16/2020 | 12/9/2020 Europe / Denmark / Hovedstaden |
| EPI_ISL_682895 | 11/16/2020 | 12/9/2020 Europe / Denmark / Hovedstaden |
| EPI_ISL_682897 | 11/16/2020 | 12/9/2020 Europe / Denmark / Syddanmark  |
| EPI_ISL_682898 | 11/16/2020 | 12/9/2020 Europe / Denmark / Syddanmark  |
| EPI_ISL_682899 | 11/16/2020 | 12/9/2020 Europe / Denmark / Syddanmark  |
| EPI_ISL_682900 | 11/16/2020 | 12/9/2020 Europe / Denmark / Hovedstaden |
| EPI_ISL_682901 | 11/16/2020 | 12/9/2020 Europe / Denmark / Sjælland    |
| EPI_ISL_682902 | 11/16/2020 | 12/9/2020 Europe / Denmark / Syddanmark  |
| EPI_ISL_682903 | 11/16/2020 | 12/9/2020 Europe / Denmark / Hovedstaden |
| EPI_ISL_682904 | 11/16/2020 | 12/9/2020 Europe / Denmark / Hovedstaden |
| EPI_ISL_682905 | 11/16/2020 | 12/9/2020 Europe / Denmark / Hovedstaden |
| EPI_ISL_682907 | 11/16/2020 | 12/9/2020 Europe / Denmark / Nordjylland |
| EPI_ISL_682908 | 11/16/2020 | 12/9/2020 Europe / Denmark / Midtjylland |
| EPI_ISL_682910 | 11/16/2020 | 12/9/2020 Europe / Denmark / Syddanmark  |
| EPI_ISL_682911 | 11/16/2020 | 12/9/2020 Europe / Denmark / Hovedstaden |
| EPI_ISL_682912 | 11/16/2020 | 12/9/2020 Europe / Denmark / Hovedstaden |
| EPI_ISL_682913 | 11/16/2020 | 12/9/2020 Europe / Denmark / Hovedstaden |
| EPI_ISL_682914 | 11/16/2020 | 12/9/2020 Europe / Denmark / Hovedstaden |
| EPI_ISL_682915 | 11/16/2020 | 12/9/2020 Europe / Denmark / Nordjylland |
| EPI_ISL_682916 | 11/16/2020 | 12/9/2020 Europe / Denmark / Syddanmark  |
| EPI_ISL_682919 | 11/16/2020 | 12/9/2020 Europe / Denmark / Sjælland    |
| EPI_ISL_682920 | 11/16/2020 | 12/9/2020 Europe / Denmark / Syddanmark  |
| EPI_ISL_682921 | 11/16/2020 | 12/9/2020 Europe / Denmark / Hovedstaden |
| EPI_ISL_682922 | 11/16/2020 | 12/9/2020 Europe / Denmark / Hovedstaden |
| EPI_ISL_682925 | 11/16/2020 | 12/9/2020 Europe / Denmark / Hovedstaden |
| EPI_ISL_682927 | 11/16/2020 | 12/9/2020 Europe / Denmark / Syddanmark  |
| EPI_ISL_682928 | 11/16/2020 | 12/9/2020 Europe / Denmark / Syddanmark  |
| EPI_ISL_682932 | 11/9/2020  | 12/9/2020 Europe / Denmark / Midtjylland |
| EPI_ISL_682933 | 11/9/2020  | 12/9/2020 Europe / Denmark / Syddanmark  |
| EPI_ISL_682934 | 11/9/2020  | 12/9/2020 Europe / Denmark / Hovedstaden |
| EPI_ISL_682935 | 11/9/2020  | 12/9/2020 Europe / Denmark / Sjælland    |
| EPI_ISL_682936 | 11/9/2020  | 12/9/2020 Europe / Denmark / Hovedstaden |
| EPI_ISL_682939 | 11/9/2020  | 12/9/2020 Europe / Denmark / Syddanmark  |
| EPI_ISL_682940 | 11/9/2020  | 12/9/2020 Europe / Denmark / Syddanmark  |
| EPI_ISL_682941 | 11/9/2020  | 12/9/2020 Europe / Denmark / Syddanmark  |
| EPI_ISL_682942 | 11/9/2020  | 12/9/2020 Europe / Denmark / Syddanmark  |
| EPI_ISL_682943 | 11/9/2020  | 12/9/2020 Europe / Denmark / Syddanmark  |
| EPI_ISL_682944 | 11/9/2020  | 12/9/2020 Europe / Denmark / Syddanmark  |
| EPI_ISL_682945 | 11/9/2020  | 12/9/2020 Europe / Denmark / Syddanmark  |
| EPI_ISL_682946 | 11/9/2020  | 12/9/2020 Europe / Denmark / Hovedstaden |
| EPI_ISL_682947 | 11/9/2020  | 12/9/2020 Europe / Denmark / Hovedstaden |

|                |            |           |                                                              |
|----------------|------------|-----------|--------------------------------------------------------------|
| EPI_ISL_682948 | 11/9/2020  | 12/9/2020 | Europe / Denmark / Hovedstaden                               |
| EPI_ISL_682951 | 11/9/2020  | 12/9/2020 | Europe / Denmark / Syddanmark                                |
| EPI_ISL_682952 | 11/9/2020  | 12/9/2020 | Europe / Denmark / Hovedstaden                               |
| EPI_ISL_682953 | 11/9/2020  | 12/9/2020 | Europe / Denmark / Syddanmark                                |
| EPI_ISL_682954 | 11/9/2020  | 12/9/2020 | Europe / Denmark / Nordjylland                               |
| EPI_ISL_682956 | 11/9/2020  | 12/9/2020 | Europe / Denmark / Nordjylland                               |
| EPI_ISL_682958 | 11/9/2020  | 12/9/2020 | Europe / Denmark / Sjaelland                                 |
| EPI_ISL_682961 | 11/9/2020  | 12/9/2020 | Europe / Denmark / Nordjylland                               |
| EPI_ISL_682962 | 11/9/2020  | 12/9/2020 | Europe / Denmark / Nordjylland                               |
| EPI_ISL_682963 | 11/9/2020  | 12/9/2020 | Europe / Denmark / Nordjylland                               |
| EPI_ISL_682964 | 11/9/2020  | 12/9/2020 | Europe / Denmark / Nordjylland                               |
| EPI_ISL_682965 | 11/9/2020  | 12/9/2020 | Europe / Denmark / Sjaelland                                 |
| EPI_ISL_682966 | 11/9/2020  | 12/9/2020 | Europe / Denmark / Midtjylland                               |
| EPI_ISL_682967 | 11/2/2020  | 12/9/2020 | Europe / Denmark / Nordjylland                               |
| EPI_ISL_682968 | 11/2/2020  | 12/9/2020 | Europe / Denmark / Nordjylland                               |
| EPI_ISL_682969 | 11/2/2020  | 12/9/2020 | Europe / Denmark / Nordjylland                               |
| EPI_ISL_682970 | 11/2/2020  | 12/9/2020 | Europe / Denmark / Sjaelland                                 |
| EPI_ISL_682971 | 11/2/2020  | 12/9/2020 | Europe / Denmark / Nordjylland                               |
| EPI_ISL_682972 | 11/2/2020  | 12/9/2020 | Europe / Denmark / Nordjylland                               |
| EPI_ISL_682973 | 11/2/2020  | 12/9/2020 | Europe / Denmark / Nordjylland                               |
| EPI_ISL_682974 | 11/2/2020  | 12/9/2020 | Europe / Denmark / Sjaelland                                 |
| EPI_ISL_682975 | 11/2/2020  | 12/9/2020 | Europe / Denmark / Midtjylland                               |
| EPI_ISL_682976 | 11/2/2020  | 12/9/2020 | Europe / Denmark / Nordjylland                               |
| EPI_ISL_682979 | 11/2/2020  | 12/9/2020 | Europe / Denmark / Nordjylland                               |
| EPI_ISL_682980 | 11/2/2020  | 12/9/2020 | Europe / Denmark / Nordjylland                               |
| EPI_ISL_682981 | 11/2/2020  | 12/9/2020 | Europe / Denmark / Syddanmark                                |
| EPI_ISL_682984 | 10/26/2020 | 12/9/2020 | Europe / Denmark / Nordjylland                               |
| EPI_ISL_682985 | 10/26/2020 | 12/9/2020 | Europe / Denmark / Nordjylland                               |
| EPI_ISL_682986 | 10/26/2020 | 12/9/2020 | Europe / Denmark / Nordjylland                               |
| EPI_ISL_682987 | 10/26/2020 | 12/9/2020 | Europe / Denmark / Nordjylland                               |
| EPI_ISL_682988 | 10/26/2020 | 12/9/2020 | Europe / Denmark / Nordjylland                               |
| EPI_ISL_682989 | 10/26/2020 | 12/9/2020 | Europe / Denmark / Nordjylland                               |
| EPI_ISL_682990 | 10/26/2020 | 12/9/2020 | Europe / Denmark / Nordjylland                               |
| EPI_ISL_682991 | 10/26/2020 | 12/9/2020 | Europe / Denmark / Nordjylland                               |
| EPI_ISL_682992 | 10/26/2020 | 12/9/2020 | Europe / Denmark / Nordjylland                               |
| EPI_ISL_682993 | 10/26/2020 | 12/9/2020 | Europe / Denmark / Nordjylland                               |
| EPI_ISL_682994 | 10/26/2020 | 12/9/2020 | Europe / Denmark / Nordjylland                               |
| EPI_ISL_682995 | 10/26/2020 | 12/9/2020 | Europe / Denmark / Nordjylland                               |
| EPI_ISL_682996 | 10/26/2020 | 12/9/2020 | Europe / Denmark / Nordjylland                               |
| EPI_ISL_682997 | 10/26/2020 | 12/9/2020 | Europe / Denmark / Nordjylland                               |
| EPI_ISL_682998 | 10/26/2020 | 12/9/2020 | Europe / Denmark / Midtjylland                               |
| EPI_ISL_682999 | 10/26/2020 | 12/9/2020 | Europe / Denmark / Nordjylland                               |
| EPI_ISL_683000 | 10/26/2020 | 12/9/2020 | Europe / Denmark / Midtjylland                               |
| EPI_ISL_683003 | 10/19/2020 | 12/9/2020 | Europe / Denmark / Nordjylland                               |
| EPI_ISL_683004 | 9/7/2020   | 12/9/2020 | Europe / Denmark / Midtjylland                               |
| EPI_ISL_683329 | 3/18/2020  | 12/9/2020 | Africa / Tunisia / Ben Arous                                 |
| EPI_ISL_683331 | 3/2/2020   | 12/9/2020 | Europe / France / Auvergne-Rhone-Alpes / Saint-Julien-en-Gei |



|                |            |                                                         |
|----------------|------------|---------------------------------------------------------|
| EPI_ISL_683387 | 9/4/2020   | 12/9/2020 Europe / France / Auvergne-Rhone-Alpes / Lyon |
| EPI_ISL_683388 | 9/4/2020   | 12/9/2020 Europe / France / Auvergne-Rhone-Alpes / Lyon |
| EPI_ISL_683389 | 9/4/2020   | 12/9/2020 Europe / France / Auvergne-Rhone-Alpes / Lyon |
| EPI_ISL_683390 | 9/4/2020   | 12/9/2020 Europe / France / Auvergne-Rhone-Alpes / Lyon |
| EPI_ISL_683391 | 9/5/2020   | 12/9/2020 Europe / France / Auvergne-Rhone-Alpes / Lyon |
| EPI_ISL_683392 | 9/5/2020   | 12/9/2020 Europe / France / Auvergne-Rhone-Alpes / Lyon |
| EPI_ISL_683393 | 9/4/2020   | 12/9/2020 Europe / France / Auvergne-Rhone-Alpes / Lyon |
| EPI_ISL_683394 | 9/4/2020   | 12/9/2020 Europe / France / Auvergne-Rhone-Alpes / Lyon |
| EPI_ISL_683395 | 9/4/2020   | 12/9/2020 Europe / France / Auvergne-Rhone-Alpes / Lyon |
| EPI_ISL_683396 | 9/4/2020   | 12/9/2020 Europe / France / Auvergne-Rhone-Alpes / Lyon |
| EPI_ISL_683397 | 9/4/2020   | 12/9/2020 Europe / France / Auvergne-Rhone-Alpes / Lyon |
| EPI_ISL_683398 | 9/19/2020  | 12/9/2020 Europe / France / Auvergne-Rhone-Alpes / Lyon |
| EPI_ISL_683399 | 9/19/2020  | 12/9/2020 Europe / France / Auvergne-Rhone-Alpes / Lyon |
| EPI_ISL_683400 | 11/1/2020  | 12/9/2020 Europe / France / Auvergne-Rhone-Alpes / Lyon |
| EPI_ISL_683401 | 11/1/2020  | 12/9/2020 Europe / France / Auvergne-Rhone-Alpes / Lyon |
| EPI_ISL_683402 | 11/2/2020  | 12/9/2020 Europe / France / Auvergne-Rhone-Alpes / Lyon |
| EPI_ISL_683443 | 6/23/2020  | 12/9/2020 North America / USA / Texas / Harris          |
| EPI_ISL_683449 | 2020       | 12/9/2020 Asia / Armenia                                |
| EPI_ISL_683450 | 2020       | 12/9/2020 Asia / Armenia                                |
| EPI_ISL_683451 | 2020       | 12/9/2020 Asia / Armenia                                |
| EPI_ISL_683461 | 11/15/2020 | 12/9/2020 Europe / United Kingdom / England             |
| EPI_ISL_683462 | 11/24/2020 | 12/9/2020 Europe / United Kingdom / England             |
| EPI_ISL_683463 | 11/24/2020 | 12/9/2020 Europe / United Kingdom / England             |
| EPI_ISL_683464 | 11/24/2020 | 12/9/2020 Europe / United Kingdom / England             |
| EPI_ISL_683465 | 11/24/2020 | 12/9/2020 Europe / United Kingdom / England             |
| EPI_ISL_683466 | 11/24/2020 | 12/9/2020 Europe / United Kingdom / England             |
| EPI_ISL_683467 | 11/24/2020 | 12/9/2020 Europe / United Kingdom / England             |
| EPI_ISL_683468 | 11/24/2020 | 12/9/2020 Europe / United Kingdom / England             |
| EPI_ISL_683469 | 11/24/2020 | 12/9/2020 Europe / United Kingdom / England             |
| EPI_ISL_683470 | 11/24/2020 | 12/9/2020 Europe / United Kingdom / England             |
| EPI_ISL_683471 | 11/24/2020 | 12/9/2020 Europe / United Kingdom / England             |
| EPI_ISL_683472 | 11/24/2020 | 12/9/2020 Europe / United Kingdom / England             |
| EPI_ISL_683473 | 11/24/2020 | 12/9/2020 Europe / United Kingdom / England             |
| EPI_ISL_683478 | 11/18/2020 | 12/9/2020 Europe / United Kingdom / England             |
| EPI_ISL_683481 | 11/9/2020  | 12/9/2020 Europe / United Kingdom / England             |
| EPI_ISL_683482 | 11/20/2020 | 12/9/2020 Europe / United Kingdom / England             |
| EPI_ISL_683483 | 11/24/2020 | 12/9/2020 Europe / United Kingdom / England             |
| EPI_ISL_683484 | 11/19/2020 | 12/9/2020 Europe / United Kingdom / England             |
| EPI_ISL_683485 | 11/12/2020 | 12/9/2020 Europe / United Kingdom / England             |
| EPI_ISL_683486 | 11/12/2020 | 12/9/2020 Europe / United Kingdom / England             |
| EPI_ISL_683487 | 11/12/2020 | 12/9/2020 Europe / United Kingdom / England             |
| EPI_ISL_683488 | 11/12/2020 | 12/9/2020 Europe / United Kingdom / England             |
| EPI_ISL_683489 | 11/18/2020 | 12/9/2020 Europe / United Kingdom / England             |
| EPI_ISL_683490 | 11/18/2020 | 12/9/2020 Europe / United Kingdom / England             |
| EPI_ISL_683491 | 11/4/2020  | 12/9/2020 Europe / United Kingdom / England             |
| EPI_ISL_683492 | 11/4/2020  | 12/9/2020 Europe / United Kingdom / England             |
| EPI_ISL_683493 | 11/6/2020  | 12/9/2020 Europe / United Kingdom / England             |







|                |            |           |                                       |
|----------------|------------|-----------|---------------------------------------|
| EPI_ISL_683588 | 11/25/2020 | 12/9/2020 | Europe / United Kingdom / England     |
| EPI_ISL_683589 | 11/25/2020 | 12/9/2020 | Europe / United Kingdom / England     |
| EPI_ISL_683590 | 11/25/2020 | 12/9/2020 | Europe / United Kingdom / England     |
| EPI_ISL_683591 | 11/25/2020 | 12/9/2020 | Europe / United Kingdom / England     |
| EPI_ISL_683595 | 4/6/2020   | 12/9/2020 | Europe / Spain / Aragon / Zaragoza    |
| EPI_ISL_683598 | 11/9/2020  | 12/9/2020 | Europe / Spain / Catalunya / Badalona |
| EPI_ISL_683601 | 9/15/2020  | 12/9/2020 | Europe / Spain / Catalunya / Badalona |
| EPI_ISL_683603 | 9/16/2020  | 12/9/2020 | Europe / Spain / Catalunya / Badalona |
| EPI_ISL_683604 | 8/19/2020  | 12/9/2020 | Europe / Spain / Catalunya / Badalona |
| EPI_ISL_683606 | 11/10/2020 | 12/9/2020 | Europe / Spain / Catalunya / Badalona |
| EPI_ISL_683607 | 11/10/2020 | 12/9/2020 | Europe / Spain / Catalunya / Badalona |
| EPI_ISL_683608 | 11/16/2020 | 12/9/2020 | Europe / Spain / Catalunya / Badalona |
| EPI_ISL_683610 | 11/14/2020 | 12/9/2020 | Europe / Spain / Catalunya / Badalona |
| EPI_ISL_683612 | 11/3/2020  | 12/9/2020 | Europe / Spain / Catalunya / Badalona |
| EPI_ISL_683613 | 11/3/2020  | 12/9/2020 | Europe / Spain / Catalunya / Badalona |
| EPI_ISL_683616 | 11/3/2020  | 12/9/2020 | Europe / Spain / Catalunya / Badalona |
| EPI_ISL_683619 | 11/6/2020  | 12/9/2020 | Europe / Spain / Catalunya / Badalona |
| EPI_ISL_683621 | 11/9/2020  | 12/9/2020 | Europe / Spain / Catalunya / Badalona |
| EPI_ISL_683623 | 11/16/2020 | 12/9/2020 | Europe / Spain / Catalunya / Badalona |
| EPI_ISL_683624 | 8/13/2020  | 12/9/2020 | Europe / Spain / Catalunya / Badalona |
| EPI_ISL_683626 | 8/19/2020  | 12/9/2020 | Europe / Spain / Catalunya / Badalona |
| EPI_ISL_683627 | 11/9/2020  | 12/9/2020 | Europe / Spain / Catalunya / Badalona |
| EPI_ISL_683628 | 9/2/2020   | 12/9/2020 | Europe / Spain / Catalunya / Badalona |
| EPI_ISL_683634 | 8/28/2020  | 12/9/2020 | Europe / Spain / Catalunya / Badalona |
| EPI_ISL_683641 | 11/14/2020 | 12/9/2020 | Europe / Spain / Catalunya / Badalona |
| EPI_ISL_683643 | 8/21/2020  | 12/9/2020 | Europe / Spain / Catalunya / Badalona |
| EPI_ISL_683646 | 11/1/2020  | 12/9/2020 | Europe / Spain / Catalunya / Badalona |
| EPI_ISL_683648 | 11/12/2020 | 12/9/2020 | Europe / Spain / Catalunya / Badalona |
| EPI_ISL_683652 | 8/12/2020  | 12/9/2020 | Europe / Spain / Catalunya / Badalona |
| EPI_ISL_683658 | 3/28/2020  | 12/9/2020 | Europe / Spain / Madrid / Madrid      |
| EPI_ISL_683659 | 3/27/2020  | 12/9/2020 | Europe / Spain / Madrid / Madrid      |
| EPI_ISL_683663 | 3/27/2020  | 12/9/2020 | Europe / Spain / Madrid / Madrid      |
| EPI_ISL_683664 | 3/24/2020  | 12/9/2020 | Europe / Spain / Madrid / Madrid      |
| EPI_ISL_683669 | 3/10/2020  | 12/9/2020 | Europe / Spain / Madrid / Madrid      |
| EPI_ISL_683670 | 3/26/2020  | 12/9/2020 | Europe / Spain / Madrid / Madrid      |
| EPI_ISL_683672 | 3/21/2020  | 12/9/2020 | Europe / Spain / Madrid / Madrid      |
| EPI_ISL_683673 | 3/24/2020  | 12/9/2020 | Europe / Spain / Madrid / Madrid      |
| EPI_ISL_683674 | 3/17/2020  | 12/9/2020 | Europe / Spain / Madrid / Madrid      |
| EPI_ISL_683678 | 3/22/2020  | 12/9/2020 | North America / USA / Minnesota       |
| EPI_ISL_683679 | 3/23/2020  | 12/9/2020 | North America / USA / Minnesota       |
| EPI_ISL_683680 | 3/26/2020  | 12/9/2020 | North America / USA / Minnesota       |
| EPI_ISL_683681 | 3/27/2020  | 12/9/2020 | North America / USA / Minnesota       |
| EPI_ISL_683682 | 3/29/2020  | 12/9/2020 | North America / USA / Minnesota       |
| EPI_ISL_683683 | 3/28/2020  | 12/9/2020 | North America / USA / Minnesota       |
| EPI_ISL_683684 | 3/27/2020  | 12/9/2020 | North America / USA / Minnesota       |
| EPI_ISL_683685 | 3/26/2020  | 12/9/2020 | North America / USA / Minnesota       |
| EPI_ISL_683686 | 3/26/2020  | 12/9/2020 | North America / USA / Minnesota       |











|                |            |                                                          |
|----------------|------------|----------------------------------------------------------|
| EPI_ISL_683978 | 11/16/2020 | 12/9/2020 North America / USA / New York / New York City |
| EPI_ISL_683979 | 11/16/2020 | 12/9/2020 North America / USA / New York / New York City |
| EPI_ISL_683980 | 11/16/2020 | 12/9/2020 North America / USA / New York / New York      |
| EPI_ISL_683981 | 11/16/2020 | 12/9/2020 North America / USA / New York / New York City |
| EPI_ISL_683982 | 11/16/2020 | 12/9/2020 North America / USA / New York / New York City |
| EPI_ISL_683983 | 11/16/2020 | 12/9/2020 North America / USA / New York / New York      |
| EPI_ISL_683984 | 11/16/2020 | 12/9/2020 North America / USA / New York / New York      |
| EPI_ISL_683985 | 11/16/2020 | 12/9/2020 North America / USA / New York / New York City |
| EPI_ISL_683986 | 11/16/2020 | 12/9/2020 North America / USA / New York / New York City |
| EPI_ISL_683987 | 11/16/2020 | 12/9/2020 North America / USA / New York / New York City |
| EPI_ISL_683988 | 11/17/2020 | 12/9/2020 North America / USA / New York / New York City |
| EPI_ISL_683989 | 11/17/2020 | 12/9/2020 North America / USA / New York / New York City |
| EPI_ISL_683990 | 11/17/2020 | 12/9/2020 North America / USA / New York / New York City |
| EPI_ISL_683991 | 11/17/2020 | 12/9/2020 North America / USA / New York / New York      |
| EPI_ISL_683992 | 11/17/2020 | 12/9/2020 North America / USA / New York / New York City |
| EPI_ISL_683993 | 11/17/2020 | 12/9/2020 North America / USA / New York / New York City |
| EPI_ISL_683994 | 11/17/2020 | 12/9/2020 North America / USA / New York / New York City |
| EPI_ISL_683995 | 11/17/2020 | 12/9/2020 North America / USA / New York / New York City |
| EPI_ISL_683996 | 11/18/2020 | 12/9/2020 North America / USA / New York / New York City |
| EPI_ISL_684003 | 9/21/2020  | 12/9/2020 North America / USA / Utah                     |
| EPI_ISL_684016 | 12/1/2020  | 12/9/2020 North America / USA / Utah                     |
| EPI_ISL_684028 | 11/16/2020 | 12/9/2020 Asia / Bahrain                                 |
| EPI_ISL_684029 | 11/16/2020 | 12/9/2020 Asia / Bahrain                                 |
| EPI_ISL_684030 | 11/15/2020 | 12/9/2020 Asia / Bahrain                                 |
| EPI_ISL_684031 | 11/12/2020 | 12/9/2020 Asia / Bahrain                                 |
| EPI_ISL_684032 | 11/15/2020 | 12/9/2020 Asia / Bahrain                                 |
| EPI_ISL_684033 | 11/15/2020 | 12/9/2020 Asia / Bahrain                                 |
| EPI_ISL_684034 | 11/12/2020 | 12/9/2020 Asia / Bahrain                                 |
| EPI_ISL_684035 | 11/12/2020 | 12/9/2020 Asia / Bahrain                                 |
| EPI_ISL_684036 | 11/16/2020 | 12/9/2020 Asia / Bahrain                                 |
| EPI_ISL_684047 | 10/14/2020 | 12/10/2020 Africa / South Africa / Free State            |
| EPI_ISL_684107 | 4/23/2020  | 12/10/2020 Europe / France / Auvergne-Rhone-Alpes / Lyon |
| EPI_ISL_684110 | 2/27/2020  | 12/10/2020 Asia / Japan / Hokkaido                       |
| EPI_ISL_684111 | 2/28/2020  | 12/10/2020 Asia / Japan / Hokkaido                       |
| EPI_ISL_684113 | 2/29/2020  | 12/10/2020 Asia / Japan / Hokkaido                       |
| EPI_ISL_684114 | 3/3/2020   | 12/10/2020 Asia / Japan / Hokkaido                       |
| EPI_ISL_684115 | 3/4/2020   | 12/10/2020 Asia / Japan / Hokkaido                       |
| EPI_ISL_684116 | 3/4/2020   | 12/10/2020 Asia / Japan / Hokkaido                       |
| EPI_ISL_684118 | 3/5/2020   | 12/10/2020 Asia / Japan / Hokkaido                       |
| EPI_ISL_684119 | 3/6/2020   | 12/10/2020 Asia / Japan / Hokkaido                       |
| EPI_ISL_684120 | 3/7/2020   | 12/10/2020 Asia / Japan / Hokkaido                       |
| EPI_ISL_684121 | 3/7/2020   | 12/10/2020 Asia / Japan / Hokkaido                       |
| EPI_ISL_684122 | 3/5/2020   | 12/10/2020 Asia / Japan / Hokkaido                       |
| EPI_ISL_684123 | 3/9/2020   | 12/10/2020 Asia / Japan / Hokkaido                       |
| EPI_ISL_684124 | 3/9/2020   | 12/10/2020 Asia / Japan / Hokkaido                       |
| EPI_ISL_684125 | 3/9/2020   | 12/10/2020 Asia / Japan / Hokkaido                       |
| EPI_ISL_684126 | 3/10/2020  | 12/10/2020 Asia / Japan / Hokkaido                       |



|                |           |                                    |
|----------------|-----------|------------------------------------|
| EPI_ISL_684128 | 3/12/2020 | 12/10/2020 Asia / Japan / Hyogo    |
| EPI_ISL_684129 | 3/12/2020 | 12/10/2020 Asia / Japan / Hyogo    |
| EPI_ISL_684130 | 2/20/2020 | 12/10/2020 Asia / Japan / Wakayama |
| EPI_ISL_684132 | 3/16/2020 | 12/10/2020 Asia / Japan / Hyogo    |
| EPI_ISL_684133 | 3/14/2020 | 12/10/2020 Asia / Japan / Hyogo    |
| EPI_ISL_684136 | 3/4/2020  | 12/10/2020 Asia / Japan / Tokyo    |
| EPI_ISL_684139 | 2/27/2020 | 12/10/2020 Asia / Japan / Shizuoka |
| EPI_ISL_684142 | 3/11/2020 | 12/10/2020 Asia / Japan / Hyogo    |
| EPI_ISL_684143 | 3/9/2020  | 12/10/2020 Asia / Japan / Niigata  |
| EPI_ISL_684145 | 3/13/2020 | 12/10/2020 Asia / Japan / Niigata  |
| EPI_ISL_684146 | 3/17/2020 | 12/10/2020 Asia / Japan / Niigata  |
| EPI_ISL_684149 | 3/17/2020 | 12/10/2020 Asia / Japan / Saitama  |
| EPI_ISL_684150 | 3/23/2020 | 12/10/2020 Asia / Japan / Ibaraki  |
| EPI_ISL_684151 | 2020-03   | 12/10/2020 Asia / Japan / Osaka    |
| EPI_ISL_684152 | 2020-03   | 12/10/2020 Asia / Japan / Osaka    |
| EPI_ISL_684153 | 2020-03   | 12/10/2020 Asia / Japan / Osaka    |
| EPI_ISL_684154 | 3/18/2020 | 12/10/2020 Asia / Japan / Tokyo    |
| EPI_ISL_684155 | 3/19/2020 | 12/10/2020 Asia / Japan / Tokyo    |
| EPI_ISL_684156 | 3/2/2020  | 12/10/2020 Asia / Japan / Hyogo    |
| EPI_ISL_684157 | 3/28/2020 | 12/10/2020 Asia / Japan / Fukui    |
| EPI_ISL_684158 | 3/18/2020 | 12/10/2020 Asia / Japan / Oita     |
| EPI_ISL_684159 | 3/29/2020 | 12/10/2020 Asia / Japan / Chiba    |
| EPI_ISL_684160 | 3/30/2020 | 12/10/2020 Asia / Japan / Chiba    |
| EPI_ISL_684161 | 3/29/2020 | 12/10/2020 Asia / Japan / Chiba    |
| EPI_ISL_684162 | 3/31/2020 | 12/10/2020 Asia / Japan / Ibaraki  |
| EPI_ISL_684163 | 2/18/2020 | 12/10/2020 Asia / Japan / Tochigi  |
| EPI_ISL_684164 | 2/29/2020 | 12/10/2020 Asia / Japan / Aichi    |
| EPI_ISL_684166 | 4/5/2020  | 12/10/2020 Asia / Japan / Hyogo    |
| EPI_ISL_684167 | 4/5/2020  | 12/10/2020 Asia / Japan / Hyogo    |
| EPI_ISL_684168 | 3/12/2020 | 12/10/2020 Asia / Japan / Saitama  |
| EPI_ISL_684170 | 3/20/2020 | 12/10/2020 Asia / Japan / Oita     |
| EPI_ISL_684171 | 3/21/2020 | 12/10/2020 Asia / Japan / Oita     |
| EPI_ISL_684172 | 3/23/2020 | 12/10/2020 Asia / Japan / Oita     |
| EPI_ISL_684173 | 3/31/2020 | 12/10/2020 Asia / Japan / Fukui    |
| EPI_ISL_684174 | 4/2/2020  | 12/10/2020 Asia / Japan / Fukui    |
| EPI_ISL_684175 | 4/6/2020  | 12/10/2020 Asia / Japan / Fukui    |
| EPI_ISL_684176 | 2020-04   | 12/10/2020 Asia / Japan / Tokyo    |
| EPI_ISL_684177 | 4/3/2020  | 12/10/2020 Asia / Japan / Toyama   |
| EPI_ISL_684178 | 4/1/2020  | 12/10/2020 Asia / Japan / Akita    |
| EPI_ISL_684179 | 4/11/2020 | 12/10/2020 Asia / Japan / Akita    |
| EPI_ISL_684180 | 4/10/2020 | 12/10/2020 Asia / Japan / Akita    |
| EPI_ISL_684181 | 4/7/2020  | 12/10/2020 Asia / Japan / Hyogo    |
| EPI_ISL_684182 | 4/7/2020  | 12/10/2020 Asia / Japan / Hyogo    |
| EPI_ISL_684183 | 4/7/2020  | 12/10/2020 Asia / Japan / Hyogo    |
| EPI_ISL_684184 | 4/8/2020  | 12/10/2020 Asia / Japan / Hyogo    |
| EPI_ISL_684185 | 4/8/2020  | 12/10/2020 Asia / Japan / Hyogo    |
| EPI_ISL_684186 | 4/9/2020  | 12/10/2020 Asia / Japan / Hyogo    |

|                |           |                                    |
|----------------|-----------|------------------------------------|
| EPI_ISL_684187 | 4/9/2020  | 12/10/2020 Asia / Japan / Hyogo    |
| EPI_ISL_684188 | 4/9/2020  | 12/10/2020 Asia / Japan / Hyogo    |
| EPI_ISL_684189 | 4/9/2020  | 12/10/2020 Asia / Japan / Hyogo    |
| EPI_ISL_684190 | 4/9/2020  | 12/10/2020 Asia / Japan / Hyogo    |
| EPI_ISL_684191 | 4/9/2020  | 12/10/2020 Asia / Japan / Hyogo    |
| EPI_ISL_684192 | 4/10/2020 | 12/10/2020 Asia / Japan / Hyogo    |
| EPI_ISL_684193 | 4/11/2020 | 12/10/2020 Asia / Japan / Hyogo    |
| EPI_ISL_684194 | 4/11/2020 | 12/10/2020 Asia / Japan / Hyogo    |
| EPI_ISL_684195 | 4/11/2020 | 12/10/2020 Asia / Japan / Hyogo    |
| EPI_ISL_684196 | 4/11/2020 | 12/10/2020 Asia / Japan / Hyogo    |
| EPI_ISL_684197 | 4/11/2020 | 12/10/2020 Asia / Japan / Hyogo    |
| EPI_ISL_684198 | 4/11/2020 | 12/10/2020 Asia / Japan / Hyogo    |
| EPI_ISL_684199 | 4/11/2020 | 12/10/2020 Asia / Japan / Hyogo    |
| EPI_ISL_684200 | 4/12/2020 | 12/10/2020 Asia / Japan / Hyogo    |
| EPI_ISL_684201 | 4/12/2020 | 12/10/2020 Asia / Japan / Hyogo    |
| EPI_ISL_684202 | 4/4/2020  | 12/10/2020 Asia / Japan / Saitama  |
| EPI_ISL_684203 | 4/6/2020  | 12/10/2020 Asia / Japan / Saitama  |
| EPI_ISL_684204 | 4/7/2020  | 12/10/2020 Asia / Japan / Saitama  |
| EPI_ISL_684205 | 4/6/2020  | 12/10/2020 Asia / Japan / Shizuoka |
| EPI_ISL_684206 | 4/6/2020  | 12/10/2020 Asia / Japan / Shizuoka |
| EPI_ISL_684207 | 4/6/2020  | 12/10/2020 Asia / Japan / Shizuoka |
| EPI_ISL_684208 | 4/8/2020  | 12/10/2020 Asia / Japan / Shizuoka |
| EPI_ISL_684209 | 4/7/2020  | 12/10/2020 Asia / Japan / Shizuoka |
| EPI_ISL_684210 | 4/6/2020  | 12/10/2020 Asia / Japan / Wakayama |
| EPI_ISL_684211 | 4/7/2020  | 12/10/2020 Asia / Japan / Wakayama |
| EPI_ISL_684212 | 4/8/2020  | 12/10/2020 Asia / Japan / Wakayama |
| EPI_ISL_684213 | 4/8/2020  | 12/10/2020 Asia / Japan / Wakayama |
| EPI_ISL_684214 | 4/8/2020  | 12/10/2020 Asia / Japan / Wakayama |
| EPI_ISL_684215 | 4/7/2020  | 12/10/2020 Asia / Japan / Wakayama |
| EPI_ISL_684216 | 4/6/2020  | 12/10/2020 Asia / Japan / Wakayama |
| EPI_ISL_684217 | 4/4/2020  | 12/10/2020 Asia / Japan / Wakayama |
| EPI_ISL_684218 | 4/5/2020  | 12/10/2020 Asia / Japan / Wakayama |
| EPI_ISL_684219 | 3/29/2020 | 12/10/2020 Asia / Japan / Wakayama |
| EPI_ISL_684220 | 4/8/2020  | 12/10/2020 Asia / Japan / Gunma    |
| EPI_ISL_684221 | 4/8/2020  | 12/10/2020 Asia / Japan / Gunma    |
| EPI_ISL_684222 | 4/8/2020  | 12/10/2020 Asia / Japan / Gunma    |
| EPI_ISL_684223 | 4/10/2020 | 12/10/2020 Asia / Japan / Gunma    |
| EPI_ISL_684224 | 4/9/2020  | 12/10/2020 Asia / Japan / Gunma    |
| EPI_ISL_684225 | 4/9/2020  | 12/10/2020 Asia / Japan / Gunma    |
| EPI_ISL_684226 | 4/10/2020 | 12/10/2020 Asia / Japan / Gunma    |
| EPI_ISL_684227 | 4/9/2020  | 12/10/2020 Asia / Japan / Gunma    |
| EPI_ISL_684228 | 4/9/2020  | 12/10/2020 Asia / Japan / Gunma    |
| EPI_ISL_684229 | 4/9/2020  | 12/10/2020 Asia / Japan / Gunma    |
| EPI_ISL_684230 | 4/10/2020 | 12/10/2020 Asia / Japan / Gunma    |
| EPI_ISL_684231 | 4/9/2020  | 12/10/2020 Asia / Japan / Gunma    |
| EPI_ISL_684232 | 4/9/2020  | 12/10/2020 Asia / Japan / Gunma    |
| EPI_ISL_684233 | 4/9/2020  | 12/10/2020 Asia / Japan / Gunma    |



|                |           |                                    |
|----------------|-----------|------------------------------------|
| EPI_ISL_684281 | 4/14/2020 | 12/10/2020 Asia / Japan / Gunma    |
| EPI_ISL_684282 | 4/14/2020 | 12/10/2020 Asia / Japan / Gunma    |
| EPI_ISL_684283 | 4/14/2020 | 12/10/2020 Asia / Japan / Gunma    |
| EPI_ISL_684284 | 4/15/2020 | 12/10/2020 Asia / Japan / Gunma    |
| EPI_ISL_684285 | 4/15/2020 | 12/10/2020 Asia / Japan / Gunma    |
| EPI_ISL_684286 | 4/15/2020 | 12/10/2020 Asia / Japan / Gunma    |
| EPI_ISL_684287 | 4/15/2020 | 12/10/2020 Asia / Japan / Gunma    |
| EPI_ISL_684288 | 4/15/2020 | 12/10/2020 Asia / Japan / Gunma    |
| EPI_ISL_684289 | 4/11/2020 | 12/10/2020 Asia / Japan / Saitama  |
| EPI_ISL_684290 | 4/8/2020  | 12/10/2020 Asia / Japan / Saitama  |
| EPI_ISL_684291 | 4/9/2020  | 12/10/2020 Asia / Japan / Saitama  |
| EPI_ISL_684292 | 4/10/2020 | 12/10/2020 Asia / Japan / Saitama  |
| EPI_ISL_684293 | 4/12/2020 | 12/10/2020 Asia / Japan / Saitama  |
| EPI_ISL_684294 | 4/14/2020 | 12/10/2020 Asia / Japan / Shizuoka |
| EPI_ISL_684295 | 4/10/2020 | 12/10/2020 Asia / Japan / Hyogo    |
| EPI_ISL_684296 | 2020      | 12/10/2020 Asia / Japan / Hyogo    |
| EPI_ISL_684297 | 4/13/2020 | 12/10/2020 Asia / Japan / Hyogo    |
| EPI_ISL_684298 | 4/11/2020 | 12/10/2020 Asia / Japan / Hyogo    |
| EPI_ISL_684299 | 4/13/2020 | 12/10/2020 Asia / Japan / Hyogo    |
| EPI_ISL_684300 | 4/14/2020 | 12/10/2020 Asia / Japan / Hyogo    |
| EPI_ISL_684301 | 4/14/2020 | 12/10/2020 Asia / Japan / Hyogo    |
| EPI_ISL_684302 | 4/14/2020 | 12/10/2020 Asia / Japan / Hyogo    |
| EPI_ISL_684303 | 4/14/2020 | 12/10/2020 Asia / Japan / Hyogo    |
| EPI_ISL_684304 | 2020      | 12/10/2020 Asia / Japan / Hyogo    |
| EPI_ISL_684305 | 4/15/2020 | 12/10/2020 Asia / Japan / Hyogo    |
| EPI_ISL_684306 | 4/15/2020 | 12/10/2020 Asia / Japan / Hyogo    |
| EPI_ISL_684307 | 4/15/2020 | 12/10/2020 Asia / Japan / Hyogo    |
| EPI_ISL_684308 | 4/15/2020 | 12/10/2020 Asia / Japan / Hyogo    |
| EPI_ISL_684309 | 4/15/2020 | 12/10/2020 Asia / Japan / Hyogo    |
| EPI_ISL_684310 | 4/15/2020 | 12/10/2020 Asia / Japan / Hyogo    |
| EPI_ISL_684311 | 4/15/2020 | 12/10/2020 Asia / Japan / Hyogo    |
| EPI_ISL_684312 | 4/16/2020 | 12/10/2020 Asia / Japan / Hyogo    |
| EPI_ISL_684315 | 4/17/2020 | 12/10/2020 Asia / Japan / Hyogo    |
| EPI_ISL_684316 | 4/17/2020 | 12/10/2020 Asia / Japan / Hyogo    |
| EPI_ISL_684317 | 4/18/2020 | 12/10/2020 Asia / Japan / Hyogo    |
| EPI_ISL_684319 | 4/18/2020 | 12/10/2020 Asia / Japan / Hyogo    |
| EPI_ISL_684320 | 4/18/2020 | 12/10/2020 Asia / Japan / Hyogo    |
| EPI_ISL_684325 | 4/15/2020 | 12/10/2020 Asia / Japan / Gunma    |
| EPI_ISL_684326 | 4/16/2020 | 12/10/2020 Asia / Japan / Gunma    |
| EPI_ISL_684327 | 4/16/2020 | 12/10/2020 Asia / Japan / Gunma    |
| EPI_ISL_684328 | 4/15/2020 | 12/10/2020 Asia / Japan / Gunma    |
| EPI_ISL_684329 | 4/15/2020 | 12/10/2020 Asia / Japan / Gunma    |
| EPI_ISL_684330 | 4/16/2020 | 12/10/2020 Asia / Japan / Gunma    |
| EPI_ISL_684331 | 4/16/2020 | 12/10/2020 Asia / Japan / Gunma    |
| EPI_ISL_684332 | 4/17/2020 | 12/10/2020 Asia / Japan / Gunma    |
| EPI_ISL_684333 | 4/17/2020 | 12/10/2020 Asia / Japan / Gunma    |
| EPI_ISL_684334 | 4/17/2020 | 12/10/2020 Asia / Japan / Gunma    |

|                |           |                                    |
|----------------|-----------|------------------------------------|
| EPI_ISL_684335 | 4/17/2020 | 12/10/2020 Asia / Japan / Gunma    |
| EPI_ISL_684336 | 4/17/2020 | 12/10/2020 Asia / Japan / Gunma    |
| EPI_ISL_684337 | 4/18/2020 | 12/10/2020 Asia / Japan / Gunma    |
| EPI_ISL_684338 | 4/19/2020 | 12/10/2020 Asia / Japan / Gunma    |
| EPI_ISL_684339 | 2020-04   | 12/10/2020 Asia / Japan / Ishikawa |
| EPI_ISL_684340 | 2020-04   | 12/10/2020 Asia / Japan / Ishikawa |
| EPI_ISL_684341 | 2020-04   | 12/10/2020 Asia / Japan / Ishikawa |
| EPI_ISL_684342 | 2020-04   | 12/10/2020 Asia / Japan / Ishikawa |
| EPI_ISL_684343 | 2020-04   | 12/10/2020 Asia / Japan / Ishikawa |
| EPI_ISL_684344 | 2020-04   | 12/10/2020 Asia / Japan / Ishikawa |
| EPI_ISL_684345 | 2020-04   | 12/10/2020 Asia / Japan / Ishikawa |
| EPI_ISL_684346 | 2020-04   | 12/10/2020 Asia / Japan / Ishikawa |
| EPI_ISL_684347 | 2020-04   | 12/10/2020 Asia / Japan / Ishikawa |
| EPI_ISL_684348 | 2020-04   | 12/10/2020 Asia / Japan / Ishikawa |
| EPI_ISL_684349 | 2020-04   | 12/10/2020 Asia / Japan / Ishikawa |
| EPI_ISL_684350 | 2020-04   | 12/10/2020 Asia / Japan / Ishikawa |
| EPI_ISL_684351 | 2020-04   | 12/10/2020 Asia / Japan / Ishikawa |
| EPI_ISL_684352 | 2020-04   | 12/10/2020 Asia / Japan / Ishikawa |
| EPI_ISL_684353 | 2020-04   | 12/10/2020 Asia / Japan / Ishikawa |
| EPI_ISL_684354 | 2020-04   | 12/10/2020 Asia / Japan / Ishikawa |
| EPI_ISL_684355 | 2020-04   | 12/10/2020 Asia / Japan / Ishikawa |
| EPI_ISL_684356 | 2020-04   | 12/10/2020 Asia / Japan / Ishikawa |
| EPI_ISL_684357 | 4/12/2020 | 12/10/2020 Asia / Japan / Saitama  |
| EPI_ISL_684358 | 4/14/2020 | 12/10/2020 Asia / Japan / Saitama  |
| EPI_ISL_684359 | 4/14/2020 | 12/10/2020 Asia / Japan / Saitama  |
| EPI_ISL_684360 | 4/14/2020 | 12/10/2020 Asia / Japan / Saitama  |
| EPI_ISL_684361 | 3/28/2020 | 12/10/2020 Asia / Japan / Fukuoka  |
| EPI_ISL_684362 | 4/14/2020 | 12/10/2020 Asia / Japan / Fukuoka  |
| EPI_ISL_684363 | 4/4/2020  | 12/10/2020 Asia / Japan / Fukuoka  |
| EPI_ISL_684365 | 4/15/2020 | 12/10/2020 Asia / Japan / Fukuoka  |
| EPI_ISL_684366 | 4/7/2020  | 12/10/2020 Asia / Japan / Fukuoka  |
| EPI_ISL_684367 | 4/6/2020  | 12/10/2020 Asia / Japan / Fukuoka  |
| EPI_ISL_684368 | 4/7/2020  | 12/10/2020 Asia / Japan / Fukuoka  |
| EPI_ISL_684369 | 4/8/2020  | 12/10/2020 Asia / Japan / Fukuoka  |
| EPI_ISL_684370 | 3/19/2020 | 12/10/2020 Asia / Japan / Saitama  |
| EPI_ISL_684371 | 3/20/2020 | 12/10/2020 Asia / Japan / Saitama  |
| EPI_ISL_684372 | 3/21/2020 | 12/10/2020 Asia / Japan / Saitama  |
| EPI_ISL_684373 | 3/21/2020 | 12/10/2020 Asia / Japan / Saitama  |
| EPI_ISL_684374 | 3/21/2020 | 12/10/2020 Asia / Japan / Saitama  |
| EPI_ISL_684375 | 3/24/2020 | 12/10/2020 Asia / Japan / Saitama  |
| EPI_ISL_684376 | 3/26/2020 | 12/10/2020 Asia / Japan / Saitama  |
| EPI_ISL_684377 | 3/26/2020 | 12/10/2020 Asia / Japan / Saitama  |
| EPI_ISL_684378 | 3/26/2020 | 12/10/2020 Asia / Japan / Saitama  |
| EPI_ISL_684379 | 3/28/2020 | 12/10/2020 Asia / Japan / Saitama  |
| EPI_ISL_684381 | 3/28/2020 | 12/10/2020 Asia / Japan / Saitama  |
| EPI_ISL_684382 | 3/29/2020 | 12/10/2020 Asia / Japan / Saitama  |
| EPI_ISL_684383 | 3/30/2020 | 12/10/2020 Asia / Japan / Saitama  |





|                |           |            |                          |
|----------------|-----------|------------|--------------------------|
| EPI_ISL_684478 | 2020      | 12/10/2020 | Asia / Japan / Fukuoka   |
| EPI_ISL_684479 | 2020      | 12/10/2020 | Asia / Japan / Fukuoka   |
| EPI_ISL_684480 | 2020      | 12/10/2020 | Asia / Japan / Fukuoka   |
| EPI_ISL_684481 | 2020      | 12/10/2020 | Asia / Japan / Fukuoka   |
| EPI_ISL_684482 | 2020      | 12/10/2020 | Asia / Japan / Fukuoka   |
| EPI_ISL_684483 | 2020      | 12/10/2020 | Asia / Japan / Fukuoka   |
| EPI_ISL_684484 | 4/16/2020 | 12/10/2020 | Asia / Japan / Hyogo     |
| EPI_ISL_684485 | 4/17/2020 | 12/10/2020 | Asia / Japan / Hyogo     |
| EPI_ISL_684486 | 3/27/2020 | 12/10/2020 | Asia / Japan / Hyogo     |
| EPI_ISL_684487 | 3/30/2020 | 12/10/2020 | Asia / Japan / Hyogo     |
| EPI_ISL_684488 | 3/30/2020 | 12/10/2020 | Asia / Japan / Hyogo     |
| EPI_ISL_684489 | 4/1/2020  | 12/10/2020 | Asia / Japan / Hyogo     |
| EPI_ISL_684490 | 4/1/2020  | 12/10/2020 | Asia / Japan / Hyogo     |
| EPI_ISL_684491 | 2020-04   | 12/10/2020 | Asia / Japan             |
| EPI_ISL_684492 | 3/28/2020 | 12/10/2020 | Asia / Japan / Hyogo     |
| EPI_ISL_684493 | 3/27/2020 | 12/10/2020 | Asia / Japan / Hyogo     |
| EPI_ISL_684494 | 4/1/2020  | 12/10/2020 | Asia / Japan / Hyogo     |
| EPI_ISL_684495 | 4/8/2020  | 12/10/2020 | Asia / Japan / Hyogo     |
| EPI_ISL_684496 | 4/9/2020  | 12/10/2020 | Asia / Japan / Hyogo     |
| EPI_ISL_684497 | 4/10/2020 | 12/10/2020 | Asia / Japan / Hyogo     |
| EPI_ISL_684498 | 4/10/2020 | 12/10/2020 | Asia / Japan / Hyogo     |
| EPI_ISL_684499 | 4/16/2020 | 12/10/2020 | Asia / Japan / Hyogo     |
| EPI_ISL_684500 | 3/26/2020 | 12/10/2020 | Asia / Japan / Kagoshima |
| EPI_ISL_684501 | 2020-03   | 12/10/2020 | Asia / Japan             |
| EPI_ISL_684502 | 4/4/2020  | 12/10/2020 | Asia / Japan / Kagoshima |
| EPI_ISL_684503 | 4/8/2020  | 12/10/2020 | Asia / Japan / Kagoshima |
| EPI_ISL_684504 | 4/16/2020 | 12/10/2020 | Asia / Japan / Kagoshima |
| EPI_ISL_684505 | 4/20/2020 | 12/10/2020 | Asia / Japan / Kagoshima |
| EPI_ISL_684506 | 3/25/2020 | 12/10/2020 | Asia / Japan / Tokyo     |
| EPI_ISL_684507 | 3/26/2020 | 12/10/2020 | Asia / Japan / Tokyo     |
| EPI_ISL_684508 | 3/26/2020 | 12/10/2020 | Asia / Japan / Tokyo     |
| EPI_ISL_684509 | 3/25/2020 | 12/10/2020 | Asia / Japan / Tokyo     |
| EPI_ISL_684510 | 3/25/2020 | 12/10/2020 | Asia / Japan / Tokyo     |
| EPI_ISL_684511 | 3/25/2020 | 12/10/2020 | Asia / Japan / Tokyo     |
| EPI_ISL_684512 | 3/26/2020 | 12/10/2020 | Asia / Japan / Tokyo     |
| EPI_ISL_684513 | 3/27/2020 | 12/10/2020 | Asia / Japan / Tokyo     |
| EPI_ISL_684514 | 3/27/2020 | 12/10/2020 | Asia / Japan / Tokyo     |
| EPI_ISL_684515 | 4/1/2020  | 12/10/2020 | Asia / Japan / Tokyo     |
| EPI_ISL_684516 | 4/1/2020  | 12/10/2020 | Asia / Japan / Tokyo     |
| EPI_ISL_684517 | 3/31/2020 | 12/10/2020 | Asia / Japan / Tokyo     |
| EPI_ISL_684518 | 4/1/2020  | 12/10/2020 | Asia / Japan / Tokyo     |
| EPI_ISL_684519 | 3/31/2020 | 12/10/2020 | Asia / Japan / Tokyo     |
| EPI_ISL_684520 | 3/31/2020 | 12/10/2020 | Asia / Japan / Tokyo     |
| EPI_ISL_684521 | 3/31/2020 | 12/10/2020 | Asia / Japan / Tokyo     |
| EPI_ISL_684522 | 3/31/2020 | 12/10/2020 | Asia / Japan / Tokyo     |
| EPI_ISL_684523 | 4/12/2020 | 12/10/2020 | Asia / Japan / Saitama   |
| EPI_ISL_684524 | 4/12/2020 | 12/10/2020 | Asia / Japan / Saitama   |



|                |           |                                     |
|----------------|-----------|-------------------------------------|
| EPI_ISL_684525 | 4/17/2020 | 12/10/2020 Asia / Japan / Saitama   |
| EPI_ISL_684526 | 4/13/2020 | 12/10/2020 Asia / Japan / Saitama   |
| EPI_ISL_684527 | 4/13/2020 | 12/10/2020 Asia / Japan / Saitama   |
| EPI_ISL_684529 | 4/15/2020 | 12/10/2020 Asia / Japan / Saitama   |
| EPI_ISL_684530 | 4/15/2020 | 12/10/2020 Asia / Japan / Saitama   |
| EPI_ISL_684531 | 4/15/2020 | 12/10/2020 Asia / Japan / Saitama   |
| EPI_ISL_684532 | 4/15/2020 | 12/10/2020 Asia / Japan / Saitama   |
| EPI_ISL_684533 | 4/16/2020 | 12/10/2020 Asia / Japan / Saitama   |
| EPI_ISL_684534 | 4/2/2020  | 12/10/2020 Asia / Japan / Oita      |
| EPI_ISL_684535 | 4/6/2020  | 12/10/2020 Asia / Japan / Oita      |
| EPI_ISL_684536 | 4/4/2020  | 12/10/2020 Asia / Japan / Oita      |
| EPI_ISL_684537 | 4/5/2020  | 12/10/2020 Asia / Japan / Oita      |
| EPI_ISL_684538 | 4/9/2020  | 12/10/2020 Asia / Japan / Oita      |
| EPI_ISL_684539 | 4/13/2020 | 12/10/2020 Asia / Japan / Oita      |
| EPI_ISL_684540 | 4/14/2020 | 12/10/2020 Asia / Japan / Oita      |
| EPI_ISL_684541 | 4/7/2020  | 12/10/2020 Asia / Japan / Oita      |
| EPI_ISL_684542 | 4/7/2020  | 12/10/2020 Asia / Japan / Oita      |
| EPI_ISL_684543 | 4/7/2020  | 12/10/2020 Asia / Japan / Oita      |
| EPI_ISL_684544 | 4/14/2020 | 12/10/2020 Asia / Japan / Oita      |
| EPI_ISL_684545 | 4/14/2020 | 12/10/2020 Asia / Japan / Oita      |
| EPI_ISL_684546 | 4/8/2020  | 12/10/2020 Asia / Japan / Oita      |
| EPI_ISL_684547 | 4/7/2020  | 12/10/2020 Asia / Japan / Oita      |
| EPI_ISL_684548 | 4/15/2020 | 12/10/2020 Asia / Japan / Oita      |
| EPI_ISL_684549 | 4/15/2020 | 12/10/2020 Asia / Japan / Oita      |
| EPI_ISL_684550 | 4/15/2020 | 12/10/2020 Asia / Japan / Oita      |
| EPI_ISL_684551 | 4/20/2020 | 12/10/2020 Asia / Japan / Oita      |
| EPI_ISL_684552 | 4/16/2020 | 12/10/2020 Asia / Japan / Oita      |
| EPI_ISL_684553 | 4/20/2020 | 12/10/2020 Asia / Japan / Oita      |
| EPI_ISL_684554 | 4/16/2020 | 12/10/2020 Asia / Japan / Oita      |
| EPI_ISL_684555 | 4/16/2020 | 12/10/2020 Asia / Japan / Oita      |
| EPI_ISL_684556 | 3/31/2020 | 12/10/2020 Asia / Japan / Tokyo     |
| EPI_ISL_684557 | 4/17/2020 | 12/10/2020 Asia / Japan / Tokyo     |
| EPI_ISL_684558 | 4/8/2020  | 12/10/2020 Asia / Japan / Fukushima |
| EPI_ISL_684559 | 4/8/2020  | 12/10/2020 Asia / Japan / Fukushima |
| EPI_ISL_684560 | 4/9/2020  | 12/10/2020 Asia / Japan / Fukushima |
| EPI_ISL_684561 | 4/9/2020  | 12/10/2020 Asia / Japan / Fukushima |
| EPI_ISL_684562 | 4/14/2020 | 12/10/2020 Asia / Japan / Fukushima |
| EPI_ISL_684563 | 4/15/2020 | 12/10/2020 Asia / Japan / Fukushima |
| EPI_ISL_684564 | 4/15/2020 | 12/10/2020 Asia / Japan / Fukushima |
| EPI_ISL_684565 | 4/17/2020 | 12/10/2020 Asia / Japan / Fukushima |
| EPI_ISL_684566 | 2020-04   | 12/10/2020 Asia / Japan / Gunma     |
| EPI_ISL_684567 | 2020-04   | 12/10/2020 Asia / Japan / Gunma     |
| EPI_ISL_684568 | 2020-04   | 12/10/2020 Asia / Japan / Gunma     |
| EPI_ISL_684569 | 2020-04   | 12/10/2020 Asia / Japan / Gunma     |
| EPI_ISL_684570 | 2020-04   | 12/10/2020 Asia / Japan / Gunma     |
| EPI_ISL_684571 | 2020-04   | 12/10/2020 Asia / Japan / Gunma     |
| EPI_ISL_684572 | 2020-04   | 12/10/2020 Asia / Japan / Gunma     |





|                |           |                                    |
|----------------|-----------|------------------------------------|
| EPI_ISL_684678 | 4/23/2020 | 12/10/2020 Asia / Japan / Fukuoka  |
| EPI_ISL_684679 | 4/23/2020 | 12/10/2020 Asia / Japan / Fukuoka  |
| EPI_ISL_684680 | 4/23/2020 | 12/10/2020 Asia / Japan / Fukuoka  |
| EPI_ISL_684681 | 4/23/2020 | 12/10/2020 Asia / Japan / Fukuoka  |
| EPI_ISL_684682 | 4/23/2020 | 12/10/2020 Asia / Japan / Fukuoka  |
| EPI_ISL_684683 | 4/23/2020 | 12/10/2020 Asia / Japan / Fukuoka  |
| EPI_ISL_684684 | 4/24/2020 | 12/10/2020 Asia / Japan / Fukuoka  |
| EPI_ISL_684685 | 4/24/2020 | 12/10/2020 Asia / Japan / Fukuoka  |
| EPI_ISL_684686 | 4/24/2020 | 12/10/2020 Asia / Japan / Fukuoka  |
| EPI_ISL_684687 | 4/24/2020 | 12/10/2020 Asia / Japan / Fukuoka  |
| EPI_ISL_684688 | 4/25/2020 | 12/10/2020 Asia / Japan / Fukuoka  |
| EPI_ISL_684689 | 4/25/2020 | 12/10/2020 Asia / Japan / Fukuoka  |
| EPI_ISL_684690 | 4/25/2020 | 12/10/2020 Asia / Japan / Fukuoka  |
| EPI_ISL_684691 | 4/25/2020 | 12/10/2020 Asia / Japan / Fukuoka  |
| EPI_ISL_684692 | 4/25/2020 | 12/10/2020 Asia / Japan / Fukuoka  |
| EPI_ISL_684693 | 3/4/2020  | 12/10/2020 Asia / Japan / Miyazaki |
| EPI_ISL_684694 | 3/16/2020 | 12/10/2020 Asia / Japan / Miyazaki |
| EPI_ISL_684695 | 4/2/2020  | 12/10/2020 Asia / Japan / Miyazaki |
| EPI_ISL_684696 | 4/17/2020 | 12/10/2020 Asia / Japan / Miyazaki |
| EPI_ISL_684697 | 4/7/2020  | 12/10/2020 Asia / Japan / Miyazaki |
| EPI_ISL_684698 | 4/8/2020  | 12/10/2020 Asia / Japan / Miyazaki |
| EPI_ISL_684699 | 4/8/2020  | 12/10/2020 Asia / Japan / Miyazaki |
| EPI_ISL_684700 | 4/8/2020  | 12/10/2020 Asia / Japan / Miyazaki |
| EPI_ISL_684701 | 4/8/2020  | 12/10/2020 Asia / Japan / Miyazaki |
| EPI_ISL_684702 | 4/8/2020  | 12/10/2020 Asia / Japan / Miyazaki |
| EPI_ISL_684703 | 4/11/2020 | 12/10/2020 Asia / Japan / Kumamoto |
| EPI_ISL_684704 | 4/12/2020 | 12/10/2020 Asia / Japan / Kumamoto |
| EPI_ISL_684705 | 4/13/2020 | 12/10/2020 Asia / Japan / Kumamoto |
| EPI_ISL_684706 | 4/14/2020 | 12/10/2020 Asia / Japan / Kumamoto |
| EPI_ISL_684707 | 4/14/2020 | 12/10/2020 Asia / Japan / Kumamoto |
| EPI_ISL_684708 | 4/17/2020 | 12/10/2020 Asia / Japan / Kumamoto |
| EPI_ISL_684709 | 4/18/2020 | 12/10/2020 Asia / Japan / Kumamoto |
| EPI_ISL_684710 | 4/20/2020 | 12/10/2020 Asia / Japan / Kumamoto |
| EPI_ISL_684711 | 4/21/2020 | 12/10/2020 Asia / Japan / Kumamoto |
| EPI_ISL_684712 | 4/22/2020 | 12/10/2020 Asia / Japan / Kumamoto |
| EPI_ISL_684713 | 4/23/2020 | 12/10/2020 Asia / Japan / Kumamoto |
| EPI_ISL_684714 | 4/25/2020 | 12/10/2020 Asia / Japan / Kumamoto |
| EPI_ISL_684715 | 4/25/2020 | 12/10/2020 Asia / Japan / Kumamoto |
| EPI_ISL_684716 | 3/30/2020 | 12/10/2020 Asia / Japan / Nagasaki |
| EPI_ISL_684717 | 3/31/2020 | 12/10/2020 Asia / Japan / Nagasaki |
| EPI_ISL_684723 | 4/25/2020 | 12/10/2020 Asia / Japan / Fukuoka  |
| EPI_ISL_684724 | 4/26/2020 | 12/10/2020 Asia / Japan / Fukuoka  |
| EPI_ISL_684725 | 4/26/2020 | 12/10/2020 Asia / Japan / Fukuoka  |
| EPI_ISL_684726 | 4/27/2020 | 12/10/2020 Asia / Japan / Fukuoka  |
| EPI_ISL_684727 | 4/27/2020 | 12/10/2020 Asia / Japan / Fukuoka  |
| EPI_ISL_684728 | 4/20/2020 | 12/10/2020 Asia / Japan / Tokyo    |
| EPI_ISL_684729 | 4/18/2020 | 12/10/2020 Asia / Japan / Tokyo    |

|                |           |                                    |
|----------------|-----------|------------------------------------|
| EPI_ISL_684730 | 4/20/2020 | 12/10/2020 Asia / Japan / Tokyo    |
| EPI_ISL_684731 | 4/20/2020 | 12/10/2020 Asia / Japan / Tokyo    |
| EPI_ISL_684732 | 4/21/2020 | 12/10/2020 Asia / Japan / Tokyo    |
| EPI_ISL_684734 | 4/22/2020 | 12/10/2020 Asia / Japan / Tokyo    |
| EPI_ISL_684735 | 4/22/2020 | 12/10/2020 Asia / Japan / Tokyo    |
| EPI_ISL_684736 | 3/26/2020 | 12/10/2020 Asia / Japan / Hyogo    |
| EPI_ISL_684737 | 4/1/2020  | 12/10/2020 Asia / Japan / Hyogo    |
| EPI_ISL_684738 | 4/3/2020  | 12/10/2020 Asia / Japan / Hyogo    |
| EPI_ISL_684739 | 4/5/2020  | 12/10/2020 Asia / Japan / Hyogo    |
| EPI_ISL_684740 | 4/6/2020  | 12/10/2020 Asia / Japan / Hyogo    |
| EPI_ISL_684741 | 4/7/2020  | 12/10/2020 Asia / Japan / Hyogo    |
| EPI_ISL_684742 | 4/7/2020  | 12/10/2020 Asia / Japan / Hyogo    |
| EPI_ISL_684743 | 4/9/2020  | 12/10/2020 Asia / Japan / Hyogo    |
| EPI_ISL_684744 | 4/9/2020  | 12/10/2020 Asia / Japan / Hyogo    |
| EPI_ISL_684745 | 4/10/2020 | 12/10/2020 Asia / Japan / Hyogo    |
| EPI_ISL_684746 | 4/13/2020 | 12/10/2020 Asia / Japan / Hyogo    |
| EPI_ISL_684747 | 4/13/2020 | 12/10/2020 Asia / Japan / Hyogo    |
| EPI_ISL_684748 | 4/16/2020 | 12/10/2020 Asia / Japan / Hyogo    |
| EPI_ISL_684749 | 4/16/2020 | 12/10/2020 Asia / Japan / Hyogo    |
| EPI_ISL_684750 | 4/17/2020 | 12/10/2020 Asia / Japan / Hyogo    |
| EPI_ISL_684751 | 4/17/2020 | 12/10/2020 Asia / Japan / Hyogo    |
| EPI_ISL_684752 | 4/17/2020 | 12/10/2020 Asia / Japan / Hyogo    |
| EPI_ISL_684753 | 4/17/2020 | 12/10/2020 Asia / Japan / Hyogo    |
| EPI_ISL_684754 | 4/20/2020 | 12/10/2020 Asia / Japan / Hyogo    |
| EPI_ISL_684755 | 4/20/2020 | 12/10/2020 Asia / Japan / Hyogo    |
| EPI_ISL_684756 | 4/20/2020 | 12/10/2020 Asia / Japan / Hyogo    |
| EPI_ISL_684757 | 4/28/2020 | 12/10/2020 Asia / Japan / Hyogo    |
| EPI_ISL_684758 | 4/28/2020 | 12/10/2020 Asia / Japan / Hyogo    |
| EPI_ISL_684759 | 4/15/2020 | 12/10/2020 Asia / Japan / Shizuoka |
| EPI_ISL_684760 | 4/24/2020 | 12/10/2020 Asia / Japan / Shizuoka |
| EPI_ISL_684761 | 4/24/2020 | 12/10/2020 Asia / Japan / Shizuoka |
| EPI_ISL_684762 | 3/30/2020 | 12/10/2020 Asia / Japan / Ishikawa |
| EPI_ISL_684763 | 3/31/2020 | 12/10/2020 Asia / Japan / Ishikawa |
| EPI_ISL_684764 | 4/1/2020  | 12/10/2020 Asia / Japan / Ishikawa |
| EPI_ISL_684765 | 4/2/2020  | 12/10/2020 Asia / Japan / Ishikawa |
| EPI_ISL_684766 | 4/2/2020  | 12/10/2020 Asia / Japan / Ishikawa |
| EPI_ISL_684767 | 4/2/2020  | 12/10/2020 Asia / Japan / Ishikawa |
| EPI_ISL_684768 | 4/2/2020  | 12/10/2020 Asia / Japan / Ishikawa |
| EPI_ISL_684769 | 4/4/2020  | 12/10/2020 Asia / Japan / Ishikawa |
| EPI_ISL_684770 | 4/5/2020  | 12/10/2020 Asia / Japan / Ishikawa |
| EPI_ISL_684771 | 4/6/2020  | 12/10/2020 Asia / Japan / Ishikawa |
| EPI_ISL_684772 | 4/6/2020  | 12/10/2020 Asia / Japan / Ishikawa |
| EPI_ISL_684773 | 4/7/2020  | 12/10/2020 Asia / Japan / Ishikawa |
| EPI_ISL_684774 | 4/7/2020  | 12/10/2020 Asia / Japan / Ishikawa |
| EPI_ISL_684775 | 4/9/2020  | 12/10/2020 Asia / Japan / Ishikawa |
| EPI_ISL_684776 | 4/9/2020  | 12/10/2020 Asia / Japan / Ishikawa |
| EPI_ISL_684777 | 4/10/2020 | 12/10/2020 Asia / Japan / Ishikawa |

















|                |           |                                     |
|----------------|-----------|-------------------------------------|
| EPI_ISL_685109 | 4/16/2020 | 12/10/2020 Asia / Japan / Saitama   |
| EPI_ISL_685110 | 4/16/2020 | 12/10/2020 Asia / Japan / Saitama   |
| EPI_ISL_685111 | 4/16/2020 | 12/10/2020 Asia / Japan / Saitama   |
| EPI_ISL_685112 | 4/16/2020 | 12/10/2020 Asia / Japan / Saitama   |
| EPI_ISL_685113 | 4/16/2020 | 12/10/2020 Asia / Japan / Saitama   |
| EPI_ISL_685114 | 4/16/2020 | 12/10/2020 Asia / Japan / Saitama   |
| EPI_ISL_685115 | 4/16/2020 | 12/10/2020 Asia / Japan / Saitama   |
| EPI_ISL_685116 | 4/17/2020 | 12/10/2020 Asia / Japan / Saitama   |
| EPI_ISL_685117 | 4/17/2020 | 12/10/2020 Asia / Japan / Saitama   |
| EPI_ISL_685118 | 4/17/2020 | 12/10/2020 Asia / Japan / Saitama   |
| EPI_ISL_685119 | 4/17/2020 | 12/10/2020 Asia / Japan / Saitama   |
| EPI_ISL_685120 | 4/17/2020 | 12/10/2020 Asia / Japan / Saitama   |
| EPI_ISL_685121 | 4/17/2020 | 12/10/2020 Asia / Japan / Saitama   |
| EPI_ISL_685122 | 4/17/2020 | 12/10/2020 Asia / Japan / Saitama   |
| EPI_ISL_685123 | 4/17/2020 | 12/10/2020 Asia / Japan / Saitama   |
| EPI_ISL_685124 | 4/17/2020 | 12/10/2020 Asia / Japan / Saitama   |
| EPI_ISL_685126 | 4/18/2020 | 12/10/2020 Asia / Japan / Saitama   |
| EPI_ISL_685127 | 4/18/2020 | 12/10/2020 Asia / Japan / Saitama   |
| EPI_ISL_685128 | 4/18/2020 | 12/10/2020 Asia / Japan / Saitama   |
| EPI_ISL_685129 | 4/19/2020 | 12/10/2020 Asia / Japan / Saitama   |
| EPI_ISL_685130 | 4/6/2020  | 12/10/2020 Asia / Japan / Saitama   |
| EPI_ISL_685131 | 4/6/2020  | 12/10/2020 Asia / Japan / Saitama   |
| EPI_ISL_685132 | 3/27/2020 | 12/10/2020 Asia / Japan / Saitama   |
| EPI_ISL_685133 | 3/31/2020 | 12/10/2020 Asia / Japan / Hiroshima |
| EPI_ISL_685134 | 3/31/2020 | 12/10/2020 Asia / Japan / Hiroshima |
| EPI_ISL_685135 | 3/31/2020 | 12/10/2020 Asia / Japan / Hiroshima |
| EPI_ISL_685136 | 4/2/2020  | 12/10/2020 Asia / Japan / Hiroshima |
| EPI_ISL_685137 | 4/6/2020  | 12/10/2020 Asia / Japan / Hiroshima |
| EPI_ISL_685138 | 4/6/2020  | 12/10/2020 Asia / Japan / Hiroshima |
| EPI_ISL_685139 | 4/6/2020  | 12/10/2020 Asia / Japan / Hiroshima |
| EPI_ISL_685140 | 4/7/2020  | 12/10/2020 Asia / Japan / Hiroshima |
| EPI_ISL_685141 | 4/21/2020 | 12/10/2020 Asia / Japan / Saitama   |
| EPI_ISL_685142 | 4/28/2020 | 12/10/2020 Asia / Japan / Saitama   |
| EPI_ISL_685143 | 4/13/2020 | 12/10/2020 Asia / Japan / Tokyo     |
| EPI_ISL_685144 | 4/13/2020 | 12/10/2020 Asia / Japan / Tokyo     |
| EPI_ISL_685145 | 4/14/2020 | 12/10/2020 Asia / Japan / Tokyo     |
| EPI_ISL_685146 | 4/17/2020 | 12/10/2020 Asia / Japan / Tokyo     |
| EPI_ISL_685147 | 4/17/2020 | 12/10/2020 Asia / Japan / Tokyo     |
| EPI_ISL_685148 | 4/18/2020 | 12/10/2020 Asia / Japan / Tokyo     |
| EPI_ISL_685149 | 4/20/2020 | 12/10/2020 Asia / Japan / Tokyo     |
| EPI_ISL_685150 | 4/27/2020 | 12/10/2020 Asia / Japan / Tokyo     |
| EPI_ISL_685151 | 4/8/2020  | 12/10/2020 Asia / Japan / Fukui     |
| EPI_ISL_685152 | 4/8/2020  | 12/10/2020 Asia / Japan / Fukui     |
| EPI_ISL_685153 | 4/8/2020  | 12/10/2020 Asia / Japan / Fukui     |
| EPI_ISL_685154 | 4/9/2020  | 12/10/2020 Asia / Japan / Fukui     |
| EPI_ISL_685155 | 4/9/2020  | 12/10/2020 Asia / Japan / Fukui     |
| EPI_ISL_685156 | 4/9/2020  | 12/10/2020 Asia / Japan / Fukui     |

|                |           |                                   |
|----------------|-----------|-----------------------------------|
| EPI_ISL_685157 | 4/9/2020  | 12/10/2020 Asia / Japan / Fukui   |
| EPI_ISL_685158 | 4/9/2020  | 12/10/2020 Asia / Japan / Fukui   |
| EPI_ISL_685159 | 4/9/2020  | 12/10/2020 Asia / Japan / Fukui   |
| EPI_ISL_685160 | 4/10/2020 | 12/10/2020 Asia / Japan / Fukui   |
| EPI_ISL_685161 | 4/11/2020 | 12/10/2020 Asia / Japan / Fukui   |
| EPI_ISL_685162 | 4/12/2020 | 12/10/2020 Asia / Japan / Fukui   |
| EPI_ISL_685163 | 4/12/2020 | 12/10/2020 Asia / Japan / Fukui   |
| EPI_ISL_685164 | 4/13/2020 | 12/10/2020 Asia / Japan / Fukui   |
| EPI_ISL_685165 | 4/13/2020 | 12/10/2020 Asia / Japan / Fukui   |
| EPI_ISL_685166 | 4/14/2020 | 12/10/2020 Asia / Japan / Fukui   |
| EPI_ISL_685167 | 4/14/2020 | 12/10/2020 Asia / Japan / Fukui   |
| EPI_ISL_685168 | 4/14/2020 | 12/10/2020 Asia / Japan / Fukui   |
| EPI_ISL_685169 | 4/16/2020 | 12/10/2020 Asia / Japan / Fukui   |
| EPI_ISL_685170 | 4/16/2020 | 12/10/2020 Asia / Japan / Fukui   |
| EPI_ISL_685171 | 4/16/2020 | 12/10/2020 Asia / Japan / Fukui   |
| EPI_ISL_685172 | 4/16/2020 | 12/10/2020 Asia / Japan / Fukui   |
| EPI_ISL_685173 | 4/17/2020 | 12/10/2020 Asia / Japan / Fukui   |
| EPI_ISL_685174 | 4/17/2020 | 12/10/2020 Asia / Japan / Fukui   |
| EPI_ISL_685175 | 4/18/2020 | 12/10/2020 Asia / Japan / Fukui   |
| EPI_ISL_685176 | 4/18/2020 | 12/10/2020 Asia / Japan / Fukui   |
| EPI_ISL_685177 | 4/20/2020 | 12/10/2020 Asia / Japan / Fukui   |
| EPI_ISL_685178 | 4/19/2020 | 12/10/2020 Asia / Japan / Fukui   |
| EPI_ISL_685179 | 4/20/2020 | 12/10/2020 Asia / Japan / Fukui   |
| EPI_ISL_685180 | 4/21/2020 | 12/10/2020 Asia / Japan / Fukui   |
| EPI_ISL_685181 | 4/24/2020 | 12/10/2020 Asia / Japan / Fukui   |
| EPI_ISL_685182 | 4/27/2020 | 12/10/2020 Asia / Japan / Fukui   |
| EPI_ISL_685183 | 4/8/2020  | 12/10/2020 Asia / Japan / Ibaraki |
| EPI_ISL_685184 | 4/9/2020  | 12/10/2020 Asia / Japan / Ibaraki |
| EPI_ISL_685185 | 4/9/2020  | 12/10/2020 Asia / Japan / Ibaraki |
| EPI_ISL_685186 | 4/10/2020 | 12/10/2020 Asia / Japan / Ibaraki |
| EPI_ISL_685187 | 4/11/2020 | 12/10/2020 Asia / Japan / Ibaraki |
| EPI_ISL_685188 | 4/10/2020 | 12/10/2020 Asia / Japan / Ibaraki |
| EPI_ISL_685189 | 4/12/2020 | 12/10/2020 Asia / Japan / Ibaraki |
| EPI_ISL_685190 | 4/12/2020 | 12/10/2020 Asia / Japan / Ibaraki |
| EPI_ISL_685191 | 4/13/2020 | 12/10/2020 Asia / Japan / Ibaraki |
| EPI_ISL_685192 | 4/14/2020 | 12/10/2020 Asia / Japan / Ibaraki |
| EPI_ISL_685193 | 4/15/2020 | 12/10/2020 Asia / Japan / Ibaraki |
| EPI_ISL_685194 | 4/16/2020 | 12/10/2020 Asia / Japan / Ibaraki |
| EPI_ISL_685195 | 4/16/2020 | 12/10/2020 Asia / Japan / Ibaraki |
| EPI_ISL_685196 | 4/20/2020 | 12/10/2020 Asia / Japan / Ibaraki |
| EPI_ISL_685197 | 4/20/2020 | 12/10/2020 Asia / Japan / Ibaraki |
| EPI_ISL_685198 | 4/20/2020 | 12/10/2020 Asia / Japan / Ibaraki |
| EPI_ISL_685199 | 4/20/2020 | 12/10/2020 Asia / Japan / Ibaraki |
| EPI_ISL_685200 | 4/21/2020 | 12/10/2020 Asia / Japan / Ibaraki |
| EPI_ISL_685201 | 4/25/2020 | 12/10/2020 Asia / Japan / Ibaraki |
| EPI_ISL_685202 | 4/29/2020 | 12/10/2020 Asia / Japan / Ibaraki |
| EPI_ISL_685203 | 3/11/2020 | 12/10/2020 Asia / Japan / Mie     |

|                |           |                                    |
|----------------|-----------|------------------------------------|
| EPI_ISL_685204 | 4/9/2020  | 12/10/2020 Asia / Japan / Mie      |
| EPI_ISL_685205 | 4/9/2020  | 12/10/2020 Asia / Japan / Mie      |
| EPI_ISL_685206 | 4/14/2020 | 12/10/2020 Asia / Japan / Mie      |
| EPI_ISL_685207 | 4/16/2020 | 12/10/2020 Asia / Japan / Mie      |
| EPI_ISL_685208 | 4/16/2020 | 12/10/2020 Asia / Japan / Mie      |
| EPI_ISL_685209 | 4/16/2020 | 12/10/2020 Asia / Japan / Mie      |
| EPI_ISL_685210 | 4/16/2020 | 12/10/2020 Asia / Japan / Mie      |
| EPI_ISL_685211 | 4/17/2020 | 12/10/2020 Asia / Japan / Mie      |
| EPI_ISL_685212 | 4/17/2020 | 12/10/2020 Asia / Japan / Mie      |
| EPI_ISL_685213 | 4/17/2020 | 12/10/2020 Asia / Japan / Mie      |
| EPI_ISL_685214 | 4/17/2020 | 12/10/2020 Asia / Japan / Mie      |
| EPI_ISL_685215 | 4/18/2020 | 12/10/2020 Asia / Japan / Mie      |
| EPI_ISL_685216 | 4/18/2020 | 12/10/2020 Asia / Japan / Mie      |
| EPI_ISL_685217 | 4/19/2020 | 12/10/2020 Asia / Japan / Mie      |
| EPI_ISL_685218 | 4/21/2020 | 12/10/2020 Asia / Japan / Mie      |
| EPI_ISL_685219 | 4/22/2020 | 12/10/2020 Asia / Japan / Mie      |
| EPI_ISL_685220 | 3/26/2020 | 12/10/2020 Asia / Japan / Tokyo    |
| EPI_ISL_685221 | 4/2/2020  | 12/10/2020 Asia / Japan / Tokyo    |
| EPI_ISL_685222 | 4/2/2020  | 12/10/2020 Asia / Japan / Tokyo    |
| EPI_ISL_685223 | 4/2/2020  | 12/10/2020 Asia / Japan / Tokyo    |
| EPI_ISL_685224 | 4/2/2020  | 12/10/2020 Asia / Japan / Tokyo    |
| EPI_ISL_685225 | 4/2/2020  | 12/10/2020 Asia / Japan / Tokyo    |
| EPI_ISL_685226 | 4/2/2020  | 12/10/2020 Asia / Japan / Tokyo    |
| EPI_ISL_685227 | 4/2/2020  | 12/10/2020 Asia / Japan / Tokyo    |
| EPI_ISL_685228 | 4/2/2020  | 12/10/2020 Asia / Japan / Tokyo    |
| EPI_ISL_685229 | 4/3/2020  | 12/10/2020 Asia / Japan / Tokyo    |
| EPI_ISL_685230 | 4/4/2020  | 12/10/2020 Asia / Japan / Tokyo    |
| EPI_ISL_685231 | 4/7/2020  | 12/10/2020 Asia / Japan / Tokyo    |
| EPI_ISL_685232 | 2020-04   | 12/10/2020 Asia / Japan / Tokyo    |
| EPI_ISL_685233 | 2020-04   | 12/10/2020 Asia / Japan / Tokyo    |
| EPI_ISL_685234 | 2020-04   | 12/10/2020 Asia / Japan / Tokyo    |
| EPI_ISL_685235 | 2020-04   | 12/10/2020 Asia / Japan / Tokyo    |
| EPI_ISL_685236 | 2020-04   | 12/10/2020 Asia / Japan / Tokyo    |
| EPI_ISL_685237 | 2020-04   | 12/10/2020 Asia / Japan / Tokyo    |
| EPI_ISL_685238 | 3/24/2020 | 12/10/2020 Asia / Japan / Hokkaido |
| EPI_ISL_685240 | 3/27/2020 | 12/10/2020 Asia / Japan / Hokkaido |
| EPI_ISL_685241 | 3/28/2020 | 12/10/2020 Asia / Japan / Hokkaido |
| EPI_ISL_685242 | 3/28/2020 | 12/10/2020 Asia / Japan / Hokkaido |
| EPI_ISL_685243 | 3/31/2020 | 12/10/2020 Asia / Japan / Hokkaido |
| EPI_ISL_685244 | 4/3/2020  | 12/10/2020 Asia / Japan / Hokkaido |
| EPI_ISL_685245 | 4/3/2020  | 12/10/2020 Asia / Japan / Hokkaido |
| EPI_ISL_685246 | 4/6/2020  | 12/10/2020 Asia / Japan / Hokkaido |
| EPI_ISL_685247 | 4/6/2020  | 12/10/2020 Asia / Japan / Hokkaido |
| EPI_ISL_685248 | 4/6/2020  | 12/10/2020 Asia / Japan / Hokkaido |
| EPI_ISL_685249 | 4/7/2020  | 12/10/2020 Asia / Japan / Hokkaido |
| EPI_ISL_685250 | 4/7/2020  | 12/10/2020 Asia / Japan / Hokkaido |
| EPI_ISL_685251 | 4/7/2020  | 12/10/2020 Asia / Japan / Hokkaido |

|                |           |                                    |
|----------------|-----------|------------------------------------|
| EPI_ISL_685252 | 4/8/2020  | 12/10/2020 Asia / Japan / Hokkaido |
| EPI_ISL_685253 | 4/8/2020  | 12/10/2020 Asia / Japan / Hokkaido |
| EPI_ISL_685254 | 4/9/2020  | 12/10/2020 Asia / Japan / Hokkaido |
| EPI_ISL_685255 | 4/9/2020  | 12/10/2020 Asia / Japan / Hokkaido |
| EPI_ISL_685256 | 4/9/2020  | 12/10/2020 Asia / Japan / Hokkaido |
| EPI_ISL_685257 | 4/9/2020  | 12/10/2020 Asia / Japan / Hokkaido |
| EPI_ISL_685258 | 4/10/2020 | 12/10/2020 Asia / Japan / Hokkaido |
| EPI_ISL_685259 | 4/11/2020 | 12/10/2020 Asia / Japan / Hokkaido |
| EPI_ISL_685260 | 4/13/2020 | 12/10/2020 Asia / Japan / Hokkaido |
| EPI_ISL_685261 | 4/13/2020 | 12/10/2020 Asia / Japan / Hokkaido |
| EPI_ISL_685262 | 4/13/2020 | 12/10/2020 Asia / Japan / Hokkaido |
| EPI_ISL_685263 | 4/13/2020 | 12/10/2020 Asia / Japan / Hokkaido |
| EPI_ISL_685264 | 4/13/2020 | 12/10/2020 Asia / Japan / Hokkaido |
| EPI_ISL_685265 | 4/13/2020 | 12/10/2020 Asia / Japan / Hokkaido |
| EPI_ISL_685266 | 4/13/2020 | 12/10/2020 Asia / Japan / Hokkaido |
| EPI_ISL_685267 | 4/14/2020 | 12/10/2020 Asia / Japan / Hokkaido |
| EPI_ISL_685268 | 4/14/2020 | 12/10/2020 Asia / Japan / Hokkaido |
| EPI_ISL_685269 | 4/14/2020 | 12/10/2020 Asia / Japan / Hokkaido |
| EPI_ISL_685270 | 4/14/2020 | 12/10/2020 Asia / Japan / Hokkaido |
| EPI_ISL_685271 | 4/15/2020 | 12/10/2020 Asia / Japan / Hokkaido |
| EPI_ISL_685272 | 4/15/2020 | 12/10/2020 Asia / Japan / Hokkaido |
| EPI_ISL_685273 | 4/15/2020 | 12/10/2020 Asia / Japan / Hokkaido |
| EPI_ISL_685274 | 4/16/2020 | 12/10/2020 Asia / Japan / Hokkaido |
| EPI_ISL_685275 | 4/16/2020 | 12/10/2020 Asia / Japan / Hokkaido |
| EPI_ISL_685276 | 4/16/2020 | 12/10/2020 Asia / Japan / Hokkaido |
| EPI_ISL_685277 | 4/16/2020 | 12/10/2020 Asia / Japan / Hokkaido |
| EPI_ISL_685278 | 4/16/2020 | 12/10/2020 Asia / Japan / Hokkaido |
| EPI_ISL_685279 | 4/26/2020 | 12/10/2020 Asia / Japan / Gunma    |
| EPI_ISL_685280 | 4/26/2020 | 12/10/2020 Asia / Japan / Gunma    |
| EPI_ISL_685281 | 5/5/2020  | 12/10/2020 Asia / Japan / Gunma    |
| EPI_ISL_685283 | 5/2/2020  | 12/10/2020 Asia / Japan / Hyogo    |
| EPI_ISL_685284 | 5/2/2020  | 12/10/2020 Asia / Japan / Hyogo    |
| EPI_ISL_685285 | 5/3/2020  | 12/10/2020 Asia / Japan / Hyogo    |
| EPI_ISL_685286 | 5/3/2020  | 12/10/2020 Asia / Japan / Hyogo    |
| EPI_ISL_685287 | 5/4/2020  | 12/10/2020 Asia / Japan / Hyogo    |
| EPI_ISL_685288 | 5/4/2020  | 12/10/2020 Asia / Japan / Hyogo    |
| EPI_ISL_685289 | 5/4/2020  | 12/10/2020 Asia / Japan / Hyogo    |
| EPI_ISL_685290 | 5/5/2020  | 12/10/2020 Asia / Japan / Hyogo    |
| EPI_ISL_685291 | 5/6/2020  | 12/10/2020 Asia / Japan / Hyogo    |
| EPI_ISL_685292 | 5/6/2020  | 12/10/2020 Asia / Japan / Hyogo    |
| EPI_ISL_685295 | 5/2/2020  | 12/10/2020 Asia / Japan / Hyogo    |
| EPI_ISL_685297 | 3/16/2020 | 12/10/2020 Asia / Japan / Niigata  |
| EPI_ISL_685298 | 3/24/2020 | 12/10/2020 Asia / Japan / Niigata  |
| EPI_ISL_685299 | 4/2/2020  | 12/10/2020 Asia / Japan / Niigata  |
| EPI_ISL_685300 | 4/6/2020  | 12/10/2020 Asia / Japan / Niigata  |
| EPI_ISL_685301 | 4/6/2020  | 12/10/2020 Asia / Japan / Niigata  |
| EPI_ISL_685302 | 4/9/2020  | 12/10/2020 Asia / Japan / Niigata  |











|                |           |            |                         |
|----------------|-----------|------------|-------------------------|
| EPI_ISL_685493 | 2020-05   | 12/10/2020 | Asia / Japan / Tokyo    |
| EPI_ISL_685494 | 5/5/2020  | 12/10/2020 | Asia / Japan / Tokyo    |
| EPI_ISL_685495 | 2020-05   | 12/10/2020 | Asia / Japan / Tokyo    |
| EPI_ISL_685496 | 5/4/2020  | 12/10/2020 | Asia / Japan / Tokyo    |
| EPI_ISL_685497 | 5/4/2020  | 12/10/2020 | Asia / Japan / Tokyo    |
| EPI_ISL_685498 | 4/21/2020 | 12/10/2020 | Asia / Japan / Yamagata |
| EPI_ISL_685499 | 4/22/2020 | 12/10/2020 | Asia / Japan / Yamagata |
| EPI_ISL_685500 | 4/27/2020 | 12/10/2020 | Asia / Japan / Yamagata |
| EPI_ISL_685503 | 4/4/2020  | 12/10/2020 | Asia / Japan / Yamagata |
| EPI_ISL_685504 | 4/18/2020 | 12/10/2020 | Asia / Japan / Yamagata |
| EPI_ISL_685505 | 5/3/2020  | 12/10/2020 | Asia / Japan / Ibaraki  |
| EPI_ISL_685506 | 4/1/2020  | 12/10/2020 | Asia / Japan / Ibaraki  |
| EPI_ISL_685507 | 4/8/2020  | 12/10/2020 | Asia / Japan / Ibaraki  |
| EPI_ISL_685508 | 4/6/2020  | 12/10/2020 | Asia / Japan / Ibaraki  |
| EPI_ISL_685509 | 4/6/2020  | 12/10/2020 | Asia / Japan / Ibaraki  |
| EPI_ISL_685510 | 4/7/2020  | 12/10/2020 | Asia / Japan / Ibaraki  |
| EPI_ISL_685511 | 4/11/2020 | 12/10/2020 | Asia / Japan / Ibaraki  |
| EPI_ISL_685512 | 4/11/2020 | 12/10/2020 | Asia / Japan / Ibaraki  |
| EPI_ISL_685513 | 4/16/2020 | 12/10/2020 | Asia / Japan / Ibaraki  |
| EPI_ISL_685514 | 4/19/2020 | 12/10/2020 | Asia / Japan / Ibaraki  |
| EPI_ISL_685515 | 4/27/2020 | 12/10/2020 | Asia / Japan / Niigata  |
| EPI_ISL_685516 | 4/26/2020 | 12/10/2020 | Asia / Japan / Niigata  |
| EPI_ISL_685517 | 4/27/2020 | 12/10/2020 | Asia / Japan / Niigata  |
| EPI_ISL_685518 | 4/27/2020 | 12/10/2020 | Asia / Japan / Niigata  |
| EPI_ISL_685519 | 4/30/2020 | 12/10/2020 | Asia / Japan / Niigata  |
| EPI_ISL_685520 | 4/30/2020 | 12/10/2020 | Asia / Japan / Niigata  |
| EPI_ISL_685521 | 5/4/2020  | 12/10/2020 | Asia / Japan / Niigata  |
| EPI_ISL_685522 | 5/7/2020  | 12/10/2020 | Asia / Japan / Niigata  |
| EPI_ISL_685523 | 5/7/2020  | 12/10/2020 | Asia / Japan / Niigata  |
| EPI_ISL_685524 | 3/27/2020 | 12/10/2020 | Asia / Japan / Saitama  |
| EPI_ISL_685525 | 3/31/2020 | 12/10/2020 | Asia / Japan / Saitama  |
| EPI_ISL_685526 | 3/31/2020 | 12/10/2020 | Asia / Japan / Saitama  |
| EPI_ISL_685527 | 3/31/2020 | 12/10/2020 | Asia / Japan / Saitama  |
| EPI_ISL_685528 | 4/2/2020  | 12/10/2020 | Asia / Japan / Saitama  |
| EPI_ISL_685529 | 4/2/2020  | 12/10/2020 | Asia / Japan / Saitama  |
| EPI_ISL_685530 | 4/2/2020  | 12/10/2020 | Asia / Japan / Saitama  |
| EPI_ISL_685531 | 4/2/2020  | 12/10/2020 | Asia / Japan / Saitama  |
| EPI_ISL_685532 | 4/3/2020  | 12/10/2020 | Asia / Japan / Saitama  |
| EPI_ISL_685533 | 4/3/2020  | 12/10/2020 | Asia / Japan / Saitama  |
| EPI_ISL_685534 | 4/3/2020  | 12/10/2020 | Asia / Japan / Saitama  |
| EPI_ISL_685535 | 4/3/2020  | 12/10/2020 | Asia / Japan / Saitama  |
| EPI_ISL_685536 | 4/3/2020  | 12/10/2020 | Asia / Japan / Saitama  |
| EPI_ISL_685537 | 4/4/2020  | 12/10/2020 | Asia / Japan / Saitama  |
| EPI_ISL_685538 | 4/4/2020  | 12/10/2020 | Asia / Japan / Saitama  |
| EPI_ISL_685539 | 4/4/2020  | 12/10/2020 | Asia / Japan / Saitama  |
| EPI_ISL_685540 | 4/4/2020  | 12/10/2020 | Asia / Japan / Saitama  |
| EPI_ISL_685541 | 4/7/2020  | 12/10/2020 | Asia / Japan / Saitama  |



|                |           |                                     |
|----------------|-----------|-------------------------------------|
| EPI_ISL_685590 | 4/13/2020 | 12/10/2020 Asia / Japan / Chiba     |
| EPI_ISL_685591 | 4/16/2020 | 12/10/2020 Asia / Japan / Chiba     |
| EPI_ISL_685592 | 4/17/2020 | 12/10/2020 Asia / Japan / Chiba     |
| EPI_ISL_685593 | 4/10/2020 | 12/10/2020 Asia / Japan / Hiroshima |
| EPI_ISL_685594 | 4/13/2020 | 12/10/2020 Asia / Japan / Hiroshima |
| EPI_ISL_685595 | 4/14/2020 | 12/10/2020 Asia / Japan / Hiroshima |
| EPI_ISL_685596 | 4/14/2020 | 12/10/2020 Asia / Japan / Hiroshima |
| EPI_ISL_685597 | 4/14/2020 | 12/10/2020 Asia / Japan / Hiroshima |
| EPI_ISL_685598 | 4/17/2020 | 12/10/2020 Asia / Japan / Hiroshima |
| EPI_ISL_685599 | 4/17/2020 | 12/10/2020 Asia / Japan / Hiroshima |
| EPI_ISL_685600 | 4/17/2020 | 12/10/2020 Asia / Japan / Hiroshima |
| EPI_ISL_685601 | 4/18/2020 | 12/10/2020 Asia / Japan / Hiroshima |
| EPI_ISL_685602 | 4/25/2020 | 12/10/2020 Asia / Japan / Hiroshima |
| EPI_ISL_685603 | 4/27/2020 | 12/10/2020 Asia / Japan / Hiroshima |
| EPI_ISL_685604 | 5/3/2020  | 12/10/2020 Asia / Japan / Hiroshima |
| EPI_ISL_685605 | 5/3/2020  | 12/10/2020 Asia / Japan / Hiroshima |
| EPI_ISL_685606 | 3/2/2020  | 12/10/2020 Asia / Japan / Tokyo     |
| EPI_ISL_685607 | 4/1/2020  | 12/10/2020 Asia / Japan / Tokyo     |
| EPI_ISL_685608 | 4/3/2020  | 12/10/2020 Asia / Japan / Tokyo     |
| EPI_ISL_685609 | 4/10/2020 | 12/10/2020 Asia / Japan / Tokyo     |
| EPI_ISL_685610 | 4/12/2020 | 12/10/2020 Asia / Japan / Tokyo     |
| EPI_ISL_685611 | 4/11/2020 | 12/10/2020 Asia / Japan / Tokyo     |
| EPI_ISL_685612 | 4/17/2020 | 12/10/2020 Asia / Japan / Tokyo     |
| EPI_ISL_685613 | 4/16/2020 | 12/10/2020 Asia / Japan / Tokyo     |
| EPI_ISL_685614 | 4/17/2020 | 12/10/2020 Asia / Japan / Tokyo     |
| EPI_ISL_685615 | 4/20/2020 | 12/10/2020 Asia / Japan / Tokyo     |
| EPI_ISL_685616 | 4/30/2020 | 12/10/2020 Asia / Japan / Tokyo     |
| EPI_ISL_685617 | 3/23/2020 | 12/10/2020 Asia / Japan / Fukuoka   |
| EPI_ISL_685618 | 3/25/2020 | 12/10/2020 Asia / Japan / Fukuoka   |
| EPI_ISL_685619 | 3/26/2020 | 12/10/2020 Asia / Japan / Fukuoka   |
| EPI_ISL_685620 | 3/26/2020 | 12/10/2020 Asia / Japan / Fukuoka   |
| EPI_ISL_685621 | 3/27/2020 | 12/10/2020 Asia / Japan / Fukuoka   |
| EPI_ISL_685622 | 3/27/2020 | 12/10/2020 Asia / Japan / Fukuoka   |
| EPI_ISL_685623 | 4/17/2020 | 12/10/2020 Asia / Japan / Saitama   |
| EPI_ISL_685624 | 4/17/2020 | 12/10/2020 Asia / Japan / Saitama   |
| EPI_ISL_685625 | 4/18/2020 | 12/10/2020 Asia / Japan / Saitama   |
| EPI_ISL_685626 | 4/18/2020 | 12/10/2020 Asia / Japan / Saitama   |
| EPI_ISL_685627 | 4/18/2020 | 12/10/2020 Asia / Japan / Saitama   |
| EPI_ISL_685628 | 4/18/2020 | 12/10/2020 Asia / Japan / Saitama   |
| EPI_ISL_685629 | 4/19/2020 | 12/10/2020 Asia / Japan / Saitama   |
| EPI_ISL_685630 | 4/20/2020 | 12/10/2020 Asia / Japan / Saitama   |
| EPI_ISL_685631 | 4/20/2020 | 12/10/2020 Asia / Japan / Saitama   |
| EPI_ISL_685632 | 4/20/2020 | 12/10/2020 Asia / Japan / Saitama   |
| EPI_ISL_685633 | 4/21/2020 | 12/10/2020 Asia / Japan / Saitama   |
| EPI_ISL_685634 | 4/22/2020 | 12/10/2020 Asia / Japan / Saitama   |
| EPI_ISL_685635 | 4/25/2020 | 12/10/2020 Asia / Japan / Saitama   |
| EPI_ISL_685636 | 4/27/2020 | 12/10/2020 Asia / Japan / Saitama   |





|                |           |                                    |
|----------------|-----------|------------------------------------|
| EPI_ISL_685684 | 4/11/2020 | 12/10/2020 Asia / Japan / Tokyo    |
| EPI_ISL_685685 | 4/11/2020 | 12/10/2020 Asia / Japan / Tokyo    |
| EPI_ISL_685686 | 4/11/2020 | 12/10/2020 Asia / Japan / Tokyo    |
| EPI_ISL_685687 | 4/11/2020 | 12/10/2020 Asia / Japan / Tokyo    |
| EPI_ISL_685688 | 4/11/2020 | 12/10/2020 Asia / Japan / Tokyo    |
| EPI_ISL_685689 | 4/11/2020 | 12/10/2020 Asia / Japan / Tokyo    |
| EPI_ISL_685690 | 4/11/2020 | 12/10/2020 Asia / Japan / Tokyo    |
| EPI_ISL_685691 | 4/11/2020 | 12/10/2020 Asia / Japan / Tokyo    |
| EPI_ISL_685692 | 4/11/2020 | 12/10/2020 Asia / Japan / Tokyo    |
| EPI_ISL_685693 | 4/11/2020 | 12/10/2020 Asia / Japan / Tokyo    |
| EPI_ISL_685694 | 4/11/2020 | 12/10/2020 Asia / Japan / Tokyo    |
| EPI_ISL_685695 | 3/18/2020 | 12/10/2020 Asia / Japan / Wakayama |
| EPI_ISL_685696 | 3/18/2020 | 12/10/2020 Asia / Japan / Wakayama |
| EPI_ISL_685697 | 3/31/2020 | 12/10/2020 Asia / Japan / Wakayama |
| EPI_ISL_685698 | 4/2/2020  | 12/10/2020 Asia / Japan / Wakayama |
| EPI_ISL_685699 | 4/6/2020  | 12/10/2020 Asia / Japan / Wakayama |
| EPI_ISL_685700 | 3/31/2020 | 12/10/2020 Asia / Japan / Wakayama |
| EPI_ISL_685701 | 4/4/2020  | 12/10/2020 Asia / Japan / Wakayama |
| EPI_ISL_685702 | 4/5/2020  | 12/10/2020 Asia / Japan / Wakayama |
| EPI_ISL_685703 | 4/7/2020  | 12/10/2020 Asia / Japan / Wakayama |
| EPI_ISL_685704 | 4/13/2020 | 12/10/2020 Asia / Japan / Wakayama |
| EPI_ISL_685705 | 4/10/2020 | 12/10/2020 Asia / Japan / Wakayama |
| EPI_ISL_685706 | 4/10/2020 | 12/10/2020 Asia / Japan / Wakayama |
| EPI_ISL_685707 | 4/15/2020 | 12/10/2020 Asia / Japan / Wakayama |
| EPI_ISL_685708 | 4/10/2020 | 12/10/2020 Asia / Japan / Wakayama |
| EPI_ISL_685709 | 4/13/2020 | 12/10/2020 Asia / Japan / Wakayama |
| EPI_ISL_685710 | 4/13/2020 | 12/10/2020 Asia / Japan / Wakayama |
| EPI_ISL_685711 | 4/24/2020 | 12/10/2020 Asia / Japan / Wakayama |
| EPI_ISL_685712 | 5/11/2020 | 12/10/2020 Asia / Japan / Wakayama |
| EPI_ISL_685713 | 5/5/2020  | 12/10/2020 Asia / Japan / Hokkaido |
| EPI_ISL_685714 | 5/6/2020  | 12/10/2020 Asia / Japan / Hokkaido |
| EPI_ISL_685715 | 5/7/2020  | 12/10/2020 Asia / Japan / Hokkaido |
| EPI_ISL_685716 | 5/8/2020  | 12/10/2020 Asia / Japan / Hokkaido |
| EPI_ISL_685717 | 5/8/2020  | 12/10/2020 Asia / Japan / Hokkaido |
| EPI_ISL_685718 | 5/8/2020  | 12/10/2020 Asia / Japan / Hokkaido |
| EPI_ISL_685719 | 5/9/2020  | 12/10/2020 Asia / Japan / Hokkaido |
| EPI_ISL_685720 | 5/9/2020  | 12/10/2020 Asia / Japan / Hokkaido |
| EPI_ISL_685721 | 5/9/2020  | 12/10/2020 Asia / Japan / Hokkaido |
| EPI_ISL_685722 | 5/9/2020  | 12/10/2020 Asia / Japan / Hokkaido |
| EPI_ISL_685723 | 5/10/2020 | 12/10/2020 Asia / Japan / Hokkaido |
| EPI_ISL_685724 | 5/10/2020 | 12/10/2020 Asia / Japan / Hokkaido |
| EPI_ISL_685725 | 5/11/2020 | 12/10/2020 Asia / Japan / Hokkaido |
| EPI_ISL_685726 | 5/12/2020 | 12/10/2020 Asia / Japan / Hokkaido |
| EPI_ISL_685727 | 5/12/2020 | 12/10/2020 Asia / Japan / Hokkaido |
| EPI_ISL_685728 | 5/14/2020 | 12/10/2020 Asia / Japan / Hokkaido |
| EPI_ISL_685729 | 5/14/2020 | 12/10/2020 Asia / Japan / Hokkaido |
| EPI_ISL_685730 | 5/15/2020 | 12/10/2020 Asia / Japan / Hokkaido |

|                |           |                                    |
|----------------|-----------|------------------------------------|
| EPI_ISL_685731 | 5/16/2020 | 12/10/2020 Asia / Japan / Hokkaido |
| EPI_ISL_685732 | 5/18/2020 | 12/10/2020 Asia / Japan / Hokkaido |
| EPI_ISL_685733 | 5/11/2020 | 12/10/2020 Asia / Japan / Saitama  |
| EPI_ISL_685734 | 4/7/2020  | 12/10/2020 Asia / Japan / Ishikawa |
| EPI_ISL_685735 | 4/7/2020  | 12/10/2020 Asia / Japan / Ishikawa |
| EPI_ISL_685736 | 4/7/2020  | 12/10/2020 Asia / Japan / Ishikawa |
| EPI_ISL_685737 | 4/7/2020  | 12/10/2020 Asia / Japan / Ishikawa |
| EPI_ISL_685738 | 4/12/2020 | 12/10/2020 Asia / Japan / Ishikawa |
| EPI_ISL_685739 | 4/21/2020 | 12/10/2020 Asia / Japan / Ishikawa |
| EPI_ISL_685740 | 4/23/2020 | 12/10/2020 Asia / Japan / Ishikawa |
| EPI_ISL_685741 | 4/27/2020 | 12/10/2020 Asia / Japan / Ishikawa |
| EPI_ISL_685742 | 4/28/2020 | 12/10/2020 Asia / Japan / Ishikawa |
| EPI_ISL_685743 | 4/29/2020 | 12/10/2020 Asia / Japan / Ishikawa |
| EPI_ISL_685744 | 5/3/2020  | 12/10/2020 Asia / Japan / Ishikawa |
| EPI_ISL_685745 | 5/14/2020 | 12/10/2020 Asia / Japan / Ishikawa |
| EPI_ISL_685746 | 4/7/2020  | 12/10/2020 Asia / Japan / Nagano   |
| EPI_ISL_685747 | 4/14/2020 | 12/10/2020 Asia / Japan / Nagano   |
| EPI_ISL_685748 | 4/2/2020  | 12/10/2020 Asia / Japan / Nagano   |
| EPI_ISL_685749 | 4/4/2020  | 12/10/2020 Asia / Japan / Nagano   |
| EPI_ISL_685750 | 4/5/2020  | 12/10/2020 Asia / Japan / Nagano   |
| EPI_ISL_685751 | 4/5/2020  | 12/10/2020 Asia / Japan / Nagano   |
| EPI_ISL_685752 | 4/7/2020  | 12/10/2020 Asia / Japan / Nagano   |
| EPI_ISL_685753 | 4/7/2020  | 12/10/2020 Asia / Japan / Nagano   |
| EPI_ISL_685754 | 4/9/2020  | 12/10/2020 Asia / Japan / Nagano   |
| EPI_ISL_685755 | 4/9/2020  | 12/10/2020 Asia / Japan / Nagano   |
| EPI_ISL_685756 | 4/10/2020 | 12/10/2020 Asia / Japan / Nagano   |
| EPI_ISL_685757 | 4/11/2020 | 12/10/2020 Asia / Japan / Nagano   |
| EPI_ISL_685758 | 4/11/2020 | 12/10/2020 Asia / Japan / Nagano   |
| EPI_ISL_685759 | 4/11/2020 | 12/10/2020 Asia / Japan / Nagano   |
| EPI_ISL_685760 | 4/13/2020 | 12/10/2020 Asia / Japan / Nagano   |
| EPI_ISL_685761 | 4/14/2020 | 12/10/2020 Asia / Japan / Nagano   |
| EPI_ISL_685762 | 4/14/2020 | 12/10/2020 Asia / Japan / Nagano   |
| EPI_ISL_685763 | 4/14/2020 | 12/10/2020 Asia / Japan / Nagano   |
| EPI_ISL_685764 | 4/15/2020 | 12/10/2020 Asia / Japan / Nagano   |
| EPI_ISL_685765 | 4/16/2020 | 12/10/2020 Asia / Japan / Nagano   |
| EPI_ISL_685766 | 4/17/2020 | 12/10/2020 Asia / Japan / Nagano   |
| EPI_ISL_685767 | 4/17/2020 | 12/10/2020 Asia / Japan / Nagano   |
| EPI_ISL_685768 | 4/18/2020 | 12/10/2020 Asia / Japan / Nagano   |
| EPI_ISL_685769 | 4/18/2020 | 12/10/2020 Asia / Japan / Nagano   |
| EPI_ISL_685770 | 4/18/2020 | 12/10/2020 Asia / Japan / Nagano   |
| EPI_ISL_685771 | 4/18/2020 | 12/10/2020 Asia / Japan / Nagano   |
| EPI_ISL_685772 | 4/21/2020 | 12/10/2020 Asia / Japan / Nagano   |
| EPI_ISL_685773 | 4/21/2020 | 12/10/2020 Asia / Japan / Nagano   |
| EPI_ISL_685774 | 4/21/2020 | 12/10/2020 Asia / Japan / Nagano   |
| EPI_ISL_685775 | 5/1/2020  | 12/10/2020 Asia / Japan / Nagano   |
| EPI_ISL_685776 | 5/1/2020  | 12/10/2020 Asia / Japan / Nagano   |
| EPI_ISL_685777 | 5/3/2020  | 12/10/2020 Asia / Japan / Nagano   |





|                |           |                                     |
|----------------|-----------|-------------------------------------|
| EPI_ISL_685872 | 4/22/2020 | 12/10/2020 Asia / Japan / Okinawa   |
| EPI_ISL_685873 | 4/22/2020 | 12/10/2020 Asia / Japan / Okinawa   |
| EPI_ISL_685874 | 4/22/2020 | 12/10/2020 Asia / Japan / Okinawa   |
| EPI_ISL_685875 | 4/23/2020 | 12/10/2020 Asia / Japan / Okinawa   |
| EPI_ISL_685876 | 4/24/2020 | 12/10/2020 Asia / Japan / Okinawa   |
| EPI_ISL_685877 | 4/25/2020 | 12/10/2020 Asia / Japan / Okinawa   |
| EPI_ISL_685878 | 4/26/2020 | 12/10/2020 Asia / Japan / Okinawa   |
| EPI_ISL_685879 | 4/28/2020 | 12/10/2020 Asia / Japan / Okinawa   |
| EPI_ISL_685880 | 4/28/2020 | 12/10/2020 Asia / Japan / Okinawa   |
| EPI_ISL_685881 | 4/28/2020 | 12/10/2020 Asia / Japan / Okinawa   |
| EPI_ISL_685882 | 4/28/2020 | 12/10/2020 Asia / Japan / Okinawa   |
| EPI_ISL_685883 | 4/30/2020 | 12/10/2020 Asia / Japan / Okinawa   |
| EPI_ISL_685884 | 4/19/2020 | 12/10/2020 Asia / Japan / Fukuoka   |
| EPI_ISL_685885 | 4/10/2020 | 12/10/2020 Asia / Japan / Fukuoka   |
| EPI_ISL_685886 | 4/10/2020 | 12/10/2020 Asia / Japan / Fukuoka   |
| EPI_ISL_685887 | 4/11/2020 | 12/10/2020 Asia / Japan / Fukuoka   |
| EPI_ISL_685888 | 4/11/2020 | 12/10/2020 Asia / Japan / Fukuoka   |
| EPI_ISL_685889 | 4/11/2020 | 12/10/2020 Asia / Japan / Fukuoka   |
| EPI_ISL_685890 | 4/12/2020 | 12/10/2020 Asia / Japan / Fukuoka   |
| EPI_ISL_685891 | 4/13/2020 | 12/10/2020 Asia / Japan / Fukuoka   |
| EPI_ISL_685892 | 4/13/2020 | 12/10/2020 Asia / Japan / Fukuoka   |
| EPI_ISL_685893 | 4/13/2020 | 12/10/2020 Asia / Japan / Fukuoka   |
| EPI_ISL_685894 | 4/14/2020 | 12/10/2020 Asia / Japan / Fukuoka   |
| EPI_ISL_685895 | 4/14/2020 | 12/10/2020 Asia / Japan / Fukuoka   |
| EPI_ISL_685896 | 4/16/2020 | 12/10/2020 Asia / Japan / Fukuoka   |
| EPI_ISL_685897 | 4/21/2020 | 12/10/2020 Asia / Japan / Fukuoka   |
| EPI_ISL_685898 | 4/21/2020 | 12/10/2020 Asia / Japan / Fukuoka   |
| EPI_ISL_685899 | 4/22/2020 | 12/10/2020 Asia / Japan / Fukuoka   |
| EPI_ISL_685900 | 4/21/2020 | 12/10/2020 Asia / Japan / Hyogo     |
| EPI_ISL_685901 | 4/28/2020 | 12/10/2020 Asia / Japan / Hyogo     |
| EPI_ISL_685902 | 4/24/2020 | 12/10/2020 Asia / Japan / Hyogo     |
| EPI_ISL_685903 | 4/27/2020 | 12/10/2020 Asia / Japan / Hyogo     |
| EPI_ISL_685904 | 5/1/2020  | 12/10/2020 Asia / Japan / Hyogo     |
| EPI_ISL_685905 | 3/30/2020 | 12/10/2020 Asia / Japan / Fukushima |
| EPI_ISL_685906 | 4/18/2020 | 12/10/2020 Asia / Japan / Fukushima |
| EPI_ISL_685907 | 4/23/2020 | 12/10/2020 Asia / Japan / Fukushima |
| EPI_ISL_685908 | 4/28/2020 | 12/10/2020 Asia / Japan / Fukushima |
| EPI_ISL_685909 | 5/12/2020 | 12/10/2020 Asia / Japan / Ehime     |
| EPI_ISL_685910 | 5/18/2020 | 12/10/2020 Asia / Japan / Ehime     |
| EPI_ISL_685911 | 5/13/2020 | 12/10/2020 Asia / Japan / Ehime     |
| EPI_ISL_685912 | 5/13/2020 | 12/10/2020 Asia / Japan / Ehime     |
| EPI_ISL_685913 | 5/13/2020 | 12/10/2020 Asia / Japan / Ehime     |
| EPI_ISL_685914 | 5/13/2020 | 12/10/2020 Asia / Japan / Ehime     |
| EPI_ISL_685915 | 5/13/2020 | 12/10/2020 Asia / Japan / Ehime     |
| EPI_ISL_685916 | 5/13/2020 | 12/10/2020 Asia / Japan / Ehime     |
| EPI_ISL_685917 | 5/16/2020 | 12/10/2020 Asia / Japan / Ehime     |
| EPI_ISL_685918 | 4/29/2020 | 12/10/2020 Asia / Japan / Fukuoka   |

|                |           |                                    |
|----------------|-----------|------------------------------------|
| EPI_ISL_685919 | 4/29/2020 | 12/10/2020 Asia / Japan / Fukuoka  |
| EPI_ISL_685920 | 4/29/2020 | 12/10/2020 Asia / Japan / Fukuoka  |
| EPI_ISL_685921 | 4/30/2020 | 12/10/2020 Asia / Japan / Fukuoka  |
| EPI_ISL_685922 | 5/1/2020  | 12/10/2020 Asia / Japan / Fukuoka  |
| EPI_ISL_685924 | 5/12/2020 | 12/10/2020 Asia / Japan / Fukuoka  |
| EPI_ISL_685925 | 4/6/2020  | 12/10/2020 Asia / Japan / Hokkaido |
| EPI_ISL_685926 | 4/16/2020 | 12/10/2020 Asia / Japan / Hokkaido |
| EPI_ISL_685927 | 4/17/2020 | 12/10/2020 Asia / Japan / Hokkaido |
| EPI_ISL_685928 | 5/4/2020  | 12/10/2020 Asia / Japan / Hokkaido |
| EPI_ISL_685929 | 4/22/2020 | 12/10/2020 Asia / Japan / Hokkaido |
| EPI_ISL_685930 | 2020-03   | 12/10/2020 Asia / Japan            |
| EPI_ISL_685931 | 4/20/2020 | 12/10/2020 Asia / Japan / Wakayama |
| EPI_ISL_685932 | 4/20/2020 | 12/10/2020 Asia / Japan / Wakayama |
| EPI_ISL_685933 | 4/6/2020  | 12/10/2020 Asia / Japan / Kumamoto |
| EPI_ISL_685934 | 4/7/2020  | 12/10/2020 Asia / Japan / Kumamoto |
| EPI_ISL_685935 | 4/11/2020 | 12/10/2020 Asia / Japan / Kumamoto |
| EPI_ISL_685936 | 4/14/2020 | 12/10/2020 Asia / Japan / Kumamoto |
| EPI_ISL_685937 | 5/1/2020  | 12/10/2020 Asia / Japan / Hokkaido |
| EPI_ISL_685938 | 5/19/2020 | 12/10/2020 Asia / Japan / Hokkaido |
| EPI_ISL_685939 | 5/19/2020 | 12/10/2020 Asia / Japan / Hokkaido |
| EPI_ISL_685940 | 5/20/2020 | 12/10/2020 Asia / Japan / Hokkaido |
| EPI_ISL_685941 | 5/20/2020 | 12/10/2020 Asia / Japan / Hokkaido |
| EPI_ISL_685942 | 5/21/2020 | 12/10/2020 Asia / Japan / Hokkaido |
| EPI_ISL_685943 | 5/21/2020 | 12/10/2020 Asia / Japan / Hokkaido |
| EPI_ISL_685944 | 5/22/2020 | 12/10/2020 Asia / Japan / Hokkaido |
| EPI_ISL_685945 | 5/23/2020 | 12/10/2020 Asia / Japan / Hokkaido |
| EPI_ISL_685946 | 5/24/2020 | 12/10/2020 Asia / Japan / Hokkaido |
| EPI_ISL_685947 | 4/29/2020 | 12/10/2020 Asia / Japan / Hokkaido |
| EPI_ISL_685948 | 5/28/2020 | 12/10/2020 Asia / Japan / Hokkaido |
| EPI_ISL_685949 | 5/5/2020  | 12/10/2020 Asia / Japan / Hyogo    |
| EPI_ISL_685950 | 5/11/2020 | 12/10/2020 Asia / Japan / Hyogo    |
| EPI_ISL_685951 | 5/21/2020 | 12/10/2020 Asia / Japan / Hyogo    |
| EPI_ISL_685952 | 5/25/2020 | 12/10/2020 Asia / Japan / Hyogo    |
| EPI_ISL_685953 | 4/25/2020 | 12/10/2020 Asia / Japan / Hyogo    |
| EPI_ISL_685954 | 4/27/2020 | 12/10/2020 Asia / Japan / Hyogo    |
| EPI_ISL_685955 | 4/29/2020 | 12/10/2020 Asia / Japan / Hyogo    |
| EPI_ISL_685957 | 4/16/2020 | 12/10/2020 Asia / Japan / Hyogo    |
| EPI_ISL_685958 | 4/22/2020 | 12/10/2020 Asia / Japan / Hyogo    |
| EPI_ISL_685959 | 4/22/2020 | 12/10/2020 Asia / Japan / Hyogo    |
| EPI_ISL_685960 | 4/22/2020 | 12/10/2020 Asia / Japan / Hyogo    |
| EPI_ISL_685961 | 4/25/2020 | 12/10/2020 Asia / Japan / Hyogo    |
| EPI_ISL_685962 | 2020-03   | 12/10/2020 Asia / Japan            |
| EPI_ISL_685963 | 5/28/2020 | 12/10/2020 Asia / Japan / Tokyo    |
| EPI_ISL_685964 | 5/28/2020 | 12/10/2020 Asia / Japan / Tokyo    |
| EPI_ISL_685965 | 5/28/2020 | 12/10/2020 Asia / Japan / Tokyo    |
| EPI_ISL_685966 | 5/28/2020 | 12/10/2020 Asia / Japan / Tokyo    |
| EPI_ISL_685967 | 5/28/2020 | 12/10/2020 Asia / Japan / Tokyo    |



|                |           |                                   |
|----------------|-----------|-----------------------------------|
| EPI_ISL_686015 | 4/23/2020 | 12/10/2020 Asia / Japan / Saitama |
| EPI_ISL_686016 | 4/24/2020 | 12/10/2020 Asia / Japan / Saitama |
| EPI_ISL_686017 | 2020-04   | 12/10/2020 Asia / Japan           |
| EPI_ISL_686018 | 2020-04   | 12/10/2020 Asia / Japan           |
| EPI_ISL_686019 | 2020-04   | 12/10/2020 Asia / Japan           |
| EPI_ISL_686020 | 2020-04   | 12/10/2020 Asia / Japan           |
| EPI_ISL_686021 | 3/31/2020 | 12/10/2020 Asia / Japan / Okayama |
| EPI_ISL_686022 | 3/26/2020 | 12/10/2020 Asia / Japan / Okayama |
| EPI_ISL_686023 | 3/27/2020 | 12/10/2020 Asia / Japan / Okayama |
| EPI_ISL_686024 | 2020-03   | 12/10/2020 Asia / Japan           |
| EPI_ISL_686025 | 4/2/2020  | 12/10/2020 Asia / Japan / Okayama |
| EPI_ISL_686026 | 4/3/2020  | 12/10/2020 Asia / Japan / Okayama |
| EPI_ISL_686027 | 4/3/2020  | 12/10/2020 Asia / Japan / Okayama |
| EPI_ISL_686028 | 2020-04   | 12/10/2020 Asia / Japan           |
| EPI_ISL_686029 | 4/3/2020  | 12/10/2020 Asia / Japan / Okayama |
| EPI_ISL_686030 | 4/6/2020  | 12/10/2020 Asia / Japan / Okayama |
| EPI_ISL_686031 | 4/6/2020  | 12/10/2020 Asia / Japan / Okayama |
| EPI_ISL_686032 | 4/7/2020  | 12/10/2020 Asia / Japan / Okayama |
| EPI_ISL_686033 | 4/7/2020  | 12/10/2020 Asia / Japan / Okayama |
| EPI_ISL_686034 | 4/15/2020 | 12/10/2020 Asia / Japan / Okayama |
| EPI_ISL_686035 | 4/22/2020 | 12/10/2020 Asia / Japan / Okayama |
| EPI_ISL_686036 | 4/23/2020 | 12/10/2020 Asia / Japan / Okayama |
| EPI_ISL_686037 | 4/25/2020 | 12/10/2020 Asia / Japan / Okayama |
| EPI_ISL_686038 | 3/1/2020  | 12/10/2020 Asia / Japan / Ehime   |
| EPI_ISL_686039 | 3/17/2020 | 12/10/2020 Asia / Japan / Ehime   |
| EPI_ISL_686040 | 3/25/2020 | 12/10/2020 Asia / Japan / Ehime   |
| EPI_ISL_686041 | 3/30/2020 | 12/10/2020 Asia / Japan / Ehime   |
| EPI_ISL_686042 | 3/31/2020 | 12/10/2020 Asia / Japan / Ehime   |
| EPI_ISL_686043 | 3/31/2020 | 12/10/2020 Asia / Japan / Ehime   |
| EPI_ISL_686044 | 4/1/2020  | 12/10/2020 Asia / Japan / Ehime   |
| EPI_ISL_686045 | 4/1/2020  | 12/10/2020 Asia / Japan / Ehime   |
| EPI_ISL_686046 | 4/1/2020  | 12/10/2020 Asia / Japan / Ehime   |
| EPI_ISL_686047 | 4/2/2020  | 12/10/2020 Asia / Japan / Ehime   |
| EPI_ISL_686048 | 4/3/2020  | 12/10/2020 Asia / Japan / Ehime   |
| EPI_ISL_686049 | 4/3/2020  | 12/10/2020 Asia / Japan / Ehime   |
| EPI_ISL_686050 | 4/3/2020  | 12/10/2020 Asia / Japan / Ehime   |
| EPI_ISL_686051 | 4/2/2020  | 12/10/2020 Asia / Japan / Ehime   |
| EPI_ISL_686052 | 4/3/2020  | 12/10/2020 Asia / Japan / Ehime   |
| EPI_ISL_686053 | 4/3/2020  | 12/10/2020 Asia / Japan / Ehime   |
| EPI_ISL_686054 | 4/5/2020  | 12/10/2020 Asia / Japan / Ehime   |
| EPI_ISL_686055 | 4/7/2020  | 12/10/2020 Asia / Japan / Ehime   |
| EPI_ISL_686056 | 4/8/2020  | 12/10/2020 Asia / Japan / Ehime   |
| EPI_ISL_686057 | 4/9/2020  | 12/10/2020 Asia / Japan / Ehime   |
| EPI_ISL_686058 | 4/8/2020  | 12/10/2020 Asia / Japan / Ehime   |
| EPI_ISL_686059 | 4/8/2020  | 12/10/2020 Asia / Japan / Ehime   |
| EPI_ISL_686060 | 4/10/2020 | 12/10/2020 Asia / Japan / Ehime   |
| EPI_ISL_686061 | 4/12/2020 | 12/10/2020 Asia / Japan / Ehime   |







|                |           |                         |
|----------------|-----------|-------------------------|
| EPI_ISL_686157 | 8/5/2020  | 12/10/2020 Asia / Japan |
| EPI_ISL_686158 | 8/5/2020  | 12/10/2020 Asia / Japan |
| EPI_ISL_686159 | 8/5/2020  | 12/10/2020 Asia / Japan |
| EPI_ISL_686160 | 8/5/2020  | 12/10/2020 Asia / Japan |
| EPI_ISL_686161 | 8/5/2020  | 12/10/2020 Asia / Japan |
| EPI_ISL_686162 | 8/5/2020  | 12/10/2020 Asia / Japan |
| EPI_ISL_686163 | 8/5/2020  | 12/10/2020 Asia / Japan |
| EPI_ISL_686164 | 8/5/2020  | 12/10/2020 Asia / Japan |
| EPI_ISL_686165 | 8/6/2020  | 12/10/2020 Asia / Japan |
| EPI_ISL_686166 | 8/6/2020  | 12/10/2020 Asia / Japan |
| EPI_ISL_686167 | 8/6/2020  | 12/10/2020 Asia / Japan |
| EPI_ISL_686168 | 8/6/2020  | 12/10/2020 Asia / Japan |
| EPI_ISL_686169 | 8/8/2020  | 12/10/2020 Asia / Japan |
| EPI_ISL_686170 | 8/7/2020  | 12/10/2020 Asia / Japan |
| EPI_ISL_686171 | 8/7/2020  | 12/10/2020 Asia / Japan |
| EPI_ISL_686172 | 8/7/2020  | 12/10/2020 Asia / Japan |
| EPI_ISL_686173 | 8/7/2020  | 12/10/2020 Asia / Japan |
| EPI_ISL_686174 | 8/7/2020  | 12/10/2020 Asia / Japan |
| EPI_ISL_686175 | 8/7/2020  | 12/10/2020 Asia / Japan |
| EPI_ISL_686176 | 8/7/2020  | 12/10/2020 Asia / Japan |
| EPI_ISL_686177 | 8/8/2020  | 12/10/2020 Asia / Japan |
| EPI_ISL_686178 | 8/8/2020  | 12/10/2020 Asia / Japan |
| EPI_ISL_686179 | 8/9/2020  | 12/10/2020 Asia / Japan |
| EPI_ISL_686180 | 8/9/2020  | 12/10/2020 Asia / Japan |
| EPI_ISL_686181 | 8/9/2020  | 12/10/2020 Asia / Japan |
| EPI_ISL_686182 | 8/9/2020  | 12/10/2020 Asia / Japan |
| EPI_ISL_686183 | 8/11/2020 | 12/10/2020 Asia / Japan |
| EPI_ISL_686184 | 8/11/2020 | 12/10/2020 Asia / Japan |
| EPI_ISL_686185 | 8/11/2020 | 12/10/2020 Asia / Japan |
| EPI_ISL_686186 | 8/12/2020 | 12/10/2020 Asia / Japan |
| EPI_ISL_686187 | 8/14/2020 | 12/10/2020 Asia / Japan |
| EPI_ISL_686188 | 8/14/2020 | 12/10/2020 Asia / Japan |
| EPI_ISL_686189 | 8/15/2020 | 12/10/2020 Asia / Japan |
| EPI_ISL_686191 | 8/15/2020 | 12/10/2020 Asia / Japan |
| EPI_ISL_686192 | 8/15/2020 | 12/10/2020 Asia / Japan |
| EPI_ISL_686193 | 8/15/2020 | 12/10/2020 Asia / Japan |
| EPI_ISL_686194 | 8/15/2020 | 12/10/2020 Asia / Japan |
| EPI_ISL_686195 | 8/15/2020 | 12/10/2020 Asia / Japan |
| EPI_ISL_686196 | 8/15/2020 | 12/10/2020 Asia / Japan |
| EPI_ISL_686197 | 8/16/2020 | 12/10/2020 Asia / Japan |
| EPI_ISL_686198 | 8/17/2020 | 12/10/2020 Asia / Japan |
| EPI_ISL_686199 | 8/17/2020 | 12/10/2020 Asia / Japan |
| EPI_ISL_686200 | 8/20/2020 | 12/10/2020 Asia / Japan |
| EPI_ISL_686201 | 8/20/2020 | 12/10/2020 Asia / Japan |
| EPI_ISL_686202 | 8/20/2020 | 12/10/2020 Asia / Japan |
| EPI_ISL_686203 | 8/21/2020 | 12/10/2020 Asia / Japan |
| EPI_ISL_686204 | 8/21/2020 | 12/10/2020 Asia / Japan |

|                |           |                                 |
|----------------|-----------|---------------------------------|
| EPI_ISL_686205 | 8/21/2020 | 12/10/2020 Asia / Japan         |
| EPI_ISL_686206 | 8/21/2020 | 12/10/2020 Asia / Japan         |
| EPI_ISL_686207 | 8/23/2020 | 12/10/2020 Asia / Japan         |
| EPI_ISL_686208 | 8/26/2020 | 12/10/2020 Asia / Japan         |
| EPI_ISL_686209 | 8/26/2020 | 12/10/2020 Asia / Japan         |
| EPI_ISL_686210 | 8/27/2020 | 12/10/2020 Asia / Japan         |
| EPI_ISL_686211 | 8/28/2020 | 12/10/2020 Asia / Japan         |
| EPI_ISL_686212 | 8/28/2020 | 12/10/2020 Asia / Japan         |
| EPI_ISL_686213 | 8/28/2020 | 12/10/2020 Asia / Japan         |
| EPI_ISL_686214 | 9/1/2020  | 12/10/2020 Asia / Japan         |
| EPI_ISL_686215 | 8/31/2020 | 12/10/2020 Asia / Japan / Hyogo |
| EPI_ISL_686216 | 8/31/2020 | 12/10/2020 Asia / Japan / Hyogo |
| EPI_ISL_686217 | 9/2/2020  | 12/10/2020 Asia / Japan / Hyogo |
| EPI_ISL_686218 | 9/2/2020  | 12/10/2020 Asia / Japan / Hyogo |
| EPI_ISL_686219 | 9/2/2020  | 12/10/2020 Asia / Japan / Hyogo |
| EPI_ISL_686220 | 9/4/2020  | 12/10/2020 Asia / Japan / Hyogo |
| EPI_ISL_686221 | 9/5/2020  | 12/10/2020 Asia / Japan / Hyogo |
| EPI_ISL_686222 | 9/5/2020  | 12/10/2020 Asia / Japan / Hyogo |
| EPI_ISL_686223 | 8/25/2020 | 12/10/2020 Asia / Japan / Hyogo |
| EPI_ISL_686224 | 8/27/2020 | 12/10/2020 Asia / Japan / Hyogo |
| EPI_ISL_686225 | 8/28/2020 | 12/10/2020 Asia / Japan / Hyogo |
| EPI_ISL_686226 | 8/27/2020 | 12/10/2020 Asia / Japan / Hyogo |
| EPI_ISL_686227 | 8/29/2020 | 12/10/2020 Asia / Japan / Hyogo |
| EPI_ISL_686228 | 8/31/2020 | 12/10/2020 Asia / Japan / Hyogo |
| EPI_ISL_686229 | 9/2/2020  | 12/10/2020 Asia / Japan / Hyogo |
| EPI_ISL_686230 | 9/2/2020  | 12/10/2020 Asia / Japan / Hyogo |
| EPI_ISL_686231 | 9/3/2020  | 12/10/2020 Asia / Japan / Hyogo |
| EPI_ISL_686232 | 9/7/2020  | 12/10/2020 Asia / Japan / Hyogo |
| EPI_ISL_686233 | 9/7/2020  | 12/10/2020 Asia / Japan / Hyogo |
| EPI_ISL_686234 | 9/8/2020  | 12/10/2020 Asia / Japan / Hyogo |
| EPI_ISL_686235 | 9/9/2020  | 12/10/2020 Asia / Japan / Hyogo |
| EPI_ISL_686236 | 9/9/2020  | 12/10/2020 Asia / Japan / Hyogo |
| EPI_ISL_686237 | 9/10/2020 | 12/10/2020 Asia / Japan / Hyogo |
| EPI_ISL_686238 | 9/11/2020 | 12/10/2020 Asia / Japan / Hyogo |
| EPI_ISL_686239 | 9/11/2020 | 12/10/2020 Asia / Japan / Hyogo |
| EPI_ISL_686240 | 9/11/2020 | 12/10/2020 Asia / Japan / Hyogo |
| EPI_ISL_686241 | 9/12/2020 | 12/10/2020 Asia / Japan / Hyogo |
| EPI_ISL_686242 | 9/12/2020 | 12/10/2020 Asia / Japan / Hyogo |
| EPI_ISL_686243 | 9/12/2020 | 12/10/2020 Asia / Japan / Hyogo |
| EPI_ISL_686244 | 9/14/2020 | 12/10/2020 Asia / Japan / Hyogo |
| EPI_ISL_686245 | 9/18/2020 | 12/10/2020 Asia / Japan / Hyogo |
| EPI_ISL_686246 | 9/18/2020 | 12/10/2020 Asia / Japan / Hyogo |
| EPI_ISL_686247 | 9/19/2020 | 12/10/2020 Asia / Japan / Hyogo |
| EPI_ISL_686248 | 9/19/2020 | 12/10/2020 Asia / Japan / Hyogo |
| EPI_ISL_686249 | 9/20/2020 | 12/10/2020 Asia / Japan / Hyogo |
| EPI_ISL_686250 | 9/20/2020 | 12/10/2020 Asia / Japan / Hyogo |
| EPI_ISL_686251 | 9/20/2020 | 12/10/2020 Asia / Japan / Hyogo |







|                |           |                                     |
|----------------|-----------|-------------------------------------|
| EPI_ISL_686396 | 8/22/2020 | 12/10/2020 Asia / Japan / Tokushima |
| EPI_ISL_686397 | 8/24/2020 | 12/10/2020 Asia / Japan / Tokushima |
| EPI_ISL_686398 | 8/25/2020 | 12/10/2020 Asia / Japan / Tokushima |
| EPI_ISL_686399 | 8/25/2020 | 12/10/2020 Asia / Japan / Tokushima |
| EPI_ISL_686400 | 8/25/2020 | 12/10/2020 Asia / Japan / Tokushima |
| EPI_ISL_686401 | 8/25/2020 | 12/10/2020 Asia / Japan / Tokushima |
| EPI_ISL_686402 | 8/25/2020 | 12/10/2020 Asia / Japan / Tokushima |
| EPI_ISL_686403 | 8/25/2020 | 12/10/2020 Asia / Japan / Tokushima |
| EPI_ISL_686404 | 8/26/2020 | 12/10/2020 Asia / Japan / Tokushima |
| EPI_ISL_686405 | 8/27/2020 | 12/10/2020 Asia / Japan / Tokushima |
| EPI_ISL_686406 | 8/27/2020 | 12/10/2020 Asia / Japan / Tokushima |
| EPI_ISL_686407 | 8/31/2020 | 12/10/2020 Asia / Japan / Tokushima |
| EPI_ISL_686408 | 8/31/2020 | 12/10/2020 Asia / Japan / Tokushima |
| EPI_ISL_686409 | 9/1/2020  | 12/10/2020 Asia / Japan / Tokushima |
| EPI_ISL_686410 | 8/4/2020  | 12/10/2020 Asia / Japan / Tokushima |
| EPI_ISL_686411 | 8/4/2020  | 12/10/2020 Asia / Japan / Tokushima |
| EPI_ISL_686412 | 8/23/2020 | 12/10/2020 Asia / Japan / Tokushima |
| EPI_ISL_686413 | 8/24/2020 | 12/10/2020 Asia / Japan / Tokushima |
| EPI_ISL_686414 | 8/24/2020 | 12/10/2020 Asia / Japan / Tokushima |
| EPI_ISL_686415 | 8/26/2020 | 12/10/2020 Asia / Japan / Tokushima |
| EPI_ISL_686416 | 9/1/2020  | 12/10/2020 Asia / Japan / Tokushima |
| EPI_ISL_686417 | 9/1/2020  | 12/10/2020 Asia / Japan / Tokushima |
| EPI_ISL_686418 | 8/20/2020 | 12/10/2020 Asia / Japan / Ibaraki   |
| EPI_ISL_686419 | 8/9/2020  | 12/10/2020 Asia / Japan / Ibaraki   |
| EPI_ISL_686420 | 8/10/2020 | 12/10/2020 Asia / Japan / Ibaraki   |
| EPI_ISL_686421 | 8/10/2020 | 12/10/2020 Asia / Japan / Ibaraki   |
| EPI_ISL_686422 | 8/11/2020 | 12/10/2020 Asia / Japan / Ibaraki   |
| EPI_ISL_686423 | 8/11/2020 | 12/10/2020 Asia / Japan / Ibaraki   |
| EPI_ISL_686424 | 8/10/2020 | 12/10/2020 Asia / Japan / Ibaraki   |
| EPI_ISL_686425 | 8/11/2020 | 12/10/2020 Asia / Japan / Ibaraki   |
| EPI_ISL_686426 | 8/13/2020 | 12/10/2020 Asia / Japan / Ibaraki   |
| EPI_ISL_686427 | 8/14/2020 | 12/10/2020 Asia / Japan / Ibaraki   |
| EPI_ISL_686429 | 8/17/2020 | 12/10/2020 Asia / Japan / Ibaraki   |
| EPI_ISL_686430 | 8/20/2020 | 12/10/2020 Asia / Japan / Ibaraki   |
| EPI_ISL_686431 | 8/10/2020 | 12/10/2020 Asia / Japan / Ibaraki   |
| EPI_ISL_686432 | 8/7/2020  | 12/10/2020 Asia / Japan / Ibaraki   |
| EPI_ISL_686433 | 8/6/2020  | 12/10/2020 Asia / Japan / Ibaraki   |
| EPI_ISL_686434 | 8/7/2020  | 12/10/2020 Asia / Japan / Ibaraki   |
| EPI_ISL_686435 | 8/17/2020 | 12/10/2020 Asia / Japan / Ibaraki   |
| EPI_ISL_686436 | 8/17/2020 | 12/10/2020 Asia / Japan / Ibaraki   |
| EPI_ISL_686437 | 8/19/2020 | 12/10/2020 Asia / Japan / Ibaraki   |
| EPI_ISL_686438 | 8/19/2020 | 12/10/2020 Asia / Japan / Ibaraki   |
| EPI_ISL_686439 | 8/20/2020 | 12/10/2020 Asia / Japan / Ibaraki   |
| EPI_ISL_686440 | 8/22/2020 | 12/10/2020 Asia / Japan / Ibaraki   |
| EPI_ISL_686441 | 8/23/2020 | 12/10/2020 Asia / Japan / Ibaraki   |
| EPI_ISL_686442 | 8/24/2020 | 12/10/2020 Asia / Japan / Ibaraki   |
| EPI_ISL_686443 | 8/24/2020 | 12/10/2020 Asia / Japan / Ibaraki   |





|                |           |                                              |
|----------------|-----------|----------------------------------------------|
| EPI_ISL_686491 | 8/29/2020 | 12/10/2020 Asia / Japan / Ibaraki            |
| EPI_ISL_686492 | 8/29/2020 | 12/10/2020 Asia / Japan / Ibaraki            |
| EPI_ISL_686493 | 8/31/2020 | 12/10/2020 Asia / Japan / Ibaraki            |
| EPI_ISL_686494 | 9/1/2020  | 12/10/2020 Asia / Japan / Ibaraki            |
| EPI_ISL_686495 | 9/1/2020  | 12/10/2020 Asia / Japan / Ibaraki            |
| EPI_ISL_686496 | 9/2/2020  | 12/10/2020 Asia / Japan / Ibaraki            |
| EPI_ISL_686497 | 9/2/2020  | 12/10/2020 Asia / Japan / Ibaraki            |
| EPI_ISL_686498 | 9/3/2020  | 12/10/2020 Asia / Japan / Ibaraki            |
| EPI_ISL_686499 | 9/3/2020  | 12/10/2020 Asia / Japan / Ibaraki            |
| EPI_ISL_686500 | 9/4/2020  | 12/10/2020 Asia / Japan / Ibaraki            |
| EPI_ISL_686501 | 9/4/2020  | 12/10/2020 Asia / Japan / Ibaraki            |
| EPI_ISL_686502 | 9/5/2020  | 12/10/2020 Asia / Japan / Ibaraki            |
| EPI_ISL_686503 | 9/5/2020  | 12/10/2020 Asia / Japan / Ibaraki            |
| EPI_ISL_686504 | 9/6/2020  | 12/10/2020 Asia / Japan / Ibaraki            |
| EPI_ISL_686505 | 9/6/2020  | 12/10/2020 Asia / Japan / Ibaraki            |
| EPI_ISL_686506 | 9/8/2020  | 12/10/2020 Asia / Japan / Ibaraki            |
| EPI_ISL_686507 | 9/9/2020  | 12/10/2020 Asia / Japan / Ibaraki            |
| EPI_ISL_686508 | 9/9/2020  | 12/10/2020 Asia / Japan / Ibaraki            |
| EPI_ISL_686509 | 9/24/2020 | 12/10/2020 Asia / Japan / Ibaraki            |
| EPI_ISL_686510 | 9/24/2020 | 12/10/2020 Asia / Japan / Ibaraki            |
| EPI_ISL_686511 | 9/24/2020 | 12/10/2020 Asia / Japan / Ibaraki            |
| EPI_ISL_686512 | 9/25/2020 | 12/10/2020 Asia / Japan / Ibaraki            |
| EPI_ISL_686513 | 9/26/2020 | 12/10/2020 Asia / Japan / Ibaraki            |
| EPI_ISL_686514 | 9/26/2020 | 12/10/2020 Asia / Japan / Ibaraki            |
| EPI_ISL_686515 | 9/26/2020 | 12/10/2020 Asia / Japan / Ibaraki            |
| EPI_ISL_686516 | 9/26/2020 | 12/10/2020 Asia / Japan / Ibaraki            |
| EPI_ISL_686517 | 9/26/2020 | 12/10/2020 Asia / Japan / Ibaraki            |
| EPI_ISL_686518 | 9/26/2020 | 12/10/2020 Asia / Japan / Ibaraki            |
| EPI_ISL_686519 | 9/26/2020 | 12/10/2020 Asia / Japan / Ibaraki            |
| EPI_ISL_686520 | 9/27/2020 | 12/10/2020 Asia / Japan / Ibaraki            |
| EPI_ISL_686521 | 8/24/2020 | 12/10/2020 Asia / Japan / Osaka              |
| EPI_ISL_686522 | 9/5/2020  | 12/10/2020 Asia / Japan / Osaka              |
| EPI_ISL_686523 | 9/8/2020  | 12/10/2020 Asia / Japan / Osaka              |
| EPI_ISL_686524 | 9/8/2020  | 12/10/2020 Asia / Japan / Osaka              |
| EPI_ISL_686525 | 9/9/2020  | 12/10/2020 Asia / Japan / Osaka              |
| EPI_ISL_686526 | 9/9/2020  | 12/10/2020 Asia / Japan / Osaka              |
| EPI_ISL_686527 | 9/9/2020  | 12/10/2020 Asia / Japan / Osaka              |
| EPI_ISL_686528 | 9/9/2020  | 12/10/2020 Asia / Japan / Osaka              |
| EPI_ISL_686529 | 9/9/2020  | 12/10/2020 Asia / Japan / Osaka              |
| EPI_ISL_686530 | 9/13/2020 | 12/10/2020 Asia / Japan / Osaka              |
| EPI_ISL_686531 | 9/15/2020 | 12/10/2020 Asia / Japan / Osaka              |
| EPI_ISL_686532 | 9/19/2020 | 12/10/2020 Asia / Japan / Osaka              |
| EPI_ISL_686533 | 9/19/2020 | 12/10/2020 Asia / Japan / Osaka              |
| EPI_ISL_686534 | 9/19/2020 | 12/10/2020 Asia / Japan / Osaka              |
| EPI_ISL_686538 | 9/27/2020 | 12/10/2020 Europe / United Kingdom / England |
| EPI_ISL_686539 | 9/28/2020 | 12/10/2020 Europe / United Kingdom / England |
| EPI_ISL_686540 | 9/30/2020 | 12/10/2020 Europe / United Kingdom / England |

























|                |           |                                    |
|----------------|-----------|------------------------------------|
| EPI_ISL_687068 | 5/13/2020 | 12/10/2020 Asia / Japan / Kanagawa |
| EPI_ISL_687069 | 5/14/2020 | 12/10/2020 Asia / Japan / Kanagawa |
| EPI_ISL_687070 | 5/15/2020 | 12/10/2020 Asia / Japan / Kanagawa |
| EPI_ISL_687071 | 5/19/2020 | 12/10/2020 Asia / Japan / Kanagawa |
| EPI_ISL_687072 | 5/22/2020 | 12/10/2020 Asia / Japan / Kanagawa |
| EPI_ISL_687073 | 5/26/2020 | 12/10/2020 Asia / Japan / Kanagawa |
| EPI_ISL_687074 | 7/10/2020 | 12/10/2020 Asia / Japan / Kanagawa |
| EPI_ISL_687075 | 8/3/2020  | 12/10/2020 Asia / Japan / Kanagawa |
| EPI_ISL_687076 | 8/20/2020 | 12/10/2020 Asia / Japan / Kanagawa |
| EPI_ISL_687077 | 8/24/2020 | 12/10/2020 Asia / Japan / Kanagawa |
| EPI_ISL_687078 | 8/25/2020 | 12/10/2020 Asia / Japan / Kanagawa |
| EPI_ISL_687079 | 8/24/2020 | 12/10/2020 Asia / Japan / Saitama  |
| EPI_ISL_687080 | 8/24/2020 | 12/10/2020 Asia / Japan / Saitama  |
| EPI_ISL_687081 | 8/24/2020 | 12/10/2020 Asia / Japan / Saitama  |
| EPI_ISL_687082 | 8/25/2020 | 12/10/2020 Asia / Japan / Saitama  |
| EPI_ISL_687083 | 8/25/2020 | 12/10/2020 Asia / Japan / Saitama  |
| EPI_ISL_687084 | 8/25/2020 | 12/10/2020 Asia / Japan / Saitama  |
| EPI_ISL_687085 | 8/25/2020 | 12/10/2020 Asia / Japan / Saitama  |
| EPI_ISL_687086 | 8/25/2020 | 12/10/2020 Asia / Japan / Saitama  |
| EPI_ISL_687087 | 8/25/2020 | 12/10/2020 Asia / Japan / Saitama  |
| EPI_ISL_687088 | 8/25/2020 | 12/10/2020 Asia / Japan / Saitama  |
| EPI_ISL_687089 | 8/25/2020 | 12/10/2020 Asia / Japan / Saitama  |
| EPI_ISL_687090 | 8/25/2020 | 12/10/2020 Asia / Japan / Saitama  |
| EPI_ISL_687091 | 8/25/2020 | 12/10/2020 Asia / Japan / Saitama  |
| EPI_ISL_687092 | 8/26/2020 | 12/10/2020 Asia / Japan / Saitama  |
| EPI_ISL_687093 | 8/27/2020 | 12/10/2020 Asia / Japan / Saitama  |
| EPI_ISL_687094 | 8/28/2020 | 12/10/2020 Asia / Japan / Saitama  |
| EPI_ISL_687095 | 8/28/2020 | 12/10/2020 Asia / Japan / Saitama  |
| EPI_ISL_687096 | 8/28/2020 | 12/10/2020 Asia / Japan / Saitama  |
| EPI_ISL_687097 | 8/31/2020 | 12/10/2020 Asia / Japan / Saitama  |
| EPI_ISL_687098 | 8/31/2020 | 12/10/2020 Asia / Japan / Saitama  |
| EPI_ISL_687099 | 9/2/2020  | 12/10/2020 Asia / Japan / Saitama  |
| EPI_ISL_687100 | 8/5/2020  | 12/10/2020 Asia / Japan / Fukuoka  |
| EPI_ISL_687101 | 8/5/2020  | 12/10/2020 Asia / Japan / Fukuoka  |
| EPI_ISL_687102 | 8/7/2020  | 12/10/2020 Asia / Japan / Fukuoka  |
| EPI_ISL_687103 | 8/8/2020  | 12/10/2020 Asia / Japan / Fukuoka  |
| EPI_ISL_687104 | 8/8/2020  | 12/10/2020 Asia / Japan / Fukuoka  |
| EPI_ISL_687105 | 8/8/2020  | 12/10/2020 Asia / Japan / Fukuoka  |
| EPI_ISL_687106 | 8/10/2020 | 12/10/2020 Asia / Japan / Fukuoka  |
| EPI_ISL_687107 | 8/10/2020 | 12/10/2020 Asia / Japan / Fukuoka  |
| EPI_ISL_687108 | 8/11/2020 | 12/10/2020 Asia / Japan / Fukuoka  |
| EPI_ISL_687109 | 8/12/2020 | 12/10/2020 Asia / Japan / Fukuoka  |
| EPI_ISL_687110 | 8/12/2020 | 12/10/2020 Asia / Japan / Fukuoka  |
| EPI_ISL_687111 | 8/12/2020 | 12/10/2020 Asia / Japan / Fukuoka  |
| EPI_ISL_687112 | 8/13/2020 | 12/10/2020 Asia / Japan / Fukuoka  |
| EPI_ISL_687113 | 8/13/2020 | 12/10/2020 Asia / Japan / Fukuoka  |
| EPI_ISL_687114 | 8/13/2020 | 12/10/2020 Asia / Japan / Fukuoka  |

|                |           |                                    |
|----------------|-----------|------------------------------------|
| EPI_ISL_687115 | 8/13/2020 | 12/10/2020 Asia / Japan / Fukuoka  |
| EPI_ISL_687116 | 8/13/2020 | 12/10/2020 Asia / Japan / Fukuoka  |
| EPI_ISL_687117 | 8/13/2020 | 12/10/2020 Asia / Japan / Fukuoka  |
| EPI_ISL_687118 | 8/14/2020 | 12/10/2020 Asia / Japan / Fukuoka  |
| EPI_ISL_687119 | 8/14/2020 | 12/10/2020 Asia / Japan / Fukuoka  |
| EPI_ISL_687120 | 8/14/2020 | 12/10/2020 Asia / Japan / Fukuoka  |
| EPI_ISL_687121 | 8/14/2020 | 12/10/2020 Asia / Japan / Fukuoka  |
| EPI_ISL_687122 | 8/15/2020 | 12/10/2020 Asia / Japan / Fukuoka  |
| EPI_ISL_687123 | 8/15/2020 | 12/10/2020 Asia / Japan / Fukuoka  |
| EPI_ISL_687124 | 8/17/2020 | 12/10/2020 Asia / Japan / Fukuoka  |
| EPI_ISL_687125 | 8/18/2020 | 12/10/2020 Asia / Japan / Fukuoka  |
| EPI_ISL_687126 | 8/18/2020 | 12/10/2020 Asia / Japan / Fukuoka  |
| EPI_ISL_687127 | 8/20/2020 | 12/10/2020 Asia / Japan / Fukuoka  |
| EPI_ISL_687128 | 8/20/2020 | 12/10/2020 Asia / Japan / Fukuoka  |
| EPI_ISL_687129 | 8/22/2020 | 12/10/2020 Asia / Japan / Fukuoka  |
| EPI_ISL_687130 | 8/22/2020 | 12/10/2020 Asia / Japan / Fukuoka  |
| EPI_ISL_687131 | 8/26/2020 | 12/10/2020 Asia / Japan / Fukuoka  |
| EPI_ISL_687132 | 8/26/2020 | 12/10/2020 Asia / Japan / Fukuoka  |
| EPI_ISL_687133 | 8/28/2020 | 12/10/2020 Asia / Japan / Fukuoka  |
| EPI_ISL_687134 | 8/28/2020 | 12/10/2020 Asia / Japan / Fukuoka  |
| EPI_ISL_687135 | 8/29/2020 | 12/10/2020 Asia / Japan / Fukuoka  |
| EPI_ISL_687136 | 8/29/2020 | 12/10/2020 Asia / Japan / Fukuoka  |
| EPI_ISL_687137 | 8/31/2020 | 12/10/2020 Asia / Japan / Fukuoka  |
| EPI_ISL_687138 | 9/3/2020  | 12/10/2020 Asia / Japan / Fukuoka  |
| EPI_ISL_687139 | 8/22/2020 | 12/10/2020 Asia / Japan / Hyogo    |
| EPI_ISL_687140 | 8/24/2020 | 12/10/2020 Asia / Japan / Hyogo    |
| EPI_ISL_687141 | 8/24/2020 | 12/10/2020 Asia / Japan / Hyogo    |
| EPI_ISL_687142 | 8/24/2020 | 12/10/2020 Asia / Japan / Hyogo    |
| EPI_ISL_687143 | 8/24/2020 | 12/10/2020 Asia / Japan / Hyogo    |
| EPI_ISL_687145 | 8/25/2020 | 12/10/2020 Asia / Japan / Hyogo    |
| EPI_ISL_687146 | 8/29/2020 | 12/10/2020 Asia / Japan / Hyogo    |
| EPI_ISL_687147 | 8/30/2020 | 12/10/2020 Asia / Japan / Hyogo    |
| EPI_ISL_687148 | 9/4/2020  | 12/10/2020 Asia / Japan / Hyogo    |
| EPI_ISL_687149 | 9/7/2020  | 12/10/2020 Asia / Japan / Hyogo    |
| EPI_ISL_687150 | 9/7/2020  | 12/10/2020 Asia / Japan / Hyogo    |
| EPI_ISL_687151 | 9/8/2020  | 12/10/2020 Asia / Japan / Hyogo    |
| EPI_ISL_687152 | 8/26/2020 | 12/10/2020 Asia / Japan / Nagano   |
| EPI_ISL_687153 | 8/27/2020 | 12/10/2020 Asia / Japan / Nagano   |
| EPI_ISL_687154 | 8/27/2020 | 12/10/2020 Asia / Japan / Nagano   |
| EPI_ISL_687155 | 8/27/2020 | 12/10/2020 Asia / Japan / Nagano   |
| EPI_ISL_687156 | 8/28/2020 | 12/10/2020 Asia / Japan / Nagano   |
| EPI_ISL_687157 | 8/28/2020 | 12/10/2020 Asia / Japan / Nagano   |
| EPI_ISL_687158 | 9/1/2020  | 12/10/2020 Asia / Japan / Nagano   |
| EPI_ISL_687159 | 9/7/2020  | 12/10/2020 Asia / Japan / Ishikawa |
| EPI_ISL_687160 | 9/8/2020  | 12/10/2020 Asia / Japan / Ishikawa |
| EPI_ISL_687161 | 9/8/2020  | 12/10/2020 Asia / Japan / Ishikawa |
| EPI_ISL_687162 | 9/8/2020  | 12/10/2020 Asia / Japan / Ishikawa |



















|                |           |                                    |
|----------------|-----------|------------------------------------|
| EPI_ISL_687551 | 9/9/2020  | 12/10/2020 Asia / Japan / Fukuoka  |
| EPI_ISL_687552 | 9/10/2020 | 12/10/2020 Asia / Japan / Fukuoka  |
| EPI_ISL_687553 | 9/10/2020 | 12/10/2020 Asia / Japan / Fukuoka  |
| EPI_ISL_687554 | 9/10/2020 | 12/10/2020 Asia / Japan / Fukuoka  |
| EPI_ISL_687555 | 9/14/2020 | 12/10/2020 Asia / Japan / Fukuoka  |
| EPI_ISL_687556 | 9/16/2020 | 12/10/2020 Asia / Japan / Fukuoka  |
| EPI_ISL_687557 | 9/17/2020 | 12/10/2020 Asia / Japan / Fukuoka  |
| EPI_ISL_687558 | 9/18/2020 | 12/10/2020 Asia / Japan / Fukuoka  |
| EPI_ISL_687559 | 9/24/2020 | 12/10/2020 Asia / Japan / Fukuoka  |
| EPI_ISL_687560 | 9/25/2020 | 12/10/2020 Asia / Japan / Fukuoka  |
| EPI_ISL_687561 | 6/9/2020  | 12/10/2020 Asia / Japan / Hokkaido |
| EPI_ISL_687562 | 7/31/2020 | 12/10/2020 Asia / Japan / Hokkaido |
| EPI_ISL_687563 | 7/31/2020 | 12/10/2020 Asia / Japan / Hokkaido |
| EPI_ISL_687564 | 8/3/2020  | 12/10/2020 Asia / Japan / Hokkaido |
| EPI_ISL_687565 | 8/22/2020 | 12/10/2020 Asia / Japan / Hokkaido |
| EPI_ISL_687566 | 8/23/2020 | 12/10/2020 Asia / Japan / Hokkaido |
| EPI_ISL_687567 | 6/29/2020 | 12/10/2020 Asia / Japan / Hokkaido |
| EPI_ISL_687568 | 6/30/2020 | 12/10/2020 Asia / Japan / Hokkaido |
| EPI_ISL_687569 | 7/8/2020  | 12/10/2020 Asia / Japan / Hokkaido |
| EPI_ISL_687570 | 8/14/2020 | 12/10/2020 Asia / Japan / Hokkaido |
| EPI_ISL_687572 | 7/1/2020  | 12/10/2020 Asia / Japan / Hokkaido |
| EPI_ISL_687573 | 8/11/2020 | 12/10/2020 Asia / Japan / Hokkaido |
| EPI_ISL_687574 | 8/21/2020 | 12/10/2020 Asia / Japan / Hokkaido |
| EPI_ISL_687575 | 8/25/2020 | 12/10/2020 Asia / Japan / Hokkaido |
| EPI_ISL_687576 | 8/27/2020 | 12/10/2020 Asia / Japan / Hokkaido |
| EPI_ISL_687577 | 7/16/2020 | 12/10/2020 Asia / Japan / Hokkaido |
| EPI_ISL_687578 | 8/3/2020  | 12/10/2020 Asia / Japan / Hokkaido |
| EPI_ISL_687579 | 8/5/2020  | 12/10/2020 Asia / Japan / Hokkaido |
| EPI_ISL_687580 | 8/5/2020  | 12/10/2020 Asia / Japan / Hokkaido |
| EPI_ISL_687581 | 8/5/2020  | 12/10/2020 Asia / Japan / Hokkaido |
| EPI_ISL_687582 | 8/6/2020  | 12/10/2020 Asia / Japan / Hokkaido |
| EPI_ISL_687583 | 8/15/2020 | 12/10/2020 Asia / Japan / Hokkaido |
| EPI_ISL_687584 | 6/2/2020  | 12/10/2020 Asia / Japan / Hokkaido |
| EPI_ISL_687585 | 6/3/2020  | 12/10/2020 Asia / Japan / Hokkaido |
| EPI_ISL_687586 | 6/16/2020 | 12/10/2020 Asia / Japan / Hokkaido |
| EPI_ISL_687587 | 6/18/2020 | 12/10/2020 Asia / Japan / Hokkaido |
| EPI_ISL_687588 | 6/26/2020 | 12/10/2020 Asia / Japan / Hokkaido |
| EPI_ISL_687589 | 6/26/2020 | 12/10/2020 Asia / Japan / Hokkaido |
| EPI_ISL_687590 | 6/26/2020 | 12/10/2020 Asia / Japan / Hokkaido |
| EPI_ISL_687591 | 6/26/2020 | 12/10/2020 Asia / Japan / Hokkaido |
| EPI_ISL_687592 | 6/26/2020 | 12/10/2020 Asia / Japan / Hokkaido |
| EPI_ISL_687593 | 6/26/2020 | 12/10/2020 Asia / Japan / Hokkaido |
| EPI_ISL_687594 | 6/26/2020 | 12/10/2020 Asia / Japan / Hokkaido |
| EPI_ISL_687595 | 6/26/2020 | 12/10/2020 Asia / Japan / Hokkaido |
| EPI_ISL_687596 | 6/26/2020 | 12/10/2020 Asia / Japan / Hokkaido |
| EPI_ISL_687597 | 6/27/2020 | 12/10/2020 Asia / Japan / Hokkaido |
| EPI_ISL_687598 | 6/27/2020 | 12/10/2020 Asia / Japan / Hokkaido |



|                |           |                                     |
|----------------|-----------|-------------------------------------|
| EPI_ISL_687599 | 7/29/2020 | 12/10/2020 Asia / Japan / Hokkaido  |
| EPI_ISL_687600 | 8/22/2020 | 12/10/2020 Asia / Japan / Hokkaido  |
| EPI_ISL_687601 | 9/11/2020 | 12/10/2020 Asia / Japan / Hyogo     |
| EPI_ISL_687602 | 9/14/2020 | 12/10/2020 Asia / Japan / Hyogo     |
| EPI_ISL_687603 | 9/14/2020 | 12/10/2020 Asia / Japan / Hyogo     |
| EPI_ISL_687604 | 9/15/2020 | 12/10/2020 Asia / Japan / Hyogo     |
| EPI_ISL_687605 | 9/15/2020 | 12/10/2020 Asia / Japan / Hyogo     |
| EPI_ISL_687606 | 9/15/2020 | 12/10/2020 Asia / Japan / Hyogo     |
| EPI_ISL_687607 | 9/17/2020 | 12/10/2020 Asia / Japan / Hyogo     |
| EPI_ISL_687608 | 9/21/2020 | 12/10/2020 Asia / Japan / Hyogo     |
| EPI_ISL_687609 | 7/20/2020 | 12/10/2020 Asia / Japan             |
| EPI_ISL_687610 | 7/20/2020 | 12/10/2020 Asia / Japan             |
| EPI_ISL_687611 | 7/22/2020 | 12/10/2020 Asia / Japan             |
| EPI_ISL_687614 | 8/27/2020 | 12/10/2020 Asia / Japan / Yamaguchi |
| EPI_ISL_687616 | 7/9/2020  | 12/10/2020 Asia / Japan / Kanagawa  |
| EPI_ISL_687617 | 8/5/2020  | 12/10/2020 Asia / Japan / Kanagawa  |
| EPI_ISL_687618 | 4/28/2020 | 12/10/2020 Asia / Japan / Osaka     |
| EPI_ISL_687619 | 7/7/2020  | 12/10/2020 Asia / Japan / Saitama   |
| EPI_ISL_687620 | 8/7/2020  | 12/10/2020 Asia / Japan / Saitama   |
| EPI_ISL_687621 | 9/3/2020  | 12/10/2020 Asia / Japan / Mie       |
| EPI_ISL_687622 | 9/3/2020  | 12/10/2020 Asia / Japan / Mie       |
| EPI_ISL_687623 | 9/3/2020  | 12/10/2020 Asia / Japan / Mie       |
| EPI_ISL_687624 | 7/27/2020 | 12/10/2020 Asia / Japan / Kumamoto  |
| EPI_ISL_687625 | 7/27/2020 | 12/10/2020 Asia / Japan / Kumamoto  |
| EPI_ISL_687626 | 7/27/2020 | 12/10/2020 Asia / Japan / Kumamoto  |
| EPI_ISL_687627 | 7/27/2020 | 12/10/2020 Asia / Japan / Kumamoto  |
| EPI_ISL_687628 | 7/27/2020 | 12/10/2020 Asia / Japan / Kumamoto  |
| EPI_ISL_687629 | 7/27/2020 | 12/10/2020 Asia / Japan / Kumamoto  |
| EPI_ISL_687630 | 7/27/2020 | 12/10/2020 Asia / Japan / Kumamoto  |
| EPI_ISL_687631 | 7/27/2020 | 12/10/2020 Asia / Japan / Kumamoto  |
| EPI_ISL_687632 | 7/27/2020 | 12/10/2020 Asia / Japan / Kumamoto  |
| EPI_ISL_687633 | 7/28/2020 | 12/10/2020 Asia / Japan / Kumamoto  |
| EPI_ISL_687634 | 7/28/2020 | 12/10/2020 Asia / Japan / Kumamoto  |
| EPI_ISL_687635 | 7/28/2020 | 12/10/2020 Asia / Japan / Kumamoto  |
| EPI_ISL_687636 | 7/29/2020 | 12/10/2020 Asia / Japan / Kumamoto  |
| EPI_ISL_687637 | 7/29/2020 | 12/10/2020 Asia / Japan / Kumamoto  |
| EPI_ISL_687638 | 7/31/2020 | 12/10/2020 Asia / Japan / Kumamoto  |
| EPI_ISL_687639 | 7/31/2020 | 12/10/2020 Asia / Japan / Kumamoto  |
| EPI_ISL_687640 | 7/31/2020 | 12/10/2020 Asia / Japan / Kumamoto  |
| EPI_ISL_687641 | 7/31/2020 | 12/10/2020 Asia / Japan / Kumamoto  |
| EPI_ISL_687642 | 8/1/2020  | 12/10/2020 Asia / Japan / Kumamoto  |
| EPI_ISL_687643 | 8/1/2020  | 12/10/2020 Asia / Japan / Kumamoto  |
| EPI_ISL_687644 | 8/2/2020  | 12/10/2020 Asia / Japan / Kumamoto  |
| EPI_ISL_687645 | 8/2/2020  | 12/10/2020 Asia / Japan / Kumamoto  |
| EPI_ISL_687646 | 8/2/2020  | 12/10/2020 Asia / Japan / Kumamoto  |
| EPI_ISL_687647 | 8/2/2020  | 12/10/2020 Asia / Japan / Kumamoto  |
| EPI_ISL_687648 | 8/3/2020  | 12/10/2020 Asia / Japan / Kumamoto  |

|                |           |                                    |
|----------------|-----------|------------------------------------|
| EPI_ISL_687649 | 8/3/2020  | 12/10/2020 Asia / Japan / Kumamoto |
| EPI_ISL_687650 | 8/3/2020  | 12/10/2020 Asia / Japan / Kumamoto |
| EPI_ISL_687651 | 8/4/2020  | 12/10/2020 Asia / Japan / Kumamoto |
| EPI_ISL_687652 | 8/5/2020  | 12/10/2020 Asia / Japan / Kumamoto |
| EPI_ISL_687653 | 8/6/2020  | 12/10/2020 Asia / Japan / Kumamoto |
| EPI_ISL_687654 | 8/6/2020  | 12/10/2020 Asia / Japan / Kumamoto |
| EPI_ISL_687655 | 7/22/2020 | 12/10/2020 Asia / Japan / Kagawa   |
| EPI_ISL_687659 | 8/4/2020  | 12/10/2020 Asia / Japan / Kagawa   |
| EPI_ISL_687660 | 8/5/2020  | 12/10/2020 Asia / Japan / Kagawa   |
| EPI_ISL_687661 | 8/6/2020  | 12/10/2020 Asia / Japan / Kagawa   |
| EPI_ISL_687662 | 8/16/2020 | 12/10/2020 Asia / Japan / Kagawa   |
| EPI_ISL_687663 | 8/18/2020 | 12/10/2020 Asia / Japan / Kagawa   |
| EPI_ISL_687664 | 8/20/2020 | 12/10/2020 Asia / Japan / Kagawa   |
| EPI_ISL_687665 | 8/24/2020 | 12/10/2020 Asia / Japan / Hyogo    |
| EPI_ISL_687666 | 8/26/2020 | 12/10/2020 Asia / Japan / Hyogo    |
| EPI_ISL_687667 | 8/28/2020 | 12/10/2020 Asia / Japan / Hyogo    |
| EPI_ISL_687668 | 8/31/2020 | 12/10/2020 Asia / Japan / Hyogo    |
| EPI_ISL_687669 | 9/1/2020  | 12/10/2020 Asia / Japan / Hyogo    |
| EPI_ISL_687670 | 9/2/2020  | 12/10/2020 Asia / Japan / Hyogo    |
| EPI_ISL_687671 | 9/2/2020  | 12/10/2020 Asia / Japan / Hyogo    |
| EPI_ISL_687672 | 9/3/2020  | 12/10/2020 Asia / Japan / Hyogo    |
| EPI_ISL_687673 | 8/30/2020 | 12/10/2020 Asia / Japan / Miyagi   |
| EPI_ISL_687674 | 8/30/2020 | 12/10/2020 Asia / Japan / Miyagi   |
| EPI_ISL_687675 | 8/31/2020 | 12/10/2020 Asia / Japan / Miyagi   |
| EPI_ISL_687676 | 9/1/2020  | 12/10/2020 Asia / Japan / Miyagi   |
| EPI_ISL_687677 | 9/2/2020  | 12/10/2020 Asia / Japan / Miyagi   |
| EPI_ISL_687678 | 9/2/2020  | 12/10/2020 Asia / Japan / Miyagi   |
| EPI_ISL_687679 | 9/2/2020  | 12/10/2020 Asia / Japan / Miyagi   |
| EPI_ISL_687680 | 9/2/2020  | 12/10/2020 Asia / Japan / Miyagi   |
| EPI_ISL_687681 | 9/2/2020  | 12/10/2020 Asia / Japan / Miyagi   |
| EPI_ISL_687682 | 9/2/2020  | 12/10/2020 Asia / Japan / Miyagi   |
| EPI_ISL_687683 | 9/3/2020  | 12/10/2020 Asia / Japan / Miyagi   |
| EPI_ISL_687684 | 9/3/2020  | 12/10/2020 Asia / Japan / Miyagi   |
| EPI_ISL_687685 | 9/3/2020  | 12/10/2020 Asia / Japan / Miyagi   |
| EPI_ISL_687686 | 9/4/2020  | 12/10/2020 Asia / Japan / Miyagi   |
| EPI_ISL_687687 | 9/4/2020  | 12/10/2020 Asia / Japan / Miyagi   |
| EPI_ISL_687688 | 9/4/2020  | 12/10/2020 Asia / Japan / Miyagi   |
| EPI_ISL_687689 | 9/5/2020  | 12/10/2020 Asia / Japan / Miyagi   |
| EPI_ISL_687690 | 9/5/2020  | 12/10/2020 Asia / Japan / Miyagi   |
| EPI_ISL_687691 | 9/6/2020  | 12/10/2020 Asia / Japan / Miyagi   |
| EPI_ISL_687692 | 9/6/2020  | 12/10/2020 Asia / Japan / Miyagi   |
| EPI_ISL_687693 | 9/6/2020  | 12/10/2020 Asia / Japan / Miyagi   |
| EPI_ISL_687694 | 9/6/2020  | 12/10/2020 Asia / Japan / Miyagi   |
| EPI_ISL_687695 | 9/6/2020  | 12/10/2020 Asia / Japan / Miyagi   |
| EPI_ISL_687696 | 9/2/2020  | 12/10/2020 Asia / Japan / Miyagi   |
| EPI_ISL_687697 | 9/2/2020  | 12/10/2020 Asia / Japan / Miyagi   |
| EPI_ISL_687698 | 9/2/2020  | 12/10/2020 Asia / Japan / Miyagi   |

|                |           |                                    |
|----------------|-----------|------------------------------------|
| EPI_ISL_687699 | 7/14/2020 | 12/10/2020 Asia / Japan / Niigata  |
| EPI_ISL_687700 | 7/14/2020 | 12/10/2020 Asia / Japan / Niigata  |
| EPI_ISL_687701 | 7/25/2020 | 12/10/2020 Asia / Japan / Niigata  |
| EPI_ISL_687702 | 7/29/2020 | 12/10/2020 Asia / Japan / Niigata  |
| EPI_ISL_687703 | 7/30/2020 | 12/10/2020 Asia / Japan / Niigata  |
| EPI_ISL_687704 | 7/30/2020 | 12/10/2020 Asia / Japan / Niigata  |
| EPI_ISL_687705 | 8/3/2020  | 12/10/2020 Asia / Japan / Niigata  |
| EPI_ISL_687706 | 8/3/2020  | 12/10/2020 Asia / Japan / Niigata  |
| EPI_ISL_687707 | 8/3/2020  | 12/10/2020 Asia / Japan / Niigata  |
| EPI_ISL_687708 | 8/3/2020  | 12/10/2020 Asia / Japan / Niigata  |
| EPI_ISL_687709 | 8/5/2020  | 12/10/2020 Asia / Japan / Niigata  |
| EPI_ISL_687710 | 8/5/2020  | 12/10/2020 Asia / Japan / Niigata  |
| EPI_ISL_687712 | 8/17/2020 | 12/10/2020 Asia / Japan / Niigata  |
| EPI_ISL_687714 | 8/18/2020 | 12/10/2020 Asia / Japan / Niigata  |
| EPI_ISL_687718 | 6/17/2020 | 12/10/2020 Asia / Japan / Niigata  |
| EPI_ISL_687719 | 7/3/2020  | 12/10/2020 Asia / Japan / Niigata  |
| EPI_ISL_687720 | 7/17/2020 | 12/10/2020 Asia / Japan / Niigata  |
| EPI_ISL_687721 | 7/25/2020 | 12/10/2020 Asia / Japan / Niigata  |
| EPI_ISL_687722 | 7/27/2020 | 12/10/2020 Asia / Japan / Niigata  |
| EPI_ISL_687723 | 7/27/2020 | 12/10/2020 Asia / Japan / Niigata  |
| EPI_ISL_687724 | 7/27/2020 | 12/10/2020 Asia / Japan / Niigata  |
| EPI_ISL_687725 | 7/28/2020 | 12/10/2020 Asia / Japan / Niigata  |
| EPI_ISL_687726 | 7/30/2020 | 12/10/2020 Asia / Japan / Niigata  |
| EPI_ISL_687727 | 7/30/2020 | 12/10/2020 Asia / Japan / Niigata  |
| EPI_ISL_687728 | 7/30/2020 | 12/10/2020 Asia / Japan / Niigata  |
| EPI_ISL_687729 | 7/30/2020 | 12/10/2020 Asia / Japan / Niigata  |
| EPI_ISL_687730 | 7/30/2020 | 12/10/2020 Asia / Japan / Niigata  |
| EPI_ISL_687731 | 7/30/2020 | 12/10/2020 Asia / Japan / Niigata  |
| EPI_ISL_687732 | 7/30/2020 | 12/10/2020 Asia / Japan / Niigata  |
| EPI_ISL_687733 | 8/1/2020  | 12/10/2020 Asia / Japan / Niigata  |
| EPI_ISL_687734 | 8/1/2020  | 12/10/2020 Asia / Japan / Niigata  |
| EPI_ISL_687735 | 8/5/2020  | 12/10/2020 Asia / Japan / Niigata  |
| EPI_ISL_687736 | 8/7/2020  | 12/10/2020 Asia / Japan / Niigata  |
| EPI_ISL_687737 | 8/21/2020 | 12/10/2020 Asia / Japan / Hokkaido |
| EPI_ISL_687738 | 8/24/2020 | 12/10/2020 Asia / Japan / Hokkaido |
| EPI_ISL_687739 | 8/25/2020 | 12/10/2020 Asia / Japan / Hokkaido |
| EPI_ISL_687740 | 8/27/2020 | 12/10/2020 Asia / Japan / Hokkaido |
| EPI_ISL_687741 | 8/29/2020 | 12/10/2020 Asia / Japan / Hokkaido |
| EPI_ISL_687742 | 8/30/2020 | 12/10/2020 Asia / Japan / Hokkaido |
| EPI_ISL_687743 | 9/1/2020  | 12/10/2020 Asia / Japan / Hokkaido |
| EPI_ISL_687744 | 9/8/2020  | 12/10/2020 Asia / Japan / Hokkaido |
| EPI_ISL_687745 | 9/10/2020 | 12/10/2020 Asia / Japan / Hokkaido |
| EPI_ISL_687746 | 6/2/2020  | 12/10/2020 Asia / Japan / Kanagawa |
| EPI_ISL_687747 | 6/4/2020  | 12/10/2020 Asia / Japan / Kanagawa |
| EPI_ISL_687748 | 6/11/2020 | 12/10/2020 Asia / Japan / Kanagawa |
| EPI_ISL_687749 | 6/11/2020 | 12/10/2020 Asia / Japan / Kanagawa |
| EPI_ISL_687750 | 6/11/2020 | 12/10/2020 Asia / Japan / Kanagawa |







|                |           |                                    |
|----------------|-----------|------------------------------------|
| EPI_ISL_687892 | 8/20/2020 | 12/10/2020 Asia / Japan / Kanagawa |
| EPI_ISL_687893 | 8/20/2020 | 12/10/2020 Asia / Japan / Kanagawa |
| EPI_ISL_687894 | 8/21/2020 | 12/10/2020 Asia / Japan / Kanagawa |
| EPI_ISL_687895 | 8/22/2020 | 12/10/2020 Asia / Japan / Kanagawa |
| EPI_ISL_687896 | 8/24/2020 | 12/10/2020 Asia / Japan / Kanagawa |
| EPI_ISL_687897 | 8/24/2020 | 12/10/2020 Asia / Japan / Kanagawa |
| EPI_ISL_687898 | 8/24/2020 | 12/10/2020 Asia / Japan / Kanagawa |
| EPI_ISL_687899 | 8/25/2020 | 12/10/2020 Asia / Japan / Kanagawa |
| EPI_ISL_687900 | 8/25/2020 | 12/10/2020 Asia / Japan / Kanagawa |
| EPI_ISL_687901 | 8/25/2020 | 12/10/2020 Asia / Japan / Kanagawa |
| EPI_ISL_687902 | 8/26/2020 | 12/10/2020 Asia / Japan / Kanagawa |
| EPI_ISL_687903 | 8/26/2020 | 12/10/2020 Asia / Japan / Kanagawa |
| EPI_ISL_687904 | 8/26/2020 | 12/10/2020 Asia / Japan / Kanagawa |
| EPI_ISL_687905 | 8/27/2020 | 12/10/2020 Asia / Japan / Kanagawa |
| EPI_ISL_687906 | 8/27/2020 | 12/10/2020 Asia / Japan / Kanagawa |
| EPI_ISL_687907 | 8/27/2020 | 12/10/2020 Asia / Japan / Kanagawa |
| EPI_ISL_687908 | 8/28/2020 | 12/10/2020 Asia / Japan / Kanagawa |
| EPI_ISL_687909 | 8/28/2020 | 12/10/2020 Asia / Japan / Kanagawa |
| EPI_ISL_687910 | 8/29/2020 | 12/10/2020 Asia / Japan / Kanagawa |
| EPI_ISL_687911 | 7/11/2020 | 12/10/2020 Asia / Japan / Kochi    |
| EPI_ISL_687912 | 7/14/2020 | 12/10/2020 Asia / Japan / Kochi    |
| EPI_ISL_687913 | 7/27/2020 | 12/10/2020 Asia / Japan / Kochi    |
| EPI_ISL_687914 | 8/13/2020 | 12/10/2020 Asia / Japan / Kochi    |
| EPI_ISL_687915 | 8/14/2020 | 12/10/2020 Asia / Japan / Kochi    |
| EPI_ISL_687916 | 8/25/2020 | 12/10/2020 Asia / Japan / Kochi    |
| EPI_ISL_687917 | 8/25/2020 | 12/10/2020 Asia / Japan / Kochi    |
| EPI_ISL_687918 | 8/27/2020 | 12/10/2020 Asia / Japan / Kochi    |
| EPI_ISL_687919 | 8/31/2020 | 12/10/2020 Asia / Japan / Kochi    |
| EPI_ISL_687920 | 9/4/2020  | 12/10/2020 Asia / Japan / Kochi    |
| EPI_ISL_687921 | 4/14/2020 | 12/10/2020 Asia / Japan / Osaka    |
| EPI_ISL_687922 | 4/15/2020 | 12/10/2020 Asia / Japan / Osaka    |
| EPI_ISL_687923 | 5/3/2020  | 12/10/2020 Asia / Japan / Osaka    |
| EPI_ISL_687924 | 4/17/2020 | 12/10/2020 Asia / Japan / Osaka    |
| EPI_ISL_687925 | 4/27/2020 | 12/10/2020 Asia / Japan / Osaka    |
| EPI_ISL_687926 | 4/17/2020 | 12/10/2020 Asia / Japan / Osaka    |
| EPI_ISL_687927 | 4/15/2020 | 12/10/2020 Asia / Japan / Osaka    |
| EPI_ISL_687928 | 4/23/2020 | 12/10/2020 Asia / Japan / Osaka    |
| EPI_ISL_687929 | 4/27/2020 | 12/10/2020 Asia / Japan / Osaka    |
| EPI_ISL_687930 | 4/13/2020 | 12/10/2020 Asia / Japan / Osaka    |
| EPI_ISL_687931 | 5/11/2020 | 12/10/2020 Asia / Japan / Osaka    |
| EPI_ISL_687932 | 6/16/2020 | 12/10/2020 Asia / Japan / Osaka    |
| EPI_ISL_687933 | 6/20/2020 | 12/10/2020 Asia / Japan / Osaka    |
| EPI_ISL_687934 | 6/29/2020 | 12/10/2020 Asia / Japan / Osaka    |
| EPI_ISL_687935 | 7/13/2020 | 12/10/2020 Asia / Japan / Osaka    |
| EPI_ISL_687936 | 7/13/2020 | 12/10/2020 Asia / Japan / Osaka    |
| EPI_ISL_687937 | 7/14/2020 | 12/10/2020 Asia / Japan / Osaka    |
| EPI_ISL_687938 | 7/24/2020 | 12/10/2020 Asia / Japan / Osaka    |









|                |           |                                     |
|----------------|-----------|-------------------------------------|
| EPI_ISL_688080 | 7/23/2020 | 12/10/2020 Asia / Japan / Hiroshima |
| EPI_ISL_688081 | 7/23/2020 | 12/10/2020 Asia / Japan / Hiroshima |
| EPI_ISL_688082 | 7/24/2020 | 12/10/2020 Asia / Japan / Hiroshima |
| EPI_ISL_688083 | 7/24/2020 | 12/10/2020 Asia / Japan / Hiroshima |
| EPI_ISL_688084 | 4/10/2020 | 12/10/2020 Asia / Japan / Tottori   |
| EPI_ISL_688085 | 4/18/2020 | 12/10/2020 Asia / Japan / Tottori   |
| EPI_ISL_688086 | 7/20/2020 | 12/10/2020 Asia / Japan / Tottori   |
| EPI_ISL_688087 | 7/12/2020 | 12/10/2020 Asia / Japan / Tottori   |
| EPI_ISL_688088 | 7/25/2020 | 12/10/2020 Asia / Japan / Tottori   |
| EPI_ISL_688089 | 7/28/2020 | 12/10/2020 Asia / Japan / Tottori   |
| EPI_ISL_688090 | 7/28/2020 | 12/10/2020 Asia / Japan / Tottori   |
| EPI_ISL_688091 | 7/29/2020 | 12/10/2020 Asia / Japan / Tottori   |
| EPI_ISL_688092 | 7/30/2020 | 12/10/2020 Asia / Japan / Tottori   |
| EPI_ISL_688093 | 7/31/2020 | 12/10/2020 Asia / Japan / Tottori   |
| EPI_ISL_688094 | 8/1/2020  | 12/10/2020 Asia / Japan / Tottori   |
| EPI_ISL_688095 | 8/2/2020  | 12/10/2020 Asia / Japan / Tottori   |
| EPI_ISL_688096 | 8/2/2020  | 12/10/2020 Asia / Japan / Tottori   |
| EPI_ISL_688097 | 8/4/2020  | 12/10/2020 Asia / Japan / Tottori   |
| EPI_ISL_688098 | 8/5/2020  | 12/10/2020 Asia / Japan / Tottori   |
| EPI_ISL_688099 | 8/6/2020  | 12/10/2020 Asia / Japan / Tottori   |
| EPI_ISL_688100 | 8/19/2020 | 12/10/2020 Asia / Japan / Tottori   |
| EPI_ISL_688101 | 9/12/2020 | 12/10/2020 Asia / Japan / Tottori   |
| EPI_ISL_688102 | 9/12/2020 | 12/10/2020 Asia / Japan / Tottori   |
| EPI_ISL_688103 | 9/12/2020 | 12/10/2020 Asia / Japan / Tottori   |
| EPI_ISL_688104 | 9/12/2020 | 12/10/2020 Asia / Japan / Tottori   |
| EPI_ISL_688105 | 9/12/2020 | 12/10/2020 Asia / Japan / Tottori   |
| EPI_ISL_688106 | 9/13/2020 | 12/10/2020 Asia / Japan / Tottori   |
| EPI_ISL_688107 | 9/14/2020 | 12/10/2020 Asia / Japan / Tottori   |
| EPI_ISL_688108 | 9/16/2020 | 12/10/2020 Asia / Japan / Tottori   |
| EPI_ISL_688109 | 8/18/2020 | 12/10/2020 Asia / Japan / Okinawa   |
| EPI_ISL_688110 | 8/18/2020 | 12/10/2020 Asia / Japan / Okinawa   |
| EPI_ISL_688111 | 8/18/2020 | 12/10/2020 Asia / Japan / Okinawa   |
| EPI_ISL_688112 | 8/5/2020  | 12/10/2020 Asia / Japan / Okinawa   |
| EPI_ISL_688113 | 8/5/2020  | 12/10/2020 Asia / Japan / Okinawa   |
| EPI_ISL_688114 | 8/5/2020  | 12/10/2020 Asia / Japan / Okinawa   |
| EPI_ISL_688115 | 8/5/2020  | 12/10/2020 Asia / Japan / Okinawa   |
| EPI_ISL_688116 | 8/5/2020  | 12/10/2020 Asia / Japan / Okinawa   |
| EPI_ISL_688117 | 8/5/2020  | 12/10/2020 Asia / Japan / Okinawa   |
| EPI_ISL_688118 | 8/5/2020  | 12/10/2020 Asia / Japan / Okinawa   |
| EPI_ISL_688119 | 8/5/2020  | 12/10/2020 Asia / Japan / Okinawa   |
| EPI_ISL_688120 | 8/5/2020  | 12/10/2020 Asia / Japan / Okinawa   |
| EPI_ISL_688121 | 8/5/2020  | 12/10/2020 Asia / Japan / Okinawa   |
| EPI_ISL_688122 | 8/6/2020  | 12/10/2020 Asia / Japan / Okinawa   |
| EPI_ISL_688123 | 8/6/2020  | 12/10/2020 Asia / Japan / Okinawa   |
| EPI_ISL_688124 | 8/6/2020  | 12/10/2020 Asia / Japan / Okinawa   |
| EPI_ISL_688125 | 8/7/2020  | 12/10/2020 Asia / Japan / Okinawa   |
| EPI_ISL_688126 | 8/7/2020  | 12/10/2020 Asia / Japan / Okinawa   |







|                |           |                                     |
|----------------|-----------|-------------------------------------|
| EPI_ISL_688268 | 9/6/2020  | 12/10/2020 Asia / Japan / Okinawa   |
| EPI_ISL_688269 | 7/16/2020 | 12/10/2020 Asia / Japan / Yamaguchi |
| EPI_ISL_688270 | 7/16/2020 | 12/10/2020 Asia / Japan / Yamaguchi |
| EPI_ISL_688271 | 7/16/2020 | 12/10/2020 Asia / Japan / Yamaguchi |
| EPI_ISL_688272 | 7/17/2020 | 12/10/2020 Asia / Japan / Yamaguchi |
| EPI_ISL_688273 | 7/22/2020 | 12/10/2020 Asia / Japan / Yamaguchi |
| EPI_ISL_688274 | 7/22/2020 | 12/10/2020 Asia / Japan / Yamaguchi |
| EPI_ISL_688275 | 7/26/2020 | 12/10/2020 Asia / Japan / Yamaguchi |
| EPI_ISL_688276 | 7/27/2020 | 12/10/2020 Asia / Japan / Yamaguchi |
| EPI_ISL_688277 | 7/29/2020 | 12/10/2020 Asia / Japan / Yamaguchi |
| EPI_ISL_688278 | 7/29/2020 | 12/10/2020 Asia / Japan / Yamaguchi |
| EPI_ISL_688279 | 7/31/2020 | 12/10/2020 Asia / Japan / Yamaguchi |
| EPI_ISL_688280 | 7/31/2020 | 12/10/2020 Asia / Japan / Yamaguchi |
| EPI_ISL_688281 | 8/4/2020  | 12/10/2020 Asia / Japan / Yamaguchi |
| EPI_ISL_688282 | 8/6/2020  | 12/10/2020 Asia / Japan / Yamaguchi |
| EPI_ISL_688283 | 8/6/2020  | 12/10/2020 Asia / Japan / Yamaguchi |
| EPI_ISL_688284 | 7/1/2020  | 12/10/2020 Asia / Japan / Saitama   |
| EPI_ISL_688285 | 7/3/2020  | 12/10/2020 Asia / Japan / Saitama   |
| EPI_ISL_688286 | 7/3/2020  | 12/10/2020 Asia / Japan / Saitama   |
| EPI_ISL_688287 | 7/6/2020  | 12/10/2020 Asia / Japan / Saitama   |
| EPI_ISL_688288 | 7/10/2020 | 12/10/2020 Asia / Japan / Saitama   |
| EPI_ISL_688289 | 7/11/2020 | 12/10/2020 Asia / Japan / Saitama   |
| EPI_ISL_688290 | 7/13/2020 | 12/10/2020 Asia / Japan / Saitama   |
| EPI_ISL_688291 | 7/13/2020 | 12/10/2020 Asia / Japan / Saitama   |
| EPI_ISL_688292 | 7/14/2020 | 12/10/2020 Asia / Japan / Saitama   |
| EPI_ISL_688293 | 7/15/2020 | 12/10/2020 Asia / Japan / Saitama   |
| EPI_ISL_688294 | 7/15/2020 | 12/10/2020 Asia / Japan / Saitama   |
| EPI_ISL_688295 | 7/15/2020 | 12/10/2020 Asia / Japan / Saitama   |
| EPI_ISL_688296 | 7/15/2020 | 12/10/2020 Asia / Japan / Saitama   |
| EPI_ISL_688297 | 7/15/2020 | 12/10/2020 Asia / Japan / Saitama   |
| EPI_ISL_688298 | 7/15/2020 | 12/10/2020 Asia / Japan / Saitama   |
| EPI_ISL_688299 | 7/14/2020 | 12/10/2020 Asia / Japan / Saitama   |
| EPI_ISL_688300 | 7/15/2020 | 12/10/2020 Asia / Japan / Saitama   |
| EPI_ISL_688301 | 7/16/2020 | 12/10/2020 Asia / Japan / Saitama   |
| EPI_ISL_688302 | 7/16/2020 | 12/10/2020 Asia / Japan / Saitama   |
| EPI_ISL_688303 | 7/20/2020 | 12/10/2020 Asia / Japan / Saitama   |
| EPI_ISL_688304 | 7/22/2020 | 12/10/2020 Asia / Japan / Saitama   |
| EPI_ISL_688305 | 7/22/2020 | 12/10/2020 Asia / Japan / Saitama   |
| EPI_ISL_688306 | 7/22/2020 | 12/10/2020 Asia / Japan / Saitama   |
| EPI_ISL_688307 | 7/23/2020 | 12/10/2020 Asia / Japan / Saitama   |
| EPI_ISL_688308 | 7/25/2020 | 12/10/2020 Asia / Japan / Saitama   |
| EPI_ISL_688309 | 7/25/2020 | 12/10/2020 Asia / Japan / Saitama   |
| EPI_ISL_688310 | 7/26/2020 | 12/10/2020 Asia / Japan / Saitama   |
| EPI_ISL_688311 | 7/26/2020 | 12/10/2020 Asia / Japan / Saitama   |
| EPI_ISL_688312 | 7/26/2020 | 12/10/2020 Asia / Japan / Saitama   |
| EPI_ISL_688313 | 7/26/2020 | 12/10/2020 Asia / Japan / Saitama   |
| EPI_ISL_688314 | 7/26/2020 | 12/10/2020 Asia / Japan / Saitama   |









|                |           |                                     |
|----------------|-----------|-------------------------------------|
| EPI_ISL_688456 | 8/28/2020 | 12/10/2020 Asia / Japan / Yamaguchi |
| EPI_ISL_688457 | 8/28/2020 | 12/10/2020 Asia / Japan / Yamaguchi |
| EPI_ISL_688458 | 8/28/2020 | 12/10/2020 Asia / Japan / Yamaguchi |
| EPI_ISL_688459 | 8/28/2020 | 12/10/2020 Asia / Japan / Yamaguchi |
| EPI_ISL_688460 | 8/28/2020 | 12/10/2020 Asia / Japan / Yamaguchi |
| EPI_ISL_688461 | 8/28/2020 | 12/10/2020 Asia / Japan / Yamaguchi |
| EPI_ISL_688462 | 8/29/2020 | 12/10/2020 Asia / Japan / Yamaguchi |
| EPI_ISL_688463 | 8/29/2020 | 12/10/2020 Asia / Japan / Yamaguchi |
| EPI_ISL_688464 | 8/30/2020 | 12/10/2020 Asia / Japan / Yamaguchi |
| EPI_ISL_688465 | 8/30/2020 | 12/10/2020 Asia / Japan / Yamaguchi |
| EPI_ISL_688466 | 8/30/2020 | 12/10/2020 Asia / Japan / Yamaguchi |
| EPI_ISL_688467 | 8/30/2020 | 12/10/2020 Asia / Japan / Yamaguchi |
| EPI_ISL_688468 | 6/15/2020 | 12/10/2020 Asia / Japan             |
| EPI_ISL_688469 | 6/15/2020 | 12/10/2020 Asia / Japan             |
| EPI_ISL_688470 | 6/15/2020 | 12/10/2020 Asia / Japan             |
| EPI_ISL_688471 | 6/18/2020 | 12/10/2020 Asia / Japan             |
| EPI_ISL_688472 | 6/25/2020 | 12/10/2020 Asia / Japan             |
| EPI_ISL_688473 | 6/25/2020 | 12/10/2020 Asia / Japan             |
| EPI_ISL_688474 | 6/25/2020 | 12/10/2020 Asia / Japan             |
| EPI_ISL_688475 | 6/28/2020 | 12/10/2020 Asia / Japan             |
| EPI_ISL_688476 | 6/28/2020 | 12/10/2020 Asia / Japan             |
| EPI_ISL_688477 | 6/27/2020 | 12/10/2020 Asia / Japan             |
| EPI_ISL_688478 | 6/30/2020 | 12/10/2020 Asia / Japan             |
| EPI_ISL_688479 | 7/2/2020  | 12/10/2020 Asia / Japan             |
| EPI_ISL_688480 | 7/2/2020  | 12/10/2020 Asia / Japan             |
| EPI_ISL_688481 | 7/3/2020  | 12/10/2020 Asia / Japan             |
| EPI_ISL_688482 | 7/3/2020  | 12/10/2020 Asia / Japan             |
| EPI_ISL_688483 | 7/2/2020  | 12/10/2020 Asia / Japan             |
| EPI_ISL_688484 | 7/5/2020  | 12/10/2020 Asia / Japan             |
| EPI_ISL_688485 | 7/6/2020  | 12/10/2020 Asia / Japan             |
| EPI_ISL_688486 | 7/6/2020  | 12/10/2020 Asia / Japan             |
| EPI_ISL_688487 | 7/6/2020  | 12/10/2020 Asia / Japan             |
| EPI_ISL_688488 | 7/6/2020  | 12/10/2020 Asia / Japan             |
| EPI_ISL_688489 | 7/6/2020  | 12/10/2020 Asia / Japan             |
| EPI_ISL_688490 | 7/6/2020  | 12/10/2020 Asia / Japan             |
| EPI_ISL_688491 | 7/7/2020  | 12/10/2020 Asia / Japan             |
| EPI_ISL_688492 | 7/7/2020  | 12/10/2020 Asia / Japan             |
| EPI_ISL_688493 | 7/8/2020  | 12/10/2020 Asia / Japan             |
| EPI_ISL_688494 | 7/9/2020  | 12/10/2020 Asia / Japan             |
| EPI_ISL_688495 | 7/8/2020  | 12/10/2020 Asia / Japan             |
| EPI_ISL_688496 | 7/9/2020  | 12/10/2020 Asia / Japan             |
| EPI_ISL_688497 | 7/9/2020  | 12/10/2020 Asia / Japan             |
| EPI_ISL_688498 | 7/9/2020  | 12/10/2020 Asia / Japan             |
| EPI_ISL_688499 | 7/9/2020  | 12/10/2020 Asia / Japan             |
| EPI_ISL_688500 | 7/9/2020  | 12/10/2020 Asia / Japan             |
| EPI_ISL_688501 | 7/9/2020  | 12/10/2020 Asia / Japan             |
| EPI_ISL_688502 | 7/9/2020  | 12/10/2020 Asia / Japan             |

|                |           |                         |
|----------------|-----------|-------------------------|
| EPI_ISL_688503 | 7/9/2020  | 12/10/2020 Asia / Japan |
| EPI_ISL_688504 | 7/9/2020  | 12/10/2020 Asia / Japan |
| EPI_ISL_688505 | 7/9/2020  | 12/10/2020 Asia / Japan |
| EPI_ISL_688506 | 7/9/2020  | 12/10/2020 Asia / Japan |
| EPI_ISL_688507 | 7/13/2020 | 12/10/2020 Asia / Japan |
| EPI_ISL_688508 | 7/13/2020 | 12/10/2020 Asia / Japan |
| EPI_ISL_688509 | 7/15/2020 | 12/10/2020 Asia / Japan |
| EPI_ISL_688510 | 7/15/2020 | 12/10/2020 Asia / Japan |
| EPI_ISL_688511 | 7/15/2020 | 12/10/2020 Asia / Japan |
| EPI_ISL_688512 | 7/16/2020 | 12/10/2020 Asia / Japan |
| EPI_ISL_688513 | 7/17/2020 | 12/10/2020 Asia / Japan |
| EPI_ISL_688514 | 7/17/2020 | 12/10/2020 Asia / Japan |
| EPI_ISL_688515 | 7/17/2020 | 12/10/2020 Asia / Japan |
| EPI_ISL_688516 | 7/17/2020 | 12/10/2020 Asia / Japan |
| EPI_ISL_688517 | 7/17/2020 | 12/10/2020 Asia / Japan |
| EPI_ISL_688518 | 7/17/2020 | 12/10/2020 Asia / Japan |
| EPI_ISL_688519 | 7/17/2020 | 12/10/2020 Asia / Japan |
| EPI_ISL_688520 | 7/18/2020 | 12/10/2020 Asia / Japan |
| EPI_ISL_688521 | 7/18/2020 | 12/10/2020 Asia / Japan |
| EPI_ISL_688522 | 7/18/2020 | 12/10/2020 Asia / Japan |
| EPI_ISL_688523 | 7/20/2020 | 12/10/2020 Asia / Japan |
| EPI_ISL_688524 | 7/20/2020 | 12/10/2020 Asia / Japan |
| EPI_ISL_688525 | 7/19/2020 | 12/10/2020 Asia / Japan |
| EPI_ISL_688526 | 7/19/2020 | 12/10/2020 Asia / Japan |
| EPI_ISL_688527 | 7/19/2020 | 12/10/2020 Asia / Japan |
| EPI_ISL_688528 | 7/20/2020 | 12/10/2020 Asia / Japan |
| EPI_ISL_688529 | 7/28/2020 | 12/10/2020 Asia / Japan |
| EPI_ISL_688530 | 7/20/2020 | 12/10/2020 Asia / Japan |
| EPI_ISL_688531 | 7/20/2020 | 12/10/2020 Asia / Japan |
| EPI_ISL_688532 | 7/20/2020 | 12/10/2020 Asia / Japan |
| EPI_ISL_688533 | 7/20/2020 | 12/10/2020 Asia / Japan |
| EPI_ISL_688534 | 7/19/2020 | 12/10/2020 Asia / Japan |
| EPI_ISL_688535 | 7/19/2020 | 12/10/2020 Asia / Japan |
| EPI_ISL_688536 | 7/19/2020 | 12/10/2020 Asia / Japan |
| EPI_ISL_688537 | 7/20/2020 | 12/10/2020 Asia / Japan |
| EPI_ISL_688538 | 7/20/2020 | 12/10/2020 Asia / Japan |
| EPI_ISL_688539 | 7/21/2020 | 12/10/2020 Asia / Japan |
| EPI_ISL_688540 | 7/9/2020  | 12/10/2020 Asia / Japan |
| EPI_ISL_688541 | 7/21/2020 | 12/10/2020 Asia / Japan |
| EPI_ISL_688542 | 7/21/2020 | 12/10/2020 Asia / Japan |
| EPI_ISL_688543 | 7/22/2020 | 12/10/2020 Asia / Japan |
| EPI_ISL_688544 | 7/10/2020 | 12/10/2020 Asia / Japan |
| EPI_ISL_688545 | 7/22/2020 | 12/10/2020 Asia / Japan |
| EPI_ISL_688546 | 7/22/2020 | 12/10/2020 Asia / Japan |
| EPI_ISL_688547 | 7/24/2020 | 12/10/2020 Asia / Japan |
| EPI_ISL_688548 | 7/24/2020 | 12/10/2020 Asia / Japan |
| EPI_ISL_688549 | 7/24/2020 | 12/10/2020 Asia / Japan |

|                |           |                                 |
|----------------|-----------|---------------------------------|
| EPI_ISL_688550 | 7/25/2020 | 12/10/2020 Asia / Japan         |
| EPI_ISL_688551 | 7/25/2020 | 12/10/2020 Asia / Japan         |
| EPI_ISL_688552 | 7/25/2020 | 12/10/2020 Asia / Japan         |
| EPI_ISL_688553 | 7/26/2020 | 12/10/2020 Asia / Japan         |
| EPI_ISL_688554 | 7/26/2020 | 12/10/2020 Asia / Japan         |
| EPI_ISL_688555 | 7/27/2020 | 12/10/2020 Asia / Japan         |
| EPI_ISL_688556 | 7/15/2020 | 12/10/2020 Asia / Japan         |
| EPI_ISL_688557 | 7/27/2020 | 12/10/2020 Asia / Japan         |
| EPI_ISL_688558 | 7/27/2020 | 12/10/2020 Asia / Japan         |
| EPI_ISL_688559 | 7/27/2020 | 12/10/2020 Asia / Japan         |
| EPI_ISL_688560 | 7/27/2020 | 12/10/2020 Asia / Japan         |
| EPI_ISL_688561 | 7/27/2020 | 12/10/2020 Asia / Japan         |
| EPI_ISL_688562 | 7/27/2020 | 12/10/2020 Asia / Japan         |
| EPI_ISL_688563 | 7/27/2020 | 12/10/2020 Asia / Japan         |
| EPI_ISL_688564 | 7/27/2020 | 12/10/2020 Asia / Japan         |
| EPI_ISL_688565 | 7/27/2020 | 12/10/2020 Asia / Japan         |
| EPI_ISL_688566 | 7/27/2020 | 12/10/2020 Asia / Japan         |
| EPI_ISL_688567 | 8/10/2020 | 12/10/2020 Asia / Japan         |
| EPI_ISL_688568 | 7/28/2020 | 12/10/2020 Asia / Japan         |
| EPI_ISL_688569 | 7/28/2020 | 12/10/2020 Asia / Japan         |
| EPI_ISL_688570 | 7/28/2020 | 12/10/2020 Asia / Japan         |
| EPI_ISL_688571 | 7/28/2020 | 12/10/2020 Asia / Japan         |
| EPI_ISL_688572 | 7/27/2020 | 12/10/2020 Asia / Japan         |
| EPI_ISL_688573 | 7/27/2020 | 12/10/2020 Asia / Japan         |
| EPI_ISL_688574 | 7/28/2020 | 12/10/2020 Asia / Japan         |
| EPI_ISL_688575 | 7/28/2020 | 12/10/2020 Asia / Japan         |
| EPI_ISL_688576 | 7/29/2020 | 12/10/2020 Asia / Japan         |
| EPI_ISL_688577 | 7/30/2020 | 12/10/2020 Asia / Japan         |
| EPI_ISL_688578 | 7/29/2020 | 12/10/2020 Asia / Japan         |
| EPI_ISL_688579 | 7/30/2020 | 12/10/2020 Asia / Japan         |
| EPI_ISL_688580 | 7/30/2020 | 12/10/2020 Asia / Japan         |
| EPI_ISL_688581 | 7/30/2020 | 12/10/2020 Asia / Japan         |
| EPI_ISL_688582 | 7/15/2020 | 12/10/2020 Asia / Japan         |
| EPI_ISL_688583 | 8/24/2020 | 12/10/2020 Asia / Japan / Tokyo |
| EPI_ISL_688584 | 8/1/2020  | 12/10/2020 Asia / Japan / Tokyo |
| EPI_ISL_688585 | 8/8/2020  | 12/10/2020 Asia / Japan / Tokyo |
| EPI_ISL_688586 | 8/6/2020  | 12/10/2020 Asia / Japan / Tokyo |
| EPI_ISL_688587 | 8/6/2020  | 12/10/2020 Asia / Japan / Tokyo |
| EPI_ISL_688588 | 8/6/2020  | 12/10/2020 Asia / Japan / Tokyo |
| EPI_ISL_688589 | 8/7/2020  | 12/10/2020 Asia / Japan / Tokyo |
| EPI_ISL_688590 | 8/7/2020  | 12/10/2020 Asia / Japan / Tokyo |
| EPI_ISL_688591 | 8/7/2020  | 12/10/2020 Asia / Japan / Tokyo |
| EPI_ISL_688592 | 8/7/2020  | 12/10/2020 Asia / Japan / Tokyo |
| EPI_ISL_688593 | 8/11/2020 | 12/10/2020 Asia / Japan / Tokyo |
| EPI_ISL_688594 | 8/22/2020 | 12/10/2020 Asia / Japan / Tokyo |
| EPI_ISL_688595 | 8/22/2020 | 12/10/2020 Asia / Japan / Tokyo |
| EPI_ISL_688596 | 8/24/2020 | 12/10/2020 Asia / Japan / Tokyo |

|                |           |                                     |
|----------------|-----------|-------------------------------------|
| EPI_ISL_688597 | 8/24/2020 | 12/10/2020 Asia / Japan / Tokyo     |
| EPI_ISL_688598 | 8/24/2020 | 12/10/2020 Asia / Japan / Tokyo     |
| EPI_ISL_688599 | 8/24/2020 | 12/10/2020 Asia / Japan / Tokyo     |
| EPI_ISL_688600 | 8/24/2020 | 12/10/2020 Asia / Japan / Tokyo     |
| EPI_ISL_688601 | 8/24/2020 | 12/10/2020 Asia / Japan / Tokyo     |
| EPI_ISL_688602 | 8/24/2020 | 12/10/2020 Asia / Japan / Tokyo     |
| EPI_ISL_688603 | 8/24/2020 | 12/10/2020 Asia / Japan / Tokyo     |
| EPI_ISL_688604 | 8/25/2020 | 12/10/2020 Asia / Japan / Tokyo     |
| EPI_ISL_688605 | 7/21/2020 | 12/10/2020 Asia / Japan / Kanagawa  |
| EPI_ISL_688606 | 7/21/2020 | 12/10/2020 Asia / Japan / Kanagawa  |
| EPI_ISL_688607 | 7/24/2020 | 12/10/2020 Asia / Japan / Kanagawa  |
| EPI_ISL_688608 | 7/27/2020 | 12/10/2020 Asia / Japan / Kanagawa  |
| EPI_ISL_688609 | 7/27/2020 | 12/10/2020 Asia / Japan / Kanagawa  |
| EPI_ISL_688610 | 7/27/2020 | 12/10/2020 Asia / Japan / Kanagawa  |
| EPI_ISL_688611 | 7/30/2020 | 12/10/2020 Asia / Japan / Kanagawa  |
| EPI_ISL_688612 | 8/14/2020 | 12/10/2020 Asia / Japan / Fukuoka   |
| EPI_ISL_688613 | 8/19/2020 | 12/10/2020 Asia / Japan / Hyogo     |
| EPI_ISL_688614 | 9/5/2020  | 12/10/2020 Asia / Japan / Ishikawa  |
| EPI_ISL_688616 | 8/16/2020 | 12/10/2020 Asia / Japan / Kagoshima |
| EPI_ISL_688617 | 8/11/2020 | 12/10/2020 Asia / Japan / Saitama   |
| EPI_ISL_688618 | 8/13/2020 | 12/10/2020 Asia / Japan / Saitama   |
| EPI_ISL_688619 | 8/28/2020 | 12/10/2020 Asia / Japan / Fukuoka   |
| EPI_ISL_688620 | 8/29/2020 | 12/10/2020 Asia / Japan / Fukuoka   |
| EPI_ISL_688621 | 8/31/2020 | 12/10/2020 Asia / Japan / Fukuoka   |
| EPI_ISL_688622 | 8/31/2020 | 12/10/2020 Asia / Japan / Fukuoka   |
| EPI_ISL_688623 | 8/31/2020 | 12/10/2020 Asia / Japan / Fukuoka   |
| EPI_ISL_688624 | 2020-03   | 12/10/2020 Asia / Japan / Shiga     |
| EPI_ISL_688625 | 8/13/2020 | 12/10/2020 Asia / Japan / Kagoshima |
| EPI_ISL_688632 | 7/17/2020 | 12/10/2020 Asia / Japan / Hiroshima |
| EPI_ISL_688633 | 8/18/2020 | 12/10/2020 Asia / Japan / Hyogo     |
| EPI_ISL_688634 | 8/19/2020 | 12/10/2020 Asia / Japan / Fukuoka   |
| EPI_ISL_688635 | 8/5/2020  | 12/10/2020 Asia / Japan / Fukuoka   |
| EPI_ISL_688636 | 8/5/2020  | 12/10/2020 Asia / Japan / Fukuoka   |
| EPI_ISL_688637 | 8/5/2020  | 12/10/2020 Asia / Japan / Fukuoka   |
| EPI_ISL_688638 | 8/5/2020  | 12/10/2020 Asia / Japan / Fukuoka   |
| EPI_ISL_688639 | 8/5/2020  | 12/10/2020 Asia / Japan / Fukuoka   |
| EPI_ISL_688640 | 8/5/2020  | 12/10/2020 Asia / Japan / Fukuoka   |
| EPI_ISL_688641 | 8/5/2020  | 12/10/2020 Asia / Japan / Fukuoka   |
| EPI_ISL_688642 | 8/6/2020  | 12/10/2020 Asia / Japan / Fukuoka   |
| EPI_ISL_688643 | 8/6/2020  | 12/10/2020 Asia / Japan / Fukuoka   |
| EPI_ISL_688644 | 8/6/2020  | 12/10/2020 Asia / Japan / Fukuoka   |
| EPI_ISL_688645 | 8/6/2020  | 12/10/2020 Asia / Japan / Fukuoka   |
| EPI_ISL_688646 | 8/6/2020  | 12/10/2020 Asia / Japan / Fukuoka   |
| EPI_ISL_688647 | 8/6/2020  | 12/10/2020 Asia / Japan / Fukuoka   |
| EPI_ISL_688648 | 8/6/2020  | 12/10/2020 Asia / Japan / Fukuoka   |
| EPI_ISL_688649 | 8/6/2020  | 12/10/2020 Asia / Japan / Fukuoka   |
| EPI_ISL_688650 | 8/6/2020  | 12/10/2020 Asia / Japan / Fukuoka   |



|                |           |                                    |
|----------------|-----------|------------------------------------|
| EPI_ISL_688698 | 8/12/2020 | 12/10/2020 Asia / Japan / Fukuoka  |
| EPI_ISL_688699 | 8/12/2020 | 12/10/2020 Asia / Japan / Fukuoka  |
| EPI_ISL_688700 | 8/11/2020 | 12/10/2020 Asia / Japan / Osaka    |
| EPI_ISL_688701 | 8/11/2020 | 12/10/2020 Asia / Japan / Osaka    |
| EPI_ISL_688702 | 8/11/2020 | 12/10/2020 Asia / Japan / Osaka    |
| EPI_ISL_688703 | 8/12/2020 | 12/10/2020 Asia / Japan / Osaka    |
| EPI_ISL_688704 | 8/12/2020 | 12/10/2020 Asia / Japan / Osaka    |
| EPI_ISL_688705 | 8/13/2020 | 12/10/2020 Asia / Japan / Osaka    |
| EPI_ISL_688706 | 8/15/2020 | 12/10/2020 Asia / Japan / Osaka    |
| EPI_ISL_688707 | 8/15/2020 | 12/10/2020 Asia / Japan / Osaka    |
| EPI_ISL_688708 | 8/16/2020 | 12/10/2020 Asia / Japan / Osaka    |
| EPI_ISL_688709 | 8/18/2020 | 12/10/2020 Asia / Japan / Osaka    |
| EPI_ISL_688710 | 8/21/2020 | 12/10/2020 Asia / Japan / Ishikawa |
| EPI_ISL_688711 | 8/21/2020 | 12/10/2020 Asia / Japan / Ishikawa |
| EPI_ISL_688712 | 8/21/2020 | 12/10/2020 Asia / Japan / Ishikawa |
| EPI_ISL_688713 | 8/21/2020 | 12/10/2020 Asia / Japan / Ishikawa |
| EPI_ISL_688714 | 8/22/2020 | 12/10/2020 Asia / Japan / Ishikawa |
| EPI_ISL_688715 | 8/22/2020 | 12/10/2020 Asia / Japan / Ishikawa |
| EPI_ISL_688716 | 8/22/2020 | 12/10/2020 Asia / Japan / Ishikawa |
| EPI_ISL_688717 | 8/22/2020 | 12/10/2020 Asia / Japan / Ishikawa |
| EPI_ISL_688718 | 8/1/2020  | 12/10/2020 Asia / Japan / Hokkaido |
| EPI_ISL_688719 | 8/1/2020  | 12/10/2020 Asia / Japan / Hokkaido |
| EPI_ISL_688720 | 8/1/2020  | 12/10/2020 Asia / Japan / Hokkaido |
| EPI_ISL_688721 | 8/2/2020  | 12/10/2020 Asia / Japan / Hokkaido |
| EPI_ISL_688722 | 8/2/2020  | 12/10/2020 Asia / Japan / Hokkaido |
| EPI_ISL_688723 | 8/2/2020  | 12/10/2020 Asia / Japan / Hokkaido |
| EPI_ISL_688724 | 8/1/2020  | 12/10/2020 Asia / Japan / Hokkaido |
| EPI_ISL_688725 | 8/5/2020  | 12/10/2020 Asia / Japan / Hokkaido |
| EPI_ISL_688726 | 8/5/2020  | 12/10/2020 Asia / Japan / Hokkaido |
| EPI_ISL_688727 | 8/5/2020  | 12/10/2020 Asia / Japan / Hokkaido |
| EPI_ISL_688728 | 8/6/2020  | 12/10/2020 Asia / Japan / Hokkaido |
| EPI_ISL_688729 | 8/4/2020  | 12/10/2020 Asia / Japan / Hokkaido |
| EPI_ISL_688730 | 8/12/2020 | 12/10/2020 Asia / Japan / Hokkaido |
| EPI_ISL_688731 | 8/15/2020 | 12/10/2020 Asia / Japan / Hokkaido |
| EPI_ISL_688732 | 8/16/2020 | 12/10/2020 Asia / Japan / Hokkaido |
| EPI_ISL_688733 | 8/18/2020 | 12/10/2020 Asia / Japan / Hokkaido |
| EPI_ISL_688734 | 8/19/2020 | 12/10/2020 Asia / Japan / Hokkaido |
| EPI_ISL_688735 | 8/20/2020 | 12/10/2020 Asia / Japan / Hokkaido |
| EPI_ISL_688736 | 8/21/2020 | 12/10/2020 Asia / Japan / Hokkaido |
| EPI_ISL_688737 | 8/21/2020 | 12/10/2020 Asia / Japan / Hokkaido |
| EPI_ISL_688738 | 7/31/2020 | 12/10/2020 Asia / Japan / Ehime    |
| EPI_ISL_688739 | 7/31/2020 | 12/10/2020 Asia / Japan / Ehime    |
| EPI_ISL_688740 | 7/31/2020 | 12/10/2020 Asia / Japan / Ehime    |
| EPI_ISL_688741 | 8/1/2020  | 12/10/2020 Asia / Japan / Ehime    |
| EPI_ISL_688742 | 8/1/2020  | 12/10/2020 Asia / Japan / Ehime    |
| EPI_ISL_688743 | 8/1/2020  | 12/10/2020 Asia / Japan / Ehime    |
| EPI_ISL_688744 | 8/2/2020  | 12/10/2020 Asia / Japan / Ehime    |

















|                |           |            |                        |
|----------------|-----------|------------|------------------------|
| EPI_ISL_689074 | 2020      | 12/10/2020 | Asia / Japan / Gunma   |
| EPI_ISL_689075 | 2020      | 12/10/2020 | Asia / Japan / Gunma   |
| EPI_ISL_689076 | 2020      | 12/10/2020 | Asia / Japan / Gunma   |
| EPI_ISL_689077 | 7/22/2020 | 12/10/2020 | Asia / Japan / Tokyo   |
| EPI_ISL_689078 | 7/22/2020 | 12/10/2020 | Asia / Japan / Tokyo   |
| EPI_ISL_689079 | 7/22/2020 | 12/10/2020 | Asia / Japan / Tokyo   |
| EPI_ISL_689080 | 7/13/2020 | 12/10/2020 | Asia / Japan / Tokyo   |
| EPI_ISL_689081 | 7/13/2020 | 12/10/2020 | Asia / Japan / Tokyo   |
| EPI_ISL_689082 | 7/14/2020 | 12/10/2020 | Asia / Japan / Tokyo   |
| EPI_ISL_689083 | 7/14/2020 | 12/10/2020 | Asia / Japan / Tokyo   |
| EPI_ISL_689084 | 7/18/2020 | 12/10/2020 | Asia / Japan / Tokyo   |
| EPI_ISL_689085 | 7/27/2020 | 12/10/2020 | Asia / Japan / Tokyo   |
| EPI_ISL_689086 | 7/29/2020 | 12/10/2020 | Asia / Japan / Tokyo   |
| EPI_ISL_689087 | 7/28/2020 | 12/10/2020 | Asia / Japan / Tokyo   |
| EPI_ISL_689088 | 7/28/2020 | 12/10/2020 | Asia / Japan / Tokyo   |
| EPI_ISL_689089 | 8/18/2020 | 12/10/2020 | Asia / Japan / Miyagi  |
| EPI_ISL_689090 | 8/20/2020 | 12/10/2020 | Asia / Japan / Miyagi  |
| EPI_ISL_689091 | 8/20/2020 | 12/10/2020 | Asia / Japan / Miyagi  |
| EPI_ISL_689092 | 8/20/2020 | 12/10/2020 | Asia / Japan / Miyagi  |
| EPI_ISL_689093 | 8/22/2020 | 12/10/2020 | Asia / Japan / Miyagi  |
| EPI_ISL_689094 | 8/27/2020 | 12/10/2020 | Asia / Japan / Miyagi  |
| EPI_ISL_689095 | 8/28/2020 | 12/10/2020 | Asia / Japan / Miyagi  |
| EPI_ISL_689096 | 8/28/2020 | 12/10/2020 | Asia / Japan / Miyagi  |
| EPI_ISL_689097 | 8/29/2020 | 12/10/2020 | Asia / Japan / Miyagi  |
| EPI_ISL_689098 | 8/11/2020 | 12/10/2020 | Asia / Japan / Saitama |
| EPI_ISL_689099 | 8/16/2020 | 12/10/2020 | Asia / Japan / Saitama |
| EPI_ISL_689100 | 8/22/2020 | 12/10/2020 | Asia / Japan / Saitama |
| EPI_ISL_689101 | 8/22/2020 | 12/10/2020 | Asia / Japan / Saitama |
| EPI_ISL_689102 | 8/22/2020 | 12/10/2020 | Asia / Japan / Saitama |
| EPI_ISL_689103 | 8/22/2020 | 12/10/2020 | Asia / Japan / Saitama |
| EPI_ISL_689104 | 7/15/2020 | 12/10/2020 | Asia / Japan / Fukuoka |
| EPI_ISL_689105 | 7/16/2020 | 12/10/2020 | Asia / Japan / Fukuoka |
| EPI_ISL_689106 | 7/17/2020 | 12/10/2020 | Asia / Japan / Fukuoka |
| EPI_ISL_689107 | 7/17/2020 | 12/10/2020 | Asia / Japan / Fukuoka |
| EPI_ISL_689108 | 7/17/2020 | 12/10/2020 | Asia / Japan / Fukuoka |
| EPI_ISL_689109 | 7/18/2020 | 12/10/2020 | Asia / Japan / Fukuoka |
| EPI_ISL_689110 | 7/18/2020 | 12/10/2020 | Asia / Japan / Fukuoka |
| EPI_ISL_689111 | 7/18/2020 | 12/10/2020 | Asia / Japan / Fukuoka |
| EPI_ISL_689112 | 7/18/2020 | 12/10/2020 | Asia / Japan / Fukuoka |
| EPI_ISL_689113 | 7/18/2020 | 12/10/2020 | Asia / Japan / Fukuoka |
| EPI_ISL_689114 | 7/17/2020 | 12/10/2020 | Asia / Japan / Fukuoka |
| EPI_ISL_689115 | 7/17/2020 | 12/10/2020 | Asia / Japan / Fukuoka |
| EPI_ISL_689116 | 7/17/2020 | 12/10/2020 | Asia / Japan / Fukuoka |
| EPI_ISL_689117 | 7/18/2020 | 12/10/2020 | Asia / Japan / Fukuoka |
| EPI_ISL_689118 | 7/18/2020 | 12/10/2020 | Asia / Japan / Fukuoka |
| EPI_ISL_689119 | 7/19/2020 | 12/10/2020 | Asia / Japan / Fukuoka |
| EPI_ISL_689120 | 7/19/2020 | 12/10/2020 | Asia / Japan / Fukuoka |





















|                |           |            |                         |
|----------------|-----------|------------|-------------------------|
| EPI_ISL_689498 | 8/24/2020 | 12/10/2020 | Asia / Japan / Fukuoka  |
| EPI_ISL_689499 | 8/24/2020 | 12/10/2020 | Asia / Japan / Fukuoka  |
| EPI_ISL_689500 | 8/25/2020 | 12/10/2020 | Asia / Japan / Fukuoka  |
| EPI_ISL_689501 | 8/25/2020 | 12/10/2020 | Asia / Japan / Fukuoka  |
| EPI_ISL_689502 | 8/26/2020 | 12/10/2020 | Asia / Japan / Fukuoka  |
| EPI_ISL_689503 | 8/26/2020 | 12/10/2020 | Asia / Japan / Fukuoka  |
| EPI_ISL_689504 | 8/26/2020 | 12/10/2020 | Asia / Japan / Fukuoka  |
| EPI_ISL_689505 | 8/1/2020  | 12/10/2020 | Asia / Japan / Fukuoka  |
| EPI_ISL_689506 | 8/3/2020  | 12/10/2020 | Asia / Japan / Fukuoka  |
| EPI_ISL_689507 | 8/3/2020  | 12/10/2020 | Asia / Japan / Fukuoka  |
| EPI_ISL_689508 | 8/3/2020  | 12/10/2020 | Asia / Japan / Fukuoka  |
| EPI_ISL_689509 | 8/4/2020  | 12/10/2020 | Asia / Japan / Fukuoka  |
| EPI_ISL_689510 | 8/4/2020  | 12/10/2020 | Asia / Japan / Fukuoka  |
| EPI_ISL_689511 | 8/4/2020  | 12/10/2020 | Asia / Japan / Fukuoka  |
| EPI_ISL_689512 | 8/4/2020  | 12/10/2020 | Asia / Japan / Fukuoka  |
| EPI_ISL_689513 | 8/4/2020  | 12/10/2020 | Asia / Japan / Fukuoka  |
| EPI_ISL_689514 | 8/4/2020  | 12/10/2020 | Asia / Japan / Fukuoka  |
| EPI_ISL_689515 | 8/4/2020  | 12/10/2020 | Asia / Japan / Fukuoka  |
| EPI_ISL_689516 | 8/18/2020 | 12/10/2020 | Asia / Japan / Fukuoka  |
| EPI_ISL_689517 | 7/16/2020 | 12/10/2020 | Asia / Japan / Tokyo    |
| EPI_ISL_689518 | 7/22/2020 | 12/10/2020 | Asia / Japan / Tokyo    |
| EPI_ISL_689519 | 7/24/2020 | 12/10/2020 | Asia / Japan / Tokyo    |
| EPI_ISL_689520 | 7/24/2020 | 12/10/2020 | Asia / Japan / Tokyo    |
| EPI_ISL_689521 | 7/24/2020 | 12/10/2020 | Asia / Japan / Tokyo    |
| EPI_ISL_689522 | 6/24/2020 | 12/10/2020 | Asia / Japan / Tokyo    |
| EPI_ISL_689523 | 7/3/2020  | 12/10/2020 | Asia / Japan / Tokyo    |
| EPI_ISL_689524 | 7/3/2020  | 12/10/2020 | Asia / Japan / Tokyo    |
| EPI_ISL_689525 | 7/6/2020  | 12/10/2020 | Asia / Japan / Tokyo    |
| EPI_ISL_689526 | 7/6/2020  | 12/10/2020 | Asia / Japan / Tokyo    |
| EPI_ISL_689527 | 7/8/2020  | 12/10/2020 | Asia / Japan / Tokyo    |
| EPI_ISL_689528 | 7/8/2020  | 12/10/2020 | Asia / Japan / Tokyo    |
| EPI_ISL_689529 | 7/8/2020  | 12/10/2020 | Asia / Japan / Tokyo    |
| EPI_ISL_689530 | 7/8/2020  | 12/10/2020 | Asia / Japan / Tokyo    |
| EPI_ISL_689531 | 7/13/2020 | 12/10/2020 | Asia / Japan / Tokyo    |
| EPI_ISL_689532 | 7/13/2020 | 12/10/2020 | Asia / Japan / Tokyo    |
| EPI_ISL_689533 | 7/13/2020 | 12/10/2020 | Asia / Japan / Tokyo    |
| EPI_ISL_689534 | 7/13/2020 | 12/10/2020 | Asia / Japan / Tokyo    |
| EPI_ISL_689535 | 7/13/2020 | 12/10/2020 | Asia / Japan / Tokyo    |
| EPI_ISL_689536 | 7/13/2020 | 12/10/2020 | Asia / Japan / Tokyo    |
| EPI_ISL_689537 | 7/13/2020 | 12/10/2020 | Asia / Japan / Tokyo    |
| EPI_ISL_689538 | 7/15/2020 | 12/10/2020 | Asia / Japan / Tokyo    |
| EPI_ISL_689539 | 7/13/2020 | 12/10/2020 | Asia / Japan / Tokyo    |
| EPI_ISL_689540 | 7/13/2020 | 12/10/2020 | Asia / Japan / Tokyo    |
| EPI_ISL_689541 | 8/12/2020 | 12/10/2020 | Asia / Japan / Tokyo    |
| EPI_ISL_689542 | 7/6/2020  | 12/10/2020 | Asia / Japan / Tokyo    |
| EPI_ISL_689543 | 7/7/2020  | 12/10/2020 | Asia / Japan / Tokyo    |
| EPI_ISL_689544 | 8/10/2020 | 12/10/2020 | Asia / Japan / Ishikawa |



|                |           |                                    |
|----------------|-----------|------------------------------------|
| EPI_ISL_689592 | 9/1/2020  | 12/10/2020 Asia / Japan / Ishikawa |
| EPI_ISL_689593 | 9/1/2020  | 12/10/2020 Asia / Japan / Ishikawa |
| EPI_ISL_689594 | 9/1/2020  | 12/10/2020 Asia / Japan / Ishikawa |
| EPI_ISL_689595 | 9/1/2020  | 12/10/2020 Asia / Japan / Ishikawa |
| EPI_ISL_689596 | 9/2/2020  | 12/10/2020 Asia / Japan / Ishikawa |
| EPI_ISL_689597 | 9/2/2020  | 12/10/2020 Asia / Japan / Ishikawa |
| EPI_ISL_689598 | 9/6/2020  | 12/10/2020 Asia / Japan / Ishikawa |
| EPI_ISL_689599 | 9/6/2020  | 12/10/2020 Asia / Japan / Ishikawa |
| EPI_ISL_689600 | 9/6/2020  | 12/10/2020 Asia / Japan / Ishikawa |
| EPI_ISL_689601 | 7/27/2020 | 12/10/2020 Asia / Japan / Kumamoto |
| EPI_ISL_689602 | 7/27/2020 | 12/10/2020 Asia / Japan / Kumamoto |
| EPI_ISL_689603 | 7/27/2020 | 12/10/2020 Asia / Japan / Kumamoto |
| EPI_ISL_689604 | 7/27/2020 | 12/10/2020 Asia / Japan / Kumamoto |
| EPI_ISL_689605 | 7/27/2020 | 12/10/2020 Asia / Japan / Kumamoto |
| EPI_ISL_689606 | 7/27/2020 | 12/10/2020 Asia / Japan / Kumamoto |
| EPI_ISL_689607 | 7/27/2020 | 12/10/2020 Asia / Japan / Kumamoto |
| EPI_ISL_689608 | 7/27/2020 | 12/10/2020 Asia / Japan / Kumamoto |
| EPI_ISL_689609 | 7/27/2020 | 12/10/2020 Asia / Japan / Kumamoto |
| EPI_ISL_689610 | 7/27/2020 | 12/10/2020 Asia / Japan / Kumamoto |
| EPI_ISL_689611 | 7/27/2020 | 12/10/2020 Asia / Japan / Kumamoto |
| EPI_ISL_689624 | 7/31/2020 | 12/10/2020 Asia / Japan / Hyogo    |
| EPI_ISL_689625 | 8/9/2020  | 12/10/2020 Asia / Japan / Hyogo    |
| EPI_ISL_689626 | 8/9/2020  | 12/10/2020 Asia / Japan / Hyogo    |
| EPI_ISL_689627 | 8/9/2020  | 12/10/2020 Asia / Japan / Hyogo    |
| EPI_ISL_689628 | 8/9/2020  | 12/10/2020 Asia / Japan / Hyogo    |
| EPI_ISL_689629 | 8/9/2020  | 12/10/2020 Asia / Japan / Hyogo    |
| EPI_ISL_689630 | 8/9/2020  | 12/10/2020 Asia / Japan / Hyogo    |
| EPI_ISL_689631 | 8/9/2020  | 12/10/2020 Asia / Japan / Hyogo    |
| EPI_ISL_689632 | 8/10/2020 | 12/10/2020 Asia / Japan / Hyogo    |
| EPI_ISL_689633 | 8/10/2020 | 12/10/2020 Asia / Japan / Hyogo    |
| EPI_ISL_689634 | 8/10/2020 | 12/10/2020 Asia / Japan / Hyogo    |
| EPI_ISL_689635 | 8/11/2020 | 12/10/2020 Asia / Japan / Hyogo    |
| EPI_ISL_689636 | 8/11/2020 | 12/10/2020 Asia / Japan / Hyogo    |
| EPI_ISL_689637 | 8/12/2020 | 12/10/2020 Asia / Japan / Hyogo    |
| EPI_ISL_689638 | 8/7/2020  | 12/10/2020 Asia / Japan / Hyogo    |
| EPI_ISL_689639 | 8/11/2020 | 12/10/2020 Asia / Japan / Hyogo    |
| EPI_ISL_689641 | 7/30/2020 | 12/10/2020 Asia / Japan / Wakayama |
| EPI_ISL_689642 | 7/29/2020 | 12/10/2020 Asia / Japan / Oita     |
| EPI_ISL_689643 | 2020      | 12/10/2020 Asia / Japan / Tokyo    |
| EPI_ISL_689644 | 8/7/2020  | 12/10/2020 Asia / Japan / Fukuoka  |
| EPI_ISL_689645 | 8/2/2020  | 12/10/2020 Asia / Japan / Fukuoka  |
| EPI_ISL_689647 | 7/24/2020 | 12/10/2020 Asia / Japan / Saitama  |
| EPI_ISL_689648 | 8/9/2020  | 12/10/2020 Asia / Japan / Saitama  |
| EPI_ISL_689649 | 7/29/2020 | 12/10/2020 Asia / Japan / Hyogo    |
| EPI_ISL_689650 | 7/29/2020 | 12/10/2020 Asia / Japan / Hyogo    |
| EPI_ISL_689651 | 7/29/2020 | 12/10/2020 Asia / Japan / Hyogo    |
| EPI_ISL_689652 | 7/29/2020 | 12/10/2020 Asia / Japan / Hyogo    |

|                |           |                                   |
|----------------|-----------|-----------------------------------|
| EPI_ISL_689653 | 7/29/2020 | 12/10/2020 Asia / Japan / Hyogo   |
| EPI_ISL_689654 | 7/29/2020 | 12/10/2020 Asia / Japan / Hyogo   |
| EPI_ISL_689655 | 7/29/2020 | 12/10/2020 Asia / Japan / Hyogo   |
| EPI_ISL_689656 | 7/29/2020 | 12/10/2020 Asia / Japan / Hyogo   |
| EPI_ISL_689657 | 7/30/2020 | 12/10/2020 Asia / Japan / Hyogo   |
| EPI_ISL_689658 | 7/28/2020 | 12/10/2020 Asia / Japan / Hyogo   |
| EPI_ISL_689659 | 7/27/2020 | 12/10/2020 Asia / Japan / Hyogo   |
| EPI_ISL_689660 | 7/28/2020 | 12/10/2020 Asia / Japan / Hyogo   |
| EPI_ISL_689661 | 8/1/2020  | 12/10/2020 Asia / Japan / Hyogo   |
| EPI_ISL_689662 | 8/1/2020  | 12/10/2020 Asia / Japan / Hyogo   |
| EPI_ISL_689663 | 8/2/2020  | 12/10/2020 Asia / Japan / Hyogo   |
| EPI_ISL_689664 | 7/22/2020 | 12/10/2020 Asia / Japan / Fukuoka |
| EPI_ISL_689665 | 7/22/2020 | 12/10/2020 Asia / Japan / Fukuoka |
| EPI_ISL_689666 | 7/22/2020 | 12/10/2020 Asia / Japan / Fukuoka |
| EPI_ISL_689667 | 7/23/2020 | 12/10/2020 Asia / Japan / Fukuoka |
| EPI_ISL_689668 | 7/23/2020 | 12/10/2020 Asia / Japan / Fukuoka |
| EPI_ISL_689669 | 7/23/2020 | 12/10/2020 Asia / Japan / Fukuoka |
| EPI_ISL_689670 | 7/25/2020 | 12/10/2020 Asia / Japan / Fukuoka |
| EPI_ISL_689671 | 7/25/2020 | 12/10/2020 Asia / Japan / Fukuoka |
| EPI_ISL_689672 | 7/25/2020 | 12/10/2020 Asia / Japan / Fukuoka |
| EPI_ISL_689673 | 7/25/2020 | 12/10/2020 Asia / Japan / Fukuoka |
| EPI_ISL_689674 | 7/26/2020 | 12/10/2020 Asia / Japan / Fukuoka |
| EPI_ISL_689675 | 7/27/2020 | 12/10/2020 Asia / Japan / Fukuoka |
| EPI_ISL_689676 | 7/27/2020 | 12/10/2020 Asia / Japan / Fukuoka |
| EPI_ISL_689677 | 7/22/2020 | 12/10/2020 Asia / Japan / Nagano  |
| EPI_ISL_689678 | 7/25/2020 | 12/10/2020 Asia / Japan / Nagano  |
| EPI_ISL_689679 | 7/28/2020 | 12/10/2020 Asia / Japan / Nagano  |
| EPI_ISL_689680 | 2020      | 12/10/2020 Asia / Japan / Kagawa  |
| EPI_ISL_689681 | 7/15/2020 | 12/10/2020 Asia / Japan / Kagawa  |
| EPI_ISL_689682 | 7/16/2020 | 12/10/2020 Asia / Japan / Kagawa  |
| EPI_ISL_689683 | 7/16/2020 | 12/10/2020 Asia / Japan / Kagawa  |
| EPI_ISL_689684 | 7/16/2020 | 12/10/2020 Asia / Japan / Kagawa  |
| EPI_ISL_689685 | 7/17/2020 | 12/10/2020 Asia / Japan / Kagawa  |
| EPI_ISL_689686 | 2020      | 12/10/2020 Asia / Japan / Gunma   |
| EPI_ISL_689687 | 2020      | 12/10/2020 Asia / Japan / Gunma   |
| EPI_ISL_689688 | 2020      | 12/10/2020 Asia / Japan / Gunma   |
| EPI_ISL_689689 | 2020      | 12/10/2020 Asia / Japan / Gunma   |
| EPI_ISL_689690 | 2020      | 12/10/2020 Asia / Japan / Gunma   |
| EPI_ISL_689691 | 2020      | 12/10/2020 Asia / Japan / Gunma   |
| EPI_ISL_689692 | 7/24/2020 | 12/10/2020 Asia / Japan / Fukuoka |
| EPI_ISL_689693 | 7/25/2020 | 12/10/2020 Asia / Japan / Fukuoka |
| EPI_ISL_689694 | 7/25/2020 | 12/10/2020 Asia / Japan / Fukuoka |
| EPI_ISL_689695 | 7/25/2020 | 12/10/2020 Asia / Japan / Fukuoka |
| EPI_ISL_689696 | 7/25/2020 | 12/10/2020 Asia / Japan / Fukuoka |
| EPI_ISL_689697 | 7/25/2020 | 12/10/2020 Asia / Japan / Fukuoka |
| EPI_ISL_689698 | 7/29/2020 | 12/10/2020 Asia / Japan / Okinawa |
| EPI_ISL_689699 | 7/29/2020 | 12/10/2020 Asia / Japan / Okinawa |







|                |           |            |                         |
|----------------|-----------|------------|-------------------------|
| EPI_ISL_689841 | 8/1/2020  | 12/10/2020 | Asia / Japan / Hyogo    |
| EPI_ISL_689842 | 7/30/2020 | 12/10/2020 | Asia / Japan / Hyogo    |
| EPI_ISL_689843 | 7/30/2020 | 12/10/2020 | Asia / Japan / Hyogo    |
| EPI_ISL_689844 | 7/29/2020 | 12/10/2020 | Asia / Japan / Hyogo    |
| EPI_ISL_689845 | 8/1/2020  | 12/10/2020 | Asia / Japan / Hyogo    |
| EPI_ISL_689846 | 7/31/2020 | 12/10/2020 | Asia / Japan / Hyogo    |
| EPI_ISL_689847 | 8/2/2020  | 12/10/2020 | Asia / Japan / Hyogo    |
| EPI_ISL_689848 | 8/2/2020  | 12/10/2020 | Asia / Japan / Hyogo    |
| EPI_ISL_689849 | 8/2/2020  | 12/10/2020 | Asia / Japan / Hyogo    |
| EPI_ISL_689850 | 8/2/2020  | 12/10/2020 | Asia / Japan / Hyogo    |
| EPI_ISL_689851 | 7/27/2020 | 12/10/2020 | Asia / Japan / Fukuoka  |
| EPI_ISL_689852 | 7/28/2020 | 12/10/2020 | Asia / Japan / Fukuoka  |
| EPI_ISL_689853 | 7/28/2020 | 12/10/2020 | Asia / Japan / Fukuoka  |
| EPI_ISL_689854 | 7/28/2020 | 12/10/2020 | Asia / Japan / Fukuoka  |
| EPI_ISL_689855 | 7/28/2020 | 12/10/2020 | Asia / Japan / Fukuoka  |
| EPI_ISL_689856 | 7/28/2020 | 12/10/2020 | Asia / Japan / Fukuoka  |
| EPI_ISL_689857 | 7/28/2020 | 12/10/2020 | Asia / Japan / Fukuoka  |
| EPI_ISL_689858 | 7/29/2020 | 12/10/2020 | Asia / Japan / Fukuoka  |
| EPI_ISL_689859 | 7/29/2020 | 12/10/2020 | Asia / Japan / Fukuoka  |
| EPI_ISL_689860 | 7/28/2020 | 12/10/2020 | Asia / Japan / Fukuoka  |
| EPI_ISL_689861 | 7/29/2020 | 12/10/2020 | Asia / Japan / Fukuoka  |
| EPI_ISL_689862 | 7/29/2020 | 12/10/2020 | Asia / Japan / Fukuoka  |
| EPI_ISL_689863 | 7/29/2020 | 12/10/2020 | Asia / Japan / Fukuoka  |
| EPI_ISL_689864 | 7/29/2020 | 12/10/2020 | Asia / Japan / Fukuoka  |
| EPI_ISL_689865 | 7/29/2020 | 12/10/2020 | Asia / Japan / Fukuoka  |
| EPI_ISL_689866 | 7/29/2020 | 12/10/2020 | Asia / Japan / Fukuoka  |
| EPI_ISL_689867 | 7/30/2020 | 12/10/2020 | Asia / Japan / Fukuoka  |
| EPI_ISL_689868 | 7/29/2020 | 12/10/2020 | Asia / Japan / Fukuoka  |
| EPI_ISL_689869 | 7/29/2020 | 12/10/2020 | Asia / Japan / Fukuoka  |
| EPI_ISL_689870 | 7/27/2020 | 12/10/2020 | Asia / Japan / Fukuoka  |
| EPI_ISL_689871 | 7/27/2020 | 12/10/2020 | Asia / Japan / Fukuoka  |
| EPI_ISL_689872 | 7/27/2020 | 12/10/2020 | Asia / Japan / Fukuoka  |
| EPI_ISL_689873 | 7/27/2020 | 12/10/2020 | Asia / Japan / Ishikawa |
| EPI_ISL_689874 | 7/28/2020 | 12/10/2020 | Asia / Japan / Ishikawa |
| EPI_ISL_689875 | 7/29/2020 | 12/10/2020 | Asia / Japan / Ishikawa |
| EPI_ISL_689876 | 7/29/2020 | 12/10/2020 | Asia / Japan / Ishikawa |
| EPI_ISL_689877 | 8/1/2020  | 12/10/2020 | Asia / Japan / Ishikawa |
| EPI_ISL_689878 | 8/6/2020  | 12/10/2020 | Asia / Japan / Ishikawa |
| EPI_ISL_689879 | 8/6/2020  | 12/10/2020 | Asia / Japan / Ishikawa |
| EPI_ISL_689880 | 8/6/2020  | 12/10/2020 | Asia / Japan / Ishikawa |
| EPI_ISL_689881 | 8/6/2020  | 12/10/2020 | Asia / Japan / Ishikawa |
| EPI_ISL_689882 | 7/16/2020 | 12/10/2020 | Asia / Japan / Ishikawa |
| EPI_ISL_689883 | 7/17/2020 | 12/10/2020 | Asia / Japan / Ishikawa |
| EPI_ISL_689884 | 7/21/2020 | 12/10/2020 | Asia / Japan / Ishikawa |
| EPI_ISL_689885 | 7/20/2020 | 12/10/2020 | Asia / Japan / Ishikawa |
| EPI_ISL_689886 | 7/21/2020 | 12/10/2020 | Asia / Japan / Ishikawa |
| EPI_ISL_689887 | 7/22/2020 | 12/10/2020 | Asia / Japan / Ishikawa |







|                |           |            |                          |
|----------------|-----------|------------|--------------------------|
| EPI_ISL_689982 | 8/5/2020  | 12/10/2020 | Asia / Japan / Kagoshima |
| EPI_ISL_689983 | 8/6/2020  | 12/10/2020 | Asia / Japan / Kagoshima |
| EPI_ISL_689984 | 7/30/2020 | 12/10/2020 | Asia / Japan / Shizuoka  |
| EPI_ISL_689985 | 7/31/2020 | 12/10/2020 | Asia / Japan / Shizuoka  |
| EPI_ISL_689986 | 7/31/2020 | 12/10/2020 | Asia / Japan / Shizuoka  |
| EPI_ISL_689987 | 7/31/2020 | 12/10/2020 | Asia / Japan / Shizuoka  |
| EPI_ISL_689988 | 8/3/2020  | 12/10/2020 | Asia / Japan / Shizuoka  |
| EPI_ISL_689989 | 8/3/2020  | 12/10/2020 | Asia / Japan / Shizuoka  |
| EPI_ISL_689990 | 8/3/2020  | 12/10/2020 | Asia / Japan / Shizuoka  |
| EPI_ISL_689991 | 7/31/2020 | 12/10/2020 | Asia / Japan / Hokkaido  |
| EPI_ISL_689992 | 8/2/2020  | 12/10/2020 | Asia / Japan / Hokkaido  |
| EPI_ISL_689993 | 8/2/2020  | 12/10/2020 | Asia / Japan / Hokkaido  |
| EPI_ISL_689994 | 8/2/2020  | 12/10/2020 | Asia / Japan / Hokkaido  |
| EPI_ISL_689995 | 8/2/2020  | 12/10/2020 | Asia / Japan / Hokkaido  |
| EPI_ISL_689996 | 8/3/2020  | 12/10/2020 | Asia / Japan / Hokkaido  |
| EPI_ISL_689997 | 8/3/2020  | 12/10/2020 | Asia / Japan / Hokkaido  |
| EPI_ISL_689998 | 8/4/2020  | 12/10/2020 | Asia / Japan / Hokkaido  |
| EPI_ISL_689999 | 8/4/2020  | 12/10/2020 | Asia / Japan / Hokkaido  |
| EPI_ISL_690000 | 8/5/2020  | 12/10/2020 | Asia / Japan / Hokkaido  |
| EPI_ISL_690001 | 8/6/2020  | 12/10/2020 | Asia / Japan / Hokkaido  |
| EPI_ISL_690002 | 8/6/2020  | 12/10/2020 | Asia / Japan / Hokkaido  |
| EPI_ISL_690003 | 8/7/2020  | 12/10/2020 | Asia / Japan / Hokkaido  |
| EPI_ISL_690004 | 8/7/2020  | 12/10/2020 | Asia / Japan / Hokkaido  |
| EPI_ISL_690005 | 8/7/2020  | 12/10/2020 | Asia / Japan / Hokkaido  |
| EPI_ISL_690006 | 8/8/2020  | 12/10/2020 | Asia / Japan / Hokkaido  |
| EPI_ISL_690007 | 8/8/2020  | 12/10/2020 | Asia / Japan / Hokkaido  |
| EPI_ISL_690008 | 8/10/2020 | 12/10/2020 | Asia / Japan / Hokkaido  |
| EPI_ISL_690009 | 8/10/2020 | 12/10/2020 | Asia / Japan / Hokkaido  |
| EPI_ISL_690010 | 8/11/2020 | 12/10/2020 | Asia / Japan / Hokkaido  |
| EPI_ISL_690011 | 8/2/2020  | 12/10/2020 | Asia / Japan / Osaka     |
| EPI_ISL_690012 | 8/3/2020  | 12/10/2020 | Asia / Japan / Osaka     |
| EPI_ISL_690013 | 8/4/2020  | 12/10/2020 | Asia / Japan / Osaka     |
| EPI_ISL_690014 | 8/4/2020  | 12/10/2020 | Asia / Japan / Osaka     |
| EPI_ISL_690015 | 8/4/2020  | 12/10/2020 | Asia / Japan / Osaka     |
| EPI_ISL_690016 | 8/5/2020  | 12/10/2020 | Asia / Japan / Osaka     |
| EPI_ISL_690017 | 8/6/2020  | 12/10/2020 | Asia / Japan / Osaka     |
| EPI_ISL_690018 | 8/5/2020  | 12/10/2020 | Asia / Japan / Osaka     |
| EPI_ISL_690019 | 8/7/2020  | 12/10/2020 | Asia / Japan / Osaka     |
| EPI_ISL_690020 | 8/7/2020  | 12/10/2020 | Asia / Japan / Osaka     |
| EPI_ISL_690021 | 8/7/2020  | 12/10/2020 | Asia / Japan / Osaka     |
| EPI_ISL_690022 | 8/7/2020  | 12/10/2020 | Asia / Japan / Osaka     |
| EPI_ISL_690023 | 8/7/2020  | 12/10/2020 | Asia / Japan / Osaka     |
| EPI_ISL_690024 | 8/8/2020  | 12/10/2020 | Asia / Japan / Osaka     |
| EPI_ISL_690025 | 8/8/2020  | 12/10/2020 | Asia / Japan / Osaka     |
| EPI_ISL_690026 | 8/10/2020 | 12/10/2020 | Asia / Japan / Osaka     |
| EPI_ISL_690027 | 8/11/2020 | 12/10/2020 | Asia / Japan / Osaka     |
| EPI_ISL_690028 | 8/11/2020 | 12/10/2020 | Asia / Japan / Osaka     |

|                |           |                                    |
|----------------|-----------|------------------------------------|
| EPI_ISL_690029 | 7/22/2020 | 12/10/2020 Asia / Japan / Saitama  |
| EPI_ISL_690030 | 7/22/2020 | 12/10/2020 Asia / Japan / Saitama  |
| EPI_ISL_690031 | 7/25/2020 | 12/10/2020 Asia / Japan / Saitama  |
| EPI_ISL_690032 | 7/26/2020 | 12/10/2020 Asia / Japan / Saitama  |
| EPI_ISL_690033 | 7/27/2020 | 12/10/2020 Asia / Japan / Saitama  |
| EPI_ISL_690034 | 7/29/2020 | 12/10/2020 Asia / Japan / Saitama  |
| EPI_ISL_690035 | 7/29/2020 | 12/10/2020 Asia / Japan / Saitama  |
| EPI_ISL_690036 | 7/29/2020 | 12/10/2020 Asia / Japan / Saitama  |
| EPI_ISL_690037 | 8/3/2020  | 12/10/2020 Asia / Japan / Saitama  |
| EPI_ISL_690038 | 8/4/2020  | 12/10/2020 Asia / Japan / Saitama  |
| EPI_ISL_690039 | 8/6/2020  | 12/10/2020 Asia / Japan / Saitama  |
| EPI_ISL_690040 | 8/6/2020  | 12/10/2020 Asia / Japan / Saitama  |
| EPI_ISL_690041 | 8/6/2020  | 12/10/2020 Asia / Japan / Saitama  |
| EPI_ISL_690042 | 8/6/2020  | 12/10/2020 Asia / Japan / Saitama  |
| EPI_ISL_690043 | 8/6/2020  | 12/10/2020 Asia / Japan / Saitama  |
| EPI_ISL_690044 | 7/16/2020 | 12/10/2020 Asia / Japan / Kumamoto |
| EPI_ISL_690045 | 7/25/2020 | 12/10/2020 Asia / Japan / Kumamoto |
| EPI_ISL_690046 | 7/26/2020 | 12/10/2020 Asia / Japan / Kumamoto |
| EPI_ISL_690047 | 7/26/2020 | 12/10/2020 Asia / Japan / Kumamoto |
| EPI_ISL_690048 | 7/26/2020 | 12/10/2020 Asia / Japan / Kumamoto |
| EPI_ISL_690049 | 7/26/2020 | 12/10/2020 Asia / Japan / Kumamoto |
| EPI_ISL_690050 | 7/26/2020 | 12/10/2020 Asia / Japan / Kumamoto |
| EPI_ISL_690051 | 7/26/2020 | 12/10/2020 Asia / Japan / Kumamoto |
| EPI_ISL_690052 | 7/26/2020 | 12/10/2020 Asia / Japan / Kumamoto |
| EPI_ISL_690053 | 7/27/2020 | 12/10/2020 Asia / Japan / Kumamoto |
| EPI_ISL_690054 | 7/31/2020 | 12/10/2020 Asia / Japan / Kumamoto |
| EPI_ISL_690055 | 8/9/2020  | 12/10/2020 Asia / Japan / Kumamoto |
| EPI_ISL_690056 | 7/28/2020 | 12/10/2020 Asia / Japan / Oita     |
| EPI_ISL_690057 | 7/28/2020 | 12/10/2020 Asia / Japan / Oita     |
| EPI_ISL_690058 | 7/29/2020 | 12/10/2020 Asia / Japan / Oita     |
| EPI_ISL_690059 | 7/30/2020 | 12/10/2020 Asia / Japan / Oita     |
| EPI_ISL_690060 | 7/30/2020 | 12/10/2020 Asia / Japan / Oita     |
| EPI_ISL_690061 | 7/31/2020 | 12/10/2020 Asia / Japan / Oita     |
| EPI_ISL_690062 | 7/31/2020 | 12/10/2020 Asia / Japan / Oita     |
| EPI_ISL_690063 | 8/2/2020  | 12/10/2020 Asia / Japan / Oita     |
| EPI_ISL_690064 | 8/2/2020  | 12/10/2020 Asia / Japan / Oita     |
| EPI_ISL_690065 | 8/2/2020  | 12/10/2020 Asia / Japan / Oita     |
| EPI_ISL_690066 | 8/3/2020  | 12/10/2020 Asia / Japan / Oita     |
| EPI_ISL_690067 | 8/3/2020  | 12/10/2020 Asia / Japan / Oita     |
| EPI_ISL_690068 | 8/4/2020  | 12/10/2020 Asia / Japan / Oita     |
| EPI_ISL_690069 | 8/5/2020  | 12/10/2020 Asia / Japan / Oita     |
| EPI_ISL_690070 | 8/6/2020  | 12/10/2020 Asia / Japan / Oita     |
| EPI_ISL_690071 | 8/6/2020  | 12/10/2020 Asia / Japan / Oita     |
| EPI_ISL_690072 | 8/7/2020  | 12/10/2020 Asia / Japan / Oita     |
| EPI_ISL_690073 | 8/8/2020  | 12/10/2020 Asia / Japan / Oita     |
| EPI_ISL_690074 | 8/8/2020  | 12/10/2020 Asia / Japan / Oita     |
| EPI_ISL_690075 | 8/8/2020  | 12/10/2020 Asia / Japan / Oita     |

|                |           |                                     |
|----------------|-----------|-------------------------------------|
| EPI_ISL_690076 | 8/8/2020  | 12/10/2020 Asia / Japan / Oita      |
| EPI_ISL_690077 | 8/8/2020  | 12/10/2020 Asia / Japan / Oita      |
| EPI_ISL_690078 | 8/9/2020  | 12/10/2020 Asia / Japan / Oita      |
| EPI_ISL_690079 | 8/9/2020  | 12/10/2020 Asia / Japan / Oita      |
| EPI_ISL_690080 | 7/22/2020 | 12/10/2020 Asia / Japan / Kagoshima |
| EPI_ISL_690081 | 7/23/2020 | 12/10/2020 Asia / Japan / Kagoshima |
| EPI_ISL_690082 | 7/30/2020 | 12/10/2020 Asia / Japan / Saitama   |
| EPI_ISL_690083 | 7/30/2020 | 12/10/2020 Asia / Japan / Saitama   |
| EPI_ISL_690084 | 7/31/2020 | 12/10/2020 Asia / Japan / Saitama   |
| EPI_ISL_690085 | 8/1/2020  | 12/10/2020 Asia / Japan / Saitama   |
| EPI_ISL_690086 | 8/1/2020  | 12/10/2020 Asia / Japan / Saitama   |
| EPI_ISL_690087 | 8/1/2020  | 12/10/2020 Asia / Japan / Saitama   |
| EPI_ISL_690088 | 8/1/2020  | 12/10/2020 Asia / Japan / Saitama   |
| EPI_ISL_690089 | 8/1/2020  | 12/10/2020 Asia / Japan / Saitama   |
| EPI_ISL_690090 | 8/2/2020  | 12/10/2020 Asia / Japan / Saitama   |
| EPI_ISL_690091 | 8/2/2020  | 12/10/2020 Asia / Japan / Saitama   |
| EPI_ISL_690092 | 8/3/2020  | 12/10/2020 Asia / Japan / Saitama   |
| EPI_ISL_690093 | 8/3/2020  | 12/10/2020 Asia / Japan / Saitama   |
| EPI_ISL_690094 | 8/6/2020  | 12/10/2020 Asia / Japan / Saitama   |
| EPI_ISL_690095 | 8/7/2020  | 12/10/2020 Asia / Japan / Saitama   |
| EPI_ISL_690096 | 8/7/2020  | 12/10/2020 Asia / Japan / Saitama   |
| EPI_ISL_690097 | 8/11/2020 | 12/10/2020 Asia / Japan / Hyogo     |
| EPI_ISL_690098 | 8/11/2020 | 12/10/2020 Asia / Japan / Hyogo     |
| EPI_ISL_690099 | 8/12/2020 | 12/10/2020 Asia / Japan / Hyogo     |
| EPI_ISL_690100 | 8/13/2020 | 12/10/2020 Asia / Japan / Hyogo     |
| EPI_ISL_690101 | 8/13/2020 | 12/10/2020 Asia / Japan / Hyogo     |
| EPI_ISL_690102 | 8/14/2020 | 12/10/2020 Asia / Japan / Hyogo     |
| EPI_ISL_690103 | 8/14/2020 | 12/10/2020 Asia / Japan / Hyogo     |
| EPI_ISL_690104 | 8/14/2020 | 12/10/2020 Asia / Japan / Hyogo     |
| EPI_ISL_690105 | 8/14/2020 | 12/10/2020 Asia / Japan / Hyogo     |
| EPI_ISL_690106 | 8/14/2020 | 12/10/2020 Asia / Japan / Hyogo     |
| EPI_ISL_690107 | 8/14/2020 | 12/10/2020 Asia / Japan / Hyogo     |
| EPI_ISL_690108 | 8/15/2020 | 12/10/2020 Asia / Japan / Hyogo     |
| EPI_ISL_690109 | 8/15/2020 | 12/10/2020 Asia / Japan / Hyogo     |
| EPI_ISL_690110 | 8/15/2020 | 12/10/2020 Asia / Japan / Hyogo     |
| EPI_ISL_690111 | 8/15/2020 | 12/10/2020 Asia / Japan / Hyogo     |
| EPI_ISL_690112 | 8/16/2020 | 12/10/2020 Asia / Japan / Hyogo     |
| EPI_ISL_690113 | 8/16/2020 | 12/10/2020 Asia / Japan / Hyogo     |
| EPI_ISL_690114 | 8/8/2020  | 12/10/2020 Asia / Japan / Hyogo     |
| EPI_ISL_690115 | 8/6/2020  | 12/10/2020 Asia / Japan / Hyogo     |
| EPI_ISL_690116 | 8/7/2020  | 12/10/2020 Asia / Japan / Hyogo     |
| EPI_ISL_690117 | 8/8/2020  | 12/10/2020 Asia / Japan / Hyogo     |
| EPI_ISL_690118 | 8/8/2020  | 12/10/2020 Asia / Japan / Hyogo     |
| EPI_ISL_690119 | 8/9/2020  | 12/10/2020 Asia / Japan / Hyogo     |
| EPI_ISL_690120 | 8/6/2020  | 12/10/2020 Asia / Japan / Hyogo     |
| EPI_ISL_690121 | 8/7/2020  | 12/10/2020 Asia / Japan / Hyogo     |
| EPI_ISL_690122 | 8/10/2020 | 12/10/2020 Asia / Japan / Hyogo     |

|                |           |                                   |
|----------------|-----------|-----------------------------------|
| EPI_ISL_690123 | 8/11/2020 | 12/10/2020 Asia / Japan / Hyogo   |
| EPI_ISL_690124 | 8/8/2020  | 12/10/2020 Asia / Japan / Hyogo   |
| EPI_ISL_690125 | 8/8/2020  | 12/10/2020 Asia / Japan / Hyogo   |
| EPI_ISL_690126 | 8/8/2020  | 12/10/2020 Asia / Japan / Hyogo   |
| EPI_ISL_690127 | 8/11/2020 | 12/10/2020 Asia / Japan / Hyogo   |
| EPI_ISL_690128 | 8/12/2020 | 12/10/2020 Asia / Japan / Hyogo   |
| EPI_ISL_690129 | 8/10/2020 | 12/10/2020 Asia / Japan / Hyogo   |
| EPI_ISL_690130 | 8/12/2020 | 12/10/2020 Asia / Japan / Hyogo   |
| EPI_ISL_690131 | 8/12/2020 | 12/10/2020 Asia / Japan / Hyogo   |
| EPI_ISL_690132 | 8/13/2020 | 12/10/2020 Asia / Japan / Hyogo   |
| EPI_ISL_690133 | 8/11/2020 | 12/10/2020 Asia / Japan / Hyogo   |
| EPI_ISL_690134 | 8/11/2020 | 12/10/2020 Asia / Japan / Hyogo   |
| EPI_ISL_690135 | 8/11/2020 | 12/10/2020 Asia / Japan / Hyogo   |
| EPI_ISL_690136 | 8/12/2020 | 12/10/2020 Asia / Japan / Hyogo   |
| EPI_ISL_690137 | 7/5/2020  | 12/10/2020 Asia / Japan / Saitama |
| EPI_ISL_690138 | 7/5/2020  | 12/10/2020 Asia / Japan / Saitama |
| EPI_ISL_690139 | 7/11/2020 | 12/10/2020 Asia / Japan / Saitama |
| EPI_ISL_690140 | 7/13/2020 | 12/10/2020 Asia / Japan / Saitama |
| EPI_ISL_690141 | 7/15/2020 | 12/10/2020 Asia / Japan / Saitama |
| EPI_ISL_690142 | 7/14/2020 | 12/10/2020 Asia / Japan / Saitama |
| EPI_ISL_690143 | 7/14/2020 | 12/10/2020 Asia / Japan / Saitama |
| EPI_ISL_690144 | 7/17/2020 | 12/10/2020 Asia / Japan / Saitama |
| EPI_ISL_690145 | 7/18/2020 | 12/10/2020 Asia / Japan / Saitama |
| EPI_ISL_690146 | 7/18/2020 | 12/10/2020 Asia / Japan / Saitama |
| EPI_ISL_690147 | 7/18/2020 | 12/10/2020 Asia / Japan / Saitama |
| EPI_ISL_690148 | 7/21/2020 | 12/10/2020 Asia / Japan / Saitama |
| EPI_ISL_690149 | 7/22/2020 | 12/10/2020 Asia / Japan / Saitama |
| EPI_ISL_690150 | 7/23/2020 | 12/10/2020 Asia / Japan / Saitama |
| EPI_ISL_690151 | 7/23/2020 | 12/10/2020 Asia / Japan / Saitama |
| EPI_ISL_690152 | 7/23/2020 | 12/10/2020 Asia / Japan / Saitama |
| EPI_ISL_690153 | 7/25/2020 | 12/10/2020 Asia / Japan / Saitama |
| EPI_ISL_690154 | 7/26/2020 | 12/10/2020 Asia / Japan / Saitama |
| EPI_ISL_690155 | 7/27/2020 | 12/10/2020 Asia / Japan / Saitama |
| EPI_ISL_690156 | 7/29/2020 | 12/10/2020 Asia / Japan / Saitama |
| EPI_ISL_690157 | 7/29/2020 | 12/10/2020 Asia / Japan / Saitama |
| EPI_ISL_690158 | 7/30/2020 | 12/10/2020 Asia / Japan / Saitama |
| EPI_ISL_690159 | 8/1/2020  | 12/10/2020 Asia / Japan / Saitama |
| EPI_ISL_690160 | 7/31/2020 | 12/10/2020 Asia / Japan / Saitama |
| EPI_ISL_690161 | 8/1/2020  | 12/10/2020 Asia / Japan / Saitama |
| EPI_ISL_690162 | 8/1/2020  | 12/10/2020 Asia / Japan / Saitama |
| EPI_ISL_690163 | 8/1/2020  | 12/10/2020 Asia / Japan / Saitama |
| EPI_ISL_690164 | 8/1/2020  | 12/10/2020 Asia / Japan / Saitama |
| EPI_ISL_690165 | 8/2/2020  | 12/10/2020 Asia / Japan / Saitama |
| EPI_ISL_690166 | 8/3/2020  | 12/10/2020 Asia / Japan / Saitama |
| EPI_ISL_690167 | 8/3/2020  | 12/10/2020 Asia / Japan / Saitama |
| EPI_ISL_690168 | 8/4/2020  | 12/10/2020 Asia / Japan / Saitama |
| EPI_ISL_690169 | 8/6/2020  | 12/10/2020 Asia / Japan / Saitama |

|                |           |                                    |
|----------------|-----------|------------------------------------|
| EPI_ISL_690170 | 8/6/2020  | 12/10/2020 Asia / Japan / Saitama  |
| EPI_ISL_690171 | 8/6/2020  | 12/10/2020 Asia / Japan / Saitama  |
| EPI_ISL_690172 | 8/6/2020  | 12/10/2020 Asia / Japan / Saitama  |
| EPI_ISL_690173 | 8/7/2020  | 12/10/2020 Asia / Japan / Saitama  |
| EPI_ISL_690174 | 8/9/2020  | 12/10/2020 Asia / Japan / Saitama  |
| EPI_ISL_690175 | 8/9/2020  | 12/10/2020 Asia / Japan / Saitama  |
| EPI_ISL_690176 | 8/9/2020  | 12/10/2020 Asia / Japan / Saitama  |
| EPI_ISL_690177 | 8/9/2020  | 12/10/2020 Asia / Japan / Saitama  |
| EPI_ISL_690178 | 8/9/2020  | 12/10/2020 Asia / Japan / Saitama  |
| EPI_ISL_690179 | 8/9/2020  | 12/10/2020 Asia / Japan / Saitama  |
| EPI_ISL_690180 | 8/9/2020  | 12/10/2020 Asia / Japan / Saitama  |
| EPI_ISL_690181 | 8/9/2020  | 12/10/2020 Asia / Japan / Saitama  |
| EPI_ISL_690182 | 8/9/2020  | 12/10/2020 Asia / Japan / Saitama  |
| EPI_ISL_690183 | 8/11/2020 | 12/10/2020 Asia / Japan / Saitama  |
| EPI_ISL_690184 | 8/10/2020 | 12/10/2020 Asia / Japan / Saitama  |
| EPI_ISL_690185 | 8/10/2020 | 12/10/2020 Asia / Japan / Saitama  |
| EPI_ISL_690186 | 8/10/2020 | 12/10/2020 Asia / Japan / Saitama  |
| EPI_ISL_690187 | 8/10/2020 | 12/10/2020 Asia / Japan / Saitama  |
| EPI_ISL_690188 | 8/12/2020 | 12/10/2020 Asia / Japan / Saitama  |
| EPI_ISL_690189 | 8/12/2020 | 12/10/2020 Asia / Japan / Saitama  |
| EPI_ISL_690190 | 8/12/2020 | 12/10/2020 Asia / Japan / Saitama  |
| EPI_ISL_690191 | 8/11/2020 | 12/10/2020 Asia / Japan / Saitama  |
| EPI_ISL_690192 | 8/11/2020 | 12/10/2020 Asia / Japan / Saitama  |
| EPI_ISL_690193 | 8/11/2020 | 12/10/2020 Asia / Japan / Saitama  |
| EPI_ISL_690194 | 8/11/2020 | 12/10/2020 Asia / Japan / Saitama  |
| EPI_ISL_690195 | 8/4/2020  | 12/10/2020 Asia / Japan / Miyagi   |
| EPI_ISL_690196 | 8/4/2020  | 12/10/2020 Asia / Japan / Miyagi   |
| EPI_ISL_690197 | 8/5/2020  | 12/10/2020 Asia / Japan / Miyagi   |
| EPI_ISL_690198 | 8/12/2020 | 12/10/2020 Asia / Japan / Miyagi   |
| EPI_ISL_690199 | 8/17/2020 | 12/10/2020 Asia / Japan / Miyagi   |
| EPI_ISL_690200 | 7/11/2020 | 12/10/2020 Asia / Japan / Hyogo    |
| EPI_ISL_690201 | 7/21/2020 | 12/10/2020 Asia / Japan / Hyogo    |
| EPI_ISL_690202 | 7/23/2020 | 12/10/2020 Asia / Japan / Hyogo    |
| EPI_ISL_690203 | 7/27/2020 | 12/10/2020 Asia / Japan / Hyogo    |
| EPI_ISL_690204 | 7/27/2020 | 12/10/2020 Asia / Japan / Hyogo    |
| EPI_ISL_690205 | 7/29/2020 | 12/10/2020 Asia / Japan / Hyogo    |
| EPI_ISL_690206 | 8/3/2020  | 12/10/2020 Asia / Japan / Hyogo    |
| EPI_ISL_690207 | 8/7/2020  | 12/10/2020 Asia / Japan / Hyogo    |
| EPI_ISL_690208 | 8/9/2020  | 12/10/2020 Asia / Japan / Hyogo    |
| EPI_ISL_690209 | 8/13/2020 | 12/10/2020 Asia / Japan / Kanagawa |
| EPI_ISL_690210 | 8/3/2020  | 12/10/2020 Asia / Japan / Gunma    |
| EPI_ISL_690211 | 8/3/2020  | 12/10/2020 Asia / Japan / Gunma    |
| EPI_ISL_690212 | 8/4/2020  | 12/10/2020 Asia / Japan / Gunma    |
| EPI_ISL_690213 | 8/5/2020  | 12/10/2020 Asia / Japan / Gunma    |
| EPI_ISL_690214 | 8/5/2020  | 12/10/2020 Asia / Japan / Gunma    |
| EPI_ISL_690215 | 8/6/2020  | 12/10/2020 Asia / Japan / Gunma    |
| EPI_ISL_690216 | 8/8/2020  | 12/10/2020 Asia / Japan / Gunma    |

















|                |           |                                    |
|----------------|-----------|------------------------------------|
| EPI_ISL_690546 | 8/15/2020 | 12/10/2020 Asia / Japan / Wakayama |
| EPI_ISL_690547 | 8/16/2020 | 12/10/2020 Asia / Japan / Wakayama |
| EPI_ISL_690548 | 8/16/2020 | 12/10/2020 Asia / Japan / Wakayama |
| EPI_ISL_690549 | 8/16/2020 | 12/10/2020 Asia / Japan / Wakayama |
| EPI_ISL_690550 | 8/16/2020 | 12/10/2020 Asia / Japan / Wakayama |
| EPI_ISL_690551 | 8/17/2020 | 12/10/2020 Asia / Japan / Wakayama |
| EPI_ISL_690552 | 8/17/2020 | 12/10/2020 Asia / Japan / Wakayama |
| EPI_ISL_690553 | 2020-08   | 12/10/2020 Asia / Japan / Wakayama |
| EPI_ISL_690554 | 8/6/2020  | 12/10/2020 Asia / Japan / Shizuoka |
| EPI_ISL_690555 | 8/6/2020  | 12/10/2020 Asia / Japan / Shizuoka |
| EPI_ISL_690556 | 8/6/2020  | 12/10/2020 Asia / Japan / Shizuoka |
| EPI_ISL_690557 | 8/7/2020  | 12/10/2020 Asia / Japan / Shizuoka |
| EPI_ISL_690558 | 8/8/2020  | 12/10/2020 Asia / Japan / Shizuoka |
| EPI_ISL_690559 | 8/9/2020  | 12/10/2020 Asia / Japan / Shizuoka |
| EPI_ISL_690560 | 8/9/2020  | 12/10/2020 Asia / Japan / Shizuoka |
| EPI_ISL_690561 | 8/9/2020  | 12/10/2020 Asia / Japan / Shizuoka |
| EPI_ISL_690562 | 8/10/2020 | 12/10/2020 Asia / Japan / Shizuoka |
| EPI_ISL_690563 | 8/11/2020 | 12/10/2020 Asia / Japan / Shizuoka |
| EPI_ISL_690564 | 8/11/2020 | 12/10/2020 Asia / Japan / Shizuoka |
| EPI_ISL_690565 | 8/19/2020 | 12/10/2020 Asia / Japan / Ishikawa |
| EPI_ISL_690566 | 8/19/2020 | 12/10/2020 Asia / Japan / Ishikawa |
| EPI_ISL_690567 | 8/19/2020 | 12/10/2020 Asia / Japan / Ishikawa |
| EPI_ISL_690568 | 8/19/2020 | 12/10/2020 Asia / Japan / Ishikawa |
| EPI_ISL_690569 | 8/19/2020 | 12/10/2020 Asia / Japan / Ishikawa |
| EPI_ISL_690570 | 8/4/2020  | 12/10/2020 Asia / Japan / Tokyo    |
| EPI_ISL_690571 | 8/4/2020  | 12/10/2020 Asia / Japan / Tokyo    |
| EPI_ISL_690572 | 8/4/2020  | 12/10/2020 Asia / Japan / Tokyo    |
| EPI_ISL_690573 | 7/30/2020 | 12/10/2020 Asia / Japan / Hyogo    |
| EPI_ISL_690574 | 7/30/2020 | 12/10/2020 Asia / Japan / Hyogo    |
| EPI_ISL_690575 | 8/1/2020  | 12/10/2020 Asia / Japan / Hyogo    |
| EPI_ISL_690576 | 8/1/2020  | 12/10/2020 Asia / Japan / Hyogo    |
| EPI_ISL_690577 | 8/3/2020  | 12/10/2020 Asia / Japan / Hyogo    |
| EPI_ISL_690578 | 8/3/2020  | 12/10/2020 Asia / Japan / Hyogo    |
| EPI_ISL_690579 | 8/5/2020  | 12/10/2020 Asia / Japan / Hyogo    |
| EPI_ISL_690580 | 8/6/2020  | 12/10/2020 Asia / Japan / Hyogo    |
| EPI_ISL_690581 | 8/7/2020  | 12/10/2020 Asia / Japan / Hyogo    |
| EPI_ISL_690582 | 8/17/2020 | 12/10/2020 Asia / Japan / Hyogo    |
| EPI_ISL_690583 | 8/14/2020 | 12/10/2020 Asia / Japan / Okinawa  |
| EPI_ISL_690584 | 8/2/2020  | 12/10/2020 Asia / Japan / Fukuoka  |
| EPI_ISL_690585 | 8/2/2020  | 12/10/2020 Asia / Japan / Fukuoka  |
| EPI_ISL_690586 | 8/3/2020  | 12/10/2020 Asia / Japan / Fukuoka  |
| EPI_ISL_690587 | 8/3/2020  | 12/10/2020 Asia / Japan / Fukuoka  |
| EPI_ISL_690588 | 8/3/2020  | 12/10/2020 Asia / Japan / Fukuoka  |
| EPI_ISL_690589 | 8/3/2020  | 12/10/2020 Asia / Japan / Fukuoka  |
| EPI_ISL_690590 | 8/3/2020  | 12/10/2020 Asia / Japan / Fukuoka  |
| EPI_ISL_690591 | 8/3/2020  | 12/10/2020 Asia / Japan / Fukuoka  |
| EPI_ISL_690592 | 8/3/2020  | 12/10/2020 Asia / Japan / Fukuoka  |

|                |           |                                     |
|----------------|-----------|-------------------------------------|
| EPI_ISL_690593 | 8/3/2020  | 12/10/2020 Asia / Japan / Fukuoka   |
| EPI_ISL_690594 | 8/3/2020  | 12/10/2020 Asia / Japan / Fukuoka   |
| EPI_ISL_690595 | 8/3/2020  | 12/10/2020 Asia / Japan / Fukuoka   |
| EPI_ISL_690596 | 8/3/2020  | 12/10/2020 Asia / Japan / Fukuoka   |
| EPI_ISL_690597 | 8/3/2020  | 12/10/2020 Asia / Japan / Fukuoka   |
| EPI_ISL_690598 | 8/4/2020  | 12/10/2020 Asia / Japan / Fukuoka   |
| EPI_ISL_690599 | 8/4/2020  | 12/10/2020 Asia / Japan / Fukuoka   |
| EPI_ISL_690600 | 8/4/2020  | 12/10/2020 Asia / Japan / Fukuoka   |
| EPI_ISL_690601 | 8/4/2020  | 12/10/2020 Asia / Japan / Fukuoka   |
| EPI_ISL_690602 | 8/4/2020  | 12/10/2020 Asia / Japan / Fukuoka   |
| EPI_ISL_690603 | 8/4/2020  | 12/10/2020 Asia / Japan / Fukuoka   |
| EPI_ISL_690604 | 8/4/2020  | 12/10/2020 Asia / Japan / Fukuoka   |
| EPI_ISL_690605 | 8/4/2020  | 12/10/2020 Asia / Japan / Fukuoka   |
| EPI_ISL_690606 | 8/4/2020  | 12/10/2020 Asia / Japan / Fukuoka   |
| EPI_ISL_690607 | 8/4/2020  | 12/10/2020 Asia / Japan / Fukuoka   |
| EPI_ISL_690608 | 8/4/2020  | 12/10/2020 Asia / Japan / Fukuoka   |
| EPI_ISL_690609 | 8/5/2020  | 12/10/2020 Asia / Japan / Fukuoka   |
| EPI_ISL_690610 | 8/5/2020  | 12/10/2020 Asia / Japan / Fukuoka   |
| EPI_ISL_690611 | 8/5/2020  | 12/10/2020 Asia / Japan / Fukuoka   |
| EPI_ISL_690614 | 4/20/2020 | 12/10/2020 Asia / Japan / Kanagawa  |
| EPI_ISL_690615 | 4/27/2020 | 12/10/2020 Asia / Japan / Kanagawa  |
| EPI_ISL_690616 | 6/29/2020 | 12/10/2020 Asia / Japan / Saitama   |
| EPI_ISL_690617 | 4/22/2020 | 12/10/2020 Asia / Japan / Toyama    |
| EPI_ISL_690619 | 5/1/2020  | 12/10/2020 Asia / Japan / Saitama   |
| EPI_ISL_690620 | 4/3/2020  | 12/10/2020 Asia / Japan / Fukuoka   |
| EPI_ISL_690621 | 4/3/2020  | 12/10/2020 Asia / Japan / Fukuoka   |
| EPI_ISL_690622 | 4/5/2020  | 12/10/2020 Asia / Japan / Fukuoka   |
| EPI_ISL_690623 | 4/7/2020  | 12/10/2020 Asia / Japan / Fukuoka   |
| EPI_ISL_690624 | 5/16/2020 | 12/10/2020 Asia / Japan / Ishikawa  |
| EPI_ISL_690625 | 4/5/2020  | 12/10/2020 Asia / Japan / Fukuoka   |
| EPI_ISL_690631 | 4/24/2020 | 12/10/2020 Asia / Japan / Saitama   |
| EPI_ISL_690632 | 6/25/2020 | 12/10/2020 Asia / Japan / Hokkaido  |
| EPI_ISL_690633 | 7/5/2020  | 12/10/2020 Asia / Japan / Kagoshima |
| EPI_ISL_690634 | 5/19/2020 | 12/10/2020 Asia / Japan             |
| EPI_ISL_690635 | 6/23/2020 | 12/10/2020 Asia / Japan / Ibaraki   |
| EPI_ISL_690636 | 4/4/2020  | 12/10/2020 Asia / Japan / Miyagi    |
| EPI_ISL_690637 | 4/6/2020  | 12/10/2020 Asia / Japan / Miyagi    |
| EPI_ISL_690638 | 6/15/2020 | 12/10/2020 Asia / Japan / Tokyo     |
| EPI_ISL_690639 | 6/15/2020 | 12/10/2020 Asia / Japan / Tokyo     |
| EPI_ISL_690640 | 6/6/2020  | 12/10/2020 Asia / Japan / Tokyo     |
| EPI_ISL_690641 | 4/22/2020 | 12/10/2020 Asia / Japan / Saitama   |
| EPI_ISL_690642 | 4/23/2020 | 12/10/2020 Asia / Japan / Saitama   |
| EPI_ISL_690643 | 4/23/2020 | 12/10/2020 Asia / Japan / Saitama   |
| EPI_ISL_690644 | 4/23/2020 | 12/10/2020 Asia / Japan / Saitama   |
| EPI_ISL_690645 | 4/23/2020 | 12/10/2020 Asia / Japan / Saitama   |
| EPI_ISL_690646 | 4/24/2020 | 12/10/2020 Asia / Japan / Saitama   |
| EPI_ISL_690647 | 4/23/2020 | 12/10/2020 Asia / Japan / Saitama   |



|                |           |            |                         |
|----------------|-----------|------------|-------------------------|
| EPI_ISL_690648 | 4/24/2020 | 12/10/2020 | Asia / Japan / Saitama  |
| EPI_ISL_690649 | 4/24/2020 | 12/10/2020 | Asia / Japan / Saitama  |
| EPI_ISL_690650 | 4/27/2020 | 12/10/2020 | Asia / Japan / Saitama  |
| EPI_ISL_690651 | 4/27/2020 | 12/10/2020 | Asia / Japan / Saitama  |
| EPI_ISL_690652 | 4/28/2020 | 12/10/2020 | Asia / Japan / Saitama  |
| EPI_ISL_690653 | 4/29/2020 | 12/10/2020 | Asia / Japan / Saitama  |
| EPI_ISL_690654 | 4/30/2020 | 12/10/2020 | Asia / Japan / Saitama  |
| EPI_ISL_690655 | 4/30/2020 | 12/10/2020 | Asia / Japan / Saitama  |
| EPI_ISL_690656 | 5/1/2020  | 12/10/2020 | Asia / Japan / Saitama  |
| EPI_ISL_690657 | 4/30/2020 | 12/10/2020 | Asia / Japan / Saitama  |
| EPI_ISL_690658 | 5/1/2020  | 12/10/2020 | Asia / Japan / Saitama  |
| EPI_ISL_690659 | 5/2/2020  | 12/10/2020 | Asia / Japan / Saitama  |
| EPI_ISL_690660 | 5/3/2020  | 12/10/2020 | Asia / Japan / Saitama  |
| EPI_ISL_690661 | 5/5/2020  | 12/10/2020 | Asia / Japan / Saitama  |
| EPI_ISL_690662 | 5/5/2020  | 12/10/2020 | Asia / Japan / Saitama  |
| EPI_ISL_690663 | 5/5/2020  | 12/10/2020 | Asia / Japan / Saitama  |
| EPI_ISL_690664 | 5/6/2020  | 12/10/2020 | Asia / Japan / Saitama  |
| EPI_ISL_690665 | 5/6/2020  | 12/10/2020 | Asia / Japan / Saitama  |
| EPI_ISL_690666 | 5/6/2020  | 12/10/2020 | Asia / Japan / Saitama  |
| EPI_ISL_690667 | 5/6/2020  | 12/10/2020 | Asia / Japan / Saitama  |
| EPI_ISL_690668 | 5/7/2020  | 12/10/2020 | Asia / Japan / Saitama  |
| EPI_ISL_690669 | 5/7/2020  | 12/10/2020 | Asia / Japan / Saitama  |
| EPI_ISL_690670 | 5/7/2020  | 12/10/2020 | Asia / Japan / Saitama  |
| EPI_ISL_690671 | 5/8/2020  | 12/10/2020 | Asia / Japan / Saitama  |
| EPI_ISL_690672 | 5/8/2020  | 12/10/2020 | Asia / Japan / Saitama  |
| EPI_ISL_690673 | 5/8/2020  | 12/10/2020 | Asia / Japan / Saitama  |
| EPI_ISL_690674 | 5/12/2020 | 12/10/2020 | Asia / Japan / Saitama  |
| EPI_ISL_690675 | 5/12/2020 | 12/10/2020 | Asia / Japan / Saitama  |
| EPI_ISL_690676 | 5/12/2020 | 12/10/2020 | Asia / Japan / Saitama  |
| EPI_ISL_690677 | 5/12/2020 | 12/10/2020 | Asia / Japan / Saitama  |
| EPI_ISL_690678 | 5/13/2020 | 12/10/2020 | Asia / Japan / Saitama  |
| EPI_ISL_690679 | 5/12/2020 | 12/10/2020 | Asia / Japan / Saitama  |
| EPI_ISL_690680 | 5/13/2020 | 12/10/2020 | Asia / Japan / Saitama  |
| EPI_ISL_690681 | 5/17/2020 | 12/10/2020 | Asia / Japan / Saitama  |
| EPI_ISL_690682 | 5/18/2020 | 12/10/2020 | Asia / Japan / Saitama  |
| EPI_ISL_690683 | 5/18/2020 | 12/10/2020 | Asia / Japan / Saitama  |
| EPI_ISL_690684 | 4/9/2020  | 12/10/2020 | Asia / Japan / Fukuoka  |
| EPI_ISL_690685 | 4/14/2020 | 12/10/2020 | Asia / Japan / Fukuoka  |
| EPI_ISL_690686 | 4/28/2020 | 12/10/2020 | Asia / Japan / Fukuoka  |
| EPI_ISL_690687 | 5/26/2020 | 12/10/2020 | Asia / Japan / Hokkaido |
| EPI_ISL_690688 | 5/30/2020 | 12/10/2020 | Asia / Japan / Hokkaido |
| EPI_ISL_690689 | 6/1/2020  | 12/10/2020 | Asia / Japan / Hokkaido |
| EPI_ISL_690690 | 6/1/2020  | 12/10/2020 | Asia / Japan / Hokkaido |
| EPI_ISL_690691 | 6/2/2020  | 12/10/2020 | Asia / Japan / Hokkaido |
| EPI_ISL_690692 | 6/3/2020  | 12/10/2020 | Asia / Japan / Hokkaido |
| EPI_ISL_690693 | 6/3/2020  | 12/10/2020 | Asia / Japan / Hokkaido |
| EPI_ISL_690694 | 6/4/2020  | 12/10/2020 | Asia / Japan / Hokkaido |

|                |           |                                    |
|----------------|-----------|------------------------------------|
| EPI_ISL_690695 | 6/7/2020  | 12/10/2020 Asia / Japan / Hokkaido |
| EPI_ISL_690696 | 6/9/2020  | 12/10/2020 Asia / Japan / Hokkaido |
| EPI_ISL_690697 | 6/9/2020  | 12/10/2020 Asia / Japan / Hokkaido |
| EPI_ISL_690698 | 6/10/2020 | 12/10/2020 Asia / Japan / Hokkaido |
| EPI_ISL_690699 | 6/10/2020 | 12/10/2020 Asia / Japan / Hokkaido |
| EPI_ISL_690700 | 6/10/2020 | 12/10/2020 Asia / Japan / Hokkaido |
| EPI_ISL_690701 | 6/10/2020 | 12/10/2020 Asia / Japan / Hokkaido |
| EPI_ISL_690702 | 6/10/2020 | 12/10/2020 Asia / Japan / Hokkaido |
| EPI_ISL_690703 | 6/11/2020 | 12/10/2020 Asia / Japan / Hokkaido |
| EPI_ISL_690704 | 6/11/2020 | 12/10/2020 Asia / Japan / Hokkaido |
| EPI_ISL_690705 | 6/12/2020 | 12/10/2020 Asia / Japan / Hokkaido |
| EPI_ISL_690706 | 6/12/2020 | 12/10/2020 Asia / Japan / Hokkaido |
| EPI_ISL_690707 | 6/12/2020 | 12/10/2020 Asia / Japan / Hokkaido |
| EPI_ISL_690708 | 3/13/2020 | 12/10/2020 Asia / Japan            |
| EPI_ISL_690709 | 3/30/2020 | 12/10/2020 Asia / Japan            |
| EPI_ISL_690710 | 3/31/2020 | 12/10/2020 Asia / Japan            |
| EPI_ISL_690711 | 4/2/2020  | 12/10/2020 Asia / Japan            |
| EPI_ISL_690712 | 4/3/2020  | 12/10/2020 Asia / Japan            |
| EPI_ISL_690713 | 4/4/2020  | 12/10/2020 Asia / Japan            |
| EPI_ISL_690714 | 4/4/2020  | 12/10/2020 Asia / Japan            |
| EPI_ISL_690715 | 4/6/2020  | 12/10/2020 Asia / Japan            |
| EPI_ISL_690716 | 4/7/2020  | 12/10/2020 Asia / Japan            |
| EPI_ISL_690717 | 4/6/2020  | 12/10/2020 Asia / Japan            |
| EPI_ISL_690718 | 4/8/2020  | 12/10/2020 Asia / Japan            |
| EPI_ISL_690719 | 4/9/2020  | 12/10/2020 Asia / Japan            |
| EPI_ISL_690720 | 4/13/2020 | 12/10/2020 Asia / Japan            |
| EPI_ISL_690721 | 4/17/2020 | 12/10/2020 Asia / Japan            |
| EPI_ISL_690722 | 4/19/2020 | 12/10/2020 Asia / Japan            |
| EPI_ISL_690723 | 4/21/2020 | 12/10/2020 Asia / Japan            |
| EPI_ISL_690724 | 4/22/2020 | 12/10/2020 Asia / Japan            |
| EPI_ISL_690725 | 4/21/2020 | 12/10/2020 Asia / Japan            |
| EPI_ISL_690726 | 4/22/2020 | 12/10/2020 Asia / Japan            |
| EPI_ISL_690727 | 4/23/2020 | 12/10/2020 Asia / Japan            |
| EPI_ISL_690728 | 4/23/2020 | 12/10/2020 Asia / Japan            |
| EPI_ISL_690729 | 4/23/2020 | 12/10/2020 Asia / Japan            |
| EPI_ISL_690730 | 4/23/2020 | 12/10/2020 Asia / Japan            |
| EPI_ISL_690731 | 4/23/2020 | 12/10/2020 Asia / Japan            |
| EPI_ISL_690732 | 4/23/2020 | 12/10/2020 Asia / Japan            |
| EPI_ISL_690733 | 4/23/2020 | 12/10/2020 Asia / Japan            |
| EPI_ISL_690734 | 4/24/2020 | 12/10/2020 Asia / Japan            |
| EPI_ISL_690735 | 4/24/2020 | 12/10/2020 Asia / Japan            |
| EPI_ISL_690736 | 4/24/2020 | 12/10/2020 Asia / Japan            |
| EPI_ISL_690737 | 4/24/2020 | 12/10/2020 Asia / Japan            |
| EPI_ISL_690738 | 4/27/2020 | 12/10/2020 Asia / Japan            |
| EPI_ISL_690739 | 4/28/2020 | 12/10/2020 Asia / Japan            |
| EPI_ISL_690740 | 4/27/2020 | 12/10/2020 Asia / Japan            |
| EPI_ISL_690741 | 5/1/2020  | 12/10/2020 Asia / Japan            |

|                |           |                                     |
|----------------|-----------|-------------------------------------|
| EPI_ISL_690742 | 5/2/2020  | 12/10/2020 Asia / Japan             |
| EPI_ISL_690743 | 5/3/2020  | 12/10/2020 Asia / Japan             |
| EPI_ISL_690744 | 6/11/2020 | 12/10/2020 Asia / Japan / Kagoshima |
| EPI_ISL_690745 | 2/29/2020 | 12/10/2020 Asia / Japan / Miyagi    |
| EPI_ISL_690746 | 3/29/2020 | 12/10/2020 Asia / Japan / Miyagi    |
| EPI_ISL_690747 | 3/30/2020 | 12/10/2020 Asia / Japan / Miyagi    |
| EPI_ISL_690748 | 3/31/2020 | 12/10/2020 Asia / Japan / Miyagi    |
| EPI_ISL_690749 | 3/31/2020 | 12/10/2020 Asia / Japan / Miyagi    |
| EPI_ISL_690750 | 3/31/2020 | 12/10/2020 Asia / Japan / Miyagi    |
| EPI_ISL_690751 | 3/31/2020 | 12/10/2020 Asia / Japan / Miyagi    |
| EPI_ISL_690752 | 4/2/2020  | 12/10/2020 Asia / Japan / Miyagi    |
| EPI_ISL_690753 | 4/3/2020  | 12/10/2020 Asia / Japan / Miyagi    |
| EPI_ISL_690754 | 4/3/2020  | 12/10/2020 Asia / Japan / Miyagi    |
| EPI_ISL_690755 | 4/3/2020  | 12/10/2020 Asia / Japan / Miyagi    |
| EPI_ISL_690756 | 4/4/2020  | 12/10/2020 Asia / Japan / Miyagi    |
| EPI_ISL_690757 | 4/5/2020  | 12/10/2020 Asia / Japan / Miyagi    |
| EPI_ISL_690758 | 4/6/2020  | 12/10/2020 Asia / Japan / Miyagi    |
| EPI_ISL_690759 | 4/7/2020  | 12/10/2020 Asia / Japan / Miyagi    |
| EPI_ISL_690760 | 4/7/2020  | 12/10/2020 Asia / Japan / Miyagi    |
| EPI_ISL_690761 | 4/8/2020  | 12/10/2020 Asia / Japan / Miyagi    |
| EPI_ISL_690762 | 4/9/2020  | 12/10/2020 Asia / Japan / Miyagi    |
| EPI_ISL_690763 | 4/10/2020 | 12/10/2020 Asia / Japan / Miyagi    |
| EPI_ISL_690764 | 4/11/2020 | 12/10/2020 Asia / Japan / Miyagi    |
| EPI_ISL_690765 | 4/11/2020 | 12/10/2020 Asia / Japan / Miyagi    |
| EPI_ISL_690766 | 4/11/2020 | 12/10/2020 Asia / Japan / Miyagi    |
| EPI_ISL_690767 | 4/11/2020 | 12/10/2020 Asia / Japan / Miyagi    |
| EPI_ISL_690768 | 4/11/2020 | 12/10/2020 Asia / Japan / Miyagi    |
| EPI_ISL_690769 | 4/14/2020 | 12/10/2020 Asia / Japan / Miyagi    |
| EPI_ISL_690770 | 4/14/2020 | 12/10/2020 Asia / Japan / Miyagi    |
| EPI_ISL_690771 | 4/14/2020 | 12/10/2020 Asia / Japan / Miyagi    |
| EPI_ISL_690772 | 4/15/2020 | 12/10/2020 Asia / Japan / Miyagi    |
| EPI_ISL_690773 | 4/15/2020 | 12/10/2020 Asia / Japan / Miyagi    |
| EPI_ISL_690774 | 4/17/2020 | 12/10/2020 Asia / Japan / Miyagi    |
| EPI_ISL_690775 | 4/17/2020 | 12/10/2020 Asia / Japan / Miyagi    |
| EPI_ISL_690776 | 4/18/2020 | 12/10/2020 Asia / Japan / Miyagi    |
| EPI_ISL_690777 | 4/28/2020 | 12/10/2020 Asia / Japan / Miyagi    |
| EPI_ISL_690778 | 6/11/2020 | 12/10/2020 Asia / Japan / Saitama   |
| EPI_ISL_690779 | 4/3/2020  | 12/10/2020 Asia / Japan / Tokyo     |
| EPI_ISL_690780 | 4/6/2020  | 12/10/2020 Asia / Japan / Tokyo     |
| EPI_ISL_690781 | 4/6/2020  | 12/10/2020 Asia / Japan / Tokyo     |
| EPI_ISL_690782 | 4/6/2020  | 12/10/2020 Asia / Japan / Tokyo     |
| EPI_ISL_690783 | 4/6/2020  | 12/10/2020 Asia / Japan / Tokyo     |
| EPI_ISL_690784 | 4/7/2020  | 12/10/2020 Asia / Japan / Tokyo     |
| EPI_ISL_690785 | 4/8/2020  | 12/10/2020 Asia / Japan / Tokyo     |
| EPI_ISL_690786 | 4/8/2020  | 12/10/2020 Asia / Japan / Tokyo     |
| EPI_ISL_690787 | 4/13/2020 | 12/10/2020 Asia / Japan / Tokyo     |
| EPI_ISL_690788 | 4/13/2020 | 12/10/2020 Asia / Japan / Tokyo     |

|                |           |                                    |
|----------------|-----------|------------------------------------|
| EPI_ISL_690789 | 4/13/2020 | 12/10/2020 Asia / Japan / Tokyo    |
| EPI_ISL_690790 | 4/13/2020 | 12/10/2020 Asia / Japan / Tokyo    |
| EPI_ISL_690791 | 4/20/2020 | 12/10/2020 Asia / Japan / Tokyo    |
| EPI_ISL_690792 | 4/9/2020  | 12/10/2020 Asia / Japan / Tokyo    |
| EPI_ISL_690793 | 4/30/2020 | 12/10/2020 Asia / Japan / Tokyo    |
| EPI_ISL_690794 | 6/4/2020  | 12/10/2020 Asia / Japan / Tokyo    |
| EPI_ISL_690795 | 6/5/2020  | 12/10/2020 Asia / Japan / Tokyo    |
| EPI_ISL_690796 | 6/5/2020  | 12/10/2020 Asia / Japan / Tokyo    |
| EPI_ISL_690797 | 6/6/2020  | 12/10/2020 Asia / Japan / Tokyo    |
| EPI_ISL_690798 | 6/6/2020  | 12/10/2020 Asia / Japan / Tokyo    |
| EPI_ISL_690799 | 6/8/2020  | 12/10/2020 Asia / Japan / Tokyo    |
| EPI_ISL_690800 | 6/10/2020 | 12/10/2020 Asia / Japan / Tokyo    |
| EPI_ISL_690801 | 6/11/2020 | 12/10/2020 Asia / Japan / Tokyo    |
| EPI_ISL_690802 | 6/11/2020 | 12/10/2020 Asia / Japan / Tokyo    |
| EPI_ISL_690803 | 6/11/2020 | 12/10/2020 Asia / Japan / Tokyo    |
| EPI_ISL_690804 | 6/11/2020 | 12/10/2020 Asia / Japan / Tokyo    |
| EPI_ISL_690805 | 6/11/2020 | 12/10/2020 Asia / Japan / Tokyo    |
| EPI_ISL_690806 | 6/11/2020 | 12/10/2020 Asia / Japan / Tokyo    |
| EPI_ISL_690807 | 6/13/2020 | 12/10/2020 Asia / Japan / Tokyo    |
| EPI_ISL_690808 | 6/14/2020 | 12/10/2020 Asia / Japan / Tokyo    |
| EPI_ISL_690809 | 6/15/2020 | 12/10/2020 Asia / Japan / Tokyo    |
| EPI_ISL_690810 | 6/16/2020 | 12/10/2020 Asia / Japan / Tokyo    |
| EPI_ISL_690811 | 6/17/2020 | 12/10/2020 Asia / Japan / Tokyo    |
| EPI_ISL_690812 | 6/18/2020 | 12/10/2020 Asia / Japan / Tokyo    |
| EPI_ISL_690813 | 6/18/2020 | 12/10/2020 Asia / Japan / Tokyo    |
| EPI_ISL_690814 | 6/18/2020 | 12/10/2020 Asia / Japan / Tokyo    |
| EPI_ISL_690815 | 6/19/2020 | 12/10/2020 Asia / Japan / Tokyo    |
| EPI_ISL_690816 | 6/19/2020 | 12/10/2020 Asia / Japan / Tokyo    |
| EPI_ISL_690817 | 6/19/2020 | 12/10/2020 Asia / Japan / Tokyo    |
| EPI_ISL_690818 | 3/23/2020 | 12/10/2020 Asia / Japan / Kanagawa |
| EPI_ISL_690819 | 3/23/2020 | 12/10/2020 Asia / Japan / Kanagawa |
| EPI_ISL_690820 | 3/23/2020 | 12/10/2020 Asia / Japan / Kanagawa |
| EPI_ISL_690821 | 3/26/2020 | 12/10/2020 Asia / Japan / Kanagawa |
| EPI_ISL_690822 | 3/27/2020 | 12/10/2020 Asia / Japan / Kanagawa |
| EPI_ISL_690823 | 3/30/2020 | 12/10/2020 Asia / Japan / Kanagawa |
| EPI_ISL_690824 | 3/30/2020 | 12/10/2020 Asia / Japan / Kanagawa |
| EPI_ISL_690825 | 3/30/2020 | 12/10/2020 Asia / Japan / Kanagawa |
| EPI_ISL_690826 | 3/31/2020 | 12/10/2020 Asia / Japan / Kanagawa |
| EPI_ISL_690827 | 4/11/2020 | 12/10/2020 Asia / Japan / Kanagawa |
| EPI_ISL_690828 | 4/10/2020 | 12/10/2020 Asia / Japan / Kanagawa |
| EPI_ISL_690829 | 4/20/2020 | 12/10/2020 Asia / Japan / Kanagawa |
| EPI_ISL_690830 | 4/21/2020 | 12/10/2020 Asia / Japan / Kanagawa |
| EPI_ISL_690831 | 4/23/2020 | 12/10/2020 Asia / Japan / Kanagawa |
| EPI_ISL_690832 | 4/22/2020 | 12/10/2020 Asia / Japan / Kanagawa |
| EPI_ISL_690833 | 4/23/2020 | 12/10/2020 Asia / Japan / Kanagawa |
| EPI_ISL_690834 | 4/30/2020 | 12/10/2020 Asia / Japan / Kanagawa |
| EPI_ISL_690835 | 5/1/2020  | 12/10/2020 Asia / Japan / Kanagawa |

|                |           |                                    |
|----------------|-----------|------------------------------------|
| EPI_ISL_690836 | 5/1/2020  | 12/10/2020 Asia / Japan / Kanagawa |
| EPI_ISL_690837 | 4/8/2020  | 12/10/2020 Asia / Japan / Osaka    |
| EPI_ISL_690838 | 4/11/2020 | 12/10/2020 Asia / Japan / Osaka    |
| EPI_ISL_690839 | 4/14/2020 | 12/10/2020 Asia / Japan / Osaka    |
| EPI_ISL_690840 | 4/16/2020 | 12/10/2020 Asia / Japan / Osaka    |
| EPI_ISL_690841 | 4/28/2020 | 12/10/2020 Asia / Japan / Osaka    |
| EPI_ISL_690842 | 5/1/2020  | 12/10/2020 Asia / Japan / Osaka    |
| EPI_ISL_690843 | 5/11/2020 | 12/10/2020 Asia / Japan / Osaka    |
| EPI_ISL_690844 | 6/15/2020 | 12/10/2020 Asia / Japan / Osaka    |
| EPI_ISL_690845 | 3/3/2020  | 12/10/2020 Asia / Japan            |
| EPI_ISL_690846 | 3/10/2020 | 12/10/2020 Asia / Japan            |
| EPI_ISL_690847 | 3/11/2020 | 12/10/2020 Asia / Japan            |
| EPI_ISL_690848 | 3/12/2020 | 12/10/2020 Asia / Japan            |
| EPI_ISL_690849 | 3/16/2020 | 12/10/2020 Asia / Japan            |
| EPI_ISL_690850 | 3/12/2020 | 12/10/2020 Asia / Japan            |
| EPI_ISL_690851 | 3/20/2020 | 12/10/2020 Asia / Japan            |
| EPI_ISL_690852 | 3/21/2020 | 12/10/2020 Asia / Japan            |
| EPI_ISL_690853 | 3/23/2020 | 12/10/2020 Asia / Japan            |
| EPI_ISL_690854 | 3/23/2020 | 12/10/2020 Asia / Japan            |
| EPI_ISL_690855 | 3/24/2020 | 12/10/2020 Asia / Japan            |
| EPI_ISL_690856 | 3/24/2020 | 12/10/2020 Asia / Japan            |
| EPI_ISL_690857 | 3/25/2020 | 12/10/2020 Asia / Japan            |
| EPI_ISL_690858 | 3/27/2020 | 12/10/2020 Asia / Japan            |
| EPI_ISL_690859 | 3/27/2020 | 12/10/2020 Asia / Japan            |
| EPI_ISL_690860 | 3/29/2020 | 12/10/2020 Asia / Japan            |
| EPI_ISL_690861 | 3/29/2020 | 12/10/2020 Asia / Japan            |
| EPI_ISL_690862 | 3/29/2020 | 12/10/2020 Asia / Japan            |
| EPI_ISL_690863 | 3/29/2020 | 12/10/2020 Asia / Japan            |
| EPI_ISL_690864 | 3/25/2020 | 12/10/2020 Asia / Japan            |
| EPI_ISL_690865 | 3/29/2020 | 12/10/2020 Asia / Japan            |
| EPI_ISL_690866 | 3/29/2020 | 12/10/2020 Asia / Japan            |
| EPI_ISL_690867 | 3/30/2020 | 12/10/2020 Asia / Japan            |
| EPI_ISL_690868 | 3/30/2020 | 12/10/2020 Asia / Japan            |
| EPI_ISL_690869 | 3/30/2020 | 12/10/2020 Asia / Japan            |
| EPI_ISL_690870 | 3/30/2020 | 12/10/2020 Asia / Japan            |
| EPI_ISL_690871 | 3/31/2020 | 12/10/2020 Asia / Japan            |
| EPI_ISL_690872 | 3/31/2020 | 12/10/2020 Asia / Japan            |
| EPI_ISL_690873 | 3/31/2020 | 12/10/2020 Asia / Japan            |
| EPI_ISL_690874 | 4/1/2020  | 12/10/2020 Asia / Japan            |
| EPI_ISL_690875 | 4/1/2020  | 12/10/2020 Asia / Japan            |
| EPI_ISL_690876 | 4/1/2020  | 12/10/2020 Asia / Japan            |
| EPI_ISL_690877 | 4/1/2020  | 12/10/2020 Asia / Japan            |
| EPI_ISL_690878 | 4/1/2020  | 12/10/2020 Asia / Japan            |
| EPI_ISL_690879 | 4/1/2020  | 12/10/2020 Asia / Japan            |
| EPI_ISL_690880 | 4/2/2020  | 12/10/2020 Asia / Japan            |
| EPI_ISL_690881 | 4/2/2020  | 12/10/2020 Asia / Japan            |
| EPI_ISL_690882 | 4/3/2020  | 12/10/2020 Asia / Japan            |

|                |           |                                 |
|----------------|-----------|---------------------------------|
| EPI_ISL_690883 | 4/3/2020  | 12/10/2020 Asia / Japan         |
| EPI_ISL_690884 | 4/3/2020  | 12/10/2020 Asia / Japan         |
| EPI_ISL_690885 | 4/3/2020  | 12/10/2020 Asia / Japan         |
| EPI_ISL_690886 | 4/4/2020  | 12/10/2020 Asia / Japan         |
| EPI_ISL_690887 | 4/4/2020  | 12/10/2020 Asia / Japan         |
| EPI_ISL_690888 | 4/4/2020  | 12/10/2020 Asia / Japan         |
| EPI_ISL_690889 | 4/4/2020  | 12/10/2020 Asia / Japan         |
| EPI_ISL_690890 | 4/6/2020  | 12/10/2020 Asia / Japan         |
| EPI_ISL_690891 | 4/5/2020  | 12/10/2020 Asia / Japan         |
| EPI_ISL_690892 | 4/5/2020  | 12/10/2020 Asia / Japan         |
| EPI_ISL_690893 | 4/5/2020  | 12/10/2020 Asia / Japan         |
| EPI_ISL_690894 | 4/5/2020  | 12/10/2020 Asia / Japan         |
| EPI_ISL_690895 | 4/5/2020  | 12/10/2020 Asia / Japan         |
| EPI_ISL_690896 | 4/6/2020  | 12/10/2020 Asia / Japan         |
| EPI_ISL_690897 | 4/6/2020  | 12/10/2020 Asia / Japan         |
| EPI_ISL_690898 | 4/6/2020  | 12/10/2020 Asia / Japan         |
| EPI_ISL_690899 | 4/6/2020  | 12/10/2020 Asia / Japan         |
| EPI_ISL_690900 | 4/6/2020  | 12/10/2020 Asia / Japan         |
| EPI_ISL_690901 | 4/6/2020  | 12/10/2020 Asia / Japan         |
| EPI_ISL_690902 | 6/21/2020 | 12/10/2020 Asia / Japan / Tokyo |
| EPI_ISL_690903 | 6/21/2020 | 12/10/2020 Asia / Japan / Tokyo |
| EPI_ISL_690904 | 6/21/2020 | 12/10/2020 Asia / Japan / Tokyo |
| EPI_ISL_690905 | 6/22/2020 | 12/10/2020 Asia / Japan / Tokyo |
| EPI_ISL_690906 | 6/22/2020 | 12/10/2020 Asia / Japan / Tokyo |
| EPI_ISL_690907 | 6/22/2020 | 12/10/2020 Asia / Japan / Tokyo |
| EPI_ISL_690908 | 6/22/2020 | 12/10/2020 Asia / Japan / Tokyo |
| EPI_ISL_690909 | 4/2/2020  | 12/10/2020 Asia / Japan / Osaka |
| EPI_ISL_690910 | 4/13/2020 | 12/10/2020 Asia / Japan         |
| EPI_ISL_690911 | 4/7/2020  | 12/10/2020 Asia / Japan         |
| EPI_ISL_690912 | 4/9/2020  | 12/10/2020 Asia / Japan         |
| EPI_ISL_690913 | 4/9/2020  | 12/10/2020 Asia / Japan         |
| EPI_ISL_690914 | 4/8/2020  | 12/10/2020 Asia / Japan         |
| EPI_ISL_690915 | 4/10/2020 | 12/10/2020 Asia / Japan         |
| EPI_ISL_690916 | 4/10/2020 | 12/10/2020 Asia / Japan         |
| EPI_ISL_690917 | 4/12/2020 | 12/10/2020 Asia / Japan         |
| EPI_ISL_690918 | 4/17/2020 | 12/10/2020 Asia / Japan         |
| EPI_ISL_690919 | 4/18/2020 | 12/10/2020 Asia / Japan         |
| EPI_ISL_690920 | 4/18/2020 | 12/10/2020 Asia / Japan         |
| EPI_ISL_690921 | 4/18/2020 | 12/10/2020 Asia / Japan         |
| EPI_ISL_690922 | 4/19/2020 | 12/10/2020 Asia / Japan         |
| EPI_ISL_690923 | 4/16/2020 | 12/10/2020 Asia / Japan         |
| EPI_ISL_690924 | 4/17/2020 | 12/10/2020 Asia / Japan         |
| EPI_ISL_690925 | 4/17/2020 | 12/10/2020 Asia / Japan         |
| EPI_ISL_690926 | 4/16/2020 | 12/10/2020 Asia / Japan         |
| EPI_ISL_690927 | 4/16/2020 | 12/10/2020 Asia / Japan         |
| EPI_ISL_690928 | 4/11/2020 | 12/10/2020 Asia / Japan         |
| EPI_ISL_690929 | 4/15/2020 | 12/10/2020 Asia / Japan         |

|                |           |                         |
|----------------|-----------|-------------------------|
| EPI_ISL_690930 | 4/15/2020 | 12/10/2020 Asia / Japan |
| EPI_ISL_690931 | 4/15/2020 | 12/10/2020 Asia / Japan |
| EPI_ISL_690932 | 4/21/2020 | 12/10/2020 Asia / Japan |
| EPI_ISL_690933 | 4/21/2020 | 12/10/2020 Asia / Japan |
| EPI_ISL_690934 | 4/7/2020  | 12/10/2020 Asia / Japan |
| EPI_ISL_690935 | 4/8/2020  | 12/10/2020 Asia / Japan |
| EPI_ISL_690936 | 4/8/2020  | 12/10/2020 Asia / Japan |
| EPI_ISL_690937 | 4/8/2020  | 12/10/2020 Asia / Japan |
| EPI_ISL_690938 | 4/9/2020  | 12/10/2020 Asia / Japan |
| EPI_ISL_690939 | 4/10/2020 | 12/10/2020 Asia / Japan |
| EPI_ISL_690940 | 4/11/2020 | 12/10/2020 Asia / Japan |
| EPI_ISL_690941 | 4/14/2020 | 12/10/2020 Asia / Japan |
| EPI_ISL_690942 | 4/14/2020 | 12/10/2020 Asia / Japan |
| EPI_ISL_690943 | 4/14/2020 | 12/10/2020 Asia / Japan |
| EPI_ISL_690944 | 4/24/2020 | 12/10/2020 Asia / Japan |
| EPI_ISL_690945 | 4/23/2020 | 12/10/2020 Asia / Japan |
| EPI_ISL_690946 | 4/20/2020 | 12/10/2020 Asia / Japan |
| EPI_ISL_690947 | 4/24/2020 | 12/10/2020 Asia / Japan |
| EPI_ISL_690948 | 4/20/2020 | 12/10/2020 Asia / Japan |
| EPI_ISL_690949 | 4/17/2020 | 12/10/2020 Asia / Japan |
| EPI_ISL_690950 | 4/17/2020 | 12/10/2020 Asia / Japan |
| EPI_ISL_690951 | 4/12/2020 | 12/10/2020 Asia / Japan |
| EPI_ISL_690952 | 4/13/2020 | 12/10/2020 Asia / Japan |
| EPI_ISL_690953 | 4/12/2020 | 12/10/2020 Asia / Japan |
| EPI_ISL_690954 | 4/12/2020 | 12/10/2020 Asia / Japan |
| EPI_ISL_690955 | 4/12/2020 | 12/10/2020 Asia / Japan |
| EPI_ISL_690956 | 4/12/2020 | 12/10/2020 Asia / Japan |
| EPI_ISL_690957 | 4/11/2020 | 12/10/2020 Asia / Japan |
| EPI_ISL_690958 | 4/11/2020 | 12/10/2020 Asia / Japan |
| EPI_ISL_690959 | 4/11/2020 | 12/10/2020 Asia / Japan |
| EPI_ISL_690960 | 4/12/2020 | 12/10/2020 Asia / Japan |
| EPI_ISL_690961 | 4/24/2020 | 12/10/2020 Asia / Japan |
| EPI_ISL_690962 | 4/11/2020 | 12/10/2020 Asia / Japan |
| EPI_ISL_690963 | 4/11/2020 | 12/10/2020 Asia / Japan |
| EPI_ISL_690964 | 4/16/2020 | 12/10/2020 Asia / Japan |
| EPI_ISL_690965 | 4/18/2020 | 12/10/2020 Asia / Japan |
| EPI_ISL_690966 | 4/18/2020 | 12/10/2020 Asia / Japan |
| EPI_ISL_690967 | 4/18/2020 | 12/10/2020 Asia / Japan |
| EPI_ISL_690968 | 4/18/2020 | 12/10/2020 Asia / Japan |
| EPI_ISL_690969 | 4/21/2020 | 12/10/2020 Asia / Japan |
| EPI_ISL_690970 | 4/21/2020 | 12/10/2020 Asia / Japan |
| EPI_ISL_690971 | 4/21/2020 | 12/10/2020 Asia / Japan |
| EPI_ISL_690972 | 4/24/2020 | 12/10/2020 Asia / Japan |
| EPI_ISL_690973 | 5/4/2020  | 12/10/2020 Asia / Japan |
| EPI_ISL_690974 | 5/4/2020  | 12/10/2020 Asia / Japan |
| EPI_ISL_690975 | 5/14/2020 | 12/10/2020 Asia / Japan |
| EPI_ISL_690976 | 5/8/2020  | 12/10/2020 Asia / Japan |

|                |           |                                     |
|----------------|-----------|-------------------------------------|
| EPI_ISL_690977 | 5/7/2020  | 12/10/2020 Asia / Japan             |
| EPI_ISL_690978 | 4/20/2020 | 12/10/2020 Asia / Japan             |
| EPI_ISL_690979 | 4/20/2020 | 12/10/2020 Asia / Japan             |
| EPI_ISL_690980 | 4/20/2020 | 12/10/2020 Asia / Japan             |
| EPI_ISL_690981 | 6/22/2020 | 12/10/2020 Asia / Japan / Hyogo     |
| EPI_ISL_690982 | 4/9/2020  | 12/10/2020 Asia / Japan / Fukuoka   |
| EPI_ISL_690983 | 4/10/2020 | 12/10/2020 Asia / Japan / Fukuoka   |
| EPI_ISL_690984 | 4/13/2020 | 12/10/2020 Asia / Japan / Fukuoka   |
| EPI_ISL_690985 | 4/13/2020 | 12/10/2020 Asia / Japan / Fukuoka   |
| EPI_ISL_690986 | 4/16/2020 | 12/10/2020 Asia / Japan / Fukuoka   |
| EPI_ISL_690987 | 3/3/2020  | 12/10/2020 Asia / Japan / Yamaguchi |
| EPI_ISL_690988 | 3/5/2020  | 12/10/2020 Asia / Japan / Yamaguchi |
| EPI_ISL_690989 | 3/21/2020 | 12/10/2020 Asia / Japan / Yamaguchi |
| EPI_ISL_690990 | 3/24/2020 | 12/10/2020 Asia / Japan / Yamaguchi |
| EPI_ISL_690991 | 4/2/2020  | 12/10/2020 Asia / Japan / Yamaguchi |
| EPI_ISL_690992 | 4/3/2020  | 12/10/2020 Asia / Japan / Yamaguchi |
| EPI_ISL_690993 | 4/5/2020  | 12/10/2020 Asia / Japan / Yamaguchi |
| EPI_ISL_690994 | 4/5/2020  | 12/10/2020 Asia / Japan / Yamaguchi |
| EPI_ISL_690995 | 4/5/2020  | 12/10/2020 Asia / Japan / Yamaguchi |
| EPI_ISL_690996 | 4/5/2020  | 12/10/2020 Asia / Japan / Yamaguchi |
| EPI_ISL_690997 | 4/6/2020  | 12/10/2020 Asia / Japan / Yamaguchi |
| EPI_ISL_690998 | 4/6/2020  | 12/10/2020 Asia / Japan / Yamaguchi |
| EPI_ISL_690999 | 4/7/2020  | 12/10/2020 Asia / Japan / Yamaguchi |
| EPI_ISL_691000 | 4/7/2020  | 12/10/2020 Asia / Japan / Yamaguchi |
| EPI_ISL_691001 | 4/11/2020 | 12/10/2020 Asia / Japan / Yamaguchi |
| EPI_ISL_691002 | 4/12/2020 | 12/10/2020 Asia / Japan / Yamaguchi |
| EPI_ISL_691003 | 4/12/2020 | 12/10/2020 Asia / Japan / Yamaguchi |
| EPI_ISL_691004 | 4/12/2020 | 12/10/2020 Asia / Japan / Yamaguchi |
| EPI_ISL_691005 | 4/14/2020 | 12/10/2020 Asia / Japan / Yamaguchi |
| EPI_ISL_691006 | 4/15/2020 | 12/10/2020 Asia / Japan / Yamaguchi |
| EPI_ISL_691007 | 4/15/2020 | 12/10/2020 Asia / Japan / Yamaguchi |
| EPI_ISL_691008 | 4/15/2020 | 12/10/2020 Asia / Japan / Yamaguchi |
| EPI_ISL_691009 | 4/16/2020 | 12/10/2020 Asia / Japan / Yamaguchi |
| EPI_ISL_691010 | 4/16/2020 | 12/10/2020 Asia / Japan / Yamaguchi |
| EPI_ISL_691011 | 4/27/2020 | 12/10/2020 Asia / Japan / Yamaguchi |
| EPI_ISL_691012 | 5/3/2020  | 12/10/2020 Asia / Japan / Yamaguchi |
| EPI_ISL_691013 | 5/4/2020  | 12/10/2020 Asia / Japan / Yamaguchi |
| EPI_ISL_691014 | 5/4/2020  | 12/10/2020 Asia / Japan / Yamaguchi |
| EPI_ISL_691015 | 3/4/2020  | 12/10/2020 Asia / Japan / Kanagawa  |
| EPI_ISL_691016 | 3/11/2020 | 12/10/2020 Asia / Japan / Kanagawa  |
| EPI_ISL_691017 | 3/21/2020 | 12/10/2020 Asia / Japan / Kanagawa  |
| EPI_ISL_691018 | 3/21/2020 | 12/10/2020 Asia / Japan / Kanagawa  |
| EPI_ISL_691019 | 3/24/2020 | 12/10/2020 Asia / Japan / Kanagawa  |
| EPI_ISL_691020 | 3/25/2020 | 12/10/2020 Asia / Japan / Kanagawa  |
| EPI_ISL_691021 | 3/24/2020 | 12/10/2020 Asia / Japan / Kanagawa  |
| EPI_ISL_691022 | 3/26/2020 | 12/10/2020 Asia / Japan / Kanagawa  |
| EPI_ISL_691023 | 3/27/2020 | 12/10/2020 Asia / Japan / Kanagawa  |











|                |           |                                    |
|----------------|-----------|------------------------------------|
| EPI_ISL_691212 | 4/23/2020 | 12/10/2020 Asia / Japan / Toyama   |
| EPI_ISL_691213 | 4/23/2020 | 12/10/2020 Asia / Japan / Toyama   |
| EPI_ISL_691214 | 4/23/2020 | 12/10/2020 Asia / Japan / Toyama   |
| EPI_ISL_691215 | 4/27/2020 | 12/10/2020 Asia / Japan / Toyama   |
| EPI_ISL_691216 | 4/25/2020 | 12/10/2020 Asia / Japan / Toyama   |
| EPI_ISL_691217 | 4/24/2020 | 12/10/2020 Asia / Japan / Toyama   |
| EPI_ISL_691218 | 4/24/2020 | 12/10/2020 Asia / Japan / Toyama   |
| EPI_ISL_691219 | 4/29/2020 | 12/10/2020 Asia / Japan / Toyama   |
| EPI_ISL_691220 | 4/28/2020 | 12/10/2020 Asia / Japan / Toyama   |
| EPI_ISL_691221 | 4/28/2020 | 12/10/2020 Asia / Japan / Toyama   |
| EPI_ISL_691222 | 4/28/2020 | 12/10/2020 Asia / Japan / Toyama   |
| EPI_ISL_691223 | 4/28/2020 | 12/10/2020 Asia / Japan / Toyama   |
| EPI_ISL_691224 | 4/28/2020 | 12/10/2020 Asia / Japan / Toyama   |
| EPI_ISL_691225 | 4/27/2020 | 12/10/2020 Asia / Japan / Toyama   |
| EPI_ISL_691226 | 5/1/2020  | 12/10/2020 Asia / Japan / Toyama   |
| EPI_ISL_691227 | 5/1/2020  | 12/10/2020 Asia / Japan / Toyama   |
| EPI_ISL_691228 | 4/30/2020 | 12/10/2020 Asia / Japan / Toyama   |
| EPI_ISL_691229 | 4/30/2020 | 12/10/2020 Asia / Japan / Toyama   |
| EPI_ISL_691230 | 4/30/2020 | 12/10/2020 Asia / Japan / Toyama   |
| EPI_ISL_691231 | 4/30/2020 | 12/10/2020 Asia / Japan / Toyama   |
| EPI_ISL_691232 | 5/4/2020  | 12/10/2020 Asia / Japan / Toyama   |
| EPI_ISL_691233 | 5/4/2020  | 12/10/2020 Asia / Japan / Toyama   |
| EPI_ISL_691234 | 5/3/2020  | 12/10/2020 Asia / Japan / Toyama   |
| EPI_ISL_691235 | 5/8/2020  | 12/10/2020 Asia / Japan / Toyama   |
| EPI_ISL_691236 | 5/8/2020  | 12/10/2020 Asia / Japan / Toyama   |
| EPI_ISL_691237 | 5/7/2020  | 12/10/2020 Asia / Japan / Toyama   |
| EPI_ISL_691238 | 5/6/2020  | 12/10/2020 Asia / Japan / Toyama   |
| EPI_ISL_691239 | 5/17/2020 | 12/10/2020 Asia / Japan / Toyama   |
| EPI_ISL_691240 | 5/15/2020 | 12/10/2020 Asia / Japan / Toyama   |
| EPI_ISL_691241 | 5/11/2020 | 12/10/2020 Asia / Japan / Toyama   |
| EPI_ISL_691242 | 3/29/2020 | 12/10/2020 Asia / Japan / Miyagi   |
| EPI_ISL_691243 | 4/7/2020  | 12/10/2020 Asia / Japan / Miyagi   |
| EPI_ISL_691244 | 2020-04   | 12/10/2020 Asia / Japan / Miyagi   |
| EPI_ISL_691245 | 4/12/2020 | 12/10/2020 Asia / Japan / Miyagi   |
| EPI_ISL_691246 | 4/13/2020 | 12/10/2020 Asia / Japan / Miyagi   |
| EPI_ISL_691247 | 4/14/2020 | 12/10/2020 Asia / Japan / Miyagi   |
| EPI_ISL_691248 | 5/18/2020 | 12/10/2020 Asia / Japan / Toyama   |
| EPI_ISL_691249 | 4/15/2020 | 12/10/2020 Asia / Japan / Miyagi   |
| EPI_ISL_691250 | 4/15/2020 | 12/10/2020 Asia / Japan / Miyagi   |
| EPI_ISL_691251 | 4/20/2020 | 12/10/2020 Asia / Japan / Miyagi   |
| EPI_ISL_691252 | 6/17/2020 | 12/10/2020 Asia / Japan / Miyagi   |
| EPI_ISL_691253 | 6/21/2020 | 12/10/2020 Asia / Japan / Miyagi   |
| EPI_ISL_691254 | 6/25/2020 | 12/10/2020 Asia / Japan / Miyagi   |
| EPI_ISL_691255 | 6/27/2020 | 12/10/2020 Asia / Japan / Miyagi   |
| EPI_ISL_691256 | 6/27/2020 | 12/10/2020 Asia / Japan / Miyagi   |
| EPI_ISL_691257 | 4/8/2020  | 12/10/2020 Asia / Japan / Fukuoka  |
| EPI_ISL_691258 | 4/30/2020 | 12/10/2020 Asia / Japan / Hokkaido |

|                |           |                                    |
|----------------|-----------|------------------------------------|
| EPI_ISL_691259 | 5/1/2020  | 12/10/2020 Asia / Japan / Hokkaido |
| EPI_ISL_691260 | 6/15/2020 | 12/10/2020 Asia / Japan / Hokkaido |
| EPI_ISL_691261 | 6/16/2020 | 12/10/2020 Asia / Japan / Hokkaido |
| EPI_ISL_691262 | 6/16/2020 | 12/10/2020 Asia / Japan / Hokkaido |
| EPI_ISL_691263 | 6/17/2020 | 12/10/2020 Asia / Japan / Hokkaido |
| EPI_ISL_691264 | 6/19/2020 | 12/10/2020 Asia / Japan / Hokkaido |
| EPI_ISL_691265 | 6/22/2020 | 12/10/2020 Asia / Japan / Hokkaido |
| EPI_ISL_691266 | 6/24/2020 | 12/10/2020 Asia / Japan / Hokkaido |
| EPI_ISL_691267 | 6/24/2020 | 12/10/2020 Asia / Japan / Hokkaido |
| EPI_ISL_691268 | 6/26/2020 | 12/10/2020 Asia / Japan / Hokkaido |
| EPI_ISL_691269 | 6/27/2020 | 12/10/2020 Asia / Japan / Hokkaido |
| EPI_ISL_691270 | 6/22/2020 | 12/10/2020 Asia / Japan / Ibaraki  |
| EPI_ISL_691271 | 6/20/2020 | 12/10/2020 Asia / Japan / Ibaraki  |
| EPI_ISL_691272 | 6/1/2020  | 12/10/2020 Asia / Japan / Ibaraki  |
| EPI_ISL_691273 | 5/1/2020  | 12/10/2020 Asia / Japan / Ibaraki  |
| EPI_ISL_691274 | 5/1/2020  | 12/10/2020 Asia / Japan / Ibaraki  |
| EPI_ISL_691275 | 6/26/2020 | 12/10/2020 Asia / Japan / Ibaraki  |
| EPI_ISL_691276 | 6/26/2020 | 12/10/2020 Asia / Japan / Ibaraki  |
| EPI_ISL_691277 | 6/26/2020 | 12/10/2020 Asia / Japan / Ibaraki  |
| EPI_ISL_691278 | 6/27/2020 | 12/10/2020 Asia / Japan / Ibaraki  |
| EPI_ISL_691279 | 6/20/2020 | 12/10/2020 Asia / Japan / Saitama  |
| EPI_ISL_691280 | 6/24/2020 | 12/10/2020 Asia / Japan / Saitama  |
| EPI_ISL_691281 | 6/25/2020 | 12/10/2020 Asia / Japan / Saitama  |
| EPI_ISL_691282 | 6/26/2020 | 12/10/2020 Asia / Japan / Saitama  |
| EPI_ISL_691283 | 6/21/2020 | 12/10/2020 Asia / Japan / Saitama  |
| EPI_ISL_691284 | 6/5/2020  | 12/10/2020 Asia / Japan / Chiba    |
| EPI_ISL_691285 | 6/5/2020  | 12/10/2020 Asia / Japan / Chiba    |
| EPI_ISL_691286 | 6/5/2020  | 12/10/2020 Asia / Japan / Chiba    |
| EPI_ISL_691287 | 6/18/2020 | 12/10/2020 Asia / Japan / Chiba    |
| EPI_ISL_691288 | 6/29/2020 | 12/10/2020 Asia / Japan / Chiba    |
| EPI_ISL_691289 | 3/27/2020 | 12/10/2020 Asia / Japan / Fukuoka  |
| EPI_ISL_691290 | 3/27/2020 | 12/10/2020 Asia / Japan / Fukuoka  |
| EPI_ISL_691291 | 3/29/2020 | 12/10/2020 Asia / Japan / Fukuoka  |
| EPI_ISL_691292 | 3/30/2020 | 12/10/2020 Asia / Japan / Fukuoka  |
| EPI_ISL_691293 | 3/30/2020 | 12/10/2020 Asia / Japan / Fukuoka  |
| EPI_ISL_691294 | 3/30/2020 | 12/10/2020 Asia / Japan / Fukuoka  |
| EPI_ISL_691295 | 3/30/2020 | 12/10/2020 Asia / Japan / Fukuoka  |
| EPI_ISL_691296 | 3/30/2020 | 12/10/2020 Asia / Japan / Fukuoka  |
| EPI_ISL_691297 | 3/31/2020 | 12/10/2020 Asia / Japan / Fukuoka  |
| EPI_ISL_691298 | 3/31/2020 | 12/10/2020 Asia / Japan / Fukuoka  |
| EPI_ISL_691299 | 3/31/2020 | 12/10/2020 Asia / Japan / Fukuoka  |
| EPI_ISL_691300 | 4/1/2020  | 12/10/2020 Asia / Japan / Fukuoka  |
| EPI_ISL_691301 | 4/1/2020  | 12/10/2020 Asia / Japan / Fukuoka  |
| EPI_ISL_691302 | 4/1/2020  | 12/10/2020 Asia / Japan / Fukuoka  |
| EPI_ISL_691303 | 4/1/2020  | 12/10/2020 Asia / Japan / Fukuoka  |
| EPI_ISL_691304 | 4/3/2020  | 12/10/2020 Asia / Japan / Fukuoka  |
| EPI_ISL_691305 | 4/3/2020  | 12/10/2020 Asia / Japan / Fukuoka  |



|                |           |            |                          |
|----------------|-----------|------------|--------------------------|
| EPI_ISL_691353 | 4/6/2020  | 12/10/2020 | Asia / Japan / Fukuoka   |
| EPI_ISL_691354 | 4/6/2020  | 12/10/2020 | Asia / Japan / Fukuoka   |
| EPI_ISL_691355 | 4/6/2020  | 12/10/2020 | Asia / Japan / Fukuoka   |
| EPI_ISL_691356 | 4/6/2020  | 12/10/2020 | Asia / Japan / Fukuoka   |
| EPI_ISL_691357 | 4/6/2020  | 12/10/2020 | Asia / Japan / Fukuoka   |
| EPI_ISL_691358 | 4/6/2020  | 12/10/2020 | Asia / Japan / Fukuoka   |
| EPI_ISL_691359 | 4/6/2020  | 12/10/2020 | Asia / Japan / Fukuoka   |
| EPI_ISL_691360 | 4/6/2020  | 12/10/2020 | Asia / Japan / Fukuoka   |
| EPI_ISL_691361 | 4/6/2020  | 12/10/2020 | Asia / Japan / Fukuoka   |
| EPI_ISL_691362 | 4/6/2020  | 12/10/2020 | Asia / Japan / Fukuoka   |
| EPI_ISL_691363 | 4/6/2020  | 12/10/2020 | Asia / Japan / Fukuoka   |
| EPI_ISL_691364 | 6/9/2020  | 12/10/2020 | Asia / Japan / Saitama   |
| EPI_ISL_691365 | 6/22/2020 | 12/10/2020 | Asia / Japan / Saitama   |
| EPI_ISL_691366 | 6/23/2020 | 12/10/2020 | Asia / Japan / Saitama   |
| EPI_ISL_691367 | 6/24/2020 | 12/10/2020 | Asia / Japan / Saitama   |
| EPI_ISL_691368 | 6/25/2020 | 12/10/2020 | Asia / Japan / Saitama   |
| EPI_ISL_691369 | 6/25/2020 | 12/10/2020 | Asia / Japan / Saitama   |
| EPI_ISL_691370 | 6/26/2020 | 12/10/2020 | Asia / Japan / Saitama   |
| EPI_ISL_691371 | 6/27/2020 | 12/10/2020 | Asia / Japan / Saitama   |
| EPI_ISL_691372 | 6/28/2020 | 12/10/2020 | Asia / Japan / Saitama   |
| EPI_ISL_691373 | 6/29/2020 | 12/10/2020 | Asia / Japan / Saitama   |
| EPI_ISL_691374 | 6/30/2020 | 12/10/2020 | Asia / Japan / Saitama   |
| EPI_ISL_691375 | 6/30/2020 | 12/10/2020 | Asia / Japan / Saitama   |
| EPI_ISL_691376 | 6/30/2020 | 12/10/2020 | Asia / Japan / Saitama   |
| EPI_ISL_691377 | 6/30/2020 | 12/10/2020 | Asia / Japan / Saitama   |
| EPI_ISL_691378 | 7/1/2020  | 12/10/2020 | Asia / Japan / Saitama   |
| EPI_ISL_691379 | 3/30/2020 | 12/10/2020 | Asia / Japan / Fukui     |
| EPI_ISL_691380 | 3/30/2020 | 12/10/2020 | Asia / Japan / Fukui     |
| EPI_ISL_691381 | 3/30/2020 | 12/10/2020 | Asia / Japan / Fukui     |
| EPI_ISL_691382 | 3/31/2020 | 12/10/2020 | Asia / Japan / Fukui     |
| EPI_ISL_691383 | 3/31/2020 | 12/10/2020 | Asia / Japan / Fukui     |
| EPI_ISL_691384 | 4/1/2020  | 12/10/2020 | Asia / Japan / Fukui     |
| EPI_ISL_691385 | 4/1/2020  | 12/10/2020 | Asia / Japan / Fukui     |
| EPI_ISL_691386 | 7/1/2020  | 12/10/2020 | Asia / Japan / Kagoshima |
| EPI_ISL_691387 | 7/2/2020  | 12/10/2020 | Asia / Japan / Kagoshima |
| EPI_ISL_691388 | 7/2/2020  | 12/10/2020 | Asia / Japan / Kagoshima |
| EPI_ISL_691389 | 7/2/2020  | 12/10/2020 | Asia / Japan / Kagoshima |
| EPI_ISL_691390 | 7/2/2020  | 12/10/2020 | Asia / Japan / Kagoshima |
| EPI_ISL_691391 | 7/2/2020  | 12/10/2020 | Asia / Japan / Kagoshima |
| EPI_ISL_691392 | 7/2/2020  | 12/10/2020 | Asia / Japan / Kagoshima |
| EPI_ISL_691393 | 7/2/2020  | 12/10/2020 | Asia / Japan / Kagoshima |
| EPI_ISL_691394 | 7/1/2020  | 12/10/2020 | Asia / Japan / Kagoshima |
| EPI_ISL_691395 | 3/30/2020 | 12/10/2020 | Asia / Japan / Ishikawa  |
| EPI_ISL_691396 | 4/2/2020  | 12/10/2020 | Asia / Japan / Ishikawa  |
| EPI_ISL_691397 | 4/2/2020  | 12/10/2020 | Asia / Japan / Ishikawa  |
| EPI_ISL_691398 | 4/2/2020  | 12/10/2020 | Asia / Japan / Ishikawa  |
| EPI_ISL_691399 | 4/3/2020  | 12/10/2020 | Asia / Japan / Ishikawa  |









|                |           |                                     |
|----------------|-----------|-------------------------------------|
| EPI_ISL_691541 | 4/23/2020 | 12/10/2020 Asia / Japan / Osaka     |
| EPI_ISL_691542 | 4/30/2020 | 12/10/2020 Asia / Japan / Osaka     |
| EPI_ISL_691543 | 7/1/2020  | 12/10/2020 Asia / Japan / Osaka     |
| EPI_ISL_691544 | 7/3/2020  | 12/10/2020 Asia / Japan / Osaka     |
| EPI_ISL_691545 | 7/6/2020  | 12/10/2020 Asia / Japan / Osaka     |
| EPI_ISL_691546 | 6/28/2020 | 12/10/2020 Asia / Japan / Miyagi    |
| EPI_ISL_691547 | 7/3/2020  | 12/10/2020 Asia / Japan / Miyagi    |
| EPI_ISL_691548 | 6/26/2020 | 12/10/2020 Asia / Japan / Saitama   |
| EPI_ISL_691549 | 6/29/2020 | 12/10/2020 Asia / Japan / Saitama   |
| EPI_ISL_691550 | 7/4/2020  | 12/10/2020 Asia / Japan / Fukuoka   |
| EPI_ISL_691551 | 7/4/2020  | 12/10/2020 Asia / Japan / Fukuoka   |
| EPI_ISL_691552 | 6/30/2020 | 12/10/2020 Asia / Japan / Hiroshima |
| EPI_ISL_691553 | 6/3/2020  | 12/10/2020 Asia / Japan / Chiba     |
| EPI_ISL_691554 | 6/11/2020 | 12/10/2020 Asia / Japan / Chiba     |
| EPI_ISL_691555 | 6/30/2020 | 12/10/2020 Asia / Japan / Fukuoka   |
| EPI_ISL_691556 | 7/2/2020  | 12/10/2020 Asia / Japan / Fukuoka   |
| EPI_ISL_691557 | 7/3/2020  | 12/10/2020 Asia / Japan / Fukuoka   |
| EPI_ISL_691558 | 7/3/2020  | 12/10/2020 Asia / Japan / Fukuoka   |
| EPI_ISL_691559 | 6/22/2020 | 12/10/2020 Asia / Japan / Wakayama  |
| EPI_ISL_691560 | 7/8/2020  | 12/10/2020 Asia / Japan / Wakayama  |
| EPI_ISL_691561 | 7/6/2020  | 12/10/2020 Asia / Japan / Saitama   |
| EPI_ISL_691562 | 7/2/2020  | 12/10/2020 Asia / Japan / Saitama   |
| EPI_ISL_691563 | 7/2/2020  | 12/10/2020 Asia / Japan / Saitama   |
| EPI_ISL_691564 | 7/2/2020  | 12/10/2020 Asia / Japan / Saitama   |
| EPI_ISL_691565 | 7/2/2020  | 12/10/2020 Asia / Japan / Saitama   |
| EPI_ISL_691566 | 7/3/2020  | 12/10/2020 Asia / Japan / Saitama   |
| EPI_ISL_691567 | 7/3/2020  | 12/10/2020 Asia / Japan / Saitama   |
| EPI_ISL_691568 | 7/2/2020  | 12/10/2020 Asia / Japan / Kagoshima |
| EPI_ISL_691569 | 7/3/2020  | 12/10/2020 Asia / Japan / Kagoshima |
| EPI_ISL_691570 | 7/3/2020  | 12/10/2020 Asia / Japan / Kagoshima |
| EPI_ISL_691571 | 7/3/2020  | 12/10/2020 Asia / Japan / Kagoshima |
| EPI_ISL_691572 | 7/3/2020  | 12/10/2020 Asia / Japan / Kagoshima |
| EPI_ISL_691573 | 7/3/2020  | 12/10/2020 Asia / Japan / Kagoshima |
| EPI_ISL_691574 | 7/3/2020  | 12/10/2020 Asia / Japan / Kagoshima |
| EPI_ISL_691575 | 7/3/2020  | 12/10/2020 Asia / Japan / Kagoshima |
| EPI_ISL_691576 | 7/3/2020  | 12/10/2020 Asia / Japan / Kagoshima |
| EPI_ISL_691577 | 7/3/2020  | 12/10/2020 Asia / Japan / Kagoshima |
| EPI_ISL_691578 | 7/3/2020  | 12/10/2020 Asia / Japan / Kagoshima |
| EPI_ISL_691579 | 7/3/2020  | 12/10/2020 Asia / Japan / Kagoshima |
| EPI_ISL_691580 | 7/3/2020  | 12/10/2020 Asia / Japan / Kagoshima |
| EPI_ISL_691581 | 7/3/2020  | 12/10/2020 Asia / Japan / Kagoshima |
| EPI_ISL_691582 | 7/3/2020  | 12/10/2020 Asia / Japan / Kagoshima |
| EPI_ISL_691583 | 7/3/2020  | 12/10/2020 Asia / Japan / Kagoshima |
| EPI_ISL_691584 | 7/3/2020  | 12/10/2020 Asia / Japan / Kagoshima |
| EPI_ISL_691585 | 7/3/2020  | 12/10/2020 Asia / Japan / Kagoshima |
| EPI_ISL_691586 | 7/3/2020  | 12/10/2020 Asia / Japan / Kagoshima |
| EPI_ISL_691587 | 7/3/2020  | 12/10/2020 Asia / Japan / Kagoshima |

|                |            |                                                                  |
|----------------|------------|------------------------------------------------------------------|
| EPI_ISL_691588 | 7/3/2020   | 12/10/2020 Asia / Japan / Kagoshima                              |
| EPI_ISL_691589 | 7/4/2020   | 12/10/2020 Asia / Japan / Kagoshima                              |
| EPI_ISL_691590 | 7/4/2020   | 12/10/2020 Asia / Japan / Kagoshima                              |
| EPI_ISL_691591 | 7/4/2020   | 12/10/2020 Asia / Japan / Kagoshima                              |
| EPI_ISL_691592 | 7/4/2020   | 12/10/2020 Asia / Japan / Kagoshima                              |
| EPI_ISL_691593 | 7/4/2020   | 12/10/2020 Asia / Japan / Kagoshima                              |
| EPI_ISL_691594 | 7/4/2020   | 12/10/2020 Asia / Japan / Kagoshima                              |
| EPI_ISL_691595 | 7/4/2020   | 12/10/2020 Asia / Japan / Kagoshima                              |
| EPI_ISL_691596 | 7/4/2020   | 12/10/2020 Asia / Japan / Kagoshima                              |
| EPI_ISL_691597 | 7/4/2020   | 12/10/2020 Asia / Japan / Kagoshima                              |
| EPI_ISL_691598 | 7/4/2020   | 12/10/2020 Asia / Japan / Kagoshima                              |
| EPI_ISL_691599 | 7/5/2020   | 12/10/2020 Asia / Japan / Kagoshima                              |
| EPI_ISL_691600 | 7/6/2020   | 12/10/2020 Asia / Japan / Kagoshima                              |
| EPI_ISL_691601 | 7/6/2020   | 12/10/2020 Asia / Japan / Kagoshima                              |
| EPI_ISL_691602 | 7/6/2020   | 12/10/2020 Asia / Japan / Kagoshima                              |
| EPI_ISL_691603 | 7/2/2020   | 12/10/2020 Asia / Japan / Kagoshima                              |
| EPI_ISL_691604 | 7/3/2020   | 12/10/2020 Asia / Japan / Kagoshima                              |
| EPI_ISL_691605 | 7/3/2020   | 12/10/2020 Asia / Japan / Kagoshima                              |
| EPI_ISL_691606 | 7/3/2020   | 12/10/2020 Asia / Japan / Kagoshima                              |
| EPI_ISL_691607 | 7/3/2020   | 12/10/2020 Asia / Japan / Kagoshima                              |
| EPI_ISL_691608 | 7/3/2020   | 12/10/2020 Asia / Japan / Kagoshima                              |
| EPI_ISL_691609 | 7/3/2020   | 12/10/2020 Asia / Japan / Kagoshima                              |
| EPI_ISL_691610 | 7/3/2020   | 12/10/2020 Asia / Japan / Kagoshima                              |
| EPI_ISL_691611 | 7/3/2020   | 12/10/2020 Asia / Japan / Kagoshima                              |
| EPI_ISL_691663 | 6/15/2020  | 12/10/2020 Europe / Spain / Balearic Islands / Palma de Mallorca |
| EPI_ISL_691664 | 6/16/2020  | 12/10/2020 Europe / Spain / Balearic Islands / Palma de Mallorca |
| EPI_ISL_691665 | 6/28/2020  | 12/10/2020 Europe / Spain / Balearic Islands / Palma de Mallorca |
| EPI_ISL_691667 | 9/30/2020  | 12/10/2020 Europe / Spain / Balearic Islands / Palma de Mallorca |
| EPI_ISL_691668 | 9/30/2020  | 12/10/2020 Europe / Spain / Balearic Islands / Palma de Mallorca |
| EPI_ISL_691669 | 10/6/2020  | 12/10/2020 Europe / Spain / Balearic Islands / Palma de Mallorca |
| EPI_ISL_691670 | 10/6/2020  | 12/10/2020 Europe / Spain / Balearic Islands / Palma de Mallorca |
| EPI_ISL_691671 | 10/6/2020  | 12/10/2020 Europe / Spain / Balearic Islands / Palma de Mallorca |
| EPI_ISL_691672 | 10/6/2020  | 12/10/2020 Europe / Spain / Balearic Islands / Palma de Mallorca |
| EPI_ISL_691673 | 10/6/2020  | 12/10/2020 Europe / Spain / Balearic Islands / Palma de Mallorca |
| EPI_ISL_691674 | 10/15/2020 | 12/10/2020 Europe / Spain / Balearic Islands / Palma de Mallorca |
| EPI_ISL_691675 | 10/17/2020 | 12/10/2020 Europe / Spain / Balearic Islands / Palma de Mallorca |
| EPI_ISL_691676 | 10/17/2020 | 12/10/2020 Europe / Spain / Balearic Islands / Palma de Mallorca |
| EPI_ISL_691678 | 9/30/2020  | 12/10/2020 Europe / Spain / Balearic Islands / Palma de Mallorca |
| EPI_ISL_691679 | 10/17/2020 | 12/10/2020 Europe / Spain / Balearic Islands / Palma de Mallorca |
| EPI_ISL_691680 | 7/20/2020  | 12/10/2020 Europe / Spain / Balearic Islands / Palma de Mallorca |
| EPI_ISL_691681 | 3/3/2020   | 12/10/2020 Europe / Spain / Castilla-La Mancha                   |
| EPI_ISL_691682 | 5/9/2020   | 12/10/2020 Europe / Spain / Castilla-La Mancha                   |
| EPI_ISL_691683 | 5/11/2020  | 12/10/2020 Europe / Spain / Castilla-La Mancha                   |
| EPI_ISL_691684 | 5/13/2020  | 12/10/2020 Europe / Spain / Castilla-La Mancha                   |
| EPI_ISL_691685 | 10/9/2020  | 12/10/2020 Europe / Spain / Castilla y Leon                      |
| EPI_ISL_691686 | 10/14/2020 | 12/10/2020 Europe / Spain / Ceuta                                |
| EPI_ISL_691687 | 10/14/2020 | 12/10/2020 Europe / Spain / Ceuta                                |



|                |           |                                     |
|----------------|-----------|-------------------------------------|
| EPI_ISL_691752 | 7/1/2020  | 12/10/2020 Asia / Japan / Hokkaido  |
| EPI_ISL_691753 | 7/27/2020 | 12/10/2020 Asia / Japan / Osaka     |
| EPI_ISL_691754 | 7/2/2020  | 12/10/2020 Asia / Japan / Shizuoka  |
| EPI_ISL_691757 | 4/24/2020 | 12/10/2020 Asia / Japan / Fukuoka   |
| EPI_ISL_691758 | 4/25/2020 | 12/10/2020 Asia / Japan / Fukuoka   |
| EPI_ISL_691759 | 7/3/2020  | 12/10/2020 Asia / Japan / Kagoshima |
| EPI_ISL_691760 | 7/3/2020  | 12/10/2020 Asia / Japan / Kagoshima |
| EPI_ISL_691761 | 7/3/2020  | 12/10/2020 Asia / Japan / Kagoshima |
| EPI_ISL_691762 | 7/4/2020  | 12/10/2020 Asia / Japan / Kagoshima |
| EPI_ISL_691763 | 7/6/2020  | 12/10/2020 Asia / Japan / Kagoshima |
| EPI_ISL_691764 | 7/8/2020  | 12/10/2020 Asia / Japan / Fukuoka   |
| EPI_ISL_691765 | 7/8/2020  | 12/10/2020 Asia / Japan / Fukuoka   |
| EPI_ISL_691766 | 6/23/2020 | 12/10/2020 Asia / Japan / Saitama   |
| EPI_ISL_691767 | 4/6/2020  | 12/10/2020 Asia / Japan / Fukui     |
| EPI_ISL_691768 | 6/3/2020  | 12/10/2020 Asia / Japan / Tokyo     |
| EPI_ISL_691769 | 6/3/2020  | 12/10/2020 Asia / Japan / Tokyo     |
| EPI_ISL_691770 | 6/3/2020  | 12/10/2020 Asia / Japan / Tokyo     |
| EPI_ISL_691771 | 6/3/2020  | 12/10/2020 Asia / Japan / Tokyo     |
| EPI_ISL_691772 | 6/3/2020  | 12/10/2020 Asia / Japan / Tokyo     |
| EPI_ISL_691773 | 6/3/2020  | 12/10/2020 Asia / Japan / Tokyo     |
| EPI_ISL_691774 | 6/3/2020  | 12/10/2020 Asia / Japan / Tokyo     |
| EPI_ISL_691775 | 6/3/2020  | 12/10/2020 Asia / Japan / Tokyo     |
| EPI_ISL_691776 | 6/3/2020  | 12/10/2020 Asia / Japan / Tokyo     |
| EPI_ISL_691777 | 6/8/2020  | 12/10/2020 Asia / Japan / Tokyo     |
| EPI_ISL_691778 | 6/11/2020 | 12/10/2020 Asia / Japan / Tokyo     |
| EPI_ISL_691779 | 6/11/2020 | 12/10/2020 Asia / Japan / Tokyo     |
| EPI_ISL_691780 | 6/11/2020 | 12/10/2020 Asia / Japan / Tokyo     |
| EPI_ISL_691781 | 6/11/2020 | 12/10/2020 Asia / Japan / Tokyo     |
| EPI_ISL_691782 | 6/11/2020 | 12/10/2020 Asia / Japan / Tokyo     |
| EPI_ISL_691783 | 6/11/2020 | 12/10/2020 Asia / Japan / Tokyo     |
| EPI_ISL_691784 | 6/11/2020 | 12/10/2020 Asia / Japan / Tokyo     |
| EPI_ISL_691785 | 6/11/2020 | 12/10/2020 Asia / Japan / Tokyo     |
| EPI_ISL_691786 | 6/11/2020 | 12/10/2020 Asia / Japan / Tokyo     |
| EPI_ISL_691787 | 6/11/2020 | 12/10/2020 Asia / Japan / Tokyo     |
| EPI_ISL_691788 | 6/11/2020 | 12/10/2020 Asia / Japan / Tokyo     |
| EPI_ISL_691789 | 6/12/2020 | 12/10/2020 Asia / Japan / Tokyo     |
| EPI_ISL_691790 | 6/12/2020 | 12/10/2020 Asia / Japan / Tokyo     |
| EPI_ISL_691791 | 6/12/2020 | 12/10/2020 Asia / Japan / Tokyo     |
| EPI_ISL_691792 | 6/12/2020 | 12/10/2020 Asia / Japan / Tokyo     |
| EPI_ISL_691793 | 6/12/2020 | 12/10/2020 Asia / Japan / Tokyo     |
| EPI_ISL_691794 | 6/12/2020 | 12/10/2020 Asia / Japan / Tokyo     |
| EPI_ISL_691795 | 6/12/2020 | 12/10/2020 Asia / Japan / Tokyo     |
| EPI_ISL_691796 | 6/12/2020 | 12/10/2020 Asia / Japan / Tokyo     |
| EPI_ISL_691797 | 6/12/2020 | 12/10/2020 Asia / Japan / Tokyo     |
| EPI_ISL_691798 | 6/12/2020 | 12/10/2020 Asia / Japan / Tokyo     |
| EPI_ISL_691799 | 6/12/2020 | 12/10/2020 Asia / Japan / Tokyo     |
| EPI_ISL_691800 | 6/12/2020 | 12/10/2020 Asia / Japan / Tokyo     |





|                |           |                                    |
|----------------|-----------|------------------------------------|
| EPI_ISL_691848 | 7/8/2020  | 12/10/2020 Asia / Japan / Miyagi   |
| EPI_ISL_691849 | 7/10/2020 | 12/10/2020 Asia / Japan / Miyagi   |
| EPI_ISL_691850 | 7/10/2020 | 12/10/2020 Asia / Japan / Miyagi   |
| EPI_ISL_691851 | 7/11/2020 | 12/10/2020 Asia / Japan / Miyagi   |
| EPI_ISL_691852 | 7/12/2020 | 12/10/2020 Asia / Japan / Miyagi   |
| EPI_ISL_691853 | 7/12/2020 | 12/10/2020 Asia / Japan / Miyagi   |
| EPI_ISL_691854 | 7/4/2020  | 12/10/2020 Asia / Japan / Saitama  |
| EPI_ISL_691855 | 7/6/2020  | 12/10/2020 Asia / Japan / Saitama  |
| EPI_ISL_691856 | 7/6/2020  | 12/10/2020 Asia / Japan / Saitama  |
| EPI_ISL_691857 | 7/6/2020  | 12/10/2020 Asia / Japan / Saitama  |
| EPI_ISL_691858 | 7/7/2020  | 12/10/2020 Asia / Japan / Saitama  |
| EPI_ISL_691859 | 7/7/2020  | 12/10/2020 Asia / Japan / Saitama  |
| EPI_ISL_691860 | 7/8/2020  | 12/10/2020 Asia / Japan / Saitama  |
| EPI_ISL_691861 | 5/2/2020  | 12/10/2020 Asia / Japan / Hokkaido |
| EPI_ISL_691862 | 6/9/2020  | 12/10/2020 Asia / Japan / Hokkaido |
| EPI_ISL_691863 | 6/30/2020 | 12/10/2020 Asia / Japan / Hokkaido |
| EPI_ISL_691864 | 7/1/2020  | 12/10/2020 Asia / Japan / Hokkaido |
| EPI_ISL_691865 | 7/4/2020  | 12/10/2020 Asia / Japan / Hokkaido |
| EPI_ISL_691866 | 7/5/2020  | 12/10/2020 Asia / Japan / Hokkaido |
| EPI_ISL_691867 | 7/6/2020  | 12/10/2020 Asia / Japan / Hokkaido |
| EPI_ISL_691868 | 7/6/2020  | 12/10/2020 Asia / Japan / Hokkaido |
| EPI_ISL_691869 | 7/7/2020  | 12/10/2020 Asia / Japan / Hokkaido |
| EPI_ISL_691870 | 7/8/2020  | 12/10/2020 Asia / Japan / Hokkaido |
| EPI_ISL_691871 | 7/9/2020  | 12/10/2020 Asia / Japan / Hokkaido |
| EPI_ISL_691872 | 4/7/2020  | 12/10/2020 Asia / Japan / Fukuoka  |
| EPI_ISL_691873 | 4/7/2020  | 12/10/2020 Asia / Japan / Fukuoka  |
| EPI_ISL_691874 | 4/7/2020  | 12/10/2020 Asia / Japan / Fukuoka  |
| EPI_ISL_691875 | 4/7/2020  | 12/10/2020 Asia / Japan / Fukuoka  |
| EPI_ISL_691876 | 4/7/2020  | 12/10/2020 Asia / Japan / Fukuoka  |
| EPI_ISL_691877 | 4/7/2020  | 12/10/2020 Asia / Japan / Fukuoka  |
| EPI_ISL_691878 | 4/7/2020  | 12/10/2020 Asia / Japan / Fukuoka  |
| EPI_ISL_691879 | 4/7/2020  | 12/10/2020 Asia / Japan / Fukuoka  |
| EPI_ISL_691880 | 4/7/2020  | 12/10/2020 Asia / Japan / Fukuoka  |
| EPI_ISL_691881 | 4/8/2020  | 12/10/2020 Asia / Japan / Fukuoka  |
| EPI_ISL_691882 | 4/8/2020  | 12/10/2020 Asia / Japan / Fukuoka  |
| EPI_ISL_691883 | 4/8/2020  | 12/10/2020 Asia / Japan / Fukuoka  |
| EPI_ISL_691884 | 4/8/2020  | 12/10/2020 Asia / Japan / Fukuoka  |
| EPI_ISL_691885 | 4/8/2020  | 12/10/2020 Asia / Japan / Fukuoka  |
| EPI_ISL_691886 | 4/8/2020  | 12/10/2020 Asia / Japan / Fukuoka  |
| EPI_ISL_691887 | 4/8/2020  | 12/10/2020 Asia / Japan / Fukuoka  |
| EPI_ISL_691888 | 4/8/2020  | 12/10/2020 Asia / Japan / Fukuoka  |
| EPI_ISL_691889 | 4/8/2020  | 12/10/2020 Asia / Japan / Fukuoka  |
| EPI_ISL_691890 | 4/8/2020  | 12/10/2020 Asia / Japan / Fukuoka  |
| EPI_ISL_691891 | 4/8/2020  | 12/10/2020 Asia / Japan / Fukuoka  |
| EPI_ISL_691892 | 4/9/2020  | 12/10/2020 Asia / Japan / Fukuoka  |
| EPI_ISL_691893 | 4/9/2020  | 12/10/2020 Asia / Japan / Fukuoka  |
| EPI_ISL_691894 | 4/9/2020  | 12/10/2020 Asia / Japan / Fukuoka  |







|                |           |            |                        |
|----------------|-----------|------------|------------------------|
| EPI_ISL_692036 | 4/26/2020 | 12/10/2020 | Asia / Japan / Fukuoka |
| EPI_ISL_692037 | 4/27/2020 | 12/10/2020 | Asia / Japan / Fukuoka |
| EPI_ISL_692038 | 4/28/2020 | 12/10/2020 | Asia / Japan / Fukuoka |
| EPI_ISL_692039 | 4/28/2020 | 12/10/2020 | Asia / Japan / Fukuoka |
| EPI_ISL_692040 | 4/28/2020 | 12/10/2020 | Asia / Japan / Fukuoka |
| EPI_ISL_692041 | 4/28/2020 | 12/10/2020 | Asia / Japan / Fukuoka |
| EPI_ISL_692042 | 4/29/2020 | 12/10/2020 | Asia / Japan / Fukuoka |
| EPI_ISL_692043 | 4/26/2020 | 12/10/2020 | Asia / Japan / Fukuoka |
| EPI_ISL_692044 | 5/2/2020  | 12/10/2020 | Asia / Japan / Fukuoka |
| EPI_ISL_692045 | 5/5/2020  | 12/10/2020 | Asia / Japan / Fukuoka |
| EPI_ISL_692046 | 5/8/2020  | 12/10/2020 | Asia / Japan / Fukuoka |
| EPI_ISL_692047 | 7/12/2020 | 12/10/2020 | Asia / Japan / Gunma   |
| EPI_ISL_692048 | 7/9/2020  | 12/10/2020 | Asia / Japan / Fukuoka |
| EPI_ISL_692049 | 7/10/2020 | 12/10/2020 | Asia / Japan / Fukuoka |
| EPI_ISL_692050 | 7/2/2020  | 12/10/2020 | Asia / Japan / Fukuoka |
| EPI_ISL_692051 | 7/10/2020 | 12/10/2020 | Asia / Japan / Niigata |
| EPI_ISL_692052 | 7/7/2020  | 12/10/2020 | Asia / Japan / Niigata |
| EPI_ISL_692053 | 2020-07   | 12/10/2020 | Asia / Japan / Osaka   |
| EPI_ISL_692054 | 2020-07   | 12/10/2020 | Asia / Japan / Osaka   |
| EPI_ISL_692055 | 2020-07   | 12/10/2020 | Asia / Japan / Osaka   |
| EPI_ISL_692056 | 2020-07   | 12/10/2020 | Asia / Japan / Osaka   |
| EPI_ISL_692057 | 2020-07   | 12/10/2020 | Asia / Japan / Osaka   |
| EPI_ISL_692058 | 2020-07   | 12/10/2020 | Asia / Japan / Osaka   |
| EPI_ISL_692059 | 5/9/2020  | 12/10/2020 | Asia / Japan / Saitama |
| EPI_ISL_692060 | 5/13/2020 | 12/10/2020 | Asia / Japan / Saitama |
| EPI_ISL_692061 | 6/11/2020 | 12/10/2020 | Asia / Japan / Saitama |
| EPI_ISL_692062 | 6/24/2020 | 12/10/2020 | Asia / Japan / Saitama |
| EPI_ISL_692063 | 6/27/2020 | 12/10/2020 | Asia / Japan / Saitama |
| EPI_ISL_692064 | 6/27/2020 | 12/10/2020 | Asia / Japan / Saitama |
| EPI_ISL_692065 | 6/28/2020 | 12/10/2020 | Asia / Japan / Saitama |
| EPI_ISL_692066 | 6/28/2020 | 12/10/2020 | Asia / Japan / Saitama |
| EPI_ISL_692067 | 6/28/2020 | 12/10/2020 | Asia / Japan / Saitama |
| EPI_ISL_692068 | 6/28/2020 | 12/10/2020 | Asia / Japan / Saitama |
| EPI_ISL_692069 | 6/28/2020 | 12/10/2020 | Asia / Japan / Saitama |
| EPI_ISL_692070 | 6/28/2020 | 12/10/2020 | Asia / Japan / Saitama |
| EPI_ISL_692071 | 6/30/2020 | 12/10/2020 | Asia / Japan / Saitama |
| EPI_ISL_692072 | 7/2/2020  | 12/10/2020 | Asia / Japan / Saitama |
| EPI_ISL_692073 | 7/3/2020  | 12/10/2020 | Asia / Japan / Saitama |
| EPI_ISL_692074 | 7/3/2020  | 12/10/2020 | Asia / Japan / Saitama |
| EPI_ISL_692075 | 7/4/2020  | 12/10/2020 | Asia / Japan / Saitama |
| EPI_ISL_692076 | 7/4/2020  | 12/10/2020 | Asia / Japan / Saitama |
| EPI_ISL_692077 | 7/4/2020  | 12/10/2020 | Asia / Japan / Saitama |
| EPI_ISL_692078 | 7/5/2020  | 12/10/2020 | Asia / Japan / Saitama |
| EPI_ISL_692079 | 7/5/2020  | 12/10/2020 | Asia / Japan / Saitama |
| EPI_ISL_692080 | 7/5/2020  | 12/10/2020 | Asia / Japan / Saitama |
| EPI_ISL_692081 | 7/5/2020  | 12/10/2020 | Asia / Japan / Saitama |
| EPI_ISL_692082 | 7/5/2020  | 12/10/2020 | Asia / Japan / Saitama |

|                |           |                                    |
|----------------|-----------|------------------------------------|
| EPI_ISL_692083 | 7/6/2020  | 12/10/2020 Asia / Japan / Saitama  |
| EPI_ISL_692084 | 7/6/2020  | 12/10/2020 Asia / Japan / Saitama  |
| EPI_ISL_692085 | 7/7/2020  | 12/10/2020 Asia / Japan / Saitama  |
| EPI_ISL_692086 | 7/7/2020  | 12/10/2020 Asia / Japan / Saitama  |
| EPI_ISL_692087 | 7/7/2020  | 12/10/2020 Asia / Japan / Saitama  |
| EPI_ISL_692088 | 7/7/2020  | 12/10/2020 Asia / Japan / Saitama  |
| EPI_ISL_692089 | 7/9/2020  | 12/10/2020 Asia / Japan / Wakayama |
| EPI_ISL_692090 | 7/9/2020  | 12/10/2020 Asia / Japan / Wakayama |
| EPI_ISL_692091 | 7/10/2020 | 12/10/2020 Asia / Japan / Wakayama |
| EPI_ISL_692092 | 7/10/2020 | 12/10/2020 Asia / Japan / Wakayama |
| EPI_ISL_692093 | 7/13/2020 | 12/10/2020 Asia / Japan / Wakayama |
| EPI_ISL_692094 | 7/5/2020  | 12/10/2020 Asia / Japan / Yamagata |
| EPI_ISL_692095 | 7/12/2020 | 12/10/2020 Asia / Japan / Yamagata |
| EPI_ISL_692096 | 7/13/2020 | 12/10/2020 Asia / Japan / Yamagata |
| EPI_ISL_692097 | 7/14/2020 | 12/10/2020 Asia / Japan / Yamagata |
| EPI_ISL_692098 | 7/14/2020 | 12/10/2020 Asia / Japan / Hyogo    |
| EPI_ISL_692099 | 7/14/2020 | 12/10/2020 Asia / Japan / Hyogo    |
| EPI_ISL_692100 | 7/15/2020 | 12/10/2020 Asia / Japan / Hyogo    |
| EPI_ISL_692101 | 7/8/2020  | 12/10/2020 Asia / Japan / Hyogo    |
| EPI_ISL_692102 | 7/14/2020 | 12/10/2020 Asia / Japan / Miyagi   |
| EPI_ISL_692103 | 7/14/2020 | 12/10/2020 Asia / Japan / Miyagi   |
| EPI_ISL_692104 | 7/14/2020 | 12/10/2020 Asia / Japan / Miyagi   |
| EPI_ISL_692105 | 7/15/2020 | 12/10/2020 Asia / Japan / Miyagi   |
| EPI_ISL_692106 | 7/15/2020 | 12/10/2020 Asia / Japan / Miyagi   |
| EPI_ISL_692107 | 7/15/2020 | 12/10/2020 Asia / Japan / Miyagi   |
| EPI_ISL_692108 | 7/15/2020 | 12/10/2020 Asia / Japan / Miyagi   |
| EPI_ISL_692109 | 7/15/2020 | 12/10/2020 Asia / Japan / Miyagi   |
| EPI_ISL_692110 | 7/15/2020 | 12/10/2020 Asia / Japan / Miyagi   |
| EPI_ISL_692111 | 7/15/2020 | 12/10/2020 Asia / Japan / Miyagi   |
| EPI_ISL_692112 | 7/15/2020 | 12/10/2020 Asia / Japan / Miyagi   |
| EPI_ISL_692113 | 7/15/2020 | 12/10/2020 Asia / Japan / Miyagi   |
| EPI_ISL_692114 | 7/15/2020 | 12/10/2020 Asia / Japan / Miyagi   |
| EPI_ISL_692115 | 7/15/2020 | 12/10/2020 Asia / Japan / Miyagi   |
| EPI_ISL_692116 | 7/11/2020 | 12/10/2020 Asia / Japan / Fukui    |
| EPI_ISL_692117 | 7/12/2020 | 12/10/2020 Asia / Japan / Fukui    |
| EPI_ISL_692118 | 7/14/2020 | 12/10/2020 Asia / Japan / Fukui    |
| EPI_ISL_692119 | 6/12/2020 | 12/10/2020 Asia / Japan / Tokyo    |
| EPI_ISL_692120 | 6/12/2020 | 12/10/2020 Asia / Japan / Tokyo    |
| EPI_ISL_692121 | 6/12/2020 | 12/10/2020 Asia / Japan / Tokyo    |
| EPI_ISL_692122 | 6/12/2020 | 12/10/2020 Asia / Japan / Tokyo    |
| EPI_ISL_692123 | 6/12/2020 | 12/10/2020 Asia / Japan / Tokyo    |
| EPI_ISL_692124 | 6/12/2020 | 12/10/2020 Asia / Japan / Tokyo    |
| EPI_ISL_692125 | 6/12/2020 | 12/10/2020 Asia / Japan / Tokyo    |
| EPI_ISL_692126 | 6/12/2020 | 12/10/2020 Asia / Japan / Tokyo    |
| EPI_ISL_692127 | 6/12/2020 | 12/10/2020 Asia / Japan / Tokyo    |
| EPI_ISL_692128 | 6/12/2020 | 12/10/2020 Asia / Japan / Tokyo    |
| EPI_ISL_692129 | 7/9/2020  | 12/10/2020 Asia / Japan / Saitama  |

|                |           |                                     |
|----------------|-----------|-------------------------------------|
| EPI_ISL_692130 | 7/9/2020  | 12/10/2020 Asia / Japan / Saitama   |
| EPI_ISL_692131 | 7/9/2020  | 12/10/2020 Asia / Japan / Saitama   |
| EPI_ISL_692132 | 7/9/2020  | 12/10/2020 Asia / Japan / Saitama   |
| EPI_ISL_692133 | 7/13/2020 | 12/10/2020 Asia / Japan / Saitama   |
| EPI_ISL_692134 | 7/13/2020 | 12/10/2020 Asia / Japan / Saitama   |
| EPI_ISL_692135 | 7/7/2020  | 12/10/2020 Asia / Japan / Fukuoka   |
| EPI_ISL_692136 | 7/7/2020  | 12/10/2020 Asia / Japan / Fukuoka   |
| EPI_ISL_692137 | 7/8/2020  | 12/10/2020 Asia / Japan / Kagoshima |
| EPI_ISL_692138 | 7/10/2020 | 12/10/2020 Asia / Japan / Kagoshima |
| EPI_ISL_692139 | 7/10/2020 | 12/10/2020 Asia / Japan / Kagoshima |
| EPI_ISL_692140 | 7/10/2020 | 12/10/2020 Asia / Japan / Kagoshima |
| EPI_ISL_692141 | 7/10/2020 | 12/10/2020 Asia / Japan / Kagoshima |
| EPI_ISL_692142 | 7/7/2020  | 12/10/2020 Asia / Japan / Kagoshima |
| EPI_ISL_692143 | 7/8/2020  | 12/10/2020 Asia / Japan / Kagoshima |
| EPI_ISL_692144 | 7/8/2020  | 12/10/2020 Asia / Japan / Kagoshima |
| EPI_ISL_692145 | 7/8/2020  | 12/10/2020 Asia / Japan / Kagoshima |
| EPI_ISL_692146 | 7/10/2020 | 12/10/2020 Asia / Japan / Kagoshima |
| EPI_ISL_692147 | 7/11/2020 | 12/10/2020 Asia / Japan / Kagoshima |
| EPI_ISL_692148 | 7/11/2020 | 12/10/2020 Asia / Japan / Kagoshima |
| EPI_ISL_692149 | 7/12/2020 | 12/10/2020 Asia / Japan / Kagoshima |
| EPI_ISL_692150 | 7/12/2020 | 12/10/2020 Asia / Japan / Kagoshima |
| EPI_ISL_692151 | 7/13/2020 | 12/10/2020 Asia / Japan / Kagoshima |
| EPI_ISL_692152 | 7/15/2020 | 12/10/2020 Asia / Japan / Kagoshima |
| EPI_ISL_692153 | 7/11/2020 | 12/10/2020 Asia / Japan / Kagoshima |
| EPI_ISL_692154 | 7/11/2020 | 12/10/2020 Asia / Japan / Kagoshima |
| EPI_ISL_692155 | 7/14/2020 | 12/10/2020 Asia / Japan / Kagoshima |
| EPI_ISL_692156 | 7/15/2020 | 12/10/2020 Asia / Japan / Kagoshima |
| EPI_ISL_692157 | 7/15/2020 | 12/10/2020 Asia / Japan / Kagoshima |
| EPI_ISL_692158 | 7/6/2020  | 12/10/2020 Asia / Japan / Tokushima |
| EPI_ISL_692159 | 7/6/2020  | 12/10/2020 Asia / Japan / Tokushima |
| EPI_ISL_692160 | 7/6/2020  | 12/10/2020 Asia / Japan / Tokushima |
| EPI_ISL_692161 | 7/9/2020  | 12/10/2020 Asia / Japan / Tokushima |
| EPI_ISL_692162 | 6/12/2020 | 12/10/2020 Asia / Japan / Tokyo     |
| EPI_ISL_692163 | 6/12/2020 | 12/10/2020 Asia / Japan / Tokyo     |
| EPI_ISL_692164 | 7/12/2020 | 12/10/2020 Asia / Japan / Kagoshima |
| EPI_ISL_692165 | 6/25/2020 | 12/10/2020 Asia / Japan / Tokushima |
| EPI_ISL_692166 | 7/7/2020  | 12/10/2020 Asia / Japan / Wakayama  |
| EPI_ISL_692167 | 7/9/2020  | 12/10/2020 Asia / Japan / Wakayama  |
| EPI_ISL_692168 | 7/9/2020  | 12/10/2020 Asia / Japan / Wakayama  |
| EPI_ISL_692169 | 7/10/2020 | 12/10/2020 Asia / Japan / Wakayama  |
| EPI_ISL_692170 | 7/10/2020 | 12/10/2020 Asia / Japan / Wakayama  |
| EPI_ISL_692171 | 7/10/2020 | 12/10/2020 Asia / Japan / Wakayama  |
| EPI_ISL_692172 | 7/15/2020 | 12/10/2020 Asia / Japan / Wakayama  |
| EPI_ISL_692173 | 7/16/2020 | 12/10/2020 Asia / Japan / Wakayama  |
| EPI_ISL_692174 | 2020-07   | 12/10/2020 Asia / Japan / Hyogo     |
| EPI_ISL_692175 | 2020-07   | 12/10/2020 Asia / Japan / Hyogo     |
| EPI_ISL_692176 | 2020-07   | 12/10/2020 Asia / Japan / Hyogo     |

|                |           |            |                        |
|----------------|-----------|------------|------------------------|
| EPI_ISL_692177 | 2020-07   | 12/10/2020 | Asia / Japan / Hyogo   |
| EPI_ISL_692178 | 2020-07   | 12/10/2020 | Asia / Japan / Hyogo   |
| EPI_ISL_692179 | 2020-07   | 12/10/2020 | Asia / Japan / Hyogo   |
| EPI_ISL_692180 | 2020-07   | 12/10/2020 | Asia / Japan / Hyogo   |
| EPI_ISL_692181 | 2020-07   | 12/10/2020 | Asia / Japan / Hyogo   |
| EPI_ISL_692182 | 2020-07   | 12/10/2020 | Asia / Japan / Hyogo   |
| EPI_ISL_692183 | 2020-07   | 12/10/2020 | Asia / Japan / Hyogo   |
| EPI_ISL_692184 | 2020-07   | 12/10/2020 | Asia / Japan / Hyogo   |
| EPI_ISL_692185 | 2020-07   | 12/10/2020 | Asia / Japan / Hyogo   |
| EPI_ISL_692186 | 2020-07   | 12/10/2020 | Asia / Japan / Hyogo   |
| EPI_ISL_692187 | 2020-07   | 12/10/2020 | Asia / Japan / Hyogo   |
| EPI_ISL_692188 | 7/6/2020  | 12/10/2020 | Asia / Japan / Toyama  |
| EPI_ISL_692189 | 7/8/2020  | 12/10/2020 | Asia / Japan / Toyama  |
| EPI_ISL_692190 | 7/15/2020 | 12/10/2020 | Asia / Japan / Saitama |
| EPI_ISL_692191 | 6/23/2020 | 12/10/2020 | Asia / Japan / Hyogo   |
| EPI_ISL_692192 | 7/2/2020  | 12/10/2020 | Asia / Japan / Hyogo   |
| EPI_ISL_692193 | 7/4/2020  | 12/10/2020 | Asia / Japan / Hyogo   |
| EPI_ISL_692194 | 7/10/2020 | 12/10/2020 | Asia / Japan / Hyogo   |
| EPI_ISL_692195 | 7/14/2020 | 12/10/2020 | Asia / Japan / Hyogo   |
| EPI_ISL_692196 | 7/14/2020 | 12/10/2020 | Asia / Japan / Hyogo   |
| EPI_ISL_692197 | 4/20/2020 | 12/10/2020 | Asia / Japan / Ibaraki |
| EPI_ISL_692198 | 7/1/2020  | 12/10/2020 | Asia / Japan / Ibaraki |
| EPI_ISL_692199 | 7/1/2020  | 12/10/2020 | Asia / Japan / Ibaraki |
| EPI_ISL_692200 | 7/2/2020  | 12/10/2020 | Asia / Japan / Ibaraki |
| EPI_ISL_692201 | 7/2/2020  | 12/10/2020 | Asia / Japan / Ibaraki |
| EPI_ISL_692202 | 7/1/2020  | 12/10/2020 | Asia / Japan / Ibaraki |
| EPI_ISL_692203 | 7/4/2020  | 12/10/2020 | Asia / Japan / Ibaraki |
| EPI_ISL_692204 | 7/4/2020  | 12/10/2020 | Asia / Japan / Ibaraki |
| EPI_ISL_692205 | 7/6/2020  | 12/10/2020 | Asia / Japan / Ibaraki |
| EPI_ISL_692206 | 7/8/2020  | 12/10/2020 | Asia / Japan / Ibaraki |
| EPI_ISL_692207 | 7/9/2020  | 12/10/2020 | Asia / Japan / Ibaraki |
| EPI_ISL_692208 | 7/9/2020  | 12/10/2020 | Asia / Japan / Ibaraki |
| EPI_ISL_692209 | 7/13/2020 | 12/10/2020 | Asia / Japan / Ibaraki |
| EPI_ISL_692210 | 7/12/2020 | 12/10/2020 | Asia / Japan / Ibaraki |
| EPI_ISL_692211 | 7/12/2020 | 12/10/2020 | Asia / Japan / Ibaraki |
| EPI_ISL_692212 | 7/7/2020  | 12/10/2020 | Asia / Japan / Ibaraki |
| EPI_ISL_692213 | 7/14/2020 | 12/10/2020 | Asia / Japan / Ibaraki |
| EPI_ISL_692214 | 7/14/2020 | 12/10/2020 | Asia / Japan / Ibaraki |
| EPI_ISL_692215 | 7/14/2020 | 12/10/2020 | Asia / Japan / Ibaraki |
| EPI_ISL_692216 | 7/15/2020 | 12/10/2020 | Asia / Japan / Ibaraki |
| EPI_ISL_692217 | 7/17/2020 | 12/10/2020 | Asia / Japan / Ibaraki |
| EPI_ISL_692218 | 7/18/2020 | 12/10/2020 | Asia / Japan / Ibaraki |
| EPI_ISL_692219 | 7/14/2020 | 12/10/2020 | Asia / Japan / Fukuoka |
| EPI_ISL_692220 | 7/14/2020 | 12/10/2020 | Asia / Japan / Fukuoka |
| EPI_ISL_692221 | 7/14/2020 | 12/10/2020 | Asia / Japan / Fukuoka |
| EPI_ISL_692222 | 7/13/2020 | 12/10/2020 | Asia / Japan / Fukuoka |
| EPI_ISL_692223 | 7/13/2020 | 12/10/2020 | Asia / Japan / Fukuoka |





|                |           |                                    |
|----------------|-----------|------------------------------------|
| EPI_ISL_692271 | 7/23/2020 | 12/10/2020 Asia / Japan / Ishikawa |
| EPI_ISL_692272 | 7/23/2020 | 12/10/2020 Asia / Japan / Ishikawa |
| EPI_ISL_692273 | 7/25/2020 | 12/10/2020 Asia / Japan / Ishikawa |
| EPI_ISL_692274 | 7/25/2020 | 12/10/2020 Asia / Japan / Ishikawa |
| EPI_ISL_692275 | 7/25/2020 | 12/10/2020 Asia / Japan / Ishikawa |
| EPI_ISL_692276 | 7/16/2020 | 12/10/2020 Asia / Japan / Miyagi   |
| EPI_ISL_692277 | 7/16/2020 | 12/10/2020 Asia / Japan / Miyagi   |
| EPI_ISL_692278 | 7/16/2020 | 12/10/2020 Asia / Japan / Miyagi   |
| EPI_ISL_692279 | 7/17/2020 | 12/10/2020 Asia / Japan / Miyagi   |
| EPI_ISL_692280 | 7/19/2020 | 12/10/2020 Asia / Japan / Miyagi   |
| EPI_ISL_692281 | 7/21/2020 | 12/10/2020 Asia / Japan / Miyagi   |
| EPI_ISL_692282 | 7/23/2020 | 12/10/2020 Asia / Japan / Miyagi   |
| EPI_ISL_692283 | 7/24/2020 | 12/10/2020 Asia / Japan / Miyagi   |
| EPI_ISL_692284 | 7/15/2020 | 12/10/2020 Asia / Japan / Osaka    |
| EPI_ISL_692285 | 7/15/2020 | 12/10/2020 Asia / Japan / Osaka    |
| EPI_ISL_692286 | 7/15/2020 | 12/10/2020 Asia / Japan / Osaka    |
| EPI_ISL_692287 | 7/15/2020 | 12/10/2020 Asia / Japan / Osaka    |
| EPI_ISL_692288 | 7/14/2020 | 12/10/2020 Asia / Japan / Osaka    |
| EPI_ISL_692289 | 7/15/2020 | 12/10/2020 Asia / Japan / Osaka    |
| EPI_ISL_692290 | 7/16/2020 | 12/10/2020 Asia / Japan / Osaka    |
| EPI_ISL_692291 | 7/16/2020 | 12/10/2020 Asia / Japan / Osaka    |
| EPI_ISL_692292 | 7/17/2020 | 12/10/2020 Asia / Japan / Osaka    |
| EPI_ISL_692293 | 7/17/2020 | 12/10/2020 Asia / Japan / Osaka    |
| EPI_ISL_692294 | 7/18/2020 | 12/10/2020 Asia / Japan / Osaka    |
| EPI_ISL_692295 | 7/17/2020 | 12/10/2020 Asia / Japan / Osaka    |
| EPI_ISL_692296 | 7/17/2020 | 12/10/2020 Asia / Japan / Osaka    |
| EPI_ISL_692297 | 7/18/2020 | 12/10/2020 Asia / Japan / Osaka    |
| EPI_ISL_692298 | 7/18/2020 | 12/10/2020 Asia / Japan / Osaka    |
| EPI_ISL_692299 | 7/18/2020 | 12/10/2020 Asia / Japan / Osaka    |
| EPI_ISL_692300 | 7/20/2020 | 12/10/2020 Asia / Japan / Osaka    |
| EPI_ISL_692301 | 7/21/2020 | 12/10/2020 Asia / Japan / Osaka    |
| EPI_ISL_692302 | 7/20/2020 | 12/10/2020 Asia / Japan / Osaka    |
| EPI_ISL_692303 | 7/21/2020 | 12/10/2020 Asia / Japan / Osaka    |
| EPI_ISL_692304 | 7/21/2020 | 12/10/2020 Asia / Japan / Osaka    |
| EPI_ISL_692305 | 7/22/2020 | 12/10/2020 Asia / Japan / Osaka    |
| EPI_ISL_692306 | 7/22/2020 | 12/10/2020 Asia / Japan / Osaka    |
| EPI_ISL_692307 | 7/22/2020 | 12/10/2020 Asia / Japan / Osaka    |
| EPI_ISL_692308 | 7/22/2020 | 12/10/2020 Asia / Japan / Osaka    |
| EPI_ISL_692309 | 7/25/2020 | 12/10/2020 Asia / Japan / Osaka    |
| EPI_ISL_692310 | 7/25/2020 | 12/10/2020 Asia / Japan / Osaka    |
| EPI_ISL_692311 | 7/25/2020 | 12/10/2020 Asia / Japan / Osaka    |
| EPI_ISL_692312 | 7/25/2020 | 12/10/2020 Asia / Japan / Osaka    |
| EPI_ISL_692313 | 7/25/2020 | 12/10/2020 Asia / Japan / Osaka    |
| EPI_ISL_692314 | 7/25/2020 | 12/10/2020 Asia / Japan / Osaka    |
| EPI_ISL_692315 | 7/26/2020 | 12/10/2020 Asia / Japan / Osaka    |
| EPI_ISL_692316 | 7/14/2020 | 12/10/2020 Asia / Japan / Gunma    |
| EPI_ISL_692317 | 7/16/2020 | 12/10/2020 Asia / Japan / Gunma    |









|                |           |                                     |
|----------------|-----------|-------------------------------------|
| EPI_ISL_692506 | 7/22/2020 | 12/10/2020 Asia / Japan / Fukuoka   |
| EPI_ISL_692507 | 7/22/2020 | 12/10/2020 Asia / Japan / Fukuoka   |
| EPI_ISL_692508 | 7/23/2020 | 12/10/2020 Asia / Japan / Fukuoka   |
| EPI_ISL_692509 | 7/24/2020 | 12/10/2020 Asia / Japan / Fukuoka   |
| EPI_ISL_692510 | 7/18/2020 | 12/10/2020 Asia / Japan / Kagoshima |
| EPI_ISL_692511 | 7/19/2020 | 12/10/2020 Asia / Japan / Kagoshima |
| EPI_ISL_692512 | 7/22/2020 | 12/10/2020 Asia / Japan / Kagoshima |
| EPI_ISL_692513 | 7/22/2020 | 12/10/2020 Asia / Japan / Kagoshima |
| EPI_ISL_692514 | 7/22/2020 | 12/10/2020 Asia / Japan / Kagoshima |
| EPI_ISL_692515 | 7/22/2020 | 12/10/2020 Asia / Japan / Kagoshima |
| EPI_ISL_692516 | 7/22/2020 | 12/10/2020 Asia / Japan / Kagoshima |
| EPI_ISL_692517 | 7/22/2020 | 12/10/2020 Asia / Japan / Kagoshima |
| EPI_ISL_692518 | 7/22/2020 | 12/10/2020 Asia / Japan / Kagoshima |
| EPI_ISL_692519 | 7/24/2020 | 12/10/2020 Asia / Japan / Kagoshima |
| EPI_ISL_692520 | 7/24/2020 | 12/10/2020 Asia / Japan / Kagoshima |
| EPI_ISL_692521 | 7/24/2020 | 12/10/2020 Asia / Japan / Kagoshima |
| EPI_ISL_692522 | 7/24/2020 | 12/10/2020 Asia / Japan / Kagoshima |
| EPI_ISL_692523 | 7/26/2020 | 12/10/2020 Asia / Japan / Kagoshima |
| EPI_ISL_692524 | 7/24/2020 | 12/10/2020 Asia / Japan / Kagoshima |
| EPI_ISL_692525 | 7/25/2020 | 12/10/2020 Asia / Japan / Kagoshima |
| EPI_ISL_692526 | 7/27/2020 | 12/10/2020 Asia / Japan / Kagoshima |
| EPI_ISL_692527 | 5/14/2020 | 12/10/2020 Asia / Japan / Kanagawa  |
| EPI_ISL_692528 | 6/16/2020 | 12/10/2020 Asia / Japan / Kanagawa  |
| EPI_ISL_692529 | 7/3/2020  | 12/10/2020 Asia / Japan / Kanagawa  |
| EPI_ISL_692530 | 7/7/2020  | 12/10/2020 Asia / Japan / Kanagawa  |
| EPI_ISL_692531 | 7/10/2020 | 12/10/2020 Asia / Japan / Kanagawa  |
| EPI_ISL_692532 | 7/10/2020 | 12/10/2020 Asia / Japan / Kanagawa  |
| EPI_ISL_692533 | 7/10/2020 | 12/10/2020 Asia / Japan / Kanagawa  |
| EPI_ISL_692534 | 7/11/2020 | 12/10/2020 Asia / Japan / Kanagawa  |
| EPI_ISL_692535 | 7/13/2020 | 12/10/2020 Asia / Japan / Kanagawa  |
| EPI_ISL_692536 | 7/14/2020 | 12/10/2020 Asia / Japan / Kanagawa  |
| EPI_ISL_692537 | 7/14/2020 | 12/10/2020 Asia / Japan / Kanagawa  |
| EPI_ISL_692538 | 7/14/2020 | 12/10/2020 Asia / Japan / Kanagawa  |
| EPI_ISL_692539 | 7/15/2020 | 12/10/2020 Asia / Japan / Kanagawa  |
| EPI_ISL_692540 | 7/15/2020 | 12/10/2020 Asia / Japan / Kanagawa  |
| EPI_ISL_692541 | 7/15/2020 | 12/10/2020 Asia / Japan / Kanagawa  |
| EPI_ISL_692542 | 7/16/2020 | 12/10/2020 Asia / Japan / Kanagawa  |
| EPI_ISL_692543 | 7/20/2020 | 12/10/2020 Asia / Japan / Kanagawa  |
| EPI_ISL_692544 | 7/20/2020 | 12/10/2020 Asia / Japan / Kanagawa  |
| EPI_ISL_692545 | 7/13/2020 | 12/10/2020 Asia / Japan / Hyogo     |
| EPI_ISL_692546 | 7/13/2020 | 12/10/2020 Asia / Japan / Hyogo     |
| EPI_ISL_692547 | 7/16/2020 | 12/10/2020 Asia / Japan / Hyogo     |
| EPI_ISL_692548 | 7/18/2020 | 12/10/2020 Asia / Japan / Hyogo     |
| EPI_ISL_692549 | 7/21/2020 | 12/10/2020 Asia / Japan / Hyogo     |
| EPI_ISL_692550 | 7/21/2020 | 12/10/2020 Asia / Japan / Hyogo     |
| EPI_ISL_692551 | 7/22/2020 | 12/10/2020 Asia / Japan / Hyogo     |
| EPI_ISL_692552 | 7/22/2020 | 12/10/2020 Asia / Japan / Hyogo     |

|                |           |                                    |
|----------------|-----------|------------------------------------|
| EPI_ISL_692553 | 7/25/2020 | 12/10/2020 Asia / Japan / Hyogo    |
| EPI_ISL_692554 | 7/27/2020 | 12/10/2020 Asia / Japan / Hyogo    |
| EPI_ISL_692555 | 7/27/2020 | 12/10/2020 Asia / Japan / Hyogo    |
| EPI_ISL_692556 | 7/27/2020 | 12/10/2020 Asia / Japan / Hyogo    |
| EPI_ISL_692557 | 7/28/2020 | 12/10/2020 Asia / Japan / Hyogo    |
| EPI_ISL_692558 | 7/28/2020 | 12/10/2020 Asia / Japan / Hyogo    |
| EPI_ISL_692559 | 7/20/2020 | 12/10/2020 Asia / Japan / Toyama   |
| EPI_ISL_692560 | 7/20/2020 | 12/10/2020 Asia / Japan / Toyama   |
| EPI_ISL_692561 | 7/22/2020 | 12/10/2020 Asia / Japan / Toyama   |
| EPI_ISL_692562 | 7/26/2020 | 12/10/2020 Asia / Japan / Toyama   |
| EPI_ISL_692563 | 7/10/2020 | 12/10/2020 Asia / Japan / Hokkaido |
| EPI_ISL_692564 | 7/11/2020 | 12/10/2020 Asia / Japan / Hokkaido |
| EPI_ISL_692565 | 7/14/2020 | 12/10/2020 Asia / Japan / Hokkaido |
| EPI_ISL_692566 | 7/14/2020 | 12/10/2020 Asia / Japan / Hokkaido |
| EPI_ISL_692567 | 7/15/2020 | 12/10/2020 Asia / Japan / Hokkaido |
| EPI_ISL_692568 | 7/15/2020 | 12/10/2020 Asia / Japan / Hokkaido |
| EPI_ISL_692569 | 7/16/2020 | 12/10/2020 Asia / Japan / Hokkaido |
| EPI_ISL_692570 | 7/18/2020 | 12/10/2020 Asia / Japan / Hokkaido |
| EPI_ISL_692571 | 7/19/2020 | 12/10/2020 Asia / Japan / Hokkaido |
| EPI_ISL_692572 | 7/19/2020 | 12/10/2020 Asia / Japan / Hokkaido |
| EPI_ISL_692573 | 7/20/2020 | 12/10/2020 Asia / Japan / Hokkaido |
| EPI_ISL_692574 | 7/20/2020 | 12/10/2020 Asia / Japan / Hokkaido |
| EPI_ISL_692575 | 7/20/2020 | 12/10/2020 Asia / Japan / Hokkaido |
| EPI_ISL_692576 | 7/22/2020 | 12/10/2020 Asia / Japan / Hokkaido |
| EPI_ISL_692577 | 7/22/2020 | 12/10/2020 Asia / Japan / Hokkaido |
| EPI_ISL_692578 | 7/26/2020 | 12/10/2020 Asia / Japan / Hokkaido |
| EPI_ISL_692579 | 7/28/2020 | 12/10/2020 Asia / Japan / Hokkaido |
| EPI_ISL_692580 | 7/28/2020 | 12/10/2020 Asia / Japan / Hokkaido |
| EPI_ISL_692581 | 7/29/2020 | 12/10/2020 Asia / Japan / Hokkaido |
| EPI_ISL_692582 | 7/29/2020 | 12/10/2020 Asia / Japan / Hokkaido |
| EPI_ISL_692583 | 7/29/2020 | 12/10/2020 Asia / Japan / Hokkaido |
| EPI_ISL_692584 | 7/30/2020 | 12/10/2020 Asia / Japan / Hokkaido |
| EPI_ISL_692585 | 7/30/2020 | 12/10/2020 Asia / Japan / Hokkaido |
| EPI_ISL_692586 | 7/31/2020 | 12/10/2020 Asia / Japan / Hokkaido |
| EPI_ISL_692587 | 7/31/2020 | 12/10/2020 Asia / Japan / Hokkaido |
| EPI_ISL_692588 | 7/19/2020 | 12/10/2020 Asia / Japan / Ehime    |
| EPI_ISL_692589 | 7/22/2020 | 12/10/2020 Asia / Japan / Ehime    |
| EPI_ISL_692590 | 7/25/2020 | 12/10/2020 Asia / Japan / Ehime    |
| EPI_ISL_692591 | 7/27/2020 | 12/10/2020 Asia / Japan / Ehime    |
| EPI_ISL_692592 | 7/26/2020 | 12/10/2020 Asia / Japan / Miyagi   |
| EPI_ISL_692593 | 7/26/2020 | 12/10/2020 Asia / Japan / Miyagi   |
| EPI_ISL_692594 | 7/27/2020 | 12/10/2020 Asia / Japan / Miyagi   |
| EPI_ISL_692595 | 7/20/2020 | 12/10/2020 Asia / Japan / Tokyo    |
| EPI_ISL_692596 | 7/22/2020 | 12/10/2020 Asia / Japan / Tokyo    |
| EPI_ISL_692597 | 5/13/2020 | 12/10/2020 Asia / Japan / Saitama  |
| EPI_ISL_692598 | 5/22/2020 | 12/10/2020 Asia / Japan / Saitama  |
| EPI_ISL_692599 | 5/27/2020 | 12/10/2020 Asia / Japan / Saitama  |





|                |           |                                    |
|----------------|-----------|------------------------------------|
| EPI_ISL_692647 | 8/2/2020  | 12/10/2020 Asia / Japan / Miyagi   |
| EPI_ISL_692648 | 8/2/2020  | 12/10/2020 Asia / Japan / Miyagi   |
| EPI_ISL_692649 | 8/3/2020  | 12/10/2020 Asia / Japan / Miyagi   |
| EPI_ISL_692650 | 7/27/2020 | 12/10/2020 Asia / Japan / Shizuoka |
| EPI_ISL_692651 | 7/27/2020 | 12/10/2020 Asia / Japan / Shizuoka |
| EPI_ISL_692652 | 7/28/2020 | 12/10/2020 Asia / Japan / Shizuoka |
| EPI_ISL_692653 | 7/27/2020 | 12/10/2020 Asia / Japan / Osaka    |
| EPI_ISL_692654 | 7/27/2020 | 12/10/2020 Asia / Japan / Osaka    |
| EPI_ISL_692655 | 7/27/2020 | 12/10/2020 Asia / Japan / Osaka    |
| EPI_ISL_692656 | 7/27/2020 | 12/10/2020 Asia / Japan / Osaka    |
| EPI_ISL_692657 | 7/28/2020 | 12/10/2020 Asia / Japan / Osaka    |
| EPI_ISL_692658 | 7/27/2020 | 12/10/2020 Asia / Japan / Osaka    |
| EPI_ISL_692659 | 7/27/2020 | 12/10/2020 Asia / Japan / Osaka    |
| EPI_ISL_692660 | 7/28/2020 | 12/10/2020 Asia / Japan / Osaka    |
| EPI_ISL_692661 | 7/28/2020 | 12/10/2020 Asia / Japan / Osaka    |
| EPI_ISL_692662 | 7/28/2020 | 12/10/2020 Asia / Japan / Osaka    |
| EPI_ISL_692663 | 7/29/2020 | 12/10/2020 Asia / Japan / Osaka    |
| EPI_ISL_692664 | 7/28/2020 | 12/10/2020 Asia / Japan / Osaka    |
| EPI_ISL_692665 | 7/28/2020 | 12/10/2020 Asia / Japan / Osaka    |
| EPI_ISL_692666 | 7/29/2020 | 12/10/2020 Asia / Japan / Osaka    |
| EPI_ISL_692667 | 7/29/2020 | 12/10/2020 Asia / Japan / Osaka    |
| EPI_ISL_692668 | 7/29/2020 | 12/10/2020 Asia / Japan / Osaka    |
| EPI_ISL_692669 | 7/29/2020 | 12/10/2020 Asia / Japan / Osaka    |
| EPI_ISL_692670 | 7/30/2020 | 12/10/2020 Asia / Japan / Osaka    |
| EPI_ISL_692671 | 7/30/2020 | 12/10/2020 Asia / Japan / Osaka    |
| EPI_ISL_692672 | 7/30/2020 | 12/10/2020 Asia / Japan / Osaka    |
| EPI_ISL_692673 | 7/31/2020 | 12/10/2020 Asia / Japan / Osaka    |
| EPI_ISL_692674 | 7/30/2020 | 12/10/2020 Asia / Japan / Osaka    |
| EPI_ISL_692675 | 7/30/2020 | 12/10/2020 Asia / Japan / Osaka    |
| EPI_ISL_692676 | 7/31/2020 | 12/10/2020 Asia / Japan / Osaka    |
| EPI_ISL_692677 | 7/31/2020 | 12/10/2020 Asia / Japan / Osaka    |
| EPI_ISL_692678 | 8/1/2020  | 12/10/2020 Asia / Japan / Osaka    |
| EPI_ISL_692679 | 8/1/2020  | 12/10/2020 Asia / Japan / Osaka    |
| EPI_ISL_692680 | 7/21/2020 | 12/10/2020 Asia / Japan / Saitama  |
| EPI_ISL_692681 | 7/21/2020 | 12/10/2020 Asia / Japan / Saitama  |
| EPI_ISL_692682 | 7/21/2020 | 12/10/2020 Asia / Japan / Saitama  |
| EPI_ISL_692683 | 7/25/2020 | 12/10/2020 Asia / Japan / Saitama  |
| EPI_ISL_692684 | 7/27/2020 | 12/10/2020 Asia / Japan / Saitama  |
| EPI_ISL_692685 | 7/28/2020 | 12/10/2020 Asia / Japan / Saitama  |
| EPI_ISL_692686 | 7/29/2020 | 12/10/2020 Asia / Japan / Saitama  |
| EPI_ISL_692687 | 7/29/2020 | 12/10/2020 Asia / Japan / Saitama  |
| EPI_ISL_692688 | 7/27/2020 | 12/10/2020 Asia / Japan / Hyogo    |
| EPI_ISL_692689 | 7/27/2020 | 12/10/2020 Asia / Japan / Hyogo    |
| EPI_ISL_692690 | 7/28/2020 | 12/10/2020 Asia / Japan / Hyogo    |
| EPI_ISL_692691 | 7/28/2020 | 12/10/2020 Asia / Japan / Hyogo    |
| EPI_ISL_692692 | 7/28/2020 | 12/10/2020 Asia / Japan / Hyogo    |
| EPI_ISL_692693 | 7/28/2020 | 12/10/2020 Asia / Japan / Hyogo    |

|                |           |                                                          |
|----------------|-----------|----------------------------------------------------------|
| EPI_ISL_692694 | 7/28/2020 | 12/10/2020 Asia / Japan / Hyogo                          |
| EPI_ISL_692695 | 7/29/2020 | 12/10/2020 Asia / Japan / Hyogo                          |
| EPI_ISL_692696 | 7/29/2020 | 12/10/2020 Asia / Japan / Hyogo                          |
| EPI_ISL_692697 | 7/29/2020 | 12/10/2020 Asia / Japan / Hyogo                          |
| EPI_ISL_692698 | 7/30/2020 | 12/10/2020 Asia / Japan / Hyogo                          |
| EPI_ISL_692699 | 7/30/2020 | 12/10/2020 Asia / Japan / Hyogo                          |
| EPI_ISL_692700 | 7/30/2020 | 12/10/2020 Asia / Japan / Hyogo                          |
| EPI_ISL_692701 | 7/30/2020 | 12/10/2020 Asia / Japan / Hyogo                          |
| EPI_ISL_692702 | 7/30/2020 | 12/10/2020 Asia / Japan / Hyogo                          |
| EPI_ISL_692703 | 7/30/2020 | 12/10/2020 Asia / Japan / Hyogo                          |
| EPI_ISL_692704 | 7/30/2020 | 12/10/2020 Asia / Japan / Hyogo                          |
| EPI_ISL_692705 | 7/31/2020 | 12/10/2020 Asia / Japan / Hyogo                          |
| EPI_ISL_692706 | 7/31/2020 | 12/10/2020 Asia / Japan / Hyogo                          |
| EPI_ISL_692707 | 7/31/2020 | 12/10/2020 Asia / Japan / Hyogo                          |
| EPI_ISL_692708 | 7/31/2020 | 12/10/2020 Asia / Japan / Hyogo                          |
| EPI_ISL_692709 | 7/31/2020 | 12/10/2020 Asia / Japan / Hyogo                          |
| EPI_ISL_692710 | 7/31/2020 | 12/10/2020 Asia / Japan / Hyogo                          |
| EPI_ISL_692711 | 7/31/2020 | 12/10/2020 Asia / Japan / Hyogo                          |
| EPI_ISL_692712 | 7/31/2020 | 12/10/2020 Asia / Japan / Hyogo                          |
| EPI_ISL_692713 | 7/22/2020 | 12/10/2020 Asia / Japan / Hyogo                          |
| EPI_ISL_692714 | 7/22/2020 | 12/10/2020 Asia / Japan / Hyogo                          |
| EPI_ISL_692715 | 7/27/2020 | 12/10/2020 Asia / Japan / Hyogo                          |
| EPI_ISL_692716 | 7/24/2020 | 12/10/2020 Asia / Japan / Hyogo                          |
| EPI_ISL_692717 | 7/24/2020 | 12/10/2020 Asia / Japan / Hyogo                          |
| EPI_ISL_692718 | 7/21/2020 | 12/10/2020 Asia / Japan / Hyogo                          |
| EPI_ISL_692719 | 7/23/2020 | 12/10/2020 Asia / Japan / Hyogo                          |
| EPI_ISL_692720 | 7/24/2020 | 12/10/2020 Asia / Japan / Hyogo                          |
| EPI_ISL_692721 | 7/24/2020 | 12/10/2020 Asia / Japan / Hyogo                          |
| EPI_ISL_692722 | 7/24/2020 | 12/10/2020 Asia / Japan / Hyogo                          |
| EPI_ISL_692723 | 7/24/2020 | 12/10/2020 Asia / Japan / Hyogo                          |
| EPI_ISL_692724 | 7/26/2020 | 12/10/2020 Asia / Japan / Hyogo                          |
| EPI_ISL_692725 | 7/27/2020 | 12/10/2020 Asia / Japan / Hyogo                          |
| EPI_ISL_692726 | 7/27/2020 | 12/10/2020 Asia / Japan / Hyogo                          |
| EPI_ISL_692727 | 7/22/2020 | 12/10/2020 Asia / Japan / Hyogo                          |
| EPI_ISL_692728 | 7/27/2020 | 12/10/2020 Asia / Japan / Hyogo                          |
| EPI_ISL_692729 | 7/27/2020 | 12/10/2020 Asia / Japan / Hyogo                          |
| EPI_ISL_692730 | 7/22/2020 | 12/10/2020 Asia / Japan / Hyogo                          |
| EPI_ISL_692731 | 7/22/2020 | 12/10/2020 Asia / Japan / Hyogo                          |
| EPI_ISL_692732 | 7/29/2020 | 12/10/2020 Asia / Japan / Hyogo                          |
| EPI_ISL_692733 | 8/2/2020  | 12/10/2020 Europe / France / Auvergne-Rhone-Alpes / Lyon |
| EPI_ISL_692734 | 8/10/2020 | 12/10/2020 Europe / France / Auvergne-Rhone-Alpes / Lyon |
| EPI_ISL_692735 | 8/10/2020 | 12/10/2020 Europe / France / Auvergne-Rhone-Alpes / Lyon |
| EPI_ISL_692736 | 8/18/2020 | 12/10/2020 Europe / France / Auvergne-Rhone-Alpes / Lyon |
| EPI_ISL_692737 | 9/1/2020  | 12/10/2020 Europe / France / Auvergne-Rhone-Alpes / Lyon |
| EPI_ISL_692738 | 9/1/2020  | 12/10/2020 Europe / France / Auvergne-Rhone-Alpes / Lyon |
| EPI_ISL_692739 | 9/2/2020  | 12/10/2020 Europe / France / Auvergne-Rhone-Alpes / Lyon |
| EPI_ISL_692740 | 9/3/2020  | 12/10/2020 Europe / France / Auvergne-Rhone-Alpes / Lyon |













|                |           |            |                                                          |
|----------------|-----------|------------|----------------------------------------------------------|
| EPI_ISL_693145 | 4/25/2020 | 12/10/2020 | North America / USA / Massachusetts                      |
| EPI_ISL_693146 | 4/25/2020 | 12/10/2020 | North America / USA / Massachusetts                      |
| EPI_ISL_693147 | 4/25/2020 | 12/10/2020 | North America / USA / Massachusetts                      |
| EPI_ISL_693152 | 4/27/2020 | 12/10/2020 | North America / USA / Massachusetts                      |
| EPI_ISL_693158 | 4/26/2020 | 12/10/2020 | North America / USA / Massachusetts                      |
| EPI_ISL_693162 | 5/28/2020 | 12/10/2020 | North America / USA / Massachusetts                      |
| EPI_ISL_693167 | 5/22/2020 | 12/10/2020 | North America / USA / Massachusetts                      |
| EPI_ISL_693176 | 5/13/2020 | 12/10/2020 | North America / USA / Massachusetts                      |
| EPI_ISL_693177 | 5/13/2020 | 12/10/2020 | North America / USA / Massachusetts                      |
| EPI_ISL_693178 | 5/4/2020  | 12/10/2020 | North America / USA / Massachusetts                      |
| EPI_ISL_693179 | 4/29/2020 | 12/10/2020 | North America / USA / Massachusetts                      |
| EPI_ISL_693182 | 4/27/2020 | 12/10/2020 | North America / USA / Massachusetts                      |
| EPI_ISL_693188 | 4/30/2020 | 12/10/2020 | North America / USA / Massachusetts                      |
| EPI_ISL_693189 | 4/30/2020 | 12/10/2020 | North America / USA / Massachusetts                      |
| EPI_ISL_693190 | 4/28/2020 | 12/10/2020 | North America / USA / Massachusetts                      |
| EPI_ISL_693192 | 2020      | 12/10/2020 | Oceania / Australia / Tasmania                           |
| EPI_ISL_693193 | 2020      | 12/10/2020 | Oceania / Australia / Tasmania                           |
| EPI_ISL_693194 | 2020      | 12/10/2020 | Oceania / Australia / Tasmania                           |
| EPI_ISL_693195 | 3/20/2020 | 12/10/2020 | South America / Brazil / Sao Paulo / Sao Paulo           |
| EPI_ISL_693196 | 5/2/2020  | 12/10/2020 | South America / Brazil / Sao Paulo / Sao Paulo           |
| EPI_ISL_693198 | 5/4/2020  | 12/10/2020 | South America / Brazil / Sao Paulo / Sao Paulo           |
| EPI_ISL_693199 | 5/20/2020 | 12/10/2020 | South America / Brazil / Sao Paulo / Sao Paulo           |
| EPI_ISL_693200 | 4/29/2020 | 12/10/2020 | South America / Brazil / Sao Paulo / Mairipora           |
| EPI_ISL_693201 | 4/1/2020  | 12/10/2020 | South America / Brazil / Sao Paulo / Sao Paulo           |
| EPI_ISL_693202 | 4/1/2020  | 12/10/2020 | South America / Brazil / Sao Paulo / Sao Paulo           |
| EPI_ISL_693203 | 4/21/2020 | 12/10/2020 | South America / Brazil / Sao Paulo / Sao Paulo           |
| EPI_ISL_693204 | 6/22/2020 | 12/10/2020 | South America / Brazil / Sao Paulo / Osasco              |
| EPI_ISL_693205 | 6/22/2020 | 12/10/2020 | South America / Brazil / Sao Paulo / Taruma              |
| EPI_ISL_693206 | 6/21/2020 | 12/10/2020 | South America / Brazil / Sao Paulo / Campinas            |
| EPI_ISL_693207 | 6/24/2020 | 12/10/2020 | South America / Brazil / Sao Paulo / Sumare              |
| EPI_ISL_693208 | 7/1/2020  | 12/10/2020 | South America / Brazil / Sao Paulo / Osasco              |
| EPI_ISL_693209 | 7/1/2020  | 12/10/2020 | South America / Brazil / Sao Paulo / Osasco              |
| EPI_ISL_693210 | 7/6/2020  | 12/10/2020 | South America / Brazil / Sao Paulo / Osasco              |
| EPI_ISL_693211 | 7/6/2020  | 12/10/2020 | South America / Brazil / Sao Paulo / Cunha               |
| EPI_ISL_693212 | 7/6/2020  | 12/10/2020 | South America / Brazil / Sao Paulo / Braganca Paulista   |
| EPI_ISL_693213 | 6/18/2020 | 12/10/2020 | South America / Brazil / Sao Paulo / Hortolandia         |
| EPI_ISL_693214 | 7/19/2020 | 12/10/2020 | South America / Brazil / Sao Paulo / Sao Sebastiao       |
| EPI_ISL_693215 | 7/6/2020  | 12/10/2020 | South America / Brazil / Sao Paulo / Limeira             |
| EPI_ISL_693216 | 7/5/2020  | 12/10/2020 | South America / Brazil / Sao Paulo / Araras              |
| EPI_ISL_693217 | 7/5/2020  | 12/10/2020 | South America / Brazil / Sao Paulo / Araras              |
| EPI_ISL_693218 | 6/16/2020 | 12/10/2020 | South America / Brazil / Sao Paulo / Presidente Prudente |
| EPI_ISL_693219 | 6/16/2020 | 12/10/2020 | South America / Brazil / Sao Paulo / Taciba              |
| EPI_ISL_693220 | 7/1/2020  | 12/10/2020 | South America / Brazil / Sao Paulo / Piracicaba          |
| EPI_ISL_693221 | 6/16/2020 | 12/10/2020 | South America / Brazil / Sao Paulo / Birigui             |
| EPI_ISL_693222 | 6/16/2020 | 12/10/2020 | South America / Brazil / Sao Paulo / Birigui             |
| EPI_ISL_693223 | 7/2/2020  | 12/10/2020 | South America / Brazil / Sao Paulo / Piracicaba          |
| EPI_ISL_693224 | 7/2/2020  | 12/10/2020 | South America / Brazil / Sao Paulo / Piracicaba          |

|                |            |                                                                       |
|----------------|------------|-----------------------------------------------------------------------|
| EPI_ISL_693225 | 7/6/2020   | 12/10/2020 South America / Brazil / Sao Paulo / Diadema               |
| EPI_ISL_693226 | 6/16/2020  | 12/10/2020 South America / Brazil / Sao Paulo / Campinas              |
| EPI_ISL_693227 | 7/6/2020   | 12/10/2020 South America / Brazil / Sao Paulo / Sao Bernardo do Campo |
| EPI_ISL_693228 | 6/22/2020  | 12/10/2020 South America / Brazil / Sao Paulo / Sorocaba              |
| EPI_ISL_693229 | 6/16/2020  | 12/10/2020 South America / Brazil / Sao Paulo / Guarulhos             |
| EPI_ISL_693230 | 6/13/2020  | 12/10/2020 South America / Brazil / Sao Paulo / Cotia                 |
| EPI_ISL_693231 | 6/27/2020  | 12/10/2020 South America / Brazil / Sao Paulo / Jacarei               |
| EPI_ISL_693232 | 5/30/2020  | 12/10/2020 South America / Brazil / Sao Paulo / Sao Paulo             |
| EPI_ISL_693233 | 6/12/2020  | 12/10/2020 South America / Brazil / Sao Paulo / ItapeERICA da Serra   |
| EPI_ISL_693234 | 6/30/2020  | 12/10/2020 South America / Brazil / Sao Paulo / Rio Grande da Serra   |
| EPI_ISL_693235 | 6/30/2020  | 12/10/2020 South America / Brazil / Sao Paulo / Rio Grande da Serra   |
| EPI_ISL_693236 | 7/2/2020   | 12/10/2020 South America / Brazil / Sao Paulo / Sao Paulo             |
| EPI_ISL_693237 | 7/1/2020   | 12/10/2020 South America / Brazil / Sao Paulo / Mogi das Cruzes       |
| EPI_ISL_693238 | 6/30/2020  | 12/10/2020 South America / Brazil / Sao Paulo / Santos                |
| EPI_ISL_693239 | 6/30/2020  | 12/10/2020 South America / Brazil / Sao Paulo / Santos                |
| EPI_ISL_693240 | 6/30/2020  | 12/10/2020 South America / Brazil / Sao Paulo / Diadema               |
| EPI_ISL_693241 | 6/30/2020  | 12/10/2020 South America / Brazil / Sao Paulo / Ribeirao Pires        |
| EPI_ISL_693242 | 6/30/2020  | 12/10/2020 South America / Brazil / Sao Paulo / Diadema               |
| EPI_ISL_693243 | 6/27/2020  | 12/10/2020 South America / Brazil / Sao Paulo / Piracicaba            |
| EPI_ISL_693244 | 7/2/2020   | 12/10/2020 South America / Brazil / Sao Paulo / Sorocaba              |
| EPI_ISL_693245 | 7/2/2020   | 12/10/2020 South America / Brazil / Sao Paulo / Mogi das Cruzes       |
| EPI_ISL_693246 | 6/30/2020  | 12/10/2020 South America / Brazil / Sao Paulo / Rio Grande da Serra   |
| EPI_ISL_693247 | 6/30/2020  | 12/10/2020 South America / Brazil / Sao Paulo / Santos                |
| EPI_ISL_693248 | 7/6/2020   | 12/10/2020 South America / Brazil / Sao Paulo / Limeira               |
| EPI_ISL_693250 | 3/22/2020  | 12/11/2020 Oceania / Australia / Queensland                           |
| EPI_ISL_693251 | 3/22/2020  | 12/11/2020 Oceania / Australia / Queensland                           |
| EPI_ISL_693252 | 3/22/2020  | 12/11/2020 Oceania / Australia / Queensland                           |
| EPI_ISL_693253 | 3/22/2020  | 12/11/2020 Oceania / Australia / Queensland                           |
| EPI_ISL_693254 | 3/23/2020  | 12/11/2020 Oceania / Australia / Queensland                           |
| EPI_ISL_693255 | 3/23/2020  | 12/11/2020 Oceania / Australia / Queensland                           |
| EPI_ISL_693256 | 3/19/2020  | 12/11/2020 Oceania / Australia / Queensland                           |
| EPI_ISL_693257 | 3/23/2020  | 12/11/2020 Oceania / Australia / Queensland                           |
| EPI_ISL_693258 | 3/22/2020  | 12/11/2020 Oceania / Australia / Queensland                           |
| EPI_ISL_693259 | 3/23/2020  | 12/11/2020 Oceania / Australia / Queensland                           |
| EPI_ISL_693260 | 3/23/2020  | 12/11/2020 Oceania / Australia / Queensland                           |
| EPI_ISL_693261 | 3/25/2020  | 12/11/2020 Oceania / Australia / Queensland                           |
| EPI_ISL_693262 | 3/25/2020  | 12/11/2020 Oceania / Australia / Queensland                           |
| EPI_ISL_693263 | 3/24/2020  | 12/11/2020 Oceania / Australia / Queensland                           |
| EPI_ISL_693264 | 3/24/2020  | 12/11/2020 Oceania / Australia / Queensland                           |
| EPI_ISL_693265 | 3/25/2020  | 12/11/2020 Oceania / Australia / Queensland                           |
| EPI_ISL_693266 | 3/25/2020  | 12/11/2020 Oceania / Australia / Queensland                           |
| EPI_ISL_693267 | 3/24/2020  | 12/11/2020 Oceania / Australia / Queensland                           |
| EPI_ISL_693268 | 3/25/2020  | 12/11/2020 Oceania / Australia / Queensland                           |
| EPI_ISL_693269 | 10/31/2020 | 12/11/2020 Oceania / Australia / Queensland                           |
| EPI_ISL_693270 | 3/22/2020  | 12/11/2020 Oceania / Australia / Queensland                           |
| EPI_ISL_693271 | 3/22/2020  | 12/11/2020 Oceania / Australia / Queensland                           |
| EPI_ISL_693272 | 3/22/2020  | 12/11/2020 Oceania / Australia / Queensland                           |

|                |            |                                             |
|----------------|------------|---------------------------------------------|
| EPI_ISL_693273 | 3/20/2020  | 12/11/2020 Oceania / Australia / Queensland |
| EPI_ISL_693274 | 3/20/2020  | 12/11/2020 Oceania / Australia / Queensland |
| EPI_ISL_693275 | 3/20/2020  | 12/11/2020 Oceania / Australia / Queensland |
| EPI_ISL_693276 | 3/21/2020  | 12/11/2020 Oceania / Australia / Queensland |
| EPI_ISL_693277 | 3/21/2020  | 12/11/2020 Oceania / Australia / Queensland |
| EPI_ISL_693278 | 3/21/2020  | 12/11/2020 Oceania / Australia / Queensland |
| EPI_ISL_693279 | 3/21/2020  | 12/11/2020 Oceania / Australia / Queensland |
| EPI_ISL_693280 | 3/20/2020  | 12/11/2020 Oceania / Australia / Queensland |
| EPI_ISL_693281 | 3/21/2020  | 12/11/2020 Oceania / Australia / Queensland |
| EPI_ISL_693282 | 11/8/2020  | 12/11/2020 Oceania / Australia / Queensland |
| EPI_ISL_693283 | 11/10/2020 | 12/11/2020 Oceania / Australia / Queensland |
| EPI_ISL_693284 | 11/11/2020 | 12/11/2020 Oceania / Australia / Queensland |
| EPI_ISL_693285 | 11/12/2020 | 12/11/2020 Oceania / Australia / Queensland |
| EPI_ISL_693286 | 3/25/2020  | 12/11/2020 Oceania / Australia / Queensland |
| EPI_ISL_693287 | 3/31/2020  | 12/11/2020 Oceania / Australia / Queensland |
| EPI_ISL_693288 | 3/30/2020  | 12/11/2020 Oceania / Australia / Queensland |
| EPI_ISL_693289 | 3/23/2020  | 12/11/2020 Oceania / Australia / Queensland |
| EPI_ISL_693290 | 2/4/2020   | 12/11/2020 Oceania / Australia / Queensland |
| EPI_ISL_693291 | 3/23/2020  | 12/11/2020 Oceania / Australia / Queensland |
| EPI_ISL_693292 | 3/22/2020  | 12/11/2020 Oceania / Australia / Queensland |
| EPI_ISL_693293 | 3/23/2020  | 12/11/2020 Oceania / Australia / Queensland |
| EPI_ISL_693294 | 3/23/2020  | 12/11/2020 Oceania / Australia / Queensland |
| EPI_ISL_693295 | 3/24/2020  | 12/11/2020 Oceania / Australia / Queensland |
| EPI_ISL_693296 | 3/24/2020  | 12/11/2020 Oceania / Australia / Queensland |
| EPI_ISL_693297 | 10/31/2020 | 12/11/2020 Oceania / Australia / Queensland |
| EPI_ISL_693298 | 7/29/2020  | 12/11/2020 Asia / Japan / Kanto             |
| EPI_ISL_693299 | 9/11/2020  | 12/11/2020 Asia / Japan / Kanto             |
| EPI_ISL_693302 | 11/11/2020 | 12/11/2020 Asia / Taiwan / Taipei           |
| EPI_ISL_693303 | 11/17/2020 | 12/11/2020 Asia / Taiwan / Taipei           |
| EPI_ISL_693304 | 11/20/2020 | 12/11/2020 Asia / Taiwan / Taipei           |
| EPI_ISL_693305 | 11/20/2020 | 12/11/2020 Asia / Taiwan / Taipei           |
| EPI_ISL_693306 | 11/20/2020 | 12/11/2020 Asia / Taiwan / Taipei           |
| EPI_ISL_693307 | 11/19/2020 | 12/11/2020 Asia / Singapore                 |
| EPI_ISL_693308 | 11/17/2020 | 12/11/2020 Asia / Singapore                 |
| EPI_ISL_693309 | 11/19/2020 | 12/11/2020 Asia / Singapore                 |
| EPI_ISL_693310 | 11/16/2020 | 12/11/2020 Asia / Singapore                 |
| EPI_ISL_693311 | 11/18/2020 | 12/11/2020 Asia / Singapore                 |
| EPI_ISL_693312 | 11/17/2020 | 12/11/2020 Asia / Singapore                 |
| EPI_ISL_693313 | 11/20/2020 | 12/11/2020 Asia / Singapore                 |
| EPI_ISL_693314 | 11/18/2020 | 12/11/2020 Asia / Singapore                 |
| EPI_ISL_693315 | 11/21/2020 | 12/11/2020 Asia / Singapore                 |
| EPI_ISL_693316 | 11/23/2020 | 12/11/2020 Asia / Singapore                 |
| EPI_ISL_693317 | 11/19/2020 | 12/11/2020 Asia / Singapore                 |
| EPI_ISL_693318 | 11/28/2020 | 12/11/2020 Asia / Singapore                 |
| EPI_ISL_693319 | 11/26/2020 | 12/11/2020 Asia / Singapore                 |
| EPI_ISL_693320 | 11/23/2020 | 12/11/2020 Asia / Singapore                 |
| EPI_ISL_693321 | 11/23/2020 | 12/11/2020 Asia / Singapore                 |



|                |            |            |                                                     |
|----------------|------------|------------|-----------------------------------------------------|
| EPI_ISL_693374 | 3/16/2020  | 12/11/2020 | Asia / Thailand / Bangkok                           |
| EPI_ISL_693375 | 3/16/2020  | 12/11/2020 | Asia / Thailand / Bangkok                           |
| EPI_ISL_693376 | 3/16/2020  | 12/11/2020 | Asia / Thailand / Bangkok                           |
| EPI_ISL_693377 | 3/16/2020  | 12/11/2020 | Asia / Thailand / Bangkok                           |
| EPI_ISL_693378 | 3/16/2020  | 12/11/2020 | Asia / Thailand / Bangkok                           |
| EPI_ISL_693379 | 3/16/2020  | 12/11/2020 | Asia / Thailand / Bangkok                           |
| EPI_ISL_693380 | 3/16/2020  | 12/11/2020 | Asia / Thailand / Bangkok                           |
| EPI_ISL_693381 | 3/17/2020  | 12/11/2020 | Asia / Thailand / Bangkok                           |
| EPI_ISL_693382 | 3/17/2020  | 12/11/2020 | Asia / Thailand / Bangkok                           |
| EPI_ISL_693383 | 3/17/2020  | 12/11/2020 | Asia / Thailand / Bangkok                           |
| EPI_ISL_693384 | 3/17/2020  | 12/11/2020 | Asia / Thailand / Bangkok                           |
| EPI_ISL_693385 | 3/17/2020  | 12/11/2020 | Asia / Thailand / Bangkok                           |
| EPI_ISL_693387 | 2/28/2020  | 12/11/2020 | Europe / France / Provence-Alpes-Cote d'Azur / Nice |
| EPI_ISL_693388 | 2/29/2020  | 12/11/2020 | Europe / France / Provence-Alpes-Cote d'Azur / Nice |
| EPI_ISL_693389 | 3/3/2020   | 12/11/2020 | Europe / France / Provence-Alpes-Cote d'Azur / Nice |
| EPI_ISL_693390 | 3/7/2020   | 12/11/2020 | Europe / France / Provence-Alpes-Cote d'Azur / Nice |
| EPI_ISL_693391 | 3/5/2020   | 12/11/2020 | Europe / France / Auvergne-Rhone-Alpes / Chambéry   |
| EPI_ISL_693397 | 11/17/2020 | 12/11/2020 | Europe / United Kingdom / England                   |
| EPI_ISL_693398 | 11/12/2020 | 12/11/2020 | Europe / United Kingdom / England                   |
| EPI_ISL_693399 | 11/12/2020 | 12/11/2020 | Europe / United Kingdom / England                   |
| EPI_ISL_693400 | 11/11/2020 | 12/11/2020 | Europe / United Kingdom / England                   |
| EPI_ISL_693401 | 11/13/2020 | 12/11/2020 | Europe / United Kingdom / England                   |
| EPI_ISL_693402 | 11/14/2020 | 12/11/2020 | Europe / United Kingdom / England                   |
| EPI_ISL_693403 | 11/15/2020 | 12/11/2020 | Europe / United Kingdom / England                   |
| EPI_ISL_693404 | 11/17/2020 | 12/11/2020 | Europe / United Kingdom / England                   |
| EPI_ISL_693406 | 11/18/2020 | 12/11/2020 | Europe / United Kingdom / England                   |
| EPI_ISL_693407 | 11/16/2020 | 12/11/2020 | Europe / United Kingdom / England                   |
| EPI_ISL_693408 | 11/7/2020  | 12/11/2020 | Europe / United Kingdom / England                   |
| EPI_ISL_693409 | 11/11/2020 | 12/11/2020 | Europe / United Kingdom / England                   |
| EPI_ISL_693410 | 11/11/2020 | 12/11/2020 | Europe / United Kingdom / England                   |
| EPI_ISL_693411 | 11/11/2020 | 12/11/2020 | Europe / United Kingdom / England                   |
| EPI_ISL_693412 | 11/12/2020 | 12/11/2020 | Europe / United Kingdom / England                   |
| EPI_ISL_693413 | 11/12/2020 | 12/11/2020 | Europe / United Kingdom / England                   |
| EPI_ISL_693414 | 11/11/2020 | 12/11/2020 | Europe / United Kingdom / England                   |
| EPI_ISL_693415 | 11/11/2020 | 12/11/2020 | Europe / United Kingdom / England                   |
| EPI_ISL_693416 | 11/12/2020 | 12/11/2020 | Europe / United Kingdom / England                   |
| EPI_ISL_693417 | 11/12/2020 | 12/11/2020 | Europe / United Kingdom / England                   |
| EPI_ISL_693418 | 11/12/2020 | 12/11/2020 | Europe / United Kingdom / England                   |
| EPI_ISL_693419 | 11/10/2020 | 12/11/2020 | Europe / United Kingdom / England                   |
| EPI_ISL_693420 | 11/11/2020 | 12/11/2020 | Europe / United Kingdom / England                   |
| EPI_ISL_693421 | 11/12/2020 | 12/11/2020 | Europe / United Kingdom / England                   |
| EPI_ISL_693422 | 11/11/2020 | 12/11/2020 | Europe / United Kingdom / England                   |
| EPI_ISL_693423 | 11/12/2020 | 12/11/2020 | Europe / United Kingdom / England                   |
| EPI_ISL_693424 | 11/12/2020 | 12/11/2020 | Europe / United Kingdom / England                   |
| EPI_ISL_693425 | 11/12/2020 | 12/11/2020 | Europe / United Kingdom / England                   |
| EPI_ISL_693426 | 11/13/2020 | 12/11/2020 | Europe / United Kingdom / England                   |
| EPI_ISL_693427 | 11/12/2020 | 12/11/2020 | Europe / United Kingdom / England                   |



|                |           |                                                          |
|----------------|-----------|----------------------------------------------------------|
| EPI_ISL_693475 | 7/20/2020 | 12/11/2020 Oceania / Papua New Guinea                    |
| EPI_ISL_693476 | 7/20/2020 | 12/11/2020 Oceania / Papua New Guinea                    |
| EPI_ISL_693477 | 8/29/2020 | 12/11/2020 Oceania / Papua New Guinea                    |
| EPI_ISL_693478 | 9/1/2020  | 12/11/2020 Oceania / Papua New Guinea                    |
| EPI_ISL_693479 | 9/14/2020 | 12/11/2020 Oceania / Papua New Guinea                    |
| EPI_ISL_693480 | 9/28/2020 | 12/11/2020 Oceania / Papua New Guinea                    |
| EPI_ISL_693481 | 9/15/2020 | 12/11/2020 Oceania / Papua New Guinea                    |
| EPI_ISL_693482 | 10/6/2020 | 12/11/2020 Oceania / Papua New Guinea                    |
| EPI_ISL_693483 | 10/6/2020 | 12/11/2020 Oceania / Papua New Guinea                    |
| EPI_ISL_693488 | 9/14/2020 | 12/11/2020 Europe / France / Auvergne-Rhone-Alpes / Lyon |
| EPI_ISL_693489 | 9/16/2020 | 12/11/2020 Europe / France / Auvergne-Rhone-Alpes / Lyon |
| EPI_ISL_693490 | 9/9/2020  | 12/11/2020 Europe / France / Auvergne-Rhone-Alpes / Lyon |
| EPI_ISL_693491 | 9/10/2020 | 12/11/2020 Europe / France / Auvergne-Rhone-Alpes / Lyon |
| EPI_ISL_693492 | 9/11/2020 | 12/11/2020 Europe / France / Auvergne-Rhone-Alpes / Lyon |
| EPI_ISL_693493 | 9/12/2020 | 12/11/2020 Europe / France / Auvergne-Rhone-Alpes / Lyon |
| EPI_ISL_693494 | 9/12/2020 | 12/11/2020 Europe / France / Auvergne-Rhone-Alpes / Lyon |
| EPI_ISL_693495 | 9/12/2020 | 12/11/2020 Europe / France / Auvergne-Rhone-Alpes / Lyon |
| EPI_ISL_693496 | 9/14/2020 | 12/11/2020 Europe / France / Auvergne-Rhone-Alpes / Lyon |
| EPI_ISL_693497 | 9/14/2020 | 12/11/2020 Europe / France / Auvergne-Rhone-Alpes / Lyon |
| EPI_ISL_693498 | 9/14/2020 | 12/11/2020 Europe / France / Auvergne-Rhone-Alpes / Lyon |
| EPI_ISL_693499 | 9/15/2020 | 12/11/2020 Europe / France / Auvergne-Rhone-Alpes / Lyon |
| EPI_ISL_693500 | 9/17/2020 | 12/11/2020 Europe / France / Auvergne-Rhone-Alpes / Lyon |
| EPI_ISL_693501 | 9/20/2020 | 12/11/2020 Europe / France / Auvergne-Rhone-Alpes / Lyon |
| EPI_ISL_693502 | 9/21/2020 | 12/11/2020 Europe / France / Auvergne-Rhone-Alpes / Lyon |
| EPI_ISL_693503 | 9/21/2020 | 12/11/2020 Europe / France / Auvergne-Rhone-Alpes / Lyon |
| EPI_ISL_693504 | 9/18/2020 | 12/11/2020 Europe / France / Auvergne-Rhone-Alpes / Lyon |
| EPI_ISL_693505 | 9/22/2020 | 12/11/2020 Europe / France / Auvergne-Rhone-Alpes / Lyon |
| EPI_ISL_693506 | 9/22/2020 | 12/11/2020 Europe / France / Auvergne-Rhone-Alpes / Lyon |
| EPI_ISL_693507 | 9/23/2020 | 12/11/2020 Europe / France / Auvergne-Rhone-Alpes / Lyon |
| EPI_ISL_693508 | 9/22/2020 | 12/11/2020 Europe / France / Auvergne-Rhone-Alpes / Lyon |
| EPI_ISL_693509 | 9/23/2020 | 12/11/2020 Europe / France / Auvergne-Rhone-Alpes / Lyon |
| EPI_ISL_693510 | 9/24/2020 | 12/11/2020 Europe / France / Auvergne-Rhone-Alpes / Lyon |
| EPI_ISL_693511 | 9/24/2020 | 12/11/2020 Europe / France / Auvergne-Rhone-Alpes / Lyon |
| EPI_ISL_693512 | 9/25/2020 | 12/11/2020 Europe / France / Auvergne-Rhone-Alpes / Lyon |
| EPI_ISL_693513 | 9/24/2020 | 12/11/2020 Europe / France / Auvergne-Rhone-Alpes / Lyon |
| EPI_ISL_693514 | 9/24/2020 | 12/11/2020 Europe / France / Auvergne-Rhone-Alpes / Lyon |
| EPI_ISL_693529 | 6/26/2020 | 12/11/2020 Europe / Portugal                             |
| EPI_ISL_693530 | 7/1/2020  | 12/11/2020 Europe / Portugal                             |
| EPI_ISL_693531 | 7/6/2020  | 12/11/2020 Europe / Portugal                             |
| EPI_ISL_693532 | 7/11/2020 | 12/11/2020 Europe / Portugal                             |
| EPI_ISL_693533 | 7/1/2020  | 12/11/2020 Europe / Portugal                             |
| EPI_ISL_693540 | 6/26/2020 | 12/11/2020 Europe / Portugal                             |
| EPI_ISL_693541 | 6/28/2020 | 12/11/2020 Europe / Portugal                             |
| EPI_ISL_693542 | 7/1/2020  | 12/11/2020 Europe / Portugal                             |
| EPI_ISL_693543 | 4/11/2020 | 12/11/2020 Europe / Portugal                             |
| EPI_ISL_693544 | 4/11/2020 | 12/11/2020 Europe / Portugal                             |
| EPI_ISL_693545 | 5/11/2020 | 12/11/2020 Europe / Portugal                             |







|                |            |            |                                                              |
|----------------|------------|------------|--------------------------------------------------------------|
| EPI_ISL_693640 | 8/24/2020  | 12/11/2020 | Europe / Portugal                                            |
| EPI_ISL_693641 | 8/24/2020  | 12/11/2020 | Europe / Portugal                                            |
| EPI_ISL_693642 | 8/24/2020  | 12/11/2020 | Europe / Portugal                                            |
| EPI_ISL_693643 | 8/24/2020  | 12/11/2020 | Europe / Portugal                                            |
| EPI_ISL_693644 | 8/24/2020  | 12/11/2020 | Europe / Portugal                                            |
| EPI_ISL_693645 | 8/24/2020  | 12/11/2020 | Europe / Portugal                                            |
| EPI_ISL_693646 | 8/24/2020  | 12/11/2020 | Europe / Portugal                                            |
| EPI_ISL_693647 | 8/24/2020  | 12/11/2020 | Europe / Portugal                                            |
| EPI_ISL_693648 | 8/24/2020  | 12/11/2020 | Europe / Portugal                                            |
| EPI_ISL_693649 | 8/24/2020  | 12/11/2020 | Europe / Portugal                                            |
| EPI_ISL_693650 | 8/24/2020  | 12/11/2020 | Europe / Portugal                                            |
| EPI_ISL_693651 | 8/25/2020  | 12/11/2020 | Europe / Portugal                                            |
| EPI_ISL_693652 | 8/23/2020  | 12/11/2020 | Europe / Portugal                                            |
| EPI_ISL_693653 | 8/24/2020  | 12/11/2020 | Europe / Portugal                                            |
| EPI_ISL_693654 | 8/24/2020  | 12/11/2020 | Europe / Portugal                                            |
| EPI_ISL_693655 | 8/24/2020  | 12/11/2020 | Europe / Portugal                                            |
| EPI_ISL_693656 | 8/24/2020  | 12/11/2020 | Europe / Portugal                                            |
| EPI_ISL_693657 | 8/22/2020  | 12/11/2020 | Europe / Portugal                                            |
| EPI_ISL_693658 | 8/14/2020  | 12/11/2020 | North America / USA / Missouri / St. Louis                   |
| EPI_ISL_693659 | 8/16/2020  | 12/11/2020 | North America / USA / Missouri / St. Louis                   |
| EPI_ISL_693660 | 10/26/2020 | 12/11/2020 | Europe / Czech Republic / South Moravian Region / Brno       |
| EPI_ISL_693661 | 11/3/2020  | 12/11/2020 | Europe / Czech Republic / Central Bohemian Region / Kochávk  |
| EPI_ISL_693663 | 11/4/2020  | 12/11/2020 | Europe / Czech Republic / Central Bohemian Region / Chrást   |
| EPI_ISL_693664 | 10/27/2020 | 12/11/2020 | Europe / Czech Republic / Hradec Kralove Region / Jiřetín    |
| EPI_ISL_693665 | 11/3/2020  | 12/11/2020 | Europe / Czech Republic / Prague                             |
| EPI_ISL_693666 | 11/3/2020  | 12/11/2020 | Europe / Czech Republic / Prague                             |
| EPI_ISL_693667 | 10/30/2020 | 12/11/2020 | Europe / Czech Republic / Prague                             |
| EPI_ISL_693668 | 11/4/2020  | 12/11/2020 | Europe / Czech Republic / Prague                             |
| EPI_ISL_693669 | 11/3/2020  | 12/11/2020 | Europe / Czech Republic                                      |
| EPI_ISL_693670 | 10/29/2020 | 12/11/2020 | Europe / Czech Republic / Central Bohemian Region / Zdiby    |
| EPI_ISL_693671 | 10/30/2020 | 12/11/2020 | Europe / Czech Republic / Moravian-Silesian Region / Ostrava |
| EPI_ISL_693672 | 11/3/2020  | 12/11/2020 | Europe / Czech Republic / Prague                             |
| EPI_ISL_693673 | 10/28/2020 | 12/11/2020 | Europe / Czech Republic / Prague                             |
| EPI_ISL_693674 | 11/4/2020  | 12/11/2020 | Europe / Czech Republic / Central Bohemian Region / Malinov  |
| EPI_ISL_693675 | 11/3/2020  | 12/11/2020 | Europe / Czech Republic                                      |
| EPI_ISL_693676 | 10/30/2020 | 12/11/2020 | Europe / Czech Republic / Prague                             |
| EPI_ISL_693677 | 11/3/2020  | 12/11/2020 | Europe / Czech Republic / Central Bohemian Region / Nymbur   |
| EPI_ISL_693678 | 11/3/2020  | 12/11/2020 | Europe / Czech Republic / ĀstĀ- nad Labem Region / Teplice   |
| EPI_ISL_693679 | 11/2/2020  | 12/11/2020 | Europe / Czech Republic / Prague                             |
| EPI_ISL_693680 | 11/1/2020  | 12/11/2020 | Europe / Czech Republic / Prague                             |
| EPI_ISL_693681 | 10/29/2020 | 12/11/2020 | Europe / Czech Republic / Prague                             |
| EPI_ISL_693682 | 11/3/2020  | 12/11/2020 | Europe / Czech Republic / ĀstĀ- nad Labem Region / TĀmbe     |
| EPI_ISL_693683 | 10/27/2020 | 12/11/2020 | Europe / Czech Republic                                      |
| EPI_ISL_693684 | 11/3/2020  | 12/11/2020 | Europe / Czech Republic / Prague                             |
| EPI_ISL_693685 | 11/3/2020  | 12/11/2020 | Europe / Czech Republic / Prague                             |
| EPI_ISL_693686 | 11/3/2020  | 12/11/2020 | Europe / Czech Republic / Central Bohemian Region / OndĀt    |
| EPI_ISL_693687 | 10/26/2020 | 12/11/2020 | Europe / Czech Republic / Prague                             |

|                |            |            |                                                         |
|----------------|------------|------------|---------------------------------------------------------|
| EPI_ISL_693727 | 5/27/2020  | 12/11/2020 | North America / USA / Delaware / Kent County            |
| EPI_ISL_693728 | 6/16/2020  | 12/11/2020 | North America / USA / Delaware / New Castle County      |
| EPI_ISL_693729 | 8/15/2020  | 12/11/2020 | North America / USA / Delaware                          |
| EPI_ISL_693730 | 5/27/2020  | 12/11/2020 | North America / USA / Delaware / Kent County            |
| EPI_ISL_693731 | 5/27/2020  | 12/11/2020 | North America / USA / Delaware / Kent County            |
| EPI_ISL_693732 | 5/27/2020  | 12/11/2020 | North America / USA / Delaware / Kent County            |
| EPI_ISL_693733 | 5/27/2020  | 12/11/2020 | North America / USA / Delaware / Kent County            |
| EPI_ISL_693734 | 5/27/2020  | 12/11/2020 | North America / USA / Delaware / Kent County            |
| EPI_ISL_693735 | 5/27/2020  | 12/11/2020 | North America / USA / Delaware / Kent County            |
| EPI_ISL_693736 | 5/27/2020  | 12/11/2020 | North America / USA / Delaware / Kent County            |
| EPI_ISL_693737 | 5/27/2020  | 12/11/2020 | North America / USA / Delaware / Kent County            |
| EPI_ISL_693738 | 5/27/2020  | 12/11/2020 | North America / USA / Delaware / Kent County            |
| EPI_ISL_693739 | 5/27/2020  | 12/11/2020 | North America / USA / Delaware / Kent County            |
| EPI_ISL_693740 | 5/27/2020  | 12/11/2020 | North America / USA / Delaware / Kent County            |
| EPI_ISL_693741 | 6/4/2020   | 12/11/2020 | North America / USA / Delaware / Kent County            |
| EPI_ISL_693742 | 7/7/2020   | 12/11/2020 | North America / USA / Delaware / Kent County            |
| EPI_ISL_693743 | 8/29/2020  | 12/11/2020 | North America / USA / Delaware / Kent County            |
| EPI_ISL_693744 | 9/21/2020  | 12/11/2020 | North America / USA / Delaware / Kent County            |
| EPI_ISL_693745 | 9/16/2020  | 12/11/2020 | North America / USA / Delaware / New Castle County      |
| EPI_ISL_693746 | 9/28/2020  | 12/11/2020 | North America / USA / Delaware / New Castle County      |
| EPI_ISL_693747 | 5/26/2020  | 12/11/2020 | North America / USA / Delaware / New Castle County      |
| EPI_ISL_693748 | 6/14/2020  | 12/11/2020 | North America / USA / Delaware / New Castle County      |
| EPI_ISL_693749 | 6/16/2020  | 12/11/2020 | North America / USA / Delaware / New Castle County      |
| EPI_ISL_693750 | 6/16/2020  | 12/11/2020 | North America / USA / Delaware / New Castle County      |
| EPI_ISL_693751 | 9/21/2020  | 12/11/2020 | North America / USA / Delaware / New Castle County      |
| EPI_ISL_693752 | 10/4/2020  | 12/11/2020 | North America / USA / Delaware / Sussex County          |
| EPI_ISL_693753 | 5/27/2020  | 12/11/2020 | North America / USA / Delaware / Sussex County          |
| EPI_ISL_693754 | 6/17/2020  | 12/11/2020 | North America / USA / Delaware / Sussex County          |
| EPI_ISL_693755 | 6/17/2020  | 12/11/2020 | North America / USA / Delaware / Sussex County          |
| EPI_ISL_693756 | 8/3/2020   | 12/11/2020 | North America / USA / Delaware / Sussex County          |
| EPI_ISL_693757 | 9/8/2020   | 12/11/2020 | North America / USA / Delaware / Sussex County          |
| EPI_ISL_693758 | 9/9/2020   | 12/11/2020 | Europe / France / Bretagne / Rennes                     |
| EPI_ISL_693759 | 9/9/2020   | 12/11/2020 | Europe / France / Bretagne / Rennes                     |
| EPI_ISL_693760 | 9/9/2020   | 12/11/2020 | Europe / France / Bretagne / Rennes                     |
| EPI_ISL_693761 | 9/9/2020   | 12/11/2020 | Europe / France / Bretagne / Rennes                     |
| EPI_ISL_693762 | 9/20/2020  | 12/11/2020 | Europe / France / Bretagne / Rennes                     |
| EPI_ISL_693764 | 10/18/2020 | 12/11/2020 | Europe / France / Bretagne / Rennes                     |
| EPI_ISL_693765 | 10/16/2020 | 12/11/2020 | Europe / France / Bretagne / Rennes                     |
| EPI_ISL_693766 | 11/24/2020 | 12/11/2020 | Europe / France / Centre-Val de Loire / Craon           |
| EPI_ISL_693767 | 11/3/2020  | 12/11/2020 | Europe / France / Grand Est / Brumath                   |
| EPI_ISL_693768 | 10/31/2020 | 12/11/2020 | Europe / France / Île-de-France / Egreville             |
| EPI_ISL_693769 | 11/3/2020  | 12/11/2020 | Europe / France / Île-de-France / Limay                 |
| EPI_ISL_693770 | 11/16/2020 | 12/11/2020 | Europe / France / Île-de-France / Paris                 |
| EPI_ISL_693771 | 11/9/2020  | 12/11/2020 | Europe / France / Île-de-France / Villeneuve-st-Georges |
| EPI_ISL_693772 | 11/9/2020  | 12/11/2020 | Europe / France / Hauts-de-France / Genech              |
| EPI_ISL_693773 | 10/23/2020 | 12/11/2020 | Europe / France / Hauts-de-France / Lille               |
| EPI_ISL_693774 | 11/25/2020 | 12/11/2020 | Europe / France / Hauts-de-France / Lille               |

|                |           |            |                                         |
|----------------|-----------|------------|-----------------------------------------|
| EPI_ISL_693775 | 11/3/2020 | 12/11/2020 | Europe / Switzerland / Wallis           |
| EPI_ISL_693776 | 11/3/2020 | 12/11/2020 | Europe / Switzerland / Basel-Landschaft |
| EPI_ISL_693777 | 11/3/2020 | 12/11/2020 | Europe / Switzerland / Basel-Landschaft |
| EPI_ISL_693778 | 11/3/2020 | 12/11/2020 | Europe / Switzerland / Jura             |
| EPI_ISL_693779 | 11/3/2020 | 12/11/2020 | Europe / Switzerland / Geneva           |
| EPI_ISL_693780 | 11/3/2020 | 12/11/2020 | Europe / Switzerland / Jura             |
| EPI_ISL_693781 | 11/3/2020 | 12/11/2020 | Europe / Switzerland / Wallis           |
| EPI_ISL_693782 | 11/3/2020 | 12/11/2020 | Europe / Switzerland / Basel-Landschaft |
| EPI_ISL_693783 | 11/3/2020 | 12/11/2020 | Europe / Switzerland / Basel-Landschaft |
| EPI_ISL_693784 | 11/3/2020 | 12/11/2020 | Europe / Switzerland / Basel-Landschaft |
| EPI_ISL_693785 | 11/3/2020 | 12/11/2020 | Europe / Switzerland / Basel-Landschaft |
| EPI_ISL_693786 | 11/3/2020 | 12/11/2020 | Europe / Switzerland / Geneva           |
| EPI_ISL_693787 | 11/3/2020 | 12/11/2020 | Europe / Switzerland / Basel-Landschaft |
| EPI_ISL_693788 | 11/3/2020 | 12/11/2020 | Europe / Switzerland / Basel-Landschaft |
| EPI_ISL_693789 | 11/3/2020 | 12/11/2020 | Europe / Switzerland / Jura             |
| EPI_ISL_693790 | 11/3/2020 | 12/11/2020 | Europe / Switzerland / Ticino           |
| EPI_ISL_693791 | 11/3/2020 | 12/11/2020 | Europe / Switzerland / Wallis           |
| EPI_ISL_693792 | 11/3/2020 | 12/11/2020 | Europe / Switzerland / Zurich           |
| EPI_ISL_693793 | 11/3/2020 | 12/11/2020 | Europe / Switzerland / Basel-Landschaft |
| EPI_ISL_693794 | 11/2/2020 | 12/11/2020 | Europe / Switzerland / Solothurn        |
| EPI_ISL_693795 | 11/2/2020 | 12/11/2020 | Europe / Switzerland / Geneva           |
| EPI_ISL_693796 | 11/2/2020 | 12/11/2020 | Europe / Switzerland / Bern             |
| EPI_ISL_693798 | 11/2/2020 | 12/11/2020 | Europe / Switzerland / Bern             |
| EPI_ISL_693799 | 11/2/2020 | 12/11/2020 | Europe / Switzerland / Wallis           |
| EPI_ISL_693800 | 11/2/2020 | 12/11/2020 | Europe / Switzerland / Geneva           |
| EPI_ISL_693802 | 11/2/2020 | 12/11/2020 | Europe / Switzerland / Grisons          |
| EPI_ISL_693803 | 11/2/2020 | 12/11/2020 | Europe / Switzerland / Solothurn        |
| EPI_ISL_693804 | 11/2/2020 | 12/11/2020 | Europe / Switzerland / Bern             |
| EPI_ISL_693805 | 11/2/2020 | 12/11/2020 | Europe / Switzerland / Geneva           |
| EPI_ISL_693806 | 11/2/2020 | 12/11/2020 | Europe / Switzerland / Vaud             |
| EPI_ISL_693808 | 11/2/2020 | 12/11/2020 | Europe / Switzerland / Bern             |
| EPI_ISL_693809 | 11/2/2020 | 12/11/2020 | Europe / Switzerland / Solothurn        |
| EPI_ISL_693810 | 11/2/2020 | 12/11/2020 | Europe / Switzerland / Schwyz           |
| EPI_ISL_693811 | 11/2/2020 | 12/11/2020 | Europe / Switzerland / Bern             |
| EPI_ISL_693812 | 11/2/2020 | 12/11/2020 | Europe / Switzerland / Aargau           |
| EPI_ISL_693813 | 11/2/2020 | 12/11/2020 | Europe / Switzerland / Aargau           |
| EPI_ISL_693814 | 11/2/2020 | 12/11/2020 | Europe / Switzerland / Zurich           |
| EPI_ISL_693815 | 11/2/2020 | 12/11/2020 | Europe / Switzerland / Zurich           |
| EPI_ISL_693816 | 11/2/2020 | 12/11/2020 | Europe / Switzerland / Wallis           |
| EPI_ISL_693817 | 11/2/2020 | 12/11/2020 | Europe / Switzerland / Aargau           |
| EPI_ISL_693818 | 11/2/2020 | 12/11/2020 | Europe / Switzerland / Zurich           |
| EPI_ISL_693819 | 11/2/2020 | 12/11/2020 | Europe / Switzerland / Lucerne          |
| EPI_ISL_693820 | 11/2/2020 | 12/11/2020 | Europe / Switzerland / Ticino           |
| EPI_ISL_693821 | 11/2/2020 | 12/11/2020 | Europe / Switzerland / Lucerne          |
| EPI_ISL_693822 | 11/2/2020 | 12/11/2020 | Europe / Switzerland / Zurich           |
| EPI_ISL_693823 | 11/2/2020 | 12/11/2020 | Europe / Switzerland / Aargau           |
| EPI_ISL_693824 | 11/2/2020 | 12/11/2020 | Europe / Switzerland / Zurich           |

|                |            |            |                                         |
|----------------|------------|------------|-----------------------------------------|
| EPI_ISL_693825 | 11/2/2020  | 12/11/2020 | Europe / Switzerland / Aargau           |
| EPI_ISL_693826 | 11/4/2020  | 12/11/2020 | Europe / Switzerland / Bern             |
| EPI_ISL_693827 | 11/4/2020  | 12/11/2020 | Europe / Switzerland / Schaffhausen     |
| EPI_ISL_693828 | 11/4/2020  | 12/11/2020 | Europe / Switzerland / Zurich           |
| EPI_ISL_693829 | 11/4/2020  | 12/11/2020 | Europe / Switzerland / Zurich           |
| EPI_ISL_693830 | 11/4/2020  | 12/11/2020 | Europe / Switzerland / Bern             |
| EPI_ISL_693831 | 11/4/2020  | 12/11/2020 | Europe / Switzerland / Solothurn        |
| EPI_ISL_693832 | 11/4/2020  | 12/11/2020 | Europe / Switzerland / Bern             |
| EPI_ISL_693833 | 11/4/2020  | 12/11/2020 | Europe / Switzerland / Schaffhausen     |
| EPI_ISL_693834 | 11/4/2020  | 12/11/2020 | Europe / Switzerland / Solothurn        |
| EPI_ISL_693835 | 11/4/2020  | 12/11/2020 | Europe / Switzerland / Aargau           |
| EPI_ISL_693836 | 11/4/2020  | 12/11/2020 | Europe / Switzerland / Vaud             |
| EPI_ISL_693837 | 11/4/2020  | 12/11/2020 | Europe / Switzerland / Schaffhausen     |
| EPI_ISL_693838 | 11/4/2020  | 12/11/2020 | Europe / Switzerland / Zurich           |
| EPI_ISL_693839 | 11/4/2020  | 12/11/2020 | Europe / Switzerland / Bern             |
| EPI_ISL_693840 | 11/4/2020  | 12/11/2020 | Europe / Switzerland / Bern             |
| EPI_ISL_693841 | 11/4/2020  | 12/11/2020 | Europe / Switzerland / Vaud             |
| EPI_ISL_693842 | 11/4/2020  | 12/11/2020 | Europe / Switzerland / Bern             |
| EPI_ISL_693843 | 11/4/2020  | 12/11/2020 | Europe / Switzerland / Neuchatel        |
| EPI_ISL_693844 | 10/30/2020 | 12/11/2020 | Europe / Switzerland / Vaud             |
| EPI_ISL_693845 | 10/30/2020 | 12/11/2020 | Europe / Switzerland / Vaud             |
| EPI_ISL_693846 | 10/30/2020 | 12/11/2020 | Europe / Switzerland / Bern             |
| EPI_ISL_693847 | 10/30/2020 | 12/11/2020 | Europe / Switzerland / Vaud             |
| EPI_ISL_693848 | 10/30/2020 | 12/11/2020 | Europe / Switzerland / Zurich           |
| EPI_ISL_693849 | 10/30/2020 | 12/11/2020 | Europe / Switzerland / Geneva           |
| EPI_ISL_693850 | 10/30/2020 | 12/11/2020 | Europe / Switzerland / Vaud             |
| EPI_ISL_693851 | 10/30/2020 | 12/11/2020 | Europe / Switzerland / Bern             |
| EPI_ISL_693852 | 10/30/2020 | 12/11/2020 | Europe / Switzerland / Zurich           |
| EPI_ISL_693853 | 10/30/2020 | 12/11/2020 | Europe / Switzerland / Vaud             |
| EPI_ISL_693854 | 10/30/2020 | 12/11/2020 | Europe / Switzerland / Geneva           |
| EPI_ISL_693855 | 10/30/2020 | 12/11/2020 | Europe / Switzerland / Geneva           |
| EPI_ISL_693856 | 10/30/2020 | 12/11/2020 | Europe / Switzerland / Geneva           |
| EPI_ISL_693857 | 10/30/2020 | 12/11/2020 | Europe / Switzerland / Vaud             |
| EPI_ISL_693859 | 10/30/2020 | 12/11/2020 | Europe / Switzerland / Geneva           |
| EPI_ISL_693860 | 11/12/2020 | 12/11/2020 | Europe / Switzerland / Aargau           |
| EPI_ISL_693861 | 11/12/2020 | 12/11/2020 | Europe / Switzerland / Basel-Landschaft |
| EPI_ISL_693862 | 11/12/2020 | 12/11/2020 | Europe / Switzerland / Basel-Stadt      |
| EPI_ISL_693863 | 11/12/2020 | 12/11/2020 | Europe / Switzerland / Basel-Landschaft |
| EPI_ISL_693864 | 11/12/2020 | 12/11/2020 | Europe / Switzerland / Basel-Landschaft |
| EPI_ISL_693865 | 11/12/2020 | 12/11/2020 | Europe / Switzerland / Basel-Landschaft |
| EPI_ISL_693866 | 11/12/2020 | 12/11/2020 | Europe / Switzerland / Basel-Landschaft |
| EPI_ISL_693867 | 11/12/2020 | 12/11/2020 | Europe / Switzerland / Basel-Stadt      |
| EPI_ISL_693868 | 11/12/2020 | 12/11/2020 | Europe / Switzerland / Basel-Landschaft |
| EPI_ISL_693869 | 11/12/2020 | 12/11/2020 | Europe / Switzerland / Basel-Landschaft |
| EPI_ISL_693870 | 11/12/2020 | 12/11/2020 | Europe / Switzerland / Basel-Stadt      |
| EPI_ISL_693871 | 11/12/2020 | 12/11/2020 | Europe / Switzerland / Basel-Landschaft |
| EPI_ISL_693872 | 11/12/2020 | 12/11/2020 | Europe / Switzerland / Basel-Stadt      |

|                |            |            |                                         |
|----------------|------------|------------|-----------------------------------------|
| EPI_ISL_693873 | 11/12/2020 | 12/11/2020 | Europe / Switzerland / Basel-Stadt      |
| EPI_ISL_693874 | 11/12/2020 | 12/11/2020 | Europe / Switzerland / Solothurn        |
| EPI_ISL_693875 | 11/10/2020 | 12/11/2020 | Europe / Switzerland / Bern             |
| EPI_ISL_693876 | 11/10/2020 | 12/11/2020 | Europe / Switzerland / Bern             |
| EPI_ISL_693877 | 11/10/2020 | 12/11/2020 | Europe / Switzerland / Bern             |
| EPI_ISL_693878 | 11/10/2020 | 12/11/2020 | Europe / Switzerland / Bern             |
| EPI_ISL_693879 | 11/10/2020 | 12/11/2020 | Europe / Switzerland / Bern             |
| EPI_ISL_693880 | 11/10/2020 | 12/11/2020 | Europe / Switzerland / Bern             |
| EPI_ISL_693881 | 11/10/2020 | 12/11/2020 | Europe / Switzerland / Bern             |
| EPI_ISL_693882 | 11/10/2020 | 12/11/2020 | Europe / Switzerland / Bern             |
| EPI_ISL_693883 | 11/10/2020 | 12/11/2020 | Europe / Switzerland / Bern             |
| EPI_ISL_693884 | 11/10/2020 | 12/11/2020 | Europe / Switzerland / Bern             |
| EPI_ISL_693885 | 11/10/2020 | 12/11/2020 | Europe / Switzerland / Vaud             |
| EPI_ISL_693886 | 11/10/2020 | 12/11/2020 | Europe / Switzerland / Vaud             |
| EPI_ISL_693887 | 11/9/2020  | 12/11/2020 | Europe / Switzerland / Grisons          |
| EPI_ISL_693888 | 11/9/2020  | 12/11/2020 | Europe / Switzerland / Basel-Stadt      |
| EPI_ISL_693889 | 11/9/2020  | 12/11/2020 | Europe / Switzerland / Grisons          |
| EPI_ISL_693890 | 11/9/2020  | 12/11/2020 | Europe / Switzerland / Geneva           |
| EPI_ISL_693891 | 11/9/2020  | 12/11/2020 | Europe / Switzerland / Wallis           |
| EPI_ISL_693892 | 11/9/2020  | 12/11/2020 | Europe / Switzerland / Aargau           |
| EPI_ISL_693893 | 11/9/2020  | 12/11/2020 | Europe / Switzerland / Schaffhausen     |
| EPI_ISL_693894 | 11/9/2020  | 12/11/2020 | Europe / Switzerland / Schaffhausen     |
| EPI_ISL_693896 | 11/8/2020  | 12/11/2020 | Europe / Switzerland / Bern             |
| EPI_ISL_693897 | 11/8/2020  | 12/11/2020 | Europe / Switzerland / Bern             |
| EPI_ISL_693898 | 11/8/2020  | 12/11/2020 | Europe / Switzerland / Bern             |
| EPI_ISL_693899 | 11/8/2020  | 12/11/2020 | Europe / Switzerland / Bern             |
| EPI_ISL_693900 | 11/8/2020  | 12/11/2020 | Europe / Switzerland / Bern             |
| EPI_ISL_693901 | 11/8/2020  | 12/11/2020 | Europe / Switzerland / Bern             |
| EPI_ISL_693902 | 11/8/2020  | 12/11/2020 | Europe / Switzerland / Bern             |
| EPI_ISL_693903 | 11/8/2020  | 12/11/2020 | Europe / Switzerland / Bern             |
| EPI_ISL_693904 | 11/8/2020  | 12/11/2020 | Europe / Switzerland / Bern             |
| EPI_ISL_693905 | 11/8/2020  | 12/11/2020 | Europe / Switzerland / Bern             |
| EPI_ISL_693906 | 11/8/2020  | 12/11/2020 | Europe / Switzerland / Bern             |
| EPI_ISL_693907 | 11/8/2020  | 12/11/2020 | Europe / Switzerland / Bern             |
| EPI_ISL_693908 | 11/8/2020  | 12/11/2020 | Europe / Switzerland / Grisons          |
| EPI_ISL_693909 | 11/8/2020  | 12/11/2020 | Europe / Switzerland / Schwyz           |
| EPI_ISL_693910 | 11/8/2020  | 12/11/2020 | Europe / Switzerland / Schwyz           |
| EPI_ISL_693911 | 11/8/2020  | 12/11/2020 | Europe / Switzerland / Zurich           |
| EPI_ISL_693913 | 11/8/2020  | 12/11/2020 | Europe / Switzerland / Schwyz           |
| EPI_ISL_693915 | 11/6/2020  | 12/11/2020 | Europe / Switzerland / Geneva           |
| EPI_ISL_693916 | 11/6/2020  | 12/11/2020 | Europe / Switzerland / Geneva           |
| EPI_ISL_693917 | 11/6/2020  | 12/11/2020 | Europe / Switzerland / Basel-Landschaft |
| EPI_ISL_693919 | 11/6/2020  | 12/11/2020 | Europe / Switzerland / Bern             |
| EPI_ISL_693920 | 11/6/2020  | 12/11/2020 | Europe / Switzerland / Basel-Landschaft |
| EPI_ISL_693921 | 11/6/2020  | 12/11/2020 | Europe / Switzerland / Basel-Landschaft |
| EPI_ISL_693922 | 11/6/2020  | 12/11/2020 | Europe / Switzerland / Basel-Landschaft |
| EPI_ISL_693923 | 11/6/2020  | 12/11/2020 | Europe / Switzerland / Basel-Landschaft |

|                |            |            |                                         |
|----------------|------------|------------|-----------------------------------------|
| EPI_ISL_693924 | 11/6/2020  | 12/11/2020 | Europe / Switzerland / Basel-Landschaft |
| EPI_ISL_693925 | 11/6/2020  | 12/11/2020 | Europe / Switzerland / Basel-Landschaft |
| EPI_ISL_693926 | 11/6/2020  | 12/11/2020 | Europe / Switzerland / Basel-Landschaft |
| EPI_ISL_693927 | 11/6/2020  | 12/11/2020 | Europe / Switzerland / Basel-Landschaft |
| EPI_ISL_693928 | 11/6/2020  | 12/11/2020 | Europe / Switzerland / Basel-Landschaft |
| EPI_ISL_693929 | 11/6/2020  | 12/11/2020 | Europe / Switzerland / Solothurn        |
| EPI_ISL_693930 | 11/6/2020  | 12/11/2020 | Europe / Switzerland / Solothurn        |
| EPI_ISL_693931 | 11/6/2020  | 12/11/2020 | Europe / Switzerland / Solothurn        |
| EPI_ISL_693932 | 11/6/2020  | 12/11/2020 | Europe / Switzerland / Basel-Landschaft |
| EPI_ISL_693933 | 11/6/2020  | 12/11/2020 | Europe / Switzerland / Solothurn        |
| EPI_ISL_693934 | 11/6/2020  | 12/11/2020 | Europe / Switzerland / Solothurn        |
| EPI_ISL_693935 | 11/6/2020  | 12/11/2020 | Europe / Switzerland / Solothurn        |
| EPI_ISL_693936 | 11/6/2020  | 12/11/2020 | Europe / Switzerland / Solothurn        |
| EPI_ISL_693937 | 11/6/2020  | 12/11/2020 | Europe / Switzerland / Solothurn        |
| EPI_ISL_693938 | 11/6/2020  | 12/11/2020 | Europe / Switzerland / Solothurn        |
| EPI_ISL_693939 | 11/5/2020  | 12/11/2020 | Europe / Switzerland / Basel-Stadt      |
| EPI_ISL_693940 | 11/6/2020  | 12/11/2020 | Europe / Switzerland / Aargau           |
| EPI_ISL_693941 | 11/7/2020  | 12/11/2020 | Europe / Switzerland / Basel-Stadt      |
| EPI_ISL_693942 | 11/10/2020 | 12/11/2020 | Europe / Switzerland / Basel-Stadt      |
| EPI_ISL_693943 | 11/10/2020 | 12/11/2020 | Europe / Switzerland / Basel-Stadt      |
| EPI_ISL_693944 | 11/13/2020 | 12/11/2020 | Europe / Switzerland / Basel-Stadt      |
| EPI_ISL_693945 | 11/13/2020 | 12/11/2020 | Europe / Switzerland / Basel-Stadt      |
| EPI_ISL_693946 | 11/14/2020 | 12/11/2020 | Europe / Switzerland / Basel-Stadt      |
| EPI_ISL_693949 | 11/16/2020 | 12/11/2020 | Europe / Switzerland / Geneva           |
| EPI_ISL_693950 | 11/17/2020 | 12/11/2020 | Europe / Switzerland / Vaud             |
| EPI_ISL_693951 | 11/17/2020 | 12/11/2020 | Europe / Switzerland / Vaud             |
| EPI_ISL_693952 | 11/16/2020 | 12/11/2020 | Europe / Switzerland / Schaffhausen     |
| EPI_ISL_693953 | 11/16/2020 | 12/11/2020 | Europe / Switzerland / Schaffhausen     |
| EPI_ISL_693954 | 11/16/2020 | 12/11/2020 | Europe / Switzerland / Schaffhausen     |
| EPI_ISL_693955 | 11/16/2020 | 12/11/2020 | Europe / Switzerland / Schaffhausen     |
| EPI_ISL_693956 | 11/16/2020 | 12/11/2020 | Europe / Switzerland / Vaud             |
| EPI_ISL_693957 | 11/16/2020 | 12/11/2020 | Europe / Switzerland / Schaffhausen     |
| EPI_ISL_693958 | 11/16/2020 | 12/11/2020 | Europe / Switzerland / Schaffhausen     |
| EPI_ISL_693959 | 11/16/2020 | 12/11/2020 | Europe / Switzerland / Schaffhausen     |
| EPI_ISL_693960 | 11/16/2020 | 12/11/2020 | Europe / Switzerland / Schaffhausen     |
| EPI_ISL_693961 | 11/16/2020 | 12/11/2020 | Europe / Switzerland / Schaffhausen     |
| EPI_ISL_693962 | 11/16/2020 | 12/11/2020 | Europe / Switzerland / Schaffhausen     |
| EPI_ISL_693963 | 11/16/2020 | 12/11/2020 | Europe / Switzerland / Schaffhausen     |
| EPI_ISL_693964 | 11/16/2020 | 12/11/2020 | Europe / Switzerland / Basel-Landschaft |
| EPI_ISL_693965 | 11/16/2020 | 12/11/2020 | Europe / Switzerland / Thurgau          |
| EPI_ISL_693966 | 11/16/2020 | 12/11/2020 | Europe / Switzerland / Zurich           |
| EPI_ISL_693967 | 11/16/2020 | 12/11/2020 | Europe / Switzerland / Bern             |
| EPI_ISL_693968 | 11/16/2020 | 12/11/2020 | Europe / Switzerland / Zurich           |
| EPI_ISL_693970 | 11/16/2020 | 12/11/2020 | Europe / Switzerland / Bern             |
| EPI_ISL_693971 | 11/16/2020 | 12/11/2020 | Europe / Switzerland / Bern             |
| EPI_ISL_693972 | 11/16/2020 | 12/11/2020 | Europe / Switzerland / Bern             |
| EPI_ISL_693973 | 11/16/2020 | 12/11/2020 | Europe / Switzerland / Bern             |

|                |            |            |                                                       |
|----------------|------------|------------|-------------------------------------------------------|
| EPI_ISL_693974 | 11/17/2020 | 12/11/2020 | Europe / Switzerland / Wallis                         |
| EPI_ISL_693975 | 11/17/2020 | 12/11/2020 | Europe / Switzerland / Vaud                           |
| EPI_ISL_693976 | 11/17/2020 | 12/11/2020 | Europe / Switzerland / Vaud                           |
| EPI_ISL_693977 | 11/17/2020 | 12/11/2020 | Europe / Switzerland / Vaud                           |
| EPI_ISL_693978 | 11/17/2020 | 12/11/2020 | Europe / Switzerland / Geneva                         |
| EPI_ISL_693979 | 11/17/2020 | 12/11/2020 | Europe / Switzerland / Geneva                         |
| EPI_ISL_693980 | 11/17/2020 | 12/11/2020 | Europe / Switzerland / Geneva                         |
| EPI_ISL_693981 | 11/17/2020 | 12/11/2020 | Europe / Switzerland / Geneva                         |
| EPI_ISL_693982 | 11/17/2020 | 12/11/2020 | Europe / Switzerland / Bern                           |
| EPI_ISL_693983 | 11/17/2020 | 12/11/2020 | Europe / Switzerland / Bern                           |
| EPI_ISL_693984 | 11/17/2020 | 12/11/2020 | Europe / Switzerland / Bern                           |
| EPI_ISL_693985 | 11/17/2020 | 12/11/2020 | Europe / Switzerland / Bern                           |
| EPI_ISL_693986 | 11/17/2020 | 12/11/2020 | Europe / Switzerland / Bern                           |
| EPI_ISL_693987 | 11/17/2020 | 12/11/2020 | Europe / Switzerland / Bern                           |
| EPI_ISL_693988 | 11/17/2020 | 12/11/2020 | Europe / Switzerland / Bern                           |
| EPI_ISL_693989 | 11/17/2020 | 12/11/2020 | Europe / Switzerland / Bern                           |
| EPI_ISL_693990 | 11/17/2020 | 12/11/2020 | Europe / Switzerland / Bern                           |
| EPI_ISL_693991 | 11/17/2020 | 12/11/2020 | Europe / Switzerland / Vaud                           |
| EPI_ISL_693992 | 11/19/2020 | 12/11/2020 | Europe / Switzerland / Bern                           |
| EPI_ISL_693993 | 11/19/2020 | 12/11/2020 | Europe / Switzerland / Bern                           |
| EPI_ISL_693994 | 11/19/2020 | 12/11/2020 | Europe / Switzerland / Bern                           |
| EPI_ISL_693995 | 11/19/2020 | 12/11/2020 | Europe / Switzerland / Zurich                         |
| EPI_ISL_693996 | 11/19/2020 | 12/11/2020 | Europe / Switzerland / Aargau                         |
| EPI_ISL_693997 | 11/19/2020 | 12/11/2020 | Europe / Switzerland / Zurich                         |
| EPI_ISL_693999 | 11/19/2020 | 12/11/2020 | Europe / Switzerland / Zurich                         |
| EPI_ISL_694000 | 11/19/2020 | 12/11/2020 | Europe / Switzerland / Zurich                         |
| EPI_ISL_694001 | 11/19/2020 | 12/11/2020 | Europe / Switzerland / Zurich                         |
| EPI_ISL_694002 | 11/19/2020 | 12/11/2020 | Europe / Switzerland / Bern                           |
| EPI_ISL_694003 | 11/19/2020 | 12/11/2020 | Europe / Switzerland / Basel-Stadt                    |
| EPI_ISL_694004 | 11/19/2020 | 12/11/2020 | Europe / Switzerland / Aargau                         |
| EPI_ISL_694005 | 11/19/2020 | 12/11/2020 | Europe / Switzerland / Aargau                         |
| EPI_ISL_694006 | 11/19/2020 | 12/11/2020 | Europe / Switzerland / Bern                           |
| EPI_ISL_694007 | 11/19/2020 | 12/11/2020 | Europe / Switzerland / Zurich                         |
| EPI_ISL_694008 | 11/19/2020 | 12/11/2020 | Europe / Switzerland / Aargau                         |
| EPI_ISL_694009 | 5/14/2020  | 12/11/2020 | North America / USA / Arizona                         |
| EPI_ISL_694010 | 5/15/2020  | 12/11/2020 | North America / USA / Arizona                         |
| EPI_ISL_694011 | 5/15/2020  | 12/11/2020 | North America / USA / Arizona                         |
| EPI_ISL_694013 | 5/16/2020  | 12/11/2020 | North America / USA / Arizona                         |
| EPI_ISL_694014 | 5/16/2020  | 12/11/2020 | North America / USA / Arizona                         |
| EPI_ISL_694016 | 5/20/2020  | 12/11/2020 | North America / USA / Arizona                         |
| EPI_ISL_694017 | 5/20/2020  | 12/11/2020 | North America / USA / Arizona                         |
| EPI_ISL_694021 | 5/22/2020  | 12/11/2020 | North America / USA / Arizona                         |
| EPI_ISL_694030 | 5/27/2020  | 12/11/2020 | North America / USA / Arizona                         |
| EPI_ISL_694031 | 5/27/2020  | 12/11/2020 | North America / USA / Arizona                         |
| EPI_ISL_694033 | 5/27/2020  | 12/11/2020 | North America / USA / Arizona                         |
| EPI_ISL_694039 | 6/8/2020   | 12/11/2020 | North America / USA / Arizona                         |
| EPI_ISL_694046 | 9/29/2020  | 12/12/2020 | North America / USA / California / Los Angeles County |















































|                |            |            |                                                   |
|----------------|------------|------------|---------------------------------------------------|
| EPI_ISL_696335 | 5/2/2020   | 12/12/2020 | North America / USA / Arizona                     |
| EPI_ISL_696338 | 5/2/2020   | 12/12/2020 | North America / USA / Arizona                     |
| EPI_ISL_696342 | 5/2/2020   | 12/12/2020 | North America / USA / Arizona                     |
| EPI_ISL_696345 | 5/2/2020   | 12/12/2020 | North America / USA / Arizona                     |
| EPI_ISL_696348 | 4/29/2020  | 12/12/2020 | North America / USA / Arizona                     |
| EPI_ISL_696354 | 4/30/2020  | 12/12/2020 | North America / USA / Arizona                     |
| EPI_ISL_696366 | 4/30/2020  | 12/12/2020 | North America / USA / Arizona                     |
| EPI_ISL_696369 | 4/29/2020  | 12/12/2020 | North America / USA / Arizona                     |
| EPI_ISL_696374 | 4/30/2020  | 12/12/2020 | North America / USA / Arizona                     |
| EPI_ISL_696375 | 4/29/2020  | 12/12/2020 | North America / USA / Arizona                     |
| EPI_ISL_696376 | 4/29/2020  | 12/12/2020 | North America / USA / Arizona                     |
| EPI_ISL_696377 | 4/29/2020  | 12/12/2020 | North America / USA / Arizona                     |
| EPI_ISL_696384 | 4/29/2020  | 12/12/2020 | North America / USA / Arizona                     |
| EPI_ISL_696392 | 4/30/2020  | 12/12/2020 | North America / USA / Arizona                     |
| EPI_ISL_696394 | 4/30/2020  | 12/12/2020 | North America / USA / Arizona                     |
| EPI_ISL_696397 | 4/30/2020  | 12/12/2020 | North America / USA / Arizona                     |
| EPI_ISL_696407 | 4/30/2020  | 12/12/2020 | North America / USA / Arizona                     |
| EPI_ISL_696409 | 4/30/2020  | 12/12/2020 | North America / USA / Arizona                     |
| EPI_ISL_696410 | 5/1/2020   | 12/12/2020 | North America / USA / Arizona                     |
| EPI_ISL_696412 | 5/1/2020   | 12/12/2020 | North America / USA / Arizona                     |
| EPI_ISL_696414 | 4/30/2020  | 12/12/2020 | North America / USA / Arizona                     |
| EPI_ISL_696416 | 3/24/2020  | 12/12/2020 | North America / USA / Arizona                     |
| EPI_ISL_696420 | 3/28/2020  | 12/12/2020 | North America / USA / Arizona                     |
| EPI_ISL_696430 | 3/27/2020  | 12/12/2020 | North America / USA / Arizona                     |
| EPI_ISL_696432 | 3/25/2020  | 12/12/2020 | North America / USA / Arizona                     |
| EPI_ISL_696433 | 3/24/2020  | 12/12/2020 | North America / USA / Arizona                     |
| EPI_ISL_696443 | 5/1/2020   | 12/12/2020 | North America / USA / Arizona                     |
| EPI_ISL_696447 | 5/1/2020   | 12/12/2020 | North America / USA / Arizona                     |
| EPI_ISL_696452 | 11/19/2020 | 12/12/2020 | Africa / South Africa / Western Cape / George     |
| EPI_ISL_696453 | 11/20/2020 | 12/12/2020 | Africa / South Africa / Western Cape / George     |
| EPI_ISL_696454 | 11/20/2020 | 12/12/2020 | Africa / South Africa / Western Cape / Bitou      |
| EPI_ISL_696455 | 11/19/2020 | 12/12/2020 | Africa / South Africa / Western Cape / George     |
| EPI_ISL_696456 | 11/20/2020 | 12/12/2020 | Africa / South Africa / Western Cape / George     |
| EPI_ISL_696457 | 11/19/2020 | 12/12/2020 | Africa / South Africa / Western Cape / Knysna     |
| EPI_ISL_696458 | 11/20/2020 | 12/12/2020 | Africa / South Africa / Western Cape / George     |
| EPI_ISL_696459 | 11/20/2020 | 12/12/2020 | Africa / South Africa / Western Cape / George     |
| EPI_ISL_696460 | 11/20/2020 | 12/12/2020 | Africa / South Africa / Western Cape / Bitou      |
| EPI_ISL_696461 | 11/19/2020 | 12/12/2020 | Africa / South Africa / Western Cape / George     |
| EPI_ISL_696462 | 11/19/2020 | 12/12/2020 | Africa / South Africa / Western Cape / Knysna     |
| EPI_ISL_696463 | 11/18/2020 | 12/12/2020 | Africa / South Africa / Western Cape / Knysna     |
| EPI_ISL_696464 | 11/19/2020 | 12/12/2020 | Africa / South Africa / Western Cape / Western    |
| EPI_ISL_696465 | 11/18/2020 | 12/12/2020 | Africa / South Africa / Western Cape / Bitou      |
| EPI_ISL_696466 | 11/19/2020 | 12/12/2020 | Africa / South Africa / Western Cape / Mossel Bay |
| EPI_ISL_696467 | 11/18/2020 | 12/12/2020 | Africa / South Africa / Western Cape / Knysna     |
| EPI_ISL_696468 | 11/18/2020 | 12/12/2020 | Africa / South Africa / Western Cape / Bitou      |
| EPI_ISL_696469 | 11/18/2020 | 12/12/2020 | Africa / South Africa / Western Cape / Knysna     |
| EPI_ISL_696470 | 11/19/2020 | 12/12/2020 | Africa / South Africa / Western Cape / George     |



|                |            |            |                                                    |
|----------------|------------|------------|----------------------------------------------------|
| EPI_ISL_696520 | 11/24/2020 | 12/12/2020 | Africa / South Africa / Western Cape / George      |
| EPI_ISL_696521 | 11/24/2020 | 12/12/2020 | Africa / South Africa / Western Cape / George      |
| EPI_ISL_697783 | 7/22/2020  | 12/13/2020 | South America / Ecuador / Imbabura / Ibarra        |
| EPI_ISL_697784 | 8/12/2020  | 12/13/2020 | South America / Ecuador / Imbabura / Otavalo       |
| EPI_ISL_697785 | 8/12/2020  | 12/13/2020 | South America / Ecuador / Imbabura / Otavalo       |
| EPI_ISL_697786 | 8/12/2020  | 12/13/2020 | South America / Ecuador / Imbabura / Otavalo       |
| EPI_ISL_697788 | 8/19/2020  | 12/13/2020 | South America / Ecuador / Imbabura / Otavalo       |
| EPI_ISL_697789 | 9/2/2020   | 12/13/2020 | South America / Ecuador / Imbabura / Otavalo       |
| EPI_ISL_697790 | 9/7/2020   | 12/13/2020 | South America / Ecuador / Imbabura / Otavalo       |
| EPI_ISL_697792 | 9/2/2020   | 12/13/2020 | South America / Ecuador / Imbabura / San Pablo     |
| EPI_ISL_697793 | 9/7/2020   | 12/13/2020 | South America / Ecuador / Imbabura / Otavalo       |
| EPI_ISL_697794 | 9/29/2020  | 12/13/2020 | South America / Ecuador / Morona Santiago / Morona |
| EPI_ISL_697795 | 9/29/2020  | 12/13/2020 | South America / Ecuador / Morona Santiago / Morona |
| EPI_ISL_697796 | 5/26/2020  | 12/13/2020 | South America / Ecuador / Napo / Tena              |
| EPI_ISL_697798 | 11/30/2020 | 12/13/2020 | South America / Ecuador / Sucumbios                |
| EPI_ISL_697799 | 11/30/2020 | 12/13/2020 | South America / Ecuador / Sucumbios                |
| EPI_ISL_697800 | 11/30/2020 | 12/13/2020 | South America / Ecuador / Santa Elena              |
| EPI_ISL_698079 | 11/24/2020 | 12/13/2020 | North America / Canada / Ontario                   |
| EPI_ISL_698080 | 11/24/2020 | 12/13/2020 | North America / Canada / Ontario                   |
| EPI_ISL_698081 | 11/24/2020 | 12/13/2020 | North America / Canada / Ontario                   |
| EPI_ISL_698083 | 11/24/2020 | 12/13/2020 | North America / Canada / Ontario                   |
| EPI_ISL_698084 | 11/24/2020 | 12/13/2020 | North America / Canada / Ontario                   |
| EPI_ISL_698085 | 11/24/2020 | 12/13/2020 | North America / Canada / Ontario                   |
| EPI_ISL_698086 | 11/24/2020 | 12/13/2020 | North America / Canada / Ontario                   |
| EPI_ISL_698089 | 11/24/2020 | 12/13/2020 | North America / Canada / Ontario                   |
| EPI_ISL_698090 | 11/24/2020 | 12/13/2020 | North America / Canada / Ontario                   |
| EPI_ISL_698091 | 11/24/2020 | 12/13/2020 | North America / Canada / Ontario                   |
| EPI_ISL_698092 | 11/24/2020 | 12/13/2020 | North America / Canada / Ontario                   |
| EPI_ISL_698093 | 11/24/2020 | 12/13/2020 | North America / Canada / Ontario                   |
| EPI_ISL_698094 | 11/24/2020 | 12/13/2020 | North America / Canada / Ontario                   |
| EPI_ISL_698095 | 11/24/2020 | 12/13/2020 | North America / Canada / Ontario                   |
| EPI_ISL_698096 | 11/24/2020 | 12/13/2020 | North America / Canada / Ontario                   |
| EPI_ISL_698097 | 11/24/2020 | 12/13/2020 | North America / Canada / Ontario                   |
| EPI_ISL_698098 | 11/24/2020 | 12/13/2020 | North America / Canada / Ontario                   |
| EPI_ISL_698099 | 11/24/2020 | 12/13/2020 | North America / Canada / Ontario                   |
| EPI_ISL_698100 | 11/24/2020 | 12/13/2020 | North America / Canada / Ontario                   |
| EPI_ISL_698101 | 11/24/2020 | 12/13/2020 | North America / Canada / Ontario                   |
| EPI_ISL_698102 | 11/24/2020 | 12/13/2020 | North America / Canada / Ontario                   |
| EPI_ISL_698103 | 11/24/2020 | 12/13/2020 | North America / Canada / Ontario                   |
| EPI_ISL_698104 | 11/24/2020 | 12/13/2020 | North America / Canada / Ontario                   |
| EPI_ISL_698105 | 6/11/2020  | 12/13/2020 | Asia / United Arab Emirates / Abu Dhabi            |
| EPI_ISL_698106 | 6/11/2020  | 12/13/2020 | Asia / United Arab Emirates / Abu Dhabi            |
| EPI_ISL_698107 | 6/11/2020  | 12/13/2020 | Asia / United Arab Emirates / Abu Dhabi            |
| EPI_ISL_698108 | 6/11/2020  | 12/13/2020 | Asia / United Arab Emirates / Abu Dhabi            |
| EPI_ISL_698109 | 6/11/2020  | 12/13/2020 | Asia / United Arab Emirates / Abu Dhabi            |
| EPI_ISL_698110 | 6/11/2020  | 12/13/2020 | Asia / United Arab Emirates / Abu Dhabi            |
| EPI_ISL_698111 | 6/11/2020  | 12/13/2020 | Asia / United Arab Emirates / Abu Dhabi            |



















































|                |            |            |                                              |
|----------------|------------|------------|----------------------------------------------|
| EPI_ISL_699150 | 6/11/2020  | 12/13/2020 | Asia / United Arab Emirates / Abu Dhabi      |
| EPI_ISL_699151 | 6/11/2020  | 12/13/2020 | Asia / United Arab Emirates / Abu Dhabi      |
| EPI_ISL_699152 | 6/11/2020  | 12/13/2020 | Asia / United Arab Emirates / Abu Dhabi      |
| EPI_ISL_699153 | 6/11/2020  | 12/13/2020 | Asia / United Arab Emirates / Abu Dhabi      |
| EPI_ISL_699154 | 6/11/2020  | 12/13/2020 | Asia / United Arab Emirates / Abu Dhabi      |
| EPI_ISL_699155 | 6/11/2020  | 12/13/2020 | Asia / United Arab Emirates / Abu Dhabi      |
| EPI_ISL_699156 | 6/11/2020  | 12/13/2020 | Asia / United Arab Emirates / Abu Dhabi      |
| EPI_ISL_699157 | 6/11/2020  | 12/13/2020 | Asia / United Arab Emirates / Abu Dhabi      |
| EPI_ISL_699158 | 6/11/2020  | 12/13/2020 | Asia / United Arab Emirates / Abu Dhabi      |
| EPI_ISL_699159 | 6/11/2020  | 12/13/2020 | Asia / United Arab Emirates / Abu Dhabi      |
| EPI_ISL_699160 | 6/11/2020  | 12/13/2020 | Asia / United Arab Emirates / Abu Dhabi      |
| EPI_ISL_699161 | 6/11/2020  | 12/13/2020 | Asia / United Arab Emirates / Abu Dhabi      |
| EPI_ISL_699464 | 3/15/2020  | 12/14/2020 | Asia / Thailand / Phuket                     |
| EPI_ISL_699484 | 2020       | 12/14/2020 | Asia / Thailand / Bangkok                    |
| EPI_ISL_699655 | 11/23/2020 | 12/14/2020 | Africa / Tunisia / Nabeul                    |
| EPI_ISL_699656 | 3/24/2020  | 12/14/2020 | Africa / Tunisia / Tunis                     |
| EPI_ISL_699657 | 3/16/2020  | 12/14/2020 | Africa / Tunisia / Monastir                  |
| EPI_ISL_699658 | 4/23/2020  | 12/14/2020 | Asia / India / Uttar Pradesh / Jaunpur       |
| EPI_ISL_699659 | 4/29/2020  | 12/14/2020 | Asia / India / Maharashtra / Raigad          |
| EPI_ISL_699660 | 5/1/2020   | 12/14/2020 | Asia / India / Maharashtra / Raigad          |
| EPI_ISL_699661 | 5/1/2020   | 12/14/2020 | Asia / India / Maharashtra / Raigad          |
| EPI_ISL_699662 | 5/1/2020   | 12/14/2020 | Asia / India / Maharashtra / Thane           |
| EPI_ISL_699663 | 5/2/2020   | 12/14/2020 | Asia / India / Maharashtra / Mumbai          |
| EPI_ISL_699664 | 5/2/2020   | 12/14/2020 | Asia / India / Maharashtra / Raigad          |
| EPI_ISL_699665 | 5/2/2020   | 12/14/2020 | Asia / India / Maharashtra / Thane           |
| EPI_ISL_699666 | 5/2/2020   | 12/14/2020 | Asia / India / Maharashtra / Thane           |
| EPI_ISL_699667 | 5/2/2020   | 12/14/2020 | Asia / India / Maharashtra / Thane           |
| EPI_ISL_699668 | 5/2/2020   | 12/14/2020 | Asia / India / Maharashtra / Thane           |
| EPI_ISL_699669 | 5/2/2020   | 12/14/2020 | Asia / India / Maharashtra / Thane           |
| EPI_ISL_699670 | 5/3/2020   | 12/14/2020 | Asia / India / Maharashtra / Raigad          |
| EPI_ISL_699671 | 5/3/2020   | 12/14/2020 | Asia / India / Maharashtra / Raigad          |
| EPI_ISL_699672 | 5/3/2020   | 12/14/2020 | Asia / India / Maharashtra / Raigad          |
| EPI_ISL_699673 | 5/3/2020   | 12/14/2020 | Asia / India / Maharashtra / Raigad          |
| EPI_ISL_699674 | 5/3/2020   | 12/14/2020 | Asia / India / Maharashtra / Raigad          |
| EPI_ISL_699675 | 5/3/2020   | 12/14/2020 | Asia / India / Maharashtra / Raigad          |
| EPI_ISL_699676 | 5/3/2020   | 12/14/2020 | Asia / India / Maharashtra / Raigad          |
| EPI_ISL_699677 | 5/4/2020   | 12/14/2020 | Asia / India / Maharashtra / Raigad          |
| EPI_ISL_699678 | 5/3/2020   | 12/14/2020 | Asia / India / Maharashtra / Thane           |
| EPI_ISL_699679 | 5/3/2020   | 12/14/2020 | Asia / India / Maharashtra / Thane           |
| EPI_ISL_699680 | 5/3/2020   | 12/14/2020 | Asia / India / Maharashtra / Thane           |
| EPI_ISL_699681 | 5/3/2020   | 12/14/2020 | Asia / India / Maharashtra / Thane           |
| EPI_ISL_699682 | 5/4/2020   | 12/14/2020 | Asia / India / Maharashtra / Raigad          |
| EPI_ISL_699683 | 5/4/2020   | 12/14/2020 | Asia / India / Maharashtra / Raigad          |
| EPI_ISL_699684 | 5/4/2020   | 12/14/2020 | Asia / India / Maharashtra / Raigad          |
| EPI_ISL_699685 | 5/5/2020   | 12/14/2020 | Asia / India / Maharashtra / Raigad          |
| EPI_ISL_699686 | 5/6/2020   | 12/14/2020 | Asia / India / Maharashtra / Raigad          |
| EPI_ISL_699687 | 5/6/2020   | 12/14/2020 | Asia / India / Maharashtra / Mumbai Suburban |





























|                |           |            |                                          |
|----------------|-----------|------------|------------------------------------------|
| EPI_ISL_700273 | 9/14/2020 | 12/14/2020 | Asia / India / Maharashtra / Raigad      |
| EPI_ISL_700274 | 9/14/2020 | 12/14/2020 | Asia / India / Maharashtra / Raigad      |
| EPI_ISL_700275 | 9/14/2020 | 12/14/2020 | Asia / India / Maharashtra / Raigad      |
| EPI_ISL_700276 | 9/14/2020 | 12/14/2020 | Asia / India / Maharashtra / Raigad      |
| EPI_ISL_700277 | 9/14/2020 | 12/14/2020 | Asia / India / Maharashtra / Raigad      |
| EPI_ISL_700278 | 9/14/2020 | 12/14/2020 | Asia / India / Maharashtra / Raigad      |
| EPI_ISL_700279 | 9/14/2020 | 12/14/2020 | Asia / India / Maharashtra / Raigad      |
| EPI_ISL_700280 | 9/14/2020 | 12/14/2020 | Asia / India / Maharashtra / Thane       |
| EPI_ISL_700281 | 9/14/2020 | 12/14/2020 | Asia / India / Maharashtra / Raigad      |
| EPI_ISL_700282 | 9/14/2020 | 12/14/2020 | Asia / India / Maharashtra / Raigad      |
| EPI_ISL_700283 | 9/14/2020 | 12/14/2020 | Asia / India / Maharashtra / Raigad      |
| EPI_ISL_700284 | 9/14/2020 | 12/14/2020 | Asia / India / Maharashtra / Raigad      |
| EPI_ISL_700285 | 9/14/2020 | 12/14/2020 | Asia / India / Maharashtra / Raigad      |
| EPI_ISL_700286 | 9/14/2020 | 12/14/2020 | Asia / India / Maharashtra / Raigad      |
| EPI_ISL_700287 | 9/14/2020 | 12/14/2020 | Asia / India / Maharashtra / Raigad      |
| EPI_ISL_700288 | 9/15/2020 | 12/14/2020 | Asia / India / Maharashtra / Raigad      |
| EPI_ISL_700289 | 9/15/2020 | 12/14/2020 | Asia / India / Maharashtra / Mumbai      |
| EPI_ISL_700290 | 9/15/2020 | 12/14/2020 | Asia / India / Maharashtra / Raigad      |
| EPI_ISL_700291 | 9/15/2020 | 12/14/2020 | Asia / India / Maharashtra / Thane       |
| EPI_ISL_700292 | 9/16/2020 | 12/14/2020 | Asia / India / Maharashtra / Raigad      |
| EPI_ISL_700293 | 9/16/2020 | 12/14/2020 | Asia / India / Maharashtra / Raigad      |
| EPI_ISL_700294 | 9/16/2020 | 12/14/2020 | Asia / India / Maharashtra / Washim      |
| EPI_ISL_700295 | 9/16/2020 | 12/14/2020 | Asia / India / Maharashtra / Thane       |
| EPI_ISL_700296 | 9/18/2020 | 12/14/2020 | Asia / India / Maharashtra / Raigad      |
| EPI_ISL_700297 | 9/18/2020 | 12/14/2020 | Asia / India / Maharashtra / Raigad      |
| EPI_ISL_700298 | 9/18/2020 | 12/14/2020 | Asia / India / Maharashtra / Raigad      |
| EPI_ISL_700299 | 9/18/2020 | 12/14/2020 | Asia / India / Maharashtra / Raigad      |
| EPI_ISL_700300 | 9/18/2020 | 12/14/2020 | Asia / India / Maharashtra / Raigad      |
| EPI_ISL_700301 | 9/18/2020 | 12/14/2020 | Asia / India / Maharashtra / Raigad      |
| EPI_ISL_700302 | 9/18/2020 | 12/14/2020 | Asia / India / Maharashtra / Raigad      |
| EPI_ISL_700303 | 9/18/2020 | 12/14/2020 | Asia / India / Maharashtra / Raigad      |
| EPI_ISL_700304 | 9/19/2020 | 12/14/2020 | Asia / India / Maharashtra / Raigad      |
| EPI_ISL_700305 | 9/19/2020 | 12/14/2020 | Asia / India / Maharashtra / Raigad      |
| EPI_ISL_700306 | 9/19/2020 | 12/14/2020 | Asia / India / Uttar Pradesh / Gorakhpur |
| EPI_ISL_700307 | 9/19/2020 | 12/14/2020 | Asia / India / Maharashtra / Raigad      |
| EPI_ISL_700308 | 9/20/2020 | 12/14/2020 | Asia / India / Maharashtra / Raigad      |
| EPI_ISL_700309 | 9/22/2020 | 12/14/2020 | Asia / India / Maharashtra / Raigad      |
| EPI_ISL_700310 | 9/22/2020 | 12/14/2020 | Asia / India / Maharashtra / Hingoli     |
| EPI_ISL_700311 | 9/23/2020 | 12/14/2020 | Asia / India / West Bengal / Murshidabad |
| EPI_ISL_700312 | 9/23/2020 | 12/14/2020 | Asia / India / Maharashtra / Thane       |
| EPI_ISL_700313 | 9/24/2020 | 12/14/2020 | Asia / India / Odisha / Ganjam           |
| EPI_ISL_700314 | 9/24/2020 | 12/14/2020 | Asia / India / Maharashtra / Thane       |
| EPI_ISL_700315 | 9/24/2020 | 12/14/2020 | Asia / India / Maharashtra / Raigad      |
| EPI_ISL_700316 | 9/24/2020 | 12/14/2020 | Asia / India / Maharashtra / Raigad      |
| EPI_ISL_700318 | 9/24/2020 | 12/14/2020 | Asia / India / Maharashtra / Raigad      |
| EPI_ISL_700319 | 9/25/2020 | 12/14/2020 | Asia / India / Maharashtra / Mumbai      |
| EPI_ISL_700320 | 9/25/2020 | 12/14/2020 | Asia / India / Maharashtra / Raigad      |

|                |           |            |                                                   |
|----------------|-----------|------------|---------------------------------------------------|
| EPI_ISL_700321 | 9/25/2020 | 12/14/2020 | Asia / India / Maharashtra / Raigad               |
| EPI_ISL_700322 | 9/25/2020 | 12/14/2020 | Asia / India / Maharashtra / Raigad               |
| EPI_ISL_700323 | 9/25/2020 | 12/14/2020 | Asia / India / Maharashtra / Raigad               |
| EPI_ISL_700324 | 9/25/2020 | 12/14/2020 | Asia / India / Maharashtra / Raigad               |
| EPI_ISL_700325 | 9/25/2020 | 12/14/2020 | Asia / India / Maharashtra / Raigad               |
| EPI_ISL_700327 | 9/4/2020  | 12/14/2020 | Europe / France / Auvergne-Rhone-Alpes / Lyon     |
| EPI_ISL_700336 | 9/21/2020 | 12/14/2020 | Asia / Bangladesh                                 |
| EPI_ISL_700339 | 8/12/2020 | 12/14/2020 | Asia / Bangladesh                                 |
| EPI_ISL_700340 | 8/15/2020 | 12/14/2020 | Asia / Bangladesh                                 |
| EPI_ISL_700341 | 8/18/2020 | 12/14/2020 | Asia / Bangladesh                                 |
| EPI_ISL_700342 | 9/1/2020  | 12/14/2020 | Asia / Bangladesh                                 |
| EPI_ISL_700343 | 9/6/2020  | 12/14/2020 | Asia / Bangladesh                                 |
| EPI_ISL_700344 | 9/13/2020 | 12/14/2020 | Asia / Bangladesh                                 |
| EPI_ISL_700345 | 9/14/2020 | 12/14/2020 | Asia / Bangladesh                                 |
| EPI_ISL_700346 | 9/17/2020 | 12/14/2020 | Asia / Bangladesh                                 |
| EPI_ISL_700347 | 9/26/2020 | 12/14/2020 | Asia / Bangladesh                                 |
| EPI_ISL_700348 | 3/9/2020  | 12/14/2020 | Europe / France / Auvergne-Rhone-Alpes / Grenoble |
| EPI_ISL_700349 | 3/9/2020  | 12/14/2020 | Europe / France / Auvergne-Rhone-Alpes / Grenoble |
| EPI_ISL_700350 | 3/10/2020 | 12/14/2020 | Europe / France / Auvergne-Rhone-Alpes / Grenoble |
| EPI_ISL_700351 | 4/13/2020 | 12/14/2020 | Europe / France / Auvergne-Rhone-Alpes / Grenoble |
| EPI_ISL_700352 | 4/7/2020  | 12/14/2020 | Europe / France / Auvergne-Rhone-Alpes / Grenoble |
| EPI_ISL_700353 | 4/10/2020 | 12/14/2020 | Europe / France / Auvergne-Rhone-Alpes / Grenoble |
| EPI_ISL_700354 | 4/11/2020 | 12/14/2020 | Europe / France / Auvergne-Rhone-Alpes / Grenoble |
| EPI_ISL_700355 | 4/2/2020  | 12/14/2020 | Europe / France / Auvergne-Rhone-Alpes / Grenoble |
| EPI_ISL_700356 | 4/3/2020  | 12/14/2020 | Europe / France / Auvergne-Rhone-Alpes / Grenoble |
| EPI_ISL_700357 | 4/3/2020  | 12/14/2020 | Europe / France / Auvergne-Rhone-Alpes / Grenoble |
| EPI_ISL_700358 | 4/6/2020  | 12/14/2020 | Europe / France / Auvergne-Rhone-Alpes / Grenoble |
| EPI_ISL_700359 | 3/30/2020 | 12/14/2020 | Europe / France / Auvergne-Rhone-Alpes / Grenoble |
| EPI_ISL_700360 | 3/30/2020 | 12/14/2020 | Europe / France / Auvergne-Rhone-Alpes / Grenoble |
| EPI_ISL_700361 | 3/31/2020 | 12/14/2020 | Europe / France / Auvergne-Rhone-Alpes / Grenoble |
| EPI_ISL_700362 | 4/28/2020 | 12/14/2020 | Europe / France / Auvergne-Rhone-Alpes / Grenoble |
| EPI_ISL_700363 | 4/28/2020 | 12/14/2020 | Europe / France / Auvergne-Rhone-Alpes / Grenoble |
| EPI_ISL_700364 | 4/28/2020 | 12/14/2020 | Europe / France / Auvergne-Rhone-Alpes / Grenoble |
| EPI_ISL_700365 | 4/28/2020 | 12/14/2020 | Europe / France / Auvergne-Rhone-Alpes / Grenoble |
| EPI_ISL_700366 | 4/27/2020 | 12/14/2020 | Europe / France / Auvergne-Rhone-Alpes / Grenoble |
| EPI_ISL_700367 | 4/28/2020 | 12/14/2020 | Europe / France / Auvergne-Rhone-Alpes / Grenoble |
| EPI_ISL_700368 | 4/28/2020 | 12/14/2020 | Europe / France / Auvergne-Rhone-Alpes / Grenoble |
| EPI_ISL_700369 | 4/28/2020 | 12/14/2020 | Europe / France / Auvergne-Rhone-Alpes / Grenoble |
| EPI_ISL_700370 | 4/27/2020 | 12/14/2020 | Europe / France / Auvergne-Rhone-Alpes / Grenoble |
| EPI_ISL_700371 | 3/16/2020 | 12/14/2020 | Europe / France / Pays de la Loire / Nantes       |
| EPI_ISL_700372 | 4/7/2020  | 12/14/2020 | Europe / France / Auvergne-Rhone-Alpes / Chambéry |
| EPI_ISL_700373 | 4/6/2020  | 12/14/2020 | Europe / France / Auvergne-Rhone-Alpes / Chambéry |
| EPI_ISL_700374 | 4/7/2020  | 12/14/2020 | Europe / France / Auvergne-Rhone-Alpes / Chambéry |
| EPI_ISL_700375 | 4/6/2020  | 12/14/2020 | Europe / France / Auvergne-Rhone-Alpes / Chambéry |
| EPI_ISL_700376 | 4/3/2020  | 12/14/2020 | Europe / France / Auvergne-Rhone-Alpes / Chambéry |
| EPI_ISL_700377 | 3/28/2020 | 12/14/2020 | Europe / France / Auvergne-Rhone-Alpes / Chambéry |
| EPI_ISL_700378 | 4/6/2020  | 12/14/2020 | Europe / France / Auvergne-Rhone-Alpes / Chambéry |

|                |            |            |                                                   |
|----------------|------------|------------|---------------------------------------------------|
| EPI_ISL_700379 | 4/13/2020  | 12/14/2020 | Europe / France / Auvergne-Rhone-Alpes / Chambéry |
| EPI_ISL_700380 | 4/12/2020  | 12/14/2020 | Europe / France / Auvergne-Rhone-Alpes / Chambéry |
| EPI_ISL_700381 | 4/12/2020  | 12/14/2020 | Europe / France / Auvergne-Rhone-Alpes / Chambéry |
| EPI_ISL_700382 | 4/13/2020  | 12/14/2020 | Europe / France / Auvergne-Rhone-Alpes / Chambéry |
| EPI_ISL_700383 | 4/13/2020  | 12/14/2020 | Europe / France / Auvergne-Rhone-Alpes / Chambéry |
| EPI_ISL_700384 | 4/14/2020  | 12/14/2020 | Europe / France / Auvergne-Rhone-Alpes / Chambéry |
| EPI_ISL_700385 | 4/13/2020  | 12/14/2020 | Europe / France / Auvergne-Rhone-Alpes / Chambéry |
| EPI_ISL_700386 | 3/30/2020  | 12/14/2020 | Europe / France / Auvergne-Rhone-Alpes / Chambéry |
| EPI_ISL_700387 | 3/28/2020  | 12/14/2020 | Europe / France / Auvergne-Rhone-Alpes / Chambéry |
| EPI_ISL_700388 | 3/23/2020  | 12/14/2020 | Europe / France / Auvergne-Rhone-Alpes / Chambéry |
| EPI_ISL_700389 | 4/14/2020  | 12/14/2020 | Europe / France / Auvergne-Rhone-Alpes / Chambéry |
| EPI_ISL_700390 | 4/14/2020  | 12/14/2020 | Europe / France / Auvergne-Rhone-Alpes / Chambéry |
| EPI_ISL_700391 | 4/14/2020  | 12/14/2020 | Europe / France / Auvergne-Rhone-Alpes / Chambéry |
| EPI_ISL_700394 | 4/23/2020  | 12/14/2020 | Europe / France / Auvergne-Rhone-Alpes / Chambéry |
| EPI_ISL_700395 | 4/20/2020  | 12/14/2020 | Europe / France / Auvergne-Rhone-Alpes / Chambéry |
| EPI_ISL_700396 | 4/7/2020   | 12/14/2020 | Europe / France / Auvergne-Rhone-Alpes / Chambéry |
| EPI_ISL_700397 | 5/1/2020   | 12/14/2020 | Europe / France / Auvergne-Rhone-Alpes / Chambéry |
| EPI_ISL_700398 | 5/9/2020   | 12/14/2020 | Europe / France / Auvergne-Rhone-Alpes / Chambéry |
| EPI_ISL_700399 | 5/7/2020   | 12/14/2020 | Europe / France / Auvergne-Rhone-Alpes / Chambéry |
| EPI_ISL_700401 | 5/11/2020  | 12/14/2020 | Europe / France / Auvergne-Rhone-Alpes / Chambéry |
| EPI_ISL_700402 | 4/27/2020  | 12/14/2020 | Europe / France / Auvergne-Rhone-Alpes / Chambéry |
| EPI_ISL_700403 | 4/27/2020  | 12/14/2020 | Europe / France / Auvergne-Rhone-Alpes / Chambéry |
| EPI_ISL_700404 | 5/10/2020  | 12/14/2020 | Europe / France / Auvergne-Rhone-Alpes / Chambéry |
| EPI_ISL_700405 | 5/2/2020   | 12/14/2020 | Europe / France / Auvergne-Rhone-Alpes / Chambéry |
| EPI_ISL_700406 | 5/1/2020   | 12/14/2020 | Europe / France / Auvergne-Rhone-Alpes / Chambéry |
| EPI_ISL_700407 | 5/4/2020   | 12/14/2020 | Europe / France / Auvergne-Rhone-Alpes / Chambéry |
| EPI_ISL_700408 | 5/5/2020   | 12/14/2020 | Europe / France / Auvergne-Rhone-Alpes / Chambéry |
| EPI_ISL_700409 | 5/4/2020   | 12/14/2020 | Europe / France / Auvergne-Rhone-Alpes / Chambéry |
| EPI_ISL_700410 | 5/8/2020   | 12/14/2020 | Europe / France / Auvergne-Rhone-Alpes / Chambéry |
| EPI_ISL_700419 | 11/12/2020 | 12/14/2020 | Africa / South Africa / Western Cape / Knysna     |
| EPI_ISL_700421 | 8/11/2020  | 12/14/2020 | Africa / South Africa / Western Cape / Southern   |
| EPI_ISL_700422 | 11/4/2020  | 12/14/2020 | Africa / South Africa / Western Cape / Knysna     |
| EPI_ISL_700423 | 11/13/2020 | 12/14/2020 | Africa / South Africa / Western Cape / Knysna     |
| EPI_ISL_700424 | 10/28/2020 | 12/14/2020 | Africa / South Africa / Western Cape / George     |
| EPI_ISL_700425 | 11/13/2020 | 12/14/2020 | Africa / South Africa / Western Cape / George     |
| EPI_ISL_700426 | 11/4/2020  | 12/14/2020 | Africa / South Africa / Western Cape / Knysna     |
| EPI_ISL_700427 | 11/12/2020 | 12/14/2020 | Africa / South Africa / Western Cape / Mossel Bay |
| EPI_ISL_700428 | 10/30/2020 | 12/14/2020 | Africa / South Africa / Western Cape / George     |
| EPI_ISL_700429 | 11/12/2020 | 12/14/2020 | Africa / South Africa / Western Cape / Knysna     |
| EPI_ISL_700430 | 11/12/2020 | 12/14/2020 | Africa / South Africa / Western Cape / Bitou      |
| EPI_ISL_700431 | 11/3/2020  | 12/14/2020 | Africa / South Africa / Western Cape / George     |
| EPI_ISL_700432 | 11/5/2020  | 12/14/2020 | Africa / South Africa / Western Cape / Mossel Bay |
| EPI_ISL_700433 | 11/5/2020  | 12/14/2020 | Africa / South Africa / Western Cape / Knysna     |
| EPI_ISL_700434 | 11/13/2020 | 12/14/2020 | Africa / South Africa / Western Cape / Bitou      |
| EPI_ISL_700435 | 10/26/2020 | 12/14/2020 | Africa / South Africa / Western Cape / George     |
| EPI_ISL_700436 | 11/13/2020 | 12/14/2020 | Africa / South Africa / Western Cape / Knysna     |
| EPI_ISL_700437 | 11/13/2020 | 12/14/2020 | Africa / South Africa / Western Cape / Bitou      |

|                |            |            |                                                      |
|----------------|------------|------------|------------------------------------------------------|
| EPI_ISL_700438 | 10/22/2020 | 12/14/2020 | Africa / South Africa / Western Cape / George        |
| EPI_ISL_700439 | 11/2/2020  | 12/14/2020 | Africa / South Africa / Western Cape / George        |
| EPI_ISL_700440 | 11/6/2020  | 12/14/2020 | Africa / South Africa / Western Cape / Knysna        |
| EPI_ISL_700441 | 10/15/2020 | 12/14/2020 | Africa / South Africa / Western Cape / George        |
| EPI_ISL_700442 | 11/13/2020 | 12/14/2020 | Africa / South Africa / Western Cape / Bitou         |
| EPI_ISL_700443 | 11/13/2020 | 12/14/2020 | Africa / South Africa / Western Cape / Bitou         |
| EPI_ISL_700444 | 11/5/2020  | 12/14/2020 | Africa / South Africa / Western Cape / Bitou         |
| EPI_ISL_700445 | 11/13/2020 | 12/14/2020 | Africa / South Africa / Western Cape / Klipfontein   |
| EPI_ISL_700446 | 8/13/2020  | 12/14/2020 | Africa / South Africa / Western Cape / Southern      |
| EPI_ISL_700447 | 8/12/2020  | 12/14/2020 | Africa / South Africa / Western Cape / Oudtshoorn    |
| EPI_ISL_700448 | 11/4/2020  | 12/14/2020 | Africa / South Africa / Western Cape / Mossel Bay    |
| EPI_ISL_700449 | 11/6/2020  | 12/14/2020 | Africa / South Africa / Western Cape / George        |
| EPI_ISL_700450 | 10/22/2020 | 12/14/2020 | Africa / South Africa / Western Cape / Knysna        |
| EPI_ISL_700451 | 10/20/2020 | 12/14/2020 | Africa / South Africa / Western Cape / George        |
| EPI_ISL_700452 | 10/20/2020 | 12/14/2020 | Africa / South Africa / Western Cape / George        |
| EPI_ISL_700453 | 9/9/2020   | 12/14/2020 | Africa / South Africa / Western Cape / Beaufort West |
| EPI_ISL_700454 | 4/21/2020  | 12/14/2020 | Africa / South Africa / Western Cape / Klipfontein   |
| EPI_ISL_700455 | 5/8/2020   | 12/14/2020 | Africa / South Africa / Western Cape / Klipfontein   |
| EPI_ISL_700456 | 11/13/2020 | 12/14/2020 | Africa / South Africa / Western Cape / Knysna        |
| EPI_ISL_700457 | 5/5/2020   | 12/14/2020 | Africa / South Africa / Western Cape / Klipfontein   |
| EPI_ISL_700458 | 11/2/2020  | 12/14/2020 | Africa / South Africa / Western Cape / Knysna        |
| EPI_ISL_700459 | 4/21/2020  | 12/14/2020 | Africa / South Africa / Western Cape / Klipfontein   |
| EPI_ISL_700460 | 10/22/2020 | 12/14/2020 | Africa / South Africa / Western Cape / George        |
| EPI_ISL_700461 | 11/5/2020  | 12/14/2020 | Africa / South Africa / Western Cape / George        |
| EPI_ISL_700462 | 5/14/2020  | 12/14/2020 | Africa / South Africa / Western Cape / Klipfontein   |
| EPI_ISL_700463 | 4/29/2020  | 12/14/2020 | Africa / South Africa / Western Cape / Klipfontein   |
| EPI_ISL_700464 | 10/29/2020 | 12/14/2020 | Africa / South Africa / Western Cape / Knysna        |
| EPI_ISL_700465 | 8/12/2020  | 12/14/2020 | Africa / South Africa / Western Cape / Hessequa      |
| EPI_ISL_700466 | 8/3/2020   | 12/14/2020 | Africa / South Africa / Western Cape / Kannaland     |
| EPI_ISL_700467 | 11/2/2020  | 12/14/2020 | Africa / South Africa / Western Cape / George        |
| EPI_ISL_700468 | 10/29/2020 | 12/14/2020 | Africa / South Africa / Western Cape / Knysna        |
| EPI_ISL_700469 | 10/20/2020 | 12/14/2020 | Africa / South Africa / Western Cape / Knysna        |
| EPI_ISL_700470 | 11/12/2020 | 12/14/2020 | Africa / South Africa / Western Cape / Mossel Bay    |
| EPI_ISL_700471 | 4/30/2020  | 12/14/2020 | Africa / South Africa / Western Cape / Klipfontein   |
| EPI_ISL_700472 | 5/5/2020   | 12/14/2020 | Africa / South Africa / Western Cape / Klipfontein   |
| EPI_ISL_700473 | 5/20/2020  | 12/14/2020 | Africa / South Africa / Western Cape / Klipfontein   |
| EPI_ISL_700474 | 11/12/2020 | 12/14/2020 | Africa / South Africa / Western Cape / Knysna        |
| EPI_ISL_700475 | 11/12/2020 | 12/14/2020 | Africa / South Africa / Western Cape / Mossel Bay    |
| EPI_ISL_700476 | 10/19/2020 | 12/14/2020 | Africa / South Africa / Western Cape / Mossel Bay    |
| EPI_ISL_700477 | 5/26/2020  | 12/14/2020 | Africa / South Africa / Western Cape / Klipfontein   |
| EPI_ISL_700478 | 10/19/2020 | 12/14/2020 | Africa / South Africa / Western Cape / George        |
| EPI_ISL_700479 | 8/6/2020   | 12/14/2020 | Africa / South Africa / Western Cape / Southern      |
| EPI_ISL_700480 | 4/25/2020  | 12/14/2020 | Africa / South Africa / Western Cape / Klipfontein   |
| EPI_ISL_700481 | 5/9/2020   | 12/14/2020 | Africa / South Africa / Western Cape / Klipfontein   |
| EPI_ISL_700482 | 10/23/2020 | 12/14/2020 | Africa / South Africa / Western Cape / George        |
| EPI_ISL_700483 | 10/23/2020 | 12/14/2020 | Africa / South Africa / Western Cape / George        |
| EPI_ISL_700484 | 10/19/2020 | 12/14/2020 | Africa / South Africa / Western Cape / Knysna        |

|                |            |            |                                                        |
|----------------|------------|------------|--------------------------------------------------------|
| EPI_ISL_700485 | 11/13/2020 | 12/14/2020 | Africa / South Africa / Western Cape / Knysna          |
| EPI_ISL_700486 | 4/29/2020  | 12/14/2020 | Africa / South Africa / Western Cape / Klipfontein     |
| EPI_ISL_700487 | 11/6/2020  | 12/14/2020 | Africa / South Africa / Western Cape / George          |
| EPI_ISL_700488 | 11/5/2020  | 12/14/2020 | Africa / South Africa / Western Cape / George          |
| EPI_ISL_700489 | 9/24/2020  | 12/14/2020 | Africa / South Africa / Western Cape / Mitchells Plain |
| EPI_ISL_700490 | 11/13/2020 | 12/14/2020 | Africa / South Africa / Western Cape / George          |
| EPI_ISL_700491 | 5/4/2020   | 12/14/2020 | Africa / South Africa / Western Cape / Klipfontein     |
| EPI_ISL_700492 | 10/15/2020 | 12/14/2020 | Africa / South Africa / Western Cape / George          |
| EPI_ISL_700493 | 8/17/2020  | 12/14/2020 | Africa / South Africa / Western Cape / Western         |
| EPI_ISL_700494 | 5/5/2020   | 12/14/2020 | Africa / South Africa / Western Cape / Klipfontein     |
| EPI_ISL_700495 | 8/6/2020   | 12/14/2020 | Africa / South Africa / Western Cape / Bitou           |
| EPI_ISL_700496 | 11/3/2020  | 12/14/2020 | Africa / South Africa / Western Cape / George          |
| EPI_ISL_700497 | 10/27/2020 | 12/14/2020 | Africa / South Africa / Western Cape / George          |
| EPI_ISL_700498 | 10/27/2020 | 12/14/2020 | Africa / South Africa / Western Cape / George          |
| EPI_ISL_700499 | 5/19/2020  | 12/14/2020 | Africa / South Africa / Western Cape / Klipfontein     |
| EPI_ISL_700500 | 11/2/2020  | 12/14/2020 | Africa / South Africa / Western Cape / Bitou           |
| EPI_ISL_700501 | 8/9/2020   | 12/14/2020 | Africa / South Africa / Western Cape / Knysna          |
| EPI_ISL_700502 | 11/13/2020 | 12/14/2020 | Africa / South Africa / Western Cape / George          |
| EPI_ISL_700503 | 5/6/2020   | 12/14/2020 | Africa / South Africa / Western Cape / Klipfontein     |
| EPI_ISL_700504 | 11/4/2020  | 12/14/2020 | Africa / South Africa / Western Cape / George          |
| EPI_ISL_700505 | 11/13/2020 | 12/14/2020 | Africa / South Africa / Western Cape / Knysna          |
| EPI_ISL_700506 | 8/11/2020  | 12/14/2020 | Africa / South Africa / Western Cape / George          |
| EPI_ISL_700507 | 8/19/2020  | 12/14/2020 | Africa / South Africa / Western Cape / Western         |
| EPI_ISL_700508 | 5/4/2020   | 12/14/2020 | Africa / South Africa / Western Cape / Klipfontein     |
| EPI_ISL_700509 | 8/14/2020  | 12/14/2020 | Africa / South Africa / Western Cape / Knysna          |
| EPI_ISL_700510 | 10/19/2020 | 12/14/2020 | Africa / South Africa / Western Cape / Knysna          |
| EPI_ISL_700511 | 4/30/2020  | 12/14/2020 | Africa / South Africa / Western Cape / Klipfontein     |
| EPI_ISL_700512 | 4/30/2020  | 12/14/2020 | Africa / South Africa / Western Cape / Klipfontein     |
| EPI_ISL_700513 | 5/8/2020   | 12/14/2020 | Africa / South Africa / Western Cape / Klipfontein     |
| EPI_ISL_700514 | 5/3/2020   | 12/14/2020 | Africa / South Africa / Western Cape / Klipfontein     |
| EPI_ISL_700515 | 5/6/2020   | 12/14/2020 | Africa / South Africa / Western Cape / Klipfontein     |
| EPI_ISL_700516 | 5/14/2020  | 12/14/2020 | Africa / South Africa / Western Cape / Klipfontein     |
| EPI_ISL_700517 | 5/21/2020  | 12/14/2020 | Africa / South Africa / Western Cape / Klipfontein     |
| EPI_ISL_700518 | 10/15/2020 | 12/14/2020 | Africa / South Africa / Western Cape / Bitou           |
| EPI_ISL_700519 | 10/15/2020 | 12/14/2020 | Africa / South Africa / Western Cape / Mossel Bay      |
| EPI_ISL_700520 | 11/12/2020 | 12/14/2020 | Africa / South Africa / Western Cape / Oudtshoorn      |
| EPI_ISL_700521 | 8/5/2020   | 12/14/2020 | Africa / South Africa / Western Cape / Mossel Bay      |
| EPI_ISL_700522 | 4/29/2020  | 12/14/2020 | Africa / South Africa / Western Cape / Klipfontein     |
| EPI_ISL_700523 | 5/5/2020   | 12/14/2020 | Africa / South Africa / Western Cape / Klipfontein     |
| EPI_ISL_700524 | 11/13/2020 | 12/14/2020 | Africa / South Africa / Western Cape / Knysna          |
| EPI_ISL_700525 | 4/30/2020  | 12/14/2020 | Africa / South Africa / Western Cape / Klipfontein     |
| EPI_ISL_700526 | 9/23/2020  | 12/14/2020 | Africa / South Africa / Western Cape / Knysna          |
| EPI_ISL_700527 | 4/15/2020  | 12/14/2020 | Africa / South Africa / Western Cape / Klipfontein     |
| EPI_ISL_700528 | 8/26/2020  | 12/14/2020 | Africa / South Africa / Western Cape / Bitou           |
| EPI_ISL_700529 | 11/5/2020  | 12/14/2020 | Africa / South Africa / Western Cape / Knysna          |
| EPI_ISL_700530 | 5/11/2020  | 12/14/2020 | Africa / South Africa / Western Cape / Klipfontein     |
| EPI_ISL_700531 | 11/6/2020  | 12/14/2020 | Africa / South Africa / Western Cape / Knysna          |

|                |            |            |                                                        |
|----------------|------------|------------|--------------------------------------------------------|
| EPI_ISL_700532 | 9/10/2020  | 12/14/2020 | Africa / South Africa / Western Cape / Beaufort West   |
| EPI_ISL_700533 | 10/27/2020 | 12/14/2020 | Africa / South Africa / Western Cape / George          |
| EPI_ISL_700534 | 8/5/2020   | 12/14/2020 | Africa / South Africa / Western Cape / Western         |
| EPI_ISL_700535 | 10/23/2020 | 12/14/2020 | Africa / South Africa / Western Cape / Bitou           |
| EPI_ISL_700536 | 10/20/2020 | 12/14/2020 | Africa / South Africa / Western Cape / George          |
| EPI_ISL_700537 | 8/11/2020  | 12/14/2020 | Africa / South Africa / Western Cape / Bitou           |
| EPI_ISL_700538 | 10/22/2020 | 12/14/2020 | Africa / South Africa / Western Cape / George          |
| EPI_ISL_700539 | 10/28/2020 | 12/14/2020 | Africa / South Africa / Western Cape / George          |
| EPI_ISL_700540 | 10/26/2020 | 12/14/2020 | Africa / South Africa / Western Cape / Knysna          |
| EPI_ISL_700541 | 11/13/2020 | 12/14/2020 | Africa / South Africa / Western Cape / Bitou           |
| EPI_ISL_700542 | 11/13/2020 | 12/14/2020 | Africa / South Africa / Western Cape / Knysna          |
| EPI_ISL_700543 | 10/15/2020 | 12/14/2020 | Africa / South Africa / Western Cape / Mossel Bay      |
| EPI_ISL_700544 | 4/29/2020  | 12/14/2020 | Africa / South Africa / Western Cape / Klipfontein     |
| EPI_ISL_700545 | 4/26/2020  | 12/14/2020 | Africa / South Africa / Western Cape / Klipfontein     |
| EPI_ISL_700546 | 8/6/2020   | 12/14/2020 | Africa / South Africa / Western Cape / Southern        |
| EPI_ISL_700547 | 5/19/2020  | 12/14/2020 | Africa / South Africa / Western Cape / Klipfontein     |
| EPI_ISL_700548 | 11/2/2020  | 12/14/2020 | Africa / South Africa / Western Cape / Mossel Bay      |
| EPI_ISL_700549 | 5/25/2020  | 12/14/2020 | Africa / South Africa / Western Cape / Klipfontein     |
| EPI_ISL_700550 | 11/12/2020 | 12/14/2020 | Africa / South Africa / Western Cape / Mossel Bay      |
| EPI_ISL_700551 | 10/15/2020 | 12/14/2020 | Africa / South Africa / Western Cape / George          |
| EPI_ISL_700552 | 4/15/2020  | 12/14/2020 | Africa / South Africa / Western Cape / Klipfontein     |
| EPI_ISL_700553 | 8/11/2020  | 12/14/2020 | Africa / South Africa / Western Cape / Beaufort West   |
| EPI_ISL_700554 | 11/2/2020  | 12/14/2020 | Africa / South Africa / Western Cape / George          |
| EPI_ISL_700555 | 8/11/2020  | 12/14/2020 | Africa / South Africa / Western Cape / Southern        |
| EPI_ISL_700556 | 10/19/2020 | 12/14/2020 | Africa / South Africa / Western Cape / George          |
| EPI_ISL_700557 | 10/22/2020 | 12/14/2020 | Africa / South Africa / Western Cape / George          |
| EPI_ISL_700558 | 9/3/2020   | 12/14/2020 | Africa / South Africa / Western Cape / Knysna          |
| EPI_ISL_700559 | 9/18/2020  | 12/14/2020 | Africa / South Africa / Western Cape / Klipfontein     |
| EPI_ISL_700560 | 10/22/2020 | 12/14/2020 | Africa / South Africa / Western Cape / Bitou           |
| EPI_ISL_700561 | 5/15/2020  | 12/14/2020 | Africa / South Africa / Western Cape / Klipfontein     |
| EPI_ISL_700562 | 5/24/2020  | 12/14/2020 | Africa / South Africa / Western Cape / Klipfontein     |
| EPI_ISL_700563 | 10/28/2020 | 12/14/2020 | Africa / South Africa / Western Cape / George          |
| EPI_ISL_700564 | 10/22/2020 | 12/14/2020 | Africa / South Africa / Western Cape / Mossel Bay      |
| EPI_ISL_700565 | 8/11/2020  | 12/14/2020 | Africa / South Africa / Western Cape / Mossel Bay      |
| EPI_ISL_700566 | 5/7/2020   | 12/14/2020 | Africa / South Africa / Western Cape / Klipfontein     |
| EPI_ISL_700567 | 4/24/2020  | 12/14/2020 | Africa / South Africa / Western Cape / Klipfontein     |
| EPI_ISL_700568 | 5/18/2020  | 12/14/2020 | Africa / South Africa / Western Cape / Klipfontein     |
| EPI_ISL_700569 | 10/16/2020 | 12/14/2020 | Africa / South Africa / Western Cape / Mossel Bay      |
| EPI_ISL_700570 | 5/19/2020  | 12/14/2020 | Africa / South Africa / Western Cape / Klipfontein     |
| EPI_ISL_700571 | 8/11/2020  | 12/14/2020 | Africa / South Africa / Western Cape / Mossel Bay      |
| EPI_ISL_700572 | 8/21/2020  | 12/14/2020 | Africa / South Africa / Western Cape / Mitchells Plain |
| EPI_ISL_700573 | 5/24/2020  | 12/14/2020 | Africa / South Africa / Western Cape / Klipfontein     |
| EPI_ISL_700574 | 5/10/2020  | 12/14/2020 | Africa / South Africa / Western Cape / Klipfontein     |
| EPI_ISL_700575 | 8/14/2020  | 12/14/2020 | Africa / South Africa / Western Cape / Oudtshoorn      |
| EPI_ISL_700576 | 5/14/2020  | 12/14/2020 | Africa / South Africa / Western Cape / Klipfontein     |
| EPI_ISL_700577 | 8/8/2020   | 12/14/2020 | Africa / South Africa / Western Cape / Western         |
| EPI_ISL_700578 | 5/7/2020   | 12/14/2020 | Africa / South Africa / Western Cape / Klipfontein     |



|                |            |            |                                                        |
|----------------|------------|------------|--------------------------------------------------------|
| EPI_ISL_700579 | 11/4/2020  | 12/14/2020 | Africa / South Africa / Western Cape / Bitou           |
| EPI_ISL_700580 | 5/13/2020  | 12/14/2020 | Africa / South Africa / Western Cape / Klipfontein     |
| EPI_ISL_700581 | 10/22/2020 | 12/14/2020 | Africa / South Africa / Western Cape / George          |
| EPI_ISL_700582 | 5/4/2020   | 12/14/2020 | Africa / South Africa / Western Cape / Klipfontein     |
| EPI_ISL_700583 | 11/13/2020 | 12/14/2020 | Africa / South Africa / Western Cape / Knysna          |
| EPI_ISL_700584 | 5/4/2020   | 12/14/2020 | Africa / South Africa / Western Cape / Klipfontein     |
| EPI_ISL_700585 | 5/10/2020  | 12/14/2020 | Africa / South Africa / Western Cape / Klipfontein     |
| EPI_ISL_700586 | 8/12/2020  | 12/14/2020 | Africa / South Africa / Western Cape / George          |
| EPI_ISL_700587 | 10/23/2020 | 12/14/2020 | Africa / South Africa / Western Cape / George          |
| EPI_ISL_700588 | 10/22/2020 | 12/14/2020 | Africa / South Africa / Western Cape / Knysna          |
| EPI_ISL_700589 | 11/12/2020 | 12/14/2020 | Africa / South Africa / Western Cape / Oudtshoorn      |
| EPI_ISL_700590 | 10/27/2020 | 12/14/2020 | Africa / South Africa / Western Cape / George          |
| EPI_ISL_700591 | 4/22/2020  | 12/14/2020 | Africa / South Africa / Western Cape / Klipfontein     |
| EPI_ISL_700592 | 5/21/2020  | 12/14/2020 | Africa / South Africa / Western Cape / Klipfontein     |
| EPI_ISL_700593 | 5/24/2020  | 12/14/2020 | Africa / South Africa / Western Cape / Klipfontein     |
| EPI_ISL_700594 | 8/3/2020   | 12/14/2020 | Africa / South Africa / Western Cape / Oudtshoorn      |
| EPI_ISL_700595 | 5/12/2020  | 12/14/2020 | Africa / South Africa / Western Cape / Klipfontein     |
| EPI_ISL_700596 | 8/25/2020  | 12/14/2020 | Africa / South Africa / Western Cape / Southern        |
| EPI_ISL_700597 | 8/31/2020  | 12/14/2020 | Africa / South Africa / Western Cape / Mitchells Plain |
| EPI_ISL_700598 | 5/20/2020  | 12/14/2020 | Africa / South Africa / Western Cape / Klipfontein     |
| EPI_ISL_700599 | 10/22/2020 | 12/14/2020 | Africa / South Africa / Western Cape / George          |
| EPI_ISL_700686 | 12/3/2020  | 12/14/2020 | Europe / United Kingdom / England                      |
| EPI_ISL_700687 | 12/3/2020  | 12/14/2020 | Europe / United Kingdom / England                      |
| EPI_ISL_700688 | 12/3/2020  | 12/14/2020 | Europe / United Kingdom / England                      |
| EPI_ISL_700689 | 12/3/2020  | 12/14/2020 | Europe / United Kingdom / England                      |
| EPI_ISL_700690 | 12/3/2020  | 12/14/2020 | Europe / United Kingdom / England                      |
| EPI_ISL_700691 | 12/3/2020  | 12/14/2020 | Europe / United Kingdom / England                      |
| EPI_ISL_700692 | 12/3/2020  | 12/14/2020 | Europe / United Kingdom / England                      |
| EPI_ISL_700693 | 12/3/2020  | 12/14/2020 | Europe / United Kingdom / England                      |
| EPI_ISL_700694 | 12/3/2020  | 12/14/2020 | Europe / United Kingdom / England                      |
| EPI_ISL_700695 | 12/3/2020  | 12/14/2020 | Europe / United Kingdom / England                      |
| EPI_ISL_700696 | 12/3/2020  | 12/14/2020 | Europe / United Kingdom / England                      |
| EPI_ISL_700697 | 12/3/2020  | 12/14/2020 | Europe / United Kingdom / England                      |
| EPI_ISL_700698 | 12/3/2020  | 12/14/2020 | Europe / United Kingdom / England                      |
| EPI_ISL_700739 | 9/30/2020  | 12/14/2020 | North America / USA / Texas / Travis County            |
| EPI_ISL_700740 | 6/22/2020  | 12/14/2020 | North America / USA / Texas / Hidalgo County           |
| EPI_ISL_700741 | 9/7/2020   | 12/14/2020 | North America / USA / Texas / Travis County            |
| EPI_ISL_701673 | 11/20/2020 | 12/14/2020 | Europe / United Kingdom / England                      |
| EPI_ISL_701674 | 11/20/2020 | 12/14/2020 | Europe / United Kingdom / Wales                        |
| EPI_ISL_701675 | 11/19/2020 | 12/14/2020 | Europe / United Kingdom / England                      |
| EPI_ISL_701676 | 11/21/2020 | 12/14/2020 | Europe / United Kingdom / England                      |
| EPI_ISL_701677 | 11/21/2020 | 12/14/2020 | Europe / United Kingdom / England                      |
| EPI_ISL_701678 | 11/20/2020 | 12/14/2020 | Europe / United Kingdom / England                      |
| EPI_ISL_701679 | 11/21/2020 | 12/14/2020 | Europe / United Kingdom / England                      |
| EPI_ISL_701680 | 11/20/2020 | 12/14/2020 | Europe / United Kingdom / England                      |
| EPI_ISL_701681 | 11/19/2020 | 12/14/2020 | Europe / United Kingdom / England                      |
| EPI_ISL_701682 | 11/20/2020 | 12/14/2020 | Europe / United Kingdom / England                      |







































































































|                |            |            |                                    |
|----------------|------------|------------|------------------------------------|
| EPI_ISL_705435 | 11/19/2020 | 12/14/2020 | Europe / United Kingdom / Wales    |
| EPI_ISL_705436 | 11/6/2020  | 12/14/2020 | Europe / United Kingdom / Wales    |
| EPI_ISL_705437 | 11/6/2020  | 12/14/2020 | Europe / United Kingdom / Wales    |
| EPI_ISL_705438 | 11/6/2020  | 12/14/2020 | Europe / United Kingdom / Wales    |
| EPI_ISL_705439 | 11/13/2020 | 12/14/2020 | Europe / United Kingdom / Wales    |
| EPI_ISL_705440 | 11/17/2020 | 12/14/2020 | Europe / United Kingdom / Wales    |
| EPI_ISL_705441 | 11/18/2020 | 12/14/2020 | Europe / United Kingdom / Wales    |
| EPI_ISL_705442 | 11/17/2020 | 12/14/2020 | Europe / United Kingdom / Wales    |
| EPI_ISL_705443 | 10/5/2020  | 12/14/2020 | Europe / United Kingdom / England  |
| EPI_ISL_705444 | 10/12/2020 | 12/14/2020 | Europe / United Kingdom / Wales    |
| EPI_ISL_705471 | 11/23/2020 | 12/14/2020 | Europe / United Kingdom / England  |
| EPI_ISL_705472 | 11/23/2020 | 12/14/2020 | Europe / United Kingdom / England  |
| EPI_ISL_705473 | 10/16/2020 | 12/14/2020 | Europe / United Kingdom / England  |
| EPI_ISL_705474 | 11/2/2020  | 12/14/2020 | Europe / United Kingdom / England  |
| EPI_ISL_705475 | 11/1/2020  | 12/14/2020 | Europe / United Kingdom / England  |
| EPI_ISL_705476 | 10/1/2020  | 12/14/2020 | Europe / United Kingdom / England  |
| EPI_ISL_705477 | 11/1/2020  | 12/14/2020 | Europe / United Kingdom / England  |
| EPI_ISL_705478 | 11/1/2020  | 12/14/2020 | Europe / United Kingdom / England  |
| EPI_ISL_705479 | 11/1/2020  | 12/14/2020 | Europe / United Kingdom / England  |
| EPI_ISL_705480 | 11/1/2020  | 12/14/2020 | Europe / United Kingdom / England  |
| EPI_ISL_705481 | 11/2/2020  | 12/14/2020 | Europe / United Kingdom / England  |
| EPI_ISL_705482 | 11/1/2020  | 12/14/2020 | Europe / United Kingdom / England  |
| EPI_ISL_705483 | 11/1/2020  | 12/14/2020 | Europe / United Kingdom / England  |
| EPI_ISL_705484 | 11/1/2020  | 12/14/2020 | Europe / United Kingdom / England  |
| EPI_ISL_705485 | 11/1/2020  | 12/14/2020 | Europe / United Kingdom / England  |
| EPI_ISL_705486 | 11/21/2020 | 12/14/2020 | Europe / United Kingdom / England  |
| EPI_ISL_705487 | 11/22/2020 | 12/14/2020 | Europe / United Kingdom / England  |
| EPI_ISL_705488 | 10/13/2020 | 12/14/2020 | Europe / United Kingdom / Wales    |
| EPI_ISL_705489 | 10/12/2020 | 12/14/2020 | Europe / United Kingdom / England  |
| EPI_ISL_705490 | 11/19/2020 | 12/14/2020 | Europe / United Kingdom / Scotland |
| EPI_ISL_705491 | 11/21/2020 | 12/14/2020 | Europe / United Kingdom / England  |
| EPI_ISL_705492 | 12/2/2020  | 12/14/2020 | Europe / United Kingdom / Scotland |
| EPI_ISL_705493 | 11/1/2020  | 12/14/2020 | Europe / United Kingdom / England  |
| EPI_ISL_705494 | 11/23/2020 | 12/14/2020 | Europe / United Kingdom / England  |
| EPI_ISL_705495 | 11/23/2020 | 12/14/2020 | Europe / United Kingdom / England  |
| EPI_ISL_705496 | 11/18/2020 | 12/14/2020 | Europe / United Kingdom / England  |
| EPI_ISL_705501 | 2020       | 12/14/2020 | Europe / United Kingdom / England  |
| EPI_ISL_705502 | 10/28/2020 | 12/14/2020 | Europe / United Kingdom / England  |
| EPI_ISL_705503 | 2020       | 12/14/2020 | Europe / United Kingdom / England  |
| EPI_ISL_705504 | 2020       | 12/14/2020 | Europe / United Kingdom / England  |
| EPI_ISL_705505 | 2020       | 12/14/2020 | Europe / United Kingdom / England  |
| EPI_ISL_705506 | 2020       | 12/14/2020 | Europe / United Kingdom / England  |
| EPI_ISL_705507 | 2020       | 12/14/2020 | Europe / United Kingdom / England  |
| EPI_ISL_705508 | 2020       | 12/14/2020 | Europe / United Kingdom / England  |
| EPI_ISL_705509 | 2020       | 12/14/2020 | Europe / United Kingdom / England  |
| EPI_ISL_705510 | 2020       | 12/14/2020 | Europe / United Kingdom / England  |
| EPI_ISL_705511 | 2020       | 12/14/2020 | Europe / United Kingdom / England  |







































































|                 |            |            |                                                               |
|-----------------|------------|------------|---------------------------------------------------------------|
| EPI_ISL_706982  | 12/3/2020  | 12/14/2020 | Europe / United Kingdom / England                             |
| EPI_ISL_706983  | 11/23/2020 | 12/14/2020 | Europe / United Kingdom / England                             |
| EPI_ISL_706984  | 12/8/2020  | 12/14/2020 | Europe / United Kingdom / England                             |
| EPI_ISL_706985  | 12/7/2020  | 12/14/2020 | Europe / United Kingdom / England                             |
| EPI_ISL_706986  | 12/8/2020  | 12/14/2020 | Europe / United Kingdom / England                             |
| EPI_ISL_706987  | 11/24/2020 | 12/14/2020 | Europe / United Kingdom / England                             |
| EPI_ISL_706988  | 11/16/2020 | 12/14/2020 | Europe / United Kingdom / England                             |
| EPI_ISL_706989  | 11/25/2020 | 12/14/2020 | Europe / United Kingdom / England                             |
| EPI_ISL_706990  | 12/2/2020  | 12/14/2020 | Europe / United Kingdom / England                             |
| EPI_ISL_706991  | 11/15/2020 | 12/14/2020 | Europe / United Kingdom / England                             |
| EPI_ISL_706992  | 11/26/2020 | 12/14/2020 | Europe / United Kingdom / England                             |
| EPI_ISL_706993  | 11/26/2020 | 12/14/2020 | Europe / United Kingdom / England                             |
| EPI_ISL_706994  | 11/12/2020 | 12/14/2020 | Europe / United Kingdom / England                             |
| EPI_ISL_706995  | 11/26/2020 | 12/14/2020 | Europe / United Kingdom / England                             |
| EPI_ISL_706996  | 11/27/2020 | 12/14/2020 | Europe / United Kingdom / England                             |
| EPI_ISL_706997  | 11/27/2020 | 12/14/2020 | Europe / United Kingdom / England                             |
| EPI_ISL_706998  | 11/27/2020 | 12/14/2020 | Europe / United Kingdom / England                             |
| EPI_ISL_706999  | 11/25/2020 | 12/14/2020 | Europe / United Kingdom / England                             |
| EPI_ISL_707000  | 11/25/2020 | 12/14/2020 | Europe / United Kingdom / England                             |
| EPI_ISL_707001  | 11/26/2020 | 12/14/2020 | Europe / United Kingdom / England                             |
| EPI_ISL_707002  | 11/27/2020 | 12/14/2020 | Europe / United Kingdom / England                             |
| EPI_ISL_707003  | 11/26/2020 | 12/14/2020 | Europe / United Kingdom / England                             |
| EPI_ISL_707004  | 11/30/2020 | 12/14/2020 | Europe / United Kingdom / England                             |
| EPI_ISL_707005  | 11/26/2020 | 12/14/2020 | Europe / United Kingdom / England                             |
| EPI_ISL_707006  | 11/25/2020 | 12/14/2020 | Europe / United Kingdom / England                             |
| EPI_ISL_1303032 | 3/12/2020  | 12/14/2020 | South America / Chile / Region Metropolitana de Santiago / Si |
| EPI_ISL_707692  | 10/4/2020  | 12/15/2020 | Asia / Indonesia / Banten                                     |
| EPI_ISL_707693  | 4/17/2020  | 12/15/2020 | North America / USA / California / Los Angeles County         |
| EPI_ISL_707694  | 9/30/2020  | 12/15/2020 | North America / USA / California / Los Angeles County         |
| EPI_ISL_707695  | 10/5/2020  | 12/15/2020 | North America / USA / California / Los Angeles County         |
| EPI_ISL_707696  | 10/15/2020 | 12/15/2020 | Asia / Indonesia / Banten                                     |
| EPI_ISL_707697  | 11/23/2020 | 12/15/2020 | Africa / Tunisia / Nabeul                                     |
| EPI_ISL_707698  | 11/23/2020 | 12/15/2020 | Africa / Tunisia / Soliman                                    |
| EPI_ISL_707699  | 11/23/2020 | 12/15/2020 | Africa / Tunisia / Nabeul                                     |
| EPI_ISL_707700  | 11/23/2020 | 12/15/2020 | Africa / Tunisia / Nabeul                                     |
| EPI_ISL_707703  | 12/3/2020  | 12/15/2020 | Europe / United Kingdom / England                             |
| EPI_ISL_707704  | 12/3/2020  | 12/15/2020 | Europe / United Kingdom / England                             |
| EPI_ISL_707707  | 11/29/2020 | 12/15/2020 | Asia / Thailand / Bangkok                                     |
| EPI_ISL_707708  | 12/1/2020  | 12/15/2020 | Asia / Thailand / Bangkok                                     |
| EPI_ISL_707709  | 12/4/2020  | 12/15/2020 | Asia / Thailand / Bangkok                                     |
| EPI_ISL_707710  | 12/5/2020  | 12/15/2020 | Asia / Thailand / Bangkok                                     |
| EPI_ISL_707721  | 11/14/2020 | 12/15/2020 | Europe / Belgium / Liège                                      |
| EPI_ISL_707723  | 9/8/2020   | 12/15/2020 | Europe / Belgium / Liège                                      |
| EPI_ISL_707724  | 9/9/2020   | 12/15/2020 | Europe / Belgium / Liège                                      |
| EPI_ISL_707725  | 9/9/2020   | 12/15/2020 | Europe / Belgium / Liège                                      |
| EPI_ISL_707726  | 11/14/2020 | 12/15/2020 | Europe / Belgium / Liège                                      |
| EPI_ISL_707727  | 9/5/2020   | 12/15/2020 | Europe / Belgium / Liège                                      |



|                |            |            |                                                 |
|----------------|------------|------------|-------------------------------------------------|
| EPI_ISL_707728 | 9/5/2020   | 12/15/2020 | Europe / Belgium / Liège                        |
| EPI_ISL_707729 | 9/5/2020   | 12/15/2020 | Europe / Belgium / Liège                        |
| EPI_ISL_707730 | 9/6/2020   | 12/15/2020 | Europe / Belgium / Liège                        |
| EPI_ISL_707731 | 9/6/2020   | 12/15/2020 | Europe / Belgium / Liège                        |
| EPI_ISL_707732 | 9/6/2020   | 12/15/2020 | Europe / Belgium / Liège                        |
| EPI_ISL_707733 | 9/7/2020   | 12/15/2020 | Europe / Belgium / Liège                        |
| EPI_ISL_707734 | 9/7/2020   | 12/15/2020 | Europe / Belgium / Liège                        |
| EPI_ISL_707735 | 9/7/2020   | 12/15/2020 | Europe / Belgium / Liège                        |
| EPI_ISL_707736 | 9/7/2020   | 12/15/2020 | Europe / Belgium / Liège                        |
| EPI_ISL_707737 | 9/7/2020   | 12/15/2020 | Europe / Belgium / Liège                        |
| EPI_ISL_707738 | 9/7/2020   | 12/15/2020 | Europe / Belgium / Liège                        |
| EPI_ISL_707739 | 9/7/2020   | 12/15/2020 | Europe / Belgium / Liège                        |
| EPI_ISL_707740 | 9/7/2020   | 12/15/2020 | Europe / Belgium / Liège                        |
| EPI_ISL_707741 | 9/8/2020   | 12/15/2020 | Europe / Belgium / Liège                        |
| EPI_ISL_707742 | 9/8/2020   | 12/15/2020 | Europe / Belgium / Liège                        |
| EPI_ISL_707743 | 9/8/2020   | 12/15/2020 | Europe / Belgium / Liège                        |
| EPI_ISL_707744 | 9/8/2020   | 12/15/2020 | Europe / Belgium / Liège                        |
| EPI_ISL_707745 | 9/8/2020   | 12/15/2020 | Europe / Belgium / Liège                        |
| EPI_ISL_707746 | 9/8/2020   | 12/15/2020 | Europe / Belgium / Liège                        |
| EPI_ISL_707747 | 9/8/2020   | 12/15/2020 | Europe / Belgium / Liège                        |
| EPI_ISL_707748 | 9/8/2020   | 12/15/2020 | Europe / Belgium / Liège                        |
| EPI_ISL_707749 | 9/8/2020   | 12/15/2020 | Europe / Belgium / Liège                        |
| EPI_ISL_707750 | 9/8/2020   | 12/15/2020 | Europe / Belgium / Liège                        |
| EPI_ISL_707751 | 9/8/2020   | 12/15/2020 | Europe / Belgium / Liège                        |
| EPI_ISL_707752 | 9/8/2020   | 12/15/2020 | Europe / Belgium / Liège                        |
| EPI_ISL_707753 | 9/8/2020   | 12/15/2020 | Europe / Belgium / Liège                        |
| EPI_ISL_707754 | 9/9/2020   | 12/15/2020 | Europe / Belgium / Liège                        |
| EPI_ISL_707755 | 9/9/2020   | 12/15/2020 | Europe / Belgium / Liège                        |
| EPI_ISL_707756 | 9/9/2020   | 12/15/2020 | Europe / Belgium / Liège                        |
| EPI_ISL_707757 | 11/14/2020 | 12/15/2020 | Europe / Belgium / Liège                        |
| EPI_ISL_707758 | 11/14/2020 | 12/15/2020 | Europe / Belgium / Liège                        |
| EPI_ISL_707759 | 11/14/2020 | 12/15/2020 | Europe / Belgium / Liège                        |
| EPI_ISL_707760 | 11/14/2020 | 12/15/2020 | Europe / Belgium / Liège                        |
| EPI_ISL_707761 | 11/14/2020 | 12/15/2020 | Europe / Belgium / Liège                        |
| EPI_ISL_707762 | 11/14/2020 | 12/15/2020 | Europe / Belgium / Liège                        |
| EPI_ISL_707763 | 11/14/2020 | 12/15/2020 | Europe / Belgium / Liège                        |
| EPI_ISL_707764 | 11/14/2020 | 12/15/2020 | Europe / Belgium / Liège                        |
| EPI_ISL_707765 | 11/14/2020 | 12/15/2020 | Europe / Belgium / Liège                        |
| EPI_ISL_707766 | 11/14/2020 | 12/15/2020 | Europe / Belgium / Liège                        |
| EPI_ISL_707767 | 11/14/2020 | 12/15/2020 | Europe / Belgium / Liège                        |
| EPI_ISL_707768 | 11/14/2020 | 12/15/2020 | Europe / Belgium / Liège                        |
| EPI_ISL_707769 | 11/15/2020 | 12/15/2020 | Europe / Belgium / Liège                        |
| EPI_ISL_707770 | 11/15/2020 | 12/15/2020 | Europe / Belgium / Liège                        |
| EPI_ISL_707781 | 3/12/2020  | 12/15/2020 | Europe / France / Nouvelle-Aquitaine / Poitiers |
| EPI_ISL_707782 | 3/17/2020  | 12/15/2020 | Europe / France / Nouvelle-Aquitaine / Poitiers |
| EPI_ISL_707791 | 3/2/2020   | 12/15/2020 | Africa / Tunisia / Gafsa                        |
| EPI_ISL_707792 | 3/31/2020  | 12/15/2020 | Africa / Tunisia / Tunis                        |

|                |            |                                                     |
|----------------|------------|-----------------------------------------------------|
| EPI_ISL_707793 | 4/11/2020  | 12/15/2020 Africa / Tunisia / Tunis                 |
| EPI_ISL_707794 | 11/28/2020 | 12/15/2020 Oceania / New Zealand / Waikato          |
| EPI_ISL_707795 | 12/2/2020  | 12/15/2020 Oceania / New Zealand / Auckland         |
| EPI_ISL_707797 | 12/2/2020  | 12/15/2020 Oceania / New Zealand / Auckland         |
| EPI_ISL_707798 | 12/1/2020  | 12/15/2020 Oceania / New Zealand / Auckland         |
| EPI_ISL_707799 | 12/3/2020  | 12/15/2020 Oceania / New Zealand / Auckland         |
| EPI_ISL_707800 | 12/3/2020  | 12/15/2020 Oceania / New Zealand / Auckland         |
| EPI_ISL_707802 | 12/3/2020  | 12/15/2020 Oceania / New Zealand / Auckland         |
| EPI_ISL_707803 | 12/3/2020  | 12/15/2020 Oceania / New Zealand / Auckland         |
| EPI_ISL_707804 | 12/6/2020  | 12/15/2020 Oceania / New Zealand / Auckland         |
| EPI_ISL_707805 | 12/6/2020  | 12/15/2020 Oceania / New Zealand / Auckland         |
| EPI_ISL_707806 | 12/3/2020  | 12/15/2020 Oceania / New Zealand / Counties Manukau |
| EPI_ISL_707807 | 12/3/2020  | 12/15/2020 Oceania / New Zealand / Counties Manukau |
| EPI_ISL_707813 | 11/3/2020  | 12/15/2020 North America / USA / Michigan           |
| EPI_ISL_707814 | 11/5/2020  | 12/15/2020 North America / USA / Michigan           |
| EPI_ISL_707815 | 11/4/2020  | 12/15/2020 North America / USA / Michigan           |
| EPI_ISL_707816 | 11/4/2020  | 12/15/2020 North America / USA / Michigan           |
| EPI_ISL_707817 | 11/5/2020  | 12/15/2020 North America / USA / Michigan           |
| EPI_ISL_707818 | 11/4/2020  | 12/15/2020 North America / USA / Michigan           |
| EPI_ISL_707819 | 11/3/2020  | 12/15/2020 North America / USA / Michigan           |
| EPI_ISL_707820 | 11/5/2020  | 12/15/2020 North America / USA / Michigan           |
| EPI_ISL_707821 | 11/5/2020  | 12/15/2020 North America / USA / Michigan           |
| EPI_ISL_707822 | 11/4/2020  | 12/15/2020 North America / USA / Michigan           |
| EPI_ISL_707823 | 11/4/2020  | 12/15/2020 North America / USA / Michigan           |
| EPI_ISL_707824 | 11/3/2020  | 12/15/2020 North America / USA / Michigan           |
| EPI_ISL_707825 | 11/3/2020  | 12/15/2020 North America / USA / Michigan           |
| EPI_ISL_707826 | 11/3/2020  | 12/15/2020 North America / USA / Michigan           |
| EPI_ISL_707827 | 11/5/2020  | 12/15/2020 North America / USA / Michigan           |
| EPI_ISL_707828 | 11/5/2020  | 12/15/2020 North America / USA / Michigan           |
| EPI_ISL_707829 | 11/4/2020  | 12/15/2020 North America / USA / Michigan           |
| EPI_ISL_707830 | 11/4/2020  | 12/15/2020 North America / USA / Michigan           |
| EPI_ISL_707831 | 11/5/2020  | 12/15/2020 North America / USA / Michigan           |
| EPI_ISL_707832 | 11/5/2020  | 12/15/2020 North America / USA / Michigan           |
| EPI_ISL_707833 | 11/5/2020  | 12/15/2020 North America / USA / Michigan           |
| EPI_ISL_707834 | 11/5/2020  | 12/15/2020 North America / USA / Michigan           |
| EPI_ISL_707835 | 11/5/2020  | 12/15/2020 North America / USA / Michigan           |
| EPI_ISL_707836 | 11/5/2020  | 12/15/2020 North America / USA / Michigan           |
| EPI_ISL_707837 | 11/5/2020  | 12/15/2020 North America / USA / Michigan           |
| EPI_ISL_707838 | 11/5/2020  | 12/15/2020 North America / USA / Michigan           |
| EPI_ISL_707839 | 11/4/2020  | 12/15/2020 North America / USA / Michigan           |
| EPI_ISL_707840 | 11/4/2020  | 12/15/2020 North America / USA / Michigan           |
| EPI_ISL_707841 | 11/5/2020  | 12/15/2020 North America / USA / Michigan           |
| EPI_ISL_707842 | 11/5/2020  | 12/15/2020 North America / USA / Michigan           |
| EPI_ISL_707843 | 11/5/2020  | 12/15/2020 North America / USA / Michigan           |
| EPI_ISL_707844 | 11/4/2020  | 12/15/2020 North America / USA / Michigan           |
| EPI_ISL_707845 | 11/4/2020  | 12/15/2020 North America / USA / Michigan           |
| EPI_ISL_707846 | 11/5/2020  | 12/15/2020 North America / USA / Michigan           |

|                |            |            |                                                       |
|----------------|------------|------------|-------------------------------------------------------|
| EPI_ISL_707847 | 11/4/2020  | 12/15/2020 | North America / USA / Michigan                        |
| EPI_ISL_707848 | 11/5/2020  | 12/15/2020 | North America / USA / Michigan                        |
| EPI_ISL_707849 | 11/4/2020  | 12/15/2020 | North America / USA / Michigan                        |
| EPI_ISL_707850 | 11/4/2020  | 12/15/2020 | North America / USA / Michigan                        |
| EPI_ISL_707851 | 11/5/2020  | 12/15/2020 | North America / USA / Michigan                        |
| EPI_ISL_707852 | 11/5/2020  | 12/15/2020 | North America / USA / Michigan                        |
| EPI_ISL_707853 | 11/5/2020  | 12/15/2020 | North America / USA / Michigan                        |
| EPI_ISL_707854 | 11/5/2020  | 12/15/2020 | North America / USA / Michigan                        |
| EPI_ISL_707855 | 11/4/2020  | 12/15/2020 | North America / USA / Michigan                        |
| EPI_ISL_707856 | 11/5/2020  | 12/15/2020 | North America / USA / Michigan                        |
| EPI_ISL_707857 | 11/4/2020  | 12/15/2020 | North America / USA / Michigan                        |
| EPI_ISL_707858 | 11/4/2020  | 12/15/2020 | North America / USA / Michigan                        |
| EPI_ISL_707859 | 11/4/2020  | 12/15/2020 | North America / USA / Michigan                        |
| EPI_ISL_707860 | 11/4/2020  | 12/15/2020 | North America / USA / Michigan                        |
| EPI_ISL_707861 | 11/4/2020  | 12/15/2020 | North America / USA / Michigan                        |
| EPI_ISL_707862 | 11/4/2020  | 12/15/2020 | North America / USA / Michigan                        |
| EPI_ISL_707863 | 11/4/2020  | 12/15/2020 | North America / USA / Michigan                        |
| EPI_ISL_707864 | 11/4/2020  | 12/15/2020 | North America / USA / Michigan                        |
| EPI_ISL_707865 | 11/4/2020  | 12/15/2020 | North America / USA / Michigan                        |
| EPI_ISL_707866 | 11/4/2020  | 12/15/2020 | North America / USA / Michigan                        |
| EPI_ISL_707867 | 11/4/2020  | 12/15/2020 | North America / USA / Michigan                        |
| EPI_ISL_707868 | 11/4/2020  | 12/15/2020 | North America / USA / Michigan                        |
| EPI_ISL_707869 | 11/5/2020  | 12/15/2020 | North America / USA / Michigan                        |
| EPI_ISL_707870 | 11/4/2020  | 12/15/2020 | North America / USA / Michigan                        |
| EPI_ISL_707871 | 11/4/2020  | 12/15/2020 | North America / USA / Michigan                        |
| EPI_ISL_707872 | 11/4/2020  | 12/15/2020 | North America / USA / Michigan                        |
| EPI_ISL_707873 | 11/4/2020  | 12/15/2020 | North America / USA / Michigan                        |
| EPI_ISL_707874 | 11/4/2020  | 12/15/2020 | North America / USA / Michigan                        |
| EPI_ISL_707875 | 11/4/2020  | 12/15/2020 | North America / USA / Michigan                        |
| EPI_ISL_707876 | 11/4/2020  | 12/15/2020 | North America / USA / Michigan                        |
| EPI_ISL_707877 | 11/5/2020  | 12/15/2020 | North America / USA / Michigan                        |
| EPI_ISL_707878 | 11/4/2020  | 12/15/2020 | North America / USA / Michigan                        |
| EPI_ISL_707879 | 11/4/2020  | 12/15/2020 | North America / USA / Michigan                        |
| EPI_ISL_707880 | 11/5/2020  | 12/15/2020 | North America / USA / Michigan                        |
| EPI_ISL_707881 | 11/5/2020  | 12/15/2020 | North America / USA / Michigan                        |
| EPI_ISL_707882 | 11/5/2020  | 12/15/2020 | North America / USA / Michigan                        |
| EPI_ISL_707885 | 8/18/2020  | 12/15/2020 | North America / USA / California / Los Angeles County |
| EPI_ISL_707886 | 8/18/2020  | 12/15/2020 | North America / USA / California / Los Angeles County |
| EPI_ISL_707888 | 8/18/2020  | 12/15/2020 | North America / USA / California / Los Angeles County |
| EPI_ISL_707891 | 3/24/2020  | 12/16/2020 | Oceania / Australia / New South Wales / Sydney        |
| EPI_ISL_707892 | 3/24/2020  | 12/16/2020 | Oceania / Australia / New South Wales / Sydney        |
| EPI_ISL_707894 | 11/2/2020  | 12/16/2020 | Oceania / Australia / New South Wales / Sydney        |
| EPI_ISL_707896 | 10/22/2020 | 12/16/2020 | Oceania / Australia / New South Wales / Sydney        |
| EPI_ISL_707897 | 10/24/2020 | 12/16/2020 | Oceania / Australia / New South Wales / Sydney        |
| EPI_ISL_707898 | 10/11/2020 | 12/16/2020 | Oceania / Australia / New South Wales / Sydney        |
| EPI_ISL_707899 | 10/20/2020 | 12/16/2020 | Oceania / Australia / New South Wales / Sydney        |
| EPI_ISL_707900 | 10/27/2020 | 12/16/2020 | Oceania / Australia / New South Wales / Sydney        |

|                |            |                                                                  |
|----------------|------------|------------------------------------------------------------------|
| EPI_ISL_707901 | 10/27/2020 | 12/16/2020 Oceania / Australia / New South Wales / Sydney        |
| EPI_ISL_707902 | 10/29/2020 | 12/16/2020 Oceania / Australia / New South Wales / Sydney        |
| EPI_ISL_707903 | 6/5/2020   | 12/16/2020 North America / USA / California / Los Angeles County |
| EPI_ISL_707904 | 6/1/2020   | 12/16/2020 North America / USA / California / Los Angeles County |
| EPI_ISL_707905 | 6/16/2020  | 12/16/2020 North America / USA / California / Los Angeles County |
| EPI_ISL_707906 | 6/27/2020  | 12/16/2020 North America / USA / California / Los Angeles County |
| EPI_ISL_707907 | 7/1/2020   | 12/16/2020 North America / USA / California / Los Angeles County |
| EPI_ISL_707908 | 7/1/2020   | 12/16/2020 North America / USA / California / Los Angeles County |
| EPI_ISL_707909 | 7/2/2020   | 12/16/2020 North America / USA / California / Los Angeles County |
| EPI_ISL_707910 | 7/2/2020   | 12/16/2020 North America / USA / California / Los Angeles County |
| EPI_ISL_707911 | 7/2/2020   | 12/16/2020 North America / USA / California / Los Angeles County |
| EPI_ISL_707912 | 7/2/2020   | 12/16/2020 North America / USA / California / Los Angeles County |
| EPI_ISL_707913 | 7/3/2020   | 12/16/2020 North America / USA / California / Los Angeles County |
| EPI_ISL_707914 | 7/3/2020   | 12/16/2020 North America / USA / California / Los Angeles County |
| EPI_ISL_707915 | 7/3/2020   | 12/16/2020 North America / USA / California / Los Angeles County |
| EPI_ISL_707916 | 7/3/2020   | 12/16/2020 North America / USA / California / Los Angeles County |
| EPI_ISL_707917 | 7/6/2020   | 12/16/2020 North America / USA / California / Los Angeles County |
| EPI_ISL_707918 | 7/6/2020   | 12/16/2020 North America / USA / California / Los Angeles County |
| EPI_ISL_707919 | 7/7/2020   | 12/16/2020 North America / USA / California / Los Angeles County |
| EPI_ISL_707920 | 7/8/2020   | 12/16/2020 North America / USA / California / Los Angeles County |
| EPI_ISL_707921 | 7/8/2020   | 12/16/2020 North America / USA / California / Los Angeles County |
| EPI_ISL_707922 | 7/8/2020   | 12/16/2020 North America / USA / California / Los Angeles County |
| EPI_ISL_707923 | 7/8/2020   | 12/16/2020 North America / USA / California / Los Angeles County |
| EPI_ISL_707924 | 7/8/2020   | 12/16/2020 North America / USA / California / Los Angeles County |
| EPI_ISL_707926 | 7/9/2020   | 12/16/2020 North America / USA / California / Los Angeles County |
| EPI_ISL_707927 | 6/8/2020   | 12/16/2020 North America / USA / California / Los Angeles County |
| EPI_ISL_707928 | 6/3/2020   | 12/16/2020 Asia / Japan / Aichi                                  |
| EPI_ISL_707929 | 6/18/2020  | 12/16/2020 North America / USA / California / Los Angeles County |
| EPI_ISL_707930 | 6/29/2020  | 12/16/2020 North America / USA / California / Los Angeles County |
| EPI_ISL_707931 | 7/9/2020   | 12/16/2020 North America / USA / California / Los Angeles County |
| EPI_ISL_707932 | 7/9/2020   | 12/16/2020 North America / USA / California / Los Angeles County |
| EPI_ISL_707936 | 8/5/2020   | 12/16/2020 Europe / Turkey / Denizli                             |
| EPI_ISL_707937 | 7/27/2020  | 12/16/2020 Europe / Turkey / Denizli                             |
| EPI_ISL_707938 | 7/26/2020  | 12/16/2020 Europe / Turkey / Denizli                             |
| EPI_ISL_707939 | 7/28/2020  | 12/16/2020 Europe / Turkey / Denizli                             |
| EPI_ISL_707943 | 3/12/2020  | 12/16/2020 Europe / Germany / Saarland                           |
| EPI_ISL_707947 | 3/13/2020  | 12/16/2020 Europe / Germany / Saarland                           |
| EPI_ISL_707948 | 3/14/2020  | 12/16/2020 Europe / Germany / Saarland                           |
| EPI_ISL_707949 | 3/15/2020  | 12/16/2020 Europe / Germany / Saarland                           |
| EPI_ISL_707950 | 3/16/2020  | 12/16/2020 Europe / Germany / Saarland                           |
| EPI_ISL_707951 | 3/16/2020  | 12/16/2020 Europe / Germany / Saarland                           |
| EPI_ISL_707954 | 3/18/2020  | 12/16/2020 Europe / Germany / Saarland                           |
| EPI_ISL_707956 | 3/24/2020  | 12/16/2020 Europe / Germany / Saarland                           |
| EPI_ISL_707959 | 3/29/2020  | 12/16/2020 Europe / Germany / Saarland                           |
| EPI_ISL_707964 | 4/2/2020   | 12/16/2020 Europe / Germany / Saarland                           |
| EPI_ISL_707966 | 4/2/2020   | 12/16/2020 Europe / Germany / Saarland                           |
| EPI_ISL_707968 | 4/3/2020   | 12/16/2020 Europe / Germany / Saarland                           |

|                |            |            |                                        |
|----------------|------------|------------|----------------------------------------|
| EPI_ISL_707970 | 10/11/2020 | 12/16/2020 | Europe / Germany / Saarland            |
| EPI_ISL_707971 | 10/11/2020 | 12/16/2020 | Europe / Germany / Saarland            |
| EPI_ISL_707972 | 10/12/2020 | 12/16/2020 | Europe / Germany / Saarland            |
| EPI_ISL_707975 | 10/12/2020 | 12/16/2020 | Europe / Germany / Saarland            |
| EPI_ISL_707981 | 10/13/2020 | 12/16/2020 | Europe / Germany / Saarland            |
| EPI_ISL_707982 | 10/13/2020 | 12/16/2020 | Europe / Germany / Saarland            |
| EPI_ISL_707986 | 10/14/2020 | 12/16/2020 | Europe / Germany / Saarland            |
| EPI_ISL_707987 | 10/15/2020 | 12/16/2020 | Europe / Germany / Saarland            |
| EPI_ISL_707988 | 10/15/2020 | 12/16/2020 | Europe / Germany / Saarland            |
| EPI_ISL_707991 | 10/15/2020 | 12/16/2020 | Europe / Germany / Saarland            |
| EPI_ISL_707992 | 10/15/2020 | 12/16/2020 | Europe / Germany / Saarland            |
| EPI_ISL_707993 | 10/15/2020 | 12/16/2020 | Europe / Germany / Saarland            |
| EPI_ISL_707994 | 10/15/2020 | 12/16/2020 | Europe / Germany / Saarland            |
| EPI_ISL_707995 | 10/17/2020 | 12/16/2020 | Europe / Germany / Saarland            |
| EPI_ISL_707996 | 10/18/2020 | 12/16/2020 | Europe / Germany / Saarland            |
| EPI_ISL_707998 | 10/18/2020 | 12/16/2020 | Europe / Germany / Saarland            |
| EPI_ISL_707999 | 10/20/2020 | 12/16/2020 | Europe / Germany / Saarland            |
| EPI_ISL_708000 | 10/20/2020 | 12/16/2020 | Europe / Germany / Saarland            |
| EPI_ISL_708001 | 10/20/2020 | 12/16/2020 | Europe / Germany / Saarland            |
| EPI_ISL_708002 | 10/21/2020 | 12/16/2020 | Europe / Germany / Saarland            |
| EPI_ISL_708003 | 3/19/2020  | 12/16/2020 | Europe / Germany / Saarland            |
| EPI_ISL_708013 | 10/14/2020 | 12/16/2020 | Europe / Germany / Saarland            |
| EPI_ISL_708014 | 10/18/2020 | 12/16/2020 | Europe / Germany / Saarland            |
| EPI_ISL_708015 | 10/21/2020 | 12/16/2020 | Europe / Germany / Saarland            |
| EPI_ISL_708026 | 8/6/2020   | 12/16/2020 | Europe / Norway                        |
| EPI_ISL_708027 | 7/31/2020  | 12/16/2020 | Europe / Norway                        |
| EPI_ISL_708028 | 10/13/2020 | 12/16/2020 | Europe / Norway / Oslo                 |
| EPI_ISL_708029 | 10/18/2020 | 12/16/2020 | Europe / Norway / Oslo                 |
| EPI_ISL_708030 | 10/15/2020 | 12/16/2020 | Europe / Norway / Innlandet            |
| EPI_ISL_708031 | 10/15/2020 | 12/16/2020 | Europe / Norway / Innlandet            |
| EPI_ISL_708032 | 10/18/2020 | 12/16/2020 | Europe / Norway / Viken                |
| EPI_ISL_708033 | 10/21/2020 | 12/16/2020 | Europe / Norway / Oslo                 |
| EPI_ISL_708034 | 10/23/2020 | 12/16/2020 | Europe / Norway / Oslo                 |
| EPI_ISL_708035 | 10/29/2020 | 12/16/2020 | Europe / Norway / Oslo                 |
| EPI_ISL_708036 | 10/27/2020 | 12/16/2020 | Europe / Norway / Innlandet            |
| EPI_ISL_708037 | 10/29/2020 | 12/16/2020 | Europe / Norway / Innlandet            |
| EPI_ISL_708038 | 10/27/2020 | 12/16/2020 | Europe / Norway / Innlandet            |
| EPI_ISL_708039 | 10/30/2020 | 12/16/2020 | Europe / Norway / Innlandet            |
| EPI_ISL_708040 | 11/3/2020  | 12/16/2020 | Europe / Norway                        |
| EPI_ISL_708041 | 10/29/2020 | 12/16/2020 | Europe / Norway / Viken                |
| EPI_ISL_708042 | 10/26/2020 | 12/16/2020 | Europe / Norway / TrÅ,ndelag           |
| EPI_ISL_708043 | 10/19/2020 | 12/16/2020 | Europe / Norway / TrÅ,ndelag           |
| EPI_ISL_708044 | 10/22/2020 | 12/16/2020 | Europe / Norway / Rogaland             |
| EPI_ISL_708045 | 10/22/2020 | 12/16/2020 | Europe / Norway / Rogaland             |
| EPI_ISL_708046 | 10/26/2020 | 12/16/2020 | Europe / Norway / Vestfold og Telemark |
| EPI_ISL_708047 | 10/26/2020 | 12/16/2020 | Europe / Norway / Vestfold og Telemark |
| EPI_ISL_708048 | 10/28/2020 | 12/16/2020 | Europe / Norway / Vestfold og Telemark |

|                |            |            |                                        |
|----------------|------------|------------|----------------------------------------|
| EPI_ISL_708049 | 10/28/2020 | 12/16/2020 | Europe / Norway / Viken                |
| EPI_ISL_708050 | 10/31/2020 | 12/16/2020 | Europe / Norway / Viken                |
| EPI_ISL_708051 | 10/26/2020 | 12/16/2020 | Europe / Norway / Viken                |
| EPI_ISL_708052 | 10/29/2020 | 12/16/2020 | Europe / Norway / Oslo                 |
| EPI_ISL_708053 | 10/28/2020 | 12/16/2020 | Europe / Norway / Oslo                 |
| EPI_ISL_708054 | 10/29/2020 | 12/16/2020 | Europe / Norway / Oslo                 |
| EPI_ISL_708055 | 11/1/2020  | 12/16/2020 | Europe / Norway / Agder                |
| EPI_ISL_708056 | 11/1/2020  | 12/16/2020 | Europe / Norway / Agder                |
| EPI_ISL_708057 | 11/4/2020  | 12/16/2020 | Europe / Norway / Oslo                 |
| EPI_ISL_708058 | 11/4/2020  | 12/16/2020 | Europe / Norway / Oslo                 |
| EPI_ISL_708059 | 11/4/2020  | 12/16/2020 | Europe / Norway / Oslo                 |
| EPI_ISL_708060 | 11/2/2020  | 12/16/2020 | Europe / Norway / Vestfold og Telemark |
| EPI_ISL_708061 | 11/2/2020  | 12/16/2020 | Europe / Norway / Vestfold og Telemark |
| EPI_ISL_708062 | 11/2/2020  | 12/16/2020 | Europe / Norway / Viken                |
| EPI_ISL_708063 | 11/2/2020  | 12/16/2020 | Europe / Norway / Viken                |
| EPI_ISL_708064 | 11/2/2020  | 12/16/2020 | Europe / Norway / Viken                |
| EPI_ISL_708065 | 11/2/2020  | 12/16/2020 | Europe / Norway / Troms og Finnmark    |
| EPI_ISL_708066 | 11/2/2020  | 12/16/2020 | Europe / Norway / Troms og Finnmark    |
| EPI_ISL_708067 | 11/2/2020  | 12/16/2020 | Europe / Norway / Troms og Finnmark    |
| EPI_ISL_708068 | 11/2/2020  | 12/16/2020 | Europe / Norway / Troms og Finnmark    |
| EPI_ISL_708069 | 10/28/2020 | 12/16/2020 | Europe / Norway                        |
| EPI_ISL_708070 | 10/26/2020 | 12/16/2020 | Europe / Norway / Troms og Finnmark    |
| EPI_ISL_708071 | 10/28/2020 | 12/16/2020 | Europe / Norway / Troms og Finnmark    |
| EPI_ISL_708072 | 10/28/2020 | 12/16/2020 | Europe / Norway / Troms og Finnmark    |
| EPI_ISL_708073 | 10/28/2020 | 12/16/2020 | Europe / Norway / Vestland             |
| EPI_ISL_708074 | 10/27/2020 | 12/16/2020 | Europe / Norway / Vestland             |
| EPI_ISL_708075 | 11/4/2020  | 12/16/2020 | Europe / Norway / Vestland             |
| EPI_ISL_708076 | 11/5/2020  | 12/16/2020 | Europe / Norway / Vestland             |
| EPI_ISL_708077 | 11/4/2020  | 12/16/2020 | Europe / Norway / Vestland             |
| EPI_ISL_708078 | 11/2/2020  | 12/16/2020 | Europe / Norway / Vestland             |
| EPI_ISL_708079 | 10/26/2020 | 12/16/2020 | Europe / Norway / Troms og Finnmark    |
| EPI_ISL_708080 | 11/3/2020  | 12/16/2020 | Europe / Norway / Troms og Finnmark    |
| EPI_ISL_708081 | 11/2/2020  | 12/16/2020 | Europe / Norway / Rogaland             |
| EPI_ISL_708082 | 10/28/2020 | 12/16/2020 | Europe / Norway / Troms og Finnmark    |
| EPI_ISL_708083 | 10/28/2020 | 12/16/2020 | Europe / Norway / Troms og Finnmark    |
| EPI_ISL_708084 | 10/29/2020 | 12/16/2020 | Europe / Norway / Troms og Finnmark    |
| EPI_ISL_708085 | 10/28/2020 | 12/16/2020 | Europe / Norway / Troms og Finnmark    |
| EPI_ISL_708086 | 11/3/2020  | 12/16/2020 | Europe / Norway / Troms og Finnmark    |
| EPI_ISL_708087 | 11/3/2020  | 12/16/2020 | Europe / Norway / Troms og Finnmark    |
| EPI_ISL_708088 | 11/3/2020  | 12/16/2020 | Europe / Norway / Troms og Finnmark    |
| EPI_ISL_708089 | 11/3/2020  | 12/16/2020 | Europe / Norway / Troms og Finnmark    |
| EPI_ISL_708090 | 11/3/2020  | 12/16/2020 | Europe / Norway / Troms og Finnmark    |
| EPI_ISL_708091 | 10/26/2020 | 12/16/2020 | Europe / Norway / Troms og Finnmark    |
| EPI_ISL_708092 | 11/3/2020  | 12/16/2020 | Europe / Norway / Troms og Finnmark    |
| EPI_ISL_708093 | 10/30/2020 | 12/16/2020 | Europe / Norway / Troms og Finnmark    |
| EPI_ISL_708094 | 11/2/2020  | 12/16/2020 | Europe / Norway / Troms og Finnmark    |
| EPI_ISL_708095 | 10/27/2020 | 12/16/2020 | Europe / Norway / Troms og Finnmark    |

|                |            |            |                              |
|----------------|------------|------------|------------------------------|
| EPI_ISL_708096 | 11/3/2020  | 12/16/2020 | Europe / Norway              |
| EPI_ISL_708097 | 11/3/2020  | 12/16/2020 | Europe / Norway / Nordland   |
| EPI_ISL_708098 | 10/28/2020 | 12/16/2020 | Europe / Norway / Nordland   |
| EPI_ISL_708099 | 10/28/2020 | 12/16/2020 | Europe / Norway / Nordland   |
| EPI_ISL_708100 | 10/28/2020 | 12/16/2020 | Europe / Norway / Nordland   |
| EPI_ISL_708101 | 11/2/2020  | 12/16/2020 | Europe / Norway / Nordland   |
| EPI_ISL_708102 | 10/31/2020 | 12/16/2020 | Europe / Norway / Nordland   |
| EPI_ISL_708103 | 10/31/2020 | 12/16/2020 | Europe / Norway / Nordland   |
| EPI_ISL_708104 | 11/3/2020  | 12/16/2020 | Europe / Norway / Nordland   |
| EPI_ISL_708105 | 11/3/2020  | 12/16/2020 | Europe / Norway / Nordland   |
| EPI_ISL_708106 | 11/5/2020  | 12/16/2020 | Europe / Norway / TrÃndelag |
| EPI_ISL_708107 | 11/4/2020  | 12/16/2020 | Europe / Norway / TrÃndelag |
| EPI_ISL_708108 | 11/4/2020  | 12/16/2020 | Europe / Norway / TrÃndelag |
| EPI_ISL_708109 | 11/6/2020  | 12/16/2020 | Europe / Norway / TrÃndelag |
| EPI_ISL_708110 | 11/2/2020  | 12/16/2020 | Europe / Norway / Viken      |
| EPI_ISL_708111 | 11/3/2020  | 12/16/2020 | Europe / Norway / Viken      |
| EPI_ISL_708112 | 11/3/2020  | 12/16/2020 | Europe / Norway / Viken      |
| EPI_ISL_708113 | 11/4/2020  | 12/16/2020 | Europe / Norway / Viken      |
| EPI_ISL_708114 | 11/4/2020  | 12/16/2020 | Europe / Norway / Viken      |
| EPI_ISL_708115 | 11/12/2020 | 12/16/2020 | Europe / Norway / Viken      |
| EPI_ISL_708116 | 11/6/2020  | 12/16/2020 | Europe / Norway / Viken      |
| EPI_ISL_708117 | 11/6/2020  | 12/16/2020 | Europe / Norway / Viken      |
| EPI_ISL_708118 | 11/7/2020  | 12/16/2020 | Europe / Norway / Oslo       |
| EPI_ISL_708119 | 11/10/2020 | 12/16/2020 | Europe / Norway / Oslo       |
| EPI_ISL_708120 | 11/7/2020  | 12/16/2020 | Europe / Norway / Oslo       |
| EPI_ISL_708121 | 11/8/2020  | 12/16/2020 | Europe / Norway / Oslo       |
| EPI_ISL_708122 | 11/9/2020  | 12/16/2020 | Europe / Norway / Agder      |
| EPI_ISL_708123 | 11/9/2020  | 12/16/2020 | Europe / Norway / Agder      |
| EPI_ISL_708124 | 11/9/2020  | 12/16/2020 | Europe / Norway / Agder      |
| EPI_ISL_708125 | 11/9/2020  | 12/16/2020 | Europe / Norway / Agder      |
| EPI_ISL_708126 | 11/10/2020 | 12/16/2020 | Europe / Norway / Viken      |
| EPI_ISL_708127 | 11/10/2020 | 12/16/2020 | Europe / Norway / Viken      |
| EPI_ISL_708128 | 11/10/2020 | 12/16/2020 | Europe / Norway / Viken      |
| EPI_ISL_708129 | 11/10/2020 | 12/16/2020 | Europe / Norway / Viken      |
| EPI_ISL_708130 | 11/10/2020 | 12/16/2020 | Europe / Norway / Viken      |
| EPI_ISL_708131 | 11/14/2020 | 12/16/2020 | Europe / Norway / Rogaland   |
| EPI_ISL_708132 | 11/9/2020  | 12/16/2020 | Europe / Norway / Rogaland   |
| EPI_ISL_708133 | 11/10/2020 | 12/16/2020 | Europe / Norway / Rogaland   |
| EPI_ISL_708134 | 11/10/2020 | 12/16/2020 | Europe / Norway / Rogaland   |
| EPI_ISL_708135 | 11/11/2020 | 12/16/2020 | Europe / Norway / Rogaland   |
| EPI_ISL_708136 | 11/17/2020 | 12/16/2020 | Europe / Norway / Viken      |
| EPI_ISL_708137 | 11/17/2020 | 12/16/2020 | Europe / Norway / Viken      |
| EPI_ISL_708138 | 11/17/2020 | 12/16/2020 | Europe / Norway / Viken      |
| EPI_ISL_708139 | 11/17/2020 | 12/16/2020 | Europe / Norway / Viken      |
| EPI_ISL_708140 | 11/17/2020 | 12/16/2020 | Europe / Norway / Oslo       |
| EPI_ISL_708141 | 10/30/2020 | 12/16/2020 | Europe / Norway / Oslo       |
| EPI_ISL_708142 | 11/8/2020  | 12/16/2020 | Europe / Norway / TrÃndelag |

|                |            |            |                                                       |
|----------------|------------|------------|-------------------------------------------------------|
| EPI_ISL_708143 | 11/9/2020  | 12/16/2020 | Europe / Norway / Tr ndelag                           |
| EPI_ISL_708144 | 11/9/2020  | 12/16/2020 | Europe / Norway / Tr ndelag                           |
| EPI_ISL_708145 | 11/8/2020  | 12/16/2020 | Europe / Norway / Tr ndelag                           |
| EPI_ISL_708146 | 11/9/2020  | 12/16/2020 | Europe / Norway / Tr ndelag                           |
| EPI_ISL_708147 | 11/10/2020 | 12/16/2020 | Europe / Norway / Vestfold og Telemark                |
| EPI_ISL_708148 | 11/9/2020  | 12/16/2020 | Europe / Norway / Vestfold og Telemark                |
| EPI_ISL_708149 | 11/10/2020 | 12/16/2020 | Europe / Norway / Vestfold og Telemark                |
| EPI_ISL_708150 | 11/11/2020 | 12/16/2020 | Europe / Norway / Vestfold og Telemark                |
| EPI_ISL_708151 | 11/14/2020 | 12/16/2020 | Europe / Norway / Innlandet                           |
| EPI_ISL_708152 | 11/12/2020 | 12/16/2020 | Europe / Norway / Innlandet                           |
| EPI_ISL_708153 | 11/13/2020 | 12/16/2020 | Europe / Norway / M re og Romsdal                     |
| EPI_ISL_708154 | 10/27/2020 | 12/16/2020 | Europe / Norway / Vestfold og Telemark                |
| EPI_ISL_708155 | 10/27/2020 | 12/16/2020 | Europe / Norway / Vestfold og Telemark                |
| EPI_ISL_708156 | 10/28/2020 | 12/16/2020 | Europe / Norway / Vestfold og Telemark                |
| EPI_ISL_708157 | 10/26/2020 | 12/16/2020 | Europe / Norway / Vestfold og Telemark                |
| EPI_ISL_708158 | 10/29/2020 | 12/16/2020 | Europe / Norway / Vestfold og Telemark                |
| EPI_ISL_708159 | 10/29/2020 | 12/16/2020 | Europe / Norway / Vestfold og Telemark                |
| EPI_ISL_708160 | 10/29/2020 | 12/16/2020 | Europe / Norway / Vestfold og Telemark                |
| EPI_ISL_708161 | 10/28/2020 | 12/16/2020 | Europe / Norway / Vestfold og Telemark                |
| EPI_ISL_708162 | 10/28/2020 | 12/16/2020 | Europe / Norway / Vestfold og Telemark                |
| EPI_ISL_708163 | 10/19/2020 | 12/16/2020 | Europe / Norway / Vestfold og Telemark                |
| EPI_ISL_708164 | 10/24/2020 | 12/16/2020 | Europe / Norway / Vestfold og Telemark                |
| EPI_ISL_708165 | 10/26/2020 | 12/16/2020 | Europe / Norway / Vestfold og Telemark                |
| EPI_ISL_708166 | 10/26/2020 | 12/16/2020 | Europe / Norway / Vestfold og Telemark                |
| EPI_ISL_708167 | 10/27/2020 | 12/16/2020 | Europe / Norway / Vestfold og Telemark                |
| EPI_ISL_708168 | 10/27/2020 | 12/16/2020 | Europe / Norway / Vestfold og Telemark                |
| EPI_ISL_708169 | 11/18/2020 | 12/16/2020 | Europe / Norway / Oslo                                |
| EPI_ISL_708170 | 11/19/2020 | 12/16/2020 | Europe / Norway / Oslo                                |
| EPI_ISL_708171 | 11/14/2020 | 12/16/2020 | Europe / Norway / Oslo                                |
| EPI_ISL_708172 | 11/17/2020 | 12/16/2020 | Europe / Norway / Oslo                                |
| EPI_ISL_708173 | 11/17/2020 | 12/16/2020 | Europe / Norway / Oslo                                |
| EPI_ISL_708174 | 11/18/2020 | 12/16/2020 | Europe / Norway / Oslo                                |
| EPI_ISL_708175 | 11/18/2020 | 12/16/2020 | Europe / Norway / Oslo                                |
| EPI_ISL_708176 | 11/9/2020  | 12/16/2020 | Europe / Norway / Vestland                            |
| EPI_ISL_708177 | 11/9/2020  | 12/16/2020 | Europe / Norway / Vestland                            |
| EPI_ISL_708178 | 11/10/2020 | 12/16/2020 | Europe / Norway / Vestland                            |
| EPI_ISL_708179 | 11/14/2020 | 12/16/2020 | Europe / Norway / Vestland                            |
| EPI_ISL_708180 | 11/17/2020 | 12/16/2020 | Europe / Norway / Viken                               |
| EPI_ISL_708181 | 11/16/2020 | 12/16/2020 | Europe / Norway / Viken                               |
| EPI_ISL_708182 | 9/1/2020   | 12/16/2020 | North America / USA / California / Los Angeles County |
| EPI_ISL_708183 | 9/1/2020   | 12/16/2020 | North America / USA / California / Los Angeles County |
| EPI_ISL_708184 | 7/29/2020  | 12/16/2020 | Europe / Turkey / Denizli                             |
| EPI_ISL_708185 | 7/29/2020  | 12/16/2020 | Europe / Turkey / Denizli                             |
| EPI_ISL_708186 | 8/26/2020  | 12/16/2020 | Europe / Turkey / Denizli                             |
| EPI_ISL_708188 | 8/27/2020  | 12/16/2020 | Europe / Turkey / Denizli                             |
| EPI_ISL_708189 | 8/26/2020  | 12/16/2020 | Europe / Turkey / Denizli                             |
| EPI_ISL_708190 | 7/30/2020  | 12/16/2020 | Europe / Turkey / Denizli                             |



|                |            |            |                                     |
|----------------|------------|------------|-------------------------------------|
| EPI_ISL_708191 | 7/30/2020  | 12/16/2020 | Europe / Turkey / Denizli           |
| EPI_ISL_708192 | 8/28/2020  | 12/16/2020 | Europe / Turkey / Denizli           |
| EPI_ISL_708193 | 8/26/2020  | 12/16/2020 | Europe / Turkey / Denizli           |
| EPI_ISL_708194 | 8/25/2020  | 12/16/2020 | Europe / Turkey / Denizli           |
| EPI_ISL_708195 | 8/26/2020  | 12/16/2020 | Europe / Turkey / Denizli           |
| EPI_ISL_708196 | 10/29/2020 | 12/16/2020 | Europe / Norway / Viken             |
| EPI_ISL_708197 | 10/27/2020 | 12/16/2020 | Europe / Norway / Nordland          |
| EPI_ISL_708198 | 10/28/2020 | 12/16/2020 | Europe / Norway / Troms og Finnmark |
| EPI_ISL_708199 | 11/7/2020  | 12/16/2020 | Europe / Norway / Viken             |
| EPI_ISL_708204 | 11/17/2020 | 12/16/2020 | North America / USA / Michigan      |
| EPI_ISL_708205 | 11/17/2020 | 12/16/2020 | North America / USA / Michigan      |
| EPI_ISL_708207 | 11/16/2020 | 12/16/2020 | North America / USA / Michigan      |
| EPI_ISL_708208 | 11/17/2020 | 12/16/2020 | North America / USA / Michigan      |
| EPI_ISL_708209 | 11/16/2020 | 12/16/2020 | North America / USA / Michigan      |
| EPI_ISL_708210 | 11/16/2020 | 12/16/2020 | North America / USA / Michigan      |
| EPI_ISL_708211 | 11/17/2020 | 12/16/2020 | North America / USA / Michigan      |
| EPI_ISL_708212 | 11/17/2020 | 12/16/2020 | North America / USA / Michigan      |
| EPI_ISL_708213 | 11/18/2020 | 12/16/2020 | North America / USA / Michigan      |
| EPI_ISL_708214 | 11/17/2020 | 12/16/2020 | North America / USA / Michigan      |
| EPI_ISL_708215 | 11/17/2020 | 12/16/2020 | North America / USA / Michigan      |
| EPI_ISL_708216 | 11/18/2020 | 12/16/2020 | North America / USA / Michigan      |
| EPI_ISL_708217 | 11/18/2020 | 12/16/2020 | North America / USA / Michigan      |
| EPI_ISL_708218 | 11/16/2020 | 12/16/2020 | North America / USA / Michigan      |
| EPI_ISL_708219 | 11/17/2020 | 12/16/2020 | North America / USA / Michigan      |
| EPI_ISL_708220 | 11/18/2020 | 12/16/2020 | North America / USA / Michigan      |
| EPI_ISL_708221 | 11/18/2020 | 12/16/2020 | North America / USA / Michigan      |
| EPI_ISL_708222 | 11/18/2020 | 12/16/2020 | North America / USA / Michigan      |
| EPI_ISL_708223 | 11/17/2020 | 12/16/2020 | North America / USA / Michigan      |
| EPI_ISL_708224 | 11/16/2020 | 12/16/2020 | North America / USA / Michigan      |
| EPI_ISL_708225 | 11/17/2020 | 12/16/2020 | North America / USA / Michigan      |
| EPI_ISL_708226 | 11/17/2020 | 12/16/2020 | North America / USA / Michigan      |
| EPI_ISL_708227 | 11/18/2020 | 12/16/2020 | North America / USA / Michigan      |
| EPI_ISL_708228 | 11/17/2020 | 12/16/2020 | North America / USA / Michigan      |
| EPI_ISL_708229 | 11/18/2020 | 12/16/2020 | North America / USA / Michigan      |
| EPI_ISL_708230 | 11/17/2020 | 12/16/2020 | North America / USA / Michigan      |
| EPI_ISL_708231 | 11/17/2020 | 12/16/2020 | North America / USA / Michigan      |
| EPI_ISL_708241 | 11/18/2020 | 12/16/2020 | North America / USA / Michigan      |
| EPI_ISL_708242 | 11/18/2020 | 12/16/2020 | North America / USA / Michigan      |
| EPI_ISL_708243 | 10/31/2020 | 12/16/2020 | North America / USA / Michigan      |
| EPI_ISL_708244 | 11/18/2020 | 12/16/2020 | North America / USA / Michigan      |
| EPI_ISL_708245 | 11/12/2020 | 12/16/2020 | North America / USA / Michigan      |
| EPI_ISL_708246 | 11/14/2020 | 12/16/2020 | North America / USA / Michigan      |
| EPI_ISL_708247 | 11/18/2020 | 12/16/2020 | North America / USA / Michigan      |
| EPI_ISL_708248 | 11/14/2020 | 12/16/2020 | North America / USA / Michigan      |
| EPI_ISL_708249 | 11/18/2020 | 12/16/2020 | North America / USA / Michigan      |
| EPI_ISL_708250 | 11/14/2020 | 12/16/2020 | North America / USA / Michigan      |
| EPI_ISL_708251 | 11/18/2020 | 12/16/2020 | North America / USA / Michigan      |



|                |            |            |                                                    |
|----------------|------------|------------|----------------------------------------------------|
| EPI_ISL_708308 | 10/28/2020 | 12/16/2020 | Europe / Switzerland / Geneva                      |
| EPI_ISL_708315 | 10/30/2020 | 12/16/2020 | Europe / Switzerland / Geneva                      |
| EPI_ISL_708354 | 11/12/2020 | 12/16/2020 | North America / USA / Michigan                     |
| EPI_ISL_708355 | 11/9/2020  | 12/16/2020 | North America / USA / Michigan                     |
| EPI_ISL_708356 | 11/10/2020 | 12/16/2020 | North America / USA / Michigan                     |
| EPI_ISL_708357 | 11/9/2020  | 12/16/2020 | North America / USA / Michigan                     |
| EPI_ISL_708358 | 11/16/2020 | 12/16/2020 | North America / USA / Michigan                     |
| EPI_ISL_708360 | 11/9/2020  | 12/16/2020 | North America / USA / Michigan                     |
| EPI_ISL_708361 | 11/12/2020 | 12/16/2020 | North America / USA / Michigan                     |
| EPI_ISL_708362 | 11/16/2020 | 12/16/2020 | North America / USA / Michigan                     |
| EPI_ISL_708363 | 11/9/2020  | 12/16/2020 | North America / USA / Michigan                     |
| EPI_ISL_708364 | 11/9/2020  | 12/16/2020 | North America / USA / Michigan                     |
| EPI_ISL_708365 | 11/13/2020 | 12/16/2020 | North America / USA / Michigan                     |
| EPI_ISL_708366 | 11/17/2020 | 12/16/2020 | North America / USA / Michigan                     |
| EPI_ISL_708367 | 11/1/2020  | 12/16/2020 | North America / USA / Michigan                     |
| EPI_ISL_708368 | 11/16/2020 | 12/16/2020 | North America / USA / Michigan                     |
| EPI_ISL_708369 | 11/16/2020 | 12/16/2020 | North America / USA / Michigan                     |
| EPI_ISL_708370 | 11/12/2020 | 12/16/2020 | North America / USA / Michigan                     |
| EPI_ISL_708371 | 11/9/2020  | 12/16/2020 | North America / USA / Michigan                     |
| EPI_ISL_708372 | 11/10/2020 | 12/16/2020 | North America / USA / Michigan                     |
| EPI_ISL_708373 | 11/9/2020  | 12/16/2020 | North America / USA / Michigan                     |
| EPI_ISL_708374 | 11/12/2020 | 12/16/2020 | North America / USA / Michigan                     |
| EPI_ISL_708375 | 11/11/2020 | 12/16/2020 | North America / USA / Michigan                     |
| EPI_ISL_708376 | 11/5/2020  | 12/16/2020 | North America / USA / Michigan                     |
| EPI_ISL_708377 | 11/9/2020  | 12/16/2020 | North America / USA / Michigan                     |
| EPI_ISL_708378 | 11/12/2020 | 12/16/2020 | North America / USA / Michigan                     |
| EPI_ISL_708379 | 11/1/2020  | 12/16/2020 | Europe / Switzerland / Geneva                      |
| EPI_ISL_708433 | 9/15/2020  | 12/16/2020 | North America / USA / Delaware / Kent County       |
| EPI_ISL_708434 | 9/10/2020  | 12/16/2020 | North America / USA / Delaware / New Castle County |
| EPI_ISL_708435 | 9/14/2020  | 12/16/2020 | North America / USA / Delaware / Kent County       |
| EPI_ISL_708436 | 9/2/2020   | 12/16/2020 | North America / USA / Delaware / Sussex County     |
| EPI_ISL_708437 | 10/28/2020 | 12/16/2020 | North America / USA / Delaware / Kent County       |
| EPI_ISL_708438 | 10/29/2020 | 12/16/2020 | North America / USA / Delaware / Kent County       |
| EPI_ISL_708439 | 11/4/2020  | 12/16/2020 | North America / USA / Delaware / Kent County       |
| EPI_ISL_708440 | 11/3/2020  | 12/16/2020 | North America / USA / Delaware / Sussex County     |
| EPI_ISL_708441 | 6/18/2020  | 12/16/2020 | North America / USA / Delaware / Sussex County     |
| EPI_ISL_708442 | 10/29/2020 | 12/16/2020 | North America / USA / Delaware / Kent County       |
| EPI_ISL_708443 | 10/29/2020 | 12/16/2020 | North America / USA / Delaware / Kent County       |
| EPI_ISL_708444 | 11/3/2020  | 12/16/2020 | North America / USA / Delaware / Sussex County     |
| EPI_ISL_708445 | 5/27/2020  | 12/16/2020 | North America / USA / Delaware / Kent County       |
| EPI_ISL_708446 | 9/8/2020   | 12/16/2020 | North America / USA / Delaware / Sussex County     |
| EPI_ISL_708447 | 10/28/2020 | 12/16/2020 | North America / USA / Delaware / Kent County       |
| EPI_ISL_708448 | 8/24/2020  | 12/16/2020 | North America / USA / Delaware / Kent County       |
| EPI_ISL_708449 | 10/26/2020 | 12/16/2020 | North America / USA / Delaware / Sussex County     |
| EPI_ISL_708450 | 10/30/2020 | 12/16/2020 | North America / USA / Delaware / Kent County       |
| EPI_ISL_708451 | 10/29/2020 | 12/16/2020 | North America / USA / Delaware / Kent County       |
| EPI_ISL_708452 | 10/30/2020 | 12/16/2020 | North America / USA / Delaware / New Castle County |



|                |            |            |                                                       |
|----------------|------------|------------|-------------------------------------------------------|
| EPI_ISL_708502 | 12/4/2020  | 12/16/2020 | North America / USA / Minnesota                       |
| EPI_ISL_708503 | 12/2/2020  | 12/16/2020 | North America / USA / Minnesota                       |
| EPI_ISL_708504 | 3/27/2020  | 12/16/2020 | North America / USA / Minnesota                       |
| EPI_ISL_708505 | 5/5/2020   | 12/16/2020 | North America / USA / California / Los Angeles County |
| EPI_ISL_708507 | 10/2/2020  | 12/16/2020 | North America / USA / California / Los Angeles County |
| EPI_ISL_708526 | 4/3/2020   | 12/16/2020 | Europe / Ireland / Meath                              |
| EPI_ISL_708527 | 4/4/2020   | 12/16/2020 | Europe / Ireland / Dublin                             |
| EPI_ISL_708529 | 6/29/2020  | 12/16/2020 | South America / Brazil / Sao Paulo / Fernandopolis    |
| EPI_ISL_708530 | 11/21/2020 | 12/16/2020 | South America / Brazil / Sao Paulo / Fernandopolis    |
| EPI_ISL_708563 | 11/8/2020  | 12/16/2020 | North America / USA / Michigan                        |
| EPI_ISL_708568 | 11/3/2020  | 12/16/2020 | North America / USA / Michigan                        |
| EPI_ISL_708569 | 11/3/2020  | 12/16/2020 | North America / USA / Michigan                        |
| EPI_ISL_708570 | 11/3/2020  | 12/16/2020 | North America / USA / Michigan                        |
| EPI_ISL_708571 | 11/8/2020  | 12/16/2020 | North America / USA / Michigan                        |
| EPI_ISL_708572 | 11/8/2020  | 12/16/2020 | North America / USA / Michigan                        |
| EPI_ISL_708573 | 11/2/2020  | 12/16/2020 | North America / USA / Michigan                        |
| EPI_ISL_708574 | 11/8/2020  | 12/16/2020 | North America / USA / Michigan                        |
| EPI_ISL_708575 | 11/8/2020  | 12/16/2020 | North America / USA / Michigan                        |
| EPI_ISL_708576 | 11/2/2020  | 12/16/2020 | North America / USA / Michigan                        |
| EPI_ISL_708577 | 10/29/2020 | 12/16/2020 | North America / USA / Michigan                        |
| EPI_ISL_708578 | 11/8/2020  | 12/16/2020 | North America / USA / Michigan                        |
| EPI_ISL_708579 | 11/2/2020  | 12/16/2020 | North America / USA / Michigan                        |
| EPI_ISL_708580 | 11/8/2020  | 12/16/2020 | North America / USA / Michigan                        |
| EPI_ISL_708581 | 11/3/2020  | 12/16/2020 | North America / USA / Michigan                        |
| EPI_ISL_708582 | 10/30/2020 | 12/16/2020 | North America / USA / Michigan                        |
| EPI_ISL_708583 | 11/8/2020  | 12/16/2020 | North America / USA / Michigan                        |
| EPI_ISL_708584 | 10/28/2020 | 12/16/2020 | North America / USA / Michigan                        |
| EPI_ISL_708585 | 11/8/2020  | 12/16/2020 | North America / USA / Michigan                        |
| EPI_ISL_708586 | 11/2/2020  | 12/16/2020 | North America / USA / Michigan                        |
| EPI_ISL_708587 | 11/8/2020  | 12/16/2020 | North America / USA / Michigan                        |
| EPI_ISL_708588 | 11/2/2020  | 12/16/2020 | North America / USA / Michigan                        |
| EPI_ISL_708589 | 11/2/2020  | 12/16/2020 | North America / USA / Michigan                        |
| EPI_ISL_708590 | 11/2/2020  | 12/16/2020 | North America / USA / Michigan                        |
| EPI_ISL_708591 | 11/3/2020  | 12/16/2020 | North America / USA / Michigan                        |
| EPI_ISL_708592 | 11/3/2020  | 12/16/2020 | North America / USA / Michigan                        |
| EPI_ISL_708593 | 11/8/2020  | 12/16/2020 | North America / USA / Michigan                        |
| EPI_ISL_708594 | 11/2/2020  | 12/16/2020 | North America / USA / Michigan                        |
| EPI_ISL_708595 | 11/4/2020  | 12/16/2020 | North America / USA / Michigan                        |
| EPI_ISL_708596 | 11/3/2020  | 12/16/2020 | North America / USA / Michigan                        |
| EPI_ISL_708597 | 11/2/2020  | 12/16/2020 | North America / USA / Michigan                        |
| EPI_ISL_708598 | 11/2/2020  | 12/16/2020 | North America / USA / Michigan                        |
| EPI_ISL_708599 | 11/3/2020  | 12/16/2020 | North America / USA / Michigan                        |
| EPI_ISL_708600 | 11/2/2020  | 12/16/2020 | North America / USA / Michigan                        |
| EPI_ISL_708601 | 11/8/2020  | 12/16/2020 | North America / USA / Michigan                        |
| EPI_ISL_708602 | 11/4/2020  | 12/16/2020 | North America / USA / Michigan                        |
| EPI_ISL_708603 | 11/8/2020  | 12/16/2020 | North America / USA / Michigan                        |
| EPI_ISL_708604 | 11/2/2020  | 12/16/2020 | North America / USA / Michigan                        |

|                |            |                                                                  |
|----------------|------------|------------------------------------------------------------------|
| EPI_ISL_708605 | 11/3/2020  | 12/16/2020 North America / USA / Michigan                        |
| EPI_ISL_708606 | 11/4/2020  | 12/16/2020 North America / USA / Michigan                        |
| EPI_ISL_708646 | 5/14/2020  | 12/16/2020 North America / USA / Texas / Hidalgo County          |
| EPI_ISL_708647 | 5/14/2020  | 12/16/2020 North America / USA / Texas / Hidalgo County          |
| EPI_ISL_708648 | 6/15/2020  | 12/16/2020 North America / USA / Texas / El Paso County          |
| EPI_ISL_708649 | 6/19/2020  | 12/16/2020 North America / USA / Texas / Harris County           |
| EPI_ISL_708650 | 6/19/2020  | 12/16/2020 North America / USA / Texas / Harris County           |
| EPI_ISL_710483 | 11/29/2020 | 12/16/2020 Asia / Palestine / West Bank / Tulkarem               |
| EPI_ISL_710484 | 11/29/2020 | 12/16/2020 Asia / Palestine / West Bank / Tulkarem               |
| EPI_ISL_708652 | 10/18/2020 | 12/17/2020 Asia / Indonesia / Banten                             |
| EPI_ISL_708721 | 2020-09    | 12/17/2020 Asia / Thailand / Bangkok                             |
| EPI_ISL_708722 | 2020-09    | 12/17/2020 Asia / Thailand / Bangkok                             |
| EPI_ISL_708723 | 3/20/2020  | 12/17/2020 Asia / Thailand / Phuket                              |
| EPI_ISL_708724 | 10/15/2020 | 12/17/2020 North America / USA / California / Los Angeles County |
| EPI_ISL_708725 | 5/5/2020   | 12/17/2020 North America / USA / California / Los Angeles County |
| EPI_ISL_708726 | 4/17/2020  | 12/17/2020 North America / USA / California / Los Angeles County |
| EPI_ISL_708727 | 9/1/2020   | 12/17/2020 North America / USA / California / Los Angeles County |
| EPI_ISL_708729 | 10/2/2020  | 12/17/2020 North America / USA / California / Los Angeles County |
| EPI_ISL_708730 | 7/15/2020  | 12/17/2020 North America / USA / California / Los Angeles County |
| EPI_ISL_708732 | 7/16/2020  | 12/17/2020 North America / USA / California / Los Angeles County |
| EPI_ISL_708733 | 7/17/2020  | 12/17/2020 North America / USA / California / Los Angeles County |
| EPI_ISL_708734 | 7/17/2020  | 12/17/2020 North America / USA / California / Los Angeles County |
| EPI_ISL_708735 | 3/23/2020  | 12/17/2020 Asia / Thailand / Phuket                              |
| EPI_ISL_708736 | 2020       | 12/17/2020 Asia / Thailand / Bangkok                             |
| EPI_ISL_708737 | 7/25/2020  | 12/17/2020 Asia / Thailand / Chonburi                            |
| EPI_ISL_708738 | 3/30/2020  | 12/17/2020 Oceania / Australia / Western Australia               |
| EPI_ISL_708739 | 3/30/2020  | 12/17/2020 Oceania / Australia / Western Australia               |
| EPI_ISL_708789 | 11/24/2020 | 12/17/2020 Oceania / Australia / Western Australia               |
| EPI_ISL_708790 | 11/24/2020 | 12/17/2020 Oceania / Australia / Western Australia               |
| EPI_ISL_708793 | 11/30/2020 | 12/17/2020 Oceania / Australia / Western Australia               |
| EPI_ISL_708797 | 7/24/2020  | 12/17/2020 Asia / Thailand / Chonburi                            |
| EPI_ISL_708798 | 12/15/2020 | 12/17/2020 Oceania / Australia / New South Wales / Sydney        |
| EPI_ISL_708799 | 12/15/2020 | 12/17/2020 Oceania / Australia / New South Wales / Sydney        |
| EPI_ISL_708800 | 7/30/2020  | 12/17/2020 Asia / Thailand / Chonburi                            |
| EPI_ISL_708801 | 7/24/2020  | 12/17/2020 Asia / Thailand / Chonburi                            |
| EPI_ISL_708802 | 7/27/2020  | 12/17/2020 Asia / Thailand / Chonburi                            |
| EPI_ISL_708804 | 10/20/2020 | 12/17/2020 Asia / Thailand / Chonburi                            |
| EPI_ISL_708806 | 10/20/2020 | 12/17/2020 Asia / Thailand / Chonburi                            |
| EPI_ISL_708807 | 10/16/2020 | 12/17/2020 Asia / Thailand / Chonburi                            |
| EPI_ISL_708808 | 11/11/2020 | 12/17/2020 Asia / Thailand / Chonburi                            |
| EPI_ISL_708810 | 11/11/2020 | 12/17/2020 Asia / Thailand / Phitsanulok                         |
| EPI_ISL_708811 | 10/26/2020 | 12/17/2020 Asia / Thailand / Phitsanulok                         |
| EPI_ISL_708812 | 9/14/2020  | 12/17/2020 Asia / Thailand / Bangkok                             |
| EPI_ISL_708813 | 10/4/2020  | 12/17/2020 Asia / Thailand / Bangkok                             |
| EPI_ISL_708814 | 10/9/2020  | 12/17/2020 Asia / Thailand / Bangkok                             |
| EPI_ISL_708815 | 9/24/2020  | 12/17/2020 Asia / Thailand / Bangkok                             |
| EPI_ISL_708816 | 10/5/2020  | 12/17/2020 Asia / Thailand / Bangkok                             |

|                |            |            |                                   |
|----------------|------------|------------|-----------------------------------|
| EPI_ISL_708817 | 10/12/2020 | 12/17/2020 | Asia / Thailand / Bangkok         |
| EPI_ISL_708818 | 10/5/2020  | 12/17/2020 | Asia / Thailand / Bangkok         |
| EPI_ISL_708819 | 2020-11    | 12/17/2020 | Asia / Thailand / Bangkok         |
| EPI_ISL_708820 | 10/11/2020 | 12/17/2020 | Asia / Thailand / Bangkok         |
| EPI_ISL_708821 | 10/9/2020  | 12/17/2020 | Asia / Thailand / Bangkok         |
| EPI_ISL_708822 | 10/16/2020 | 12/17/2020 | Asia / Thailand / Bangkok         |
| EPI_ISL_708823 | 10/31/2020 | 12/17/2020 | Asia / Thailand / Bangkok         |
| EPI_ISL_708824 | 2020       | 12/17/2020 | Asia / Thailand / Bangkok         |
| EPI_ISL_708825 | 2020       | 12/17/2020 | Asia / Thailand / Bangkok         |
| EPI_ISL_708826 | 2020       | 12/17/2020 | Asia / Thailand / Bangkok         |
| EPI_ISL_708839 | 6/6/2020   | 12/17/2020 | Asia / Pakistan / Karachi         |
| EPI_ISL_708840 | 6/10/2020  | 12/17/2020 | Asia / Pakistan / Karachi         |
| EPI_ISL_708841 | 12/4/2020  | 12/17/2020 | Europe / United Kingdom / England |
| EPI_ISL_708843 | 11/13/2020 | 12/17/2020 | Europe / United Kingdom / England |
| EPI_ISL_708844 | 11/30/2020 | 12/17/2020 | Europe / United Kingdom / England |
| EPI_ISL_708845 | 12/3/2020  | 12/17/2020 | Europe / United Kingdom / England |
| EPI_ISL_708846 | 12/3/2020  | 12/17/2020 | Europe / United Kingdom / England |
| EPI_ISL_708847 | 11/30/2020 | 12/17/2020 | Europe / United Kingdom / England |
| EPI_ISL_708848 | 11/30/2020 | 12/17/2020 | Europe / United Kingdom / England |
| EPI_ISL_708849 | 11/30/2020 | 12/17/2020 | Europe / United Kingdom / England |
| EPI_ISL_708850 | 11/30/2020 | 12/17/2020 | Europe / United Kingdom / England |
| EPI_ISL_708851 | 12/2/2020  | 12/17/2020 | Europe / United Kingdom / England |
| EPI_ISL_708852 | 12/3/2020  | 12/17/2020 | Europe / United Kingdom / England |
| EPI_ISL_708853 | 12/3/2020  | 12/17/2020 | Europe / United Kingdom / England |
| EPI_ISL_708854 | 12/3/2020  | 12/17/2020 | Europe / United Kingdom / England |
| EPI_ISL_708855 | 12/3/2020  | 12/17/2020 | Europe / United Kingdom / England |
| EPI_ISL_708856 | 11/30/2020 | 12/17/2020 | Europe / United Kingdom / England |
| EPI_ISL_708857 | 11/30/2020 | 12/17/2020 | Europe / United Kingdom / England |
| EPI_ISL_708858 | 11/30/2020 | 12/17/2020 | Europe / United Kingdom / England |
| EPI_ISL_708861 | 12/3/2020  | 12/17/2020 | Europe / United Kingdom / England |
| EPI_ISL_708862 | 11/30/2020 | 12/17/2020 | Europe / United Kingdom / England |
| EPI_ISL_708863 | 11/28/2020 | 12/17/2020 | Europe / United Kingdom / England |
| EPI_ISL_708864 | 12/3/2020  | 12/17/2020 | Europe / United Kingdom / England |
| EPI_ISL_708865 | 12/3/2020  | 12/17/2020 | Europe / United Kingdom / England |
| EPI_ISL_708866 | 12/3/2020  | 12/17/2020 | Europe / United Kingdom / England |
| EPI_ISL_708867 | 12/3/2020  | 12/17/2020 | Europe / United Kingdom / England |
| EPI_ISL_708868 | 12/3/2020  | 12/17/2020 | Europe / United Kingdom / England |
| EPI_ISL_708869 | 11/30/2020 | 12/17/2020 | Europe / United Kingdom / England |
| EPI_ISL_708870 | 12/3/2020  | 12/17/2020 | Europe / United Kingdom / England |
| EPI_ISL_708871 | 11/30/2020 | 12/17/2020 | Europe / United Kingdom / England |
| EPI_ISL_708872 | 12/3/2020  | 12/17/2020 | Europe / United Kingdom / England |
| EPI_ISL_708873 | 12/2/2020  | 12/17/2020 | Europe / United Kingdom / England |
| EPI_ISL_708875 | 12/2/2020  | 12/17/2020 | Europe / United Kingdom / England |
| EPI_ISL_708876 | 12/3/2020  | 12/17/2020 | Europe / United Kingdom / England |
| EPI_ISL_708877 | 12/3/2020  | 12/17/2020 | Europe / United Kingdom / England |
| EPI_ISL_708878 | 12/3/2020  | 12/17/2020 | Europe / United Kingdom / England |
| EPI_ISL_708879 | 11/30/2020 | 12/17/2020 | Europe / United Kingdom / England |















































|                |            |            |                                                       |
|----------------|------------|------------|-------------------------------------------------------|
| EPI_ISL_709999 | 2020-12    | 12/17/2020 | Europe / Gibraltar                                    |
| EPI_ISL_710000 | 2020-12    | 12/17/2020 | Europe / Gibraltar                                    |
| EPI_ISL_710001 | 2020-12    | 12/17/2020 | Europe / Gibraltar                                    |
| EPI_ISL_710002 | 2020-12    | 12/17/2020 | Europe / Gibraltar                                    |
| EPI_ISL_710003 | 2020-12    | 12/17/2020 | Europe / Gibraltar                                    |
| EPI_ISL_710004 | 2020-12    | 12/17/2020 | Europe / Gibraltar                                    |
| EPI_ISL_710005 | 2020-12    | 12/17/2020 | Europe / Gibraltar                                    |
| EPI_ISL_710006 | 2020-12    | 12/17/2020 | Europe / Gibraltar                                    |
| EPI_ISL_710007 | 2020-12    | 12/17/2020 | Europe / Gibraltar                                    |
| EPI_ISL_710008 | 2020-12    | 12/17/2020 | Europe / Gibraltar                                    |
| EPI_ISL_710009 | 2020-12    | 12/17/2020 | Europe / Gibraltar                                    |
| EPI_ISL_710010 | 2020-12    | 12/17/2020 | Europe / Gibraltar                                    |
| EPI_ISL_710011 | 2020-12    | 12/17/2020 | Europe / Gibraltar                                    |
| EPI_ISL_710012 | 2020-12    | 12/17/2020 | Europe / Gibraltar                                    |
| EPI_ISL_710013 | 2020-12    | 12/17/2020 | Europe / Gibraltar                                    |
| EPI_ISL_710014 | 2020-12    | 12/17/2020 | Europe / Gibraltar                                    |
| EPI_ISL_710015 | 2020-12    | 12/17/2020 | Europe / Gibraltar                                    |
| EPI_ISL_710016 | 2020-12    | 12/17/2020 | Europe / Gibraltar                                    |
| EPI_ISL_710017 | 2020-12    | 12/17/2020 | Europe / Gibraltar                                    |
| EPI_ISL_710018 | 2020-12    | 12/17/2020 | Europe / Gibraltar                                    |
| EPI_ISL_710019 | 2020-12    | 12/17/2020 | Europe / Gibraltar                                    |
| EPI_ISL_710020 | 2020-12    | 12/17/2020 | Europe / Gibraltar                                    |
| EPI_ISL_710021 | 2020-12    | 12/17/2020 | Europe / Gibraltar                                    |
| EPI_ISL_710022 | 2020-12    | 12/17/2020 | Europe / Gibraltar                                    |
| EPI_ISL_710023 | 2020-12    | 12/17/2020 | Europe / Gibraltar                                    |
| EPI_ISL_710024 | 2020-12    | 12/17/2020 | Europe / Gibraltar                                    |
| EPI_ISL_710025 | 2020-12    | 12/17/2020 | Europe / Gibraltar                                    |
| EPI_ISL_710026 | 2020-12    | 12/17/2020 | Europe / Gibraltar                                    |
| EPI_ISL_710027 | 2020-12    | 12/17/2020 | Europe / Gibraltar                                    |
| EPI_ISL_710028 | 2020-12    | 12/17/2020 | Europe / Gibraltar                                    |
| EPI_ISL_710029 | 2020-12    | 12/17/2020 | Europe / Gibraltar                                    |
| EPI_ISL_710030 | 2020-12    | 12/17/2020 | Europe / Gibraltar                                    |
| EPI_ISL_710031 | 2020-12    | 12/17/2020 | Europe / Gibraltar                                    |
| EPI_ISL_710032 | 2020-12    | 12/17/2020 | Europe / Gibraltar                                    |
| EPI_ISL_710033 | 2020-12    | 12/17/2020 | Europe / Gibraltar                                    |
| EPI_ISL_710087 | 6/24/2020  | 12/17/2020 | North America / USA / Texas / Hidalgo County          |
| EPI_ISL_710088 | 6/24/2020  | 12/17/2020 | North America / USA / Texas / Hidalgo County          |
| EPI_ISL_710090 | 11/11/2020 | 12/17/2020 | North America / USA / Maryland                        |
| EPI_ISL_710091 | 11/11/2020 | 12/17/2020 | North America / USA / Maryland                        |
| EPI_ISL_710092 | 11/11/2020 | 12/17/2020 | North America / USA / Maryland                        |
| EPI_ISL_710093 | 11/11/2020 | 12/17/2020 | North America / USA / Maryland                        |
| EPI_ISL_710094 | 11/12/2020 | 12/17/2020 | North America / USA / Maryland                        |
| EPI_ISL_710095 | 11/11/2020 | 12/17/2020 | North America / USA / Maryland                        |
| EPI_ISL_710096 | 11/13/2020 | 12/17/2020 | North America / USA / Maryland                        |
| EPI_ISL_710097 | 11/12/2020 | 12/17/2020 | North America / USA / Maryland                        |
| EPI_ISL_710098 | 11/12/2020 | 12/17/2020 | North America / USA / Maryland                        |
| EPI_ISL_710099 | 7/30/2020  | 12/17/2020 | North America / USA / California / Los Angeles County |











|                |            |            |                                                       |
|----------------|------------|------------|-------------------------------------------------------|
| EPI_ISL_710414 | 6/20/2020  | 12/17/2020 | North America / USA / Texas / Harris County           |
| EPI_ISL_710415 | 6/19/2020  | 12/17/2020 | North America / USA / Texas / Harris County           |
| EPI_ISL_710430 | 10/14/2020 | 12/17/2020 | North America / USA / California / Los Angeles County |
| EPI_ISL_710431 | 10/23/2020 | 12/17/2020 | North America / USA / California / Los Angeles County |
| EPI_ISL_710432 | 10/14/2020 | 12/17/2020 | North America / USA / California / Los Angeles County |
| EPI_ISL_710487 | 3/13/2020  | 12/17/2020 | Europe / Spain / Asturias                             |
| EPI_ISL_710488 | 3/5/2020   | 12/17/2020 | Europe / Spain / Asturias                             |
| EPI_ISL_710489 | 3/28/2020  | 12/17/2020 | Europe / Spain / Asturias                             |
| EPI_ISL_710490 | 3/25/2020  | 12/17/2020 | Europe / Spain / Asturias                             |
| EPI_ISL_710491 | 3/27/2020  | 12/17/2020 | Europe / Spain / Asturias                             |
| EPI_ISL_710492 | 4/14/2020  | 12/17/2020 | Europe / Spain / Asturias                             |
| EPI_ISL_710503 | 10/19/2020 | 12/18/2020 | Europe / Italy / Sardinia                             |
| EPI_ISL_710513 | 12/16/2020 | 12/18/2020 | Oceania / Australia / New South Wales                 |
| EPI_ISL_710515 | 2020       | 12/18/2020 | Europe / United Kingdom / England                     |
| EPI_ISL_710516 | 2020       | 12/18/2020 | Europe / United Kingdom / England                     |
| EPI_ISL_710517 | 2020       | 12/18/2020 | Europe / United Kingdom / England                     |
| EPI_ISL_710518 | 2020       | 12/18/2020 | Europe / United Kingdom / England                     |
| EPI_ISL_710519 | 2020       | 12/18/2020 | Europe / United Kingdom / England                     |
| EPI_ISL_710520 | 2020       | 12/18/2020 | Europe / United Kingdom / England                     |
| EPI_ISL_710521 | 2020       | 12/18/2020 | Europe / United Kingdom / England                     |
| EPI_ISL_710525 | 2020       | 12/18/2020 | Europe / United Kingdom / England                     |
| EPI_ISL_710526 | 2020       | 12/18/2020 | Europe / United Kingdom / England                     |
| EPI_ISL_710527 | 2020       | 12/18/2020 | Europe / United Kingdom / England                     |
| EPI_ISL_710528 | 2020       | 12/18/2020 | Europe / United Kingdom / England                     |
| EPI_ISL_710529 | 2020       | 12/18/2020 | Europe / United Kingdom / England                     |
| EPI_ISL_710532 | 9/20/2020  | 12/18/2020 | Africa / Tunisia / Monastir                           |
| EPI_ISL_710534 | 10/14/2020 | 12/18/2020 | Africa / Tunisia / Monastir                           |
| EPI_ISL_710535 | 2020-12    | 12/18/2020 | Europe / Gibraltar                                    |
| EPI_ISL_710537 | 10/14/2020 | 12/18/2020 | Africa / Tunisia / Monastir                           |
| EPI_ISL_710540 | 10/16/2020 | 12/18/2020 | Africa / Tunisia / Monastir                           |
| EPI_ISL_710541 | 10/16/2020 | 12/18/2020 | Africa / Tunisia / Monastir                           |
| EPI_ISL_710542 | 10/26/2020 | 12/18/2020 | Europe / Italy / Lazio / Rome                         |
| EPI_ISL_710543 | 10/26/2020 | 12/18/2020 | Europe / Italy / Lazio / Rome                         |
| EPI_ISL_710544 | 10/27/2020 | 12/18/2020 | Europe / Italy / Lazio / Rome                         |
| EPI_ISL_710545 | 10/27/2020 | 12/18/2020 | Europe / Italy / Lazio / Rome                         |
| EPI_ISL_710546 | 11/4/2020  | 12/18/2020 | Europe / Italy / Lazio / Rome                         |
| EPI_ISL_710547 | 9/3/2020   | 12/18/2020 | Europe / Croatia / Zagreb                             |
| EPI_ISL_710548 | 8/31/2020  | 12/18/2020 | Europe / Croatia / Zagreb                             |
| EPI_ISL_710549 | 8/24/2020  | 12/18/2020 | Europe / Croatia / Zagreb                             |
| EPI_ISL_710550 | 9/6/2020   | 12/18/2020 | Europe / Croatia / Zagreb                             |
| EPI_ISL_710551 | 9/9/2020   | 12/18/2020 | Europe / Croatia / Zagreb                             |
| EPI_ISL_710552 | 9/29/2020  | 12/18/2020 | Europe / Croatia / Zagreb                             |
| EPI_ISL_710553 | 9/29/2020  | 12/18/2020 | Europe / Croatia / Zagreb                             |
| EPI_ISL_710554 | 8/14/2020  | 12/18/2020 | Europe / Croatia / Zagreb                             |
| EPI_ISL_710555 | 8/17/2020  | 12/18/2020 | Europe / Croatia / Zagreb                             |
| EPI_ISL_710556 | 8/30/2020  | 12/18/2020 | Europe / Croatia / Zagreb                             |
| EPI_ISL_710557 | 9/3/2020   | 12/18/2020 | Europe / Croatia / Zagreb                             |

|                |            |            |                                   |
|----------------|------------|------------|-----------------------------------|
| EPI_ISL_710558 | 9/6/2020   | 12/18/2020 | Europe / Croatia / Zagreb         |
| EPI_ISL_710559 | 9/7/2020   | 12/18/2020 | Europe / Croatia / Zagreb         |
| EPI_ISL_710560 | 9/8/2020   | 12/18/2020 | Europe / Croatia / Zagreb         |
| EPI_ISL_710561 | 9/8/2020   | 12/18/2020 | Europe / Croatia / Zagreb         |
| EPI_ISL_710562 | 9/8/2020   | 12/18/2020 | Europe / Croatia / Zagreb         |
| EPI_ISL_710563 | 9/9/2020   | 12/18/2020 | Europe / Croatia / Zagreb         |
| EPI_ISL_710564 | 9/19/2020  | 12/18/2020 | Europe / Croatia / Zagreb         |
| EPI_ISL_710565 | 9/28/2020  | 12/18/2020 | Europe / Croatia / Zagreb         |
| EPI_ISL_710566 | 9/29/2020  | 12/18/2020 | Europe / Croatia / Zagreb         |
| EPI_ISL_710567 | 9/30/2020  | 12/18/2020 | Europe / Croatia / Zagreb         |
| EPI_ISL_710568 | 9/30/2020  | 12/18/2020 | Europe / Croatia / Zagreb         |
| EPI_ISL_710569 | 9/30/2020  | 12/18/2020 | Europe / Croatia / Zagreb         |
| EPI_ISL_710570 | 10/1/2020  | 12/18/2020 | Europe / Croatia / Zagreb         |
| EPI_ISL_710571 | 10/2/2020  | 12/18/2020 | Europe / Croatia / Zagreb         |
| EPI_ISL_710572 | 10/4/2020  | 12/18/2020 | Europe / Croatia / Zagreb         |
| EPI_ISL_710573 | 10/4/2020  | 12/18/2020 | Europe / Croatia / Zagreb         |
| EPI_ISL_710574 | 10/5/2020  | 12/18/2020 | Europe / Croatia / Zagreb         |
| EPI_ISL_710575 | 10/13/2020 | 12/18/2020 | Africa / Tunisia / Monastir       |
| EPI_ISL_710576 | 11/26/2020 | 12/18/2020 | Europe / Sweden / Skane           |
| EPI_ISL_710577 | 11/23/2020 | 12/18/2020 | Europe / Sweden / Ostergotland    |
| EPI_ISL_710578 | 11/25/2020 | 12/18/2020 | Europe / Sweden / Ostergotland    |
| EPI_ISL_710579 | 3/19/2020  | 12/18/2020 | Europe / Sweden / Uppsala         |
| EPI_ISL_710580 | 4/6/2020   | 12/18/2020 | Europe / Sweden / Uppsala         |
| EPI_ISL_710581 | 11/25/2020 | 12/18/2020 | Europe / Sweden / Ostergotland    |
| EPI_ISL_710582 | 11/24/2020 | 12/18/2020 | Europe / Sweden / Ostergotland    |
| EPI_ISL_710583 | 11/25/2020 | 12/18/2020 | Europe / Sweden / Ostergotland    |
| EPI_ISL_710584 | 3/27/2020  | 12/18/2020 | Europe / Sweden / Vastra Gotaland |
| EPI_ISL_710585 | 11/24/2020 | 12/18/2020 | Europe / Sweden / Dalarna         |
| EPI_ISL_710586 | 11/24/2020 | 12/18/2020 | Europe / Sweden / Dalarna         |
| EPI_ISL_710587 | 7/15/2020  | 12/18/2020 | Europe / Sweden / Vastra Gotaland |
| EPI_ISL_710588 | 11/25/2020 | 12/18/2020 | Europe / Sweden / Vastra Gotaland |
| EPI_ISL_710589 | 11/19/2020 | 12/18/2020 | Europe / Sweden / Vastra Gotaland |
| EPI_ISL_710590 | 11/19/2020 | 12/18/2020 | Europe / Sweden / Vastra Gotaland |
| EPI_ISL_710591 | 12/3/2020  | 12/18/2020 | Europe / Sweden / Vastra Gotaland |
| EPI_ISL_710592 | 11/2/2020  | 12/18/2020 | Europe / Sweden / Stockholm       |
| EPI_ISL_710593 | 11/2/2020  | 12/18/2020 | Europe / Sweden / Stockholm       |
| EPI_ISL_710594 | 9/20/2020  | 12/18/2020 | Europe / Sweden / Vasternorrland  |
| EPI_ISL_710595 | 7/16/2020  | 12/18/2020 | Europe / Sweden / Skane           |
| EPI_ISL_710596 | 10/31/2020 | 12/18/2020 | Europe / Sweden / Skane           |
| EPI_ISL_710597 | 11/4/2020  | 12/18/2020 | Europe / Sweden / Skane           |
| EPI_ISL_710598 | 11/1/2020  | 12/18/2020 | Europe / Sweden / Halland         |
| EPI_ISL_710599 | 11/1/2020  | 12/18/2020 | Europe / Sweden / Halland         |
| EPI_ISL_710600 | 11/1/2020  | 12/18/2020 | Europe / Sweden / Halland         |
| EPI_ISL_710601 | 11/2/2020  | 12/18/2020 | Europe / Sweden / Halland         |
| EPI_ISL_710602 | 11/3/2020  | 12/18/2020 | Europe / Sweden / Halland         |
| EPI_ISL_710603 | 12/3/2020  | 12/18/2020 | Europe / Sweden / Vastra Gotaland |
| EPI_ISL_710604 | 11/24/2020 | 12/18/2020 | Europe / Sweden / Vastra Gotaland |

|                |            |            |                                    |
|----------------|------------|------------|------------------------------------|
| EPI_ISL_710605 | 9/21/2020  | 12/18/2020 | Europe / Sweden / Kalmar           |
| EPI_ISL_710606 | 11/6/2020  | 12/18/2020 | Europe / Sweden / Skane            |
| EPI_ISL_710607 | 11/16/2020 | 12/18/2020 | Europe / Sweden / Skane            |
| EPI_ISL_710608 | 6/30/2020  | 12/18/2020 | Europe / Sweden / Gavleborg        |
| EPI_ISL_710609 | 9/1/2020   | 12/18/2020 | Europe / Sweden / Gavleborg        |
| EPI_ISL_710610 | 10/21/2020 | 12/18/2020 | Europe / Sweden / Stockholm        |
| EPI_ISL_710611 | 10/28/2020 | 12/18/2020 | Europe / Sweden / Stockholm        |
| EPI_ISL_710612 | 11/23/2020 | 12/18/2020 | Europe / Sweden / Stockholm        |
| EPI_ISL_710613 | 11/4/2020  | 12/18/2020 | Europe / Sweden / Halland          |
| EPI_ISL_710614 | 12/3/2020  | 12/18/2020 | Europe / United Kingdom / Wales    |
| EPI_ISL_710615 | 12/4/2020  | 12/18/2020 | Europe / United Kingdom / Scotland |
| EPI_ISL_710616 | 12/2/2020  | 12/18/2020 | Europe / United Kingdom / Wales    |
| EPI_ISL_710617 | 12/1/2020  | 12/18/2020 | Europe / United Kingdom / Wales    |
| EPI_ISL_710619 | 12/4/2020  | 12/18/2020 | Europe / United Kingdom / Scotland |
| EPI_ISL_710620 | 12/3/2020  | 12/18/2020 | Europe / United Kingdom / Wales    |
| EPI_ISL_710621 | 12/4/2020  | 12/18/2020 | Europe / United Kingdom / Scotland |
| EPI_ISL_710622 | 12/4/2020  | 12/18/2020 | Europe / United Kingdom / Scotland |
| EPI_ISL_710623 | 12/4/2020  | 12/18/2020 | Europe / United Kingdom / Scotland |
| EPI_ISL_710625 | 12/2/2020  | 12/18/2020 | Europe / United Kingdom / Wales    |
| EPI_ISL_710627 | 12/5/2020  | 12/18/2020 | Europe / United Kingdom / Scotland |
| EPI_ISL_710628 | 12/2/2020  | 12/18/2020 | Europe / United Kingdom / Wales    |
| EPI_ISL_710629 | 12/4/2020  | 12/18/2020 | Europe / United Kingdom / Scotland |
| EPI_ISL_710631 | 12/3/2020  | 12/18/2020 | Europe / United Kingdom / Wales    |
| EPI_ISL_710633 | 12/4/2020  | 12/18/2020 | Europe / United Kingdom / Scotland |
| EPI_ISL_710635 | 12/4/2020  | 12/18/2020 | Europe / United Kingdom / Scotland |
| EPI_ISL_710637 | 12/4/2020  | 12/18/2020 | Europe / United Kingdom / Scotland |
| EPI_ISL_710638 | 12/3/2020  | 12/18/2020 | Europe / United Kingdom / Wales    |
| EPI_ISL_710640 | 12/4/2020  | 12/18/2020 | Europe / United Kingdom / Scotland |
| EPI_ISL_710641 | 12/4/2020  | 12/18/2020 | Europe / United Kingdom / Scotland |
| EPI_ISL_710642 | 12/4/2020  | 12/18/2020 | Europe / United Kingdom / Scotland |
| EPI_ISL_710643 | 12/4/2020  | 12/18/2020 | Europe / United Kingdom / Scotland |
| EPI_ISL_710644 | 12/4/2020  | 12/18/2020 | Europe / United Kingdom / Scotland |
| EPI_ISL_710645 | 12/1/2020  | 12/18/2020 | Europe / United Kingdom / Wales    |
| EPI_ISL_710646 | 12/3/2020  | 12/18/2020 | Europe / United Kingdom / Scotland |
| EPI_ISL_710647 | 12/3/2020  | 12/18/2020 | Europe / United Kingdom / Wales    |
| EPI_ISL_710650 | 12/5/2020  | 12/18/2020 | Europe / United Kingdom / Scotland |
| EPI_ISL_710651 | 12/5/2020  | 12/18/2020 | Europe / United Kingdom / Scotland |
| EPI_ISL_710652 | 12/5/2020  | 12/18/2020 | Europe / United Kingdom / Scotland |
| EPI_ISL_710654 | 12/6/2020  | 12/18/2020 | Europe / United Kingdom / Scotland |
| EPI_ISL_710655 | 12/6/2020  | 12/18/2020 | Europe / United Kingdom / Scotland |
| EPI_ISL_710656 | 12/5/2020  | 12/18/2020 | Europe / United Kingdom / Wales    |
| EPI_ISL_710657 | 12/6/2020  | 12/18/2020 | Europe / United Kingdom / Scotland |
| EPI_ISL_710658 | 12/6/2020  | 12/18/2020 | Europe / United Kingdom / Scotland |
| EPI_ISL_710659 | 12/6/2020  | 12/18/2020 | Europe / United Kingdom / Scotland |
| EPI_ISL_710660 | 12/6/2020  | 12/18/2020 | Europe / United Kingdom / Scotland |
| EPI_ISL_710661 | 12/6/2020  | 12/18/2020 | Europe / United Kingdom / Wales    |
| EPI_ISL_710662 | 12/5/2020  | 12/18/2020 | Europe / United Kingdom / Wales    |

















|                |            |            |                                 |
|----------------|------------|------------|---------------------------------|
| EPI_ISL_711024 | 11/2/2020  | 12/18/2020 | Europe / United Kingdom / Wales |
| EPI_ISL_711026 | 10/31/2020 | 12/18/2020 | Europe / United Kingdom / Wales |
| EPI_ISL_711027 | 11/1/2020  | 12/18/2020 | Europe / United Kingdom / Wales |
| EPI_ISL_711028 | 11/1/2020  | 12/18/2020 | Europe / United Kingdom / Wales |
| EPI_ISL_711029 | 11/1/2020  | 12/18/2020 | Europe / United Kingdom / Wales |
| EPI_ISL_711030 | 11/1/2020  | 12/18/2020 | Europe / United Kingdom / Wales |
| EPI_ISL_711031 | 11/1/2020  | 12/18/2020 | Europe / United Kingdom / Wales |
| EPI_ISL_711032 | 11/1/2020  | 12/18/2020 | Europe / United Kingdom / Wales |
| EPI_ISL_711033 | 11/1/2020  | 12/18/2020 | Europe / United Kingdom / Wales |
| EPI_ISL_711034 | 11/1/2020  | 12/18/2020 | Europe / United Kingdom / Wales |
| EPI_ISL_711036 | 11/1/2020  | 12/18/2020 | Europe / United Kingdom / Wales |
| EPI_ISL_711037 | 11/1/2020  | 12/18/2020 | Europe / United Kingdom / Wales |
| EPI_ISL_711038 | 11/1/2020  | 12/18/2020 | Europe / United Kingdom / Wales |
| EPI_ISL_711039 | 11/1/2020  | 12/18/2020 | Europe / United Kingdom / Wales |
| EPI_ISL_711040 | 11/1/2020  | 12/18/2020 | Europe / United Kingdom / Wales |
| EPI_ISL_711041 | 11/1/2020  | 12/18/2020 | Europe / United Kingdom / Wales |
| EPI_ISL_711042 | 11/1/2020  | 12/18/2020 | Europe / United Kingdom / Wales |
| EPI_ISL_711044 | 11/1/2020  | 12/18/2020 | Europe / United Kingdom / Wales |
| EPI_ISL_711045 | 11/1/2020  | 12/18/2020 | Europe / United Kingdom / Wales |
| EPI_ISL_711047 | 11/1/2020  | 12/18/2020 | Europe / United Kingdom / Wales |
| EPI_ISL_711049 | 10/28/2020 | 12/18/2020 | Europe / United Kingdom / Wales |
| EPI_ISL_711052 | 10/29/2020 | 12/18/2020 | Europe / United Kingdom / Wales |
| EPI_ISL_711053 | 10/29/2020 | 12/18/2020 | Europe / United Kingdom / Wales |
| EPI_ISL_711054 | 10/29/2020 | 12/18/2020 | Europe / United Kingdom / Wales |
| EPI_ISL_711057 | 10/19/2020 | 12/18/2020 | Africa / Tunisia / Monastir     |
| EPI_ISL_711229 | 11/30/2020 | 12/18/2020 | Europe / Denmark / Nordjylland  |
| EPI_ISL_711230 | 11/30/2020 | 12/18/2020 | Europe / Denmark / Nordjylland  |
| EPI_ISL_711231 | 11/30/2020 | 12/18/2020 | Europe / Denmark / Nordjylland  |
| EPI_ISL_711232 | 11/23/2020 | 12/18/2020 | Europe / Denmark / Hovedstaden  |
| EPI_ISL_711233 | 11/30/2020 | 12/18/2020 | Europe / Denmark / Midtjylland  |
| EPI_ISL_711234 | 11/30/2020 | 12/18/2020 | Europe / Denmark / Midtjylland  |
| EPI_ISL_711235 | 11/30/2020 | 12/18/2020 | Europe / Denmark / Midtjylland  |
| EPI_ISL_711236 | 11/30/2020 | 12/18/2020 | Europe / Denmark / Nordjylland  |
| EPI_ISL_711237 | 11/30/2020 | 12/18/2020 | Europe / Denmark / Midtjylland  |
| EPI_ISL_711238 | 11/30/2020 | 12/18/2020 | Europe / Denmark / Midtjylland  |
| EPI_ISL_711239 | 11/30/2020 | 12/18/2020 | Europe / Denmark / Midtjylland  |
| EPI_ISL_711240 | 11/30/2020 | 12/18/2020 | Europe / Denmark / Midtjylland  |
| EPI_ISL_711241 | 11/30/2020 | 12/18/2020 | Europe / Denmark / Midtjylland  |
| EPI_ISL_711242 | 11/30/2020 | 12/18/2020 | Europe / Denmark / Syddanmark   |
| EPI_ISL_711243 | 11/30/2020 | 12/18/2020 | Europe / Denmark / Midtjylland  |
| EPI_ISL_711244 | 11/30/2020 | 12/18/2020 | Europe / Denmark / Midtjylland  |
| EPI_ISL_711245 | 11/30/2020 | 12/18/2020 | Europe / Denmark / Syddanmark   |
| EPI_ISL_711246 | 11/30/2020 | 12/18/2020 | Europe / Denmark / Midtjylland  |
| EPI_ISL_711247 | 11/30/2020 | 12/18/2020 | Europe / Denmark / Midtjylland  |
| EPI_ISL_711248 | 11/30/2020 | 12/18/2020 | Europe / Denmark / Syddanmark   |
| EPI_ISL_711249 | 11/30/2020 | 12/18/2020 | Europe / Denmark / Hovedstaden  |
| EPI_ISL_711250 | 11/30/2020 | 12/18/2020 | Europe / Denmark / Midtjylland  |





































|                |            |                                                                         |
|----------------|------------|-------------------------------------------------------------------------|
| EPI_ISL_712060 | 10/19/2020 | 12/18/2020 Africa / Tunisia / Monastir                                  |
| EPI_ISL_712062 | 11/8/2020  | 12/18/2020 Africa / Tunisia / Sfax                                      |
| EPI_ISL_712063 | 11/8/2020  | 12/18/2020 Africa / Tunisia / Sfax                                      |
| EPI_ISL_712064 | 11/8/2020  | 12/18/2020 Africa / Tunisia / Sfax                                      |
| EPI_ISL_712065 | 11/8/2020  | 12/18/2020 Africa / Tunisia / Sfax                                      |
| EPI_ISL_712066 | 11/8/2020  | 12/18/2020 Africa / Tunisia / Sfax                                      |
| EPI_ISL_712067 | 11/8/2020  | 12/18/2020 Africa / Tunisia / Sfax                                      |
| EPI_ISL_712096 | 11/4/2020  | 12/18/2020 Africa / South Africa / Eastern Cape / Nelson Mandela Bay Me |
| EPI_ISL_712249 | 11/30/2020 | 12/18/2020 Europe / Denmark / Midtjylland                               |
| EPI_ISL_712250 | 12/7/2020  | 12/18/2020 Europe / Denmark / Hovedstaden                               |
| EPI_ISL_712251 | 12/7/2020  | 12/18/2020 Europe / Denmark                                             |
| EPI_ISL_712252 | 12/7/2020  | 12/18/2020 Europe / Denmark / Syddanmark                                |
| EPI_ISL_712253 | 12/7/2020  | 12/18/2020 Europe / Denmark / Midtjylland                               |
| EPI_ISL_712254 | 11/30/2020 | 12/18/2020 Europe / Denmark / Hovedstaden                               |
| EPI_ISL_712255 | 11/30/2020 | 12/18/2020 Europe / Denmark / Midtjylland                               |
| EPI_ISL_712256 | 11/30/2020 | 12/18/2020 Europe / Denmark / Midtjylland                               |
| EPI_ISL_712257 | 11/30/2020 | 12/18/2020 Europe / Denmark / Syddanmark                                |
| EPI_ISL_712258 | 11/30/2020 | 12/18/2020 Europe / Denmark / Midtjylland                               |
| EPI_ISL_712259 | 11/30/2020 | 12/18/2020 Europe / Denmark / Midtjylland                               |
| EPI_ISL_712260 | 11/30/2020 | 12/18/2020 Europe / Denmark / Midtjylland                               |
| EPI_ISL_712261 | 11/30/2020 | 12/18/2020 Europe / Denmark / Sjaelland                                 |
| EPI_ISL_712262 | 11/30/2020 | 12/18/2020 Europe / Denmark / Midtjylland                               |
| EPI_ISL_712263 | 11/30/2020 | 12/18/2020 Europe / Denmark / Hovedstaden                               |
| EPI_ISL_712264 | 11/30/2020 | 12/18/2020 Europe / Denmark / Sjaelland                                 |
| EPI_ISL_712265 | 11/30/2020 | 12/18/2020 Europe / Denmark / Hovedstaden                               |
| EPI_ISL_712266 | 11/30/2020 | 12/18/2020 Europe / Denmark / Sjaelland                                 |
| EPI_ISL_712267 | 11/30/2020 | 12/18/2020 Europe / Denmark / Hovedstaden                               |
| EPI_ISL_712268 | 11/30/2020 | 12/18/2020 Europe / Denmark / Syddanmark                                |
| EPI_ISL_712269 | 11/30/2020 | 12/18/2020 Europe / Denmark / Syddanmark                                |
| EPI_ISL_712270 | 11/30/2020 | 12/18/2020 Europe / Denmark / Midtjylland                               |
| EPI_ISL_712271 | 11/30/2020 | 12/18/2020 Europe / Denmark / Sjaelland                                 |
| EPI_ISL_712272 | 11/30/2020 | 12/18/2020 Europe / Denmark / Midtjylland                               |
| EPI_ISL_712273 | 11/30/2020 | 12/18/2020 Europe / Denmark / Midtjylland                               |
| EPI_ISL_712274 | 11/30/2020 | 12/18/2020 Europe / Denmark / Midtjylland                               |
| EPI_ISL_712275 | 11/30/2020 | 12/18/2020 Europe / Denmark / Midtjylland                               |
| EPI_ISL_712276 | 11/30/2020 | 12/18/2020 Europe / Denmark / Midtjylland                               |
| EPI_ISL_712277 | 11/30/2020 | 12/18/2020 Europe / Denmark / Midtjylland                               |
| EPI_ISL_712278 | 11/30/2020 | 12/18/2020 Europe / Denmark / Midtjylland                               |
| EPI_ISL_712279 | 11/30/2020 | 12/18/2020 Europe / Denmark / Syddanmark                                |
| EPI_ISL_712280 | 11/30/2020 | 12/18/2020 Europe / Denmark / Syddanmark                                |
| EPI_ISL_712281 | 11/30/2020 | 12/18/2020 Europe / Denmark / Syddanmark                                |
| EPI_ISL_712282 | 11/30/2020 | 12/18/2020 Europe / Denmark / Syddanmark                                |
| EPI_ISL_712283 | 11/30/2020 | 12/18/2020 Europe / Denmark / Syddanmark                                |
| EPI_ISL_712284 | 11/30/2020 | 12/18/2020 Europe / Denmark / Midtjylland                               |
| EPI_ISL_712285 | 11/30/2020 | 12/18/2020 Europe / Denmark / Midtjylland                               |
| EPI_ISL_712286 | 11/30/2020 | 12/18/2020 Europe / Denmark / Midtjylland                               |
| EPI_ISL_712287 | 11/30/2020 | 12/18/2020 Europe / Denmark / Midtjylland                               |

|                |            |            |                                |
|----------------|------------|------------|--------------------------------|
| EPI_ISL_712288 | 11/30/2020 | 12/18/2020 | Europe / Denmark / Midtjylland |
| EPI_ISL_712289 | 11/30/2020 | 12/18/2020 | Europe / Denmark / Midtjylland |
| EPI_ISL_712290 | 11/30/2020 | 12/18/2020 | Europe / Denmark / Midtjylland |
| EPI_ISL_712291 | 11/30/2020 | 12/18/2020 | Europe / Denmark / Midtjylland |
| EPI_ISL_712292 | 11/30/2020 | 12/18/2020 | Europe / Denmark / Syddanmark  |
| EPI_ISL_712293 | 11/30/2020 | 12/18/2020 | Europe / Denmark / Midtjylland |
| EPI_ISL_712294 | 11/30/2020 | 12/18/2020 | Europe / Denmark / Syddanmark  |
| EPI_ISL_712295 | 12/7/2020  | 12/18/2020 | Europe / Denmark / Midtjylland |
| EPI_ISL_712296 | 11/30/2020 | 12/18/2020 | Europe / Denmark / Hovedstaden |
| EPI_ISL_712297 | 11/30/2020 | 12/18/2020 | Europe / Denmark / Hovedstaden |
| EPI_ISL_712298 | 11/30/2020 | 12/18/2020 | Europe / Denmark / Hovedstaden |
| EPI_ISL_712299 | 11/30/2020 | 12/18/2020 | Europe / Denmark / Sjælland    |
| EPI_ISL_712300 | 11/30/2020 | 12/18/2020 | Europe / Denmark / Hovedstaden |
| EPI_ISL_712301 | 11/30/2020 | 12/18/2020 | Europe / Denmark / Midtjylland |
| EPI_ISL_712302 | 11/30/2020 | 12/18/2020 | Europe / Denmark / Sjælland    |
| EPI_ISL_712303 | 11/30/2020 | 12/18/2020 | Europe / Denmark / Hovedstaden |
| EPI_ISL_712304 | 11/30/2020 | 12/18/2020 | Europe / Denmark / Sjælland    |
| EPI_ISL_712321 | 12/7/2020  | 12/18/2020 | Europe / Denmark / Syddanmark  |
| EPI_ISL_712322 | 11/30/2020 | 12/18/2020 | Europe / Denmark / Hovedstaden |
| EPI_ISL_712323 | 11/30/2020 | 12/18/2020 | Europe / Denmark / Syddanmark  |
| EPI_ISL_712324 | 11/30/2020 | 12/18/2020 | Europe / Denmark / Syddanmark  |
| EPI_ISL_712325 | 11/30/2020 | 12/18/2020 | Europe / Denmark / Syddanmark  |
| EPI_ISL_712326 | 11/30/2020 | 12/18/2020 | Europe / Denmark / Sjælland    |
| EPI_ISL_712327 | 11/30/2020 | 12/18/2020 | Europe / Denmark / Syddanmark  |
| EPI_ISL_712328 | 11/30/2020 | 12/18/2020 | Europe / Denmark / Syddanmark  |
| EPI_ISL_712329 | 11/30/2020 | 12/18/2020 | Europe / Denmark / Syddanmark  |
| EPI_ISL_712330 | 11/30/2020 | 12/18/2020 | Europe / Denmark / Syddanmark  |
| EPI_ISL_712331 | 11/30/2020 | 12/18/2020 | Europe / Denmark / Syddanmark  |
| EPI_ISL_712332 | 11/30/2020 | 12/18/2020 | Europe / Denmark / Hovedstaden |
| EPI_ISL_712333 | 11/30/2020 | 12/18/2020 | Europe / Denmark / Syddanmark  |
| EPI_ISL_712334 | 11/30/2020 | 12/18/2020 | Europe / Denmark / Sjælland    |
| EPI_ISL_712335 | 11/30/2020 | 12/18/2020 | Europe / Denmark / Midtjylland |
| EPI_ISL_712336 | 11/30/2020 | 12/18/2020 | Europe / Denmark / Syddanmark  |
| EPI_ISL_712337 | 11/30/2020 | 12/18/2020 | Europe / Denmark / Hovedstaden |
| EPI_ISL_712340 | 12/7/2020  | 12/18/2020 | Europe / Denmark / Hovedstaden |
| EPI_ISL_712341 | 12/7/2020  | 12/18/2020 | Europe / Denmark / Midtjylland |
| EPI_ISL_712342 | 12/7/2020  | 12/18/2020 | Europe / Denmark / Hovedstaden |
| EPI_ISL_712343 | 12/7/2020  | 12/18/2020 | Europe / Denmark / Midtjylland |
| EPI_ISL_712344 | 12/7/2020  | 12/18/2020 | Europe / Denmark / Syddanmark  |
| EPI_ISL_712345 | 12/7/2020  | 12/18/2020 | Europe / Denmark / Hovedstaden |
| EPI_ISL_712346 | 12/7/2020  | 12/18/2020 | Europe / Denmark / Hovedstaden |
| EPI_ISL_712347 | 11/30/2020 | 12/18/2020 | Europe / Denmark / Hovedstaden |
| EPI_ISL_712348 | 11/30/2020 | 12/18/2020 | Europe / Denmark / Hovedstaden |
| EPI_ISL_712349 | 11/30/2020 | 12/18/2020 | Europe / Denmark / Hovedstaden |
| EPI_ISL_712350 | 11/30/2020 | 12/18/2020 | Europe / Denmark / Hovedstaden |
| EPI_ISL_712351 | 11/30/2020 | 12/18/2020 | Europe / Denmark / Hovedstaden |
| EPI_ISL_712352 | 11/30/2020 | 12/18/2020 | Europe / Denmark / Hovedstaden |



|                |            |            |                                |
|----------------|------------|------------|--------------------------------|
| EPI_ISL_712400 | 11/30/2020 | 12/18/2020 | Europe / Denmark / Hovedstaden |
| EPI_ISL_712401 | 11/30/2020 | 12/18/2020 | Europe / Denmark / Hovedstaden |
| EPI_ISL_712402 | 11/30/2020 | 12/18/2020 | Europe / Denmark / Sjælland    |
| EPI_ISL_712403 | 11/30/2020 | 12/18/2020 | Europe / Denmark / Midtjylland |
| EPI_ISL_712404 | 11/30/2020 | 12/18/2020 | Europe / Denmark / Syddanmark  |
| EPI_ISL_712405 | 11/30/2020 | 12/18/2020 | Europe / Denmark / Hovedstaden |
| EPI_ISL_712406 | 11/30/2020 | 12/18/2020 | Europe / Denmark / Hovedstaden |
| EPI_ISL_712407 | 11/30/2020 | 12/18/2020 | Europe / Denmark / Midtjylland |
| EPI_ISL_712408 | 11/30/2020 | 12/18/2020 | Europe / Denmark / Hovedstaden |
| EPI_ISL_712409 | 11/30/2020 | 12/18/2020 | Europe / Denmark / Hovedstaden |
| EPI_ISL_712410 | 11/30/2020 | 12/18/2020 | Europe / Denmark / Hovedstaden |
| EPI_ISL_712411 | 11/30/2020 | 12/18/2020 | Europe / Denmark / Midtjylland |
| EPI_ISL_712412 | 11/30/2020 | 12/18/2020 | Europe / Denmark / Midtjylland |
| EPI_ISL_712413 | 11/30/2020 | 12/18/2020 | Europe / Denmark / Midtjylland |
| EPI_ISL_712414 | 11/30/2020 | 12/18/2020 | Europe / Denmark / Midtjylland |
| EPI_ISL_712415 | 11/30/2020 | 12/18/2020 | Europe / Denmark / Nordjylland |
| EPI_ISL_712416 | 11/30/2020 | 12/18/2020 | Europe / Denmark / Syddanmark  |
| EPI_ISL_712420 | 11/30/2020 | 12/18/2020 | Europe / Denmark / Hovedstaden |
| EPI_ISL_712421 | 11/30/2020 | 12/18/2020 | Europe / Denmark / Sjælland    |
| EPI_ISL_712422 | 11/30/2020 | 12/18/2020 | Europe / Denmark / Hovedstaden |
| EPI_ISL_712423 | 11/30/2020 | 12/18/2020 | Europe / Denmark / Sjælland    |
| EPI_ISL_712424 | 11/30/2020 | 12/18/2020 | Europe / Denmark / Hovedstaden |
| EPI_ISL_712425 | 11/30/2020 | 12/18/2020 | Europe / Denmark / Hovedstaden |
| EPI_ISL_712426 | 11/30/2020 | 12/18/2020 | Europe / Denmark / Hovedstaden |
| EPI_ISL_712427 | 11/30/2020 | 12/18/2020 | Europe / Denmark / Hovedstaden |
| EPI_ISL_712428 | 11/30/2020 | 12/18/2020 | Europe / Denmark / Syddanmark  |
| EPI_ISL_712429 | 11/30/2020 | 12/18/2020 | Europe / Denmark / Midtjylland |
| EPI_ISL_712431 | 12/7/2020  | 12/18/2020 | Europe / Denmark / Midtjylland |
| EPI_ISL_712432 | 11/30/2020 | 12/18/2020 | Europe / Denmark / Midtjylland |
| EPI_ISL_712433 | 11/30/2020 | 12/18/2020 | Europe / Denmark / Midtjylland |
| EPI_ISL_712434 | 11/30/2020 | 12/18/2020 | Europe / Denmark / Midtjylland |
| EPI_ISL_712435 | 11/30/2020 | 12/18/2020 | Europe / Denmark / Nordjylland |
| EPI_ISL_712436 | 11/30/2020 | 12/18/2020 | Europe / Denmark / Midtjylland |
| EPI_ISL_712437 | 11/30/2020 | 12/18/2020 | Europe / Denmark / Midtjylland |
| EPI_ISL_712455 | 12/7/2020  | 12/18/2020 | Europe / Denmark / Hovedstaden |
| EPI_ISL_712456 | 12/7/2020  | 12/18/2020 | Europe / Denmark / Syddanmark  |
| EPI_ISL_712457 | 12/7/2020  | 12/18/2020 | Europe / Denmark / Hovedstaden |
| EPI_ISL_712458 | 12/7/2020  | 12/18/2020 | Europe / Denmark / Hovedstaden |
| EPI_ISL_712459 | 12/7/2020  | 12/18/2020 | Europe / Denmark / Hovedstaden |
| EPI_ISL_712460 | 12/7/2020  | 12/18/2020 | Europe / Denmark / Midtjylland |
| EPI_ISL_712461 | 12/7/2020  | 12/18/2020 | Europe / Denmark / Hovedstaden |
| EPI_ISL_712462 | 12/7/2020  | 12/18/2020 | Europe / Denmark / Syddanmark  |
| EPI_ISL_712463 | 12/7/2020  | 12/18/2020 | Europe / Denmark / Sjælland    |
| EPI_ISL_712464 | 12/7/2020  | 12/18/2020 | Europe / Denmark / Midtjylland |
| EPI_ISL_712465 | 12/7/2020  | 12/18/2020 | Europe / Denmark / Hovedstaden |
| EPI_ISL_712466 | 12/7/2020  | 12/18/2020 | Europe / Denmark / Midtjylland |
| EPI_ISL_712467 | 12/7/2020  | 12/18/2020 | Europe / Denmark / Midtjylland |







|                |            |            |                                |
|----------------|------------|------------|--------------------------------|
| EPI_ISL_712562 | 11/30/2020 | 12/18/2020 | Europe / Denmark / Midtjylland |
| EPI_ISL_712563 | 11/30/2020 | 12/18/2020 | Europe / Denmark / Midtjylland |
| EPI_ISL_712564 | 11/30/2020 | 12/18/2020 | Europe / Denmark / Hovedstaden |
| EPI_ISL_712565 | 11/30/2020 | 12/18/2020 | Europe / Denmark / Midtjylland |
| EPI_ISL_712566 | 11/30/2020 | 12/18/2020 | Europe / Denmark / Hovedstaden |
| EPI_ISL_712567 | 11/30/2020 | 12/18/2020 | Europe / Denmark / Sjaelland   |
| EPI_ISL_712568 | 9/29/2020  | 12/18/2020 | Africa / Tunisia / Sfax        |
| EPI_ISL_712569 | 11/30/2020 | 12/18/2020 | Europe / Denmark / Syddanmark  |
| EPI_ISL_712570 | 11/30/2020 | 12/18/2020 | Europe / Denmark / Hovedstaden |
| EPI_ISL_712571 | 11/30/2020 | 12/18/2020 | Europe / Denmark / Hovedstaden |
| EPI_ISL_712572 | 11/30/2020 | 12/18/2020 | Europe / Denmark / Hovedstaden |
| EPI_ISL_712573 | 11/30/2020 | 12/18/2020 | Europe / Denmark / Hovedstaden |
| EPI_ISL_712574 | 11/30/2020 | 12/18/2020 | Europe / Denmark / Hovedstaden |
| EPI_ISL_712575 | 11/30/2020 | 12/18/2020 | Europe / Denmark / Hovedstaden |
| EPI_ISL_712576 | 11/30/2020 | 12/18/2020 | Europe / Denmark / Hovedstaden |
| EPI_ISL_712577 | 11/30/2020 | 12/18/2020 | Europe / Denmark / Syddanmark  |
| EPI_ISL_712578 | 11/30/2020 | 12/18/2020 | Europe / Denmark / Hovedstaden |
| EPI_ISL_712579 | 11/30/2020 | 12/18/2020 | Europe / Denmark / Hovedstaden |
| EPI_ISL_712580 | 11/30/2020 | 12/18/2020 | Europe / Denmark / Midtjylland |
| EPI_ISL_712581 | 11/30/2020 | 12/18/2020 | Europe / Denmark / Syddanmark  |
| EPI_ISL_712582 | 11/30/2020 | 12/18/2020 | Europe / Denmark / Midtjylland |
| EPI_ISL_712583 | 11/30/2020 | 12/18/2020 | Europe / Denmark / Hovedstaden |
| EPI_ISL_712584 | 11/30/2020 | 12/18/2020 | Europe / Denmark / Midtjylland |
| EPI_ISL_712585 | 11/30/2020 | 12/18/2020 | Europe / Denmark / Hovedstaden |
| EPI_ISL_712586 | 11/30/2020 | 12/18/2020 | Europe / Denmark / Syddanmark  |
| EPI_ISL_712587 | 11/30/2020 | 12/18/2020 | Europe / Denmark               |
| EPI_ISL_712588 | 11/30/2020 | 12/18/2020 | Europe / Denmark / Hovedstaden |
| EPI_ISL_712589 | 11/30/2020 | 12/18/2020 | Europe / Denmark / Midtjylland |
| EPI_ISL_712590 | 11/30/2020 | 12/18/2020 | Europe / Denmark / Hovedstaden |
| EPI_ISL_712591 | 11/30/2020 | 12/18/2020 | Europe / Denmark / Hovedstaden |
| EPI_ISL_712592 | 11/30/2020 | 12/18/2020 | Europe / Denmark / Hovedstaden |
| EPI_ISL_712593 | 11/30/2020 | 12/18/2020 | Europe / Denmark / Midtjylland |
| EPI_ISL_712594 | 11/30/2020 | 12/18/2020 | Europe / Denmark / Hovedstaden |
| EPI_ISL_712595 | 11/30/2020 | 12/18/2020 | Europe / Denmark / Syddanmark  |
| EPI_ISL_712596 | 11/30/2020 | 12/18/2020 | Europe / Denmark / Sjaelland   |
| EPI_ISL_712597 | 11/30/2020 | 12/18/2020 | Europe / Denmark / Hovedstaden |
| EPI_ISL_712598 | 11/30/2020 | 12/18/2020 | Europe / Denmark / Hovedstaden |
| EPI_ISL_712599 | 11/30/2020 | 12/18/2020 | Europe / Denmark / Syddanmark  |
| EPI_ISL_712600 | 11/30/2020 | 12/18/2020 | Europe / Denmark / Hovedstaden |
| EPI_ISL_712601 | 11/30/2020 | 12/18/2020 | Europe / Denmark / Syddanmark  |
| EPI_ISL_712602 | 11/30/2020 | 12/18/2020 | Europe / Denmark / Hovedstaden |
| EPI_ISL_712603 | 11/30/2020 | 12/18/2020 | Europe / Denmark / Hovedstaden |
| EPI_ISL_712604 | 11/30/2020 | 12/18/2020 | Europe / Denmark / Sjaelland   |
| EPI_ISL_712605 | 11/30/2020 | 12/18/2020 | Europe / Denmark / Midtjylland |
| EPI_ISL_712606 | 11/30/2020 | 12/18/2020 | Europe / Denmark / Hovedstaden |
| EPI_ISL_712607 | 11/30/2020 | 12/18/2020 | Europe / Denmark / Midtjylland |
| EPI_ISL_712608 | 11/30/2020 | 12/18/2020 | Europe / Denmark / Hovedstaden |























|                |            |            |                                |
|----------------|------------|------------|--------------------------------|
| EPI_ISL_713079 | 11/30/2020 | 12/18/2020 | Europe / Denmark / Midtjylland |
| EPI_ISL_713080 | 11/30/2020 | 12/18/2020 | Europe / Denmark / Hovedstaden |
| EPI_ISL_713081 | 11/30/2020 | 12/18/2020 | Europe / Denmark / Midtjylland |
| EPI_ISL_713082 | 11/30/2020 | 12/18/2020 | Europe / Denmark / Hovedstaden |
| EPI_ISL_713083 | 11/30/2020 | 12/18/2020 | Europe / Denmark / Sjælland    |
| EPI_ISL_713084 | 11/30/2020 | 12/18/2020 | Europe / Denmark / Syddanmark  |
| EPI_ISL_713085 | 11/30/2020 | 12/18/2020 | Europe / Denmark / Hovedstaden |
| EPI_ISL_713086 | 11/30/2020 | 12/18/2020 | Europe / Denmark / Hovedstaden |
| EPI_ISL_713087 | 11/30/2020 | 12/18/2020 | Europe / Denmark / Hovedstaden |
| EPI_ISL_713088 | 11/30/2020 | 12/18/2020 | Europe / Denmark / Hovedstaden |
| EPI_ISL_713089 | 11/30/2020 | 12/18/2020 | Europe / Denmark / Hovedstaden |
| EPI_ISL_713090 | 11/30/2020 | 12/18/2020 | Europe / Denmark / Syddanmark  |
| EPI_ISL_713091 | 11/30/2020 | 12/18/2020 | Europe / Denmark / Sjælland    |
| EPI_ISL_713092 | 11/30/2020 | 12/18/2020 | Europe / Denmark / Midtjylland |
| EPI_ISL_713093 | 11/30/2020 | 12/18/2020 | Europe / Denmark / Sjælland    |
| EPI_ISL_713094 | 11/30/2020 | 12/18/2020 | Europe / Denmark / Hovedstaden |
| EPI_ISL_713095 | 11/30/2020 | 12/18/2020 | Europe / Denmark / Sjælland    |
| EPI_ISL_713096 | 11/30/2020 | 12/18/2020 | Europe / Denmark / Hovedstaden |
| EPI_ISL_713097 | 11/30/2020 | 12/18/2020 | Europe / Denmark / Midtjylland |
| EPI_ISL_713269 | 11/23/2020 | 12/18/2020 | Europe / Denmark / Hovedstaden |
| EPI_ISL_713270 | 11/23/2020 | 12/18/2020 | Europe / Denmark / Midtjylland |
| EPI_ISL_713271 | 11/23/2020 | 12/18/2020 | Europe / Denmark / Syddanmark  |
| EPI_ISL_713272 | 11/23/2020 | 12/18/2020 | Europe / Denmark / Syddanmark  |
| EPI_ISL_713273 | 11/23/2020 | 12/18/2020 | Europe / Denmark / Hovedstaden |
| EPI_ISL_713274 | 11/23/2020 | 12/18/2020 | Europe / Denmark / Syddanmark  |
| EPI_ISL_713275 | 11/23/2020 | 12/18/2020 | Europe / Denmark / Midtjylland |
| EPI_ISL_713276 | 11/23/2020 | 12/18/2020 | Europe / Denmark / Syddanmark  |
| EPI_ISL_713277 | 11/23/2020 | 12/18/2020 | Europe / Denmark / Midtjylland |
| EPI_ISL_713278 | 11/23/2020 | 12/18/2020 | Europe / Denmark / Syddanmark  |
| EPI_ISL_713279 | 11/23/2020 | 12/18/2020 | Europe / Denmark / Midtjylland |
| EPI_ISL_713280 | 11/23/2020 | 12/18/2020 | Europe / Denmark / Hovedstaden |
| EPI_ISL_713281 | 11/23/2020 | 12/18/2020 | Europe / Denmark / Syddanmark  |
| EPI_ISL_713282 | 11/23/2020 | 12/18/2020 | Europe / Denmark / Nordjylland |
| EPI_ISL_713283 | 11/23/2020 | 12/18/2020 | Europe / Denmark / Midtjylland |
| EPI_ISL_713284 | 11/23/2020 | 12/18/2020 | Europe / Denmark / Syddanmark  |
| EPI_ISL_713285 | 11/23/2020 | 12/18/2020 | Europe / Denmark / Midtjylland |
| EPI_ISL_713286 | 11/23/2020 | 12/18/2020 | Europe / Denmark / Hovedstaden |
| EPI_ISL_713287 | 11/23/2020 | 12/18/2020 | Europe / Denmark / Syddanmark  |
| EPI_ISL_713288 | 11/23/2020 | 12/18/2020 | Europe / Denmark / Syddanmark  |
| EPI_ISL_713289 | 11/23/2020 | 12/18/2020 | Europe / Denmark / Syddanmark  |
| EPI_ISL_713290 | 11/23/2020 | 12/18/2020 | Europe / Denmark / Syddanmark  |
| EPI_ISL_713291 | 11/23/2020 | 12/18/2020 | Europe / Denmark / Syddanmark  |
| EPI_ISL_713292 | 11/23/2020 | 12/18/2020 | Europe / Denmark / Syddanmark  |
| EPI_ISL_713293 | 11/23/2020 | 12/18/2020 | Europe / Denmark / Hovedstaden |
| EPI_ISL_713294 | 11/23/2020 | 12/18/2020 | Europe / Denmark / Midtjylland |
| EPI_ISL_713315 | 11/23/2020 | 12/18/2020 | Europe / Denmark / Midtjylland |
| EPI_ISL_713316 | 11/23/2020 | 12/18/2020 | Europe / Denmark / Syddanmark  |











|                |            |            |                                |
|----------------|------------|------------|--------------------------------|
| EPI_ISL_713562 | 11/23/2020 | 12/18/2020 | Europe / Denmark / Hovedstaden |
| EPI_ISL_713563 | 11/23/2020 | 12/18/2020 | Europe / Denmark / Nordjylland |
| EPI_ISL_713564 | 11/23/2020 | 12/18/2020 | Europe / Denmark / Midtjylland |
| EPI_ISL_713565 | 11/23/2020 | 12/18/2020 | Europe / Denmark / Hovedstaden |
| EPI_ISL_713566 | 11/23/2020 | 12/18/2020 | Europe / Denmark / Syddanmark  |
| EPI_ISL_713567 | 11/23/2020 | 12/18/2020 | Europe / Denmark / Hovedstaden |
| EPI_ISL_713568 | 11/23/2020 | 12/18/2020 | Europe / Denmark / Hovedstaden |
| EPI_ISL_713569 | 11/23/2020 | 12/18/2020 | Europe / Denmark / Midtjylland |
| EPI_ISL_713570 | 11/23/2020 | 12/18/2020 | Europe / Denmark / Hovedstaden |
| EPI_ISL_713571 | 11/23/2020 | 12/18/2020 | Europe / Denmark / Hovedstaden |
| EPI_ISL_713572 | 11/23/2020 | 12/18/2020 | Europe / Denmark / Hovedstaden |
| EPI_ISL_713573 | 11/23/2020 | 12/18/2020 | Europe / Denmark / Nordjylland |
| EPI_ISL_713574 | 11/23/2020 | 12/18/2020 | Europe / Denmark / Hovedstaden |
| EPI_ISL_713575 | 11/23/2020 | 12/18/2020 | Europe / Denmark / Hovedstaden |
| EPI_ISL_713576 | 11/23/2020 | 12/18/2020 | Europe / Denmark / Midtjylland |
| EPI_ISL_713577 | 11/23/2020 | 12/18/2020 | Europe / Denmark / Midtjylland |
| EPI_ISL_713578 | 11/23/2020 | 12/18/2020 | Europe / Denmark / Syddanmark  |
| EPI_ISL_713579 | 11/23/2020 | 12/18/2020 | Europe / Denmark / Nordjylland |
| EPI_ISL_713580 | 11/23/2020 | 12/18/2020 | Europe / Denmark / Syddanmark  |
| EPI_ISL_713581 | 11/23/2020 | 12/18/2020 | Europe / Denmark / Syddanmark  |
| EPI_ISL_713582 | 11/23/2020 | 12/18/2020 | Europe / Denmark / Hovedstaden |
| EPI_ISL_713583 | 11/23/2020 | 12/18/2020 | Europe / Denmark / Hovedstaden |
| EPI_ISL_713584 | 11/23/2020 | 12/18/2020 | Europe / Denmark / Sjælland    |
| EPI_ISL_713585 | 11/23/2020 | 12/18/2020 | Europe / Denmark / Midtjylland |
| EPI_ISL_713586 | 11/23/2020 | 12/18/2020 | Europe / Denmark / Hovedstaden |
| EPI_ISL_713587 | 11/23/2020 | 12/18/2020 | Europe / Denmark / Midtjylland |
| EPI_ISL_713588 | 11/23/2020 | 12/18/2020 | Europe / Denmark / Sjælland    |
| EPI_ISL_713589 | 11/23/2020 | 12/18/2020 | Europe / Denmark / Midtjylland |
| EPI_ISL_713590 | 11/23/2020 | 12/18/2020 | Europe / Denmark / Hovedstaden |
| EPI_ISL_713591 | 11/23/2020 | 12/18/2020 | Europe / Denmark / Sjælland    |
| EPI_ISL_713592 | 11/23/2020 | 12/18/2020 | Europe / Denmark / Hovedstaden |
| EPI_ISL_713593 | 11/23/2020 | 12/18/2020 | Europe / Denmark / Midtjylland |
| EPI_ISL_713594 | 11/23/2020 | 12/18/2020 | Europe / Denmark / Midtjylland |
| EPI_ISL_713595 | 11/23/2020 | 12/18/2020 | Europe / Denmark / Hovedstaden |
| EPI_ISL_713596 | 11/23/2020 | 12/18/2020 | Europe / Denmark / Midtjylland |
| EPI_ISL_713597 | 11/23/2020 | 12/18/2020 | Europe / Denmark / Syddanmark  |
| EPI_ISL_713598 | 11/23/2020 | 12/18/2020 | Europe / Denmark / Hovedstaden |
| EPI_ISL_713599 | 11/23/2020 | 12/18/2020 | Europe / Denmark / Sjælland    |
| EPI_ISL_713600 | 11/23/2020 | 12/18/2020 | Europe / Denmark / Hovedstaden |
| EPI_ISL_713601 | 11/23/2020 | 12/18/2020 | Europe / Denmark / Sjælland    |
| EPI_ISL_713602 | 11/23/2020 | 12/18/2020 | Europe / Denmark / Midtjylland |
| EPI_ISL_713603 | 11/23/2020 | 12/18/2020 | Europe / Denmark / Hovedstaden |
| EPI_ISL_713604 | 11/23/2020 | 12/18/2020 | Europe / Denmark / Hovedstaden |
| EPI_ISL_713605 | 11/23/2020 | 12/18/2020 | Europe / Denmark / Syddanmark  |
| EPI_ISL_713606 | 11/23/2020 | 12/18/2020 | Europe / Denmark / Hovedstaden |
| EPI_ISL_713607 | 11/23/2020 | 12/18/2020 | Europe / Denmark / Hovedstaden |
| EPI_ISL_713608 | 11/23/2020 | 12/18/2020 | Europe / Denmark / Hovedstaden |























|                |            |            |                                |
|----------------|------------|------------|--------------------------------|
| EPI_ISL_714079 | 11/23/2020 | 12/18/2020 | Europe / Denmark / Nordjylland |
| EPI_ISL_714080 | 11/23/2020 | 12/18/2020 | Europe / Denmark / Nordjylland |
| EPI_ISL_714081 | 11/23/2020 | 12/18/2020 | Europe / Denmark / Hovedstaden |
| EPI_ISL_714082 | 11/23/2020 | 12/18/2020 | Europe / Denmark / Syddanmark  |
| EPI_ISL_714083 | 11/23/2020 | 12/18/2020 | Europe / Denmark / Midtjylland |
| EPI_ISL_714084 | 11/23/2020 | 12/18/2020 | Europe / Denmark / Midtjylland |
| EPI_ISL_714085 | 11/23/2020 | 12/18/2020 | Europe / Denmark / Sjaelland   |
| EPI_ISL_714086 | 11/23/2020 | 12/18/2020 | Europe / Denmark / Syddanmark  |
| EPI_ISL_714087 | 11/23/2020 | 12/18/2020 | Europe / Denmark / Syddanmark  |
| EPI_ISL_714088 | 11/23/2020 | 12/18/2020 | Europe / Denmark / Sjaelland   |
| EPI_ISL_714089 | 11/23/2020 | 12/18/2020 | Europe / Denmark / Hovedstaden |
| EPI_ISL_714090 | 11/23/2020 | 12/18/2020 | Europe / Denmark / Hovedstaden |
| EPI_ISL_714091 | 11/23/2020 | 12/18/2020 | Europe / Denmark / Sjaelland   |
| EPI_ISL_714092 | 11/23/2020 | 12/18/2020 | Europe / Denmark / Hovedstaden |
| EPI_ISL_714093 | 11/23/2020 | 12/18/2020 | Europe / Denmark / Syddanmark  |
| EPI_ISL_714094 | 11/23/2020 | 12/18/2020 | Europe / Denmark / Sjaelland   |
| EPI_ISL_714095 | 11/23/2020 | 12/18/2020 | Europe / Denmark / Hovedstaden |
| EPI_ISL_714096 | 11/23/2020 | 12/18/2020 | Europe / Denmark / Hovedstaden |
| EPI_ISL_714097 | 11/23/2020 | 12/18/2020 | Europe / Denmark / Midtjylland |
| EPI_ISL_714259 | 11/23/2020 | 12/18/2020 | Europe / Denmark / Syddanmark  |
| EPI_ISL_714260 | 11/23/2020 | 12/18/2020 | Europe / Denmark / Midtjylland |
| EPI_ISL_714261 | 11/16/2020 | 12/18/2020 | Europe / Denmark / Syddanmark  |
| EPI_ISL_714262 | 11/16/2020 | 12/18/2020 | Europe / Denmark / Syddanmark  |
| EPI_ISL_714263 | 11/16/2020 | 12/18/2020 | Europe / Denmark / Syddanmark  |
| EPI_ISL_714264 | 11/23/2020 | 12/18/2020 | Europe / Denmark / Syddanmark  |
| EPI_ISL_714265 | 11/16/2020 | 12/18/2020 | Europe / Denmark / Hovedstaden |
| EPI_ISL_714266 | 11/16/2020 | 12/18/2020 | Europe / Denmark / Hovedstaden |
| EPI_ISL_714267 | 11/16/2020 | 12/18/2020 | Europe / Denmark / Hovedstaden |
| EPI_ISL_714268 | 11/16/2020 | 12/18/2020 | Europe / Denmark / Hovedstaden |
| EPI_ISL_714269 | 11/2/2020  | 12/18/2020 | Europe / Denmark               |
| EPI_ISL_714270 | 11/16/2020 | 12/18/2020 | Europe / Denmark / Hovedstaden |
| EPI_ISL_714271 | 11/16/2020 | 12/18/2020 | Europe / Denmark / Sjaelland   |
| EPI_ISL_714289 | 11/23/2020 | 12/18/2020 | Europe / Denmark / Syddanmark  |
| EPI_ISL_714290 | 11/16/2020 | 12/18/2020 | Europe / Denmark / Syddanmark  |
| EPI_ISL_714291 | 11/16/2020 | 12/18/2020 | Europe / Denmark / Syddanmark  |
| EPI_ISL_714292 | 11/16/2020 | 12/18/2020 | Europe / Denmark / Syddanmark  |
| EPI_ISL_714293 | 11/16/2020 | 12/18/2020 | Europe / Denmark / Nordjylland |
| EPI_ISL_714294 | 11/16/2020 | 12/18/2020 | Europe / Denmark / Syddanmark  |
| EPI_ISL_714295 | 11/16/2020 | 12/18/2020 | Europe / Denmark / Syddanmark  |
| EPI_ISL_714296 | 11/16/2020 | 12/18/2020 | Europe / Denmark / Syddanmark  |
| EPI_ISL_714297 | 11/16/2020 | 12/18/2020 | Europe / Denmark / Syddanmark  |
| EPI_ISL_714298 | 11/16/2020 | 12/18/2020 | Europe / Denmark / Syddanmark  |
| EPI_ISL_714300 | 11/23/2020 | 12/18/2020 | Europe / Denmark / Midtjylland |
| EPI_ISL_714301 | 11/23/2020 | 12/18/2020 | Europe / Denmark / Hovedstaden |
| EPI_ISL_714302 | 11/23/2020 | 12/18/2020 | Europe / Denmark / Sjaelland   |
| EPI_ISL_714303 | 11/23/2020 | 12/18/2020 | Europe / Denmark / Midtjylland |
| EPI_ISL_714304 | 11/23/2020 | 12/18/2020 | Europe / Denmark / Hovedstaden |



|                |            |            |                                |
|----------------|------------|------------|--------------------------------|
| EPI_ISL_714352 | 11/16/2020 | 12/18/2020 | Europe / Denmark / Hovedstaden |
| EPI_ISL_714353 | 11/16/2020 | 12/18/2020 | Europe / Denmark / Hovedstaden |
| EPI_ISL_714354 | 11/16/2020 | 12/18/2020 | Europe / Denmark / Midtjylland |
| EPI_ISL_714355 | 11/16/2020 | 12/18/2020 | Europe / Denmark / Syddanmark  |
| EPI_ISL_714356 | 11/16/2020 | 12/18/2020 | Europe / Denmark / Syddanmark  |
| EPI_ISL_714357 | 11/16/2020 | 12/18/2020 | Europe / Denmark / Hovedstaden |
| EPI_ISL_714358 | 11/16/2020 | 12/18/2020 | Europe / Denmark / Midtjylland |
| EPI_ISL_714359 | 11/16/2020 | 12/18/2020 | Europe / Denmark / Sjælland    |
| EPI_ISL_714360 | 11/16/2020 | 12/18/2020 | Europe / Denmark / Hovedstaden |
| EPI_ISL_714361 | 11/16/2020 | 12/18/2020 | Europe / Denmark / Syddanmark  |
| EPI_ISL_714362 | 11/16/2020 | 12/18/2020 | Europe / Denmark / Midtjylland |
| EPI_ISL_714363 | 11/9/2020  | 12/18/2020 | Europe / Denmark / Hovedstaden |
| EPI_ISL_714364 | 7/6/2020   | 12/18/2020 | Europe / Denmark / Hovedstaden |
| EPI_ISL_714366 | 11/23/2020 | 12/18/2020 | Europe / Denmark / Midtjylland |
| EPI_ISL_714367 | 11/16/2020 | 12/18/2020 | Europe / Denmark / Midtjylland |
| EPI_ISL_714372 | 11/16/2020 | 12/18/2020 | Europe / Denmark / Midtjylland |
| EPI_ISL_714373 | 11/16/2020 | 12/18/2020 | Europe / Denmark / Midtjylland |
| EPI_ISL_714374 | 11/16/2020 | 12/18/2020 | Europe / Denmark / Nordjylland |
| EPI_ISL_714375 | 11/16/2020 | 12/18/2020 | Europe / Denmark / Hovedstaden |
| EPI_ISL_714376 | 11/16/2020 | 12/18/2020 | Europe / Denmark / Hovedstaden |
| EPI_ISL_714377 | 11/2/2020  | 12/18/2020 | Europe / Denmark / Hovedstaden |
| EPI_ISL_714378 | 11/16/2020 | 12/18/2020 | Europe / Denmark / Hovedstaden |
| EPI_ISL_714379 | 11/16/2020 | 12/18/2020 | Europe / Denmark / Sjælland    |
| EPI_ISL_714380 | 11/16/2020 | 12/18/2020 | Europe / Denmark / Midtjylland |
| EPI_ISL_714382 | 11/16/2020 | 12/18/2020 | Europe / Denmark / Syddanmark  |
| EPI_ISL_714383 | 11/16/2020 | 12/18/2020 | Europe / Denmark / Syddanmark  |
| EPI_ISL_714384 | 11/16/2020 | 12/18/2020 | Europe / Denmark / Syddanmark  |
| EPI_ISL_714385 | 11/23/2020 | 12/18/2020 | Europe / Denmark / Syddanmark  |
| EPI_ISL_714386 | 11/23/2020 | 12/18/2020 | Europe / Denmark / Midtjylland |
| EPI_ISL_714387 | 11/23/2020 | 12/18/2020 | Europe / Denmark / Syddanmark  |
| EPI_ISL_714388 | 11/23/2020 | 12/18/2020 | Europe / Denmark / Midtjylland |
| EPI_ISL_714389 | 11/23/2020 | 12/18/2020 | Europe / Denmark / Midtjylland |
| EPI_ISL_714390 | 11/23/2020 | 12/18/2020 | Europe / Denmark / Midtjylland |
| EPI_ISL_714391 | 11/23/2020 | 12/18/2020 | Europe / Denmark / Nordjylland |
| EPI_ISL_714392 | 11/16/2020 | 12/18/2020 | Europe / Denmark / Syddanmark  |
| EPI_ISL_714393 | 11/16/2020 | 12/18/2020 | Europe / Denmark / Midtjylland |
| EPI_ISL_714394 | 11/16/2020 | 12/18/2020 | Europe / Denmark / Midtjylland |
| EPI_ISL_714395 | 11/16/2020 | 12/18/2020 | Europe / Denmark / Midtjylland |
| EPI_ISL_714396 | 11/16/2020 | 12/18/2020 | Europe / Denmark / Midtjylland |
| EPI_ISL_714397 | 11/16/2020 | 12/18/2020 | Europe / Denmark / Midtjylland |
| EPI_ISL_714398 | 11/16/2020 | 12/18/2020 | Europe / Denmark / Syddanmark  |
| EPI_ISL_714399 | 11/16/2020 | 12/18/2020 | Europe / Denmark / Midtjylland |
| EPI_ISL_714400 | 11/16/2020 | 12/18/2020 | Europe / Denmark / Nordjylland |
| EPI_ISL_714401 | 11/16/2020 | 12/18/2020 | Europe / Denmark / Midtjylland |
| EPI_ISL_714402 | 11/16/2020 | 12/18/2020 | Europe / Denmark / Midtjylland |
| EPI_ISL_714403 | 11/16/2020 | 12/18/2020 | Europe / Denmark / Nordjylland |
| EPI_ISL_714404 | 11/16/2020 | 12/18/2020 | Europe / Denmark / Midtjylland |

|                |            |            |                                |
|----------------|------------|------------|--------------------------------|
| EPI_ISL_714405 | 11/16/2020 | 12/18/2020 | Europe / Denmark / Nordjylland |
| EPI_ISL_714406 | 11/16/2020 | 12/18/2020 | Europe / Denmark / Midtjylland |
| EPI_ISL_714407 | 11/16/2020 | 12/18/2020 | Europe / Denmark / Syddanmark  |
| EPI_ISL_714408 | 11/16/2020 | 12/18/2020 | Europe / Denmark / Nordjylland |
| EPI_ISL_714409 | 11/16/2020 | 12/18/2020 | Europe / Denmark / Syddanmark  |
| EPI_ISL_714410 | 11/16/2020 | 12/18/2020 | Europe / Denmark / Syddanmark  |
| EPI_ISL_714411 | 11/9/2020  | 12/18/2020 | Europe / Denmark / Midtjylland |
| EPI_ISL_714412 | 11/9/2020  | 12/18/2020 | Europe / Denmark / Midtjylland |
| EPI_ISL_714413 | 11/16/2020 | 12/18/2020 | Europe / Denmark / Midtjylland |
| EPI_ISL_714414 | 11/16/2020 | 12/18/2020 | Europe / Denmark / Nordjylland |
| EPI_ISL_714478 | 11/23/2020 | 12/18/2020 | Europe / Denmark / Sjaelland   |
| EPI_ISL_714479 | 11/23/2020 | 12/18/2020 | Europe / Denmark / Sjaelland   |
| EPI_ISL_714480 | 11/23/2020 | 12/18/2020 | Europe / Denmark / Midtjylland |
| EPI_ISL_714481 | 11/23/2020 | 12/18/2020 | Europe / Denmark / Midtjylland |
| EPI_ISL_714482 | 11/23/2020 | 12/18/2020 | Europe / Denmark / Midtjylland |
| EPI_ISL_714483 | 11/23/2020 | 12/18/2020 | Europe / Denmark / Hovedstaden |
| EPI_ISL_714484 | 11/23/2020 | 12/18/2020 | Europe / Denmark / Midtjylland |
| EPI_ISL_714485 | 11/23/2020 | 12/18/2020 | Europe / Denmark / Hovedstaden |
| EPI_ISL_714486 | 11/23/2020 | 12/18/2020 | Europe / Denmark / Syddanmark  |
| EPI_ISL_714487 | 11/23/2020 | 12/18/2020 | Europe / Denmark / Midtjylland |
| EPI_ISL_714488 | 11/23/2020 | 12/18/2020 | Europe / Denmark / Hovedstaden |
| EPI_ISL_714489 | 11/23/2020 | 12/18/2020 | Europe / Denmark / Nordjylland |
| EPI_ISL_714490 | 11/23/2020 | 12/18/2020 | Europe / Denmark / Midtjylland |
| EPI_ISL_714491 | 11/23/2020 | 12/18/2020 | Europe / Denmark / Hovedstaden |
| EPI_ISL_714492 | 11/23/2020 | 12/18/2020 | Europe / Denmark / Sjaelland   |
| EPI_ISL_714493 | 11/23/2020 | 12/18/2020 | Europe / Denmark / Sjaelland   |
| EPI_ISL_714494 | 11/23/2020 | 12/18/2020 | Europe / Denmark / Hovedstaden |
| EPI_ISL_714495 | 11/23/2020 | 12/18/2020 | Europe / Denmark / Syddanmark  |
| EPI_ISL_714496 | 11/23/2020 | 12/18/2020 | Europe / Denmark / Hovedstaden |
| EPI_ISL_714497 | 11/23/2020 | 12/18/2020 | Europe / Denmark / Syddanmark  |
| EPI_ISL_714498 | 11/23/2020 | 12/18/2020 | Europe / Denmark / Sjaelland   |
| EPI_ISL_714499 | 11/23/2020 | 12/18/2020 | Europe / Denmark / Sjaelland   |
| EPI_ISL_714500 | 11/23/2020 | 12/18/2020 | Europe / Denmark / Sjaelland   |
| EPI_ISL_714501 | 11/23/2020 | 12/18/2020 | Europe / Denmark / Hovedstaden |
| EPI_ISL_714502 | 11/23/2020 | 12/18/2020 | Europe / Denmark / Hovedstaden |
| EPI_ISL_714503 | 11/23/2020 | 12/18/2020 | Europe / Denmark / Hovedstaden |
| EPI_ISL_714504 | 11/23/2020 | 12/18/2020 | Europe / Denmark / Midtjylland |
| EPI_ISL_714505 | 11/23/2020 | 12/18/2020 | Europe / Denmark / Sjaelland   |
| EPI_ISL_714506 | 11/23/2020 | 12/18/2020 | Europe / Denmark / Sjaelland   |
| EPI_ISL_714507 | 11/23/2020 | 12/18/2020 | Europe / Denmark / Midtjylland |
| EPI_ISL_714508 | 11/23/2020 | 12/18/2020 | Europe / Denmark / Hovedstaden |
| EPI_ISL_714509 | 11/23/2020 | 12/18/2020 | Europe / Denmark / Syddanmark  |
| EPI_ISL_714510 | 11/23/2020 | 12/18/2020 | Europe / Denmark / Sjaelland   |
| EPI_ISL_714511 | 11/23/2020 | 12/18/2020 | Europe / Denmark / Midtjylland |
| EPI_ISL_714512 | 11/23/2020 | 12/18/2020 | Europe / Denmark / Hovedstaden |
| EPI_ISL_714513 | 11/23/2020 | 12/18/2020 | Europe / Denmark / Hovedstaden |
| EPI_ISL_714514 | 11/23/2020 | 12/18/2020 | Europe / Denmark / Syddanmark  |













|                |            |            |                                |
|----------------|------------|------------|--------------------------------|
| EPI_ISL_714750 | 11/16/2020 | 12/18/2020 | Europe / Denmark / Hovedstaden |
| EPI_ISL_714751 | 11/16/2020 | 12/18/2020 | Europe / Denmark / Sjaelland   |
| EPI_ISL_714752 | 11/16/2020 | 12/18/2020 | Europe / Denmark / Hovedstaden |
| EPI_ISL_714753 | 11/16/2020 | 12/18/2020 | Europe / Denmark / Hovedstaden |
| EPI_ISL_714754 | 11/16/2020 | 12/18/2020 | Europe / Denmark / Hovedstaden |
| EPI_ISL_714755 | 11/16/2020 | 12/18/2020 | Europe / Denmark / Hovedstaden |
| EPI_ISL_714756 | 11/16/2020 | 12/18/2020 | Europe / Denmark / Nordjylland |
| EPI_ISL_714757 | 11/16/2020 | 12/18/2020 | Europe / Denmark / Sjaelland   |
| EPI_ISL_714758 | 11/16/2020 | 12/18/2020 | Europe / Denmark / Hovedstaden |
| EPI_ISL_714759 | 11/16/2020 | 12/18/2020 | Europe / Denmark / Hovedstaden |
| EPI_ISL_714760 | 11/16/2020 | 12/18/2020 | Europe / Denmark / Midtjylland |
| EPI_ISL_714761 | 11/16/2020 | 12/18/2020 | Europe / Denmark / Sjaelland   |
| EPI_ISL_714762 | 11/16/2020 | 12/18/2020 | Europe / Denmark / Sjaelland   |
| EPI_ISL_714763 | 11/16/2020 | 12/18/2020 | Europe / Denmark / Midtjylland |
| EPI_ISL_714764 | 11/16/2020 | 12/18/2020 | Europe / Denmark / Hovedstaden |
| EPI_ISL_714765 | 11/16/2020 | 12/18/2020 | Europe / Denmark / Hovedstaden |
| EPI_ISL_714766 | 11/16/2020 | 12/18/2020 | Europe / Denmark / Sjaelland   |
| EPI_ISL_714767 | 11/16/2020 | 12/18/2020 | Europe / Denmark / Hovedstaden |
| EPI_ISL_714768 | 11/16/2020 | 12/18/2020 | Europe / Denmark / Sjaelland   |
| EPI_ISL_714769 | 11/16/2020 | 12/18/2020 | Europe / Denmark / Hovedstaden |
| EPI_ISL_714770 | 11/16/2020 | 12/18/2020 | Europe / Denmark / Syddanmark  |
| EPI_ISL_714771 | 11/16/2020 | 12/18/2020 | Europe / Denmark / Hovedstaden |
| EPI_ISL_714772 | 11/16/2020 | 12/18/2020 | Europe / Denmark / Midtjylland |
| EPI_ISL_714773 | 11/16/2020 | 12/18/2020 | Europe / Denmark / Sjaelland   |
| EPI_ISL_714774 | 11/16/2020 | 12/18/2020 | Europe / Denmark / Sjaelland   |
| EPI_ISL_714775 | 11/16/2020 | 12/18/2020 | Europe / Denmark / Syddanmark  |
| EPI_ISL_714776 | 11/16/2020 | 12/18/2020 | Europe / Denmark / Hovedstaden |
| EPI_ISL_714777 | 11/16/2020 | 12/18/2020 | Europe / Denmark / Hovedstaden |
| EPI_ISL_714778 | 11/16/2020 | 12/18/2020 | Europe / Denmark / Sjaelland   |
| EPI_ISL_714779 | 11/16/2020 | 12/18/2020 | Europe / Denmark / Hovedstaden |
| EPI_ISL_714780 | 11/16/2020 | 12/18/2020 | Europe / Denmark / Midtjylland |
| EPI_ISL_714781 | 11/16/2020 | 12/18/2020 | Europe / Denmark / Midtjylland |
| EPI_ISL_714782 | 11/16/2020 | 12/18/2020 | Europe / Denmark / Hovedstaden |
| EPI_ISL_714783 | 11/16/2020 | 12/18/2020 | Europe / Denmark               |
| EPI_ISL_714784 | 11/16/2020 | 12/18/2020 | Europe / Denmark / Hovedstaden |
| EPI_ISL_714785 | 11/16/2020 | 12/18/2020 | Europe / Denmark / Sjaelland   |
| EPI_ISL_714786 | 11/16/2020 | 12/18/2020 | Europe / Denmark / Hovedstaden |
| EPI_ISL_714787 | 11/16/2020 | 12/18/2020 | Europe / Denmark / Nordjylland |
| EPI_ISL_714788 | 11/16/2020 | 12/18/2020 | Europe / Denmark / Syddanmark  |
| EPI_ISL_714789 | 11/16/2020 | 12/18/2020 | Europe / Denmark / Midtjylland |
| EPI_ISL_714790 | 11/16/2020 | 12/18/2020 | Europe / Denmark / Nordjylland |
| EPI_ISL_714791 | 11/16/2020 | 12/18/2020 | Europe / Denmark / Sjaelland   |
| EPI_ISL_714792 | 11/16/2020 | 12/18/2020 | Europe / Denmark / Hovedstaden |
| EPI_ISL_714793 | 11/16/2020 | 12/18/2020 | Europe / Denmark / Syddanmark  |
| EPI_ISL_714794 | 11/16/2020 | 12/18/2020 | Europe / Denmark / Nordjylland |
| EPI_ISL_714795 | 11/16/2020 | 12/18/2020 | Europe / Denmark / Midtjylland |
| EPI_ISL_714796 | 11/16/2020 | 12/18/2020 | Europe / Denmark / Midtjylland |







|                |            |            |                                |
|----------------|------------|------------|--------------------------------|
| EPI_ISL_714891 | 11/16/2020 | 12/18/2020 | Europe / Denmark / Midtjylland |
| EPI_ISL_714892 | 11/16/2020 | 12/18/2020 | Europe / Denmark / Sjaelland   |
| EPI_ISL_714893 | 11/16/2020 | 12/18/2020 | Europe / Denmark / Midtjylland |
| EPI_ISL_714894 | 11/16/2020 | 12/18/2020 | Europe / Denmark               |
| EPI_ISL_714895 | 11/16/2020 | 12/18/2020 | Europe / Denmark / Sjaelland   |
| EPI_ISL_714896 | 11/16/2020 | 12/18/2020 | Europe / Denmark / Syddanmark  |
| EPI_ISL_714897 | 11/16/2020 | 12/18/2020 | Europe / Denmark / Hovedstaden |
| EPI_ISL_714898 | 11/16/2020 | 12/18/2020 | Europe / Denmark / Hovedstaden |
| EPI_ISL_714899 | 11/16/2020 | 12/18/2020 | Europe / Denmark / Midtjylland |
| EPI_ISL_714900 | 11/16/2020 | 12/18/2020 | Europe / Denmark / Midtjylland |
| EPI_ISL_714901 | 11/16/2020 | 12/18/2020 | Europe / Denmark / Hovedstaden |
| EPI_ISL_714902 | 11/16/2020 | 12/18/2020 | Europe / Denmark / Midtjylland |
| EPI_ISL_714903 | 11/16/2020 | 12/18/2020 | Europe / Denmark / Midtjylland |
| EPI_ISL_714904 | 11/9/2020  | 12/18/2020 | Europe / Denmark / Nordjylland |
| EPI_ISL_714905 | 11/9/2020  | 12/18/2020 | Europe / Denmark / Hovedstaden |
| EPI_ISL_714906 | 11/9/2020  | 12/18/2020 | Europe / Denmark / Hovedstaden |
| EPI_ISL_714907 | 11/9/2020  | 12/18/2020 | Europe / Denmark / Syddanmark  |
| EPI_ISL_714908 | 11/9/2020  | 12/18/2020 | Europe / Denmark / Midtjylland |
| EPI_ISL_714909 | 11/9/2020  | 12/18/2020 | Europe / Denmark / Syddanmark  |
| EPI_ISL_714910 | 11/9/2020  | 12/18/2020 | Europe / Denmark / Midtjylland |
| EPI_ISL_714911 | 11/9/2020  | 12/18/2020 | Europe / Denmark               |
| EPI_ISL_714912 | 11/9/2020  | 12/18/2020 | Europe / Denmark / Syddanmark  |
| EPI_ISL_714913 | 11/9/2020  | 12/18/2020 | Europe / Denmark / Hovedstaden |
| EPI_ISL_714914 | 11/9/2020  | 12/18/2020 | Europe / Denmark / Sjaelland   |
| EPI_ISL_714915 | 11/9/2020  | 12/18/2020 | Europe / Denmark / Midtjylland |
| EPI_ISL_714916 | 11/9/2020  | 12/18/2020 | Europe / Denmark / Midtjylland |
| EPI_ISL_714917 | 11/9/2020  | 12/18/2020 | Europe / Denmark / Midtjylland |
| EPI_ISL_714918 | 11/9/2020  | 12/18/2020 | Europe / Denmark / Midtjylland |
| EPI_ISL_714919 | 11/9/2020  | 12/18/2020 | Europe / Denmark / Hovedstaden |
| EPI_ISL_714920 | 11/9/2020  | 12/18/2020 | Europe / Denmark / Hovedstaden |
| EPI_ISL_714921 | 11/9/2020  | 12/18/2020 | Europe / Denmark / Midtjylland |
| EPI_ISL_714922 | 11/9/2020  | 12/18/2020 | Europe / Denmark / Midtjylland |
| EPI_ISL_714923 | 11/2/2020  | 12/18/2020 | Europe / Denmark / Midtjylland |
| EPI_ISL_714924 | 11/2/2020  | 12/18/2020 | Europe / Denmark / Midtjylland |
| EPI_ISL_714925 | 11/2/2020  | 12/18/2020 | Europe / Denmark / Midtjylland |
| EPI_ISL_714926 | 11/2/2020  | 12/18/2020 | Europe / Denmark / Syddanmark  |
| EPI_ISL_714927 | 11/2/2020  | 12/18/2020 | Europe / Denmark / Midtjylland |
| EPI_ISL_714928 | 10/19/2020 | 12/18/2020 | Europe / Denmark / Hovedstaden |
| EPI_ISL_714929 | 9/14/2020  | 12/18/2020 | Europe / Denmark / Syddanmark  |
| EPI_ISL_714930 | 9/7/2020   | 12/18/2020 | Europe / Denmark / Hovedstaden |
| EPI_ISL_714931 | 7/27/2020  | 12/18/2020 | Europe / Denmark / Sjaelland   |
| EPI_ISL_714932 | 6/22/2020  | 12/18/2020 | Europe / Denmark / Nordjylland |
| EPI_ISL_714933 | 6/15/2020  | 12/18/2020 | Europe / Denmark / Nordjylland |
| EPI_ISL_714934 | 6/15/2020  | 12/18/2020 | Europe / Denmark / Nordjylland |
| EPI_ISL_714935 | 6/15/2020  | 12/18/2020 | Europe / Denmark / Nordjylland |
| EPI_ISL_714936 | 6/15/2020  | 12/18/2020 | Europe / Denmark / Nordjylland |
| EPI_ISL_714937 | 4/6/2020   | 12/18/2020 | Europe / Denmark / Hovedstaden |

|                |            |            |                                                |
|----------------|------------|------------|------------------------------------------------|
| EPI_ISL_717603 | 10/23/2020 | 12/18/2020 | Europe / Belgium / Ghent                       |
| EPI_ISL_717604 | 10/21/2020 | 12/18/2020 | Europe / Belgium / Ghent                       |
| EPI_ISL_717605 | 10/19/2020 | 12/18/2020 | Europe / Belgium / Ghent                       |
| EPI_ISL_717606 | 7/5/2020   | 12/18/2020 | Europe / Belgium / Ghent                       |
| EPI_ISL_717607 | 10/20/2020 | 12/18/2020 | Europe / Belgium / Ghent                       |
| EPI_ISL_717608 | 10/20/2020 | 12/18/2020 | Europe / Belgium / Ghent                       |
| EPI_ISL_717609 | 10/20/2020 | 12/18/2020 | Europe / Belgium / Ghent                       |
| EPI_ISL_717610 | 10/22/2020 | 12/18/2020 | Europe / Belgium / Ghent                       |
| EPI_ISL_717611 | 10/22/2020 | 12/18/2020 | Europe / Belgium / Ghent                       |
| EPI_ISL_717612 | 10/22/2020 | 12/18/2020 | Europe / Belgium / Ghent                       |
| EPI_ISL_717613 | 10/23/2020 | 12/18/2020 | Europe / Belgium / Ghent                       |
| EPI_ISL_717614 | 10/23/2020 | 12/18/2020 | Europe / Belgium / Ghent                       |
| EPI_ISL_717615 | 10/23/2020 | 12/18/2020 | Europe / Belgium / Ghent                       |
| EPI_ISL_717616 | 10/19/2020 | 12/18/2020 | Europe / Belgium / Ghent                       |
| EPI_ISL_717617 | 10/20/2020 | 12/18/2020 | Europe / Belgium / Ghent                       |
| EPI_ISL_717618 | 10/19/2020 | 12/18/2020 | Europe / Belgium / Ghent                       |
| EPI_ISL_717619 | 10/19/2020 | 12/18/2020 | Europe / Belgium / Ghent                       |
| EPI_ISL_717620 | 11/16/2020 | 12/18/2020 | Europe / Belgium / Ghent                       |
| EPI_ISL_717621 | 11/16/2020 | 12/18/2020 | Europe / Belgium / Ghent                       |
| EPI_ISL_717622 | 11/8/2020  | 12/18/2020 | Europe / Belgium / Ghent                       |
| EPI_ISL_717623 | 11/12/2020 | 12/18/2020 | Europe / Belgium / Ghent                       |
| EPI_ISL_717624 | 11/12/2020 | 12/18/2020 | Europe / Belgium / Ghent                       |
| EPI_ISL_717625 | 11/13/2020 | 12/18/2020 | Europe / Belgium / Ghent                       |
| EPI_ISL_717626 | 11/8/2020  | 12/18/2020 | Europe / Belgium / Ghent                       |
| EPI_ISL_717627 | 11/12/2020 | 12/18/2020 | Europe / Belgium / Ghent                       |
| EPI_ISL_717628 | 11/13/2020 | 12/18/2020 | Europe / Belgium / Ghent                       |
| EPI_ISL_717629 | 10/26/2020 | 12/18/2020 | Europe / Belgium / Ghent                       |
| EPI_ISL_717630 | 11/13/2020 | 12/18/2020 | Europe / Belgium / Ghent                       |
| EPI_ISL_717631 | 11/14/2020 | 12/18/2020 | Europe / Belgium / Ghent                       |
| EPI_ISL_717632 | 11/11/2020 | 12/18/2020 | Europe / Belgium / Ghent                       |
| EPI_ISL_717633 | 11/11/2020 | 12/18/2020 | Europe / Belgium / Ghent                       |
| EPI_ISL_717701 | 12/14/2020 | 12/19/2020 | Oceania / Australia / New South Wales / Sydney |
| EPI_ISL_717702 | 12/14/2020 | 12/19/2020 | Oceania / Australia / New South Wales / Sydney |
| EPI_ISL_717703 | 12/8/2020  | 12/19/2020 | Oceania / Australia / New South Wales / Sydney |
| EPI_ISL_717704 | 12/10/2020 | 12/19/2020 | Oceania / Australia / New South Wales / Sydney |
| EPI_ISL_717705 | 12/12/2020 | 12/19/2020 | Oceania / Australia / New South Wales / Sydney |
| EPI_ISL_717706 | 12/11/2020 | 12/19/2020 | Oceania / Australia / New South Wales / Sydney |
| EPI_ISL_717707 | 12/12/2020 | 12/19/2020 | Oceania / Australia / New South Wales / Sydney |
| EPI_ISL_717708 | 12/8/2020  | 12/19/2020 | Oceania / Australia / New South Wales / Sydney |
| EPI_ISL_717710 | 12/8/2020  | 12/19/2020 | Oceania / Australia / New South Wales / Sydney |
| EPI_ISL_717711 | 12/9/2020  | 12/19/2020 | Oceania / Australia / New South Wales / Sydney |
| EPI_ISL_717712 | 12/8/2020  | 12/19/2020 | Oceania / Australia / New South Wales / Sydney |
| EPI_ISL_717713 | 12/9/2020  | 12/19/2020 | Oceania / Australia / New South Wales / Sydney |
| EPI_ISL_717727 | 4/19/2020  | 12/19/2020 | North America / Canada / Ontario               |
| EPI_ISL_717728 | 4/14/2020  | 12/19/2020 | North America / Canada / Ontario               |
| EPI_ISL_717729 | 4/17/2020  | 12/19/2020 | North America / Canada / Ontario               |
| EPI_ISL_717730 | 4/22/2020  | 12/19/2020 | North America / Canada / Ontario               |

|                |            |            |                                  |
|----------------|------------|------------|----------------------------------|
| EPI_ISL_717731 | 5/8/2020   | 12/19/2020 | North America / Canada / Ontario |
| EPI_ISL_717732 | 5/2/2020   | 12/19/2020 | North America / Canada / Ontario |
| EPI_ISL_717733 | 4/25/2020  | 12/19/2020 | North America / Canada / Ontario |
| EPI_ISL_717734 | 11/24/2020 | 12/19/2020 | North America / Canada / Ontario |
| EPI_ISL_717735 | 4/18/2020  | 12/19/2020 | North America / Canada / Ontario |
| EPI_ISL_717736 | 4/21/2020  | 12/19/2020 | North America / Canada / Ontario |
| EPI_ISL_717737 | 11/24/2020 | 12/19/2020 | North America / Canada / Ontario |
| EPI_ISL_717738 | 4/25/2020  | 12/19/2020 | North America / Canada / Ontario |
| EPI_ISL_717739 | 4/27/2020  | 12/19/2020 | North America / Canada / Ontario |
| EPI_ISL_717740 | 4/17/2020  | 12/19/2020 | North America / Canada / Ontario |
| EPI_ISL_717741 | 11/24/2020 | 12/19/2020 | North America / Canada / Ontario |
| EPI_ISL_717742 | 4/18/2020  | 12/19/2020 | North America / Canada / Ontario |
| EPI_ISL_717743 | 4/23/2020  | 12/19/2020 | North America / Canada / Ontario |
| EPI_ISL_717744 | 5/9/2020   | 12/19/2020 | North America / Canada / Ontario |
| EPI_ISL_717745 | 4/18/2020  | 12/19/2020 | North America / Canada / Ontario |
| EPI_ISL_717746 | 4/12/2020  | 12/19/2020 | North America / Canada / Ontario |
| EPI_ISL_717747 | 4/17/2020  | 12/19/2020 | North America / Canada / Ontario |
| EPI_ISL_717748 | 4/23/2020  | 12/19/2020 | North America / Canada / Ontario |
| EPI_ISL_717749 | 4/14/2020  | 12/19/2020 | North America / Canada / Ontario |
| EPI_ISL_717750 | 4/15/2020  | 12/19/2020 | North America / Canada / Ontario |
| EPI_ISL_717751 | 4/16/2020  | 12/19/2020 | North America / Canada / Ontario |
| EPI_ISL_717752 | 11/24/2020 | 12/19/2020 | North America / Canada / Ontario |
| EPI_ISL_717753 | 4/22/2020  | 12/19/2020 | North America / Canada / Ontario |
| EPI_ISL_717754 | 4/18/2020  | 12/19/2020 | North America / Canada / Ontario |
| EPI_ISL_717755 | 4/20/2020  | 12/19/2020 | North America / Canada / Ontario |
| EPI_ISL_717756 | 4/17/2020  | 12/19/2020 | North America / Canada / Ontario |
| EPI_ISL_717757 | 4/19/2020  | 12/19/2020 | North America / Canada / Ontario |
| EPI_ISL_717758 | 4/26/2020  | 12/19/2020 | North America / Canada / Ontario |
| EPI_ISL_717759 | 4/18/2020  | 12/19/2020 | North America / Canada / Ontario |
| EPI_ISL_717760 | 4/14/2020  | 12/19/2020 | North America / Canada / Ontario |
| EPI_ISL_717761 | 4/28/2020  | 12/19/2020 | North America / Canada / Ontario |
| EPI_ISL_717766 | 7/8/2020   | 12/20/2020 | North America / USA / Washington |
| EPI_ISL_717767 | 7/17/2020  | 12/20/2020 | North America / USA / Washington |
| EPI_ISL_717768 | 3/24/2020  | 12/20/2020 | North America / USA / Washington |
| EPI_ISL_717769 | 8/7/2020   | 12/20/2020 | North America / USA / Washington |
| EPI_ISL_717770 | 9/5/2020   | 12/20/2020 | North America / USA / Washington |
| EPI_ISL_717771 | 9/7/2020   | 12/20/2020 | North America / USA / Washington |
| EPI_ISL_717772 | 9/8/2020   | 12/20/2020 | North America / USA / Washington |
| EPI_ISL_717773 | 9/15/2020  | 12/20/2020 | North America / USA / Washington |
| EPI_ISL_717774 | 9/16/2020  | 12/20/2020 | North America / USA / Washington |
| EPI_ISL_717775 | 9/16/2020  | 12/20/2020 | North America / USA / Washington |
| EPI_ISL_717777 | 9/28/2020  | 12/20/2020 | North America / USA / Washington |
| EPI_ISL_717778 | 9/28/2020  | 12/20/2020 | North America / USA / Washington |
| EPI_ISL_717780 | 9/28/2020  | 12/20/2020 | North America / USA / Washington |
| EPI_ISL_717781 | 9/28/2020  | 12/20/2020 | North America / USA / Washington |
| EPI_ISL_717782 | 11/5/2020  | 12/20/2020 | North America / USA / Washington |
| EPI_ISL_717783 | 3/13/2020  | 12/20/2020 | North America / USA / Washington |

|                |            |            |                                                              |
|----------------|------------|------------|--------------------------------------------------------------|
| EPI_ISL_717784 | 5/22/2020  | 12/20/2020 | North America / USA / Washington                             |
| EPI_ISL_717806 | 9/3/2020   | 12/20/2020 | South America / Brazil / Rio de Janeiro / Rio de Janeiro     |
| EPI_ISL_717807 | 11/5/2020  | 12/20/2020 | South America / Brazil / Rio de Janeiro / São João de Meriti |
| EPI_ISL_717808 | 11/3/2020  | 12/20/2020 | South America / Brazil / Rio de Janeiro / Rio de Janeiro     |
| EPI_ISL_717809 | 9/28/2020  | 12/20/2020 | South America / Brazil / Rio de Janeiro / Maricãj            |
| EPI_ISL_717810 | 4/14/2020  | 12/20/2020 | South America / Brazil / Rio de Janeiro / Rio de Janeiro     |
| EPI_ISL_717811 | 4/16/2020  | 12/20/2020 | South America / Brazil / Rio de Janeiro / Rio de Janeiro     |
| EPI_ISL_717812 | 6/1/2020   | 12/20/2020 | South America / Brazil / Rio de Janeiro / Rio de Janeiro     |
| EPI_ISL_717813 | 6/1/2020   | 12/20/2020 | South America / Brazil / Rio de Janeiro / Rio de Janeiro     |
| EPI_ISL_717814 | 9/3/2020   | 12/20/2020 | South America / Brazil / Rio de Janeiro / Nilópolis          |
| EPI_ISL_717815 | 9/3/2020   | 12/20/2020 | South America / Brazil / Rio de Janeiro / Rio de Janeiro     |
| EPI_ISL_717816 | 9/3/2020   | 12/20/2020 | South America / Brazil / Rio de Janeiro / Rio de Janeiro     |
| EPI_ISL_717817 | 9/4/2020   | 12/20/2020 | South America / Brazil / Rio de Janeiro / Rio de Janeiro     |
| EPI_ISL_717818 | 10/8/2020  | 12/20/2020 | South America / Brazil / Rio de Janeiro / Rio de Janeiro     |
| EPI_ISL_717819 | 10/9/2020  | 12/20/2020 | South America / Brazil / Rio de Janeiro / Rio de Janeiro     |
| EPI_ISL_717820 | 10/26/2020 | 12/20/2020 | South America / Brazil / Rio de Janeiro / Duque de Caxias    |
| EPI_ISL_717821 | 10/26/2020 | 12/20/2020 | South America / Brazil / Rio de Janeiro / Rio de Janeiro     |
| EPI_ISL_717822 | 10/26/2020 | 12/20/2020 | South America / Brazil / Rio de Janeiro / Duque de Caxias    |
| EPI_ISL_717823 | 10/29/2020 | 12/20/2020 | South America / Brazil / Rio de Janeiro / Rio de Janeiro     |
| EPI_ISL_717824 | 10/29/2020 | 12/20/2020 | South America / Brazil / Rio de Janeiro / Rio de Janeiro     |
| EPI_ISL_717825 | 11/3/2020  | 12/20/2020 | South America / Brazil / Rio de Janeiro / Nova Iguacu        |
| EPI_ISL_717826 | 11/3/2020  | 12/20/2020 | South America / Brazil / Rio de Janeiro / Rio de Janeiro     |
| EPI_ISL_717827 | 11/3/2020  | 12/20/2020 | South America / Brazil / Rio de Janeiro / Rio de Janeiro     |
| EPI_ISL_717828 | 11/4/2020  | 12/20/2020 | South America / Brazil / Rio de Janeiro / Rio de Janeiro     |
| EPI_ISL_717829 | 11/4/2020  | 12/20/2020 | South America / Brazil / Rio de Janeiro / Rio de Janeiro     |
| EPI_ISL_717830 | 11/5/2020  | 12/20/2020 | South America / Brazil / Rio de Janeiro / Rio de Janeiro     |
| EPI_ISL_717831 | 10/30/2020 | 12/20/2020 | South America / Brazil / Rio de Janeiro / São Gonçalo        |
| EPI_ISL_717832 | 6/1/2020   | 12/20/2020 | South America / Brazil / Rio de Janeiro / Maricãj            |
| EPI_ISL_717833 | 6/3/2020   | 12/20/2020 | South America / Brazil / Rio de Janeiro / Maricãj            |
| EPI_ISL_717834 | 6/2/2020   | 12/20/2020 | South America / Brazil / Rio de Janeiro / Maricãj            |
| EPI_ISL_717835 | 6/3/2020   | 12/20/2020 | South America / Brazil / Rio de Janeiro / Maricãj            |
| EPI_ISL_717836 | 6/3/2020   | 12/20/2020 | South America / Brazil / Rio de Janeiro / Maricãj            |
| EPI_ISL_717837 | 4/7/2020   | 12/20/2020 | South America / Brazil / Rio de Janeiro / Rio de Janeiro     |
| EPI_ISL_717838 | 4/8/2020   | 12/20/2020 | South America / Brazil / Rio de Janeiro / Rio de Janeiro     |
| EPI_ISL_717839 | 4/8/2020   | 12/20/2020 | South America / Brazil / Rio de Janeiro / Rio de Janeiro     |
| EPI_ISL_717840 | 4/13/2020  | 12/20/2020 | South America / Brazil / Rio de Janeiro / Rio de Janeiro     |
| EPI_ISL_717841 | 7/28/2020  | 12/20/2020 | South America / Brazil / Rio de Janeiro / Maricãj            |
| EPI_ISL_717842 | 4/16/2020  | 12/20/2020 | South America / Brazil / Rio de Janeiro / Rio de Janeiro     |
| EPI_ISL_717843 | 4/20/2020  | 12/20/2020 | South America / Brazil / Rio de Janeiro / Rio de Janeiro     |
| EPI_ISL_717844 | 4/24/2020  | 12/20/2020 | South America / Brazil / Rio de Janeiro / Rio de Janeiro     |
| EPI_ISL_717845 | 6/1/2020   | 12/20/2020 | South America / Brazil / Rio de Janeiro / Nova Iguacu        |
| EPI_ISL_717846 | 6/1/2020   | 12/20/2020 | South America / Brazil / Rio de Janeiro / Rio de Janeiro     |
| EPI_ISL_717847 | 6/1/2020   | 12/20/2020 | South America / Brazil / Rio de Janeiro / Belford Roxo       |
| EPI_ISL_717848 | 6/1/2020   | 12/20/2020 | South America / Brazil / Rio de Janeiro / Seropedica         |
| EPI_ISL_717849 | 6/1/2020   | 12/20/2020 | South America / Brazil / Rio de Janeiro / Nilópolis          |
| EPI_ISL_717850 | 6/1/2020   | 12/20/2020 | South America / Brazil / Rio de Janeiro / Itaguaçu           |
| EPI_ISL_717851 | 6/1/2020   | 12/20/2020 | South America / Brazil / Rio de Janeiro / Rio de Janeiro     |



|                |            |            |                                                           |
|----------------|------------|------------|-----------------------------------------------------------|
| EPI_ISL_717899 | 7/27/2020  | 12/20/2020 | South America / Brazil / Rio de Janeiro / Rio de Janeiro  |
| EPI_ISL_717900 | 7/27/2020  | 12/20/2020 | South America / Brazil / Rio de Janeiro / Rio de Janeiro  |
| EPI_ISL_717901 | 7/30/2020  | 12/20/2020 | South America / Brazil / Rio de Janeiro / Rio de Janeiro  |
| EPI_ISL_717902 | 7/27/2020  | 12/20/2020 | South America / Brazil / Rio de Janeiro / SÃ£o GonÃ§alo   |
| EPI_ISL_717903 | 7/28/2020  | 12/20/2020 | South America / Brazil / Rio de Janeiro / MacaÃ©          |
| EPI_ISL_717904 | 7/28/2020  | 12/20/2020 | South America / Brazil / Rio de Janeiro / Nova Friburgo   |
| EPI_ISL_717905 | 7/28/2020  | 12/20/2020 | South America / Brazil / Rio de Janeiro / PetrÃ³polis     |
| EPI_ISL_717906 | 7/29/2020  | 12/20/2020 | South America / Brazil / Rio de Janeiro / PetrÃ³polis     |
| EPI_ISL_717907 | 7/18/2020  | 12/20/2020 | South America / Brazil / Rio de Janeiro / TrÃªs Rios      |
| EPI_ISL_717908 | 8/1/2020   | 12/20/2020 | South America / Brazil / Rio de Janeiro / TrÃªs Rios      |
| EPI_ISL_717909 | 7/29/2020  | 12/20/2020 | South America / Brazil / Rio de Janeiro / Nova Iguacu     |
| EPI_ISL_717910 | 5/31/2020  | 12/20/2020 | South America / Brazil / Rio de Janeiro / MaricÃ¡         |
| EPI_ISL_717911 | 6/1/2020   | 12/20/2020 | South America / Brazil / Rio de Janeiro / MaricÃ¡         |
| EPI_ISL_717912 | 6/2/2020   | 12/20/2020 | South America / Brazil / Rio de Janeiro / MaricÃ¡         |
| EPI_ISL_717913 | 7/29/2020  | 12/20/2020 | South America / Brazil / Rio de Janeiro / MaricÃ¡         |
| EPI_ISL_717914 | 7/29/2020  | 12/20/2020 | South America / Brazil / Rio de Janeiro / MaricÃ¡         |
| EPI_ISL_717915 | 7/29/2020  | 12/20/2020 | South America / Brazil / Rio de Janeiro / MaricÃ¡         |
| EPI_ISL_717916 | 7/29/2020  | 12/20/2020 | South America / Brazil / Rio de Janeiro / MaricÃ¡         |
| EPI_ISL_717917 | 7/29/2020  | 12/20/2020 | South America / Brazil / Rio de Janeiro / MaricÃ¡         |
| EPI_ISL_717918 | 6/2/2020   | 12/20/2020 | South America / Brazil / Rio de Janeiro / MaricÃ¡         |
| EPI_ISL_717919 | 6/2/2020   | 12/20/2020 | South America / Brazil / Rio de Janeiro / MaricÃ¡         |
| EPI_ISL_717920 | 10/29/2020 | 12/20/2020 | South America / Brazil / Rio de Janeiro / Rio de Janeiro  |
| EPI_ISL_717921 | 10/26/2020 | 12/20/2020 | South America / Brazil / Rio de Janeiro / Cabo Frio       |
| EPI_ISL_717922 | 10/29/2020 | 12/20/2020 | South America / Brazil / Rio de Janeiro / Rio de Janeiro  |
| EPI_ISL_717923 | 11/5/2020  | 12/20/2020 | South America / Brazil / Rio de Janeiro / Rio de Janeiro  |
| EPI_ISL_717924 | 10/29/2020 | 12/20/2020 | South America / Brazil / Rio de Janeiro / Rio de Janeiro  |
| EPI_ISL_717925 | 10/9/2020  | 12/20/2020 | South America / Brazil / Rio de Janeiro / Rio de Janeiro  |
| EPI_ISL_717926 | 10/26/2020 | 12/20/2020 | South America / Brazil / Rio de Janeiro / Duque de Caxias |
| EPI_ISL_717927 | 10/27/2020 | 12/20/2020 | South America / Brazil / Rio de Janeiro / Rio de Janeiro  |
| EPI_ISL_717928 | 10/27/2020 | 12/20/2020 | South America / Brazil / Rio de Janeiro / Rio de Janeiro  |
| EPI_ISL_717929 | 10/27/2020 | 12/20/2020 | South America / Brazil / Rio de Janeiro / Duque de Caxias |
| EPI_ISL_717930 | 10/27/2020 | 12/20/2020 | South America / Brazil / Rio de Janeiro / Rio de Janeiro  |
| EPI_ISL_717931 | 10/27/2020 | 12/20/2020 | South America / Brazil / Rio de Janeiro / Rio de Janeiro  |
| EPI_ISL_717932 | 10/29/2020 | 12/20/2020 | South America / Brazil / Rio de Janeiro / Rio de Janeiro  |
| EPI_ISL_717933 | 10/29/2020 | 12/20/2020 | South America / Brazil / Rio de Janeiro / Rio de Janeiro  |
| EPI_ISL_717934 | 10/29/2020 | 12/20/2020 | South America / Brazil / Rio de Janeiro / Rio de Janeiro  |
| EPI_ISL_717935 | 10/29/2020 | 12/20/2020 | South America / Brazil / Rio de Janeiro / Rio de Janeiro  |
| EPI_ISL_717936 | 10/29/2020 | 12/20/2020 | South America / Brazil / Rio de Janeiro / Rio de Janeiro  |
| EPI_ISL_717937 | 10/29/2020 | 12/20/2020 | South America / Brazil / Rio de Janeiro / Duque de Caxias |
| EPI_ISL_717938 | 10/29/2020 | 12/20/2020 | South America / Brazil / Rio de Janeiro / NiterÃ³i        |
| EPI_ISL_717939 | 10/29/2020 | 12/20/2020 | South America / Brazil / Rio de Janeiro / Rio de Janeiro  |
| EPI_ISL_717940 | 10/30/2020 | 12/20/2020 | South America / Brazil / Rio de Janeiro / NiterÃ³i        |
| EPI_ISL_717941 | 10/30/2020 | 12/20/2020 | South America / Brazil / Rio de Janeiro / Rio de Janeiro  |
| EPI_ISL_717942 | 11/3/2020  | 12/20/2020 | South America / Brazil / Rio de Janeiro / Rio de Janeiro  |
| EPI_ISL_717943 | 11/3/2020  | 12/20/2020 | South America / Brazil / Rio de Janeiro / Rio de Janeiro  |
| EPI_ISL_717944 | 11/3/2020  | 12/20/2020 | South America / Brazil / Rio de Janeiro / Rio de Janeiro  |
| EPI_ISL_717945 | 11/3/2020  | 12/20/2020 | South America / Brazil / Rio de Janeiro / Rio de Janeiro  |

|                |            |            |                                                          |
|----------------|------------|------------|----------------------------------------------------------|
| EPI_ISL_717946 | 11/3/2020  | 12/20/2020 | South America / Brazil / Rio de Janeiro / Rio de Janeiro |
| EPI_ISL_717947 | 11/3/2020  | 12/20/2020 | South America / Brazil / Rio de Janeiro / Rio de Janeiro |
| EPI_ISL_717948 | 11/3/2020  | 12/20/2020 | South America / Brazil / Rio de Janeiro / Rio de Janeiro |
| EPI_ISL_717949 | 11/3/2020  | 12/20/2020 | South America / Brazil / Rio de Janeiro / Rio de Janeiro |
| EPI_ISL_717950 | 11/3/2020  | 12/20/2020 | South America / Brazil / Rio de Janeiro / Rio de Janeiro |
| EPI_ISL_717951 | 11/4/2020  | 12/20/2020 | South America / Brazil / Rio de Janeiro / Rio de Janeiro |
| EPI_ISL_717952 | 11/4/2020  | 12/20/2020 | South America / Brazil / Rio de Janeiro / Rio de Janeiro |
| EPI_ISL_717953 | 11/4/2020  | 12/20/2020 | South America / Brazil / Rio de Janeiro / Rio de Janeiro |
| EPI_ISL_717954 | 11/4/2020  | 12/20/2020 | South America / Brazil / Rio de Janeiro / Rio de Janeiro |
| EPI_ISL_717955 | 11/5/2020  | 12/20/2020 | South America / Brazil / Rio de Janeiro / Rio de Janeiro |
| EPI_ISL_717956 | 11/5/2020  | 12/20/2020 | South America / Brazil / Rio de Janeiro / Rio de Janeiro |
| EPI_ISL_717957 | 11/5/2020  | 12/20/2020 | South America / Brazil / Rio de Janeiro / Rio de Janeiro |
| EPI_ISL_717958 | 7/28/2020  | 12/20/2020 | South America / Brazil / Rio de Janeiro / MaricÃj        |
| EPI_ISL_717959 | 8/3/2020   | 12/20/2020 | South America / Brazil / Rio de Janeiro / Rio de Janeiro |
| EPI_ISL_717960 | 10/9/2020  | 12/20/2020 | South America / Brazil / Rio de Janeiro / Rio de Janeiro |
| EPI_ISL_717961 | 11/5/2020  | 12/20/2020 | South America / Brazil / Rio de Janeiro / Rio de Janeiro |
| EPI_ISL_717962 | 7/28/2020  | 12/20/2020 | South America / Brazil / Rio de Janeiro / MacaÃ©         |
| EPI_ISL_717963 | 7/29/2020  | 12/20/2020 | South America / Brazil / Rio de Janeiro / MaricÃj        |
| EPI_ISL_717964 | 7/29/2020  | 12/20/2020 | South America / Brazil / Rio de Janeiro / MaricÃj        |
| EPI_ISL_717965 | 11/7/2020  | 12/20/2020 | Europe / Russia / Moscow                                 |
| EPI_ISL_717966 | 11/7/2020  | 12/20/2020 | Europe / Russia / Moscow                                 |
| EPI_ISL_717967 | 11/6/2020  | 12/20/2020 | Europe / Russia / Moscow                                 |
| EPI_ISL_717968 | 11/6/2020  | 12/20/2020 | Europe / Russia / Moscow                                 |
| EPI_ISL_717969 | 11/7/2020  | 12/20/2020 | Europe / Russia / Moscow                                 |
| EPI_ISL_717970 | 11/6/2020  | 12/20/2020 | Europe / Russia / Moscow                                 |
| EPI_ISL_717971 | 11/6/2020  | 12/20/2020 | Europe / Russia / Moscow                                 |
| EPI_ISL_717972 | 11/6/2020  | 12/20/2020 | Europe / Russia / Moscow                                 |
| EPI_ISL_717973 | 11/6/2020  | 12/20/2020 | Europe / Russia / Moscow                                 |
| EPI_ISL_717974 | 11/6/2020  | 12/20/2020 | Europe / Russia / Moscow                                 |
| EPI_ISL_717977 | 3/12/2020  | 12/20/2020 | Europe / Germany / North Rhine-Westphalia / Essen        |
| EPI_ISL_717978 | 12/14/2020 | 12/20/2020 | Europe / Italy / Lazio                                   |
| EPI_ISL_717991 | 10/26/2020 | 12/20/2020 | Europe / Belgium / Ghent                                 |
| EPI_ISL_717992 | 10/27/2020 | 12/20/2020 | Europe / Belgium / Ghent                                 |
| EPI_ISL_717993 | 10/27/2020 | 12/20/2020 | Europe / Belgium / Ghent                                 |
| EPI_ISL_717994 | 10/31/2020 | 12/20/2020 | Europe / Belgium / Ghent                                 |
| EPI_ISL_717995 | 11/2/2020  | 12/20/2020 | Europe / Belgium / Ghent                                 |
| EPI_ISL_717996 | 11/3/2020  | 12/20/2020 | Europe / Belgium / Ghent                                 |
| EPI_ISL_717997 | 11/4/2020  | 12/20/2020 | Europe / Belgium / Ghent                                 |
| EPI_ISL_717998 | 11/5/2020  | 12/20/2020 | Europe / Belgium / Ghent                                 |
| EPI_ISL_717999 | 11/5/2020  | 12/20/2020 | Europe / Belgium / Ghent                                 |
| EPI_ISL_718000 | 11/10/2020 | 12/20/2020 | Europe / Belgium / Ghent                                 |
| EPI_ISL_718001 | 11/4/2020  | 12/20/2020 | Europe / Belgium / Ghent                                 |
| EPI_ISL_718002 | 11/4/2020  | 12/20/2020 | Europe / Belgium / Ghent                                 |
| EPI_ISL_718003 | 11/4/2020  | 12/20/2020 | Europe / Belgium / Ghent                                 |
| EPI_ISL_718004 | 11/10/2020 | 12/20/2020 | Europe / Belgium / Ghent                                 |
| EPI_ISL_718005 | 11/10/2020 | 12/20/2020 | Europe / Belgium / Ghent                                 |
| EPI_ISL_718006 | 11/12/2020 | 12/20/2020 | Europe / Belgium / Ghent                                 |







|                |            |            |                           |
|----------------|------------|------------|---------------------------|
| EPI_ISL_718158 | 4/25/2020  | 12/21/2020 | Asia / Malaysia / Sarawak |
| EPI_ISL_718159 | 4/29/2020  | 12/21/2020 | Asia / Malaysia / Sarawak |
| EPI_ISL_718160 | 4/15/2020  | 12/21/2020 | Asia / Malaysia / Sarawak |
| EPI_ISL_718161 | 4/10/2020  | 12/21/2020 | Asia / Malaysia / Sarawak |
| EPI_ISL_718162 | 4/1/2020   | 12/21/2020 | Asia / Malaysia / Sarawak |
| EPI_ISL_718163 | 3/31/2020  | 12/21/2020 | Asia / Malaysia / Sarawak |
| EPI_ISL_718164 | 4/1/2020   | 12/21/2020 | Asia / Malaysia / Sarawak |
| EPI_ISL_718165 | 5/11/2020  | 12/21/2020 | Asia / Malaysia / Sarawak |
| EPI_ISL_718166 | 5/10/2020  | 12/21/2020 | Asia / Malaysia / Sarawak |
| EPI_ISL_718167 | 11/1/2020  | 12/21/2020 | Asia / Malaysia / Sarawak |
| EPI_ISL_718168 | 10/14/2020 | 12/21/2020 | Asia / Malaysia / Sarawak |
| EPI_ISL_718169 | 10/28/2020 | 12/21/2020 | Asia / Malaysia / Sarawak |
| EPI_ISL_718170 | 10/28/2020 | 12/21/2020 | Asia / Malaysia / Sarawak |
| EPI_ISL_718171 | 10/31/2020 | 12/21/2020 | Asia / Malaysia / Sarawak |
| EPI_ISL_718172 | 11/18/2020 | 12/21/2020 | Asia / Malaysia / Sarawak |
| EPI_ISL_718173 | 11/4/2020  | 12/21/2020 | Asia / Malaysia / Sarawak |
| EPI_ISL_718174 | 10/27/2020 | 12/21/2020 | Asia / Malaysia / Sarawak |
| EPI_ISL_718175 | 11/5/2020  | 12/21/2020 | Asia / Malaysia / Sarawak |
| EPI_ISL_718176 | 11/8/2020  | 12/21/2020 | Asia / Malaysia / Sarawak |
| EPI_ISL_718177 | 11/1/2020  | 12/21/2020 | Asia / Malaysia / Sarawak |
| EPI_ISL_718178 | 10/25/2020 | 12/21/2020 | Asia / Malaysia / Sarawak |
| EPI_ISL_718179 | 11/7/2020  | 12/21/2020 | Asia / Malaysia / Sarawak |
| EPI_ISL_718180 | 11/10/2020 | 12/21/2020 | Asia / Malaysia / Sarawak |
| EPI_ISL_718181 | 11/14/2020 | 12/21/2020 | Asia / Malaysia / Sarawak |
| EPI_ISL_718182 | 10/27/2020 | 12/21/2020 | Asia / Malaysia / Sarawak |
| EPI_ISL_718183 | 11/10/2020 | 12/21/2020 | Asia / Malaysia / Sarawak |
| EPI_ISL_718184 | 11/9/2020  | 12/21/2020 | Asia / Malaysia / Sarawak |
| EPI_ISL_718185 | 11/8/2020  | 12/21/2020 | Asia / Malaysia / Sarawak |
| EPI_ISL_718186 | 11/13/2020 | 12/21/2020 | Asia / Malaysia / Sarawak |
| EPI_ISL_718187 | 11/13/2020 | 12/21/2020 | Asia / Malaysia / Sarawak |
| EPI_ISL_718188 | 11/3/2020  | 12/21/2020 | Asia / Malaysia / Sarawak |
| EPI_ISL_718189 | 11/11/2020 | 12/21/2020 | Asia / Malaysia / Sarawak |
| EPI_ISL_718190 | 11/7/2020  | 12/21/2020 | Asia / Malaysia / Sarawak |
| EPI_ISL_718191 | 11/2/2020  | 12/21/2020 | Asia / Malaysia / Sarawak |
| EPI_ISL_718192 | 10/23/2020 | 12/21/2020 | Asia / Malaysia / Sarawak |
| EPI_ISL_718193 | 11/13/2020 | 12/21/2020 | Asia / Malaysia / Sarawak |
| EPI_ISL_718194 | 11/8/2020  | 12/21/2020 | Asia / Malaysia / Sarawak |
| EPI_ISL_718195 | 11/14/2020 | 12/21/2020 | Asia / Malaysia / Sarawak |
| EPI_ISL_718196 | 11/14/2020 | 12/21/2020 | Asia / Malaysia / Sarawak |
| EPI_ISL_718197 | 10/27/2020 | 12/21/2020 | Asia / Malaysia / Sarawak |
| EPI_ISL_718198 | 10/26/2020 | 12/21/2020 | Asia / Malaysia / Sarawak |
| EPI_ISL_718199 | 11/9/2020  | 12/21/2020 | Asia / Malaysia / Sarawak |
| EPI_ISL_718200 | 11/18/2020 | 12/21/2020 | Asia / Malaysia / Sarawak |
| EPI_ISL_718201 | 11/6/2020  | 12/21/2020 | Asia / Malaysia / Sarawak |
| EPI_ISL_718202 | 11/23/2020 | 12/21/2020 | Asia / Malaysia / Sarawak |
| EPI_ISL_718203 | 10/30/2020 | 12/21/2020 | Asia / Malaysia / Sarawak |
| EPI_ISL_718204 | 10/25/2020 | 12/21/2020 | Asia / Malaysia / Sarawak |

|                |            |            |                                     |
|----------------|------------|------------|-------------------------------------|
| EPI_ISL_718205 | 10/30/2020 | 12/21/2020 | Asia / Malaysia / Sarawak           |
| EPI_ISL_718206 | 10/27/2020 | 12/21/2020 | Asia / Malaysia / Sarawak           |
| EPI_ISL_718207 | 11/4/2020  | 12/21/2020 | Asia / Malaysia / Sarawak           |
| EPI_ISL_718208 | 10/30/2020 | 12/21/2020 | Asia / Malaysia / Sarawak           |
| EPI_ISL_718209 | 10/31/2020 | 12/21/2020 | Asia / Malaysia / Sarawak           |
| EPI_ISL_718210 | 10/8/2020  | 12/21/2020 | Asia / Malaysia / Sarawak           |
| EPI_ISL_718211 | 10/22/2020 | 12/21/2020 | Asia / Malaysia / Sarawak           |
| EPI_ISL_718212 | 10/22/2020 | 12/21/2020 | Asia / Malaysia / Sarawak           |
| EPI_ISL_718213 | 10/22/2020 | 12/21/2020 | Asia / Malaysia / Sarawak           |
| EPI_ISL_718214 | 10/1/2020  | 12/21/2020 | Asia / Malaysia / Sarawak           |
| EPI_ISL_718215 | 10/1/2020  | 12/21/2020 | Asia / Malaysia / Sarawak           |
| EPI_ISL_718216 | 11/6/2020  | 12/21/2020 | Asia / Malaysia / Sarawak           |
| EPI_ISL_718217 | 10/25/2020 | 12/21/2020 | Asia / Malaysia / Sarawak           |
| EPI_ISL_718218 | 10/23/2020 | 12/21/2020 | Asia / Malaysia / Sarawak           |
| EPI_ISL_718220 | 11/12/2020 | 12/21/2020 | Asia / Malaysia / Sarawak           |
| EPI_ISL_718221 | 4/17/2020  | 12/21/2020 | Asia / Malaysia / Sarawak           |
| EPI_ISL_718222 | 10/24/2020 | 12/21/2020 | Asia / Malaysia / Sarawak           |
| EPI_ISL_718226 | 10/31/2020 | 12/21/2020 | Europe / France / Bretagne / Rennes |
| EPI_ISL_718227 | 10/31/2020 | 12/21/2020 | Europe / France / Bretagne / Rennes |
| EPI_ISL_718228 | 10/27/2020 | 12/21/2020 | Europe / France / Bretagne / Rennes |
| EPI_ISL_718229 | 9/14/2020  | 12/21/2020 | Europe / France / Bretagne / Rennes |
| EPI_ISL_718230 | 9/26/2020  | 12/21/2020 | Europe / France / Bretagne / Rennes |
| EPI_ISL_718231 | 10/24/2020 | 12/21/2020 | Europe / France / Bretagne / Rennes |
| EPI_ISL_718232 | 10/24/2020 | 12/21/2020 | Europe / France / Bretagne / Rennes |
| EPI_ISL_718233 | 9/11/2020  | 12/21/2020 | Europe / France / Bretagne / Rennes |
| EPI_ISL_718234 | 10/25/2020 | 12/21/2020 | Europe / France / Bretagne / Rennes |
| EPI_ISL_718235 | 11/9/2020  | 12/21/2020 | Europe / France / Bretagne / Rennes |
| EPI_ISL_718236 | 10/2/2020  | 12/21/2020 | Europe / France / Bretagne / Rennes |
| EPI_ISL_718237 | 10/8/2020  | 12/21/2020 | Europe / France / Bretagne / Rennes |
| EPI_ISL_718238 | 10/16/2020 | 12/21/2020 | Europe / France / Bretagne / Rennes |
| EPI_ISL_718239 | 10/23/2020 | 12/21/2020 | Europe / France / Bretagne / Rennes |
| EPI_ISL_718240 | 11/4/2020  | 12/21/2020 | Europe / France / Bretagne / Rennes |
| EPI_ISL_718241 | 10/3/2020  | 12/21/2020 | Europe / France / Bretagne / Rennes |
| EPI_ISL_718242 | 10/17/2020 | 12/21/2020 | Europe / France / Bretagne / Rennes |
| EPI_ISL_718243 | 11/14/2020 | 12/21/2020 | Europe / France / Bretagne / Rennes |
| EPI_ISL_718244 | 10/10/2020 | 12/21/2020 | Europe / France / Bretagne / Rennes |
| EPI_ISL_718245 | 10/17/2020 | 12/21/2020 | Europe / France / Bretagne / Rennes |
| EPI_ISL_718246 | 10/10/2020 | 12/21/2020 | Europe / France / Bretagne / Rennes |
| EPI_ISL_718247 | 10/30/2020 | 12/21/2020 | Europe / France / Bretagne / Rennes |
| EPI_ISL_718248 | 11/2/2020  | 12/21/2020 | Europe / France / Bretagne / Rennes |
| EPI_ISL_718249 | 10/27/2020 | 12/21/2020 | Europe / France / Bretagne / Rennes |
| EPI_ISL_718250 | 11/22/2020 | 12/21/2020 | Europe / Slovakia / Bratislava      |
| EPI_ISL_718251 | 11/27/2020 | 12/21/2020 | Europe / Slovakia / Bratislava      |
| EPI_ISL_718252 | 11/30/2020 | 12/21/2020 | Europe / Slovakia / Bratislava      |
| EPI_ISL_718253 | 11/30/2020 | 12/21/2020 | Europe / Slovakia / Bratislava      |
| EPI_ISL_718254 | 11/30/2020 | 12/21/2020 | Europe / Slovakia / Bratislava      |
| EPI_ISL_718255 | 11/30/2020 | 12/21/2020 | Europe / Slovakia / Bratislava      |

|                |            |            |                                |
|----------------|------------|------------|--------------------------------|
| EPI_ISL_718256 | 11/30/2020 | 12/21/2020 | Europe / Slovakia / Bratislava |
| EPI_ISL_718257 | 11/19/2020 | 12/21/2020 | Europe / Slovakia / Nitra      |
| EPI_ISL_718258 | 11/19/2020 | 12/21/2020 | Europe / Slovakia / Nitra      |
| EPI_ISL_718259 | 11/13/2020 | 12/21/2020 | Europe / Slovakia / Bratislava |
| EPI_ISL_718260 | 11/12/2020 | 12/21/2020 | Europe / Slovakia / Nove Zamky |
| EPI_ISL_718262 | 11/2/2020  | 12/21/2020 | Europe / Italy / Lazio / Rome  |
| EPI_ISL_718263 | 11/4/2020  | 12/21/2020 | Europe / Italy / Lazio / Rome  |
| EPI_ISL_718264 | 11/3/2020  | 12/21/2020 | Europe / Italy / Lazio / Rome  |
| EPI_ISL_718265 | 11/3/2020  | 12/21/2020 | Europe / Italy / Lazio / Rome  |
| EPI_ISL_718267 | 7/27/2020  | 12/21/2020 | Asia / Malaysia                |
| EPI_ISL_718268 | 7/31/2020  | 12/21/2020 | Asia / Malaysia                |
| EPI_ISL_718270 | 7/31/2020  | 12/21/2020 | Asia / Malaysia                |
| EPI_ISL_718271 | 8/13/2020  | 12/21/2020 | Asia / Malaysia                |
| EPI_ISL_718272 | 8/13/2020  | 12/21/2020 | Asia / Malaysia                |
| EPI_ISL_718273 | 2/21/2020  | 12/21/2020 | Asia / Japan / Aichi           |
| EPI_ISL_718274 | 8/13/2020  | 12/21/2020 | Asia / Malaysia                |
| EPI_ISL_718275 | 8/13/2020  | 12/21/2020 | Asia / Malaysia                |
| EPI_ISL_718276 | 8/16/2020  | 12/21/2020 | Asia / Malaysia                |
| EPI_ISL_718277 | 8/16/2020  | 12/21/2020 | Asia / Malaysia                |
| EPI_ISL_718279 | 8/16/2020  | 12/21/2020 | Asia / Malaysia                |
| EPI_ISL_718280 | 12/19/2020 | 12/21/2020 | Asia / Malaysia                |
| EPI_ISL_718281 | 8/18/2020  | 12/21/2020 | Asia / Malaysia                |
| EPI_ISL_718282 | 9/10/2020  | 12/21/2020 | Asia / Malaysia                |
| EPI_ISL_718283 | 7/25/2020  | 12/21/2020 | Asia / Malaysia                |
| EPI_ISL_718284 | 7/25/2020  | 12/21/2020 | Asia / Malaysia                |
| EPI_ISL_718285 | 9/29/2020  | 12/21/2020 | Asia / Malaysia                |
| EPI_ISL_718286 | 9/29/2020  | 12/21/2020 | Asia / Malaysia                |
| EPI_ISL_718287 | 9/1/2020   | 12/21/2020 | Asia / Malaysia                |
| EPI_ISL_718289 | 9/1/2020   | 12/21/2020 | Asia / Malaysia                |
| EPI_ISL_718290 | 9/1/2020   | 12/21/2020 | Asia / Malaysia                |
| EPI_ISL_718291 | 9/1/2020   | 12/21/2020 | Asia / Malaysia                |
| EPI_ISL_718292 | 9/1/2020   | 12/21/2020 | Asia / Malaysia                |
| EPI_ISL_718293 | 9/1/2020   | 12/21/2020 | Asia / Malaysia                |
| EPI_ISL_718294 | 9/1/2020   | 12/21/2020 | Asia / Malaysia                |
| EPI_ISL_718295 | 9/1/2020   | 12/21/2020 | Asia / Malaysia                |
| EPI_ISL_718296 | 9/1/2020   | 12/21/2020 | Asia / Malaysia                |
| EPI_ISL_718297 | 9/1/2020   | 12/21/2020 | Asia / Malaysia                |
| EPI_ISL_718298 | 9/1/2020   | 12/21/2020 | Asia / Malaysia                |
| EPI_ISL_718299 | 9/1/2020   | 12/21/2020 | Asia / Malaysia                |
| EPI_ISL_718300 | 9/1/2020   | 12/21/2020 | Asia / Malaysia                |
| EPI_ISL_718301 | 9/1/2020   | 12/21/2020 | Asia / Malaysia                |
| EPI_ISL_718302 | 9/1/2020   | 12/21/2020 | Asia / Malaysia                |
| EPI_ISL_718303 | 9/1/2020   | 12/21/2020 | Asia / Malaysia                |
| EPI_ISL_718304 | 9/1/2020   | 12/21/2020 | Asia / Malaysia                |
| EPI_ISL_718305 | 9/1/2020   | 12/21/2020 | Asia / Malaysia                |
| EPI_ISL_718306 | 9/1/2020   | 12/21/2020 | Asia / Malaysia                |
| EPI_ISL_718307 | 10/16/2020 | 12/21/2020 | Asia / Malaysia                |































































































































|                |            |            |                                    |
|----------------|------------|------------|------------------------------------|
| EPI_ISL_721516 | 11/20/2020 | 12/21/2020 | Europe / United Kingdom / England  |
| EPI_ISL_721517 | 12/5/2020  | 12/21/2020 | Europe / United Kingdom / England  |
| EPI_ISL_721518 | 12/6/2020  | 12/21/2020 | Europe / United Kingdom / England  |
| EPI_ISL_721519 | 12/6/2020  | 12/21/2020 | Europe / United Kingdom / England  |
| EPI_ISL_721520 | 12/6/2020  | 12/21/2020 | Europe / United Kingdom / England  |
| EPI_ISL_721521 | 12/6/2020  | 12/21/2020 | Europe / United Kingdom / England  |
| EPI_ISL_721525 | 12/3/2020  | 12/21/2020 | Europe / United Kingdom / England  |
| EPI_ISL_721526 | 11/30/2020 | 12/21/2020 | Europe / United Kingdom / England  |
| EPI_ISL_721529 | 11/28/2020 | 12/21/2020 | Europe / United Kingdom / England  |
| EPI_ISL_721530 | 11/28/2020 | 12/21/2020 | Europe / United Kingdom / England  |
| EPI_ISL_721531 | 11/27/2020 | 12/21/2020 | Europe / United Kingdom / England  |
| EPI_ISL_721532 | 11/28/2020 | 12/21/2020 | Europe / United Kingdom / England  |
| EPI_ISL_721533 | 11/24/2020 | 12/21/2020 | Europe / United Kingdom / England  |
| EPI_ISL_721534 | 11/2/2020  | 12/21/2020 | Europe / United Kingdom / England  |
| EPI_ISL_721535 | 11/1/2020  | 12/21/2020 | Europe / United Kingdom / England  |
| EPI_ISL_721536 | 10/18/2020 | 12/21/2020 | Europe / United Kingdom / England  |
| EPI_ISL_721537 | 10/18/2020 | 12/21/2020 | Europe / United Kingdom / England  |
| EPI_ISL_721538 | 10/18/2020 | 12/21/2020 | Europe / United Kingdom / England  |
| EPI_ISL_721540 | 10/18/2020 | 12/21/2020 | Europe / United Kingdom / Scotland |
| EPI_ISL_721541 | 10/18/2020 | 12/21/2020 | Europe / United Kingdom / England  |
| EPI_ISL_721543 | 10/21/2020 | 12/21/2020 | Europe / United Kingdom / England  |
| EPI_ISL_721544 | 10/17/2020 | 12/21/2020 | Europe / United Kingdom / England  |
| EPI_ISL_721548 | 10/21/2020 | 12/21/2020 | Europe / United Kingdom / England  |
| EPI_ISL_721549 | 10/21/2020 | 12/21/2020 | Europe / United Kingdom / England  |
| EPI_ISL_721551 | 10/21/2020 | 12/21/2020 | Europe / United Kingdom / England  |
| EPI_ISL_721552 | 10/20/2020 | 12/21/2020 | Europe / United Kingdom / England  |
| EPI_ISL_721554 | 10/20/2020 | 12/21/2020 | Europe / United Kingdom / England  |
| EPI_ISL_721558 | 10/19/2020 | 12/21/2020 | Europe / United Kingdom / England  |
| EPI_ISL_721559 | 10/19/2020 | 12/21/2020 | Europe / United Kingdom / England  |
| EPI_ISL_721560 | 10/20/2020 | 12/21/2020 | Europe / United Kingdom / England  |
| EPI_ISL_721561 | 10/19/2020 | 12/21/2020 | Europe / United Kingdom / England  |
| EPI_ISL_721563 | 10/19/2020 | 12/21/2020 | Europe / United Kingdom / England  |
| EPI_ISL_721564 | 10/19/2020 | 12/21/2020 | Europe / United Kingdom / England  |
| EPI_ISL_721565 | 10/19/2020 | 12/21/2020 | Europe / United Kingdom / England  |
| EPI_ISL_721566 | 10/20/2020 | 12/21/2020 | Europe / United Kingdom / England  |
| EPI_ISL_721567 | 10/19/2020 | 12/21/2020 | Europe / United Kingdom / England  |
| EPI_ISL_721568 | 12/1/2020  | 12/21/2020 | Asia / Japan                       |
| EPI_ISL_721569 | 11/20/2020 | 12/21/2020 | Asia / Japan                       |
| EPI_ISL_721575 | 12/2/2020  | 12/21/2020 | Asia / Japan                       |
| EPI_ISL_721577 | 11/15/2020 | 12/21/2020 | Asia / Japan                       |
| EPI_ISL_721578 | 11/14/2020 | 12/21/2020 | Asia / Japan                       |
| EPI_ISL_721579 | 11/18/2020 | 12/21/2020 | Asia / Japan                       |
| EPI_ISL_721580 | 11/18/2020 | 12/21/2020 | Asia / Japan                       |
| EPI_ISL_721581 | 11/15/2020 | 12/21/2020 | Asia / Japan                       |
| EPI_ISL_721582 | 11/16/2020 | 12/21/2020 | Asia / Japan                       |
| EPI_ISL_721583 | 11/16/2020 | 12/21/2020 | Asia / Japan                       |
| EPI_ISL_721584 | 11/17/2020 | 12/21/2020 | Asia / Japan                       |

|                |            |                                          |
|----------------|------------|------------------------------------------|
| EPI_ISL_721585 | 11/17/2020 | 12/21/2020 Asia / Japan                  |
| EPI_ISL_721586 | 11/17/2020 | 12/21/2020 Asia / Japan                  |
| EPI_ISL_721587 | 11/20/2020 | 12/21/2020 Asia / Japan                  |
| EPI_ISL_721588 | 11/23/2020 | 12/21/2020 Asia / Japan                  |
| EPI_ISL_721589 | 11/23/2020 | 12/21/2020 Asia / Japan                  |
| EPI_ISL_721590 | 11/24/2020 | 12/21/2020 Asia / Japan                  |
| EPI_ISL_721591 | 11/24/2020 | 12/21/2020 Asia / Japan                  |
| EPI_ISL_721592 | 11/25/2020 | 12/21/2020 Asia / Japan                  |
| EPI_ISL_721593 | 11/27/2020 | 12/21/2020 Asia / Japan                  |
| EPI_ISL_721594 | 11/27/2020 | 12/21/2020 Asia / Japan                  |
| EPI_ISL_721595 | 11/28/2020 | 12/21/2020 Asia / Japan                  |
| EPI_ISL_721596 | 11/29/2020 | 12/21/2020 Asia / Japan                  |
| EPI_ISL_721597 | 11/30/2020 | 12/21/2020 Asia / Japan                  |
| EPI_ISL_721598 | 12/2/2020  | 12/21/2020 Asia / Japan                  |
| EPI_ISL_721599 | 12/2/2020  | 12/21/2020 Asia / Japan                  |
| EPI_ISL_721600 | 12/4/2020  | 12/21/2020 Asia / Japan                  |
| EPI_ISL_721601 | 11/16/2020 | 12/21/2020 Asia / Japan                  |
| EPI_ISL_721602 | 11/18/2020 | 12/21/2020 Asia / Japan                  |
| EPI_ISL_721603 | 11/19/2020 | 12/21/2020 Asia / Japan                  |
| EPI_ISL_721604 | 11/20/2020 | 12/21/2020 Asia / Japan                  |
| EPI_ISL_721605 | 11/20/2020 | 12/21/2020 Asia / Japan                  |
| EPI_ISL_721606 | 11/20/2020 | 12/21/2020 Asia / Japan                  |
| EPI_ISL_721607 | 11/23/2020 | 12/21/2020 Asia / Japan                  |
| EPI_ISL_721608 | 11/25/2020 | 12/21/2020 Asia / Japan                  |
| EPI_ISL_721609 | 11/27/2020 | 12/21/2020 Asia / Japan                  |
| EPI_ISL_721610 | 11/27/2020 | 12/21/2020 Asia / Japan                  |
| EPI_ISL_721611 | 12/1/2020  | 12/21/2020 Asia / Japan                  |
| EPI_ISL_721612 | 12/2/2020  | 12/21/2020 Asia / Japan                  |
| EPI_ISL_721613 | 12/4/2020  | 12/21/2020 Asia / Japan                  |
| EPI_ISL_721614 | 12/4/2020  | 12/21/2020 Asia / Japan                  |
| EPI_ISL_721615 | 12/5/2020  | 12/21/2020 Asia / Japan                  |
| EPI_ISL_721616 | 12/5/2020  | 12/21/2020 Asia / Japan                  |
| EPI_ISL_721617 | 12/6/2020  | 12/21/2020 Asia / Japan                  |
| EPI_ISL_721618 | 11/19/2020 | 12/21/2020 Asia / Japan                  |
| EPI_ISL_721619 | 11/22/2020 | 12/21/2020 Asia / Japan                  |
| EPI_ISL_721620 | 11/25/2020 | 12/21/2020 Asia / Japan                  |
| EPI_ISL_721621 | 11/29/2020 | 12/21/2020 Asia / Japan                  |
| EPI_ISL_721622 | 12/5/2020  | 12/21/2020 Asia / Japan                  |
| EPI_ISL_721623 | 12/6/2020  | 12/21/2020 Asia / Japan                  |
| EPI_ISL_721624 | 11/17/2020 | 12/21/2020 Europe / Italy / Lazio / Rome |
| EPI_ISL_721625 | 11/17/2020 | 12/21/2020 Europe / Italy / Lazio / Rome |
| EPI_ISL_721626 | 11/20/2020 | 12/21/2020 Europe / Italy / Lazio / Rome |
| EPI_ISL_721627 | 11/22/2020 | 12/21/2020 Europe / Italy / Lazio / Rome |
| EPI_ISL_721628 | 11/17/2020 | 12/21/2020 Europe / Italy / Lazio / Rome |
| EPI_ISL_721629 | 7/22/2020  | 12/21/2020 Asia / India / Maharashtra    |
| EPI_ISL_721630 | 7/22/2020  | 12/21/2020 Asia / India / Maharashtra    |
| EPI_ISL_721631 | 7/25/2020  | 12/21/2020 Asia / India / Maharashtra    |

|                |            |            |                                         |
|----------------|------------|------------|-----------------------------------------|
| EPI_ISL_721632 | 7/25/2020  | 12/21/2020 | Asia / India / Maharashtra              |
| EPI_ISL_721633 | 7/26/2020  | 12/21/2020 | Asia / India / Maharashtra              |
| EPI_ISL_721634 | 7/27/2020  | 12/21/2020 | Asia / India / Maharashtra              |
| EPI_ISL_721635 | 7/27/2020  | 12/21/2020 | Asia / India / Maharashtra              |
| EPI_ISL_721636 | 7/27/2020  | 12/21/2020 | Asia / India / Maharashtra              |
| EPI_ISL_721637 | 6/16/2020  | 12/21/2020 | Asia / India / Maharashtra              |
| EPI_ISL_721638 | 6/17/2020  | 12/21/2020 | Asia / India / Maharashtra              |
| EPI_ISL_721639 | 6/19/2020  | 12/21/2020 | Asia / India / Maharashtra              |
| EPI_ISL_721640 | 6/22/2020  | 12/21/2020 | Asia / India / Maharashtra              |
| EPI_ISL_721641 | 6/22/2020  | 12/21/2020 | Asia / India / Maharashtra              |
| EPI_ISL_721642 | 6/23/2020  | 12/21/2020 | Asia / India / Maharashtra              |
| EPI_ISL_721643 | 6/23/2020  | 12/21/2020 | Asia / India / Maharashtra              |
| EPI_ISL_721644 | 6/23/2020  | 12/21/2020 | Asia / India / Maharashtra              |
| EPI_ISL_721645 | 6/26/2020  | 12/21/2020 | Asia / India / Maharashtra              |
| EPI_ISL_721646 | 7/10/2020  | 12/21/2020 | Asia / India / Maharashtra              |
| EPI_ISL_721647 | 7/11/2020  | 12/21/2020 | Asia / India / Maharashtra              |
| EPI_ISL_721648 | 7/13/2020  | 12/21/2020 | Asia / India / Maharashtra              |
| EPI_ISL_721649 | 7/14/2020  | 12/21/2020 | Asia / India / Maharashtra              |
| EPI_ISL_721650 | 7/15/2020  | 12/21/2020 | Asia / India / Maharashtra              |
| EPI_ISL_721651 | 7/18/2020  | 12/21/2020 | Asia / India / Maharashtra              |
| EPI_ISL_721653 | 7/22/2020  | 12/21/2020 | Asia / India / Maharashtra              |
| EPI_ISL_721654 | 7/23/2020  | 12/21/2020 | Asia / India / Maharashtra              |
| EPI_ISL_721655 | 7/26/2020  | 12/21/2020 | Asia / India / Maharashtra              |
| EPI_ISL_721656 | 7/30/2020  | 12/21/2020 | Asia / India / Maharashtra              |
| EPI_ISL_721657 | 6/5/2020   | 12/21/2020 | Asia / India / Maharashtra              |
| EPI_ISL_721658 | 6/8/2020   | 12/21/2020 | Asia / India / Maharashtra              |
| EPI_ISL_721659 | 6/19/2020  | 12/21/2020 | Asia / India / Maharashtra              |
| EPI_ISL_721660 | 6/26/2020  | 12/21/2020 | Asia / India / Maharashtra              |
| EPI_ISL_721661 | 6/26/2020  | 12/21/2020 | Asia / India / Maharashtra              |
| EPI_ISL_721662 | 6/26/2020  | 12/21/2020 | Asia / India / Maharashtra              |
| EPI_ISL_721663 | 6/26/2020  | 12/21/2020 | Asia / India / Maharashtra              |
| EPI_ISL_721664 | 7/1/2020   | 12/21/2020 | Asia / India / Maharashtra              |
| EPI_ISL_721665 | 7/1/2020   | 12/21/2020 | Asia / India / Maharashtra              |
| EPI_ISL_721666 | 6/3/2020   | 12/21/2020 | Asia / India / Maharashtra              |
| EPI_ISL_721667 | 6/3/2020   | 12/21/2020 | Asia / India / Maharashtra              |
| EPI_ISL_721679 | 11/23/2020 | 12/21/2020 | Europe / Switzerland / Bern             |
| EPI_ISL_721680 | 10/27/2020 | 12/21/2020 | Europe / Switzerland / Aargau           |
| EPI_ISL_721681 | 11/25/2020 | 12/21/2020 | Europe / Switzerland / Solothurn        |
| EPI_ISL_721688 | 10/27/2020 | 12/21/2020 | Europe / Switzerland / Basel-Landschaft |
| EPI_ISL_721689 | 11/27/2020 | 12/21/2020 | Europe / Switzerland / Solothurn        |
| EPI_ISL_721690 | 11/27/2020 | 12/21/2020 | Europe / Switzerland / Solothurn        |
| EPI_ISL_721691 | 11/22/2020 | 12/21/2020 | Europe / Switzerland / Basel-Landschaft |
| EPI_ISL_721692 | 11/26/2020 | 12/21/2020 | Europe / Switzerland / Aargau           |
| EPI_ISL_721693 | 11/22/2020 | 12/21/2020 | Europe / Switzerland / Aargau           |
| EPI_ISL_721694 | 11/27/2020 | 12/21/2020 | Europe / Switzerland / St Gall          |
| EPI_ISL_721695 | 12/1/2020  | 12/21/2020 | Europe / Switzerland / Zurich           |
| EPI_ISL_721697 | 10/27/2020 | 12/21/2020 | Europe / Switzerland / Aargau           |

|                |            |            |                                               |
|----------------|------------|------------|-----------------------------------------------|
| EPI_ISL_721698 | 10/26/2020 | 12/21/2020 | Europe / Switzerland / Bern                   |
| EPI_ISL_721699 | 12/3/2020  | 12/21/2020 | Europe / Switzerland / Grisons                |
| EPI_ISL_721700 | 10/28/2020 | 12/21/2020 | Europe / Switzerland / Zurich                 |
| EPI_ISL_721701 | 11/23/2020 | 12/21/2020 | Europe / Switzerland / Basel-Landschaft       |
| EPI_ISL_721702 | 12/2/2020  | 12/21/2020 | Europe / Switzerland / Wallis                 |
| EPI_ISL_721703 | 10/26/2020 | 12/21/2020 | Europe / Switzerland / Aargau                 |
| EPI_ISL_721704 | 10/27/2020 | 12/21/2020 | Europe / Switzerland / Aargau                 |
| EPI_ISL_721705 | 10/27/2020 | 12/21/2020 | Europe / Switzerland / Aargau                 |
| EPI_ISL_721706 | 10/27/2020 | 12/21/2020 | Europe / Switzerland / Aargau                 |
| EPI_ISL_721707 | 10/27/2020 | 12/21/2020 | Europe / Switzerland / Aargau                 |
| EPI_ISL_721708 | 10/27/2020 | 12/21/2020 | Europe / Switzerland / Aargau                 |
| EPI_ISL_721709 | 10/27/2020 | 12/21/2020 | Europe / Switzerland / Aargau                 |
| EPI_ISL_721710 | 10/27/2020 | 12/21/2020 | Europe / Switzerland / Aargau                 |
| EPI_ISL_721711 | 11/21/2020 | 12/21/2020 | Europe / Switzerland / Aargau                 |
| EPI_ISL_721712 | 11/21/2020 | 12/21/2020 | Europe / Switzerland / Aargau                 |
| EPI_ISL_721713 | 11/21/2020 | 12/21/2020 | Europe / Switzerland / Aargau                 |
| EPI_ISL_721714 | 11/21/2020 | 12/21/2020 | Europe / Switzerland / Aargau                 |
| EPI_ISL_721715 | 11/21/2020 | 12/21/2020 | Europe / Switzerland / Aargau                 |
| EPI_ISL_721716 | 11/25/2020 | 12/21/2020 | Europe / Switzerland / Aargau                 |
| EPI_ISL_721717 | 11/25/2020 | 12/21/2020 | Europe / Switzerland / Aargau                 |
| EPI_ISL_721718 | 11/25/2020 | 12/21/2020 | Europe / Switzerland / Aargau                 |
| EPI_ISL_721719 | 11/25/2020 | 12/21/2020 | Europe / Switzerland / Aargau                 |
| EPI_ISL_721720 | 11/25/2020 | 12/21/2020 | Europe / Switzerland / Aargau                 |
| EPI_ISL_721721 | 11/25/2020 | 12/21/2020 | Europe / Switzerland / Aargau                 |
| EPI_ISL_721722 | 11/25/2020 | 12/21/2020 | Europe / Switzerland / Aargau                 |
| EPI_ISL_721723 | 11/25/2020 | 12/21/2020 | Europe / Switzerland / Aargau                 |
| EPI_ISL_721724 | 11/26/2020 | 12/21/2020 | Europe / Switzerland / Aargau                 |
| EPI_ISL_721725 | 11/26/2020 | 12/21/2020 | Europe / Switzerland / Aargau                 |
| EPI_ISL_721726 | 11/26/2020 | 12/21/2020 | Europe / Switzerland / Aargau                 |
| EPI_ISL_721727 | 11/26/2020 | 12/21/2020 | Europe / Switzerland / Aargau                 |
| EPI_ISL_721728 | 11/26/2020 | 12/21/2020 | Europe / Switzerland / Aargau                 |
| EPI_ISL_721729 | 11/26/2020 | 12/21/2020 | Europe / Switzerland / Aargau                 |
| EPI_ISL_721730 | 11/26/2020 | 12/21/2020 | Europe / Switzerland / Aargau                 |
| EPI_ISL_721731 | 11/26/2020 | 12/21/2020 | Europe / Switzerland / Aargau                 |
| EPI_ISL_721732 | 11/26/2020 | 12/21/2020 | Europe / Switzerland / Aargau                 |
| EPI_ISL_721733 | 11/26/2020 | 12/21/2020 | Europe / Switzerland / Aargau                 |
| EPI_ISL_721734 | 11/27/2020 | 12/21/2020 | Europe / Switzerland / Aargau                 |
| EPI_ISL_721735 | 11/27/2020 | 12/21/2020 | Europe / Switzerland / Aargau                 |
| EPI_ISL_721736 | 11/27/2020 | 12/21/2020 | Europe / Switzerland / Aargau                 |
| EPI_ISL_721737 | 10/26/2020 | 12/21/2020 | Europe / Switzerland / Appenzell Ausserrhoden |
| EPI_ISL_721738 | 10/28/2020 | 12/21/2020 | Europe / Switzerland / Appenzell Ausserrhoden |
| EPI_ISL_721739 | 10/28/2020 | 12/21/2020 | Europe / Switzerland / Appenzell Ausserrhoden |
| EPI_ISL_721740 | 11/27/2020 | 12/21/2020 | Europe / Switzerland / Appenzell Ausserrhoden |
| EPI_ISL_721741 | 12/1/2020  | 12/21/2020 | Europe / Switzerland / Appenzell Ausserrhoden |
| EPI_ISL_721742 | 10/26/2020 | 12/21/2020 | Europe / Switzerland / Bern                   |
| EPI_ISL_721743 | 10/26/2020 | 12/21/2020 | Europe / Switzerland / Bern                   |
| EPI_ISL_721744 | 10/26/2020 | 12/21/2020 | Europe / Switzerland / Bern                   |









|                |            |            |                                  |
|----------------|------------|------------|----------------------------------|
| EPI_ISL_721886 | 11/21/2020 | 12/21/2020 | Europe / Switzerland / Solothurn |
| EPI_ISL_721887 | 11/21/2020 | 12/21/2020 | Europe / Switzerland / Solothurn |
| EPI_ISL_721888 | 11/27/2020 | 12/21/2020 | Europe / Switzerland / Solothurn |
| EPI_ISL_721889 | 11/30/2020 | 12/21/2020 | Europe / Switzerland / Solothurn |
| EPI_ISL_721890 | 11/30/2020 | 12/21/2020 | Europe / Switzerland / Solothurn |
| EPI_ISL_721891 | 11/30/2020 | 12/21/2020 | Europe / Switzerland / Solothurn |
| EPI_ISL_721892 | 11/30/2020 | 12/21/2020 | Europe / Switzerland / Solothurn |
| EPI_ISL_721893 | 11/30/2020 | 12/21/2020 | Europe / Switzerland / Solothurn |
| EPI_ISL_721894 | 11/30/2020 | 12/21/2020 | Europe / Switzerland / Solothurn |
| EPI_ISL_721895 | 11/30/2020 | 12/21/2020 | Europe / Switzerland / Solothurn |
| EPI_ISL_721896 | 11/30/2020 | 12/21/2020 | Europe / Switzerland / Solothurn |
| EPI_ISL_721897 | 10/26/2020 | 12/21/2020 | Europe / Switzerland / Schwyz    |
| EPI_ISL_721898 | 10/26/2020 | 12/21/2020 | Europe / Switzerland / Schwyz    |
| EPI_ISL_721899 | 10/26/2020 | 12/21/2020 | Europe / Switzerland / Schwyz    |
| EPI_ISL_721900 | 10/27/2020 | 12/21/2020 | Europe / Switzerland / Schwyz    |
| EPI_ISL_721901 | 12/1/2020  | 12/21/2020 | Europe / Switzerland / Schwyz    |
| EPI_ISL_721902 | 11/30/2020 | 12/21/2020 | Europe / Switzerland / Schwyz    |
| EPI_ISL_721903 | 12/3/2020  | 12/21/2020 | Europe / Switzerland / Schwyz    |
| EPI_ISL_721904 | 12/3/2020  | 12/21/2020 | Europe / Switzerland / Schwyz    |
| EPI_ISL_721905 | 11/24/2020 | 12/21/2020 | Europe / Switzerland / Thurgau   |
| EPI_ISL_721906 | 12/1/2020  | 12/21/2020 | Europe / Switzerland / Thurgau   |
| EPI_ISL_721907 | 12/1/2020  | 12/21/2020 | Europe / Switzerland / Thurgau   |
| EPI_ISL_721908 | 12/2/2020  | 12/21/2020 | Europe / Switzerland / Thurgau   |
| EPI_ISL_721909 | 12/3/2020  | 12/21/2020 | Europe / Switzerland / Thurgau   |
| EPI_ISL_721910 | 11/24/2020 | 12/21/2020 | Europe / Switzerland / Ticino    |
| EPI_ISL_721911 | 11/24/2020 | 12/21/2020 | Europe / Switzerland / Ticino    |
| EPI_ISL_721912 | 11/24/2020 | 12/21/2020 | Europe / Switzerland / Ticino    |
| EPI_ISL_721913 | 10/26/2020 | 12/21/2020 | Europe / Switzerland / Vaud      |
| EPI_ISL_721914 | 10/26/2020 | 12/21/2020 | Europe / Switzerland / Vaud      |
| EPI_ISL_721915 | 11/23/2020 | 12/21/2020 | Europe / Switzerland / Vaud      |
| EPI_ISL_721916 | 11/23/2020 | 12/21/2020 | Europe / Switzerland / Vaud      |
| EPI_ISL_721917 | 11/29/2020 | 12/21/2020 | Europe / Switzerland / Vaud      |
| EPI_ISL_721918 | 12/3/2020  | 12/21/2020 | Europe / Switzerland / Vaud      |
| EPI_ISL_721919 | 10/29/2020 | 12/21/2020 | Europe / Switzerland / Wallis    |
| EPI_ISL_721920 | 10/28/2020 | 12/21/2020 | Europe / Switzerland / Wallis    |
| EPI_ISL_721921 | 10/28/2020 | 12/21/2020 | Europe / Switzerland / Wallis    |
| EPI_ISL_721922 | 11/24/2020 | 12/21/2020 | Europe / Switzerland / Wallis    |
| EPI_ISL_721923 | 11/24/2020 | 12/21/2020 | Europe / Switzerland / Wallis    |
| EPI_ISL_721924 | 11/24/2020 | 12/21/2020 | Europe / Switzerland / Wallis    |
| EPI_ISL_721925 | 11/24/2020 | 12/21/2020 | Europe / Switzerland / Wallis    |
| EPI_ISL_721926 | 11/26/2020 | 12/21/2020 | Europe / Switzerland / Wallis    |
| EPI_ISL_721927 | 11/26/2020 | 12/21/2020 | Europe / Switzerland / Wallis    |
| EPI_ISL_721928 | 12/1/2020  | 12/21/2020 | Europe / Switzerland / Wallis    |
| EPI_ISL_721929 | 10/26/2020 | 12/21/2020 | Europe / Switzerland / Zurich    |
| EPI_ISL_721930 | 10/26/2020 | 12/21/2020 | Europe / Switzerland / Zurich    |
| EPI_ISL_721931 | 10/26/2020 | 12/21/2020 | Europe / Switzerland / Zurich    |
| EPI_ISL_721932 | 10/26/2020 | 12/21/2020 | Europe / Switzerland / Zurich    |



|                |            |                                                       |
|----------------|------------|-------------------------------------------------------|
| EPI_ISL_722177 | 7/25/2020  | 12/21/2020 Asia / India / Maharashtra                 |
| EPI_ISL_722178 | 7/1/2020   | 12/21/2020 Asia / India / Maharashtra                 |
| EPI_ISL_722179 | 7/29/2020  | 12/21/2020 Asia / India / Maharashtra                 |
| EPI_ISL_722180 | 7/18/2020  | 12/21/2020 Asia / India / Maharashtra                 |
| EPI_ISL_722181 | 6/28/2020  | 12/21/2020 Asia / India / Maharashtra                 |
| EPI_ISL_722182 | 6/21/2020  | 12/21/2020 Asia / India / Maharashtra                 |
| EPI_ISL_722183 | 6/26/2020  | 12/21/2020 Asia / India / Maharashtra                 |
| EPI_ISL_722184 | 6/11/2020  | 12/21/2020 Asia / India / Maharashtra                 |
| EPI_ISL_722185 | 6/27/2020  | 12/21/2020 Asia / India / Maharashtra                 |
| EPI_ISL_722186 | 6/26/2020  | 12/21/2020 Asia / India / Maharashtra                 |
| EPI_ISL_722187 | 6/15/2020  | 12/21/2020 Asia / India / Maharashtra                 |
| EPI_ISL_722188 | 6/17/2020  | 12/21/2020 Asia / India / Maharashtra                 |
| EPI_ISL_722189 | 6/17/2020  | 12/21/2020 Asia / India / Maharashtra                 |
| EPI_ISL_722190 | 6/17/2020  | 12/21/2020 Asia / India / Maharashtra                 |
| EPI_ISL_722191 | 6/19/2020  | 12/21/2020 Asia / India / Maharashtra                 |
| EPI_ISL_722192 | 6/22/2020  | 12/21/2020 Asia / India / Maharashtra                 |
| EPI_ISL_722193 | 6/22/2020  | 12/21/2020 Asia / India / Maharashtra                 |
| EPI_ISL_722194 | 6/22/2020  | 12/21/2020 Asia / India / Maharashtra                 |
| EPI_ISL_722195 | 6/23/2020  | 12/21/2020 Asia / India / Maharashtra                 |
| EPI_ISL_722196 | 6/26/2020  | 12/21/2020 Asia / India / Maharashtra                 |
| EPI_ISL_722197 | 7/22/2020  | 12/21/2020 Asia / India / Maharashtra                 |
| EPI_ISL_722198 | 7/25/2020  | 12/21/2020 Asia / India / Maharashtra                 |
| EPI_ISL_722199 | 7/26/2020  | 12/21/2020 Asia / India / Maharashtra                 |
| EPI_ISL_722200 | 7/27/2020  | 12/21/2020 Asia / India / Maharashtra                 |
| EPI_ISL_722201 | 11/20/2020 | 12/21/2020 Europe / Bosnia and Herzegovina / Mostar   |
| EPI_ISL_722202 | 11/11/2020 | 12/21/2020 Europe / Switzerland / Zurich              |
| EPI_ISL_722203 | 11/5/2020  | 12/21/2020 Europe / Switzerland / Lucerne             |
| EPI_ISL_722204 | 11/10/2020 | 12/21/2020 Europe / Switzerland / Zurich              |
| EPI_ISL_722205 | 11/11/2020 | 12/21/2020 Europe / Switzerland / Schwyz              |
| EPI_ISL_722206 | 11/12/2020 | 12/21/2020 Europe / Switzerland / Aargau              |
| EPI_ISL_722207 | 11/10/2020 | 12/21/2020 Europe / Switzerland / Zurich              |
| EPI_ISL_722208 | 4/1/2020   | 12/21/2020 Europe / Switzerland / Zurich              |
| EPI_ISL_722209 | 11/20/2020 | 12/21/2020 Europe / Bosnia and Herzegovina / Sarajevo |
| EPI_ISL_722224 | 9/30/2020  | 12/21/2020 Europe / Spain / Aragon / Zaragoza         |
| EPI_ISL_722225 | 9/30/2020  | 12/21/2020 Europe / Spain / Aragon / Zaragoza         |
| EPI_ISL_722226 | 9/30/2020  | 12/21/2020 Europe / Spain / Aragon / Zaragoza         |
| EPI_ISL_722227 | 9/30/2020  | 12/21/2020 Europe / Spain / Aragon / Zaragoza         |
| EPI_ISL_722228 | 10/3/2020  | 12/21/2020 Europe / Spain / Aragon / Zaragoza         |
| EPI_ISL_722229 | 10/3/2020  | 12/21/2020 Europe / Spain / Aragon / Zaragoza         |
| EPI_ISL_722230 | 10/4/2020  | 12/21/2020 Europe / Spain / Aragon / Zaragoza         |
| EPI_ISL_722231 | 10/5/2020  | 12/21/2020 Europe / Spain / Aragon / Zaragoza         |
| EPI_ISL_722232 | 10/6/2020  | 12/21/2020 Europe / Spain / Aragon / Zaragoza         |
| EPI_ISL_722241 | 3/19/2020  | 12/21/2020 Europe / Spain / Asturias / Oviedo         |
| EPI_ISL_722242 | 11/11/2020 | 12/21/2020 Europe / Spain / Aragon / Zaragoza         |
| EPI_ISL_722243 | 11/11/2020 | 12/21/2020 Europe / Spain / Aragon / Zaragoza         |
| EPI_ISL_722244 | 11/11/2020 | 12/21/2020 Europe / Spain / Aragon / Zaragoza         |
| EPI_ISL_722245 | 10/5/2020  | 12/21/2020 Europe / Spain / Aragon / Zaragoza         |

|                |            |            |                                     |
|----------------|------------|------------|-------------------------------------|
| EPI_ISL_722246 | 10/5/2020  | 12/21/2020 | Europe / Spain / Aragon / Zaragoza  |
| EPI_ISL_722247 | 11/6/2020  | 12/21/2020 | Europe / Spain / Aragon / Zaragoza  |
| EPI_ISL_722248 | 10/3/2020  | 12/21/2020 | Europe / Spain / Aragon / Zaragoza  |
| EPI_ISL_722249 | 10/3/2020  | 12/21/2020 | Europe / Spain / Aragon / Zaragoza  |
| EPI_ISL_722250 | 10/3/2020  | 12/21/2020 | Europe / Spain / Aragon / Zaragoza  |
| EPI_ISL_722251 | 10/2/2020  | 12/21/2020 | Europe / Spain / Aragon / Zaragoza  |
| EPI_ISL_722252 | 10/2/2020  | 12/21/2020 | Europe / Spain / Aragon / Zaragoza  |
| EPI_ISL_722253 | 10/2/2020  | 12/21/2020 | Europe / Spain / Aragon / Zaragoza  |
| EPI_ISL_722254 | 10/2/2020  | 12/21/2020 | Europe / Spain / Aragon / Zaragoza  |
| EPI_ISL_722255 | 9/30/2020  | 12/21/2020 | Europe / Spain / Aragon / Zaragoza  |
| EPI_ISL_722256 | 10/1/2020  | 12/21/2020 | Europe / Spain / Aragon / Zaragoza  |
| EPI_ISL_722257 | 9/30/2020  | 12/21/2020 | Europe / Spain / Aragon / Zaragoza  |
| EPI_ISL_722258 | 11/10/2020 | 12/21/2020 | Europe / Spain / Aragon / Zaragoza  |
| EPI_ISL_722259 | 11/10/2020 | 12/21/2020 | Europe / Spain / Aragon / Zaragoza  |
| EPI_ISL_722260 | 9/30/2020  | 12/21/2020 | Europe / Spain / Aragon / Zaragoza  |
| EPI_ISL_722261 | 10/1/2020  | 12/21/2020 | Europe / Spain / Aragon / Zaragoza  |
| EPI_ISL_722262 | 11/10/2020 | 12/21/2020 | Europe / Spain / Aragon / Zaragoza  |
| EPI_ISL_722263 | 11/11/2020 | 12/21/2020 | Europe / Spain / Aragon / Zaragoza  |
| EPI_ISL_722264 | 10/6/2020  | 12/21/2020 | Europe / Spain / Aragon / Zaragoza  |
| EPI_ISL_722265 | 10/5/2020  | 12/21/2020 | Europe / Spain / Aragon / Zaragoza  |
| EPI_ISL_722266 | 10/5/2020  | 12/21/2020 | Europe / Spain / Aragon / Zaragoza  |
| EPI_ISL_722267 | 11/12/2020 | 12/21/2020 | Europe / Spain / Aragon / Zaragoza  |
| EPI_ISL_722268 | 11/12/2020 | 12/21/2020 | Europe / Spain / Aragon / Zaragoza  |
| EPI_ISL_722269 | 10/2/2020  | 12/21/2020 | Europe / Spain / Aragon / Zaragoza  |
| EPI_ISL_722270 | 10/7/2020  | 12/21/2020 | Europe / Spain / Aragon / Zaragoza  |
| EPI_ISL_722271 | 11/12/2020 | 12/21/2020 | Europe / Spain / Aragon / Zaragoza  |
| EPI_ISL_722272 | 11/12/2020 | 12/21/2020 | Europe / Spain / Aragon / Zaragoza  |
| EPI_ISL_722370 | 12/6/2020  | 12/21/2020 | Europe / Netherlands / Zuid-Holland |
| EPI_ISL_722371 | 11/15/2020 | 12/21/2020 | Europe / Netherlands / Utrecht      |
| EPI_ISL_722413 | 10/1/2020  | 12/21/2020 | Europe / Netherlands / Limburg      |
| EPI_ISL_722419 | 11/16/2020 | 12/21/2020 | Europe / Netherlands / Zuid-Holland |
| EPI_ISL_722420 | 10/14/2020 | 12/21/2020 | Europe / Netherlands / Limburg      |
| EPI_ISL_722421 | 10/14/2020 | 12/21/2020 | Europe / Netherlands / Zuid-Holland |
| EPI_ISL_722422 | 10/15/2020 | 12/21/2020 | Europe / Netherlands / Zuid-Holland |
| EPI_ISL_722423 | 10/18/2020 | 12/21/2020 | Europe / Netherlands / Zuid-Holland |
| EPI_ISL_722424 | 10/24/2020 | 12/21/2020 | Europe / Netherlands / Utrecht      |
| EPI_ISL_722425 | 10/5/2020  | 12/21/2020 | Europe / Netherlands / Zuid-Holland |
| EPI_ISL_722426 | 11/11/2020 | 12/21/2020 | Europe / Netherlands                |
| EPI_ISL_722427 | 11/11/2020 | 12/21/2020 | Europe / Netherlands                |
| EPI_ISL_722428 | 11/11/2020 | 12/21/2020 | Europe / Netherlands                |
| EPI_ISL_722429 | 11/12/2020 | 12/21/2020 | Europe / Netherlands                |
| EPI_ISL_722430 | 11/12/2020 | 12/21/2020 | Europe / Netherlands                |
| EPI_ISL_722431 | 11/12/2020 | 12/21/2020 | Europe / Netherlands                |
| EPI_ISL_722432 | 11/17/2020 | 12/21/2020 | Europe / Netherlands                |
| EPI_ISL_722433 | 12/12/2020 | 12/21/2020 | Europe / Netherlands / Zuid-Holland |
| EPI_ISL_722434 | 12/6/2020  | 12/21/2020 | Europe / Netherlands / Zuid-Holland |
| EPI_ISL_722437 | 10/13/2020 | 12/21/2020 | Europe / Netherlands / Limburg      |

|                |            |            |                                      |
|----------------|------------|------------|--------------------------------------|
| EPI_ISL_722438 | 10/14/2020 | 12/21/2020 | Europe / Netherlands / Limburg       |
| EPI_ISL_722439 | 10/14/2020 | 12/21/2020 | Europe / Netherlands / Limburg       |
| EPI_ISL_722440 | 10/15/2020 | 12/21/2020 | Europe / Netherlands / Drenthe       |
| EPI_ISL_722441 | 10/15/2020 | 12/21/2020 | Europe / Netherlands / Zuid-Holland  |
| EPI_ISL_722442 | 10/23/2020 | 12/21/2020 | Europe / Netherlands / Gelderland    |
| EPI_ISL_722443 | 10/24/2020 | 12/21/2020 | Europe / Netherlands / Gelderland    |
| EPI_ISL_722444 | 10/29/2020 | 12/21/2020 | Europe / Netherlands / Gelderland    |
| EPI_ISL_722445 | 10/6/2020  | 12/21/2020 | Europe / Netherlands / Limburg       |
| EPI_ISL_722446 | 10/8/2020  | 12/21/2020 | Europe / Netherlands / Limburg       |
| EPI_ISL_722447 | 11/12/2020 | 12/21/2020 | Europe / Netherlands / Gelderland    |
| EPI_ISL_722452 | 11/7/2020  | 12/21/2020 | Europe / Netherlands / Limburg       |
| EPI_ISL_722453 | 11/9/2020  | 12/21/2020 | Europe / Netherlands / Gelderland    |
| EPI_ISL_722454 | 12/1/2020  | 12/21/2020 | Europe / Netherlands / Gelderland    |
| EPI_ISL_722455 | 12/10/2020 | 12/21/2020 | Europe / Netherlands / Noord-Holland |
| EPI_ISL_722456 | 12/10/2020 | 12/21/2020 | Europe / Netherlands / Utrecht       |
| EPI_ISL_722457 | 12/10/2020 | 12/21/2020 | Europe / Netherlands / Utrecht       |
| EPI_ISL_722458 | 12/10/2020 | 12/21/2020 | Europe / Netherlands / Utrecht       |
| EPI_ISL_722459 | 12/11/2020 | 12/21/2020 | Europe / Netherlands / Flevoland     |
| EPI_ISL_722460 | 12/11/2020 | 12/21/2020 | Europe / Netherlands / Utrecht       |
| EPI_ISL_722461 | 12/8/2020  | 12/21/2020 | Europe / Netherlands / Utrecht       |
| EPI_ISL_722462 | 12/9/2020  | 12/21/2020 | Europe / Netherlands / Utrecht       |
| EPI_ISL_722463 | 9/9/2020   | 12/21/2020 | Europe / Netherlands / Overijssel    |
| EPI_ISL_722464 | 11/4/2020  | 12/21/2020 | Europe / Netherlands / Zuid-Holland  |
| EPI_ISL_722466 | 2020       | 12/21/2020 | Europe / Netherlands / Limburg       |
| EPI_ISL_722467 | 2020       | 12/21/2020 | Europe / Netherlands / Noord-Brabant |
| EPI_ISL_722468 | 2020       | 12/21/2020 | Europe / Netherlands / Noord-Brabant |
| EPI_ISL_722469 | 2020       | 12/21/2020 | Europe / Netherlands / Noord-Brabant |
| EPI_ISL_722470 | 2020       | 12/21/2020 | Europe / Netherlands / Noord-Brabant |
| EPI_ISL_722471 | 2020       | 12/21/2020 | Europe / Netherlands / Noord-Brabant |
| EPI_ISL_722472 | 2020       | 12/21/2020 | Europe / Netherlands / Noord-Brabant |
| EPI_ISL_722473 | 2020       | 12/21/2020 | Europe / Netherlands / Noord-Brabant |
| EPI_ISL_722474 | 2020       | 12/21/2020 | Europe / Netherlands / Noord-Brabant |
| EPI_ISL_722475 | 2020       | 12/21/2020 | Europe / Netherlands / Noord-Brabant |
| EPI_ISL_722476 | 2020       | 12/21/2020 | Europe / Netherlands / Noord-Brabant |
| EPI_ISL_722477 | 2020       | 12/21/2020 | Europe / Netherlands / Noord-Brabant |
| EPI_ISL_722478 | 2020       | 12/21/2020 | Europe / Netherlands / Noord-Brabant |
| EPI_ISL_722479 | 2020       | 12/21/2020 | Europe / Netherlands / Noord-Brabant |
| EPI_ISL_722480 | 2020       | 12/21/2020 | Europe / Netherlands / Noord-Brabant |
| EPI_ISL_722481 | 2020       | 12/21/2020 | Europe / Netherlands / Noord-Brabant |
| EPI_ISL_722482 | 2020       | 12/21/2020 | Europe / Netherlands / Noord-Brabant |
| EPI_ISL_722483 | 2020       | 12/21/2020 | Europe / Netherlands / Noord-Brabant |
| EPI_ISL_722484 | 2020       | 12/21/2020 | Europe / Netherlands / Noord-Brabant |
| EPI_ISL_722485 | 2020       | 12/21/2020 | Europe / Netherlands / Noord-Brabant |
| EPI_ISL_722486 | 2020       | 12/21/2020 | Europe / Netherlands                 |
| EPI_ISL_722487 | 2020       | 12/21/2020 | Europe / Netherlands                 |
| EPI_ISL_722488 | 2020       | 12/21/2020 | Europe / Netherlands / Zuid-Holland  |
| EPI_ISL_722489 | 2020       | 12/21/2020 | Europe / Netherlands / Zuid-Holland  |



|                |            |            |                                      |
|----------------|------------|------------|--------------------------------------|
| EPI_ISL_722490 | 2020       | 12/21/2020 | Europe / Netherlands / Zuid-Holland  |
| EPI_ISL_722491 | 2020       | 12/21/2020 | Europe / Netherlands / Zuid-Holland  |
| EPI_ISL_722492 | 10/1/2020  | 12/21/2020 | Europe / Netherlands / Noord-Brabant |
| EPI_ISL_722493 | 10/1/2020  | 12/21/2020 | Europe / Netherlands / Zuid-Holland  |
| EPI_ISL_722494 | 10/1/2020  | 12/21/2020 | Europe / Netherlands / Zuid-Holland  |
| EPI_ISL_722495 | 10/1/2020  | 12/21/2020 | Europe / Netherlands / Zuid-Holland  |
| EPI_ISL_722496 | 10/10/2020 | 12/21/2020 | Europe / Netherlands / Noord-Brabant |
| EPI_ISL_722497 | 10/11/2020 | 12/21/2020 | Europe / Netherlands / Gelderland    |
| EPI_ISL_722498 | 10/11/2020 | 12/21/2020 | Europe / Netherlands / Gelderland    |
| EPI_ISL_722499 | 10/11/2020 | 12/21/2020 | Europe / Netherlands / Zuid-Holland  |
| EPI_ISL_722500 | 10/13/2020 | 12/21/2020 | Europe / Netherlands / Zuid-Holland  |
| EPI_ISL_722501 | 10/13/2020 | 12/21/2020 | Europe / Netherlands / Zuid-Holland  |
| EPI_ISL_722502 | 10/14/2020 | 12/21/2020 | Europe / Netherlands / Drenthe       |
| EPI_ISL_722503 | 10/14/2020 | 12/21/2020 | Europe / Netherlands / Zuid-Holland  |
| EPI_ISL_722504 | 10/14/2020 | 12/21/2020 | Europe / Netherlands / Zuid-Holland  |
| EPI_ISL_722505 | 10/14/2020 | 12/21/2020 | Europe / Netherlands / Zuid-Holland  |
| EPI_ISL_722506 | 10/14/2020 | 12/21/2020 | Europe / Netherlands / Zuid-Holland  |
| EPI_ISL_722507 | 10/15/2020 | 12/21/2020 | Europe / Netherlands / Zuid-Holland  |
| EPI_ISL_722508 | 10/16/2020 | 12/21/2020 | Europe / Netherlands / Noord-Brabant |
| EPI_ISL_722509 | 10/17/2020 | 12/21/2020 | Europe / Netherlands / Zuid-Holland  |
| EPI_ISL_722510 | 10/17/2020 | 12/21/2020 | Europe / Netherlands / Zuid-Holland  |
| EPI_ISL_722511 | 10/18/2020 | 12/21/2020 | Europe / Netherlands / Gelderland    |
| EPI_ISL_722512 | 10/18/2020 | 12/21/2020 | Europe / Netherlands / Gelderland    |
| EPI_ISL_722513 | 10/18/2020 | 12/21/2020 | Europe / Netherlands / Zuid-Holland  |
| EPI_ISL_722514 | 10/19/2020 | 12/21/2020 | Europe / Netherlands / Utrecht       |
| EPI_ISL_722515 | 10/19/2020 | 12/21/2020 | Europe / Netherlands / Zuid-Holland  |
| EPI_ISL_722516 | 10/19/2020 | 12/21/2020 | Europe / Netherlands / Zuid-Holland  |
| EPI_ISL_722517 | 10/2/2020  | 12/21/2020 | Europe / Netherlands / Zuid-Holland  |
| EPI_ISL_722518 | 10/20/2020 | 12/21/2020 | Europe / Netherlands / Utrecht       |
| EPI_ISL_722519 | 10/20/2020 | 12/21/2020 | Europe / Netherlands / Zuid-Holland  |
| EPI_ISL_722520 | 10/20/2020 | 12/21/2020 | Europe / Netherlands / Zuid-Holland  |
| EPI_ISL_722521 | 10/20/2020 | 12/21/2020 | Europe / Netherlands / Zuid-Holland  |
| EPI_ISL_722522 | 10/21/2020 | 12/21/2020 | Europe / Netherlands / Gelderland    |
| EPI_ISL_722523 | 10/21/2020 | 12/21/2020 | Europe / Netherlands / Gelderland    |
| EPI_ISL_722524 | 10/21/2020 | 12/21/2020 | Europe / Netherlands / Noord-Brabant |
| EPI_ISL_722525 | 10/21/2020 | 12/21/2020 | Europe / Netherlands / Noord-Brabant |
| EPI_ISL_722526 | 10/21/2020 | 12/21/2020 | Europe / Netherlands / Noord-Brabant |
| EPI_ISL_722527 | 10/21/2020 | 12/21/2020 | Europe / Netherlands / Overijssel    |
| EPI_ISL_722528 | 10/22/2020 | 12/21/2020 | Europe / Netherlands / Noord-Brabant |
| EPI_ISL_722529 | 10/22/2020 | 12/21/2020 | Europe / Netherlands / Noord-Brabant |
| EPI_ISL_722530 | 10/22/2020 | 12/21/2020 | Europe / Netherlands / Noord-Brabant |
| EPI_ISL_722531 | 10/22/2020 | 12/21/2020 | Europe / Netherlands / Noord-Brabant |
| EPI_ISL_722532 | 10/22/2020 | 12/21/2020 | Europe / Netherlands / Noord-Brabant |
| EPI_ISL_722533 | 10/22/2020 | 12/21/2020 | Europe / Netherlands / Noord-Brabant |
| EPI_ISL_722534 | 10/22/2020 | 12/21/2020 | Europe / Netherlands / Utrecht       |
| EPI_ISL_722535 | 10/22/2020 | 12/21/2020 | Europe / Netherlands / Utrecht       |
| EPI_ISL_722536 | 10/22/2020 | 12/21/2020 | Europe / Netherlands / Utrecht       |

|                |            |            |                                      |
|----------------|------------|------------|--------------------------------------|
| EPI_ISL_722537 | 10/23/2020 | 12/21/2020 | Europe / Netherlands / Gelderland    |
| EPI_ISL_722538 | 10/23/2020 | 12/21/2020 | Europe / Netherlands / Noord-Brabant |
| EPI_ISL_722539 | 10/23/2020 | 12/21/2020 | Europe / Netherlands / Noord-Brabant |
| EPI_ISL_722540 | 10/23/2020 | 12/21/2020 | Europe / Netherlands / Noord-Brabant |
| EPI_ISL_722541 | 10/23/2020 | 12/21/2020 | Europe / Netherlands / Noord-Brabant |
| EPI_ISL_722542 | 10/23/2020 | 12/21/2020 | Europe / Netherlands / Noord-Brabant |
| EPI_ISL_722543 | 10/24/2020 | 12/21/2020 | Europe / Netherlands / Noord-Brabant |
| EPI_ISL_722544 | 10/24/2020 | 12/21/2020 | Europe / Netherlands / Zuid-Holland  |
| EPI_ISL_722545 | 10/25/2020 | 12/21/2020 | Europe / Netherlands / Gelderland    |
| EPI_ISL_722546 | 10/25/2020 | 12/21/2020 | Europe / Netherlands / Gelderland    |
| EPI_ISL_722547 | 10/25/2020 | 12/21/2020 | Europe / Netherlands / Zuid-Holland  |
| EPI_ISL_722548 | 10/25/2020 | 12/21/2020 | Europe / Netherlands / Zuid-Holland  |
| EPI_ISL_722549 | 10/26/2020 | 12/21/2020 | Europe / Netherlands / Gelderland    |
| EPI_ISL_722550 | 10/26/2020 | 12/21/2020 | Europe / Netherlands / Noord-Brabant |
| EPI_ISL_722551 | 10/26/2020 | 12/21/2020 | Europe / Netherlands / Noord-Brabant |
| EPI_ISL_722552 | 10/26/2020 | 12/21/2020 | Europe / Netherlands / Noord-Brabant |
| EPI_ISL_722553 | 10/26/2020 | 12/21/2020 | Europe / Netherlands / Noord-Brabant |
| EPI_ISL_722554 | 10/26/2020 | 12/21/2020 | Europe / Netherlands / Zuid-Holland  |
| EPI_ISL_722555 | 10/26/2020 | 12/21/2020 | Europe / Netherlands / Zuid-Holland  |
| EPI_ISL_722556 | 10/27/2020 | 12/21/2020 | Europe / Netherlands / Noord-Brabant |
| EPI_ISL_722557 | 10/27/2020 | 12/21/2020 | Europe / Netherlands / Noord-Holland |
| EPI_ISL_722558 | 10/27/2020 | 12/21/2020 | Europe / Netherlands / Utrecht       |
| EPI_ISL_722559 | 10/28/2020 | 12/21/2020 | Europe / Netherlands / Gelderland    |
| EPI_ISL_722560 | 10/28/2020 | 12/21/2020 | Europe / Netherlands / Gelderland    |
| EPI_ISL_722561 | 10/28/2020 | 12/21/2020 | Europe / Netherlands / Noord-Brabant |
| EPI_ISL_722562 | 10/28/2020 | 12/21/2020 | Europe / Netherlands / Utrecht       |
| EPI_ISL_722563 | 10/29/2020 | 12/21/2020 | Europe / Netherlands / Gelderland    |
| EPI_ISL_722564 | 10/29/2020 | 12/21/2020 | Europe / Netherlands / Noord-Brabant |
| EPI_ISL_722565 | 10/29/2020 | 12/21/2020 | Europe / Netherlands / Noord-Brabant |
| EPI_ISL_722566 | 10/29/2020 | 12/21/2020 | Europe / Netherlands / Noord-Brabant |
| EPI_ISL_722567 | 10/29/2020 | 12/21/2020 | Europe / Netherlands / Noord-Brabant |
| EPI_ISL_722568 | 10/29/2020 | 12/21/2020 | Europe / Netherlands / Noord-Brabant |
| EPI_ISL_722569 | 10/29/2020 | 12/21/2020 | Europe / Netherlands / Zuid-Holland  |
| EPI_ISL_722570 | 10/3/2020  | 12/21/2020 | Europe / Netherlands / Gelderland    |
| EPI_ISL_722571 | 10/30/2020 | 12/21/2020 | Europe / Netherlands / Gelderland    |
| EPI_ISL_722572 | 10/30/2020 | 12/21/2020 | Europe / Netherlands / Limburg       |
| EPI_ISL_722573 | 10/30/2020 | 12/21/2020 | Europe / Netherlands / Limburg       |
| EPI_ISL_722574 | 10/30/2020 | 12/21/2020 | Europe / Netherlands / Limburg       |
| EPI_ISL_722575 | 10/30/2020 | 12/21/2020 | Europe / Netherlands / Limburg       |
| EPI_ISL_722576 | 10/30/2020 | 12/21/2020 | Europe / Netherlands / Limburg       |
| EPI_ISL_722577 | 10/30/2020 | 12/21/2020 | Europe / Netherlands / Limburg       |
| EPI_ISL_722578 | 10/30/2020 | 12/21/2020 | Europe / Netherlands / Limburg       |
| EPI_ISL_722579 | 10/30/2020 | 12/21/2020 | Europe / Netherlands / Limburg       |
| EPI_ISL_722580 | 10/30/2020 | 12/21/2020 | Europe / Netherlands / Utrecht       |
| EPI_ISL_722581 | 10/31/2020 | 12/21/2020 | Europe / Netherlands / Gelderland    |
| EPI_ISL_722582 | 10/31/2020 | 12/21/2020 | Europe / Netherlands / Limburg       |
| EPI_ISL_722583 | 10/31/2020 | 12/21/2020 | Europe / Netherlands / Noord-Brabant |

|                |            |            |                                      |
|----------------|------------|------------|--------------------------------------|
| EPI_ISL_722584 | 10/31/2020 | 12/21/2020 | Europe / Netherlands / Noord-Brabant |
| EPI_ISL_722585 | 10/31/2020 | 12/21/2020 | Europe / Netherlands / Noord-Brabant |
| EPI_ISL_722586 | 10/31/2020 | 12/21/2020 | Europe / Netherlands / Utrecht       |
| EPI_ISL_722587 | 10/31/2020 | 12/21/2020 | Europe / Netherlands / Utrecht       |
| EPI_ISL_722588 | 10/31/2020 | 12/21/2020 | Europe / Netherlands / Utrecht       |
| EPI_ISL_722589 | 10/31/2020 | 12/21/2020 | Europe / Netherlands / Zuid-Holland  |
| EPI_ISL_722590 | 10/31/2020 | 12/21/2020 | Europe / Netherlands / Zuid-Holland  |
| EPI_ISL_722591 | 10/5/2020  | 12/21/2020 | Europe / Netherlands / Noord-Brabant |
| EPI_ISL_722592 | 10/5/2020  | 12/21/2020 | Europe / Netherlands / Noord-Brabant |
| EPI_ISL_722593 | 10/5/2020  | 12/21/2020 | Europe / Netherlands / Zuid-Holland  |
| EPI_ISL_722594 | 10/5/2020  | 12/21/2020 | Europe / Netherlands / Zuid-Holland  |
| EPI_ISL_722595 | 10/5/2020  | 12/21/2020 | Europe / Netherlands / Zuid-Holland  |
| EPI_ISL_722596 | 10/6/2020  | 12/21/2020 | Europe / Netherlands / Zuid-Holland  |
| EPI_ISL_722597 | 11/1/2020  | 12/21/2020 | Europe / Netherlands / Gelderland    |
| EPI_ISL_722598 | 11/1/2020  | 12/21/2020 | Europe / Netherlands / Gelderland    |
| EPI_ISL_722599 | 11/1/2020  | 12/21/2020 | Europe / Netherlands / Gelderland    |
| EPI_ISL_722600 | 11/1/2020  | 12/21/2020 | Europe / Netherlands / Limburg       |
| EPI_ISL_722601 | 11/1/2020  | 12/21/2020 | Europe / Netherlands                 |
| EPI_ISL_722602 | 11/1/2020  | 12/21/2020 | Europe / Netherlands / Utrecht       |
| EPI_ISL_722603 | 11/1/2020  | 12/21/2020 | Europe / Netherlands / Utrecht       |
| EPI_ISL_722604 | 11/1/2020  | 12/21/2020 | Europe / Netherlands / Utrecht       |
| EPI_ISL_722605 | 11/1/2020  | 12/21/2020 | Europe / Netherlands / Zuid-Holland  |
| EPI_ISL_722606 | 11/1/2020  | 12/21/2020 | Europe / Netherlands / Zuid-Holland  |
| EPI_ISL_722607 | 11/1/2020  | 12/21/2020 | Europe / Netherlands / Zuid-Holland  |
| EPI_ISL_722608 | 11/10/2020 | 12/21/2020 | Europe / Netherlands / Gelderland    |
| EPI_ISL_722609 | 11/10/2020 | 12/21/2020 | Europe / Netherlands / Noord-Brabant |
| EPI_ISL_722610 | 11/10/2020 | 12/21/2020 | Europe / Netherlands / Noord-Brabant |
| EPI_ISL_722611 | 11/10/2020 | 12/21/2020 | Europe / Netherlands / Utrecht       |
| EPI_ISL_722612 | 11/11/2020 | 12/21/2020 | Europe / Netherlands / Flevoland     |
| EPI_ISL_722613 | 11/11/2020 | 12/21/2020 | Europe / Netherlands / Gelderland    |
| EPI_ISL_722614 | 11/11/2020 | 12/21/2020 | Europe / Netherlands / Noord-Brabant |
| EPI_ISL_722615 | 11/11/2020 | 12/21/2020 | Europe / Netherlands / Noord-Brabant |
| EPI_ISL_722616 | 11/11/2020 | 12/21/2020 | Europe / Netherlands / Noord-Brabant |
| EPI_ISL_722617 | 11/11/2020 | 12/21/2020 | Europe / Netherlands / Zuid-Holland  |
| EPI_ISL_722618 | 11/11/2020 | 12/21/2020 | Europe / Netherlands / Zuid-Holland  |
| EPI_ISL_722619 | 11/12/2020 | 12/21/2020 | Europe / Netherlands / Gelderland    |
| EPI_ISL_722620 | 11/12/2020 | 12/21/2020 | Europe / Netherlands / Gelderland    |
| EPI_ISL_722621 | 11/12/2020 | 12/21/2020 | Europe / Netherlands / Gelderland    |
| EPI_ISL_722622 | 11/12/2020 | 12/21/2020 | Europe / Netherlands / Noord-Brabant |
| EPI_ISL_722623 | 11/12/2020 | 12/21/2020 | Europe / Netherlands / Noord-Brabant |
| EPI_ISL_722624 | 11/12/2020 | 12/21/2020 | Europe / Netherlands / Noord-Brabant |
| EPI_ISL_722625 | 11/12/2020 | 12/21/2020 | Europe / Netherlands / Utrecht       |
| EPI_ISL_722626 | 11/12/2020 | 12/21/2020 | Europe / Netherlands / Zuid-Holland  |
| EPI_ISL_722627 | 11/12/2020 | 12/21/2020 | Europe / Netherlands / Zuid-Holland  |
| EPI_ISL_722628 | 11/12/2020 | 12/21/2020 | Europe / Netherlands / Zuid-Holland  |
| EPI_ISL_722629 | 11/13/2020 | 12/21/2020 | Europe / Netherlands / Gelderland    |
| EPI_ISL_722630 | 11/13/2020 | 12/21/2020 | Europe / Netherlands / Gelderland    |



|                |            |            |                                      |
|----------------|------------|------------|--------------------------------------|
| EPI_ISL_722678 | 11/19/2020 | 12/21/2020 | Europe / Netherlands / Zuid-Holland  |
| EPI_ISL_722679 | 11/2/2020  | 12/21/2020 | Europe / Netherlands / Noord-Brabant |
| EPI_ISL_722680 | 11/2/2020  | 12/21/2020 | Europe / Netherlands                 |
| EPI_ISL_722681 | 11/2/2020  | 12/21/2020 | Europe / Netherlands / Utrecht       |
| EPI_ISL_722682 | 11/20/2020 | 12/21/2020 | Europe / Netherlands / Noord-Brabant |
| EPI_ISL_722683 | 11/20/2020 | 12/21/2020 | Europe / Netherlands / Zuid-Holland  |
| EPI_ISL_722684 | 11/21/2020 | 12/21/2020 | Europe / Netherlands / Zuid-Holland  |
| EPI_ISL_722685 | 11/22/2020 | 12/21/2020 | Europe / Netherlands / Zuid-Holland  |
| EPI_ISL_722686 | 11/23/2020 | 12/21/2020 | Europe / Netherlands / Zuid-Holland  |
| EPI_ISL_722687 | 11/24/2020 | 12/21/2020 | Europe / Netherlands / Noord-Brabant |
| EPI_ISL_722688 | 11/25/2020 | 12/21/2020 | Europe / Netherlands / Zuid-Holland  |
| EPI_ISL_722689 | 11/26/2020 | 12/21/2020 | Europe / Netherlands / Noord-Brabant |
| EPI_ISL_722690 | 11/26/2020 | 12/21/2020 | Europe / Netherlands / Utrecht       |
| EPI_ISL_722691 | 11/26/2020 | 12/21/2020 | Europe / Netherlands / Zuid-Holland  |
| EPI_ISL_722692 | 11/26/2020 | 12/21/2020 | Europe / Netherlands / Zuid-Holland  |
| EPI_ISL_722693 | 11/27/2020 | 12/21/2020 | Europe / Netherlands / Gelderland    |
| EPI_ISL_722694 | 11/27/2020 | 12/21/2020 | Europe / Netherlands / Noord-Brabant |
| EPI_ISL_722695 | 11/27/2020 | 12/21/2020 | Europe / Netherlands / Utrecht       |
| EPI_ISL_722696 | 11/27/2020 | 12/21/2020 | Europe / Netherlands / Zuid-Holland  |
| EPI_ISL_722697 | 11/29/2020 | 12/21/2020 | Europe / Netherlands / Zuid-Holland  |
| EPI_ISL_722698 | 11/3/2020  | 12/21/2020 | Europe / Netherlands / Limburg       |
| EPI_ISL_722699 | 11/3/2020  | 12/21/2020 | Europe / Netherlands / Noord-Brabant |
| EPI_ISL_722700 | 11/3/2020  | 12/21/2020 | Europe / Netherlands / Noord-Brabant |
| EPI_ISL_722701 | 11/3/2020  | 12/21/2020 | Europe / Netherlands / Utrecht       |
| EPI_ISL_722702 | 11/3/2020  | 12/21/2020 | Europe / Netherlands / Zuid-Holland  |
| EPI_ISL_722703 | 11/3/2020  | 12/21/2020 | Europe / Netherlands / Zuid-Holland  |
| EPI_ISL_722704 | 11/3/2020  | 12/21/2020 | Europe / Netherlands / Zuid-Holland  |
| EPI_ISL_722705 | 11/3/2020  | 12/21/2020 | Europe / Netherlands / Zuid-Holland  |
| EPI_ISL_722706 | 11/3/2020  | 12/21/2020 | Europe / Netherlands / Zuid-Holland  |
| EPI_ISL_722707 | 11/3/2020  | 12/21/2020 | Europe / Netherlands / Zuid-Holland  |
| EPI_ISL_722708 | 11/3/2020  | 12/21/2020 | Europe / Netherlands / Zuid-Holland  |
| EPI_ISL_722709 | 11/3/2020  | 12/21/2020 | Europe / Netherlands / Zuid-Holland  |
| EPI_ISL_722710 | 11/3/2020  | 12/21/2020 | Europe / Netherlands / Zuid-Holland  |
| EPI_ISL_722711 | 11/30/2020 | 12/21/2020 | Europe / Netherlands / Gelderland    |
| EPI_ISL_722712 | 11/30/2020 | 12/21/2020 | Europe / Netherlands / Gelderland    |
| EPI_ISL_722713 | 11/30/2020 | 12/21/2020 | Europe / Netherlands / Noord-Brabant |
| EPI_ISL_722714 | 11/4/2020  | 12/21/2020 | Europe / Netherlands / Flevoland     |
| EPI_ISL_722715 | 11/4/2020  | 12/21/2020 | Europe / Netherlands / Gelderland    |
| EPI_ISL_722716 | 11/4/2020  | 12/21/2020 | Europe / Netherlands / Gelderland    |
| EPI_ISL_722717 | 11/4/2020  | 12/21/2020 | Europe / Netherlands / Gelderland    |
| EPI_ISL_722718 | 11/4/2020  | 12/21/2020 | Europe / Netherlands / Limburg       |
| EPI_ISL_722719 | 11/4/2020  | 12/21/2020 | Europe / Netherlands / Limburg       |
| EPI_ISL_722720 | 11/4/2020  | 12/21/2020 | Europe / Netherlands / Noord-Brabant |
| EPI_ISL_722721 | 11/4/2020  | 12/21/2020 | Europe / Netherlands / Utrecht       |
| EPI_ISL_722722 | 11/4/2020  | 12/21/2020 | Europe / Netherlands / Zuid-Holland  |
| EPI_ISL_722723 | 11/4/2020  | 12/21/2020 | Europe / Netherlands / Zuid-Holland  |
| EPI_ISL_722724 | 11/5/2020  | 12/21/2020 | Europe / Netherlands / Gelderland    |

|                |            |            |                                      |
|----------------|------------|------------|--------------------------------------|
| EPI_ISL_722725 | 11/5/2020  | 12/21/2020 | Europe / Netherlands / Gelderland    |
| EPI_ISL_722726 | 11/5/2020  | 12/21/2020 | Europe / Netherlands / Limburg       |
| EPI_ISL_722727 | 11/5/2020  | 12/21/2020 | Europe / Netherlands / Limburg       |
| EPI_ISL_722728 | 11/5/2020  | 12/21/2020 | Europe / Netherlands / Utrecht       |
| EPI_ISL_722729 | 11/6/2020  | 12/21/2020 | Europe / Netherlands / Gelderland    |
| EPI_ISL_722730 | 11/6/2020  | 12/21/2020 | Europe / Netherlands / Gelderland    |
| EPI_ISL_722731 | 11/6/2020  | 12/21/2020 | Europe / Netherlands / Limburg       |
| EPI_ISL_722732 | 11/6/2020  | 12/21/2020 | Europe / Netherlands / Limburg       |
| EPI_ISL_722733 | 11/6/2020  | 12/21/2020 | Europe / Netherlands / Noord-Brabant |
| EPI_ISL_722734 | 11/6/2020  | 12/21/2020 | Europe / Netherlands / Zuid-Holland  |
| EPI_ISL_722735 | 11/6/2020  | 12/21/2020 | Europe / Netherlands / Zuid-Holland  |
| EPI_ISL_722736 | 11/6/2020  | 12/21/2020 | Europe / Netherlands / Zuid-Holland  |
| EPI_ISL_722737 | 11/7/2020  | 12/21/2020 | Europe / Netherlands / Gelderland    |
| EPI_ISL_722738 | 11/7/2020  | 12/21/2020 | Europe / Netherlands / Limburg       |
| EPI_ISL_722739 | 11/7/2020  | 12/21/2020 | Europe / Netherlands / Limburg       |
| EPI_ISL_722740 | 11/7/2020  | 12/21/2020 | Europe / Netherlands / Utrecht       |
| EPI_ISL_722741 | 11/7/2020  | 12/21/2020 | Europe / Netherlands / Zuid-Holland  |
| EPI_ISL_722742 | 11/7/2020  | 12/21/2020 | Europe / Netherlands / Zuid-Holland  |
| EPI_ISL_722743 | 11/8/2020  | 12/21/2020 | Europe / Netherlands / Gelderland    |
| EPI_ISL_722744 | 11/8/2020  | 12/21/2020 | Europe / Netherlands / Gelderland    |
| EPI_ISL_722745 | 11/8/2020  | 12/21/2020 | Europe / Netherlands / Gelderland    |
| EPI_ISL_722746 | 11/8/2020  | 12/21/2020 | Europe / Netherlands / Gelderland    |
| EPI_ISL_722747 | 11/8/2020  | 12/21/2020 | Europe / Netherlands / Noord-Brabant |
| EPI_ISL_722748 | 11/8/2020  | 12/21/2020 | Europe / Netherlands / Utrecht       |
| EPI_ISL_722749 | 11/8/2020  | 12/21/2020 | Europe / Netherlands / Zuid-Holland  |
| EPI_ISL_722750 | 11/9/2020  | 12/21/2020 | Europe / Netherlands / Gelderland    |
| EPI_ISL_722751 | 11/9/2020  | 12/21/2020 | Europe / Netherlands / Noord-Brabant |
| EPI_ISL_722752 | 11/9/2020  | 12/21/2020 | Europe / Netherlands / Noord-Holland |
| EPI_ISL_722753 | 11/9/2020  | 12/21/2020 | Europe / Netherlands / Utrecht       |
| EPI_ISL_722754 | 11/9/2020  | 12/21/2020 | Europe / Netherlands / Utrecht       |
| EPI_ISL_722755 | 11/9/2020  | 12/21/2020 | Europe / Netherlands / Zuid-Holland  |
| EPI_ISL_722756 | 11/9/2020  | 12/21/2020 | Europe / Netherlands / Zuid-Holland  |
| EPI_ISL_722757 | 11/9/2020  | 12/21/2020 | Europe / Netherlands / Zuid-Holland  |
| EPI_ISL_722758 | 12/1/2020  | 12/21/2020 | Europe / Netherlands / Gelderland    |
| EPI_ISL_722759 | 12/1/2020  | 12/21/2020 | Europe / Netherlands / Gelderland    |
| EPI_ISL_722760 | 12/1/2020  | 12/21/2020 | Europe / Netherlands / Gelderland    |
| EPI_ISL_722761 | 12/1/2020  | 12/21/2020 | Europe / Netherlands / Gelderland    |
| EPI_ISL_722762 | 12/1/2020  | 12/21/2020 | Europe / Netherlands / Gelderland    |
| EPI_ISL_722763 | 12/10/2020 | 12/21/2020 | Europe / Netherlands / Utrecht       |
| EPI_ISL_722764 | 12/11/2020 | 12/21/2020 | Europe / Netherlands / Zuid-Holland  |
| EPI_ISL_722765 | 12/12/2020 | 12/21/2020 | Europe / Netherlands / Zuid-Holland  |
| EPI_ISL_722766 | 12/12/2020 | 12/21/2020 | Europe / Netherlands / Zuid-Holland  |
| EPI_ISL_722767 | 12/13/2020 | 12/21/2020 | Europe / Netherlands / Utrecht       |
| EPI_ISL_722768 | 12/13/2020 | 12/21/2020 | Europe / Netherlands / Zuid-Holland  |
| EPI_ISL_722769 | 12/13/2020 | 12/21/2020 | Europe / Netherlands / Zuid-Holland  |
| EPI_ISL_722770 | 12/13/2020 | 12/21/2020 | Europe / Netherlands / Zuid-Holland  |
| EPI_ISL_722771 | 12/13/2020 | 12/21/2020 | Europe / Netherlands / Zuid-Holland  |

|                |            |            |                                      |
|----------------|------------|------------|--------------------------------------|
| EPI_ISL_722772 | 12/13/2020 | 12/21/2020 | Europe / Netherlands / Zuid-Holland  |
| EPI_ISL_722773 | 12/13/2020 | 12/21/2020 | Europe / Netherlands / Zuid-Holland  |
| EPI_ISL_722774 | 12/13/2020 | 12/21/2020 | Europe / Netherlands / Zuid-Holland  |
| EPI_ISL_722775 | 12/13/2020 | 12/21/2020 | Europe / Netherlands / Zuid-Holland  |
| EPI_ISL_722776 | 12/13/2020 | 12/21/2020 | Europe / Netherlands / Zuid-Holland  |
| EPI_ISL_722777 | 12/13/2020 | 12/21/2020 | Europe / Netherlands / Zuid-Holland  |
| EPI_ISL_722778 | 12/14/2020 | 12/21/2020 | Europe / Netherlands / Zuid-Holland  |
| EPI_ISL_722779 | 12/14/2020 | 12/21/2020 | Europe / Netherlands / Zuid-Holland  |
| EPI_ISL_722780 | 12/14/2020 | 12/21/2020 | Europe / Netherlands / Zuid-Holland  |
| EPI_ISL_722781 | 12/15/2020 | 12/21/2020 | Europe / Netherlands / Zuid-Holland  |
| EPI_ISL_722782 | 12/15/2020 | 12/21/2020 | Europe / Netherlands / Zuid-Holland  |
| EPI_ISL_722783 | 12/15/2020 | 12/21/2020 | Europe / Netherlands / Zuid-Holland  |
| EPI_ISL_722784 | 12/2/2020  | 12/21/2020 | Europe / Netherlands / Gelderland    |
| EPI_ISL_722785 | 12/2/2020  | 12/21/2020 | Europe / Netherlands / Gelderland    |
| EPI_ISL_722786 | 12/2/2020  | 12/21/2020 | Europe / Netherlands / Zuid-Holland  |
| EPI_ISL_722787 | 12/3/2020  | 12/21/2020 | Europe / Netherlands / Zuid-Holland  |
| EPI_ISL_722788 | 12/3/2020  | 12/21/2020 | Europe / Netherlands / Zuid-Holland  |
| EPI_ISL_722789 | 12/6/2020  | 12/21/2020 | Europe / Netherlands / Utrecht       |
| EPI_ISL_722790 | 12/6/2020  | 12/21/2020 | Europe / Netherlands / Utrecht       |
| EPI_ISL_722791 | 12/6/2020  | 12/21/2020 | Europe / Netherlands / Zuid-Holland  |
| EPI_ISL_722792 | 12/6/2020  | 12/21/2020 | Europe / Netherlands / Zuid-Holland  |
| EPI_ISL_722793 | 12/6/2020  | 12/21/2020 | Europe / Netherlands / Zuid-Holland  |
| EPI_ISL_722794 | 12/6/2020  | 12/21/2020 | Europe / Netherlands / Zuid-Holland  |
| EPI_ISL_722795 | 12/6/2020  | 12/21/2020 | Europe / Netherlands / Zuid-Holland  |
| EPI_ISL_722796 | 12/7/2020  | 12/21/2020 | Europe / Netherlands / Utrecht       |
| EPI_ISL_722797 | 12/7/2020  | 12/21/2020 | Europe / Netherlands / Zuid-Holland  |
| EPI_ISL_722798 | 12/7/2020  | 12/21/2020 | Europe / Netherlands / Zuid-Holland  |
| EPI_ISL_722799 | 12/7/2020  | 12/21/2020 | Europe / Netherlands / Zuid-Holland  |
| EPI_ISL_722800 | 6/11/2020  | 12/21/2020 | Europe / Netherlands / Zeeland       |
| EPI_ISL_722801 | 7/11/2020  | 12/21/2020 | Europe / Netherlands / Noord-Brabant |
| EPI_ISL_722802 | 7/12/2020  | 12/21/2020 | Europe / Netherlands / Noord-Brabant |
| EPI_ISL_722803 | 7/14/2020  | 12/21/2020 | Europe / Netherlands / Noord-Brabant |
| EPI_ISL_722804 | 7/15/2020  | 12/21/2020 | Europe / Netherlands / Noord-Brabant |
| EPI_ISL_722805 | 7/15/2020  | 12/21/2020 | Europe / Netherlands / Noord-Brabant |
| EPI_ISL_722806 | 7/17/2020  | 12/21/2020 | Europe / Netherlands / Noord-Brabant |
| EPI_ISL_722807 | 7/18/2020  | 12/21/2020 | Europe / Netherlands / Noord-Brabant |
| EPI_ISL_722808 | 7/19/2020  | 12/21/2020 | Europe / Netherlands / Noord-Brabant |
| EPI_ISL_722809 | 7/20/2020  | 12/21/2020 | Europe / Netherlands / Noord-Brabant |
| EPI_ISL_722810 | 7/24/2020  | 12/21/2020 | Europe / Netherlands / Noord-Brabant |
| EPI_ISL_722811 | 7/25/2020  | 12/21/2020 | Europe / Netherlands / Noord-Brabant |
| EPI_ISL_722812 | 7/27/2020  | 12/21/2020 | Europe / Netherlands / Noord-Brabant |
| EPI_ISL_722813 | 7/29/2020  | 12/21/2020 | Europe / Netherlands / Noord-Brabant |
| EPI_ISL_722814 | 7/31/2020  | 12/21/2020 | Europe / Netherlands / Noord-Brabant |
| EPI_ISL_722815 | 8/28/2020  | 12/21/2020 | Europe / Netherlands / Zuid-Holland  |
| EPI_ISL_722816 | 9/11/2020  | 12/21/2020 | Europe / Netherlands / Overijssel    |
| EPI_ISL_722817 | 9/12/2020  | 12/21/2020 | Europe / Netherlands / Overijssel    |
| EPI_ISL_722818 | 9/13/2020  | 12/21/2020 | Europe / Netherlands / Gelderland    |

|                |           |            |                                                     |
|----------------|-----------|------------|-----------------------------------------------------|
| EPI_ISL_722819 | 9/14/2020 | 12/21/2020 | Europe / Netherlands / Overijssel                   |
| EPI_ISL_722820 | 9/14/2020 | 12/21/2020 | Europe / Netherlands / Overijssel                   |
| EPI_ISL_722821 | 9/16/2020 | 12/21/2020 | Europe / Netherlands / Overijssel                   |
| EPI_ISL_722822 | 9/17/2020 | 12/21/2020 | Europe / Netherlands / Overijssel                   |
| EPI_ISL_722823 | 9/17/2020 | 12/21/2020 | Europe / Netherlands / Overijssel                   |
| EPI_ISL_722824 | 9/18/2020 | 12/21/2020 | Europe / Netherlands / Overijssel                   |
| EPI_ISL_722825 | 9/19/2020 | 12/21/2020 | Europe / Netherlands / Overijssel                   |
| EPI_ISL_722826 | 9/19/2020 | 12/21/2020 | Europe / Netherlands / Zuid-Holland                 |
| EPI_ISL_722827 | 9/22/2020 | 12/21/2020 | Europe / Netherlands / Noord-Brabant                |
| EPI_ISL_722828 | 9/24/2020 | 12/21/2020 | Europe / Netherlands / Zuid-Holland                 |
| EPI_ISL_722829 | 9/25/2020 | 12/21/2020 | Europe / Netherlands / Noord-Brabant                |
| EPI_ISL_722830 | 9/26/2020 | 12/21/2020 | Europe / Netherlands / Overijssel                   |
| EPI_ISL_722831 | 9/27/2020 | 12/21/2020 | Europe / Netherlands / Overijssel                   |
| EPI_ISL_722832 | 9/28/2020 | 12/21/2020 | Europe / Netherlands / Noord-Brabant                |
| EPI_ISL_722833 | 9/28/2020 | 12/21/2020 | Europe / Netherlands / Noord-Brabant                |
| EPI_ISL_722834 | 9/28/2020 | 12/21/2020 | Europe / Netherlands / Noord-Brabant                |
| EPI_ISL_722835 | 9/28/2020 | 12/21/2020 | Europe / Netherlands / Noord-Brabant                |
| EPI_ISL_722836 | 9/28/2020 | 12/21/2020 | Europe / Netherlands / Noord-Brabant                |
| EPI_ISL_722837 | 9/28/2020 | 12/21/2020 | Europe / Netherlands / Overijssel                   |
| EPI_ISL_722838 | 9/29/2020 | 12/21/2020 | Europe / Netherlands / Gelderland                   |
| EPI_ISL_722839 | 9/29/2020 | 12/21/2020 | Europe / Netherlands / Overijssel                   |
| EPI_ISL_722840 | 9/30/2020 | 12/21/2020 | Europe / Belgium                                    |
| EPI_ISL_722841 | 9/30/2020 | 12/21/2020 | Europe / Netherlands / Noord-Brabant                |
| EPI_ISL_722842 | 9/4/2020  | 12/21/2020 | Europe / Netherlands / Overijssel                   |
| EPI_ISL_722843 | 9/7/2020  | 12/21/2020 | Europe / Netherlands / Overijssel                   |
| EPI_ISL_722844 | 9/7/2020  | 12/21/2020 | Europe / Netherlands / Overijssel                   |
| EPI_ISL_722845 | 9/7/2020  | 12/21/2020 | Europe / Netherlands / Overijssel                   |
| EPI_ISL_722846 | 9/7/2020  | 12/21/2020 | Europe / Netherlands / Zuid-Holland                 |
| EPI_ISL_722847 | 9/8/2020  | 12/21/2020 | Europe / Netherlands / Overijssel                   |
| EPI_ISL_722848 | 9/9/2020  | 12/21/2020 | Europe / Netherlands / Gelderland                   |
| EPI_ISL_722849 | 9/9/2020  | 12/21/2020 | Europe / Netherlands / Gelderland                   |
| EPI_ISL_722850 | 11/2/2020 | 12/21/2020 | Europe / Netherlands / Zuid-Holland                 |
| EPI_ISL_722851 | 8/28/2020 | 12/21/2020 | Europe / Italy / Apulia / Bari / Triggiano          |
| EPI_ISL_722852 | 8/28/2020 | 12/21/2020 | Europe / Italy / Apulia / Bari                      |
| EPI_ISL_722853 | 8/28/2020 | 12/21/2020 | Europe / Italy / Apulia / Bari                      |
| EPI_ISL_722854 | 8/28/2020 | 12/21/2020 | Europe / Italy / Apulia / Bari                      |
| EPI_ISL_722855 | 7/20/2020 | 12/21/2020 | Europe / Italy / Apulia / Bari / Sannicelle di Bari |
| EPI_ISL_722856 | 7/18/2020 | 12/21/2020 | Europe / Italy / Apulia / Brindisi / Fasano         |
| EPI_ISL_722857 | 7/18/2020 | 12/21/2020 | Europe / Italy / Apulia / Brindisi / Fasano         |
| EPI_ISL_722858 | 7/18/2020 | 12/21/2020 | Europe / Italy / Apulia / Brindisi / Fasano         |
| EPI_ISL_722859 | 8/28/2020 | 12/21/2020 | Europe / Italy / Apulia / Bari                      |
| EPI_ISL_722860 | 8/28/2020 | 12/21/2020 | Europe / Italy / Apulia / Bari                      |
| EPI_ISL_722861 | 8/28/2020 | 12/21/2020 | Europe / Italy / Apulia / Bari / Torre a Mare       |
| EPI_ISL_722862 | 8/28/2020 | 12/21/2020 | Europe / Italy / Apulia / Bari                      |
| EPI_ISL_722863 | 8/28/2020 | 12/21/2020 | Europe / Italy / Apulia / Bari                      |
| EPI_ISL_722864 | 8/28/2020 | 12/21/2020 | Europe / Italy / Apulia / Bari                      |
| EPI_ISL_722865 | 8/28/2020 | 12/21/2020 | Europe / Italy / Apulia / Bari                      |



|                |            |            |                                                          |
|----------------|------------|------------|----------------------------------------------------------|
| EPI_ISL_722866 | 8/28/2020  | 12/21/2020 | Europe / Italy / Apulia / Bari                           |
| EPI_ISL_722867 | 8/28/2020  | 12/21/2020 | Europe / Italy / Apulia / Bari                           |
| EPI_ISL_722868 | 8/28/2020  | 12/21/2020 | Europe / Italy / Apulia / Bari                           |
| EPI_ISL_722869 | 8/28/2020  | 12/21/2020 | Europe / Italy / Apulia / Bari                           |
| EPI_ISL_722870 | 8/28/2020  | 12/21/2020 | Europe / Italy / Apulia / Bari                           |
| EPI_ISL_722871 | 8/28/2020  | 12/21/2020 | Europe / Italy / Apulia / Bari                           |
| EPI_ISL_722872 | 7/18/2020  | 12/21/2020 | Europe / Italy / Apulia / Brindisi / Fasano              |
| EPI_ISL_722873 | 10/27/2020 | 12/21/2020 | Europe / Italy / Basilicata / Matera / Policoro          |
| EPI_ISL_722874 | 10/29/2020 | 12/21/2020 | Europe / Italy / Basilicata / Matera / Garaguso          |
| EPI_ISL_722875 | 10/28/2020 | 12/21/2020 | Europe / Italy / Basilicata / Matera                     |
| EPI_ISL_722876 | 10/28/2020 | 12/21/2020 | Europe / Italy / Basilicata / Matera                     |
| EPI_ISL_722877 | 10/29/2020 | 12/21/2020 | Europe / Italy / Basilicata / Potenza                    |
| EPI_ISL_722878 | 10/15/2020 | 12/21/2020 | Europe / Italy / Basilicata / Matera / Calciano          |
| EPI_ISL_722879 | 10/16/2020 | 12/21/2020 | Europe / Italy / Basilicata / Potenza / Noepoli          |
| EPI_ISL_722880 | 10/16/2020 | 12/21/2020 | Europe / Italy / Basilicata / Matera / Miglionico        |
| EPI_ISL_722881 | 10/16/2020 | 12/21/2020 | Europe / Italy / Basilicata / Matera / Miglionico        |
| EPI_ISL_722882 | 10/25/2020 | 12/21/2020 | Europe / Italy / Basilicata / Matera                     |
| EPI_ISL_722883 | 10/26/2020 | 12/21/2020 | Europe / Italy / Basilicata / Matera                     |
| EPI_ISL_722884 | 10/25/2020 | 12/21/2020 | Europe / Italy / Basilicata / Matera                     |
| EPI_ISL_722885 | 10/20/2020 | 12/21/2020 | Europe / Italy / Basilicata / Matera / Rotondella        |
| EPI_ISL_722886 | 10/20/2020 | 12/21/2020 | Europe / Italy / Basilicata / Potenza / Roccanova        |
| EPI_ISL_722887 | 10/26/2020 | 12/21/2020 | Europe / Italy / Basilicata / Matera                     |
| EPI_ISL_722888 | 10/25/2020 | 12/21/2020 | Europe / Italy / Basilicata / Potenza / Roccanova        |
| EPI_ISL_722889 | 10/25/2020 | 12/21/2020 | Europe / Italy / Basilicata / Matera                     |
| EPI_ISL_722890 | 10/25/2020 | 12/21/2020 | Europe / Italy / Basilicata / Matera                     |
| EPI_ISL_722891 | 10/25/2020 | 12/21/2020 | Europe / Italy / Basilicata / Matera / Montescaglioso    |
| EPI_ISL_722892 | 8/24/2020  | 12/21/2020 | Europe / Italy / Basilicata / Potenza                    |
| EPI_ISL_722893 | 10/10/2020 | 12/21/2020 | Europe / Italy / Apulia / Foggia                         |
| EPI_ISL_722894 | 11/5/2020  | 12/21/2020 | Europe / Italy / Apulia / Foggia / Lucera                |
| EPI_ISL_722895 | 8/28/2020  | 12/21/2020 | Europe / Italy / Apulia / Bari                           |
| EPI_ISL_722897 | 7/28/2020  | 12/21/2020 | Europe / Italy / Apulia / Bari / Modugno                 |
| EPI_ISL_722898 | 8/28/2020  | 12/21/2020 | Europe / Italy / Apulia / Bari                           |
| EPI_ISL_722899 | 2020       | 12/21/2020 | Europe / Italy / Apulia / Lecce / Copertino              |
| EPI_ISL_722900 | 8/28/2020  | 12/21/2020 | Europe / Italy / Apulia / Bari                           |
| EPI_ISL_722901 | 10/28/2020 | 12/21/2020 | Europe / Italy / Basilicata / Matera / Montalbano Jonico |
| EPI_ISL_722902 | 10/27/2020 | 12/21/2020 | Europe / Italy / Basilicata / Matera / Policoro          |
| EPI_ISL_722903 | 10/29/2020 | 12/21/2020 | Europe / Italy / Basilicata / Potenza / Lauria           |
| EPI_ISL_722904 | 10/16/2020 | 12/21/2020 | Europe / Italy / Basilicata / Potenza / Roccanova        |
| EPI_ISL_722905 | 10/28/2020 | 12/21/2020 | Europe / Italy / Basilicata / Matera / Irsina            |
| EPI_ISL_722906 | 10/26/2020 | 12/21/2020 | Europe / Italy / Basilicata / Matera / Accettura         |
| EPI_ISL_722907 | 10/19/2020 | 12/21/2020 | Europe / Italy / Basilicata / Matera                     |
| EPI_ISL_722908 | 10/21/2020 | 12/21/2020 | Europe / Italy / Apulia / Foggia                         |
| EPI_ISL_722909 | 11/4/2020  | 12/21/2020 | Europe / Italy / Apulia / Foggia / Lucera                |
| EPI_ISL_722910 | 11/20/2020 | 12/21/2020 | Europe / Italy / Apulia / Foggia                         |
| EPI_ISL_722911 | 11/5/2020  | 12/21/2020 | Europe / Italy / Apulia / Foggia / Lucera                |
| EPI_ISL_722912 | 2020       | 12/21/2020 | Europe / Italy / Apulia / Lecce / Galatina               |
| EPI_ISL_722913 | 10/28/2020 | 12/21/2020 | Europe / Italy / Basilicata / Matera                     |

|                |            |            |                                                   |
|----------------|------------|------------|---------------------------------------------------|
| EPI_ISL_722914 | 10/28/2020 | 12/21/2020 | Europe / Italy / Basilicata / Matera              |
| EPI_ISL_722915 | 10/15/2020 | 12/21/2020 | Europe / Italy / Basilicata / Matera / Tricarico  |
| EPI_ISL_722916 | 10/15/2020 | 12/21/2020 | Europe / Italy / Basilicata / Matera / Calciano   |
| EPI_ISL_722917 | 10/16/2020 | 12/21/2020 | Europe / Italy / Basilicata / Matera              |
| EPI_ISL_722918 | 10/14/2020 | 12/21/2020 | Europe / Italy / Apulia / Bari                    |
| EPI_ISL_722919 | 10/17/2020 | 12/21/2020 | Europe / Italy / Basilicata / Matera              |
| EPI_ISL_722920 | 10/25/2020 | 12/21/2020 | Europe / Italy / Basilicata / Matera              |
| EPI_ISL_722921 | 10/20/2020 | 12/21/2020 | Europe / Italy / Basilicata / Matera / Irsina     |
| EPI_ISL_722922 | 10/24/2020 | 12/21/2020 | Europe / Italy / Basilicata / Matera / Tursi      |
| EPI_ISL_722923 | 10/25/2020 | 12/21/2020 | Europe / Italy / Basilicata / Potenza / Roccanova |
| EPI_ISL_722924 | 10/21/2020 | 12/21/2020 | Europe / Italy / Basilicata / Matera / Irsina     |
| EPI_ISL_722925 | 10/21/2020 | 12/21/2020 | Europe / Italy / Basilicata / Matera / Irsina     |
| EPI_ISL_722934 | 11/27/2020 | 12/21/2020 | Europe / Belgium / Liege                          |
| EPI_ISL_722935 | 11/30/2020 | 12/21/2020 | Europe / Belgium / Liege                          |
| EPI_ISL_722936 | 11/28/2020 | 12/21/2020 | Europe / Belgium / Liege                          |
| EPI_ISL_722937 | 11/28/2020 | 12/21/2020 | Europe / Belgium / Liege                          |
| EPI_ISL_722938 | 11/28/2020 | 12/21/2020 | Europe / Belgium / Liege                          |
| EPI_ISL_722939 | 11/28/2020 | 12/21/2020 | Europe / Belgium / Liege                          |
| EPI_ISL_722940 | 11/28/2020 | 12/21/2020 | Europe / Belgium / Liege                          |
| EPI_ISL_722941 | 11/29/2020 | 12/21/2020 | Europe / Belgium / Liege                          |
| EPI_ISL_722942 | 11/29/2020 | 12/21/2020 | Europe / Belgium / Liege                          |
| EPI_ISL_722943 | 11/29/2020 | 12/21/2020 | Europe / Belgium / Liege                          |
| EPI_ISL_722944 | 11/30/2020 | 12/21/2020 | Europe / Belgium / Liege                          |
| EPI_ISL_722945 | 11/30/2020 | 12/21/2020 | Europe / Belgium / Liege                          |
| EPI_ISL_722946 | 11/30/2020 | 12/21/2020 | Europe / Belgium / Liege                          |
| EPI_ISL_722947 | 11/30/2020 | 12/21/2020 | Europe / Belgium / Liege                          |
| EPI_ISL_722948 | 11/30/2020 | 12/21/2020 | Europe / Belgium / Liege                          |
| EPI_ISL_722949 | 11/30/2020 | 12/21/2020 | Europe / Belgium / Liege                          |
| EPI_ISL_722950 | 11/30/2020 | 12/21/2020 | Europe / Belgium / Liege                          |
| EPI_ISL_722951 | 11/30/2020 | 12/21/2020 | Europe / Belgium / Liege                          |
| EPI_ISL_722952 | 11/30/2020 | 12/21/2020 | Europe / Belgium / Liege                          |
| EPI_ISL_722953 | 11/30/2020 | 12/21/2020 | Europe / Belgium / Liege                          |
| EPI_ISL_722954 | 11/30/2020 | 12/21/2020 | Europe / Belgium / Liege                          |
| EPI_ISL_722955 | 11/30/2020 | 12/21/2020 | Europe / Belgium / Liege                          |
| EPI_ISL_722956 | 11/30/2020 | 12/21/2020 | Europe / Belgium / Liege                          |
| EPI_ISL_722957 | 11/30/2020 | 12/21/2020 | Europe / Belgium / Liege                          |
| EPI_ISL_722958 | 12/1/2020  | 12/21/2020 | Europe / Belgium / Liege                          |
| EPI_ISL_722959 | 12/1/2020  | 12/21/2020 | Europe / Belgium / Liege                          |
| EPI_ISL_722960 | 12/1/2020  | 12/21/2020 | Europe / Belgium / Liege                          |
| EPI_ISL_722961 | 12/1/2020  | 12/21/2020 | Europe / Belgium / Liege                          |
| EPI_ISL_722962 | 12/1/2020  | 12/21/2020 | Europe / Belgium / Liege                          |
| EPI_ISL_722963 | 12/2/2020  | 12/21/2020 | Europe / Belgium / Liege                          |
| EPI_ISL_722964 | 12/2/2020  | 12/21/2020 | Europe / Belgium / Liege                          |
| EPI_ISL_722965 | 12/2/2020  | 12/21/2020 | Europe / Belgium / Liege                          |
| EPI_ISL_722966 | 12/2/2020  | 12/21/2020 | Europe / Belgium / Liege                          |
| EPI_ISL_722977 | 11/30/2020 | 12/21/2020 | Europe / United Kingdom / England                 |
| EPI_ISL_722978 | 11/30/2020 | 12/21/2020 | Europe / United Kingdom / England                 |





|                |            |            |                                      |
|----------------|------------|------------|--------------------------------------|
| EPI_ISL_723112 | 4/5/2020   | 12/21/2020 | Europe / Germany / Baden-Wurttemberg |
| EPI_ISL_723113 | 4/10/2020  | 12/21/2020 | Europe / Germany / Baden-Wurttemberg |
| EPI_ISL_723114 | 4/10/2020  | 12/21/2020 | Europe / Germany / Baden-Wurttemberg |
| EPI_ISL_723115 | 4/11/2020  | 12/21/2020 | Europe / Germany / Baden-Wurttemberg |
| EPI_ISL_723116 | 4/14/2020  | 12/21/2020 | Europe / Germany / Baden-Wurttemberg |
| EPI_ISL_723117 | 4/14/2020  | 12/21/2020 | Europe / Germany / Baden-Wurttemberg |
| EPI_ISL_723118 | 5/8/2020   | 12/21/2020 | North America / USA / Minnesota      |
| EPI_ISL_723119 | 11/10/2020 | 12/21/2020 | North America / USA / Minnesota      |
| EPI_ISL_723120 | 11/13/2020 | 12/21/2020 | North America / USA / Minnesota      |
| EPI_ISL_723121 | 11/15/2020 | 12/21/2020 | North America / USA / Minnesota      |
| EPI_ISL_723122 | 11/15/2020 | 12/21/2020 | North America / USA / Minnesota      |
| EPI_ISL_723123 | 11/18/2020 | 12/21/2020 | North America / USA / Minnesota      |
| EPI_ISL_723124 | 11/23/2020 | 12/21/2020 | North America / USA / Minnesota      |
| EPI_ISL_723125 | 11/23/2020 | 12/21/2020 | North America / USA / Minnesota      |
| EPI_ISL_723126 | 11/21/2020 | 12/21/2020 | North America / USA / Minnesota      |
| EPI_ISL_723127 | 11/24/2020 | 12/21/2020 | North America / USA / Minnesota      |
| EPI_ISL_723128 | 11/24/2020 | 12/21/2020 | North America / USA / Minnesota      |
| EPI_ISL_723129 | 11/24/2020 | 12/21/2020 | North America / USA / Minnesota      |
| EPI_ISL_723130 | 11/26/2020 | 12/21/2020 | North America / USA / Minnesota      |
| EPI_ISL_723131 | 11/27/2020 | 12/21/2020 | North America / USA / Minnesota      |
| EPI_ISL_723132 | 11/27/2020 | 12/21/2020 | North America / USA / Minnesota      |
| EPI_ISL_723133 | 11/27/2020 | 12/21/2020 | North America / USA / Minnesota      |
| EPI_ISL_723134 | 11/29/2020 | 12/21/2020 | North America / USA / Minnesota      |
| EPI_ISL_723135 | 11/29/2020 | 12/21/2020 | North America / USA / Minnesota      |
| EPI_ISL_723136 | 11/29/2020 | 12/21/2020 | North America / USA / Minnesota      |
| EPI_ISL_723137 | 12/2/2020  | 12/21/2020 | North America / USA / Minnesota      |
| EPI_ISL_723138 | 12/4/2020  | 12/21/2020 | North America / USA / Minnesota      |
| EPI_ISL_723139 | 12/7/2020  | 12/21/2020 | North America / USA / Minnesota      |
| EPI_ISL_723140 | 12/7/2020  | 12/21/2020 | North America / USA / Minnesota      |
| EPI_ISL_723141 | 11/2/2020  | 12/21/2020 | North America / USA / Minnesota      |
| EPI_ISL_723142 | 11/6/2020  | 12/21/2020 | North America / USA / Minnesota      |
| EPI_ISL_723143 | 11/6/2020  | 12/21/2020 | North America / USA / Minnesota      |
| EPI_ISL_723144 | 11/9/2020  | 12/21/2020 | North America / USA / Minnesota      |
| EPI_ISL_723145 | 11/18/2020 | 12/21/2020 | North America / USA / Minnesota      |
| EPI_ISL_723146 | 12/8/2020  | 12/21/2020 | North America / USA / Minnesota      |
| EPI_ISL_723147 | 11/28/2020 | 12/21/2020 | North America / USA / Minnesota      |
| EPI_ISL_723148 | 11/29/2020 | 12/21/2020 | North America / USA / Minnesota      |
| EPI_ISL_723149 | 11/24/2020 | 12/21/2020 | North America / USA / Minnesota      |
| EPI_ISL_723150 | 11/23/2020 | 12/21/2020 | North America / USA / Minnesota      |
| EPI_ISL_723151 | 11/24/2020 | 12/21/2020 | North America / USA / Minnesota      |
| EPI_ISL_723152 | 11/28/2020 | 12/21/2020 | North America / USA / Minnesota      |
| EPI_ISL_723153 | 11/29/2020 | 12/21/2020 | North America / USA / Minnesota      |
| EPI_ISL_723154 | 11/26/2020 | 12/21/2020 | North America / USA / Minnesota      |
| EPI_ISL_723155 | 11/30/2020 | 12/21/2020 | Europe / Netherlands / Utrecht       |
| EPI_ISL_723156 | 11/23/2020 | 12/21/2020 | Europe / Netherlands / Noord-Holland |
| EPI_ISL_723157 | 11/16/2020 | 12/21/2020 | Europe / Netherlands / Noord-Brabant |
| EPI_ISL_723158 | 12/2/2020  | 12/21/2020 | Europe / Netherlands / Gelderland    |

|                |            |            |                                      |
|----------------|------------|------------|--------------------------------------|
| EPI_ISL_723159 | 12/2/2020  | 12/21/2020 | Europe / Netherlands / Gelderland    |
| EPI_ISL_723160 | 11/25/2020 | 12/21/2020 | Europe / Netherlands / Utrecht       |
| EPI_ISL_723161 | 12/2/2020  | 12/21/2020 | Europe / Netherlands / Gelderland    |
| EPI_ISL_723162 | 12/2/2020  | 12/21/2020 | Europe / Netherlands / Gelderland    |
| EPI_ISL_723163 | 12/2/2020  | 12/21/2020 | Europe / Netherlands / Gelderland    |
| EPI_ISL_723164 | 11/11/2020 | 12/21/2020 | Europe / Netherlands / Overijssel    |
| EPI_ISL_723165 | 12/2/2020  | 12/21/2020 | Europe / Netherlands / Gelderland    |
| EPI_ISL_723166 | 11/10/2020 | 12/21/2020 | Europe / Netherlands / Noord-Holland |
| EPI_ISL_723167 | 12/3/2020  | 12/21/2020 | Europe / Netherlands / Gelderland    |
| EPI_ISL_723168 | 12/3/2020  | 12/21/2020 | Europe / Netherlands / Gelderland    |
| EPI_ISL_723169 | 11/30/2020 | 12/21/2020 | Europe / Netherlands / Utrecht       |
| EPI_ISL_723170 | 12/3/2020  | 12/21/2020 | Europe / Netherlands / Gelderland    |
| EPI_ISL_723171 | 12/3/2020  | 12/21/2020 | Europe / Netherlands / Gelderland    |
| EPI_ISL_723172 | 12/3/2020  | 12/21/2020 | Europe / Netherlands / Gelderland    |
| EPI_ISL_723173 | 12/3/2020  | 12/21/2020 | Europe / Netherlands / Gelderland    |
| EPI_ISL_723174 | 12/3/2020  | 12/21/2020 | Europe / Netherlands / Gelderland    |
| EPI_ISL_723175 | 12/1/2020  | 12/21/2020 | Europe / Netherlands / Noord-Holland |
| EPI_ISL_723176 | 12/2/2020  | 12/21/2020 | Europe / Netherlands / Limburg       |
| EPI_ISL_723177 | 12/2/2020  | 12/21/2020 | Europe / Netherlands / Limburg       |
| EPI_ISL_723178 | 11/9/2020  | 12/21/2020 | Europe / Netherlands / Gelderland    |
| EPI_ISL_723179 | 11/17/2020 | 12/21/2020 | Europe / Netherlands / Noord-Brabant |
| EPI_ISL_723180 | 11/9/2020  | 12/21/2020 | Europe / Netherlands / Overijssel    |
| EPI_ISL_723181 | 11/25/2020 | 12/21/2020 | Europe / Netherlands / Gelderland    |
| EPI_ISL_723182 | 12/3/2020  | 12/21/2020 | Europe / Netherlands / Gelderland    |
| EPI_ISL_723183 | 12/3/2020  | 12/21/2020 | Europe / Netherlands / Gelderland    |
| EPI_ISL_723184 | 12/3/2020  | 12/21/2020 | Europe / Netherlands / Gelderland    |
| EPI_ISL_723185 | 12/3/2020  | 12/21/2020 | Europe / Netherlands / Gelderland    |
| EPI_ISL_723186 | 12/3/2020  | 12/21/2020 | Europe / Netherlands / Gelderland    |
| EPI_ISL_723187 | 12/3/2020  | 12/21/2020 | Europe / Netherlands / Gelderland    |
| EPI_ISL_723188 | 12/3/2020  | 12/21/2020 | Europe / Netherlands / Gelderland    |
| EPI_ISL_723189 | 12/3/2020  | 12/21/2020 | Europe / Netherlands / Gelderland    |
| EPI_ISL_723190 | 12/3/2020  | 12/21/2020 | Europe / Netherlands / Gelderland    |
| EPI_ISL_723191 | 12/3/2020  | 12/21/2020 | Europe / Netherlands / Gelderland    |
| EPI_ISL_723193 | 11/13/2020 | 12/21/2020 | Europe / Netherlands / Utrecht       |
| EPI_ISL_723194 | 12/5/2020  | 12/21/2020 | Europe / Netherlands / Noord-Holland |
| EPI_ISL_723195 | 12/4/2020  | 12/21/2020 | Europe / Netherlands / Noord-Holland |
| EPI_ISL_723196 | 11/25/2020 | 12/21/2020 | Europe / Netherlands / Noord-Brabant |
| EPI_ISL_723197 | 11/26/2020 | 12/21/2020 | Europe / Netherlands / Noord-Brabant |
| EPI_ISL_723198 | 11/26/2020 | 12/21/2020 | Europe / Netherlands / Noord-Brabant |
| EPI_ISL_723199 | 11/5/2020  | 12/21/2020 | Europe / Netherlands / Noord-Holland |
| EPI_ISL_723200 | 11/20/2020 | 12/21/2020 | Europe / Netherlands / Noord-Holland |
| EPI_ISL_723201 | 11/30/2020 | 12/21/2020 | Europe / Netherlands / Friesland     |
| EPI_ISL_723202 | 11/20/2020 | 12/21/2020 | Europe / Netherlands / Noord-Holland |
| EPI_ISL_723203 | 11/20/2020 | 12/21/2020 | Europe / Netherlands / Noord-Holland |
| EPI_ISL_723204 | 11/20/2020 | 12/21/2020 | Europe / Netherlands / Noord-Holland |
| EPI_ISL_723205 | 11/21/2020 | 12/21/2020 | Europe / Netherlands / Noord-Holland |
| EPI_ISL_723206 | 11/21/2020 | 12/21/2020 | Europe / Netherlands / Noord-Holland |

|                |            |            |                                      |
|----------------|------------|------------|--------------------------------------|
| EPI_ISL_723207 | 11/21/2020 | 12/21/2020 | Europe / Netherlands / Noord-Holland |
| EPI_ISL_723208 | 11/21/2020 | 12/21/2020 | Europe / Netherlands / Noord-Holland |
| EPI_ISL_723209 | 11/21/2020 | 12/21/2020 | Europe / Netherlands / Noord-Holland |
| EPI_ISL_723210 | 11/22/2020 | 12/21/2020 | Europe / Netherlands / Noord-Holland |
| EPI_ISL_723211 | 11/22/2020 | 12/21/2020 | Europe / Netherlands / Utrecht       |
| EPI_ISL_723212 | 10/10/2020 | 12/21/2020 | Europe / Netherlands / Zeeland       |
| EPI_ISL_723213 | 11/20/2020 | 12/21/2020 | Europe / Netherlands / Noord-Holland |
| EPI_ISL_723214 | 11/20/2020 | 12/21/2020 | Europe / Netherlands / Noord-Holland |
| EPI_ISL_723215 | 11/20/2020 | 12/21/2020 | Europe / Netherlands / Noord-Holland |
| EPI_ISL_723216 | 11/21/2020 | 12/21/2020 | Europe / Netherlands / Noord-Holland |
| EPI_ISL_723217 | 11/21/2020 | 12/21/2020 | Europe / Netherlands / Noord-Holland |
| EPI_ISL_723218 | 11/24/2020 | 12/21/2020 | Europe / Netherlands / Zuid-Holland  |
| EPI_ISL_723219 | 11/11/2020 | 12/21/2020 | Europe / Netherlands / Noord-Holland |
| EPI_ISL_723220 | 11/23/2020 | 12/21/2020 | Europe / Netherlands / Noord-Holland |
| EPI_ISL_723221 | 11/24/2020 | 12/21/2020 | Europe / Netherlands / Zuid-Holland  |
| EPI_ISL_723222 | 11/26/2020 | 12/21/2020 | Europe / Netherlands / Limburg       |
| EPI_ISL_723223 | 11/9/2020  | 12/21/2020 | Europe / Netherlands / Groningen     |
| EPI_ISL_723224 | 11/10/2020 | 12/21/2020 | Europe / Netherlands / Noord-Brabant |
| EPI_ISL_723225 | 11/19/2020 | 12/21/2020 | Europe / Netherlands / Noord-Brabant |
| EPI_ISL_723226 | 11/20/2020 | 12/21/2020 | Europe / Netherlands / Noord-Holland |
| EPI_ISL_723227 | 11/21/2020 | 12/21/2020 | Europe / Netherlands / Noord-Holland |
| EPI_ISL_723228 | 11/26/2020 | 12/21/2020 | Europe / Netherlands / Limburg       |
| EPI_ISL_723229 | 11/23/2020 | 12/21/2020 | Europe / Netherlands / Utrecht       |
| EPI_ISL_723230 | 11/23/2020 | 12/21/2020 | Europe / Netherlands / Utrecht       |
| EPI_ISL_723231 | 11/21/2020 | 12/21/2020 | Europe / Netherlands / Noord-Holland |
| EPI_ISL_723232 | 11/9/2020  | 12/21/2020 | Europe / Netherlands / Gelderland    |
| EPI_ISL_723233 | 11/5/2020  | 12/21/2020 | Europe / Netherlands / Noord-Holland |
| EPI_ISL_723234 | 11/8/2020  | 12/21/2020 | Europe / Netherlands / Noord-Holland |
| EPI_ISL_723235 | 11/7/2020  | 12/21/2020 | Europe / Netherlands / Noord-Holland |
| EPI_ISL_723236 | 11/5/2020  | 12/21/2020 | Europe / Netherlands / Noord-Holland |
| EPI_ISL_723237 | 11/5/2020  | 12/21/2020 | Europe / Netherlands / Noord-Holland |
| EPI_ISL_723238 | 11/9/2020  | 12/21/2020 | Europe / Netherlands / Noord-Holland |
| EPI_ISL_723239 | 11/13/2020 | 12/21/2020 | Europe / Netherlands / Utrecht       |
| EPI_ISL_723240 | 11/13/2020 | 12/21/2020 | Europe / Netherlands / Utrecht       |
| EPI_ISL_723241 | 11/15/2020 | 12/21/2020 | Europe / Netherlands / Noord-Holland |
| EPI_ISL_723242 | 11/28/2020 | 12/21/2020 | Europe / Netherlands / Noord-Holland |
| EPI_ISL_723243 | 11/27/2020 | 12/21/2020 | Europe / Netherlands / Noord-Holland |
| EPI_ISL_723244 | 11/24/2020 | 12/21/2020 | Europe / Netherlands / Noord-Holland |
| EPI_ISL_723245 | 11/24/2020 | 12/21/2020 | Europe / Netherlands / Noord-Holland |
| EPI_ISL_723246 | 11/24/2020 | 12/21/2020 | Europe / Netherlands / Noord-Holland |
| EPI_ISL_723247 | 11/24/2020 | 12/21/2020 | Europe / Netherlands / Noord-Holland |
| EPI_ISL_723248 | 11/26/2020 | 12/21/2020 | Europe / Netherlands / Noord-Holland |
| EPI_ISL_723249 | 11/24/2020 | 12/21/2020 | Europe / Netherlands / Utrecht       |
| EPI_ISL_723250 | 11/25/2020 | 12/21/2020 | Europe / Netherlands / Utrecht       |
| EPI_ISL_723251 | 11/16/2020 | 12/21/2020 | Europe / Netherlands / Gelderland    |
| EPI_ISL_723252 | 12/2/2020  | 12/21/2020 | Europe / Netherlands / Friesland     |
| EPI_ISL_723253 | 11/8/2020  | 12/21/2020 | Europe / Netherlands / Flevoland     |

|                |            |            |                                      |
|----------------|------------|------------|--------------------------------------|
| EPI_ISL_723254 | 11/8/2020  | 12/21/2020 | Europe / Netherlands / Noord-Holland |
| EPI_ISL_723255 | 11/8/2020  | 12/21/2020 | Europe / Netherlands / Noord-Holland |
| EPI_ISL_723256 | 11/8/2020  | 12/21/2020 | Europe / Netherlands / Noord-Holland |
| EPI_ISL_723257 | 11/6/2020  | 12/21/2020 | Europe / Netherlands / Noord-Holland |
| EPI_ISL_723258 | 11/10/2020 | 12/21/2020 | Europe / Netherlands / Noord-Holland |
| EPI_ISL_723259 | 11/12/2020 | 12/21/2020 | Europe / Netherlands / Noord-Holland |
| EPI_ISL_723260 | 11/13/2020 | 12/21/2020 | Europe / Netherlands / Noord-Holland |
| EPI_ISL_723261 | 11/13/2020 | 12/21/2020 | Europe / Netherlands / Noord-Holland |
| EPI_ISL_723262 | 11/15/2020 | 12/21/2020 | Europe / Netherlands / Noord-Holland |
| EPI_ISL_723263 | 11/27/2020 | 12/21/2020 | Europe / Netherlands / Noord-Holland |
| EPI_ISL_723264 | 11/27/2020 | 12/21/2020 | Europe / Netherlands / Noord-Holland |
| EPI_ISL_723265 | 11/27/2020 | 12/21/2020 | Europe / Netherlands / Noord-Holland |
| EPI_ISL_723266 | 11/23/2020 | 12/21/2020 | Europe / Netherlands / Noord-Holland |
| EPI_ISL_723267 | 11/23/2020 | 12/21/2020 | Europe / Netherlands / Noord-Holland |
| EPI_ISL_723268 | 11/23/2020 | 12/21/2020 | Europe / Netherlands / Noord-Holland |
| EPI_ISL_723269 | 11/24/2020 | 12/21/2020 | Europe / Netherlands / Noord-Holland |
| EPI_ISL_723270 | 11/24/2020 | 12/21/2020 | Europe / Netherlands / Utrecht       |
| EPI_ISL_723271 | 11/11/2020 | 12/21/2020 | Europe / Netherlands / Overijssel    |
| EPI_ISL_723272 | 11/18/2020 | 12/21/2020 | Europe / Netherlands / Overijssel    |
| EPI_ISL_723273 | 11/19/2020 | 12/21/2020 | Europe / Netherlands / Gelderland    |
| EPI_ISL_723274 | 11/19/2020 | 12/21/2020 | Europe / Netherlands / Overijssel    |
| EPI_ISL_723275 | 11/10/2020 | 12/21/2020 | Europe / Netherlands / Gelderland    |
| EPI_ISL_723276 | 11/9/2020  | 12/21/2020 | Europe / Netherlands / Overijssel    |
| EPI_ISL_723277 | 12/2/2020  | 12/21/2020 | Europe / Netherlands / Friesland     |
| EPI_ISL_723278 | 12/2/2020  | 12/21/2020 | Europe / Netherlands / Friesland     |
| EPI_ISL_723279 | 12/2/2020  | 12/21/2020 | Europe / Netherlands / Friesland     |
| EPI_ISL_723280 | 11/7/2020  | 12/21/2020 | Europe / Netherlands / Noord-Holland |
| EPI_ISL_723281 | 11/7/2020  | 12/21/2020 | Europe / Netherlands / Noord-Holland |
| EPI_ISL_723282 | 11/5/2020  | 12/21/2020 | Europe / Netherlands / Noord-Holland |
| EPI_ISL_723283 | 11/10/2020 | 12/21/2020 | Europe / Netherlands / Noord-Holland |
| EPI_ISL_723284 | 11/15/2020 | 12/21/2020 | Europe / Netherlands / Noord-Holland |
| EPI_ISL_723285 | 11/15/2020 | 12/21/2020 | Europe / Netherlands / Noord-Holland |
| EPI_ISL_723286 | 11/15/2020 | 12/21/2020 | Europe / Netherlands / Noord-Holland |
| EPI_ISL_723287 | 11/14/2020 | 12/21/2020 | Europe / Netherlands / Noord-Holland |
| EPI_ISL_723288 | 11/27/2020 | 12/21/2020 | Europe / Netherlands / Noord-Holland |
| EPI_ISL_723289 | 11/23/2020 | 12/21/2020 | Europe / Netherlands / Noord-Holland |
| EPI_ISL_723290 | 11/25/2020 | 12/21/2020 | Europe / Netherlands / Utrecht       |
| EPI_ISL_723291 | 11/25/2020 | 12/21/2020 | Europe / Netherlands / Utrecht       |
| EPI_ISL_723292 | 11/17/2020 | 12/21/2020 | Europe / Netherlands / Overijssel    |
| EPI_ISL_723293 | 11/18/2020 | 12/21/2020 | Europe / Netherlands / Overijssel    |
| EPI_ISL_723294 | 11/18/2020 | 12/21/2020 | Europe / Netherlands / Overijssel    |
| EPI_ISL_723295 | 11/17/2020 | 12/21/2020 | Europe / Netherlands / Gelderland    |
| EPI_ISL_723296 | 11/16/2020 | 12/21/2020 | Europe / Netherlands / Overijssel    |
| EPI_ISL_723297 | 11/18/2020 | 12/21/2020 | Europe / Netherlands / Gelderland    |
| EPI_ISL_723298 | 11/10/2020 | 12/21/2020 | Europe / Netherlands / Overijssel    |
| EPI_ISL_723299 | 11/10/2020 | 12/21/2020 | Europe / Netherlands / Overijssel    |
| EPI_ISL_723300 | 11/11/2020 | 12/21/2020 | Europe / Netherlands / Overijssel    |



|                |            |            |                                      |
|----------------|------------|------------|--------------------------------------|
| EPI_ISL_723301 | 11/8/2020  | 12/21/2020 | Europe / Netherlands / Noord-Holland |
| EPI_ISL_723302 | 11/8/2020  | 12/21/2020 | Europe / Netherlands / Noord-Holland |
| EPI_ISL_723303 | 11/10/2020 | 12/21/2020 | Europe / Netherlands / Noord-Holland |
| EPI_ISL_723304 | 11/15/2020 | 12/21/2020 | Europe / Netherlands / Noord-Holland |
| EPI_ISL_723305 | 11/14/2020 | 12/21/2020 | Europe / Netherlands / Noord-Holland |
| EPI_ISL_723306 | 11/25/2020 | 12/21/2020 | Europe / Netherlands / Utrecht       |
| EPI_ISL_723307 | 11/25/2020 | 12/21/2020 | Europe / Netherlands / Utrecht       |
| EPI_ISL_723308 | 11/24/2020 | 12/21/2020 | Europe / Netherlands / Utrecht       |
| EPI_ISL_723309 | 11/25/2020 | 12/21/2020 | Europe / Netherlands / Utrecht       |
| EPI_ISL_723310 | 11/24/2020 | 12/21/2020 | Europe / Netherlands / Utrecht       |
| EPI_ISL_723311 | 11/29/2020 | 12/21/2020 | Europe / Netherlands / Utrecht       |
| EPI_ISL_723312 | 11/30/2020 | 12/21/2020 | Europe / Netherlands / Utrecht       |
| EPI_ISL_723313 | 11/27/2020 | 12/21/2020 | Europe / Netherlands / Overijssel    |
| EPI_ISL_723314 | 11/28/2020 | 12/21/2020 | Europe / Netherlands / Overijssel    |
| EPI_ISL_723315 | 11/29/2020 | 12/21/2020 | Europe / Netherlands / Overijssel    |
| EPI_ISL_723316 | 11/23/2020 | 12/21/2020 | Europe / Netherlands / Friesland     |
| EPI_ISL_723317 | 11/23/2020 | 12/21/2020 | Europe / Netherlands / Friesland     |
| EPI_ISL_723318 | 11/26/2020 | 12/21/2020 | Europe / Netherlands / Gelderland    |
| EPI_ISL_723319 | 11/30/2020 | 12/21/2020 | Europe / Netherlands / Utrecht       |
| EPI_ISL_723320 | 11/29/2020 | 12/21/2020 | Europe / Netherlands / Utrecht       |
| EPI_ISL_723321 | 11/26/2020 | 12/21/2020 | Europe / Netherlands / Overijssel    |
| EPI_ISL_723322 | 11/27/2020 | 12/21/2020 | Europe / Netherlands / Overijssel    |
| EPI_ISL_723323 | 11/23/2020 | 12/21/2020 | Europe / Netherlands / Friesland     |
| EPI_ISL_723324 | 11/16/2020 | 12/21/2020 | Europe / Netherlands / Overijssel    |
| EPI_ISL_723325 | 11/17/2020 | 12/21/2020 | Europe / Netherlands / Overijssel    |
| EPI_ISL_723326 | 11/10/2020 | 12/21/2020 | Europe / Netherlands / Gelderland    |
| EPI_ISL_723327 | 11/24/2020 | 12/21/2020 | Europe / Netherlands / Noord-Holland |
| EPI_ISL_723328 | 11/30/2020 | 12/21/2020 | Europe / Netherlands / Utrecht       |
| EPI_ISL_723329 | 11/29/2020 | 12/21/2020 | Europe / Netherlands / Utrecht       |
| EPI_ISL_723330 | 11/29/2020 | 12/21/2020 | Europe / Netherlands / Utrecht       |
| EPI_ISL_723331 | 11/29/2020 | 12/21/2020 | Europe / Netherlands / Utrecht       |
| EPI_ISL_723332 | 11/30/2020 | 12/21/2020 | Europe / Netherlands / Utrecht       |
| EPI_ISL_723333 | 11/29/2020 | 12/21/2020 | Europe / Netherlands / Zuid-Holland  |
| EPI_ISL_723334 | 11/30/2020 | 12/21/2020 | Europe / Netherlands / Overijssel    |
| EPI_ISL_723335 | 11/30/2020 | 12/21/2020 | Europe / Netherlands / Utrecht       |
| EPI_ISL_723336 | 11/30/2020 | 12/21/2020 | Europe / Netherlands / Utrecht       |
| EPI_ISL_723337 | 11/30/2020 | 12/21/2020 | Europe / Netherlands / Utrecht       |
| EPI_ISL_723338 | 11/30/2020 | 12/21/2020 | Europe / Netherlands / Utrecht       |
| EPI_ISL_723339 | 11/30/2020 | 12/21/2020 | Europe / Netherlands / Utrecht       |
| EPI_ISL_723340 | 11/7/2020  | 12/21/2020 | Europe / Netherlands / Noord-Holland |
| EPI_ISL_723341 | 11/27/2020 | 12/21/2020 | Europe / Netherlands / Noord-Holland |
| EPI_ISL_723342 | 11/25/2020 | 12/21/2020 | Europe / Netherlands / Utrecht       |
| EPI_ISL_723343 | 11/24/2020 | 12/21/2020 | Europe / Netherlands / Utrecht       |
| EPI_ISL_723344 | 11/25/2020 | 12/21/2020 | Europe / Netherlands / Utrecht       |
| EPI_ISL_723345 | 11/29/2020 | 12/21/2020 | Europe / Netherlands / Utrecht       |
| EPI_ISL_723346 | 11/30/2020 | 12/21/2020 | Europe / Netherlands / Utrecht       |
| EPI_ISL_723347 | 11/29/2020 | 12/21/2020 | Europe / Netherlands / Utrecht       |

|                |            |            |                                      |
|----------------|------------|------------|--------------------------------------|
| EPI_ISL_723348 | 11/29/2020 | 12/21/2020 | Europe / Netherlands / Friesland     |
| EPI_ISL_723349 | 11/29/2020 | 12/21/2020 | Europe / Netherlands / Friesland     |
| EPI_ISL_723350 | 11/29/2020 | 12/21/2020 | Europe / Netherlands / Friesland     |
| EPI_ISL_723351 | 11/29/2020 | 12/21/2020 | Europe / Netherlands / Friesland     |
| EPI_ISL_723352 | 11/29/2020 | 12/21/2020 | Europe / Netherlands / Friesland     |
| EPI_ISL_723353 | 11/29/2020 | 12/21/2020 | Europe / Netherlands / Friesland     |
| EPI_ISL_723354 | 11/30/2020 | 12/21/2020 | Europe / Netherlands / Friesland     |
| EPI_ISL_723355 | 11/30/2020 | 12/21/2020 | Europe / Netherlands / Friesland     |
| EPI_ISL_723356 | 11/20/2020 | 12/21/2020 | Europe / Netherlands / Friesland     |
| EPI_ISL_723357 | 11/26/2020 | 12/21/2020 | Europe / Netherlands / Friesland     |
| EPI_ISL_723358 | 11/20/2020 | 12/21/2020 | Europe / Netherlands / Friesland     |
| EPI_ISL_723359 | 11/22/2020 | 12/21/2020 | Europe / Netherlands / Noord-Brabant |
| EPI_ISL_723360 | 11/25/2020 | 12/21/2020 | Europe / Netherlands / Gelderland    |
| EPI_ISL_723361 | 11/24/2020 | 12/21/2020 | Europe / Netherlands / Gelderland    |
| EPI_ISL_723362 | 11/26/2020 | 12/21/2020 | Europe / Netherlands / Gelderland    |
| EPI_ISL_723363 | 11/26/2020 | 12/21/2020 | Europe / Netherlands / Noord-Brabant |
| EPI_ISL_723364 | 11/26/2020 | 12/21/2020 | Europe / Netherlands / Limburg       |
| EPI_ISL_723365 | 11/27/2020 | 12/21/2020 | Europe / Netherlands / Friesland     |
| EPI_ISL_723366 | 11/30/2020 | 12/21/2020 | Europe / Netherlands / Limburg       |
| EPI_ISL_723367 | 12/1/2020  | 12/21/2020 | Europe / Netherlands / Gelderland    |
| EPI_ISL_723368 | 11/30/2020 | 12/21/2020 | Europe / Netherlands / Limburg       |
| EPI_ISL_723369 | 12/1/2020  | 12/21/2020 | Europe / Netherlands / Gelderland    |
| EPI_ISL_723370 | 12/4/2020  | 12/21/2020 | Europe / Netherlands / Noord-Holland |
| EPI_ISL_723371 | 12/4/2020  | 12/21/2020 | Europe / Netherlands / Noord-Holland |
| EPI_ISL_723372 | 12/4/2020  | 12/21/2020 | Europe / Netherlands / Noord-Holland |
| EPI_ISL_723373 | 12/4/2020  | 12/21/2020 | Europe / Netherlands / Utrecht       |
| EPI_ISL_723374 | 12/5/2020  | 12/21/2020 | Europe / Netherlands / Noord-Holland |
| EPI_ISL_723375 | 12/5/2020  | 12/21/2020 | Europe / Netherlands / Noord-Holland |
| EPI_ISL_723376 | 12/5/2020  | 12/21/2020 | Europe / Netherlands / Noord-Holland |
| EPI_ISL_723377 | 12/5/2020  | 12/21/2020 | Europe / Netherlands / Noord-Holland |
| EPI_ISL_723378 | 12/5/2020  | 12/21/2020 | Europe / Netherlands / Noord-Holland |
| EPI_ISL_723379 | 12/6/2020  | 12/21/2020 | Europe / Netherlands / Noord-Holland |
| EPI_ISL_723380 | 12/6/2020  | 12/21/2020 | Europe / Netherlands / Noord-Holland |
| EPI_ISL_723381 | 11/30/2020 | 12/21/2020 | Europe / Netherlands / Noord-Holland |
| EPI_ISL_723382 | 12/1/2020  | 12/21/2020 | Europe / Netherlands / Noord-Holland |
| EPI_ISL_723383 | 11/21/2020 | 12/21/2020 | Europe / Netherlands / Noord-Brabant |
| EPI_ISL_723384 | 12/1/2020  | 12/21/2020 | Europe / Netherlands / Overijssel    |
| EPI_ISL_723385 | 12/5/2020  | 12/21/2020 | Europe / Netherlands / Overijssel    |
| EPI_ISL_723386 | 11/30/2020 | 12/21/2020 | Europe / Netherlands / Limburg       |
| EPI_ISL_723387 | 12/1/2020  | 12/21/2020 | Europe / Netherlands / Limburg       |
| EPI_ISL_723388 | 12/1/2020  | 12/21/2020 | Europe / Netherlands / Limburg       |
| EPI_ISL_723389 | 12/2/2020  | 12/21/2020 | Europe / Netherlands / Limburg       |
| EPI_ISL_723390 | 12/2/2020  | 12/21/2020 | Europe / Netherlands / Limburg       |
| EPI_ISL_723391 | 12/2/2020  | 12/21/2020 | Europe / Netherlands / Limburg       |
| EPI_ISL_723392 | 12/2/2020  | 12/21/2020 | Europe / Netherlands / Limburg       |
| EPI_ISL_723393 | 12/2/2020  | 12/21/2020 | Europe / Netherlands / Limburg       |
| EPI_ISL_723394 | 11/23/2020 | 12/21/2020 | Europe / Netherlands / Drenthe       |

|                |            |            |                                      |
|----------------|------------|------------|--------------------------------------|
| EPI_ISL_723395 | 11/23/2020 | 12/21/2020 | Europe / Netherlands / Groningen     |
| EPI_ISL_723396 | 11/23/2020 | 12/21/2020 | Europe / Netherlands / Drenthe       |
| EPI_ISL_723397 | 11/23/2020 | 12/21/2020 | Europe / Netherlands / Drenthe       |
| EPI_ISL_723398 | 11/27/2020 | 12/21/2020 | Europe / Netherlands / Groningen     |
| EPI_ISL_723399 | 11/25/2020 | 12/21/2020 | Europe / Netherlands / Groningen     |
| EPI_ISL_723400 | 11/27/2020 | 12/21/2020 | Europe / Netherlands / Groningen     |
| EPI_ISL_723401 | 11/27/2020 | 12/21/2020 | Europe / Netherlands / Groningen     |
| EPI_ISL_723402 | 11/27/2020 | 12/21/2020 | Europe / Netherlands / Friesland     |
| EPI_ISL_723403 | 11/28/2020 | 12/21/2020 | Europe / Netherlands / Groningen     |
| EPI_ISL_723404 | 11/28/2020 | 12/21/2020 | Europe / Netherlands / Drenthe       |
| EPI_ISL_723405 | 11/29/2020 | 12/21/2020 | Europe / Netherlands / Groningen     |
| EPI_ISL_723406 | 11/16/2020 | 12/21/2020 | Europe / Netherlands / Noord-Brabant |
| EPI_ISL_723407 | 11/16/2020 | 12/21/2020 | Europe / Netherlands / Gelderland    |
| EPI_ISL_723408 | 11/16/2020 | 12/21/2020 | Europe / Netherlands / Noord-Brabant |
| EPI_ISL_723409 | 11/17/2020 | 12/21/2020 | Europe / Netherlands / Noord-Brabant |
| EPI_ISL_723410 | 11/16/2020 | 12/21/2020 | Europe / Netherlands / Noord-Brabant |
| EPI_ISL_723411 | 11/17/2020 | 12/21/2020 | Europe / Netherlands / Noord-Brabant |
| EPI_ISL_723412 | 11/20/2020 | 12/21/2020 | Europe / Netherlands / Noord-Brabant |
| EPI_ISL_723413 | 11/20/2020 | 12/21/2020 | Europe / Netherlands / Noord-Brabant |
| EPI_ISL_723414 | 11/25/2020 | 12/21/2020 | Europe / Netherlands / Noord-Brabant |
| EPI_ISL_723415 | 11/26/2020 | 12/21/2020 | Europe / Netherlands / Noord-Brabant |
| EPI_ISL_723416 | 11/27/2020 | 12/21/2020 | Europe / Netherlands / Noord-Brabant |
| EPI_ISL_723417 | 11/24/2020 | 12/21/2020 | Europe / Netherlands / Noord-Brabant |
| EPI_ISL_723418 | 11/24/2020 | 12/21/2020 | Europe / Netherlands / Noord-Brabant |
| EPI_ISL_723419 | 11/28/2020 | 12/21/2020 | Europe / Netherlands / Noord-Brabant |
| EPI_ISL_723420 | 11/28/2020 | 12/21/2020 | Europe / Netherlands / Gelderland    |
| EPI_ISL_723421 | 11/28/2020 | 12/21/2020 | Europe / Netherlands / Noord-Brabant |
| EPI_ISL_723422 | 11/28/2020 | 12/21/2020 | Europe / Netherlands / Noord-Brabant |
| EPI_ISL_723423 | 11/20/2020 | 12/21/2020 | Europe / Netherlands / Gelderland    |
| EPI_ISL_723424 | 11/18/2020 | 12/21/2020 | Europe / Netherlands / Gelderland    |
| EPI_ISL_723425 | 11/14/2020 | 12/21/2020 | Europe / Netherlands / Gelderland    |
| EPI_ISL_723426 | 11/14/2020 | 12/21/2020 | Europe / Netherlands / Gelderland    |
| EPI_ISL_723427 | 11/10/2020 | 12/21/2020 | Europe / Netherlands / Gelderland    |
| EPI_ISL_723428 | 11/16/2020 | 12/21/2020 | Europe / Netherlands / Noord-Brabant |
| EPI_ISL_723429 | 11/21/2020 | 12/21/2020 | Europe / Netherlands / Gelderland    |
| EPI_ISL_723430 | 11/18/2020 | 12/21/2020 | Europe / Netherlands / Gelderland    |
| EPI_ISL_723431 | 11/18/2020 | 12/21/2020 | Europe / Netherlands / Gelderland    |
| EPI_ISL_723432 | 11/17/2020 | 12/21/2020 | Europe / Netherlands / Gelderland    |
| EPI_ISL_723433 | 11/17/2020 | 12/21/2020 | Europe / Netherlands / Gelderland    |
| EPI_ISL_723434 | 11/16/2020 | 12/21/2020 | Europe / Netherlands / Gelderland    |
| EPI_ISL_723435 | 11/16/2020 | 12/21/2020 | Europe / Netherlands / Gelderland    |
| EPI_ISL_723436 | 11/16/2020 | 12/21/2020 | Europe / Netherlands / Gelderland    |
| EPI_ISL_723437 | 11/14/2020 | 12/21/2020 | Europe / Netherlands / Gelderland    |
| EPI_ISL_723438 | 11/12/2020 | 12/21/2020 | Europe / Netherlands / Gelderland    |
| EPI_ISL_723439 | 11/8/2020  | 12/21/2020 | Europe / Netherlands / Gelderland    |
| EPI_ISL_723440 | 11/17/2020 | 12/21/2020 | Europe / Netherlands / Friesland     |
| EPI_ISL_723441 | 11/23/2020 | 12/21/2020 | Europe / Netherlands / Friesland     |

|                |            |            |                                      |
|----------------|------------|------------|--------------------------------------|
| EPI_ISL_723442 | 11/22/2020 | 12/21/2020 | Europe / Netherlands / Friesland     |
| EPI_ISL_723443 | 11/23/2020 | 12/21/2020 | Europe / Netherlands / Friesland     |
| EPI_ISL_723444 | 11/19/2020 | 12/21/2020 | Europe / Netherlands / Friesland     |
| EPI_ISL_723445 | 11/21/2020 | 12/21/2020 | Europe / Netherlands / Friesland     |
| EPI_ISL_723446 | 12/1/2020  | 12/21/2020 | Europe / Netherlands / Gelderland    |
| EPI_ISL_723447 | 11/30/2020 | 12/21/2020 | Europe / Netherlands / Limburg       |
| EPI_ISL_723448 | 11/13/2020 | 12/21/2020 | Europe / Netherlands / Gelderland    |
| EPI_ISL_723449 | 11/21/2020 | 12/21/2020 | Europe / Netherlands / Gelderland    |
| EPI_ISL_723450 | 11/20/2020 | 12/21/2020 | Europe / Netherlands / Gelderland    |
| EPI_ISL_723451 | 11/20/2020 | 12/21/2020 | Europe / Netherlands / Gelderland    |
| EPI_ISL_723452 | 11/11/2020 | 12/21/2020 | Europe / Netherlands / Overijssel    |
| EPI_ISL_723453 | 11/9/2020  | 12/21/2020 | Europe / Netherlands / Overijssel    |
| EPI_ISL_723454 | 12/2/2020  | 12/21/2020 | Europe / Netherlands / Friesland     |
| EPI_ISL_723455 | 12/3/2020  | 12/21/2020 | Europe / Netherlands / Gelderland    |
| EPI_ISL_723456 | 12/3/2020  | 12/21/2020 | Europe / Netherlands / Gelderland    |
| EPI_ISL_723457 | 12/3/2020  | 12/21/2020 | Europe / Netherlands / Gelderland    |
| EPI_ISL_723458 | 12/5/2020  | 12/21/2020 | Europe / Netherlands / Gelderland    |
| EPI_ISL_723459 | 11/18/2020 | 12/21/2020 | Europe / Netherlands / Gelderland    |
| EPI_ISL_723460 | 12/3/2020  | 12/21/2020 | Europe / Netherlands / Gelderland    |
| EPI_ISL_723461 | 12/3/2020  | 12/21/2020 | Europe / Netherlands / Gelderland    |
| EPI_ISL_723462 | 12/3/2020  | 12/21/2020 | Europe / Netherlands / Gelderland    |
| EPI_ISL_723463 | 12/3/2020  | 12/21/2020 | Europe / Netherlands / Gelderland    |
| EPI_ISL_723464 | 12/3/2020  | 12/21/2020 | Europe / Netherlands / Gelderland    |
| EPI_ISL_723465 | 12/5/2020  | 12/21/2020 | Europe / Netherlands / Noord-Holland |
| EPI_ISL_723466 | 11/30/2020 | 12/21/2020 | Europe / Netherlands / Noord-Holland |
| EPI_ISL_723467 | 12/2/2020  | 12/21/2020 | Europe / Netherlands / Gelderland    |
| EPI_ISL_723469 | 2020-11    | 12/21/2020 | Africa / Morocco / Rabat             |
| EPI_ISL_723470 | 10/8/2020  | 12/21/2020 | North America / USA / Virginia       |
| EPI_ISL_723471 | 10/8/2020  | 12/21/2020 | North America / USA / Virginia       |
| EPI_ISL_723472 | 10/8/2020  | 12/21/2020 | North America / USA / Virginia       |
| EPI_ISL_723473 | 11/24/2020 | 12/21/2020 | North America / USA / Virginia       |
| EPI_ISL_723474 | 11/24/2020 | 12/21/2020 | North America / USA / Virginia       |
| EPI_ISL_723475 | 11/24/2020 | 12/21/2020 | North America / USA / Virginia       |
| EPI_ISL_723476 | 11/24/2020 | 12/21/2020 | North America / USA / Virginia       |
| EPI_ISL_723477 | 11/24/2020 | 12/21/2020 | North America / USA / Virginia       |
| EPI_ISL_723478 | 11/24/2020 | 12/21/2020 | North America / USA / Virginia       |
| EPI_ISL_723479 | 11/24/2020 | 12/21/2020 | North America / USA / Virginia       |
| EPI_ISL_723480 | 11/23/2020 | 12/21/2020 | North America / USA / Virginia       |
| EPI_ISL_723481 | 11/23/2020 | 12/21/2020 | North America / USA / Virginia       |
| EPI_ISL_723482 | 11/23/2020 | 12/21/2020 | North America / USA / Virginia       |
| EPI_ISL_723483 | 11/23/2020 | 12/21/2020 | North America / USA / Virginia       |
| EPI_ISL_723484 | 11/23/2020 | 12/21/2020 | North America / USA / Virginia       |
| EPI_ISL_723485 | 11/23/2020 | 12/21/2020 | North America / USA / Virginia       |
| EPI_ISL_723486 | 11/23/2020 | 12/21/2020 | North America / USA / Virginia       |
| EPI_ISL_723487 | 11/23/2020 | 12/21/2020 | North America / USA / Virginia       |
| EPI_ISL_723488 | 11/23/2020 | 12/21/2020 | North America / USA / Virginia       |
| EPI_ISL_723489 | 11/23/2020 | 12/21/2020 | North America / USA / Virginia       |



















































































































































|                |            |            |                                                    |
|----------------|------------|------------|----------------------------------------------------|
| EPI_ISL_727968 | 11/25/2020 | 12/22/2020 | Europe / United Kingdom / England                  |
| EPI_ISL_727969 | 11/26/2020 | 12/22/2020 | Europe / United Kingdom / England                  |
| EPI_ISL_727970 | 12/3/2020  | 12/22/2020 | Europe / United Kingdom / England                  |
| EPI_ISL_727971 | 12/1/2020  | 12/22/2020 | Europe / United Kingdom / England                  |
| EPI_ISL_727972 | 12/15/2020 | 12/22/2020 | Europe / United Kingdom / England                  |
| EPI_ISL_727974 | 12/14/2020 | 12/22/2020 | Europe / United Kingdom / England                  |
| EPI_ISL_727975 | 12/9/2020  | 12/22/2020 | Europe / United Kingdom / England                  |
| EPI_ISL_727982 | 12/4/2020  | 12/22/2020 | Europe / United Kingdom / England                  |
| EPI_ISL_727983 | 12/1/2020  | 12/22/2020 | Europe / United Kingdom / England                  |
| EPI_ISL_727984 | 12/12/2020 | 12/22/2020 | Europe / United Kingdom / England                  |
| EPI_ISL_727985 | 12/1/2020  | 12/22/2020 | Europe / United Kingdom / England                  |
| EPI_ISL_727986 | 11/30/2020 | 12/22/2020 | Europe / United Kingdom / England                  |
| EPI_ISL_727987 | 12/7/2020  | 12/22/2020 | Europe / United Kingdom / England                  |
| EPI_ISL_727988 | 12/4/2020  | 12/22/2020 | Europe / United Kingdom / England                  |
| EPI_ISL_727993 | 11/1/2020  | 12/22/2020 | Europe / United Kingdom / England                  |
| EPI_ISL_727994 | 10/31/2020 | 12/22/2020 | Europe / United Kingdom / England                  |
| EPI_ISL_727997 | 11/11/2020 | 12/22/2020 | Europe / United Kingdom / England                  |
| EPI_ISL_727998 | 2/21/2020  | 12/22/2020 | Asia / Japan / Aichi                               |
| EPI_ISL_727999 | 2/21/2020  | 12/22/2020 | Asia / Japan / Aichi                               |
| EPI_ISL_728000 | 2/21/2020  | 12/22/2020 | Asia / Japan / Aichi                               |
| EPI_ISL_728001 | 11/4/2020  | 12/22/2020 | North America / USA / Wisconsin / Marathon County  |
| EPI_ISL_728002 | 10/25/2020 | 12/22/2020 | North America / USA / Wisconsin / Dane County      |
| EPI_ISL_728004 | 11/13/2020 | 12/22/2020 | North America / USA / Wisconsin / Dane County      |
| EPI_ISL_728005 | 11/14/2020 | 12/22/2020 | North America / USA / Wisconsin / Dane County      |
| EPI_ISL_728006 | 11/16/2020 | 12/22/2020 | North America / USA / Wisconsin / Dane County      |
| EPI_ISL_728007 | 11/12/2020 | 12/22/2020 | North America / USA / Illinois / Winnebago County  |
| EPI_ISL_728008 | 11/17/2020 | 12/22/2020 | North America / USA / Wisconsin / Outagamie County |
| EPI_ISL_728009 | 11/11/2020 | 12/22/2020 | North America / USA / Wisconsin / Dane County      |
| EPI_ISL_728010 | 11/13/2020 | 12/22/2020 | North America / USA / Wisconsin / Dane County      |
| EPI_ISL_728011 | 11/14/2020 | 12/22/2020 | North America / USA / Wisconsin / Dane County      |
| EPI_ISL_728012 | 9/21/2020  | 12/22/2020 | North America / USA / Wisconsin / Dane County      |
| EPI_ISL_728013 | 9/27/2020  | 12/22/2020 | North America / USA / Wisconsin / Dane County      |
| EPI_ISL_728014 | 10/5/2020  | 12/22/2020 | North America / USA / Wisconsin / Dodge County     |
| EPI_ISL_728015 | 10/6/2020  | 12/22/2020 | North America / USA / Illinois / Winnebago County  |
| EPI_ISL_728016 | 9/18/2020  | 12/22/2020 | North America / USA / Wisconsin / Dane County      |
| EPI_ISL_728017 | 10/8/2020  | 12/22/2020 | North America / USA / Wisconsin / Dane County      |
| EPI_ISL_728018 | 9/26/2020  | 12/22/2020 | North America / USA / Wisconsin / Dane County      |
| EPI_ISL_728019 | 9/25/2020  | 12/22/2020 | North America / USA / Wisconsin / Dane County      |
| EPI_ISL_728020 | 9/23/2020  | 12/22/2020 | North America / USA / Wisconsin / Dane County      |
| EPI_ISL_728021 | 10/7/2020  | 12/22/2020 | North America / USA / Wisconsin / Dane County      |
| EPI_ISL_728022 | 9/18/2020  | 12/22/2020 | North America / USA / Wisconsin / Dane County      |
| EPI_ISL_728023 | 10/7/2020  | 12/22/2020 | North America / USA / Wisconsin / Dane County      |
| EPI_ISL_728024 | 9/29/2020  | 12/22/2020 | North America / USA / Wisconsin / Dane County      |
| EPI_ISL_728025 | 9/30/2020  | 12/22/2020 | North America / USA / Illinois / Winnebago County  |
| EPI_ISL_728026 | 9/25/2020  | 12/22/2020 | North America / USA / Wisconsin / Dane County      |
| EPI_ISL_728027 | 10/7/2020  | 12/22/2020 | North America / USA / Illinois / Winnebago County  |
| EPI_ISL_728028 | 10/11/2020 | 12/22/2020 | North America / USA / Wisconsin / Dane County      |

|                |            |            |                                                    |
|----------------|------------|------------|----------------------------------------------------|
| EPI_ISL_728030 | 10/10/2020 | 12/22/2020 | North America / USA / Wisconsin / Dane County      |
| EPI_ISL_728031 | 10/11/2020 | 12/22/2020 | North America / USA / Wisconsin / Columbia County  |
| EPI_ISL_728032 | 10/11/2020 | 12/22/2020 | North America / USA / Wisconsin / Dane County      |
| EPI_ISL_728033 | 10/11/2020 | 12/22/2020 | North America / USA / Wisconsin / Dane County      |
| EPI_ISL_728034 | 11/1/2020  | 12/22/2020 | North America / USA / Wisconsin / Grant County     |
| EPI_ISL_728035 | 10/28/2020 | 12/22/2020 | North America / USA / Wisconsin / Dane County      |
| EPI_ISL_728036 | 10/27/2020 | 12/22/2020 | North America / USA / Wisconsin / Dane County      |
| EPI_ISL_728037 | 10/9/2020  | 12/22/2020 | North America / USA / Wisconsin / Dane County      |
| EPI_ISL_728038 | 11/18/2020 | 12/22/2020 | North America / USA / Wisconsin / Dane County      |
| EPI_ISL_728039 | 11/17/2020 | 12/22/2020 | North America / USA / Wisconsin / Dane County      |
| EPI_ISL_728040 | 11/17/2020 | 12/22/2020 | North America / USA / Wisconsin / Rock County      |
| EPI_ISL_728041 | 10/25/2020 | 12/22/2020 | North America / USA / Wisconsin / Dane County      |
| EPI_ISL_728042 | 11/5/2020  | 12/22/2020 | North America / USA / Wisconsin / Dane County      |
| EPI_ISL_728043 | 11/10/2020 | 12/22/2020 | North America / USA / Wisconsin / Dane County      |
| EPI_ISL_728044 | 11/12/2020 | 12/22/2020 | North America / USA / Wisconsin / Green County     |
| EPI_ISL_728045 | 11/14/2020 | 12/22/2020 | North America / USA / Wisconsin / Dane County      |
| EPI_ISL_728046 | 11/15/2020 | 12/22/2020 | North America / USA / Wisconsin / Dane County      |
| EPI_ISL_728047 | 11/16/2020 | 12/22/2020 | North America / USA / Wisconsin / Dane County      |
| EPI_ISL_728048 | 11/17/2020 | 12/22/2020 | North America / USA / Wisconsin / Dane County      |
| EPI_ISL_728049 | 11/18/2020 | 12/22/2020 | North America / USA / Wisconsin / Dane County      |
| EPI_ISL_728050 | 10/13/2020 | 12/22/2020 | North America / USA / Wisconsin / Dane County      |
| EPI_ISL_728051 | 10/21/2020 | 12/22/2020 | North America / USA / Wisconsin / Dane County      |
| EPI_ISL_728052 | 10/28/2020 | 12/22/2020 | North America / USA / Wisconsin / Dane County      |
| EPI_ISL_728053 | 11/1/2020  | 12/22/2020 | North America / USA / Wisconsin / Dane County      |
| EPI_ISL_728054 | 11/5/2020  | 12/22/2020 | North America / USA / Wisconsin / Dodge County     |
| EPI_ISL_728055 | 11/5/2020  | 12/22/2020 | North America / USA / Wisconsin / Dane County      |
| EPI_ISL_728056 | 11/12/2020 | 12/22/2020 | North America / USA / Wisconsin / Marquette County |
| EPI_ISL_728057 | 11/12/2020 | 12/22/2020 | North America / USA / Wisconsin / Columbia County  |
| EPI_ISL_728058 | 11/20/2020 | 12/22/2020 | North America / USA / Wisconsin / Dane County      |
| EPI_ISL_728059 | 11/25/2020 | 12/22/2020 | North America / USA / Wisconsin / Dane County      |
| EPI_ISL_728060 | 11/12/2020 | 12/22/2020 | North America / USA / Wisconsin / Dane County      |
| EPI_ISL_728061 | 11/20/2020 | 12/22/2020 | North America / USA / Wisconsin / Dane County      |
| EPI_ISL_728062 | 11/21/2020 | 12/22/2020 | North America / USA / Wisconsin / Dane County      |
| EPI_ISL_728063 | 11/20/2020 | 12/22/2020 | North America / USA / Wisconsin / Dane County      |
| EPI_ISL_728064 | 11/25/2020 | 12/22/2020 | North America / USA / Wisconsin / Dane County      |
| EPI_ISL_728065 | 11/25/2020 | 12/22/2020 | North America / USA / Wisconsin / Dane County      |
| EPI_ISL_728066 | 11/25/2020 | 12/22/2020 | North America / USA / Wisconsin / Jefferson County |
| EPI_ISL_728067 | 11/25/2020 | 12/22/2020 | North America / USA / Wisconsin / Dane County      |
| EPI_ISL_728068 | 11/26/2020 | 12/22/2020 | North America / USA / Wisconsin / Dane County      |
| EPI_ISL_728069 | 11/25/2020 | 12/22/2020 | North America / USA / Wisconsin / Dane County      |
| EPI_ISL_728070 | 11/25/2020 | 12/22/2020 | North America / USA / Wisconsin / Dane County      |
| EPI_ISL_728071 | 11/25/2020 | 12/22/2020 | North America / USA / Wisconsin / Dane County      |
| EPI_ISL_728072 | 11/26/2020 | 12/22/2020 | North America / USA / Wisconsin / Dane County      |
| EPI_ISL_728073 | 11/26/2020 | 12/22/2020 | North America / USA / Wisconsin / Dane County      |
| EPI_ISL_728074 | 11/26/2020 | 12/22/2020 | North America / USA / Wisconsin / Dane County      |
| EPI_ISL_728075 | 11/9/2020  | 12/22/2020 | North America / USA / Wisconsin / Jackson County   |
| EPI_ISL_728076 | 10/14/2020 | 12/22/2020 | North America / USA / Wisconsin / Dane County      |

|                |            |            |                                                    |
|----------------|------------|------------|----------------------------------------------------|
| EPI_ISL_728077 | 10/10/2020 | 12/22/2020 | North America / USA / Wisconsin / Monroe County    |
| EPI_ISL_728078 | 11/10/2020 | 12/22/2020 | North America / USA / Wisconsin / Dane County      |
| EPI_ISL_728079 | 11/6/2020  | 12/22/2020 | North America / USA / Wisconsin / Dane County      |
| EPI_ISL_728080 | 11/13/2020 | 12/22/2020 | North America / USA / Wisconsin / Dane County      |
| EPI_ISL_728081 | 11/13/2020 | 12/22/2020 | North America / USA / Wisconsin / Columbia County  |
| EPI_ISL_728082 | 11/13/2020 | 12/22/2020 | North America / USA / Wisconsin / Dane County      |
| EPI_ISL_728083 | 11/12/2020 | 12/22/2020 | North America / USA / Wisconsin / Dane County      |
| EPI_ISL_728085 | 11/13/2020 | 12/22/2020 | North America / USA / Wisconsin / Dane County      |
| EPI_ISL_728086 | 11/13/2020 | 12/22/2020 | North America / USA / Wisconsin / Dane County      |
| EPI_ISL_728087 | 11/12/2020 | 12/22/2020 | North America / USA / Wisconsin / Dane County      |
| EPI_ISL_728088 | 10/4/2020  | 12/22/2020 | North America / USA / Wisconsin / Dane County      |
| EPI_ISL_728089 | 12/5/2020  | 12/22/2020 | North America / USA / Wisconsin / Dane County      |
| EPI_ISL_728090 | 11/21/2020 | 12/22/2020 | North America / USA / Wisconsin / Dane County      |
| EPI_ISL_728091 | 11/14/2020 | 12/22/2020 | North America / USA / Wisconsin / Columbia County  |
| EPI_ISL_728092 | 10/12/2020 | 12/22/2020 | North America / USA / Wisconsin / Dane County      |
| EPI_ISL_728093 | 9/25/2020  | 12/22/2020 | North America / USA / Illinois / DeKalb County     |
| EPI_ISL_728094 | 11/16/2020 | 12/22/2020 | North America / USA / Wisconsin / Dane County      |
| EPI_ISL_728095 | 11/27/2020 | 12/22/2020 | North America / USA / Wisconsin / Monroe County    |
| EPI_ISL_728096 | 11/13/2020 | 12/22/2020 | North America / USA / Wisconsin / Dane County      |
| EPI_ISL_728097 | 11/13/2020 | 12/22/2020 | North America / USA / Wisconsin / Dane County      |
| EPI_ISL_728098 | 11/19/2020 | 12/22/2020 | North America / USA / Wisconsin / Dane County      |
| EPI_ISL_728100 | 11/17/2020 | 12/22/2020 | North America / USA / Wisconsin / Dane County      |
| EPI_ISL_728101 | 11/19/2020 | 12/22/2020 | North America / USA / Wisconsin / Columbia County  |
| EPI_ISL_728102 | 11/19/2020 | 12/22/2020 | North America / USA / Wisconsin / Dane County      |
| EPI_ISL_728103 | 11/13/2020 | 12/22/2020 | North America / USA / Wisconsin / Dane County      |
| EPI_ISL_728104 | 11/13/2020 | 12/22/2020 | North America / USA / Wisconsin / Columbia County  |
| EPI_ISL_728105 | 11/13/2020 | 12/22/2020 | North America / USA / Wisconsin / Dane County      |
| EPI_ISL_728106 | 11/13/2020 | 12/22/2020 | North America / USA / Wisconsin / Dane County      |
| EPI_ISL_728107 | 11/13/2020 | 12/22/2020 | North America / USA / Illinois / Lake County       |
| EPI_ISL_728108 | 11/18/2020 | 12/22/2020 | North America / USA / Wisconsin / Dane County      |
| EPI_ISL_728109 | 11/17/2020 | 12/22/2020 | North America / USA / Wisconsin / Green County     |
| EPI_ISL_728110 | 11/13/2020 | 12/22/2020 | North America / USA / Wisconsin / Dane County      |
| EPI_ISL_728112 | 11/19/2020 | 12/22/2020 | North America / USA / Illinois / Boone County      |
| EPI_ISL_728113 | 11/19/2020 | 12/22/2020 | North America / USA / Wisconsin / Columbia County  |
| EPI_ISL_728114 | 11/13/2020 | 12/22/2020 | North America / USA / Wisconsin / Columbia County  |
| EPI_ISL_728115 | 11/13/2020 | 12/22/2020 | North America / USA / Wisconsin / Dane County      |
| EPI_ISL_728116 | 11/19/2020 | 12/22/2020 | North America / USA / Wisconsin / Dane County      |
| EPI_ISL_728118 | 11/19/2020 | 12/22/2020 | North America / USA / Wisconsin / Dane County      |
| EPI_ISL_728119 | 11/15/2020 | 12/22/2020 | North America / USA / Wisconsin / Dodge County     |
| EPI_ISL_728120 | 11/16/2020 | 12/22/2020 | North America / USA / Wisconsin / Dane County      |
| EPI_ISL_728122 | 11/17/2020 | 12/22/2020 | North America / USA / Wisconsin / Dane County      |
| EPI_ISL_728124 | 11/19/2020 | 12/22/2020 | North America / USA / Wisconsin / Dane County      |
| EPI_ISL_728125 | 11/19/2020 | 12/22/2020 | North America / USA / Wisconsin / Dane County      |
| EPI_ISL_728126 | 11/19/2020 | 12/22/2020 | North America / USA / Wisconsin / Outagamie County |
| EPI_ISL_728127 | 11/19/2020 | 12/22/2020 | North America / USA / Wisconsin / Dane County      |
| EPI_ISL_728128 | 10/4/2020  | 12/22/2020 | North America / USA / Wisconsin / Dane County      |
| EPI_ISL_728129 | 11/16/2020 | 12/22/2020 | North America / USA / Wisconsin / Dane County      |



|                |            |            |                                                |
|----------------|------------|------------|------------------------------------------------|
| EPI_ISL_728130 | 11/14/2020 | 12/22/2020 | North America / USA / Wisconsin / Green County |
| EPI_ISL_728131 | 11/13/2020 | 12/22/2020 | North America / USA / Wisconsin / Dane County  |
| EPI_ISL_728132 | 11/13/2020 | 12/22/2020 | North America / USA / Wisconsin / Dane County  |
| EPI_ISL_728133 | 11/16/2020 | 12/22/2020 | North America / USA / Wisconsin / Dane County  |
| EPI_ISL_728134 | 11/2/2020  | 12/22/2020 | North America / USA / Wisconsin / Dane County  |
| EPI_ISL_728135 | 11/2/2020  | 12/22/2020 | North America / USA / Wisconsin / Dane County  |
| EPI_ISL_728136 | 11/2/2020  | 12/22/2020 | North America / USA / Wisconsin / Dane County  |
| EPI_ISL_728137 | 11/2/2020  | 12/22/2020 | North America / USA / Wisconsin / Dane County  |
| EPI_ISL_728138 | 11/2/2020  | 12/22/2020 | North America / USA / Wisconsin / Dane County  |
| EPI_ISL_728139 | 11/2/2020  | 12/22/2020 | North America / USA / Wisconsin / Green County |
| EPI_ISL_728140 | 11/2/2020  | 12/22/2020 | North America / USA / Wisconsin / Dodge County |
| EPI_ISL_728141 | 11/1/2020  | 12/22/2020 | North America / USA / Wisconsin / Dane County  |
| EPI_ISL_728142 | 10/30/2020 | 12/22/2020 | North America / USA / Wisconsin / Dane County  |
| EPI_ISL_728144 | 11/1/2020  | 12/22/2020 | North America / USA / Wisconsin / Dane County  |
| EPI_ISL_728145 | 11/1/2020  | 12/22/2020 | North America / USA / Wisconsin / Dane County  |
| EPI_ISL_728146 | 10/29/2020 | 12/22/2020 | North America / USA / Wisconsin / Dodge County |
| EPI_ISL_728147 | 10/29/2020 | 12/22/2020 | North America / USA / Wisconsin / Dane County  |
| EPI_ISL_728148 | 10/27/2020 | 12/22/2020 | North America / USA / Wisconsin / Dane County  |
| EPI_ISL_728149 | 10/27/2020 | 12/22/2020 | North America / USA / Wisconsin / Dane County  |
| EPI_ISL_728152 | 10/29/2020 | 12/22/2020 | North America / USA / Wisconsin / Dane County  |
| EPI_ISL_728153 | 3/1/2020   | 12/22/2020 | Asia / Japan / Aichi                           |
| EPI_ISL_728154 | 2/22/2020  | 12/22/2020 | Asia / Japan / Aichi                           |
| EPI_ISL_728155 | 2/22/2020  | 12/22/2020 | Asia / Japan / Aichi                           |
| EPI_ISL_728156 | 2/22/2020  | 12/22/2020 | Asia / Japan / Aichi                           |
| EPI_ISL_728158 | 10/1/2020  | 12/22/2020 | Asia / Malaysia                                |
| EPI_ISL_728159 | 2/24/2020  | 12/22/2020 | Asia / Japan / Aichi                           |
| EPI_ISL_728160 | 10/2/2020  | 12/22/2020 | Asia / Malaysia                                |
| EPI_ISL_728161 | 9/30/2020  | 12/22/2020 | Asia / Malaysia                                |
| EPI_ISL_728162 | 9/29/2020  | 12/22/2020 | Asia / Malaysia                                |
| EPI_ISL_728163 | 9/29/2020  | 12/22/2020 | Asia / Malaysia                                |
| EPI_ISL_728165 | 10/12/2020 | 12/22/2020 | Asia / Malaysia                                |
| EPI_ISL_728166 | 10/7/2020  | 12/22/2020 | Asia / Malaysia                                |
| EPI_ISL_728167 | 10/30/2020 | 12/22/2020 | Asia / Malaysia                                |
| EPI_ISL_728169 | 11/2/2020  | 12/22/2020 | Asia / Malaysia                                |
| EPI_ISL_728170 | 11/2/2020  | 12/22/2020 | Asia / Malaysia                                |
| EPI_ISL_728178 | 11/6/2020  | 12/22/2020 | Asia / Malaysia                                |
| EPI_ISL_728179 | 12/5/2020  | 12/22/2020 | Asia / Singapore                               |
| EPI_ISL_728180 | 12/7/2020  | 12/22/2020 | Asia / Singapore                               |
| EPI_ISL_728181 | 12/5/2020  | 12/22/2020 | Asia / Singapore                               |
| EPI_ISL_728182 | 12/6/2020  | 12/22/2020 | Asia / Singapore                               |
| EPI_ISL_728183 | 12/7/2020  | 12/22/2020 | Asia / Singapore                               |
| EPI_ISL_728184 | 12/7/2020  | 12/22/2020 | Asia / Singapore                               |
| EPI_ISL_728185 | 12/6/2020  | 12/22/2020 | Asia / Singapore                               |
| EPI_ISL_728186 | 12/4/2020  | 12/22/2020 | Asia / Singapore                               |
| EPI_ISL_728187 | 12/4/2020  | 12/22/2020 | Asia / Singapore                               |
| EPI_ISL_728188 | 12/2/2020  | 12/22/2020 | Asia / Singapore                               |
| EPI_ISL_728189 | 12/8/2020  | 12/22/2020 | Asia / Singapore                               |

|                |            |                                                                    |
|----------------|------------|--------------------------------------------------------------------|
| EPI_ISL_728190 | 12/5/2020  | 12/22/2020 Asia / Singapore                                        |
| EPI_ISL_728191 | 12/9/2020  | 12/22/2020 Asia / Singapore                                        |
| EPI_ISL_728192 | 12/11/2020 | 12/22/2020 Asia / Singapore                                        |
| EPI_ISL_728193 | 12/11/2020 | 12/22/2020 Asia / Singapore                                        |
| EPI_ISL_728194 | 12/6/2020  | 12/22/2020 Asia / Singapore                                        |
| EPI_ISL_728195 | 12/10/2020 | 12/22/2020 Asia / Singapore                                        |
| EPI_ISL_728196 | 12/11/2020 | 12/22/2020 Asia / Singapore                                        |
| EPI_ISL_728198 | 12/13/2020 | 12/22/2020 Asia / Singapore                                        |
| EPI_ISL_728199 | 12/10/2020 | 12/22/2020 Asia / Singapore                                        |
| EPI_ISL_728204 | 12/1/2020  | 12/22/2020 South America / Ecuador / Santo Domingo / Santo Domingo |
| EPI_ISL_728206 | 2/27/2020  | 12/22/2020 Asia / Japan / Aichi                                    |
| EPI_ISL_728207 | 2/24/2020  | 12/22/2020 Asia / Japan / Aichi                                    |
| EPI_ISL_728208 | 2/28/2020  | 12/22/2020 Asia / Japan / Aichi                                    |
| EPI_ISL_728209 | 11/6/2020  | 12/22/2020 Asia / Malaysia                                         |
| EPI_ISL_728210 | 11/6/2020  | 12/22/2020 Asia / Malaysia                                         |
| EPI_ISL_728211 | 11/7/2020  | 12/22/2020 Asia / Malaysia                                         |
| EPI_ISL_728212 | 11/11/2020 | 12/22/2020 Asia / Malaysia                                         |
| EPI_ISL_728219 | 2020-11    | 12/22/2020 Africa / Morocco / Rabat                                |
| EPI_ISL_728242 | 11/11/2020 | 12/22/2020 Asia / Malaysia                                         |
| EPI_ISL_728243 | 11/11/2020 | 12/22/2020 Asia / Malaysia                                         |
| EPI_ISL_728244 | 11/11/2020 | 12/22/2020 Asia / Malaysia                                         |
| EPI_ISL_728245 | 11/11/2020 | 12/22/2020 Asia / Malaysia                                         |
| EPI_ISL_728246 | 11/11/2020 | 12/22/2020 Asia / Malaysia                                         |
| EPI_ISL_728247 | 11/12/2020 | 12/22/2020 Asia / Malaysia                                         |
| EPI_ISL_728249 | 11/16/2020 | 12/22/2020 Asia / Malaysia                                         |
| EPI_ISL_728250 | 11/16/2020 | 12/22/2020 Asia / Malaysia                                         |
| EPI_ISL_728251 | 11/18/2020 | 12/22/2020 Asia / Malaysia                                         |
| EPI_ISL_728252 | 11/18/2020 | 12/22/2020 Asia / Malaysia                                         |
| EPI_ISL_728254 | 7/18/2020  | 12/22/2020 Asia / India / Maharashtra                              |
| EPI_ISL_728255 | 7/18/2020  | 12/22/2020 Asia / India / Maharashtra                              |
| EPI_ISL_728256 | 7/18/2020  | 12/22/2020 Asia / India / Maharashtra                              |
| EPI_ISL_728257 | 6/30/2020  | 12/22/2020 Asia / India / Maharashtra                              |
| EPI_ISL_728258 | 6/29/2020  | 12/22/2020 Asia / India / Maharashtra                              |
| EPI_ISL_728259 | 6/2/2020   | 12/22/2020 Asia / India / Maharashtra                              |
| EPI_ISL_728260 | 6/4/2020   | 12/22/2020 Asia / India / Maharashtra                              |
| EPI_ISL_728261 | 6/4/2020   | 12/22/2020 Asia / India / Maharashtra                              |
| EPI_ISL_728262 | 6/4/2020   | 12/22/2020 Asia / India / Maharashtra                              |
| EPI_ISL_728263 | 6/23/2020  | 12/22/2020 Asia / India / Maharashtra                              |
| EPI_ISL_728264 | 6/23/2020  | 12/22/2020 Asia / India / Maharashtra                              |
| EPI_ISL_728265 | 6/23/2020  | 12/22/2020 Asia / India / Maharashtra                              |
| EPI_ISL_728266 | 6/13/2020  | 12/22/2020 Asia / India / Maharashtra                              |
| EPI_ISL_728267 | 6/13/2020  | 12/22/2020 Asia / India / Maharashtra                              |
| EPI_ISL_728268 | 6/27/2020  | 12/22/2020 Asia / India / Maharashtra                              |
| EPI_ISL_728269 | 7/18/2020  | 12/22/2020 Asia / India / Maharashtra                              |
| EPI_ISL_728270 | 6/13/2020  | 12/22/2020 Asia / India / Maharashtra                              |
| EPI_ISL_728271 | 7/11/2020  | 12/22/2020 Asia / India / Maharashtra                              |
| EPI_ISL_728272 | 2020-11    | 12/22/2020 Africa / Morocco / Rabat                                |

|                |            |            |                                               |
|----------------|------------|------------|-----------------------------------------------|
| EPI_ISL_728273 | 2020-11    | 12/22/2020 | Africa / Morocco / Rabat                      |
| EPI_ISL_728274 | 2020-11    | 12/22/2020 | Africa / Morocco / Rabat                      |
| EPI_ISL_728275 | 2020-11    | 12/22/2020 | Africa / Morocco / Rabat                      |
| EPI_ISL_728276 | 2020-11    | 12/22/2020 | Africa / Morocco / Rabat                      |
| EPI_ISL_728277 | 2020-11    | 12/22/2020 | Africa / Morocco / Rabat                      |
| EPI_ISL_728279 | 12/1/2020  | 12/22/2020 | Europe / Italy / Lazio / Rome                 |
| EPI_ISL_728280 | 12/1/2020  | 12/22/2020 | Europe / Italy / Lazio / Rome                 |
| EPI_ISL_728281 | 12/1/2020  | 12/22/2020 | Europe / Italy / Lazio / Rome                 |
| EPI_ISL_728282 | 12/1/2020  | 12/22/2020 | Europe / Italy / Lazio / Rome                 |
| EPI_ISL_728283 | 12/1/2020  | 12/22/2020 | Europe / Italy / Lazio / Rome                 |
| EPI_ISL_728284 | 12/1/2020  | 12/22/2020 | Europe / Italy / Lazio / Rome                 |
| EPI_ISL_728285 | 12/2/2020  | 12/22/2020 | Europe / Italy / Lazio / Rome                 |
| EPI_ISL_728286 | 11/26/2020 | 12/22/2020 | Europe / Italy / Lazio / Rome                 |
| EPI_ISL_728287 | 11/30/2020 | 12/22/2020 | Europe / Italy / Lazio / Rome                 |
| EPI_ISL_728288 | 4/3/2020   | 12/22/2020 | Europe / Germany / Thuringia                  |
| EPI_ISL_728289 | 2020-11    | 12/22/2020 | Africa / Morocco / Rabat                      |
| EPI_ISL_728290 | 2020-11    | 12/22/2020 | Africa / Morocco / Rabat                      |
| EPI_ISL_728291 | 2020-11    | 12/22/2020 | Africa / Morocco / Rabat                      |
| EPI_ISL_728292 | 4/3/2020   | 12/22/2020 | Europe / Germany / Thuringia                  |
| EPI_ISL_728293 | 4/3/2020   | 12/22/2020 | Europe / Germany / Thuringia                  |
| EPI_ISL_728294 | 5/19/2020  | 12/22/2020 | Europe / Germany / Thuringia                  |
| EPI_ISL_728295 | 2020-11    | 12/22/2020 | Africa / Morocco / Rabat                      |
| EPI_ISL_728296 | 5/19/2020  | 12/22/2020 | Europe / Germany / Thuringia                  |
| EPI_ISL_728297 | 2020-11    | 12/22/2020 | Africa / Morocco / Rabat                      |
| EPI_ISL_728298 | 5/19/2020  | 12/22/2020 | Europe / Germany / Thuringia                  |
| EPI_ISL_728299 | 12/10/2020 | 12/22/2020 | Europe / United Kingdom / England             |
| EPI_ISL_728300 | 11/18/2020 | 12/22/2020 | Europe / United Kingdom / England             |
| EPI_ISL_728301 | 2020-11    | 12/22/2020 | Africa / Morocco / Rabat                      |
| EPI_ISL_728302 | 5/19/2020  | 12/22/2020 | Europe / Germany / Thuringia                  |
| EPI_ISL_728303 | 5/24/2020  | 12/22/2020 | Europe / Germany / Thuringia                  |
| EPI_ISL_728304 | 11/12/2020 | 12/22/2020 | Europe / France / Auvergne-Rhone-Alpes / Lyon |
| EPI_ISL_728305 | 11/12/2020 | 12/22/2020 | Europe / France / Auvergne-Rhone-Alpes / Lyon |
| EPI_ISL_728306 | 11/12/2020 | 12/22/2020 | Europe / France / Auvergne-Rhone-Alpes / Lyon |
| EPI_ISL_728307 | 11/12/2020 | 12/22/2020 | Europe / France / Auvergne-Rhone-Alpes / Lyon |
| EPI_ISL_728308 | 11/13/2020 | 12/22/2020 | Europe / France / Auvergne-Rhone-Alpes / Lyon |
| EPI_ISL_728309 | 11/13/2020 | 12/22/2020 | Europe / France / Auvergne-Rhone-Alpes / Lyon |
| EPI_ISL_728310 | 11/15/2020 | 12/22/2020 | Europe / France / Auvergne-Rhone-Alpes / Lyon |
| EPI_ISL_728311 | 11/16/2020 | 12/22/2020 | Europe / France / Auvergne-Rhone-Alpes / Lyon |
| EPI_ISL_728312 | 11/16/2020 | 12/22/2020 | Europe / France / Auvergne-Rhone-Alpes / Lyon |
| EPI_ISL_728313 | 11/16/2020 | 12/22/2020 | Europe / France / Auvergne-Rhone-Alpes / Lyon |
| EPI_ISL_728314 | 11/16/2020 | 12/22/2020 | Europe / France / Auvergne-Rhone-Alpes / Lyon |
| EPI_ISL_728315 | 11/16/2020 | 12/22/2020 | Europe / France / Auvergne-Rhone-Alpes / Lyon |
| EPI_ISL_728316 | 11/16/2020 | 12/22/2020 | Europe / France / Auvergne-Rhone-Alpes / Lyon |
| EPI_ISL_728317 | 11/17/2020 | 12/22/2020 | Europe / France / Auvergne-Rhone-Alpes / Lyon |
| EPI_ISL_728318 | 11/17/2020 | 12/22/2020 | Europe / France / Auvergne-Rhone-Alpes / Lyon |
| EPI_ISL_728319 | 11/17/2020 | 12/22/2020 | Europe / France / Auvergne-Rhone-Alpes / Lyon |
| EPI_ISL_728320 | 11/17/2020 | 12/22/2020 | Europe / France / Auvergne-Rhone-Alpes / Lyon |

|                |            |            |                                   |
|----------------|------------|------------|-----------------------------------|
| EPI_ISL_728322 | 2020-11    | 12/22/2020 | Africa / Morocco / Rabat          |
| EPI_ISL_728323 | 8/18/2020  | 12/22/2020 | Europe / Germany / Thuringia      |
| EPI_ISL_728324 | 11/30/2020 | 12/22/2020 | Europe / Germany / Thuringia      |
| EPI_ISL_728325 | 6/2/2020   | 12/22/2020 | Asia / India / Maharashtra        |
| EPI_ISL_728326 | 7/28/2020  | 12/22/2020 | Asia / India / Maharashtra        |
| EPI_ISL_728327 | 7/16/2020  | 12/22/2020 | Asia / India / Maharashtra        |
| EPI_ISL_728328 | 6/3/2020   | 12/22/2020 | Asia / India / Maharashtra        |
| EPI_ISL_728331 | 12/1/2020  | 12/22/2020 | Europe / Germany / Thuringia      |
| EPI_ISL_728332 | 2020-11    | 12/22/2020 | Africa / Morocco / Rabat          |
| EPI_ISL_728333 | 12/1/2020  | 12/22/2020 | Europe / Germany / Thuringia      |
| EPI_ISL_728334 | 2020-12    | 12/22/2020 | Africa / Morocco / Rabat          |
| EPI_ISL_728335 | 12/3/2020  | 12/22/2020 | Europe / Germany / Thuringia      |
| EPI_ISL_728337 | 12/6/2020  | 12/22/2020 | Europe / Germany / Thuringia      |
| EPI_ISL_728338 | 12/6/2020  | 12/22/2020 | Europe / Germany / Thuringia      |
| EPI_ISL_728339 | 2020-12    | 12/22/2020 | Africa / Morocco / Temara         |
| EPI_ISL_728340 | 2020-12    | 12/22/2020 | Africa / Morocco / Mohammedia     |
| EPI_ISL_728341 | 12/6/2020  | 12/22/2020 | Europe / Germany / Thuringia      |
| EPI_ISL_728342 | 2020-12    | 12/22/2020 | Africa / Morocco / Temara         |
| EPI_ISL_728343 | 12/12/2020 | 12/22/2020 | Europe / United Kingdom / England |
| EPI_ISL_728344 | 2020-12    | 12/22/2020 | Africa / Morocco / Rabat          |
| EPI_ISL_728346 | 4/16/2020  | 12/22/2020 | Europe / Germany / Saxony-Anhalt  |
| EPI_ISL_728347 | 2020-12    | 12/22/2020 | Africa / Morocco / Temara         |
| EPI_ISL_728352 | 2020-12    | 12/22/2020 | Africa / Morocco / Temara         |
| EPI_ISL_728353 | 2020-12    | 12/22/2020 | Africa / Morocco / Harhoura       |
| EPI_ISL_728355 | 2020-12    | 12/22/2020 | Africa / Morocco / Harhoura       |
| EPI_ISL_728360 | 2020-12    | 12/22/2020 | Africa / Morocco / Temara         |
| EPI_ISL_728361 | 4/21/2020  | 12/22/2020 | Europe / Spain / Catalonia        |
| EPI_ISL_728362 | 4/21/2020  | 12/22/2020 | Europe / Spain / Catalonia        |
| EPI_ISL_728364 | 4/21/2020  | 12/22/2020 | Europe / Spain / Catalonia        |
| EPI_ISL_728365 | 4/21/2020  | 12/22/2020 | Europe / Spain / Catalonia        |
| EPI_ISL_728366 | 2020-12    | 12/22/2020 | Africa / Morocco / Temara         |
| EPI_ISL_728367 | 2020-12    | 12/22/2020 | Africa / Morocco                  |
| EPI_ISL_728368 | 11/4/2020  | 12/22/2020 | North America / USA / Michigan    |
| EPI_ISL_728370 | 11/4/2020  | 12/22/2020 | North America / USA / Michigan    |
| EPI_ISL_728371 | 11/4/2020  | 12/22/2020 | North America / USA / Michigan    |
| EPI_ISL_728373 | 11/4/2020  | 12/22/2020 | North America / USA / Michigan    |
| EPI_ISL_728374 | 11/5/2020  | 12/22/2020 | North America / USA / Michigan    |
| EPI_ISL_728375 | 11/6/2020  | 12/22/2020 | North America / USA / Michigan    |
| EPI_ISL_728376 | 11/6/2020  | 12/22/2020 | North America / USA / Michigan    |
| EPI_ISL_728377 | 11/6/2020  | 12/22/2020 | North America / USA / Michigan    |
| EPI_ISL_728378 | 11/6/2020  | 12/22/2020 | North America / USA / Michigan    |
| EPI_ISL_728379 | 11/6/2020  | 12/22/2020 | North America / USA / Michigan    |
| EPI_ISL_728380 | 11/5/2020  | 12/22/2020 | North America / USA / Michigan    |
| EPI_ISL_728381 | 11/5/2020  | 12/22/2020 | North America / USA / Michigan    |
| EPI_ISL_728382 | 11/6/2020  | 12/22/2020 | North America / USA / Michigan    |
| EPI_ISL_728383 | 11/6/2020  | 12/22/2020 | North America / USA / Michigan    |
| EPI_ISL_728384 | 11/5/2020  | 12/22/2020 | North America / USA / Michigan    |







|                |            |            |                                      |
|----------------|------------|------------|--------------------------------------|
| EPI_ISL_728558 | 12/8/2020  | 12/22/2020 | Asia / Thailand / Bangkok            |
| EPI_ISL_728563 | 12/8/2020  | 12/22/2020 | Asia / Thailand / Bangkok            |
| EPI_ISL_728564 | 11/25/2020 | 12/22/2020 | Europe / Netherlands / Utrecht       |
| EPI_ISL_728565 | 11/13/2020 | 12/22/2020 | Europe / Netherlands / Noord-Holland |
| EPI_ISL_728566 | 12/5/2020  | 12/22/2020 | Europe / Netherlands / Noord-Holland |
| EPI_ISL_728567 | 12/6/2020  | 12/22/2020 | Europe / Netherlands / Noord-Holland |
| EPI_ISL_728568 | 12/13/2020 | 12/22/2020 | Europe / Netherlands / Noord-Holland |
| EPI_ISL_728569 | 12/11/2020 | 12/22/2020 | Europe / Netherlands / Zuid-Holland  |
| EPI_ISL_728570 | 12/9/2020  | 12/22/2020 | Europe / Netherlands / Noord-Brabant |
| EPI_ISL_728571 | 12/9/2020  | 12/22/2020 | Europe / Netherlands / Noord-Brabant |
| EPI_ISL_728572 | 12/9/2020  | 12/22/2020 | Europe / Netherlands / Noord-Brabant |
| EPI_ISL_728573 | 12/9/2020  | 12/22/2020 | Europe / Netherlands / Noord-Brabant |
| EPI_ISL_728574 | 12/9/2020  | 12/22/2020 | Europe / Netherlands / Noord-Brabant |
| EPI_ISL_728575 | 12/9/2020  | 12/22/2020 | Europe / Netherlands / Noord-Brabant |
| EPI_ISL_728576 | 12/9/2020  | 12/22/2020 | Europe / Netherlands / Noord-Brabant |
| EPI_ISL_728577 | 12/6/2020  | 12/22/2020 | Europe / Netherlands / Utrecht       |
| EPI_ISL_728578 | 12/7/2020  | 12/22/2020 | Europe / Netherlands / Utrecht       |
| EPI_ISL_728579 | 12/7/2020  | 12/22/2020 | Europe / Netherlands / Utrecht       |
| EPI_ISL_728580 | 12/6/2020  | 12/22/2020 | Europe / Netherlands / Friesland     |
| EPI_ISL_728581 | 12/7/2020  | 12/22/2020 | Europe / Netherlands / Friesland     |
| EPI_ISL_728582 | 12/8/2020  | 12/22/2020 | Europe / Netherlands / Friesland     |
| EPI_ISL_728583 | 12/7/2020  | 12/22/2020 | Europe / Netherlands / Utrecht       |
| EPI_ISL_728584 | 12/7/2020  | 12/22/2020 | Europe / Netherlands / Utrecht       |
| EPI_ISL_728585 | 12/7/2020  | 12/22/2020 | Europe / Netherlands / Zuid-Holland  |
| EPI_ISL_728586 | 12/11/2020 | 12/22/2020 | Europe / Netherlands / Zuid-Holland  |
| EPI_ISL_728587 | 12/22/2020 | 12/22/2020 | Europe / Netherlands / Zuid-Holland  |
| EPI_ISL_728588 | 12/9/2020  | 12/22/2020 | Europe / Netherlands / Noord-Brabant |
| EPI_ISL_728589 | 12/7/2020  | 12/22/2020 | Europe / Netherlands / Utrecht       |
| EPI_ISL_728590 | 12/7/2020  | 12/22/2020 | Europe / Netherlands / Friesland     |
| EPI_ISL_728591 | 12/7/2020  | 12/22/2020 | Europe / Netherlands / Friesland     |
| EPI_ISL_728592 | 12/11/2020 | 12/22/2020 | Europe / Netherlands / Zuid-Holland  |
| EPI_ISL_728593 | 12/11/2020 | 12/22/2020 | Europe / Netherlands / Zuid-Holland  |
| EPI_ISL_728594 | 12/11/2020 | 12/22/2020 | Europe / Netherlands / Zuid-Holland  |
| EPI_ISL_728595 | 12/9/2020  | 12/22/2020 | Europe / Netherlands / Noord-Brabant |
| EPI_ISL_728596 | 12/9/2020  | 12/22/2020 | Europe / Netherlands / Noord-Brabant |
| EPI_ISL_728597 | 12/6/2020  | 12/22/2020 | Europe / Netherlands / Utrecht       |
| EPI_ISL_728598 | 12/6/2020  | 12/22/2020 | Europe / Netherlands / Utrecht       |
| EPI_ISL_728599 | 12/6/2020  | 12/22/2020 | Europe / Netherlands / Utrecht       |
| EPI_ISL_728600 | 12/7/2020  | 12/22/2020 | Europe / Netherlands / Utrecht       |
| EPI_ISL_728601 | 12/7/2020  | 12/22/2020 | Europe / Netherlands / Utrecht       |
| EPI_ISL_728602 | 12/7/2020  | 12/22/2020 | Europe / Netherlands / Utrecht       |
| EPI_ISL_728603 | 12/7/2020  | 12/22/2020 | Europe / Netherlands / Utrecht       |
| EPI_ISL_728604 | 12/6/2020  | 12/22/2020 | Europe / Netherlands / Friesland     |
| EPI_ISL_728605 | 12/6/2020  | 12/22/2020 | Europe / Netherlands / Friesland     |
| EPI_ISL_728606 | 12/7/2020  | 12/22/2020 | Europe / Netherlands / Friesland     |
| EPI_ISL_728607 | 12/7/2020  | 12/22/2020 | Europe / Netherlands / Friesland     |
| EPI_ISL_728608 | 12/7/2020  | 12/22/2020 | Europe / Netherlands / Friesland     |



|                |            |            |                                      |
|----------------|------------|------------|--------------------------------------|
| EPI_ISL_728609 | 12/8/2020  | 12/22/2020 | Europe / Netherlands / Friesland     |
| EPI_ISL_728610 | 12/7/2020  | 12/22/2020 | Europe / Netherlands / Zuid-Holland  |
| EPI_ISL_728611 | 12/7/2020  | 12/22/2020 | Europe / Netherlands / Utrecht       |
| EPI_ISL_728612 | 12/8/2020  | 12/22/2020 | Europe / Netherlands / Utrecht       |
| EPI_ISL_728613 | 12/7/2020  | 12/22/2020 | Europe / Netherlands / Utrecht       |
| EPI_ISL_728614 | 12/11/2020 | 12/22/2020 | Europe / Netherlands / Zuid-Holland  |
| EPI_ISL_728615 | 12/11/2020 | 12/22/2020 | Europe / Netherlands / Zuid-Holland  |
| EPI_ISL_728616 | 12/11/2020 | 12/22/2020 | Europe / Netherlands / Zuid-Holland  |
| EPI_ISL_728617 | 12/11/2020 | 12/22/2020 | Europe / Netherlands / Zuid-Holland  |
| EPI_ISL_728618 | 12/9/2020  | 12/22/2020 | Europe / Netherlands / Noord-Brabant |
| EPI_ISL_728619 | 12/9/2020  | 12/22/2020 | Europe / Netherlands / Noord-Brabant |
| EPI_ISL_728620 | 12/6/2020  | 12/22/2020 | Europe / Netherlands / Utrecht       |
| EPI_ISL_728621 | 12/6/2020  | 12/22/2020 | Europe / Netherlands / Utrecht       |
| EPI_ISL_728622 | 12/7/2020  | 12/22/2020 | Europe / Netherlands / Utrecht       |
| EPI_ISL_728623 | 12/7/2020  | 12/22/2020 | Europe / Netherlands / Utrecht       |
| EPI_ISL_728624 | 12/7/2020  | 12/22/2020 | Europe / Netherlands / Utrecht       |
| EPI_ISL_728625 | 12/7/2020  | 12/22/2020 | Europe / Netherlands / Utrecht       |
| EPI_ISL_728626 | 12/7/2020  | 12/22/2020 | Europe / Netherlands / Utrecht       |
| EPI_ISL_728627 | 12/7/2020  | 12/22/2020 | Europe / Netherlands / Utrecht       |
| EPI_ISL_728628 | 12/7/2020  | 12/22/2020 | Europe / Netherlands / Drenthe       |
| EPI_ISL_728629 | 12/7/2020  | 12/22/2020 | Europe / Netherlands / Utrecht       |
| EPI_ISL_728630 | 12/8/2020  | 12/22/2020 | Europe / Netherlands / Zuid-Holland  |
| EPI_ISL_728631 | 12/7/2020  | 12/22/2020 | Europe / Netherlands / Utrecht       |
| EPI_ISL_728632 | 12/11/2020 | 12/22/2020 | Europe / Netherlands / Zuid-Holland  |
| EPI_ISL_728633 | 12/11/2020 | 12/22/2020 | Europe / Netherlands / Zuid-Holland  |
| EPI_ISL_728634 | 12/11/2020 | 12/22/2020 | Europe / Netherlands / Zuid-Holland  |
| EPI_ISL_728635 | 12/1/2020  | 12/22/2020 | Europe / Netherlands / Noord-Brabant |
| EPI_ISL_728636 | 12/1/2020  | 12/22/2020 | Europe / Netherlands / Limburg       |
| EPI_ISL_728637 | 12/2/2020  | 12/22/2020 | Europe / Netherlands / Limburg       |
| EPI_ISL_728638 | 11/29/2020 | 12/22/2020 | Europe / Netherlands / Groningen     |
| EPI_ISL_728639 | 11/29/2020 | 12/22/2020 | Europe / Netherlands / Drenthe       |
| EPI_ISL_728640 | 11/30/2020 | 12/22/2020 | Europe / Netherlands / Drenthe       |
| EPI_ISL_728641 | 11/30/2020 | 12/22/2020 | Europe / Netherlands / Groningen     |
| EPI_ISL_728642 | 12/14/2020 | 12/22/2020 | Europe / Netherlands / Drenthe       |
| EPI_ISL_728643 | 11/30/2020 | 12/22/2020 | Europe / Netherlands / Drenthe       |
| EPI_ISL_728644 | 12/14/2020 | 12/22/2020 | Europe / Netherlands / Groningen     |
| EPI_ISL_728645 | 12/1/2020  | 12/22/2020 | Europe / Netherlands / Groningen     |
| EPI_ISL_728646 | 12/1/2020  | 12/22/2020 | Europe / Netherlands / Friesland     |
| EPI_ISL_728647 | 12/1/2020  | 12/22/2020 | Europe / Netherlands / Groningen     |
| EPI_ISL_728648 | 12/1/2020  | 12/22/2020 | Europe / Netherlands / Groningen     |
| EPI_ISL_728649 | 12/8/2020  | 12/22/2020 | Europe / Netherlands / Noord-Holland |
| EPI_ISL_728650 | 12/8/2020  | 12/22/2020 | Europe / Netherlands / Noord-Holland |
| EPI_ISL_728651 | 12/13/2020 | 12/22/2020 | Europe / Netherlands / Utrecht       |
| EPI_ISL_728652 | 12/7/2020  | 12/22/2020 | Europe / Netherlands / Noord-Holland |
| EPI_ISL_728653 | 12/7/2020  | 12/22/2020 | Europe / Netherlands / Noord-Holland |
| EPI_ISL_728654 | 12/7/2020  | 12/22/2020 | Europe / Netherlands / Noord-Holland |
| EPI_ISL_728655 | 12/9/2020  | 12/22/2020 | Europe / Netherlands / Noord-Holland |

|                |            |            |                                      |
|----------------|------------|------------|--------------------------------------|
| EPI_ISL_728656 | 12/9/2020  | 12/22/2020 | Europe / Netherlands / Noord-Holland |
| EPI_ISL_728657 | 12/9/2020  | 12/22/2020 | Europe / Netherlands / Noord-Holland |
| EPI_ISL_728658 | 12/9/2020  | 12/22/2020 | Europe / Netherlands / Noord-Holland |
| EPI_ISL_728659 | 12/7/2020  | 12/22/2020 | Europe / Netherlands / Noord-Holland |
| EPI_ISL_728660 | 12/15/2020 | 12/22/2020 | Europe / Netherlands / Zuid-Holland  |
| EPI_ISL_728661 | 12/15/2020 | 12/22/2020 | Europe / Netherlands / Zuid-Holland  |
| EPI_ISL_728662 | 12/7/2020  | 12/22/2020 | Europe / Netherlands / Limburg       |
| EPI_ISL_728663 | 12/7/2020  | 12/22/2020 | Europe / Netherlands / Limburg       |
| EPI_ISL_728664 | 12/9/2020  | 12/22/2020 | Europe / Netherlands / Limburg       |
| EPI_ISL_728665 | 12/8/2020  | 12/22/2020 | Europe / Netherlands / Limburg       |
| EPI_ISL_728666 | 12/9/2020  | 12/22/2020 | Europe / Netherlands / Limburg       |
| EPI_ISL_728667 | 12/9/2020  | 12/22/2020 | Europe / Netherlands / Limburg       |
| EPI_ISL_728668 | 10/26/2020 | 12/22/2020 | Europe / Netherlands / Zuid-Holland  |
| EPI_ISL_728669 | 10/26/2020 | 12/22/2020 | Europe / Netherlands / Zuid-Holland  |
| EPI_ISL_728670 | 10/26/2020 | 12/22/2020 | Europe / Netherlands / Zuid-Holland  |
| EPI_ISL_728671 | 10/26/2020 | 12/22/2020 | Europe / Netherlands / Zuid-Holland  |
| EPI_ISL_728672 | 10/26/2020 | 12/22/2020 | Europe / Netherlands / Zuid-Holland  |
| EPI_ISL_728673 | 10/26/2020 | 12/22/2020 | Europe / Netherlands / Zuid-Holland  |
| EPI_ISL_728674 | 11/20/2020 | 12/22/2020 | Europe / Netherlands / Overijssel    |
| EPI_ISL_728675 | 11/20/2020 | 12/22/2020 | Europe / Netherlands / Overijssel    |
| EPI_ISL_728676 | 11/19/2020 | 12/22/2020 | Europe / Netherlands / Overijssel    |
| EPI_ISL_728677 | 11/19/2020 | 12/22/2020 | Europe / Netherlands / Overijssel    |
| EPI_ISL_728678 | 11/18/2020 | 12/22/2020 | Europe / Netherlands / Overijssel    |
| EPI_ISL_728679 | 11/17/2020 | 12/22/2020 | Europe / Netherlands / Overijssel    |
| EPI_ISL_728680 | 11/16/2020 | 12/22/2020 | Europe / Netherlands / Overijssel    |
| EPI_ISL_728681 | 11/17/2020 | 12/22/2020 | Europe / Netherlands / Overijssel    |
| EPI_ISL_728682 | 11/15/2020 | 12/22/2020 | Europe / Netherlands / Overijssel    |
| EPI_ISL_728683 | 11/15/2020 | 12/22/2020 | Europe / Netherlands / Overijssel    |
| EPI_ISL_728684 | 11/19/2020 | 12/22/2020 | Europe / Netherlands / Overijssel    |
| EPI_ISL_728685 | 11/20/2020 | 12/22/2020 | Europe / Netherlands / Overijssel    |
| EPI_ISL_728686 | 11/14/2020 | 12/22/2020 | Europe / Netherlands / Overijssel    |
| EPI_ISL_728687 | 11/29/2020 | 12/22/2020 | Europe / Netherlands / Overijssel    |
| EPI_ISL_728688 | 11/24/2020 | 12/22/2020 | Europe / Netherlands / Gelderland    |
| EPI_ISL_728689 | 12/3/2020  | 12/22/2020 | Europe / Netherlands / Gelderland    |
| EPI_ISL_728690 | 12/4/2020  | 12/22/2020 | Europe / Netherlands / Gelderland    |
| EPI_ISL_728691 | 12/3/2020  | 12/22/2020 | Europe / Netherlands / Noord-Brabant |
| EPI_ISL_728692 | 12/3/2020  | 12/22/2020 | Europe / Netherlands / Noord-Brabant |
| EPI_ISL_728693 | 12/3/2020  | 12/22/2020 | Europe / Netherlands / Limburg       |
| EPI_ISL_728694 | 12/6/2020  | 12/22/2020 | Europe / Netherlands / Limburg       |
| EPI_ISL_728695 | 12/8/2020  | 12/22/2020 | Europe / Netherlands / Groningen     |
| EPI_ISL_728696 | 11/30/2020 | 12/22/2020 | Europe / Netherlands / Groningen     |
| EPI_ISL_728697 | 12/10/2020 | 12/22/2020 | Europe / Netherlands / Noord-Holland |
| EPI_ISL_728698 | 12/8/2020  | 12/22/2020 | Europe / Netherlands / Noord-Holland |
| EPI_ISL_728699 | 12/8/2020  | 12/22/2020 | Europe / Netherlands / Noord-Holland |
| EPI_ISL_728700 | 12/7/2020  | 12/22/2020 | Europe / Netherlands / Noord-Holland |
| EPI_ISL_728701 | 12/6/2020  | 12/22/2020 | Europe / Netherlands / Noord-Holland |
| EPI_ISL_728702 | 12/7/2020  | 12/22/2020 | Europe / Netherlands / Noord-Holland |

|                |            |            |                                      |
|----------------|------------|------------|--------------------------------------|
| EPI_ISL_728704 | 10/26/2020 | 12/22/2020 | Europe / Netherlands / Zuid-Holland  |
| EPI_ISL_728705 | 10/26/2020 | 12/22/2020 | Europe / Netherlands / Zuid-Holland  |
| EPI_ISL_728706 | 10/26/2020 | 12/22/2020 | Europe / Netherlands / Zuid-Holland  |
| EPI_ISL_728707 | 10/26/2020 | 12/22/2020 | Europe / Netherlands / Zuid-Holland  |
| EPI_ISL_728708 | 11/24/2020 | 12/22/2020 | Europe / Netherlands / Overijssel    |
| EPI_ISL_728709 | 11/23/2020 | 12/22/2020 | Europe / Netherlands / Overijssel    |
| EPI_ISL_728710 | 11/21/2020 | 12/22/2020 | Europe / Netherlands / Overijssel    |
| EPI_ISL_728711 | 11/21/2020 | 12/22/2020 | Europe / Netherlands / Overijssel    |
| EPI_ISL_728712 | 11/20/2020 | 12/22/2020 | Europe / Netherlands / Overijssel    |
| EPI_ISL_728713 | 11/19/2020 | 12/22/2020 | Europe / Netherlands / Overijssel    |
| EPI_ISL_728714 | 11/19/2020 | 12/22/2020 | Europe / Netherlands / Overijssel    |
| EPI_ISL_728715 | 11/18/2020 | 12/22/2020 | Europe / Netherlands / Overijssel    |
| EPI_ISL_728716 | 11/18/2020 | 12/22/2020 | Europe / Netherlands / Overijssel    |
| EPI_ISL_728717 | 11/18/2020 | 12/22/2020 | Europe / Netherlands / Overijssel    |
| EPI_ISL_728718 | 11/17/2020 | 12/22/2020 | Europe / Netherlands / Overijssel    |
| EPI_ISL_728719 | 11/17/2020 | 12/22/2020 | Europe / Netherlands / Overijssel    |
| EPI_ISL_728720 | 11/17/2020 | 12/22/2020 | Europe / Netherlands / Overijssel    |
| EPI_ISL_728721 | 12/7/2020  | 12/22/2020 | Europe / Netherlands / Limburg       |
| EPI_ISL_728722 | 12/7/2020  | 12/22/2020 | Europe / Netherlands / Limburg       |
| EPI_ISL_728723 | 11/16/2020 | 12/22/2020 | Europe / Netherlands / Overijssel    |
| EPI_ISL_728724 | 11/16/2020 | 12/22/2020 | Europe / Netherlands / Overijssel    |
| EPI_ISL_728725 | 11/14/2020 | 12/22/2020 | Europe / Netherlands / Overijssel    |
| EPI_ISL_728726 | 11/1/2020  | 12/22/2020 | Europe / Netherlands / Overijssel    |
| EPI_ISL_728727 | 11/20/2020 | 12/22/2020 | Europe / Netherlands / Overijssel    |
| EPI_ISL_728728 | 11/11/2020 | 12/22/2020 | Europe / Netherlands / Overijssel    |
| EPI_ISL_728729 | 10/22/2020 | 12/22/2020 | Europe / Netherlands / Overijssel    |
| EPI_ISL_728730 | 10/22/2020 | 12/22/2020 | Europe / Netherlands / Overijssel    |
| EPI_ISL_728731 | 10/15/2020 | 12/22/2020 | Europe / Netherlands / Overijssel    |
| EPI_ISL_728732 | 10/10/2020 | 12/22/2020 | Europe / Netherlands / Overijssel    |
| EPI_ISL_728733 | 11/27/2020 | 12/22/2020 | Europe / Netherlands / Overijssel    |
| EPI_ISL_728735 | 11/23/2020 | 12/22/2020 | Europe / Netherlands / Gelderland    |
| EPI_ISL_728736 | 11/24/2020 | 12/22/2020 | Europe / Netherlands / Gelderland    |
| EPI_ISL_728737 | 11/25/2020 | 12/22/2020 | Europe / Netherlands / Gelderland    |
| EPI_ISL_728738 | 12/3/2020  | 12/22/2020 | Europe / Netherlands / Gelderland    |
| EPI_ISL_728739 | 12/3/2020  | 12/22/2020 | Europe / Netherlands / Gelderland    |
| EPI_ISL_728740 | 12/3/2020  | 12/22/2020 | Europe / Netherlands / Gelderland    |
| EPI_ISL_728741 | 12/3/2020  | 12/22/2020 | Europe / Netherlands / Gelderland    |
| EPI_ISL_728742 | 12/4/2020  | 12/22/2020 | Europe / Netherlands / Gelderland    |
| EPI_ISL_728743 | 12/4/2020  | 12/22/2020 | Europe / Netherlands / Gelderland    |
| EPI_ISL_728744 | 12/4/2020  | 12/22/2020 | Europe / Netherlands / Gelderland    |
| EPI_ISL_728745 | 12/2/2020  | 12/22/2020 | Europe / Netherlands / Noord-Brabant |
| EPI_ISL_728746 | 12/8/2020  | 12/22/2020 | Europe / Netherlands / Noord-Holland |
| EPI_ISL_728747 | 12/15/2020 | 12/22/2020 | Europe / Netherlands / Zuid-Holland  |
| EPI_ISL_728748 | 11/23/2020 | 12/22/2020 | Europe / Netherlands / Overijssel    |
| EPI_ISL_728749 | 11/21/2020 | 12/22/2020 | Europe / Netherlands / Overijssel    |
| EPI_ISL_728750 | 11/22/2020 | 12/22/2020 | Europe / Netherlands / Overijssel    |
| EPI_ISL_728751 | 11/22/2020 | 12/22/2020 | Europe / Netherlands / Overijssel    |

|                |            |            |                                         |
|----------------|------------|------------|-----------------------------------------|
| EPI_ISL_728752 | 11/21/2020 | 12/22/2020 | Europe / Netherlands / Overijssel       |
| EPI_ISL_728753 | 11/17/2020 | 12/22/2020 | Europe / Netherlands / Overijssel       |
| EPI_ISL_728754 | 11/17/2020 | 12/22/2020 | Europe / Netherlands / Overijssel       |
| EPI_ISL_728755 | 11/19/2020 | 12/22/2020 | Europe / Netherlands / Overijssel       |
| EPI_ISL_728756 | 10/6/2020  | 12/22/2020 | Europe / Netherlands / Overijssel       |
| EPI_ISL_728757 | 11/23/2020 | 12/22/2020 | Europe / Netherlands / Gelderland       |
| EPI_ISL_728758 | 11/24/2020 | 12/22/2020 | Europe / Netherlands / Gelderland       |
| EPI_ISL_728759 | 11/24/2020 | 12/22/2020 | Europe / Netherlands / Gelderland       |
| EPI_ISL_728760 | 11/25/2020 | 12/22/2020 | Europe / Netherlands / Gelderland       |
| EPI_ISL_728761 | 11/25/2020 | 12/22/2020 | Europe / Netherlands / Gelderland       |
| EPI_ISL_728762 | 11/25/2020 | 12/22/2020 | Europe / Netherlands / Gelderland       |
| EPI_ISL_728763 | 12/5/2020  | 12/22/2020 | Europe / Netherlands / Gelderland       |
| EPI_ISL_728881 | 12/6/2020  | 12/22/2020 | Europe / Switzerland / Bern             |
| EPI_ISL_728882 | 12/8/2020  | 12/22/2020 | Europe / Switzerland / Bern             |
| EPI_ISL_728883 | 12/10/2020 | 12/22/2020 | Europe / Switzerland / Aargau           |
| EPI_ISL_728884 | 11/9/2020  | 12/22/2020 | Europe / Switzerland / Basel-Landschaft |
| EPI_ISL_729048 | 11/4/2020  | 12/22/2020 | Europe / Switzerland / St Gall          |
| EPI_ISL_729049 | 12/10/2020 | 12/22/2020 | Europe / Switzerland / Basel-Landschaft |
| EPI_ISL_729050 | 12/7/2020  | 12/22/2020 | Europe / Switzerland / Solothurn        |
| EPI_ISL_729051 | 11/8/2020  | 12/22/2020 | Europe / Switzerland / Basel-Landschaft |
| EPI_ISL_729052 | 12/4/2020  | 12/22/2020 | Europe / Switzerland / Schaffhausen     |
| EPI_ISL_729053 | 12/10/2020 | 12/22/2020 | Europe / Switzerland / Bern             |
| EPI_ISL_729054 | 11/6/2020  | 12/22/2020 | Europe / Switzerland / Vaud             |
| EPI_ISL_729055 | 11/9/2020  | 12/22/2020 | Europe / Switzerland / Basel-Landschaft |
| EPI_ISL_729056 | 12/4/2020  | 12/22/2020 | Europe / Switzerland / Grisons          |
| EPI_ISL_729057 | 12/9/2020  | 12/22/2020 | Europe / Switzerland / Zurich           |
| EPI_ISL_729058 | 12/6/2020  | 12/22/2020 | Europe / Switzerland / Grisons          |
| EPI_ISL_729059 | 12/7/2020  | 12/22/2020 | Europe / Switzerland / Grisons          |
| EPI_ISL_729060 | 12/7/2020  | 12/22/2020 | Europe / Switzerland / Grisons          |
| EPI_ISL_729061 | 12/7/2020  | 12/22/2020 | Europe / Switzerland / Solothurn        |
| EPI_ISL_729062 | 12/7/2020  | 12/22/2020 | Europe / Switzerland / Solothurn        |
| EPI_ISL_729063 | 12/7/2020  | 12/22/2020 | Europe / Switzerland / Solothurn        |
| EPI_ISL_729064 | 12/9/2020  | 12/22/2020 | Europe / Switzerland / Zurich           |
| EPI_ISL_729065 | 12/9/2020  | 12/22/2020 | Europe / Switzerland / Zurich           |
| EPI_ISL_729066 | 12/9/2020  | 12/22/2020 | Europe / Switzerland / Zurich           |
| EPI_ISL_729067 | 12/10/2020 | 12/22/2020 | Europe / Switzerland / Basel-Landschaft |
| EPI_ISL_729068 | 11/30/2020 | 12/22/2020 | Europe / Switzerland / Bern             |
| EPI_ISL_729069 | 11/4/2020  | 12/22/2020 | Europe / Switzerland / Zurich           |
| EPI_ISL_729070 | 11/4/2020  | 12/22/2020 | Europe / Switzerland / Neuchatel        |
| EPI_ISL_729071 | 11/4/2020  | 12/22/2020 | Europe / Switzerland / Zurich           |
| EPI_ISL_729072 | 11/4/2020  | 12/22/2020 | Europe / Switzerland / Neuchatel        |
| EPI_ISL_729073 | 11/4/2020  | 12/22/2020 | Europe / Switzerland / St Gall          |
| EPI_ISL_729074 | 11/4/2020  | 12/22/2020 | Europe / Switzerland / Zurich           |
| EPI_ISL_729075 | 11/4/2020  | 12/22/2020 | Europe / Switzerland / St Gall          |
| EPI_ISL_729076 | 11/4/2020  | 12/22/2020 | Europe / Switzerland / St Gall          |
| EPI_ISL_729077 | 11/4/2020  | 12/22/2020 | Europe / Switzerland / Bern             |
| EPI_ISL_729078 | 11/4/2020  | 12/22/2020 | Europe / Switzerland / Zurich           |

|                |            |            |                                         |
|----------------|------------|------------|-----------------------------------------|
| EPI_ISL_729079 | 11/4/2020  | 12/22/2020 | Europe / Switzerland / St Gall          |
| EPI_ISL_729080 | 11/4/2020  | 12/22/2020 | Europe / Switzerland / Bern             |
| EPI_ISL_729081 | 11/4/2020  | 12/22/2020 | Europe / Switzerland / Basel-Stadt      |
| EPI_ISL_729082 | 11/4/2020  | 12/22/2020 | Europe / Switzerland / Zurich           |
| EPI_ISL_729083 | 11/4/2020  | 12/22/2020 | Europe / Switzerland / Schwyz           |
| EPI_ISL_729084 | 11/4/2020  | 12/22/2020 | Europe / Switzerland / Zurich           |
| EPI_ISL_729085 | 11/4/2020  | 12/22/2020 | Europe / Switzerland / Grisons          |
| EPI_ISL_729086 | 11/4/2020  | 12/22/2020 | Europe / Switzerland / Schwyz           |
| EPI_ISL_729087 | 11/4/2020  | 12/22/2020 | Europe / Switzerland / Schwyz           |
| EPI_ISL_729088 | 12/10/2020 | 12/22/2020 | Europe / Switzerland / Aargau           |
| EPI_ISL_729089 | 12/10/2020 | 12/22/2020 | Europe / Switzerland / Basel-Landschaft |
| EPI_ISL_729090 | 12/4/2020  | 12/22/2020 | Europe / Switzerland / Schaffhausen     |
| EPI_ISL_729091 | 12/4/2020  | 12/22/2020 | Europe / Switzerland / Aargau           |
| EPI_ISL_729092 | 12/4/2020  | 12/22/2020 | Europe / Switzerland / Zurich           |
| EPI_ISL_729093 | 12/4/2020  | 12/22/2020 | Europe / Switzerland / Thurgau          |
| EPI_ISL_729094 | 12/4/2020  | 12/22/2020 | Europe / Switzerland / Zurich           |
| EPI_ISL_729095 | 12/4/2020  | 12/22/2020 | Europe / Switzerland / Zurich           |
| EPI_ISL_729096 | 12/4/2020  | 12/22/2020 | Europe / Switzerland / Bern             |
| EPI_ISL_729097 | 12/4/2020  | 12/22/2020 | Europe / Switzerland / Basel-Landschaft |
| EPI_ISL_729098 | 12/4/2020  | 12/22/2020 | Europe / Switzerland / Grisons          |
| EPI_ISL_729099 | 12/4/2020  | 12/22/2020 | Europe / Switzerland / Basel-Landschaft |
| EPI_ISL_729100 | 12/4/2020  | 12/22/2020 | Europe / Switzerland / Solothurn        |
| EPI_ISL_729101 | 12/4/2020  | 12/22/2020 | Europe / Switzerland / Aargau           |
| EPI_ISL_729102 | 12/4/2020  | 12/22/2020 | Europe / Switzerland / Solothurn        |
| EPI_ISL_729103 | 12/4/2020  | 12/22/2020 | Europe / Switzerland / Solothurn        |
| EPI_ISL_729104 | 12/4/2020  | 12/22/2020 | Europe / Switzerland / Aargau           |
| EPI_ISL_729105 | 12/4/2020  | 12/22/2020 | Europe / Switzerland / Solothurn        |
| EPI_ISL_729106 | 12/4/2020  | 12/22/2020 | Europe / Switzerland / Solothurn        |
| EPI_ISL_729107 | 12/4/2020  | 12/22/2020 | Europe / Switzerland / Solothurn        |
| EPI_ISL_729108 | 12/4/2020  | 12/22/2020 | Europe / Switzerland / Solothurn        |
| EPI_ISL_729109 | 12/5/2020  | 12/22/2020 | Europe / Switzerland / Zurich           |
| EPI_ISL_729110 | 12/5/2020  | 12/22/2020 | Europe / Switzerland / Bern             |
| EPI_ISL_729111 | 12/5/2020  | 12/22/2020 | Europe / Switzerland / Bern             |
| EPI_ISL_729112 | 12/5/2020  | 12/22/2020 | Europe / Switzerland / Bern             |
| EPI_ISL_729113 | 12/5/2020  | 12/22/2020 | Europe / Switzerland                    |
| EPI_ISL_729114 | 12/5/2020  | 12/22/2020 | Europe / Switzerland / Bern             |
| EPI_ISL_729115 | 12/5/2020  | 12/22/2020 | Europe / Switzerland / Bern             |
| EPI_ISL_729116 | 12/5/2020  | 12/22/2020 | Europe / Switzerland / Bern             |
| EPI_ISL_729117 | 12/5/2020  | 12/22/2020 | Europe / Switzerland / Bern             |
| EPI_ISL_729118 | 12/5/2020  | 12/22/2020 | Europe / Switzerland / Bern             |
| EPI_ISL_729119 | 12/5/2020  | 12/22/2020 | Europe / Switzerland / Bern             |
| EPI_ISL_729120 | 12/5/2020  | 12/22/2020 | Europe / Switzerland / Bern             |
| EPI_ISL_729121 | 12/5/2020  | 12/22/2020 | Europe / Switzerland / Zurich           |
| EPI_ISL_729122 | 12/6/2020  | 12/22/2020 | Europe / Switzerland / Bern             |
| EPI_ISL_729123 | 12/6/2020  | 12/22/2020 | Europe / Switzerland / Bern             |
| EPI_ISL_729124 | 12/6/2020  | 12/22/2020 | Europe / Switzerland / Bern             |
| EPI_ISL_729125 | 12/6/2020  | 12/22/2020 | Europe / Switzerland / Bern             |

|                |           |            |                                         |
|----------------|-----------|------------|-----------------------------------------|
| EPI_ISL_729126 | 12/6/2020 | 12/22/2020 | Europe / Switzerland / Bern             |
| EPI_ISL_729127 | 12/6/2020 | 12/22/2020 | Europe / Switzerland / Bern             |
| EPI_ISL_729128 | 12/6/2020 | 12/22/2020 | Europe / Switzerland / Bern             |
| EPI_ISL_729129 | 12/6/2020 | 12/22/2020 | Europe / Switzerland / Bern             |
| EPI_ISL_729130 | 12/6/2020 | 12/22/2020 | Europe / Switzerland / Basel-Stadt      |
| EPI_ISL_729131 | 12/6/2020 | 12/22/2020 | Europe / Switzerland / Bern             |
| EPI_ISL_729132 | 12/6/2020 | 12/22/2020 | Europe / Switzerland / Bern             |
| EPI_ISL_729133 | 12/6/2020 | 12/22/2020 | Europe / Switzerland / Bern             |
| EPI_ISL_729134 | 12/6/2020 | 12/22/2020 | Europe / Switzerland / Bern             |
| EPI_ISL_729135 | 12/6/2020 | 12/22/2020 | Europe / Switzerland / Bern             |
| EPI_ISL_729136 | 12/6/2020 | 12/22/2020 | Europe / Switzerland / Bern             |
| EPI_ISL_729137 | 12/6/2020 | 12/22/2020 | Europe / Switzerland / Bern             |
| EPI_ISL_729138 | 12/6/2020 | 12/22/2020 | Europe / Switzerland / Basel-Landschaft |
| EPI_ISL_729139 | 12/7/2020 | 12/22/2020 | Europe / Switzerland / Basel-Landschaft |
| EPI_ISL_729140 | 12/7/2020 | 12/22/2020 | Europe / Switzerland / Basel-Landschaft |
| EPI_ISL_729141 | 12/7/2020 | 12/22/2020 | Europe / Switzerland / Basel-Landschaft |
| EPI_ISL_729142 | 12/7/2020 | 12/22/2020 | Europe / Switzerland / Solothurn        |
| EPI_ISL_729143 | 12/7/2020 | 12/22/2020 | Europe / Switzerland / Basel-Landschaft |
| EPI_ISL_729144 | 12/7/2020 | 12/22/2020 | Europe / Switzerland / Basel-Landschaft |
| EPI_ISL_729145 | 12/7/2020 | 12/22/2020 | Europe / Switzerland / Bern             |
| EPI_ISL_729146 | 12/7/2020 | 12/22/2020 | Europe / Switzerland / Basel-Landschaft |
| EPI_ISL_729147 | 12/7/2020 | 12/22/2020 | Europe / Switzerland / Bern             |
| EPI_ISL_729148 | 12/7/2020 | 12/22/2020 | Europe / Switzerland / Solothurn        |
| EPI_ISL_729149 | 12/7/2020 | 12/22/2020 | Europe / Switzerland / Basel-Landschaft |
| EPI_ISL_729150 | 12/7/2020 | 12/22/2020 | Europe / Switzerland / Basel-Landschaft |
| EPI_ISL_729151 | 12/7/2020 | 12/22/2020 | Europe / Switzerland / Zurich           |
| EPI_ISL_729152 | 12/6/2020 | 12/22/2020 | Europe / Switzerland / Grisons          |
| EPI_ISL_729153 | 12/6/2020 | 12/22/2020 | Europe / Switzerland / Grisons          |
| EPI_ISL_729154 | 12/6/2020 | 12/22/2020 | Europe / Switzerland / Grisons          |
| EPI_ISL_729155 | 12/6/2020 | 12/22/2020 | Europe / Switzerland / Grisons          |
| EPI_ISL_729156 | 12/7/2020 | 12/22/2020 | Europe / Switzerland / Solothurn        |
| EPI_ISL_729157 | 12/7/2020 | 12/22/2020 | Europe / Switzerland / Solothurn        |
| EPI_ISL_729158 | 12/7/2020 | 12/22/2020 | Europe / Switzerland / Solothurn        |
| EPI_ISL_729159 | 12/7/2020 | 12/22/2020 | Europe / Switzerland / Solothurn        |
| EPI_ISL_729160 | 12/7/2020 | 12/22/2020 | Europe / Switzerland / Solothurn        |
| EPI_ISL_729161 | 12/7/2020 | 12/22/2020 | Europe / Switzerland / Solothurn        |
| EPI_ISL_729162 | 12/7/2020 | 12/22/2020 | Europe / Switzerland / Solothurn        |
| EPI_ISL_729163 | 12/7/2020 | 12/22/2020 | Europe / Switzerland / Solothurn        |
| EPI_ISL_729164 | 12/7/2020 | 12/22/2020 | Europe / Switzerland / Solothurn        |
| EPI_ISL_729165 | 12/8/2020 | 12/22/2020 | Europe / Switzerland / Zurich           |
| EPI_ISL_729166 | 12/8/2020 | 12/22/2020 | Europe / Switzerland / Schaffhausen     |
| EPI_ISL_729167 | 12/8/2020 | 12/22/2020 | Europe / Switzerland / Zurich           |
| EPI_ISL_729168 | 12/8/2020 | 12/22/2020 | Europe / Switzerland / Zurich           |
| EPI_ISL_729169 | 12/8/2020 | 12/22/2020 | Europe / Switzerland / Zurich           |
| EPI_ISL_729170 | 12/8/2020 | 12/22/2020 | Europe / Switzerland / Zurich           |
| EPI_ISL_729171 | 12/8/2020 | 12/22/2020 | Europe / Switzerland / Zurich           |
| EPI_ISL_729172 | 12/8/2020 | 12/22/2020 | Europe / Switzerland / Bern             |

|                |            |            |                                         |
|----------------|------------|------------|-----------------------------------------|
| EPI_ISL_729173 | 12/8/2020  | 12/22/2020 | Europe / Switzerland / Bern             |
| EPI_ISL_729174 | 12/8/2020  | 12/22/2020 | Europe / Switzerland / Bern             |
| EPI_ISL_729175 | 12/8/2020  | 12/22/2020 | Europe / Switzerland / Zurich           |
| EPI_ISL_729176 | 12/8/2020  | 12/22/2020 | Europe / Switzerland / Zurich           |
| EPI_ISL_729177 | 12/8/2020  | 12/22/2020 | Europe / Switzerland / Bern             |
| EPI_ISL_729178 | 12/8/2020  | 12/22/2020 | Europe / Switzerland / Bern             |
| EPI_ISL_729179 | 12/8/2020  | 12/22/2020 | Europe / Switzerland / Bern             |
| EPI_ISL_729180 | 12/9/2020  | 12/22/2020 | Europe / Switzerland / Basel-Landschaft |
| EPI_ISL_729181 | 12/9/2020  | 12/22/2020 | Europe / Switzerland / Aargau           |
| EPI_ISL_729182 | 12/9/2020  | 12/22/2020 | Europe / Switzerland / Lucerne          |
| EPI_ISL_729183 | 12/9/2020  | 12/22/2020 | Europe / Switzerland / Zurich           |
| EPI_ISL_729184 | 12/9/2020  | 12/22/2020 | Europe / Switzerland / Lucerne          |
| EPI_ISL_729185 | 12/9/2020  | 12/22/2020 | Europe / Switzerland / Zurich           |
| EPI_ISL_729186 | 12/9/2020  | 12/22/2020 | Europe / Switzerland / Bern             |
| EPI_ISL_729187 | 12/10/2020 | 12/22/2020 | Europe / Switzerland / Basel-Landschaft |
| EPI_ISL_729188 | 12/10/2020 | 12/22/2020 | Europe / Switzerland / Basel-Landschaft |
| EPI_ISL_729189 | 12/10/2020 | 12/22/2020 | Europe / Switzerland / Aargau           |
| EPI_ISL_729190 | 10/30/2020 | 12/22/2020 | Europe / Switzerland / Basel-Landschaft |
| EPI_ISL_729191 | 10/30/2020 | 12/22/2020 | Europe / Switzerland / Aargau           |
| EPI_ISL_729192 | 11/3/2020  | 12/22/2020 | Europe / Switzerland / Wallis           |
| EPI_ISL_729193 | 11/3/2020  | 12/22/2020 | Europe / Switzerland / Neuchatel        |
| EPI_ISL_729194 | 11/3/2020  | 12/22/2020 | Europe / Switzerland / Neuchatel        |
| EPI_ISL_729195 | 11/3/2020  | 12/22/2020 | Europe / Switzerland / Vaud             |
| EPI_ISL_729196 | 11/3/2020  | 12/22/2020 | Europe / Switzerland / Bern             |
| EPI_ISL_729197 | 11/2/2020  | 12/22/2020 | Europe / Switzerland / Basel-Landschaft |
| EPI_ISL_729198 | 11/2/2020  | 12/22/2020 | Europe / Switzerland / Aargau           |
| EPI_ISL_729199 | 11/2/2020  | 12/22/2020 | Europe / Switzerland / Aargau           |
| EPI_ISL_729200 | 11/2/2020  | 12/22/2020 | Europe / Switzerland / Basel-Landschaft |
| EPI_ISL_729201 | 11/4/2020  | 12/22/2020 | Europe / Switzerland / Geneva           |
| EPI_ISL_729202 | 11/4/2020  | 12/22/2020 | Europe / Switzerland / Neuchatel        |
| EPI_ISL_729203 | 11/4/2020  | 12/22/2020 | Europe / Switzerland / Aargau           |
| EPI_ISL_729204 | 11/3/2020  | 12/22/2020 | Europe / Switzerland / Neuchatel        |
| EPI_ISL_729205 | 11/3/2020  | 12/22/2020 | Europe / Switzerland / Neuchatel        |
| EPI_ISL_729206 | 11/3/2020  | 12/22/2020 | Europe / Switzerland / Zurich           |
| EPI_ISL_729207 | 11/3/2020  | 12/22/2020 | Europe / Switzerland / Neuchatel        |
| EPI_ISL_729208 | 11/3/2020  | 12/22/2020 | Europe / Switzerland / Neuchatel        |
| EPI_ISL_729209 | 11/3/2020  | 12/22/2020 | Europe / Switzerland / Bern             |
| EPI_ISL_729210 | 11/3/2020  | 12/22/2020 | Europe / Switzerland / Grisons          |
| EPI_ISL_729211 | 11/6/2020  | 12/22/2020 | Europe / Switzerland / Bern             |
| EPI_ISL_729212 | 11/6/2020  | 12/22/2020 | Europe / Switzerland / Bern             |
| EPI_ISL_729213 | 11/6/2020  | 12/22/2020 | Europe / Switzerland / Wallis           |
| EPI_ISL_729214 | 11/6/2020  | 12/22/2020 | Europe / Switzerland / Zurich           |
| EPI_ISL_729215 | 11/6/2020  | 12/22/2020 | Europe / Switzerland / Vaud             |
| EPI_ISL_729216 | 11/6/2020  | 12/22/2020 | Europe / Switzerland / Bern             |
| EPI_ISL_729217 | 11/6/2020  | 12/22/2020 | Europe / Switzerland / Vaud             |
| EPI_ISL_729218 | 11/6/2020  | 12/22/2020 | Europe / Switzerland / Vaud             |
| EPI_ISL_729219 | 11/6/2020  | 12/22/2020 | Europe / Switzerland / Schaffhausen     |

|                |            |            |                                            |
|----------------|------------|------------|--------------------------------------------|
| EPI_ISL_729220 | 11/6/2020  | 12/22/2020 | Europe / Switzerland / Schaffhausen        |
| EPI_ISL_729221 | 11/6/2020  | 12/22/2020 | Europe / Switzerland / Solothurn           |
| EPI_ISL_729222 | 11/6/2020  | 12/22/2020 | Europe / Switzerland / Bern                |
| EPI_ISL_729223 | 11/6/2020  | 12/22/2020 | Europe / Switzerland / Vaud                |
| EPI_ISL_729224 | 11/6/2020  | 12/22/2020 | Europe / Switzerland / Vaud                |
| EPI_ISL_729225 | 11/6/2020  | 12/22/2020 | Europe / Switzerland / Vaud                |
| EPI_ISL_729226 | 11/6/2020  | 12/22/2020 | Europe / Switzerland / Bern                |
| EPI_ISL_729227 | 11/8/2020  | 12/22/2020 | Europe / Switzerland / Basel-Landschaft    |
| EPI_ISL_729228 | 11/8/2020  | 12/22/2020 | Europe / Switzerland / Basel-Landschaft    |
| EPI_ISL_729229 | 11/8/2020  | 12/22/2020 | Europe / Switzerland / Basel-Landschaft    |
| EPI_ISL_729230 | 11/8/2020  | 12/22/2020 | Europe / Switzerland / Basel-Landschaft    |
| EPI_ISL_729231 | 11/8/2020  | 12/22/2020 | Europe / Switzerland / Basel-Landschaft    |
| EPI_ISL_729232 | 11/8/2020  | 12/22/2020 | Europe / Switzerland / Basel-Landschaft    |
| EPI_ISL_729233 | 11/8/2020  | 12/22/2020 | Europe / Switzerland / Basel-Landschaft    |
| EPI_ISL_729234 | 11/8/2020  | 12/22/2020 | Europe / Switzerland / Basel-Landschaft    |
| EPI_ISL_729235 | 11/8/2020  | 12/22/2020 | Europe / Switzerland / Basel-Landschaft    |
| EPI_ISL_729236 | 11/8/2020  | 12/22/2020 | Europe / Switzerland / Basel-Landschaft    |
| EPI_ISL_729237 | 11/8/2020  | 12/22/2020 | Europe / Switzerland / Zurich              |
| EPI_ISL_729238 | 11/9/2020  | 12/22/2020 | Europe / Switzerland / Bern                |
| EPI_ISL_729239 | 11/9/2020  | 12/22/2020 | Europe / Switzerland / Lucerne             |
| EPI_ISL_729240 | 11/9/2020  | 12/22/2020 | Europe / Switzerland / Bern                |
| EPI_ISL_729241 | 11/9/2020  | 12/22/2020 | Europe / Switzerland / Aargau              |
| EPI_ISL_729242 | 11/9/2020  | 12/22/2020 | Europe / Switzerland / Grisons             |
| EPI_ISL_729243 | 11/9/2020  | 12/22/2020 | Europe / Switzerland / Neuchatel           |
| EPI_ISL_729244 | 11/9/2020  | 12/22/2020 | Europe / Switzerland / Aargau              |
| EPI_ISL_729245 | 11/9/2020  | 12/22/2020 | Europe / Switzerland / Aargau              |
| EPI_ISL_729246 | 11/9/2020  | 12/22/2020 | Europe / Switzerland / Basel-Landschaft    |
| EPI_ISL_729247 | 11/9/2020  | 12/22/2020 | Europe / Switzerland / Aargau              |
| EPI_ISL_729248 | 11/9/2020  | 12/22/2020 | Europe / Switzerland / Solothurn           |
| EPI_ISL_729249 | 11/9/2020  | 12/22/2020 | Europe / Switzerland / Solothurn           |
| EPI_ISL_729250 | 11/9/2020  | 12/22/2020 | Europe / Switzerland / Solothurn           |
| EPI_ISL_729251 | 11/9/2020  | 12/22/2020 | Europe / Switzerland / Aargau              |
| EPI_ISL_729252 | 11/9/2020  | 12/22/2020 | Europe / Switzerland / Solothurn           |
| EPI_ISL_729253 | 11/9/2020  | 12/22/2020 | Europe / Switzerland / Solothurn           |
| EPI_ISL_729254 | 11/9/2020  | 12/22/2020 | Europe / Switzerland / Solothurn           |
| EPI_ISL_729255 | 11/9/2020  | 12/22/2020 | Europe / Switzerland / Solothurn           |
| EPI_ISL_729256 | 11/3/2020  | 12/22/2020 | Europe / Switzerland / Neuchatel           |
| EPI_ISL_729257 | 11/4/2020  | 12/22/2020 | Europe / Switzerland / Lucerne             |
| EPI_ISL_729258 | 11/4/2020  | 12/22/2020 | Europe / Switzerland / Neuchatel           |
| EPI_ISL_729265 | 11/24/2020 | 12/22/2020 | North America / Canada / Ontario / Toronto |
| EPI_ISL_729266 | 11/24/2020 | 12/22/2020 | North America / Canada / Ontario / Toronto |
| EPI_ISL_729270 | 11/24/2020 | 12/22/2020 | North America / Canada / Ontario / Toronto |
| EPI_ISL_729271 | 11/24/2020 | 12/22/2020 | North America / Canada / Ontario / Toronto |
| EPI_ISL_729272 | 11/24/2020 | 12/22/2020 | North America / Canada / Ontario / Toronto |
| EPI_ISL_729273 | 11/24/2020 | 12/22/2020 | North America / Canada / Ontario / Toronto |
| EPI_ISL_729274 | 11/24/2020 | 12/22/2020 | North America / Canada / Ontario / Toronto |
| EPI_ISL_729275 | 11/24/2020 | 12/22/2020 | North America / Canada / Ontario / Toronto |







|                |            |            |                                                  |
|----------------|------------|------------|--------------------------------------------------|
| EPI_ISL_729449 | 12/2/2020  | 12/22/2020 | Europe / Germany / Schleswig-Holstein            |
| EPI_ISL_729450 | 12/2/2020  | 12/22/2020 | Europe / Germany / Schleswig-Holstein            |
| EPI_ISL_729451 | 12/2/2020  | 12/22/2020 | Europe / Germany / Schleswig-Holstein            |
| EPI_ISL_729452 | 11/30/2020 | 12/22/2020 | Europe / Germany / Schleswig-Holstein            |
| EPI_ISL_729453 | 12/1/2020  | 12/22/2020 | Europe / Germany / Schleswig-Holstein            |
| EPI_ISL_729454 | 12/1/2020  | 12/22/2020 | Europe / Germany / Schleswig-Holstein            |
| EPI_ISL_729455 | 12/1/2020  | 12/22/2020 | Europe / Germany / Schleswig-Holstein            |
| EPI_ISL_729456 | 12/1/2020  | 12/22/2020 | Europe / Germany / Schleswig-Holstein            |
| EPI_ISL_729457 | 12/3/2020  | 12/22/2020 | Europe / Germany / Schleswig-Holstein            |
| EPI_ISL_729458 | 12/3/2020  | 12/22/2020 | Europe / Germany / Schleswig-Holstein            |
| EPI_ISL_729459 | 11/30/2020 | 12/22/2020 | Europe / Germany / Schleswig-Holstein            |
| EPI_ISL_729461 | 3/22/2020  | 12/22/2020 | Europe / Germany / Schleswig-Holstein            |
| EPI_ISL_729462 | 11/3/2020  | 12/22/2020 | Europe / Germany / Schleswig-Holstein            |
| EPI_ISL_729463 | 12/1/2020  | 12/22/2020 | Europe / Germany / Schleswig-Holstein            |
| EPI_ISL_729464 | 11/26/2020 | 12/22/2020 | Europe / Germany / Schleswig-Holstein            |
| EPI_ISL_729465 | 3/22/2020  | 12/22/2020 | Europe / Germany / Schleswig-Holstein            |
| EPI_ISL_729467 | 11/16/2020 | 12/22/2020 | Europe / Germany                                 |
| EPI_ISL_729473 | 2/26/2020  | 12/22/2020 | Europe / Germany / Baden-Wurttemberg             |
| EPI_ISL_729474 | 3/1/2020   | 12/22/2020 | Europe / Germany / Rhineland-Palatinate          |
| EPI_ISL_729475 | 2/26/2020  | 12/22/2020 | Europe / Germany / Baden-Wurttemberg             |
| EPI_ISL_729476 | 3/2/2020   | 12/22/2020 | Europe / Germany / North Rhine-Westphalia        |
| EPI_ISL_729477 | 3/2/2020   | 12/22/2020 | Europe / Germany / Berlin                        |
| EPI_ISL_729478 | 2/28/2020  | 12/22/2020 | Europe / Germany / North Rhine-Westphalia        |
| EPI_ISL_729479 | 3/2/2020   | 12/22/2020 | Europe / Germany / Berlin                        |
| EPI_ISL_729480 | 3/2/2020   | 12/22/2020 | Europe / Germany / Mecklenburg-Western Pomerania |
| EPI_ISL_729481 | 3/4/2020   | 12/22/2020 | Europe / Germany / Berlin                        |
| EPI_ISL_729482 | 3/17/2020  | 12/22/2020 | Europe / Germany / Berlin                        |
| EPI_ISL_729483 | 3/17/2020  | 12/22/2020 | Europe / Germany / Berlin                        |
| EPI_ISL_729484 | 3/5/2020   | 12/22/2020 | Europe / Germany / Baden-Wurttemberg             |
| EPI_ISL_729485 | 3/4/2020   | 12/22/2020 | Europe / Germany / Rhineland-Palatinate          |
| EPI_ISL_729486 | 3/2/2020   | 12/22/2020 | Europe / Germany / Rhineland-Palatinate          |
| EPI_ISL_729487 | 3/5/2020   | 12/22/2020 | Europe / Germany / Berlin                        |
| EPI_ISL_729488 | 3/5/2020   | 12/22/2020 | Europe / Germany / Baden-Wurttemberg             |
| EPI_ISL_729489 | 3/7/2020   | 12/22/2020 | Europe / Germany / Berlin                        |
| EPI_ISL_729490 | 3/7/2020   | 12/22/2020 | Europe / Germany / Berlin                        |
| EPI_ISL_729491 | 3/7/2020   | 12/22/2020 | Europe / Germany                                 |
| EPI_ISL_729492 | 3/8/2020   | 12/22/2020 | Europe / Germany / Berlin                        |
| EPI_ISL_729493 | 3/8/2020   | 12/22/2020 | Europe / Germany / Berlin                        |
| EPI_ISL_729494 | 3/6/2020   | 12/22/2020 | Europe / Germany / Bavaria                       |
| EPI_ISL_729495 | 3/6/2020   | 12/22/2020 | Europe / Germany / Bavaria                       |
| EPI_ISL_729496 | 3/9/2020   | 12/22/2020 | Europe / Germany                                 |
| EPI_ISL_729497 | 3/8/2020   | 12/22/2020 | Europe / Germany                                 |
| EPI_ISL_729498 | 3/9/2020   | 12/22/2020 | Europe / Germany / Schleswig-Holstein            |
| EPI_ISL_729499 | 3/5/2020   | 12/22/2020 | Europe / Germany / Berlin                        |
| EPI_ISL_729500 | 3/11/2020  | 12/22/2020 | Europe / Germany / Bremen                        |
| EPI_ISL_729501 | 3/11/2020  | 12/22/2020 | Europe / Germany / Lower Saxony                  |
| EPI_ISL_729502 | 3/11/2020  | 12/22/2020 | Europe / Germany / Lower Saxony                  |



|                |           |            |                                       |
|----------------|-----------|------------|---------------------------------------|
| EPI_ISL_729550 | 4/8/2020  | 12/22/2020 | Europe / Germany / Schleswig-Holstein |
| EPI_ISL_729551 | 4/8/2020  | 12/22/2020 | Europe / Germany / Schleswig-Holstein |
| EPI_ISL_729552 | 4/12/2020 | 12/22/2020 | Europe / Germany / Schleswig-Holstein |
| EPI_ISL_729553 | 2020      | 12/22/2020 | Europe / Germany                      |
| EPI_ISL_729554 | 2020      | 12/22/2020 | Europe / Germany                      |
| EPI_ISL_729555 | 6/4/2020  | 12/22/2020 | Europe / Germany / Berlin             |
| EPI_ISL_729556 | 6/5/2020  | 12/22/2020 | Europe / Germany / Berlin             |
| EPI_ISL_729557 | 6/5/2020  | 12/22/2020 | Europe / Germany / Berlin             |
| EPI_ISL_729558 | 2020-04   | 12/22/2020 | Europe / Germany / Berlin             |
| EPI_ISL_729559 | 2020      | 12/22/2020 | Europe / Germany                      |
| EPI_ISL_729560 | 2020      | 12/22/2020 | Europe / Germany                      |
| EPI_ISL_729561 | 2020      | 12/22/2020 | Europe / Germany / Berlin             |
| EPI_ISL_729562 | 6/30/2020 | 12/22/2020 | Europe / Germany / Schleswig-Holstein |
| EPI_ISL_729563 | 7/1/2020  | 12/22/2020 | Europe / Germany / Schleswig-Holstein |
| EPI_ISL_729564 | 7/11/2020 | 12/22/2020 | Europe / Germany / Schleswig-Holstein |
| EPI_ISL_729565 | 7/11/2020 | 12/22/2020 | Europe / Germany / Schleswig-Holstein |
| EPI_ISL_729566 | 7/11/2020 | 12/22/2020 | Europe / Germany / Schleswig-Holstein |
| EPI_ISL_729567 | 7/11/2020 | 12/22/2020 | Europe / Germany / Schleswig-Holstein |
| EPI_ISL_729568 | 7/17/2020 | 12/22/2020 | Europe / Germany / Schleswig-Holstein |
| EPI_ISL_729569 | 7/19/2020 | 12/22/2020 | Europe / Germany / Schleswig-Holstein |
| EPI_ISL_729570 | 7/19/2020 | 12/22/2020 | Europe / Germany / Schleswig-Holstein |
| EPI_ISL_729571 | 7/21/2020 | 12/22/2020 | Europe / Germany / Schleswig-Holstein |
| EPI_ISL_729572 | 7/23/2020 | 12/22/2020 | Europe / Germany / Schleswig-Holstein |
| EPI_ISL_729573 | 7/23/2020 | 12/22/2020 | Europe / Germany / Schleswig-Holstein |
| EPI_ISL_729574 | 7/26/2020 | 12/22/2020 | Europe / Germany / Schleswig-Holstein |
| EPI_ISL_729575 | 7/26/2020 | 12/22/2020 | Europe / Germany / Schleswig-Holstein |
| EPI_ISL_729576 | 7/26/2020 | 12/22/2020 | Europe / Germany / Schleswig-Holstein |
| EPI_ISL_729577 | 7/26/2020 | 12/22/2020 | Europe / Germany / Schleswig-Holstein |
| EPI_ISL_729578 | 7/27/2020 | 12/22/2020 | Europe / Germany / Schleswig-Holstein |
| EPI_ISL_729579 | 7/27/2020 | 12/22/2020 | Europe / Germany / Schleswig-Holstein |
| EPI_ISL_729580 | 7/28/2020 | 12/22/2020 | Europe / Germany / Schleswig-Holstein |
| EPI_ISL_729581 | 7/28/2020 | 12/22/2020 | Europe / Germany / Schleswig-Holstein |
| EPI_ISL_729582 | 7/31/2020 | 12/22/2020 | Europe / Germany / Schleswig-Holstein |
| EPI_ISL_729583 | 7/31/2020 | 12/22/2020 | Europe / Germany / Schleswig-Holstein |
| EPI_ISL_729584 | 8/1/2020  | 12/22/2020 | Europe / Germany / Berlin             |
| EPI_ISL_729585 | 8/4/2020  | 12/22/2020 | Europe / Germany / Schleswig-Holstein |
| EPI_ISL_729586 | 8/5/2020  | 12/22/2020 | Europe / Germany / Schleswig-Holstein |
| EPI_ISL_729587 | 8/5/2020  | 12/22/2020 | Europe / Germany / Schleswig-Holstein |
| EPI_ISL_729588 | 8/12/2020 | 12/22/2020 | Europe / Germany / Schleswig-Holstein |
| EPI_ISL_729589 | 8/19/2020 | 12/22/2020 | Europe / Germany / Schleswig-Holstein |
| EPI_ISL_729590 | 8/19/2020 | 12/22/2020 | Europe / Germany / Schleswig-Holstein |
| EPI_ISL_729591 | 8/19/2020 | 12/22/2020 | Europe / Germany / Schleswig-Holstein |
| EPI_ISL_729592 | 8/22/2020 | 12/22/2020 | Europe / Germany / Schleswig-Holstein |
| EPI_ISL_729593 | 8/23/2020 | 12/22/2020 | Europe / Germany / Schleswig-Holstein |
| EPI_ISL_729594 | 8/24/2020 | 12/22/2020 | Europe / Germany / Schleswig-Holstein |
| EPI_ISL_729595 | 8/25/2020 | 12/22/2020 | Europe / Germany / Schleswig-Holstein |
| EPI_ISL_729596 | 2020      | 12/22/2020 | Europe / Germany                      |

|                |            |            |                                           |
|----------------|------------|------------|-------------------------------------------|
| EPI_ISL_729597 | 2020       | 12/22/2020 | Europe / Germany                          |
| EPI_ISL_729598 | 9/18/2020  | 12/22/2020 | Europe / Germany                          |
| EPI_ISL_729599 | 9/20/2020  | 12/22/2020 | Europe / Germany / Berlin                 |
| EPI_ISL_729600 | 9/21/2020  | 12/22/2020 | Europe / Germany / Berlin                 |
| EPI_ISL_729601 | 9/22/2020  | 12/22/2020 | Europe / Germany / Berlin                 |
| EPI_ISL_729602 | 9/22/2020  | 12/22/2020 | Europe / Germany / Berlin                 |
| EPI_ISL_729603 | 9/22/2020  | 12/22/2020 | Europe / Germany / Berlin                 |
| EPI_ISL_729604 | 9/22/2020  | 12/22/2020 | Europe / Germany / Berlin                 |
| EPI_ISL_729605 | 9/20/2020  | 12/22/2020 | Europe / Germany / Berlin                 |
| EPI_ISL_729606 | 9/21/2020  | 12/22/2020 | Europe / Germany / Berlin                 |
| EPI_ISL_729607 | 9/20/2020  | 12/22/2020 | Europe / Germany / Berlin                 |
| EPI_ISL_729608 | 9/17/2020  | 12/22/2020 | Europe / Germany / Schleswig-Holstein     |
| EPI_ISL_729609 | 9/21/2020  | 12/22/2020 | Europe / Germany / Schleswig-Holstein     |
| EPI_ISL_729610 | 9/28/2020  | 12/22/2020 | Europe / Germany / Schleswig-Holstein     |
| EPI_ISL_729611 | 9/28/2020  | 12/22/2020 | Europe / Germany / Schleswig-Holstein     |
| EPI_ISL_729612 | 10/2/2020  | 12/22/2020 | Europe / Germany / Schleswig-Holstein     |
| EPI_ISL_729613 | 10/5/2020  | 12/22/2020 | Europe / Germany / Schleswig-Holstein     |
| EPI_ISL_729614 | 10/5/2020  | 12/22/2020 | Europe / Germany / Schleswig-Holstein     |
| EPI_ISL_729615 | 9/28/2020  | 12/22/2020 | Europe / Germany / Schleswig-Holstein     |
| EPI_ISL_729616 | 9/28/2020  | 12/22/2020 | Europe / Germany / Schleswig-Holstein     |
| EPI_ISL_729617 | 10/6/2020  | 12/22/2020 | Europe / Germany / Schleswig-Holstein     |
| EPI_ISL_729618 | 10/3/2020  | 12/22/2020 | Europe / Germany / Schleswig-Holstein     |
| EPI_ISL_729619 | 10/16/2020 | 12/22/2020 | Europe / Germany / Schleswig-Holstein     |
| EPI_ISL_729620 | 11/3/2020  | 12/22/2020 | Europe / Germany / Schleswig-Holstein     |
| EPI_ISL_729621 | 10/31/2020 | 12/22/2020 | Europe / Germany / Schleswig-Holstein     |
| EPI_ISL_729622 | 11/2/2020  | 12/22/2020 | Europe / Germany / Schleswig-Holstein     |
| EPI_ISL_729623 | 11/2/2020  | 12/22/2020 | Europe / Germany / Schleswig-Holstein     |
| EPI_ISL_729624 | 11/4/2020  | 12/22/2020 | Europe / Germany / Schleswig-Holstein     |
| EPI_ISL_729625 | 11/4/2020  | 12/22/2020 | Europe / Germany / Schleswig-Holstein     |
| EPI_ISL_729626 | 11/4/2020  | 12/22/2020 | Europe / Germany / Schleswig-Holstein     |
| EPI_ISL_729627 | 11/4/2020  | 12/22/2020 | Europe / Germany / Schleswig-Holstein     |
| EPI_ISL_729628 | 11/4/2020  | 12/22/2020 | Europe / Germany / North Rhine-Westphalia |
| EPI_ISL_729629 | 11/4/2020  | 12/22/2020 | Europe / Germany / Schleswig-Holstein     |
| EPI_ISL_729630 | 11/6/2020  | 12/22/2020 | Europe / Germany / Schleswig-Holstein     |
| EPI_ISL_729631 | 11/6/2020  | 12/22/2020 | Europe / Germany / Schleswig-Holstein     |
| EPI_ISL_729632 | 11/6/2020  | 12/22/2020 | Europe / Germany / Schleswig-Holstein     |
| EPI_ISL_729633 | 11/6/2020  | 12/22/2020 | Europe / Germany / Schleswig-Holstein     |
| EPI_ISL_729634 | 11/6/2020  | 12/22/2020 | Europe / Germany / Schleswig-Holstein     |
| EPI_ISL_729635 | 11/13/2020 | 12/22/2020 | Europe / Germany / Schleswig-Holstein     |
| EPI_ISL_729636 | 11/13/2020 | 12/22/2020 | Europe / Germany / Schleswig-Holstein     |
| EPI_ISL_729637 | 11/13/2020 | 12/22/2020 | Europe / Germany / Schleswig-Holstein     |
| EPI_ISL_729638 | 11/14/2020 | 12/22/2020 | Europe / Germany / Schleswig-Holstein     |
| EPI_ISL_729639 | 11/14/2020 | 12/22/2020 | Europe / Germany / Schleswig-Holstein     |
| EPI_ISL_729640 | 11/14/2020 | 12/22/2020 | Europe / Germany / Schleswig-Holstein     |
| EPI_ISL_729641 | 11/14/2020 | 12/22/2020 | Europe / Germany                          |
| EPI_ISL_729642 | 11/15/2020 | 12/22/2020 | Europe / Germany / Schleswig-Holstein     |
| EPI_ISL_729643 | 11/15/2020 | 12/22/2020 | Europe / Germany / Schleswig-Holstein     |



|                |            |            |                                                             |
|----------------|------------|------------|-------------------------------------------------------------|
| EPI_ISL_729691 | 11/27/2020 | 12/22/2020 | Europe / Germany / Schleswig-Holstein                       |
| EPI_ISL_729692 | 11/28/2020 | 12/22/2020 | Europe / Germany / Schleswig-Holstein                       |
| EPI_ISL_729693 | 11/28/2020 | 12/22/2020 | Europe / Germany / Schleswig-Holstein                       |
| EPI_ISL_729694 | 11/28/2020 | 12/22/2020 | Europe / Germany / Schleswig-Holstein                       |
| EPI_ISL_729695 | 11/28/2020 | 12/22/2020 | Europe / Germany / Schleswig-Holstein                       |
| EPI_ISL_729696 | 11/28/2020 | 12/22/2020 | Europe / Germany / Schleswig-Holstein                       |
| EPI_ISL_729697 | 12/2/2020  | 12/22/2020 | Europe / Germany / Schleswig-Holstein                       |
| EPI_ISL_729698 | 12/2/2020  | 12/22/2020 | Europe / Germany / Schleswig-Holstein                       |
| EPI_ISL_729699 | 12/2/2020  | 12/22/2020 | Europe / Germany / Schleswig-Holstein                       |
| EPI_ISL_729700 | 12/2/2020  | 12/22/2020 | Europe / Germany / Schleswig-Holstein                       |
| EPI_ISL_729701 | 12/2/2020  | 12/22/2020 | Europe / Germany / Schleswig-Holstein                       |
| EPI_ISL_729702 | 12/2/2020  | 12/22/2020 | Europe / Germany / Schleswig-Holstein                       |
| EPI_ISL_729703 | 12/2/2020  | 12/22/2020 | Europe / Germany / Schleswig-Holstein                       |
| EPI_ISL_729704 | 11/29/2020 | 12/22/2020 | Europe / Germany / Schleswig-Holstein                       |
| EPI_ISL_729705 | 12/2/2020  | 12/22/2020 | Europe / Germany / Schleswig-Holstein                       |
| EPI_ISL_729706 | 12/2/2020  | 12/22/2020 | Europe / Germany / Schleswig-Holstein                       |
| EPI_ISL_729707 | 12/2/2020  | 12/22/2020 | Europe / Germany / Schleswig-Holstein                       |
| EPI_ISL_729708 | 12/2/2020  | 12/22/2020 | Europe / Germany / Schleswig-Holstein                       |
| EPI_ISL_729709 | 12/2/2020  | 12/22/2020 | Europe / Germany / Schleswig-Holstein                       |
| EPI_ISL_729710 | 12/1/2020  | 12/22/2020 | Europe / Germany / Schleswig-Holstein                       |
| EPI_ISL_729711 | 12/1/2020  | 12/22/2020 | Europe / Germany / Schleswig-Holstein                       |
| EPI_ISL_729712 | 12/1/2020  | 12/22/2020 | Europe / Germany / Schleswig-Holstein                       |
| EPI_ISL_729713 | 12/1/2020  | 12/22/2020 | Europe / Germany / Schleswig-Holstein                       |
| EPI_ISL_729714 | 12/1/2020  | 12/22/2020 | Europe / Germany / Schleswig-Holstein                       |
| EPI_ISL_729715 | 11/30/2020 | 12/22/2020 | Europe / Germany / Schleswig-Holstein                       |
| EPI_ISL_729716 | 12/1/2020  | 12/22/2020 | Europe / Germany / Schleswig-Holstein                       |
| EPI_ISL_729717 | 12/1/2020  | 12/22/2020 | Europe / Germany / Schleswig-Holstein                       |
| EPI_ISL_729718 | 2020       | 12/22/2020 | Europe / Germany                                            |
| EPI_ISL_729719 | 12/1/2020  | 12/22/2020 | Europe / Germany / Schleswig-Holstein                       |
| EPI_ISL_729720 | 11/29/2020 | 12/22/2020 | Europe / Germany / Schleswig-Holstein                       |
| EPI_ISL_729721 | 12/1/2020  | 12/22/2020 | Europe / Germany / Schleswig-Holstein                       |
| EPI_ISL_729722 | 11/30/2020 | 12/22/2020 | Europe / Germany / Schleswig-Holstein                       |
| EPI_ISL_729723 | 11/29/2020 | 12/22/2020 | Europe / Germany / Schleswig-Holstein                       |
| EPI_ISL_729724 | 12/3/2020  | 12/22/2020 | Europe / Germany / Schleswig-Holstein                       |
| EPI_ISL_729725 | 12/3/2020  | 12/22/2020 | Europe / Germany / Schleswig-Holstein                       |
| EPI_ISL_729726 | 12/3/2020  | 12/22/2020 | Europe / Germany / Schleswig-Holstein                       |
| EPI_ISL_729727 | 12/3/2020  | 12/22/2020 | Europe / Germany / Schleswig-Holstein                       |
| EPI_ISL_729728 | 11/30/2020 | 12/22/2020 | Europe / Germany / Schleswig-Holstein                       |
| EPI_ISL_729729 | 11/30/2020 | 12/22/2020 | Europe / Germany / Schleswig-Holstein                       |
| EPI_ISL_729730 | 11/30/2020 | 12/22/2020 | Europe / Germany / Schleswig-Holstein                       |
| EPI_ISL_729731 | 11/30/2020 | 12/22/2020 | Europe / Germany / Schleswig-Holstein                       |
| EPI_ISL_729732 | 11/30/2020 | 12/22/2020 | Europe / Germany / Schleswig-Holstein                       |
| EPI_ISL_729733 | 11/30/2020 | 12/22/2020 | Europe / Germany / Schleswig-Holstein                       |
| EPI_ISL_729734 | 11/29/2020 | 12/22/2020 | Europe / Germany / Schleswig-Holstein                       |
| EPI_ISL_729794 | 5/11/2020  | 12/22/2020 | South America / Brazil / Rio Grande do Sul / Nova Araca     |
| EPI_ISL_729797 | 5/6/2020   | 12/22/2020 | South America / Brazil / Rio Grande do Sul / Venancio Aires |
| EPI_ISL_729798 | 5/9/2020   | 12/22/2020 | South America / Brazil / Rio Grande do Sul / Passo Fundo    |



|                |           |            |                                                                |
|----------------|-----------|------------|----------------------------------------------------------------|
| EPI_ISL_729800 | 5/28/2020 | 12/22/2020 | South America / Brazil / Rio Grande do Sul / Lajeado           |
| EPI_ISL_729801 | 7/13/2020 | 12/22/2020 | South America / Brazil / Rio Grande do Sul / Passo Fundo       |
| EPI_ISL_729802 | 8/9/2020  | 12/22/2020 | South America / Brazil / Rio Grande do Sul / Porto Alegre      |
| EPI_ISL_729803 | 8/14/2020 | 12/22/2020 | South America / Brazil / Rio Grande do Sul / Sao Borja         |
| EPI_ISL_729804 | 3/9/2020  | 12/22/2020 | South America / Brazil / Rio Grande do Sul / Porto Alegre      |
| EPI_ISL_729805 | 3/17/2020 | 12/22/2020 | South America / Brazil / Rio Grande do Sul / Erechim           |
| EPI_ISL_729806 | 3/16/2020 | 12/22/2020 | South America / Brazil / Rio Grande do Sul / Santana do Livrar |
| EPI_ISL_729807 | 3/18/2020 | 12/22/2020 | South America / Brazil / Rio Grande do Sul / Torres            |
| EPI_ISL_729808 | 3/19/2020 | 12/22/2020 | South America / Brazil / Rio Grande do Sul / Santa Maria       |
| EPI_ISL_729809 | 3/19/2020 | 12/22/2020 | South America / Brazil / Rio Grande do Sul / Torres            |
| EPI_ISL_729810 | 3/20/2020 | 12/22/2020 | South America / Brazil / Rio Grande do Sul / Porto Alegre      |
| EPI_ISL_729811 | 3/22/2020 | 12/22/2020 | South America / Brazil / Rio Grande do Sul / Marau             |
| EPI_ISL_729812 | 3/20/2020 | 12/22/2020 | South America / Brazil / Rio Grande do Sul / Sao Leopoldo      |
| EPI_ISL_729813 | 3/25/2020 | 12/22/2020 | South America / Brazil / Rio Grande do Sul / Sao Domingos do   |
| EPI_ISL_729814 | 3/25/2020 | 12/22/2020 | South America / Brazil / Rio Grande do Sul / Porto Alegre      |
| EPI_ISL_729815 | 3/27/2020 | 12/22/2020 | South America / Brazil / Rio Grande do Sul / Farroupilha       |
| EPI_ISL_729816 | 4/3/2020  | 12/22/2020 | South America / Brazil / Rio Grande do Sul / Porto Alegre      |
| EPI_ISL_729817 | 4/3/2020  | 12/22/2020 | South America / Brazil / Rio Grande do Sul / Porto Alegre      |
| EPI_ISL_729818 | 4/6/2020  | 12/22/2020 | South America / Brazil / Rio Grande do Sul / Porto Alegre      |
| EPI_ISL_729819 | 3/12/2020 | 12/22/2020 | South America / Brazil / Rio Grande do Sul / Passo Fundo       |
| EPI_ISL_729820 | 5/6/2020  | 12/22/2020 | South America / Brazil / Rio Grande do Sul / Carlos Barbosa    |
| EPI_ISL_729821 | 5/6/2020  | 12/22/2020 | South America / Brazil / Rio Grande do Sul / Santa Rosa        |
| EPI_ISL_729822 | 5/6/2020  | 12/22/2020 | South America / Brazil / Rio Grande do Sul / Saldanha Marinh   |
| EPI_ISL_729823 | 5/8/2020  | 12/22/2020 | South America / Brazil / Rio Grande do Sul / Itaqui            |
| EPI_ISL_729824 | 5/10/2020 | 12/22/2020 | South America / Brazil / Rio Grande do Sul / Caxias do Sul     |
| EPI_ISL_729825 | 5/10/2020 | 12/22/2020 | South America / Brazil / Rio Grande do Sul / Caxias do Sul     |
| EPI_ISL_729826 | 5/11/2020 | 12/22/2020 | South America / Brazil / Rio Grande do Sul / Arroio do Meio    |
| EPI_ISL_729827 | 5/12/2020 | 12/22/2020 | South America / Brazil / Rio Grande do Sul / Serafina Correa   |
| EPI_ISL_729828 | 5/12/2020 | 12/22/2020 | South America / Brazil / Rio Grande do Sul / Passo Fundo       |
| EPI_ISL_729829 | 5/13/2020 | 12/22/2020 | South America / Brazil / Rio Grande do Sul / Nao-Me-Toque      |
| EPI_ISL_729830 | 5/14/2020 | 12/22/2020 | South America / Brazil / Rio Grande do Sul / Serafina Correa   |
| EPI_ISL_729831 | 5/14/2020 | 12/22/2020 | South America / Brazil / Rio Grande do Sul / Quaraí            |
| EPI_ISL_729832 | 5/18/2020 | 12/22/2020 | South America / Brazil / Rio Grande do Sul / Santana do Livrar |
| EPI_ISL_729833 | 5/19/2020 | 12/22/2020 | South America / Brazil / Rio Grande do Sul / Frederico Westph  |
| EPI_ISL_729834 | 4/20/2020 | 12/22/2020 | South America / Brazil / Rio Grande do Sul / Passo Fundo       |
| EPI_ISL_729835 | 5/20/2020 | 12/22/2020 | South America / Brazil / Rio Grande do Sul / Passo Fundo       |
| EPI_ISL_729836 | 5/27/2020 | 12/22/2020 | South America / Brazil / Rio Grande do Sul / Porto Alegre      |
| EPI_ISL_729837 | 5/28/2020 | 12/22/2020 | South America / Brazil / Rio Grande do Sul / Flores Da Cunha   |
| EPI_ISL_729838 | 5/29/2020 | 12/22/2020 | South America / Brazil / Rio Grande do Sul / Venancio Aires    |
| EPI_ISL_729839 | 5/29/2020 | 12/22/2020 | South America / Brazil / Rio Grande do Sul / Cacapava do Sul   |
| EPI_ISL_729840 | 5/28/2020 | 12/22/2020 | South America / Brazil / Rio Grande do Sul / Lavras do Sul     |
| EPI_ISL_729841 | 6/1/2020  | 12/22/2020 | South America / Brazil / Rio Grande do Sul / Santo Angelo      |
| EPI_ISL_729842 | 6/1/2020  | 12/22/2020 | South America / Brazil / Rio Grande do Sul / Girua             |
| EPI_ISL_729843 | 5/31/2020 | 12/22/2020 | South America / Brazil / Rio Grande do Sul / Cruz Alta         |
| EPI_ISL_729844 | 7/17/2020 | 12/22/2020 | South America / Brazil / Rio Grande do Sul / Cachoeira do Sul  |
| EPI_ISL_729845 | 7/28/2020 | 12/22/2020 | South America / Brazil / Rio Grande do Sul / Nova Brescia      |
| EPI_ISL_729846 | 5/29/2020 | 12/22/2020 | South America / Brazil / Rio Grande do Sul / Porto Alegre      |

|                |            |            |                                                               |
|----------------|------------|------------|---------------------------------------------------------------|
| EPI_ISL_729847 | 6/2/2020   | 12/22/2020 | South America / Brazil / Rio Grande do Sul / Porto Alegre     |
| EPI_ISL_729848 | 7/27/2020  | 12/22/2020 | South America / Brazil / Rio Grande do Sul / Tapejara         |
| EPI_ISL_729849 | 8/12/2020  | 12/22/2020 | South America / Brazil / Rio Grande do Sul / Carazinho        |
| EPI_ISL_729850 | 7/17/2020  | 12/22/2020 | South America / Brazil / Rio Grande do Sul / Porto Alegre     |
| EPI_ISL_729851 | 7/28/2020  | 12/22/2020 | South America / Brazil / Rio Grande do Sul / Porto Alegre     |
| EPI_ISL_729852 | 8/7/2020   | 12/22/2020 | South America / Brazil / Rio Grande do Sul / Farrroupilha     |
| EPI_ISL_729853 | 8/12/2020  | 12/22/2020 | South America / Brazil / Rio Grande do Sul / Ijuí             |
| EPI_ISL_729854 | 8/14/2020  | 12/22/2020 | South America / Brazil / Rio Grande do Sul / Porto Alegre     |
| EPI_ISL_729855 | 8/15/2020  | 12/22/2020 | South America / Brazil / Rio Grande do Sul / Tres Passos      |
| EPI_ISL_729856 | 7/18/2020  | 12/22/2020 | South America / Brazil / Rio Grande do Sul / Pelotas          |
| EPI_ISL_729857 | 7/20/2020  | 12/22/2020 | South America / Brazil / Rio Grande do Sul / Bom Retiro do Su |
| EPI_ISL_729858 | 8/6/2020   | 12/22/2020 | South America / Brazil / Rio Grande do Sul / Caxias do Sul    |
| EPI_ISL_729859 | 8/14/2020  | 12/22/2020 | South America / Brazil / Rio Grande do Sul / Venancio Aires   |
| EPI_ISL_729860 | 8/13/2020  | 12/22/2020 | South America / Brazil / Rio Grande do Sul / Santa Rosa       |
| EPI_ISL_729861 | 8/16/2020  | 12/22/2020 | South America / Brazil / Rio Grande do Sul / Porto Alegre     |
| EPI_ISL_729862 | 10/14/2020 | 12/22/2020 | South America / Peru / Lima / Lima                            |
| EPI_ISL_729863 | 10/14/2020 | 12/22/2020 | South America / Peru / Lima / Lima                            |
| EPI_ISL_729864 | 10/14/2020 | 12/22/2020 | South America / Peru / Lima / Lima                            |
| EPI_ISL_729865 | 10/15/2020 | 12/22/2020 | South America / Peru / Lima / Lima                            |
| EPI_ISL_729866 | 10/15/2020 | 12/22/2020 | South America / Peru / Lima / Lima                            |
| EPI_ISL_729867 | 10/15/2020 | 12/22/2020 | South America / Peru / Lima / Lima                            |
| EPI_ISL_729868 | 10/15/2020 | 12/22/2020 | South America / Peru / Lima / Lima                            |
| EPI_ISL_729869 | 9/21/2020  | 12/22/2020 | South America / Peru / Amazonas / Bongara                     |
| EPI_ISL_729870 | 10/1/2020  | 12/22/2020 | South America / Peru / Amazonas / Bongara                     |
| EPI_ISL_729871 | 9/16/2020  | 12/22/2020 | South America / Peru / Amazonas / Chachapoyas                 |
| EPI_ISL_729872 | 10/14/2020 | 12/22/2020 | South America / Peru / Lima / Lima                            |
| EPI_ISL_729873 | 10/14/2020 | 12/22/2020 | South America / Peru / Lima / Lima                            |
| EPI_ISL_729874 | 10/14/2020 | 12/22/2020 | South America / Peru / Lima / Lima                            |
| EPI_ISL_729875 | 10/14/2020 | 12/22/2020 | South America / Peru / Lima / Lima                            |
| EPI_ISL_729876 | 10/12/2020 | 12/22/2020 | South America / Peru / Lima / Lima                            |
| EPI_ISL_729877 | 10/14/2020 | 12/22/2020 | South America / Peru / Lima / Lima                            |
| EPI_ISL_729878 | 10/13/2020 | 12/22/2020 | South America / Peru / Lima / Lima                            |
| EPI_ISL_729879 | 10/13/2020 | 12/22/2020 | South America / Peru / Lima / Lima                            |
| EPI_ISL_729880 | 10/14/2020 | 12/22/2020 | South America / Peru / Lima / Lima                            |
| EPI_ISL_729881 | 10/14/2020 | 12/22/2020 | South America / Peru / Lima / Lima                            |
| EPI_ISL_729882 | 10/13/2020 | 12/22/2020 | South America / Peru / Lima / Lima                            |
| EPI_ISL_729883 | 10/13/2020 | 12/22/2020 | South America / Peru / Lima / Lima                            |
| EPI_ISL_729884 | 10/13/2020 | 12/22/2020 | South America / Peru / Lima / Lima                            |
| EPI_ISL_729885 | 10/13/2020 | 12/22/2020 | South America / Peru / Lima / Lima                            |
| EPI_ISL_729886 | 10/14/2020 | 12/22/2020 | South America / Peru / Lima / Lima                            |
| EPI_ISL_729887 | 10/15/2020 | 12/22/2020 | South America / Peru / Lima / Lima                            |
| EPI_ISL_729888 | 10/16/2020 | 12/22/2020 | South America / Peru / Lima / Lima                            |
| EPI_ISL_729889 | 10/14/2020 | 12/22/2020 | South America / Peru / Lima / Lima                            |
| EPI_ISL_729890 | 10/14/2020 | 12/22/2020 | South America / Peru / Lima / Lima                            |
| EPI_ISL_729891 | 10/14/2020 | 12/22/2020 | South America / Peru / Lima / Lima                            |
| EPI_ISL_729892 | 10/16/2020 | 12/22/2020 | South America / Peru / Lima / Lima                            |
| EPI_ISL_729893 | 10/15/2020 | 12/22/2020 | South America / Peru / Lima / Lima                            |

|                |            |            |                                               |
|----------------|------------|------------|-----------------------------------------------|
| EPI_ISL_729894 | 10/15/2020 | 12/22/2020 | South America / Peru / Lima / Lima            |
| EPI_ISL_729895 | 10/15/2020 | 12/22/2020 | South America / Peru / Lima / Lima            |
| EPI_ISL_729896 | 10/15/2020 | 12/22/2020 | South America / Peru / Lima / Lima            |
| EPI_ISL_729897 | 10/16/2020 | 12/22/2020 | South America / Peru / Lima / Lima            |
| EPI_ISL_729898 | 10/14/2020 | 12/22/2020 | South America / Peru / Lima / Lima            |
| EPI_ISL_729899 | 10/15/2020 | 12/22/2020 | South America / Peru / Lima / Lima            |
| EPI_ISL_729900 | 10/14/2020 | 12/22/2020 | South America / Peru / Lima / Lima            |
| EPI_ISL_729901 | 10/14/2020 | 12/22/2020 | South America / Peru / Lima / Lima            |
| EPI_ISL_729902 | 8/29/2020  | 12/22/2020 | South America / Peru / Amazonas / Bongara     |
| EPI_ISL_729903 | 9/28/2020  | 12/22/2020 | South America / Peru / Amazonas / Chachapoyas |
| EPI_ISL_729904 | 9/8/2020   | 12/22/2020 | South America / Peru / Amazonas / Bongara     |
| EPI_ISL_729905 | 9/8/2020   | 12/22/2020 | South America / Peru / Amazonas / Chachapoyas |
| EPI_ISL_729906 | 9/17/2020  | 12/22/2020 | South America / Peru / Amazonas / Chachapoyas |
| EPI_ISL_729907 | 9/28/2020  | 12/22/2020 | South America / Peru / Amazonas / Chachapoyas |
| EPI_ISL_729908 | 9/21/2020  | 12/22/2020 | South America / Peru / Amazonas / Chachapoyas |
| EPI_ISL_729909 | 9/21/2020  | 12/22/2020 | South America / Peru / Amazonas / Bongara     |
| EPI_ISL_729910 | 8/20/2020  | 12/22/2020 | South America / Peru / Amazonas / Chachapoyas |
| EPI_ISL_729911 | 9/21/2020  | 12/22/2020 | South America / Peru / Amazonas / Chachapoyas |
| EPI_ISL_729912 | 8/26/2020  | 12/22/2020 | South America / Peru / Amazonas / Chachapoyas |
| EPI_ISL_729913 | 8/18/2020  | 12/22/2020 | South America / Peru / Amazonas / Chachapoyas |
| EPI_ISL_729914 | 8/17/2020  | 12/22/2020 | South America / Peru / Amazonas / Chachapoyas |
| EPI_ISL_729915 | 9/21/2020  | 12/22/2020 | South America / Peru / Amazonas / Bongara     |
| EPI_ISL_729916 | 9/21/2020  | 12/22/2020 | South America / Peru / Amazonas / Luya        |
| EPI_ISL_729917 | 8/11/2020  | 12/22/2020 | South America / Peru / Amazonas / Chachapoyas |
| EPI_ISL_729918 | 8/11/2020  | 12/22/2020 | South America / Peru / Amazonas / Chachapoyas |
| EPI_ISL_729919 | 8/26/2020  | 12/22/2020 | South America / Peru / Amazonas / Chachapoyas |
| EPI_ISL_729920 | 4/20/2020  | 12/23/2020 | Africa / Nigeria / Kaduna State               |
| EPI_ISL_729923 | 6/1/2020   | 12/23/2020 | Africa / Nigeria / Niger State                |
| EPI_ISL_729924 | 6/2/2020   | 12/23/2020 | Africa / Nigeria / Abuja                      |
| EPI_ISL_729925 | 6/11/2020  | 12/23/2020 | Africa / Nigeria / Nasarawa State             |
| EPI_ISL_729926 | 5/31/2020  | 12/23/2020 | Africa / Nigeria / Nasarawa State             |
| EPI_ISL_729928 | 7/5/2020   | 12/23/2020 | Africa / Nigeria / Benue State                |
| EPI_ISL_729929 | 7/2/2020   | 12/23/2020 | Africa / Nigeria / Niger State                |
| EPI_ISL_729930 | 7/7/2020   | 12/23/2020 | Africa / Nigeria / Abuja                      |
| EPI_ISL_729931 | 7/7/2020   | 12/23/2020 | Africa / Nigeria / Abuja                      |
| EPI_ISL_729932 | 7/8/2020   | 12/23/2020 | Africa / Nigeria / Abuja                      |
| EPI_ISL_729935 | 7/10/2020  | 12/23/2020 | Africa / Nigeria / Abuja                      |
| EPI_ISL_729937 | 4/25/2020  | 12/23/2020 | Africa / Nigeria / Kano State                 |
| EPI_ISL_729938 | 4/20/2020  | 12/23/2020 | Africa / Nigeria / Lagos State                |
| EPI_ISL_729939 | 4/20/2020  | 12/23/2020 | Africa / Nigeria / Lagos State                |
| EPI_ISL_729940 | 4/20/2020  | 12/23/2020 | Africa / Nigeria / Lagos State                |
| EPI_ISL_729941 | 4/9/2020   | 12/23/2020 | Africa / Nigeria / Lagos State                |
| EPI_ISL_729942 | 4/25/2020  | 12/23/2020 | Africa / Nigeria / Kogi State                 |
| EPI_ISL_729943 | 4/25/2020  | 12/23/2020 | Africa / Nigeria / Lagos State                |
| EPI_ISL_729944 | 5/16/2020  | 12/23/2020 | Africa / Nigeria / Ogun State                 |
| EPI_ISL_729945 | 5/14/2020  | 12/23/2020 | Africa / Nigeria / Lagos State                |
| EPI_ISL_729946 | 4/5/2020   | 12/23/2020 | Africa / Nigeria / Lagos State                |

|                |            |            |                                    |
|----------------|------------|------------|------------------------------------|
| EPI_ISL_729947 | 5/14/2020  | 12/23/2020 | Africa / Nigeria / Lagos State     |
| EPI_ISL_729948 | 5/14/2020  | 12/23/2020 | Africa / Nigeria / Lagos State     |
| EPI_ISL_729950 | 5/16/2020  | 12/23/2020 | Africa / Nigeria / Lagos State     |
| EPI_ISL_729951 | 6/25/2020  | 12/23/2020 | Africa / Nigeria / Akwa-Ibom State |
| EPI_ISL_729952 | 6/27/2020  | 12/23/2020 | Africa / Nigeria / Akwa-Ibom State |
| EPI_ISL_729953 | 6/29/2020  | 12/23/2020 | Africa / Nigeria / Akwa-Ibom State |
| EPI_ISL_729954 | 6/29/2020  | 12/23/2020 | Africa / Nigeria / Akwa-Ibom State |
| EPI_ISL_729955 | 7/1/2020   | 12/23/2020 | Africa / Nigeria / Akwa-Ibom State |
| EPI_ISL_729956 | 7/12/2020  | 12/23/2020 | Africa / Nigeria / Akwa-Ibom State |
| EPI_ISL_729957 | 7/20/2020  | 12/23/2020 | Africa / Nigeria / Akwa-Ibom State |
| EPI_ISL_729958 | 7/25/2020  | 12/23/2020 | Africa / Nigeria / Akwa-Ibom State |
| EPI_ISL_729959 | 4/23/2020  | 12/23/2020 | Africa / Nigeria / Borno State     |
| EPI_ISL_729960 | 4/27/2020  | 12/23/2020 | Africa / Nigeria / Borno State     |
| EPI_ISL_729961 | 4/27/2020  | 12/23/2020 | Africa / Nigeria / Borno State     |
| EPI_ISL_729962 | 4/27/2020  | 12/23/2020 | Africa / Nigeria / Borno State     |
| EPI_ISL_729964 | 5/5/2020   | 12/23/2020 | Africa / Nigeria / Borno State     |
| EPI_ISL_729966 | 6/24/2020  | 12/23/2020 | Africa / Nigeria / Osun State      |
| EPI_ISL_729967 | 6/23/2020  | 12/23/2020 | Africa / Nigeria / Osun State      |
| EPI_ISL_729968 | 6/27/2020  | 12/23/2020 | Africa / Nigeria / Osun State      |
| EPI_ISL_729969 | 6/30/2020  | 12/23/2020 | Africa / Nigeria / Osun State      |
| EPI_ISL_729970 | 7/3/2020   | 12/23/2020 | Africa / Nigeria / Osun State      |
| EPI_ISL_729972 | 7/7/2020   | 12/23/2020 | Africa / Nigeria / Osun State      |
| EPI_ISL_729973 | 7/8/2020   | 12/23/2020 | Africa / Nigeria / Osun State      |
| EPI_ISL_729974 | 7/8/2020   | 12/23/2020 | Africa / Nigeria / Osun State      |
| EPI_ISL_729975 | 8/3/2020   | 12/23/2020 | Africa / Nigeria / Osun State      |
| EPI_ISL_729976 | 8/4/2020   | 12/23/2020 | Africa / Nigeria / Osun State      |
| EPI_ISL_729977 | 8/7/2020   | 12/23/2020 | Africa / Nigeria / Osun State      |
| EPI_ISL_729978 | 8/31/2020  | 12/23/2020 | Africa / Nigeria / Osun State      |
| EPI_ISL_729979 | 9/1/2020   | 12/23/2020 | Africa / Nigeria / Osun State      |
| EPI_ISL_729980 | 9/3/2020   | 12/23/2020 | Africa / Nigeria / Osun State      |
| EPI_ISL_729982 | 10/5/2020  | 12/23/2020 | Africa / Nigeria / Osun State      |
| EPI_ISL_729985 | 10/12/2020 | 12/23/2020 | Africa / Nigeria / Osun State      |
| EPI_ISL_729986 | 6/12/2020  | 12/23/2020 | Africa / Nigeria / Akwa-Ibom State |
| EPI_ISL_729987 | 6/27/2020  | 12/23/2020 | Africa / Nigeria / Akwa-Ibom State |
| EPI_ISL_729988 | 6/29/2020  | 12/23/2020 | Africa / Nigeria / Akwa-Ibom State |
| EPI_ISL_729989 | 7/4/2020   | 12/23/2020 | Africa / Nigeria / Akwa-Ibom State |
| EPI_ISL_729992 | 7/17/2020  | 12/23/2020 | Africa / Nigeria / Akwa-Ibom State |
| EPI_ISL_729993 | 7/20/2020  | 12/23/2020 | Africa / Nigeria / Akwa-Ibom State |
| EPI_ISL_729994 | 7/27/2020  | 12/23/2020 | Africa / Nigeria / Akwa-Ibom State |
| EPI_ISL_729995 | 4/19/2020  | 12/23/2020 | Africa / Nigeria / Borno State     |
| EPI_ISL_729999 | 4/26/2020  | 12/23/2020 | Africa / Nigeria / Borno State     |
| EPI_ISL_730004 | 5/1/2020   | 12/23/2020 | Africa / Nigeria / Borno State     |
| EPI_ISL_730006 | 5/3/2020   | 12/23/2020 | Africa / Nigeria / Borno State     |
| EPI_ISL_730007 | 5/4/2020   | 12/23/2020 | Africa / Nigeria / Borno State     |
| EPI_ISL_730008 | 5/4/2020   | 12/23/2020 | Africa / Nigeria / Borno State     |
| EPI_ISL_730009 | 5/6/2020   | 12/23/2020 | Africa / Nigeria / Borno State     |
| EPI_ISL_730010 | 5/8/2020   | 12/23/2020 | Africa / Nigeria / Borno State     |

|                |            |                                                         |
|----------------|------------|---------------------------------------------------------|
| EPI_ISL_730012 | 5/17/2020  | 12/23/2020 Africa / Nigeria / Borno State               |
| EPI_ISL_730013 | 5/18/2020  | 12/23/2020 Africa / Nigeria / Borno State               |
| EPI_ISL_730015 | 5/23/2020  | 12/23/2020 Africa / Nigeria / Borno State               |
| EPI_ISL_730017 | 6/1/2020   | 12/23/2020 Africa / Nigeria / Benue State               |
| EPI_ISL_730019 | 6/24/2020  | 12/23/2020 Africa / Nigeria / Abuja                     |
| EPI_ISL_730020 | 6/26/2020  | 12/23/2020 Africa / Nigeria / Abuja                     |
| EPI_ISL_730021 | 6/26/2020  | 12/23/2020 Africa / Nigeria / Abuja                     |
| EPI_ISL_730024 | 7/1/2020   | 12/23/2020 Africa / Nigeria / Abuja                     |
| EPI_ISL_730028 | 4/25/2020  | 12/23/2020 Africa / Nigeria / Lagos State               |
| EPI_ISL_730029 | 4/25/2020  | 12/23/2020 Africa / Nigeria / Lagos State               |
| EPI_ISL_730031 | 4/9/2020   | 12/23/2020 Africa / Nigeria / Lagos State               |
| EPI_ISL_730032 | 5/14/2020  | 12/23/2020 Africa / Nigeria / Lagos State               |
| EPI_ISL_730033 | 5/16/2020  | 12/23/2020 Africa / Nigeria / Lagos State               |
| EPI_ISL_730034 | 5/20/2020  | 12/23/2020 Africa / Nigeria / Lagos State               |
| EPI_ISL_730035 | 5/30/2020  | 12/23/2020 Africa / Nigeria / Lagos State               |
| EPI_ISL_730036 | 5/16/2020  | 12/23/2020 Africa / Nigeria / Lagos State               |
| EPI_ISL_730038 | 5/27/2020  | 12/23/2020 Africa / Nigeria / Lagos State               |
| EPI_ISL_730039 | 5/22/2020  | 12/23/2020 Africa / Nigeria / Lagos State               |
| EPI_ISL_730042 | 8/17/2020  | 12/23/2020 Africa / Nigeria / Lagos State               |
| EPI_ISL_730044 | 7/10/2020  | 12/23/2020 Africa / Nigeria / Kwara State               |
| EPI_ISL_730048 | 7/12/2020  | 12/23/2020 Africa / Nigeria / Kwara State               |
| EPI_ISL_730085 | 9/29/2020  | 12/23/2020 North America / USA / California / San Diego |
| EPI_ISL_730086 | 11/11/2020 | 12/23/2020 North America / USA / California / San Diego |
| EPI_ISL_730087 | 10/7/2020  | 12/23/2020 North America / USA / California / San Diego |
| EPI_ISL_730088 | 6/26/2020  | 12/23/2020 North America / USA / California / San Diego |
| EPI_ISL_730089 | 10/15/2020 | 12/23/2020 North America / USA / California / San Diego |
| EPI_ISL_730090 | 10/5/2020  | 12/23/2020 North America / USA / California / San Diego |
| EPI_ISL_730091 | 9/9/2020   | 12/23/2020 North America / USA / California / San Diego |
| EPI_ISL_730092 | 9/28/2020  | 12/23/2020 North America / USA / California / San Diego |
| EPI_ISL_730093 | 10/30/2020 | 12/23/2020 North America / USA / California / San Diego |
| EPI_ISL_730094 | 10/28/2020 | 12/23/2020 North America / USA / California / San Diego |
| EPI_ISL_730095 | 10/9/2020  | 12/23/2020 North America / USA / California / San Diego |
| EPI_ISL_730096 | 6/29/2020  | 12/23/2020 North America / USA / California / San Diego |
| EPI_ISL_730097 | 9/29/2020  | 12/23/2020 North America / USA / California / San Diego |
| EPI_ISL_730098 | 9/29/2020  | 12/23/2020 North America / USA / California / San Diego |
| EPI_ISL_730099 | 10/5/2020  | 12/23/2020 North America / USA / California / San Diego |
| EPI_ISL_730100 | 10/29/2020 | 12/23/2020 North America / USA / California / San Diego |
| EPI_ISL_730101 | 9/21/2020  | 12/23/2020 North America / USA / California / San Diego |
| EPI_ISL_730102 | 10/9/2020  | 12/23/2020 North America / USA / California / San Diego |
| EPI_ISL_730103 | 6/29/2020  | 12/23/2020 North America / USA / California / San Diego |
| EPI_ISL_730104 | 6/29/2020  | 12/23/2020 North America / USA / California / San Diego |
| EPI_ISL_730105 | 9/29/2020  | 12/23/2020 North America / USA / California / San Diego |
| EPI_ISL_730106 | 9/29/2020  | 12/23/2020 North America / USA / California / San Diego |
| EPI_ISL_730107 | 9/29/2020  | 12/23/2020 North America / USA / California / San Diego |
| EPI_ISL_730108 | 10/29/2020 | 12/23/2020 North America / USA / California / San Diego |
| EPI_ISL_730109 | 9/21/2020  | 12/23/2020 North America / USA / California / San Diego |
| EPI_ISL_730110 | 9/21/2020  | 12/23/2020 North America / USA / California / San Diego |

|                |            |            |                                                     |
|----------------|------------|------------|-----------------------------------------------------|
| EPI_ISL_730111 | 10/30/2020 | 12/23/2020 | North America / USA / California / San Diego        |
| EPI_ISL_730112 | 10/28/2020 | 12/23/2020 | North America / USA / California / Orange           |
| EPI_ISL_730114 | 10/15/2020 | 12/23/2020 | North America / USA / California / San Diego        |
| EPI_ISL_730115 | 9/17/2020  | 12/23/2020 | North America / USA / California / San Diego        |
| EPI_ISL_730116 | 9/17/2020  | 12/23/2020 | North America / USA / California / San Diego        |
| EPI_ISL_730117 | 10/30/2020 | 12/23/2020 | North America / USA / California / San Diego        |
| EPI_ISL_730118 | 6/30/2020  | 12/23/2020 | North America / USA / California / San Diego        |
| EPI_ISL_730120 | 9/29/2020  | 12/23/2020 | North America / USA / California / San Diego        |
| EPI_ISL_730121 | 9/21/2020  | 12/23/2020 | North America / USA / California / San Diego        |
| EPI_ISL_730122 | 10/6/2020  | 12/23/2020 | North America / USA / California / San Diego        |
| EPI_ISL_730123 | 10/30/2020 | 12/23/2020 | North America / USA / California / San Diego        |
| EPI_ISL_730124 | 10/28/2020 | 12/23/2020 | North America / USA / California / San Diego        |
| EPI_ISL_730125 | 10/5/2020  | 12/23/2020 | North America / USA / California / San Diego        |
| EPI_ISL_730127 | 8/24/2020  | 12/23/2020 | North America / Mexico / Baja California / Tijuana  |
| EPI_ISL_730128 | 8/24/2020  | 12/23/2020 | North America / Mexico / Baja California / Tijuana  |
| EPI_ISL_730129 | 8/25/2020  | 12/23/2020 | North America / Mexico / Baja California / Tijuana  |
| EPI_ISL_730130 | 8/24/2020  | 12/23/2020 | North America / Mexico / Baja California / Tijuana  |
| EPI_ISL_730132 | 8/25/2020  | 12/23/2020 | North America / Mexico / Baja California / Ensenada |
| EPI_ISL_730133 | 8/25/2020  | 12/23/2020 | North America / Mexico / Baja California / Rosarito |
| EPI_ISL_730134 | 8/25/2020  | 12/23/2020 | North America / Mexico / Baja California / Tijuana  |
| EPI_ISL_730135 | 8/25/2020  | 12/23/2020 | North America / Mexico / Baja California / Tijuana  |
| EPI_ISL_730136 | 8/22/2020  | 12/23/2020 | North America / Mexico / Baja California / Tijuana  |
| EPI_ISL_730138 | 4/6/2020   | 12/23/2020 | North America / USA / California / San Diego        |
| EPI_ISL_730139 | 5/4/2020   | 12/23/2020 | North America / USA / California / San Diego        |
| EPI_ISL_730140 | 5/5/2020   | 12/23/2020 | North America / USA / California / San Diego        |
| EPI_ISL_730141 | 4/30/2020  | 12/23/2020 | North America / USA / California / San Diego        |
| EPI_ISL_730142 | 5/1/2020   | 12/23/2020 | North America / USA / California / San Diego        |
| EPI_ISL_730143 | 5/1/2020   | 12/23/2020 | North America / USA / California / San Diego        |
| EPI_ISL_730144 | 5/1/2020   | 12/23/2020 | North America / USA / California / San Diego        |
| EPI_ISL_730146 | 5/1/2020   | 12/23/2020 | North America / USA / California / San Diego        |
| EPI_ISL_730150 | 5/2/2020   | 12/23/2020 | North America / USA / California / San Diego        |
| EPI_ISL_730151 | 5/3/2020   | 12/23/2020 | North America / USA / California / San Diego        |
| EPI_ISL_730152 | 5/8/2020   | 12/23/2020 | North America / USA / California / San Diego        |
| EPI_ISL_730156 | 4/4/2020   | 12/23/2020 | North America / USA / California / San Diego        |
| EPI_ISL_730158 | 4/5/2020   | 12/23/2020 | North America / USA / California / San Diego        |
| EPI_ISL_730159 | 5/4/2020   | 12/23/2020 | North America / USA / California / San Diego        |
| EPI_ISL_730160 | 4/3/2020   | 12/23/2020 | North America / USA / California / San Diego        |
| EPI_ISL_730161 | 11/4/2020  | 12/23/2020 | North America / USA / California / San Diego        |
| EPI_ISL_730162 | 11/4/2020  | 12/23/2020 | North America / USA / California / San Diego        |
| EPI_ISL_730163 | 10/28/2020 | 12/23/2020 | North America / USA / California / San Diego        |
| EPI_ISL_730164 | 11/4/2020  | 12/23/2020 | North America / USA / California / San Diego        |
| EPI_ISL_730165 | 10/28/2020 | 12/23/2020 | North America / USA / California / San Diego        |
| EPI_ISL_730166 | 11/9/2020  | 12/23/2020 | North America / USA / California / San Diego        |
| EPI_ISL_730167 | 11/4/2020  | 12/23/2020 | North America / USA / California / San Diego        |
| EPI_ISL_730168 | 11/2/2020  | 12/23/2020 | North America / USA / California / San Diego        |
| EPI_ISL_730169 | 11/9/2020  | 12/23/2020 | North America / USA / California / San Diego        |
| EPI_ISL_730170 | 10/21/2020 | 12/23/2020 | North America / USA / California / San Diego        |



|                |            |            |                                                    |
|----------------|------------|------------|----------------------------------------------------|
| EPI_ISL_730221 | 8/31/2020  | 12/23/2020 | North America / Mexico / Baja California / Tijuana |
| EPI_ISL_730222 | 8/2/2020   | 12/23/2020 | North America / Mexico / Baja California / Tijuana |
| EPI_ISL_730223 | 8/2/2020   | 12/23/2020 | North America / Mexico / Baja California / Tijuana |
| EPI_ISL_730225 | 8/2/2020   | 12/23/2020 | North America / Mexico / Baja California / Tijuana |
| EPI_ISL_730226 | 8/2/2020   | 12/23/2020 | North America / Mexico / Baja California / Tijuana |
| EPI_ISL_730227 | 8/2/2020   | 12/23/2020 | North America / Mexico / Baja California / Tijuana |
| EPI_ISL_730228 | 8/2/2020   | 12/23/2020 | North America / Mexico / Baja California / Tijuana |
| EPI_ISL_730229 | 9/12/2020  | 12/23/2020 | Asia / Jordan / Amman                              |
| EPI_ISL_730230 | 10/4/2020  | 12/23/2020 | Asia / Jordan / Amman                              |
| EPI_ISL_730231 | 10/5/2020  | 12/23/2020 | Asia / Jordan / Amman                              |
| EPI_ISL_730232 | 10/8/2020  | 12/23/2020 | Asia / Jordan / Amman                              |
| EPI_ISL_730233 | 10/3/2020  | 12/23/2020 | Asia / Jordan / Amman                              |
| EPI_ISL_730234 | 10/3/2020  | 12/23/2020 | Asia / Jordan / Amman                              |
| EPI_ISL_730235 | 10/5/2020  | 12/23/2020 | Asia / Jordan / Amman                              |
| EPI_ISL_730236 | 10/6/2020  | 12/23/2020 | Asia / Jordan / Amman                              |
| EPI_ISL_730237 | 10/3/2020  | 12/23/2020 | Asia / Jordan / Amman                              |
| EPI_ISL_730238 | 10/3/2020  | 12/23/2020 | Asia / Jordan / Amman                              |
| EPI_ISL_730239 | 10/4/2020  | 12/23/2020 | Asia / Jordan / Amman                              |
| EPI_ISL_730240 | 10/7/2020  | 12/23/2020 | Asia / Jordan / Amman                              |
| EPI_ISL_730241 | 10/8/2020  | 12/23/2020 | Asia / Jordan / Amman                              |
| EPI_ISL_730242 | 10/10/2020 | 12/23/2020 | Asia / Jordan / Amman                              |
| EPI_ISL_730243 | 10/3/2020  | 12/23/2020 | Asia / Jordan / Amman                              |
| EPI_ISL_730244 | 10/3/2020  | 12/23/2020 | Asia / Jordan / Amman                              |
| EPI_ISL_730245 | 10/4/2020  | 12/23/2020 | Asia / Jordan / Amman                              |
| EPI_ISL_730246 | 10/5/2020  | 12/23/2020 | Asia / Jordan / Amman                              |
| EPI_ISL_730247 | 10/6/2020  | 12/23/2020 | Asia / Jordan / Amman                              |
| EPI_ISL_730248 | 10/8/2020  | 12/23/2020 | Asia / Jordan / Amman                              |
| EPI_ISL_730249 | 10/10/2020 | 12/23/2020 | Asia / Jordan / Amman                              |
| EPI_ISL_730250 | 10/3/2020  | 12/23/2020 | Asia / Jordan / Amman                              |
| EPI_ISL_730251 | 10/5/2020  | 12/23/2020 | Asia / Jordan / Amman                              |
| EPI_ISL_730252 | 10/6/2020  | 12/23/2020 | Asia / Jordan / Amman                              |
| EPI_ISL_730253 | 10/7/2020  | 12/23/2020 | Asia / Jordan / Amman                              |
| EPI_ISL_730254 | 10/10/2020 | 12/23/2020 | Asia / Jordan / Amman                              |
| EPI_ISL_730255 | 10/11/2020 | 12/23/2020 | Asia / Jordan / Amman                              |
| EPI_ISL_730256 | 10/3/2020  | 12/23/2020 | Asia / Jordan / Amman                              |
| EPI_ISL_730257 | 10/3/2020  | 12/23/2020 | Asia / Jordan / Amman                              |
| EPI_ISL_730258 | 10/3/2020  | 12/23/2020 | Asia / Jordan / Amman                              |
| EPI_ISL_730259 | 10/5/2020  | 12/23/2020 | Asia / Jordan / Amman                              |
| EPI_ISL_730260 | 10/6/2020  | 12/23/2020 | Asia / Jordan / Amman                              |
| EPI_ISL_730261 | 10/8/2020  | 12/23/2020 | Asia / Jordan / Amman                              |
| EPI_ISL_730262 | 10/10/2020 | 12/23/2020 | Asia / Jordan / Amman                              |
| EPI_ISL_730263 | 10/11/2020 | 12/23/2020 | Asia / Jordan / Amman                              |
| EPI_ISL_730264 | 10/3/2020  | 12/23/2020 | Asia / Jordan / Amman                              |
| EPI_ISL_730265 | 10/4/2020  | 12/23/2020 | Asia / Jordan / Amman                              |
| EPI_ISL_730266 | 10/6/2020  | 12/23/2020 | Asia / Jordan / Amman                              |
| EPI_ISL_730267 | 10/6/2020  | 12/23/2020 | Asia / Jordan / Amman                              |
| EPI_ISL_730268 | 10/8/2020  | 12/23/2020 | Asia / Jordan / Amman                              |



|                |            |                                                         |
|----------------|------------|---------------------------------------------------------|
| EPI_ISL_730269 | 10/10/2020 | 12/23/2020 Asia / Jordan / Amman                        |
| EPI_ISL_730270 | 10/11/2020 | 12/23/2020 Asia / Jordan / Amman                        |
| EPI_ISL_730271 | 10/3/2020  | 12/23/2020 Asia / Jordan / Amman                        |
| EPI_ISL_730272 | 10/5/2020  | 12/23/2020 Asia / Jordan / Amman                        |
| EPI_ISL_730273 | 10/5/2020  | 12/23/2020 Asia / Jordan / Amman                        |
| EPI_ISL_730274 | 10/6/2020  | 12/23/2020 Asia / Jordan / Amman                        |
| EPI_ISL_730275 | 10/8/2020  | 12/23/2020 Asia / Jordan / Amman                        |
| EPI_ISL_730276 | 10/10/2020 | 12/23/2020 Asia / Jordan / Amman                        |
| EPI_ISL_730277 | 10/11/2020 | 12/23/2020 Asia / Jordan / Amman                        |
| EPI_ISL_730278 | 10/10/2020 | 12/23/2020 Asia / Jordan / Amman                        |
| EPI_ISL_730279 | 10/11/2020 | 12/23/2020 Asia / Jordan / Amman                        |
| EPI_ISL_730280 | 10/3/2020  | 12/23/2020 Asia / Jordan / Amman                        |
| EPI_ISL_730281 | 10/5/2020  | 12/23/2020 Asia / Jordan / Amman                        |
| EPI_ISL_730282 | 10/5/2020  | 12/23/2020 Asia / Jordan / Amman                        |
| EPI_ISL_730283 | 10/6/2020  | 12/23/2020 Asia / Jordan / Amman                        |
| EPI_ISL_730284 | 10/7/2020  | 12/23/2020 Asia / Jordan / Amman                        |
| EPI_ISL_730285 | 10/10/2020 | 12/23/2020 Asia / Jordan / Amman                        |
| EPI_ISL_730286 | 10/11/2020 | 12/23/2020 Asia / Jordan / Amman                        |
| EPI_ISL_730287 | 10/3/2020  | 12/23/2020 Asia / Jordan / Amman                        |
| EPI_ISL_730288 | 10/4/2020  | 12/23/2020 Asia / Jordan / Amman                        |
| EPI_ISL_730289 | 10/5/2020  | 12/23/2020 Asia / Jordan / Amman                        |
| EPI_ISL_730290 | 10/6/2020  | 12/23/2020 Asia / Jordan / Amman                        |
| EPI_ISL_730291 | 12/4/2020  | 12/23/2020 North America / USA / California / San Diego |
| EPI_ISL_730296 | 12/5/2020  | 12/23/2020 North America / USA / California / San Diego |
| EPI_ISL_730297 | 11/15/2020 | 12/23/2020 North America / USA / California / San Diego |
| EPI_ISL_730299 | 12/6/2020  | 12/23/2020 North America / USA / California / San Diego |
| EPI_ISL_730300 | 11/15/2020 | 12/23/2020 North America / USA / California / San Diego |
| EPI_ISL_730304 | 11/11/2020 | 12/23/2020 North America / USA / California / San Diego |
| EPI_ISL_730306 | 11/15/2020 | 12/23/2020 North America / USA / California / San Diego |
| EPI_ISL_730307 | 12/6/2020  | 12/23/2020 North America / USA / California / San Diego |
| EPI_ISL_730309 | 11/15/2020 | 12/23/2020 North America / USA / California / San Diego |
| EPI_ISL_730312 | 12/2/2020  | 12/23/2020 North America / USA / California / San Diego |
| EPI_ISL_730313 | 12/4/2020  | 12/23/2020 North America / USA / California / San Diego |
| EPI_ISL_730314 | 12/6/2020  | 12/23/2020 North America / USA / California / San Diego |
| EPI_ISL_730315 | 12/5/2020  | 12/23/2020 North America / USA / California / San Diego |
| EPI_ISL_730318 | 9/21/2020  | 12/23/2020 North America / USA / California / San Diego |
| EPI_ISL_730319 | 12/1/2020  | 12/23/2020 North America / USA / California / San Diego |
| EPI_ISL_730320 | 11/27/2020 | 12/23/2020 North America / USA / California / San Diego |
| EPI_ISL_730321 | 6/24/2020  | 12/23/2020 North America / USA / California / San Diego |
| EPI_ISL_730322 | 11/27/2020 | 12/23/2020 North America / USA / California / San Diego |
| EPI_ISL_730323 | 9/21/2020  | 12/23/2020 North America / USA / California / San Diego |
| EPI_ISL_730324 | 11/27/2020 | 12/23/2020 North America / USA / California / San Diego |
| EPI_ISL_730325 | 12/1/2020  | 12/23/2020 North America / USA / California / San Diego |
| EPI_ISL_730326 | 9/21/2020  | 12/23/2020 North America / USA / California / San Diego |
| EPI_ISL_730327 | 6/26/2020  | 12/23/2020 North America / USA / California / San Diego |
| EPI_ISL_730328 | 11/27/2020 | 12/23/2020 North America / USA / California / San Diego |
| EPI_ISL_730330 | 7/1/2020   | 12/23/2020 North America / USA / California / San Diego |

|                |            |            |                                              |
|----------------|------------|------------|----------------------------------------------|
| EPI_ISL_730331 | 6/27/2020  | 12/23/2020 | North America / USA / California / San Diego |
| EPI_ISL_730332 | 12/1/2020  | 12/23/2020 | North America / USA / California / San Diego |
| EPI_ISL_730333 | 9/21/2020  | 12/23/2020 | North America / USA / California / San Diego |
| EPI_ISL_730334 | 6/25/2020  | 12/23/2020 | North America / USA / California / San Diego |
| EPI_ISL_730335 | 9/21/2020  | 12/23/2020 | North America / USA / California / San Diego |
| EPI_ISL_730337 | 9/21/2020  | 12/23/2020 | North America / USA / California / San Diego |
| EPI_ISL_730338 | 11/9/2020  | 12/23/2020 | North America / USA / California / San Diego |
| EPI_ISL_730339 | 5/24/2020  | 12/23/2020 | North America / USA / California / San Diego |
| EPI_ISL_730340 | 12/1/2020  | 12/23/2020 | North America / USA / California / San Diego |
| EPI_ISL_730341 | 9/17/2020  | 12/23/2020 | North America / USA / California / San Diego |
| EPI_ISL_730342 | 11/10/2020 | 12/23/2020 | North America / USA / California / San Diego |
| EPI_ISL_730343 | 7/1/2020   | 12/23/2020 | North America / USA / California / San Diego |
| EPI_ISL_730344 | 5/24/2020  | 12/23/2020 | North America / USA / California / San Diego |
| EPI_ISL_730345 | 9/28/2020  | 12/23/2020 | North America / USA / California / San Diego |
| EPI_ISL_730347 | 5/23/2020  | 12/23/2020 | North America / USA / California / San Diego |
| EPI_ISL_730348 | 9/21/2020  | 12/23/2020 | North America / USA / California / San Diego |
| EPI_ISL_730349 | 12/2/2020  | 12/23/2020 | North America / USA / California / San Diego |
| EPI_ISL_730351 | 11/12/2020 | 12/23/2020 | North America / USA / California / San Diego |
| EPI_ISL_730353 | 12/3/2020  | 12/23/2020 | North America / USA / California / San Diego |
| EPI_ISL_730354 | 12/3/2020  | 12/23/2020 | North America / USA / California / San Diego |
| EPI_ISL_730355 | 12/3/2020  | 12/23/2020 | North America / USA / California / San Diego |
| EPI_ISL_730356 | 11/12/2020 | 12/23/2020 | North America / USA / California / San Diego |
| EPI_ISL_730357 | 11/15/2020 | 12/23/2020 | North America / USA / California / San Diego |
| EPI_ISL_730358 | 12/3/2020  | 12/23/2020 | North America / USA / California / San Diego |
| EPI_ISL_730359 | 12/4/2020  | 12/23/2020 | North America / USA / California / San Diego |
| EPI_ISL_730361 | 12/3/2020  | 12/23/2020 | North America / USA / California / Kern      |
| EPI_ISL_730362 | 12/4/2020  | 12/23/2020 | North America / USA / California / San Diego |
| EPI_ISL_730363 | 12/3/2020  | 12/23/2020 | North America / USA / California / San Diego |
| EPI_ISL_730364 | 12/3/2020  | 12/23/2020 | North America / USA / California / San Diego |
| EPI_ISL_730365 | 12/3/2020  | 12/23/2020 | North America / USA / California / San Diego |
| EPI_ISL_730366 | 12/3/2020  | 12/23/2020 | North America / USA / California / San Diego |
| EPI_ISL_730368 | 12/3/2020  | 12/23/2020 | North America / USA / California / San Diego |
| EPI_ISL_730369 | 12/4/2020  | 12/23/2020 | North America / USA / California / San Diego |
| EPI_ISL_730370 | 11/13/2020 | 12/23/2020 | North America / USA / California / San Diego |
| EPI_ISL_730372 | 10/12/2020 | 12/23/2020 | Asia / Jordan / Amman                        |
| EPI_ISL_730373 | 10/15/2020 | 12/23/2020 | Asia / Jordan / Amman                        |
| EPI_ISL_730374 | 10/16/2020 | 12/23/2020 | Asia / Jordan / Amman                        |
| EPI_ISL_730375 | 10/17/2020 | 12/23/2020 | Asia / Jordan / Amman                        |
| EPI_ISL_730376 | 10/20/2020 | 12/23/2020 | Asia / Jordan / Amman                        |
| EPI_ISL_730377 | 10/16/2020 | 12/23/2020 | Asia / Jordan / Amman                        |
| EPI_ISL_730378 | 10/20/2020 | 12/23/2020 | Asia / Jordan / Amman                        |
| EPI_ISL_730379 | 10/12/2020 | 12/23/2020 | Asia / Jordan / Amman                        |
| EPI_ISL_730380 | 10/12/2020 | 12/23/2020 | Asia / Jordan / Amman                        |
| EPI_ISL_730381 | 10/15/2020 | 12/23/2020 | Asia / Jordan / Amman                        |
| EPI_ISL_730382 | 10/12/2020 | 12/23/2020 | Asia / Jordan / Amman                        |
| EPI_ISL_730383 | 10/15/2020 | 12/23/2020 | Asia / Jordan / Amman                        |
| EPI_ISL_730384 | 10/18/2020 | 12/23/2020 | Asia / Jordan / Amman                        |

|                |            |                                  |
|----------------|------------|----------------------------------|
| EPI_ISL_730385 | 10/15/2020 | 12/23/2020 Asia / Jordan / Amman |
| EPI_ISL_730386 | 10/16/2020 | 12/23/2020 Asia / Jordan / Amman |
| EPI_ISL_730387 | 10/16/2020 | 12/23/2020 Asia / Jordan / Amman |
| EPI_ISL_730388 | 10/18/2020 | 12/23/2020 Asia / Jordan / Amman |
| EPI_ISL_730389 | 10/20/2020 | 12/23/2020 Asia / Jordan / Amman |
| EPI_ISL_730390 | 10/12/2020 | 12/23/2020 Asia / Jordan / Amman |
| EPI_ISL_730391 | 10/12/2020 | 12/23/2020 Asia / Jordan / Amman |
| EPI_ISL_730392 | 10/16/2020 | 12/23/2020 Asia / Jordan / Amman |
| EPI_ISL_730393 | 10/16/2020 | 12/23/2020 Asia / Jordan / Amman |
| EPI_ISL_730394 | 10/12/2020 | 12/23/2020 Asia / Jordan / Amman |
| EPI_ISL_730395 | 10/15/2020 | 12/23/2020 Asia / Jordan / Amman |
| EPI_ISL_730396 | 10/16/2020 | 12/23/2020 Asia / Jordan / Amman |
| EPI_ISL_730397 | 10/18/2020 | 12/23/2020 Asia / Jordan / Amman |
| EPI_ISL_730398 | 10/18/2020 | 12/23/2020 Asia / Jordan / Amman |
| EPI_ISL_730399 | 10/21/2020 | 12/23/2020 Asia / Jordan / Amman |
| EPI_ISL_730401 | 10/16/2020 | 12/23/2020 Asia / Jordan / Amman |
| EPI_ISL_730402 | 10/16/2020 | 12/23/2020 Asia / Jordan / Amman |
| EPI_ISL_730403 | 10/20/2020 | 12/23/2020 Asia / Jordan / Amman |
| EPI_ISL_730404 | 10/12/2020 | 12/23/2020 Asia / Jordan / Amman |
| EPI_ISL_730405 | 10/15/2020 | 12/23/2020 Asia / Jordan / Amman |
| EPI_ISL_730406 | 10/15/2020 | 12/23/2020 Asia / Jordan / Amman |
| EPI_ISL_730407 | 10/16/2020 | 12/23/2020 Asia / Jordan / Amman |
| EPI_ISL_730408 | 10/16/2020 | 12/23/2020 Asia / Jordan / Amman |
| EPI_ISL_730409 | 10/18/2020 | 12/23/2020 Asia / Jordan / Amman |
| EPI_ISL_730410 | 10/18/2020 | 12/23/2020 Asia / Jordan / Amman |
| EPI_ISL_730411 | 10/7/2020  | 12/23/2020 Asia / Jordan / Amman |
| EPI_ISL_730412 | 10/12/2020 | 12/23/2020 Asia / Jordan / Amman |
| EPI_ISL_730413 | 10/14/2020 | 12/23/2020 Asia / Jordan / Amman |
| EPI_ISL_730414 | 10/16/2020 | 12/23/2020 Asia / Jordan / Amman |
| EPI_ISL_730415 | 10/16/2020 | 12/23/2020 Asia / Jordan / Amman |
| EPI_ISL_730416 | 10/18/2020 | 12/23/2020 Asia / Jordan / Amman |
| EPI_ISL_730417 | 10/19/2020 | 12/23/2020 Asia / Jordan / Amman |
| EPI_ISL_730418 | 10/11/2020 | 12/23/2020 Asia / Jordan / Amman |
| EPI_ISL_730419 | 10/12/2020 | 12/23/2020 Asia / Jordan / Amman |
| EPI_ISL_730420 | 10/15/2020 | 12/23/2020 Asia / Jordan / Amman |
| EPI_ISL_730421 | 10/18/2020 | 12/23/2020 Asia / Jordan / Amman |
| EPI_ISL_730422 | 10/19/2020 | 12/23/2020 Asia / Jordan / Amman |
| EPI_ISL_730423 | 10/15/2020 | 12/23/2020 Asia / Jordan / Amman |
| EPI_ISL_730424 | 10/15/2020 | 12/23/2020 Asia / Jordan / Amman |
| EPI_ISL_730425 | 10/16/2020 | 12/23/2020 Asia / Jordan / Amman |
| EPI_ISL_730426 | 10/16/2020 | 12/23/2020 Asia / Jordan / Amman |
| EPI_ISL_730427 | 10/17/2020 | 12/23/2020 Asia / Jordan / Amman |
| EPI_ISL_730428 | 10/20/2020 | 12/23/2020 Asia / Jordan / Amman |
| EPI_ISL_730429 | 10/5/2020  | 12/23/2020 Asia / Jordan / Irbid |
| EPI_ISL_730431 | 10/20/2020 | 12/23/2020 Asia / Jordan / Irbid |
| EPI_ISL_730432 | 10/8/2020  | 12/23/2020 Asia / Jordan / Irbid |
| EPI_ISL_730433 | 10/11/2020 | 12/23/2020 Asia / Jordan / Irbid |

|                |            |                                  |
|----------------|------------|----------------------------------|
| EPI_ISL_730434 | 10/20/2020 | 12/23/2020 Asia / Jordan / Irbid |
| EPI_ISL_730435 | 10/18/2020 | 12/23/2020 Asia / Jordan / Irbid |
| EPI_ISL_730436 | 10/6/2020  | 12/23/2020 Asia / Jordan / Irbid |
| EPI_ISL_730437 | 10/11/2020 | 12/23/2020 Asia / Jordan / Irbid |
| EPI_ISL_730438 | 10/18/2020 | 12/23/2020 Asia / Jordan / Irbid |
| EPI_ISL_730439 | 10/7/2020  | 12/23/2020 Asia / Jordan / Irbid |
| EPI_ISL_730440 | 10/8/2020  | 12/23/2020 Asia / Jordan / Irbid |
| EPI_ISL_730441 | 10/12/2020 | 12/23/2020 Asia / Jordan / Irbid |
| EPI_ISL_730442 | 10/20/2020 | 12/23/2020 Asia / Jordan / Irbid |
| EPI_ISL_730443 | 10/5/2020  | 12/23/2020 Asia / Jordan / Irbid |
| EPI_ISL_730444 | 10/11/2020 | 12/23/2020 Asia / Jordan / Irbid |
| EPI_ISL_730445 | 10/12/2020 | 12/23/2020 Asia / Jordan / Irbid |
| EPI_ISL_730446 | 10/20/2020 | 12/23/2020 Asia / Jordan / Irbid |
| EPI_ISL_730447 | 10/18/2020 | 12/23/2020 Asia / Jordan / Irbid |
| EPI_ISL_730448 | 10/5/2020  | 12/23/2020 Asia / Jordan / Irbid |
| EPI_ISL_730449 | 10/7/2020  | 12/23/2020 Asia / Jordan / Irbid |
| EPI_ISL_730450 | 10/11/2020 | 12/23/2020 Asia / Jordan / Irbid |
| EPI_ISL_730451 | 10/12/2020 | 12/23/2020 Asia / Jordan / Irbid |
| EPI_ISL_730452 | 10/20/2020 | 12/23/2020 Asia / Jordan / Irbid |
| EPI_ISL_730453 | 10/18/2020 | 12/23/2020 Asia / Jordan / Irbid |
| EPI_ISL_730454 | 10/18/2020 | 12/23/2020 Asia / Jordan / Irbid |
| EPI_ISL_730455 | 10/5/2020  | 12/23/2020 Asia / Jordan / Irbid |
| EPI_ISL_730456 | 10/8/2020  | 12/23/2020 Asia / Jordan / Irbid |
| EPI_ISL_730457 | 10/11/2020 | 12/23/2020 Asia / Jordan / Irbid |
| EPI_ISL_730458 | 10/20/2020 | 12/23/2020 Asia / Jordan / Irbid |
| EPI_ISL_730459 | 10/18/2020 | 12/23/2020 Asia / Jordan / Irbid |
| EPI_ISL_730460 | 10/18/2020 | 12/23/2020 Asia / Jordan / Zarqa |
| EPI_ISL_730461 | 10/7/2020  | 12/23/2020 Asia / Jordan / Irbid |
| EPI_ISL_730462 | 10/8/2020  | 12/23/2020 Asia / Jordan / Irbid |
| EPI_ISL_730463 | 10/11/2020 | 12/23/2020 Asia / Jordan / Irbid |
| EPI_ISL_730464 | 10/12/2020 | 12/23/2020 Asia / Jordan / Irbid |
| EPI_ISL_730465 | 10/18/2020 | 12/23/2020 Asia / Jordan / Zarqa |
| EPI_ISL_730466 | 10/5/2020  | 12/23/2020 Asia / Jordan / Irbid |
| EPI_ISL_730467 | 10/7/2020  | 12/23/2020 Asia / Jordan / Irbid |
| EPI_ISL_730468 | 10/11/2020 | 12/23/2020 Asia / Jordan / Irbid |
| EPI_ISL_730469 | 10/18/2020 | 12/23/2020 Asia / Jordan / Irbid |
| EPI_ISL_730470 | 10/18/2020 | 12/23/2020 Asia / Jordan / Irbid |
| EPI_ISL_730471 | 10/19/2020 | 12/23/2020 Asia / Jordan / Irbid |
| EPI_ISL_730472 | 10/18/2020 | 12/23/2020 Asia / Jordan / Irbid |
| EPI_ISL_730474 | 10/6/2020  | 12/23/2020 Asia / Jordan / Irbid |
| EPI_ISL_730475 | 10/7/2020  | 12/23/2020 Asia / Jordan / Irbid |
| EPI_ISL_730476 | 10/11/2020 | 12/23/2020 Asia / Jordan / Irbid |
| EPI_ISL_730477 | 10/18/2020 | 12/23/2020 Asia / Jordan / Irbid |
| EPI_ISL_730478 | 10/18/2020 | 12/23/2020 Asia / Jordan / Aqaba |
| EPI_ISL_730479 | 10/6/2020  | 12/23/2020 Asia / Jordan / Aqaba |
| EPI_ISL_730480 | 10/6/2020  | 12/23/2020 Asia / Jordan / Aqaba |
| EPI_ISL_730481 | 10/18/2020 | 12/23/2020 Asia / Jordan / Aqaba |

|                |            |                                  |
|----------------|------------|----------------------------------|
| EPI_ISL_730482 | 10/6/2020  | 12/23/2020 Asia / Jordan / Aqaba |
| EPI_ISL_730483 | 10/6/2020  | 12/23/2020 Asia / Jordan / Aqaba |
| EPI_ISL_730484 | 10/5/2020  | 12/23/2020 Asia / Jordan / Aqaba |
| EPI_ISL_730485 | 10/15/2020 | 12/23/2020 Asia / Jordan / Aqaba |
| EPI_ISL_730486 | 10/6/2020  | 12/23/2020 Asia / Jordan / Aqaba |
| EPI_ISL_730487 | 10/6/2020  | 12/23/2020 Asia / Jordan / Aqaba |
| EPI_ISL_730488 | 10/7/2020  | 12/23/2020 Asia / Jordan / Aqaba |
| EPI_ISL_730489 | 10/18/2020 | 12/23/2020 Asia / Jordan / Aqaba |
| EPI_ISL_730490 | 10/15/2020 | 12/23/2020 Asia / Jordan / Aqaba |
| EPI_ISL_730491 | 10/5/2020  | 12/23/2020 Asia / Jordan / Aqaba |
| EPI_ISL_730492 | 10/6/2020  | 12/23/2020 Asia / Jordan / Aqaba |
| EPI_ISL_730493 | 10/10/2020 | 12/23/2020 Asia / Jordan / Aqaba |
| EPI_ISL_730494 | 10/6/2020  | 12/23/2020 Asia / Jordan / Aqaba |
| EPI_ISL_730495 | 10/6/2020  | 12/23/2020 Asia / Jordan / Aqaba |
| EPI_ISL_730496 | 10/17/2020 | 12/23/2020 Asia / Jordan / Aqaba |
| EPI_ISL_730497 | 10/18/2020 | 12/23/2020 Asia / Jordan / Aqaba |
| EPI_ISL_730498 | 10/12/2020 | 12/23/2020 Asia / Jordan / Aqaba |
| EPI_ISL_730499 | 10/6/2020  | 12/23/2020 Asia / Jordan / Aqaba |
| EPI_ISL_730500 | 10/6/2020  | 12/23/2020 Asia / Jordan / Aqaba |
| EPI_ISL_730501 | 10/12/2020 | 12/23/2020 Asia / Jordan / Aqaba |
| EPI_ISL_730502 | 10/15/2020 | 12/23/2020 Asia / Jordan / Aqaba |
| EPI_ISL_730503 | 10/6/2020  | 12/23/2020 Asia / Jordan / Aqaba |
| EPI_ISL_730504 | 10/6/2020  | 12/23/2020 Asia / Jordan / Aqaba |
| EPI_ISL_730505 | 10/7/2020  | 12/23/2020 Asia / Jordan / Aqaba |
| EPI_ISL_730506 | 10/7/2020  | 12/23/2020 Asia / Jordan / Aqaba |
| EPI_ISL_730507 | 10/18/2020 | 12/23/2020 Asia / Jordan / Aqaba |
| EPI_ISL_730508 | 10/8/2020  | 12/23/2020 Asia / Jordan / Aqaba |
| EPI_ISL_730509 | 10/6/2020  | 12/23/2020 Asia / Jordan / Aqaba |
| EPI_ISL_730510 | 10/6/2020  | 12/23/2020 Asia / Jordan / Aqaba |
| EPI_ISL_730511 | 10/7/2020  | 12/23/2020 Asia / Jordan / Aqaba |
| EPI_ISL_730512 | 10/7/2020  | 12/23/2020 Asia / Jordan / Aqaba |
| EPI_ISL_730513 | 10/8/2020  | 12/23/2020 Asia / Jordan / Aqaba |
| EPI_ISL_730514 | 10/18/2020 | 12/23/2020 Asia / Jordan / Aqaba |
| EPI_ISL_730515 | 10/5/2020  | 12/23/2020 Asia / Jordan / Aqaba |
| EPI_ISL_730516 | 10/7/2020  | 12/23/2020 Asia / Jordan / Aqaba |
| EPI_ISL_730517 | 11/3/2020  | 12/23/2020 Asia / Jordan / Irbid |
| EPI_ISL_730518 | 11/4/2020  | 12/23/2020 Asia / Jordan / Amman |
| EPI_ISL_730519 | 11/4/2020  | 12/23/2020 Asia / Jordan / Amman |
| EPI_ISL_730520 | 11/6/2020  | 12/23/2020 Asia / Jordan / Amman |
| EPI_ISL_730521 | 10/31/2020 | 12/23/2020 Asia / Jordan / Amman |
| EPI_ISL_730522 | 11/6/2020  | 12/23/2020 Asia / Jordan / Amman |
| EPI_ISL_730523 | 11/3/2020  | 12/23/2020 Asia / Jordan / Amman |
| EPI_ISL_730524 | 11/4/2020  | 12/23/2020 Asia / Jordan / Amman |
| EPI_ISL_730525 | 11/6/2020  | 12/23/2020 Asia / Jordan / Amman |
| EPI_ISL_730526 | 11/6/2020  | 12/23/2020 Asia / Jordan / Amman |
| EPI_ISL_730527 | 10/31/2020 | 12/23/2020 Asia / Jordan / Amman |
| EPI_ISL_730528 | 11/2/2020  | 12/23/2020 Asia / Jordan / Amman |

|                |            |                                           |
|----------------|------------|-------------------------------------------|
| EPI_ISL_730529 | 11/4/2020  | 12/23/2020 Asia / Jordan / Amman          |
| EPI_ISL_730530 | 11/4/2020  | 12/23/2020 Asia / Jordan / Amman          |
| EPI_ISL_730531 | 11/6/2020  | 12/23/2020 Asia / Jordan / Amman          |
| EPI_ISL_730532 | 11/2/2020  | 12/23/2020 Asia / Jordan / Amman          |
| EPI_ISL_730533 | 11/1/2020  | 12/23/2020 Asia / Jordan / Zarqa          |
| EPI_ISL_730534 | 11/4/2020  | 12/23/2020 Asia / Jordan / Amman          |
| EPI_ISL_730535 | 11/6/2020  | 12/23/2020 Asia / Jordan / Amman          |
| EPI_ISL_730536 | 11/6/2020  | 12/23/2020 Asia / Jordan / Amman          |
| EPI_ISL_730537 | 10/31/2020 | 12/23/2020 Asia / Jordan / Zarqa          |
| EPI_ISL_730538 | 11/3/2020  | 12/23/2020 Asia / Jordan / Irbid          |
| EPI_ISL_730539 | 11/4/2020  | 12/23/2020 Asia / Jordan / Amman          |
| EPI_ISL_730540 | 11/6/2020  | 12/23/2020 Asia / Jordan / Amman          |
| EPI_ISL_730541 | 11/7/2020  | 12/23/2020 Asia / Jordan / Amman          |
| EPI_ISL_730542 | 10/31/2020 | 12/23/2020 Asia / Jordan / Amman          |
| EPI_ISL_730544 | 11/2/2020  | 12/23/2020 Asia / Jordan / Amman          |
| EPI_ISL_730546 | 11/7/2020  | 12/23/2020 Asia / Jordan / Amman          |
| EPI_ISL_730547 | 10/31/2020 | 12/23/2020 Asia / Jordan / Amman          |
| EPI_ISL_730548 | 11/2/2020  | 12/23/2020 Asia / Jordan / Amman          |
| EPI_ISL_730549 | 11/3/2020  | 12/23/2020 Asia / Jordan / Amman          |
| EPI_ISL_730550 | 11/4/2020  | 12/23/2020 Asia / Jordan / Amman          |
| EPI_ISL_730551 | 11/4/2020  | 12/23/2020 Asia / Jordan / Amman          |
| EPI_ISL_730552 | 11/6/2020  | 12/23/2020 Asia / Jordan / Amman          |
| EPI_ISL_730553 | 11/7/2020  | 12/23/2020 Asia / Jordan / Amman          |
| EPI_ISL_730554 | 11/2/2020  | 12/23/2020 Asia / Jordan / Amman          |
| EPI_ISL_730555 | 11/3/2020  | 12/23/2020 Asia / Jordan / Amman          |
| EPI_ISL_730556 | 11/4/2020  | 12/23/2020 Asia / Jordan / Amman          |
| EPI_ISL_730557 | 11/4/2020  | 12/23/2020 Asia / Jordan / Amman          |
| EPI_ISL_730558 | 11/6/2020  | 12/23/2020 Asia / Jordan / Amman          |
| EPI_ISL_730559 | 11/7/2020  | 12/23/2020 Asia / Jordan / Amman          |
| EPI_ISL_730560 | 11/3/2020  | 12/23/2020 Asia / Jordan / Amman          |
| EPI_ISL_730561 | 11/4/2020  | 12/23/2020 Asia / Jordan / Amman          |
| EPI_ISL_730562 | 11/3/2020  | 12/23/2020 Asia / Jordan / Amman          |
| EPI_ISL_730563 | 11/4/2020  | 12/23/2020 Asia / Jordan / Amman          |
| EPI_ISL_730565 | 11/10/2020 | 12/23/2020 North America / USA / Michigan |
| EPI_ISL_730566 | 11/6/2020  | 12/23/2020 North America / USA / Michigan |
| EPI_ISL_730567 | 9/30/2020  | 12/23/2020 Europe / Turkey / Ankara       |
| EPI_ISL_730568 | 9/1/2020   | 12/23/2020 Europe / Turkey / Ankara       |
| EPI_ISL_730569 | 9/14/2020  | 12/23/2020 Europe / Turkey / Ankara       |
| EPI_ISL_730570 | 10/4/2020  | 12/23/2020 Europe / Turkey / Ankara       |
| EPI_ISL_730571 | 8/26/2020  | 12/23/2020 Europe / Turkey / Ankara       |
| EPI_ISL_730572 | 8/26/2020  | 12/23/2020 Europe / Turkey / Ankara       |
| EPI_ISL_730573 | 9/7/2020   | 12/23/2020 Europe / Turkey / Ankara       |
| EPI_ISL_730574 | 8/11/2020  | 12/23/2020 Europe / Turkey / Ankara       |
| EPI_ISL_730575 | 9/20/2020  | 12/23/2020 Europe / Turkey / Ankara       |
| EPI_ISL_730576 | 6/25/2020  | 12/23/2020 Europe / Turkey / Ankara       |
| EPI_ISL_730577 | 10/24/2020 | 12/23/2020 Europe / Turkey / Ankara       |
| EPI_ISL_730620 | 10/22/2020 | 12/23/2020 Europe / Turkey / Ankara       |

|                |            |            |                                               |
|----------------|------------|------------|-----------------------------------------------|
| EPI_ISL_730621 | 12/20/2020 | 12/23/2020 | Europe / Switzerland / Aargau                 |
| EPI_ISL_730622 | 12/20/2020 | 12/23/2020 | Europe / Switzerland / St Gall                |
| EPI_ISL_730623 | 12/20/2020 | 12/23/2020 | Europe / Switzerland / Thurgau                |
| EPI_ISL_730624 | 12/20/2020 | 12/23/2020 | Europe / Switzerland / Zurich                 |
| EPI_ISL_730625 | 12/20/2020 | 12/23/2020 | Europe / Switzerland / Zurich                 |
| EPI_ISL_730626 | 12/20/2020 | 12/23/2020 | Europe / Switzerland / Zurich                 |
| EPI_ISL_730627 | 12/20/2020 | 12/23/2020 | Europe / Switzerland / Zurich                 |
| EPI_ISL_730628 | 12/19/2020 | 12/23/2020 | Europe / Switzerland / Zurich                 |
| EPI_ISL_730629 | 12/19/2020 | 12/23/2020 | Europe / Switzerland / Zurich                 |
| EPI_ISL_730630 | 12/20/2020 | 12/23/2020 | Europe / Switzerland / Zurich                 |
| EPI_ISL_730631 | 12/19/2020 | 12/23/2020 | Europe / Switzerland / Zurich                 |
| EPI_ISL_730632 | 12/20/2020 | 12/23/2020 | Europe / Switzerland / Zurich                 |
| EPI_ISL_730633 | 12/20/2020 | 12/23/2020 | Europe / Switzerland / Zurich                 |
| EPI_ISL_730634 | 12/20/2020 | 12/23/2020 | Europe / Switzerland / Zurich                 |
| EPI_ISL_730635 | 12/20/2020 | 12/23/2020 | Europe / Switzerland / Zurich                 |
| EPI_ISL_730636 | 12/20/2020 | 12/23/2020 | Europe / Switzerland / Zurich                 |
| EPI_ISL_730637 | 12/20/2020 | 12/23/2020 | Europe / Switzerland / Zurich                 |
| EPI_ISL_730638 | 12/20/2020 | 12/23/2020 | Europe / Switzerland / Zurich                 |
| EPI_ISL_730639 | 12/19/2020 | 12/23/2020 | Europe / Switzerland / Zurich                 |
| EPI_ISL_730640 | 11/9/2020  | 12/23/2020 | Europe / France / Auvergne-Rhone-Alpes / Lyon |
| EPI_ISL_730641 | 11/9/2020  | 12/23/2020 | Europe / France / Auvergne-Rhone-Alpes / Lyon |
| EPI_ISL_730642 | 11/9/2020  | 12/23/2020 | Europe / France / Auvergne-Rhone-Alpes / Lyon |
| EPI_ISL_730643 | 11/10/2020 | 12/23/2020 | Europe / France / Auvergne-Rhone-Alpes / Lyon |
| EPI_ISL_730644 | 11/10/2020 | 12/23/2020 | Europe / France / Auvergne-Rhone-Alpes / Lyon |
| EPI_ISL_730645 | 11/10/2020 | 12/23/2020 | Europe / France / Auvergne-Rhone-Alpes / Lyon |
| EPI_ISL_730646 | 11/10/2020 | 12/23/2020 | Europe / France / Auvergne-Rhone-Alpes / Lyon |
| EPI_ISL_730647 | 11/10/2020 | 12/23/2020 | Europe / France / Auvergne-Rhone-Alpes / Lyon |
| EPI_ISL_730648 | 11/10/2020 | 12/23/2020 | Europe / France / Auvergne-Rhone-Alpes / Lyon |
| EPI_ISL_730649 | 11/10/2020 | 12/23/2020 | Europe / France / Auvergne-Rhone-Alpes / Lyon |
| EPI_ISL_730650 | 11/11/2020 | 12/23/2020 | Europe / France / Auvergne-Rhone-Alpes / Lyon |
| EPI_ISL_730651 | 11/11/2020 | 12/23/2020 | Europe / France / Auvergne-Rhone-Alpes / Lyon |
| EPI_ISL_730653 | 11/4/2020  | 12/23/2020 | Europe / Italy / Apulia                       |
| EPI_ISL_730654 | 12/8/2020  | 12/23/2020 | Europe / United Kingdom / England             |
| EPI_ISL_730656 | 12/11/2020 | 12/23/2020 | Europe / United Kingdom / England             |
| EPI_ISL_730657 | 12/11/2020 | 12/23/2020 | Europe / United Kingdom / England             |
| EPI_ISL_730658 | 12/10/2020 | 12/23/2020 | Europe / United Kingdom / England             |
| EPI_ISL_730659 | 12/11/2020 | 12/23/2020 | Europe / United Kingdom / England             |
| EPI_ISL_730660 | 12/8/2020  | 12/23/2020 | Europe / United Kingdom / England             |
| EPI_ISL_730661 | 12/8/2020  | 12/23/2020 | Europe / United Kingdom / England             |
| EPI_ISL_730662 | 12/8/2020  | 12/23/2020 | Europe / United Kingdom / England             |
| EPI_ISL_730663 | 12/9/2020  | 12/23/2020 | Europe / United Kingdom / England             |
| EPI_ISL_730664 | 12/11/2020 | 12/23/2020 | Europe / United Kingdom / England             |
| EPI_ISL_730665 | 12/9/2020  | 12/23/2020 | Europe / United Kingdom / England             |
| EPI_ISL_730666 | 12/9/2020  | 12/23/2020 | Europe / United Kingdom / England             |
| EPI_ISL_730667 | 12/10/2020 | 12/23/2020 | Europe / United Kingdom / England             |
| EPI_ISL_730668 | 12/10/2020 | 12/23/2020 | Europe / United Kingdom / England             |
| EPI_ISL_730669 | 12/8/2020  | 12/23/2020 | Europe / United Kingdom / England             |





















































|                |            |            |                   |
|----------------|------------|------------|-------------------|
| EPI_ISL_731922 | 11/11/2020 | 12/23/2020 | Europe / Portugal |
| EPI_ISL_731923 | 11/11/2020 | 12/23/2020 | Europe / Portugal |
| EPI_ISL_731924 | 11/13/2020 | 12/23/2020 | Europe / Portugal |
| EPI_ISL_731925 | 11/16/2020 | 12/23/2020 | Europe / Portugal |
| EPI_ISL_731926 | 11/9/2020  | 12/23/2020 | Europe / Portugal |
| EPI_ISL_731927 | 11/19/2020 | 12/23/2020 | Europe / Portugal |
| EPI_ISL_731928 | 11/19/2020 | 12/23/2020 | Europe / Portugal |
| EPI_ISL_731929 | 11/22/2020 | 12/23/2020 | Europe / Portugal |
| EPI_ISL_731930 | 11/21/2020 | 12/23/2020 | Europe / Portugal |
| EPI_ISL_731931 | 11/11/2020 | 12/23/2020 | Europe / Portugal |
| EPI_ISL_731932 | 11/7/2020  | 12/23/2020 | Europe / Portugal |
| EPI_ISL_731933 | 11/14/2020 | 12/23/2020 | Europe / Portugal |
| EPI_ISL_731934 | 11/15/2020 | 12/23/2020 | Europe / Portugal |
| EPI_ISL_731935 | 11/15/2020 | 12/23/2020 | Europe / Portugal |
| EPI_ISL_731936 | 11/15/2020 | 12/23/2020 | Europe / Portugal |
| EPI_ISL_731937 | 11/9/2020  | 12/23/2020 | Europe / Portugal |
| EPI_ISL_731938 | 11/9/2020  | 12/23/2020 | Europe / Portugal |
| EPI_ISL_731939 | 11/10/2020 | 12/23/2020 | Europe / Portugal |
| EPI_ISL_731940 | 11/14/2020 | 12/23/2020 | Europe / Portugal |
| EPI_ISL_731941 | 11/13/2020 | 12/23/2020 | Europe / Portugal |
| EPI_ISL_731942 | 4/17/2020  | 12/23/2020 | Europe / Portugal |
| EPI_ISL_731943 | 4/17/2020  | 12/23/2020 | Europe / Portugal |
| EPI_ISL_731944 | 4/17/2020  | 12/23/2020 | Europe / Portugal |
| EPI_ISL_731945 | 5/28/2020  | 12/23/2020 | Europe / Portugal |
| EPI_ISL_731946 | 5/13/2020  | 12/23/2020 | Europe / Portugal |
| EPI_ISL_731947 | 5/13/2020  | 12/23/2020 | Europe / Portugal |
| EPI_ISL_731948 | 11/7/2020  | 12/23/2020 | Europe / Portugal |
| EPI_ISL_731949 | 11/9/2020  | 12/23/2020 | Europe / Portugal |
| EPI_ISL_731950 | 11/10/2020 | 12/23/2020 | Europe / Portugal |
| EPI_ISL_731951 | 11/16/2020 | 12/23/2020 | Europe / Portugal |
| EPI_ISL_731952 | 11/7/2020  | 12/23/2020 | Europe / Portugal |
| EPI_ISL_731953 | 11/7/2020  | 12/23/2020 | Europe / Portugal |
| EPI_ISL_731954 | 11/7/2020  | 12/23/2020 | Europe / Portugal |
| EPI_ISL_731955 | 11/7/2020  | 12/23/2020 | Europe / Portugal |
| EPI_ISL_731956 | 11/8/2020  | 12/23/2020 | Europe / Portugal |
| EPI_ISL_731957 | 11/8/2020  | 12/23/2020 | Europe / Portugal |
| EPI_ISL_731958 | 11/9/2020  | 12/23/2020 | Europe / Portugal |
| EPI_ISL_731959 | 11/9/2020  | 12/23/2020 | Europe / Portugal |
| EPI_ISL_731960 | 11/9/2020  | 12/23/2020 | Europe / Portugal |
| EPI_ISL_731961 | 11/10/2020 | 12/23/2020 | Europe / Portugal |
| EPI_ISL_731962 | 11/11/2020 | 12/23/2020 | Europe / Portugal |
| EPI_ISL_731963 | 11/11/2020 | 12/23/2020 | Europe / Portugal |
| EPI_ISL_731964 | 11/12/2020 | 12/23/2020 | Europe / Portugal |
| EPI_ISL_731965 | 11/12/2020 | 12/23/2020 | Europe / Portugal |
| EPI_ISL_731966 | 11/12/2020 | 12/23/2020 | Europe / Portugal |
| EPI_ISL_731967 | 11/12/2020 | 12/23/2020 | Europe / Portugal |
| EPI_ISL_731968 | 11/12/2020 | 12/23/2020 | Europe / Portugal |















|                |            |            |                           |
|----------------|------------|------------|---------------------------|
| EPI_ISL_732251 | 11/9/2020  | 12/23/2020 | Europe / Portugal         |
| EPI_ISL_732252 | 11/9/2020  | 12/23/2020 | Europe / Portugal         |
| EPI_ISL_732253 | 11/9/2020  | 12/23/2020 | Europe / Portugal         |
| EPI_ISL_732254 | 11/10/2020 | 12/23/2020 | Europe / Portugal         |
| EPI_ISL_732255 | 11/10/2020 | 12/23/2020 | Europe / Portugal         |
| EPI_ISL_732256 | 11/10/2020 | 12/23/2020 | Europe / Portugal         |
| EPI_ISL_732257 | 11/10/2020 | 12/23/2020 | Europe / Portugal         |
| EPI_ISL_732258 | 11/12/2020 | 12/23/2020 | Europe / Portugal         |
| EPI_ISL_732259 | 11/12/2020 | 12/23/2020 | Europe / Portugal         |
| EPI_ISL_732260 | 11/12/2020 | 12/23/2020 | Europe / Portugal         |
| EPI_ISL_732261 | 11/13/2020 | 12/23/2020 | Europe / Portugal         |
| EPI_ISL_732262 | 11/13/2020 | 12/23/2020 | Europe / Portugal         |
| EPI_ISL_732263 | 11/13/2020 | 12/23/2020 | Europe / Portugal         |
| EPI_ISL_732264 | 11/13/2020 | 12/23/2020 | Europe / Portugal         |
| EPI_ISL_732265 | 11/13/2020 | 12/23/2020 | Europe / Portugal         |
| EPI_ISL_732266 | 11/13/2020 | 12/23/2020 | Europe / Portugal         |
| EPI_ISL_732267 | 11/9/2020  | 12/23/2020 | Europe / Portugal         |
| EPI_ISL_732268 | 11/9/2020  | 12/23/2020 | Europe / Portugal         |
| EPI_ISL_732269 | 11/9/2020  | 12/23/2020 | Europe / Portugal         |
| EPI_ISL_732270 | 11/9/2020  | 12/23/2020 | Europe / Portugal         |
| EPI_ISL_732271 | 11/9/2020  | 12/23/2020 | Europe / Portugal         |
| EPI_ISL_732272 | 11/9/2020  | 12/23/2020 | Europe / Portugal         |
| EPI_ISL_732273 | 11/10/2020 | 12/23/2020 | Europe / Portugal         |
| EPI_ISL_732274 | 11/10/2020 | 12/23/2020 | Europe / Portugal         |
| EPI_ISL_732275 | 11/10/2020 | 12/23/2020 | Europe / Portugal         |
| EPI_ISL_732276 | 11/10/2020 | 12/23/2020 | Europe / Portugal         |
| EPI_ISL_732277 | 11/10/2020 | 12/23/2020 | Europe / Portugal         |
| EPI_ISL_732278 | 11/11/2020 | 12/23/2020 | Europe / Portugal         |
| EPI_ISL_732279 | 11/11/2020 | 12/23/2020 | Europe / Portugal         |
| EPI_ISL_732280 | 11/11/2020 | 12/23/2020 | Europe / Portugal         |
| EPI_ISL_732281 | 11/11/2020 | 12/23/2020 | Europe / Portugal         |
| EPI_ISL_732282 | 11/11/2020 | 12/23/2020 | Europe / Portugal         |
| EPI_ISL_732283 | 11/11/2020 | 12/23/2020 | Europe / Portugal         |
| EPI_ISL_732284 | 11/12/2020 | 12/23/2020 | Europe / Portugal         |
| EPI_ISL_732285 | 11/12/2020 | 12/23/2020 | Europe / Portugal         |
| EPI_ISL_732286 | 11/12/2020 | 12/23/2020 | Europe / Portugal         |
| EPI_ISL_732287 | 11/12/2020 | 12/23/2020 | Europe / Portugal         |
| EPI_ISL_732288 | 11/13/2020 | 12/23/2020 | Europe / Portugal         |
| EPI_ISL_732289 | 11/13/2020 | 12/23/2020 | Europe / Portugal         |
| EPI_ISL_732290 | 11/13/2020 | 12/23/2020 | Europe / Portugal         |
| EPI_ISL_732291 | 11/13/2020 | 12/23/2020 | Europe / Portugal         |
| EPI_ISL_732292 | 11/13/2020 | 12/23/2020 | Europe / Portugal         |
| EPI_ISL_732293 | 11/13/2020 | 12/23/2020 | Europe / Portugal         |
| EPI_ISL_732458 | 10/17/2020 | 12/23/2020 | Europe / Ireland / Dublin |
| EPI_ISL_732459 | 10/18/2020 | 12/23/2020 | Europe / Ireland / Galway |
| EPI_ISL_732460 | 10/18/2020 | 12/23/2020 | Europe / Ireland / Kerry  |
| EPI_ISL_732461 | 10/18/2020 | 12/23/2020 | Europe / Ireland / Sligo  |

|                |            |            |                             |
|----------------|------------|------------|-----------------------------|
| EPI_ISL_732462 | 10/18/2020 | 12/23/2020 | Europe / Ireland / Wexford  |
| EPI_ISL_732463 | 10/18/2020 | 12/23/2020 | Europe / Ireland / Cavan    |
| EPI_ISL_732464 | 10/18/2020 | 12/23/2020 | Europe / Ireland / Cork     |
| EPI_ISL_732465 | 10/18/2020 | 12/23/2020 | Europe / Ireland / Cork     |
| EPI_ISL_732466 | 10/18/2020 | 12/23/2020 | Europe / Ireland / Cork     |
| EPI_ISL_732467 | 10/18/2020 | 12/23/2020 | Europe / Ireland / Galway   |
| EPI_ISL_732468 | 10/18/2020 | 12/23/2020 | Europe / Ireland / Galway   |
| EPI_ISL_732469 | 10/18/2020 | 12/23/2020 | Europe / Ireland / Galway   |
| EPI_ISL_732470 | 10/18/2020 | 12/23/2020 | Europe / Ireland / Kildare  |
| EPI_ISL_732471 | 10/18/2020 | 12/23/2020 | Europe / Ireland / Louth    |
| EPI_ISL_732472 | 11/27/2020 | 12/23/2020 | Europe / Ireland / Limerick |
| EPI_ISL_732473 | 10/18/2020 | 12/23/2020 | Europe / Ireland / Meath    |
| EPI_ISL_732474 | 10/18/2020 | 12/23/2020 | Europe / Ireland / Meath    |
| EPI_ISL_732475 | 10/18/2020 | 12/23/2020 | Europe / Ireland / Monaghan |
| EPI_ISL_732476 | 10/18/2020 | 12/23/2020 | Europe / Ireland / Sligo    |
| EPI_ISL_732477 | 10/18/2020 | 12/23/2020 | Europe / Ireland / Sligo    |
| EPI_ISL_732478 | 10/18/2020 | 12/23/2020 | Europe / Ireland / Cork     |
| EPI_ISL_732479 | 10/18/2020 | 12/23/2020 | Europe / Ireland / Dublin   |
| EPI_ISL_732480 | 10/18/2020 | 12/23/2020 | Europe / Ireland / Dublin   |
| EPI_ISL_732481 | 10/18/2020 | 12/23/2020 | Europe / Ireland / Kildare  |
| EPI_ISL_732482 | 11/9/2020  | 12/23/2020 | Europe / Ireland / Louth    |
| EPI_ISL_732483 | 10/18/2020 | 12/23/2020 | Europe / Ireland / Dublin   |
| EPI_ISL_732484 | 11/29/2020 | 12/23/2020 | Europe / Ireland / Dublin   |
| EPI_ISL_732485 | 10/18/2020 | 12/23/2020 | Europe / Ireland / Louth    |
| EPI_ISL_732486 | 10/18/2020 | 12/23/2020 | Europe / Ireland / Louth    |
| EPI_ISL_732487 | 10/18/2020 | 12/23/2020 | Europe / Ireland / Meath    |
| EPI_ISL_732488 | 10/18/2020 | 12/23/2020 | Europe / Ireland / Meath    |
| EPI_ISL_732489 | 10/19/2020 | 12/23/2020 | Europe / Ireland / Offaly   |
| EPI_ISL_732490 | 10/16/2020 | 12/23/2020 | Europe / Ireland / Dublin   |
| EPI_ISL_732491 | 10/18/2020 | 12/23/2020 | Europe / Ireland / Dublin   |
| EPI_ISL_732492 | 10/18/2020 | 12/23/2020 | Europe / Ireland / Kilkenny |
| EPI_ISL_732493 | 11/19/2020 | 12/23/2020 | Europe / Ireland / Kildare  |
| EPI_ISL_732494 | 10/18/2020 | 12/23/2020 | Europe / Ireland / Meath    |
| EPI_ISL_732495 | 11/28/2020 | 12/23/2020 | Europe / Ireland / Mayo     |
| EPI_ISL_732496 | 10/18/2020 | 12/23/2020 | Europe / Ireland / Mayo     |
| EPI_ISL_732497 | 11/26/2020 | 12/23/2020 | Europe / Ireland / Dublin   |
| EPI_ISL_732498 | 11/25/2020 | 12/23/2020 | Europe / Ireland / Dublin   |
| EPI_ISL_732499 | 11/26/2020 | 12/23/2020 | Europe / Ireland / Dublin   |
| EPI_ISL_732500 | 11/26/2020 | 12/23/2020 | Europe / Ireland / Dublin   |
| EPI_ISL_732501 | 11/26/2020 | 12/23/2020 | Europe / Ireland / Dublin   |
| EPI_ISL_732502 | 11/5/2020  | 12/23/2020 | Europe / Ireland / Louth    |
| EPI_ISL_732503 | 11/16/2020 | 12/23/2020 | Europe / Ireland / Louth    |
| EPI_ISL_732504 | 11/17/2020 | 12/23/2020 | Europe / Ireland / Louth    |
| EPI_ISL_732505 | 11/17/2020 | 12/23/2020 | Europe / Ireland / Louth    |
| EPI_ISL_732506 | 11/17/2020 | 12/23/2020 | Europe / Ireland / Louth    |
| EPI_ISL_732507 | 11/18/2020 | 12/23/2020 | Europe / Ireland / Louth    |
| EPI_ISL_732508 | 11/19/2020 | 12/23/2020 | Europe / Ireland / Louth    |

|                |            |            |                                     |
|----------------|------------|------------|-------------------------------------|
| EPI_ISL_732509 | 11/19/2020 | 12/23/2020 | Europe / Ireland / Louth            |
| EPI_ISL_732510 | 11/20/2020 | 12/23/2020 | Europe / Ireland / Louth            |
| EPI_ISL_732511 | 11/22/2020 | 12/23/2020 | Europe / Ireland / Louth            |
| EPI_ISL_732512 | 11/22/2020 | 12/23/2020 | Europe / Ireland / Louth            |
| EPI_ISL_732513 | 11/22/2020 | 12/23/2020 | Europe / Ireland / Louth            |
| EPI_ISL_732514 | 11/24/2020 | 12/23/2020 | Europe / Ireland / Louth            |
| EPI_ISL_732515 | 11/26/2020 | 12/23/2020 | Europe / Ireland / Louth            |
| EPI_ISL_732516 | 12/3/2020  | 12/23/2020 | Europe / Ireland / Louth            |
| EPI_ISL_732517 | 9/26/2020  | 12/23/2020 | Europe / Ireland / Clare            |
| EPI_ISL_732518 | 10/18/2020 | 12/23/2020 | Europe / Ireland / Cavan            |
| EPI_ISL_732519 | 10/18/2020 | 12/23/2020 | Europe / Ireland / Cork             |
| EPI_ISL_732520 | 10/18/2020 | 12/23/2020 | Europe / Ireland / Galway           |
| EPI_ISL_732521 | 10/18/2020 | 12/23/2020 | Europe / Ireland / Kildare          |
| EPI_ISL_732522 | 11/28/2020 | 12/23/2020 | Europe / Ireland / Kildare          |
| EPI_ISL_732523 | 10/18/2020 | 12/23/2020 | Europe / Ireland / Offaly           |
| EPI_ISL_732531 | 7/28/2020  | 12/23/2020 | Europe / Germany / Bavaria / Munich |
| EPI_ISL_732532 | 8/11/2020  | 12/23/2020 | Europe / Germany / Bavaria / Munich |
| EPI_ISL_732533 | 5/26/2020  | 12/23/2020 | Europe / Germany / Bavaria / Munich |
| EPI_ISL_732534 | 7/7/2020   | 12/23/2020 | Europe / Germany / Bavaria / Munich |
| EPI_ISL_732535 | 6/23/2020  | 12/23/2020 | Europe / Germany / Bavaria / Munich |
| EPI_ISL_732536 | 6/29/2020  | 12/23/2020 | Europe / Germany / Bavaria / Munich |
| EPI_ISL_732537 | 6/16/2020  | 12/23/2020 | Europe / Germany / Bavaria / Munich |
| EPI_ISL_732538 | 5/26/2020  | 12/23/2020 | Europe / Germany / Bavaria / Munich |
| EPI_ISL_732539 | 6/2/2020   | 12/23/2020 | Europe / Germany / Bavaria / Munich |
| EPI_ISL_732540 | 6/8/2020   | 12/23/2020 | Europe / Germany / Bavaria / Munich |
| EPI_ISL_732541 | 2/1/2020   | 12/23/2020 | Europe / Germany / Bavaria / Munich |
| EPI_ISL_732542 | 3/1/2020   | 12/23/2020 | Europe / Germany / Bavaria / Munich |
| EPI_ISL_732543 | 3/1/2020   | 12/23/2020 | Europe / Germany / Bavaria / Munich |
| EPI_ISL_732544 | 3/9/2020   | 12/23/2020 | Europe / Germany / Bavaria / Munich |
| EPI_ISL_732545 | 3/17/2020  | 12/23/2020 | Europe / Germany / Bavaria / Munich |
| EPI_ISL_732546 | 3/18/2020  | 12/23/2020 | Europe / Germany / Bavaria / Munich |
| EPI_ISL_732547 | 3/19/2020  | 12/23/2020 | Europe / Germany / Bavaria / Munich |
| EPI_ISL_732548 | 3/25/2020  | 12/23/2020 | Europe / Germany / Bavaria / Munich |
| EPI_ISL_732549 | 3/26/2020  | 12/23/2020 | Europe / Germany / Bavaria / Munich |
| EPI_ISL_732550 | 3/28/2020  | 12/23/2020 | Europe / Germany / Bavaria / Munich |
| EPI_ISL_732551 | 3/29/2020  | 12/23/2020 | Europe / Germany / Bavaria / Munich |
| EPI_ISL_732552 | 3/31/2020  | 12/23/2020 | Europe / Germany / Bavaria / Munich |
| EPI_ISL_732553 | 4/9/2020   | 12/23/2020 | Europe / Germany / Bavaria / Munich |
| EPI_ISL_732554 | 4/14/2020  | 12/23/2020 | Europe / Germany / Bavaria / Munich |
| EPI_ISL_732555 | 4/15/2020  | 12/23/2020 | Europe / Germany / Bavaria / Munich |
| EPI_ISL_732556 | 5/7/2020   | 12/23/2020 | Europe / Germany / Bavaria / Munich |
| EPI_ISL_732557 | 5/13/2020  | 12/23/2020 | Europe / Germany / Bavaria / Munich |
| EPI_ISL_732558 | 5/13/2020  | 12/23/2020 | Europe / Germany / Bavaria / Munich |
| EPI_ISL_732559 | 5/20/2020  | 12/23/2020 | Europe / Germany / Bavaria / Munich |
| EPI_ISL_732560 | 5/26/2020  | 12/23/2020 | Europe / Germany / Bavaria / Munich |
| EPI_ISL_732561 | 9/24/2020  | 12/23/2020 | Europe / Germany / Bavaria / Munich |
| EPI_ISL_732562 | 9/24/2020  | 12/23/2020 | Europe / Germany / Bavaria / Munich |



|                |            |            |                                                     |
|----------------|------------|------------|-----------------------------------------------------|
| EPI_ISL_732563 | 10/8/2020  | 12/23/2020 | Europe / Germany / Bavaria / Munich                 |
| EPI_ISL_732564 | 3/6/2020   | 12/23/2020 | Europe / Germany / North Rhine-Westphalia / Koblenz |
| EPI_ISL_732565 | 10/31/2020 | 12/23/2020 | Europe / Finland / Uusimaa                          |
| EPI_ISL_732566 | 10/31/2020 | 12/23/2020 | Europe / Finland / Uusimaa                          |
| EPI_ISL_732568 | 10/31/2020 | 12/23/2020 | Europe / Finland / Uusimaa                          |
| EPI_ISL_732569 | 10/31/2020 | 12/23/2020 | Europe / Finland / Uusimaa                          |
| EPI_ISL_732570 | 12/2/2020  | 12/23/2020 | Europe / Finland / Uusimaa                          |
| EPI_ISL_732571 | 10/31/2020 | 12/23/2020 | Europe / Finland / Uusimaa                          |
| EPI_ISL_732572 | 12/2/2020  | 12/23/2020 | Europe / Finland / Uusimaa                          |
| EPI_ISL_732573 | 10/31/2020 | 12/23/2020 | Europe / Finland / Uusimaa                          |
| EPI_ISL_732574 | 12/3/2020  | 12/23/2020 | Europe / Finland / Uusimaa                          |
| EPI_ISL_732575 | 12/3/2020  | 12/23/2020 | Europe / Finland / Uusimaa                          |
| EPI_ISL_732576 | 12/2/2020  | 12/23/2020 | Europe / Finland / Uusimaa                          |
| EPI_ISL_732577 | 12/2/2020  | 12/23/2020 | Europe / Finland / Uusimaa                          |
| EPI_ISL_732578 | 12/2/2020  | 12/23/2020 | Europe / Finland / Uusimaa                          |
| EPI_ISL_732579 | 12/2/2020  | 12/23/2020 | Europe / Finland / Uusimaa                          |
| EPI_ISL_732580 | 12/2/2020  | 12/23/2020 | Europe / Finland / Uusimaa                          |
| EPI_ISL_732581 | 12/1/2020  | 12/23/2020 | Europe / Finland / Uusimaa                          |
| EPI_ISL_732582 | 12/1/2020  | 12/23/2020 | Europe / Finland / Uusimaa                          |
| EPI_ISL_732583 | 12/2/2020  | 12/23/2020 | Europe / Finland / Uusimaa                          |
| EPI_ISL_732584 | 12/2/2020  | 12/23/2020 | Europe / Finland / Uusimaa                          |
| EPI_ISL_732585 | 12/4/2020  | 12/23/2020 | Europe / Finland / Uusimaa                          |
| EPI_ISL_732586 | 12/4/2020  | 12/23/2020 | Europe / Finland / Uusimaa                          |
| EPI_ISL_732587 | 12/3/2020  | 12/23/2020 | Europe / Finland / Uusimaa                          |
| EPI_ISL_732588 | 12/3/2020  | 12/23/2020 | Europe / Finland / Uusimaa                          |
| EPI_ISL_732589 | 12/3/2020  | 12/23/2020 | Europe / Finland / Uusimaa                          |
| EPI_ISL_732590 | 12/3/2020  | 12/23/2020 | Europe / Finland / Uusimaa                          |
| EPI_ISL_732591 | 12/4/2020  | 12/23/2020 | Europe / Finland / Uusimaa                          |
| EPI_ISL_732592 | 12/4/2020  | 12/23/2020 | Europe / Finland / Uusimaa                          |
| EPI_ISL_732593 | 12/3/2020  | 12/23/2020 | Europe / Finland / Uusimaa                          |
| EPI_ISL_732594 | 12/3/2020  | 12/23/2020 | Europe / Finland / Uusimaa                          |
| EPI_ISL_732595 | 12/4/2020  | 12/23/2020 | Europe / Finland / Uusimaa                          |
| EPI_ISL_732596 | 12/4/2020  | 12/23/2020 | Europe / Finland / Uusimaa                          |
| EPI_ISL_732597 | 12/1/2020  | 12/23/2020 | Europe / Finland / Uusimaa                          |
| EPI_ISL_732598 | 12/1/2020  | 12/23/2020 | Europe / Finland / Uusimaa                          |
| EPI_ISL_732599 | 10/31/2020 | 12/23/2020 | Europe / Finland / Uusimaa                          |
| EPI_ISL_732600 | 12/1/2020  | 12/23/2020 | Europe / Finland / Uusimaa                          |
| EPI_ISL_732601 | 10/31/2020 | 12/23/2020 | Europe / Finland / Uusimaa                          |
| EPI_ISL_732602 | 10/31/2020 | 12/23/2020 | Europe / Finland / Uusimaa                          |
| EPI_ISL_732603 | 10/31/2020 | 12/23/2020 | Europe / Finland / Uusimaa                          |
| EPI_ISL_732604 | 12/4/2020  | 12/23/2020 | Europe / Finland / Uusimaa                          |
| EPI_ISL_732605 | 12/3/2020  | 12/23/2020 | Europe / Finland / Uusimaa                          |
| EPI_ISL_732606 | 12/3/2020  | 12/23/2020 | Europe / Finland / Uusimaa                          |
| EPI_ISL_732607 | 12/3/2020  | 12/23/2020 | Europe / Finland / Uusimaa                          |
| EPI_ISL_732608 | 12/3/2020  | 12/23/2020 | Europe / Finland / Uusimaa                          |
| EPI_ISL_732609 | 12/3/2020  | 12/23/2020 | Europe / Finland / Uusimaa                          |
| EPI_ISL_732610 | 12/3/2020  | 12/23/2020 | Europe / Finland / Uusimaa                          |



|                |            |            |                                               |
|----------------|------------|------------|-----------------------------------------------|
| EPI_ISL_732658 | 10/7/2020  | 12/23/2020 | Europe / Germany / Bavaria / Munich           |
| EPI_ISL_732659 | 11/7/2020  | 12/23/2020 | Europe / Russia / Moscow                      |
| EPI_ISL_732660 | 11/6/2020  | 12/23/2020 | Europe / Russia / Moscow                      |
| EPI_ISL_732661 | 11/7/2020  | 12/23/2020 | Europe / Russia / Moscow                      |
| EPI_ISL_732662 | 11/6/2020  | 12/23/2020 | Europe / Russia / Moscow                      |
| EPI_ISL_732663 | 11/6/2020  | 12/23/2020 | Europe / Russia / Moscow                      |
| EPI_ISL_732664 | 11/6/2020  | 12/23/2020 | Europe / Russia / Moscow                      |
| EPI_ISL_732665 | 11/6/2020  | 12/23/2020 | Europe / Russia / Moscow                      |
| EPI_ISL_732666 | 11/6/2020  | 12/23/2020 | Europe / Russia / Moscow                      |
| EPI_ISL_732667 | 11/6/2020  | 12/23/2020 | Europe / Russia / Moscow                      |
| EPI_ISL_732668 | 11/6/2020  | 12/23/2020 | Europe / Russia / Moscow                      |
| EPI_ISL_732669 | 11/6/2020  | 12/23/2020 | Europe / Russia / Moscow                      |
| EPI_ISL_732670 | 11/7/2020  | 12/23/2020 | Europe / Russia / Moscow                      |
| EPI_ISL_732671 | 11/6/2020  | 12/23/2020 | Europe / Russia / Moscow                      |
| EPI_ISL_732672 | 11/6/2020  | 12/23/2020 | Europe / Russia / Moscow                      |
| EPI_ISL_732673 | 11/6/2020  | 12/23/2020 | Europe / Russia / Moscow                      |
| EPI_ISL_732674 | 11/7/2020  | 12/23/2020 | Europe / Russia / Moscow                      |
| EPI_ISL_732675 | 11/6/2020  | 12/23/2020 | Europe / Russia / Moscow                      |
| EPI_ISL_732676 | 11/6/2020  | 12/23/2020 | Europe / Russia / Moscow                      |
| EPI_ISL_732677 | 11/3/2020  | 12/23/2020 | Europe / France / Auvergne-Rhone-Alpes / Lyon |
| EPI_ISL_732678 | 11/3/2020  | 12/23/2020 | Europe / France / Auvergne-Rhone-Alpes / Lyon |
| EPI_ISL_732679 | 11/4/2020  | 12/23/2020 | Europe / France / Auvergne-Rhone-Alpes / Lyon |
| EPI_ISL_732680 | 11/5/2020  | 12/23/2020 | Europe / France / Auvergne-Rhone-Alpes / Lyon |
| EPI_ISL_732681 | 11/5/2020  | 12/23/2020 | Europe / France / Auvergne-Rhone-Alpes / Lyon |
| EPI_ISL_732682 | 11/6/2020  | 12/23/2020 | Europe / France / Auvergne-Rhone-Alpes / Lyon |
| EPI_ISL_732683 | 11/9/2020  | 12/23/2020 | Europe / France / Auvergne-Rhone-Alpes / Lyon |
| EPI_ISL_732684 | 11/12/2020 | 12/23/2020 | Europe / France / Auvergne-Rhone-Alpes / Lyon |
| EPI_ISL_732685 | 11/12/2020 | 12/23/2020 | Europe / France / Auvergne-Rhone-Alpes / Lyon |
| EPI_ISL_732686 | 11/16/2020 | 12/23/2020 | Europe / France / Auvergne-Rhone-Alpes / Lyon |
| EPI_ISL_732687 | 11/17/2020 | 12/23/2020 | Europe / France / Auvergne-Rhone-Alpes / Lyon |
| EPI_ISL_732688 | 11/18/2020 | 12/23/2020 | Europe / France / Auvergne-Rhone-Alpes / Lyon |
| EPI_ISL_732689 | 11/22/2020 | 12/23/2020 | Europe / France / Auvergne-Rhone-Alpes / Lyon |
| EPI_ISL_732690 | 11/23/2020 | 12/23/2020 | Europe / France / Auvergne-Rhone-Alpes / Lyon |
| EPI_ISL_732691 | 11/24/2020 | 12/23/2020 | Europe / France / Auvergne-Rhone-Alpes / Lyon |
| EPI_ISL_732692 | 11/24/2020 | 12/23/2020 | Europe / France / Auvergne-Rhone-Alpes / Lyon |
| EPI_ISL_732693 | 9/20/2020  | 12/23/2020 | Europe / France / Auvergne-Rhone-Alpes / Lyon |
| EPI_ISL_732694 | 9/28/2020  | 12/23/2020 | Europe / France / Auvergne-Rhone-Alpes / Lyon |
| EPI_ISL_732695 | 9/26/2020  | 12/23/2020 | Europe / France / Auvergne-Rhone-Alpes / Lyon |
| EPI_ISL_732696 | 10/13/2020 | 12/23/2020 | Europe / France / Auvergne-Rhone-Alpes / Lyon |
| EPI_ISL_732697 | 10/13/2020 | 12/23/2020 | Europe / France / Auvergne-Rhone-Alpes / Lyon |
| EPI_ISL_732698 | 10/14/2020 | 12/23/2020 | Europe / France / Auvergne-Rhone-Alpes / Lyon |
| EPI_ISL_732699 | 10/27/2020 | 12/23/2020 | Europe / France / Auvergne-Rhone-Alpes / Lyon |
| EPI_ISL_732700 | 10/28/2020 | 12/23/2020 | Europe / France / Auvergne-Rhone-Alpes / Lyon |
| EPI_ISL_732701 | 10/28/2020 | 12/23/2020 | Europe / France / Auvergne-Rhone-Alpes / Lyon |
| EPI_ISL_732702 | 10/29/2020 | 12/23/2020 | Europe / France / Auvergne-Rhone-Alpes / Lyon |
| EPI_ISL_732703 | 11/1/2020  | 12/23/2020 | Europe / France / Auvergne-Rhone-Alpes / Lyon |
| EPI_ISL_732704 | 8/27/2020  | 12/23/2020 | North America / USA / New Mexico              |



|                |            |            |                                     |
|----------------|------------|------------|-------------------------------------|
| EPI_ISL_732758 | 4/4/2020   | 12/23/2020 | Europe / Spain / La_Rioja / Logrono |
| EPI_ISL_732759 | 4/21/2020  | 12/23/2020 | Europe / Spain / La_Rioja / Logrono |
| EPI_ISL_732762 | 3/10/2020  | 12/23/2020 | Europe / Spain / La_Rioja / Logrono |
| EPI_ISL_732763 | 3/26/2020  | 12/23/2020 | Europe / Spain / La_Rioja / Logrono |
| EPI_ISL_732764 | 3/26/2020  | 12/23/2020 | Europe / Spain / La_Rioja / Logrono |
| EPI_ISL_732765 | 9/22/2020  | 12/23/2020 | Europe / Spain / La_Rioja / Logrono |
| EPI_ISL_732766 | 4/13/2020  | 12/23/2020 | Europe / Spain / La_Rioja / Logrono |
| EPI_ISL_732767 | 8/29/2020  | 12/23/2020 | Europe / Spain / La_Rioja / Logrono |
| EPI_ISL_732768 | 9/7/2020   | 12/23/2020 | Europe / Spain / La_Rioja / Logrono |
| EPI_ISL_732769 | 9/11/2020  | 12/23/2020 | Europe / Spain / La_Rioja / Logrono |
| EPI_ISL_732770 | 9/17/2020  | 12/23/2020 | Europe / Spain / La_Rioja / Logrono |
| EPI_ISL_732772 | 11/11/2020 | 12/23/2020 | Europe / Spain / La_Rioja / Logrono |
| EPI_ISL_732773 | 6/19/2020  | 12/23/2020 | Europe / Spain / La_Rioja / Logrono |
| EPI_ISL_732774 | 7/10/2020  | 12/23/2020 | Europe / Spain / La_Rioja / Logrono |
| EPI_ISL_732777 | 7/17/2020  | 12/23/2020 | Europe / Spain / La_Rioja / Logrono |
| EPI_ISL_732778 | 8/11/2020  | 12/23/2020 | Europe / Spain / La_Rioja / Logrono |
| EPI_ISL_732779 | 8/13/2020  | 12/23/2020 | Europe / Spain / La_Rioja / Logrono |
| EPI_ISL_732780 | 8/15/2020  | 12/23/2020 | Europe / Spain / La_Rioja / Logrono |
| EPI_ISL_732783 | 9/13/2020  | 12/23/2020 | Europe / Spain / La_Rioja / Logrono |
| EPI_ISL_732785 | 10/24/2020 | 12/23/2020 | Europe / Spain / La_Rioja / Logrono |
| EPI_ISL_732786 | 10/27/2020 | 12/23/2020 | Europe / Spain / La_Rioja / Logrono |
| EPI_ISL_732787 | 10/31/2020 | 12/23/2020 | Europe / Spain / La_Rioja / Logrono |
| EPI_ISL_732788 | 11/11/2020 | 12/23/2020 | Europe / Spain / La_Rioja / Logrono |
| EPI_ISL_732789 | 11/10/2020 | 12/23/2020 | Europe / Spain / La_Rioja / Logrono |
| EPI_ISL_732792 | 11/2/2020  | 12/23/2020 | Europe / Spain / La_Rioja / Logrono |
| EPI_ISL_732793 | 10/29/2020 | 12/23/2020 | Europe / Spain / La_Rioja / Logrono |
| EPI_ISL_732794 | 9/30/2020  | 12/23/2020 | Europe / Spain / La_Rioja / Logrono |
| EPI_ISL_732795 | 10/21/2020 | 12/23/2020 | Europe / Spain / La_Rioja / Logrono |
| EPI_ISL_732796 | 11/12/2020 | 12/23/2020 | Europe / Spain / La_Rioja / Logrono |
| EPI_ISL_732797 | 11/5/2020  | 12/23/2020 | Europe / Spain / La_Rioja / Logrono |
| EPI_ISL_732798 | 11/9/2020  | 12/23/2020 | Europe / Spain / La_Rioja / Logrono |
| EPI_ISL_732799 | 11/7/2020  | 12/23/2020 | Europe / Spain / La_Rioja / Logrono |
| EPI_ISL_732800 | 10/9/2020  | 12/23/2020 | Europe / Spain / La_Rioja / Logrono |
| EPI_ISL_732801 | 9/23/2020  | 12/23/2020 | Europe / Spain / La_Rioja / Logrono |
| EPI_ISL_732802 | 9/23/2020  | 12/23/2020 | Europe / Spain / La_Rioja / Logrono |
| EPI_ISL_732803 | 10/8/2020  | 12/23/2020 | Europe / Spain / La_Rioja / Logrono |
| EPI_ISL_732804 | 10/1/2020  | 12/23/2020 | Europe / Spain / La_Rioja / Logrono |
| EPI_ISL_732805 | 10/28/2020 | 12/23/2020 | Europe / Spain / La_Rioja / Logrono |
| EPI_ISL_732806 | 7/11/2020  | 12/23/2020 | Europe / Spain / La_Rioja / Logrono |
| EPI_ISL_732807 | 3/20/2020  | 12/23/2020 | Europe / Spain / La_Rioja / Logrono |
| EPI_ISL_732808 | 3/25/2020  | 12/23/2020 | Europe / Spain / La_Rioja / Logrono |
| EPI_ISL_732809 | 8/18/2020  | 12/23/2020 | Europe / Spain / La_Rioja / Logrono |
| EPI_ISL_732810 | 8/28/2020  | 12/23/2020 | Europe / Spain / La_Rioja / Logrono |
| EPI_ISL_732811 | 8/7/2020   | 12/23/2020 | Europe / Spain / La_Rioja / Logrono |
| EPI_ISL_732812 | 8/11/2020  | 12/23/2020 | Europe / Spain / La_Rioja / Logrono |
| EPI_ISL_732813 | 10/18/2020 | 12/23/2020 | Europe / Spain / La_Rioja / Logrono |
| EPI_ISL_732814 | 10/18/2020 | 12/23/2020 | Europe / Spain / La_Rioja / Logrono |

|                |            |            |                                     |
|----------------|------------|------------|-------------------------------------|
| EPI_ISL_732815 | 9/10/2020  | 12/23/2020 | Europe / Spain / La_Rioja / Logrono |
| EPI_ISL_732816 | 11/6/2020  | 12/23/2020 | Europe / Spain / La_Rioja / Logrono |
| EPI_ISL_732817 | 10/22/2020 | 12/23/2020 | Europe / Spain / La_Rioja / Logrono |
| EPI_ISL_732818 | 10/14/2020 | 12/23/2020 | Europe / Spain / La_Rioja / Logrono |
| EPI_ISL_732819 | 9/6/2020   | 12/23/2020 | Europe / Spain / La_Rioja / Logrono |
| EPI_ISL_732820 | 9/26/2020  | 12/23/2020 | North America / USA / Nebraska      |
| EPI_ISL_732821 | 9/26/2020  | 12/23/2020 | North America / USA / Nebraska      |
| EPI_ISL_732822 | 9/26/2020  | 12/23/2020 | North America / USA / Nebraska      |
| EPI_ISL_732823 | 9/26/2020  | 12/23/2020 | North America / USA / Nebraska      |
| EPI_ISL_732824 | 9/26/2020  | 12/23/2020 | North America / USA / Nebraska      |
| EPI_ISL_732825 | 9/26/2020  | 12/23/2020 | North America / USA / Nebraska      |
| EPI_ISL_732826 | 9/26/2020  | 12/23/2020 | North America / USA / Nebraska      |
| EPI_ISL_732828 | 2020-11    | 12/23/2020 | Europe / Poland                     |
| EPI_ISL_732829 | 2020-11    | 12/23/2020 | Europe / Poland                     |
| EPI_ISL_732830 | 2020-11    | 12/23/2020 | Europe / Poland                     |
| EPI_ISL_732831 | 2020-11    | 12/23/2020 | Europe / Poland                     |
| EPI_ISL_732832 | 2020-11    | 12/23/2020 | Europe / Poland                     |
| EPI_ISL_732833 | 2020-11    | 12/23/2020 | Europe / Poland                     |
| EPI_ISL_732834 | 2020-11    | 12/23/2020 | Europe / Poland                     |
| EPI_ISL_732835 | 2020-11    | 12/23/2020 | Europe / Poland                     |
| EPI_ISL_732836 | 2020-11    | 12/23/2020 | Europe / Poland                     |
| EPI_ISL_732837 | 2020-11    | 12/23/2020 | Europe / Poland                     |
| EPI_ISL_732838 | 2020-11    | 12/23/2020 | Europe / Poland                     |
| EPI_ISL_732839 | 2020-11    | 12/23/2020 | Europe / Poland                     |
| EPI_ISL_732840 | 2020-11    | 12/23/2020 | Europe / Poland                     |
| EPI_ISL_732841 | 2020-11    | 12/23/2020 | Europe / Poland                     |
| EPI_ISL_732842 | 2020-11    | 12/23/2020 | Europe / Poland                     |
| EPI_ISL_732843 | 2020-11    | 12/23/2020 | Europe / Poland                     |
| EPI_ISL_732844 | 2020-11    | 12/23/2020 | Europe / Poland                     |
| EPI_ISL_732845 | 2020-11    | 12/23/2020 | Europe / Poland                     |
| EPI_ISL_732846 | 2020-11    | 12/23/2020 | Europe / Poland                     |
| EPI_ISL_732847 | 2020-11    | 12/23/2020 | Europe / Poland                     |
| EPI_ISL_732848 | 2020-11    | 12/23/2020 | Europe / Poland                     |
| EPI_ISL_732849 | 2020-11    | 12/23/2020 | Europe / Poland                     |
| EPI_ISL_732850 | 2020-11    | 12/23/2020 | Europe / Poland                     |
| EPI_ISL_732851 | 2020-11    | 12/23/2020 | Europe / Poland                     |
| EPI_ISL_732852 | 2020-11    | 12/23/2020 | Europe / Poland                     |
| EPI_ISL_732853 | 2020-11    | 12/23/2020 | Europe / Poland                     |
| EPI_ISL_732854 | 2020-11    | 12/23/2020 | Europe / Poland                     |
| EPI_ISL_732855 | 2020-11    | 12/23/2020 | Europe / Poland                     |
| EPI_ISL_732856 | 2020-11    | 12/23/2020 | Europe / Poland                     |
| EPI_ISL_732857 | 2020-11    | 12/23/2020 | Europe / Poland                     |
| EPI_ISL_732858 | 2020-11    | 12/23/2020 | Europe / Poland                     |
| EPI_ISL_732859 | 2020-11    | 12/23/2020 | Europe / Poland                     |
| EPI_ISL_732860 | 2020-11    | 12/23/2020 | Europe / Poland                     |
| EPI_ISL_732861 | 2020-11    | 12/23/2020 | Europe / Poland                     |
| EPI_ISL_732862 | 2020-11    | 12/23/2020 | Europe / Poland                     |



|                |            |            |                                    |
|----------------|------------|------------|------------------------------------|
| EPI_ISL_732911 | 2020-11    | 12/23/2020 | Europe / Poland                    |
| EPI_ISL_732912 | 2020-11    | 12/23/2020 | Europe / Poland                    |
| EPI_ISL_732913 | 2020-11    | 12/23/2020 | Europe / Poland                    |
| EPI_ISL_732914 | 2020-11    | 12/23/2020 | Europe / Poland                    |
| EPI_ISL_732915 | 2020-11    | 12/23/2020 | Europe / Poland                    |
| EPI_ISL_732916 | 2020-11    | 12/23/2020 | Europe / Poland                    |
| EPI_ISL_732917 | 2020-11    | 12/23/2020 | Europe / Poland                    |
| EPI_ISL_732918 | 2020-11    | 12/23/2020 | Europe / Poland                    |
| EPI_ISL_732919 | 2020-11    | 12/23/2020 | Europe / Poland                    |
| EPI_ISL_732920 | 2020-11    | 12/23/2020 | Europe / Poland                    |
| EPI_ISL_732921 | 2020-11    | 12/23/2020 | Europe / Poland                    |
| EPI_ISL_732922 | 2020-11    | 12/23/2020 | Europe / Poland                    |
| EPI_ISL_732923 | 2020-11    | 12/23/2020 | Europe / Poland                    |
| EPI_ISL_732924 | 2020-11    | 12/23/2020 | Europe / Poland                    |
| EPI_ISL_732925 | 2020-11    | 12/23/2020 | Europe / Poland                    |
| EPI_ISL_732926 | 2020-11    | 12/23/2020 | Europe / Poland                    |
| EPI_ISL_747032 | 10/30/2020 | 12/23/2020 | North America / USA / Montana      |
| EPI_ISL_747033 | 10/30/2020 | 12/23/2020 | North America / USA / Montana      |
| EPI_ISL_747034 | 10/30/2020 | 12/23/2020 | North America / USA / Montana      |
| EPI_ISL_747035 | 10/29/2020 | 12/23/2020 | North America / USA / Montana      |
| EPI_ISL_747036 | 10/21/2020 | 12/23/2020 | North America / USA / Delaware     |
| EPI_ISL_747038 | 10/20/2020 | 12/23/2020 | North America / USA / Delaware     |
| EPI_ISL_747039 | 10/1/2020  | 12/23/2020 | North America / USA / New York     |
| EPI_ISL_747040 | 10/1/2020  | 12/23/2020 | North America / USA / New York     |
| EPI_ISL_747041 | 10/5/2020  | 12/23/2020 | North America / USA / New York     |
| EPI_ISL_747042 | 10/18/2020 | 12/23/2020 | North America / USA / New York     |
| EPI_ISL_747043 | 10/28/2020 | 12/23/2020 | North America / USA / New York     |
| EPI_ISL_747044 | 11/4/2020  | 12/23/2020 | North America / USA / Alabama      |
| EPI_ISL_747046 | 11/4/2020  | 12/23/2020 | North America / USA / Alabama      |
| EPI_ISL_747047 | 11/4/2020  | 12/23/2020 | North America / USA / Alabama      |
| EPI_ISL_747048 | 11/4/2020  | 12/23/2020 | North America / USA / Alabama      |
| EPI_ISL_747049 | 11/5/2020  | 12/23/2020 | North America / USA / Pennsylvania |
| EPI_ISL_747050 | 11/5/2020  | 12/23/2020 | North America / USA / Pennsylvania |
| EPI_ISL_747051 | 11/9/2020  | 12/23/2020 | North America / USA / Pennsylvania |
| EPI_ISL_747052 | 11/7/2020  | 12/23/2020 | North America / USA / Pennsylvania |
| EPI_ISL_747053 | 11/12/2020 | 12/23/2020 | North America / USA / Pennsylvania |
| EPI_ISL_747054 | 11/9/2020  | 12/23/2020 | North America / USA / Alaska       |
| EPI_ISL_747055 | 11/8/2020  | 12/23/2020 | North America / USA / Alaska       |
| EPI_ISL_747056 | 11/9/2020  | 12/23/2020 | North America / USA / Alaska       |
| EPI_ISL_747057 | 11/8/2020  | 12/23/2020 | North America / USA / Alaska       |
| EPI_ISL_747058 | 11/9/2020  | 12/23/2020 | North America / USA / Alaska       |
| EPI_ISL_747059 | 11/6/2020  | 12/23/2020 | North America / USA / Tennessee    |
| EPI_ISL_747061 | 11/6/2020  | 12/23/2020 | North America / USA / Tennessee    |
| EPI_ISL_747062 | 11/6/2020  | 12/23/2020 | North America / USA / Tennessee    |
| EPI_ISL_747063 | 11/6/2020  | 12/23/2020 | North America / USA / Tennessee    |
| EPI_ISL_747064 | 10/26/2020 | 12/23/2020 | North America / USA / Arkansas     |
| EPI_ISL_747065 | 10/28/2020 | 12/23/2020 | North America / USA / Arkansas     |



|                |            |            |                                   |
|----------------|------------|------------|-----------------------------------|
| EPI_ISL_747066 | 10/29/2020 | 12/23/2020 | North America / USA / Arkansas    |
| EPI_ISL_747067 | 10/30/2020 | 12/23/2020 | North America / USA / Arkansas    |
| EPI_ISL_747068 | 10/29/2020 | 12/23/2020 | North America / USA / Arkansas    |
| EPI_ISL_747069 | 11/4/2020  | 12/23/2020 | North America / USA / Louisiana   |
| EPI_ISL_747070 | 11/4/2020  | 12/23/2020 | North America / USA / Louisiana   |
| EPI_ISL_747071 | 11/4/2020  | 12/23/2020 | North America / USA / Louisiana   |
| EPI_ISL_747072 | 11/4/2020  | 12/23/2020 | North America / USA / Louisiana   |
| EPI_ISL_747073 | 11/6/2020  | 12/23/2020 | North America / USA / Louisiana   |
| EPI_ISL_747074 | 11/5/2020  | 12/23/2020 | North America / USA / Utah        |
| EPI_ISL_747075 | 11/5/2020  | 12/23/2020 | North America / USA / Utah        |
| EPI_ISL_747076 | 11/5/2020  | 12/23/2020 | North America / USA / Utah        |
| EPI_ISL_747077 | 11/5/2020  | 12/23/2020 | North America / USA / Utah        |
| EPI_ISL_747079 | 11/6/2020  | 12/23/2020 | North America / USA / Wisconsin   |
| EPI_ISL_747080 | 11/7/2020  | 12/23/2020 | North America / USA / Wisconsin   |
| EPI_ISL_747081 | 11/7/2020  | 12/23/2020 | North America / USA / Wisconsin   |
| EPI_ISL_747082 | 11/6/2020  | 12/23/2020 | North America / USA / Wisconsin   |
| EPI_ISL_747083 | 11/7/2020  | 12/23/2020 | North America / USA / Wisconsin   |
| EPI_ISL_747084 | 11/6/2020  | 12/23/2020 | North America / USA / Indiana     |
| EPI_ISL_747085 | 11/7/2020  | 12/23/2020 | North America / USA / Indiana     |
| EPI_ISL_747086 | 11/6/2020  | 12/23/2020 | North America / USA / Indiana     |
| EPI_ISL_747087 | 11/6/2020  | 12/23/2020 | North America / USA / Indiana     |
| EPI_ISL_747088 | 11/6/2020  | 12/23/2020 | North America / USA / Indiana     |
| EPI_ISL_747089 | 11/5/2020  | 12/23/2020 | North America / USA / Kentucky    |
| EPI_ISL_747090 | 11/4/2020  | 12/23/2020 | North America / USA / Kentucky    |
| EPI_ISL_747091 | 11/4/2020  | 12/23/2020 | North America / USA / Kentucky    |
| EPI_ISL_747092 | 11/4/2020  | 12/23/2020 | North America / USA / Kentucky    |
| EPI_ISL_747093 | 11/2/2020  | 12/23/2020 | North America / USA / Kentucky    |
| EPI_ISL_747094 | 11/5/2020  | 12/23/2020 | North America / USA / Oklahoma    |
| EPI_ISL_747095 | 11/5/2020  | 12/23/2020 | North America / USA / Oklahoma    |
| EPI_ISL_747096 | 11/5/2020  | 12/23/2020 | North America / USA / Oklahoma    |
| EPI_ISL_747097 | 11/5/2020  | 12/23/2020 | North America / USA / Oklahoma    |
| EPI_ISL_747098 | 11/4/2020  | 12/23/2020 | North America / USA / Oklahoma    |
| EPI_ISL_747099 | 10/30/2020 | 12/23/2020 | North America / USA / Mississippi |
| EPI_ISL_747100 | 11/3/2020  | 12/23/2020 | North America / USA / Mississippi |
| EPI_ISL_747101 | 11/2/2020  | 12/23/2020 | North America / USA / Mississippi |
| EPI_ISL_747102 | 11/4/2020  | 12/23/2020 | North America / USA / Mississippi |
| EPI_ISL_747103 | 11/10/2020 | 12/23/2020 | North America / USA / Illinois    |
| EPI_ISL_747104 | 11/10/2020 | 12/23/2020 | North America / USA / Illinois    |
| EPI_ISL_747105 | 11/10/2020 | 12/23/2020 | North America / USA / Illinois    |
| EPI_ISL_747106 | 11/10/2020 | 12/23/2020 | North America / USA / Illinois    |
| EPI_ISL_747107 | 10/31/2020 | 12/23/2020 | North America / USA / New Jersey  |
| EPI_ISL_747108 | 10/31/2020 | 12/23/2020 | North America / USA / New Jersey  |
| EPI_ISL_747110 | 11/9/2020  | 12/23/2020 | North America / USA / New Jersey  |
| EPI_ISL_747111 | 11/9/2020  | 12/23/2020 | North America / USA / New Jersey  |
| EPI_ISL_747112 | 11/7/2020  | 12/23/2020 | North America / USA / Michigan    |
| EPI_ISL_747113 | 11/7/2020  | 12/23/2020 | North America / USA / Michigan    |
| EPI_ISL_747114 | 11/7/2020  | 12/23/2020 | North America / USA / Michigan    |

|                |            |            |                                      |
|----------------|------------|------------|--------------------------------------|
| EPI_ISL_747116 | 10/16/2020 | 12/23/2020 | North America / USA / Michigan       |
| EPI_ISL_747117 | 11/3/2020  | 12/23/2020 | North America / USA / North Carolina |
| EPI_ISL_747118 | 10/28/2020 | 12/23/2020 | North America / USA / North Carolina |
| EPI_ISL_747119 | 10/30/2020 | 12/23/2020 | North America / USA / North Carolina |
| EPI_ISL_747120 | 11/2/2020  | 12/23/2020 | North America / USA / North Carolina |
| EPI_ISL_747122 | 11/2/2020  | 12/23/2020 | North America / USA / Arizona        |
| EPI_ISL_747123 | 11/2/2020  | 12/23/2020 | North America / USA / Arizona        |
| EPI_ISL_747124 | 11/3/2020  | 12/23/2020 | North America / USA / Arizona        |
| EPI_ISL_747125 | 11/3/2020  | 12/23/2020 | North America / USA / Arizona        |
| EPI_ISL_747126 | 11/3/2020  | 12/23/2020 | North America / USA / Arizona        |
| EPI_ISL_747128 | 11/4/2020  | 12/23/2020 | North America / USA / Ohio           |
| EPI_ISL_747129 | 11/4/2020  | 12/23/2020 | North America / USA / Ohio           |
| EPI_ISL_747131 | 11/4/2020  | 12/23/2020 | North America / USA / Ohio           |
| EPI_ISL_747132 | 10/25/2020 | 12/23/2020 | North America / USA / Connecticut    |
| EPI_ISL_747133 | 10/26/2020 | 12/23/2020 | North America / USA / Connecticut    |
| EPI_ISL_747134 | 11/5/2020  | 12/23/2020 | North America / USA / Connecticut    |
| EPI_ISL_747135 | 11/5/2020  | 12/23/2020 | North America / USA / Connecticut    |
| EPI_ISL_747136 | 11/3/2020  | 12/23/2020 | North America / USA / Kansas         |
| EPI_ISL_747137 | 11/3/2020  | 12/23/2020 | North America / USA / Kansas         |
| EPI_ISL_747138 | 11/3/2020  | 12/23/2020 | North America / USA / Kansas         |
| EPI_ISL_747139 | 11/3/2020  | 12/23/2020 | North America / USA / Kansas         |
| EPI_ISL_747140 | 11/2/2020  | 12/23/2020 | North America / USA / Kansas         |
| EPI_ISL_747141 | 11/2/2020  | 12/23/2020 | North America / USA / Missouri       |
| EPI_ISL_747142 | 11/2/2020  | 12/23/2020 | North America / USA / Missouri       |
| EPI_ISL_747143 | 11/3/2020  | 12/23/2020 | North America / USA / Missouri       |
| EPI_ISL_747144 | 11/4/2020  | 12/23/2020 | North America / USA / Missouri       |
| EPI_ISL_747145 | 11/5/2020  | 12/23/2020 | North America / USA / Missouri       |
| EPI_ISL_747146 | 10/26/2020 | 12/23/2020 | North America / USA / Texas          |
| EPI_ISL_747147 | 10/26/2020 | 12/23/2020 | North America / USA / Texas          |
| EPI_ISL_747149 | 11/4/2020  | 12/23/2020 | North America / USA / Texas          |
| EPI_ISL_747150 | 11/4/2020  | 12/23/2020 | North America / USA / Texas          |
| EPI_ISL_747151 | 11/6/2020  | 12/23/2020 | North America / USA / Nevada         |
| EPI_ISL_747152 | 11/7/2020  | 12/23/2020 | North America / USA / Nevada         |
| EPI_ISL_747153 | 11/10/2020 | 12/23/2020 | North America / USA / Nevada         |
| EPI_ISL_747154 | 11/9/2020  | 12/23/2020 | North America / USA / Nevada         |
| EPI_ISL_747155 | 11/17/2020 | 12/23/2020 | North America / USA / Oklahoma       |
| EPI_ISL_747156 | 11/17/2020 | 12/23/2020 | North America / USA / Oklahoma       |
| EPI_ISL_747157 | 11/16/2020 | 12/23/2020 | North America / USA / Oklahoma       |
| EPI_ISL_747158 | 11/17/2020 | 12/23/2020 | North America / USA / Oklahoma       |
| EPI_ISL_747160 | 11/16/2020 | 12/23/2020 | North America / USA / Oklahoma       |
| EPI_ISL_747161 | 11/18/2020 | 12/23/2020 | North America / USA / Oklahoma       |
| EPI_ISL_747162 | 11/18/2020 | 12/23/2020 | North America / USA / Oklahoma       |
| EPI_ISL_747163 | 11/17/2020 | 12/23/2020 | North America / USA / Oklahoma       |
| EPI_ISL_747166 | 11/19/2020 | 12/23/2020 | North America / USA / Oregon         |
| EPI_ISL_747167 | 11/18/2020 | 12/23/2020 | North America / USA / Oregon         |
| EPI_ISL_747168 | 11/20/2020 | 12/23/2020 | North America / USA / Oregon         |
| EPI_ISL_747169 | 11/19/2020 | 12/23/2020 | North America / USA / Oregon         |

|                |            |            |                                                     |
|----------------|------------|------------|-----------------------------------------------------|
| EPI_ISL_747170 | 11/23/2020 | 12/23/2020 | North America / USA / Oregon                        |
| EPI_ISL_747171 | 11/23/2020 | 12/23/2020 | North America / USA / Oregon                        |
| EPI_ISL_747172 | 11/24/2020 | 12/23/2020 | North America / USA / Oregon                        |
| EPI_ISL_747175 | 11/9/2020  | 12/23/2020 | North America / USA / North Carolina                |
| EPI_ISL_747176 | 11/10/2020 | 12/23/2020 | North America / USA / North Carolina                |
| EPI_ISL_747177 | 11/10/2020 | 12/23/2020 | North America / USA / North Carolina                |
| EPI_ISL_747178 | 11/10/2020 | 12/23/2020 | North America / USA / North Carolina                |
| EPI_ISL_747179 | 11/18/2020 | 12/23/2020 | North America / USA / North Carolina                |
| EPI_ISL_747180 | 11/18/2020 | 12/23/2020 | North America / USA / North Carolina                |
| EPI_ISL_747182 | 11/20/2020 | 12/23/2020 | North America / USA / North Carolina                |
| EPI_ISL_747183 | 11/25/2020 | 12/23/2020 | North America / USA / Tennessee                     |
| EPI_ISL_747184 | 11/25/2020 | 12/23/2020 | North America / USA / Tennessee                     |
| EPI_ISL_747185 | 11/25/2020 | 12/23/2020 | North America / USA / Tennessee                     |
| EPI_ISL_747186 | 11/25/2020 | 12/23/2020 | North America / USA / Tennessee                     |
| EPI_ISL_747187 | 11/25/2020 | 12/23/2020 | North America / USA / Tennessee                     |
| EPI_ISL_747188 | 11/25/2020 | 12/23/2020 | North America / USA / Tennessee                     |
| EPI_ISL_747189 | 11/15/2020 | 12/23/2020 | North America / USA / Oregon                        |
| EPI_ISL_747190 | 11/13/2020 | 12/23/2020 | North America / USA / Oregon                        |
| EPI_ISL_747191 | 11/16/2020 | 12/23/2020 | North America / USA / Oregon                        |
| EPI_ISL_747192 | 11/14/2020 | 12/23/2020 | North America / USA / Oregon                        |
| EPI_ISL_747193 | 11/16/2020 | 12/23/2020 | North America / USA / Oregon                        |
| EPI_ISL_732960 | 12/19/2020 | 12/24/2020 | Oceania / Australia / South Australia               |
| EPI_ISL_732961 | 12/19/2020 | 12/24/2020 | Oceania / Australia / South Australia               |
| EPI_ISL_732963 | 12/13/2020 | 12/24/2020 | Oceania / New Zealand / Canterbury                  |
| EPI_ISL_732964 | 12/11/2020 | 12/24/2020 | Oceania / New Zealand / Auckland                    |
| EPI_ISL_732965 | 12/15/2020 | 12/24/2020 | Oceania / New Zealand / Auckland                    |
| EPI_ISL_732966 | 12/11/2020 | 12/24/2020 | Oceania / New Zealand / Auckland                    |
| EPI_ISL_732967 | 12/15/2020 | 12/24/2020 | Oceania / New Zealand / Auckland                    |
| EPI_ISL_732968 | 12/9/2020  | 12/24/2020 | Oceania / New Zealand / Auckland / Counties Manukau |
| EPI_ISL_732969 | 12/9/2020  | 12/24/2020 | Oceania / New Zealand / Auckland / Counties Manukau |
| EPI_ISL_732970 | 12/9/2020  | 12/24/2020 | Oceania / New Zealand / Auckland / Counties Manukau |
| EPI_ISL_732975 | 11/16/2020 | 12/24/2020 | Europe / Russia / Karelia / Podporozhye             |
| EPI_ISL_732976 | 11/16/2020 | 12/24/2020 | Europe / Russia / Karelia / Podporozhye             |
| EPI_ISL_732979 | 11/16/2020 | 12/24/2020 | Europe / Russia / Karelia / Medvezhyegorsk          |
| EPI_ISL_732980 | 11/16/2020 | 12/24/2020 | Europe / Russia / Karelia / Povenets                |
| EPI_ISL_732982 | 11/16/2020 | 12/24/2020 | Europe / Russia / Karelia / Pindushi                |
| EPI_ISL_732983 | 11/17/2020 | 12/24/2020 | Europe / Russia / Karelia / Kazhma                  |
| EPI_ISL_732985 | 11/18/2020 | 12/24/2020 | Europe / Russia / Karelia / Shuya                   |
| EPI_ISL_732986 | 11/19/2020 | 12/24/2020 | Europe / Russia / Saint Petersburg                  |
| EPI_ISL_732987 | 11/16/2020 | 12/24/2020 | Europe / Russia / Saint Petersburg                  |
| EPI_ISL_732988 | 11/16/2020 | 12/24/2020 | Europe / Russia / Saint Petersburg                  |
| EPI_ISL_732990 | 7/8/2020   | 12/24/2020 | Europe / Russia / Sverdlovsk / Verkhnyaya Pyshma    |
| EPI_ISL_732991 | 7/8/2020   | 12/24/2020 | Europe / Russia / Sverdlovsk / Verkhnyaya Pyshma    |
| EPI_ISL_732992 | 7/8/2020   | 12/24/2020 | Europe / Russia / Sverdlovsk / Yekaterinburg        |
| EPI_ISL_732995 | 7/25/2020  | 12/24/2020 | Europe / Russia / Sverdlovsk / Yekaterinburg        |
| EPI_ISL_732997 | 7/29/2020  | 12/24/2020 | Europe / Russia / Sverdlovsk / Yekaterinburg        |
| EPI_ISL_732998 | 7/29/2020  | 12/24/2020 | Europe / Russia / Sverdlovsk / Yekaterinburg        |

|                |           |            |                                                 |
|----------------|-----------|------------|-------------------------------------------------|
| EPI_ISL_733002 | 8/8/2020  | 12/24/2020 | Europe / Russia / Sverdlovsk / Yekaterinburg    |
| EPI_ISL_733003 | 8/8/2020  | 12/24/2020 | Europe / Russia / Sverdlovsk / Yekaterinburg    |
| EPI_ISL_733005 | 8/7/2020  | 12/24/2020 | Europe / Russia / Primorsky / Vladivostok       |
| EPI_ISL_733006 | 8/8/2020  | 12/24/2020 | Europe / Russia / Primorsky / Vladivostok       |
| EPI_ISL_733009 | 8/10/2020 | 12/24/2020 | Europe / Russia / Primorsky / Vladivostok       |
| EPI_ISL_733010 | 8/11/2020 | 12/24/2020 | Europe / Russia / Primorsky / Vladivostok       |
| EPI_ISL_733011 | 8/11/2020 | 12/24/2020 | Europe / Russia / Primorsky / Vladivostok       |
| EPI_ISL_733012 | 8/11/2020 | 12/24/2020 | Europe / Russia / Primorsky / Vladivostok       |
| EPI_ISL_733013 | 8/11/2020 | 12/24/2020 | Europe / Russia / Primorsky / Vladivostok       |
| EPI_ISL_733018 | 8/7/2020  | 12/24/2020 | Europe / Russia / Primorsky / Ussuriysk         |
| EPI_ISL_733019 | 8/2/2020  | 12/24/2020 | Europe / Russia / Primorsky / Vladivostok       |
| EPI_ISL_733022 | 8/12/2020 | 12/24/2020 | Europe / Russia / Primorsky / Vladivostok       |
| EPI_ISL_733024 | 9/24/2020 | 12/24/2020 | Europe / Russia / Sverdlovsk / Yekaterinburg    |
| EPI_ISL_733025 | 9/24/2020 | 12/24/2020 | Europe / Russia / Sverdlovsk / Revda            |
| EPI_ISL_733027 | 9/24/2020 | 12/24/2020 | Europe / Russia / Sverdlovsk / Nizhny Tagil     |
| EPI_ISL_733028 | 9/26/2020 | 12/24/2020 | Europe / Russia / Sverdlovsk / Svobodny         |
| EPI_ISL_733030 | 9/25/2020 | 12/24/2020 | Europe / Russia / Sverdlovsk / Zarechny         |
| EPI_ISL_733032 | 9/24/2020 | 12/24/2020 | Europe / Russia / Sverdlovsk / Yekaterinburg    |
| EPI_ISL_733033 | 9/26/2020 | 12/24/2020 | Europe / Russia / Sverdlovsk / Svobodny         |
| EPI_ISL_733034 | 9/24/2020 | 12/24/2020 | Europe / Russia / Sverdlovsk / Yekaterinburg    |
| EPI_ISL_733037 | 9/21/2020 | 12/24/2020 | Europe / Russia / Tambov / Morshansk            |
| EPI_ISL_733038 | 9/26/2020 | 12/24/2020 | Europe / Russia / Tambov / Morshansk            |
| EPI_ISL_733039 | 9/20/2020 | 12/24/2020 | Europe / Russia / Tambov / Tambov               |
| EPI_ISL_733041 | 9/23/2020 | 12/24/2020 | Europe / Russia / Chelyabinsk / Ozyorsk         |
| EPI_ISL_733044 | 9/24/2020 | 12/24/2020 | Europe / Russia / Moscow / Moscow               |
| EPI_ISL_733048 | 9/21/2020 | 12/24/2020 | Europe / Russia / Moscow / Moscow               |
| EPI_ISL_733053 | 9/23/2020 | 12/24/2020 | Europe / Russia / Moscow / Moscow               |
| EPI_ISL_733055 | 9/23/2020 | 12/24/2020 | Europe / Russia / Moscow / Moscow               |
| EPI_ISL_733059 | 9/25/2020 | 12/24/2020 | Europe / Russia / Moscow / Moscow               |
| EPI_ISL_733060 | 9/25/2020 | 12/24/2020 | Europe / Russia / Moscow / Moscow               |
| EPI_ISL_733061 | 9/19/2020 | 12/24/2020 | Europe / Russia / Moscow / Moscow               |
| EPI_ISL_733062 | 9/21/2020 | 12/24/2020 | Europe / Russia / Moscow / Moscow               |
| EPI_ISL_733065 | 9/27/2020 | 12/24/2020 | Europe / Russia / Moscow / Moscow               |
| EPI_ISL_733066 | 9/27/2020 | 12/24/2020 | Europe / Russia / Moscow / Moscow               |
| EPI_ISL_733067 | 9/21/2020 | 12/24/2020 | Europe / Russia / Moscow / Moscow               |
| EPI_ISL_733069 | 9/23/2020 | 12/24/2020 | Europe / Russia / Moscow / Moscow               |
| EPI_ISL_733071 | 9/17/2020 | 12/24/2020 | Europe / Russia / Moscow / Moscow               |
| EPI_ISL_733073 | 9/23/2020 | 12/24/2020 | Europe / Russia / Moscow / Moscow               |
| EPI_ISL_733074 | 9/27/2020 | 12/24/2020 | Europe / Russia / Moscow / Moscow               |
| EPI_ISL_733075 | 9/17/2020 | 12/24/2020 | Europe / Russia / Khanty-Mansi / Nizhnevartovsk |
| EPI_ISL_733077 | 9/21/2020 | 12/24/2020 | Europe / Crimea / Simpheropol                   |
| EPI_ISL_733079 | 9/30/2020 | 12/24/2020 | Europe / Russia / Novgorod / Chudovo            |
| EPI_ISL_733080 | 9/29/2020 | 12/24/2020 | Europe / Russia / Sverdlovsk / Yekaterinburg    |
| EPI_ISL_733082 | 10/1/2020 | 12/24/2020 | Europe / Russia / Sverdlovsk / Yekaterinburg    |
| EPI_ISL_733086 | 10/2/2020 | 12/24/2020 | Europe / Russia / Sverdlovsk / Kamensk-Uralsky  |
| EPI_ISL_733087 | 10/3/2020 | 12/24/2020 | Europe / Russia / Sverdlovsk / Yekaterinburg    |
| EPI_ISL_733088 | 10/3/2020 | 12/24/2020 | Europe / Russia / Sverdlovsk / Yekaterinburg    |

|                |            |            |                                                      |
|----------------|------------|------------|------------------------------------------------------|
| EPI_ISL_733089 | 10/3/2020  | 12/24/2020 | Europe / Russia / Sverdlovsk / Serov                 |
| EPI_ISL_733090 | 10/3/2020  | 12/24/2020 | Europe / Russia / Sverdlovsk / Yekaterinburg         |
| EPI_ISL_733092 | 10/3/2020  | 12/24/2020 | Europe / Russia / Tyumen / Tyumen                    |
| EPI_ISL_733093 | 9/30/2020  | 12/24/2020 | Europe / Russia / Leningrad / Tosno                  |
| EPI_ISL_733095 | 9/30/2020  | 12/24/2020 | Europe / Russia / Leningrad / Kirovsk                |
| EPI_ISL_733096 | 10/1/2020  | 12/24/2020 | Europe / Russia / Leningrad / Vsevolozhsk            |
| EPI_ISL_733097 | 9/29/2020  | 12/24/2020 | Europe / Russia / Leningrad / Gatchina               |
| EPI_ISL_733100 | 10/7/2020  | 12/24/2020 | Europe / Russia / Moscow / Moscow                    |
| EPI_ISL_733102 | 10/7/2020  | 12/24/2020 | Europe / Russia / North Ossetia-Alania / Vladikavkaz |
| EPI_ISL_733103 | 10/7/2020  | 12/24/2020 | Europe / Russia / North Ossetia-Alania / Vladikavkaz |
| EPI_ISL_733105 | 10/7/2020  | 12/24/2020 | Europe / Russia / Ryazan / Ryazan                    |
| EPI_ISL_733106 | 10/7/2020  | 12/24/2020 | Europe / Russia / Ryazan / Ryazan                    |
| EPI_ISL_733113 | 10/7/2020  | 12/24/2020 | Europe / Russia / Tula / Novomoskovsk                |
| EPI_ISL_733117 | 10/7/2020  | 12/24/2020 | Europe / Russia / Rostov / Zernograd                 |
| EPI_ISL_733121 | 10/7/2020  | 12/24/2020 | Europe / Russia / Yaroslavl / Yaroslavl              |
| EPI_ISL_733126 | 10/7/2020  | 12/24/2020 | Europe / Russia / Moscow Region / Sergiyev Posad     |
| EPI_ISL_733128 | 10/7/2020  | 12/24/2020 | Europe / Russia / Moscow / Moscow                    |
| EPI_ISL_733129 | 10/7/2020  | 12/24/2020 | Europe / Russia / Moscow Region / Kalininet          |
| EPI_ISL_733132 | 10/7/2020  | 12/24/2020 | Europe / Russia / Moscow / Moscow                    |
| EPI_ISL_733135 | 10/7/2020  | 12/24/2020 | Europe / Russia / Stavropol / Stavropol              |
| EPI_ISL_733137 | 10/6/2020  | 12/24/2020 | Europe / Russia / Komi / Ukhta                       |
| EPI_ISL_733138 | 10/6/2020  | 12/24/2020 | Europe / Russia / Khanty-Mansi / Surgut              |
| EPI_ISL_733140 | 10/6/2020  | 12/24/2020 | Europe / Russia / Khanty-Mansi / Surgut              |
| EPI_ISL_733142 | 10/6/2020  | 12/24/2020 | Europe / Russia / Kaluga / Tovarkovo                 |
| EPI_ISL_733144 | 10/6/2020  | 12/24/2020 | Europe / Russia / Kaluga / Tovarkovo                 |
| EPI_ISL_733145 | 10/7/2020  | 12/24/2020 | Europe / Russia / Moscow Region / Zvenigorod         |
| EPI_ISL_733146 | 10/6/2020  | 12/24/2020 | Europe / Russia / Rostov / Kamensk-Shakhtinsky       |
| EPI_ISL_733147 | 10/7/2020  | 12/24/2020 | Europe / Russia / Orenburg / Orenburg                |
| EPI_ISL_733148 | 10/7/2020  | 12/24/2020 | Europe / Russia / Moscow / Moscow                    |
| EPI_ISL_733151 | 10/7/2020  | 12/24/2020 | Europe / Crimea / Simpheropol                        |
| EPI_ISL_733153 | 10/7/2020  | 12/24/2020 | Europe / Russia / Orenburg / Orenburg                |
| EPI_ISL_733154 | 10/13/2020 | 12/24/2020 | Europe / Russia / Mordovia / Saransk                 |
| EPI_ISL_733156 | 6/9/2020   | 12/24/2020 | Europe / Russia / Moscow / Moscow                    |
| EPI_ISL_733158 | 6/6/2020   | 12/24/2020 | Europe / Russia / Moscow / Moscow                    |
| EPI_ISL_733160 | 6/18/2020  | 12/24/2020 | Europe / Russia / Moscow / Moscow                    |
| EPI_ISL_733163 | 5/12/2020  | 12/24/2020 | Europe / Russia / Moscow / Moscow                    |
| EPI_ISL_733167 | 8/4/2020   | 12/24/2020 | Europe / Russia / Astrakhan / Astrakhan              |
| EPI_ISL_733168 | 8/4/2020   | 12/24/2020 | Europe / Russia / Astrakhan / Astrakhan              |
| EPI_ISL_733170 | 7/29/2020  | 12/24/2020 | Europe / Russia / Astrakhan / Astrakhan              |
| EPI_ISL_733174 | 8/13/2020  | 12/24/2020 | Europe / Russia / Astrakhan / Astrakhan              |
| EPI_ISL_733175 | 8/18/2020  | 12/24/2020 | Europe / Russia / Astrakhan / Volodarskiy            |
| EPI_ISL_733176 | 8/11/2020  | 12/24/2020 | Europe / Russia / Astrakhan / Astrakhan              |
| EPI_ISL_733178 | 8/18/2020  | 12/24/2020 | Europe / Russia / Astrakhan / Astrakhan              |
| EPI_ISL_733179 | 8/18/2020  | 12/24/2020 | Europe / Russia / Astrakhan / Astrakhan              |
| EPI_ISL_733180 | 8/18/2020  | 12/24/2020 | Europe / Russia / Astrakhan / Astrakhan              |
| EPI_ISL_733181 | 8/5/2020   | 12/24/2020 | Europe / Russia / Astrakhan / Astrakhan              |
| EPI_ISL_733182 | 8/5/2020   | 12/24/2020 | Europe / Russia / Astrakhan / Astrakhan              |

|                |            |            |                                              |
|----------------|------------|------------|----------------------------------------------|
| EPI_ISL_733189 | 8/11/2020  | 12/24/2020 | Europe / Russia / Astrakhan / Astrakhan      |
| EPI_ISL_733190 | 10/1/2020  | 12/24/2020 | Europe / Russia / Astrakhan / Astrakhan      |
| EPI_ISL_733191 | 9/9/2020   | 12/24/2020 | Europe / Russia / Astrakhan / Astrakhan      |
| EPI_ISL_733192 | 9/28/2020  | 12/24/2020 | Europe / Russia / Astrakhan / Akhtubinsk     |
| EPI_ISL_733194 | 9/14/2020  | 12/24/2020 | Europe / Russia / Astrakhan / Astrakhan      |
| EPI_ISL_733196 | 8/11/2020  | 12/24/2020 | Europe / Russia / Astrakhan / Astrakhan      |
| EPI_ISL_733197 | 8/15/2020  | 12/24/2020 | Europe / Russia / Astrakhan / Astrakhan      |
| EPI_ISL_733198 | 8/2/2020   | 12/24/2020 | Europe / Russia / Astrakhan / Astrakhan      |
| EPI_ISL_733199 | 8/15/2020  | 12/24/2020 | Europe / Russia / Astrakhan / Astrakhan      |
| EPI_ISL_733200 | 8/15/2020  | 12/24/2020 | Europe / Russia / Astrakhan / Astrakhan      |
| EPI_ISL_733203 | 9/11/2020  | 12/24/2020 | Europe / Russia / Astrakhan / Astrakhan      |
| EPI_ISL_733204 | 9/10/2020  | 12/24/2020 | Europe / Russia / Astrakhan / Astrakhan      |
| EPI_ISL_733205 | 9/23/2020  | 12/24/2020 | Europe / Russia / Astrakhan / Astrakhan      |
| EPI_ISL_733206 | 9/23/2020  | 12/24/2020 | Europe / Russia / Astrakhan / Astrakhan      |
| EPI_ISL_733207 | 9/23/2020  | 12/24/2020 | Europe / Russia / Astrakhan / Astrakhan      |
| EPI_ISL_733208 | 9/26/2020  | 12/24/2020 | Europe / Russia / Astrakhan / Kharabali      |
| EPI_ISL_733210 | 8/6/2020   | 12/24/2020 | Europe / Russia / Astrakhan / Astrakhan      |
| EPI_ISL_733211 | 8/6/2020   | 12/24/2020 | Europe / Russia / Astrakhan / Astrakhan      |
| EPI_ISL_733215 | 8/12/2020  | 12/24/2020 | Europe / Russia / Astrakhan / Astrakhan      |
| EPI_ISL_733220 | 9/30/2020  | 12/24/2020 | Europe / Russia / Astrakhan / Astrakhan      |
| EPI_ISL_733222 | 8/25/2020  | 12/24/2020 | Europe / Russia / Astrakhan / Astrakhan      |
| EPI_ISL_733223 | 8/28/2020  | 12/24/2020 | Europe / Russia / Sverdlovsk / Yekaterinburg |
| EPI_ISL_733224 | 8/25/2020  | 12/24/2020 | Europe / Russia / Sverdlovsk / Yekaterinburg |
| EPI_ISL_733225 | 8/29/2020  | 12/24/2020 | Europe / Russia / Sverdlovsk / Yekaterinburg |
| EPI_ISL_733226 | 8/29/2020  | 12/24/2020 | Europe / Russia / Sverdlovsk / Yekaterinburg |
| EPI_ISL_733228 | 9/9/2020   | 12/24/2020 | Europe / Russia / Sverdlovsk / Yekaterinburg |
| EPI_ISL_733231 | 9/18/2020  | 12/24/2020 | Europe / Russia / Sverdlovsk / Yekaterinburg |
| EPI_ISL_733232 | 9/20/2020  | 12/24/2020 | Europe / Russia / Sverdlovsk / Yekaterinburg |
| EPI_ISL_733233 | 9/25/2020  | 12/24/2020 | Europe / Russia / Sverdlovsk / Yekaterinburg |
| EPI_ISL_733238 | 10/27/2020 | 12/24/2020 | Europe / Russia / Sverdlovsk / Yekaterinburg |
| EPI_ISL_733240 | 10/19/2020 | 12/24/2020 | Europe / Russia / Sverdlovsk / Yekaterinburg |
| EPI_ISL_733241 | 11/11/2020 | 12/24/2020 | Europe / Russia / Saratov / Balakovo         |
| EPI_ISL_733243 | 10/5/2020  | 12/24/2020 | Europe / Russia / Krasnodar / Krasnodar      |
| EPI_ISL_733246 | 10/5/2020  | 12/24/2020 | Europe / Russia / Krasnodar / Krasnodar      |
| EPI_ISL_733247 | 10/11/2020 | 12/24/2020 | Europe / Russia / Krasnodar / Krasnodar      |
| EPI_ISL_733248 | 10/14/2020 | 12/24/2020 | Europe / Russia / Krasnodar / Krasnodar      |
| EPI_ISL_733249 | 10/14/2020 | 12/24/2020 | Europe / Russia / Krasnodar / Krasnodar      |
| EPI_ISL_733252 | 10/17/2020 | 12/24/2020 | Europe / Russia / Krasnodar / Krasnodar      |
| EPI_ISL_733254 | 10/20/2020 | 12/24/2020 | Europe / Russia / Krasnodar / Krasnodar      |
| EPI_ISL_733255 | 10/21/2020 | 12/24/2020 | Europe / Russia / Krasnodar / Krasnodar      |
| EPI_ISL_733256 | 10/21/2020 | 12/24/2020 | Europe / Russia / Krasnodar / Krasnodar      |
| EPI_ISL_733269 | 10/8/2020  | 12/24/2020 | Europe / Russia / Krasnodar / Krasnodar      |
| EPI_ISL_733272 | 10/13/2020 | 12/24/2020 | Europe / Russia / Krasnodar / Krasnodar      |
| EPI_ISL_733275 | 10/18/2020 | 12/24/2020 | Europe / Russia / Krasnodar / Krasnodar      |
| EPI_ISL_733277 | 10/21/2020 | 12/24/2020 | Europe / Russia / Krasnodar / Krasnodar      |
| EPI_ISL_733278 | 10/21/2020 | 12/24/2020 | Europe / Russia / Krasnodar / Krasnodar      |
| EPI_ISL_733279 | 10/22/2020 | 12/24/2020 | Europe / Russia / Krasnodar / Krasnodar      |

|                |            |            |                                                       |
|----------------|------------|------------|-------------------------------------------------------|
| EPI_ISL_733280 | 10/25/2020 | 12/24/2020 | Europe / Russia / Krasnodar / Krasnodar               |
| EPI_ISL_733281 | 11/4/2020  | 12/24/2020 | Europe / Russia / Krasnodar / Krasnodar               |
| EPI_ISL_733284 | 10/17/2020 | 12/24/2020 | Europe / Russia / Krasnodar / Armavir                 |
| EPI_ISL_733287 | 10/14/2020 | 12/24/2020 | Europe / Russia / Krasnodar / Armavir                 |
| EPI_ISL_733289 | 10/14/2020 | 12/24/2020 | Europe / Russia / Krasnodar / Armavir                 |
| EPI_ISL_733290 | 10/14/2020 | 12/24/2020 | Europe / Russia / Krasnodar / Armavir                 |
| EPI_ISL_733300 | 9/23/2020  | 12/24/2020 | Europe / Russia / Kalmykia / Elista                   |
| EPI_ISL_733303 | 11/9/2020  | 12/24/2020 | Europe / Russia / Pskov / Velikiye Luki               |
| EPI_ISL_733304 | 11/9/2020  | 12/24/2020 | Europe / Russia / Leningrad / Gatchina                |
| EPI_ISL_733308 | 11/9/2020  | 12/24/2020 | Europe / Russia / Pskov / Velikiye Luki               |
| EPI_ISL_733309 | 11/9/2020  | 12/24/2020 | Europe / Russia / Leningrad / Yanino-1                |
| EPI_ISL_733318 | 11/5/2020  | 12/24/2020 | Europe / Russia / Saint Petersburg / Saint Petersburg |
| EPI_ISL_733321 | 11/5/2020  | 12/24/2020 | Europe / Russia / Saint Petersburg / Saint Petersburg |
| EPI_ISL_733323 | 11/6/2020  | 12/24/2020 | Europe / Russia / Saint Petersburg / Saint Petersburg |
| EPI_ISL_733324 | 11/5/2020  | 12/24/2020 | Europe / Russia / Saint Petersburg / Saint Petersburg |
| EPI_ISL_733325 | 11/5/2020  | 12/24/2020 | Europe / Russia / Saint Petersburg / Saint Petersburg |
| EPI_ISL_733331 | 11/11/2020 | 12/24/2020 | Europe / Russia / Leningrad / Volkhov                 |
| EPI_ISL_733332 | 11/10/2020 | 12/24/2020 | Europe / Russia / Pskov / Borisovichi                 |
| EPI_ISL_733333 | 11/14/2020 | 12/24/2020 | Europe / Russia / Novgorod / Borovichi                |
| EPI_ISL_733334 | 11/11/2020 | 12/24/2020 | Europe / Russia / Murmansk / Murmansk                 |
| EPI_ISL_733337 | 11/11/2020 | 12/24/2020 | Europe / Russia / Leningrad / Gatchina                |
| EPI_ISL_733341 | 11/13/2020 | 12/24/2020 | Europe / Russia / Pskov / Velikiye Luki               |
| EPI_ISL_733342 | 11/14/2020 | 12/24/2020 | Europe / Russia / Pskov / Velikiye Luki               |
| EPI_ISL_733343 | 11/14/2020 | 12/24/2020 | Europe / Russia / Pskov / Velikiye Luki               |
| EPI_ISL_733344 | 11/14/2020 | 12/24/2020 | Europe / Russia / Pskov / Velikiye Luki               |
| EPI_ISL_733345 | 11/14/2020 | 12/24/2020 | Europe / Russia / Pskov / Velikiye Luki               |
| EPI_ISL_733350 | 11/6/2020  | 12/24/2020 | Europe / Russia / Novgorod / Veliky Novgorod          |
| EPI_ISL_733351 | 11/6/2020  | 12/24/2020 | Europe / Russia / Leningrad / Volkhov                 |
| EPI_ISL_733353 | 11/14/2020 | 12/24/2020 | Europe / Russia / Pskov / Velikiye Luki               |
| EPI_ISL_733354 | 11/14/2020 | 12/24/2020 | Europe / Russia / Pskov / Velikiye Luki               |
| EPI_ISL_733355 | 11/13/2020 | 12/24/2020 | Europe / Russia / Murmansk / Severomorsk              |
| EPI_ISL_733361 | 11/13/2020 | 12/24/2020 | Europe / Russia / Pskov / Borisovichi                 |
| EPI_ISL_733365 | 11/13/2020 | 12/24/2020 | Europe / Russia / Murmansk / Murmansk                 |
| EPI_ISL_733366 | 11/12/2020 | 12/24/2020 | Europe / Russia / Murmansk / Murmansk                 |
| EPI_ISL_733368 | 11/12/2020 | 12/24/2020 | Europe / Russia / Pskov / Velikiye Luki               |
| EPI_ISL_733369 | 11/12/2020 | 12/24/2020 | Europe / Russia / Novgorod / Veliky Novgorod          |
| EPI_ISL_733371 | 11/9/2020  | 12/24/2020 | Europe / Russia / Pskov / Velikiye Luki               |
| EPI_ISL_733374 | 11/10/2020 | 12/24/2020 | Europe / Russia / Novgorod / Veliky Novgorod          |
| EPI_ISL_733376 | 11/12/2020 | 12/24/2020 | Europe / Russia / Novgorod / Veliky Novgorod          |
| EPI_ISL_733378 | 11/12/2020 | 12/24/2020 | Europe / Russia / Pskov / Velikiye Luki               |
| EPI_ISL_733379 | 11/12/2020 | 12/24/2020 | Europe / Russia / Pskov / Velikiye Luki               |
| EPI_ISL_733381 | 11/12/2020 | 12/24/2020 | Europe / Russia / Novgorod / Veliky Novgorod          |
| EPI_ISL_733382 | 11/12/2020 | 12/24/2020 | Europe / Russia / Novgorod / Veliky Novgorod          |
| EPI_ISL_733383 | 11/9/2020  | 12/24/2020 | Europe / Russia / Pskov / Velikiye Luki               |
| EPI_ISL_733387 | 11/10/2020 | 12/24/2020 | Europe / Russia / Murmansk / Murmansk                 |
| EPI_ISL_733392 | 8/4/2020   | 12/24/2020 | Europe / Russia / Novosibirsk / Novosibirsk           |
| EPI_ISL_733393 | 9/6/2020   | 12/24/2020 | Europe / Russia / Moscow / Moscow                     |

|                |            |            |                                                  |
|----------------|------------|------------|--------------------------------------------------|
| EPI_ISL_733394 | 9/26/2020  | 12/24/2020 | Europe / Russia / Chechen / Grozny               |
| EPI_ISL_733395 | 9/11/2020  | 12/24/2020 | Europe / Russia / Chechen / Grozny               |
| EPI_ISL_733396 | 9/21/2020  | 12/24/2020 | Europe / Russia / Stavropol / Stavropol          |
| EPI_ISL_733406 | 10/1/2020  | 12/24/2020 | Europe / Russia / Sverdlovsk / Dvurechensk       |
| EPI_ISL_733407 | 10/1/2020  | 12/24/2020 | Europe / Russia / Sverdlovsk / Bobrovsky         |
| EPI_ISL_733412 | 10/1/2020  | 12/24/2020 | Europe / Russia / Sverdlovsk / Verkhnyaya Pyshma |
| EPI_ISL_733414 | 10/3/2020  | 12/24/2020 | Europe / Russia / Sverdlovsk / Yekaterinburg     |
| EPI_ISL_733424 | 10/10/2020 | 12/24/2020 | Europe / Russia / Khanty-Mansi / Nizhnevartovsk  |
| EPI_ISL_733436 | 10/11/2020 | 12/24/2020 | Europe / Russia / Krasnodar / Anapa              |
| EPI_ISL_733439 | 10/11/2020 | 12/24/2020 | Europe / Russia / Moscow Region / Lapino         |
| EPI_ISL_733455 | 10/14/2020 | 12/24/2020 | Europe / Russia / Moscow Region / Pushkino       |
| EPI_ISL_733456 | 10/14/2020 | 12/24/2020 | Europe / Russia / Moscow Region / Naro-Fominsk   |
| EPI_ISL_733466 | 11/28/2020 | 12/24/2020 | Europe / Russia / Amur / Zeya                    |
| EPI_ISL_733478 | 11/27/2020 | 12/24/2020 | Europe / Russia / Amur / Svobodnyi               |
| EPI_ISL_733482 | 4/19/2020  | 12/24/2020 | Europe / Russia / Omsk / Omsk                    |
| EPI_ISL_733484 | 11/2/2020  | 12/24/2020 | Europe / Russia / Omsk / Omsk                    |
| EPI_ISL_733485 | 11/6/2020  | 12/24/2020 | Europe / Russia / Omsk / Tara                    |
| EPI_ISL_733489 | 11/12/2020 | 12/24/2020 | Europe / Russia / Omsk / Tara                    |
| EPI_ISL_733490 | 11/12/2020 | 12/24/2020 | Europe / Russia / Omsk / Tara                    |
| EPI_ISL_733493 | 11/17/2020 | 12/24/2020 | Europe / Russia / Omsk / Tara                    |
| EPI_ISL_733496 | 11/21/2020 | 12/24/2020 | Europe / Switzerland / Zurich                    |
| EPI_ISL_733497 | 12/14/2020 | 12/24/2020 | Europe / Switzerland / Zurich                    |
| EPI_ISL_733498 | 12/16/2020 | 12/24/2020 | Asia / Israel                                    |
| EPI_ISL_733499 | 12/1/2020  | 12/24/2020 | Africa / Tunisia / Nabeul                        |
| EPI_ISL_733500 | 7/12/2020  | 12/24/2020 | Africa / Tunisia / Ben Arous                     |
| EPI_ISL_733502 | 10/25/2020 | 12/24/2020 | Europe / Germany / North Rhine-Westphalia        |
| EPI_ISL_733503 | 10/26/2020 | 12/24/2020 | Europe / Germany / North Rhine-Westphalia        |
| EPI_ISL_733504 | 10/26/2020 | 12/24/2020 | Europe / Germany / North Rhine-Westphalia        |
| EPI_ISL_733505 | 10/26/2020 | 12/24/2020 | Europe / Germany / North Rhine-Westphalia        |
| EPI_ISL_733506 | 10/25/2020 | 12/24/2020 | Europe / Germany / North Rhine-Westphalia        |
| EPI_ISL_733507 | 10/25/2020 | 12/24/2020 | Europe / Germany / North Rhine-Westphalia        |
| EPI_ISL_733508 | 10/25/2020 | 12/24/2020 | Europe / Germany / North Rhine-Westphalia        |
| EPI_ISL_733509 | 10/25/2020 | 12/24/2020 | Europe / Germany / North Rhine-Westphalia        |
| EPI_ISL_733510 | 10/25/2020 | 12/24/2020 | Europe / Germany / North Rhine-Westphalia        |
| EPI_ISL_733511 | 10/25/2020 | 12/24/2020 | Europe / Germany / North Rhine-Westphalia        |
| EPI_ISL_733512 | 10/25/2020 | 12/24/2020 | Europe / Germany / North Rhine-Westphalia        |
| EPI_ISL_733513 | 10/25/2020 | 12/24/2020 | Europe / Germany / North Rhine-Westphalia        |
| EPI_ISL_733514 | 10/25/2020 | 12/24/2020 | Europe / Germany / North Rhine-Westphalia        |
| EPI_ISL_733515 | 10/25/2020 | 12/24/2020 | Europe / Germany / North Rhine-Westphalia        |
| EPI_ISL_733516 | 10/25/2020 | 12/24/2020 | Europe / Germany / North Rhine-Westphalia        |
| EPI_ISL_733517 | 10/25/2020 | 12/24/2020 | Europe / Germany / North Rhine-Westphalia        |
| EPI_ISL_733518 | 10/25/2020 | 12/24/2020 | Europe / Germany / North Rhine-Westphalia        |
| EPI_ISL_733519 | 10/25/2020 | 12/24/2020 | Europe / Germany / North Rhine-Westphalia        |
| EPI_ISL_733520 | 10/26/2020 | 12/24/2020 | Europe / Germany / North Rhine-Westphalia        |
| EPI_ISL_733521 | 10/26/2020 | 12/24/2020 | Europe / Germany / North Rhine-Westphalia        |
| EPI_ISL_733522 | 10/26/2020 | 12/24/2020 | Europe / Germany / North Rhine-Westphalia        |
| EPI_ISL_733523 | 10/26/2020 | 12/24/2020 | Europe / Germany / North Rhine-Westphalia        |









































|                |            |            |                                                  |
|----------------|------------|------------|--------------------------------------------------|
| EPI_ISL_734452 | 10/15/2020 | 12/24/2020 | North America / USA / New York / Oneida County   |
| EPI_ISL_734453 | 10/20/2020 | 12/24/2020 | North America / USA / New York / Oneida County   |
| EPI_ISL_734454 | 10/20/2020 | 12/24/2020 | North America / USA / New York / Oneida County   |
| EPI_ISL_734455 | 10/20/2020 | 12/24/2020 | North America / USA / New York / Oneida County   |
| EPI_ISL_734456 | 10/20/2020 | 12/24/2020 | North America / USA / New York / Oneida County   |
| EPI_ISL_734457 | 10/20/2020 | 12/24/2020 | North America / USA / New York / Oneida County   |
| EPI_ISL_734458 | 10/20/2020 | 12/24/2020 | North America / USA / New York / Oneida County   |
| EPI_ISL_734459 | 10/20/2020 | 12/24/2020 | North America / USA / New York / Oneida County   |
| EPI_ISL_734460 | 10/23/2020 | 12/24/2020 | North America / USA / New York / Oneida County   |
| EPI_ISL_734461 | 10/21/2020 | 12/24/2020 | North America / USA / New York / Oneida County   |
| EPI_ISL_734462 | 10/26/2020 | 12/24/2020 | North America / USA / New York / Oneida County   |
| EPI_ISL_734463 | 10/27/2020 | 12/24/2020 | North America / USA / New York / Oneida County   |
| EPI_ISL_734464 | 10/27/2020 | 12/24/2020 | North America / USA / New York / Oneida County   |
| EPI_ISL_734465 | 10/27/2020 | 12/24/2020 | North America / USA / New York / Oneida County   |
| EPI_ISL_734466 | 10/27/2020 | 12/24/2020 | North America / USA / New York / Oneida County   |
| EPI_ISL_734467 | 10/27/2020 | 12/24/2020 | North America / USA / New York / Oneida County   |
| EPI_ISL_734468 | 10/27/2020 | 12/24/2020 | North America / USA / New York / Oneida County   |
| EPI_ISL_734469 | 10/27/2020 | 12/24/2020 | North America / USA / New York / Oneida County   |
| EPI_ISL_734470 | 10/30/2020 | 12/24/2020 | North America / USA / New York / Oneida County   |
| EPI_ISL_734471 | 11/3/2020  | 12/24/2020 | North America / USA / New York / Oneida County   |
| EPI_ISL_734472 | 11/2/2020  | 12/24/2020 | North America / USA / New York / Oneida County   |
| EPI_ISL_734473 | 11/3/2020  | 12/24/2020 | North America / USA / New York / Oneida County   |
| EPI_ISL_734474 | 11/3/2020  | 12/24/2020 | North America / USA / New York / Oneida County   |
| EPI_ISL_734475 | 11/5/2020  | 12/24/2020 | North America / USA / New York / Oneida County   |
| EPI_ISL_734476 | 11/5/2020  | 12/24/2020 | North America / USA / New York / Oneida County   |
| EPI_ISL_734477 | 11/5/2020  | 12/24/2020 | North America / USA / New York / Onondaga County |
| EPI_ISL_734478 | 11/5/2020  | 12/24/2020 | North America / USA / New York / Oneida County   |
| EPI_ISL_734479 | 11/5/2020  | 12/24/2020 | North America / USA / New York / Oneida County   |
| EPI_ISL_734480 | 11/5/2020  | 12/24/2020 | North America / USA / New York / Oneida County   |
| EPI_ISL_734481 | 11/17/2020 | 12/24/2020 | North America / USA / New York / Oneida County   |
| EPI_ISL_734492 | 5/11/2020  | 12/24/2020 | Europe / Belgium / Brussel                       |
| EPI_ISL_734493 | 6/11/2020  | 12/24/2020 | Europe / Belgium / Overijse                      |
| EPI_ISL_734494 | 7/14/2020  | 12/24/2020 | Europe / Belgium / Steenokkerzeel                |
| EPI_ISL_734495 | 10/15/2020 | 12/24/2020 | Europe / Belgium / Overijse                      |
| EPI_ISL_734496 | 10/19/2020 | 12/24/2020 | Europe / Belgium / Overijse                      |
| EPI_ISL_734498 | 10/19/2020 | 12/24/2020 | Europe / Belgium / Bost                          |
| EPI_ISL_734499 | 10/19/2020 | 12/24/2020 | Europe / Belgium / Berg                          |
| EPI_ISL_734500 | 4/29/2020  | 12/24/2020 | Europe / Belgium / Hennuyeres                    |
| EPI_ISL_734501 | 10/19/2020 | 12/24/2020 | Europe / Belgium / Bost                          |
| EPI_ISL_734502 | 10/19/2020 | 12/24/2020 | Europe / Belgium / Veerle                        |
| EPI_ISL_734503 | 3/3/2020   | 12/24/2020 | Europe / Belgium / Langdorp                      |
| EPI_ISL_734504 | 3/12/2020  | 12/24/2020 | Europe / Belgium / Thines                        |
| EPI_ISL_734505 | 3/15/2020  | 12/24/2020 | Europe / Belgium / Ottignies-Louvain-la-Neuve    |
| EPI_ISL_734506 | 3/17/2020  | 12/24/2020 | Europe / Belgium / MÃ©lin                        |
| EPI_ISL_734507 | 3/19/2020  | 12/24/2020 | Europe / Belgium / Gembloux                      |
| EPI_ISL_734508 | 3/19/2020  | 12/24/2020 | Europe / Belgium / Mont-Saint-Guibert            |
| EPI_ISL_734509 | 3/19/2020  | 12/24/2020 | Europe / Belgium / Auderghem                     |

|                |           |            |                                               |
|----------------|-----------|------------|-----------------------------------------------|
| EPI_ISL_734510 | 3/20/2020 | 12/24/2020 | Europe / Belgium / Pont-a-Celles              |
| EPI_ISL_734511 | 3/20/2020 | 12/24/2020 | Europe / Belgium / Genval                     |
| EPI_ISL_734512 | 3/20/2020 | 12/24/2020 | Europe / Belgium / Rixensart                  |
| EPI_ISL_734513 | 3/20/2020 | 12/24/2020 | Europe / Belgium / Loupoigne                  |
| EPI_ISL_734514 | 3/22/2020 | 12/24/2020 | Europe / Belgium / Chaumont-gistoux           |
| EPI_ISL_734515 | 3/22/2020 | 12/24/2020 | Europe / Belgium / Chaumont-gistoux           |
| EPI_ISL_734516 | 3/22/2020 | 12/24/2020 | Europe / Belgium / PÃ©crot                    |
| EPI_ISL_734517 | 3/23/2020 | 12/24/2020 | Europe / Belgium / Waterloo                   |
| EPI_ISL_734518 | 3/23/2020 | 12/24/2020 | Europe / Belgium / Eghezee                    |
| EPI_ISL_734519 | 3/23/2020 | 12/24/2020 | Europe / Belgium / Ottignies-Louvain-la-Neuve |
| EPI_ISL_734520 | 3/24/2020 | 12/24/2020 | Europe / Belgium / Chaumont-gistoux           |
| EPI_ISL_734521 | 3/25/2020 | 12/24/2020 | Europe / Belgium / Ottignies-Louvain-la-Neuve |
| EPI_ISL_734522 | 3/25/2020 | 12/24/2020 | Europe / Belgium / Rixensart                  |
| EPI_ISL_734523 | 3/26/2020 | 12/24/2020 | Europe / Belgium / Glimes                     |
| EPI_ISL_734524 | 3/28/2020 | 12/24/2020 | Europe / Belgium / La hulpe                   |
| EPI_ISL_734525 | 3/30/2020 | 12/24/2020 | Europe / Belgium / Wavre                      |
| EPI_ISL_734526 | 3/31/2020 | 12/24/2020 | Europe / Belgium / Gembloux                   |
| EPI_ISL_734527 | 3/31/2020 | 12/24/2020 | Europe / Belgium / Ligny                      |
| EPI_ISL_734528 | 4/1/2020  | 12/24/2020 | Europe / Belgium / Gembloux                   |
| EPI_ISL_734529 | 4/1/2020  | 12/24/2020 | Europe / Belgium / Chaumont-gistoux           |
| EPI_ISL_734530 | 4/1/2020  | 12/24/2020 | Europe / Belgium / La hulpe                   |
| EPI_ISL_734531 | 4/2/2020  | 12/24/2020 | Europe / Belgium / Genval                     |
| EPI_ISL_734532 | 4/3/2020  | 12/24/2020 | Europe / Belgium / Beauvechain                |
| EPI_ISL_734533 | 4/3/2020  | 12/24/2020 | Europe / Belgium / Gembloux                   |
| EPI_ISL_734534 | 4/3/2020  | 12/24/2020 | Europe / Belgium / Ottignies-Louvain-la-Neuve |
| EPI_ISL_734535 | 4/4/2020  | 12/24/2020 | Europe / Belgium / Moriensart                 |
| EPI_ISL_734536 | 4/6/2020  | 12/24/2020 | Europe / Belgium / PÃ©crot                    |
| EPI_ISL_734537 | 4/6/2020  | 12/24/2020 | Europe / Belgium / Bois-de-Villers            |
| EPI_ISL_734538 | 4/6/2020  | 12/24/2020 | Europe / Belgium / Waterloo                   |
| EPI_ISL_734539 | 4/6/2020  | 12/24/2020 | Europe / Belgium / Wavre                      |
| EPI_ISL_734540 | 4/7/2020  | 12/24/2020 | Europe / Belgium / Chastre                    |
| EPI_ISL_734541 | 4/7/2020  | 12/24/2020 | Europe / Belgium / Ottignies                  |
| EPI_ISL_734542 | 4/7/2020  | 12/24/2020 | Europe / Belgium / Perwez                     |
| EPI_ISL_734543 | 4/7/2020  | 12/24/2020 | Europe / Belgium / Villers-la-Ville           |
| EPI_ISL_734544 | 4/8/2020  | 12/24/2020 | Europe / Belgium / Koekelberg                 |
| EPI_ISL_734545 | 4/8/2020  | 12/24/2020 | Europe / Belgium / Gembloux                   |
| EPI_ISL_734546 | 4/8/2020  | 12/24/2020 | Europe / Belgium / Gembloux                   |
| EPI_ISL_734547 | 4/8/2020  | 12/24/2020 | Europe / Belgium / Lasne                      |
| EPI_ISL_734548 | 4/8/2020  | 12/24/2020 | Europe / Belgium / Ukkel                      |
| EPI_ISL_734549 | 4/8/2020  | 12/24/2020 | Europe / Belgium / Wavre                      |
| EPI_ISL_734550 | 4/9/2020  | 12/24/2020 | Europe / Belgium / Saint-Gilles               |
| EPI_ISL_734551 | 4/9/2020  | 12/24/2020 | Europe / Belgium / Braine-le-Comte            |
| EPI_ISL_734552 | 4/9/2020  | 12/24/2020 | Europe / Belgium / Soignies                   |
| EPI_ISL_734553 | 4/9/2020  | 12/24/2020 | Europe / Belgium / Heppen                     |
| EPI_ISL_734554 | 4/9/2020  | 12/24/2020 | Europe / Belgium / Evere                      |
| EPI_ISL_734555 | 4/9/2020  | 12/24/2020 | Europe / Belgium / Tienen                     |
| EPI_ISL_734556 | 4/9/2020  | 12/24/2020 | Europe / Belgium / Lubbeek                    |

|                |           |            |                                         |
|----------------|-----------|------------|-----------------------------------------|
| EPI_ISL_734557 | 4/9/2020  | 12/24/2020 | Europe / Belgium / Tienen               |
| EPI_ISL_734558 | 4/9/2020  | 12/24/2020 | Europe / Belgium / Tienen               |
| EPI_ISL_734559 | 4/9/2020  | 12/24/2020 | Europe / Belgium / Maffe                |
| EPI_ISL_734560 | 4/10/2020 | 12/24/2020 | Europe / Belgium / Bornem               |
| EPI_ISL_734561 | 4/10/2020 | 12/24/2020 | Europe / Belgium / Mons                 |
| EPI_ISL_734562 | 4/10/2020 | 12/24/2020 | Europe / Belgium / Kessel-Lo            |
| EPI_ISL_734563 | 4/10/2020 | 12/24/2020 | Europe / Belgium / Tienen               |
| EPI_ISL_734564 | 4/10/2020 | 12/24/2020 | Europe / Belgium / Glabbeek             |
| EPI_ISL_734565 | 4/11/2020 | 12/24/2020 | Europe / Belgium / Nivelles             |
| EPI_ISL_734566 | 4/11/2020 | 12/24/2020 | Europe / Belgium / Perwez               |
| EPI_ISL_734567 | 4/12/2020 | 12/24/2020 | Europe / Belgium / Anderlues            |
| EPI_ISL_734568 | 4/13/2020 | 12/24/2020 | Europe / Belgium / Sint-Amands          |
| EPI_ISL_734569 | 4/13/2020 | 12/24/2020 | Europe / Belgium / Tienen               |
| EPI_ISL_734570 | 4/13/2020 | 12/24/2020 | Europe / Belgium / Boom                 |
| EPI_ISL_734571 | 4/13/2020 | 12/24/2020 | Europe / Belgium / Aarschot             |
| EPI_ISL_734572 | 4/14/2020 | 12/24/2020 | Europe / Belgium / Overijze             |
| EPI_ISL_734573 | 4/14/2020 | 12/24/2020 | Europe / Belgium / Tubize               |
| EPI_ISL_734574 | 4/14/2020 | 12/24/2020 | Europe / Belgium / Forest               |
| EPI_ISL_734575 | 4/14/2020 | 12/24/2020 | Europe / Belgium / Heusden-Zolder       |
| EPI_ISL_734576 | 4/14/2020 | 12/24/2020 | Europe / Belgium / Honnelles            |
| EPI_ISL_734577 | 4/14/2020 | 12/24/2020 | Europe / Belgium / Ath                  |
| EPI_ISL_734578 | 4/14/2020 | 12/24/2020 | Europe / Belgium / Tienen               |
| EPI_ISL_734579 | 4/14/2020 | 12/24/2020 | Europe / Belgium / Harmignies           |
| EPI_ISL_734580 | 4/14/2020 | 12/24/2020 | Europe / Belgium / Herent               |
| EPI_ISL_734581 | 4/14/2020 | 12/24/2020 | Europe / Belgium / Wilsele              |
| EPI_ISL_734582 | 4/14/2020 | 12/24/2020 | Europe / Belgium / Houthalen-Helchteren |
| EPI_ISL_734583 | 4/14/2020 | 12/24/2020 | Europe / Belgium / Court-saint-etienne  |
| EPI_ISL_734584 | 4/14/2020 | 12/24/2020 | Europe / Belgium / Etterbeek            |
| EPI_ISL_734585 | 4/14/2020 | 12/24/2020 | Europe / Belgium / Chaumont-gistoux     |
| EPI_ISL_734586 | 4/15/2020 | 12/24/2020 | Europe / Belgium / Waterloo             |
| EPI_ISL_734587 | 4/15/2020 | 12/24/2020 | Europe / Belgium / Rixensart            |
| EPI_ISL_734588 | 4/16/2020 | 12/24/2020 | Europe / Belgium / Temse                |
| EPI_ISL_734589 | 4/16/2020 | 12/24/2020 | Europe / Belgium / Niel                 |
| EPI_ISL_734590 | 4/16/2020 | 12/24/2020 | Europe / Belgium / Bruxelles            |
| EPI_ISL_734591 | 4/16/2020 | 12/24/2020 | Europe / Belgium / Heverlee             |
| EPI_ISL_734592 | 4/16/2020 | 12/24/2020 | Europe / Belgium / Huldenberg           |
| EPI_ISL_734593 | 4/16/2020 | 12/24/2020 | Europe / Belgium / Leuven               |
| EPI_ISL_734594 | 4/16/2020 | 12/24/2020 | Europe / Belgium / Beverlo              |
| EPI_ISL_734595 | 4/16/2020 | 12/24/2020 | Europe / Belgium / Auderghem            |
| EPI_ISL_734596 | 4/17/2020 | 12/24/2020 | Europe / Belgium / Mouscron             |
| EPI_ISL_734597 | 4/17/2020 | 12/24/2020 | Europe / Belgium / Sint-Jans-Molenbeek  |
| EPI_ISL_734598 | 4/17/2020 | 12/24/2020 | Europe / Belgium / Mouscron             |
| EPI_ISL_734599 | 4/17/2020 | 12/24/2020 | Europe / Belgium / Sint-Truiden         |
| EPI_ISL_734600 | 4/17/2020 | 12/24/2020 | Europe / Belgium / Havre                |
| EPI_ISL_734601 | 4/17/2020 | 12/24/2020 | Europe / Belgium / Sirault              |
| EPI_ISL_734602 | 4/17/2020 | 12/24/2020 | Europe / Belgium / Gent                 |
| EPI_ISL_734603 | 4/17/2020 | 12/24/2020 | Europe / Belgium / Bertem               |

|                |           |            |                                         |
|----------------|-----------|------------|-----------------------------------------|
| EPI_ISL_734604 | 4/17/2020 | 12/24/2020 | Europe / Belgium / Oostakker            |
| EPI_ISL_734605 | 4/17/2020 | 12/24/2020 | Europe / Belgium / Le Roeulx            |
| EPI_ISL_734606 | 4/17/2020 | 12/24/2020 | Europe / Belgium / Enghien              |
| EPI_ISL_734607 | 4/17/2020 | 12/24/2020 | Europe / Belgium / Lubbeek              |
| EPI_ISL_734608 | 4/17/2020 | 12/24/2020 | Europe / Belgium / Ecaussinnes          |
| EPI_ISL_734609 | 4/17/2020 | 12/24/2020 | Europe / Belgium / Tervuren             |
| EPI_ISL_734610 | 4/17/2020 | 12/24/2020 | Europe / Belgium / Tessengerlo          |
| EPI_ISL_734611 | 4/17/2020 | 12/24/2020 | Europe / Belgium / Tournai              |
| EPI_ISL_734612 | 4/17/2020 | 12/24/2020 | Europe / Belgium / Tourpes              |
| EPI_ISL_734613 | 4/17/2020 | 12/24/2020 | Europe / Belgium / Kortenberg           |
| EPI_ISL_734614 | 4/17/2020 | 12/24/2020 | Europe / Belgium / Herent               |
| EPI_ISL_734615 | 4/17/2020 | 12/24/2020 | Europe / Belgium / Mouscron             |
| EPI_ISL_734616 | 4/17/2020 | 12/24/2020 | Europe / Belgium / Mouscron             |
| EPI_ISL_734617 | 4/17/2020 | 12/24/2020 | Europe / Belgium / Melsbroek            |
| EPI_ISL_734618 | 4/17/2020 | 12/24/2020 | Europe / Belgium / Tervuren             |
| EPI_ISL_734619 | 4/17/2020 | 12/24/2020 | Europe / Belgium / Mont-Saint-Guibert   |
| EPI_ISL_734620 | 4/18/2020 | 12/24/2020 | Europe / Belgium / Gaurain-Ramecroix    |
| EPI_ISL_734621 | 4/18/2020 | 12/24/2020 | Europe / Belgium / Herseaux             |
| EPI_ISL_734622 | 4/18/2020 | 12/24/2020 | Europe / Belgium / Paal                 |
| EPI_ISL_734623 | 4/19/2020 | 12/24/2020 | Europe / Belgium / Templeuve            |
| EPI_ISL_734624 | 4/19/2020 | 12/24/2020 | Europe / Belgium / Tienen               |
| EPI_ISL_734625 | 4/19/2020 | 12/24/2020 | Europe / Belgium / Tournai              |
| EPI_ISL_734626 | 4/19/2020 | 12/24/2020 | Europe / Belgium / Tienen               |
| EPI_ISL_734627 | 4/19/2020 | 12/24/2020 | Europe / Belgium / Cuesmes              |
| EPI_ISL_734628 | 4/19/2020 | 12/24/2020 | Europe / Belgium / Bertem               |
| EPI_ISL_734629 | 4/19/2020 | 12/24/2020 | Europe / Belgium / Lubbeek              |
| EPI_ISL_734630 | 4/19/2020 | 12/24/2020 | Europe / Belgium / Geetbets             |
| EPI_ISL_734631 | 4/19/2020 | 12/24/2020 | Europe / Belgium / Mouscron             |
| EPI_ISL_734632 | 4/20/2020 | 12/24/2020 | Europe / Belgium / Beauvechain          |
| EPI_ISL_734633 | 4/22/2020 | 12/24/2020 | Europe / Belgium / Bon-Secours          |
| EPI_ISL_734634 | 4/22/2020 | 12/24/2020 | Europe / Belgium / Heusden-Zolder       |
| EPI_ISL_734635 | 4/22/2020 | 12/24/2020 | Europe / Belgium / Houthalen-Helchteren |
| EPI_ISL_734636 | 4/22/2020 | 12/24/2020 | Europe / Belgium / Rochefort            |
| EPI_ISL_734637 | 4/22/2020 | 12/24/2020 | Europe / Belgium / Averbode             |
| EPI_ISL_734638 | 4/22/2020 | 12/24/2020 | Europe / Belgium / Affligem             |
| EPI_ISL_734639 | 4/22/2020 | 12/24/2020 | Europe / Belgium / Blandain             |
| EPI_ISL_734640 | 4/23/2020 | 12/24/2020 | Europe / Belgium / Beringen             |
| EPI_ISL_734641 | 4/23/2020 | 12/24/2020 | Europe / Belgium / Beverlo              |
| EPI_ISL_734642 | 4/23/2020 | 12/24/2020 | Europe / Belgium / Diegem               |
| EPI_ISL_734643 | 4/23/2020 | 12/24/2020 | Europe / Belgium / Thieulain            |
| EPI_ISL_734644 | 4/23/2020 | 12/24/2020 | Europe / Belgium / Anderlecht           |
| EPI_ISL_734645 | 4/23/2020 | 12/24/2020 | Europe / Belgium / Wilsele              |
| EPI_ISL_734646 | 4/23/2020 | 12/24/2020 | Europe / Belgium / Saint-Gilles         |
| EPI_ISL_734647 | 4/23/2020 | 12/24/2020 | Europe / Belgium / Kessel-Lo            |
| EPI_ISL_734648 | 4/23/2020 | 12/24/2020 | Europe / Belgium / Sint-Jans-Molenbeek  |
| EPI_ISL_734649 | 4/24/2020 | 12/24/2020 | Europe / Belgium / Autre-eglise         |
| EPI_ISL_734650 | 4/26/2020 | 12/24/2020 | Europe / Belgium / Tournai              |

|                |           |            |                                        |
|----------------|-----------|------------|----------------------------------------|
| EPI_ISL_734651 | 4/26/2020 | 12/24/2020 | Europe / Belgium / Moeskroen           |
| EPI_ISL_734652 | 4/26/2020 | 12/24/2020 | Europe / Belgium / Moeskroen           |
| EPI_ISL_734653 | 4/26/2020 | 12/24/2020 | Europe / Belgium / Templeuve           |
| EPI_ISL_734654 | 4/26/2020 | 12/24/2020 | Europe / Belgium / Comines-Warneton    |
| EPI_ISL_734655 | 4/26/2020 | 12/24/2020 | Europe / Belgium / Estaimbourg         |
| EPI_ISL_734656 | 4/26/2020 | 12/24/2020 | Europe / Belgium / Koersel             |
| EPI_ISL_734657 | 4/27/2020 | 12/24/2020 | Europe / Belgium / Blaton              |
| EPI_ISL_734658 | 4/27/2020 | 12/24/2020 | Europe / Belgium / Tessenderlo         |
| EPI_ISL_734659 | 4/27/2020 | 12/24/2020 | Europe / Belgium / Tournai             |
| EPI_ISL_734660 | 4/27/2020 | 12/24/2020 | Europe / Belgium / Ittre               |
| EPI_ISL_734661 | 4/27/2020 | 12/24/2020 | Europe / Belgium / Herzele             |
| EPI_ISL_734662 | 4/27/2020 | 12/24/2020 | Europe / Belgium / Herzele             |
| EPI_ISL_734663 | 4/27/2020 | 12/24/2020 | Europe / Belgium / Heusden-Zolder      |
| EPI_ISL_734664 | 4/27/2020 | 12/24/2020 | Europe / Belgium / Peruwelz            |
| EPI_ISL_734665 | 4/27/2020 | 12/24/2020 | Europe / Belgium / Tournai             |
| EPI_ISL_734666 | 4/27/2020 | 12/24/2020 | Europe / Belgium / Kain                |
| EPI_ISL_734667 | 4/27/2020 | 12/24/2020 | Europe / Belgium / Ramegnies-Chin      |
| EPI_ISL_734668 | 4/27/2020 | 12/24/2020 | Europe / Belgium / Sint-Jans-Molenbeek |
| EPI_ISL_734669 | 4/27/2020 | 12/24/2020 | Europe / Belgium / Brunehaut           |
| EPI_ISL_734670 | 4/28/2020 | 12/24/2020 | Europe / Belgium / Guignies            |
| EPI_ISL_734671 | 4/29/2020 | 12/24/2020 | Europe / Belgium / Sint-Jans-Molenbeek |
| EPI_ISL_734672 | 4/29/2020 | 12/24/2020 | Europe / Belgium / Mouscron            |
| EPI_ISL_734673 | 4/29/2020 | 12/24/2020 | Europe / Belgium / Herseaux            |
| EPI_ISL_734674 | 4/29/2020 | 12/24/2020 | Europe / Belgium / Estaimpuis          |
| EPI_ISL_734675 | 4/29/2020 | 12/24/2020 | Europe / Belgium / Ham                 |
| EPI_ISL_734676 | 4/29/2020 | 12/24/2020 | Europe / Belgium / Couvin              |
| EPI_ISL_734677 | 4/29/2020 | 12/24/2020 | Europe / Belgium / Humbeek             |
| EPI_ISL_734678 | 4/29/2020 | 12/24/2020 | Europe / Belgium / Leuven              |
| EPI_ISL_734679 | 4/29/2020 | 12/24/2020 | Europe / Belgium / Peruwelz            |
| EPI_ISL_734680 | 4/29/2020 | 12/24/2020 | Europe / Belgium / Blandain            |
| EPI_ISL_734681 | 4/29/2020 | 12/24/2020 | Europe / Belgium / Sint-Truiden        |
| EPI_ISL_734682 | 4/29/2020 | 12/24/2020 | Europe / Belgium / Grimbergen          |
| EPI_ISL_734683 | 4/29/2020 | 12/24/2020 | Europe / Belgium / Londerzeel          |
| EPI_ISL_734684 | 4/29/2020 | 12/24/2020 | Europe / Belgium / Wemmel              |
| EPI_ISL_734685 | 4/29/2020 | 12/24/2020 | Europe / Belgium / Baal                |
| EPI_ISL_734686 | 4/29/2020 | 12/24/2020 | Europe / Belgium / Jemeppe-sur-Sambre  |
| EPI_ISL_734687 | 4/30/2020 | 12/24/2020 | Europe / Belgium / Leuven              |
| EPI_ISL_734688 | 4/30/2020 | 12/24/2020 | Europe / Belgium / Averbode            |
| EPI_ISL_734689 | 5/1/2020  | 12/24/2020 | Europe / Belgium / Steenokkerzeel      |
| EPI_ISL_734690 | 5/1/2020  | 12/24/2020 | Europe / Belgium / Mouscron            |
| EPI_ISL_734691 | 5/1/2020  | 12/24/2020 | Europe / Belgium / Vilvoorde           |
| EPI_ISL_734692 | 5/1/2020  | 12/24/2020 | Europe / Belgium / Maplaigne           |
| EPI_ISL_734693 | 5/1/2020  | 12/24/2020 | Europe / Belgium / Blicquy             |
| EPI_ISL_734694 | 5/1/2020  | 12/24/2020 | Europe / Belgium / Hertain             |
| EPI_ISL_734695 | 5/2/2020  | 12/24/2020 | Europe / Belgium / Froyennes           |
| EPI_ISL_734696 | 5/2/2020  | 12/24/2020 | Europe / Belgium / Quevaucamps         |
| EPI_ISL_734697 | 5/2/2020  | 12/24/2020 | Europe / Belgium / Kessel-Lo           |

|                |           |            |                                         |
|----------------|-----------|------------|-----------------------------------------|
| EPI_ISL_734698 | 5/2/2020  | 12/24/2020 | Europe / Belgium / Vilvoorde            |
| EPI_ISL_734699 | 5/2/2020  | 12/24/2020 | Europe / Belgium / Anderlues            |
| EPI_ISL_734700 | 5/2/2020  | 12/24/2020 | Europe / Belgium / Genval               |
| EPI_ISL_734701 | 5/3/2020  | 12/24/2020 | Europe / Belgium / Callenelle           |
| EPI_ISL_734702 | 5/3/2020  | 12/24/2020 | Europe / Belgium / Zoutleeuw            |
| EPI_ISL_734703 | 5/3/2020  | 12/24/2020 | Europe / Belgium / Jodoigne             |
| EPI_ISL_734704 | 5/5/2020  | 12/24/2020 | Europe / Belgium / Tubize               |
| EPI_ISL_734705 | 5/6/2020  | 12/24/2020 | Europe / Belgium / Geetbets             |
| EPI_ISL_734706 | 5/6/2020  | 12/24/2020 | Europe / Belgium / Linter               |
| EPI_ISL_734707 | 5/7/2020  | 12/24/2020 | Europe / Belgium / Willaupuis           |
| EPI_ISL_734708 | 5/7/2020  | 12/24/2020 | Europe / Belgium / Boortmeerbeek        |
| EPI_ISL_734709 | 5/7/2020  | 12/24/2020 | Europe / Belgium / Waterloo             |
| EPI_ISL_734710 | 5/8/2020  | 12/24/2020 | Europe / Belgium / Koekelberg           |
| EPI_ISL_734711 | 5/8/2020  | 12/24/2020 | Europe / Belgium / Forest               |
| EPI_ISL_734712 | 5/8/2020  | 12/24/2020 | Europe / Belgium / Peruwelz             |
| EPI_ISL_734713 | 5/8/2020  | 12/24/2020 | Europe / Belgium / Casteau              |
| EPI_ISL_734714 | 5/8/2020  | 12/24/2020 | Europe / Belgium / Auderghem            |
| EPI_ISL_734715 | 5/8/2020  | 12/24/2020 | Europe / Belgium / Wilsele              |
| EPI_ISL_734716 | 5/8/2020  | 12/24/2020 | Europe / Belgium / Houthalen-Helchteren |
| EPI_ISL_734717 | 5/8/2020  | 12/24/2020 | Europe / Belgium / Evere                |
| EPI_ISL_734718 | 5/9/2020  | 12/24/2020 | Europe / Belgium / Hoegaarden           |
| EPI_ISL_734719 | 5/9/2020  | 12/24/2020 | Europe / Belgium / Hornu                |
| EPI_ISL_734720 | 5/9/2020  | 12/24/2020 | Europe / Belgium / Buggenhout           |
| EPI_ISL_734721 | 5/9/2020  | 12/24/2020 | Europe / Belgium / Auderghem            |
| EPI_ISL_734722 | 5/9/2020  | 12/24/2020 | Europe / Belgium / Saint-Gilles         |
| EPI_ISL_734723 | 5/9/2020  | 12/24/2020 | Europe / Belgium / Gaurain-Ramecroix    |
| EPI_ISL_734724 | 5/10/2020 | 12/24/2020 | Europe / Belgium / Holsbeek             |
| EPI_ISL_734725 | 5/12/2020 | 12/24/2020 | Europe / Belgium / Blaton               |
| EPI_ISL_734726 | 5/12/2020 | 12/24/2020 | Europe / Belgium / Zele                 |
| EPI_ISL_734727 | 5/12/2020 | 12/24/2020 | Europe / Belgium / Oud-Turnhout         |
| EPI_ISL_734728 | 5/13/2020 | 12/24/2020 | Europe / Belgium / Tervuren             |
| EPI_ISL_734729 | 5/13/2020 | 12/24/2020 | Europe / Belgium / Brussel              |
| EPI_ISL_734730 | 5/13/2020 | 12/24/2020 | Europe / Belgium / Wilsele              |
| EPI_ISL_734731 | 5/14/2020 | 12/24/2020 | Europe / Belgium / Bekkevoort           |
| EPI_ISL_734732 | 5/14/2020 | 12/24/2020 | Europe / Belgium / Leuven               |
| EPI_ISL_734733 | 5/14/2020 | 12/24/2020 | Europe / Belgium / Heverlee             |
| EPI_ISL_734734 | 5/14/2020 | 12/24/2020 | Europe / Belgium / Leuven               |
| EPI_ISL_734735 | 5/16/2020 | 12/24/2020 | Europe / Belgium / Waterloo             |
| EPI_ISL_734736 | 4/17/2020 | 12/24/2020 | Europe / Belgium / Kortenberg           |
| EPI_ISL_734737 | 5/17/2020 | 12/24/2020 | Europe / Belgium / Zaventem             |
| EPI_ISL_734738 | 5/17/2020 | 12/24/2020 | Europe / Belgium / Westerlo             |
| EPI_ISL_734739 | 5/17/2020 | 12/24/2020 | Europe / Belgium / Westerlo             |
| EPI_ISL_734740 | 5/21/2020 | 12/24/2020 | Europe / Belgium / Bonheiden            |
| EPI_ISL_734741 | 5/21/2020 | 12/24/2020 | Europe / Belgium / Ixelles              |
| EPI_ISL_734742 | 5/21/2020 | 12/24/2020 | Europe / Belgium / Zaventem             |
| EPI_ISL_734743 | 5/21/2020 | 12/24/2020 | Europe / Belgium / Evere                |
| EPI_ISL_734744 | 5/26/2020 | 12/24/2020 | Europe / Belgium / Leuven               |

|                |           |            |                                         |
|----------------|-----------|------------|-----------------------------------------|
| EPI_ISL_734745 | 5/28/2020 | 12/24/2020 | Europe / Belgium / Stevoort             |
| EPI_ISL_734746 | 5/28/2020 | 12/24/2020 | Europe / Belgium / Stevoort             |
| EPI_ISL_734747 | 6/2/2020  | 12/24/2020 | Europe / Belgium / Kortenaak            |
| EPI_ISL_734748 | 6/3/2020  | 12/24/2020 | Europe / Belgium / Tervuren             |
| EPI_ISL_734749 | 6/10/2020 | 12/24/2020 | Europe / Belgium / Haren                |
| EPI_ISL_734750 | 6/11/2020 | 12/24/2020 | Europe / Belgium / Houthalen-Helchteren |
| EPI_ISL_734751 | 6/11/2020 | 12/24/2020 | Europe / Belgium / Kessel-Lo            |
| EPI_ISL_734752 | 6/12/2020 | 12/24/2020 | Europe / Belgium / Houthalen-Helchteren |
| EPI_ISL_734753 | 6/15/2020 | 12/24/2020 | Europe / Belgium / Leuven               |
| EPI_ISL_734754 | 6/15/2020 | 12/24/2020 | Europe / Belgium / Tervuren             |
| EPI_ISL_734755 | 6/15/2020 | 12/24/2020 | Europe / Belgium / Holsbeek             |
| EPI_ISL_734756 | 6/15/2020 | 12/24/2020 | Europe / Belgium / Tervuren             |
| EPI_ISL_734757 | 6/16/2020 | 12/24/2020 | Europe / Belgium / Kortenberg           |
| EPI_ISL_734758 | 6/16/2020 | 12/24/2020 | Europe / Belgium / Jette                |
| EPI_ISL_734759 | 6/16/2020 | 12/24/2020 | Europe / Belgium / Ganshoren            |
| EPI_ISL_734760 | 6/16/2020 | 12/24/2020 | Europe / Belgium / Ganshoren            |
| EPI_ISL_734761 | 6/16/2020 | 12/24/2020 | Europe / Belgium / Hulste               |
| EPI_ISL_734762 | 6/16/2020 | 12/24/2020 | Europe / Belgium / Harelbeke            |
| EPI_ISL_734763 | 6/16/2020 | 12/24/2020 | Europe / Belgium / Begijnendijk         |
| EPI_ISL_734764 | 6/16/2020 | 12/24/2020 | Europe / Belgium / Wijgmaal             |
| EPI_ISL_734765 | 6/17/2020 | 12/24/2020 | Europe / Belgium / Winksele             |
| EPI_ISL_734766 | 6/17/2020 | 12/24/2020 | Europe / Belgium / Heusden-Zolder       |
| EPI_ISL_734767 | 6/17/2020 | 12/24/2020 | Europe / Belgium / Harelbeke            |
| EPI_ISL_734768 | 6/17/2020 | 12/24/2020 | Europe / Belgium / Kortenberg           |
| EPI_ISL_734769 | 6/19/2020 | 12/24/2020 | Europe / Belgium / Sint-Jans-Molenbeek  |
| EPI_ISL_734770 | 6/19/2020 | 12/24/2020 | Europe / Belgium / Leuven               |
| EPI_ISL_734771 | 6/20/2020 | 12/24/2020 | Europe / Belgium / Brussel              |
| EPI_ISL_734772 | 6/20/2020 | 12/24/2020 | Europe / Belgium / Brussel              |
| EPI_ISL_734773 | 6/20/2020 | 12/24/2020 | Europe / Belgium / Antwerp              |
| EPI_ISL_734774 | 6/20/2020 | 12/24/2020 | Europe / Belgium / Antwerp              |
| EPI_ISL_734775 | 6/21/2020 | 12/24/2020 | Europe / Belgium / Brussel              |
| EPI_ISL_734776 | 6/22/2020 | 12/24/2020 | Europe / Belgium / Heverlee             |
| EPI_ISL_734777 | 6/23/2020 | 12/24/2020 | Europe / Belgium / Sint-Joost-ten-Noode |
| EPI_ISL_734778 | 6/23/2020 | 12/24/2020 | Europe / Belgium / Brussel              |
| EPI_ISL_734779 | 6/23/2020 | 12/24/2020 | Europe / Belgium / Brugge               |
| EPI_ISL_734780 | 6/26/2020 | 12/24/2020 | Europe / Belgium / Heusden-Zolder       |
| EPI_ISL_734781 | 6/28/2020 | 12/24/2020 | Europe / Belgium / Braine-l'Alleud      |
| EPI_ISL_734782 | 6/29/2020 | 12/24/2020 | Europe / Belgium / Puurs                |
| EPI_ISL_734783 | 6/29/2020 | 12/24/2020 | Europe / Belgium / Oudenburg            |
| EPI_ISL_734784 | 6/29/2020 | 12/24/2020 | Europe / Belgium / Turnhout             |
| EPI_ISL_734785 | 6/30/2020 | 12/24/2020 | Europe / Belgium / Sint-Jans-Molenbeek  |
| EPI_ISL_734786 | 6/30/2020 | 12/24/2020 | Europe / Belgium / Laeken               |
| EPI_ISL_734787 | 6/30/2020 | 12/24/2020 | Europe / Belgium / Schaerbeek           |
| EPI_ISL_734788 | 7/1/2020  | 12/24/2020 | Europe / Belgium / Sint-Jans-Molenbeek  |
| EPI_ISL_734789 | 7/2/2020  | 12/24/2020 | Europe / Belgium / Wilsele              |
| EPI_ISL_734790 | 7/2/2020  | 12/24/2020 | Europe / Belgium / Vosselaar            |
| EPI_ISL_734791 | 7/3/2020  | 12/24/2020 | Europe / Belgium / Diegem               |



|                |           |            |                                       |
|----------------|-----------|------------|---------------------------------------|
| EPI_ISL_734792 | 7/6/2020  | 12/24/2020 | Europe / Belgium / Tervuren           |
| EPI_ISL_734793 | 7/7/2020  | 12/24/2020 | Europe / Belgium / Langdorp           |
| EPI_ISL_734794 | 7/7/2020  | 12/24/2020 | Europe / Belgium / Molenstede         |
| EPI_ISL_734795 | 7/10/2020 | 12/24/2020 | Europe / Belgium / Leuven             |
| EPI_ISL_734796 | 7/17/2020 | 12/24/2020 | Europe / Belgium / Winksele           |
| EPI_ISL_734797 | 7/17/2020 | 12/24/2020 | Europe / Belgium / Bocholt            |
| EPI_ISL_734798 | 6/17/2020 | 12/24/2020 | Europe / Belgium / Diest              |
| EPI_ISL_734799 | 6/17/2020 | 12/24/2020 | Europe / Belgium / Harelbeke          |
| EPI_ISL_734800 | 6/17/2020 | 12/24/2020 | Europe / Belgium / Harelbeke          |
| EPI_ISL_734801 | 7/19/2020 | 12/24/2020 | Europe / Belgium / Landen             |
| EPI_ISL_734802 | 7/20/2020 | 12/24/2020 | Europe / Belgium / Herzele            |
| EPI_ISL_734803 | 7/20/2020 | 12/24/2020 | Europe / Belgium / Geheul             |
| EPI_ISL_734804 | 7/21/2020 | 12/24/2020 | Europe / Belgium / Schaerbeek         |
| EPI_ISL_734805 | 7/21/2020 | 12/24/2020 | Europe / Belgium / Jette              |
| EPI_ISL_734806 | 7/21/2020 | 12/24/2020 | Europe / Belgium / Koningshooikt      |
| EPI_ISL_734807 | 7/21/2020 | 12/24/2020 | Europe / Belgium / Malle              |
| EPI_ISL_734808 | 7/21/2020 | 12/24/2020 | Europe / Belgium / Ranst              |
| EPI_ISL_734810 | 7/21/2020 | 12/24/2020 | Europe / Belgium / Roermond           |
| EPI_ISL_734811 | 7/21/2020 | 12/24/2020 | Europe / Belgium / Erpe-mere          |
| EPI_ISL_734812 | 7/21/2020 | 12/24/2020 | Europe / Belgium / Erpent             |
| EPI_ISL_734813 | 7/21/2020 | 12/24/2020 | Europe / Belgium / Erpent             |
| EPI_ISL_734814 | 7/21/2020 | 12/24/2020 | Europe / Belgium / Namur              |
| EPI_ISL_734815 | 7/22/2020 | 12/24/2020 | Europe / Belgium / Antwerp            |
| EPI_ISL_734816 | 7/22/2020 | 12/24/2020 | Europe / Belgium / Antwerp            |
| EPI_ISL_734817 | 7/22/2020 | 12/24/2020 | Europe / Belgium / Antwerp            |
| EPI_ISL_734819 | 7/22/2020 | 12/24/2020 | Europe / Belgium / Sint-Niklaas       |
| EPI_ISL_734821 | 7/22/2020 | 12/24/2020 | Europe / Belgium / Sint-Genesius-Rode |
| EPI_ISL_734822 | 7/22/2020 | 12/24/2020 | Europe / Belgium / La Louvi re        |
| EPI_ISL_734823 | 7/22/2020 | 12/24/2020 | Europe / Belgium / Leuven             |
| EPI_ISL_734824 | 7/22/2020 | 12/24/2020 | Europe / Belgium / Antwerp            |
| EPI_ISL_734825 | 7/23/2020 | 12/24/2020 | Europe / Belgium / Deurne             |
| EPI_ISL_734826 | 7/23/2020 | 12/24/2020 | Europe / Belgium / Antwerp            |
| EPI_ISL_734827 | 7/29/2020 | 12/24/2020 | Europe / Belgium / Holsbeek           |
| EPI_ISL_734828 | 7/31/2020 | 12/24/2020 | Europe / Belgium / Vremde             |
| EPI_ISL_734829 | 7/31/2020 | 12/24/2020 | Europe / Belgium / Deurne             |
| EPI_ISL_734830 | 7/31/2020 | 12/24/2020 | Europe / Belgium / Deurne             |
| EPI_ISL_734831 | 7/31/2020 | 12/24/2020 | Europe / Belgium / Deurne             |
| EPI_ISL_734832 | 7/31/2020 | 12/24/2020 | Europe / Belgium / Deurne             |
| EPI_ISL_734833 | 7/31/2020 | 12/24/2020 | Europe / Belgium / Antwerp            |
| EPI_ISL_734834 | 7/31/2020 | 12/24/2020 | Europe / Belgium / Hoevenen           |
| EPI_ISL_734835 | 7/31/2020 | 12/24/2020 | Europe / Belgium / Schoten            |
| EPI_ISL_734836 | 7/31/2020 | 12/24/2020 | Europe / Belgium / Antwerp            |
| EPI_ISL_734837 | 7/31/2020 | 12/24/2020 | Europe / Belgium / Ekeren             |
| EPI_ISL_734838 | 7/31/2020 | 12/24/2020 | Europe / Belgium / Merksem            |
| EPI_ISL_734839 | 7/31/2020 | 12/24/2020 | Europe / Belgium / Merksem            |
| EPI_ISL_734840 | 8/1/2020  | 12/24/2020 | Europe / Belgium / Antwerp            |
| EPI_ISL_734841 | 8/1/2020  | 12/24/2020 | Europe / Belgium / Antwerp            |

|                |          |            |                                        |
|----------------|----------|------------|----------------------------------------|
| EPI_ISL_734842 | 8/1/2020 | 12/24/2020 | Europe / Belgium / Antwerp             |
| EPI_ISL_734843 | 8/1/2020 | 12/24/2020 | Europe / Belgium / Willebroek          |
| EPI_ISL_734844 | 8/1/2020 | 12/24/2020 | Europe / Belgium / Sterrebeek          |
| EPI_ISL_734845 | 8/1/2020 | 12/24/2020 | Europe / Belgium / Borsbeek            |
| EPI_ISL_734846 | 8/1/2020 | 12/24/2020 | Europe / Belgium / Merksem             |
| EPI_ISL_734847 | 8/1/2020 | 12/24/2020 | Europe / Belgium / Evere               |
| EPI_ISL_734848 | 8/1/2020 | 12/24/2020 | Europe / Belgium / Schaarbeek          |
| EPI_ISL_734849 | 8/1/2020 | 12/24/2020 | Europe / Belgium / La Louvière         |
| EPI_ISL_734850 | 8/1/2020 | 12/24/2020 | Europe / Belgium / Deurne              |
| EPI_ISL_734851 | 8/1/2020 | 12/24/2020 | Europe / Belgium / Ekeren              |
| EPI_ISL_734852 | 8/1/2020 | 12/24/2020 | Europe / Belgium / Wijnegem            |
| EPI_ISL_734853 | 8/1/2020 | 12/24/2020 | Europe / Belgium / Balen               |
| EPI_ISL_734854 | 8/1/2020 | 12/24/2020 | Europe / Belgium / Duffel              |
| EPI_ISL_734855 | 8/1/2020 | 12/24/2020 | Europe / Belgium / Wommelgem           |
| EPI_ISL_734856 | 8/1/2020 | 12/24/2020 | Europe / Belgium / Sint-Niklaas        |
| EPI_ISL_734857 | 8/1/2020 | 12/24/2020 | Europe / Belgium / s Gravenwezel       |
| EPI_ISL_734858 | 8/1/2020 | 12/24/2020 | Europe / Belgium / Oevel               |
| EPI_ISL_734859 | 8/1/2020 | 12/24/2020 | Europe / Belgium / Lier                |
| EPI_ISL_734860 | 8/1/2020 | 12/24/2020 | Europe / Belgium / Mons                |
| EPI_ISL_734861 | 8/1/2020 | 12/24/2020 | Europe / Belgium / Ranst               |
| EPI_ISL_734862 | 8/1/2020 | 12/24/2020 | Europe / Belgium / Montigny-le-Tilleul |
| EPI_ISL_734863 | 8/1/2020 | 12/24/2020 | Europe / Belgium / Brugge              |
| EPI_ISL_734864 | 8/1/2020 | 12/24/2020 | Europe / Belgium / Beerse              |
| EPI_ISL_734865 | 8/1/2020 | 12/24/2020 | Europe / Belgium / Overijse            |
| EPI_ISL_734866 | 8/1/2020 | 12/24/2020 | Europe / Belgium / Lubbeek             |
| EPI_ISL_734867 | 8/1/2020 | 12/24/2020 | Europe / Belgium / Winksele            |
| EPI_ISL_734868 | 8/1/2020 | 12/24/2020 | Europe / Belgium / Fontaine-l'Évêque   |
| EPI_ISL_734869 | 8/1/2020 | 12/24/2020 | Europe / Belgium / Hasselt             |
| EPI_ISL_734870 | 9/8/2020 | 12/24/2020 | Europe / Belgium / Huldenberg          |
| EPI_ISL_734871 | 8/2/2020 | 12/24/2020 | Europe / Belgium / Antwerp             |
| EPI_ISL_734872 | 8/2/2020 | 12/24/2020 | Europe / Belgium / Ekeren              |
| EPI_ISL_734873 | 8/2/2020 | 12/24/2020 | Europe / Belgium / Deurne              |
| EPI_ISL_734874 | 8/2/2020 | 12/24/2020 | Europe / Belgium / Borsbeek            |
| EPI_ISL_734875 | 8/2/2020 | 12/24/2020 | Europe / Belgium / Maldegem            |
| EPI_ISL_734876 | 8/2/2020 | 12/24/2020 | Europe / Belgium / Nijlen              |
| EPI_ISL_734877 | 8/3/2020 | 12/24/2020 | Europe / Belgium / Merksem             |
| EPI_ISL_734878 | 8/3/2020 | 12/24/2020 | Europe / Belgium / Merksem             |
| EPI_ISL_734879 | 8/3/2020 | 12/24/2020 | Europe / Belgium / Merksem             |
| EPI_ISL_734880 | 8/3/2020 | 12/24/2020 | Europe / Belgium / Ekeren              |
| EPI_ISL_734881 | 8/3/2020 | 12/24/2020 | Europe / Belgium / Merksem             |
| EPI_ISL_734882 | 8/3/2020 | 12/24/2020 | Europe / Belgium / Merksem             |
| EPI_ISL_734883 | 8/3/2020 | 12/24/2020 | Europe / Belgium / Antwerp             |
| EPI_ISL_734884 | 8/3/2020 | 12/24/2020 | Europe / Belgium / Antwerp             |
| EPI_ISL_734885 | 8/3/2020 | 12/24/2020 | Europe / Belgium / Berchem             |
| EPI_ISL_734886 | 8/3/2020 | 12/24/2020 | Europe / Belgium / Merksem             |
| EPI_ISL_734887 | 8/3/2020 | 12/24/2020 | Europe / Belgium / Ekeren              |
| EPI_ISL_734888 | 8/3/2020 | 12/24/2020 | Europe / Belgium / Deurne              |

|                |           |            |                                      |
|----------------|-----------|------------|--------------------------------------|
| EPI_ISL_734889 | 8/3/2020  | 12/24/2020 | Europe / Belgium / Merksem           |
| EPI_ISL_734890 | 8/3/2020  | 12/24/2020 | Europe / Belgium / Deurne            |
| EPI_ISL_734891 | 8/3/2020  | 12/24/2020 | Europe / Belgium / Antwerp           |
| EPI_ISL_734892 | 8/4/2020  | 12/24/2020 | Europe / Belgium / Heist-op-den-Berg |
| EPI_ISL_734893 | 8/3/2020  | 12/24/2020 | Europe / Belgium / Antwerp           |
| EPI_ISL_734894 | 8/3/2020  | 12/24/2020 | Europe / Belgium / Wilrijk           |
| EPI_ISL_734895 | 8/3/2020  | 12/24/2020 | Europe / Belgium / Antwerp           |
| EPI_ISL_734896 | 8/3/2020  | 12/24/2020 | Europe / Belgium / Merksem           |
| EPI_ISL_734897 | 8/3/2020  | 12/24/2020 | Europe / Belgium / Merksem           |
| EPI_ISL_734898 | 8/3/2020  | 12/24/2020 | Europe / Belgium / Vosselaar         |
| EPI_ISL_734899 | 8/3/2020  | 12/24/2020 | Europe / Belgium / Weert             |
| EPI_ISL_734900 | 8/3/2020  | 12/24/2020 | Europe / Belgium / Merksem           |
| EPI_ISL_734901 | 8/3/2020  | 12/24/2020 | Europe / Belgium / Berchem           |
| EPI_ISL_734902 | 8/3/2020  | 12/24/2020 | Europe / Belgium / Deurne            |
| EPI_ISL_734903 | 8/3/2020  | 12/24/2020 | Europe / Belgium / Aartselaar        |
| EPI_ISL_734904 | 8/3/2020  | 12/24/2020 | Europe / Belgium / Deurne            |
| EPI_ISL_734905 | 8/3/2020  | 12/24/2020 | Europe / Belgium / Niel              |
| EPI_ISL_734906 | 8/4/2020  | 12/24/2020 | Europe / Belgium / Deurne            |
| EPI_ISL_734907 | 8/4/2020  | 12/24/2020 | Europe / Belgium / Deurne            |
| EPI_ISL_734908 | 8/4/2020  | 12/24/2020 | Europe / Belgium / Wijnegem          |
| EPI_ISL_734909 | 8/4/2020  | 12/24/2020 | Europe / Belgium / Deurne            |
| EPI_ISL_734910 | 8/4/2020  | 12/24/2020 | Europe / Belgium / Deurne            |
| EPI_ISL_734911 | 8/4/2020  | 12/24/2020 | Europe / Belgium / Deurne            |
| EPI_ISL_734912 | 8/4/2020  | 12/24/2020 | Europe / Belgium / Herentals         |
| EPI_ISL_734913 | 8/4/2020  | 12/24/2020 | Europe / Belgium / Malle             |
| EPI_ISL_734914 | 8/4/2020  | 12/24/2020 | Europe / Belgium / Seneffe           |
| EPI_ISL_734915 | 8/4/2020  | 12/24/2020 | Europe / Belgium / Herentals         |
| EPI_ISL_734916 | 8/4/2020  | 12/24/2020 | Europe / Belgium / Beerse            |
| EPI_ISL_734917 | 9/8/2020  | 12/24/2020 | Europe / Belgium / Wilsele           |
| EPI_ISL_734918 | 9/9/2020  | 12/24/2020 | Europe / Belgium / Haacht            |
| EPI_ISL_734919 | 9/9/2020  | 12/24/2020 | Europe / Belgium / Fontaine-l'Évêque |
| EPI_ISL_734920 | 9/9/2020  | 12/24/2020 | Europe / Belgium / Tervuren          |
| EPI_ISL_734921 | 9/9/2020  | 12/24/2020 | Europe / Belgium / Bierbeek          |
| EPI_ISL_734922 | 9/9/2020  | 12/24/2020 | Europe / Belgium / Fontaine-l'Évêque |
| EPI_ISL_734923 | 9/10/2020 | 12/24/2020 | Europe / Belgium / Leuven            |
| EPI_ISL_734924 | 9/11/2020 | 12/24/2020 | Europe / Belgium / Zaventem          |
| EPI_ISL_734925 | 9/12/2020 | 12/24/2020 | Europe / Belgium / Wilsele           |
| EPI_ISL_734926 | 9/11/2020 | 12/24/2020 | Europe / Belgium / Zaventem          |
| EPI_ISL_734927 | 9/11/2020 | 12/24/2020 | Europe / Belgium / Huldenberg        |
| EPI_ISL_734928 | 9/11/2020 | 12/24/2020 | Europe / Belgium / Hoeilaart         |
| EPI_ISL_734929 | 9/12/2020 | 12/24/2020 | Europe / Belgium / Overijse          |
| EPI_ISL_734930 | 9/12/2020 | 12/24/2020 | Europe / Belgium / Maasmechelen      |
| EPI_ISL_734931 | 9/12/2020 | 12/24/2020 | Europe / Belgium / Tervuren          |
| EPI_ISL_734932 | 9/13/2020 | 12/24/2020 | Europe / Belgium / Everberg          |
| EPI_ISL_734933 | 9/13/2020 | 12/24/2020 | Europe / Belgium / Genval            |
| EPI_ISL_734934 | 9/14/2020 | 12/24/2020 | Europe / Belgium / Zaventem          |
| EPI_ISL_734935 | 9/15/2020 | 12/24/2020 | Europe / Belgium / Wezembeek-Oppem   |

|                |           |            |                                    |
|----------------|-----------|------------|------------------------------------|
| EPI_ISL_734936 | 9/15/2020 | 12/24/2020 | Europe / Belgium / Tervuren        |
| EPI_ISL_734937 | 9/15/2020 | 12/24/2020 | Europe / Belgium / Steenokkerzeel  |
| EPI_ISL_734938 | 9/15/2020 | 12/24/2020 | Europe / Belgium / Overijse        |
| EPI_ISL_734939 | 9/15/2020 | 12/24/2020 | Europe / Belgium / Oud-Heverlee    |
| EPI_ISL_734940 | 9/15/2020 | 12/24/2020 | Europe / Belgium / Bierbeek        |
| EPI_ISL_734941 | 9/15/2020 | 12/24/2020 | Europe / Belgium / Oud-Heverlee    |
| EPI_ISL_734942 | 9/15/2020 | 12/24/2020 | Europe / Belgium / Huldenberg      |
| EPI_ISL_734943 | 9/15/2020 | 12/24/2020 | Europe / Belgium / Everberg        |
| EPI_ISL_734944 | 9/15/2020 | 12/24/2020 | Europe / Belgium / Geel            |
| EPI_ISL_734945 | 9/15/2020 | 12/24/2020 | Europe / Belgium / Bost            |
| EPI_ISL_734946 | 9/15/2020 | 12/24/2020 | Europe / Belgium / Berg            |
| EPI_ISL_734947 | 9/15/2020 | 12/24/2020 | Europe / Belgium / Overijse        |
| EPI_ISL_734948 | 9/15/2020 | 12/24/2020 | Europe / Belgium / Berg            |
| EPI_ISL_734949 | 9/15/2020 | 12/24/2020 | Europe / Belgium / Berg            |
| EPI_ISL_734950 | 9/15/2020 | 12/24/2020 | Europe / Belgium / Erps-Kwerps     |
| EPI_ISL_734951 | 9/16/2020 | 12/24/2020 | Europe / Belgium / Tervuren        |
| EPI_ISL_734952 | 9/16/2020 | 12/24/2020 | Europe / Belgium / Bost            |
| EPI_ISL_734953 | 9/16/2020 | 12/24/2020 | Europe / Belgium / Kessel-Lo       |
| EPI_ISL_734954 | 9/16/2020 | 12/24/2020 | Europe / Belgium / Zaventem        |
| EPI_ISL_734955 | 9/16/2020 | 12/24/2020 | Europe / Belgium / Wezembeek-Oppem |
| EPI_ISL_734956 | 9/16/2020 | 12/24/2020 | Europe / Belgium / Winksele        |
| EPI_ISL_734957 | 9/16/2020 | 12/24/2020 | Europe / Belgium / Berg            |
| EPI_ISL_734958 | 9/16/2020 | 12/24/2020 | Europe / Belgium / Hoeilaart       |
| EPI_ISL_734959 | 9/16/2020 | 12/24/2020 | Europe / Belgium / Kraainem        |
| EPI_ISL_734960 | 9/16/2020 | 12/24/2020 | Europe / Belgium / Overijse        |
| EPI_ISL_734961 | 9/16/2020 | 12/24/2020 | Europe / Belgium / Begijnendijk    |
| EPI_ISL_734962 | 9/16/2020 | 12/24/2020 | Europe / Belgium / Wezembeek-Oppem |
| EPI_ISL_734963 | 9/16/2020 | 12/24/2020 | Europe / Belgium / Rotselaar       |
| EPI_ISL_734964 | 9/16/2020 | 12/24/2020 | Europe / Belgium / Berg            |
| EPI_ISL_734965 | 9/16/2020 | 12/24/2020 | Europe / Belgium / Steenokkerzeel  |
| EPI_ISL_734966 | 9/16/2020 | 12/24/2020 | Europe / Belgium / Berg            |
| EPI_ISL_734967 | 9/16/2020 | 12/24/2020 | Europe / Belgium / Hoeilaart       |
| EPI_ISL_734968 | 9/16/2020 | 12/24/2020 | Europe / Belgium / Winksele        |
| EPI_ISL_734969 | 9/16/2020 | 12/24/2020 | Europe / Belgium / Wilsele         |
| EPI_ISL_734970 | 9/16/2020 | 12/24/2020 | Europe / Belgium / Winksele        |
| EPI_ISL_734971 | 9/16/2020 | 12/24/2020 | Europe / Belgium / Oud-Heverlee    |
| EPI_ISL_734972 | 9/16/2020 | 12/24/2020 | Europe / Belgium / Leuven          |
| EPI_ISL_734973 | 9/17/2020 | 12/24/2020 | Europe / Belgium / Tervuren        |
| EPI_ISL_734974 | 9/17/2020 | 12/24/2020 | Europe / Belgium / Tervuren        |
| EPI_ISL_734975 | 9/17/2020 | 12/24/2020 | Europe / Belgium / Tervuren        |
| EPI_ISL_734976 | 9/17/2020 | 12/24/2020 | Europe / Belgium / Steenokkerzeel  |
| EPI_ISL_734977 | 9/17/2020 | 12/24/2020 | Europe / Belgium / Hoeilaart       |
| EPI_ISL_734978 | 9/17/2020 | 12/24/2020 | Europe / Belgium / Laken           |
| EPI_ISL_734979 | 9/17/2020 | 12/24/2020 | Europe / Belgium / Deurne          |
| EPI_ISL_734980 | 9/17/2020 | 12/24/2020 | Europe / Belgium / Koekelberg      |
| EPI_ISL_734981 | 9/17/2020 | 12/24/2020 | Europe / Belgium / Oud-Heverlee    |
| EPI_ISL_734982 | 9/17/2020 | 12/24/2020 | Europe / Belgium / Wilsele         |

|                |           |            |                                        |
|----------------|-----------|------------|----------------------------------------|
| EPI_ISL_734983 | 9/17/2020 | 12/24/2020 | Europe / Belgium / Bost                |
| EPI_ISL_734984 | 9/17/2020 | 12/24/2020 | Europe / Belgium / Herk-de-Stad        |
| EPI_ISL_734985 | 9/17/2020 | 12/24/2020 | Europe / Belgium / Sint-Stevens-Woluwe |
| EPI_ISL_734986 | 9/17/2020 | 12/24/2020 | Europe / Belgium / Zaventem            |
| EPI_ISL_734987 | 9/17/2020 | 12/24/2020 | Europe / Belgium / Laken               |
| EPI_ISL_734988 | 9/17/2020 | 12/24/2020 | Europe / Belgium / Schaarbeek          |
| EPI_ISL_734989 | 9/17/2020 | 12/24/2020 | Europe / Belgium / Etterbeek           |
| EPI_ISL_734990 | 9/17/2020 | 12/24/2020 | Europe / Belgium / Etterbeek           |
| EPI_ISL_734991 | 9/18/2020 | 12/24/2020 | Europe / Belgium / Wijgmaal            |
| EPI_ISL_734992 | 9/18/2020 | 12/24/2020 | Europe / Belgium / Bost                |
| EPI_ISL_734993 | 9/18/2020 | 12/24/2020 | Europe / Belgium / Steenokkerzeel      |
| EPI_ISL_734994 | 9/18/2020 | 12/24/2020 | Europe / Belgium / Boortmeerbeek       |
| EPI_ISL_734995 | 9/18/2020 | 12/24/2020 | Europe / Belgium / Overijse            |
| EPI_ISL_734996 | 9/18/2020 | 12/24/2020 | Europe / Belgium / Hoeilaart           |
| EPI_ISL_734997 | 9/18/2020 | 12/24/2020 | Europe / Belgium / Steenokkerzeel      |
| EPI_ISL_734998 | 9/18/2020 | 12/24/2020 | Europe / Belgium / Winksele            |
| EPI_ISL_734999 | 9/18/2020 | 12/24/2020 | Europe / Belgium / Overijse            |
| EPI_ISL_735000 | 9/18/2020 | 12/24/2020 | Europe / Belgium / Sint-Pieters-Woluwe |
| EPI_ISL_735001 | 9/19/2020 | 12/24/2020 | Europe / Belgium / Bost                |
| EPI_ISL_735002 | 9/19/2020 | 12/24/2020 | Europe / Belgium / Bost                |
| EPI_ISL_735003 | 9/19/2020 | 12/24/2020 | Europe / Belgium / Bost                |
| EPI_ISL_735004 | 9/20/2020 | 12/24/2020 | Europe / Belgium / Kessel-Lo           |
| EPI_ISL_735005 | 9/20/2020 | 12/24/2020 | Europe / Belgium / Leuven              |
| EPI_ISL_735006 | 9/21/2020 | 12/24/2020 | Europe / Belgium / Kessel-Lo           |
| EPI_ISL_735007 | 9/22/2020 | 12/24/2020 | Europe / Belgium / Huldenberg          |
| EPI_ISL_735008 | 9/22/2020 | 12/24/2020 | Europe / Belgium / Hoeilaart           |
| EPI_ISL_735009 | 9/22/2020 | 12/24/2020 | Europe / Belgium / Hoeilaart           |
| EPI_ISL_735010 | 9/22/2020 | 12/24/2020 | Europe / Belgium / Heverlee            |
| EPI_ISL_735011 | 9/22/2020 | 12/24/2020 | Europe / Belgium / Bost                |
| EPI_ISL_735012 | 9/22/2020 | 12/24/2020 | Europe / Belgium / Haacht              |
| EPI_ISL_735013 | 9/22/2020 | 12/24/2020 | Europe / Belgium / Holsbeek            |
| EPI_ISL_735014 | 9/22/2020 | 12/24/2020 | Europe / Belgium / Haacht              |
| EPI_ISL_735015 | 9/22/2020 | 12/24/2020 | Europe / Belgium / Bost                |
| EPI_ISL_735016 | 9/22/2020 | 12/24/2020 | Europe / Belgium / Bost                |
| EPI_ISL_735017 | 9/22/2020 | 12/24/2020 | Europe / Belgium / Bost                |
| EPI_ISL_735018 | 9/22/2020 | 12/24/2020 | Europe / Belgium / Tervuren            |
| EPI_ISL_735019 | 9/22/2020 | 12/24/2020 | Europe / Belgium / Kessel-Lo           |
| EPI_ISL_735020 | 9/22/2020 | 12/24/2020 | Europe / Belgium / Bertem              |
| EPI_ISL_735021 | 9/22/2020 | 12/24/2020 | Europe / Belgium / Bost                |
| EPI_ISL_735022 | 9/22/2020 | 12/24/2020 | Europe / Belgium / Aarschot            |
| EPI_ISL_735023 | 9/22/2020 | 12/24/2020 | Europe / Belgium / Leuven              |
| EPI_ISL_735024 | 9/22/2020 | 12/24/2020 | Europe / Belgium / Bost                |
| EPI_ISL_735025 | 9/22/2020 | 12/24/2020 | Europe / Belgium / Wezembeek-Oppem     |
| EPI_ISL_735026 | 9/23/2020 | 12/24/2020 | Europe / Belgium / Sint-Stevens-Woluwe |
| EPI_ISL_735027 | 9/23/2020 | 12/24/2020 | Europe / Belgium / Bekkevoort          |
| EPI_ISL_735028 | 9/23/2020 | 12/24/2020 | Europe / Belgium / Steenokkerzeel      |
| EPI_ISL_735029 | 9/23/2020 | 12/24/2020 | Europe / Belgium / Leest               |

|                |           |            |                                        |
|----------------|-----------|------------|----------------------------------------|
| EPI_ISL_735030 | 9/23/2020 | 12/24/2020 | Europe / Belgium / Wijgmaal            |
| EPI_ISL_735031 | 9/23/2020 | 12/24/2020 | Europe / Belgium / Winksele            |
| EPI_ISL_735032 | 9/23/2020 | 12/24/2020 | Europe / Belgium / Leuven              |
| EPI_ISL_735033 | 9/23/2020 | 12/24/2020 | Europe / Belgium / Werchter            |
| EPI_ISL_735034 | 9/23/2020 | 12/24/2020 | Europe / Belgium / Nossegem            |
| EPI_ISL_735035 | 9/23/2020 | 12/24/2020 | Europe / Belgium / Kessel-Lo           |
| EPI_ISL_735036 | 9/24/2020 | 12/24/2020 | Europe / Belgium / Nossegem            |
| EPI_ISL_735037 | 9/24/2020 | 12/24/2020 | Europe / Belgium / Tervuren            |
| EPI_ISL_735038 | 9/24/2020 | 12/24/2020 | Europe / Belgium / Grimbergen          |
| EPI_ISL_735039 | 9/24/2020 | 12/24/2020 | Europe / Belgium / Berg                |
| EPI_ISL_735040 | 9/24/2020 | 12/24/2020 | Europe / Belgium / Oudsbergen          |
| EPI_ISL_735041 | 9/24/2020 | 12/24/2020 | Europe / Belgium / Berg                |
| EPI_ISL_735042 | 9/24/2020 | 12/24/2020 | Europe / Belgium / Huldenberg          |
| EPI_ISL_735043 | 9/24/2020 | 12/24/2020 | Europe / Belgium / Tervuren            |
| EPI_ISL_735044 | 10/3/2020 | 12/24/2020 | Europe / Belgium / Heverlee            |
| EPI_ISL_735045 | 10/3/2020 | 12/24/2020 | Europe / Belgium / Haacht              |
| EPI_ISL_735046 | 10/3/2020 | 12/24/2020 | Europe / Belgium / Heverlee            |
| EPI_ISL_735047 | 10/3/2020 | 12/24/2020 | Europe / Belgium / Bost                |
| EPI_ISL_735048 | 10/3/2020 | 12/24/2020 | Europe / Belgium / Rotselaar           |
| EPI_ISL_735049 | 10/6/2020 | 12/24/2020 | Europe / Belgium / Overijse            |
| EPI_ISL_735050 | 10/6/2020 | 12/24/2020 | Europe / Belgium / Overijse            |
| EPI_ISL_735051 | 10/6/2020 | 12/24/2020 | Europe / Belgium / Tervuren            |
| EPI_ISL_735052 | 10/6/2020 | 12/24/2020 | Europe / Belgium / Sint-Stevens-Woluwe |
| EPI_ISL_735053 | 10/6/2020 | 12/24/2020 | Europe / Belgium / Overijse            |
| EPI_ISL_735054 | 10/6/2020 | 12/24/2020 | Europe / Belgium / Leuven              |
| EPI_ISL_735055 | 10/6/2020 | 12/24/2020 | Europe / Belgium / Rotselaar           |
| EPI_ISL_735056 | 10/6/2020 | 12/24/2020 | Europe / Belgium / Hoeilaart           |
| EPI_ISL_735057 | 10/6/2020 | 12/24/2020 | Europe / Belgium / Hoeilaart           |
| EPI_ISL_735058 | 10/6/2020 | 12/24/2020 | Europe / Belgium / Nossegem            |
| EPI_ISL_735059 | 10/6/2020 | 12/24/2020 | Europe / Belgium / Leuven              |
| EPI_ISL_735060 | 10/6/2020 | 12/24/2020 | Europe / Belgium / Haasrode            |
| EPI_ISL_735061 | 10/6/2020 | 12/24/2020 | Europe / Belgium / Overijse            |
| EPI_ISL_735062 | 10/6/2020 | 12/24/2020 | Europe / Belgium / Erps-Kwerps         |
| EPI_ISL_735063 | 10/6/2020 | 12/24/2020 | Europe / Belgium / Kraainem            |
| EPI_ISL_735064 | 10/6/2020 | 12/24/2020 | Europe / Belgium / Nossegem            |
| EPI_ISL_735065 | 10/6/2020 | 12/24/2020 | Europe / Belgium / Leuven              |
| EPI_ISL_735066 | 10/6/2020 | 12/24/2020 | Europe / Belgium / Steenokkerzeel      |
| EPI_ISL_735067 | 10/6/2020 | 12/24/2020 | Europe / Belgium / Bost                |
| EPI_ISL_735068 | 10/6/2020 | 12/24/2020 | Europe / Belgium / Bost                |
| EPI_ISL_735069 | 10/6/2020 | 12/24/2020 | Europe / Belgium / Wezembeek-Oppem     |
| EPI_ISL_735070 | 10/6/2020 | 12/24/2020 | Europe / Belgium / Overijse            |
| EPI_ISL_735071 | 10/6/2020 | 12/24/2020 | Europe / Belgium / Tervuren            |
| EPI_ISL_735072 | 10/6/2020 | 12/24/2020 | Europe / Belgium / Winksele            |
| EPI_ISL_735073 | 10/6/2020 | 12/24/2020 | Europe / Belgium / Leuven              |
| EPI_ISL_735074 | 10/6/2020 | 12/24/2020 | Europe / Belgium / Overijse            |
| EPI_ISL_735075 | 10/7/2020 | 12/24/2020 | Europe / Belgium / Haasrode            |
| EPI_ISL_735076 | 10/7/2020 | 12/24/2020 | Europe / Belgium / Huldenberg          |

|                |            |            |                                               |
|----------------|------------|------------|-----------------------------------------------|
| EPI_ISL_735077 | 10/7/2020  | 12/24/2020 | Europe / Belgium / Nossegem                   |
| EPI_ISL_735078 | 10/7/2020  | 12/24/2020 | Europe / Belgium / Hoeilaart                  |
| EPI_ISL_735079 | 10/7/2020  | 12/24/2020 | Europe / Belgium / Heverlee                   |
| EPI_ISL_735080 | 10/8/2020  | 12/24/2020 | Europe / Belgium / Kortemark                  |
| EPI_ISL_735081 | 10/8/2020  | 12/24/2020 | Europe / Belgium / Wilsele                    |
| EPI_ISL_735082 | 10/8/2020  | 12/24/2020 | Europe / Belgium / Kasterlee                  |
| EPI_ISL_735083 | 10/8/2020  | 12/24/2020 | Europe / Belgium / Wilsele                    |
| EPI_ISL_735084 | 10/8/2020  | 12/24/2020 | Europe / Belgium / Diegem                     |
| EPI_ISL_735085 | 10/8/2020  | 12/24/2020 | Europe / Belgium / Etterbeek                  |
| EPI_ISL_735086 | 10/8/2020  | 12/24/2020 | Europe / Belgium / Overijse                   |
| EPI_ISL_735087 | 10/8/2020  | 12/24/2020 | Europe / Belgium / Nossegem                   |
| EPI_ISL_735088 | 10/8/2020  | 12/24/2020 | Europe / Belgium / Sint-Pieters-Woluwe        |
| EPI_ISL_735089 | 10/8/2020  | 12/24/2020 | Europe / Belgium / Nossegem                   |
| EPI_ISL_735090 | 10/8/2020  | 12/24/2020 | Europe / Belgium / Hoeilaart                  |
| EPI_ISL_735091 | 10/8/2020  | 12/24/2020 | Europe / Belgium / Rotselaar                  |
| EPI_ISL_735092 | 10/8/2020  | 12/24/2020 | Europe / Belgium / Tervuren                   |
| EPI_ISL_735093 | 10/8/2020  | 12/24/2020 | Europe / Belgium / Wilsele                    |
| EPI_ISL_735094 | 10/8/2020  | 12/24/2020 | Europe / Belgium / Oud-Turnhout               |
| EPI_ISL_735095 | 10/15/2020 | 12/24/2020 | Europe / Belgium / Hoeilaart                  |
| EPI_ISL_735096 | 10/15/2020 | 12/24/2020 | Europe / Belgium / Hoeilaart                  |
| EPI_ISL_735097 | 10/15/2020 | 12/24/2020 | Europe / Belgium / Hoeilaart                  |
| EPI_ISL_735098 | 10/15/2020 | 12/24/2020 | Europe / Belgium / Hoeilaart                  |
| EPI_ISL_735099 | 10/15/2020 | 12/24/2020 | Europe / Belgium / Boutersem                  |
| EPI_ISL_735100 | 10/15/2020 | 12/24/2020 | Europe / Belgium / Leuven                     |
| EPI_ISL_735101 | 10/15/2020 | 12/24/2020 | Europe / Belgium / Heverlee                   |
| EPI_ISL_735102 | 10/15/2020 | 12/24/2020 | Europe / Belgium / Hoeilaart                  |
| EPI_ISL_735103 | 10/15/2020 | 12/24/2020 | Europe / Belgium / Hoeilaart                  |
| EPI_ISL_735104 | 10/15/2020 | 12/24/2020 | Europe / Belgium / Hoeilaart                  |
| EPI_ISL_735105 | 10/15/2020 | 12/24/2020 | Europe / Belgium / Hoeilaart                  |
| EPI_ISL_735106 | 10/18/2020 | 12/24/2020 | Europe / Belgium / Sint-Stevens-Woluwe        |
| EPI_ISL_735107 | 10/18/2020 | 12/24/2020 | Europe / Belgium / Sint-Lambrechts-Woluwe     |
| EPI_ISL_735108 | 10/18/2020 | 12/24/2020 | Europe / Belgium / Sint-Stevens-Woluwe        |
| EPI_ISL_735109 | 10/18/2020 | 12/24/2020 | Europe / Belgium / Bierbeek                   |
| EPI_ISL_735110 | 10/18/2020 | 12/24/2020 | Europe / Belgium / Hever                      |
| EPI_ISL_735111 | 10/18/2020 | 12/24/2020 | Europe / Belgium / Overijse                   |
| EPI_ISL_735112 | 10/18/2020 | 12/24/2020 | Europe / Belgium / Sint-Stevens-Woluwe        |
| EPI_ISL_735113 | 10/18/2020 | 12/24/2020 | Europe / Belgium / Anderlecht                 |
| EPI_ISL_735114 | 10/18/2020 | 12/24/2020 | Europe / Belgium / Sint-Stevens-Woluwe        |
| EPI_ISL_735115 | 10/18/2020 | 12/24/2020 | Europe / Belgium / Boortmeerbeek              |
| EPI_ISL_735116 | 10/18/2020 | 12/24/2020 | Europe / Belgium / Leuven                     |
| EPI_ISL_735117 | 10/18/2020 | 12/24/2020 | Europe / Belgium / Ophain-bois-seigneur-isaac |
| EPI_ISL_735118 | 10/16/2020 | 12/24/2020 | Europe / Belgium / Tervuren                   |
| EPI_ISL_735119 | 10/18/2020 | 12/24/2020 | Europe / Belgium / Kessel-Lo                  |
| EPI_ISL_735120 | 10/18/2020 | 12/24/2020 | Europe / Belgium / Sint-Stevens-Woluwe        |
| EPI_ISL_735121 | 10/18/2020 | 12/24/2020 | Europe / Belgium / Tervuren                   |
| EPI_ISL_735122 | 10/18/2020 | 12/24/2020 | Europe / Belgium / Heverlee                   |
| EPI_ISL_735123 | 10/18/2020 | 12/24/2020 | Europe / Belgium / Kessel-Lo                  |

|                |            |            |                                       |
|----------------|------------|------------|---------------------------------------|
| EPI_ISL_735124 | 10/18/2020 | 12/24/2020 | Europe / Belgium / Winksele           |
| EPI_ISL_735125 | 10/18/2020 | 12/24/2020 | Europe / Belgium / Kessel-Lo          |
| EPI_ISL_735126 | 10/18/2020 | 12/24/2020 | Europe / Belgium / Heverlee           |
| EPI_ISL_735127 | 10/18/2020 | 12/24/2020 | Europe / Belgium / Kessel-Lo          |
| EPI_ISL_735128 | 10/18/2020 | 12/24/2020 | Europe / Belgium / Hoeilaart          |
| EPI_ISL_735129 | 10/18/2020 | 12/24/2020 | Europe / Belgium / Tervuren           |
| EPI_ISL_735130 | 10/18/2020 | 12/24/2020 | Europe / Belgium / Tervuren           |
| EPI_ISL_735131 | 10/18/2020 | 12/24/2020 | Europe / Belgium / Huldenberg         |
| EPI_ISL_735132 | 10/18/2020 | 12/24/2020 | Europe / Belgium / Overijse           |
| EPI_ISL_735133 | 10/18/2020 | 12/24/2020 | Europe / Belgium / Sint-Joris-Weert   |
| EPI_ISL_735134 | 10/18/2020 | 12/24/2020 | Europe / Belgium / Kessel-Lo          |
| EPI_ISL_735135 | 10/18/2020 | 12/24/2020 | Europe / Belgium / Bierbeek           |
| EPI_ISL_735136 | 10/18/2020 | 12/24/2020 | Europe / Belgium / Leuven             |
| EPI_ISL_735137 | 10/18/2020 | 12/24/2020 | Europe / Belgium / Holsbeek           |
| EPI_ISL_735138 | 10/18/2020 | 12/24/2020 | Europe / Belgium / Wilsele            |
| EPI_ISL_735139 | 10/18/2020 | 12/24/2020 | Europe / Belgium / Huldenberg         |
| EPI_ISL_735140 | 10/19/2020 | 12/24/2020 | Europe / Belgium / Molenbeek-Wersbeek |
| EPI_ISL_735141 | 10/19/2020 | 12/24/2020 | Europe / Belgium / Kraainem           |
| EPI_ISL_735142 | 10/19/2020 | 12/24/2020 | Europe / Belgium / Hoeilaart          |
| EPI_ISL_735143 | 10/19/2020 | 12/24/2020 | Europe / Belgium / Bost               |
| EPI_ISL_735144 | 10/19/2020 | 12/24/2020 | Europe / Belgium / Bierbeek           |
| EPI_ISL_735145 | 10/19/2020 | 12/24/2020 | Europe / Belgium / Kapellen           |
| EPI_ISL_735146 | 10/19/2020 | 12/24/2020 | Europe / Belgium / Bost               |
| EPI_ISL_735147 | 10/19/2020 | 12/24/2020 | Europe / Belgium / Bunsbeek           |
| EPI_ISL_735148 | 10/19/2020 | 12/24/2020 | Europe / Belgium / Antwerp            |
| EPI_ISL_735149 | 10/19/2020 | 12/24/2020 | Europe / Belgium / Tervuren           |
| EPI_ISL_735150 | 10/19/2020 | 12/24/2020 | Europe / Belgium / Kessel-Lo          |
| EPI_ISL_735151 | 10/19/2020 | 12/24/2020 | Europe / Belgium / Tervuren           |
| EPI_ISL_735152 | 10/19/2020 | 12/24/2020 | Europe / Belgium / Bost               |
| EPI_ISL_735153 | 10/19/2020 | 12/24/2020 | Europe / Belgium / Hoogstraten        |
| EPI_ISL_735154 | 10/19/2020 | 12/24/2020 | Europe / Belgium / Rijkevorsel        |
| EPI_ISL_735155 | 10/19/2020 | 12/24/2020 | Europe / Belgium / Kasterlee          |
| EPI_ISL_735156 | 10/19/2020 | 12/24/2020 | Europe / Belgium / Nieuwerkerken      |
| EPI_ISL_735157 | 10/19/2020 | 12/24/2020 | Europe / Belgium / Maaseik            |
| EPI_ISL_735158 | 10/19/2020 | 12/24/2020 | Europe / Belgium / Puurs              |
| EPI_ISL_735159 | 10/19/2020 | 12/24/2020 | Europe / Belgium / Ans                |
| EPI_ISL_735160 | 10/19/2020 | 12/24/2020 | Europe / Belgium / Herk-de-Stad       |
| EPI_ISL_735161 | 10/16/2020 | 12/24/2020 | Europe / Belgium / Hoeilaart          |
| EPI_ISL_735162 | 10/19/2020 | 12/24/2020 | Europe / Belgium / Leuven             |
| EPI_ISL_735163 | 10/19/2020 | 12/24/2020 | Europe / Belgium / Sint-Joris-Weert   |
| EPI_ISL_735164 | 10/19/2020 | 12/24/2020 | Europe / Belgium / Schriek            |
| EPI_ISL_735165 | 10/19/2020 | 12/24/2020 | Europe / Belgium / Tervuren           |
| EPI_ISL_735166 | 10/19/2020 | 12/24/2020 | Europe / Belgium / Huldenberg         |
| EPI_ISL_735167 | 10/19/2020 | 12/24/2020 | Europe / Belgium / Huldenberg         |
| EPI_ISL_735168 | 10/19/2020 | 12/24/2020 | Europe / Belgium / Nossegem           |
| EPI_ISL_735169 | 10/19/2020 | 12/24/2020 | Europe / Belgium / Nossegem           |
| EPI_ISL_735170 | 10/19/2020 | 12/24/2020 | Europe / Belgium / Kraainem           |



|                |            |            |                                       |
|----------------|------------|------------|---------------------------------------|
| EPI_ISL_735171 | 10/19/2020 | 12/24/2020 | Europe / Belgium / Oostende           |
| EPI_ISL_735172 | 10/19/2020 | 12/24/2020 | Europe / Belgium / Bost               |
| EPI_ISL_735173 | 10/19/2020 | 12/24/2020 | Europe / Belgium / Overijse           |
| EPI_ISL_735174 | 10/19/2020 | 12/24/2020 | Europe / Belgium / Kessel-Lo          |
| EPI_ISL_735175 | 10/19/2020 | 12/24/2020 | Europe / Belgium / Sint-Pieter-Woluwe |
| EPI_ISL_735176 | 10/19/2020 | 12/24/2020 | Europe / Belgium / Winksele           |
| EPI_ISL_735177 | 10/19/2020 | 12/24/2020 | Europe / Belgium / Berchem            |
| EPI_ISL_735178 | 10/19/2020 | 12/24/2020 | Europe / Belgium / Veerle             |
| EPI_ISL_735179 | 10/19/2020 | 12/24/2020 | Europe / Belgium / Winksele           |
| EPI_ISL_735180 | 10/19/2020 | 12/24/2020 | Europe / Belgium / Wezembeek-Oppem    |
| EPI_ISL_735181 | 10/19/2020 | 12/24/2020 | Europe / Belgium / Hoeilaart          |
| EPI_ISL_735182 | 10/19/2020 | 12/24/2020 | Europe / Belgium / Overijse           |
| EPI_ISL_735183 | 10/19/2020 | 12/24/2020 | Europe / Belgium / Haacht             |
| EPI_ISL_735184 | 10/19/2020 | 12/24/2020 | Europe / Belgium / Nimy               |
| EPI_ISL_735185 | 10/19/2020 | 12/24/2020 | Europe / Belgium / Winksele           |
| EPI_ISL_735186 | 10/19/2020 | 12/24/2020 | Europe / Belgium / Hoeilaart          |
| EPI_ISL_735187 | 10/19/2020 | 12/24/2020 | Europe / Belgium / Bunsbeek           |
| EPI_ISL_735188 | 10/19/2020 | 12/24/2020 | Europe / Belgium / Rotselaar          |
| EPI_ISL_735189 | 10/19/2020 | 12/24/2020 | Europe / Belgium / Everberg           |
| EPI_ISL_735190 | 10/19/2020 | 12/24/2020 | Europe / Belgium / Sterrebeek         |
| EPI_ISL_735191 | 10/19/2020 | 12/24/2020 | Europe / Belgium / Blanden            |
| EPI_ISL_735192 | 10/19/2020 | 12/24/2020 | Europe / Belgium / Bierbeek           |
| EPI_ISL_735193 | 10/19/2020 | 12/24/2020 | Europe / Belgium / Tervuren           |
| EPI_ISL_735194 | 10/19/2020 | 12/24/2020 | Europe / Belgium / Overijse           |
| EPI_ISL_735195 | 10/19/2020 | 12/24/2020 | Europe / Belgium / Nossegem           |
| EPI_ISL_735196 | 10/19/2020 | 12/24/2020 | Europe / Belgium / Wezembeek-Oppem    |
| EPI_ISL_735197 | 10/19/2020 | 12/24/2020 | Europe / Belgium / Tervuren           |
| EPI_ISL_735198 | 10/19/2020 | 12/24/2020 | Europe / Belgium / Nossegem           |
| EPI_ISL_735199 | 10/19/2020 | 12/24/2020 | Europe / Belgium / Diest              |
| EPI_ISL_735200 | 10/19/2020 | 12/24/2020 | Europe / Belgium / Leuven             |
| EPI_ISL_735201 | 10/19/2020 | 12/24/2020 | Europe / Belgium / Bost               |
| EPI_ISL_735202 | 10/19/2020 | 12/24/2020 | Europe / Belgium / Hannut             |
| EPI_ISL_735203 | 10/19/2020 | 12/24/2020 | Europe / Belgium / Sterrebeek         |
| EPI_ISL_735204 | 10/19/2020 | 12/24/2020 | Europe / Belgium / Kortenberg         |
| EPI_ISL_735205 | 10/19/2020 | 12/24/2020 | Europe / Belgium / Winksele           |
| EPI_ISL_735206 | 10/19/2020 | 12/24/2020 | Europe / Belgium / Bost               |
| EPI_ISL_735207 | 10/19/2020 | 12/24/2020 | Europe / Belgium / Blanden            |
| EPI_ISL_735208 | 10/19/2020 | 12/24/2020 | Europe / Belgium / Heverlee           |
| EPI_ISL_735209 | 10/19/2020 | 12/24/2020 | Europe / Belgium / Erps-Kwerps        |
| EPI_ISL_735210 | 10/20/2020 | 12/24/2020 | Europe / Belgium / Keerbergen         |
| EPI_ISL_735211 | 10/20/2020 | 12/24/2020 | Europe / Belgium / Grimbergen         |
| EPI_ISL_735212 | 10/20/2020 | 12/24/2020 | Europe / Belgium / Bertem             |
| EPI_ISL_735213 | 10/20/2020 | 12/24/2020 | Europe / Belgium / Nossegem           |
| EPI_ISL_735214 | 10/20/2020 | 12/24/2020 | Europe / Belgium / Nossegem           |
| EPI_ISL_735215 | 11/2/2020  | 12/24/2020 | Europe / Belgium / Meulebeke          |
| EPI_ISL_735216 | 11/2/2020  | 12/24/2020 | Europe / Belgium / Meulebeke          |
| EPI_ISL_735217 | 11/3/2020  | 12/24/2020 | Europe / Belgium / Roeselare          |

|                |            |            |                                                    |
|----------------|------------|------------|----------------------------------------------------|
| EPI_ISL_735218 | 11/3/2020  | 12/24/2020 | Europe / Belgium / Meulebeke                       |
| EPI_ISL_735219 | 11/3/2020  | 12/24/2020 | Europe / Belgium / Ieper                           |
| EPI_ISL_735220 | 11/3/2020  | 12/24/2020 | Europe / Belgium / Antwerp                         |
| EPI_ISL_735221 | 11/27/2020 | 12/24/2020 | Europe / Belgium / Riemst                          |
| EPI_ISL_735222 | 11/27/2020 | 12/24/2020 | Europe / Belgium / Riemst                          |
| EPI_ISL_735223 | 11/27/2020 | 12/24/2020 | Europe / Belgium / Bilzen                          |
| EPI_ISL_735224 | 11/27/2020 | 12/24/2020 | Europe / Belgium / Riemst                          |
| EPI_ISL_735225 | 11/27/2020 | 12/24/2020 | Europe / Belgium / Bilzen                          |
| EPI_ISL_735226 | 11/27/2020 | 12/24/2020 | Europe / Belgium / Bilzen                          |
| EPI_ISL_735227 | 11/27/2020 | 12/24/2020 | Europe / Belgium / Riemst                          |
| EPI_ISL_735228 | 11/27/2020 | 12/24/2020 | Europe / Belgium / Bilzen                          |
| EPI_ISL_735229 | 11/27/2020 | 12/24/2020 | Europe / Belgium / Bilzen                          |
| EPI_ISL_735230 | 11/27/2020 | 12/24/2020 | Europe / Belgium / Bilzen                          |
| EPI_ISL_735231 | 11/27/2020 | 12/24/2020 | Europe / Belgium / Riemst                          |
| EPI_ISL_735232 | 11/27/2020 | 12/24/2020 | Europe / Belgium / Bilzen                          |
| EPI_ISL_735233 | 11/27/2020 | 12/24/2020 | Europe / Belgium / Bilzen                          |
| EPI_ISL_735234 | 11/27/2020 | 12/24/2020 | Europe / Belgium / Bilzen                          |
| EPI_ISL_735235 | 11/27/2020 | 12/24/2020 | Europe / Belgium / Tongeren                        |
| EPI_ISL_735236 | 11/30/2020 | 12/24/2020 | Europe / Belgium / Assenede                        |
| EPI_ISL_735237 | 11/30/2020 | 12/24/2020 | Europe / Belgium / Assenede                        |
| EPI_ISL_735238 | 11/30/2020 | 12/24/2020 | Europe / Belgium / Assenede                        |
| EPI_ISL_735239 | 12/1/2020  | 12/24/2020 | Europe / Belgium / Oostrozebeke                    |
| EPI_ISL_735240 | 12/1/2020  | 12/24/2020 | Europe / Belgium / Oostrozebeke                    |
| EPI_ISL_735241 | 4/13/2020  | 12/24/2020 | Europe / France / Hauts-de-France / Lyz-Les-Lannoy |
| EPI_ISL_735242 | 4/14/2020  | 12/24/2020 | Europe / France / Hauts-de-France / Tourcoing      |
| EPI_ISL_735243 | 4/17/2020  | 12/24/2020 | Europe / France / Hauts-de-France / Roubaix        |
| EPI_ISL_735244 | 4/23/2020  | 12/24/2020 | Europe / France / Normandie / Bernieres-Le-Patry   |
| EPI_ISL_735245 | 5/8/2020   | 12/24/2020 | Europe / France / Île-de-France / Groslay          |
| EPI_ISL_735246 | 5/10/2020  | 12/24/2020 | Europe / France / Hauts-de-France / Wambrechies    |
| EPI_ISL_735247 | 7/3/2020   | 12/24/2020 | Europe / France / Hauts-de-France / Leers          |
| EPI_ISL_735248 | 4/26/2020  | 12/24/2020 | Europe / Netherlands / Limburg / Roermond          |
| EPI_ISL_735249 | 4/29/2020  | 12/24/2020 | Europe / Belgium / Leuven                          |
| EPI_ISL_735260 | 4/15/2020  | 12/25/2020 | Europe / Turkey / Istanbul                         |
| EPI_ISL_735261 | 4/17/2020  | 12/25/2020 | Europe / Turkey / Istanbul                         |
| EPI_ISL_735262 | 4/17/2020  | 12/25/2020 | Europe / Turkey / Istanbul                         |
| EPI_ISL_735263 | 4/22/2020  | 12/25/2020 | Europe / Turkey / Istanbul                         |
| EPI_ISL_735264 | 4/22/2020  | 12/25/2020 | Europe / Turkey / Istanbul                         |
| EPI_ISL_735265 | 4/22/2020  | 12/25/2020 | Europe / Turkey / Istanbul                         |
| EPI_ISL_735266 | 4/22/2020  | 12/25/2020 | Europe / Turkey / Istanbul                         |
| EPI_ISL_735267 | 4/29/2020  | 12/25/2020 | Europe / Turkey / Istanbul                         |
| EPI_ISL_735268 | 4/30/2020  | 12/25/2020 | Europe / Turkey / Istanbul                         |
| EPI_ISL_735269 | 4/27/2020  | 12/25/2020 | Europe / Turkey / Istanbul                         |
| EPI_ISL_735270 | 4/29/2020  | 12/25/2020 | Europe / Turkey / Istanbul                         |
| EPI_ISL_735271 | 4/29/2020  | 12/25/2020 | Europe / Turkey / Istanbul                         |
| EPI_ISL_735272 | 4/29/2020  | 12/25/2020 | Europe / Turkey / Istanbul                         |
| EPI_ISL_735273 | 4/30/2020  | 12/25/2020 | Europe / Turkey / Istanbul                         |
| EPI_ISL_735274 | 4/29/2020  | 12/25/2020 | Europe / Turkey / Istanbul                         |





|                |            |            |                                                            |
|----------------|------------|------------|------------------------------------------------------------|
| EPI_ISL_735373 | 6/1/2020   | 12/25/2020 | Europe / Turkey / Istanbul                                 |
| EPI_ISL_735374 | 7/9/2020   | 12/25/2020 | North America / USA / California / Los Angeles County      |
| EPI_ISL_735375 | 7/9/2020   | 12/25/2020 | North America / USA / California / Los Angeles County      |
| EPI_ISL_735376 | 7/9/2020   | 12/25/2020 | North America / USA / California / Los Angeles County      |
| EPI_ISL_735377 | 7/9/2020   | 12/25/2020 | North America / USA / California / Los Angeles County      |
| EPI_ISL_735378 | 7/13/2020  | 12/25/2020 | North America / USA / California / Los Angeles County      |
| EPI_ISL_735379 | 7/13/2020  | 12/25/2020 | North America / USA / California / Los Angeles County      |
| EPI_ISL_735380 | 7/13/2020  | 12/25/2020 | North America / USA / California / Los Angeles County      |
| EPI_ISL_735381 | 7/15/2020  | 12/25/2020 | North America / USA / California / Los Angeles County      |
| EPI_ISL_735382 | 7/15/2020  | 12/25/2020 | North America / USA / California / Los Angeles County      |
| EPI_ISL_735383 | 7/14/2020  | 12/25/2020 | North America / USA / California / Los Angeles County      |
| EPI_ISL_735384 | 12/20/2020 | 12/25/2020 | Europe / Ireland / Dublin                                  |
| EPI_ISL_735385 | 12/19/2020 | 12/25/2020 | Europe / Ireland / Kilkenny                                |
| EPI_ISL_735386 | 12/18/2020 | 12/25/2020 | Europe / Ireland / Dublin                                  |
| EPI_ISL_735387 | 12/20/2020 | 12/25/2020 | Europe / Ireland / Dublin                                  |
| EPI_ISL_735388 | 12/21/2020 | 12/25/2020 | Europe / Ireland / Dublin                                  |
| EPI_ISL_735389 | 12/20/2020 | 12/25/2020 | Europe / Ireland / Dublin                                  |
| EPI_ISL_735391 | 12/21/2020 | 12/25/2020 | Europe / France / Centre-Val de Loire / Tours              |
| EPI_ISL_735396 | 7/5/2020   | 12/25/2020 | South America / Brazil / Sao Paulo / Taboao da Serra       |
| EPI_ISL_735397 | 7/9/2020   | 12/25/2020 | South America / Brazil / Sao Paulo / Hortolandia           |
| EPI_ISL_735398 | 7/9/2020   | 12/25/2020 | South America / Brazil / Sao Paulo / Sao Paulo             |
| EPI_ISL_735399 | 4/6/2020   | 12/25/2020 | South America / Brazil / Sao Paulo / Sao Paulo             |
| EPI_ISL_735400 | 7/9/2020   | 12/25/2020 | South America / Brazil / Sao Paulo / Santos                |
| EPI_ISL_735401 | 7/4/2020   | 12/25/2020 | South America / Brazil / Sao Paulo / Rio Claro             |
| EPI_ISL_735402 | 7/4/2020   | 12/25/2020 | South America / Brazil / Sao Paulo / Rio Claro             |
| EPI_ISL_735403 | 7/4/2020   | 12/25/2020 | South America / Brazil / Sao Paulo / Rio Claro             |
| EPI_ISL_735404 | 7/4/2020   | 12/25/2020 | South America / Brazil / Sao Paulo / Rio Claro             |
| EPI_ISL_735405 | 6/16/2020  | 12/25/2020 | South America / Brazil / Sao Paulo / Birigui               |
| EPI_ISL_735406 | 7/8/2020   | 12/25/2020 | South America / Brazil / Sao Paulo / Santa Isabel          |
| EPI_ISL_735407 | 6/26/2020  | 12/25/2020 | South America / Brazil / Sao Paulo / Marilia               |
| EPI_ISL_735408 | 6/25/2020  | 12/25/2020 | South America / Brazil / Sao Paulo / Jandira               |
| EPI_ISL_735409 | 6/17/2020  | 12/25/2020 | South America / Brazil / Sao Paulo / Campinas              |
| EPI_ISL_735410 | 7/3/2020   | 12/25/2020 | South America / Brazil / Sao Paulo / Rio Claro             |
| EPI_ISL_735411 | 7/6/2020   | 12/25/2020 | South America / Brazil / Sao Paulo / Diadema               |
| EPI_ISL_735412 | 6/15/2020  | 12/25/2020 | South America / Brazil / Sao Paulo / Sao Paulo             |
| EPI_ISL_735413 | 6/17/2020  | 12/25/2020 | South America / Brazil / Sao Paulo / Sao Paulo             |
| EPI_ISL_735414 | 6/26/2020  | 12/25/2020 | South America / Brazil / Sao Paulo / Mongagua              |
| EPI_ISL_735415 | 6/25/2020  | 12/25/2020 | South America / Brazil / Sao Paulo / Mongagua              |
| EPI_ISL_735416 | 6/26/2020  | 12/25/2020 | South America / Brazil / Sao Paulo / Mococa                |
| EPI_ISL_735417 | 6/26/2020  | 12/25/2020 | South America / Brazil / Sao Paulo / Mongagua              |
| EPI_ISL_735418 | 6/27/2020  | 12/25/2020 | South America / Brazil / Sao Paulo / Taubate               |
| EPI_ISL_735419 | 7/1/2020   | 12/25/2020 | South America / Brazil / Sao Paulo / Juquia                |
| EPI_ISL_735420 | 7/1/2020   | 12/25/2020 | South America / Brazil / Sao Paulo / Sao Bernardo do Campo |
| EPI_ISL_735421 | 7/1/2020   | 12/25/2020 | South America / Brazil / Sao Paulo / Sao Bernardo do Campo |
| EPI_ISL_735422 | 6/20/2020  | 12/25/2020 | South America / Brazil / Sao Paulo / Sao Bernardo do Campo |
| EPI_ISL_735423 | 7/1/2020   | 12/25/2020 | South America / Brazil / Sao Paulo / Diadema               |
| EPI_ISL_735424 | 7/1/2020   | 12/25/2020 | South America / Brazil / Sao Paulo / Diadema               |

|                |            |                                                                |
|----------------|------------|----------------------------------------------------------------|
| EPI_ISL_735425 | 6/20/2020  | 12/25/2020 South America / Brazil / Sao Paulo / Ribeirao Pires |
| EPI_ISL_735426 | 7/1/2020   | 12/25/2020 South America / Brazil / Sao Paulo / Diadema        |
| EPI_ISL_735427 | 7/1/2020   | 12/25/2020 South America / Brazil / Sao Paulo / Santos         |
| EPI_ISL_735428 | 7/2/2020   | 12/25/2020 South America / Brazil / Sao Paulo / Sao Paulo      |
| EPI_ISL_735429 | 7/1/2020   | 12/25/2020 South America / Brazil / Sao Paulo / Sao Paulo      |
| EPI_ISL_735430 | 7/1/2020   | 12/25/2020 South America / Brazil / Sao Paulo / Santos         |
| EPI_ISL_735431 | 7/2/2020   | 12/25/2020 South America / Brazil / Sao Paulo / Sao Paulo      |
| EPI_ISL_735432 | 7/2/2020   | 12/25/2020 South America / Brazil / Sao Paulo / Sao Paulo      |
| EPI_ISL_735433 | 7/1/2020   | 12/25/2020 South America / Brazil / Sao Paulo / Cajati         |
| EPI_ISL_735436 | 8/27/2020  | 12/25/2020 Africa / Rwanda / Kigali                            |
| EPI_ISL_735437 | 8/30/2020  | 12/25/2020 Africa / Rwanda                                     |
| EPI_ISL_735438 | 8/30/2020  | 12/25/2020 Africa / Rwanda / Kigali                            |
| EPI_ISL_735439 | 12/18/2020 | 12/25/2020 Asia / Japan                                        |
| EPI_ISL_735440 | 12/20/2020 | 12/25/2020 Asia / Japan                                        |
| EPI_ISL_735441 | 12/21/2020 | 12/25/2020 Asia / Japan                                        |
| EPI_ISL_735442 | 12/21/2020 | 12/25/2020 Asia / Japan                                        |
| EPI_ISL_735443 | 12/21/2020 | 12/25/2020 Asia / Japan                                        |
| EPI_ISL_735444 | 10/19/2020 | 12/25/2020 Africa / Rwanda / Kigali                            |
| EPI_ISL_735445 | 10/22/2020 | 12/25/2020 Africa / Rwanda / Kigali                            |
| EPI_ISL_735446 | 10/17/2020 | 12/25/2020 Africa / Rwanda / Kigali                            |
| EPI_ISL_735447 | 10/17/2020 | 12/25/2020 Africa / Rwanda / Kigali                            |
| EPI_ISL_735448 | 10/19/2020 | 12/25/2020 Africa / Rwanda / Kigali                            |
| EPI_ISL_735449 | 3/18/2020  | 12/25/2020 North America / USA / Washington                    |
| EPI_ISL_735450 | 3/14/2020  | 12/25/2020 North America / USA / Washington                    |
| EPI_ISL_735451 | 9/28/2020  | 12/25/2020 North America / USA / Washington                    |
| EPI_ISL_735452 | 10/13/2020 | 12/25/2020 North America / USA / Washington                    |
| EPI_ISL_735453 | 10/13/2020 | 12/25/2020 North America / USA / Washington                    |
| EPI_ISL_735457 | 10/14/2020 | 12/25/2020 North America / USA / Washington                    |
| EPI_ISL_735458 | 10/10/2020 | 12/25/2020 North America / USA / Washington                    |
| EPI_ISL_735459 | 10/13/2020 | 12/25/2020 North America / USA / Washington                    |
| EPI_ISL_735461 | 10/13/2020 | 12/25/2020 North America / USA / Washington                    |
| EPI_ISL_735462 | 10/13/2020 | 12/25/2020 North America / USA / Washington                    |
| EPI_ISL_735463 | 10/13/2020 | 12/25/2020 North America / USA / Washington                    |
| EPI_ISL_735464 | 10/12/2020 | 12/25/2020 North America / USA / Washington                    |
| EPI_ISL_735465 | 10/12/2020 | 12/25/2020 North America / USA / Washington                    |
| EPI_ISL_735466 | 10/13/2020 | 12/25/2020 North America / USA                                 |
| EPI_ISL_735469 | 10/13/2020 | 12/25/2020 North America / USA / Washington                    |
| EPI_ISL_735470 | 10/12/2020 | 12/25/2020 North America / USA / Washington                    |
| EPI_ISL_735472 | 10/10/2020 | 12/25/2020 North America / USA / Washington                    |
| EPI_ISL_735473 | 10/10/2020 | 12/25/2020 North America / USA / Washington                    |
| EPI_ISL_735474 | 10/10/2020 | 12/25/2020 North America / USA / Washington                    |
| EPI_ISL_735475 | 10/14/2020 | 12/25/2020 North America / USA / Washington                    |
| EPI_ISL_735477 | 10/14/2020 | 12/25/2020 North America / USA / Washington                    |
| EPI_ISL_735478 | 10/14/2020 | 12/25/2020 North America / USA / Washington                    |
| EPI_ISL_735479 | 10/14/2020 | 12/25/2020 North America / USA / Washington                    |
| EPI_ISL_735482 | 10/14/2020 | 12/25/2020 North America / USA / Washington                    |
| EPI_ISL_735484 | 10/13/2020 | 12/25/2020 North America / USA / Washington                    |

|                |            |            |                                                    |
|----------------|------------|------------|----------------------------------------------------|
| EPI_ISL_735485 | 10/15/2020 | 12/25/2020 | North America / USA / Washington                   |
| EPI_ISL_735489 | 10/18/2020 | 12/25/2020 | North America / USA / Washington                   |
| EPI_ISL_735490 | 11/26/2020 | 12/25/2020 | Asia / Bangladesh / Chittagong                     |
| EPI_ISL_735492 | 10/16/2020 | 12/25/2020 | Asia / Bangladesh / Chittagong                     |
| EPI_ISL_735493 | 11/22/2020 | 12/25/2020 | Asia / Bangladesh / Chittagong / Coxâ€™s Bazar     |
| EPI_ISL_735494 | 11/24/2020 | 12/25/2020 | Asia / Bangladesh / Chittagong / Bandarban         |
| EPI_ISL_735495 | 11/15/2020 | 12/25/2020 | Asia / Bangladesh / Chittagong / Chandpur          |
| EPI_ISL_735496 | 11/23/2020 | 12/25/2020 | Asia / Bangladesh / Chittagong / Khagrachari       |
| EPI_ISL_735497 | 11/21/2020 | 12/25/2020 | Asia / Bangladesh / Chittagong                     |
| EPI_ISL_735498 | 12/4/2020  | 12/25/2020 | Asia / Bangladesh / Chittagong                     |
| EPI_ISL_735499 | 12/5/2020  | 12/25/2020 | Asia / Bangladesh / Chittagong                     |
| EPI_ISL_735500 | 12/2/2020  | 12/25/2020 | Asia / Bangladesh / Chittagong                     |
| EPI_ISL_735501 | 8/23/2020  | 12/25/2020 | Asia / Bangladesh / Chittagong / Feni              |
| EPI_ISL_735502 | 8/26/2020  | 12/25/2020 | Asia / Bangladesh / Chittagong / Noakhali          |
| EPI_ISL_735503 | 12/19/2020 | 12/25/2020 | Oceania / Australia / Australian Capital Territory |
| EPI_ISL_735510 | 12/20/2020 | 12/26/2020 | Europe / Italy / Lazio                             |
| EPI_ISL_735511 | 12/21/2020 | 12/26/2020 | Europe / Italy / Lazio                             |
| EPI_ISL_735512 | 12/12/2020 | 12/26/2020 | Europe / United Kingdom / England                  |
| EPI_ISL_735513 | 12/13/2020 | 12/26/2020 | Europe / United Kingdom / England                  |
| EPI_ISL_735514 | 12/13/2020 | 12/26/2020 | Europe / United Kingdom / England                  |
| EPI_ISL_735515 | 12/12/2020 | 12/26/2020 | Europe / United Kingdom / England                  |
| EPI_ISL_735516 | 12/13/2020 | 12/26/2020 | Europe / United Kingdom / England                  |
| EPI_ISL_735517 | 12/13/2020 | 12/26/2020 | Europe / United Kingdom / England                  |
| EPI_ISL_735518 | 12/13/2020 | 12/26/2020 | Europe / United Kingdom / England                  |
| EPI_ISL_735520 | 12/13/2020 | 12/26/2020 | Europe / United Kingdom / England                  |
| EPI_ISL_735521 | 12/13/2020 | 12/26/2020 | Europe / United Kingdom / England                  |
| EPI_ISL_735522 | 12/12/2020 | 12/26/2020 | Europe / United Kingdom / England                  |
| EPI_ISL_735524 | 12/13/2020 | 12/26/2020 | Europe / United Kingdom / England                  |
| EPI_ISL_735525 | 12/13/2020 | 12/26/2020 | Europe / United Kingdom / England                  |
| EPI_ISL_735526 | 12/13/2020 | 12/26/2020 | Europe / United Kingdom / England                  |
| EPI_ISL_735528 | 12/13/2020 | 12/26/2020 | Europe / United Kingdom / England                  |
| EPI_ISL_735529 | 12/13/2020 | 12/26/2020 | Europe / United Kingdom / England                  |
| EPI_ISL_735531 | 12/13/2020 | 12/26/2020 | Europe / United Kingdom / England                  |
| EPI_ISL_735533 | 12/13/2020 | 12/26/2020 | Europe / United Kingdom / England                  |
| EPI_ISL_735534 | 12/13/2020 | 12/26/2020 | Europe / United Kingdom / England                  |
| EPI_ISL_735535 | 12/13/2020 | 12/26/2020 | Europe / United Kingdom / England                  |
| EPI_ISL_735536 | 12/13/2020 | 12/26/2020 | Europe / United Kingdom / England                  |
| EPI_ISL_735537 | 12/13/2020 | 12/26/2020 | Europe / United Kingdom / England                  |
| EPI_ISL_735538 | 12/13/2020 | 12/26/2020 | Europe / United Kingdom / England                  |
| EPI_ISL_735539 | 12/13/2020 | 12/26/2020 | Europe / United Kingdom / England                  |
| EPI_ISL_735540 | 12/13/2020 | 12/26/2020 | Europe / United Kingdom / England                  |
| EPI_ISL_735542 | 12/13/2020 | 12/26/2020 | Europe / United Kingdom / England                  |
| EPI_ISL_735543 | 12/13/2020 | 12/26/2020 | Europe / United Kingdom / England                  |
| EPI_ISL_735544 | 12/13/2020 | 12/26/2020 | Europe / United Kingdom / England                  |
| EPI_ISL_735545 | 12/13/2020 | 12/26/2020 | Europe / United Kingdom / England                  |
| EPI_ISL_735547 | 12/13/2020 | 12/26/2020 | Europe / United Kingdom / England                  |
| EPI_ISL_735548 | 12/13/2020 | 12/26/2020 | Europe / United Kingdom / England                  |























































|                |            |                                      |
|----------------|------------|--------------------------------------|
| EPI_ISL_736877 | 10/26/2020 | 12/26/2020 Europe / Italy / Campania |
| EPI_ISL_736878 | 10/26/2020 | 12/26/2020 Europe / Italy / Campania |
| EPI_ISL_736879 | 10/26/2020 | 12/26/2020 Europe / Italy / Campania |
| EPI_ISL_736880 | 10/26/2020 | 12/26/2020 Europe / Italy / Campania |
| EPI_ISL_736881 | 10/26/2020 | 12/26/2020 Europe / Italy / Campania |
| EPI_ISL_736882 | 10/26/2020 | 12/26/2020 Europe / Italy / Campania |
| EPI_ISL_736883 | 10/26/2020 | 12/26/2020 Europe / Italy / Campania |
| EPI_ISL_736884 | 10/26/2020 | 12/26/2020 Europe / Italy / Campania |
| EPI_ISL_736885 | 10/26/2020 | 12/26/2020 Europe / Italy / Campania |
| EPI_ISL_736886 | 10/26/2020 | 12/26/2020 Europe / Italy / Campania |
| EPI_ISL_736887 | 10/26/2020 | 12/26/2020 Europe / Italy / Campania |
| EPI_ISL_736888 | 10/26/2020 | 12/26/2020 Europe / Italy / Campania |
| EPI_ISL_736889 | 10/26/2020 | 12/26/2020 Europe / Italy / Campania |
| EPI_ISL_736890 | 12/21/2020 | 12/26/2020 Europe / Italy / Campania |
| EPI_ISL_736891 | 12/22/2020 | 12/26/2020 Asia / Japan              |
| EPI_ISL_736892 | 12/20/2020 | 12/26/2020 Asia / Japan              |
| EPI_ISL_736893 | 12/9/2020  | 12/26/2020 Asia / Japan              |
| EPI_ISL_736894 | 12/7/2020  | 12/26/2020 Asia / Japan              |
| EPI_ISL_736895 | 12/11/2020 | 12/26/2020 Asia / Japan              |
| EPI_ISL_736896 | 12/16/2020 | 12/26/2020 Asia / Japan              |
| EPI_ISL_736897 | 12/10/2020 | 12/26/2020 Asia / Japan              |
| EPI_ISL_736898 | 12/11/2020 | 12/26/2020 Asia / Japan              |
| EPI_ISL_736899 | 12/7/2020  | 12/26/2020 Asia / Japan              |
| EPI_ISL_736900 | 12/8/2020  | 12/26/2020 Asia / Japan              |
| EPI_ISL_736901 | 12/9/2020  | 12/26/2020 Asia / Japan              |
| EPI_ISL_736902 | 12/11/2020 | 12/26/2020 Asia / Japan              |
| EPI_ISL_736903 | 12/11/2020 | 12/26/2020 Asia / Japan              |
| EPI_ISL_736904 | 12/6/2020  | 12/26/2020 Asia / Japan              |
| EPI_ISL_736905 | 12/7/2020  | 12/26/2020 Asia / Japan              |
| EPI_ISL_736906 | 12/8/2020  | 12/26/2020 Asia / Japan              |
| EPI_ISL_736907 | 12/8/2020  | 12/26/2020 Asia / Japan              |
| EPI_ISL_736908 | 12/11/2020 | 12/26/2020 Asia / Japan              |
| EPI_ISL_736909 | 12/12/2020 | 12/26/2020 Asia / Japan              |
| EPI_ISL_736910 | 12/13/2020 | 12/26/2020 Asia / Japan              |
| EPI_ISL_736911 | 12/12/2020 | 12/26/2020 Asia / Japan              |
| EPI_ISL_736912 | 12/13/2020 | 12/26/2020 Asia / Japan              |
| EPI_ISL_736913 | 12/13/2020 | 12/26/2020 Asia / Japan              |
| EPI_ISL_736914 | 12/12/2020 | 12/26/2020 Asia / Japan              |
| EPI_ISL_736915 | 12/14/2020 | 12/26/2020 Asia / Japan              |
| EPI_ISL_736916 | 12/15/2020 | 12/26/2020 Asia / Japan              |
| EPI_ISL_736917 | 12/14/2020 | 12/26/2020 Asia / Japan              |
| EPI_ISL_736918 | 12/16/2020 | 12/26/2020 Asia / Japan              |
| EPI_ISL_736919 | 12/17/2020 | 12/26/2020 Asia / Japan              |
| EPI_ISL_736920 | 12/17/2020 | 12/26/2020 Asia / Japan              |
| EPI_ISL_736921 | 12/18/2020 | 12/26/2020 Asia / Japan              |
| EPI_ISL_736922 | 12/19/2020 | 12/26/2020 Asia / Japan              |
| EPI_ISL_736923 | 12/19/2020 | 12/26/2020 Asia / Japan              |



|                |            |                                                                      |
|----------------|------------|----------------------------------------------------------------------|
| EPI_ISL_736924 | 12/19/2020 | 12/26/2020 Asia / Japan                                              |
| EPI_ISL_736926 | 11/26/2020 | 12/26/2020 Africa / South Africa / KwaZulu-Natal / Ugu               |
| EPI_ISL_736927 | 12/7/2020  | 12/26/2020 Africa / South Africa / KwaZulu-Natal / eThekwini         |
| EPI_ISL_736928 | 11/24/2020 | 12/26/2020 Africa / South Africa / Western Cape / Garden Route       |
| EPI_ISL_736929 | 11/24/2020 | 12/26/2020 Africa / South Africa / Western Cape / Garden Route       |
| EPI_ISL_736930 | 12/6/2020  | 12/26/2020 Africa / South Africa / KwaZulu-Natal / eThekwini         |
| EPI_ISL_736931 | 11/25/2020 | 12/26/2020 Africa / South Africa / KwaZulu-Natal / iLembe            |
| EPI_ISL_736932 | 11/25/2020 | 12/26/2020 Africa / South Africa / KwaZulu-Natal / Harry Gwala       |
| EPI_ISL_736933 | 11/25/2020 | 12/26/2020 Africa / South Africa / KwaZulu-Natal / iLembe            |
| EPI_ISL_736934 | 11/25/2020 | 12/26/2020 Africa / South Africa / KwaZulu-Natal / Ugu               |
| EPI_ISL_736935 | 11/26/2020 | 12/26/2020 Africa / South Africa / KwaZulu-Natal / Ugu               |
| EPI_ISL_736936 | 11/19/2020 | 12/26/2020 Africa / South Africa / Eastern Cape / Nelson Mandela Bay |
| EPI_ISL_736937 | 11/19/2020 | 12/26/2020 Africa / South Africa / Eastern Cape / Nelson Mandela Bay |
| EPI_ISL_736938 | 12/7/2020  | 12/26/2020 Africa / South Africa / Eastern Cape / Sarah Baartman     |
| EPI_ISL_736939 | 11/24/2020 | 12/26/2020 Africa / South Africa / Western Cape / Garden Route       |
| EPI_ISL_736940 | 11/25/2020 | 12/26/2020 Africa / South Africa / KwaZulu-Natal / iLembe            |
| EPI_ISL_736941 | 11/26/2020 | 12/26/2020 Africa / South Africa / KwaZulu-Natal / iLembe            |
| EPI_ISL_736942 | 11/24/2020 | 12/26/2020 Africa / South Africa / KwaZulu-Natal / Ugu               |
| EPI_ISL_736943 | 11/24/2020 | 12/26/2020 Africa / South Africa / KwaZulu-Natal / Ugu               |
| EPI_ISL_736944 | 11/24/2020 | 12/26/2020 Africa / South Africa / KwaZulu-Natal / Ugu               |
| EPI_ISL_736945 | 11/25/2020 | 12/26/2020 Africa / South Africa / KwaZulu-Natal / Ugu               |
| EPI_ISL_736946 | 11/25/2020 | 12/26/2020 Africa / South Africa / KwaZulu-Natal / Ugu               |
| EPI_ISL_736947 | 11/25/2020 | 12/26/2020 Africa / South Africa / KwaZulu-Natal / uThukela          |
| EPI_ISL_736948 | 11/25/2020 | 12/26/2020 Africa / South Africa / KwaZulu-Natal / uThukela          |
| EPI_ISL_736949 | 11/26/2020 | 12/26/2020 Africa / South Africa / KwaZulu-Natal / uThukela          |
| EPI_ISL_736950 | 11/26/2020 | 12/26/2020 Africa / South Africa / KwaZulu-Natal / uThukela          |
| EPI_ISL_736951 | 11/26/2020 | 12/26/2020 Africa / South Africa / KwaZulu-Natal / uThukela          |
| EPI_ISL_736952 | 11/26/2020 | 12/26/2020 Africa / South Africa / KwaZulu-Natal / uThukela          |
| EPI_ISL_736953 | 11/25/2020 | 12/26/2020 Africa / South Africa / KwaZulu-Natal / Harry Gwala       |
| EPI_ISL_736954 | 11/25/2020 | 12/26/2020 Africa / South Africa / KwaZulu-Natal / Harry Gwala       |
| EPI_ISL_736955 | 11/25/2020 | 12/26/2020 Africa / South Africa / KwaZulu-Natal / Harry Gwala       |
| EPI_ISL_736956 | 11/24/2020 | 12/26/2020 Africa / South Africa / KwaZulu-Natal / Zululand          |
| EPI_ISL_736957 | 11/20/2020 | 12/26/2020 Africa / South Africa / KwaZulu-Natal / Amathole          |
| EPI_ISL_736958 | 11/20/2020 | 12/26/2020 Africa / South Africa / KwaZulu-Natal / Amathole          |
| EPI_ISL_736959 | 11/20/2020 | 12/26/2020 Africa / South Africa / KwaZulu-Natal / Amathole          |
| EPI_ISL_736960 | 11/19/2020 | 12/26/2020 Africa / South Africa / KwaZulu-Natal / Amathole          |
| EPI_ISL_736961 | 11/19/2020 | 12/26/2020 Africa / South Africa / Eastern Cape / Nelson Mandela Bay |
| EPI_ISL_736962 | 11/19/2020 | 12/26/2020 Africa / South Africa / Eastern Cape / Nelson Mandela Bay |
| EPI_ISL_736963 | 11/19/2020 | 12/26/2020 Africa / South Africa / Eastern Cape / Nelson Mandela Bay |
| EPI_ISL_736964 | 11/19/2020 | 12/26/2020 Africa / South Africa / Eastern Cape / Nelson Mandela Bay |
| EPI_ISL_736965 | 11/19/2020 | 12/26/2020 Africa / South Africa / Eastern Cape / Nelson Mandela Bay |
| EPI_ISL_736966 | 12/6/2020  | 12/26/2020 Africa / South Africa / KwaZulu-Natal / eThekwini         |
| EPI_ISL_736967 | 12/6/2020  | 12/26/2020 Africa / South Africa / KwaZulu-Natal / eThekwini         |
| EPI_ISL_736968 | 12/6/2020  | 12/26/2020 Africa / South Africa / KwaZulu-Natal / eThekwini         |
| EPI_ISL_736969 | 12/1/2020  | 12/26/2020 Africa / South Africa / Eastern Cape / Sarah Baartman     |
| EPI_ISL_736970 | 12/7/2020  | 12/26/2020 Africa / South Africa / Eastern Cape / Sarah Baartman     |
| EPI_ISL_736971 | 12/8/2020  | 12/26/2020 Africa / South Africa / Eastern Cape / Sarah Baartman     |

|                |            |            |                                                                            |
|----------------|------------|------------|----------------------------------------------------------------------------|
| EPI_ISL_736972 | 12/10/2020 | 12/26/2020 | Africa / South Africa / Eastern Cape / Nelson Mandela Bay                  |
| EPI_ISL_736973 | 12/9/2020  | 12/26/2020 | Africa / South Africa / Eastern Cape / Nelson Mandela Bay                  |
| EPI_ISL_736974 | 12/9/2020  | 12/26/2020 | Africa / South Africa / Eastern Cape / Nelson Mandela Bay                  |
| EPI_ISL_736975 | 12/8/2020  | 12/26/2020 | Africa / South Africa / Eastern Cape / Sarah Baartman                      |
| EPI_ISL_736976 | 12/8/2020  | 12/26/2020 | Africa / South Africa / Eastern Cape / Sarah Baartman                      |
| EPI_ISL_736977 | 12/9/2020  | 12/26/2020 | Africa / South Africa / Eastern Cape / Nelson Mandela Bay                  |
| EPI_ISL_736978 | 12/7/2020  | 12/26/2020 | Africa / South Africa / Eastern Cape / Sarah Baartman                      |
| EPI_ISL_736979 | 12/9/2020  | 12/26/2020 | Africa / South Africa / Eastern Cape / Nelson Mandela Bay                  |
| EPI_ISL_736980 | 12/9/2020  | 12/26/2020 | Africa / South Africa / Eastern Cape / Sarah Baartman                      |
| EPI_ISL_736981 | 11/24/2020 | 12/26/2020 | Africa / South Africa / Western Cape / Garden Route                        |
| EPI_ISL_736982 | 11/24/2020 | 12/26/2020 | Africa / South Africa / Western Cape / Garden Route                        |
| EPI_ISL_736983 | 11/24/2020 | 12/26/2020 | Africa / South Africa / Western Cape / Garden Route                        |
| EPI_ISL_736984 | 11/25/2020 | 12/26/2020 | Africa / South Africa / KwaZulu-Natal / iLembe                             |
| EPI_ISL_736985 | 11/25/2020 | 12/26/2020 | Africa / South Africa / KwaZulu-Natal / Ugu                                |
| EPI_ISL_736986 | 11/25/2020 | 12/26/2020 | Africa / South Africa / KwaZulu-Natal / Ugu                                |
| EPI_ISL_736987 | 11/25/2020 | 12/26/2020 | Africa / South Africa / KwaZulu-Natal / Ugu                                |
| EPI_ISL_736988 | 11/25/2020 | 12/26/2020 | Africa / South Africa / KwaZulu-Natal / Ugu                                |
| EPI_ISL_736989 | 11/26/2020 | 12/26/2020 | Africa / South Africa / KwaZulu-Natal / Harry Gwala                        |
| EPI_ISL_736990 | 11/26/2020 | 12/26/2020 | Africa / South Africa / KwaZulu-Natal / iLembe                             |
| EPI_ISL_736991 | 11/27/2020 | 12/26/2020 | Africa / South Africa / KwaZulu-Natal / iLembe                             |
| EPI_ISL_736992 | 11/26/2020 | 12/26/2020 | Africa / South Africa / KwaZulu-Natal / Harry Gwala                        |
| EPI_ISL_736993 | 11/25/2020 | 12/26/2020 | Africa / South Africa / KwaZulu-Natal / Zululand                           |
| EPI_ISL_736994 | 11/25/2020 | 12/26/2020 | Africa / South Africa / KwaZulu-Natal / Zululand                           |
| EPI_ISL_736995 | 12/7/2020  | 12/26/2020 | Africa / South Africa / KwaZulu-Natal / eThekweni                          |
| EPI_ISL_736996 | 12/20/2020 | 12/26/2020 | Europe / Italy / Campania                                                  |
| EPI_ISL_736997 | 12/20/2020 | 12/26/2020 | Europe / Italy / Campania                                                  |
| EPI_ISL_736998 | 10/23/2020 | 12/26/2020 | Europe / Czech Republic / Prague                                           |
| EPI_ISL_736999 | 10/25/2020 | 12/26/2020 | Europe / Czech Republic / Central Bohemian Region / Nová Paka              |
| EPI_ISL_737000 | 10/25/2020 | 12/26/2020 | Europe / Czech Republic / Prague                                           |
| EPI_ISL_737001 | 10/25/2020 | 12/26/2020 | Europe / Czech Republic / Prague                                           |
| EPI_ISL_737002 | 10/26/2020 | 12/26/2020 | Europe / Czech Republic / Prague                                           |
| EPI_ISL_737003 | 10/26/2020 | 12/26/2020 | Europe / Czech Republic / Central Bohemian Region / Kosteletky nad Lázněmi |
| EPI_ISL_737004 | 10/26/2020 | 12/26/2020 | Europe / Czech Republic / Central Bohemian Region / Loučkov                |
| EPI_ISL_737005 | 10/26/2020 | 12/26/2020 | Europe / Czech Republic / Central Bohemian Region / Mladá Boleslav         |
| EPI_ISL_737006 | 10/26/2020 | 12/26/2020 | Europe / Czech Republic / Central Bohemian Region / Zvettlův Újezd         |
| EPI_ISL_737007 | 10/26/2020 | 12/26/2020 | Europe / Czech Republic / Prague                                           |
| EPI_ISL_737008 | 10/26/2020 | 12/26/2020 | Europe / Czech Republic / Central Bohemian Region / Radonice               |
| EPI_ISL_737009 | 10/26/2020 | 12/26/2020 | Europe / Czech Republic / Central Bohemian Region / Mladá Boleslav         |
| EPI_ISL_737010 | 10/26/2020 | 12/26/2020 | Europe / Czech Republic / Central Bohemian Region / Neratovice             |
| EPI_ISL_737011 | 10/26/2020 | 12/26/2020 | Europe / Czech Republic / Prague                                           |
| EPI_ISL_737012 | 10/26/2020 | 12/26/2020 | Europe / Czech Republic / Prague                                           |
| EPI_ISL_737013 | 10/27/2020 | 12/26/2020 | Europe / Czech Republic / Prague                                           |
| EPI_ISL_737014 | 11/2/2020  | 12/26/2020 | Europe / Czech Republic / Středočeský územní svaz / Telnice                |
| EPI_ISL_737015 | 11/2/2020  | 12/26/2020 | Europe / Czech Republic / Středočeský územní svaz / Tisová                 |
| EPI_ISL_737016 | 11/1/2020  | 12/26/2020 | Europe / Czech Republic / South Moravian Region / Brno                     |
| EPI_ISL_737017 | 11/4/2020  | 12/26/2020 | Europe / Czech Republic / Central Bohemian Region / Kutná Hora             |
| EPI_ISL_737018 | 11/6/2020  | 12/26/2020 | Europe / Czech Republic / Prague                                           |

|                |            |            |                                                              |
|----------------|------------|------------|--------------------------------------------------------------|
| EPI_ISL_737019 | 11/5/2020  | 12/26/2020 | Europe / Czech Republic / Central Bohemian Region / Hruškov  |
| EPI_ISL_737020 | 11/9/2020  | 12/26/2020 | Europe / Czech Republic / Olomouc                            |
| EPI_ISL_737021 | 11/9/2020  | 12/26/2020 | Europe / Czech Republic / Prague                             |
| EPI_ISL_737022 | 11/4/2020  | 12/26/2020 | Europe / Czech Republic / Prague                             |
| EPI_ISL_737023 | 11/4/2020  | 12/26/2020 | Europe / Czech Republic / Prague                             |
| EPI_ISL_737024 | 11/9/2020  | 12/26/2020 | Europe / Czech Republic / Prague                             |
| EPI_ISL_737025 | 11/6/2020  | 12/26/2020 | Europe / Czech Republic / Central Bohemian Region / Hořovice |
| EPI_ISL_737026 | 11/8/2020  | 12/26/2020 | Europe / Czech Republic / Prague                             |
| EPI_ISL_737027 | 11/9/2020  | 12/26/2020 | Europe / Czech Republic / Central Bohemian Region / Beroun   |
| EPI_ISL_737028 | 10/30/2020 | 12/26/2020 | Europe / Czech Republic / Prague                             |
| EPI_ISL_737029 | 10/29/2020 | 12/26/2020 | Europe / Czech Republic / Prague                             |
| EPI_ISL_737030 | 10/30/2020 | 12/26/2020 | Europe / Czech Republic / Prague                             |
| EPI_ISL_737031 | 10/30/2020 | 12/26/2020 | Europe / Czech Republic / Prague                             |
| EPI_ISL_737032 | 10/30/2020 | 12/26/2020 | Europe / Czech Republic / Central Bohemian Region / Benešov  |
| EPI_ISL_737034 | 8/10/2020  | 12/26/2020 | Europe / Finland / Uusimaa                                   |
| EPI_ISL_737035 | 8/10/2020  | 12/26/2020 | Europe / Finland / Uusimaa                                   |
| EPI_ISL_737036 | 8/10/2020  | 12/26/2020 | Europe / Finland / Uusimaa                                   |
| EPI_ISL_737037 | 10/10/2020 | 12/26/2020 | Europe / Finland / Uusimaa                                   |
| EPI_ISL_737038 | 10/10/2020 | 12/26/2020 | Europe / Finland / Uusimaa                                   |
| EPI_ISL_737039 | 10/10/2020 | 12/26/2020 | Europe / Finland / Uusimaa                                   |
| EPI_ISL_737040 | 10/10/2020 | 12/26/2020 | Europe / Finland / Uusimaa                                   |
| EPI_ISL_737041 | 10/10/2020 | 12/26/2020 | Europe / Finland / Uusimaa                                   |
| EPI_ISL_737042 | 10/10/2020 | 12/26/2020 | Europe / Finland / Uusimaa                                   |
| EPI_ISL_737043 | 10/10/2020 | 12/26/2020 | Europe / Finland / Uusimaa                                   |
| EPI_ISL_737044 | 10/10/2020 | 12/26/2020 | Europe / Finland / Uusimaa                                   |
| EPI_ISL_737045 | 10/10/2020 | 12/26/2020 | Europe / Finland / Uusimaa                                   |
| EPI_ISL_737046 | 10/10/2020 | 12/26/2020 | Europe / Finland / Uusimaa                                   |
| EPI_ISL_737047 | 10/10/2020 | 12/26/2020 | Europe / Finland / Uusimaa                                   |
| EPI_ISL_737048 | 10/10/2020 | 12/26/2020 | Europe / Finland / Uusimaa                                   |
| EPI_ISL_737049 | 10/10/2020 | 12/26/2020 | Europe / Finland / Uusimaa                                   |
| EPI_ISL_737050 | 10/10/2020 | 12/26/2020 | Europe / Finland / Uusimaa                                   |
| EPI_ISL_737051 | 10/10/2020 | 12/26/2020 | Europe / Finland / Uusimaa                                   |
| EPI_ISL_737052 | 10/10/2020 | 12/26/2020 | Europe / Finland / Uusimaa                                   |
| EPI_ISL_737053 | 10/10/2020 | 12/26/2020 | Europe / Finland / Uusimaa                                   |
| EPI_ISL_737054 | 10/10/2020 | 12/26/2020 | Europe / Finland / Uusimaa                                   |
| EPI_ISL_737055 | 10/10/2020 | 12/26/2020 | Europe / Finland / Uusimaa                                   |
| EPI_ISL_737056 | 10/10/2020 | 12/26/2020 | Europe / Finland / Uusimaa                                   |
| EPI_ISL_737057 | 10/10/2020 | 12/26/2020 | Europe / Finland / Uusimaa                                   |
| EPI_ISL_737058 | 10/10/2020 | 12/26/2020 | Europe / Finland / Uusimaa                                   |
| EPI_ISL_737059 | 10/10/2020 | 12/26/2020 | Europe / Finland / Uusimaa                                   |
| EPI_ISL_737060 | 10/10/2020 | 12/26/2020 | Europe / Finland / Uusimaa                                   |
| EPI_ISL_737061 | 9/10/2020  | 12/26/2020 | Europe / Finland / Uusimaa                                   |
| EPI_ISL_737062 | 9/10/2020  | 12/26/2020 | Europe / Finland / Uusimaa                                   |
| EPI_ISL_737063 | 9/10/2020  | 12/26/2020 | Europe / Finland / Uusimaa                                   |
| EPI_ISL_737064 | 9/10/2020  | 12/26/2020 | Europe / Finland / Uusimaa                                   |
| EPI_ISL_737065 | 9/10/2020  | 12/26/2020 | Europe / Finland / Uusimaa                                   |
| EPI_ISL_737066 | 9/10/2020  | 12/26/2020 | Europe / Finland / Uusimaa                                   |



|                |            |            |                                |
|----------------|------------|------------|--------------------------------|
| EPI_ISL_737172 | 11/9/2020  | 12/26/2020 | North America / USA / Michigan |
| EPI_ISL_737173 | 11/10/2020 | 12/26/2020 | North America / USA / Michigan |
| EPI_ISL_737174 | 11/24/2020 | 12/26/2020 | North America / USA / Michigan |
| EPI_ISL_737175 | 11/23/2020 | 12/26/2020 | North America / USA / Michigan |
| EPI_ISL_737176 | 11/29/2020 | 12/26/2020 | North America / USA / Michigan |
| EPI_ISL_737177 | 11/25/2020 | 12/26/2020 | North America / USA / Michigan |
| EPI_ISL_737178 | 11/18/2020 | 12/26/2020 | North America / USA / Michigan |
| EPI_ISL_737179 | 11/19/2020 | 12/26/2020 | North America / USA / Michigan |
| EPI_ISL_737180 | 11/19/2020 | 12/26/2020 | North America / USA / Michigan |
| EPI_ISL_737181 | 11/30/2020 | 12/26/2020 | North America / USA / Michigan |
| EPI_ISL_737182 | 11/18/2020 | 12/26/2020 | North America / USA / Michigan |
| EPI_ISL_737183 | 11/23/2020 | 12/26/2020 | North America / USA / Michigan |
| EPI_ISL_737184 | 11/9/2020  | 12/26/2020 | North America / USA / Michigan |
| EPI_ISL_737185 | 11/24/2020 | 12/26/2020 | North America / USA / Michigan |
| EPI_ISL_737186 | 11/10/2020 | 12/26/2020 | North America / USA / Michigan |
| EPI_ISL_737187 | 11/9/2020  | 12/26/2020 | North America / USA / Michigan |
| EPI_ISL_737188 | 11/25/2020 | 12/26/2020 | North America / USA / Michigan |
| EPI_ISL_737189 | 11/10/2020 | 12/26/2020 | North America / USA / Michigan |
| EPI_ISL_737190 | 11/10/2020 | 12/26/2020 | North America / USA / Michigan |
| EPI_ISL_737191 | 11/10/2020 | 12/26/2020 | North America / USA / Michigan |
| EPI_ISL_737192 | 11/10/2020 | 12/26/2020 | North America / USA / Michigan |
| EPI_ISL_737193 | 11/19/2020 | 12/26/2020 | North America / USA / Michigan |
| EPI_ISL_737194 | 11/23/2020 | 12/26/2020 | North America / USA / Michigan |
| EPI_ISL_737195 | 11/10/2020 | 12/26/2020 | North America / USA / Michigan |
| EPI_ISL_737196 | 11/23/2020 | 12/26/2020 | North America / USA / Michigan |
| EPI_ISL_737197 | 11/27/2020 | 12/26/2020 | North America / USA / Michigan |
| EPI_ISL_737198 | 11/30/2020 | 12/26/2020 | North America / USA / Michigan |
| EPI_ISL_737201 | 5/22/2020  | 12/27/2020 | Africa / Nigeria / FCT         |
| EPI_ISL_737202 | 12/20/2020 | 12/27/2020 | Asia / Israel                  |
| EPI_ISL_737203 | 12/20/2020 | 12/27/2020 | Asia / Israel                  |
| EPI_ISL_737204 | 12/20/2020 | 12/27/2020 | Asia / Israel                  |
| EPI_ISL_737209 | 8/13/2020  | 12/27/2020 | Europe / Finland / Uusimaa     |
| EPI_ISL_737210 | 8/13/2020  | 12/27/2020 | Europe / Finland / Uusimaa     |
| EPI_ISL_737211 | 6/13/2020  | 12/27/2020 | Europe / Finland / Uusimaa     |
| EPI_ISL_737212 | 10/13/2020 | 12/27/2020 | Europe / Finland / Uusimaa     |
| EPI_ISL_737213 | 10/13/2020 | 12/27/2020 | Europe / Finland / Uusimaa     |
| EPI_ISL_737214 | 10/13/2020 | 12/27/2020 | Europe / Finland / Uusimaa     |
| EPI_ISL_737215 | 10/13/2020 | 12/27/2020 | Europe / Finland / Uusimaa     |
| EPI_ISL_737216 | 10/13/2020 | 12/27/2020 | Europe / Finland / Uusimaa     |
| EPI_ISL_737217 | 10/13/2020 | 12/27/2020 | Europe / Finland / Uusimaa     |
| EPI_ISL_737218 | 10/13/2020 | 12/27/2020 | Europe / Finland / Uusimaa     |
| EPI_ISL_737219 | 10/13/2020 | 12/27/2020 | Europe / Finland / Uusimaa     |
| EPI_ISL_737220 | 10/13/2020 | 12/27/2020 | Europe / Finland / Uusimaa     |
| EPI_ISL_737221 | 10/13/2020 | 12/27/2020 | Europe / Finland / Uusimaa     |
| EPI_ISL_737222 | 10/13/2020 | 12/27/2020 | Europe / Finland / Uusimaa     |
| EPI_ISL_737223 | 10/13/2020 | 12/27/2020 | Europe / Finland / Uusimaa     |
| EPI_ISL_737224 | 10/13/2020 | 12/27/2020 | Europe / Finland / Uusimaa     |





|                |            |            |                                               |
|----------------|------------|------------|-----------------------------------------------|
| EPI_ISL_737604 | 12/14/2020 | 12/27/2020 | Europe / Switzerland / Bern                   |
| EPI_ISL_737605 | 11/30/2020 | 12/27/2020 | Europe / Switzerland / Thurgau                |
| EPI_ISL_737606 | 12/14/2020 | 12/27/2020 | Europe / Switzerland / Bern                   |
| EPI_ISL_737607 | 10/13/2020 | 12/27/2020 | Europe / Switzerland / Vaud                   |
| EPI_ISL_737608 | 10/12/2020 | 12/27/2020 | Europe / Switzerland / Vaud                   |
| EPI_ISL_737609 | 11/25/2020 | 12/27/2020 | Europe / Switzerland / Wallis                 |
| EPI_ISL_737625 | 12/17/2020 | 12/27/2020 | Europe / Switzerland / Solothurn              |
| EPI_ISL_737626 | 12/17/2020 | 12/27/2020 | Europe / Switzerland / Wallis                 |
| EPI_ISL_737627 | 12/14/2020 | 12/27/2020 | Europe / Switzerland / Basel-Landschaft       |
| EPI_ISL_737628 | 10/10/2020 | 12/27/2020 | Europe / Switzerland / Bern                   |
| EPI_ISL_737629 | 11/27/2020 | 12/27/2020 | Europe / Switzerland / Solothurn              |
| EPI_ISL_737630 | 12/9/2020  | 12/27/2020 | Europe / Switzerland / Wallis                 |
| EPI_ISL_737631 | 12/17/2020 | 12/27/2020 | Europe / Switzerland / Zurich                 |
| EPI_ISL_737632 | 12/17/2020 | 12/27/2020 | Europe / Switzerland / Zurich                 |
| EPI_ISL_737633 | 12/17/2020 | 12/27/2020 | Europe / Switzerland / Zurich                 |
| EPI_ISL_737634 | 12/17/2020 | 12/27/2020 | Europe / Switzerland / Zurich                 |
| EPI_ISL_737636 | 11/26/2020 | 12/27/2020 | Europe / Switzerland / Bern                   |
| EPI_ISL_737637 | 11/30/2020 | 12/27/2020 | Europe / Switzerland / Schaffhausen           |
| EPI_ISL_737638 | 11/30/2020 | 12/27/2020 | Europe / Switzerland / Schaffhausen           |
| EPI_ISL_737639 | 12/4/2020  | 12/27/2020 | Europe / Switzerland / Wallis                 |
| EPI_ISL_737640 | 12/11/2020 | 12/27/2020 | Europe / Switzerland / Wallis                 |
| EPI_ISL_737641 | 12/11/2020 | 12/27/2020 | Europe / Switzerland / Wallis                 |
| EPI_ISL_737642 | 12/15/2020 | 12/27/2020 | Europe / Switzerland                          |
| EPI_ISL_737643 | 10/12/2020 | 12/27/2020 | Europe / Switzerland / Vaud                   |
| EPI_ISL_737644 | 12/17/2020 | 12/27/2020 | Europe / Switzerland / Wallis                 |
| EPI_ISL_737645 | 12/10/2020 | 12/27/2020 | Europe / Switzerland / Wallis                 |
| EPI_ISL_737646 | 12/11/2020 | 12/27/2020 | Europe / Switzerland / Wallis                 |
| EPI_ISL_737647 | 12/19/2020 | 12/27/2020 | Europe / Switzerland                          |
| EPI_ISL_737648 | 11/26/2020 | 12/27/2020 | Europe / Switzerland                          |
| EPI_ISL_737649 | 12/16/2020 | 12/27/2020 | Europe / Switzerland / Aargau                 |
| EPI_ISL_737650 | 12/16/2020 | 12/27/2020 | Europe / Switzerland / Aargau                 |
| EPI_ISL_737651 | 12/16/2020 | 12/27/2020 | Europe / Switzerland / Aargau                 |
| EPI_ISL_737652 | 12/14/2020 | 12/27/2020 | Europe / Switzerland / Aargau                 |
| EPI_ISL_737653 | 12/16/2020 | 12/27/2020 | Europe / Switzerland / Aargau                 |
| EPI_ISL_737654 | 12/16/2020 | 12/27/2020 | Europe / Switzerland / Aargau                 |
| EPI_ISL_737655 | 12/16/2020 | 12/27/2020 | Europe / Switzerland / Aargau                 |
| EPI_ISL_737656 | 12/12/2020 | 12/27/2020 | Europe / Switzerland / Aargau                 |
| EPI_ISL_737657 | 12/13/2020 | 12/27/2020 | Europe / Switzerland / Aargau                 |
| EPI_ISL_737658 | 12/14/2020 | 12/27/2020 | Europe / Switzerland / Aargau                 |
| EPI_ISL_737659 | 12/14/2020 | 12/27/2020 | Europe / Switzerland / Aargau                 |
| EPI_ISL_737660 | 11/27/2020 | 12/27/2020 | Europe / Switzerland / Aargau                 |
| EPI_ISL_737661 | 11/30/2020 | 12/27/2020 | Europe / Switzerland / Appenzell Ausserrhoden |
| EPI_ISL_737662 | 12/17/2020 | 12/27/2020 | Europe / Switzerland / Basel-Landschaft       |
| EPI_ISL_737663 | 12/17/2020 | 12/27/2020 | Europe / Switzerland / Basel-Landschaft       |
| EPI_ISL_737664 | 12/17/2020 | 12/27/2020 | Europe / Switzerland / Basel-Landschaft       |
| EPI_ISL_737665 | 12/17/2020 | 12/27/2020 | Europe / Switzerland / Basel-Landschaft       |
| EPI_ISL_737666 | 12/12/2020 | 12/27/2020 | Europe / Switzerland / Basel-Landschaft       |













|                |            |            |                               |
|----------------|------------|------------|-------------------------------|
| EPI_ISL_737902 | 12/13/2020 | 12/27/2020 | Europe / Switzerland / Vaud   |
| EPI_ISL_737903 | 11/26/2020 | 12/27/2020 | Europe / Switzerland / Vaud   |
| EPI_ISL_737904 | 11/26/2020 | 12/27/2020 | Europe / Switzerland / Vaud   |
| EPI_ISL_737905 | 11/26/2020 | 12/27/2020 | Europe / Switzerland / Vaud   |
| EPI_ISL_737906 | 11/26/2020 | 12/27/2020 | Europe / Switzerland / Vaud   |
| EPI_ISL_737907 | 11/30/2020 | 12/27/2020 | Europe / Switzerland / Vaud   |
| EPI_ISL_737908 | 12/15/2020 | 12/27/2020 | Europe / Switzerland / Zug    |
| EPI_ISL_737909 | 12/15/2020 | 12/27/2020 | Europe / Switzerland / Zurich |
| EPI_ISL_737910 | 12/16/2020 | 12/27/2020 | Europe / Switzerland / Zurich |
| EPI_ISL_737911 | 12/16/2020 | 12/27/2020 | Europe / Switzerland / Zurich |
| EPI_ISL_737912 | 12/17/2020 | 12/27/2020 | Europe / Switzerland / Zurich |
| EPI_ISL_737913 | 12/14/2020 | 12/27/2020 | Europe / Switzerland / Zurich |
| EPI_ISL_737914 | 12/17/2020 | 12/27/2020 | Europe / Switzerland / Zurich |
| EPI_ISL_737915 | 12/17/2020 | 12/27/2020 | Europe / Switzerland / Zurich |
| EPI_ISL_737916 | 12/17/2020 | 12/27/2020 | Europe / Switzerland / Zurich |
| EPI_ISL_737917 | 12/11/2020 | 12/27/2020 | Europe / Switzerland / Zurich |
| EPI_ISL_737918 | 12/14/2020 | 12/27/2020 | Europe / Switzerland / Zurich |
| EPI_ISL_737919 | 11/26/2020 | 12/27/2020 | Europe / Switzerland / Zurich |
| EPI_ISL_737920 | 11/26/2020 | 12/27/2020 | Europe / Switzerland / Zurich |
| EPI_ISL_737921 | 11/26/2020 | 12/27/2020 | Europe / Switzerland / Zurich |
| EPI_ISL_737922 | 11/26/2020 | 12/27/2020 | Europe / Switzerland / Zurich |
| EPI_ISL_737923 | 11/26/2020 | 12/27/2020 | Europe / Switzerland / Zurich |
| EPI_ISL_737924 | 11/26/2020 | 12/27/2020 | Europe / Switzerland / Zurich |
| EPI_ISL_737925 | 11/30/2020 | 12/27/2020 | Europe / Switzerland / Zurich |
| EPI_ISL_737926 | 11/30/2020 | 12/27/2020 | Europe / Switzerland / Zurich |
| EPI_ISL_737927 | 11/30/2020 | 12/27/2020 | Europe / Switzerland / Zurich |
| EPI_ISL_737928 | 11/30/2020 | 12/27/2020 | Europe / Switzerland / Zurich |
| EPI_ISL_737929 | 11/30/2020 | 12/27/2020 | Europe / Switzerland / Zurich |
| EPI_ISL_737935 | 4/2/2020   | 12/27/2020 | Africa / Uganda               |
| EPI_ISL_737939 | 7/15/2020  | 12/27/2020 | Africa / Uganda               |
| EPI_ISL_737940 | 8/27/2020  | 12/27/2020 | Africa / Uganda               |
| EPI_ISL_737941 | 8/26/2020  | 12/27/2020 | Africa / Uganda               |
| EPI_ISL_737942 | 8/24/2020  | 12/27/2020 | Africa / Uganda               |
| EPI_ISL_737943 | 8/24/2020  | 12/27/2020 | Africa / Uganda               |
| EPI_ISL_737944 | 8/24/2020  | 12/27/2020 | Africa / Uganda               |
| EPI_ISL_737945 | 8/14/2020  | 12/27/2020 | Africa / Uganda               |
| EPI_ISL_737946 | 5/4/2020   | 12/27/2020 | Africa / Uganda               |
| EPI_ISL_737947 | 5/7/2020   | 12/27/2020 | Africa / Uganda               |
| EPI_ISL_737948 | 5/1/2020   | 12/27/2020 | Africa / Uganda               |
| EPI_ISL_737949 | 5/2/2020   | 12/27/2020 | Africa / Uganda               |
| EPI_ISL_737950 | 5/1/2020   | 12/27/2020 | Africa / Uganda               |
| EPI_ISL_737951 | 4/4/2020   | 12/27/2020 | Africa / Uganda               |
| EPI_ISL_737952 | 5/7/2020   | 12/27/2020 | Africa / Uganda               |
| EPI_ISL_737953 | 5/7/2020   | 12/27/2020 | Africa / Uganda               |
| EPI_ISL_737954 | 3/21/2020  | 12/27/2020 | Africa / Uganda               |
| EPI_ISL_737955 | 3/27/2020  | 12/27/2020 | Africa / Uganda               |
| EPI_ISL_737956 | 3/30/2020  | 12/27/2020 | Africa / Uganda               |

|                |           |                            |
|----------------|-----------|----------------------------|
| EPI_ISL_737957 | 3/25/2020 | 12/27/2020 Africa / Uganda |
| EPI_ISL_737958 | 3/26/2020 | 12/27/2020 Africa / Uganda |
| EPI_ISL_737959 | 3/27/2020 | 12/27/2020 Africa / Uganda |
| EPI_ISL_737960 | 5/7/2020  | 12/27/2020 Africa / Uganda |
| EPI_ISL_737961 | 5/7/2020  | 12/27/2020 Africa / Uganda |
| EPI_ISL_737962 | 5/2/2020  | 12/27/2020 Africa / Uganda |
| EPI_ISL_737963 | 5/4/2020  | 12/27/2020 Africa / Uganda |
| EPI_ISL_737964 | 5/7/2020  | 12/27/2020 Africa / Uganda |
| EPI_ISL_737965 | 7/24/2020 | 12/27/2020 Africa / Uganda |
| EPI_ISL_737966 | 5/6/2020  | 12/27/2020 Africa / Uganda |
| EPI_ISL_737967 | 5/7/2020  | 12/27/2020 Africa / Uganda |
| EPI_ISL_737968 | 5/7/2020  | 12/27/2020 Africa / Uganda |
| EPI_ISL_737969 | 5/7/2020  | 12/27/2020 Africa / Uganda |
| EPI_ISL_737970 | 5/11/2020 | 12/27/2020 Africa / Uganda |
| EPI_ISL_737971 | 8/8/2020  | 12/27/2020 Africa / Uganda |
| EPI_ISL_737972 | 7/21/2020 | 12/27/2020 Africa / Uganda |
| EPI_ISL_737973 | 7/16/2020 | 12/27/2020 Africa / Uganda |
| EPI_ISL_737974 | 7/24/2020 | 12/27/2020 Africa / Uganda |
| EPI_ISL_737975 | 7/27/2020 | 12/27/2020 Africa / Uganda |
| EPI_ISL_737976 | 7/28/2020 | 12/27/2020 Africa / Uganda |
| EPI_ISL_737977 | 7/22/2020 | 12/27/2020 Africa / Uganda |
| EPI_ISL_737978 | 7/21/2020 | 12/27/2020 Africa / Uganda |
| EPI_ISL_737979 | 7/21/2020 | 12/27/2020 Africa / Uganda |
| EPI_ISL_737980 | 8/26/2020 | 12/27/2020 Africa / Uganda |
| EPI_ISL_737981 | 8/26/2020 | 12/27/2020 Africa / Uganda |
| EPI_ISL_737982 | 8/27/2020 | 12/27/2020 Africa / Uganda |
| EPI_ISL_737983 | 8/26/2020 | 12/27/2020 Africa / Uganda |
| EPI_ISL_737984 | 2020      | 12/27/2020 Africa / Uganda |
| EPI_ISL_737985 | 8/26/2020 | 12/27/2020 Africa / Uganda |
| EPI_ISL_737986 | 8/24/2020 | 12/27/2020 Africa / Uganda |
| EPI_ISL_737987 | 8/26/2020 | 12/27/2020 Africa / Uganda |
| EPI_ISL_737988 | 8/30/2020 | 12/27/2020 Africa / Uganda |
| EPI_ISL_737989 | 8/27/2020 | 12/27/2020 Africa / Uganda |
| EPI_ISL_737990 | 9/5/2020  | 12/27/2020 Africa / Uganda |
| EPI_ISL_737991 | 8/15/2020 | 12/27/2020 Africa / Uganda |
| EPI_ISL_737992 | 8/15/2020 | 12/27/2020 Africa / Uganda |
| EPI_ISL_737993 | 8/15/2020 | 12/27/2020 Africa / Uganda |
| EPI_ISL_737994 | 8/15/2020 | 12/27/2020 Africa / Uganda |
| EPI_ISL_737995 | 8/15/2020 | 12/27/2020 Africa / Uganda |
| EPI_ISL_737996 | 2020      | 12/27/2020 Africa / Uganda |
| EPI_ISL_737997 | 8/24/2020 | 12/27/2020 Africa / Uganda |
| EPI_ISL_737998 | 8/25/2020 | 12/27/2020 Africa / Uganda |
| EPI_ISL_737999 | 8/22/2020 | 12/27/2020 Africa / Uganda |
| EPI_ISL_738000 | 8/25/2020 | 12/27/2020 Africa / Uganda |
| EPI_ISL_738001 | 8/15/2020 | 12/27/2020 Africa / Uganda |
| EPI_ISL_738002 | 8/15/2020 | 12/27/2020 Africa / Uganda |
| EPI_ISL_738003 | 8/26/2020 | 12/27/2020 Africa / Uganda |

|                |            |            |                                       |
|----------------|------------|------------|---------------------------------------|
| EPI_ISL_738004 | 8/26/2020  | 12/27/2020 | Africa / Uganda                       |
| EPI_ISL_738006 | 8/26/2020  | 12/27/2020 | Africa / Uganda                       |
| EPI_ISL_738007 | 8/15/2020  | 12/27/2020 | Africa / Uganda                       |
| EPI_ISL_738008 | 8/16/2020  | 12/27/2020 | Africa / Uganda                       |
| EPI_ISL_738009 | 7/4/2020   | 12/27/2020 | Africa / Uganda                       |
| EPI_ISL_738010 | 7/4/2020   | 12/27/2020 | Africa / Uganda                       |
| EPI_ISL_738011 | 7/4/2020   | 12/27/2020 | Africa / Uganda                       |
| EPI_ISL_738012 | 7/4/2020   | 12/27/2020 | Africa / Uganda                       |
| EPI_ISL_738013 | 8/6/2020   | 12/27/2020 | Africa / Uganda                       |
| EPI_ISL_738014 | 8/8/2020   | 12/27/2020 | Africa / Uganda                       |
| EPI_ISL_738015 | 8/8/2020   | 12/27/2020 | Africa / Uganda                       |
| EPI_ISL_738016 | 8/14/2020  | 12/27/2020 | Africa / Uganda                       |
| EPI_ISL_738017 | 8/11/2020  | 12/27/2020 | Africa / Uganda                       |
| EPI_ISL_738018 | 8/17/2020  | 12/27/2020 | Africa / Uganda                       |
| EPI_ISL_738019 | 8/17/2020  | 12/27/2020 | Africa / Uganda                       |
| EPI_ISL_738020 | 8/17/2020  | 12/27/2020 | Africa / Uganda                       |
| EPI_ISL_738021 | 8/15/2020  | 12/27/2020 | Africa / Uganda                       |
| EPI_ISL_738022 | 8/21/2020  | 12/27/2020 | Africa / Uganda                       |
| EPI_ISL_738023 | 8/21/2020  | 12/27/2020 | Africa / Uganda                       |
| EPI_ISL_738024 | 2020       | 12/27/2020 | Africa / Uganda                       |
| EPI_ISL_738025 | 9/1/2020   | 12/27/2020 | Africa / Uganda                       |
| EPI_ISL_738026 | 9/1/2020   | 12/27/2020 | Africa / Uganda                       |
| EPI_ISL_738027 | 9/1/2020   | 12/27/2020 | Africa / Uganda                       |
| EPI_ISL_738028 | 9/1/2020   | 12/27/2020 | Africa / Uganda                       |
| EPI_ISL_738029 | 9/1/2020   | 12/27/2020 | Africa / Uganda                       |
| EPI_ISL_738030 | 8/15/2020  | 12/27/2020 | Africa / Uganda                       |
| EPI_ISL_738031 | 9/1/2020   | 12/27/2020 | Africa / Uganda                       |
| EPI_ISL_738032 | 9/1/2020   | 12/27/2020 | Africa / Uganda                       |
| EPI_ISL_738033 | 9/1/2020   | 12/27/2020 | Africa / Uganda                       |
| EPI_ISL_738034 | 9/1/2020   | 12/27/2020 | Africa / Uganda                       |
| EPI_ISL_738035 | 9/1/2020   | 12/27/2020 | Africa / Uganda                       |
| EPI_ISL_738036 | 9/1/2020   | 12/27/2020 | Africa / Uganda                       |
| EPI_ISL_738037 | 9/1/2020   | 12/27/2020 | Africa / Uganda                       |
| EPI_ISL_738038 | 10/1/2020  | 12/27/2020 | Africa / Uganda                       |
| EPI_ISL_738039 | 10/1/2020  | 12/27/2020 | Africa / Uganda                       |
| EPI_ISL_738040 | 10/1/2020  | 12/27/2020 | Africa / Uganda                       |
| EPI_ISL_738041 | 10/1/2020  | 12/27/2020 | Africa / Uganda                       |
| EPI_ISL_738042 | 10/1/2020  | 12/27/2020 | Africa / Uganda                       |
| EPI_ISL_738043 | 10/1/2020  | 12/27/2020 | Africa / Uganda                       |
| EPI_ISL_738044 | 12/18/2020 | 12/27/2020 | Europe / Italy / Abruzzo              |
| EPI_ISL_738045 | 12/18/2020 | 12/27/2020 | Europe / Italy / Abruzzo              |
| EPI_ISL_738046 | 12/18/2020 | 12/27/2020 | Europe / Italy / Abruzzo              |
| EPI_ISL_738047 | 12/18/2020 | 12/27/2020 | Europe / Italy / Abruzzo              |
| EPI_ISL_738048 | 12/18/2020 | 12/27/2020 | Europe / Italy / Abruzzo              |
| EPI_ISL_739660 | 11/29/2020 | 12/27/2020 | Asia / Palestine / West Bank / Salfit |
| EPI_ISL_739661 | 11/29/2020 | 12/27/2020 | Asia / Palestine / West Bank / Salfit |
| EPI_ISL_738064 | 11/27/2020 | 12/28/2020 | Asia / Taiwan / Taipei                |



|                |            |                                                  |
|----------------|------------|--------------------------------------------------|
| EPI_ISL_738065 | 11/26/2020 | 12/28/2020 Asia / Taiwan / Taipei                |
| EPI_ISL_738085 | 3/17/2020  | 12/28/2020 Europe / Switzerland / Geneva         |
| EPI_ISL_738086 | 4/7/2020   | 12/28/2020 Asia / Malaysia / Kuala Lumpur        |
| EPI_ISL_738092 | 12/20/2020 | 12/28/2020 Europe / Portugal                     |
| EPI_ISL_738093 | 12/19/2020 | 12/28/2020 Europe / Portugal                     |
| EPI_ISL_738094 | 12/20/2020 | 12/28/2020 Europe / Portugal                     |
| EPI_ISL_738095 | 12/20/2020 | 12/28/2020 Europe / Portugal                     |
| EPI_ISL_738096 | 12/19/2020 | 12/28/2020 Europe / Portugal                     |
| EPI_ISL_738097 | 12/19/2020 | 12/28/2020 Europe / Portugal                     |
| EPI_ISL_738098 | 12/19/2020 | 12/28/2020 Europe / Portugal                     |
| EPI_ISL_738099 | 12/18/2020 | 12/28/2020 Europe / Portugal                     |
| EPI_ISL_738100 | 12/18/2020 | 12/28/2020 Europe / Portugal                     |
| EPI_ISL_738101 | 12/18/2020 | 12/28/2020 Europe / Portugal                     |
| EPI_ISL_738102 | 12/18/2020 | 12/28/2020 Europe / Portugal                     |
| EPI_ISL_738103 | 12/17/2020 | 12/28/2020 Europe / Portugal                     |
| EPI_ISL_738104 | 12/17/2020 | 12/28/2020 Europe / Portugal                     |
| EPI_ISL_738105 | 12/17/2020 | 12/28/2020 Europe / Portugal                     |
| EPI_ISL_738106 | 12/15/2020 | 12/28/2020 Europe / Portugal                     |
| EPI_ISL_738107 | 11/9/2020  | 12/28/2020 Europe / Portugal                     |
| EPI_ISL_738108 | 12/7/2020  | 12/28/2020 Europe / Portugal                     |
| EPI_ISL_738109 | 12/19/2020 | 12/28/2020 Europe / Portugal                     |
| EPI_ISL_738110 | 12/20/2020 | 12/28/2020 Europe / Portugal                     |
| EPI_ISL_738112 | 12/8/2020  | 12/28/2020 Europe / Portugal                     |
| EPI_ISL_738113 | 12/5/2020  | 12/28/2020 Europe / Portugal                     |
| EPI_ISL_738114 | 12/20/2020 | 12/28/2020 Europe / Portugal                     |
| EPI_ISL_738115 | 11/7/2020  | 12/28/2020 Europe / Portugal                     |
| EPI_ISL_738116 | 11/8/2020  | 12/28/2020 Europe / Portugal                     |
| EPI_ISL_738117 | 11/8/2020  | 12/28/2020 Europe / Portugal                     |
| EPI_ISL_738118 | 11/8/2020  | 12/28/2020 Europe / Portugal                     |
| EPI_ISL_738119 | 11/8/2020  | 12/28/2020 Europe / Portugal                     |
| EPI_ISL_738120 | 11/8/2020  | 12/28/2020 Europe / Portugal                     |
| EPI_ISL_738121 | 10/23/2020 | 12/28/2020 Europe / Italy / Campania             |
| EPI_ISL_738122 | 8/23/2020  | 12/28/2020 Europe / Italy / Campania             |
| EPI_ISL_738123 | 8/23/2020  | 12/28/2020 Europe / Italy / Campania             |
| EPI_ISL_738124 | 8/23/2020  | 12/28/2020 Europe / Italy / Campania             |
| EPI_ISL_738125 | 8/25/2020  | 12/28/2020 Europe / Italy / Campania             |
| EPI_ISL_738126 | 8/26/2020  | 12/28/2020 Europe / Italy / Campania             |
| EPI_ISL_738127 | 8/26/2020  | 12/28/2020 Europe / Italy / Campania             |
| EPI_ISL_738128 | 8/26/2020  | 12/28/2020 Europe / Italy / Campania             |
| EPI_ISL_738129 | 10/22/2020 | 12/28/2020 Europe / Italy / Campania             |
| EPI_ISL_738130 | 8/25/2020  | 12/28/2020 Europe / Italy / Campania             |
| EPI_ISL_738131 | 8/26/2020  | 12/28/2020 Europe / Italy / Campania             |
| EPI_ISL_738132 | 8/30/2020  | 12/28/2020 Europe / Italy / Campania             |
| EPI_ISL_738133 | 12/20/2020 | 12/28/2020 Europe / Sweden / Sormland            |
| EPI_ISL_738134 | 12/19/2020 | 12/28/2020 Europe / Finland / Uusimaa            |
| EPI_ISL_738137 | 12/25/2020 | 12/28/2020 Oceania / Australia / New South Wales |
| EPI_ISL_738139 | 12/22/2020 | 12/28/2020 Asia / South Korea                    |

|                |            |                                                      |
|----------------|------------|------------------------------------------------------|
| EPI_ISL_738142 | 12/22/2020 | 12/28/2020 Asia / South Korea                        |
| EPI_ISL_738144 | 12/19/2020 | 12/28/2020 Europe / Italy / Apulia                   |
| EPI_ISL_738147 | 2/25/2020  | 12/28/2020 Europe / Italy / Tuscany / Florence       |
| EPI_ISL_738158 | 6/13/2020  | 12/28/2020 North America / USA / Texas / Harris      |
| EPI_ISL_738160 | 6/13/2020  | 12/28/2020 North America / USA / Texas / Harris      |
| EPI_ISL_738161 | 6/13/2020  | 12/28/2020 North America / USA / Texas / Harris      |
| EPI_ISL_738162 | 6/13/2020  | 12/28/2020 North America / USA / Texas / Harris      |
| EPI_ISL_738163 | 6/13/2020  | 12/28/2020 North America / USA / Texas / Harris      |
| EPI_ISL_738164 | 6/13/2020  | 12/28/2020 North America / USA / Texas / Harris      |
| EPI_ISL_738165 | 6/13/2020  | 12/28/2020 North America / USA / Texas / Harris      |
| EPI_ISL_738166 | 6/13/2020  | 12/28/2020 North America / USA / Texas / Harris      |
| EPI_ISL_738167 | 6/13/2020  | 12/28/2020 North America / USA / Texas / Harris      |
| EPI_ISL_738168 | 6/13/2020  | 12/28/2020 North America / USA / Texas / Harris      |
| EPI_ISL_738169 | 6/13/2020  | 12/28/2020 North America / USA / Texas / Harris      |
| EPI_ISL_738170 | 6/13/2020  | 12/28/2020 North America / USA / Texas / Harris      |
| EPI_ISL_738171 | 6/13/2020  | 12/28/2020 North America / USA / Texas / Harris      |
| EPI_ISL_738172 | 6/13/2020  | 12/28/2020 North America / USA / Texas / Harris      |
| EPI_ISL_738173 | 6/13/2020  | 12/28/2020 North America / USA / Texas / Harris      |
| EPI_ISL_738174 | 6/13/2020  | 12/28/2020 North America / USA / Texas / Harris      |
| EPI_ISL_738175 | 6/13/2020  | 12/28/2020 North America / USA / Texas / Harris      |
| EPI_ISL_738176 | 6/15/2020  | 12/28/2020 North America / USA / Texas / Harris      |
| EPI_ISL_738177 | 6/15/2020  | 12/28/2020 North America / USA / Texas / Harris      |
| EPI_ISL_738178 | 6/15/2020  | 12/28/2020 North America / USA / Texas / Harris      |
| EPI_ISL_738179 | 6/15/2020  | 12/28/2020 North America / USA / Texas / Harris      |
| EPI_ISL_738180 | 6/15/2020  | 12/28/2020 North America / USA / Texas / Harris      |
| EPI_ISL_738181 | 6/15/2020  | 12/28/2020 North America / USA / Texas / Harris      |
| EPI_ISL_738182 | 6/22/2020  | 12/28/2020 North America / USA / Texas / Hidalgo     |
| EPI_ISL_738183 | 6/22/2020  | 12/28/2020 North America / USA / Texas / Hidalgo     |
| EPI_ISL_738184 | 6/22/2020  | 12/28/2020 North America / USA / Texas / Hidalgo     |
| EPI_ISL_738185 | 6/22/2020  | 12/28/2020 North America / USA / Texas / Hidalgo     |
| EPI_ISL_738186 | 6/22/2020  | 12/28/2020 North America / USA / Texas / Hidalgo     |
| EPI_ISL_738187 | 6/22/2020  | 12/28/2020 North America / USA / Texas / Hidalgo     |
| EPI_ISL_738188 | 6/22/2020  | 12/28/2020 North America / USA / Texas / Hidalgo     |
| EPI_ISL_738189 | 6/22/2020  | 12/28/2020 North America / USA / Texas / Hidalgo     |
| EPI_ISL_738190 | 6/22/2020  | 12/28/2020 North America / USA / Texas / Hidalgo     |
| EPI_ISL_738191 | 6/22/2020  | 12/28/2020 North America / USA / Texas / Hidalgo     |
| EPI_ISL_738192 | 6/24/2020  | 12/28/2020 North America / USA / Texas / Hidalgo     |
| EPI_ISL_738194 | 2/24/2020  | 12/28/2020 Europe / Italy / Tuscany                  |
| EPI_ISL_738196 | 3/13/2020  | 12/28/2020 Europe / Belgium / Waterloo               |
| EPI_ISL_738197 | 5/16/2020  | 12/28/2020 Europe / Belgium / Saint-Gilles           |
| EPI_ISL_738198 | 3/2/2020   | 12/28/2020 Europe / Belgium / Jumet                  |
| EPI_ISL_738199 | 3/3/2020   | 12/28/2020 Europe / Belgium / Leuven                 |
| EPI_ISL_738200 | 3/3/2020   | 12/28/2020 Europe / Belgium / Zonhoven               |
| EPI_ISL_738201 | 3/4/2020   | 12/28/2020 Europe / Belgium / Ottignies              |
| EPI_ISL_738202 | 3/5/2020   | 12/28/2020 Europe / Belgium / Gent                   |
| EPI_ISL_738203 | 3/6/2020   | 12/28/2020 Europe / Belgium / Sint-Lambrechts-Woluwe |
| EPI_ISL_738204 | 3/7/2020   | 12/28/2020 Europe / Belgium / Grimbergen             |

|                |           |            |                                                |
|----------------|-----------|------------|------------------------------------------------|
| EPI_ISL_738205 | 3/7/2020  | 12/28/2020 | Europe / Belgium / Brussel                     |
| EPI_ISL_738206 | 3/12/2020 | 12/28/2020 | Europe / Belgium / Saive                       |
| EPI_ISL_738207 | 3/13/2020 | 12/28/2020 | Europe / Belgium / Wilsele                     |
| EPI_ISL_738208 | 4/9/2020  | 12/28/2020 | Europe / Belgium / Sint-Niklaas                |
| EPI_ISL_738209 | 4/9/2020  | 12/28/2020 | Europe / Belgium / Brussel                     |
| EPI_ISL_738210 | 4/11/2020 | 12/28/2020 | Europe / Belgium / Horrues                     |
| EPI_ISL_738211 | 4/14/2020 | 12/28/2020 | Europe / Belgium / Diest                       |
| EPI_ISL_738212 | 4/14/2020 | 12/28/2020 | Europe / Belgium / Anderlecht                  |
| EPI_ISL_738213 | 4/14/2020 | 12/28/2020 | Europe / Belgium / Chercq                      |
| EPI_ISL_738214 | 5/8/2020  | 12/28/2020 | Europe / Belgium / Bekkevoort                  |
| EPI_ISL_738215 | 5/8/2020  | 12/28/2020 | Europe / Belgium / Tessenderlo                 |
| EPI_ISL_738216 | 5/12/2020 | 12/28/2020 | Europe / Belgium / Oud-Heverlee                |
| EPI_ISL_738217 | 5/21/2020 | 12/28/2020 | Europe / Belgium / Saint-Gilles                |
| EPI_ISL_738218 | 6/4/2020  | 12/28/2020 | Europe / Belgium / Koekelberg                  |
| EPI_ISL_738219 | 6/7/2020  | 12/28/2020 | Europe / Belgium / Tienen                      |
| EPI_ISL_738220 | 6/17/2020 | 12/28/2020 | Europe / Belgium / Brussel                     |
| EPI_ISL_738221 | 7/10/2020 | 12/28/2020 | Europe / Belgium / Beringen                    |
| EPI_ISL_738222 | 7/12/2020 | 12/28/2020 | Europe / Belgium / Brussel                     |
| EPI_ISL_738223 | 9/15/2020 | 12/28/2020 | Europe / Belgium / Wilsele                     |
| EPI_ISL_738224 | 9/17/2020 | 12/28/2020 | Europe / Belgium / Wilsele                     |
| EPI_ISL_738225 | 9/17/2020 | 12/28/2020 | Europe / Belgium / Wavre                       |
| EPI_ISL_738226 | 9/17/2020 | 12/28/2020 | Europe / Belgium / Haacht                      |
| EPI_ISL_738227 | 9/18/2020 | 12/28/2020 | Europe / Belgium / Overijse                    |
| EPI_ISL_738228 | 9/19/2020 | 12/28/2020 | Europe / Belgium / Bost                        |
| EPI_ISL_738229 | 9/20/2020 | 12/28/2020 | Europe / Belgium / Sint-Pieters-Woluwe         |
| EPI_ISL_738230 | 9/21/2020 | 12/28/2020 | Europe / Belgium / Jette                       |
| EPI_ISL_738231 | 9/21/2020 | 12/28/2020 | Europe / Belgium / Bovesse                     |
| EPI_ISL_738232 | 9/22/2020 | 12/28/2020 | Europe / Belgium / Kumtich                     |
| EPI_ISL_738233 | 9/22/2020 | 12/28/2020 | Europe / Belgium / Kumtich                     |
| EPI_ISL_738234 | 9/22/2020 | 12/28/2020 | Europe / Belgium / Zolder                      |
| EPI_ISL_738235 | 9/22/2020 | 12/28/2020 | Europe / Belgium / Hoeilaart                   |
| EPI_ISL_738236 | 9/22/2020 | 12/28/2020 | Europe / Belgium / Tervuren                    |
| EPI_ISL_738237 | 9/22/2020 | 12/28/2020 | Europe / Belgium / Haren                       |
| EPI_ISL_738238 | 9/23/2020 | 12/28/2020 | Europe / Belgium / Koekelberg                  |
| EPI_ISL_738239 | 9/24/2020 | 12/28/2020 | Europe / Belgium / Kraainem                    |
| EPI_ISL_738240 | 10/6/2020 | 12/28/2020 | Europe / Belgium / Hoeilaart                   |
| EPI_ISL_738241 | 4/16/2020 | 12/28/2020 | Europe / France / Hauts-de-France / Bousbecque |
| EPI_ISL_738242 | 4/17/2020 | 12/28/2020 | Europe / France / Hauts-de-France / Crespin    |
| EPI_ISL_738243 | 3/3/2020  | 12/28/2020 | Europe / Italy / Tuscany / Florence            |
| EPI_ISL_738291 | 5/28/2020 | 12/28/2020 | North America / USA / Connecticut              |
| EPI_ISL_738293 | 5/27/2020 | 12/28/2020 | North America / USA / Connecticut              |
| EPI_ISL_738294 | 5/26/2020 | 12/28/2020 | North America / USA / Connecticut              |
| EPI_ISL_738295 | 5/22/2020 | 12/28/2020 | North America / USA / Connecticut              |
| EPI_ISL_738296 | 5/14/2020 | 12/28/2020 | North America / USA / Connecticut              |
| EPI_ISL_738297 | 5/14/2020 | 12/28/2020 | North America / USA / Connecticut              |
| EPI_ISL_738310 | 5/5/2020  | 12/28/2020 | North America / USA / Connecticut              |
| EPI_ISL_738312 | 5/5/2020  | 12/28/2020 | North America / USA / Connecticut              |

|                |            |                                                |
|----------------|------------|------------------------------------------------|
| EPI_ISL_738313 | 12/21/2020 | 12/28/2020 Europe / Norway / Vestland          |
| EPI_ISL_738314 | 12/13/2020 | 12/28/2020 Europe / Norway / Oslo              |
| EPI_ISL_738326 | 11/28/2020 | 12/28/2020 Europe / Romania                    |
| EPI_ISL_738327 | 11/28/2020 | 12/28/2020 Europe / Romania                    |
| EPI_ISL_738328 | 11/28/2020 | 12/28/2020 Europe / Romania                    |
| EPI_ISL_738329 | 11/28/2020 | 12/28/2020 Europe / Romania                    |
| EPI_ISL_738330 | 11/28/2020 | 12/28/2020 Europe / Romania                    |
| EPI_ISL_738331 | 11/28/2020 | 12/28/2020 Europe / Romania                    |
| EPI_ISL_738332 | 11/28/2020 | 12/28/2020 Europe / Romania                    |
| EPI_ISL_738333 | 11/28/2020 | 12/28/2020 Europe / Romania                    |
| EPI_ISL_738334 | 11/28/2020 | 12/28/2020 Europe / Romania                    |
| EPI_ISL_738335 | 11/28/2020 | 12/28/2020 Europe / Romania                    |
| EPI_ISL_738336 | 11/28/2020 | 12/28/2020 Europe / Romania                    |
| EPI_ISL_738337 | 11/28/2020 | 12/28/2020 Europe / Romania                    |
| EPI_ISL_738338 | 11/28/2020 | 12/28/2020 Europe / Romania                    |
| EPI_ISL_738339 | 11/28/2020 | 12/28/2020 Europe / Romania                    |
| EPI_ISL_738340 | 11/28/2020 | 12/28/2020 Europe / Romania                    |
| EPI_ISL_738341 | 11/28/2020 | 12/28/2020 Europe / Romania                    |
| EPI_ISL_738342 | 11/28/2020 | 12/28/2020 Europe / Romania                    |
| EPI_ISL_738343 | 11/28/2020 | 12/28/2020 Europe / Romania                    |
| EPI_ISL_738344 | 11/28/2020 | 12/28/2020 Europe / Romania                    |
| EPI_ISL_738345 | 11/28/2020 | 12/28/2020 Europe / Romania                    |
| EPI_ISL_738346 | 11/28/2020 | 12/28/2020 Europe / Romania                    |
| EPI_ISL_738347 | 11/28/2020 | 12/28/2020 Europe / Romania                    |
| EPI_ISL_738348 | 11/28/2020 | 12/28/2020 Europe / Romania                    |
| EPI_ISL_738349 | 11/28/2020 | 12/28/2020 Europe / Romania                    |
| EPI_ISL_738352 | 12/15/2020 | 12/28/2020 North America / USA / Wisconsin     |
| EPI_ISL_738353 | 12/16/2020 | 12/28/2020 North America / USA / Kentucky      |
| EPI_ISL_738354 | 12/18/2020 | 12/28/2020 North America / USA / Massachusetts |
| EPI_ISL_738355 | 12/14/2020 | 12/28/2020 North America / USA / New Hampshire |
| EPI_ISL_738356 | 12/18/2020 | 12/28/2020 North America / USA / Massachusetts |
| EPI_ISL_738357 | 12/15/2020 | 12/28/2020 North America / USA / New Hampshire |
| EPI_ISL_738358 | 12/18/2020 | 12/28/2020 North America / USA / New Hampshire |
| EPI_ISL_738359 | 12/18/2020 | 12/28/2020 North America / USA / Massachusetts |
| EPI_ISL_738360 | 10/14/2020 | 12/28/2020 Europe / Belgium / Overijse         |
| EPI_ISL_738361 | 12/9/2020  | 12/28/2020 Europe / Belgium / Mol              |
| EPI_ISL_738362 | 12/11/2020 | 12/28/2020 Europe / Belgium / Mol              |
| EPI_ISL_738363 | 12/14/2020 | 12/28/2020 Europe / Belgium / Mol              |
| EPI_ISL_738364 | 12/11/2020 | 12/28/2020 Europe / Belgium / Mol              |
| EPI_ISL_738365 | 12/14/2020 | 12/28/2020 Europe / Belgium / Mol              |
| EPI_ISL_738366 | 12/11/2020 | 12/28/2020 Europe / Belgium / Mol              |
| EPI_ISL_738367 | 12/11/2020 | 12/28/2020 Europe / Belgium / Mol              |
| EPI_ISL_738368 | 12/11/2020 | 12/28/2020 Europe / Belgium / Mol              |
| EPI_ISL_738369 | 12/14/2020 | 12/28/2020 Europe / Belgium / Mol              |
| EPI_ISL_738370 | 12/11/2020 | 12/28/2020 Europe / Belgium / Mol              |
| EPI_ISL_738371 | 12/8/2020  | 12/28/2020 Europe / Belgium / Mol              |
| EPI_ISL_738372 | 12/11/2020 | 12/28/2020 Europe / Belgium / Mol              |



|                |            |            |                                    |
|----------------|------------|------------|------------------------------------|
| EPI_ISL_738422 | 12/11/2020 | 12/28/2020 | Europe / Belgium / Mol             |
| EPI_ISL_738423 | 12/11/2020 | 12/28/2020 | Europe / Belgium / Mol             |
| EPI_ISL_738424 | 12/14/2020 | 12/28/2020 | Europe / Belgium / Mol             |
| EPI_ISL_738425 | 10/14/2020 | 12/28/2020 | Europe / Belgium / Brussel         |
| EPI_ISL_738426 | 12/11/2020 | 12/28/2020 | Europe / Belgium / Mol             |
| EPI_ISL_738427 | 12/14/2020 | 12/28/2020 | Europe / Belgium / Mol             |
| EPI_ISL_738428 | 12/11/2020 | 12/28/2020 | Europe / Belgium / Mol             |
| EPI_ISL_738429 | 12/11/2020 | 12/28/2020 | Europe / Belgium / Mol             |
| EPI_ISL_738430 | 12/14/2020 | 12/28/2020 | Europe / Belgium / Mol             |
| EPI_ISL_738431 | 12/9/2020  | 12/28/2020 | Europe / Belgium / Mol             |
| EPI_ISL_738432 | 12/14/2020 | 12/28/2020 | Europe / Belgium / Mol             |
| EPI_ISL_738433 | 12/11/2020 | 12/28/2020 | Europe / Belgium / Mol             |
| EPI_ISL_738434 | 12/11/2020 | 12/28/2020 | Europe / Belgium / Mol             |
| EPI_ISL_738435 | 12/14/2020 | 12/28/2020 | Europe / Belgium / Mol             |
| EPI_ISL_738436 | 10/14/2020 | 12/28/2020 | Europe / Belgium / Wezembeek-Oppem |
| EPI_ISL_738437 | 12/9/2020  | 12/28/2020 | Europe / Belgium / Mol             |
| EPI_ISL_738438 | 12/11/2020 | 12/28/2020 | Europe / Belgium / Mol             |
| EPI_ISL_738439 | 12/14/2020 | 12/28/2020 | Europe / Belgium / Mol             |
| EPI_ISL_738440 | 12/11/2020 | 12/28/2020 | Europe / Belgium / Mol             |
| EPI_ISL_738441 | 12/14/2020 | 12/28/2020 | Europe / Belgium / Mol             |
| EPI_ISL_738442 | 10/14/2020 | 12/28/2020 | Europe / Belgium / Tervuren        |
| EPI_ISL_738443 | 12/11/2020 | 12/28/2020 | Europe / Belgium / Mol             |
| EPI_ISL_738444 | 12/11/2020 | 12/28/2020 | Europe / Belgium / Mol             |
| EPI_ISL_738445 | 12/11/2020 | 12/28/2020 | Europe / Belgium / Mol             |
| EPI_ISL_738446 | 12/11/2020 | 12/28/2020 | Europe / Belgium / Mol             |
| EPI_ISL_738447 | 10/14/2020 | 12/28/2020 | Europe / Belgium / Tervuren        |
| EPI_ISL_738448 | 10/14/2020 | 12/28/2020 | Europe / Belgium / Putte           |
| EPI_ISL_738449 | 12/11/2020 | 12/28/2020 | Europe / Belgium / Mol             |
| EPI_ISL_738450 | 12/14/2020 | 12/28/2020 | Europe / Belgium / Mol             |
| EPI_ISL_738451 | 12/11/2020 | 12/28/2020 | Europe / Belgium / Mol             |
| EPI_ISL_738452 | 12/14/2020 | 12/28/2020 | Europe / Belgium / Mol             |
| EPI_ISL_738453 | 10/14/2020 | 12/28/2020 | Europe / Belgium / Bertem          |
| EPI_ISL_738454 | 12/14/2020 | 12/28/2020 | Europe / Belgium / Mol             |
| EPI_ISL_738455 | 12/14/2020 | 12/28/2020 | Europe / Belgium / Arendonk        |
| EPI_ISL_738456 | 12/11/2020 | 12/28/2020 | Europe / Belgium / Mol             |
| EPI_ISL_738457 | 12/11/2020 | 12/28/2020 | Europe / Belgium / Meerhout        |
| EPI_ISL_738458 | 12/14/2020 | 12/28/2020 | Europe / Belgium / Laakdal         |
| EPI_ISL_738459 | 12/14/2020 | 12/28/2020 | Europe / Belgium / Mol             |
| EPI_ISL_738461 | 12/14/2020 | 12/28/2020 | Europe / Belgium / Boechout        |
| EPI_ISL_738462 | 12/11/2020 | 12/28/2020 | Europe / Belgium / Balen           |
| EPI_ISL_738463 | 12/11/2020 | 12/28/2020 | Europe / Belgium / Dessel          |
| EPI_ISL_738464 | 12/14/2020 | 12/28/2020 | Europe / Belgium / Geel            |
| EPI_ISL_738465 | 12/12/2020 | 12/28/2020 | Europe / Belgium / Mol             |
| EPI_ISL_738466 | 12/14/2020 | 12/28/2020 | Europe / Belgium / Mol             |
| EPI_ISL_738467 | 12/14/2020 | 12/28/2020 | Europe / Belgium / Deurne          |
| EPI_ISL_738468 | 12/11/2020 | 12/28/2020 | Europe / Belgium / Mol             |
| EPI_ISL_738469 | 12/6/2020  | 12/28/2020 | Europe / Belgium / Olmen           |

|                |            |            |                                                         |
|----------------|------------|------------|---------------------------------------------------------|
| EPI_ISL_738470 | 10/13/2020 | 12/28/2020 | Europe / Belgium / Kraainem                             |
| EPI_ISL_738471 | 12/14/2020 | 12/28/2020 | Europe / Belgium / Mol                                  |
| EPI_ISL_738472 | 12/14/2020 | 12/28/2020 | Europe / Belgium / Beerse                               |
| EPI_ISL_738473 | 12/11/2020 | 12/28/2020 | Europe / Belgium / Mol                                  |
| EPI_ISL_738474 | 12/14/2020 | 12/28/2020 | Europe / Belgium / Mol                                  |
| EPI_ISL_738475 | 10/13/2020 | 12/28/2020 | Europe / Belgium / Bost                                 |
| EPI_ISL_738476 | 12/14/2020 | 12/28/2020 | Europe / Belgium / Arendonk                             |
| EPI_ISL_738477 | 12/14/2020 | 12/28/2020 | Europe / Belgium / Arendonk                             |
| EPI_ISL_738478 | 12/11/2020 | 12/28/2020 | Europe / Belgium / Mol                                  |
| EPI_ISL_738479 | 12/14/2020 | 12/28/2020 | Europe / Belgium / Halen                                |
| EPI_ISL_738480 | 10/14/2020 | 12/28/2020 | Europe / Belgium / Diegem                               |
| EPI_ISL_738481 | 12/11/2020 | 12/28/2020 | Europe / Belgium / Mol                                  |
| EPI_ISL_738482 | 12/14/2020 | 12/28/2020 | Europe / Belgium / Arendonk                             |
| EPI_ISL_738483 | 12/14/2020 | 12/28/2020 | Europe / Belgium / Arendonk                             |
| EPI_ISL_738484 | 12/11/2020 | 12/28/2020 | Europe / Belgium / Mol                                  |
| EPI_ISL_738485 | 12/14/2020 | 12/28/2020 | Europe / Belgium / Mol                                  |
| EPI_ISL_738486 | 10/13/2020 | 12/28/2020 | Europe / Belgium / Leuven                               |
| EPI_ISL_738487 | 12/11/2020 | 12/28/2020 | Europe / Belgium / Mol                                  |
| EPI_ISL_738488 | 12/14/2020 | 12/28/2020 | Europe / Belgium / Rijkevorsel                          |
| EPI_ISL_738489 | 12/14/2020 | 12/28/2020 | Europe / Belgium / Merksplas                            |
| EPI_ISL_738490 | 12/11/2020 | 12/28/2020 | Europe / Belgium / Balen                                |
| EPI_ISL_738491 | 12/14/2020 | 12/28/2020 | Europe / Belgium / Overpelt                             |
| EPI_ISL_738492 | 10/13/2020 | 12/28/2020 | Europe / Belgium / Nossegem                             |
| EPI_ISL_738493 | 12/14/2020 | 12/28/2020 | Europe / Belgium / Mol                                  |
| EPI_ISL_738494 | 12/14/2020 | 12/28/2020 | Europe / Belgium / Arendonk                             |
| EPI_ISL_738495 | 12/11/2020 | 12/28/2020 | Europe / Belgium / Mol                                  |
| EPI_ISL_738496 | 12/11/2020 | 12/28/2020 | Europe / Belgium / Arendonk                             |
| EPI_ISL_738497 | 12/14/2020 | 12/28/2020 | Europe / Belgium / Arendonk                             |
| EPI_ISL_738498 | 10/12/2020 | 12/28/2020 | Europe / Belgium / Tervuren                             |
| EPI_ISL_738499 | 12/14/2020 | 12/28/2020 | Europe / Belgium / Mol                                  |
| EPI_ISL_738678 | 6/8/2020   | 12/29/2020 | North America / USA / California / Alameda County       |
| EPI_ISL_738707 | 10/17/2020 | 12/29/2020 | North America / USA / California / Madera County        |
| EPI_ISL_738708 | 10/17/2020 | 12/29/2020 | North America / USA / California / Madera County        |
| EPI_ISL_738709 | 11/16/2020 | 12/29/2020 | North America / USA / California / Orange County        |
| EPI_ISL_738710 | 11/18/2020 | 12/29/2020 | North America / USA / California / Santa Clara County   |
| EPI_ISL_738711 | 8/28/2020  | 12/29/2020 | North America / USA / California / Alameda County       |
| EPI_ISL_738712 | 12/2/2020  | 12/29/2020 | North America / USA / California / San Francisco County |
| EPI_ISL_738713 | 11/25/2020 | 12/29/2020 | North America / USA / California / San Francisco County |
| EPI_ISL_738714 | 11/25/2020 | 12/29/2020 | North America / USA / California / San Francisco County |
| EPI_ISL_738715 | 7/8/2020   | 12/29/2020 | North America / USA / California / Alameda County       |
| EPI_ISL_738722 | 11/16/2020 | 12/29/2020 | North America / USA / California / Orange County        |
| EPI_ISL_738723 | 11/23/2020 | 12/29/2020 | North America / USA / California / San Francisco County |
| EPI_ISL_738724 | 5/25/2020  | 12/29/2020 | North America / USA / California / Alameda County       |
| EPI_ISL_738725 | 12/1/2020  | 12/29/2020 | North America / USA / California / San Francisco County |
| EPI_ISL_738726 | 11/12/2020 | 12/29/2020 | North America / USA / California / Santa Clara County   |
| EPI_ISL_738727 | 11/25/2020 | 12/29/2020 | North America / USA / California / San Francisco County |
| EPI_ISL_738728 | 11/12/2020 | 12/29/2020 | North America / USA / California / Santa Clara County   |

|                |            |            |                                                                |
|----------------|------------|------------|----------------------------------------------------------------|
| EPI_ISL_738729 | 11/17/2020 | 12/29/2020 | North America / USA / California / Orange County               |
| EPI_ISL_738730 | 11/12/2020 | 12/29/2020 | North America / USA / California / Santa Clara County          |
| EPI_ISL_738731 | 12/3/2020  | 12/29/2020 | North America / USA / California / Orange County               |
| EPI_ISL_738732 | 11/27/2020 | 12/29/2020 | North America / USA / California / Orange County               |
| EPI_ISL_738733 | 12/3/2020  | 12/29/2020 | North America / USA / California / Orange County               |
| EPI_ISL_738734 | 11/27/2020 | 12/29/2020 | North America / USA / California / Orange County               |
| EPI_ISL_738735 | 11/27/2020 | 12/29/2020 | North America / USA / California / Orange County               |
| EPI_ISL_738736 | 11/29/2020 | 12/29/2020 | North America / USA / California / Orange County               |
| EPI_ISL_738737 | 11/29/2020 | 12/29/2020 | North America / USA / California / Orange County               |
| EPI_ISL_738738 | 11/27/2020 | 12/29/2020 | North America / USA / California / Orange County               |
| EPI_ISL_738739 | 11/29/2020 | 12/29/2020 | North America / USA / California / Orange County               |
| EPI_ISL_738740 | 11/29/2020 | 12/29/2020 | North America / USA / California / Orange County               |
| EPI_ISL_738741 | 11/27/2020 | 12/29/2020 | North America / USA / California / Orange County               |
| EPI_ISL_738742 | 11/7/2020  | 12/29/2020 | North America / USA / California / Humboldt County             |
| EPI_ISL_738743 | 8/14/2020  | 12/29/2020 | North America / USA / California / Alameda County              |
| EPI_ISL_738744 | 8/17/2020  | 12/29/2020 | North America / USA / California / Alameda County              |
| EPI_ISL_738745 | 9/9/2020   | 12/29/2020 | North America / USA / California / Alameda County              |
| EPI_ISL_738746 | 11/20/2020 | 12/29/2020 | North America / USA / California / Santa Clara County          |
| EPI_ISL_738747 | 11/30/2020 | 12/29/2020 | North America / USA / California / Santa Clara County          |
| EPI_ISL_738748 | 8/5/2020   | 12/29/2020 | North America / USA / California / Alameda County              |
| EPI_ISL_738749 | 6/16/2020  | 12/29/2020 | North America / USA / California / Alameda County              |
| EPI_ISL_738750 | 12/2/2020  | 12/29/2020 | North America / USA / California / Santa Clara County          |
| EPI_ISL_738751 | 6/6/2020   | 12/29/2020 | North America / USA / California / Alameda County              |
| EPI_ISL_738752 | 12/3/2020  | 12/29/2020 | North America / USA / California / Orange County               |
| EPI_ISL_738753 | 5/27/2020  | 12/29/2020 | North America / USA / California / Alameda County              |
| EPI_ISL_738754 | 10/29/2020 | 12/29/2020 | North America / USA / California / Napa, Solano, Yolo, Marin ( |
| EPI_ISL_738755 | 11/16/2020 | 12/29/2020 | North America / USA / California / Orange County               |
| EPI_ISL_738756 | 10/21/2020 | 12/29/2020 | North America / USA / California / Humboldt County             |
| EPI_ISL_738757 | 11/10/2020 | 12/29/2020 | North America / USA / California / Orange County               |
| EPI_ISL_738758 | 12/2/2020  | 12/29/2020 | North America / USA / California / Orange County               |
| EPI_ISL_738759 | 11/10/2020 | 12/29/2020 | North America / USA / California / Humboldt County             |
| EPI_ISL_738760 | 6/15/2020  | 12/29/2020 | North America / USA / California / Alameda County              |
| EPI_ISL_738761 | 11/16/2020 | 12/29/2020 | North America / USA / California / Orange County               |
| EPI_ISL_738762 | 11/12/2020 | 12/29/2020 | North America / USA / California / Orange County               |
| EPI_ISL_738763 | 11/23/2020 | 12/29/2020 | North America / USA / California / Santa Clara County          |
| EPI_ISL_738764 | 11/24/2020 | 12/29/2020 | North America / USA / California / Santa Clara County          |
| EPI_ISL_738765 | 11/11/2020 | 12/29/2020 | North America / USA / California / Santa Clara County          |
| EPI_ISL_738766 | 8/7/2020   | 12/29/2020 | North America / USA / California / Alameda County              |
| EPI_ISL_738767 | 9/22/2020  | 12/29/2020 | North America / USA / California / Alameda County              |
| EPI_ISL_738769 | 11/18/2020 | 12/29/2020 | North America / USA / California / Santa Clara County          |
| EPI_ISL_738770 | 11/30/2020 | 12/29/2020 | North America / USA / California / San Francisco County        |
| EPI_ISL_738771 | 11/18/2020 | 12/29/2020 | North America / USA / California / Santa Clara County          |
| EPI_ISL_738772 | 11/22/2020 | 12/29/2020 | North America / USA / California / Santa Clara County          |
| EPI_ISL_738773 | 5/25/2020  | 12/29/2020 | North America / USA / California / Alameda County              |
| EPI_ISL_738774 | 8/26/2020  | 12/29/2020 | North America / USA / California / Alameda County              |
| EPI_ISL_738775 | 6/22/2020  | 12/29/2020 | North America / USA / California / Alameda County              |
| EPI_ISL_738776 | 8/11/2020  | 12/29/2020 | North America / USA / California / Alameda County              |



|                |            |            |                                                                |
|----------------|------------|------------|----------------------------------------------------------------|
| EPI_ISL_738777 | 4/30/2020  | 12/29/2020 | North America / USA / California / Napa, Solano, Yolo, Marin ( |
| EPI_ISL_738778 | 9/23/2020  | 12/29/2020 | North America / USA / California / Humboldt County             |
| EPI_ISL_738779 | 11/10/2020 | 12/29/2020 | North America / USA / California / Humboldt County             |
| EPI_ISL_738780 | 11/18/2020 | 12/29/2020 | North America / USA / California / Santa Clara County          |
| EPI_ISL_738781 | 7/6/2020   | 12/29/2020 | North America / USA / California / Alameda County              |
| EPI_ISL_738782 | 11/27/2020 | 12/29/2020 | North America / USA / California / Orange County               |
| EPI_ISL_738783 | 8/17/2020  | 12/29/2020 | North America / USA / California / Alameda County              |
| EPI_ISL_738784 | 12/2/2020  | 12/29/2020 | North America / USA / California / Orange County               |
| EPI_ISL_738785 | 9/22/2020  | 12/29/2020 | North America / USA / California / Humboldt County             |
| EPI_ISL_738786 | 11/5/2020  | 12/29/2020 | North America / USA / California / Humboldt County             |
| EPI_ISL_738787 | 12/4/2020  | 12/29/2020 | North America / USA / California / Orange County               |
| EPI_ISL_738788 | 5/23/2020  | 12/29/2020 | North America / USA / California / Alameda County              |
| EPI_ISL_738789 | 11/23/2020 | 12/29/2020 | North America / USA / California / Santa Clara County          |
| EPI_ISL_738790 | 11/22/2020 | 12/29/2020 | North America / USA / California / Orange County               |
| EPI_ISL_738791 | 11/20/2020 | 12/29/2020 | North America / USA / California / Santa Clara County          |
| EPI_ISL_738792 | 9/21/2020  | 12/29/2020 | North America / USA / California / Alameda County              |
| EPI_ISL_738793 | 8/14/2020  | 12/29/2020 | North America / USA / California / Alameda County              |
| EPI_ISL_738794 | 11/20/2020 | 12/29/2020 | North America / USA / California / Santa Clara County          |
| EPI_ISL_738795 | 11/10/2020 | 12/29/2020 | North America / USA / California / Humboldt County             |
| EPI_ISL_738796 | 9/23/2020  | 12/29/2020 | North America / USA / California / Alameda County              |
| EPI_ISL_738797 | 9/15/2020  | 12/29/2020 | North America / USA / California / Alameda County              |
| EPI_ISL_738798 | 11/16/2020 | 12/29/2020 | North America / USA / California / Santa Clara County          |
| EPI_ISL_738799 | 11/16/2020 | 12/29/2020 | North America / USA / California / Orange County               |
| EPI_ISL_738800 | 8/10/2020  | 12/29/2020 | North America / USA / California / Alameda County              |
| EPI_ISL_738801 | 11/18/2020 | 12/29/2020 | North America / USA / California / Humboldt County             |
| EPI_ISL_738802 | 11/4/2020  | 12/29/2020 | North America / USA / California / Alameda County              |
| EPI_ISL_738803 | 11/23/2020 | 12/29/2020 | North America / USA / California / Santa Clara County          |
| EPI_ISL_738804 | 6/27/2020  | 12/29/2020 | North America / USA / California / Alameda County              |
| EPI_ISL_738805 | 11/30/2020 | 12/29/2020 | North America / USA / California / Santa Clara County          |
| EPI_ISL_738806 | 11/16/2020 | 12/29/2020 | North America / USA / California / Humboldt County             |
| EPI_ISL_738807 | 11/18/2020 | 12/29/2020 | North America / USA / California / Humboldt County             |
| EPI_ISL_738808 | 12/5/2020  | 12/29/2020 | North America / USA / California / Orange County               |
| EPI_ISL_738809 | 11/23/2020 | 12/29/2020 | North America / USA / California / Humboldt County             |
| EPI_ISL_738810 | 11/11/2020 | 12/29/2020 | North America / USA / California / Humboldt County             |
| EPI_ISL_738811 | 11/16/2020 | 12/29/2020 | North America / USA / California / Orange County               |
| EPI_ISL_738812 | 11/23/2020 | 12/29/2020 | North America / USA / California / Santa Clara County          |
| EPI_ISL_738813 | 7/29/2020  | 12/29/2020 | North America / USA / California / Alameda County              |
| EPI_ISL_738814 | 9/24/2020  | 12/29/2020 | North America / USA / California / Alameda County              |
| EPI_ISL_738815 | 11/13/2020 | 12/29/2020 | North America / USA / California / Orange County               |
| EPI_ISL_738816 | 12/2/2020  | 12/29/2020 | North America / USA / California / Orange County               |
| EPI_ISL_738817 | 6/25/2020  | 12/29/2020 | North America / USA / California / Alameda County              |
| EPI_ISL_738818 | 11/16/2020 | 12/29/2020 | North America / USA / California / Orange County               |
| EPI_ISL_738819 | 7/29/2020  | 12/29/2020 | North America / USA / California / Alameda County              |
| EPI_ISL_738820 | 4/24/2020  | 12/29/2020 | North America / USA / California / Napa, Solano, Yolo, Marin ( |
| EPI_ISL_738821 | 6/10/2020  | 12/29/2020 | North America / USA / California / Alameda County              |
| EPI_ISL_738822 | 6/24/2020  | 12/29/2020 | North America / USA / California / Alameda County              |
| EPI_ISL_738823 | 11/25/2020 | 12/29/2020 | North America / USA / California / Orange County               |

|                |            |            |                                                                |
|----------------|------------|------------|----------------------------------------------------------------|
| EPI_ISL_738824 | 11/16/2020 | 12/29/2020 | North America / USA / California / Orange County               |
| EPI_ISL_738825 | 8/8/2020   | 12/29/2020 | North America / USA / California / Alameda County              |
| EPI_ISL_738826 | 11/24/2020 | 12/29/2020 | North America / USA / California / Orange County               |
| EPI_ISL_738827 | 11/9/2020  | 12/29/2020 | North America / USA / California / Humboldt County             |
| EPI_ISL_738828 | 6/22/2020  | 12/29/2020 | North America / USA / California / Alameda County              |
| EPI_ISL_738829 | 12/6/2020  | 12/29/2020 | North America / USA / California / Orange County               |
| EPI_ISL_738830 | 11/16/2020 | 12/29/2020 | North America / USA / California / Orange County               |
| EPI_ISL_738831 | 8/12/2020  | 12/29/2020 | North America / USA / California / Alameda County              |
| EPI_ISL_738832 | 11/5/2020  | 12/29/2020 | North America / USA / California / Humboldt County             |
| EPI_ISL_738833 | 8/19/2020  | 12/29/2020 | North America / USA / California / Alameda County              |
| EPI_ISL_738834 | 12/1/2020  | 12/29/2020 | North America / USA / California / Santa Clara County          |
| EPI_ISL_738835 | 8/17/2020  | 12/29/2020 | North America / USA / California / Alameda County              |
| EPI_ISL_738836 | 10/29/2020 | 12/29/2020 | North America / USA / California / Napa, Solano, Yolo, Marin ( |
| EPI_ISL_738837 | 6/25/2020  | 12/29/2020 | North America / USA / California / Alameda County              |
| EPI_ISL_738838 | 6/22/2020  | 12/29/2020 | North America / USA / California / Alameda County              |
| EPI_ISL_738839 | 11/24/2020 | 12/29/2020 | North America / USA / California / Santa Clara County          |
| EPI_ISL_738840 | 11/25/2020 | 12/29/2020 | North America / USA / California / Orange County               |
| EPI_ISL_738841 | 11/25/2020 | 12/29/2020 | North America / USA / California / Orange County               |
| EPI_ISL_738842 | 11/18/2020 | 12/29/2020 | North America / USA / California / Santa Clara County          |
| EPI_ISL_738843 | 5/26/2020  | 12/29/2020 | North America / USA / California / Alameda County              |
| EPI_ISL_738844 | 11/6/2020  | 12/29/2020 | North America / USA / California / Humboldt County             |
| EPI_ISL_738845 | 11/16/2020 | 12/29/2020 | North America / USA / California / Orange County               |
| EPI_ISL_738846 | 8/28/2020  | 12/29/2020 | North America / USA / California / Alameda County              |
| EPI_ISL_738847 | 7/8/2020   | 12/29/2020 | North America / USA / California / Alameda County              |
| EPI_ISL_738848 | 8/11/2020  | 12/29/2020 | North America / USA / California / Alameda County              |
| EPI_ISL_738849 | 11/16/2020 | 12/29/2020 | North America / USA / California / Humboldt County             |
| EPI_ISL_738850 | 12/5/2020  | 12/29/2020 | North America / USA / California / Orange County               |
| EPI_ISL_738851 | 12/1/2020  | 12/29/2020 | North America / USA / California / San Francisco County        |
| EPI_ISL_738852 | 11/9/2020  | 12/29/2020 | North America / USA / California / Humboldt County             |
| EPI_ISL_738853 | 11/4/2020  | 12/29/2020 | North America / USA / California / Santa Clara County          |
| EPI_ISL_738854 | 11/22/2020 | 12/29/2020 | North America / USA / California / Humboldt County             |
| EPI_ISL_738855 | 11/30/2020 | 12/29/2020 | North America / USA / California / Santa Clara County          |
| EPI_ISL_738856 | 12/5/2020  | 12/29/2020 | North America / USA / California / Orange County               |
| EPI_ISL_738857 | 11/15/2020 | 12/29/2020 | North America / USA / California / Orange County               |
| EPI_ISL_738858 | 5/24/2020  | 12/29/2020 | North America / USA / California / Alameda County              |
| EPI_ISL_738859 | 11/28/2020 | 12/29/2020 | North America / USA / California / Santa Clara County          |
| EPI_ISL_738860 | 11/16/2020 | 12/29/2020 | North America / USA / California / Orange County               |
| EPI_ISL_738861 | 11/14/2020 | 12/29/2020 | North America / USA / California / Santa Clara County          |
| EPI_ISL_738862 | 11/17/2020 | 12/29/2020 | North America / USA / California / Orange County               |
| EPI_ISL_738863 | 11/26/2020 | 12/29/2020 | North America / USA / California / Orange County               |
| EPI_ISL_738864 | 11/18/2020 | 12/29/2020 | North America / USA / California / Santa Clara County          |
| EPI_ISL_738865 | 11/19/2020 | 12/29/2020 | North America / USA / California / Humboldt County             |
| EPI_ISL_738866 | 12/5/2020  | 12/29/2020 | North America / USA / California / Orange County               |
| EPI_ISL_738867 | 11/18/2020 | 12/29/2020 | North America / USA / California / Santa Clara County          |
| EPI_ISL_738868 | 9/9/2020   | 12/29/2020 | North America / USA / California / Alameda County              |
| EPI_ISL_738869 | 11/16/2020 | 12/29/2020 | North America / USA / California / Orange County               |
| EPI_ISL_738870 | 9/1/2020   | 12/29/2020 | North America / USA / California / Napa, Solano, Yolo, Marin ( |

|                |            |            |                                                                |
|----------------|------------|------------|----------------------------------------------------------------|
| EPI_ISL_738871 | 11/15/2020 | 12/29/2020 | North America / USA / California / Orange County               |
| EPI_ISL_738872 | 12/5/2020  | 12/29/2020 | North America / USA / California / Orange County               |
| EPI_ISL_738873 | 11/17/2020 | 12/29/2020 | North America / USA / California / Orange County               |
| EPI_ISL_738874 | 12/2/2020  | 12/29/2020 | North America / USA / California / Orange County               |
| EPI_ISL_738875 | 11/18/2020 | 12/29/2020 | North America / USA / California / Humboldt County             |
| EPI_ISL_738876 | 6/25/2020  | 12/29/2020 | North America / USA / California / Alameda County              |
| EPI_ISL_738877 | 11/24/2020 | 12/29/2020 | North America / USA / California / San Francisco County        |
| EPI_ISL_738878 | 12/2/2020  | 12/29/2020 | North America / USA / California / Orange County               |
| EPI_ISL_738879 | 10/23/2020 | 12/29/2020 | North America / USA / California / Humboldt County             |
| EPI_ISL_738880 | 12/3/2020  | 12/29/2020 | North America / USA / California / Orange County               |
| EPI_ISL_738881 | 7/8/2020   | 12/29/2020 | North America / USA / California / Alameda County              |
| EPI_ISL_738882 | 11/9/2020  | 12/29/2020 | North America / USA / California / Orange County               |
| EPI_ISL_738883 | 11/20/2020 | 12/29/2020 | North America / USA / California / Santa Clara County          |
| EPI_ISL_738884 | 11/16/2020 | 12/29/2020 | North America / USA / California / Orange County               |
| EPI_ISL_738885 | 11/12/2020 | 12/29/2020 | North America / USA / California / Orange County               |
| EPI_ISL_738886 | 6/22/2020  | 12/29/2020 | North America / USA / California / Alameda County              |
| EPI_ISL_738887 | 11/17/2020 | 12/29/2020 | North America / USA / California / Santa Clara County          |
| EPI_ISL_738888 | 11/10/2020 | 12/29/2020 | North America / USA / California / Orange County               |
| EPI_ISL_738889 | 11/23/2020 | 12/29/2020 | North America / USA / California / Santa Clara County          |
| EPI_ISL_738890 | 9/4/2020   | 12/29/2020 | North America / USA / California / San Luis Obispo County      |
| EPI_ISL_738891 | 7/2/2020   | 12/29/2020 | North America / USA / California / Alameda County              |
| EPI_ISL_738892 | 6/24/2020  | 12/29/2020 | North America / USA / California / Alameda County              |
| EPI_ISL_738893 | 11/24/2020 | 12/29/2020 | North America / USA / California / Orange County               |
| EPI_ISL_738894 | 11/29/2020 | 12/29/2020 | North America / USA / California / Santa Clara County          |
| EPI_ISL_738895 | 11/4/2020  | 12/29/2020 | North America / USA / California / Alameda County              |
| EPI_ISL_738896 | 7/8/2020   | 12/29/2020 | North America / USA / California / Alameda County              |
| EPI_ISL_738897 | 5/2/2020   | 12/29/2020 | North America / USA / California / Napa, Solano, Yolo, Marin ( |
| EPI_ISL_738898 | 11/14/2020 | 12/29/2020 | North America / USA / California / Santa Clara County          |
| EPI_ISL_738899 | 11/25/2020 | 12/29/2020 | North America / USA / California / Orange County               |
| EPI_ISL_738900 | 11/14/2020 | 12/29/2020 | North America / USA / California / Orange County               |
| EPI_ISL_738901 | 11/29/2020 | 12/29/2020 | North America / USA / California / San Francisco County        |
| EPI_ISL_738902 | 11/17/2020 | 12/29/2020 | North America / USA / California / Humboldt County             |
| EPI_ISL_738903 | 11/19/2020 | 12/29/2020 | North America / USA / California / Santa Clara County          |
| EPI_ISL_738904 | 7/24/2020  | 12/29/2020 | North America / USA / California / Alameda County              |
| EPI_ISL_738905 | 11/16/2020 | 12/29/2020 | North America / USA / California / Orange County               |
| EPI_ISL_738906 | 11/20/2020 | 12/29/2020 | North America / USA / California / Santa Clara County          |
| EPI_ISL_738907 | 11/27/2020 | 12/29/2020 | North America / USA / California / Orange County               |
| EPI_ISL_738908 | 11/25/2020 | 12/29/2020 | North America / USA / California / Orange County               |
| EPI_ISL_738909 | 11/20/2020 | 12/29/2020 | North America / USA / California / Santa Clara County          |
| EPI_ISL_738910 | 11/4/2020  | 12/29/2020 | North America / USA / California / Santa Clara County          |
| EPI_ISL_738911 | 9/18/2020  | 12/29/2020 | North America / USA / California / Napa, Solano, Yolo, Marin ( |
| EPI_ISL_738912 | 11/10/2020 | 12/29/2020 | North America / USA / California / Humboldt County             |
| EPI_ISL_738913 | 11/12/2020 | 12/29/2020 | North America / USA / California / Humboldt County             |
| EPI_ISL_738914 | 6/12/2020  | 12/29/2020 | North America / USA / California / Alameda County              |
| EPI_ISL_738915 | 11/24/2020 | 12/29/2020 | North America / USA / California / Santa Clara County          |
| EPI_ISL_738916 | 11/4/2020  | 12/29/2020 | North America / USA / California / Madera County               |
| EPI_ISL_738917 | 11/18/2020 | 12/29/2020 | North America / USA / California / Humboldt County             |

|                |            |            |                                                                |
|----------------|------------|------------|----------------------------------------------------------------|
| EPI_ISL_738918 | 11/5/2020  | 12/29/2020 | North America / USA / California / Humboldt County             |
| EPI_ISL_738919 | 8/10/2020  | 12/29/2020 | North America / USA / California / Alameda County              |
| EPI_ISL_738920 | 11/14/2020 | 12/29/2020 | North America / USA / California / Santa Clara County          |
| EPI_ISL_738921 | 11/17/2020 | 12/29/2020 | North America / USA / California / Orange County               |
| EPI_ISL_738922 | 11/5/2020  | 12/29/2020 | North America / USA / California / Santa Clara County          |
| EPI_ISL_738923 | 11/12/2020 | 12/29/2020 | North America / USA / California / Humboldt County             |
| EPI_ISL_738924 | 11/18/2020 | 12/29/2020 | North America / USA / California / Santa Clara County          |
| EPI_ISL_738925 | 11/5/2020  | 12/29/2020 | North America / USA / California / Alameda County              |
| EPI_ISL_738926 | 11/14/2020 | 12/29/2020 | North America / USA / California / Santa Clara County          |
| EPI_ISL_738927 | 11/24/2020 | 12/29/2020 | North America / USA / California / Santa Clara County          |
| EPI_ISL_738928 | 11/27/2020 | 12/29/2020 | North America / USA / California / Orange County               |
| EPI_ISL_738929 | 11/20/2020 | 12/29/2020 | North America / USA / California / Humboldt County             |
| EPI_ISL_738930 | 11/10/2020 | 12/29/2020 | North America / USA / California / Orange County               |
| EPI_ISL_738931 | 11/20/2020 | 12/29/2020 | North America / USA / California / Santa Clara County          |
| EPI_ISL_738932 | 9/12/2020  | 12/29/2020 | North America / USA / California / Alameda County              |
| EPI_ISL_738933 | 11/20/2020 | 12/29/2020 | North America / USA / California / Santa Clara County          |
| EPI_ISL_738934 | 6/16/2020  | 12/29/2020 | North America / USA / California / Alameda County              |
| EPI_ISL_738935 | 11/17/2020 | 12/29/2020 | North America / USA / California / Orange County               |
| EPI_ISL_738936 | 11/18/2020 | 12/29/2020 | North America / USA / California / Santa Clara County          |
| EPI_ISL_738937 | 11/13/2020 | 12/29/2020 | North America / USA / California / Orange County               |
| EPI_ISL_738938 | 11/19/2020 | 12/29/2020 | North America / USA / California / Humboldt County             |
| EPI_ISL_738939 | 12/3/2020  | 12/29/2020 | North America / USA / California / Orange County               |
| EPI_ISL_738940 | 9/22/2020  | 12/29/2020 | North America / USA / California / Alameda County              |
| EPI_ISL_738941 | 11/20/2020 | 12/29/2020 | North America / USA / California / Santa Clara County          |
| EPI_ISL_738942 | 11/20/2020 | 12/29/2020 | North America / USA / California / Santa Clara County          |
| EPI_ISL_738943 | 11/14/2020 | 12/29/2020 | North America / USA / California / Santa Clara County          |
| EPI_ISL_738944 | 11/16/2020 | 12/29/2020 | North America / USA / California / Orange County               |
| EPI_ISL_738945 | 6/16/2020  | 12/29/2020 | North America / USA / California / Alameda County              |
| EPI_ISL_738946 | 11/10/2020 | 12/29/2020 | North America / USA / California / Orange County               |
| EPI_ISL_738947 | 11/2/2020  | 12/29/2020 | North America / USA / California / Humboldt County             |
| EPI_ISL_738948 | 11/23/2020 | 12/29/2020 | North America / USA / California / Santa Clara County          |
| EPI_ISL_738949 | 12/2/2020  | 12/29/2020 | North America / USA / California / Orange County               |
| EPI_ISL_738950 | 5/23/2020  | 12/29/2020 | North America / USA / California / Alameda County              |
| EPI_ISL_738951 | 10/27/2020 | 12/29/2020 | North America / USA / California / Humboldt County             |
| EPI_ISL_738952 | 9/11/2020  | 12/29/2020 | North America / USA / California / Napa, Solano, Yolo, Marin ( |
| EPI_ISL_738953 | 11/3/2020  | 12/29/2020 | North America / USA / California / Humboldt County             |
| EPI_ISL_738954 | 12/3/2020  | 12/29/2020 | North America / USA / California / Orange County               |
| EPI_ISL_738955 | 11/30/2020 | 12/29/2020 | North America / USA / California / Santa Clara County          |
| EPI_ISL_738956 | 11/4/2020  | 12/29/2020 | North America / USA / California / Santa Clara County          |
| EPI_ISL_738957 | 6/14/2020  | 12/29/2020 | North America / USA / California / Alameda County              |
| EPI_ISL_738959 | 9/18/2020  | 12/29/2020 | North America / USA / California / Napa, Solano, Yolo, Marin ( |
| EPI_ISL_738960 | 11/18/2020 | 12/29/2020 | North America / USA / California / Santa Clara County          |
| EPI_ISL_738961 | 10/16/2020 | 12/29/2020 | North America / USA / California / Humboldt County             |
| EPI_ISL_738962 | 11/14/2020 | 12/29/2020 | North America / USA / California / Santa Clara County          |
| EPI_ISL_738963 | 9/23/2020  | 12/29/2020 | North America / USA / California / Alameda County              |
| EPI_ISL_738964 | 10/15/2020 | 12/29/2020 | North America / USA / California / Madera County               |
| EPI_ISL_738965 | 11/19/2020 | 12/29/2020 | North America / USA / California / Santa Clara County          |

|                |            |            |                                                           |
|----------------|------------|------------|-----------------------------------------------------------|
| EPI_ISL_738966 | 11/16/2020 | 12/29/2020 | North America / USA / California / Orange County          |
| EPI_ISL_738967 | 12/4/2020  | 12/29/2020 | North America / USA / California / Santa Clara County     |
| EPI_ISL_738968 | 11/16/2020 | 12/29/2020 | North America / USA / California / Orange County          |
| EPI_ISL_738969 | 11/19/2020 | 12/29/2020 | North America / USA / California / Humboldt County        |
| EPI_ISL_738970 | 11/16/2020 | 12/29/2020 | North America / USA / California / Orange County          |
| EPI_ISL_738971 | 11/23/2020 | 12/29/2020 | North America / USA / California / Santa Clara County     |
| EPI_ISL_738972 | 11/11/2020 | 12/29/2020 | North America / USA / California / Santa Clara County     |
| EPI_ISL_738973 | 11/16/2020 | 12/29/2020 | North America / USA / California / Orange County          |
| EPI_ISL_738974 | 8/10/2020  | 12/29/2020 | North America / USA / California / Alameda County         |
| EPI_ISL_738975 | 11/16/2020 | 12/29/2020 | North America / USA / California / Orange County          |
| EPI_ISL_738976 | 6/22/2020  | 12/29/2020 | North America / USA / California / Alameda County         |
| EPI_ISL_738977 | 12/1/2020  | 12/29/2020 | North America / USA / California / San Francisco County   |
| EPI_ISL_738978 | 11/30/2020 | 12/29/2020 | North America / USA / California / Orange County          |
| EPI_ISL_738979 | 11/25/2020 | 12/29/2020 | North America / USA / California / Santa Clara County     |
| EPI_ISL_738980 | 11/18/2020 | 12/29/2020 | North America / USA / California / Humboldt County        |
| EPI_ISL_738981 | 12/2/2020  | 12/29/2020 | North America / USA / California / Orange County          |
| EPI_ISL_738982 | 8/19/2020  | 12/29/2020 | North America / USA / California / Alameda County         |
| EPI_ISL_738983 | 7/15/2020  | 12/29/2020 | North America / USA / California / Alameda County         |
| EPI_ISL_738984 | 11/20/2020 | 12/29/2020 | North America / USA / California / Santa Clara County     |
| EPI_ISL_738985 | 11/11/2020 | 12/29/2020 | North America / USA / California / Humboldt County        |
| EPI_ISL_738986 | 5/22/2020  | 12/29/2020 | North America / USA / California / Alameda County         |
| EPI_ISL_738987 | 11/23/2020 | 12/29/2020 | North America / USA / California / Santa Clara County     |
| EPI_ISL_738988 | 10/9/2020  | 12/29/2020 | North America / USA / California / Humboldt County        |
| EPI_ISL_738989 | 12/5/2020  | 12/29/2020 | North America / USA / California / Orange County          |
| EPI_ISL_738990 | 9/17/2020  | 12/29/2020 | North America / USA / California / San Luis Obispo County |
| EPI_ISL_738991 | 11/21/2020 | 12/29/2020 | North America / USA / California / Orange County          |
| EPI_ISL_738992 | 7/9/2020   | 12/29/2020 | North America / USA / California / Alameda County         |
| EPI_ISL_738993 | 12/3/2020  | 12/29/2020 | North America / USA / California / Orange County          |
| EPI_ISL_738994 | 11/25/2020 | 12/29/2020 | North America / USA / California / Santa Clara County     |
| EPI_ISL_738995 | 11/28/2020 | 12/29/2020 | North America / USA / California / Orange County          |
| EPI_ISL_738996 | 11/25/2020 | 12/29/2020 | North America / USA / California / Santa Clara County     |
| EPI_ISL_738997 | 11/27/2020 | 12/29/2020 | North America / USA / California / Santa Clara County     |
| EPI_ISL_738998 | 11/14/2020 | 12/29/2020 | North America / USA / California / Santa Clara County     |
| EPI_ISL_738999 | 11/20/2020 | 12/29/2020 | North America / USA / California / Humboldt County        |
| EPI_ISL_739000 | 11/17/2020 | 12/29/2020 | North America / USA / California / Humboldt County        |
| EPI_ISL_739001 | 11/18/2020 | 12/29/2020 | North America / USA / California / Humboldt County        |
| EPI_ISL_739002 | 12/2/2020  | 12/29/2020 | North America / USA / California / Orange County          |
| EPI_ISL_739003 | 5/24/2020  | 12/29/2020 | North America / USA / California / Alameda County         |
| EPI_ISL_739004 | 10/15/2020 | 12/29/2020 | North America / USA / California / Marin County           |
| EPI_ISL_739005 | 11/24/2020 | 12/29/2020 | North America / USA / California / Santa Clara County     |
| EPI_ISL_739006 | 11/5/2020  | 12/29/2020 | North America / USA / California / Santa Clara County     |
| EPI_ISL_739007 | 11/18/2020 | 12/29/2020 | North America / USA / California / Humboldt County        |
| EPI_ISL_739008 | 11/23/2020 | 12/29/2020 | North America / USA / California / Santa Clara County     |
| EPI_ISL_739009 | 11/25/2020 | 12/29/2020 | North America / USA / California / Santa Clara County     |
| EPI_ISL_739010 | 11/11/2020 | 12/29/2020 | North America / USA / California / Santa Clara County     |
| EPI_ISL_739011 | 9/22/2020  | 12/29/2020 | North America / USA / California / Humboldt County        |
| EPI_ISL_739012 | 11/23/2020 | 12/29/2020 | North America / USA / California / Santa Clara County     |

|                |            |            |                                                           |
|----------------|------------|------------|-----------------------------------------------------------|
| EPI_ISL_739013 | 11/25/2020 | 12/29/2020 | North America / USA / California / Orange County          |
| EPI_ISL_739014 | 11/30/2020 | 12/29/2020 | North America / USA / California / San Francisco County   |
| EPI_ISL_739015 | 11/17/2020 | 12/29/2020 | North America / USA / California / Santa Clara County     |
| EPI_ISL_739016 | 11/13/2020 | 12/29/2020 | North America / USA / California / Orange County          |
| EPI_ISL_739017 | 9/22/2020  | 12/29/2020 | North America / USA / California / San Luis Obispo County |
| EPI_ISL_739018 | 6/26/2020  | 12/29/2020 | North America / USA / California / Alameda County         |
| EPI_ISL_739019 | 11/4/2020  | 12/29/2020 | North America / USA / California / Santa Clara County     |
| EPI_ISL_739020 | 11/25/2020 | 12/29/2020 | North America / USA / California / Santa Clara County     |
| EPI_ISL_739021 | 11/23/2020 | 12/29/2020 | North America / USA / California / Santa Clara County     |
| EPI_ISL_739022 | 11/29/2020 | 12/29/2020 | North America / USA / California / San Francisco County   |
| EPI_ISL_739023 | 8/17/2020  | 12/29/2020 | North America / USA / California / Alameda County         |
| EPI_ISL_739024 | 5/22/2020  | 12/29/2020 | North America / USA / California / Santa Clara County     |
| EPI_ISL_739025 | 11/25/2020 | 12/29/2020 | North America / USA / California / Santa Clara County     |
| EPI_ISL_739026 | 11/18/2020 | 12/29/2020 | North America / USA / California / Santa Clara County     |
| EPI_ISL_739027 | 11/30/2020 | 12/29/2020 | North America / USA / California / Santa Clara County     |
| EPI_ISL_739028 | 11/19/2020 | 12/29/2020 | North America / USA / California / Orange County          |
| EPI_ISL_739029 | 5/26/2020  | 12/29/2020 | North America / USA / California / Alameda County         |
| EPI_ISL_739030 | 11/27/2020 | 12/29/2020 | North America / USA / California / Santa Clara County     |
| EPI_ISL_739031 | 11/18/2020 | 12/29/2020 | North America / USA / California / Santa Clara County     |
| EPI_ISL_739032 | 11/13/2020 | 12/29/2020 | North America / USA / California / Humboldt County        |
| EPI_ISL_739033 | 9/18/2020  | 12/29/2020 | North America / USA / California / Alameda County         |
| EPI_ISL_739034 | 11/28/2020 | 12/29/2020 | North America / USA / California / Orange County          |
| EPI_ISL_739035 | 6/10/2020  | 12/29/2020 | North America / USA / California / Alameda County         |
| EPI_ISL_739036 | 12/3/2020  | 12/29/2020 | North America / USA / California / Santa Clara County     |
| EPI_ISL_739037 | 11/30/2020 | 12/29/2020 | North America / USA / California / Santa Clara County     |
| EPI_ISL_739038 | 9/18/2020  | 12/29/2020 | North America / USA / California / San Luis Obispo County |
| EPI_ISL_739039 | 11/6/2020  | 12/29/2020 | North America / USA / California / Santa Clara County     |
| EPI_ISL_739040 | 12/1/2020  | 12/29/2020 | North America / USA / California / Santa Clara County     |
| EPI_ISL_739041 | 11/20/2020 | 12/29/2020 | North America / USA / California / Santa Clara County     |
| EPI_ISL_739042 | 11/9/2020  | 12/29/2020 | North America / USA / California / Orange County          |
| EPI_ISL_739043 | 11/16/2020 | 12/29/2020 | North America / USA / California / Humboldt County        |
| EPI_ISL_739044 | 11/28/2020 | 12/29/2020 | North America / USA / California / Orange County          |
| EPI_ISL_739045 | 11/28/2020 | 12/29/2020 | North America / USA / California / Santa Clara County     |
| EPI_ISL_739046 | 8/17/2020  | 12/29/2020 | North America / USA / California / Alameda County         |
| EPI_ISL_739047 | 7/9/2020   | 12/29/2020 | North America / USA / California / Alameda County         |
| EPI_ISL_739048 | 11/16/2020 | 12/29/2020 | North America / USA / California / Orange County          |
| EPI_ISL_739049 | 8/5/2020   | 12/29/2020 | North America / USA / California / Alameda County         |
| EPI_ISL_739050 | 12/2/2020  | 12/29/2020 | North America / USA / California / Santa Clara County     |
| EPI_ISL_739051 | 11/6/2020  | 12/29/2020 | North America / USA / California / Humboldt County        |
| EPI_ISL_739052 | 11/4/2020  | 12/29/2020 | North America / USA / California / Humboldt County        |
| EPI_ISL_739053 | 11/30/2020 | 12/29/2020 | North America / USA / California / Santa Clara County     |
| EPI_ISL_739054 | 6/26/2020  | 12/29/2020 | North America / USA / California / Alameda County         |
| EPI_ISL_739055 | 11/16/2020 | 12/29/2020 | North America / USA / California / Orange County          |
| EPI_ISL_739056 | 6/23/2020  | 12/29/2020 | North America / USA / California / Alameda County         |
| EPI_ISL_739057 | 6/25/2020  | 12/29/2020 | North America / USA / California / Alameda County         |
| EPI_ISL_739058 | 12/2/2020  | 12/29/2020 | North America / USA / California / Santa Clara County     |
| EPI_ISL_739059 | 8/27/2020  | 12/29/2020 | North America / USA / California / Alameda County         |

|                |            |            |                                                           |
|----------------|------------|------------|-----------------------------------------------------------|
| EPI_ISL_739060 | 11/18/2020 | 12/29/2020 | North America / USA / California / Santa Clara County     |
| EPI_ISL_739061 | 10/17/2020 | 12/29/2020 | North America / USA / California / Madera County          |
| EPI_ISL_739062 | 9/17/2020  | 12/29/2020 | North America / USA / California / Alameda County         |
| EPI_ISL_739063 | 11/17/2020 | 12/29/2020 | North America / USA / California / Orange County          |
| EPI_ISL_739064 | 6/22/2020  | 12/29/2020 | North America / USA / California / Alameda County         |
| EPI_ISL_739065 | 11/23/2020 | 12/29/2020 | North America / USA / California / Santa Clara County     |
| EPI_ISL_739066 | 11/27/2020 | 12/29/2020 | North America / USA / California / Santa Clara County     |
| EPI_ISL_739067 | 11/25/2020 | 12/29/2020 | North America / USA / California / Santa Clara County     |
| EPI_ISL_739068 | 11/30/2020 | 12/29/2020 | North America / USA / California / Santa Clara County     |
| EPI_ISL_739069 | 11/28/2020 | 12/29/2020 | North America / USA / California / Orange County          |
| EPI_ISL_739070 | 11/23/2020 | 12/29/2020 | North America / USA / California / Santa Clara County     |
| EPI_ISL_739071 | 11/16/2020 | 12/29/2020 | North America / USA / California / Orange County          |
| EPI_ISL_739072 | 11/20/2020 | 12/29/2020 | North America / USA / California / Orange County          |
| EPI_ISL_739073 | 8/12/2020  | 12/29/2020 | North America / USA / California / Alameda County         |
| EPI_ISL_739074 | 11/18/2020 | 12/29/2020 | North America / USA / California / Santa Clara County     |
| EPI_ISL_739075 | 6/18/2020  | 12/29/2020 | North America / USA / California / Alameda County         |
| EPI_ISL_739076 | 11/25/2020 | 12/29/2020 | North America / USA / California / Santa Clara County     |
| EPI_ISL_739077 | 7/9/2020   | 12/29/2020 | North America / USA / California / Alameda County         |
| EPI_ISL_739078 | 11/17/2020 | 12/29/2020 | North America / USA / California / Orange County          |
| EPI_ISL_739079 | 11/5/2020  | 12/29/2020 | North America / USA / California / Humboldt County        |
| EPI_ISL_739080 | 11/11/2020 | 12/29/2020 | North America / USA / California / Santa Clara County     |
| EPI_ISL_739081 | 12/3/2020  | 12/29/2020 | North America / USA / California / Orange County          |
| EPI_ISL_739082 | 8/24/2020  | 12/29/2020 | North America / USA / California / Alameda County         |
| EPI_ISL_739083 | 7/15/2020  | 12/29/2020 | North America / USA / California / Alameda County         |
| EPI_ISL_739084 | 7/16/2020  | 12/29/2020 | North America / USA / California / Alameda County         |
| EPI_ISL_739085 | 11/20/2020 | 12/29/2020 | North America / USA / California / Santa Clara County     |
| EPI_ISL_739086 | 9/30/2020  | 12/29/2020 | North America / USA / California / Humboldt County        |
| EPI_ISL_739087 | 11/30/2020 | 12/29/2020 | North America / USA / California / Santa Clara County     |
| EPI_ISL_739088 | 8/24/2020  | 12/29/2020 | North America / USA / California / Alameda County         |
| EPI_ISL_739089 | 11/24/2020 | 12/29/2020 | North America / USA / California / Orange County          |
| EPI_ISL_739090 | 11/4/2020  | 12/29/2020 | North America / USA / California / Alameda County         |
| EPI_ISL_739091 | 11/18/2020 | 12/29/2020 | North America / USA / California / Santa Clara County     |
| EPI_ISL_739092 | 11/17/2020 | 12/29/2020 | North America / USA / California / Orange County          |
| EPI_ISL_739093 | 7/31/2020  | 12/29/2020 | North America / USA / California / Alameda County         |
| EPI_ISL_739094 | 11/27/2020 | 12/29/2020 | North America / USA / California / Orange County          |
| EPI_ISL_739095 | 9/4/2020   | 12/29/2020 | North America / USA / California / San Luis Obispo County |
| EPI_ISL_739096 | 8/10/2020  | 12/29/2020 | North America / USA / California / Alameda County         |
| EPI_ISL_739097 | 11/25/2020 | 12/29/2020 | North America / USA / California / Orange County          |
| EPI_ISL_739098 | 11/24/2020 | 12/29/2020 | North America / USA / California / Santa Clara County     |
| EPI_ISL_739099 | 11/16/2020 | 12/29/2020 | North America / USA / California / Orange County          |
| EPI_ISL_739100 | 6/7/2020   | 12/29/2020 | North America / USA / California / Alameda County         |
| EPI_ISL_739101 | 6/6/2020   | 12/29/2020 | North America / USA / California / Monterey County        |
| EPI_ISL_739102 | 6/15/2020  | 12/29/2020 | North America / USA / California / San Luis Obispo County |
| EPI_ISL_739103 | 11/18/2020 | 12/29/2020 | North America / USA / California / Santa Clara County     |
| EPI_ISL_739104 | 11/30/2020 | 12/29/2020 | North America / USA / California / Santa Clara County     |
| EPI_ISL_739105 | 11/15/2020 | 12/29/2020 | North America / USA / California / Orange County          |
| EPI_ISL_739106 | 11/20/2020 | 12/29/2020 | North America / USA / California / Humboldt County        |

|                |            |            |                                                       |
|----------------|------------|------------|-------------------------------------------------------|
| EPI_ISL_739107 | 11/6/2020  | 12/29/2020 | North America / USA / California / Santa Clara County |
| EPI_ISL_739108 | 11/9/2020  | 12/29/2020 | North America / USA / California / Orange County      |
| EPI_ISL_739109 | 8/17/2020  | 12/29/2020 | North America / USA / California / Alameda County     |
| EPI_ISL_739110 | 9/14/2020  | 12/29/2020 | North America / USA / California / Alameda County     |
| EPI_ISL_739111 | 6/26/2020  | 12/29/2020 | North America / USA / California / Alameda County     |
| EPI_ISL_739112 | 11/17/2020 | 12/29/2020 | North America / USA / California / Humboldt County    |
| EPI_ISL_739113 | 8/20/2020  | 12/29/2020 | North America / USA / California / Alameda County     |
| EPI_ISL_739114 | 11/18/2020 | 12/29/2020 | North America / USA / California / Humboldt County    |
| EPI_ISL_739115 | 8/17/2020  | 12/29/2020 | North America / USA / California / Alameda County     |
| EPI_ISL_739116 | 12/2/2020  | 12/29/2020 | North America / USA / California / Orange County      |
| EPI_ISL_739117 | 11/20/2020 | 12/29/2020 | North America / USA / California / Santa Clara County |
| EPI_ISL_739118 | 6/22/2020  | 12/29/2020 | North America / USA / California / Alameda County     |
| EPI_ISL_739119 | 10/22/2020 | 12/29/2020 | North America / USA / California / Tulare County      |
| EPI_ISL_739120 | 6/19/2020  | 12/29/2020 | North America / USA / California / Alameda County     |
| EPI_ISL_739121 | 11/23/2020 | 12/29/2020 | North America / USA / California / Santa Clara County |
| EPI_ISL_739122 | 11/9/2020  | 12/29/2020 | North America / USA / California / Santa Clara County |
| EPI_ISL_739123 | 11/19/2020 | 12/29/2020 | North America / USA / California / Humboldt County    |
| EPI_ISL_739124 | 6/28/2020  | 12/29/2020 | North America / USA / California / Alameda County     |
| EPI_ISL_739125 | 11/25/2020 | 12/29/2020 | North America / USA / California / Orange County      |
| EPI_ISL_739126 | 11/20/2020 | 12/29/2020 | North America / USA / California / Humboldt County    |
| EPI_ISL_739127 | 9/9/2020   | 12/29/2020 | North America / USA / California / Alameda County     |
| EPI_ISL_739128 | 11/23/2020 | 12/29/2020 | North America / USA / California / Santa Clara County |
| EPI_ISL_739129 | 11/20/2020 | 12/29/2020 | North America / USA / California / Santa Clara County |
| EPI_ISL_739130 | 11/11/2020 | 12/29/2020 | North America / USA / California / Santa Clara County |
| EPI_ISL_739131 | 11/23/2020 | 12/29/2020 | North America / USA / California / Humboldt County    |
| EPI_ISL_739132 | 11/29/2020 | 12/29/2020 | North America / USA / California / Orange County      |
| EPI_ISL_739133 | 10/15/2020 | 12/29/2020 | North America / USA / California / Madera County      |
| EPI_ISL_739134 | 7/17/2020  | 12/29/2020 | North America / USA / California / Alameda County     |
| EPI_ISL_739135 | 6/18/2020  | 12/29/2020 | North America / USA / California / Alameda County     |
| EPI_ISL_739136 | 8/17/2020  | 12/29/2020 | North America / USA / California / Alameda County     |
| EPI_ISL_739137 | 8/11/2020  | 12/29/2020 | North America / USA / California / Alameda County     |
| EPI_ISL_739138 | 11/23/2020 | 12/29/2020 | North America / USA / California / Santa Clara County |
| EPI_ISL_739139 | 11/14/2020 | 12/29/2020 | North America / USA / California / Orange County      |
| EPI_ISL_739140 | 6/23/2020  | 12/29/2020 | North America / USA / California / Alameda County     |
| EPI_ISL_739141 | 11/30/2020 | 12/29/2020 | North America / USA / California / Santa Clara County |
| EPI_ISL_739142 | 11/27/2020 | 12/29/2020 | North America / USA / California / Orange County      |
| EPI_ISL_739143 | 11/9/2020  | 12/29/2020 | North America / USA / California / Orange County      |
| EPI_ISL_739144 | 6/28/2020  | 12/29/2020 | North America / USA / California / Alameda County     |
| EPI_ISL_739145 | 11/14/2020 | 12/29/2020 | North America / USA / California / Santa Clara County |
| EPI_ISL_739146 | 11/29/2020 | 12/29/2020 | North America / USA / California / Santa Clara County |
| EPI_ISL_739147 | 11/18/2020 | 12/29/2020 | North America / USA / California / Santa Clara County |
| EPI_ISL_739148 | 10/29/2020 | 12/29/2020 | North America / USA / California / Humboldt County    |
| EPI_ISL_739149 | 6/19/2020  | 12/29/2020 | North America / USA / California / Alameda County     |
| EPI_ISL_739150 | 8/9/2020   | 12/29/2020 | North America / USA / California / Alameda County     |
| EPI_ISL_739151 | 11/9/2020  | 12/29/2020 | North America / USA / California / Orange County      |
| EPI_ISL_739152 | 11/24/2020 | 12/29/2020 | North America / USA / California / Santa Clara County |
| EPI_ISL_739153 | 11/25/2020 | 12/29/2020 | North America / USA / California / Santa Clara County |



|                |            |            |                                                                |
|----------------|------------|------------|----------------------------------------------------------------|
| EPI_ISL_739154 | 11/28/2020 | 12/29/2020 | North America / USA / California / Orange County               |
| EPI_ISL_739155 | 11/22/2020 | 12/29/2020 | North America / USA / California / Humboldt County             |
| EPI_ISL_739156 | 11/10/2020 | 12/29/2020 | North America / USA / California / Orange County               |
| EPI_ISL_739157 | 11/4/2020  | 12/29/2020 | North America / USA / California / Santa Clara County          |
| EPI_ISL_739158 | 8/14/2020  | 12/29/2020 | North America / USA / California / Alameda County              |
| EPI_ISL_739159 | 11/23/2020 | 12/29/2020 | North America / USA / California / Humboldt County             |
| EPI_ISL_739160 | 6/22/2020  | 12/29/2020 | North America / USA / California / Alameda County              |
| EPI_ISL_739161 | 5/26/2020  | 12/29/2020 | North America / USA / California / Alameda County              |
| EPI_ISL_739162 | 11/17/2020 | 12/29/2020 | North America / USA / California / Orange County               |
| EPI_ISL_739163 | 8/11/2020  | 12/29/2020 | North America / USA / California / Alameda County              |
| EPI_ISL_739164 | 6/22/2020  | 12/29/2020 | North America / USA / California / Alameda County              |
| EPI_ISL_739165 | 11/5/2020  | 12/29/2020 | North America / USA / California / Humboldt County             |
| EPI_ISL_739166 | 12/1/2020  | 12/29/2020 | North America / USA / California / Santa Clara County          |
| EPI_ISL_739167 | 11/11/2020 | 12/29/2020 | North America / USA / California / Santa Clara County          |
| EPI_ISL_739168 | 11/11/2020 | 12/29/2020 | North America / USA / California / Santa Clara County          |
| EPI_ISL_739169 | 9/11/2020  | 12/29/2020 | North America / USA / California / Napa, Solano, Yolo, Marin ( |
| EPI_ISL_739170 | 11/18/2020 | 12/29/2020 | North America / USA / California / Humboldt County             |
| EPI_ISL_739171 | 5/27/2020  | 12/29/2020 | North America / USA / California / Alameda County              |
| EPI_ISL_739172 | 11/4/2020  | 12/29/2020 | North America / USA / California / Madera County               |
| EPI_ISL_739173 | 9/10/2020  | 12/29/2020 | North America / USA / California / Alameda County              |
| EPI_ISL_739174 | 5/27/2020  | 12/29/2020 | North America / USA / California / Alameda County              |
| EPI_ISL_739175 | 11/13/2020 | 12/29/2020 | North America / USA / California / Orange County               |
| EPI_ISL_739176 | 12/5/2020  | 12/29/2020 | North America / USA / California / Orange County               |
| EPI_ISL_739177 | 10/16/2020 | 12/29/2020 | North America / USA / California / Humboldt County             |
| EPI_ISL_739178 | 5/23/2020  | 12/29/2020 | North America / USA / California / Alameda County              |
| EPI_ISL_739179 | 8/24/2020  | 12/29/2020 | North America / USA / California / Alameda County              |
| EPI_ISL_739180 | 11/23/2020 | 12/29/2020 | North America / USA / California / Santa Clara County          |
| EPI_ISL_739181 | 9/11/2020  | 12/29/2020 | North America / USA / California / Napa, Solano, Yolo, Marin ( |
| EPI_ISL_739182 | 12/3/2020  | 12/29/2020 | North America / USA / California / Orange County               |
| EPI_ISL_739183 | 11/20/2020 | 12/29/2020 | North America / USA / California / Humboldt County             |
| EPI_ISL_739184 | 11/11/2020 | 12/29/2020 | North America / USA / California / Santa Clara County          |
| EPI_ISL_739185 | 11/9/2020  | 12/29/2020 | North America / USA / California / Orange County               |
| EPI_ISL_739186 | 11/30/2020 | 12/29/2020 | North America / USA / California / Santa Clara County          |
| EPI_ISL_739187 | 11/22/2020 | 12/29/2020 | North America / USA / California / Santa Clara County          |
| EPI_ISL_739188 | 11/4/2020  | 12/29/2020 | North America / USA / California / Santa Clara County          |
| EPI_ISL_739189 | 6/29/2020  | 12/29/2020 | North America / USA / California / Alameda County              |
| EPI_ISL_739190 | 6/25/2020  | 12/29/2020 | North America / USA / California / Alameda County              |
| EPI_ISL_739191 | 11/25/2020 | 12/29/2020 | North America / USA / California / Orange County               |
| EPI_ISL_739192 | 5/27/2020  | 12/29/2020 | North America / USA / California / Alameda County              |
| EPI_ISL_739193 | 10/23/2020 | 12/29/2020 | North America / USA / California / Tulare County               |
| EPI_ISL_739194 | 11/12/2020 | 12/29/2020 | North America / USA / California / Humboldt County             |
| EPI_ISL_739195 | 11/17/2020 | 12/29/2020 | North America / USA / California / Santa Clara County          |
| EPI_ISL_739196 | 5/23/2020  | 12/29/2020 | North America / USA / California / Alameda County              |
| EPI_ISL_739197 | 10/15/2020 | 12/29/2020 | North America / USA / California / Madera County               |
| EPI_ISL_739198 | 11/22/2020 | 12/29/2020 | North America / USA / California / Humboldt County             |
| EPI_ISL_739199 | 11/13/2020 | 12/29/2020 | North America / USA / California / Orange County               |
| EPI_ISL_739200 | 7/15/2020  | 12/29/2020 | North America / USA / California / Alameda County              |

|                |            |            |                                                                |
|----------------|------------|------------|----------------------------------------------------------------|
| EPI_ISL_739201 | 6/21/2020  | 12/29/2020 | North America / USA / California / Alameda County              |
| EPI_ISL_739202 | 9/22/2020  | 12/29/2020 | North America / USA / California / Alameda County              |
| EPI_ISL_739203 | 10/8/2020  | 12/29/2020 | North America / USA / California / Marin County                |
| EPI_ISL_739204 | 11/16/2020 | 12/29/2020 | North America / USA / California / Santa Clara County          |
| EPI_ISL_739205 | 11/17/2020 | 12/29/2020 | North America / USA / California / Orange County               |
| EPI_ISL_739206 | 6/22/2020  | 12/29/2020 | North America / USA / California / Alameda County              |
| EPI_ISL_739207 | 5/23/2020  | 12/29/2020 | North America / USA / California / Alameda County              |
| EPI_ISL_739208 | 6/18/2020  | 12/29/2020 | North America / USA / California / Alameda County              |
| EPI_ISL_739209 | 11/5/2020  | 12/29/2020 | North America / USA / California / Alameda County              |
| EPI_ISL_739210 | 11/16/2020 | 12/29/2020 | North America / USA / California / Humboldt County             |
| EPI_ISL_739211 | 11/24/2020 | 12/29/2020 | North America / USA / California / Orange County               |
| EPI_ISL_739212 | 7/7/2020   | 12/29/2020 | North America / USA / California / Alameda County              |
| EPI_ISL_739213 | 8/12/2020  | 12/29/2020 | North America / USA / California / Alameda County              |
| EPI_ISL_739214 | 11/28/2020 | 12/29/2020 | North America / USA / California / Santa Clara County          |
| EPI_ISL_739215 | 11/5/2020  | 12/29/2020 | North America / USA / California / Alameda County              |
| EPI_ISL_739216 | 11/27/2020 | 12/29/2020 | North America / USA / California / Orange County               |
| EPI_ISL_739217 | 6/24/2020  | 12/29/2020 | North America / USA / California / Alameda County              |
| EPI_ISL_739218 | 8/25/2020  | 12/29/2020 | North America / USA / California / Alameda County              |
| EPI_ISL_739219 | 11/23/2020 | 12/29/2020 | North America / USA / California / Santa Clara County          |
| EPI_ISL_739220 | 8/2/2020   | 12/29/2020 | North America / USA / California / Alameda County              |
| EPI_ISL_739221 | 11/27/2020 | 12/29/2020 | North America / USA / California / Santa Clara County          |
| EPI_ISL_739222 | 11/25/2020 | 12/29/2020 | North America / USA / California / Orange County               |
| EPI_ISL_739223 | 9/11/2020  | 12/29/2020 | North America / USA / California / Napa, Solano, Yolo, Marin ( |
| EPI_ISL_739224 | 11/4/2020  | 12/29/2020 | North America / USA / California / Santa Clara County          |
| EPI_ISL_739225 | 10/23/2020 | 12/29/2020 | North America / USA / California / Humboldt County             |
| EPI_ISL_739226 | 8/6/2020   | 12/29/2020 | North America / USA / California / Alameda County              |
| EPI_ISL_739227 | 11/16/2020 | 12/29/2020 | North America / USA / California / Orange County               |
| EPI_ISL_739228 | 11/18/2020 | 12/29/2020 | North America / USA / California / Humboldt County             |
| EPI_ISL_739229 | 5/27/2020  | 12/29/2020 | North America / USA / California / Alameda County              |
| EPI_ISL_739230 | 11/16/2020 | 12/29/2020 | North America / USA / California / Orange County               |
| EPI_ISL_739231 | 8/23/2020  | 12/29/2020 | North America / USA / California / Alameda County              |
| EPI_ISL_739232 | 11/18/2020 | 12/29/2020 | North America / USA / California / Santa Clara County          |
| EPI_ISL_739233 | 7/8/2020   | 12/29/2020 | North America / USA / California / Alameda County              |
| EPI_ISL_739234 | 11/23/2020 | 12/29/2020 | North America / USA / California / Santa Clara County          |
| EPI_ISL_739235 | 11/23/2020 | 12/29/2020 | North America / USA / California / Humboldt County             |
| EPI_ISL_739236 | 6/29/2020  | 12/29/2020 | North America / USA / California / Alameda County              |
| EPI_ISL_739237 | 11/20/2020 | 12/29/2020 | North America / USA / California / Santa Clara County          |
| EPI_ISL_739238 | 11/16/2020 | 12/29/2020 | North America / USA / California / Orange County               |
| EPI_ISL_739239 | 11/10/2020 | 12/29/2020 | North America / USA / California / Orange County               |
| EPI_ISL_739240 | 11/17/2020 | 12/29/2020 | North America / USA / California / Humboldt County             |
| EPI_ISL_739241 | 7/8/2020   | 12/29/2020 | North America / USA / California / Alameda County              |
| EPI_ISL_739242 | 11/18/2020 | 12/29/2020 | North America / USA / California / Humboldt County             |
| EPI_ISL_739243 | 7/10/2020  | 12/29/2020 | North America / USA / California / Alameda County              |
| EPI_ISL_739244 | 8/17/2020  | 12/29/2020 | North America / USA / California / Alameda County              |
| EPI_ISL_739245 | 11/9/2020  | 12/29/2020 | North America / USA / California / Orange County               |
| EPI_ISL_739246 | 11/18/2020 | 12/29/2020 | North America / USA / California / Santa Clara County          |
| EPI_ISL_739247 | 11/24/2020 | 12/29/2020 | North America / USA / California / Santa Clara County          |

|                |            |            |                                                                |
|----------------|------------|------------|----------------------------------------------------------------|
| EPI_ISL_739248 | 11/25/2020 | 12/29/2020 | North America / USA / California / Santa Clara County          |
| EPI_ISL_739249 | 5/13/2020  | 12/29/2020 | North America / USA / California / Santa Clara County          |
| EPI_ISL_739250 | 11/23/2020 | 12/29/2020 | North America / USA / California / Humboldt County             |
| EPI_ISL_739251 | 5/9/2020   | 12/29/2020 | North America / USA / California / Napa, Solano, Yolo, Marin ( |
| EPI_ISL_739252 | 11/23/2020 | 12/29/2020 | North America / USA / California / Santa Clara County          |
| EPI_ISL_739253 | 11/18/2020 | 12/29/2020 | North America / USA / California / Santa Clara County          |
| EPI_ISL_739254 | 11/23/2020 | 12/29/2020 | North America / USA / California / Santa Clara County          |
| EPI_ISL_739255 | 11/16/2020 | 12/29/2020 | North America / USA / California / Orange County               |
| EPI_ISL_739256 | 11/5/2020  | 12/29/2020 | North America / USA / California / Santa Clara County          |
| EPI_ISL_739257 | 6/22/2020  | 12/29/2020 | North America / USA / California / Alameda County              |
| EPI_ISL_739258 | 12/5/2020  | 12/29/2020 | North America / USA / California / Orange County               |
| EPI_ISL_739259 | 12/2/2020  | 12/29/2020 | North America / USA / California / Orange County               |
| EPI_ISL_739260 | 11/6/2020  | 12/29/2020 | North America / USA / California / Santa Clara County          |
| EPI_ISL_739261 | 8/8/2020   | 12/29/2020 | North America / USA / California / Alameda County              |
| EPI_ISL_739262 | 8/5/2020   | 12/29/2020 | North America / USA / California / Alameda County              |
| EPI_ISL_739263 | 11/30/2020 | 12/29/2020 | North America / USA / California / Santa Clara County          |
| EPI_ISL_739264 | 9/28/2020  | 12/29/2020 | North America / USA / California / Humboldt County             |
| EPI_ISL_739265 | 12/5/2020  | 12/29/2020 | North America / USA / California / Orange County               |
| EPI_ISL_739266 | 11/27/2020 | 12/29/2020 | North America / USA / California / Orange County               |
| EPI_ISL_739267 | 11/25/2020 | 12/29/2020 | North America / USA / California / Orange County               |
| EPI_ISL_739268 | 5/25/2020  | 12/29/2020 | North America / USA / California / Alameda County              |
| EPI_ISL_739269 | 11/23/2020 | 12/29/2020 | North America / USA / California / Humboldt County             |
| EPI_ISL_739270 | 6/28/2020  | 12/29/2020 | North America / USA / California / Alameda County              |
| EPI_ISL_739271 | 11/17/2020 | 12/29/2020 | North America / USA / California / Orange County               |
| EPI_ISL_739272 | 11/6/2020  | 12/29/2020 | North America / USA / California / Humboldt County             |
| EPI_ISL_739273 | 11/20/2020 | 12/29/2020 | North America / USA / California / Santa Clara County          |
| EPI_ISL_739274 | 11/19/2020 | 12/29/2020 | North America / USA / California / Humboldt County             |
| EPI_ISL_739275 | 11/16/2020 | 12/29/2020 | North America / USA / California / Santa Clara County          |
| EPI_ISL_739276 | 11/17/2020 | 12/29/2020 | North America / USA / California / Orange County               |
| EPI_ISL_739277 | 11/27/2020 | 12/29/2020 | North America / USA / California / Santa Clara County          |
| EPI_ISL_739278 | 11/20/2020 | 12/29/2020 | North America / USA / California / Santa Clara County          |
| EPI_ISL_739279 | 11/25/2020 | 12/29/2020 | North America / USA / California / Orange County               |
| EPI_ISL_739280 | 8/17/2020  | 12/29/2020 | North America / USA / California / Alameda County              |
| EPI_ISL_739281 | 11/13/2020 | 12/29/2020 | North America / USA / California / Santa Clara County          |
| EPI_ISL_739282 | 11/25/2020 | 12/29/2020 | North America / USA / California / Santa Clara County          |
| EPI_ISL_739283 | 9/20/2020  | 12/29/2020 | North America / USA / California / Alameda County              |
| EPI_ISL_739284 | 11/18/2020 | 12/29/2020 | North America / USA / California / Santa Clara County          |
| EPI_ISL_739285 | 9/24/2020  | 12/29/2020 | North America / USA / California / Alameda County              |
| EPI_ISL_739286 | 5/26/2020  | 12/29/2020 | North America / USA / California / Alameda County              |
| EPI_ISL_739287 | 11/18/2020 | 12/29/2020 | North America / USA / California / Humboldt County             |
| EPI_ISL_739288 | 9/9/2020   | 12/29/2020 | North America / USA / California / Alameda County              |
| EPI_ISL_739289 | 11/17/2020 | 12/29/2020 | North America / USA / California / Orange County               |
| EPI_ISL_739290 | 6/23/2020  | 12/29/2020 | North America / USA / California / Alameda County              |
| EPI_ISL_739291 | 11/10/2020 | 12/29/2020 | North America / USA / California / Orange County               |
| EPI_ISL_739292 | 11/5/2020  | 12/29/2020 | North America / USA / California / Humboldt County             |
| EPI_ISL_739293 | 11/16/2020 | 12/29/2020 | North America / USA / California / Santa Clara County          |
| EPI_ISL_739294 | 6/10/2020  | 12/29/2020 | North America / USA / California / Alameda County              |

|                |            |            |                                                                |
|----------------|------------|------------|----------------------------------------------------------------|
| EPI_ISL_739295 | 10/14/2020 | 12/29/2020 | North America / USA / California / Marin County                |
| EPI_ISL_739296 | 11/16/2020 | 12/29/2020 | North America / USA / California / Orange County               |
| EPI_ISL_739297 | 9/25/2020  | 12/29/2020 | North America / USA / California / Humboldt County             |
| EPI_ISL_739298 | 11/30/2020 | 12/29/2020 | North America / USA / California / Santa Clara County          |
| EPI_ISL_739299 | 11/20/2020 | 12/29/2020 | North America / USA / California / Humboldt County             |
| EPI_ISL_739300 | 9/18/2020  | 12/29/2020 | North America / USA / California / Alameda County              |
| EPI_ISL_739301 | 4/30/2020  | 12/29/2020 | North America / USA / California / Napa, Solano, Yolo, Marin ( |
| EPI_ISL_739302 | 8/10/2020  | 12/29/2020 | North America / USA / California / Alameda County              |
| EPI_ISL_739303 | 8/17/2020  | 12/29/2020 | North America / USA / California / Alameda County              |
| EPI_ISL_739304 | 11/15/2020 | 12/29/2020 | North America / USA / California / Orange County               |
| EPI_ISL_739305 | 11/18/2020 | 12/29/2020 | North America / USA / California / Santa Clara County          |
| EPI_ISL_739306 | 5/22/2020  | 12/29/2020 | North America / USA / California / Alameda County              |
| EPI_ISL_739307 | 6/19/2020  | 12/29/2020 | North America / USA / California / Alameda County              |
| EPI_ISL_739308 | 8/3/2020   | 12/29/2020 | North America / USA / California / Alameda County              |
| EPI_ISL_739309 | 6/26/2020  | 12/29/2020 | North America / USA / California / Alameda County              |
| EPI_ISL_739310 | 11/23/2020 | 12/29/2020 | North America / USA / California / Santa Clara County          |
| EPI_ISL_739311 | 10/12/2020 | 12/29/2020 | North America / USA / California / Humboldt County             |
| EPI_ISL_739312 | 8/22/2020  | 12/29/2020 | North America / USA / California / Alameda County              |
| EPI_ISL_739313 | 11/18/2020 | 12/29/2020 | North America / USA / California / Humboldt County             |
| EPI_ISL_739314 | 12/4/2020  | 12/29/2020 | North America / USA / California / Orange County               |
| EPI_ISL_739315 | 10/29/2020 | 12/29/2020 | North America / USA / California / Napa, Solano, Yolo, Marin ( |
| EPI_ISL_739316 | 11/29/2020 | 12/29/2020 | North America / USA / California / San Francisco County        |
| EPI_ISL_739317 | 11/25/2020 | 12/29/2020 | North America / USA / California / Santa Clara County          |
| EPI_ISL_739318 | 11/13/2020 | 12/29/2020 | North America / USA / California / Humboldt County             |
| EPI_ISL_739319 | 11/30/2020 | 12/29/2020 | North America / USA / California / Santa Clara County          |
| EPI_ISL_739320 | 11/25/2020 | 12/29/2020 | North America / USA / California / Santa Clara County          |
| EPI_ISL_739321 | 11/4/2020  | 12/29/2020 | North America / USA / California / Santa Clara County          |
| EPI_ISL_739322 | 11/25/2020 | 12/29/2020 | North America / USA / California / Orange County               |
| EPI_ISL_739323 | 7/8/2020   | 12/29/2020 | North America / USA / California / Alameda County              |
| EPI_ISL_739324 | 7/8/2020   | 12/29/2020 | North America / USA / California / Alameda County              |
| EPI_ISL_739325 | 10/29/2020 | 12/29/2020 | North America / USA / California / Napa, Solano, Yolo, Marin ( |
| EPI_ISL_739326 | 8/12/2020  | 12/29/2020 | North America / USA / California / Alameda County              |
| EPI_ISL_739327 | 11/18/2020 | 12/29/2020 | North America / USA / California / Santa Clara County          |
| EPI_ISL_739328 | 8/28/2020  | 12/29/2020 | North America / USA / California / Alameda County              |
| EPI_ISL_739329 | 6/6/2020   | 12/29/2020 | North America / USA / California / Monterey County             |
| EPI_ISL_739330 | 11/10/2020 | 12/29/2020 | North America / USA / California / Humboldt County             |
| EPI_ISL_739331 | 11/16/2020 | 12/29/2020 | North America / USA / California / Orange County               |
| EPI_ISL_739332 | 11/17/2020 | 12/29/2020 | North America / USA / California / Santa Clara County          |
| EPI_ISL_739333 | 5/22/2020  | 12/29/2020 | North America / USA / California / Alameda County              |
| EPI_ISL_739334 | 11/16/2020 | 12/29/2020 | North America / USA / California / Orange County               |
| EPI_ISL_739335 | 11/16/2020 | 12/29/2020 | North America / USA / California / Santa Clara County          |
| EPI_ISL_739336 | 9/18/2020  | 12/29/2020 | North America / USA / California / Monterey County             |
| EPI_ISL_739337 | 6/26/2020  | 12/29/2020 | North America / USA / California / Alameda County              |
| EPI_ISL_739338 | 7/23/2020  | 12/29/2020 | North America / USA / California / Alameda County              |
| EPI_ISL_739339 | 9/11/2020  | 12/29/2020 | North America / USA / California / Napa, Solano, Yolo, Marin ( |
| EPI_ISL_739340 | 7/2/2020   | 12/29/2020 | North America / USA / California / Alameda County              |
| EPI_ISL_739341 | 12/2/2020  | 12/29/2020 | North America / USA / California / Orange County               |

|                |            |            |                                                           |
|----------------|------------|------------|-----------------------------------------------------------|
| EPI_ISL_739342 | 12/5/2020  | 12/29/2020 | North America / USA / California / Orange County          |
| EPI_ISL_739343 | 11/18/2020 | 12/29/2020 | North America / USA / California / Santa Clara County     |
| EPI_ISL_739344 | 12/2/2020  | 12/29/2020 | North America / USA / California / Santa Clara County     |
| EPI_ISL_739345 | 11/16/2020 | 12/29/2020 | North America / USA / California / Orange County          |
| EPI_ISL_739346 | 11/13/2020 | 12/29/2020 | North America / USA / California / Santa Clara County     |
| EPI_ISL_739347 | 11/25/2020 | 12/29/2020 | North America / USA / California / Orange County          |
| EPI_ISL_739348 | 11/30/2020 | 12/29/2020 | North America / USA / California / San Francisco County   |
| EPI_ISL_739349 | 7/14/2020  | 12/29/2020 | North America / USA / California / Alameda County         |
| EPI_ISL_739350 | 11/17/2020 | 12/29/2020 | North America / USA / California / Orange County          |
| EPI_ISL_739351 | 11/5/2020  | 12/29/2020 | North America / USA / California / Alameda County         |
| EPI_ISL_739352 | 11/18/2020 | 12/29/2020 | North America / USA / California / Santa Clara County     |
| EPI_ISL_739353 | 11/16/2020 | 12/29/2020 | North America / USA / California / Orange County          |
| EPI_ISL_739354 | 12/2/2020  | 12/29/2020 | North America / USA / California / Santa Clara County     |
| EPI_ISL_739355 | 12/1/2020  | 12/29/2020 | North America / USA / California / San Francisco County   |
| EPI_ISL_739356 | 8/19/2020  | 12/29/2020 | North America / USA / California / Alameda County         |
| EPI_ISL_739357 | 11/14/2020 | 12/29/2020 | North America / USA / California / Santa Clara County     |
| EPI_ISL_739358 | 6/22/2020  | 12/29/2020 | North America / USA / California / Alameda County         |
| EPI_ISL_739359 | 12/3/2020  | 12/29/2020 | North America / USA / California / Orange County          |
| EPI_ISL_739360 | 11/20/2020 | 12/29/2020 | North America / USA / California / Santa Clara County     |
| EPI_ISL_739361 | 8/10/2020  | 12/29/2020 | North America / USA / California / Alameda County         |
| EPI_ISL_739362 | 11/17/2020 | 12/29/2020 | North America / USA / California / Orange County          |
| EPI_ISL_739363 | 9/2/2020   | 12/29/2020 | North America / USA / California / San Luis Obispo County |
| EPI_ISL_739364 | 6/6/2020   | 12/29/2020 | North America / USA / California / Monterey County        |
| EPI_ISL_739365 | 11/17/2020 | 12/29/2020 | North America / USA / California / Santa Clara County     |
| EPI_ISL_739366 | 10/5/2020  | 12/29/2020 | North America / USA / California / Humboldt County        |
| EPI_ISL_739367 | 11/10/2020 | 12/29/2020 | North America / USA / California / Humboldt County        |
| EPI_ISL_739368 | 8/24/2020  | 12/29/2020 | North America / USA / California / Alameda County         |
| EPI_ISL_739369 | 11/5/2020  | 12/29/2020 | North America / USA / California / Orange County          |
| EPI_ISL_739370 | 12/1/2020  | 12/29/2020 | North America / USA / California / Santa Clara County     |
| EPI_ISL_739371 | 12/2/2020  | 12/29/2020 | North America / USA / California / Santa Clara County     |
| EPI_ISL_739372 | 9/4/2020   | 12/29/2020 | North America / USA / California / Monterey County        |
| EPI_ISL_739373 | 11/16/2020 | 12/29/2020 | North America / USA / California / Orange County          |
| EPI_ISL_739374 | 11/14/2020 | 12/29/2020 | North America / USA / California / Santa Clara County     |
| EPI_ISL_739375 | 11/6/2020  | 12/29/2020 | North America / USA / California / Orange County          |
| EPI_ISL_739376 | 11/18/2020 | 12/29/2020 | North America / USA / California / Santa Clara County     |
| EPI_ISL_739377 | 11/20/2020 | 12/29/2020 | North America / USA / California / Santa Clara County     |
| EPI_ISL_739378 | 6/8/2020   | 12/29/2020 | North America / USA / California / Alameda County         |
| EPI_ISL_739379 | 11/16/2020 | 12/29/2020 | North America / USA / California / Orange County          |
| EPI_ISL_739380 | 11/18/2020 | 12/29/2020 | North America / USA / California / Santa Clara County     |
| EPI_ISL_739381 | 11/28/2020 | 12/29/2020 | North America / USA / California / Santa Clara County     |
| EPI_ISL_739382 | 11/23/2020 | 12/29/2020 | North America / USA / California / Santa Clara County     |
| EPI_ISL_739383 | 5/25/2020  | 12/29/2020 | North America / USA / California / Alameda County         |
| EPI_ISL_739384 | 11/9/2020  | 12/29/2020 | North America / USA / California / Orange County          |
| EPI_ISL_739385 | 6/8/2020   | 12/29/2020 | North America / USA / California / Alameda County         |
| EPI_ISL_739386 | 11/13/2020 | 12/29/2020 | North America / USA / California / Orange County          |
| EPI_ISL_739387 | 8/17/2020  | 12/29/2020 | North America / USA / California / Alameda County         |
| EPI_ISL_739388 | 11/4/2020  | 12/29/2020 | North America / USA / California / Santa Clara County     |

|                |            |            |                                                           |
|----------------|------------|------------|-----------------------------------------------------------|
| EPI_ISL_739389 | 11/16/2020 | 12/29/2020 | North America / USA / California / Humboldt County        |
| EPI_ISL_739390 | 10/15/2020 | 12/29/2020 | North America / USA / California / Madera County          |
| EPI_ISL_739391 | 6/28/2020  | 12/29/2020 | North America / USA / California / Alameda County         |
| EPI_ISL_739392 | 11/25/2020 | 12/29/2020 | North America / USA / California / Santa Clara County     |
| EPI_ISL_739393 | 11/4/2020  | 12/29/2020 | North America / USA / California / Madera County          |
| EPI_ISL_739394 | 11/23/2020 | 12/29/2020 | North America / USA / California / San Francisco County   |
| EPI_ISL_739395 | 6/29/2020  | 12/29/2020 | North America / USA / California / Alameda County         |
| EPI_ISL_739396 | 11/6/2020  | 12/29/2020 | North America / USA / California / Orange County          |
| EPI_ISL_739397 | 11/16/2020 | 12/29/2020 | North America / USA / California / Orange County          |
| EPI_ISL_739398 | 11/30/2020 | 12/29/2020 | North America / USA / California / Santa Clara County     |
| EPI_ISL_739399 | 11/4/2020  | 12/29/2020 | North America / USA / California / San Luis Obispo County |
| EPI_ISL_739400 | 11/13/2020 | 12/29/2020 | North America / USA / California / Santa Clara County     |
| EPI_ISL_739401 | 12/3/2020  | 12/29/2020 | North America / USA / California / Orange County          |
| EPI_ISL_739402 | 10/26/2020 | 12/29/2020 | North America / USA / California / Santa Clara County     |
| EPI_ISL_739403 | 11/19/2020 | 12/29/2020 | North America / USA / California / Humboldt County        |
| EPI_ISL_739404 | 11/18/2020 | 12/29/2020 | North America / USA / California / Santa Clara County     |
| EPI_ISL_739405 | 11/19/2020 | 12/29/2020 | North America / USA / California / Humboldt County        |
| EPI_ISL_739406 | 8/12/2020  | 12/29/2020 | North America / USA / California / Alameda County         |
| EPI_ISL_739407 | 7/23/2020  | 12/29/2020 | North America / USA / California / Alameda County         |
| EPI_ISL_739408 | 6/18/2020  | 12/29/2020 | North America / USA / California / Alameda County         |
| EPI_ISL_739409 | 11/18/2020 | 12/29/2020 | North America / USA / California / Santa Clara County     |
| EPI_ISL_739410 | 11/16/2020 | 12/29/2020 | North America / USA / California / Orange County          |
| EPI_ISL_739411 | 11/9/2020  | 12/29/2020 | North America / USA / California / Humboldt County        |
| EPI_ISL_739412 | 11/16/2020 | 12/29/2020 | North America / USA / California / Orange County          |
| EPI_ISL_739413 | 11/20/2020 | 12/29/2020 | North America / USA / California / Santa Clara County     |
| EPI_ISL_739414 | 5/22/2020  | 12/29/2020 | North America / USA / California / Santa Clara County     |
| EPI_ISL_739415 | 11/24/2020 | 12/29/2020 | North America / USA / California / Santa Clara County     |
| EPI_ISL_739416 | 11/23/2020 | 12/29/2020 | North America / USA / California / Santa Clara County     |
| EPI_ISL_739417 | 11/18/2020 | 12/29/2020 | North America / USA / California / Humboldt County        |
| EPI_ISL_739418 | 11/21/2020 | 12/29/2020 | North America / USA / California / Humboldt County        |
| EPI_ISL_739419 | 12/1/2020  | 12/29/2020 | North America / USA / California / Santa Clara County     |
| EPI_ISL_739420 | 11/9/2020  | 12/29/2020 | North America / USA / California / Orange County          |
| EPI_ISL_739421 | 12/6/2020  | 12/29/2020 | North America / USA / California / Orange County          |
| EPI_ISL_739422 | 7/14/2020  | 12/29/2020 | North America / USA / California / Alameda County         |
| EPI_ISL_739423 | 11/9/2020  | 12/29/2020 | North America / USA / California / Orange County          |
| EPI_ISL_739424 | 5/25/2020  | 12/29/2020 | North America / USA / California / Alameda County         |
| EPI_ISL_739425 | 11/19/2020 | 12/29/2020 | North America / USA / California / Humboldt County        |
| EPI_ISL_739426 | 8/27/2020  | 12/29/2020 | North America / USA / California / Alameda County         |
| EPI_ISL_739427 | 8/27/2020  | 12/29/2020 | North America / USA / California / Alameda County         |
| EPI_ISL_739428 | 11/17/2020 | 12/29/2020 | North America / USA / California / Orange County          |
| EPI_ISL_739429 | 10/17/2020 | 12/29/2020 | North America / USA / California / Madera County          |
| EPI_ISL_739430 | 10/30/2020 | 12/29/2020 | North America / USA / California / Humboldt County        |
| EPI_ISL_739431 | 11/20/2020 | 12/29/2020 | North America / USA / California / Santa Clara County     |
| EPI_ISL_739432 | 12/4/2020  | 12/29/2020 | North America / USA / California / Orange County          |
| EPI_ISL_739433 | 11/2/2020  | 12/29/2020 | North America / USA / California / Humboldt County        |
| EPI_ISL_739434 | 6/29/2020  | 12/29/2020 | North America / USA / California / Alameda County         |
| EPI_ISL_739435 | 6/18/2020  | 12/29/2020 | North America / USA / California / Alameda County         |

|                |            |            |                                                                |
|----------------|------------|------------|----------------------------------------------------------------|
| EPI_ISL_739436 | 11/17/2020 | 12/29/2020 | North America / USA / California / Humboldt County             |
| EPI_ISL_739438 | 11/16/2020 | 12/29/2020 | North America / USA / California / Orange County               |
| EPI_ISL_739439 | 6/16/2020  | 12/29/2020 | North America / USA / California / Alameda County              |
| EPI_ISL_739440 | 11/25/2020 | 12/29/2020 | North America / USA / California / Santa Clara County          |
| EPI_ISL_739441 | 11/20/2020 | 12/29/2020 | North America / USA / California / Orange County               |
| EPI_ISL_739442 | 11/3/2020  | 12/29/2020 | North America / USA / California / Humboldt County             |
| EPI_ISL_739443 | 11/23/2020 | 12/29/2020 | North America / USA / California / Santa Clara County          |
| EPI_ISL_739444 | 9/10/2020  | 12/29/2020 | North America / USA / California / Alameda County              |
| EPI_ISL_739445 | 11/20/2020 | 12/29/2020 | North America / USA / California / Orange County               |
| EPI_ISL_739446 | 6/16/2020  | 12/29/2020 | North America / USA / California / Alameda County              |
| EPI_ISL_739447 | 11/13/2020 | 12/29/2020 | North America / USA / California / Humboldt County             |
| EPI_ISL_739448 | 8/17/2020  | 12/29/2020 | North America / USA / California / Alameda County              |
| EPI_ISL_739449 | 8/8/2020   | 12/29/2020 | North America / USA / California / Alameda County              |
| EPI_ISL_739450 | 11/25/2020 | 12/29/2020 | North America / USA / California / Orange County               |
| EPI_ISL_739451 | 11/11/2020 | 12/29/2020 | North America / USA / California / Santa Clara County          |
| EPI_ISL_739452 | 11/22/2020 | 12/29/2020 | North America / USA / California / Humboldt County             |
| EPI_ISL_739453 | 11/17/2020 | 12/29/2020 | North America / USA / California / Santa Clara County          |
| EPI_ISL_739454 | 6/22/2020  | 12/29/2020 | North America / USA / California / Alameda County              |
| EPI_ISL_739455 | 11/27/2020 | 12/29/2020 | North America / USA / California / Orange County               |
| EPI_ISL_739456 | 11/24/2020 | 12/29/2020 | North America / USA / California / Santa Clara County          |
| EPI_ISL_739457 | 11/25/2020 | 12/29/2020 | North America / USA / California / Santa Clara County          |
| EPI_ISL_739458 | 11/23/2020 | 12/29/2020 | North America / USA / California / Santa Clara County          |
| EPI_ISL_739459 | 7/1/2020   | 12/29/2020 | North America / USA / California / Alameda County              |
| EPI_ISL_739460 | 12/5/2020  | 12/29/2020 | North America / USA / California / Orange County               |
| EPI_ISL_739461 | 11/19/2020 | 12/29/2020 | North America / USA / California / Humboldt County             |
| EPI_ISL_739462 | 12/2/2020  | 12/29/2020 | North America / USA / California / Orange County               |
| EPI_ISL_739463 | 6/29/2020  | 12/29/2020 | North America / USA / California / Alameda County              |
| EPI_ISL_739464 | 11/29/2020 | 12/29/2020 | North America / USA / California / Orange County               |
| EPI_ISL_739465 | 11/16/2020 | 12/29/2020 | North America / USA / California / Orange County               |
| EPI_ISL_739466 | 11/29/2020 | 12/29/2020 | North America / USA / California / San Francisco County        |
| EPI_ISL_739467 | 12/1/2020  | 12/29/2020 | North America / USA / California / San Francisco County        |
| EPI_ISL_739468 | 5/24/2020  | 12/29/2020 | North America / USA / California / Alameda County              |
| EPI_ISL_739469 | 9/11/2020  | 12/29/2020 | North America / USA / California / Napa, Solano, Yolo, Marin ( |
| EPI_ISL_739470 | 8/12/2020  | 12/29/2020 | North America / USA / California / Alameda County              |
| EPI_ISL_739471 | 9/18/2020  | 12/29/2020 | North America / USA / California / Napa, Solano, Yolo, Marin ( |
| EPI_ISL_739472 | 8/20/2020  | 12/29/2020 | North America / USA / California / Alameda County              |
| EPI_ISL_739473 | 8/27/2020  | 12/29/2020 | North America / USA / California / Alameda County              |
| EPI_ISL_739474 | 10/29/2020 | 12/29/2020 | North America / USA / California / Napa, Solano, Yolo, Marin ( |
| EPI_ISL_739475 | 11/18/2020 | 12/29/2020 | North America / USA / California / Humboldt County             |
| EPI_ISL_739476 | 11/16/2020 | 12/29/2020 | North America / USA / California / Santa Clara County          |
| EPI_ISL_739477 | 11/9/2020  | 12/29/2020 | North America / USA / California / Orange County               |
| EPI_ISL_739478 | 11/30/2020 | 12/29/2020 | North America / USA / California / San Francisco County        |
| EPI_ISL_739479 | 11/18/2020 | 12/29/2020 | North America / USA / California / Santa Clara County          |
| EPI_ISL_739480 | 11/4/2020  | 12/29/2020 | North America / USA / California / San Luis Obispo County      |
| EPI_ISL_739481 | 11/18/2020 | 12/29/2020 | North America / USA / California / Santa Clara County          |
| EPI_ISL_739482 | 11/17/2020 | 12/29/2020 | North America / USA / California / Orange County               |
| EPI_ISL_739483 | 8/25/2020  | 12/29/2020 | North America / USA / California / Alameda County              |

|                |            |            |                                                                |
|----------------|------------|------------|----------------------------------------------------------------|
| EPI_ISL_739484 | 6/23/2020  | 12/29/2020 | North America / USA / California / Alameda County              |
| EPI_ISL_739485 | 11/30/2020 | 12/29/2020 | North America / USA / California / Santa Clara County          |
| EPI_ISL_739486 | 11/15/2020 | 12/29/2020 | North America / USA / California / Orange County               |
| EPI_ISL_739487 | 11/30/2020 | 12/29/2020 | North America / USA / California / Santa Clara County          |
| EPI_ISL_739488 | 12/3/2020  | 12/29/2020 | North America / USA / California / Orange County               |
| EPI_ISL_739489 | 9/25/2020  | 12/29/2020 | North America / USA / California / Humboldt County             |
| EPI_ISL_739490 | 11/5/2020  | 12/29/2020 | North America / USA / California / Orange County               |
| EPI_ISL_739491 | 11/23/2020 | 12/29/2020 | North America / USA / California / Santa Clara County          |
| EPI_ISL_739492 | 9/16/2020  | 12/29/2020 | North America / USA / California / San Luis Obispo County      |
| EPI_ISL_739493 | 11/17/2020 | 12/29/2020 | North America / USA / California / Orange County               |
| EPI_ISL_739494 | 11/9/2020  | 12/29/2020 | North America / USA / California / Orange County               |
| EPI_ISL_739495 | 6/23/2020  | 12/29/2020 | North America / USA / California / Alameda County              |
| EPI_ISL_739496 | 11/30/2020 | 12/29/2020 | North America / USA / California / Orange County               |
| EPI_ISL_739497 | 11/25/2020 | 12/29/2020 | North America / USA / California / Orange County               |
| EPI_ISL_739498 | 11/20/2020 | 12/29/2020 | North America / USA / California / Santa Clara County          |
| EPI_ISL_739499 | 11/23/2020 | 12/29/2020 | North America / USA / California / Humboldt County             |
| EPI_ISL_739500 | 12/3/2020  | 12/29/2020 | North America / USA / California / Orange County               |
| EPI_ISL_739501 | 11/20/2020 | 12/29/2020 | North America / USA / California / Santa Clara County          |
| EPI_ISL_739502 | 11/18/2020 | 12/29/2020 | North America / USA / California / Santa Clara County          |
| EPI_ISL_739503 | 6/19/2020  | 12/29/2020 | North America / USA / California / Alameda County              |
| EPI_ISL_739504 | 11/5/2020  | 12/29/2020 | North America / USA / California / Santa Clara County          |
| EPI_ISL_739505 | 12/2/2020  | 12/29/2020 | North America / USA / California / Santa Clara County          |
| EPI_ISL_739506 | 6/18/2020  | 12/29/2020 | North America / USA / California / Alameda County              |
| EPI_ISL_739507 | 9/14/2020  | 12/29/2020 | North America / USA / California / Alameda County              |
| EPI_ISL_739508 | 11/20/2020 | 12/29/2020 | North America / USA / California / Santa Clara County          |
| EPI_ISL_739509 | 11/23/2020 | 12/29/2020 | North America / USA / California / Santa Clara County          |
| EPI_ISL_739510 | 11/19/2020 | 12/29/2020 | North America / USA / California / Santa Clara County          |
| EPI_ISL_739511 | 5/27/2020  | 12/29/2020 | North America / USA / California / Alameda County              |
| EPI_ISL_739512 | 11/24/2020 | 12/29/2020 | North America / USA / California / Santa Clara County          |
| EPI_ISL_739513 | 11/25/2020 | 12/29/2020 | North America / USA / California / Orange County               |
| EPI_ISL_739514 | 4/30/2020  | 12/29/2020 | North America / USA / California / Napa, Solano, Yolo, Marin ( |
| EPI_ISL_739515 | 8/17/2020  | 12/29/2020 | North America / USA / California / Alameda County              |
| EPI_ISL_739516 | 7/17/2020  | 12/29/2020 | North America / USA / California / Alameda County              |
| EPI_ISL_739517 | 11/24/2020 | 12/29/2020 | North America / USA / California / Orange County               |
| EPI_ISL_739518 | 8/5/2020   | 12/29/2020 | North America / USA / California / Alameda County              |
| EPI_ISL_739519 | 8/6/2020   | 12/29/2020 | North America / USA / California / Alameda County              |
| EPI_ISL_739520 | 11/23/2020 | 12/29/2020 | North America / USA / California / Santa Clara County          |
| EPI_ISL_739521 | 11/18/2020 | 12/29/2020 | North America / USA / California / Santa Clara County          |
| EPI_ISL_739522 | 6/28/2020  | 12/29/2020 | North America / USA / California / Alameda County              |
| EPI_ISL_739523 | 9/24/2020  | 12/29/2020 | North America / USA / California / Alameda County              |
| EPI_ISL_739524 | 11/30/2020 | 12/29/2020 | North America / USA / California / Orange County               |
| EPI_ISL_739525 | 11/13/2020 | 12/29/2020 | North America / USA / California / Humboldt County             |
| EPI_ISL_739526 | 8/16/2020  | 12/29/2020 | North America / USA / California / Alameda County              |
| EPI_ISL_739527 | 11/9/2020  | 12/29/2020 | North America / USA / California / Humboldt County             |
| EPI_ISL_739528 | 6/22/2020  | 12/29/2020 | North America / USA / California / Alameda County              |
| EPI_ISL_739529 | 11/25/2020 | 12/29/2020 | North America / USA / California / Orange County               |
| EPI_ISL_739530 | 11/2/2020  | 12/29/2020 | North America / USA / California / Humboldt County             |



|                |            |            |                                                                |
|----------------|------------|------------|----------------------------------------------------------------|
| EPI_ISL_739531 | 11/18/2020 | 12/29/2020 | North America / USA / California / Humboldt County             |
| EPI_ISL_739532 | 11/16/2020 | 12/29/2020 | North America / USA / California / Orange County               |
| EPI_ISL_739533 | 10/12/2020 | 12/29/2020 | North America / USA / California / Humboldt County             |
| EPI_ISL_739534 | 11/17/2020 | 12/29/2020 | North America / USA / California / Orange County               |
| EPI_ISL_739535 | 9/16/2020  | 12/29/2020 | North America / USA / California / Alameda County              |
| EPI_ISL_739536 | 11/11/2020 | 12/29/2020 | North America / USA / California / Santa Clara County          |
| EPI_ISL_739537 | 11/23/2020 | 12/29/2020 | North America / USA / California / Santa Clara County          |
| EPI_ISL_739538 | 5/26/2020  | 12/29/2020 | North America / USA / California / Alameda County              |
| EPI_ISL_739539 | 10/17/2020 | 12/29/2020 | North America / USA / California / Madera County               |
| EPI_ISL_739540 | 11/6/2020  | 12/29/2020 | North America / USA / California / Orange County               |
| EPI_ISL_739541 | 8/22/2020  | 12/29/2020 | North America / USA / California / Alameda County              |
| EPI_ISL_739542 | 11/16/2020 | 12/29/2020 | North America / USA / California / Humboldt County             |
| EPI_ISL_739543 | 11/18/2020 | 12/29/2020 | North America / USA / California / Santa Clara County          |
| EPI_ISL_739544 | 6/22/2020  | 12/29/2020 | North America / USA / California / Alameda County              |
| EPI_ISL_739545 | 11/13/2020 | 12/29/2020 | North America / USA / California / Orange County               |
| EPI_ISL_739546 | 9/10/2020  | 12/29/2020 | North America / USA / California / Monterey County             |
| EPI_ISL_739547 | 11/16/2020 | 12/29/2020 | North America / USA / California / Orange County               |
| EPI_ISL_739548 | 11/30/2020 | 12/29/2020 | North America / USA / California / Santa Clara County          |
| EPI_ISL_739549 | 11/20/2020 | 12/29/2020 | North America / USA / California / Santa Clara County          |
| EPI_ISL_739550 | 11/24/2020 | 12/29/2020 | North America / USA / California / Santa Clara County          |
| EPI_ISL_739551 | 6/27/2020  | 12/29/2020 | North America / USA / California / Alameda County              |
| EPI_ISL_739552 | 6/26/2020  | 12/29/2020 | North America / USA / California / Alameda County              |
| EPI_ISL_739553 | 11/11/2020 | 12/29/2020 | North America / USA / California / Humboldt County             |
| EPI_ISL_739554 | 5/22/2020  | 12/29/2020 | North America / USA / California / Santa Clara County          |
| EPI_ISL_739555 | 8/15/2020  | 12/29/2020 | North America / USA / California / Alameda County              |
| EPI_ISL_739556 | 11/24/2020 | 12/29/2020 | North America / USA / California / Orange County               |
| EPI_ISL_739557 | 9/11/2020  | 12/29/2020 | North America / USA / California / Napa, Solano, Yolo, Marin ( |
| EPI_ISL_739558 | 10/16/2020 | 12/29/2020 | North America / USA / California / Humboldt County             |
| EPI_ISL_739559 | 11/20/2020 | 12/29/2020 | North America / USA / California / Orange County               |
| EPI_ISL_739560 | 11/18/2020 | 12/29/2020 | North America / USA / California / Santa Clara County          |
| EPI_ISL_739561 | 11/11/2020 | 12/29/2020 | North America / USA / California / Santa Clara County          |
| EPI_ISL_739562 | 11/25/2020 | 12/29/2020 | North America / USA / California / Santa Clara County          |
| EPI_ISL_739563 | 8/20/2020  | 12/29/2020 | North America / USA / California / Alameda County              |
| EPI_ISL_739564 | 11/29/2020 | 12/29/2020 | North America / USA / California / San Francisco County        |
| EPI_ISL_739565 | 8/24/2020  | 12/29/2020 | North America / USA / California / Alameda County              |
| EPI_ISL_739566 | 11/29/2020 | 12/29/2020 | North America / USA / California / Orange County               |
| EPI_ISL_739567 | 11/4/2020  | 12/29/2020 | North America / USA / California / Madera County               |
| EPI_ISL_739568 | 11/16/2020 | 12/29/2020 | North America / USA / California / Orange County               |
| EPI_ISL_739569 | 6/21/2020  | 12/29/2020 | North America / USA / California / Alameda County              |
| EPI_ISL_739570 | 11/17/2020 | 12/29/2020 | North America / USA / California / Orange County               |
| EPI_ISL_739571 | 10/5/2020  | 12/29/2020 | North America / USA / California / Humboldt County             |
| EPI_ISL_739572 | 8/6/2020   | 12/29/2020 | North America / USA / California / Alameda County              |
| EPI_ISL_739573 | 11/16/2020 | 12/29/2020 | North America / USA / California / Orange County               |
| EPI_ISL_739574 | 11/18/2020 | 12/29/2020 | North America / USA / California / Santa Clara County          |
| EPI_ISL_739575 | 8/24/2020  | 12/29/2020 | North America / USA / California / Alameda County              |
| EPI_ISL_739576 | 5/23/2020  | 12/29/2020 | North America / USA / California / Alameda County              |
| EPI_ISL_739577 | 11/28/2020 | 12/29/2020 | North America / USA / California / Orange County               |

|                |            |            |                                                           |
|----------------|------------|------------|-----------------------------------------------------------|
| EPI_ISL_739578 | 7/6/2020   | 12/29/2020 | North America / USA / California / Alameda County         |
| EPI_ISL_739579 | 11/25/2020 | 12/29/2020 | North America / USA / California / Santa Clara County     |
| EPI_ISL_739580 | 11/4/2020  | 12/29/2020 | North America / USA / California / Santa Clara County     |
| EPI_ISL_739581 | 11/22/2020 | 12/29/2020 | North America / USA / California / Orange County          |
| EPI_ISL_739582 | 11/16/2020 | 12/29/2020 | North America / USA / California / Orange County          |
| EPI_ISL_739583 | 9/10/2020  | 12/29/2020 | North America / USA / California / Alameda County         |
| EPI_ISL_739584 | 11/27/2020 | 12/29/2020 | North America / USA / California / Santa Clara County     |
| EPI_ISL_739585 | 11/20/2020 | 12/29/2020 | North America / USA / California / Humboldt County        |
| EPI_ISL_739586 | 12/5/2020  | 12/29/2020 | North America / USA / California / Orange County          |
| EPI_ISL_739587 | 6/28/2020  | 12/29/2020 | North America / USA / California / Alameda County         |
| EPI_ISL_739588 | 9/15/2020  | 12/29/2020 | North America / USA / California / San Luis Obispo County |
| EPI_ISL_739589 | 11/25/2020 | 12/29/2020 | North America / USA / California / Santa Clara County     |
| EPI_ISL_739590 | 6/28/2020  | 12/29/2020 | North America / USA / California / Alameda County         |
| EPI_ISL_739591 | 11/16/2020 | 12/29/2020 | North America / USA / California / Orange County          |
| EPI_ISL_739592 | 12/5/2020  | 12/29/2020 | North America / USA / California / Orange County          |
| EPI_ISL_739593 | 12/3/2020  | 12/29/2020 | North America / USA / California / Santa Clara County     |
| EPI_ISL_739594 | 11/23/2020 | 12/29/2020 | North America / USA / California / Santa Clara County     |
| EPI_ISL_739596 | 11/18/2020 | 12/29/2020 | North America / USA / California / Santa Clara County     |
| EPI_ISL_739597 | 11/23/2020 | 12/29/2020 | North America / USA / California / Santa Clara County     |
| EPI_ISL_739598 | 7/17/2020  | 12/29/2020 | North America / USA / California / Alameda County         |
| EPI_ISL_739599 | 12/3/2020  | 12/29/2020 | North America / USA / California / Orange County          |
| EPI_ISL_739600 | 7/9/2020   | 12/29/2020 | North America / USA / California / Alameda County         |
| EPI_ISL_739601 | 5/23/2020  | 12/29/2020 | North America / USA / California / Alameda County         |
| EPI_ISL_739602 | 11/20/2020 | 12/29/2020 | North America / USA / California / Santa Clara County     |
| EPI_ISL_739603 | 11/10/2020 | 12/29/2020 | North America / USA / California / San Francisco County   |
| EPI_ISL_739604 | 8/11/2020  | 12/29/2020 | North America / USA / California / Alameda County         |
| EPI_ISL_739605 | 11/5/2020  | 12/29/2020 | North America / USA / California / Santa Clara County     |
| EPI_ISL_739606 | 11/5/2020  | 12/29/2020 | North America / USA / California / Alameda County         |
| EPI_ISL_739607 | 11/20/2020 | 12/29/2020 | North America / USA / California / Orange County          |
| EPI_ISL_739608 | 11/23/2020 | 12/29/2020 | North America / USA / California / Humboldt County        |
| EPI_ISL_739609 | 12/1/2020  | 12/29/2020 | North America / USA / California / Orange County          |
| EPI_ISL_739610 | 8/25/2020  | 12/29/2020 | North America / USA / California / Alameda County         |
| EPI_ISL_739611 | 11/17/2020 | 12/29/2020 | North America / USA / California / Humboldt County        |
| EPI_ISL_739612 | 11/18/2020 | 12/29/2020 | North America / USA / California / Santa Clara County     |
| EPI_ISL_739613 | 10/15/2020 | 12/29/2020 | North America / USA / California / Marin County           |
| EPI_ISL_739614 | 11/16/2020 | 12/29/2020 | North America / USA / California / Orange County          |
| EPI_ISL_739615 | 5/13/2020  | 12/29/2020 | North America / USA / California / Santa Clara County     |
| EPI_ISL_739616 | 8/11/2020  | 12/29/2020 | North America / USA / California / Alameda County         |
| EPI_ISL_739617 | 12/2/2020  | 12/29/2020 | North America / USA / California / Santa Clara County     |
| EPI_ISL_739618 | 11/4/2020  | 12/29/2020 | North America / USA / California / Santa Clara County     |
| EPI_ISL_739619 | 6/24/2020  | 12/29/2020 | North America / USA / California / Alameda County         |
| EPI_ISL_739620 | 11/9/2020  | 12/29/2020 | North America / USA / California / Orange County          |
| EPI_ISL_739621 | 11/12/2020 | 12/29/2020 | North America / USA / California / Humboldt County        |
| EPI_ISL_739622 | 7/12/2020  | 12/29/2020 | North America / USA / California / Alameda County         |
| EPI_ISL_739623 | 9/11/2020  | 12/29/2020 | North America / USA / California / Alameda County         |
| EPI_ISL_739624 | 11/18/2020 | 12/29/2020 | North America / USA / California / Santa Clara County     |
| EPI_ISL_739625 | 11/16/2020 | 12/29/2020 | North America / USA / California / Orange County          |

|                |            |            |                                                                |
|----------------|------------|------------|----------------------------------------------------------------|
| EPI_ISL_739626 | 11/23/2020 | 12/29/2020 | North America / USA / California / Santa Clara County          |
| EPI_ISL_739627 | 11/16/2020 | 12/29/2020 | North America / USA / California / Orange County               |
| EPI_ISL_739628 | 10/29/2020 | 12/29/2020 | North America / USA / California / Napa, Solano, Yolo, Marin ( |
| EPI_ISL_739629 | 11/23/2020 | 12/29/2020 | North America / USA / California / Santa Clara County          |
| EPI_ISL_739630 | 11/29/2020 | 12/29/2020 | North America / USA / California / San Francisco County        |
| EPI_ISL_739631 | 8/17/2020  | 12/29/2020 | North America / USA / California / Alameda County              |
| EPI_ISL_739632 | 10/14/2020 | 12/29/2020 | North America / USA / California / Marin County                |
| EPI_ISL_739633 | 10/17/2020 | 12/29/2020 | North America / USA / California / Marin County                |
| EPI_ISL_739634 | 9/17/2020  | 12/29/2020 | North America / USA / California / Alameda County              |
| EPI_ISL_739635 | 4/27/2020  | 12/29/2020 | North America / USA / California / Napa, Solano, Yolo, Marin ( |
| EPI_ISL_739636 | 11/16/2020 | 12/29/2020 | North America / USA / California / Orange County               |
| EPI_ISL_739637 | 11/10/2020 | 12/29/2020 | North America / USA / California / Orange County               |
| EPI_ISL_739638 | 7/10/2020  | 12/29/2020 | North America / USA / California / Alameda County              |
| EPI_ISL_739639 | 10/26/2020 | 12/29/2020 | North America / USA / California / Tulare County               |
| EPI_ISL_739640 | 5/25/2020  | 12/29/2020 | North America / USA / California / Alameda County              |
| EPI_ISL_739641 | 12/5/2020  | 12/29/2020 | North America / USA / California / Orange County               |
| EPI_ISL_739642 | 11/28/2020 | 12/29/2020 | North America / USA / California / Santa Clara County          |
| EPI_ISL_739643 | 6/22/2020  | 12/29/2020 | North America / USA / California / Alameda County              |
| EPI_ISL_739644 | 6/22/2020  | 12/29/2020 | North America / USA / California / Alameda County              |
| EPI_ISL_739645 | 9/1/2020   | 12/29/2020 | North America / USA / California / Napa, Solano, Yolo, Marin ( |
| EPI_ISL_739646 | 11/27/2020 | 12/29/2020 | North America / USA / California / Orange County               |
| EPI_ISL_739647 | 11/20/2020 | 12/29/2020 | North America / USA / California / Santa Clara County          |
| EPI_ISL_739648 | 7/7/2020   | 12/29/2020 | North America / USA / California / Alameda County              |
| EPI_ISL_739649 | 11/25/2020 | 12/29/2020 | North America / USA / California / Santa Clara County          |
| EPI_ISL_739650 | 11/30/2020 | 12/29/2020 | North America / USA / California / Santa Clara County          |
| EPI_ISL_739651 | 11/18/2020 | 12/29/2020 | North America / USA / California / Humboldt County             |
| EPI_ISL_739652 | 5/27/2020  | 12/29/2020 | North America / USA / California / Alameda County              |
| EPI_ISL_739653 | 11/30/2020 | 12/29/2020 | North America / USA / California / Santa Clara County          |
| EPI_ISL_739654 | 11/13/2020 | 12/29/2020 | North America / USA / California / Orange County               |
| EPI_ISL_739655 | 11/25/2020 | 12/29/2020 | North America / USA / California / San Francisco County        |
| EPI_ISL_739656 | 7/11/2020  | 12/29/2020 | North America / USA / California / Alameda County              |
| EPI_ISL_739657 | 11/14/2020 | 12/29/2020 | North America / USA / California / Santa Clara County          |
| EPI_ISL_739658 | 11/11/2020 | 12/29/2020 | North America / USA / California / Orange County               |
| EPI_ISL_739662 | 12/19/2020 | 12/29/2020 | North America / Canada / British Columbia                      |
| EPI_ISL_739671 | 11/6/2020  | 12/29/2020 | South America / Colombia / Bogotá                              |
| EPI_ISL_739672 | 11/20/2020 | 12/29/2020 | South America / Colombia / Caqueta                             |
| EPI_ISL_739673 | 11/9/2020  | 12/29/2020 | South America / Colombia / Bogotá                              |
| EPI_ISL_739693 | 11/11/2020 | 12/29/2020 | Europe / Luxembourg                                            |
| EPI_ISL_739694 | 11/23/2020 | 12/29/2020 | Europe / Luxembourg                                            |
| EPI_ISL_739695 | 10/24/2020 | 12/29/2020 | Europe / Luxembourg                                            |
| EPI_ISL_739696 | 11/15/2020 | 12/29/2020 | Europe / Luxembourg                                            |
| EPI_ISL_739697 | 11/21/2020 | 12/29/2020 | Europe / Luxembourg                                            |
| EPI_ISL_739698 | 10/22/2020 | 12/29/2020 | Europe / Luxembourg                                            |
| EPI_ISL_739699 | 11/3/2020  | 12/29/2020 | Europe / Luxembourg                                            |
| EPI_ISL_739700 | 6/24/2020  | 12/29/2020 | Europe / Luxembourg                                            |
| EPI_ISL_739701 | 11/2/2020  | 12/29/2020 | Europe / Luxembourg                                            |
| EPI_ISL_739702 | 10/26/2020 | 12/29/2020 | Europe / Luxembourg                                            |

|                |            |            |                     |
|----------------|------------|------------|---------------------|
| EPI_ISL_739703 | 10/25/2020 | 12/29/2020 | Europe / Luxembourg |
| EPI_ISL_739704 | 10/26/2020 | 12/29/2020 | Europe / Luxembourg |
| EPI_ISL_739705 | 10/16/2020 | 12/29/2020 | Europe / Luxembourg |
| EPI_ISL_739706 | 11/19/2020 | 12/29/2020 | Europe / Luxembourg |
| EPI_ISL_739707 | 11/19/2020 | 12/29/2020 | Europe / Luxembourg |
| EPI_ISL_739708 | 11/16/2020 | 12/29/2020 | Europe / Luxembourg |
| EPI_ISL_739709 | 11/10/2020 | 12/29/2020 | Europe / Luxembourg |
| EPI_ISL_739710 | 11/16/2020 | 12/29/2020 | Europe / Luxembourg |
| EPI_ISL_739711 | 10/31/2020 | 12/29/2020 | Europe / Luxembourg |
| EPI_ISL_739712 | 12/18/2020 | 12/29/2020 | Europe / Luxembourg |
| EPI_ISL_739713 | 11/14/2020 | 12/29/2020 | Europe / Luxembourg |
| EPI_ISL_739714 | 12/18/2020 | 12/29/2020 | Europe / Luxembourg |
| EPI_ISL_739715 | 10/26/2020 | 12/29/2020 | Europe / Luxembourg |
| EPI_ISL_739716 | 10/17/2020 | 12/29/2020 | Europe / Luxembourg |
| EPI_ISL_739717 | 10/23/2020 | 12/29/2020 | Europe / Luxembourg |
| EPI_ISL_739718 | 10/30/2020 | 12/29/2020 | Europe / Luxembourg |
| EPI_ISL_739719 | 11/16/2020 | 12/29/2020 | Europe / Luxembourg |
| EPI_ISL_739720 | 10/22/2020 | 12/29/2020 | Europe / Luxembourg |
| EPI_ISL_739721 | 11/21/2020 | 12/29/2020 | Europe / Luxembourg |
| EPI_ISL_739722 | 10/23/2020 | 12/29/2020 | Europe / Luxembourg |
| EPI_ISL_739723 | 11/25/2020 | 12/29/2020 | Europe / Luxembourg |
| EPI_ISL_739724 | 11/22/2020 | 12/29/2020 | Europe / Luxembourg |
| EPI_ISL_739725 | 11/4/2020  | 12/29/2020 | Europe / Luxembourg |
| EPI_ISL_739726 | 10/20/2020 | 12/29/2020 | Europe / Luxembourg |
| EPI_ISL_739728 | 10/7/2020  | 12/29/2020 | Europe / Luxembourg |
| EPI_ISL_739729 | 10/20/2020 | 12/29/2020 | Europe / Luxembourg |
| EPI_ISL_739730 | 11/22/2020 | 12/29/2020 | Europe / Luxembourg |
| EPI_ISL_739731 | 10/22/2020 | 12/29/2020 | Europe / Luxembourg |
| EPI_ISL_739732 | 11/15/2020 | 12/29/2020 | Europe / Luxembourg |
| EPI_ISL_739733 | 8/27/2020  | 12/29/2020 | Europe / Luxembourg |
| EPI_ISL_739734 | 10/30/2020 | 12/29/2020 | Europe / Luxembourg |
| EPI_ISL_739735 | 10/23/2020 | 12/29/2020 | Europe / Luxembourg |
| EPI_ISL_739736 | 11/15/2020 | 12/29/2020 | Europe / Luxembourg |
| EPI_ISL_739737 | 11/11/2020 | 12/29/2020 | Europe / Luxembourg |
| EPI_ISL_739738 | 11/8/2020  | 12/29/2020 | Europe / Luxembourg |
| EPI_ISL_739739 | 11/8/2020  | 12/29/2020 | Europe / Luxembourg |
| EPI_ISL_739740 | 11/21/2020 | 12/29/2020 | Europe / Luxembourg |
| EPI_ISL_739741 | 11/17/2020 | 12/29/2020 | Europe / Luxembourg |
| EPI_ISL_739742 | 11/29/2020 | 12/29/2020 | Europe / Luxembourg |
| EPI_ISL_739743 | 11/1/2020  | 12/29/2020 | Europe / Luxembourg |
| EPI_ISL_739744 | 11/8/2020  | 12/29/2020 | Europe / Luxembourg |
| EPI_ISL_739745 | 10/26/2020 | 12/29/2020 | Europe / Luxembourg |
| EPI_ISL_739746 | 11/10/2020 | 12/29/2020 | Europe / Luxembourg |
| EPI_ISL_739748 | 10/29/2020 | 12/29/2020 | Europe / Luxembourg |
| EPI_ISL_739749 | 10/19/2020 | 12/29/2020 | Europe / Luxembourg |
| EPI_ISL_739750 | 10/13/2020 | 12/29/2020 | Europe / Luxembourg |
| EPI_ISL_739751 | 10/28/2020 | 12/29/2020 | Europe / Luxembourg |

|                |            |            |                     |
|----------------|------------|------------|---------------------|
| EPI_ISL_739752 | 11/17/2020 | 12/29/2020 | Europe / Luxembourg |
| EPI_ISL_739753 | 7/7/2020   | 12/29/2020 | Europe / Luxembourg |
| EPI_ISL_739754 | 10/26/2020 | 12/29/2020 | Europe / Luxembourg |
| EPI_ISL_739755 | 11/3/2020  | 12/29/2020 | Europe / Luxembourg |
| EPI_ISL_739756 | 10/2/2020  | 12/29/2020 | Europe / Luxembourg |
| EPI_ISL_739757 | 10/17/2020 | 12/29/2020 | Europe / Luxembourg |
| EPI_ISL_739759 | 11/29/2020 | 12/29/2020 | Europe / Luxembourg |
| EPI_ISL_739760 | 10/23/2020 | 12/29/2020 | Europe / Luxembourg |
| EPI_ISL_739761 | 11/6/2020  | 12/29/2020 | Europe / Luxembourg |
| EPI_ISL_739762 | 11/4/2020  | 12/29/2020 | Europe / Luxembourg |
| EPI_ISL_739763 | 11/25/2020 | 12/29/2020 | Europe / Luxembourg |
| EPI_ISL_739764 | 11/22/2020 | 12/29/2020 | Europe / Luxembourg |
| EPI_ISL_739765 | 10/28/2020 | 12/29/2020 | Europe / Luxembourg |
| EPI_ISL_739766 | 10/21/2020 | 12/29/2020 | Europe / Luxembourg |
| EPI_ISL_739767 | 10/26/2020 | 12/29/2020 | Europe / Luxembourg |
| EPI_ISL_739768 | 11/14/2020 | 12/29/2020 | Europe / Luxembourg |
| EPI_ISL_739769 | 10/22/2020 | 12/29/2020 | Europe / Luxembourg |
| EPI_ISL_739770 | 10/26/2020 | 12/29/2020 | Europe / Luxembourg |
| EPI_ISL_739771 | 11/23/2020 | 12/29/2020 | Europe / Luxembourg |
| EPI_ISL_739772 | 11/17/2020 | 12/29/2020 | Europe / Luxembourg |
| EPI_ISL_739773 | 8/10/2020  | 12/29/2020 | Europe / Luxembourg |
| EPI_ISL_739774 | 11/13/2020 | 12/29/2020 | Europe / Luxembourg |
| EPI_ISL_739775 | 11/19/2020 | 12/29/2020 | Europe / Luxembourg |
| EPI_ISL_739776 | 11/24/2020 | 12/29/2020 | Europe / Luxembourg |
| EPI_ISL_739777 | 10/26/2020 | 12/29/2020 | Europe / Luxembourg |
| EPI_ISL_739778 | 10/20/2020 | 12/29/2020 | Europe / Luxembourg |
| EPI_ISL_739779 | 11/15/2020 | 12/29/2020 | Europe / Luxembourg |
| EPI_ISL_739780 | 11/13/2020 | 12/29/2020 | Europe / Luxembourg |
| EPI_ISL_739781 | 10/19/2020 | 12/29/2020 | Europe / Luxembourg |
| EPI_ISL_739782 | 10/21/2020 | 12/29/2020 | Europe / Luxembourg |
| EPI_ISL_739783 | 10/23/2020 | 12/29/2020 | Europe / Luxembourg |
| EPI_ISL_739784 | 10/24/2020 | 12/29/2020 | Europe / Luxembourg |
| EPI_ISL_739786 | 10/23/2020 | 12/29/2020 | Europe / Luxembourg |
| EPI_ISL_739787 | 10/22/2020 | 12/29/2020 | Europe / Luxembourg |
| EPI_ISL_739788 | 10/24/2020 | 12/29/2020 | Europe / Luxembourg |
| EPI_ISL_739790 | 10/19/2020 | 12/29/2020 | Europe / Luxembourg |
| EPI_ISL_739791 | 10/31/2020 | 12/29/2020 | Europe / Luxembourg |
| EPI_ISL_739792 | 7/13/2020  | 12/29/2020 | Europe / Luxembourg |
| EPI_ISL_739793 | 11/27/2020 | 12/29/2020 | Europe / Luxembourg |
| EPI_ISL_739794 | 10/30/2020 | 12/29/2020 | Europe / Luxembourg |
| EPI_ISL_739795 | 9/26/2020  | 12/29/2020 | Europe / Luxembourg |
| EPI_ISL_739797 | 11/24/2020 | 12/29/2020 | Europe / Luxembourg |
| EPI_ISL_739798 | 11/12/2020 | 12/29/2020 | Europe / Luxembourg |
| EPI_ISL_739799 | 11/10/2020 | 12/29/2020 | Europe / Luxembourg |
| EPI_ISL_739800 | 11/1/2020  | 12/29/2020 | Europe / Luxembourg |
| EPI_ISL_739801 | 11/28/2020 | 12/29/2020 | Europe / Luxembourg |
| EPI_ISL_739802 | 10/31/2020 | 12/29/2020 | Europe / Luxembourg |

|                |            |            |                     |
|----------------|------------|------------|---------------------|
| EPI_ISL_739803 | 10/31/2020 | 12/29/2020 | Europe / Luxembourg |
| EPI_ISL_739804 | 10/21/2020 | 12/29/2020 | Europe / Luxembourg |
| EPI_ISL_739805 | 11/17/2020 | 12/29/2020 | Europe / Luxembourg |
| EPI_ISL_739806 | 10/31/2020 | 12/29/2020 | Europe / Luxembourg |
| EPI_ISL_739807 | 10/23/2020 | 12/29/2020 | Europe / Luxembourg |
| EPI_ISL_739809 | 11/3/2020  | 12/29/2020 | Europe / Luxembourg |
| EPI_ISL_739810 | 11/3/2020  | 12/29/2020 | Europe / Luxembourg |
| EPI_ISL_739811 | 11/19/2020 | 12/29/2020 | Europe / Luxembourg |
| EPI_ISL_739812 | 11/10/2020 | 12/29/2020 | Europe / Luxembourg |
| EPI_ISL_739814 | 11/8/2020  | 12/29/2020 | Europe / Luxembourg |
| EPI_ISL_739815 | 11/7/2020  | 12/29/2020 | Europe / Luxembourg |
| EPI_ISL_739816 | 11/3/2020  | 12/29/2020 | Europe / Luxembourg |
| EPI_ISL_739817 | 11/2/2020  | 12/29/2020 | Europe / Luxembourg |
| EPI_ISL_739818 | 10/22/2020 | 12/29/2020 | Europe / Luxembourg |
| EPI_ISL_739819 | 10/28/2020 | 12/29/2020 | Europe / Luxembourg |
| EPI_ISL_739820 | 11/6/2020  | 12/29/2020 | Europe / Luxembourg |
| EPI_ISL_739821 | 11/25/2020 | 12/29/2020 | Europe / Luxembourg |
| EPI_ISL_739822 | 10/31/2020 | 12/29/2020 | Europe / Luxembourg |
| EPI_ISL_739823 | 11/26/2020 | 12/29/2020 | Europe / Luxembourg |
| EPI_ISL_739824 | 10/30/2020 | 12/29/2020 | Europe / Luxembourg |
| EPI_ISL_739825 | 11/1/2020  | 12/29/2020 | Europe / Luxembourg |
| EPI_ISL_739826 | 10/9/2020  | 12/29/2020 | Europe / Luxembourg |
| EPI_ISL_739827 | 10/31/2020 | 12/29/2020 | Europe / Luxembourg |
| EPI_ISL_739828 | 10/10/2020 | 12/29/2020 | Europe / Luxembourg |
| EPI_ISL_739829 | 11/3/2020  | 12/29/2020 | Europe / Luxembourg |
| EPI_ISL_739830 | 11/7/2020  | 12/29/2020 | Europe / Luxembourg |
| EPI_ISL_739831 | 10/30/2020 | 12/29/2020 | Europe / Luxembourg |
| EPI_ISL_739832 | 10/28/2020 | 12/29/2020 | Europe / Luxembourg |
| EPI_ISL_739833 | 8/3/2020   | 12/29/2020 | Europe / Luxembourg |
| EPI_ISL_739834 | 7/29/2020  | 12/29/2020 | Europe / Luxembourg |
| EPI_ISL_739835 | 6/23/2020  | 12/29/2020 | Europe / Luxembourg |
| EPI_ISL_739836 | 11/5/2020  | 12/29/2020 | Europe / Luxembourg |
| EPI_ISL_739837 | 11/12/2020 | 12/29/2020 | Europe / Luxembourg |
| EPI_ISL_739838 | 11/1/2020  | 12/29/2020 | Europe / Luxembourg |
| EPI_ISL_739839 | 11/11/2020 | 12/29/2020 | Europe / Luxembourg |
| EPI_ISL_739840 | 11/12/2020 | 12/29/2020 | Europe / Luxembourg |
| EPI_ISL_739841 | 10/20/2020 | 12/29/2020 | Europe / Luxembourg |
| EPI_ISL_739842 | 11/18/2020 | 12/29/2020 | Europe / Luxembourg |
| EPI_ISL_739844 | 11/3/2020  | 12/29/2020 | Europe / Luxembourg |
| EPI_ISL_739845 | 10/22/2020 | 12/29/2020 | Europe / Luxembourg |
| EPI_ISL_739846 | 11/22/2020 | 12/29/2020 | Europe / Luxembourg |
| EPI_ISL_739847 | 11/25/2020 | 12/29/2020 | Europe / Luxembourg |
| EPI_ISL_739848 | 7/13/2020  | 12/29/2020 | Europe / Luxembourg |
| EPI_ISL_739849 | 11/25/2020 | 12/29/2020 | Europe / Luxembourg |
| EPI_ISL_739850 | 12/18/2020 | 12/29/2020 | Europe / Luxembourg |
| EPI_ISL_739851 | 11/3/2020  | 12/29/2020 | Europe / Luxembourg |
| EPI_ISL_739852 | 11/14/2020 | 12/29/2020 | Europe / Luxembourg |

|                |            |            |                     |
|----------------|------------|------------|---------------------|
| EPI_ISL_739853 | 10/26/2020 | 12/29/2020 | Europe / Luxembourg |
| EPI_ISL_739854 | 10/22/2020 | 12/29/2020 | Europe / Luxembourg |
| EPI_ISL_739855 | 11/5/2020  | 12/29/2020 | Europe / Luxembourg |
| EPI_ISL_739856 | 10/21/2020 | 12/29/2020 | Europe / Luxembourg |
| EPI_ISL_739857 | 11/21/2020 | 12/29/2020 | Europe / Luxembourg |
| EPI_ISL_739858 | 11/22/2020 | 12/29/2020 | Europe / Luxembourg |
| EPI_ISL_739859 | 11/13/2020 | 12/29/2020 | Europe / Luxembourg |
| EPI_ISL_739860 | 10/24/2020 | 12/29/2020 | Europe / Luxembourg |
| EPI_ISL_739861 | 10/26/2020 | 12/29/2020 | Europe / Luxembourg |
| EPI_ISL_739862 | 10/19/2020 | 12/29/2020 | Europe / Luxembourg |
| EPI_ISL_739863 | 10/22/2020 | 12/29/2020 | Europe / Luxembourg |
| EPI_ISL_739864 | 10/26/2020 | 12/29/2020 | Europe / Luxembourg |
| EPI_ISL_739865 | 11/24/2020 | 12/29/2020 | Europe / Luxembourg |
| EPI_ISL_739867 | 10/19/2020 | 12/29/2020 | Europe / Luxembourg |
| EPI_ISL_739868 | 10/20/2020 | 12/29/2020 | Europe / Luxembourg |
| EPI_ISL_739869 | 11/9/2020  | 12/29/2020 | Europe / Luxembourg |
| EPI_ISL_739870 | 6/30/2020  | 12/29/2020 | Europe / Luxembourg |
| EPI_ISL_739871 | 10/24/2020 | 12/29/2020 | Europe / Luxembourg |
| EPI_ISL_739872 | 11/24/2020 | 12/29/2020 | Europe / Luxembourg |
| EPI_ISL_739873 | 11/5/2020  | 12/29/2020 | Europe / Luxembourg |
| EPI_ISL_739874 | 11/4/2020  | 12/29/2020 | Europe / Luxembourg |
| EPI_ISL_739875 | 10/16/2020 | 12/29/2020 | Europe / Luxembourg |
| EPI_ISL_739876 | 11/19/2020 | 12/29/2020 | Europe / Luxembourg |
| EPI_ISL_739878 | 11/10/2020 | 12/29/2020 | Europe / Luxembourg |
| EPI_ISL_739879 | 11/19/2020 | 12/29/2020 | Europe / Luxembourg |
| EPI_ISL_739881 | 10/26/2020 | 12/29/2020 | Europe / Luxembourg |
| EPI_ISL_739882 | 10/26/2020 | 12/29/2020 | Europe / Luxembourg |
| EPI_ISL_739883 | 11/13/2020 | 12/29/2020 | Europe / Luxembourg |
| EPI_ISL_739884 | 11/7/2020  | 12/29/2020 | Europe / Luxembourg |
| EPI_ISL_739885 | 11/28/2020 | 12/29/2020 | Europe / Luxembourg |
| EPI_ISL_739886 | 10/30/2020 | 12/29/2020 | Europe / Luxembourg |
| EPI_ISL_739887 | 11/17/2020 | 12/29/2020 | Europe / Luxembourg |
| EPI_ISL_739888 | 11/16/2020 | 12/29/2020 | Europe / Luxembourg |
| EPI_ISL_739889 | 10/24/2020 | 12/29/2020 | Europe / Luxembourg |
| EPI_ISL_739890 | 11/25/2020 | 12/29/2020 | Europe / Luxembourg |
| EPI_ISL_739891 | 10/23/2020 | 12/29/2020 | Europe / Luxembourg |
| EPI_ISL_739892 | 11/2/2020  | 12/29/2020 | Europe / Luxembourg |
| EPI_ISL_739893 | 11/17/2020 | 12/29/2020 | Europe / Luxembourg |
| EPI_ISL_739894 | 11/5/2020  | 12/29/2020 | Europe / Luxembourg |
| EPI_ISL_739896 | 10/26/2020 | 12/29/2020 | Europe / Luxembourg |
| EPI_ISL_739897 | 3/22/2020  | 12/29/2020 | Europe / Luxembourg |
| EPI_ISL_739898 | 11/1/2020  | 12/29/2020 | Europe / Luxembourg |
| EPI_ISL_739899 | 11/18/2020 | 12/29/2020 | Europe / Luxembourg |
| EPI_ISL_739901 | 11/20/2020 | 12/29/2020 | Europe / Luxembourg |
| EPI_ISL_739902 | 10/19/2020 | 12/29/2020 | Europe / Luxembourg |
| EPI_ISL_739903 | 11/9/2020  | 12/29/2020 | Europe / Luxembourg |
| EPI_ISL_739904 | 11/8/2020  | 12/29/2020 | Europe / Luxembourg |

|                |            |            |                     |
|----------------|------------|------------|---------------------|
| EPI_ISL_739905 | 11/2/2020  | 12/29/2020 | Europe / Luxembourg |
| EPI_ISL_739906 | 11/6/2020  | 12/29/2020 | Europe / Luxembourg |
| EPI_ISL_739907 | 11/25/2020 | 12/29/2020 | Europe / Luxembourg |
| EPI_ISL_739908 | 10/23/2020 | 12/29/2020 | Europe / Luxembourg |
| EPI_ISL_739909 | 10/29/2020 | 12/29/2020 | Europe / Luxembourg |
| EPI_ISL_739910 | 12/18/2020 | 12/29/2020 | Europe / Luxembourg |
| EPI_ISL_739911 | 10/27/2020 | 12/29/2020 | Europe / Luxembourg |
| EPI_ISL_739912 | 10/15/2020 | 12/29/2020 | Europe / Luxembourg |
| EPI_ISL_739913 | 11/15/2020 | 12/29/2020 | Europe / Luxembourg |
| EPI_ISL_739914 | 10/29/2020 | 12/29/2020 | Europe / Luxembourg |
| EPI_ISL_739915 | 10/22/2020 | 12/29/2020 | Europe / Luxembourg |
| EPI_ISL_739916 | 11/3/2020  | 12/29/2020 | Europe / Luxembourg |
| EPI_ISL_739917 | 11/1/2020  | 12/29/2020 | Europe / Luxembourg |
| EPI_ISL_739918 | 7/8/2020   | 12/29/2020 | Europe / Luxembourg |
| EPI_ISL_739919 | 10/19/2020 | 12/29/2020 | Europe / Luxembourg |
| EPI_ISL_739920 | 11/1/2020  | 12/29/2020 | Europe / Luxembourg |
| EPI_ISL_739921 | 11/20/2020 | 12/29/2020 | Europe / Luxembourg |
| EPI_ISL_739922 | 10/26/2020 | 12/29/2020 | Europe / Luxembourg |
| EPI_ISL_739923 | 10/22/2020 | 12/29/2020 | Europe / Luxembourg |
| EPI_ISL_739924 | 10/25/2020 | 12/29/2020 | Europe / Luxembourg |
| EPI_ISL_739925 | 11/14/2020 | 12/29/2020 | Europe / Luxembourg |
| EPI_ISL_739926 | 10/26/2020 | 12/29/2020 | Europe / Luxembourg |
| EPI_ISL_739927 | 11/1/2020  | 12/29/2020 | Europe / Luxembourg |
| EPI_ISL_739928 | 11/27/2020 | 12/29/2020 | Europe / Luxembourg |
| EPI_ISL_739929 | 11/13/2020 | 12/29/2020 | Europe / Luxembourg |
| EPI_ISL_739930 | 10/22/2020 | 12/29/2020 | Europe / Luxembourg |
| EPI_ISL_739931 | 11/9/2020  | 12/29/2020 | Europe / Luxembourg |
| EPI_ISL_739932 | 11/16/2020 | 12/29/2020 | Europe / Luxembourg |
| EPI_ISL_739933 | 11/3/2020  | 12/29/2020 | Europe / Luxembourg |
| EPI_ISL_739934 | 8/24/2020  | 12/29/2020 | Europe / Luxembourg |
| EPI_ISL_739935 | 11/24/2020 | 12/29/2020 | Europe / Luxembourg |
| EPI_ISL_739936 | 12/11/2020 | 12/29/2020 | Europe / Luxembourg |
| EPI_ISL_739937 | 12/18/2020 | 12/29/2020 | Europe / Luxembourg |
| EPI_ISL_739938 | 11/17/2020 | 12/29/2020 | Europe / Luxembourg |
| EPI_ISL_739939 | 10/25/2020 | 12/29/2020 | Europe / Luxembourg |
| EPI_ISL_739940 | 11/9/2020  | 12/29/2020 | Europe / Luxembourg |
| EPI_ISL_739941 | 10/22/2020 | 12/29/2020 | Europe / Luxembourg |
| EPI_ISL_739942 | 11/16/2020 | 12/29/2020 | Europe / Luxembourg |
| EPI_ISL_739943 | 12/16/2020 | 12/29/2020 | Europe / Luxembourg |
| EPI_ISL_739944 | 10/5/2020  | 12/29/2020 | Europe / Luxembourg |
| EPI_ISL_739945 | 11/14/2020 | 12/29/2020 | Europe / Luxembourg |
| EPI_ISL_739946 | 10/26/2020 | 12/29/2020 | Europe / Luxembourg |
| EPI_ISL_739948 | 10/25/2020 | 12/29/2020 | Europe / Luxembourg |
| EPI_ISL_739949 | 11/4/2020  | 12/29/2020 | Europe / Luxembourg |
| EPI_ISL_739950 | 11/26/2020 | 12/29/2020 | Europe / Luxembourg |
| EPI_ISL_739952 | 10/23/2020 | 12/29/2020 | Europe / Luxembourg |
| EPI_ISL_739953 | 10/31/2020 | 12/29/2020 | Europe / Luxembourg |



|                |            |            |                     |
|----------------|------------|------------|---------------------|
| EPI_ISL_739954 | 11/5/2020  | 12/29/2020 | Europe / Luxembourg |
| EPI_ISL_739955 | 11/1/2020  | 12/29/2020 | Europe / Luxembourg |
| EPI_ISL_739956 | 10/22/2020 | 12/29/2020 | Europe / Luxembourg |
| EPI_ISL_739957 | 11/14/2020 | 12/29/2020 | Europe / Luxembourg |
| EPI_ISL_739958 | 10/21/2020 | 12/29/2020 | Europe / Luxembourg |
| EPI_ISL_739960 | 11/28/2020 | 12/29/2020 | Europe / Luxembourg |
| EPI_ISL_739962 | 11/8/2020  | 12/29/2020 | Europe / Luxembourg |
| EPI_ISL_739963 | 11/2/2020  | 12/29/2020 | Europe / Luxembourg |
| EPI_ISL_739964 | 11/5/2020  | 12/29/2020 | Europe / Luxembourg |
| EPI_ISL_739965 | 10/24/2020 | 12/29/2020 | Europe / Luxembourg |
| EPI_ISL_739966 | 11/20/2020 | 12/29/2020 | Europe / Luxembourg |
| EPI_ISL_739967 | 11/8/2020  | 12/29/2020 | Europe / Luxembourg |
| EPI_ISL_739968 | 10/29/2020 | 12/29/2020 | Europe / Luxembourg |
| EPI_ISL_739969 | 11/4/2020  | 12/29/2020 | Europe / Luxembourg |
| EPI_ISL_739970 | 11/14/2020 | 12/29/2020 | Europe / Luxembourg |
| EPI_ISL_739971 | 12/18/2020 | 12/29/2020 | Europe / Luxembourg |
| EPI_ISL_739972 | 11/21/2020 | 12/29/2020 | Europe / Luxembourg |
| EPI_ISL_739973 | 11/11/2020 | 12/29/2020 | Europe / Luxembourg |
| EPI_ISL_739974 | 10/22/2020 | 12/29/2020 | Europe / Luxembourg |
| EPI_ISL_739975 | 11/10/2020 | 12/29/2020 | Europe / Luxembourg |
| EPI_ISL_739976 | 11/20/2020 | 12/29/2020 | Europe / Luxembourg |
| EPI_ISL_739978 | 6/28/2020  | 12/29/2020 | Europe / Luxembourg |
| EPI_ISL_739979 | 11/18/2020 | 12/29/2020 | Europe / Luxembourg |
| EPI_ISL_739980 | 10/23/2020 | 12/29/2020 | Europe / Luxembourg |
| EPI_ISL_739981 | 10/28/2020 | 12/29/2020 | Europe / Luxembourg |
| EPI_ISL_739982 | 11/14/2020 | 12/29/2020 | Europe / Luxembourg |
| EPI_ISL_739983 | 10/30/2020 | 12/29/2020 | Europe / Luxembourg |
| EPI_ISL_739984 | 11/23/2020 | 12/29/2020 | Europe / Luxembourg |
| EPI_ISL_739985 | 10/26/2020 | 12/29/2020 | Europe / Luxembourg |
| EPI_ISL_739986 | 11/26/2020 | 12/29/2020 | Europe / Luxembourg |
| EPI_ISL_739987 | 10/21/2020 | 12/29/2020 | Europe / Luxembourg |
| EPI_ISL_739989 | 11/18/2020 | 12/29/2020 | Europe / Luxembourg |
| EPI_ISL_739990 | 10/22/2020 | 12/29/2020 | Europe / Luxembourg |
| EPI_ISL_739991 | 11/21/2020 | 12/29/2020 | Europe / Luxembourg |
| EPI_ISL_739992 | 10/31/2020 | 12/29/2020 | Europe / Luxembourg |
| EPI_ISL_739993 | 10/27/2020 | 12/29/2020 | Europe / Luxembourg |
| EPI_ISL_739995 | 7/15/2020  | 12/29/2020 | Europe / Luxembourg |
| EPI_ISL_739996 | 10/31/2020 | 12/29/2020 | Europe / Luxembourg |
| EPI_ISL_739997 | 11/15/2020 | 12/29/2020 | Europe / Luxembourg |
| EPI_ISL_739998 | 11/3/2020  | 12/29/2020 | Europe / Luxembourg |
| EPI_ISL_739999 | 10/22/2020 | 12/29/2020 | Europe / Luxembourg |
| EPI_ISL_740000 | 11/7/2020  | 12/29/2020 | Europe / Luxembourg |
| EPI_ISL_740001 | 10/28/2020 | 12/29/2020 | Europe / Luxembourg |
| EPI_ISL_740002 | 10/22/2020 | 12/29/2020 | Europe / Luxembourg |
| EPI_ISL_740003 | 10/4/2020  | 12/29/2020 | Europe / Luxembourg |
| EPI_ISL_740004 | 10/30/2020 | 12/29/2020 | Europe / Luxembourg |
| EPI_ISL_740005 | 8/7/2020   | 12/29/2020 | Europe / Luxembourg |

|                |            |            |                     |
|----------------|------------|------------|---------------------|
| EPI_ISL_740006 | 11/1/2020  | 12/29/2020 | Europe / Luxembourg |
| EPI_ISL_740007 | 11/2/2020  | 12/29/2020 | Europe / Luxembourg |
| EPI_ISL_740008 | 11/1/2020  | 12/29/2020 | Europe / Luxembourg |
| EPI_ISL_740009 | 11/17/2020 | 12/29/2020 | Europe / Luxembourg |
| EPI_ISL_740010 | 10/27/2020 | 12/29/2020 | Europe / Luxembourg |
| EPI_ISL_740011 | 11/28/2020 | 12/29/2020 | Europe / Luxembourg |
| EPI_ISL_740012 | 11/22/2020 | 12/29/2020 | Europe / Luxembourg |
| EPI_ISL_740013 | 10/22/2020 | 12/29/2020 | Europe / Luxembourg |
| EPI_ISL_740014 | 10/20/2020 | 12/29/2020 | Europe / Luxembourg |
| EPI_ISL_740015 | 11/4/2020  | 12/29/2020 | Europe / Luxembourg |
| EPI_ISL_740017 | 10/22/2020 | 12/29/2020 | Europe / Luxembourg |
| EPI_ISL_740018 | 11/13/2020 | 12/29/2020 | Europe / Luxembourg |
| EPI_ISL_740019 | 11/13/2020 | 12/29/2020 | Europe / Luxembourg |
| EPI_ISL_740020 | 10/26/2020 | 12/29/2020 | Europe / Luxembourg |
| EPI_ISL_740021 | 10/22/2020 | 12/29/2020 | Europe / Luxembourg |
| EPI_ISL_740022 | 10/17/2020 | 12/29/2020 | Europe / Luxembourg |
| EPI_ISL_740024 | 11/10/2020 | 12/29/2020 | Europe / Luxembourg |
| EPI_ISL_740025 | 12/14/2020 | 12/29/2020 | Europe / Luxembourg |
| EPI_ISL_740026 | 10/31/2020 | 12/29/2020 | Europe / Luxembourg |
| EPI_ISL_740027 | 9/25/2020  | 12/29/2020 | Europe / Luxembourg |
| EPI_ISL_740028 | 8/3/2020   | 12/29/2020 | Europe / Luxembourg |
| EPI_ISL_740029 | 11/26/2020 | 12/29/2020 | Europe / Luxembourg |
| EPI_ISL_740030 | 7/3/2020   | 12/29/2020 | Europe / Luxembourg |
| EPI_ISL_740031 | 10/30/2020 | 12/29/2020 | Europe / Luxembourg |
| EPI_ISL_740032 | 7/13/2020  | 12/29/2020 | Europe / Luxembourg |
| EPI_ISL_740034 | 10/28/2020 | 12/29/2020 | Europe / Luxembourg |
| EPI_ISL_740035 | 11/19/2020 | 12/29/2020 | Europe / Luxembourg |
| EPI_ISL_740036 | 10/31/2020 | 12/29/2020 | Europe / Luxembourg |
| EPI_ISL_740037 | 11/12/2020 | 12/29/2020 | Europe / Luxembourg |
| EPI_ISL_740039 | 12/17/2020 | 12/29/2020 | Europe / Luxembourg |
| EPI_ISL_740041 | 10/31/2020 | 12/29/2020 | Europe / Luxembourg |
| EPI_ISL_740042 | 10/27/2020 | 12/29/2020 | Europe / Luxembourg |
| EPI_ISL_740043 | 10/29/2020 | 12/29/2020 | Europe / Luxembourg |
| EPI_ISL_740044 | 10/23/2020 | 12/29/2020 | Europe / Luxembourg |
| EPI_ISL_740045 | 11/12/2020 | 12/29/2020 | Europe / Luxembourg |
| EPI_ISL_740046 | 10/26/2020 | 12/29/2020 | Europe / Luxembourg |
| EPI_ISL_740047 | 11/2/2020  | 12/29/2020 | Europe / Luxembourg |
| EPI_ISL_740048 | 7/23/2020  | 12/29/2020 | Europe / Luxembourg |
| EPI_ISL_740051 | 8/10/2020  | 12/29/2020 | Europe / Luxembourg |
| EPI_ISL_740052 | 10/23/2020 | 12/29/2020 | Europe / Luxembourg |
| EPI_ISL_740053 | 10/31/2020 | 12/29/2020 | Europe / Luxembourg |
| EPI_ISL_740054 | 10/26/2020 | 12/29/2020 | Europe / Luxembourg |
| EPI_ISL_740055 | 11/1/2020  | 12/29/2020 | Europe / Luxembourg |
| EPI_ISL_740056 | 12/18/2020 | 12/29/2020 | Europe / Luxembourg |
| EPI_ISL_740057 | 10/31/2020 | 12/29/2020 | Europe / Luxembourg |
| EPI_ISL_740058 | 11/6/2020  | 12/29/2020 | Europe / Luxembourg |
| EPI_ISL_740059 | 11/27/2020 | 12/29/2020 | Europe / Luxembourg |

|                |            |            |                     |
|----------------|------------|------------|---------------------|
| EPI_ISL_740060 | 10/31/2020 | 12/29/2020 | Europe / Luxembourg |
| EPI_ISL_740061 | 12/16/2020 | 12/29/2020 | Europe / Luxembourg |
| EPI_ISL_740062 | 7/10/2020  | 12/29/2020 | Europe / Luxembourg |
| EPI_ISL_740063 | 8/16/2020  | 12/29/2020 | Europe / Luxembourg |
| EPI_ISL_740064 | 10/21/2020 | 12/29/2020 | Europe / Luxembourg |
| EPI_ISL_740065 | 11/16/2020 | 12/29/2020 | Europe / Luxembourg |
| EPI_ISL_740066 | 11/6/2020  | 12/29/2020 | Europe / Luxembourg |
| EPI_ISL_740067 | 11/14/2020 | 12/29/2020 | Europe / Luxembourg |
| EPI_ISL_740068 | 10/10/2020 | 12/29/2020 | Europe / Luxembourg |
| EPI_ISL_740069 | 11/15/2020 | 12/29/2020 | Europe / Luxembourg |
| EPI_ISL_740071 | 11/7/2020  | 12/29/2020 | Europe / Luxembourg |
| EPI_ISL_740072 | 11/21/2020 | 12/29/2020 | Europe / Luxembourg |
| EPI_ISL_740073 | 11/10/2020 | 12/29/2020 | Europe / Luxembourg |
| EPI_ISL_740074 | 10/23/2020 | 12/29/2020 | Europe / Luxembourg |
| EPI_ISL_740075 | 11/18/2020 | 12/29/2020 | Europe / Luxembourg |
| EPI_ISL_740076 | 10/31/2020 | 12/29/2020 | Europe / Luxembourg |
| EPI_ISL_740077 | 12/18/2020 | 12/29/2020 | Europe / Luxembourg |
| EPI_ISL_740078 | 10/26/2020 | 12/29/2020 | Europe / Luxembourg |
| EPI_ISL_740079 | 7/23/2020  | 12/29/2020 | Europe / Luxembourg |
| EPI_ISL_740080 | 10/30/2020 | 12/29/2020 | Europe / Luxembourg |
| EPI_ISL_740081 | 10/18/2020 | 12/29/2020 | Europe / Luxembourg |
| EPI_ISL_740082 | 10/26/2020 | 12/29/2020 | Europe / Luxembourg |
| EPI_ISL_740083 | 11/24/2020 | 12/29/2020 | Europe / Luxembourg |
| EPI_ISL_740084 | 11/5/2020  | 12/29/2020 | Europe / Luxembourg |
| EPI_ISL_740085 | 10/23/2020 | 12/29/2020 | Europe / Luxembourg |
| EPI_ISL_740086 | 10/19/2020 | 12/29/2020 | Europe / Luxembourg |
| EPI_ISL_740087 | 11/9/2020  | 12/29/2020 | Europe / Luxembourg |
| EPI_ISL_740088 | 11/16/2020 | 12/29/2020 | Europe / Luxembourg |
| EPI_ISL_740089 | 11/16/2020 | 12/29/2020 | Europe / Luxembourg |
| EPI_ISL_740090 | 10/19/2020 | 12/29/2020 | Europe / Luxembourg |
| EPI_ISL_740091 | 10/23/2020 | 12/29/2020 | Europe / Luxembourg |
| EPI_ISL_740093 | 11/14/2020 | 12/29/2020 | Europe / Luxembourg |
| EPI_ISL_740094 | 11/20/2020 | 12/29/2020 | Europe / Luxembourg |
| EPI_ISL_740095 | 11/1/2020  | 12/29/2020 | Europe / Luxembourg |
| EPI_ISL_740096 | 11/24/2020 | 12/29/2020 | Europe / Luxembourg |
| EPI_ISL_740097 | 10/23/2020 | 12/29/2020 | Europe / Luxembourg |
| EPI_ISL_740099 | 10/27/2020 | 12/29/2020 | Europe / Luxembourg |
| EPI_ISL_740100 | 10/22/2020 | 12/29/2020 | Europe / Luxembourg |
| EPI_ISL_740101 | 10/31/2020 | 12/29/2020 | Europe / Luxembourg |
| EPI_ISL_740102 | 11/18/2020 | 12/29/2020 | Europe / Luxembourg |
| EPI_ISL_740103 | 7/10/2020  | 12/29/2020 | Europe / Luxembourg |
| EPI_ISL_740104 | 11/9/2020  | 12/29/2020 | Europe / Luxembourg |
| EPI_ISL_740106 | 10/31/2020 | 12/29/2020 | Europe / Luxembourg |
| EPI_ISL_740107 | 10/23/2020 | 12/29/2020 | Europe / Luxembourg |
| EPI_ISL_740108 | 10/19/2020 | 12/29/2020 | Europe / Luxembourg |
| EPI_ISL_740109 | 11/7/2020  | 12/29/2020 | Europe / Luxembourg |
| EPI_ISL_740110 | 11/4/2020  | 12/29/2020 | Europe / Luxembourg |

|                |            |            |                     |
|----------------|------------|------------|---------------------|
| EPI_ISL_740111 | 12/17/2020 | 12/29/2020 | Europe / Luxembourg |
| EPI_ISL_740112 | 11/19/2020 | 12/29/2020 | Europe / Luxembourg |
| EPI_ISL_740113 | 11/6/2020  | 12/29/2020 | Europe / Luxembourg |
| EPI_ISL_740114 | 10/30/2020 | 12/29/2020 | Europe / Luxembourg |
| EPI_ISL_740115 | 10/23/2020 | 12/29/2020 | Europe / Luxembourg |
| EPI_ISL_740116 | 10/31/2020 | 12/29/2020 | Europe / Luxembourg |
| EPI_ISL_740117 | 10/26/2020 | 12/29/2020 | Europe / Luxembourg |
| EPI_ISL_740118 | 10/24/2020 | 12/29/2020 | Europe / Luxembourg |
| EPI_ISL_740119 | 11/22/2020 | 12/29/2020 | Europe / Luxembourg |
| EPI_ISL_740120 | 10/12/2020 | 12/29/2020 | Europe / Luxembourg |
| EPI_ISL_740121 | 11/9/2020  | 12/29/2020 | Europe / Luxembourg |
| EPI_ISL_740122 | 10/16/2020 | 12/29/2020 | Europe / Luxembourg |
| EPI_ISL_740123 | 11/3/2020  | 12/29/2020 | Europe / Luxembourg |
| EPI_ISL_740124 | 10/23/2020 | 12/29/2020 | Europe / Luxembourg |
| EPI_ISL_740126 | 10/18/2020 | 12/29/2020 | Europe / Luxembourg |
| EPI_ISL_740128 | 11/18/2020 | 12/29/2020 | Europe / Luxembourg |
| EPI_ISL_740130 | 11/5/2020  | 12/29/2020 | Europe / Luxembourg |
| EPI_ISL_740131 | 10/9/2020  | 12/29/2020 | Europe / Luxembourg |
| EPI_ISL_740132 | 7/15/2020  | 12/29/2020 | Europe / Luxembourg |
| EPI_ISL_740133 | 11/10/2020 | 12/29/2020 | Europe / Luxembourg |
| EPI_ISL_740134 | 11/7/2020  | 12/29/2020 | Europe / Luxembourg |
| EPI_ISL_740135 | 11/7/2020  | 12/29/2020 | Europe / Luxembourg |
| EPI_ISL_740136 | 10/25/2020 | 12/29/2020 | Europe / Luxembourg |
| EPI_ISL_740137 | 11/4/2020  | 12/29/2020 | Europe / Luxembourg |
| EPI_ISL_740139 | 11/8/2020  | 12/29/2020 | Europe / Luxembourg |
| EPI_ISL_740140 | 11/27/2020 | 12/29/2020 | Europe / Luxembourg |
| EPI_ISL_740141 | 11/13/2020 | 12/29/2020 | Europe / Luxembourg |
| EPI_ISL_740142 | 11/4/2020  | 12/29/2020 | Europe / Luxembourg |
| EPI_ISL_740143 | 11/19/2020 | 12/29/2020 | Europe / Luxembourg |
| EPI_ISL_740144 | 10/22/2020 | 12/29/2020 | Europe / Luxembourg |
| EPI_ISL_740145 | 11/14/2020 | 12/29/2020 | Europe / Luxembourg |
| EPI_ISL_740146 | 8/13/2020  | 12/29/2020 | Europe / Luxembourg |
| EPI_ISL_740147 | 10/22/2020 | 12/29/2020 | Europe / Luxembourg |
| EPI_ISL_740148 | 11/28/2020 | 12/29/2020 | Europe / Luxembourg |
| EPI_ISL_740149 | 10/23/2020 | 12/29/2020 | Europe / Luxembourg |
| EPI_ISL_740151 | 11/18/2020 | 12/29/2020 | Europe / Luxembourg |
| EPI_ISL_740152 | 11/18/2020 | 12/29/2020 | Europe / Luxembourg |
| EPI_ISL_740153 | 10/29/2020 | 12/29/2020 | Europe / Luxembourg |
| EPI_ISL_740154 | 10/29/2020 | 12/29/2020 | Europe / Luxembourg |
| EPI_ISL_740155 | 11/1/2020  | 12/29/2020 | Europe / Luxembourg |
| EPI_ISL_740156 | 11/12/2020 | 12/29/2020 | Europe / Luxembourg |
| EPI_ISL_740158 | 11/23/2020 | 12/29/2020 | Europe / Luxembourg |
| EPI_ISL_740159 | 10/26/2020 | 12/29/2020 | Europe / Luxembourg |
| EPI_ISL_740160 | 12/12/2020 | 12/29/2020 | Europe / Luxembourg |
| EPI_ISL_740161 | 10/21/2020 | 12/29/2020 | Europe / Luxembourg |
| EPI_ISL_740162 | 10/23/2020 | 12/29/2020 | Europe / Luxembourg |
| EPI_ISL_740163 | 11/24/2020 | 12/29/2020 | Europe / Luxembourg |

|                |            |            |                     |
|----------------|------------|------------|---------------------|
| EPI_ISL_740164 | 11/16/2020 | 12/29/2020 | Europe / Luxembourg |
| EPI_ISL_740165 | 12/19/2020 | 12/29/2020 | Europe / Luxembourg |
| EPI_ISL_740166 | 11/5/2020  | 12/29/2020 | Europe / Luxembourg |
| EPI_ISL_740167 | 11/20/2020 | 12/29/2020 | Europe / Luxembourg |
| EPI_ISL_740168 | 10/28/2020 | 12/29/2020 | Europe / Luxembourg |
| EPI_ISL_740169 | 10/30/2020 | 12/29/2020 | Europe / Luxembourg |
| EPI_ISL_740170 | 10/26/2020 | 12/29/2020 | Europe / Luxembourg |
| EPI_ISL_740171 | 11/12/2020 | 12/29/2020 | Europe / Luxembourg |
| EPI_ISL_740172 | 10/22/2020 | 12/29/2020 | Europe / Luxembourg |
| EPI_ISL_740173 | 10/26/2020 | 12/29/2020 | Europe / Luxembourg |
| EPI_ISL_740174 | 11/28/2020 | 12/29/2020 | Europe / Luxembourg |
| EPI_ISL_740175 | 11/15/2020 | 12/29/2020 | Europe / Luxembourg |
| EPI_ISL_740177 | 11/28/2020 | 12/29/2020 | Europe / Luxembourg |
| EPI_ISL_740178 | 11/10/2020 | 12/29/2020 | Europe / Luxembourg |
| EPI_ISL_740179 | 11/13/2020 | 12/29/2020 | Europe / Luxembourg |
| EPI_ISL_740180 | 10/26/2020 | 12/29/2020 | Europe / Luxembourg |
| EPI_ISL_740181 | 10/28/2020 | 12/29/2020 | Europe / Luxembourg |
| EPI_ISL_740183 | 11/19/2020 | 12/29/2020 | Europe / Luxembourg |
| EPI_ISL_740184 | 11/10/2020 | 12/29/2020 | Europe / Luxembourg |
| EPI_ISL_740185 | 11/9/2020  | 12/29/2020 | Europe / Luxembourg |
| EPI_ISL_740186 | 7/16/2020  | 12/29/2020 | Europe / Luxembourg |
| EPI_ISL_740187 | 10/31/2020 | 12/29/2020 | Europe / Luxembourg |
| EPI_ISL_740188 | 10/25/2020 | 12/29/2020 | Europe / Luxembourg |
| EPI_ISL_740189 | 9/24/2020  | 12/29/2020 | Europe / Luxembourg |
| EPI_ISL_740190 | 11/3/2020  | 12/29/2020 | Europe / Luxembourg |
| EPI_ISL_740191 | 10/21/2020 | 12/29/2020 | Europe / Luxembourg |
| EPI_ISL_740192 | 10/27/2020 | 12/29/2020 | Europe / Luxembourg |
| EPI_ISL_740193 | 10/22/2020 | 12/29/2020 | Europe / Luxembourg |
| EPI_ISL_740194 | 10/24/2020 | 12/29/2020 | Europe / Luxembourg |
| EPI_ISL_740195 | 10/25/2020 | 12/29/2020 | Europe / Luxembourg |
| EPI_ISL_740196 | 10/26/2020 | 12/29/2020 | Europe / Luxembourg |
| EPI_ISL_740197 | 10/28/2020 | 12/29/2020 | Europe / Luxembourg |
| EPI_ISL_740198 | 10/23/2020 | 12/29/2020 | Europe / Luxembourg |
| EPI_ISL_740199 | 3/22/2020  | 12/29/2020 | Europe / Luxembourg |
| EPI_ISL_740200 | 10/9/2020  | 12/29/2020 | Europe / Luxembourg |
| EPI_ISL_740201 | 11/8/2020  | 12/29/2020 | Europe / Luxembourg |
| EPI_ISL_740203 | 12/15/2020 | 12/29/2020 | Europe / Luxembourg |
| EPI_ISL_740205 | 12/18/2020 | 12/29/2020 | Europe / Luxembourg |
| EPI_ISL_740206 | 10/27/2020 | 12/29/2020 | Europe / Luxembourg |
| EPI_ISL_740207 | 11/15/2020 | 12/29/2020 | Europe / Luxembourg |
| EPI_ISL_740208 | 11/13/2020 | 12/29/2020 | Europe / Luxembourg |
| EPI_ISL_740209 | 10/26/2020 | 12/29/2020 | Europe / Luxembourg |
| EPI_ISL_740210 | 10/19/2020 | 12/29/2020 | Europe / Luxembourg |
| EPI_ISL_740211 | 11/29/2020 | 12/29/2020 | Europe / Luxembourg |
| EPI_ISL_740212 | 11/23/2020 | 12/29/2020 | Europe / Luxembourg |
| EPI_ISL_740213 | 11/22/2020 | 12/29/2020 | Europe / Luxembourg |
| EPI_ISL_740214 | 12/17/2020 | 12/29/2020 | Europe / Luxembourg |

|                |            |            |                     |
|----------------|------------|------------|---------------------|
| EPI_ISL_740215 | 11/4/2020  | 12/29/2020 | Europe / Luxembourg |
| EPI_ISL_740216 | 11/16/2020 | 12/29/2020 | Europe / Luxembourg |
| EPI_ISL_740217 | 10/23/2020 | 12/29/2020 | Europe / Luxembourg |
| EPI_ISL_740218 | 10/22/2020 | 12/29/2020 | Europe / Luxembourg |
| EPI_ISL_740220 | 10/19/2020 | 12/29/2020 | Europe / Luxembourg |
| EPI_ISL_740221 | 11/7/2020  | 12/29/2020 | Europe / Luxembourg |
| EPI_ISL_740222 | 9/26/2020  | 12/29/2020 | Europe / Luxembourg |
| EPI_ISL_740223 | 11/27/2020 | 12/29/2020 | Europe / Luxembourg |
| EPI_ISL_740224 | 10/31/2020 | 12/29/2020 | Europe / Luxembourg |
| EPI_ISL_740225 | 11/5/2020  | 12/29/2020 | Europe / Luxembourg |
| EPI_ISL_740226 | 9/28/2020  | 12/29/2020 | Europe / Luxembourg |
| EPI_ISL_740227 | 6/30/2020  | 12/29/2020 | Europe / Luxembourg |
| EPI_ISL_740228 | 11/26/2020 | 12/29/2020 | Europe / Luxembourg |
| EPI_ISL_740229 | 8/12/2020  | 12/29/2020 | Europe / Luxembourg |
| EPI_ISL_740230 | 10/22/2020 | 12/29/2020 | Europe / Luxembourg |
| EPI_ISL_740231 | 11/3/2020  | 12/29/2020 | Europe / Luxembourg |
| EPI_ISL_740232 | 10/29/2020 | 12/29/2020 | Europe / Luxembourg |
| EPI_ISL_740233 | 10/26/2020 | 12/29/2020 | Europe / Luxembourg |
| EPI_ISL_740234 | 11/10/2020 | 12/29/2020 | Europe / Luxembourg |
| EPI_ISL_740235 | 11/17/2020 | 12/29/2020 | Europe / Luxembourg |
| EPI_ISL_740236 | 11/23/2020 | 12/29/2020 | Europe / Luxembourg |
| EPI_ISL_740237 | 12/16/2020 | 12/29/2020 | Europe / Luxembourg |
| EPI_ISL_740238 | 11/15/2020 | 12/29/2020 | Europe / Luxembourg |
| EPI_ISL_740239 | 11/5/2020  | 12/29/2020 | Europe / Luxembourg |
| EPI_ISL_740240 | 11/15/2020 | 12/29/2020 | Europe / Luxembourg |
| EPI_ISL_740241 | 11/24/2020 | 12/29/2020 | Europe / Luxembourg |
| EPI_ISL_740242 | 3/13/2020  | 12/29/2020 | Europe / Luxembourg |
| EPI_ISL_740243 | 10/26/2020 | 12/29/2020 | Europe / Luxembourg |
| EPI_ISL_740244 | 10/31/2020 | 12/29/2020 | Europe / Luxembourg |
| EPI_ISL_740245 | 10/22/2020 | 12/29/2020 | Europe / Luxembourg |
| EPI_ISL_740247 | 10/28/2020 | 12/29/2020 | Europe / Luxembourg |
| EPI_ISL_740248 | 11/5/2020  | 12/29/2020 | Europe / Luxembourg |
| EPI_ISL_740249 | 11/14/2020 | 12/29/2020 | Europe / Luxembourg |
| EPI_ISL_740251 | 7/29/2020  | 12/29/2020 | Europe / Luxembourg |
| EPI_ISL_740253 | 11/16/2020 | 12/29/2020 | Europe / Luxembourg |
| EPI_ISL_740254 | 11/5/2020  | 12/29/2020 | Europe / Luxembourg |
| EPI_ISL_740255 | 11/16/2020 | 12/29/2020 | Europe / Luxembourg |
| EPI_ISL_740256 | 10/20/2020 | 12/29/2020 | Europe / Luxembourg |
| EPI_ISL_740257 | 11/27/2020 | 12/29/2020 | Europe / Luxembourg |
| EPI_ISL_740260 | 10/29/2020 | 12/29/2020 | Europe / Luxembourg |
| EPI_ISL_740261 | 11/15/2020 | 12/29/2020 | Europe / Luxembourg |
| EPI_ISL_740262 | 10/22/2020 | 12/29/2020 | Europe / Luxembourg |
| EPI_ISL_740263 | 10/25/2020 | 12/29/2020 | Europe / Luxembourg |
| EPI_ISL_740264 | 11/7/2020  | 12/29/2020 | Europe / Luxembourg |
| EPI_ISL_740265 | 10/28/2020 | 12/29/2020 | Europe / Luxembourg |
| EPI_ISL_740266 | 10/30/2020 | 12/29/2020 | Europe / Luxembourg |
| EPI_ISL_740267 | 12/18/2020 | 12/29/2020 | Europe / Luxembourg |

|                |            |            |                     |
|----------------|------------|------------|---------------------|
| EPI_ISL_740268 | 10/24/2020 | 12/29/2020 | Europe / Luxembourg |
| EPI_ISL_740269 | 11/15/2020 | 12/29/2020 | Europe / Luxembourg |
| EPI_ISL_740270 | 11/3/2020  | 12/29/2020 | Europe / Luxembourg |
| EPI_ISL_740271 | 12/16/2020 | 12/29/2020 | Europe / Luxembourg |
| EPI_ISL_740272 | 10/31/2020 | 12/29/2020 | Europe / Luxembourg |
| EPI_ISL_740273 | 10/24/2020 | 12/29/2020 | Europe / Luxembourg |
| EPI_ISL_740274 | 12/16/2020 | 12/29/2020 | Europe / Luxembourg |
| EPI_ISL_740275 | 10/26/2020 | 12/29/2020 | Europe / Luxembourg |
| EPI_ISL_740276 | 11/12/2020 | 12/29/2020 | Europe / Luxembourg |
| EPI_ISL_740277 | 11/11/2020 | 12/29/2020 | Europe / Luxembourg |
| EPI_ISL_740278 | 8/10/2020  | 12/29/2020 | Europe / Luxembourg |
| EPI_ISL_740279 | 10/21/2020 | 12/29/2020 | Europe / Luxembourg |
| EPI_ISL_740280 | 10/24/2020 | 12/29/2020 | Europe / Luxembourg |
| EPI_ISL_740281 | 11/5/2020  | 12/29/2020 | Europe / Luxembourg |
| EPI_ISL_740282 | 11/15/2020 | 12/29/2020 | Europe / Luxembourg |
| EPI_ISL_740283 | 10/22/2020 | 12/29/2020 | Europe / Luxembourg |
| EPI_ISL_740284 | 11/20/2020 | 12/29/2020 | Europe / Luxembourg |
| EPI_ISL_740285 | 11/17/2020 | 12/29/2020 | Europe / Luxembourg |
| EPI_ISL_740286 | 11/15/2020 | 12/29/2020 | Europe / Luxembourg |
| EPI_ISL_740288 | 10/21/2020 | 12/29/2020 | Europe / Luxembourg |
| EPI_ISL_740289 | 6/8/2020   | 12/29/2020 | Europe / Luxembourg |
| EPI_ISL_740290 | 11/12/2020 | 12/29/2020 | Europe / Luxembourg |
| EPI_ISL_740291 | 10/1/2020  | 12/29/2020 | Europe / Luxembourg |
| EPI_ISL_740292 | 10/26/2020 | 12/29/2020 | Europe / Luxembourg |
| EPI_ISL_740293 | 11/12/2020 | 12/29/2020 | Europe / Luxembourg |
| EPI_ISL_740294 | 11/28/2020 | 12/29/2020 | Europe / Luxembourg |
| EPI_ISL_740295 | 11/2/2020  | 12/29/2020 | Europe / Luxembourg |
| EPI_ISL_740296 | 10/23/2020 | 12/29/2020 | Europe / Luxembourg |
| EPI_ISL_740297 | 11/17/2020 | 12/29/2020 | Europe / Luxembourg |
| EPI_ISL_740298 | 10/30/2020 | 12/29/2020 | Europe / Luxembourg |
| EPI_ISL_740299 | 11/21/2020 | 12/29/2020 | Europe / Luxembourg |
| EPI_ISL_740300 | 10/26/2020 | 12/29/2020 | Europe / Luxembourg |
| EPI_ISL_740301 | 11/24/2020 | 12/29/2020 | Europe / Luxembourg |
| EPI_ISL_740303 | 11/19/2020 | 12/29/2020 | Europe / Luxembourg |
| EPI_ISL_740304 | 11/5/2020  | 12/29/2020 | Europe / Luxembourg |
| EPI_ISL_740305 | 10/26/2020 | 12/29/2020 | Europe / Luxembourg |
| EPI_ISL_740307 | 8/13/2020  | 12/29/2020 | Europe / Luxembourg |
| EPI_ISL_740309 | 11/22/2020 | 12/29/2020 | Europe / Luxembourg |
| EPI_ISL_740310 | 10/26/2020 | 12/29/2020 | Europe / Luxembourg |
| EPI_ISL_740311 | 11/19/2020 | 12/29/2020 | Europe / Luxembourg |
| EPI_ISL_740312 | 11/16/2020 | 12/29/2020 | Europe / Luxembourg |
| EPI_ISL_740314 | 7/18/2020  | 12/29/2020 | Europe / Luxembourg |
| EPI_ISL_740315 | 11/19/2020 | 12/29/2020 | Europe / Luxembourg |
| EPI_ISL_740316 | 10/20/2020 | 12/29/2020 | Europe / Luxembourg |
| EPI_ISL_740317 | 10/19/2020 | 12/29/2020 | Europe / Luxembourg |
| EPI_ISL_740318 | 10/23/2020 | 12/29/2020 | Europe / Luxembourg |
| EPI_ISL_740319 | 12/12/2020 | 12/29/2020 | Europe / Luxembourg |

|                |            |            |                     |
|----------------|------------|------------|---------------------|
| EPI_ISL_740320 | 11/13/2020 | 12/29/2020 | Europe / Luxembourg |
| EPI_ISL_740322 | 10/17/2020 | 12/29/2020 | Europe / Luxembourg |
| EPI_ISL_740324 | 10/26/2020 | 12/29/2020 | Europe / Luxembourg |
| EPI_ISL_740325 | 11/26/2020 | 12/29/2020 | Europe / Luxembourg |
| EPI_ISL_740326 | 10/17/2020 | 12/29/2020 | Europe / Luxembourg |
| EPI_ISL_740327 | 10/19/2020 | 12/29/2020 | Europe / Luxembourg |
| EPI_ISL_740328 | 11/7/2020  | 12/29/2020 | Europe / Luxembourg |
| EPI_ISL_740329 | 10/27/2020 | 12/29/2020 | Europe / Luxembourg |
| EPI_ISL_740330 | 12/17/2020 | 12/29/2020 | Europe / Luxembourg |
| EPI_ISL_740331 | 10/19/2020 | 12/29/2020 | Europe / Luxembourg |
| EPI_ISL_740332 | 11/2/2020  | 12/29/2020 | Europe / Luxembourg |
| EPI_ISL_740333 | 10/21/2020 | 12/29/2020 | Europe / Luxembourg |
| EPI_ISL_740334 | 10/4/2020  | 12/29/2020 | Europe / Luxembourg |
| EPI_ISL_740335 | 11/22/2020 | 12/29/2020 | Europe / Luxembourg |
| EPI_ISL_740336 | 10/21/2020 | 12/29/2020 | Europe / Luxembourg |
| EPI_ISL_740337 | 10/29/2020 | 12/29/2020 | Europe / Luxembourg |
| EPI_ISL_740338 | 11/10/2020 | 12/29/2020 | Europe / Luxembourg |
| EPI_ISL_740339 | 11/22/2020 | 12/29/2020 | Europe / Luxembourg |
| EPI_ISL_740340 | 10/23/2020 | 12/29/2020 | Europe / Luxembourg |
| EPI_ISL_740341 | 11/20/2020 | 12/29/2020 | Europe / Luxembourg |
| EPI_ISL_740342 | 10/19/2020 | 12/29/2020 | Europe / Luxembourg |
| EPI_ISL_740343 | 7/7/2020   | 12/29/2020 | Europe / Luxembourg |
| EPI_ISL_740344 | 10/22/2020 | 12/29/2020 | Europe / Luxembourg |
| EPI_ISL_740345 | 12/15/2020 | 12/29/2020 | Europe / Luxembourg |
| EPI_ISL_740346 | 10/26/2020 | 12/29/2020 | Europe / Luxembourg |
| EPI_ISL_740347 | 10/22/2020 | 12/29/2020 | Europe / Luxembourg |
| EPI_ISL_740348 | 11/2/2020  | 12/29/2020 | Europe / Luxembourg |
| EPI_ISL_740349 | 10/31/2020 | 12/29/2020 | Europe / Luxembourg |
| EPI_ISL_740350 | 11/17/2020 | 12/29/2020 | Europe / Luxembourg |
| EPI_ISL_740351 | 11/23/2020 | 12/29/2020 | Europe / Luxembourg |
| EPI_ISL_740352 | 10/28/2020 | 12/29/2020 | Europe / Luxembourg |
| EPI_ISL_740354 | 10/23/2020 | 12/29/2020 | Europe / Luxembourg |
| EPI_ISL_740355 | 10/22/2020 | 12/29/2020 | Europe / Luxembourg |
| EPI_ISL_740356 | 10/28/2020 | 12/29/2020 | Europe / Luxembourg |
| EPI_ISL_740357 | 10/19/2020 | 12/29/2020 | Europe / Luxembourg |
| EPI_ISL_740358 | 11/7/2020  | 12/29/2020 | Europe / Luxembourg |
| EPI_ISL_740359 | 10/20/2020 | 12/29/2020 | Europe / Luxembourg |
| EPI_ISL_740360 | 7/23/2020  | 12/29/2020 | Europe / Luxembourg |
| EPI_ISL_740361 | 10/31/2020 | 12/29/2020 | Europe / Luxembourg |
| EPI_ISL_740362 | 11/6/2020  | 12/29/2020 | Europe / Luxembourg |
| EPI_ISL_740363 | 11/24/2020 | 12/29/2020 | Europe / Luxembourg |
| EPI_ISL_740364 | 11/2/2020  | 12/29/2020 | Europe / Luxembourg |
| EPI_ISL_740366 | 10/27/2020 | 12/29/2020 | Europe / Luxembourg |
| EPI_ISL_740367 | 11/17/2020 | 12/29/2020 | Europe / Luxembourg |
| EPI_ISL_740369 | 11/17/2020 | 12/29/2020 | Europe / Luxembourg |
| EPI_ISL_740370 | 10/21/2020 | 12/29/2020 | Europe / Luxembourg |
| EPI_ISL_740371 | 11/27/2020 | 12/29/2020 | Europe / Luxembourg |



|                |            |            |                     |
|----------------|------------|------------|---------------------|
| EPI_ISL_740372 | 11/3/2020  | 12/29/2020 | Europe / Luxembourg |
| EPI_ISL_740373 | 10/26/2020 | 12/29/2020 | Europe / Luxembourg |
| EPI_ISL_740374 | 11/24/2020 | 12/29/2020 | Europe / Luxembourg |
| EPI_ISL_740375 | 12/17/2020 | 12/29/2020 | Europe / Luxembourg |
| EPI_ISL_740376 | 11/23/2020 | 12/29/2020 | Europe / Luxembourg |
| EPI_ISL_740378 | 11/21/2020 | 12/29/2020 | Europe / Luxembourg |
| EPI_ISL_740379 | 11/17/2020 | 12/29/2020 | Europe / Luxembourg |
| EPI_ISL_740380 | 11/22/2020 | 12/29/2020 | Europe / Luxembourg |
| EPI_ISL_740381 | 10/24/2020 | 12/29/2020 | Europe / Luxembourg |
| EPI_ISL_740382 | 11/1/2020  | 12/29/2020 | Europe / Luxembourg |
| EPI_ISL_740383 | 10/24/2020 | 12/29/2020 | Europe / Luxembourg |
| EPI_ISL_740384 | 10/27/2020 | 12/29/2020 | Europe / Luxembourg |
| EPI_ISL_740385 | 11/25/2020 | 12/29/2020 | Europe / Luxembourg |
| EPI_ISL_740386 | 10/24/2020 | 12/29/2020 | Europe / Luxembourg |
| EPI_ISL_740387 | 12/17/2020 | 12/29/2020 | Europe / Luxembourg |
| EPI_ISL_740388 | 10/27/2020 | 12/29/2020 | Europe / Luxembourg |
| EPI_ISL_740389 | 11/23/2020 | 12/29/2020 | Europe / Luxembourg |
| EPI_ISL_740390 | 10/31/2020 | 12/29/2020 | Europe / Luxembourg |
| EPI_ISL_740391 | 10/25/2020 | 12/29/2020 | Europe / Luxembourg |
| EPI_ISL_740392 | 11/22/2020 | 12/29/2020 | Europe / Luxembourg |
| EPI_ISL_740393 | 11/20/2020 | 12/29/2020 | Europe / Luxembourg |
| EPI_ISL_740394 | 11/9/2020  | 12/29/2020 | Europe / Luxembourg |
| EPI_ISL_740395 | 11/22/2020 | 12/29/2020 | Europe / Luxembourg |
| EPI_ISL_740396 | 10/7/2020  | 12/29/2020 | Europe / Luxembourg |
| EPI_ISL_740397 | 11/8/2020  | 12/29/2020 | Europe / Luxembourg |
| EPI_ISL_740398 | 11/1/2020  | 12/29/2020 | Europe / Luxembourg |
| EPI_ISL_740399 | 10/30/2020 | 12/29/2020 | Europe / Luxembourg |
| EPI_ISL_740400 | 11/25/2020 | 12/29/2020 | Europe / Luxembourg |
| EPI_ISL_740401 | 10/9/2020  | 12/29/2020 | Europe / Luxembourg |
| EPI_ISL_740402 | 10/25/2020 | 12/29/2020 | Europe / Luxembourg |
| EPI_ISL_740403 | 10/23/2020 | 12/29/2020 | Europe / Luxembourg |
| EPI_ISL_740404 | 7/2/2020   | 12/29/2020 | Europe / Luxembourg |
| EPI_ISL_740405 | 3/13/2020  | 12/29/2020 | Europe / Luxembourg |
| EPI_ISL_740406 | 10/20/2020 | 12/29/2020 | Europe / Luxembourg |
| EPI_ISL_740407 | 10/29/2020 | 12/29/2020 | Europe / Luxembourg |
| EPI_ISL_740410 | 10/30/2020 | 12/29/2020 | Europe / Luxembourg |
| EPI_ISL_740411 | 11/25/2020 | 12/29/2020 | Europe / Luxembourg |
| EPI_ISL_740412 | 10/25/2020 | 12/29/2020 | Europe / Luxembourg |
| EPI_ISL_740413 | 11/24/2020 | 12/29/2020 | Europe / Luxembourg |
| EPI_ISL_740414 | 10/26/2020 | 12/29/2020 | Europe / Luxembourg |
| EPI_ISL_740415 | 10/23/2020 | 12/29/2020 | Europe / Luxembourg |
| EPI_ISL_740416 | 11/21/2020 | 12/29/2020 | Europe / Luxembourg |
| EPI_ISL_740417 | 11/13/2020 | 12/29/2020 | Europe / Luxembourg |
| EPI_ISL_740418 | 10/24/2020 | 12/29/2020 | Europe / Luxembourg |
| EPI_ISL_740419 | 10/22/2020 | 12/29/2020 | Europe / Luxembourg |
| EPI_ISL_740420 | 11/23/2020 | 12/29/2020 | Europe / Luxembourg |
| EPI_ISL_740422 | 11/18/2020 | 12/29/2020 | Europe / Luxembourg |

|                |            |            |                     |
|----------------|------------|------------|---------------------|
| EPI_ISL_740423 | 10/31/2020 | 12/29/2020 | Europe / Luxembourg |
| EPI_ISL_740424 | 12/18/2020 | 12/29/2020 | Europe / Luxembourg |
| EPI_ISL_740425 | 11/10/2020 | 12/29/2020 | Europe / Luxembourg |
| EPI_ISL_740426 | 11/18/2020 | 12/29/2020 | Europe / Luxembourg |
| EPI_ISL_740427 | 11/12/2020 | 12/29/2020 | Europe / Luxembourg |
| EPI_ISL_740428 | 11/23/2020 | 12/29/2020 | Europe / Luxembourg |
| EPI_ISL_740430 | 7/28/2020  | 12/29/2020 | Europe / Luxembourg |
| EPI_ISL_740431 | 11/10/2020 | 12/29/2020 | Europe / Luxembourg |
| EPI_ISL_740432 | 11/15/2020 | 12/29/2020 | Europe / Luxembourg |
| EPI_ISL_740433 | 10/23/2020 | 12/29/2020 | Europe / Luxembourg |
| EPI_ISL_740434 | 11/2/2020  | 12/29/2020 | Europe / Luxembourg |
| EPI_ISL_740436 | 11/2/2020  | 12/29/2020 | Europe / Luxembourg |
| EPI_ISL_740437 | 11/22/2020 | 12/29/2020 | Europe / Luxembourg |
| EPI_ISL_740438 | 6/20/2020  | 12/29/2020 | Europe / Luxembourg |
| EPI_ISL_740441 | 10/22/2020 | 12/29/2020 | Europe / Luxembourg |
| EPI_ISL_740442 | 10/26/2020 | 12/29/2020 | Europe / Luxembourg |
| EPI_ISL_740443 | 10/26/2020 | 12/29/2020 | Europe / Luxembourg |
| EPI_ISL_740444 | 3/21/2020  | 12/29/2020 | Europe / Luxembourg |
| EPI_ISL_740445 | 10/31/2020 | 12/29/2020 | Europe / Luxembourg |
| EPI_ISL_740446 | 11/27/2020 | 12/29/2020 | Europe / Luxembourg |
| EPI_ISL_740447 | 10/16/2020 | 12/29/2020 | Europe / Luxembourg |
| EPI_ISL_740448 | 10/24/2020 | 12/29/2020 | Europe / Luxembourg |
| EPI_ISL_740449 | 10/30/2020 | 12/29/2020 | Europe / Luxembourg |
| EPI_ISL_740450 | 11/3/2020  | 12/29/2020 | Europe / Luxembourg |
| EPI_ISL_740451 | 10/25/2020 | 12/29/2020 | Europe / Luxembourg |
| EPI_ISL_740452 | 11/24/2020 | 12/29/2020 | Europe / Luxembourg |
| EPI_ISL_740453 | 10/30/2020 | 12/29/2020 | Europe / Luxembourg |
| EPI_ISL_740454 | 11/24/2020 | 12/29/2020 | Europe / Luxembourg |
| EPI_ISL_740455 | 11/1/2020  | 12/29/2020 | Europe / Luxembourg |
| EPI_ISL_740456 | 6/24/2020  | 12/29/2020 | Europe / Luxembourg |
| EPI_ISL_740457 | 11/13/2020 | 12/29/2020 | Europe / Luxembourg |
| EPI_ISL_740458 | 11/28/2020 | 12/29/2020 | Europe / Luxembourg |
| EPI_ISL_740459 | 11/18/2020 | 12/29/2020 | Europe / Luxembourg |
| EPI_ISL_740460 | 10/24/2020 | 12/29/2020 | Europe / Luxembourg |
| EPI_ISL_740461 | 10/26/2020 | 12/29/2020 | Europe / Luxembourg |
| EPI_ISL_740462 | 11/7/2020  | 12/29/2020 | Europe / Luxembourg |
| EPI_ISL_740463 | 11/23/2020 | 12/29/2020 | Europe / Luxembourg |
| EPI_ISL_740464 | 10/21/2020 | 12/29/2020 | Europe / Luxembourg |
| EPI_ISL_740467 | 11/15/2020 | 12/29/2020 | Europe / Luxembourg |
| EPI_ISL_740468 | 10/27/2020 | 12/29/2020 | Europe / Luxembourg |
| EPI_ISL_740469 | 7/3/2020   | 12/29/2020 | Europe / Luxembourg |
| EPI_ISL_740470 | 10/26/2020 | 12/29/2020 | Europe / Luxembourg |
| EPI_ISL_740471 | 8/6/2020   | 12/29/2020 | Europe / Luxembourg |
| EPI_ISL_740472 | 11/20/2020 | 12/29/2020 | Europe / Luxembourg |
| EPI_ISL_740474 | 10/26/2020 | 12/29/2020 | Europe / Luxembourg |
| EPI_ISL_740475 | 11/7/2020  | 12/29/2020 | Europe / Luxembourg |
| EPI_ISL_740476 | 11/19/2020 | 12/29/2020 | Europe / Luxembourg |

|                |            |            |                     |
|----------------|------------|------------|---------------------|
| EPI_ISL_740477 | 11/1/2020  | 12/29/2020 | Europe / Luxembourg |
| EPI_ISL_740478 | 11/23/2020 | 12/29/2020 | Europe / Luxembourg |
| EPI_ISL_740479 | 10/18/2020 | 12/29/2020 | Europe / Luxembourg |
| EPI_ISL_740480 | 11/14/2020 | 12/29/2020 | Europe / Luxembourg |
| EPI_ISL_740481 | 11/11/2020 | 12/29/2020 | Europe / Luxembourg |
| EPI_ISL_740482 | 10/27/2020 | 12/29/2020 | Europe / Luxembourg |
| EPI_ISL_740483 | 11/19/2020 | 12/29/2020 | Europe / Luxembourg |
| EPI_ISL_740484 | 11/18/2020 | 12/29/2020 | Europe / Luxembourg |
| EPI_ISL_740485 | 10/23/2020 | 12/29/2020 | Europe / Luxembourg |
| EPI_ISL_740486 | 6/29/2020  | 12/29/2020 | Europe / Luxembourg |
| EPI_ISL_740488 | 9/9/2020   | 12/29/2020 | Europe / Luxembourg |
| EPI_ISL_740489 | 12/14/2020 | 12/29/2020 | Europe / Luxembourg |
| EPI_ISL_740490 | 11/13/2020 | 12/29/2020 | Europe / Luxembourg |
| EPI_ISL_740491 | 10/24/2020 | 12/29/2020 | Europe / Luxembourg |
| EPI_ISL_740492 | 10/21/2020 | 12/29/2020 | Europe / Luxembourg |
| EPI_ISL_740494 | 11/23/2020 | 12/29/2020 | Europe / Luxembourg |
| EPI_ISL_740495 | 11/11/2020 | 12/29/2020 | Europe / Luxembourg |
| EPI_ISL_740496 | 10/22/2020 | 12/29/2020 | Europe / Luxembourg |
| EPI_ISL_740497 | 10/29/2020 | 12/29/2020 | Europe / Luxembourg |
| EPI_ISL_740498 | 10/30/2020 | 12/29/2020 | Europe / Luxembourg |
| EPI_ISL_740499 | 11/2/2020  | 12/29/2020 | Europe / Luxembourg |
| EPI_ISL_740500 | 10/21/2020 | 12/29/2020 | Europe / Luxembourg |
| EPI_ISL_740501 | 11/14/2020 | 12/29/2020 | Europe / Luxembourg |
| EPI_ISL_740502 | 11/8/2020  | 12/29/2020 | Europe / Luxembourg |
| EPI_ISL_740504 | 11/2/2020  | 12/29/2020 | Europe / Luxembourg |
| EPI_ISL_740505 | 11/23/2020 | 12/29/2020 | Europe / Luxembourg |
| EPI_ISL_740506 | 11/2/2020  | 12/29/2020 | Europe / Luxembourg |
| EPI_ISL_740507 | 10/31/2020 | 12/29/2020 | Europe / Luxembourg |
| EPI_ISL_740508 | 11/5/2020  | 12/29/2020 | Europe / Luxembourg |
| EPI_ISL_740509 | 10/19/2020 | 12/29/2020 | Europe / Luxembourg |
| EPI_ISL_740510 | 3/22/2020  | 12/29/2020 | Europe / Luxembourg |
| EPI_ISL_740511 | 11/13/2020 | 12/29/2020 | Europe / Luxembourg |
| EPI_ISL_740512 | 10/30/2020 | 12/29/2020 | Europe / Luxembourg |
| EPI_ISL_740513 | 10/26/2020 | 12/29/2020 | Europe / Luxembourg |
| EPI_ISL_740514 | 10/30/2020 | 12/29/2020 | Europe / Luxembourg |
| EPI_ISL_740515 | 11/9/2020  | 12/29/2020 | Europe / Luxembourg |
| EPI_ISL_740516 | 11/1/2020  | 12/29/2020 | Europe / Luxembourg |
| EPI_ISL_740517 | 11/17/2020 | 12/29/2020 | Europe / Luxembourg |
| EPI_ISL_740518 | 11/8/2020  | 12/29/2020 | Europe / Luxembourg |
| EPI_ISL_740519 | 10/17/2020 | 12/29/2020 | Europe / Luxembourg |
| EPI_ISL_740520 | 11/15/2020 | 12/29/2020 | Europe / Luxembourg |
| EPI_ISL_740521 | 10/19/2020 | 12/29/2020 | Europe / Luxembourg |
| EPI_ISL_740522 | 11/7/2020  | 12/29/2020 | Europe / Luxembourg |
| EPI_ISL_740523 | 11/21/2020 | 12/29/2020 | Europe / Luxembourg |
| EPI_ISL_740524 | 11/17/2020 | 12/29/2020 | Europe / Luxembourg |
| EPI_ISL_740525 | 10/26/2020 | 12/29/2020 | Europe / Luxembourg |
| EPI_ISL_740526 | 10/26/2020 | 12/29/2020 | Europe / Luxembourg |

|                |            |            |                                           |
|----------------|------------|------------|-------------------------------------------|
| EPI_ISL_740527 | 10/22/2020 | 12/29/2020 | Europe / Luxembourg                       |
| EPI_ISL_740528 | 11/12/2020 | 12/29/2020 | Europe / Luxembourg                       |
| EPI_ISL_740529 | 11/23/2020 | 12/29/2020 | Europe / Luxembourg                       |
| EPI_ISL_740530 | 10/24/2020 | 12/29/2020 | Europe / Luxembourg                       |
| EPI_ISL_740531 | 11/4/2020  | 12/29/2020 | Europe / Luxembourg                       |
| EPI_ISL_740532 | 12/15/2020 | 12/29/2020 | Europe / Luxembourg                       |
| EPI_ISL_740533 | 11/14/2020 | 12/29/2020 | Europe / Luxembourg                       |
| EPI_ISL_740534 | 10/23/2020 | 12/29/2020 | Europe / Luxembourg                       |
| EPI_ISL_740535 | 11/1/2020  | 12/29/2020 | Europe / Luxembourg                       |
| EPI_ISL_740536 | 10/23/2020 | 12/29/2020 | Europe / Luxembourg                       |
| EPI_ISL_740537 | 10/26/2020 | 12/29/2020 | Europe / Luxembourg                       |
| EPI_ISL_740538 | 11/4/2020  | 12/29/2020 | Europe / Luxembourg                       |
| EPI_ISL_740539 | 10/24/2020 | 12/29/2020 | Europe / Luxembourg                       |
| EPI_ISL_740540 | 10/24/2020 | 12/29/2020 | Europe / Luxembourg                       |
| EPI_ISL_740541 | 11/20/2020 | 12/29/2020 | Europe / Luxembourg                       |
| EPI_ISL_740542 | 10/26/2020 | 12/29/2020 | Europe / Luxembourg                       |
| EPI_ISL_740543 | 11/15/2020 | 12/29/2020 | Europe / Luxembourg                       |
| EPI_ISL_740544 | 10/23/2020 | 12/29/2020 | Europe / Luxembourg                       |
| EPI_ISL_740545 | 11/15/2020 | 12/29/2020 | Europe / Luxembourg                       |
| EPI_ISL_740546 | 12/18/2020 | 12/29/2020 | Europe / Luxembourg                       |
| EPI_ISL_740547 | 11/26/2020 | 12/29/2020 | Asia / Taiwan / Taipei                    |
| EPI_ISL_740548 | 2020-10    | 12/29/2020 | North America / Canada / British Columbia |
| EPI_ISL_740550 | 2020-10    | 12/29/2020 | North America / Canada / British Columbia |
| EPI_ISL_740551 | 2020-10    | 12/29/2020 | North America / Canada / British Columbia |
| EPI_ISL_740553 | 2020-10    | 12/29/2020 | North America / Canada / British Columbia |
| EPI_ISL_740554 | 2020-10    | 12/29/2020 | North America / Canada / British Columbia |
| EPI_ISL_740555 | 2020-10    | 12/29/2020 | North America / Canada / British Columbia |
| EPI_ISL_740557 | 2020-10    | 12/29/2020 | North America / Canada / British Columbia |
| EPI_ISL_740559 | 2020-10    | 12/29/2020 | North America / Canada / British Columbia |
| EPI_ISL_740560 | 2020-10    | 12/29/2020 | North America / Canada / British Columbia |
| EPI_ISL_740561 | 2020-10    | 12/29/2020 | North America / Canada / British Columbia |
| EPI_ISL_740562 | 2020-10    | 12/29/2020 | North America / Canada / British Columbia |
| EPI_ISL_740563 | 2020-10    | 12/29/2020 | North America / Canada / British Columbia |
| EPI_ISL_740564 | 2020-10    | 12/29/2020 | North America / Canada / British Columbia |
| EPI_ISL_740565 | 2020-10    | 12/29/2020 | North America / Canada / British Columbia |
| EPI_ISL_740566 | 2020-10    | 12/29/2020 | North America / Canada / British Columbia |
| EPI_ISL_740567 | 2020-10    | 12/29/2020 | North America / Canada / British Columbia |
| EPI_ISL_740568 | 2020-10    | 12/29/2020 | North America / Canada / British Columbia |
| EPI_ISL_740569 | 2020-10    | 12/29/2020 | North America / Canada / British Columbia |
| EPI_ISL_740570 | 2020-10    | 12/29/2020 | North America / Canada / British Columbia |
| EPI_ISL_740571 | 2020-10    | 12/29/2020 | North America / Canada / British Columbia |
| EPI_ISL_740572 | 2020-10    | 12/29/2020 | North America / Canada / British Columbia |
| EPI_ISL_740573 | 2020-10    | 12/29/2020 | North America / Canada / British Columbia |
| EPI_ISL_740574 | 2020-10    | 12/29/2020 | North America / Canada / British Columbia |
| EPI_ISL_740575 | 2020-10    | 12/29/2020 | North America / Canada / British Columbia |
| EPI_ISL_740576 | 2020-10    | 12/29/2020 | North America / Canada / British Columbia |
| EPI_ISL_740577 | 2020-10    | 12/29/2020 | North America / Canada / British Columbia |



































































































































|                |            |            |                     |
|----------------|------------|------------|---------------------|
| EPI_ISL_744148 | 11/17/2020 | 12/29/2020 | Europe / Luxembourg |
| EPI_ISL_744149 | 9/4/2020   | 12/29/2020 | Europe / Luxembourg |
| EPI_ISL_744150 | 10/25/2020 | 12/29/2020 | Europe / Luxembourg |
| EPI_ISL_744152 | 10/24/2020 | 12/29/2020 | Europe / Luxembourg |
| EPI_ISL_744153 | 10/19/2020 | 12/29/2020 | Europe / Luxembourg |
| EPI_ISL_744154 | 10/13/2020 | 12/29/2020 | Europe / Luxembourg |
| EPI_ISL_744155 | 10/23/2020 | 12/29/2020 | Europe / Luxembourg |
| EPI_ISL_744156 | 10/26/2020 | 12/29/2020 | Europe / Luxembourg |
| EPI_ISL_744157 | 10/20/2020 | 12/29/2020 | Europe / Luxembourg |
| EPI_ISL_744158 | 12/14/2020 | 12/29/2020 | Europe / Luxembourg |
| EPI_ISL_744159 | 10/26/2020 | 12/29/2020 | Europe / Luxembourg |
| EPI_ISL_744160 | 11/9/2020  | 12/29/2020 | Europe / Luxembourg |
| EPI_ISL_744161 | 10/21/2020 | 12/29/2020 | Europe / Luxembourg |
| EPI_ISL_744162 | 11/26/2020 | 12/29/2020 | Europe / Luxembourg |
| EPI_ISL_744163 | 10/22/2020 | 12/29/2020 | Europe / Luxembourg |
| EPI_ISL_744164 | 10/31/2020 | 12/29/2020 | Europe / Luxembourg |
| EPI_ISL_744165 | 9/23/2020  | 12/29/2020 | Europe / Luxembourg |
| EPI_ISL_744166 | 10/25/2020 | 12/29/2020 | Europe / Luxembourg |
| EPI_ISL_744167 | 10/26/2020 | 12/29/2020 | Europe / Luxembourg |
| EPI_ISL_744168 | 11/3/2020  | 12/29/2020 | Europe / Luxembourg |
| EPI_ISL_744169 | 11/6/2020  | 12/29/2020 | Europe / Luxembourg |
| EPI_ISL_744170 | 11/14/2020 | 12/29/2020 | Europe / Luxembourg |
| EPI_ISL_744171 | 11/4/2020  | 12/29/2020 | Europe / Luxembourg |
| EPI_ISL_744172 | 11/2/2020  | 12/29/2020 | Europe / Luxembourg |
| EPI_ISL_744174 | 10/20/2020 | 12/29/2020 | Europe / Luxembourg |
| EPI_ISL_744175 | 10/20/2020 | 12/29/2020 | Europe / Luxembourg |
| EPI_ISL_744176 | 11/22/2020 | 12/29/2020 | Europe / Luxembourg |
| EPI_ISL_744177 | 11/16/2020 | 12/29/2020 | Europe / Luxembourg |
| EPI_ISL_744178 | 11/4/2020  | 12/29/2020 | Europe / Luxembourg |
| EPI_ISL_744179 | 11/16/2020 | 12/29/2020 | Europe / Luxembourg |
| EPI_ISL_744180 | 10/25/2020 | 12/29/2020 | Europe / Luxembourg |
| EPI_ISL_744181 | 10/19/2020 | 12/29/2020 | Europe / Luxembourg |
| EPI_ISL_744182 | 10/24/2020 | 12/29/2020 | Europe / Luxembourg |
| EPI_ISL_744183 | 11/22/2020 | 12/29/2020 | Europe / Luxembourg |
| EPI_ISL_744184 | 11/11/2020 | 12/29/2020 | Europe / Luxembourg |
| EPI_ISL_744185 | 11/14/2020 | 12/29/2020 | Europe / Luxembourg |
| EPI_ISL_744186 | 11/19/2020 | 12/29/2020 | Europe / Luxembourg |
| EPI_ISL_744187 | 8/31/2020  | 12/29/2020 | Europe / Luxembourg |
| EPI_ISL_744188 | 11/8/2020  | 12/29/2020 | Europe / Luxembourg |
| EPI_ISL_744190 | 11/14/2020 | 12/29/2020 | Europe / Luxembourg |
| EPI_ISL_744191 | 11/1/2020  | 12/29/2020 | Europe / Luxembourg |
| EPI_ISL_744192 | 10/26/2020 | 12/29/2020 | Europe / Luxembourg |
| EPI_ISL_744193 | 11/1/2020  | 12/29/2020 | Europe / Luxembourg |
| EPI_ISL_744194 | 11/3/2020  | 12/29/2020 | Europe / Luxembourg |
| EPI_ISL_744195 | 11/4/2020  | 12/29/2020 | Europe / Luxembourg |
| EPI_ISL_744196 | 11/13/2020 | 12/29/2020 | Europe / Luxembourg |
| EPI_ISL_744197 | 12/18/2020 | 12/29/2020 | Europe / Luxembourg |

|                |            |            |                     |
|----------------|------------|------------|---------------------|
| EPI_ISL_744198 | 7/29/2020  | 12/29/2020 | Europe / Luxembourg |
| EPI_ISL_744199 | 11/28/2020 | 12/29/2020 | Europe / Luxembourg |
| EPI_ISL_744201 | 10/30/2020 | 12/29/2020 | Europe / Luxembourg |
| EPI_ISL_744202 | 7/28/2020  | 12/29/2020 | Europe / Luxembourg |
| EPI_ISL_744203 | 12/18/2020 | 12/29/2020 | Europe / Luxembourg |
| EPI_ISL_744204 | 10/28/2020 | 12/29/2020 | Europe / Luxembourg |
| EPI_ISL_744205 | 10/27/2020 | 12/29/2020 | Europe / Luxembourg |
| EPI_ISL_744206 | 12/15/2020 | 12/29/2020 | Europe / Luxembourg |
| EPI_ISL_744207 | 10/31/2020 | 12/29/2020 | Europe / Luxembourg |
| EPI_ISL_744208 | 11/6/2020  | 12/29/2020 | Europe / Luxembourg |
| EPI_ISL_744209 | 10/24/2020 | 12/29/2020 | Europe / Luxembourg |
| EPI_ISL_744210 | 11/23/2020 | 12/29/2020 | Europe / Luxembourg |
| EPI_ISL_744212 | 11/13/2020 | 12/29/2020 | Europe / Luxembourg |
| EPI_ISL_744213 | 10/23/2020 | 12/29/2020 | Europe / Luxembourg |
| EPI_ISL_744214 | 11/12/2020 | 12/29/2020 | Europe / Luxembourg |
| EPI_ISL_744215 | 10/30/2020 | 12/29/2020 | Europe / Luxembourg |
| EPI_ISL_744216 | 10/26/2020 | 12/29/2020 | Europe / Luxembourg |
| EPI_ISL_744217 | 11/2/2020  | 12/29/2020 | Europe / Luxembourg |
| EPI_ISL_744218 | 11/2/2020  | 12/29/2020 | Europe / Luxembourg |
| EPI_ISL_744219 | 10/30/2020 | 12/29/2020 | Europe / Luxembourg |
| EPI_ISL_744220 | 10/31/2020 | 12/29/2020 | Europe / Luxembourg |
| EPI_ISL_744221 | 8/5/2020   | 12/29/2020 | Europe / Luxembourg |
| EPI_ISL_744222 | 11/11/2020 | 12/29/2020 | Europe / Luxembourg |
| EPI_ISL_744223 | 11/13/2020 | 12/29/2020 | Europe / Luxembourg |
| EPI_ISL_744224 | 10/21/2020 | 12/29/2020 | Europe / Luxembourg |
| EPI_ISL_744225 | 11/24/2020 | 12/29/2020 | Europe / Luxembourg |
| EPI_ISL_744226 | 10/23/2020 | 12/29/2020 | Europe / Luxembourg |
| EPI_ISL_744227 | 10/24/2020 | 12/29/2020 | Europe / Luxembourg |
| EPI_ISL_744228 | 10/5/2020  | 12/29/2020 | Europe / Luxembourg |
| EPI_ISL_744229 | 10/24/2020 | 12/29/2020 | Europe / Luxembourg |
| EPI_ISL_744230 | 11/20/2020 | 12/29/2020 | Europe / Luxembourg |
| EPI_ISL_744231 | 10/23/2020 | 12/29/2020 | Europe / Luxembourg |
| EPI_ISL_744232 | 10/30/2020 | 12/29/2020 | Europe / Luxembourg |
| EPI_ISL_744233 | 3/20/2020  | 12/29/2020 | Europe / Luxembourg |
| EPI_ISL_744234 | 10/10/2020 | 12/29/2020 | Europe / Luxembourg |
| EPI_ISL_744235 | 7/24/2020  | 12/29/2020 | Europe / Luxembourg |
| EPI_ISL_744236 | 11/15/2020 | 12/29/2020 | Europe / Luxembourg |
| EPI_ISL_744237 | 10/23/2020 | 12/29/2020 | Europe / Luxembourg |
| EPI_ISL_744238 | 10/29/2020 | 12/29/2020 | Europe / Luxembourg |
| EPI_ISL_744239 | 11/26/2020 | 12/29/2020 | Europe / Luxembourg |
| EPI_ISL_744240 | 11/7/2020  | 12/29/2020 | Europe / Luxembourg |
| EPI_ISL_744241 | 10/26/2020 | 12/29/2020 | Europe / Luxembourg |
| EPI_ISL_744242 | 11/14/2020 | 12/29/2020 | Europe / Luxembourg |
| EPI_ISL_744243 | 11/12/2020 | 12/29/2020 | Europe / Luxembourg |
| EPI_ISL_744244 | 11/18/2020 | 12/29/2020 | Europe / Luxembourg |
| EPI_ISL_744245 | 9/21/2020  | 12/29/2020 | Europe / Luxembourg |
| EPI_ISL_744246 | 10/19/2020 | 12/29/2020 | Europe / Luxembourg |



|                |            |            |                     |
|----------------|------------|------------|---------------------|
| EPI_ISL_744247 | 11/28/2020 | 12/29/2020 | Europe / Luxembourg |
| EPI_ISL_744248 | 11/16/2020 | 12/29/2020 | Europe / Luxembourg |
| EPI_ISL_744250 | 11/16/2020 | 12/29/2020 | Europe / Luxembourg |
| EPI_ISL_744251 | 11/18/2020 | 12/29/2020 | Europe / Luxembourg |
| EPI_ISL_744252 | 10/26/2020 | 12/29/2020 | Europe / Luxembourg |
| EPI_ISL_744253 | 10/5/2020  | 12/29/2020 | Europe / Luxembourg |
| EPI_ISL_744254 | 11/16/2020 | 12/29/2020 | Europe / Luxembourg |
| EPI_ISL_744255 | 11/25/2020 | 12/29/2020 | Europe / Luxembourg |
| EPI_ISL_744256 | 11/18/2020 | 12/29/2020 | Europe / Luxembourg |
| EPI_ISL_744257 | 11/15/2020 | 12/29/2020 | Europe / Luxembourg |
| EPI_ISL_744258 | 11/2/2020  | 12/29/2020 | Europe / Luxembourg |
| EPI_ISL_744260 | 10/22/2020 | 12/29/2020 | Europe / Luxembourg |
| EPI_ISL_744261 | 10/31/2020 | 12/29/2020 | Europe / Luxembourg |
| EPI_ISL_744262 | 10/24/2020 | 12/29/2020 | Europe / Luxembourg |
| EPI_ISL_744263 | 11/19/2020 | 12/29/2020 | Europe / Luxembourg |
| EPI_ISL_744264 | 12/17/2020 | 12/29/2020 | Europe / Luxembourg |
| EPI_ISL_744265 | 11/11/2020 | 12/29/2020 | Europe / Luxembourg |
| EPI_ISL_744266 | 11/10/2020 | 12/29/2020 | Europe / Luxembourg |
| EPI_ISL_744267 | 11/24/2020 | 12/29/2020 | Europe / Luxembourg |
| EPI_ISL_744268 | 11/16/2020 | 12/29/2020 | Europe / Luxembourg |
| EPI_ISL_744270 | 11/4/2020  | 12/29/2020 | Europe / Luxembourg |
| EPI_ISL_744271 | 11/18/2020 | 12/29/2020 | Europe / Luxembourg |
| EPI_ISL_744272 | 10/23/2020 | 12/29/2020 | Europe / Luxembourg |
| EPI_ISL_744273 | 11/23/2020 | 12/29/2020 | Europe / Luxembourg |
| EPI_ISL_744275 | 10/21/2020 | 12/29/2020 | Europe / Luxembourg |
| EPI_ISL_744276 | 11/26/2020 | 12/29/2020 | Europe / Luxembourg |
| EPI_ISL_744277 | 11/19/2020 | 12/29/2020 | Europe / Luxembourg |
| EPI_ISL_744278 | 10/27/2020 | 12/29/2020 | Europe / Luxembourg |
| EPI_ISL_744280 | 12/17/2020 | 12/29/2020 | Europe / Luxembourg |
| EPI_ISL_744281 | 11/14/2020 | 12/29/2020 | Europe / Luxembourg |
| EPI_ISL_744282 | 10/23/2020 | 12/29/2020 | Europe / Luxembourg |
| EPI_ISL_744283 | 11/4/2020  | 12/29/2020 | Europe / Luxembourg |
| EPI_ISL_744284 | 10/22/2020 | 12/29/2020 | Europe / Luxembourg |
| EPI_ISL_744285 | 10/27/2020 | 12/29/2020 | Europe / Luxembourg |
| EPI_ISL_744286 | 11/28/2020 | 12/29/2020 | Europe / Luxembourg |
| EPI_ISL_744287 | 11/14/2020 | 12/29/2020 | Europe / Luxembourg |
| EPI_ISL_744288 | 11/14/2020 | 12/29/2020 | Europe / Luxembourg |
| EPI_ISL_744289 | 10/26/2020 | 12/29/2020 | Europe / Luxembourg |
| EPI_ISL_744290 | 10/31/2020 | 12/29/2020 | Europe / Luxembourg |
| EPI_ISL_744292 | 11/12/2020 | 12/29/2020 | Europe / Luxembourg |
| EPI_ISL_744293 | 11/26/2020 | 12/29/2020 | Europe / Luxembourg |
| EPI_ISL_744294 | 12/17/2020 | 12/29/2020 | Europe / Luxembourg |
| EPI_ISL_744295 | 6/30/2020  | 12/29/2020 | Europe / Luxembourg |
| EPI_ISL_744296 | 10/19/2020 | 12/29/2020 | Europe / Luxembourg |
| EPI_ISL_744297 | 10/23/2020 | 12/29/2020 | Europe / Luxembourg |
| EPI_ISL_744298 | 10/17/2020 | 12/29/2020 | Europe / Luxembourg |
| EPI_ISL_744299 | 11/25/2020 | 12/29/2020 | Europe / Luxembourg |

|                |            |            |                     |
|----------------|------------|------------|---------------------|
| EPI_ISL_744300 | 11/6/2020  | 12/29/2020 | Europe / Luxembourg |
| EPI_ISL_744301 | 10/22/2020 | 12/29/2020 | Europe / Luxembourg |
| EPI_ISL_744302 | 11/11/2020 | 12/29/2020 | Europe / Luxembourg |
| EPI_ISL_744304 | 11/4/2020  | 12/29/2020 | Europe / Luxembourg |
| EPI_ISL_744305 | 11/13/2020 | 12/29/2020 | Europe / Luxembourg |
| EPI_ISL_744306 | 10/27/2020 | 12/29/2020 | Europe / Luxembourg |
| EPI_ISL_744308 | 10/23/2020 | 12/29/2020 | Europe / Luxembourg |
| EPI_ISL_744309 | 11/5/2020  | 12/29/2020 | Europe / Luxembourg |
| EPI_ISL_744310 | 11/18/2020 | 12/29/2020 | Europe / Luxembourg |
| EPI_ISL_744311 | 8/10/2020  | 12/29/2020 | Europe / Luxembourg |
| EPI_ISL_744312 | 10/23/2020 | 12/29/2020 | Europe / Luxembourg |
| EPI_ISL_744313 | 10/24/2020 | 12/29/2020 | Europe / Luxembourg |
| EPI_ISL_744314 | 11/25/2020 | 12/29/2020 | Europe / Luxembourg |
| EPI_ISL_744316 | 10/22/2020 | 12/29/2020 | Europe / Luxembourg |
| EPI_ISL_744317 | 11/14/2020 | 12/29/2020 | Europe / Luxembourg |
| EPI_ISL_744318 | 11/25/2020 | 12/29/2020 | Europe / Luxembourg |
| EPI_ISL_744319 | 11/28/2020 | 12/29/2020 | Europe / Luxembourg |
| EPI_ISL_744320 | 11/12/2020 | 12/29/2020 | Europe / Luxembourg |
| EPI_ISL_744321 | 11/13/2020 | 12/29/2020 | Europe / Luxembourg |
| EPI_ISL_744322 | 11/25/2020 | 12/29/2020 | Europe / Luxembourg |
| EPI_ISL_744323 | 10/28/2020 | 12/29/2020 | Europe / Luxembourg |
| EPI_ISL_744324 | 10/31/2020 | 12/29/2020 | Europe / Luxembourg |
| EPI_ISL_744325 | 10/31/2020 | 12/29/2020 | Europe / Luxembourg |
| EPI_ISL_744326 | 11/14/2020 | 12/29/2020 | Europe / Luxembourg |
| EPI_ISL_744327 | 11/9/2020  | 12/29/2020 | Europe / Luxembourg |
| EPI_ISL_744328 | 11/21/2020 | 12/29/2020 | Europe / Luxembourg |
| EPI_ISL_744331 | 11/26/2020 | 12/29/2020 | Europe / Luxembourg |
| EPI_ISL_744332 | 10/31/2020 | 12/29/2020 | Europe / Luxembourg |
| EPI_ISL_744333 | 11/20/2020 | 12/29/2020 | Europe / Luxembourg |
| EPI_ISL_744334 | 11/7/2020  | 12/29/2020 | Europe / Luxembourg |
| EPI_ISL_744335 | 11/20/2020 | 12/29/2020 | Europe / Luxembourg |
| EPI_ISL_744337 | 11/15/2020 | 12/29/2020 | Europe / Luxembourg |
| EPI_ISL_744338 | 11/20/2020 | 12/29/2020 | Europe / Luxembourg |
| EPI_ISL_744339 | 10/26/2020 | 12/29/2020 | Europe / Luxembourg |
| EPI_ISL_744340 | 10/22/2020 | 12/29/2020 | Europe / Luxembourg |
| EPI_ISL_744341 | 11/15/2020 | 12/29/2020 | Europe / Luxembourg |
| EPI_ISL_744342 | 11/23/2020 | 12/29/2020 | Europe / Luxembourg |
| EPI_ISL_744343 | 10/22/2020 | 12/29/2020 | Europe / Luxembourg |
| EPI_ISL_744344 | 10/29/2020 | 12/29/2020 | Europe / Luxembourg |
| EPI_ISL_744345 | 11/28/2020 | 12/29/2020 | Europe / Luxembourg |
| EPI_ISL_744346 | 11/27/2020 | 12/29/2020 | Europe / Luxembourg |
| EPI_ISL_744347 | 11/3/2020  | 12/29/2020 | Europe / Luxembourg |
| EPI_ISL_744349 | 11/17/2020 | 12/29/2020 | Europe / Luxembourg |
| EPI_ISL_744350 | 11/9/2020  | 12/29/2020 | Europe / Luxembourg |
| EPI_ISL_744351 | 10/24/2020 | 12/29/2020 | Europe / Luxembourg |
| EPI_ISL_744352 | 11/7/2020  | 12/29/2020 | Europe / Luxembourg |
| EPI_ISL_744353 | 11/18/2020 | 12/29/2020 | Europe / Luxembourg |

|                |            |            |                     |
|----------------|------------|------------|---------------------|
| EPI_ISL_744354 | 10/24/2020 | 12/29/2020 | Europe / Luxembourg |
| EPI_ISL_744355 | 11/25/2020 | 12/29/2020 | Europe / Luxembourg |
| EPI_ISL_744356 | 11/26/2020 | 12/29/2020 | Europe / Luxembourg |
| EPI_ISL_744357 | 10/14/2020 | 12/29/2020 | Europe / Luxembourg |
| EPI_ISL_744358 | 11/8/2020  | 12/29/2020 | Europe / Luxembourg |
| EPI_ISL_744359 | 11/3/2020  | 12/29/2020 | Europe / Luxembourg |
| EPI_ISL_744360 | 11/23/2020 | 12/29/2020 | Europe / Luxembourg |
| EPI_ISL_744361 | 10/22/2020 | 12/29/2020 | Europe / Luxembourg |
| EPI_ISL_744362 | 10/28/2020 | 12/29/2020 | Europe / Luxembourg |
| EPI_ISL_744363 | 11/13/2020 | 12/29/2020 | Europe / Luxembourg |
| EPI_ISL_744364 | 10/20/2020 | 12/29/2020 | Europe / Luxembourg |
| EPI_ISL_744365 | 11/11/2020 | 12/29/2020 | Europe / Luxembourg |
| EPI_ISL_744366 | 11/25/2020 | 12/29/2020 | Europe / Luxembourg |
| EPI_ISL_744367 | 6/29/2020  | 12/29/2020 | Europe / Luxembourg |
| EPI_ISL_744369 | 11/13/2020 | 12/29/2020 | Europe / Luxembourg |
| EPI_ISL_744370 | 11/9/2020  | 12/29/2020 | Europe / Luxembourg |
| EPI_ISL_744371 | 11/12/2020 | 12/29/2020 | Europe / Luxembourg |
| EPI_ISL_744372 | 10/27/2020 | 12/29/2020 | Europe / Luxembourg |
| EPI_ISL_744373 | 10/31/2020 | 12/29/2020 | Europe / Luxembourg |
| EPI_ISL_744374 | 10/31/2020 | 12/29/2020 | Europe / Luxembourg |
| EPI_ISL_744375 | 10/26/2020 | 12/29/2020 | Europe / Luxembourg |
| EPI_ISL_744376 | 10/23/2020 | 12/29/2020 | Europe / Luxembourg |
| EPI_ISL_744378 | 10/31/2020 | 12/29/2020 | Europe / Luxembourg |
| EPI_ISL_744379 | 11/7/2020  | 12/29/2020 | Europe / Luxembourg |
| EPI_ISL_744380 | 10/19/2020 | 12/29/2020 | Europe / Luxembourg |
| EPI_ISL_744381 | 11/1/2020  | 12/29/2020 | Europe / Luxembourg |
| EPI_ISL_744383 | 10/24/2020 | 12/29/2020 | Europe / Luxembourg |
| EPI_ISL_744385 | 11/1/2020  | 12/29/2020 | Europe / Luxembourg |
| EPI_ISL_744386 | 11/8/2020  | 12/29/2020 | Europe / Luxembourg |
| EPI_ISL_744387 | 11/11/2020 | 12/29/2020 | Europe / Luxembourg |
| EPI_ISL_744388 | 10/19/2020 | 12/29/2020 | Europe / Luxembourg |
| EPI_ISL_744389 | 11/3/2020  | 12/29/2020 | Europe / Luxembourg |
| EPI_ISL_744390 | 11/25/2020 | 12/29/2020 | Europe / Luxembourg |
| EPI_ISL_744391 | 10/20/2020 | 12/29/2020 | Europe / Luxembourg |
| EPI_ISL_744392 | 10/20/2020 | 12/29/2020 | Europe / Luxembourg |
| EPI_ISL_744393 | 11/15/2020 | 12/29/2020 | Europe / Luxembourg |
| EPI_ISL_744394 | 10/27/2020 | 12/29/2020 | Europe / Luxembourg |
| EPI_ISL_744395 | 12/17/2020 | 12/29/2020 | Europe / Luxembourg |
| EPI_ISL_744396 | 12/17/2020 | 12/29/2020 | Europe / Luxembourg |
| EPI_ISL_744397 | 11/6/2020  | 12/29/2020 | Europe / Luxembourg |
| EPI_ISL_744398 | 11/15/2020 | 12/29/2020 | Europe / Luxembourg |
| EPI_ISL_744399 | 10/22/2020 | 12/29/2020 | Europe / Luxembourg |
| EPI_ISL_744400 | 12/16/2020 | 12/29/2020 | Europe / Luxembourg |
| EPI_ISL_744401 | 11/1/2020  | 12/29/2020 | Europe / Luxembourg |
| EPI_ISL_744402 | 10/30/2020 | 12/29/2020 | Europe / Luxembourg |
| EPI_ISL_744404 | 11/26/2020 | 12/29/2020 | Europe / Luxembourg |
| EPI_ISL_744405 | 11/1/2020  | 12/29/2020 | Europe / Luxembourg |

|                |            |            |                     |
|----------------|------------|------------|---------------------|
| EPI_ISL_744406 | 7/25/2020  | 12/29/2020 | Europe / Luxembourg |
| EPI_ISL_744407 | 11/17/2020 | 12/29/2020 | Europe / Luxembourg |
| EPI_ISL_744408 | 10/26/2020 | 12/29/2020 | Europe / Luxembourg |
| EPI_ISL_744409 | 10/23/2020 | 12/29/2020 | Europe / Luxembourg |
| EPI_ISL_744410 | 10/8/2020  | 12/29/2020 | Europe / Luxembourg |
| EPI_ISL_744411 | 10/21/2020 | 12/29/2020 | Europe / Luxembourg |
| EPI_ISL_744412 | 11/8/2020  | 12/29/2020 | Europe / Luxembourg |
| EPI_ISL_744413 | 10/26/2020 | 12/29/2020 | Europe / Luxembourg |
| EPI_ISL_744414 | 10/24/2020 | 12/29/2020 | Europe / Luxembourg |
| EPI_ISL_744415 | 11/19/2020 | 12/29/2020 | Europe / Luxembourg |
| EPI_ISL_744416 | 10/19/2020 | 12/29/2020 | Europe / Luxembourg |
| EPI_ISL_744417 | 11/5/2020  | 12/29/2020 | Europe / Luxembourg |
| EPI_ISL_744418 | 9/2/2020   | 12/29/2020 | Europe / Luxembourg |
| EPI_ISL_744420 | 11/13/2020 | 12/29/2020 | Europe / Luxembourg |
| EPI_ISL_744423 | 10/21/2020 | 12/29/2020 | Europe / Luxembourg |
| EPI_ISL_744424 | 11/16/2020 | 12/29/2020 | Europe / Luxembourg |
| EPI_ISL_744425 | 11/11/2020 | 12/29/2020 | Europe / Luxembourg |
| EPI_ISL_744426 | 11/18/2020 | 12/29/2020 | Europe / Luxembourg |
| EPI_ISL_744427 | 11/26/2020 | 12/29/2020 | Europe / Luxembourg |
| EPI_ISL_744428 | 11/2/2020  | 12/29/2020 | Europe / Luxembourg |
| EPI_ISL_744429 | 11/7/2020  | 12/29/2020 | Europe / Luxembourg |
| EPI_ISL_744430 | 10/24/2020 | 12/29/2020 | Europe / Luxembourg |
| EPI_ISL_744431 | 11/24/2020 | 12/29/2020 | Europe / Luxembourg |
| EPI_ISL_744432 | 11/25/2020 | 12/29/2020 | Europe / Luxembourg |
| EPI_ISL_744433 | 10/22/2020 | 12/29/2020 | Europe / Luxembourg |
| EPI_ISL_744434 | 7/23/2020  | 12/29/2020 | Europe / Luxembourg |
| EPI_ISL_744435 | 12/16/2020 | 12/29/2020 | Europe / Luxembourg |
| EPI_ISL_744436 | 10/29/2020 | 12/29/2020 | Europe / Luxembourg |
| EPI_ISL_744437 | 11/1/2020  | 12/29/2020 | Europe / Luxembourg |
| EPI_ISL_744438 | 12/15/2020 | 12/29/2020 | Europe / Luxembourg |
| EPI_ISL_744439 | 10/24/2020 | 12/29/2020 | Europe / Luxembourg |
| EPI_ISL_744440 | 11/2/2020  | 12/29/2020 | Europe / Luxembourg |
| EPI_ISL_744441 | 10/29/2020 | 12/29/2020 | Europe / Luxembourg |
| EPI_ISL_744442 | 10/23/2020 | 12/29/2020 | Europe / Luxembourg |
| EPI_ISL_744443 | 11/3/2020  | 12/29/2020 | Europe / Luxembourg |
| EPI_ISL_744444 | 7/23/2020  | 12/29/2020 | Europe / Luxembourg |
| EPI_ISL_744445 | 10/23/2020 | 12/29/2020 | Europe / Luxembourg |
| EPI_ISL_744446 | 11/11/2020 | 12/29/2020 | Europe / Luxembourg |
| EPI_ISL_744447 | 11/14/2020 | 12/29/2020 | Europe / Luxembourg |
| EPI_ISL_744448 | 11/9/2020  | 12/29/2020 | Europe / Luxembourg |
| EPI_ISL_744449 | 11/25/2020 | 12/29/2020 | Europe / Luxembourg |
| EPI_ISL_744450 | 11/24/2020 | 12/29/2020 | Europe / Luxembourg |
| EPI_ISL_744451 | 11/14/2020 | 12/29/2020 | Europe / Luxembourg |
| EPI_ISL_744452 | 10/23/2020 | 12/29/2020 | Europe / Luxembourg |
| EPI_ISL_744453 | 11/16/2020 | 12/29/2020 | Europe / Luxembourg |
| EPI_ISL_744454 | 10/24/2020 | 12/29/2020 | Europe / Luxembourg |
| EPI_ISL_744455 | 11/13/2020 | 12/29/2020 | Europe / Luxembourg |

|                |            |            |                     |
|----------------|------------|------------|---------------------|
| EPI_ISL_744456 | 12/15/2020 | 12/29/2020 | Europe / Luxembourg |
| EPI_ISL_744457 | 11/12/2020 | 12/29/2020 | Europe / Luxembourg |
| EPI_ISL_744458 | 10/21/2020 | 12/29/2020 | Europe / Luxembourg |
| EPI_ISL_744459 | 10/29/2020 | 12/29/2020 | Europe / Luxembourg |
| EPI_ISL_744460 | 11/3/2020  | 12/29/2020 | Europe / Luxembourg |
| EPI_ISL_744461 | 10/23/2020 | 12/29/2020 | Europe / Luxembourg |
| EPI_ISL_744462 | 11/16/2020 | 12/29/2020 | Europe / Luxembourg |
| EPI_ISL_744463 | 10/21/2020 | 12/29/2020 | Europe / Luxembourg |
| EPI_ISL_744465 | 10/22/2020 | 12/29/2020 | Europe / Luxembourg |
| EPI_ISL_744466 | 10/16/2020 | 12/29/2020 | Europe / Luxembourg |
| EPI_ISL_744467 | 11/1/2020  | 12/29/2020 | Europe / Luxembourg |
| EPI_ISL_744468 | 11/23/2020 | 12/29/2020 | Europe / Luxembourg |
| EPI_ISL_744469 | 11/27/2020 | 12/29/2020 | Europe / Luxembourg |
| EPI_ISL_744470 | 11/10/2020 | 12/29/2020 | Europe / Luxembourg |
| EPI_ISL_744471 | 10/24/2020 | 12/29/2020 | Europe / Luxembourg |
| EPI_ISL_744472 | 8/20/2020  | 12/29/2020 | Europe / Luxembourg |
| EPI_ISL_744473 | 11/1/2020  | 12/29/2020 | Europe / Luxembourg |
| EPI_ISL_744474 | 10/21/2020 | 12/29/2020 | Europe / Luxembourg |
| EPI_ISL_744475 | 10/20/2020 | 12/29/2020 | Europe / Luxembourg |
| EPI_ISL_744476 | 11/16/2020 | 12/29/2020 | Europe / Luxembourg |
| EPI_ISL_744478 | 3/18/2020  | 12/29/2020 | Europe / Luxembourg |
| EPI_ISL_744479 | 11/20/2020 | 12/29/2020 | Europe / Luxembourg |
| EPI_ISL_744480 | 6/26/2020  | 12/29/2020 | Europe / Luxembourg |
| EPI_ISL_744481 | 10/19/2020 | 12/29/2020 | Europe / Luxembourg |
| EPI_ISL_744482 | 10/24/2020 | 12/29/2020 | Europe / Luxembourg |
| EPI_ISL_744483 | 12/18/2020 | 12/29/2020 | Europe / Luxembourg |
| EPI_ISL_744486 | 7/16/2020  | 12/29/2020 | Europe / Luxembourg |
| EPI_ISL_744487 | 10/26/2020 | 12/29/2020 | Europe / Luxembourg |
| EPI_ISL_744489 | 9/21/2020  | 12/29/2020 | Europe / Luxembourg |
| EPI_ISL_744490 | 8/4/2020   | 12/29/2020 | Europe / Luxembourg |
| EPI_ISL_744491 | 11/12/2020 | 12/29/2020 | Europe / Luxembourg |
| EPI_ISL_744492 | 10/24/2020 | 12/29/2020 | Europe / Luxembourg |
| EPI_ISL_744493 | 11/14/2020 | 12/29/2020 | Europe / Luxembourg |
| EPI_ISL_744494 | 11/19/2020 | 12/29/2020 | Europe / Luxembourg |
| EPI_ISL_744495 | 10/15/2020 | 12/29/2020 | Europe / Luxembourg |
| EPI_ISL_744496 | 9/21/2020  | 12/29/2020 | Europe / Luxembourg |
| EPI_ISL_744497 | 10/23/2020 | 12/29/2020 | Europe / Luxembourg |
| EPI_ISL_744498 | 11/14/2020 | 12/29/2020 | Europe / Luxembourg |
| EPI_ISL_744499 | 11/17/2020 | 12/29/2020 | Europe / Luxembourg |
| EPI_ISL_744500 | 7/6/2020   | 12/29/2020 | Europe / Luxembourg |
| EPI_ISL_744501 | 11/3/2020  | 12/29/2020 | Europe / Luxembourg |
| EPI_ISL_744502 | 10/19/2020 | 12/29/2020 | Europe / Luxembourg |
| EPI_ISL_744503 | 10/29/2020 | 12/29/2020 | Europe / Luxembourg |
| EPI_ISL_744504 | 11/23/2020 | 12/29/2020 | Europe / Luxembourg |
| EPI_ISL_744505 | 10/23/2020 | 12/29/2020 | Europe / Luxembourg |
| EPI_ISL_744506 | 10/21/2020 | 12/29/2020 | Europe / Luxembourg |
| EPI_ISL_744507 | 10/10/2020 | 12/29/2020 | Europe / Luxembourg |

|                |            |            |                     |
|----------------|------------|------------|---------------------|
| EPI_ISL_744508 | 11/23/2020 | 12/29/2020 | Europe / Luxembourg |
| EPI_ISL_744509 | 10/29/2020 | 12/29/2020 | Europe / Luxembourg |
| EPI_ISL_744510 | 11/13/2020 | 12/29/2020 | Europe / Luxembourg |
| EPI_ISL_744511 | 10/25/2020 | 12/29/2020 | Europe / Luxembourg |
| EPI_ISL_744512 | 10/31/2020 | 12/29/2020 | Europe / Luxembourg |
| EPI_ISL_744513 | 10/22/2020 | 12/29/2020 | Europe / Luxembourg |
| EPI_ISL_744514 | 10/16/2020 | 12/29/2020 | Europe / Luxembourg |
| EPI_ISL_744515 | 10/9/2020  | 12/29/2020 | Europe / Luxembourg |
| EPI_ISL_744516 | 10/21/2020 | 12/29/2020 | Europe / Luxembourg |
| EPI_ISL_744517 | 11/9/2020  | 12/29/2020 | Europe / Luxembourg |
| EPI_ISL_744518 | 11/22/2020 | 12/29/2020 | Europe / Luxembourg |
| EPI_ISL_744519 | 12/11/2020 | 12/29/2020 | Europe / Luxembourg |
| EPI_ISL_744521 | 9/30/2020  | 12/29/2020 | Europe / Luxembourg |
| EPI_ISL_744522 | 10/23/2020 | 12/29/2020 | Europe / Luxembourg |
| EPI_ISL_744524 | 10/27/2020 | 12/29/2020 | Europe / Luxembourg |
| EPI_ISL_744525 | 11/28/2020 | 12/29/2020 | Europe / Luxembourg |
| EPI_ISL_744526 | 11/17/2020 | 12/29/2020 | Europe / Luxembourg |
| EPI_ISL_744527 | 11/7/2020  | 12/29/2020 | Europe / Luxembourg |
| EPI_ISL_744528 | 9/11/2020  | 12/29/2020 | Europe / Luxembourg |
| EPI_ISL_744529 | 10/31/2020 | 12/29/2020 | Europe / Luxembourg |
| EPI_ISL_744530 | 11/15/2020 | 12/29/2020 | Europe / Luxembourg |
| EPI_ISL_744533 | 11/5/2020  | 12/29/2020 | Europe / Luxembourg |
| EPI_ISL_744534 | 11/2/2020  | 12/29/2020 | Europe / Luxembourg |
| EPI_ISL_744535 | 11/6/2020  | 12/29/2020 | Europe / Luxembourg |
| EPI_ISL_744536 | 11/2/2020  | 12/29/2020 | Europe / Luxembourg |
| EPI_ISL_744537 | 10/22/2020 | 12/29/2020 | Europe / Luxembourg |
| EPI_ISL_744538 | 10/19/2020 | 12/29/2020 | Europe / Luxembourg |
| EPI_ISL_744539 | 11/4/2020  | 12/29/2020 | Europe / Luxembourg |
| EPI_ISL_744540 | 11/28/2020 | 12/29/2020 | Europe / Luxembourg |
| EPI_ISL_744541 | 11/11/2020 | 12/29/2020 | Europe / Luxembourg |
| EPI_ISL_744542 | 11/22/2020 | 12/29/2020 | Europe / Luxembourg |
| EPI_ISL_744543 | 10/22/2020 | 12/29/2020 | Europe / Luxembourg |
| EPI_ISL_744544 | 11/24/2020 | 12/29/2020 | Europe / Luxembourg |
| EPI_ISL_744545 | 11/16/2020 | 12/29/2020 | Europe / Luxembourg |
| EPI_ISL_744546 | 10/28/2020 | 12/29/2020 | Europe / Luxembourg |
| EPI_ISL_744547 | 10/22/2020 | 12/29/2020 | Europe / Luxembourg |
| EPI_ISL_744548 | 10/29/2020 | 12/29/2020 | Europe / Luxembourg |
| EPI_ISL_744549 | 11/10/2020 | 12/29/2020 | Europe / Luxembourg |
| EPI_ISL_744550 | 11/7/2020  | 12/29/2020 | Europe / Luxembourg |
| EPI_ISL_744552 | 11/14/2020 | 12/29/2020 | Europe / Luxembourg |
| EPI_ISL_744553 | 10/24/2020 | 12/29/2020 | Europe / Luxembourg |
| EPI_ISL_744554 | 11/22/2020 | 12/29/2020 | Europe / Luxembourg |
| EPI_ISL_744555 | 10/21/2020 | 12/29/2020 | Europe / Luxembourg |
| EPI_ISL_744556 | 11/1/2020  | 12/29/2020 | Europe / Luxembourg |
| EPI_ISL_744557 | 12/17/2020 | 12/29/2020 | Europe / Luxembourg |
| EPI_ISL_744558 | 11/20/2020 | 12/29/2020 | Europe / Luxembourg |
| EPI_ISL_744559 | 10/31/2020 | 12/29/2020 | Europe / Luxembourg |

|                |            |            |                     |
|----------------|------------|------------|---------------------|
| EPI_ISL_744563 | 10/26/2020 | 12/29/2020 | Europe / Luxembourg |
| EPI_ISL_744564 | 11/21/2020 | 12/29/2020 | Europe / Luxembourg |
| EPI_ISL_744565 | 11/2/2020  | 12/29/2020 | Europe / Luxembourg |
| EPI_ISL_744566 | 11/7/2020  | 12/29/2020 | Europe / Luxembourg |
| EPI_ISL_744567 | 11/2/2020  | 12/29/2020 | Europe / Luxembourg |
| EPI_ISL_744568 | 11/14/2020 | 12/29/2020 | Europe / Luxembourg |
| EPI_ISL_744569 | 10/28/2020 | 12/29/2020 | Europe / Luxembourg |
| EPI_ISL_744570 | 11/7/2020  | 12/29/2020 | Europe / Luxembourg |
| EPI_ISL_744571 | 11/11/2020 | 12/29/2020 | Europe / Luxembourg |
| EPI_ISL_744572 | 11/3/2020  | 12/29/2020 | Europe / Luxembourg |
| EPI_ISL_744573 | 11/25/2020 | 12/29/2020 | Europe / Luxembourg |
| EPI_ISL_744574 | 10/21/2020 | 12/29/2020 | Europe / Luxembourg |
| EPI_ISL_744575 | 11/2/2020  | 12/29/2020 | Europe / Luxembourg |
| EPI_ISL_744576 | 11/23/2020 | 12/29/2020 | Europe / Luxembourg |
| EPI_ISL_744577 | 8/13/2020  | 12/29/2020 | Europe / Luxembourg |
| EPI_ISL_744578 | 10/19/2020 | 12/29/2020 | Europe / Luxembourg |
| EPI_ISL_744579 | 10/19/2020 | 12/29/2020 | Europe / Luxembourg |
| EPI_ISL_744580 | 11/20/2020 | 12/29/2020 | Europe / Luxembourg |
| EPI_ISL_744581 | 11/2/2020  | 12/29/2020 | Europe / Luxembourg |
| EPI_ISL_744582 | 10/9/2020  | 12/29/2020 | Europe / Luxembourg |
| EPI_ISL_744583 | 10/26/2020 | 12/29/2020 | Europe / Luxembourg |
| EPI_ISL_744584 | 10/25/2020 | 12/29/2020 | Europe / Luxembourg |
| EPI_ISL_744586 | 7/10/2020  | 12/29/2020 | Europe / Luxembourg |
| EPI_ISL_744587 | 11/6/2020  | 12/29/2020 | Europe / Luxembourg |
| EPI_ISL_744589 | 11/5/2020  | 12/29/2020 | Europe / Luxembourg |
| EPI_ISL_744590 | 11/14/2020 | 12/29/2020 | Europe / Luxembourg |
| EPI_ISL_744591 | 10/19/2020 | 12/29/2020 | Europe / Luxembourg |
| EPI_ISL_744592 | 11/29/2020 | 12/29/2020 | Europe / Luxembourg |
| EPI_ISL_744593 | 11/27/2020 | 12/29/2020 | Europe / Luxembourg |
| EPI_ISL_744594 | 10/26/2020 | 12/29/2020 | Europe / Luxembourg |
| EPI_ISL_744596 | 10/23/2020 | 12/29/2020 | Europe / Luxembourg |
| EPI_ISL_744599 | 10/16/2020 | 12/29/2020 | Europe / Luxembourg |
| EPI_ISL_744600 | 10/6/2020  | 12/29/2020 | Europe / Luxembourg |
| EPI_ISL_744601 | 10/20/2020 | 12/29/2020 | Europe / Luxembourg |
| EPI_ISL_744602 | 10/24/2020 | 12/29/2020 | Europe / Luxembourg |
| EPI_ISL_744603 | 11/19/2020 | 12/29/2020 | Europe / Luxembourg |
| EPI_ISL_744604 | 10/31/2020 | 12/29/2020 | Europe / Luxembourg |
| EPI_ISL_744605 | 12/17/2020 | 12/29/2020 | Europe / Luxembourg |
| EPI_ISL_744606 | 11/21/2020 | 12/29/2020 | Europe / Luxembourg |
| EPI_ISL_744608 | 11/21/2020 | 12/29/2020 | Europe / Luxembourg |
| EPI_ISL_744611 | 11/5/2020  | 12/29/2020 | Europe / Luxembourg |
| EPI_ISL_744612 | 10/20/2020 | 12/29/2020 | Europe / Luxembourg |
| EPI_ISL_744613 | 10/27/2020 | 12/29/2020 | Europe / Luxembourg |
| EPI_ISL_744614 | 11/19/2020 | 12/29/2020 | Europe / Luxembourg |
| EPI_ISL_744615 | 10/22/2020 | 12/29/2020 | Europe / Luxembourg |
| EPI_ISL_744616 | 10/30/2020 | 12/29/2020 | Europe / Luxembourg |
| EPI_ISL_744617 | 10/30/2020 | 12/29/2020 | Europe / Luxembourg |

|                |            |            |                     |
|----------------|------------|------------|---------------------|
| EPI_ISL_744619 | 10/27/2020 | 12/29/2020 | Europe / Luxembourg |
| EPI_ISL_744620 | 10/23/2020 | 12/29/2020 | Europe / Luxembourg |
| EPI_ISL_744621 | 10/24/2020 | 12/29/2020 | Europe / Luxembourg |
| EPI_ISL_744622 | 11/9/2020  | 12/29/2020 | Europe / Luxembourg |
| EPI_ISL_744623 | 10/23/2020 | 12/29/2020 | Europe / Luxembourg |
| EPI_ISL_744624 | 11/3/2020  | 12/29/2020 | Europe / Luxembourg |
| EPI_ISL_744625 | 10/30/2020 | 12/29/2020 | Europe / Luxembourg |
| EPI_ISL_744626 | 10/24/2020 | 12/29/2020 | Europe / Luxembourg |
| EPI_ISL_744627 | 10/30/2020 | 12/29/2020 | Europe / Luxembourg |
| EPI_ISL_744628 | 10/26/2020 | 12/29/2020 | Europe / Luxembourg |
| EPI_ISL_744629 | 11/16/2020 | 12/29/2020 | Europe / Luxembourg |
| EPI_ISL_744630 | 10/31/2020 | 12/29/2020 | Europe / Luxembourg |
| EPI_ISL_744631 | 6/30/2020  | 12/29/2020 | Europe / Luxembourg |
| EPI_ISL_744632 | 11/4/2020  | 12/29/2020 | Europe / Luxembourg |
| EPI_ISL_744633 | 10/9/2020  | 12/29/2020 | Europe / Luxembourg |
| EPI_ISL_744634 | 11/28/2020 | 12/29/2020 | Europe / Luxembourg |
| EPI_ISL_744635 | 11/28/2020 | 12/29/2020 | Europe / Luxembourg |
| EPI_ISL_744636 | 11/11/2020 | 12/29/2020 | Europe / Luxembourg |
| EPI_ISL_744637 | 11/12/2020 | 12/29/2020 | Europe / Luxembourg |
| EPI_ISL_744639 | 10/26/2020 | 12/29/2020 | Europe / Luxembourg |
| EPI_ISL_744640 | 10/26/2020 | 12/29/2020 | Europe / Luxembourg |
| EPI_ISL_744641 | 10/22/2020 | 12/29/2020 | Europe / Luxembourg |
| EPI_ISL_744642 | 10/26/2020 | 12/29/2020 | Europe / Luxembourg |
| EPI_ISL_744643 | 11/8/2020  | 12/29/2020 | Europe / Luxembourg |
| EPI_ISL_744645 | 11/11/2020 | 12/29/2020 | Europe / Luxembourg |
| EPI_ISL_744646 | 10/20/2020 | 12/29/2020 | Europe / Luxembourg |
| EPI_ISL_744648 | 11/17/2020 | 12/29/2020 | Europe / Luxembourg |
| EPI_ISL_744649 | 10/30/2020 | 12/29/2020 | Europe / Luxembourg |
| EPI_ISL_744650 | 10/23/2020 | 12/29/2020 | Europe / Luxembourg |
| EPI_ISL_744653 | 10/15/2020 | 12/29/2020 | Europe / Luxembourg |
| EPI_ISL_744654 | 11/9/2020  | 12/29/2020 | Europe / Luxembourg |
| EPI_ISL_744655 | 10/26/2020 | 12/29/2020 | Europe / Luxembourg |
| EPI_ISL_744656 | 11/16/2020 | 12/29/2020 | Europe / Luxembourg |
| EPI_ISL_744657 | 11/19/2020 | 12/29/2020 | Europe / Luxembourg |
| EPI_ISL_744658 | 10/27/2020 | 12/29/2020 | Europe / Luxembourg |
| EPI_ISL_744659 | 11/2/2020  | 12/29/2020 | Europe / Luxembourg |
| EPI_ISL_744660 | 10/19/2020 | 12/29/2020 | Europe / Luxembourg |
| EPI_ISL_744661 | 11/14/2020 | 12/29/2020 | Europe / Luxembourg |
| EPI_ISL_744662 | 10/26/2020 | 12/29/2020 | Europe / Luxembourg |
| EPI_ISL_744663 | 10/15/2020 | 12/29/2020 | Europe / Luxembourg |
| EPI_ISL_744664 | 10/26/2020 | 12/29/2020 | Europe / Luxembourg |
| EPI_ISL_744665 | 11/26/2020 | 12/29/2020 | Europe / Luxembourg |
| EPI_ISL_744666 | 10/25/2020 | 12/29/2020 | Europe / Luxembourg |
| EPI_ISL_744667 | 11/17/2020 | 12/29/2020 | Europe / Luxembourg |
| EPI_ISL_744668 | 10/31/2020 | 12/29/2020 | Europe / Luxembourg |
| EPI_ISL_744669 | 10/27/2020 | 12/29/2020 | Europe / Luxembourg |
| EPI_ISL_744670 | 10/23/2020 | 12/29/2020 | Europe / Luxembourg |



|                |            |            |                     |
|----------------|------------|------------|---------------------|
| EPI_ISL_744671 | 11/6/2020  | 12/29/2020 | Europe / Luxembourg |
| EPI_ISL_744672 | 11/5/2020  | 12/29/2020 | Europe / Luxembourg |
| EPI_ISL_744673 | 11/5/2020  | 12/29/2020 | Europe / Luxembourg |
| EPI_ISL_744674 | 10/23/2020 | 12/29/2020 | Europe / Luxembourg |
| EPI_ISL_744675 | 11/1/2020  | 12/29/2020 | Europe / Luxembourg |
| EPI_ISL_744676 | 12/18/2020 | 12/29/2020 | Europe / Luxembourg |
| EPI_ISL_744678 | 11/11/2020 | 12/29/2020 | Europe / Luxembourg |
| EPI_ISL_744679 | 10/19/2020 | 12/29/2020 | Europe / Luxembourg |
| EPI_ISL_744680 | 11/2/2020  | 12/29/2020 | Europe / Luxembourg |
| EPI_ISL_744681 | 7/2/2020   | 12/29/2020 | Europe / Luxembourg |
| EPI_ISL_744682 | 10/19/2020 | 12/29/2020 | Europe / Luxembourg |
| EPI_ISL_744683 | 10/31/2020 | 12/29/2020 | Europe / Luxembourg |
| EPI_ISL_744684 | 11/3/2020  | 12/29/2020 | Europe / Luxembourg |
| EPI_ISL_744685 | 10/26/2020 | 12/29/2020 | Europe / Luxembourg |
| EPI_ISL_744686 | 11/2/2020  | 12/29/2020 | Europe / Luxembourg |
| EPI_ISL_744687 | 10/25/2020 | 12/29/2020 | Europe / Luxembourg |
| EPI_ISL_744688 | 10/12/2020 | 12/29/2020 | Europe / Luxembourg |
| EPI_ISL_744689 | 11/23/2020 | 12/29/2020 | Europe / Luxembourg |
| EPI_ISL_744690 | 10/21/2020 | 12/29/2020 | Europe / Luxembourg |
| EPI_ISL_744692 | 11/19/2020 | 12/29/2020 | Europe / Luxembourg |
| EPI_ISL_744693 | 10/19/2020 | 12/29/2020 | Europe / Luxembourg |
| EPI_ISL_744694 | 10/26/2020 | 12/29/2020 | Europe / Luxembourg |
| EPI_ISL_744695 | 11/6/2020  | 12/29/2020 | Europe / Luxembourg |
| EPI_ISL_744696 | 7/13/2020  | 12/29/2020 | Europe / Luxembourg |
| EPI_ISL_744697 | 10/23/2020 | 12/29/2020 | Europe / Luxembourg |
| EPI_ISL_744698 | 11/24/2020 | 12/29/2020 | Europe / Luxembourg |
| EPI_ISL_744699 | 10/22/2020 | 12/29/2020 | Europe / Luxembourg |
| EPI_ISL_744700 | 10/19/2020 | 12/29/2020 | Europe / Luxembourg |
| EPI_ISL_744701 | 10/31/2020 | 12/29/2020 | Europe / Luxembourg |
| EPI_ISL_744702 | 11/14/2020 | 12/29/2020 | Europe / Luxembourg |
| EPI_ISL_744703 | 10/19/2020 | 12/29/2020 | Europe / Luxembourg |
| EPI_ISL_744704 | 11/17/2020 | 12/29/2020 | Europe / Luxembourg |
| EPI_ISL_744705 | 10/29/2020 | 12/29/2020 | Europe / Luxembourg |
| EPI_ISL_744706 | 10/22/2020 | 12/29/2020 | Europe / Luxembourg |
| EPI_ISL_744707 | 11/29/2020 | 12/29/2020 | Europe / Luxembourg |
| EPI_ISL_744708 | 11/18/2020 | 12/29/2020 | Europe / Luxembourg |
| EPI_ISL_744709 | 11/12/2020 | 12/29/2020 | Europe / Luxembourg |
| EPI_ISL_744711 | 7/16/2020  | 12/29/2020 | Europe / Luxembourg |
| EPI_ISL_744712 | 11/2/2020  | 12/29/2020 | Europe / Luxembourg |
| EPI_ISL_744713 | 10/29/2020 | 12/29/2020 | Europe / Luxembourg |
| EPI_ISL_744714 | 11/27/2020 | 12/29/2020 | Europe / Luxembourg |
| EPI_ISL_744715 | 11/24/2020 | 12/29/2020 | Europe / Luxembourg |
| EPI_ISL_744716 | 10/20/2020 | 12/29/2020 | Europe / Luxembourg |
| EPI_ISL_744717 | 11/21/2020 | 12/29/2020 | Europe / Luxembourg |
| EPI_ISL_744718 | 10/26/2020 | 12/29/2020 | Europe / Luxembourg |
| EPI_ISL_744719 | 7/27/2020  | 12/29/2020 | Europe / Luxembourg |
| EPI_ISL_744720 | 7/14/2020  | 12/29/2020 | Europe / Luxembourg |

|                |            |            |                     |
|----------------|------------|------------|---------------------|
| EPI_ISL_744721 | 10/23/2020 | 12/29/2020 | Europe / Luxembourg |
| EPI_ISL_744722 | 10/28/2020 | 12/29/2020 | Europe / Luxembourg |
| EPI_ISL_744723 | 3/20/2020  | 12/29/2020 | Europe / Luxembourg |
| EPI_ISL_744724 | 6/28/2020  | 12/29/2020 | Europe / Luxembourg |
| EPI_ISL_744726 | 10/27/2020 | 12/29/2020 | Europe / Luxembourg |
| EPI_ISL_744727 | 10/22/2020 | 12/29/2020 | Europe / Luxembourg |
| EPI_ISL_744728 | 11/21/2020 | 12/29/2020 | Europe / Luxembourg |
| EPI_ISL_744729 | 10/31/2020 | 12/29/2020 | Europe / Luxembourg |
| EPI_ISL_744730 | 11/20/2020 | 12/29/2020 | Europe / Luxembourg |
| EPI_ISL_744732 | 11/2/2020  | 12/29/2020 | Europe / Luxembourg |
| EPI_ISL_744733 | 10/31/2020 | 12/29/2020 | Europe / Luxembourg |
| EPI_ISL_744734 | 12/16/2020 | 12/29/2020 | Europe / Luxembourg |
| EPI_ISL_744735 | 10/27/2020 | 12/29/2020 | Europe / Luxembourg |
| EPI_ISL_744737 | 11/26/2020 | 12/29/2020 | Europe / Luxembourg |
| EPI_ISL_744739 | 11/15/2020 | 12/29/2020 | Europe / Luxembourg |
| EPI_ISL_744740 | 11/18/2020 | 12/29/2020 | Europe / Luxembourg |
| EPI_ISL_744741 | 10/20/2020 | 12/29/2020 | Europe / Luxembourg |
| EPI_ISL_744742 | 11/2/2020  | 12/29/2020 | Europe / Luxembourg |
| EPI_ISL_744743 | 11/21/2020 | 12/29/2020 | Europe / Luxembourg |
| EPI_ISL_744744 | 10/27/2020 | 12/29/2020 | Europe / Luxembourg |
| EPI_ISL_744745 | 10/23/2020 | 12/29/2020 | Europe / Luxembourg |
| EPI_ISL_744746 | 11/6/2020  | 12/29/2020 | Europe / Luxembourg |
| EPI_ISL_744747 | 11/23/2020 | 12/29/2020 | Europe / Luxembourg |
| EPI_ISL_744748 | 11/14/2020 | 12/29/2020 | Europe / Luxembourg |
| EPI_ISL_744749 | 11/6/2020  | 12/29/2020 | Europe / Luxembourg |
| EPI_ISL_744750 | 11/12/2020 | 12/29/2020 | Europe / Luxembourg |
| EPI_ISL_744751 | 7/27/2020  | 12/29/2020 | Europe / Luxembourg |
| EPI_ISL_744752 | 10/22/2020 | 12/29/2020 | Europe / Luxembourg |
| EPI_ISL_744753 | 11/13/2020 | 12/29/2020 | Europe / Luxembourg |
| EPI_ISL_744754 | 10/21/2020 | 12/29/2020 | Europe / Luxembourg |
| EPI_ISL_744755 | 10/21/2020 | 12/29/2020 | Europe / Luxembourg |
| EPI_ISL_744756 | 12/18/2020 | 12/29/2020 | Europe / Luxembourg |
| EPI_ISL_744757 | 10/28/2020 | 12/29/2020 | Europe / Luxembourg |
| EPI_ISL_744758 | 10/22/2020 | 12/29/2020 | Europe / Luxembourg |
| EPI_ISL_744759 | 10/26/2020 | 12/29/2020 | Europe / Luxembourg |
| EPI_ISL_744760 | 10/23/2020 | 12/29/2020 | Europe / Luxembourg |
| EPI_ISL_744761 | 10/1/2020  | 12/29/2020 | Europe / Luxembourg |
| EPI_ISL_744762 | 10/23/2020 | 12/29/2020 | Europe / Luxembourg |
| EPI_ISL_744763 | 10/31/2020 | 12/29/2020 | Europe / Luxembourg |
| EPI_ISL_744764 | 11/13/2020 | 12/29/2020 | Europe / Luxembourg |
| EPI_ISL_744765 | 11/28/2020 | 12/29/2020 | Europe / Luxembourg |
| EPI_ISL_744766 | 6/15/2020  | 12/29/2020 | Europe / Luxembourg |
| EPI_ISL_744767 | 11/10/2020 | 12/29/2020 | Europe / Luxembourg |
| EPI_ISL_744768 | 11/25/2020 | 12/29/2020 | Europe / Luxembourg |
| EPI_ISL_744770 | 10/26/2020 | 12/29/2020 | Europe / Luxembourg |
| EPI_ISL_744771 | 11/28/2020 | 12/29/2020 | Europe / Luxembourg |
| EPI_ISL_744772 | 11/11/2020 | 12/29/2020 | Europe / Luxembourg |

|                |            |            |                     |
|----------------|------------|------------|---------------------|
| EPI_ISL_744773 | 11/4/2020  | 12/29/2020 | Europe / Luxembourg |
| EPI_ISL_744774 | 10/21/2020 | 12/29/2020 | Europe / Luxembourg |
| EPI_ISL_744775 | 10/23/2020 | 12/29/2020 | Europe / Luxembourg |
| EPI_ISL_744776 | 11/16/2020 | 12/29/2020 | Europe / Luxembourg |
| EPI_ISL_744777 | 11/15/2020 | 12/29/2020 | Europe / Luxembourg |
| EPI_ISL_744778 | 10/26/2020 | 12/29/2020 | Europe / Luxembourg |
| EPI_ISL_744779 | 10/23/2020 | 12/29/2020 | Europe / Luxembourg |
| EPI_ISL_744780 | 12/17/2020 | 12/29/2020 | Europe / Luxembourg |
| EPI_ISL_744782 | 10/12/2020 | 12/29/2020 | Europe / Luxembourg |
| EPI_ISL_744783 | 11/1/2020  | 12/29/2020 | Europe / Luxembourg |
| EPI_ISL_744784 | 10/19/2020 | 12/29/2020 | Europe / Luxembourg |
| EPI_ISL_744785 | 10/21/2020 | 12/29/2020 | Europe / Luxembourg |
| EPI_ISL_744787 | 11/21/2020 | 12/29/2020 | Europe / Luxembourg |
| EPI_ISL_744788 | 11/3/2020  | 12/29/2020 | Europe / Luxembourg |
| EPI_ISL_744789 | 10/31/2020 | 12/29/2020 | Europe / Luxembourg |
| EPI_ISL_744790 | 10/19/2020 | 12/29/2020 | Europe / Luxembourg |
| EPI_ISL_744792 | 12/16/2020 | 12/29/2020 | Europe / Luxembourg |
| EPI_ISL_744793 | 12/11/2020 | 12/29/2020 | Europe / Luxembourg |
| EPI_ISL_744794 | 10/24/2020 | 12/29/2020 | Europe / Luxembourg |
| EPI_ISL_744795 | 11/16/2020 | 12/29/2020 | Europe / Luxembourg |
| EPI_ISL_744796 | 11/8/2020  | 12/29/2020 | Europe / Luxembourg |
| EPI_ISL_744797 | 11/17/2020 | 12/29/2020 | Europe / Luxembourg |
| EPI_ISL_744798 | 11/27/2020 | 12/29/2020 | Europe / Luxembourg |
| EPI_ISL_744799 | 10/28/2020 | 12/29/2020 | Europe / Luxembourg |
| EPI_ISL_744802 | 11/16/2020 | 12/29/2020 | Europe / Luxembourg |
| EPI_ISL_744803 | 11/25/2020 | 12/29/2020 | Europe / Luxembourg |
| EPI_ISL_744804 | 11/7/2020  | 12/29/2020 | Europe / Luxembourg |
| EPI_ISL_744805 | 12/14/2020 | 12/29/2020 | Europe / Luxembourg |
| EPI_ISL_744806 | 11/1/2020  | 12/29/2020 | Europe / Luxembourg |
| EPI_ISL_744807 | 11/28/2020 | 12/29/2020 | Europe / Luxembourg |
| EPI_ISL_744808 | 11/3/2020  | 12/29/2020 | Europe / Luxembourg |
| EPI_ISL_744809 | 12/18/2020 | 12/29/2020 | Europe / Luxembourg |
| EPI_ISL_744810 | 11/12/2020 | 12/29/2020 | Europe / Luxembourg |
| EPI_ISL_744811 | 7/13/2020  | 12/29/2020 | Europe / Luxembourg |
| EPI_ISL_744812 | 9/24/2020  | 12/29/2020 | Europe / Luxembourg |
| EPI_ISL_744813 | 11/8/2020  | 12/29/2020 | Europe / Luxembourg |
| EPI_ISL_744814 | 10/19/2020 | 12/29/2020 | Europe / Luxembourg |
| EPI_ISL_744815 | 10/26/2020 | 12/29/2020 | Europe / Luxembourg |
| EPI_ISL_744816 | 10/19/2020 | 12/29/2020 | Europe / Luxembourg |
| EPI_ISL_744817 | 11/22/2020 | 12/29/2020 | Europe / Luxembourg |
| EPI_ISL_744818 | 10/30/2020 | 12/29/2020 | Europe / Luxembourg |
| EPI_ISL_744819 | 5/5/2020   | 12/29/2020 | Europe / Luxembourg |
| EPI_ISL_744820 | 10/22/2020 | 12/29/2020 | Europe / Luxembourg |
| EPI_ISL_744821 | 11/9/2020  | 12/29/2020 | Europe / Luxembourg |
| EPI_ISL_744822 | 9/14/2020  | 12/29/2020 | Europe / Luxembourg |
| EPI_ISL_744823 | 11/11/2020 | 12/29/2020 | Europe / Luxembourg |
| EPI_ISL_744824 | 10/20/2020 | 12/29/2020 | Europe / Luxembourg |

|                |            |            |                     |
|----------------|------------|------------|---------------------|
| EPI_ISL_744825 | 11/13/2020 | 12/29/2020 | Europe / Luxembourg |
| EPI_ISL_744826 | 11/8/2020  | 12/29/2020 | Europe / Luxembourg |
| EPI_ISL_744827 | 11/25/2020 | 12/29/2020 | Europe / Luxembourg |
| EPI_ISL_744828 | 10/22/2020 | 12/29/2020 | Europe / Luxembourg |
| EPI_ISL_744831 | 11/10/2020 | 12/29/2020 | Europe / Luxembourg |
| EPI_ISL_744832 | 10/23/2020 | 12/29/2020 | Europe / Luxembourg |
| EPI_ISL_744833 | 10/16/2020 | 12/29/2020 | Europe / Luxembourg |
| EPI_ISL_744834 | 11/16/2020 | 12/29/2020 | Europe / Luxembourg |
| EPI_ISL_744835 | 11/6/2020  | 12/29/2020 | Europe / Luxembourg |
| EPI_ISL_744836 | 11/7/2020  | 12/29/2020 | Europe / Luxembourg |
| EPI_ISL_744837 | 11/4/2020  | 12/29/2020 | Europe / Luxembourg |
| EPI_ISL_744838 | 11/22/2020 | 12/29/2020 | Europe / Luxembourg |
| EPI_ISL_744839 | 11/23/2020 | 12/29/2020 | Europe / Luxembourg |
| EPI_ISL_744840 | 11/20/2020 | 12/29/2020 | Europe / Luxembourg |
| EPI_ISL_744841 | 11/9/2020  | 12/29/2020 | Europe / Luxembourg |
| EPI_ISL_744842 | 10/20/2020 | 12/29/2020 | Europe / Luxembourg |
| EPI_ISL_744843 | 3/22/2020  | 12/29/2020 | Europe / Luxembourg |
| EPI_ISL_744844 | 11/16/2020 | 12/29/2020 | Europe / Luxembourg |
| EPI_ISL_744845 | 11/24/2020 | 12/29/2020 | Europe / Luxembourg |
| EPI_ISL_744847 | 11/15/2020 | 12/29/2020 | Europe / Luxembourg |
| EPI_ISL_744848 | 10/31/2020 | 12/29/2020 | Europe / Luxembourg |
| EPI_ISL_744849 | 10/23/2020 | 12/29/2020 | Europe / Luxembourg |
| EPI_ISL_744850 | 11/20/2020 | 12/29/2020 | Europe / Luxembourg |
| EPI_ISL_744851 | 11/14/2020 | 12/29/2020 | Europe / Luxembourg |
| EPI_ISL_744852 | 10/23/2020 | 12/29/2020 | Europe / Luxembourg |
| EPI_ISL_744853 | 11/18/2020 | 12/29/2020 | Europe / Luxembourg |
| EPI_ISL_744854 | 11/13/2020 | 12/29/2020 | Europe / Luxembourg |
| EPI_ISL_744855 | 10/26/2020 | 12/29/2020 | Europe / Luxembourg |
| EPI_ISL_744856 | 11/21/2020 | 12/29/2020 | Europe / Luxembourg |
| EPI_ISL_744857 | 10/24/2020 | 12/29/2020 | Europe / Luxembourg |
| EPI_ISL_744858 | 10/22/2020 | 12/29/2020 | Europe / Luxembourg |
| EPI_ISL_744859 | 10/21/2020 | 12/29/2020 | Europe / Luxembourg |
| EPI_ISL_744860 | 10/28/2020 | 12/29/2020 | Europe / Luxembourg |
| EPI_ISL_744861 | 9/30/2020  | 12/29/2020 | Europe / Luxembourg |
| EPI_ISL_744862 | 10/29/2020 | 12/29/2020 | Europe / Luxembourg |
| EPI_ISL_744864 | 10/23/2020 | 12/29/2020 | Europe / Luxembourg |
| EPI_ISL_744865 | 11/7/2020  | 12/29/2020 | Europe / Luxembourg |
| EPI_ISL_744866 | 10/20/2020 | 12/29/2020 | Europe / Luxembourg |
| EPI_ISL_744868 | 10/23/2020 | 12/29/2020 | Europe / Luxembourg |
| EPI_ISL_744869 | 10/22/2020 | 12/29/2020 | Europe / Luxembourg |
| EPI_ISL_744871 | 11/21/2020 | 12/29/2020 | Europe / Luxembourg |
| EPI_ISL_744872 | 10/30/2020 | 12/29/2020 | Europe / Luxembourg |
| EPI_ISL_744873 | 11/13/2020 | 12/29/2020 | Europe / Luxembourg |
| EPI_ISL_744874 | 8/1/2020   | 12/29/2020 | Europe / Luxembourg |
| EPI_ISL_744875 | 10/27/2020 | 12/29/2020 | Europe / Luxembourg |
| EPI_ISL_744876 | 10/30/2020 | 12/29/2020 | Europe / Luxembourg |
| EPI_ISL_744877 | 11/3/2020  | 12/29/2020 | Europe / Luxembourg |

|                |            |            |                     |
|----------------|------------|------------|---------------------|
| EPI_ISL_744878 | 11/25/2020 | 12/29/2020 | Europe / Luxembourg |
| EPI_ISL_744879 | 12/18/2020 | 12/29/2020 | Europe / Luxembourg |
| EPI_ISL_744880 | 11/19/2020 | 12/29/2020 | Europe / Luxembourg |
| EPI_ISL_744881 | 11/8/2020  | 12/29/2020 | Europe / Luxembourg |
| EPI_ISL_744882 | 10/30/2020 | 12/29/2020 | Europe / Luxembourg |
| EPI_ISL_744883 | 11/9/2020  | 12/29/2020 | Europe / Luxembourg |
| EPI_ISL_744884 | 11/20/2020 | 12/29/2020 | Europe / Luxembourg |
| EPI_ISL_744885 | 11/9/2020  | 12/29/2020 | Europe / Luxembourg |
| EPI_ISL_744886 | 8/6/2020   | 12/29/2020 | Europe / Luxembourg |
| EPI_ISL_744887 | 11/11/2020 | 12/29/2020 | Europe / Luxembourg |
| EPI_ISL_744888 | 10/25/2020 | 12/29/2020 | Europe / Luxembourg |
| EPI_ISL_744889 | 11/24/2020 | 12/29/2020 | Europe / Luxembourg |
| EPI_ISL_744890 | 11/12/2020 | 12/29/2020 | Europe / Luxembourg |
| EPI_ISL_744891 | 11/9/2020  | 12/29/2020 | Europe / Luxembourg |
| EPI_ISL_744892 | 10/27/2020 | 12/29/2020 | Europe / Luxembourg |
| EPI_ISL_744893 | 12/18/2020 | 12/29/2020 | Europe / Luxembourg |
| EPI_ISL_744895 | 10/31/2020 | 12/29/2020 | Europe / Luxembourg |
| EPI_ISL_744896 | 11/15/2020 | 12/29/2020 | Europe / Luxembourg |
| EPI_ISL_744897 | 10/24/2020 | 12/29/2020 | Europe / Luxembourg |
| EPI_ISL_744898 | 11/25/2020 | 12/29/2020 | Europe / Luxembourg |
| EPI_ISL_744899 | 10/16/2020 | 12/29/2020 | Europe / Luxembourg |
| EPI_ISL_744900 | 11/26/2020 | 12/29/2020 | Europe / Luxembourg |
| EPI_ISL_744901 | 10/26/2020 | 12/29/2020 | Europe / Luxembourg |
| EPI_ISL_744902 | 11/1/2020  | 12/29/2020 | Europe / Luxembourg |
| EPI_ISL_744903 | 10/9/2020  | 12/29/2020 | Europe / Luxembourg |
| EPI_ISL_744904 | 11/10/2020 | 12/29/2020 | Europe / Luxembourg |
| EPI_ISL_744905 | 11/23/2020 | 12/29/2020 | Europe / Luxembourg |
| EPI_ISL_744906 | 11/14/2020 | 12/29/2020 | Europe / Luxembourg |
| EPI_ISL_744907 | 11/2/2020  | 12/29/2020 | Europe / Luxembourg |
| EPI_ISL_744909 | 11/10/2020 | 12/29/2020 | Europe / Luxembourg |
| EPI_ISL_744911 | 10/29/2020 | 12/29/2020 | Europe / Luxembourg |
| EPI_ISL_744912 | 10/25/2020 | 12/29/2020 | Europe / Luxembourg |
| EPI_ISL_744913 | 11/4/2020  | 12/29/2020 | Europe / Luxembourg |
| EPI_ISL_744914 | 11/11/2020 | 12/29/2020 | Europe / Luxembourg |
| EPI_ISL_744915 | 11/23/2020 | 12/29/2020 | Europe / Luxembourg |
| EPI_ISL_744916 | 10/24/2020 | 12/29/2020 | Europe / Luxembourg |
| EPI_ISL_744917 | 10/21/2020 | 12/29/2020 | Europe / Luxembourg |
| EPI_ISL_744918 | 11/11/2020 | 12/29/2020 | Europe / Luxembourg |
| EPI_ISL_744919 | 10/27/2020 | 12/29/2020 | Europe / Luxembourg |
| EPI_ISL_744920 | 11/9/2020  | 12/29/2020 | Europe / Luxembourg |
| EPI_ISL_744921 | 11/26/2020 | 12/29/2020 | Europe / Luxembourg |
| EPI_ISL_744922 | 10/23/2020 | 12/29/2020 | Europe / Luxembourg |
| EPI_ISL_744923 | 11/16/2020 | 12/29/2020 | Europe / Luxembourg |
| EPI_ISL_744924 | 11/12/2020 | 12/29/2020 | Europe / Luxembourg |
| EPI_ISL_744925 | 10/19/2020 | 12/29/2020 | Europe / Luxembourg |
| EPI_ISL_744926 | 10/30/2020 | 12/29/2020 | Europe / Luxembourg |
| EPI_ISL_744927 | 11/23/2020 | 12/29/2020 | Europe / Luxembourg |

|                |            |            |                     |
|----------------|------------|------------|---------------------|
| EPI_ISL_744928 | 10/21/2020 | 12/29/2020 | Europe / Luxembourg |
| EPI_ISL_744929 | 10/26/2020 | 12/29/2020 | Europe / Luxembourg |
| EPI_ISL_744930 | 11/21/2020 | 12/29/2020 | Europe / Luxembourg |
| EPI_ISL_744931 | 11/20/2020 | 12/29/2020 | Europe / Luxembourg |
| EPI_ISL_744932 | 10/26/2020 | 12/29/2020 | Europe / Luxembourg |
| EPI_ISL_744933 | 11/17/2020 | 12/29/2020 | Europe / Luxembourg |
| EPI_ISL_744934 | 10/29/2020 | 12/29/2020 | Europe / Luxembourg |
| EPI_ISL_744935 | 11/7/2020  | 12/29/2020 | Europe / Luxembourg |
| EPI_ISL_744936 | 9/17/2020  | 12/29/2020 | Europe / Luxembourg |
| EPI_ISL_744937 | 10/23/2020 | 12/29/2020 | Europe / Luxembourg |
| EPI_ISL_744938 | 11/5/2020  | 12/29/2020 | Europe / Luxembourg |
| EPI_ISL_744939 | 10/26/2020 | 12/29/2020 | Europe / Luxembourg |
| EPI_ISL_744940 | 11/26/2020 | 12/29/2020 | Europe / Luxembourg |
| EPI_ISL_744941 | 9/17/2020  | 12/29/2020 | Europe / Luxembourg |
| EPI_ISL_744942 | 10/19/2020 | 12/29/2020 | Europe / Luxembourg |
| EPI_ISL_744943 | 11/9/2020  | 12/29/2020 | Europe / Luxembourg |
| EPI_ISL_744944 | 11/23/2020 | 12/29/2020 | Europe / Luxembourg |
| EPI_ISL_744945 | 10/28/2020 | 12/29/2020 | Europe / Luxembourg |
| EPI_ISL_744946 | 12/11/2020 | 12/29/2020 | Europe / Luxembourg |
| EPI_ISL_744947 | 11/2/2020  | 12/29/2020 | Europe / Luxembourg |
| EPI_ISL_744948 | 10/11/2020 | 12/29/2020 | Europe / Luxembourg |
| EPI_ISL_744950 | 11/29/2020 | 12/29/2020 | Europe / Luxembourg |
| EPI_ISL_744951 | 10/19/2020 | 12/29/2020 | Europe / Luxembourg |
| EPI_ISL_744952 | 10/23/2020 | 12/29/2020 | Europe / Luxembourg |
| EPI_ISL_744953 | 11/16/2020 | 12/29/2020 | Europe / Luxembourg |
| EPI_ISL_744954 | 8/6/2020   | 12/29/2020 | Europe / Luxembourg |
| EPI_ISL_744955 | 10/31/2020 | 12/29/2020 | Europe / Luxembourg |
| EPI_ISL_744956 | 10/26/2020 | 12/29/2020 | Europe / Luxembourg |
| EPI_ISL_744957 | 11/17/2020 | 12/29/2020 | Europe / Luxembourg |
| EPI_ISL_744959 | 11/21/2020 | 12/29/2020 | Europe / Luxembourg |
| EPI_ISL_744960 | 10/26/2020 | 12/29/2020 | Europe / Luxembourg |
| EPI_ISL_744961 | 10/24/2020 | 12/29/2020 | Europe / Luxembourg |
| EPI_ISL_744962 | 10/23/2020 | 12/29/2020 | Europe / Luxembourg |
| EPI_ISL_744963 | 10/22/2020 | 12/29/2020 | Europe / Luxembourg |
| EPI_ISL_744964 | 10/30/2020 | 12/29/2020 | Europe / Luxembourg |
| EPI_ISL_744965 | 11/20/2020 | 12/29/2020 | Europe / Luxembourg |
| EPI_ISL_744966 | 11/22/2020 | 12/29/2020 | Europe / Luxembourg |
| EPI_ISL_744967 | 10/18/2020 | 12/29/2020 | Europe / Luxembourg |
| EPI_ISL_744968 | 7/9/2020   | 12/29/2020 | Europe / Luxembourg |
| EPI_ISL_744969 | 11/8/2020  | 12/29/2020 | Europe / Luxembourg |
| EPI_ISL_744970 | 11/24/2020 | 12/29/2020 | Europe / Luxembourg |
| EPI_ISL_744972 | 11/24/2020 | 12/29/2020 | Europe / Luxembourg |
| EPI_ISL_744973 | 11/14/2020 | 12/29/2020 | Europe / Luxembourg |
| EPI_ISL_744974 | 10/27/2020 | 12/29/2020 | Europe / Luxembourg |
| EPI_ISL_744975 | 11/25/2020 | 12/29/2020 | Europe / Luxembourg |
| EPI_ISL_744976 | 11/26/2020 | 12/29/2020 | Europe / Luxembourg |
| EPI_ISL_744977 | 11/28/2020 | 12/29/2020 | Europe / Luxembourg |

|                |            |            |                                       |
|----------------|------------|------------|---------------------------------------|
| EPI_ISL_744978 | 11/1/2020  | 12/29/2020 | Europe / Luxembourg                   |
| EPI_ISL_744979 | 11/12/2020 | 12/29/2020 | Europe / Luxembourg                   |
| EPI_ISL_744980 | 11/23/2020 | 12/29/2020 | Europe / Luxembourg                   |
| EPI_ISL_744981 | 11/9/2020  | 12/29/2020 | Europe / Luxembourg                   |
| EPI_ISL_744982 | 11/17/2020 | 12/29/2020 | Europe / Luxembourg                   |
| EPI_ISL_744983 | 11/17/2020 | 12/29/2020 | Europe / Luxembourg                   |
| EPI_ISL_744984 | 10/31/2020 | 12/29/2020 | Europe / Luxembourg                   |
| EPI_ISL_744985 | 11/9/2020  | 12/29/2020 | Europe / Luxembourg                   |
| EPI_ISL_744986 | 11/25/2020 | 12/29/2020 | Europe / Luxembourg                   |
| EPI_ISL_744988 | 10/30/2020 | 12/29/2020 | Europe / Luxembourg                   |
| EPI_ISL_744989 | 11/14/2020 | 12/29/2020 | Europe / Luxembourg                   |
| EPI_ISL_744990 | 10/19/2020 | 12/29/2020 | Europe / Luxembourg                   |
| EPI_ISL_744991 | 11/21/2020 | 12/29/2020 | Europe / Luxembourg                   |
| EPI_ISL_744992 | 10/29/2020 | 12/29/2020 | Europe / Luxembourg                   |
| EPI_ISL_744994 | 9/26/2020  | 12/29/2020 | Europe / Luxembourg                   |
| EPI_ISL_744995 | 10/22/2020 | 12/29/2020 | Europe / Luxembourg                   |
| EPI_ISL_744996 | 11/26/2020 | 12/29/2020 | Europe / Luxembourg                   |
| EPI_ISL_744997 | 11/4/2020  | 12/29/2020 | Europe / Luxembourg                   |
| EPI_ISL_744999 | 11/14/2020 | 12/29/2020 | Europe / Luxembourg                   |
| EPI_ISL_745000 | 11/18/2020 | 12/29/2020 | Europe / Luxembourg                   |
| EPI_ISL_745001 | 10/23/2020 | 12/29/2020 | Europe / Luxembourg                   |
| EPI_ISL_745002 | 10/19/2020 | 12/29/2020 | Europe / Luxembourg                   |
| EPI_ISL_745004 | 10/20/2020 | 12/29/2020 | Europe / Luxembourg                   |
| EPI_ISL_745005 | 11/8/2020  | 12/29/2020 | Europe / Luxembourg                   |
| EPI_ISL_745006 | 10/18/2020 | 12/29/2020 | Europe / Luxembourg                   |
| EPI_ISL_745007 | 10/26/2020 | 12/29/2020 | Europe / Luxembourg                   |
| EPI_ISL_745008 | 11/23/2020 | 12/29/2020 | Europe / Luxembourg                   |
| EPI_ISL_745009 | 11/22/2020 | 12/29/2020 | Europe / Luxembourg                   |
| EPI_ISL_745010 | 10/31/2020 | 12/29/2020 | Europe / Luxembourg                   |
| EPI_ISL_745011 | 3/13/2020  | 12/29/2020 | Europe / Luxembourg                   |
| EPI_ISL_745012 | 10/24/2020 | 12/29/2020 | Europe / Luxembourg                   |
| EPI_ISL_745013 | 7/29/2020  | 12/29/2020 | Europe / Luxembourg                   |
| EPI_ISL_745014 | 11/4/2020  | 12/29/2020 | Europe / Luxembourg                   |
| EPI_ISL_745016 | 10/23/2020 | 12/29/2020 | Europe / Luxembourg                   |
| EPI_ISL_745017 | 10/25/2020 | 12/29/2020 | Europe / Luxembourg                   |
| EPI_ISL_745018 | 11/5/2020  | 12/29/2020 | Europe / Luxembourg                   |
| EPI_ISL_745020 | 10/26/2020 | 12/29/2020 | Europe / Luxembourg                   |
| EPI_ISL_745021 | 11/19/2020 | 12/29/2020 | Europe / Luxembourg                   |
| EPI_ISL_745022 | 7/25/2020  | 12/29/2020 | Europe / Luxembourg                   |
| EPI_ISL_745023 | 9/29/2020  | 12/29/2020 | Europe / Luxembourg                   |
| EPI_ISL_745025 | 11/1/2020  | 12/29/2020 | Europe / Luxembourg                   |
| EPI_ISL_745026 | 11/17/2020 | 12/29/2020 | Europe / Luxembourg                   |
| EPI_ISL_745027 | 11/12/2020 | 12/29/2020 | Europe / Luxembourg                   |
| EPI_ISL_745029 | 12/28/2020 | 12/29/2020 | Oceania / Australia / New South Wales |
| EPI_ISL_745030 | 12/28/2020 | 12/29/2020 | Oceania / Australia / New South Wales |
| EPI_ISL_745031 | 12/27/2020 | 12/29/2020 | Oceania / Australia / New South Wales |
| EPI_ISL_745033 | 10/4/2020  | 12/29/2020 | Asia / Indonesia / West Java          |

|                |            |                                                           |
|----------------|------------|-----------------------------------------------------------|
| EPI_ISL_745034 | 12/1/2020  | 12/29/2020 Asia / Israel / Tel Aviv                       |
| EPI_ISL_745035 | 12/1/2020  | 12/29/2020 Asia / Israel / Northern                       |
| EPI_ISL_745036 | 12/2/2020  | 12/29/2020 Asia / Israel / Northern                       |
| EPI_ISL_745037 | 12/2/2020  | 12/29/2020 Asia / Israel / Tel Aviv                       |
| EPI_ISL_745038 | 12/2/2020  | 12/29/2020 Asia / Israel / Tel Aviv                       |
| EPI_ISL_745039 | 12/3/2020  | 12/29/2020 Asia / Israel / Tel Aviv                       |
| EPI_ISL_745040 | 12/3/2020  | 12/29/2020 Asia / Israel / Haifa                          |
| EPI_ISL_745041 | 12/3/2020  | 12/29/2020 Asia / Israel / Haifa                          |
| EPI_ISL_745042 | 12/3/2020  | 12/29/2020 Asia / Israel / Central                        |
| EPI_ISL_745043 | 12/7/2020  | 12/29/2020 Asia / Israel / Jerusalem                      |
| EPI_ISL_745044 | 12/7/2020  | 12/29/2020 Asia / Israel / Jerusalem                      |
| EPI_ISL_745045 | 12/7/2020  | 12/29/2020 Asia / Israel / Northern                       |
| EPI_ISL_745046 | 12/7/2020  | 12/29/2020 Asia / Israel / Central                        |
| EPI_ISL_745047 | 12/7/2020  | 12/29/2020 Asia / Israel / Central                        |
| EPI_ISL_745048 | 12/8/2020  | 12/29/2020 Asia / Israel / Northern                       |
| EPI_ISL_745049 | 12/8/2020  | 12/29/2020 Asia / Israel / Tel Aviv                       |
| EPI_ISL_745051 | 12/9/2020  | 12/29/2020 Asia / Israel / Tel Aviv                       |
| EPI_ISL_745052 | 12/9/2020  | 12/29/2020 Asia / Israel / Tel Aviv                       |
| EPI_ISL_745053 | 12/9/2020  | 12/29/2020 Asia / Israel / Central                        |
| EPI_ISL_745054 | 12/9/2020  | 12/29/2020 Asia / Israel / Central                        |
| EPI_ISL_745056 | 12/10/2020 | 12/29/2020 Asia / Israel / Tel Aviv                       |
| EPI_ISL_745057 | 12/9/2020  | 12/29/2020 Asia / Israel / Tel Aviv                       |
| EPI_ISL_745058 | 12/10/2020 | 12/29/2020 Asia / Israel / Jerusalem                      |
| EPI_ISL_745061 | 12/10/2020 | 12/29/2020 Asia / Israel / Tel Aviv                       |
| EPI_ISL_745062 | 12/10/2020 | 12/29/2020 Asia / Israel / Tel Aviv                       |
| EPI_ISL_745063 | 12/10/2020 | 12/29/2020 Asia / Israel / Tel Aviv                       |
| EPI_ISL_745064 | 12/10/2020 | 12/29/2020 Asia / Israel / Tel Aviv                       |
| EPI_ISL_745065 | 12/10/2020 | 12/29/2020 Asia / Israel / Northern                       |
| EPI_ISL_745066 | 12/10/2020 | 12/29/2020 Asia / Israel / Northern                       |
| EPI_ISL_745067 | 12/13/2020 | 12/29/2020 Asia / Israel / Tel Aviv                       |
| EPI_ISL_745068 | 12/13/2020 | 12/29/2020 Asia / Israel / Central                        |
| EPI_ISL_745069 | 12/13/2020 | 12/29/2020 Asia / Israel / Tel Aviv                       |
| EPI_ISL_745070 | 12/15/2020 | 12/29/2020 Asia / Israel / Tel Aviv                       |
| EPI_ISL_745071 | 12/15/2020 | 12/29/2020 Asia / Israel / Tel Aviv                       |
| EPI_ISL_745072 | 12/15/2020 | 12/29/2020 Asia / Israel / Tel Aviv                       |
| EPI_ISL_745073 | 12/15/2020 | 12/29/2020 Asia / Israel / Haifa                          |
| EPI_ISL_745075 | 12/15/2020 | 12/29/2020 Asia / Israel / Haifa                          |
| EPI_ISL_745078 | 12/16/2020 | 12/29/2020 Asia / Israel / Tel Aviv                       |
| EPI_ISL_745079 | 12/16/2020 | 12/29/2020 Asia / Israel / Haifa                          |
| EPI_ISL_745080 | 12/16/2020 | 12/29/2020 Asia / Israel / Tel Aviv                       |
| EPI_ISL_745081 | 12/16/2020 | 12/29/2020 Asia / Israel / Tel Aviv                       |
| EPI_ISL_745083 | 12/17/2020 | 12/29/2020 Asia / Israel / Northern                       |
| EPI_ISL_745084 | 12/17/2020 | 12/29/2020 Asia / Israel / Northern                       |
| EPI_ISL_745085 | 12/17/2020 | 12/29/2020 Asia / Israel / Tel Aviv                       |
| EPI_ISL_745086 | 12/17/2020 | 12/29/2020 Asia / Israel / Central                        |
| EPI_ISL_745090 | 2020       | 12/29/2020 Europe / Germany / Lower Saxony                |
| EPI_ISL_745091 | 12/17/2020 | 12/29/2020 Oceania / Australia / New South Wales / Sydney |





|                |            |                                                                   |
|----------------|------------|-------------------------------------------------------------------|
| EPI_ISL_745170 | 12/7/2020  | 12/29/2020 Africa / South Africa / Western Cape / Cape Town Metro |
| EPI_ISL_745171 | 12/7/2020  | 12/29/2020 Africa / South Africa / Western Cape / Cape Town Metro |
| EPI_ISL_745172 | 12/7/2020  | 12/29/2020 Africa / South Africa / Western Cape / Cape Town Metro |
| EPI_ISL_745173 | 12/7/2020  | 12/29/2020 Africa / South Africa / Western Cape / Cape Town Metro |
| EPI_ISL_745174 | 12/7/2020  | 12/29/2020 Africa / South Africa / Western Cape / Cape Town Metro |
| EPI_ISL_745175 | 12/7/2020  | 12/29/2020 Africa / South Africa / Western Cape / Cape Town Metro |
| EPI_ISL_745176 | 12/7/2020  | 12/29/2020 Africa / South Africa / Western Cape / Cape Town Metro |
| EPI_ISL_745177 | 12/7/2020  | 12/29/2020 Africa / South Africa / Western Cape / Cape Town Metro |
| EPI_ISL_745178 | 12/7/2020  | 12/29/2020 Africa / South Africa / Western Cape / Cape Town Metro |
| EPI_ISL_745179 | 12/7/2020  | 12/29/2020 Africa / South Africa / Western Cape / Cape Town Metro |
| EPI_ISL_745180 | 12/7/2020  | 12/29/2020 Africa / South Africa / Western Cape / Cape Town Metro |
| EPI_ISL_745181 | 12/7/2020  | 12/29/2020 Africa / South Africa / Western Cape / Cape Town Metro |
| EPI_ISL_745182 | 12/7/2020  | 12/29/2020 Africa / South Africa / Western Cape / Cape Town Metro |
| EPI_ISL_745183 | 12/7/2020  | 12/29/2020 Africa / South Africa / Western Cape / Cape Town Metro |
| EPI_ISL_745184 | 12/7/2020  | 12/29/2020 Africa / South Africa / Western Cape / Cape Town Metro |
| EPI_ISL_745185 | 12/7/2020  | 12/29/2020 Africa / South Africa / Western Cape / Cape Town Metro |
| EPI_ISL_745186 | 12/7/2020  | 12/29/2020 Africa / South Africa / Western Cape / Cape Town Metro |
| EPI_ISL_745187 | 12/3/2020  | 12/29/2020 Africa / South Africa / Northern Cape / Namakwa        |
| EPI_ISL_745188 | 12/4/2020  | 12/29/2020 Africa / South Africa / Northern Cape / Namakwa        |
| EPI_ISL_745189 | 12/3/2020  | 12/29/2020 Africa / South Africa / Western Cape / West Coast      |
| EPI_ISL_745190 | 12/7/2020  | 12/29/2020 Africa / South Africa / Western Cape / Cape Town Metro |
| EPI_ISL_745192 | 12/21/2020 | 12/29/2020 Europe / Italy / Apulia / Bari / Molfetta              |
| EPI_ISL_745193 | 12/21/2020 | 12/29/2020 Europe / Italy / Apulia / Bari / Casamassima           |
| EPI_ISL_745198 | 12/25/2020 | 12/29/2020 Asia / India / Telangana                               |
| EPI_ISL_745201 | 12/25/2020 | 12/29/2020 Asia / India / Andhra Pradesh                          |
| EPI_ISL_745202 | 12/2/2020  | 12/29/2020 Europe / Belgium / Ghent                               |
| EPI_ISL_745203 | 12/3/2020  | 12/29/2020 Europe / Belgium / Ghent                               |
| EPI_ISL_745205 | 12/6/2020  | 12/29/2020 Europe / Belgium / Ghent                               |
| EPI_ISL_745206 | 12/6/2020  | 12/29/2020 Europe / Belgium / Ghent                               |
| EPI_ISL_745207 | 12/4/2020  | 12/29/2020 Europe / Belgium / Ghent                               |
| EPI_ISL_745209 | 12/8/2020  | 12/29/2020 Europe / Belgium / Ghent                               |
| EPI_ISL_745211 | 12/10/2020 | 12/29/2020 Europe / Belgium / Ghent                               |
| EPI_ISL_745212 | 12/14/2020 | 12/29/2020 Europe / Belgium / Ghent                               |
| EPI_ISL_745214 | 12/13/2020 | 12/29/2020 Europe / Belgium / Ghent                               |
| EPI_ISL_745215 | 12/13/2020 | 12/29/2020 Europe / Belgium / Ghent                               |
| EPI_ISL_745216 | 12/11/2020 | 12/29/2020 Europe / Belgium / Ghent                               |
| EPI_ISL_745217 | 12/11/2020 | 12/29/2020 Europe / Belgium / Ghent                               |
| EPI_ISL_745218 | 12/14/2020 | 12/29/2020 Europe / Belgium / Ghent                               |
| EPI_ISL_745219 | 12/14/2020 | 12/29/2020 Europe / Belgium / Ghent                               |
| EPI_ISL_745222 | 12/14/2020 | 12/29/2020 Europe / Belgium / Mol                                 |
| EPI_ISL_745223 | 8/24/2020  | 12/29/2020 Europe / Russia / Moscow                               |
| EPI_ISL_745224 | 11/7/2020  | 12/29/2020 Europe / Russia / Moscow                               |
| EPI_ISL_745230 | 11/9/2020  | 12/29/2020 Europe / Russia / Moscow                               |
| EPI_ISL_745231 | 11/9/2020  | 12/29/2020 Europe / Russia / Moscow                               |
| EPI_ISL_745232 | 11/9/2020  | 12/29/2020 Europe / Russia / Moscow                               |
| EPI_ISL_745233 | 11/6/2020  | 12/29/2020 Europe / Russia / Moscow                               |
| EPI_ISL_745234 | 11/6/2020  | 12/29/2020 Europe / Russia / Moscow                               |



|                |            |            |                                                           |
|----------------|------------|------------|-----------------------------------------------------------|
| EPI_ISL_745297 | 6/24/2020  | 12/29/2020 | North America / USA / Texas / Hidalgo                     |
| EPI_ISL_745298 | 6/24/2020  | 12/29/2020 | North America / USA / Texas / Hidalgo                     |
| EPI_ISL_745299 | 6/24/2020  | 12/29/2020 | North America / USA / Texas / Hidalgo                     |
| EPI_ISL_745300 | 6/24/2020  | 12/29/2020 | North America / USA / Texas / Hidalgo                     |
| EPI_ISL_745301 | 6/24/2020  | 12/29/2020 | North America / USA / Texas / Hidalgo                     |
| EPI_ISL_745302 | 6/24/2020  | 12/29/2020 | North America / USA / Texas / Hidalgo                     |
| EPI_ISL_745303 | 6/24/2020  | 12/29/2020 | North America / USA / Texas / Hidalgo                     |
| EPI_ISL_745304 | 6/24/2020  | 12/29/2020 | North America / USA / Texas / Hidalgo                     |
| EPI_ISL_745305 | 6/24/2020  | 12/29/2020 | North America / USA / Texas / Hidalgo                     |
| EPI_ISL_745306 | 6/23/2020  | 12/29/2020 | North America / USA / Texas / Harris                      |
| EPI_ISL_745311 | 12/16/2020 | 12/29/2020 | Europe / France / Auvergne-Rhone-Alpes / Lyon             |
| EPI_ISL_745312 | 10/24/2020 | 12/29/2020 | Europe / France / Auvergne-Rhone-Alpes / Clermond-Ferrand |
| EPI_ISL_745313 | 11/2/2020  | 12/29/2020 | Europe / France / Auvergne-Rhone-Alpes / Clermond-Ferrand |
| EPI_ISL_745314 | 8/14/2020  | 12/29/2020 | Europe / France / Auvergne-Rhone-Alpes / Clermond-Ferrand |
| EPI_ISL_745315 | 9/1/2020   | 12/29/2020 | Europe / France / Auvergne-Rhone-Alpes / Clermond-Ferrand |
| EPI_ISL_745316 | 11/27/2020 | 12/29/2020 | Europe / France / Auvergne-Rhone-Alpes / Lyon             |
| EPI_ISL_745317 | 11/30/2020 | 12/29/2020 | Europe / France / Auvergne-Rhone-Alpes / Lyon             |
| EPI_ISL_745319 | 12/4/2020  | 12/29/2020 | Europe / France / Auvergne-Rhone-Alpes / Lyon             |
| EPI_ISL_745320 | 11/28/2020 | 12/29/2020 | Europe / France / Auvergne-Rhone-Alpes / Lyon             |
| EPI_ISL_745321 | 11/29/2020 | 12/29/2020 | Europe / France / Auvergne-Rhone-Alpes / Lyon             |
| EPI_ISL_745322 | 12/19/2020 | 12/29/2020 | Europe / France / Auvergne-Rhone-Alpes / Lyon             |
| EPI_ISL_745323 | 12/3/2020  | 12/29/2020 | Europe / France / Auvergne-Rhone-Alpes / Lyon             |
| EPI_ISL_745324 | 12/14/2020 | 12/29/2020 | Europe / France / Auvergne-Rhone-Alpes / Lyon             |
| EPI_ISL_745325 | 12/19/2020 | 12/29/2020 | Europe / France / Auvergne-Rhone-Alpes / Lyon             |
| EPI_ISL_745326 | 11/30/2020 | 12/29/2020 | Europe / France / Auvergne-Rhone-Alpes / Lyon             |
| EPI_ISL_745327 | 12/1/2020  | 12/29/2020 | Europe / France / Auvergne-Rhone-Alpes / Lyon             |
| EPI_ISL_745328 | 12/1/2020  | 12/29/2020 | Europe / France / Auvergne-Rhone-Alpes / Lyon             |
| EPI_ISL_745329 | 12/1/2020  | 12/29/2020 | Europe / France / Auvergne-Rhone-Alpes / Lyon             |
| EPI_ISL_745330 | 12/8/2020  | 12/29/2020 | Europe / France / Auvergne-Rhone-Alpes / Lyon             |
| EPI_ISL_745331 | 12/10/2020 | 12/29/2020 | Europe / France / Auvergne-Rhone-Alpes / Lyon             |
| EPI_ISL_745332 | 12/14/2020 | 12/29/2020 | Europe / France / Auvergne-Rhone-Alpes / Lyon             |
| EPI_ISL_745333 | 12/17/2020 | 12/29/2020 | Europe / France / Auvergne-Rhone-Alpes / Lyon             |
| EPI_ISL_745334 | 12/18/2020 | 12/29/2020 | Europe / France / Auvergne-Rhone-Alpes / Lyon             |
| EPI_ISL_745335 | 11/20/2020 | 12/29/2020 | Europe / France / Auvergne-Rhone-Alpes / Clermond-Ferrand |
| EPI_ISL_745336 | 12/1/2020  | 12/29/2020 | Europe / France / Auvergne-Rhone-Alpes / Clermond-Ferrand |
| EPI_ISL_745337 | 11/26/2020 | 12/29/2020 | Europe / France / Auvergne-Rhone-Alpes / Lyon             |
| EPI_ISL_745338 | 11/26/2020 | 12/29/2020 | Europe / France / Auvergne-Rhone-Alpes / Lyon             |
| EPI_ISL_745339 | 11/26/2020 | 12/29/2020 | Europe / France / Auvergne-Rhone-Alpes / Lyon             |
| EPI_ISL_745340 | 11/26/2020 | 12/29/2020 | Europe / France / Auvergne-Rhone-Alpes / Lyon             |
| EPI_ISL_745341 | 11/27/2020 | 12/29/2020 | Europe / France / Auvergne-Rhone-Alpes / Lyon             |
| EPI_ISL_745342 | 11/27/2020 | 12/29/2020 | Europe / France / Auvergne-Rhone-Alpes / Lyon             |
| EPI_ISL_745343 | 11/28/2020 | 12/29/2020 | Europe / France / Auvergne-Rhone-Alpes / Lyon             |
| EPI_ISL_745344 | 11/28/2020 | 12/29/2020 | Europe / France / Auvergne-Rhone-Alpes / Lyon             |
| EPI_ISL_745345 | 11/28/2020 | 12/29/2020 | Europe / France / Auvergne-Rhone-Alpes / Lyon             |
| EPI_ISL_745346 | 11/30/2020 | 12/29/2020 | Europe / France / Auvergne-Rhone-Alpes / Lyon             |
| EPI_ISL_745347 | 11/30/2020 | 12/29/2020 | Europe / France / Auvergne-Rhone-Alpes / Lyon             |
| EPI_ISL_745348 | 11/30/2020 | 12/29/2020 | Europe / France / Auvergne-Rhone-Alpes / Lyon             |

























|                |            |            |                            |
|----------------|------------|------------|----------------------------|
| EPI_ISL_746059 | 8/17/2020  | 12/29/2020 | North America / USA / Utah |
| EPI_ISL_746060 | 8/3/2020   | 12/29/2020 | North America / USA / Utah |
| EPI_ISL_746061 | 8/17/2020  | 12/29/2020 | North America / USA / Utah |
| EPI_ISL_746062 | 8/17/2020  | 12/29/2020 | North America / USA / Utah |
| EPI_ISL_746063 | 8/6/2020   | 12/29/2020 | North America / USA / Utah |
| EPI_ISL_746064 | 8/13/2020  | 12/29/2020 | North America / USA / Utah |
| EPI_ISL_746065 | 8/4/2020   | 12/29/2020 | North America / USA / Utah |
| EPI_ISL_746066 | 8/3/2020   | 12/29/2020 | North America / USA / Utah |
| EPI_ISL_746067 | 8/17/2020  | 12/29/2020 | North America / USA / Utah |
| EPI_ISL_746068 | 8/17/2020  | 12/29/2020 | North America / USA / Utah |
| EPI_ISL_746069 | 8/5/2020   | 12/29/2020 | North America / USA / Utah |
| EPI_ISL_746070 | 8/4/2020   | 12/29/2020 | North America / USA / Utah |
| EPI_ISL_746071 | 8/1/2020   | 12/29/2020 | North America / USA / Utah |
| EPI_ISL_746072 | 8/1/2020   | 12/29/2020 | North America / USA / Utah |
| EPI_ISL_746073 | 8/17/2020  | 12/29/2020 | North America / USA / Utah |
| EPI_ISL_746074 | 8/17/2020  | 12/29/2020 | North America / USA / Utah |
| EPI_ISL_746075 | 8/6/2020   | 12/29/2020 | North America / USA / Utah |
| EPI_ISL_746076 | 8/6/2020   | 12/29/2020 | North America / USA / Utah |
| EPI_ISL_746077 | 8/4/2020   | 12/29/2020 | North America / USA / Utah |
| EPI_ISL_746078 | 8/4/2020   | 12/29/2020 | North America / USA / Utah |
| EPI_ISL_746079 | 8/1/2020   | 12/29/2020 | North America / USA / Utah |
| EPI_ISL_746080 | 8/3/2020   | 12/29/2020 | North America / USA / Utah |
| EPI_ISL_746081 | 8/17/2020  | 12/29/2020 | North America / USA / Utah |
| EPI_ISL_746082 | 8/17/2020  | 12/29/2020 | North America / USA / Utah |
| EPI_ISL_746083 | 8/6/2020   | 12/29/2020 | North America / USA / Utah |
| EPI_ISL_746084 | 8/4/2020   | 12/29/2020 | North America / USA / Utah |
| EPI_ISL_746085 | 8/6/2020   | 12/29/2020 | North America / USA / Utah |
| EPI_ISL_746086 | 8/4/2020   | 12/29/2020 | North America / USA / Utah |
| EPI_ISL_746087 | 8/8/2020   | 12/29/2020 | North America / USA / Utah |
| EPI_ISL_746088 | 7/31/2020  | 12/29/2020 | North America / USA / Utah |
| EPI_ISL_746089 | 8/3/2020   | 12/29/2020 | North America / USA / Utah |
| EPI_ISL_746090 | 8/17/2020  | 12/29/2020 | North America / USA / Utah |
| EPI_ISL_746091 | 8/17/2020  | 12/29/2020 | North America / USA / Utah |
| EPI_ISL_746092 | 8/17/2020  | 12/29/2020 | North America / USA / Utah |
| EPI_ISL_746093 | 8/6/2020   | 12/29/2020 | North America / USA / Utah |
| EPI_ISL_746094 | 8/13/2020  | 12/29/2020 | North America / USA / Utah |
| EPI_ISL_746095 | 10/2/2020  | 12/29/2020 | North America / USA / Utah |
| EPI_ISL_746096 | 9/5/2020   | 12/29/2020 | North America / USA / Utah |
| EPI_ISL_746097 | 10/12/2020 | 12/29/2020 | North America / USA / Utah |
| EPI_ISL_746098 | 8/18/2020  | 12/29/2020 | North America / USA / Utah |
| EPI_ISL_746099 | 10/2/2020  | 12/29/2020 | North America / USA / Utah |
| EPI_ISL_746100 | 8/18/2020  | 12/29/2020 | North America / USA / Utah |
| EPI_ISL_746101 | 8/18/2020  | 12/29/2020 | North America / USA / Utah |
| EPI_ISL_746102 | 10/2/2020  | 12/29/2020 | North America / USA / Utah |
| EPI_ISL_746103 | 10/2/2020  | 12/29/2020 | North America / USA / Utah |
| EPI_ISL_746104 | 9/9/2020   | 12/29/2020 | North America / USA / Utah |
| EPI_ISL_746105 | 8/15/2020  | 12/29/2020 | North America / USA / Utah |



|                |            |            |                            |
|----------------|------------|------------|----------------------------|
| EPI_ISL_746106 | 10/2/2020  | 12/29/2020 | North America / USA / Utah |
| EPI_ISL_746107 | 8/14/2020  | 12/29/2020 | North America / USA / Utah |
| EPI_ISL_746108 | 8/14/2020  | 12/29/2020 | North America / USA / Utah |
| EPI_ISL_746109 | 8/18/2020  | 12/29/2020 | North America / USA / Utah |
| EPI_ISL_746110 | 9/9/2020   | 12/29/2020 | North America / USA / Utah |
| EPI_ISL_746111 | 8/14/2020  | 12/29/2020 | North America / USA / Utah |
| EPI_ISL_746112 | 8/18/2020  | 12/29/2020 | North America / USA / Utah |
| EPI_ISL_746113 | 9/8/2020   | 12/29/2020 | North America / USA / Utah |
| EPI_ISL_746114 | 10/12/2020 | 12/29/2020 | North America / USA / Utah |
| EPI_ISL_746115 | 8/14/2020  | 12/29/2020 | North America / USA / Utah |
| EPI_ISL_746116 | 8/18/2020  | 12/29/2020 | North America / USA / Utah |
| EPI_ISL_746117 | 10/2/2020  | 12/29/2020 | North America / USA / Utah |
| EPI_ISL_746118 | 10/2/2020  | 12/29/2020 | North America / USA / Utah |
| EPI_ISL_746119 | 8/14/2020  | 12/29/2020 | North America / USA / Utah |
| EPI_ISL_746120 | 8/18/2020  | 12/29/2020 | North America / USA / Utah |
| EPI_ISL_746121 | 10/1/2020  | 12/29/2020 | North America / USA / Utah |
| EPI_ISL_746122 | 8/15/2020  | 12/29/2020 | North America / USA / Utah |
| EPI_ISL_746123 | 8/17/2020  | 12/29/2020 | North America / USA / Utah |
| EPI_ISL_746124 | 9/30/2020  | 12/29/2020 | North America / USA / Utah |
| EPI_ISL_746125 | 8/14/2020  | 12/29/2020 | North America / USA / Utah |
| EPI_ISL_746126 | 8/14/2020  | 12/29/2020 | North America / USA / Utah |
| EPI_ISL_746127 | 9/9/2020   | 12/29/2020 | North America / USA / Utah |
| EPI_ISL_746128 | 9/5/2020   | 12/29/2020 | North America / USA / Utah |
| EPI_ISL_746129 | 9/9/2020   | 12/29/2020 | North America / USA / Utah |
| EPI_ISL_746130 | 8/15/2020  | 12/29/2020 | North America / USA / Utah |
| EPI_ISL_746131 | 10/2/2020  | 12/29/2020 | North America / USA / Utah |
| EPI_ISL_746132 | 8/14/2020  | 12/29/2020 | North America / USA / Utah |
| EPI_ISL_746133 | 8/14/2020  | 12/29/2020 | North America / USA / Utah |
| EPI_ISL_746134 | 8/14/2020  | 12/29/2020 | North America / USA / Utah |
| EPI_ISL_746135 | 9/7/2020   | 12/29/2020 | North America / USA / Utah |
| EPI_ISL_746136 | 10/11/2020 | 12/29/2020 | North America / USA / Utah |
| EPI_ISL_746137 | 9/9/2020   | 12/29/2020 | North America / USA / Utah |
| EPI_ISL_746138 | 8/14/2020  | 12/29/2020 | North America / USA / Utah |
| EPI_ISL_746139 | 10/2/2020  | 12/29/2020 | North America / USA / Utah |
| EPI_ISL_746140 | 8/14/2020  | 12/29/2020 | North America / USA / Utah |
| EPI_ISL_746141 | 8/14/2020  | 12/29/2020 | North America / USA / Utah |
| EPI_ISL_746142 | 8/18/2020  | 12/29/2020 | North America / USA / Utah |
| EPI_ISL_746143 | 9/8/2020   | 12/29/2020 | North America / USA / Utah |
| EPI_ISL_746144 | 9/4/2020   | 12/29/2020 | North America / USA / Utah |
| EPI_ISL_746145 | 8/15/2020  | 12/29/2020 | North America / USA / Utah |
| EPI_ISL_746146 | 8/18/2020  | 12/29/2020 | North America / USA / Utah |
| EPI_ISL_746147 | 10/2/2020  | 12/29/2020 | North America / USA / Utah |
| EPI_ISL_746148 | 8/14/2020  | 12/29/2020 | North America / USA / Utah |
| EPI_ISL_746149 | 8/14/2020  | 12/29/2020 | North America / USA / Utah |
| EPI_ISL_746150 | 8/18/2020  | 12/29/2020 | North America / USA / Utah |
| EPI_ISL_746151 | 8/18/2020  | 12/29/2020 | North America / USA / Utah |
| EPI_ISL_746152 | 8/14/2020  | 12/29/2020 | North America / USA / Utah |



|                |            |            |                            |
|----------------|------------|------------|----------------------------|
| EPI_ISL_746200 | 8/14/2020  | 12/29/2020 | North America / USA / Utah |
| EPI_ISL_746201 | 8/14/2020  | 12/29/2020 | North America / USA / Utah |
| EPI_ISL_746202 | 8/14/2020  | 12/29/2020 | North America / USA / Utah |
| EPI_ISL_746203 | 8/17/2020  | 12/29/2020 | North America / USA / Utah |
| EPI_ISL_746204 | 10/7/2020  | 12/29/2020 | North America / USA / Utah |
| EPI_ISL_746205 | 10/19/2020 | 12/29/2020 | North America / USA / Utah |
| EPI_ISL_746206 | 10/24/2020 | 12/29/2020 | North America / USA / Utah |
| EPI_ISL_746207 | 10/26/2020 | 12/29/2020 | North America / USA / Utah |
| EPI_ISL_746208 | 10/27/2020 | 12/29/2020 | North America / USA / Utah |
| EPI_ISL_746209 | 10/21/2020 | 12/29/2020 | North America / USA / Utah |
| EPI_ISL_746210 | 8/16/2020  | 12/29/2020 | North America / USA / Utah |
| EPI_ISL_746211 | 10/8/2020  | 12/29/2020 | North America / USA / Utah |
| EPI_ISL_746212 | 10/19/2020 | 12/29/2020 | North America / USA / Utah |
| EPI_ISL_746213 | 10/22/2020 | 12/29/2020 | North America / USA / Utah |
| EPI_ISL_746214 | 10/26/2020 | 12/29/2020 | North America / USA / Utah |
| EPI_ISL_746215 | 8/16/2020  | 12/29/2020 | North America / USA / Utah |
| EPI_ISL_746216 | 10/19/2020 | 12/29/2020 | North America / USA / Utah |
| EPI_ISL_746217 | 10/21/2020 | 12/29/2020 | North America / USA / Utah |
| EPI_ISL_746218 | 10/24/2020 | 12/29/2020 | North America / USA / Utah |
| EPI_ISL_746219 | 10/22/2020 | 12/29/2020 | North America / USA / Utah |
| EPI_ISL_746220 | 10/26/2020 | 12/29/2020 | North America / USA / Utah |
| EPI_ISL_746221 | 10/27/2020 | 12/29/2020 | North America / USA / Utah |
| EPI_ISL_746222 | 10/26/2020 | 12/29/2020 | North America / USA / Utah |
| EPI_ISL_746223 | 8/16/2020  | 12/29/2020 | North America / USA / Utah |
| EPI_ISL_746224 | 10/4/2020  | 12/29/2020 | North America / USA / Utah |
| EPI_ISL_746225 | 10/24/2020 | 12/29/2020 | North America / USA / Utah |
| EPI_ISL_746226 | 10/24/2020 | 12/29/2020 | North America / USA / Utah |
| EPI_ISL_746227 | 10/22/2020 | 12/29/2020 | North America / USA / Utah |
| EPI_ISL_746228 | 10/26/2020 | 12/29/2020 | North America / USA / Utah |
| EPI_ISL_746229 | 10/26/2020 | 12/29/2020 | North America / USA / Utah |
| EPI_ISL_746230 | 10/19/2020 | 12/29/2020 | North America / USA / Utah |
| EPI_ISL_746231 | 10/23/2020 | 12/29/2020 | North America / USA / Utah |
| EPI_ISL_746232 | 10/19/2020 | 12/29/2020 | North America / USA / Utah |
| EPI_ISL_746233 | 10/27/2020 | 12/29/2020 | North America / USA / Utah |
| EPI_ISL_746234 | 10/25/2020 | 12/29/2020 | North America / USA / Utah |
| EPI_ISL_746235 | 10/26/2020 | 12/29/2020 | North America / USA / Utah |
| EPI_ISL_746236 | 10/20/2020 | 12/29/2020 | North America / USA / Utah |
| EPI_ISL_746237 | 10/7/2020  | 12/29/2020 | North America / USA / Utah |
| EPI_ISL_746238 | 10/19/2020 | 12/29/2020 | North America / USA / Utah |
| EPI_ISL_746239 | 10/22/2020 | 12/29/2020 | North America / USA / Utah |
| EPI_ISL_746240 | 10/21/2020 | 12/29/2020 | North America / USA / Utah |
| EPI_ISL_746241 | 10/27/2020 | 12/29/2020 | North America / USA / Utah |
| EPI_ISL_746242 | 10/26/2020 | 12/29/2020 | North America / USA / Utah |
| EPI_ISL_746243 | 10/22/2020 | 12/29/2020 | North America / USA / Utah |
| EPI_ISL_746244 | 8/15/2020  | 12/29/2020 | North America / USA / Utah |
| EPI_ISL_746245 | 10/19/2020 | 12/29/2020 | North America / USA / Utah |
| EPI_ISL_746246 | 10/27/2020 | 12/29/2020 | North America / USA / Utah |

|                |            |            |                            |
|----------------|------------|------------|----------------------------|
| EPI_ISL_746247 | 10/26/2020 | 12/29/2020 | North America / USA / Utah |
| EPI_ISL_746248 | 10/27/2020 | 12/29/2020 | North America / USA / Utah |
| EPI_ISL_746249 | 10/26/2020 | 12/29/2020 | North America / USA / Utah |
| EPI_ISL_746250 | 8/15/2020  | 12/29/2020 | North America / USA / Utah |
| EPI_ISL_746251 | 8/15/2020  | 12/29/2020 | North America / USA / Utah |
| EPI_ISL_746252 | 10/19/2020 | 12/29/2020 | North America / USA / Utah |
| EPI_ISL_746253 | 10/25/2020 | 12/29/2020 | North America / USA / Utah |
| EPI_ISL_746254 | 10/22/2020 | 12/29/2020 | North America / USA / Utah |
| EPI_ISL_746255 | 10/26/2020 | 12/29/2020 | North America / USA / Utah |
| EPI_ISL_746256 | 10/27/2020 | 12/29/2020 | North America / USA / Utah |
| EPI_ISL_746257 | 10/21/2020 | 12/29/2020 | North America / USA / Utah |
| EPI_ISL_746258 | 8/17/2020  | 12/29/2020 | North America / USA / Utah |
| EPI_ISL_746259 | 8/15/2020  | 12/29/2020 | North America / USA / Utah |
| EPI_ISL_746260 | 10/20/2020 | 12/29/2020 | North America / USA / Utah |
| EPI_ISL_746261 | 8/15/2020  | 12/29/2020 | North America / USA / Utah |
| EPI_ISL_746262 | 10/19/2020 | 12/29/2020 | North America / USA / Utah |
| EPI_ISL_746263 | 10/12/2020 | 12/29/2020 | North America / USA / Utah |
| EPI_ISL_746264 | 10/12/2020 | 12/29/2020 | North America / USA / Utah |
| EPI_ISL_746265 | 8/9/2020   | 12/29/2020 | North America / USA / Utah |
| EPI_ISL_746266 | 8/15/2020  | 12/29/2020 | North America / USA / Utah |
| EPI_ISL_746267 | 10/23/2020 | 12/29/2020 | North America / USA / Utah |
| EPI_ISL_746268 | 8/15/2020  | 12/29/2020 | North America / USA / Utah |
| EPI_ISL_746269 | 8/16/2020  | 12/29/2020 | North America / USA / Utah |
| EPI_ISL_746270 | 8/16/2020  | 12/29/2020 | North America / USA / Utah |
| EPI_ISL_746271 | 10/19/2020 | 12/29/2020 | North America / USA / Utah |
| EPI_ISL_746272 | 8/15/2020  | 12/29/2020 | North America / USA / Utah |
| EPI_ISL_746273 | 8/9/2020   | 12/29/2020 | North America / USA / Utah |
| EPI_ISL_746274 | 8/17/2020  | 12/29/2020 | North America / USA / Utah |
| EPI_ISL_746275 | 10/22/2020 | 12/29/2020 | North America / USA / Utah |
| EPI_ISL_746276 | 8/16/2020  | 12/29/2020 | North America / USA / Utah |
| EPI_ISL_746277 | 10/20/2020 | 12/29/2020 | North America / USA / Utah |
| EPI_ISL_746278 | 8/15/2020  | 12/29/2020 | North America / USA / Utah |
| EPI_ISL_746279 | 10/19/2020 | 12/29/2020 | North America / USA / Utah |
| EPI_ISL_746280 | 10/22/2020 | 12/29/2020 | North America / USA / Utah |
| EPI_ISL_746281 | 8/9/2020   | 12/29/2020 | North America / USA / Utah |
| EPI_ISL_746282 | 10/24/2020 | 12/29/2020 | North America / USA / Utah |
| EPI_ISL_746283 | 8/15/2020  | 12/29/2020 | North America / USA / Utah |
| EPI_ISL_746284 | 10/23/2020 | 12/29/2020 | North America / USA / Utah |
| EPI_ISL_746285 | 8/17/2020  | 12/29/2020 | North America / USA / Utah |
| EPI_ISL_746286 | 10/20/2020 | 12/29/2020 | North America / USA / Utah |
| EPI_ISL_746287 | 8/15/2020  | 12/29/2020 | North America / USA / Utah |
| EPI_ISL_746288 | 8/17/2020  | 12/29/2020 | North America / USA / Utah |
| EPI_ISL_746289 | 8/9/2020   | 12/29/2020 | North America / USA / Utah |
| EPI_ISL_746290 | 8/15/2020  | 12/29/2020 | North America / USA / Utah |
| EPI_ISL_746291 | 10/21/2020 | 12/29/2020 | North America / USA / Utah |
| EPI_ISL_746292 | 8/15/2020  | 12/29/2020 | North America / USA / Utah |
| EPI_ISL_746293 | 8/16/2020  | 12/29/2020 | North America / USA / Utah |

|                |            |            |                                     |
|----------------|------------|------------|-------------------------------------|
| EPI_ISL_746294 | 7/26/2020  | 12/29/2020 | North America / USA / Utah          |
| EPI_ISL_746295 | 10/23/2020 | 12/29/2020 | North America / USA / Utah          |
| EPI_ISL_746296 | 8/15/2020  | 12/29/2020 | North America / USA / Utah          |
| EPI_ISL_746297 | 8/15/2020  | 12/29/2020 | North America / USA / Utah          |
| EPI_ISL_746298 | 10/23/2020 | 12/29/2020 | North America / USA / Utah          |
| EPI_ISL_746299 | 8/16/2020  | 12/29/2020 | North America / USA / Utah          |
| EPI_ISL_746300 | 10/20/2020 | 12/29/2020 | North America / USA / Utah          |
| EPI_ISL_746301 | 10/19/2020 | 12/29/2020 | North America / USA / Utah          |
| EPI_ISL_746302 | 10/13/2020 | 12/29/2020 | North America / USA / Utah          |
| EPI_ISL_746303 | 8/15/2020  | 12/29/2020 | North America / USA / Utah          |
| EPI_ISL_746304 | 8/15/2020  | 12/29/2020 | North America / USA / Utah          |
| EPI_ISL_746305 | 8/15/2020  | 12/29/2020 | North America / USA / Utah          |
| EPI_ISL_746306 | 8/9/2020   | 12/29/2020 | North America / USA / Utah          |
| EPI_ISL_746307 | 10/24/2020 | 12/29/2020 | North America / USA / Utah          |
| EPI_ISL_746308 | 8/16/2020  | 12/29/2020 | North America / USA / Utah          |
| EPI_ISL_746309 | 8/17/2020  | 12/29/2020 | North America / USA / Utah          |
| EPI_ISL_746310 | 10/6/2020  | 12/29/2020 | North America / USA / Utah          |
| EPI_ISL_746311 | 10/7/2020  | 12/29/2020 | North America / USA / Utah          |
| EPI_ISL_746312 | 10/13/2020 | 12/29/2020 | North America / USA / Utah          |
| EPI_ISL_746313 | 8/9/2020   | 12/29/2020 | North America / USA / Utah          |
| EPI_ISL_746314 | 8/9/2020   | 12/29/2020 | North America / USA / Utah          |
| EPI_ISL_746315 | 8/16/2020  | 12/29/2020 | North America / USA / Utah          |
| EPI_ISL_746316 | 8/17/2020  | 12/29/2020 | North America / USA / Utah          |
| EPI_ISL_746317 | 8/17/2020  | 12/29/2020 | North America / USA / Utah          |
| EPI_ISL_746324 | 6/27/2020  | 12/29/2020 | Asia / Bangladesh / Khulna / Magura |
| EPI_ISL_746341 | 6/16/2020  | 12/29/2020 | North America / USA / Utah          |
| EPI_ISL_746360 | 6/18/2020  | 12/29/2020 | North America / USA / Utah          |
| EPI_ISL_746361 | 6/18/2020  | 12/29/2020 | North America / USA / Utah          |
| EPI_ISL_746362 | 6/18/2020  | 12/29/2020 | North America / USA / Utah          |
| EPI_ISL_746363 | 6/16/2020  | 12/29/2020 | North America / USA / Utah          |
| EPI_ISL_746364 | 6/18/2020  | 12/29/2020 | North America / USA / Utah          |
| EPI_ISL_746365 | 6/17/2020  | 12/29/2020 | North America / USA / Utah          |
| EPI_ISL_746366 | 6/18/2020  | 12/29/2020 | North America / USA / Utah          |
| EPI_ISL_746367 | 6/16/2020  | 12/29/2020 | North America / USA / Utah          |
| EPI_ISL_746368 | 6/18/2020  | 12/29/2020 | North America / USA / Utah          |
| EPI_ISL_746369 | 6/18/2020  | 12/29/2020 | North America / USA / Utah          |
| EPI_ISL_746370 | 6/17/2020  | 12/29/2020 | North America / USA / Utah          |
| EPI_ISL_746371 | 6/17/2020  | 12/29/2020 | North America / USA / Utah          |
| EPI_ISL_746372 | 6/17/2020  | 12/29/2020 | North America / USA / Utah          |
| EPI_ISL_746373 | 6/17/2020  | 12/29/2020 | North America / USA / Utah          |
| EPI_ISL_746374 | 6/16/2020  | 12/29/2020 | North America / USA / Utah          |
| EPI_ISL_746375 | 6/18/2020  | 12/29/2020 | North America / USA / Utah          |
| EPI_ISL_746376 | 6/18/2020  | 12/29/2020 | North America / USA / Utah          |
| EPI_ISL_746377 | 6/16/2020  | 12/29/2020 | North America / USA / Utah          |
| EPI_ISL_746378 | 6/18/2020  | 12/29/2020 | North America / USA / Utah          |
| EPI_ISL_746379 | 6/16/2020  | 12/29/2020 | North America / USA / Utah          |
| EPI_ISL_746380 | 6/16/2020  | 12/29/2020 | North America / USA / Utah          |



|                |            |            |                                                              |
|----------------|------------|------------|--------------------------------------------------------------|
| EPI_ISL_746463 | 11/30/2020 | 12/29/2020 | North America / USA / Utah                                   |
| EPI_ISL_746464 | 7/14/2020  | 12/29/2020 | North America / USA / Utah                                   |
| EPI_ISL_746465 | 6/18/2020  | 12/29/2020 | North America / USA / Utah                                   |
| EPI_ISL_746466 | 11/30/2020 | 12/29/2020 | North America / USA / Utah                                   |
| EPI_ISL_746467 | 11/29/2020 | 12/29/2020 | North America / USA / Utah                                   |
| EPI_ISL_746468 | 6/19/2020  | 12/29/2020 | North America / USA / Utah                                   |
| EPI_ISL_746469 | 11/30/2020 | 12/29/2020 | North America / USA / Utah                                   |
| EPI_ISL_746470 | 6/19/2020  | 12/29/2020 | North America / USA / Utah                                   |
| EPI_ISL_746471 | 6/18/2020  | 12/29/2020 | North America / USA / Utah                                   |
| EPI_ISL_746472 | 6/19/2020  | 12/29/2020 | North America / USA / Utah                                   |
| EPI_ISL_746473 | 6/18/2020  | 12/29/2020 | North America / USA / Utah                                   |
| EPI_ISL_746474 | 6/18/2020  | 12/29/2020 | North America / USA / Utah                                   |
| EPI_ISL_746475 | 6/19/2020  | 12/29/2020 | North America / USA / Utah                                   |
| EPI_ISL_746476 | 6/19/2020  | 12/29/2020 | North America / USA / Utah                                   |
| EPI_ISL_746477 | 6/18/2020  | 12/29/2020 | North America / USA / Utah                                   |
| EPI_ISL_746478 | 9/2/2020   | 12/29/2020 | South America / Chile / Region Metropolitana de Santiago / S |
| EPI_ISL_746479 | 10/2/2020  | 12/29/2020 | South America / Chile / Ñuble / Chillan                      |
| EPI_ISL_746480 | 9/29/2020  | 12/29/2020 | South America / Chile / La Araucania / Temuco                |
| EPI_ISL_746481 | 9/15/2020  | 12/29/2020 | South America / Chile / La Araucania / Temuco                |
| EPI_ISL_746482 | 5/29/2020  | 12/29/2020 | South America / Chile / Region Metropolitana de Santiago / S |
| EPI_ISL_746483 | 9/28/2020  | 12/29/2020 | South America / Chile / Region Metropolitana de Santiago / S |
| EPI_ISL_746484 | 6/3/2020   | 12/29/2020 | South America / Chile / Region Metropolitana de Santiago / S |
| EPI_ISL_746485 | 7/22/2020  | 12/29/2020 | South America / Chile / Region Metropolitana de Santiago / S |
| EPI_ISL_746486 | 8/17/2020  | 12/29/2020 | South America / Chile / Region Metropolitana de Santiago / S |
| EPI_ISL_746487 | 8/19/2020  | 12/29/2020 | South America / Chile / Region Metropolitana de Santiago / S |
| EPI_ISL_746488 | 8/19/2020  | 12/29/2020 | South America / Chile / Region Metropolitana de Santiago / S |
| EPI_ISL_746489 | 5/23/2020  | 12/29/2020 | South America / Chile / Region Metropolitana de Santiago / S |
| EPI_ISL_746490 | 9/24/2020  | 12/29/2020 | South America / Chile / Region Metropolitana de Santiago / S |
| EPI_ISL_746491 | 9/30/2020  | 12/29/2020 | South America / Chile / Biobio / Concepcion                  |
| EPI_ISL_746492 | 10/1/2020  | 12/29/2020 | South America / Chile / Antofagasta / Antofagasta            |
| EPI_ISL_746493 | 5/30/2020  | 12/29/2020 | South America / Chile / Region Metropolitana de Santiago / S |
| EPI_ISL_746494 | 8/21/2020  | 12/29/2020 | South America / Chile / Region Metropolitana de Santiago / S |
| EPI_ISL_746495 | 8/21/2020  | 12/29/2020 | South America / Chile / Region Metropolitana de Santiago / S |
| EPI_ISL_746496 | 9/2/2020   | 12/29/2020 | South America / Chile / Region Metropolitana de Santiago / S |
| EPI_ISL_746497 | 7/18/2020  | 12/29/2020 | South America / Chile / Region Metropolitana de Santiago / S |
| EPI_ISL_746498 | 10/1/2020  | 12/29/2020 | South America / Chile / Antofagasta / Antofagasta            |
| EPI_ISL_746499 | 9/8/2020   | 12/29/2020 | South America / Chile / La Araucania / Temuco                |
| EPI_ISL_746500 | 9/15/2020  | 12/29/2020 | South America / Chile / La Araucania / Temuco                |
| EPI_ISL_746501 | 9/29/2020  | 12/29/2020 | South America / Chile / La Araucania / Temuco                |
| EPI_ISL_746502 | 9/29/2020  | 12/29/2020 | South America / Chile / La Araucania / Angol                 |
| EPI_ISL_746503 | 10/16/2020 | 12/29/2020 | South America / Chile / La Araucania / Temuco                |
| EPI_ISL_746504 | 10/16/2020 | 12/29/2020 | South America / Chile / La Araucania / Temuco                |
| EPI_ISL_746505 | 10/16/2020 | 12/29/2020 | South America / Chile / La Araucania / Temuco                |
| EPI_ISL_746506 | 6/24/2020  | 12/29/2020 | South America / Chile / Region Metropolitana de Santiago / S |
| EPI_ISL_746507 | 9/2/2020   | 12/29/2020 | South America / Chile / Biobio / Concepcion                  |
| EPI_ISL_746508 | 9/2/2020   | 12/29/2020 | South America / Chile / Biobio / Concepcion                  |
| EPI_ISL_746509 | 9/14/2020  | 12/29/2020 | South America / Chile / Biobio / Concepcion                  |

















|                |            |            |                            |
|----------------|------------|------------|----------------------------|
| EPI_ISL_746948 | 11/12/2020 | 12/29/2020 | North America / USA / Utah |
| EPI_ISL_746949 | 11/30/2020 | 12/29/2020 | North America / USA / Utah |
| EPI_ISL_746950 | 12/4/2020  | 12/29/2020 | North America / USA / Utah |
| EPI_ISL_746951 | 11/25/2020 | 12/29/2020 | North America / USA / Utah |
| EPI_ISL_746952 | 11/27/2020 | 12/29/2020 | North America / USA / Utah |
| EPI_ISL_746953 | 11/28/2020 | 12/29/2020 | North America / USA / Utah |
| EPI_ISL_746954 | 11/27/2020 | 12/29/2020 | North America / USA / Utah |
| EPI_ISL_746955 | 11/27/2020 | 12/29/2020 | North America / USA / Utah |
| EPI_ISL_746956 | 11/30/2020 | 12/29/2020 | North America / USA / Utah |
| EPI_ISL_746957 | 11/30/2020 | 12/29/2020 | North America / USA / Utah |
| EPI_ISL_746958 | 12/3/2020  | 12/29/2020 | North America / USA / Utah |
| EPI_ISL_746959 | 12/1/2020  | 12/29/2020 | North America / USA / Utah |
| EPI_ISL_746961 | 11/30/2020 | 12/29/2020 | North America / USA / Utah |
| EPI_ISL_746962 | 12/1/2020  | 12/29/2020 | North America / USA / Utah |
| EPI_ISL_746963 | 11/20/2020 | 12/29/2020 | North America / USA / Utah |
| EPI_ISL_746964 | 11/10/2020 | 12/29/2020 | North America / USA / Utah |
| EPI_ISL_746965 | 11/19/2020 | 12/29/2020 | North America / USA / Utah |
| EPI_ISL_746966 | 12/7/2020  | 12/29/2020 | North America / USA / Utah |
| EPI_ISL_746967 | 12/1/2020  | 12/29/2020 | North America / USA / Utah |
| EPI_ISL_746968 | 11/30/2020 | 12/29/2020 | North America / USA / Utah |
| EPI_ISL_746969 | 11/18/2020 | 12/29/2020 | North America / USA / Utah |
| EPI_ISL_746970 | 11/29/2020 | 12/29/2020 | North America / USA / Utah |
| EPI_ISL_746971 | 12/1/2020  | 12/29/2020 | North America / USA / Utah |
| EPI_ISL_746972 | 11/12/2020 | 12/29/2020 | North America / USA / Utah |
| EPI_ISL_746973 | 11/30/2020 | 12/29/2020 | North America / USA / Utah |
| EPI_ISL_746974 | 11/23/2020 | 12/29/2020 | North America / USA / Utah |
| EPI_ISL_746975 | 12/1/2020  | 12/29/2020 | North America / USA / Utah |
| EPI_ISL_746976 | 12/3/2020  | 12/29/2020 | North America / USA / Utah |
| EPI_ISL_746977 | 11/30/2020 | 12/29/2020 | North America / USA / Utah |
| EPI_ISL_746978 | 11/30/2020 | 12/29/2020 | North America / USA / Utah |
| EPI_ISL_746979 | 11/23/2020 | 12/29/2020 | North America / USA / Utah |
| EPI_ISL_746980 | 11/30/2020 | 12/29/2020 | North America / USA / Utah |
| EPI_ISL_746981 | 11/30/2020 | 12/29/2020 | North America / USA / Utah |
| EPI_ISL_746982 | 11/16/2020 | 12/29/2020 | North America / USA / Utah |
| EPI_ISL_746983 | 12/3/2020  | 12/29/2020 | North America / USA / Utah |
| EPI_ISL_746984 | 12/3/2020  | 12/29/2020 | North America / USA / Utah |
| EPI_ISL_746985 | 11/30/2020 | 12/29/2020 | North America / USA / Utah |
| EPI_ISL_746986 | 12/4/2020  | 12/29/2020 | North America / USA / Utah |
| EPI_ISL_746987 | 11/30/2020 | 12/29/2020 | North America / USA / Utah |
| EPI_ISL_746988 | 11/30/2020 | 12/29/2020 | North America / USA / Utah |
| EPI_ISL_746989 | 11/30/2020 | 12/29/2020 | North America / USA / Utah |
| EPI_ISL_746990 | 11/30/2020 | 12/29/2020 | North America / USA / Utah |
| EPI_ISL_746991 | 12/1/2020  | 12/29/2020 | North America / USA / Utah |
| EPI_ISL_746992 | 12/4/2020  | 12/29/2020 | North America / USA / Utah |
| EPI_ISL_746993 | 12/2/2020  | 12/29/2020 | North America / USA / Utah |
| EPI_ISL_746994 | 12/2/2020  | 12/29/2020 | North America / USA / Utah |
| EPI_ISL_746995 | 11/30/2020 | 12/29/2020 | North America / USA / Utah |





|                |            |            |                                            |
|----------------|------------|------------|--------------------------------------------|
| EPI_ISL_747206 | 12/8/2020  | 12/30/2020 | North America / USA / Washington           |
| EPI_ISL_747207 | 12/8/2020  | 12/30/2020 | North America / USA / Washington           |
| EPI_ISL_747208 | 12/8/2020  | 12/30/2020 | North America / USA / Washington           |
| EPI_ISL_747209 | 12/8/2020  | 12/30/2020 | North America / USA / Washington           |
| EPI_ISL_747210 | 12/8/2020  | 12/30/2020 | North America / USA / Washington           |
| EPI_ISL_747211 | 12/8/2020  | 12/30/2020 | North America / USA / Washington           |
| EPI_ISL_747212 | 12/8/2020  | 12/30/2020 | North America / USA / Washington           |
| EPI_ISL_747213 | 12/8/2020  | 12/30/2020 | North America / USA / Washington           |
| EPI_ISL_747215 | 12/8/2020  | 12/30/2020 | North America / USA / Washington           |
| EPI_ISL_747216 | 12/8/2020  | 12/30/2020 | North America / USA / Washington           |
| EPI_ISL_747217 | 12/8/2020  | 12/30/2020 | North America / USA / Washington           |
| EPI_ISL_747218 | 12/8/2020  | 12/30/2020 | North America / USA / Washington           |
| EPI_ISL_747219 | 12/8/2020  | 12/30/2020 | North America / USA / Washington           |
| EPI_ISL_747220 | 12/8/2020  | 12/30/2020 | North America / USA / Washington           |
| EPI_ISL_747221 | 12/8/2020  | 12/30/2020 | North America / USA / Washington           |
| EPI_ISL_747222 | 12/8/2020  | 12/30/2020 | North America / USA / Washington           |
| EPI_ISL_747223 | 12/8/2020  | 12/30/2020 | North America / USA / Washington           |
| EPI_ISL_747224 | 12/8/2020  | 12/30/2020 | North America / USA / Washington           |
| EPI_ISL_747225 | 12/8/2020  | 12/30/2020 | North America / USA / Washington           |
| EPI_ISL_747227 | 12/8/2020  | 12/30/2020 | North America / USA / Washington           |
| EPI_ISL_747228 | 12/8/2020  | 12/30/2020 | North America / USA / Washington           |
| EPI_ISL_747229 | 12/8/2020  | 12/30/2020 | North America / USA / Washington           |
| EPI_ISL_747230 | 12/8/2020  | 12/30/2020 | North America / USA / Washington           |
| EPI_ISL_747231 | 12/7/2020  | 12/30/2020 | North America / USA / Washington           |
| EPI_ISL_747232 | 12/7/2020  | 12/30/2020 | North America / USA / Washington           |
| EPI_ISL_747233 | 9/18/2020  | 12/30/2020 | Asia / Indonesia / Jakarta                 |
| EPI_ISL_747234 | 6/5/2020   | 12/30/2020 | Asia / Indonesia / Jakarta                 |
| EPI_ISL_747235 | 10/21/2020 | 12/30/2020 | Asia / Indonesia / West Java               |
| EPI_ISL_747236 | 10/23/2020 | 12/30/2020 | Asia / Indonesia / West Java               |
| EPI_ISL_747237 | 10/1/2020  | 12/30/2020 | Asia / Indonesia / Bangka Belitung Islands |
| EPI_ISL_747238 | 9/23/2020  | 12/30/2020 | Asia / Indonesia / West Java               |
| EPI_ISL_747239 | 10/2/2020  | 12/30/2020 | Asia / Indonesia / West Java               |
| EPI_ISL_747240 | 10/14/2020 | 12/30/2020 | Asia / Indonesia / West Java               |
| EPI_ISL_747241 | 10/15/2020 | 12/30/2020 | Asia / Indonesia / West Java               |
| EPI_ISL_747242 | 8/28/2020  | 12/30/2020 | North America / Mexico / Baja California   |
| EPI_ISL_747243 | 9/21/2020  | 12/30/2020 | North America / Mexico / Baja California   |
| EPI_ISL_747244 | 12/22/2020 | 12/30/2020 | Asia / India / Karnataka                   |
| EPI_ISL_747245 | 9/8/2020   | 12/30/2020 | Asia / South Korea                         |
| EPI_ISL_747246 | 9/8/2020   | 12/30/2020 | Asia / South Korea                         |
| EPI_ISL_747247 | 9/5/2020   | 12/30/2020 | Asia / South Korea                         |
| EPI_ISL_747248 | 9/2/2020   | 12/30/2020 | Asia / South Korea                         |
| EPI_ISL_747249 | 9/7/2020   | 12/30/2020 | Asia / South Korea                         |
| EPI_ISL_747250 | 9/8/2020   | 12/30/2020 | Asia / South Korea                         |
| EPI_ISL_747251 | 9/8/2020   | 12/30/2020 | Asia / South Korea                         |
| EPI_ISL_747252 | 9/3/2020   | 12/30/2020 | Asia / South Korea                         |
| EPI_ISL_747253 | 9/4/2020   | 12/30/2020 | Asia / South Korea                         |
| EPI_ISL_747254 | 9/4/2020   | 12/30/2020 | Asia / South Korea                         |

|                |           |                                      |
|----------------|-----------|--------------------------------------|
| EPI_ISL_747256 | 8/27/2020 | 12/30/2020 Asia / South Korea        |
| EPI_ISL_747257 | 8/26/2020 | 12/30/2020 Asia / South Korea        |
| EPI_ISL_747258 | 9/5/2020  | 12/30/2020 Asia / South Korea        |
| EPI_ISL_747259 | 9/5/2020  | 12/30/2020 Asia / South Korea        |
| EPI_ISL_747260 | 9/4/2020  | 12/30/2020 Asia / South Korea        |
| EPI_ISL_747261 | 9/4/2020  | 12/30/2020 Asia / South Korea        |
| EPI_ISL_747262 | 8/21/2020 | 12/30/2020 Asia / South Korea        |
| EPI_ISL_747263 | 9/5/2020  | 12/30/2020 Asia / South Korea        |
| EPI_ISL_747264 | 8/28/2020 | 12/30/2020 Asia / South Korea        |
| EPI_ISL_747265 | 9/11/2020 | 12/30/2020 Asia / South Korea        |
| EPI_ISL_747266 | 9/10/2020 | 12/30/2020 Asia / South Korea        |
| EPI_ISL_747267 | 9/9/2020  | 12/30/2020 Asia / South Korea        |
| EPI_ISL_747268 | 9/10/2020 | 12/30/2020 Asia / South Korea        |
| EPI_ISL_747269 | 9/8/2020  | 12/30/2020 Asia / South Korea        |
| EPI_ISL_747270 | 9/1/2020  | 12/30/2020 Asia / South Korea        |
| EPI_ISL_747271 | 8/29/2020 | 12/30/2020 Asia / South Korea        |
| EPI_ISL_747272 | 8/24/2020 | 12/30/2020 Asia / South Korea        |
| EPI_ISL_747273 | 8/23/2020 | 12/30/2020 Asia / South Korea        |
| EPI_ISL_747274 | 9/10/2020 | 12/30/2020 Asia / South Korea        |
| EPI_ISL_747275 | 9/10/2020 | 12/30/2020 Asia / South Korea        |
| EPI_ISL_747276 | 9/10/2020 | 12/30/2020 Asia / South Korea        |
| EPI_ISL_747277 | 9/1/2020  | 12/30/2020 Asia / South Korea        |
| EPI_ISL_747278 | 9/1/2020  | 12/30/2020 Asia / South Korea        |
| EPI_ISL_747279 | 8/31/2020 | 12/30/2020 Asia / South Korea        |
| EPI_ISL_747280 | 9/9/2020  | 12/30/2020 Asia / South Korea        |
| EPI_ISL_747281 | 9/10/2020 | 12/30/2020 Asia / South Korea        |
| EPI_ISL_747283 | 12/6/2020 | 12/30/2020 Asia / Bangladesh / Dhaka |
| EPI_ISL_747284 | 9/23/2020 | 12/30/2020 Asia / South Korea        |
| EPI_ISL_747285 | 9/17/2020 | 12/30/2020 Asia / South Korea        |
| EPI_ISL_747286 | 9/15/2020 | 12/30/2020 Asia / South Korea        |
| EPI_ISL_747287 | 9/24/2020 | 12/30/2020 Asia / South Korea        |
| EPI_ISL_747289 | 9/4/2020  | 12/30/2020 Asia / South Korea        |
| EPI_ISL_747290 | 9/24/2020 | 12/30/2020 Asia / South Korea        |
| EPI_ISL_747291 | 9/15/2020 | 12/30/2020 Asia / South Korea        |
| EPI_ISL_747292 | 9/16/2020 | 12/30/2020 Asia / South Korea        |
| EPI_ISL_747293 | 9/15/2020 | 12/30/2020 Asia / South Korea        |
| EPI_ISL_747294 | 9/13/2020 | 12/30/2020 Asia / South Korea        |
| EPI_ISL_747295 | 9/23/2020 | 12/30/2020 Asia / South Korea        |
| EPI_ISL_747296 | 9/22/2020 | 12/30/2020 Asia / South Korea        |
| EPI_ISL_747297 | 9/21/2020 | 12/30/2020 Asia / South Korea        |
| EPI_ISL_747298 | 9/15/2020 | 12/30/2020 Asia / South Korea        |
| EPI_ISL_747299 | 9/15/2020 | 12/30/2020 Asia / South Korea        |
| EPI_ISL_747300 | 9/2/2020  | 12/30/2020 Asia / South Korea        |
| EPI_ISL_747301 | 9/9/2020  | 12/30/2020 Asia / South Korea        |
| EPI_ISL_747302 | 9/23/2020 | 12/30/2020 Asia / South Korea        |
| EPI_ISL_747303 | 9/17/2020 | 12/30/2020 Asia / South Korea        |
| EPI_ISL_747304 | 9/17/2020 | 12/30/2020 Asia / South Korea        |

|                |            |                               |
|----------------|------------|-------------------------------|
| EPI_ISL_747306 | 9/16/2020  | 12/30/2020 Asia / South Korea |
| EPI_ISL_747308 | 9/23/2020  | 12/30/2020 Asia / South Korea |
| EPI_ISL_747309 | 9/23/2020  | 12/30/2020 Asia / South Korea |
| EPI_ISL_747310 | 9/18/2020  | 12/30/2020 Asia / South Korea |
| EPI_ISL_747312 | 9/21/2020  | 12/30/2020 Asia / South Korea |
| EPI_ISL_747313 | 9/21/2020  | 12/30/2020 Asia / South Korea |
| EPI_ISL_747314 | 9/23/2020  | 12/30/2020 Asia / South Korea |
| EPI_ISL_747315 | 9/30/2020  | 12/30/2020 Asia / South Korea |
| EPI_ISL_747316 | 9/29/2020  | 12/30/2020 Asia / South Korea |
| EPI_ISL_747317 | 9/23/2020  | 12/30/2020 Asia / South Korea |
| EPI_ISL_747319 | 9/14/2020  | 12/30/2020 Asia / South Korea |
| EPI_ISL_747320 | 10/10/2020 | 12/30/2020 Asia / South Korea |
| EPI_ISL_747321 | 10/9/2020  | 12/30/2020 Asia / South Korea |
| EPI_ISL_747322 | 10/2/2020  | 12/30/2020 Asia / South Korea |
| EPI_ISL_747324 | 10/8/2020  | 12/30/2020 Asia / South Korea |
| EPI_ISL_747325 | 10/9/2020  | 12/30/2020 Asia / South Korea |
| EPI_ISL_747326 | 9/1/2020   | 12/30/2020 Asia / South Korea |
| EPI_ISL_747327 | 10/2/2020  | 12/30/2020 Asia / South Korea |
| EPI_ISL_747328 | 10/1/2020  | 12/30/2020 Asia / South Korea |
| EPI_ISL_747329 | 9/18/2020  | 12/30/2020 Asia / South Korea |
| EPI_ISL_747330 | 9/23/2020  | 12/30/2020 Asia / South Korea |
| EPI_ISL_747331 | 9/26/2020  | 12/30/2020 Asia / South Korea |
| EPI_ISL_747332 | 10/4/2020  | 12/30/2020 Asia / South Korea |
| EPI_ISL_747336 | 9/11/2020  | 12/30/2020 Asia / South Korea |
| EPI_ISL_747337 | 9/12/2020  | 12/30/2020 Asia / South Korea |
| EPI_ISL_747338 | 9/17/2020  | 12/30/2020 Asia / South Korea |
| EPI_ISL_747339 | 9/17/2020  | 12/30/2020 Asia / South Korea |
| EPI_ISL_747340 | 9/18/2020  | 12/30/2020 Asia / South Korea |
| EPI_ISL_747341 | 9/19/2020  | 12/30/2020 Asia / South Korea |
| EPI_ISL_747343 | 9/25/2020  | 12/30/2020 Asia / South Korea |
| EPI_ISL_747344 | 9/25/2020  | 12/30/2020 Asia / South Korea |
| EPI_ISL_747345 | 9/25/2020  | 12/30/2020 Asia / South Korea |
| EPI_ISL_747346 | 9/26/2020  | 12/30/2020 Asia / South Korea |
| EPI_ISL_747347 | 9/26/2020  | 12/30/2020 Asia / South Korea |
| EPI_ISL_747349 | 9/29/2020  | 12/30/2020 Asia / South Korea |
| EPI_ISL_747350 | 9/30/2020  | 12/30/2020 Asia / South Korea |
| EPI_ISL_747351 | 9/29/2020  | 12/30/2020 Asia / South Korea |
| EPI_ISL_747352 | 10/1/2020  | 12/30/2020 Asia / South Korea |
| EPI_ISL_747353 | 9/30/2020  | 12/30/2020 Asia / South Korea |
| EPI_ISL_747355 | 10/1/2020  | 12/30/2020 Asia / South Korea |
| EPI_ISL_747356 | 10/2/2020  | 12/30/2020 Asia / South Korea |
| EPI_ISL_747357 | 10/4/2020  | 12/30/2020 Asia / South Korea |
| EPI_ISL_747358 | 10/4/2020  | 12/30/2020 Asia / South Korea |
| EPI_ISL_747359 | 10/4/2020  | 12/30/2020 Asia / South Korea |
| EPI_ISL_747360 | 10/4/2020  | 12/30/2020 Asia / South Korea |
| EPI_ISL_747361 | 10/5/2020  | 12/30/2020 Asia / South Korea |
| EPI_ISL_747363 | 10/5/2020  | 12/30/2020 Asia / South Korea |

|                |            |                               |
|----------------|------------|-------------------------------|
| EPI_ISL_747364 | 10/5/2020  | 12/30/2020 Asia / South Korea |
| EPI_ISL_747365 | 10/6/2020  | 12/30/2020 Asia / South Korea |
| EPI_ISL_747366 | 10/7/2020  | 12/30/2020 Asia / South Korea |
| EPI_ISL_747367 | 10/9/2020  | 12/30/2020 Asia / South Korea |
| EPI_ISL_747368 | 10/11/2020 | 12/30/2020 Asia / South Korea |
| EPI_ISL_747369 | 10/13/2020 | 12/30/2020 Asia / South Korea |
| EPI_ISL_747370 | 10/14/2020 | 12/30/2020 Asia / South Korea |
| EPI_ISL_747371 | 10/13/2020 | 12/30/2020 Asia / South Korea |
| EPI_ISL_747372 | 10/15/2020 | 12/30/2020 Asia / South Korea |
| EPI_ISL_747373 | 10/16/2020 | 12/30/2020 Asia / South Korea |
| EPI_ISL_747374 | 9/14/2020  | 12/30/2020 Asia / South Korea |
| EPI_ISL_747375 | 9/18/2020  | 12/30/2020 Asia / South Korea |
| EPI_ISL_747377 | 10/13/2020 | 12/30/2020 Asia / South Korea |
| EPI_ISL_747378 | 10/16/2020 | 12/30/2020 Asia / South Korea |
| EPI_ISL_747379 | 10/20/2020 | 12/30/2020 Asia / South Korea |
| EPI_ISL_747380 | 10/20/2020 | 12/30/2020 Asia / South Korea |
| EPI_ISL_747381 | 10/20/2020 | 12/30/2020 Asia / South Korea |
| EPI_ISL_747382 | 10/21/2020 | 12/30/2020 Asia / South Korea |
| EPI_ISL_747383 | 11/12/2020 | 12/30/2020 Asia / South Korea |
| EPI_ISL_747384 | 11/19/2020 | 12/30/2020 Asia / South Korea |
| EPI_ISL_747385 | 11/10/2020 | 12/30/2020 Asia / South Korea |
| EPI_ISL_747386 | 11/16/2020 | 12/30/2020 Asia / South Korea |
| EPI_ISL_747387 | 11/15/2020 | 12/30/2020 Asia / South Korea |
| EPI_ISL_747388 | 11/14/2020 | 12/30/2020 Asia / South Korea |
| EPI_ISL_747389 | 11/12/2020 | 12/30/2020 Asia / South Korea |
| EPI_ISL_747390 | 11/12/2020 | 12/30/2020 Asia / South Korea |
| EPI_ISL_747391 | 11/20/2020 | 12/30/2020 Asia / South Korea |
| EPI_ISL_747392 | 11/18/2020 | 12/30/2020 Asia / South Korea |
| EPI_ISL_747393 | 11/16/2020 | 12/30/2020 Asia / South Korea |
| EPI_ISL_747394 | 11/14/2020 | 12/30/2020 Asia / South Korea |
| EPI_ISL_747395 | 11/12/2020 | 12/30/2020 Asia / South Korea |
| EPI_ISL_747396 | 11/9/2020  | 12/30/2020 Asia / South Korea |
| EPI_ISL_747397 | 11/16/2020 | 12/30/2020 Asia / South Korea |
| EPI_ISL_747398 | 11/20/2020 | 12/30/2020 Asia / South Korea |
| EPI_ISL_747399 | 11/21/2020 | 12/30/2020 Asia / South Korea |
| EPI_ISL_747400 | 11/19/2020 | 12/30/2020 Asia / South Korea |
| EPI_ISL_747401 | 11/19/2020 | 12/30/2020 Asia / South Korea |
| EPI_ISL_747402 | 11/17/2020 | 12/30/2020 Asia / South Korea |
| EPI_ISL_747403 | 11/15/2020 | 12/30/2020 Asia / South Korea |
| EPI_ISL_747406 | 11/14/2020 | 12/30/2020 Asia / South Korea |
| EPI_ISL_747407 | 11/11/2020 | 12/30/2020 Asia / South Korea |
| EPI_ISL_747408 | 11/20/2020 | 12/30/2020 Asia / South Korea |
| EPI_ISL_747409 | 11/13/2020 | 12/30/2020 Asia / South Korea |
| EPI_ISL_747410 | 11/12/2020 | 12/30/2020 Asia / South Korea |
| EPI_ISL_747411 | 11/15/2020 | 12/30/2020 Asia / South Korea |
| EPI_ISL_747412 | 11/14/2020 | 12/30/2020 Asia / South Korea |
| EPI_ISL_747413 | 10/28/2020 | 12/30/2020 Asia / South Korea |

|                |            |                                             |
|----------------|------------|---------------------------------------------|
| EPI_ISL_747414 | 7/3/2020   | 12/30/2020 Asia / South Korea               |
| EPI_ISL_747416 | 7/4/2020   | 12/30/2020 Asia / South Korea               |
| EPI_ISL_747417 | 7/4/2020   | 12/30/2020 Asia / South Korea               |
| EPI_ISL_747418 | 7/8/2020   | 12/30/2020 Asia / South Korea               |
| EPI_ISL_747419 | 7/13/2020  | 12/30/2020 Asia / South Korea               |
| EPI_ISL_747420 | 11/14/2020 | 12/30/2020 Asia / South Korea               |
| EPI_ISL_747425 | 11/22/2020 | 12/30/2020 Asia / South Korea               |
| EPI_ISL_747426 | 11/21/2020 | 12/30/2020 Asia / South Korea               |
| EPI_ISL_747427 | 11/22/2020 | 12/30/2020 Asia / South Korea               |
| EPI_ISL_747428 | 11/22/2020 | 12/30/2020 Asia / South Korea               |
| EPI_ISL_747429 | 11/22/2020 | 12/30/2020 Asia / South Korea               |
| EPI_ISL_747430 | 11/7/2020  | 12/30/2020 Asia / South Korea               |
| EPI_ISL_747431 | 11/24/2020 | 12/30/2020 Asia / South Korea               |
| EPI_ISL_747432 | 11/24/2020 | 12/30/2020 Asia / South Korea               |
| EPI_ISL_747433 | 11/24/2020 | 12/30/2020 Asia / South Korea               |
| EPI_ISL_747435 | 11/24/2020 | 12/30/2020 Asia / South Korea               |
| EPI_ISL_747436 | 11/24/2020 | 12/30/2020 Asia / South Korea               |
| EPI_ISL_747437 | 11/24/2020 | 12/30/2020 Asia / South Korea               |
| EPI_ISL_747438 | 11/20/2020 | 12/30/2020 Asia / South Korea               |
| EPI_ISL_747439 | 11/18/2020 | 12/30/2020 Asia / South Korea               |
| EPI_ISL_747440 | 11/26/2020 | 12/30/2020 Asia / South Korea               |
| EPI_ISL_747441 | 11/26/2020 | 12/30/2020 Asia / South Korea               |
| EPI_ISL_747442 | 11/26/2020 | 12/30/2020 Asia / South Korea               |
| EPI_ISL_747443 | 11/25/2020 | 12/30/2020 Asia / South Korea               |
| EPI_ISL_747444 | 11/25/2020 | 12/30/2020 Asia / South Korea               |
| EPI_ISL_747445 | 11/25/2020 | 12/30/2020 Asia / South Korea               |
| EPI_ISL_747446 | 11/18/2020 | 12/30/2020 Asia / South Korea               |
| EPI_ISL_747447 | 11/17/2020 | 12/30/2020 Asia / South Korea               |
| EPI_ISL_747448 | 11/16/2020 | 12/30/2020 Asia / South Korea               |
| EPI_ISL_747449 | 11/13/2020 | 12/30/2020 Asia / South Korea               |
| EPI_ISL_747450 | 11/13/2020 | 12/30/2020 Asia / South Korea               |
| EPI_ISL_747451 | 11/19/2020 | 12/30/2020 Asia / South Korea               |
| EPI_ISL_747452 | 11/17/2020 | 12/30/2020 Asia / South Korea               |
| EPI_ISL_747453 | 11/26/2020 | 12/30/2020 Asia / South Korea               |
| EPI_ISL_747454 | 11/26/2020 | 12/30/2020 Asia / South Korea               |
| EPI_ISL_747455 | 11/11/2020 | 12/30/2020 Asia / South Korea               |
| EPI_ISL_747456 | 11/5/2020  | 12/30/2020 Asia / South Korea               |
| EPI_ISL_747458 | 11/23/2020 | 12/30/2020 Asia / South Korea               |
| EPI_ISL_747459 | 11/26/2020 | 12/30/2020 Europe / Italy / Veneto / Verona |
| EPI_ISL_747460 | 11/26/2020 | 12/30/2020 Europe / Italy / Veneto / Verona |
| EPI_ISL_747461 | 11/26/2020 | 12/30/2020 Europe / Italy / Veneto / Verona |
| EPI_ISL_747462 | 11/26/2020 | 12/30/2020 Europe / Italy / Veneto / Verona |
| EPI_ISL_747463 | 11/26/2020 | 12/30/2020 Europe / Italy / Veneto / Verona |
| EPI_ISL_747464 | 11/30/2020 | 12/30/2020 Europe / Italy / Veneto / Verona |
| EPI_ISL_747465 | 11/4/2020  | 12/30/2020 Europe / Italy / Veneto / Verona |
| EPI_ISL_747466 | 11/9/2020  | 12/30/2020 Europe / Italy / Veneto / Verona |
| EPI_ISL_747467 | 11/9/2020  | 12/30/2020 Europe / Italy / Veneto / Verona |



|                |            |            |                                   |
|----------------|------------|------------|-----------------------------------|
| EPI_ISL_747515 | 12/11/2020 | 12/30/2020 | Europe / United Kingdom / England |
| EPI_ISL_747516 | 12/11/2020 | 12/30/2020 | Europe / United Kingdom / England |
| EPI_ISL_747517 | 12/11/2020 | 12/30/2020 | Europe / United Kingdom / England |
| EPI_ISL_747518 | 12/12/2020 | 12/30/2020 | Europe / United Kingdom / England |
| EPI_ISL_747519 | 12/11/2020 | 12/30/2020 | Europe / United Kingdom / England |
| EPI_ISL_747523 | 12/22/2020 | 12/30/2020 | Europe / Netherlands / Gelderland |
| EPI_ISL_747525 | 12/22/2020 | 12/30/2020 | Europe / Netherlands / Gelderland |
| EPI_ISL_747610 | 12/7/2020  | 12/30/2020 | Europe / Denmark / Syddanmark     |
| EPI_ISL_747612 | 12/7/2020  | 12/30/2020 | Europe / Denmark / Midtjylland    |
| EPI_ISL_747613 | 12/7/2020  | 12/30/2020 | Europe / Denmark / Syddanmark     |
| EPI_ISL_747614 | 12/7/2020  | 12/30/2020 | Europe / Denmark / Syddanmark     |
| EPI_ISL_747615 | 5/5/2020   | 12/30/2020 | South America / Uruguay / Rivera  |
| EPI_ISL_747616 | 12/7/2020  | 12/30/2020 | Europe / Denmark / Hovedstaden    |
| EPI_ISL_747617 | 12/7/2020  | 12/30/2020 | Europe / Denmark / Sjaelland      |
| EPI_ISL_747618 | 12/7/2020  | 12/30/2020 | Europe / Denmark / Sjaelland      |
| EPI_ISL_747619 | 12/7/2020  | 12/30/2020 | Europe / Denmark / Syddanmark     |
| EPI_ISL_747620 | 12/7/2020  | 12/30/2020 | Europe / Denmark / Syddanmark     |
| EPI_ISL_747621 | 12/7/2020  | 12/30/2020 | Europe / Denmark / Syddanmark     |
| EPI_ISL_747622 | 12/7/2020  | 12/30/2020 | Europe / Denmark / Syddanmark     |
| EPI_ISL_747623 | 12/7/2020  | 12/30/2020 | Europe / Denmark / Hovedstaden    |
| EPI_ISL_747624 | 11/30/2020 | 12/30/2020 | Europe / Denmark / Midtjylland    |
| EPI_ISL_747625 | 11/30/2020 | 12/30/2020 | Europe / Denmark / Syddanmark     |
| EPI_ISL_747626 | 11/30/2020 | 12/30/2020 | Europe / Denmark / Syddanmark     |
| EPI_ISL_747627 | 11/30/2020 | 12/30/2020 | Europe / Denmark / Syddanmark     |
| EPI_ISL_747628 | 11/30/2020 | 12/30/2020 | Europe / Denmark / Syddanmark     |
| EPI_ISL_747629 | 11/23/2020 | 12/30/2020 | Europe / Denmark / Syddanmark     |
| EPI_ISL_747630 | 11/23/2020 | 12/30/2020 | Europe / Denmark / Hovedstaden    |
| EPI_ISL_747631 | 11/23/2020 | 12/30/2020 | Europe / Denmark / Syddanmark     |
| EPI_ISL_747632 | 12/7/2020  | 12/30/2020 | Europe / Denmark / Syddanmark     |
| EPI_ISL_747633 | 11/30/2020 | 12/30/2020 | Europe / Denmark / Syddanmark     |
| EPI_ISL_747634 | 11/30/2020 | 12/30/2020 | Europe / Denmark / Syddanmark     |
| EPI_ISL_747635 | 11/30/2020 | 12/30/2020 | Europe / Denmark / Syddanmark     |
| EPI_ISL_747661 | 12/7/2020  | 12/30/2020 | Europe / Denmark / Syddanmark     |
| EPI_ISL_747662 | 12/7/2020  | 12/30/2020 | Europe / Denmark / Syddanmark     |
| EPI_ISL_747663 | 12/7/2020  | 12/30/2020 | Europe / Denmark / Syddanmark     |
| EPI_ISL_747664 | 12/7/2020  | 12/30/2020 | Europe / Denmark / Syddanmark     |
| EPI_ISL_747665 | 12/7/2020  | 12/30/2020 | Europe / Denmark / Syddanmark     |
| EPI_ISL_747666 | 12/7/2020  | 12/30/2020 | Europe / Denmark / Syddanmark     |
| EPI_ISL_747667 | 12/7/2020  | 12/30/2020 | Europe / Denmark / Syddanmark     |
| EPI_ISL_747668 | 12/7/2020  | 12/30/2020 | Europe / Denmark / Hovedstaden    |
| EPI_ISL_747669 | 12/7/2020  | 12/30/2020 | Europe / Denmark / Syddanmark     |
| EPI_ISL_747670 | 12/7/2020  | 12/30/2020 | Europe / Denmark / Syddanmark     |
| EPI_ISL_747671 | 12/7/2020  | 12/30/2020 | Europe / Denmark / Syddanmark     |
| EPI_ISL_747672 | 12/7/2020  | 12/30/2020 | Europe / Denmark / Syddanmark     |
| EPI_ISL_747673 | 12/7/2020  | 12/30/2020 | Europe / Denmark / Syddanmark     |
| EPI_ISL_747674 | 12/7/2020  | 12/30/2020 | Europe / Denmark / Syddanmark     |
| EPI_ISL_747675 | 11/30/2020 | 12/30/2020 | Europe / Denmark / Syddanmark     |





|                |            |            |                                |
|----------------|------------|------------|--------------------------------|
| EPI_ISL_747732 | 12/7/2020  | 12/30/2020 | Europe / Denmark / Hovedstaden |
| EPI_ISL_747733 | 12/7/2020  | 12/30/2020 | Europe / Denmark / Hovedstaden |
| EPI_ISL_747734 | 12/7/2020  | 12/30/2020 | Europe / Denmark / Hovedstaden |
| EPI_ISL_747735 | 11/30/2020 | 12/30/2020 | Europe / Denmark / Hovedstaden |
| EPI_ISL_747736 | 11/30/2020 | 12/30/2020 | Europe / Denmark / Syddanmark  |
| EPI_ISL_747737 | 11/30/2020 | 12/30/2020 | Europe / Denmark / Syddanmark  |
| EPI_ISL_747738 | 11/30/2020 | 12/30/2020 | Europe / Denmark / Syddanmark  |
| EPI_ISL_747739 | 12/7/2020  | 12/30/2020 | Europe / Denmark / Midtjylland |
| EPI_ISL_747740 | 12/7/2020  | 12/30/2020 | Europe / Denmark / Midtjylland |
| EPI_ISL_747741 | 12/7/2020  | 12/30/2020 | Europe / Denmark / Midtjylland |
| EPI_ISL_747742 | 12/7/2020  | 12/30/2020 | Europe / Denmark / Sjælland    |
| EPI_ISL_747743 | 12/7/2020  | 12/30/2020 | Europe / Denmark / Midtjylland |
| EPI_ISL_747744 | 11/16/2020 | 12/30/2020 | Europe / Denmark / Nordjylland |
| EPI_ISL_747756 | 12/7/2020  | 12/30/2020 | Europe / Denmark / Midtjylland |
| EPI_ISL_747757 | 12/7/2020  | 12/30/2020 | Europe / Denmark / Midtjylland |
| EPI_ISL_747758 | 12/7/2020  | 12/30/2020 | Europe / Denmark / Hovedstaden |
| EPI_ISL_747759 | 12/7/2020  | 12/30/2020 | Europe / Denmark / Sjælland    |
| EPI_ISL_747760 | 12/7/2020  | 12/30/2020 | Europe / Denmark / Hovedstaden |
| EPI_ISL_747761 | 12/7/2020  | 12/30/2020 | Europe / Denmark / Hovedstaden |
| EPI_ISL_747762 | 12/7/2020  | 12/30/2020 | Europe / Denmark / Hovedstaden |
| EPI_ISL_747763 | 12/7/2020  | 12/30/2020 | Europe / Denmark / Syddanmark  |
| EPI_ISL_747764 | 12/7/2020  | 12/30/2020 | Europe / Denmark / Hovedstaden |
| EPI_ISL_747765 | 12/7/2020  | 12/30/2020 | Europe / Denmark / Hovedstaden |
| EPI_ISL_747766 | 12/7/2020  | 12/30/2020 | Europe / Denmark / Syddanmark  |
| EPI_ISL_747767 | 12/7/2020  | 12/30/2020 | Europe / Denmark / Sjælland    |
| EPI_ISL_747768 | 12/7/2020  | 12/30/2020 | Europe / Denmark / Midtjylland |
| EPI_ISL_747769 | 12/7/2020  | 12/30/2020 | Europe / Denmark / Nordjylland |
| EPI_ISL_747770 | 12/7/2020  | 12/30/2020 | Europe / Denmark / Hovedstaden |
| EPI_ISL_747771 | 12/7/2020  | 12/30/2020 | Europe / Denmark / Syddanmark  |
| EPI_ISL_747772 | 12/7/2020  | 12/30/2020 | Europe / Denmark / Hovedstaden |
| EPI_ISL_747773 | 12/7/2020  | 12/30/2020 | Europe / Denmark / Syddanmark  |
| EPI_ISL_747774 | 12/7/2020  | 12/30/2020 | Europe / Denmark / Hovedstaden |
| EPI_ISL_747775 | 12/7/2020  | 12/30/2020 | Europe / Denmark / Syddanmark  |
| EPI_ISL_747776 | 12/7/2020  | 12/30/2020 | Europe / Denmark / Hovedstaden |
| EPI_ISL_747777 | 12/7/2020  | 12/30/2020 | Europe / Denmark / Hovedstaden |
| EPI_ISL_747778 | 12/7/2020  | 12/30/2020 | Europe / Denmark / Sjælland    |
| EPI_ISL_747779 | 12/7/2020  | 12/30/2020 | Europe / Denmark / Hovedstaden |
| EPI_ISL_747780 | 12/7/2020  | 12/30/2020 | Europe / Denmark / Hovedstaden |
| EPI_ISL_747781 | 12/7/2020  | 12/30/2020 | Europe / Denmark / Midtjylland |
| EPI_ISL_747782 | 12/7/2020  | 12/30/2020 | Europe / Denmark / Sjælland    |
| EPI_ISL_747783 | 12/7/2020  | 12/30/2020 | Europe / Denmark / Hovedstaden |
| EPI_ISL_747784 | 12/7/2020  | 12/30/2020 | Europe / Denmark / Midtjylland |
| EPI_ISL_747785 | 12/7/2020  | 12/30/2020 | Europe / Denmark / Syddanmark  |
| EPI_ISL_747786 | 12/7/2020  | 12/30/2020 | Europe / Denmark / Hovedstaden |
| EPI_ISL_747787 | 12/7/2020  | 12/30/2020 | Europe / Denmark / Hovedstaden |
| EPI_ISL_747788 | 12/7/2020  | 12/30/2020 | Europe / Denmark / Syddanmark  |
| EPI_ISL_747789 | 12/7/2020  | 12/30/2020 | Europe / Denmark / Midtjylland |





|                |           |            |                                |
|----------------|-----------|------------|--------------------------------|
| EPI_ISL_747884 | 12/7/2020 | 12/30/2020 | Europe / Denmark / Hovedstaden |
| EPI_ISL_747885 | 12/7/2020 | 12/30/2020 | Europe / Denmark / Hovedstaden |
| EPI_ISL_747886 | 12/7/2020 | 12/30/2020 | Europe / Denmark / Hovedstaden |
| EPI_ISL_747887 | 12/7/2020 | 12/30/2020 | Europe / Denmark / Sjælland    |
| EPI_ISL_747888 | 12/7/2020 | 12/30/2020 | Europe / Denmark / Syddanmark  |
| EPI_ISL_747889 | 12/7/2020 | 12/30/2020 | Europe / Denmark / Hovedstaden |
| EPI_ISL_747890 | 12/7/2020 | 12/30/2020 | Europe / Denmark / Midtjylland |
| EPI_ISL_747891 | 12/7/2020 | 12/30/2020 | Europe / Denmark / Syddanmark  |
| EPI_ISL_747892 | 12/7/2020 | 12/30/2020 | Europe / Denmark / Hovedstaden |
| EPI_ISL_747893 | 12/7/2020 | 12/30/2020 | Europe / Denmark / Hovedstaden |
| EPI_ISL_747894 | 12/7/2020 | 12/30/2020 | Europe / Denmark / Nordjylland |
| EPI_ISL_747895 | 12/7/2020 | 12/30/2020 | Europe / Denmark / Syddanmark  |
| EPI_ISL_747896 | 12/7/2020 | 12/30/2020 | Europe / Denmark / Sjælland    |
| EPI_ISL_747897 | 12/7/2020 | 12/30/2020 | Europe / Denmark / Hovedstaden |
| EPI_ISL_747898 | 12/7/2020 | 12/30/2020 | Europe / Denmark / Sjælland    |
| EPI_ISL_747899 | 12/7/2020 | 12/30/2020 | Europe / Denmark / Syddanmark  |
| EPI_ISL_747900 | 12/7/2020 | 12/30/2020 | Europe / Denmark / Hovedstaden |
| EPI_ISL_747901 | 12/7/2020 | 12/30/2020 | Europe / Denmark / Sjælland    |
| EPI_ISL_747902 | 12/7/2020 | 12/30/2020 | Europe / Denmark / Hovedstaden |
| EPI_ISL_747903 | 12/7/2020 | 12/30/2020 | Europe / Denmark / Hovedstaden |
| EPI_ISL_747904 | 12/7/2020 | 12/30/2020 | Europe / Denmark / Sjælland    |
| EPI_ISL_747905 | 12/7/2020 | 12/30/2020 | Europe / Denmark / Hovedstaden |
| EPI_ISL_747906 | 12/7/2020 | 12/30/2020 | Europe / Denmark / Hovedstaden |
| EPI_ISL_747907 | 12/7/2020 | 12/30/2020 | Europe / Denmark / Hovedstaden |
| EPI_ISL_747908 | 12/7/2020 | 12/30/2020 | Europe / Denmark / Sjælland    |
| EPI_ISL_747909 | 12/7/2020 | 12/30/2020 | Europe / Denmark / Hovedstaden |
| EPI_ISL_747910 | 12/7/2020 | 12/30/2020 | Europe / Denmark / Hovedstaden |
| EPI_ISL_747911 | 12/7/2020 | 12/30/2020 | Europe / Denmark / Sjælland    |
| EPI_ISL_747912 | 12/7/2020 | 12/30/2020 | Europe / Denmark / Hovedstaden |
| EPI_ISL_747913 | 12/7/2020 | 12/30/2020 | Europe / Denmark / Nordjylland |
| EPI_ISL_747914 | 12/7/2020 | 12/30/2020 | Europe / Denmark / Hovedstaden |
| EPI_ISL_747915 | 12/7/2020 | 12/30/2020 | Europe / Denmark / Hovedstaden |
| EPI_ISL_747916 | 12/7/2020 | 12/30/2020 | Europe / Denmark / Hovedstaden |
| EPI_ISL_747917 | 12/7/2020 | 12/30/2020 | Europe / Denmark / Hovedstaden |
| EPI_ISL_747918 | 12/7/2020 | 12/30/2020 | Europe / Denmark / Hovedstaden |
| EPI_ISL_747919 | 12/7/2020 | 12/30/2020 | Europe / Denmark / Midtjylland |
| EPI_ISL_747920 | 12/7/2020 | 12/30/2020 | Europe / Denmark / Hovedstaden |
| EPI_ISL_747921 | 12/7/2020 | 12/30/2020 | Europe / Denmark / Hovedstaden |
| EPI_ISL_747922 | 12/7/2020 | 12/30/2020 | Europe / Denmark / Syddanmark  |
| EPI_ISL_747923 | 12/7/2020 | 12/30/2020 | Europe / Denmark / Sjælland    |
| EPI_ISL_747924 | 12/7/2020 | 12/30/2020 | Europe / Denmark / Midtjylland |
| EPI_ISL_747925 | 12/7/2020 | 12/30/2020 | Europe / Denmark / Sjælland    |
| EPI_ISL_747926 | 12/7/2020 | 12/30/2020 | Europe / Denmark / Hovedstaden |
| EPI_ISL_747927 | 12/7/2020 | 12/30/2020 | Europe / Denmark / Hovedstaden |
| EPI_ISL_747928 | 12/7/2020 | 12/30/2020 | Europe / Denmark / Hovedstaden |
| EPI_ISL_747929 | 12/7/2020 | 12/30/2020 | Europe / Denmark / Hovedstaden |
| EPI_ISL_747930 | 12/7/2020 | 12/30/2020 | Europe / Denmark / Syddanmark  |







|                |            |            |                                |
|----------------|------------|------------|--------------------------------|
| EPI_ISL_748072 | 11/30/2020 | 12/30/2020 | Europe / Denmark / Sjaelland   |
| EPI_ISL_748073 | 11/30/2020 | 12/30/2020 | Europe / Denmark / Hovedstaden |
| EPI_ISL_748074 | 11/30/2020 | 12/30/2020 | Europe / Denmark / Hovedstaden |
| EPI_ISL_748075 | 11/30/2020 | 12/30/2020 | Europe / Denmark / Sjaelland   |
| EPI_ISL_748076 | 11/30/2020 | 12/30/2020 | Europe / Denmark / Sjaelland   |
| EPI_ISL_748077 | 11/30/2020 | 12/30/2020 | Europe / Denmark / Sjaelland   |
| EPI_ISL_748078 | 11/30/2020 | 12/30/2020 | Europe / Denmark / Sjaelland   |
| EPI_ISL_748079 | 11/30/2020 | 12/30/2020 | Europe / Denmark / Hovedstaden |
| EPI_ISL_748080 | 11/30/2020 | 12/30/2020 | Europe / Denmark / Sjaelland   |
| EPI_ISL_748081 | 11/30/2020 | 12/30/2020 | Europe / Denmark / Sjaelland   |
| EPI_ISL_748082 | 11/30/2020 | 12/30/2020 | Europe / Denmark / Hovedstaden |
| EPI_ISL_748083 | 11/30/2020 | 12/30/2020 | Europe / Denmark / Hovedstaden |
| EPI_ISL_748084 | 11/30/2020 | 12/30/2020 | Europe / Denmark / Sjaelland   |
| EPI_ISL_748085 | 11/30/2020 | 12/30/2020 | Europe / Denmark               |
| EPI_ISL_748086 | 11/30/2020 | 12/30/2020 | Europe / Denmark / Syddanmark  |
| EPI_ISL_748087 | 11/30/2020 | 12/30/2020 | Europe / Denmark / Hovedstaden |
| EPI_ISL_748088 | 11/30/2020 | 12/30/2020 | Europe / Denmark / Sjaelland   |
| EPI_ISL_748089 | 11/30/2020 | 12/30/2020 | Europe / Denmark / Syddanmark  |
| EPI_ISL_748090 | 11/30/2020 | 12/30/2020 | Europe / Denmark / Syddanmark  |
| EPI_ISL_748091 | 11/30/2020 | 12/30/2020 | Europe / Denmark / Sjaelland   |
| EPI_ISL_748092 | 11/30/2020 | 12/30/2020 | Europe / Denmark / Syddanmark  |
| EPI_ISL_748093 | 11/30/2020 | 12/30/2020 | Europe / Denmark / Syddanmark  |
| EPI_ISL_748094 | 11/30/2020 | 12/30/2020 | Europe / Denmark / Syddanmark  |
| EPI_ISL_748095 | 11/30/2020 | 12/30/2020 | Europe / Denmark / Syddanmark  |
| EPI_ISL_748096 | 11/30/2020 | 12/30/2020 | Europe / Denmark / Hovedstaden |
| EPI_ISL_748097 | 11/30/2020 | 12/30/2020 | Europe / Denmark / Syddanmark  |
| EPI_ISL_748098 | 11/30/2020 | 12/30/2020 | Europe / Denmark / Hovedstaden |
| EPI_ISL_748099 | 11/23/2020 | 12/30/2020 | Europe / Denmark / Syddanmark  |
| EPI_ISL_748100 | 11/23/2020 | 12/30/2020 | Europe / Denmark / Syddanmark  |
| EPI_ISL_748101 | 11/23/2020 | 12/30/2020 | Europe / Denmark / Sjaelland   |
| EPI_ISL_748102 | 11/23/2020 | 12/30/2020 | Europe / Denmark / Hovedstaden |
| EPI_ISL_748103 | 11/23/2020 | 12/30/2020 | Europe / Denmark / Hovedstaden |
| EPI_ISL_748104 | 11/23/2020 | 12/30/2020 | Europe / Denmark / Syddanmark  |
| EPI_ISL_748105 | 11/23/2020 | 12/30/2020 | Europe / Denmark / Hovedstaden |
| EPI_ISL_748106 | 11/23/2020 | 12/30/2020 | Europe / Denmark               |
| EPI_ISL_748107 | 11/23/2020 | 12/30/2020 | Europe / Denmark / Sjaelland   |
| EPI_ISL_748108 | 11/23/2020 | 12/30/2020 | Europe / Denmark / Hovedstaden |
| EPI_ISL_748109 | 11/23/2020 | 12/30/2020 | Europe / Denmark / Hovedstaden |
| EPI_ISL_748110 | 11/23/2020 | 12/30/2020 | Europe / Denmark / Hovedstaden |
| EPI_ISL_748111 | 11/23/2020 | 12/30/2020 | Europe / Denmark / Syddanmark  |
| EPI_ISL_748112 | 11/23/2020 | 12/30/2020 | Europe / Denmark / Nordjylland |
| EPI_ISL_748113 | 11/16/2020 | 12/30/2020 | Europe / Denmark / Hovedstaden |
| EPI_ISL_748114 | 11/16/2020 | 12/30/2020 | Europe / Denmark / Hovedstaden |
| EPI_ISL_748115 | 11/16/2020 | 12/30/2020 | Europe / Denmark / Hovedstaden |
| EPI_ISL_748116 | 11/16/2020 | 12/30/2020 | Europe / Denmark / Midtjylland |
| EPI_ISL_748117 | 11/16/2020 | 12/30/2020 | Europe / Denmark / Syddanmark  |
| EPI_ISL_748118 | 11/16/2020 | 12/30/2020 | Europe / Denmark / Sjaelland   |



|                |            |            |                                  |
|----------------|------------|------------|----------------------------------|
| EPI_ISL_748119 | 11/9/2020  | 12/30/2020 | Europe / Denmark                 |
| EPI_ISL_748120 | 11/9/2020  | 12/30/2020 | Europe / Denmark / Hovedstaden   |
| EPI_ISL_748121 | 11/9/2020  | 12/30/2020 | Europe / Denmark / Midtjylland   |
| EPI_ISL_748122 | 11/2/2020  | 12/30/2020 | Europe / Denmark / Midtjylland   |
| EPI_ISL_748123 | 11/2/2020  | 12/30/2020 | Europe / Denmark / Hovedstaden   |
| EPI_ISL_748124 | 10/26/2020 | 12/30/2020 | Europe / Denmark / Hovedstaden   |
| EPI_ISL_748125 | 10/19/2020 | 12/30/2020 | Europe / Denmark / Hovedstaden   |
| EPI_ISL_748126 | 10/19/2020 | 12/30/2020 | Europe / Denmark / Hovedstaden   |
| EPI_ISL_748127 | 10/19/2020 | 12/30/2020 | Europe / Denmark / Hovedstaden   |
| EPI_ISL_748128 | 10/19/2020 | 12/30/2020 | Europe / Denmark / Hovedstaden   |
| EPI_ISL_748129 | 10/12/2020 | 12/30/2020 | Europe / Denmark / Hovedstaden   |
| EPI_ISL_748130 | 10/12/2020 | 12/30/2020 | Europe / Denmark / Midtjylland   |
| EPI_ISL_748131 | 10/5/2020  | 12/30/2020 | Europe / Denmark                 |
| EPI_ISL_748132 | 9/28/2020  | 12/30/2020 | Europe / Denmark                 |
| EPI_ISL_748133 | 9/28/2020  | 12/30/2020 | Europe / Denmark / Nordjylland   |
| EPI_ISL_748134 | 9/28/2020  | 12/30/2020 | Europe / Denmark / Syddanmark    |
| EPI_ISL_748135 | 9/28/2020  | 12/30/2020 | Europe / Denmark / Hovedstaden   |
| EPI_ISL_748136 | 9/14/2020  | 12/30/2020 | Europe / Denmark / Hovedstaden   |
| EPI_ISL_748137 | 9/14/2020  | 12/30/2020 | Europe / Denmark / Syddanmark    |
| EPI_ISL_748138 | 5/21/2020  | 12/30/2020 | South America / Uruguay / Rivera |
| EPI_ISL_748139 | 5/21/2020  | 12/30/2020 | South America / Uruguay / Rivera |
| EPI_ISL_748140 | 5/21/2020  | 12/30/2020 | South America / Uruguay / Rivera |
| EPI_ISL_748141 | 5/21/2020  | 12/30/2020 | South America / Uruguay / Rivera |
| EPI_ISL_748142 | 5/21/2020  | 12/30/2020 | South America / Uruguay / Rivera |
| EPI_ISL_748143 | 5/21/2020  | 12/30/2020 | South America / Uruguay / Rivera |
| EPI_ISL_748144 | 5/21/2020  | 12/30/2020 | South America / Uruguay / Rivera |
| EPI_ISL_748145 | 5/21/2020  | 12/30/2020 | South America / Uruguay / Rivera |
| EPI_ISL_748279 | 12/7/2020  | 12/30/2020 | Europe / Denmark / Nordjylland   |
| EPI_ISL_748280 | 12/7/2020  | 12/30/2020 | Europe / Denmark / Nordjylland   |
| EPI_ISL_748281 | 12/7/2020  | 12/30/2020 | Europe / Denmark / Syddanmark    |
| EPI_ISL_748282 | 12/7/2020  | 12/30/2020 | Europe / Denmark / Midtjylland   |
| EPI_ISL_748283 | 12/7/2020  | 12/30/2020 | Europe / Denmark / Midtjylland   |
| EPI_ISL_748284 | 12/7/2020  | 12/30/2020 | Europe / Denmark / Midtjylland   |
| EPI_ISL_748285 | 12/7/2020  | 12/30/2020 | Europe / Denmark / Syddanmark    |
| EPI_ISL_748286 | 12/7/2020  | 12/30/2020 | Europe / Denmark / Midtjylland   |
| EPI_ISL_748287 | 12/7/2020  | 12/30/2020 | Europe / Denmark / Sjælland      |
| EPI_ISL_748288 | 12/7/2020  | 12/30/2020 | Europe / Denmark / Midtjylland   |
| EPI_ISL_748289 | 12/7/2020  | 12/30/2020 | Europe / Denmark / Midtjylland   |
| EPI_ISL_748290 | 12/7/2020  | 12/30/2020 | Europe / Denmark / Syddanmark    |
| EPI_ISL_748291 | 12/7/2020  | 12/30/2020 | Europe / Denmark / Syddanmark    |
| EPI_ISL_748292 | 12/7/2020  | 12/30/2020 | Europe / Denmark / Hovedstaden   |
| EPI_ISL_748293 | 12/7/2020  | 12/30/2020 | Europe / Denmark / Hovedstaden   |
| EPI_ISL_748294 | 12/7/2020  | 12/30/2020 | Europe / Denmark / Midtjylland   |
| EPI_ISL_748295 | 12/7/2020  | 12/30/2020 | Europe / Denmark / Midtjylland   |
| EPI_ISL_748296 | 12/7/2020  | 12/30/2020 | Europe / Denmark / Syddanmark    |
| EPI_ISL_748297 | 12/7/2020  | 12/30/2020 | Europe / Denmark / Syddanmark    |
| EPI_ISL_748298 | 12/7/2020  | 12/30/2020 | Europe / Denmark / Sjælland      |













|                |           |            |                                  |
|----------------|-----------|------------|----------------------------------|
| EPI_ISL_748658 | 12/7/2020 | 12/30/2020 | Europe / Denmark / Hovedstaden   |
| EPI_ISL_748659 | 12/7/2020 | 12/30/2020 | Europe / Denmark / Hovedstaden   |
| EPI_ISL_748660 | 12/7/2020 | 12/30/2020 | Europe / Denmark / Syddanmark    |
| EPI_ISL_748661 | 12/7/2020 | 12/30/2020 | Europe / Denmark / Hovedstaden   |
| EPI_ISL_748662 | 12/7/2020 | 12/30/2020 | Europe / Denmark / Hovedstaden   |
| EPI_ISL_748663 | 12/7/2020 | 12/30/2020 | Europe / Denmark / Sjaelland     |
| EPI_ISL_748664 | 12/7/2020 | 12/30/2020 | Europe / Denmark / Sjaelland     |
| EPI_ISL_748665 | 12/7/2020 | 12/30/2020 | Europe / Denmark / Hovedstaden   |
| EPI_ISL_748666 | 12/7/2020 | 12/30/2020 | Europe / Denmark / Hovedstaden   |
| EPI_ISL_748667 | 5/21/2020 | 12/30/2020 | South America / Uruguay / Rivera |
| EPI_ISL_748668 | 12/7/2020 | 12/30/2020 | Europe / Denmark / Nordjylland   |
| EPI_ISL_748669 | 12/7/2020 | 12/30/2020 | Europe / Denmark / Hovedstaden   |
| EPI_ISL_748670 | 12/7/2020 | 12/30/2020 | Europe / Denmark / Hovedstaden   |
| EPI_ISL_748671 | 12/7/2020 | 12/30/2020 | Europe / Denmark / Hovedstaden   |
| EPI_ISL_748672 | 12/7/2020 | 12/30/2020 | Europe / Denmark / Hovedstaden   |
| EPI_ISL_748673 | 12/7/2020 | 12/30/2020 | Europe / Denmark / Hovedstaden   |
| EPI_ISL_748674 | 12/7/2020 | 12/30/2020 | Europe / Denmark / Hovedstaden   |
| EPI_ISL_748675 | 12/7/2020 | 12/30/2020 | Europe / Denmark / Syddanmark    |
| EPI_ISL_748676 | 12/7/2020 | 12/30/2020 | Europe / Denmark / Hovedstaden   |
| EPI_ISL_748677 | 12/7/2020 | 12/30/2020 | Europe / Denmark / Hovedstaden   |
| EPI_ISL_748678 | 12/7/2020 | 12/30/2020 | Europe / Denmark / Midtjylland   |
| EPI_ISL_748679 | 12/7/2020 | 12/30/2020 | Europe / Denmark / Hovedstaden   |
| EPI_ISL_748680 | 12/7/2020 | 12/30/2020 | Europe / Denmark / Hovedstaden   |
| EPI_ISL_748681 | 12/7/2020 | 12/30/2020 | Europe / Denmark / Hovedstaden   |
| EPI_ISL_748682 | 12/7/2020 | 12/30/2020 | Europe / Denmark / Hovedstaden   |
| EPI_ISL_748683 | 12/7/2020 | 12/30/2020 | Europe / Denmark / Syddanmark    |
| EPI_ISL_748684 | 12/7/2020 | 12/30/2020 | Europe / Denmark / Sjaelland     |
| EPI_ISL_748685 | 12/7/2020 | 12/30/2020 | Europe / Denmark / Midtjylland   |
| EPI_ISL_748686 | 12/7/2020 | 12/30/2020 | Europe / Denmark / Syddanmark    |
| EPI_ISL_748687 | 12/7/2020 | 12/30/2020 | Europe / Denmark / Syddanmark    |
| EPI_ISL_748688 | 12/7/2020 | 12/30/2020 | Europe / Denmark / Hovedstaden   |
| EPI_ISL_748689 | 12/7/2020 | 12/30/2020 | Europe / Denmark / Hovedstaden   |
| EPI_ISL_748690 | 12/7/2020 | 12/30/2020 | Europe / Denmark / Hovedstaden   |
| EPI_ISL_748691 | 12/7/2020 | 12/30/2020 | Europe / Denmark / Midtjylland   |
| EPI_ISL_748692 | 12/7/2020 | 12/30/2020 | Europe / Denmark / Hovedstaden   |
| EPI_ISL_748693 | 12/7/2020 | 12/30/2020 | Europe / Denmark / Syddanmark    |
| EPI_ISL_748694 | 12/7/2020 | 12/30/2020 | Europe / Denmark / Hovedstaden   |
| EPI_ISL_748695 | 12/7/2020 | 12/30/2020 | Europe / Denmark / Hovedstaden   |
| EPI_ISL_748696 | 12/7/2020 | 12/30/2020 | Europe / Denmark / Hovedstaden   |
| EPI_ISL_748697 | 12/7/2020 | 12/30/2020 | Europe / Denmark                 |
| EPI_ISL_748698 | 12/7/2020 | 12/30/2020 | Europe / Denmark / Hovedstaden   |
| EPI_ISL_748699 | 12/7/2020 | 12/30/2020 | Europe / Denmark / Hovedstaden   |
| EPI_ISL_748700 | 12/7/2020 | 12/30/2020 | Europe / Denmark / Hovedstaden   |
| EPI_ISL_748701 | 12/7/2020 | 12/30/2020 | Europe / Denmark / Hovedstaden   |
| EPI_ISL_748702 | 12/7/2020 | 12/30/2020 | Europe / Denmark / Sjaelland     |
| EPI_ISL_748703 | 12/7/2020 | 12/30/2020 | Europe / Denmark / Syddanmark    |
| EPI_ISL_748704 | 12/7/2020 | 12/30/2020 | Europe / Denmark / Sjaelland     |











|                |           |            |                                |
|----------------|-----------|------------|--------------------------------|
| EPI_ISL_748893 | 12/7/2020 | 12/30/2020 | Europe / Denmark / Midtjylland |
| EPI_ISL_748894 | 12/7/2020 | 12/30/2020 | Europe / Denmark / Syddanmark  |
| EPI_ISL_748895 | 12/7/2020 | 12/30/2020 | Europe / Denmark / Syddanmark  |
| EPI_ISL_748896 | 12/7/2020 | 12/30/2020 | Europe / Denmark               |
| EPI_ISL_748897 | 12/7/2020 | 12/30/2020 | Europe / Denmark / Syddanmark  |
| EPI_ISL_748898 | 12/7/2020 | 12/30/2020 | Europe / Denmark / Hovedstaden |
| EPI_ISL_748899 | 12/7/2020 | 12/30/2020 | Europe / Denmark / Syddanmark  |
| EPI_ISL_748900 | 12/7/2020 | 12/30/2020 | Europe / Denmark / Syddanmark  |
| EPI_ISL_748901 | 12/7/2020 | 12/30/2020 | Europe / Denmark / Nordjylland |
| EPI_ISL_748902 | 12/7/2020 | 12/30/2020 | Europe / Denmark / Hovedstaden |
| EPI_ISL_748903 | 12/7/2020 | 12/30/2020 | Europe / Denmark / Syddanmark  |
| EPI_ISL_748904 | 12/7/2020 | 12/30/2020 | Europe / Denmark / Syddanmark  |
| EPI_ISL_748905 | 12/7/2020 | 12/30/2020 | Europe / Denmark / Syddanmark  |
| EPI_ISL_748906 | 12/7/2020 | 12/30/2020 | Europe / Denmark / Syddanmark  |
| EPI_ISL_748907 | 12/7/2020 | 12/30/2020 | Europe / Denmark / Sjaelland   |
| EPI_ISL_748908 | 12/7/2020 | 12/30/2020 | Europe / Denmark / Syddanmark  |
| EPI_ISL_748909 | 12/7/2020 | 12/30/2020 | Europe / Denmark / Syddanmark  |
| EPI_ISL_748910 | 12/7/2020 | 12/30/2020 | Europe / Denmark / Syddanmark  |
| EPI_ISL_748911 | 12/7/2020 | 12/30/2020 | Europe / Denmark / Syddanmark  |
| EPI_ISL_748912 | 12/7/2020 | 12/30/2020 | Europe / Denmark / Syddanmark  |
| EPI_ISL_748913 | 12/7/2020 | 12/30/2020 | Europe / Denmark               |
| EPI_ISL_748914 | 12/7/2020 | 12/30/2020 | Europe / Denmark / Syddanmark  |
| EPI_ISL_748915 | 12/7/2020 | 12/30/2020 | Europe / Denmark / Hovedstaden |
| EPI_ISL_748916 | 12/7/2020 | 12/30/2020 | Europe / Denmark / Syddanmark  |
| EPI_ISL_748917 | 12/7/2020 | 12/30/2020 | Europe / Denmark / Syddanmark  |
| EPI_ISL_748918 | 12/7/2020 | 12/30/2020 | Europe / Denmark / Sjaelland   |
| EPI_ISL_748919 | 12/7/2020 | 12/30/2020 | Europe / Denmark / Hovedstaden |
| EPI_ISL_748920 | 12/7/2020 | 12/30/2020 | Europe / Denmark / Hovedstaden |
| EPI_ISL_748921 | 12/7/2020 | 12/30/2020 | Europe / Denmark / Hovedstaden |
| EPI_ISL_748922 | 12/7/2020 | 12/30/2020 | Europe / Denmark / Hovedstaden |
| EPI_ISL_748923 | 12/7/2020 | 12/30/2020 | Europe / Denmark / Hovedstaden |
| EPI_ISL_748924 | 12/7/2020 | 12/30/2020 | Europe / Denmark / Sjaelland   |
| EPI_ISL_748925 | 12/7/2020 | 12/30/2020 | Europe / Denmark / Hovedstaden |
| EPI_ISL_748926 | 12/7/2020 | 12/30/2020 | Europe / Denmark / Hovedstaden |
| EPI_ISL_748927 | 12/7/2020 | 12/30/2020 | Europe / Denmark / Syddanmark  |
| EPI_ISL_748928 | 12/7/2020 | 12/30/2020 | Europe / Denmark / Syddanmark  |
| EPI_ISL_748929 | 12/7/2020 | 12/30/2020 | Europe / Denmark / Hovedstaden |
| EPI_ISL_748930 | 12/7/2020 | 12/30/2020 | Europe / Denmark / Hovedstaden |
| EPI_ISL_748931 | 12/7/2020 | 12/30/2020 | Europe / Denmark / Sjaelland   |
| EPI_ISL_748932 | 12/7/2020 | 12/30/2020 | Europe / Denmark / Syddanmark  |
| EPI_ISL_748933 | 12/7/2020 | 12/30/2020 | Europe / Denmark / Midtjylland |
| EPI_ISL_748934 | 12/7/2020 | 12/30/2020 | Europe / Denmark / Midtjylland |
| EPI_ISL_748935 | 12/7/2020 | 12/30/2020 | Europe / Denmark / Syddanmark  |
| EPI_ISL_748936 | 12/7/2020 | 12/30/2020 | Europe / Denmark / Sjaelland   |
| EPI_ISL_748937 | 12/7/2020 | 12/30/2020 | Europe / Denmark               |
| EPI_ISL_748938 | 12/7/2020 | 12/30/2020 | Europe / Denmark / Hovedstaden |
| EPI_ISL_748939 | 12/7/2020 | 12/30/2020 | Europe / Denmark / Hovedstaden |



|                |           |            |                                |
|----------------|-----------|------------|--------------------------------|
| EPI_ISL_748987 | 12/7/2020 | 12/30/2020 | Europe / Denmark / Syddanmark  |
| EPI_ISL_748988 | 12/7/2020 | 12/30/2020 | Europe / Denmark / Syddanmark  |
| EPI_ISL_748989 | 12/7/2020 | 12/30/2020 | Europe / Denmark / Syddanmark  |
| EPI_ISL_748990 | 12/7/2020 | 12/30/2020 | Europe / Denmark / Sjaelland   |
| EPI_ISL_748991 | 12/7/2020 | 12/30/2020 | Europe / Denmark / Hovedstaden |
| EPI_ISL_748992 | 12/7/2020 | 12/30/2020 | Europe / Denmark / Hovedstaden |
| EPI_ISL_748993 | 12/7/2020 | 12/30/2020 | Europe / Denmark / Syddanmark  |
| EPI_ISL_748994 | 12/7/2020 | 12/30/2020 | Europe / Denmark / Hovedstaden |
| EPI_ISL_748995 | 12/7/2020 | 12/30/2020 | Europe / Denmark / Hovedstaden |
| EPI_ISL_748996 | 12/7/2020 | 12/30/2020 | Europe / Denmark / Hovedstaden |
| EPI_ISL_748997 | 12/7/2020 | 12/30/2020 | Europe / Denmark / Hovedstaden |
| EPI_ISL_748998 | 12/7/2020 | 12/30/2020 | Europe / Denmark / Hovedstaden |
| EPI_ISL_748999 | 12/7/2020 | 12/30/2020 | Europe / Denmark / Midtjylland |
| EPI_ISL_749000 | 12/7/2020 | 12/30/2020 | Europe / Denmark / Midtjylland |
| EPI_ISL_749001 | 12/7/2020 | 12/30/2020 | Europe / Denmark / Sjaelland   |
| EPI_ISL_749002 | 12/7/2020 | 12/30/2020 | Europe / Denmark / Sjaelland   |
| EPI_ISL_749003 | 12/7/2020 | 12/30/2020 | Europe / Denmark / Sjaelland   |
| EPI_ISL_749004 | 12/7/2020 | 12/30/2020 | Europe / Denmark / Syddanmark  |
| EPI_ISL_749005 | 12/7/2020 | 12/30/2020 | Europe / Denmark / Hovedstaden |
| EPI_ISL_749006 | 12/7/2020 | 12/30/2020 | Europe / Denmark / Syddanmark  |
| EPI_ISL_749007 | 12/7/2020 | 12/30/2020 | Europe / Denmark / Hovedstaden |
| EPI_ISL_749008 | 12/7/2020 | 12/30/2020 | Europe / Denmark / Syddanmark  |
| EPI_ISL_749009 | 12/7/2020 | 12/30/2020 | Europe / Denmark / Midtjylland |
| EPI_ISL_749010 | 12/7/2020 | 12/30/2020 | Europe / Denmark / Midtjylland |
| EPI_ISL_749011 | 12/7/2020 | 12/30/2020 | Europe / Denmark / Midtjylland |
| EPI_ISL_749012 | 12/7/2020 | 12/30/2020 | Europe / Denmark / Hovedstaden |
| EPI_ISL_749013 | 12/7/2020 | 12/30/2020 | Europe / Denmark / Midtjylland |
| EPI_ISL_749014 | 12/7/2020 | 12/30/2020 | Europe / Denmark / Sjaelland   |
| EPI_ISL_749015 | 12/7/2020 | 12/30/2020 | Europe / Denmark / Hovedstaden |
| EPI_ISL_749016 | 12/7/2020 | 12/30/2020 | Europe / Denmark / Sjaelland   |
| EPI_ISL_749017 | 12/7/2020 | 12/30/2020 | Europe / Denmark / Syddanmark  |
| EPI_ISL_749018 | 12/7/2020 | 12/30/2020 | Europe / Denmark / Hovedstaden |
| EPI_ISL_749019 | 12/7/2020 | 12/30/2020 | Europe / Denmark / Midtjylland |
| EPI_ISL_749020 | 12/7/2020 | 12/30/2020 | Europe / Denmark / Sjaelland   |
| EPI_ISL_749021 | 12/7/2020 | 12/30/2020 | Europe / Denmark / Syddanmark  |
| EPI_ISL_749022 | 12/7/2020 | 12/30/2020 | Europe / Denmark / Syddanmark  |
| EPI_ISL_749023 | 12/7/2020 | 12/30/2020 | Europe / Denmark / Hovedstaden |
| EPI_ISL_749024 | 12/7/2020 | 12/30/2020 | Europe / Denmark / Sjaelland   |
| EPI_ISL_749025 | 12/7/2020 | 12/30/2020 | Europe / Denmark / Hovedstaden |
| EPI_ISL_749026 | 12/7/2020 | 12/30/2020 | Europe / Denmark / Hovedstaden |
| EPI_ISL_749027 | 12/7/2020 | 12/30/2020 | Europe / Denmark / Sjaelland   |
| EPI_ISL_749028 | 12/7/2020 | 12/30/2020 | Europe / Denmark / Sjaelland   |
| EPI_ISL_749029 | 12/7/2020 | 12/30/2020 | Europe / Denmark / Hovedstaden |
| EPI_ISL_749030 | 12/7/2020 | 12/30/2020 | Europe / Denmark / Syddanmark  |
| EPI_ISL_749031 | 12/7/2020 | 12/30/2020 | Europe / Denmark / Hovedstaden |
| EPI_ISL_749032 | 12/7/2020 | 12/30/2020 | Europe / Denmark / Sjaelland   |
| EPI_ISL_749033 | 12/7/2020 | 12/30/2020 | Europe / Denmark / Midtjylland |







|                |            |            |                                          |
|----------------|------------|------------|------------------------------------------|
| EPI_ISL_749129 | 12/7/2020  | 12/30/2020 | Europe / Denmark / Hovedstaden           |
| EPI_ISL_749130 | 12/7/2020  | 12/30/2020 | Europe / Denmark / Hovedstaden           |
| EPI_ISL_749131 | 12/7/2020  | 12/30/2020 | Europe / Denmark / Hovedstaden           |
| EPI_ISL_749132 | 12/7/2020  | 12/30/2020 | Europe / Denmark / Midtjylland           |
| EPI_ISL_749133 | 12/7/2020  | 12/30/2020 | Europe / Denmark / Hovedstaden           |
| EPI_ISL_749134 | 12/7/2020  | 12/30/2020 | Europe / Denmark / Hovedstaden           |
| EPI_ISL_749135 | 12/7/2020  | 12/30/2020 | Europe / Denmark / Hovedstaden           |
| EPI_ISL_749136 | 12/7/2020  | 12/30/2020 | Europe / Denmark / Syddanmark            |
| EPI_ISL_749137 | 12/7/2020  | 12/30/2020 | Europe / Denmark / Hovedstaden           |
| EPI_ISL_749138 | 12/7/2020  | 12/30/2020 | Europe / Denmark / Hovedstaden           |
| EPI_ISL_749139 | 12/7/2020  | 12/30/2020 | Europe / Denmark / Sjælland              |
| EPI_ISL_749140 | 12/7/2020  | 12/30/2020 | Europe / Denmark / Sjælland              |
| EPI_ISL_749141 | 12/7/2020  | 12/30/2020 | Europe / Denmark / Hovedstaden           |
| EPI_ISL_749142 | 12/7/2020  | 12/30/2020 | Europe / Denmark / Midtjylland           |
| EPI_ISL_749143 | 12/7/2020  | 12/30/2020 | Europe / Denmark / Hovedstaden           |
| EPI_ISL_749144 | 12/7/2020  | 12/30/2020 | Europe / Denmark / Hovedstaden           |
| EPI_ISL_749145 | 12/7/2020  | 12/30/2020 | Europe / Denmark / Hovedstaden           |
| EPI_ISL_749146 | 12/7/2020  | 12/30/2020 | Europe / Denmark / Hovedstaden           |
| EPI_ISL_749147 | 12/7/2020  | 12/30/2020 | Europe / Denmark / Syddanmark            |
| EPI_ISL_749148 | 6/18/2020  | 12/30/2020 | South America / Uruguay / Treinta y Tres |
| EPI_ISL_749151 | 6/18/2020  | 12/30/2020 | South America / Uruguay / Treinta y Tres |
| EPI_ISL_749155 | 6/21/2020  | 12/30/2020 | South America / Uruguay / Treinta y Tres |
| EPI_ISL_749287 | 12/7/2020  | 12/30/2020 | Europe / Denmark / Nordjylland           |
| EPI_ISL_749288 | 12/14/2020 | 12/30/2020 | Europe / Denmark / Hovedstaden           |
| EPI_ISL_749289 | 12/14/2020 | 12/30/2020 | Europe / Denmark / Sjælland              |
| EPI_ISL_749290 | 12/7/2020  | 12/30/2020 | Europe / Denmark / Hovedstaden           |
| EPI_ISL_749291 | 12/7/2020  | 12/30/2020 | Europe / Denmark / Nordjylland           |
| EPI_ISL_749292 | 12/7/2020  | 12/30/2020 | Europe / Denmark / Nordjylland           |
| EPI_ISL_749293 | 12/7/2020  | 12/30/2020 | Europe / Denmark / Nordjylland           |
| EPI_ISL_749294 | 12/7/2020  | 12/30/2020 | Europe / Denmark / Hovedstaden           |
| EPI_ISL_749295 | 12/7/2020  | 12/30/2020 | Europe / Denmark / Nordjylland           |
| EPI_ISL_749296 | 12/14/2020 | 12/30/2020 | Europe / Denmark / Syddanmark            |
| EPI_ISL_749297 | 12/14/2020 | 12/30/2020 | Europe / Denmark / Syddanmark            |
| EPI_ISL_749298 | 12/14/2020 | 12/30/2020 | Europe / Denmark / Midtjylland           |
| EPI_ISL_749299 | 12/14/2020 | 12/30/2020 | Europe / Denmark / Midtjylland           |
| EPI_ISL_749300 | 12/14/2020 | 12/30/2020 | Europe / Denmark / Midtjylland           |
| EPI_ISL_749301 | 12/14/2020 | 12/30/2020 | Europe / Denmark / Midtjylland           |
| EPI_ISL_749302 | 12/14/2020 | 12/30/2020 | Europe / Denmark / Syddanmark            |
| EPI_ISL_749303 | 12/14/2020 | 12/30/2020 | Europe / Denmark / Sjælland              |
| EPI_ISL_749304 | 12/14/2020 | 12/30/2020 | Europe / Denmark / Hovedstaden           |
| EPI_ISL_749305 | 12/14/2020 | 12/30/2020 | Europe / Denmark / Midtjylland           |
| EPI_ISL_749306 | 12/14/2020 | 12/30/2020 | Europe / Denmark / Midtjylland           |
| EPI_ISL_749307 | 12/14/2020 | 12/30/2020 | Europe / Denmark / Midtjylland           |
| EPI_ISL_749308 | 12/14/2020 | 12/30/2020 | Europe / Denmark / Syddanmark            |
| EPI_ISL_749309 | 12/14/2020 | 12/30/2020 | Europe / Denmark / Midtjylland           |
| EPI_ISL_749310 | 12/14/2020 | 12/30/2020 | Europe / Denmark / Midtjylland           |
| EPI_ISL_749311 | 12/14/2020 | 12/30/2020 | Europe / Denmark / Midtjylland           |





|                |            |            |                                |
|----------------|------------|------------|--------------------------------|
| EPI_ISL_749427 | 12/14/2020 | 12/30/2020 | Europe / Denmark / Hovedstaden |
| EPI_ISL_749428 | 12/14/2020 | 12/30/2020 | Europe / Denmark / Sjælland    |
| EPI_ISL_749429 | 12/14/2020 | 12/30/2020 | Europe / Denmark / Sjælland    |
| EPI_ISL_749430 | 12/14/2020 | 12/30/2020 | Europe / Denmark / Hovedstaden |
| EPI_ISL_749431 | 12/14/2020 | 12/30/2020 | Europe / Denmark / Hovedstaden |
| EPI_ISL_749432 | 12/14/2020 | 12/30/2020 | Europe / Denmark / Hovedstaden |
| EPI_ISL_749433 | 12/14/2020 | 12/30/2020 | Europe / Denmark / Syddanmark  |
| EPI_ISL_749434 | 12/14/2020 | 12/30/2020 | Europe / Denmark / Hovedstaden |
| EPI_ISL_749435 | 12/14/2020 | 12/30/2020 | Europe / Denmark / Hovedstaden |
| EPI_ISL_749436 | 12/14/2020 | 12/30/2020 | Europe / Denmark / Syddanmark  |
| EPI_ISL_749437 | 12/14/2020 | 12/30/2020 | Europe / Denmark / Syddanmark  |
| EPI_ISL_749438 | 12/14/2020 | 12/30/2020 | Europe / Denmark / Sjælland    |
| EPI_ISL_749439 | 12/14/2020 | 12/30/2020 | Europe / Denmark / Hovedstaden |
| EPI_ISL_749440 | 12/14/2020 | 12/30/2020 | Europe / Denmark / Syddanmark  |
| EPI_ISL_749441 | 12/14/2020 | 12/30/2020 | Europe / Denmark / Midtjylland |
| EPI_ISL_749442 | 12/14/2020 | 12/30/2020 | Europe / Denmark / Hovedstaden |
| EPI_ISL_749443 | 12/14/2020 | 12/30/2020 | Europe / Denmark / Syddanmark  |
| EPI_ISL_749444 | 12/14/2020 | 12/30/2020 | Europe / Denmark / Hovedstaden |
| EPI_ISL_749445 | 12/14/2020 | 12/30/2020 | Europe / Denmark / Sjælland    |
| EPI_ISL_749446 | 12/14/2020 | 12/30/2020 | Europe / Denmark / Midtjylland |
| EPI_ISL_749447 | 12/14/2020 | 12/30/2020 | Europe / Denmark / Sjælland    |
| EPI_ISL_749448 | 12/14/2020 | 12/30/2020 | Europe / Denmark / Midtjylland |
| EPI_ISL_749449 | 12/14/2020 | 12/30/2020 | Europe / Denmark / Hovedstaden |
| EPI_ISL_749450 | 12/14/2020 | 12/30/2020 | Europe / Denmark / Hovedstaden |
| EPI_ISL_749451 | 12/14/2020 | 12/30/2020 | Europe / Denmark / Hovedstaden |
| EPI_ISL_749452 | 12/7/2020  | 12/30/2020 | Europe / Denmark               |
| EPI_ISL_749453 | 12/7/2020  | 12/30/2020 | Europe / Denmark / Hovedstaden |
| EPI_ISL_749454 | 12/7/2020  | 12/30/2020 | Europe / Denmark / Syddanmark  |
| EPI_ISL_749455 | 12/7/2020  | 12/30/2020 | Europe / Denmark / Syddanmark  |
| EPI_ISL_749456 | 12/7/2020  | 12/30/2020 | Europe / Denmark / Hovedstaden |
| EPI_ISL_749457 | 12/7/2020  | 12/30/2020 | Europe / Denmark / Hovedstaden |
| EPI_ISL_749458 | 12/7/2020  | 12/30/2020 | Europe / Denmark / Hovedstaden |
| EPI_ISL_749459 | 12/7/2020  | 12/30/2020 | Europe / Denmark / Nordjylland |
| EPI_ISL_749460 | 12/7/2020  | 12/30/2020 | Europe / Denmark / Hovedstaden |
| EPI_ISL_749461 | 12/7/2020  | 12/30/2020 | Europe / Denmark / Syddanmark  |
| EPI_ISL_749462 | 12/7/2020  | 12/30/2020 | Europe / Denmark / Hovedstaden |
| EPI_ISL_749463 | 12/7/2020  | 12/30/2020 | Europe / Denmark / Hovedstaden |
| EPI_ISL_749464 | 12/7/2020  | 12/30/2020 | Europe / Denmark / Syddanmark  |
| EPI_ISL_749465 | 12/7/2020  | 12/30/2020 | Europe / Denmark / Hovedstaden |
| EPI_ISL_749466 | 12/7/2020  | 12/30/2020 | Europe / Denmark / Hovedstaden |
| EPI_ISL_749467 | 12/7/2020  | 12/30/2020 | Europe / Denmark / Hovedstaden |
| EPI_ISL_749468 | 12/7/2020  | 12/30/2020 | Europe / Denmark / Midtjylland |
| EPI_ISL_749469 | 12/7/2020  | 12/30/2020 | Europe / Denmark / Midtjylland |
| EPI_ISL_749470 | 12/7/2020  | 12/30/2020 | Europe / Denmark / Hovedstaden |
| EPI_ISL_749471 | 12/7/2020  | 12/30/2020 | Europe / Denmark / Hovedstaden |
| EPI_ISL_749472 | 12/7/2020  | 12/30/2020 | Europe / Denmark / Sjælland    |
| EPI_ISL_749473 | 12/7/2020  | 12/30/2020 | Europe / Denmark / Hovedstaden |

|                |            |            |                                |
|----------------|------------|------------|--------------------------------|
| EPI_ISL_749475 | 12/7/2020  | 12/30/2020 | Europe / Denmark / Hovedstaden |
| EPI_ISL_749476 | 12/7/2020  | 12/30/2020 | Europe / Denmark / Midtjylland |
| EPI_ISL_749477 | 12/7/2020  | 12/30/2020 | Europe / Denmark / Hovedstaden |
| EPI_ISL_749478 | 12/7/2020  | 12/30/2020 | Europe / Denmark / Hovedstaden |
| EPI_ISL_749479 | 12/7/2020  | 12/30/2020 | Europe / Denmark / Hovedstaden |
| EPI_ISL_749480 | 12/7/2020  | 12/30/2020 | Europe / Denmark / Hovedstaden |
| EPI_ISL_749481 | 12/7/2020  | 12/30/2020 | Europe / Denmark / Midtjylland |
| EPI_ISL_749482 | 12/7/2020  | 12/30/2020 | Europe / Denmark / Hovedstaden |
| EPI_ISL_749483 | 12/7/2020  | 12/30/2020 | Europe / Denmark / Midtjylland |
| EPI_ISL_749493 | 12/14/2020 | 12/30/2020 | Europe / Denmark / Sjælland    |
| EPI_ISL_749494 | 12/7/2020  | 12/30/2020 | Europe / Denmark / Hovedstaden |
| EPI_ISL_749495 | 12/7/2020  | 12/30/2020 | Europe / Denmark / Sjælland    |
| EPI_ISL_749496 | 12/7/2020  | 12/30/2020 | Europe / Denmark / Syddanmark  |
| EPI_ISL_749498 | 12/14/2020 | 12/30/2020 | Europe / Denmark / Syddanmark  |
| EPI_ISL_749499 | 12/7/2020  | 12/30/2020 | Europe / Denmark / Hovedstaden |
| EPI_ISL_749500 | 12/14/2020 | 12/30/2020 | Europe / Denmark / Nordjylland |
| EPI_ISL_749504 | 12/14/2020 | 12/30/2020 | Europe / Denmark / Syddanmark  |
| EPI_ISL_749505 | 12/14/2020 | 12/30/2020 | Europe / Denmark / Syddanmark  |
| EPI_ISL_749506 | 12/7/2020  | 12/30/2020 | Europe / Denmark / Syddanmark  |
| EPI_ISL_749507 | 12/14/2020 | 12/30/2020 | Europe / Denmark / Hovedstaden |
| EPI_ISL_749508 | 12/7/2020  | 12/30/2020 | Europe / Denmark / Hovedstaden |
| EPI_ISL_749509 | 12/7/2020  | 12/30/2020 | Europe / Denmark / Syddanmark  |
| EPI_ISL_749510 | 12/7/2020  | 12/30/2020 | Europe / Denmark / Syddanmark  |
| EPI_ISL_749511 | 12/14/2020 | 12/30/2020 | Europe / Denmark / Nordjylland |
| EPI_ISL_749512 | 12/14/2020 | 12/30/2020 | Europe / Denmark / Nordjylland |
| EPI_ISL_749513 | 12/7/2020  | 12/30/2020 | Europe / Denmark / Midtjylland |
| EPI_ISL_749514 | 12/7/2020  | 12/30/2020 | Europe / Denmark / Midtjylland |
| EPI_ISL_749519 | 12/14/2020 | 12/30/2020 | Europe / Denmark / Nordjylland |
| EPI_ISL_749520 | 12/7/2020  | 12/30/2020 | Europe / Denmark / Midtjylland |
| EPI_ISL_749521 | 12/7/2020  | 12/30/2020 | Europe / Denmark / Nordjylland |
| EPI_ISL_749522 | 12/7/2020  | 12/30/2020 | Europe / Denmark / Nordjylland |
| EPI_ISL_749542 | 12/14/2020 | 12/30/2020 | Europe / Denmark / Midtjylland |
| EPI_ISL_749543 | 12/14/2020 | 12/30/2020 | Europe / Denmark / Syddanmark  |
| EPI_ISL_749544 | 12/14/2020 | 12/30/2020 | Europe / Denmark / Syddanmark  |
| EPI_ISL_749545 | 12/14/2020 | 12/30/2020 | Europe / Denmark / Midtjylland |
| EPI_ISL_749546 | 12/14/2020 | 12/30/2020 | Europe / Denmark / Sjælland    |
| EPI_ISL_749547 | 12/14/2020 | 12/30/2020 | Europe / Denmark / Hovedstaden |
| EPI_ISL_749548 | 12/14/2020 | 12/30/2020 | Europe / Denmark / Sjælland    |
| EPI_ISL_749549 | 12/14/2020 | 12/30/2020 | Europe / Denmark / Nordjylland |
| EPI_ISL_749550 | 12/14/2020 | 12/30/2020 | Europe / Denmark / Syddanmark  |
| EPI_ISL_749551 | 12/14/2020 | 12/30/2020 | Europe / Denmark / Midtjylland |
| EPI_ISL_749552 | 12/14/2020 | 12/30/2020 | Europe / Denmark / Nordjylland |
| EPI_ISL_749553 | 12/14/2020 | 12/30/2020 | Europe / Denmark / Syddanmark  |
| EPI_ISL_749554 | 12/14/2020 | 12/30/2020 | Europe / Denmark / Hovedstaden |
| EPI_ISL_749555 | 12/14/2020 | 12/30/2020 | Europe / Denmark               |
| EPI_ISL_749556 | 12/14/2020 | 12/30/2020 | Europe / Denmark / Nordjylland |
| EPI_ISL_749557 | 12/14/2020 | 12/30/2020 | Europe / Denmark / Midtjylland |

















|                |           |            |                                |
|----------------|-----------|------------|--------------------------------|
| EPI_ISL_749888 | 12/7/2020 | 12/30/2020 | Europe / Denmark / Sjaelland   |
| EPI_ISL_749889 | 12/7/2020 | 12/30/2020 | Europe / Denmark / Hovedstaden |
| EPI_ISL_749890 | 12/7/2020 | 12/30/2020 | Europe / Denmark / Sjaelland   |
| EPI_ISL_749891 | 12/7/2020 | 12/30/2020 | Europe / Denmark / Nordjylland |
| EPI_ISL_749892 | 12/7/2020 | 12/30/2020 | Europe / Denmark / Midtjylland |
| EPI_ISL_749893 | 12/7/2020 | 12/30/2020 | Europe / Denmark / Hovedstaden |
| EPI_ISL_749894 | 12/7/2020 | 12/30/2020 | Europe / Denmark / Nordjylland |
| EPI_ISL_749895 | 12/7/2020 | 12/30/2020 | Europe / Denmark / Midtjylland |
| EPI_ISL_749896 | 12/7/2020 | 12/30/2020 | Europe / Denmark / Syddanmark  |
| EPI_ISL_749897 | 12/7/2020 | 12/30/2020 | Europe / Denmark / Hovedstaden |
| EPI_ISL_749898 | 12/7/2020 | 12/30/2020 | Europe / Denmark / Hovedstaden |
| EPI_ISL_749899 | 12/7/2020 | 12/30/2020 | Europe / Denmark / Sjaelland   |
| EPI_ISL_749900 | 12/7/2020 | 12/30/2020 | Europe / Denmark / Hovedstaden |
| EPI_ISL_749901 | 12/7/2020 | 12/30/2020 | Europe / Denmark / Hovedstaden |
| EPI_ISL_749902 | 12/7/2020 | 12/30/2020 | Europe / Denmark / Midtjylland |
| EPI_ISL_749903 | 12/7/2020 | 12/30/2020 | Europe / Denmark / Midtjylland |
| EPI_ISL_749904 | 12/7/2020 | 12/30/2020 | Europe / Denmark / Hovedstaden |
| EPI_ISL_749905 | 12/7/2020 | 12/30/2020 | Europe / Denmark / Midtjylland |
| EPI_ISL_749907 | 12/7/2020 | 12/30/2020 | Europe / Denmark / Hovedstaden |
| EPI_ISL_749908 | 12/7/2020 | 12/30/2020 | Europe / Denmark / Sjaelland   |
| EPI_ISL_749909 | 12/7/2020 | 12/30/2020 | Europe / Denmark / Hovedstaden |
| EPI_ISL_749910 | 12/7/2020 | 12/30/2020 | Europe / Denmark / Midtjylland |
| EPI_ISL_749911 | 12/7/2020 | 12/30/2020 | Europe / Denmark / Hovedstaden |
| EPI_ISL_749912 | 12/7/2020 | 12/30/2020 | Europe / Denmark / Hovedstaden |
| EPI_ISL_749913 | 12/7/2020 | 12/30/2020 | Europe / Denmark / Hovedstaden |
| EPI_ISL_749914 | 12/7/2020 | 12/30/2020 | Europe / Denmark / Syddanmark  |
| EPI_ISL_749915 | 12/7/2020 | 12/30/2020 | Europe / Denmark / Syddanmark  |
| EPI_ISL_749916 | 12/7/2020 | 12/30/2020 | Europe / Denmark / Midtjylland |
| EPI_ISL_749917 | 12/7/2020 | 12/30/2020 | Europe / Denmark / Midtjylland |
| EPI_ISL_749918 | 12/7/2020 | 12/30/2020 | Europe / Denmark / Midtjylland |
| EPI_ISL_749919 | 12/7/2020 | 12/30/2020 | Europe / Denmark / Hovedstaden |
| EPI_ISL_749920 | 12/7/2020 | 12/30/2020 | Europe / Denmark / Sjaelland   |
| EPI_ISL_749921 | 12/7/2020 | 12/30/2020 | Europe / Denmark / Hovedstaden |
| EPI_ISL_749922 | 12/7/2020 | 12/30/2020 | Europe / Denmark / Sjaelland   |
| EPI_ISL_749923 | 12/7/2020 | 12/30/2020 | Europe / Denmark / Hovedstaden |
| EPI_ISL_749924 | 12/7/2020 | 12/30/2020 | Europe / Denmark / Midtjylland |
| EPI_ISL_749925 | 12/7/2020 | 12/30/2020 | Europe / Denmark / Midtjylland |
| EPI_ISL_749926 | 12/7/2020 | 12/30/2020 | Europe / Denmark / Hovedstaden |
| EPI_ISL_749927 | 12/7/2020 | 12/30/2020 | Europe / Denmark / Midtjylland |
| EPI_ISL_749928 | 12/7/2020 | 12/30/2020 | Europe / Denmark / Midtjylland |
| EPI_ISL_749929 | 12/7/2020 | 12/30/2020 | Europe / Denmark / Midtjylland |
| EPI_ISL_749930 | 12/7/2020 | 12/30/2020 | Europe / Denmark / Hovedstaden |
| EPI_ISL_749931 | 12/7/2020 | 12/30/2020 | Europe / Denmark / Hovedstaden |
| EPI_ISL_749932 | 12/7/2020 | 12/30/2020 | Europe / Denmark / Midtjylland |
| EPI_ISL_749933 | 12/7/2020 | 12/30/2020 | Europe / Denmark               |
| EPI_ISL_749934 | 12/7/2020 | 12/30/2020 | Europe / Denmark / Hovedstaden |
| EPI_ISL_749935 | 12/7/2020 | 12/30/2020 | Europe / Denmark / Midtjylland |









|                |           |            |                                |
|----------------|-----------|------------|--------------------------------|
| EPI_ISL_750077 | 12/7/2020 | 12/30/2020 | Europe / Denmark / Syddanmark  |
| EPI_ISL_750078 | 12/7/2020 | 12/30/2020 | Europe / Denmark / Midtjylland |
| EPI_ISL_750079 | 12/7/2020 | 12/30/2020 | Europe / Denmark / Midtjylland |
| EPI_ISL_750080 | 12/7/2020 | 12/30/2020 | Europe / Denmark / Midtjylland |
| EPI_ISL_750081 | 12/7/2020 | 12/30/2020 | Europe / Denmark / Syddanmark  |
| EPI_ISL_750082 | 12/7/2020 | 12/30/2020 | Europe / Denmark / Midtjylland |
| EPI_ISL_750083 | 12/7/2020 | 12/30/2020 | Europe / Denmark / Hovedstaden |
| EPI_ISL_750084 | 12/7/2020 | 12/30/2020 | Europe / Denmark / Midtjylland |
| EPI_ISL_750085 | 12/7/2020 | 12/30/2020 | Europe / Denmark / Sjaelland   |
| EPI_ISL_750086 | 12/7/2020 | 12/30/2020 | Europe / Denmark / Midtjylland |
| EPI_ISL_750087 | 12/7/2020 | 12/30/2020 | Europe / Denmark / Nordjylland |
| EPI_ISL_750088 | 12/7/2020 | 12/30/2020 | Europe / Denmark / Syddanmark  |
| EPI_ISL_750089 | 12/7/2020 | 12/30/2020 | Europe / Denmark / Hovedstaden |
| EPI_ISL_750090 | 12/7/2020 | 12/30/2020 | Europe / Denmark / Midtjylland |
| EPI_ISL_750091 | 12/7/2020 | 12/30/2020 | Europe / Denmark / Hovedstaden |
| EPI_ISL_750092 | 12/7/2020 | 12/30/2020 | Europe / Denmark / Nordjylland |
| EPI_ISL_750093 | 12/7/2020 | 12/30/2020 | Europe / Denmark / Hovedstaden |
| EPI_ISL_750094 | 12/7/2020 | 12/30/2020 | Europe / Denmark / Midtjylland |
| EPI_ISL_750095 | 12/7/2020 | 12/30/2020 | Europe / Denmark / Sjaelland   |
| EPI_ISL_750096 | 12/7/2020 | 12/30/2020 | Europe / Denmark / Midtjylland |
| EPI_ISL_750097 | 12/7/2020 | 12/30/2020 | Europe / Denmark / Hovedstaden |
| EPI_ISL_750098 | 12/7/2020 | 12/30/2020 | Europe / Denmark / Hovedstaden |
| EPI_ISL_750099 | 12/7/2020 | 12/30/2020 | Europe / Denmark / Hovedstaden |
| EPI_ISL_750100 | 12/7/2020 | 12/30/2020 | Europe / Denmark / Hovedstaden |
| EPI_ISL_750101 | 12/7/2020 | 12/30/2020 | Europe / Denmark / Hovedstaden |
| EPI_ISL_750102 | 12/7/2020 | 12/30/2020 | Europe / Denmark / Midtjylland |
| EPI_ISL_750103 | 12/7/2020 | 12/30/2020 | Europe / Denmark / Nordjylland |
| EPI_ISL_750104 | 12/7/2020 | 12/30/2020 | Europe / Denmark / Hovedstaden |
| EPI_ISL_750105 | 12/7/2020 | 12/30/2020 | Europe / Denmark / Syddanmark  |
| EPI_ISL_750106 | 12/7/2020 | 12/30/2020 | Europe / Denmark / Hovedstaden |
| EPI_ISL_750107 | 12/7/2020 | 12/30/2020 | Europe / Denmark / Midtjylland |
| EPI_ISL_750109 | 12/7/2020 | 12/30/2020 | Europe / Denmark / Syddanmark  |
| EPI_ISL_750110 | 12/7/2020 | 12/30/2020 | Europe / Denmark / Midtjylland |
| EPI_ISL_750111 | 12/7/2020 | 12/30/2020 | Europe / Denmark / Syddanmark  |
| EPI_ISL_750112 | 12/7/2020 | 12/30/2020 | Europe / Denmark / Hovedstaden |
| EPI_ISL_750113 | 12/7/2020 | 12/30/2020 | Europe / Denmark / Syddanmark  |
| EPI_ISL_750114 | 12/7/2020 | 12/30/2020 | Europe / Denmark / Midtjylland |
| EPI_ISL_750115 | 12/7/2020 | 12/30/2020 | Europe / Denmark / Midtjylland |
| EPI_ISL_750116 | 12/7/2020 | 12/30/2020 | Europe / Denmark / Sjaelland   |
| EPI_ISL_750117 | 12/7/2020 | 12/30/2020 | Europe / Denmark / Midtjylland |
| EPI_ISL_750118 | 12/7/2020 | 12/30/2020 | Europe / Denmark / Syddanmark  |
| EPI_ISL_750119 | 12/7/2020 | 12/30/2020 | Europe / Denmark / Hovedstaden |
| EPI_ISL_750120 | 12/7/2020 | 12/30/2020 | Europe / Denmark / Midtjylland |
| EPI_ISL_750121 | 12/7/2020 | 12/30/2020 | Europe / Denmark / Hovedstaden |
| EPI_ISL_750122 | 12/7/2020 | 12/30/2020 | Europe / Denmark / Hovedstaden |
| EPI_ISL_750123 | 12/7/2020 | 12/30/2020 | Europe / Denmark / Hovedstaden |
| EPI_ISL_750124 | 12/7/2020 | 12/30/2020 | Europe / Denmark / Syddanmark  |

|                |            |            |                                          |
|----------------|------------|------------|------------------------------------------|
| EPI_ISL_750125 | 12/7/2020  | 12/30/2020 | Europe / Denmark / Midtjylland           |
| EPI_ISL_750126 | 12/7/2020  | 12/30/2020 | Europe / Denmark / Hovedstaden           |
| EPI_ISL_750127 | 12/7/2020  | 12/30/2020 | Europe / Denmark / Hovedstaden           |
| EPI_ISL_750128 | 12/7/2020  | 12/30/2020 | Europe / Denmark / Nordjylland           |
| EPI_ISL_750129 | 12/7/2020  | 12/30/2020 | Europe / Denmark / Midtjylland           |
| EPI_ISL_750130 | 12/7/2020  | 12/30/2020 | Europe / Denmark / Midtjylland           |
| EPI_ISL_750131 | 12/7/2020  | 12/30/2020 | Europe / Denmark / Sjælland              |
| EPI_ISL_750132 | 12/7/2020  | 12/30/2020 | Europe / Denmark / Nordjylland           |
| EPI_ISL_750133 | 12/7/2020  | 12/30/2020 | Europe / Denmark / Syddanmark            |
| EPI_ISL_750134 | 12/7/2020  | 12/30/2020 | Europe / Denmark / Midtjylland           |
| EPI_ISL_750135 | 12/7/2020  | 12/30/2020 | Europe / Denmark / Syddanmark            |
| EPI_ISL_750136 | 12/7/2020  | 12/30/2020 | Europe / Denmark / Midtjylland           |
| EPI_ISL_750137 | 12/7/2020  | 12/30/2020 | Europe / Denmark / Midtjylland           |
| EPI_ISL_750138 | 12/7/2020  | 12/30/2020 | Europe / Denmark / Hovedstaden           |
| EPI_ISL_750139 | 12/7/2020  | 12/30/2020 | Europe / Denmark / Syddanmark            |
| EPI_ISL_750140 | 12/7/2020  | 12/30/2020 | Europe / Denmark / Hovedstaden           |
| EPI_ISL_750141 | 12/7/2020  | 12/30/2020 | Europe / Denmark / Midtjylland           |
| EPI_ISL_750142 | 12/7/2020  | 12/30/2020 | Europe / Denmark / Syddanmark            |
| EPI_ISL_750143 | 12/7/2020  | 12/30/2020 | Europe / Denmark / Hovedstaden           |
| EPI_ISL_750144 | 12/7/2020  | 12/30/2020 | Europe / Denmark / Midtjylland           |
| EPI_ISL_750145 | 12/7/2020  | 12/30/2020 | Europe / Denmark / Nordjylland           |
| EPI_ISL_750146 | 12/7/2020  | 12/30/2020 | Europe / Denmark / Midtjylland           |
| EPI_ISL_750147 | 12/7/2020  | 12/30/2020 | Europe / Denmark / Midtjylland           |
| EPI_ISL_750148 | 12/7/2020  | 12/30/2020 | Europe / Denmark / Midtjylland           |
| EPI_ISL_750149 | 12/7/2020  | 12/30/2020 | Europe / Denmark / Nordjylland           |
| EPI_ISL_750150 | 12/7/2020  | 12/30/2020 | Europe / Denmark / Nordjylland           |
| EPI_ISL_750151 | 12/7/2020  | 12/30/2020 | Europe / Denmark / Nordjylland           |
| EPI_ISL_750152 | 12/7/2020  | 12/30/2020 | Europe / Denmark / Midtjylland           |
| EPI_ISL_750153 | 12/7/2020  | 12/30/2020 | Europe / Denmark / Hovedstaden           |
| EPI_ISL_750154 | 12/7/2020  | 12/30/2020 | Europe / Denmark / Sjælland              |
| EPI_ISL_750155 | 12/7/2020  | 12/30/2020 | Europe / Denmark / Hovedstaden           |
| EPI_ISL_750156 | 12/7/2020  | 12/30/2020 | Europe / Denmark / Midtjylland           |
| EPI_ISL_750157 | 12/7/2020  | 12/30/2020 | Europe / Denmark / Midtjylland           |
| EPI_ISL_750158 | 12/7/2020  | 12/30/2020 | Europe / Denmark / Midtjylland           |
| EPI_ISL_750159 | 12/7/2020  | 12/30/2020 | Europe / Denmark / Midtjylland           |
| EPI_ISL_750160 | 12/7/2020  | 12/30/2020 | Europe / Denmark / Midtjylland           |
| EPI_ISL_750168 | 6/24/2020  | 12/30/2020 | South America / Uruguay / Treinta y Tres |
| EPI_ISL_750169 | 6/25/2020  | 12/30/2020 | South America / Uruguay / Treinta y Tres |
| EPI_ISL_750170 | 6/25/2020  | 12/30/2020 | South America / Uruguay / Treinta y Tres |
| EPI_ISL_750173 | 6/27/2020  | 12/30/2020 | South America / Uruguay / Treinta y Tres |
| EPI_ISL_750177 | 7/17/2020  | 12/30/2020 | South America / Uruguay / Rio Branco     |
| EPI_ISL_750178 | 7/19/2020  | 12/30/2020 | South America / Uruguay / Rivera         |
| EPI_ISL_750287 | 12/14/2020 | 12/30/2020 | Europe / Denmark / Syddanmark            |
| EPI_ISL_750288 | 12/14/2020 | 12/30/2020 | Europe / Denmark / Nordjylland           |
| EPI_ISL_750289 | 12/14/2020 | 12/30/2020 | Europe / Denmark / Nordjylland           |
| EPI_ISL_750290 | 12/14/2020 | 12/30/2020 | Europe / Denmark / Syddanmark            |
| EPI_ISL_750291 | 12/14/2020 | 12/30/2020 | Europe / Denmark / Nordjylland           |





|                |            |            |                                          |
|----------------|------------|------------|------------------------------------------|
| EPI_ISL_750408 | 12/14/2020 | 12/30/2020 | Europe / Denmark / Hovedstaden           |
| EPI_ISL_750409 | 12/14/2020 | 12/30/2020 | Europe / Denmark / Sjaelland             |
| EPI_ISL_750410 | 12/14/2020 | 12/30/2020 | Europe / Denmark / Sjaelland             |
| EPI_ISL_750411 | 12/14/2020 | 12/30/2020 | Europe / Denmark / Syddanmark            |
| EPI_ISL_750412 | 12/14/2020 | 12/30/2020 | Europe / Denmark / Sjaelland             |
| EPI_ISL_750413 | 12/14/2020 | 12/30/2020 | Europe / Denmark / Hovedstaden           |
| EPI_ISL_750414 | 12/14/2020 | 12/30/2020 | Europe / Denmark / Nordjylland           |
| EPI_ISL_750415 | 12/14/2020 | 12/30/2020 | Europe / Denmark / Hovedstaden           |
| EPI_ISL_750416 | 12/14/2020 | 12/30/2020 | Europe / Denmark / Nordjylland           |
| EPI_ISL_750417 | 12/14/2020 | 12/30/2020 | Europe / Denmark / Sjaelland             |
| EPI_ISL_750418 | 12/14/2020 | 12/30/2020 | Europe / Denmark / Midtjylland           |
| EPI_ISL_750419 | 12/14/2020 | 12/30/2020 | Europe / Denmark / Midtjylland           |
| EPI_ISL_750420 | 12/14/2020 | 12/30/2020 | Europe / Denmark / Syddanmark            |
| EPI_ISL_750421 | 12/14/2020 | 12/30/2020 | Europe / Denmark / Nordjylland           |
| EPI_ISL_750422 | 12/14/2020 | 12/30/2020 | Europe / Denmark / Syddanmark            |
| EPI_ISL_750423 | 12/14/2020 | 12/30/2020 | Europe / Denmark / Hovedstaden           |
| EPI_ISL_750424 | 12/14/2020 | 12/30/2020 | Europe / Denmark / Nordjylland           |
| EPI_ISL_750425 | 12/14/2020 | 12/30/2020 | Europe / Denmark / Nordjylland           |
| EPI_ISL_750426 | 12/14/2020 | 12/30/2020 | Europe / Denmark / Midtjylland           |
| EPI_ISL_750427 | 12/14/2020 | 12/30/2020 | Europe / Denmark / Hovedstaden           |
| EPI_ISL_750428 | 12/14/2020 | 12/30/2020 | Europe / Denmark / Syddanmark            |
| EPI_ISL_750429 | 12/14/2020 | 12/30/2020 | Europe / Denmark / Midtjylland           |
| EPI_ISL_750430 | 7/1/2020   | 12/30/2020 | South America / Uruguay / Treinta y Tres |
| EPI_ISL_750431 | 12/14/2020 | 12/30/2020 | Europe / Denmark / Hovedstaden           |
| EPI_ISL_750432 | 12/14/2020 | 12/30/2020 | Europe / Denmark / Midtjylland           |
| EPI_ISL_750433 | 12/14/2020 | 12/30/2020 | Europe / Denmark / Nordjylland           |
| EPI_ISL_750434 | 12/14/2020 | 12/30/2020 | Europe / Denmark / Sjaelland             |
| EPI_ISL_750435 | 12/14/2020 | 12/30/2020 | Europe / Denmark / Syddanmark            |
| EPI_ISL_750436 | 12/14/2020 | 12/30/2020 | Europe / Denmark / Nordjylland           |
| EPI_ISL_750437 | 12/14/2020 | 12/30/2020 | Europe / Denmark / Sjaelland             |
| EPI_ISL_750438 | 12/14/2020 | 12/30/2020 | Europe / Denmark / Hovedstaden           |
| EPI_ISL_750439 | 12/14/2020 | 12/30/2020 | Europe / Denmark / Hovedstaden           |
| EPI_ISL_750440 | 12/14/2020 | 12/30/2020 | Europe / Denmark / Sjaelland             |
| EPI_ISL_750441 | 12/14/2020 | 12/30/2020 | Europe / Denmark / Sjaelland             |
| EPI_ISL_750442 | 12/14/2020 | 12/30/2020 | Europe / Denmark / Midtjylland           |
| EPI_ISL_750443 | 12/14/2020 | 12/30/2020 | Europe / Denmark / Syddanmark            |
| EPI_ISL_750444 | 12/14/2020 | 12/30/2020 | Europe / Denmark / Nordjylland           |
| EPI_ISL_750445 | 12/14/2020 | 12/30/2020 | Europe / Denmark / Hovedstaden           |
| EPI_ISL_750446 | 12/14/2020 | 12/30/2020 | Europe / Denmark / Hovedstaden           |
| EPI_ISL_750447 | 12/14/2020 | 12/30/2020 | Europe / Denmark / Sjaelland             |
| EPI_ISL_750448 | 12/14/2020 | 12/30/2020 | Europe / Denmark / Syddanmark            |
| EPI_ISL_750449 | 12/14/2020 | 12/30/2020 | Europe / Denmark / Hovedstaden           |
| EPI_ISL_750450 | 12/14/2020 | 12/30/2020 | Europe / Denmark / Nordjylland           |
| EPI_ISL_750451 | 12/14/2020 | 12/30/2020 | Europe / Denmark / Midtjylland           |
| EPI_ISL_750452 | 12/14/2020 | 12/30/2020 | Europe / Denmark / Midtjylland           |
| EPI_ISL_750453 | 12/14/2020 | 12/30/2020 | Europe / Denmark / Midtjylland           |
| EPI_ISL_750454 | 12/14/2020 | 12/30/2020 | Europe / Denmark / Sjaelland             |











|                |            |            |                                |
|----------------|------------|------------|--------------------------------|
| EPI_ISL_750678 | 12/14/2020 | 12/30/2020 | Europe / Denmark / Hovedstaden |
| EPI_ISL_750679 | 12/14/2020 | 12/30/2020 | Europe / Denmark / Midtjylland |
| EPI_ISL_750680 | 12/14/2020 | 12/30/2020 | Europe / Denmark / Nordjylland |
| EPI_ISL_750681 | 12/14/2020 | 12/30/2020 | Europe / Denmark / Midtjylland |
| EPI_ISL_750682 | 12/14/2020 | 12/30/2020 | Europe / Denmark / Sjaelland   |
| EPI_ISL_750683 | 12/14/2020 | 12/30/2020 | Europe / Denmark / Midtjylland |
| EPI_ISL_750684 | 12/14/2020 | 12/30/2020 | Europe / Denmark / Midtjylland |
| EPI_ISL_750685 | 12/14/2020 | 12/30/2020 | Europe / Denmark / Midtjylland |
| EPI_ISL_750686 | 12/14/2020 | 12/30/2020 | Europe / Denmark / Syddanmark  |
| EPI_ISL_750687 | 12/14/2020 | 12/30/2020 | Europe / Denmark / Midtjylland |
| EPI_ISL_750688 | 12/14/2020 | 12/30/2020 | Europe / Denmark / Midtjylland |
| EPI_ISL_750689 | 12/14/2020 | 12/30/2020 | Europe / Denmark / Syddanmark  |
| EPI_ISL_750690 | 12/14/2020 | 12/30/2020 | Europe / Denmark / Hovedstaden |
| EPI_ISL_750691 | 12/14/2020 | 12/30/2020 | Europe / Denmark / Midtjylland |
| EPI_ISL_750692 | 12/14/2020 | 12/30/2020 | Europe / Denmark / Midtjylland |
| EPI_ISL_750693 | 12/14/2020 | 12/30/2020 | Europe / Denmark / Syddanmark  |
| EPI_ISL_750694 | 12/14/2020 | 12/30/2020 | Europe / Denmark / Midtjylland |
| EPI_ISL_750695 | 12/14/2020 | 12/30/2020 | Europe / Denmark / Hovedstaden |
| EPI_ISL_750696 | 12/14/2020 | 12/30/2020 | Europe / Denmark / Midtjylland |
| EPI_ISL_750697 | 12/14/2020 | 12/30/2020 | Europe / Denmark / Midtjylland |
| EPI_ISL_750698 | 12/14/2020 | 12/30/2020 | Europe / Denmark / Midtjylland |
| EPI_ISL_750699 | 12/14/2020 | 12/30/2020 | Europe / Denmark / Hovedstaden |
| EPI_ISL_750700 | 12/14/2020 | 12/30/2020 | Europe / Denmark / Nordjylland |
| EPI_ISL_750701 | 12/14/2020 | 12/30/2020 | Europe / Denmark / Midtjylland |
| EPI_ISL_750702 | 12/14/2020 | 12/30/2020 | Europe / Denmark / Sjaelland   |
| EPI_ISL_750703 | 12/14/2020 | 12/30/2020 | Europe / Denmark / Sjaelland   |
| EPI_ISL_750704 | 12/14/2020 | 12/30/2020 | Europe / Denmark / Syddanmark  |
| EPI_ISL_750705 | 12/14/2020 | 12/30/2020 | Europe / Denmark / Hovedstaden |
| EPI_ISL_750706 | 12/14/2020 | 12/30/2020 | Europe / Denmark / Hovedstaden |
| EPI_ISL_750707 | 12/14/2020 | 12/30/2020 | Europe / Denmark / Nordjylland |
| EPI_ISL_750708 | 12/14/2020 | 12/30/2020 | Europe / Denmark / Midtjylland |
| EPI_ISL_750709 | 12/14/2020 | 12/30/2020 | Europe / Denmark / Midtjylland |
| EPI_ISL_750710 | 12/14/2020 | 12/30/2020 | Europe / Denmark / Midtjylland |
| EPI_ISL_750711 | 12/14/2020 | 12/30/2020 | Europe / Denmark / Nordjylland |
| EPI_ISL_750712 | 12/14/2020 | 12/30/2020 | Europe / Denmark / Midtjylland |
| EPI_ISL_750713 | 12/14/2020 | 12/30/2020 | Europe / Denmark / Hovedstaden |
| EPI_ISL_750714 | 12/14/2020 | 12/30/2020 | Europe / Denmark / Nordjylland |
| EPI_ISL_750715 | 12/14/2020 | 12/30/2020 | Europe / Denmark / Midtjylland |
| EPI_ISL_750716 | 12/14/2020 | 12/30/2020 | Europe / Denmark / Midtjylland |
| EPI_ISL_750717 | 12/14/2020 | 12/30/2020 | Europe / Denmark / Midtjylland |
| EPI_ISL_750718 | 12/14/2020 | 12/30/2020 | Europe / Denmark / Sjaelland   |
| EPI_ISL_750719 | 12/14/2020 | 12/30/2020 | Europe / Denmark / Midtjylland |
| EPI_ISL_750720 | 12/14/2020 | 12/30/2020 | Europe / Denmark / Sjaelland   |
| EPI_ISL_750721 | 12/14/2020 | 12/30/2020 | Europe / Denmark / Hovedstaden |
| EPI_ISL_750722 | 12/14/2020 | 12/30/2020 | Europe / Denmark / Midtjylland |
| EPI_ISL_750723 | 12/14/2020 | 12/30/2020 | Europe / Denmark / Nordjylland |
| EPI_ISL_750724 | 12/14/2020 | 12/30/2020 | Europe / Denmark / Midtjylland |





|                |            |            |                                          |
|----------------|------------|------------|------------------------------------------|
| EPI_ISL_750819 | 12/14/2020 | 12/30/2020 | Europe / Denmark / Nordjylland           |
| EPI_ISL_750820 | 7/2/2020   | 12/30/2020 | South America / Uruguay / Treinta y Tres |
| EPI_ISL_750821 | 12/14/2020 | 12/30/2020 | Europe / Denmark / Syddanmark            |
| EPI_ISL_750822 | 12/14/2020 | 12/30/2020 | Europe / Denmark / Sjaelland             |
| EPI_ISL_750823 | 12/14/2020 | 12/30/2020 | Europe / Denmark / Midtjylland           |
| EPI_ISL_750824 | 12/14/2020 | 12/30/2020 | Europe / Denmark / Sjaelland             |
| EPI_ISL_750825 | 12/14/2020 | 12/30/2020 | Europe / Denmark / Midtjylland           |
| EPI_ISL_750826 | 12/14/2020 | 12/30/2020 | Europe / Denmark / Midtjylland           |
| EPI_ISL_750827 | 12/14/2020 | 12/30/2020 | Europe / Denmark / Sjaelland             |
| EPI_ISL_750828 | 12/14/2020 | 12/30/2020 | Europe / Denmark / Midtjylland           |
| EPI_ISL_750829 | 12/14/2020 | 12/30/2020 | Europe / Denmark / Hovedstaden           |
| EPI_ISL_750830 | 12/14/2020 | 12/30/2020 | Europe / Denmark / Nordjylland           |
| EPI_ISL_750831 | 12/14/2020 | 12/30/2020 | Europe / Denmark / Sjaelland             |
| EPI_ISL_750832 | 12/14/2020 | 12/30/2020 | Europe / Denmark / Midtjylland           |
| EPI_ISL_750833 | 12/14/2020 | 12/30/2020 | Europe / Denmark / Midtjylland           |
| EPI_ISL_750834 | 12/14/2020 | 12/30/2020 | Europe / Denmark / Hovedstaden           |
| EPI_ISL_750835 | 12/14/2020 | 12/30/2020 | Europe / Denmark / Syddanmark            |
| EPI_ISL_750836 | 12/14/2020 | 12/30/2020 | Europe / Denmark / Midtjylland           |
| EPI_ISL_750837 | 12/14/2020 | 12/30/2020 | Europe / Denmark / Midtjylland           |
| EPI_ISL_750838 | 12/14/2020 | 12/30/2020 | Europe / Denmark / Midtjylland           |
| EPI_ISL_750839 | 12/14/2020 | 12/30/2020 | Europe / Denmark / Hovedstaden           |
| EPI_ISL_750840 | 12/14/2020 | 12/30/2020 | Europe / Denmark / Midtjylland           |
| EPI_ISL_750841 | 12/14/2020 | 12/30/2020 | Europe / Denmark / Syddanmark            |
| EPI_ISL_750842 | 12/14/2020 | 12/30/2020 | Europe / Denmark / Midtjylland           |
| EPI_ISL_750843 | 12/14/2020 | 12/30/2020 | Europe / Denmark / Midtjylland           |
| EPI_ISL_750844 | 12/14/2020 | 12/30/2020 | Europe / Denmark / Hovedstaden           |
| EPI_ISL_750845 | 12/14/2020 | 12/30/2020 | Europe / Denmark / Midtjylland           |
| EPI_ISL_750846 | 12/14/2020 | 12/30/2020 | Europe / Denmark / Syddanmark            |
| EPI_ISL_750847 | 12/14/2020 | 12/30/2020 | Europe / Denmark / Midtjylland           |
| EPI_ISL_750848 | 12/14/2020 | 12/30/2020 | Europe / Denmark / Syddanmark            |
| EPI_ISL_750849 | 12/14/2020 | 12/30/2020 | Europe / Denmark / Syddanmark            |
| EPI_ISL_750850 | 12/14/2020 | 12/30/2020 | Europe / Denmark / Syddanmark            |
| EPI_ISL_750851 | 12/14/2020 | 12/30/2020 | Europe / Denmark / Nordjylland           |
| EPI_ISL_750852 | 12/14/2020 | 12/30/2020 | Europe / Denmark / Midtjylland           |
| EPI_ISL_750853 | 12/14/2020 | 12/30/2020 | Europe / Denmark / Syddanmark            |
| EPI_ISL_750854 | 12/14/2020 | 12/30/2020 | Europe / Denmark / Syddanmark            |
| EPI_ISL_750855 | 12/14/2020 | 12/30/2020 | Europe / Denmark / Syddanmark            |
| EPI_ISL_750856 | 12/14/2020 | 12/30/2020 | Europe / Denmark / Midtjylland           |
| EPI_ISL_750857 | 12/14/2020 | 12/30/2020 | Europe / Denmark / Syddanmark            |
| EPI_ISL_750858 | 12/14/2020 | 12/30/2020 | Europe / Denmark / Midtjylland           |
| EPI_ISL_750859 | 12/14/2020 | 12/30/2020 | Europe / Denmark / Midtjylland           |
| EPI_ISL_750860 | 12/14/2020 | 12/30/2020 | Europe / Denmark / Midtjylland           |
| EPI_ISL_750861 | 12/14/2020 | 12/30/2020 | Europe / Denmark / Midtjylland           |
| EPI_ISL_750862 | 12/14/2020 | 12/30/2020 | Europe / Denmark / Midtjylland           |
| EPI_ISL_750863 | 12/14/2020 | 12/30/2020 | Europe / Denmark / Sjaelland             |
| EPI_ISL_750864 | 12/14/2020 | 12/30/2020 | Europe / Denmark / Sjaelland             |
| EPI_ISL_750865 | 12/14/2020 | 12/30/2020 | Europe / Denmark / Syddanmark            |









|                |            |            |                                          |
|----------------|------------|------------|------------------------------------------|
| EPI_ISL_751007 | 12/14/2020 | 12/30/2020 | Europe / Denmark / Midtjylland           |
| EPI_ISL_751008 | 12/14/2020 | 12/30/2020 | Europe / Denmark / Syddanmark            |
| EPI_ISL_751009 | 12/14/2020 | 12/30/2020 | Europe / Denmark / Midtjylland           |
| EPI_ISL_751010 | 12/14/2020 | 12/30/2020 | Europe / Denmark / Midtjylland           |
| EPI_ISL_751011 | 7/2/2020   | 12/30/2020 | South America / Uruguay / Treinta y Tres |
| EPI_ISL_751012 | 12/14/2020 | 12/30/2020 | Europe / Denmark / Nordjylland           |
| EPI_ISL_751013 | 12/14/2020 | 12/30/2020 | Europe / Denmark / Syddanmark            |
| EPI_ISL_751014 | 12/14/2020 | 12/30/2020 | Europe / Denmark / Midtjylland           |
| EPI_ISL_751015 | 12/14/2020 | 12/30/2020 | Europe / Denmark / Midtjylland           |
| EPI_ISL_751016 | 12/14/2020 | 12/30/2020 | Europe / Denmark / Nordjylland           |
| EPI_ISL_751017 | 12/14/2020 | 12/30/2020 | Europe / Denmark / Midtjylland           |
| EPI_ISL_751018 | 12/14/2020 | 12/30/2020 | Europe / Denmark / Syddanmark            |
| EPI_ISL_751019 | 12/14/2020 | 12/30/2020 | Europe / Denmark / Midtjylland           |
| EPI_ISL_751020 | 12/14/2020 | 12/30/2020 | Europe / Denmark / Midtjylland           |
| EPI_ISL_751021 | 12/14/2020 | 12/30/2020 | Europe / Denmark / Nordjylland           |
| EPI_ISL_751022 | 12/14/2020 | 12/30/2020 | Europe / Denmark / Nordjylland           |
| EPI_ISL_751023 | 12/14/2020 | 12/30/2020 | Europe / Denmark / Midtjylland           |
| EPI_ISL_751024 | 12/14/2020 | 12/30/2020 | Europe / Denmark / Syddanmark            |
| EPI_ISL_751025 | 12/14/2020 | 12/30/2020 | Europe / Denmark / Nordjylland           |
| EPI_ISL_751026 | 12/14/2020 | 12/30/2020 | Europe / Denmark / Syddanmark            |
| EPI_ISL_751027 | 12/14/2020 | 12/30/2020 | Europe / Denmark / Hovedstaden           |
| EPI_ISL_751028 | 12/14/2020 | 12/30/2020 | Europe / Denmark / Sjælland              |
| EPI_ISL_751029 | 12/14/2020 | 12/30/2020 | Europe / Denmark / Syddanmark            |
| EPI_ISL_751030 | 12/14/2020 | 12/30/2020 | Europe / Denmark / Syddanmark            |
| EPI_ISL_751031 | 12/14/2020 | 12/30/2020 | Europe / Denmark / Syddanmark            |
| EPI_ISL_751032 | 12/14/2020 | 12/30/2020 | Europe / Denmark                         |
| EPI_ISL_751033 | 12/14/2020 | 12/30/2020 | Europe / Denmark / Midtjylland           |
| EPI_ISL_751034 | 12/14/2020 | 12/30/2020 | Europe / Denmark / Sjælland              |
| EPI_ISL_751035 | 12/14/2020 | 12/30/2020 | Europe / Denmark / Syddanmark            |
| EPI_ISL_751036 | 12/14/2020 | 12/30/2020 | Europe / Denmark / Sjælland              |
| EPI_ISL_751037 | 12/14/2020 | 12/30/2020 | Europe / Denmark / Sjælland              |
| EPI_ISL_751038 | 12/14/2020 | 12/30/2020 | Europe / Denmark / Sjælland              |
| EPI_ISL_751039 | 12/14/2020 | 12/30/2020 | Europe / Denmark / Hovedstaden           |
| EPI_ISL_751040 | 12/14/2020 | 12/30/2020 | Europe / Denmark / Midtjylland           |
| EPI_ISL_751041 | 12/14/2020 | 12/30/2020 | Europe / Denmark / Hovedstaden           |
| EPI_ISL_751042 | 12/14/2020 | 12/30/2020 | Europe / Denmark / Midtjylland           |
| EPI_ISL_751043 | 12/14/2020 | 12/30/2020 | Europe / Denmark / Midtjylland           |
| EPI_ISL_751044 | 12/14/2020 | 12/30/2020 | Europe / Denmark / Nordjylland           |
| EPI_ISL_751045 | 12/14/2020 | 12/30/2020 | Europe / Denmark / Midtjylland           |
| EPI_ISL_751046 | 12/14/2020 | 12/30/2020 | Europe / Denmark / Midtjylland           |
| EPI_ISL_751047 | 12/14/2020 | 12/30/2020 | Europe / Denmark / Hovedstaden           |
| EPI_ISL_751048 | 12/14/2020 | 12/30/2020 | Europe / Denmark / Syddanmark            |
| EPI_ISL_751049 | 12/14/2020 | 12/30/2020 | Europe / Denmark / Sjælland              |
| EPI_ISL_751050 | 12/14/2020 | 12/30/2020 | Europe / Denmark / Hovedstaden           |
| EPI_ISL_751051 | 12/14/2020 | 12/30/2020 | Europe / Denmark / Syddanmark            |
| EPI_ISL_751052 | 12/14/2020 | 12/30/2020 | Europe / Denmark / Hovedstaden           |
| EPI_ISL_751053 | 12/14/2020 | 12/30/2020 | Europe / Denmark / Hovedstaden           |





|                |            |            |                                |
|----------------|------------|------------|--------------------------------|
| EPI_ISL_751148 | 12/14/2020 | 12/30/2020 | Europe / Denmark / Midtjylland |
| EPI_ISL_751149 | 12/14/2020 | 12/30/2020 | Europe / Denmark / Sjaelland   |
| EPI_ISL_751150 | 12/14/2020 | 12/30/2020 | Europe / Denmark / Hovedstaden |
| EPI_ISL_751151 | 12/14/2020 | 12/30/2020 | Europe / Denmark / Syddanmark  |
| EPI_ISL_751152 | 12/14/2020 | 12/30/2020 | Europe / Denmark / Midtjylland |
| EPI_ISL_751153 | 12/14/2020 | 12/30/2020 | Europe / Denmark / Syddanmark  |
| EPI_ISL_751154 | 12/14/2020 | 12/30/2020 | Europe / Denmark / Hovedstaden |
| EPI_ISL_751155 | 12/14/2020 | 12/30/2020 | Europe / Denmark / Hovedstaden |
| EPI_ISL_751156 | 12/14/2020 | 12/30/2020 | Europe / Denmark / Sjaelland   |
| EPI_ISL_751157 | 12/14/2020 | 12/30/2020 | Europe / Denmark / Syddanmark  |
| EPI_ISL_751158 | 12/14/2020 | 12/30/2020 | Europe / Denmark / Midtjylland |
| EPI_ISL_751159 | 12/14/2020 | 12/30/2020 | Europe / Denmark / Syddanmark  |
| EPI_ISL_751160 | 12/14/2020 | 12/30/2020 | Europe / Denmark / Hovedstaden |
| EPI_ISL_751161 | 12/14/2020 | 12/30/2020 | Europe / Denmark / Midtjylland |
| EPI_ISL_751162 | 12/14/2020 | 12/30/2020 | Europe / Denmark / Syddanmark  |
| EPI_ISL_751163 | 12/14/2020 | 12/30/2020 | Europe / Denmark / Syddanmark  |
| EPI_ISL_751164 | 12/14/2020 | 12/30/2020 | Europe / Denmark / Midtjylland |
| EPI_ISL_751165 | 12/14/2020 | 12/30/2020 | Europe / Denmark / Nordjylland |
| EPI_ISL_751166 | 12/14/2020 | 12/30/2020 | Europe / Denmark / Hovedstaden |
| EPI_ISL_751167 | 12/14/2020 | 12/30/2020 | Europe / Denmark / Midtjylland |
| EPI_ISL_751168 | 12/14/2020 | 12/30/2020 | Europe / Denmark / Midtjylland |
| EPI_ISL_751169 | 12/14/2020 | 12/30/2020 | Europe / Denmark / Nordjylland |
| EPI_ISL_751170 | 12/14/2020 | 12/30/2020 | Europe / Denmark / Nordjylland |
| EPI_ISL_751171 | 12/14/2020 | 12/30/2020 | Europe / Denmark / Nordjylland |
| EPI_ISL_751172 | 12/14/2020 | 12/30/2020 | Europe / Denmark / Hovedstaden |
| EPI_ISL_751173 | 12/14/2020 | 12/30/2020 | Europe / Denmark / Syddanmark  |
| EPI_ISL_751174 | 12/14/2020 | 12/30/2020 | Europe / Denmark / Midtjylland |
| EPI_ISL_751175 | 12/14/2020 | 12/30/2020 | Europe / Denmark / Syddanmark  |
| EPI_ISL_751176 | 12/14/2020 | 12/30/2020 | Europe / Denmark / Hovedstaden |
| EPI_ISL_751177 | 12/14/2020 | 12/30/2020 | Europe / Denmark / Midtjylland |
| EPI_ISL_751178 | 12/14/2020 | 12/30/2020 | Europe / Denmark / Midtjylland |
| EPI_ISL_751179 | 12/14/2020 | 12/30/2020 | Europe / Denmark / Midtjylland |
| EPI_ISL_751180 | 12/14/2020 | 12/30/2020 | Europe / Denmark / Sjaelland   |
| EPI_ISL_751181 | 12/14/2020 | 12/30/2020 | Europe / Denmark / Sjaelland   |
| EPI_ISL_751182 | 12/14/2020 | 12/30/2020 | Europe / Denmark / Sjaelland   |
| EPI_ISL_751183 | 12/14/2020 | 12/30/2020 | Europe / Denmark / Syddanmark  |
| EPI_ISL_751191 | 12/9/2020  | 12/30/2020 | Europe / Switzerland / Zurich  |
| EPI_ISL_751192 | 12/21/2020 | 12/30/2020 | Europe / Switzerland / Zurich  |
| EPI_ISL_751193 | 12/18/2020 | 12/30/2020 | Europe / Switzerland / Zurich  |
| EPI_ISL_751194 | 12/26/2020 | 12/30/2020 | Europe / Switzerland / Lucerne |
| EPI_ISL_751196 | 12/26/2020 | 12/30/2020 | Europe / Switzerland / Lucerne |
| EPI_ISL_751197 | 12/26/2020 | 12/30/2020 | Europe / Switzerland / Lucerne |
| EPI_ISL_751198 | 12/26/2020 | 12/30/2020 | Europe / Switzerland / Lucerne |
| EPI_ISL_751199 | 12/26/2020 | 12/30/2020 | Europe / Switzerland / Lucerne |
| EPI_ISL_751200 | 12/26/2020 | 12/30/2020 | Europe / Switzerland / Lucerne |
| EPI_ISL_751223 | 4/13/2020  | 12/30/2020 | Asia / Saudi Arabia / Makkah   |
| EPI_ISL_751224 | 4/8/2020   | 12/30/2020 | Asia / Saudi Arabia / Jeddah   |

|                |           |            |                               |
|----------------|-----------|------------|-------------------------------|
| EPI_ISL_751225 | 8/23/2020 | 12/30/2020 | Asia / Saudi Arabia / Madinah |
| EPI_ISL_751226 | 7/17/2020 | 12/30/2020 | Asia / Saudi Arabia / Madinah |
| EPI_ISL_751227 | 8/23/2020 | 12/30/2020 | Asia / Saudi Arabia / Madinah |
| EPI_ISL_751228 | 7/17/2020 | 12/30/2020 | Asia / Saudi Arabia / Madinah |
| EPI_ISL_751229 | 8/23/2020 | 12/30/2020 | Asia / Saudi Arabia / Madinah |
| EPI_ISL_751230 | 8/23/2020 | 12/30/2020 | Asia / Saudi Arabia / Madinah |
| EPI_ISL_751231 | 8/23/2020 | 12/30/2020 | Asia / Saudi Arabia / Madinah |
| EPI_ISL_751232 | 8/23/2020 | 12/30/2020 | Asia / Saudi Arabia / Madinah |
| EPI_ISL_751233 | 8/23/2020 | 12/30/2020 | Asia / Saudi Arabia / Madinah |
| EPI_ISL_751234 | 7/17/2020 | 12/30/2020 | Asia / Saudi Arabia / Madinah |
| EPI_ISL_751235 | 8/23/2020 | 12/30/2020 | Asia / Saudi Arabia / Madinah |
| EPI_ISL_751236 | 8/23/2020 | 12/30/2020 | Asia / Saudi Arabia / Madinah |
| EPI_ISL_751237 | 3/23/2020 | 12/30/2020 | Asia / Saudi Arabia / Madinah |
| EPI_ISL_751238 | 4/14/2020 | 12/30/2020 | Asia / Saudi Arabia / Makkah  |
| EPI_ISL_751245 | 2020-07   | 12/30/2020 | Asia / India / Delhi          |
| EPI_ISL_751246 | 2020-08   | 12/30/2020 | Asia / India / Delhi          |
| EPI_ISL_751277 | 2020-07   | 12/30/2020 | Asia / India / Delhi          |
| EPI_ISL_751278 | 2020-07   | 12/30/2020 | Asia / India / Delhi          |
| EPI_ISL_751279 | 2020-07   | 12/30/2020 | Asia / India / Delhi          |
| EPI_ISL_751280 | 2020-07   | 12/30/2020 | Asia / India / Delhi          |
| EPI_ISL_751281 | 2020-08   | 12/30/2020 | Asia / India / Delhi          |
| EPI_ISL_751282 | 2020-07   | 12/30/2020 | Asia / India / Delhi          |
| EPI_ISL_751283 | 2020-08   | 12/30/2020 | Asia / India / Delhi          |
| EPI_ISL_751284 | 2020-08   | 12/30/2020 | Asia / India / Delhi          |
| EPI_ISL_751285 | 2020-08   | 12/30/2020 | Asia / India / Delhi          |
| EPI_ISL_751286 | 2020-07   | 12/30/2020 | Asia / India / Delhi          |
| EPI_ISL_751287 | 2020-08   | 12/30/2020 | Asia / India / Delhi          |
| EPI_ISL_751288 | 2020-07   | 12/30/2020 | Asia / India / Delhi          |
| EPI_ISL_751289 | 2020-07   | 12/30/2020 | Asia / India / Delhi          |
| EPI_ISL_751290 | 2020-07   | 12/30/2020 | Asia / India / Delhi          |
| EPI_ISL_751291 | 2020-07   | 12/30/2020 | Asia / India / Delhi          |
| EPI_ISL_751292 | 2020-07   | 12/30/2020 | Asia / India / Delhi          |
| EPI_ISL_751293 | 2020-07   | 12/30/2020 | Asia / India / Delhi          |
| EPI_ISL_751294 | 2020-07   | 12/30/2020 | Asia / India / Delhi          |
| EPI_ISL_751295 | 2020-08   | 12/30/2020 | Asia / India / Delhi          |
| EPI_ISL_751296 | 2020-07   | 12/30/2020 | Asia / India / Delhi          |
| EPI_ISL_751297 | 2020-03   | 12/30/2020 | Asia / India / Delhi          |
| EPI_ISL_751298 | 2020-07   | 12/30/2020 | Asia / India / Delhi          |
| EPI_ISL_751299 | 2020-07   | 12/30/2020 | Asia / India / Delhi          |
| EPI_ISL_751300 | 2020-07   | 12/30/2020 | Asia / India / Delhi          |
| EPI_ISL_751301 | 2020      | 12/30/2020 | Asia / India / Delhi          |
| EPI_ISL_751302 | 2020-07   | 12/30/2020 | Asia / India / Delhi          |
| EPI_ISL_751303 | 2020-07   | 12/30/2020 | Asia / India / Delhi          |
| EPI_ISL_751304 | 2020-07   | 12/30/2020 | Asia / India / Delhi          |
| EPI_ISL_751305 | 2020-07   | 12/30/2020 | Asia / India / Delhi          |
| EPI_ISL_751306 | 2020-07   | 12/30/2020 | Asia / India / Delhi          |
| EPI_ISL_751307 | 2020-07   | 12/30/2020 | Asia / India / Delhi          |

|                |           |            |                                  |
|----------------|-----------|------------|----------------------------------|
| EPI_ISL_751308 | 2020-08   | 12/30/2020 | Asia / India / Delhi             |
| EPI_ISL_751309 | 2020-08   | 12/30/2020 | Asia / India / Delhi             |
| EPI_ISL_751310 | 2020-08   | 12/30/2020 | Asia / India / Delhi             |
| EPI_ISL_751311 | 2020-08   | 12/30/2020 | Asia / India / Delhi             |
| EPI_ISL_751312 | 2020-08   | 12/30/2020 | Asia / India / Delhi             |
| EPI_ISL_751313 | 2020-08   | 12/30/2020 | Asia / India / Delhi             |
| EPI_ISL_751315 | 2020-08   | 12/30/2020 | Asia / India / Delhi             |
| EPI_ISL_751316 | 2020-08   | 12/30/2020 | Asia / India / Delhi             |
| EPI_ISL_751317 | 2020-07   | 12/30/2020 | Asia / India / Delhi             |
| EPI_ISL_751320 | 3/29/2020 | 12/30/2020 | Europe / Italy / Veneto / Verona |
| EPI_ISL_751321 | 4/1/2020  | 12/30/2020 | Europe / Italy / Veneto / Verona |
| EPI_ISL_751322 | 4/13/2020 | 12/30/2020 | Europe / Italy / Veneto / Verona |
| EPI_ISL_751323 | 8/11/2020 | 12/30/2020 | Europe / Italy / Veneto / Verona |
| EPI_ISL_751324 | 8/10/2020 | 12/30/2020 | Europe / Italy / Veneto / Verona |
| EPI_ISL_751331 | 8/11/2020 | 12/30/2020 | Europe / Italy / Veneto / Verona |
| EPI_ISL_751332 | 8/20/2020 | 12/30/2020 | Europe / Italy / Veneto / Verona |
| EPI_ISL_751333 | 4/30/2020 | 12/30/2020 | Europe / Italy / Veneto / Verona |
| EPI_ISL_751334 | 4/17/2020 | 12/30/2020 | Europe / Italy / Veneto / Verona |
| EPI_ISL_751335 | 8/28/2020 | 12/30/2020 | Europe / Italy / Veneto / Verona |
| EPI_ISL_751336 | 4/20/2020 | 12/30/2020 | Europe / Italy / Veneto / Verona |
| EPI_ISL_751337 | 8/12/2020 | 12/30/2020 | Europe / Italy / Veneto / Verona |
| EPI_ISL_751338 | 4/20/2020 | 12/30/2020 | Europe / Italy / Veneto / Verona |
| EPI_ISL_751339 | 8/4/2020  | 12/30/2020 | Europe / Italy / Veneto / Verona |
| EPI_ISL_751340 | 8/21/2020 | 12/30/2020 | Europe / Italy / Veneto / Verona |
| EPI_ISL_751341 | 8/26/2020 | 12/30/2020 | Europe / Italy / Veneto / Verona |
| EPI_ISL_751342 | 8/7/2020  | 12/30/2020 | Europe / Italy / Veneto / Verona |
| EPI_ISL_751343 | 8/13/2020 | 12/30/2020 | Europe / Italy / Veneto / Verona |
| EPI_ISL_751344 | 8/28/2020 | 12/30/2020 | Europe / Italy / Veneto / Verona |
| EPI_ISL_751345 | 8/28/2020 | 12/30/2020 | Europe / Italy / Veneto / Verona |
| EPI_ISL_751346 | 8/28/2020 | 12/30/2020 | Europe / Italy / Veneto / Verona |
| EPI_ISL_751347 | 3/7/2020  | 12/30/2020 | Europe / Italy / Veneto / Verona |
| EPI_ISL_751348 | 3/7/2020  | 12/30/2020 | Europe / Italy / Veneto / Verona |
| EPI_ISL_751349 | 3/7/2020  | 12/30/2020 | Europe / Italy / Veneto / Verona |
| EPI_ISL_751350 | 3/8/2020  | 12/30/2020 | Europe / Italy / Veneto / Verona |
| EPI_ISL_751351 | 3/10/2020 | 12/30/2020 | Europe / Italy / Veneto / Verona |
| EPI_ISL_751352 | 3/10/2020 | 12/30/2020 | Europe / Italy / Veneto / Verona |
| EPI_ISL_751353 | 3/10/2020 | 12/30/2020 | Europe / Italy / Veneto / Verona |
| EPI_ISL_751354 | 3/11/2020 | 12/30/2020 | Europe / Italy / Veneto / Verona |
| EPI_ISL_751355 | 3/12/2020 | 12/30/2020 | Europe / Italy / Veneto / Verona |
| EPI_ISL_751356 | 3/12/2020 | 12/30/2020 | Europe / Italy / Veneto / Verona |
| EPI_ISL_751357 | 3/12/2020 | 12/30/2020 | Europe / Italy / Veneto / Verona |
| EPI_ISL_751358 | 3/12/2020 | 12/30/2020 | Europe / Italy / Veneto / Verona |
| EPI_ISL_751359 | 3/12/2020 | 12/30/2020 | Europe / Italy / Veneto / Verona |
| EPI_ISL_751360 | 3/12/2020 | 12/30/2020 | Europe / Italy / Veneto / Verona |
| EPI_ISL_751361 | 3/12/2020 | 12/30/2020 | Europe / Italy / Veneto / Verona |
| EPI_ISL_751362 | 3/12/2020 | 12/30/2020 | Europe / Italy / Veneto / Verona |
| EPI_ISL_751363 | 3/12/2020 | 12/30/2020 | Europe / Italy / Veneto / Verona |







|                |            |            |                                     |
|----------------|------------|------------|-------------------------------------|
| EPI_ISL_751460 | 11/23/2020 | 12/30/2020 | Europe / France / Occitanie         |
| EPI_ISL_751461 | 11/12/2020 | 12/30/2020 | Europe / France / Occitanie         |
| EPI_ISL_751462 | 11/12/2020 | 12/30/2020 | Europe / France / Occitanie         |
| EPI_ISL_751463 | 11/18/2020 | 12/30/2020 | Europe / France / Occitanie         |
| EPI_ISL_751464 | 11/20/2020 | 12/30/2020 | Europe / France / Occitanie         |
| EPI_ISL_751465 | 11/16/2020 | 12/30/2020 | Europe / France / Occitanie         |
| EPI_ISL_751466 | 11/13/2020 | 12/30/2020 | Europe / France / Occitanie         |
| EPI_ISL_751467 | 11/12/2020 | 12/30/2020 | Europe / France / Occitanie         |
| EPI_ISL_751468 | 11/12/2020 | 12/30/2020 | Europe / France / Occitanie         |
| EPI_ISL_751469 | 11/14/2020 | 12/30/2020 | Europe / France / Occitanie         |
| EPI_ISL_751470 | 11/14/2020 | 12/30/2020 | Europe / France / Occitanie         |
| EPI_ISL_751471 | 11/15/2020 | 12/30/2020 | Europe / France / Occitanie         |
| EPI_ISL_751472 | 11/25/2020 | 12/30/2020 | Europe / France / Occitanie         |
| EPI_ISL_751473 | 11/21/2020 | 12/30/2020 | Europe / France / Occitanie         |
| EPI_ISL_751474 | 11/18/2020 | 12/30/2020 | Europe / France / Occitanie         |
| EPI_ISL_751475 | 11/18/2020 | 12/30/2020 | Europe / France / Occitanie         |
| EPI_ISL_751476 | 11/18/2020 | 12/30/2020 | Europe / France / Occitanie         |
| EPI_ISL_751477 | 10/13/2020 | 12/30/2020 | Europe / France / Occitanie         |
| EPI_ISL_751478 | 10/22/2020 | 12/30/2020 | Europe / France / Occitanie         |
| EPI_ISL_751479 | 10/23/2020 | 12/30/2020 | Europe / France / Occitanie         |
| EPI_ISL_751480 | 10/9/2020  | 12/30/2020 | Europe / France / Occitanie         |
| EPI_ISL_751481 | 10/23/2020 | 12/30/2020 | Europe / France / Occitanie         |
| EPI_ISL_751482 | 10/23/2020 | 12/30/2020 | Europe / France / Occitanie         |
| EPI_ISL_751483 | 10/29/2020 | 12/30/2020 | Europe / France / Occitanie         |
| EPI_ISL_751484 | 10/29/2020 | 12/30/2020 | Europe / France / Occitanie         |
| EPI_ISL_751485 | 10/29/2020 | 12/30/2020 | Europe / France / Occitanie         |
| EPI_ISL_751486 | 10/12/2020 | 12/30/2020 | Europe / France / Occitanie         |
| EPI_ISL_751487 | 10/16/2020 | 12/30/2020 | Europe / France / Occitanie         |
| EPI_ISL_751488 | 10/19/2020 | 12/30/2020 | Europe / France / Occitanie         |
| EPI_ISL_751489 | 10/24/2020 | 12/30/2020 | Europe / France / Occitanie         |
| EPI_ISL_751490 | 10/30/2020 | 12/30/2020 | Europe / France / Occitanie         |
| EPI_ISL_751491 | 11/10/2020 | 12/30/2020 | Europe / France / Occitanie         |
| EPI_ISL_751492 | 11/10/2020 | 12/30/2020 | Europe / France / Occitanie         |
| EPI_ISL_751493 | 11/10/2020 | 12/30/2020 | Europe / France / Occitanie         |
| EPI_ISL_751494 | 11/10/2020 | 12/30/2020 | Europe / France / Occitanie         |
| EPI_ISL_751495 | 10/5/2020  | 12/30/2020 | Europe / France / Occitanie         |
| EPI_ISL_751496 | 10/9/2020  | 12/30/2020 | Europe / France / Occitanie         |
| EPI_ISL_751497 | 11/14/2020 | 12/30/2020 | Europe / France / Occitanie         |
| EPI_ISL_751498 | 11/2/2020  | 12/30/2020 | Europe / France / Occitanie         |
| EPI_ISL_751499 | 10/1/2020  | 12/30/2020 | Europe / France / Occitanie         |
| EPI_ISL_751554 | 11/10/2020 | 12/30/2020 | North America / USA / Connecticut   |
| EPI_ISL_751555 | 12/5/2020  | 12/30/2020 | North America / USA / Wyoming       |
| EPI_ISL_751556 | 12/4/2020  | 12/30/2020 | North America / USA / Nevada        |
| EPI_ISL_751557 | 12/4/2020  | 12/30/2020 | North America / USA / Nevada        |
| EPI_ISL_751558 | 11/16/2020 | 12/30/2020 | North America / USA / New Hampshire |
| EPI_ISL_751559 | 12/2/2020  | 12/30/2020 | North America / USA / Maryland      |
| EPI_ISL_751560 | 11/17/2020 | 12/30/2020 | North America / USA / New York      |

|                |            |            |                                     |
|----------------|------------|------------|-------------------------------------|
| EPI_ISL_751561 | 12/3/2020  | 12/30/2020 | North America / USA / Montana       |
| EPI_ISL_751564 | 11/18/2020 | 12/30/2020 | North America / USA / Virginia      |
| EPI_ISL_751565 | 11/28/2020 | 12/30/2020 | North America / USA / Iowa          |
| EPI_ISL_751566 | 12/1/2020  | 12/30/2020 | North America / USA / West Virginia |
| EPI_ISL_751567 | 11/15/2020 | 12/30/2020 | North America / USA / Idaho         |
| EPI_ISL_751568 | 11/5/2020  | 12/30/2020 | North America / USA / Mississippi   |
| EPI_ISL_751569 | 11/7/2020  | 12/30/2020 | North America / USA / Michigan      |
| EPI_ISL_751570 | 12/5/2020  | 12/30/2020 | North America / USA / Kentucky      |
| EPI_ISL_751571 | 11/13/2020 | 12/30/2020 | North America / USA / Texas         |
| EPI_ISL_751572 | 11/3/2020  | 12/30/2020 | North America / USA / Kansas        |
| EPI_ISL_751573 | 11/9/2020  | 12/30/2020 | North America / USA / Minnesota     |
| EPI_ISL_751574 | 9/2/2020   | 12/30/2020 | North America / USA / Arkansas      |
| EPI_ISL_751575 | 12/3/2020  | 12/30/2020 | North America / USA / Colorado      |
| EPI_ISL_751576 | 11/16/2020 | 12/30/2020 | North America / USA / Minnesota     |
| EPI_ISL_751577 | 11/22/2020 | 12/30/2020 | North America / USA / Maryland      |
| EPI_ISL_751578 | 11/25/2020 | 12/30/2020 | North America / USA / Hawaii        |
| EPI_ISL_751579 | 12/3/2020  | 12/30/2020 | North America / USA / Indiana       |
| EPI_ISL_751580 | 11/24/2020 | 12/30/2020 | North America / USA / New York      |
| EPI_ISL_751581 | 11/20/2020 | 12/30/2020 | North America / USA / New York      |
| EPI_ISL_751582 | 11/6/2020  | 12/30/2020 | North America / USA / New Hampshire |
| EPI_ISL_751583 | 10/28/2020 | 12/30/2020 | North America / USA / Nebraska      |
| EPI_ISL_751584 | 11/2/2020  | 12/30/2020 | North America / USA / New Hampshire |
| EPI_ISL_751585 | 11/25/2020 | 12/30/2020 | North America / USA / Nebraska      |
| EPI_ISL_751586 | 11/10/2020 | 12/30/2020 | North America / USA / Ohio          |
| EPI_ISL_751587 | 11/2/2020  | 12/30/2020 | North America / USA / New Hampshire |
| EPI_ISL_751588 | 11/18/2020 | 12/30/2020 | North America / USA / Virginia      |
| EPI_ISL_751589 | 12/1/2020  | 12/30/2020 | North America / USA / West Virginia |
| EPI_ISL_751590 | 11/18/2020 | 12/30/2020 | North America / USA / Idaho         |
| EPI_ISL_751591 | 12/4/2020  | 12/30/2020 | North America / USA / Wyoming       |
| EPI_ISL_751592 | 11/17/2020 | 12/30/2020 | North America / USA / Alaska        |
| EPI_ISL_751593 | 11/14/2020 | 12/30/2020 | North America / USA / Alaska        |
| EPI_ISL_751594 | 11/27/2020 | 12/30/2020 | North America / USA / Kentucky      |
| EPI_ISL_751595 | 12/3/2020  | 12/30/2020 | North America / USA / Rhode Island  |
| EPI_ISL_751596 | 12/4/2020  | 12/30/2020 | North America / USA / Kentucky      |
| EPI_ISL_751597 | 11/15/2020 | 12/30/2020 | North America / USA / Alaska        |
| EPI_ISL_751598 | 11/16/2020 | 12/30/2020 | North America / USA / Alaska        |
| EPI_ISL_751599 | 12/4/2020  | 12/30/2020 | North America / USA / Indiana       |
| EPI_ISL_751600 | 12/4/2020  | 12/30/2020 | North America / USA / Indiana       |
| EPI_ISL_751601 | 10/16/2020 | 12/30/2020 | North America / USA / Michigan      |
| EPI_ISL_751602 | 11/18/2020 | 12/30/2020 | North America / USA / Delaware      |
| EPI_ISL_751603 | 11/25/2020 | 12/30/2020 | North America / USA / Hawaii        |
| EPI_ISL_751604 | 12/3/2020  | 12/30/2020 | North America / USA / Maryland      |
| EPI_ISL_751605 | 10/28/2020 | 12/30/2020 | North America / USA / Delaware      |
| EPI_ISL_751606 | 11/22/2020 | 12/30/2020 | North America / USA / Maryland      |
| EPI_ISL_751607 | 11/20/2020 | 12/30/2020 | North America / USA / Maryland      |
| EPI_ISL_751608 | 10/29/2020 | 12/30/2020 | North America / USA / Nebraska      |
| EPI_ISL_751609 | 11/11/2020 | 12/30/2020 | North America / USA / Ohio          |

|                |            |            |                                      |
|----------------|------------|------------|--------------------------------------|
| EPI_ISL_751610 | 11/16/2020 | 12/30/2020 | North America / USA / Ohio           |
| EPI_ISL_751611 | 12/2/2020  | 12/30/2020 | North America / USA / South Carolina |
| EPI_ISL_751612 | 11/18/2020 | 12/30/2020 | North America / USA / Idaho          |
| EPI_ISL_751613 | 11/19/2020 | 12/30/2020 | North America / USA / Ohio           |
| EPI_ISL_751614 | 11/19/2020 | 12/30/2020 | North America / USA / Idaho          |
| EPI_ISL_751615 | 11/30/2020 | 12/30/2020 | North America / USA / Oregon         |
| EPI_ISL_751616 | 11/16/2020 | 12/30/2020 | North America / USA / Ohio           |
| EPI_ISL_751617 | 12/1/2020  | 12/30/2020 | North America / USA / Texas          |
| EPI_ISL_751618 | 11/19/2020 | 12/30/2020 | North America / USA / Idaho          |
| EPI_ISL_751619 | 12/5/2020  | 12/30/2020 | North America / USA / Wyoming        |
| EPI_ISL_751620 | 12/2/2020  | 12/30/2020 | North America / USA / Louisiana      |
| EPI_ISL_751621 | 10/28/2020 | 12/30/2020 | North America / USA / Delaware       |
| EPI_ISL_751622 | 10/20/2020 | 12/30/2020 | North America / USA / Michigan       |
| EPI_ISL_751623 | 10/28/2020 | 12/30/2020 | North America / USA / Delaware       |
| EPI_ISL_751624 | 11/12/2020 | 12/30/2020 | North America / USA / Connecticut    |
| EPI_ISL_751625 | 12/3/2020  | 12/30/2020 | North America / USA / Maryland       |
| EPI_ISL_751626 | 12/4/2020  | 12/30/2020 | North America / USA / Indiana        |
| EPI_ISL_751627 | 10/28/2020 | 12/30/2020 | North America / USA / Delaware       |
| EPI_ISL_751628 | 12/3/2020  | 12/30/2020 | North America / USA / Maryland       |
| EPI_ISL_751629 | 11/27/2020 | 12/30/2020 | North America / USA / Maryland       |
| EPI_ISL_751630 | 12/4/2020  | 12/30/2020 | North America / USA / Colorado       |
| EPI_ISL_751631 | 10/27/2020 | 12/30/2020 | North America / USA / Delaware       |
| EPI_ISL_751632 | 12/4/2020  | 12/30/2020 | North America / USA / Indiana        |
| EPI_ISL_751633 | 12/2/2020  | 12/30/2020 | North America / USA / Montana        |
| EPI_ISL_751634 | 12/1/2020  | 12/30/2020 | North America / USA / Missouri       |
| EPI_ISL_751635 | 11/9/2020  | 12/30/2020 | North America / USA / Missouri       |
| EPI_ISL_751636 | 12/4/2020  | 12/30/2020 | North America / USA / Nevada         |
| EPI_ISL_751637 | 12/4/2020  | 12/30/2020 | North America / USA / Nevada         |
| EPI_ISL_751638 | 11/20/2020 | 12/30/2020 | North America / USA / Nebraska       |
| EPI_ISL_751639 | 12/4/2020  | 12/30/2020 | North America / USA / Nevada         |
| EPI_ISL_751640 | 12/2/2020  | 12/30/2020 | North America / USA / Montana        |
| EPI_ISL_751641 | 11/18/2020 | 12/30/2020 | North America / USA / Minnesota      |
| EPI_ISL_751642 | 11/6/2020  | 12/30/2020 | North America / USA / New Hampshire  |
| EPI_ISL_751643 | 12/5/2020  | 12/30/2020 | North America / USA / Wyoming        |
| EPI_ISL_751644 | 12/4/2020  | 12/30/2020 | North America / USA / Texas          |
| EPI_ISL_751645 | 12/2/2020  | 12/30/2020 | North America / USA / Texas          |
| EPI_ISL_751646 | 12/3/2020  | 12/30/2020 | North America / USA / Texas          |
| EPI_ISL_751647 | 11/4/2020  | 12/30/2020 | North America / USA / Alabama        |
| EPI_ISL_751648 | 12/3/2020  | 12/30/2020 | North America / USA / Kentucky       |
| EPI_ISL_751649 | 11/20/2020 | 12/30/2020 | North America / USA / Connecticut    |
| EPI_ISL_751650 | 11/20/2020 | 12/30/2020 | North America / USA / Connecticut    |
| EPI_ISL_751651 | 11/25/2020 | 12/30/2020 | North America / USA / Hawaii         |
| EPI_ISL_751652 | 9/2/2020   | 12/30/2020 | North America / USA / Arkansas       |
| EPI_ISL_751653 | 11/9/2020  | 12/30/2020 | North America / USA / Minnesota      |
| EPI_ISL_751654 | 11/9/2020  | 12/30/2020 | North America / USA / Minnesota      |
| EPI_ISL_751655 | 11/30/2020 | 12/30/2020 | North America / USA / Minnesota      |
| EPI_ISL_751656 | 11/17/2020 | 12/30/2020 | North America / USA / Missouri       |

|                |            |            |                                      |
|----------------|------------|------------|--------------------------------------|
| EPI_ISL_751657 | 11/10/2020 | 12/30/2020 | North America / USA / Missouri       |
| EPI_ISL_751658 | 11/10/2020 | 12/30/2020 | North America / USA / New York       |
| EPI_ISL_751659 | 11/16/2020 | 12/30/2020 | North America / USA / New Jersey     |
| EPI_ISL_751660 | 11/13/2020 | 12/30/2020 | North America / USA / Minnesota      |
| EPI_ISL_751661 | 11/30/2020 | 12/30/2020 | North America / USA / Mississippi    |
| EPI_ISL_751662 | 11/17/2020 | 12/30/2020 | North America / USA / New Jersey     |
| EPI_ISL_751663 | 12/5/2020  | 12/30/2020 | North America / USA / Wyoming        |
| EPI_ISL_751664 | 12/1/2020  | 12/30/2020 | North America / USA / South Carolina |
| EPI_ISL_751665 | 12/2/2020  | 12/30/2020 | North America / USA / South Carolina |
| EPI_ISL_751666 | 11/29/2020 | 12/30/2020 | North America / USA / Iowa           |
| EPI_ISL_751667 | 12/4/2020  | 12/30/2020 | North America / USA / Rhode Island   |
| EPI_ISL_751668 | 11/4/2020  | 12/30/2020 | North America / USA / Alabama        |
| EPI_ISL_751669 | 12/3/2020  | 12/30/2020 | North America / USA / Louisiana      |
| EPI_ISL_751670 | 12/3/2020  | 12/30/2020 | North America / USA / Kentucky       |
| EPI_ISL_751671 | 12/3/2020  | 12/30/2020 | North America / USA / Rhode Island   |
| EPI_ISL_751672 | 12/4/2020  | 12/30/2020 | North America / USA / Indiana        |
| EPI_ISL_751673 | 11/23/2020 | 12/30/2020 | North America / USA / Hawaii         |
| EPI_ISL_751674 | 11/5/2020  | 12/30/2020 | North America / USA / Hawaii         |
| EPI_ISL_751675 | 11/6/2020  | 12/30/2020 | North America / USA / Hawaii         |
| EPI_ISL_751676 | 12/4/2020  | 12/30/2020 | North America / USA / Indiana        |
| EPI_ISL_751677 | 11/3/2020  | 12/30/2020 | North America / USA / Kansas         |
| EPI_ISL_751678 | 11/2/2020  | 12/30/2020 | North America / USA / New Hampshire  |
| EPI_ISL_751679 | 11/5/2020  | 12/30/2020 | North America / USA / Mississippi    |
| EPI_ISL_751680 | 6/24/2020  | 12/30/2020 | North America / USA / New Jersey     |
| EPI_ISL_751681 | 11/2/2020  | 12/30/2020 | North America / USA / Nebraska       |
| EPI_ISL_751682 | 10/29/2020 | 12/30/2020 | North America / USA / New York       |
| EPI_ISL_751683 | 11/27/2020 | 12/30/2020 | North America / USA / Mississippi    |
| EPI_ISL_751684 | 12/3/2020  | 12/30/2020 | North America / USA / Texas          |
| EPI_ISL_751685 | 11/9/2020  | 12/30/2020 | North America / USA / Virginia       |
| EPI_ISL_751686 | 11/11/2020 | 12/30/2020 | North America / USA / Virginia       |
| EPI_ISL_751687 | 11/29/2020 | 12/30/2020 | North America / USA / Iowa           |
| EPI_ISL_751688 | 12/5/2020  | 12/30/2020 | North America / USA / Wyoming        |
| EPI_ISL_751689 | 11/28/2020 | 12/30/2020 | North America / USA / Oregon         |
| EPI_ISL_751690 | 11/10/2020 | 12/30/2020 | North America / USA / Virginia       |
| EPI_ISL_751692 | 11/27/2020 | 12/30/2020 | North America / USA / Iowa           |
| EPI_ISL_751693 | 11/30/2020 | 12/30/2020 | North America / USA / Oregon         |
| EPI_ISL_751694 | 11/16/2020 | 12/30/2020 | North America / USA / Alaska         |
| EPI_ISL_751695 | 12/3/2020  | 12/30/2020 | North America / USA / Rhode Island   |
| EPI_ISL_751696 | 12/2/2020  | 12/30/2020 | North America / USA / Louisiana      |
| EPI_ISL_751697 | 9/1/2020   | 12/30/2020 | North America / USA / Arkansas       |
| EPI_ISL_751698 | 9/2/2020   | 12/30/2020 | North America / USA / Arkansas       |
| EPI_ISL_751699 | 9/2/2020   | 12/30/2020 | North America / USA / Arkansas       |
| EPI_ISL_751700 | 12/3/2020  | 12/30/2020 | North America / USA / Maryland       |
| EPI_ISL_751701 | 12/3/2020  | 12/30/2020 | North America / USA / Colorado       |
| EPI_ISL_751702 | 11/21/2020 | 12/30/2020 | North America / USA / Maryland       |
| EPI_ISL_751703 | 12/2/2020  | 12/30/2020 | North America / USA / Maryland       |
| EPI_ISL_751704 | 12/3/2020  | 12/30/2020 | North America / USA / Colorado       |

|                |            |            |                                      |
|----------------|------------|------------|--------------------------------------|
| EPI_ISL_751705 | 12/3/2020  | 12/30/2020 | North America / USA / Colorado       |
| EPI_ISL_751706 | 11/15/2020 | 12/30/2020 | North America / USA / Connecticut    |
| EPI_ISL_751707 | 11/3/2020  | 12/30/2020 | North America / USA / Kansas         |
| EPI_ISL_751708 | 12/4/2020  | 12/30/2020 | North America / USA / Nevada         |
| EPI_ISL_751709 | 11/21/2020 | 12/30/2020 | North America / USA / New Jersey     |
| EPI_ISL_751710 | 12/4/2020  | 12/30/2020 | North America / USA / Montana        |
| EPI_ISL_751711 | 12/3/2020  | 12/30/2020 | North America / USA / Montana        |
| EPI_ISL_751712 | 11/2/2020  | 12/30/2020 | North America / USA / New Hampshire  |
| EPI_ISL_751713 | 12/2/2020  | 12/30/2020 | North America / USA / Montana        |
| EPI_ISL_751714 | 12/4/2020  | 12/30/2020 | North America / USA / Nevada         |
| EPI_ISL_751715 | 11/24/2020 | 12/30/2020 | North America / USA / Missouri       |
| EPI_ISL_751716 | 11/16/2020 | 12/30/2020 | North America / USA / Minnesota      |
| EPI_ISL_751717 | 11/15/2020 | 12/30/2020 | North America / USA / New York       |
| EPI_ISL_751718 | 12/2/2020  | 12/30/2020 | North America / USA / South Carolina |
| EPI_ISL_751719 | 11/10/2020 | 12/30/2020 | North America / USA / Idaho          |
| EPI_ISL_751720 | 11/17/2020 | 12/30/2020 | North America / USA / Texas          |
| EPI_ISL_751721 | 11/28/2020 | 12/30/2020 | North America / USA / Iowa           |
| EPI_ISL_751722 | 12/4/2020  | 12/30/2020 | North America / USA / Louisiana      |
| EPI_ISL_751723 | 9/2/2020   | 12/30/2020 | North America / USA / Arkansas       |
| EPI_ISL_751724 | 11/2/2020  | 12/30/2020 | North America / USA / Kansas         |
| EPI_ISL_751725 | 11/22/2020 | 12/30/2020 | North America / USA / Maryland       |
| EPI_ISL_751726 | 10/21/2020 | 12/30/2020 | North America / USA / Delaware       |
| EPI_ISL_751727 | 12/4/2020  | 12/30/2020 | North America / USA / Indiana        |
| EPI_ISL_751728 | 12/2/2020  | 12/30/2020 | North America / USA / Colorado       |
| EPI_ISL_751729 | 11/24/2020 | 12/30/2020 | North America / USA / Connecticut    |
| EPI_ISL_751730 | 11/3/2020  | 12/30/2020 | North America / USA / Kansas         |
| EPI_ISL_751731 | 9/2/2020   | 12/30/2020 | North America / USA / Arkansas       |
| EPI_ISL_751732 | 10/30/2020 | 12/30/2020 | North America / USA / Nebraska       |
| EPI_ISL_751733 | 11/28/2020 | 12/30/2020 | North America / USA / Minnesota      |
| EPI_ISL_751734 | 11/17/2020 | 12/30/2020 | North America / USA / Nebraska       |
| EPI_ISL_751735 | 11/6/2020  | 12/30/2020 | North America / USA / New Hampshire  |
| EPI_ISL_751736 | 12/4/2020  | 12/30/2020 | North America / USA / Nevada         |
| EPI_ISL_751737 | 11/7/2020  | 12/30/2020 | North America / USA / Missouri       |
| EPI_ISL_751738 | 12/3/2020  | 12/30/2020 | North America / USA / Montana        |
| EPI_ISL_751739 | 11/28/2020 | 12/30/2020 | North America / USA / Minnesota      |
| EPI_ISL_751740 | 11/30/2020 | 12/30/2020 | North America / USA / Missouri       |
| EPI_ISL_751741 | 11/18/2020 | 12/30/2020 | North America / USA / Ohio           |
| EPI_ISL_751742 | 11/28/2020 | 12/30/2020 | North America / USA / Iowa           |
| EPI_ISL_751743 | 12/6/2020  | 12/30/2020 | North America / USA / Wyoming        |
| EPI_ISL_751744 | 12/1/2020  | 12/30/2020 | North America / USA / South Carolina |
| EPI_ISL_751745 | 11/9/2020  | 12/30/2020 | North America / USA / Virginia       |
| EPI_ISL_751746 | 12/1/2020  | 12/30/2020 | North America / USA / West Virginia  |
| EPI_ISL_751747 | 11/11/2020 | 12/30/2020 | North America / USA / Virginia       |
| EPI_ISL_751748 | 11/18/2020 | 12/30/2020 | North America / USA / Idaho          |
| EPI_ISL_751749 | 12/1/2020  | 12/30/2020 | North America / USA / Texas          |
| EPI_ISL_751750 | 11/13/2020 | 12/30/2020 | North America / USA / Idaho          |
| EPI_ISL_751751 | 12/4/2020  | 12/30/2020 | North America / USA / Rhode Island   |

|                |            |            |                                     |
|----------------|------------|------------|-------------------------------------|
| EPI_ISL_751752 | 11/30/2020 | 12/30/2020 | North America / USA / Louisiana     |
| EPI_ISL_751753 | 11/4/2020  | 12/30/2020 | North America / USA / Alabama       |
| EPI_ISL_751754 | 12/3/2020  | 12/30/2020 | North America / USA / Kentucky      |
| EPI_ISL_751755 | 11/5/2020  | 12/30/2020 | North America / USA / Alabama       |
| EPI_ISL_751756 | 11/4/2020  | 12/30/2020 | North America / USA / Alabama       |
| EPI_ISL_751757 | 12/4/2020  | 12/30/2020 | North America / USA / Rhode Island  |
| EPI_ISL_751758 | 11/26/2020 | 12/30/2020 | North America / USA / Hawaii        |
| EPI_ISL_751759 | 11/15/2020 | 12/30/2020 | North America / USA / Connecticut   |
| EPI_ISL_751760 | 9/2/2020   | 12/30/2020 | North America / USA / Arkansas      |
| EPI_ISL_751761 | 11/14/2020 | 12/30/2020 | North America / USA / Hawaii        |
| EPI_ISL_751762 | 11/15/2020 | 12/30/2020 | North America / USA / Connecticut   |
| EPI_ISL_751763 | 12/2/2020  | 12/30/2020 | North America / USA / Colorado      |
| EPI_ISL_751764 | 9/1/2020   | 12/30/2020 | North America / USA / Arkansas      |
| EPI_ISL_751765 | 9/2/2020   | 12/30/2020 | North America / USA / Arkansas      |
| EPI_ISL_751766 | 12/3/2020  | 12/30/2020 | North America / USA / Colorado      |
| EPI_ISL_751767 | 11/20/2020 | 12/30/2020 | North America / USA / Hawaii        |
| EPI_ISL_751768 | 12/4/2020  | 12/30/2020 | North America / USA / Indiana       |
| EPI_ISL_751769 | 11/7/2020  | 12/30/2020 | North America / USA / Michigan      |
| EPI_ISL_751770 | 12/4/2020  | 12/30/2020 | North America / USA / Indiana       |
| EPI_ISL_751771 | 12/2/2020  | 12/30/2020 | North America / USA / Maryland      |
| EPI_ISL_751772 | 11/30/2020 | 12/30/2020 | North America / USA / Hawaii        |
| EPI_ISL_751773 | 12/4/2020  | 12/30/2020 | North America / USA / New Jersey    |
| EPI_ISL_751774 | 11/10/2020 | 12/30/2020 | North America / USA / Missouri      |
| EPI_ISL_751775 | 12/2/2020  | 12/30/2020 | North America / USA / Montana       |
| EPI_ISL_751776 | 11/6/2020  | 12/30/2020 | North America / USA / Mississippi   |
| EPI_ISL_751777 | 11/9/2020  | 12/30/2020 | North America / USA / Ohio          |
| EPI_ISL_751778 | 12/4/2020  | 12/30/2020 | North America / USA / Nevada        |
| EPI_ISL_751779 | 11/29/2020 | 12/30/2020 | North America / USA / Iowa          |
| EPI_ISL_751780 | 11/30/2020 | 12/30/2020 | North America / USA / Idaho         |
| EPI_ISL_751781 | 12/4/2020  | 12/30/2020 | North America / USA / Wyoming       |
| EPI_ISL_751782 | 11/18/2020 | 12/30/2020 | North America / USA / Idaho         |
| EPI_ISL_751783 | 11/28/2020 | 12/30/2020 | North America / USA / Iowa          |
| EPI_ISL_751784 | 11/18/2020 | 12/30/2020 | North America / USA / Virginia      |
| EPI_ISL_751785 | 12/1/2020  | 12/30/2020 | North America / USA / West Virginia |
| EPI_ISL_751786 | 12/1/2020  | 12/30/2020 | North America / USA / West Virginia |
| EPI_ISL_751787 | 11/23/2020 | 12/30/2020 | North America / USA / Texas         |
| EPI_ISL_751788 | 11/23/2020 | 12/30/2020 | North America / USA / Ohio          |
| EPI_ISL_751789 | 11/18/2020 | 12/30/2020 | North America / USA / Idaho         |
| EPI_ISL_751790 | 12/1/2020  | 12/30/2020 | North America / USA / Rhode Island  |
| EPI_ISL_751791 | 11/9/2020  | 12/30/2020 | North America / USA / Alabama       |
| EPI_ISL_751792 | 11/4/2020  | 12/30/2020 | North America / USA / Alabama       |
| EPI_ISL_751793 | 11/16/2020 | 12/30/2020 | North America / USA / Alaska        |
| EPI_ISL_751794 | 12/2/2020  | 12/30/2020 | North America / USA / Kentucky      |
| EPI_ISL_751795 | 12/4/2020  | 12/30/2020 | North America / USA / Rhode Island  |
| EPI_ISL_751796 | 2020-12    | 12/30/2020 | North America / Canada / Ontario    |
| EPI_ISL_751797 | 2020-12    | 12/30/2020 | North America / Canada / Ontario    |
| EPI_ISL_751798 | 2020-12    | 12/30/2020 | North America / Canada / Ontario    |





|                |            |            |                                       |
|----------------|------------|------------|---------------------------------------|
| EPI_ISL_752512 | 11/5/2020  | 12/31/2020 | Europe / Ireland / Kildare            |
| EPI_ISL_752513 | 11/5/2020  | 12/31/2020 | Europe / Ireland / Dublin             |
| EPI_ISL_752514 | 11/5/2020  | 12/31/2020 | Europe / Ireland / Dublin             |
| EPI_ISL_752515 | 11/5/2020  | 12/31/2020 | Europe / Ireland / Dublin             |
| EPI_ISL_752516 | 11/5/2020  | 12/31/2020 | Europe / Ireland / Meath              |
| EPI_ISL_752517 | 11/4/2020  | 12/31/2020 | Europe / Ireland / Wicklow            |
| EPI_ISL_752518 | 11/5/2020  | 12/31/2020 | Europe / Ireland / Longford           |
| EPI_ISL_752519 | 11/5/2020  | 12/31/2020 | Europe / Ireland / Meath              |
| EPI_ISL_752520 | 11/5/2020  | 12/31/2020 | Europe / Ireland / Meath              |
| EPI_ISL_752521 | 11/5/2020  | 12/31/2020 | Europe / Ireland / Monaghan           |
| EPI_ISL_752522 | 11/5/2020  | 12/31/2020 | Europe / Ireland / Meath              |
| EPI_ISL_752523 | 11/5/2020  | 12/31/2020 | Europe / Ireland / Meath              |
| EPI_ISL_752524 | 11/5/2020  | 12/31/2020 | Europe / Ireland / Meath              |
| EPI_ISL_752525 | 11/5/2020  | 12/31/2020 | Europe / Ireland / Meath              |
| EPI_ISL_752526 | 11/5/2020  | 12/31/2020 | Europe / Ireland / Monaghan           |
| EPI_ISL_752527 | 11/5/2020  | 12/31/2020 | Europe / Ireland / Louth              |
| EPI_ISL_752528 | 11/5/2020  | 12/31/2020 | Europe / Ireland / Cork               |
| EPI_ISL_752529 | 11/5/2020  | 12/31/2020 | Europe / Ireland / Waterford          |
| EPI_ISL_752530 | 11/5/2020  | 12/31/2020 | Europe / Ireland / Cork               |
| EPI_ISL_752531 | 11/22/2020 | 12/31/2020 | Europe / Ireland / Kilkenny           |
| EPI_ISL_752532 | 11/22/2020 | 12/31/2020 | Europe / Ireland / Tipperary          |
| EPI_ISL_752533 | 11/22/2020 | 12/31/2020 | Europe / Ireland / Louth              |
| EPI_ISL_752534 | 11/22/2020 | 12/31/2020 | Europe / Ireland / Clare              |
| EPI_ISL_752535 | 11/22/2020 | 12/31/2020 | Europe / Ireland / Limerick           |
| EPI_ISL_752536 | 11/22/2020 | 12/31/2020 | Europe / Ireland / Tipperary          |
| EPI_ISL_752538 | 11/22/2020 | 12/31/2020 | Europe / Ireland / Mayo               |
| EPI_ISL_752539 | 11/22/2020 | 12/31/2020 | Europe / Ireland / Wicklow            |
| EPI_ISL_752540 | 11/22/2020 | 12/31/2020 | Europe / Ireland / Limerick           |
| EPI_ISL_752541 | 11/22/2020 | 12/31/2020 | Europe / Ireland / Wicklow            |
| EPI_ISL_752542 | 11/22/2020 | 12/31/2020 | Europe / Ireland / Limerick           |
| EPI_ISL_752543 | 11/22/2020 | 12/31/2020 | Europe / Ireland / Dublin             |
| EPI_ISL_752544 | 11/22/2020 | 12/31/2020 | Europe / Ireland / Wexford            |
| EPI_ISL_752545 | 11/22/2020 | 12/31/2020 | Europe / Ireland / Dublin             |
| EPI_ISL_752546 | 11/22/2020 | 12/31/2020 | Europe / Ireland / Monaghan           |
| EPI_ISL_752547 | 11/22/2020 | 12/31/2020 | Europe / Ireland / Tipperary          |
| EPI_ISL_752548 | 11/22/2020 | 12/31/2020 | Europe / Ireland / Westmeath          |
| EPI_ISL_752549 | 11/23/2020 | 12/31/2020 | Europe / Ireland / Kildare            |
| EPI_ISL_752550 | 11/23/2020 | 12/31/2020 | Europe / Ireland / Limerick           |
| EPI_ISL_752551 | 11/23/2020 | 12/31/2020 | Europe / Ireland / Kildare            |
| EPI_ISL_752552 | 11/23/2020 | 12/31/2020 | Europe / Ireland / Wicklow            |
| EPI_ISL_752553 | 11/22/2020 | 12/31/2020 | Europe / Ireland / Cork               |
| EPI_ISL_752554 | 11/23/2020 | 12/31/2020 | Europe / Ireland / Galway             |
| EPI_ISL_752555 | 11/23/2020 | 12/31/2020 | Europe / Ireland / Kildare            |
| EPI_ISL_752597 | 11/24/2020 | 12/31/2020 | Europe / Ireland / Laois              |
| EPI_ISL_752598 | 12/26/2020 | 12/31/2020 | Oceania / Australia / South Australia |
| EPI_ISL_752599 | 12/28/2020 | 12/31/2020 | Oceania / Australia / South Australia |
| EPI_ISL_752607 | 3/12/2020  | 12/31/2020 | North America / USA / Hawaii          |





















































|                |            |            |                                           |
|----------------|------------|------------|-------------------------------------------|
| EPI_ISL_753775 | 5/11/2020  | 12/31/2020 | Europe / Germany / Berlin                 |
| EPI_ISL_753777 | 10/1/2020  | 12/31/2020 | Europe / Germany / Berlin                 |
| EPI_ISL_753781 | 10/9/2020  | 12/31/2020 | Europe / Germany / Berlin                 |
| EPI_ISL_753782 | 10/8/2020  | 12/31/2020 | Europe / Germany / Berlin                 |
| EPI_ISL_753783 | 10/8/2020  | 12/31/2020 | Europe / Germany / Berlin                 |
| EPI_ISL_753784 | 10/11/2020 | 12/31/2020 | Europe / Germany / Berlin                 |
| EPI_ISL_753785 | 9/24/2020  | 12/31/2020 | Europe / Germany / Berlin                 |
| EPI_ISL_753786 | 9/28/2020  | 12/31/2020 | Europe / Germany / Berlin                 |
| EPI_ISL_753787 | 9/26/2020  | 12/31/2020 | Europe / Germany / Berlin                 |
| EPI_ISL_753788 | 10/1/2020  | 12/31/2020 | Europe / Germany / Berlin                 |
| EPI_ISL_753789 | 10/11/2020 | 12/31/2020 | Europe / Germany / Berlin                 |
| EPI_ISL_753790 | 10/19/2020 | 12/31/2020 | Europe / Germany / Berlin                 |
| EPI_ISL_753791 | 10/15/2020 | 12/31/2020 | Europe / Germany / Berlin                 |
| EPI_ISL_753792 | 10/14/2020 | 12/31/2020 | Europe / Germany / Berlin                 |
| EPI_ISL_753793 | 10/15/2020 | 12/31/2020 | Europe / Germany / Berlin                 |
| EPI_ISL_753794 | 10/12/2020 | 12/31/2020 | Europe / Germany / Berlin                 |
| EPI_ISL_753795 | 10/12/2020 | 12/31/2020 | Europe / Germany / Berlin                 |
| EPI_ISL_753796 | 10/19/2020 | 12/31/2020 | Europe / Germany / North Rhine-Westphalia |
| EPI_ISL_753797 | 4/16/2020  | 12/31/2020 | Europe / Germany / Saxony                 |
| EPI_ISL_753798 | 4/17/2020  | 12/31/2020 | Europe / Germany / Saxony                 |
| EPI_ISL_753799 | 3/15/2020  | 12/31/2020 | Europe / Germany / Berlin                 |
| EPI_ISL_753800 | 4/30/2020  | 12/31/2020 | Europe / Germany / Berlin                 |
| EPI_ISL_753801 | 10/5/2020  | 12/31/2020 | Europe / Germany / Bremen                 |
| EPI_ISL_753802 | 10/5/2020  | 12/31/2020 | Europe / Germany / Berlin                 |
| EPI_ISL_753803 | 10/5/2020  | 12/31/2020 | Europe / Germany / Berlin                 |
| EPI_ISL_753804 | 10/19/2020 | 12/31/2020 | Europe / Germany / Berlin                 |
| EPI_ISL_753805 | 4/29/2020  | 12/31/2020 | Europe / Germany / Berlin                 |
| EPI_ISL_753806 | 5/3/2020   | 12/31/2020 | Europe / Germany / Berlin                 |
| EPI_ISL_753807 | 6/28/2020  | 12/31/2020 | Europe / Germany / Berlin                 |
| EPI_ISL_753808 | 6/23/2020  | 12/31/2020 | Europe / Germany / Berlin                 |
| EPI_ISL_753809 | 7/1/2020   | 12/31/2020 | Europe / Germany / Berlin                 |
| EPI_ISL_753811 | 4/4/2020   | 12/31/2020 | Europe / Germany / Berlin                 |
| EPI_ISL_753812 | 5/5/2020   | 12/31/2020 | Europe / Germany                          |
| EPI_ISL_753813 | 3/14/2020  | 12/31/2020 | Europe / Germany / Brandenburg            |
| EPI_ISL_753814 | 3/13/2020  | 12/31/2020 | Europe / Germany / Brandenburg            |
| EPI_ISL_753815 | 10/5/2020  | 12/31/2020 | Europe / Germany / Berlin                 |
| EPI_ISL_753816 | 10/8/2020  | 12/31/2020 | Europe / Germany / Berlin                 |
| EPI_ISL_753817 | 10/10/2020 | 12/31/2020 | Europe / Germany / Berlin                 |
| EPI_ISL_753818 | 10/9/2020  | 12/31/2020 | Europe / Germany / Berlin                 |
| EPI_ISL_753819 | 9/26/2020  | 12/31/2020 | Europe / Germany / Berlin                 |
| EPI_ISL_753820 | 9/26/2020  | 12/31/2020 | Europe / Germany / Berlin                 |
| EPI_ISL_753822 | 3/5/2020   | 12/31/2020 | Europe / Germany / Berlin                 |
| EPI_ISL_753823 | 5/4/2020   | 12/31/2020 | Europe / Germany / Berlin                 |
| EPI_ISL_753824 | 5/11/2020  | 12/31/2020 | Europe / Germany / Berlin                 |
| EPI_ISL_753825 | 5/20/2020  | 12/31/2020 | Europe / Germany / Berlin                 |
| EPI_ISL_753826 | 6/8/2020   | 12/31/2020 | Europe / Germany / Berlin                 |
| EPI_ISL_753827 | 11/16/2020 | 12/31/2020 | Europe / Germany / Berlin                 |

|                |            |            |                                |
|----------------|------------|------------|--------------------------------|
| EPI_ISL_753828 | 11/21/2020 | 12/31/2020 | Europe / Germany / Berlin      |
| EPI_ISL_753829 | 11/22/2020 | 12/31/2020 | Europe / Germany / Berlin      |
| EPI_ISL_753830 | 11/21/2020 | 12/31/2020 | Europe / Germany / Berlin      |
| EPI_ISL_753831 | 11/16/2020 | 12/31/2020 | Europe / Germany / Berlin      |
| EPI_ISL_753832 | 11/10/2020 | 12/31/2020 | Europe / Germany / Berlin      |
| EPI_ISL_753833 | 11/16/2020 | 12/31/2020 | Europe / Germany / Berlin      |
| EPI_ISL_753834 | 5/3/2020   | 12/31/2020 | Europe / Germany / Hesse       |
| EPI_ISL_753835 | 6/17/2020  | 12/31/2020 | Europe / Germany / Hesse       |
| EPI_ISL_753836 | 4/15/2020  | 12/31/2020 | Europe / Germany / Saxony      |
| EPI_ISL_753837 | 9/29/2020  | 12/31/2020 | Europe / Germany               |
| EPI_ISL_753838 | 3/6/2020   | 12/31/2020 | Europe / Germany               |
| EPI_ISL_753839 | 4/1/2020   | 12/31/2020 | Europe / Germany               |
| EPI_ISL_753840 | 4/1/2020   | 12/31/2020 | Europe / Germany               |
| EPI_ISL_753841 | 4/24/2020  | 12/31/2020 | Europe / Germany               |
| EPI_ISL_753842 | 8/17/2020  | 12/31/2020 | Europe / Germany               |
| EPI_ISL_753843 | 3/25/2020  | 12/31/2020 | Europe / Germany / Brandenburg |
| EPI_ISL_753844 | 3/28/2020  | 12/31/2020 | Europe / Germany / Brandenburg |
| EPI_ISL_753845 | 3/30/2020  | 12/31/2020 | Europe / Germany / Brandenburg |
| EPI_ISL_753846 | 3/31/2020  | 12/31/2020 | Europe / Germany / Brandenburg |
| EPI_ISL_753847 | 4/1/2020   | 12/31/2020 | Europe / Germany / Brandenburg |
| EPI_ISL_753848 | 4/1/2020   | 12/31/2020 | Europe / Germany / Brandenburg |
| EPI_ISL_753849 | 4/3/2020   | 12/31/2020 | Europe / Germany / Brandenburg |
| EPI_ISL_753850 | 3/31/2020  | 12/31/2020 | Europe / Germany / Brandenburg |
| EPI_ISL_753851 | 3/31/2020  | 12/31/2020 | Europe / Germany / Brandenburg |
| EPI_ISL_753852 | 4/8/2020   | 12/31/2020 | Europe / Germany / Brandenburg |
| EPI_ISL_753853 | 6/19/2020  | 12/31/2020 | Europe / Germany / Brandenburg |
| EPI_ISL_753854 | 6/18/2020  | 12/31/2020 | Europe / Germany / Brandenburg |
| EPI_ISL_753855 | 6/19/2020  | 12/31/2020 | Europe / Germany / Brandenburg |
| EPI_ISL_753856 | 6/19/2020  | 12/31/2020 | Europe / Germany / Brandenburg |
| EPI_ISL_753857 | 6/19/2020  | 12/31/2020 | Europe / Germany / Brandenburg |
| EPI_ISL_753858 | 8/5/2020   | 12/31/2020 | Europe / Germany / Brandenburg |
| EPI_ISL_753859 | 10/9/2020  | 12/31/2020 | Europe / Germany / Brandenburg |
| EPI_ISL_753860 | 9/29/2020  | 12/31/2020 | Europe / Germany / Berlin      |
| EPI_ISL_753861 | 10/3/2020  | 12/31/2020 | Europe / Germany / Berlin      |
| EPI_ISL_753862 | 10/5/2020  | 12/31/2020 | Europe / Germany / Berlin      |
| EPI_ISL_753863 | 10/6/2020  | 12/31/2020 | Europe / Germany / Berlin      |
| EPI_ISL_753864 | 10/6/2020  | 12/31/2020 | Europe / Germany / Berlin      |
| EPI_ISL_753865 | 10/4/2020  | 12/31/2020 | Europe / Germany / Berlin      |
| EPI_ISL_753866 | 10/5/2020  | 12/31/2020 | Europe / Germany / Berlin      |
| EPI_ISL_753867 | 10/5/2020  | 12/31/2020 | Europe / Germany / Berlin      |
| EPI_ISL_753868 | 10/5/2020  | 12/31/2020 | Europe / Germany / Berlin      |
| EPI_ISL_753869 | 10/9/2020  | 12/31/2020 | Europe / Germany / Berlin      |
| EPI_ISL_753870 | 10/10/2020 | 12/31/2020 | Europe / Germany / Berlin      |
| EPI_ISL_753871 | 10/9/2020  | 12/31/2020 | Europe / Germany / Berlin      |
| EPI_ISL_753872 | 10/9/2020  | 12/31/2020 | Europe / Germany / Berlin      |
| EPI_ISL_753873 | 10/10/2020 | 12/31/2020 | Europe / Germany / Berlin      |
| EPI_ISL_753874 | 10/8/2020  | 12/31/2020 | Europe / Germany / Berlin      |



|                |           |            |                           |
|----------------|-----------|------------|---------------------------|
| EPI_ISL_753923 | 3/26/2020 | 12/31/2020 | Europe / Germany / Berlin |
| EPI_ISL_753924 | 3/26/2020 | 12/31/2020 | Europe / Germany / Berlin |
| EPI_ISL_753925 | 3/26/2020 | 12/31/2020 | Europe / Germany / Berlin |
| EPI_ISL_753926 | 3/27/2020 | 12/31/2020 | Europe / Germany / Berlin |
| EPI_ISL_753927 | 3/30/2020 | 12/31/2020 | Europe / Germany / Berlin |
| EPI_ISL_753928 | 3/30/2020 | 12/31/2020 | Europe / Germany / Berlin |
| EPI_ISL_753929 | 4/1/2020  | 12/31/2020 | Europe / Germany / Berlin |
| EPI_ISL_753930 | 4/2/2020  | 12/31/2020 | Europe / Germany / Berlin |
| EPI_ISL_753931 | 4/3/2020  | 12/31/2020 | Europe / Germany / Berlin |
| EPI_ISL_753932 | 4/4/2020  | 12/31/2020 | Europe / Germany / Berlin |
| EPI_ISL_753933 | 4/6/2020  | 12/31/2020 | Europe / Germany / Berlin |
| EPI_ISL_753934 | 4/5/2020  | 12/31/2020 | Europe / Germany / Berlin |
| EPI_ISL_753935 | 4/6/2020  | 12/31/2020 | Europe / Germany / Berlin |
| EPI_ISL_753936 | 3/31/2020 | 12/31/2020 | Europe / Germany / Berlin |
| EPI_ISL_753937 | 4/1/2020  | 12/31/2020 | Europe / Germany / Berlin |
| EPI_ISL_753938 | 4/5/2020  | 12/31/2020 | Europe / Germany / Berlin |
| EPI_ISL_753939 | 4/9/2020  | 12/31/2020 | Europe / Germany / Berlin |
| EPI_ISL_753940 | 4/6/2020  | 12/31/2020 | Europe / Germany / Berlin |
| EPI_ISL_753941 | 4/7/2020  | 12/31/2020 | Europe / Germany / Berlin |
| EPI_ISL_753942 | 4/9/2020  | 12/31/2020 | Europe / Germany / Berlin |
| EPI_ISL_753943 | 4/9/2020  | 12/31/2020 | Europe / Germany / Berlin |
| EPI_ISL_753944 | 4/12/2020 | 12/31/2020 | Europe / Germany / Berlin |
| EPI_ISL_753945 | 4/1/2020  | 12/31/2020 | Europe / Germany / Berlin |
| EPI_ISL_753946 | 4/16/2020 | 12/31/2020 | Europe / Germany / Berlin |
| EPI_ISL_753947 | 4/17/2020 | 12/31/2020 | Europe / Germany / Berlin |
| EPI_ISL_753948 | 4/18/2020 | 12/31/2020 | Europe / Germany / Berlin |
| EPI_ISL_753949 | 4/21/2020 | 12/31/2020 | Europe / Germany / Berlin |
| EPI_ISL_753950 | 4/27/2020 | 12/31/2020 | Europe / Germany / Berlin |
| EPI_ISL_753951 | 4/28/2020 | 12/31/2020 | Europe / Germany / Berlin |
| EPI_ISL_753952 | 4/30/2020 | 12/31/2020 | Europe / Germany / Berlin |
| EPI_ISL_753953 | 5/8/2020  | 12/31/2020 | Europe / Germany / Berlin |
| EPI_ISL_753954 | 5/5/2020  | 12/31/2020 | Europe / Germany / Berlin |
| EPI_ISL_753955 | 5/12/2020 | 12/31/2020 | Europe / Germany / Berlin |
| EPI_ISL_753956 | 6/22/2020 | 12/31/2020 | Europe / Germany / Berlin |
| EPI_ISL_753957 | 6/23/2020 | 12/31/2020 | Europe / Germany / Berlin |
| EPI_ISL_753958 | 6/22/2020 | 12/31/2020 | Europe / Germany / Berlin |
| EPI_ISL_753959 | 6/22/2020 | 12/31/2020 | Europe / Germany / Berlin |
| EPI_ISL_753960 | 6/30/2020 | 12/31/2020 | Europe / Germany / Berlin |
| EPI_ISL_753961 | 6/25/2020 | 12/31/2020 | Europe / Germany / Berlin |
| EPI_ISL_753962 | 6/27/2020 | 12/31/2020 | Europe / Germany / Berlin |
| EPI_ISL_753963 | 6/19/2020 | 12/31/2020 | Europe / Germany / Berlin |
| EPI_ISL_753964 | 6/26/2020 | 12/31/2020 | Europe / Germany / Berlin |
| EPI_ISL_753965 | 6/17/2020 | 12/31/2020 | Europe / Germany / Berlin |
| EPI_ISL_753966 | 6/16/2020 | 12/31/2020 | Europe / Germany / Berlin |
| EPI_ISL_753967 | 6/20/2020 | 12/31/2020 | Europe / Germany / Berlin |
| EPI_ISL_753968 | 6/18/2020 | 12/31/2020 | Europe / Germany / Berlin |
| EPI_ISL_753969 | 6/25/2020 | 12/31/2020 | Europe / Germany / Berlin |

|                |           |            |                           |
|----------------|-----------|------------|---------------------------|
| EPI_ISL_753970 | 6/29/2020 | 12/31/2020 | Europe / Germany / Berlin |
| EPI_ISL_753971 | 6/29/2020 | 12/31/2020 | Europe / Germany / Berlin |
| EPI_ISL_753972 | 6/29/2020 | 12/31/2020 | Europe / Germany / Berlin |
| EPI_ISL_753973 | 8/5/2020  | 12/31/2020 | Europe / Germany / Berlin |
| EPI_ISL_753974 | 8/2/2020  | 12/31/2020 | Europe / Germany / Berlin |
| EPI_ISL_753975 | 8/2/2020  | 12/31/2020 | Europe / Germany / Berlin |
| EPI_ISL_753976 | 8/3/2020  | 12/31/2020 | Europe / Germany / Berlin |
| EPI_ISL_753977 | 8/5/2020  | 12/31/2020 | Europe / Germany / Berlin |
| EPI_ISL_753978 | 8/5/2020  | 12/31/2020 | Europe / Germany / Berlin |
| EPI_ISL_753979 | 8/5/2020  | 12/31/2020 | Europe / Germany / Berlin |
| EPI_ISL_753980 | 8/2/2020  | 12/31/2020 | Europe / Germany / Berlin |
| EPI_ISL_753981 | 7/16/2020 | 12/31/2020 | Europe / Germany / Berlin |
| EPI_ISL_753982 | 7/20/2020 | 12/31/2020 | Europe / Germany / Berlin |
| EPI_ISL_753983 | 7/20/2020 | 12/31/2020 | Europe / Germany / Berlin |
| EPI_ISL_753984 | 7/16/2020 | 12/31/2020 | Europe / Germany / Berlin |
| EPI_ISL_753985 | 7/17/2020 | 12/31/2020 | Europe / Germany / Berlin |
| EPI_ISL_753986 | 7/31/2020 | 12/31/2020 | Europe / Germany / Berlin |
| EPI_ISL_753987 | 7/8/2020  | 12/31/2020 | Europe / Germany / Berlin |
| EPI_ISL_753988 | 8/4/2020  | 12/31/2020 | Europe / Germany / Berlin |
| EPI_ISL_753989 | 7/29/2020 | 12/31/2020 | Europe / Germany / Berlin |
| EPI_ISL_753990 | 7/1/2020  | 12/31/2020 | Europe / Germany / Berlin |
| EPI_ISL_753991 | 7/23/2020 | 12/31/2020 | Europe / Germany / Berlin |
| EPI_ISL_753992 | 7/13/2020 | 12/31/2020 | Europe / Germany / Berlin |
| EPI_ISL_753993 | 7/30/2020 | 12/31/2020 | Europe / Germany / Berlin |
| EPI_ISL_753994 | 8/9/2020  | 12/31/2020 | Europe / Germany / Berlin |
| EPI_ISL_753995 | 8/19/2020 | 12/31/2020 | Europe / Germany / Berlin |
| EPI_ISL_753996 | 8/9/2020  | 12/31/2020 | Europe / Germany / Berlin |
| EPI_ISL_753997 | 8/15/2020 | 12/31/2020 | Europe / Germany / Berlin |
| EPI_ISL_753998 | 8/5/2020  | 12/31/2020 | Europe / Germany / Berlin |
| EPI_ISL_753999 | 8/10/2020 | 12/31/2020 | Europe / Germany / Berlin |
| EPI_ISL_754000 | 8/6/2020  | 12/31/2020 | Europe / Germany / Berlin |
| EPI_ISL_754001 | 8/8/2020  | 12/31/2020 | Europe / Germany / Berlin |
| EPI_ISL_754002 | 8/7/2020  | 12/31/2020 | Europe / Germany / Berlin |
| EPI_ISL_754003 | 8/5/2020  | 12/31/2020 | Europe / Germany / Berlin |
| EPI_ISL_754004 | 8/6/2020  | 12/31/2020 | Europe / Germany / Berlin |
| EPI_ISL_754005 | 8/8/2020  | 12/31/2020 | Europe / Germany / Berlin |
| EPI_ISL_754006 | 8/16/2020 | 12/31/2020 | Europe / Germany / Berlin |
| EPI_ISL_754007 | 8/15/2020 | 12/31/2020 | Europe / Germany / Berlin |
| EPI_ISL_754008 | 8/16/2020 | 12/31/2020 | Europe / Germany / Berlin |
| EPI_ISL_754009 | 8/14/2020 | 12/31/2020 | Europe / Germany / Berlin |
| EPI_ISL_754010 | 8/14/2020 | 12/31/2020 | Europe / Germany / Berlin |
| EPI_ISL_754011 | 8/16/2020 | 12/31/2020 | Europe / Germany / Berlin |
| EPI_ISL_754012 | 8/20/2020 | 12/31/2020 | Europe / Germany / Berlin |
| EPI_ISL_754013 | 8/20/2020 | 12/31/2020 | Europe / Germany / Berlin |
| EPI_ISL_754014 | 8/19/2020 | 12/31/2020 | Europe / Germany / Berlin |
| EPI_ISL_754015 | 8/17/2020 | 12/31/2020 | Europe / Germany / Berlin |
| EPI_ISL_754016 | 8/7/2020  | 12/31/2020 | Europe / Germany / Berlin |

|                |            |            |                                           |
|----------------|------------|------------|-------------------------------------------|
| EPI_ISL_754017 | 10/12/2020 | 12/31/2020 | Europe / Germany / Berlin                 |
| EPI_ISL_754018 | 10/15/2020 | 12/31/2020 | Europe / Germany / Berlin                 |
| EPI_ISL_754019 | 10/16/2020 | 12/31/2020 | Europe / Germany / Berlin                 |
| EPI_ISL_754020 | 10/18/2020 | 12/31/2020 | Europe / Germany / Berlin                 |
| EPI_ISL_754021 | 9/27/2020  | 12/31/2020 | Europe / Germany / Berlin                 |
| EPI_ISL_754022 | 6/28/2020  | 12/31/2020 | Europe / Germany / Baden-Wurttemberg      |
| EPI_ISL_754023 | 6/19/2020  | 12/31/2020 | Europe / Germany / Baden-Wurttemberg      |
| EPI_ISL_754024 | 3/27/2020  | 12/31/2020 | Europe / Germany / Bavaria                |
| EPI_ISL_754025 | 3/27/2020  | 12/31/2020 | Europe / Germany / Bavaria                |
| EPI_ISL_754026 | 3/26/2020  | 12/31/2020 | Europe / Germany / Bavaria                |
| EPI_ISL_754027 | 3/27/2020  | 12/31/2020 | Europe / Germany / Bavaria                |
| EPI_ISL_754028 | 3/30/2020  | 12/31/2020 | Europe / Germany / Bavaria                |
| EPI_ISL_754029 | 3/27/2020  | 12/31/2020 | Europe / Germany / Bavaria                |
| EPI_ISL_754030 | 3/27/2020  | 12/31/2020 | Europe / Germany / Bavaria                |
| EPI_ISL_754031 | 3/27/2020  | 12/31/2020 | Europe / Germany / Bavaria                |
| EPI_ISL_754032 | 3/27/2020  | 12/31/2020 | Europe / Germany / Bavaria                |
| EPI_ISL_754033 | 3/27/2020  | 12/31/2020 | Europe / Germany / Bavaria                |
| EPI_ISL_754034 | 3/27/2020  | 12/31/2020 | Europe / Germany / Bavaria                |
| EPI_ISL_754035 | 3/27/2020  | 12/31/2020 | Europe / Germany / Bavaria                |
| EPI_ISL_754036 | 4/15/2020  | 12/31/2020 | Europe / Germany / Bavaria                |
| EPI_ISL_754037 | 3/30/2020  | 12/31/2020 | Europe / Germany / Bavaria                |
| EPI_ISL_754038 | 3/28/2020  | 12/31/2020 | Europe / Germany / Bavaria                |
| EPI_ISL_754039 | 7/19/2020  | 12/31/2020 | Europe / Germany / Bavaria                |
| EPI_ISL_754040 | 4/7/2020   | 12/31/2020 | Europe / Germany / Hesse                  |
| EPI_ISL_754041 | 4/27/2020  | 12/31/2020 | Europe / Germany / Hesse                  |
| EPI_ISL_754042 | 5/18/2020  | 12/31/2020 | Europe / Germany / Hesse                  |
| EPI_ISL_754043 | 8/5/2020   | 12/31/2020 | Europe / Germany / Lower Saxony           |
| EPI_ISL_754044 | 8/10/2020  | 12/31/2020 | Europe / Germany / Lower Saxony           |
| EPI_ISL_754045 | 8/7/2020   | 12/31/2020 | Europe / Germany / Lower Saxony           |
| EPI_ISL_754046 | 3/25/2020  | 12/31/2020 | Europe / Germany / North Rhine-Westphalia |
| EPI_ISL_754047 | 3/26/2020  | 12/31/2020 | Europe / Germany / North Rhine-Westphalia |
| EPI_ISL_754048 | 4/6/2020   | 12/31/2020 | Europe / Germany / Saxony                 |
| EPI_ISL_754049 | 4/6/2020   | 12/31/2020 | Europe / Germany / Saxony                 |
| EPI_ISL_754050 | 4/7/2020   | 12/31/2020 | Europe / Germany / Saxony                 |
| EPI_ISL_754051 | 4/6/2020   | 12/31/2020 | Europe / Germany / Saxony                 |
| EPI_ISL_754052 | 4/15/2020  | 12/31/2020 | Europe / Germany / Saxony                 |
| EPI_ISL_754053 | 4/15/2020  | 12/31/2020 | Europe / Germany / Saxony                 |
| EPI_ISL_754054 | 8/9/2020   | 12/31/2020 | Europe / Germany / Saxony-Anhalt          |
| EPI_ISL_754055 | 3/5/2020   | 12/31/2020 | Europe / Germany / Berlin                 |
| EPI_ISL_754056 | 3/15/2020  | 12/31/2020 | Europe / Germany / Berlin                 |
| EPI_ISL_754057 | 3/13/2020  | 12/31/2020 | Europe / Germany / Berlin                 |
| EPI_ISL_754058 | 3/16/2020  | 12/31/2020 | Europe / Germany / Berlin                 |
| EPI_ISL_754059 | 12/2/2020  | 12/31/2020 | Asia / Bangladesh / Sylhet / Sunamganj    |
| EPI_ISL_754082 | 12/19/2020 | 12/31/2020 | Asia / Singapore                          |
| EPI_ISL_754083 | 12/17/2020 | 12/31/2020 | Asia / Singapore                          |
| EPI_ISL_754084 | 12/16/2020 | 12/31/2020 | Asia / Singapore                          |
| EPI_ISL_754085 | 12/14/2020 | 12/31/2020 | Asia / Singapore                          |



|                |            |            |                                                       |
|----------------|------------|------------|-------------------------------------------------------|
| EPI_ISL_754133 | 12/18/2020 | 12/31/2020 | North America / USA / California / Los Angeles County |
| EPI_ISL_754134 | 12/18/2020 | 12/31/2020 | North America / USA / California / Los Angeles County |
| EPI_ISL_754135 | 12/19/2020 | 12/31/2020 | North America / USA / California / Los Angeles County |
| EPI_ISL_754136 | 9/7/2020   | 12/31/2020 | Europe / France / Occitanie                           |
| EPI_ISL_754137 | 10/27/2020 | 12/31/2020 | Europe / France / Occitanie                           |
| EPI_ISL_754138 | 10/11/2020 | 12/31/2020 | Europe / France / Occitanie                           |
| EPI_ISL_754139 | 11/9/2020  | 12/31/2020 | Europe / France / Occitanie                           |
| EPI_ISL_754141 | 11/19/2020 | 12/31/2020 | Europe / France / Bretagne / Quimper                  |
| EPI_ISL_754142 | 12/11/2020 | 12/31/2020 | Europe / France / Bretagne / Quimper                  |
| EPI_ISL_754143 | 11/23/2020 | 12/31/2020 | Europe / France / Bretagne / Quimper                  |
| EPI_ISL_754144 | 11/20/2020 | 12/31/2020 | Europe / France / Bretagne / Quimper                  |
| EPI_ISL_754145 | 11/25/2020 | 12/31/2020 | Europe / France / Bretagne / Quimper                  |
| EPI_ISL_754147 | 12/3/2020  | 12/31/2020 | Europe / France / Bretagne / Quimper                  |
| EPI_ISL_754148 | 12/2/2020  | 12/31/2020 | Europe / France / Bretagne / Quimper                  |
| EPI_ISL_754149 | 12/7/2020  | 12/31/2020 | Europe / France / Bretagne / Quimper                  |
| EPI_ISL_754150 | 12/9/2020  | 12/31/2020 | Europe / France / Bretagne / Quimper                  |
| EPI_ISL_754151 | 12/12/2020 | 12/31/2020 | Europe / France / Bretagne / Quimper                  |
| EPI_ISL_754152 | 11/23/2020 | 12/31/2020 | Europe / France / Bretagne / Quimper                  |
| EPI_ISL_754153 | 11/23/2020 | 12/31/2020 | Europe / France / Bretagne / Quimper                  |
| EPI_ISL_754154 | 11/20/2020 | 12/31/2020 | Europe / France / Bretagne / Quimper                  |
| EPI_ISL_754155 | 11/26/2020 | 12/31/2020 | Europe / France / Bretagne / Quimper                  |
| EPI_ISL_754156 | 11/30/2020 | 12/31/2020 | Europe / France / Bretagne / Quimper                  |
| EPI_ISL_754157 | 11/30/2020 | 12/31/2020 | Europe / France / Bretagne / Quimper                  |
| EPI_ISL_754158 | 12/1/2020  | 12/31/2020 | Europe / France / Bretagne / Quimper                  |
| EPI_ISL_754159 | 12/3/2020  | 12/31/2020 | Europe / France / Bretagne / Quimper                  |
| EPI_ISL_754160 | 12/1/2020  | 12/31/2020 | Europe / France / Bretagne / Quimper                  |
| EPI_ISL_754161 | 11/18/2020 | 12/31/2020 | Europe / France / Bretagne / Quimper                  |
| EPI_ISL_754162 | 11/26/2020 | 12/31/2020 | Europe / France / Bretagne / Quimper                  |
| EPI_ISL_754163 | 12/7/2020  | 12/31/2020 | Europe / France / Bretagne / Quimper                  |
| EPI_ISL_754164 | 12/1/2020  | 12/31/2020 | Europe / France / Bretagne / Quimper                  |
| EPI_ISL_754165 | 12/8/2020  | 12/31/2020 | Europe / France / Bretagne / Quimper                  |
| EPI_ISL_754166 | 12/8/2020  | 12/31/2020 | Europe / France / Bretagne / Quimper                  |
| EPI_ISL_754167 | 12/12/2020 | 12/31/2020 | Europe / France / Bretagne / Quimper                  |
| EPI_ISL_754168 | 12/11/2020 | 12/31/2020 | Europe / France / Bretagne / Quimper                  |
| EPI_ISL_754169 | 11/15/2020 | 12/31/2020 | Europe / France / Bretagne / Quimper                  |
| EPI_ISL_754170 | 12/10/2020 | 12/31/2020 | Europe / France / Bretagne / Quimper                  |
| EPI_ISL_754171 | 12/10/2020 | 12/31/2020 | Europe / France / Bretagne / Quimper                  |
| EPI_ISL_754172 | 12/10/2020 | 12/31/2020 | Europe / France / Bretagne / Quimper                  |
| EPI_ISL_754173 | 11/25/2020 | 12/31/2020 | Asia / Bangladesh / Sylhet / Habiganj                 |
| EPI_ISL_754174 | 12/21/2020 | 12/31/2020 | Europe / Germany / Baden-Wurttemberg                  |
| EPI_ISL_754175 | 12/20/2020 | 12/31/2020 | Europe / Germany / Lower Saxony                       |
| EPI_ISL_754176 | 11/30/2020 | 12/31/2020 | Asia / Bangladesh / Sylhet / Sunamganj                |
| EPI_ISL_754177 | 11/25/2020 | 12/31/2020 | Asia / Bangladesh / Sylhet / Habiganj                 |
| EPI_ISL_754179 | 11/12/2020 | 12/31/2020 | Asia / Bangladesh / Sylhet / Habiganj                 |
| EPI_ISL_754180 | 9/17/2020  | 12/31/2020 | Asia / Georgia / Tbilisi                              |
| EPI_ISL_754181 | 9/23/2020  | 12/31/2020 | Asia / Georgia / Tbilisi                              |
| EPI_ISL_754182 | 9/30/2020  | 12/31/2020 | North America / USA / Wyoming                         |



|                |            |            |                                                |
|----------------|------------|------------|------------------------------------------------|
| EPI_ISL_754183 | 10/12/2020 | 12/31/2020 | North America / USA / Wyoming                  |
| EPI_ISL_754186 | 10/15/2020 | 12/31/2020 | Europe / Germany / Berlin                      |
| EPI_ISL_754187 | 9/24/2020  | 12/31/2020 | Europe / Germany / Berlin                      |
| EPI_ISL_754188 | 10/6/2020  | 12/31/2020 | Europe / Germany / Berlin                      |
| EPI_ISL_754189 | 10/4/2020  | 12/31/2020 | Europe / Germany / Berlin                      |
| EPI_ISL_754190 | 10/15/2020 | 12/31/2020 | Europe / Germany / Berlin                      |
| EPI_ISL_754191 | 10/14/2020 | 12/31/2020 | Europe / Germany / Berlin                      |
| EPI_ISL_754192 | 10/7/2020  | 12/31/2020 | Europe / Germany / Berlin                      |
| EPI_ISL_754193 | 10/7/2020  | 12/31/2020 | Europe / Germany / North Rhine-Westphalia      |
| EPI_ISL_754194 | 10/19/2020 | 12/31/2020 | Europe / Germany / Berlin                      |
| EPI_ISL_754196 | 11/9/2020  | 12/31/2020 | Europe / Russia / Moscow                       |
| EPI_ISL_754197 | 11/9/2020  | 12/31/2020 | Europe / Russia / Moscow                       |
| EPI_ISL_754198 | 11/9/2020  | 12/31/2020 | Europe / Russia / Moscow                       |
| EPI_ISL_754199 | 11/9/2020  | 12/31/2020 | Europe / Russia / Moscow                       |
| EPI_ISL_754200 | 11/9/2020  | 12/31/2020 | Europe / Russia / Moscow                       |
| EPI_ISL_754201 | 11/9/2020  | 12/31/2020 | Europe / Russia / Moscow                       |
| EPI_ISL_754202 | 11/9/2020  | 12/31/2020 | Europe / Russia / Moscow                       |
| EPI_ISL_754203 | 11/9/2020  | 12/31/2020 | Europe / Russia / Moscow                       |
| EPI_ISL_754204 | 11/9/2020  | 12/31/2020 | Europe / Russia / Moscow                       |
| EPI_ISL_754205 | 11/9/2020  | 12/31/2020 | Europe / Russia / Moscow                       |
| EPI_ISL_754206 | 11/9/2020  | 12/31/2020 | Europe / Russia / Moscow                       |
| EPI_ISL_754207 | 11/9/2020  | 12/31/2020 | Europe / Russia / Moscow                       |
| EPI_ISL_754208 | 11/9/2020  | 12/31/2020 | Europe / Russia / Moscow                       |
| EPI_ISL_754209 | 11/9/2020  | 12/31/2020 | Europe / Russia / Moscow                       |
| EPI_ISL_754210 | 11/9/2020  | 12/31/2020 | Europe / Russia / Moscow                       |
| EPI_ISL_754211 | 11/9/2020  | 12/31/2020 | Europe / Russia / Moscow                       |
| EPI_ISL_754212 | 11/9/2020  | 12/31/2020 | Europe / Russia / Moscow                       |
| EPI_ISL_754213 | 11/9/2020  | 12/31/2020 | Europe / Russia / Moscow                       |
| EPI_ISL_754214 | 11/9/2020  | 12/31/2020 | Europe / Russia / Moscow                       |
| EPI_ISL_754215 | 12/12/2020 | 12/31/2020 | North America / USA / Wyoming                  |
| EPI_ISL_754216 | 12/12/2020 | 12/31/2020 | North America / USA / Wyoming                  |
| EPI_ISL_754217 | 10/12/2020 | 12/31/2020 | North America / USA / Wyoming                  |
| EPI_ISL_754218 | 10/12/2020 | 12/31/2020 | North America / USA / Wyoming                  |
| EPI_ISL_754219 | 10/12/2020 | 12/31/2020 | North America / USA / Wyoming                  |
| EPI_ISL_754220 | 10/12/2020 | 12/31/2020 | North America / USA / Wyoming                  |
| EPI_ISL_754221 | 10/12/2020 | 12/31/2020 | North America / USA / Wyoming                  |
| EPI_ISL_754223 | 10/12/2020 | 12/31/2020 | North America / USA / Wyoming                  |
| EPI_ISL_754224 | 10/12/2020 | 12/31/2020 | North America / USA / Wyoming                  |
| EPI_ISL_754225 | 10/12/2020 | 12/31/2020 | North America / USA / Wyoming                  |
| EPI_ISL_754226 | 10/12/2020 | 12/31/2020 | North America / USA / Wyoming                  |
| EPI_ISL_754227 | 10/12/2020 | 12/31/2020 | North America / USA / Wyoming                  |
| EPI_ISL_754228 | 10/12/2020 | 12/31/2020 | North America / USA / Wyoming                  |
| EPI_ISL_754232 | 11/24/2020 | 12/31/2020 | Europe / Belarus / Gomel region / Kalinkavichy |
| EPI_ISL_754233 | 11/23/2020 | 12/31/2020 | Europe / Belarus / Minsk region / Kolodishchi  |
| EPI_ISL_754235 | 10/11/2020 | 12/31/2020 | Europe / Belarus / Mogilev region / Babruysk   |
| EPI_ISL_754238 | 12/29/2020 | 12/31/2020 | Europe / Romania                               |
| EPI_ISL_754239 | 7/20/2020  | 12/31/2020 | Asia / Indonesia / West Java / Bandung         |

|                |            |            |                                            |
|----------------|------------|------------|--------------------------------------------|
| EPI_ISL_754241 | 7/24/2020  | 12/31/2020 | Asia / Indonesia / West Java / Tasikmalaya |
| EPI_ISL_754247 | 11/29/2020 | 12/31/2020 | Europe / United Kingdom / England          |
| EPI_ISL_754248 | 12/1/2020  | 12/31/2020 | Europe / United Kingdom / England          |
| EPI_ISL_754249 | 12/2/2020  | 12/31/2020 | Europe / United Kingdom / England          |
| EPI_ISL_754250 | 12/2/2020  | 12/31/2020 | Europe / United Kingdom / England          |
| EPI_ISL_754251 | 12/3/2020  | 12/31/2020 | Europe / United Kingdom / England          |
| EPI_ISL_754252 | 12/4/2020  | 12/31/2020 | Europe / United Kingdom / England          |
| EPI_ISL_754253 | 12/4/2020  | 12/31/2020 | Europe / United Kingdom / England          |
| EPI_ISL_754254 | 12/19/2020 | 12/31/2020 | Europe / United Kingdom / England          |
| EPI_ISL_754255 | 12/23/2020 | 12/31/2020 | Europe / United Kingdom / England          |
| EPI_ISL_754256 | 12/3/2020  | 12/31/2020 | Europe / United Kingdom / England          |
| EPI_ISL_754257 | 11/27/2020 | 12/31/2020 | Europe / United Kingdom / England          |
| EPI_ISL_754258 | 12/2/2020  | 12/31/2020 | Europe / United Kingdom / England          |
| EPI_ISL_754259 | 12/3/2020  | 12/31/2020 | Europe / United Kingdom / England          |
| EPI_ISL_754260 | 12/2/2020  | 12/31/2020 | Europe / United Kingdom / England          |
| EPI_ISL_754261 | 12/4/2020  | 12/31/2020 | Europe / United Kingdom / England          |
| EPI_ISL_754262 | 12/3/2020  | 12/31/2020 | Europe / United Kingdom / England          |
| EPI_ISL_754263 | 12/4/2020  | 12/31/2020 | Europe / United Kingdom / England          |
| EPI_ISL_754264 | 12/5/2020  | 12/31/2020 | Europe / United Kingdom / England          |
| EPI_ISL_754265 | 12/5/2020  | 12/31/2020 | Europe / United Kingdom / England          |
| EPI_ISL_754266 | 2020       | 12/31/2020 | Europe / United Kingdom / England          |
| EPI_ISL_754267 | 12/19/2020 | 12/31/2020 | Europe / United Kingdom / England          |
| EPI_ISL_754268 | 12/18/2020 | 12/31/2020 | Europe / United Kingdom / England          |
| EPI_ISL_754269 | 12/19/2020 | 12/31/2020 | Europe / United Kingdom / England          |
| EPI_ISL_754270 | 12/21/2020 | 12/31/2020 | Europe / United Kingdom / England          |
| EPI_ISL_754271 | 12/21/2020 | 12/31/2020 | Europe / United Kingdom / England          |
| EPI_ISL_754272 | 12/19/2020 | 12/31/2020 | Europe / United Kingdom / England          |
| EPI_ISL_754273 | 12/18/2020 | 12/31/2020 | Europe / United Kingdom / England          |
| EPI_ISL_754274 | 12/4/2020  | 12/31/2020 | Europe / United Kingdom / England          |
| EPI_ISL_754275 | 12/8/2020  | 12/31/2020 | Europe / United Kingdom / England          |
| EPI_ISL_754276 | 12/4/2020  | 12/31/2020 | Europe / United Kingdom / England          |
| EPI_ISL_754277 | 12/19/2020 | 12/31/2020 | Europe / United Kingdom / England          |
| EPI_ISL_754278 | 12/18/2020 | 12/31/2020 | Europe / United Kingdom / England          |
| EPI_ISL_754279 | 12/22/2020 | 12/31/2020 | Europe / United Kingdom / England          |
| EPI_ISL_754280 | 12/21/2020 | 12/31/2020 | Europe / United Kingdom / England          |
| EPI_ISL_754281 | 12/21/2020 | 12/31/2020 | Europe / United Kingdom / England          |
| EPI_ISL_754282 | 12/20/2020 | 12/31/2020 | Europe / United Kingdom / England          |
| EPI_ISL_754283 | 12/20/2020 | 12/31/2020 | Europe / United Kingdom / England          |
| EPI_ISL_754284 | 12/18/2020 | 12/31/2020 | Europe / United Kingdom / England          |
| EPI_ISL_754285 | 12/22/2020 | 12/31/2020 | Europe / United Kingdom / England          |
| EPI_ISL_754286 | 12/5/2020  | 12/31/2020 | Europe / United Kingdom / England          |
| EPI_ISL_754287 | 11/26/2020 | 12/31/2020 | Europe / United Kingdom / England          |
| EPI_ISL_754288 | 12/5/2020  | 12/31/2020 | Europe / United Kingdom / England          |
| EPI_ISL_754290 | 12/1/2020  | 12/31/2020 | Europe / United Kingdom / England          |
| EPI_ISL_754291 | 12/4/2020  | 12/31/2020 | Europe / United Kingdom / England          |
| EPI_ISL_754292 | 12/3/2020  | 12/31/2020 | Europe / United Kingdom / England          |
| EPI_ISL_754293 | 12/4/2020  | 12/31/2020 | Europe / United Kingdom / England          |





|                |            |            |                                                              |
|----------------|------------|------------|--------------------------------------------------------------|
| EPI_ISL_754388 | 12/2/2020  | 12/31/2020 | North America / USA / Wyoming                                |
| EPI_ISL_754389 | 12/2/2020  | 12/31/2020 | North America / USA / Wyoming                                |
| EPI_ISL_754390 | 12/19/2020 | 12/31/2020 | North America / USA / California / Los Angeles County        |
| EPI_ISL_754391 | 7/17/2020  | 12/31/2020 | South America / Chile / Region Metropolitana de Santiago / S |
| EPI_ISL_754392 | 9/6/2020   | 12/31/2020 | South America / Chile / Region Metropolitana de Santiago / S |
| EPI_ISL_754393 | 9/26/2020  | 12/31/2020 | South America / Chile / Region Metropolitana de Santiago / S |
| EPI_ISL_754400 | 11/3/2020  | 12/31/2020 | North America / USA / New York / Cattaraugus County          |
| EPI_ISL_754401 | 11/9/2020  | 12/31/2020 | North America / USA / New York / Erie County                 |
| EPI_ISL_754402 | 11/27/2020 | 12/31/2020 | North America / USA / New York / Montgomery County           |
| EPI_ISL_754403 | 12/1/2020  | 12/31/2020 | North America / USA / New York / Montgomery County           |
| EPI_ISL_754404 | 12/4/2020  | 12/31/2020 | North America / USA / New York / Montgomery County           |
| EPI_ISL_754407 | 12/1/2020  | 12/31/2020 | North America / USA / New York / Oswego County               |
| EPI_ISL_754408 | 11/29/2020 | 12/31/2020 | North America / USA / New York / Erie County                 |
| EPI_ISL_754409 | 11/30/2020 | 12/31/2020 | North America / USA / New York / Warren County               |
| EPI_ISL_754410 | 11/30/2020 | 12/31/2020 | North America / USA / New York / Washington County           |
| EPI_ISL_754411 | 11/30/2020 | 12/31/2020 | North America / USA / New York / Montgomery County           |
| EPI_ISL_754412 | 12/1/2020  | 12/31/2020 | North America / USA / New York / Schenectady County          |
| EPI_ISL_754413 | 12/1/2020  | 12/31/2020 | North America / USA / New York / Albany County               |
| EPI_ISL_754414 | 12/1/2020  | 12/31/2020 | North America / USA / New York / Albany County               |
| EPI_ISL_754415 | 12/1/2020  | 12/31/2020 | North America / USA / New York / Albany County               |
| EPI_ISL_754416 | 12/1/2020  | 12/31/2020 | North America / USA / New York / Albany County               |
| EPI_ISL_754417 | 11/30/2020 | 12/31/2020 | North America / USA / New York / Cattaraugus County          |
| EPI_ISL_754418 | 12/1/2020  | 12/31/2020 | North America / USA / New York / Warren County               |
| EPI_ISL_754419 | 12/1/2020  | 12/31/2020 | North America / USA / New York / Warren County               |
| EPI_ISL_754420 | 12/1/2020  | 12/31/2020 | North America / USA / New York / Warren County               |
| EPI_ISL_754421 | 11/30/2020 | 12/31/2020 | North America / USA / New York / Cattaraugus County          |
| EPI_ISL_754422 | 12/1/2020  | 12/31/2020 | North America / USA / New York / Wayne County                |
| EPI_ISL_754423 | 12/1/2020  | 12/31/2020 | North America / USA / New York / Wayne County                |
| EPI_ISL_754424 | 12/1/2020  | 12/31/2020 | North America / USA / New York / Wayne County                |
| EPI_ISL_754425 | 12/1/2020  | 12/31/2020 | North America / USA / New York / Wayne County                |
| EPI_ISL_754426 | 12/1/2020  | 12/31/2020 | North America / USA / New York / Wayne County                |
| EPI_ISL_754427 | 12/1/2020  | 12/31/2020 | North America / USA / New York / Wayne County                |
| EPI_ISL_754428 | 11/30/2020 | 12/31/2020 | North America / USA / New York / Rockland County             |
| EPI_ISL_754429 | 12/2/2020  | 12/31/2020 | North America / USA / New York / Greene County               |
| EPI_ISL_754430 | 12/2/2020  | 12/31/2020 | North America / USA / New York / Greene County               |
| EPI_ISL_754431 | 12/2/2020  | 12/31/2020 | North America / USA / New York / Greene County               |
| EPI_ISL_754432 | 12/2/2020  | 12/31/2020 | North America / USA / New York / Greene County               |
| EPI_ISL_754433 | 12/2/2020  | 12/31/2020 | North America / USA / New York / Greene County               |
| EPI_ISL_754434 | 12/2/2020  | 12/31/2020 | North America / USA / New York / Greene County               |
| EPI_ISL_754435 | 12/2/2020  | 12/31/2020 | North America / USA / New York / Greene County               |
| EPI_ISL_754436 | 12/2/2020  | 12/31/2020 | North America / USA / New York / Hamilton County             |
| EPI_ISL_754437 | 12/2/2020  | 12/31/2020 | North America / USA / New York / Fulton County               |
| EPI_ISL_754438 | 12/2/2020  | 12/31/2020 | North America / USA / New York / Fulton County               |
| EPI_ISL_754439 | 12/3/2020  | 12/31/2020 | North America / USA / New York / Warren County               |
| EPI_ISL_754440 | 12/4/2020  | 12/31/2020 | North America / USA / New York / Albany County               |
| EPI_ISL_754441 | 12/3/2020  | 12/31/2020 | North America / USA / New York / Montgomery County           |
| EPI_ISL_754442 | 12/4/2020  | 12/31/2020 | North America / USA / New York / Washington County           |

|                |            |            |                                                     |
|----------------|------------|------------|-----------------------------------------------------|
| EPI_ISL_754443 | 12/4/2020  | 12/31/2020 | North America / USA / New York / Rensselaer County  |
| EPI_ISL_754444 | 12/5/2020  | 12/31/2020 | North America / USA / New York / Rensselaer County  |
| EPI_ISL_754445 | 12/5/2020  | 12/31/2020 | North America / USA / New York / Rensselaer County  |
| EPI_ISL_754446 | 12/5/2020  | 12/31/2020 | North America / USA / New York / Albany County      |
| EPI_ISL_754447 | 12/6/2020  | 12/31/2020 | North America / USA / New York / Montgomery County  |
| EPI_ISL_754448 | 12/7/2020  | 12/31/2020 | North America / USA / New York / Albany County      |
| EPI_ISL_754449 | 12/7/2020  | 12/31/2020 | North America / USA / New York / Albany County      |
| EPI_ISL_754450 | 12/7/2020  | 12/31/2020 | North America / USA / New York / Montgomery County  |
| EPI_ISL_754451 | 12/7/2020  | 12/31/2020 | North America / USA / New York / Albany County      |
| EPI_ISL_754452 | 12/7/2020  | 12/31/2020 | North America / USA / New York / Onondaga County    |
| EPI_ISL_754453 | 12/8/2020  | 12/31/2020 | North America / USA / New York / Columbia County    |
| EPI_ISL_754454 | 12/7/2020  | 12/31/2020 | North America / USA / New York / Warren County      |
| EPI_ISL_754455 | 12/8/2020  | 12/31/2020 | North America / USA / New York / Columbia County    |
| EPI_ISL_754456 | 12/8/2020  | 12/31/2020 | North America / USA / New York / Columbia County    |
| EPI_ISL_754457 | 12/8/2020  | 12/31/2020 | North America / USA / New York / Columbia County    |
| EPI_ISL_754458 | 12/8/2020  | 12/31/2020 | North America / USA / New York / Columbia County    |
| EPI_ISL_754459 | 12/8/2020  | 12/31/2020 | North America / USA / New York / Ulster County      |
| EPI_ISL_754460 | 12/7/2020  | 12/31/2020 | North America / USA / New York / Erie County        |
| EPI_ISL_754461 | 12/8/2020  | 12/31/2020 | North America / USA / New York / Rensselaer County  |
| EPI_ISL_754462 | 12/7/2020  | 12/31/2020 | North America / USA / New York / Oswego County      |
| EPI_ISL_754463 | 12/7/2020  | 12/31/2020 | North America / USA / New York / Oswego County      |
| EPI_ISL_754464 | 12/7/2020  | 12/31/2020 | North America / USA / New York / Oswego County      |
| EPI_ISL_754465 | 12/8/2020  | 12/31/2020 | North America / USA / New York / Oswego County      |
| EPI_ISL_754466 | 12/8/2020  | 12/31/2020 | North America / USA / New York / Oswego County      |
| EPI_ISL_754467 | 12/8/2020  | 12/31/2020 | North America / USA / New York / Oswego County      |
| EPI_ISL_754468 | 12/8/2020  | 12/31/2020 | North America / USA / New York / Washington County  |
| EPI_ISL_754469 | 12/8/2020  | 12/31/2020 | North America / USA / New York / Washington County  |
| EPI_ISL_754470 | 12/7/2020  | 12/31/2020 | North America / USA / New York / Cattaraugus County |
| EPI_ISL_754471 | 12/8/2020  | 12/31/2020 | North America / USA / New York / Washington County  |
| EPI_ISL_754472 | 12/8/2020  | 12/31/2020 | North America / USA / New York / Washington County  |
| EPI_ISL_754473 | 12/8/2020  | 12/31/2020 | North America / USA / New York / Cattaraugus County |
| EPI_ISL_754474 | 12/9/2020  | 12/31/2020 | North America / USA / New York / Hamilton County    |
| EPI_ISL_754475 | 12/8/2020  | 12/31/2020 | North America / USA / New York / Hamilton County    |
| EPI_ISL_754476 | 12/8/2020  | 12/31/2020 | North America / USA / New York / Montgomery County  |
| EPI_ISL_754477 | 11/23/2020 | 12/31/2020 | North America / USA / New York / Suffolk County     |
| EPI_ISL_754478 | 11/23/2020 | 12/31/2020 | North America / USA / New York / Oneida County      |
| EPI_ISL_754479 | 11/23/2020 | 12/31/2020 | North America / USA / New York / Oneida County      |
| EPI_ISL_754480 | 11/23/2020 | 12/31/2020 | North America / USA / New York / Oneida County      |
| EPI_ISL_754481 | 11/23/2020 | 12/31/2020 | North America / USA / New York / Bronx              |
| EPI_ISL_754482 | 11/24/2020 | 12/31/2020 | North America / USA / New York / Albany County      |
| EPI_ISL_754483 | 11/24/2020 | 12/31/2020 | North America / USA / New York / Saratoga County    |
| EPI_ISL_754484 | 11/24/2020 | 12/31/2020 | North America / USA / New York / Oneida County      |
| EPI_ISL_754485 | 11/24/2020 | 12/31/2020 | North America / USA / New York / Herkimer County    |
| EPI_ISL_754486 | 2020       | 12/31/2020 | North America / USA / New York / Orleans County     |
| EPI_ISL_754487 | 11/24/2020 | 12/31/2020 | North America / USA / New York / Chenango County    |
| EPI_ISL_754488 | 11/22/2020 | 12/31/2020 | North America / USA / New York / Wyoming County     |
| EPI_ISL_754489 | 11/26/2020 | 12/31/2020 | North America / USA / New York / Albany County      |

|                |            |            |                                                     |
|----------------|------------|------------|-----------------------------------------------------|
| EPI_ISL_754490 | 11/26/2020 | 12/31/2020 | North America / USA / New York / Albany County      |
| EPI_ISL_754491 | 11/25/2020 | 12/31/2020 | North America / USA / New York / Oneida County      |
| EPI_ISL_754492 | 11/25/2020 | 12/31/2020 | North America / USA / New York / Oneida County      |
| EPI_ISL_754493 | 11/25/2020 | 12/31/2020 | North America / USA / New York / Montgomery County  |
| EPI_ISL_754494 | 11/25/2020 | 12/31/2020 | North America / USA / New York / Oneida County      |
| EPI_ISL_754495 | 11/25/2020 | 12/31/2020 | North America / USA / New York / Saratoga County    |
| EPI_ISL_754496 | 11/25/2020 | 12/31/2020 | North America / USA / New York / Washington County  |
| EPI_ISL_754497 | 11/25/2020 | 12/31/2020 | North America / USA / New York / Washington County  |
| EPI_ISL_754498 | 11/25/2020 | 12/31/2020 | North America / USA / New York / Warren County      |
| EPI_ISL_754499 | 11/29/2020 | 12/31/2020 | North America / USA / New York / Saratoga County    |
| EPI_ISL_754500 | 11/29/2020 | 12/31/2020 | North America / USA / New York / Saratoga County    |
| EPI_ISL_754501 | 11/29/2020 | 12/31/2020 | North America / USA / New York / Saratoga County    |
| EPI_ISL_754502 | 11/29/2020 | 12/31/2020 | North America / USA / New York / Saratoga County    |
| EPI_ISL_754503 | 11/29/2020 | 12/31/2020 | North America / USA / New York / Albany County      |
| EPI_ISL_754504 | 11/29/2020 | 12/31/2020 | North America / USA / New York / Chemung County     |
| EPI_ISL_754505 | 11/30/2020 | 12/31/2020 | North America / USA / New York / Westchester County |
| EPI_ISL_754506 | 11/30/2020 | 12/31/2020 | North America / USA / New York / Hamilton County    |
| EPI_ISL_754507 | 11/30/2020 | 12/31/2020 | North America / USA / New York / Hamilton County    |
| EPI_ISL_754508 | 11/30/2020 | 12/31/2020 | North America / USA / New York / Hamilton County    |
| EPI_ISL_754509 | 11/30/2020 | 12/31/2020 | North America / USA / New York / Hamilton County    |
| EPI_ISL_754510 | 11/2/2020  | 12/31/2020 | North America / USA / New York / Washington County  |
| EPI_ISL_754511 | 11/2/2020  | 12/31/2020 | North America / USA / New York / Washington County  |
| EPI_ISL_754512 | 11/2/2020  | 12/31/2020 | North America / USA / New York / Washington County  |
| EPI_ISL_754513 | 11/4/2020  | 12/31/2020 | North America / USA / New York / Greene County      |
| EPI_ISL_754514 | 11/4/2020  | 12/31/2020 | North America / USA / New York / Albany County      |
| EPI_ISL_754515 | 11/4/2020  | 12/31/2020 | North America / USA / New York / Greene County      |
| EPI_ISL_754516 | 11/4/2020  | 12/31/2020 | North America / USA / New York / Greene County      |
| EPI_ISL_754517 | 11/5/2020  | 12/31/2020 | North America / USA / New York / Greene County      |
| EPI_ISL_754518 | 11/5/2020  | 12/31/2020 | North America / USA / New York / Greene County      |
| EPI_ISL_754519 | 11/5/2020  | 12/31/2020 | North America / USA / New York / Greene County      |
| EPI_ISL_754520 | 11/5/2020  | 12/31/2020 | North America / USA / New York / Greene County      |
| EPI_ISL_754521 | 11/5/2020  | 12/31/2020 | North America / USA / New York / Greene County      |
| EPI_ISL_754522 | 11/5/2020  | 12/31/2020 | North America / USA / New York / Greene County      |
| EPI_ISL_754523 | 11/5/2020  | 12/31/2020 | North America / USA / New York / Greene County      |
| EPI_ISL_754524 | 11/5/2020  | 12/31/2020 | North America / USA / New York / Warren County      |
| EPI_ISL_754525 | 11/9/2020  | 12/31/2020 | North America / USA / New York / Greene County      |
| EPI_ISL_754526 | 10/1/2020  | 12/31/2020 | North America / USA / New York / Broome County      |
| EPI_ISL_754527 | 10/1/2020  | 12/31/2020 | North America / USA / New York / Warren County      |
| EPI_ISL_754528 | 10/1/2020  | 12/31/2020 | North America / USA / New York / Columbia County    |
| EPI_ISL_754529 | 10/1/2020  | 12/31/2020 | North America / USA / New York / Greene County      |
| EPI_ISL_754530 | 10/1/2020  | 12/31/2020 | North America / USA / New York / Niagara County     |
| EPI_ISL_754531 | 10/1/2020  | 12/31/2020 | North America / USA / New York / Niagara County     |
| EPI_ISL_754532 | 10/1/2020  | 12/31/2020 | North America / USA / New York / Niagara County     |
| EPI_ISL_754533 | 10/3/2020  | 12/31/2020 | North America / USA / New York / Greene County      |
| EPI_ISL_754534 | 10/5/2020  | 12/31/2020 | North America / USA / New York / Greene County      |
| EPI_ISL_754535 | 10/4/2020  | 12/31/2020 | North America / USA / New York / Tioga County       |
| EPI_ISL_754536 | 10/5/2020  | 12/31/2020 | North America / USA / New York / Broome County      |

|                |            |            |                                                     |
|----------------|------------|------------|-----------------------------------------------------|
| EPI_ISL_754537 | 10/5/2020  | 12/31/2020 | North America / USA / New York / Wayne County       |
| EPI_ISL_754538 | 10/5/2020  | 12/31/2020 | North America / USA / New York / Greene County      |
| EPI_ISL_754539 | 10/5/2020  | 12/31/2020 | North America / USA / New York / Wayne County       |
| EPI_ISL_754544 | 12/10/2020 | 12/31/2020 | North America / USA / New York / Montgomery County  |
| EPI_ISL_754545 | 11/10/2020 | 12/31/2020 | North America / USA / New York / Washington County  |
| EPI_ISL_754546 | 11/17/2020 | 12/31/2020 | North America / USA / New York / Montgomery County  |
| EPI_ISL_754547 | 12/9/2020  | 12/31/2020 | North America / USA / New York / Greene County      |
| EPI_ISL_754548 | 12/9/2020  | 12/31/2020 | North America / USA / New York / Greene County      |
| EPI_ISL_754549 | 12/9/2020  | 12/31/2020 | North America / USA / New York / Greene County      |
| EPI_ISL_754550 | 12/10/2020 | 12/31/2020 | North America / USA / New York / Albany County      |
| EPI_ISL_754551 | 12/10/2020 | 12/31/2020 | North America / USA / New York / Albany County      |
| EPI_ISL_754552 | 12/10/2020 | 12/31/2020 | North America / USA / New York / Albany County      |
| EPI_ISL_754553 | 12/10/2020 | 12/31/2020 | North America / USA / New York / Albany County      |
| EPI_ISL_754554 | 12/10/2020 | 12/31/2020 | North America / USA / New York / Albany County      |
| EPI_ISL_754555 | 12/10/2020 | 12/31/2020 | North America / USA / New York / Ulster County      |
| EPI_ISL_754556 | 12/10/2020 | 12/31/2020 | North America / USA / New York / Washington County  |
| EPI_ISL_754557 | 12/10/2020 | 12/31/2020 | North America / USA / New York / Washington County  |
| EPI_ISL_754558 | 12/10/2020 | 12/31/2020 | North America / USA / New York / Washington County  |
| EPI_ISL_754559 | 12/10/2020 | 12/31/2020 | North America / USA / New York / Warren County      |
| EPI_ISL_754560 | 12/11/2020 | 12/31/2020 | North America / USA / New York / Rensselaer County  |
| EPI_ISL_754561 | 12/10/2020 | 12/31/2020 | North America / USA / New York / Saratoga County    |
| EPI_ISL_754562 | 12/10/2020 | 12/31/2020 | North America / USA / New York / Saratoga County    |
| EPI_ISL_754563 | 12/10/2020 | 12/31/2020 | North America / USA / New York / Saratoga County    |
| EPI_ISL_754564 | 12/10/2020 | 12/31/2020 | North America / USA / New York / Saratoga County    |
| EPI_ISL_754565 | 12/10/2020 | 12/31/2020 | North America / USA / New York / Saratoga County    |
| EPI_ISL_754566 | 12/10/2020 | 12/31/2020 | North America / USA / New York / Schenectady County |
| EPI_ISL_754567 | 2020       | 12/31/2020 | North America / USA / New York / Albany County      |
| EPI_ISL_754568 | 12/10/2020 | 12/31/2020 | North America / USA / New York / Putnam County      |
| EPI_ISL_754569 | 12/11/2020 | 12/31/2020 | North America / USA / New York / Albany County      |
| EPI_ISL_754570 | 12/10/2020 | 12/31/2020 | North America / USA / New York / Wayne County       |
| EPI_ISL_754571 | 12/10/2020 | 12/31/2020 | North America / USA / New York / Fulton County      |
| EPI_ISL_754572 | 12/9/2020  | 12/31/2020 | North America / USA / New York / Albany County      |
| EPI_ISL_754573 | 12/11/2020 | 12/31/2020 | North America / USA / New York / Albany County      |
| EPI_ISL_754574 | 12/11/2020 | 12/31/2020 | North America / USA / New York / Albany County      |
| EPI_ISL_754575 | 11/10/2020 | 12/31/2020 | North America / USA / New York / Columbia County    |
| EPI_ISL_754576 | 11/10/2020 | 12/31/2020 | North America / USA / New York / Columbia County    |
| EPI_ISL_754577 | 11/15/2020 | 12/31/2020 | North America / USA / New York / Albany County      |
| EPI_ISL_754578 | 11/13/2020 | 12/31/2020 | North America / USA / New York / Montgomery County  |
| EPI_ISL_754579 | 11/16/2020 | 12/31/2020 | North America / USA / New York / Hamilton County    |
| EPI_ISL_754580 | 11/16/2020 | 12/31/2020 | North America / USA / New York / Hamilton County    |
| EPI_ISL_754581 | 11/18/2020 | 12/31/2020 | North America / USA / New York / Greene County      |
| EPI_ISL_754582 | 11/18/2020 | 12/31/2020 | North America / USA / New York / Greene County      |
| EPI_ISL_754583 | 11/18/2020 | 12/31/2020 | North America / USA / New York / Montgomery County  |
| EPI_ISL_754584 | 11/19/2020 | 12/31/2020 | North America / USA / New York / Albany County      |
| EPI_ISL_754585 | 11/19/2020 | 12/31/2020 | North America / USA / New York / Cattaraugus County |
| EPI_ISL_754586 | 11/19/2020 | 12/31/2020 | North America / USA / New York / Warren County      |
| EPI_ISL_754587 | 11/20/2020 | 12/31/2020 | North America / USA / New York / Warren County      |











|                |            |            |                                                        |
|----------------|------------|------------|--------------------------------------------------------|
| EPI_ISL_754835 | 10/21/2020 | 12/31/2020 | North America / USA / New York / Chemung County        |
| EPI_ISL_754836 | 10/21/2020 | 12/31/2020 | North America / USA / New York / Chemung County        |
| EPI_ISL_754837 | 10/21/2020 | 12/31/2020 | North America / USA / New York / Chemung County        |
| EPI_ISL_754838 | 10/21/2020 | 12/31/2020 | North America / USA / New York / Chemung County        |
| EPI_ISL_754839 | 10/21/2020 | 12/31/2020 | North America / USA / New York / Chemung County        |
| EPI_ISL_754840 | 10/22/2020 | 12/31/2020 | North America / USA / New York / Chemung County        |
| EPI_ISL_754841 | 10/22/2020 | 12/31/2020 | North America / USA / New York / Chemung County        |
| EPI_ISL_754843 | 12/17/2020 | 12/31/2020 | Europe / France / Grand Est / Reims                    |
| EPI_ISL_754844 | 12/18/2020 | 12/31/2020 | Europe / France / Grand Est / Reims                    |
| EPI_ISL_754845 | 12/17/2020 | 12/31/2020 | Europe / France / Grand Est / Reims                    |
| EPI_ISL_754846 | 12/18/2020 | 12/31/2020 | Europe / France / Grand Est / Reims                    |
| EPI_ISL_754847 | 12/21/2020 | 12/31/2020 | Europe / France / Bourgogne-Franche-Comte / St Clair   |
| EPI_ISL_754849 | 12/18/2020 | 12/31/2020 | Europe / France / Grand Est / Reims                    |
| EPI_ISL_754850 | 12/18/2020 | 12/31/2020 | Europe / France / Grand Est / Reims                    |
| EPI_ISL_754851 | 12/18/2020 | 12/31/2020 | Europe / France / Grand Est / Reims                    |
| EPI_ISL_754852 | 12/18/2020 | 12/31/2020 | Europe / France / Grand Est / Reims                    |
| EPI_ISL_754853 | 12/16/2020 | 12/31/2020 | Europe / France / Bretagne / Brest                     |
| EPI_ISL_754854 | 12/16/2020 | 12/31/2020 | Europe / France / Bretagne / Brest                     |
| EPI_ISL_754855 | 12/16/2020 | 12/31/2020 | Europe / France / Bretagne / Brest                     |
| EPI_ISL_754856 | 9/16/2020  | 12/31/2020 | Europe / France / Bretagne / Brest                     |
| EPI_ISL_754864 | 7/8/2020   | 12/31/2020 | North America / USA / California / Alameda County      |
| EPI_ISL_754865 | 7/21/2020  | 12/31/2020 | North America / USA / California / Alameda County      |
| EPI_ISL_754866 | 7/22/2020  | 12/31/2020 | North America / USA / California / Contra Costa County |
| EPI_ISL_754867 | 7/21/2020  | 12/31/2020 | North America / USA / California / Contra Costa County |
| EPI_ISL_754868 | 7/17/2020  | 12/31/2020 | North America / USA / California / Alameda County      |
| EPI_ISL_754869 | 7/17/2020  | 12/31/2020 | North America / USA / California / Alameda County      |
| EPI_ISL_754870 | 7/21/2020  | 12/31/2020 | North America / USA / California / Alameda County      |
| EPI_ISL_754871 | 7/17/2020  | 12/31/2020 | North America / USA / California / Alameda County      |
| EPI_ISL_754872 | 7/20/2020  | 12/31/2020 | North America / USA / California / Alameda County      |
| EPI_ISL_754873 | 7/21/2020  | 12/31/2020 | North America / USA / California / Alameda County      |
| EPI_ISL_754874 | 7/17/2020  | 12/31/2020 | North America / USA / California / Contra Costa County |
| EPI_ISL_754875 | 7/20/2020  | 12/31/2020 | North America / USA / California / Alameda County      |
| EPI_ISL_754876 | 7/22/2020  | 12/31/2020 | North America / USA / California / Contra Costa County |
| EPI_ISL_754877 | 7/22/2020  | 12/31/2020 | North America / USA / California / Contra Costa County |
| EPI_ISL_754878 | 7/9/2020   | 12/31/2020 | North America / USA / California / Contra Costa County |
| EPI_ISL_754879 | 7/14/2020  | 12/31/2020 | North America / USA / California / Alameda County      |
| EPI_ISL_754880 | 7/20/2020  | 12/31/2020 | North America / USA / California / Alameda County      |
| EPI_ISL_754881 | 7/9/2020   | 12/31/2020 | North America / USA / California / Alameda County      |
| EPI_ISL_754882 | 7/17/2020  | 12/31/2020 | North America / USA / California / Alameda County      |
| EPI_ISL_754883 | 7/15/2020  | 12/31/2020 | North America / USA / California / Alameda County      |
| EPI_ISL_754884 | 7/15/2020  | 12/31/2020 | North America / USA / California / Alameda County      |
| EPI_ISL_754885 | 7/10/2020  | 12/31/2020 | North America / USA / California / Alameda County      |
| EPI_ISL_754886 | 7/13/2020  | 12/31/2020 | North America / USA / California / Alameda County      |
| EPI_ISL_754887 | 7/20/2020  | 12/31/2020 | North America / USA / California / Alameda County      |
| EPI_ISL_754888 | 7/15/2020  | 12/31/2020 | North America / USA / California / Alameda County      |
| EPI_ISL_754889 | 7/8/2020   | 12/31/2020 | North America / USA / California / Alameda County      |
| EPI_ISL_754890 | 7/15/2020  | 12/31/2020 | North America / USA / California / Contra Costa County |

|                |           |            |                                                        |
|----------------|-----------|------------|--------------------------------------------------------|
| EPI_ISL_754891 | 7/15/2020 | 12/31/2020 | North America / USA / California / Alameda County      |
| EPI_ISL_754892 | 7/17/2020 | 12/31/2020 | North America / USA / California / Alameda County      |
| EPI_ISL_754893 | 7/9/2020  | 12/31/2020 | North America / USA / California / Alameda County      |
| EPI_ISL_754894 | 7/9/2020  | 12/31/2020 | North America / USA / California / Contra Costa County |
| EPI_ISL_754895 | 7/9/2020  | 12/31/2020 | North America / USA / California / Alameda County      |
| EPI_ISL_754896 | 7/17/2020 | 12/31/2020 | North America / USA / California / Alameda County      |
| EPI_ISL_754897 | 7/6/2020  | 12/31/2020 | North America / USA / California / Alameda County      |
| EPI_ISL_754898 | 7/16/2020 | 12/31/2020 | North America / USA / California / Contra Costa County |
| EPI_ISL_754899 | 7/10/2020 | 12/31/2020 | North America / USA / California / Alameda County      |
| EPI_ISL_754900 | 7/15/2020 | 12/31/2020 | North America / USA / California / Alameda County      |
| EPI_ISL_754901 | 6/29/2020 | 12/31/2020 | North America / USA / California / Riverside County    |
| EPI_ISL_754902 | 9/27/2020 | 12/31/2020 | Europe / Poland / Masovia                              |
| EPI_ISL_754903 | 5/16/2020 | 12/31/2020 | Europe / Poland / Masovia                              |
| EPI_ISL_754904 | 8/28/2020 | 12/31/2020 | Europe / Poland / Masovia                              |
| EPI_ISL_754905 | 9/6/2020  | 12/31/2020 | Europe / Poland / Masovia                              |
| EPI_ISL_754906 | 8/28/2020 | 12/31/2020 | Europe / Poland / Masovia                              |
| EPI_ISL_754907 | 9/4/2020  | 12/31/2020 | Europe / Poland / Masovia                              |
| EPI_ISL_754908 | 5/20/2020 | 12/31/2020 | Europe / Poland / Masovia                              |
| EPI_ISL_754909 | 9/20/2020 | 12/31/2020 | Europe / Poland / Masovia                              |
| EPI_ISL_754910 | 9/24/2020 | 12/31/2020 | Europe / Poland / Masovia                              |
| EPI_ISL_754911 | 5/26/2020 | 12/31/2020 | Europe / Poland / Masovia                              |
| EPI_ISL_754912 | 9/17/2020 | 12/31/2020 | Europe / Poland / Masovia                              |
| EPI_ISL_754913 | 9/9/2020  | 12/31/2020 | Europe / Poland / Masovia                              |
| EPI_ISL_755015 | 12/4/2020 | 12/31/2020 | North America / USA / California / Solano County       |
| EPI_ISL_755030 | 5/20/2020 | 12/31/2020 | North America / USA / California / San Diego County    |
| EPI_ISL_755031 | 9/29/2020 | 12/31/2020 | North America / USA / California / San Joaquin County  |
| EPI_ISL_755032 | 9/28/2020 | 12/31/2020 | North America / USA / California                       |
| EPI_ISL_755033 | 5/19/2020 | 12/31/2020 | North America / USA / California / Los Angeles County  |
| EPI_ISL_755034 | 6/23/2020 | 12/31/2020 | North America / USA / California / Madera County       |
| EPI_ISL_755035 | 6/19/2020 | 12/31/2020 | North America / USA / California / Kings County        |
| EPI_ISL_755036 | 3/27/2020 | 12/31/2020 | North America / USA / California                       |
| EPI_ISL_755037 | 3/27/2020 | 12/31/2020 | North America / USA / California                       |
| EPI_ISL_755038 | 4/13/2020 | 12/31/2020 | North America / USA / California                       |
| EPI_ISL_755039 | 4/13/2020 | 12/31/2020 | North America / USA / California                       |
| EPI_ISL_755040 | 4/13/2020 | 12/31/2020 | North America / USA / California                       |
| EPI_ISL_755041 | 4/13/2020 | 12/31/2020 | North America / USA / California                       |
| EPI_ISL_755042 | 7/1/2020  | 12/31/2020 | North America / USA / California                       |
| EPI_ISL_755043 | 7/20/2020 | 12/31/2020 | North America / USA / California / Mono County         |
| EPI_ISL_755044 | 7/28/2020 | 12/31/2020 | North America / USA / California                       |
| EPI_ISL_755045 | 7/27/2020 | 12/31/2020 | North America / USA / California / Butte County        |
| EPI_ISL_755046 | 7/27/2020 | 12/31/2020 | North America / USA / California / Butte County        |
| EPI_ISL_755047 | 8/5/2020  | 12/31/2020 | North America / USA / California / Butte County        |
| EPI_ISL_755048 | 8/17/2020 | 12/31/2020 | North America / USA / California / Marin County        |
| EPI_ISL_755049 | 9/16/2020 | 12/31/2020 | North America / USA / California / Fresno County       |
| EPI_ISL_755050 | 9/17/2020 | 12/31/2020 | North America / USA / California / Madera County       |
| EPI_ISL_755051 | 9/18/2020 | 12/31/2020 | North America / USA / California / Madera County       |
| EPI_ISL_755052 | 9/18/2020 | 12/31/2020 | North America / USA / California / Madera County       |









|                |            |            |                                              |
|----------------|------------|------------|----------------------------------------------|
| EPI_ISL_755215 | 10/18/2020 | 12/31/2020 | North America / USA / California / San Diego |
| EPI_ISL_755216 | 11/30/2020 | 12/31/2020 | North America / USA / California / San Diego |
| EPI_ISL_755217 | 11/30/2020 | 12/31/2020 | North America / USA / California / San Diego |
| EPI_ISL_755218 | 12/1/2020  | 12/31/2020 | North America / USA / California / San Diego |
| EPI_ISL_755219 | 12/1/2020  | 12/31/2020 | North America / USA / California / San Diego |
| EPI_ISL_755220 | 11/30/2020 | 12/31/2020 | North America / USA / California / San Diego |
| EPI_ISL_755221 | 12/6/2020  | 12/31/2020 | North America / USA / California / San Diego |
| EPI_ISL_755222 | 11/25/2020 | 12/31/2020 | North America / USA / California / San Diego |
| EPI_ISL_755223 | 11/28/2020 | 12/31/2020 | North America / USA / California / San Diego |
| EPI_ISL_755224 | 11/25/2020 | 12/31/2020 | North America / USA / California / San Diego |
| EPI_ISL_755225 | 11/29/2020 | 12/31/2020 | North America / USA / California / San Diego |
| EPI_ISL_755226 | 11/30/2020 | 12/31/2020 | North America / USA / California / San Diego |
| EPI_ISL_755227 | 11/30/2020 | 12/31/2020 | North America / USA / California / San Diego |
| EPI_ISL_755228 | 11/30/2020 | 12/31/2020 | North America / USA / California / San Diego |
| EPI_ISL_755229 | 11/29/2020 | 12/31/2020 | North America / USA / California / San Diego |
| EPI_ISL_755230 | 11/30/2020 | 12/31/2020 | North America / USA / California / San Diego |
| EPI_ISL_755231 | 11/30/2020 | 12/31/2020 | North America / USA / California / San Diego |
| EPI_ISL_755232 | 8/13/2020  | 12/31/2020 | Asia / Jordan / Amman                        |
| EPI_ISL_755233 | 8/23/2020  | 12/31/2020 | Asia / Jordan / Amman                        |
| EPI_ISL_755234 | 8/30/2020  | 12/31/2020 | Asia / Jordan / Irbid                        |
| EPI_ISL_755235 | 9/6/2020   | 12/31/2020 | Asia / Jordan / Amman                        |
| EPI_ISL_755236 | 8/18/2020  | 12/31/2020 | Asia / Jordan / Amman                        |
| EPI_ISL_755237 | 8/23/2020  | 12/31/2020 | Asia / Jordan / Amman                        |
| EPI_ISL_755238 | 8/31/2020  | 12/31/2020 | Asia / Jordan / Amman                        |
| EPI_ISL_755239 | 9/7/2020   | 12/31/2020 | Asia / Jordan / Amman                        |
| EPI_ISL_755240 | 8/24/2020  | 12/31/2020 | Asia / Jordan / Amman                        |
| EPI_ISL_755241 | 9/9/2020   | 12/31/2020 | Asia / Jordan / Amman                        |
| EPI_ISL_755242 | 9/13/2020  | 12/31/2020 | Asia / Jordan / Amman                        |
| EPI_ISL_755243 | 9/7/2020   | 12/31/2020 | Asia / Jordan / Amman                        |
| EPI_ISL_755244 | 9/13/2020  | 12/31/2020 | Asia / Jordan / Amman                        |
| EPI_ISL_755245 | 9/7/2020   | 12/31/2020 | Asia / Jordan / Amman                        |
| EPI_ISL_755246 | 9/13/2020  | 12/31/2020 | Asia / Jordan / Amman                        |
| EPI_ISL_755247 | 9/14/2020  | 12/31/2020 | Asia / Jordan / Amman                        |
| EPI_ISL_755248 | 9/15/2020  | 12/31/2020 | Asia / Jordan / Amman                        |
| EPI_ISL_755249 | 9/7/2020   | 12/31/2020 | Asia / Jordan / Amman                        |
| EPI_ISL_755250 | 9/8/2020   | 12/31/2020 | Asia / Jordan / Amman                        |
| EPI_ISL_755251 | 9/15/2020  | 12/31/2020 | Asia / Jordan / Amman                        |
| EPI_ISL_755252 | 8/20/2020  | 12/31/2020 | Asia / Jordan / Amman                        |
| EPI_ISL_755253 | 8/25/2020  | 12/31/2020 | Asia / Jordan / Amman                        |
| EPI_ISL_755254 | 8/22/2020  | 12/31/2020 | Asia / Jordan / Amman                        |
| EPI_ISL_755255 | 8/29/2020  | 12/31/2020 | Asia / Jordan / Amman                        |
| EPI_ISL_755256 | 9/8/2020   | 12/31/2020 | Asia / Jordan / Amman                        |
| EPI_ISL_755257 | 9/11/2020  | 12/31/2020 | Asia / Jordan / Amman                        |
| EPI_ISL_755258 | 9/13/2020  | 12/31/2020 | Asia / Jordan / Amman                        |
| EPI_ISL_755259 | 9/14/2020  | 12/31/2020 | Asia / Jordan / Amman                        |
| EPI_ISL_755260 | 9/15/2020  | 12/31/2020 | Asia / Jordan / Amman                        |
| EPI_ISL_755261 | 9/8/2020   | 12/31/2020 | Asia / Jordan / Amman                        |

|                |            |            |                                                              |
|----------------|------------|------------|--------------------------------------------------------------|
| EPI_ISL_755262 | 9/14/2020  | 12/31/2020 | Asia / Jordan / Amman                                        |
| EPI_ISL_755263 | 9/7/2020   | 12/31/2020 | Asia / Jordan / Aqaba                                        |
| EPI_ISL_755264 | 9/7/2020   | 12/31/2020 | Asia / Jordan / Amman                                        |
| EPI_ISL_755265 | 9/8/2020   | 12/31/2020 | Asia / Jordan / Amman                                        |
| EPI_ISL_755266 | 9/12/2020  | 12/31/2020 | Asia / Jordan / Amman                                        |
| EPI_ISL_755267 | 9/14/2020  | 12/31/2020 | Asia / Jordan / Amman                                        |
| EPI_ISL_755268 | 9/14/2020  | 12/31/2020 | Asia / Jordan / Amman                                        |
| EPI_ISL_755269 | 11/25/2020 | 12/31/2020 | North America / USA / California / San Diego                 |
| EPI_ISL_755270 | 11/18/2020 | 12/31/2020 | North America / USA / California / San Diego                 |
| EPI_ISL_755271 | 11/18/2020 | 12/31/2020 | North America / USA / California / San Diego                 |
| EPI_ISL_755272 | 11/23/2020 | 12/31/2020 | North America / USA / California / San Diego                 |
| EPI_ISL_755273 | 11/25/2020 | 12/31/2020 | North America / USA / California / San Diego                 |
| EPI_ISL_755274 | 11/17/2020 | 12/31/2020 | North America / USA / California / San Diego                 |
| EPI_ISL_755275 | 11/18/2020 | 12/31/2020 | North America / USA / California / San Diego                 |
| EPI_ISL_755276 | 11/25/2020 | 12/31/2020 | North America / USA / California / San Diego                 |
| EPI_ISL_755277 | 11/25/2020 | 12/31/2020 | North America / USA / California / San Diego                 |
| EPI_ISL_755278 | 11/25/2020 | 12/31/2020 | North America / USA / California / San Diego                 |
| EPI_ISL_755279 | 11/30/2020 | 12/31/2020 | North America / USA / California / San Diego                 |
| EPI_ISL_755280 | 11/19/2020 | 12/31/2020 | North America / USA / California / San Diego                 |
| EPI_ISL_755281 | 11/23/2020 | 12/31/2020 | North America / USA / California / San Diego                 |
| EPI_ISL_755282 | 11/25/2020 | 12/31/2020 | North America / USA / California / San Diego                 |
| EPI_ISL_755283 | 11/30/2020 | 12/31/2020 | North America / USA / California / San Diego                 |
| EPI_ISL_755284 | 11/23/2020 | 12/31/2020 | North America / USA / California / San Diego                 |
| EPI_ISL_755285 | 11/30/2020 | 12/31/2020 | North America / USA / California / San Diego                 |
| EPI_ISL_755286 | 12/1/2020  | 12/31/2020 | North America / USA / California / San Diego                 |
| EPI_ISL_755287 | 11/24/2020 | 12/31/2020 | North America / USA / California / San Diego                 |
| EPI_ISL_755288 | 11/29/2020 | 12/31/2020 | North America / USA / California / San Diego                 |
| EPI_ISL_755289 | 11/30/2020 | 12/31/2020 | North America / USA / California / San Diego                 |
| EPI_ISL_755290 | 11/18/2020 | 12/31/2020 | North America / USA / California / San Diego                 |
| EPI_ISL_755291 | 11/24/2020 | 12/31/2020 | North America / USA / California / San Diego                 |
| EPI_ISL_755292 | 11/25/2020 | 12/31/2020 | North America / USA / California / San Diego                 |
| EPI_ISL_755293 | 11/25/2020 | 12/31/2020 | North America / USA / California / San Diego                 |
| EPI_ISL_755294 | 11/30/2020 | 12/31/2020 | North America / USA / California / San Diego                 |
| EPI_ISL_755295 | 11/18/2020 | 12/31/2020 | North America / USA / California / San Diego                 |
| EPI_ISL_755296 | 11/25/2020 | 12/31/2020 | North America / USA / California / San Diego                 |
| EPI_ISL_755297 | 11/25/2020 | 12/31/2020 | North America / USA / California / San Diego                 |
| EPI_ISL_755298 | 11/25/2020 | 12/31/2020 | North America / USA / California / San Diego                 |
| EPI_ISL_755299 | 11/22/2020 | 12/31/2020 | North America / USA / California / San Diego                 |
| EPI_ISL_755300 | 11/25/2020 | 12/31/2020 | North America / USA / California / San Diego                 |
| EPI_ISL_755302 | 8/20/2020  | 12/31/2020 | South America / Chile / Oâ€™Higgins / San Francisco de Most  |
| EPI_ISL_755303 | 8/3/2020   | 12/31/2020 | South America / Chile / Oâ€™Higgins / Lolol                  |
| EPI_ISL_755304 | 5/15/2020  | 12/31/2020 | South America / Chile / Region Metropolitana de Santiago / S |
| EPI_ISL_755572 | 12/22/2020 | 12/31/2020 | Europe / Italy / Abruzzo                                     |
| EPI_ISL_755573 | 12/10/2020 | 12/31/2020 | Europe / Italy / Abruzzo                                     |
| EPI_ISL_755574 | 12/27/2020 | 12/31/2020 | Europe / Italy / Abruzzo                                     |
| EPI_ISL_755587 | 4/29/2020  | 12/31/2020 | Asia / India                                                 |
| EPI_ISL_755306 | 8/25/2020  | 1/1/2021   | North America / USA / Maine                                  |









|                |            |                                                |
|----------------|------------|------------------------------------------------|
| EPI_ISL_755535 | 12/17/2020 | 1/1/2021 North America / USA / Maine           |
| EPI_ISL_755536 | 12/17/2020 | 1/1/2021 North America / USA / Maine           |
| EPI_ISL_755537 | 12/17/2020 | 1/1/2021 North America / USA / Maine           |
| EPI_ISL_755538 | 12/17/2020 | 1/1/2021 North America / USA / Maine           |
| EPI_ISL_755539 | 12/17/2020 | 1/1/2021 North America / USA / Maine           |
| EPI_ISL_755540 | 12/17/2020 | 1/1/2021 North America / USA / Maine           |
| EPI_ISL_755541 | 12/17/2020 | 1/1/2021 North America / USA / Maine           |
| EPI_ISL_755543 | 12/17/2020 | 1/1/2021 North America / USA / Maine           |
| EPI_ISL_755544 | 12/17/2020 | 1/1/2021 North America / USA / Maine           |
| EPI_ISL_755545 | 12/17/2020 | 1/1/2021 North America / USA / Maine           |
| EPI_ISL_755546 | 12/17/2020 | 1/1/2021 North America / USA / Maine           |
| EPI_ISL_755547 | 12/18/2020 | 1/1/2021 North America / USA / Maine           |
| EPI_ISL_755548 | 12/17/2020 | 1/1/2021 North America / USA / Maine           |
| EPI_ISL_755549 | 12/17/2020 | 1/1/2021 North America / USA / Maine           |
| EPI_ISL_755551 | 12/3/2020  | 1/1/2021 North America / USA / Maine           |
| EPI_ISL_755553 | 12/16/2020 | 1/1/2021 North America / USA / Maine           |
| EPI_ISL_755556 | 12/15/2020 | 1/1/2021 North America / USA / Maine           |
| EPI_ISL_755557 | 12/14/2020 | 1/1/2021 North America / USA / Maine           |
| EPI_ISL_755558 | 12/14/2020 | 1/1/2021 North America / USA / Maine           |
| EPI_ISL_755559 | 12/14/2020 | 1/1/2021 North America / USA / Maine           |
| EPI_ISL_755560 | 12/16/2020 | 1/1/2021 North America / USA / Maine           |
| EPI_ISL_755561 | 12/11/2020 | 1/1/2021 North America / USA / Maine           |
| EPI_ISL_755562 | 12/11/2020 | 1/1/2021 North America / USA / Maine           |
| EPI_ISL_755563 | 12/11/2020 | 1/1/2021 North America / USA / Maine           |
| EPI_ISL_755564 | 12/11/2020 | 1/1/2021 North America / USA / Maine           |
| EPI_ISL_755565 | 12/11/2020 | 1/1/2021 North America / USA / Maine           |
| EPI_ISL_755566 | 12/15/2020 | 1/1/2021 North America / USA / Maine           |
| EPI_ISL_755567 | 12/15/2020 | 1/1/2021 North America / USA / Maine           |
| EPI_ISL_755568 | 12/29/2020 | 1/1/2021 Oceania / Australia / South Australia |
| EPI_ISL_755570 | 12/30/2020 | 1/1/2021 Oceania / Australia / South Australia |
| EPI_ISL_755571 | 12/29/2020 | 1/1/2021 Oceania / Australia / South Australia |
| EPI_ISL_755589 | 12/24/2020 | 1/1/2021 Europe / Luxembourg                   |
| EPI_ISL_755590 | 12/20/2020 | 1/1/2021 North America / USA / Massachusetts   |
| EPI_ISL_755591 | 12/20/2020 | 1/1/2021 North America / USA / Pennsylvania    |
| EPI_ISL_755592 | 12/19/2020 | 1/1/2021 North America / USA / Florida         |
| EPI_ISL_755593 | 12/19/2020 | 1/1/2021 North America / USA / Florida         |
| EPI_ISL_755594 | 12/20/2020 | 1/1/2021 North America / USA / California      |
| EPI_ISL_755595 | 12/21/2020 | 1/1/2021 North America / USA / California      |
| EPI_ISL_755597 | 12/21/2020 | 1/1/2021 North America / USA / California      |
| EPI_ISL_755598 | 12/19/2020 | 1/1/2021 North America / USA / Florida         |
| EPI_ISL_755599 | 12/19/2020 | 1/1/2021 North America / USA / Florida         |
| EPI_ISL_755600 | 12/19/2020 | 1/1/2021 North America / USA / Massachusetts   |
| EPI_ISL_755601 | 12/19/2020 | 1/1/2021 North America / USA / Florida         |
| EPI_ISL_755602 | 12/21/2020 | 1/1/2021 North America / USA / California      |
| EPI_ISL_755603 | 12/19/2020 | 1/1/2021 North America / USA / Massachusetts   |
| EPI_ISL_755604 | 12/20/2020 | 1/1/2021 North America / USA / Florida         |
| EPI_ISL_755605 | 12/20/2020 | 1/1/2021 North America / USA / Florida         |



|                |            |                                                                     |
|----------------|------------|---------------------------------------------------------------------|
| EPI_ISL_755606 | 12/19/2020 | 1/1/2021 North America / USA / Florida                              |
| EPI_ISL_755607 | 12/20/2020 | 1/1/2021 North America / USA / Florida                              |
| EPI_ISL_755609 | 12/19/2020 | 1/1/2021 North America / USA / Massachusetts                        |
| EPI_ISL_755610 | 12/19/2020 | 1/1/2021 North America / USA / Pennsylvania                         |
| EPI_ISL_755611 | 12/19/2020 | 1/1/2021 North America / USA / Massachusetts                        |
| EPI_ISL_755616 | 12/18/2020 | 1/1/2021 North America / USA / Indiana                              |
| EPI_ISL_755617 | 12/19/2020 | 1/1/2021 North America / USA / Massachusetts                        |
| EPI_ISL_755622 | 12/19/2020 | 1/1/2021 Oceania / New Zealand / Canterbury                         |
| EPI_ISL_755624 | 12/19/2020 | 1/1/2021 Oceania / New Zealand / Counties Manukau                   |
| EPI_ISL_755626 | 12/20/2020 | 1/1/2021 Oceania / New Zealand / Bay of Plenty                      |
| EPI_ISL_755629 | 12/20/2020 | 1/1/2021 Oceania / New Zealand / Auckland                           |
| EPI_ISL_755630 | 12/22/2020 | 1/1/2021 Oceania / New Zealand / Auckland                           |
| EPI_ISL_755631 | 12/23/2020 | 1/1/2021 Oceania / New Zealand / Auckland                           |
| EPI_ISL_755632 | 12/27/2020 | 1/1/2021 Oceania / New Zealand / Auckland                           |
| EPI_ISL_755633 | 12/27/2020 | 1/1/2021 Oceania / New Zealand / Auckland                           |
| EPI_ISL_755634 | 12/25/2020 | 1/1/2021 Oceania / New Zealand / Counties Manukau                   |
| EPI_ISL_755635 | 12/28/2020 | 1/1/2021 Oceania / New Zealand / Counties Manukau                   |
| EPI_ISL_755637 | 12/24/2020 | 1/1/2021 Oceania / New Zealand / Auckland                           |
| EPI_ISL_755639 | 12/20/2020 | 1/1/2021 Europe / Germany / Bavaria / Munich                        |
| EPI_ISL_755640 | 12/3/2020  | 1/1/2021 South America / Brazil / Sao Paulo / Sao Paulo             |
| EPI_ISL_755641 | 12/1/2020  | 1/1/2021 South America / Brazil / Sao Paulo / Sao Bernardo do Campo |
| EPI_ISL_755642 | 12/5/2020  | 1/1/2021 South America / Brazil / Sao Paulo / Mogi das Cruzes       |
| EPI_ISL_755643 | 12/7/2020  | 1/1/2021 South America / Brazil / Sao Paulo / Mogi das Cruzes       |
| EPI_ISL_755644 | 12/8/2020  | 1/1/2021 South America / Brazil / Sao Paulo / Embu das Artes        |
| EPI_ISL_755645 | 12/8/2020  | 1/1/2021 South America / Brazil / Sao Paulo / Taboao da Serra       |
| EPI_ISL_755646 | 12/7/2020  | 1/1/2021 South America / Brazil / Sao Paulo / Sao Bernardo do Campo |
| EPI_ISL_755647 | 12/8/2020  | 1/1/2021 South America / Brazil / Sao Paulo / Sao Bernardo do Campo |
| EPI_ISL_755648 | 12/8/2020  | 1/1/2021 South America / Brazil / Sao Paulo / Caraguatatuba         |
| EPI_ISL_755649 | 12/6/2020  | 1/1/2021 South America / Brazil / Sao Paulo / Sao Bernardo do Campo |
| EPI_ISL_755650 | 12/8/2020  | 1/1/2021 South America / Brazil / Sao Paulo / Caraguatatuba         |
| EPI_ISL_755651 | 12/10/2020 | 1/1/2021 South America / Brazil / Sao Paulo / Poa                   |
| EPI_ISL_755652 | 12/9/2020  | 1/1/2021 South America / Brazil / Sao Paulo / Embu das Artes        |
| EPI_ISL_755653 | 12/12/2020 | 1/1/2021 South America / Brazil / Sao Paulo / Guararema             |
| EPI_ISL_755654 | 12/11/2020 | 1/1/2021 South America / Brazil / Sao Paulo / Sao Paulo             |
| EPI_ISL_755655 | 12/11/2020 | 1/1/2021 South America / Brazil / Sao Paulo / Indaiatuba            |
| EPI_ISL_759860 | 5/4/2020   | 1/1/2021 North America / USA                                        |
| EPI_ISL_759861 | 5/3/2020   | 1/1/2021 North America / USA                                        |
| EPI_ISL_759862 | 4/4/2020   | 1/1/2021 North America / USA                                        |
| EPI_ISL_759863 | 4/4/2020   | 1/1/2021 North America / USA                                        |
| EPI_ISL_759864 | 4/5/2020   | 1/1/2021 North America / USA                                        |
| EPI_ISL_759865 | 4/21/2020  | 1/1/2021 North America / USA                                        |
| EPI_ISL_759866 | 2020-09    | 1/1/2021 Asia / India                                               |
| EPI_ISL_759867 | 2020-09    | 1/1/2021 Asia / India                                               |
| EPI_ISL_755656 | 11/24/2020 | 1/2/2021 North America / Canada / Ontario / Toronto                 |
| EPI_ISL_755658 | 11/24/2020 | 1/2/2021 North America / Canada / Ontario / Toronto                 |
| EPI_ISL_755659 | 11/24/2020 | 1/2/2021 North America / Canada / Ontario / Toronto                 |
| EPI_ISL_755660 | 11/24/2020 | 1/2/2021 North America / Canada / Ontario / Toronto                 |



















|                |            |                                            |
|----------------|------------|--------------------------------------------|
| EPI_ISL_756161 | 12/16/2020 | 1/2/2021 Europe / United Kingdom / England |
| EPI_ISL_756164 | 12/2/2020  | 1/2/2021 North America / USA / Wyoming     |
| EPI_ISL_756165 | 8/15/2020  | 1/2/2021 Europe / Finland / Uusimaa        |
| EPI_ISL_756166 | 8/15/2020  | 1/2/2021 Europe / Finland / Uusimaa        |
| EPI_ISL_756167 | 10/15/2020 | 1/2/2021 Europe / Finland / Uusimaa        |
| EPI_ISL_756168 | 10/15/2020 | 1/2/2021 Europe / Finland / Uusimaa        |
| EPI_ISL_756169 | 10/15/2020 | 1/2/2021 Europe / Finland / Uusimaa        |
| EPI_ISL_756170 | 10/15/2020 | 1/2/2021 Europe / Finland / Uusimaa        |
| EPI_ISL_756171 | 10/15/2020 | 1/2/2021 Europe / Finland / Uusimaa        |
| EPI_ISL_756172 | 10/15/2020 | 1/2/2021 Europe / Finland / Uusimaa        |
| EPI_ISL_756173 | 10/15/2020 | 1/2/2021 Europe / Finland / Uusimaa        |
| EPI_ISL_756174 | 10/15/2020 | 1/2/2021 Europe / Finland / Uusimaa        |
| EPI_ISL_756175 | 10/15/2020 | 1/2/2021 Europe / Finland / Uusimaa        |
| EPI_ISL_756176 | 10/15/2020 | 1/2/2021 Europe / Finland / Uusimaa        |
| EPI_ISL_756177 | 10/15/2020 | 1/2/2021 Europe / Finland / Uusimaa        |
| EPI_ISL_756178 | 10/15/2020 | 1/2/2021 Europe / Finland / Uusimaa        |
| EPI_ISL_756179 | 10/15/2020 | 1/2/2021 Europe / Finland / Uusimaa        |
| EPI_ISL_756180 | 10/15/2020 | 1/2/2021 Europe / Finland / Uusimaa        |
| EPI_ISL_756181 | 9/15/2020  | 1/2/2021 Europe / Finland / Uusimaa        |
| EPI_ISL_756182 | 9/15/2020  | 1/2/2021 Europe / Finland / Uusimaa        |
| EPI_ISL_756183 | 9/15/2020  | 1/2/2021 Europe / Finland / Uusimaa        |
| EPI_ISL_756184 | 12/2/2020  | 1/2/2021 North America / USA / Wyoming     |
| EPI_ISL_756185 | 12/2/2020  | 1/2/2021 North America / USA / Wyoming     |
| EPI_ISL_756186 | 12/2/2020  | 1/2/2021 North America / USA / Wyoming     |
| EPI_ISL_756187 | 12/3/2020  | 1/2/2021 North America / USA / Wyoming     |
| EPI_ISL_756188 | 12/3/2020  | 1/2/2021 North America / USA / Wyoming     |
| EPI_ISL_756189 | 12/3/2020  | 1/2/2021 North America / USA / Wyoming     |
| EPI_ISL_756191 | 12/12/2020 | 1/2/2021 North America / USA / Washington  |
| EPI_ISL_756192 | 12/12/2020 | 1/2/2021 North America / USA / Washington  |
| EPI_ISL_756194 | 12/11/2020 | 1/2/2021 North America / USA / Washington  |
| EPI_ISL_756195 | 12/11/2020 | 1/2/2021 North America / USA / Washington  |
| EPI_ISL_756196 | 12/11/2020 | 1/2/2021 North America / USA / Washington  |
| EPI_ISL_756197 | 12/11/2020 | 1/2/2021 North America / USA / Washington  |
| EPI_ISL_756198 | 12/12/2020 | 1/2/2021 North America / USA / Washington  |
| EPI_ISL_756199 | 12/10/2020 | 1/2/2021 North America / USA / Washington  |
| EPI_ISL_756200 | 12/12/2020 | 1/2/2021 North America / USA / Washington  |
| EPI_ISL_756201 | 12/12/2020 | 1/2/2021 North America / USA / Washington  |
| EPI_ISL_756202 | 12/7/2020  | 1/2/2021 North America / USA / Washington  |
| EPI_ISL_756203 | 12/7/2020  | 1/2/2021 North America / USA / Washington  |
| EPI_ISL_756205 | 12/8/2020  | 1/2/2021 North America / USA / Washington  |
| EPI_ISL_756206 | 12/5/2020  | 1/2/2021 North America / USA / Washington  |
| EPI_ISL_756207 | 12/8/2020  | 1/2/2021 North America / USA / Washington  |
| EPI_ISL_756209 | 12/13/2020 | 1/2/2021 North America / USA / Washington  |
| EPI_ISL_756210 | 12/13/2020 | 1/2/2021 North America / USA / Washington  |
| EPI_ISL_756212 | 12/13/2020 | 1/2/2021 North America / USA / Washington  |
| EPI_ISL_756213 | 12/13/2020 | 1/2/2021 North America / USA / Washington  |
| EPI_ISL_756214 | 12/13/2020 | 1/2/2021 North America / USA / Washington  |

|                |            |          |                                                   |
|----------------|------------|----------|---------------------------------------------------|
| EPI_ISL_756215 | 12/11/2020 | 1/2/2021 | North America / USA / Washington                  |
| EPI_ISL_756216 | 12/14/2020 | 1/2/2021 | North America / USA / Washington                  |
| EPI_ISL_756217 | 12/12/2020 | 1/2/2021 | North America / USA / Washington                  |
| EPI_ISL_756218 | 12/14/2020 | 1/2/2021 | North America / USA / Washington                  |
| EPI_ISL_756219 | 12/14/2020 | 1/2/2021 | North America / USA / Washington                  |
| EPI_ISL_756220 | 12/14/2020 | 1/2/2021 | North America / USA / Washington                  |
| EPI_ISL_756221 | 12/15/2020 | 1/2/2021 | North America / USA / Washington                  |
| EPI_ISL_756223 | 12/14/2020 | 1/2/2021 | North America / USA / Washington                  |
| EPI_ISL_756224 | 12/14/2020 | 1/2/2021 | North America / USA / Washington                  |
| EPI_ISL_756226 | 12/14/2020 | 1/2/2021 | North America / USA / Washington                  |
| EPI_ISL_756227 | 12/15/2020 | 1/2/2021 | North America / USA / Washington                  |
| EPI_ISL_756228 | 12/16/2020 | 1/2/2021 | North America / USA / Washington                  |
| EPI_ISL_756229 | 12/16/2020 | 1/2/2021 | North America / USA / Washington                  |
| EPI_ISL_756230 | 12/16/2020 | 1/2/2021 | North America / USA / Washington                  |
| EPI_ISL_756231 | 12/15/2020 | 1/2/2021 | North America / USA / Washington                  |
| EPI_ISL_756233 | 12/15/2020 | 1/2/2021 | North America / USA / Washington                  |
| EPI_ISL_756234 | 12/16/2020 | 1/2/2021 | North America / USA / Washington                  |
| EPI_ISL_756235 | 12/16/2020 | 1/2/2021 | North America / USA / Washington                  |
| EPI_ISL_756236 | 12/16/2020 | 1/2/2021 | North America / USA / Washington                  |
| EPI_ISL_756237 | 12/18/2020 | 1/2/2021 | North America / USA / Washington                  |
| EPI_ISL_756238 | 12/18/2020 | 1/2/2021 | North America / USA / Washington                  |
| EPI_ISL_756239 | 12/18/2020 | 1/2/2021 | North America / USA / Washington                  |
| EPI_ISL_756240 | 12/17/2020 | 1/2/2021 | North America / USA / Washington                  |
| EPI_ISL_756241 | 12/3/2020  | 1/2/2021 | North America / USA / Wyoming                     |
| EPI_ISL_756242 | 12/3/2020  | 1/2/2021 | North America / USA / Wyoming                     |
| EPI_ISL_756243 | 12/3/2020  | 1/2/2021 | North America / USA / Wyoming                     |
| EPI_ISL_756245 | 12/3/2020  | 1/2/2021 | North America / USA / Wyoming                     |
| EPI_ISL_756246 | 12/3/2020  | 1/2/2021 | North America / USA / Wyoming                     |
| EPI_ISL_756247 | 6/12/2020  | 1/2/2021 | Europe / Finland / Uusimaa                        |
| EPI_ISL_756248 | 8/17/2020  | 1/2/2021 | Europe / Finland / Uusimaa                        |
| EPI_ISL_756249 | 9/17/2020  | 1/2/2021 | Europe / Finland / Uusimaa                        |
| EPI_ISL_756250 | 9/17/2020  | 1/2/2021 | Europe / Finland / Uusimaa                        |
| EPI_ISL_756251 | 9/17/2020  | 1/2/2021 | Europe / Finland / Uusimaa                        |
| EPI_ISL_756252 | 9/17/2020  | 1/2/2021 | Europe / Finland / Uusimaa                        |
| EPI_ISL_756253 | 12/4/2020  | 1/2/2021 | North America / USA / Wyoming                     |
| EPI_ISL_756254 | 12/4/2020  | 1/2/2021 | North America / USA / Wyoming                     |
| EPI_ISL_756256 | 12/4/2020  | 1/2/2021 | North America / USA / Wyoming                     |
| EPI_ISL_756258 | 12/4/2020  | 1/2/2021 | North America / USA / Wyoming                     |
| EPI_ISL_756260 | 12/22/2020 | 1/2/2021 | North America / USA / Wyoming                     |
| EPI_ISL_756268 | 12/24/2020 | 1/2/2021 | North America / USA / Wyoming                     |
| EPI_ISL_756269 | 12/24/2020 | 1/2/2021 | North America / USA / Wyoming                     |
| EPI_ISL_756272 | 12/21/2020 | 1/2/2021 | Europe / Spain / Madrid                           |
| EPI_ISL_756273 | 12/23/2020 | 1/2/2021 | Europe / Spain / Madrid                           |
| EPI_ISL_756277 | 10/29/2020 | 1/2/2021 | North America / USA / Hawaii / Honolulu County HI |
| EPI_ISL_756278 | 9/29/2020  | 1/2/2021 | North America / USA / Hawaii / Honolulu County HI |
| EPI_ISL_756279 | 11/23/2020 | 1/2/2021 | North America / USA / Hawaii / Honolulu County HI |
| EPI_ISL_756280 | 11/25/2020 | 1/2/2021 | North America / USA / Hawaii / Honolulu County HI |

|                |            |                                                            |
|----------------|------------|------------------------------------------------------------|
| EPI_ISL_756281 | 12/1/2020  | 1/2/2021 North America / USA / Hawaii / Honolulu County HI |
| EPI_ISL_756282 | 8/18/2020  | 1/2/2021 Europe / Finland / Uusimaa                        |
| EPI_ISL_756283 | 8/18/2020  | 1/2/2021 Europe / Finland / Uusimaa                        |
| EPI_ISL_756284 | 8/18/2020  | 1/2/2021 Europe / Finland / Uusimaa                        |
| EPI_ISL_756285 | 10/18/2020 | 1/2/2021 Europe / Finland / Uusimaa                        |
| EPI_ISL_756286 | 10/18/2020 | 1/2/2021 Europe / Finland / Uusimaa                        |
| EPI_ISL_756287 | 10/18/2020 | 1/2/2021 Europe / Finland / Uusimaa                        |
| EPI_ISL_756288 | 9/18/2020  | 1/2/2021 Europe / Finland / Uusimaa                        |
| EPI_ISL_756289 | 9/18/2020  | 1/2/2021 Europe / Finland / Uusimaa                        |
| EPI_ISL_756290 | 9/18/2020  | 1/2/2021 Europe / Finland / Uusimaa                        |
| EPI_ISL_756291 | 9/18/2020  | 1/2/2021 Europe / Finland / Uusimaa                        |
| EPI_ISL_756292 | 9/18/2020  | 1/2/2021 Europe / Finland / Uusimaa                        |
| EPI_ISL_756293 | 6/1/2020   | 1/2/2021 South America / Brazil / Bahia                    |
| EPI_ISL_756294 | 10/26/2020 | 1/2/2021 South America / Brazil / Bahia                    |
| EPI_ISL_756302 | 12/13/2020 | 1/2/2021 North America / USA / Washington                  |
| EPI_ISL_756303 | 12/14/2020 | 1/2/2021 North America / USA / Washington                  |
| EPI_ISL_756304 | 12/14/2020 | 1/2/2021 North America / USA / Washington                  |
| EPI_ISL_756305 | 12/15/2020 | 1/2/2021 North America / USA / Washington                  |
| EPI_ISL_756312 | 7/15/2020  | 1/3/2021 North America / USA / California / Alameda County |
| EPI_ISL_756313 | 7/17/2020  | 1/3/2021 North America / USA / California / Alameda County |
| EPI_ISL_756314 | 7/15/2020  | 1/3/2021 North America / USA / California / Alameda County |
| EPI_ISL_756315 | 7/10/2020  | 1/3/2021 North America / USA / California / Alameda County |
| EPI_ISL_756316 | 7/14/2020  | 1/3/2021 North America / USA / California / Alameda County |
| EPI_ISL_756317 | 7/17/2020  | 1/3/2021 North America / USA / California / Alameda County |
| EPI_ISL_756318 | 7/20/2020  | 1/3/2021 North America / USA / California / Alameda County |
| EPI_ISL_756320 | 7/13/2020  | 1/3/2021 North America / USA / California / Alameda County |
| EPI_ISL_756330 | 7/24/2020  | 1/3/2021 North America / USA / California / Alameda County |
| EPI_ISL_756332 | 7/27/2020  | 1/3/2021 North America / USA / California / Alameda County |
| EPI_ISL_756336 | 7/24/2020  | 1/3/2021 North America / USA / California / Alameda County |
| EPI_ISL_756339 | 7/1/2020   | 1/3/2021 North America / USA / California / Alameda County |
| EPI_ISL_756340 | 7/7/2020   | 1/3/2021 North America / USA / California / Alameda County |
| EPI_ISL_756341 | 6/30/2020  | 1/3/2021 North America / USA / California / Alameda County |
| EPI_ISL_756342 | 7/6/2020   | 1/3/2021 North America / USA / California / Alameda County |
| EPI_ISL_756343 | 7/2/2020   | 1/3/2021 North America / USA / California / Alameda County |
| EPI_ISL_756346 | 6/30/2020  | 1/3/2021 North America / USA / California / Alameda County |
| EPI_ISL_756347 | 6/30/2020  | 1/3/2021 North America / USA / California / Alameda County |
| EPI_ISL_756348 | 7/7/2020   | 1/3/2021 North America / USA / California / Alameda County |
| EPI_ISL_756349 | 7/1/2020   | 1/3/2021 North America / USA / California / Alameda County |
| EPI_ISL_756351 | 6/30/2020  | 1/3/2021 North America / USA / California / Alameda County |
| EPI_ISL_756352 | 7/8/2020   | 1/3/2021 North America / USA / California / Alameda County |
| EPI_ISL_756353 | 7/2/2020   | 1/3/2021 North America / USA / California / Alameda County |
| EPI_ISL_756354 | 7/9/2020   | 1/3/2021 North America / USA / California / Alameda County |
| EPI_ISL_756355 | 7/23/2020  | 1/3/2021 North America / USA / California / Alameda County |
| EPI_ISL_756356 | 6/30/2020  | 1/3/2021 North America / USA / California / Alameda County |
| EPI_ISL_756375 | 12/28/2020 | 1/3/2021 Asia / Thailand / Bangkok                         |
| EPI_ISL_756376 | 9/16/2020  | 1/3/2021 Asia / Indonesia / West Java                      |
| EPI_ISL_756377 | 10/19/2020 | 1/3/2021 Europe / United Kingdom / England                 |











































|                |            |                                         |
|----------------|------------|-----------------------------------------|
| EPI_ISL_757384 | 8/22/2020  | 1/3/2021 Europe / Finland / Uusimaa     |
| EPI_ISL_757385 | 10/22/2020 | 1/3/2021 Europe / Finland / Uusimaa     |
| EPI_ISL_757386 | 9/22/2020  | 1/3/2021 Europe / Finland / Uusimaa     |
| EPI_ISL_757387 | 9/22/2020  | 1/3/2021 Europe / Finland / Uusimaa     |
| EPI_ISL_757388 | 9/22/2020  | 1/3/2021 Europe / Finland / Uusimaa     |
| EPI_ISL_757389 | 9/22/2020  | 1/3/2021 Europe / Finland / Uusimaa     |
| EPI_ISL_757390 | 9/22/2020  | 1/3/2021 Europe / Finland / Uusimaa     |
| EPI_ISL_757391 | 9/22/2020  | 1/3/2021 Europe / Finland / Uusimaa     |
| EPI_ISL_757392 | 9/22/2020  | 1/3/2021 Europe / Finland / Uusimaa     |
| EPI_ISL_757393 | 9/22/2020  | 1/3/2021 Europe / Finland / Uusimaa     |
| EPI_ISL_757394 | 9/22/2020  | 1/3/2021 Europe / Finland / Uusimaa     |
| EPI_ISL_757451 | 12/14/2020 | 1/3/2021 Europe / Denmark / Nordjylland |
| EPI_ISL_757452 | 12/14/2020 | 1/3/2021 Europe / Denmark / Syddanmark  |
| EPI_ISL_757453 | 12/14/2020 | 1/3/2021 Europe / Denmark / Hovedstaden |
| EPI_ISL_757454 | 12/14/2020 | 1/3/2021 Europe / Denmark / Midtjylland |
| EPI_ISL_757455 | 12/14/2020 | 1/3/2021 Europe / Denmark / Syddanmark  |
| EPI_ISL_757456 | 12/14/2020 | 1/3/2021 Europe / Denmark / Nordjylland |
| EPI_ISL_757457 | 12/14/2020 | 1/3/2021 Europe / Denmark / Syddanmark  |
| EPI_ISL_757458 | 12/14/2020 | 1/3/2021 Europe / Denmark / Syddanmark  |
| EPI_ISL_757459 | 12/14/2020 | 1/3/2021 Europe / Denmark / Midtjylland |
| EPI_ISL_757460 | 12/14/2020 | 1/3/2021 Europe / Denmark / Syddanmark  |
| EPI_ISL_757461 | 12/14/2020 | 1/3/2021 Europe / Denmark / Nordjylland |
| EPI_ISL_757462 | 12/14/2020 | 1/3/2021 Europe / Denmark / Midtjylland |
| EPI_ISL_757465 | 12/14/2020 | 1/3/2021 Europe / Denmark / Syddanmark  |
| EPI_ISL_757466 | 12/14/2020 | 1/3/2021 Europe / Denmark / Syddanmark  |
| EPI_ISL_757467 | 12/14/2020 | 1/3/2021 Europe / Denmark / Hovedstaden |
| EPI_ISL_757468 | 12/14/2020 | 1/3/2021 Europe / Denmark / Hovedstaden |
| EPI_ISL_757469 | 12/14/2020 | 1/3/2021 Europe / Denmark / Midtjylland |
| EPI_ISL_757471 | 12/14/2020 | 1/3/2021 Europe / Denmark / Syddanmark  |
| EPI_ISL_757472 | 12/14/2020 | 1/3/2021 Europe / Denmark / Sjælland    |
| EPI_ISL_757473 | 12/14/2020 | 1/3/2021 Europe / Denmark / Nordjylland |
| EPI_ISL_757474 | 12/14/2020 | 1/3/2021 Europe / Denmark / Hovedstaden |
| EPI_ISL_757475 | 12/14/2020 | 1/3/2021 Europe / Denmark / Hovedstaden |
| EPI_ISL_757476 | 12/14/2020 | 1/3/2021 Europe / Denmark / Hovedstaden |
| EPI_ISL_757477 | 12/14/2020 | 1/3/2021 Europe / Denmark / Midtjylland |
| EPI_ISL_757478 | 12/14/2020 | 1/3/2021 Europe / Denmark / Hovedstaden |
| EPI_ISL_757479 | 12/14/2020 | 1/3/2021 Europe / Denmark / Syddanmark  |
| EPI_ISL_757480 | 12/14/2020 | 1/3/2021 Europe / Denmark / Hovedstaden |
| EPI_ISL_757481 | 12/14/2020 | 1/3/2021 Europe / Denmark / Nordjylland |
| EPI_ISL_757482 | 12/14/2020 | 1/3/2021 Europe / Denmark / Nordjylland |
| EPI_ISL_757483 | 12/14/2020 | 1/3/2021 Europe / Denmark / Nordjylland |
| EPI_ISL_757484 | 12/14/2020 | 1/3/2021 Europe / Denmark / Nordjylland |
| EPI_ISL_757485 | 12/14/2020 | 1/3/2021 Europe / Denmark / Sjælland    |
| EPI_ISL_757486 | 12/14/2020 | 1/3/2021 Europe / Denmark / Syddanmark  |
| EPI_ISL_757487 | 12/14/2020 | 1/3/2021 Europe / Denmark / Syddanmark  |
| EPI_ISL_757488 | 12/14/2020 | 1/3/2021 Europe / Denmark / Hovedstaden |
| EPI_ISL_757489 | 12/14/2020 | 1/3/2021 Europe / Denmark / Hovedstaden |



|                |            |                                         |
|----------------|------------|-----------------------------------------|
| EPI_ISL_757490 | 12/14/2020 | 1/3/2021 Europe / Denmark / Nordjylland |
| EPI_ISL_757491 | 12/7/2020  | 1/3/2021 Europe / Denmark / Hovedstaden |
| EPI_ISL_757494 | 12/14/2020 | 1/3/2021 Europe / Denmark / Hovedstaden |
| EPI_ISL_757495 | 12/14/2020 | 1/3/2021 Europe / Denmark / Hovedstaden |
| EPI_ISL_757498 | 12/14/2020 | 1/3/2021 Europe / Denmark / Midtjylland |
| EPI_ISL_757499 | 12/14/2020 | 1/3/2021 Europe / Denmark / Hovedstaden |
| EPI_ISL_757500 | 12/14/2020 | 1/3/2021 Europe / Denmark / Hovedstaden |
| EPI_ISL_757502 | 12/14/2020 | 1/3/2021 Europe / Denmark / Midtjylland |
| EPI_ISL_757503 | 12/14/2020 | 1/3/2021 Europe / Denmark / Hovedstaden |
| EPI_ISL_757510 | 12/14/2020 | 1/3/2021 Europe / Denmark / Hovedstaden |
| EPI_ISL_757511 | 12/14/2020 | 1/3/2021 Europe / Denmark / Hovedstaden |
| EPI_ISL_757512 | 12/14/2020 | 1/3/2021 Europe / Denmark / Syddanmark  |
| EPI_ISL_757513 | 12/14/2020 | 1/3/2021 Europe / Denmark / Sjælland    |
| EPI_ISL_757514 | 12/14/2020 | 1/3/2021 Europe / Denmark / Nordjylland |
| EPI_ISL_757515 | 12/14/2020 | 1/3/2021 Europe / Denmark / Hovedstaden |
| EPI_ISL_757516 | 12/14/2020 | 1/3/2021 Europe / Denmark / Midtjylland |
| EPI_ISL_757517 | 12/14/2020 | 1/3/2021 Europe / Denmark / Hovedstaden |
| EPI_ISL_757518 | 12/14/2020 | 1/3/2021 Europe / Denmark / Hovedstaden |
| EPI_ISL_757519 | 12/14/2020 | 1/3/2021 Europe / Denmark / Midtjylland |
| EPI_ISL_757520 | 12/14/2020 | 1/3/2021 Europe / Denmark / Midtjylland |
| EPI_ISL_757521 | 12/14/2020 | 1/3/2021 Europe / Denmark / Hovedstaden |
| EPI_ISL_757522 | 12/14/2020 | 1/3/2021 Europe / Denmark / Midtjylland |
| EPI_ISL_757523 | 12/14/2020 | 1/3/2021 Europe / Denmark / Syddanmark  |
| EPI_ISL_757524 | 12/14/2020 | 1/3/2021 Europe / Denmark / Hovedstaden |
| EPI_ISL_757525 | 12/14/2020 | 1/3/2021 Europe / Denmark / Syddanmark  |
| EPI_ISL_757526 | 12/14/2020 | 1/3/2021 Europe / Denmark / Midtjylland |
| EPI_ISL_757527 | 12/14/2020 | 1/3/2021 Europe / Denmark / Hovedstaden |
| EPI_ISL_757528 | 12/14/2020 | 1/3/2021 Europe / Denmark / Midtjylland |
| EPI_ISL_757529 | 12/14/2020 | 1/3/2021 Europe / Denmark / Hovedstaden |
| EPI_ISL_757530 | 12/14/2020 | 1/3/2021 Europe / Denmark / Hovedstaden |
| EPI_ISL_757531 | 12/14/2020 | 1/3/2021 Europe / Denmark / Hovedstaden |
| EPI_ISL_757532 | 12/14/2020 | 1/3/2021 Europe / Denmark / Hovedstaden |
| EPI_ISL_757533 | 12/14/2020 | 1/3/2021 Europe / Denmark / Hovedstaden |
| EPI_ISL_757534 | 12/14/2020 | 1/3/2021 Europe / Denmark / Hovedstaden |
| EPI_ISL_757535 | 12/14/2020 | 1/3/2021 Europe / Denmark / Syddanmark  |
| EPI_ISL_757536 | 12/14/2020 | 1/3/2021 Europe / Denmark / Hovedstaden |
| EPI_ISL_757537 | 12/14/2020 | 1/3/2021 Europe / Denmark / Hovedstaden |
| EPI_ISL_757538 | 12/14/2020 | 1/3/2021 Europe / Denmark / Hovedstaden |
| EPI_ISL_757539 | 12/14/2020 | 1/3/2021 Europe / Denmark / Hovedstaden |
| EPI_ISL_757540 | 12/14/2020 | 1/3/2021 Europe / Denmark / Syddanmark  |
| EPI_ISL_757541 | 12/14/2020 | 1/3/2021 Europe / Denmark / Syddanmark  |
| EPI_ISL_757542 | 12/14/2020 | 1/3/2021 Europe / Denmark / Sjælland    |
| EPI_ISL_757543 | 12/14/2020 | 1/3/2021 Europe / Denmark / Midtjylland |
| EPI_ISL_757544 | 12/14/2020 | 1/3/2021 Europe / Denmark / Hovedstaden |
| EPI_ISL_757545 | 12/14/2020 | 1/3/2021 Europe / Denmark / Midtjylland |
| EPI_ISL_757546 | 12/14/2020 | 1/3/2021 Europe / Denmark / Syddanmark  |
| EPI_ISL_757547 | 12/14/2020 | 1/3/2021 Europe / Denmark / Hovedstaden |







|                |            |                                         |
|----------------|------------|-----------------------------------------|
| EPI_ISL_757689 | 12/7/2020  | 1/3/2021 Europe / Denmark / Syddanmark  |
| EPI_ISL_757690 | 12/7/2020  | 1/3/2021 Europe / Denmark / Hovedstaden |
| EPI_ISL_757691 | 12/7/2020  | 1/3/2021 Europe / Denmark / Hovedstaden |
| EPI_ISL_757692 | 12/7/2020  | 1/3/2021 Europe / Denmark / Hovedstaden |
| EPI_ISL_757693 | 12/7/2020  | 1/3/2021 Europe / Denmark / Hovedstaden |
| EPI_ISL_757694 | 12/7/2020  | 1/3/2021 Europe / Denmark / Hovedstaden |
| EPI_ISL_757695 | 12/7/2020  | 1/3/2021 Europe / Denmark / Hovedstaden |
| EPI_ISL_757696 | 12/7/2020  | 1/3/2021 Europe / Denmark / Hovedstaden |
| EPI_ISL_757697 | 12/7/2020  | 1/3/2021 Europe / Denmark / Hovedstaden |
| EPI_ISL_757698 | 12/7/2020  | 1/3/2021 Europe / Denmark / Hovedstaden |
| EPI_ISL_757699 | 11/30/2020 | 1/3/2021 Europe / Denmark / Hovedstaden |
| EPI_ISL_757700 | 11/2/2020  | 1/3/2021 Europe / Denmark / Hovedstaden |
| EPI_ISL_757877 | 12/21/2020 | 1/3/2021 Europe / Denmark / Sjaelland   |
| EPI_ISL_757878 | 12/21/2020 | 1/3/2021 Europe / Denmark / Midtjylland |
| EPI_ISL_757879 | 12/21/2020 | 1/3/2021 Europe / Denmark / Sjaelland   |
| EPI_ISL_757880 | 12/21/2020 | 1/3/2021 Europe / Denmark / Hovedstaden |
| EPI_ISL_757881 | 12/21/2020 | 1/3/2021 Europe / Denmark / Sjaelland   |
| EPI_ISL_757882 | 12/21/2020 | 1/3/2021 Europe / Denmark / Hovedstaden |
| EPI_ISL_757883 | 12/21/2020 | 1/3/2021 Europe / Denmark / Midtjylland |
| EPI_ISL_757884 | 12/21/2020 | 1/3/2021 Europe / Denmark / Sjaelland   |
| EPI_ISL_757885 | 12/21/2020 | 1/3/2021 Europe / Denmark / Sjaelland   |
| EPI_ISL_757886 | 12/21/2020 | 1/3/2021 Europe / Denmark / Nordjylland |
| EPI_ISL_757887 | 12/14/2020 | 1/3/2021 Europe / Denmark / Sjaelland   |
| EPI_ISL_757888 | 12/14/2020 | 1/3/2021 Europe / Denmark / Hovedstaden |
| EPI_ISL_757889 | 12/14/2020 | 1/3/2021 Europe / Denmark / Syddanmark  |
| EPI_ISL_757890 | 12/14/2020 | 1/3/2021 Europe / Denmark               |
| EPI_ISL_757891 | 12/21/2020 | 1/3/2021 Europe / Denmark / Sjaelland   |
| EPI_ISL_757892 | 12/21/2020 | 1/3/2021 Europe / Denmark / Nordjylland |
| EPI_ISL_757893 | 12/14/2020 | 1/3/2021 Europe / Denmark / Hovedstaden |
| EPI_ISL_757894 | 12/14/2020 | 1/3/2021 Europe / Denmark / Hovedstaden |
| EPI_ISL_757895 | 12/14/2020 | 1/3/2021 Europe / Denmark / Hovedstaden |
| EPI_ISL_757896 | 12/21/2020 | 1/3/2021 Europe / Denmark / Midtjylland |
| EPI_ISL_757897 | 12/21/2020 | 1/3/2021 Europe / Denmark / Hovedstaden |
| EPI_ISL_757898 | 12/21/2020 | 1/3/2021 Europe / Denmark / Syddanmark  |
| EPI_ISL_757899 | 12/21/2020 | 1/3/2021 Europe / Denmark / Syddanmark  |
| EPI_ISL_757900 | 12/21/2020 | 1/3/2021 Europe / Denmark               |
| EPI_ISL_757901 | 12/21/2020 | 1/3/2021 Europe / Denmark / Hovedstaden |
| EPI_ISL_757902 | 12/21/2020 | 1/3/2021 Europe / Denmark / Syddanmark  |
| EPI_ISL_757903 | 12/21/2020 | 1/3/2021 Europe / Denmark / Midtjylland |
| EPI_ISL_757904 | 12/21/2020 | 1/3/2021 Europe / Denmark / Hovedstaden |
| EPI_ISL_757905 | 12/21/2020 | 1/3/2021 Europe / Denmark / Hovedstaden |
| EPI_ISL_757906 | 12/21/2020 | 1/3/2021 Europe / Denmark / Sjaelland   |
| EPI_ISL_757907 | 12/21/2020 | 1/3/2021 Europe / Denmark / Midtjylland |
| EPI_ISL_757908 | 12/21/2020 | 1/3/2021 Europe / Denmark / Midtjylland |
| EPI_ISL_757909 | 12/21/2020 | 1/3/2021 Europe / Denmark / Midtjylland |
| EPI_ISL_757910 | 12/21/2020 | 1/3/2021 Europe / Denmark / Hovedstaden |
| EPI_ISL_757911 | 12/21/2020 | 1/3/2021 Europe / Denmark / Hovedstaden |

|                |            |                                         |
|----------------|------------|-----------------------------------------|
| EPI_ISL_757912 | 12/21/2020 | 1/3/2021 Europe / Denmark / Nordjylland |
| EPI_ISL_757913 | 12/21/2020 | 1/3/2021 Europe / Denmark / Midtjylland |
| EPI_ISL_757914 | 12/21/2020 | 1/3/2021 Europe / Denmark / Sjælland    |
| EPI_ISL_757915 | 12/21/2020 | 1/3/2021 Europe / Denmark / Midtjylland |
| EPI_ISL_757916 | 12/21/2020 | 1/3/2021 Europe / Denmark / Syddanmark  |
| EPI_ISL_757917 | 12/21/2020 | 1/3/2021 Europe / Denmark / Syddanmark  |
| EPI_ISL_757918 | 12/21/2020 | 1/3/2021 Europe / Denmark / Midtjylland |
| EPI_ISL_757919 | 12/21/2020 | 1/3/2021 Europe / Denmark / Syddanmark  |
| EPI_ISL_757920 | 12/21/2020 | 1/3/2021 Europe / Denmark / Hovedstaden |
| EPI_ISL_757921 | 12/21/2020 | 1/3/2021 Europe / Denmark / Syddanmark  |
| EPI_ISL_757922 | 12/21/2020 | 1/3/2021 Europe / Denmark / Hovedstaden |
| EPI_ISL_757923 | 12/21/2020 | 1/3/2021 Europe / Denmark / Syddanmark  |
| EPI_ISL_757924 | 12/21/2020 | 1/3/2021 Europe / Denmark / Midtjylland |
| EPI_ISL_757925 | 12/21/2020 | 1/3/2021 Europe / Denmark / Syddanmark  |
| EPI_ISL_757926 | 12/21/2020 | 1/3/2021 Europe / Denmark / Nordjylland |
| EPI_ISL_757927 | 12/14/2020 | 1/3/2021 Europe / Denmark / Midtjylland |
| EPI_ISL_757928 | 12/14/2020 | 1/3/2021 Europe / Denmark / Syddanmark  |
| EPI_ISL_757929 | 12/14/2020 | 1/3/2021 Europe / Denmark / Syddanmark  |
| EPI_ISL_757930 | 12/14/2020 | 1/3/2021 Europe / Denmark / Syddanmark  |
| EPI_ISL_757931 | 12/14/2020 | 1/3/2021 Europe / Denmark / Syddanmark  |
| EPI_ISL_757932 | 12/14/2020 | 1/3/2021 Europe / Denmark / Syddanmark  |
| EPI_ISL_757933 | 12/14/2020 | 1/3/2021 Europe / Denmark / Midtjylland |
| EPI_ISL_757934 | 12/14/2020 | 1/3/2021 Europe / Denmark / Midtjylland |
| EPI_ISL_757935 | 12/14/2020 | 1/3/2021 Europe / Denmark / Midtjylland |
| EPI_ISL_757936 | 12/14/2020 | 1/3/2021 Europe / Denmark / Midtjylland |
| EPI_ISL_757937 | 12/14/2020 | 1/3/2021 Europe / Denmark / Syddanmark  |
| EPI_ISL_757938 | 12/14/2020 | 1/3/2021 Europe / Denmark / Syddanmark  |
| EPI_ISL_757939 | 12/14/2020 | 1/3/2021 Europe / Denmark / Midtjylland |
| EPI_ISL_757940 | 12/14/2020 | 1/3/2021 Europe / Denmark / Hovedstaden |
| EPI_ISL_757941 | 12/14/2020 | 1/3/2021 Europe / Denmark / Nordjylland |
| EPI_ISL_757942 | 12/14/2020 | 1/3/2021 Europe / Denmark / Sjælland    |
| EPI_ISL_757943 | 12/14/2020 | 1/3/2021 Europe / Denmark / Syddanmark  |
| EPI_ISL_757944 | 12/14/2020 | 1/3/2021 Europe / Denmark / Midtjylland |
| EPI_ISL_757960 | 12/21/2020 | 1/3/2021 Europe / Denmark / Hovedstaden |
| EPI_ISL_757961 | 12/21/2020 | 1/3/2021 Europe / Denmark / Hovedstaden |
| EPI_ISL_757962 | 12/21/2020 | 1/3/2021 Europe / Denmark / Hovedstaden |
| EPI_ISL_757963 | 12/21/2020 | 1/3/2021 Europe / Denmark / Syddanmark  |
| EPI_ISL_757964 | 12/21/2020 | 1/3/2021 Europe / Denmark / Syddanmark  |
| EPI_ISL_757965 | 12/21/2020 | 1/3/2021 Europe / Denmark / Nordjylland |
| EPI_ISL_757966 | 12/21/2020 | 1/3/2021 Europe / Denmark / Syddanmark  |
| EPI_ISL_757967 | 12/14/2020 | 1/3/2021 Europe / Denmark / Syddanmark  |
| EPI_ISL_757968 | 12/14/2020 | 1/3/2021 Europe / Denmark / Syddanmark  |
| EPI_ISL_757969 | 12/14/2020 | 1/3/2021 Europe / Denmark / Syddanmark  |
| EPI_ISL_757970 | 12/14/2020 | 1/3/2021 Europe / Denmark / Midtjylland |
| EPI_ISL_757971 | 12/14/2020 | 1/3/2021 Europe / Denmark / Syddanmark  |
| EPI_ISL_757972 | 12/14/2020 | 1/3/2021 Europe / Denmark / Syddanmark  |
| EPI_ISL_757973 | 12/14/2020 | 1/3/2021 Europe / Denmark / Syddanmark  |

|                |            |                                         |
|----------------|------------|-----------------------------------------|
| EPI_ISL_757975 | 12/21/2020 | 1/3/2021 Europe / Denmark / Hovedstaden |
| EPI_ISL_757976 | 12/21/2020 | 1/3/2021 Europe / Denmark / Syddanmark  |
| EPI_ISL_757977 | 12/21/2020 | 1/3/2021 Europe / Denmark / Sjælland    |
| EPI_ISL_757978 | 12/21/2020 | 1/3/2021 Europe / Denmark / Sjælland    |
| EPI_ISL_757979 | 12/21/2020 | 1/3/2021 Europe / Denmark / Hovedstaden |
| EPI_ISL_757980 | 12/21/2020 | 1/3/2021 Europe / Denmark / Hovedstaden |
| EPI_ISL_757981 | 12/21/2020 | 1/3/2021 Europe / Denmark / Hovedstaden |
| EPI_ISL_757982 | 12/21/2020 | 1/3/2021 Europe / Denmark / Hovedstaden |
| EPI_ISL_757983 | 12/21/2020 | 1/3/2021 Europe / Denmark / Syddanmark  |
| EPI_ISL_757984 | 12/21/2020 | 1/3/2021 Europe / Denmark / Nordjylland |
| EPI_ISL_757985 | 12/21/2020 | 1/3/2021 Europe / Denmark / Hovedstaden |
| EPI_ISL_757986 | 12/21/2020 | 1/3/2021 Europe / Denmark / Midtjylland |
| EPI_ISL_757987 | 12/21/2020 | 1/3/2021 Europe / Denmark / Syddanmark  |
| EPI_ISL_757988 | 12/21/2020 | 1/3/2021 Europe / Denmark / Hovedstaden |
| EPI_ISL_757989 | 12/21/2020 | 1/3/2021 Europe / Denmark / Hovedstaden |
| EPI_ISL_757990 | 12/21/2020 | 1/3/2021 Europe / Denmark / Syddanmark  |
| EPI_ISL_757991 | 12/21/2020 | 1/3/2021 Europe / Denmark / Hovedstaden |
| EPI_ISL_757992 | 12/21/2020 | 1/3/2021 Europe / Denmark / Hovedstaden |
| EPI_ISL_757993 | 12/21/2020 | 1/3/2021 Europe / Denmark / Hovedstaden |
| EPI_ISL_757994 | 12/21/2020 | 1/3/2021 Europe / Denmark / Sjælland    |
| EPI_ISL_757995 | 12/21/2020 | 1/3/2021 Europe / Denmark / Sjælland    |
| EPI_ISL_757996 | 12/21/2020 | 1/3/2021 Europe / Denmark / Hovedstaden |
| EPI_ISL_757997 | 12/21/2020 | 1/3/2021 Europe / Denmark / Hovedstaden |
| EPI_ISL_757998 | 12/21/2020 | 1/3/2021 Europe / Denmark / Hovedstaden |
| EPI_ISL_757999 | 12/21/2020 | 1/3/2021 Europe / Denmark / Hovedstaden |
| EPI_ISL_758000 | 12/21/2020 | 1/3/2021 Europe / Denmark / Sjælland    |
| EPI_ISL_758001 | 12/21/2020 | 1/3/2021 Europe / Denmark / Hovedstaden |
| EPI_ISL_758002 | 12/21/2020 | 1/3/2021 Europe / Denmark / Syddanmark  |
| EPI_ISL_758003 | 12/21/2020 | 1/3/2021 Europe / Denmark / Hovedstaden |
| EPI_ISL_758004 | 12/21/2020 | 1/3/2021 Europe / Denmark / Hovedstaden |
| EPI_ISL_758005 | 12/21/2020 | 1/3/2021 Europe / Denmark / Hovedstaden |
| EPI_ISL_758006 | 12/21/2020 | 1/3/2021 Europe / Denmark / Syddanmark  |
| EPI_ISL_758007 | 12/21/2020 | 1/3/2021 Europe / Denmark / Hovedstaden |
| EPI_ISL_758008 | 12/21/2020 | 1/3/2021 Europe / Denmark / Nordjylland |
| EPI_ISL_758009 | 12/21/2020 | 1/3/2021 Europe / Denmark / Sjælland    |
| EPI_ISL_758010 | 12/21/2020 | 1/3/2021 Europe / Denmark / Hovedstaden |
| EPI_ISL_758011 | 12/21/2020 | 1/3/2021 Europe / Denmark / Hovedstaden |
| EPI_ISL_758012 | 12/21/2020 | 1/3/2021 Europe / Denmark / Hovedstaden |
| EPI_ISL_758013 | 12/21/2020 | 1/3/2021 Europe / Denmark / Hovedstaden |
| EPI_ISL_758014 | 12/21/2020 | 1/3/2021 Europe / Denmark / Hovedstaden |
| EPI_ISL_758015 | 12/21/2020 | 1/3/2021 Europe / Denmark / Hovedstaden |
| EPI_ISL_758016 | 12/21/2020 | 1/3/2021 Europe / Denmark / Sjælland    |
| EPI_ISL_758017 | 12/21/2020 | 1/3/2021 Europe / Denmark / Hovedstaden |
| EPI_ISL_758018 | 12/21/2020 | 1/3/2021 Europe / Denmark / Hovedstaden |
| EPI_ISL_758019 | 12/21/2020 | 1/3/2021 Europe / Denmark / Hovedstaden |
| EPI_ISL_758020 | 12/21/2020 | 1/3/2021 Europe / Denmark / Hovedstaden |
| EPI_ISL_758021 | 12/21/2020 | 1/3/2021 Europe / Denmark / Hovedstaden |

|                |            |                                         |
|----------------|------------|-----------------------------------------|
| EPI_ISL_758022 | 12/21/2020 | 1/3/2021 Europe / Denmark / Sjaelland   |
| EPI_ISL_758023 | 12/21/2020 | 1/3/2021 Europe / Denmark / Hovedstaden |
| EPI_ISL_758024 | 12/21/2020 | 1/3/2021 Europe / Denmark / Sjaelland   |
| EPI_ISL_758025 | 12/21/2020 | 1/3/2021 Europe / Denmark / Hovedstaden |
| EPI_ISL_758026 | 12/14/2020 | 1/3/2021 Europe / Denmark / Hovedstaden |
| EPI_ISL_758027 | 12/14/2020 | 1/3/2021 Europe / Denmark / Sjaelland   |
| EPI_ISL_758028 | 12/14/2020 | 1/3/2021 Europe / Denmark / Hovedstaden |
| EPI_ISL_758029 | 12/14/2020 | 1/3/2021 Europe / Denmark / Sjaelland   |
| EPI_ISL_758030 | 12/14/2020 | 1/3/2021 Europe / Denmark / Sjaelland   |
| EPI_ISL_758031 | 12/14/2020 | 1/3/2021 Europe / Denmark / Nordjylland |
| EPI_ISL_758032 | 12/14/2020 | 1/3/2021 Europe / Denmark / Sjaelland   |
| EPI_ISL_758033 | 12/14/2020 | 1/3/2021 Europe / Denmark / Sjaelland   |
| EPI_ISL_758034 | 12/14/2020 | 1/3/2021 Europe / Denmark / Sjaelland   |
| EPI_ISL_758035 | 12/14/2020 | 1/3/2021 Europe / Denmark / Hovedstaden |
| EPI_ISL_758036 | 12/14/2020 | 1/3/2021 Europe / Denmark / Hovedstaden |
| EPI_ISL_758037 | 12/14/2020 | 1/3/2021 Europe / Denmark / Sjaelland   |
| EPI_ISL_758038 | 12/14/2020 | 1/3/2021 Europe / Denmark / Hovedstaden |
| EPI_ISL_758039 | 12/14/2020 | 1/3/2021 Europe / Denmark / Hovedstaden |
| EPI_ISL_758040 | 12/14/2020 | 1/3/2021 Europe / Denmark / Sjaelland   |
| EPI_ISL_758041 | 12/14/2020 | 1/3/2021 Europe / Denmark / Hovedstaden |
| EPI_ISL_758042 | 12/14/2020 | 1/3/2021 Europe / Denmark / Hovedstaden |
| EPI_ISL_758043 | 12/14/2020 | 1/3/2021 Europe / Denmark / Sjaelland   |
| EPI_ISL_758044 | 12/14/2020 | 1/3/2021 Europe / Denmark / Midtjylland |
| EPI_ISL_758045 | 12/14/2020 | 1/3/2021 Europe / Denmark / Hovedstaden |
| EPI_ISL_758046 | 12/14/2020 | 1/3/2021 Europe / Denmark / Hovedstaden |
| EPI_ISL_758047 | 12/14/2020 | 1/3/2021 Europe / Denmark / Hovedstaden |
| EPI_ISL_758048 | 12/14/2020 | 1/3/2021 Europe / Denmark / Syddanmark  |
| EPI_ISL_758049 | 12/14/2020 | 1/3/2021 Europe / Denmark / Hovedstaden |
| EPI_ISL_758050 | 12/14/2020 | 1/3/2021 Europe / Denmark / Hovedstaden |
| EPI_ISL_758051 | 12/14/2020 | 1/3/2021 Europe / Denmark / Hovedstaden |
| EPI_ISL_758052 | 12/14/2020 | 1/3/2021 Europe / Denmark / Nordjylland |
| EPI_ISL_758053 | 12/14/2020 | 1/3/2021 Europe / Denmark / Hovedstaden |
| EPI_ISL_758054 | 12/14/2020 | 1/3/2021 Europe / Denmark / Syddanmark  |
| EPI_ISL_758055 | 12/14/2020 | 1/3/2021 Europe / Denmark / Hovedstaden |
| EPI_ISL_758056 | 12/14/2020 | 1/3/2021 Europe / Denmark / Syddanmark  |
| EPI_ISL_758057 | 12/14/2020 | 1/3/2021 Europe / Denmark / Syddanmark  |
| EPI_ISL_758058 | 12/14/2020 | 1/3/2021 Europe / Denmark / Midtjylland |
| EPI_ISL_758059 | 12/14/2020 | 1/3/2021 Europe / Denmark / Midtjylland |
| EPI_ISL_758060 | 12/14/2020 | 1/3/2021 Europe / Denmark / Sjaelland   |
| EPI_ISL_758061 | 12/14/2020 | 1/3/2021 Europe / Denmark / Hovedstaden |
| EPI_ISL_758062 | 12/14/2020 | 1/3/2021 Europe / Denmark / Hovedstaden |
| EPI_ISL_758063 | 12/14/2020 | 1/3/2021 Europe / Denmark / Hovedstaden |
| EPI_ISL_758064 | 12/14/2020 | 1/3/2021 Europe / Denmark / Hovedstaden |
| EPI_ISL_758065 | 12/14/2020 | 1/3/2021 Europe / Denmark / Hovedstaden |
| EPI_ISL_758073 | 12/21/2020 | 1/3/2021 Europe / Denmark / Hovedstaden |
| EPI_ISL_758074 | 12/21/2020 | 1/3/2021 Europe / Denmark / Syddanmark  |
| EPI_ISL_758075 | 12/21/2020 | 1/3/2021 Europe / Denmark / Hovedstaden |



|                |            |                                         |
|----------------|------------|-----------------------------------------|
| EPI_ISL_758076 | 12/21/2020 | 1/3/2021 Europe / Denmark / Syddanmark  |
| EPI_ISL_758077 | 12/21/2020 | 1/3/2021 Europe / Denmark / Syddanmark  |
| EPI_ISL_758078 | 12/21/2020 | 1/3/2021 Europe / Denmark / Hovedstaden |
| EPI_ISL_758079 | 12/21/2020 | 1/3/2021 Europe / Denmark / Syddanmark  |
| EPI_ISL_758080 | 12/21/2020 | 1/3/2021 Europe / Denmark / Hovedstaden |
| EPI_ISL_758081 | 12/21/2020 | 1/3/2021 Europe / Denmark / Hovedstaden |
| EPI_ISL_758082 | 12/14/2020 | 1/3/2021 Europe / Denmark / Hovedstaden |
| EPI_ISL_758088 | 12/21/2020 | 1/3/2021 Europe / Denmark / Nordjylland |
| EPI_ISL_758089 | 12/21/2020 | 1/3/2021 Europe / Denmark / Nordjylland |
| EPI_ISL_758090 | 12/21/2020 | 1/3/2021 Europe / Denmark / Syddanmark  |
| EPI_ISL_758091 | 12/21/2020 | 1/3/2021 Europe / Denmark / Syddanmark  |
| EPI_ISL_758092 | 12/21/2020 | 1/3/2021 Europe / Denmark / Syddanmark  |
| EPI_ISL_758093 | 12/14/2020 | 1/3/2021 Europe / Denmark / Hovedstaden |
| EPI_ISL_758094 | 12/21/2020 | 1/3/2021 Europe / Denmark / Syddanmark  |
| EPI_ISL_758095 | 12/21/2020 | 1/3/2021 Europe / Denmark / Syddanmark  |
| EPI_ISL_758096 | 12/21/2020 | 1/3/2021 Europe / Denmark / Syddanmark  |
| EPI_ISL_758097 | 12/21/2020 | 1/3/2021 Europe / Denmark / Syddanmark  |
| EPI_ISL_758098 | 12/21/2020 | 1/3/2021 Europe / Denmark / Syddanmark  |
| EPI_ISL_758099 | 12/21/2020 | 1/3/2021 Europe / Denmark / Syddanmark  |
| EPI_ISL_758100 | 12/21/2020 | 1/3/2021 Europe / Denmark / Syddanmark  |
| EPI_ISL_758101 | 12/14/2020 | 1/3/2021 Europe / Denmark / Hovedstaden |
| EPI_ISL_758102 | 12/21/2020 | 1/3/2021 Europe / Denmark / Sjælland    |
| EPI_ISL_758103 | 12/21/2020 | 1/3/2021 Europe / Denmark / Midtjylland |
| EPI_ISL_758104 | 12/21/2020 | 1/3/2021 Europe / Denmark / Sjælland    |
| EPI_ISL_758128 | 12/21/2020 | 1/3/2021 Europe / Denmark / Hovedstaden |
| EPI_ISL_758129 | 12/21/2020 | 1/3/2021 Europe / Denmark / Nordjylland |
| EPI_ISL_758130 | 12/21/2020 | 1/3/2021 Europe / Denmark / Sjælland    |
| EPI_ISL_758131 | 12/21/2020 | 1/3/2021 Europe / Denmark / Hovedstaden |
| EPI_ISL_758132 | 12/21/2020 | 1/3/2021 Europe / Denmark / Hovedstaden |
| EPI_ISL_758133 | 12/21/2020 | 1/3/2021 Europe / Denmark / Hovedstaden |
| EPI_ISL_758134 | 12/21/2020 | 1/3/2021 Europe / Denmark / Midtjylland |
| EPI_ISL_758135 | 12/21/2020 | 1/3/2021 Europe / Denmark / Midtjylland |
| EPI_ISL_758136 | 12/21/2020 | 1/3/2021 Europe / Denmark / Hovedstaden |
| EPI_ISL_758137 | 12/21/2020 | 1/3/2021 Europe / Denmark / Nordjylland |
| EPI_ISL_758138 | 12/21/2020 | 1/3/2021 Europe / Denmark / Syddanmark  |
| EPI_ISL_758139 | 12/21/2020 | 1/3/2021 Europe / Denmark / Midtjylland |
| EPI_ISL_758140 | 12/21/2020 | 1/3/2021 Europe / Denmark / Syddanmark  |
| EPI_ISL_758141 | 12/21/2020 | 1/3/2021 Europe / Denmark / Midtjylland |
| EPI_ISL_758142 | 12/21/2020 | 1/3/2021 Europe / Denmark / Hovedstaden |
| EPI_ISL_758143 | 12/21/2020 | 1/3/2021 Europe / Denmark / Midtjylland |
| EPI_ISL_758144 | 12/21/2020 | 1/3/2021 Europe / Denmark / Hovedstaden |
| EPI_ISL_758145 | 12/21/2020 | 1/3/2021 Europe / Denmark / Midtjylland |
| EPI_ISL_758146 | 12/21/2020 | 1/3/2021 Europe / Denmark / Hovedstaden |
| EPI_ISL_758147 | 12/21/2020 | 1/3/2021 Europe / Denmark / Hovedstaden |
| EPI_ISL_758148 | 12/21/2020 | 1/3/2021 Europe / Denmark               |
| EPI_ISL_758149 | 12/21/2020 | 1/3/2021 Europe / Denmark / Midtjylland |
| EPI_ISL_758150 | 12/21/2020 | 1/3/2021 Europe / Denmark / Midtjylland |



|                |            |                                         |
|----------------|------------|-----------------------------------------|
| EPI_ISL_758198 | 12/21/2020 | 1/3/2021 Europe / Denmark / Midtjylland |
| EPI_ISL_758199 | 12/21/2020 | 1/3/2021 Europe / Denmark / Hovedstaden |
| EPI_ISL_758200 | 12/21/2020 | 1/3/2021 Europe / Denmark / Hovedstaden |
| EPI_ISL_758201 | 12/21/2020 | 1/3/2021 Europe / Denmark / Syddanmark  |
| EPI_ISL_758202 | 12/21/2020 | 1/3/2021 Europe / Denmark / Hovedstaden |
| EPI_ISL_758203 | 12/21/2020 | 1/3/2021 Europe / Denmark / Midtjylland |
| EPI_ISL_758204 | 12/21/2020 | 1/3/2021 Europe / Denmark / Hovedstaden |
| EPI_ISL_758205 | 12/21/2020 | 1/3/2021 Europe / Denmark / Midtjylland |
| EPI_ISL_758206 | 12/21/2020 | 1/3/2021 Europe / Denmark / Hovedstaden |
| EPI_ISL_758207 | 12/21/2020 | 1/3/2021 Europe / Denmark / Hovedstaden |
| EPI_ISL_758208 | 12/21/2020 | 1/3/2021 Europe / Denmark / Hovedstaden |
| EPI_ISL_758209 | 12/21/2020 | 1/3/2021 Europe / Denmark / Syddanmark  |
| EPI_ISL_758210 | 12/21/2020 | 1/3/2021 Europe / Denmark / Hovedstaden |
| EPI_ISL_758211 | 12/21/2020 | 1/3/2021 Europe / Denmark / Syddanmark  |
| EPI_ISL_758212 | 12/21/2020 | 1/3/2021 Europe / Denmark / Midtjylland |
| EPI_ISL_758213 | 12/21/2020 | 1/3/2021 Europe / Denmark / Sjælland    |
| EPI_ISL_758214 | 12/21/2020 | 1/3/2021 Europe / Denmark / Midtjylland |
| EPI_ISL_758215 | 12/21/2020 | 1/3/2021 Europe / Denmark / Hovedstaden |
| EPI_ISL_758216 | 12/21/2020 | 1/3/2021 Europe / Denmark / Nordjylland |
| EPI_ISL_758217 | 12/21/2020 | 1/3/2021 Europe / Denmark / Nordjylland |
| EPI_ISL_758218 | 12/21/2020 | 1/3/2021 Europe / Denmark / Sjælland    |
| EPI_ISL_758219 | 12/21/2020 | 1/3/2021 Europe / Denmark / Nordjylland |
| EPI_ISL_758220 | 12/21/2020 | 1/3/2021 Europe / Denmark / Syddanmark  |
| EPI_ISL_758221 | 12/21/2020 | 1/3/2021 Europe / Denmark / Hovedstaden |
| EPI_ISL_758222 | 12/21/2020 | 1/3/2021 Europe / Denmark / Hovedstaden |
| EPI_ISL_758223 | 12/21/2020 | 1/3/2021 Europe / Denmark / Midtjylland |
| EPI_ISL_758224 | 12/21/2020 | 1/3/2021 Europe / Denmark / Syddanmark  |
| EPI_ISL_758225 | 12/21/2020 | 1/3/2021 Europe / Denmark / Hovedstaden |
| EPI_ISL_758226 | 12/21/2020 | 1/3/2021 Europe / Denmark               |
| EPI_ISL_758227 | 12/21/2020 | 1/3/2021 Europe / Denmark / Sjælland    |
| EPI_ISL_758228 | 12/21/2020 | 1/3/2021 Europe / Denmark / Hovedstaden |
| EPI_ISL_758229 | 12/21/2020 | 1/3/2021 Europe / Denmark / Midtjylland |
| EPI_ISL_758230 | 12/21/2020 | 1/3/2021 Europe / Denmark / Hovedstaden |
| EPI_ISL_758231 | 12/21/2020 | 1/3/2021 Europe / Denmark / Hovedstaden |
| EPI_ISL_758232 | 12/21/2020 | 1/3/2021 Europe / Denmark / Hovedstaden |
| EPI_ISL_758233 | 12/21/2020 | 1/3/2021 Europe / Denmark / Hovedstaden |
| EPI_ISL_758234 | 12/21/2020 | 1/3/2021 Europe / Denmark / Hovedstaden |
| EPI_ISL_758235 | 12/21/2020 | 1/3/2021 Europe / Denmark / Syddanmark  |
| EPI_ISL_758236 | 12/21/2020 | 1/3/2021 Europe / Denmark / Nordjylland |
| EPI_ISL_758237 | 12/21/2020 | 1/3/2021 Europe / Denmark / Hovedstaden |
| EPI_ISL_758238 | 12/21/2020 | 1/3/2021 Europe / Denmark / Hovedstaden |
| EPI_ISL_758239 | 12/21/2020 | 1/3/2021 Europe / Denmark / Hovedstaden |
| EPI_ISL_758240 | 12/21/2020 | 1/3/2021 Europe / Denmark / Midtjylland |
| EPI_ISL_758241 | 12/21/2020 | 1/3/2021 Europe / Denmark / Hovedstaden |
| EPI_ISL_758242 | 12/21/2020 | 1/3/2021 Europe / Denmark / Hovedstaden |
| EPI_ISL_758243 | 12/21/2020 | 1/3/2021 Europe / Denmark / Hovedstaden |
| EPI_ISL_758244 | 12/21/2020 | 1/3/2021 Europe / Denmark / Syddanmark  |

|                |            |                                         |
|----------------|------------|-----------------------------------------|
| EPI_ISL_758245 | 12/21/2020 | 1/3/2021 Europe / Denmark / Midtjylland |
| EPI_ISL_758246 | 12/21/2020 | 1/3/2021 Europe / Denmark / Hovedstaden |
| EPI_ISL_758247 | 12/21/2020 | 1/3/2021 Europe / Denmark / Hovedstaden |
| EPI_ISL_758248 | 12/21/2020 | 1/3/2021 Europe / Denmark / Hovedstaden |
| EPI_ISL_758249 | 12/21/2020 | 1/3/2021 Europe / Denmark / Hovedstaden |
| EPI_ISL_758250 | 12/21/2020 | 1/3/2021 Europe / Denmark / Hovedstaden |
| EPI_ISL_758251 | 12/21/2020 | 1/3/2021 Europe / Denmark / Syddanmark  |
| EPI_ISL_758252 | 12/21/2020 | 1/3/2021 Europe / Denmark / Sjælland    |
| EPI_ISL_758253 | 12/21/2020 | 1/3/2021 Europe / Denmark / Syddanmark  |
| EPI_ISL_758254 | 12/21/2020 | 1/3/2021 Europe / Denmark / Hovedstaden |
| EPI_ISL_758255 | 12/21/2020 | 1/3/2021 Europe / Denmark / Sjælland    |
| EPI_ISL_758256 | 12/21/2020 | 1/3/2021 Europe / Denmark / Hovedstaden |
| EPI_ISL_758257 | 12/21/2020 | 1/3/2021 Europe / Denmark / Hovedstaden |
| EPI_ISL_758258 | 12/21/2020 | 1/3/2021 Europe / Denmark / Hovedstaden |
| EPI_ISL_758259 | 12/21/2020 | 1/3/2021 Europe / Denmark / Midtjylland |
| EPI_ISL_758260 | 12/21/2020 | 1/3/2021 Europe / Denmark / Syddanmark  |
| EPI_ISL_758261 | 12/21/2020 | 1/3/2021 Europe / Denmark / Hovedstaden |
| EPI_ISL_758262 | 12/21/2020 | 1/3/2021 Europe / Denmark / Hovedstaden |
| EPI_ISL_758263 | 12/21/2020 | 1/3/2021 Europe / Denmark / Sjælland    |
| EPI_ISL_758264 | 12/21/2020 | 1/3/2021 Europe / Denmark / Midtjylland |
| EPI_ISL_758265 | 12/21/2020 | 1/3/2021 Europe / Denmark / Hovedstaden |
| EPI_ISL_758266 | 12/21/2020 | 1/3/2021 Europe / Denmark / Midtjylland |
| EPI_ISL_758267 | 12/21/2020 | 1/3/2021 Europe / Denmark / Nordjylland |
| EPI_ISL_758268 | 12/21/2020 | 1/3/2021 Europe / Denmark / Hovedstaden |
| EPI_ISL_758269 | 12/21/2020 | 1/3/2021 Europe / Denmark               |
| EPI_ISL_758270 | 12/21/2020 | 1/3/2021 Europe / Denmark / Midtjylland |
| EPI_ISL_758271 | 12/21/2020 | 1/3/2021 Europe / Denmark / Hovedstaden |
| EPI_ISL_758272 | 12/21/2020 | 1/3/2021 Europe / Denmark / Hovedstaden |
| EPI_ISL_758273 | 12/21/2020 | 1/3/2021 Europe / Denmark / Hovedstaden |
| EPI_ISL_758274 | 12/21/2020 | 1/3/2021 Europe / Denmark / Hovedstaden |
| EPI_ISL_758275 | 12/21/2020 | 1/3/2021 Europe / Denmark / Nordjylland |
| EPI_ISL_758276 | 12/21/2020 | 1/3/2021 Europe / Denmark / Hovedstaden |
| EPI_ISL_758277 | 12/21/2020 | 1/3/2021 Europe / Denmark / Sjælland    |
| EPI_ISL_758278 | 12/21/2020 | 1/3/2021 Europe / Denmark / Hovedstaden |
| EPI_ISL_758279 | 12/21/2020 | 1/3/2021 Europe / Denmark / Sjælland    |
| EPI_ISL_758280 | 12/21/2020 | 1/3/2021 Europe / Denmark / Sjælland    |
| EPI_ISL_758281 | 12/21/2020 | 1/3/2021 Europe / Denmark / Midtjylland |
| EPI_ISL_758282 | 12/21/2020 | 1/3/2021 Europe / Denmark / Sjælland    |
| EPI_ISL_758283 | 12/21/2020 | 1/3/2021 Europe / Denmark / Hovedstaden |
| EPI_ISL_758284 | 12/21/2020 | 1/3/2021 Europe / Denmark / Midtjylland |
| EPI_ISL_758285 | 12/21/2020 | 1/3/2021 Europe / Denmark / Hovedstaden |
| EPI_ISL_758286 | 12/21/2020 | 1/3/2021 Europe / Denmark / Hovedstaden |
| EPI_ISL_758287 | 12/21/2020 | 1/3/2021 Europe / Denmark / Hovedstaden |
| EPI_ISL_758288 | 12/21/2020 | 1/3/2021 Europe / Denmark / Nordjylland |
| EPI_ISL_758289 | 12/21/2020 | 1/3/2021 Europe / Denmark / Hovedstaden |
| EPI_ISL_758290 | 12/21/2020 | 1/3/2021 Europe / Denmark / Syddanmark  |
| EPI_ISL_758291 | 12/21/2020 | 1/3/2021 Europe / Denmark / Hovedstaden |



















|                |            |                                         |
|----------------|------------|-----------------------------------------|
| EPI_ISL_758668 | 12/14/2020 | 1/3/2021 Europe / Denmark / Hovedstaden |
| EPI_ISL_758669 | 12/14/2020 | 1/3/2021 Europe / Denmark / Hovedstaden |
| EPI_ISL_758670 | 12/14/2020 | 1/3/2021 Europe / Denmark / Sjælland    |
| EPI_ISL_758671 | 12/14/2020 | 1/3/2021 Europe / Denmark / Syddanmark  |
| EPI_ISL_758672 | 12/14/2020 | 1/3/2021 Europe / Denmark / Midtjylland |
| EPI_ISL_758673 | 12/14/2020 | 1/3/2021 Europe / Denmark / Sjælland    |
| EPI_ISL_758674 | 12/14/2020 | 1/3/2021 Europe / Denmark / Midtjylland |
| EPI_ISL_758675 | 12/14/2020 | 1/3/2021 Europe / Denmark / Sjælland    |
| EPI_ISL_758676 | 12/14/2020 | 1/3/2021 Europe / Denmark / Hovedstaden |
| EPI_ISL_758677 | 12/14/2020 | 1/3/2021 Europe / Denmark / Sjælland    |
| EPI_ISL_758678 | 12/14/2020 | 1/3/2021 Europe / Denmark / Hovedstaden |
| EPI_ISL_758679 | 12/14/2020 | 1/3/2021 Europe / Denmark / Syddanmark  |
| EPI_ISL_758680 | 12/14/2020 | 1/3/2021 Europe / Denmark / Hovedstaden |
| EPI_ISL_758681 | 12/14/2020 | 1/3/2021 Europe / Denmark / Hovedstaden |
| EPI_ISL_758682 | 12/14/2020 | 1/3/2021 Europe / Denmark / Midtjylland |
| EPI_ISL_758683 | 12/14/2020 | 1/3/2021 Europe / Denmark / Nordjylland |
| EPI_ISL_758684 | 12/14/2020 | 1/3/2021 Europe / Denmark / Sjælland    |
| EPI_ISL_758685 | 12/14/2020 | 1/3/2021 Europe / Denmark / Hovedstaden |
| EPI_ISL_758686 | 12/14/2020 | 1/3/2021 Europe / Denmark / Midtjylland |
| EPI_ISL_758687 | 12/14/2020 | 1/3/2021 Europe / Denmark / Sjælland    |
| EPI_ISL_758688 | 12/14/2020 | 1/3/2021 Europe / Denmark / Nordjylland |
| EPI_ISL_758689 | 12/14/2020 | 1/3/2021 Europe / Denmark / Hovedstaden |
| EPI_ISL_758690 | 12/14/2020 | 1/3/2021 Europe / Denmark / Hovedstaden |
| EPI_ISL_758691 | 12/14/2020 | 1/3/2021 Europe / Denmark / Midtjylland |
| EPI_ISL_758692 | 12/14/2020 | 1/3/2021 Europe / Denmark / Midtjylland |
| EPI_ISL_758693 | 12/14/2020 | 1/3/2021 Europe / Denmark / Sjælland    |
| EPI_ISL_758694 | 12/14/2020 | 1/3/2021 Europe / Denmark / Hovedstaden |
| EPI_ISL_758695 | 12/14/2020 | 1/3/2021 Europe / Denmark / Hovedstaden |
| EPI_ISL_758696 | 12/14/2020 | 1/3/2021 Europe / Denmark / Midtjylland |
| EPI_ISL_758697 | 12/14/2020 | 1/3/2021 Europe / Denmark / Hovedstaden |
| EPI_ISL_758698 | 12/14/2020 | 1/3/2021 Europe / Denmark / Hovedstaden |
| EPI_ISL_758699 | 12/14/2020 | 1/3/2021 Europe / Denmark / Hovedstaden |
| EPI_ISL_758700 | 12/14/2020 | 1/3/2021 Europe / Denmark / Midtjylland |
| EPI_ISL_758869 | 12/21/2020 | 1/3/2021 Europe / Denmark / Nordjylland |
| EPI_ISL_758870 | 12/21/2020 | 1/3/2021 Europe / Denmark / Nordjylland |
| EPI_ISL_758871 | 12/21/2020 | 1/3/2021 Europe / Denmark / Hovedstaden |
| EPI_ISL_758872 | 12/21/2020 | 1/3/2021 Europe / Denmark / Midtjylland |
| EPI_ISL_758873 | 12/21/2020 | 1/3/2021 Europe / Denmark / Hovedstaden |
| EPI_ISL_758874 | 12/21/2020 | 1/3/2021 Europe / Denmark / Hovedstaden |
| EPI_ISL_758875 | 12/21/2020 | 1/3/2021 Europe / Denmark / Sjælland    |
| EPI_ISL_758876 | 12/21/2020 | 1/3/2021 Europe / Denmark / Nordjylland |
| EPI_ISL_758877 | 12/21/2020 | 1/3/2021 Europe / Denmark / Nordjylland |
| EPI_ISL_758878 | 12/21/2020 | 1/3/2021 Europe / Denmark / Midtjylland |
| EPI_ISL_758879 | 12/21/2020 | 1/3/2021 Europe / Denmark / Midtjylland |
| EPI_ISL_758880 | 12/21/2020 | 1/3/2021 Europe / Denmark / Nordjylland |
| EPI_ISL_758881 | 12/21/2020 | 1/3/2021 Europe / Denmark / Nordjylland |
| EPI_ISL_758882 | 12/21/2020 | 1/3/2021 Europe / Denmark / Sjælland    |

|                |            |                                         |
|----------------|------------|-----------------------------------------|
| EPI_ISL_758883 | 12/21/2020 | 1/3/2021 Europe / Denmark / Sjaelland   |
| EPI_ISL_758884 | 12/21/2020 | 1/3/2021 Europe / Denmark / Nordjylland |
| EPI_ISL_758885 | 12/21/2020 | 1/3/2021 Europe / Denmark / Hovedstaden |
| EPI_ISL_758886 | 12/21/2020 | 1/3/2021 Europe / Denmark / Sjaelland   |
| EPI_ISL_758887 | 12/21/2020 | 1/3/2021 Europe / Denmark / Nordjylland |
| EPI_ISL_758888 | 12/21/2020 | 1/3/2021 Europe / Denmark / Syddanmark  |
| EPI_ISL_758889 | 12/21/2020 | 1/3/2021 Europe / Denmark / Hovedstaden |
| EPI_ISL_758890 | 12/21/2020 | 1/3/2021 Europe / Denmark / Nordjylland |
| EPI_ISL_758891 | 12/21/2020 | 1/3/2021 Europe / Denmark / Hovedstaden |
| EPI_ISL_758892 | 12/21/2020 | 1/3/2021 Europe / Denmark / Syddanmark  |
| EPI_ISL_758893 | 12/21/2020 | 1/3/2021 Europe / Denmark / Syddanmark  |
| EPI_ISL_758894 | 12/21/2020 | 1/3/2021 Europe / Denmark / Syddanmark  |
| EPI_ISL_758895 | 12/21/2020 | 1/3/2021 Europe / Denmark / Syddanmark  |
| EPI_ISL_758896 | 12/21/2020 | 1/3/2021 Europe / Denmark / Syddanmark  |
| EPI_ISL_758897 | 12/21/2020 | 1/3/2021 Europe / Denmark / Midtjylland |
| EPI_ISL_758898 | 12/21/2020 | 1/3/2021 Europe / Denmark / Midtjylland |
| EPI_ISL_758899 | 12/21/2020 | 1/3/2021 Europe / Denmark / Midtjylland |
| EPI_ISL_758900 | 12/21/2020 | 1/3/2021 Europe / Denmark / Syddanmark  |
| EPI_ISL_758901 | 12/21/2020 | 1/3/2021 Europe / Denmark / Hovedstaden |
| EPI_ISL_758902 | 12/21/2020 | 1/3/2021 Europe / Denmark / Syddanmark  |
| EPI_ISL_758903 | 12/21/2020 | 1/3/2021 Europe / Denmark / Syddanmark  |
| EPI_ISL_758904 | 12/21/2020 | 1/3/2021 Europe / Denmark / Hovedstaden |
| EPI_ISL_758905 | 12/21/2020 | 1/3/2021 Europe / Denmark / Midtjylland |
| EPI_ISL_758906 | 12/21/2020 | 1/3/2021 Europe / Denmark / Midtjylland |
| EPI_ISL_758907 | 12/21/2020 | 1/3/2021 Europe / Denmark / Syddanmark  |
| EPI_ISL_758908 | 12/21/2020 | 1/3/2021 Europe / Denmark / Nordjylland |
| EPI_ISL_758909 | 12/21/2020 | 1/3/2021 Europe / Denmark / Midtjylland |
| EPI_ISL_758910 | 12/21/2020 | 1/3/2021 Europe / Denmark / Sjaelland   |
| EPI_ISL_758911 | 12/21/2020 | 1/3/2021 Europe / Denmark / Syddanmark  |
| EPI_ISL_758912 | 12/21/2020 | 1/3/2021 Europe / Denmark / Syddanmark  |
| EPI_ISL_758913 | 12/21/2020 | 1/3/2021 Europe / Denmark / Midtjylland |
| EPI_ISL_758914 | 12/21/2020 | 1/3/2021 Europe / Denmark / Midtjylland |
| EPI_ISL_758915 | 12/21/2020 | 1/3/2021 Europe / Denmark / Syddanmark  |
| EPI_ISL_758916 | 12/21/2020 | 1/3/2021 Europe / Denmark / Midtjylland |
| EPI_ISL_758917 | 12/21/2020 | 1/3/2021 Europe / Denmark / Midtjylland |
| EPI_ISL_758918 | 12/21/2020 | 1/3/2021 Europe / Denmark / Nordjylland |
| EPI_ISL_758919 | 12/21/2020 | 1/3/2021 Europe / Denmark / Sjaelland   |
| EPI_ISL_758920 | 12/21/2020 | 1/3/2021 Europe / Denmark / Hovedstaden |
| EPI_ISL_758921 | 12/21/2020 | 1/3/2021 Europe / Denmark / Nordjylland |
| EPI_ISL_758922 | 12/21/2020 | 1/3/2021 Europe / Denmark / Syddanmark  |
| EPI_ISL_758923 | 12/21/2020 | 1/3/2021 Europe / Denmark / Midtjylland |
| EPI_ISL_758924 | 12/21/2020 | 1/3/2021 Europe / Denmark / Syddanmark  |
| EPI_ISL_758925 | 12/21/2020 | 1/3/2021 Europe / Denmark / Syddanmark  |
| EPI_ISL_758926 | 12/21/2020 | 1/3/2021 Europe / Denmark / Hovedstaden |
| EPI_ISL_758927 | 12/21/2020 | 1/3/2021 Europe / Denmark / Syddanmark  |
| EPI_ISL_758928 | 12/21/2020 | 1/3/2021 Europe / Denmark / Nordjylland |
| EPI_ISL_758929 | 12/21/2020 | 1/3/2021 Europe / Denmark / Hovedstaden |

|                |            |                                         |
|----------------|------------|-----------------------------------------|
| EPI_ISL_758930 | 12/21/2020 | 1/3/2021 Europe / Denmark / Hovedstaden |
| EPI_ISL_758931 | 12/21/2020 | 1/3/2021 Europe / Denmark / Midtjylland |
| EPI_ISL_758932 | 12/21/2020 | 1/3/2021 Europe / Denmark / Hovedstaden |
| EPI_ISL_758933 | 12/21/2020 | 1/3/2021 Europe / Denmark / Syddanmark  |
| EPI_ISL_758934 | 12/21/2020 | 1/3/2021 Europe / Denmark / Syddanmark  |
| EPI_ISL_758935 | 12/21/2020 | 1/3/2021 Europe / Denmark               |
| EPI_ISL_758936 | 12/21/2020 | 1/3/2021 Europe / Denmark / Sjaelland   |
| EPI_ISL_758937 | 12/21/2020 | 1/3/2021 Europe / Denmark / Syddanmark  |
| EPI_ISL_758938 | 12/21/2020 | 1/3/2021 Europe / Denmark / Nordjylland |
| EPI_ISL_758939 | 12/21/2020 | 1/3/2021 Europe / Denmark / Midtjylland |
| EPI_ISL_758940 | 12/21/2020 | 1/3/2021 Europe / Denmark / Syddanmark  |
| EPI_ISL_758941 | 12/21/2020 | 1/3/2021 Europe / Denmark / Midtjylland |
| EPI_ISL_758942 | 12/21/2020 | 1/3/2021 Europe / Denmark / Hovedstaden |
| EPI_ISL_758943 | 12/21/2020 | 1/3/2021 Europe / Denmark / Hovedstaden |
| EPI_ISL_758944 | 12/21/2020 | 1/3/2021 Europe / Denmark / Midtjylland |
| EPI_ISL_758970 | 12/21/2020 | 1/3/2021 Europe / Denmark / Syddanmark  |
| EPI_ISL_758971 | 12/21/2020 | 1/3/2021 Europe / Denmark / Syddanmark  |
| EPI_ISL_758972 | 12/21/2020 | 1/3/2021 Europe / Denmark / Syddanmark  |
| EPI_ISL_758973 | 12/21/2020 | 1/3/2021 Europe / Denmark / Syddanmark  |
| EPI_ISL_758974 | 12/21/2020 | 1/3/2021 Europe / Denmark / Syddanmark  |
| EPI_ISL_758975 | 12/21/2020 | 1/3/2021 Europe / Denmark / Syddanmark  |
| EPI_ISL_758976 | 12/21/2020 | 1/3/2021 Europe / Denmark / Syddanmark  |
| EPI_ISL_758977 | 12/21/2020 | 1/3/2021 Europe / Denmark / Hovedstaden |
| EPI_ISL_758978 | 12/21/2020 | 1/3/2021 Europe / Denmark / Syddanmark  |
| EPI_ISL_758979 | 12/21/2020 | 1/3/2021 Europe / Denmark / Sjaelland   |
| EPI_ISL_758980 | 12/21/2020 | 1/3/2021 Europe / Denmark / Sjaelland   |
| EPI_ISL_758981 | 12/21/2020 | 1/3/2021 Europe / Denmark / Hovedstaden |
| EPI_ISL_758982 | 12/21/2020 | 1/3/2021 Europe / Denmark / Midtjylland |
| EPI_ISL_758983 | 12/21/2020 | 1/3/2021 Europe / Denmark / Hovedstaden |
| EPI_ISL_758984 | 12/21/2020 | 1/3/2021 Europe / Denmark / Hovedstaden |
| EPI_ISL_758985 | 12/21/2020 | 1/3/2021 Europe / Denmark / Sjaelland   |
| EPI_ISL_758986 | 12/21/2020 | 1/3/2021 Europe / Denmark / Hovedstaden |
| EPI_ISL_758987 | 12/21/2020 | 1/3/2021 Europe / Denmark / Sjaelland   |
| EPI_ISL_758988 | 12/21/2020 | 1/3/2021 Europe / Denmark / Hovedstaden |
| EPI_ISL_758989 | 12/21/2020 | 1/3/2021 Europe / Denmark / Hovedstaden |
| EPI_ISL_758990 | 12/21/2020 | 1/3/2021 Europe / Denmark / Hovedstaden |
| EPI_ISL_758991 | 12/21/2020 | 1/3/2021 Europe / Denmark / Hovedstaden |
| EPI_ISL_758992 | 12/21/2020 | 1/3/2021 Europe / Denmark / Midtjylland |
| EPI_ISL_758993 | 12/21/2020 | 1/3/2021 Europe / Denmark / Sjaelland   |
| EPI_ISL_758994 | 12/21/2020 | 1/3/2021 Europe / Denmark / Sjaelland   |
| EPI_ISL_758995 | 12/21/2020 | 1/3/2021 Europe / Denmark / Sjaelland   |
| EPI_ISL_758996 | 12/21/2020 | 1/3/2021 Europe / Denmark               |
| EPI_ISL_758997 | 12/21/2020 | 1/3/2021 Europe / Denmark               |
| EPI_ISL_758998 | 12/21/2020 | 1/3/2021 Europe / Denmark / Sjaelland   |
| EPI_ISL_758999 | 12/21/2020 | 1/3/2021 Europe / Denmark / Hovedstaden |
| EPI_ISL_759000 | 12/21/2020 | 1/3/2021 Europe / Denmark / Midtjylland |
| EPI_ISL_759001 | 12/21/2020 | 1/3/2021 Europe / Denmark / Hovedstaden |

|                |            |                                         |
|----------------|------------|-----------------------------------------|
| EPI_ISL_759002 | 12/21/2020 | 1/3/2021 Europe / Denmark / Hovedstaden |
| EPI_ISL_759003 | 12/21/2020 | 1/3/2021 Europe / Denmark / Midtjylland |
| EPI_ISL_759004 | 12/21/2020 | 1/3/2021 Europe / Denmark / Syddanmark  |
| EPI_ISL_759005 | 12/21/2020 | 1/3/2021 Europe / Denmark / Midtjylland |
| EPI_ISL_759006 | 12/21/2020 | 1/3/2021 Europe / Denmark / Hovedstaden |
| EPI_ISL_759007 | 12/21/2020 | 1/3/2021 Europe / Denmark / Hovedstaden |
| EPI_ISL_759008 | 12/21/2020 | 1/3/2021 Europe / Denmark / Hovedstaden |
| EPI_ISL_759009 | 12/21/2020 | 1/3/2021 Europe / Denmark / Hovedstaden |
| EPI_ISL_759010 | 12/21/2020 | 1/3/2021 Europe / Denmark / Sjaelland   |
| EPI_ISL_759011 | 12/21/2020 | 1/3/2021 Europe / Denmark / Syddanmark  |
| EPI_ISL_759012 | 12/21/2020 | 1/3/2021 Europe / Denmark / Syddanmark  |
| EPI_ISL_759013 | 12/21/2020 | 1/3/2021 Europe / Denmark / Hovedstaden |
| EPI_ISL_759014 | 12/21/2020 | 1/3/2021 Europe / Denmark / Hovedstaden |
| EPI_ISL_759015 | 12/21/2020 | 1/3/2021 Europe / Denmark / Hovedstaden |
| EPI_ISL_759016 | 12/21/2020 | 1/3/2021 Europe / Denmark / Hovedstaden |
| EPI_ISL_759017 | 12/21/2020 | 1/3/2021 Europe / Denmark / Sjaelland   |
| EPI_ISL_759018 | 12/21/2020 | 1/3/2021 Europe / Denmark / Hovedstaden |
| EPI_ISL_759019 | 12/21/2020 | 1/3/2021 Europe / Denmark / Syddanmark  |
| EPI_ISL_759020 | 12/21/2020 | 1/3/2021 Europe / Denmark / Hovedstaden |
| EPI_ISL_759021 | 12/21/2020 | 1/3/2021 Europe / Denmark / Sjaelland   |
| EPI_ISL_759022 | 12/21/2020 | 1/3/2021 Europe / Denmark / Hovedstaden |
| EPI_ISL_759023 | 12/21/2020 | 1/3/2021 Europe / Denmark / Nordjylland |
| EPI_ISL_759024 | 12/21/2020 | 1/3/2021 Europe / Denmark / Hovedstaden |
| EPI_ISL_759025 | 12/21/2020 | 1/3/2021 Europe / Denmark / Hovedstaden |
| EPI_ISL_759026 | 12/21/2020 | 1/3/2021 Europe / Denmark / Sjaelland   |
| EPI_ISL_759027 | 12/21/2020 | 1/3/2021 Europe / Denmark / Hovedstaden |
| EPI_ISL_759028 | 12/21/2020 | 1/3/2021 Europe / Denmark / Hovedstaden |
| EPI_ISL_759029 | 12/21/2020 | 1/3/2021 Europe / Denmark / Hovedstaden |
| EPI_ISL_759030 | 12/21/2020 | 1/3/2021 Europe / Denmark / Sjaelland   |
| EPI_ISL_759031 | 12/21/2020 | 1/3/2021 Europe / Denmark / Nordjylland |
| EPI_ISL_759032 | 12/21/2020 | 1/3/2021 Europe / Denmark / Hovedstaden |
| EPI_ISL_759033 | 12/21/2020 | 1/3/2021 Europe / Denmark / Hovedstaden |
| EPI_ISL_759034 | 12/21/2020 | 1/3/2021 Europe / Denmark / Syddanmark  |
| EPI_ISL_759035 | 12/21/2020 | 1/3/2021 Europe / Denmark / Syddanmark  |
| EPI_ISL_759036 | 12/21/2020 | 1/3/2021 Europe / Denmark / Syddanmark  |
| EPI_ISL_759037 | 12/21/2020 | 1/3/2021 Europe / Denmark / Hovedstaden |
| EPI_ISL_759038 | 12/21/2020 | 1/3/2021 Europe / Denmark / Syddanmark  |
| EPI_ISL_759039 | 12/21/2020 | 1/3/2021 Europe / Denmark / Sjaelland   |
| EPI_ISL_759040 | 12/21/2020 | 1/3/2021 Europe / Denmark / Hovedstaden |
| EPI_ISL_759046 | 12/21/2020 | 1/3/2021 Europe / Denmark / Hovedstaden |
| EPI_ISL_759047 | 12/21/2020 | 1/3/2021 Europe / Denmark / Syddanmark  |
| EPI_ISL_759048 | 12/21/2020 | 1/3/2021 Europe / Denmark / Syddanmark  |
| EPI_ISL_759049 | 12/21/2020 | 1/3/2021 Europe / Denmark / Hovedstaden |
| EPI_ISL_759050 | 12/21/2020 | 1/3/2021 Europe / Denmark / Syddanmark  |
| EPI_ISL_759051 | 12/21/2020 | 1/3/2021 Europe / Denmark / Hovedstaden |
| EPI_ISL_759052 | 12/21/2020 | 1/3/2021 Europe / Denmark / Hovedstaden |
| EPI_ISL_759053 | 12/21/2020 | 1/3/2021 Europe / Denmark / Syddanmark  |



|                |            |                                         |
|----------------|------------|-----------------------------------------|
| EPI_ISL_759054 | 12/21/2020 | 1/3/2021 Europe / Denmark / Syddanmark  |
| EPI_ISL_759055 | 12/21/2020 | 1/3/2021 Europe / Denmark / Hovedstaden |
| EPI_ISL_759056 | 12/21/2020 | 1/3/2021 Europe / Denmark / Hovedstaden |
| EPI_ISL_759057 | 12/21/2020 | 1/3/2021 Europe / Denmark / Syddanmark  |
| EPI_ISL_759058 | 12/21/2020 | 1/3/2021 Europe / Denmark / Hovedstaden |
| EPI_ISL_759059 | 12/21/2020 | 1/3/2021 Europe / Denmark / Syddanmark  |
| EPI_ISL_759063 | 12/21/2020 | 1/3/2021 Europe / Denmark / Nordjylland |
| EPI_ISL_759064 | 12/21/2020 | 1/3/2021 Europe / Denmark / Nordjylland |
| EPI_ISL_759065 | 12/21/2020 | 1/3/2021 Europe / Denmark / Syddanmark  |
| EPI_ISL_759071 | 12/21/2020 | 1/3/2021 Europe / Denmark / Syddanmark  |
| EPI_ISL_759072 | 12/21/2020 | 1/3/2021 Europe / Denmark / Syddanmark  |
| EPI_ISL_759074 | 12/21/2020 | 1/3/2021 Europe / Denmark / Hovedstaden |
| EPI_ISL_759075 | 12/21/2020 | 1/3/2021 Europe / Denmark / Midtjylland |
| EPI_ISL_759076 | 12/21/2020 | 1/3/2021 Europe / Denmark / Nordjylland |
| EPI_ISL_759104 | 12/21/2020 | 1/3/2021 Europe / Denmark / Nordjylland |
| EPI_ISL_759105 | 12/21/2020 | 1/3/2021 Europe / Denmark / Sjælland    |
| EPI_ISL_759106 | 12/21/2020 | 1/3/2021 Europe / Denmark / Sjælland    |
| EPI_ISL_759107 | 12/21/2020 | 1/3/2021 Europe / Denmark / Hovedstaden |
| EPI_ISL_759108 | 12/21/2020 | 1/3/2021 Europe / Denmark / Midtjylland |
| EPI_ISL_759109 | 12/21/2020 | 1/3/2021 Europe / Denmark / Hovedstaden |
| EPI_ISL_759110 | 12/21/2020 | 1/3/2021 Europe / Denmark / Hovedstaden |
| EPI_ISL_759111 | 12/21/2020 | 1/3/2021 Europe / Denmark / Midtjylland |
| EPI_ISL_759112 | 12/21/2020 | 1/3/2021 Europe / Denmark / Midtjylland |
| EPI_ISL_759113 | 12/21/2020 | 1/3/2021 Europe / Denmark / Midtjylland |
| EPI_ISL_759114 | 12/21/2020 | 1/3/2021 Europe / Denmark / Syddanmark  |
| EPI_ISL_759115 | 12/21/2020 | 1/3/2021 Europe / Denmark / Hovedstaden |
| EPI_ISL_759116 | 12/21/2020 | 1/3/2021 Europe / Denmark / Hovedstaden |
| EPI_ISL_759117 | 12/21/2020 | 1/3/2021 Europe / Denmark / Midtjylland |
| EPI_ISL_759118 | 12/21/2020 | 1/3/2021 Europe / Denmark / Hovedstaden |
| EPI_ISL_759119 | 12/21/2020 | 1/3/2021 Europe / Denmark / Midtjylland |
| EPI_ISL_759120 | 12/21/2020 | 1/3/2021 Europe / Denmark / Hovedstaden |
| EPI_ISL_759121 | 12/21/2020 | 1/3/2021 Europe / Denmark / Hovedstaden |
| EPI_ISL_759122 | 12/21/2020 | 1/3/2021 Europe / Denmark / Hovedstaden |
| EPI_ISL_759123 | 12/21/2020 | 1/3/2021 Europe / Denmark / Hovedstaden |
| EPI_ISL_759124 | 12/21/2020 | 1/3/2021 Europe / Denmark / Sjælland    |
| EPI_ISL_759125 | 12/21/2020 | 1/3/2021 Europe / Denmark / Syddanmark  |
| EPI_ISL_759126 | 12/21/2020 | 1/3/2021 Europe / Denmark / Hovedstaden |
| EPI_ISL_759127 | 12/21/2020 | 1/3/2021 Europe / Denmark / Midtjylland |
| EPI_ISL_759128 | 12/21/2020 | 1/3/2021 Europe / Denmark / Nordjylland |
| EPI_ISL_759129 | 12/21/2020 | 1/3/2021 Europe / Denmark / Syddanmark  |
| EPI_ISL_759130 | 12/21/2020 | 1/3/2021 Europe / Denmark / Nordjylland |
| EPI_ISL_759131 | 12/21/2020 | 1/3/2021 Europe / Denmark / Hovedstaden |
| EPI_ISL_759132 | 12/21/2020 | 1/3/2021 Europe / Denmark / Hovedstaden |
| EPI_ISL_759133 | 12/21/2020 | 1/3/2021 Europe / Denmark / Hovedstaden |
| EPI_ISL_759134 | 12/21/2020 | 1/3/2021 Europe / Denmark / Hovedstaden |
| EPI_ISL_759135 | 12/21/2020 | 1/3/2021 Europe / Denmark / Nordjylland |
| EPI_ISL_759136 | 12/21/2020 | 1/3/2021 Europe / Denmark / Hovedstaden |

|                |            |                                         |
|----------------|------------|-----------------------------------------|
| EPI_ISL_759137 | 12/21/2020 | 1/3/2021 Europe / Denmark / Sjælland    |
| EPI_ISL_759138 | 12/21/2020 | 1/3/2021 Europe / Denmark / Hovedstaden |
| EPI_ISL_759139 | 12/21/2020 | 1/3/2021 Europe / Denmark / Hovedstaden |
| EPI_ISL_759140 | 12/21/2020 | 1/3/2021 Europe / Denmark / Syddanmark  |
| EPI_ISL_759141 | 12/21/2020 | 1/3/2021 Europe / Denmark / Hovedstaden |
| EPI_ISL_759142 | 12/21/2020 | 1/3/2021 Europe / Denmark / Midtjylland |
| EPI_ISL_759143 | 12/21/2020 | 1/3/2021 Europe / Denmark / Hovedstaden |
| EPI_ISL_759144 | 12/21/2020 | 1/3/2021 Europe / Denmark / Hovedstaden |
| EPI_ISL_759145 | 12/21/2020 | 1/3/2021 Europe / Denmark / Syddanmark  |
| EPI_ISL_759146 | 12/21/2020 | 1/3/2021 Europe / Denmark / Nordjylland |
| EPI_ISL_759147 | 12/21/2020 | 1/3/2021 Europe / Denmark / Nordjylland |
| EPI_ISL_759148 | 12/21/2020 | 1/3/2021 Europe / Denmark / Hovedstaden |
| EPI_ISL_759149 | 12/21/2020 | 1/3/2021 Europe / Denmark / Syddanmark  |
| EPI_ISL_759150 | 12/21/2020 | 1/3/2021 Europe / Denmark / Hovedstaden |
| EPI_ISL_759151 | 12/21/2020 | 1/3/2021 Europe / Denmark / Midtjylland |
| EPI_ISL_759152 | 12/21/2020 | 1/3/2021 Europe / Denmark / Hovedstaden |
| EPI_ISL_759153 | 12/21/2020 | 1/3/2021 Europe / Denmark / Sjælland    |
| EPI_ISL_759154 | 12/21/2020 | 1/3/2021 Europe / Denmark / Midtjylland |
| EPI_ISL_759155 | 12/21/2020 | 1/3/2021 Europe / Denmark / Midtjylland |
| EPI_ISL_759156 | 12/21/2020 | 1/3/2021 Europe / Denmark / Midtjylland |
| EPI_ISL_759157 | 12/21/2020 | 1/3/2021 Europe / Denmark / Syddanmark  |
| EPI_ISL_759158 | 12/21/2020 | 1/3/2021 Europe / Denmark / Hovedstaden |
| EPI_ISL_759159 | 12/21/2020 | 1/3/2021 Europe / Denmark / Sjælland    |
| EPI_ISL_759160 | 12/21/2020 | 1/3/2021 Europe / Denmark / Hovedstaden |
| EPI_ISL_759161 | 12/21/2020 | 1/3/2021 Europe / Denmark / Nordjylland |
| EPI_ISL_759162 | 12/21/2020 | 1/3/2021 Europe / Denmark / Nordjylland |
| EPI_ISL_759163 | 12/21/2020 | 1/3/2021 Europe / Denmark / Nordjylland |
| EPI_ISL_759164 | 12/21/2020 | 1/3/2021 Europe / Denmark / Midtjylland |
| EPI_ISL_759165 | 12/21/2020 | 1/3/2021 Europe / Denmark / Hovedstaden |
| EPI_ISL_759166 | 12/21/2020 | 1/3/2021 Europe / Denmark / Hovedstaden |
| EPI_ISL_759167 | 12/21/2020 | 1/3/2021 Europe / Denmark / Nordjylland |
| EPI_ISL_759168 | 12/21/2020 | 1/3/2021 Europe / Denmark / Midtjylland |
| EPI_ISL_759169 | 12/21/2020 | 1/3/2021 Europe / Denmark / Midtjylland |
| EPI_ISL_759170 | 12/21/2020 | 1/3/2021 Europe / Denmark / Sjælland    |
| EPI_ISL_759171 | 12/21/2020 | 1/3/2021 Europe / Denmark / Sjælland    |
| EPI_ISL_759172 | 12/21/2020 | 1/3/2021 Europe / Denmark / Hovedstaden |
| EPI_ISL_759173 | 12/21/2020 | 1/3/2021 Europe / Denmark / Sjælland    |
| EPI_ISL_759174 | 12/21/2020 | 1/3/2021 Europe / Denmark / Hovedstaden |
| EPI_ISL_759175 | 12/21/2020 | 1/3/2021 Europe / Denmark / Midtjylland |
| EPI_ISL_759176 | 12/21/2020 | 1/3/2021 Europe / Denmark / Hovedstaden |
| EPI_ISL_759177 | 12/21/2020 | 1/3/2021 Europe / Denmark / Midtjylland |
| EPI_ISL_759178 | 12/21/2020 | 1/3/2021 Europe / Denmark / Hovedstaden |
| EPI_ISL_759179 | 12/21/2020 | 1/3/2021 Europe / Denmark / Hovedstaden |
| EPI_ISL_759180 | 12/21/2020 | 1/3/2021 Europe / Denmark / Sjælland    |
| EPI_ISL_759181 | 12/21/2020 | 1/3/2021 Europe / Denmark / Midtjylland |
| EPI_ISL_759182 | 12/21/2020 | 1/3/2021 Europe / Denmark / Hovedstaden |
| EPI_ISL_759183 | 12/21/2020 | 1/3/2021 Europe / Denmark / Midtjylland |

|                |            |                                         |
|----------------|------------|-----------------------------------------|
| EPI_ISL_759184 | 12/21/2020 | 1/3/2021 Europe / Denmark / Midtjylland |
| EPI_ISL_759185 | 12/21/2020 | 1/3/2021 Europe / Denmark / Nordjylland |
| EPI_ISL_759186 | 12/21/2020 | 1/3/2021 Europe / Denmark / Syddanmark  |
| EPI_ISL_759187 | 12/21/2020 | 1/3/2021 Europe / Denmark / Hovedstaden |
| EPI_ISL_759188 | 12/21/2020 | 1/3/2021 Europe / Denmark / Sjælland    |
| EPI_ISL_759189 | 12/21/2020 | 1/3/2021 Europe / Denmark / Midtjylland |
| EPI_ISL_759190 | 12/21/2020 | 1/3/2021 Europe / Denmark / Midtjylland |
| EPI_ISL_759191 | 12/21/2020 | 1/3/2021 Europe / Denmark / Sjælland    |
| EPI_ISL_759192 | 12/21/2020 | 1/3/2021 Europe / Denmark / Syddanmark  |
| EPI_ISL_759193 | 12/21/2020 | 1/3/2021 Europe / Denmark / Syddanmark  |
| EPI_ISL_759194 | 12/21/2020 | 1/3/2021 Europe / Denmark / Hovedstaden |
| EPI_ISL_759195 | 12/21/2020 | 1/3/2021 Europe / Denmark / Sjælland    |
| EPI_ISL_759196 | 12/21/2020 | 1/3/2021 Europe / Denmark / Hovedstaden |
| EPI_ISL_759197 | 12/21/2020 | 1/3/2021 Europe / Denmark / Hovedstaden |
| EPI_ISL_759198 | 12/21/2020 | 1/3/2021 Europe / Denmark / Hovedstaden |
| EPI_ISL_759199 | 12/21/2020 | 1/3/2021 Europe / Denmark / Midtjylland |
| EPI_ISL_759200 | 12/21/2020 | 1/3/2021 Europe / Denmark / Hovedstaden |
| EPI_ISL_759201 | 12/21/2020 | 1/3/2021 Europe / Denmark / Nordjylland |
| EPI_ISL_759202 | 12/21/2020 | 1/3/2021 Europe / Denmark / Hovedstaden |
| EPI_ISL_759203 | 12/21/2020 | 1/3/2021 Europe / Denmark / Nordjylland |
| EPI_ISL_759204 | 12/21/2020 | 1/3/2021 Europe / Denmark / Hovedstaden |
| EPI_ISL_759205 | 12/21/2020 | 1/3/2021 Europe / Denmark / Nordjylland |
| EPI_ISL_759206 | 12/21/2020 | 1/3/2021 Europe / Denmark / Hovedstaden |
| EPI_ISL_759207 | 12/21/2020 | 1/3/2021 Europe / Denmark / Nordjylland |
| EPI_ISL_759208 | 12/21/2020 | 1/3/2021 Europe / Denmark / Hovedstaden |
| EPI_ISL_759209 | 12/21/2020 | 1/3/2021 Europe / Denmark / Midtjylland |
| EPI_ISL_759210 | 12/21/2020 | 1/3/2021 Europe / Denmark / Hovedstaden |
| EPI_ISL_759211 | 12/21/2020 | 1/3/2021 Europe / Denmark / Sjælland    |
| EPI_ISL_759212 | 12/21/2020 | 1/3/2021 Europe / Denmark / Midtjylland |
| EPI_ISL_759213 | 12/21/2020 | 1/3/2021 Europe / Denmark / Sjælland    |
| EPI_ISL_759214 | 12/21/2020 | 1/3/2021 Europe / Denmark / Nordjylland |
| EPI_ISL_759215 | 12/21/2020 | 1/3/2021 Europe / Denmark / Midtjylland |
| EPI_ISL_759216 | 12/21/2020 | 1/3/2021 Europe / Denmark / Nordjylland |
| EPI_ISL_759217 | 12/21/2020 | 1/3/2021 Europe / Denmark / Hovedstaden |
| EPI_ISL_759218 | 12/21/2020 | 1/3/2021 Europe / Denmark / Nordjylland |
| EPI_ISL_759219 | 12/21/2020 | 1/3/2021 Europe / Denmark / Hovedstaden |
| EPI_ISL_759220 | 12/21/2020 | 1/3/2021 Europe / Denmark / Syddanmark  |
| EPI_ISL_759221 | 12/21/2020 | 1/3/2021 Europe / Denmark / Hovedstaden |
| EPI_ISL_759222 | 12/21/2020 | 1/3/2021 Europe / Denmark / Hovedstaden |
| EPI_ISL_759223 | 12/21/2020 | 1/3/2021 Europe / Denmark / Nordjylland |
| EPI_ISL_759224 | 12/21/2020 | 1/3/2021 Europe / Denmark / Hovedstaden |
| EPI_ISL_759225 | 12/21/2020 | 1/3/2021 Europe / Denmark / Hovedstaden |
| EPI_ISL_759226 | 12/21/2020 | 1/3/2021 Europe / Denmark / Hovedstaden |
| EPI_ISL_759227 | 12/21/2020 | 1/3/2021 Europe / Denmark / Nordjylland |
| EPI_ISL_759228 | 12/21/2020 | 1/3/2021 Europe / Denmark / Syddanmark  |
| EPI_ISL_759229 | 12/21/2020 | 1/3/2021 Europe / Denmark / Hovedstaden |
| EPI_ISL_759230 | 12/21/2020 | 1/3/2021 Europe / Denmark / Hovedstaden |

|                |            |                                         |
|----------------|------------|-----------------------------------------|
| EPI_ISL_759231 | 12/21/2020 | 1/3/2021 Europe / Denmark / Midtjylland |
| EPI_ISL_759232 | 12/21/2020 | 1/3/2021 Europe / Denmark / Midtjylland |
| EPI_ISL_759233 | 12/21/2020 | 1/3/2021 Europe / Denmark / Midtjylland |
| EPI_ISL_759234 | 12/21/2020 | 1/3/2021 Europe / Denmark / Nordjylland |
| EPI_ISL_759235 | 12/21/2020 | 1/3/2021 Europe / Denmark               |
| EPI_ISL_759236 | 12/21/2020 | 1/3/2021 Europe / Denmark / Hovedstaden |
| EPI_ISL_759237 | 12/21/2020 | 1/3/2021 Europe / Denmark / Hovedstaden |
| EPI_ISL_759238 | 12/21/2020 | 1/3/2021 Europe / Denmark / Sjælland    |
| EPI_ISL_759239 | 12/21/2020 | 1/3/2021 Europe / Denmark / Sjælland    |
| EPI_ISL_759240 | 12/21/2020 | 1/3/2021 Europe / Denmark / Nordjylland |
| EPI_ISL_759241 | 12/21/2020 | 1/3/2021 Europe / Denmark / Hovedstaden |
| EPI_ISL_759242 | 12/21/2020 | 1/3/2021 Europe / Denmark / Syddanmark  |
| EPI_ISL_759243 | 12/21/2020 | 1/3/2021 Europe / Denmark / Midtjylland |
| EPI_ISL_759244 | 12/21/2020 | 1/3/2021 Europe / Denmark / Hovedstaden |
| EPI_ISL_759245 | 12/21/2020 | 1/3/2021 Europe / Denmark / Hovedstaden |
| EPI_ISL_759246 | 12/21/2020 | 1/3/2021 Europe / Denmark / Hovedstaden |
| EPI_ISL_759247 | 12/21/2020 | 1/3/2021 Europe / Denmark / Midtjylland |
| EPI_ISL_759248 | 12/21/2020 | 1/3/2021 Europe / Denmark / Midtjylland |
| EPI_ISL_759249 | 12/21/2020 | 1/3/2021 Europe / Denmark / Hovedstaden |
| EPI_ISL_759250 | 12/21/2020 | 1/3/2021 Europe / Denmark / Hovedstaden |
| EPI_ISL_759251 | 12/21/2020 | 1/3/2021 Europe / Denmark / Hovedstaden |
| EPI_ISL_759252 | 12/21/2020 | 1/3/2021 Europe / Denmark / Midtjylland |
| EPI_ISL_759253 | 12/21/2020 | 1/3/2021 Europe / Denmark / Hovedstaden |
| EPI_ISL_759254 | 12/21/2020 | 1/3/2021 Europe / Denmark / Hovedstaden |
| EPI_ISL_759255 | 12/21/2020 | 1/3/2021 Europe / Denmark / Nordjylland |
| EPI_ISL_759256 | 12/21/2020 | 1/3/2021 Europe / Denmark / Midtjylland |
| EPI_ISL_759257 | 12/21/2020 | 1/3/2021 Europe / Denmark / Hovedstaden |
| EPI_ISL_759258 | 12/21/2020 | 1/3/2021 Europe / Denmark / Syddanmark  |
| EPI_ISL_759259 | 12/21/2020 | 1/3/2021 Europe / Denmark / Hovedstaden |
| EPI_ISL_759260 | 12/21/2020 | 1/3/2021 Europe / Denmark / Midtjylland |
| EPI_ISL_759261 | 12/21/2020 | 1/3/2021 Europe / Denmark / Midtjylland |
| EPI_ISL_759262 | 12/21/2020 | 1/3/2021 Europe / Denmark / Midtjylland |
| EPI_ISL_759263 | 12/21/2020 | 1/3/2021 Europe / Denmark / Hovedstaden |
| EPI_ISL_759264 | 12/21/2020 | 1/3/2021 Europe / Denmark / Sjælland    |
| EPI_ISL_759265 | 12/21/2020 | 1/3/2021 Europe / Denmark / Hovedstaden |
| EPI_ISL_759266 | 12/21/2020 | 1/3/2021 Europe / Denmark / Syddanmark  |
| EPI_ISL_759267 | 12/21/2020 | 1/3/2021 Europe / Denmark / Hovedstaden |
| EPI_ISL_759268 | 12/21/2020 | 1/3/2021 Europe / Denmark / Nordjylland |
| EPI_ISL_759269 | 12/21/2020 | 1/3/2021 Europe / Denmark / Midtjylland |
| EPI_ISL_759270 | 12/21/2020 | 1/3/2021 Europe / Denmark / Midtjylland |
| EPI_ISL_759271 | 12/21/2020 | 1/3/2021 Europe / Denmark / Nordjylland |
| EPI_ISL_759272 | 12/21/2020 | 1/3/2021 Europe / Denmark / Hovedstaden |
| EPI_ISL_759273 | 12/21/2020 | 1/3/2021 Europe / Denmark / Hovedstaden |
| EPI_ISL_759274 | 12/21/2020 | 1/3/2021 Europe / Denmark / Syddanmark  |
| EPI_ISL_759275 | 12/21/2020 | 1/3/2021 Europe / Denmark / Hovedstaden |
| EPI_ISL_759276 | 12/21/2020 | 1/3/2021 Europe / Denmark / Midtjylland |
| EPI_ISL_759277 | 12/21/2020 | 1/3/2021 Europe / Denmark / Midtjylland |





|                |            |                                         |
|----------------|------------|-----------------------------------------|
| EPI_ISL_759372 | 12/21/2020 | 1/3/2021 Europe / Denmark / Nordjylland |
| EPI_ISL_759373 | 12/21/2020 | 1/3/2021 Europe / Denmark / Hovedstaden |
| EPI_ISL_759374 | 12/21/2020 | 1/3/2021 Europe / Denmark / Syddanmark  |
| EPI_ISL_759375 | 12/21/2020 | 1/3/2021 Europe / Denmark / Hovedstaden |
| EPI_ISL_759376 | 12/21/2020 | 1/3/2021 Europe / Denmark / Midtjylland |
| EPI_ISL_759377 | 12/21/2020 | 1/3/2021 Europe / Denmark / Syddanmark  |
| EPI_ISL_759378 | 12/21/2020 | 1/3/2021 Europe / Denmark / Hovedstaden |
| EPI_ISL_759379 | 12/21/2020 | 1/3/2021 Europe / Denmark / Syddanmark  |
| EPI_ISL_759380 | 12/21/2020 | 1/3/2021 Europe / Denmark / Sjaelland   |
| EPI_ISL_759381 | 12/21/2020 | 1/3/2021 Europe / Denmark / Syddanmark  |
| EPI_ISL_759382 | 12/21/2020 | 1/3/2021 Europe / Denmark / Nordjylland |
| EPI_ISL_759383 | 12/21/2020 | 1/3/2021 Europe / Denmark / Hovedstaden |
| EPI_ISL_759384 | 12/21/2020 | 1/3/2021 Europe / Denmark / Midtjylland |
| EPI_ISL_759385 | 12/21/2020 | 1/3/2021 Europe / Denmark / Sjaelland   |
| EPI_ISL_759386 | 12/21/2020 | 1/3/2021 Europe / Denmark / Midtjylland |
| EPI_ISL_759387 | 12/21/2020 | 1/3/2021 Europe / Denmark / Hovedstaden |
| EPI_ISL_759388 | 12/21/2020 | 1/3/2021 Europe / Denmark / Syddanmark  |
| EPI_ISL_759389 | 12/21/2020 | 1/3/2021 Europe / Denmark / Sjaelland   |
| EPI_ISL_759390 | 12/21/2020 | 1/3/2021 Europe / Denmark / Nordjylland |
| EPI_ISL_759391 | 12/21/2020 | 1/3/2021 Europe / Denmark / Hovedstaden |
| EPI_ISL_759392 | 12/21/2020 | 1/3/2021 Europe / Denmark / Midtjylland |
| EPI_ISL_759393 | 12/21/2020 | 1/3/2021 Europe / Denmark / Hovedstaden |
| EPI_ISL_759394 | 12/21/2020 | 1/3/2021 Europe / Denmark / Syddanmark  |
| EPI_ISL_759395 | 12/21/2020 | 1/3/2021 Europe / Denmark / Syddanmark  |
| EPI_ISL_759396 | 12/21/2020 | 1/3/2021 Europe / Denmark / Hovedstaden |
| EPI_ISL_759397 | 12/21/2020 | 1/3/2021 Europe / Denmark / Nordjylland |
| EPI_ISL_759398 | 12/21/2020 | 1/3/2021 Europe / Denmark / Midtjylland |
| EPI_ISL_759399 | 12/21/2020 | 1/3/2021 Europe / Denmark / Sjaelland   |
| EPI_ISL_759400 | 12/21/2020 | 1/3/2021 Europe / Denmark / Syddanmark  |
| EPI_ISL_759401 | 12/21/2020 | 1/3/2021 Europe / Denmark / Hovedstaden |
| EPI_ISL_759402 | 12/21/2020 | 1/3/2021 Europe / Denmark / Hovedstaden |
| EPI_ISL_759403 | 12/21/2020 | 1/3/2021 Europe / Denmark / Nordjylland |
| EPI_ISL_759404 | 12/21/2020 | 1/3/2021 Europe / Denmark / Nordjylland |
| EPI_ISL_759405 | 12/21/2020 | 1/3/2021 Europe / Denmark / Nordjylland |
| EPI_ISL_759406 | 12/21/2020 | 1/3/2021 Europe / Denmark / Midtjylland |
| EPI_ISL_759407 | 12/21/2020 | 1/3/2021 Europe / Denmark / Midtjylland |
| EPI_ISL_759408 | 12/21/2020 | 1/3/2021 Europe / Denmark / Nordjylland |
| EPI_ISL_759409 | 12/21/2020 | 1/3/2021 Europe / Denmark / Hovedstaden |
| EPI_ISL_759410 | 12/21/2020 | 1/3/2021 Europe / Denmark / Syddanmark  |
| EPI_ISL_759411 | 12/21/2020 | 1/3/2021 Europe / Denmark / Hovedstaden |
| EPI_ISL_759412 | 12/21/2020 | 1/3/2021 Europe / Denmark / Midtjylland |
| EPI_ISL_759413 | 12/21/2020 | 1/3/2021 Europe / Denmark / Syddanmark  |
| EPI_ISL_759414 | 12/21/2020 | 1/3/2021 Europe / Denmark / Hovedstaden |
| EPI_ISL_759415 | 12/21/2020 | 1/3/2021 Europe / Denmark / Nordjylland |
| EPI_ISL_759416 | 12/21/2020 | 1/3/2021 Europe / Denmark / Nordjylland |
| EPI_ISL_759417 | 12/21/2020 | 1/3/2021 Europe / Denmark / Midtjylland |
| EPI_ISL_759418 | 12/21/2020 | 1/3/2021 Europe / Denmark / Hovedstaden |





|                |            |                                         |
|----------------|------------|-----------------------------------------|
| EPI_ISL_759466 | 12/21/2020 | 1/3/2021 Europe / Denmark / Hovedstaden |
| EPI_ISL_759467 | 12/21/2020 | 1/3/2021 Europe / Denmark / Sjaelland   |
| EPI_ISL_759468 | 12/21/2020 | 1/3/2021 Europe / Denmark / Syddanmark  |
| EPI_ISL_759469 | 12/21/2020 | 1/3/2021 Europe / Denmark / Sjaelland   |
| EPI_ISL_759470 | 12/21/2020 | 1/3/2021 Europe / Denmark / Midtjylland |
| EPI_ISL_759471 | 12/21/2020 | 1/3/2021 Europe / Denmark / Hovedstaden |
| EPI_ISL_759472 | 12/21/2020 | 1/3/2021 Europe / Denmark / Midtjylland |
| EPI_ISL_759473 | 12/21/2020 | 1/3/2021 Europe / Denmark / Midtjylland |
| EPI_ISL_759474 | 12/21/2020 | 1/3/2021 Europe / Denmark / Nordjylland |
| EPI_ISL_759475 | 12/21/2020 | 1/3/2021 Europe / Denmark / Nordjylland |
| EPI_ISL_759476 | 12/21/2020 | 1/3/2021 Europe / Denmark / Nordjylland |
| EPI_ISL_759477 | 12/21/2020 | 1/3/2021 Europe / Denmark / Syddanmark  |
| EPI_ISL_759478 | 12/21/2020 | 1/3/2021 Europe / Denmark / Syddanmark  |
| EPI_ISL_759479 | 12/21/2020 | 1/3/2021 Europe / Denmark / Nordjylland |
| EPI_ISL_759480 | 12/21/2020 | 1/3/2021 Europe / Denmark / Midtjylland |
| EPI_ISL_759481 | 12/21/2020 | 1/3/2021 Europe / Denmark / Hovedstaden |
| EPI_ISL_759482 | 12/21/2020 | 1/3/2021 Europe / Denmark / Hovedstaden |
| EPI_ISL_759483 | 12/21/2020 | 1/3/2021 Europe / Denmark / Hovedstaden |
| EPI_ISL_759484 | 12/21/2020 | 1/3/2021 Europe / Denmark / Nordjylland |
| EPI_ISL_759485 | 12/21/2020 | 1/3/2021 Europe / Denmark / Hovedstaden |
| EPI_ISL_759486 | 12/21/2020 | 1/3/2021 Europe / Denmark / Nordjylland |
| EPI_ISL_759487 | 12/21/2020 | 1/3/2021 Europe / Denmark / Hovedstaden |
| EPI_ISL_759488 | 12/21/2020 | 1/3/2021 Europe / Denmark / Midtjylland |
| EPI_ISL_759489 | 12/21/2020 | 1/3/2021 Europe / Denmark / Hovedstaden |
| EPI_ISL_759490 | 12/21/2020 | 1/3/2021 Europe / Denmark / Hovedstaden |
| EPI_ISL_759491 | 12/21/2020 | 1/3/2021 Europe / Denmark / Nordjylland |
| EPI_ISL_759492 | 12/21/2020 | 1/3/2021 Europe / Denmark / Midtjylland |
| EPI_ISL_759493 | 12/21/2020 | 1/3/2021 Europe / Denmark / Sjaelland   |
| EPI_ISL_759494 | 12/21/2020 | 1/3/2021 Europe / Denmark / Sjaelland   |
| EPI_ISL_759495 | 12/21/2020 | 1/3/2021 Europe / Denmark / Hovedstaden |
| EPI_ISL_759496 | 12/21/2020 | 1/3/2021 Europe / Denmark / Hovedstaden |
| EPI_ISL_759497 | 12/21/2020 | 1/3/2021 Europe / Denmark / Hovedstaden |
| EPI_ISL_759498 | 12/21/2020 | 1/3/2021 Europe / Denmark / Midtjylland |
| EPI_ISL_759499 | 12/21/2020 | 1/3/2021 Europe / Denmark / Hovedstaden |
| EPI_ISL_759500 | 12/21/2020 | 1/3/2021 Europe / Denmark / Hovedstaden |
| EPI_ISL_759501 | 12/21/2020 | 1/3/2021 Europe / Denmark / Hovedstaden |
| EPI_ISL_759502 | 12/21/2020 | 1/3/2021 Europe / Denmark / Sjaelland   |
| EPI_ISL_759503 | 12/21/2020 | 1/3/2021 Europe / Denmark / Nordjylland |
| EPI_ISL_759504 | 12/21/2020 | 1/3/2021 Europe / Denmark / Nordjylland |
| EPI_ISL_759505 | 12/21/2020 | 1/3/2021 Europe / Denmark / Midtjylland |
| EPI_ISL_759506 | 12/21/2020 | 1/3/2021 Europe / Denmark / Syddanmark  |
| EPI_ISL_759507 | 12/21/2020 | 1/3/2021 Europe / Denmark / Midtjylland |
| EPI_ISL_759508 | 12/21/2020 | 1/3/2021 Europe / Denmark / Hovedstaden |
| EPI_ISL_759509 | 12/21/2020 | 1/3/2021 Europe / Denmark / Hovedstaden |
| EPI_ISL_759510 | 12/21/2020 | 1/3/2021 Europe / Denmark / Hovedstaden |
| EPI_ISL_759511 | 12/21/2020 | 1/3/2021 Europe / Denmark / Midtjylland |
| EPI_ISL_759512 | 12/21/2020 | 1/3/2021 Europe / Denmark / Sjaelland   |





|                |            |                                         |
|----------------|------------|-----------------------------------------|
| EPI_ISL_759607 | 12/21/2020 | 1/3/2021 Europe / Denmark / Nordjylland |
| EPI_ISL_759608 | 12/21/2020 | 1/3/2021 Europe / Denmark / Sjaelland   |
| EPI_ISL_759609 | 12/21/2020 | 1/3/2021 Europe / Denmark / Hovedstaden |
| EPI_ISL_759610 | 12/21/2020 | 1/3/2021 Europe / Denmark / Hovedstaden |
| EPI_ISL_759611 | 12/21/2020 | 1/3/2021 Europe / Denmark / Hovedstaden |
| EPI_ISL_759612 | 12/21/2020 | 1/3/2021 Europe / Denmark / Midtjylland |
| EPI_ISL_759613 | 12/21/2020 | 1/3/2021 Europe / Denmark / Hovedstaden |
| EPI_ISL_759614 | 12/21/2020 | 1/3/2021 Europe / Denmark / Hovedstaden |
| EPI_ISL_759615 | 12/21/2020 | 1/3/2021 Europe / Denmark / Midtjylland |
| EPI_ISL_759616 | 12/21/2020 | 1/3/2021 Europe / Denmark / Midtjylland |
| EPI_ISL_759617 | 12/21/2020 | 1/3/2021 Europe / Denmark / Hovedstaden |
| EPI_ISL_759618 | 12/21/2020 | 1/3/2021 Europe / Denmark / Sjaelland   |
| EPI_ISL_759619 | 12/21/2020 | 1/3/2021 Europe / Denmark / Sjaelland   |
| EPI_ISL_759620 | 12/21/2020 | 1/3/2021 Europe / Denmark / Syddanmark  |
| EPI_ISL_759621 | 12/21/2020 | 1/3/2021 Europe / Denmark / Syddanmark  |
| EPI_ISL_759622 | 12/21/2020 | 1/3/2021 Europe / Denmark / Syddanmark  |
| EPI_ISL_759623 | 12/21/2020 | 1/3/2021 Europe / Denmark / Nordjylland |
| EPI_ISL_759624 | 12/21/2020 | 1/3/2021 Europe / Denmark / Hovedstaden |
| EPI_ISL_759625 | 12/21/2020 | 1/3/2021 Europe / Denmark / Syddanmark  |
| EPI_ISL_759626 | 12/21/2020 | 1/3/2021 Europe / Denmark / Hovedstaden |
| EPI_ISL_759627 | 12/21/2020 | 1/3/2021 Europe / Denmark / Syddanmark  |
| EPI_ISL_759628 | 12/21/2020 | 1/3/2021 Europe / Denmark / Midtjylland |
| EPI_ISL_759629 | 12/21/2020 | 1/3/2021 Europe / Denmark / Midtjylland |
| EPI_ISL_759630 | 12/21/2020 | 1/3/2021 Europe / Denmark / Hovedstaden |
| EPI_ISL_759631 | 12/21/2020 | 1/3/2021 Europe / Denmark / Hovedstaden |
| EPI_ISL_759632 | 12/21/2020 | 1/3/2021 Europe / Denmark / Nordjylland |
| EPI_ISL_759633 | 12/21/2020 | 1/3/2021 Europe / Denmark / Nordjylland |
| EPI_ISL_759634 | 12/21/2020 | 1/3/2021 Europe / Denmark / Nordjylland |
| EPI_ISL_759635 | 12/21/2020 | 1/3/2021 Europe / Denmark / Hovedstaden |
| EPI_ISL_759636 | 12/21/2020 | 1/3/2021 Europe / Denmark / Hovedstaden |
| EPI_ISL_759637 | 12/21/2020 | 1/3/2021 Europe / Denmark / Nordjylland |
| EPI_ISL_759638 | 12/21/2020 | 1/3/2021 Europe / Denmark / Sjaelland   |
| EPI_ISL_759639 | 12/21/2020 | 1/3/2021 Europe / Denmark / Syddanmark  |
| EPI_ISL_759640 | 12/21/2020 | 1/3/2021 Europe / Denmark / Hovedstaden |
| EPI_ISL_759641 | 12/21/2020 | 1/3/2021 Europe / Denmark / Hovedstaden |
| EPI_ISL_759642 | 12/21/2020 | 1/3/2021 Europe / Denmark / Nordjylland |
| EPI_ISL_759643 | 12/21/2020 | 1/3/2021 Europe / Denmark               |
| EPI_ISL_759644 | 12/21/2020 | 1/3/2021 Europe / Denmark / Midtjylland |
| EPI_ISL_759645 | 12/21/2020 | 1/3/2021 Europe / Denmark / Hovedstaden |
| EPI_ISL_759646 | 12/21/2020 | 1/3/2021 Europe / Denmark / Hovedstaden |
| EPI_ISL_759647 | 12/21/2020 | 1/3/2021 Europe / Denmark / Hovedstaden |
| EPI_ISL_759648 | 12/21/2020 | 1/3/2021 Europe / Denmark / Nordjylland |
| EPI_ISL_759649 | 12/21/2020 | 1/3/2021 Europe / Denmark / Hovedstaden |
| EPI_ISL_759650 | 12/21/2020 | 1/3/2021 Europe / Denmark / Nordjylland |
| EPI_ISL_759651 | 12/21/2020 | 1/3/2021 Europe / Denmark / Syddanmark  |
| EPI_ISL_759652 | 12/21/2020 | 1/3/2021 Europe / Denmark / Nordjylland |
| EPI_ISL_759653 | 12/21/2020 | 1/3/2021 Europe / Denmark / Hovedstaden |

|                |            |                                         |
|----------------|------------|-----------------------------------------|
| EPI_ISL_759654 | 12/21/2020 | 1/3/2021 Europe / Denmark / Nordjylland |
| EPI_ISL_759655 | 12/21/2020 | 1/3/2021 Europe / Denmark / Hovedstaden |
| EPI_ISL_759656 | 12/21/2020 | 1/3/2021 Europe / Denmark / Syddanmark  |
| EPI_ISL_759657 | 12/21/2020 | 1/3/2021 Europe / Denmark / Syddanmark  |
| EPI_ISL_759658 | 12/21/2020 | 1/3/2021 Europe / Denmark / Hovedstaden |
| EPI_ISL_759659 | 12/21/2020 | 1/3/2021 Europe / Denmark / Sjælland    |
| EPI_ISL_759660 | 12/21/2020 | 1/3/2021 Europe / Denmark / Nordjylland |
| EPI_ISL_759661 | 12/21/2020 | 1/3/2021 Europe / Denmark / Syddanmark  |
| EPI_ISL_759662 | 12/21/2020 | 1/3/2021 Europe / Denmark / Syddanmark  |
| EPI_ISL_759663 | 12/21/2020 | 1/3/2021 Europe / Denmark / Hovedstaden |
| EPI_ISL_759664 | 12/21/2020 | 1/3/2021 Europe / Denmark / Hovedstaden |
| EPI_ISL_759665 | 12/21/2020 | 1/3/2021 Europe / Denmark / Sjælland    |
| EPI_ISL_759666 | 12/21/2020 | 1/3/2021 Europe / Denmark / Syddanmark  |
| EPI_ISL_759667 | 12/21/2020 | 1/3/2021 Europe / Denmark / Syddanmark  |
| EPI_ISL_759668 | 12/21/2020 | 1/3/2021 Europe / Denmark / Sjælland    |
| EPI_ISL_759669 | 12/21/2020 | 1/3/2021 Europe / Denmark / Hovedstaden |
| EPI_ISL_759670 | 12/21/2020 | 1/3/2021 Europe / Denmark / Hovedstaden |
| EPI_ISL_759671 | 12/21/2020 | 1/3/2021 Europe / Denmark / Midtjylland |
| EPI_ISL_759672 | 12/21/2020 | 1/3/2021 Europe / Denmark / Midtjylland |
| EPI_ISL_759673 | 12/21/2020 | 1/3/2021 Europe / Denmark / Hovedstaden |
| EPI_ISL_759674 | 12/21/2020 | 1/3/2021 Europe / Denmark / Syddanmark  |
| EPI_ISL_759675 | 12/21/2020 | 1/3/2021 Europe / Denmark / Nordjylland |
| EPI_ISL_759676 | 12/21/2020 | 1/3/2021 Europe / Denmark / Nordjylland |
| EPI_ISL_759677 | 12/21/2020 | 1/3/2021 Europe / Denmark / Hovedstaden |
| EPI_ISL_759678 | 12/21/2020 | 1/3/2021 Europe / Denmark / Hovedstaden |
| EPI_ISL_759679 | 12/21/2020 | 1/3/2021 Europe / Denmark               |
| EPI_ISL_759680 | 12/21/2020 | 1/3/2021 Europe / Denmark / Syddanmark  |
| EPI_ISL_759681 | 12/21/2020 | 1/3/2021 Europe / Denmark / Sjælland    |
| EPI_ISL_759682 | 12/21/2020 | 1/3/2021 Europe / Denmark / Syddanmark  |
| EPI_ISL_759683 | 12/21/2020 | 1/3/2021 Europe / Denmark / Sjælland    |
| EPI_ISL_759684 | 12/21/2020 | 1/3/2021 Europe / Denmark / Syddanmark  |
| EPI_ISL_759685 | 12/21/2020 | 1/3/2021 Europe / Denmark / Hovedstaden |
| EPI_ISL_759686 | 12/21/2020 | 1/3/2021 Europe / Denmark / Nordjylland |
| EPI_ISL_759687 | 12/21/2020 | 1/3/2021 Europe / Denmark / Nordjylland |
| EPI_ISL_759688 | 12/21/2020 | 1/3/2021 Europe / Denmark / Nordjylland |
| EPI_ISL_759689 | 12/21/2020 | 1/3/2021 Europe / Denmark / Nordjylland |
| EPI_ISL_759690 | 12/21/2020 | 1/3/2021 Europe / Denmark / Syddanmark  |
| EPI_ISL_759691 | 12/21/2020 | 1/3/2021 Europe / Denmark / Hovedstaden |
| EPI_ISL_759692 | 12/21/2020 | 1/3/2021 Europe / Denmark / Midtjylland |
| EPI_ISL_759693 | 12/21/2020 | 1/3/2021 Europe / Denmark / Sjælland    |
| EPI_ISL_759694 | 12/21/2020 | 1/3/2021 Europe / Denmark / Syddanmark  |
| EPI_ISL_759695 | 12/21/2020 | 1/3/2021 Europe / Denmark / Syddanmark  |
| EPI_ISL_759696 | 12/21/2020 | 1/3/2021 Europe / Denmark / Syddanmark  |
| EPI_ISL_759697 | 12/21/2020 | 1/3/2021 Europe / Denmark / Hovedstaden |
| EPI_ISL_759698 | 12/21/2020 | 1/3/2021 Europe / Denmark / Hovedstaden |
| EPI_ISL_759699 | 12/21/2020 | 1/3/2021 Europe / Denmark / Hovedstaden |
| EPI_ISL_759700 | 12/21/2020 | 1/3/2021 Europe / Denmark / Hovedstaden |

|                |            |                                                             |
|----------------|------------|-------------------------------------------------------------|
| EPI_ISL_759701 | 10/14/2020 | 1/3/2021 Asia / Indonesia / Central Java                    |
| EPI_ISL_759707 | 12/26/2020 | 1/3/2021 Europe / Portugal                                  |
| EPI_ISL_759708 | 12/23/2020 | 1/3/2021 Europe / Portugal                                  |
| EPI_ISL_759709 | 12/26/2020 | 1/3/2021 Europe / Portugal                                  |
| EPI_ISL_759711 | 12/21/2020 | 1/3/2021 Europe / Portugal                                  |
| EPI_ISL_759715 | 12/22/2020 | 1/3/2021 Europe / Portugal                                  |
| EPI_ISL_759716 | 12/23/2020 | 1/3/2021 Europe / Portugal                                  |
| EPI_ISL_759719 | 12/23/2020 | 1/3/2021 Europe / Portugal                                  |
| EPI_ISL_759721 | 12/21/2020 | 1/3/2021 Europe / Portugal                                  |
| EPI_ISL_759724 | 12/27/2020 | 1/3/2021 North America / USA / Illinois / Lake County       |
| EPI_ISL_759725 | 12/24/2020 | 1/3/2021 North America / USA / Wisconsin / Dane County      |
| EPI_ISL_759726 | 12/18/2020 | 1/3/2021 North America / USA / Wisconsin / Dane County      |
| EPI_ISL_759728 | 12/21/2020 | 1/3/2021 North America / USA / Wisconsin / Dane County      |
| EPI_ISL_759729 | 12/21/2020 | 1/3/2021 North America / USA / Wisconsin / Dane County      |
| EPI_ISL_759730 | 12/22/2020 | 1/3/2021 North America / USA / Wisconsin / Dane County      |
| EPI_ISL_759731 | 12/21/2020 | 1/3/2021 North America / USA / Wisconsin / Dane County      |
| EPI_ISL_759733 | 12/22/2020 | 1/3/2021 North America / USA / Iowa / Fayette County        |
| EPI_ISL_759734 | 12/21/2020 | 1/3/2021 North America / USA / Wisconsin / Jefferson County |
| EPI_ISL_759735 | 12/21/2020 | 1/3/2021 North America / USA / Wisconsin / Dane County      |
| EPI_ISL_759737 | 12/21/2020 | 1/3/2021 North America / USA / Wisconsin / Dane County      |
| EPI_ISL_759739 | 12/18/2020 | 1/3/2021 North America / USA / Wisconsin / Dane County      |
| EPI_ISL_759740 | 12/18/2020 | 1/3/2021 North America / USA / Wisconsin / Dane County      |
| EPI_ISL_759741 | 12/28/2020 | 1/3/2021 North America / USA / Wisconsin / Dane County      |
| EPI_ISL_759742 | 12/18/2020 | 1/3/2021 North America / USA / Wisconsin / Dane County      |
| EPI_ISL_759743 | 12/28/2020 | 1/3/2021 North America / USA / Wisconsin / Dane County      |
| EPI_ISL_759744 | 12/26/2020 | 1/3/2021 North America / USA / Wisconsin / Dane County      |
| EPI_ISL_759745 | 12/28/2020 | 1/3/2021 North America / USA / Wisconsin / Dane County      |
| EPI_ISL_759746 | 12/28/2020 | 1/3/2021 North America / USA / Wisconsin / Dane County      |
| EPI_ISL_759747 | 12/28/2020 | 1/3/2021 North America / USA / Wisconsin / Dane County      |
| EPI_ISL_759748 | 12/28/2020 | 1/3/2021 North America / USA / Wisconsin / Dane County      |
| EPI_ISL_759749 | 12/28/2020 | 1/3/2021 North America / USA / Wisconsin / Dane County      |
| EPI_ISL_759750 | 12/28/2020 | 1/3/2021 North America / USA / Wisconsin / Dane County      |
| EPI_ISL_759751 | 12/27/2020 | 1/3/2021 North America / USA / Wisconsin / Dane County      |
| EPI_ISL_759752 | 12/24/2020 | 1/3/2021 North America / USA / Wisconsin / Dane County      |
| EPI_ISL_759754 | 12/23/2020 | 1/3/2021 North America / USA / Wisconsin / Columbia County  |
| EPI_ISL_759755 | 12/25/2020 | 1/3/2021 North America / USA / Wisconsin / Dane County      |
| EPI_ISL_759756 | 12/24/2020 | 1/3/2021 North America / USA / Wisconsin / Dane County      |
| EPI_ISL_759758 | 12/2/2020  | 1/3/2021 North America / USA / Wisconsin / Dane County      |
| EPI_ISL_759759 | 12/3/2020  | 1/3/2021 North America / USA / Wisconsin / Dane County      |
| EPI_ISL_759763 | 8/23/2020  | 1/3/2021 Europe / Finland / Uusimaa                         |
| EPI_ISL_759764 | 8/23/2020  | 1/3/2021 Europe / Finland / Uusimaa                         |
| EPI_ISL_759765 | 10/23/2020 | 1/3/2021 Europe / Finland / Uusimaa                         |
| EPI_ISL_759766 | 10/23/2020 | 1/3/2021 Europe / Finland / Uusimaa                         |
| EPI_ISL_759767 | 10/23/2020 | 1/3/2021 Europe / Finland / Uusimaa                         |
| EPI_ISL_759768 | 10/23/2020 | 1/3/2021 Europe / Finland / Uusimaa                         |
| EPI_ISL_759769 | 10/23/2020 | 1/3/2021 Europe / Finland / Uusimaa                         |
| EPI_ISL_759770 | 10/23/2020 | 1/3/2021 Europe / Finland / Uusimaa                         |
